# Supplementary material
Source: publisher figshare collection journal article supplement (https://acs.figshare.com/ndownloader/files/5127205)
Supplement: Supplementary file 1 [file 5127205]

Archive with 84 entries (83 files):
- supporting_ja043819b/
- supporting_ja043819b/Figure1S.gif
- supporting_ja043819b/Figure1S.jpg
- supporting_ja043819b/Figure2S.gif
- supporting_ja043819b/Figure2S.jpg
- supporting_ja043819b/index.html
- supporting_ja043819b/JmolApplet.jar
- supporting_ja043819b/lactide.mol
- supporting_ja043819b/lactide.xml
- supporting_ja043819b/RR_fm-5-reactant-thf-solv.log
- supporting_ja043819b/RR_fm-5-thf.mol
- supporting_ja043819b/RR_fm-5-thf.xml
- supporting_ja043819b/RR_fm-reactant-solv.log
- supporting_ja043819b/RR_fm-reactant.mol
- supporting_ja043819b/RR_fm-reactant.xml
- supporting_ja043819b/RRRR_fm-5-ts1-136.xyz
- supporting_ja043819b/RRRR_fm-5-ts1-freq-136.log
- supporting_ja043819b/RRRR_fm-5-ts1.mol
- supporting_ja043819b/thf.xml
- supporting_ja043819b/RRRR_fm-5-ts2-55.xyz
- supporting_ja043819b/RRRR_fm-5-ts2-freq-54.log
- supporting_ja043819b/RRRR_fm-5-ts2.mol
- supporting_ja043819b/RRRR_fm-5-ts2.xml
- supporting_ja043819b/RRRR_fm-ts2.mol
- supporting_ja043819b/RRRR_fm-ts2.xml
- supporting_ja043819b/RRSS_fm-5-product-thf-anti.mol
- supporting_ja043819b/RRSS_fm-5-product-thf-freq.log
- supporting_ja043819b/RRSS_fm-5-product-thf-solv.log
- supporting_ja043819b/RRSS_fm-5-product-thf.log
- supporting_ja043819b/RRSS_fm-5-product-thf.mol
- supporting_ja043819b/RRSS_fm-5-product-thf.xml
- supporting_ja043819b/RRSS_fm-5-react-solv.log
- supporting_ja043819b/RRSS_fm-5-react.log
- supporting_ja043819b/RRSS_fm-5-react.mol
- supporting_ja043819b/RRSS_fm-5-react.xml
- supporting_ja043819b/RRSS_fm-5-thf.log
- supporting_ja043819b/RRSS_fm-5-ti1.log
- supporting_ja043819b/RRSS_fm-5-ti1.mol
- supporting_ja043819b/RRSS_fm-5-ti1.xml
- supporting_ja043819b/RRSS_fm-5-ti2.log
- supporting_ja043819b/RRSS_fm-5-ti2.mol
- supporting_ja043819b/RRSS_fm-5-ti2.xml
- supporting_ja043819b/RRSS_fm-5-ts1-101.xyz
- supporting_ja043819b/RRSS_fm-5-ts1-freq-101.log
- supporting_ja043819b/RRSS_fm-5-ts1.mol
- supporting_ja043819b/RRSS_fm-5-ts1.xml
- supporting_ja043819b/RRSS_fm-5-ts2-49.xyz
- supporting_ja043819b/RRSS_fm-5-ts2-freq-49.log
- supporting_ja043819b/RRSS_fm-5-ts2-nbo.log
- supporting_ja043819b/RRSS_fm-5-ts2.mol
- supporting_ja043819b/RRSS_fm-5-ts2.xml
- supporting_ja043819b/RRSS_fm-product-solv.log
- supporting_ja043819b/RRSS_fm-product.log
- supporting_ja043819b/RRSS_fm-product.mol
- supporting_ja043819b/RRSS_fm-product.xml
- supporting_ja043819b/Scheme.gif
- supporting_ja043819b/Scheme.jpg
- supporting_ja043819b/SS-freq.log
- supporting_ja043819b/SS-solv.log
- supporting_ja043819b/SSRR_fm-5-ts1-143.xyz
- supporting_ja043819b/SSRR_fm-5-ts1-freq-143.log
- supporting_ja043819b/SSRR_fm-5-ts1.mol
- supporting_ja043819b/SSRR_fm-5-ts1.xml
- supporting_ja043819b/SSRR_fm-5-ts2-44.xyz
- supporting_ja043819b/SSRR_fm-5-ts2-freq-44.log
- supporting_ja043819b/SSRR_fm-5-ts2.mol
- supporting_ja043819b/SSRR_fm-5-ts2.xml
- supporting_ja043819b/SSSS_fm-5-ts1-134.xyz
- supporting_ja043819b/Table S1.pdf
- supporting_ja043819b/SSSS_fm-5-ts1-freq-134.log
- supporting_ja043819b/SSSS_fm-5-ts1.mol
- supporting_ja043819b/SSSS_fm-5-ts1.xml
- supporting_ja043819b/SSSS_fm-5-ts2-50.xyz
- supporting_ja043819b/SSSS_fm-5-ts2-freq-50.log
- supporting_ja043819b/SSSS_fm-5-ts2.mol
- supporting_ja043819b/SSSS_fm-5-ts2.xml
- supporting_ja043819b/Supporting.pdf
- supporting_ja043819b/Table S2.pdf
- supporting_ja043819b/Table S3.pdf
- supporting_ja043819b/table1.html
- supporting_ja043819b/table2.html
- supporting_ja043819b/table3.html
- supporting_ja043819b/thf-freq.log
- supporting_ja043819b/thf-solv.log
