# Supplementary material
Source: publisher figshare collection journal article supplement (https://acs.figshare.com/ndownloader/files/5127205)
Supplement: Supplementary file 1 [file 5127205 › supporting_ja043819b/index.html]

A computational analysis of the ring-opening
polymerization of rac-lactide initiated by single-site beta
diketiminate metal complexes: defining the mechanistic pathway
and the origin of stereocontrol


# Supporting Information. A computational analysis of the ring-opening polymerization of *rac*-lactide initiated by single-site β diketiminate metal complexes: defining the mechanistic pathway and the origin of stereocontrol

## Vernon C. Gibson, Edward L. Marshall and Henry S. Rzepa

*Department of Chemistry, Imperial College London, SW7 2AY,
UK*.

---

## Contents

1. Viewing the Supporting
   Information
2. Figures S1
   and S2. Assembly modes considered
3. Table S1. Commentary on the Stationary
   points on the potential surface for the overall mechanism,
   illustrated using the RR,SS stereoisomer.
4. Table S2. Commentary on the Four
   diasteromeric Stationary points corresponding to TS2.
5. Table S3. Commentary on the Four
   diastereomeric Stationary points corresponding to TS1.
6. ZIP Archive containing these
   pages for local viewing in a Web browser (open
   **index.html**).

## 1. Viewing the Supporting Information

The storyboard below uses the Jmol
Java-based applet for visualisation of molecular geometries
and animations. To ensure this runs correctly, please install
Java JRE Version 1.4.2\_5 or higher on your
computer, and ensure that the local security policy enables
applet display. The coordinates for each computed stationary
point are in CML (Chemical Markup
Language), MDL Molfile or XYZ animation form.

Key species in this supporting information have had InChI
International Chemical identifiers added (in the CML file) to
assist in search engine retrieval of structures. See
"Enhancement of the Chemical Semantic Web through
INChIfication", Simon J. Coles, Nick E. Day, Peter Murray-Rust,
Henry S. Rzepa and Yong Zhang, submitted for publication.

## 2. Assembly modes considered

For the insertion of a lactide molecule into the
metal-alkoxide bond of a five-membered metallacyclic
metal-lactate, there are a total of eight possible assembly
modes. Both the approaching monomer, and the two chiral centres
of the last inserted repeat unit, may be either (R,R) or (S,S).
Further more, the incoming monomer may approach either face of
the metal-lactate chelate. This is illustrated below in Fig. 1S
for the RR,SS mode of addition described in the accompanying
communication, with attack from *above* the metal-lactate,
and for the approach of an (R,R)-lactide molecule from
*below* the lactate chelate formed from the ring-opening
of (S,S)-lactide. These are enantiomers and will therefore
possess the same energy. Fig. 2S schematically represents all
eight assembly modes, shown in their four enantiomeric
pairs.

|  |  |
| --- | --- |
|  |  |
| Figure 1S. An enantiomeric pair of assembly modes | Figure 2S. The eight assembly modes divided into four enantiomeric pairs: the four alternatives in the left hand column are those described in the communication (from top to bottom: RR,SS; SS,RR; RR,RR; SS,SS). |

---
