# Supplementary material
Source: publisher figshare collection journal article supplement (https://acs.figshare.com/ndownloader/files/5127205)
Supplement: Supplementary file 1 [file 5127205 › supporting_ja043819b/lactide.mol]

  MacMolPlt                       

 18 18  0  0  0  0  0  0  0  0  0 v2000
    0.2585   -1.3540   -0.1057 O   0  0  0  0  0  0  0  0  0  0  0  0
   -1.0376   -0.9655   -0.0565 C   0  0  0  0  0  0  0  0  0  0  0  0
   -1.9229   -1.7166   -0.3784 O   0  0  0  0  0  0  0  0  0  0  0  0
   -0.2585    1.3540   -0.1056 O   0  0  0  0  0  0  0  0  0  0  0  0
    1.0376    0.9655   -0.0563 C   0  0  0  0  0  0  0  0  0  0  0  0
    1.2647   -0.4650    0.4369 C   0  0  0  0  0  0  0  0  0  0  0  0
   -1.2647    0.4649    0.4368 C   0  0  0  0  0  0  0  0  0  0  0  0
    1.9229    1.7166   -0.3780 O   0  0  0  0  0  0  0  0  0  0  0  0
    2.6235   -1.0113    0.0389 C   0  0  0  0  0  0  0  0  0  0  0  0
   -2.6235    1.0113    0.0388 C   0  0  0  0  0  0  0  0  0  0  0  0
    1.1638   -0.4643    1.5331 H   0  0  0  0  0  0  0  0  0  0  0  0
   -1.1640    0.4641    1.5331 H   0  0  0  0  0  0  0  0  0  0  0  0
    2.7402   -2.0294    0.4199 H   0  0  0  0  0  0  0  0  0  0  0  0
    2.7242   -1.0231   -1.0496 H   0  0  0  0  0  0  0  0  0  0  0  0
    3.4106   -0.3760    0.4512 H   0  0  0  0  0  0  0  0  0  0  0  0
   -3.4107    0.3758    0.4508 H   0  0  0  0  0  0  0  0  0  0  0  0
   -2.7402    2.0293    0.4199 H   0  0  0  0  0  0  0  0  0  0  0  0
   -2.7240    1.0233   -1.0498 H   0  0  0  0  0  0  0  0  0  0  0  0
  1  2  1  0  0  0  0
  1  6  1  0  0  0  0
  2  3  2  0  0  0  0
  2  7  1  0  0  0  0
  4  5  1  0  0  0  0
  4  7  1  0  0  0  0
  5  6  1  0  0  0  0
  5  8  2  0  0  0  0
  6  9  1  0  0  0  0
  6 11  1  0  0  0  0
  7 10  1  0  0  0  0
  7 12  1  0  0  0  0
  9 13  1  0  0  0  0
  9 14  1  0  0  0  0
  9 15  1  0  0  0  0
 10 16  1  0  0  0  0
 10 17  1  0  0  0  0
 10 18  1  0  0  0  0
M  END
