# Supplementary material
Source: publisher figshare collection journal article supplement (https://acs.figshare.com/ndownloader/files/5127205)
Supplement: Supplementary file 1 [file 5127205 › supporting_ja043819b/lactide.xml]

<cml:molecule xmlns:cml="http://www.xml-cml.org/schema/cml2/core"
>
<cml:metadataList title="generated automatically from Openbabel">
<cml:metadata name="dc:creator" content="OpenBabel version 1-100.1"/>
<cml:metadata name="dc:description" content="Conversion of legacy filetype to CML"/>
<cml:metadata name="dc:identifier" content="Unknown"/>
<cml:metadata name="dc:content"/>
<cml:metadata name="dc:rights" content="unknown"/>
<cml:metadata name="dc:type" content="chemistry"/>
<cml:metadata name="dc:contributor" content="unknown"/>
<cml:metadata name="dc:creator" content="Openbabel V1-100.1"/>
<cml:metadata name="dc:date" content="Sun Oct 10 09:43:54 BST 2004"/>
<cml:metadata name="cmlm:structure" content="yes"/>
</cml:metadataList>
<cml:atomArray atomID="a1 a2 a3 a4 a5 a6 a7 a8 a9 a10 a11 a12 a13 a14 a15 a16 a17 a18" elementType="O C O O C C C O C C H H H H H H H H" formalCharge="0 0 0 0 0 0 0 0 0 0 0 0 0 0 0 0 0 0" x3="0.258500 -1.037600 -1.922900 -0.258500 1.037600 1.264700 -1.264700 1.922900 2.623500 -2.623500 1.163800 -1.164000 2.740200 2.724200 3.410600 -3.410700 -2.740200 -2.724000" y3="-1.354000 -0.965500 -1.716600 1.354000 0.965500 -0.465000 0.464900 1.716600 -1.011300 1.011300 -0.464300 0.464100 -2.029400 -1.023100 -0.376000 0.375800 2.029300 1.023300" z3="-0.105700 -0.056500 -0.378400 -0.105600 -0.056300 0.436900 0.436800 -0.378000 0.038900 0.038800 1.533100 1.533100 0.419900 -1.049600 0.451200 0.450800 0.419900 -1.049800"/>
<cml:bondArray atomRef1="a1 a1 a2 a2 a4 a4 a5 a5 a6 a6 a7 a7 a9 a9 a9 a10 a10 a10" atomRef2="a2 a6 a3 a7 a5 a7 a6 a8 a9 a11 a10 a12 a13 a14 a15 a16 a17 a18" order="1 1 2 1 1 1 1 2 1 1 1 1 1 1 1 1 1 1"/>
</cml:molecule>
