# Supplementary material
Source: publisher figshare collection journal article supplement (https://acs.figshare.com/ndownloader/files/5127205)
Supplement: Supplementary file 1 [file 5127205 › supporting_ja043819b/RR_fm-5-reactant-thf-solv.log]

 Entering Gaussian System, Link 0=g03
 Input=RRSS_fm-5-thf-solv.gjf
 Output=RRSS_fm-5-thf-solv.log
 Initial command:
 /usr/local/g03/l1.exe /home/rzepa/Gau-3014.inp -scrdir=/home/rzepa/
 Entering Link 1 = /usr/local/g03/l1.exe PID=      3015.
  
 Copyright (c) 1988,1990,1992,1993,1995,1998,2003, Gaussian, Inc.
                  All Rights Reserved.
  
 This is the Gaussian(R) 03 program.  It is based on the
 the Gaussian(R) 98 system (copyright 1998, Gaussian, Inc.),
 the Gaussian(R) 94 system (copyright 1995, Gaussian, Inc.),
 the Gaussian 92(TM) system (copyright 1992, Gaussian, Inc.),
 the Gaussian 90(TM) system (copyright 1990, Gaussian, Inc.),
 the Gaussian 88(TM) system (copyright 1988, Gaussian, Inc.),
 the Gaussian 86(TM) system (copyright 1986, Carnegie Mellon
 University), and the Gaussian 82(TM) system (copyright 1983,
 Carnegie Mellon University). Gaussian is a federally registered
 trademark of Gaussian, Inc.
  
 This software contains proprietary and confidential information,
 including trade secrets, belonging to Gaussian, Inc.
  
 This software is provided under written license and may be
 used, copied, transmitted, or stored only in accord with that
 written license.
  
 The following legend is applicable only to US Government
 contracts under DFARS:
  
                    RESTRICTED RIGHTS LEGEND
  
 Use, duplication or disclosure by the US Government is subject
 to restrictions as set forth in subparagraph (c)(1)(ii) of the
 Rights in Technical Data and Computer Software clause at DFARS
 252.227-7013.
  
 Gaussian, Inc.
 Carnegie Office Park, Building 6, Pittsburgh, PA 15106 USA
  
 The following legend is applicable only to US Government
 contracts under FAR:
  
                    RESTRICTED RIGHTS LEGEND
  
 Use, reproduction and disclosure by the US Government is subject
 to restrictions as set forth in subparagraph (c) of the
 Commercial Computer Software - Restricted Rights clause at FAR
 52.227-19.
  
 Gaussian, Inc.
 Carnegie Office Park, Building 6, Pittsburgh, PA 15106 USA
  
  
 ---------------------------------------------------------------
 Warning -- This program may not be used in any manner that
 competes with the business of Gaussian, Inc. or will provide
 assistance to any competitor of Gaussian, Inc.  The licensee
 of this program is prohibited from giving any competitor of
 Gaussian, Inc. access to this program.  By using this program,
 the user acknowledges that Gaussian, Inc. is engaged in the
 business of creating and licensing software in the field of
 computational chemistry and represents and warrants to the
 licensee that it is not a competitor of Gaussian, Inc. and that
 it will not use this program in any manner prohibited above.
 ---------------------------------------------------------------
  

 Cite this work as:
 Gaussian 03, Revision B.04,
 M. J. Frisch, G. W. Trucks, H. B. Schlegel, G. E. Scuseria, 
 M. A. Robb, J. R. Cheeseman, J. A. Montgomery, Jr., T. Vreven, 
 K. N. Kudin, J. C. Burant, J. M. Millam, S. S. Iyengar, J. Tomasi, 
 V. Barone, B. Mennucci, M. Cossi, G. Scalmani, N. Rega, 
 G. A. Petersson, H. Nakatsuji, M. Hada, M. Ehara, K. Toyota, 
 R. Fukuda, J. Hasegawa, M. Ishida, T. Nakajima, Y. Honda, O. Kitao, 
 H. Nakai, M. Klene, X. Li, J. E. Knox, H. P. Hratchian, J. B. Cross, 
 C. Adamo, J. Jaramillo, R. Gomperts, R. E. Stratmann, O. Yazyev, 
 A. J. Austin, R. Cammi, C. Pomelli, J. W. Ochterski, P. Y. Ayala, 
 K. Morokuma, G. A. Voth, P. Salvador, J. J. Dannenberg, 
 V. G. Zakrzewski, S. Dapprich, A. D. Daniels, M. C. Strain, 
 O. Farkas, D. K. Malick, A. D. Rabuck, K. Raghavachari, 
 J. B. Foresman, J. V. Ortiz, Q. Cui, A. G. Baboul, S. Clifford, 
 J. Cioslowski, B. B. Stefanov, G. Liu, A. Liashenko, P. Piskorz, 
 I. Komaromi, R. L. Martin, D. J. Fox, T. Keith, M. A. Al-Laham, 
 C. Y. Peng, A. Nanayakkara, M. Challacombe, P. M. W. Gill, 
 B. Johnson, W. Chen, M. W. Wong, C. Gonzalez, and J. A. Pople, 
 Gaussian, Inc., Pittsburgh PA, 2003.
 
 *********************************************
 Gaussian 03:  x86-Linux-G03RevB.04 2-Jun-2003
                  28-Nov-2004 
 *********************************************
 %mem=800MB
 %nprocshared=2
 Will use up to    2 processors via shared memory.
 %chk=RRSS_fm-5-rhf.chk
 ------------------------------------
 # b3lyp/Gen scrf(IEFPCM,solvent=thf)
 ------------------------------------
 1/38=1/1;
 2/17=6,18=5,40=1/2;
 3/5=7,11=2,16=1,25=1,30=1,70=2201,72=20,74=-5/1,2,3;
 4//1;
 5/5=2,32=1,38=5,53=20/2;
 6/7=2,8=2,9=2,10=2,28=1/1;
 99/5=1,9=1/99;
 ----------------
 from RRSS_fm.gjf
 ----------------
 Symbolic Z-matrix:
 Charge =  0 Multiplicity = 1
 8                    0     4.68019  -3.00811   0.53123 
 12                   0    -0.47139   0.33204  -0.30364 
 8                    0    -0.16874   0.34252  -2.2068 
 6                    0     3.83992  -2.69966  -0.48105 
 7                    0     0.35113   1.84608   0.90093 
 7                    0    -2.37817   0.99205   0.32946 
 8                    0     3.01395  -3.46275  -0.92874 
 6                    0    -0.29575   2.82998   1.52498 
 6                    0    -1.69235   2.97731   1.53181 
 6                    0    -2.66144   2.11488   0.98011 
 8                    0     3.16221  -0.9313   -1.9885 
 6                    0     1.91259  -0.62415  -1.61598 
 6                    0     1.00259  -0.12235  -2.73824 
 6                    0     4.09858  -1.27346  -0.95096 
 8                    0     1.5371   -0.69106  -0.44916 
 6                    0     4.52098  -4.32386   1.08492 
 6                    0    -2.26621  -3.81575  -0.39171 
 6                    0    -1.22816  -4.07326   0.73213 
 6                    0    -0.27678  -2.8619    0.63724 
 8                    0    -1.01576  -1.8564   -0.08139 
 6                    0    -1.71899  -2.58057  -1.11522 
 6                    0     0.82496  -1.22917  -3.80304 
 6                    0     5.49215  -1.08201  -1.54331 
 6                    0     1.79676   1.90025   0.83123 
 6                    0    -3.44848   0.07692  -0.00494 
 6                    0     2.41725   2.69461  -0.19871 
 6                    0     3.81833   2.57469  -0.38377 
 6                    0     4.60212   1.76179   0.46066 
 6                    0     3.99126   1.04092   1.51402 
 6                    0     2.58329   1.08153   1.70431 
 6                    0     1.61834   3.73949  -1.03135 
 6                    0     1.93589   0.27872   2.8625 
 6                    0    -3.99147  -0.78248   1.00738 
 6                    0    -4.90888  -1.79489   0.61389 
 6                    0    -5.29326  -1.94569  -0.73393 
 6                    0    -4.79199  -1.06111  -1.714 
 6                    0    -3.87187  -0.03282  -1.37632 
 6                    0    -3.65508  -0.6087    2.51509 
 6                    0    -3.39218   0.97888  -2.45123 
 6                    0     1.44728   3.33052  -2.52763 
 6                    0     2.28362   5.15499  -0.92509 
 6                    0     2.35505  -1.22506   2.83793 
 6                    0     2.27949   0.91016   4.25425 
 6                    0    -3.08039   0.30438  -3.82068 
 6                    0    -4.44306   2.12701  -2.6308 
 6                    0    -2.84117  -1.81252   3.0879 
 6                    0    -4.95654  -0.38942   3.35978 
 6                    0     0.49496   3.89249   2.28077 
 6                    0    -4.10733   2.54386   1.21867 
 1                    0    -2.07791   3.84748   2.05219 
 1                    0     1.59265   0.67886  -3.22854 
 1                    0     3.96981  -0.58843  -0.10701 
 1                    0     4.62075  -5.08505   0.30713 
 1                    0     3.53863  -4.42063   1.55557 
 1                    0     5.31156  -4.42696   1.82889 
 1                    0    -3.24522  -3.54965   0.01056 
 1                    0    -2.38231  -4.67006  -1.06663 
 1                    0    -0.68107  -5.01053   0.58947 
 1                    0    -1.71612  -4.11246   1.70938 
 1                    0     0.63272  -3.10586   0.0771 
 1                    0     0.00713  -2.43632   1.60064 
 1                    0    -2.49837  -1.93561  -1.50896 
 1                    0    -1.00546  -2.84375  -1.90602 
 1                    0     1.78191  -1.50919  -4.25806 
 1                    0     0.15638  -0.84872  -4.58107 
 1                    0     0.37001  -2.12525  -3.36924 
 1                    0     5.6326   -0.02001  -1.76386 
 1                    0     5.61158  -1.65876  -2.46567 
 1                    0     6.25291  -1.39594  -0.82367 
 1                    0     4.30858   3.16873  -1.16628 
 1                    0     5.69365   1.7271    0.33518 
 1                    0     4.61613   0.46335   2.20796 
 1                    0     0.60168   3.81072  -0.6 
 1                    0     0.83575   0.3352    2.72595 
 1                    0    -5.35014  -2.44819   1.37811 
 1                    0    -6.01108  -2.72833  -1.01559 
 1                    0    -5.13169  -1.15821  -2.75336 
 1                    0    -3.01941   0.29016   2.6231 
 1                    0    -2.45206   1.43564  -2.08587 
 1                    0     1.00338   4.16432  -3.09474 
 1                    0     0.76489   2.46559  -2.59595 
 1                    0     2.41731   3.07707  -2.98377 
 1                    0     1.62794   5.90538  -1.39248 
 1                    0     3.2533    5.17462  -1.44486 
 1                    0     2.44727   5.44145   0.12533 
 1                    0     1.78153  -1.78698   3.59258 
 1                    0     3.42676  -1.34374   3.06117 
 1                    0     2.16135  -1.65856   1.8433 
 1                    0     1.7891    0.33659   5.05578 
 1                    0     1.93002   1.95214   4.31145 
 1                    0     3.36643   0.89614   4.42993 
 1                    0    -2.63539   1.04858  -4.49841 
 1                    0    -3.98871  -0.09798  -4.29546 
 1                    0    -2.35327  -0.5127   -3.6842 
 1                    0    -4.08355   2.84097  -3.3875 
 1                    0    -4.59633   2.67291  -1.68642 
 1                    0    -5.4122    1.72214  -2.96295 
 1                    0    -2.67333  -1.67714   4.16835 
 1                    0    -1.85703  -1.86869   2.59107 
 1                    0    -3.37487  -2.76385   2.93216 
 1                    0    -4.6877   -0.1355    4.39659 
 1                    0    -5.57192  -1.30178   3.37671 
 1                    0    -5.56379   0.42961   2.94557 
 1                    0     1.07178   4.52498   1.59717 
 1                    0    -0.17485   4.54341   2.85273 
 1                    0     1.20355   3.4342    2.97866 
 1                    0    -4.80276   2.08883   0.50901 
 1                    0    -4.4321    2.27249   2.23076 
 1                    0    -4.19025   3.63403   1.13526 
 
 Stoichiometry    C40H60MgN2O6
 Framework group  C1[X(C40H60MgN2O6)]
 Deg. of freedom   321
 Full point group                 C1      NOp   1
 Largest Abelian subgroup         C1      NOp   1
 Largest concise Abelian subgroup C1      NOp   1
                         Standard orientation:                         
 ---------------------------------------------------------------------
 Center     Atomic     Atomic              Coordinates (Angstroms)
 Number     Number      Type              X           Y           Z
 ---------------------------------------------------------------------
    1          8             0        4.680191   -3.008108    0.531231
    2         12             0       -0.471392    0.332037   -0.303636
    3          8             0       -0.168735    0.342523   -2.206803
    4          6             0        3.839915   -2.699659   -0.481049
    5          7             0        0.351132    1.846075    0.900925
    6          7             0       -2.378166    0.992050    0.329462
    7          8             0        3.013947   -3.462752   -0.928741
    8          6             0       -0.295749    2.829977    1.524975
    9          6             0       -1.692354    2.977306    1.531812
   10          6             0       -2.661436    2.114880    0.980112
   11          8             0        3.162209   -0.931299   -1.988501
   12          6             0        1.912591   -0.624147   -1.615983
   13          6             0        1.002595   -0.122346   -2.738241
   14          6             0        4.098581   -1.273455   -0.950959
   15          8             0        1.537103   -0.691063   -0.449162
   16          6             0        4.520978   -4.323856    1.084917
   17          6             0       -2.266208   -3.815746   -0.391714
   18          6             0       -1.228163   -4.073264    0.732129
   19          6             0       -0.276783   -2.861898    0.637240
   20          8             0       -1.015758   -1.856397   -0.081385
   21          6             0       -1.718986   -2.580566   -1.115216
   22          6             0        0.824959   -1.229171   -3.803037
   23          6             0        5.492152   -1.082008   -1.543309
   24          6             0        1.796758    1.900249    0.831227
   25          6             0       -3.448484    0.076923   -0.004937
   26          6             0        2.417246    2.694609   -0.198708
   27          6             0        3.818331    2.574690   -0.383773
   28          6             0        4.602124    1.761788    0.460658
   29          6             0        3.991260    1.040919    1.514021
   30          6             0        2.583291    1.081530    1.704309
   31          6             0        1.618341    3.739492   -1.031346
   32          6             0        1.935889    0.278720    2.862496
   33          6             0       -3.991470   -0.782476    1.007377
   34          6             0       -4.908883   -1.794889    0.613885
   35          6             0       -5.293255   -1.945691   -0.733927
   36          6             0       -4.791993   -1.061106   -1.714001
   37          6             0       -3.871874   -0.032816   -1.376320
   38          6             0       -3.655076   -0.608701    2.515086
   39          6             0       -3.392184    0.978881   -2.451234
   40          6             0        1.447275    3.330522   -2.527630
   41          6             0        2.283618    5.154991   -0.925089
   42          6             0        2.355049   -1.225057    2.837930
   43          6             0        2.279492    0.910161    4.254251
   44          6             0       -3.080390    0.304382   -3.820684
   45          6             0       -4.443056    2.127012   -2.630804
   46          6             0       -2.841169   -1.812517    3.087904
   47          6             0       -4.956540   -0.389422    3.359782
   48          6             0        0.494960    3.892490    2.280770
   49          6             0       -4.107328    2.543861    1.218674
   50          1             0       -2.077910    3.847481    2.052191
   51          1             0        1.592646    0.678857   -3.228545
   52          1             0        3.969811   -0.588434   -0.107007
   53          1             0        4.620747   -5.085045    0.307127
   54          1             0        3.538632   -4.420633    1.555572
   55          1             0        5.311561   -4.426959    1.828893
   56          1             0       -3.245221   -3.549646    0.010556
   57          1             0       -2.382308   -4.670062   -1.066627
   58          1             0       -0.681066   -5.010534    0.589469
   59          1             0       -1.716120   -4.112463    1.709384
   60          1             0        0.632719   -3.105863    0.077098
   61          1             0        0.007125   -2.436321    1.600643
   62          1             0       -2.498371   -1.935610   -1.508962
   63          1             0       -1.005462   -2.843747   -1.906018
   64          1             0        1.781912   -1.509190   -4.258056
   65          1             0        0.156380   -0.848719   -4.581069
   66          1             0        0.370006   -2.125248   -3.369238
   67          1             0        5.632605   -0.020012   -1.763859
   68          1             0        5.611580   -1.658755   -2.465669
   69          1             0        6.252914   -1.395937   -0.823666
   70          1             0        4.308575    3.168730   -1.166278
   71          1             0        5.693645    1.727104    0.335182
   72          1             0        4.616128    0.463353    2.207961
   73          1             0        0.601684    3.810716   -0.599999
   74          1             0        0.835746    0.335202    2.725946
   75          1             0       -5.350139   -2.448186    1.378111
   76          1             0       -6.011078   -2.728330   -1.015594
   77          1             0       -5.131688   -1.158206   -2.753363
   78          1             0       -3.019408    0.290157    2.623103
   79          1             0       -2.452057    1.435637   -2.085870
   80          1             0        1.003380    4.164323   -3.094740
   81          1             0        0.764887    2.465588   -2.595948
   82          1             0        2.417307    3.077067   -2.983772
   83          1             0        1.627939    5.905377   -1.392478
   84          1             0        3.253299    5.174625   -1.444859
   85          1             0        2.447272    5.441447    0.125326
   86          1             0        1.781527   -1.786984    3.592578
   87          1             0        3.426763   -1.343741    3.061168
   88          1             0        2.161350   -1.658555    1.843297
   89          1             0        1.789095    0.336586    5.055784
   90          1             0        1.930020    1.952142    4.311448
   91          1             0        3.366429    0.896144    4.429929
   92          1             0       -2.635393    1.048583   -4.498408
   93          1             0       -3.988711   -0.097976   -4.295462
   94          1             0       -2.353266   -0.512704   -3.684198
   95          1             0       -4.083549    2.840974   -3.387495
   96          1             0       -4.596331    2.672909   -1.686420
   97          1             0       -5.412198    1.722142   -2.962950
   98          1             0       -2.673325   -1.677138    4.168347
   99          1             0       -1.857028   -1.868688    2.591073
  100          1             0       -3.374874   -2.763851    2.932164
  101          1             0       -4.687697   -0.135496    4.396591
  102          1             0       -5.571923   -1.301783    3.376709
  103          1             0       -5.563794    0.429612    2.945574
  104          1             0        1.071785    4.524980    1.597173
  105          1             0       -0.174847    4.543413    2.852733
  106          1             0        1.203547    3.434204    2.978655
  107          1             0       -4.802762    2.088833    0.509014
  108          1             0       -4.432103    2.272489    2.230762
  109          1             0       -4.190254    3.634028    1.135255
 ---------------------------------------------------------------------
 Rotational constants (GHZ):      0.0841854      0.0559607      0.0499005
 General basis read from cards:  (5D, 7F)
 There are   572 symmetry adapted basis functions of A   symmetry.
 Integral buffers will be    262144 words long.
 Raffenetti 2 integral format.
 Two-electron integral symmetry is turned on.
   572 basis functions,  1290 primitive gaussians,   599 cartesian basis functions
   187 alpha electrons      187 beta electrons
       nuclear repulsion energy      7746.0655989525 Hartrees.
 NAtoms=  109 NActive=  109 NUniq=  109 SFac= 1.00D+00 NAtFMM=   60 Big=T
 ------------------------------------------------------------------------------
 United Atom Topological Model (UA0  parameters set).
  Nord Group  Hybr  Charge Alpha Radius          Bonded to
    1   O     *     0.00   1.00  1.750   C4   [s]  C16  [s]
    2  Mg     *     0.00   1.00  1.511   O3   [d]  N5   [s]  N6   [s]  O15  [s]
                                         O20  [s]
    3   O     *     0.00   1.00  1.750  Mg2   [d]  C13  [s]
    4   C     *     0.00   1.00  1.925   O1   [s]  O7   [d]  C14  [s]
    5   N     *     0.00   1.00  1.830  Mg2   [s]  C8   [d]  C24  [s]
    6   N     *     0.00   1.00  1.830  Mg2   [s]  C10  [d]  C25  [s]
    7   O     *     0.00   1.00  1.750   C4   [d]
    8   C     *     0.00   1.00  1.925   N5   [d]  C9   [s]  C48  [s]
    9   CH    *     0.00   1.00  2.125   C8   [s]  C10  [s]
   10   C     *     0.00   1.00  1.925   N6   [d]  C9   [s]  C49  [s]
   11   O     *     0.00   1.00  1.750   C12  [s]  C14  [s]
   12   C     *     0.00   1.00  1.925   O11  [s]  C13  [s]  O15  [d]
   13   CH    *     0.00   1.00  2.125   O3   [s]  C12  [s]  C22  [s]
   14   CH    *     0.00   1.00  2.125   C4   [s]  O11  [s]  C23  [s]
   15   O     *     0.00   1.00  1.750  Mg2   [s]  C12  [d]
   16   CH3   *     0.00   1.00  2.525   O1   [s]
   17   CH2   *     0.00   1.00  2.325   C18  [s]  C21  [s]
   18   CH2   *     0.00   1.00  2.325   C17  [s]  C19  [s]
   19   CH2   *     0.00   1.00  2.325   C18  [s]  O20  [s]
   20   O     *     0.00   1.00  1.750  Mg2   [s]  C19  [s]  C21  [s]
   21   CH2   *     0.00   1.00  2.325   C17  [s]  O20  [s]
   22   CH3   *     0.00   1.00  2.525   C13  [s]
   23   CH3   *     0.00   1.00  2.525   C14  [s]
   24   C     *     0.00   1.00  1.925   N5   [s]  C26  [s]  C30  [s]
   25   C     *     0.00   1.00  1.925   N6   [s]  C33  [s]  C37  [s]
   26   C     *     0.00   1.00  1.925   C24  [s]  C27  [s]  C31  [s]
   27   CH    *     0.00   1.00  2.125   C26  [s]  C28  [s]
   28   CH    *     0.00   1.00  2.125   C27  [s]  C29  [s]
   29   CH    *     0.00   1.00  2.125   C28  [s]  C30  [s]
   30   C     *     0.00   1.00  1.925   C24  [s]  C29  [s]  C32  [s]
   31   CH    *     0.00   1.00  2.125   C26  [s]  C40  [s]  C41  [s]
   32   CH    *     0.00   1.00  2.125   C30  [s]  C42  [s]  C43  [s]
   33   C     *     0.00   1.00  1.925   C25  [s]  C34  [s]  C38  [s]
   34   CH    *     0.00   1.00  2.125   C33  [s]  C35  [s]
   35   CH    *     0.00   1.00  2.125   C34  [s]  C36  [s]
   36   CH    *     0.00   1.00  2.125   C35  [s]  C37  [s]
   37   C     *     0.00   1.00  1.925   C25  [s]  C36  [s]  C39  [s]
   38   CH    *     0.00   1.00  2.125   C33  [s]  C46  [s]  C47  [s]
   39   CH    *     0.00   1.00  2.125   C37  [s]  C44  [s]  C45  [s]
   40   CH3   *     0.00   1.00  2.525   C31  [s]
   41   CH3   *     0.00   1.00  2.525   C31  [s]
   42   CH3   *     0.00   1.00  2.525   C32  [s]
   43   CH3   *     0.00   1.00  2.525   C32  [s]
   44   CH3   *     0.00   1.00  2.525   C39  [s]
   45   CH3   *     0.00   1.00  2.525   C39  [s]
   46   CH3   *     0.00   1.00  2.525   C38  [s]
   47   CH3   *     0.00   1.00  2.525   C38  [s]
   48   CH3   *     0.00   1.00  2.525   C8   [s]
   49   CH3   *     0.00   1.00  2.525   C10  [s]
 ------------------------------------------------------------------------------
 Polarizable Continuum Model (PCM)
 =================================
 Model                : PCM.
 Atomic radii         : UA0 (Simple United Atom Topological Model).
 Polarization charges : Total charges.
 Charge compensation  : None.
 Solution method      : Matrix inversion.
 Cavity               : GePol (RMin=0.200 OFac=0.890).
                        Default sphere list used, NSphG=   49.
                        Tesserae with average area of 0.200 Ang**2.
 Solvent              : THF, Eps=   7.580000.
 ------------------------------------------------------------------------------
 DisRep: Neglecting contributions from atom    2
 One-electron integrals computed using PRISM.
 NBasis=   572 RedAO= T  NBF=   572
 NBsUse=   572 1.00D-06 NBFU=   572
 Harris functional with IExCor=  402 diagonalized for initial guess.
 ExpMin= 3.48D-02 ExpMax= 4.39D+04 ExpMxC= 1.51D+03 IAcc=3 IRadAn=         5 AccDes= 0.00D+00
 HarFok:  IExCor= 402 AccDes= 0.00D+00 IRadAn=         5 IDoV=1
 ScaDFX=  1.000000  1.000000  1.000000  1.000000
 Initial guess orbital symmetries:
       Occupied  (A) (A) (A) (A) (A) (A) (A) (A) (A) (A) (A) (A)
                 (A) (A) (A) (A) (A) (A) (A) (A) (A) (A) (A) (A)
                 (A) (A) (A) (A) (A) (A) (A) (A) (A) (A) (A) (A)
                 (A) (A) (A) (A) (A) (A) (A) (A) (A) (A) (A) (A)
                 (A) (A) (A) (A) (A) (A) (A) (A) (A) (A) (A) (A)
                 (A) (A) (A) (A) (A) (A) (A) (A) (A) (A) (A) (A)
                 (A) (A) (A) (A) (A) (A) (A) (A) (A) (A) (A) (A)
                 (A) (A) (A) (A) (A) (A) (A) (A) (A) (A) (A) (A)
                 (A) (A) (A) (A) (A) (A) (A) (A) (A) (A) (A) (A)
                 (A) (A) (A) (A) (A) (A) (A) (A) (A) (A) (A) (A)
                 (A) (A) (A) (A) (A) (A) (A) (A) (A) (A) (A) (A)
                 (A) (A) (A) (A) (A) (A) (A) (A) (A) (A) (A) (A)
                 (A) (A) (A) (A) (A) (A) (A) (A) (A) (A) (A) (A)
                 (A) (A) (A) (A) (A) (A) (A) (A) (A) (A) (A) (A)
                 (A) (A) (A) (A) (A) (A) (A) (A) (A) (A) (A) (A)
                 (A) (A) (A) (A) (A) (A) (A)
       Virtual   (A) (A) (A) (A) (A) (A) (A) (A) (A) (A) (A) (A)
                 (A) (A) (A) (A) (A) (A) (A) (A) (A) (A) (A) (A)
                 (A) (A) (A) (A) (A) (A) (A) (A) (A) (A) (A) (A)
                 (A) (A) (A) (A) (A) (A) (A) (A) (A) (A) (A) (A)
                 (A) (A) (A) (A) (A) (A) (A) (A) (A) (A) (A) (A)
                 (A) (A) (A) (A) (A) (A) (A) (A) (A) (A) (A) (A)
                 (A) (A) (A) (A) (A) (A) (A) (A) (A) (A) (A) (A)
                 (A) (A) (A) (A) (A) (A) (A) (A) (A) (A) (A) (A)
                 (A) (A) (A) (A) (A) (A) (A) (A) (A) (A) (A) (A)
                 (A) (A) (A) (A) (A) (A) (A) (A) (A) (A) (A) (A)
                 (A) (A) (A) (A) (A) (A) (A) (A) (A) (A) (A) (A)
                 (A) (A) (A) (A) (A) (A) (A) (A) (A) (A) (A) (A)
                 (A) (A) (A) (A) (A) (A) (A) (A) (A) (A) (A) (A)
                 (A) (A) (A) (A) (A) (A) (A) (A) (A) (A) (A) (A)
                 (A) (A) (A) (A) (A) (A) (A) (A) (A) (A) (A) (A)
                 (A) (A) (A) (A) (A) (A) (A) (A) (A) (A) (A) (A)
                 (A) (A) (A) (A) (A) (A) (A) (A) (A) (A) (A) (A)
                 (A) (A) (A) (A) (A) (A) (A) (A) (A) (A) (A) (A)
                 (A) (A) (A) (A) (A) (A) (A) (A) (A) (A) (A) (A)
                 (A) (A) (A) (A) (A) (A) (A) (A) (A) (A) (A) (A)
                 (A) (A) (A) (A) (A) (A) (A) (A) (A) (A) (A) (A)
                 (A) (A) (A) (A) (A) (A) (A) (A) (A) (A) (A) (A)
                 (A) (A) (A) (A) (A) (A) (A) (A) (A) (A) (A) (A)
                 (A) (A) (A) (A) (A) (A) (A) (A) (A) (A) (A) (A)
                 (A) (A) (A) (A) (A) (A) (A) (A) (A) (A) (A) (A)
                 (A) (A) (A) (A) (A) (A) (A) (A) (A) (A) (A) (A)
                 (A) (A) (A) (A) (A) (A) (A) (A) (A) (A) (A) (A)
                 (A) (A) (A) (A) (A) (A) (A) (A) (A) (A) (A) (A)
                 (A) (A) (A) (A) (A) (A) (A) (A) (A) (A) (A) (A)
                 (A) (A) (A) (A) (A) (A) (A) (A) (A) (A) (A) (A)
                 (A) (A) (A) (A) (A) (A) (A) (A) (A) (A) (A) (A)
                 (A) (A) (A) (A) (A) (A) (A) (A) (A) (A) (A) (A)
                 (A)
 The electronic state of the initial guess is 1-A.
 Requested convergence on RMS density matrix=1.00D-04 within 128 cycles.
 Requested convergence on MAX density matrix=1.00D-02.
 Requested convergence on             energy=1.00D-02.
 No special actions if energy rises.
 Error on total polarization charges =  0.00815
 SCF Done:  E(RB+HF-LYP) =  -2310.30705050     A.U. after    7 cycles
             Convg  =    0.1001D-04             -V/T =  2.0112
             S**2   =   0.0000
 --------------------------------------------------------------------
 Variational PCM results
 =======================
 <psi(f)|   H    |psi(f)>                     (a.u.) =   -2310.298297
 <psi(f)|H+V(f)/2|psi(f)>                     (a.u.) =   -2310.307051
 Total free energy in solution:
  with all non electrostatic terms            (a.u.) =   -2310.250638
 --------------------------------------------------------------------
 (Polarized solute)-Solvent               (kcal/mol) =      -5.49
 --------------------------------------------------------------------
 Cavitation energy                        (kcal/mol) =      69.83
 Dispersion energy                        (kcal/mol) =     -35.60
 Repulsion energy                         (kcal/mol) =       1.18
 Total non electrostatic                  (kcal/mol) =      35.40
 --------------------------------------------------------------------
 Partition over spheres:
 Sphere  on Atom  Surface  Charge   GEl     GCav    GDR
    1      O1       0.00   0.000    0.00    0.26    0.00
    2     Mg2       0.00   0.000    0.00    0.23    0.00
    3      O3       0.00   0.000    0.00    0.35    0.00
    4      C4       0.00   0.000    0.00    0.15    0.00
    5      N5       0.00   0.000    0.00    0.36    0.00
    6      N6       0.00   0.000    0.00    0.35    0.00
    7      O7       3.83   0.035   -0.54    1.51   -0.55
    8      C8       0.00   0.000    0.00    0.12    0.00
    9      C9       3.49   0.000   -0.10    1.42   -0.33
   10      C10      0.00   0.000    0.00    0.12    0.00
   11      O11      0.00   0.000    0.00    0.46    0.00
   12      C12      0.00   0.000    0.00    0.15    0.00
   13      C13      0.00   0.000    0.00    0.30    0.00
   14      C14      0.00   0.000    0.00    0.06    0.00
   15      O15      0.00   0.000    0.00    0.08    0.00
   16      C16     39.54  -0.074   -0.41    5.06   -2.66
   17      C17     15.25  -0.001   -0.04    1.88   -1.45
   18      C18     14.57  -0.004   -0.03    2.13   -1.46
   19      C19      0.00   0.000    0.00    1.17    0.00
   20      O20      0.00   0.000    0.00    0.06    0.00
   21      C21      2.56  -0.001    0.00    0.94   -0.26
   22      C22     27.28   0.021   -0.15    4.06   -2.01
   23      C23     32.26  -0.026   -0.07    4.42   -2.50
   24      C24      0.00   0.000    0.00    0.05    0.00
   25      C25      0.00   0.000    0.00    0.03    0.00
   26      C26      0.00   0.000    0.00    0.03    0.00
   27      C27      4.24  -0.016   -0.16    1.30   -0.51
   28      C28     10.47  -0.025   -0.32    1.39   -1.12
   29      C29      4.74  -0.012   -0.16    1.12   -0.57
   30      C30      0.00   0.000    0.00    0.03    0.00
   31      C31      0.00   0.000    0.00    0.16    0.00
   32      C32      0.00   0.000    0.00    0.30    0.00
   33      C33      0.00   0.000    0.00    0.03    0.00
   34      C34      6.33  -0.017   -0.20    1.11   -0.59
   35      C35     13.84  -0.023   -0.27    1.75   -1.57
   36      C36      7.63  -0.018   -0.19    1.23   -0.69
   37      C37      0.00   0.000    0.00    0.03    0.00
   38      C38      0.00   0.000    0.00    0.18    0.00
   39      C39      0.00   0.000    0.00    0.23    0.00
   40      C40     19.12   0.002   -0.06    3.65   -1.61
   41      C41     30.93  -0.011   -0.04    3.91   -2.36
   42      C42     10.00  -0.009   -0.05    2.57   -0.90
   43      C43     30.78  -0.012   -0.07    3.97   -2.16
   44      C44     22.97   0.004   -0.06    3.28   -1.67
   45      C45     29.33  -0.003   -0.03    3.89   -2.05
   46      C46     17.29  -0.011   -0.05    3.36   -1.43
   47      C47     31.65  -0.014   -0.07    3.84   -2.32
   48      C48     25.82   0.002   -0.04    3.44   -1.84
   49      C49     22.76  -0.004   -0.01    3.33   -1.81
 Added spheres:   202.13   0.208   -2.37    0.00    0.00
 --------------------------------------------------------------------

 **********************************************************************

            Population analysis using the SCF density.

 **********************************************************************

 Orbital symmetries:
       Occupied  (A) (A) (A) (A) (A) (A) (A) (A) (A) (A) (A) (A)
                 (A) (A) (A) (A) (A) (A) (A) (A) (A) (A) (A) (A)
                 (A) (A) (A) (A) (A) (A) (A) (A) (A) (A) (A) (A)
                 (A) (A) (A) (A) (A) (A) (A) (A) (A) (A) (A) (A)
                 (A) (A) (A) (A) (A) (A) (A) (A) (A) (A) (A) (A)
                 (A) (A) (A) (A) (A) (A) (A) (A) (A) (A) (A) (A)
                 (A) (A) (A) (A) (A) (A) (A) (A) (A) (A) (A) (A)
                 (A) (A) (A) (A) (A) (A) (A) (A) (A) (A) (A) (A)
                 (A) (A) (A) (A) (A) (A) (A) (A) (A) (A) (A) (A)
                 (A) (A) (A) (A) (A) (A) (A) (A) (A) (A) (A) (A)
                 (A) (A) (A) (A) (A) (A) (A) (A) (A) (A) (A) (A)
                 (A) (A) (A) (A) (A) (A) (A) (A) (A) (A) (A) (A)
                 (A) (A) (A) (A) (A) (A) (A) (A) (A) (A) (A) (A)
                 (A) (A) (A) (A) (A) (A) (A) (A) (A) (A) (A) (A)
                 (A) (A) (A) (A) (A) (A) (A) (A) (A) (A) (A) (A)
                 (A) (A) (A) (A) (A) (A) (A)
       Virtual   (A) (A) (A) (A) (A) (A) (A) (A) (A) (A) (A) (A)
                 (A) (A) (A) (A) (A) (A) (A) (A) (A) (A) (A) (A)
                 (A) (A) (A) (A) (A) (A) (A) (A) (A) (A) (A) (A)
                 (A) (A) (A) (A) (A) (A) (A) (A) (A) (A) (A) (A)
                 (A) (A) (A) (A) (A) (A) (A) (A) (A) (A) (A) (A)
                 (A) (A) (A) (A) (A) (A) (A) (A) (A) (A) (A) (A)
                 (A) (A) (A) (A) (A) (A) (A) (A) (A) (A) (A) (A)
                 (A) (A) (A) (A) (A) (A) (A) (A) (A) (A) (A) (A)
                 (A) (A) (A) (A) (A) (A) (A) (A) (A) (A) (A) (A)
                 (A) (A) (A) (A) (A) (A) (A) (A) (A) (A) (A) (A)
                 (A) (A) (A) (A) (A) (A) (A) (A) (A) (A) (A) (A)
                 (A) (A) (A) (A) (A) (A) (A) (A) (A) (A) (A) (A)
                 (A) (A) (A) (A) (A) (A) (A) (A) (A) (A) (A) (A)
                 (A) (A) (A) (A) (A) (A) (A) (A) (A) (A) (A) (A)
                 (A) (A) (A) (A) (A) (A) (A) (A) (A) (A) (A) (A)
                 (A) (A) (A) (A) (A) (A) (A) (A) (A) (A) (A) (A)
                 (A) (A) (A) (A) (A) (A) (A) (A) (A) (A) (A) (A)
                 (A) (A) (A) (A) (A) (A) (A) (A) (A) (A) (A) (A)
                 (A) (A) (A) (A) (A) (A) (A) (A) (A) (A) (A) (A)
                 (A) (A) (A) (A) (A) (A) (A) (A) (A) (A) (A) (A)
                 (A) (A) (A) (A) (A) (A) (A) (A) (A) (A) (A) (A)
                 (A) (A) (A) (A) (A) (A) (A) (A) (A) (A) (A) (A)
                 (A) (A) (A) (A) (A) (A) (A) (A) (A) (A) (A) (A)
                 (A) (A) (A) (A) (A) (A) (A) (A) (A) (A) (A) (A)
                 (A) (A) (A) (A) (A) (A) (A) (A) (A) (A) (A) (A)
                 (A) (A) (A) (A) (A) (A) (A) (A) (A) (A) (A) (A)
                 (A) (A) (A) (A) (A) (A) (A) (A) (A) (A) (A) (A)
                 (A) (A) (A) (A) (A) (A) (A) (A) (A) (A) (A) (A)
                 (A) (A) (A) (A) (A) (A) (A) (A) (A) (A) (A) (A)
                 (A) (A) (A) (A) (A) (A) (A) (A) (A) (A) (A) (A)
                 (A) (A) (A) (A) (A) (A) (A) (A) (A) (A) (A) (A)
                 (A) (A) (A) (A) (A) (A) (A) (A) (A) (A) (A) (A)
                 (A)
 The electronic state is 1-A.
 Alpha  occ. eigenvalues --  -46.70098 -19.19153 -19.18581 -19.14847 -19.14111
 Alpha  occ. eigenvalues --  -19.13548 -19.03389 -14.27862 -14.27466 -10.31474
 Alpha  occ. eigenvalues --  -10.29817 -10.24365 -10.23254 -10.21066 -10.20280
 Alpha  occ. eigenvalues --  -10.20104 -10.19877 -10.19714 -10.17678 -10.16675
 Alpha  occ. eigenvalues --  -10.15946 -10.15450 -10.15403 -10.14698 -10.11949
 Alpha  occ. eigenvalues --  -10.05516 -10.05471 -10.03127 -10.03022 -10.02727
 Alpha  occ. eigenvalues --  -10.02653 -10.02614 -10.02604 -10.02569 -10.01997
 Alpha  occ. eigenvalues --  -10.01940 -10.01925 -10.01692 -10.01562 -10.01464
 Alpha  occ. eigenvalues --  -10.01279 -10.00861 -10.00717 -10.00683 -10.00506
 Alpha  occ. eigenvalues --  -10.00446 -10.00072  -9.99330  -9.99244  -3.00451
 Alpha  occ. eigenvalues --   -1.75194  -1.75109  -1.74833  -1.11116  -1.09765
 Alpha  occ. eigenvalues --   -1.03029  -1.02072  -1.01269  -0.91204  -0.88828
 Alpha  occ. eigenvalues --   -0.87551  -0.81091  -0.80505  -0.79598  -0.76569
 Alpha  occ. eigenvalues --   -0.76512  -0.76383  -0.74420  -0.74044  -0.73744
 Alpha  occ. eigenvalues --   -0.72854  -0.72193  -0.71663  -0.71255  -0.68290
 Alpha  occ. eigenvalues --   -0.68198  -0.68088  -0.67665  -0.65941  -0.65542
 Alpha  occ. eigenvalues --   -0.64864  -0.64806  -0.64172  -0.63828  -0.61772
 Alpha  occ. eigenvalues --   -0.58964  -0.58903  -0.58759  -0.58128  -0.57696
 Alpha  occ. eigenvalues --   -0.56971  -0.56611  -0.54962  -0.54653  -0.54559
 Alpha  occ. eigenvalues --   -0.52351  -0.52263  -0.49991  -0.49823  -0.49721
 Alpha  occ. eigenvalues --   -0.49164  -0.48971  -0.48391  -0.48232  -0.47305
 Alpha  occ. eigenvalues --   -0.46701  -0.46212  -0.44899  -0.44681  -0.44485
 Alpha  occ. eigenvalues --   -0.44147  -0.44016  -0.43566  -0.43432  -0.43122
 Alpha  occ. eigenvalues --   -0.41348  -0.41131  -0.40876  -0.40755  -0.40546
 Alpha  occ. eigenvalues --   -0.40497  -0.40268  -0.40091  -0.39910  -0.39762
 Alpha  occ. eigenvalues --   -0.39384  -0.39235  -0.39146  -0.39042  -0.38566
 Alpha  occ. eigenvalues --   -0.38524  -0.38423  -0.38147  -0.38014  -0.37125
 Alpha  occ. eigenvalues --   -0.37044  -0.36591  -0.36405  -0.36313  -0.35973
 Alpha  occ. eigenvalues --   -0.35766  -0.35546  -0.35474  -0.35134  -0.35100
 Alpha  occ. eigenvalues --   -0.34916  -0.34826  -0.34576  -0.34401  -0.34175
 Alpha  occ. eigenvalues --   -0.34067  -0.33941  -0.33658  -0.33641  -0.33261
 Alpha  occ. eigenvalues --   -0.32575  -0.32162  -0.31712  -0.31342  -0.30837
 Alpha  occ. eigenvalues --   -0.30698  -0.30594  -0.30424  -0.30241  -0.30106
 Alpha  occ. eigenvalues --   -0.29846  -0.29613  -0.29367  -0.28628  -0.28306
 Alpha  occ. eigenvalues --   -0.28132  -0.27904  -0.27864  -0.27307  -0.27199
 Alpha  occ. eigenvalues --   -0.27074  -0.26853  -0.25694  -0.24792  -0.24451
 Alpha  occ. eigenvalues --   -0.21117  -0.19358  -0.18861  -0.18719  -0.18335
 Alpha  occ. eigenvalues --   -0.17843  -0.15184
 Alpha virt. eigenvalues --    0.00645   0.01212   0.01544   0.06369   0.06770
 Alpha virt. eigenvalues --    0.07066   0.07191   0.07683   0.08462   0.09799
 Alpha virt. eigenvalues --    0.10621   0.11270   0.11830   0.12562   0.13258
 Alpha virt. eigenvalues --    0.13450   0.14084   0.14552   0.15077   0.15602
 Alpha virt. eigenvalues --    0.15622   0.16252   0.16325   0.16828   0.17307
 Alpha virt. eigenvalues --    0.17584   0.18070   0.18132   0.18996   0.19334
 Alpha virt. eigenvalues --    0.20064   0.20304   0.20630   0.21138   0.21801
 Alpha virt. eigenvalues --    0.22042   0.22789   0.23116   0.23426   0.24208
 Alpha virt. eigenvalues --    0.24582   0.25454   0.25746   0.26345   0.26430
 Alpha virt. eigenvalues --    0.26667   0.27992   0.28096   0.28941   0.29472
 Alpha virt. eigenvalues --    0.29850   0.29964   0.30698   0.31040   0.31483
 Alpha virt. eigenvalues --    0.31868   0.32661   0.32836   0.32958   0.33731
 Alpha virt. eigenvalues --    0.34249   0.34457   0.34776   0.35247   0.35481
 Alpha virt. eigenvalues --    0.35720   0.36410   0.36640   0.37650   0.38295
 Alpha virt. eigenvalues --    0.38523   0.38640   0.39022   0.39551   0.39646
 Alpha virt. eigenvalues --    0.40157   0.40333   0.40756   0.40804   0.41316
 Alpha virt. eigenvalues --    0.41760   0.42109   0.42781   0.42876   0.43311
 Alpha virt. eigenvalues --    0.43601   0.44135   0.44982   0.45584   0.45834
 Alpha virt. eigenvalues --    0.45927   0.46171   0.46522   0.46585   0.46893
 Alpha virt. eigenvalues --    0.47082   0.47486   0.47866   0.48240   0.48527
 Alpha virt. eigenvalues --    0.48642   0.48782   0.49216   0.49325   0.49553
 Alpha virt. eigenvalues --    0.49676   0.50164   0.50484   0.50631   0.50780
 Alpha virt. eigenvalues --    0.51053   0.51253   0.51557   0.51756   0.52109
 Alpha virt. eigenvalues --    0.53412   0.53659   0.54127   0.54573   0.54758
 Alpha virt. eigenvalues --    0.55520   0.55912   0.55941   0.56198   0.56498
 Alpha virt. eigenvalues --    0.56777   0.57045   0.57128   0.57461   0.57763
 Alpha virt. eigenvalues --    0.57951   0.58246   0.58534   0.58878   0.59023
 Alpha virt. eigenvalues --    0.59506   0.59894   0.60268   0.60750   0.61272
 Alpha virt. eigenvalues --    0.61660   0.62629   0.62666   0.63115   0.63507
 Alpha virt. eigenvalues --    0.64409   0.64654   0.64953   0.65597   0.66510
 Alpha virt. eigenvalues --    0.66780   0.67584   0.67806   0.68865   0.69182
 Alpha virt. eigenvalues --    0.69784   0.70644   0.71142   0.71692   0.71985
 Alpha virt. eigenvalues --    0.72743   0.72886   0.73245   0.74114   0.74656
 Alpha virt. eigenvalues --    0.75471   0.75569   0.76034   0.76634   0.76858
 Alpha virt. eigenvalues --    0.77122   0.78184   0.78356   0.79808   0.79934
 Alpha virt. eigenvalues --    0.80973   0.81840   0.83650   0.83953   0.84384
 Alpha virt. eigenvalues --    0.84985   0.85147   0.85832   0.86678   0.87637
 Alpha virt. eigenvalues --    0.88160   0.88653   0.89049   0.89889   0.90754
 Alpha virt. eigenvalues --    0.90989   0.91632   0.92296   0.92853   0.93066
 Alpha virt. eigenvalues --    0.93622   0.94640   0.95036   0.95308   0.96140
 Alpha virt. eigenvalues --    0.96980   0.97764   0.98745   0.99674   0.99724
 Alpha virt. eigenvalues --    1.01414   1.01882   1.04102   1.04511   1.05992
 Alpha virt. eigenvalues --    1.06244   1.07626   1.08563   1.09755   1.11315
 Alpha virt. eigenvalues --    1.12686   1.13586   1.14176   1.14688   1.16384
 Alpha virt. eigenvalues --    1.17713   1.18516   1.20752   1.21636   1.22252
 Alpha virt. eigenvalues --    1.23554   1.24940   1.25759   1.26204   1.28363
 Alpha virt. eigenvalues --    1.30973   1.32025   1.33612   1.34975   1.35934
 Alpha virt. eigenvalues --    1.37251   1.37911   1.39806   1.40675   1.41485
 Alpha virt. eigenvalues --    1.41792   1.42558   1.43963   1.45071   1.46780
 Alpha virt. eigenvalues --    1.46908   1.48117   1.49208   1.50500   1.50896
 Alpha virt. eigenvalues --    1.51109   1.52380   1.53780   1.55865   1.57244
 Alpha virt. eigenvalues --    1.59780   1.62716   1.63620   1.65006   1.65449
 Alpha virt. eigenvalues --    1.66801   1.68328   1.68964   1.69976   1.71533
 Alpha virt. eigenvalues --    1.73079   1.73640   1.74204   1.76332   1.77736
 Alpha virt. eigenvalues --    1.79125   1.79324   1.80520   1.82185   1.83223
 Alpha virt. eigenvalues --    1.83580   1.83664   1.84326   1.85788   1.86385
 Alpha virt. eigenvalues --    1.87615   1.88202   1.88692   1.88985   1.90157
 Alpha virt. eigenvalues --    1.90792   1.91566   1.92022   1.92759   1.93097
 Alpha virt. eigenvalues --    1.94701   1.95551   1.96668   1.98066   1.98579
 Alpha virt. eigenvalues --    1.99270   2.00459   2.00703   2.01637   2.02001
 Alpha virt. eigenvalues --    2.02421   2.03075   2.03246   2.04436   2.05399
 Alpha virt. eigenvalues --    2.06968   2.08575   2.09126   2.09756   2.10633
 Alpha virt. eigenvalues --    2.11526   2.13295   2.14383   2.14712   2.15256
 Alpha virt. eigenvalues --    2.16196   2.16424   2.16935   2.17211   2.18483
 Alpha virt. eigenvalues --    2.19368   2.19635   2.21807   2.22971   2.23884
 Alpha virt. eigenvalues --    2.24818   2.27056   2.27409   2.28687   2.28917
 Alpha virt. eigenvalues --    2.29441   2.29826   2.31308   2.31622   2.33548
 Alpha virt. eigenvalues --    2.34119   2.34581   2.35644   2.36062   2.38504
 Alpha virt. eigenvalues --    2.40603   2.41034   2.42007   2.44721   2.45492
 Alpha virt. eigenvalues --    2.46171   2.48117   2.48406   2.51716   2.54803
 Alpha virt. eigenvalues --    2.56629   2.57993   2.59972   2.61948   2.63025
 Alpha virt. eigenvalues --    2.64074   2.66957   2.67166   2.67860   2.69550
 Alpha virt. eigenvalues --    2.73705   2.74509   2.75746   2.75870   2.77143
 Alpha virt. eigenvalues --    2.79240   2.82168   2.87502   2.87911   2.89829
 Alpha virt. eigenvalues --    2.95548   2.97877   2.99059   3.03162   3.03958
 Alpha virt. eigenvalues --    3.08865   3.15392   3.18899   3.22259   3.26894
 Alpha virt. eigenvalues --    3.76971   6.05408   6.13425   6.29167 103.47691
          Condensed to atoms (all electrons):
 Mulliken atomic charges:
              1
     1  O   -0.449387
     2  Mg   0.855597
     3  O   -0.666943
     4  C    0.589023
     5  N   -0.538442
     6  N   -0.521342
     7  O   -0.453518
     8  C    0.335966
     9  C   -0.254423
    10  C    0.335159
    11  O   -0.457264
    12  C    0.617465
    13  C    0.140511
    14  C    0.046551
    15  O   -0.465229
    16  C   -0.222072
    17  C   -0.288757
    18  C   -0.304702
    19  C   -0.042359
    20  O   -0.507663
    21  C   -0.033123
    22  C   -0.472720
    23  C   -0.469180
    24  C    0.021978
    25  C    0.015903
    26  C    0.003371
    27  C   -0.080989
    28  C   -0.073486
    29  C   -0.074204
    30  C    0.004216
    31  C   -0.055355
    32  C   -0.055457
    33  C    0.007089
    34  C   -0.075696
    35  C   -0.074047
    36  C   -0.078151
    37  C   -0.000478
    38  C   -0.050025
    39  C   -0.060570
    40  C   -0.226350
    41  C   -0.218631
    42  C   -0.222857
    43  C   -0.217369
    44  C   -0.217401
    45  C   -0.218312
    46  C   -0.213915
    47  C   -0.218537
    48  C   -0.452473
    49  C   -0.451980
    50  H    0.079045
    51  H    0.100955
    52  H    0.132190
    53  H    0.175814
    54  H    0.171678
    55  H    0.175584
    56  H    0.110746
    57  H    0.137766
    58  H    0.144769
    59  H    0.137831
    60  H    0.182215
    61  H    0.147210
    62  H    0.113531
    63  H    0.150520
    64  H    0.133475
    65  H    0.150273
    66  H    0.157772
    67  H    0.161848
    68  H    0.165507
    69  H    0.170083
    70  H    0.090348
    71  H    0.094767
    72  H    0.092888
    73  H    0.096621
    74  H    0.099117
    75  H    0.091406
    76  H    0.093597
    77  H    0.092573
    78  H    0.098661
    79  H    0.112145
    80  H    0.071457
    81  H    0.118817
    82  H    0.070262
    83  H    0.076663
    84  H    0.074092
    85  H    0.071977
    86  H    0.073647
    87  H    0.074630
    88  H    0.093176
    89  H    0.076942
    90  H    0.074995
    91  H    0.074146
    92  H    0.074921
    93  H    0.064945
    94  H    0.095506
    95  H    0.075816
    96  H    0.077273
    97  H    0.071010
    98  H    0.077285
    99  H    0.092400
   100  H    0.077101
   101  H    0.076841
   102  H    0.074847
   103  H    0.075804
   104  H    0.129168
   105  H    0.124020
   106  H    0.126793
   107  H    0.126220
   108  H    0.130765
   109  H    0.128126
 Sum of Mulliken charges=   0.00000
 Atomic charges with hydrogens summed into heavy atoms:
              1
     1  O   -0.449387
     2  Mg   0.855597
     3  O   -0.666943
     4  C    0.589023
     5  N   -0.538442
     6  N   -0.521342
     7  O   -0.453518
     8  C    0.335966
     9  C   -0.175378
    10  C    0.335159
    11  O   -0.457264
    12  C    0.617465
    13  C    0.241466
    14  C    0.178741
    15  O   -0.465229
    16  C    0.301004
    17  C   -0.040245
    18  C   -0.022102
    19  C    0.287065
    20  O   -0.507663
    21  C    0.230928
    22  C   -0.031199
    23  C    0.028258
    24  C    0.021978
    25  C    0.015903
    26  C    0.003371
    27  C    0.009359
    28  C    0.021281
    29  C    0.018684
    30  C    0.004216
    31  C    0.041266
    32  C    0.043659
    33  C    0.007089
    34  C    0.015710
    35  C    0.019551
    36  C    0.014421
    37  C   -0.000478
    38  C    0.048636
    39  C    0.051575
    40  C    0.034186
    41  C    0.004101
    42  C    0.018596
    43  C    0.008714
    44  C    0.017970
    45  C    0.005787
    46  C    0.032871
    47  C    0.008955
    48  C   -0.072491
    49  C   -0.066869
    50  H    0.000000
    51  H    0.000000
    52  H    0.000000
    53  H    0.000000
    54  H    0.000000
    55  H    0.000000
    56  H    0.000000
    57  H    0.000000
    58  H    0.000000
    59  H    0.000000
    60  H    0.000000
    61  H    0.000000
    62  H    0.000000
    63  H    0.000000
    64  H    0.000000
    65  H    0.000000
    66  H    0.000000
    67  H    0.000000
    68  H    0.000000
    69  H    0.000000
    70  H    0.000000
    71  H    0.000000
    72  H    0.000000
    73  H    0.000000
    74  H    0.000000
    75  H    0.000000
    76  H    0.000000
    77  H    0.000000
    78  H    0.000000
    79  H    0.000000
    80  H    0.000000
    81  H    0.000000
    82  H    0.000000
    83  H    0.000000
    84  H    0.000000
    85  H    0.000000
    86  H    0.000000
    87  H    0.000000
    88  H    0.000000
    89  H    0.000000
    90  H    0.000000
    91  H    0.000000
    92  H    0.000000
    93  H    0.000000
    94  H    0.000000
    95  H    0.000000
    96  H    0.000000
    97  H    0.000000
    98  H    0.000000
    99  H    0.000000
   100  H    0.000000
   101  H    0.000000
   102  H    0.000000
   103  H    0.000000
   104  H    0.000000
   105  H    0.000000
   106  H    0.000000
   107  H    0.000000
   108  H    0.000000
   109  H    0.000000
 Sum of Mulliken charges=   0.00000
 Electronic spatial extent (au):  <R**2>= 25966.7170
 Charge=     0.0000 electrons
 Dipole moment (field-independent basis, Debye):
    X=     1.7459    Y=    -1.7442    Z=     4.5852  Tot=     5.2071
 Quadrupole moment (field-independent basis, Debye-Ang):
   XX=  -246.0137   YY=  -277.0299   ZZ=  -286.2004
   XY=     5.0053   XZ=     6.8414   YZ=    -9.4296
 Traceless Quadrupole moment (field-independent basis, Debye-Ang):
   XX=    23.7343   YY=    -7.2819   ZZ=   -16.4524
   XY=     5.0053   XZ=     6.8414   YZ=    -9.4296
 Octapole moment (field-independent basis, Debye-Ang**2):
  XXX=    69.0211  YYY=   -40.1892  ZZZ=    32.2700  XYY=    52.1590
  XXY=   -60.3574  XXZ=    10.9262  XZZ=    -3.1992  YZZ=   -14.4804
  YYZ=    25.1398  XYZ=   -30.2863
 Hexadecapole moment (field-independent basis, Debye-Ang**3):
 XXXX=-16017.0405 YYYY= -9397.6738 ZZZZ= -6941.5662 XXXY=   -80.1891
 XXXZ=   105.8807 YYYX=  -190.2039 YYYZ=  -187.1239 ZZZX=    70.4178
 ZZZY=   -86.8893 XXYY= -4116.0427 XXZZ= -3829.7136 YYZZ= -2732.9990
 XXYZ=  -120.4203 YYXZ=    87.8008 ZZXY=    -5.4525
 N-N= 7.746065598953D+03 E-N=-2.088084754472D+04  KE= 2.284777671218D+03
 1\1\GINC-KETIDE\SP\RB3LYP\Gen\C40H60Mg1N2O6\RZEPA\28-Nov-2004\0\\# B3L
 YP/GEN SCRF(IEFPCM,SOLVENT=THF)\\from RRSS_fm.gjf\\0,1\O,0,4.680191,-3
 .008108,0.531231\Mg,0,-0.471392,0.332037,-0.303636\O,0,-0.168735,0.342
 523,-2.206803\C,0,3.839915,-2.699659,-0.481049\N,0,0.351132,1.846075,0
 .900925\N,0,-2.378166,0.99205,0.329462\O,0,3.013947,-3.462752,-0.92874
 1\C,0,-0.295749,2.829977,1.524975\C,0,-1.692354,2.977306,1.531812\C,0,
 -2.661436,2.11488,0.980112\O,0,3.162209,-0.931299,-1.988501\C,0,1.9125
 91,-0.624147,-1.615983\C,0,1.002595,-0.122346,-2.738241\C,0,4.098581,-
 1.273455,-0.950959\O,0,1.537103,-0.691063,-0.449162\C,0,4.520978,-4.32
 3856,1.084917\C,0,-2.266208,-3.815746,-0.391714\C,0,-1.228163,-4.07326
 4,0.732129\C,0,-0.276783,-2.861898,0.63724\O,0,-1.015758,-1.856397,-0.
 081385\C,0,-1.718986,-2.580566,-1.115216\C,0,0.824959,-1.229171,-3.803
 037\C,0,5.492152,-1.082008,-1.543309\C,0,1.796758,1.900249,0.831227\C,
 0,-3.448484,0.076923,-0.004937\C,0,2.417246,2.694609,-0.198708\C,0,3.8
 18331,2.57469,-0.383773\C,0,4.602124,1.761788,0.460658\C,0,3.99126,1.0
 40919,1.514021\C,0,2.583291,1.08153,1.704309\C,0,1.618341,3.739492,-1.
 031346\C,0,1.935889,0.27872,2.862496\C,0,-3.99147,-0.782476,1.007377\C
 ,0,-4.908883,-1.794889,0.613885\C,0,-5.293255,-1.945691,-0.733927\C,0,
 -4.791993,-1.061106,-1.714001\C,0,-3.871874,-0.032816,-1.37632\C,0,-3.
 655076,-0.608701,2.515086\C,0,-3.392184,0.978881,-2.451234\C,0,1.44727
 5,3.330522,-2.52763\C,0,2.283618,5.154991,-0.925089\C,0,2.355049,-1.22
 5057,2.83793\C,0,2.279492,0.910161,4.254251\C,0,-3.08039,0.304382,-3.8
 20684\C,0,-4.443056,2.127012,-2.630804\C,0,-2.841169,-1.812517,3.08790
 4\C,0,-4.95654,-0.389422,3.359782\C,0,0.49496,3.89249,2.28077\C,0,-4.1
 07328,2.543861,1.218674\H,0,-2.07791,3.847481,2.052191\H,0,1.592646,0.
 678857,-3.228545\H,0,3.969811,-0.588434,-0.107007\H,0,4.620747,-5.0850
 45,0.307127\H,0,3.538632,-4.420633,1.555572\H,0,5.311561,-4.426959,1.8
 28893\H,0,-3.245221,-3.549646,0.010556\H,0,-2.382308,-4.670062,-1.0666
 27\H,0,-0.681066,-5.010534,0.589469\H,0,-1.71612,-4.112463,1.709384\H,
 0,0.632719,-3.105863,0.077098\H,0,0.007125,-2.436321,1.600643\H,0,-2.4
 98371,-1.93561,-1.508962\H,0,-1.005462,-2.843747,-1.906018\H,0,1.78191
 2,-1.50919,-4.258056\H,0,0.15638,-0.848719,-4.581069\H,0,0.370006,-2.1
 25248,-3.369238\H,0,5.632605,-0.020012,-1.763859\H,0,5.61158,-1.658755
 ,-2.465669\H,0,6.252914,-1.395937,-0.823666\H,0,4.308575,3.16873,-1.16
 6278\H,0,5.693645,1.727104,0.335182\H,0,4.616128,0.463353,2.207961\H,0
 ,0.601684,3.810716,-0.599999\H,0,0.835746,0.335202,2.725946\H,0,-5.350
 139,-2.448186,1.378111\H,0,-6.011078,-2.72833,-1.015594\H,0,-5.131688,
 -1.158206,-2.753363\H,0,-3.019408,0.290157,2.623103\H,0,-2.452057,1.43
 5637,-2.08587\H,0,1.00338,4.164323,-3.09474\H,0,0.764887,2.465588,-2.5
 95948\H,0,2.417307,3.077067,-2.983772\H,0,1.627939,5.905377,-1.392478\
 H,0,3.253299,5.174625,-1.444859\H,0,2.447272,5.441447,0.125326\H,0,1.7
 81527,-1.786984,3.592578\H,0,3.426763,-1.343741,3.061168\H,0,2.16135,-
 1.658555,1.843297\H,0,1.789095,0.336586,5.055784\H,0,1.93002,1.952142,
 4.311448\H,0,3.366429,0.896144,4.429929\H,0,-2.635393,1.048583,-4.4984
 08\H,0,-3.988711,-0.097976,-4.295462\H,0,-2.353266,-0.512704,-3.684198
 \H,0,-4.083549,2.840974,-3.387495\H,0,-4.596331,2.672909,-1.68642\H,0,
 -5.412198,1.722142,-2.96295\H,0,-2.673325,-1.677138,4.168347\H,0,-1.85
 7028,-1.868688,2.591073\H,0,-3.374874,-2.763851,2.932164\H,0,-4.687697
 ,-0.135496,4.396591\H,0,-5.571923,-1.301783,3.376709\H,0,-5.563794,0.4
 29612,2.945574\H,0,1.071785,4.52498,1.597173\H,0,-0.174847,4.543413,2.
 852733\H,0,1.203547,3.434204,2.978655\H,0,-4.802762,2.088833,0.509014\
 H,0,-4.432103,2.272489,2.230762\H,0,-4.190254,3.634028,1.135255\\Versi
 on=x86-Linux-G03RevB.04\State=1-A\HF=-2310.3070505\RMSD=1.001e-05\Dipo
 le=0.6868784,-0.6862269,1.8039475\PG=C01 [X(C40H60Mg1N2O6)]\\@


      LET US REMEMBER, PLEASE, THAT THE SEARCH FOR THE CONSTITUTION
      OF THE WORLD IS ONE OF THE GREATEST AND NOBLEST PROBLEMS PRESENTED 
      BY NATURE.

                                                  -- GALILEO
 Job cpu time:  0 days  2 hours 13 minutes 58.6 seconds.
 File lengths (MBytes):  RWF=    895 Int=      0 D2E=      0 Chk=     21 Scr=      1
 Normal termination of Gaussian 03 at Sun Nov 28 19:09:58 2004.
