# Supplementary material
Source: publisher figshare collection journal article supplement (https://acs.figshare.com/ndownloader/files/5127205)
Supplement: Supplementary file 1 [file 5127205 › supporting_ja043819b/RR_fm-5-thf.mol]

  MacMolPlt                       

109113  0  0  0  0  0  0  0  0  0 v2000
    4.6907   -3.0125    0.5195 O   0  0  0  0  0  0  0  0  0  0  0  0
   -0.4713    0.3311   -0.3037 Mg  0  0  0  0  0  0  0  0  0  0  0  0
   -0.1698    0.3436   -2.2080 O   0  0  0  0  0  0  0  0  0  0  0  0
    3.8411   -2.6964   -0.4826 C   0  0  0  0  0  0  0  0  0  0  0  0
    0.3502    1.8435    0.9032 N   0  0  0  0  0  0  0  0  0  0  0  0
   -2.3801    0.9875    0.3313 N   0  0  0  0  0  0  0  0  0  0  0  0
    3.0118   -3.4565   -0.9291 O   0  0  0  0  0  0  0  0  0  0  0  0
   -0.2978    2.8268    1.5271 C   0  0  0  0  0  0  0  0  0  0  0  0
   -1.6944    2.9737    1.5329 C   0  0  0  0  0  0  0  0  0  0  0  0
   -2.6631    2.1108    0.9813 C   0  0  0  0  0  0  0  0  0  0  0  0
    3.1628   -0.9261   -1.9860 O   0  0  0  0  0  0  0  0  0  0  0  0
    1.9126   -0.6196   -1.6152 C   0  0  0  0  0  0  0  0  0  0  0  0
    1.0033   -0.1181   -2.7382 C   0  0  0  0  0  0  0  0  0  0  0  0
    4.0974   -1.2680   -0.9468 C   0  0  0  0  0  0  0  0  0  0  0  0
    1.5355   -0.6880   -0.4490 O   0  0  0  0  0  0  0  0  0  0  0  0
    4.5341   -4.3314    1.0665 C   0  0  0  0  0  0  0  0  0  0  0  0
   -2.2611   -3.8135   -0.3974 C   0  0  0  0  0  0  0  0  0  0  0  0
   -1.2236   -4.0730    0.7268 C   0  0  0  0  0  0  0  0  0  0  0  0
   -0.2708   -2.8630    0.6323 C   0  0  0  0  0  0  0  0  0  0  0  0
   -1.0104   -1.8542   -0.0808 O   0  0  0  0  0  0  0  0  0  0  0  0
   -1.7153   -2.5747   -1.1162 C   0  0  0  0  0  0  0  0  0  0  0  0
    0.8291   -1.2233   -3.8051 C   0  0  0  0  0  0  0  0  0  0  0  0
    5.4920   -1.0672   -1.5334 C   0  0  0  0  0  0  0  0  0  0  0  0
    1.7957    1.9001    0.8331 C   0  0  0  0  0  0  0  0  0  0  0  0
   -3.4505    0.0732   -0.0039 C   0  0  0  0  0  0  0  0  0  0  0  0
    2.4150    2.6989   -0.1939 C   0  0  0  0  0  0  0  0  0  0  0  0
    3.8167    2.5835   -0.3780 C   0  0  0  0  0  0  0  0  0  0  0  0
    4.6018    1.7698    0.4642 C   0  0  0  0  0  0  0  0  0  0  0  0
    3.9918    1.0430    1.5141 C   0  0  0  0  0  0  0  0  0  0  0  0
    2.5837    1.0796    1.7036 C   0  0  0  0  0  0  0  0  0  0  0  0
    1.6137    3.7425   -1.0257 C   0  0  0  0  0  0  0  0  0  0  0  0
    1.9370    0.2704    2.8577 C   0  0  0  0  0  0  0  0  0  0  0  0
   -3.9929   -0.7875    1.0074 C   0  0  0  0  0  0  0  0  0  0  0  0
   -4.9104   -1.7997    0.6129 C   0  0  0  0  0  0  0  0  0  0  0  0
   -5.2953   -1.9485   -0.7349 C   0  0  0  0  0  0  0  0  0  0  0  0
   -4.7947   -1.0622   -1.7139 C   0  0  0  0  0  0  0  0  0  0  0  0
   -3.8747   -0.0344   -1.3754 C   0  0  0  0  0  0  0  0  0  0  0  0
   -3.6566   -0.6149    2.5151 C   0  0  0  0  0  0  0  0  0  0  0  0
   -3.3954    0.9795   -2.4486 C   0  0  0  0  0  0  0  0  0  0  0  0
    1.4447    3.3338   -2.5224 C   0  0  0  0  0  0  0  0  0  0  0  0
    2.2742    5.1600   -0.9181 C   0  0  0  0  0  0  0  0  0  0  0  0
    2.3633   -1.2312    2.8297 C   0  0  0  0  0  0  0  0  0  0  0  0
    2.2741    0.8994    4.2522 C   0  0  0  0  0  0  0  0  0  0  0  0
   -3.0847    0.3075   -3.8195 C   0  0  0  0  0  0  0  0  0  0  0  0
   -4.4449    2.1293   -2.6249 C   0  0  0  0  0  0  0  0  0  0  0  0
   -2.8385   -1.8163    3.0871 C   0  0  0  0  0  0  0  0  0  0  0  0
   -4.9591   -0.4006    3.3595 C   0  0  0  0  0  0  0  0  0  0  0  0
    0.4918    3.8898    2.2837 C   0  0  0  0  0  0  0  0  0  0  0  0
   -4.1091    2.5400    1.2198 C   0  0  0  0  0  0  0  0  0  0  0  0
   -2.0805    3.8438    2.0530 H   0  0  0  0  0  0  0  0  0  0  0  0
    1.5932    0.6851   -3.2260 H   0  0  0  0  0  0  0  0  0  0  0  0
    3.9637   -0.5869   -0.1003 H   0  0  0  0  0  0  0  0  0  0  0  0
    4.6332   -5.0883    0.2844 H   0  0  0  0  0  0  0  0  0  0  0  0
    3.5528   -4.4321    1.5385 H   0  0  0  0  0  0  0  0  0  0  0  0
    5.3265   -4.4376    1.8081 H   0  0  0  0  0  0  0  0  0  0  0  0
   -3.2407   -3.5511    0.0054 H   0  0  0  0  0  0  0  0  0  0  0  0
   -2.3750   -4.6655   -1.0757 H   0  0  0  0  0  0  0  0  0  0  0  0
   -0.6780   -5.0112    0.5851 H   0  0  0  0  0  0  0  0  0  0  0  0
   -1.7120   -4.1102    1.7039 H   0  0  0  0  0  0  0  0  0  0  0  0
    0.6359   -3.1068    0.0673 H   0  0  0  0  0  0  0  0  0  0  0  0
    0.0177   -2.4415    1.5958 H   0  0  0  0  0  0  0  0  0  0  0  0
   -2.4956   -1.9290   -1.5066 H   0  0  0  0  0  0  0  0  0  0  0  0
   -1.0021   -2.8355   -1.9080 H   0  0  0  0  0  0  0  0  0  0  0  0
    1.7871   -1.5005   -4.2600 H   0  0  0  0  0  0  0  0  0  0  0  0
    0.1606   -0.8426   -4.5831 H   0  0  0  0  0  0  0  0  0  0  0  0
    0.3759   -2.1213   -3.3735 H   0  0  0  0  0  0  0  0  0  0  0  0
    5.6283   -0.0028   -1.7445 H   0  0  0  0  0  0  0  0  0  0  0  0
    5.6164   -1.6362   -2.4599 H   0  0  0  0  0  0  0  0  0  0  0  0
    6.2520   -1.3837   -0.8140 H   0  0  0  0  0  0  0  0  0  0  0  0
    4.3060    3.1813   -1.1582 H   0  0  0  0  0  0  0  0  0  0  0  0
    5.6936    1.7389    0.3400 H   0  0  0  0  0  0  0  0  0  0  0  0
    4.6176    0.4639    2.2060 H   0  0  0  0  0  0  0  0  0  0  0  0
    0.5965    3.8104   -0.5950 H   0  0  0  0  0  0  0  0  0  0  0  0
    0.8370    0.3224    2.7184 H   0  0  0  0  0  0  0  0  0  0  0  0
   -5.3507   -2.4545    1.3764 H   0  0  0  0  0  0  0  0  0  0  0  0
   -6.0133   -2.7307   -1.0173 H   0  0  0  0  0  0  0  0  0  0  0  0
   -5.1354   -1.1578   -2.7531 H   0  0  0  0  0  0  0  0  0  0  0  0
   -3.0238    0.2857    2.6244 H   0  0  0  0  0  0  0  0  0  0  0  0
   -2.4544    1.4345   -2.0833 H   0  0  0  0  0  0  0  0  0  0  0  0
    0.9982    4.1665   -3.0892 H   0  0  0  0  0  0  0  0  0  0  0  0
    0.7653    2.4666   -2.5918 H   0  0  0  0  0  0  0  0  0  0  0  0
    2.4158    3.0840   -2.9782 H   0  0  0  0  0  0  0  0  0  0  0  0
    1.6162    5.9085   -1.3852 H   0  0  0  0  0  0  0  0  0  0  0  0
    3.2440    5.1834   -1.4376 H   0  0  0  0  0  0  0  0  0  0  0  0
    2.4365    5.4461    0.1326 H   0  0  0  0  0  0  0  0  0  0  0  0
    1.7902   -1.7983    3.5808 H   0  0  0  0  0  0  0  0  0  0  0  0
    3.4349   -1.3457    3.0560 H   0  0  0  0  0  0  0  0  0  0  0  0
    2.1748   -1.6626    1.8331 H   0  0  0  0  0  0  0  0  0  0  0  0
    1.7854    0.3203    5.0508 H   0  0  0  0  0  0  0  0  0  0  0  0
    1.9181    1.9390    4.3120 H   0  0  0  0  0  0  0  0  0  0  0  0
    3.3607    0.8913    4.4301 H   0  0  0  0  0  0  0  0  0  0  0  0
   -2.6384    1.0525   -4.4955 H   0  0  0  0  0  0  0  0  0  0  0  0
   -3.9933   -0.0924   -4.2956 H   0  0  0  0  0  0  0  0  0  0  0  0
   -2.3588   -0.5110   -3.6846 H   0  0  0  0  0  0  0  0  0  0  0  0
   -4.0855    2.8435   -3.3814 H   0  0  0  0  0  0  0  0  0  0  0  0
   -4.5957    2.6743   -1.6796 H   0  0  0  0  0  0  0  0  0  0  0  0
   -5.4152    1.7263   -2.9559 H   0  0  0  0  0  0  0  0  0  0  0  0
   -2.6759   -1.6835    4.1687 H   0  0  0  0  0  0  0  0  0  0  0  0
   -1.8514   -1.8647    2.5949 H   0  0  0  0  0  0  0  0  0  0  0  0
   -3.3659   -2.7703    2.9260 H   0  0  0  0  0  0  0  0  0  0  0  0
   -4.6918   -0.1433    4.3959 H   0  0  0  0  0  0  0  0  0  0  0  0
   -5.5702   -1.3158    3.3781 H   0  0  0  0  0  0  0  0  0  0  0  0
   -5.5701    0.4147    2.9435 H   0  0  0  0  0  0  0  0  0  0  0  0
    1.0642    4.5267    1.6005 H   0  0  0  0  0  0  0  0  0  0  0  0
   -0.1785    4.5366    2.8598 H   0  0  0  0  0  0  0  0  0  0  0  0
    1.2043    3.4319    2.9778 H   0  0  0  0  0  0  0  0  0  0  0  0
   -4.8049    2.0837    0.5114 H   0  0  0  0  0  0  0  0  0  0  0  0
   -4.4336    2.2704    2.2325 H   0  0  0  0  0  0  0  0  0  0  0  0
   -4.1922    3.6300    1.1345 H   0  0  0  0  0  0  0  0  0  0  0  0
  1  4  1  0  0  0  0
  1 16  1  0  0  0  0
  2  3  2  0  0  0  0
  2  5  1  0  0  0  0
  2  6  1  0  0  0  0
  2 15  1  0  0  0  0
  2 20  1  0  0  0  0
  3 13  1  0  0  0  0
  4  7  2  0  0  0  0
  4 14  1  0  0  0  0
  5  8  1  0  0  0  0
  5 24  1  0  0  0  0
  6 10  1  0  0  0  0
  6 25  1  0  0  0  0
  8  9  1  0  0  0  0
  8 48  1  0  0  0  0
  9 10  1  0  0  0  0
  9 50  1  0  0  0  0
 10 49  1  0  0  0  0
 11 12  1  0  0  0  0
 11 14  1  0  0  0  0
 12 13  1  0  0  0  0
 12 15  2  0  0  0  0
 13 22  1  0  0  0  0
 13 51  1  0  0  0  0
 14 23  1  0  0  0  0
 14 52  1  0  0  0  0
 16 53  1  0  0  0  0
 16 54  1  0  0  0  0
 16 55  1  0  0  0  0
 17 18  1  0  0  0  0
 17 21  1  0  0  0  0
 17 56  1  0  0  0  0
 17 57  1  0  0  0  0
 18 19  1  0  0  0  0
 18 58  1  0  0  0  0
 18 59  1  0  0  0  0
 19 20  1  0  0  0  0
 19 60  1  0  0  0  0
 19 61  1  0  0  0  0
 20 21  1  0  0  0  0
 21 62  1  0  0  0  0
 21 63  1  0  0  0  0
 22 64  1  0  0  0  0
 22 65  1  0  0  0  0
 22 66  1  0  0  0  0
 23 67  1  0  0  0  0
 23 68  1  0  0  0  0
 23 69  1  0  0  0  0
 24 26  1  0  0  0  0
 24 30  1  0  0  0  0
 25 33  1  0  0  0  0
 25 37  1  0  0  0  0
 26 27  1  0  0  0  0
 26 31  1  0  0  0  0
 27 28  1  0  0  0  0
 27 70  1  0  0  0  0
 28 29  1  0  0  0  0
 28 71  1  0  0  0  0
 29 30  1  0  0  0  0
 29 72  1  0  0  0  0
 30 32  1  0  0  0  0
 31 40  1  0  0  0  0
 31 41  1  0  0  0  0
 31 73  1  0  0  0  0
 32 42  1  0  0  0  0
 32 43  1  0  0  0  0
 32 74  1  0  0  0  0
 33 34  1  0  0  0  0
 33 38  1  0  0  0  0
 34 35  1  0  0  0  0
 34 75  1  0  0  0  0
 35 36  1  0  0  0  0
 35 76  1  0  0  0  0
 36 37  1  0  0  0  0
 36 77  1  0  0  0  0
 37 39  1  0  0  0  0
 38 46  1  0  0  0  0
 38 47  1  0  0  0  0
 38 78  1  0  0  0  0
 39 44  1  0  0  0  0
 39 45  1  0  0  0  0
 39 79  1  0  0  0  0
 40 80  1  0  0  0  0
 40 81  1  0  0  0  0
 40 82  1  0  0  0  0
 41 83  1  0  0  0  0
 41 84  1  0  0  0  0
 41 85  1  0  0  0  0
 42 86  1  0  0  0  0
 42 87  1  0  0  0  0
 42 88  1  0  0  0  0
 43 89  1  0  0  0  0
 43 90  1  0  0  0  0
 43 91  1  0  0  0  0
 44 92  1  0  0  0  0
 44 93  1  0  0  0  0
 44 94  1  0  0  0  0
 45 95  1  0  0  0  0
 45 96  1  0  0  0  0
 45 97  1  0  0  0  0
 46 98  1  0  0  0  0
 46 99  1  0  0  0  0
 46100  1  0  0  0  0
 47101  1  0  0  0  0
 47102  1  0  0  0  0
 47103  1  0  0  0  0
 48104  1  0  0  0  0
 48105  1  0  0  0  0
 48106  1  0  0  0  0
 49107  1  0  0  0  0
 49108  1  0  0  0  0
 49109  1  0  0  0  0
M  END
