# Supplementary material
Source: publisher figshare collection journal article supplement (https://acs.figshare.com/ndownloader/files/5127205)
Supplement: Supplementary file 1 [file 5127205 › supporting_ja043819b/RR_fm-reactant-solv.log]

 Entering Gaussian System, Link 0=g03
 Input=RR_fm-reactant-solv.gjf
 Output=RR_fm-reactant-solv.log
 Initial command:
 /usr/local/g03/l1.exe /home/rzepa/Gau-12610.inp -scrdir=/home/rzepa/
 Entering Link 1 = /usr/local/g03/l1.exe PID=     12611.
  
 Copyright (c) 1988,1990,1992,1993,1995,1998,2003, Gaussian, Inc.
                  All Rights Reserved.
  
 This is the Gaussian(R) 03 program.  It is based on the
 the Gaussian(R) 98 system (copyright 1998, Gaussian, Inc.),
 the Gaussian(R) 94 system (copyright 1995, Gaussian, Inc.),
 the Gaussian 92(TM) system (copyright 1992, Gaussian, Inc.),
 the Gaussian 90(TM) system (copyright 1990, Gaussian, Inc.),
 the Gaussian 88(TM) system (copyright 1988, Gaussian, Inc.),
 the Gaussian 86(TM) system (copyright 1986, Carnegie Mellon
 University), and the Gaussian 82(TM) system (copyright 1983,
 Carnegie Mellon University). Gaussian is a federally registered
 trademark of Gaussian, Inc.
  
 This software contains proprietary and confidential information,
 including trade secrets, belonging to Gaussian, Inc.
  
 This software is provided under written license and may be
 used, copied, transmitted, or stored only in accord with that
 written license.
  
 The following legend is applicable only to US Government
 contracts under DFARS:
  
                    RESTRICTED RIGHTS LEGEND
  
 Use, duplication or disclosure by the US Government is subject
 to restrictions as set forth in subparagraph (c)(1)(ii) of the
 Rights in Technical Data and Computer Software clause at DFARS
 252.227-7013.
  
 Gaussian, Inc.
 Carnegie Office Park, Building 6, Pittsburgh, PA 15106 USA
  
 The following legend is applicable only to US Government
 contracts under FAR:
  
                    RESTRICTED RIGHTS LEGEND
  
 Use, reproduction and disclosure by the US Government is subject
 to restrictions as set forth in subparagraph (c) of the
 Commercial Computer Software - Restricted Rights clause at FAR
 52.227-19.
  
 Gaussian, Inc.
 Carnegie Office Park, Building 6, Pittsburgh, PA 15106 USA
  
  
 ---------------------------------------------------------------
 Warning -- This program may not be used in any manner that
 competes with the business of Gaussian, Inc. or will provide
 assistance to any competitor of Gaussian, Inc.  The licensee
 of this program is prohibited from giving any competitor of
 Gaussian, Inc. access to this program.  By using this program,
 the user acknowledges that Gaussian, Inc. is engaged in the
 business of creating and licensing software in the field of
 computational chemistry and represents and warrants to the
 licensee that it is not a competitor of Gaussian, Inc. and that
 it will not use this program in any manner prohibited above.
 ---------------------------------------------------------------
  

 Cite this work as:
 Gaussian 03, Revision B.04,
 M. J. Frisch, G. W. Trucks, H. B. Schlegel, G. E. Scuseria, 
 M. A. Robb, J. R. Cheeseman, J. A. Montgomery, Jr., T. Vreven, 
 K. N. Kudin, J. C. Burant, J. M. Millam, S. S. Iyengar, J. Tomasi, 
 V. Barone, B. Mennucci, M. Cossi, G. Scalmani, N. Rega, 
 G. A. Petersson, H. Nakatsuji, M. Hada, M. Ehara, K. Toyota, 
 R. Fukuda, J. Hasegawa, M. Ishida, T. Nakajima, Y. Honda, O. Kitao, 
 H. Nakai, M. Klene, X. Li, J. E. Knox, H. P. Hratchian, J. B. Cross, 
 C. Adamo, J. Jaramillo, R. Gomperts, R. E. Stratmann, O. Yazyev, 
 A. J. Austin, R. Cammi, C. Pomelli, J. W. Ochterski, P. Y. Ayala, 
 K. Morokuma, G. A. Voth, P. Salvador, J. J. Dannenberg, 
 V. G. Zakrzewski, S. Dapprich, A. D. Daniels, M. C. Strain, 
 O. Farkas, D. K. Malick, A. D. Rabuck, K. Raghavachari, 
 J. B. Foresman, J. V. Ortiz, Q. Cui, A. G. Baboul, S. Clifford, 
 J. Cioslowski, B. B. Stefanov, G. Liu, A. Liashenko, P. Piskorz, 
 I. Komaromi, R. L. Martin, D. J. Fox, T. Keith, M. A. Al-Laham, 
 C. Y. Peng, A. Nanayakkara, M. Challacombe, P. M. W. Gill, 
 B. Johnson, W. Chen, M. W. Wong, C. Gonzalez, and J. A. Pople, 
 Gaussian, Inc., Pittsburgh PA, 2003.
 
 *********************************************
 Gaussian 03:  x86-Linux-G03RevB.04 2-Jun-2003
                  22-Nov-2004 
 *********************************************
 %nproc=2
 Will use up to    2 processors via shared memory.
 %mem=500MB
 %chk=RRSS_fm-reactant.chk
 -------------------------------------
 # RB3LYP/Gen scrf(IEFPCM,solvent=thf)
 -------------------------------------
 1/38=1/1;
 2/17=6,18=5,40=1/2;
 3/5=7,11=2,16=1,25=1,30=1,70=2201,72=20,74=-5/1,2,3;
 4/7=1/1;
 5/5=2,32=1,38=5,53=20/2;
 6/7=2,8=2,9=2,10=2,28=1/1;
 99/5=1,9=1/99;
 -------------------------
 from RRSS_fm-reactant.mop
 -------------------------
 Symbolic Z-matrix:
 Charge =  0 Multiplicity = 1
 O                    0    -4.4766   -0.41068   3.06715 
 Mg                   0     0.67572   0.54926  -0.2638 
 O                    0    -0.05166   2.05468   0.66365 
 C                    0    -4.48363  -1.34467   2.10553 
 N                    0     1.95002   0.70915  -1.81815 
 N                    0     1.70883  -1.1413    0.22766 
 O                    0    -5.10717  -2.3841    2.16817 
 C                    0     3.05923   0.07208  -2.13123 
 C                    0     3.50782  -1.03624  -1.37172 
 C                    0     2.84189  -1.62268  -0.27629 
 O                    0    -3.15465   0.36239   1.02198 
 C                    0    -1.96554   0.67587   0.52429 
 C                    0    -1.41113   2.07343   0.8443 
 C                    0    -3.58473  -1.02066   0.91682 
 O                    0    -1.31035  -0.12233  -0.15792 
 C                    0    -5.28075  -0.71437   4.21942 
 C                    0    -1.83851   2.54235   2.24631 
 C                    0    -4.30039  -1.27088  -0.40587 
 C                    0     1.39248   1.91333  -2.37811 
 C                    0     0.88735  -1.81415   1.20573 
 C                    0     1.90268   3.18823  -1.95597 
 C                    0     1.10129   4.3304   -2.18457 
 C                    0    -0.15932   4.22695  -2.81 
 C                    0    -0.63109   2.97763  -3.26202 
 C                    0     0.12615   1.79702  -3.05219 
 C                    0     3.2692    3.28796  -1.22567 
 C                    0    -0.33634   0.42498  -3.60959 
 C                    0    -0.03548  -2.83059   0.78723 
 C                    0    -1.05452  -3.23179   1.69307 
 C                    0    -1.16996  -2.63784   2.97108 
 C                    0    -0.22901  -1.67401   3.38974 
 C                    0     0.82202  -1.25812   2.53253 
 C                    0     0.06121  -3.50507  -0.60658 
 C                    0     1.94141  -0.31961   3.0563 
 C                    0     3.11203   3.02812   0.30896 
 C                    0     3.98695   4.65356  -1.47447 
 C                    0    -1.88487   0.24401  -3.61145 
 C                    0     0.24519   0.20653  -5.04739 
 C                    0     1.39746   1.01646   3.64642 
 C                    0     2.81823  -1.07873   4.11002 
 C                    0    -1.21289  -3.24832  -1.47175 
 C                    0     0.32299  -5.04324  -0.46613 
 C                    0     3.88905   0.4711   -3.344 
 C                    0     3.46669  -2.86539   0.3413 
 H                    0     4.43454  -1.50258  -1.69012 
 H                    0    -1.92386   2.73691   0.10959 
 H                    0    -2.70066  -1.66137   1.02548 
 H                    0    -4.92656  -1.62808   4.70434 
 H                    0    -6.32691  -0.84834   3.93229 
 H                    0    -5.1697    0.14244   4.88402 
 H                    0    -2.92737   2.58834   2.35099 
 H                    0    -1.41753   3.53858   2.41202 
 H                    0    -1.43571   1.87231   3.01146 
 H                    0    -3.60491  -1.1414   -1.23721 
 H                    0    -5.13816  -0.57578  -0.52632 
 H                    0    -4.69065  -2.29148  -0.41878 
 H                    0     1.46505   5.31807  -1.87498 
 H                    0    -0.76025   5.13115  -2.97888 
 H                    0    -1.58331   2.92307  -3.80585 
 H                    0     3.92768   2.49459  -1.627 
 H                    0     0.10238  -0.36325  -2.96019 
 H                    0    -1.74518  -4.03668   1.40751 
 H                    0    -1.96448  -2.96704   3.65583 
 H                    0    -0.2825   -1.27056   4.40981 
 H                    0     0.91906  -3.05607  -1.14321 
 H                    0     2.5941   -0.07093   2.19391 
 H                    0     4.07789   3.17822   0.82032 
 H                    0     2.78871   1.98604   0.49132 
 H                    0     2.3567    3.70142   0.74641 
 H                    0     5.00919   4.6086   -1.06917 
 H                    0     3.45793   5.47814  -0.97357 
 H                    0     4.0481    4.87511  -2.55093 
 H                    0    -2.13598  -0.78717  -3.90331 
 H                    0    -2.3715    0.93002  -4.32102 
 H                    0    -2.2985    0.43474  -2.60468 
 H                    0    -0.04706  -0.78515  -5.42558 
 H                    0     1.34541   0.26339  -5.02918 
 H                    0    -0.13463   0.97412  -5.73997 
 H                    0     2.23399   1.62519   4.02464 
 H                    0     0.70094   0.83064   4.47844 
 H                    0     0.87572   1.58751   2.85957 
 H                    0     3.65897  -0.44101   4.42333 
 H                    0     3.2261   -2.00854   3.68335 
 H                    0     2.22306  -1.33444   5.00039 
 H                    0    -1.097    -3.71972  -2.46027 
 H                    0    -1.36054  -2.16354  -1.61231 
 H                    0    -2.11063  -3.66415  -0.98908 
 H                    0     0.47821  -5.48809  -1.46097 
 H                    0    -0.53604  -5.5431    0.00676 
 H                    0     1.2169   -5.23759   0.14622 
 H                    0     3.51997   1.39461  -3.80197 
 H                    0     4.94269   0.61083  -3.07138 
 H                    0     3.85428  -0.32473  -4.10035 
 H                    0     3.52227  -2.76971   1.43266 
 H                    0     2.87425  -3.76055   0.11834 
 H                    0     4.47936  -3.03074  -0.04206 
 
 Stoichiometry    C36H52MgN2O5
 Framework group  C1[X(C36H52MgN2O5)]
 Deg. of freedom   282
 Full point group                 C1      NOp   1
 Largest Abelian subgroup         C1      NOp   1
 Largest concise Abelian subgroup C1      NOp   1
                         Standard orientation:                         
 ---------------------------------------------------------------------
 Center     Atomic     Atomic              Coordinates (Angstroms)
 Number     Number      Type              X           Y           Z
 ---------------------------------------------------------------------
    1          8             0       -4.911011   -1.942740   -1.312927
    2         12             0        0.865244    0.083976   -0.268666
    3          8             0        0.588764   -0.983757   -1.830402
    4          6             0       -4.823125   -1.755460    0.011570
    5          7             0        2.671994    0.366997    0.580429
    6          7             0        0.446199    1.993398    0.318990
    7          8             0       -5.778038   -1.590928    0.742473
    8          6             0        3.274544    1.435227    1.060061
    9          6             0        2.599377    2.676682    1.157069
   10          6             0        1.249046    2.920646    0.833933
   11          8             0       -2.494594   -2.154974   -0.510569
   12          6             0       -1.271023   -1.642683   -0.530217
   13          6             0       -0.405301   -1.926690   -1.768289
   14          6             0       -3.393222   -1.710813    0.540168
   15          8             0       -0.837492   -0.947414    0.397396
   16          6             0       -6.247519   -1.942727   -1.842405
   17          6             0       -1.258144   -2.005922   -3.046793
   18          6             0       -3.236035   -2.567520    1.791416
   19          6             0        3.208087   -0.937816    0.289697
   20          6             0       -0.982423    2.130865    0.163074
   21          6             0        3.926637   -1.146769   -0.936634
   22          6             0        4.082368   -2.475417   -1.394303
   23          6             0        3.553179   -3.565510   -0.671345
   24          6             0        2.889548   -3.353874    0.554427
   25          6             0        2.696529   -2.042193    1.057928
   26          6             0        4.464457    0.060888   -1.750866
   27          6             0        2.039273   -1.790917    2.440667
   28          6             0       -1.850427    1.889437    1.280294
   29          6             0       -3.236456    1.699360    1.029796
   30          6             0       -3.751203    1.732206   -0.286776
   31          6             0       -2.896917    2.017309   -1.372383
   32          6             0       -1.510228    2.239885   -1.172357
   33          6             0       -1.321395    1.847607    2.738156
   34          6             0       -0.609934    2.708295   -2.346333
   35          6             0        3.360099    0.647789   -2.690687
   36          6             0        5.746618   -0.289615   -2.572532
   37          6             0        0.926626   -2.823050    2.797608
   38          6             0        3.136581   -1.755920    3.557746
   39          6             0       -0.655370    1.751345   -3.575718
   40          6             0       -0.998903    4.168391   -2.761345
   41          6             0       -1.547585    0.453634    3.404104
   42          6             0       -1.977200    2.977071    3.603274
   43          6             0        4.708934    1.377297    1.567795
   44          6             0        0.705928    4.317760    1.097040
   45          1             0        3.167256    3.510700    1.556554
   46          1             0       -0.003417   -2.949762   -1.582028
   47          1             0       -3.181658   -0.653826    0.744903
   48          1             0       -6.734074   -0.981554   -1.655656
   49          1             0       -6.842160   -2.736153   -1.382277
   50          1             0       -6.135001   -2.116101   -2.912656
   51          1             0       -2.016473   -2.793416   -2.987784
   52          1             0       -0.588427   -2.211924   -3.887152
   53          1             0       -1.753362   -1.048730   -3.234434
   54          1             0       -2.239059   -2.431279    2.214576
   55          1             0       -3.383717   -3.626156    1.552633
   56          1             0       -3.984263   -2.269937    2.530119
   57          1             0        4.628102   -2.666679   -2.326640
   58          1             0        3.691757   -4.588422   -1.047711
   59          1             0        2.541944   -4.216579    1.137826
   60          1             0        4.742601    0.856876   -1.034538
   61          1             0        1.576173   -0.780893    2.410606
   62          1             0       -3.923348    1.554102    1.874477
   63          1             0       -4.827593    1.585727   -0.455434
   64          1             0       -3.316571    2.112593   -2.382817
   65          1             0       -0.229038    2.024769    2.709063
   66          1             0        0.434432    2.733246   -1.971871
   67          1             0        3.781758    1.453719   -3.314848
   68          1             0        2.534565    1.077133   -2.092458
   69          1             0        2.938768   -0.137013   -3.340143
   70          1             0        6.170989    0.631968   -2.998966
   71          1             0        5.512728   -0.972810   -3.402734
   72          1             0        6.507891   -0.759950   -1.931559
   73          1             0        0.424203   -2.517704    3.728152
   74          1             0        1.342457   -3.830921    2.946521
   75          1             0        0.172406   -2.874049    1.991622
   76          1             0        2.675299   -1.534597    4.532477
   77          1             0        3.882565   -0.975169    3.338701
   78          1             0        3.653218   -2.726380    3.624247
   79          1             0       -0.020180    2.150058   -4.382521
   80          1             0       -1.680867    1.647069   -3.962270
   81          1             0       -0.274793    0.756186   -3.288901
   82          1             0       -0.309842    4.530117   -3.539840
   83          1             0       -0.938762    4.850118   -1.898455
   84          1             0       -2.024535    4.199759   -3.160685
   85          1             0       -1.137664    0.454662    4.426246
   86          1             0       -1.036973   -0.330730    2.819013
   87          1             0       -2.619488    0.208661    3.457429
   88          1             0       -1.524701    2.989352    4.606653
   89          1             0       -3.058827    2.805415    3.713026
   90          1             0       -1.828472    3.965195    3.141420
   91          1             0        5.175060    0.409260    1.356976
   92          1             0        5.319597    2.167670    1.113474
   93          1             0        4.728872    1.538443    2.654192
   94          1             0        0.168001    4.696165    0.219112
   95          1             0        0.004476    4.319118    1.939641
   96          1             0        1.514314    5.017884    1.333964
 ---------------------------------------------------------------------
 Rotational constants (GHZ):      0.1020978      0.0642473      0.0595749
 General basis read from cards:  (5D, 7F)
 There are   486 symmetry adapted basis functions of A   symmetry.
 Integral buffers will be    262144 words long.
 Raffenetti 2 integral format.
 Two-electron integral symmetry is turned on.
   486 basis functions,  1118 primitive gaussians,   508 cartesian basis functions
   167 alpha electrons      167 beta electrons
       nuclear repulsion energy      6367.0017683615 Hartrees.
 NAtoms=   96 NActive=   96 NUniq=   96 SFac= 1.00D+00 NAtFMM=   60 Big=T
 ------------------------------------------------------------------------------
 United Atom Topological Model (UA0  parameters set).
  Nord Group  Hybr  Charge Alpha Radius          Bonded to
    1   O     *     0.00   1.00  1.750   C4   [s]  C16  [s]
    2  Mg     *     0.00   1.00  1.511   O3   [d]  N5   [s]  N6   [s]  O15  [s]
                                         C19  [s]
    3   O     *     0.00   1.00  1.750  Mg2   [d]  C13  [s]
    4   C     *     0.00   1.00  1.925   O1   [s]  O7   [d]  C14  [s]
    5   N     *     0.00   1.00  1.830  Mg2   [s]  C8   [d]  C19  [s]
    6   N     *     0.00   1.00  1.830  Mg2   [s]  C10  [d]  C20  [s]
    7   O     *     0.00   1.00  1.750   C4   [d]
    8   C     *     0.00   1.00  1.925   N5   [d]  C9   [s]  C43  [s]
    9   CH    *     0.00   1.00  2.125   C8   [s]  C10  [s]
   10   C     *     0.00   1.00  1.925   N6   [d]  C9   [s]  C44  [s]
   11   O     *     0.00   1.00  1.750   C12  [s]  C14  [s]
   12   C     *     0.00   1.00  1.925   O11  [s]  C13  [s]  O15  [d]
   13   CH    *     0.00   1.00  2.125   O3   [s]  C12  [s]  C17  [s]
   14   CH    *     0.00   1.00  2.125   C4   [s]  O11  [s]  C18  [s]
   15   O     *     0.00   1.00  1.750  Mg2   [s]  C12  [d]
   16   CH3   *     0.00   1.00  2.525   O1   [s]
   17   CH3   *     0.00   1.00  2.525   C13  [s]
   18   CH3   *     0.00   1.00  2.525   C14  [s]
   19   C     *     0.00   1.00  1.925  Mg2   [s]  N5   [s]  C21  [s]  C25  [s]
   20   C     *     0.00   1.00  1.925   N6   [s]  C28  [s]  C32  [s]
   21   C     *     0.00   1.00  1.925   C19  [s]  C22  [s]  C26  [s]
   22   CH    *     0.00   1.00  2.125   C21  [s]  C23  [s]
   23   CH    *     0.00   1.00  2.125   C22  [s]  C24  [s]
   24   CH    *     0.00   1.00  2.125   C23  [s]  C25  [s]
   25   C     *     0.00   1.00  1.925   C19  [s]  C24  [s]  C27  [s]
   26   CH    *     0.00   1.00  2.125   C21  [s]  C35  [s]  C36  [s]
   27   CH    *     0.00   1.00  2.125   C25  [s]  C37  [s]  C38  [s]
   28   C     *     0.00   1.00  1.925   C20  [s]  C29  [s]  C33  [s]
   29   CH    *     0.00   1.00  2.125   C28  [s]  C30  [s]
   30   CH    *     0.00   1.00  2.125   C29  [s]  C31  [s]
   31   CH    *     0.00   1.00  2.125   C30  [s]  C32  [s]
   32   C     *     0.00   1.00  1.925   C20  [s]  C31  [s]  C34  [s]
   33   CH    *     0.00   1.00  2.125   C28  [s]  C41  [s]  C42  [s]
   34   CH    *     0.00   1.00  2.125   C32  [s]  C39  [s]  C40  [s]
   35   CH3   *     0.00   1.00  2.525   C26  [s]
   36   CH3   *     0.00   1.00  2.525   C26  [s]
   37   CH3   *     0.00   1.00  2.525   C27  [s]
   38   CH3   *     0.00   1.00  2.525   C27  [s]
   39   CH3   *     0.00   1.00  2.525   C34  [s]
   40   CH3   *     0.00   1.00  2.525   C34  [s]
   41   CH3   *     0.00   1.00  2.525   C33  [s]
   42   CH3   *     0.00   1.00  2.525   C33  [s]
   43   CH3   *     0.00   1.00  2.525   C8   [s]
   44   CH3   *     0.00   1.00  2.525   C10  [s]
 ------------------------------------------------------------------------------
 Polarizable Continuum Model (PCM)
 =================================
 Model                : PCM.
 Atomic radii         : UA0 (Simple United Atom Topological Model).
 Polarization charges : Total charges.
 Charge compensation  : None.
 Solution method      : Matrix inversion.
 Cavity               : GePol (RMin=0.200 OFac=0.890).
                        Default sphere list used, NSphG=   44.
                        Tesserae with average area of 0.200 Ang**2.
 Solvent              : THF, Eps=   7.580000.
 ------------------------------------------------------------------------------
 DisRep: Neglecting contributions from atom    2
 One-electron integrals computed using PRISM.
 NBasis=   486 RedAO= T  NBF=   486
 NBsUse=   486 1.00D-06 NBFU=   486
 Harris functional with IExCor=  402 diagonalized for initial guess.
 ExpMin= 3.48D-02 ExpMax= 4.39D+04 ExpMxC= 1.51D+03 IAcc=3 IRadAn=         5 AccDes= 0.00D+00
 HarFok:  IExCor= 402 AccDes= 0.00D+00 IRadAn=         5 IDoV=1
 ScaDFX=  1.000000  1.000000  1.000000  1.000000
 Initial guess orbital symmetries:
       Occupied  (A) (A) (A) (A) (A) (A) (A) (A) (A) (A) (A) (A)
                 (A) (A) (A) (A) (A) (A) (A) (A) (A) (A) (A) (A)
                 (A) (A) (A) (A) (A) (A) (A) (A) (A) (A) (A) (A)
                 (A) (A) (A) (A) (A) (A) (A) (A) (A) (A) (A) (A)
                 (A) (A) (A) (A) (A) (A) (A) (A) (A) (A) (A) (A)
                 (A) (A) (A) (A) (A) (A) (A) (A) (A) (A) (A) (A)
                 (A) (A) (A) (A) (A) (A) (A) (A) (A) (A) (A) (A)
                 (A) (A) (A) (A) (A) (A) (A) (A) (A) (A) (A) (A)
                 (A) (A) (A) (A) (A) (A) (A) (A) (A) (A) (A) (A)
                 (A) (A) (A) (A) (A) (A) (A) (A) (A) (A) (A) (A)
                 (A) (A) (A) (A) (A) (A) (A) (A) (A) (A) (A) (A)
                 (A) (A) (A) (A) (A) (A) (A) (A) (A) (A) (A) (A)
                 (A) (A) (A) (A) (A) (A) (A) (A) (A) (A) (A) (A)
                 (A) (A) (A) (A) (A) (A) (A) (A) (A) (A) (A)
       Virtual   (A) (A) (A) (A) (A) (A) (A) (A) (A) (A) (A) (A)
                 (A) (A) (A) (A) (A) (A) (A) (A) (A) (A) (A) (A)
                 (A) (A) (A) (A) (A) (A) (A) (A) (A) (A) (A) (A)
                 (A) (A) (A) (A) (A) (A) (A) (A) (A) (A) (A) (A)
                 (A) (A) (A) (A) (A) (A) (A) (A) (A) (A) (A) (A)
                 (A) (A) (A) (A) (A) (A) (A) (A) (A) (A) (A) (A)
                 (A) (A) (A) (A) (A) (A) (A) (A) (A) (A) (A) (A)
                 (A) (A) (A) (A) (A) (A) (A) (A) (A) (A) (A) (A)
                 (A) (A) (A) (A) (A) (A) (A) (A) (A) (A) (A) (A)
                 (A) (A) (A) (A) (A) (A) (A) (A) (A) (A) (A) (A)
                 (A) (A) (A) (A) (A) (A) (A) (A) (A) (A) (A) (A)
                 (A) (A) (A) (A) (A) (A) (A) (A) (A) (A) (A) (A)
                 (A) (A) (A) (A) (A) (A) (A) (A) (A) (A) (A) (A)
                 (A) (A) (A) (A) (A) (A) (A) (A) (A) (A) (A) (A)
                 (A) (A) (A) (A) (A) (A) (A) (A) (A) (A) (A) (A)
                 (A) (A) (A) (A) (A) (A) (A) (A) (A) (A) (A) (A)
                 (A) (A) (A) (A) (A) (A) (A) (A) (A) (A) (A) (A)
                 (A) (A) (A) (A) (A) (A) (A) (A) (A) (A) (A) (A)
                 (A) (A) (A) (A) (A) (A) (A) (A) (A) (A) (A) (A)
                 (A) (A) (A) (A) (A) (A) (A) (A) (A) (A) (A) (A)
                 (A) (A) (A) (A) (A) (A) (A) (A) (A) (A) (A) (A)
                 (A) (A) (A) (A) (A) (A) (A) (A) (A) (A) (A) (A)
                 (A) (A) (A) (A) (A) (A) (A) (A) (A) (A) (A) (A)
                 (A) (A) (A) (A) (A) (A) (A) (A) (A) (A) (A) (A)
                 (A) (A) (A) (A) (A) (A) (A) (A) (A) (A) (A) (A)
                 (A) (A) (A) (A) (A) (A) (A) (A) (A) (A) (A) (A)
                 (A) (A) (A) (A) (A) (A) (A)
 The electronic state of the initial guess is 1-A.
 Requested convergence on RMS density matrix=1.00D-04 within 128 cycles.
 Requested convergence on MAX density matrix=1.00D-02.
 Requested convergence on             energy=1.00D-02.
 No special actions if energy rises.
 Error on total polarization charges =  0.00727
 SCF Done:  E(RB+HF-LYP) =  -2077.84471019     A.U. after    7 cycles
             Convg  =    0.1029D-04             -V/T =  2.0117
             S**2   =   0.0000
 --------------------------------------------------------------------
 Variational PCM results
 =======================
 <psi(f)|   H    |psi(f)>                     (a.u.) =   -2077.835365
 <psi(f)|H+V(f)/2|psi(f)>                     (a.u.) =   -2077.844710
 Total free energy in solution:
  with all non electrostatic terms            (a.u.) =   -2077.789249
 --------------------------------------------------------------------
 (Polarized solute)-Solvent               (kcal/mol) =      -5.86
 --------------------------------------------------------------------
 Cavitation energy                        (kcal/mol) =      66.82
 Dispersion energy                        (kcal/mol) =     -33.14
 Repulsion energy                         (kcal/mol) =       1.12
 Total non electrostatic                  (kcal/mol) =      34.80
 --------------------------------------------------------------------
 Partition over spheres:
 Sphere  on Atom  Surface  Charge   GEl     GCav    GDR
    1      O1       0.00   0.000    0.00    0.38    0.00
    2     Mg2       0.00   0.000    0.00    0.22    0.00
    3      O3       0.00   0.000    0.00    0.39    0.00
    4      C4       0.00   0.000    0.00    0.23    0.00
    5      N5       0.00   0.000    0.00    0.14    0.00
    6      N6       0.00   0.000    0.00    0.30    0.00
    7      O7       8.64   0.081   -1.21    1.66   -0.92
    8      C8       0.00   0.000    0.00    0.07    0.00
    9      C9       5.14   0.005   -0.19    1.43   -0.43
   10      C10      0.00   0.000    0.00    0.12    0.00
   11      O11      0.00   0.000    0.00    0.40   -0.04
   12      C12      0.00   0.000    0.00    0.41    0.00
   13      C13      0.27  -0.001    0.00    0.99   -0.13
   14      C14      0.00   0.000    0.00    0.16    0.00
   15      O15      0.00   0.000    0.00    0.21    0.00
   16      C16     45.01  -0.088   -0.42    5.61   -2.89
   17      C17     23.13   0.016   -0.08    4.18   -2.03
   18      C18     25.22  -0.028   -0.05    3.54   -1.93
   19      C19      0.00   0.000    0.00    0.13    0.00
   20      C20      0.00   0.000    0.00    0.08    0.00
   21      C21      0.00   0.000    0.00    0.13    0.00
   22      C22      5.68  -0.001   -0.05    1.49   -0.78
   23      C23     14.31  -0.021   -0.25    2.03   -1.69
   24      C24      6.65  -0.012   -0.15    1.52   -0.72
   25      C25      0.00   0.000    0.00    0.15    0.00
   26      C26      0.00   0.000    0.00    0.06    0.00
   27      C27      0.00   0.000    0.00    0.27    0.00
   28      C28      0.00   0.000    0.00    0.05    0.00
   29      C29      4.99  -0.014   -0.15    1.10   -0.47
   30      C30      8.67  -0.015   -0.18    1.69   -0.97
   31      C31      4.75  -0.020   -0.22    1.47   -0.47
   32      C32      0.00   0.000    0.00    0.15    0.00
   33      C33      0.00   0.000    0.00    0.18    0.00
   34      C34      0.00   0.000    0.00    0.26    0.00
   35      C35     12.74  -0.004   -0.01    3.15   -1.28
   36      C36     34.66  -0.019   -0.06    4.32   -2.58
   37      C37     18.83  -0.010   -0.07    2.95   -1.40
   38      C38     27.50  -0.011   -0.06    3.95   -2.08
   39      C39     17.89  -0.001   -0.05    2.87   -1.33
   40      C40     34.15  -0.013   -0.05    4.06   -2.29
   41      C41     13.45  -0.009   -0.03    2.73   -1.13
   42      C42     30.81  -0.014   -0.07    3.95   -2.37
   43      C43     27.39  -0.018   -0.05    4.00   -2.17
   44      C44     26.86   0.000   -0.04    3.68   -1.92
 Added spheres:   199.09   0.191   -2.44    0.00    0.00
 --------------------------------------------------------------------

 **********************************************************************

            Population analysis using the SCF density.

 **********************************************************************

 Orbital symmetries:
       Occupied  (A) (A) (A) (A) (A) (A) (A) (A) (A) (A) (A) (A)
                 (A) (A) (A) (A) (A) (A) (A) (A) (A) (A) (A) (A)
                 (A) (A) (A) (A) (A) (A) (A) (A) (A) (A) (A) (A)
                 (A) (A) (A) (A) (A) (A) (A) (A) (A) (A) (A) (A)
                 (A) (A) (A) (A) (A) (A) (A) (A) (A) (A) (A) (A)
                 (A) (A) (A) (A) (A) (A) (A) (A) (A) (A) (A) (A)
                 (A) (A) (A) (A) (A) (A) (A) (A) (A) (A) (A) (A)
                 (A) (A) (A) (A) (A) (A) (A) (A) (A) (A) (A) (A)
                 (A) (A) (A) (A) (A) (A) (A) (A) (A) (A) (A) (A)
                 (A) (A) (A) (A) (A) (A) (A) (A) (A) (A) (A) (A)
                 (A) (A) (A) (A) (A) (A) (A) (A) (A) (A) (A) (A)
                 (A) (A) (A) (A) (A) (A) (A) (A) (A) (A) (A) (A)
                 (A) (A) (A) (A) (A) (A) (A) (A) (A) (A) (A) (A)
                 (A) (A) (A) (A) (A) (A) (A) (A) (A) (A) (A)
       Virtual   (A) (A) (A) (A) (A) (A) (A) (A) (A) (A) (A) (A)
                 (A) (A) (A) (A) (A) (A) (A) (A) (A) (A) (A) (A)
                 (A) (A) (A) (A) (A) (A) (A) (A) (A) (A) (A) (A)
                 (A) (A) (A) (A) (A) (A) (A) (A) (A) (A) (A) (A)
                 (A) (A) (A) (A) (A) (A) (A) (A) (A) (A) (A) (A)
                 (A) (A) (A) (A) (A) (A) (A) (A) (A) (A) (A) (A)
                 (A) (A) (A) (A) (A) (A) (A) (A) (A) (A) (A) (A)
                 (A) (A) (A) (A) (A) (A) (A) (A) (A) (A) (A) (A)
                 (A) (A) (A) (A) (A) (A) (A) (A) (A) (A) (A) (A)
                 (A) (A) (A) (A) (A) (A) (A) (A) (A) (A) (A) (A)
                 (A) (A) (A) (A) (A) (A) (A) (A) (A) (A) (A) (A)
                 (A) (A) (A) (A) (A) (A) (A) (A) (A) (A) (A) (A)
                 (A) (A) (A) (A) (A) (A) (A) (A) (A) (A) (A) (A)
                 (A) (A) (A) (A) (A) (A) (A) (A) (A) (A) (A) (A)
                 (A) (A) (A) (A) (A) (A) (A) (A) (A) (A) (A) (A)
                 (A) (A) (A) (A) (A) (A) (A) (A) (A) (A) (A) (A)
                 (A) (A) (A) (A) (A) (A) (A) (A) (A) (A) (A) (A)
                 (A) (A) (A) (A) (A) (A) (A) (A) (A) (A) (A) (A)
                 (A) (A) (A) (A) (A) (A) (A) (A) (A) (A) (A) (A)
                 (A) (A) (A) (A) (A) (A) (A) (A) (A) (A) (A) (A)
                 (A) (A) (A) (A) (A) (A) (A) (A) (A) (A) (A) (A)
                 (A) (A) (A) (A) (A) (A) (A) (A) (A) (A) (A) (A)
                 (A) (A) (A) (A) (A) (A) (A) (A) (A) (A) (A) (A)
                 (A) (A) (A) (A) (A) (A) (A) (A) (A) (A) (A) (A)
                 (A) (A) (A) (A) (A) (A) (A) (A) (A) (A) (A) (A)
                 (A) (A) (A) (A) (A) (A) (A) (A) (A) (A) (A) (A)
                 (A) (A) (A) (A) (A) (A) (A)
 The electronic state is 1-A.
 Alpha  occ. eigenvalues --  -46.70233 -19.20055 -19.19579 -19.15157 -19.14278
 Alpha  occ. eigenvalues --  -19.04400 -14.27994 -14.27628 -10.32057 -10.31606
 Alpha  occ. eigenvalues --  -10.25412 -10.23365 -10.21460 -10.20543 -10.20230
 Alpha  occ. eigenvalues --  -10.17704 -10.16067 -10.15794 -10.14792 -10.12510
 Alpha  occ. eigenvalues --  -10.06158 -10.06032 -10.03401 -10.03211 -10.03204
 Alpha  occ. eigenvalues --  -10.03108 -10.02994 -10.02923 -10.02862 -10.02665
 Alpha  occ. eigenvalues --  -10.02216 -10.02134 -10.01801 -10.01644 -10.01582
 Alpha  occ. eigenvalues --  -10.01321 -10.00890 -10.00826 -10.00803 -10.00621
 Alpha  occ. eigenvalues --  -10.00589 -10.00494 -10.00461  -9.99472  -3.00913
 Alpha  occ. eigenvalues --   -1.75746  -1.75633  -1.75185  -1.12223  -1.10766
 Alpha  occ. eigenvalues --   -1.02835  -1.02317  -0.92201  -0.89464  -0.87903
 Alpha  occ. eigenvalues --   -0.81510  -0.80780  -0.80001  -0.76862  -0.76835
 Alpha  occ. eigenvalues --   -0.74838  -0.74327  -0.74160  -0.73207  -0.72353
 Alpha  occ. eigenvalues --   -0.71937  -0.68577  -0.68429  -0.68322  -0.67891
 Alpha  occ. eigenvalues --   -0.66795  -0.65931  -0.65044  -0.64814  -0.64582
 Alpha  occ. eigenvalues --   -0.64327  -0.62265  -0.59262  -0.59092  -0.58796
 Alpha  occ. eigenvalues --   -0.57283  -0.56915  -0.56481  -0.55316  -0.54957
 Alpha  occ. eigenvalues --   -0.52604  -0.52400  -0.50407  -0.50273  -0.50147
 Alpha  occ. eigenvalues --   -0.49804  -0.49352  -0.47814  -0.47500  -0.47216
 Alpha  occ. eigenvalues --   -0.45761  -0.45276  -0.44850  -0.44262  -0.43851
 Alpha  occ. eigenvalues --   -0.43679  -0.43469  -0.42916  -0.41562  -0.41176
 Alpha  occ. eigenvalues --   -0.40996  -0.40768  -0.40589  -0.40451  -0.40168
 Alpha  occ. eigenvalues --   -0.40065  -0.39894  -0.39522  -0.39484  -0.39420
 Alpha  occ. eigenvalues --   -0.38741  -0.38619  -0.38419  -0.37963  -0.37649
 Alpha  occ. eigenvalues --   -0.37472  -0.37203  -0.37015  -0.36826  -0.36272
 Alpha  occ. eigenvalues --   -0.36098  -0.35819  -0.35779  -0.35396  -0.35281
 Alpha  occ. eigenvalues --   -0.35211  -0.34950  -0.34924  -0.34579  -0.34448
 Alpha  occ. eigenvalues --   -0.34316  -0.33996  -0.33549  -0.32789  -0.32208
 Alpha  occ. eigenvalues --   -0.31524  -0.31424  -0.30886  -0.30729  -0.30703
 Alpha  occ. eigenvalues --   -0.30533  -0.30324  -0.30073  -0.29652  -0.29551
 Alpha  occ. eigenvalues --   -0.29135  -0.28889  -0.28334  -0.28295  -0.28021
 Alpha  occ. eigenvalues --   -0.27684  -0.27678  -0.27190  -0.25460  -0.24757
 Alpha  occ. eigenvalues --   -0.22352  -0.20293  -0.19184  -0.18930  -0.18456
 Alpha  occ. eigenvalues --   -0.17682  -0.15387
 Alpha virt. eigenvalues --   -0.00242   0.00327   0.00914   0.06174   0.06336
 Alpha virt. eigenvalues --    0.06844   0.07259   0.08219   0.09230   0.09748
 Alpha virt. eigenvalues --    0.10455   0.11283   0.12182   0.12996   0.13659
 Alpha virt. eigenvalues --    0.13727   0.14744   0.15079   0.15878   0.16590
 Alpha virt. eigenvalues --    0.16739   0.17183   0.18217   0.18226   0.18738
 Alpha virt. eigenvalues --    0.19321   0.19943   0.20740   0.21237   0.22221
 Alpha virt. eigenvalues --    0.22276   0.22941   0.23642   0.24469   0.25249
 Alpha virt. eigenvalues --    0.25397   0.25682   0.25965   0.26595   0.27960
 Alpha virt. eigenvalues --    0.28099   0.29032   0.29737   0.30514   0.31170
 Alpha virt. eigenvalues --    0.32186   0.32656   0.33521   0.33588   0.34597
 Alpha virt. eigenvalues --    0.34750   0.34807   0.35101   0.35424   0.36633
 Alpha virt. eigenvalues --    0.36873   0.37674   0.37814   0.38449   0.38923
 Alpha virt. eigenvalues --    0.38956   0.39396   0.39569   0.40033   0.40473
 Alpha virt. eigenvalues --    0.40616   0.41078   0.41460   0.42133   0.42381
 Alpha virt. eigenvalues --    0.43116   0.43729   0.43812   0.44411   0.45044
 Alpha virt. eigenvalues --    0.45346   0.45599   0.45771   0.45876   0.46095
 Alpha virt. eigenvalues --    0.46164   0.46448   0.47306   0.47546   0.47792
 Alpha virt. eigenvalues --    0.48056   0.48281   0.48558   0.48732   0.48864
 Alpha virt. eigenvalues --    0.48952   0.49307   0.49376   0.49977   0.50099
 Alpha virt. eigenvalues --    0.50195   0.50432   0.51007   0.51337   0.51783
 Alpha virt. eigenvalues --    0.52049   0.52746   0.53042   0.53179   0.53774
 Alpha virt. eigenvalues --    0.54303   0.55177   0.55315   0.55592   0.56008
 Alpha virt. eigenvalues --    0.56328   0.56495   0.56877   0.57287   0.57618
 Alpha virt. eigenvalues --    0.58164   0.58185   0.58509   0.58958   0.59586
 Alpha virt. eigenvalues --    0.59818   0.60213   0.60897   0.61299   0.62471
 Alpha virt. eigenvalues --    0.63296   0.63408   0.64092   0.64681   0.64982
 Alpha virt. eigenvalues --    0.65590   0.66225   0.66808   0.67347   0.67826
 Alpha virt. eigenvalues --    0.69400   0.70084   0.70439   0.71119   0.71538
 Alpha virt. eigenvalues --    0.71840   0.72427   0.73817   0.74170   0.74676
 Alpha virt. eigenvalues --    0.75229   0.75614   0.76478   0.76736   0.77208
 Alpha virt. eigenvalues --    0.77635   0.78775   0.79000   0.79620   0.80632
 Alpha virt. eigenvalues --    0.81055   0.82826   0.84324   0.84898   0.85317
 Alpha virt. eigenvalues --    0.86395   0.86511   0.88082   0.89352   0.90391
 Alpha virt. eigenvalues --    0.91479   0.91737   0.92759   0.93431   0.94348
 Alpha virt. eigenvalues --    0.95060   0.96444   0.96825   0.97899   0.98630
 Alpha virt. eigenvalues --    1.00095   1.01635   1.02767   1.03650   1.04246
 Alpha virt. eigenvalues --    1.06037   1.06506   1.08432   1.10985   1.12240
 Alpha virt. eigenvalues --    1.15340   1.16928   1.17381   1.18138   1.19629
 Alpha virt. eigenvalues --    1.20551   1.23826   1.24602   1.25612   1.30006
 Alpha virt. eigenvalues --    1.31721   1.33055   1.34773   1.36139   1.37139
 Alpha virt. eigenvalues --    1.38422   1.38953   1.39996   1.41905   1.42827
 Alpha virt. eigenvalues --    1.43638   1.44323   1.45717   1.48572   1.49470
 Alpha virt. eigenvalues --    1.49945   1.51125   1.52548   1.53723   1.54232
 Alpha virt. eigenvalues --    1.58727   1.61014   1.61741   1.62817   1.63235
 Alpha virt. eigenvalues --    1.67400   1.67510   1.69843   1.72624   1.72911
 Alpha virt. eigenvalues --    1.73794   1.74319   1.75810   1.78142   1.78921
 Alpha virt. eigenvalues --    1.80361   1.81288   1.83208   1.84396   1.85347
 Alpha virt. eigenvalues --    1.86079   1.86586   1.87066   1.87313   1.88726
 Alpha virt. eigenvalues --    1.90846   1.91238   1.93318   1.93712   1.94429
 Alpha virt. eigenvalues --    1.95448   1.97870   1.98414   1.98653   1.99367
 Alpha virt. eigenvalues --    1.99960   2.01244   2.01847   2.04022   2.05106
 Alpha virt. eigenvalues --    2.05832   2.08128   2.08949   2.09823   2.10319
 Alpha virt. eigenvalues --    2.12688   2.13406   2.13692   2.14459   2.16235
 Alpha virt. eigenvalues --    2.17685   2.18569   2.20070   2.21639   2.22734
 Alpha virt. eigenvalues --    2.24270   2.25085   2.25877   2.27659   2.27960
 Alpha virt. eigenvalues --    2.29500   2.33288   2.33543   2.34166   2.34677
 Alpha virt. eigenvalues --    2.35332   2.36315   2.36885   2.40366   2.41488
 Alpha virt. eigenvalues --    2.46365   2.47912   2.48578   2.51577   2.52426
 Alpha virt. eigenvalues --    2.54033   2.57555   2.58309   2.62415   2.64753
 Alpha virt. eigenvalues --    2.65967   2.68930   2.71677   2.74043   2.75510
 Alpha virt. eigenvalues --    2.79052   2.79149   2.85998   2.86440   2.88026
 Alpha virt. eigenvalues --    2.94673   2.94957   2.99722   3.02135   3.02951
 Alpha virt. eigenvalues --    3.10498   3.18626   3.21248   3.25881   3.64403
 Alpha virt. eigenvalues --    5.99562   6.13844   6.38488 103.39698
          Condensed to atoms (all electrons):
 Mulliken atomic charges:
              1
     1  O   -0.422714
     2  Mg   0.759388
     3  O   -0.653688
     4  C    0.573414
     5  N   -0.528038
     6  N   -0.534449
     7  O   -0.475719
     8  C    0.327702
     9  C   -0.263383
    10  C    0.331399
    11  O   -0.442398
    12  C    0.627139
    13  C    0.129509
    14  C    0.042792
    15  O   -0.491522
    16  C   -0.225939
    17  C   -0.461507
    18  C   -0.474259
    19  C    0.006792
    20  C    0.011143
    21  C    0.000572
    22  C   -0.075512
    23  C   -0.072191
    24  C   -0.078232
    25  C   -0.008918
    26  C   -0.056047
    27  C   -0.058834
    28  C    0.004650
    29  C   -0.077387
    30  C   -0.074266
    31  C   -0.078363
    32  C    0.000053
    33  C   -0.054456
    34  C   -0.059644
    35  C   -0.217479
    36  C   -0.219938
    37  C   -0.221049
    38  C   -0.217502
    39  C   -0.229677
    40  C   -0.217852
    41  C   -0.219637
    42  C   -0.218682
    43  C   -0.444806
    44  C   -0.442245
    45  H    0.084867
    46  H    0.138125
    47  H    0.151244
    48  H    0.174444
    49  H    0.176933
    50  H    0.179449
    51  H    0.137693
    52  H    0.148477
    53  H    0.159415
    54  H    0.176554
    55  H    0.164027
    56  H    0.174723
    57  H    0.090364
    58  H    0.092654
    59  H    0.092397
    60  H    0.085017
    61  H    0.098361
    62  H    0.094429
    63  H    0.094359
    64  H    0.093041
    65  H    0.096251
    66  H    0.097408
    67  H    0.075844
    68  H    0.093575
    69  H    0.095307
    70  H    0.076800
    71  H    0.075935
    72  H    0.075799
    73  H    0.077624
    74  H    0.075270
    75  H    0.090238
    76  H    0.076979
    77  H    0.080695
    78  H    0.074788
    79  H    0.072341
    80  H    0.068724
    81  H    0.116494
    82  H    0.077005
    83  H    0.074042
    84  H    0.074022
    85  H    0.075136
    86  H    0.098739
    87  H    0.072918
    88  H    0.077820
    89  H    0.075683
    90  H    0.074014
    91  H    0.127828
    92  H    0.131517
    93  H    0.133017
    94  H    0.128445
    95  H    0.129391
    96  H    0.125559
 Sum of Mulliken charges=   0.00000
 Atomic charges with hydrogens summed into heavy atoms:
              1
     1  O   -0.422714
     2  Mg   0.759388
     3  O   -0.653688
     4  C    0.573414
     5  N   -0.528038
     6  N   -0.534449
     7  O   -0.475719
     8  C    0.327702
     9  C   -0.178516
    10  C    0.331399
    11  O   -0.442398
    12  C    0.627139
    13  C    0.267634
    14  C    0.194036
    15  O   -0.491522
    16  C    0.304886
    17  C   -0.015921
    18  C    0.041046
    19  C    0.006792
    20  C    0.011143
    21  C    0.000572
    22  C    0.014853
    23  C    0.020463
    24  C    0.014165
    25  C   -0.008918
    26  C    0.028970
    27  C    0.039527
    28  C    0.004650
    29  C    0.017041
    30  C    0.020093
    31  C    0.014678
    32  C    0.000053
    33  C    0.041795
    34  C    0.037765
    35  C    0.047247
    36  C    0.008595
    37  C    0.022083
    38  C    0.014960
    39  C    0.027882
    40  C    0.007216
    41  C    0.027156
    42  C    0.008835
    43  C   -0.052444
    44  C   -0.058850
    45  H    0.000000
    46  H    0.000000
    47  H    0.000000
    48  H    0.000000
    49  H    0.000000
    50  H    0.000000
    51  H    0.000000
    52  H    0.000000
    53  H    0.000000
    54  H    0.000000
    55  H    0.000000
    56  H    0.000000
    57  H    0.000000
    58  H    0.000000
    59  H    0.000000
    60  H    0.000000
    61  H    0.000000
    62  H    0.000000
    63  H    0.000000
    64  H    0.000000
    65  H    0.000000
    66  H    0.000000
    67  H    0.000000
    68  H    0.000000
    69  H    0.000000
    70  H    0.000000
    71  H    0.000000
    72  H    0.000000
    73  H    0.000000
    74  H    0.000000
    75  H    0.000000
    76  H    0.000000
    77  H    0.000000
    78  H    0.000000
    79  H    0.000000
    80  H    0.000000
    81  H    0.000000
    82  H    0.000000
    83  H    0.000000
    84  H    0.000000
    85  H    0.000000
    86  H    0.000000
    87  H    0.000000
    88  H    0.000000
    89  H    0.000000
    90  H    0.000000
    91  H    0.000000
    92  H    0.000000
    93  H    0.000000
    94  H    0.000000
    95  H    0.000000
    96  H    0.000000
 Sum of Mulliken charges=   0.00000
 Electronic spatial extent (au):  <R**2>= 21962.6857
 Charge=     0.0000 electrons
 Dipole moment (field-independent basis, Debye):
    X=    -0.4016    Y=     0.0038    Z=     1.0529  Tot=     1.1269
 Quadrupole moment (field-independent basis, Debye-Ang):
   XX=  -240.0800   YY=  -245.4727   ZZ=  -251.2217
   XY=    -8.4602   XZ=    11.8593   YZ=    -3.3370
 Traceless Quadrupole moment (field-independent basis, Debye-Ang):
   XX=     5.5115   YY=     0.1188   ZZ=    -5.6302
   XY=    -8.4602   XZ=    11.8593   YZ=    -3.3370
 Octapole moment (field-independent basis, Debye-Ang**2):
  XXX=    11.2181  YYY=   -48.3614  ZZZ=    12.9139  XYY=    -7.6500
  XXY=   -19.8660  XXZ=  -111.2376  XZZ=   -25.4248  YZZ=     2.1585
  YYZ=     1.3765  XYZ=   -19.5731
 Hexadecapole moment (field-independent basis, Debye-Ang**3):
 XXXX=-14265.6585 YYYY= -7359.3131 ZZZZ= -6073.6399 XXXY=    32.4877
 XXXZ=   565.6237 YYYX=   -36.5329 YYYZ=   -21.9448 ZZZX=    15.5448
 ZZZY=   -45.7713 XXYY= -3547.5931 XXZZ= -3268.1272 YYZZ= -2224.2621
 XXYZ=   175.2548 YYXZ=    34.8389 ZZXY=   -10.1135
 N-N= 6.367001768362D+03 E-N=-1.757917104029D+04  KE= 2.053773674238D+03
 1\1\GINC-WOODWARD\SP\RB3LYP\Gen\C36H52Mg1N2O5\RZEPA\22-Nov-2004\0\\# R
 B3LYP/GEN SCRF(IEFPCM,SOLVENT=THF)\\from RRSS_fm-reactant.mop\\0,1\O,0
 ,-4.4766046551,-0.4106799952,3.0671483446\Mg,0,0.6757242132,0.54926143
 95,-0.263796683\O,0,-0.0516582543,2.0546770117,0.6636459605\C,0,-4.483
 6263462,-1.3446697371,2.1055329486\N,0,1.9500160761,0.7091456891,-1.81
 81541529\N,0,1.7088258078,-1.141301405,0.2276624473\O,0,-5.1071657853,
 -2.3841038325,2.1681673604\C,0,3.0592309449,0.0720794754,-2.1312330785
 \C,0,3.5078182627,-1.0362417263,-1.3717177476\C,0,2.8418858719,-1.6226
 765781,-0.2762918748\O,0,-3.1546495484,0.362387765,1.0219843927\C,0,-1
 .9655427873,0.6758735124,0.5242859196\C,0,-1.411129318,2.0734342705,0.
 8442951831\C,0,-3.5847324659,-1.0206624641,0.9168182619\O,0,-1.3103459
 171,-0.1223254595,-0.1579247738\C,0,-5.2807528143,-0.7143683197,4.2194
 158133\C,0,-1.838508546,2.5423531663,2.2463134368\C,0,-4.3003923428,-1
 .2708845298,-0.4058669866\C,0,1.3924823751,1.913332785,-2.3781070856\C
 ,0,0.8873522681,-1.8141529182,1.2057313225\C,0,1.9026811279,3.18823075
 51,-1.9559731798\C,0,1.1012922909,4.3303958844,-2.1845656438\C,0,-0.15
 93183012,4.2269546507,-2.8100034404\C,0,-0.631091335,2.9776274405,-3.2
 620249724\C,0,0.1261463273,1.797019492,-3.0521862219\C,0,3.2691997487,
 3.2879599741,-1.2256712354\C,0,-0.3363384741,0.4249769371,-3.609590710
 6\C,0,-0.0354807557,-2.83058567,0.7872299672\C,0,-1.054524455,-3.23178
 7302,1.6930680437\C,0,-1.1699597066,-2.637840112,2.9710763563\C,0,-0.2
 2901346,-1.674008788,3.3897415028\C,0,0.8220243058,-1.2581174945,2.532
 5306383\C,0,0.0612143202,-3.5050749158,-0.6065777167\C,0,1.9414099579,
 -0.3196054567,3.0562956773\C,0,3.1120339981,3.0281151399,0.3089627239\
 C,0,3.9869470427,4.6535599533,-1.4744651692\C,0,-1.88486642,0.24401334
 18,-3.6114527911\C,0,0.2451922003,0.2065271207,-5.0473931347\C,0,1.397
 4628828,1.0164639723,3.6464192291\C,0,2.8182267775,-1.0787295565,4.110
 0194756\C,0,-1.2128939667,-3.2483154979,-1.4717542035\C,0,0.3229930346
 ,-5.0432383166,-0.4661335676\C,0,3.8890494544,0.4711030505,-3.34400080
 97\C,0,3.4666931629,-2.8653863134,0.341300056\H,0,4.4345410945,-1.5025
 758032,-1.6901161625\H,0,-1.9238563086,2.73691149,0.1095928864\H,0,-2.
 7006598345,-1.6613703832,1.0254774183\H,0,-4.9265571848,-1.6280754646,
 4.7043389446\H,0,-6.3269116929,-0.8483430627,3.9322872266\H,0,-5.16969
 55833,0.1424426519,4.8840184369\H,0,-2.9273707952,2.5883435529,2.35099
 35015\H,0,-1.4175252221,3.5385818971,2.4120243401\H,0,-1.4357053246,1.
 8723057277,3.0114609894\H,0,-3.6049092844,-1.1414022805,-1.2372058935\
 H,0,-5.1381596157,-0.5757771103,-0.5263235042\H,0,-4.6906513198,-2.291
 4795976,-0.4187795593\H,0,1.4650452067,5.3180687095,-1.8749782842\H,0,
 -0.7602536162,5.1311455073,-2.9788828752\H,0,-1.5833120069,2.923066389
 8,-3.8058472494\H,0,3.9276785785,2.4945930939,-1.6269957181\H,0,0.1023
 841107,-0.3632545953,-2.9601858276\H,0,-1.7451848268,-4.0366813241,1.4
 075135339\H,0,-1.96447509,-2.9670426954,3.6558313362\H,0,-0.2825001342
 ,-1.2705573464,4.4098055243\H,0,0.9190570596,-3.0560711322,-1.14321294
 73\H,0,2.5940982759,-0.070925556,2.1939148285\H,0,4.0778907068,3.17822
 17873,0.8203183255\H,0,2.7887059321,1.986036852,0.491315489\H,0,2.3566
 996191,3.7014225348,0.7464050173\H,0,5.0091854679,4.6086015734,-1.0691
 748205\H,0,3.4579256008,5.4781418639,-0.9735699642\H,0,4.0481036781,4.
 8751122794,-2.5509279965\H,0,-2.1359826206,-0.7871686611,-3.9033118596
 \H,0,-2.3714951311,0.9300172085,-4.3210197108\H,0,-2.2984973166,0.4347
 398384,-2.6046788377\H,0,-0.0470643199,-0.7851521786,-5.4255763467\H,0
 ,1.3454102031,0.2633882139,-5.0291841627\H,0,-0.1346289254,0.974120315
 9,-5.7399717943\H,0,2.2339920298,1.6251853835,4.0246369305\H,0,0.70093
 74069,0.8306442856,4.4784430901\H,0,0.8757175825,1.5875087685,2.859569
 1181\H,0,3.6589736172,-0.4410109177,4.4233311515\H,0,3.2261005833,-2.0
 085386363,3.6833548275\H,0,2.2230587592,-1.3344393606,5.0003929426\H,0
 ,-1.0970016037,-3.7197211389,-2.4602669919\H,0,-1.3605417386,-2.163544
 3342,-1.612306094\H,0,-2.1106341577,-3.6641524305,-0.9890820676\H,0,0.
 4782090738,-5.4880854308,-1.4609672313\H,0,-0.536041503,-5.5430992445,
 0.0067562971\H,0,1.2169030247,-5.2375918234,0.1462163605\H,0,3.5199724
 988,1.3946066241,-3.801972254\H,0,4.9426925401,0.6108335068,-3.0713849
 801\H,0,3.8542778163,-0.3247300478,-4.1003495186\H,0,3.5222707931,-2.7
 697098302,1.4326616776\H,0,2.8742474356,-3.7605459653,0.118343089\H,0,
 4.4793568366,-3.0307362347,-0.0420606877\\Version=x86-Linux-G03RevB.04
 \State=1-A\HF=-2077.8447102\RMSD=1.029e-05\Dipole=-0.1669135,-0.349540
 4,-0.215712\PG=C01 [X(C36H52Mg1N2O5)]\\@


 IT IS A SIMPLE TASK TO MAKE THINGS COMPLEX,
 BUT A COMPLEX TASK TO MAKE THEM SIMPLE.
 Job cpu time:  0 days  2 hours 34 minutes 35.0 seconds.
 File lengths (MBytes):  RWF=    823 Int=      0 D2E=      0 Chk=     20 Scr=      1
 Normal termination of Gaussian 03 at Mon Nov 22 10:19:03 2004.
