# Supplementary material
Source: publisher figshare collection journal article supplement (https://acs.figshare.com/ndownloader/files/5127205)
Supplement: Supplementary file 1 [file 5127205 › supporting_ja043819b/RR_fm-reactant.mol]

  -ISIS-  10010408003D

 96 99  0  0  0  0  0  0  0  0999 V2000
   -4.9110   -1.9427   -1.3129 O   0  0  0  0  0  0  0  0  0  0  0  0
    0.8652    0.0840   -0.2687 Mg  0  0  0  0  0  0  0  0  0  0  0  0
    0.5888   -0.9838   -1.8304 O   0  0  0  0  0  0  0  0  0  0  0  0
   -4.8231   -1.7555    0.0116 C   0  0  0  0  0  0  0  0  0  0  0  0
    2.6720    0.3670    0.5804 N   0  0  3  0  0  0  0  0  0  0  0  0
    0.4462    1.9934    0.3190 N   0  0  3  0  0  0  0  0  0  0  0  0
   -5.7780   -1.5909    0.7425 O   0  0  0  0  0  0  0  0  0  0  0  0
    3.2745    1.4352    1.0601 C   0  0  3  0  0  0  0  0  0  0  0  0
    2.5994    2.6767    1.1571 C   0  0  0  0  0  0  0  0  0  0  0  0
    1.2490    2.9206    0.8339 C   0  0  3  0  0  0  0  0  0  0  0  0
   -2.4946   -2.1550   -0.5106 O   0  0  0  0  0  0  0  0  0  0  0  0
   -1.2710   -1.6427   -0.5302 C   0  0  0  0  0  0  0  0  0  0  0  0
   -0.4053   -1.9267   -1.7683 C   0  0  3  0  0  0  0  0  0  0  0  0
   -3.3932   -1.7108    0.5402 C   0  0  3  0  0  0  0  0  0  0  0  0
   -0.8375   -0.9474    0.3974 O   0  0  0  0  0  0  0  0  0  0  0  0
   -6.2475   -1.9427   -1.8424 C   0  0  0  0  0  0  0  0  0  0  0  0
   -1.2581   -2.0059   -3.0468 C   0  0  0  0  0  0  0  0  0  0  0  0
   -3.2360   -2.5675    1.7914 C   0  0  0  0  0  0  0  0  0  0  0  0
    3.2081   -0.9378    0.2897 C   0  0  3  0  0  0  0  0  0  0  0  0
   -0.9824    2.1309    0.1631 C   0  0  3  0  0  0  0  0  0  0  0  0
    3.9266   -1.1468   -0.9366 C   0  0  3  0  0  0  0  0  0  0  0  0
    4.0824   -2.4754   -1.3943 C   0  0  0  0  0  0  0  0  0  0  0  0
    3.5532   -3.5655   -0.6713 C   0  0  0  0  0  0  0  0  0  0  0  0
    2.8895   -3.3539    0.5544 C   0  0  0  0  0  0  0  0  0  0  0  0
    2.6965   -2.0422    1.0579 C   0  0  3  0  0  0  0  0  0  0  0  0
    4.4645    0.0609   -1.7509 C   0  0  3  0  0  0  0  0  0  0  0  0
    2.0393   -1.7909    2.4407 C   0  0  3  0  0  0  0  0  0  0  0  0
   -1.8504    1.8894    1.2803 C   0  0  3  0  0  0  0  0  0  0  0  0
   -3.2365    1.6994    1.0298 C   0  0  0  0  0  0  0  0  0  0  0  0
   -3.7512    1.7322   -0.2868 C   0  0  0  0  0  0  0  0  0  0  0  0
   -2.8969    2.0173   -1.3724 C   0  0  0  0  0  0  0  0  0  0  0  0
   -1.5102    2.2399   -1.1724 C   0  0  3  0  0  0  0  0  0  0  0  0
   -1.3214    1.8476    2.7382 C   0  0  3  0  0  0  0  0  0  0  0  0
   -0.6099    2.7083   -2.3463 C   0  0  3  0  0  0  0  0  0  0  0  0
    3.3601    0.6478   -2.6907 C   0  0  0  0  0  0  0  0  0  0  0  0
    5.7466   -0.2896   -2.5725 C   0  0  0  0  0  0  0  0  0  0  0  0
    0.9266   -2.8231    2.7976 C   0  0  0  0  0  0  0  0  0  0  0  0
    3.1366   -1.7559    3.5577 C   0  0  0  0  0  0  0  0  0  0  0  0
   -0.6554    1.7513   -3.5757 C   0  0  0  0  0  0  0  0  0  0  0  0
   -0.9989    4.1684   -2.7613 C   0  0  0  0  0  0  0  0  0  0  0  0
   -1.5476    0.4536    3.4041 C   0  0  0  0  0  0  0  0  0  0  0  0
   -1.9772    2.9771    3.6033 C   0  0  0  0  0  0  0  0  0  0  0  0
    4.7089    1.3773    1.5678 C   0  0  0  0  0  0  0  0  0  0  0  0
    0.7059    4.3178    1.0970 C   0  0  0  0  0  0  0  0  0  0  0  0
    3.1673    3.5107    1.5566 H   0  0  0  0  0  0  0  0  0  0  0  0
   -0.0034   -2.9498   -1.5820 H   0  0  0  0  0  0  0  0  0  0  0  0
   -3.1817   -0.6538    0.7449 H   0  0  0  0  0  0  0  0  0  0  0  0
   -6.7341   -0.9816   -1.6557 H   0  0  0  0  0  0  0  0  0  0  0  0
   -6.8422   -2.7362   -1.3823 H   0  0  0  0  0  0  0  0  0  0  0  0
   -6.1350   -2.1161   -2.9127 H   0  0  0  0  0  0  0  0  0  0  0  0
   -2.0165   -2.7934   -2.9878 H   0  0  0  0  0  0  0  0  0  0  0  0
   -0.5884   -2.2119   -3.8872 H   0  0  0  0  0  0  0  0  0  0  0  0
   -1.7534   -1.0487   -3.2344 H   0  0  0  0  0  0  0  0  0  0  0  0
   -2.2391   -2.4313    2.2146 H   0  0  0  0  0  0  0  0  0  0  0  0
   -3.3837   -3.6262    1.5526 H   0  0  0  0  0  0  0  0  0  0  0  0
   -3.9843   -2.2699    2.5301 H   0  0  0  0  0  0  0  0  0  0  0  0
    4.6281   -2.6667   -2.3266 H   0  0  0  0  0  0  0  0  0  0  0  0
    3.6918   -4.5884   -1.0477 H   0  0  0  0  0  0  0  0  0  0  0  0
    2.5419   -4.2166    1.1378 H   0  0  0  0  0  0  0  0  0  0  0  0
    4.7426    0.8569   -1.0345 H   0  0  0  0  0  0  0  0  0  0  0  0
    1.5762   -0.7809    2.4106 H   0  0  0  0  0  0  0  0  0  0  0  0
   -3.9233    1.5541    1.8745 H   0  0  0  0  0  0  0  0  0  0  0  0
   -4.8276    1.5857   -0.4554 H   0  0  0  0  0  0  0  0  0  0  0  0
   -3.3166    2.1126   -2.3828 H   0  0  0  0  0  0  0  0  0  0  0  0
   -0.2290    2.0248    2.7091 H   0  0  0  0  0  0  0  0  0  0  0  0
    0.4344    2.7332   -1.9719 H   0  0  0  0  0  0  0  0  0  0  0  0
    3.7818    1.4537   -3.3148 H   0  0  0  0  0  0  0  0  0  0  0  0
    2.5346    1.0771   -2.0925 H   0  0  0  0  0  0  0  0  0  0  0  0
    2.9388   -0.1370   -3.3401 H   0  0  0  0  0  0  0  0  0  0  0  0
    6.1710    0.6320   -2.9990 H   0  0  0  0  0  0  0  0  0  0  0  0
    5.5127   -0.9728   -3.4027 H   0  0  0  0  0  0  0  0  0  0  0  0
    6.5079   -0.7599   -1.9316 H   0  0  0  0  0  0  0  0  0  0  0  0
    0.4242   -2.5177    3.7282 H   0  0  0  0  0  0  0  0  0  0  0  0
    1.3425   -3.8309    2.9465 H   0  0  0  0  0  0  0  0  0  0  0  0
    0.1724   -2.8740    1.9916 H   0  0  0  0  0  0  0  0  0  0  0  0
    2.6753   -1.5346    4.5325 H   0  0  0  0  0  0  0  0  0  0  0  0
    3.8826   -0.9752    3.3387 H   0  0  0  0  0  0  0  0  0  0  0  0
    3.6532   -2.7264    3.6242 H   0  0  0  0  0  0  0  0  0  0  0  0
   -0.0202    2.1501   -4.3825 H   0  0  0  0  0  0  0  0  0  0  0  0
   -1.6809    1.6471   -3.9623 H   0  0  0  0  0  0  0  0  0  0  0  0
   -0.2748    0.7562   -3.2889 H   0  0  0  0  0  0  0  0  0  0  0  0
   -0.3098    4.5301   -3.5398 H   0  0  0  0  0  0  0  0  0  0  0  0
   -0.9388    4.8501   -1.8985 H   0  0  0  0  0  0  0  0  0  0  0  0
   -2.0245    4.1998   -3.1607 H   0  0  0  0  0  0  0  0  0  0  0  0
   -1.1377    0.4547    4.4262 H   0  0  0  0  0  0  0  0  0  0  0  0
   -1.0370   -0.3307    2.8190 H   0  0  0  0  0  0  0  0  0  0  0  0
   -2.6195    0.2087    3.4574 H   0  0  0  0  0  0  0  0  0  0  0  0
   -1.5247    2.9894    4.6067 H   0  0  0  0  0  0  0  0  0  0  0  0
   -3.0588    2.8054    3.7130 H   0  0  0  0  0  0  0  0  0  0  0  0
   -1.8285    3.9652    3.1414 H   0  0  0  0  0  0  0  0  0  0  0  0
    5.1751    0.4093    1.3570 H   0  0  0  0  0  0  0  0  0  0  0  0
    5.3196    2.1677    1.1135 H   0  0  0  0  0  0  0  0  0  0  0  0
    4.7289    1.5384    2.6542 H   0  0  0  0  0  0  0  0  0  0  0  0
    0.1680    4.6962    0.2191 H   0  0  0  0  0  0  0  0  0  0  0  0
    0.0045    4.3191    1.9396 H   0  0  0  0  0  0  0  0  0  0  0  0
    1.5143    5.0179    1.3340 H   0  0  0  0  0  0  0  0  0  0  0  0
  1  4  1  0  0  0  0
  1 16  1  0  0  0  0
  2  3  2  0  0  0  0
  2  5  2  0  0  0  0
  2  6  1  0  0  0  0
  2 15  1  0  0  0  0
  3 13  1  0  0  0  0
  4  7  2  0  0  0  0
  4 14  1  0  0  0  0
  5  8  1  0  0  0  0
  5 19  1  0  0  0  0
  6 10  1  0  0  0  0
  6 20  1  0  0  0  0
  8  9  1  0  0  0  0
  8 43  1  0  0  0  0
  9 10  1  0  0  0  0
  9 45  1  0  0  0  0
 10 44  1  0  0  0  0
 11 12  1  0  0  0  0
 11 14  1  0  0  0  0
 12 13  1  0  0  0  0
 12 15  2  0  0  0  0
 13 17  1  0  0  0  0
 13 46  1  0  0  0  0
 14 18  1  0  0  0  0
 14 47  1  0  0  0  0
 16 48  1  0  0  0  0
 16 49  1  0  0  0  0
 16 50  1  0  0  0  0
 17 51  1  0  0  0  0
 17 52  1  0  0  0  0
 17 53  1  0  0  0  0
 18 54  1  0  0  0  0
 18 55  1  0  0  0  0
 18 56  1  0  0  0  0
 19 21  1  0  0  0  0
 19 25  1  0  0  0  0
 20 28  1  0  0  0  0
 20 32  1  0  0  0  0
 21 22  1  0  0  0  0
 21 26  1  0  0  0  0
 22 23  1  0  0  0  0
 22 57  1  0  0  0  0
 23 24  1  0  0  0  0
 23 58  1  0  0  0  0
 24 25  1  0  0  0  0
 24 59  1  0  0  0  0
 25 27  1  0  0  0  0
 26 35  1  0  0  0  0
 26 36  1  0  0  0  0
 26 60  1  0  0  0  0
 27 37  1  0  0  0  0
 27 38  1  0  0  0  0
 27 61  1  0  0  0  0
 28 29  1  0  0  0  0
 28 33  1  0  0  0  0
 29 30  1  0  0  0  0
 29 62  1  0  0  0  0
 30 31  1  0  0  0  0
 30 63  1  0  0  0  0
 31 32  1  0  0  0  0
 31 64  1  0  0  0  0
 32 34  1  0  0  0  0
 33 41  1  0  0  0  0
 33 42  1  0  0  0  0
 33 65  1  0  0  0  0
 34 39  1  0  0  0  0
 34 40  1  0  0  0  0
 34 66  1  0  0  0  0
 35 67  1  0  0  0  0
 35 68  1  0  0  0  0
 35 69  1  0  0  0  0
 36 70  1  0  0  0  0
 36 71  1  0  0  0  0
 36 72  1  0  0  0  0
 37 73  1  0  0  0  0
 37 74  1  0  0  0  0
 37 75  1  0  0  0  0
 38 76  1  0  0  0  0
 38 77  1  0  0  0  0
 38 78  1  0  0  0  0
 39 79  1  0  0  0  0
 39 80  1  0  0  0  0
 39 81  1  0  0  0  0
 40 82  1  0  0  0  0
 40 83  1  0  0  0  0
 40 84  1  0  0  0  0
 41 85  1  0  0  0  0
 41 86  1  0  0  0  0
 41 87  1  0  0  0  0
 42 88  1  0  0  0  0
 42 89  1  0  0  0  0
 42 90  1  0  0  0  0
 43 91  1  0  0  0  0
 43 92  1  0  0  0  0
 43 93  1  0  0  0  0
 44 94  1  0  0  0  0
 44 95  1  0  0  0  0
 44 96  1  0  0  0  0
M  END
