# Supplementary material
Source: publisher figshare collection journal article supplement (https://acs.figshare.com/ndownloader/files/5127205)
Supplement: Supplementary file 1 [file 5127205 › supporting_ja043819b/RRRR_fm-5-ts1-136.xyz]

114
O	-5.163845	1.742629	0.392454	0.0	-0.02	-0.01
Mg	0.39357	-0.637511	0.071287	0.01	0.05	0.16
O	0.735898	0.668518	-1.475692	0.07	0.28	0.22
C	-4.100466	2.012631	-0.39004	0.01	-0.01	0.0
N	-0.608764	-2.29852	0.813168	0.0	0.0	0.02
N	2.175862	-1.718299	0.271278	0.0	0.0	0.0
O	-3.371095	2.965316	-0.240726	0.0	-0.01	0.0
C	-0.078518	-3.424593	1.298641	0.0	-0.01	0.0
C	1.289886	-3.72683	1.274836	0.0	0.0	0.0
C	2.344987	-2.931837	0.775159	0.0	0.0	0.0
O	-2.739688	1.126605	-2.191763	0.06	0.03	0.02
C	-1.625889	0.749636	-1.555125	0.04	0.05	0.05
C	-0.32444	0.86454	-2.352308	0.08	0.15	0.12
C	-3.994887	0.966002	-1.4975	0.04	-0.01	0.0
O	-1.633439	0.267078	-0.430425	0.02	-0.03	0.01
C	-5.353144	2.635617	1.503281	-0.01	-0.01	-0.01
O	-0.001423	2.854117	-0.126403	-0.03	0.02	-0.24
C	1.024582	2.004139	0.192868	-0.07	-0.12	-0.28
O	0.872098	1.114957	1.046573	-0.08	0.08	0.0
O	2.468001	3.826186	0.747186	-0.05	-0.14	-0.06
C	1.395964	4.603339	0.98991	-0.03	-0.13	-0.02
C	1.57E-4	4.101441	0.60402	-0.03	-0.12	-0.03
C	2.395726	2.615485	-0.086978	-0.04	-0.09	-0.15
O	1.526725	5.661161	1.562448	0.0	-0.15	0.0
C	-0.756683	5.136918	-0.218096	-0.05	-0.01	0.11
C	2.742183	2.973824	-1.520088	0.03	0.04	-0.1
C	-0.257534	2.136073	-3.210658	0.03	0.06	0.0
C	-5.092035	1.151454	-2.543957	0.05	-0.01	-0.02
C	-2.052363	-2.182401	0.780898	0.0	0.0	0.01
C	3.31525	-0.921271	-0.132554	0.0	0.0	0.0
C	-2.760391	-2.71169	-0.346568	0.0	0.0	0.01
C	-4.145379	-2.42981	-0.460896	0.0	0.0	0.0
C	-4.817974	-1.673582	0.529076	0.0	0.0	0.0
C	-4.111501	-1.193588	1.652464	0.0	0.0	0.0
C	-2.725765	-1.432559	1.799075	0.0	0.0	0.01
C	-2.028043	-3.570469	-1.413962	0.0	0.01	0.0
C	-1.965488	-0.877817	3.030677	0.0	0.0	0.01
C	4.091987	-0.21953	0.852769	0.0	-0.01	0.0
C	5.108586	0.665696	0.396247	0.01	-0.01	0.0
C	5.3624	0.838348	-0.98188	0.01	-0.01	0.0
C	4.619961	0.11238	-1.935544	0.0	-0.01	0.0
C	3.585172	-0.772587	-1.535314	-0.01	0.0	0.0
C	3.898355	-0.431222	2.380019	0.0	0.0	0.0
C	2.826755	-1.628621	-2.582502	-0.02	0.01	0.01
C	-1.394656	-2.677318	-2.528887	0.0	0.02	0.01
C	-2.947429	-4.663485	-2.049671	0.01	0.01	0.0
C	-2.015549	0.682304	3.078265	0.0	0.0	0.01
C	-2.510857	-1.490952	4.363564	0.0	0.0	0.01
C	2.556957	-0.865918	-3.914936	-0.02	0.01	0.01
C	3.591447	-2.967269	-2.859807	-0.03	0.01	-0.01
C	3.501083	0.8867	3.1186	-0.02	0.01	-0.02
C	5.19499	-1.03377	3.022077	-0.01	0.01	0.01
C	-0.994531	-4.468635	1.927703	0.0	-0.01	0.0
C	3.724091	-3.577993	0.871375	0.0	0.0	-0.01
H	1.577424	-4.688978	1.685197	0.0	0.0	0.0
H	-0.375068	0.01674	-3.065001	0.27	0.06	0.23
H	-4.058386	-0.028077	-1.042677	0.05	-0.01	-0.01
H	-5.384507	3.674164	1.165701	-0.01	-0.02	-0.01
H	-4.536257	2.512291	2.21966	-0.01	-0.01	-0.01
H	-6.303592	2.346818	1.953266	-0.01	-0.02	-0.02
H	-0.528333	3.927483	1.55116	0.0	-0.24	-0.04
H	3.17109	1.969721	0.315727	-0.07	-0.11	-0.16
H	-0.819825	6.068568	0.349438	-0.02	-0.07	0.21
H	-1.759045	4.76075	-0.431681	-0.06	0.03	0.09
H	-0.237172	5.336168	-1.161425	-0.07	0.09	0.12
H	3.59471	3.661677	-1.498913	0.04	0.03	-0.01
H	1.912327	3.452296	-2.043158	0.06	0.09	-0.1
H	3.049823	2.064781	-2.036088	0.05	0.08	-0.16
H	-1.087049	2.159578	-3.924375	0.05	-0.09	-0.03
H	0.683446	2.13478	-3.768196	0.04	0.07	0.03
H	-0.30347	3.032952	-2.591842	-0.07	0.12	-0.09
H	-4.990715	0.39269	-3.32572	0.07	0.0	-0.02
H	-5.025052	2.140636	-3.008016	0.04	-0.01	-0.01
H	-6.073873	1.044929	-2.074732	0.05	-0.03	-0.03
H	-4.716805	-2.832236	-1.30679	0.0	0.01	0.0
H	-5.897638	-1.491192	0.437986	0.0	0.01	0.0
H	-4.650266	-0.633853	2.428684	0.0	0.0	0.0
H	-1.191766	-4.09306	-0.911255	0.0	0.01	0.0
H	-0.901916	-1.177264	2.929858	0.0	0.0	0.01
H	5.722608	1.202375	1.13158	0.0	0.0	0.0
H	6.162441	1.516739	-1.30961	0.01	-0.01	0.0
H	4.864929	0.213393	-3.000323	0.0	-0.01	0.0
H	3.07288	-1.15665	2.521794	0.0	0.0	0.0
H	1.846821	-1.8955	-2.135662	-0.02	0.01	0.01
H	-0.927148	-3.305045	-3.306004	0.01	0.02	0.01
H	-0.604653	-2.040446	-2.090502	0.0	0.01	0.03
H	-2.154897	-2.034715	-3.004064	0.0	0.02	0.01
H	-2.339422	-5.335978	-2.673755	0.01	0.01	-0.01
H	-3.722761	-4.213912	-2.688062	0.01	0.01	0.0
H	-3.439226	-5.263061	-1.26862	0.01	0.0	-0.01
H	-1.404804	1.054718	3.91678	-0.01	0.0	0.02
H	-3.050941	1.037422	3.21917	-0.01	0.0	0.0
H	-1.621069	1.107809	2.138623	0.01	0.0	0.02
H	-1.917781	-1.121588	5.21413	-0.01	0.0	0.01
H	-2.444275	-2.589811	4.344633	0.0	0.0	0.01
H	-3.562593	-1.208112	4.524098	-0.01	0.0	0.01
H	1.884678	-1.460866	-4.552696	-0.04	0.03	0.01
H	3.488727	-0.687885	-4.473708	-0.02	0.0	0.0
H	2.082413	0.105962	-3.705435	0.0	0.03	0.0
H	3.038553	-3.566208	-3.599763	-0.03	0.01	-0.01
H	3.688612	-3.56042	-1.936668	-0.03	0.0	-0.01
H	4.599933	-2.765235	-3.25403	-0.03	0.01	-0.01
H	3.390904	0.688774	4.196206	-0.05	0.02	-0.02
H	2.539591	1.264921	2.733001	0.0	0.01	-0.06
H	4.26636	1.665858	2.98366	0.0	0.0	0.0
H	5.00638	-1.278301	4.078565	-0.01	0.02	0.01
H	6.022184	-0.308959	2.977031	-0.01	0.01	0.01
H	5.509155	-1.95101	2.501789	0.0	0.0	0.02
H	-1.712641	-4.872252	1.204696	0.0	-0.01	-0.01
H	-0.413266	-5.305948	2.328259	0.0	-0.01	-0.01
H	-1.57118	-4.031542	2.751599	0.0	-0.02	0.0
H	4.491581	-3.028621	0.321603	-0.01	0.0	-0.02
H	4.037245	-3.646669	1.920818	0.0	0.01	-0.01
H	3.682209	-4.602958	0.482749	0.0	0.0	0.0
114
O	-5.163845	1.7383027620787508	0.39029088103937537	0.0	-0.02	-0.01
Mg	0.39573311896062463	-0.6266954051968769	0.1058969033699941	0.01	0.05	0.16
O	0.7510398327243725	0.7290853308974896	-1.4281033828662582	0.07	0.28	0.22
C	-4.098302881039375	2.010467881039375	-0.39004	0.01	-0.01	0.0
N	-0.608764	-2.29852	0.8174942379212493	0.0	0.0	0.02
N	2.175862	-1.718299	0.271278	0.0	0.0	0.0
O	-3.371095	2.9631528810393752	-0.240726	0.0	-0.01	0.0
C	-0.078518	-3.426756118960625	1.298641	0.0	-0.01	0.0
C	1.289886	-3.72683	1.274836	0.0	0.0	0.0
C	2.344987	-2.931837	0.775159	0.0	0.0	0.0
O	-2.7267092862362525	1.1330943568818739	-2.1874367620787507	0.06	0.03	0.02
C	-1.6172365241575013	0.7604515948031231	-1.5443094051968769	0.04	0.05	0.05
C	-0.30713504831500293	0.8969867844093694	-2.326350572472504	0.08	0.15	0.12
C	-3.9862345241575015	0.9638388810393754	-1.4975	0.04	-0.01	0.0
O	-1.6291127620787509	0.2605886431181261	-0.42826188103937535	0.02	-0.03	0.01
C	-5.355307118960625	2.633453881039375	1.5011178810393755	-0.01	-0.01	-0.01
O	-0.007912356881873896	2.858443237921249	-0.17831785505499115	-0.03	0.02	-0.24
C	1.0094401672756277	1.9781815724725043	0.13230066910251032	-0.07	-0.12	-0.28
O	0.854793048315003	1.132261951684997	1.046573	-0.08	0.08	0.0
O	2.457185405196877	3.795902334551255	0.7342072862362522	-0.05	-0.14	-0.06
C	1.3894746431181262	4.57521845351188	0.9855837620787506	-0.03	-0.13	-0.02
C	-0.006332356881873895	4.075483572472505	0.5975306431181261	-0.03	-0.12	-0.03
C	2.3870735241575014	2.5960169293543784	-0.11942478440936947	-0.04	-0.09	-0.15
O	1.526725	5.62871421559063	1.562448	0.0	-0.15	0.0
C	-0.7674985948031231	5.134754881039375	-0.19430169143312906	-0.05	-0.01	0.11
C	2.748672356881874	2.9824764758424984	-1.5417191896062463	0.03	0.04	-0.1
C	-0.2510446431181261	2.1490517137637477	-3.210658	0.03	0.06	0.0
C	-5.081219405196877	1.1492908810393754	-2.548283237921249	0.05	-0.01	-0.02
C	-2.052363	-2.182401	0.7830611189606246	0.0	0.0	0.01
C	3.31525	-0.921271	-0.132554	0.0	0.0	0.0
C	-2.760391	-2.71169	-0.34440488103937533	0.0	0.0	0.01
C	-4.145379	-2.42981	-0.460896	0.0	0.0	0.0
C	-4.817974	-1.673582	0.529076	0.0	0.0	0.0
C	-4.111501	-1.193588	1.652464	0.0	0.0	0.0
C	-2.725765	-1.432559	1.8012381189606246	0.0	0.0	0.01
C	-2.028043	-3.5683058810393753	-1.413962	0.0	0.01	0.0
C	-1.965488	-0.877817	3.0328401189606247	0.0	0.0	0.01
C	4.091987	-0.22169311896062463	0.852769	0.0	-0.01	0.0
C	5.110749118960625	0.6635328810393754	0.396247	0.01	-0.01	0.0
C	5.364563118960625	0.8361848810393754	-0.98188	0.01	-0.01	0.0
C	4.619961	0.11021688103937537	-1.935544	0.0	-0.01	0.0
C	3.583008881039375	-0.772587	-1.535314	-0.01	0.0	0.0
C	3.898355	-0.431222	2.380019	0.0	0.0	0.0
C	2.8224287620787507	-1.6264578810393755	-2.580338881039375	-0.02	0.01	0.01
C	-1.394656	-2.672991762078751	-2.5267238810393753	0.0	0.02	0.01
C	-2.9452658810393753	-4.661321881039375	-2.049671	0.01	0.01	0.0
C	-2.015549	0.682304	3.080428118960625	0.0	0.0	0.01
C	-2.510857	-1.490952	4.365727118960625	0.0	0.0	0.01
C	2.552630762078751	-0.8637548810393754	-3.912772881039375	-0.02	0.01	0.01
C	3.584957643118126	-2.965105881039375	-2.861970118960625	-0.03	0.01	-0.01
C	3.4967567620787507	0.8888631189606246	3.1142737620787506	-0.02	0.01	-0.02
C	5.192826881039375	-1.0316068810393755	3.0242401189606247	-0.01	0.01	0.01
C	-0.994531	-4.470798118960625	1.927703	0.0	-0.01	0.0
C	3.724091	-3.577993	0.8692118810393754	0.0	0.0	-0.01
H	1.577424	-4.688978	1.685197	0.0	0.0	0.0
H	-0.31666378806313494	0.02971871376374779	-3.0152492639056336	0.27	0.06	0.23
H	-4.047570405196876	-0.030240118960624632	-1.0448401189606247	0.05	-0.01	-0.01
H	-5.386670118960625	3.669837762078751	1.1635378810393755	-0.01	-0.02	-0.01
H	-4.538420118960625	2.510127881039375	2.2174968810393754	-0.01	-0.01	-0.01
H	-6.305755118960625	2.3424917620787507	1.9489397620787507	-0.01	-0.02	-0.02
H	-0.528333	3.875568144945009	1.5425075241575015	0.0	-0.24	-0.04
H	3.1559481672756275	1.945926691433129	0.2811170966300059	-0.07	-0.11	-0.16
H	-0.8241512379212493	6.053426167275627	0.3948634981731173	-0.02	-0.07	0.21
H	-1.7720237137637478	4.767239356881873	-0.4122129293543783	-0.06	0.03	0.09
H	-0.2523138327243724	5.355636070645621	-1.1354675724725043	-0.07	0.09	0.12
H	3.6033624758424985	3.668166356881874	-1.5010761189606245	0.04	0.03	-0.01
H	1.925305713763748	3.4717640706456216	-2.0647891896062465	0.06	0.09	-0.1
H	3.060638594803123	2.082085951684997	-2.070697903369994	0.05	0.08	-0.16
H	-1.0762334051968767	2.1401099293543786	-3.930864356881874	0.05	-0.09	-0.03
H	0.6920984758424985	2.1499218327243725	-3.761706643118126	0.04	0.07	0.03
H	-0.31861183272437243	3.0589094275274955	-2.611310070645622	-0.07	0.12	-0.09
H	-4.975573167275627	0.39269	-3.330046237921249	0.07	0.0	-0.02
H	-5.016399524157501	2.1384728810393754	-3.010179118960625	0.04	-0.01	-0.01
H	-6.063057405196877	1.0384396431181262	-2.081221356881874	0.05	-0.03	-0.03
H	-4.716805	-2.830072881039375	-1.30679	0.0	0.01	0.0
H	-5.897638	-1.4890288810393755	0.437986	0.0	0.01	0.0
H	-4.650266	-0.633853	2.428684	0.0	0.0	0.0
H	-1.191766	-4.0908968810393755	-0.911255	0.0	0.01	0.0
H	-0.901916	-1.177264	2.9320211189606247	0.0	0.0	0.01
H	5.722608	1.202375	1.13158	0.0	0.0	0.0
H	6.164604118960625	1.5145758810393755	-1.30961	0.01	-0.01	0.0
H	4.864929	0.21122988103937537	-3.000323	0.0	-0.01	0.0
H	3.07288	-1.15665	2.521794	0.0	0.0	0.0
H	1.8424947620787508	-1.8933368810393754	-2.133498881039375	-0.02	0.01	0.01
H	-0.9249848810393754	-3.3007187620787506	-3.3038408810393753	0.01	0.02	0.01
H	-0.604653	-2.0382828810393754	-2.084012643118126	0.0	0.01	0.03
H	-2.154897	-2.0303887620787506	-3.0019008810393752	0.0	0.02	0.01
H	-2.337258881039375	-5.333814881039375	-2.6759181189606247	0.01	0.01	-0.01
H	-3.7205978810393754	-4.211748881039375	-2.688062	0.01	0.01	0.0
H	-3.4370628810393753	-5.263061	-1.2707831189606247	0.01	0.0	-0.01
H	-1.4069671189606245	1.054718	3.9211062379212493	-0.01	0.0	0.02
H	-3.0531041189606247	1.037422	3.21917	-0.01	0.0	0.0
H	-1.6189058810393755	1.107809	2.142949237921249	0.01	0.0	0.02
H	-1.9199441189606246	-1.121588	5.216293118960625	-0.01	0.0	0.01
H	-2.444275	-2.589811	4.346796118960625	0.0	0.0	0.01
H	-3.564756118960625	-1.208112	4.526261118960625	-0.01	0.0	0.01
H	1.8760255241575015	-1.4543766431181262	-4.550532881039375	-0.04	0.03	0.01
H	3.4844007620787507	-0.687885	-4.473708	-0.02	0.0	0.0
H	2.082413	0.1124513568818739	-3.705435	0.0	0.03	0.0
H	3.032063643118126	-3.5640448810393752	-3.6019261189606246	-0.03	0.01	-0.01
H	3.682122643118126	-3.56042	-1.9388311189606247	-0.03	0.0	-0.01
H	4.5934436431181265	-2.7630718810393753	-3.256193118960625	-0.03	0.01	-0.01
H	3.3800884051968767	0.6931002379212493	4.1918797620787505	-0.05	0.02	-0.02
H	2.539591	1.2670841189606246	2.720022286236252	0.0	0.01	-0.06
H	4.26636	1.665858	2.98366	0.0	0.0	0.0
H	5.004216881039375	-1.2739747620787507	4.080728118960625	-0.01	0.02	0.01
H	6.020020881039375	-0.30679588103937533	2.979194118960625	-0.01	0.01	0.01
H	5.509155	-1.95101	2.5061152379212492	0.0	0.0	0.02
H	-1.712641	-4.874415118960624	1.2025328810393754	0.0	-0.01	-0.01
H	-0.413266	-5.308111118960625	2.3260958810393753	0.0	-0.01	-0.01
H	-1.57118	-4.03586823792125	2.751599	0.0	-0.02	0.0
H	4.489417881039375	-3.028621	0.3172767620787508	-0.01	0.0	-0.02
H	4.037245	-3.6445058810393753	1.9186548810393753	0.0	0.01	-0.01
H	3.682209	-4.602958	0.482749	0.0	0.0	0.0
114
O	-5.163845	1.7344000064679053	0.3883395032339527	0.0	-0.02	-0.01
Mg	0.3976844967660473	-0.6169385161697635	0.137118948256757	0.01	0.05	0.16
O	0.7646994773623312	0.7837239094493247	-1.3851730711469592	0.07	0.28	0.22
C	-4.096351503233953	2.0085165032339525	-0.39004	0.01	-0.01	0.0
N	-0.608764	-2.29852	0.8213969935320946	0.0	0.0	0.02
N	2.175862	-1.718299	0.271278	0.0	0.0	0.0
O	-3.371095	2.9612015032339527	-0.240726	0.0	-0.01	0.0
C	-0.078518	-3.4287074967660476	1.298641	0.0	-0.01	0.0
C	1.289886	-3.72683	1.274836	0.0	0.0	0.0
C	2.344987	-2.931837	0.775159	0.0	0.0	0.0
O	-2.7150010194037164	1.138948490298142	-2.183534006467905	0.06	0.03	0.02
C	-1.6094310129358107	0.7702084838302365	-1.5345525161697635	0.04	0.05	0.05
C	-0.2915240258716215	0.9262574514907096	-2.302934038807432	0.08	0.15	0.12
C	-3.9784290129358104	0.9618875032339527	-1.4975	0.04	-0.01	0.0
O	-1.6252100064679054	0.25473450970185807	-0.4263105032339527	0.02	-0.03	0.01
C	-5.357258496766048	2.6315025032339525	1.4991665032339527	-0.01	-0.01	-0.01
O	-0.013766490298141936	2.8623459935320947	-0.22515092238513545	-0.03	0.02	-0.24
C	0.9957805226376689	1.9547650388074322	0.07766209055067527	-0.07	-0.12	-0.28
O	0.8391820258716215	1.1478729741283784	1.046573	-0.08	0.08	0.0
O	2.4474285161697638	3.7685830452753377	0.7224990194037162	-0.05	-0.14	-0.06
C	1.3836205097018581	4.549850542041385	0.9816810064679053	-0.03	-0.13	-0.02
C	-0.012186490298141936	4.052067038807433	0.591676509701858	-0.03	-0.12	-0.03
C	2.3792680129358104	2.5784545291055743	-0.14869545149070967	-0.04	-0.09	-0.15
O	1.526725	5.59944354850929	1.562448	0.0	-0.15	0.0
C	-0.7772554838302366	5.132803503233952	-0.17283653557347958	-0.05	-0.01	0.11
C	2.754526490298142	2.9902819870641895	-1.5612329676604733	0.03	0.04	-0.1
C	-0.24519050970185804	2.160759980596284	-3.210658	0.03	0.06	0.0
C	-5.071462516169763	1.1473395032339526	-2.5521859935320945	0.05	-0.01	-0.02
C	-2.052363	-2.182401	0.7850124967660473	0.0	0.0	0.01
C	3.31525	-0.921271	-0.132554	0.0	0.0	0.0
C	-2.760391	-2.71169	-0.3424535032339527	0.0	0.0	0.01
C	-4.145379	-2.42981	-0.460896	0.0	0.0	0.0
C	-4.817974	-1.673582	0.529076	0.0	0.0	0.0
C	-4.111501	-1.193588	1.652464	0.0	0.0	0.0
C	-2.725765	-1.432559	1.8031894967660473	0.0	0.0	0.01
C	-2.028043	-3.5663545032339528	-1.413962	0.0	0.01	0.0
C	-1.965488	-0.877817	3.034791496766047	0.0	0.0	0.01
C	4.091987	-0.2236444967660473	0.852769	0.0	-0.01	0.0
C	5.112700496766047	0.6615815032339526	0.396247	0.01	-0.01	0.0
C	5.366514496766047	0.8342335032339526	-0.98188	0.01	-0.01	0.0
C	4.619961	0.10826550323395268	-1.935544	0.0	-0.01	0.0
C	3.5810575032339527	-0.772587	-1.535314	-0.01	0.0	0.0
C	3.898355	-0.431222	2.380019	0.0	0.0	0.0
C	2.818526006467905	-1.6245065032339527	-2.5783875032339525	-0.02	0.01	0.01
C	-1.394656	-2.6690890064679054	-2.5247725032339527	0.0	0.02	0.01
C	-2.9433145032339527	-4.659370503233952	-2.049671	0.01	0.01	0.0
C	-2.015549	0.682304	3.0823794967660474	0.0	0.0	0.01
C	-2.510857	-1.490952	4.367678496766048	0.0	0.0	0.01
C	2.5487280064679054	-0.8618035032339526	-3.9108215032339526	-0.02	0.01	0.01
C	3.579103509701858	-2.9631545032339526	-2.8639214967660473	-0.03	0.01	-0.01
C	3.4928540064679052	0.8908144967660474	3.110371006467905	-0.02	0.01	-0.02
C	5.190875503233952	-1.0296555032339527	3.0261914967660473	-0.01	0.01	0.01
C	-0.994531	-4.472749496766047	1.927703	0.0	-0.01	0.0
C	3.724091	-3.577993	0.8672605032339527	0.0	0.0	-0.01
H	1.577424	-4.688978	1.685197	0.0	0.0	0.0
H	-0.2639765873167226	0.04142698059628387	-2.9703675743809117	0.27	0.06	0.23
H	-4.037813516169763	-0.032191496766047316	-1.0467914967660474	0.05	-0.01	-0.01
H	-5.3886214967660475	3.6659350064679055	1.1615865032339527	-0.01	-0.02	-0.01
H	-4.540371496766047	2.5081765032339525	2.215545503233953	-0.01	-0.01	-0.01
H	-6.307706496766047	2.338589006467905	1.9450370064679052	-0.01	-0.02	-0.02
H	-0.528333	3.8287350776148648	1.5347020129358109	0.0	-0.24	-0.04
H	3.142288522637669	1.9244615355734795	0.249895051743243	-0.07	-0.11	-0.16
H	-0.8280539935320946	6.0397665226376684	0.4358424320869936	-0.02	-0.07	0.21
H	-1.783731980596284	4.773093490298142	-0.3946505291055742	-0.06	0.03	0.09
H	-0.2659734773623312	5.373198470894426	-1.1120510388074323	-0.07	0.09	0.12
H	3.6111679870641895	3.674020490298142	-1.5030274967660473	0.04	0.03	-0.01
H	1.937013980596284	3.489326470894426	-2.084302967660473	0.06	0.09	-0.1
H	3.0703954838302363	2.0976969741283784	-2.1019199482567568	0.05	0.08	-0.16
H	-1.0664765161697634	2.1225475291055744	-3.936718490298142	0.05	-0.09	-0.03
H	0.6999039870641892	2.163581477362331	-3.755852509701858	0.04	0.07	0.03
H	-0.3322714773623312	3.0823259611925677	-2.628872470894426	-0.07	0.12	-0.09
H	-4.961913522637668	0.39269	-3.3339489935320947	0.07	0.0	-0.02
H	-5.00859401293581	2.136521503233953	-3.0121304967660474	0.04	-0.01	-0.01
H	-6.053300516169763	1.0325855097018581	-2.087075490298142	0.05	-0.03	-0.03
H	-4.716805	-2.8281215032339526	-1.30679	0.0	0.01	0.0
H	-5.897638	-1.4870775032339527	0.437986	0.0	0.01	0.0
H	-4.650266	-0.633853	2.428684	0.0	0.0	0.0
H	-1.191766	-4.088945503233953	-0.911255	0.0	0.01	0.0
H	-0.901916	-1.177264	2.933972496766047	0.0	0.0	0.01
H	5.722608	1.202375	1.13158	0.0	0.0	0.0
H	6.166555496766048	1.5126245032339527	-1.30961	0.01	-0.01	0.0
H	4.864929	0.2092785032339527	-3.000323	0.0	-0.01	0.0
H	3.07288	-1.15665	2.521794	0.0	0.0	0.0
H	1.8385920064679053	-1.8913855032339526	-2.1315475032339526	-0.02	0.01	0.01
H	-0.9230335032339526	-3.296816006467905	-3.301889503233953	0.01	0.02	0.01
H	-0.604653	-2.036331503233953	-2.078158509701858	0.0	0.01	0.03
H	-2.154897	-2.026486006467905	-2.9999495032339527	0.0	0.02	0.01
H	-2.3353075032339525	-5.3318635032339525	-2.6778694967660472	0.01	0.01	-0.01
H	-3.718646503233953	-4.209797503233952	-2.688062	0.01	0.01	0.0
H	-3.4351115032339528	-5.263061	-1.2727344967660474	0.01	0.0	-0.01
H	-1.4089184967660473	1.054718	3.925008993532095	-0.01	0.0	0.02
H	-3.0550554967660473	1.037422	3.21917	-0.01	0.0	0.0
H	-1.6169545032339527	1.107809	2.1468519935320947	0.01	0.0	0.02
H	-1.9218954967660473	-1.121588	5.218244496766047	-0.01	0.0	0.01
H	-2.444275	-2.589811	4.348747496766047	0.0	0.0	0.01
H	-3.5667074967660475	-1.208112	4.528212496766048	-0.01	0.0	0.01
H	1.8682200129358109	-1.4485225097018581	-4.548581503233953	-0.04	0.03	0.01
H	3.480498006467905	-0.687885	-4.473708	-0.02	0.0	0.0
H	2.082413	0.11830549029814194	-3.705435	0.0	0.03	0.0
H	3.0262095097018578	-3.5620935032339527	-3.603877496766047	-0.03	0.01	-0.01
H	3.676268509701858	-3.56042	-1.9407824967660474	-0.03	0.0	-0.01
H	4.587589509701858	-2.7611205032339527	-3.2581444967660476	-0.03	0.01	-0.01
H	3.3703315161697636	0.6970029935320946	4.187977006467905	-0.05	0.02	-0.02
H	2.539591	1.2690354967660473	2.708314019403716	0.0	0.01	-0.06
H	4.26636	1.665858	2.98366	0.0	0.0	0.0
H	5.002265503233953	-1.2700720064679052	4.082679496766048	-0.01	0.02	0.01
H	6.018069503233953	-0.3048445032339527	2.9811454967660476	-0.01	0.01	0.01
H	5.509155	-1.95101	2.5100179935320948	0.0	0.0	0.02
H	-1.712641	-4.876366496766047	1.2005815032339526	0.0	-0.01	-0.01
H	-0.413266	-5.310062496766047	2.3241445032339527	0.0	-0.01	-0.01
H	-1.57118	-4.039770993532095	2.751599	0.0	-0.02	0.0
H	4.487466503233953	-3.028621	0.3133740064679054	-0.01	0.0	-0.02
H	4.037245	-3.642554503233953	1.9167035032339526	0.0	0.01	-0.01
H	3.682209	-4.602958	0.482749	0.0	0.0	0.0
114
O	-5.163845	1.7313027620787507	0.38679088103937537	0.0	-0.02	-0.01
Mg	0.39923311896062463	-0.6091954051968769	0.1618969033699941	0.01	0.05	0.16
O	0.7755398327243724	0.8270853308974897	-1.3511033828662582	0.07	0.28	0.22
C	-4.094802881039375	2.006967881039375	-0.39004	0.01	-0.01	0.0
N	-0.608764	-2.29852	0.8244942379212493	0.0	0.0	0.02
N	2.175862	-1.718299	0.271278	0.0	0.0	0.0
O	-3.371095	2.9596528810393754	-0.240726	0.0	-0.01	0.0
C	-0.078518	-3.430256118960625	1.298641	0.0	-0.01	0.0
C	1.289886	-3.72683	1.274836	0.0	0.0	0.0
C	2.344987	-2.931837	0.775159	0.0	0.0	0.0
O	-2.705709286236252	1.143594356881874	-2.1804367620787506	0.06	0.03	0.02
C	-1.6032365241575013	0.7779515948031231	-1.526809405196877	0.04	0.05	0.05
C	-0.27913504831500296	0.9494867844093694	-2.2843505724725044	0.08	0.15	0.12
C	-3.9722345241575012	0.9603388810393754	-1.4975	0.04	-0.01	0.0
O	-1.6221127620787508	0.25008864311812606	-0.42476188103937534	0.02	-0.03	0.01
C	-5.358807118960625	2.629953881039375	1.4976178810393754	-0.01	-0.01	-0.01
O	-0.018412356881873895	2.8654432379212493	-0.26231785505499117	-0.03	0.02	-0.24
C	0.9849401672756277	1.9361815724725042	0.03430066910251031	-0.07	-0.12	-0.28
O	0.826793048315003	1.160261951684997	1.046573	-0.08	0.08	0.0
O	2.439685405196877	3.746902334551255	0.7132072862362522	-0.05	-0.14	-0.06
C	1.378974643118126	4.5297184535118795	0.9785837620787506	-0.03	-0.13	-0.02
C	-0.016832356881873893	4.033483572472504	0.5870306431181261	-0.03	-0.12	-0.03
C	2.373073524157501	2.5645169293543786	-0.17192478440936948	-0.04	-0.09	-0.15
O	1.526725	5.57621421559063	1.562448	0.0	-0.15	0.0
C	-0.7849985948031232	5.131254881039375	-0.15580169143312905	-0.05	-0.01	0.11
C	2.759172356881874	2.9964764758424987	-1.5767191896062465	0.03	0.04	-0.1
C	-0.2405446431181261	2.170051713763748	-3.210658	0.03	0.06	0.0
C	-5.063719405196877	1.1457908810393753	-2.555283237921249	0.05	-0.01	-0.02
C	-2.052363	-2.182401	0.7865611189606246	0.0	0.0	0.01
C	3.31525	-0.921271	-0.132554	0.0	0.0	0.0
C	-2.760391	-2.71169	-0.34090488103937533	0.0	0.0	0.01
C	-4.145379	-2.42981	-0.460896	0.0	0.0	0.0
C	-4.817974	-1.673582	0.529076	0.0	0.0	0.0
C	-4.111501	-1.193588	1.652464	0.0	0.0	0.0
C	-2.725765	-1.432559	1.8047381189606246	0.0	0.0	0.01
C	-2.028043	-3.5648058810393755	-1.413962	0.0	0.01	0.0
C	-1.965488	-0.877817	3.0363401189606245	0.0	0.0	0.01
C	4.091987	-0.22519311896062463	0.852769	0.0	-0.01	0.0
C	5.1142491189606245	0.6600328810393753	0.396247	0.01	-0.01	0.0
C	5.368063118960625	0.8326848810393753	-0.98188	0.01	-0.01	0.0
C	4.619961	0.10671688103937536	-1.935544	0.0	-0.01	0.0
C	3.5795088810393754	-0.772587	-1.535314	-0.01	0.0	0.0
C	3.898355	-0.431222	2.380019	0.0	0.0	0.0
C	2.8154287620787506	-1.6229578810393754	-2.576838881039375	-0.02	0.01	0.01
C	-1.394656	-2.6659917620787508	-2.5232238810393754	0.0	0.02	0.01
C	-2.9417658810393754	-4.657821881039375	-2.049671	0.01	0.01	0.0
C	-2.015549	0.682304	3.0839281189606247	0.0	0.0	0.01
C	-2.510857	-1.490952	4.369227118960625	0.0	0.0	0.01
C	2.545630762078751	-0.8602548810393753	-3.9092728810393753	-0.02	0.01	0.01
C	3.574457643118126	-2.9616058810393753	-2.8654701189606246	-0.03	0.01	-0.01
C	3.4897567620787506	0.8923631189606247	3.1072737620787505	-0.02	0.01	-0.02
C	5.189326881039375	-1.0281068810393754	3.0277401189606246	-0.01	0.01	0.01
C	-0.994531	-4.474298118960625	1.927703	0.0	-0.01	0.0
C	3.724091	-3.577993	0.8657118810393754	0.0	0.0	-0.01
H	1.577424	-4.688978	1.685197	0.0	0.0	0.0
H	-0.22216378806313497	0.050718713763747786	-2.9347492639056334	0.27	0.06	0.23
H	-4.030070405196876	-0.033740118960624635	-1.0483401189606247	0.05	-0.01	-0.01
H	-5.390170118960625	3.662837762078751	1.1600378810393754	-0.01	-0.02	-0.01
H	-4.541920118960625	2.506627881039375	2.2139968810393755	-0.01	-0.01	-0.01
H	-6.309255118960625	2.3354917620787505	1.9419397620787506	-0.01	-0.02	-0.02
H	-0.528333	3.7915681449450087	1.5285075241575015	0.0	-0.24	-0.04
H	3.1314481672756274	1.907426691433129	0.2251170966300059	-0.07	-0.11	-0.16
H	-0.8311512379212493	6.028926167275627	0.4683634981731173	-0.02	-0.07	0.21
H	-1.7930237137637477	4.777739356881874	-0.3807129293543783	-0.06	0.03	0.09
H	-0.27681383272437243	5.387136070645622	-1.0934675724725043	-0.07	0.09	0.12
H	3.6173624758424987	3.678666356881874	-1.5045761189606246	0.04	0.03	-0.01
H	1.9463057137637478	3.5032640706456215	-2.099789189606246	0.06	0.09	-0.1
H	3.0781385948031232	2.1100859516849972	-2.126697903369994	0.05	0.08	-0.16
H	-1.0587334051968769	2.1086099293543787	-3.941364356881874	0.05	-0.09	-0.03
H	0.7060984758424985	2.1744218327243727	-3.751206643118126	0.04	0.07	0.03
H	-0.34311183272437246	3.1009094275274953	-2.6428100706456217	-0.07	0.12	-0.09
H	-4.951073167275627	0.39269	-3.3370462379212493	0.07	0.0	-0.02
H	-5.002399524157501	2.1349728810393755	-3.0136791189606247	0.04	-0.01	-0.01
H	-6.045557405196877	1.027939643118126	-2.091721356881874	0.05	-0.03	-0.03
H	-4.716805	-2.8265728810393753	-1.30679	0.0	0.01	0.0
H	-5.897638	-1.4855288810393754	0.437986	0.0	0.01	0.0
H	-4.650266	-0.633853	2.428684	0.0	0.0	0.0
H	-1.191766	-4.087396881039376	-0.911255	0.0	0.01	0.0
H	-0.901916	-1.177264	2.9355211189606245	0.0	0.0	0.01
H	5.722608	1.202375	1.13158	0.0	0.0	0.0
H	6.168104118960625	1.5110758810393754	-1.30961	0.01	-0.01	0.0
H	4.864929	0.20772988103937537	-3.000323	0.0	-0.01	0.0
H	3.07288	-1.15665	2.521794	0.0	0.0	0.0
H	1.8354947620787507	-1.8898368810393753	-2.1299988810393753	-0.02	0.01	0.01
H	-0.9214848810393753	-3.2937187620787505	-3.3003408810393755	0.01	0.02	0.01
H	-0.604653	-2.0347828810393755	-2.073512643118126	0.0	0.01	0.03
H	-2.154897	-2.0233887620787505	-2.9984008810393754	0.0	0.02	0.01
H	-2.3337588810393752	-5.330314881039375	-2.6794181189606245	0.01	0.01	-0.01
H	-3.7170978810393756	-4.208248881039375	-2.688062	0.01	0.01	0.0
H	-3.4335628810393755	-5.263061	-1.2742831189606247	0.01	0.0	-0.01
H	-1.4104671189606246	1.054718	3.9281062379212495	-0.01	0.0	0.02
H	-3.0566041189606246	1.037422	3.21917	-0.01	0.0	0.0
H	-1.6154058810393754	1.107809	2.1499492379212493	0.01	0.0	0.02
H	-1.9234441189606246	-1.121588	5.219793118960625	-0.01	0.0	0.01
H	-2.444275	-2.589811	4.350296118960625	0.0	0.0	0.01
H	-3.568256118960625	-1.208112	4.529761118960625	-0.01	0.0	0.01
H	1.8620255241575014	-1.443876643118126	-4.547032881039375	-0.04	0.03	0.01
H	3.4774007620787506	-0.687885	-4.473708	-0.02	0.0	0.0
H	2.082413	0.12295135688187389	-3.705435	0.0	0.03	0.0
H	3.021563643118126	-3.5605448810393754	-3.6054261189606245	-0.03	0.01	-0.01
H	3.671622643118126	-3.56042	-1.9423311189606247	-0.03	0.0	-0.01
H	4.582943643118126	-2.7595718810393755	-3.259693118960625	-0.03	0.01	-0.01
H	3.3625884051968766	0.7001002379212493	4.184879762078751	-0.05	0.02	-0.02
H	2.539591	1.2705841189606246	2.699022286236252	0.0	0.01	-0.06
H	4.26636	1.665858	2.98366	0.0	0.0	0.0
H	5.000716881039375	-1.2669747620787506	4.084228118960625	-0.01	0.02	0.01
H	6.0165208810393755	-0.3032958810393753	2.982694118960625	-0.01	0.01	0.01
H	5.509155	-1.95101	2.5131152379212494	0.0	0.0	0.02
H	-1.712641	-4.877915118960624	1.1990328810393753	0.0	-0.01	-0.01
H	-0.413266	-5.3116111189606245	2.3225958810393754	0.0	-0.01	-0.01
H	-1.57118	-4.042868237921249	2.751599	0.0	-0.02	0.0
H	4.485917881039375	-3.028621	0.31027676207875077	-0.01	0.0	-0.02
H	4.037245	-3.6410058810393755	1.9151548810393753	0.0	0.01	-0.01
H	3.682209	-4.602958	0.482749	0.0	0.0	0.0
114
O	-5.163845	1.7293142087718678	0.38579660438593394	0.0	-0.02	-0.01
Mg	0.40022739561406606	-0.6042240219296697	0.1778053298250572	0.01	0.05	0.16
O	0.7824997692984625	0.85492507719385	-1.3292292964905463	0.07	0.28	0.22
C	-4.093808604385934	2.0059736043859338	-0.39004	0.01	-0.01	0.0
N	-0.608764	-2.29852	0.8264827912281322	0.0	0.0	0.02
N	2.175862	-1.718299	0.271278	0.0	0.0	0.0
O	-3.371095	2.958658604385934	-0.240726	0.0	-0.01	0.0
C	-0.078518	-3.4312503956140663	1.298641	0.0	-0.01	0.0
C	1.289886	-3.72683	1.274836	0.0	0.0	0.0
C	2.344987	-2.931837	0.775159	0.0	0.0	0.0
O	-2.6997436263156036	1.1465771868421983	-2.1784482087718677	0.06	0.03	0.02
C	-1.5992594175437356	0.7829229780703303	-1.5218380219296697	0.04	0.05	0.05
C	-0.27118083508747143	0.964400934210991	-2.272419252631207	0.08	0.15	0.12
C	-3.9682574175437355	0.9593446043859339	-1.4975	0.04	-0.01	0.0
O	-1.620124208771868	0.24710581315780175	-0.4237676043859339	0.02	-0.03	0.01
C	-5.359801395614066	2.628959604385934	1.496623604385934	-0.01	-0.01	-0.01
O	-0.02139518684219822	2.867431791228132	-0.2861804947375858	-0.03	0.02	-0.24
C	0.9779802307015376	1.924250252631207	0.006460922806149932	-0.07	-0.12	-0.28
O	0.8188388350874715	1.1682161649125287	1.046573	-0.08	0.08	0.0
O	2.4347140219296697	3.7329824614030747	0.7072416263156036	-0.05	-0.14	-0.06
C	1.3759918131578017	4.516792857017141	0.9765952087718678	-0.03	-0.13	-0.02
C	-0.01981518684219822	4.021552252631207	0.5840478131578017	-0.03	-0.12	-0.03
C	2.3690964175437355	2.5555684394734053	-0.18683893421099113	-0.04	-0.09	-0.15
O	1.526725	5.561300065789009	1.562448	0.0	-0.15	0.0
C	-0.7899699780703303	5.130260604385934	-0.1448646482452732	-0.05	-0.01	0.11
C	2.762155186842198	3.0004535824562644	-1.5866619561406607	0.03	0.04	-0.1
C	-0.23756181315780175	2.1760173736843966	-3.210658	0.03	0.06	0.0
C	-5.05874802192967	1.144796604385934	-2.557271791228132	0.05	-0.01	-0.02
C	-2.052363	-2.182401	0.7875553956140661	0.0	0.0	0.01
C	3.31525	-0.921271	-0.132554	0.0	0.0	0.0
C	-2.760391	-2.71169	-0.3399106043859339	0.0	0.0	0.01
C	-4.145379	-2.42981	-0.460896	0.0	0.0	0.0
C	-4.817974	-1.673582	0.529076	0.0	0.0	0.0
C	-4.111501	-1.193588	1.652464	0.0	0.0	0.0
C	-2.725765	-1.432559	1.805732395614066	0.0	0.0	0.01
C	-2.028043	-3.563811604385934	-1.413962	0.0	0.01	0.0
C	-1.965488	-0.877817	3.037334395614066	0.0	0.0	0.01
C	4.091987	-0.2261873956140661	0.852769	0.0	-0.01	0.0
C	5.1152433956140655	0.6590386043859339	0.396247	0.01	-0.01	0.0
C	5.369057395614066	0.8316906043859339	-0.98188	0.01	-0.01	0.0
C	4.619961	0.10572260438593392	-1.935544	0.0	-0.01	0.0
C	3.578514604385934	-0.772587	-1.535314	-0.01	0.0	0.0
C	3.898355	-0.431222	2.380019	0.0	0.0	0.0
C	2.8134402087718677	-1.621963604385934	-2.5758446043859338	-0.02	0.01	0.01
C	-1.394656	-2.664003208771868	-2.522229604385934	0.0	0.02	0.01
C	-2.940771604385934	-4.656827604385934	-2.049671	0.01	0.01	0.0
C	-2.015549	0.682304	3.084922395614066	0.0	0.0	0.01
C	-2.510857	-1.490952	4.370221395614066	0.0	0.0	0.01
C	2.543642208771868	-0.8592606043859339	-3.908278604385934	-0.02	0.01	0.01
C	3.571474813157802	-2.960611604385934	-2.866464395614066	-0.03	0.01	-0.01
C	3.4877682087718678	0.8933573956140661	3.1052852087718676	-0.02	0.01	-0.02
C	5.188332604385934	-1.027112604385934	3.028734395614066	-0.01	0.01	0.01
C	-0.994531	-4.4752923956140656	1.927703	0.0	-0.01	0.0
C	3.724091	-3.577993	0.8647176043859339	0.0	0.0	-0.01
H	1.577424	-4.688978	1.685197	0.0	0.0	0.0
H	-0.195318318420216	0.05668437368439644	-2.9118809008764805	0.27	0.06	0.23
H	-4.02509902192967	-0.03473439561406608	-1.0493343956140662	0.05	-0.01	-0.01
H	-5.391164395614066	3.660849208771868	1.159043604385934	-0.01	-0.02	-0.01
H	-4.542914395614066	2.5056336043859337	2.213002604385934	-0.01	-0.01	-0.01
H	-6.310249395614066	2.3335032087718677	1.9399512087718678	-0.01	-0.02	-0.02
H	-0.528333	3.7677055052624144	1.5245304175437357	0.0	-0.24	-0.04
H	3.1244882307015374	1.8964896482452733	0.2092086701749428	-0.07	-0.11	-0.16
H	-0.8331397912281322	6.021966230701538	0.4892433078953876	-0.02	-0.07	0.21
H	-1.7989893736843965	4.780722186842198	-0.3717644394734053	-0.06	0.03	0.09
H	-0.28377376929846254	5.396084560526594	-1.0815362526312071	-0.07	0.09	0.12
H	3.6213395824562644	3.6816491868421983	-1.505570395614066	0.04	0.03	-0.01
H	1.9522713736843966	3.512212560526595	-2.109731956140661	0.06	0.09	-0.1
H	3.0831099780703304	2.1180401649125287	-2.1426063298250573	0.05	0.08	-0.16
H	-1.0537620219296695	2.0996614394734054	-3.944347186842198	0.05	-0.09	-0.03
H	0.7100755824562643	2.1813817692984627	-3.748223813157802	0.04	0.07	0.03
H	-0.3500717692984625	3.112840747368793	-2.651758560526595	-0.07	0.12	-0.09
H	-4.944113230701538	0.39269	-3.339034791228132	0.07	0.0	-0.02
H	-4.998422417543735	2.133978604385934	-3.014673395614066	0.04	-0.01	-0.01
H	-6.04058602192967	1.0249568131578017	-2.0947041868421983	0.05	-0.03	-0.03
H	-4.716805	-2.825578604385934	-1.30679	0.0	0.01	0.0
H	-5.897638	-1.484534604385934	0.437986	0.0	0.01	0.0
H	-4.650266	-0.633853	2.428684	0.0	0.0	0.0
H	-1.191766	-4.086402604385935	-0.911255	0.0	0.01	0.0
H	-0.901916	-1.177264	2.936515395614066	0.0	0.0	0.01
H	5.722608	1.202375	1.13158	0.0	0.0	0.0
H	6.169098395614066	1.510081604385934	-1.30961	0.01	-0.01	0.0
H	4.864929	0.2067356043859339	-3.000323	0.0	-0.01	0.0
H	3.07288	-1.15665	2.521794	0.0	0.0	0.0
H	1.8335062087718679	-1.8888426043859339	-2.129004604385934	-0.02	0.01	0.01
H	-0.9204906043859339	-3.2917302087718676	-3.299346604385934	0.01	0.02	0.01
H	-0.604653	-2.033788604385934	-2.0705298131578016	0.0	0.01	0.03
H	-2.154897	-2.0214002087718677	-2.997406604385934	0.0	0.02	0.01
H	-2.332764604385934	-5.329320604385934	-2.680412395614066	0.01	0.01	-0.01
H	-3.716103604385934	-4.207254604385934	-2.688062	0.01	0.01	0.0
H	-3.432568604385934	-5.263061	-1.2752773956140662	0.01	0.0	-0.01
H	-1.411461395614066	1.054718	3.9300947912281323	-0.01	0.0	0.02
H	-3.057598395614066	1.037422	3.21917	-0.01	0.0	0.0
H	-1.614411604385934	1.107809	2.151937791228132	0.01	0.0	0.02
H	-1.924438395614066	-1.121588	5.220787395614066	-0.01	0.0	0.01
H	-2.444275	-2.589811	4.351290395614066	0.0	0.0	0.01
H	-3.569250395614066	-1.208112	4.530755395614066	-0.01	0.0	0.01
H	1.8580484175437357	-1.4408938131578017	-4.546038604385934	-0.04	0.03	0.01
H	3.4754122087718677	-0.687885	-4.473708	-0.02	0.0	0.0
H	2.082413	0.12593418684219823	-3.705435	0.0	0.03	0.0
H	3.0185808131578016	-3.559550604385934	-3.606420395614066	-0.03	0.01	-0.01
H	3.6686398131578017	-3.56042	-1.9433253956140661	-0.03	0.0	-0.01
H	4.579960813157802	-2.758577604385934	-3.2606873956140663	-0.03	0.01	-0.01
H	3.3576170219296695	0.7020887912281322	4.182891208771868	-0.05	0.02	-0.02
H	2.539591	1.271578395614066	2.6930566263156033	0.0	0.01	-0.06
H	4.26636	1.665858	2.98366	0.0	0.0	0.0
H	4.999722604385934	-1.2649862087718677	4.085222395614066	-0.01	0.02	0.01
H	6.015526604385935	-0.3023016043859339	2.9836883956140663	-0.01	0.01	0.01
H	5.509155	-1.95101	2.515103791228132	0.0	0.0	0.02
H	-1.712641	-4.878909395614065	1.198038604385934	0.0	-0.01	-0.01
H	-0.413266	-5.3126053956140655	2.321601604385934	0.0	-0.01	-0.01
H	-1.57118	-4.044856791228132	2.751599	0.0	-0.02	0.0
H	4.484923604385934	-3.028621	0.30828820877186786	-0.01	0.0	-0.02
H	4.037245	-3.640011604385934	1.9141606043859338	0.0	0.01	-0.01
H	3.682209	-4.602958	0.482749	0.0	0.0	0.0
114
O	-5.163845	1.728629	0.385454	0.0	-0.02	-0.01
Mg	0.40057	-0.602511	0.18328699999999998	0.01	0.05	0.16
O	0.7848980000000001	0.8645179999999999	-1.321692	0.07	0.28	0.22
C	-4.093466	2.0056309999999997	-0.39004	0.01	-0.01	0.0
N	-0.608764	-2.29852	0.827168	0.0	0.0	0.02
N	2.175862	-1.718299	0.271278	0.0	0.0	0.0
O	-3.371095	2.958316	-0.240726	0.0	-0.01	0.0
C	-0.078518	-3.4315930000000003	1.298641	0.0	-0.01	0.0
C	1.289886	-3.72683	1.274836	0.0	0.0	0.0
C	2.344987	-2.931837	0.775159	0.0	0.0	0.0
O	-2.6976880000000003	1.147605	-2.177763	0.06	0.03	0.02
C	-1.597889	0.784636	-1.5201250000000002	0.04	0.05	0.05
C	-0.26844	0.96954	-2.2683079999999998	0.08	0.15	0.12
C	-3.966887	0.959002	-1.4975	0.04	-0.01	0.0
O	-1.619439	0.246078	-0.423425	0.02	-0.03	0.01
C	-5.360144	2.6286169999999998	1.4962810000000002	-0.01	-0.01	-0.01
O	-0.022423	2.868117	-0.29440299999999997	-0.03	0.02	-0.24
C	0.9755820000000001	1.9201389999999998	-0.003131999999999996	-0.07	-0.12	-0.28
O	0.816098	1.170957	1.046573	-0.08	0.08	0.0
O	2.433001	3.728186	0.705186	-0.05	-0.14	-0.06
C	1.374964	4.512339	0.9759099999999999	-0.03	-0.13	-0.02
C	-0.020842999999999997	4.017441000000001	0.58302	-0.03	-0.12	-0.03
C	2.3677259999999998	2.552485	-0.19197799999999998	-0.04	-0.09	-0.15
O	1.526725	5.5561609999999995	1.562448	0.0	-0.15	0.0
C	-0.791683	5.129918	-0.141096	-0.05	-0.01	0.11
C	2.7631829999999997	3.001824	-1.5900880000000002	0.03	0.04	-0.1
C	-0.236534	2.178073	-3.210658	0.03	0.06	0.0
C	-5.057035	1.144454	-2.5579569999999996	0.05	-0.01	-0.02
C	-2.052363	-2.182401	0.787898	0.0	0.0	0.01
C	3.31525	-0.921271	-0.132554	0.0	0.0	0.0
C	-2.760391	-2.71169	-0.339568	0.0	0.0	0.01
C	-4.145379	-2.42981	-0.460896	0.0	0.0	0.0
C	-4.817974	-1.673582	0.529076	0.0	0.0	0.0
C	-4.111501	-1.193588	1.652464	0.0	0.0	0.0
C	-2.725765	-1.432559	1.8060749999999999	0.0	0.0	0.01
C	-2.028043	-3.563469	-1.413962	0.0	0.01	0.0
C	-1.965488	-0.877817	3.037677	0.0	0.0	0.01
C	4.091987	-0.22653	0.852769	0.0	-0.01	0.0
C	5.1155859999999995	0.658696	0.396247	0.01	-0.01	0.0
C	5.3694	0.831348	-0.98188	0.01	-0.01	0.0
C	4.619961	0.10538	-1.935544	0.0	-0.01	0.0
C	3.578172	-0.772587	-1.535314	-0.01	0.0	0.0
C	3.898355	-0.431222	2.380019	0.0	0.0	0.0
C	2.812755	-1.6216210000000002	-2.5755019999999997	-0.02	0.01	0.01
C	-1.394656	-2.6633180000000003	-2.521887	0.0	0.02	0.01
C	-2.940429	-4.656485	-2.049671	0.01	0.01	0.0
C	-2.015549	0.682304	3.085265	0.0	0.0	0.01
C	-2.510857	-1.490952	4.370564	0.0	0.0	0.01
C	2.5429570000000004	-0.858918	-3.907936	-0.02	0.01	0.01
C	3.570447	-2.960269	-2.866807	-0.03	0.01	-0.01
C	3.487083	0.8937	3.1046	-0.02	0.01	-0.02
C	5.18799	-1.0267700000000002	3.029077	-0.01	0.01	0.01
C	-0.994531	-4.475635	1.927703	0.0	-0.01	0.0
C	3.724091	-3.577993	0.864375	0.0	0.0	-0.01
H	1.577424	-4.688978	1.685197	0.0	0.0	0.0
H	-0.186068	0.05874	-2.904001	0.27	0.06	0.23
H	-4.0233859999999995	-0.035077	-1.049677	0.05	-0.01	-0.01
H	-5.391507	3.6601640000000004	1.1587010000000002	-0.01	-0.02	-0.01
H	-4.543257	2.5052909999999997	2.21266	-0.01	-0.01	-0.01
H	-6.310592	2.332818	1.939266	-0.01	-0.02	-0.02
H	-0.528333	3.759483	1.52316	0.0	-0.24	-0.04
H	3.12209	1.892721	0.203727	-0.07	-0.11	-0.16
H	-0.833825	6.019568	0.49643800000000005	-0.02	-0.07	0.21
H	-1.801045	4.78175	-0.368681	-0.06	0.03	0.09
H	-0.286172	5.3991679999999995	-1.0774249999999999	-0.07	0.09	0.12
H	3.62271	3.682677	-1.5059129999999998	0.04	0.03	-0.01
H	1.9543270000000001	3.515296	-2.113158	0.06	0.09	-0.1
H	3.084823	2.120781	-2.148088	0.05	0.08	-0.16
H	-1.052049	2.096578	-3.945375	0.05	-0.09	-0.03
H	0.711446	2.18378	-3.747196	0.04	0.07	0.03
H	-0.35247	3.116952	-2.6548420000000004	-0.07	0.12	-0.09
H	-4.941714999999999	0.39269	-3.33972	0.07	0.0	-0.02
H	-4.997052	2.133636	-3.015016	0.04	-0.01	-0.01
H	-6.038873	1.023929	-2.095732	0.05	-0.03	-0.03
H	-4.716805	-2.825236	-1.30679	0.0	0.01	0.0
H	-5.897638	-1.4841920000000002	0.437986	0.0	0.01	0.0
H	-4.650266	-0.633853	2.428684	0.0	0.0	0.0
H	-1.191766	-4.086060000000001	-0.911255	0.0	0.01	0.0
H	-0.901916	-1.177264	2.936858	0.0	0.0	0.01
H	5.722608	1.202375	1.13158	0.0	0.0	0.0
H	6.169441	1.5097390000000002	-1.30961	0.01	-0.01	0.0
H	4.864929	0.206393	-3.000323	0.0	-0.01	0.0
H	3.07288	-1.15665	2.521794	0.0	0.0	0.0
H	1.832821	-1.8885	-2.128662	-0.02	0.01	0.01
H	-0.920148	-3.291045	-3.299004	0.01	0.02	0.01
H	-0.604653	-2.033446	-2.069502	0.0	0.01	0.03
H	-2.154897	-2.020715	-2.997064	0.0	0.02	0.01
H	-2.3324219999999998	-5.328978	-2.680755	0.01	0.01	-0.01
H	-3.715761	-4.206912	-2.688062	0.01	0.01	0.0
H	-3.432226	-5.263061	-1.27562	0.01	0.0	-0.01
H	-1.4118039999999998	1.054718	3.93078	-0.01	0.0	0.02
H	-3.057941	1.037422	3.21917	-0.01	0.0	0.0
H	-1.6140690000000002	1.107809	2.1526229999999997	0.01	0.0	0.02
H	-1.9247809999999999	-1.121588	5.22113	-0.01	0.0	0.01
H	-2.444275	-2.589811	4.351633	0.0	0.0	0.01
H	-3.5695930000000002	-1.208112	4.531098	-0.01	0.0	0.01
H	1.856678	-1.439866	-4.545696	-0.04	0.03	0.01
H	3.474727	-0.687885	-4.473708	-0.02	0.0	0.0
H	2.082413	0.126962	-3.705435	0.0	0.03	0.0
H	3.017553	-3.559208	-3.606763	-0.03	0.01	-0.01
H	3.667612	-3.56042	-1.943668	-0.03	0.0	-0.01
H	4.578933	-2.758235	-3.2610300000000003	-0.03	0.01	-0.01
H	3.3559039999999998	0.702774	4.182206	-0.05	0.02	-0.02
H	2.539591	1.2719209999999999	2.691001	0.0	0.01	-0.06
H	4.26636	1.665858	2.98366	0.0	0.0	0.0
H	4.99938	-1.264301	4.085565	-0.01	0.02	0.01
H	6.0151840000000005	-0.301959	2.9840310000000003	-0.01	0.01	0.01
H	5.509155	-1.95101	2.515789	0.0	0.0	0.02
H	-1.712641	-4.879251999999999	1.197696	0.0	-0.01	-0.01
H	-0.413266	-5.312948	2.321259	0.0	-0.01	-0.01
H	-1.57118	-4.045542	2.751599	0.0	-0.02	0.0
H	4.484581	-3.028621	0.307603	-0.01	0.0	-0.02
H	4.037245	-3.639669	1.913818	0.0	0.01	-0.01
H	3.682209	-4.602958	0.482749	0.0	0.0	0.0
114
O	-5.163845	1.7293142087718678	0.38579660438593394	0.0	-0.02	-0.01
Mg	0.40022739561406606	-0.6042240219296697	0.1778053298250572	0.01	0.05	0.16
O	0.7824997692984625	0.85492507719385	-1.3292292964905463	0.07	0.28	0.22
C	-4.093808604385934	2.0059736043859338	-0.39004	0.01	-0.01	0.0
N	-0.608764	-2.29852	0.8264827912281322	0.0	0.0	0.02
N	2.175862	-1.718299	0.271278	0.0	0.0	0.0
O	-3.371095	2.958658604385934	-0.240726	0.0	-0.01	0.0
C	-0.078518	-3.4312503956140663	1.298641	0.0	-0.01	0.0
C	1.289886	-3.72683	1.274836	0.0	0.0	0.0
C	2.344987	-2.931837	0.775159	0.0	0.0	0.0
O	-2.6997436263156036	1.1465771868421983	-2.1784482087718677	0.06	0.03	0.02
C	-1.5992594175437356	0.7829229780703304	-1.5218380219296697	0.04	0.05	0.05
C	-0.27118083508747143	0.9644009342109912	-2.272419252631207	0.08	0.15	0.12
C	-3.9682574175437355	0.9593446043859339	-1.4975	0.04	-0.01	0.0
O	-1.620124208771868	0.24710581315780175	-0.4237676043859339	0.02	-0.03	0.01
C	-5.359801395614066	2.628959604385934	1.496623604385934	-0.01	-0.01	-0.01
O	-0.021395186842198224	2.867431791228132	-0.2861804947375858	-0.03	0.02	-0.24
C	0.9779802307015376	1.924250252631207	0.006460922806149905	-0.07	-0.12	-0.28
O	0.8188388350874715	1.1682161649125287	1.046573	-0.08	0.08	0.0
O	2.4347140219296697	3.7329824614030747	0.7072416263156036	-0.05	-0.14	-0.06
C	1.3759918131578017	4.516792857017141	0.9765952087718678	-0.03	-0.13	-0.02
C	-0.019815186842198223	4.021552252631207	0.5840478131578017	-0.03	-0.12	-0.03
C	2.3690964175437355	2.5555684394734053	-0.18683893421099113	-0.04	-0.09	-0.15
O	1.526725	5.561300065789009	1.562448	0.0	-0.15	0.0
C	-0.7899699780703304	5.130260604385934	-0.14486464824527318	-0.05	-0.01	0.11
C	2.762155186842198	3.0004535824562644	-1.5866619561406607	0.03	0.04	-0.1
C	-0.23756181315780175	2.1760173736843966	-3.210658	0.03	0.06	0.0
C	-5.05874802192967	1.144796604385934	-2.557271791228132	0.05	-0.01	-0.02
C	-2.052363	-2.182401	0.7875553956140661	0.0	0.0	0.01
C	3.31525	-0.921271	-0.132554	0.0	0.0	0.0
C	-2.760391	-2.71169	-0.3399106043859339	0.0	0.0	0.01
C	-4.145379	-2.42981	-0.460896	0.0	0.0	0.0
C	-4.817974	-1.673582	0.529076	0.0	0.0	0.0
C	-4.111501	-1.193588	1.652464	0.0	0.0	0.0
C	-2.725765	-1.432559	1.805732395614066	0.0	0.0	0.01
C	-2.028043	-3.563811604385934	-1.413962	0.0	0.01	0.0
C	-1.965488	-0.877817	3.037334395614066	0.0	0.0	0.01
C	4.091987	-0.2261873956140661	0.852769	0.0	-0.01	0.0
C	5.1152433956140655	0.6590386043859339	0.396247	0.01	-0.01	0.0
C	5.369057395614066	0.8316906043859339	-0.98188	0.01	-0.01	0.0
C	4.619961	0.10572260438593392	-1.935544	0.0	-0.01	0.0
C	3.578514604385934	-0.772587	-1.535314	-0.01	0.0	0.0
C	3.898355	-0.431222	2.380019	0.0	0.0	0.0
C	2.8134402087718677	-1.621963604385934	-2.5758446043859338	-0.02	0.01	0.01
C	-1.394656	-2.664003208771868	-2.522229604385934	0.0	0.02	0.01
C	-2.940771604385934	-4.656827604385934	-2.049671	0.01	0.01	0.0
C	-2.015549	0.682304	3.084922395614066	0.0	0.0	0.01
C	-2.510857	-1.490952	4.370221395614066	0.0	0.0	0.01
C	2.543642208771868	-0.8592606043859339	-3.908278604385934	-0.02	0.01	0.01
C	3.571474813157802	-2.960611604385934	-2.866464395614066	-0.03	0.01	-0.01
C	3.4877682087718678	0.8933573956140661	3.1052852087718676	-0.02	0.01	-0.02
C	5.188332604385934	-1.027112604385934	3.028734395614066	-0.01	0.01	0.01
C	-0.994531	-4.4752923956140656	1.927703	0.0	-0.01	0.0
C	3.724091	-3.577993	0.8647176043859339	0.0	0.0	-0.01
H	1.577424	-4.688978	1.685197	0.0	0.0	0.0
H	-0.19531831842021596	0.05668437368439645	-2.9118809008764805	0.27	0.06	0.23
H	-4.02509902192967	-0.03473439561406608	-1.0493343956140662	0.05	-0.01	-0.01
H	-5.391164395614066	3.660849208771868	1.159043604385934	-0.01	-0.02	-0.01
H	-4.542914395614066	2.5056336043859337	2.213002604385934	-0.01	-0.01	-0.01
H	-6.310249395614066	2.3335032087718677	1.9399512087718678	-0.01	-0.02	-0.02
H	-0.528333	3.7677055052624144	1.5245304175437357	0.0	-0.24	-0.04
H	3.1244882307015374	1.8964896482452733	0.20920867017494277	-0.07	-0.11	-0.16
H	-0.8331397912281322	6.021966230701538	0.4892433078953876	-0.02	-0.07	0.21
H	-1.7989893736843965	4.780722186842198	-0.3717644394734053	-0.06	0.03	0.09
H	-0.28377376929846254	5.396084560526594	-1.0815362526312071	-0.07	0.09	0.12
H	3.6213395824562644	3.6816491868421983	-1.505570395614066	0.04	0.03	-0.01
H	1.9522713736843966	3.512212560526595	-2.109731956140661	0.06	0.09	-0.1
H	3.0831099780703304	2.1180401649125287	-2.1426063298250573	0.05	0.08	-0.16
H	-1.0537620219296695	2.0996614394734054	-3.944347186842198	0.05	-0.09	-0.03
H	0.7100755824562643	2.1813817692984627	-3.748223813157802	0.04	0.07	0.03
H	-0.35007176929846257	3.112840747368793	-2.651758560526595	-0.07	0.12	-0.09
H	-4.944113230701538	0.39269	-3.339034791228132	0.07	0.0	-0.02
H	-4.998422417543735	2.133978604385934	-3.014673395614066	0.04	-0.01	-0.01
H	-6.04058602192967	1.0249568131578017	-2.0947041868421983	0.05	-0.03	-0.03
H	-4.716805	-2.825578604385934	-1.30679	0.0	0.01	0.0
H	-5.897638	-1.484534604385934	0.437986	0.0	0.01	0.0
H	-4.650266	-0.633853	2.428684	0.0	0.0	0.0
H	-1.191766	-4.086402604385935	-0.911255	0.0	0.01	0.0
H	-0.901916	-1.177264	2.936515395614066	0.0	0.0	0.01
H	5.722608	1.202375	1.13158	0.0	0.0	0.0
H	6.169098395614066	1.510081604385934	-1.30961	0.01	-0.01	0.0
H	4.864929	0.2067356043859339	-3.000323	0.0	-0.01	0.0
H	3.07288	-1.15665	2.521794	0.0	0.0	0.0
H	1.8335062087718679	-1.8888426043859339	-2.129004604385934	-0.02	0.01	0.01
H	-0.9204906043859339	-3.2917302087718676	-3.299346604385934	0.01	0.02	0.01
H	-0.604653	-2.033788604385934	-2.0705298131578016	0.0	0.01	0.03
H	-2.154897	-2.0214002087718677	-2.997406604385934	0.0	0.02	0.01
H	-2.332764604385934	-5.329320604385934	-2.680412395614066	0.01	0.01	-0.01
H	-3.716103604385934	-4.207254604385934	-2.688062	0.01	0.01	0.0
H	-3.432568604385934	-5.263061	-1.2752773956140662	0.01	0.0	-0.01
H	-1.411461395614066	1.054718	3.9300947912281323	-0.01	0.0	0.02
H	-3.057598395614066	1.037422	3.21917	-0.01	0.0	0.0
H	-1.614411604385934	1.107809	2.151937791228132	0.01	0.0	0.02
H	-1.924438395614066	-1.121588	5.220787395614066	-0.01	0.0	0.01
H	-2.444275	-2.589811	4.351290395614066	0.0	0.0	0.01
H	-3.569250395614066	-1.208112	4.530755395614066	-0.01	0.0	0.01
H	1.8580484175437357	-1.4408938131578017	-4.546038604385934	-0.04	0.03	0.01
H	3.4754122087718677	-0.687885	-4.473708	-0.02	0.0	0.0
H	2.082413	0.12593418684219823	-3.705435	0.0	0.03	0.0
H	3.0185808131578016	-3.559550604385934	-3.606420395614066	-0.03	0.01	-0.01
H	3.6686398131578017	-3.56042	-1.9433253956140661	-0.03	0.0	-0.01
H	4.579960813157802	-2.758577604385934	-3.2606873956140663	-0.03	0.01	-0.01
H	3.3576170219296695	0.7020887912281322	4.182891208771868	-0.05	0.02	-0.02
H	2.539591	1.271578395614066	2.6930566263156033	0.0	0.01	-0.06
H	4.26636	1.665858	2.98366	0.0	0.0	0.0
H	4.999722604385934	-1.2649862087718677	4.085222395614066	-0.01	0.02	0.01
H	6.015526604385935	-0.3023016043859339	2.9836883956140663	-0.01	0.01	0.01
H	5.509155	-1.95101	2.515103791228132	0.0	0.0	0.02
H	-1.712641	-4.878909395614065	1.198038604385934	0.0	-0.01	-0.01
H	-0.413266	-5.3126053956140655	2.321601604385934	0.0	-0.01	-0.01
H	-1.57118	-4.044856791228132	2.751599	0.0	-0.02	0.0
H	4.484923604385934	-3.028621	0.30828820877186786	-0.01	0.0	-0.02
H	4.037245	-3.640011604385934	1.9141606043859338	0.0	0.01	-0.01
H	3.682209	-4.602958	0.482749	0.0	0.0	0.0
114
O	-5.163845	1.7313027620787507	0.38679088103937537	0.0	-0.02	-0.01
Mg	0.39923311896062463	-0.6091954051968769	0.1618969033699941	0.01	0.05	0.16
O	0.7755398327243724	0.8270853308974897	-1.3511033828662582	0.07	0.28	0.22
C	-4.094802881039375	2.006967881039375	-0.39004	0.01	-0.01	0.0
N	-0.608764	-2.29852	0.8244942379212493	0.0	0.0	0.02
N	2.175862	-1.718299	0.271278	0.0	0.0	0.0
O	-3.371095	2.9596528810393754	-0.240726	0.0	-0.01	0.0
C	-0.078518	-3.430256118960625	1.298641	0.0	-0.01	0.0
C	1.289886	-3.72683	1.274836	0.0	0.0	0.0
C	2.344987	-2.931837	0.775159	0.0	0.0	0.0
O	-2.705709286236252	1.143594356881874	-2.1804367620787506	0.06	0.03	0.02
C	-1.6032365241575013	0.7779515948031231	-1.526809405196877	0.04	0.05	0.05
C	-0.27913504831500296	0.9494867844093694	-2.2843505724725044	0.08	0.15	0.12
C	-3.9722345241575012	0.9603388810393754	-1.4975	0.04	-0.01	0.0
O	-1.6221127620787508	0.25008864311812606	-0.42476188103937534	0.02	-0.03	0.01
C	-5.358807118960625	2.629953881039375	1.4976178810393754	-0.01	-0.01	-0.01
O	-0.018412356881873895	2.8654432379212493	-0.26231785505499117	-0.03	0.02	-0.24
C	0.9849401672756277	1.9361815724725042	0.03430066910251031	-0.07	-0.12	-0.28
O	0.826793048315003	1.160261951684997	1.046573	-0.08	0.08	0.0
O	2.439685405196877	3.746902334551255	0.7132072862362522	-0.05	-0.14	-0.06
C	1.378974643118126	4.5297184535118795	0.9785837620787506	-0.03	-0.13	-0.02
C	-0.016832356881873893	4.033483572472504	0.5870306431181261	-0.03	-0.12	-0.03
C	2.373073524157501	2.5645169293543786	-0.17192478440936948	-0.04	-0.09	-0.15
O	1.526725	5.57621421559063	1.562448	0.0	-0.15	0.0
C	-0.7849985948031232	5.131254881039375	-0.15580169143312905	-0.05	-0.01	0.11
C	2.759172356881874	2.9964764758424987	-1.5767191896062465	0.03	0.04	-0.1
C	-0.2405446431181261	2.170051713763748	-3.210658	0.03	0.06	0.0
C	-5.063719405196877	1.1457908810393753	-2.555283237921249	0.05	-0.01	-0.02
C	-2.052363	-2.182401	0.7865611189606246	0.0	0.0	0.01
C	3.31525	-0.921271	-0.132554	0.0	0.0	0.0
C	-2.760391	-2.71169	-0.34090488103937533	0.0	0.0	0.01
C	-4.145379	-2.42981	-0.460896	0.0	0.0	0.0
C	-4.817974	-1.673582	0.529076	0.0	0.0	0.0
C	-4.111501	-1.193588	1.652464	0.0	0.0	0.0
C	-2.725765	-1.432559	1.8047381189606246	0.0	0.0	0.01
C	-2.028043	-3.5648058810393755	-1.413962	0.0	0.01	0.0
C	-1.965488	-0.877817	3.0363401189606245	0.0	0.0	0.01
C	4.091987	-0.22519311896062463	0.852769	0.0	-0.01	0.0
C	5.1142491189606245	0.6600328810393753	0.396247	0.01	-0.01	0.0
C	5.368063118960625	0.8326848810393753	-0.98188	0.01	-0.01	0.0
C	4.619961	0.10671688103937536	-1.935544	0.0	-0.01	0.0
C	3.5795088810393754	-0.772587	-1.535314	-0.01	0.0	0.0
C	3.898355	-0.431222	2.380019	0.0	0.0	0.0
C	2.8154287620787506	-1.6229578810393754	-2.576838881039375	-0.02	0.01	0.01
C	-1.394656	-2.6659917620787508	-2.5232238810393754	0.0	0.02	0.01
C	-2.9417658810393754	-4.657821881039375	-2.049671	0.01	0.01	0.0
C	-2.015549	0.682304	3.0839281189606247	0.0	0.0	0.01
C	-2.510857	-1.490952	4.369227118960625	0.0	0.0	0.01
C	2.545630762078751	-0.8602548810393753	-3.9092728810393753	-0.02	0.01	0.01
C	3.574457643118126	-2.9616058810393753	-2.8654701189606246	-0.03	0.01	-0.01
C	3.4897567620787506	0.8923631189606247	3.1072737620787505	-0.02	0.01	-0.02
C	5.189326881039375	-1.0281068810393754	3.0277401189606246	-0.01	0.01	0.01
C	-0.994531	-4.474298118960625	1.927703	0.0	-0.01	0.0
C	3.724091	-3.577993	0.8657118810393754	0.0	0.0	-0.01
H	1.577424	-4.688978	1.685197	0.0	0.0	0.0
H	-0.22216378806313497	0.050718713763747786	-2.9347492639056334	0.27	0.06	0.23
H	-4.030070405196876	-0.033740118960624635	-1.0483401189606247	0.05	-0.01	-0.01
H	-5.390170118960625	3.662837762078751	1.1600378810393754	-0.01	-0.02	-0.01
H	-4.541920118960625	2.506627881039375	2.2139968810393755	-0.01	-0.01	-0.01
H	-6.309255118960625	2.3354917620787505	1.9419397620787506	-0.01	-0.02	-0.02
H	-0.528333	3.7915681449450087	1.5285075241575015	0.0	-0.24	-0.04
H	3.1314481672756274	1.907426691433129	0.2251170966300059	-0.07	-0.11	-0.16
H	-0.8311512379212493	6.028926167275627	0.4683634981731173	-0.02	-0.07	0.21
H	-1.7930237137637477	4.777739356881874	-0.3807129293543783	-0.06	0.03	0.09
H	-0.27681383272437243	5.387136070645622	-1.0934675724725043	-0.07	0.09	0.12
H	3.6173624758424987	3.678666356881874	-1.5045761189606246	0.04	0.03	-0.01
H	1.9463057137637478	3.5032640706456215	-2.099789189606246	0.06	0.09	-0.1
H	3.0781385948031232	2.1100859516849972	-2.126697903369994	0.05	0.08	-0.16
H	-1.0587334051968769	2.1086099293543787	-3.941364356881874	0.05	-0.09	-0.03
H	0.7060984758424985	2.1744218327243727	-3.751206643118126	0.04	0.07	0.03
H	-0.34311183272437246	3.1009094275274953	-2.6428100706456217	-0.07	0.12	-0.09
H	-4.951073167275627	0.39269	-3.3370462379212493	0.07	0.0	-0.02
H	-5.002399524157501	2.1349728810393755	-3.0136791189606247	0.04	-0.01	-0.01
H	-6.045557405196877	1.027939643118126	-2.091721356881874	0.05	-0.03	-0.03
H	-4.716805	-2.8265728810393753	-1.30679	0.0	0.01	0.0
H	-5.897638	-1.4855288810393754	0.437986	0.0	0.01	0.0
H	-4.650266	-0.633853	2.428684	0.0	0.0	0.0
H	-1.191766	-4.087396881039376	-0.911255	0.0	0.01	0.0
H	-0.901916	-1.177264	2.9355211189606245	0.0	0.0	0.01
H	5.722608	1.202375	1.13158	0.0	0.0	0.0
H	6.168104118960625	1.5110758810393754	-1.30961	0.01	-0.01	0.0
H	4.864929	0.20772988103937537	-3.000323	0.0	-0.01	0.0
H	3.07288	-1.15665	2.521794	0.0	0.0	0.0
H	1.8354947620787507	-1.8898368810393753	-2.1299988810393753	-0.02	0.01	0.01
H	-0.9214848810393753	-3.2937187620787505	-3.3003408810393755	0.01	0.02	0.01
H	-0.604653	-2.0347828810393755	-2.073512643118126	0.0	0.01	0.03
H	-2.154897	-2.0233887620787505	-2.9984008810393754	0.0	0.02	0.01
H	-2.3337588810393752	-5.330314881039375	-2.6794181189606245	0.01	0.01	-0.01
H	-3.7170978810393756	-4.208248881039375	-2.688062	0.01	0.01	0.0
H	-3.4335628810393755	-5.263061	-1.2742831189606247	0.01	0.0	-0.01
H	-1.4104671189606246	1.054718	3.9281062379212495	-0.01	0.0	0.02
H	-3.0566041189606246	1.037422	3.21917	-0.01	0.0	0.0
H	-1.6154058810393754	1.107809	2.1499492379212493	0.01	0.0	0.02
H	-1.9234441189606246	-1.121588	5.219793118960625	-0.01	0.0	0.01
H	-2.444275	-2.589811	4.350296118960625	0.0	0.0	0.01
H	-3.568256118960625	-1.208112	4.529761118960625	-0.01	0.0	0.01
H	1.8620255241575014	-1.443876643118126	-4.547032881039375	-0.04	0.03	0.01
H	3.4774007620787506	-0.687885	-4.473708	-0.02	0.0	0.0
H	2.082413	0.12295135688187389	-3.705435	0.0	0.03	0.0
H	3.021563643118126	-3.5605448810393754	-3.6054261189606245	-0.03	0.01	-0.01
H	3.671622643118126	-3.56042	-1.9423311189606247	-0.03	0.0	-0.01
H	4.582943643118126	-2.7595718810393755	-3.259693118960625	-0.03	0.01	-0.01
H	3.3625884051968766	0.7001002379212493	4.184879762078751	-0.05	0.02	-0.02
H	2.539591	1.2705841189606246	2.699022286236252	0.0	0.01	-0.06
H	4.26636	1.665858	2.98366	0.0	0.0	0.0
H	5.000716881039375	-1.2669747620787506	4.084228118960625	-0.01	0.02	0.01
H	6.0165208810393755	-0.3032958810393753	2.982694118960625	-0.01	0.01	0.01
H	5.509155	-1.95101	2.5131152379212494	0.0	0.0	0.02
H	-1.712641	-4.877915118960624	1.1990328810393753	0.0	-0.01	-0.01
H	-0.413266	-5.3116111189606245	2.3225958810393754	0.0	-0.01	-0.01
H	-1.57118	-4.042868237921249	2.751599	0.0	-0.02	0.0
H	4.485917881039375	-3.028621	0.31027676207875077	-0.01	0.0	-0.02
H	4.037245	-3.6410058810393755	1.9151548810393753	0.0	0.01	-0.01
H	3.682209	-4.602958	0.482749	0.0	0.0	0.0
114
O	-5.163845	1.7344000064679053	0.3883395032339527	0.0	-0.02	-0.01
Mg	0.3976844967660473	-0.6169385161697635	0.13711894825675702	0.01	0.05	0.16
O	0.7646994773623312	0.7837239094493247	-1.3851730711469592	0.07	0.28	0.22
C	-4.096351503233953	2.0085165032339525	-0.39004	0.01	-0.01	0.0
N	-0.608764	-2.29852	0.8213969935320946	0.0	0.0	0.02
N	2.175862	-1.718299	0.271278	0.0	0.0	0.0
O	-3.371095	2.9612015032339527	-0.240726	0.0	-0.01	0.0
C	-0.078518	-3.4287074967660476	1.298641	0.0	-0.01	0.0
C	1.289886	-3.72683	1.274836	0.0	0.0	0.0
C	2.344987	-2.931837	0.775159	0.0	0.0	0.0
O	-2.7150010194037164	1.138948490298142	-2.183534006467905	0.06	0.03	0.02
C	-1.6094310129358107	0.7702084838302365	-1.5345525161697635	0.04	0.05	0.05
C	-0.2915240258716215	0.9262574514907097	-2.302934038807432	0.08	0.15	0.12
C	-3.9784290129358104	0.9618875032339527	-1.4975	0.04	-0.01	0.0
O	-1.6252100064679054	0.25473450970185807	-0.4263105032339527	0.02	-0.03	0.01
C	-5.357258496766048	2.6315025032339525	1.4991665032339527	-0.01	-0.01	-0.01
O	-0.013766490298141938	2.8623459935320947	-0.22515092238513548	-0.03	0.02	-0.24
C	0.9957805226376689	1.9547650388074322	0.07766209055067524	-0.07	-0.12	-0.28
O	0.8391820258716215	1.1478729741283784	1.046573	-0.08	0.08	0.0
O	2.4474285161697638	3.7685830452753373	0.7224990194037162	-0.05	-0.14	-0.06
C	1.3836205097018581	4.549850542041385	0.9816810064679053	-0.03	-0.13	-0.02
C	-0.012186490298141938	4.052067038807433	0.591676509701858	-0.03	-0.12	-0.03
C	2.3792680129358104	2.5784545291055743	-0.14869545149070967	-0.04	-0.09	-0.15
O	1.526725	5.59944354850929	1.562448	0.0	-0.15	0.0
C	-0.7772554838302366	5.132803503233952	-0.17283653557347958	-0.05	-0.01	0.11
C	2.754526490298142	2.9902819870641895	-1.5612329676604733	0.03	0.04	-0.1
C	-0.24519050970185804	2.160759980596284	-3.210658	0.03	0.06	0.0
C	-5.071462516169763	1.1473395032339526	-2.5521859935320945	0.05	-0.01	-0.02
C	-2.052363	-2.182401	0.7850124967660473	0.0	0.0	0.01
C	3.31525	-0.921271	-0.132554	0.0	0.0	0.0
C	-2.760391	-2.71169	-0.3424535032339527	0.0	0.0	0.01
C	-4.145379	-2.42981	-0.460896	0.0	0.0	0.0
C	-4.817974	-1.673582	0.529076	0.0	0.0	0.0
C	-4.111501	-1.193588	1.652464	0.0	0.0	0.0
C	-2.725765	-1.432559	1.8031894967660473	0.0	0.0	0.01
C	-2.028043	-3.5663545032339528	-1.413962	0.0	0.01	0.0
C	-1.965488	-0.877817	3.034791496766047	0.0	0.0	0.01
C	4.091987	-0.2236444967660473	0.852769	0.0	-0.01	0.0
C	5.112700496766047	0.6615815032339526	0.396247	0.01	-0.01	0.0
C	5.366514496766047	0.8342335032339526	-0.98188	0.01	-0.01	0.0
C	4.619961	0.10826550323395268	-1.935544	0.0	-0.01	0.0
C	3.5810575032339527	-0.772587	-1.535314	-0.01	0.0	0.0
C	3.898355	-0.431222	2.380019	0.0	0.0	0.0
C	2.818526006467905	-1.6245065032339527	-2.5783875032339525	-0.02	0.01	0.01
C	-1.394656	-2.6690890064679054	-2.5247725032339527	0.0	0.02	0.01
C	-2.9433145032339527	-4.659370503233952	-2.049671	0.01	0.01	0.0
C	-2.015549	0.682304	3.0823794967660474	0.0	0.0	0.01
C	-2.510857	-1.490952	4.367678496766048	0.0	0.0	0.01
C	2.5487280064679054	-0.8618035032339526	-3.9108215032339526	-0.02	0.01	0.01
C	3.579103509701858	-2.9631545032339526	-2.8639214967660473	-0.03	0.01	-0.01
C	3.4928540064679052	0.8908144967660474	3.110371006467905	-0.02	0.01	-0.02
C	5.190875503233952	-1.0296555032339527	3.0261914967660473	-0.01	0.01	0.01
C	-0.994531	-4.472749496766047	1.927703	0.0	-0.01	0.0
C	3.724091	-3.577993	0.8672605032339527	0.0	0.0	-0.01
H	1.577424	-4.688978	1.685197	0.0	0.0	0.0
H	-0.2639765873167226	0.04142698059628387	-2.9703675743809117	0.27	0.06	0.23
H	-4.037813516169763	-0.032191496766047316	-1.0467914967660474	0.05	-0.01	-0.01
H	-5.3886214967660475	3.6659350064679055	1.1615865032339527	-0.01	-0.02	-0.01
H	-4.540371496766047	2.5081765032339525	2.215545503233953	-0.01	-0.01	-0.01
H	-6.307706496766047	2.338589006467905	1.9450370064679052	-0.01	-0.02	-0.02
H	-0.528333	3.8287350776148648	1.5347020129358109	0.0	-0.24	-0.04
H	3.142288522637669	1.9244615355734795	0.24989505174324297	-0.07	-0.11	-0.16
H	-0.8280539935320946	6.0397665226376684	0.4358424320869936	-0.02	-0.07	0.21
H	-1.783731980596284	4.773093490298142	-0.3946505291055742	-0.06	0.03	0.09
H	-0.2659734773623312	5.373198470894426	-1.1120510388074323	-0.07	0.09	0.12
H	3.6111679870641895	3.674020490298142	-1.5030274967660473	0.04	0.03	-0.01
H	1.937013980596284	3.489326470894426	-2.084302967660473	0.06	0.09	-0.1
H	3.0703954838302363	2.0976969741283784	-2.1019199482567568	0.05	0.08	-0.16
H	-1.0664765161697634	2.1225475291055744	-3.936718490298142	0.05	-0.09	-0.03
H	0.6999039870641892	2.163581477362331	-3.755852509701858	0.04	0.07	0.03
H	-0.3322714773623312	3.0823259611925677	-2.628872470894426	-0.07	0.12	-0.09
H	-4.961913522637668	0.39269	-3.3339489935320947	0.07	0.0	-0.02
H	-5.00859401293581	2.136521503233953	-3.0121304967660474	0.04	-0.01	-0.01
H	-6.053300516169763	1.0325855097018581	-2.087075490298142	0.05	-0.03	-0.03
H	-4.716805	-2.8281215032339526	-1.30679	0.0	0.01	0.0
H	-5.897638	-1.4870775032339527	0.437986	0.0	0.01	0.0
H	-4.650266	-0.633853	2.428684	0.0	0.0	0.0
H	-1.191766	-4.088945503233953	-0.911255	0.0	0.01	0.0
H	-0.901916	-1.177264	2.933972496766047	0.0	0.0	0.01
H	5.722608	1.202375	1.13158	0.0	0.0	0.0
H	6.166555496766048	1.5126245032339527	-1.30961	0.01	-0.01	0.0
H	4.864929	0.2092785032339527	-3.000323	0.0	-0.01	0.0
H	3.07288	-1.15665	2.521794	0.0	0.0	0.0
H	1.8385920064679053	-1.8913855032339526	-2.1315475032339526	-0.02	0.01	0.01
H	-0.9230335032339526	-3.296816006467905	-3.301889503233953	0.01	0.02	0.01
H	-0.604653	-2.036331503233953	-2.078158509701858	0.0	0.01	0.03
H	-2.154897	-2.026486006467905	-2.9999495032339527	0.0	0.02	0.01
H	-2.3353075032339525	-5.3318635032339525	-2.6778694967660472	0.01	0.01	-0.01
H	-3.718646503233953	-4.209797503233952	-2.688062	0.01	0.01	0.0
H	-3.4351115032339528	-5.263061	-1.2727344967660474	0.01	0.0	-0.01
H	-1.4089184967660473	1.054718	3.925008993532095	-0.01	0.0	0.02
H	-3.0550554967660473	1.037422	3.21917	-0.01	0.0	0.0
H	-1.6169545032339527	1.107809	2.1468519935320947	0.01	0.0	0.02
H	-1.9218954967660473	-1.121588	5.218244496766047	-0.01	0.0	0.01
H	-2.444275	-2.589811	4.348747496766047	0.0	0.0	0.01
H	-3.5667074967660475	-1.208112	4.528212496766048	-0.01	0.0	0.01
H	1.8682200129358109	-1.4485225097018581	-4.548581503233953	-0.04	0.03	0.01
H	3.480498006467905	-0.687885	-4.473708	-0.02	0.0	0.0
H	2.082413	0.11830549029814194	-3.705435	0.0	0.03	0.0
H	3.0262095097018578	-3.5620935032339527	-3.603877496766047	-0.03	0.01	-0.01
H	3.676268509701858	-3.56042	-1.9407824967660474	-0.03	0.0	-0.01
H	4.587589509701858	-2.7611205032339527	-3.2581444967660476	-0.03	0.01	-0.01
H	3.3703315161697636	0.6970029935320946	4.187977006467905	-0.05	0.02	-0.02
H	2.539591	1.2690354967660473	2.708314019403716	0.0	0.01	-0.06
H	4.26636	1.665858	2.98366	0.0	0.0	0.0
H	5.002265503233953	-1.2700720064679052	4.082679496766048	-0.01	0.02	0.01
H	6.018069503233953	-0.3048445032339527	2.9811454967660476	-0.01	0.01	0.01
H	5.509155	-1.95101	2.5100179935320948	0.0	0.0	0.02
H	-1.712641	-4.876366496766047	1.2005815032339526	0.0	-0.01	-0.01
H	-0.413266	-5.310062496766047	2.3241445032339527	0.0	-0.01	-0.01
H	-1.57118	-4.039770993532095	2.751599	0.0	-0.02	0.0
H	4.487466503233953	-3.028621	0.3133740064679054	-0.01	0.0	-0.02
H	4.037245	-3.642554503233953	1.9167035032339526	0.0	0.01	-0.01
H	3.682209	-4.602958	0.482749	0.0	0.0	0.0
114
O	-5.163845	1.7383027620787508	0.39029088103937537	0.0	-0.02	-0.01
Mg	0.39573311896062463	-0.6266954051968769	0.10589690336999412	0.01	0.05	0.16
O	0.7510398327243725	0.7290853308974896	-1.4281033828662582	0.07	0.28	0.22
C	-4.098302881039375	2.010467881039375	-0.39004	0.01	-0.01	0.0
N	-0.608764	-2.29852	0.8174942379212493	0.0	0.0	0.02
N	2.175862	-1.718299	0.271278	0.0	0.0	0.0
O	-3.371095	2.9631528810393752	-0.240726	0.0	-0.01	0.0
C	-0.078518	-3.426756118960625	1.298641	0.0	-0.01	0.0
C	1.289886	-3.72683	1.274836	0.0	0.0	0.0
C	2.344987	-2.931837	0.775159	0.0	0.0	0.0
O	-2.7267092862362525	1.1330943568818739	-2.1874367620787507	0.06	0.03	0.02
C	-1.6172365241575013	0.7604515948031232	-1.5443094051968769	0.04	0.05	0.05
C	-0.30713504831500293	0.8969867844093694	-2.326350572472504	0.08	0.15	0.12
C	-3.9862345241575015	0.9638388810393754	-1.4975	0.04	-0.01	0.0
O	-1.6291127620787509	0.2605886431181261	-0.42826188103937535	0.02	-0.03	0.01
C	-5.355307118960625	2.633453881039375	1.5011178810393755	-0.01	-0.01	-0.01
O	-0.007912356881873897	2.858443237921249	-0.17831785505499115	-0.03	0.02	-0.24
C	1.0094401672756277	1.9781815724725043	0.13230066910251032	-0.07	-0.12	-0.28
O	0.854793048315003	1.132261951684997	1.046573	-0.08	0.08	0.0
O	2.457185405196877	3.795902334551255	0.7342072862362522	-0.05	-0.14	-0.06
C	1.3894746431181262	4.57521845351188	0.9855837620787506	-0.03	-0.13	-0.02
C	-0.006332356881873897	4.075483572472505	0.5975306431181261	-0.03	-0.12	-0.03
C	2.3870735241575014	2.5960169293543784	-0.11942478440936949	-0.04	-0.09	-0.15
O	1.526725	5.62871421559063	1.562448	0.0	-0.15	0.0
C	-0.7674985948031232	5.134754881039375	-0.19430169143312906	-0.05	-0.01	0.11
C	2.748672356881874	2.9824764758424984	-1.5417191896062463	0.03	0.04	-0.1
C	-0.2510446431181261	2.1490517137637477	-3.210658	0.03	0.06	0.0
C	-5.081219405196877	1.1492908810393754	-2.548283237921249	0.05	-0.01	-0.02
C	-2.052363	-2.182401	0.7830611189606246	0.0	0.0	0.01
C	3.31525	-0.921271	-0.132554	0.0	0.0	0.0
C	-2.760391	-2.71169	-0.34440488103937533	0.0	0.0	0.01
C	-4.145379	-2.42981	-0.460896	0.0	0.0	0.0
C	-4.817974	-1.673582	0.529076	0.0	0.0	0.0
C	-4.111501	-1.193588	1.652464	0.0	0.0	0.0
C	-2.725765	-1.432559	1.8012381189606246	0.0	0.0	0.01
C	-2.028043	-3.5683058810393753	-1.413962	0.0	0.01	0.0
C	-1.965488	-0.877817	3.0328401189606247	0.0	0.0	0.01
C	4.091987	-0.22169311896062463	0.852769	0.0	-0.01	0.0
C	5.110749118960625	0.6635328810393754	0.396247	0.01	-0.01	0.0
C	5.364563118960625	0.8361848810393754	-0.98188	0.01	-0.01	0.0
C	4.619961	0.11021688103937537	-1.935544	0.0	-0.01	0.0
C	3.583008881039375	-0.772587	-1.535314	-0.01	0.0	0.0
C	3.898355	-0.431222	2.380019	0.0	0.0	0.0
C	2.8224287620787507	-1.6264578810393755	-2.580338881039375	-0.02	0.01	0.01
C	-1.394656	-2.672991762078751	-2.5267238810393753	0.0	0.02	0.01
C	-2.9452658810393753	-4.661321881039375	-2.049671	0.01	0.01	0.0
C	-2.015549	0.682304	3.080428118960625	0.0	0.0	0.01
C	-2.510857	-1.490952	4.365727118960625	0.0	0.0	0.01
C	2.552630762078751	-0.8637548810393754	-3.912772881039375	-0.02	0.01	0.01
C	3.584957643118126	-2.965105881039375	-2.861970118960625	-0.03	0.01	-0.01
C	3.4967567620787507	0.8888631189606246	3.1142737620787506	-0.02	0.01	-0.02
C	5.192826881039375	-1.0316068810393755	3.0242401189606247	-0.01	0.01	0.01
C	-0.994531	-4.470798118960625	1.927703	0.0	-0.01	0.0
C	3.724091	-3.577993	0.8692118810393754	0.0	0.0	-0.01
H	1.577424	-4.688978	1.685197	0.0	0.0	0.0
H	-0.31666378806313494	0.029718713763747795	-3.0152492639056336	0.27	0.06	0.23
H	-4.047570405196876	-0.030240118960624632	-1.0448401189606247	0.05	-0.01	-0.01
H	-5.386670118960625	3.669837762078751	1.1635378810393755	-0.01	-0.02	-0.01
H	-4.538420118960625	2.510127881039375	2.2174968810393754	-0.01	-0.01	-0.01
H	-6.305755118960625	2.3424917620787507	1.9489397620787507	-0.01	-0.02	-0.02
H	-0.528333	3.875568144945009	1.5425075241575015	0.0	-0.24	-0.04
H	3.1559481672756275	1.945926691433129	0.28111709663000584	-0.07	-0.11	-0.16
H	-0.8241512379212493	6.053426167275627	0.3948634981731173	-0.02	-0.07	0.21
H	-1.7720237137637478	4.767239356881873	-0.4122129293543783	-0.06	0.03	0.09
H	-0.2523138327243724	5.355636070645621	-1.1354675724725043	-0.07	0.09	0.12
H	3.6033624758424985	3.668166356881874	-1.5010761189606245	0.04	0.03	-0.01
H	1.925305713763748	3.4717640706456216	-2.0647891896062465	0.06	0.09	-0.1
H	3.060638594803123	2.082085951684997	-2.070697903369994	0.05	0.08	-0.16
H	-1.0762334051968767	2.1401099293543786	-3.930864356881874	0.05	-0.09	-0.03
H	0.6920984758424985	2.1499218327243725	-3.761706643118126	0.04	0.07	0.03
H	-0.31861183272437243	3.0589094275274955	-2.611310070645622	-0.07	0.12	-0.09
H	-4.975573167275627	0.39269	-3.330046237921249	0.07	0.0	-0.02
H	-5.016399524157501	2.1384728810393754	-3.010179118960625	0.04	-0.01	-0.01
H	-6.063057405196877	1.0384396431181262	-2.081221356881874	0.05	-0.03	-0.03
H	-4.716805	-2.830072881039375	-1.30679	0.0	0.01	0.0
H	-5.897638	-1.4890288810393755	0.437986	0.0	0.01	0.0
H	-4.650266	-0.633853	2.428684	0.0	0.0	0.0
H	-1.191766	-4.0908968810393755	-0.911255	0.0	0.01	0.0
H	-0.901916	-1.177264	2.9320211189606247	0.0	0.0	0.01
H	5.722608	1.202375	1.13158	0.0	0.0	0.0
H	6.164604118960625	1.5145758810393755	-1.30961	0.01	-0.01	0.0
H	4.864929	0.21122988103937537	-3.000323	0.0	-0.01	0.0
H	3.07288	-1.15665	2.521794	0.0	0.0	0.0
H	1.8424947620787508	-1.8933368810393754	-2.133498881039375	-0.02	0.01	0.01
H	-0.9249848810393754	-3.3007187620787506	-3.3038408810393753	0.01	0.02	0.01
H	-0.604653	-2.0382828810393754	-2.084012643118126	0.0	0.01	0.03
H	-2.154897	-2.0303887620787506	-3.0019008810393752	0.0	0.02	0.01
H	-2.337258881039375	-5.333814881039375	-2.6759181189606247	0.01	0.01	-0.01
H	-3.7205978810393754	-4.211748881039375	-2.688062	0.01	0.01	0.0
H	-3.4370628810393753	-5.263061	-1.2707831189606247	0.01	0.0	-0.01
H	-1.4069671189606245	1.054718	3.9211062379212493	-0.01	0.0	0.02
H	-3.0531041189606247	1.037422	3.21917	-0.01	0.0	0.0
H	-1.6189058810393755	1.107809	2.142949237921249	0.01	0.0	0.02
H	-1.9199441189606246	-1.121588	5.216293118960625	-0.01	0.0	0.01
H	-2.444275	-2.589811	4.346796118960625	0.0	0.0	0.01
H	-3.564756118960625	-1.208112	4.526261118960625	-0.01	0.0	0.01
H	1.8760255241575015	-1.4543766431181262	-4.550532881039375	-0.04	0.03	0.01
H	3.4844007620787507	-0.687885	-4.473708	-0.02	0.0	0.0
H	2.082413	0.1124513568818739	-3.705435	0.0	0.03	0.0
H	3.032063643118126	-3.5640448810393752	-3.6019261189606246	-0.03	0.01	-0.01
H	3.682122643118126	-3.56042	-1.9388311189606247	-0.03	0.0	-0.01
H	4.5934436431181265	-2.7630718810393753	-3.256193118960625	-0.03	0.01	-0.01
H	3.3800884051968767	0.6931002379212493	4.1918797620787505	-0.05	0.02	-0.02
H	2.539591	1.2670841189606246	2.720022286236252	0.0	0.01	-0.06
H	4.26636	1.665858	2.98366	0.0	0.0	0.0
H	5.004216881039375	-1.2739747620787507	4.080728118960625	-0.01	0.02	0.01
H	6.020020881039375	-0.30679588103937533	2.979194118960625	-0.01	0.01	0.01
H	5.509155	-1.95101	2.5061152379212492	0.0	0.0	0.02
H	-1.712641	-4.874415118960624	1.2025328810393754	0.0	-0.01	-0.01
H	-0.413266	-5.308111118960625	2.3260958810393753	0.0	-0.01	-0.01
H	-1.57118	-4.03586823792125	2.751599	0.0	-0.02	0.0
H	4.489417881039375	-3.028621	0.3172767620787508	-0.01	0.0	-0.02
H	4.037245	-3.6445058810393753	1.9186548810393753	0.0	0.01	-0.01
H	3.682209	-4.602958	0.482749	0.0	0.0	0.0
114
O	-5.163845	1.742629	0.392454	0.0	-0.02	-0.01
Mg	0.39357	-0.637511	0.07128700000000002	0.01	0.05	0.16
O	0.735898	0.668518	-1.475692	0.07	0.28	0.22
C	-4.100466	2.012631	-0.39004	0.01	-0.01	0.0
N	-0.608764	-2.29852	0.813168	0.0	0.0	0.02
N	2.175862	-1.718299	0.271278	0.0	0.0	0.0
O	-3.371095	2.965316	-0.240726	0.0	-0.01	0.0
C	-0.078518	-3.424593	1.298641	0.0	-0.01	0.0
C	1.289886	-3.72683	1.274836	0.0	0.0	0.0
C	2.344987	-2.931837	0.775159	0.0	0.0	0.0
O	-2.739688	1.126605	-2.191763	0.06	0.03	0.02
C	-1.625889	0.749636	-1.555125	0.04	0.05	0.05
C	-0.32444	0.86454	-2.352308	0.08	0.15	0.12
C	-3.994887	0.966002	-1.4975	0.04	-0.01	0.0
O	-1.633439	0.267078	-0.430425	0.02	-0.03	0.01
C	-5.353144	2.635617	1.503281	-0.01	-0.01	-0.01
O	-0.0014230000000000026	2.854117	-0.12640300000000002	-0.03	0.02	-0.24
C	1.024582	2.004139	0.19286799999999998	-0.07	-0.12	-0.28
O	0.872098	1.114957	1.046573	-0.08	0.08	0.0
O	2.468001	3.826186	0.747186	-0.05	-0.14	-0.06
C	1.395964	4.603339	0.98991	-0.03	-0.13	-0.02
C	1.5699999999999742E-4	4.101441	0.60402	-0.03	-0.12	-0.03
C	2.395726	2.615485	-0.08697800000000001	-0.04	-0.09	-0.15
O	1.526725	5.661161	1.562448	0.0	-0.15	0.0
C	-0.756683	5.136918	-0.218096	-0.05	-0.01	0.11
C	2.742183	2.973824	-1.520088	0.03	0.04	-0.1
C	-0.257534	2.136073	-3.210658	0.03	0.06	0.0
C	-5.092035	1.151454	-2.543957	0.05	-0.01	-0.02
C	-2.052363	-2.182401	0.780898	0.0	0.0	0.01
C	3.31525	-0.921271	-0.132554	0.0	0.0	0.0
C	-2.760391	-2.71169	-0.346568	0.0	0.0	0.01
C	-4.145379	-2.42981	-0.460896	0.0	0.0	0.0
C	-4.817974	-1.673582	0.529076	0.0	0.0	0.0
C	-4.111501	-1.193588	1.652464	0.0	0.0	0.0
C	-2.725765	-1.432559	1.799075	0.0	0.0	0.01
C	-2.028043	-3.570469	-1.413962	0.0	0.01	0.0
C	-1.965488	-0.877817	3.030677	0.0	0.0	0.01
C	4.091987	-0.21953	0.852769	0.0	-0.01	0.0
C	5.108586	0.665696	0.396247	0.01	-0.01	0.0
C	5.3624	0.838348	-0.98188	0.01	-0.01	0.0
C	4.619961	0.11238	-1.935544	0.0	-0.01	0.0
C	3.585172	-0.772587	-1.535314	-0.01	0.0	0.0
C	3.898355	-0.431222	2.380019	0.0	0.0	0.0
C	2.826755	-1.628621	-2.582502	-0.02	0.01	0.01
C	-1.394656	-2.677318	-2.528887	0.0	0.02	0.01
C	-2.947429	-4.663485	-2.049671	0.01	0.01	0.0
C	-2.015549	0.682304	3.078265	0.0	0.0	0.01
C	-2.510857	-1.490952	4.363564	0.0	0.0	0.01
C	2.556957	-0.865918	-3.914936	-0.02	0.01	0.01
C	3.591447	-2.967269	-2.859807	-0.03	0.01	-0.01
C	3.501083	0.8867	3.1186	-0.02	0.01	-0.02
C	5.19499	-1.03377	3.022077	-0.01	0.01	0.01
C	-0.994531	-4.468635	1.927703	0.0	-0.01	0.0
C	3.724091	-3.577993	0.871375	0.0	0.0	-0.01
H	1.577424	-4.688978	1.685197	0.0	0.0	0.0
H	-0.375068	0.016740000000000005	-3.065001	0.27	0.06	0.23
H	-4.058386	-0.028077	-1.042677	0.05	-0.01	-0.01
H	-5.384507	3.674164	1.165701	-0.01	-0.02	-0.01
H	-4.536257	2.512291	2.21966	-0.01	-0.01	-0.01
H	-6.303592	2.346818	1.953266	-0.01	-0.02	-0.02
H	-0.528333	3.927483	1.55116	0.0	-0.24	-0.04
H	3.17109	1.969721	0.315727	-0.07	-0.11	-0.16
H	-0.819825	6.068568	0.349438	-0.02	-0.07	0.21
H	-1.759045	4.76075	-0.431681	-0.06	0.03	0.09
H	-0.237172	5.336168	-1.161425	-0.07	0.09	0.12
H	3.59471	3.661677	-1.498913	0.04	0.03	-0.01
H	1.912327	3.452296	-2.043158	0.06	0.09	-0.1
H	3.049823	2.064781	-2.036088	0.05	0.08	-0.16
H	-1.087049	2.159578	-3.924375	0.05	-0.09	-0.03
H	0.683446	2.13478	-3.768196	0.04	0.07	0.03
H	-0.30347	3.032952	-2.591842	-0.07	0.12	-0.09
H	-4.990715	0.39269	-3.32572	0.07	0.0	-0.02
H	-5.025052	2.140636	-3.008016	0.04	-0.01	-0.01
H	-6.073873	1.044929	-2.074732	0.05	-0.03	-0.03
H	-4.716805	-2.832236	-1.30679	0.0	0.01	0.0
H	-5.897638	-1.491192	0.437986	0.0	0.01	0.0
H	-4.650266	-0.633853	2.428684	0.0	0.0	0.0
H	-1.191766	-4.09306	-0.911255	0.0	0.01	0.0
H	-0.901916	-1.177264	2.929858	0.0	0.0	0.01
H	5.722608	1.202375	1.13158	0.0	0.0	0.0
H	6.162441	1.516739	-1.30961	0.01	-0.01	0.0
H	4.864929	0.213393	-3.000323	0.0	-0.01	0.0
H	3.07288	-1.15665	2.521794	0.0	0.0	0.0
H	1.846821	-1.8955	-2.135662	-0.02	0.01	0.01
H	-0.927148	-3.305045	-3.306004	0.01	0.02	0.01
H	-0.604653	-2.040446	-2.090502	0.0	0.01	0.03
H	-2.154897	-2.034715	-3.004064	0.0	0.02	0.01
H	-2.339422	-5.335978	-2.673755	0.01	0.01	-0.01
H	-3.722761	-4.213912	-2.688062	0.01	0.01	0.0
H	-3.439226	-5.263061	-1.26862	0.01	0.0	-0.01
H	-1.404804	1.054718	3.91678	-0.01	0.0	0.02
H	-3.050941	1.037422	3.21917	-0.01	0.0	0.0
H	-1.621069	1.107809	2.138623	0.01	0.0	0.02
H	-1.917781	-1.121588	5.21413	-0.01	0.0	0.01
H	-2.444275	-2.589811	4.344633	0.0	0.0	0.01
H	-3.562593	-1.208112	4.524098	-0.01	0.0	0.01
H	1.884678	-1.460866	-4.552696	-0.04	0.03	0.01
H	3.488727	-0.687885	-4.473708	-0.02	0.0	0.0
H	2.082413	0.105962	-3.705435	0.0	0.03	0.0
H	3.038553	-3.566208	-3.599763	-0.03	0.01	-0.01
H	3.688612	-3.56042	-1.936668	-0.03	0.0	-0.01
H	4.599933	-2.765235	-3.25403	-0.03	0.01	-0.01
H	3.390904	0.688774	4.196206	-0.05	0.02	-0.02
H	2.539591	1.264921	2.733001	0.0	0.01	-0.06
H	4.26636	1.665858	2.98366	0.0	0.0	0.0
H	5.00638	-1.278301	4.078565	-0.01	0.02	0.01
H	6.022184	-0.308959	2.977031	-0.01	0.01	0.01
H	5.509155	-1.95101	2.501789	0.0	0.0	0.02
H	-1.712641	-4.872252	1.204696	0.0	-0.01	-0.01
H	-0.413266	-5.305948	2.328259	0.0	-0.01	-0.01
H	-1.57118	-4.031542	2.751599	0.0	-0.02	0.0
H	4.491581	-3.028621	0.321603	-0.01	0.0	-0.02
H	4.037245	-3.646669	1.920818	0.0	0.01	-0.01
H	3.682209	-4.602958	0.482749	0.0	0.0	0.0
114
O	-5.163845	1.7469552379212492	0.3946171189606247	0.0	-0.02	-0.01
Mg	0.3914068810393753	-0.6483265948031232	0.03667709663000595	0.01	0.05	0.16
O	0.7207561672756276	0.6079506691025104	-1.5232806171337419	0.07	0.28	0.22
C	-4.102629118960625	2.0147941189606247	-0.39004	0.01	-0.01	0.0
N	-0.608764	-2.29852	0.8088417620787507	0.0	0.0	0.02
N	2.175862	-1.718299	0.271278	0.0	0.0	0.0
O	-3.371095	2.967479118960625	-0.240726	0.0	-0.01	0.0
C	-0.078518	-3.4224298810393754	1.298641	0.0	-0.01	0.0
C	1.289886	-3.72683	1.274836	0.0	0.0	0.0
C	2.344987	-2.931837	0.775159	0.0	0.0	0.0
O	-2.7526667137637477	1.1201156431181263	-2.196089237921249	0.06	0.03	0.02
C	-1.6345414758424985	0.7388204051968769	-1.5659405948031233	0.04	0.05	0.05
C	-0.341744951684997	0.8320932155906305	-2.3782654275274955	0.08	0.15	0.12
C	-4.003539475842499	0.9681651189606246	-1.4975	0.04	-0.01	0.0
O	-1.6377652379212493	0.2735673568818739	-0.43258811896062466	0.02	-0.03	0.01
C	-5.3509808810393755	2.6377801189606247	1.5054441189606247	-0.01	-0.01	-0.01
O	0.005066356881873885	2.849790762078751	-0.07448814494500891	-0.03	0.02	-0.24
C	1.0397238327243725	2.0300964275274955	0.2534353308974896	-0.07	-0.12	-0.28
O	0.8894029516849971	1.097652048315003	1.046573	-0.08	0.08	0.0
O	2.4788165948031233	3.8564696654487447	0.7601647137637478	-0.05	-0.14	-0.06
C	1.4024533568818738	4.63145954648812	0.9942362379212493	-0.03	-0.13	-0.02
C	0.006646356881873885	4.1273984275274955	0.6105093568818739	-0.03	-0.12	-0.03
C	2.404378475842498	2.6349530706456217	-0.05453121559063058	-0.04	-0.09	-0.15
O	1.526725	5.6936077844093695	1.562448	0.0	-0.15	0.0
C	-0.7458674051968769	5.1390811189606245	-0.24189030856687094	-0.05	-0.01	0.11
C	2.735693643118126	2.9651715241575016	-1.498456810393754	0.03	0.04	-0.1
C	-0.2640233568818739	2.1230942862362525	-3.210658	0.03	0.06	0.0
C	-5.102850594803123	1.1536171189606246	-2.5396307620787506	0.05	-0.01	-0.02
C	-2.052363	-2.182401	0.7787348810393754	0.0	0.0	0.01
C	3.31525	-0.921271	-0.132554	0.0	0.0	0.0
C	-2.760391	-2.71169	-0.34873111896062464	0.0	0.0	0.01
C	-4.145379	-2.42981	-0.460896	0.0	0.0	0.0
C	-4.817974	-1.673582	0.529076	0.0	0.0	0.0
C	-4.111501	-1.193588	1.652464	0.0	0.0	0.0
C	-2.725765	-1.432559	1.7969118810393754	0.0	0.0	0.01
C	-2.028043	-3.572632118960625	-1.413962	0.0	0.01	0.0
C	-1.965488	-0.877817	3.028513881039375	0.0	0.0	0.01
C	4.091987	-0.21736688103937538	0.852769	0.0	-0.01	0.0
C	5.106422881039375	0.6678591189606246	0.396247	0.01	-0.01	0.0
C	5.360236881039375	0.8405111189606246	-0.98188	0.01	-0.01	0.0
C	4.619961	0.11454311896062462	-1.935544	0.0	-0.01	0.0
C	3.587335118960625	-0.772587	-1.535314	-0.01	0.0	0.0
C	3.898355	-0.431222	2.380019	0.0	0.0	0.0
C	2.831081237921249	-1.6307841189606247	-2.5846651189606247	-0.02	0.01	0.01
C	-1.394656	-2.6816442379212493	-2.531050118960625	0.0	0.02	0.01
C	-2.949592118960625	-4.6656481189606245	-2.049671	0.01	0.01	0.0
C	-2.015549	0.682304	3.076101881039375	0.0	0.0	0.01
C	-2.510857	-1.490952	4.361400881039375	0.0	0.0	0.01
C	2.5612832379212493	-0.8680811189606246	-3.917099118960625	-0.02	0.01	0.01
C	3.597936356881874	-2.9694321189606248	-2.857643881039375	-0.03	0.01	-0.01
C	3.505409237921249	0.8845368810393754	3.122926237921249	-0.02	0.01	-0.02
C	5.197153118960625	-1.0359331189606247	3.019913881039375	-0.01	0.01	0.01
C	-0.994531	-4.466471881039375	1.927703	0.0	-0.01	0.0
C	3.724091	-3.577993	0.8735381189606246	0.0	0.0	-0.01
H	1.577424	-4.688978	1.685197	0.0	0.0	0.0
H	-0.43347221193686497	0.003761286236252232	-3.1147527360943665	0.27	0.06	0.23
H	-4.069201594803123	-0.025913881039375374	-1.0405138810393755	0.05	-0.01	-0.01
H	-5.382343881039375	3.6784902379212494	1.1678641189606247	-0.01	-0.02	-0.01
H	-4.534093881039375	2.5144541189606247	2.221823118960625	-0.01	-0.01	-0.01
H	-6.301428881039375	2.351144237921249	1.9575922379212491	-0.01	-0.02	-0.02
H	-0.528333	3.9793978550549913	1.5598124758424987	0.0	-0.24	-0.04
H	3.1862318327243724	1.9935153085668709	0.350336903369994	-0.07	-0.11	-0.16
H	-0.8154987620787507	6.083709832724372	0.30401250182688283	-0.02	-0.07	0.21
H	-1.7460662862362522	4.754260643118126	-0.45114907064562165	-0.06	0.03	0.09
H	-0.2220301672756276	5.316699929354378	-1.1873824275274956	-0.07	0.09	0.12
H	3.5860575241575017	3.655187643118126	-1.4967498810393753	0.04	0.03	-0.01
H	1.8993482862362523	3.4328279293543784	-2.0215268103937536	0.06	0.09	-0.1
H	3.0390074051968767	2.0474760483150027	-2.001478096630006	0.05	0.08	-0.16
H	-1.0978645948031232	2.179046070645622	-3.917885643118126	0.05	-0.09	-0.03
H	0.6747935241575015	2.1196381672756277	-3.774685356881874	0.04	0.07	0.03
H	-0.2883281672756276	3.0069945724725042	-2.5723739293543786	-0.07	0.12	-0.09
H	-5.005856832724372	0.39269	-3.321393762078751	0.07	0.0	-0.02
H	-5.033704475842498	2.142799118960625	-3.005852881039375	0.04	-0.01	-0.01
H	-6.084688594803123	1.0514183568818738	-2.068242643118126	0.05	-0.03	-0.03
H	-4.716805	-2.834399118960625	-1.30679	0.0	0.01	0.0
H	-5.897638	-1.4933551189606247	0.437986	0.0	0.01	0.0
H	-4.650266	-0.633853	2.428684	0.0	0.0	0.0
H	-1.191766	-4.095223118960625	-0.911255	0.0	0.01	0.0
H	-0.901916	-1.177264	2.927694881039375	0.0	0.0	0.01
H	5.722608	1.202375	1.13158	0.0	0.0	0.0
H	6.1602778810393755	1.5189021189606247	-1.30961	0.01	-0.01	0.0
H	4.864929	0.21555611896062463	-3.000323	0.0	-0.01	0.0
H	3.07288	-1.15665	2.521794	0.0	0.0	0.0
H	1.8511472379212492	-1.8976631189606246	-2.1378251189606248	-0.02	0.01	0.01
H	-0.9293111189606246	-3.309371237921249	-3.308167118960625	0.01	0.02	0.01
H	-0.604653	-2.042609118960625	-2.096991356881874	0.0	0.01	0.03
H	-2.154897	-2.039041237921249	-3.006227118960625	0.0	0.02	0.01
H	-2.3415851189606247	-5.338141118960625	-2.671591881039375	0.01	0.01	-0.01
H	-3.724924118960625	-4.2160751189606245	-2.688062	0.01	0.01	0.0
H	-3.441389118960625	-5.263061	-1.2664568810393755	0.01	0.0	-0.01
H	-1.4026408810393753	1.054718	3.912453762078751	-0.01	0.0	0.02
H	-3.048777881039375	1.037422	3.21917	-0.01	0.0	0.0
H	-1.6232321189606247	1.107809	2.1342967620787507	0.01	0.0	0.02
H	-1.9156178810393754	-1.121588	5.211966881039375	-0.01	0.0	0.01
H	-2.444275	-2.589811	4.342469881039375	0.0	0.0	0.01
H	-3.5604298810393753	-1.208112	4.521934881039376	-0.01	0.0	0.01
H	1.8933304758424987	-1.4673553568818738	-4.554859118960625	-0.04	0.03	0.01
H	3.493053237921249	-0.687885	-4.473708	-0.02	0.0	0.0
H	2.082413	0.09947264311812612	-3.705435	0.0	0.03	0.0
H	3.045042356881874	-3.568371118960625	-3.597599881039375	-0.03	0.01	-0.01
H	3.695101356881874	-3.56042	-1.9345048810393755	-0.03	0.0	-0.01
H	4.606422356881874	-2.767398118960625	-3.2518668810393754	-0.03	0.01	-0.01
H	3.401719594803123	0.6844477620787507	4.20053223792125	-0.05	0.02	-0.02
H	2.539591	1.2627578810393754	2.7459797137637474	0.0	0.01	-0.06
H	4.26636	1.665858	2.98366	0.0	0.0	0.0
H	5.008543118960625	-1.282627237921249	4.076401881039375	-0.01	0.02	0.01
H	6.024347118960625	-0.31112211896062464	2.9748678810393754	-0.01	0.01	0.01
H	5.509155	-1.95101	2.497462762078751	0.0	0.0	0.02
H	-1.712641	-4.870088881039375	1.2068591189606246	0.0	-0.01	-0.01
H	-0.413266	-5.303784881039375	2.330422118960625	0.0	-0.01	-0.01
H	-1.57118	-4.02721576207875	2.751599	0.0	-0.02	0.0
H	4.493744118960625	-3.028621	0.3259292379212493	-0.01	0.0	-0.02
H	4.037245	-3.648832118960625	1.9229811189606245	0.0	0.01	-0.01
H	3.682209	-4.602958	0.482749	0.0	0.0	0.0
114
O	-5.163845	1.7508579935320947	0.39656849676604733	0.0	-0.02	-0.01
Mg	0.38945550323395267	-0.6580834838302366	0.005455051743243025	0.01	0.05	0.16
O	0.7070965226376689	0.5533120905506752	-1.5662109288530408	0.07	0.28	0.22
C	-4.104580496766047	2.016745496766047	-0.39004	0.01	-0.01	0.0
N	-0.608764	-2.29852	0.8049390064679054	0.0	0.0	0.02
N	2.175862	-1.718299	0.271278	0.0	0.0	0.0
O	-3.371095	2.9694304967660474	-0.240726	0.0	-0.01	0.0
C	-0.078518	-3.420478503233953	1.298641	0.0	-0.01	0.0
C	1.289886	-3.72683	1.274836	0.0	0.0	0.0
C	2.344987	-2.931837	0.775159	0.0	0.0	0.0
O	-2.764374980596284	1.1142615097018582	-2.1999919935320946	0.06	0.03	0.02
C	-1.6423469870641891	0.7290635161697634	-1.5756974838302367	0.04	0.05	0.05
C	-0.3573559741283785	0.8028225485092904	-2.4016819611925677	0.08	0.15	0.12
C	-4.011344987064189	0.9701164967660474	-1.4975	0.04	-0.01	0.0
O	-1.6416679935320948	0.2794214902981419	-0.4345394967660473	0.02	-0.03	0.01
C	-5.349029503233953	2.6397314967660472	1.5073954967660474	-0.01	-0.01	-0.01
O	0.010920490298141931	2.8458880064679053	-0.027655077614864534	-0.03	0.02	-0.24
C	1.0533834773623312	2.0535129611925678	0.3080739094493247	-0.07	-0.12	-0.28
O	0.9050139741283785	1.0820410258716215	1.046573	-0.08	0.08	0.0
O	2.4885734838302365	3.883788954724662	0.7718729805962838	-0.05	-0.14	-0.06
C	1.4083074902981418	4.656827457958615	0.9981389935320946	-0.03	-0.13	-0.02
C	0.01250049029814193	4.150814961192568	0.616363490298142	-0.03	-0.12	-0.03
C	2.4121839870641892	2.652515470894426	-0.02526054850929034	-0.04	-0.09	-0.15
O	1.526725	5.722878451490709	1.562448	0.0	-0.15	0.0
C	-0.7361105161697634	5.141032496766047	-0.2633554644265204	-0.05	-0.01	0.11
C	2.7298395097018577	2.9573660129358106	-1.478943032339527	0.03	0.04	-0.1
C	-0.2698774902981419	2.1113860194037164	-3.210658	0.03	0.06	0.0
C	-5.112607483830237	1.1555684967660473	-2.535728006467905	0.05	-0.01	-0.02
C	-2.052363	-2.182401	0.7767835032339526	0.0	0.0	0.01
C	3.31525	-0.921271	-0.132554	0.0	0.0	0.0
C	-2.760391	-2.71169	-0.3506824967660473	0.0	0.0	0.01
C	-4.145379	-2.42981	-0.460896	0.0	0.0	0.0
C	-4.817974	-1.673582	0.529076	0.0	0.0	0.0
C	-4.111501	-1.193588	1.652464	0.0	0.0	0.0
C	-2.725765	-1.432559	1.7949605032339526	0.0	0.0	0.01
C	-2.028043	-3.5745834967660475	-1.413962	0.0	0.01	0.0
C	-1.965488	-0.877817	3.0265625032339525	0.0	0.0	0.01
C	4.091987	-0.2154155032339527	0.852769	0.0	-0.01	0.0
C	5.1044715032339525	0.6698104967660473	0.396247	0.01	-0.01	0.0
C	5.358285503233953	0.8424624967660473	-0.98188	0.01	-0.01	0.0
C	4.619961	0.11649449676604731	-1.935544	0.0	-0.01	0.0
C	3.5892864967660474	-0.772587	-1.535314	-0.01	0.0	0.0
C	3.898355	-0.431222	2.380019	0.0	0.0	0.0
C	2.8349839935320946	-1.6327354967660475	-2.586616496766047	-0.02	0.01	0.01
C	-1.394656	-2.685546993532095	-2.5330014967660475	0.0	0.02	0.01
C	-2.9515434967660474	-4.667599496766047	-2.049671	0.01	0.01	0.0
C	-2.015549	0.682304	3.0741505032339527	0.0	0.0	0.01
C	-2.510857	-1.490952	4.359449503233953	0.0	0.0	0.01
C	2.565185993532095	-0.8700324967660473	-3.9190504967660473	-0.02	0.01	0.01
C	3.603790490298142	-2.9713834967660473	-2.8556925032339526	-0.03	0.01	-0.01
C	3.5093119935320947	0.8825855032339527	3.1268289935320945	-0.02	0.01	-0.02
C	5.199104496766047	-1.0378844967660474	3.0179625032339525	-0.01	0.01	0.01
C	-0.994531	-4.4645205032339526	1.927703	0.0	-0.01	0.0
C	3.724091	-3.577993	0.8754894967660474	0.0	0.0	-0.01
H	1.577424	-4.688978	1.685197	0.0	0.0	0.0
H	-0.4861594126832774	-0.007946980596283862	-3.159634425619088	0.27	0.06	0.23
H	-4.078958483830236	-0.02396250323395269	-1.0385625032339527	0.05	-0.01	-0.01
H	-5.380392503233953	3.682392993532095	1.1698154967660475	-0.01	-0.02	-0.01
H	-4.532142503233953	2.516405496766047	2.2237744967660475	-0.01	-0.01	-0.01
H	-6.299477503233953	2.3550469935320946	1.9614949935320947	-0.01	-0.02	-0.02
H	-0.528333	4.026230922385135	1.5676179870641893	0.0	-0.24	-0.04
H	3.199891477362331	2.0149804644265203	0.38155894825675696	-0.07	-0.11	-0.16
H	-0.8115960064679054	6.0973694773623315	0.26303356791300647	-0.02	-0.07	0.21
H	-1.734358019403716	4.748406509701858	-0.4687114708944258	-0.06	0.03	0.09
H	-0.2083705226376688	5.299137529105574	-1.2107989611925676	-0.07	0.09	0.12
H	3.5782520129358106	3.649333509701858	-1.4947985032339526	0.04	0.03	-0.01
H	1.8876400194037162	3.4152655291055742	-2.002013032339527	0.06	0.09	-0.1
H	3.0292505161697636	2.0318650258716215	-1.970256051743243	0.05	0.08	-0.16
H	-1.1076214838302365	2.196608470894426	-3.912031509701858	0.05	-0.09	-0.03
H	0.6669880129358108	2.105978522637669	-3.780539490298142	0.04	0.07	0.03
H	-0.27466852263766883	2.983578038807432	-2.5548115291055744	-0.07	0.12	-0.09
H	-5.019516477362331	0.39269	-3.3174910064679053	0.07	0.0	-0.02
H	-5.041509987064189	2.1447504967660476	-3.0039015032339527	0.04	-0.01	-0.01
H	-6.094445483830237	1.0572724902981419	-2.062388509701858	0.05	-0.03	-0.03
H	-4.716805	-2.8363504967660473	-1.30679	0.0	0.01	0.0
H	-5.897638	-1.4953064967660474	0.437986	0.0	0.01	0.0
H	-4.650266	-0.633853	2.428684	0.0	0.0	0.0
H	-1.191766	-4.097174496766048	-0.911255	0.0	0.01	0.0
H	-0.901916	-1.177264	2.9257435032339525	0.0	0.0	0.01
H	5.722608	1.202375	1.13158	0.0	0.0	0.0
H	6.158326503233953	1.5208534967660474	-1.30961	0.01	-0.01	0.0
H	4.864929	0.2175074967660473	-3.000323	0.0	-0.01	0.0
H	3.07288	-1.15665	2.521794	0.0	0.0	0.0
H	1.8550499935320948	-1.8996144967660473	-2.1397764967660473	-0.02	0.01	0.01
H	-0.9312624967660473	-3.3132739935320945	-3.3101184967660475	0.01	0.02	0.01
H	-0.604653	-2.0445604967660476	-2.102845490298142	0.0	0.01	0.03
H	-2.154897	-2.0429439935320945	-3.0081784967660474	0.0	0.02	0.01
H	-2.3435364967660473	-5.340092496766047	-2.6696405032339525	0.01	0.01	-0.01
H	-3.7268754967660476	-4.218026496766047	-2.688062	0.01	0.01	0.0
H	-3.4433404967660475	-5.263061	-1.2645055032339527	0.01	0.0	-0.01
H	-1.4006895032339526	1.054718	3.9085510064679054	-0.01	0.0	0.02
H	-3.0468265032339525	1.037422	3.21917	-0.01	0.0	0.0
H	-1.6251834967660475	1.107809	2.130394006467905	0.01	0.0	0.02
H	-1.9136665032339526	-1.121588	5.210015503233953	-0.01	0.0	0.01
H	-2.444275	-2.589811	4.340518503233953	0.0	0.0	0.01
H	-3.5584785032339528	-1.208112	4.519983503233953	-0.01	0.0	0.01
H	1.9011359870641893	-1.4732094902981419	-4.556810496766047	-0.04	0.03	0.01
H	3.4969559935320946	-0.687885	-4.473708	-0.02	0.0	0.0
H	2.082413	0.09361850970185807	-3.705435	0.0	0.03	0.0
H	3.050896490298142	-3.5703224967660474	-3.5956485032339525	-0.03	0.01	-0.01
H	3.700955490298142	-3.56042	-1.9325535032339527	-0.03	0.0	-0.01
H	4.612276490298142	-2.7693494967660475	-3.249915503233953	-0.03	0.01	-0.01
H	3.4114764838302363	0.6805450064679054	4.204434993532095	-0.05	0.02	-0.02
H	2.539591	1.2608065032339526	2.7576879805962835	0.0	0.01	-0.06
H	4.26636	1.665858	2.98366	0.0	0.0	0.0
H	5.010494496766047	-1.2865299935320946	4.074450503233953	-0.01	0.02	0.01
H	6.026298496766048	-0.3130734967660473	2.972916503233953	-0.01	0.01	0.01
H	5.509155	-1.95101	2.4935600064679053	0.0	0.0	0.02
H	-1.712641	-4.868137503233952	1.2088104967660473	0.0	-0.01	-0.01
H	-0.413266	-5.3018335032339525	2.3323734967660474	0.0	-0.01	-0.01
H	-1.57118	-4.023313006467905	2.751599	0.0	-0.02	0.0
H	4.495695496766047	-3.028621	0.32983199353209464	-0.01	0.0	-0.02
H	4.037245	-3.6507834967660475	1.9249324967660473	0.0	0.01	-0.01
H	3.682209	-4.602958	0.482749	0.0	0.0	0.0
114
O	-5.163845	1.7539552379212493	0.3981171189606247	0.0	-0.02	-0.01
Mg	0.3879068810393753	-0.6658265948031232	-0.019322903369994093	0.01	0.05	0.16
O	0.6962561672756277	0.5099506691025102	-1.6002806171337418	0.07	0.28	0.22
C	-4.106129118960625	2.0182941189606245	-0.39004	0.01	-0.01	0.0
N	-0.608764	-2.29852	0.8018417620787507	0.0	0.0	0.02
N	2.175862	-1.718299	0.271278	0.0	0.0	0.0
O	-3.371095	2.9709791189606247	-0.240726	0.0	-0.01	0.0
C	-0.078518	-3.4189298810393756	1.298641	0.0	-0.01	0.0
C	1.289886	-3.72683	1.274836	0.0	0.0	0.0
C	2.344987	-2.931837	0.775159	0.0	0.0	0.0
O	-2.773666713763748	1.109615643118126	-2.203089237921249	0.06	0.03	0.02
C	-1.6485414758424985	0.7213204051968768	-1.5834405948031232	0.04	0.05	0.05
C	-0.36974495168499705	0.7795932155906306	-2.4202654275274953	0.08	0.15	0.12
C	-4.017539475842498	0.9716651189606247	-1.4975	0.04	-0.01	0.0
O	-1.6447652379212494	0.2840673568818739	-0.43608811896062466	0.02	-0.03	0.01
C	-5.347480881039376	2.6412801189606245	1.5089441189606247	-0.01	-0.01	-0.01
O	0.015566356881873893	2.8427907620787507	0.009511855054991164	-0.03	0.02	-0.24
C	1.0642238327243725	2.0720964275274953	0.3514353308974897	-0.07	-0.12	-0.28
O	0.9174029516849971	1.069652048315003	1.046573	-0.08	0.08	0.0
O	2.4963165948031234	3.9054696654487446	0.7811647137637479	-0.05	-0.14	-0.06
C	1.412953356881874	4.676959546488121	1.0012362379212492	-0.03	-0.13	-0.02
C	0.017146356881873895	4.169398427527496	0.6210093568818739	-0.03	-0.12	-0.03
C	2.4183784758424984	2.6664530706456215	-0.0020312155906305335	-0.04	-0.09	-0.15
O	1.526725	5.74610778440937	1.562448	0.0	-0.15	0.0
C	-0.7283674051968768	5.142581118960624	-0.28039030856687097	-0.05	-0.01	0.11
C	2.725193643118126	2.9511715241575014	-1.4634568103937537	0.03	0.04	-0.1
C	-0.2745233568818739	2.102094286236252	-3.210658	0.03	0.06	0.0
C	-5.120350594803123	1.1571171189606246	-2.5326307620787505	0.05	-0.01	-0.02
C	-2.052363	-2.182401	0.7752348810393753	0.0	0.0	0.01
C	3.31525	-0.921271	-0.132554	0.0	0.0	0.0
C	-2.760391	-2.71169	-0.35223111896062465	0.0	0.0	0.01
C	-4.145379	-2.42981	-0.460896	0.0	0.0	0.0
C	-4.817974	-1.673582	0.529076	0.0	0.0	0.0
C	-4.111501	-1.193588	1.652464	0.0	0.0	0.0
C	-2.725765	-1.432559	1.7934118810393753	0.0	0.0	0.01
C	-2.028043	-3.5761321189606248	-1.413962	0.0	0.01	0.0
C	-1.965488	-0.877817	3.025013881039375	0.0	0.0	0.01
C	4.091987	-0.21386688103937537	0.852769	0.0	-0.01	0.0
C	5.102922881039375	0.6713591189606246	0.396247	0.01	-0.01	0.0
C	5.356736881039375	0.8440111189606246	-0.98188	0.01	-0.01	0.0
C	4.619961	0.11804311896062462	-1.935544	0.0	-0.01	0.0
C	3.5908351189606247	-0.772587	-1.535314	-0.01	0.0	0.0
C	3.898355	-0.431222	2.380019	0.0	0.0	0.0
C	2.8380812379212492	-1.6342841189606248	-2.5881651189606245	-0.02	0.01	0.01
C	-1.394656	-2.6886442379212494	-2.5345501189606248	0.0	0.02	0.01
C	-2.9530921189606247	-4.669148118960624	-2.049671	0.01	0.01	0.0
C	-2.015549	0.682304	3.0726018810393754	0.0	0.0	0.01
C	-2.510857	-1.490952	4.357900881039376	0.0	0.0	0.01
C	2.5682832379212495	-0.8715811189606246	-3.9205991189606246	-0.02	0.01	0.01
C	3.608436356881874	-2.9729321189606246	-2.8541438810393753	-0.03	0.01	-0.01
C	3.5124092379212493	0.8810368810393754	3.129926237921249	-0.02	0.01	-0.02
C	5.200653118960624	-1.0394331189606247	3.0164138810393752	-0.01	0.01	0.01
C	-0.994531	-4.462971881039375	1.927703	0.0	-0.01	0.0
C	3.724091	-3.577993	0.8770381189606247	0.0	0.0	-0.01
H	1.577424	-4.688978	1.685197	0.0	0.0	0.0
H	-0.527972211936865	-0.017238713763747786	-3.1952527360943668	0.27	0.06	0.23
H	-4.086701594803123	-0.02241388103937537	-1.0370138810393754	0.05	-0.01	-0.01
H	-5.3788438810393755	3.6854902379212495	1.1713641189606248	-0.01	-0.02	-0.01
H	-4.530593881039375	2.5179541189606245	2.225323118960625	-0.01	-0.01	-0.01
H	-6.297928881039375	2.358144237921249	1.9645922379212493	-0.01	-0.02	-0.02
H	-0.528333	4.063397855054991	1.5738124758424987	0.0	-0.24	-0.04
H	3.2107318327243726	2.032015308566871	0.40633690336999406	-0.07	-0.11	-0.16
H	-0.8084987620787507	6.108209832724373	0.23051250182688277	-0.02	-0.07	0.21
H	-1.7250662862362522	4.743760643118126	-0.4826490706456217	-0.06	0.03	0.09
H	-0.19753016727562756	5.285199929354378	-1.2293824275274956	-0.07	0.09	0.12
H	3.5720575241575014	3.644687643118126	-1.4932498810393753	0.04	0.03	-0.01
H	1.8783482862362524	3.4013279293543786	-1.9865268103937537	0.06	0.09	-0.1
H	3.0215074051968767	2.0194760483150027	-1.9454780966300058	0.05	0.08	-0.16
H	-1.115364594803123	2.2105460706456217	-3.907385643118126	0.05	-0.09	-0.03
H	0.6607935241575015	2.0951381672756275	-3.785185356881874	0.04	0.07	0.03
H	-0.2638281672756276	2.9649945724725044	-2.5408739293543787	-0.07	0.12	-0.09
H	-5.030356832724372	0.39269	-3.3143937620787507	0.07	0.0	-0.02
H	-5.047704475842498	2.146299118960625	-3.0023528810393754	0.04	-0.01	-0.01
H	-6.102188594803123	1.061918356881874	-2.057742643118126	0.05	-0.03	-0.03
H	-4.716805	-2.8378991189606246	-1.30679	0.0	0.01	0.0
H	-5.897638	-1.4968551189606247	0.437986	0.0	0.01	0.0
H	-4.650266	-0.633853	2.428684	0.0	0.0	0.0
H	-1.191766	-4.098723118960625	-0.911255	0.0	0.01	0.0
H	-0.901916	-1.177264	2.924194881039375	0.0	0.0	0.01
H	5.722608	1.202375	1.13158	0.0	0.0	0.0
H	6.156777881039376	1.5224021189606247	-1.30961	0.01	-0.01	0.0
H	4.864929	0.21905611896062463	-3.000323	0.0	-0.01	0.0
H	3.07288	-1.15665	2.521794	0.0	0.0	0.0
H	1.8581472379212494	-1.9011631189606246	-2.1413251189606246	-0.02	0.01	0.01
H	-0.9328111189606246	-3.316371237921249	-3.311667118960625	0.01	0.02	0.01
H	-0.604653	-2.046109118960625	-2.107491356881874	0.0	0.01	0.03
H	-2.154897	-2.046041237921249	-3.0097271189606247	0.0	0.02	0.01
H	-2.3450851189606245	-5.3416411189606245	-2.6680918810393752	0.01	0.01	-0.01
H	-3.728424118960625	-4.219575118960624	-2.688062	0.01	0.01	0.0
H	-3.4448891189606248	-5.263061	-1.2629568810393754	0.01	0.0	-0.01
H	-1.3991408810393753	1.054718	3.905453762078751	-0.01	0.0	0.02
H	-3.0452778810393752	1.037422	3.21917	-0.01	0.0	0.0
H	-1.6267321189606248	1.107809	2.1272967620787506	0.01	0.0	0.02
H	-1.9121178810393753	-1.121588	5.208466881039375	-0.01	0.0	0.01
H	-2.444275	-2.589811	4.338969881039375	0.0	0.0	0.01
H	-3.5569298810393755	-1.208112	4.518434881039376	-0.01	0.0	0.01
H	1.9073304758424987	-1.477855356881874	-4.558359118960625	-0.04	0.03	0.01
H	3.5000532379212492	-0.687885	-4.473708	-0.02	0.0	0.0
H	2.082413	0.08897264311812611	-3.705435	0.0	0.03	0.0
H	3.055542356881874	-3.5718711189606247	-3.594099881039375	-0.03	0.01	-0.01
H	3.705601356881874	-3.56042	-1.9310048810393754	-0.03	0.0	-0.01
H	4.616922356881874	-2.7708981189606248	-3.2483668810393755	-0.03	0.01	-0.01
H	3.419219594803123	0.6774477620787507	4.207532237921249	-0.05	0.02	-0.02
H	2.539591	1.2592578810393753	2.7669797137637477	0.0	0.01	-0.06
H	4.26636	1.665858	2.98366	0.0	0.0	0.0
H	5.012043118960625	-1.2896272379212492	4.072901881039376	-0.01	0.02	0.01
H	6.027847118960625	-0.31462211896062464	2.9713678810393755	-0.01	0.01	0.01
H	5.509155	-1.95101	2.4904627620787507	0.0	0.0	0.02
H	-1.712641	-4.866588881039375	1.2103591189606246	0.0	-0.01	-0.01
H	-0.413266	-5.300284881039375	2.3339221189606247	0.0	-0.01	-0.01
H	-1.57118	-4.020215762078751	2.751599	0.0	-0.02	0.0
H	4.497244118960625	-3.028621	0.3329292379212493	-0.01	0.0	-0.02
H	4.037245	-3.652332118960625	1.9264811189606246	0.0	0.01	-0.01
H	3.682209	-4.602958	0.482749	0.0	0.0	0.0
114
O	-5.163845	1.7559437912281322	0.3991113956140661	0.0	-0.02	-0.01
Mg	0.3869126043859339	-0.6707979780703304	-0.03523132982505718	0.01	0.05	0.16
O	0.6892962307015376	0.48211092280614987	-1.6221547035094537	0.07	0.28	0.22
C	-4.107123395614066	2.019288395614066	-0.39004	0.01	-0.01	0.0
N	-0.608764	-2.29852	0.7998532087718678	0.0	0.0	0.02
N	2.175862	-1.718299	0.271278	0.0	0.0	0.0
O	-3.371095	2.971973395614066	-0.240726	0.0	-0.01	0.0
C	-0.078518	-3.417935604385934	1.298641	0.0	-0.01	0.0
C	1.289886	-3.72683	1.274836	0.0	0.0	0.0
C	2.344987	-2.931837	0.775159	0.0	0.0	0.0
O	-2.7796323736843966	1.1066328131578018	-2.205077791228132	0.06	0.03	0.02
C	-1.6525185824562643	0.7163490219296696	-1.5884119780703305	0.04	0.05	0.05
C	-0.3776991649125286	0.7646790657890089	-2.432196747368793	0.08	0.15	0.12
C	-4.021516582456264	0.9726593956140661	-1.4975	0.04	-0.01	0.0
O	-1.6467537912281323	0.2870501868421982	-0.4370823956140661	0.02	-0.03	0.01
C	-5.346486604385935	2.642274395614066	1.5099383956140662	-0.01	-0.01	-0.01
O	0.01854918684219822	2.840802208771868	0.033374494737585775	-0.03	0.02	-0.24
C	1.0711837692984627	2.084027747368793	0.3792750771938501	-0.07	-0.12	-0.28
O	0.9253571649125286	1.0616978350874713	1.046573	-0.08	0.08	0.0
O	2.5012879780703305	3.919389538596925	0.7871303736843964	-0.05	-0.14	-0.06
C	1.4159361868421982	4.689885142982859	1.003224791228132	-0.03	-0.13	-0.02
C	0.02012918684219822	4.181329747368793	0.6239921868421983	-0.03	-0.12	-0.03
C	2.422355582456264	2.675401560526595	0.012882934210991112	-0.04	-0.09	-0.15
O	1.526725	5.761021934210991	1.562448	0.0	-0.15	0.0
C	-0.7233960219296697	5.143575395614065	-0.2913273517547268	-0.05	-0.01	0.11
C	2.7222108131578016	2.9471944175437357	-1.4535140438593395	0.03	0.04	-0.1
C	-0.2775061868421982	2.0961286263156036	-3.210658	0.03	0.06	0.0
C	-5.12532197807033	1.158111395614066	-2.5306422087718676	0.05	-0.01	-0.02
C	-2.052363	-2.182401	0.7742406043859339	0.0	0.0	0.01
C	3.31525	-0.921271	-0.132554	0.0	0.0	0.0
C	-2.760391	-2.71169	-0.3532253956140661	0.0	0.0	0.01
C	-4.145379	-2.42981	-0.460896	0.0	0.0	0.0
C	-4.817974	-1.673582	0.529076	0.0	0.0	0.0
C	-4.111501	-1.193588	1.652464	0.0	0.0	0.0
C	-2.725765	-1.432559	1.792417604385934	0.0	0.0	0.01
C	-2.028043	-3.577126395614066	-1.413962	0.0	0.01	0.0
C	-1.965488	-0.877817	3.0240196043859338	0.0	0.0	0.01
C	4.091987	-0.21287260438593392	0.852769	0.0	-0.01	0.0
C	5.101928604385934	0.672353395614066	0.396247	0.01	-0.01	0.0
C	5.355742604385934	0.8450053956140661	-0.98188	0.01	-0.01	0.0
C	4.619961	0.11903739561406607	-1.935544	0.0	-0.01	0.0
C	3.591829395614066	-0.772587	-1.535314	-0.01	0.0	0.0
C	3.898355	-0.431222	2.380019	0.0	0.0	0.0
C	2.840069791228132	-1.6352783956140662	-2.589159395614066	-0.02	0.01	0.01
C	-1.394656	-2.6906327912281323	-2.535544395614066	0.0	0.02	0.01
C	-2.954086395614066	-4.670142395614065	-2.049671	0.01	0.01	0.0
C	-2.015549	0.682304	3.071607604385934	0.0	0.0	0.01
C	-2.510857	-1.490952	4.356906604385935	0.0	0.0	0.01
C	2.5702717912281323	-0.872575395614066	-3.921593395614066	-0.02	0.01	0.01
C	3.6114191868421983	-2.973926395614066	-2.853149604385934	-0.03	0.01	-0.01
C	3.514397791228132	0.880042604385934	3.131914791228132	-0.02	0.01	-0.02
C	5.201647395614065	-1.0404273956140662	3.015419604385934	-0.01	0.01	0.01
C	-0.994531	-4.461977604385934	1.927703	0.0	-0.01	0.0
C	3.724091	-3.577993	0.8780323956140661	0.0	0.0	-0.01
H	1.577424	-4.688978	1.685197	0.0	0.0	0.0
H	-0.5548176815797841	-0.02320437368439644	-3.2181210991235196	0.27	0.06	0.23
H	-4.09167297807033	-0.021419604385933926	-1.036019604385934	0.05	-0.01	-0.01
H	-5.3778496043859345	3.6874787912281324	1.1723583956140662	-0.01	-0.02	-0.01
H	-4.529599604385934	2.518948395614066	2.2263173956140663	-0.01	-0.01	-0.01
H	-6.296934604385934	2.360132791228132	1.9665807912281321	-0.01	-0.02	-0.02
H	-0.528333	4.087260494737586	1.5777895824562644	0.0	-0.24	-0.04
H	3.2176917692984626	2.042952351754727	0.42224532982505714	-0.07	-0.11	-0.16
H	-0.8065102087718679	6.115169769298462	0.20963269210461247	-0.02	-0.07	0.21
H	-1.7191006263156035	4.740777813157802	-0.49159756052659465	-0.06	0.03	0.09
H	-0.19057023070153747	5.2762514394734055	-1.2413137473687927	-0.07	0.09	0.12
H	3.5680804175437357	3.641704813157802	-1.4922556043859339	0.04	0.03	-0.01
H	1.8723826263156036	3.3923794394734053	-1.9765840438593394	0.06	0.09	-0.1
H	3.0165360219296695	2.0115218350874713	-1.9295696701749427	0.05	0.08	-0.16
H	-1.1203359780703304	2.219494560526595	-3.9044028131578017	0.05	-0.09	-0.03
H	0.6568164175437357	2.0881782307015375	-3.7881681868421984	0.04	0.07	0.03
H	-0.2568682307015375	2.953063252631207	-2.5319254394734054	-0.07	0.12	-0.09
H	-5.037316769298462	0.39269	-3.312405208771868	0.07	0.0	-0.02
H	-5.051681582456264	2.1472933956140663	-3.001358604385934	0.04	-0.01	-0.01
H	-6.10715997807033	1.0649011868421983	-2.0547598131578018	0.05	-0.03	-0.03
H	-4.716805	-2.838893395614066	-1.30679	0.0	0.01	0.0
H	-5.897638	-1.4978493956140662	0.437986	0.0	0.01	0.0
H	-4.650266	-0.633853	2.428684	0.0	0.0	0.0
H	-1.191766	-4.099717395614066	-0.911255	0.0	0.01	0.0
H	-0.901916	-1.177264	2.9232006043859338	0.0	0.0	0.01
H	5.722608	1.202375	1.13158	0.0	0.0	0.0
H	6.155783604385935	1.5233963956140661	-1.30961	0.01	-0.01	0.0
H	4.864929	0.22005039561406609	-3.000323	0.0	-0.01	0.0
H	3.07288	-1.15665	2.521794	0.0	0.0	0.0
H	1.8601357912281322	-1.902157395614066	-2.142319395614066	-0.02	0.01	0.01
H	-0.9338053956140661	-3.318359791228132	-3.3126613956140663	0.01	0.02	0.01
H	-0.604653	-2.0471033956140663	-2.110474186842198	0.0	0.01	0.03
H	-2.154897	-2.048029791228132	-3.010721395614066	0.0	0.02	0.01
H	-2.346079395614066	-5.3426353956140655	-2.667097604385934	0.01	0.01	-0.01
H	-3.7294183956140663	-4.220569395614065	-2.688062	0.01	0.01	0.0
H	-3.445883395614066	-5.263061	-1.261962604385934	0.01	0.0	-0.01
H	-1.3981466043859339	1.054718	3.903465208771868	-0.01	0.0	0.02
H	-3.044283604385934	1.037422	3.21917	-0.01	0.0	0.0
H	-1.6277263956140662	1.107809	2.1253082087718678	0.01	0.0	0.02
H	-1.9111236043859339	-1.121588	5.207472604385934	-0.01	0.0	0.01
H	-2.444275	-2.589811	4.337975604385934	0.0	0.0	0.01
H	-3.555935604385934	-1.208112	4.517440604385935	-0.01	0.0	0.01
H	1.9113075824562644	-1.4808381868421983	-4.559353395614066	-0.04	0.03	0.01
H	3.502041791228132	-0.687885	-4.473708	-0.02	0.0	0.0
H	2.082413	0.08598981315780178	-3.705435	0.0	0.03	0.0
H	3.058525186842198	-3.572865395614066	-3.5931056043859337	-0.03	0.01	-0.01
H	3.7085841868421983	-3.56042	-1.930010604385934	-0.03	0.0	-0.01
H	4.619905186842198	-2.771892395614066	-3.247372604385934	-0.03	0.01	-0.01
H	3.4241909780703303	0.6754592087718678	4.209520791228132	-0.05	0.02	-0.02
H	2.539591	1.2582636043859339	2.7729453736843963	0.0	0.01	-0.06
H	4.26636	1.665858	2.98366	0.0	0.0	0.0
H	5.013037395614066	-1.291615791228132	4.071907604385935	-0.01	0.02	0.01
H	6.028841395614066	-0.31561639561406607	2.970373604385934	-0.01	0.01	0.01
H	5.509155	-1.95101	2.488474208771868	0.0	0.0	0.02
H	-1.712641	-4.865594604385934	1.211353395614066	0.0	-0.01	-0.01
H	-0.413266	-5.299290604385934	2.334916395614066	0.0	-0.01	-0.01
H	-1.57118	-4.018227208771868	2.751599	0.0	-0.02	0.0
H	4.498238395614066	-3.028621	0.3349177912281322	-0.01	0.0	-0.02
H	4.037245	-3.6533263956140662	1.927475395614066	0.0	0.01	-0.01
H	3.682209	-4.602958	0.482749	0.0	0.0	0.0
114
O	-5.163845	1.756629	0.39945400000000003	0.0	-0.02	-0.01
Mg	0.38656999999999997	-0.6725110000000001	-0.040712999999999985	0.01	0.05	0.16
O	0.686898	0.47251799999999994	-1.629692	0.07	0.28	0.22
C	-4.107466	2.019631	-0.39004	0.01	-0.01	0.0
N	-0.608764	-2.29852	0.799168	0.0	0.0	0.02
N	2.175862	-1.718299	0.271278	0.0	0.0	0.0
O	-3.371095	2.972316	-0.240726	0.0	-0.01	0.0
C	-0.078518	-3.417593	1.298641	0.0	-0.01	0.0
C	1.289886	-3.72683	1.274836	0.0	0.0	0.0
C	2.344987	-2.931837	0.775159	0.0	0.0	0.0
O	-2.781688	1.1056050000000002	-2.2057629999999997	0.06	0.03	0.02
C	-1.653889	0.7146359999999999	-1.590125	0.04	0.05	0.05
C	-0.38044	0.75954	-2.436308	0.08	0.15	0.12
C	-4.022887	0.973002	-1.4975	0.04	-0.01	0.0
O	-1.647439	0.288078	-0.437425	0.02	-0.03	0.01
C	-5.346144000000001	2.642617	1.510281	-0.01	-0.01	-0.01
O	0.019576999999999997	2.8401170000000002	0.041596999999999995	-0.03	0.02	-0.24
C	1.073582	2.088139	0.388868	-0.07	-0.12	-0.28
O	0.9280980000000001	1.058957	1.046573	-0.08	0.08	0.0
O	2.5030010000000003	3.9241859999999997	0.789186	-0.05	-0.14	-0.06
C	1.416964	4.694339	1.0039099999999999	-0.03	-0.13	-0.02
C	0.021157	4.185441	0.62502	-0.03	-0.12	-0.03
C	2.423726	2.6784850000000002	0.018021999999999996	-0.04	-0.09	-0.15
O	1.526725	5.766161	1.562448	0.0	-0.15	0.0
C	-0.721683	5.143917999999999	-0.295096	-0.05	-0.01	0.11
C	2.721183	2.945824	-1.450088	0.03	0.04	-0.1
C	-0.278534	2.0940730000000003	-3.210658	0.03	0.06	0.0
C	-5.127035	1.1584539999999999	-2.529957	0.05	-0.01	-0.02
C	-2.052363	-2.182401	0.773898	0.0	0.0	0.01
C	3.31525	-0.921271	-0.132554	0.0	0.0	0.0
C	-2.760391	-2.71169	-0.353568	0.0	0.0	0.01
C	-4.145379	-2.42981	-0.460896	0.0	0.0	0.0
C	-4.817974	-1.673582	0.529076	0.0	0.0	0.0
C	-4.111501	-1.193588	1.652464	0.0	0.0	0.0
C	-2.725765	-1.432559	1.792075	0.0	0.0	0.01
C	-2.028043	-3.5774690000000002	-1.413962	0.0	0.01	0.0
C	-1.965488	-0.877817	3.0236769999999997	0.0	0.0	0.01
C	4.091987	-0.21253	0.852769	0.0	-0.01	0.0
C	5.101586	0.672696	0.396247	0.01	-0.01	0.0
C	5.3554	0.845348	-0.98188	0.01	-0.01	0.0
C	4.619961	0.11937999999999999	-1.935544	0.0	-0.01	0.0
C	3.592172	-0.772587	-1.535314	-0.01	0.0	0.0
C	3.898355	-0.431222	2.380019	0.0	0.0	0.0
C	2.8407549999999997	-1.635621	-2.589502	-0.02	0.01	0.01
C	-1.394656	-2.691318	-2.5358870000000002	0.0	0.02	0.01
C	-2.954429	-4.670484999999999	-2.049671	0.01	0.01	0.0
C	-2.015549	0.682304	3.071265	0.0	0.0	0.01
C	-2.510857	-1.490952	4.3565640000000005	0.0	0.0	0.01
C	2.570957	-0.872918	-3.921936	-0.02	0.01	0.01
C	3.612447	-2.974269	-2.852807	-0.03	0.01	-0.01
C	3.5150829999999997	0.8797	3.1325999999999996	-0.02	0.01	-0.02
C	5.2019899999999994	-1.04077	3.015077	-0.01	0.01	0.01
C	-0.994531	-4.461635	1.927703	0.0	-0.01	0.0
C	3.724091	-3.577993	0.878375	0.0	0.0	-0.01
H	1.577424	-4.688978	1.685197	0.0	0.0	0.0
H	-0.564068	-0.025259999999999994	-3.226001	0.27	0.06	0.23
H	-4.093386	-0.021077000000000002	-1.0356770000000002	0.05	-0.01	-0.01
H	-5.3775070000000005	3.688164	1.172701	-0.01	-0.02	-0.01
H	-4.529257	2.519291	2.2266600000000003	-0.01	-0.01	-0.01
H	-6.296592	2.3608179999999996	1.967266	-0.01	-0.02	-0.02
H	-0.528333	4.095483	1.5791600000000001	0.0	-0.24	-0.04
H	3.22009	2.0467210000000002	0.42772699999999997	-0.07	-0.11	-0.16
H	-0.805825	6.117568	0.20243800000000003	-0.02	-0.07	0.21
H	-1.717045	4.73975	-0.494681	-0.06	0.03	0.09
H	-0.188172	5.273168	-1.245425	-0.07	0.09	0.12
H	3.56671	3.640677	-1.491913	0.04	0.03	-0.01
H	1.870327	3.389296	-1.973158	0.06	0.09	-0.1
H	3.014823	2.008781	-1.9240879999999998	0.05	0.08	-0.16
H	-1.1220489999999999	2.2225780000000004	-3.903375	0.05	-0.09	-0.03
H	0.655446	2.08578	-3.789196	0.04	0.07	0.03
H	-0.25447000000000003	2.948952	-2.528842	-0.07	0.12	-0.09
H	-5.039715	0.39269	-3.31172	0.07	0.0	-0.02
H	-5.053051999999999	2.1476360000000003	-3.001016	0.04	-0.01	-0.01
H	-6.108873	1.065929	-2.053732	0.05	-0.03	-0.03
H	-4.716805	-2.839236	-1.30679	0.0	0.01	0.0
H	-5.897638	-1.498192	0.437986	0.0	0.01	0.0
H	-4.650266	-0.633853	2.428684	0.0	0.0	0.0
H	-1.191766	-4.10006	-0.911255	0.0	0.01	0.0
H	-0.901916	-1.177264	2.9228579999999997	0.0	0.0	0.01
H	5.722608	1.202375	1.13158	0.0	0.0	0.0
H	6.155441000000001	1.523739	-1.30961	0.01	-0.01	0.0
H	4.864929	0.220393	-3.000323	0.0	-0.01	0.0
H	3.07288	-1.15665	2.521794	0.0	0.0	0.0
H	1.860821	-1.9024999999999999	-2.142662	-0.02	0.01	0.01
H	-0.934148	-3.3190449999999996	-3.3130040000000003	0.01	0.02	0.01
H	-0.604653	-2.0474460000000003	-2.1115019999999998	0.0	0.01	0.03
H	-2.154897	-2.0487149999999996	-3.011064	0.0	0.02	0.01
H	-2.346422	-5.342978	-2.6667549999999998	0.01	0.01	-0.01
H	-3.7297610000000003	-4.220911999999999	-2.688062	0.01	0.01	0.0
H	-3.4462260000000002	-5.263061	-1.2616200000000002	0.01	0.0	-0.01
H	-1.397804	1.054718	3.9027800000000004	-0.01	0.0	0.02
H	-3.043941	1.037422	3.21917	-0.01	0.0	0.0
H	-1.628069	1.107809	2.124623	0.01	0.0	0.02
H	-1.910781	-1.121588	5.20713	-0.01	0.0	0.01
H	-2.444275	-2.589811	4.337633	0.0	0.0	0.01
H	-3.555593	-1.208112	4.517098000000001	-0.01	0.0	0.01
H	1.912678	-1.481866	-4.559696	-0.04	0.03	0.01
H	3.5027269999999997	-0.687885	-4.473708	-0.02	0.0	0.0
H	2.082413	0.08496200000000001	-3.705435	0.0	0.03	0.0
H	3.0595529999999997	-3.573208	-3.5927629999999997	-0.03	0.01	-0.01
H	3.709612	-3.56042	-1.9296680000000002	-0.03	0.0	-0.01
H	4.620933	-2.7722350000000002	-3.24703	-0.03	0.01	-0.01
H	3.425904	0.674774	4.210206	-0.05	0.02	-0.02
H	2.539591	1.257921	2.7750009999999996	0.0	0.01	-0.06
H	4.26636	1.665858	2.98366	0.0	0.0	0.0
H	5.01338	-1.292301	4.0715650000000005	-0.01	0.02	0.01
H	6.029184	-0.315959	2.970031	-0.01	0.01	0.01
H	5.509155	-1.95101	2.4877890000000003	0.0	0.0	0.02
H	-1.712641	-4.865252	1.2116959999999999	0.0	-0.01	-0.01
H	-0.413266	-5.298948	2.335259	0.0	-0.01	-0.01
H	-1.57118	-4.017542	2.751599	0.0	-0.02	0.0
H	4.498581	-3.028621	0.33560300000000004	-0.01	0.0	-0.02
H	4.037245	-3.6536690000000003	1.9278179999999998	0.0	0.01	-0.01
H	3.682209	-4.602958	0.482749	0.0	0.0	0.0
114
O	-5.163845	1.7559437912281322	0.3991113956140661	0.0	-0.02	-0.01
Mg	0.3869126043859339	-0.6707979780703304	-0.035231329825057195	0.01	0.05	0.16
O	0.6892962307015376	0.48211092280614987	-1.6221547035094537	0.07	0.28	0.22
C	-4.107123395614066	2.019288395614066	-0.39004	0.01	-0.01	0.0
N	-0.608764	-2.29852	0.7998532087718678	0.0	0.0	0.02
N	2.175862	-1.718299	0.271278	0.0	0.0	0.0
O	-3.371095	2.971973395614066	-0.240726	0.0	-0.01	0.0
C	-0.078518	-3.417935604385934	1.298641	0.0	-0.01	0.0
C	1.289886	-3.72683	1.274836	0.0	0.0	0.0
C	2.344987	-2.931837	0.775159	0.0	0.0	0.0
O	-2.7796323736843966	1.1066328131578018	-2.205077791228132	0.06	0.03	0.02
C	-1.6525185824562643	0.7163490219296695	-1.5884119780703305	0.04	0.05	0.05
C	-0.3776991649125286	0.7646790657890088	-2.432196747368793	0.08	0.15	0.12
C	-4.021516582456264	0.9726593956140661	-1.4975	0.04	-0.01	0.0
O	-1.6467537912281323	0.2870501868421982	-0.4370823956140661	0.02	-0.03	0.01
C	-5.346486604385935	2.642274395614066	1.5099383956140662	-0.01	-0.01	-0.01
O	0.018549186842198223	2.840802208771868	0.0333744947375858	-0.03	0.02	-0.24
C	1.0711837692984627	2.084027747368793	0.3792750771938501	-0.07	-0.12	-0.28
O	0.9253571649125286	1.0616978350874713	1.046573	-0.08	0.08	0.0
O	2.5012879780703305	3.919389538596925	0.7871303736843964	-0.05	-0.14	-0.06
C	1.4159361868421982	4.689885142982859	1.003224791228132	-0.03	-0.13	-0.02
C	0.020129186842198225	4.181329747368793	0.6239921868421983	-0.03	-0.12	-0.03
C	2.422355582456264	2.675401560526595	0.012882934210991126	-0.04	-0.09	-0.15
O	1.526725	5.761021934210991	1.562448	0.0	-0.15	0.0
C	-0.7233960219296696	5.143575395614065	-0.29132735175472685	-0.05	-0.01	0.11
C	2.7222108131578016	2.9471944175437357	-1.4535140438593395	0.03	0.04	-0.1
C	-0.2775061868421982	2.0961286263156036	-3.210658	0.03	0.06	0.0
C	-5.12532197807033	1.158111395614066	-2.5306422087718676	0.05	-0.01	-0.02
C	-2.052363	-2.182401	0.7742406043859339	0.0	0.0	0.01
C	3.31525	-0.921271	-0.132554	0.0	0.0	0.0
C	-2.760391	-2.71169	-0.3532253956140661	0.0	0.0	0.01
C	-4.145379	-2.42981	-0.460896	0.0	0.0	0.0
C	-4.817974	-1.673582	0.529076	0.0	0.0	0.0
C	-4.111501	-1.193588	1.652464	0.0	0.0	0.0
C	-2.725765	-1.432559	1.792417604385934	0.0	0.0	0.01
C	-2.028043	-3.577126395614066	-1.413962	0.0	0.01	0.0
C	-1.965488	-0.877817	3.0240196043859338	0.0	0.0	0.01
C	4.091987	-0.21287260438593392	0.852769	0.0	-0.01	0.0
C	5.101928604385934	0.672353395614066	0.396247	0.01	-0.01	0.0
C	5.355742604385934	0.8450053956140661	-0.98188	0.01	-0.01	0.0
C	4.619961	0.11903739561406607	-1.935544	0.0	-0.01	0.0
C	3.591829395614066	-0.772587	-1.535314	-0.01	0.0	0.0
C	3.898355	-0.431222	2.380019	0.0	0.0	0.0
C	2.840069791228132	-1.6352783956140662	-2.589159395614066	-0.02	0.01	0.01
C	-1.394656	-2.6906327912281323	-2.535544395614066	0.0	0.02	0.01
C	-2.954086395614066	-4.670142395614065	-2.049671	0.01	0.01	0.0
C	-2.015549	0.682304	3.071607604385934	0.0	0.0	0.01
C	-2.510857	-1.490952	4.356906604385935	0.0	0.0	0.01
C	2.5702717912281323	-0.872575395614066	-3.921593395614066	-0.02	0.01	0.01
C	3.6114191868421983	-2.973926395614066	-2.853149604385934	-0.03	0.01	-0.01
C	3.514397791228132	0.880042604385934	3.131914791228132	-0.02	0.01	-0.02
C	5.201647395614065	-1.0404273956140662	3.015419604385934	-0.01	0.01	0.01
C	-0.994531	-4.461977604385934	1.927703	0.0	-0.01	0.0
C	3.724091	-3.577993	0.8780323956140661	0.0	0.0	-0.01
H	1.577424	-4.688978	1.685197	0.0	0.0	0.0
H	-0.5548176815797841	-0.023204373684396446	-3.2181210991235196	0.27	0.06	0.23
H	-4.09167297807033	-0.021419604385933926	-1.036019604385934	0.05	-0.01	-0.01
H	-5.3778496043859345	3.6874787912281324	1.1723583956140662	-0.01	-0.02	-0.01
H	-4.529599604385934	2.518948395614066	2.2263173956140663	-0.01	-0.01	-0.01
H	-6.296934604385934	2.360132791228132	1.9665807912281321	-0.01	-0.02	-0.02
H	-0.528333	4.087260494737586	1.5777895824562644	0.0	-0.24	-0.04
H	3.2176917692984626	2.042952351754727	0.4222453298250572	-0.07	-0.11	-0.16
H	-0.8065102087718679	6.115169769298462	0.20963269210461247	-0.02	-0.07	0.21
H	-1.7191006263156035	4.740777813157802	-0.49159756052659465	-0.06	0.03	0.09
H	-0.19057023070153747	5.2762514394734055	-1.2413137473687927	-0.07	0.09	0.12
H	3.5680804175437357	3.641704813157802	-1.4922556043859339	0.04	0.03	-0.01
H	1.8723826263156036	3.3923794394734053	-1.9765840438593392	0.06	0.09	-0.1
H	3.0165360219296695	2.0115218350874713	-1.9295696701749427	0.05	0.08	-0.16
H	-1.1203359780703304	2.219494560526595	-3.9044028131578017	0.05	-0.09	-0.03
H	0.6568164175437357	2.0881782307015375	-3.7881681868421984	0.04	0.07	0.03
H	-0.25686823070153747	2.953063252631207	-2.5319254394734054	-0.07	0.12	-0.09
H	-5.037316769298462	0.39269	-3.312405208771868	0.07	0.0	-0.02
H	-5.051681582456264	2.1472933956140663	-3.001358604385934	0.04	-0.01	-0.01
H	-6.10715997807033	1.0649011868421983	-2.0547598131578018	0.05	-0.03	-0.03
H	-4.716805	-2.838893395614066	-1.30679	0.0	0.01	0.0
H	-5.897638	-1.4978493956140662	0.437986	0.0	0.01	0.0
H	-4.650266	-0.633853	2.428684	0.0	0.0	0.0
H	-1.191766	-4.099717395614066	-0.911255	0.0	0.01	0.0
H	-0.901916	-1.177264	2.9232006043859338	0.0	0.0	0.01
H	5.722608	1.202375	1.13158	0.0	0.0	0.0
H	6.155783604385935	1.5233963956140661	-1.30961	0.01	-0.01	0.0
H	4.864929	0.22005039561406609	-3.000323	0.0	-0.01	0.0
H	3.07288	-1.15665	2.521794	0.0	0.0	0.0
H	1.8601357912281322	-1.902157395614066	-2.142319395614066	-0.02	0.01	0.01
H	-0.9338053956140661	-3.318359791228132	-3.3126613956140663	0.01	0.02	0.01
H	-0.604653	-2.0471033956140663	-2.110474186842198	0.0	0.01	0.03
H	-2.154897	-2.048029791228132	-3.010721395614066	0.0	0.02	0.01
H	-2.346079395614066	-5.3426353956140655	-2.667097604385934	0.01	0.01	-0.01
H	-3.7294183956140663	-4.220569395614065	-2.688062	0.01	0.01	0.0
H	-3.445883395614066	-5.263061	-1.261962604385934	0.01	0.0	-0.01
H	-1.3981466043859339	1.054718	3.903465208771868	-0.01	0.0	0.02
H	-3.044283604385934	1.037422	3.21917	-0.01	0.0	0.0
H	-1.6277263956140662	1.107809	2.1253082087718678	0.01	0.0	0.02
H	-1.9111236043859339	-1.121588	5.207472604385934	-0.01	0.0	0.01
H	-2.444275	-2.589811	4.337975604385934	0.0	0.0	0.01
H	-3.555935604385934	-1.208112	4.517440604385935	-0.01	0.0	0.01
H	1.9113075824562644	-1.4808381868421983	-4.559353395614066	-0.04	0.03	0.01
H	3.502041791228132	-0.687885	-4.473708	-0.02	0.0	0.0
H	2.082413	0.08598981315780177	-3.705435	0.0	0.03	0.0
H	3.058525186842198	-3.572865395614066	-3.5931056043859337	-0.03	0.01	-0.01
H	3.7085841868421983	-3.56042	-1.930010604385934	-0.03	0.0	-0.01
H	4.619905186842198	-2.771892395614066	-3.247372604385934	-0.03	0.01	-0.01
H	3.4241909780703303	0.6754592087718678	4.209520791228132	-0.05	0.02	-0.02
H	2.539591	1.2582636043859339	2.7729453736843963	0.0	0.01	-0.06
H	4.26636	1.665858	2.98366	0.0	0.0	0.0
H	5.013037395614066	-1.291615791228132	4.071907604385935	-0.01	0.02	0.01
H	6.028841395614066	-0.31561639561406607	2.970373604385934	-0.01	0.01	0.01
H	5.509155	-1.95101	2.488474208771868	0.0	0.0	0.02
H	-1.712641	-4.865594604385934	1.211353395614066	0.0	-0.01	-0.01
H	-0.413266	-5.299290604385934	2.334916395614066	0.0	-0.01	-0.01
H	-1.57118	-4.018227208771868	2.751599	0.0	-0.02	0.0
H	4.498238395614066	-3.028621	0.3349177912281322	-0.01	0.0	-0.02
H	4.037245	-3.6533263956140662	1.927475395614066	0.0	0.01	-0.01
H	3.682209	-4.602958	0.482749	0.0	0.0	0.0
114
O	-5.163845	1.7539552379212493	0.3981171189606247	0.0	-0.02	-0.01
Mg	0.3879068810393753	-0.6658265948031232	-0.01932290336999412	0.01	0.05	0.16
O	0.6962561672756277	0.5099506691025102	-1.600280617133742	0.07	0.28	0.22
C	-4.106129118960625	2.0182941189606245	-0.39004	0.01	-0.01	0.0
N	-0.608764	-2.29852	0.8018417620787507	0.0	0.0	0.02
N	2.175862	-1.718299	0.271278	0.0	0.0	0.0
O	-3.371095	2.9709791189606247	-0.240726	0.0	-0.01	0.0
C	-0.078518	-3.4189298810393756	1.298641	0.0	-0.01	0.0
C	1.289886	-3.72683	1.274836	0.0	0.0	0.0
C	2.344987	-2.931837	0.775159	0.0	0.0	0.0
O	-2.773666713763748	1.109615643118126	-2.203089237921249	0.06	0.03	0.02
C	-1.6485414758424985	0.7213204051968768	-1.5834405948031232	0.04	0.05	0.05
C	-0.36974495168499705	0.7795932155906304	-2.4202654275274953	0.08	0.15	0.12
C	-4.017539475842498	0.9716651189606247	-1.4975	0.04	-0.01	0.0
O	-1.6447652379212494	0.2840673568818739	-0.43608811896062466	0.02	-0.03	0.01
C	-5.347480881039376	2.6412801189606245	1.5089441189606247	-0.01	-0.01	-0.01
O	0.015566356881873897	2.8427907620787507	0.009511855054991192	-0.03	0.02	-0.24
C	1.0642238327243725	2.0720964275274953	0.35143533089748974	-0.07	-0.12	-0.28
O	0.9174029516849971	1.069652048315003	1.046573	-0.08	0.08	0.0
O	2.4963165948031234	3.9054696654487446	0.7811647137637479	-0.05	-0.14	-0.06
C	1.412953356881874	4.676959546488121	1.0012362379212492	-0.03	-0.13	-0.02
C	0.0171463568818739	4.169398427527496	0.6210093568818739	-0.03	-0.12	-0.03
C	2.4183784758424984	2.6664530706456215	-0.0020312155906305196	-0.04	-0.09	-0.15
O	1.526725	5.74610778440937	1.562448	0.0	-0.15	0.0
C	-0.7283674051968768	5.142581118960624	-0.28039030856687097	-0.05	-0.01	0.11
C	2.725193643118126	2.9511715241575014	-1.4634568103937537	0.03	0.04	-0.1
C	-0.2745233568818739	2.102094286236252	-3.210658	0.03	0.06	0.0
C	-5.120350594803123	1.1571171189606246	-2.5326307620787505	0.05	-0.01	-0.02
C	-2.052363	-2.182401	0.7752348810393753	0.0	0.0	0.01
C	3.31525	-0.921271	-0.132554	0.0	0.0	0.0
C	-2.760391	-2.71169	-0.35223111896062465	0.0	0.0	0.01
C	-4.145379	-2.42981	-0.460896	0.0	0.0	0.0
C	-4.817974	-1.673582	0.529076	0.0	0.0	0.0
C	-4.111501	-1.193588	1.652464	0.0	0.0	0.0
C	-2.725765	-1.432559	1.7934118810393753	0.0	0.0	0.01
C	-2.028043	-3.5761321189606248	-1.413962	0.0	0.01	0.0
C	-1.965488	-0.877817	3.025013881039375	0.0	0.0	0.01
C	4.091987	-0.21386688103937537	0.852769	0.0	-0.01	0.0
C	5.102922881039375	0.6713591189606246	0.396247	0.01	-0.01	0.0
C	5.356736881039375	0.8440111189606246	-0.98188	0.01	-0.01	0.0
C	4.619961	0.11804311896062462	-1.935544	0.0	-0.01	0.0
C	3.5908351189606247	-0.772587	-1.535314	-0.01	0.0	0.0
C	3.898355	-0.431222	2.380019	0.0	0.0	0.0
C	2.8380812379212492	-1.6342841189606248	-2.5881651189606245	-0.02	0.01	0.01
[truncated: 300 more rows]
