# Supplementary material
Source: publisher figshare collection journal article supplement (https://acs.figshare.com/ndownloader/files/5127205)
Supplement: Supplementary file 1 [file 5127205 › supporting_ja043819b/RRRR_fm-5-ts1-freq-136.log]

 Entering Gaussian System, Link 0=/homes/rzepa/g98/g98
 Input=RRRR_fm-5-ts.gjf
 Output=RRRR_fm-5-ts.log
 Initial command:
 /homes/rzepa/g98/l1.exe /scratch/Gau-6318.inp -scrdir=/scratch/
 Entering Link 1 = /homes/rzepa/g98/l1.exe PID=      6319.
  
 Copyright (c) 1988,1990,1992,1993,1995,1998 Gaussian, Inc.
                  All Rights Reserved.
  
 This is part of the Gaussian(R) 98 program.  It is based on
 the Gaussian 94(TM) system (copyright 1995 Gaussian, Inc.),
 the Gaussian 92(TM) system (copyright 1992 Gaussian, Inc.),
 the Gaussian 90(TM) system (copyright 1990 Gaussian, Inc.),
 the Gaussian 88(TM) system (copyright 1988 Gaussian, Inc.),
 the Gaussian 86(TM) system (copyright 1986 Carnegie Mellon
 University), and the Gaussian 82(TM) system (copyright 1983
 Carnegie Mellon University). Gaussian is a federally registered
 trademark of Gaussian, Inc.
  
 This software contains proprietary and confidential information,
 including trade secrets, belonging to Gaussian, Inc.
  
 This software is provided under written license and may be
 used, copied, transmitted, or stored only in accord with that
 written license.
  
 The following legend is applicable only to US Government
 contracts under DFARS:
  
                    RESTRICTED RIGHTS LEGEND
  
 Use, duplication or disclosure by the US Government is subject
 to restrictions as set forth in subparagraph (c)(1)(ii) of the
 Rights in Technical Data and Computer Software clause at DFARS
 252.227-7013.
  
 Gaussian, Inc.
 Carnegie Office Park, Building 6, Pittsburgh, PA 15106 USA
  
 The following legend is applicable only to US Government
 contracts under FAR:
  
                    RESTRICTED RIGHTS LEGEND
  
 Use, reproduction and disclosure by the US Government is subject
 to restrictions as set forth in subparagraph (c) of the
 Commercial Computer Software - Restricted Rights clause at FAR
 52.227-19.
  
 Gaussian, Inc.
 Carnegie Office Park, Building 6, Pittsburgh, PA 15106 USA
  
  
 ---------------------------------------------------------------
 Warning -- This program may not be used in any manner that
 competes with the business of Gaussian, Inc. or will provide
 assistance to any competitor of Gaussian, Inc.  The licensee
 of this program is prohibited from giving any competitor of
 Gaussian, Inc. access to this program.  By using this program,
 the user acknowledges that Gaussian, Inc. is engaged in the
 business of creating and licensing software in the field of
 computational chemistry and represents and warrants to the
 licensee that it is not a competitor of Gaussian, Inc. and that
 it will not use this program in any manner prohibited above.
 ---------------------------------------------------------------
  

 Cite this work as:
 Gaussian 98, Revision A.11.3,
 M. J. Frisch, G. W. Trucks, H. B. Schlegel, G. E. Scuseria, 
 M. A. Robb, J. R. Cheeseman, V. G. Zakrzewski, J. A. Montgomery, Jr., 
 R. E. Stratmann, J. C. Burant, S. Dapprich, J. M. Millam, 
 A. D. Daniels, K. N. Kudin, M. C. Strain, O. Farkas, J. Tomasi, 
 V. Barone, M. Cossi, R. Cammi, B. Mennucci, C. Pomelli, C. Adamo, 
 S. Clifford, J. Ochterski, G. A. Petersson, P. Y. Ayala, Q. Cui, 
 K. Morokuma, N. Rega, P. Salvador, J. J. Dannenberg, D. K. Malick, 
 A. D. Rabuck, K. Raghavachari, J. B. Foresman, J. Cioslowski, 
 J. V. Ortiz, A. G. Baboul, B. B. Stefanov, G. Liu, A. Liashenko, 
 P. Piskorz, I. Komaromi, R. Gomperts, R. L. Martin, D. J. Fox, 
 T. Keith, M. A. Al-Laham, C. Y. Peng, A. Nanayakkara, M. Challacombe, 
 P. M. W. Gill, B. Johnson, W. Chen, M. W. Wong, J. L. Andres, 
 C. Gonzalez, M. Head-Gordon, E. S. Replogle, and J. A. Pople, 
 Gaussian, Inc., Pittsburgh PA, 2002.

 ***********************************************
 Gaussian 98:  x86-Linux-G98RevA.11.3 5-Feb-2002
                    2-Apr-2004 
 ***********************************************
 %mem=500MB
 %nproc=2
 Will use up to    2 processors via shared memory.
 %chk=RRRR_fm-5-ts.chk
 %rwf=/scratch/51.rwf,1800MB,/scratch/52.rwf,1800MB,/scratch/53.rwf,1800MB,/scrat
 ch/54.rwf,1800MB,/scratch/55.rwf,1800MB,/scratch/56.rwf,1800MB,/scratch/57.rwf,1
 800MB,/scratch/58.rwf,1800MB,/scratch/59.rwf,1800MB
 -------------------------------------------
 # b3lyp/Gen freq guess=read geom=checkpoint
 -------------------------------------------
 1/10=4,29=2,30=1,38=1/1,3;
 2/40=1/2;
 3/5=7,11=2,25=1,30=1/1,2,3;
 4/5=1/1;
 5/5=2,42=-5/2;
 8/6=4,11=11/1;
 11/6=1,8=1,9=11,15=111,16=11/1,2,10;
 10/6=1/2;
 6/7=2,8=2,9=2,10=2,18=1,28=1/1;
 7/8=1,10=1,25=1/1,2,3,16;
 1/10=4,30=1/3;
 99//99;
 -------------------
 from RRRR_fm-ts.gjf
 -------------------
 Redundant internal coordinates taken from checkpoint file:
 RRRR_fm-5-ts.chk
 Charge =  0 Multiplicity = 1
 O,0,-5.1278656299,1.8372162343,0.430937201
 Mg,0,0.381959026,-0.6450852752,0.0661172972
 O,0,0.7396194644,0.6613103813,-1.4770783213
 C,0,-4.0642270541,2.0908069491,-0.3566789769
 N,0,-0.6469679212,-2.2903844069,0.80659994
 N,0,2.1448162504,-1.759953015,0.2506943369
 O,0,-3.3162556125,3.0289802629,-0.2074986624
 C,0,-0.135085929,-3.4283794017,1.2839140592
 C,0,1.2272461168,-3.7560750143,1.2506151039
 C,0,2.2941139151,-2.9787196596,0.7481817675
 O,0,-2.7309136874,1.1876403351,-2.1703852334
 C,0,-1.620657128,0.7869975942,-1.5420719046
 C,0,-0.3219904898,0.8811277408,-2.3464820445
 C,0,-3.9848020343,1.0474210647,-1.4693698405
 O,0,-1.6306446661,0.2995666669,-0.4194946529
 C,0,-5.2938548523,2.728543167,1.5468144372
 O,0,0.0513525391,2.8541877743,-0.1137567899
 C,0,1.063097206,1.9837071989,0.1956273269
 O,0,0.8989867153,1.0936718226,1.0462813115
 O,0,2.5436615466,3.7758733535,0.7493914846
 C,0,1.4878303143,4.5718534103,1.0019389289
 C,0,0.0806135316,4.0979360299,0.6221574251
 C,0,2.4437959208,2.5705347893,-0.0896786838
 O,0,1.6417659252,5.6244330382,1.5783642116
 C,0,-0.6614947502,5.1511226277,-0.1908409003
 C,0,2.788483663,2.9288224413,-1.5232273028
 C,0,-0.2362987391,2.1550668176,-3.1995784749
 C,0,-5.0844107948,1.258130194,-2.5084374603
 C,0,-2.0883002566,-2.1471093863,0.7834490572
 C,0,3.2965561082,-0.9825753604,-0.1563891682
 C,0,-2.8127426022,-2.657926765,-0.3421084153
 C,0,-4.1928489652,-2.3496469539,-0.4469293961
 C,0,-4.8453164809,-1.5854569698,0.5503716882
 C,0,-4.1233773958,-1.1238781874,1.6716422384
 C,0,-2.7415283634,-1.3894175693,1.8089320342
 C,0,-2.1029119323,-3.5254161144,-1.4176396732
 C,0,-1.9637581542,-0.8546022647,3.0384238468
 C,0,4.09209143,-0.2999796125,0.8273825273
 C,0,5.122411089,0.5681177635,0.3687321701
 C,0,5.3713141315,0.7422382516,-1.0101060374
 C,0,4.6098017751,0.0346338914,-1.962531255
 C,0,3.5609697575,-0.8326082213,-1.5600620862
 C,0,3.9035032697,-0.5149366069,2.3548077133
 C,0,2.7804935659,-1.6695302867,-2.606489538
 C,0,-1.4594511012,-2.6392320292,-2.5323559184
 C,0,-3.0463512525,-4.5981289002,-2.0526886648
 C,0,-1.9842752967,0.7059507875,3.0932140397
 C,0,-2.5126859325,-1.4634598177,4.3718103309
 C,0,2.5172195175,-0.8958713369,-3.9339023274
 C,0,3.5183068327,-3.020990992,-2.8942707204
 C,0,3.5353608218,0.8068284289,3.101570028
 C,0,5.1923627074,-1.1445648991,2.9864521497
 C,0,-1.0668027701,-4.4579300928,1.9137977007
 C,0,3.661400936,-3.6510152176,0.8333141939
 H,0,1.4990989593,-4.7252911363,1.6549918459
 H,0,-0.3926934223,0.0376675683,-3.062606977
 H,0,-4.0642564613,0.0526515008,-1.0185814958
 H,0,-5.3077214121,3.7690157399,1.2140283136
 H,0,-4.4752285754,2.5866928244,2.2577585786
 H,0,-6.2468899243,2.455552694,2.0011738991
 H,0,-0.4454698172,3.9296086405,1.5716521329
 H,0,3.2092678053,1.9085454076,0.3055351865
 H,0,-0.7038204251,6.0812067941,0.3811783168
 H,0,-1.6719724977,4.7947621934,-0.4001105281
 H,0,-0.1438922357,5.3448880775,-1.1363586089
 H,0,3.6538683463,3.6004887347,-1.5040903858
 H,0,1.9646853799,3.425117863,-2.0392182724
 H,0,3.0759861052,2.0165296806,-2.0450707345
 H,0,-1.0694071428,2.1973383572,-3.9082276785
 H,0,0.7011992546,2.1386847281,-3.7627159964
 H,0,-0.2617713824,3.0498314334,-2.5765358401
 H,0,-5.0019323287,0.5011574935,-3.2941421939
 H,0,-5.0016193483,2.247980278,-2.9685043002
 H,0,-6.0652994978,1.1678800963,-2.0338452749
 H,0,-4.7766821323,-2.7374595701,-1.2911751672
 H,0,-5.9218869652,-1.3824709108,0.4665269814
 H,0,-4.646981076,-0.5576804509,2.4535300384
 H,0,-1.2736411984,-4.0658501607,-0.9222445237
 H,0,-0.9065987177,-1.1734520234,2.9299420811
 H,0,5.7506987389,1.0898628249,1.1027600883
 H,0,6.1819954456,1.4070097508,-1.3395927225
 H,0,4.8503588826,0.1358733895,-3.0282936573
 H,0,3.065418038,-1.2254166591,2.4982876586
 H,0,1.7983703739,-1.9200388105,-2.1550017782
 H,0,-1.0083707636,-3.272069776,-3.3150164869
 H,0,-0.6550827567,-2.0192600106,-2.0958721814
 H,0,-2.2102881542,-1.9803566343,-3.0001437266
 H,0,-2.454739134,-5.2790500709,-2.6833570441
 H,0,-3.8168551095,-4.1312253329,-2.6844506105
 H,0,-3.5447061531,-5.1919295383,-1.2713817037
 H,0,-1.3617374166,1.0630543975,3.9297144322
 H,0,-3.0119805265,1.0797500302,3.2418596969
 H,0,-1.5874150054,1.1282533134,2.1531307893
 H,0,-1.9078001769,-1.1091291364,5.2204524902
 H,0,-2.4668329623,-2.5632755848,4.3476185867
 H,0,-3.5579718149,-1.1617071974,4.5398613125
 H,0,1.8301659636,-1.4752269098,-4.5702716098
 H,0,3.4488636041,-0.7327833074,-4.497425172
 H,0,2.0622220282,0.0837628587,-3.7172762007
 H,0,2.9499410106,-3.6061086384,-3.6335613902
 H,0,3.6097558955,-3.620039467,-1.9743618048
 H,0,4.5280699418,-2.8360886251,-3.2935999493
 H,0,3.4278244724,0.6061127605,4.1789269229
 H,0,2.5788801924,1.2047324434,2.7233870317
 H,0,4.3143069222,1.5721241913,2.9655207734
 H,0,5.005412271,-1.3903129155,4.0429527511
 H,0,6.0327224871,-0.4351731249,2.9396850704
 H,0,5.4862098776,-2.065157434,2.4602456298
 H,0,-1.7965915098,-4.8447448188,1.1933035674
 H,0,-0.4989967961,-5.3077892846,2.3071714262
 H,0,-1.6303026166,-4.0138589573,2.7430422187
 H,0,4.4358135978,-3.1136217273,0.2814144216
 H,0,3.979374487,-3.7303039607,1.8805582731
 H,0,3.598023994,-4.6732425131,0.4404117399
 Recover connectivity data from disk.

 GradGradGradGradGradGradGradGradGradGradGradGradGradGradGradGradGradGrad
 Berny optimization.
 Initialization pass.
                         ----------------------------
                         !    Initial Parameters    !
                         ! (Angstroms and Degrees)  !
 ------------------------                            -------------------------
 ! Name  Definition              Value          Derivative Info.             !
 -----------------------------------------------------------------------------
 ! R1    R(1,4)                  1.3476         calculate D2E/DX2 analyticall!
 ! R2    R(1,16)                 1.4378         calculate D2E/DX2 analyticall!
 ! R3    R(2,3)                  2.0533         calculate D2E/DX2 analyticall!
 ! R4    R(2,5)                  2.077          calculate D2E/DX2 analyticall!
 ! R5    R(2,6)                  2.094          calculate D2E/DX2 analyticall!
 ! R6    R(2,15)                 2.2757         calculate D2E/DX2 analyticall!
 ! R7    R(2,19)                 2.0619         calculate D2E/DX2 analyticall!
 ! R8    R(3,13)                 1.3897         calculate D2E/DX2 analyticall!
 ! R9    R(4,7)                  1.2091         calculate D2E/DX2 analyticall!
 ! R10   R(4,14)                 1.5274         calculate D2E/DX2 analyticall!
 ! R11   R(5,8)                  1.336          calculate D2E/DX2 analyticall!
 ! R12   R(5,29)                 1.4486         calculate D2E/DX2 analyticall!
 ! R13   R(6,10)                 1.3248         calculate D2E/DX2 analyticall!
 ! R14   R(6,30)                 1.4479         calculate D2E/DX2 analyticall!
 ! R15   R(8,9)                  1.4016         calculate D2E/DX2 analyticall!
 ! R16   R(8,53)                 1.5247         calculate D2E/DX2 analyticall!
 ! R17   R(9,10)                 1.4124         calculate D2E/DX2 analyticall!
 ! R18   R(9,55)                 1.0848         calculate D2E/DX2 analyticall!
 ! R19   R(10,54)                1.526          calculate D2E/DX2 analyticall!
 ! R20   R(11,12)                1.3371         calculate D2E/DX2 analyticall!
 ! R21   R(11,14)                1.4434         calculate D2E/DX2 analyticall!
 ! R22   R(12,13)                1.5305         calculate D2E/DX2 analyticall!
 ! R23   R(12,15)                1.2239         calculate D2E/DX2 analyticall!
 ! R24   R(13,27)                1.5356         calculate D2E/DX2 analyticall!
 ! R25   R(13,56)                1.1087         calculate D2E/DX2 analyticall!
 ! R26   R(14,28)                1.5275         calculate D2E/DX2 analyticall!
 ! R27   R(14,57)                1.095          calculate D2E/DX2 analyticall!
 ! R28   R(16,58)                1.0925         calculate D2E/DX2 analyticall!
 ! R29   R(16,59)                1.0935         calculate D2E/DX2 analyticall!
 ! R30   R(16,60)                1.0905         calculate D2E/DX2 analyticall!
 ! R31   R(17,18)                1.3701         calculate D2E/DX2 analyticall!
 ! R32   R(17,22)                1.4455         calculate D2E/DX2 analyticall!
 ! R33   R(18,19)                1.2421         calculate D2E/DX2 analyticall!
 ! R34   R(18,23)                1.5271         calculate D2E/DX2 analyticall!
 ! R35   R(20,21)                1.3462         calculate D2E/DX2 analyticall!
 ! R36   R(20,23)                1.472          calculate D2E/DX2 analyticall!
 ! R37   R(21,22)                1.5327         calculate D2E/DX2 analyticall!
 ! R38   R(21,24)                1.2099         calculate D2E/DX2 analyticall!
 ! R39   R(22,25)                1.5234         calculate D2E/DX2 analyticall!
 ! R40   R(22,61)                1.0985         calculate D2E/DX2 analyticall!
 ! R41   R(23,26)                1.5173         calculate D2E/DX2 analyticall!
 ! R42   R(23,62)                1.0864         calculate D2E/DX2 analyticall!
 ! R43   R(25,63)                1.0927         calculate D2E/DX2 analyticall!
 ! R44   R(25,64)                1.0917         calculate D2E/DX2 analyticall!
 ! R45   R(25,65)                1.0952         calculate D2E/DX2 analyticall!
 ! R46   R(26,66)                1.0956         calculate D2E/DX2 analyticall!
 ! R47   R(26,67)                1.0914         calculate D2E/DX2 analyticall!
 ! R48   R(26,68)                1.0896         calculate D2E/DX2 analyticall!
 ! R49   R(27,69)                1.0946         calculate D2E/DX2 analyticall!
 ! R50   R(27,70)                1.0938         calculate D2E/DX2 analyticall!
 ! R51   R(27,71)                1.0906         calculate D2E/DX2 analyticall!
 ! R52   R(28,72)                1.0941         calculate D2E/DX2 analyticall!
 ! R53   R(28,73)                1.0947         calculate D2E/DX2 analyticall!
 ! R54   R(28,74)                1.0934         calculate D2E/DX2 analyticall!
 ! R55   R(29,31)                1.4327         calculate D2E/DX2 analyticall!
 ! R56   R(29,35)                1.4326         calculate D2E/DX2 analyticall!
 ! R57   R(30,38)                1.4376         calculate D2E/DX2 analyticall!
 ! R58   R(30,42)                1.4362         calculate D2E/DX2 analyticall!
 ! R59   R(31,32)                1.418          calculate D2E/DX2 analyticall!
 ! R60   R(31,36)                1.5534         calculate D2E/DX2 analyticall!
 ! R61   R(32,33)                1.4157         calculate D2E/DX2 analyticall!
 ! R62   R(32,75)                1.0973         calculate D2E/DX2 analyticall!
 ! R63   R(33,34)                1.4112         calculate D2E/DX2 analyticall!
 ! R64   R(33,76)                1.0987         calculate D2E/DX2 analyticall!
 ! R65   R(34,35)                1.4138         calculate D2E/DX2 analyticall!
 ! R66   R(34,77)                1.0982         calculate D2E/DX2 analyticall!
 ! R67   R(35,37)                1.55           calculate D2E/DX2 analyticall!
 ! R68   R(36,45)                1.5627         calculate D2E/DX2 analyticall!
 ! R69   R(36,46)                1.5634         calculate D2E/DX2 analyticall!
 ! R70   R(36,78)                1.1069         calculate D2E/DX2 analyticall!
 ! R71   R(37,47)                1.5616         calculate D2E/DX2 analyticall!
 ! R72   R(37,48)                1.5652         calculate D2E/DX2 analyticall!
 ! R73   R(37,79)                1.1095         calculate D2E/DX2 analyticall!
 ! R74   R(38,39)                1.4232         calculate D2E/DX2 analyticall!
 ! R75   R(38,43)                1.554          calculate D2E/DX2 analyticall!
 ! R76   R(39,40)                1.4119         calculate D2E/DX2 analyticall!
 ! R77   R(39,80)                1.0981         calculate D2E/DX2 analyticall!
 ! R78   R(40,41)                1.4099         calculate D2E/DX2 analyticall!
 ! R79   R(40,81)                1.0989         calculate D2E/DX2 analyticall!
 ! R80   R(41,42)                1.4192         calculate D2E/DX2 analyticall!
 ! R81   R(41,82)                1.0973         calculate D2E/DX2 analyticall!
 ! R82   R(42,44)                1.5507         calculate D2E/DX2 analyticall!
 ! R83   R(43,51)                1.5621         calculate D2E/DX2 analyticall!
 ! R84   R(43,52)                1.5673         calculate D2E/DX2 analyticall!
 ! R85   R(43,83)                1.108          calculate D2E/DX2 analyticall!
 ! R86   R(44,49)                1.5588         calculate D2E/DX2 analyticall!
 ! R87   R(44,50)                1.5664         calculate D2E/DX2 analyticall!
 ! R88   R(44,84)                1.1096         calculate D2E/DX2 analyticall!
 ! R89   R(45,85)                1.103          calculate D2E/DX2 analyticall!
 ! R90   R(45,86)                1.1054         calculate D2E/DX2 analyticall!
 ! R91   R(45,87)                1.103          calculate D2E/DX2 analyticall!
 ! R92   R(46,88)                1.1006         calculate D2E/DX2 analyticall!
 ! R93   R(46,89)                1.1004         calculate D2E/DX2 analyticall!
 ! R94   R(46,90)                1.1006         calculate D2E/DX2 analyticall!
 ! R95   R(47,91)                1.1022         calculate D2E/DX2 analyticall!
 ! R96   R(47,92)                1.1036         calculate D2E/DX2 analyticall!
 ! R97   R(47,93)                1.1044         calculate D2E/DX2 analyticall!
 ! R98   R(48,94)                1.1007         calculate D2E/DX2 analyticall!
 ! R99   R(48,95)                1.101          calculate D2E/DX2 analyticall!
 ! R100  R(48,96)                1.1009         calculate D2E/DX2 analyticall!
 ! R101  R(49,97)                1.1012         calculate D2E/DX2 analyticall!
 ! R102  R(49,98)                1.101          calculate D2E/DX2 analyticall!
 ! R103  R(49,99)                1.1017         calculate D2E/DX2 analyticall!
 ! R104  R(50,100)               1.1009         calculate D2E/DX2 analyticall!
 ! R105  R(50,101)               1.1016         calculate D2E/DX2 analyticall!
 ! R106  R(50,102)               1.1015         calculate D2E/DX2 analyticall!
 ! R107  R(51,103)               1.1012         calculate D2E/DX2 analyticall!
 ! R108  R(51,104)               1.1028         calculate D2E/DX2 analyticall!
 ! R109  R(51,105)               1.1004         calculate D2E/DX2 analyticall!
 ! R110  R(52,106)               1.1007         calculate D2E/DX2 analyticall!
 ! R111  R(52,107)               1.1007         calculate D2E/DX2 analyticall!
 ! R112  R(52,108)               1.1003         calculate D2E/DX2 analyticall!
 ! R113  R(53,109)               1.0961         calculate D2E/DX2 analyticall!
 ! R114  R(53,110)               1.0952         calculate D2E/DX2 analyticall!
 ! R115  R(53,111)               1.0965         calculate D2E/DX2 analyticall!
 ! R116  R(54,112)               1.0923         calculate D2E/DX2 analyticall!
 ! R117  R(54,113)               1.0973         calculate D2E/DX2 analyticall!
 ! R118  R(54,114)               1.097          calculate D2E/DX2 analyticall!
 ! A1    A(4,1,16)             115.3455         calculate D2E/DX2 analyticall!
 ! A2    A(3,2,5)              149.1183         calculate D2E/DX2 analyticall!
 ! A3    A(3,2,6)              104.9723         calculate D2E/DX2 analyticall!
 ! A4    A(3,2,15)              74.3098         calculate D2E/DX2 analyticall!
 ! A5    A(3,2,19)              77.1183         calculate D2E/DX2 analyticall!
 ! A6    A(5,2,6)               87.9297         calculate D2E/DX2 analyticall!
 ! A7    A(5,2,15)              88.0965         calculate D2E/DX2 analyticall!
 ! A8    A(5,2,19)             128.5173         calculate D2E/DX2 analyticall!
 ! A9    A(6,2,15)             169.8572         calculate D2E/DX2 analyticall!
 ! A10   A(6,2,19)             101.3018         calculate D2E/DX2 analyticall!
 ! A11   A(15,2,19)             88.4616         calculate D2E/DX2 analyticall!
 ! A12   A(2,3,13)             115.9615         calculate D2E/DX2 analyticall!
 ! A13   A(1,4,7)              124.2069         calculate D2E/DX2 analyticall!
 ! A14   A(1,4,14)             109.7711         calculate D2E/DX2 analyticall!
 ! A15   A(7,4,14)             125.9978         calculate D2E/DX2 analyticall!
 ! A16   A(2,5,8)              127.7568         calculate D2E/DX2 analyticall!
 ! A17   A(2,5,29)             114.1326         calculate D2E/DX2 analyticall!
 ! A18   A(8,5,29)             118.1106         calculate D2E/DX2 analyticall!
 ! A19   A(2,6,10)             128.1534         calculate D2E/DX2 analyticall!
 ! A20   A(2,6,30)             111.0404         calculate D2E/DX2 analyticall!
 ! A21   A(10,6,30)            120.653          calculate D2E/DX2 analyticall!
 ! A22   A(5,8,9)              124.2691         calculate D2E/DX2 analyticall!
 ! A23   A(5,8,53)             119.2501         calculate D2E/DX2 analyticall!
 ! A24   A(9,8,53)             116.4807         calculate D2E/DX2 analyticall!
 ! A25   A(8,9,10)             127.8768         calculate D2E/DX2 analyticall!
 ! A26   A(8,9,55)             116.3349         calculate D2E/DX2 analyticall!
 ! A27   A(10,9,55)            115.7878         calculate D2E/DX2 analyticall!
 ! A28   A(6,10,9)             123.6946         calculate D2E/DX2 analyticall!
 ! A29   A(6,10,54)            121.817          calculate D2E/DX2 analyticall!
 ! A30   A(9,10,54)            114.4858         calculate D2E/DX2 analyticall!
 ! A31   A(12,11,14)           117.645          calculate D2E/DX2 analyticall!
 ! A32   A(11,12,13)           116.0493         calculate D2E/DX2 analyticall!
 ! A33   A(11,12,15)           122.926          calculate D2E/DX2 analyticall!
 ! A34   A(13,12,15)           120.8972         calculate D2E/DX2 analyticall!
 ! A35   A(3,13,12)            108.039          calculate D2E/DX2 analyticall!
 ! A36   A(3,13,27)            115.859          calculate D2E/DX2 analyticall!
 ! A37   A(3,13,56)            109.4186         calculate D2E/DX2 analyticall!
 ! A38   A(12,13,27)           112.9769         calculate D2E/DX2 analyticall!
 ! A39   A(12,13,56)           103.8026         calculate D2E/DX2 analyticall!
 ! A40   A(27,13,56)           106.0129         calculate D2E/DX2 analyticall!
 ! A41   A(4,14,11)            109.4276         calculate D2E/DX2 analyticall!
 ! A42   A(4,14,28)            111.3386         calculate D2E/DX2 analyticall!
 ! A43   A(4,14,57)            108.4751         calculate D2E/DX2 analyticall!
 ! A44   A(11,14,28)           106.3554         calculate D2E/DX2 analyticall!
 ! A45   A(11,14,57)           110.5622         calculate D2E/DX2 analyticall!
 ! A46   A(28,14,57)           110.6781         calculate D2E/DX2 analyticall!
 ! A47   A(2,15,12)            110.7221         calculate D2E/DX2 analyticall!
 ! A48   A(1,16,58)            110.8223         calculate D2E/DX2 analyticall!
 ! A49   A(1,16,59)            109.7399         calculate D2E/DX2 analyticall!
 ! A50   A(1,16,60)            105.6088         calculate D2E/DX2 analyticall!
 ! A51   A(58,16,59)           109.3354         calculate D2E/DX2 analyticall!
 ! A52   A(58,16,60)           110.7466         calculate D2E/DX2 analyticall!
 ! A53   A(59,16,60)           110.542          calculate D2E/DX2 analyticall!
 ! A54   A(18,17,22)           114.6313         calculate D2E/DX2 analyticall!
 ! A55   A(17,18,19)           120.8218         calculate D2E/DX2 analyticall!
 ! A56   A(17,18,23)           112.4156         calculate D2E/DX2 analyticall!
 ! A57   A(19,18,23)           121.5185         calculate D2E/DX2 analyticall!
 ! A58   A(2,19,18)            108.1705         calculate D2E/DX2 analyticall!
 ! A59   A(21,20,23)           122.5408         calculate D2E/DX2 analyticall!
 ! A60   A(20,21,22)           119.3936         calculate D2E/DX2 analyticall!
 ! A61   A(20,21,24)           120.2648         calculate D2E/DX2 analyticall!
 ! A62   A(22,21,24)           120.2562         calculate D2E/DX2 analyticall!
 ! A63   A(17,22,21)           114.2553         calculate D2E/DX2 analyticall!
 ! A64   A(17,22,25)           108.2576         calculate D2E/DX2 analyticall!
 ! A65   A(17,22,61)           107.3691         calculate D2E/DX2 analyticall!
 ! A66   A(21,22,25)           111.4521         calculate D2E/DX2 analyticall!
 ! A67   A(21,22,61)           105.838          calculate D2E/DX2 analyticall!
 ! A68   A(25,22,61)           109.507          calculate D2E/DX2 analyticall!
 ! A69   A(18,23,20)           105.6344         calculate D2E/DX2 analyticall!
 ! A70   A(18,23,26)           118.2058         calculate D2E/DX2 analyticall!
 ! A71   A(18,23,62)           109.5668         calculate D2E/DX2 analyticall!
 ! A72   A(20,23,26)           109.2553         calculate D2E/DX2 analyticall!
 ! A73   A(20,23,62)           104.1095         calculate D2E/DX2 analyticall!
 ! A74   A(26,23,62)           109.1176         calculate D2E/DX2 analyticall!
 ! A75   A(22,25,63)           109.1433         calculate D2E/DX2 analyticall!
 ! A76   A(22,25,64)           109.1177         calculate D2E/DX2 analyticall!
 ! A77   A(22,25,65)           110.6594         calculate D2E/DX2 analyticall!
 ! A78   A(63,25,64)           110.0188         calculate D2E/DX2 analyticall!
 ! A79   A(63,25,65)           108.6418         calculate D2E/DX2 analyticall!
 ! A80   A(64,25,65)           109.2507         calculate D2E/DX2 analyticall!
 ! A81   A(23,26,66)           107.92           calculate D2E/DX2 analyticall!
 ! A82   A(23,26,67)           112.4935         calculate D2E/DX2 analyticall!
 ! A83   A(23,26,68)           108.344          calculate D2E/DX2 analyticall!
 ! A84   A(66,26,67)           109.0062         calculate D2E/DX2 analyticall!
 ! A85   A(66,26,68)           108.2543         calculate D2E/DX2 analyticall!
 ! A86   A(67,26,68)           110.6991         calculate D2E/DX2 analyticall!
 ! A87   A(13,27,69)           110.4412         calculate D2E/DX2 analyticall!
 ! A88   A(13,27,70)           108.75           calculate D2E/DX2 analyticall!
 ! A89   A(13,27,71)           111.2203         calculate D2E/DX2 analyticall!
 ! A90   A(69,27,70)           108.6412         calculate D2E/DX2 analyticall!
 ! A91   A(69,27,71)           108.6873         calculate D2E/DX2 analyticall!
 ! A92   A(70,27,71)           109.0529         calculate D2E/DX2 analyticall!
 ! A93   A(14,28,72)           109.8029         calculate D2E/DX2 analyticall!
 ! A94   A(14,28,73)           110.8659         calculate D2E/DX2 analyticall!
 ! A95   A(14,28,74)           109.8256         calculate D2E/DX2 analyticall!
 ! A96   A(72,28,73)           108.5474         calculate D2E/DX2 analyticall!
 ! A97   A(72,28,74)           108.7968         calculate D2E/DX2 analyticall!
 ! A98   A(73,28,74)           108.9599         calculate D2E/DX2 analyticall!
 ! A99   A(5,29,31)            118.7113         calculate D2E/DX2 analyticall!
 ! A100  A(5,29,35)            119.6395         calculate D2E/DX2 analyticall!
 ! A101  A(31,29,35)           121.3565         calculate D2E/DX2 analyticall!
 ! A102  A(6,30,38)            120.1796         calculate D2E/DX2 analyticall!
 ! A103  A(6,30,42)            118.5079         calculate D2E/DX2 analyticall!
 ! A104  A(38,30,42)           121.1555         calculate D2E/DX2 analyticall!
 ! A105  A(29,31,32)           118.2095         calculate D2E/DX2 analyticall!
 ! A106  A(29,31,36)           120.7959         calculate D2E/DX2 analyticall!
 ! A107  A(32,31,36)           120.9946         calculate D2E/DX2 analyticall!
 ! A108  A(31,32,33)           120.9193         calculate D2E/DX2 analyticall!
 ! A109  A(31,32,75)           119.8609         calculate D2E/DX2 analyticall!
 ! A110  A(33,32,75)           119.1802         calculate D2E/DX2 analyticall!
 ! A111  A(32,33,34)           120.0328         calculate D2E/DX2 analyticall!
 ! A112  A(32,33,76)           119.8369         calculate D2E/DX2 analyticall!
 ! A113  A(34,33,76)           120.0965         calculate D2E/DX2 analyticall!
 ! A114  A(33,34,35)           121.0466         calculate D2E/DX2 analyticall!
 ! A115  A(33,34,77)           119.3675         calculate D2E/DX2 analyticall!
 ! A116  A(35,34,77)           119.5835         calculate D2E/DX2 analyticall!
 ! A117  A(29,35,34)           118.3907         calculate D2E/DX2 analyticall!
 ! A118  A(29,35,37)           121.4309         calculate D2E/DX2 analyticall!
 ! A119  A(34,35,37)           120.1757         calculate D2E/DX2 analyticall!
 ! A120  A(31,36,45)           111.4294         calculate D2E/DX2 analyticall!
 ! A121  A(31,36,46)           112.8714         calculate D2E/DX2 analyticall!
 ! A122  A(31,36,78)           107.7656         calculate D2E/DX2 analyticall!
 ! A123  A(45,36,46)           110.3555         calculate D2E/DX2 analyticall!
 ! A124  A(45,36,78)           106.7173         calculate D2E/DX2 analyticall!
 ! A125  A(46,36,78)           107.3918         calculate D2E/DX2 analyticall!
 ! A126  A(35,37,47)           111.4709         calculate D2E/DX2 analyticall!
 ! A127  A(35,37,48)           111.4399         calculate D2E/DX2 analyticall!
 ! A128  A(35,37,79)           107.5411         calculate D2E/DX2 analyticall!
 ! A129  A(47,37,48)           110.7457         calculate D2E/DX2 analyticall!
 ! A130  A(47,37,79)           107.6454         calculate D2E/DX2 analyticall!
 ! A131  A(48,37,79)           107.7977         calculate D2E/DX2 analyticall!
 ! A132  A(30,38,39)           118.0154         calculate D2E/DX2 analyticall!
 ! A133  A(30,38,43)           122.6701         calculate D2E/DX2 analyticall!
 ! A134  A(39,38,43)           119.2745         calculate D2E/DX2 analyticall!
 ! A135  A(38,39,40)           121.1691         calculate D2E/DX2 analyticall!
 ! A136  A(38,39,80)           119.2497         calculate D2E/DX2 analyticall!
 ! A137  A(40,39,80)           119.5611         calculate D2E/DX2 analyticall!
 ! A138  A(39,40,41)           120.1728         calculate D2E/DX2 analyticall!
 ! A139  A(39,40,81)           119.8312         calculate D2E/DX2 analyticall!
 ! A140  A(41,40,81)           119.9677         calculate D2E/DX2 analyticall!
 ! A141  A(40,41,42)           120.9502         calculate D2E/DX2 analyticall!
 ! A142  A(40,41,82)           119.4347         calculate D2E/DX2 analyticall!
 ! A143  A(42,41,82)           119.5941         calculate D2E/DX2 analyticall!
 ! A144  A(30,42,41)           118.4916         calculate D2E/DX2 analyticall!
 ! A145  A(30,42,44)           120.698          calculate D2E/DX2 analyticall!
 ! A146  A(41,42,44)           120.6904         calculate D2E/DX2 analyticall!
 ! A147  A(38,43,51)           112.4226         calculate D2E/DX2 analyticall!
 ! A148  A(38,43,52)           110.6032         calculate D2E/DX2 analyticall!
 ! A149  A(38,43,83)           107.9247         calculate D2E/DX2 analyticall!
 ! A150  A(51,43,52)           109.9407         calculate D2E/DX2 analyticall!
 ! A151  A(51,43,83)           107.6012         calculate D2E/DX2 analyticall!
 ! A152  A(52,43,83)           108.1924         calculate D2E/DX2 analyticall!
 ! A153  A(42,44,49)           113.0657         calculate D2E/DX2 analyticall!
 ! A154  A(42,44,50)           110.644          calculate D2E/DX2 analyticall!
 ! A155  A(42,44,84)           107.0236         calculate D2E/DX2 analyticall!
 ! A156  A(49,44,50)           110.5677         calculate D2E/DX2 analyticall!
 ! A157  A(49,44,84)           108.0024         calculate D2E/DX2 analyticall!
 ! A158  A(50,44,84)           107.2706         calculate D2E/DX2 analyticall!
 ! A159  A(36,45,85)           110.439          calculate D2E/DX2 analyticall!
 ! A160  A(36,45,86)           109.6347         calculate D2E/DX2 analyticall!
 ! A161  A(36,45,87)           111.1597         calculate D2E/DX2 analyticall!
 ! A162  A(85,45,86)           107.7221         calculate D2E/DX2 analyticall!
 ! A163  A(85,45,87)           108.6737         calculate D2E/DX2 analyticall!
 ! A164  A(86,45,87)           109.1335         calculate D2E/DX2 analyticall!
 ! A165  A(36,46,88)           109.4439         calculate D2E/DX2 analyticall!
 ! A166  A(36,46,89)           111.3853         calculate D2E/DX2 analyticall!
 ! A167  A(36,46,90)           110.7982         calculate D2E/DX2 analyticall!
 ! A168  A(88,46,89)           108.0538         calculate D2E/DX2 analyticall!
 ! A169  A(88,46,90)           108.4434         calculate D2E/DX2 analyticall!
 ! A170  A(89,46,90)           108.6286         calculate D2E/DX2 analyticall!
 ! A171  A(37,47,91)           110.0583         calculate D2E/DX2 analyticall!
 ! A172  A(37,47,92)           110.8193         calculate D2E/DX2 analyticall!
 ! A173  A(37,47,93)           110.3371         calculate D2E/DX2 analyticall!
 ! A174  A(91,47,92)           108.3008         calculate D2E/DX2 analyticall!
 ! A175  A(91,47,93)           108.6137         calculate D2E/DX2 analyticall!
 ! A176  A(92,47,93)           108.6492         calculate D2E/DX2 analyticall!
 ! A177  A(37,48,94)           109.8062         calculate D2E/DX2 analyticall!
 ! A178  A(37,48,95)           110.8079         calculate D2E/DX2 analyticall!
 ! A179  A(37,48,96)           110.88           calculate D2E/DX2 analyticall!
 ! A180  A(94,48,95)           108.397          calculate D2E/DX2 analyticall!
 ! A181  A(94,48,96)           108.4123         calculate D2E/DX2 analyticall!
 ! A182  A(95,48,96)           108.4632         calculate D2E/DX2 analyticall!
 ! A183  A(44,49,97)           109.6552         calculate D2E/DX2 analyticall!
 ! A184  A(44,49,98)           111.4978         calculate D2E/DX2 analyticall!
 ! A185  A(44,49,99)           110.0995         calculate D2E/DX2 analyticall!
 ! A186  A(97,49,98)           108.0655         calculate D2E/DX2 analyticall!
 ! A187  A(97,49,99)           108.8922         calculate D2E/DX2 analyticall!
 ! A188  A(98,49,99)           108.5674         calculate D2E/DX2 analyticall!
 ! A189  A(44,50,100)          109.8013         calculate D2E/DX2 analyticall!
 ! A190  A(44,50,101)          110.7855         calculate D2E/DX2 analyticall!
 ! A191  A(44,50,102)          110.706          calculate D2E/DX2 analyticall!
 ! A192  A(100,50,101)         108.338          calculate D2E/DX2 analyticall!
 ! A193  A(100,50,102)         108.6055         calculate D2E/DX2 analyticall!
 ! A194  A(101,50,102)         108.538          calculate D2E/DX2 analyticall!
 ! A195  A(43,51,103)          109.6634         calculate D2E/DX2 analyticall!
 ! A196  A(43,51,104)          110.2278         calculate D2E/DX2 analyticall!
 ! A197  A(43,51,105)          111.2552         calculate D2E/DX2 analyticall!
 ! A198  A(103,51,104)         108.4562         calculate D2E/DX2 analyticall!
 ! A199  A(103,51,105)         108.4727         calculate D2E/DX2 analyticall!
 ! A200  A(104,51,105)         108.6997         calculate D2E/DX2 analyticall!
 ! A201  A(43,52,106)          109.6846         calculate D2E/DX2 analyticall!
 ! A202  A(43,52,107)          110.5965         calculate D2E/DX2 analyticall!
 ! A203  A(43,52,108)          111.2829         calculate D2E/DX2 analyticall!
 ! A204  A(106,52,107)         108.3209         calculate D2E/DX2 analyticall!
 ! A205  A(106,52,108)         108.517          calculate D2E/DX2 analyticall!
 ! A206  A(107,52,108)         108.3605         calculate D2E/DX2 analyticall!
 ! A207  A(8,53,109)           111.9385         calculate D2E/DX2 analyticall!
 ! A208  A(8,53,110)           110.8272         calculate D2E/DX2 analyticall!
 ! A209  A(8,53,111)           110.6698         calculate D2E/DX2 analyticall!
 ! A210  A(109,53,110)         107.9062         calculate D2E/DX2 analyticall!
 ! A211  A(109,53,111)         107.3301         calculate D2E/DX2 analyticall!
 ! A212  A(110,53,111)         108.0029         calculate D2E/DX2 analyticall!
 ! A213  A(10,54,112)          112.9733         calculate D2E/DX2 analyticall!
 ! A214  A(10,54,113)          110.164          calculate D2E/DX2 analyticall!
 ! A215  A(10,54,114)          109.8034         calculate D2E/DX2 analyticall!
 ! A216  A(112,54,113)         108.1989         calculate D2E/DX2 analyticall!
 ! A217  A(112,54,114)         108.5695         calculate D2E/DX2 analyticall!
 ! A218  A(113,54,114)         106.9318         calculate D2E/DX2 analyticall!
 ! D1    D(16,1,4,7)            -3.4838         calculate D2E/DX2 analyticall!
 ! D2    D(16,1,4,14)          178.213          calculate D2E/DX2 analyticall!
 ! D3    D(4,1,16,58)           53.7567         calculate D2E/DX2 analyticall!
 ! D4    D(4,1,16,59)          -67.0951         calculate D2E/DX2 analyticall!
 ! D5    D(4,1,16,60)          173.74           calculate D2E/DX2 analyticall!
 ! D6    D(5,2,3,13)            28.4345         calculate D2E/DX2 analyticall!
 ! D7    D(6,2,3,13)           140.4163         calculate D2E/DX2 analyticall!
 ! D8    D(15,2,3,13)          -29.0918         calculate D2E/DX2 analyticall!
 ! D9    D(19,2,3,13)         -121.134          calculate D2E/DX2 analyticall!
 ! D10   D(3,2,5,8)            122.5309         calculate D2E/DX2 analyticall!
 ! D11   D(3,2,5,29)           -57.3786         calculate D2E/DX2 analyticall!
 ! D12   D(6,2,5,8)              6.2206         calculate D2E/DX2 analyticall!
 ! D13   D(6,2,5,29)          -173.6889         calculate D2E/DX2 analyticall!
 ! D14   D(15,2,5,8)           176.8867         calculate D2E/DX2 analyticall!
 ! D15   D(15,2,5,29)           -3.0228         calculate D2E/DX2 analyticall!
 ! D16   D(19,2,5,8)           -96.598          calculate D2E/DX2 analyticall!
 ! D17   D(19,2,5,29)           83.4924         calculate D2E/DX2 analyticall!
 ! D18   D(3,2,6,10)          -154.9655         calculate D2E/DX2 analyticall!
 ! D19   D(3,2,6,30)            29.571          calculate D2E/DX2 analyticall!
 ! D20   D(5,2,6,10)            -3.4073         calculate D2E/DX2 analyticall!
 ! D21   D(5,2,6,30)          -178.8708         calculate D2E/DX2 analyticall!
 ! D22   D(15,2,6,10)          -70.4028         calculate D2E/DX2 analyticall!
 ! D23   D(15,2,6,30)          114.1337         calculate D2E/DX2 analyticall!
 ! D24   D(19,2,6,10)          125.5143         calculate D2E/DX2 analyticall!
 ! D25   D(19,2,6,30)          -49.9492         calculate D2E/DX2 analyticall!
 ! D26   D(3,2,15,12)           19.5604         calculate D2E/DX2 analyticall!
 ! D27   D(5,2,15,12)         -134.7655         calculate D2E/DX2 analyticall!
 ! D28   D(6,2,15,12)          -67.7836         calculate D2E/DX2 analyticall!
 ! D29   D(19,2,15,12)          96.6101         calculate D2E/DX2 analyticall!
 ! D30   D(3,2,19,18)            3.8391         calculate D2E/DX2 analyticall!
 ! D31   D(5,2,19,18)         -156.7543         calculate D2E/DX2 analyticall!
 ! D32   D(6,2,19,18)          106.816          calculate D2E/DX2 analyticall!
 ! D33   D(15,2,19,18)         -70.4147         calculate D2E/DX2 analyticall!
 ! D34   D(2,3,13,12)           32.935          calculate D2E/DX2 analyticall!
 ! D35   D(2,3,13,27)          160.8194         calculate D2E/DX2 analyticall!
 ! D36   D(2,3,13,56)          -79.4514         calculate D2E/DX2 analyticall!
 ! D37   D(1,4,14,11)         -170.5045         calculate D2E/DX2 analyticall!
 ! D38   D(1,4,14,28)           72.2143         calculate D2E/DX2 analyticall!
 ! D39   D(1,4,14,57)          -49.8068         calculate D2E/DX2 analyticall!
 ! D40   D(7,4,14,11)           11.2299         calculate D2E/DX2 analyticall!
 ! D41   D(7,4,14,28)         -106.0512         calculate D2E/DX2 analyticall!
 ! D42   D(7,4,14,57)          131.9276         calculate D2E/DX2 analyticall!
 ! D43   D(2,5,8,9)             -6.1915         calculate D2E/DX2 analyticall!
 ! D44   D(2,5,8,53)           173.7304         calculate D2E/DX2 analyticall!
 ! D45   D(29,5,8,9)           173.7148         calculate D2E/DX2 analyticall!
 ! D46   D(29,5,8,53)           -6.3632         calculate D2E/DX2 analyticall!
 ! D47   D(2,5,29,31)           94.0429         calculate D2E/DX2 analyticall!
 ! D48   D(2,5,29,35)          -79.8287         calculate D2E/DX2 analyticall!
 ! D49   D(8,5,29,31)          -85.876          calculate D2E/DX2 analyticall!
 ! D50   D(8,5,29,35)          100.2524         calculate D2E/DX2 analyticall!
 ! D51   D(2,6,10,9)             0.3617         calculate D2E/DX2 analyticall!
 ! D52   D(2,6,10,54)         -179.0191         calculate D2E/DX2 analyticall!
 ! D53   D(30,6,10,9)          175.4391         calculate D2E/DX2 analyticall!
 ! D54   D(30,6,10,54)          -3.9418         calculate D2E/DX2 analyticall!
 ! D55   D(2,6,30,38)           96.6128         calculate D2E/DX2 analyticall!
 ! D56   D(2,6,30,42)          -78.8852         calculate D2E/DX2 analyticall!
 ! D57   D(10,6,30,38)         -79.2411         calculate D2E/DX2 analyticall!
 ! D58   D(10,6,30,42)         105.2608         calculate D2E/DX2 analyticall!
 ! D59   D(5,8,9,10)             1.0421         calculate D2E/DX2 analyticall!
 ! D60   D(5,8,9,55)          -178.6725         calculate D2E/DX2 analyticall!
 ! D61   D(53,8,9,10)         -178.8818         calculate D2E/DX2 analyticall!
 ! D62   D(53,8,9,55)            1.4036         calculate D2E/DX2 analyticall!
 ! D63   D(5,8,53,109)          62.6428         calculate D2E/DX2 analyticall!
 ! D64   D(5,8,53,110)        -176.8361         calculate D2E/DX2 analyticall!
 ! D65   D(5,8,53,111)         -57.0386         calculate D2E/DX2 analyticall!
 ! D66   D(9,8,53,109)        -117.4292         calculate D2E/DX2 analyticall!
 ! D67   D(9,8,53,110)           3.0918         calculate D2E/DX2 analyticall!
 ! D68   D(9,8,53,111)         122.8894         calculate D2E/DX2 analyticall!
 ! D69   D(8,9,10,6)             2.0531         calculate D2E/DX2 analyticall!
 ! D70   D(8,9,10,54)         -178.525          calculate D2E/DX2 analyticall!
 ! D71   D(55,9,10,6)         -178.2309         calculate D2E/DX2 analyticall!
 ! D72   D(55,9,10,54)           1.191          calculate D2E/DX2 analyticall!
 ! D73   D(6,10,54,112)        -10.908          calculate D2E/DX2 analyticall!
 ! D74   D(6,10,54,113)        110.2259         calculate D2E/DX2 analyticall!
 ! D75   D(6,10,54,114)       -132.2591         calculate D2E/DX2 analyticall!
 ! D76   D(9,10,54,112)        169.658          calculate D2E/DX2 analyticall!
 ! D77   D(9,10,54,113)        -69.208          calculate D2E/DX2 analyticall!
 ! D78   D(9,10,54,114)         48.3069         calculate D2E/DX2 analyticall!
 ! D79   D(14,11,12,13)        176.7912         calculate D2E/DX2 analyticall!
 ! D80   D(14,11,12,15)          0.8681         calculate D2E/DX2 analyticall!
 ! D81   D(12,11,14,4)          72.6744         calculate D2E/DX2 analyticall!
 ! D82   D(12,11,14,28)       -166.9526         calculate D2E/DX2 analyticall!
 ! D83   D(12,11,14,57)        -46.7448         calculate D2E/DX2 analyticall!
 ! D84   D(11,12,13,3)         169.4008         calculate D2E/DX2 analyticall!
 ! D85   D(11,12,13,27)         39.883          calculate D2E/DX2 analyticall!
 ! D86   D(11,12,13,56)        -74.4915         calculate D2E/DX2 analyticall!
 ! D87   D(15,12,13,3)         -14.5871         calculate D2E/DX2 analyticall!
 ! D88   D(15,12,13,27)       -144.1048         calculate D2E/DX2 analyticall!
 ! D89   D(15,12,13,56)        101.5206         calculate D2E/DX2 analyticall!
 ! D90   D(11,12,15,2)         167.5614         calculate D2E/DX2 analyticall!
 ! D91   D(13,12,15,2)          -8.1698         calculate D2E/DX2 analyticall!
 ! D92   D(3,13,27,69)         175.2288         calculate D2E/DX2 analyticall!
 ! D93   D(3,13,27,70)          56.1011         calculate D2E/DX2 analyticall!
 ! D94   D(3,13,27,71)         -64.0058         calculate D2E/DX2 analyticall!
 ! D95   D(12,13,27,69)        -59.3711         calculate D2E/DX2 analyticall!
 ! D96   D(12,13,27,70)       -178.4988         calculate D2E/DX2 analyticall!
 ! D97   D(12,13,27,71)         61.3943         calculate D2E/DX2 analyticall!
 ! D98   D(56,13,27,69)         53.6631         calculate D2E/DX2 analyticall!
 ! D99   D(56,13,27,70)        -65.4647         calculate D2E/DX2 analyticall!
 ! D100  D(56,13,27,71)        174.4285         calculate D2E/DX2 analyticall!
 ! D101  D(4,14,28,72)         179.7845         calculate D2E/DX2 analyticall!
 ! D102  D(4,14,28,73)          59.8463         calculate D2E/DX2 analyticall!
 ! D103  D(4,14,28,74)         -60.6208         calculate D2E/DX2 analyticall!
 ! D104  D(11,14,28,72)         60.6539         calculate D2E/DX2 analyticall!
 ! D105  D(11,14,28,73)        -59.2844         calculate D2E/DX2 analyticall!
 ! D106  D(11,14,28,74)       -179.7515         calculate D2E/DX2 analyticall!
 ! D107  D(57,14,28,72)        -59.479          calculate D2E/DX2 analyticall!
 ! D108  D(57,14,28,73)       -179.4172         calculate D2E/DX2 analyticall!
 ! D109  D(57,14,28,74)         60.1157         calculate D2E/DX2 analyticall!
 ! D110  D(22,17,18,19)         94.1897         calculate D2E/DX2 analyticall!
 ! D111  D(22,17,18,23)        -60.5812         calculate D2E/DX2 analyticall!
 ! D112  D(18,17,22,21)         31.2225         calculate D2E/DX2 analyticall!
 ! D113  D(18,17,22,25)        156.0455         calculate D2E/DX2 analyticall!
 ! D114  D(18,17,22,61)        -85.8156         calculate D2E/DX2 analyticall!
 ! D115  D(17,18,19,2)          95.8728         calculate D2E/DX2 analyticall!
 ! D116  D(23,18,19,2)        -111.658          calculate D2E/DX2 analyticall!
 ! D117  D(17,18,23,20)         60.0685         calculate D2E/DX2 analyticall!
 ! D118  D(17,18,23,26)        -62.5256         calculate D2E/DX2 analyticall!
 ! D119  D(17,18,23,62)        171.6685         calculate D2E/DX2 analyticall!
 ! D120  D(19,18,23,20)        -94.5029         calculate D2E/DX2 analyticall!
 ! D121  D(19,18,23,26)        142.9031         calculate D2E/DX2 analyticall!
 ! D122  D(19,18,23,62)         17.0971         calculate D2E/DX2 analyticall!
 ! D123  D(23,20,21,22)         11.1084         calculate D2E/DX2 analyticall!
 ! D124  D(23,20,21,24)       -172.2436         calculate D2E/DX2 analyticall!
 ! D125  D(21,20,23,18)        -35.3775         calculate D2E/DX2 analyticall!
 ! D126  D(21,20,23,26)         92.7665         calculate D2E/DX2 analyticall!
 ! D127  D(21,20,23,62)       -150.7774         calculate D2E/DX2 analyticall!
 ! D128  D(20,21,22,17)         -5.9716         calculate D2E/DX2 analyticall!
 ! D129  D(20,21,22,25)       -129.082          calculate D2E/DX2 analyticall!
 ! D130  D(20,21,22,61)        111.9443         calculate D2E/DX2 analyticall!
 ! D131  D(24,21,22,17)        177.3801         calculate D2E/DX2 analyticall!
 ! D132  D(24,21,22,25)         54.2698         calculate D2E/DX2 analyticall!
 ! D133  D(24,21,22,61)        -64.704          calculate D2E/DX2 analyticall!
 ! D134  D(17,22,25,63)        176.4044         calculate D2E/DX2 analyticall!
 ! D135  D(17,22,25,64)         56.1499         calculate D2E/DX2 analyticall!
 ! D136  D(17,22,25,65)        -64.0903         calculate D2E/DX2 analyticall!
 ! D137  D(21,22,25,63)        -57.125          calculate D2E/DX2 analyticall!
 ! D138  D(21,22,25,64)       -177.3795         calculate D2E/DX2 analyticall!
 ! D139  D(21,22,25,65)         62.3803         calculate D2E/DX2 analyticall!
 ! D140  D(61,22,25,63)         59.6375         calculate D2E/DX2 analyticall!
 ! D141  D(61,22,25,64)        -60.617          calculate D2E/DX2 analyticall!
 ! D142  D(61,22,25,65)        179.1428         calculate D2E/DX2 analyticall!
 ! D143  D(18,23,26,66)        162.8012         calculate D2E/DX2 analyticall!
 ! D144  D(18,23,26,67)         42.5122         calculate D2E/DX2 analyticall!
 ! D145  D(18,23,26,68)        -80.1948         calculate D2E/DX2 analyticall!
 ! D146  D(20,23,26,66)         42.052          calculate D2E/DX2 analyticall!
 ! D147  D(20,23,26,67)        -78.237          calculate D2E/DX2 analyticall!
 ! D148  D(20,23,26,68)        159.056          calculate D2E/DX2 analyticall!
 ! D149  D(62,23,26,66)        -71.1751         calculate D2E/DX2 analyticall!
 ! D150  D(62,23,26,67)        168.5359         calculate D2E/DX2 analyticall!
 ! D151  D(62,23,26,68)         45.8289         calculate D2E/DX2 analyticall!
 ! D152  D(5,29,31,32)        -171.2981         calculate D2E/DX2 analyticall!
 ! D153  D(5,29,31,36)           8.6763         calculate D2E/DX2 analyticall!
 ! D154  D(35,29,31,32)          2.4639         calculate D2E/DX2 analyticall!
 ! D155  D(35,29,31,36)       -177.5617         calculate D2E/DX2 analyticall!
 ! D156  D(5,29,35,34)         172.1526         calculate D2E/DX2 analyticall!
 ! D157  D(5,29,35,37)          -7.2518         calculate D2E/DX2 analyticall!
 ! D158  D(31,29,35,34)         -1.5524         calculate D2E/DX2 analyticall!
 ! D159  D(31,29,35,37)        179.0431         calculate D2E/DX2 analyticall!
 ! D160  D(6,30,38,39)        -173.2069         calculate D2E/DX2 analyticall!
 ! D161  D(6,30,38,43)           9.1119         calculate D2E/DX2 analyticall!
 ! D162  D(42,30,38,39)          2.1699         calculate D2E/DX2 analyticall!
 ! D163  D(42,30,38,43)       -175.5112         calculate D2E/DX2 analyticall!
 ! D164  D(6,30,42,41)         173.9189         calculate D2E/DX2 analyticall!
 ! D165  D(6,30,42,44)         -10.0353         calculate D2E/DX2 analyticall!
 ! D166  D(38,30,42,41)         -1.5333         calculate D2E/DX2 analyticall!
 ! D167  D(38,30,42,44)        174.5125         calculate D2E/DX2 analyticall!
 ! D168  D(29,31,32,33)         -1.5308         calculate D2E/DX2 analyticall!
 ! D169  D(29,31,32,75)       -179.2233         calculate D2E/DX2 analyticall!
 ! D170  D(36,31,32,33)        178.4948         calculate D2E/DX2 analyticall!
 ! D171  D(36,31,32,75)          0.8023         calculate D2E/DX2 analyticall!
 ! D172  D(29,31,36,45)        -87.3446         calculate D2E/DX2 analyticall!
 ! D173  D(29,31,36,46)        147.8267         calculate D2E/DX2 analyticall!
 ! D174  D(29,31,36,78)         29.4146         calculate D2E/DX2 analyticall!
 ! D175  D(32,31,36,45)         92.6291         calculate D2E/DX2 analyticall!
 ! D176  D(32,31,36,46)        -32.1996         calculate D2E/DX2 analyticall!
 ! D177  D(32,31,36,78)       -150.6117         calculate D2E/DX2 analyticall!
 ! D178  D(31,32,33,34)         -0.2822         calculate D2E/DX2 analyticall!
 ! D179  D(31,32,33,76)       -178.1709         calculate D2E/DX2 analyticall!
 ! D180  D(75,32,33,34)        177.4258         calculate D2E/DX2 analyticall!
 ! D181  D(75,32,33,76)         -0.4629         calculate D2E/DX2 analyticall!
 ! D182  D(32,33,34,35)          1.2418         calculate D2E/DX2 analyticall!
 ! D183  D(32,33,34,77)       -178.1797         calculate D2E/DX2 analyticall!
 ! D184  D(76,33,34,35)        179.1249         calculate D2E/DX2 analyticall!
 ! D185  D(76,33,34,77)         -0.2965         calculate D2E/DX2 analyticall!
 ! D186  D(33,34,35,29)         -0.3278         calculate D2E/DX2 analyticall!
 ! D187  D(33,34,35,37)        179.0843         calculate D2E/DX2 analyticall!
 ! D188  D(77,34,35,29)        179.0924         calculate D2E/DX2 analyticall!
 ! D189  D(77,34,35,37)         -1.4954         calculate D2E/DX2 analyticall!
 ! D190  D(29,35,37,47)        117.67           calculate D2E/DX2 analyticall!
 ! D191  D(29,35,37,48)       -118.0393         calculate D2E/DX2 analyticall!
 ! D192  D(29,35,37,79)         -0.101          calculate D2E/DX2 analyticall!
 ! D193  D(34,35,37,47)        -61.7239         calculate D2E/DX2 analyticall!
 ! D194  D(34,35,37,48)         62.5667         calculate D2E/DX2 analyticall!
 ! D195  D(34,35,37,79)       -179.4949         calculate D2E/DX2 analyticall!
 ! D196  D(31,36,45,85)       -176.911          calculate D2E/DX2 analyticall!
 ! D197  D(31,36,45,86)         64.543          calculate D2E/DX2 analyticall!
 ! D198  D(31,36,45,87)        -56.2045         calculate D2E/DX2 analyticall!
 ! D199  D(46,36,45,85)        -50.6861         calculate D2E/DX2 analyticall!
 ! D200  D(46,36,45,86)       -169.232          calculate D2E/DX2 analyticall!
 ! D201  D(46,36,45,87)         70.0204         calculate D2E/DX2 analyticall!
 ! D202  D(78,36,45,85)         65.6934         calculate D2E/DX2 analyticall!
 ! D203  D(78,36,45,86)        -52.8526         calculate D2E/DX2 analyticall!
 ! D204  D(78,36,45,87)       -173.6001         calculate D2E/DX2 analyticall!
 ! D205  D(31,36,46,88)       -171.1286         calculate D2E/DX2 analyticall!
 ! D206  D(31,36,46,89)         69.4522         calculate D2E/DX2 analyticall!
 ! D207  D(31,36,46,90)        -51.5924         calculate D2E/DX2 analyticall!
 ! D208  D(45,36,46,88)         63.4598         calculate D2E/DX2 analyticall!
 ! D209  D(45,36,46,89)        -55.9594         calculate D2E/DX2 analyticall!
 ! D210  D(45,36,46,90)       -177.004          calculate D2E/DX2 analyticall!
 ! D211  D(78,36,46,88)        -52.4986         calculate D2E/DX2 analyticall!
 ! D212  D(78,36,46,89)       -171.9178         calculate D2E/DX2 analyticall!
 ! D213  D(78,36,46,90)         67.0376         calculate D2E/DX2 analyticall!
 ! D214  D(35,37,47,91)       -175.6731         calculate D2E/DX2 analyticall!
 ! D215  D(35,37,47,92)         64.56           calculate D2E/DX2 analyticall!
 ! D216  D(35,37,47,93)        -55.824          calculate D2E/DX2 analyticall!
 ! D217  D(48,37,47,91)         59.6464         calculate D2E/DX2 analyticall!
 ! D218  D(48,37,47,92)        -60.1204         calculate D2E/DX2 analyticall!
 ! D219  D(48,37,47,93)        179.4956         calculate D2E/DX2 analyticall!
 ! D220  D(79,37,47,91)        -57.965          calculate D2E/DX2 analyticall!
 ! D221  D(79,37,47,92)       -177.7319         calculate D2E/DX2 analyticall!
 ! D222  D(79,37,47,93)         61.8841         calculate D2E/DX2 analyticall!
 ! D223  D(35,37,48,94)        176.9405         calculate D2E/DX2 analyticall!
 ! D224  D(35,37,48,95)         57.2239         calculate D2E/DX2 analyticall!
 ! D225  D(35,37,48,96)        -63.2781         calculate D2E/DX2 analyticall!
 ! D226  D(47,37,48,94)        -58.3614         calculate D2E/DX2 analyticall!
 ! D227  D(47,37,48,95)       -178.078          calculate D2E/DX2 analyticall!
 ! D228  D(47,37,48,96)         61.4199         calculate D2E/DX2 analyticall!
 ! D229  D(79,37,48,94)         59.1568         calculate D2E/DX2 analyticall!
 ! D230  D(79,37,48,95)        -60.5598         calculate D2E/DX2 analyticall!
 ! D231  D(79,37,48,96)        178.9381         calculate D2E/DX2 analyticall!
 ! D232  D(30,38,39,40)         -0.8658         calculate D2E/DX2 analyticall!
 ! D233  D(30,38,39,80)       -179.2263         calculate D2E/DX2 analyticall!
 ! D234  D(43,38,39,40)        176.8965         calculate D2E/DX2 analyticall!
 ! D235  D(43,38,39,80)         -1.464          calculate D2E/DX2 analyticall!
 ! D236  D(30,38,43,51)       -120.299          calculate D2E/DX2 analyticall!
 ! D237  D(30,38,43,52)        116.3837         calculate D2E/DX2 analyticall!
 ! D238  D(30,38,43,83)         -1.791          calculate D2E/DX2 analyticall!
 ! D239  D(39,38,43,51)         62.0478         calculate D2E/DX2 analyticall!
 ! D240  D(39,38,43,52)        -61.2694         calculate D2E/DX2 analyticall!
 ! D241  D(39,38,43,83)       -179.4441         calculate D2E/DX2 analyticall!
 ! D242  D(38,39,40,41)         -1.0624         calculate D2E/DX2 analyticall!
 ! D243  D(38,39,40,81)       -179.1254         calculate D2E/DX2 analyticall!
 ! D244  D(80,39,40,41)        177.293          calculate D2E/DX2 analyticall!
 ! D245  D(80,39,40,81)         -0.77           calculate D2E/DX2 analyticall!
 ! D246  D(39,40,41,42)          1.7383         calculate D2E/DX2 analyticall!
 ! D247  D(39,40,41,82)       -176.587          calculate D2E/DX2 analyticall!
 ! D248  D(81,40,41,42)        179.7986         calculate D2E/DX2 analyticall!
 ! D249  D(81,40,41,82)          1.4733         calculate D2E/DX2 analyticall!
 ! D250  D(40,41,42,30)         -0.4446         calculate D2E/DX2 analyticall!
 ! D251  D(40,41,42,44)       -176.4907         calculate D2E/DX2 analyticall!
 ! D252  D(82,41,42,30)        177.878          calculate D2E/DX2 analyticall!
 ! D253  D(82,41,42,44)          1.8319         calculate D2E/DX2 analyticall!
 ! D254  D(30,42,44,49)        145.627          calculate D2E/DX2 analyticall!
 ! D255  D(30,42,44,50)        -89.7294         calculate D2E/DX2 analyticall!
 ! D256  D(30,42,44,84)         26.8315         calculate D2E/DX2 analyticall!
 ! D257  D(41,42,44,49)        -38.4145         calculate D2E/DX2 analyticall!
 ! D258  D(41,42,44,50)         86.2292         calculate D2E/DX2 analyticall!
 ! D259  D(41,42,44,84)       -157.21           calculate D2E/DX2 analyticall!
 ! D260  D(38,43,51,103)      -179.142          calculate D2E/DX2 analyticall!
 ! D261  D(38,43,51,104)        61.5207         calculate D2E/DX2 analyticall!
 ! D262  D(38,43,51,105)       -59.14           calculate D2E/DX2 analyticall!
 ! D263  D(52,43,51,103)       -55.4551         calculate D2E/DX2 analyticall!
 ! D264  D(52,43,51,104)      -174.7924         calculate D2E/DX2 analyticall!
 ! D265  D(52,43,51,105)        64.5469         calculate D2E/DX2 analyticall!
 ! D266  D(83,43,51,103)        62.1599         calculate D2E/DX2 analyticall!
 ! D267  D(83,43,51,104)       -57.1774         calculate D2E/DX2 analyticall!
 ! D268  D(83,43,51,105)      -177.8382         calculate D2E/DX2 analyticall!
 ! D269  D(38,43,52,106)      -173.9428         calculate D2E/DX2 analyticall!
 ! D270  D(38,43,52,107)        66.6451         calculate D2E/DX2 analyticall!
 ! D271  D(38,43,52,108)       -53.854          calculate D2E/DX2 analyticall!
 ! D272  D(51,43,52,106)        61.3155         calculate D2E/DX2 analyticall!
 ! D273  D(51,43,52,107)       -58.0966         calculate D2E/DX2 analyticall!
 ! D274  D(51,43,52,108)      -178.5956         calculate D2E/DX2 analyticall!
 ! D275  D(83,43,52,106)       -55.9316         calculate D2E/DX2 analyticall!
 ! D276  D(83,43,52,107)      -175.3437         calculate D2E/DX2 analyticall!
 ! D277  D(83,43,52,108)        64.1572         calculate D2E/DX2 analyticall!
 ! D278  D(42,44,49,97)       -171.1603         calculate D2E/DX2 analyticall!
 ! D279  D(42,44,49,98)         69.1971         calculate D2E/DX2 analyticall!
 ! D280  D(42,44,49,99)        -51.3704         calculate D2E/DX2 analyticall!
 ! D281  D(50,44,49,97)         64.1545         calculate D2E/DX2 analyticall!
 ! D282  D(50,44,49,98)        -55.4881         calculate D2E/DX2 analyticall!
 ! D283  D(50,44,49,99)       -176.0556         calculate D2E/DX2 analyticall!
 ! D284  D(84,44,49,97)        -52.9334         calculate D2E/DX2 analyticall!
 ! D285  D(84,44,49,98)       -172.5761         calculate D2E/DX2 analyticall!
 ! D286  D(84,44,49,99)         66.8565         calculate D2E/DX2 analyticall!
 ! D287  D(42,44,50,100)       179.6649         calculate D2E/DX2 analyticall!
 ! D288  D(42,44,50,101)        60.0389         calculate D2E/DX2 analyticall!
 ! D289  D(42,44,50,102)       -60.427          calculate D2E/DX2 analyticall!
 ! D290  D(49,44,50,100)       -54.2815         calculate D2E/DX2 analyticall!
 ! D291  D(49,44,50,101)      -173.9075         calculate D2E/DX2 analyticall!
 ! D292  D(49,44,50,102)        65.6266         calculate D2E/DX2 analyticall!
 ! D293  D(84,44,50,100)        63.257          calculate D2E/DX2 analyticall!
 ! D294  D(84,44,50,101)       -56.369          calculate D2E/DX2 analyticall!
 ! D295  D(84,44,50,102)      -176.8349         calculate D2E/DX2 analyticall!
 -----------------------------------------------------------------------------
 Trust Radius=3.00D-01 FncErr=1.00D-07 GrdErr=1.00D-07
 Number of steps in this run= 641 maximum allowed number of steps= 684.
 GradGradGradGradGradGradGradGradGradGradGradGradGradGradGradGradGradGrad

 Stoichiometry    C42H60MgN2O9
 Framework group  C1[X(C42H60MgN2O9)]
 Deg. of freedom  336
 Full point group                 C1      NOp   1
 Largest Abelian subgroup         C1      NOp   1
 Largest concise Abelian subgroup C1      NOp   1
                         Standard orientation:                         
 ---------------------------------------------------------------------
 Center     Atomic     Atomic              Coordinates (Angstroms)
 Number     Number      Type              X           Y           Z
 ---------------------------------------------------------------------
    1          8             0       -5.163845    1.742629    0.392454
    2         12             0        0.393570   -0.637511    0.071287
    3          8             0        0.735898    0.668518   -1.475692
    4          6             0       -4.100466    2.012631   -0.390040
    5          7             0       -0.608764   -2.298520    0.813168
    6          7             0        2.175862   -1.718299    0.271278
    7          8             0       -3.371095    2.965316   -0.240726
    8          6             0       -0.078518   -3.424593    1.298641
    9          6             0        1.289886   -3.726830    1.274836
   10          6             0        2.344987   -2.931837    0.775159
   11          8             0       -2.739688    1.126605   -2.191763
   12          6             0       -1.625889    0.749636   -1.555125
   13          6             0       -0.324440    0.864540   -2.352308
   14          6             0       -3.994887    0.966002   -1.497500
   15          8             0       -1.633439    0.267078   -0.430425
   16          6             0       -5.353144    2.635617    1.503281
   17          8             0       -0.001423    2.854117   -0.126403
   18          6             0        1.024582    2.004139    0.192868
   19          8             0        0.872098    1.114957    1.046573
   20          8             0        2.468001    3.826186    0.747186
   21          6             0        1.395964    4.603339    0.989910
   22          6             0        0.000157    4.101441    0.604020
   23          6             0        2.395726    2.615485   -0.086978
   24          8             0        1.526725    5.661161    1.562448
   25          6             0       -0.756683    5.136918   -0.218096
   26          6             0        2.742183    2.973824   -1.520088
   27          6             0       -0.257534    2.136073   -3.210658
   28          6             0       -5.092035    1.151454   -2.543957
   29          6             0       -2.052363   -2.182401    0.780898
   30          6             0        3.315250   -0.921271   -0.132554
   31          6             0       -2.760391   -2.711690   -0.346568
   32          6             0       -4.145379   -2.429810   -0.460896
   33          6             0       -4.817974   -1.673582    0.529076
   34          6             0       -4.111501   -1.193588    1.652464
   35          6             0       -2.725765   -1.432559    1.799075
   36          6             0       -2.028043   -3.570469   -1.413962
   37          6             0       -1.965488   -0.877817    3.030677
   38          6             0        4.091987   -0.219530    0.852769
   39          6             0        5.108586    0.665696    0.396247
   40          6             0        5.362400    0.838348   -0.981880
   41          6             0        4.619961    0.112380   -1.935544
   42          6             0        3.585172   -0.772587   -1.535314
   43          6             0        3.898355   -0.431222    2.380019
   44          6             0        2.826755   -1.628621   -2.582502
   45          6             0       -1.394656   -2.677318   -2.528887
   46          6             0       -2.947429   -4.663485   -2.049671
   47          6             0       -2.015549    0.682304    3.078265
   48          6             0       -2.510857   -1.490952    4.363564
   49          6             0        2.556957   -0.865918   -3.914936
   50          6             0        3.591447   -2.967269   -2.859807
   51          6             0        3.501083    0.886700    3.118600
   52          6             0        5.194990   -1.033770    3.022077
   53          6             0       -0.994531   -4.468635    1.927703
   54          6             0        3.724091   -3.577993    0.871375
   55          1             0        1.577424   -4.688978    1.685197
   56          1             0       -0.375068    0.016740   -3.065001
   57          1             0       -4.058386   -0.028077   -1.042677
   58          1             0       -5.384507    3.674164    1.165701
   59          1             0       -4.536257    2.512291    2.219660
   60          1             0       -6.303592    2.346818    1.953266
   61          1             0       -0.528333    3.927483    1.551160
   62          1             0        3.171090    1.969721    0.315727
   63          1             0       -0.819825    6.068568    0.349438
   64          1             0       -1.759045    4.760750   -0.431681
   65          1             0       -0.237172    5.336168   -1.161425
   66          1             0        3.594710    3.661677   -1.498913
   67          1             0        1.912327    3.452296   -2.043158
   68          1             0        3.049823    2.064781   -2.036088
   69          1             0       -1.087049    2.159578   -3.924375
   70          1             0        0.683446    2.134780   -3.768196
   71          1             0       -0.303470    3.032952   -2.591842
   72          1             0       -4.990715    0.392690   -3.325720
   73          1             0       -5.025052    2.140636   -3.008016
   74          1             0       -6.073873    1.044929   -2.074732
   75          1             0       -4.716805   -2.832236   -1.306790
   76          1             0       -5.897638   -1.491192    0.437986
   77          1             0       -4.650266   -0.633853    2.428684
   78          1             0       -1.191766   -4.093060   -0.911255
   79          1             0       -0.901916   -1.177264    2.929858
   80          1             0        5.722608    1.202375    1.131580
   81          1             0        6.162441    1.516739   -1.309610
   82          1             0        4.864929    0.213393   -3.000323
   83          1             0        3.072880   -1.156650    2.521794
   84          1             0        1.846821   -1.895500   -2.135662
   85          1             0       -0.927148   -3.305045   -3.306004
   86          1             0       -0.604653   -2.040446   -2.090502
   87          1             0       -2.154897   -2.034715   -3.004064
   88          1             0       -2.339422   -5.335978   -2.673755
   89          1             0       -3.722761   -4.213912   -2.688062
   90          1             0       -3.439226   -5.263061   -1.268620
   91          1             0       -1.404804    1.054718    3.916780
   92          1             0       -3.050941    1.037422    3.219170
   93          1             0       -1.621069    1.107809    2.138623
   94          1             0       -1.917781   -1.121588    5.214130
   95          1             0       -2.444275   -2.589811    4.344633
   96          1             0       -3.562593   -1.208112    4.524098
   97          1             0        1.884678   -1.460866   -4.552696
   98          1             0        3.488727   -0.687885   -4.473708
   99          1             0        2.082413    0.105962   -3.705435
  100          1             0        3.038553   -3.566208   -3.599763
  101          1             0        3.688612   -3.560420   -1.936668
  102          1             0        4.599933   -2.765235   -3.254030
  103          1             0        3.390904    0.688774    4.196206
  104          1             0        2.539591    1.264921    2.733001
  105          1             0        4.266360    1.665858    2.983660
  106          1             0        5.006380   -1.278301    4.078565
  107          1             0        6.022184   -0.308959    2.977031
  108          1             0        5.509155   -1.951010    2.501789
  109          1             0       -1.712641   -4.872252    1.204696
  110          1             0       -0.413266   -5.305948    2.328259
  111          1             0       -1.571180   -4.031542    2.751599
  112          1             0        4.491581   -3.028621    0.321603
  113          1             0        4.037245   -3.646669    1.920818
  114          1             0        3.682209   -4.602958    0.482749
 ---------------------------------------------------------------------
 Rotational constants (GHZ):      0.0681978      0.0530152      0.0428884
 Isotopes: O-16,Mg-24,O-16,C-12,N-14,N-14,O-16,C-12,C-12,C-12,O-16,C-12,C-12,C-12
 ,O-16,C-12,O-16,C-12,O-16,O-16,C-12,C-12,C-12,O-16,C-12,C-12,C-12,C-12,C-12,C-12
 ,C-12,C-12,C-12,C-12,C-12,C-12,C-12,C-12,C-12,C-12,C-12,C-12,C-12,C-12,C-12,C-12
 ,C-12,C-12,C-12,C-12,C-12,C-12,C-12,C-12,H-1,H-1,H-1,H-1,H-1,H-1,H-1,H-1,H-1,H-1
 ,H-1,H-1,H-1,H-1,H-1,H-1,H-1,H-1,H-1,H-1,H-1,H-1,H-1,H-1,H-1,H-1,H-1,H-1,H-1,H-1
 ,H-1,H-1,H-1,H-1,H-1,H-1,H-1,H-1,H-1,H-1,H-1,H-1,H-1,H-1,H-1,H-1,H-1,H-1,H-1,H-1
 ,H-1,H-1,H-1,H-1,H-1,H-1,H-1,H-1,H-1,H-1
 General basis read from cards:  (5D, 7F)
 There are   642 symmetry adapted basis functions of A   symmetry.
 Crude estimate of integral set expansion from redundant integrals=1.000.
 Integral buffers will be    262144 words long.
 Raffenetti 2 integral format.
 Two-electron integral symmetry is turned on.
   642 basis functions     1430 primitive gaussians
   205 alpha electrons      205 beta electrons
       nuclear repulsion energy      9149.4342033809 Hartrees.
 One-electron integrals computed using PRISM.
 NBasis=   642 RedAO= T  NBF=   642
 NBsUse=   642 1.00D-04 NBFU=   642
 Initial guess read from the checkpoint file:
 RRRR_fm-5-ts.chk
 Requested convergence on RMS density matrix=1.00D-08 within  64 cycles.
 Requested convergence on MAX density matrix=1.00D-06.
 SCF Done:  E(RB+HF-LYP) =  -2612.18355986     A.U. after    1 cycles
             Convg  =    0.5608D-08             -V/T =  2.0106
             S**2   =   0.0000
 Range of M.O.s used for correlation:     1   642
 NBasis=   642 NAE=   205 NBE=   205 NFC=     0 NFV=     0
 NROrb=    642 NOA=   205 NOB=   205 NVA=   437 NVB=   437
 PrsmSu:  requested number of processors reduced to:   1 ShMem   1 Linda.
 PrsmSu:  requested number of processors reduced to:   1 ShMem   1 Linda.
 G2DrvN: will do   23 atoms at a time, making    5 passes doing MaxLOS=2.
 FoFDir used for L=0 through L=2.
          Differentiating once with respect to electric field.
                with respect to dipole field.
          Differentiating once with respect to nuclear coordinates.
 Integrals replicated using symmetry in FoFDir.
 MinBra= 0 MaxBra= 2 Meth= 1.
 IRaf=       0 NMat=  69 IRICut=      69 DoRegI=T DoRafI=T ISym2E= 2 JSym2E=2.
 Raff turned off since only 54.11% of shell-pairs survive.
          There are 345 degrees of freedom in the 1st order CPHF.
 345 vectors were produced by pass  0.
 AX will form  69 AO Fock derivatives at one time.
 345 vectors were produced by pass  1.
 345 vectors were produced by pass  2.
 342 vectors were produced by pass  3.
 342 vectors were produced by pass  4.
 207 vectors were produced by pass  5.
  41 vectors were produced by pass  6.
   3 vectors were produced by pass  7.
 Inv2:  IOpt= 1 Iter= 1 AM= 7.36D-15 Conv= 1.00D-12.
 Inverted reduced A of dimension1970 with in-core refinement.

 **********************************************************************

            Population analysis using the SCF density.

 **********************************************************************

 Alpha  occ. eigenvalues --  -46.71758 -19.19419 -19.19375 -19.17579 -19.16027
 Alpha  occ. eigenvalues --  -19.14078 -19.13869 -19.12685 -19.11504 -19.07759
 Alpha  occ. eigenvalues --  -14.28373 -14.27956 -10.32776 -10.31456 -10.30770
 Alpha  occ. eigenvalues --  -10.30113 -10.25084 -10.24737 -10.23755 -10.23068
 Alpha  occ. eigenvalues --  -10.22059 -10.20369 -10.20137 -10.18628 -10.16272
 Alpha  occ. eigenvalues --  -10.15844 -10.15828 -10.15236 -10.15213 -10.12327
 Alpha  occ. eigenvalues --  -10.05928 -10.05814 -10.03999 -10.03287 -10.03204
 Alpha  occ. eigenvalues --  -10.03105 -10.03053 -10.02912 -10.02893 -10.02738
 Alpha  occ. eigenvalues --  -10.02684 -10.02403 -10.02290 -10.02207 -10.02087
 Alpha  occ. eigenvalues --  -10.01856 -10.01822 -10.01609 -10.00945 -10.00823
 Alpha  occ. eigenvalues --  -10.00667 -10.00395 -10.00369  -9.99611  -3.02106
 Alpha  occ. eigenvalues --   -1.76924  -1.76694  -1.76488  -1.11566  -1.10278
 Alpha  occ. eigenvalues --   -1.09943  -1.07007  -1.02482  -1.01714  -1.00783
 Alpha  occ. eigenvalues --   -1.00203  -0.93824  -0.89344  -0.88044  -0.81575
 Alpha  occ. eigenvalues --   -0.80974  -0.80274  -0.78077  -0.77311  -0.76761
 Alpha  occ. eigenvalues --   -0.75625  -0.74987  -0.74576  -0.74137  -0.73634
 Alpha  occ. eigenvalues --   -0.72494  -0.72076  -0.68884  -0.68688  -0.68505
 Alpha  occ. eigenvalues --   -0.68128  -0.66633  -0.65974  -0.65893  -0.65456
 Alpha  occ. eigenvalues --   -0.64790  -0.64742  -0.64310  -0.64102  -0.62644
 Alpha  occ. eigenvalues --   -0.61690  -0.59634  -0.59161  -0.58620  -0.58323
 Alpha  occ. eigenvalues --   -0.57108  -0.55597  -0.55065  -0.54976  -0.54164
 Alpha  occ. eigenvalues --   -0.52722  -0.52709  -0.50922  -0.50642  -0.50201
 Alpha  occ. eigenvalues --   -0.50057  -0.49932  -0.49118  -0.48708  -0.48047
 Alpha  occ. eigenvalues --   -0.47159  -0.46965  -0.46304  -0.45728  -0.45505
 Alpha  occ. eigenvalues --   -0.45214  -0.44966  -0.44492  -0.44117  -0.43960
 Alpha  occ. eigenvalues --   -0.43937  -0.43283  -0.42431  -0.42147  -0.41941
 Alpha  occ. eigenvalues --   -0.41402  -0.41225  -0.41071  -0.40902  -0.40819
 Alpha  occ. eigenvalues --   -0.40648  -0.40484  -0.40093  -0.39894  -0.39754
 Alpha  occ. eigenvalues --   -0.39532  -0.39339  -0.39193  -0.39006  -0.38870
 Alpha  occ. eigenvalues --   -0.38791  -0.38454  -0.38323  -0.37898  -0.37671
 Alpha  occ. eigenvalues --   -0.37616  -0.37459  -0.37149  -0.37122  -0.36712
 Alpha  occ. eigenvalues --   -0.36537  -0.36474  -0.36394  -0.35888  -0.35674
 Alpha  occ. eigenvalues --   -0.35517  -0.35409  -0.35328  -0.35145  -0.34995
 Alpha  occ. eigenvalues --   -0.34830  -0.34784  -0.34539  -0.34471  -0.34101
 Alpha  occ. eigenvalues --   -0.34043  -0.33166  -0.32893  -0.32046  -0.31531
 Alpha  occ. eigenvalues --   -0.31485  -0.31126  -0.30791  -0.30723  -0.30630
 Alpha  occ. eigenvalues --   -0.30332  -0.30099  -0.29948  -0.29420  -0.29248
 Alpha  occ. eigenvalues --   -0.29116  -0.28676  -0.28287  -0.28095  -0.27860
 Alpha  occ. eigenvalues --   -0.27750  -0.27586  -0.27476  -0.27346  -0.26325
 Alpha  occ. eigenvalues --   -0.25228  -0.24937  -0.24739  -0.24178  -0.22242
 Alpha  occ. eigenvalues --   -0.19291  -0.19092  -0.18837  -0.18203  -0.15735
 Alpha virt. eigenvalues --   -0.01423   0.00606   0.00854   0.01089   0.02002
 Alpha virt. eigenvalues --    0.05994   0.06458   0.06781   0.07074   0.08435
 Alpha virt. eigenvalues --    0.08587   0.08948   0.10307   0.10840   0.11201
 Alpha virt. eigenvalues --    0.11407   0.12582   0.13112   0.13807   0.14228
 Alpha virt. eigenvalues --    0.14846   0.14997   0.15131   0.15471   0.16057
 Alpha virt. eigenvalues --    0.16275   0.16548   0.16998   0.17324   0.17812
 Alpha virt. eigenvalues --    0.18059   0.18578   0.19252   0.19873   0.20392
 Alpha virt. eigenvalues --    0.20736   0.21201   0.21417   0.21628   0.21887
 Alpha virt. eigenvalues --    0.21927   0.22704   0.22910   0.23323   0.24090
 Alpha virt. eigenvalues --    0.24469   0.24883   0.24999   0.25253   0.25489
 Alpha virt. eigenvalues --    0.26166   0.26356   0.27080   0.27566   0.28370
 Alpha virt. eigenvalues --    0.29241   0.29630   0.29910   0.30579   0.31197
 Alpha virt. eigenvalues --    0.31845   0.32206   0.32894   0.33501   0.33735
 Alpha virt. eigenvalues --    0.33931   0.34406   0.34818   0.34893   0.35453
 Alpha virt. eigenvalues --    0.35997   0.36694   0.36845   0.37346   0.37932
 Alpha virt. eigenvalues --    0.38110   0.38196   0.38751   0.39211   0.39434
 Alpha virt. eigenvalues --    0.39948   0.40275   0.40412   0.40629   0.40931
 Alpha virt. eigenvalues --    0.41244   0.41524   0.41803   0.41972   0.42252
 Alpha virt. eigenvalues --    0.43054   0.43559   0.43691   0.43995   0.44492
 Alpha virt. eigenvalues --    0.44591   0.44896   0.45271   0.45585   0.45797
 Alpha virt. eigenvalues --    0.46226   0.46431   0.46774   0.47053   0.47235
 Alpha virt. eigenvalues --    0.47573   0.47763   0.48385   0.48621   0.48731
 Alpha virt. eigenvalues --    0.48867   0.49098   0.49158   0.49374   0.49687
 Alpha virt. eigenvalues --    0.49906   0.50051   0.50186   0.50697   0.50944
 Alpha virt. eigenvalues --    0.51311   0.51380   0.51921   0.52500   0.52927
 Alpha virt. eigenvalues --    0.53116   0.53348   0.53703   0.54454   0.54835
 Alpha virt. eigenvalues --    0.55272   0.55452   0.55864   0.55926   0.56084
 Alpha virt. eigenvalues --    0.56170   0.56606   0.57063   0.57253   0.57617
 Alpha virt. eigenvalues --    0.57955   0.57987   0.58612   0.58862   0.59412
 Alpha virt. eigenvalues --    0.59611   0.59773   0.60243   0.60517   0.60887
 Alpha virt. eigenvalues --    0.61719   0.62338   0.62501   0.62788   0.63753
 Alpha virt. eigenvalues --    0.64113   0.64336   0.65327   0.66080   0.66526
 Alpha virt. eigenvalues --    0.67117   0.67334   0.67576   0.68165   0.69719
 Alpha virt. eigenvalues --    0.69828   0.70391   0.70569   0.71134   0.71406
 Alpha virt. eigenvalues --    0.71690   0.72093   0.72278   0.72909   0.73793
 Alpha virt. eigenvalues --    0.73979   0.74518   0.75028   0.75271   0.75704
 Alpha virt. eigenvalues --    0.76318   0.76535   0.76680   0.77543   0.78652
 Alpha virt. eigenvalues --    0.79436   0.79531   0.79849   0.81101   0.81666
 Alpha virt. eigenvalues --    0.82467   0.83141   0.84181   0.84707   0.85458
 Alpha virt. eigenvalues --    0.85554   0.86162   0.87215   0.87648   0.88579
 Alpha virt. eigenvalues --    0.88931   0.89000   0.90060   0.90231   0.90644
 Alpha virt. eigenvalues --    0.91529   0.91738   0.92100   0.93449   0.93871
 Alpha virt. eigenvalues --    0.94394   0.95256   0.95363   0.96497   0.96744
 Alpha virt. eigenvalues --    0.97326   0.98095   0.98558   0.99269   1.00130
 Alpha virt. eigenvalues --    1.00896   1.02331   1.03332   1.03802   1.04268
 Alpha virt. eigenvalues --    1.04895   1.06193   1.07279   1.08300   1.09204
 Alpha virt. eigenvalues --    1.10114   1.10768   1.11118   1.12544   1.13042
 Alpha virt. eigenvalues --    1.13362   1.14571   1.15215   1.16521   1.17098
 Alpha virt. eigenvalues --    1.17869   1.18420   1.19460   1.20857   1.21070
 Alpha virt. eigenvalues --    1.21790   1.24218   1.24752   1.24927   1.27008
 Alpha virt. eigenvalues --    1.27718   1.29702   1.30705   1.32259   1.32751
 Alpha virt. eigenvalues --    1.33651   1.34933   1.36318   1.37005   1.37859
 Alpha virt. eigenvalues --    1.38592   1.38941   1.39636   1.40488   1.41346
 Alpha virt. eigenvalues --    1.41963   1.42764   1.44008   1.45808   1.46262
 Alpha virt. eigenvalues --    1.47512   1.48174   1.49910   1.51440   1.51759
 Alpha virt. eigenvalues --    1.52851   1.53044   1.54069   1.54724   1.56015
 Alpha virt. eigenvalues --    1.56287   1.58187   1.60603   1.61301   1.61479
 Alpha virt. eigenvalues --    1.63201   1.63674   1.64604   1.65152   1.68715
 Alpha virt. eigenvalues --    1.69032   1.69145   1.69722   1.70634   1.72238
 Alpha virt. eigenvalues --    1.73971   1.74364   1.75584   1.75930   1.76834
 Alpha virt. eigenvalues --    1.77442   1.78084   1.79134   1.79570   1.81525
 Alpha virt. eigenvalues --    1.82169   1.82380   1.83697   1.83970   1.84436
 Alpha virt. eigenvalues --    1.84810   1.85704   1.86614   1.87757   1.87848
 Alpha virt. eigenvalues --    1.88424   1.88825   1.89610   1.90872   1.91460
 Alpha virt. eigenvalues --    1.91926   1.92370   1.93739   1.94710   1.94772
 Alpha virt. eigenvalues --    1.95351   1.96464   1.97050   1.97706   1.98645
 Alpha virt. eigenvalues --    1.98851   2.00488   2.00965   2.01215   2.02091
 Alpha virt. eigenvalues --    2.02199   2.02408   2.02990   2.03533   2.03690
 Alpha virt. eigenvalues --    2.05034   2.05547   2.06696   2.08088   2.08835
 Alpha virt. eigenvalues --    2.09640   2.10899   2.11499   2.13011   2.13597
 Alpha virt. eigenvalues --    2.13973   2.14420   2.15392   2.15719   2.17169
 Alpha virt. eigenvalues --    2.17638   2.18079   2.18266   2.19438   2.20222
 Alpha virt. eigenvalues --    2.21346   2.23145   2.23556   2.24519   2.26043
 Alpha virt. eigenvalues --    2.26770   2.27202   2.27642   2.28715   2.29111
 Alpha virt. eigenvalues --    2.29598   2.30387   2.30996   2.32693   2.33203
 Alpha virt. eigenvalues --    2.33802   2.34335   2.34479   2.35221   2.35460
 Alpha virt. eigenvalues --    2.36325   2.37838   2.38970   2.40985   2.41827
 Alpha virt. eigenvalues --    2.42749   2.43874   2.45951   2.47296   2.47837
 Alpha virt. eigenvalues --    2.50230   2.51781   2.53516   2.57303   2.57938
 Alpha virt. eigenvalues --    2.59986   2.60648   2.63524   2.64683   2.66170
 Alpha virt. eigenvalues --    2.66392   2.67241   2.67580   2.69361   2.69691
 Alpha virt. eigenvalues --    2.72265   2.74697   2.74859   2.75433   2.77077
 Alpha virt. eigenvalues --    2.79482   2.81921   2.84096   2.87595   2.87875
 Alpha virt. eigenvalues --    2.88187   2.89514   2.96651   2.99015   3.00340
 Alpha virt. eigenvalues --    3.00533   3.02971   3.04073   3.06399   3.09049
 Alpha virt. eigenvalues --    3.10634   3.15713   3.17067   3.19920   3.22700
 Alpha virt. eigenvalues --    3.23563   3.26484   3.85436   5.99465   6.13230
 Alpha virt. eigenvalues --    6.34057 103.58913
          Condensed to atoms (all electrons):
 Total atomic charges:
              1
  1  O   -0.451033
  2  Mg   0.868425
  3  O   -0.632130
  4  C    0.592703
  5  N   -0.546607
  6  N   -0.525365
  7  O   -0.426536
  8  C    0.330268
  9  C   -0.236472
 10  C    0.343757
 11  O   -0.455647
 12  C    0.635149
 13  C    0.096785
 14  C    0.054748
 15  O   -0.450692
 16  C   -0.215910
 17  O   -0.477119
 18  C    0.673476
 19  O   -0.508759
 20  O   -0.450232
 21  C    0.545380
 22  C    0.055246
 23  C    0.099757
 24  O   -0.426786
 25  C   -0.483382
 26  C   -0.455988
 27  C   -0.470425
 28  C   -0.469940
 29  C    0.025371
 30  C    0.014309
 31  C   -0.005264
 32  C   -0.075225
 33  C   -0.066710
 34  C   -0.075564
 35  C   -0.000681
 36  C   -0.055611
 37  C   -0.060081
 38  C    0.008045
 39  C   -0.071877
 40  C   -0.069794
 41  C   -0.078803
 42  C    0.009275
 43  C   -0.053612
 44  C   -0.051838
 45  C   -0.217975
 46  C   -0.218776
 47  C   -0.221565
 48  C   -0.216973
 49  C   -0.220164
 50  C   -0.217945
 51  C   -0.220048
 52  C   -0.217548
 53  C   -0.447560
 54  C   -0.452001
 55  H    0.077055
 56  H    0.140690
 57  H    0.131369
 58  H    0.173980
 59  H    0.162780
 60  H    0.161732
 61  H    0.184213
 62  H    0.104216
 63  H    0.172084
 64  H    0.203388
 65  H    0.152408
 66  H    0.147480
 67  H    0.147970
 68  H    0.154354
 69  H    0.143664
 70  H    0.145121
 71  H    0.176877
 72  H    0.164636
 73  H    0.168818
 74  H    0.167499
 75  H    0.083793
 76  H    0.087163
 77  H    0.081577
 78  H    0.095725
 79  H    0.100671
 80  H    0.088467
 81  H    0.087767
 82  H    0.086230
 83  H    0.098308
 84  H    0.099342
 85  H    0.080250
 86  H    0.088585
 87  H    0.077176
 88  H    0.077413
 89  H    0.071946
 90  H    0.075897
 91  H    0.078191
 92  H    0.066617
 93  H    0.110188
 94  H    0.077670
 95  H    0.073713
 96  H    0.070256
 97  H    0.072656
 98  H    0.068630
 99  H    0.095023
100  H    0.075479
101  H    0.082674
102  H    0.071749
103  H    0.073673
104  H    0.105128
105  H    0.072944
106  H    0.076404
107  H    0.072458
108  H    0.075229
109  H    0.127419
110  H    0.123650
111  H    0.128274
112  H    0.125681
113  H    0.132338
114  H    0.129262
 Sum of Mulliken charges=   0.00000
 Atomic charges with hydrogens summed into heavy atoms:
              1
  1  O   -0.451033
  2  Mg   0.868425
  3  O   -0.632130
  4  C    0.592703
  5  N   -0.546607
  6  N   -0.525365
  7  O   -0.426536
  8  C    0.330268
  9  C   -0.159417
 10  C    0.343757
 11  O   -0.455647
 12  C    0.635149
 13  C    0.237474
 14  C    0.186116
 15  O   -0.450692
 16  C    0.282582
 17  O   -0.477119
 18  C    0.673476
 19  O   -0.508759
 20  O   -0.450232
 21  C    0.545380
 22  C    0.239459
 23  C    0.203973
 24  O   -0.426786
 25  C    0.044498
 26  C   -0.006185
 27  C   -0.004764
 28  C    0.031013
 29  C    0.025371
 30  C    0.014309
 31  C   -0.005264
 32  C    0.008568
 33  C    0.020454
 34  C    0.006013
 35  C   -0.000681
 36  C    0.040114
 37  C    0.040590
 38  C    0.008045
 39  C    0.016590
 40  C    0.017973
 41  C    0.007427
 42  C    0.009275
 43  C    0.044696
 44  C    0.047504
 45  C    0.028035
 46  C    0.006480
 47  C    0.033431
 48  C    0.004666
 49  C    0.016145
 50  C    0.011957
 51  C    0.031696
 52  C    0.006543
 53  C   -0.068218
 54  C   -0.064720
 55  H    0.000000
 56  H    0.000000
 57  H    0.000000
 58  H    0.000000
 59  H    0.000000
 60  H    0.000000
 61  H    0.000000
 62  H    0.000000
 63  H    0.000000
 64  H    0.000000
 65  H    0.000000
 66  H    0.000000
 67  H    0.000000
 68  H    0.000000
 69  H    0.000000
 70  H    0.000000
 71  H    0.000000
 72  H    0.000000
 73  H    0.000000
 74  H    0.000000
 75  H    0.000000
 76  H    0.000000
 77  H    0.000000
 78  H    0.000000
 79  H    0.000000
 80  H    0.000000
 81  H    0.000000
 82  H    0.000000
 83  H    0.000000
 84  H    0.000000
 85  H    0.000000
 86  H    0.000000
 87  H    0.000000
 88  H    0.000000
 89  H    0.000000
 90  H    0.000000
 91  H    0.000000
 92  H    0.000000
 93  H    0.000000
 94  H    0.000000
 95  H    0.000000
 96  H    0.000000
 97  H    0.000000
 98  H    0.000000
 99  H    0.000000
100  H    0.000000
101  H    0.000000
102  H    0.000000
103  H    0.000000
104  H    0.000000
105  H    0.000000
106  H    0.000000
107  H    0.000000
108  H    0.000000
109  H    0.000000
110  H    0.000000
111  H    0.000000
112  H    0.000000
113  H    0.000000
114  H    0.000000
 Sum of Mulliken charges=   0.00000
 Electronic spatial extent (au):  <R**2>= 29336.2623
 Charge=     0.0000 electrons
 Dipole moment (Debye):
    X=    -3.8121    Y=    -5.0562    Z=    -1.8682  Tot=     6.6021
 Quadrupole moment (Debye-Ang):
   XX=  -274.0097   YY=  -335.9294   ZZ=  -303.3653
   XY=   -11.6166   XZ=    -8.1474   YZ=    -4.1450
 Octapole moment (Debye-Ang**2):
  XXX=   -81.8865  YYY=  -154.2873  ZZZ=     3.0260  XYY=  -102.2925
  XXY=    17.9133  XXZ=     5.8866  XZZ=   -28.2862  YZZ=   -11.8176
  YYZ=   -66.6242  XYZ=   -46.5783
 Hexadecapole moment (Debye-Ang**3):
 XXXX=-16724.3045 YYYY=-13647.3017 ZZZZ= -7172.1686 XXXY=  -182.6369
 XXXZ=  -122.0118 YYYX=  -461.6614 YYYZ=  -316.3727 ZZZX=   -49.5054
 ZZZY=    94.6833 XXYY= -5076.4965 XXZZ= -3954.8416 YYZZ= -3384.6795
 XXYZ=    67.7258 YYXZ=  -162.3395 ZZXY=   -74.7999
 N-N= 9.149434203381D+03 E-N=-2.439556563375D+04  KE= 2.584679293515D+03
  Exact polarizability: 465.749  10.549 396.946  -4.104   6.699 370.725
 Approx polarizability: 652.301  30.926 561.179  -5.670  20.484 590.791
 Full mass-weighted force constant matrix:
 Low frequencies --- -135.4759   -4.6615   -3.5340   -0.0165   -0.0100   -0.0065
 Low frequencies ---    2.9740    8.9914   18.8465
 ******    1 imaginary frequencies (negative Signs) ****** 
 Harmonic frequencies (cm**-1), IR intensities (KM/Mole),
 Raman scattering activities (A**4/AMU), Raman depolarization ratios,
 reduced masses (AMU), force constants (mDyne/A) and normal coordinates:
                     1                      2                      3
                    ?A                     ?A                     ?A
 Frequencies --  -135.4712                 7.7404                18.7451
 Red. masses --     8.2923                 4.5496                 4.3440
 Frc consts  --     0.0897                 0.0002                 0.0009
 IR Inten    --    58.3531                 0.6211                 0.1246
 Raman Activ --     0.0000                 0.0000                 0.0000
 Depolar     --     0.0000                 0.0000                 0.0000
 Atom AN      X      Y      Z        X      Y      Z        X      Y      Z
   1   8     0.00  -0.02  -0.01    -0.05  -0.07  -0.10    -0.02   0.06   0.03
   2  12     0.01   0.05   0.16     0.00   0.01  -0.02     0.00   0.01   0.00
   3   8     0.07   0.28   0.22     0.00   0.00  -0.02    -0.03  -0.01   0.00
   4   6     0.01  -0.01   0.00    -0.04  -0.07  -0.09    -0.02   0.04   0.02
   5   7     0.00   0.00   0.02    -0.01   0.03   0.00     0.00   0.01   0.01
   6   7     0.00   0.00   0.00     0.00   0.01  -0.01     0.00   0.01   0.03
   7   8     0.00  -0.01   0.00    -0.05  -0.06  -0.09    -0.02   0.04   0.00
   8   6     0.00  -0.01   0.00    -0.01   0.03   0.01     0.00   0.02   0.04
   9   6     0.00   0.00   0.00    -0.01   0.02   0.00     0.01   0.03   0.06
  10   6     0.00   0.00   0.00    -0.01   0.01  -0.01     0.01   0.02   0.05
  11   8     0.06   0.03   0.02     0.00  -0.06  -0.06    -0.03   0.01   0.03
  12   6     0.04   0.05   0.05     0.00  -0.01  -0.03    -0.03   0.01   0.02
  13   6     0.08   0.15   0.12     0.01   0.01  -0.02    -0.04   0.01   0.01
  14   6     0.04  -0.01   0.00    -0.01  -0.08  -0.08    -0.03   0.02   0.04
  15   8     0.02  -0.03   0.01     0.00   0.01  -0.02    -0.02   0.02   0.03
  16   6    -0.01  -0.01  -0.01    -0.07  -0.07  -0.11    -0.02   0.09   0.00
  17   8    -0.03   0.02  -0.24     0.04   0.03   0.04     0.03   0.03   0.02
  18   6    -0.07  -0.12  -0.28     0.03   0.02   0.03     0.02   0.01   0.01
  19   8    -0.08   0.08   0.00     0.03   0.00   0.00     0.02   0.01   0.00
  20   8    -0.05  -0.14  -0.06     0.04   0.02   0.00     0.05   0.00  -0.03
  21   6    -0.03  -0.13  -0.02     0.04   0.00   0.06     0.06  -0.01   0.02
  22   6    -0.03  -0.12  -0.03     0.03  -0.03   0.14     0.04  -0.01   0.08
  23   6    -0.04  -0.09  -0.15     0.03   0.01   0.02     0.02  -0.01  -0.02
  24   8     0.00  -0.15   0.00     0.05   0.00   0.06     0.08  -0.01   0.03
  25   6    -0.05  -0.01   0.11    -0.08  -0.01   0.27    -0.02   0.02   0.16
  26   6     0.03   0.04  -0.10     0.02   0.00   0.01     0.00  -0.02  -0.03
  27   6     0.03   0.06   0.00     0.00   0.03   0.02    -0.04   0.01   0.02
  28   6     0.05  -0.01  -0.02     0.01  -0.11  -0.09    -0.03   0.01   0.04
  29   6     0.00   0.00   0.01    -0.01   0.03   0.02     0.00  -0.02  -0.03
  30   6     0.00   0.00   0.00     0.00   0.00  -0.02     0.00   0.00   0.00
  31   6     0.00   0.00   0.01    -0.02   0.02   0.04     0.04  -0.03  -0.05
  32   6     0.00   0.00   0.00    -0.03   0.01   0.06     0.04  -0.05  -0.09
  33   6     0.00   0.00   0.00    -0.01   0.01   0.06     0.00  -0.06  -0.11
  34   6     0.00   0.00   0.00     0.00   0.03   0.04    -0.04  -0.05  -0.09
  35   6     0.00   0.00   0.01     0.01   0.04   0.02    -0.04  -0.03  -0.05
  36   6     0.00   0.01   0.00    -0.03   0.02   0.03     0.09  -0.03  -0.02
  37   6     0.00   0.00   0.01     0.03   0.07   0.00    -0.09  -0.02  -0.02
  38   6     0.00  -0.01   0.00     0.01  -0.01  -0.02     0.03   0.01  -0.03
  39   6     0.01  -0.01   0.00     0.02  -0.02  -0.02     0.02   0.00  -0.06
  40   6     0.01  -0.01   0.00     0.01  -0.01  -0.02     0.00  -0.03  -0.07
  41   6     0.00  -0.01   0.00     0.00   0.00  -0.02    -0.02  -0.04  -0.05
  42   6    -0.01   0.00   0.00     0.00   0.00  -0.02    -0.02  -0.03  -0.01
  43   6     0.00   0.00   0.00     0.02  -0.02  -0.02     0.05   0.04  -0.02
  44   6    -0.02   0.01   0.01    -0.01   0.01  -0.02    -0.03  -0.05   0.02
  45   6     0.00   0.02   0.01    -0.05   0.01   0.02     0.07  -0.03  -0.03
  46   6     0.01   0.01   0.00    -0.04   0.01   0.04     0.13  -0.07  -0.01
  47   6     0.00   0.00   0.01     0.01   0.07  -0.03    -0.08  -0.02  -0.03
  48   6     0.00   0.00   0.01     0.06   0.09   0.02    -0.15  -0.01  -0.04
  49   6    -0.02   0.01   0.01     0.00   0.02  -0.02    -0.07  -0.08   0.01
  50   6    -0.03   0.01  -0.01    -0.03   0.00  -0.02    -0.02  -0.05   0.03
  51   6    -0.02   0.01  -0.02     0.03  -0.02  -0.01     0.06   0.06  -0.04
  52   6    -0.01   0.01   0.01     0.02  -0.03  -0.03     0.07   0.06  -0.03
  53   6     0.00  -0.01   0.00    -0.01   0.04   0.02     0.00   0.02   0.03
  54   6     0.00   0.00  -0.01    -0.01  -0.01  -0.02     0.01   0.03   0.06
  55   1     0.00   0.00   0.00    -0.02   0.02   0.00     0.01   0.04   0.09
  56   1     0.27   0.06   0.23     0.02   0.03  -0.04    -0.05   0.01   0.00
  57   1     0.05  -0.01  -0.01     0.01  -0.07  -0.07    -0.03   0.03   0.05
  58   1    -0.01  -0.02  -0.01    -0.08  -0.07  -0.11    -0.03   0.08  -0.03
  59   1    -0.01  -0.01  -0.01    -0.08  -0.06  -0.10    -0.02   0.12   0.01
  60   1    -0.01  -0.02  -0.02    -0.07  -0.08  -0.12    -0.02   0.10   0.02
  61   1     0.00  -0.24  -0.04     0.11  -0.13   0.17     0.09  -0.06   0.10
  62   1    -0.07  -0.11  -0.16     0.03   0.01   0.02     0.02  -0.01  -0.03
  63   1    -0.02  -0.07   0.21    -0.07  -0.05   0.34     0.01  -0.01   0.20
  64   1    -0.06   0.03   0.09    -0.09  -0.03   0.33    -0.02   0.02   0.20
  65   1    -0.07   0.09   0.12    -0.17   0.08   0.24    -0.07   0.06   0.14
  66   1     0.04   0.03  -0.01     0.03   0.00   0.00     0.01  -0.03  -0.04
  67   1     0.06   0.09  -0.10     0.02   0.00   0.02     0.00  -0.01  -0.01
  68   1     0.05   0.08  -0.16     0.01   0.00   0.01    -0.02  -0.03  -0.03
  69   1     0.05  -0.09  -0.03     0.00   0.05   0.02    -0.05   0.03   0.03
  70   1     0.04   0.07   0.03     0.01   0.05   0.02    -0.05   0.01   0.01
  71   1    -0.07   0.12  -0.09     0.00   0.01   0.05    -0.02   0.01   0.04
  72   1     0.07   0.00  -0.02     0.03  -0.12  -0.08    -0.04   0.00   0.05
  73   1     0.04  -0.01  -0.01    -0.01  -0.11  -0.10    -0.03   0.00   0.02
  74   1     0.05  -0.03  -0.03     0.00  -0.13  -0.11    -0.03   0.02   0.05
  75   1     0.00   0.01   0.00    -0.04  -0.01   0.07     0.08  -0.06  -0.11
  76   1     0.00   0.01   0.00    -0.02   0.01   0.08     0.00  -0.08  -0.15
  77   1     0.00   0.00   0.00     0.01   0.04   0.05    -0.08  -0.05  -0.11
  78   1     0.00   0.01   0.00    -0.03   0.02   0.02     0.10   0.01   0.00
  79   1     0.00   0.00   0.01     0.03   0.08  -0.02    -0.09  -0.03   0.02
  80   1     0.00   0.00   0.00     0.03  -0.03  -0.02     0.04   0.01  -0.09
  81   1     0.01  -0.01   0.00     0.02  -0.02  -0.02     0.00  -0.04  -0.10
  82   1     0.00  -0.01   0.00     0.00   0.00  -0.02    -0.04  -0.06  -0.05
  83   1     0.00   0.00   0.00     0.02  -0.01  -0.01     0.06   0.04   0.01
  84   1    -0.02   0.01   0.01    -0.02   0.03  -0.02    -0.02  -0.06   0.05
  85   1     0.01   0.02   0.01    -0.06   0.01   0.02     0.11  -0.02  -0.01
  86   1     0.00   0.01   0.03    -0.04   0.01   0.01     0.03   0.02  -0.03
  87   1     0.00   0.02   0.01    -0.05   0.01   0.03     0.05  -0.07  -0.06
  88   1     0.01   0.01  -0.01    -0.05   0.01   0.04     0.16  -0.06   0.01
  89   1     0.01   0.01   0.00    -0.05   0.01   0.05     0.12  -0.11  -0.02
  90   1     0.01   0.00  -0.01    -0.03   0.01   0.05     0.15  -0.07   0.00
  91   1    -0.01   0.00   0.02     0.03   0.09  -0.05    -0.12  -0.02  -0.01
  92   1    -0.01   0.00   0.00     0.01   0.06  -0.02    -0.09  -0.02  -0.08
  93   1     0.01   0.00   0.02    -0.01   0.06  -0.04    -0.03  -0.03  -0.02
  94   1    -0.01   0.00   0.01     0.07   0.11   0.00    -0.17  -0.01  -0.02
  95   1     0.00   0.00   0.01     0.07   0.09   0.04    -0.16  -0.01  -0.03
  96   1    -0.01   0.00   0.01     0.06   0.08   0.03    -0.15   0.00  -0.08
  97   1    -0.04   0.03   0.01    -0.01   0.03  -0.02    -0.08  -0.10   0.04
  98   1    -0.02   0.00   0.00     0.00   0.00  -0.02    -0.09  -0.07  -0.01
  99   1     0.00   0.03   0.00     0.02   0.02  -0.02    -0.08  -0.08   0.01
 100   1    -0.03   0.01  -0.01    -0.04   0.01  -0.02    -0.04  -0.07   0.05
 101   1    -0.03   0.00  -0.01    -0.04   0.00  -0.02     0.01  -0.03   0.03
 102   1    -0.03   0.01  -0.01    -0.03  -0.01  -0.01    -0.04  -0.04   0.00
 103   1    -0.05   0.02  -0.02     0.04  -0.02  -0.01     0.09   0.08  -0.03
 104   1     0.00   0.01  -0.06     0.03  -0.01   0.01     0.05   0.04  -0.03
 105   1     0.00   0.00   0.00     0.04  -0.02  -0.01     0.06   0.06  -0.08
 106   1    -0.01   0.02   0.01     0.03  -0.03  -0.03     0.08   0.07  -0.03
 107   1    -0.01   0.01   0.01     0.02  -0.03  -0.03     0.06   0.06  -0.06
 108   1     0.00   0.00   0.02     0.01  -0.03  -0.03     0.06   0.05  -0.02
 109   1     0.00  -0.01  -0.01    -0.02   0.03   0.03     0.02   0.00   0.02
 110   1     0.00  -0.01  -0.01    -0.01   0.04   0.03     0.00   0.03   0.06
 111   1     0.00  -0.02   0.00     0.00   0.05   0.02    -0.02   0.02   0.02
 112   1    -0.01   0.00  -0.02    -0.01  -0.01  -0.02     0.00   0.01   0.03
 113   1     0.00   0.01  -0.01    -0.01  -0.01  -0.02     0.02   0.06   0.06
 114   1     0.00   0.00   0.00    -0.02   0.00  -0.02     0.00   0.01   0.09
                     4                      5                      6
                    ?A                     ?A                     ?A
 Frequencies --    22.5500                30.6564                35.6757
 Red. masses --     4.7456                 4.9823                 4.8288
 Frc consts  --     0.0014                 0.0028                 0.0036
 IR Inten    --     2.6719                 0.2254                 0.4452
 Raman Activ --     0.0000                 0.0000                 0.0000
 Depolar     --     0.0000                 0.0000                 0.0000
 Atom AN      X      Y      Z        X      Y      Z        X      Y      Z
   1   8     0.02   0.02  -0.06     0.08   0.13   0.05     0.05   0.01   0.02
   2  12     0.01  -0.01   0.03    -0.01  -0.01  -0.01     0.00  -0.01  -0.05
   3   8     0.03   0.03   0.05    -0.04  -0.02  -0.01     0.00  -0.03  -0.05
   4   6     0.03   0.02  -0.06     0.03   0.07  -0.05     0.04   0.01   0.01
   5   7     0.01   0.00   0.04     0.01  -0.01   0.01     0.00  -0.01  -0.05
   6   7     0.00  -0.01  -0.01     0.00   0.00  -0.03     0.01   0.00   0.03
   7   8     0.03   0.02  -0.06     0.02   0.10  -0.19     0.06  -0.01   0.01
   8   6     0.01   0.00   0.04     0.02  -0.01   0.00    -0.01  -0.01  -0.03
   9   6     0.01   0.00   0.03     0.02  -0.01  -0.03     0.00   0.00   0.02
  10   6     0.01   0.00   0.01     0.01  -0.01  -0.04     0.01   0.01   0.05
  11   8     0.05   0.00  -0.03    -0.05  -0.09  -0.02     0.00   0.01  -0.03
  12   6     0.04  -0.01  -0.01    -0.04  -0.05  -0.01     0.00  -0.01  -0.04
  13   6     0.05   0.01   0.02    -0.04  -0.04  -0.01     0.00  -0.02  -0.05
  14   6     0.04   0.00  -0.04    -0.03  -0.02   0.03     0.01   0.02  -0.01
  15   8     0.01  -0.02  -0.02    -0.03  -0.01   0.01     0.00  -0.01  -0.04
  16   6     0.01   0.03  -0.07     0.14   0.24  -0.03     0.08   0.00   0.04
  17   8    -0.05  -0.03   0.06    -0.02   0.00  -0.01    -0.02  -0.01  -0.03
  18   6    -0.03  -0.02   0.05    -0.02  -0.01  -0.02    -0.01   0.00  -0.02
  19   8    -0.02  -0.03   0.05    -0.02  -0.01  -0.02    -0.02  -0.01  -0.03
  20   8    -0.06  -0.03   0.14    -0.01  -0.03  -0.01    -0.04   0.00   0.02
  21   6    -0.06  -0.02   0.09     0.00  -0.05   0.05    -0.07  -0.06   0.10
  22   6    -0.04   0.01  -0.02    -0.01  -0.02   0.03    -0.05  -0.05   0.04
  23   6    -0.04   0.01   0.08    -0.02  -0.02  -0.03    -0.02   0.01   0.00
  24   8    -0.09  -0.04   0.12     0.00  -0.09   0.11    -0.09  -0.11   0.20
  25   6     0.07   0.01  -0.14     0.02   0.02   0.05    -0.03  -0.01   0.07
  26   6    -0.03   0.07   0.10    -0.04   0.00  -0.03    -0.01   0.03   0.00
  27   6     0.06   0.01   0.02    -0.06  -0.04  -0.01     0.01  -0.01  -0.04
  28   6     0.05  -0.01  -0.06    -0.06  -0.07   0.05     0.00   0.06   0.01
  29   6     0.01   0.00   0.02     0.01  -0.02   0.02     0.00   0.01  -0.03
  30   6    -0.01  -0.01  -0.04     0.00   0.01  -0.01     0.00   0.00   0.01
  31   6     0.02  -0.01   0.02     0.01  -0.04   0.03    -0.03   0.02  -0.02
  32   6     0.02   0.00   0.00     0.01  -0.04   0.02    -0.03   0.04   0.01
  33   6     0.02   0.02  -0.02     0.01  -0.03   0.01     0.00   0.04   0.02
  34   6     0.00   0.02  -0.02     0.01   0.00   0.00     0.03   0.03   0.01
  35   6     0.00   0.01   0.01     0.01   0.00   0.00     0.03   0.01  -0.02
  36   6     0.03  -0.02   0.03     0.01  -0.05   0.04    -0.06   0.01  -0.03
  37   6    -0.01   0.02   0.01     0.01   0.03  -0.01     0.06   0.01  -0.03
  38   6     0.02  -0.01  -0.05    -0.02   0.00   0.02     0.00   0.04  -0.01
  39   6    -0.01   0.00  -0.08    -0.02   0.01   0.05    -0.02   0.04  -0.04
  40   6    -0.05   0.02  -0.08     0.00   0.04   0.06    -0.03   0.01  -0.05
  41   6    -0.08   0.02  -0.07     0.02   0.05   0.03    -0.02  -0.03  -0.02
  42   6    -0.06   0.01  -0.04     0.02   0.04   0.00     0.00  -0.04   0.01
  43   6     0.07  -0.03  -0.05    -0.05  -0.02   0.01     0.01   0.08   0.00
  44   6    -0.09   0.02  -0.02     0.04   0.06  -0.03     0.04  -0.12   0.04
  45   6     0.01  -0.02   0.02     0.01  -0.06   0.03    -0.05   0.01  -0.03
  46   6     0.04  -0.04   0.06     0.01  -0.06   0.05    -0.09   0.04  -0.04
  47   6    -0.02   0.02   0.00    -0.01   0.03  -0.03     0.06   0.01  -0.02
  48   6    -0.02   0.03   0.01     0.03   0.04   0.00     0.10   0.00  -0.02
  49   6    -0.04  -0.01  -0.05     0.04   0.09  -0.01    -0.03  -0.17   0.02
  50   6    -0.17  -0.03   0.02     0.06   0.08  -0.06     0.12  -0.08   0.07
  51   6     0.05  -0.05  -0.03    -0.06  -0.04   0.02    -0.01   0.09  -0.04
  52   6     0.10   0.00  -0.09    -0.06  -0.03   0.03     0.02   0.12   0.01
  53   6     0.02   0.01   0.05     0.03  -0.01   0.02    -0.02  -0.01  -0.04
  54   6     0.01   0.00   0.00     0.01  -0.01  -0.06     0.01   0.03   0.10
  55   1     0.02   0.01   0.04     0.03  -0.01  -0.03    -0.01   0.01   0.03
  56   1     0.09   0.01   0.02    -0.03  -0.04  -0.01    -0.02  -0.01  -0.05
  57   1     0.03   0.01  -0.03    -0.04   0.02   0.10     0.00   0.02  -0.02
  58   1     0.02   0.03  -0.08     0.11   0.20  -0.14     0.10   0.00   0.06
  59   1     0.01   0.04  -0.06     0.18   0.31  -0.06     0.09  -0.03   0.02
  60   1     0.01   0.04  -0.08     0.16   0.27   0.05     0.08   0.01   0.05
  61   1    -0.14   0.09  -0.05    -0.02  -0.04   0.01    -0.08  -0.10   0.01
  62   1    -0.03   0.00   0.05    -0.02  -0.03  -0.04    -0.02   0.01  -0.01
  63   1     0.06   0.03  -0.19     0.04   0.00   0.08    -0.04  -0.03   0.11
  64   1     0.08   0.03  -0.21     0.01   0.05   0.03    -0.02   0.01   0.02
  65   1     0.17  -0.06  -0.10     0.03   0.03   0.06     0.00   0.04   0.09
  66   1    -0.04   0.08   0.13    -0.04   0.00  -0.03    -0.02   0.04   0.02
  67   1    -0.03   0.08   0.11    -0.05   0.00  -0.01    -0.02   0.02   0.00
  68   1    -0.02   0.10   0.07    -0.04   0.00  -0.04     0.01   0.04   0.00
  69   1     0.08   0.00   0.00    -0.06  -0.05  -0.01     0.01   0.00  -0.04
  70   1     0.07   0.03   0.05    -0.06  -0.02  -0.01     0.01  -0.02  -0.04
  71   1     0.02   0.01   0.02    -0.07  -0.04  -0.01     0.01  -0.02  -0.03
  72   1     0.06  -0.02  -0.05    -0.10  -0.13   0.10    -0.03   0.07  -0.01
  73   1     0.06  -0.01  -0.07    -0.05  -0.10  -0.03     0.01   0.07   0.02
  74   1     0.05   0.00  -0.07    -0.05  -0.01   0.08     0.00   0.07   0.02
  75   1     0.03   0.00  -0.01     0.01  -0.06   0.03    -0.05   0.05   0.02
  76   1     0.02   0.02  -0.04     0.01  -0.03   0.01     0.00   0.05   0.05
  77   1     0.00   0.03  -0.03     0.01   0.02  -0.01     0.05   0.03   0.02
  78   1     0.04   0.01   0.04     0.01  -0.05   0.04    -0.06  -0.01  -0.05
  79   1    -0.01   0.03   0.02     0.02   0.04  -0.01     0.06   0.01  -0.06
  80   1     0.01   0.00  -0.09    -0.03   0.00   0.07    -0.02   0.07  -0.06
  81   1    -0.07   0.03  -0.10     0.00   0.04   0.08    -0.04   0.02  -0.07
  82   1    -0.11   0.04  -0.07     0.03   0.07   0.04    -0.02  -0.06  -0.03
  83   1     0.09  -0.05  -0.03    -0.05  -0.03  -0.01     0.02   0.07   0.02
  84   1    -0.11   0.09  -0.02     0.03   0.04  -0.05     0.06  -0.17   0.06
  85   1     0.02  -0.03   0.03     0.02  -0.07   0.04    -0.07   0.01  -0.05
  86   1    -0.01   0.00   0.00     0.01  -0.06   0.02    -0.03  -0.01  -0.04
  87   1    -0.01  -0.05   0.00     0.01  -0.07   0.02    -0.04   0.03  -0.02
  88   1     0.05  -0.05   0.07     0.01  -0.06   0.05    -0.11   0.03  -0.05
  89   1     0.03  -0.07   0.06     0.01  -0.06   0.04    -0.08   0.06  -0.02
  90   1     0.06  -0.04   0.07     0.01  -0.05   0.05    -0.09   0.04  -0.04
  91   1    -0.03   0.03   0.01    -0.01   0.04  -0.03     0.09   0.00  -0.04
  92   1    -0.03   0.02  -0.01    -0.01   0.02  -0.04     0.06   0.00   0.03
  93   1    -0.02   0.02   0.00    -0.01   0.02  -0.03     0.01   0.01  -0.03
  94   1    -0.03   0.03   0.01     0.03   0.06  -0.01     0.12   0.00  -0.03
  95   1    -0.01   0.03   0.01     0.05   0.04   0.01     0.11   0.00  -0.03
  96   1    -0.03   0.02   0.00     0.03   0.02   0.00     0.10  -0.01   0.01
  97   1    -0.09   0.02  -0.03     0.06   0.10  -0.04     0.00  -0.23   0.05
  98   1    -0.03  -0.10  -0.06     0.04   0.12   0.00    -0.05  -0.12   0.01
  99   1     0.03   0.04  -0.09     0.02   0.08   0.01    -0.09  -0.20   0.01
 100   1    -0.19  -0.01   0.02     0.07   0.09  -0.08     0.14  -0.13   0.10
 101   1    -0.22  -0.02   0.03     0.06   0.05  -0.07     0.17  -0.04   0.09
 102   1    -0.15  -0.10   0.03     0.06   0.10  -0.05     0.10  -0.02   0.04
 103   1     0.10  -0.06  -0.02    -0.09  -0.05   0.02     0.01   0.13  -0.03
 104   1     0.03  -0.07   0.01    -0.05  -0.03   0.00    -0.03   0.06  -0.03
 105   1     0.03  -0.02  -0.05    -0.06  -0.03   0.05    -0.04   0.11  -0.07
 106   1     0.14  -0.02  -0.09    -0.08  -0.04   0.02     0.03   0.14   0.01
 107   1     0.08   0.03  -0.10    -0.06  -0.03   0.05     0.01   0.14  -0.01
 108   1     0.12   0.02  -0.11    -0.05  -0.03   0.02     0.04   0.12   0.03
 109   1     0.02  -0.01   0.05     0.02  -0.02   0.04    -0.01   0.00  -0.05
 110   1     0.02   0.01   0.06     0.04   0.00   0.02    -0.02  -0.01  -0.04
 111   1     0.01   0.01   0.04     0.04   0.00   0.03    -0.02  -0.01  -0.04
 112   1     0.00  -0.02  -0.04     0.01   0.02  -0.04     0.01   0.01   0.08
 113   1     0.03   0.03  -0.01     0.01  -0.05  -0.07     0.00   0.10   0.11
 114   1     0.00  -0.01   0.03     0.01   0.01  -0.11     0.03   0.01   0.17
                     7                      8                      9
                    ?A                     ?A                     ?A
 Frequencies --    38.0539                42.8493                50.2235
 Red. masses --     4.2630                 3.4203                 4.5108
 Frc consts  --     0.0036                 0.0037                 0.0067
 IR Inten    --     0.4208                 0.5664                 0.2985
 Raman Activ --     0.0000                 0.0000                 0.0000
 Depolar     --     0.0000                 0.0000                 0.0000
 Atom AN      X      Y      Z        X      Y      Z        X      Y      Z
   1   8    -0.09   0.03  -0.03     0.01  -0.01  -0.02     0.13  -0.08   0.04
   2  12     0.01  -0.01  -0.03     0.01   0.01   0.04    -0.02   0.02  -0.02
   3   8     0.00  -0.01  -0.03     0.00   0.02   0.04     0.01   0.00  -0.03
   4   6    -0.02   0.01   0.06    -0.03   0.02  -0.05     0.09  -0.06   0.00
   5   7     0.01   0.02   0.03     0.00   0.01   0.02    -0.02   0.04   0.04
   6   7     0.00  -0.02  -0.04     0.00  -0.01   0.00    -0.02   0.01  -0.03
   7   8     0.02  -0.04   0.16    -0.07   0.06  -0.11     0.10  -0.07  -0.01
   8   6     0.01   0.02   0.04    -0.01   0.00   0.01    -0.02   0.05   0.06
   9   6     0.00   0.00   0.01    -0.01  -0.01   0.00    -0.02   0.04   0.03
  10   6     0.00  -0.02  -0.03    -0.01  -0.02  -0.01    -0.03   0.02  -0.01
  11   8     0.00   0.08   0.03     0.01  -0.03   0.00     0.02  -0.04  -0.06
  12   6     0.00   0.02   0.00     0.00   0.01   0.02     0.02  -0.02  -0.06
  13   6    -0.01   0.01  -0.01     0.01   0.01   0.04     0.03  -0.01  -0.05
  14   6     0.00   0.05   0.02     0.00  -0.02  -0.02     0.03  -0.02  -0.05
  15   8     0.01  -0.02  -0.01    -0.01   0.03   0.03     0.02  -0.01  -0.05
  16   6    -0.13  -0.02   0.00    -0.01   0.03  -0.05     0.20  -0.13   0.09
  17   8     0.00  -0.03  -0.01    -0.02   0.00   0.04     0.01   0.03  -0.03
  18   6     0.00  -0.01  -0.01    -0.01   0.00   0.02     0.00   0.03  -0.01
  19   8     0.01  -0.02  -0.02     0.00   0.00   0.03    -0.02   0.03  -0.02
  20   8    -0.03   0.00   0.01    -0.01   0.00   0.02     0.00   0.03  -0.01
  21   6    -0.04  -0.03   0.03    -0.01   0.02   0.00    -0.01   0.01   0.02
  22   6    -0.03  -0.03   0.00     0.00   0.02  -0.01    -0.01   0.01   0.01
  23   6     0.00   0.00   0.00    -0.01   0.01   0.02     0.00   0.02   0.00
  24   8    -0.06  -0.05   0.07     0.00   0.03  -0.02    -0.01   0.00   0.04
  25   6    -0.01  -0.03  -0.01     0.01   0.00  -0.05    -0.02   0.03   0.05
  26   6     0.01   0.01   0.01    -0.01   0.01   0.02     0.01   0.02   0.00
  27   6     0.01   0.00  -0.02     0.00   0.01   0.03     0.02   0.00  -0.04
  28   6     0.01   0.07   0.02     0.01  -0.07  -0.03     0.01   0.06  -0.02
  29   6     0.01   0.02   0.02     0.00   0.01   0.02    -0.02   0.02   0.03
  30   6     0.01  -0.02  -0.03     0.00  -0.02  -0.01    -0.02   0.01  -0.03
  31   6     0.03  -0.01   0.02     0.00   0.03   0.01     0.00   0.02   0.02
  32   6     0.03   0.00  -0.01     0.00   0.02   0.01     0.00   0.01   0.00
  33   6     0.02   0.03  -0.04     0.00   0.00   0.03    -0.03   0.00  -0.01
  34   6     0.00   0.05  -0.04    -0.01  -0.02   0.04    -0.05  -0.02   0.01
  35   6     0.00   0.05  -0.01    -0.01  -0.01   0.04    -0.05  -0.01   0.04
  36   6     0.04  -0.03   0.05     0.01   0.05   0.00     0.02   0.02   0.04
  37   6    -0.02   0.09  -0.02    -0.02  -0.04   0.05    -0.08  -0.05   0.08
  38   6    -0.01  -0.02  -0.02    -0.01   0.00  -0.02    -0.03   0.01  -0.02
  39   6    -0.02  -0.01   0.00    -0.02   0.01  -0.03    -0.02   0.00  -0.01
  40   6     0.00   0.00   0.01    -0.02   0.00  -0.04     0.00   0.00  -0.01
  41   6     0.02   0.00  -0.01    -0.01  -0.03  -0.03     0.01   0.00  -0.02
  42   6     0.03  -0.02  -0.03     0.01  -0.04  -0.01     0.00   0.00  -0.03
  43   6    -0.03  -0.04  -0.02     0.00   0.01  -0.02    -0.05   0.01  -0.02
  44   6     0.07  -0.04  -0.04     0.05  -0.09   0.00     0.01   0.01  -0.04
  45   6     0.03  -0.06   0.03     0.07   0.07   0.05     0.03   0.01   0.03
  46   6     0.06  -0.06   0.08     0.00   0.10  -0.07     0.04   0.00   0.04
  47   6    -0.02   0.09  -0.07     0.00  -0.04   0.07     0.00  -0.05   0.08
  48   6    -0.03   0.13  -0.01    -0.04  -0.05   0.04    -0.19  -0.02   0.05
  49   6    -0.01  -0.01  -0.01    -0.10  -0.08   0.04     0.02   0.02  -0.04
  50   6     0.18   0.04  -0.10     0.20   0.01  -0.08     0.01   0.01  -0.04
  51   6     0.00  -0.04   0.00     0.06   0.02  -0.01    -0.02   0.02  -0.03
  52   6    -0.05  -0.08  -0.02    -0.01  -0.04  -0.04    -0.08  -0.03  -0.01
  53   6     0.01   0.04   0.08    -0.01   0.00   0.00    -0.01   0.07   0.09
  54   6    -0.01  -0.05  -0.07    -0.01  -0.04  -0.05    -0.03   0.00  -0.04
  55   1     0.00   0.00   0.02    -0.01  -0.02  -0.01    -0.02   0.05   0.04
  56   1    -0.03   0.01  -0.01     0.02   0.01   0.04     0.04  -0.01  -0.05
  57   1     0.01   0.04   0.00     0.01  -0.01   0.01     0.00  -0.04  -0.08
  58   1    -0.08   0.00   0.04    -0.06   0.01  -0.09     0.21  -0.11   0.13
  59   1    -0.17  -0.07   0.04     0.01   0.09  -0.06     0.22  -0.18   0.05
  60   1    -0.16  -0.01  -0.07     0.01   0.00  -0.02     0.21  -0.12   0.11
  61   1    -0.05  -0.05  -0.02    -0.02   0.06  -0.01     0.00  -0.03   0.01
  62   1     0.00   0.01   0.00    -0.01   0.00   0.01     0.00   0.02   0.00
  63   1    -0.03  -0.04   0.00     0.01   0.02  -0.07    -0.02   0.01   0.08
  64   1    -0.01  -0.03  -0.04     0.01   0.01  -0.05    -0.02   0.03   0.05
  65   1     0.01  -0.02   0.00     0.03  -0.03  -0.04    -0.03   0.05   0.05
  66   1     0.00   0.02   0.01    -0.02   0.02   0.02     0.01   0.02   0.00
  67   1     0.00   0.00   0.00    -0.01   0.01   0.02     0.02   0.01  -0.01
  68   1     0.02   0.01   0.01    -0.01   0.02   0.01     0.02   0.01   0.01
  69   1     0.00   0.01  -0.01     0.01   0.01   0.03     0.03   0.00  -0.04
  70   1     0.00  -0.01  -0.02     0.01   0.02   0.04     0.03   0.01  -0.03
  71   1     0.03   0.01  -0.02    -0.01   0.01   0.03     0.01  -0.01  -0.03
  72   1     0.02   0.09   0.00     0.03  -0.09  -0.01    -0.03   0.10  -0.05
  73   1     0.00   0.08   0.04     0.00  -0.08  -0.06     0.04   0.08   0.03
  74   1     0.00   0.04   0.00     0.00  -0.07  -0.04     0.02   0.07   0.00
  75   1     0.04  -0.02  -0.01     0.00   0.03   0.01     0.02   0.01  -0.01
  76   1     0.02   0.03  -0.06     0.00   0.00   0.03    -0.03  -0.01  -0.03
  77   1    -0.01   0.08  -0.07    -0.01  -0.03   0.05    -0.07  -0.04   0.02
  78   1     0.05   0.00   0.07    -0.02   0.00   0.00     0.02   0.03   0.06
  79   1    -0.01   0.09   0.00    -0.02  -0.05   0.06    -0.10  -0.11   0.13
  80   1    -0.03  -0.01   0.01    -0.02   0.02  -0.04    -0.02  -0.01   0.00
  81   1    -0.01   0.01   0.02    -0.03   0.01  -0.05     0.01  -0.01   0.00
  82   1     0.04   0.00   0.00    -0.01  -0.04  -0.03     0.02   0.00  -0.01
  83   1    -0.05  -0.02  -0.04    -0.02   0.04  -0.01    -0.08   0.03  -0.03
  84   1     0.10  -0.13  -0.03     0.10  -0.22   0.04     0.00   0.01  -0.05
  85   1     0.05  -0.07   0.05     0.07   0.08   0.04     0.04   0.00   0.05
  86   1     0.02  -0.02   0.01     0.08   0.02   0.09     0.02   0.02   0.03
  87   1     0.02  -0.09   0.00     0.10   0.11   0.05     0.03   0.00   0.02
  88   1     0.07  -0.07   0.11     0.00   0.11  -0.08     0.06   0.00   0.06
  89   1     0.06  -0.10   0.07     0.03   0.15  -0.08     0.04  -0.02   0.03
  90   1     0.07  -0.05   0.10    -0.05   0.09  -0.12     0.04   0.01   0.05
  91   1    -0.02   0.12  -0.08    -0.02  -0.05   0.09     0.01  -0.08   0.09
  92   1    -0.02   0.09  -0.08     0.00  -0.03   0.04     0.02   0.00   0.06
  93   1    -0.02   0.07  -0.08     0.03  -0.03   0.08     0.04  -0.07   0.08
  94   1    -0.04   0.16  -0.01    -0.04  -0.07   0.05    -0.20  -0.07   0.08
  95   1    -0.02   0.13   0.03    -0.05  -0.05   0.02    -0.28  -0.02   0.05
  96   1    -0.03   0.13  -0.03    -0.03  -0.03   0.03    -0.18   0.06   0.00
  97   1     0.04  -0.05  -0.02    -0.06  -0.14   0.05     0.03   0.02  -0.05
  98   1    -0.03   0.09  -0.01    -0.15   0.05   0.00     0.03   0.02  -0.03
  99   1    -0.09  -0.06   0.04    -0.21  -0.14   0.10     0.02   0.02  -0.04
 100   1     0.21   0.01  -0.10     0.23  -0.05  -0.06     0.02   0.02  -0.05
 101   1     0.27   0.02  -0.12     0.34   0.01  -0.10     0.00   0.01  -0.04
 102   1     0.15   0.14  -0.13     0.15   0.15  -0.15     0.01   0.01  -0.03
 103   1    -0.02  -0.06  -0.01     0.06   0.02  -0.01    -0.03   0.02  -0.03
 104   1     0.01  -0.01  -0.01     0.08   0.06   0.00     0.00   0.05  -0.03
 105   1     0.02  -0.06   0.02     0.10  -0.01  -0.01     0.01   0.00  -0.02
 106   1    -0.05  -0.08  -0.03     0.00  -0.02  -0.03    -0.09  -0.02  -0.01
 107   1    -0.03  -0.10  -0.02     0.02  -0.08  -0.07    -0.05  -0.06  -0.01
 108   1    -0.07  -0.08  -0.03    -0.06  -0.06  -0.04    -0.10  -0.04  -0.01
 109   1     0.00   0.03   0.10    -0.02   0.01   0.00    -0.03   0.06   0.12
 110   1     0.01   0.05   0.10    -0.01  -0.01  -0.01    -0.01   0.07   0.10
 111   1     0.02   0.07   0.08     0.00  -0.01   0.01     0.01   0.09   0.10
 112   1     0.01  -0.01  -0.01     0.00   0.00   0.01    -0.02   0.02  -0.01
 113   1    -0.02  -0.15  -0.07    -0.03  -0.14  -0.05    -0.04  -0.07  -0.05
 114   1    -0.02  -0.01  -0.16    -0.02   0.00  -0.14    -0.05   0.02  -0.11
                    10                     11                     12
                    ?A                     ?A                     ?A
 Frequencies --    54.6007                58.7169                61.2429
 Red. masses --     3.0139                 4.6022                 3.7429
 Frc consts  --     0.0053                 0.0093                 0.0083
 IR Inten    --     0.0384                 0.2432                 1.6496
 Raman Activ --     0.0000                 0.0000                 0.0000
 Depolar     --     0.0000                 0.0000                 0.0000
 Atom AN      X      Y      Z        X      Y      Z        X      Y      Z
   1   8    -0.02   0.00   0.01     0.07  -0.03   0.05    -0.07   0.04  -0.06
   2  12     0.00  -0.01  -0.02     0.01   0.02   0.03    -0.01   0.01   0.00
   3   8    -0.01  -0.03  -0.03     0.02   0.05   0.04     0.00   0.00   0.00
   4   6    -0.02   0.00   0.01     0.08  -0.08   0.04     0.00  -0.03   0.01
   5   7     0.00   0.00   0.01    -0.02   0.00  -0.02    -0.01   0.00   0.00
   6   7     0.01  -0.01  -0.01    -0.02  -0.01   0.02    -0.01   0.03   0.00
   7   8    -0.02   0.00   0.02     0.13  -0.12   0.04     0.06  -0.09   0.07
   8   6     0.00   0.01   0.03    -0.03   0.00  -0.02     0.00   0.00  -0.01
   9   6     0.00   0.01   0.03    -0.03  -0.01   0.00     0.01   0.01  -0.02
  10   6     0.00   0.00   0.01    -0.03  -0.01   0.01     0.00   0.02  -0.02
  11   8    -0.02   0.00   0.01     0.01  -0.09   0.00    -0.01  -0.04   0.01
  12   6    -0.01  -0.01   0.00     0.02  -0.04   0.01     0.00  -0.02   0.01
  13   6    -0.02  -0.03  -0.02     0.02   0.03   0.02     0.00  -0.01   0.00
  14   6    -0.01   0.00   0.02     0.02  -0.08   0.04     0.00  -0.04   0.02
  15   8    -0.01   0.00   0.01     0.03  -0.03   0.01     0.01  -0.02   0.01
  16   6    -0.03   0.00   0.01     0.12   0.00   0.04    -0.07   0.04  -0.06
  17   8     0.00  -0.02  -0.02    -0.01   0.02   0.04     0.02   0.01   0.00
  18   6     0.01  -0.01  -0.02    -0.01   0.02   0.02     0.02   0.01   0.01
  19   8     0.01  -0.01  -0.02     0.00   0.02   0.03     0.01   0.01   0.00
  20   8    -0.01   0.00  -0.03     0.00   0.01   0.04     0.03  -0.01   0.01
  21   6    -0.03  -0.03   0.01     0.01   0.04  -0.02     0.03  -0.02   0.05
  22   6    -0.02  -0.04   0.00     0.01   0.04   0.00     0.03   0.02  -0.02
  23   6     0.00   0.00  -0.02    -0.01   0.02   0.02     0.02  -0.01   0.00
  24   8    -0.04  -0.04   0.04     0.02   0.06  -0.06     0.03  -0.06   0.12
  25   6    -0.03  -0.03   0.01     0.01   0.03  -0.02     0.11   0.04  -0.07
  26   6    -0.01  -0.01  -0.03    -0.02   0.04   0.02     0.03  -0.02   0.00
  27   6    -0.01  -0.04  -0.03    -0.02   0.04   0.04    -0.01   0.00   0.01
  28   6    -0.02   0.00   0.02    -0.01  -0.07   0.07    -0.01  -0.07   0.02
  29   6     0.01   0.01   0.01    -0.02   0.00  -0.03    -0.01  -0.01   0.01
  30   6     0.01  -0.01  -0.01    -0.02  -0.01   0.01     0.00   0.03  -0.01
  31   6     0.01   0.02   0.00    -0.02  -0.04  -0.02    -0.01  -0.01   0.01
  32   6     0.01   0.01   0.00    -0.03  -0.08   0.00    -0.01  -0.02   0.02
  33   6     0.01   0.00   0.01    -0.04  -0.09   0.00    -0.02  -0.03   0.02
  34   6     0.00   0.00   0.01    -0.03  -0.03  -0.03    -0.01  -0.03   0.02
  35   6     0.00   0.00   0.01    -0.02   0.02  -0.05    -0.01  -0.02   0.01
  36   6     0.02   0.02   0.00     0.00  -0.01  -0.03    -0.01   0.00   0.00
  37   6     0.00   0.01   0.01    -0.01   0.11  -0.10    -0.01  -0.01   0.01
  38   6     0.01  -0.02   0.00    -0.01  -0.01   0.01    -0.01   0.04  -0.01
  39   6     0.00  -0.01   0.00    -0.03   0.01   0.00     0.03  -0.01  -0.02
  40   6     0.00   0.01   0.01    -0.04   0.01  -0.01     0.06  -0.05  -0.02
  41   6     0.00   0.01   0.00    -0.05   0.01   0.00     0.04  -0.04  -0.01
  42   6     0.00   0.01  -0.01    -0.03  -0.01   0.01     0.01   0.00  -0.01
  43   6     0.02  -0.04   0.00     0.00  -0.02   0.01    -0.07   0.12  -0.01
  44   6    -0.01   0.03  -0.01    -0.02  -0.02   0.02    -0.02   0.02  -0.01
  45   6     0.21   0.04   0.12     0.04   0.02   0.03     0.02   0.02   0.03
  46   6    -0.02   0.16  -0.17     0.00   0.03  -0.10    -0.02   0.03  -0.05
  47   6     0.03   0.02  -0.02    -0.09   0.11  -0.16    -0.03  -0.01   0.01
  48   6    -0.03   0.05   0.02     0.08   0.14  -0.05     0.01  -0.03   0.01
  49   6     0.06   0.01  -0.04    -0.08  -0.02   0.03     0.01   0.04  -0.01
  50   6    -0.08  -0.02   0.03     0.02   0.01  -0.01    -0.08  -0.01  -0.01
  51   6    -0.02  -0.06   0.01     0.02  -0.02   0.02     0.07   0.19  -0.07
  52   6     0.04   0.00  -0.01     0.01  -0.03  -0.02    -0.15   0.00   0.05
  53   6     0.01   0.03   0.06    -0.04   0.00  -0.03     0.02  -0.01  -0.01
  54   6     0.01   0.00   0.03    -0.03  -0.02   0.00     0.00   0.01  -0.05
  55   1     0.00   0.01   0.04    -0.04  -0.01   0.00     0.02   0.01  -0.03
  56   1    -0.04  -0.04  -0.01     0.07   0.03   0.01     0.00   0.00   0.00
  57   1    -0.01   0.00   0.02     0.02  -0.08   0.03     0.01  -0.04   0.03
  58   1    -0.04   0.00   0.00     0.15   0.00   0.02     0.02   0.05  -0.05
  59   1    -0.03   0.02   0.01     0.12  -0.02   0.03    -0.12  -0.02  -0.01
  60   1    -0.03   0.00   0.01     0.11   0.04   0.05    -0.12   0.10  -0.12
  61   1    -0.02  -0.06  -0.01     0.01   0.07   0.01    -0.02   0.05  -0.04
  62   1     0.01   0.01  -0.02    -0.01   0.01   0.00     0.01  -0.01   0.00
  63   1    -0.04  -0.04   0.02     0.03   0.04  -0.04     0.11   0.05  -0.09
  64   1    -0.02  -0.04   0.00     0.00   0.03   0.01     0.11   0.07  -0.12
  65   1    -0.02  -0.01   0.01     0.00   0.00  -0.03     0.17   0.00  -0.05
  66   1    -0.02   0.00  -0.04    -0.02   0.04   0.03     0.02   0.00   0.00
  67   1    -0.02  -0.03  -0.03    -0.02   0.05   0.03     0.03  -0.03  -0.01
  68   1     0.00  -0.01  -0.02    -0.03   0.05   0.00     0.05  -0.02   0.02
  69   1    -0.02  -0.04  -0.02    -0.02   0.02   0.04    -0.02   0.00   0.02
  70   1    -0.02  -0.06  -0.04    -0.02   0.09   0.05    -0.02   0.01   0.00
  71   1     0.00  -0.03  -0.04    -0.06   0.03   0.06    -0.01   0.00   0.02
  72   1    -0.02   0.00   0.02    -0.04  -0.06   0.07     0.00  -0.09   0.04
  73   1    -0.02   0.00   0.02    -0.01  -0.06   0.07    -0.03  -0.08   0.00
  74   1    -0.02   0.00   0.02     0.01  -0.06   0.10     0.00  -0.08   0.03
  75   1     0.01   0.01   0.00    -0.03  -0.11   0.01    -0.02  -0.03   0.02
  76   1     0.00   0.00   0.00    -0.05  -0.12   0.01    -0.02  -0.04   0.03
  77   1     0.00   0.00   0.01    -0.04  -0.02  -0.04    -0.01  -0.03   0.02
  78   1    -0.07  -0.09   0.04    -0.03  -0.05  -0.02    -0.03  -0.03   0.00
  79   1    -0.01  -0.01   0.02     0.01   0.17  -0.13    -0.01   0.00   0.00
  80   1     0.00  -0.01   0.01    -0.02   0.01  -0.01     0.03  -0.01  -0.02
  81   1     0.00   0.01   0.01    -0.06   0.02  -0.01     0.09  -0.09  -0.02
  82   1     0.00   0.02   0.00    -0.06   0.01   0.00     0.05  -0.07  -0.01
  83   1     0.05  -0.06  -0.01     0.00  -0.01   0.01    -0.16   0.22  -0.01
  84   1    -0.04   0.09  -0.04     0.00  -0.07   0.04    -0.03   0.06  -0.01
  85   1     0.23   0.04   0.13     0.07   0.04   0.02     0.03   0.03   0.02
  86   1     0.22  -0.05   0.23     0.03   0.00   0.08     0.03  -0.01   0.06
  87   1     0.30   0.13   0.08     0.06   0.04   0.02     0.04   0.04   0.03
  88   1    -0.02   0.15  -0.16     0.02   0.04  -0.11    -0.02   0.04  -0.05
  89   1     0.09   0.28  -0.22     0.03   0.06  -0.11     0.00   0.06  -0.05
  90   1    -0.16   0.15  -0.27    -0.03   0.00  -0.15    -0.04   0.02  -0.07
  91   1     0.02   0.02  -0.03    -0.05   0.18  -0.21    -0.04  -0.01   0.02
  92   1     0.03   0.04  -0.04    -0.10   0.06  -0.09    -0.04  -0.03   0.00
  93   1     0.04  -0.01  -0.03    -0.18   0.10  -0.20    -0.03  -0.01   0.02
  94   1    -0.02   0.06   0.01     0.08   0.22  -0.09     0.00  -0.02   0.01
  95   1    -0.05   0.05   0.04     0.17   0.14   0.00     0.02  -0.02   0.00
  96   1    -0.02   0.08   0.00     0.07   0.07  -0.03     0.00  -0.04   0.02
  97   1     0.05   0.03  -0.04    -0.08  -0.04   0.04    -0.02   0.06  -0.01
  98   1     0.09  -0.04  -0.02    -0.10   0.01   0.01     0.02   0.00  -0.01
  99   1     0.10   0.04  -0.07    -0.10  -0.04   0.05     0.05   0.05   0.00
 100   1    -0.08   0.00   0.02     0.03  -0.01   0.00    -0.10   0.02  -0.01
 101   1    -0.15  -0.01   0.05     0.08   0.01  -0.02    -0.10  -0.01  -0.01
 102   1    -0.05  -0.08   0.07     0.00   0.05  -0.04    -0.07  -0.05  -0.02
 103   1    -0.01  -0.07   0.01     0.02  -0.03   0.02     0.03   0.25  -0.06
 104   1    -0.03  -0.09   0.01     0.02  -0.01   0.03     0.12   0.29  -0.09
 105   1    -0.05  -0.03   0.01     0.02  -0.03   0.03     0.16   0.10  -0.09
 106   1     0.05  -0.02  -0.02     0.02  -0.03  -0.01    -0.20   0.08   0.06
 107   1     0.02   0.03   0.00     0.01  -0.04  -0.03    -0.07  -0.10   0.02
 108   1     0.08   0.02  -0.03    -0.01  -0.03  -0.02    -0.25  -0.07   0.11
 109   1    -0.02   0.04   0.08    -0.03   0.00  -0.04     0.01  -0.01  -0.01
 110   1     0.00   0.02   0.05    -0.05   0.01  -0.01     0.03  -0.01  -0.02
 111   1     0.04   0.04   0.07    -0.06   0.01  -0.04     0.02  -0.02   0.00
 112   1     0.00  -0.02  -0.01    -0.02  -0.02   0.02     0.01   0.05   0.01
 113   1     0.02   0.05   0.02    -0.04  -0.05   0.00    -0.03  -0.08  -0.05
 114   1     0.00  -0.01   0.07    -0.03  -0.01  -0.02     0.00   0.05  -0.14
                    13                     14                     15
                    ?A                     ?A                     ?A
 Frequencies --    62.8745                63.1790                68.5224
 Red. masses --     4.3074                 4.3023                 4.3513
 Frc consts  --     0.0100                 0.0101                 0.0120
 IR Inten    --     1.1754                 1.2118                 0.0797
 Raman Activ --     0.0000                 0.0000                 0.0000
 Depolar     --     0.0000                 0.0000                 0.0000
 Atom AN      X      Y      Z        X      Y      Z        X      Y      Z
   1   8     0.00  -0.11   0.04    -0.08   0.12  -0.12     0.02  -0.03   0.00
   2  12    -0.01   0.00  -0.03    -0.02  -0.01  -0.01    -0.03  -0.03   0.00
   3   8    -0.03   0.02  -0.03    -0.01   0.01  -0.01    -0.04   0.00   0.03
   4   6    -0.05  -0.04   0.00     0.04  -0.02  -0.01    -0.01   0.02  -0.03
   5   7    -0.01   0.02  -0.01     0.00  -0.01   0.02     0.02  -0.03   0.02
   6   7     0.00   0.01   0.00    -0.01   0.00  -0.01    -0.01  -0.01  -0.01
   7   8    -0.11   0.01  -0.03     0.18  -0.15   0.10    -0.04   0.04  -0.03
   8   6    -0.01   0.03   0.02     0.00  -0.01   0.01     0.03  -0.03   0.02
   9   6    -0.01   0.03   0.03     0.01   0.00   0.01     0.03  -0.02   0.01
  10   6    -0.01   0.02   0.03     0.00   0.01   0.01     0.01  -0.01  -0.01
  11   8    -0.04   0.00  -0.01    -0.01  -0.03  -0.02    -0.01   0.04  -0.04
  12   6    -0.03   0.02  -0.01     0.00  -0.03  -0.03    -0.03   0.00  -0.03
  13   6    -0.03   0.03  -0.02     0.00   0.00  -0.02    -0.01   0.00   0.00
  14   6    -0.03  -0.03  -0.01     0.00  -0.01  -0.02    -0.03   0.06  -0.07
  15   8    -0.02   0.01  -0.01     0.00  -0.06  -0.04    -0.06  -0.02  -0.04
  16   6    -0.02  -0.14   0.05    -0.03   0.10  -0.09     0.04  -0.09   0.04
  17   8     0.02   0.01   0.00    -0.01   0.03   0.01    -0.04   0.01   0.05
  18   6     0.01  -0.01  -0.03    -0.03   0.00  -0.01    -0.07  -0.03   0.04
  19   8     0.00  -0.02  -0.03    -0.05   0.00  -0.01    -0.10  -0.03   0.03
  20   8     0.06  -0.08   0.01     0.02  -0.04   0.02     0.01  -0.10   0.07
  21   6     0.09  -0.06   0.04     0.05   0.00  -0.02     0.05  -0.01  -0.01
  22   6     0.08   0.03  -0.04     0.03   0.03   0.01     0.03   0.02   0.03
  23   6     0.02  -0.04  -0.04    -0.02  -0.02  -0.01    -0.04  -0.07   0.04
  24   8     0.11  -0.10   0.12     0.08   0.02  -0.05     0.11   0.02  -0.08
  25   6     0.21   0.06  -0.13     0.03   0.05   0.03     0.02   0.03   0.05
  26   6    -0.01   0.01  -0.03    -0.03   0.01  -0.01    -0.03  -0.05   0.05
  27   6    -0.04   0.05   0.01    -0.02   0.02   0.00     0.01   0.01   0.01
  28   6    -0.04  -0.04   0.00    -0.01   0.00  -0.01     0.00   0.15  -0.08
  29   6    -0.01   0.01  -0.01    -0.01  -0.01   0.02     0.03  -0.02   0.02
  30   6     0.00   0.01   0.01    -0.01   0.01  -0.01    -0.02   0.00  -0.01
  31   6    -0.01   0.01   0.00    -0.01   0.00   0.02     0.03  -0.02   0.02
  32   6    -0.02  -0.02   0.01    -0.01   0.02   0.02     0.04   0.00   0.00
  33   6    -0.02  -0.04   0.02     0.00   0.02   0.02     0.04   0.03  -0.02
  34   6    -0.02  -0.03   0.01     0.00   0.01   0.02     0.04   0.04  -0.02
  35   6    -0.02   0.00   0.00     0.00  -0.02   0.03     0.03   0.02  -0.01
  36   6     0.00   0.02  -0.01    -0.02   0.00   0.01     0.04  -0.04   0.04
  37   6    -0.02   0.01  -0.01    -0.01  -0.05   0.05     0.04   0.05  -0.02
  38   6     0.02  -0.01   0.01     0.00   0.00   0.00    -0.03   0.01  -0.01
  39   6     0.01   0.00   0.02    -0.02   0.02   0.00    -0.01  -0.01  -0.02
  40   6     0.00   0.02   0.02    -0.04   0.05   0.00     0.00  -0.03  -0.02
  41   6     0.00   0.03   0.01    -0.03   0.04   0.00     0.00  -0.03  -0.01
  42   6     0.00   0.02   0.01    -0.01   0.02  -0.01    -0.01  -0.01  -0.01
  43   6     0.03  -0.02   0.01     0.03  -0.04   0.00    -0.07   0.05  -0.01
  44   6     0.01   0.02   0.00     0.01   0.00  -0.01    -0.02  -0.01  -0.01
  45   6    -0.04   0.03  -0.02     0.01   0.00   0.03     0.12  -0.06   0.07
  46   6     0.01   0.00   0.00    -0.03   0.03  -0.01     0.02   0.01  -0.02
  47   6     0.01   0.02  -0.04    -0.01  -0.05   0.09    -0.05   0.04   0.01
  48   6    -0.03   0.06   0.01    -0.02  -0.09   0.03     0.14  -0.01  -0.01
  49   6    -0.03   0.03   0.02    -0.03   0.00   0.00    -0.04   0.01   0.00
  50   6     0.06   0.05  -0.03     0.08   0.04  -0.03    -0.02   0.00  -0.04
  51   6    -0.07  -0.05   0.01    -0.11  -0.09   0.01    -0.08   0.08  -0.06
  52   6     0.07   0.07   0.02     0.09   0.09  -0.02    -0.09   0.07   0.04
  53   6    -0.01   0.04   0.03     0.01  -0.01   0.01     0.04  -0.03   0.03
  54   6     0.00   0.04   0.06     0.01   0.04   0.04     0.02   0.02  -0.02
  55   1    -0.01   0.04   0.05     0.01   0.01   0.01     0.05  -0.01   0.00
  56   1    -0.03   0.05  -0.03     0.02   0.01  -0.03     0.00   0.00   0.00
  57   1    -0.01  -0.03  -0.02    -0.01  -0.01  -0.01    -0.06   0.05  -0.10
  58   1    -0.11  -0.13   0.06     0.18   0.12  -0.05     0.02  -0.07   0.10
  59   1     0.01  -0.08   0.02    -0.12  -0.07  -0.02     0.06  -0.12   0.02
  60   1     0.01  -0.21   0.08    -0.12   0.24  -0.19     0.05  -0.12   0.05
  61   1     0.00   0.11  -0.07     0.05   0.03   0.02     0.05   0.05   0.06
  62   1     0.01  -0.07  -0.08    -0.02  -0.04  -0.03    -0.07  -0.11   0.03
  63   1     0.22   0.08  -0.16     0.07   0.05   0.04     0.07   0.04   0.05
  64   1     0.19   0.12  -0.19     0.01   0.07   0.07     0.00   0.06   0.09
  65   1     0.28   0.00  -0.10     0.00   0.03   0.02    -0.01   0.01   0.03
  66   1     0.01  -0.02  -0.03    -0.01  -0.02   0.00     0.00  -0.09   0.07
  67   1    -0.01   0.04   0.00    -0.03   0.05   0.03    -0.01   0.00   0.07
  68   1    -0.04   0.02  -0.08    -0.07   0.02  -0.04    -0.07  -0.05   0.02
  69   1    -0.05   0.06   0.01    -0.02   0.01   0.00     0.03   0.01  -0.01
  70   1    -0.05   0.06   0.00    -0.02   0.04   0.01     0.02   0.01   0.04
  71   1    -0.04   0.04   0.02    -0.04   0.00   0.02    -0.01   0.00   0.02
  72   1    -0.03  -0.03  -0.01    -0.02  -0.01  -0.01    -0.02   0.18  -0.11
  73   1    -0.06  -0.03   0.01     0.00  -0.01  -0.02     0.05   0.17  -0.03
  74   1    -0.03  -0.07   0.00    -0.01   0.02   0.00    -0.02   0.17  -0.10
  75   1    -0.02  -0.02   0.01    -0.01   0.03   0.01     0.04   0.00   0.00
  76   1    -0.03  -0.05   0.03     0.00   0.04   0.01     0.05   0.05  -0.03
  77   1    -0.03  -0.04   0.02     0.00   0.01   0.02     0.04   0.06  -0.04
  78   1     0.01   0.04  -0.02    -0.03  -0.02   0.02    -0.01  -0.09   0.06
  79   1    -0.02   0.00   0.01    -0.01  -0.05   0.05     0.06   0.11  -0.07
  80   1     0.02  -0.01   0.02    -0.02   0.02   0.00    -0.02   0.00  -0.02
  81   1     0.00   0.02   0.02    -0.05   0.07   0.00     0.01  -0.04  -0.02
  82   1     0.00   0.03   0.01    -0.04   0.05   0.00     0.00  -0.04  -0.01
  83   1     0.08  -0.08   0.01     0.11  -0.13   0.00    -0.08   0.06  -0.01
  84   1     0.03  -0.02   0.01     0.03  -0.06   0.00    -0.01  -0.02  -0.01
  85   1    -0.04   0.04  -0.03     0.00   0.00   0.03     0.16  -0.07   0.10
  86   1    -0.04   0.05  -0.03     0.02  -0.02   0.04     0.11  -0.07   0.12
  87   1    -0.06   0.02  -0.01     0.02   0.02   0.03     0.16  -0.04   0.03
  88   1     0.02   0.01   0.00    -0.04   0.02  -0.01     0.01  -0.01   0.00
  89   1     0.00  -0.02   0.01    -0.02   0.05  -0.01     0.06   0.05  -0.05
  90   1     0.04  -0.01   0.01    -0.05   0.03  -0.02    -0.05   0.02  -0.05
  91   1     0.02   0.03  -0.06    -0.03  -0.08   0.11    -0.02   0.06  -0.02
  92   1     0.01   0.03  -0.05    -0.01  -0.05   0.08    -0.06  -0.03   0.09
  93   1     0.01  -0.01  -0.06     0.01  -0.03   0.11    -0.13   0.08  -0.01
  94   1    -0.03   0.07   0.00    -0.03  -0.12   0.04     0.13   0.03  -0.03
  95   1    -0.05   0.05   0.04    -0.03  -0.09  -0.01     0.23  -0.01  -0.03
  96   1    -0.03   0.08   0.00    -0.02  -0.09   0.03     0.12  -0.11   0.02
  97   1    -0.01   0.02   0.02    -0.01  -0.02   0.00    -0.04   0.01   0.00
  98   1    -0.04   0.08   0.02    -0.05   0.05   0.00    -0.04   0.02  -0.01
  99   1    -0.07   0.01   0.05    -0.08  -0.02   0.02    -0.04   0.00   0.01
 100   1     0.07   0.04  -0.03     0.11   0.02  -0.03    -0.03   0.00  -0.04
 101   1     0.10   0.04  -0.03     0.12   0.04  -0.04     0.00  -0.01  -0.05
 102   1     0.05   0.10  -0.04     0.07   0.10  -0.03    -0.02   0.01  -0.05
 103   1    -0.05  -0.06   0.01    -0.07  -0.11   0.01    -0.07   0.11  -0.05
 104   1    -0.10  -0.13   0.01    -0.17  -0.20   0.03    -0.08   0.06  -0.07
 105   1    -0.13   0.01   0.00    -0.21   0.00   0.00    -0.08   0.08  -0.09
 106   1     0.08   0.04   0.01     0.12   0.04  -0.03    -0.12   0.10   0.04
 107   1     0.01   0.13   0.04     0.01   0.19   0.01    -0.09   0.06   0.05
 108   1     0.15   0.10   0.00     0.20   0.14  -0.05    -0.08   0.05   0.08
 109   1    -0.01   0.03   0.03     0.01  -0.01   0.02     0.04  -0.04   0.04
 110   1    -0.01   0.04   0.04     0.02  -0.01   0.01     0.05  -0.02   0.04
 111   1    -0.01   0.05   0.02     0.02  -0.02   0.02     0.04  -0.03   0.03
 112   1    -0.02  -0.02  -0.01    -0.01  -0.02  -0.06     0.01   0.01  -0.05
 113   1     0.03   0.15   0.06     0.05   0.18   0.04     0.05   0.04  -0.03
 114   1    -0.01   0.00   0.18     0.02  -0.01   0.17     0.03   0.01   0.00
                    16                     17                     18
                    ?A                     ?A                     ?A
 Frequencies --    75.2009                77.2459                79.6551
 Red. masses --     3.7796                 3.2375                 3.2497
 Frc consts  --     0.0126                 0.0114                 0.0121
 IR Inten    --     0.1070                 0.5085                 0.2649
 Raman Activ --     0.0000                 0.0000                 0.0000
 Depolar     --     0.0000                 0.0000                 0.0000
 Atom AN      X      Y      Z        X      Y      Z        X      Y      Z
   1   8     0.00   0.00   0.02    -0.01   0.01  -0.02     0.01   0.02   0.02
   2  12     0.02   0.00  -0.04     0.01  -0.02   0.01    -0.01  -0.02  -0.03
   3   8     0.02   0.04  -0.03     0.00   0.02   0.02     0.01   0.01   0.00
   4   6    -0.01   0.01   0.02     0.00   0.00  -0.01     0.00   0.01   0.01
   5   7     0.03   0.01   0.02     0.02  -0.04  -0.02     0.00  -0.01  -0.01
   6   7    -0.01  -0.05  -0.05     0.00  -0.02   0.02     0.00   0.01  -0.01
   7   8    -0.03   0.03   0.00     0.01  -0.01   0.01     0.00   0.01  -0.01
   8   6     0.01   0.00   0.01     0.01  -0.03   0.00     0.01   0.00   0.00
   9   6     0.00  -0.03  -0.01     0.01  -0.03   0.01     0.01   0.01   0.00
  10   6     0.00  -0.04  -0.02     0.01  -0.02   0.01     0.01   0.01   0.00
  11   8     0.01   0.03   0.02     0.01   0.00   0.00     0.00   0.01   0.01
  12   6     0.02   0.02  -0.01     0.00  -0.01   0.00     0.01   0.00  -0.01
  13   6     0.01   0.06  -0.02     0.00   0.01   0.01     0.01   0.04   0.00
  14   6     0.02  -0.02   0.05     0.00   0.01  -0.02     0.01  -0.01   0.02
  15   8     0.04  -0.01  -0.02     0.00  -0.03  -0.01     0.01  -0.04  -0.03
  16   6    -0.03   0.03   0.00    -0.01  -0.01  -0.01     0.01   0.05  -0.01
  17   8    -0.01   0.02   0.02    -0.02  -0.02   0.07     0.00  -0.03   0.00
  18   6    -0.01   0.01  -0.01     0.01  -0.01   0.00    -0.01  -0.03   0.02
  19   8    -0.02  -0.01  -0.03     0.05  -0.03  -0.01    -0.03  -0.04   0.00
  20   8     0.00  -0.01   0.03     0.02  -0.02  -0.01    -0.03  -0.03   0.07
  21   6     0.01   0.02   0.00     0.04   0.00  -0.01    -0.04   0.00  -0.01
  22   6     0.01   0.03   0.01     0.03   0.00   0.03    -0.03  -0.03   0.00
  23   6    -0.01   0.01   0.00    -0.01   0.01  -0.04     0.00  -0.03   0.08
  24   8     0.03   0.03  -0.02     0.06   0.00  -0.03    -0.05   0.03  -0.07
  25   6     0.01   0.03   0.01     0.03   0.00   0.02    -0.05  -0.05   0.00
  26   6    -0.01   0.04   0.01    -0.08   0.07  -0.05     0.07  -0.04   0.09
  27   6     0.00   0.09   0.02    -0.01   0.02   0.02     0.01   0.07   0.04
  28   6    -0.01  -0.11   0.06     0.01   0.02  -0.03    -0.01  -0.05   0.03
  29   6     0.03   0.02   0.02     0.02  -0.03  -0.01     0.00  -0.02   0.00
  30   6    -0.02  -0.04  -0.04    -0.02   0.00   0.02     0.01  -0.01  -0.01
  31   6     0.04   0.02   0.01     0.01  -0.01  -0.01    -0.01   0.00   0.00
  32   6     0.04   0.00   0.01     0.01   0.01  -0.01    -0.01   0.00   0.01
  33   6     0.02  -0.03   0.02     0.03   0.03  -0.01     0.00  -0.01   0.02
  34   6     0.02  -0.02   0.03     0.04   0.01  -0.01     0.00  -0.02   0.02
  35   6     0.02   0.00   0.02     0.03  -0.03  -0.01     0.00  -0.03   0.01
  36   6     0.07   0.06  -0.01    -0.01  -0.03  -0.01    -0.01   0.01  -0.02
  37   6     0.02   0.01   0.02     0.04  -0.05   0.00     0.01  -0.02   0.00
  38   6    -0.06  -0.02  -0.02    -0.03   0.02   0.02     0.02  -0.01  -0.01
  39   6    -0.07   0.00   0.00    -0.06   0.05   0.01     0.05  -0.05  -0.01
  40   6    -0.05   0.01   0.00    -0.09   0.08   0.01     0.08  -0.08  -0.01
  41   6    -0.02  -0.01  -0.02    -0.08   0.07   0.01     0.07  -0.07  -0.01
  42   6     0.00  -0.03  -0.03    -0.04   0.03   0.01     0.03  -0.03  -0.01
  43   6    -0.10  -0.02  -0.02    -0.04   0.03   0.01     0.00   0.03  -0.01
  44   6     0.02  -0.06  -0.03    -0.03   0.01   0.02     0.00   0.01  -0.02
  45   6    -0.01   0.10  -0.02     0.01  -0.05  -0.01    -0.04   0.03  -0.02
  46   6     0.12   0.01   0.01    -0.04  -0.01  -0.01    -0.01   0.01  -0.02
  47   6     0.00   0.00   0.02     0.22  -0.04  -0.09     0.13  -0.02  -0.09
  48   6     0.03   0.00   0.03    -0.09   0.09   0.01    -0.09   0.10   0.02
  49   6     0.12  -0.13  -0.09    -0.04  -0.02   0.01    -0.05   0.07   0.03
  50   6    -0.02  -0.11   0.08    -0.02   0.01   0.05    -0.01   0.02  -0.10
  51   6    -0.15  -0.03  -0.03     0.03   0.05   0.02    -0.07   0.04  -0.05
  52   6    -0.11   0.01   0.02    -0.07  -0.04   0.01     0.01   0.10   0.04
  53   6    -0.01   0.01   0.00     0.01  -0.01   0.02     0.02   0.01   0.03
  54   6     0.00  -0.02   0.00     0.01  -0.02   0.00     0.01   0.03   0.02
  55   1    -0.01  -0.03   0.00     0.01  -0.02   0.02     0.02   0.01   0.01
  56   1     0.01   0.08  -0.05     0.02   0.01   0.01     0.02   0.06  -0.03
  57   1     0.07  -0.01   0.07    -0.01   0.01  -0.02     0.03   0.00   0.03
  58   1    -0.07   0.02  -0.04    -0.01   0.00   0.00    -0.02   0.04  -0.04
  59   1    -0.03   0.08   0.00     0.00  -0.01  -0.02     0.03   0.09  -0.02
  60   1    -0.02   0.02   0.00     0.00  -0.01  -0.01     0.03   0.04   0.02
  61   1     0.01   0.04   0.01     0.04   0.04   0.04    -0.02  -0.04   0.00
  62   1    -0.02   0.00  -0.01     0.01   0.00  -0.10    -0.02  -0.03   0.11
  63   1     0.02   0.03   0.02     0.05   0.01   0.00    -0.07  -0.05   0.00
  64   1     0.00   0.04   0.02     0.02   0.01   0.05    -0.05  -0.07   0.00
  65   1     0.00   0.03   0.01     0.01  -0.03   0.00    -0.06  -0.03   0.00
  66   1     0.00   0.03   0.03    -0.06   0.04  -0.06     0.06  -0.03   0.13
  67   1     0.00   0.07   0.03    -0.10   0.11   0.02     0.09  -0.07   0.04
  68   1    -0.03   0.05  -0.01    -0.14   0.08  -0.10     0.12  -0.04   0.12
  69   1    -0.01   0.10   0.02    -0.01   0.00   0.01     0.00   0.09   0.04
  70   1    -0.01   0.11   0.01    -0.01   0.04   0.03     0.00   0.09   0.04
  71   1    -0.01   0.07   0.04    -0.04   0.01   0.02     0.01   0.05   0.07
  72   1     0.02  -0.13   0.09     0.01   0.03  -0.03     0.00  -0.06   0.05
  73   1    -0.07  -0.12   0.02     0.03   0.03  -0.02    -0.04  -0.06   0.01
  74   1     0.01  -0.15   0.08     0.01   0.03  -0.04     0.00  -0.06   0.05
  75   1     0.05   0.00   0.00     0.00   0.02  -0.01    -0.01   0.01   0.01
  76   1     0.02  -0.05   0.02     0.03   0.05  -0.01     0.00  -0.01   0.02
  77   1     0.01  -0.04   0.03     0.05   0.02  -0.01     0.01  -0.02   0.02
  78   1     0.11   0.12  -0.03    -0.03  -0.05  -0.01     0.00   0.02  -0.03
  79   1     0.02   0.02   0.02     0.01  -0.18   0.06    -0.01  -0.12   0.06
  80   1    -0.09   0.01   0.01    -0.07   0.06   0.01     0.06  -0.05  -0.01
  81   1    -0.06   0.03   0.01    -0.12   0.11   0.01     0.11  -0.12  -0.01
  82   1    -0.01   0.01  -0.01    -0.11   0.10   0.01     0.08  -0.10  -0.01
  83   1    -0.09  -0.04  -0.05    -0.08   0.07   0.01     0.02   0.00   0.00
  84   1    -0.01   0.00  -0.07    -0.03   0.00   0.02     0.01  -0.01   0.01
  85   1    -0.02   0.13  -0.05     0.01  -0.06   0.00    -0.05   0.05  -0.03
  86   1    -0.02   0.13  -0.05     0.01  -0.05   0.00    -0.04   0.03  -0.03
  87   1    -0.06   0.08   0.01     0.02  -0.04  -0.02    -0.05   0.03   0.00
  88   1     0.14   0.05  -0.01    -0.05  -0.02  -0.01    -0.01   0.03  -0.04
  89   1     0.07  -0.04   0.04    -0.02   0.01  -0.02    -0.02   0.01  -0.01
  90   1     0.18  -0.03   0.03    -0.05   0.00  -0.02     0.00   0.00  -0.02
  91   1    -0.01   0.01   0.02     0.24  -0.07  -0.09     0.14  -0.02  -0.09
  92   1    -0.01   0.00   0.00     0.26   0.08  -0.14     0.16   0.07  -0.14
  93   1     0.01   0.00   0.02     0.30  -0.13  -0.09     0.19  -0.10  -0.10
  94   1     0.03   0.01   0.02    -0.06   0.04   0.01    -0.07   0.08   0.02
  95   1     0.04   0.00   0.03    -0.25   0.08   0.06    -0.21   0.09   0.08
  96   1     0.03  -0.01   0.03    -0.05   0.25  -0.04    -0.06   0.22  -0.02
  97   1     0.15  -0.15  -0.10    -0.03  -0.04   0.02    -0.07   0.10   0.02
  98   1     0.16  -0.17  -0.04    -0.04  -0.02   0.01    -0.07   0.09   0.00
  99   1     0.11  -0.11  -0.18    -0.05  -0.02  -0.01    -0.03   0.06   0.09
 100   1     0.00  -0.12   0.08    -0.01  -0.01   0.06    -0.03   0.05  -0.10
 101   1    -0.11  -0.07   0.12    -0.01   0.03   0.06     0.02  -0.02  -0.12
 102   1     0.02  -0.18   0.14    -0.02   0.01   0.04    -0.02   0.04  -0.12
 103   1    -0.17  -0.04  -0.03     0.00   0.04   0.01    -0.04   0.07  -0.04
 104   1    -0.15  -0.06  -0.05     0.06   0.11   0.00    -0.09  -0.03  -0.05
 105   1    -0.17  -0.01  -0.01     0.08   0.00   0.04    -0.11   0.07  -0.10
 106   1    -0.14   0.00   0.01    -0.08  -0.01   0.02    -0.02   0.10   0.04
 107   1    -0.13   0.03   0.05    -0.03  -0.09  -0.01    -0.03   0.14   0.06
 108   1    -0.07   0.02   0.02    -0.13  -0.07   0.03     0.07   0.11   0.06
 109   1     0.00   0.01  -0.01    -0.02   0.00   0.04    -0.01   0.01   0.05
 110   1    -0.02   0.00   0.01     0.00  -0.02   0.01     0.02   0.00   0.02
 111   1    -0.02   0.01  -0.01     0.04   0.00   0.04     0.04   0.02   0.04
 112   1     0.01  -0.02   0.01     0.03   0.05   0.10    -0.02  -0.05  -0.11
 113   1    -0.02  -0.02   0.01    -0.04  -0.15   0.01     0.08   0.21   0.01
 114   1     0.02  -0.03   0.00     0.04   0.02  -0.12     0.00  -0.03   0.19
                    19                     20                     21
                    ?A                     ?A                     ?A
 Frequencies --    83.9672                87.5687                95.8472
 Red. masses --     4.1267                 4.1772                 3.8820
 Frc consts  --     0.0171                 0.0189                 0.0210
 IR Inten    --     0.3970                 0.2053                 0.2961
 Raman Activ --     0.0000                 0.0000                 0.0000
 Depolar     --     0.0000                 0.0000                 0.0000
 Atom AN      X      Y      Z        X      Y      Z        X      Y      Z
   1   8    -0.02   0.03  -0.04     0.01  -0.03   0.01     0.01   0.00   0.02
   2  12     0.01  -0.01  -0.02     0.01   0.02   0.02     0.01  -0.02  -0.08
   3   8    -0.04  -0.01  -0.04     0.04  -0.01  -0.01     0.03   0.03  -0.06
   4   6     0.00  -0.01  -0.03     0.00   0.01   0.01     0.00   0.02   0.01
   5   7     0.04   0.01   0.04     0.01  -0.01   0.00     0.00  -0.01  -0.05
   6   7     0.00  -0.03   0.05    -0.03  -0.02   0.02     0.00  -0.02   0.00
   7   8     0.05  -0.06  -0.01    -0.03   0.04   0.00    -0.02   0.04   0.00
   8   6     0.01  -0.01   0.02    -0.01  -0.03  -0.03    -0.01   0.05   0.08
   9   6     0.01  -0.03   0.03    -0.01  -0.05  -0.04    -0.01   0.05   0.14
  10   6     0.01  -0.03   0.03    -0.02  -0.04  -0.03    -0.01   0.02   0.08
  11   8    -0.04  -0.02  -0.05     0.04   0.01   0.03     0.02   0.05   0.01
  12   6    -0.04   0.00  -0.03     0.05   0.01   0.02     0.03   0.02  -0.03
  13   6    -0.04   0.02  -0.03     0.04  -0.03   0.00     0.02   0.06  -0.05
  14   6    -0.04   0.00  -0.04     0.04   0.00   0.02     0.04   0.00   0.03
  15   8    -0.04   0.01  -0.03     0.05   0.02   0.03     0.06  -0.03  -0.06
  16   6     0.05   0.00   0.00    -0.04  -0.02  -0.01    -0.01   0.02   0.00
  17   8    -0.01  -0.03   0.00     0.05   0.08  -0.05     0.01  -0.02  -0.01
  18   6     0.01  -0.01  -0.02     0.05   0.08  -0.01     0.02  -0.02  -0.03
  19   8     0.04  -0.02  -0.03     0.03   0.08  -0.02     0.03  -0.04  -0.05
  20   8    -0.01   0.03  -0.07     0.03   0.12  -0.04     0.00  -0.02   0.04
  21   6    -0.03  -0.02  -0.01     0.00   0.06   0.03     0.00  -0.01  -0.01
  22   6    -0.02  -0.03  -0.01     0.02   0.05  -0.01     0.00  -0.03  -0.01
  23   6     0.00   0.01  -0.04     0.05   0.08   0.00     0.02   0.01  -0.01
  24   8    -0.05  -0.04   0.03    -0.02   0.03   0.10    -0.01   0.01  -0.04
  25   6    -0.02  -0.03  -0.03     0.02   0.07   0.01    -0.02  -0.03   0.01
  26   6    -0.01  -0.03  -0.05     0.06   0.04  -0.01     0.02   0.06   0.01
  27   6    -0.05   0.05   0.02     0.04  -0.06  -0.04     0.01   0.08  -0.01
  28   6    -0.04   0.03  -0.03     0.05  -0.05   0.01     0.01  -0.10   0.05
  29   6     0.05   0.02   0.02     0.01  -0.01   0.00     0.00   0.00  -0.04
  30   6    -0.01  -0.03   0.04    -0.04  -0.02   0.01    -0.01  -0.01   0.00
  31   6     0.07   0.05   0.00     0.01  -0.02   0.00    -0.02   0.00  -0.03
  32   6     0.07   0.04  -0.01     0.02  -0.01   0.00    -0.01   0.01  -0.02
  33   6     0.05   0.02   0.00     0.02   0.01  -0.02     0.00   0.01  -0.01
  34   6     0.04   0.01   0.01     0.02   0.02  -0.02     0.01   0.00  -0.01
  35   6     0.04   0.02   0.02     0.02   0.00  -0.01     0.01  -0.01  -0.03
  36   6     0.10   0.10  -0.02     0.01  -0.06   0.03    -0.03  -0.04  -0.01
  37   6     0.04   0.01   0.02     0.02  -0.01  -0.01     0.03  -0.03  -0.03
  38   6     0.00  -0.03   0.04    -0.05  -0.01   0.00     0.00  -0.02   0.01
  39   6     0.00  -0.03   0.03    -0.05  -0.01   0.00    -0.01  -0.02   0.01
  40   6    -0.01  -0.04   0.02    -0.04  -0.04  -0.01    -0.02   0.00   0.01
  41   6    -0.03  -0.03   0.03    -0.04  -0.05   0.00    -0.04   0.03   0.00
  42   6    -0.03  -0.02   0.04    -0.04  -0.04   0.01    -0.03   0.02   0.00
  43   6     0.00  -0.02   0.04    -0.06  -0.01   0.00    -0.02  -0.01   0.01
  44   6    -0.08   0.00   0.05    -0.07  -0.03   0.01    -0.04   0.03   0.00
  45   6     0.00   0.15  -0.04     0.08  -0.10   0.04     0.02  -0.08  -0.01
  46   6     0.17   0.03   0.01    -0.02  -0.03   0.01    -0.07   0.00  -0.02
  47   6     0.03   0.01   0.03     0.05  -0.02   0.01    -0.04  -0.04   0.05
  48   6     0.07   0.00   0.02     0.01  -0.02  -0.01     0.10  -0.13  -0.04
  49   6    -0.16   0.06   0.10    -0.16   0.02   0.06    -0.08   0.05   0.02
  50   6    -0.08   0.02  -0.04    -0.06   0.00  -0.08    -0.02   0.05  -0.04
  51   6     0.01  -0.01   0.03    -0.17  -0.04   0.00     0.04   0.01   0.00
  52   6    -0.02  -0.04   0.05    -0.02   0.08   0.03    -0.05  -0.06   0.02
  53   6    -0.01  -0.01  -0.02    -0.01  -0.03  -0.03    -0.01   0.10   0.16
  54   6     0.01  -0.03   0.01    -0.01  -0.01  -0.04    -0.01   0.00   0.09
  55   1     0.00  -0.04   0.02    -0.01  -0.07  -0.07    -0.01   0.09   0.21
  56   1    -0.04   0.05  -0.06     0.01  -0.06   0.03     0.02   0.08  -0.07
  57   1    -0.05   0.00  -0.05     0.06   0.00   0.03     0.09   0.01   0.05
  58   1     0.14   0.01   0.04    -0.10  -0.03  -0.02    -0.04   0.01  -0.02
  59   1     0.03  -0.10   0.00    -0.03   0.03   0.00     0.00   0.05   0.00
  60   1     0.02   0.06  -0.02    -0.02  -0.07   0.00     0.00   0.00   0.01
  61   1    -0.03  -0.02  -0.02     0.00   0.01  -0.02     0.02  -0.04   0.00
  62   1     0.01   0.02  -0.02     0.05   0.10   0.02     0.02   0.00  -0.02
  63   1    -0.04  -0.03  -0.03    -0.01   0.05   0.03    -0.03  -0.04   0.02
  64   1    -0.01  -0.04  -0.04     0.03   0.06  -0.02    -0.02  -0.05   0.01
  65   1    -0.01  -0.03  -0.02     0.03   0.10   0.02    -0.03  -0.01   0.01
  66   1    -0.01  -0.02  -0.07     0.04   0.06  -0.03     0.02   0.06   0.03
  67   1    -0.01  -0.05  -0.06     0.05  -0.01  -0.05     0.02   0.08   0.02
  68   1    -0.01  -0.04  -0.03     0.09   0.02   0.03     0.02   0.08  -0.03
  69   1    -0.06   0.07   0.03     0.03  -0.07  -0.03     0.00   0.11   0.00
  70   1    -0.06   0.07   0.00     0.04  -0.09  -0.05     0.00   0.10  -0.02
  71   1    -0.05   0.03   0.04     0.07  -0.04  -0.07     0.02   0.06   0.02
  72   1    -0.07   0.04  -0.04     0.08  -0.06   0.02     0.04  -0.12   0.07
  73   1    -0.02   0.04  -0.03     0.03  -0.06  -0.01    -0.07  -0.11   0.01
  74   1    -0.04   0.06  -0.03     0.05  -0.07   0.00     0.02  -0.14   0.07
  75   1     0.08   0.05  -0.02     0.01  -0.02   0.00    -0.02   0.01  -0.02
  76   1     0.05   0.01  -0.01     0.02   0.02  -0.02     0.00   0.02  -0.01
  77   1     0.03   0.00   0.01     0.02   0.03  -0.03     0.02   0.00   0.00
  78   1     0.16   0.17  -0.05    -0.03  -0.09   0.05    -0.06  -0.07   0.01
  79   1     0.05   0.03   0.00     0.02  -0.03   0.00     0.04   0.03  -0.08
  80   1     0.01  -0.03   0.02    -0.04  -0.01  -0.01     0.00  -0.03   0.01
  81   1    -0.01  -0.05   0.02    -0.03  -0.05  -0.01    -0.02   0.01   0.01
  82   1    -0.04  -0.04   0.03    -0.03  -0.06   0.00    -0.05   0.05   0.00
  83   1    -0.02  -0.01   0.04     0.00  -0.07  -0.01    -0.05   0.02   0.01
  84   1    -0.05  -0.02   0.10    -0.04  -0.06   0.05    -0.02   0.00   0.01
  85   1    -0.02   0.19  -0.08     0.12  -0.13   0.08     0.05  -0.10   0.03
  86   1    -0.01   0.18  -0.08     0.06  -0.10   0.07     0.01  -0.06   0.00
  87   1    -0.06   0.13   0.01     0.11  -0.10  -0.02     0.04  -0.09  -0.07
  88   1     0.21   0.09  -0.02    -0.03  -0.06   0.04    -0.08  -0.04   0.00
  89   1     0.10  -0.04   0.05     0.02   0.00  -0.02    -0.03   0.02  -0.04
  90   1     0.26  -0.02   0.03    -0.07   0.00   0.00    -0.11   0.03  -0.03
  91   1     0.04   0.02   0.02     0.05  -0.03   0.02    -0.05  -0.05   0.06
  92   1     0.02   0.00   0.06     0.05   0.00   0.00    -0.06  -0.09   0.08
  93   1     0.00   0.02   0.03     0.07  -0.01   0.02    -0.07   0.02   0.07
  94   1     0.07   0.01   0.02     0.01  -0.04  -0.01     0.12  -0.14  -0.04
  95   1     0.10   0.00   0.02    -0.01  -0.02  -0.03     0.16  -0.12  -0.09
  96   1     0.07  -0.03   0.04     0.01   0.00  -0.01     0.09  -0.19   0.01
  97   1    -0.21   0.08   0.12    -0.20   0.04   0.08    -0.09   0.06   0.03
  98   1    -0.20   0.08   0.05    -0.19   0.04   0.00    -0.09   0.07   0.00
  99   1    -0.15   0.05   0.18    -0.14   0.01   0.13    -0.08   0.05   0.06
 100   1    -0.13   0.04  -0.02    -0.09   0.02  -0.08    -0.04   0.03  -0.01
 101   1    -0.01   0.00  -0.06     0.00  -0.04  -0.11     0.04   0.06  -0.04
 102   1    -0.12   0.04  -0.11    -0.08   0.03  -0.13    -0.04   0.07  -0.08
 103   1    -0.01  -0.01   0.03    -0.14  -0.05   0.00     0.00   0.02  -0.01
 104   1     0.03   0.01   0.02    -0.20  -0.13   0.00     0.06   0.06  -0.02
 105   1     0.03  -0.03   0.04    -0.23   0.02  -0.01     0.08  -0.03   0.01
 106   1    -0.03  -0.03   0.05    -0.03   0.05   0.02    -0.07  -0.04   0.02
 107   1     0.00  -0.06   0.04    -0.08   0.14   0.06    -0.01  -0.10   0.02
 108   1    -0.04  -0.05   0.05     0.06   0.11   0.02    -0.08  -0.08   0.04
 109   1     0.02  -0.01  -0.06    -0.03  -0.02  -0.03    -0.03   0.07   0.19
 110   1    -0.03  -0.02  -0.01    -0.02  -0.05  -0.05    -0.02   0.12   0.20
 111   1    -0.05  -0.02  -0.05     0.00  -0.04  -0.02     0.01   0.16   0.14
 112   1     0.00  -0.03   0.01    -0.05  -0.07  -0.17     0.01   0.03   0.16
 113   1     0.02  -0.05   0.00     0.07   0.13  -0.06    -0.06  -0.10   0.10
 114   1     0.00  -0.03  -0.01    -0.02  -0.07   0.10    -0.01   0.03   0.00
                    22                     23                     24
                    ?A                     ?A                     ?A
 Frequencies --   100.8195               105.8793               110.4985
 Red. masses --     4.4464                 3.7634                 4.4886
 Frc consts  --     0.0266                 0.0249                 0.0323
 IR Inten    --     1.3207                 1.8496                 1.0178
 Raman Activ --     0.0000                 0.0000                 0.0000
 Depolar     --     0.0000                 0.0000                 0.0000
 Atom AN      X      Y      Z        X      Y      Z        X      Y      Z
   1   8     0.05  -0.03   0.02     0.02   0.00  -0.01    -0.01   0.01  -0.02
   2  12     0.02  -0.04   0.01    -0.02   0.00   0.01     0.02   0.01   0.03
   3   8     0.05  -0.07   0.00     0.01  -0.01   0.00    -0.01   0.09   0.07
   4   6     0.04   0.00   0.02     0.02   0.02   0.00    -0.01  -0.01  -0.03
   5   7    -0.02   0.00   0.04    -0.01  -0.03  -0.01    -0.01   0.00  -0.02
   6   7     0.00  -0.03  -0.02    -0.01   0.00   0.00     0.00  -0.02  -0.04
   7   8     0.00   0.04   0.00     0.00   0.04   0.00     0.02  -0.03  -0.03
   8   6    -0.02  -0.01   0.00     0.01   0.01   0.05    -0.01   0.01   0.01
   9   6    -0.02  -0.02  -0.02     0.02   0.03   0.07    -0.01   0.01   0.02
  10   6     0.00  -0.02   0.00     0.00   0.02   0.03     0.00  -0.01  -0.01
  11   8     0.07   0.01   0.03     0.02   0.03   0.00    -0.01  -0.04   0.00
  12   6     0.06  -0.02   0.03     0.01  -0.01   0.00    -0.02   0.02   0.05
  13   6     0.05  -0.06   0.01     0.02  -0.01   0.00    -0.01   0.10   0.07
  14   6     0.06   0.01   0.02     0.01   0.05  -0.03    -0.03   0.00  -0.04
  15   8     0.06   0.00   0.03    -0.01  -0.03  -0.01    -0.02   0.02   0.05
  16   6    -0.02   0.01  -0.03    -0.06   0.06  -0.07     0.05   0.00   0.00
  17   8     0.01  -0.11   0.07     0.03   0.03  -0.04    -0.03  -0.06   0.13
  18   6     0.06  -0.07   0.02     0.01   0.03  -0.01     0.04  -0.01   0.03
  19   8     0.12  -0.09   0.01    -0.01   0.03  -0.01     0.14  -0.04   0.03
  20   8     0.03  -0.03  -0.03     0.01   0.04  -0.02     0.01   0.11  -0.14
  21   6     0.02  -0.05  -0.02     0.00   0.02   0.00    -0.02   0.03   0.00
  22   6     0.02  -0.09   0.03     0.01   0.02  -0.01    -0.02   0.00   0.03
  23   6     0.03  -0.02  -0.04     0.02   0.03   0.00     0.01   0.05  -0.05
  24   8     0.01  -0.04  -0.04    -0.01   0.01   0.02    -0.05   0.00   0.05
  25   6    -0.02  -0.13   0.02     0.00   0.03   0.01     0.01  -0.06  -0.06
  26   6    -0.06   0.02  -0.05     0.03   0.00   0.00    -0.02  -0.04  -0.08
  27   6     0.07  -0.07  -0.01     0.03  -0.02  -0.01    -0.07   0.16   0.15
  28   6     0.08   0.03   0.00     0.05   0.20  -0.06     0.01   0.08  -0.07
  29   6    -0.02   0.01   0.03    -0.01  -0.06   0.01    -0.01  -0.01  -0.02
  30   6    -0.01  -0.01  -0.01    -0.02   0.01  -0.01     0.01  -0.02  -0.03
  31   6    -0.01   0.02   0.02    -0.02  -0.05   0.01    -0.02  -0.02  -0.01
  32   6    -0.01   0.01   0.01    -0.03  -0.09   0.04    -0.02  -0.02   0.00
  33   6    -0.03   0.00   0.01    -0.03  -0.15   0.09    -0.01   0.00  -0.01
  34   6    -0.04   0.00   0.01    -0.03  -0.17   0.09     0.00   0.00  -0.01
  35   6    -0.04   0.01   0.02    -0.01  -0.11   0.04     0.00   0.00  -0.02
  36   6     0.00   0.05   0.00    -0.01   0.00  -0.03    -0.02  -0.05   0.01
  37   6    -0.06   0.04   0.02     0.02  -0.05   0.00     0.01  -0.01  -0.02
  38   6    -0.02   0.02  -0.01    -0.02   0.00  -0.01    -0.01  -0.01  -0.02
  39   6    -0.04   0.04  -0.01    -0.01   0.00   0.00    -0.01  -0.01  -0.01
  40   6    -0.06   0.07  -0.01    -0.01   0.00   0.00     0.03  -0.04   0.00
  41   6    -0.06   0.06  -0.01    -0.01   0.00   0.00     0.05  -0.05  -0.01
  42   6    -0.02   0.03  -0.02    -0.01   0.00  -0.01     0.04  -0.04  -0.02
  43   6    -0.04   0.06  -0.01    -0.02  -0.02  -0.01    -0.03   0.00  -0.02
  44   6    -0.01   0.04  -0.03    -0.01   0.00  -0.01     0.04  -0.02  -0.04
  45   6    -0.05   0.08   0.00    -0.06   0.07  -0.01     0.02  -0.07   0.01
  46   6     0.02   0.03   0.00     0.02   0.00  -0.06    -0.04  -0.03   0.00
  47   6    -0.13   0.04   0.02    -0.01  -0.05  -0.10    -0.01  -0.01   0.01
  48   6    -0.03   0.02   0.02     0.08   0.02   0.06     0.03  -0.05  -0.02
  49   6    -0.03   0.07  -0.02    -0.02  -0.01  -0.01     0.08  -0.01  -0.04
  50   6     0.01   0.06  -0.07     0.00   0.01  -0.01     0.01  -0.04  -0.03
  51   6    -0.07   0.08  -0.05    -0.02  -0.03   0.01    -0.07  -0.02  -0.02
  52   6    -0.03   0.11   0.03    -0.01  -0.03  -0.02    -0.02   0.04   0.00
  53   6    -0.02  -0.04  -0.04     0.03   0.02   0.09     0.00   0.04   0.06
  54   6     0.00   0.00   0.04     0.00   0.01   0.00     0.00   0.01   0.03
  55   1    -0.02  -0.03  -0.03     0.03   0.04   0.10    -0.01   0.02   0.04
  56   1     0.02  -0.06   0.02     0.01  -0.02   0.01     0.04   0.14   0.02
  57   1     0.05   0.00   0.01    -0.06   0.03  -0.08    -0.08  -0.01  -0.05
  58   1    -0.10  -0.01  -0.08    -0.15   0.03  -0.14     0.11   0.01   0.02
  59   1    -0.02   0.12  -0.02    -0.06   0.18  -0.05     0.04  -0.07   0.00
  60   1     0.00  -0.04  -0.01    -0.04   0.01  -0.06     0.03   0.05  -0.01
  61   1     0.05  -0.07   0.05     0.00  -0.01  -0.01    -0.03   0.08   0.04
  62   1     0.07   0.00  -0.09     0.01   0.03   0.02     0.03   0.09  -0.02
  63   1    -0.03  -0.11   0.00     0.00   0.02   0.03    -0.02  -0.02  -0.12
  64   1    -0.01  -0.16   0.05     0.01   0.03   0.00     0.02  -0.08  -0.07
  65   1    -0.04  -0.14   0.01     0.01   0.05   0.02     0.04  -0.12  -0.06
  66   1    -0.05   0.01  -0.09     0.03   0.00   0.00    -0.03  -0.03  -0.13
  67   1    -0.09   0.06   0.02     0.04  -0.01  -0.02    -0.03  -0.09  -0.10
  68   1    -0.12   0.03  -0.10     0.04  -0.01   0.02    -0.01  -0.07  -0.02
  69   1     0.06  -0.07   0.00     0.03  -0.03  -0.02    -0.08   0.16   0.16
  70   1     0.06  -0.09  -0.01     0.03  -0.04  -0.01    -0.08   0.24   0.14
  71   1     0.08  -0.06  -0.02     0.03  -0.02  -0.02    -0.12   0.12   0.21
  72   1     0.10   0.04  -0.01     0.03   0.26  -0.12    -0.01   0.10  -0.08
  73   1     0.10   0.03   0.01     0.15   0.23   0.03     0.08   0.09  -0.04
  74   1     0.07   0.03  -0.03     0.03   0.23  -0.11    -0.01   0.13  -0.10
  75   1     0.00   0.02   0.00    -0.03  -0.08   0.04    -0.02  -0.03   0.01
  76   1    -0.03  -0.01   0.00    -0.04  -0.19   0.12    -0.01   0.00   0.00
  77   1    -0.04   0.00   0.01    -0.03  -0.21   0.12     0.00   0.01  -0.01
  78   1     0.02   0.07  -0.02     0.02   0.02  -0.06    -0.05  -0.07   0.03
  79   1    -0.04   0.09   0.02     0.02  -0.03  -0.02     0.01   0.00  -0.04
  80   1    -0.06   0.05  -0.01    -0.01  -0.01   0.00    -0.02   0.00   0.00
  81   1    -0.08   0.09  -0.01    -0.01  -0.01   0.00     0.04  -0.04   0.01
  82   1    -0.08   0.09  -0.02     0.00   0.00   0.00     0.08  -0.06   0.00
  83   1    -0.03   0.05   0.01    -0.01  -0.02  -0.02    -0.01  -0.03  -0.02
  84   1    -0.01   0.02  -0.04    -0.01  -0.01   0.00     0.02   0.00  -0.05
  85   1    -0.09   0.11  -0.04    -0.09   0.11  -0.06     0.06  -0.09   0.05
  86   1    -0.03   0.06  -0.01    -0.06   0.06  -0.01    -0.01  -0.05   0.03
  87   1    -0.07   0.11   0.06    -0.09   0.08   0.05     0.03  -0.09  -0.04
  88   1     0.03   0.06  -0.02     0.03   0.05  -0.10    -0.05  -0.05   0.02
  89   1    -0.01   0.02   0.02    -0.01  -0.01  -0.02    -0.02  -0.01  -0.02
  90   1     0.05   0.01   0.00     0.06  -0.06  -0.07    -0.08   0.00   0.00
  91   1    -0.17   0.07   0.03    -0.01   0.02  -0.13     0.00  -0.03   0.01
  92   1    -0.15  -0.01  -0.01    -0.02  -0.06  -0.11    -0.01  -0.03   0.04
  93   1    -0.14   0.06   0.02    -0.04  -0.10  -0.13    -0.02   0.01   0.01
  94   1    -0.06   0.06   0.02     0.11   0.09   0.01     0.04  -0.06  -0.02
  95   1     0.04   0.02   0.02     0.11   0.02   0.13     0.04  -0.04  -0.05
  96   1    -0.05  -0.05   0.01     0.08   0.01   0.08     0.03  -0.06   0.00
  97   1    -0.04   0.09  -0.02    -0.01  -0.01  -0.01     0.10  -0.01  -0.07
  98   1    -0.03   0.07  -0.03    -0.02   0.00  -0.01     0.10   0.00  -0.01
  99   1    -0.01   0.07   0.01    -0.02  -0.01  -0.01     0.07  -0.01  -0.05
 100   1     0.02   0.08  -0.09     0.00  -0.01   0.01     0.01  -0.02  -0.05
 101   1     0.01   0.04  -0.09     0.02   0.02   0.00    -0.04  -0.05  -0.03
 102   1     0.00   0.09  -0.06     0.00   0.02  -0.02     0.03  -0.07   0.01
 103   1    -0.05   0.11  -0.04    -0.02  -0.05   0.01    -0.06  -0.02  -0.02
 104   1    -0.08   0.04  -0.05    -0.02  -0.03   0.01    -0.09  -0.05  -0.01
 105   1    -0.09   0.09  -0.09    -0.02  -0.03   0.03    -0.10   0.01  -0.02
 106   1    -0.04   0.14   0.03    -0.01  -0.05  -0.02    -0.04   0.00  -0.01
 107   1    -0.05   0.14   0.02    -0.01  -0.03  -0.01    -0.05   0.08   0.04
 108   1     0.00   0.11   0.06    -0.01  -0.02  -0.03     0.04   0.07  -0.02
 109   1     0.01  -0.04  -0.07     0.03  -0.01   0.10    -0.03   0.03   0.09
 110   1    -0.02  -0.03  -0.04     0.04   0.04   0.11     0.00   0.04   0.06
 111   1    -0.05  -0.06  -0.06     0.03   0.04   0.08     0.02   0.07   0.06
 112   1    -0.03  -0.07  -0.07     0.01   0.06   0.06    -0.03  -0.08  -0.09
 113   1     0.05   0.17   0.04    -0.02  -0.09   0.00     0.05   0.17   0.03
 114   1     0.00  -0.06   0.20     0.01   0.05  -0.10    -0.02  -0.05   0.19
                    25                     26                     27
                    ?A                     ?A                     ?A
 Frequencies --   113.5644               126.7646               128.6335
 Red. masses --     4.7287                 3.9821                 3.0423
 Frc consts  --     0.0359                 0.0377                 0.0297
 IR Inten    --     1.1185                 1.7340                 1.5192
 Raman Activ --     0.0000                 0.0000                 0.0000
 Depolar     --     0.0000                 0.0000                 0.0000
 Atom AN      X      Y      Z        X      Y      Z        X      Y      Z
   1   8     0.02   0.00   0.01    -0.05   0.06  -0.04     0.02  -0.06   0.04
   2  12    -0.03  -0.01  -0.07    -0.04   0.02   0.03     0.06   0.01  -0.02
   3   8     0.00   0.04  -0.08    -0.02  -0.05   0.01    -0.01   0.02  -0.02
   4   6     0.00   0.02   0.00    -0.04   0.02  -0.03     0.01  -0.07   0.02
   5   7    -0.02   0.00   0.04    -0.01   0.00   0.00     0.01   0.04  -0.02
   6   7    -0.01   0.02   0.02    -0.03   0.03  -0.02     0.02  -0.03  -0.01
   7   8    -0.02   0.04  -0.01     0.00  -0.02  -0.03     0.00  -0.06   0.00
   8   6    -0.01  -0.05  -0.07     0.00   0.00   0.00    -0.02   0.02  -0.03
   9   6    -0.01  -0.05  -0.13     0.00   0.03   0.01    -0.03  -0.02  -0.03
  10   6    -0.01  -0.01  -0.05    -0.01   0.04   0.00     0.00  -0.04  -0.01
  11   8     0.00   0.08  -0.03    -0.04  -0.02   0.00    -0.04  -0.09  -0.01
  12   6     0.01   0.02  -0.08    -0.04   0.04   0.04    -0.03  -0.01   0.02
  13   6     0.01   0.10  -0.07    -0.04   0.00   0.04    -0.04  -0.01   0.00
  14   6     0.01   0.03  -0.01    -0.05   0.00  -0.02    -0.04  -0.03  -0.01
  15   8     0.01  -0.10  -0.13    -0.05   0.11   0.07    -0.01   0.06   0.05
  16   6    -0.01   0.02  -0.01     0.07  -0.03   0.06    -0.06   0.07  -0.08
  17   8     0.02  -0.02  -0.02     0.11  -0.04  -0.09     0.02   0.01  -0.04
  18   6     0.04  -0.01  -0.04     0.11  -0.03  -0.03     0.01   0.00  -0.03
  19   8     0.05  -0.04  -0.07     0.09   0.00  -0.01     0.02   0.01  -0.03
  20   8     0.01   0.01   0.00     0.03  -0.04   0.11    -0.01  -0.05   0.11
  21   6     0.00   0.00  -0.01     0.01  -0.03   0.00     0.00   0.00   0.01
  22   6     0.01  -0.02  -0.01     0.04  -0.08  -0.04     0.00  -0.01  -0.02
  23   6     0.03   0.02  -0.02     0.10   0.01   0.04     0.01   0.02   0.00
  24   8    -0.02   0.00  -0.01    -0.04   0.00  -0.05    -0.01   0.02  -0.03
  25   6    -0.01  -0.03  -0.01    -0.01  -0.09  -0.02    -0.01   0.00   0.00
  26   6     0.05   0.04  -0.01     0.13   0.09   0.07     0.00   0.14   0.03
  27   6    -0.01   0.18   0.04     0.02   0.00   0.04    -0.07  -0.01  -0.01
  28   6    -0.01   0.04   0.00    -0.03  -0.01  -0.04    -0.03   0.14   0.00
  29   6    -0.02  -0.02   0.06    -0.01  -0.01   0.00     0.01   0.05  -0.02
  30   6    -0.01   0.03   0.04    -0.04   0.04  -0.02     0.03  -0.04   0.00
  31   6    -0.02  -0.06   0.07    -0.01  -0.02   0.00     0.01   0.03  -0.01
  32   6    -0.02  -0.07   0.06    -0.01  -0.03   0.01     0.00  -0.01   0.01
  33   6    -0.03  -0.04   0.04    -0.01  -0.02   0.00     0.00  -0.02   0.02
  34   6    -0.03  -0.02   0.04    -0.01  -0.01   0.00     0.01   0.00   0.01
  35   6    -0.03  -0.01   0.04    -0.01   0.00   0.00     0.01   0.03  -0.01
  36   6     0.00  -0.06   0.09     0.01  -0.01   0.01     0.01   0.00   0.01
  37   6    -0.05   0.01   0.04     0.01  -0.01  -0.01     0.01   0.00   0.01
  38   6     0.01   0.02   0.03    -0.02   0.01  -0.01     0.03  -0.03   0.00
  39   6     0.01   0.01   0.02     0.00  -0.01  -0.01     0.02  -0.03   0.00
  40   6     0.00   0.01   0.01    -0.02   0.01  -0.01     0.00   0.00   0.00
  41   6    -0.01   0.01   0.02    -0.04   0.04  -0.02     0.00   0.01   0.00
  42   6    -0.01   0.02   0.04    -0.05   0.04  -0.02     0.02  -0.02   0.00
  43   6     0.04   0.01   0.03    -0.04   0.00  -0.02     0.01   0.00   0.00
  44   6    -0.01  -0.01   0.05    -0.02   0.01  -0.01     0.01  -0.01   0.00
  45   6     0.07  -0.05   0.13     0.01   0.00   0.02     0.04  -0.04   0.00
  46   6     0.00  -0.02   0.03     0.03  -0.02   0.00     0.01  -0.01   0.04
  47   6    -0.07   0.01   0.02     0.03  -0.01  -0.01     0.02   0.00   0.04
  48   6    -0.05   0.02   0.04     0.03   0.00   0.00     0.00  -0.03  -0.01
  49   6    -0.03  -0.04   0.04    -0.02  -0.05  -0.04     0.01   0.01   0.00
  50   6     0.00  -0.01   0.08     0.03   0.02   0.05    -0.01  -0.01  -0.01
  51   6     0.07   0.02   0.04    -0.07  -0.02  -0.01     0.02   0.02  -0.04
  52   6     0.04  -0.01   0.00    -0.03   0.02  -0.01    -0.02  -0.01   0.05
  53   6     0.01  -0.10  -0.12     0.01  -0.01  -0.02    -0.05   0.05  -0.03
  54   6     0.00   0.02  -0.03     0.00   0.05  -0.01    -0.01  -0.04   0.04
  55   1     0.00  -0.08  -0.20     0.02   0.03   0.01    -0.06  -0.03  -0.04
  56   1     0.02   0.16  -0.14    -0.08   0.00   0.03    -0.03  -0.01   0.01
  57   1     0.03   0.03  -0.03    -0.06   0.01   0.00    -0.11  -0.05  -0.06
  58   1    -0.08   0.01  -0.03     0.38   0.02   0.20    -0.32   0.01  -0.24
  59   1     0.02   0.09  -0.02    -0.02  -0.35   0.11     0.03   0.37  -0.13
  60   1     0.02  -0.03   0.02    -0.04   0.16  -0.06     0.04  -0.06   0.06
  61   1     0.01  -0.03  -0.01     0.03  -0.14  -0.06     0.00  -0.03  -0.03
  62   1     0.04   0.02  -0.01     0.11   0.01   0.03     0.02   0.00  -0.04
  63   1    -0.03  -0.04   0.00    -0.07  -0.11   0.01    -0.01  -0.01   0.01
  64   1     0.00  -0.05  -0.02     0.02  -0.14  -0.05     0.00  -0.01  -0.01
  65   1     0.00  -0.01   0.00     0.00  -0.03  -0.01    -0.01   0.02   0.00
  66   1     0.06   0.03   0.02     0.12   0.10   0.12    -0.04   0.19   0.07
  67   1     0.07   0.06  -0.01     0.14   0.10   0.07    -0.03   0.11   0.05
  68   1     0.04   0.05  -0.02     0.16   0.11   0.03     0.05   0.18  -0.02
  69   1    -0.02   0.23   0.05     0.01   0.04   0.05    -0.08  -0.03   0.00
  70   1    -0.02   0.24   0.03     0.02  -0.05   0.03    -0.07   0.01  -0.01
  71   1    -0.02   0.13   0.12     0.08   0.00   0.04    -0.08  -0.01  -0.01
  72   1     0.00   0.07  -0.02    -0.04  -0.04  -0.02    -0.09   0.20  -0.07
  73   1    -0.03   0.06   0.03    -0.01  -0.03  -0.07     0.06   0.17   0.09
  74   1     0.00   0.01   0.01    -0.04   0.02  -0.05    -0.04   0.18  -0.01
  75   1    -0.02  -0.09   0.07    -0.01  -0.04   0.01     0.00  -0.03   0.03
  76   1    -0.03  -0.05   0.04    -0.01  -0.03   0.01    -0.01  -0.05   0.04
  77   1    -0.04  -0.01   0.02    -0.01  -0.01   0.00     0.00  -0.02   0.02
  78   1    -0.04  -0.09   0.10     0.01   0.00   0.02     0.00   0.00   0.03
  79   1    -0.04   0.03   0.05     0.01  -0.01  -0.03     0.01  -0.01   0.01
  80   1     0.03   0.00   0.01     0.02  -0.03  -0.01     0.02  -0.03   0.00
  81   1     0.00   0.01   0.01    -0.01   0.00  -0.01    -0.01   0.01   0.00
  82   1    -0.02   0.00   0.02    -0.05   0.05  -0.02    -0.02   0.03   0.00
  83   1     0.03   0.02   0.04    -0.02  -0.02  -0.03    -0.01   0.01   0.00
  84   1    -0.01  -0.01   0.06    -0.02   0.00  -0.02     0.01   0.00   0.00
  85   1     0.15  -0.05   0.18     0.04   0.01   0.03     0.06  -0.07   0.03
  86   1     0.01  -0.02   0.19     0.00   0.01   0.04     0.04  -0.03  -0.01
  87   1     0.09  -0.08   0.06     0.01  -0.01   0.01     0.06  -0.05  -0.04
  88   1     0.01  -0.03   0.04     0.05  -0.01  -0.01     0.01  -0.04   0.07
  89   1     0.03   0.01   0.01     0.03  -0.03   0.00     0.02  -0.02   0.01
  90   1    -0.05  -0.03   0.00     0.04  -0.04  -0.01    -0.01   0.02   0.05
  91   1    -0.09   0.04   0.03     0.07  -0.01  -0.04    -0.02  -0.03   0.09
  92   1    -0.08   0.00  -0.01     0.04   0.01   0.04     0.02   0.01  -0.02
  93   1    -0.06   0.00   0.02    -0.01  -0.01  -0.03     0.09   0.02   0.08
  94   1    -0.08   0.04   0.05     0.05  -0.01  -0.01     0.01  -0.08   0.00
  95   1    -0.02   0.02   0.06     0.03   0.00  -0.01    -0.04  -0.03  -0.05
  96   1    -0.06  -0.01   0.02     0.04   0.00   0.02     0.01   0.00   0.00
  97   1    -0.02  -0.06   0.06     0.02  -0.10  -0.04     0.00   0.02   0.00
  98   1    -0.04  -0.03   0.04    -0.01  -0.03  -0.02     0.01   0.00   0.00
  99   1    -0.05  -0.04   0.03    -0.07  -0.06  -0.09     0.02   0.01   0.01
 100   1     0.01  -0.02   0.08     0.06  -0.03   0.07    -0.01   0.01  -0.03
 101   1    -0.01   0.00   0.08     0.04   0.07   0.08    -0.03  -0.03  -0.02
 102   1     0.00  -0.01   0.08     0.02   0.04   0.05     0.00  -0.02   0.00
 103   1     0.07   0.02   0.04    -0.05  -0.03  -0.01    -0.02   0.05  -0.04
 104   1     0.08   0.04   0.04    -0.08  -0.04   0.00     0.04   0.04  -0.07
 105   1     0.09   0.00   0.04    -0.09   0.01   0.00     0.04   0.00  -0.04
 106   1     0.07   0.00   0.01    -0.05   0.00  -0.01    -0.05   0.02   0.05
 107   1     0.05  -0.02  -0.02    -0.05   0.03   0.02    -0.01  -0.02   0.05
 108   1     0.02  -0.01   0.00    -0.01   0.03  -0.01    -0.01  -0.02   0.08
 109   1     0.00  -0.07  -0.13     0.04  -0.03  -0.03    -0.08   0.09  -0.02
 110   1     0.03  -0.12  -0.18     0.02   0.00   0.00    -0.07   0.02  -0.05
 111   1     0.02  -0.16  -0.08    -0.02  -0.03  -0.03    -0.01   0.06  -0.01
 112   1    -0.01   0.01  -0.05     0.02   0.12   0.09    -0.03  -0.14  -0.08
 113   1     0.00   0.06  -0.03    -0.06  -0.06   0.00     0.04   0.14   0.04
 114   1     0.02   0.00   0.01     0.03   0.09  -0.13    -0.04  -0.11   0.22
                    28                     29                     30
                    ?A                     ?A                     ?A
 Frequencies --   132.4549               134.7865               144.7138
 Red. masses --     2.0173                 2.6668                 2.1928
 Frc consts  --     0.0209                 0.0285                 0.0271
 IR Inten    --     0.6341                 0.8932                 0.1199
 Raman Activ --     0.0000                 0.0000                 0.0000
 Depolar     --     0.0000                 0.0000                 0.0000
 Atom AN      X      Y      Z        X      Y      Z        X      Y      Z
   1   8    -0.03   0.05  -0.03     0.02  -0.03   0.02     0.00  -0.01   0.01
   2  12     0.02   0.00  -0.01    -0.05   0.00   0.02     0.05  -0.02  -0.01
   3   8     0.00   0.02   0.00    -0.01  -0.01   0.01     0.00   0.01  -0.01
   4   6    -0.02   0.05  -0.02     0.01  -0.03   0.01    -0.01   0.00   0.00
   5   7    -0.01   0.00   0.00    -0.01  -0.02   0.04     0.02  -0.01   0.02
   6   7     0.00  -0.04  -0.01    -0.04   0.01  -0.03     0.05  -0.03  -0.01
   7   8    -0.01   0.04  -0.01     0.00  -0.02   0.01    -0.03   0.02  -0.03
   8   6    -0.03  -0.01  -0.01     0.00  -0.03   0.02     0.04  -0.01   0.02
   9   6    -0.03  -0.02   0.01     0.01   0.03   0.08     0.04   0.01   0.06
  10   6    -0.01  -0.03   0.03    -0.01   0.05   0.07     0.05  -0.01   0.04
  11   8     0.00   0.03   0.01     0.00  -0.01   0.00     0.00  -0.03   0.02
  12   6     0.00   0.01   0.00     0.00  -0.02   0.00     0.00  -0.04   0.01
  13   6     0.00  -0.01   0.00     0.00   0.00   0.01    -0.01  -0.01   0.00
  14   6     0.00   0.03   0.00     0.00  -0.02   0.00    -0.01   0.00   0.01
  15   8     0.00   0.00  -0.01    -0.01  -0.03  -0.01     0.01  -0.05   0.01
  16   6     0.03  -0.04   0.05    -0.02   0.02  -0.03    -0.01  -0.02   0.02
  17   8    -0.02   0.02   0.00     0.02   0.01  -0.02     0.00   0.02  -0.01
  18   6    -0.01   0.02  -0.01     0.01   0.01   0.01     0.00   0.02  -0.02
  19   8    -0.01   0.02  -0.01    -0.01   0.02   0.01     0.01   0.01  -0.03
  20   8    -0.01   0.01   0.01     0.01   0.03  -0.03    -0.01   0.01   0.02
  21   6     0.00   0.02   0.01     0.00   0.01   0.00    -0.01   0.02   0.01
  22   6    -0.01   0.03   0.00     0.00   0.01  -0.01     0.00   0.02   0.00
  23   6    -0.02   0.02  -0.01     0.01   0.00   0.01     0.00   0.03  -0.01
  24   8     0.00   0.02   0.00    -0.01   0.00   0.02    -0.01   0.02   0.01
  25   6     0.00   0.03   0.01     0.01   0.01  -0.01     0.00   0.03   0.00
  26   6    -0.04   0.05  -0.01     0.04  -0.05   0.01    -0.01   0.06  -0.01
  27   6     0.00  -0.03  -0.04     0.00   0.01   0.03    -0.06   0.01   0.02
  28   6     0.01  -0.02  -0.02     0.00   0.01   0.01     0.01   0.04  -0.01
  29   6    -0.01   0.00   0.00     0.00  -0.02   0.02     0.02  -0.02   0.01
  30   6     0.01  -0.04  -0.01    -0.04   0.01  -0.03     0.04  -0.02  -0.01
  31   6     0.00  -0.01   0.01     0.00  -0.02   0.02     0.01  -0.02   0.02
  32   6    -0.01  -0.03   0.02     0.01   0.01   0.00     0.01  -0.01   0.02
  33   6    -0.01  -0.04   0.02     0.02   0.05  -0.02     0.01   0.02   0.00
  34   6    -0.01  -0.04   0.03     0.02   0.07  -0.03     0.02   0.03  -0.02
  35   6    -0.01  -0.02   0.01     0.01   0.02  -0.01     0.01   0.01   0.00
  36   6     0.01  -0.01   0.01     0.01  -0.01   0.01    -0.03  -0.01  -0.01
  37   6     0.00  -0.01   0.00     0.02   0.01   0.00    -0.03   0.03   0.01
  38   6     0.01  -0.04   0.00    -0.03  -0.01  -0.03     0.04  -0.03  -0.01
  39   6     0.00  -0.03   0.00    -0.01  -0.03  -0.01     0.04  -0.03  -0.01
  40   6    -0.01  -0.01   0.00     0.00  -0.02  -0.01     0.03  -0.02  -0.01
  41   6    -0.01   0.00   0.00    -0.02   0.01  -0.02     0.02   0.00  -0.01
  42   6     0.01  -0.02  -0.01    -0.04   0.03  -0.03     0.02  -0.01  -0.01
  43   6     0.01  -0.01   0.00    -0.03  -0.02  -0.03     0.01  -0.02  -0.01
  44   6     0.02   0.00  -0.03    -0.01   0.02  -0.05     0.00   0.00  -0.01
  45   6     0.02   0.00   0.02     0.01   0.02   0.03    -0.05   0.01   0.00
  46   6     0.03  -0.02   0.01     0.02  -0.01   0.00    -0.07   0.03  -0.02
  47   6     0.02  -0.01  -0.02     0.05   0.01   0.01    -0.06   0.03   0.01
  48   6     0.02   0.01   0.02     0.01   0.00  -0.01    -0.08   0.02  -0.01
  49   6     0.04   0.04  -0.02     0.01   0.01  -0.06    -0.02   0.01   0.00
  50   6     0.02   0.01  -0.06     0.05   0.05  -0.02    -0.02  -0.01  -0.01
  51   6     0.08   0.03  -0.03     0.03  -0.02  -0.01    -0.05  -0.02  -0.04
  52   6    -0.02  -0.04   0.01    -0.04  -0.07  -0.04    -0.01   0.00   0.04
  53   6    -0.04  -0.02  -0.05     0.00  -0.10  -0.10     0.04  -0.06  -0.05
  54   6    -0.01   0.00   0.11     0.00   0.09   0.15     0.04  -0.03   0.04
  55   1    -0.04  -0.02   0.01     0.03   0.05   0.10     0.04   0.01   0.07
  56   1     0.00  -0.03   0.02     0.01   0.01  -0.01     0.01   0.00  -0.01
  57   1     0.01   0.04   0.02     0.00  -0.02  -0.01    -0.04   0.00   0.01
  58   1     0.34   0.01   0.18    -0.32  -0.01  -0.13     0.23   0.00   0.05
  59   1    -0.10  -0.34   0.15     0.12   0.30  -0.14    -0.14  -0.19   0.13
  60   1    -0.11   0.14  -0.12     0.12  -0.16   0.14    -0.13   0.13  -0.14
  61   1    -0.01   0.02   0.01     0.00   0.00  -0.01     0.00   0.01  -0.01
  62   1    -0.01   0.02  -0.03     0.01   0.01   0.04     0.01   0.03  -0.03
  63   1     0.01   0.03   0.02     0.00   0.00   0.00    -0.01   0.02   0.01
  64   1    -0.01   0.04   0.02     0.01   0.01  -0.02     0.00   0.03   0.00
  65   1    -0.01   0.03   0.01     0.01   0.02   0.00     0.00   0.04   0.01
  66   1    -0.05   0.07  -0.01     0.05  -0.06   0.00    -0.04   0.11   0.00
  67   1    -0.05   0.04   0.00     0.05  -0.04  -0.01    -0.03   0.03  -0.01
  68   1    -0.02   0.06  -0.02     0.03  -0.06   0.04     0.04   0.08  -0.01
  69   1     0.01  -0.05  -0.05     0.01   0.02   0.03    -0.06  -0.01   0.03
  70   1     0.01  -0.04  -0.03     0.01   0.02   0.03    -0.06   0.05   0.01
  71   1     0.00  -0.01  -0.07     0.00   0.00   0.04    -0.08   0.00   0.03
  72   1     0.02  -0.05   0.01    -0.01   0.02   0.00    -0.01   0.04  -0.01
  73   1     0.00  -0.04  -0.05     0.00   0.01   0.03     0.06   0.04  -0.01
  74   1     0.00  -0.02  -0.02     0.00   0.00   0.02     0.00   0.08  -0.03
  75   1    -0.01  -0.04   0.02     0.00   0.01   0.00     0.01  -0.01   0.02
  76   1    -0.01  -0.06   0.03     0.02   0.08  -0.04     0.01   0.03  -0.01
  77   1    -0.02  -0.05   0.03     0.03   0.10  -0.05     0.03   0.05  -0.03
  78   1     0.01   0.00   0.02     0.01   0.00   0.01    -0.03  -0.04  -0.04
  79   1     0.00  -0.02   0.00     0.01  -0.02  -0.01    -0.02   0.04   0.05
  80   1     0.00  -0.03   0.00     0.01  -0.06  -0.01     0.04  -0.03  -0.01
  81   1    -0.02   0.01   0.01     0.02  -0.04   0.00     0.03  -0.02  -0.01
  82   1    -0.01   0.02   0.00    -0.02   0.01  -0.02     0.01   0.01  -0.01
  83   1    -0.03   0.03   0.02    -0.05   0.01  -0.03     0.02  -0.04  -0.03
  84   1     0.01   0.00  -0.05    -0.01   0.00  -0.07     0.00   0.01   0.01
  85   1     0.04   0.00   0.03     0.02   0.04   0.02    -0.11   0.03  -0.05
  86   1     0.01   0.00   0.03     0.00   0.02   0.05    -0.01  -0.03  -0.01
  87   1     0.02  -0.01   0.01     0.00   0.02   0.04    -0.05   0.06   0.06
  88   1     0.04  -0.01   0.01     0.03   0.02  -0.02    -0.10   0.02  -0.03
  89   1     0.02  -0.03   0.01     0.01  -0.01   0.01    -0.06   0.07  -0.01
  90   1     0.04  -0.03   0.00     0.04  -0.03  -0.01    -0.09   0.04  -0.03
  91   1     0.05   0.00  -0.04     0.06  -0.02   0.02    -0.10   0.04   0.04
  92   1     0.03   0.00   0.01     0.06   0.03   0.01    -0.08   0.00  -0.03
  93   1    -0.01  -0.03  -0.04     0.07   0.01   0.02    -0.03   0.04   0.03
  94   1     0.03   0.03   0.01     0.01  -0.03  -0.01    -0.14   0.05   0.02
  95   1     0.01   0.01   0.04    -0.01  -0.01  -0.03    -0.04   0.02   0.00
  96   1     0.02   0.02   0.03     0.01   0.01  -0.01    -0.10  -0.01  -0.07
  97   1     0.04   0.07  -0.04     0.06  -0.01  -0.08    -0.02   0.01   0.01
  98   1     0.05   0.04  -0.01     0.03   0.04  -0.03    -0.02   0.01  -0.01
  99   1     0.06   0.04   0.00    -0.02   0.00  -0.08    -0.01   0.01   0.01
 100   1     0.05   0.04  -0.10     0.08   0.01  -0.01    -0.08  -0.04   0.06
 101   1    -0.02  -0.03  -0.08     0.06   0.07   0.00     0.06   0.04   0.01
 102   1     0.04   0.02  -0.01     0.04   0.08  -0.01    -0.05  -0.02  -0.10
 103   1     0.05   0.06  -0.03     0.03  -0.03  -0.01    -0.09  -0.01  -0.05
 104   1     0.11   0.08  -0.05     0.04   0.03   0.00    -0.04  -0.05  -0.09
 105   1     0.13  -0.02  -0.04     0.06  -0.05   0.00    -0.06  -0.01  -0.02
 106   1    -0.04  -0.05   0.01    -0.07  -0.14  -0.06    -0.03   0.07   0.06
 107   1     0.00  -0.06   0.04    -0.04  -0.07   0.03     0.00  -0.01   0.01
 108   1    -0.02  -0.04   0.01    -0.03  -0.04  -0.08    -0.02  -0.04   0.11
 109   1    -0.01  -0.02  -0.08     0.17  -0.20  -0.22     0.17  -0.15  -0.13
 110   1    -0.05  -0.02  -0.03     0.02  -0.03   0.01     0.06   0.01   0.06
 111   1    -0.08  -0.03  -0.07    -0.20  -0.15  -0.21    -0.11  -0.07  -0.15
 112   1    -0.06  -0.17  -0.11     0.01   0.09   0.15     0.11   0.11   0.29
 113   1     0.07   0.32   0.11    -0.04   0.14   0.16    -0.10  -0.33   0.06
 114   1    -0.04  -0.12   0.43     0.05   0.08   0.19     0.09   0.08  -0.25
                    31                     32                     33
                    ?A                     ?A                     ?A
 Frequencies --   148.6717               151.6240               152.0058
 Red. masses --     2.3030                 2.7966                 1.7498
 Frc consts  --     0.0300                 0.0379                 0.0238
 IR Inten    --     0.6848                 0.1803                 0.9346
 Raman Activ --     0.0000                 0.0000                 0.0000
 Depolar     --     0.0000                 0.0000                 0.0000
 Atom AN      X      Y      Z        X      Y      Z        X      Y      Z
   1   8    -0.03   0.02  -0.01     0.01   0.00   0.00    -0.06   0.07  -0.05
   2  12    -0.01  -0.02   0.02     0.00   0.02   0.00     0.02  -0.01   0.01
   3   8    -0.01  -0.02   0.01     0.00   0.02   0.01    -0.01   0.01   0.01
   4   6    -0.02   0.00  -0.01     0.01  -0.01   0.00    -0.03   0.03  -0.02
   5   7     0.01  -0.05   0.02     0.03   0.01   0.00     0.00   0.00   0.01
   6   7     0.00  -0.02   0.01     0.01   0.03  -0.03     0.01  -0.02   0.01
   7   8    -0.01  -0.01   0.00     0.02  -0.01   0.01     0.02  -0.02   0.04
   8   6     0.03  -0.04   0.04     0.04   0.01  -0.02    -0.01   0.00   0.01
   9   6     0.03  -0.04  -0.01     0.04   0.02  -0.03    -0.01   0.00   0.03
  10   6     0.02  -0.03  -0.02     0.03   0.04  -0.01     0.00  -0.02   0.02
  11   8    -0.01  -0.01   0.01     0.00   0.01  -0.01    -0.01   0.04   0.00
  12   6    -0.02  -0.03   0.01     0.00   0.01   0.00    -0.01   0.02   0.00
  13   6    -0.02  -0.01   0.01     0.00   0.00   0.00    -0.01   0.00   0.01
  14   6    -0.02   0.00  -0.01     0.00   0.00   0.00    -0.01   0.02  -0.02
  15   8    -0.02  -0.06  -0.01    -0.01   0.02   0.00    -0.02   0.00  -0.01
  16   6     0.03  -0.02   0.03     0.01   0.00   0.00     0.07  -0.02   0.04
  17   8     0.04   0.03  -0.05    -0.01  -0.01   0.02     0.00   0.00   0.01
  18   6     0.03   0.02  -0.03     0.00  -0.01   0.01     0.01   0.01  -0.01
  19   8     0.02   0.03  -0.02     0.01  -0.01   0.01     0.02   0.00  -0.01
  20   8     0.01   0.02   0.02     0.00   0.00   0.00     0.00   0.01   0.01
  21   6     0.01   0.02   0.00     0.00   0.00   0.00     0.00   0.01   0.00
  22   6     0.01   0.01  -0.02     0.00   0.00   0.01     0.00   0.01   0.00
  23   6     0.03   0.03   0.00    -0.01   0.00   0.00     0.00   0.02  -0.01
  24   8    -0.01   0.02   0.00     0.00   0.00   0.00     0.00   0.01   0.00
  25   6     0.01   0.02   0.00     0.00  -0.01   0.00     0.00   0.00   0.00
  26   6     0.04   0.06   0.01    -0.02   0.00  -0.01    -0.01   0.04  -0.01
  27   6    -0.03   0.01   0.04     0.00  -0.02  -0.02     0.01  -0.01  -0.01
  28   6    -0.01  -0.01  -0.02    -0.01  -0.02   0.01    -0.01  -0.05  -0.04
  29   6     0.01  -0.05   0.02     0.02   0.01   0.01     0.00   0.00   0.01
  30   6     0.00  -0.01   0.01     0.00   0.03  -0.02     0.02  -0.02   0.00
  31   6     0.00  -0.03   0.01     0.04   0.08  -0.04     0.00   0.01  -0.01
  32   6     0.02   0.02  -0.02     0.04   0.10  -0.05     0.00   0.02  -0.01
  33   6     0.02   0.06  -0.04     0.02   0.01   0.00    -0.01  -0.01   0.01
  34   6     0.02   0.04  -0.04    -0.01  -0.09   0.05    -0.02  -0.04   0.03
  35   6     0.01  -0.01  -0.01     0.00  -0.06   0.04    -0.01  -0.03   0.02
  36   6    -0.02   0.00  -0.03     0.00   0.02  -0.02     0.00   0.00   0.00
  37   6    -0.02   0.01   0.00    -0.02  -0.01   0.04    -0.01  -0.01   0.01
  38   6    -0.01   0.00   0.01     0.01  -0.01  -0.01     0.02  -0.02   0.00
  39   6    -0.02   0.01   0.01     0.04  -0.03   0.00     0.01  -0.01   0.00
  40   6    -0.03   0.02   0.01     0.03  -0.03  -0.01     0.01   0.00   0.00
  41   6    -0.02   0.00   0.01     0.01   0.01  -0.02     0.00   0.00   0.00
  42   6     0.00  -0.02   0.01    -0.01   0.03  -0.02     0.01  -0.01   0.00
  43   6     0.00   0.01   0.01    -0.03  -0.03  -0.02     0.02   0.00   0.00
  44   6     0.01  -0.02   0.00    -0.02   0.00   0.02     0.01   0.00  -0.01
  45   6    -0.08   0.05  -0.02     0.04  -0.08  -0.08     0.02  -0.02  -0.01
  46   6    -0.04   0.03  -0.04    -0.08   0.04   0.05    -0.01   0.00   0.02
  47   6    -0.07   0.01  -0.01    -0.09   0.00  -0.05    -0.03  -0.01  -0.03
  48   6    -0.03   0.00  -0.01    -0.01   0.06   0.07     0.01   0.01   0.03
  49   6     0.02  -0.01   0.00    -0.08  -0.05   0.00     0.03   0.02  -0.01
  50   6     0.01  -0.02  -0.01     0.00   0.00   0.04     0.00   0.00  -0.02
  51   6     0.05   0.02   0.02    -0.02  -0.05   0.01    -0.02   0.01  -0.03
  52   6    -0.01  -0.02   0.00    -0.08  -0.09   0.03     0.03   0.04   0.02
  53   6     0.06  -0.02   0.11     0.05  -0.01  -0.03    -0.02  -0.02  -0.03
  54   6     0.03   0.00  -0.05     0.05   0.09   0.04    -0.01  -0.05   0.01
  55   1     0.05  -0.04  -0.01     0.05   0.02  -0.04    -0.02  -0.01   0.03
  56   1    -0.01   0.00  -0.01     0.00  -0.01   0.02    -0.01  -0.01   0.02
  57   1    -0.03   0.01   0.01     0.02   0.00  -0.01     0.01   0.03   0.00
  58   1    -0.14  -0.02   0.04     0.00   0.00  -0.01    -0.35  -0.02   0.08
  59   1     0.14   0.07  -0.09     0.01   0.01  -0.01     0.35   0.20  -0.24
  60   1     0.12  -0.13   0.15     0.01   0.00   0.00     0.30  -0.30   0.35
  61   1     0.01  -0.02  -0.03     0.00   0.01   0.01     0.00   0.01   0.00
  62   1     0.03   0.03  -0.01     0.00   0.00  -0.01     0.01   0.02  -0.02
  63   1    -0.01   0.00   0.03     0.00  -0.01  -0.02     0.00   0.01   0.00
  64   1     0.01   0.01  -0.01     0.00  -0.02   0.00     0.00   0.00   0.01
  65   1     0.01   0.05   0.01     0.00  -0.03  -0.01     0.00   0.00   0.00
  66   1     0.03   0.08   0.03    -0.04   0.02  -0.02    -0.02   0.06   0.00
  67   1     0.03   0.06   0.01    -0.04  -0.02   0.00    -0.02   0.03   0.00
  68   1     0.06   0.08   0.00    -0.01   0.01  -0.01     0.01   0.05  -0.01
  69   1    -0.03   0.01   0.04     0.01  -0.04  -0.03     0.01  -0.02  -0.02
  70   1    -0.03   0.02   0.04     0.00  -0.03  -0.02     0.01  -0.03  -0.01
  71   1    -0.03  -0.01   0.05    -0.01   0.00  -0.05     0.01   0.00  -0.03
  72   1    -0.02  -0.03   0.00     0.00  -0.02   0.01     0.02  -0.08   0.00
  73   1     0.01  -0.02  -0.04    -0.03  -0.02   0.00    -0.03  -0.07  -0.08
  74   1    -0.02   0.02  -0.02     0.00  -0.04   0.02    -0.01  -0.05  -0.04
  75   1     0.02   0.04  -0.03     0.06   0.16  -0.09     0.01   0.04  -0.02
  76   1     0.03   0.10  -0.07     0.02   0.00   0.00    -0.01  -0.02   0.01
  77   1     0.03   0.08  -0.06    -0.02  -0.15   0.09    -0.02  -0.07   0.04
  78   1     0.00  -0.01  -0.07    -0.02   0.00   0.00    -0.01   0.00   0.01
  79   1    -0.01   0.04   0.02    -0.01   0.03   0.06    -0.01   0.00   0.01
  80   1    -0.03   0.02   0.01     0.06  -0.06   0.00     0.01  -0.01   0.00
  81   1    -0.04   0.03   0.01     0.05  -0.05   0.00     0.00   0.00   0.00
  82   1    -0.02   0.01   0.01     0.01   0.02  -0.02     0.00   0.00   0.00
  83   1    -0.02   0.03   0.02    -0.06  -0.01  -0.06     0.03  -0.02   0.01
  84   1     0.00  -0.02  -0.01     0.00  -0.01   0.05     0.00   0.01  -0.02
  85   1    -0.15   0.09  -0.09     0.00  -0.16  -0.04     0.02  -0.04   0.01
  86   1    -0.03   0.01  -0.04     0.08  -0.09  -0.14     0.02  -0.02  -0.01
  87   1    -0.10   0.10   0.08     0.07  -0.07  -0.12     0.03  -0.03  -0.03
  88   1    -0.06   0.04  -0.08    -0.12  -0.07   0.13    -0.02  -0.02   0.03
  89   1    -0.05   0.05  -0.01    -0.03   0.05   0.00     0.00   0.00   0.00
  90   1    -0.03   0.00  -0.05    -0.14   0.16   0.10    -0.03   0.03   0.02
  91   1    -0.08   0.04  -0.01    -0.12   0.07  -0.07    -0.01   0.02  -0.05
  92   1    -0.08  -0.02  -0.01    -0.11  -0.05  -0.08    -0.03  -0.02  -0.01
  93   1    -0.08   0.02  -0.01    -0.11  -0.04  -0.08    -0.05  -0.03  -0.05
  94   1    -0.07   0.05   0.01    -0.06   0.17   0.05     0.01   0.06   0.02
  95   1     0.03   0.01   0.01     0.07   0.06   0.16     0.05   0.01   0.07
  96   1    -0.05  -0.05  -0.05    -0.04  -0.01   0.03     0.01  -0.02   0.03
  97   1     0.02   0.00   0.00    -0.06  -0.10   0.03     0.02   0.04  -0.02
  98   1     0.03  -0.01   0.01    -0.10  -0.03  -0.02     0.04   0.01   0.00
  99   1     0.03  -0.01   0.01    -0.12  -0.07  -0.02     0.05   0.03   0.00
 100   1     0.05   0.04  -0.09    -0.02  -0.04   0.10    -0.02   0.00  -0.01
 101   1    -0.08  -0.08  -0.04     0.05   0.05   0.07     0.01   0.00  -0.02
 102   1     0.04  -0.02   0.08    -0.02   0.01  -0.01    -0.01  -0.01  -0.04
 103   1     0.04   0.02   0.01    -0.08  -0.08   0.00    -0.01   0.04  -0.03
 104   1     0.07   0.07   0.01     0.01   0.00  -0.02    -0.03  -0.03  -0.04
 105   1     0.09  -0.01   0.02     0.02  -0.07   0.08    -0.04   0.03  -0.06
 106   1    -0.02  -0.08  -0.02    -0.17  -0.21  -0.02     0.05   0.13   0.04
 107   1    -0.01  -0.02   0.05    -0.09  -0.07   0.19     0.04   0.03  -0.07
 108   1     0.01   0.00  -0.04    -0.01  -0.02  -0.04     0.00  -0.01   0.09
 109   1     0.00  -0.01   0.17    -0.02   0.08   0.00     0.03  -0.04  -0.07
 110   1     0.08  -0.03   0.08     0.06  -0.06  -0.14    -0.02   0.00   0.01
 111   1     0.14   0.00   0.15     0.14  -0.04   0.05    -0.08  -0.03  -0.07
 112   1    -0.06  -0.16  -0.34     0.02   0.03  -0.06     0.03   0.03   0.16
 113   1     0.21   0.34  -0.08     0.08   0.26   0.05    -0.09  -0.24   0.02
 114   1    -0.02  -0.12   0.29     0.07   0.03   0.20     0.00   0.02  -0.18
                    34                     35                     36
                    ?A                     ?A                     ?A
 Frequencies --   153.5348               159.2536               163.6505
 Red. masses --     3.0762                 3.5902                 2.3241
 Frc consts  --     0.0427                 0.0536                 0.0367
 IR Inten    --     1.2067                 4.9507                 0.6041
 Raman Activ --     0.0000                 0.0000                 0.0000
 Depolar     --     0.0000                 0.0000                 0.0000
 Atom AN      X      Y      Z        X      Y      Z        X      Y      Z
   1   8     0.03  -0.04   0.03     0.03  -0.03   0.03     0.00   0.00   0.00
   2  12     0.01  -0.02   0.01    -0.07   0.02   0.04     0.02   0.01  -0.01
   3   8    -0.01  -0.05   0.00    -0.01   0.05   0.02     0.00   0.00  -0.01
   4   6     0.01  -0.02   0.01     0.01  -0.01   0.01     0.00   0.00   0.00
   5   7     0.00  -0.01   0.02    -0.03  -0.02   0.04     0.02   0.02   0.00
   6   7     0.00  -0.04   0.02    -0.06   0.05   0.02     0.01   0.00   0.01
   7   8    -0.01   0.00  -0.02    -0.02   0.02  -0.01     0.01  -0.01   0.00
   8   6    -0.02  -0.03   0.02    -0.02  -0.01   0.04     0.02   0.02   0.02
   9   6    -0.02  -0.04   0.03    -0.02   0.03   0.04     0.02   0.03   0.05
  10   6    -0.02  -0.04   0.03    -0.05   0.04   0.00     0.02   0.01   0.02
  11   8    -0.01  -0.04   0.00    -0.01  -0.01   0.00    -0.01   0.01  -0.02
  12   6    -0.01  -0.03   0.01    -0.01  -0.06  -0.03    -0.01   0.03  -0.01
  13   6    -0.01   0.00   0.01     0.00  -0.02  -0.01    -0.01   0.01  -0.01
  14   6    -0.01  -0.02   0.01     0.00  -0.01   0.01    -0.01   0.00  -0.01
  15   8    -0.01  -0.03   0.01    -0.01  -0.11  -0.06    -0.01   0.05   0.00
  16   6    -0.03   0.01  -0.02    -0.04   0.01  -0.02     0.01   0.00   0.00
  17   8     0.04   0.02  -0.07    -0.01  -0.02   0.05     0.00  -0.01   0.00
  18   6     0.01   0.01  -0.01     0.03   0.00  -0.01     0.00  -0.01  -0.01
  19   8    -0.04   0.02  -0.01     0.09  -0.01  -0.02     0.01  -0.01   0.00
  20   8     0.01   0.02  -0.02     0.01  -0.01   0.06     0.00  -0.04   0.03
  21   6     0.00   0.00  -0.01     0.01   0.01   0.01     0.01  -0.02   0.00
  22   6     0.01   0.00  -0.03     0.01   0.00   0.02     0.01  -0.02   0.00
  23   6     0.02  -0.02   0.02     0.01   0.05  -0.03     0.00  -0.01   0.00
  24   8    -0.01  -0.01   0.01     0.01   0.02  -0.01     0.02  -0.01  -0.02
  25   6     0.00   0.02   0.00     0.01  -0.02   0.00     0.01  -0.01   0.00
  26   6     0.09  -0.07   0.03    -0.07   0.16  -0.03     0.02   0.01   0.01
  27   6    -0.01   0.07   0.10    -0.05  -0.05  -0.06     0.02   0.00  -0.02
  28   6    -0.01   0.02   0.02    -0.02   0.01   0.03    -0.02   0.00   0.01
  29   6     0.00   0.00   0.01    -0.03  -0.02   0.02     0.01   0.01  -0.01
  30   6    -0.01  -0.03   0.01    -0.04   0.03   0.01     0.01   0.00   0.00
  31   6     0.03   0.07  -0.04     0.00   0.03  -0.02     0.01   0.00   0.00
  32   6     0.04   0.11  -0.07     0.01   0.09  -0.06     0.00  -0.02   0.02
  33   6     0.02   0.04  -0.02     0.00   0.07  -0.05     0.00  -0.03   0.02
  34   6    -0.01  -0.05   0.03    -0.02   0.01   0.00     0.01  -0.02   0.01
  35   6    -0.01  -0.04   0.03    -0.03  -0.03   0.02     0.01   0.00   0.00
  36   6     0.01   0.03  -0.01     0.02   0.03   0.00    -0.01  -0.01   0.00
  37   6     0.00  -0.02   0.02     0.01  -0.03   0.00     0.00   0.01   0.01
  38   6    -0.03   0.01   0.00    -0.02   0.01   0.01    -0.05   0.08   0.00
  39   6    -0.06   0.05   0.00     0.02  -0.04   0.01    -0.09   0.11   0.00
  40   6    -0.07   0.06   0.00     0.06  -0.09   0.01    -0.03   0.04   0.00
  41   6    -0.04   0.02   0.01     0.05  -0.08   0.02     0.06  -0.06   0.01
  42   6    -0.01  -0.01   0.01     0.00  -0.02   0.02     0.06  -0.06   0.01
  43   6     0.01   0.03   0.01     0.01   0.01   0.01    -0.04   0.03   0.00
  44   6     0.01   0.01  -0.03     0.02  -0.02   0.00     0.03  -0.04   0.01
  45   6     0.06  -0.07  -0.07     0.03   0.00  -0.02     0.00  -0.02  -0.01
  46   6    -0.03   0.03   0.05     0.03   0.00   0.02    -0.04   0.01   0.00
  47   6    -0.03  -0.02  -0.05     0.03  -0.03  -0.04    -0.01   0.01   0.00
  48   6     0.04   0.04   0.06     0.08   0.00   0.04    -0.03   0.01   0.00
  49   6     0.07   0.05  -0.02     0.05   0.01   0.00     0.01   0.02   0.05
  50   6     0.01   0.01  -0.04     0.02  -0.01  -0.01    -0.06  -0.07  -0.07
  51   6     0.03   0.05  -0.01     0.00   0.00   0.03     0.00  -0.02   0.10
  52   6     0.04   0.05  -0.04     0.05   0.04  -0.03    -0.02  -0.02  -0.10
  53   6    -0.05  -0.03  -0.02    -0.01  -0.04   0.00     0.01  -0.01  -0.05
  54   6    -0.03  -0.07   0.01    -0.04   0.03  -0.09     0.02   0.01   0.00
  55   1    -0.03  -0.04   0.02     0.01   0.03   0.03     0.02   0.04   0.06
  56   1    -0.01   0.05  -0.05     0.06  -0.05   0.02    -0.02   0.01   0.00
  57   1    -0.02  -0.02   0.00     0.00  -0.01   0.01     0.00   0.00  -0.01
  58   1     0.16   0.01  -0.05     0.08   0.00  -0.05     0.00   0.00   0.00
  59   1    -0.16  -0.08   0.11    -0.14  -0.03   0.09     0.02   0.01  -0.01
  60   1    -0.14   0.14  -0.15    -0.12   0.10  -0.12     0.01   0.00   0.01
  61   1     0.00  -0.04  -0.04     0.02   0.02   0.03     0.01  -0.01   0.00
  62   1     0.00  -0.01   0.07     0.04   0.04  -0.10    -0.01  -0.02  -0.01
  63   1    -0.02  -0.01   0.03     0.02  -0.01  -0.02     0.01  -0.01   0.00
  64   1     0.01   0.01  -0.03     0.00  -0.02   0.03     0.01  -0.01   0.01
  65   1     0.02   0.07   0.01     0.00  -0.05  -0.01     0.00  -0.02   0.00
  66   1     0.15  -0.14   0.04    -0.18   0.30  -0.02     0.01   0.02   0.03
  67   1     0.14   0.00   0.00    -0.15   0.04  -0.01     0.02   0.01   0.00
  68   1     0.03  -0.10   0.05     0.07   0.22  -0.06     0.04   0.02   0.00
  69   1    -0.02   0.13   0.12    -0.03  -0.14  -0.09     0.01   0.02  -0.02
  70   1    -0.02   0.10   0.09    -0.03  -0.01  -0.03     0.01  -0.02  -0.02
  71   1     0.01   0.02   0.17    -0.13  -0.03  -0.10     0.04   0.01  -0.03
  72   1    -0.03   0.03   0.01    -0.04   0.01   0.03    -0.02   0.01   0.00
  73   1     0.01   0.02   0.03    -0.03   0.01   0.04    -0.04   0.01   0.02
  74   1    -0.01   0.03   0.02    -0.01   0.00   0.06    -0.01  -0.02   0.02
  75   1     0.05   0.18  -0.10     0.02   0.14  -0.10     0.00  -0.03   0.02
  76   1     0.02   0.05  -0.03     0.01   0.11  -0.08     0.00  -0.05   0.03
  77   1    -0.02  -0.10   0.06    -0.03   0.00   0.00     0.01  -0.03   0.02
  78   1    -0.01   0.02   0.02     0.01   0.05   0.02    -0.01  -0.03  -0.01
  79   1     0.00  -0.01   0.01     0.00  -0.04  -0.05     0.00   0.01   0.03
  80   1    -0.09   0.07   0.00     0.03  -0.06   0.01    -0.14   0.18   0.00
  81   1    -0.10   0.09   0.00     0.11  -0.14   0.01    -0.04   0.06   0.00
  82   1    -0.05   0.03   0.01     0.09  -0.13   0.02     0.11  -0.10   0.01
  83   1     0.02   0.02   0.05     0.03  -0.01   0.03    -0.04   0.03  -0.02
  84   1    -0.01   0.01  -0.07     0.00  -0.01  -0.02     0.03  -0.01   0.03
  85   1     0.05  -0.15  -0.01     0.03  -0.02   0.00    -0.01  -0.04  -0.01
  86   1     0.07  -0.06  -0.11     0.03   0.01  -0.02     0.01  -0.03  -0.02
  87   1     0.09  -0.09  -0.13     0.04  -0.01  -0.04     0.01  -0.02  -0.01
  88   1    -0.06  -0.06   0.12     0.04   0.00   0.03    -0.05  -0.02   0.02
  89   1     0.00   0.02   0.01     0.02  -0.02   0.01    -0.01   0.03  -0.01
  90   1    -0.08   0.12   0.09     0.04   0.01   0.03    -0.07   0.04   0.00
  91   1    -0.01   0.03  -0.08     0.10  -0.01  -0.10    -0.04   0.01   0.02
  92   1    -0.03  -0.03  -0.03     0.04  -0.01   0.04    -0.01   0.00  -0.03
  93   1    -0.07  -0.05  -0.08    -0.04  -0.06  -0.08     0.02   0.01   0.02
  94   1     0.03   0.12   0.03     0.11   0.04   0.00    -0.06   0.02   0.01
  95   1     0.09   0.04   0.13     0.11   0.00   0.07    -0.01   0.01   0.01
  96   1     0.03  -0.01   0.06     0.08  -0.03   0.08    -0.04  -0.01  -0.03
  97   1     0.06   0.08  -0.05     0.06   0.03  -0.02    -0.05   0.09   0.05
  98   1     0.09   0.03   0.01     0.07   0.00   0.03    -0.01   0.00   0.02
  99   1     0.09   0.06  -0.02     0.06   0.01   0.01     0.07   0.04   0.11
 100   1     0.04   0.05  -0.09     0.06   0.03  -0.07    -0.14  -0.01  -0.06
 101   1    -0.05  -0.02  -0.05    -0.05  -0.06  -0.03    -0.04  -0.11  -0.10
 102   1     0.03   0.02   0.02     0.05  -0.01   0.07    -0.07  -0.12  -0.13
 103   1     0.08   0.08   0.00     0.05   0.00   0.03     0.01  -0.10   0.09
 104   1     0.01   0.03   0.02    -0.03  -0.04   0.07     0.00   0.03   0.15
 105   1     0.02   0.05  -0.07    -0.04   0.03  -0.01     0.01  -0.02   0.15
 106   1     0.12   0.14  -0.01     0.09   0.04  -0.03     0.00  -0.17  -0.13
 107   1     0.06   0.03  -0.15     0.03   0.06  -0.07    -0.04   0.01  -0.01
 108   1    -0.02   0.01   0.01     0.05   0.05  -0.05     0.00   0.06  -0.23
 109   1    -0.05   0.01  -0.04     0.10  -0.13  -0.06     0.29  -0.25  -0.19
 110   1    -0.07  -0.05  -0.04     0.01   0.02   0.10     0.04   0.15   0.25
 111   1    -0.04  -0.04  -0.01    -0.14  -0.05  -0.08    -0.30   0.02  -0.28
 112   1    -0.01  -0.04   0.07    -0.06   0.06  -0.08    -0.01  -0.03  -0.08
 113   1    -0.05  -0.15   0.02     0.00  -0.04  -0.11     0.07   0.07  -0.02
 114   1    -0.03  -0.04  -0.07    -0.07   0.06  -0.15    -0.01  -0.02   0.06
                    37                     38                     39
                    ?A                     ?A                     ?A
 Frequencies --   170.0698               172.6619               185.7238
 Red. masses --     2.0292                 2.1685                 4.7117
 Frc consts  --     0.0346                 0.0381                 0.0958
 IR Inten    --     0.4747                 0.5455                 5.0775
 Raman Activ --     0.0000                 0.0000                 0.0000
 Depolar     --     0.0000                 0.0000                 0.0000
 Atom AN      X      Y      Z        X      Y      Z        X      Y      Z
   1   8     0.03  -0.03   0.01    -0.03   0.03  -0.02     0.03  -0.02  -0.02
   2  12    -0.01   0.00   0.02     0.01   0.00  -0.03    -0.06  -0.02  -0.04
   3   8    -0.02   0.00   0.02     0.03  -0.03  -0.04     0.02  -0.11  -0.10
   4   6     0.02  -0.02   0.00    -0.02   0.03   0.00     0.04  -0.01   0.00
   5   7     0.01  -0.01   0.01    -0.01   0.03  -0.01     0.00  -0.05   0.02
   6   7     0.00  -0.01   0.01     0.00   0.03   0.00    -0.05   0.01   0.03
   7   8     0.02  -0.02   0.00    -0.01   0.02   0.00     0.04  -0.01   0.01
   8   6     0.01   0.00   0.03    -0.01   0.04   0.01     0.02  -0.05   0.02
   9   6     0.01   0.00   0.03    -0.01   0.03   0.00     0.02  -0.01   0.04
  10   6     0.00  -0.02  -0.01    -0.01   0.02  -0.03    -0.01   0.02   0.03
  11   8    -0.02   0.04  -0.05     0.04  -0.05   0.06     0.04  -0.01   0.02
  12   6    -0.02   0.06  -0.03     0.03  -0.06   0.04     0.04   0.09   0.06
  13   6     0.00   0.03   0.00     0.00  -0.03   0.00    -0.01   0.02  -0.02
  14   6     0.00   0.00  -0.02     0.01   0.00   0.02     0.05   0.00   0.00
  15   8    -0.04   0.08  -0.02     0.06  -0.06   0.04     0.07   0.24   0.13
  16   6    -0.01   0.02  -0.03     0.01  -0.02   0.03     0.00  -0.01  -0.02
  17   8    -0.01   0.00   0.01     0.00   0.00  -0.02    -0.04   0.02  -0.03
  18   6     0.00   0.00   0.01    -0.01   0.00   0.01    -0.04   0.02  -0.01
  19   8     0.01   0.00   0.01    -0.04   0.01   0.00    -0.05   0.01  -0.04
  20   8     0.00   0.02  -0.02    -0.01  -0.02   0.00    -0.03  -0.05   0.01
  21   6    -0.01   0.01   0.00     0.00  -0.01  -0.01    -0.02  -0.02  -0.01
  22   6    -0.01   0.00   0.00    -0.01   0.00  -0.01    -0.03   0.02  -0.03
  23   6     0.00   0.00   0.00    -0.01  -0.02   0.00    -0.05   0.00  -0.06
  24   8    -0.01   0.00   0.01     0.00  -0.01   0.00     0.00  -0.02  -0.01
  25   6    -0.01   0.00  -0.01    -0.01   0.01   0.00    -0.02   0.05   0.01
  26   6    -0.01  -0.01  -0.01    -0.02  -0.03   0.00    -0.14   0.10  -0.06
  27   6     0.08   0.01  -0.02    -0.08   0.02   0.06     0.01   0.10   0.09
  28   6    -0.06  -0.01   0.05     0.09   0.01  -0.06     0.08  -0.02  -0.04
  29   6     0.01  -0.01   0.00    -0.01   0.02  -0.01     0.01  -0.04   0.02
  30   6     0.00  -0.02   0.01     0.00   0.02   0.00    -0.05   0.01   0.02
  31   6     0.01  -0.01   0.00     0.00   0.02  -0.01     0.00  -0.02   0.01
  32   6     0.01  -0.01   0.01    -0.01   0.01  -0.01     0.01   0.00   0.00
  33   6     0.01  -0.01   0.01    -0.01   0.00   0.00     0.01   0.01   0.00
  34   6     0.01  -0.01   0.00    -0.02  -0.01   0.01     0.01  -0.01   0.00
  35   6     0.01  -0.01   0.00    -0.01   0.00   0.00     0.01  -0.02   0.01
  36   6    -0.01  -0.01  -0.01     0.01   0.01   0.00    -0.01  -0.02   0.00
  37   6     0.00   0.00   0.00     0.00  -0.01   0.00     0.00   0.00   0.01
  38   6     0.03  -0.05   0.01     0.02   0.00   0.00    -0.03  -0.01   0.01
  39   6     0.03  -0.05   0.01     0.03  -0.01   0.00     0.01  -0.06   0.01
  40   6    -0.01   0.00   0.00     0.01   0.01   0.00     0.04  -0.10   0.02
  41   6    -0.05   0.04   0.00    -0.01   0.03   0.00     0.01  -0.08   0.02
  42   6    -0.03   0.02   0.01    -0.01   0.03   0.00    -0.03  -0.03   0.02
  43   6     0.02  -0.02   0.01     0.01  -0.01   0.00     0.00   0.00   0.02
  44   6    -0.01   0.01   0.00    -0.01   0.01   0.02    -0.01  -0.01  -0.01
  45   6    -0.01  -0.01  -0.01     0.03  -0.02  -0.01    -0.01   0.00   0.01
  46   6    -0.03   0.01  -0.01     0.01   0.00   0.01    -0.02  -0.01  -0.01
  47   6     0.00   0.00  -0.01     0.03  -0.01   0.00    -0.02   0.00  -0.02
  48   6    -0.01   0.00   0.00     0.02   0.00   0.01    -0.01   0.02   0.02
  49   6     0.00  -0.02  -0.02    -0.03  -0.03   0.00     0.04   0.03   0.00
  50   6     0.03   0.02   0.03     0.01   0.01   0.05     0.01   0.00  -0.03
  51   6     0.01   0.02  -0.05     0.00   0.00  -0.01     0.03   0.01   0.02
  52   6     0.01   0.02   0.07    -0.01  -0.01   0.03     0.04   0.01  -0.03
  53   6     0.01  -0.01   0.01    -0.02   0.03  -0.01     0.04  -0.08   0.01
  54   6     0.00  -0.04  -0.08    -0.02   0.00  -0.08     0.01   0.05  -0.02
  55   1     0.01   0.00   0.03    -0.02   0.03  -0.01     0.05  -0.01   0.03
  56   1    -0.01   0.02   0.01    -0.01   0.01  -0.04    -0.14   0.09  -0.10
  57   1     0.04  -0.01  -0.03    -0.03   0.01   0.04     0.04   0.00   0.00
  58   1     0.04   0.00  -0.08    -0.05   0.00   0.08    -0.01  -0.02  -0.03
  59   1    -0.07   0.02   0.03     0.07  -0.02  -0.03     0.00   0.00  -0.01
  60   1    -0.05   0.06  -0.08     0.06  -0.07   0.08     0.00  -0.02  -0.04
  61   1    -0.01   0.01   0.01    -0.01  -0.02  -0.01    -0.02   0.01  -0.03
  62   1     0.00   0.01   0.00    -0.01  -0.02   0.01    -0.03  -0.02  -0.13
  63   1    -0.01   0.00  -0.02    -0.01   0.00   0.02     0.00   0.03   0.05
  64   1     0.00  -0.01  -0.01    -0.01   0.01   0.00    -0.04   0.08   0.02
  65   1     0.00  -0.01  -0.01    -0.01   0.02   0.01    -0.04   0.08   0.01
  66   1     0.04  -0.06  -0.02    -0.02  -0.04  -0.01    -0.12   0.08  -0.06
  67   1     0.01   0.05   0.02    -0.02  -0.03   0.01    -0.15   0.16   0.02
  68   1    -0.07  -0.02  -0.02    -0.03  -0.04   0.00    -0.19   0.12  -0.15
  69   1     0.10   0.04  -0.04    -0.11   0.02   0.09    -0.04   0.23   0.16
  70   1     0.09  -0.04   0.00    -0.10   0.09   0.02    -0.03   0.10   0.02
  71   1     0.11   0.02  -0.03    -0.10  -0.01   0.10     0.12   0.04   0.18
  72   1    -0.06   0.04   0.00     0.09  -0.05   0.00     0.13  -0.02  -0.03
  73   1    -0.16   0.02   0.10     0.21  -0.03  -0.12     0.10  -0.02  -0.04
  74   1    -0.03  -0.11   0.10     0.05   0.12  -0.13     0.06  -0.03  -0.08
  75   1     0.01  -0.01   0.01    -0.01   0.02  -0.01     0.01   0.01  -0.01
  76   1     0.01  -0.01   0.01    -0.01  -0.02   0.00     0.02   0.03  -0.01
  77   1     0.01  -0.01   0.00    -0.02  -0.03   0.02     0.02   0.00   0.00
  78   1    -0.01  -0.03  -0.02     0.00   0.02   0.02    -0.01  -0.03  -0.01
  79   1     0.00   0.00   0.02     0.00  -0.02  -0.02     0.00   0.00   0.02
  80   1     0.06  -0.08   0.00     0.05  -0.03   0.00     0.02  -0.08   0.01
  81   1    -0.02   0.01   0.00     0.01   0.00   0.00     0.08  -0.14   0.01
  82   1    -0.08   0.07   0.00    -0.03   0.04   0.00     0.04  -0.11   0.03
  83   1     0.02  -0.02   0.03     0.00   0.00  -0.01     0.01   0.00   0.06
  84   1    -0.01  -0.01  -0.02    -0.01   0.01   0.03    -0.02  -0.02  -0.05
  85   1    -0.02  -0.01  -0.01     0.04  -0.04   0.02     0.01   0.01   0.02
  86   1    -0.01  -0.02  -0.01     0.02   0.00  -0.02    -0.03   0.02   0.02
  87   1    -0.01  -0.01   0.00     0.04  -0.03  -0.05    -0.02  -0.02   0.01
  88   1    -0.05  -0.01  -0.01     0.01  -0.01   0.03    -0.02   0.00  -0.02
  89   1    -0.02   0.03  -0.02     0.02  -0.01  -0.01    -0.02   0.01   0.00
  90   1    -0.05   0.02  -0.01     0.00   0.02   0.02    -0.02  -0.02  -0.02
  91   1    -0.02   0.00   0.00     0.06  -0.02  -0.02    -0.05   0.02  -0.01
  92   1    -0.01  -0.01  -0.03     0.04   0.01   0.03    -0.03  -0.01  -0.06
  93   1     0.01  -0.01   0.00     0.01  -0.01  -0.01     0.01  -0.01  -0.01
  94   1    -0.04   0.02   0.01     0.04  -0.01  -0.01    -0.04   0.07   0.02
  95   1     0.01   0.00   0.02     0.01   0.00   0.01     0.03   0.03   0.06
  96   1    -0.02  -0.02  -0.03     0.03   0.01   0.03    -0.02  -0.01  -0.02
  97   1     0.02  -0.04  -0.02    -0.01  -0.07   0.02     0.09   0.04  -0.05
  98   1     0.01  -0.03  -0.01    -0.04  -0.02   0.00     0.07   0.07   0.05
  99   1    -0.01  -0.02  -0.05    -0.06  -0.04  -0.02     0.01   0.01   0.01
 100   1     0.11   0.05  -0.05     0.05   0.02   0.02     0.08   0.06  -0.13
 101   1    -0.06  -0.02   0.01    -0.04   0.00   0.05    -0.09  -0.06  -0.06
 102   1     0.07   0.05   0.14     0.03   0.02   0.10     0.05   0.02   0.09
 103   1    -0.01   0.07  -0.05    -0.02   0.00  -0.01     0.09   0.02   0.03
 104   1     0.01  -0.01  -0.09     0.01   0.00  -0.02     0.01  -0.01   0.06
 105   1     0.01   0.01  -0.08     0.00  -0.01   0.00     0.02   0.01  -0.03
 106   1    -0.01   0.11   0.09    -0.04  -0.03   0.02     0.09   0.02  -0.02
 107   1     0.02   0.00   0.02    -0.01  -0.01   0.07     0.03   0.01  -0.08
 108   1     0.00  -0.03   0.16     0.01   0.00   0.02     0.01   0.00  -0.03
 109   1     0.30  -0.29  -0.12     0.27  -0.25  -0.15    -0.04   0.01   0.04
 110   1     0.04   0.17   0.35     0.01   0.22   0.33     0.05  -0.13  -0.11
 111   1    -0.31   0.06  -0.25    -0.34   0.10  -0.28     0.12  -0.13   0.10
 112   1    -0.04  -0.10  -0.21    -0.06  -0.08  -0.22    -0.01   0.11   0.02
 113   1     0.11   0.07  -0.11     0.09   0.13  -0.10     0.01  -0.03  -0.03
 114   1    -0.05  -0.08   0.03    -0.07  -0.05   0.05     0.03   0.08  -0.10
                    40                     41                     42
                    ?A                     ?A                     ?A
 Frequencies --   194.3190               201.1339               210.5928
 Red. masses --     2.6607                 2.5393                 1.9108
 Frc consts  --     0.0592                 0.0605                 0.0499
 IR Inten    --     3.8105                 2.6991                 2.8061
 Raman Activ --     0.0000                 0.0000                 0.0000
 Depolar     --     0.0000                 0.0000                 0.0000
 Atom AN      X      Y      Z        X      Y      Z        X      Y      Z
   1   8    -0.02   0.01   0.00     0.00   0.03  -0.03    -0.02  -0.01   0.03
   2  12    -0.01   0.02  -0.03     0.01   0.02   0.04     0.01   0.00  -0.01
   3   8     0.02   0.10  -0.01    -0.01  -0.08   0.02     0.01   0.03  -0.02
   4   6    -0.02   0.00   0.00     0.01   0.04  -0.01    -0.03  -0.04   0.01
   5   7     0.05   0.00  -0.01     0.03   0.04   0.01    -0.01   0.00   0.02
   6   7    -0.05  -0.02   0.01    -0.01   0.03   0.05     0.02   0.02   0.03
   7   8    -0.01  -0.01  -0.01     0.00   0.04   0.01    -0.02  -0.04  -0.01
   8   6     0.01  -0.01   0.00     0.01   0.03   0.02     0.01   0.02   0.03
   9   6     0.01  -0.03   0.01     0.01   0.05   0.09     0.02   0.06   0.10
  10   6    -0.01  -0.02   0.01     0.00   0.03   0.05     0.02   0.03   0.05
  11   8     0.00  -0.01   0.02    -0.01  -0.01  -0.02     0.00   0.03   0.03
  12   6     0.01   0.01   0.01    -0.01  -0.05  -0.04     0.01   0.03   0.02
  13   6    -0.01   0.03  -0.01     0.02  -0.04  -0.01    -0.01   0.02  -0.01
  14   6    -0.01  -0.01   0.00     0.00   0.02   0.01    -0.01  -0.02  -0.01
  15   8     0.04   0.01   0.01    -0.02  -0.08  -0.05     0.02   0.01   0.01
  16   6     0.02   0.01   0.02    -0.02  -0.03   0.01     0.04   0.05   0.00
  17   8     0.00  -0.01   0.03     0.00  -0.01  -0.01     0.00   0.00   0.01
  18   6     0.00  -0.02   0.00     0.01   0.01   0.01     0.00   0.00   0.00
  19   8     0.01  -0.03  -0.01     0.00   0.03   0.03     0.00  -0.02  -0.01
  20   8     0.00   0.01   0.00     0.00  -0.01   0.00     0.00   0.00   0.00
  21   6     0.00   0.00   0.01     0.00  -0.01  -0.01     0.00   0.00   0.00
  22   6     0.01  -0.01   0.02     0.00  -0.01  -0.01     0.00   0.00   0.01
  23   6     0.01  -0.01   0.03     0.00   0.00  -0.02     0.00  -0.01   0.02
  24   8     0.00   0.01   0.00     0.00  -0.01   0.00     0.00   0.00   0.00
  25   6     0.01  -0.02   0.00    -0.01  -0.01   0.00     0.00  -0.01   0.00
  26   6     0.05  -0.06   0.03    -0.04   0.04  -0.02     0.02  -0.03   0.01
  27   6    -0.09  -0.03  -0.11     0.07   0.03   0.09    -0.03   0.00  -0.05
  28   6     0.03   0.02  -0.03    -0.03   0.01   0.04     0.03   0.00  -0.05
  29   6     0.05   0.01  -0.01     0.03   0.04  -0.02    -0.02  -0.01   0.01
  30   6    -0.08   0.00   0.01    -0.01   0.01   0.01     0.03   0.00   0.00
  31   6     0.05   0.00   0.00     0.03   0.01  -0.01    -0.02   0.00   0.00
  32   6     0.04  -0.04   0.03     0.02  -0.05   0.03    -0.02   0.02  -0.01
  33   6     0.04  -0.05   0.04     0.01  -0.08   0.04    -0.02   0.03  -0.01
  34   6     0.05  -0.02   0.01     0.02  -0.02   0.01    -0.02   0.01  -0.01
  35   6     0.06   0.02  -0.01     0.03   0.04  -0.02    -0.02  -0.01   0.00
  36   6     0.01   0.00  -0.03     0.01   0.01  -0.02    -0.01   0.00   0.01
  37   6     0.01   0.03   0.02     0.01   0.04  -0.01    -0.01  -0.01  -0.01
  38   6    -0.07  -0.01   0.01     0.00   0.00   0.00     0.04   0.00  -0.01
  39   6    -0.04  -0.04   0.01     0.02  -0.02  -0.01     0.01   0.03  -0.02
  40   6    -0.02  -0.06   0.02     0.00  -0.03  -0.02    -0.03   0.05  -0.03
  41   6    -0.04  -0.03   0.02    -0.02  -0.02  -0.01    -0.02   0.02  -0.02
  42   6    -0.08   0.01   0.02    -0.02  -0.01   0.00     0.02  -0.02   0.00
  43   6    -0.02   0.01   0.02    -0.01   0.00   0.00     0.02  -0.01  -0.01
  44   6    -0.04   0.01  -0.01    -0.01  -0.01  -0.01     0.01  -0.02   0.01
  45   6     0.00  -0.02  -0.05     0.01  -0.03  -0.06     0.00   0.01   0.03
  46   6    -0.04   0.03  -0.01    -0.03   0.03   0.00     0.00  -0.01   0.00
  47   6    -0.03   0.03   0.04     0.01   0.03   0.04     0.01  -0.01  -0.02
  48   6    -0.05   0.01  -0.02    -0.03  -0.01  -0.05     0.01   0.00   0.00
  49   6     0.02   0.02  -0.03     0.01   0.00  -0.01    -0.01   0.00   0.02
  50   6     0.04   0.05   0.03     0.02   0.00  -0.02     0.00  -0.02  -0.02
  51   6     0.03   0.03   0.02    -0.02  -0.01   0.01    -0.02  -0.02  -0.01
  52   6     0.03   0.03  -0.05    -0.02  -0.01   0.01    -0.02  -0.02   0.05
  53   6    -0.02   0.01   0.00    -0.03   0.01  -0.07     0.02  -0.05  -0.06
  54   6     0.00   0.02  -0.01     0.00   0.00  -0.06     0.00  -0.02  -0.06
  55   1     0.01  -0.03   0.01     0.00   0.04   0.07     0.02   0.06   0.09
  56   1     0.02  -0.02   0.05     0.03   0.01  -0.06    -0.03   0.01   0.01
  57   1    -0.02  -0.01   0.00     0.00   0.03   0.03     0.00  -0.03  -0.04
  58   1     0.04   0.01   0.03    -0.07  -0.02   0.06     0.10   0.03  -0.05
  59   1     0.04  -0.02  -0.01    -0.01  -0.03   0.00     0.03   0.03   0.00
  60   1     0.03   0.02   0.03    -0.01  -0.09   0.01     0.02   0.12   0.02
  61   1     0.00   0.01   0.02     0.00  -0.02  -0.01     0.00   0.01   0.01
  62   1    -0.01  -0.01   0.06     0.01   0.00  -0.05    -0.01  -0.01   0.03
  63   1     0.03   0.00  -0.03    -0.03  -0.02   0.01     0.01   0.00  -0.02
  64   1     0.01  -0.01   0.01     0.00  -0.03  -0.01     0.00  -0.01   0.01
  65   1     0.01  -0.06  -0.01    -0.01   0.01   0.00     0.00  -0.03  -0.01
  66   1    -0.02   0.02   0.03     0.01  -0.02  -0.03     0.00  -0.01   0.01
  67   1     0.02  -0.18  -0.04    -0.03   0.13   0.04     0.02  -0.07  -0.01
  68   1     0.16  -0.06   0.10    -0.13   0.04  -0.08     0.05  -0.04   0.04
  69   1    -0.10  -0.14  -0.10     0.10   0.10   0.06    -0.06  -0.03  -0.02
  70   1    -0.10  -0.02  -0.13     0.09   0.05   0.13    -0.06  -0.03  -0.09
  71   1    -0.13   0.02  -0.19     0.06  -0.03   0.16    -0.01   0.02  -0.08
  72   1     0.04   0.01  -0.03    -0.10  -0.04   0.07     0.14   0.08  -0.11
  73   1     0.08   0.02  -0.03    -0.01  -0.02  -0.01    -0.03   0.05   0.05
  74   1     0.01   0.05  -0.07    -0.01   0.07   0.09     0.01  -0.13  -0.11
  75   1     0.03  -0.06   0.05     0.01  -0.09   0.06    -0.01   0.02  -0.01
  76   1     0.03  -0.09   0.07    -0.01  -0.14   0.08    -0.01   0.04  -0.03
  77   1     0.05  -0.03   0.02     0.01  -0.03   0.02    -0.02   0.02  -0.01
  78   1     0.02  -0.03  -0.05     0.01  -0.01  -0.04    -0.01   0.00   0.02
  79   1     0.03   0.05   0.06     0.02   0.04   0.01    -0.01  -0.02  -0.02
  80   1    -0.03  -0.06   0.01     0.04  -0.02  -0.02     0.01   0.05  -0.03
  81   1     0.02  -0.10   0.02     0.01  -0.05  -0.03    -0.07   0.08  -0.04
  82   1    -0.03  -0.05   0.02    -0.03  -0.03  -0.01    -0.04   0.02  -0.02
  83   1    -0.01   0.01   0.08    -0.01   0.00  -0.02     0.01  -0.01  -0.04
  84   1    -0.05  -0.02  -0.07    -0.01  -0.02  -0.03     0.01  -0.02   0.01
  85   1    -0.10  -0.04  -0.10    -0.06  -0.06  -0.07     0.08   0.02   0.07
  86   1     0.07  -0.08  -0.10     0.06  -0.06  -0.10    -0.07   0.06   0.06
  87   1     0.00   0.03   0.01     0.02   0.00  -0.03    -0.01  -0.05  -0.03
  88   1    -0.07  -0.02   0.02    -0.06  -0.04   0.05     0.01   0.02  -0.02
  89   1     0.00   0.05  -0.03     0.01   0.05  -0.05    -0.01  -0.01   0.02
  90   1    -0.08   0.08   0.00    -0.09   0.09   0.01     0.03  -0.03   0.00
  91   1    -0.14   0.03   0.12    -0.05   0.00   0.10     0.05  -0.01  -0.06
  92   1    -0.05   0.00  -0.08     0.00   0.03  -0.02     0.01   0.00   0.02
  93   1     0.08   0.06   0.09     0.08   0.07   0.08    -0.04  -0.03  -0.05
  94   1    -0.12   0.03   0.02     0.03  -0.14  -0.02     0.05  -0.02  -0.01
  95   1    -0.02   0.02  -0.02    -0.15  -0.01  -0.13    -0.01  -0.01  -0.01
  96   1    -0.07  -0.02  -0.09     0.01   0.09  -0.01     0.02   0.02   0.04
  97   1     0.05   0.01  -0.06    -0.02   0.03   0.00    -0.10   0.05   0.07
  98   1     0.04   0.03   0.02     0.02  -0.04  -0.01    -0.02  -0.09  -0.04
  99   1     0.00   0.01  -0.04     0.05   0.02  -0.01     0.09   0.04   0.05
 100   1     0.24   0.11  -0.17     0.16   0.11  -0.21     0.16   0.14  -0.27
 101   1    -0.18  -0.05  -0.01    -0.19  -0.12  -0.07    -0.28  -0.19  -0.09
 102   1     0.14   0.10   0.30     0.10   0.03   0.22     0.12  -0.02   0.28
 103   1     0.17   0.07   0.04    -0.02  -0.02   0.01    -0.19  -0.07  -0.04
 104   1    -0.03  -0.02   0.13    -0.03  -0.02   0.01     0.05   0.04  -0.13
 105   1    -0.02   0.05  -0.11    -0.03   0.00   0.01     0.03  -0.05   0.13
 106   1     0.11   0.07  -0.03    -0.06  -0.09  -0.02    -0.06   0.02   0.05
 107   1     0.03   0.02  -0.14    -0.04   0.02   0.10     0.00  -0.04   0.05
 108   1    -0.02   0.01  -0.04     0.03   0.04  -0.05    -0.02  -0.05   0.09
 109   1    -0.02   0.02  -0.01    -0.15   0.22  -0.06    -0.08   0.12  -0.06
 110   1    -0.04   0.00   0.01    -0.08  -0.12  -0.28     0.01  -0.15  -0.26
 111   1    -0.01   0.03  -0.01     0.10  -0.07   0.07     0.12  -0.16   0.08
 112   1     0.00   0.07   0.03    -0.04  -0.02  -0.12    -0.03  -0.05  -0.14
 113   1    -0.01  -0.03  -0.01     0.08  -0.01  -0.08     0.10  -0.01  -0.09
 114   1     0.04   0.04  -0.06    -0.06   0.00  -0.05    -0.07  -0.02  -0.04
                    43                     44                     45
                    ?A                     ?A                     ?A
 Frequencies --   213.2036               215.1803               217.6164
 Red. masses --     2.1443                 1.2764                 1.1712
 Frc consts  --     0.0574                 0.0348                 0.0327
 IR Inten    --     3.4637                 1.9401                 1.7264
 Raman Activ --     0.0000                 0.0000                 0.0000
 Depolar     --     0.0000                 0.0000                 0.0000
 Atom AN      X      Y      Z        X      Y      Z        X      Y      Z
   1   8     0.04   0.02  -0.07    -0.01   0.00   0.01    -0.01   0.00   0.01
   2  12     0.01   0.01   0.01     0.03  -0.01   0.00    -0.01   0.02   0.00
   3   8     0.00   0.04   0.00     0.00  -0.01   0.01     0.00  -0.01   0.00
   4   6     0.07   0.07  -0.02    -0.01  -0.01   0.00    -0.01  -0.01   0.00
   5   7    -0.01   0.00  -0.01     0.00   0.00  -0.02     0.01   0.01  -0.02
   6   7     0.01   0.00   0.01     0.02  -0.01   0.01    -0.01   0.01   0.00
   7   8     0.06   0.08   0.01    -0.01  -0.01   0.00    -0.01   0.00   0.00
   8   6     0.00   0.00   0.00    -0.01   0.00  -0.02     0.00   0.01  -0.01
   9   6     0.00   0.01   0.01    -0.01  -0.02  -0.03     0.00   0.02   0.01
  10   6     0.01   0.00   0.01     0.01  -0.02   0.00    -0.01   0.02   0.00
  11   8     0.00  -0.08  -0.05     0.00   0.01   0.00     0.00   0.00   0.01
  12   6     0.01  -0.01  -0.02    -0.01   0.00   0.00     0.00  -0.01   0.00
  13   6     0.00   0.00  -0.02     0.00  -0.01   0.01     0.00  -0.01   0.00
  14   6     0.03   0.03   0.01    -0.01   0.00   0.00     0.00   0.00   0.00
  15   8     0.01   0.07   0.02    -0.01  -0.01   0.00     0.00  -0.02  -0.01
  16   6    -0.08  -0.10  -0.01     0.01   0.01   0.00     0.00   0.01   0.00
  17   8     0.00  -0.01   0.01     0.00   0.00   0.00     0.00   0.00   0.00
  18   6     0.00  -0.01   0.00     0.00   0.00   0.00     0.00   0.00   0.01
  19   8     0.01  -0.02   0.00     0.00   0.00   0.00     0.00   0.01   0.02
  20   8     0.00   0.00   0.00     0.00   0.00   0.00     0.00  -0.01   0.00
  21   6    -0.01   0.00   0.00     0.00   0.00   0.00     0.00   0.00   0.00
  22   6     0.00  -0.01   0.01     0.00   0.01   0.00     0.00   0.00   0.00
  23   6     0.00  -0.01   0.01     0.00   0.00  -0.01     0.00   0.00   0.00
  24   8    -0.01   0.00  -0.01     0.00   0.00   0.00     0.00  -0.01   0.00
  25   6     0.01  -0.01   0.01     0.00   0.01   0.00     0.00  -0.01   0.00
  26   6     0.03  -0.03   0.01     0.00   0.01  -0.01    -0.01   0.00   0.00
  27   6    -0.07   0.01  -0.02     0.02   0.00   0.01     0.01   0.00   0.01
  28   6    -0.04   0.01   0.09    -0.01   0.00   0.00     0.01   0.00  -0.01
  29   6    -0.01  -0.01   0.00     0.00   0.00  -0.01     0.01   0.01  -0.01
  30   6     0.01   0.00   0.00     0.01   0.00   0.00    -0.01   0.00   0.00
  31   6    -0.02  -0.01   0.01    -0.01   0.00   0.00     0.00   0.00   0.00
  32   6    -0.01   0.01   0.00    -0.01   0.01   0.00     0.00  -0.02   0.02
  33   6     0.00   0.03  -0.01     0.00   0.02   0.00     0.01   0.00   0.01
  34   6     0.00   0.00   0.00     0.00   0.01   0.00     0.02   0.01   0.00
  35   6    -0.01  -0.02   0.01     0.00  -0.01   0.00     0.02   0.00   0.00
  36   6    -0.01  -0.01   0.01    -0.01   0.00   0.01     0.00   0.00   0.00
  37   6     0.00  -0.02   0.00     0.00  -0.01   0.01     0.01  -0.01   0.01
  38   6     0.01   0.00   0.00     0.00   0.02  -0.01     0.00  -0.01   0.00
  39   6     0.00   0.02  -0.01     0.02   0.00  -0.02    -0.01   0.00   0.00
  40   6    -0.02   0.02  -0.01     0.03  -0.02  -0.02    -0.01   0.00   0.00
  41   6    -0.01   0.01  -0.01     0.00  -0.01  -0.01     0.00   0.00   0.00
  42   6     0.00   0.00   0.00    -0.01   0.01   0.01     0.00  -0.01   0.00
  43   6     0.00   0.00  -0.01    -0.01   0.02  -0.02     0.00  -0.01   0.01
  44   6     0.00  -0.01   0.00    -0.01   0.01   0.01     0.00  -0.01  -0.01
  45   6    -0.01   0.01   0.04     0.00   0.01   0.02     0.00  -0.01  -0.01
  46   6     0.01  -0.02  -0.01     0.01  -0.01   0.00     0.00   0.00  -0.01
  47   6     0.00  -0.02  -0.02     0.01  -0.01  -0.01     0.03  -0.01   0.01
  48   6     0.00   0.00   0.02    -0.01   0.00   0.01    -0.03  -0.01  -0.01
  49   6    -0.01   0.00   0.01    -0.01   0.02   0.01     0.01  -0.01  -0.01
  50   6     0.01   0.00   0.00     0.02   0.03   0.04    -0.01  -0.01  -0.02
  51   6    -0.01  -0.01   0.00    -0.01   0.01   0.00     0.00  -0.01   0.01
  52   6    -0.01  -0.01   0.01    -0.02  -0.01  -0.03     0.01   0.01   0.01
  53   6     0.01  -0.01  -0.01    -0.02   0.02   0.01    -0.02   0.02  -0.02
  54   6     0.00  -0.01   0.00     0.00  -0.04   0.02    -0.01   0.02  -0.01
  55   1     0.00   0.01   0.02    -0.02  -0.02  -0.02     0.00   0.02   0.01
  56   1     0.04   0.00  -0.01    -0.01   0.00   0.00     0.00   0.00  -0.01
  57   1     0.00   0.06   0.08     0.00  -0.01  -0.01     0.00  -0.01   0.00
  58   1    -0.21  -0.07   0.08     0.02   0.01  -0.02     0.01   0.01  -0.01
  59   1    -0.08  -0.05   0.00     0.01   0.01   0.00     0.01   0.01   0.00
  60   1    -0.05  -0.25  -0.05     0.01   0.03   0.00     0.00   0.03   0.01
  61   1    -0.01  -0.01   0.01     0.00   0.00   0.00     0.00  -0.01   0.00
  62   1     0.00   0.00   0.03     0.00   0.00  -0.01     0.00   0.00  -0.01
  63   1     0.01  -0.01   0.01     0.00   0.01   0.00    -0.01  -0.01  -0.01
  64   1     0.01   0.00   0.00     0.00   0.01   0.00     0.00  -0.02   0.00
  65   1     0.02  -0.01   0.01     0.00   0.01   0.00    -0.01  -0.01   0.00
  66   1    -0.02   0.02   0.02     0.01   0.00   0.00     0.00  -0.02  -0.01
  67   1     0.01  -0.11  -0.03     0.00   0.03   0.00    -0.01   0.03   0.02
  68   1     0.11  -0.03   0.06    -0.02   0.01  -0.02    -0.04   0.00  -0.02
  69   1    -0.06  -0.06  -0.03     0.02   0.02   0.01     0.02   0.01   0.01
  70   1    -0.06   0.07  -0.01     0.02  -0.02   0.01     0.02   0.00   0.01
  71   1    -0.14   0.01  -0.03     0.04  -0.01   0.02     0.02   0.00   0.02
  72   1    -0.31  -0.20   0.26     0.04   0.04  -0.04     0.03   0.02  -0.02
  73   1     0.13  -0.11  -0.15    -0.05   0.02   0.04     0.00   0.01   0.01
  74   1    -0.01   0.35   0.23     0.00  -0.07  -0.02     0.00  -0.02  -0.02
  75   1    -0.01   0.02  -0.01    -0.02   0.01   0.00    -0.01  -0.03   0.03
  76   1     0.00   0.05  -0.02     0.00   0.04   0.00     0.01   0.00   0.02
  77   1     0.00   0.01   0.00     0.01   0.02   0.00     0.03   0.02   0.00
  78   1    -0.01  -0.01   0.02    -0.01   0.01   0.01     0.00   0.00  -0.01
  79   1     0.00  -0.02   0.00     0.00  -0.01   0.01     0.01  -0.01   0.03
  80   1    -0.01   0.03  -0.02     0.03   0.00  -0.02    -0.01   0.00   0.00
  81   1    -0.03   0.03  -0.02     0.05  -0.05  -0.03    -0.01   0.01   0.01
  82   1    -0.02   0.00  -0.01    -0.01  -0.02  -0.01     0.01   0.00   0.00
  83   1     0.00   0.00  -0.02    -0.02   0.03  -0.04     0.01  -0.01   0.01
  84   1     0.00  -0.01   0.00    -0.01   0.00   0.01     0.00   0.00  -0.01
  85   1     0.06   0.04   0.06     0.07   0.02   0.06     0.02  -0.01   0.00
  86   1    -0.07   0.05   0.07    -0.06   0.06   0.05    -0.01   0.01   0.00
  87   1    -0.02  -0.03   0.00    -0.01  -0.04  -0.03     0.00  -0.02  -0.02
  88   1     0.02   0.03  -0.05     0.02   0.03  -0.04     0.00   0.01  -0.03
  89   1    -0.03  -0.02   0.03    -0.02  -0.02   0.03    -0.01   0.00   0.01
  90   1     0.06  -0.07  -0.02     0.05  -0.05  -0.01     0.02  -0.02  -0.01
  91   1     0.03   0.00  -0.05     0.06   0.00  -0.05     0.12  -0.01  -0.06
  92   1     0.00  -0.02   0.00     0.02  -0.01   0.05     0.05   0.01   0.12
  93   1    -0.03  -0.04  -0.05    -0.05  -0.02  -0.04    -0.06  -0.01  -0.03
  94   1    -0.08   0.13   0.02    -0.16   0.18   0.03    -0.36   0.36   0.06
  95   1     0.14   0.01   0.09     0.20   0.01   0.10     0.41   0.02   0.18
  96   1    -0.04  -0.12  -0.05    -0.08  -0.19  -0.12    -0.18  -0.40  -0.28
  97   1    -0.06   0.04   0.04    -0.06   0.05   0.04     0.03  -0.02  -0.02
  98   1    -0.02  -0.05  -0.03    -0.02  -0.03  -0.02     0.01   0.01   0.01
  99   1     0.05   0.03   0.02     0.04   0.04   0.02    -0.01  -0.02  -0.01
 100   1     0.11   0.08  -0.13     0.16   0.10  -0.12    -0.05  -0.03   0.03
 101   1    -0.15  -0.08  -0.03    -0.17  -0.05   0.01     0.05   0.01  -0.01
 102   1     0.08   0.01   0.18     0.10   0.05   0.25    -0.03  -0.02  -0.09
 103   1    -0.08  -0.03  -0.01     0.16   0.04   0.02    -0.11  -0.04  -0.01
 104   1     0.02   0.02  -0.05    -0.09  -0.08   0.12     0.05   0.04  -0.06
 105   1     0.01  -0.02   0.06    -0.09   0.07  -0.14     0.04  -0.04   0.10
 106   1    -0.02   0.02   0.01    -0.13  -0.36  -0.13     0.06   0.19   0.06
 107   1     0.00  -0.02   0.00    -0.11   0.11   0.31     0.05  -0.06  -0.17
 108   1    -0.02  -0.02   0.03     0.17   0.19  -0.27    -0.09  -0.10   0.13
 109   1    -0.01   0.01   0.00     0.00  -0.01   0.01    -0.05   0.06  -0.01
 110   1     0.01  -0.02  -0.04    -0.02   0.04   0.06    -0.03  -0.01  -0.05
 111   1     0.03  -0.03   0.01    -0.04   0.06  -0.02     0.01   0.02   0.01
 112   1     0.01  -0.01   0.00     0.03   0.01   0.11    -0.02   0.00  -0.05
 113   1     0.01  -0.02   0.00    -0.06  -0.12   0.04     0.02   0.06  -0.02
 114   1     0.00   0.00  -0.01     0.02   0.00  -0.06    -0.02   0.01   0.03
                    46                     47                     48
                    ?A                     ?A                     ?A
 Frequencies --   220.1999               228.5021               229.4330
 Red. masses --     1.3744                 1.2154                 1.4698
 Frc consts  --     0.0393                 0.0374                 0.0456
 IR Inten    --     1.1823                 0.3055                 1.3811
 Raman Activ --     0.0000                 0.0000                 0.0000
 Depolar     --     0.0000                 0.0000                 0.0000
 Atom AN      X      Y      Z        X      Y      Z        X      Y      Z
   1   8     0.00   0.00   0.01    -0.02   0.00   0.02    -0.03  -0.01   0.03
   2  12     0.00  -0.01   0.00     0.00   0.00   0.00     0.00  -0.01  -0.01
   3   8     0.00  -0.02   0.02     0.00   0.00   0.01     0.01   0.02   0.00
   4   6    -0.01   0.00   0.00    -0.02  -0.01   0.01    -0.04  -0.02   0.01
   5   7     0.00   0.00  -0.02     0.00  -0.01  -0.02    -0.01   0.00   0.02
   6   7     0.00   0.00  -0.02     0.00   0.00   0.00     0.00   0.00   0.00
   7   8    -0.01   0.00   0.00    -0.02  -0.01   0.00    -0.03  -0.03   0.00
   8   6     0.00   0.00  -0.03     0.01   0.00   0.00     0.00   0.00   0.01
   9   6     0.00  -0.03  -0.08     0.01   0.00   0.02     0.00   0.00   0.00
  10   6     0.01  -0.01  -0.03     0.01   0.00   0.01     0.00   0.00   0.00
  11   8     0.00   0.00   0.00    -0.01  -0.01   0.01    -0.02  -0.03   0.01
  12   6    -0.01  -0.01   0.00     0.00   0.00   0.00     0.00   0.01   0.00
  13   6     0.00  -0.01   0.01     0.01   0.00   0.00     0.01   0.02  -0.01
  14   6     0.00   0.00   0.00    -0.02  -0.01   0.00    -0.03  -0.02   0.01
  15   8    -0.01  -0.02   0.00     0.01  -0.02  -0.01     0.03   0.01   0.00
  16   6     0.01   0.01   0.00     0.01   0.01   0.01     0.01   0.03   0.01
  17   8    -0.01   0.00   0.00    -0.01   0.00   0.01    -0.04   0.00   0.04
  18   6     0.00   0.00   0.00     0.00   0.00   0.00    -0.02   0.00  -0.02
  19   8     0.00   0.01   0.00     0.00   0.00   0.00     0.02  -0.02  -0.04
  20   8     0.00   0.00   0.00     0.00   0.00   0.00    -0.01   0.00  -0.01
  21   6     0.00   0.00   0.00     0.00   0.00   0.00     0.00   0.00   0.00
  22   6     0.00   0.00   0.00     0.00   0.00   0.00    -0.01   0.02   0.01
  23   6     0.00   0.01  -0.01     0.00   0.00  -0.01    -0.02   0.01  -0.02
  24   8     0.00   0.00   0.00     0.00   0.00   0.00     0.01   0.00   0.00
  25   6     0.00   0.01   0.00     0.00   0.00   0.00     0.00   0.02   0.00
  26   6     0.00   0.02  -0.01     0.01   0.01   0.00     0.05   0.02   0.00
  27   6     0.04  -0.01   0.03     0.04  -0.01  -0.01     0.09   0.00  -0.02
  28   6     0.00   0.00   0.00     0.00   0.01  -0.01     0.00   0.01  -0.02
  29   6     0.00   0.00   0.00     0.00   0.00  -0.01    -0.01   0.00   0.01
  30   6     0.00   0.01   0.00    -0.01   0.00   0.00     0.00   0.00   0.00
  31   6     0.00   0.01   0.00    -0.02   0.02  -0.01     0.01   0.00   0.00
  32   6     0.00   0.01   0.00    -0.02   0.03   0.01     0.01  -0.01  -0.01
  33   6     0.00   0.01   0.00     0.00   0.02   0.04     0.00  -0.01  -0.02
  34   6     0.00   0.00   0.00     0.02   0.00   0.03    -0.01   0.00  -0.02
  35   6     0.00   0.00   0.00     0.02   0.00   0.00    -0.02   0.00   0.00
  36   6     0.00   0.01   0.00    -0.02   0.01  -0.01     0.01   0.00   0.01
  37   6     0.00   0.00   0.00     0.01   0.01   0.00    -0.01   0.00   0.00
  38   6    -0.01   0.02  -0.01    -0.01  -0.01   0.01     0.00   0.00   0.00
  39   6     0.00   0.01  -0.02     0.00  -0.01   0.01     0.01   0.00   0.00
  40   6     0.01  -0.02  -0.02     0.00  -0.01   0.01     0.01   0.00   0.00
  41   6     0.02  -0.03  -0.01     0.00   0.00   0.01     0.01   0.00   0.00
  42   6     0.00   0.00   0.00    -0.01   0.00   0.00     0.00   0.00   0.00
  43   6    -0.01   0.00  -0.01     0.00   0.00   0.01     0.00   0.00   0.00
  44   6    -0.01   0.00   0.00     0.00   0.00   0.00     0.00   0.00   0.01
  45   6     0.01   0.00   0.00     0.01  -0.01  -0.01     0.00   0.01   0.00
  46   6     0.01   0.00   0.00     0.01   0.00  -0.02    -0.01   0.00   0.02
  47   6    -0.01   0.00   0.00    -0.03   0.01   0.00     0.02   0.00   0.00
  48   6     0.00   0.00   0.00    -0.02   0.01  -0.01     0.01  -0.01   0.00
  49   6    -0.03   0.01   0.02     0.01   0.00  -0.01    -0.01   0.00   0.01
  50   6     0.01   0.01   0.01     0.00   0.00  -0.01     0.00   0.00   0.01
  51   6    -0.02  -0.03   0.03     0.01   0.00   0.00     0.00   0.00   0.00
  52   6     0.00   0.00  -0.02     0.00   0.00   0.00     0.00   0.00   0.00
  53   6     0.01   0.03   0.03     0.01  -0.01   0.00     0.00  -0.01   0.00
  54   6     0.02   0.03   0.07     0.01   0.01  -0.02    -0.01   0.00  -0.01
  55   1     0.00  -0.02  -0.07     0.01   0.01   0.02     0.00   0.00   0.00
  56   1     0.00  -0.01   0.00     0.01   0.00   0.00     0.00   0.00   0.00
  57   1     0.00   0.00   0.00    -0.03  -0.01   0.00    -0.05  -0.02   0.00
  58   1     0.01   0.00   0.00     0.03   0.01   0.01     0.04   0.02  -0.01
  59   1     0.01   0.00   0.00     0.01   0.00   0.01     0.01   0.03   0.01
  60   1     0.00   0.02   0.01     0.00   0.04   0.02     0.00   0.07   0.03
  61   1     0.00   0.01   0.00     0.00   0.01   0.00    -0.01   0.04   0.02
  62   1     0.00   0.00  -0.02    -0.01   0.00   0.00    -0.04  -0.01  -0.01
  63   1     0.01   0.01   0.00     0.01   0.01  -0.01     0.07   0.05  -0.04
  64   1     0.00   0.01   0.00    -0.01   0.01   0.02    -0.03   0.06   0.06
  65   1     0.00   0.01   0.00    -0.01  -0.02  -0.01    -0.04  -0.05  -0.03
  66   1     0.01   0.01   0.01     0.05  -0.04   0.01     0.17  -0.12   0.06
  67   1     0.01   0.04   0.00     0.04   0.07   0.01     0.14   0.19   0.02
  68   1     0.00   0.02  -0.02    -0.04   0.00  -0.02    -0.08   0.00  -0.05
  69   1     0.05   0.03   0.03     0.04   0.02  -0.01     0.06   0.10   0.02
  70   1     0.04  -0.03   0.04     0.04  -0.05  -0.02     0.06  -0.11  -0.07
  71   1     0.07  -0.02   0.05     0.08   0.00  -0.02     0.24   0.00  -0.02
  72   1     0.01   0.01  -0.01    -0.12  -0.11   0.08    -0.24  -0.21   0.17
  73   1    -0.01   0.00   0.01     0.15  -0.06  -0.14     0.30  -0.12  -0.27
  74   1     0.00  -0.02  -0.01    -0.01   0.21   0.00    -0.02   0.43   0.01
  75   1     0.00   0.02  -0.01    -0.04   0.04   0.02     0.02  -0.01  -0.02
  76   1     0.00   0.01   0.00     0.00   0.02   0.06     0.00  -0.01  -0.03
  77   1     0.00  -0.01   0.01     0.04   0.00   0.04    -0.02   0.01  -0.02
  78   1     0.00   0.01   0.01    -0.02   0.03   0.00     0.01   0.00   0.00
  79   1     0.00   0.01   0.00     0.02   0.02   0.02    -0.01  -0.01  -0.02
  80   1    -0.01   0.02  -0.02     0.00  -0.01   0.01     0.01   0.00   0.00
  81   1     0.03  -0.04  -0.02     0.00  -0.01   0.01     0.01  -0.01   0.00
  82   1     0.02  -0.06  -0.01     0.00   0.00   0.01     0.00   0.00   0.00
  83   1     0.00  -0.01  -0.02     0.00   0.00   0.02     0.00   0.00   0.00
  84   1     0.00  -0.01   0.01    -0.01   0.00  -0.01     0.00   0.00   0.01
  85   1     0.03   0.00   0.01     0.39  -0.03   0.23    -0.19   0.01  -0.11
  86   1    -0.01   0.02   0.00    -0.29   0.30   0.08     0.15  -0.14  -0.04
  87   1     0.01  -0.01  -0.02    -0.05  -0.32  -0.33     0.03   0.15   0.15
  88   1     0.01   0.01   0.00     0.00   0.12  -0.16     0.00  -0.07   0.11
  89   1     0.00  -0.01   0.01    -0.10  -0.01   0.11     0.06   0.00  -0.07
  90   1     0.02  -0.01   0.01     0.15  -0.13  -0.03    -0.09   0.09   0.03
  91   1    -0.04   0.00   0.02    -0.17   0.02   0.09     0.10  -0.01  -0.05
  92   1    -0.02  -0.01  -0.03    -0.06  -0.02  -0.16     0.04   0.01   0.10
  93   1     0.01   0.01   0.02     0.10   0.02   0.06    -0.06  -0.01  -0.03
  94   1     0.05  -0.06  -0.01    -0.01  -0.03   0.00     0.00   0.02   0.00
  95   1    -0.07   0.00  -0.03    -0.06   0.00  -0.03     0.05   0.00   0.02
  96   1     0.02   0.07   0.04    -0.01   0.04  -0.01     0.00  -0.04   0.00
  97   1    -0.11   0.06   0.06     0.04  -0.02  -0.03    -0.03   0.01   0.02
  98   1    -0.05  -0.05  -0.04     0.02   0.02   0.02    -0.01  -0.02  -0.01
  99   1     0.05   0.05   0.04    -0.02  -0.02  -0.02     0.02   0.01   0.01
 100   1     0.19   0.13  -0.22    -0.03  -0.02   0.03     0.01   0.00   0.00
 101   1    -0.26  -0.12  -0.04     0.05   0.02   0.00    -0.01   0.00   0.01
 102   1     0.13   0.03   0.32    -0.02   0.00  -0.06     0.00   0.00   0.02
 103   1    -0.27  -0.12  -0.02     0.04   0.01   0.01    -0.02   0.00  -0.01
 104   1     0.10   0.11  -0.14    -0.01  -0.01   0.03     0.01   0.01  -0.02
 105   1     0.09  -0.10   0.27     0.00   0.01  -0.03     0.01   0.00   0.01
 106   1     0.09   0.25   0.05     0.01   0.02   0.01    -0.01  -0.04  -0.01
 107   1     0.07  -0.09  -0.27     0.01   0.00  -0.02    -0.01   0.01   0.03
 108   1    -0.15  -0.14   0.14    -0.01  -0.01   0.01     0.02   0.02  -0.02
 109   1     0.07  -0.09   0.04     0.02  -0.01   0.00    -0.01   0.00   0.00
 110   1     0.03   0.10   0.17     0.01   0.00   0.00     0.00  -0.02  -0.02
 111   1    -0.05   0.10  -0.05     0.01  -0.01   0.00     0.01  -0.02   0.01
 112   1     0.05   0.07   0.16     0.00   0.01  -0.04    -0.01   0.00  -0.01
 113   1    -0.09  -0.01   0.10     0.04   0.02  -0.02     0.00  -0.01  -0.01
 114   1     0.09   0.04   0.02     0.01   0.00   0.00    -0.01   0.00  -0.01
                    49                     50                     51
                    ?A                     ?A                     ?A
 Frequencies --   236.3499               237.6216               241.2880
 Red. masses --     1.4613                 1.5872                 2.0129
 Frc consts  --     0.0481                 0.0528                 0.0690
 IR Inten    --     0.9544                 1.1363                 1.9417
 Raman Activ --     0.0000                 0.0000                 0.0000
 Depolar     --     0.0000                 0.0000                 0.0000
 Atom AN      X      Y      Z        X      Y      Z        X      Y      Z
   1   8     0.01  -0.01   0.02    -0.03   0.03  -0.04     0.05  -0.04   0.04
   2  12    -0.02   0.02   0.00     0.04  -0.01   0.00     0.05  -0.02  -0.01
   3   8     0.00   0.00   0.01     0.02   0.00   0.00    -0.02  -0.02   0.01
   4   6    -0.01  -0.01   0.01     0.00   0.01  -0.01     0.01  -0.01   0.01
   5   7     0.00   0.01  -0.01     0.00   0.01   0.01     0.00   0.01   0.00
   6   7     0.00   0.01  -0.02     0.01  -0.01  -0.02     0.03  -0.02  -0.01
   7   8     0.00  -0.01   0.01    -0.01   0.01  -0.03     0.02  -0.01   0.03
   8   6     0.01   0.01  -0.02     0.01   0.01   0.01     0.00   0.02   0.02
   9   6     0.01   0.01  -0.03     0.01   0.02   0.03     0.00   0.02   0.05
  10   6     0.01   0.02  -0.01     0.02   0.00   0.00     0.01  -0.02   0.02
  11   8     0.00   0.02   0.00     0.00  -0.06   0.00     0.00   0.08  -0.01
  12   6     0.00   0.01   0.00     0.01  -0.02   0.00    -0.02   0.02   0.01
  13   6     0.00   0.01   0.00     0.01  -0.01   0.00    -0.02   0.00   0.02
  14   6     0.00   0.00  -0.01     0.00  -0.01   0.02     0.01   0.03  -0.03
  15   8    -0.01  -0.01  -0.01     0.03   0.00   0.01    -0.07  -0.01  -0.01
  16   6     0.00   0.02   0.00    -0.01  -0.02   0.01     0.00   0.02  -0.02
  17   8     0.03   0.00  -0.03    -0.04   0.00   0.02     0.02   0.01  -0.02
  18   6     0.01   0.00   0.02    -0.02   0.00  -0.02     0.01   0.00   0.00
  19   8    -0.01   0.02   0.03     0.01  -0.01  -0.03    -0.01   0.00   0.00
  20   8     0.01   0.00   0.00    -0.01  -0.01  -0.01     0.00   0.00   0.01
  21   6     0.01   0.00   0.00    -0.01   0.00   0.00     0.00   0.00   0.00
  22   6     0.01  -0.01  -0.01    -0.01   0.01   0.01     0.00   0.00   0.00
  23   6     0.01   0.00   0.01    -0.01   0.00  -0.02     0.00   0.00   0.00
  24   8     0.00   0.00   0.00     0.00   0.00   0.00     0.00   0.00   0.00
  25   6    -0.01  -0.02  -0.01     0.00   0.02   0.00     0.01   0.00   0.00
  26   6    -0.05   0.00  -0.01     0.05   0.02   0.00    -0.02   0.00  -0.01
  27   6     0.00   0.01   0.00     0.03  -0.01   0.01    -0.02   0.00   0.02
  28   6     0.01  -0.01  -0.02    -0.03   0.04   0.05     0.02  -0.05  -0.05
  29   6     0.00   0.00   0.00    -0.01   0.00   0.00     0.00   0.00   0.00
  30   6     0.01  -0.01  -0.01     0.00   0.00  -0.01     0.01   0.00  -0.01
  31   6     0.00   0.00   0.00    -0.01   0.01   0.00     0.00  -0.01   0.01
  32   6     0.00   0.00   0.00    -0.01   0.01  -0.01     0.00   0.00   0.00
  33   6     0.00   0.00   0.00    -0.01   0.01  -0.01     0.00   0.01   0.00
  34   6    -0.01   0.00   0.00    -0.02   0.00  -0.01     0.00   0.00   0.00
  35   6    -0.01   0.00   0.00    -0.02   0.00   0.00     0.00  -0.01   0.00
  36   6     0.00   0.00   0.00    -0.01   0.00   0.00    -0.01  -0.01   0.01
  37   6     0.00   0.00   0.00    -0.01  -0.01   0.00     0.00  -0.01   0.00
  38   6     0.00  -0.03   0.01    -0.02   0.00   0.00    -0.02   0.03  -0.01
  39   6    -0.02   0.00   0.02    -0.01   0.00   0.02     0.00   0.02   0.01
  40   6    -0.04   0.03   0.02     0.03  -0.01   0.03     0.06  -0.02   0.01
  41   6     0.00   0.01   0.01     0.03   0.01   0.01     0.04   0.01   0.00
  42   6     0.03  -0.03   0.00     0.01   0.02  -0.01     0.01   0.04  -0.01
  43   6     0.00  -0.03   0.01    -0.03   0.00   0.00    -0.03   0.02  -0.02
  44   6     0.02  -0.03   0.00     0.00   0.02   0.01    -0.01   0.04   0.01
  45   6     0.00   0.00   0.01     0.00   0.01   0.01     0.00   0.01   0.03
  46   6     0.00   0.00   0.00     0.00   0.00   0.01     0.00  -0.01   0.00
  47   6     0.00   0.00   0.00     0.00  -0.01  -0.01    -0.01  -0.01  -0.02
  48   6     0.00   0.00   0.00     0.00  -0.01   0.00     0.00  -0.01   0.00
  49   6    -0.01  -0.01   0.03    -0.04  -0.01   0.00    -0.05   0.00   0.00
  50   6    -0.01  -0.04  -0.04     0.00   0.01   0.04    -0.01   0.03   0.07
  51   6     0.01   0.00  -0.03    -0.01   0.00   0.00    -0.03   0.00   0.01
  52   6    -0.01  -0.04   0.03    -0.01  -0.02  -0.05    -0.02   0.00  -0.09
  53   6     0.03   0.01   0.00     0.02  -0.01  -0.02    -0.03   0.01  -0.04
  54   6     0.02   0.05   0.03     0.01  -0.01  -0.01    -0.01  -0.07  -0.01
  55   1     0.01   0.01  -0.02     0.01   0.02   0.03    -0.02   0.02   0.05
  56   1     0.00   0.01   0.00     0.02  -0.01   0.00    -0.04   0.00   0.02
  57   1     0.01   0.00  -0.01    -0.03  -0.01   0.02     0.04   0.02  -0.02
  58   1     0.02   0.01  -0.03    -0.04  -0.01   0.06     0.04   0.00  -0.08
  59   1    -0.01   0.03   0.01     0.02  -0.04  -0.03    -0.04   0.05   0.03
  60   1    -0.01   0.04  -0.01     0.02  -0.06   0.03    -0.03   0.06  -0.05
  61   1     0.01  -0.03  -0.01    -0.01   0.03   0.01     0.00  -0.02  -0.01
  62   1     0.03   0.01  -0.01    -0.03  -0.01   0.00     0.01   0.01   0.00
  63   1    -0.09  -0.05   0.02     0.09   0.05  -0.03    -0.08  -0.03   0.05
  64   1     0.03  -0.08  -0.06    -0.04   0.07   0.07     0.04  -0.04  -0.08
  65   1     0.02   0.04   0.02    -0.04  -0.05  -0.03     0.05   0.08   0.05
  66   1    -0.06   0.01  -0.05     0.12  -0.07   0.05    -0.11   0.10  -0.02
  67   1    -0.09  -0.02   0.04     0.11   0.12   0.00    -0.08  -0.12  -0.03
  68   1    -0.07   0.00  -0.02    -0.03   0.01  -0.03     0.09   0.02   0.03
  69   1     0.02  -0.02  -0.03     0.00   0.05   0.04     0.01  -0.03  -0.01
  70   1     0.02   0.03   0.03     0.01  -0.05  -0.03     0.00   0.02   0.05
  71   1    -0.06   0.01  -0.01     0.11  -0.02   0.02    -0.07   0.00   0.01
  72   1    -0.07  -0.12   0.07     0.07   0.21  -0.10    -0.07  -0.22   0.10
  73   1     0.12  -0.08  -0.14    -0.18   0.14   0.25     0.14  -0.15  -0.25
  74   1     0.00   0.14  -0.01    -0.01  -0.20   0.04     0.01   0.15  -0.04
  75   1     0.00   0.00   0.00     0.00   0.01  -0.01     0.00   0.00   0.00
  76   1     0.00   0.00  -0.01    -0.01   0.01  -0.02     0.01   0.03  -0.01
  77   1    -0.01   0.00   0.00    -0.02   0.00  -0.01     0.01   0.00   0.00
  78   1     0.00   0.00   0.00    -0.01   0.01   0.01    -0.01  -0.02   0.01
  79   1    -0.01   0.00   0.00    -0.01  -0.01  -0.02     0.00  -0.01   0.00
  80   1    -0.02   0.00   0.02    -0.02  -0.01   0.03    -0.01   0.02   0.02
  81   1    -0.06   0.07   0.03     0.05  -0.03   0.05     0.09  -0.05   0.03
  82   1     0.00   0.03   0.01     0.05   0.01   0.02     0.07  -0.01   0.01
  83   1     0.00  -0.02   0.02    -0.03   0.00   0.01    -0.03   0.02  -0.03
  84   1     0.03  -0.03   0.02     0.00   0.02   0.03    -0.01   0.05   0.03
  85   1    -0.01   0.01   0.00     0.05   0.01   0.04    -0.07   0.03  -0.02
  86   1     0.01  -0.01   0.01    -0.05   0.05   0.03     0.05  -0.06   0.03
  87   1     0.00   0.01   0.02    -0.01  -0.03  -0.03     0.01   0.07   0.09
  88   1     0.00  -0.01   0.02     0.00   0.00   0.01     0.00   0.02  -0.04
  89   1     0.01   0.00  -0.01     0.00   0.00   0.00    -0.03  -0.01   0.04
  90   1    -0.01   0.01   0.01     0.00   0.00   0.01     0.04  -0.05   0.00
  91   1     0.08   0.00  -0.05     0.10   0.00  -0.08    -0.08   0.00   0.02
  92   1     0.02   0.00   0.09     0.02   0.00   0.11    -0.02  -0.01  -0.12
  93   1    -0.08   0.00  -0.03    -0.10  -0.01  -0.06     0.07  -0.02   0.00
  94   1     0.01  -0.02   0.00     0.02  -0.02  -0.01     0.00  -0.01   0.00
  95   1    -0.03   0.00  -0.01    -0.01  -0.01  -0.01     0.01  -0.01   0.00
  96   1     0.00   0.02   0.01     0.01   0.01   0.02     0.00  -0.02   0.00
  97   1    -0.14   0.07   0.09     0.01  -0.06   0.00     0.16  -0.15  -0.08
  98   1    -0.04  -0.12  -0.06    -0.05   0.06   0.01    -0.03   0.24   0.10
  99   1     0.12   0.05   0.07    -0.12  -0.05   0.00    -0.30  -0.12  -0.02
 100   1     0.03   0.05  -0.14     0.03   0.02   0.01     0.03   0.02   0.06
 101   1    -0.12  -0.12  -0.08    -0.06   0.01   0.04    -0.06   0.05   0.09
 102   1     0.04  -0.06   0.07     0.02   0.00   0.09     0.02   0.01   0.13
 103   1     0.40   0.13   0.04     0.27   0.07   0.04     0.02  -0.01   0.01
 104   1    -0.19  -0.23   0.23    -0.15  -0.15   0.19    -0.06  -0.03   0.05
 105   1    -0.18   0.12  -0.39    -0.14   0.09  -0.24    -0.07   0.03  -0.02
 106   1     0.01   0.10   0.07     0.10   0.19   0.02     0.09   0.13  -0.04
 107   1     0.04  -0.11  -0.09     0.07  -0.13  -0.30     0.04  -0.08  -0.27
 108   1    -0.10  -0.13   0.13    -0.18  -0.15   0.08    -0.15  -0.09  -0.02
 109   1     0.04  -0.02   0.01     0.00   0.03  -0.03    -0.05   0.08  -0.05
 110   1     0.05   0.04   0.02     0.02  -0.03  -0.07    -0.05  -0.04  -0.10
 111   1     0.02   0.02  -0.01     0.04  -0.05   0.01     0.00  -0.03   0.00
 112   1     0.04   0.08   0.08    -0.01  -0.06  -0.10    -0.03  -0.17  -0.14
 113   1    -0.03   0.01   0.04     0.07   0.08  -0.02     0.07   0.04  -0.03
 114   1     0.06   0.06  -0.02    -0.02  -0.04   0.08    -0.09  -0.11   0.12
                    52                     53                     54
                    ?A                     ?A                     ?A
 Frequencies --   243.1542               246.1073               250.0428
 Red. masses --     1.2062                 1.4274                 1.5180
 Frc consts  --     0.0420                 0.0509                 0.0559
 IR Inten    --     0.1187                 1.0118                 0.2843
 Raman Activ --     0.0000                 0.0000                 0.0000
 Depolar     --     0.0000                 0.0000                 0.0000
 Atom AN      X      Y      Z        X      Y      Z        X      Y      Z
   1   8     0.00  -0.01   0.00    -0.01   0.01  -0.01     0.03  -0.01   0.00
   2  12     0.01   0.00   0.01     0.03   0.03  -0.01    -0.03  -0.02   0.01
   3   8     0.00   0.00  -0.01     0.01   0.02   0.00    -0.02  -0.02   0.01
   4   6     0.00   0.00   0.00    -0.01   0.00   0.00     0.02   0.01   0.00
   5   7     0.01   0.00   0.03     0.01   0.02  -0.02    -0.01  -0.01   0.00
   6   7     0.01  -0.02   0.00     0.00   0.00   0.01     0.00   0.01  -0.01
   7   8     0.00   0.00   0.00    -0.01   0.00  -0.01     0.03   0.01   0.01
   8   6     0.01  -0.01   0.01     0.01   0.02  -0.02     0.00  -0.01   0.00
   9   6     0.01  -0.02  -0.01     0.01   0.00  -0.01     0.00   0.00  -0.02
  10   6     0.01  -0.02   0.00     0.01   0.00   0.00     0.00   0.01  -0.01
  11   8     0.00   0.01   0.00     0.00  -0.02   0.00     0.01   0.02   0.00
  12   6     0.00   0.01  -0.01     0.00  -0.01   0.00    -0.01   0.00   0.01
  13   6     0.00   0.01  -0.01     0.01   0.01   0.00    -0.02  -0.02   0.01
  14   6     0.00   0.00   0.00    -0.01  -0.01   0.00     0.01   0.02   0.00
  15   8     0.00   0.01  -0.01     0.02  -0.01  -0.01    -0.04  -0.01   0.01
  16   6    -0.01   0.01  -0.01     0.00   0.00   0.00    -0.01  -0.01  -0.01
  17   8     0.01   0.00  -0.01     0.02   0.00  -0.01    -0.02   0.00   0.01
  18   6     0.00   0.00   0.01     0.01   0.01   0.02    -0.01   0.00  -0.02
  19   8    -0.01   0.00   0.01    -0.01   0.02   0.03     0.02  -0.02  -0.03
  20   8     0.00   0.00   0.00     0.01   0.00   0.01    -0.01   0.00   0.00
  21   6     0.00   0.00   0.00     0.01   0.00   0.00    -0.01   0.00   0.00
  22   6     0.00   0.00   0.00     0.01  -0.01  -0.01    -0.01   0.01   0.00
  23   6     0.00   0.00   0.01     0.01   0.00   0.01     0.00   0.01  -0.01
  24   8     0.00   0.00   0.00     0.00  -0.01   0.01     0.00   0.00   0.00
  25   6     0.00   0.00   0.00    -0.02  -0.03  -0.01     0.00   0.03   0.01
  26   6    -0.02  -0.01   0.00    -0.03  -0.01   0.01     0.05   0.01   0.00
  27   6    -0.01   0.00  -0.01     0.00   0.00  -0.02    -0.02  -0.02   0.02
  28   6     0.00   0.00   0.00    -0.01   0.01   0.02     0.02  -0.02  -0.02
  29   6     0.00   0.00   0.01     0.00   0.00   0.00    -0.01   0.01   0.00
  30   6     0.00   0.00   0.00    -0.01   0.00   0.01     0.01   0.00   0.00
  31   6     0.01   0.00   0.00    -0.01  -0.01   0.01    -0.01   0.03  -0.01
  32   6     0.01  -0.02   0.00     0.00   0.02  -0.01    -0.02   0.00   0.00
  33   6    -0.01  -0.03   0.00     0.01   0.04  -0.02    -0.03  -0.03   0.02
  34   6    -0.02   0.00  -0.01     0.00   0.00   0.00    -0.01   0.00   0.01
  35   6    -0.02   0.02   0.00     0.00  -0.02   0.01    -0.01   0.02  -0.01
  36   6     0.00   0.01  -0.01    -0.01  -0.02   0.02     0.00   0.04   0.00
  37   6    -0.02   0.01   0.00    -0.01  -0.02   0.00     0.01   0.01  -0.02
  38   6    -0.01   0.00   0.00     0.00  -0.01   0.01     0.01  -0.01   0.00
  39   6     0.00   0.00   0.00    -0.01  -0.01   0.00    -0.01   0.01   0.01
  40   6     0.00  -0.01   0.00    -0.02  -0.01   0.00    -0.02   0.03   0.01
  41   6     0.00  -0.01   0.00    -0.02  -0.02   0.01     0.00   0.01   0.00
  42   6    -0.01   0.00   0.00    -0.02  -0.02   0.00     0.02  -0.01   0.00
  43   6     0.00   0.01   0.00     0.01   0.00   0.02     0.02  -0.02   0.00
  44   6    -0.01   0.01  -0.01    -0.01  -0.02  -0.02     0.01  -0.01   0.00
  45   6    -0.02  -0.01  -0.03     0.00   0.01   0.04     0.00   0.02  -0.01
  46   6    -0.02   0.02  -0.01     0.00  -0.02   0.01     0.02   0.01   0.03
  47   6     0.02   0.02   0.04    -0.02  -0.02  -0.03     0.03   0.01   0.00
  48   6    -0.01   0.01   0.00     0.00   0.00   0.02     0.00  -0.02  -0.04
  49   6     0.00   0.01  -0.01     0.01   0.00  -0.02    -0.01   0.00   0.01
  50   6     0.00   0.01   0.01    -0.03  -0.03  -0.05    -0.03  -0.03  -0.02
  51   6     0.00   0.00   0.01     0.02   0.00   0.03     0.02   0.00  -0.02
  52   6     0.00   0.01  -0.01     0.01   0.02   0.03     0.01  -0.01   0.04
  53   6     0.02  -0.01   0.01     0.00   0.03  -0.02     0.03  -0.01   0.02
  54   6     0.02  -0.01   0.01     0.02   0.02   0.00     0.01   0.02   0.01
  55   1     0.01  -0.02  -0.01     0.00   0.00  -0.01     0.01   0.01  -0.01
  56   1     0.00   0.01  -0.01     0.01   0.00   0.01    -0.03  -0.02   0.02
  57   1     0.01   0.00   0.00    -0.01  -0.01   0.00     0.02   0.02   0.00
  58   1    -0.02   0.01  -0.03     0.00   0.00   0.01    -0.02  -0.01  -0.01
  59   1    -0.01   0.03  -0.01     0.01  -0.01  -0.01    -0.03   0.00   0.02
  60   1     0.00   0.01  -0.01     0.01   0.00   0.02    -0.02  -0.03  -0.03
  61   1     0.00  -0.01   0.00     0.01  -0.01  -0.01     0.00   0.02   0.01
  62   1     0.01   0.00   0.00     0.01  -0.01   0.00    -0.02   0.00   0.00
  63   1    -0.04  -0.02   0.02    -0.07  -0.03  -0.01     0.19   0.08  -0.05
  64   1     0.02  -0.03  -0.04     0.00  -0.07  -0.03    -0.07   0.13   0.16
  65   1     0.03   0.03   0.02    -0.01   0.00   0.00    -0.08  -0.12  -0.07
  66   1    -0.06   0.05  -0.02     0.11  -0.18  -0.03     0.03   0.04   0.05
  67   1    -0.05  -0.07  -0.01     0.02   0.19   0.10     0.07  -0.02  -0.05
  68   1     0.04   0.00   0.02    -0.25  -0.04  -0.07     0.12   0.02   0.03
  69   1     0.00  -0.02  -0.03     0.00  -0.01  -0.02    -0.03  -0.01   0.03
  70   1     0.00   0.02   0.00     0.00   0.00  -0.02    -0.03  -0.02   0.00
  71   1    -0.04   0.01  -0.02     0.00   0.01  -0.03     0.00  -0.02   0.02
  72   1    -0.04  -0.04   0.03    -0.03   0.03   0.00     0.07  -0.03  -0.01
  73   1     0.04  -0.02  -0.05    -0.02   0.02   0.04    -0.01  -0.03  -0.03
  74   1     0.00   0.06   0.01    -0.01   0.01   0.03     0.02  -0.06  -0.04
  75   1     0.02  -0.04   0.00     0.00   0.03  -0.01    -0.02  -0.01   0.00
  76   1    -0.02  -0.06  -0.01     0.01   0.06  -0.03    -0.03  -0.06   0.04
  77   1    -0.03   0.00  -0.02     0.01   0.00   0.00    -0.01  -0.01   0.01
  78   1     0.01   0.01  -0.02    -0.01  -0.02   0.01     0.01   0.06   0.02
  79   1    -0.02   0.00  -0.01     0.00  -0.02   0.00     0.00   0.01  -0.03
  80   1     0.00   0.00   0.00     0.00  -0.01   0.00    -0.02   0.02   0.01
  81   1     0.01  -0.03   0.00    -0.02  -0.01  -0.01    -0.04   0.06   0.01
  82   1     0.00  -0.01   0.00    -0.01  -0.01   0.01     0.01   0.01   0.01
  83   1     0.00   0.01   0.00     0.01   0.00   0.03     0.01  -0.01   0.01
  84   1    -0.01   0.00  -0.02    -0.02  -0.02  -0.04     0.01  -0.01   0.00
  85   1     0.16  -0.02   0.08    -0.07   0.04  -0.02     0.08   0.01   0.05
  86   1    -0.16   0.16  -0.02     0.06  -0.07   0.05    -0.06   0.09   0.00
  87   1    -0.07  -0.17  -0.18     0.02   0.09   0.12    -0.01  -0.05  -0.07
  88   1    -0.02  -0.05   0.07    -0.01   0.05  -0.07     0.07  -0.17   0.27
  89   1     0.06   0.04  -0.10    -0.07  -0.02   0.09     0.19  -0.02  -0.21
  90   1    -0.12   0.10  -0.02     0.08  -0.08   0.01    -0.20   0.21   0.04
  91   1     0.39  -0.01  -0.22    -0.01   0.01  -0.06    -0.07  -0.01   0.08
  92   1     0.09   0.04   0.51    -0.03  -0.03  -0.01     0.02   0.03  -0.13
  93   1    -0.38   0.03  -0.12    -0.06  -0.04  -0.05     0.16   0.02   0.05
  94   1     0.04  -0.06  -0.01     0.05  -0.04   0.00    -0.08   0.03  -0.02
  95   1    -0.09   0.00  -0.04    -0.05  -0.01   0.01     0.10  -0.01  -0.04
  96   1     0.01   0.08   0.04     0.02   0.05   0.05    -0.04  -0.12  -0.10
  97   1     0.10  -0.05  -0.06     0.35  -0.18  -0.21     0.22  -0.12  -0.11
  98   1     0.02   0.11   0.06     0.06   0.38   0.20     0.02   0.28   0.14
  99   1    -0.11  -0.04  -0.02    -0.37  -0.18  -0.03    -0.27  -0.13   0.03
 100   1     0.01   0.00   0.01     0.00   0.05  -0.14     0.01   0.04  -0.11
 101   1     0.00   0.02   0.01    -0.13  -0.09  -0.08    -0.14  -0.09  -0.05
 102   1     0.00   0.01   0.01     0.01  -0.04   0.05     0.02  -0.06   0.08
 103   1    -0.07  -0.03   0.00    -0.01  -0.02   0.02     0.06   0.04  -0.01
 104   1     0.04   0.06  -0.03     0.03   0.03   0.02     0.00  -0.03  -0.01
 105   1     0.04  -0.02   0.09     0.04  -0.02   0.06     0.00   0.01  -0.08
 106   1     0.01  -0.01  -0.02    -0.02  -0.03   0.02    -0.03  -0.04   0.02
 107   1    -0.01   0.03   0.01    -0.01   0.04   0.09     0.00   0.01   0.09
 108   1     0.02   0.03  -0.03     0.05   0.04   0.01     0.04   0.01   0.03
 109   1     0.02  -0.02   0.02     0.01   0.02  -0.02     0.03  -0.04   0.03
 110   1     0.03  -0.01   0.01     0.00   0.04   0.00     0.05   0.00   0.03
 111   1     0.02  -0.02   0.01     0.00   0.05  -0.03     0.02  -0.01   0.02
 112   1     0.02  -0.01   0.02     0.03   0.07   0.06     0.02   0.06   0.06
 113   1     0.01  -0.01   0.01    -0.01  -0.04   0.01    -0.03  -0.02   0.02
 114   1     0.03  -0.01   0.00     0.05   0.05  -0.07     0.04   0.04  -0.05
                    55                     56                     57
                    ?A                     ?A                     ?A
 Frequencies --   251.2000               253.8474               258.6678
 Red. masses --     1.2614                 1.5092                 2.6540
 Frc consts  --     0.0469                 0.0573                 0.1046
 IR Inten    --     1.6630                 2.1259                 4.3627
 Raman Activ --     0.0000                 0.0000                 0.0000
 Depolar     --     0.0000                 0.0000                 0.0000
 Atom AN      X      Y      Z        X      Y      Z        X      Y      Z
   1   8     0.03  -0.01   0.01     0.02   0.00   0.00     0.02  -0.01   0.01
   2  12    -0.01   0.01   0.01    -0.04  -0.02   0.00     0.05  -0.02  -0.02
   3   8    -0.01  -0.02  -0.01    -0.01   0.00   0.01    -0.01  -0.01   0.01
   4   6     0.02   0.01   0.00     0.01   0.01   0.00     0.01   0.01   0.00
   5   7     0.01   0.01   0.00    -0.01  -0.01   0.00     0.01   0.00  -0.05
   6   7     0.00   0.01   0.00    -0.01   0.01  -0.01     0.00  -0.02   0.02
   7   8     0.02   0.01   0.01     0.02   0.01   0.00     0.01   0.00   0.01
   8   6     0.00   0.01  -0.01    -0.01  -0.01   0.00     0.03   0.02  -0.02
   9   6     0.00   0.00  -0.01     0.00   0.01   0.00     0.04   0.01   0.02
  10   6     0.00   0.00   0.00    -0.01   0.01  -0.01     0.04  -0.01   0.02
  11   8     0.01   0.03   0.00     0.00   0.00   0.00     0.00   0.02   0.00
  12   6    -0.01   0.00   0.00    -0.01   0.00   0.01    -0.01  -0.01   0.01
  13   6    -0.02  -0.01   0.00    -0.01  -0.01   0.01    -0.01  -0.02   0.02
  14   6     0.01   0.02  -0.01     0.01   0.00   0.00     0.00   0.01  -0.01
  15   8    -0.03   0.00   0.00    -0.02  -0.01   0.01    -0.03  -0.01   0.00
  16   6    -0.01   0.00  -0.01    -0.01  -0.01  -0.01     0.00   0.00  -0.01
  17   8    -0.02   0.00   0.01    -0.03  -0.01   0.03    -0.02   0.00   0.00
  18   6     0.00   0.01  -0.01    -0.01  -0.01  -0.03    -0.01   0.00  -0.01
  19   8     0.01   0.01  -0.01     0.02  -0.03  -0.04     0.01  -0.01  -0.01
  20   8     0.00  -0.01   0.01    -0.02   0.01  -0.01    -0.01   0.00  -0.01
  21   6     0.00   0.00  -0.01    -0.02  -0.01   0.01    -0.01   0.00   0.00
  22   6     0.00   0.01  -0.01    -0.02   0.00   0.03    -0.01   0.00   0.00
  23   6     0.00   0.00  -0.01    -0.01   0.01  -0.02    -0.01   0.00  -0.01
  24   8     0.00  -0.02   0.02    -0.01   0.02  -0.04    -0.01   0.00  -0.01
  25   6    -0.03   0.00  -0.01     0.06   0.05   0.03     0.02   0.03   0.01
  26   6     0.04   0.01   0.00     0.04   0.01   0.00     0.03   0.00   0.00
  27   6    -0.03   0.00   0.02     0.00  -0.02   0.01    -0.01  -0.01   0.03
  28   6     0.02  -0.02  -0.02     0.01  -0.01  -0.01     0.00  -0.02  -0.01
  29   6     0.01   0.00   0.00     0.00   0.01   0.00     0.00   0.02  -0.03
  30   6     0.00   0.00   0.00     0.01   0.00   0.00    -0.03   0.00   0.01
  31   6     0.01  -0.01   0.00     0.00   0.01  -0.01    -0.04   0.06  -0.01
  32   6     0.01  -0.01   0.00    -0.01   0.00   0.01    -0.04   0.06   0.01
  33   6     0.02   0.00   0.00    -0.01  -0.02   0.02    -0.04   0.01   0.06
  34   6     0.01   0.00   0.00     0.00   0.00   0.01    -0.01  -0.02   0.04
  35   6     0.01   0.00   0.01     0.00   0.02   0.00     0.00   0.00  -0.03
  36   6     0.00  -0.02  -0.02     0.00   0.01  -0.02    -0.02   0.05   0.04
  37   6     0.00   0.00   0.02     0.00   0.02   0.00     0.00  -0.01  -0.06
  38   6     0.01   0.00   0.00     0.01  -0.01   0.00    -0.03  -0.01   0.02
  39   6     0.00   0.00   0.00     0.00   0.01   0.01    -0.02  -0.04   0.01
  40   6    -0.01   0.01   0.00    -0.01   0.02   0.01    -0.02  -0.05   0.01
  41   6     0.00   0.00   0.00     0.01   0.01   0.00    -0.05  -0.02   0.00
  42   6     0.00   0.00   0.00     0.02   0.00   0.00    -0.06   0.00   0.00
  43   6     0.00  -0.01   0.00     0.01  -0.01   0.00    -0.01   0.01   0.04
  44   6     0.00   0.00   0.00     0.01  -0.01   0.00    -0.03  -0.01  -0.03
  45   6     0.01  -0.03  -0.02     0.04  -0.04  -0.04     0.05   0.05   0.08
  46   6    -0.01  -0.01  -0.03     0.00   0.00  -0.01     0.01   0.00   0.11
  47   6    -0.01   0.01   0.03     0.01   0.02   0.04    -0.02  -0.01  -0.10
  48   6    -0.01   0.02   0.02    -0.01   0.01  -0.01    -0.06  -0.08  -0.12
  49   6     0.00   0.00   0.00    -0.01   0.00   0.01     0.02  -0.03  -0.06
  50   6     0.00   0.00   0.00    -0.01  -0.02   0.00     0.01   0.02  -0.04
  51   6     0.00   0.00  -0.01     0.01   0.00  -0.03     0.03   0.01   0.07
  52   6     0.00  -0.01   0.01     0.01  -0.01   0.02     0.01   0.03   0.03
  53   6    -0.01   0.02  -0.01     0.00  -0.01   0.01     0.04   0.01  -0.02
  54   6     0.00   0.01   0.00    -0.01   0.02   0.00     0.07   0.02  -0.03
  55   1    -0.01   0.00  -0.01     0.01   0.01   0.00     0.02   0.00   0.03
  56   1    -0.02  -0.01   0.00    -0.01  -0.02   0.02     0.00  -0.01   0.01
  57   1     0.02   0.02   0.00     0.00   0.01   0.01     0.01   0.01  -0.01
  58   1    -0.02   0.00  -0.03    -0.03  -0.01   0.00    -0.01   0.00  -0.02
  59   1    -0.03   0.03   0.01    -0.02   0.01   0.00    -0.01   0.02   0.01
  60   1    -0.02   0.00  -0.03    -0.01  -0.03  -0.02    -0.01   0.00  -0.01
  61   1     0.02   0.02   0.00    -0.04   0.00   0.02    -0.01   0.00   0.00
  62   1    -0.01  -0.01   0.00    -0.02   0.00   0.00    -0.01   0.00   0.00
  63   1     0.33   0.12  -0.17    -0.23  -0.08   0.20     0.06   0.03   0.03
  64   1    -0.17   0.17   0.34     0.17  -0.05  -0.31     0.00   0.07   0.01
  65   1    -0.25  -0.32  -0.19     0.29   0.33   0.21     0.03   0.02   0.02
  66   1     0.03   0.02   0.04     0.06  -0.01   0.04    -0.03   0.07   0.02
  67   1     0.06   0.00  -0.03     0.08   0.03  -0.03     0.02  -0.07  -0.05
  68   1     0.08   0.02   0.01     0.05   0.01   0.00     0.12   0.01   0.03
  69   1    -0.04   0.01   0.03    -0.06   0.05   0.08     0.01  -0.02   0.01
  70   1    -0.03   0.01   0.01    -0.04  -0.08  -0.07     0.01   0.01   0.06
  71   1    -0.03  -0.01   0.03     0.12  -0.02   0.02    -0.04  -0.02   0.04
  72   1     0.05  -0.04   0.00     0.05   0.01  -0.02     0.02  -0.04   0.00
  73   1     0.01  -0.04  -0.05    -0.01   0.00   0.01     0.00  -0.03  -0.04
  74   1     0.01  -0.03  -0.04     0.01  -0.05  -0.03     0.00  -0.02  -0.02
  75   1     0.01   0.00   0.01    -0.02   0.01   0.01    -0.05   0.08   0.01
  76   1     0.02   0.00   0.00    -0.01  -0.04   0.04    -0.05  -0.01   0.09
  77   1     0.01   0.00   0.00     0.00  -0.01   0.02     0.02  -0.06   0.09
  78   1     0.00  -0.04  -0.02    -0.01   0.00  -0.01    -0.03   0.07   0.09
  79   1     0.00   0.01   0.02     0.00   0.02   0.01     0.00   0.00  -0.04
  80   1     0.00   0.01   0.00    -0.01   0.01   0.01     0.00  -0.05   0.00
  81   1    -0.02   0.02   0.00    -0.02   0.04   0.01     0.00  -0.08   0.00
  82   1     0.00   0.00   0.00     0.02   0.01   0.01    -0.05  -0.02   0.00
  83   1     0.00   0.00   0.00     0.01  -0.01   0.00    -0.01   0.01   0.06
  84   1     0.00   0.00   0.00     0.01   0.00   0.01    -0.04  -0.03  -0.06
  85   1    -0.06  -0.04  -0.05    -0.06  -0.08  -0.07    -0.03   0.06   0.03
  86   1     0.07  -0.09  -0.04     0.12  -0.12  -0.08     0.12  -0.07   0.12
  87   1     0.03   0.02   0.02     0.08   0.04   0.00     0.11   0.17   0.15
  88   1    -0.06   0.18  -0.28    -0.04   0.17  -0.24     0.00   0.02   0.08
  89   1    -0.19   0.02   0.21    -0.18   0.00   0.22    -0.07  -0.06   0.16
  90   1     0.22  -0.21  -0.04     0.24  -0.18   0.00     0.10  -0.01   0.16
  91   1     0.11   0.00  -0.06     0.09   0.00  -0.01     0.14   0.05  -0.24
  92   1     0.01   0.00   0.18     0.02   0.02   0.14     0.00  -0.02   0.09
  93   1    -0.15   0.02  -0.02    -0.08   0.05   0.01    -0.21  -0.05  -0.20
  94   1     0.03  -0.02   0.01    -0.02   0.00   0.00    -0.08  -0.18  -0.06
  95   1    -0.07   0.02   0.01    -0.02   0.01  -0.02    -0.10  -0.08  -0.22
  96   1     0.01   0.08   0.05    -0.02   0.01  -0.02    -0.06  -0.06  -0.14
  97   1     0.01   0.00   0.00     0.06  -0.04  -0.02    -0.11   0.04   0.02
  98   1     0.01   0.01   0.01    -0.01   0.10   0.05     0.03  -0.22  -0.11
  99   1     0.00   0.00   0.01    -0.10  -0.05   0.03     0.19   0.07  -0.10
 100   1     0.00   0.00  -0.01     0.00   0.02  -0.04    -0.01  -0.03   0.03
 101   1    -0.01  -0.01  -0.01    -0.07  -0.05  -0.02     0.13   0.05  -0.03
 102   1     0.00  -0.01   0.00     0.01  -0.04   0.05    -0.03   0.06  -0.13
 103   1     0.02   0.01   0.00     0.02   0.03  -0.02     0.03  -0.02   0.06
 104   1    -0.01  -0.02   0.00     0.01  -0.01  -0.03     0.03   0.05   0.09
 105   1    -0.01   0.01  -0.03     0.01   0.00  -0.05     0.05  -0.01   0.08
 106   1    -0.01   0.00   0.01    -0.02  -0.03   0.01     0.02   0.03   0.03
 107   1     0.00  -0.01   0.02     0.00   0.01   0.06    -0.01   0.04   0.02
 108   1     0.00  -0.01   0.01     0.04   0.01   0.01     0.03   0.03   0.03
 109   1    -0.01   0.02  -0.01     0.00  -0.02   0.01     0.05   0.00  -0.02
 110   1    -0.03   0.02   0.00     0.01   0.00   0.01     0.04   0.02  -0.01
 111   1    -0.02   0.03  -0.02     0.00  -0.01   0.01     0.03   0.01  -0.02
 112   1     0.00   0.01   0.01     0.00   0.04   0.02     0.03   0.06  -0.05
 113   1    -0.01   0.00   0.01    -0.02  -0.01   0.00     0.11   0.02  -0.05
 114   1     0.00   0.01   0.00     0.00   0.03  -0.03     0.08   0.03  -0.05
                    58                     59                     60
                    ?A                     ?A                     ?A
 Frequencies --   258.7735               263.1403               270.5603
 Red. masses --     1.5526                 1.9979                 2.2688
 Frc consts  --     0.0613                 0.0815                 0.0979
 IR Inten    --     2.7992                 3.7963                 3.6786
 Raman Activ --     0.0000                 0.0000                 0.0000
 Depolar     --     0.0000                 0.0000                 0.0000
 Atom AN      X      Y      Z        X      Y      Z        X      Y      Z
   1   8     0.05  -0.02   0.01    -0.01  -0.01   0.01    -0.01   0.00  -0.01
   2  12     0.02   0.02   0.02     0.03   0.04   0.02    -0.01   0.04   0.08
   3   8    -0.02   0.01  -0.01     0.00  -0.04  -0.02     0.00  -0.01  -0.04
   4   6     0.03   0.02   0.00    -0.01  -0.01   0.00     0.00   0.00   0.00
   5   7     0.01   0.02   0.00     0.02   0.04  -0.02     0.01  -0.01   0.03
   6   7     0.00   0.00   0.01     0.00   0.01   0.03     0.01   0.02   0.07
   7   8     0.04   0.01   0.02    -0.01  -0.01   0.01    -0.01   0.00   0.00
   8   6     0.00   0.01  -0.01     0.01   0.04  -0.03     0.00  -0.03   0.01
   9   6     0.00   0.00  -0.01     0.00   0.01  -0.02    -0.01  -0.04  -0.04
  10   6     0.00   0.00   0.00     0.01   0.01   0.01    -0.01  -0.01   0.01
  11   8     0.00   0.03   0.00     0.00   0.00   0.00     0.00   0.01   0.00
  12   6    -0.02  -0.01   0.01     0.00  -0.01  -0.01     0.01   0.01  -0.02
  13   6    -0.04  -0.02   0.00     0.00  -0.02  -0.01     0.00   0.01  -0.04
  14   6     0.01   0.03  -0.01    -0.01   0.00   0.00     0.00   0.00   0.00
  15   8    -0.05  -0.02   0.01     0.00  -0.01  -0.01     0.03   0.00  -0.03
  16   6    -0.02  -0.01  -0.01     0.01   0.01   0.00     0.01   0.00   0.00
  17   8    -0.02  -0.01   0.02    -0.05  -0.01   0.04     0.00   0.00   0.02
  18   6     0.00   0.01  -0.01    -0.02   0.00  -0.02     0.00   0.01   0.01
  19   8     0.02   0.00  -0.01     0.02   0.00   0.00    -0.01   0.02   0.02
  20   8     0.00   0.00   0.00    -0.03  -0.03  -0.01     0.00  -0.02   0.01
  21   6    -0.01   0.00   0.00    -0.02  -0.02   0.00     0.01   0.00   0.00
  22   6    -0.01   0.00   0.01    -0.03   0.00   0.02     0.00   0.02   0.00
  23   6     0.00   0.00   0.00    -0.02  -0.01  -0.03     0.00  -0.01  -0.01
  24   8    -0.01   0.00  -0.01     0.01  -0.01  -0.03     0.04  -0.01   0.02
  25   6     0.00   0.00   0.00     0.03   0.04   0.02    -0.05  -0.05  -0.03
  26   6     0.04   0.01   0.02     0.06  -0.01  -0.02     0.00  -0.01  -0.01
  27   6    -0.09  -0.03  -0.02     0.04   0.00   0.03    -0.03   0.02  -0.03
  28   6     0.03  -0.04  -0.04     0.00   0.00  -0.01     0.00   0.01   0.00
  29   6     0.01   0.00   0.00     0.01   0.00   0.00     0.01   0.00   0.00
  30   6    -0.01   0.00   0.01    -0.01   0.01   0.01     0.01   0.01   0.02
  31   6     0.01  -0.02   0.01     0.01  -0.04   0.02     0.01   0.02   0.00
  32   6     0.01  -0.02   0.00     0.02  -0.02  -0.01     0.01   0.02   0.00
  33   6     0.01   0.01  -0.02     0.03   0.04  -0.05     0.00  -0.02   0.02
  34   6     0.01   0.00  -0.01     0.01   0.01  -0.03     0.00  -0.02   0.01
  35   6     0.00  -0.01   0.01     0.00  -0.03   0.02     0.00   0.00  -0.02
  36   6     0.00  -0.01   0.00     0.00  -0.04   0.01     0.01   0.02   0.01
  37   6     0.00  -0.01   0.01    -0.01  -0.03   0.03     0.01   0.00  -0.03
  38   6    -0.01   0.01   0.00     0.00   0.00   0.01     0.04   0.03  -0.02
  39   6     0.01  -0.01  -0.01    -0.01   0.01  -0.01     0.02   0.03  -0.06
  40   6     0.01  -0.03  -0.01    -0.03   0.00  -0.02    -0.01   0.01  -0.07
  41   6    -0.01  -0.01   0.00    -0.04  -0.01  -0.01    -0.03  -0.02  -0.03
  42   6    -0.01   0.00   0.00    -0.04  -0.01   0.00    -0.02  -0.01   0.02
  43   6    -0.01   0.01   0.00     0.01   0.00   0.02     0.01   0.00  -0.04
  44   6     0.00   0.00   0.00    -0.02  -0.01  -0.02    -0.01   0.00   0.02
  45   6    -0.03   0.01   0.01    -0.04   0.01   0.03     0.02   0.02   0.01
  46   6     0.00   0.00  -0.02    -0.01  -0.02  -0.04    -0.03   0.03   0.05
  47   6    -0.01  -0.01   0.00    -0.02  -0.03   0.00     0.01   0.00  -0.05
  48   6     0.01   0.01   0.02     0.03   0.02   0.07    -0.02  -0.05  -0.07
  49   6     0.02   0.00  -0.01     0.02  -0.01  -0.03     0.06   0.06   0.04
  50   6     0.01   0.01  -0.01     0.00   0.01  -0.03     0.02   0.01   0.03
  51   6    -0.01   0.00   0.03     0.01  -0.01   0.04    -0.05  -0.03  -0.02
  52   6    -0.01   0.00   0.00    -0.01  -0.01   0.06    -0.03  -0.05  -0.01
  53   6    -0.01   0.03  -0.01    -0.03   0.07  -0.04     0.02  -0.03   0.04
  54   6     0.01   0.00   0.00     0.02   0.03   0.00    -0.02  -0.03   0.03
  55   1    -0.01   0.00  -0.01    -0.02   0.00  -0.03     0.00  -0.04  -0.06
  56   1    -0.04  -0.03   0.02    -0.02   0.00  -0.03    -0.02   0.02  -0.05
  57   1     0.02   0.03   0.00     0.00   0.00   0.00     0.01   0.00   0.00
  58   1    -0.03  -0.02  -0.03     0.02   0.01  -0.01     0.01   0.00   0.01
  59   1    -0.05   0.03   0.03     0.01   0.01   0.00     0.01  -0.01  -0.01
  60   1    -0.03  -0.03  -0.05     0.00   0.03   0.01     0.01   0.01   0.01
  61   1    -0.01   0.01   0.01    -0.04   0.02   0.02     0.01   0.03   0.01
  62   1    -0.02  -0.02   0.00    -0.03  -0.01  -0.01     0.00  -0.01  -0.01
  63   1    -0.09  -0.03   0.03    -0.01   0.00   0.07    -0.16  -0.04  -0.05
  64   1     0.03  -0.04  -0.08     0.05   0.05  -0.08    -0.01  -0.15  -0.05
  65   1     0.05   0.07   0.04     0.11   0.10   0.07    -0.05  -0.01  -0.02
  66   1     0.31  -0.32   0.03    -0.18   0.29   0.06    -0.04   0.05   0.00
  67   1     0.18   0.40   0.13    -0.02  -0.34  -0.20    -0.01  -0.07  -0.04
  68   1    -0.35  -0.04  -0.11     0.46   0.05   0.12     0.07   0.00   0.02
  69   1    -0.21   0.03   0.12    -0.02   0.13   0.11    -0.25   0.19   0.23
  70   1    -0.18  -0.08  -0.17    -0.01  -0.07  -0.06    -0.20  -0.11  -0.33
  71   1     0.07  -0.03   0.00     0.19  -0.02   0.08     0.30   0.01   0.01
  72   1     0.11  -0.05  -0.02     0.00   0.00  -0.01    -0.02   0.00   0.01
  73   1    -0.01  -0.04  -0.06     0.00   0.00  -0.01     0.02   0.01   0.00
  74   1     0.02  -0.09  -0.07     0.00   0.00  -0.02     0.00   0.03   0.01
  75   1     0.02  -0.02   0.00     0.03  -0.03  -0.01     0.02   0.03  -0.01
  76   1     0.02   0.02  -0.03     0.04   0.08  -0.08    -0.01  -0.05   0.03
  77   1     0.00   0.01  -0.02     0.00   0.03  -0.04     0.00  -0.04   0.03
  78   1     0.01  -0.02  -0.01     0.01  -0.05  -0.02     0.00   0.01   0.01
  79   1     0.00  -0.01   0.01     0.00  -0.02   0.03     0.01   0.00  -0.03
  80   1     0.02  -0.02  -0.01     0.00   0.01  -0.03     0.04   0.05  -0.08
  81   1     0.02  -0.04  -0.02    -0.04  -0.01  -0.04    -0.02   0.00  -0.11
  82   1    -0.03  -0.01  -0.01    -0.03  -0.03  -0.01    -0.05  -0.06  -0.04
  83   1    -0.01   0.01   0.00     0.01   0.00   0.01     0.00   0.00  -0.09
  84   1    -0.01  -0.01  -0.01    -0.03  -0.02  -0.05    -0.02   0.00  -0.01
  85   1     0.06   0.04   0.05     0.02   0.06   0.03     0.01   0.02   0.01
  86   1    -0.11   0.10   0.03    -0.11   0.07   0.06     0.03   0.00   0.02
  87   1    -0.07  -0.07  -0.04    -0.09  -0.04   0.02     0.03   0.03   0.02
  88   1     0.02  -0.08   0.08     0.01  -0.07   0.04    -0.08   0.06  -0.03
  89   1     0.09   0.01  -0.12     0.08   0.01  -0.12    -0.10   0.03   0.14
  90   1    -0.12   0.07  -0.03    -0.12   0.04  -0.06     0.06  -0.01   0.08
  91   1     0.00   0.00   0.00    -0.05   0.00   0.01     0.00   0.02  -0.06
  92   1    -0.01  -0.01   0.01    -0.03  -0.04  -0.03     0.01   0.01  -0.07
  93   1    -0.02  -0.01   0.00    -0.01  -0.04   0.00     0.02  -0.02  -0.06
  94   1     0.03   0.00   0.01     0.08   0.04   0.03    -0.05  -0.08  -0.03
  95   1    -0.01   0.01   0.03    -0.01   0.02   0.11     0.00  -0.05  -0.12
  96   1     0.02   0.03   0.04     0.04   0.07   0.11    -0.03  -0.07  -0.09
  97   1    -0.10   0.06   0.04     0.07  -0.02  -0.06     0.15   0.07  -0.06
  98   1     0.01  -0.15  -0.07     0.05   0.01   0.01     0.09   0.16   0.14
  99   1     0.16   0.07  -0.02     0.00  -0.01  -0.06    -0.01   0.02   0.08
 100   1     0.00  -0.02   0.02    -0.01  -0.01  -0.02     0.00  -0.04   0.09
 101   1     0.07   0.03   0.00     0.05   0.01  -0.04     0.09   0.06   0.05
 102   1    -0.01   0.03  -0.06    -0.02   0.03  -0.07    -0.01   0.03  -0.03
 103   1     0.02  -0.02   0.03     0.10  -0.01   0.05     0.02  -0.03  -0.01
 104   1    -0.02  -0.01   0.05    -0.03  -0.05   0.10    -0.10  -0.11   0.02
 105   1    -0.02   0.01   0.02    -0.03   0.02  -0.03    -0.12   0.04  -0.07
 106   1     0.01   0.03   0.01    -0.03   0.03   0.06    -0.05   0.03   0.01
 107   1     0.01  -0.01  -0.04     0.01  -0.02   0.05     0.03  -0.13  -0.06
 108   1    -0.03  -0.02   0.01    -0.01  -0.03   0.10    -0.12  -0.11   0.05
 109   1    -0.01   0.04  -0.02    -0.03   0.08  -0.04     0.02  -0.08   0.06
 110   1    -0.03   0.02  -0.01    -0.06   0.06  -0.01     0.04   0.01   0.08
 111   1    -0.01   0.04  -0.02    -0.03   0.10  -0.05     0.01  -0.01   0.03
 112   1     0.00   0.00  -0.01     0.01   0.04   0.00     0.00  -0.07   0.01
 113   1     0.01   0.01   0.00     0.02   0.02   0.00    -0.03   0.03   0.04
 114   1     0.01   0.00   0.01     0.03   0.03  -0.02    -0.03  -0.05   0.09
                    61                     62                     63
                    ?A                     ?A                     ?A
 Frequencies --   273.3503               277.0997               278.8137
 Red. masses --     1.8654                 2.3120                 2.2173
 Frc consts  --     0.0821                 0.1046                 0.1016
 IR Inten    --     2.5267                 4.3811                 7.1307
 Raman Activ --     0.0000                 0.0000                 0.0000
 Depolar     --     0.0000                 0.0000                 0.0000
 Atom AN      X      Y      Z        X      Y      Z        X      Y      Z
   1   8     0.01   0.00  -0.01    -0.01   0.00   0.01     0.01   0.00  -0.03
   2  12    -0.01   0.03   0.00    -0.05   0.02   0.00     0.00  -0.06  -0.06
   3   8     0.00   0.00   0.00     0.00  -0.01   0.00     0.01   0.04   0.04
   4   6     0.01   0.00  -0.01     0.00   0.00   0.01     0.01   0.00  -0.02
   5   7     0.01   0.01  -0.01     0.02  -0.03  -0.08    -0.02  -0.05  -0.07
   6   7    -0.02  -0.03  -0.07    -0.02   0.02   0.03     0.01   0.02   0.02
   7   8     0.01   0.00  -0.01    -0.01   0.00   0.01     0.02   0.00  -0.03
   8   6     0.01   0.01   0.00     0.00  -0.01  -0.02    -0.01  -0.02  -0.01
   9   6     0.01   0.01   0.02    -0.01   0.00   0.02     0.00   0.01   0.02
  10   6     0.00   0.00  -0.02    -0.02   0.02   0.01     0.00   0.01   0.02
  11   8     0.00   0.00   0.00     0.00  -0.02   0.00     0.00   0.01   0.01
  12   6     0.00   0.00   0.01     0.00  -0.01  -0.01     0.00   0.02   0.04
  13   6     0.00   0.00   0.01     0.00  -0.01  -0.01     0.00   0.03   0.05
  14   6     0.00   0.00   0.00     0.00   0.00   0.01     0.00  -0.01   0.00
  15   8    -0.01  -0.03   0.00     0.01   0.01   0.01    -0.03  -0.03   0.02
  16   6     0.00  -0.01  -0.01     0.00   0.01   0.01    -0.01  -0.02  -0.02
  17   8     0.01   0.01   0.01    -0.01  -0.01   0.01     0.04   0.01  -0.03
  18   6     0.00   0.01   0.01     0.00   0.00  -0.01     0.01  -0.01   0.01
  19   8    -0.01   0.02   0.03     0.01  -0.01  -0.01    -0.02  -0.01   0.01
  20   8     0.00  -0.02   0.01     0.00   0.00  -0.01     0.01   0.02   0.00
  21   6     0.01   0.01   0.00    -0.01  -0.01   0.00     0.01   0.01   0.00
  22   6     0.01   0.02  -0.01    -0.01  -0.01   0.01     0.02   0.00  -0.01
  23   6     0.00   0.00  -0.01     0.00   0.00   0.00     0.01   0.01   0.01
  24   8     0.04  -0.01   0.03    -0.02   0.00  -0.02    -0.01   0.01   0.01
  25   6    -0.05  -0.04  -0.03     0.03   0.01   0.01     0.00  -0.01   0.00
  26   6    -0.01   0.00  -0.01     0.02   0.01   0.00    -0.05   0.01   0.00
  27   6     0.00   0.00   0.00     0.01   0.00   0.01     0.01  -0.01   0.00
  28   6     0.00   0.00   0.01     0.01   0.00  -0.01    -0.03   0.01   0.03
  29   6     0.01   0.00   0.00     0.04  -0.01  -0.03    -0.02  -0.02  -0.02
  30   6    -0.01  -0.02  -0.03    -0.01   0.00   0.01     0.01   0.02   0.01
  31   6     0.01  -0.01   0.01    -0.01  -0.01   0.00    -0.04   0.01  -0.02
  32   6     0.01   0.00   0.01     0.00   0.02   0.04    -0.05   0.02   0.02
  33   6     0.02   0.01   0.00     0.05   0.06   0.05     0.00   0.03   0.05
  34   6     0.02   0.00   0.00     0.09   0.01   0.04     0.03   0.03   0.03
  35   6     0.02  -0.01   0.00     0.08  -0.04   0.01     0.03   0.00   0.01
  36   6     0.00   0.00   0.01     0.00  -0.01   0.01    -0.01   0.01  -0.02
  37   6     0.01  -0.01   0.00     0.03  -0.02   0.02     0.01   0.01   0.02
  38   6    -0.04  -0.05   0.01     0.02  -0.01  -0.02     0.02   0.03   0.00
  39   6    -0.04  -0.03   0.07     0.00   0.01  -0.01     0.03   0.01  -0.03
  40   6     0.00   0.02   0.09    -0.01   0.02  -0.01     0.01   0.00  -0.04
  41   6     0.04   0.03   0.04     0.00  -0.01   0.01    -0.01   0.00  -0.02
  42   6     0.03   0.01  -0.01     0.01  -0.01   0.02    -0.01   0.00   0.00
  43   6    -0.01  -0.03   0.00     0.00  -0.02  -0.04     0.01   0.02   0.01
  44   6     0.02   0.00   0.01     0.01  -0.01   0.04     0.00   0.00  -0.01
  45   6    -0.01   0.01   0.02    -0.01   0.02   0.03     0.02  -0.03  -0.03
  46   6    -0.01   0.00   0.01     0.04  -0.04  -0.01     0.08  -0.05  -0.05
  47   6    -0.02  -0.01  -0.03    -0.09  -0.02  -0.05    -0.03   0.01   0.06
  48   6    -0.01  -0.01  -0.01    -0.06   0.00  -0.01    -0.03   0.05   0.03
  49   6    -0.05  -0.02   0.01     0.03   0.06   0.08     0.02  -0.01  -0.02
  50   6    -0.01  -0.02   0.02     0.01  -0.01   0.05     0.00   0.00  -0.02
  51   6     0.03   0.03  -0.08    -0.03   0.00  -0.11    -0.01  -0.01   0.06
  52   6     0.04   0.03  -0.04     0.00  -0.04  -0.05    -0.02  -0.01   0.03
  53   6    -0.01   0.02  -0.02    -0.05   0.04  -0.02    -0.01  -0.02   0.00
  54   6     0.00   0.02  -0.01    -0.02   0.01  -0.01    -0.01  -0.01  -0.02
  55   1     0.01   0.02   0.05     0.00   0.00   0.03     0.00   0.02   0.03
  56   1    -0.02   0.00   0.01     0.02  -0.01  -0.01    -0.02   0.01   0.08
  57   1     0.00   0.00   0.00    -0.01   0.00   0.01     0.00  -0.01   0.00
  58   1    -0.02  -0.01   0.00    -0.01   0.01   0.01    -0.03  -0.02   0.00
  59   1    -0.01  -0.01   0.00     0.00   0.01   0.01     0.00  -0.02  -0.02
  60   1     0.00  -0.02  -0.01     0.00   0.00   0.01     0.00  -0.05  -0.02
  61   1     0.02   0.02   0.00    -0.01  -0.01   0.01     0.02  -0.02  -0.01
  62   1     0.00   0.00  -0.02    -0.01   0.00   0.00     0.03   0.02   0.00
  63   1    -0.13  -0.03  -0.05     0.04   0.00   0.03     0.06   0.01  -0.03
  64   1    -0.02  -0.13  -0.02     0.02   0.04  -0.02    -0.02   0.01   0.06
  65   1    -0.07  -0.03  -0.03     0.05   0.02   0.03    -0.05  -0.06  -0.04
  66   1    -0.08   0.09   0.00     0.07  -0.05   0.02    -0.10   0.07  -0.04
  67   1    -0.04  -0.10  -0.05     0.05   0.07   0.02    -0.10  -0.07   0.01
  68   1     0.11   0.02   0.02    -0.04   0.00  -0.02     0.00   0.02   0.00
  69   1    -0.22   0.19   0.27     0.15  -0.10  -0.15    -0.20   0.15   0.25
  70   1    -0.17  -0.18  -0.29     0.12   0.10   0.19    -0.16  -0.22  -0.29
  71   1     0.38  -0.02   0.05    -0.20   0.00   0.00     0.38   0.01   0.00
  72   1    -0.01   0.00   0.01     0.05   0.02  -0.02    -0.09   0.00   0.03
  73   1    -0.01   0.00   0.01     0.01   0.01   0.01    -0.02   0.01   0.03
  74   1     0.00   0.00   0.02     0.00  -0.03  -0.03    -0.01   0.05   0.08
  75   1     0.00   0.00   0.01    -0.03   0.03   0.05    -0.08   0.02   0.04
  76   1     0.02   0.03   0.00     0.06   0.10   0.07     0.00   0.05   0.09
  77   1     0.03   0.00   0.01     0.13   0.02   0.06     0.06   0.04   0.04
  78   1     0.00  -0.01   0.00     0.00   0.01   0.01    -0.02   0.04   0.02
  79   1     0.01   0.00   0.01     0.05   0.01   0.08     0.02   0.03   0.05
  80   1    -0.07  -0.04   0.10    -0.01   0.01  -0.01     0.04   0.02  -0.04
  81   1     0.00   0.04   0.13    -0.03   0.04  -0.02     0.01  -0.01  -0.05
  82   1     0.08   0.05   0.05    -0.01  -0.02   0.00    -0.03  -0.01  -0.02
  83   1     0.00  -0.03   0.06     0.00  -0.02  -0.05     0.00   0.02  -0.02
  84   1     0.04   0.01   0.05     0.01   0.00   0.03    -0.01  -0.01  -0.02
  85   1     0.03   0.03   0.03     0.00   0.05   0.01    -0.08  -0.07  -0.06
  86   1    -0.04   0.04   0.04    -0.01   0.01   0.06     0.11  -0.11  -0.07
  87   1    -0.02  -0.01   0.01    -0.01   0.03   0.05     0.07   0.05   0.00
  88   1    -0.01  -0.02   0.03     0.10  -0.13   0.15     0.19  -0.10   0.10
  89   1     0.01   0.00  -0.01     0.15  -0.07  -0.17     0.17  -0.11  -0.21
  90   1    -0.03   0.02   0.01    -0.10   0.07  -0.02    -0.03   0.01  -0.08
  91   1     0.01   0.02  -0.07     0.04   0.08  -0.19     0.02   0.01   0.02
  92   1    -0.02  -0.03   0.00    -0.09  -0.12   0.14    -0.03  -0.03   0.15
  93   1    -0.07  -0.03  -0.06    -0.31  -0.03  -0.15    -0.12   0.06   0.04
  94   1     0.00  -0.05   0.00    -0.02  -0.12   0.02    -0.01   0.03   0.03
  95   1    -0.05  -0.02  -0.03    -0.22  -0.01  -0.05    -0.09   0.04   0.05
  96   1     0.00   0.02  -0.01    -0.02   0.15  -0.01    -0.01   0.11   0.02
  97   1    -0.11  -0.01   0.07     0.07   0.10   0.01     0.04  -0.02  -0.03
  98   1    -0.09  -0.05  -0.06     0.05   0.13   0.13     0.03  -0.01   0.00
  99   1    -0.01  -0.01   0.03     0.00   0.03   0.15     0.01  -0.01  -0.04
 100   1     0.01   0.01  -0.02    -0.01  -0.04   0.09    -0.01   0.00   0.00
 101   1    -0.08  -0.03   0.02     0.05   0.03   0.07     0.03   0.00  -0.02
 102   1     0.02  -0.05   0.08     0.00  -0.02   0.01    -0.01   0.01  -0.04
 103   1    -0.13   0.09  -0.09    -0.10   0.05  -0.11     0.07  -0.05   0.06
 104   1     0.13   0.13  -0.22    -0.01  -0.03  -0.19    -0.05  -0.05   0.13
 105   1     0.14  -0.06  -0.02    -0.03  -0.01  -0.10    -0.06   0.03   0.04
 106   1     0.07  -0.09  -0.07     0.00  -0.05  -0.05    -0.03   0.05   0.04
 107   1    -0.04   0.13   0.03     0.01  -0.05  -0.05     0.02  -0.05   0.00
 108   1     0.14   0.12  -0.14    -0.02  -0.04  -0.07    -0.06  -0.04   0.07
 109   1    -0.02   0.05  -0.03    -0.05   0.04  -0.03    -0.01  -0.03   0.01
 110   1    -0.03   0.00  -0.04    -0.09   0.03   0.02     0.00  -0.01   0.01
 111   1    -0.01   0.01  -0.02    -0.06   0.08  -0.04    -0.01  -0.01   0.00
 112   1     0.01   0.05   0.03    -0.04   0.00  -0.05    -0.03  -0.03  -0.06
 113   1    -0.02  -0.02  -0.01     0.01   0.04  -0.02     0.03   0.01  -0.03
 114   1     0.03   0.03  -0.06    -0.04   0.00   0.01    -0.04  -0.02   0.01
                    64                     65                     66
                    ?A                     ?A                     ?A
 Frequencies --   282.5647               290.2969               295.4408
 Red. masses --     2.4732                 3.3229                 3.8004
 Frc consts  --     0.1163                 0.1650                 0.1954
 IR Inten    --     1.6561                 6.5375                14.1646
 Raman Activ --     0.0000                 0.0000                 0.0000
 Depolar     --     0.0000                 0.0000                 0.0000
 Atom AN      X      Y      Z        X      Y      Z        X      Y      Z
   1   8     0.01   0.00   0.00     0.01   0.00  -0.01    -0.03  -0.01   0.02
   2  12     0.01  -0.02  -0.01     0.05  -0.04  -0.09     0.05   0.07   0.14
   3   8    -0.01   0.01   0.01     0.01   0.03   0.05     0.01  -0.04  -0.06
   4   6     0.01   0.01   0.01     0.01   0.00  -0.01    -0.03  -0.01   0.01
   5   7    -0.01  -0.02  -0.03     0.00   0.04   0.00    -0.03  -0.01  -0.06
   6   7     0.00   0.00   0.01    -0.02  -0.01   0.04     0.02  -0.04   0.01
   7   8     0.00   0.01   0.02     0.02   0.00  -0.02    -0.05   0.00   0.04
   8   6     0.00   0.00  -0.01     0.03   0.05  -0.02     0.03   0.02  -0.03
   9   6     0.01   0.01   0.01     0.04   0.01   0.00     0.04   0.01   0.01
  10   6     0.01   0.00   0.01     0.04   0.00   0.02     0.06  -0.03   0.01
  11   8     0.00  -0.01  -0.01     0.00   0.01   0.01     0.00   0.02  -0.03
  12   6     0.00  -0.02   0.00    -0.01   0.00   0.04     0.02  -0.01  -0.07
  13   6     0.00  -0.02   0.00    -0.01   0.01   0.06     0.01  -0.02  -0.08
  14   6     0.01   0.01   0.00     0.00   0.00   0.00     0.00   0.01  -0.01
  15   8    -0.01   0.02   0.01    -0.04  -0.03   0.03     0.05   0.03  -0.06
  16   6     0.00   0.01   0.00    -0.01  -0.01  -0.01     0.03   0.03   0.00
  17   8    -0.03   0.04   0.05     0.02   0.01  -0.02    -0.01  -0.02   0.01
  18   6    -0.03   0.02  -0.02     0.00  -0.01   0.00     0.00   0.01   0.01
  19   8    -0.02   0.00  -0.04    -0.02  -0.02  -0.01     0.03   0.04   0.04
  20   8    -0.01  -0.04  -0.01     0.01   0.02  -0.01    -0.01  -0.01   0.02
  21   6     0.04   0.04  -0.01     0.00   0.01   0.00    -0.02  -0.02   0.01
  22   6     0.00   0.09  -0.02     0.01   0.00  -0.01    -0.01  -0.02   0.02
  23   6    -0.02  -0.01  -0.03     0.00   0.00   0.01     0.00   0.00   0.00
  24   8     0.13  -0.03   0.09     0.00   0.00   0.01    -0.04   0.00  -0.03
  25   6    -0.17  -0.09  -0.08     0.00  -0.01   0.00     0.05   0.02   0.02
  26   6     0.09   0.03   0.00    -0.02   0.00   0.00     0.00  -0.02   0.00
  27   6     0.00  -0.01   0.02     0.03  -0.03   0.02    -0.06   0.04  -0.02
  28   6     0.01  -0.01  -0.01    -0.02   0.00   0.01     0.00   0.00  -0.01
  29   6    -0.02   0.00  -0.01    -0.02   0.02   0.01    -0.05   0.00  -0.03
  30   6     0.00   0.00   0.00    -0.05  -0.01   0.03    -0.01  -0.03   0.00
  31   6    -0.03   0.01  -0.01    -0.01   0.01   0.00    -0.09   0.03  -0.04
  32   6    -0.03   0.01   0.00    -0.01  -0.01  -0.04    -0.10   0.05   0.00
  33   6    -0.02   0.01   0.02    -0.04  -0.03  -0.06    -0.07   0.03   0.04
  34   6     0.00   0.01   0.01    -0.07  -0.02  -0.04    -0.04   0.01   0.03
  35   6     0.00   0.00   0.00    -0.06   0.02   0.00    -0.03   0.01  -0.01
  36   6    -0.01   0.00  -0.01    -0.01   0.00   0.01    -0.05   0.01  -0.02
  37   6     0.00   0.01   0.01    -0.03   0.01   0.00    -0.01   0.02   0.01
  38   6     0.00   0.00   0.01    -0.02  -0.03   0.00    -0.03  -0.03   0.01
  39   6    -0.01   0.00   0.00    -0.03  -0.03  -0.02    -0.03  -0.04   0.03
  40   6    -0.01  -0.01   0.00    -0.07  -0.03  -0.02    -0.02  -0.03   0.04
  41   6    -0.01  -0.01   0.00    -0.07  -0.05   0.01    -0.02  -0.01   0.03
  42   6    -0.01   0.00   0.00    -0.05  -0.04   0.05    -0.02  -0.01   0.01
  43   6     0.01   0.00   0.01    -0.01  -0.04  -0.02    -0.03  -0.02   0.00
  44   6    -0.01   0.00   0.00    -0.01  -0.04   0.05    -0.01   0.00   0.00
  45   6     0.01  -0.02  -0.02    -0.01   0.01   0.02     0.03  -0.05  -0.03
  46   6     0.04  -0.03  -0.03    -0.03   0.02   0.02     0.10  -0.09  -0.08
  47   6     0.00   0.01   0.04     0.05   0.01   0.05     0.01   0.02   0.08
  48   6     0.00   0.03   0.02     0.04   0.02   0.03     0.01   0.06   0.04
  49   6     0.01   0.00  -0.01     0.09   0.11   0.12     0.00   0.01   0.01
  50   6     0.00   0.01  -0.01     0.04  -0.01   0.07     0.01   0.01   0.01
  51   6     0.01   0.00   0.01    -0.02   0.00  -0.11    -0.01   0.02  -0.06
  52   6     0.00  -0.01   0.02     0.00  -0.04  -0.07     0.01   0.01  -0.07
  53   6     0.02  -0.01   0.00     0.04   0.04  -0.04     0.11  -0.02   0.01
  54   6     0.01   0.01  -0.01     0.09   0.09  -0.05     0.07  -0.02   0.01
  55   1     0.01   0.01   0.02     0.01   0.00  -0.01     0.01   0.01   0.03
  56   1     0.02  -0.02   0.00    -0.01  -0.01   0.08     0.03   0.01  -0.11
  57   1     0.00   0.01   0.01     0.00   0.00   0.00     0.02   0.00  -0.03
  58   1     0.00   0.00   0.00    -0.02  -0.01  -0.01     0.07   0.02  -0.03
  59   1    -0.01   0.01   0.01    -0.01  -0.01   0.00     0.04   0.02  -0.01
  60   1    -0.01   0.00  -0.01    -0.01  -0.03  -0.02     0.02   0.09   0.03
  61   1     0.04   0.13   0.01     0.01  -0.01  -0.01    -0.03  -0.03   0.01
  62   1    -0.04  -0.03  -0.02     0.01   0.01   0.00     0.00  -0.01   0.00
  63   1    -0.52  -0.10  -0.09     0.02   0.00  -0.01     0.12   0.02   0.02
  64   1    -0.03  -0.40  -0.17     0.00   0.00   0.02     0.02   0.10   0.02
  65   1    -0.14   0.07  -0.04    -0.01  -0.02  -0.01     0.06  -0.02   0.02
  66   1     0.06   0.05   0.09    -0.03   0.02  -0.01     0.03  -0.05  -0.01
  67   1     0.12   0.02  -0.07    -0.04  -0.02   0.01     0.02   0.00   0.00
  68   1     0.16   0.05   0.01    -0.01   0.01   0.00    -0.03  -0.04   0.01
  69   1     0.16  -0.11  -0.16     0.02  -0.01   0.04    -0.12   0.05   0.04
  70   1     0.13   0.11   0.23     0.02  -0.09   0.01    -0.10   0.11  -0.09
  71   1    -0.24  -0.02   0.01     0.08  -0.01   0.00    -0.05   0.00   0.04
  72   1     0.06  -0.01  -0.01    -0.04  -0.01   0.02    -0.01  -0.02   0.00
  73   1    -0.01  -0.01  -0.01    -0.03   0.00   0.00     0.00  -0.01  -0.03
  74   1     0.01  -0.05  -0.03    -0.01   0.01   0.04     0.00   0.01  -0.01
  75   1    -0.04   0.01   0.01     0.02  -0.02  -0.05    -0.12   0.06   0.00
  76   1    -0.02   0.01   0.03    -0.04  -0.04  -0.08    -0.07   0.04   0.08
  77   1     0.00   0.01   0.01    -0.10  -0.03  -0.05    -0.02   0.00   0.05
  78   1    -0.02   0.02   0.01    -0.01  -0.01   0.01    -0.07   0.05   0.05
  79   1     0.00   0.01   0.01    -0.05  -0.01  -0.05    -0.02   0.01   0.00
  80   1    -0.01   0.01  -0.01    -0.01  -0.04  -0.03    -0.03  -0.05   0.04
  81   1    -0.01  -0.01  -0.01    -0.08  -0.03  -0.04    -0.01  -0.03   0.05
  82   1     0.00  -0.02   0.00    -0.08  -0.08   0.01    -0.02   0.01   0.03
  83   1     0.00   0.00   0.01    -0.01  -0.03  -0.01    -0.02  -0.02   0.03
  84   1    -0.01   0.00  -0.01    -0.04  -0.07  -0.01    -0.02  -0.01  -0.01
  85   1    -0.04  -0.04  -0.03     0.02   0.02   0.03    -0.16  -0.11  -0.09
  86   1     0.06  -0.06  -0.04    -0.02   0.02   0.03     0.18  -0.21  -0.07
  87   1     0.03   0.03   0.00    -0.01   0.00   0.01     0.11   0.10   0.04
  88   1     0.09  -0.04   0.03    -0.05   0.05  -0.05     0.24  -0.07   0.04
  89   1     0.07  -0.06  -0.09    -0.07   0.03   0.08     0.15  -0.18  -0.21
  90   1     0.00  -0.02  -0.05     0.03  -0.03   0.02     0.04  -0.09  -0.12
  91   1     0.01  -0.01   0.04     0.01  -0.07   0.12    -0.04  -0.05   0.15
  92   1     0.00   0.01   0.06     0.06   0.08  -0.01     0.01   0.03   0.03
  93   1    -0.01   0.04   0.05     0.16   0.03   0.11     0.08   0.08   0.14
  94   1     0.00   0.05   0.01     0.05   0.11  -0.01     0.01   0.13   0.01
  95   1     0.00   0.03   0.05     0.13   0.03   0.08     0.05   0.06   0.10
  96   1     0.00   0.03   0.02     0.03  -0.05   0.06     0.01   0.04   0.03
  97   1     0.01  -0.01  -0.01     0.11   0.24  -0.01    -0.01   0.03   0.00
  98   1     0.01  -0.01   0.00     0.14   0.15   0.21     0.01   0.00   0.01
  99   1     0.01   0.00  -0.02     0.13   0.10   0.24     0.02   0.02   0.02
 100   1     0.00   0.00   0.00     0.01  -0.11   0.18     0.01  -0.02   0.03
 101   1     0.02   0.01  -0.01     0.17   0.07   0.11     0.03   0.02   0.02
 102   1    -0.01   0.02  -0.02    -0.01   0.03  -0.04     0.00   0.02   0.00
 103   1     0.03   0.00   0.02    -0.13   0.07  -0.11    -0.09   0.06  -0.06
 104   1    -0.01  -0.01   0.03     0.02   0.01  -0.23     0.04   0.06  -0.13
 105   1     0.00   0.01  -0.01     0.01  -0.03  -0.09     0.04  -0.03  -0.03
 106   1    -0.01   0.00   0.02     0.04  -0.06  -0.06     0.07  -0.04  -0.07
 107   1     0.01  -0.01   0.01     0.00  -0.04  -0.08    -0.02   0.04  -0.08
 108   1     0.00  -0.01   0.02    -0.01  -0.03  -0.10     0.02   0.04  -0.11
 109   1     0.02  -0.02   0.01     0.04   0.05  -0.04     0.10  -0.07   0.04
 110   1     0.03   0.00   0.00     0.04   0.03  -0.05     0.17   0.01   0.00
 111   1     0.02  -0.01   0.00     0.04   0.02  -0.03     0.11  -0.04   0.02
 112   1     0.00   0.01  -0.03     0.02   0.15  -0.08     0.06  -0.02   0.00
 113   1     0.04   0.01  -0.02     0.15   0.09  -0.07     0.08  -0.01   0.00
 114   1     0.01   0.01  -0.01     0.14   0.09  -0.07     0.08  -0.02   0.01
                    67                     68                     69
                    ?A                     ?A                     ?A
 Frequencies --   308.9374               317.5660               321.2880
 Red. masses --     3.2902                 3.2279                 3.2594
 Frc consts  --     0.1850                 0.1918                 0.1982
 IR Inten    --     4.5072                 2.2768                 1.5696
 Raman Activ --     0.0000                 0.0000                 0.0000
 Depolar     --     0.0000                 0.0000                 0.0000
 Atom AN      X      Y      Z        X      Y      Z        X      Y      Z
   1   8    -0.06  -0.06  -0.10     0.01   0.00   0.00     0.01   0.00   0.01
   2  12     0.03  -0.02   0.03     0.06   0.01  -0.02     0.04  -0.02   0.01
   3   8     0.04  -0.06  -0.02     0.00   0.00  -0.01     0.00   0.01   0.00
   4   6    -0.01  -0.08  -0.04     0.01   0.00   0.00     0.00   0.01   0.00
   5   7     0.00   0.00   0.01    -0.02   0.05   0.10    -0.01   0.00   0.02
   6   7    -0.01   0.02   0.01    -0.01  -0.01  -0.04     0.01   0.06   0.12
   7   8    -0.07  -0.03  -0.04     0.01   0.00  -0.01     0.01   0.00   0.00
   8   6    -0.02  -0.01   0.00    -0.01   0.03   0.04    -0.01  -0.01  -0.01
   9   6    -0.01  -0.01  -0.01    -0.01   0.01  -0.02    -0.01  -0.02  -0.05
  10   6    -0.02   0.02   0.00    -0.01   0.00  -0.03     0.00   0.02   0.03
  11   8     0.07   0.17   0.05     0.00   0.01   0.01    -0.01  -0.01   0.00
  12   6     0.03   0.03   0.05     0.00   0.01   0.01     0.00   0.01   0.01
  13   6     0.00  -0.04   0.03    -0.01   0.01   0.00     0.00   0.01   0.00
  14   6     0.08  -0.02  -0.02     0.00   0.00   0.00    -0.01   0.00   0.00
  15   8    -0.01  -0.02   0.03    -0.01   0.00   0.01    -0.01   0.00   0.00
  16   6     0.13  -0.01  -0.12    -0.01  -0.01   0.00    -0.01   0.00   0.01
  17   8    -0.02   0.00   0.02     0.00   0.00   0.00     0.00   0.00   0.01
  18   6    -0.01   0.00  -0.01     0.00   0.01   0.01     0.00  -0.01  -0.02
  19   8     0.01  -0.01  -0.03     0.01   0.02   0.02    -0.01  -0.03  -0.04
  20   8    -0.01  -0.01   0.00     0.00  -0.01   0.00     0.00   0.01  -0.01
  21   6     0.00   0.00   0.00     0.00  -0.01   0.00     0.00   0.01   0.00
  22   6    -0.01   0.02   0.00    -0.01   0.00   0.00     0.00   0.01   0.01
  23   6    -0.01   0.00  -0.01     0.00   0.00   0.00     0.00   0.00   0.01
  24   8     0.01   0.00   0.00     0.00  -0.01   0.00     0.01   0.01   0.01
  25   6    -0.01   0.02   0.00     0.00   0.01   0.00     0.00   0.00   0.00
  26   6     0.04   0.01   0.00     0.00  -0.01   0.00     0.00  -0.01   0.01
  27   6    -0.10  -0.03   0.03     0.00   0.00   0.00     0.01   0.00   0.00
  28   6    -0.06   0.06   0.15     0.00   0.00   0.00     0.00   0.00  -0.01
  29   6     0.00   0.00   0.00    -0.02   0.01   0.05     0.00   0.00   0.01
  30   6    -0.01   0.01   0.00    -0.01  -0.01  -0.01     0.00   0.04   0.05
  31   6     0.01  -0.01   0.00    -0.01   0.01   0.03     0.00   0.00   0.01
  32   6     0.01   0.00   0.00    -0.04  -0.09   0.14    -0.01  -0.04   0.04
  33   6     0.01   0.00   0.00    -0.02   0.05   0.06     0.00   0.01   0.01
  34   6     0.01  -0.01   0.01     0.00   0.17  -0.02     0.00   0.05  -0.02
  35   6     0.01   0.00   0.00    -0.04   0.00   0.03    -0.01   0.00   0.01
  36   6     0.00  -0.01   0.00     0.02   0.05  -0.02     0.01   0.02   0.00
  37   6     0.01   0.00   0.00    -0.02  -0.06   0.02    -0.01  -0.02   0.01
  38   6     0.00   0.00   0.00    -0.01  -0.01   0.00     0.02   0.03   0.02
  39   6     0.00   0.00   0.01    -0.04   0.01  -0.02     0.14  -0.09   0.07
  40   6     0.00   0.01   0.01    -0.02  -0.01  -0.02     0.03   0.02   0.07
  41   6     0.01   0.00   0.01     0.00  -0.04  -0.02    -0.10   0.14   0.06
  42   6     0.00   0.00   0.00    -0.01  -0.01  -0.01    -0.01   0.01   0.04
  43   6     0.01  -0.01   0.00     0.00  -0.01   0.01    -0.04   0.04  -0.01
  44   6     0.00   0.00   0.00    -0.01   0.00   0.00     0.03  -0.04   0.02
  45   6    -0.01   0.00   0.00     0.03  -0.09  -0.14     0.01  -0.01  -0.04
  46   6     0.00   0.00   0.00     0.06   0.04  -0.05     0.01   0.02   0.01
  47   6     0.00   0.00  -0.01    -0.03  -0.06  -0.16    -0.01  -0.02  -0.04
  48   6     0.00  -0.01  -0.01     0.01  -0.09   0.02     0.00  -0.02   0.01
  49   6     0.00  -0.01   0.00     0.01   0.04   0.02     0.03  -0.08  -0.01
  50   6     0.00   0.00  -0.01     0.02   0.00   0.04    -0.04  -0.06  -0.14
  51   6     0.00   0.00  -0.02     0.02  -0.01   0.01    -0.08   0.04  -0.04
  52   6     0.00  -0.01   0.00     0.00   0.01   0.04    -0.01  -0.03  -0.16
  53   6    -0.04   0.01   0.00     0.03  -0.02   0.01    -0.01   0.00   0.02
  54   6    -0.01   0.05  -0.01     0.00   0.02  -0.01     0.00   0.03   0.02
  55   1     0.00   0.00  -0.02    -0.01   0.00  -0.04    -0.01  -0.03  -0.08
  56   1    -0.05  -0.03   0.03    -0.02   0.00   0.01    -0.01   0.01   0.01
  57   1     0.16  -0.05  -0.09     0.00   0.00   0.00    -0.01   0.00   0.00
  58   1     0.23  -0.02  -0.15    -0.01  -0.01   0.01    -0.02   0.00   0.01
  59   1     0.19  -0.08  -0.20    -0.01   0.00   0.01    -0.02   0.00   0.02
  60   1     0.14   0.12  -0.02    -0.01  -0.02   0.00    -0.01  -0.02   0.00
  61   1    -0.01   0.03   0.00    -0.01   0.00   0.00     0.00   0.01   0.01
  62   1    -0.02  -0.01   0.00     0.00  -0.01  -0.01     0.00   0.01   0.02
  63   1    -0.03   0.01   0.03     0.00   0.00   0.01    -0.01   0.00  -0.01
  64   1     0.00   0.02  -0.02     0.00   0.01   0.00     0.00  -0.01   0.00
  65   1     0.00   0.06   0.01     0.00   0.01   0.00     0.00  -0.01   0.00
  66   1     0.09  -0.05   0.03     0.01  -0.02   0.00    -0.05   0.05   0.00
  67   1     0.08   0.08   0.00     0.01   0.00   0.00    -0.02  -0.08  -0.02
  68   1    -0.02   0.00  -0.01    -0.01  -0.01   0.00     0.07   0.00   0.04
  69   1    -0.09  -0.13   0.01     0.03  -0.01  -0.03     0.02   0.01  -0.01
  70   1    -0.09   0.08   0.05     0.02   0.00   0.03     0.02  -0.01   0.00
  71   1    -0.23  -0.03   0.03    -0.02   0.01  -0.01     0.02   0.01  -0.01
  72   1    -0.39  -0.01   0.18     0.00   0.00   0.00     0.02   0.00  -0.01
  73   1     0.00   0.02   0.09     0.01   0.00  -0.01     0.00   0.00  -0.01
  74   1     0.03   0.27   0.39     0.00   0.01   0.00    -0.01  -0.01  -0.02
  75   1     0.01   0.00   0.00    -0.08  -0.19   0.21    -0.02  -0.07   0.06
  76   1     0.01   0.00   0.00    -0.02   0.06   0.04     0.00   0.00   0.00
  77   1     0.01  -0.01   0.01     0.05   0.30  -0.07     0.01   0.09  -0.04
  78   1     0.01  -0.01  -0.01     0.03   0.06  -0.01     0.01   0.02  -0.01
  79   1     0.01   0.01   0.00    -0.03  -0.06   0.01    -0.01  -0.02   0.00
  80   1     0.00   0.00   0.01    -0.05   0.03  -0.03     0.23  -0.21   0.08
  81   1     0.00   0.01   0.01    -0.03  -0.01  -0.02     0.03   0.00   0.05
  82   1     0.02   0.00   0.01     0.01  -0.06  -0.02    -0.17   0.24   0.05
  83   1     0.01  -0.01   0.00     0.01  -0.01   0.02    -0.04   0.04  -0.02
  84   1     0.01   0.00   0.00    -0.01  -0.01  -0.01     0.03  -0.05   0.02
  85   1     0.01   0.01   0.00    -0.08  -0.24  -0.08    -0.01  -0.05  -0.02
  86   1    -0.02   0.02   0.00     0.12  -0.09  -0.29     0.03  -0.01  -0.07
  87   1    -0.02  -0.01   0.00     0.05  -0.10  -0.18     0.02  -0.02  -0.05
  88   1     0.00   0.00   0.00     0.10   0.08  -0.05     0.00   0.03  -0.01
  89   1     0.01   0.01  -0.01     0.08   0.05  -0.07     0.00   0.03   0.02
  90   1    -0.01   0.00  -0.01     0.04   0.01  -0.09     0.01   0.02   0.01
  91   1    -0.01   0.01  -0.01    -0.05   0.08  -0.21    -0.01   0.02  -0.06
  92   1    -0.01   0.00  -0.01    -0.04  -0.05  -0.23    -0.01  -0.02  -0.06
  93   1     0.00   0.00  -0.01    -0.03  -0.21  -0.22    -0.01  -0.06  -0.06
  94   1    -0.01  -0.02   0.00     0.03  -0.13   0.02     0.02  -0.03   0.01
  95   1    -0.01  -0.01  -0.02     0.01  -0.09  -0.03     0.00  -0.02   0.01
  96   1     0.00   0.00  -0.02     0.01  -0.10   0.07     0.01  -0.02   0.03
  97   1    -0.02  -0.01   0.01     0.00   0.08   0.00     0.05  -0.12   0.01
  98   1    -0.01  -0.03  -0.02     0.01   0.06   0.04     0.04  -0.11   0.00
  99   1     0.01   0.00  -0.01     0.02   0.04   0.07     0.02  -0.07  -0.07
 100   1    -0.01   0.01  -0.02     0.03  -0.05   0.07    -0.11   0.10  -0.22
 101   1    -0.01  -0.02  -0.02     0.03   0.05   0.07    -0.05  -0.21  -0.24
 102   1     0.00  -0.01  -0.01     0.01   0.01   0.04    -0.04  -0.07  -0.15
 103   1    -0.01   0.02  -0.02     0.04  -0.01   0.01    -0.16   0.05  -0.04
 104   1     0.00  -0.01  -0.04     0.02   0.00   0.03    -0.05   0.02  -0.12
 105   1     0.00   0.00  -0.03     0.03  -0.02   0.00    -0.08   0.05   0.01
 106   1     0.00  -0.01   0.00    -0.02   0.02   0.04     0.13  -0.09  -0.15
 107   1     0.01  -0.01   0.00    -0.01   0.03   0.06     0.02  -0.08  -0.24
 108   1     0.00  -0.01   0.00     0.04   0.01   0.06    -0.12  -0.01  -0.27
 109   1    -0.04   0.02   0.00     0.04  -0.01   0.00     0.00  -0.03   0.04
 110   1    -0.06   0.00   0.02     0.07  -0.02  -0.04     0.00   0.02   0.05
 111   1    -0.04   0.03  -0.01     0.02  -0.08   0.03    -0.01   0.03   0.00
 112   1    -0.03   0.09   0.00     0.00   0.04   0.02    -0.01   0.04   0.03
 113   1    -0.01   0.04  -0.01    -0.03   0.02   0.00    -0.01   0.00   0.02
 114   1     0.03   0.06  -0.03     0.03   0.03  -0.01     0.01   0.04   0.00
                    70                     71                     72
                    ?A                     ?A                     ?A
 Frequencies --   327.1300               330.5377               336.3144
 Red. masses --     5.8784                 4.3612                 3.8916
 Frc consts  --     0.3706                 0.2807                 0.2593
 IR Inten    --    17.8007                 4.9185                 7.3431
 Raman Activ --     0.0000                 0.0000                 0.0000
 Depolar     --     0.0000                 0.0000                 0.0000
 Atom AN      X      Y      Z        X      Y      Z        X      Y      Z
   1   8     0.01  -0.01   0.04    -0.02  -0.01   0.01    -0.03  -0.04  -0.01
   2  12     0.29  -0.05  -0.02    -0.03  -0.10   0.13    -0.02  -0.03  -0.02
   3   8     0.02   0.02  -0.01     0.01   0.01   0.02     0.02   0.03   0.05
   4   6    -0.01   0.03   0.01    -0.01   0.01   0.02    -0.02   0.02   0.02
   5   7    -0.01  -0.08   0.06     0.00  -0.03  -0.02     0.00   0.01   0.02
   6   7    -0.06   0.07   0.00     0.02  -0.03   0.03    -0.01  -0.04  -0.12
   7   8    -0.01   0.02   0.07    -0.05   0.03   0.08    -0.10   0.06   0.16
   8   6    -0.10  -0.11   0.06     0.01  -0.02  -0.01     0.00   0.01   0.02
   9   6    -0.07  -0.04  -0.01     0.02  -0.04   0.02     0.00   0.02   0.02
  10   6    -0.13   0.05  -0.01     0.05  -0.03   0.02    -0.01   0.00  -0.04
  11   8    -0.03  -0.04  -0.06     0.00  -0.05  -0.06     0.02  -0.07  -0.08
  12   6    -0.01  -0.02  -0.04     0.02  -0.02  -0.05     0.01  -0.05  -0.06
  13   6     0.01  -0.01  -0.02     0.04  -0.01  -0.02     0.05  -0.05  -0.01
  14   6    -0.03   0.04  -0.03     0.01   0.01  -0.01     0.03   0.03  -0.02
  15   8     0.00   0.03  -0.02     0.00   0.05  -0.03    -0.02   0.06  -0.02
  16   6    -0.01   0.03   0.02     0.03   0.03   0.00     0.09   0.04  -0.05
  17   8     0.00   0.00   0.00     0.05   0.02  -0.03     0.00   0.01   0.00
  18   6     0.00   0.01   0.02     0.01  -0.05  -0.06    -0.01  -0.01   0.00
  19   8     0.00   0.05   0.06    -0.03  -0.13  -0.15    -0.02  -0.01   0.00
  20   8     0.00   0.00   0.00     0.01   0.05   0.03     0.00   0.01  -0.03
  21   6     0.00  -0.02   0.00     0.02   0.06   0.02     0.00   0.01   0.00
  22   6     0.00  -0.02   0.02     0.04   0.02  -0.02     0.00   0.00   0.00
  23   6     0.00   0.00   0.00     0.00   0.02   0.05     0.00   0.00   0.00
  24   8    -0.01  -0.01  -0.02    -0.01   0.05   0.04     0.00   0.00   0.00
  25   6     0.02  -0.02   0.00    -0.01  -0.01   0.00     0.00   0.00   0.00
  26   6     0.01   0.00   0.00    -0.09  -0.03   0.02     0.02   0.01   0.01
  27   6     0.00   0.01   0.00    -0.02   0.01   0.00    -0.03  -0.02   0.04
  28   6    -0.03  -0.03  -0.06     0.01  -0.01  -0.01     0.01  -0.01   0.00
  29   6     0.00  -0.02   0.02    -0.01   0.01  -0.01     0.00   0.00   0.01
  30   6    -0.02   0.04   0.00     0.00   0.01   0.00     0.01  -0.02  -0.04
  31   6     0.01  -0.01   0.00    -0.01   0.02  -0.01     0.01  -0.01   0.01
  32   6     0.03   0.07  -0.03    -0.03  -0.07   0.03     0.02   0.01   0.00
  33   6     0.02  -0.01   0.02    -0.02  -0.01  -0.01     0.01   0.00   0.00
  34   6     0.00  -0.06   0.05     0.00   0.06  -0.05     0.00  -0.02   0.02
  35   6     0.02   0.00   0.00    -0.01   0.00  -0.01     0.00   0.00   0.01
  36   6    -0.01  -0.03   0.00     0.01   0.04  -0.01     0.00  -0.02   0.01
  37   6     0.02   0.03  -0.01    -0.02  -0.03   0.01     0.01   0.01   0.00
  38   6     0.01   0.01   0.00     0.01   0.01   0.00    -0.01  -0.01  -0.02
  39   6    -0.02   0.05   0.00    -0.04   0.07   0.00     0.09  -0.13  -0.04
  40   6     0.00   0.03   0.01     0.02   0.00   0.00     0.00   0.00  -0.04
  41   6     0.05  -0.03   0.01     0.06  -0.05   0.01    -0.09   0.11  -0.05
  42   6     0.01   0.01   0.00     0.01   0.01   0.00     0.03  -0.01  -0.02
  43   6     0.03  -0.03  -0.01     0.03  -0.02  -0.01    -0.04   0.05   0.00
  44   6     0.01   0.01   0.00    -0.01   0.03  -0.01     0.05  -0.05   0.02
  45   6    -0.03  -0.01   0.01     0.03   0.01  -0.01    -0.02  -0.01   0.00
  46   6     0.01  -0.03  -0.04    -0.01   0.03   0.05     0.00  -0.01  -0.02
  47   6     0.02   0.04   0.02    -0.02  -0.04  -0.01     0.00   0.01  -0.01
  48   6    -0.02  -0.01  -0.05     0.02   0.01   0.05     0.00  -0.01  -0.01
  49   6    -0.02  -0.01  -0.01    -0.02  -0.03  -0.05     0.02   0.07   0.11
  50   6    -0.01   0.00   0.00     0.00   0.04   0.00     0.01  -0.09   0.04
  51   6     0.01  -0.02  -0.06     0.01  -0.01  -0.03     0.02   0.01   0.13
  52   6     0.01  -0.03   0.04     0.01  -0.03   0.03    -0.03   0.07  -0.01
  53   6    -0.12  -0.12   0.09    -0.14   0.09  -0.03    -0.02   0.00  -0.01
  54   6    -0.08   0.22  -0.07     0.12   0.10  -0.05    -0.01   0.01  -0.01
  55   1     0.02  -0.03  -0.04     0.01  -0.04   0.03     0.01   0.03   0.04
  56   1     0.05   0.00  -0.03     0.10   0.00  -0.03     0.15  -0.05  -0.01
  57   1    -0.05   0.05  -0.01     0.00   0.02   0.01     0.02   0.04   0.01
  58   1     0.01   0.02  -0.02     0.07   0.02  -0.02     0.19   0.02  -0.11
  59   1    -0.02   0.05   0.04     0.04   0.01  -0.01     0.11   0.01  -0.08
  60   1    -0.02   0.04   0.00     0.02   0.08   0.02     0.08   0.16   0.01
  61   1    -0.01  -0.03   0.01     0.05  -0.01  -0.02     0.00   0.00   0.00
  62   1     0.00   0.00   0.00     0.02   0.04   0.04     0.00   0.00   0.01
  63   1     0.05   0.00  -0.02     0.01   0.01  -0.02     0.02   0.01  -0.01
  64   1     0.01   0.01   0.01    -0.01  -0.02   0.05    -0.01   0.01   0.01
  65   1     0.03  -0.06   0.00    -0.06  -0.02  -0.03    -0.01  -0.01  -0.01
  66   1     0.01   0.01   0.01    -0.07  -0.05  -0.09    -0.01   0.04   0.04
  67   1     0.01   0.00  -0.01    -0.12  -0.03   0.08     0.01  -0.01   0.00
  68   1     0.02   0.01  -0.01    -0.16  -0.06   0.02     0.06   0.03   0.00
  69   1    -0.03   0.03   0.03    -0.10   0.05   0.11    -0.13   0.02   0.15
  70   1    -0.02   0.01  -0.04    -0.08   0.03  -0.11    -0.11   0.02  -0.09
  71   1     0.03  -0.01   0.02     0.06  -0.01   0.04     0.04  -0.06   0.10
  72   1     0.05  -0.03  -0.05     0.05   0.00  -0.02     0.03  -0.01   0.00
  73   1    -0.10  -0.03  -0.08    -0.01  -0.01  -0.01    -0.05  -0.01  -0.01
  74   1    -0.04  -0.10  -0.09     0.01  -0.04  -0.03     0.02  -0.06   0.01
  75   1     0.04   0.13  -0.07    -0.04  -0.13   0.07     0.02   0.02  -0.01
  76   1     0.01  -0.02   0.02    -0.02  -0.03   0.00     0.01   0.00   0.00
  77   1    -0.01  -0.11   0.08     0.01   0.11  -0.08    -0.01  -0.03   0.03
  78   1    -0.01  -0.03   0.00     0.01   0.04   0.00     0.00  -0.02   0.00
  79   1     0.02   0.04   0.00    -0.02  -0.04   0.01     0.01   0.01   0.00
  80   1    -0.05   0.07   0.01    -0.08   0.12   0.00     0.16  -0.21  -0.04
  81   1    -0.01   0.04   0.01     0.02   0.00   0.00    -0.01   0.01  -0.02
  82   1     0.09  -0.07   0.01     0.10  -0.10   0.01    -0.17   0.21  -0.06
  83   1     0.03  -0.03  -0.02     0.02  -0.01  -0.01    -0.04   0.05   0.01
  84   1     0.01   0.01   0.00    -0.01   0.04   0.00     0.06  -0.05   0.03
  85   1    -0.04   0.02  -0.01     0.04  -0.01   0.01     0.00   0.00   0.01
  86   1    -0.03   0.00   0.01     0.04   0.00  -0.01    -0.04   0.02   0.00
  87   1    -0.05  -0.01   0.04     0.06   0.02  -0.04    -0.04  -0.03   0.00
  88   1     0.05  -0.02  -0.02    -0.05   0.01   0.03     0.01   0.00  -0.02
  89   1     0.04  -0.02  -0.07    -0.05   0.01   0.08     0.02   0.01  -0.03
  90   1    -0.02  -0.04  -0.07     0.03   0.05   0.09    -0.02  -0.02  -0.04
  91   1     0.04   0.01   0.02    -0.03  -0.02  -0.02     0.01   0.02  -0.02
  92   1     0.02   0.04   0.05    -0.02  -0.04  -0.03     0.00   0.01  -0.01
  93   1     0.00   0.06   0.02    -0.02  -0.05  -0.02     0.00   0.00  -0.02
  94   1    -0.05  -0.04  -0.01     0.05   0.04   0.01    -0.01  -0.03   0.00
  95   1    -0.02   0.00  -0.09     0.01   0.01   0.10     0.00  -0.01  -0.04
  96   1    -0.02  -0.01  -0.08     0.02   0.02   0.08    -0.01  -0.02  -0.02
  97   1    -0.02  -0.03   0.02    -0.01  -0.07  -0.01     0.03   0.16   0.03
  98   1    -0.03  -0.02  -0.03    -0.02  -0.05  -0.06     0.01   0.19   0.13
  99   1    -0.02  -0.01  -0.02    -0.03  -0.02  -0.11     0.01   0.03   0.27
 100   1    -0.01   0.01   0.00     0.01   0.03   0.00    -0.02  -0.08   0.06
 101   1    -0.02   0.00   0.00     0.00   0.04   0.00    -0.02  -0.06   0.05
 102   1     0.00  -0.01   0.00     0.00   0.05   0.01     0.02  -0.15   0.03
 103   1    -0.01   0.03  -0.06     0.01   0.02  -0.03     0.10  -0.12   0.12
 104   1     0.01  -0.05  -0.10     0.01  -0.04  -0.04     0.00   0.08   0.25
 105   1     0.00  -0.01  -0.09     0.00   0.00  -0.05     0.03   0.00   0.16
 106   1    -0.03   0.00   0.03    -0.03  -0.01   0.03     0.00   0.09   0.00
 107   1     0.02  -0.04   0.05     0.03  -0.05   0.03    -0.05   0.08  -0.04
 108   1     0.02  -0.05   0.07     0.00  -0.05   0.06    -0.02   0.06   0.00
 109   1    -0.12  -0.13   0.09    -0.14   0.17  -0.06    -0.02   0.04  -0.04
 110   1    -0.11  -0.11   0.10    -0.28   0.03   0.05    -0.04  -0.02  -0.04
 111   1    -0.11  -0.11   0.08    -0.14   0.21  -0.09    -0.03  -0.02  -0.01
 112   1    -0.17   0.38  -0.03     0.02   0.21  -0.06     0.00   0.03   0.01
 113   1    -0.05   0.19  -0.08     0.18   0.09  -0.07    -0.03   0.01   0.00
 114   1     0.08   0.25  -0.15     0.23   0.11  -0.09     0.01   0.02  -0.02
                    73                     74                     75
                    ?A                     ?A                     ?A
 Frequencies --   338.0628               341.8596               349.1143
 Red. masses --     3.6396                 3.9142                 3.9749
 Frc consts  --     0.2451                 0.2695                 0.2854
 IR Inten    --     2.7857                22.9603                 5.1256
 Raman Activ --     0.0000                 0.0000                 0.0000
 Depolar     --     0.0000                 0.0000                 0.0000
 Atom AN      X      Y      Z        X      Y      Z        X      Y      Z
   1   8     0.01   0.02   0.01    -0.02  -0.04  -0.02     0.00  -0.02  -0.01
   2  12    -0.01  -0.01   0.07    -0.06   0.00  -0.09     0.03   0.03  -0.02
   3   8    -0.01  -0.01  -0.02     0.02   0.04   0.05     0.01   0.03   0.04
   4   6     0.00  -0.01  -0.01    -0.01   0.01   0.01     0.00   0.01   0.00
   5   7     0.01   0.07   0.12     0.01   0.08   0.06     0.00   0.01  -0.03
   6   7     0.01  -0.02  -0.02     0.01   0.04   0.09    -0.02   0.04   0.01
   7   8     0.05  -0.03  -0.08    -0.08   0.06   0.13    -0.04   0.03   0.07
   8   6     0.01   0.04   0.03     0.03   0.06  -0.01    -0.01   0.02  -0.02
   9   6     0.01  -0.01  -0.02     0.00   0.02  -0.05    -0.02   0.04  -0.01
  10   6     0.03  -0.02  -0.02     0.02   0.01   0.02    -0.04   0.04   0.00
  11   8    -0.01   0.01   0.04     0.02  -0.06  -0.06     0.00  -0.03  -0.03
  12   6     0.00   0.02   0.03     0.00  -0.04  -0.02     0.00  -0.02   0.00
  13   6    -0.02   0.03   0.00     0.03  -0.04   0.02     0.02  -0.01   0.02
  14   6    -0.02  -0.02   0.01     0.03   0.02  -0.01     0.01   0.01  -0.01
  15   8     0.01  -0.03   0.01    -0.04   0.03   0.01    -0.03  -0.01   0.00
  16   6    -0.05  -0.02   0.03     0.08   0.03  -0.05     0.03   0.01  -0.02
  17   8     0.02   0.01  -0.01     0.00   0.00  -0.01     0.02   0.00   0.00
  18   6     0.01  -0.02  -0.04    -0.01  -0.01   0.00     0.07   0.00  -0.01
  19   8     0.02  -0.08  -0.10    -0.06  -0.01  -0.01     0.19  -0.06  -0.05
  20   8    -0.01   0.00   0.04     0.02   0.03  -0.03    -0.05  -0.09   0.14
  21   6     0.00   0.03   0.00     0.01   0.00   0.01    -0.02   0.02  -0.04
  22   6     0.01   0.03  -0.03     0.01  -0.03   0.04    -0.02   0.09  -0.14
  23   6     0.00   0.00   0.03    -0.01   0.01   0.00     0.02  -0.01   0.01
  24   8     0.00   0.02   0.03     0.00   0.01  -0.01    -0.02  -0.02   0.04
  25   6    -0.03   0.04   0.00     0.04  -0.06   0.00    -0.11   0.18   0.01
  26   6    -0.06  -0.06   0.00     0.00   0.04   0.01    -0.07  -0.15  -0.04
  27   6     0.04   0.02  -0.01    -0.01  -0.03   0.05     0.03  -0.01   0.02
  28   6     0.00   0.01   0.00     0.01  -0.01   0.01     0.00  -0.01   0.00
  29   6     0.00   0.01   0.04     0.00   0.02   0.04     0.01   0.00  -0.01
  30   6     0.00  -0.01  -0.01    -0.01   0.02   0.04    -0.01   0.01   0.01
  31   6     0.01  -0.02   0.04     0.02  -0.02   0.04     0.01   0.00  -0.01
  32   6     0.05   0.13  -0.03     0.04   0.05   0.00     0.01  -0.02   0.00
  33   6     0.01   0.04   0.03     0.01   0.02   0.01     0.02   0.00  -0.01
  34   6    -0.04  -0.08   0.11    -0.02  -0.03   0.06     0.02   0.00  -0.01
  35   6    -0.02   0.02   0.03    -0.01   0.01   0.03     0.02  -0.01   0.00
  36   6    -0.03  -0.08   0.03     0.00  -0.04   0.02     0.01   0.00  -0.01
  37   6     0.01   0.05  -0.01     0.00   0.03   0.00     0.01   0.00   0.01
  38   6     0.00   0.00   0.00     0.01   0.01   0.02     0.00  -0.01   0.01
  39   6     0.02  -0.02  -0.01    -0.05   0.08   0.03    -0.02   0.01   0.01
  40   6     0.00   0.00  -0.01    -0.01  -0.01   0.03    -0.02   0.00   0.01
  41   6    -0.02   0.02  -0.01     0.04  -0.08   0.04     0.00  -0.02   0.01
  42   6     0.00   0.00   0.00    -0.04   0.00   0.03    -0.01  -0.01   0.01
  43   6    -0.01   0.01   0.00     0.03  -0.03   0.01     0.00  -0.01   0.00
  44   6     0.01  -0.01   0.00    -0.05   0.03   0.00    -0.01   0.00   0.00
  45   6    -0.08  -0.07   0.01    -0.05  -0.05  -0.01     0.01   0.02   0.00
  46   6     0.05  -0.07  -0.15     0.03  -0.01  -0.08    -0.01   0.01   0.02
  47   6     0.04   0.06  -0.03     0.02   0.03  -0.04    -0.01   0.00   0.01
  48   6    -0.02  -0.06  -0.08    -0.01  -0.05  -0.04     0.00   0.01   0.01
  49   6     0.00   0.01   0.02     0.00  -0.06  -0.07     0.01   0.00   0.00
  50   6     0.00  -0.01   0.00    -0.01   0.06  -0.04     0.00   0.01  -0.01
  51   6     0.01   0.00   0.03    -0.02   0.01  -0.09    -0.01   0.00  -0.02
  52   6    -0.01   0.01  -0.01     0.03  -0.05   0.00     0.01   0.00   0.00
  53   6    -0.06   0.07  -0.03     0.08   0.02  -0.02     0.08  -0.04   0.01
  54   6     0.05   0.03  -0.01    -0.02  -0.08   0.04    -0.08  -0.03   0.02
  55   1    -0.01  -0.03  -0.04    -0.03  -0.01  -0.10     0.00   0.04  -0.02
  56   1    -0.06   0.03   0.00     0.11  -0.05   0.03     0.05  -0.01   0.03
  57   1    -0.01  -0.02   0.00     0.01   0.03   0.01    -0.01   0.02   0.01
  58   1    -0.09  -0.01   0.06     0.16   0.01  -0.10     0.07   0.00  -0.05
  59   1    -0.05   0.00   0.04     0.09   0.00  -0.07     0.04   0.00  -0.03
  60   1    -0.04  -0.08   0.00     0.07   0.12  -0.01     0.03   0.06  -0.01
  61   1     0.01   0.03  -0.03     0.01  -0.04   0.03     0.00   0.12  -0.12
  62   1     0.01   0.01   0.03     0.00   0.01   0.00     0.03   0.00   0.00
  63   1    -0.04   0.01   0.04     0.05  -0.02  -0.06    -0.08   0.07   0.19
  64   1    -0.03   0.02   0.02     0.04  -0.06   0.00    -0.13   0.20   0.06
  65   1    -0.07   0.09  -0.01     0.06  -0.13  -0.01    -0.22   0.38  -0.01
  66   1    -0.06  -0.06  -0.09     0.00   0.04   0.04    -0.03  -0.20  -0.24
  67   1    -0.09  -0.10   0.02     0.01   0.07   0.02    -0.10  -0.20  -0.04
  68   1    -0.09  -0.09   0.04     0.00   0.06  -0.02    -0.17  -0.25   0.07
  69   1     0.08   0.02  -0.06    -0.07   0.01   0.12     0.01   0.02   0.05
  70   1     0.07  -0.02   0.04    -0.06  -0.02  -0.03     0.01  -0.04   0.00
  71   1     0.02   0.04  -0.04     0.06  -0.06   0.09     0.07  -0.02   0.03
  72   1     0.00   0.01  -0.01     0.02  -0.01   0.01     0.01  -0.01   0.00
  73   1     0.03   0.01   0.01    -0.04  -0.01   0.00    -0.03  -0.01  -0.01
  74   1    -0.01   0.02  -0.02     0.02  -0.05   0.02     0.00  -0.03   0.00
  75   1     0.07   0.23  -0.09     0.05   0.09  -0.03     0.00  -0.02   0.01
  76   1     0.02   0.06  -0.01     0.02   0.03  -0.02     0.02   0.00   0.00
  77   1    -0.06  -0.17   0.16    -0.04  -0.07   0.07     0.02   0.00  -0.01
  78   1    -0.02  -0.08   0.02     0.01  -0.05   0.01     0.01   0.00  -0.01
  79   1     0.00   0.05  -0.02     0.00   0.02  -0.01     0.01   0.00   0.01
  80   1     0.03  -0.04  -0.01    -0.09   0.14   0.02    -0.02   0.02   0.00
  81   1     0.00   0.00   0.00     0.00  -0.03   0.01    -0.03   0.01   0.00
  82   1    -0.03   0.04  -0.01     0.09  -0.15   0.05     0.01  -0.03   0.01
  83   1    -0.01   0.01   0.00     0.03  -0.03   0.01     0.00  -0.01   0.01
  84   1     0.01  -0.01   0.01    -0.05   0.01  -0.03    -0.02  -0.01  -0.01
  85   1    -0.14  -0.07  -0.03    -0.07  -0.06  -0.01     0.03   0.03   0.00
  86   1    -0.05  -0.07  -0.05    -0.05  -0.01  -0.07    -0.01   0.02   0.02
  87   1    -0.12  -0.08   0.07    -0.10  -0.09   0.01     0.01   0.01   0.00
  88   1     0.18   0.01  -0.12     0.08   0.04  -0.08    -0.04  -0.01   0.02
  89   1     0.14  -0.03  -0.23     0.08   0.03  -0.12    -0.02   0.01   0.03
  90   1    -0.05  -0.16  -0.28    -0.03  -0.07  -0.17     0.00   0.03   0.04
  91   1     0.05   0.06  -0.05     0.04   0.05  -0.06    -0.01   0.00   0.01
  92   1     0.05   0.10  -0.04     0.03   0.06  -0.06    -0.02  -0.02   0.03
  93   1     0.05   0.02  -0.05     0.03  -0.02  -0.06    -0.03   0.01   0.01
  94   1    -0.07  -0.15  -0.01    -0.04  -0.11   0.00     0.00   0.02   0.01
  95   1     0.02  -0.06  -0.21     0.02  -0.05  -0.13    -0.02   0.01   0.02
  96   1    -0.04  -0.12  -0.10    -0.02  -0.09  -0.04     0.00   0.03   0.00
  97   1     0.00   0.03   0.01     0.03  -0.12  -0.04     0.01   0.00  -0.01
  98   1     0.00   0.02   0.02     0.03  -0.13  -0.05     0.02  -0.02   0.01
  99   1     0.01   0.01   0.05     0.00  -0.03  -0.21     0.01   0.00  -0.02
 100   1     0.00  -0.01   0.00     0.01   0.07  -0.07     0.01   0.01  -0.01
 101   1     0.00  -0.01   0.01     0.03   0.03  -0.07     0.02   0.01  -0.01
 102   1     0.01  -0.02   0.01    -0.03   0.13  -0.05     0.00   0.03  -0.01
 103   1     0.02  -0.02   0.03    -0.09   0.10  -0.08    -0.03   0.03  -0.02
 104   1     0.00   0.02   0.05     0.00  -0.05  -0.19     0.00  -0.01  -0.05
 105   1     0.01   0.00   0.03    -0.03   0.01  -0.11    -0.01   0.00  -0.03
 106   1     0.00   0.02   0.00     0.02  -0.09  -0.01     0.01  -0.02  -0.01
 107   1    -0.01   0.01  -0.02     0.04  -0.07   0.02     0.00   0.00   0.01
 108   1    -0.01   0.00   0.00     0.01  -0.04  -0.04     0.01   0.01  -0.02
 109   1    -0.05   0.12  -0.07     0.09  -0.01  -0.01     0.08  -0.10   0.05
 110   1    -0.13   0.02  -0.02     0.14   0.04  -0.04     0.18   0.01  -0.02
 111   1    -0.07   0.08  -0.05     0.08  -0.03   0.00     0.09  -0.10   0.05
 112   1     0.03   0.08   0.02     0.03  -0.17   0.03    -0.03  -0.10   0.02
 113   1     0.04   0.03   0.00    -0.05  -0.08   0.05    -0.10  -0.03   0.03
 114   1     0.12   0.04  -0.02    -0.12  -0.09   0.08    -0.15  -0.04   0.04
                    76                     77                     78
                    ?A                     ?A                     ?A
 Frequencies --   360.6895               379.9218               387.3028
 Red. masses --     5.0193                 4.7233                 4.6894
 Frc consts  --     0.3847                 0.4017                 0.4145
 IR Inten    --    14.3360                 1.4613                17.4776
 Raman Activ --     0.0000                 0.0000                 0.0000
 Depolar     --     0.0000                 0.0000                 0.0000
 Atom AN      X      Y      Z        X      Y      Z        X      Y      Z
   1   8    -0.01   0.00   0.00     0.01  -0.03  -0.04     0.06  -0.08  -0.10
   2  12    -0.11  -0.03  -0.11    -0.02   0.04  -0.04     0.02   0.08   0.03
   3   8    -0.03   0.02   0.05    -0.05   0.00  -0.01    -0.07   0.00  -0.11
   4   6     0.00   0.00   0.01     0.02   0.01   0.00     0.05   0.05  -0.03
   5   7     0.01  -0.04   0.05     0.00  -0.02   0.01     0.00  -0.02   0.01
   6   7     0.04  -0.06   0.06     0.01  -0.02   0.00     0.00  -0.02   0.01
   7   8    -0.02   0.01   0.02    -0.02   0.03   0.04    -0.04   0.10   0.14
   8   6     0.02  -0.06   0.03     0.00  -0.03   0.01     0.00  -0.02   0.01
   9   6     0.04  -0.10   0.02     0.01  -0.03   0.01     0.01  -0.03   0.01
  10   6     0.07  -0.07   0.04     0.01  -0.02   0.01     0.01  -0.02   0.01
  11   8     0.00  -0.02  -0.02    -0.01  -0.03   0.02    -0.04  -0.11   0.07
  12   6     0.01   0.01  -0.03    -0.02   0.00   0.03    -0.05   0.03   0.12
  13   6     0.02   0.02  -0.01    -0.05   0.02   0.00    -0.14   0.12   0.02
  14   6     0.01  -0.01   0.01     0.02   0.00   0.02    -0.01   0.02   0.03
  15   8     0.03   0.02  -0.02    -0.01  -0.03   0.02    -0.02  -0.12   0.07
  16   6     0.01   0.00   0.00     0.04  -0.01  -0.06     0.12  -0.04  -0.16
  17   8    -0.03  -0.03   0.02     0.14   0.13  -0.01    -0.07  -0.05   0.00
  18   6     0.03   0.04   0.11     0.06   0.02  -0.05    -0.03   0.03   0.01
  19   8     0.12   0.13   0.21     0.05   0.07  -0.02    -0.03   0.00  -0.02
  20   8    -0.01  -0.07   0.01    -0.19  -0.09   0.08     0.09   0.03   0.00
  21   6    -0.02  -0.04  -0.07    -0.12   0.01   0.16     0.05  -0.02  -0.04
  22   6    -0.04   0.03  -0.09    -0.11   0.00   0.20     0.04  -0.02  -0.05
  23   6     0.02  -0.02  -0.04     0.00  -0.01  -0.09     0.00   0.01   0.04
  24   8    -0.01  -0.08  -0.01     0.07   0.10  -0.04    -0.04  -0.03   0.00
  25   6    -0.06   0.11   0.01     0.05  -0.09  -0.04     0.00  -0.01   0.02
  26   6     0.06   0.01  -0.03    -0.01  -0.10  -0.12    -0.02   0.01   0.04
  27   6    -0.04   0.01  -0.04     0.04   0.01  -0.01     0.10   0.06  -0.09
  28   6     0.02   0.00   0.00     0.03   0.00   0.02     0.01   0.00   0.01
  29   6    -0.01  -0.02   0.03     0.00  -0.01   0.01    -0.01  -0.02   0.00
  30   6     0.03  -0.02   0.02     0.01  -0.01   0.00     0.01  -0.01   0.00
  31   6    -0.02   0.01   0.01    -0.01   0.00   0.00    -0.01   0.00   0.00
  32   6    -0.02   0.02   0.01    -0.01   0.00   0.00    -0.02   0.00   0.00
  33   6    -0.04   0.00   0.01    -0.02   0.00   0.00    -0.02   0.00   0.00
  34   6    -0.04   0.01   0.00    -0.01   0.00   0.00     0.00   0.01   0.00
  35   6    -0.04   0.01   0.00    -0.01   0.00   0.00    -0.01  -0.01   0.00
  36   6    -0.01   0.01   0.01     0.00   0.01   0.00    -0.01   0.01  -0.01
  37   6    -0.03   0.01  -0.01    -0.01   0.00   0.00     0.00   0.00  -0.01
  38   6     0.03   0.02  -0.01     0.01   0.00   0.00     0.00   0.00  -0.01
  39   6     0.03   0.03   0.00     0.01   0.00  -0.01     0.01   0.00   0.00
  40   6     0.04   0.02   0.00     0.01   0.01  -0.01     0.01   0.00   0.00
  41   6     0.02   0.02   0.01     0.00   0.01   0.00     0.01   0.01   0.00
  42   6     0.02   0.01   0.01     0.01   0.00   0.00     0.01   0.00   0.00
  43   6     0.01   0.01  -0.02     0.00   0.01   0.00     0.00   0.00  -0.01
  44   6     0.01   0.03   0.01     0.01   0.01   0.00     0.01   0.00  -0.01
  45   6    -0.01  -0.03  -0.01     0.00   0.00   0.00     0.02   0.00  -0.01
  46   6     0.02   0.00  -0.02     0.00   0.00   0.00     0.00  -0.01   0.01
  47   6     0.02   0.01  -0.01     0.00   0.00   0.00     0.00   0.00   0.01
  48   6     0.01  -0.02  -0.01     0.00   0.00   0.00     0.00   0.01  -0.01
  49   6    -0.01  -0.03  -0.03     0.00   0.00   0.00     0.00   0.00  -0.01
  50   6    -0.01   0.02  -0.02     0.00   0.00   0.00     0.00   0.00   0.00
  51   6    -0.03   0.00  -0.02     0.00   0.00   0.01     0.00   0.00   0.01
  52   6    -0.01  -0.02  -0.03     0.00   0.00   0.00     0.00   0.00   0.00
  53   6    -0.15   0.05  -0.01    -0.04  -0.01   0.01    -0.03   0.00   0.01
  54   6     0.16   0.04  -0.03     0.04   0.01  -0.01     0.03   0.01   0.00
  55   1     0.01  -0.11   0.02     0.01  -0.03   0.02     0.00  -0.03   0.01
  56   1     0.05   0.02   0.00    -0.08   0.02   0.00    -0.31   0.13   0.01
  57   1     0.01  -0.01   0.01     0.00   0.01   0.04    -0.10   0.07   0.12
  58   1     0.02   0.00   0.00     0.07  -0.02  -0.07     0.20  -0.06  -0.21
  59   1     0.01   0.00  -0.01     0.05  -0.03  -0.07     0.12  -0.05  -0.17
  60   1     0.01   0.02   0.01     0.04   0.02  -0.04     0.10   0.05  -0.13
  61   1    -0.02   0.08  -0.07    -0.24  -0.10   0.11     0.10   0.01  -0.01
  62   1     0.02  -0.03  -0.05     0.05   0.04  -0.08    -0.04  -0.03   0.03
  63   1    -0.05   0.03   0.15     0.09   0.07  -0.30    -0.02  -0.04   0.07
  64   1    -0.08   0.15   0.00     0.04  -0.04  -0.09     0.01  -0.04   0.04
  65   1    -0.11   0.27   0.02     0.20  -0.42  -0.02    -0.04   0.06   0.01
  66   1     0.08  -0.01   0.03     0.08  -0.21  -0.23    -0.06   0.07   0.04
  67   1     0.10   0.05  -0.05     0.03  -0.06  -0.14    -0.04  -0.05   0.03
  68   1     0.08   0.02  -0.04    -0.13  -0.19  -0.03     0.04   0.03   0.04
  69   1    -0.08  -0.05   0.00     0.11   0.05  -0.08     0.25   0.09  -0.27
  70   1    -0.07   0.03  -0.09     0.09  -0.06   0.08     0.21  -0.17   0.10
  71   1    -0.05   0.03  -0.07     0.05   0.02  -0.02     0.12   0.16  -0.23
  72   1     0.03   0.01   0.00     0.05   0.01   0.01     0.10   0.01   0.01
  73   1     0.03   0.00   0.01     0.04   0.01   0.03    -0.02   0.00   0.01
  74   1     0.01   0.00  -0.01     0.02  -0.01   0.00     0.00  -0.07  -0.05
  75   1     0.00   0.02  -0.01    -0.01   0.01   0.00    -0.02   0.01   0.00
  76   1    -0.04  -0.01   0.00    -0.02   0.00   0.00    -0.02   0.00   0.01
  77   1    -0.04   0.01   0.00     0.00   0.01  -0.01     0.01   0.02   0.00
  78   1    -0.01   0.02   0.02    -0.01   0.01   0.00    -0.01   0.02   0.00
  79   1    -0.03   0.00  -0.03    -0.01   0.00  -0.01     0.00   0.00  -0.02
  80   1     0.01   0.04   0.00     0.01   0.00   0.00     0.00   0.00   0.00
  81   1     0.04   0.02  -0.01     0.01   0.01  -0.01     0.01   0.00   0.00
  82   1     0.01   0.01   0.01    -0.01   0.02   0.00     0.00   0.01   0.00
  83   1     0.00   0.01  -0.05     0.00   0.01  -0.01     0.00   0.00  -0.01
  84   1     0.01   0.03   0.02     0.01   0.01   0.01     0.01   0.01   0.00
  85   1    -0.03  -0.06   0.00     0.00  -0.01   0.00     0.00  -0.01  -0.01
  86   1     0.02  -0.02  -0.05     0.01  -0.01  -0.01     0.03  -0.02   0.00
  87   1     0.00  -0.03  -0.03     0.01   0.00  -0.01     0.04   0.02  -0.01
  88   1     0.05   0.03  -0.02     0.01   0.00   0.01     0.00  -0.01   0.02
  89   1     0.03   0.00  -0.03     0.00  -0.01   0.00    -0.01  -0.03   0.00
  90   1     0.01  -0.03  -0.05     0.01   0.00   0.00     0.01   0.00   0.02
  91   1     0.02   0.00  -0.01     0.00  -0.01   0.01    -0.01  -0.02   0.03
  92   1     0.03   0.06  -0.03     0.00   0.01   0.01     0.00   0.00   0.01
  93   1     0.06  -0.01  -0.01     0.01   0.01   0.01     0.01   0.02   0.03
  94   1     0.01  -0.03  -0.01     0.00   0.00  -0.01     0.00   0.02  -0.01
  95   1     0.04  -0.02  -0.04     0.01   0.00   0.00     0.00   0.01   0.00
  96   1     0.00  -0.06   0.02     0.00   0.00   0.00     0.00   0.01  -0.02
  97   1     0.01  -0.09   0.01     0.00  -0.01   0.01    -0.03   0.01   0.01
  98   1    -0.01  -0.05  -0.04     0.00  -0.01  -0.01    -0.02  -0.01  -0.03
  99   1    -0.03  -0.03  -0.09     0.00   0.00  -0.01     0.01   0.01   0.01
 100   1    -0.02   0.05  -0.03    -0.01   0.01   0.00     0.00  -0.01   0.01
 101   1    -0.02   0.00  -0.03    -0.01   0.00   0.00    -0.01   0.01   0.01
 102   1    -0.01   0.02  -0.02     0.00   0.00   0.00     0.00  -0.02   0.01
 103   1    -0.04  -0.01  -0.03     0.01  -0.01   0.01     0.01  -0.01   0.00
 104   1    -0.04  -0.04  -0.03    -0.01  -0.01   0.02     0.00   0.01   0.02
 105   1    -0.06   0.03  -0.01    -0.02   0.01   0.01     0.01   0.00   0.01
 106   1    -0.01  -0.01  -0.02    -0.01   0.00   0.00    -0.01   0.01   0.00
 107   1     0.02  -0.05  -0.04     0.00  -0.01  -0.01     0.00   0.00   0.00
 108   1    -0.05  -0.04  -0.02    -0.01  -0.01   0.00     0.00   0.00   0.01
 109   1    -0.15   0.14  -0.06    -0.04   0.01   0.00    -0.03   0.01   0.01
 110   1    -0.31  -0.03   0.06    -0.07  -0.02   0.02    -0.05  -0.02   0.02
 111   1    -0.16   0.15  -0.07    -0.04   0.02  -0.01    -0.03   0.02   0.00
 112   1     0.05   0.16  -0.05     0.01   0.04  -0.01     0.01   0.04   0.00
 113   1     0.23   0.04  -0.05     0.06   0.01  -0.01     0.04   0.01  -0.01
 114   1     0.27   0.05  -0.07     0.07   0.01  -0.02     0.07   0.01  -0.01
                    79                     80                     81
                    ?A                     ?A                     ?A
 Frequencies --   395.9428               410.6151               430.3850
 Red. masses --     4.6210                 6.4244                 4.6856
 Frc consts  --     0.4268                 0.6382                 0.5114
 IR Inten    --    48.0251                18.6706                11.6271
 Raman Activ --     0.0000                 0.0000                 0.0000
 Depolar     --     0.0000                 0.0000                 0.0000
 Atom AN      X      Y      Z        X      Y      Z        X      Y      Z
   1   8    -0.08   0.05  -0.05    -0.03   0.03   0.02    -0.01   0.01   0.00
   2  12     0.05  -0.04   0.01    -0.01   0.24  -0.11     0.00   0.13  -0.03
   3   8    -0.16  -0.01   0.06     0.07   0.09   0.00     0.05   0.01  -0.03
   4   6     0.05  -0.08   0.07    -0.01  -0.03   0.02     0.00  -0.01   0.01
   5   7     0.00   0.01   0.00     0.04  -0.03   0.04     0.04   0.06   0.15
   6   7     0.00   0.01   0.00    -0.01  -0.05   0.00    -0.01  -0.03  -0.03
   7   8    -0.04   0.01  -0.06     0.00  -0.03  -0.05    -0.01   0.00   0.00
   8   6    -0.01   0.01   0.00    -0.01  -0.07   0.05     0.00   0.01   0.09
   9   6    -0.01   0.02  -0.01     0.01  -0.10   0.04     0.00  -0.05  -0.01
  10   6    -0.01   0.01   0.00     0.00  -0.07   0.02    -0.01  -0.04  -0.03
  11   8    -0.02  -0.02  -0.05     0.03   0.06  -0.03     0.00   0.00  -0.01
  12   6    -0.04   0.02  -0.08    -0.02  -0.05  -0.03    -0.01   0.00   0.01
  13   6    -0.07   0.03  -0.04     0.03  -0.12   0.01     0.00  -0.01   0.02
  14   6     0.15  -0.15   0.16     0.04  -0.02   0.01     0.01  -0.01   0.01
  15   8    -0.15   0.05  -0.07    -0.12   0.04   0.01    -0.07  -0.01   0.00
  16   6     0.01  -0.01   0.02    -0.03   0.01   0.05     0.00   0.00   0.00
  17   8     0.00   0.00  -0.01    -0.13  -0.02   0.00     0.12  -0.01   0.00
  18   6    -0.01   0.00   0.00    -0.06   0.09  -0.08     0.05  -0.09   0.05
  19   8     0.01   0.00   0.01    -0.02   0.03  -0.14    -0.02  -0.13   0.01
  20   8     0.02   0.01   0.00     0.14   0.00   0.12    -0.11   0.02  -0.15
  21   6     0.01   0.00  -0.01     0.08  -0.03   0.01    -0.07   0.01  -0.02
  22   6     0.01  -0.01  -0.01     0.07  -0.03   0.01    -0.06   0.01  -0.02
  23   6     0.00   0.00   0.01    -0.01   0.07   0.01     0.02  -0.08   0.04
  24   8    -0.01   0.00   0.00    -0.10   0.00  -0.01     0.10  -0.03   0.01
  25   6     0.00   0.00   0.00     0.03  -0.09   0.01    -0.03   0.08  -0.01
  26   6     0.00   0.01   0.01    -0.04  -0.09  -0.04    -0.02   0.08   0.09
  27   6     0.00   0.04  -0.05     0.03  -0.08   0.14     0.00  -0.02   0.01
  28   6     0.29   0.02   0.13     0.04   0.00   0.03     0.02   0.00   0.01
  29   6     0.00   0.01  -0.01     0.02  -0.01   0.00     0.03   0.04  -0.05
  30   6    -0.01   0.01   0.00     0.03  -0.05   0.01     0.01  -0.02   0.02
  31   6     0.00   0.00   0.00    -0.02   0.03  -0.01     0.01   0.05  -0.06
  32   6     0.01   0.01  -0.01    -0.03   0.01   0.01    -0.01   0.02   0.01
  33   6     0.01   0.01  -0.01    -0.05  -0.01   0.01    -0.02  -0.01   0.04
  34   6     0.00   0.00   0.00    -0.02   0.02  -0.02     0.01   0.04  -0.01
  35   6     0.01   0.00   0.00    -0.02   0.00  -0.02     0.01   0.02  -0.05
  36   6     0.00  -0.01   0.00    -0.03   0.02  -0.01    -0.08  -0.02  -0.10
  37   6     0.00   0.00   0.00    -0.02  -0.01  -0.02     0.01  -0.05  -0.03
  38   6    -0.01   0.00   0.00     0.03   0.00  -0.01     0.01   0.00   0.00
  39   6    -0.01   0.00   0.00     0.03   0.00  -0.02     0.00   0.02  -0.01
  40   6    -0.01  -0.01   0.00     0.03   0.02  -0.02     0.01   0.00  -0.02
  41   6     0.00   0.00   0.00     0.01   0.03   0.00     0.01  -0.01   0.00
  42   6    -0.01   0.00   0.00     0.03   0.00   0.01     0.01   0.00   0.02
  43   6     0.00  -0.01   0.00     0.01   0.03  -0.01     0.02   0.02   0.01
  44   6     0.00  -0.01   0.00     0.01   0.02   0.01    -0.01   0.02   0.04
  45   6     0.00   0.00   0.01     0.00   0.01   0.00     0.04   0.06   0.01
  46   6     0.00  -0.01  -0.01     0.00  -0.02  -0.01    -0.05  -0.13  -0.02
  47   6     0.00   0.00   0.00     0.00  -0.02   0.01    -0.02  -0.07   0.01
  48   6     0.00   0.00   0.00     0.01   0.01   0.00     0.01   0.04   0.00
  49   6     0.00   0.00   0.00    -0.01  -0.01  -0.01     0.02  -0.03   0.01
  50   6     0.00  -0.01   0.00    -0.01   0.02   0.00    -0.01   0.04  -0.01
  51   6     0.00   0.00  -0.01    -0.01   0.01   0.03    -0.02   0.01   0.00
  52   6     0.00   0.00   0.00    -0.01  -0.01  -0.01     0.01  -0.02   0.00
  53   6     0.02  -0.01   0.00    -0.06  -0.07   0.05    -0.01  -0.04   0.03
  54   6    -0.03   0.01   0.00     0.06   0.03  -0.01     0.02   0.02   0.00
  55   1    -0.01   0.02  -0.01     0.02  -0.10   0.04     0.00  -0.06  -0.03
  56   1    -0.04   0.04  -0.06     0.12  -0.14   0.03    -0.01  -0.02   0.03
  57   1     0.21  -0.17   0.10     0.09  -0.04  -0.04     0.01  -0.02   0.00
  58   1     0.00   0.02   0.10    -0.05   0.02   0.07     0.00   0.00   0.01
  59   1     0.05  -0.08  -0.05    -0.02   0.01   0.04     0.00   0.00   0.00
  60   1     0.03  -0.02   0.06    -0.02  -0.01   0.05     0.00   0.00   0.01
  61   1     0.02  -0.01  -0.01     0.13  -0.01   0.05    -0.12  -0.01  -0.06
  62   1     0.00   0.00   0.01    -0.09  -0.04  -0.01     0.08   0.01   0.08
  63   1     0.00  -0.01   0.01    -0.05  -0.07  -0.03     0.06   0.04   0.06
  64   1     0.00  -0.01   0.01     0.07  -0.18   0.02    -0.06   0.18  -0.01
  65   1    -0.01   0.01   0.00     0.02  -0.10   0.00    -0.02   0.11   0.00
  66   1    -0.01   0.03   0.02    -0.02  -0.10  -0.19    -0.07   0.13   0.21
  67   1     0.00   0.00   0.01    -0.04  -0.18  -0.11    -0.06   0.14   0.22
  68   1     0.03   0.02   0.01    -0.06  -0.18   0.12     0.02   0.19  -0.09
  69   1     0.01   0.08  -0.05     0.02   0.06   0.15     0.00  -0.01   0.01
  70   1     0.00  -0.02  -0.04     0.03  -0.03   0.14     0.00  -0.03   0.02
  71   1     0.05   0.05  -0.05     0.06  -0.18   0.28     0.02  -0.02   0.02
  72   1     0.33   0.10   0.06     0.00   0.00   0.02     0.02   0.00   0.01
  73   1     0.56   0.06   0.24     0.07   0.00   0.03     0.03   0.00   0.02
  74   1     0.19   0.14  -0.06     0.04   0.04   0.05     0.01   0.01   0.00
  75   1     0.01   0.03  -0.02    -0.02  -0.01   0.01    -0.03  -0.02   0.05
  76   1     0.01   0.03  -0.02    -0.05  -0.03   0.03    -0.04  -0.08   0.09
  77   1     0.00  -0.01   0.00     0.00   0.03  -0.01     0.03   0.02   0.02
  78   1     0.00  -0.01   0.00    -0.03   0.03   0.01    -0.08  -0.01  -0.08
  79   1     0.00   0.00   0.01    -0.02  -0.02  -0.03     0.01  -0.05  -0.03
  80   1     0.00   0.00   0.00     0.02   0.01  -0.01    -0.01   0.03  -0.02
  81   1     0.00  -0.01   0.00     0.02   0.03  -0.02     0.01   0.00  -0.02
  82   1     0.01  -0.01   0.00    -0.03   0.04  -0.01    -0.01  -0.02   0.00
  83   1     0.00  -0.01   0.01     0.00   0.03  -0.03     0.01   0.02  -0.01
  84   1     0.00  -0.01  -0.01     0.02   0.03   0.03    -0.01   0.02   0.04
  85   1    -0.01   0.01   0.00     0.03   0.00   0.02     0.14   0.14   0.00
  86   1     0.00   0.00   0.01     0.00  -0.01   0.04     0.00  -0.03   0.21
  87   1    -0.01   0.01   0.02     0.03   0.02  -0.03     0.13   0.15  -0.01
  88   1     0.00  -0.01  -0.01     0.04  -0.01   0.02     0.00  -0.16   0.06
  89   1     0.00  -0.01  -0.01    -0.01  -0.06  -0.02    -0.10  -0.27  -0.06
  90   1    -0.01  -0.01  -0.01     0.02  -0.02   0.00     0.01  -0.07   0.06
  91   1    -0.01   0.01   0.00     0.00  -0.04   0.02    -0.04  -0.08   0.03
  92   1     0.00  -0.01   0.00     0.00   0.00   0.01    -0.04  -0.11   0.03
  93   1     0.00   0.00   0.00     0.01   0.00   0.02    -0.04  -0.01   0.03
  94   1     0.00   0.00   0.00     0.03   0.04  -0.02     0.03   0.11  -0.04
  95   1     0.00   0.00   0.00     0.02   0.01   0.04    -0.01   0.04   0.11
  96   1     0.00   0.00   0.00     0.01   0.01   0.02     0.02   0.09  -0.01
  97   1     0.00   0.01   0.00     0.01  -0.05   0.02     0.04  -0.07   0.02
  98   1     0.01   0.00   0.00    -0.01   0.00  -0.02     0.03  -0.06   0.03
  99   1     0.01   0.00   0.01    -0.03  -0.02  -0.04     0.00  -0.02  -0.06
 100   1     0.00  -0.01   0.00    -0.02   0.03  -0.01    -0.02   0.07  -0.04
 101   1     0.01   0.00   0.00    -0.02   0.01   0.00     0.01  -0.01  -0.05
 102   1     0.00   0.00   0.00     0.00   0.01   0.00    -0.02   0.07  -0.02
 103   1     0.00   0.01   0.00     0.00  -0.03   0.02    -0.05   0.01   0.00
 104   1     0.00   0.00  -0.01    -0.03  -0.01   0.05    -0.02  -0.01  -0.02
 105   1     0.00  -0.01  -0.01    -0.03   0.04   0.05    -0.03   0.04   0.02
 106   1     0.00   0.00   0.00    -0.01  -0.01  -0.01     0.01  -0.04  -0.01
 107   1     0.00   0.00   0.00     0.02  -0.03  -0.01     0.03  -0.05   0.00
 108   1     0.01   0.00   0.00    -0.04  -0.01  -0.02    -0.03  -0.02  -0.02
 109   1     0.02  -0.02   0.01    -0.05  -0.05   0.03     0.02  -0.01  -0.02
 110   1     0.04   0.01  -0.01    -0.09  -0.09   0.05     0.00  -0.06  -0.02
 111   1     0.02  -0.02   0.01    -0.06  -0.06   0.04    -0.04  -0.11   0.04
 112   1    -0.02   0.00   0.00    -0.01   0.12  -0.02     0.00   0.07   0.04
 113   1    -0.03   0.01   0.00     0.10   0.03  -0.03    -0.02   0.04   0.01
 114   1    -0.03   0.01   0.00     0.16   0.04  -0.04     0.10   0.02   0.00
                    82                     83                     84
                    ?A                     ?A                     ?A
 Frequencies --   434.2161               439.9024               447.7782
 Red. masses --     4.2547                 3.4189                 3.1190
 Frc consts  --     0.4726                 0.3898                 0.3685
 IR Inten    --    24.5426                11.2146                 1.5971
 Raman Activ --     0.0000                 0.0000                 0.0000
 Depolar     --     0.0000                 0.0000                 0.0000
 Atom AN      X      Y      Z        X      Y      Z        X      Y      Z
   1   8    -0.01   0.01   0.01     0.00   0.00   0.00     0.01  -0.01  -0.01
   2  12     0.01   0.12  -0.01    -0.02  -0.05  -0.02    -0.01  -0.01   0.01
   3   8     0.08   0.01  -0.05    -0.01   0.00   0.02    -0.04   0.00   0.02
   4   6     0.00  -0.01   0.01     0.00   0.00   0.00     0.00   0.00   0.00
   5   7    -0.01  -0.07  -0.14     0.02   0.05   0.10     0.00   0.00  -0.02
   6   7     0.00   0.03   0.12     0.02   0.08   0.19     0.01  -0.01  -0.05
   7   8    -0.01   0.00   0.00     0.00   0.00   0.00     0.00   0.00   0.00
   8   6    -0.01  -0.06  -0.08     0.01   0.01   0.01    -0.02   0.01  -0.01
   9   6     0.00  -0.03   0.02     0.00  -0.02  -0.06    -0.02   0.02   0.01
  10   6     0.00   0.01   0.08     0.01   0.02   0.05    -0.03   0.01  -0.02
  11   8     0.01  -0.01  -0.03     0.00   0.00   0.00    -0.01   0.01   0.02
  12   6    -0.01   0.00   0.01     0.00   0.00   0.00     0.00  -0.01  -0.01
  13   6     0.02   0.00   0.02     0.00   0.00   0.01    -0.02  -0.01  -0.01
  14   6     0.02  -0.02   0.00     0.00   0.00   0.00    -0.01   0.01   0.01
  15   8    -0.10   0.00   0.01     0.02   0.00   0.00     0.04   0.00  -0.01
  16   6    -0.01   0.01   0.02     0.00   0.00   0.00     0.01  -0.01  -0.01
  17   8     0.07  -0.01   0.01    -0.02   0.01   0.00     0.00   0.00   0.00
  18   6     0.03  -0.05   0.02    -0.01   0.02   0.00     0.00   0.00   0.00
  19   8    -0.02  -0.08  -0.01     0.01   0.02  -0.01     0.00   0.00   0.00
  20   8    -0.07   0.01  -0.09     0.02   0.00   0.02     0.00   0.00   0.00
  21   6    -0.04   0.00  -0.01     0.01   0.00   0.01     0.00   0.00   0.00
  22   6    -0.04   0.01  -0.01     0.01   0.00   0.01     0.00   0.00   0.00
  23   6     0.01  -0.05   0.03     0.00   0.01  -0.01     0.00   0.00   0.00
  24   8     0.06  -0.02   0.00    -0.01   0.00   0.00    -0.01   0.00   0.00
  25   6    -0.02   0.05  -0.01     0.00  -0.01   0.00     0.00   0.00   0.00
  26   6    -0.02   0.04   0.06     0.00  -0.01  -0.02     0.00   0.01   0.00
  27   6     0.01  -0.01   0.01     0.00   0.00   0.00     0.00   0.00   0.00
  28   6     0.02   0.00   0.01    -0.01   0.00   0.00     0.00   0.00   0.00
  29   6    -0.01  -0.04   0.04     0.02   0.04  -0.03     0.01   0.04  -0.02
  30   6     0.02  -0.05  -0.01     0.01  -0.02  -0.02     0.11  -0.11   0.02
  31   6    -0.02  -0.03   0.07     0.02   0.03  -0.05     0.01   0.02  -0.01
  32   6    -0.01  -0.01  -0.01     0.01   0.01   0.01     0.01   0.00  -0.01
  33   6    -0.01   0.01  -0.04     0.00  -0.01   0.03     0.01  -0.01   0.00
  34   6    -0.02  -0.03  -0.01     0.01   0.03   0.00     0.01   0.00  -0.01
  35   6    -0.02  -0.02   0.03     0.01   0.03  -0.02     0.01   0.02   0.00
  36   6     0.06   0.03   0.11    -0.05  -0.02  -0.08     0.01  -0.01   0.02
  37   6    -0.03   0.04   0.02     0.00  -0.02   0.00     0.00   0.00   0.02
  38   6     0.01  -0.03  -0.02     0.01  -0.03  -0.02     0.07  -0.07   0.07
  39   6     0.01  -0.01   0.02     0.02  -0.02   0.04     0.01  -0.04   0.00
  40   6    -0.01   0.02   0.02    -0.02   0.02   0.05    -0.07   0.00  -0.02
  41   6     0.02   0.00   0.01     0.01   0.00   0.03    -0.01  -0.05  -0.02
  42   6     0.03  -0.04  -0.03     0.01  -0.05  -0.05     0.05  -0.09   0.00
  43   6    -0.03  -0.01  -0.03    -0.05  -0.02  -0.03     0.06   0.11   0.13
  44   6     0.03   0.01  -0.09     0.05  -0.01  -0.16    -0.01   0.02  -0.07
  45   6    -0.05  -0.07  -0.01     0.03   0.05   0.01    -0.02  -0.01   0.01
  46   6     0.06   0.13   0.02    -0.04  -0.10  -0.02     0.01   0.01  -0.01
  47   6     0.02   0.05  -0.01    -0.01  -0.03  -0.01     0.00   0.00  -0.01
  48   6     0.00  -0.03   0.00     0.00   0.01   0.01     0.00  -0.01   0.02
  49   6    -0.06   0.06  -0.07    -0.09   0.10  -0.11    -0.05   0.04  -0.08
  50   6     0.02  -0.04   0.05     0.04  -0.09   0.07     0.01   0.02   0.05
  51   6     0.03  -0.02   0.01     0.04  -0.03   0.01    -0.12   0.14   0.07
  52   6    -0.03   0.04  -0.02    -0.03   0.05  -0.02     0.07  -0.11  -0.03
  53   6    -0.01  -0.01   0.01     0.01   0.01   0.01     0.02  -0.02   0.01
  54   6     0.01   0.01  -0.02     0.00   0.00   0.00    -0.01   0.07  -0.03
  55   1     0.00  -0.03   0.03    -0.01  -0.06  -0.13    -0.01   0.03   0.03
  56   1    -0.01  -0.01   0.03     0.01   0.00   0.01     0.00  -0.01  -0.01
  57   1     0.03  -0.02  -0.01    -0.01   0.00   0.00    -0.01   0.01   0.01
  58   1    -0.01   0.01   0.03     0.00   0.00   0.00     0.01  -0.01  -0.02
  59   1    -0.01   0.00   0.02     0.00   0.00   0.00     0.01   0.00  -0.01
  60   1    -0.01   0.00   0.02     0.00   0.00   0.00     0.01   0.00  -0.01
  61   1    -0.08  -0.01  -0.04     0.01   0.00   0.01     0.01   0.00   0.00
  62   1     0.05   0.00   0.05    -0.01   0.00  -0.02     0.00  -0.01   0.00
  63   1     0.04   0.03   0.04    -0.01   0.00  -0.02     0.00   0.00   0.00
  64   1    -0.04   0.11  -0.01     0.01  -0.03   0.00     0.00   0.00   0.00
  65   1    -0.01   0.07   0.00     0.01  -0.02   0.00     0.00   0.00   0.00
  66   1    -0.05   0.08   0.13     0.02  -0.02  -0.04    -0.01   0.02   0.01
  67   1    -0.05   0.08   0.14     0.01  -0.02  -0.04    -0.01   0.00   0.01
  68   1     0.00   0.11  -0.05     0.00  -0.03   0.01     0.01   0.01   0.00
  69   1     0.01  -0.01   0.01    -0.01  -0.02   0.00     0.00   0.02   0.00
  70   1     0.01  -0.02   0.02    -0.01   0.00  -0.01     0.00   0.00   0.01
  71   1     0.01  -0.01   0.00    -0.01   0.00  -0.01     0.01  -0.01   0.02
  72   1     0.01   0.01   0.00    -0.01   0.00   0.00     0.01   0.00   0.00
  73   1     0.03   0.00   0.02    -0.01   0.00  -0.01     0.00   0.00  -0.01
  74   1     0.02   0.01   0.01     0.00   0.00   0.00    -0.01   0.00  -0.01
  75   1     0.03   0.01  -0.04    -0.01  -0.02   0.03     0.01  -0.02   0.00
  76   1     0.00   0.07  -0.08    -0.01  -0.07   0.06     0.00  -0.03   0.01
  77   1    -0.04  -0.01  -0.03     0.01   0.01   0.02    -0.01  -0.03   0.00
  78   1     0.06   0.03   0.10    -0.05  -0.03  -0.08     0.00  -0.01   0.02
  79   1    -0.02   0.04   0.01     0.00  -0.02   0.00     0.00   0.00   0.02
  80   1    -0.01  -0.01   0.03     0.00  -0.03   0.06    -0.02   0.05  -0.04
  81   1    -0.04   0.07   0.02    -0.06   0.06   0.04    -0.17   0.11  -0.03
  82   1     0.01   0.03   0.02     0.02   0.05   0.03    -0.07   0.02  -0.03
  83   1    -0.04   0.00  -0.03    -0.05  -0.02  -0.03     0.05   0.11   0.16
  84   1     0.03   0.02  -0.09     0.04  -0.02  -0.18    -0.02   0.04  -0.08
  85   1    -0.15  -0.17   0.01     0.11   0.12   0.00    -0.03   0.00   0.00
  86   1     0.00   0.01  -0.22    -0.01  -0.01   0.16    -0.02   0.00   0.00
  87   1    -0.13  -0.16  -0.01     0.09   0.11   0.00    -0.04  -0.02   0.03
  88   1     0.04   0.19  -0.06    -0.02  -0.13   0.04     0.01   0.03  -0.02
  89   1     0.11   0.26   0.05    -0.08  -0.20  -0.05     0.02   0.03   0.00
  90   1     0.00   0.06  -0.08     0.01  -0.05   0.05    -0.01  -0.01  -0.03
  91   1     0.04   0.05  -0.01    -0.01  -0.01  -0.01     0.00   0.03  -0.03
  92   1     0.04   0.11  -0.03    -0.01  -0.04   0.00     0.00   0.00  -0.02
  93   1     0.06   0.01  -0.02    -0.02  -0.03  -0.01    -0.01  -0.03  -0.03
  94   1    -0.01  -0.08   0.03     0.02   0.03   0.00     0.00  -0.01   0.02
  95   1     0.03  -0.03  -0.08     0.00   0.01   0.05     0.00  -0.01   0.01
  96   1    -0.01  -0.08   0.03     0.01   0.02   0.02     0.00  -0.01   0.03
  97   1    -0.11   0.08  -0.04    -0.19   0.17  -0.07    -0.06   0.02  -0.06
  98   1    -0.12   0.12  -0.15    -0.19   0.21  -0.24    -0.07   0.07  -0.12
  99   1    -0.07   0.03   0.04    -0.09   0.06   0.10    -0.07   0.02  -0.06
 100   1     0.04  -0.13   0.11     0.07  -0.25   0.17     0.08  -0.09   0.09
 101   1    -0.05   0.09   0.14    -0.07   0.12   0.22    -0.01   0.13   0.12
 102   1     0.05  -0.13   0.08     0.09  -0.24   0.12     0.03   0.01   0.08
 103   1     0.07  -0.07   0.01     0.10  -0.06   0.01    -0.26   0.16   0.06
 104   1     0.02   0.04   0.08     0.03   0.04   0.08    -0.13  -0.03  -0.08
 105   1     0.05  -0.05   0.02     0.08  -0.07  -0.01    -0.23   0.25   0.14
 106   1    -0.03   0.07  -0.01    -0.03   0.09  -0.01     0.18  -0.28  -0.05
 107   1    -0.06   0.08  -0.03    -0.08   0.10  -0.04     0.18  -0.24  -0.03
 108   1     0.01   0.04   0.01     0.03   0.05   0.03    -0.15  -0.06  -0.24
 109   1    -0.05  -0.08   0.08     0.02  -0.01   0.02     0.02  -0.04   0.02
 110   1     0.00   0.02   0.07     0.02   0.02   0.02     0.06   0.00  -0.01
 111   1     0.03   0.06   0.00     0.01   0.02   0.00     0.02  -0.05   0.02
 112   1    -0.04   0.03  -0.07     0.00  -0.01  -0.01    -0.05   0.11  -0.02
 113   1     0.11  -0.01  -0.05     0.02  -0.01  -0.01     0.00   0.07  -0.03
 114   1    -0.01   0.02  -0.04    -0.03   0.00   0.00     0.04   0.07  -0.04
                    85                     86                     87
                    ?A                     ?A                     ?A
 Frequencies --   449.5559               452.5393               459.4115
 Red. masses --     4.4724                 2.8197                 5.1220
 Frc consts  --     0.5325                 0.3402                 0.6369
 IR Inten    --     5.2291                 2.7688                 7.0503
 Raman Activ --     0.0000                 0.0000                 0.0000
 Depolar     --     0.0000                 0.0000                 0.0000
 Atom AN      X      Y      Z        X      Y      Z        X      Y      Z
   1   8    -0.02   0.03   0.03    -0.01   0.01   0.01    -0.01   0.03   0.02
   2  12     0.00  -0.03   0.01     0.00   0.00   0.01    -0.04  -0.07   0.03
   3   8     0.16  -0.03  -0.09     0.07  -0.02  -0.04     0.18  -0.07  -0.09
   4   6     0.00  -0.01   0.01     0.00   0.00   0.00     0.00   0.00   0.01
   5   7    -0.06   0.03   0.07    -0.01  -0.03  -0.05     0.05   0.01  -0.01
   6   7     0.01   0.01  -0.02     0.00  -0.01  -0.02    -0.01  -0.01  -0.01
   7   8    -0.02   0.00   0.01    -0.01   0.00   0.00    -0.02   0.01   0.02
   8   6     0.01   0.05   0.02     0.00  -0.01  -0.03     0.00  -0.02   0.01
   9   6     0.00   0.04  -0.03     0.00   0.01   0.01    -0.01  -0.01   0.01
  10   6     0.02   0.01  -0.03     0.00   0.00   0.00    -0.02   0.00  -0.01
  11   8     0.03  -0.06  -0.07     0.01  -0.02  -0.02     0.02  -0.07  -0.06
  12   6     0.01   0.04   0.04     0.00   0.01   0.02     0.01   0.06   0.06
  13   6     0.06   0.06   0.05     0.02   0.02   0.02     0.07   0.10   0.08
  14   6     0.03  -0.02  -0.02     0.01  -0.01  -0.01     0.02  -0.02  -0.02
  15   8    -0.15  -0.01   0.02    -0.07  -0.01   0.01    -0.17  -0.06   0.01
  16   6    -0.02   0.02   0.05    -0.01   0.01   0.02    -0.02   0.02   0.04
  17   8    -0.01   0.00   0.03     0.00   0.00   0.01     0.00   0.00   0.05
  18   6     0.01   0.03   0.02     0.01   0.01   0.01     0.01   0.03   0.02
  19   8    -0.02   0.03   0.01    -0.01   0.01   0.00    -0.05   0.04   0.01
  20   8     0.01  -0.02   0.03     0.00  -0.01   0.01     0.02  -0.03   0.05
  21   6     0.00  -0.01   0.00     0.00   0.00   0.00     0.01   0.00   0.00
  22   6    -0.01   0.01   0.01     0.00   0.00   0.00     0.01   0.02   0.02
  23   6     0.01   0.01  -0.03     0.00   0.00  -0.01     0.02   0.01  -0.06
  24   8    -0.02   0.00  -0.01    -0.01   0.00   0.00    -0.05   0.01   0.00
  25   6     0.00   0.00   0.00     0.00   0.00   0.00     0.00   0.00   0.00
  26   6     0.02  -0.01  -0.05     0.01   0.00  -0.02     0.04  -0.01  -0.09
  27   6    -0.01   0.03  -0.04     0.00   0.01  -0.01    -0.01   0.04  -0.06
  28   6     0.01   0.00   0.00     0.00   0.00   0.00     0.00   0.00   0.00
  29   6    -0.07  -0.16   0.07    -0.02  -0.02   0.02     0.07   0.18  -0.09
  30   6     0.02   0.00   0.00     0.00   0.00   0.00     0.01  -0.01   0.00
  31   6    -0.02  -0.12   0.04     0.00  -0.02  -0.02     0.03   0.14  -0.04
  32   6    -0.01  -0.01   0.04     0.01  -0.02  -0.02     0.01   0.04  -0.04
  33   6     0.02   0.07   0.01     0.03  -0.01  -0.01    -0.02  -0.07   0.01
  34   6    -0.01  -0.02   0.06     0.01   0.00   0.00     0.02   0.03  -0.06
  35   6    -0.03  -0.11   0.03     0.01   0.01   0.06     0.04   0.11  -0.08
  36   6     0.04   0.02  -0.06    -0.04  -0.01  -0.12    -0.03  -0.03   0.11
  37   6     0.07  -0.01  -0.10    -0.08   0.11   0.14    -0.01  -0.06   0.02
  38   6     0.01  -0.01   0.03     0.00   0.00   0.01     0.01  -0.01   0.00
  39   6     0.00  -0.01   0.01     0.00   0.00  -0.01     0.00  -0.01  -0.01
  40   6    -0.03  -0.01   0.00     0.00   0.00  -0.01     0.00   0.01  -0.01
  41   6    -0.01  -0.02  -0.01     0.00   0.00  -0.01     0.00   0.00   0.00
  42   6     0.00  -0.02  -0.01     0.00   0.00   0.00     0.01   0.00   0.01
  43   6     0.02   0.03   0.05     0.01   0.01   0.01    -0.01   0.00  -0.01
  44   6     0.00  -0.01  -0.03    -0.01   0.00   0.01    -0.01   0.01   0.02
  45   6     0.07   0.03  -0.07     0.07   0.06  -0.03    -0.10  -0.06   0.09
  46   6    -0.01   0.02   0.04    -0.05  -0.10  -0.01     0.03   0.02  -0.04
  47   6    -0.01  -0.03   0.07     0.05   0.15  -0.05    -0.02  -0.07  -0.03
  48   6     0.00   0.08  -0.13    -0.02  -0.12   0.10     0.01   0.00   0.06
  49   6    -0.02   0.02  -0.02     0.01  -0.01   0.01     0.01  -0.01   0.01
  50   6     0.01  -0.01   0.01     0.00   0.01   0.00    -0.01   0.02   0.00
  51   6    -0.04   0.04   0.01    -0.01   0.01   0.00     0.00   0.00   0.01
  52   6     0.03  -0.04   0.00     0.01  -0.01   0.00    -0.01   0.01   0.00
  53   6    -0.02   0.06  -0.03     0.00   0.01   0.00     0.03  -0.05   0.02
  54   6     0.01  -0.01   0.01     0.00   0.00   0.00    -0.02   0.02   0.00
  55   1    -0.01   0.02  -0.04     0.00   0.02   0.03     0.01   0.00   0.02
  56   1    -0.04   0.07   0.04    -0.03   0.03   0.02    -0.09   0.11   0.07
  57   1     0.04  -0.02  -0.03     0.01  -0.01  -0.01     0.00  -0.02  -0.03
  58   1    -0.04   0.03   0.07    -0.01   0.01   0.02    -0.03   0.02   0.06
  59   1    -0.03   0.02   0.05    -0.01   0.00   0.02    -0.02   0.01   0.04
  60   1    -0.02   0.00   0.04    -0.01   0.00   0.01    -0.02   0.00   0.03
  61   1     0.00   0.02   0.02     0.00   0.01   0.01     0.02   0.04   0.03
  62   1     0.01   0.00  -0.05     0.01   0.00  -0.02     0.02   0.01  -0.08
  63   1    -0.01   0.01  -0.01     0.00   0.00   0.00    -0.02   0.01  -0.01
  64   1     0.00  -0.01   0.00     0.00   0.00   0.00     0.01  -0.02   0.01
  65   1     0.01  -0.01   0.00     0.00   0.00   0.00     0.00   0.00   0.00
  66   1     0.05  -0.04  -0.06     0.01  -0.01  -0.02     0.08  -0.05  -0.10
  67   1     0.04   0.00  -0.07     0.01   0.00  -0.02     0.07   0.01  -0.13
  68   1     0.00  -0.04  -0.02     0.00  -0.01  -0.01     0.01  -0.05  -0.04
  69   1    -0.02  -0.11  -0.03     0.00  -0.04  -0.01    -0.03  -0.16  -0.05
  70   1    -0.02   0.03  -0.06     0.00   0.01  -0.02    -0.03   0.02  -0.09
  71   1    -0.06   0.10  -0.14    -0.02   0.04  -0.06    -0.09   0.16  -0.23
  72   1    -0.03   0.01  -0.01    -0.01   0.00   0.00    -0.03   0.01  -0.01
  73   1     0.00   0.01   0.02     0.00   0.00   0.01    -0.01   0.00   0.01
  74   1     0.02   0.00   0.03     0.01   0.00   0.01     0.01  -0.01   0.03
  75   1    -0.03   0.11  -0.01     0.00   0.00  -0.02     0.02  -0.10   0.02
  76   1     0.06   0.23  -0.08     0.03   0.01  -0.02    -0.06  -0.26   0.12
  77   1     0.04   0.08   0.02    -0.02   0.03  -0.03    -0.01  -0.09   0.01
  78   1     0.06   0.02  -0.09    -0.03  -0.02  -0.13    -0.05  -0.03   0.15
  79   1     0.07   0.00  -0.12    -0.06   0.12   0.16    -0.01  -0.08   0.03
  80   1     0.00   0.00  -0.01     0.00   0.00  -0.01     0.00   0.00  -0.01
  81   1    -0.04   0.00   0.00     0.00   0.00   0.00    -0.01   0.02  -0.01
  82   1    -0.01   0.00  -0.01    -0.01   0.00  -0.01    -0.01   0.01  -0.01
  83   1     0.02   0.02   0.07     0.01   0.01   0.01    -0.01   0.00  -0.01
  84   1    -0.01  -0.01  -0.05     0.00   0.01   0.01    -0.01   0.02   0.03
  85   1     0.09   0.00  -0.03     0.16   0.12  -0.02    -0.15  -0.04   0.04
  86   1     0.07   0.03  -0.06     0.03   0.00   0.14    -0.09  -0.02   0.01
  87   1     0.11   0.04  -0.12     0.15   0.14  -0.07    -0.17  -0.09   0.16
  88   1    -0.10  -0.08   0.07    -0.06  -0.17   0.06     0.11   0.14  -0.09
  89   1    -0.04   0.00   0.06    -0.11  -0.22  -0.02     0.08   0.09  -0.05
  90   1     0.00   0.12   0.13     0.02  -0.01   0.11    -0.02  -0.12  -0.18
  91   1    -0.06  -0.14   0.15     0.12   0.23  -0.13    -0.03   0.00  -0.06
  92   1    -0.04  -0.13   0.12     0.10   0.34  -0.12    -0.03  -0.11  -0.04
  93   1    -0.02   0.17   0.15     0.11  -0.08  -0.14    -0.05  -0.11  -0.06
  94   1    -0.06   0.11  -0.10     0.01  -0.28   0.15     0.05   0.07   0.01
  95   1    -0.08   0.08  -0.05     0.09  -0.11  -0.16     0.01   0.00   0.15
  96   1     0.00   0.16  -0.26    -0.04  -0.26   0.22     0.02   0.02   0.10
  97   1    -0.03   0.04  -0.03     0.01  -0.01   0.01     0.02  -0.03   0.02
  98   1    -0.03   0.04  -0.04     0.01  -0.02   0.02     0.02  -0.03   0.03
  99   1    -0.01   0.02   0.02     0.00   0.00  -0.01     0.01  -0.01  -0.02
 100   1     0.03  -0.05   0.03     0.00   0.02  -0.01    -0.01   0.04  -0.02
 101   1     0.00   0.03   0.04     0.01   0.00  -0.01     0.01   0.00  -0.02
 102   1     0.02  -0.02   0.03    -0.01   0.02  -0.01    -0.01   0.05  -0.01
 103   1    -0.09   0.07   0.01    -0.02   0.01   0.00     0.02  -0.02   0.00
 104   1    -0.04  -0.01  -0.05    -0.01   0.00  -0.01     0.00   0.01   0.02
 105   1    -0.07   0.08   0.03    -0.02   0.02   0.01     0.01  -0.01   0.00
 106   1     0.06  -0.10  -0.01     0.01  -0.02   0.00    -0.01   0.01   0.00
 107   1     0.07  -0.08   0.00     0.02  -0.02   0.00    -0.01   0.01  -0.01
 108   1    -0.04  -0.03  -0.07    -0.01  -0.01  -0.02     0.00   0.01   0.00
 109   1    -0.01   0.11  -0.07    -0.01   0.00   0.02     0.03  -0.07   0.02
 110   1    -0.07   0.03  -0.04     0.00   0.01   0.01     0.07  -0.02   0.00
 111   1    -0.03   0.06  -0.04     0.01   0.03   0.00     0.02  -0.07   0.03
 112   1     0.04  -0.02   0.02    -0.01   0.00  -0.01    -0.02   0.03   0.00
 113   1    -0.03   0.00   0.02     0.01   0.00  -0.01    -0.02   0.02   0.00
 114   1     0.01  -0.01   0.02    -0.01   0.00   0.00     0.00   0.02  -0.01
                    88                     89                     90
                    ?A                     ?A                     ?A
 Frequencies --   461.6651               474.1489               509.4941
 Red. masses --     3.3251                 8.0787                 3.3639
 Frc consts  --     0.4176                 1.0701                 0.5145
 IR Inten    --     1.9802                14.7879                 2.2626
 Raman Activ --     0.0000                 0.0000                 0.0000
 Depolar     --     0.0000                 0.0000                 0.0000
 Atom AN      X      Y      Z        X      Y      Z        X      Y      Z
   1   8     0.00   0.00   0.00    -0.01   0.01   0.01     0.00   0.00   0.00
   2  12     0.01   0.02   0.00    -0.02  -0.04  -0.01     0.03  -0.01   0.01
   3   8     0.01   0.01  -0.01     0.06  -0.07  -0.03     0.01   0.05  -0.03
   4   6     0.00   0.00   0.00     0.00   0.00   0.00     0.00   0.00   0.00
   5   7     0.03  -0.03   0.00     0.00   0.00   0.00     0.09  -0.10   0.05
   6   7    -0.03  -0.02  -0.04     0.00   0.00  -0.01     0.00   0.12  -0.03
   7   8     0.00   0.00   0.00    -0.01   0.00   0.01     0.00   0.00   0.00
   8   6     0.03  -0.03   0.01     0.00   0.00   0.00     0.12  -0.09   0.04
   9   6     0.03  -0.03   0.02     0.00   0.00   0.00     0.13   0.00  -0.03
  10   6     0.02  -0.02  -0.01     0.00   0.00  -0.01     0.02   0.11  -0.07
  11   8     0.00   0.00   0.00     0.02  -0.03  -0.03    -0.01   0.01   0.01
  12   6     0.00   0.00   0.00     0.01   0.03   0.02    -0.01  -0.02   0.00
  13   6     0.00   0.00   0.00     0.03   0.04   0.03    -0.01  -0.02  -0.02
  14   6     0.00   0.00   0.00     0.01  -0.01  -0.02     0.00   0.00   0.01
  15   8    -0.01   0.00   0.00    -0.06  -0.02   0.00    -0.02   0.01   0.01
  16   6     0.00   0.00   0.00    -0.01   0.01   0.02     0.00   0.00   0.00
  17   8     0.01  -0.01   0.00    -0.22  -0.10  -0.24     0.00   0.01   0.01
  18   6     0.01  -0.01   0.00    -0.07   0.07  -0.08     0.01   0.02   0.01
  19   8     0.00  -0.01   0.00     0.25   0.11  -0.01     0.01   0.01   0.00
  20   8    -0.01   0.00   0.00    -0.03   0.11  -0.02     0.01   0.00  -0.01
  21   6     0.00   0.00   0.00    -0.01   0.01   0.09    -0.01  -0.02   0.00
  22   6     0.00   0.00  -0.01    -0.12  -0.12   0.00    -0.01   0.00   0.01
  23   6     0.00   0.00   0.00    -0.12   0.13   0.16     0.01  -0.01   0.01
  24   8     0.00   0.00   0.00     0.34   0.01   0.01     0.00  -0.02  -0.01
  25   6     0.00   0.01   0.00     0.01  -0.05  -0.01    -0.01   0.00   0.00
  26   6     0.00   0.00   0.00    -0.10  -0.05   0.20    -0.01   0.00   0.02
  27   6     0.00   0.00   0.01    -0.01   0.03  -0.02     0.01  -0.01   0.01
  28   6     0.00   0.00   0.00     0.00   0.00   0.00     0.00   0.00   0.00
  29   6     0.02   0.01   0.00     0.01   0.02  -0.01     0.05  -0.08   0.05
  30   6    -0.13   0.15  -0.01     0.01  -0.01   0.00     0.01   0.06  -0.02
  31   6     0.00   0.03   0.00     0.00   0.02  -0.01    -0.02   0.05   0.02
  32   6    -0.01   0.01  -0.01     0.00   0.01  -0.01    -0.02   0.04  -0.01
  33   6    -0.03  -0.02   0.00     0.00  -0.01   0.00    -0.08  -0.05   0.02
  34   6    -0.01   0.01  -0.02     0.00   0.00  -0.01     0.00   0.02  -0.07
  35   6     0.00   0.02  -0.01     0.01   0.01  -0.01     0.00  -0.02  -0.03
  36   6    -0.02   0.01   0.02     0.00   0.00   0.01    -0.06   0.04   0.02
  37   6    -0.02   0.00   0.01     0.00  -0.01   0.00    -0.05   0.00  -0.01
  38   6    -0.08   0.11   0.02     0.00   0.00   0.00     0.02  -0.05   0.03
  39   6    -0.02   0.05   0.00     0.00  -0.01   0.00     0.01  -0.07   0.01
  40   6     0.06  -0.04   0.01     0.00  -0.01   0.00    -0.10   0.02   0.00
  41   6    -0.02   0.06  -0.01     0.00   0.00   0.00     0.03  -0.06  -0.04
  42   6    -0.08   0.10  -0.04     0.00   0.00   0.00     0.02  -0.03  -0.02
  43   6     0.12   0.03   0.06     0.00   0.00   0.01    -0.04  -0.02   0.04
  44   6     0.08  -0.06  -0.09     0.00   0.00   0.00    -0.05  -0.01   0.01
  45   6    -0.02  -0.01   0.01    -0.01  -0.01   0.01    -0.01  -0.02   0.02
  46   6     0.01   0.00  -0.01     0.00   0.00   0.00     0.01   0.00  -0.01
  47   6     0.00   0.00  -0.01     0.00  -0.01   0.00     0.01   0.01   0.00
  48   6     0.00  -0.01   0.02     0.00   0.00   0.01     0.00   0.00   0.01
  49   6    -0.03   0.06  -0.02     0.00   0.00   0.00     0.01  -0.01   0.01
  50   6     0.03  -0.15  -0.01     0.00   0.00   0.00     0.00   0.03   0.00
  51   6    -0.05   0.04  -0.03    -0.01   0.01   0.00    -0.01   0.02   0.01
  52   6     0.09  -0.10   0.08     0.01  -0.01   0.00     0.00   0.01  -0.02
  53   6    -0.02   0.00   0.00     0.00   0.00   0.00    -0.07   0.07  -0.03
  54   6     0.01  -0.07   0.02     0.00   0.00   0.00    -0.07  -0.05   0.03
  55   1     0.04  -0.02   0.03     0.01   0.01   0.00     0.24   0.03  -0.05
  56   1     0.00  -0.01   0.00    -0.04   0.06   0.01     0.01  -0.03  -0.01
  57   1     0.00   0.00   0.00     0.01  -0.01  -0.03     0.00   0.00   0.00
  58   1     0.00   0.00   0.00    -0.02   0.01   0.03     0.00   0.00  -0.01
  59   1     0.00   0.00   0.00    -0.01   0.01   0.03     0.00   0.00  -0.01
  60   1     0.00   0.00   0.00    -0.01   0.00   0.02     0.00   0.00   0.00
  61   1     0.00   0.00  -0.01    -0.17  -0.26  -0.07    -0.02   0.01   0.01
  62   1     0.01   0.01   0.01    -0.21   0.06   0.23     0.01  -0.01   0.01
  63   1     0.01   0.00   0.01     0.08  -0.04  -0.03    -0.01   0.01  -0.01
  64   1     0.00   0.01   0.00    -0.01   0.06  -0.10     0.00   0.00  -0.01
  65   1     0.00   0.01   0.00     0.12  -0.12   0.03     0.00  -0.01   0.00
  66   1     0.00  -0.01   0.00    -0.10  -0.05   0.09    -0.02   0.02   0.01
  67   1     0.00   0.01   0.01    -0.10  -0.11   0.15    -0.03  -0.01   0.04
  68   1    -0.01   0.00   0.00    -0.12  -0.11   0.30    -0.01   0.01   0.00
  69   1     0.01   0.00   0.00    -0.04  -0.06   0.02     0.03   0.06  -0.01
  70   1     0.01  -0.01   0.01    -0.04   0.03  -0.07     0.03  -0.01   0.04
  71   1     0.00  -0.01   0.01    -0.02   0.08  -0.09     0.03  -0.04   0.06
  72   1     0.00   0.00   0.00    -0.03   0.00  -0.01     0.01   0.00   0.00
  73   1     0.00   0.00   0.00    -0.02   0.00   0.00     0.01   0.00   0.00
  74   1     0.00   0.00   0.00     0.01   0.00   0.03     0.00   0.00  -0.01
  75   1     0.00  -0.01   0.00     0.00  -0.01   0.00     0.03   0.04  -0.05
  76   1    -0.03  -0.05   0.02    -0.01  -0.03   0.02    -0.09  -0.10   0.06
  77   1     0.00   0.00  -0.01     0.00  -0.01   0.00     0.04   0.08  -0.07
  78   1    -0.02   0.01   0.03    -0.01  -0.01   0.01    -0.07   0.05   0.04
  79   1    -0.02   0.00   0.01     0.00  -0.01   0.01    -0.05   0.00  -0.01
  80   1     0.06  -0.05   0.01     0.00  -0.01   0.00     0.03  -0.05  -0.02
  81   1     0.20  -0.20   0.02     0.00  -0.01   0.00    -0.18   0.12   0.02
  82   1     0.07  -0.03   0.01    -0.02   0.02   0.00     0.06  -0.04  -0.03
  83   1     0.13   0.01   0.08     0.01   0.00   0.01    -0.04  -0.02   0.06
  84   1     0.08  -0.10  -0.11     0.00   0.00   0.00    -0.04   0.01   0.02
  85   1    -0.03  -0.03   0.02    -0.01   0.00   0.00    -0.03  -0.07   0.05
  86   1    -0.01  -0.01   0.00    -0.01   0.00   0.01     0.01  -0.05   0.01
  87   1    -0.02  -0.02   0.01    -0.02  -0.01   0.02     0.04   0.01  -0.03
  88   1     0.04   0.03  -0.01     0.01   0.01  -0.01     0.10   0.05   0.02
  89   1     0.01   0.00  -0.02     0.00   0.00  -0.01     0.01  -0.06  -0.04
  90   1     0.00  -0.03  -0.03     0.00  -0.01  -0.02     0.03  -0.05  -0.04
  91   1     0.01   0.00  -0.01    -0.01   0.00   0.00     0.03  -0.04   0.01
  92   1     0.01   0.03  -0.01    -0.01  -0.01   0.00     0.03   0.07   0.01
  93   1     0.01  -0.02  -0.01    -0.01  -0.01  -0.01     0.04   0.00   0.01
  94   1     0.02   0.00   0.00     0.00   0.01   0.00     0.05   0.01  -0.02
  95   1     0.02  -0.01   0.02     0.00   0.00   0.02     0.03   0.00   0.01
  96   1     0.00  -0.02   0.05     0.00   0.00   0.01     0.01  -0.03   0.07
  97   1    -0.13   0.16  -0.01     0.01   0.00   0.00     0.04   0.00  -0.03
  98   1    -0.11   0.15  -0.11     0.00   0.00   0.01     0.05  -0.03   0.06
  99   1     0.00   0.03   0.20     0.00   0.00   0.00     0.02   0.01  -0.02
 100   1    -0.05  -0.15   0.05     0.00   0.00   0.00     0.04   0.01  -0.01
 101   1    -0.07  -0.08   0.05     0.00   0.00   0.00     0.03   0.03   0.00
 102   1     0.06  -0.32  -0.01     0.00   0.01   0.00    -0.02   0.11   0.02
 103   1    -0.18   0.13  -0.02    -0.02   0.02   0.00     0.00   0.06   0.02
 104   1    -0.04  -0.11  -0.20    -0.01  -0.01  -0.02     0.01   0.04   0.01
 105   1    -0.13   0.13   0.00    -0.02   0.02   0.00     0.03  -0.02  -0.02
 106   1     0.01  -0.15   0.06     0.01  -0.02   0.00     0.08  -0.02  -0.01
 107   1     0.20  -0.22   0.16     0.01  -0.02   0.00    -0.04   0.05  -0.06
 108   1    -0.02  -0.12   0.04    -0.01  -0.01  -0.01     0.01   0.04  -0.06
 109   1    -0.02   0.04  -0.02     0.01   0.00  -0.01    -0.07   0.23  -0.12
 110   1    -0.08  -0.03   0.02     0.00   0.00   0.00    -0.31  -0.06   0.07
 111   1    -0.03   0.03  -0.02     0.00   0.00   0.00    -0.08   0.23  -0.12
 112   1     0.05  -0.14   0.00     0.00   0.00   0.00     0.12  -0.27   0.08
 113   1    -0.01  -0.05   0.03    -0.01   0.00   0.00    -0.21  -0.07   0.07
 114   1    -0.05  -0.09   0.07     0.00   0.00   0.00    -0.27  -0.07   0.10
                    91                     92                     93
                    ?A                     ?A                     ?A
 Frequencies --   522.6759               532.2427               534.8389
 Red. masses --     5.9664                 4.3519                 4.5720
 Frc consts  --     0.9603                 0.7264                 0.7706
 IR Inten    --    42.3482                 6.1015                 6.9620
 Raman Activ --     0.0000                 0.0000                 0.0000
 Depolar     --     0.0000                 0.0000                 0.0000
 Atom AN      X      Y      Z        X      Y      Z        X      Y      Z
   1   8     0.00  -0.02  -0.02     0.00   0.00   0.00    -0.01   0.01   0.01
   2  12    -0.04  -0.11   0.07     0.01  -0.04   0.02     0.01  -0.04   0.02
   3   8     0.09   0.24  -0.16    -0.01   0.02   0.00    -0.05  -0.02   0.04
   4   6     0.00   0.00   0.00     0.00   0.00   0.00     0.00  -0.01   0.00
   5   7    -0.09   0.01   0.01     0.05   0.02  -0.01     0.07   0.03  -0.04
   6   7     0.07  -0.01  -0.01    -0.10  -0.04   0.02    -0.11  -0.05   0.04
   7   8     0.02  -0.01  -0.02     0.00   0.00   0.00    -0.01   0.00   0.00
   8   6    -0.07   0.03   0.00     0.02  -0.07  -0.18     0.07   0.10   0.14
   9   6    -0.05   0.07  -0.02     0.01  -0.06   0.03     0.01  -0.08   0.04
  10   6     0.04   0.00  -0.01    -0.01   0.03   0.19    -0.08  -0.12  -0.12
  11   8    -0.04   0.05   0.06     0.01   0.00   0.00     0.04  -0.02  -0.02
  12   6    -0.04  -0.08  -0.02     0.00  -0.01   0.00     0.03   0.00   0.02
  13   6    -0.02  -0.10  -0.09     0.00   0.00   0.00     0.00   0.02   0.02
  14   6    -0.03   0.01   0.05     0.00   0.00  -0.01     0.03   0.00  -0.04
  15   8    -0.09   0.03   0.04     0.00   0.00   0.01     0.02  -0.01   0.01
  16   6     0.02  -0.02  -0.04     0.00   0.00   0.00    -0.01   0.01   0.03
  17   8     0.02   0.09   0.03     0.00   0.04   0.02     0.00   0.08   0.03
  18   6     0.05   0.13   0.05     0.02   0.05   0.01     0.02   0.10   0.01
  19   8     0.05   0.09  -0.03     0.01   0.02  -0.04     0.02   0.03  -0.09
  20   8     0.06  -0.02  -0.05     0.03  -0.01  -0.02     0.05  -0.02  -0.03
  21   6    -0.03  -0.14  -0.02    -0.01  -0.06  -0.01    -0.02  -0.10  -0.01
  22   6    -0.09   0.01   0.05    -0.04   0.01   0.03    -0.06   0.02   0.05
  23   6     0.08  -0.03   0.07     0.03  -0.01   0.03     0.06  -0.02   0.05
  24   8    -0.01  -0.13  -0.09    -0.01  -0.05  -0.04    -0.02  -0.09  -0.06
  25   6    -0.04   0.02  -0.03    -0.02   0.01  -0.01    -0.03   0.02  -0.02
  26   6    -0.04  -0.01   0.08    -0.01   0.00   0.03    -0.02   0.00   0.05
  27   6     0.05  -0.04   0.05     0.00   0.00   0.00     0.00   0.02  -0.02
  28   6     0.02   0.00   0.01     0.00   0.00   0.00    -0.01   0.00   0.00
  29   6    -0.06   0.03  -0.02     0.03   0.05   0.01     0.04  -0.01  -0.02
  30   6     0.04   0.01  -0.01    -0.11   0.01  -0.01    -0.09  -0.01   0.04
  31   6     0.01   0.00  -0.04     0.07  -0.02   0.04    -0.06   0.01   0.01
  32   6     0.02   0.00  -0.05     0.07   0.03   0.10    -0.08  -0.06  -0.01
  33   6     0.06  -0.04   0.01    -0.02   0.06   0.03    -0.02   0.05  -0.06
  34   6     0.03   0.02   0.01    -0.09   0.03   0.07     0.03  -0.08  -0.04
  35   6     0.03   0.04   0.01    -0.08   0.03  -0.02     0.03  -0.07   0.01
  36   6     0.04  -0.03   0.00     0.02  -0.03  -0.04    -0.05   0.05   0.02
  37   6     0.06  -0.01   0.03    -0.07  -0.02  -0.06    -0.01   0.03   0.01
  38   6     0.00   0.02   0.01    -0.06  -0.06  -0.02     0.03   0.01  -0.05
  39   6    -0.02   0.04   0.03    -0.04  -0.11  -0.09     0.07  -0.01  -0.02
  40   6     0.01  -0.04   0.02    -0.01   0.07  -0.07     0.01   0.09  -0.01
  41   6    -0.03   0.01   0.01     0.09   0.01  -0.08     0.03  -0.03   0.08
  42   6    -0.04   0.01  -0.02     0.09   0.04   0.01     0.01  -0.03   0.06
  43   6    -0.01  -0.02   0.01     0.02   0.02   0.03     0.04   0.05  -0.07
  44   6    -0.03  -0.03  -0.01     0.10   0.08   0.05     0.04   0.03  -0.01
  45   6    -0.01   0.00   0.01     0.02   0.02  -0.02     0.00  -0.01   0.01
  46   6     0.00   0.01   0.00    -0.01  -0.04  -0.01     0.01   0.02   0.01
  47   6    -0.01  -0.01  -0.01    -0.01  -0.04   0.00     0.01   0.04   0.01
  48   6     0.00   0.00   0.01     0.01   0.02  -0.03     0.00  -0.01   0.00
  49   6     0.00   0.01   0.00     0.01  -0.02   0.03    -0.02   0.00  -0.03
  50   6     0.01  -0.02   0.00    -0.02   0.04   0.00     0.00   0.01   0.00
  51   6     0.01  -0.01  -0.01    -0.02   0.03   0.03     0.00  -0.01   0.00
  52   6     0.00   0.00   0.00     0.02  -0.02   0.02    -0.01   0.01   0.00
  53   6    -0.02  -0.03   0.02     0.06   0.03  -0.02     0.08   0.05  -0.04
  54   6     0.06   0.00  -0.01    -0.03  -0.01   0.00    -0.06   0.03   0.00
  55   1    -0.07   0.07  -0.01    -0.02  -0.08   0.01    -0.02  -0.07   0.06
  56   1     0.05  -0.14  -0.06     0.00   0.00  -0.01    -0.03   0.03  -0.01
  57   1    -0.02   0.02   0.06     0.01   0.00  -0.01     0.03   0.00  -0.05
  58   1     0.02  -0.02  -0.05     0.00   0.00   0.00    -0.02   0.02   0.03
  59   1     0.02  -0.02  -0.04     0.00   0.00   0.00    -0.01   0.01   0.03
  60   1     0.02   0.00  -0.02     0.00   0.00   0.00    -0.01   0.00   0.02
  61   1    -0.12   0.04   0.04    -0.05   0.02   0.02    -0.08   0.04   0.05
  62   1     0.03  -0.07   0.08     0.01  -0.04   0.03     0.02  -0.07   0.05
  63   1    -0.06   0.06  -0.10    -0.03   0.03  -0.05    -0.06   0.06  -0.10
  64   1    -0.03   0.01  -0.06    -0.01   0.00  -0.03    -0.01  -0.01  -0.05
  65   1     0.02  -0.07  -0.01     0.01  -0.04  -0.01     0.02  -0.07  -0.01
  66   1    -0.11   0.07   0.01    -0.04   0.03   0.00    -0.07   0.06   0.01
  67   1    -0.15  -0.06   0.21    -0.06  -0.02   0.09    -0.10  -0.03   0.15
  68   1    -0.05   0.03   0.00    -0.02   0.02   0.00    -0.02   0.03  -0.01
  69   1     0.13   0.27  -0.03     0.01   0.02  -0.01    -0.02  -0.02   0.00
  70   1     0.13  -0.05   0.19     0.01   0.00   0.00    -0.02   0.00  -0.04
  71   1     0.14  -0.19   0.28     0.01   0.00   0.00     0.00   0.05  -0.06
  72   1     0.08  -0.01   0.03    -0.01   0.00   0.00    -0.06   0.00  -0.01
  73   1     0.05  -0.01   0.00    -0.01   0.00   0.00    -0.05   0.00  -0.01
  74   1    -0.02   0.00  -0.06     0.00   0.00   0.01     0.02  -0.01   0.06
  75   1    -0.02   0.01  -0.03     0.07   0.02   0.10    -0.06  -0.09   0.00
  76   1     0.04  -0.09   0.05    -0.02   0.02  -0.08     0.00   0.17  -0.05
  77   1    -0.01   0.00  -0.01    -0.07  -0.01   0.11     0.06  -0.06  -0.04
  78   1     0.04  -0.03   0.01     0.03  -0.06  -0.08    -0.05   0.07   0.05
  79   1     0.06  -0.01   0.05    -0.08  -0.05  -0.11     0.00   0.05   0.04
  80   1    -0.02   0.07   0.01    -0.02  -0.16  -0.07     0.07  -0.06   0.02
  81   1     0.04  -0.09   0.01    -0.04   0.15   0.03    -0.06   0.14  -0.06
  82   1    -0.01   0.03   0.01     0.07  -0.06  -0.09    -0.01  -0.09   0.07
  83   1    -0.01  -0.02   0.00     0.02   0.02   0.08     0.04   0.05  -0.10
  84   1    -0.04  -0.04  -0.02     0.11   0.11   0.10     0.04   0.04  -0.03
  85   1    -0.01   0.05  -0.03     0.06   0.06  -0.03    -0.03  -0.09   0.05
  86   1    -0.03   0.03   0.00     0.00   0.02   0.02     0.03  -0.04  -0.02
  87   1    -0.06  -0.02   0.06     0.02   0.02  -0.01     0.05   0.00  -0.05
  88   1    -0.05  -0.01  -0.03    -0.03  -0.07   0.00     0.07   0.06   0.03
  89   1     0.01   0.06   0.03    -0.02  -0.05  -0.02     0.00  -0.02  -0.01
  90   1    -0.02   0.02   0.00    -0.01   0.00   0.02     0.03  -0.01  -0.01
  91   1    -0.04   0.07  -0.03     0.00  -0.12   0.03     0.03   0.01   0.01
  92   1    -0.04  -0.09  -0.02     0.01   0.01   0.02     0.03   0.08   0.02
  93   1    -0.05  -0.02  -0.03     0.02   0.00   0.03     0.03   0.03   0.01
  94   1    -0.04  -0.02   0.05     0.05   0.08  -0.09     0.00  -0.04   0.01
  95   1    -0.04  -0.01   0.01     0.03   0.02   0.04     0.01  -0.01  -0.04
  96   1    -0.01   0.02  -0.05     0.01   0.00   0.03     0.00  -0.02   0.02
  97   1     0.00   0.05  -0.04     0.01  -0.13   0.13    -0.04  -0.06   0.04
  98   1     0.02   0.00   0.03    -0.04  -0.01  -0.05    -0.06   0.02  -0.10
  99   1     0.03   0.01   0.04    -0.05  -0.04  -0.03    -0.05  -0.01  -0.05
 100   1     0.03  -0.04  -0.01    -0.11   0.13   0.00    -0.03   0.02   0.02
 101   1     0.02  -0.01   0.00    -0.05  -0.01  -0.03    -0.04   0.02   0.02
 102   1     0.00   0.02   0.00    -0.01  -0.06  -0.03     0.01  -0.06   0.00
 103   1     0.00   0.02  -0.01    -0.05   0.01   0.02     0.02  -0.11  -0.01
 104   1     0.01   0.00  -0.02    -0.02   0.00   0.00    -0.02  -0.03   0.05
 105   1     0.02  -0.02  -0.03    -0.04   0.05   0.05    -0.04   0.04   0.07
 106   1     0.01   0.01   0.00     0.01  -0.05   0.01    -0.10   0.03  -0.02
 107   1    -0.01   0.01  -0.01     0.05  -0.05   0.04     0.03  -0.04   0.05
 108   1     0.01   0.00   0.00    -0.02  -0.02  -0.01    -0.03  -0.02   0.03
 109   1    -0.02  -0.06   0.03    -0.05  -0.12   0.18     0.18   0.18  -0.21
 110   1     0.04   0.01  -0.01     0.09   0.12   0.12     0.07  -0.02  -0.18
 111   1    -0.02  -0.07   0.04     0.18   0.24  -0.04    -0.03  -0.16  -0.01
 112   1     0.03   0.03  -0.01    -0.11  -0.03  -0.14    -0.04   0.11   0.12
 113   1     0.07   0.01  -0.01     0.20  -0.12  -0.08    -0.25   0.14   0.07
 114   1     0.09   0.00  -0.01    -0.20   0.03  -0.08     0.15   0.00   0.06
                    94                     95                     96
                    ?A                     ?A                     ?A
 Frequencies --   537.9830               550.7392               559.2582
 Red. masses --     5.7268                 4.6545                 4.6011
 Frc consts  --     0.9766                 0.8318                 0.8479
 IR Inten    --    36.9974                 2.3649                 7.2429
 Raman Activ --     0.0000                 0.0000                 0.0000
 Depolar     --     0.0000                 0.0000                 0.0000
 Atom AN      X      Y      Z        X      Y      Z        X      Y      Z
   1   8     0.01  -0.03  -0.03     0.00   0.00   0.00    -0.03   0.05   0.05
   2  12    -0.01  -0.08   0.03    -0.02  -0.03   0.02    -0.01  -0.03   0.01
   3   8     0.13   0.14  -0.14     0.01   0.02  -0.02    -0.12   0.11  -0.10
   4   6     0.00   0.02   0.00     0.00   0.00   0.00     0.00  -0.04  -0.01
   5   7     0.04   0.03  -0.02     0.11  -0.04  -0.08    -0.01   0.00   0.00
   6   7    -0.10  -0.04   0.04     0.03   0.00  -0.09    -0.01  -0.01  -0.01
   7   8     0.03   0.00  -0.02     0.00   0.00   0.00    -0.04  -0.02   0.01
   8   6     0.05   0.06   0.04     0.05  -0.07  -0.02     0.00   0.01  -0.01
   9   6     0.00  -0.07   0.03     0.03  -0.02   0.05     0.00   0.00   0.00
  10   6    -0.05  -0.07  -0.03    -0.05   0.02  -0.05     0.00  -0.01   0.01
  11   8    -0.10   0.05   0.08     0.00   0.00   0.01     0.20  -0.02  -0.09
  12   6    -0.07  -0.05  -0.04     0.00  -0.01   0.00     0.05  -0.11   0.07
  13   6    -0.01  -0.08  -0.08     0.00  -0.01  -0.01    -0.15  -0.02  -0.07
  14   6    -0.07   0.01   0.10     0.00   0.00   0.00     0.15   0.02  -0.18
  15   8    -0.07   0.04   0.00    -0.01   0.00   0.01    -0.02  -0.04   0.12
  16   6     0.03  -0.04  -0.07     0.00   0.00   0.00    -0.05   0.06   0.11
  17   8    -0.01  -0.10  -0.05     0.00   0.01   0.00     0.02   0.00  -0.03
  18   6    -0.03  -0.12  -0.01     0.00   0.01   0.00    -0.04  -0.05  -0.01
  19   8     0.00   0.00   0.16     0.01   0.01   0.01     0.05   0.00   0.08
  20   8    -0.06   0.02   0.05     0.00   0.00   0.00    -0.04  -0.01  -0.01
  21   6     0.02   0.13   0.01     0.00  -0.01   0.00     0.02   0.06  -0.02
  22   6     0.07  -0.03  -0.07     0.00   0.00   0.00     0.07   0.01  -0.02
  23   6    -0.07   0.03  -0.05     0.00   0.00   0.00    -0.06  -0.05  -0.02
  24   8     0.03   0.11   0.08     0.00  -0.01   0.00    -0.03   0.05   0.04
  25   6     0.03  -0.02   0.02     0.00   0.00   0.00     0.03  -0.02   0.02
  26   6     0.02   0.00  -0.07     0.00   0.00   0.00    -0.01   0.00   0.02
  27   6     0.03  -0.04   0.04     0.00   0.00   0.00     0.02   0.03  -0.02
  28   6     0.03   0.00   0.02     0.00   0.00   0.00    -0.01   0.00  -0.01
  29   6     0.02   0.01  -0.01     0.10   0.08  -0.04    -0.01   0.00   0.00
  30   6    -0.09   0.00   0.03     0.10  -0.06   0.01    -0.01   0.00   0.00
  31   6    -0.02   0.00   0.01     0.08  -0.02   0.05     0.01   0.01  -0.01
  32   6    -0.02  -0.02   0.01     0.06   0.00   0.16     0.01   0.01   0.00
  33   6    -0.01   0.04  -0.03    -0.04   0.14   0.00     0.01  -0.02   0.02
  34   6     0.00  -0.03   0.00    -0.11  -0.02   0.09     0.00   0.02   0.00
  35   6     0.00  -0.03   0.00    -0.09   0.00  -0.05     0.00   0.02   0.00
  36   6    -0.02   0.02   0.00     0.03  -0.02  -0.04     0.01  -0.01   0.00
  37   6    -0.01   0.01  -0.01    -0.16  -0.01  -0.08     0.00   0.00   0.00
  38   6     0.01  -0.01  -0.04     0.07   0.05  -0.01     0.01   0.00  -0.01
  39   6     0.05  -0.05  -0.04     0.04   0.14   0.09     0.02   0.00   0.00
  40   6     0.00   0.09  -0.02     0.06  -0.06   0.07    -0.01   0.02   0.00
  41   6     0.04  -0.02   0.03    -0.09   0.01   0.11     0.01  -0.01   0.02
  42   6     0.04  -0.02   0.05    -0.08  -0.04   0.00     0.00  -0.01   0.01
  43   6     0.03   0.04  -0.04     0.03   0.02  -0.06     0.01   0.01  -0.01
  44   6     0.06   0.05   0.00    -0.11  -0.07  -0.03     0.00   0.00   0.00
  45   6     0.00   0.00   0.00     0.03   0.02  -0.03     0.00   0.00   0.00
  46   6     0.00   0.01   0.00    -0.01  -0.03  -0.01     0.00   0.00   0.00
  47   6     0.01   0.01   0.00     0.00  -0.02   0.01     0.00  -0.01   0.00
  48   6     0.00   0.00  -0.01     0.01   0.01  -0.02     0.00   0.00   0.00
  49   6    -0.01   0.00  -0.02    -0.01   0.01  -0.02     0.00   0.00   0.00
  50   6    -0.01   0.02   0.00     0.01  -0.03   0.00     0.00   0.00   0.00
  51   6    -0.01   0.00   0.01     0.01  -0.02  -0.02     0.00   0.00   0.00
  52   6    -0.01   0.00   0.00    -0.01   0.02  -0.01     0.00   0.00   0.00
  53   6     0.08   0.05  -0.04     0.00  -0.01   0.00     0.01   0.01   0.00
  54   6    -0.05   0.02   0.00    -0.09   0.04  -0.01     0.01   0.00   0.00
  55   1    -0.03  -0.07   0.04     0.11   0.03   0.10    -0.01   0.00   0.01
  56   1     0.08  -0.12  -0.03     0.00  -0.01  -0.01    -0.14  -0.01  -0.09
  57   1    -0.07   0.02   0.13     0.00   0.00   0.01     0.18  -0.02  -0.26
  58   1     0.05  -0.04  -0.09     0.00   0.00   0.00    -0.07   0.07   0.14
  59   1     0.04  -0.03  -0.08     0.00   0.00   0.00    -0.06   0.05   0.12
  60   1     0.03  -0.01  -0.04     0.00   0.00   0.00    -0.05   0.02   0.07
  61   1     0.10  -0.06  -0.06     0.00   0.00   0.00     0.11   0.00   0.00
  62   1    -0.01   0.09  -0.06     0.00   0.00   0.00    -0.06  -0.03   0.00
  63   1     0.08  -0.08   0.12    -0.01   0.00  -0.01     0.02  -0.03   0.03
  64   1     0.01   0.02   0.05     0.00   0.00   0.00     0.04  -0.05   0.04
  65   1    -0.03   0.09   0.01     0.00  -0.01   0.00    -0.01   0.01   0.00
  66   1     0.07  -0.07  -0.02     0.00   0.00   0.00    -0.02   0.00   0.11
  67   1     0.11   0.02  -0.19     0.00   0.00   0.00     0.02   0.02  -0.01
  68   1     0.02  -0.05   0.01     0.00   0.00   0.00     0.04   0.03  -0.01
  69   1     0.09   0.17  -0.02     0.01   0.03  -0.01     0.15   0.30  -0.16
  70   1     0.08   0.00   0.14     0.01   0.00   0.02     0.12  -0.16   0.15
  71   1     0.06  -0.16   0.22     0.01  -0.01   0.02     0.17  -0.04   0.08
  72   1     0.16   0.00   0.04     0.01   0.00   0.00    -0.27  -0.02  -0.03
  73   1     0.13  -0.01   0.01     0.00   0.00   0.00    -0.23   0.00  -0.03
  74   1    -0.05   0.01  -0.15     0.00   0.00   0.00     0.14  -0.04   0.32
  75   1    -0.01  -0.04   0.01     0.06  -0.05   0.19     0.00   0.00   0.01
  76   1     0.00   0.09  -0.05    -0.03   0.16  -0.15     0.00  -0.05   0.02
  77   1     0.01  -0.03   0.00    -0.06  -0.09   0.19    -0.01   0.02  -0.01
  78   1    -0.02   0.03   0.00     0.05  -0.05  -0.08     0.01  -0.01   0.00
  79   1    -0.01   0.02   0.00    -0.16  -0.03  -0.12     0.00  -0.01   0.00
  80   1     0.06  -0.10   0.00    -0.02   0.20   0.09     0.02  -0.01   0.01
  81   1    -0.06   0.15  -0.03     0.09  -0.15  -0.04    -0.02   0.03  -0.01
  82   1     0.01  -0.07   0.02    -0.09   0.10   0.11     0.01  -0.02   0.02
  83   1     0.03   0.04  -0.05     0.02   0.02  -0.11     0.01   0.01  -0.02
  84   1     0.06   0.06   0.01    -0.12  -0.11  -0.08    -0.01   0.00  -0.01
  85   1     0.00  -0.03   0.02     0.05   0.05  -0.03     0.00   0.02  -0.01
  86   1     0.01  -0.01   0.00     0.01   0.02   0.01    -0.01   0.01   0.01
  87   1     0.03   0.01  -0.03     0.02   0.02  -0.02    -0.01  -0.01   0.01
  88   1     0.03   0.02   0.01    -0.03  -0.06   0.00    -0.01  -0.01  -0.01
  89   1     0.00  -0.02  -0.01    -0.01  -0.03  -0.01     0.00   0.01   0.00
  90   1     0.01   0.00   0.00    -0.01   0.01   0.02    -0.01   0.00   0.00
  91   1     0.01  -0.02   0.01     0.06  -0.19   0.05     0.00   0.00  -0.01
  92   1     0.01   0.04   0.01     0.06   0.14   0.03     0.00  -0.02  -0.01
  93   1     0.02   0.02   0.02     0.09   0.01   0.05    -0.01  -0.01  -0.01
  94   1     0.01   0.00  -0.01     0.12   0.10  -0.14     0.00   0.00   0.00
  95   1     0.01   0.00  -0.02     0.09   0.02   0.03     0.00   0.00   0.01
  96   1     0.00  -0.01   0.01     0.02  -0.05   0.14     0.00   0.00   0.00
  97   1    -0.02  -0.08   0.06    -0.01   0.12  -0.12     0.00   0.00   0.00
  98   1    -0.06   0.01  -0.09     0.05  -0.01   0.07     0.00  -0.01  -0.01
  99   1    -0.06  -0.02  -0.04     0.06   0.03   0.04     0.00   0.00   0.00
 100   1    -0.05   0.05   0.01     0.11  -0.12   0.00     0.00   0.00   0.00
 101   1    -0.04   0.02   0.01     0.06   0.00   0.02     0.00   0.00   0.00
 102   1     0.00  -0.05   0.00     0.00   0.08   0.02     0.00   0.00   0.00
 103   1     0.00  -0.07  -0.01     0.04  -0.08  -0.03     0.00  -0.02   0.00
 104   1    -0.02  -0.02   0.03     0.00  -0.02   0.02    -0.01  -0.01   0.01
 105   1    -0.04   0.04   0.06    -0.01   0.00   0.01    -0.01   0.01   0.01
 106   1    -0.07   0.01  -0.01    -0.07   0.04  -0.01    -0.02   0.00  -0.01
 107   1     0.03  -0.04   0.04     0.00   0.00   0.02     0.00  -0.01   0.01
 108   1    -0.02  -0.02   0.02    -0.01   0.00   0.03    -0.01   0.00   0.00
 109   1     0.12   0.09  -0.10    -0.01   0.01   0.00     0.01   0.00   0.00
 110   1     0.08   0.03  -0.09    -0.04  -0.03   0.03     0.02   0.01   0.00
 111   1     0.03  -0.04  -0.02     0.02   0.05  -0.02     0.01   0.01   0.00
 112   1    -0.06   0.07   0.04    -0.06   0.02   0.01     0.00   0.00  -0.01
 113   1    -0.10   0.06   0.02    -0.14   0.06   0.00     0.02  -0.01   0.00
 114   1     0.05   0.01   0.02    -0.09   0.04   0.01     0.01   0.00   0.00
                    97                     98                     99
                    ?A                     ?A                     ?A
 Frequencies --   559.4453               566.7742               573.1317
 Red. masses --     4.4008                 4.0180                 3.7633
 Frc consts  --     0.8115                 0.7605                 0.7283
 IR Inten    --     1.8663                 0.5059                 0.2901
 Raman Activ --     0.0000                 0.0000                 0.0000
 Depolar     --     0.0000                 0.0000                 0.0000
 Atom AN      X      Y      Z        X      Y      Z        X      Y      Z
   1   8     0.00   0.00   0.00     0.00   0.00   0.00     0.00   0.00   0.00
   2  12     0.02   0.02  -0.01     0.00   0.01   0.00     0.00   0.00   0.00
   3   8     0.00  -0.03   0.02     0.00   0.00   0.00     0.00   0.00   0.00
   4   6     0.00   0.00   0.00     0.00   0.00   0.00     0.00   0.00   0.00
   5   7    -0.08  -0.05  -0.06    -0.02  -0.03  -0.06    -0.01  -0.06  -0.12
   6   7    -0.07  -0.05  -0.08     0.04   0.04   0.02     0.01   0.05   0.13
   7   8     0.00   0.00   0.00     0.00   0.00   0.00     0.00   0.00   0.00
   8   6     0.00   0.02  -0.03    -0.06   0.01   0.11     0.03   0.07   0.12
   9   6     0.01   0.03   0.04     0.00   0.05  -0.02     0.00  -0.01   0.01
  10   6     0.01  -0.04  -0.03     0.07  -0.02  -0.11    -0.04  -0.07  -0.13
  11   8    -0.02   0.00   0.00     0.00   0.00   0.00     0.00   0.00   0.00
  12   6     0.00   0.02  -0.01     0.00   0.00   0.00     0.00   0.00   0.00
  13   6     0.02   0.01   0.01    -0.01   0.00   0.01     0.00   0.00   0.00
  14   6    -0.01   0.00   0.01     0.00   0.00   0.00     0.00   0.00   0.00
  15   8     0.01   0.00  -0.01     0.00  -0.01   0.00     0.00   0.00   0.00
  16   6     0.00   0.00  -0.01     0.00   0.00   0.00     0.00   0.00   0.00
  17   8    -0.01   0.00   0.00    -0.01  -0.02   0.00     0.01   0.01   0.00
  18   6     0.00   0.00  -0.01     0.01   0.00   0.00    -0.01   0.00   0.00
  19   8    -0.01   0.00  -0.01    -0.02   0.00   0.00     0.02   0.00   0.00
  20   8     0.00   0.00   0.00     0.00   0.01   0.01     0.00  -0.01  -0.01
  21   6     0.00   0.00   0.00    -0.01   0.00   0.01     0.01   0.00  -0.01
  22   6    -0.01   0.00   0.00    -0.01  -0.01  -0.01     0.01   0.01   0.00
  23   6     0.01   0.01   0.00     0.01   0.02   0.00    -0.01  -0.02   0.00
  24   8     0.01   0.00   0.00     0.02   0.00   0.00    -0.01   0.00   0.00
  25   6     0.00   0.00   0.00     0.00   0.00   0.00     0.00   0.00   0.00
  26   6     0.00   0.00   0.00     0.00   0.00  -0.01     0.00   0.00   0.01
  27   6     0.00   0.00   0.00     0.00   0.00   0.00     0.00   0.00   0.00
  28   6     0.00   0.00   0.00     0.00   0.00   0.00     0.00   0.00   0.00
  29   6    -0.08  -0.09   0.07     0.01   0.13  -0.11    -0.02  -0.06   0.01
  30   6    -0.09   0.05   0.02    -0.08   0.15  -0.01     0.05  -0.05   0.02
  31   6     0.06  -0.03  -0.02     0.02  -0.03  -0.03     0.04  -0.04  -0.01
  32   6     0.09   0.14  -0.04     0.00  -0.06   0.08     0.06   0.10   0.02
  33   6     0.01  -0.14   0.13     0.04   0.13  -0.03    -0.01  -0.04   0.10
  34   6    -0.03   0.16   0.02    -0.04  -0.05   0.10    -0.03   0.10   0.03
  35   6    -0.04   0.08  -0.01    -0.02   0.03  -0.03    -0.04   0.03  -0.04
  36   6     0.09  -0.08  -0.02     0.08  -0.05  -0.02     0.09  -0.07  -0.01
  37   6    -0.01  -0.02  -0.01    -0.05   0.00  -0.01    -0.09  -0.01  -0.03
  38   6     0.07   0.02  -0.05     0.00   0.00   0.03    -0.06   0.00   0.04
  39   6     0.14  -0.01   0.04     0.07  -0.10   0.00    -0.10   0.00  -0.06
  40   6    -0.05   0.12   0.04    -0.12   0.09  -0.02     0.05  -0.08  -0.06
  41   6     0.03  -0.10   0.14     0.07  -0.09  -0.03    -0.03   0.07  -0.10
  42   6    -0.04  -0.06   0.05     0.01   0.00  -0.02     0.06   0.03   0.01
  43   6     0.06   0.07  -0.09    -0.04  -0.03   0.04    -0.05  -0.06   0.07
  44   6    -0.05  -0.02  -0.02    -0.01   0.00   0.00     0.10   0.06   0.01
  45   6     0.00   0.01   0.00     0.01   0.01  -0.01     0.01   0.01   0.00
  46   6    -0.01  -0.02  -0.01     0.00   0.01   0.01     0.00   0.00   0.00
  47   6    -0.01  -0.04  -0.01     0.00   0.01   0.00     0.00  -0.02   0.00
  48   6     0.00   0.00   0.01     0.00   0.00   0.01     0.00   0.00   0.02
  49   6    -0.02   0.01  -0.03     0.00   0.00  -0.01     0.00   0.00   0.00
  50   6     0.00   0.00   0.00     0.00   0.01   0.00     0.00   0.01   0.00
  51   6     0.00  -0.01   0.00     0.00   0.01   0.01     0.00  -0.01  -0.01
  52   6    -0.02   0.02  -0.02     0.00   0.00  -0.01     0.01  -0.01   0.01
  53   6     0.02   0.04  -0.03    -0.09  -0.11   0.07     0.02   0.03  -0.02
  54   6     0.03  -0.03   0.00     0.13  -0.07   0.02    -0.03   0.03   0.00
  55   1    -0.03   0.04   0.08     0.01   0.07   0.01     0.00   0.00   0.04
  56   1     0.01   0.01   0.01    -0.01   0.00   0.01     0.00   0.00   0.00
  57   1    -0.01   0.00   0.02     0.00   0.00  -0.01     0.00   0.00   0.00
  58   1     0.00   0.00  -0.01     0.00   0.00   0.00     0.00   0.00   0.00
  59   1     0.00   0.00  -0.01     0.00   0.00   0.00     0.00   0.00   0.00
  60   1     0.00   0.00  -0.01     0.00   0.00   0.00     0.00   0.00   0.00
  61   1    -0.01   0.00   0.00    -0.02  -0.01  -0.01     0.02   0.01   0.01
  62   1     0.01   0.01   0.00     0.02   0.02  -0.01    -0.02  -0.02   0.00
  63   1     0.00   0.00   0.00     0.01  -0.01   0.01    -0.01   0.00  -0.01
  64   1     0.00   0.01   0.00    -0.01   0.02   0.00     0.01  -0.02   0.01
  65   1     0.00   0.00   0.00     0.00   0.01   0.00     0.00  -0.01   0.00
  66   1     0.00   0.00  -0.02     0.01  -0.01  -0.04    -0.01   0.01   0.04
  67   1     0.00   0.00   0.00     0.00   0.00  -0.01     0.00   0.00   0.01
  68   1    -0.01   0.00   0.00    -0.01  -0.01   0.00     0.01   0.01   0.00
[truncated: 1,589,434 more chars]
