# Supplementary material
Source: publisher figshare collection journal article supplement (https://acs.figshare.com/ndownloader/files/5127205)
Supplement: Supplementary file 1 [file 5127205 › supporting_ja043819b/RRRR_fm-5-ts1.mol]

  MacMolPlt                       

114118  0  0  0  0  0  0  0  0  0 v2000
   -5.1638    1.7426    0.3925 O   0  0  0  0  0  0  0  0  0  0  0  0
    0.3936   -0.6375    0.0713 Mg  0  0  0  0  0  0  0  0  0  0  0  0
    0.7359    0.6685   -1.4757 O   0  0  0  0  0  0  0  0  0  0  0  0
   -4.1005    2.0126   -0.3900 C   0  0  0  0  0  0  0  0  0  0  0  0
   -0.6088   -2.2985    0.8132 N   0  0  0  0  0  0  0  0  0  0  0  0
    2.1759   -1.7183    0.2713 N   0  0  0  0  0  0  0  0  0  0  0  0
   -3.3711    2.9653   -0.2407 O   0  0  0  0  0  0  0  0  0  0  0  0
   -0.0785   -3.4246    1.2986 C   0  0  0  0  0  0  0  0  0  0  0  0
    1.2899   -3.7268    1.2748 C   0  0  0  0  0  0  0  0  0  0  0  0
    2.3450   -2.9318    0.7752 C   0  0  0  0  0  0  0  0  0  0  0  0
   -2.7397    1.1266   -2.1918 O   0  0  0  0  0  0  0  0  0  0  0  0
   -1.6259    0.7496   -1.5551 C   0  0  0  0  0  0  0  0  0  0  0  0
   -0.3244    0.8645   -2.3523 C   0  0  0  0  0  0  0  0  0  0  0  0
   -3.9949    0.9660   -1.4975 C   0  0  0  0  0  0  0  0  0  0  0  0
   -1.6334    0.2671   -0.4304 O   0  0  0  0  0  0  0  0  0  0  0  0
   -5.3531    2.6356    1.5033 C   0  0  0  0  0  0  0  0  0  0  0  0
   -0.0014    2.8541   -0.1264 O   0  0  0  0  0  0  0  0  0  0  0  0
    1.0246    2.0041    0.1929 C   0  0  0  0  0  0  0  0  0  0  0  0
    0.8721    1.1150    1.0466 O   0  0  0  0  0  0  0  0  0  0  0  0
    2.4680    3.8262    0.7472 O   0  0  0  0  0  0  0  0  0  0  0  0
    1.3960    4.6033    0.9899 C   0  0  0  0  0  0  0  0  0  0  0  0
    0.0002    4.1014    0.6040 C   0  0  0  0  0  0  0  0  0  0  0  0
    2.3957    2.6155   -0.0870 C   0  0  0  0  0  0  0  0  0  0  0  0
    1.5267    5.6612    1.5624 O   0  0  0  0  0  0  0  0  0  0  0  0
   -0.7567    5.1369   -0.2181 C   0  0  0  0  0  0  0  0  0  0  0  0
    2.7422    2.9738   -1.5201 C   0  0  0  0  0  0  0  0  0  0  0  0
   -0.2575    2.1361   -3.2107 C   0  0  0  0  0  0  0  0  0  0  0  0
   -5.0920    1.1515   -2.5440 C   0  0  0  0  0  0  0  0  0  0  0  0
   -2.0524   -2.1824    0.7809 C   0  0  0  0  0  0  0  0  0  0  0  0
    3.3152   -0.9213   -0.1326 C   0  0  0  0  0  0  0  0  0  0  0  0
   -2.7604   -2.7117   -0.3466 C   0  0  0  0  0  0  0  0  0  0  0  0
   -4.1454   -2.4298   -0.4609 C   0  0  0  0  0  0  0  0  0  0  0  0
   -4.8180   -1.6736    0.5291 C   0  0  0  0  0  0  0  0  0  0  0  0
   -4.1115   -1.1936    1.6525 C   0  0  0  0  0  0  0  0  0  0  0  0
   -2.7258   -1.4326    1.7991 C   0  0  0  0  0  0  0  0  0  0  0  0
   -2.0280   -3.5705   -1.4140 C   0  0  0  0  0  0  0  0  0  0  0  0
   -1.9655   -0.8778    3.0307 C   0  0  0  0  0  0  0  0  0  0  0  0
    4.0920   -0.2195    0.8528 C   0  0  0  0  0  0  0  0  0  0  0  0
    5.1086    0.6657    0.3962 C   0  0  0  0  0  0  0  0  0  0  0  0
    5.3624    0.8383   -0.9819 C   0  0  0  0  0  0  0  0  0  0  0  0
    4.6200    0.1124   -1.9355 C   0  0  0  0  0  0  0  0  0  0  0  0
    3.5852   -0.7726   -1.5353 C   0  0  0  0  0  0  0  0  0  0  0  0
    3.8984   -0.4312    2.3800 C   0  0  0  0  0  0  0  0  0  0  0  0
    2.8268   -1.6286   -2.5825 C   0  0  0  0  0  0  0  0  0  0  0  0
   -1.3947   -2.6773   -2.5289 C   0  0  0  0  0  0  0  0  0  0  0  0
   -2.9474   -4.6635   -2.0497 C   0  0  0  0  0  0  0  0  0  0  0  0
   -2.0155    0.6823    3.0783 C   0  0  0  0  0  0  0  0  0  0  0  0
   -2.5109   -1.4910    4.3636 C   0  0  0  0  0  0  0  0  0  0  0  0
    2.5570   -0.8659   -3.9149 C   0  0  0  0  0  0  0  0  0  0  0  0
    3.5914   -2.9673   -2.8598 C   0  0  0  0  0  0  0  0  0  0  0  0
    3.5011    0.8867    3.1186 C   0  0  0  0  0  0  0  0  0  0  0  0
    5.1950   -1.0338    3.0221 C   0  0  0  0  0  0  0  0  0  0  0  0
   -0.9945   -4.4686    1.9277 C   0  0  0  0  0  0  0  0  0  0  0  0
    3.7241   -3.5780    0.8714 C   0  0  0  0  0  0  0  0  0  0  0  0
    1.5774   -4.6890    1.6852 H   0  0  0  0  0  0  0  0  0  0  0  0
   -0.3751    0.0167   -3.0650 H   0  0  0  0  0  0  0  0  0  0  0  0
   -4.0584   -0.0281   -1.0427 H   0  0  0  0  0  0  0  0  0  0  0  0
   -5.3845    3.6742    1.1657 H   0  0  0  0  0  0  0  0  0  0  0  0
   -4.5363    2.5123    2.2197 H   0  0  0  0  0  0  0  0  0  0  0  0
   -6.3036    2.3468    1.9533 H   0  0  0  0  0  0  0  0  0  0  0  0
   -0.5283    3.9275    1.5512 H   0  0  0  0  0  0  0  0  0  0  0  0
    3.1711    1.9697    0.3157 H   0  0  0  0  0  0  0  0  0  0  0  0
   -0.8198    6.0686    0.3494 H   0  0  0  0  0  0  0  0  0  0  0  0
   -1.7590    4.7607   -0.4317 H   0  0  0  0  0  0  0  0  0  0  0  0
   -0.2372    5.3362   -1.1614 H   0  0  0  0  0  0  0  0  0  0  0  0
    3.5947    3.6617   -1.4989 H   0  0  0  0  0  0  0  0  0  0  0  0
    1.9123    3.4523   -2.0432 H   0  0  0  0  0  0  0  0  0  0  0  0
    3.0498    2.0648   -2.0361 H   0  0  0  0  0  0  0  0  0  0  0  0
   -1.0870    2.1596   -3.9244 H   0  0  0  0  0  0  0  0  0  0  0  0
    0.6834    2.1348   -3.7682 H   0  0  0  0  0  0  0  0  0  0  0  0
   -0.3035    3.0330   -2.5918 H   0  0  0  0  0  0  0  0  0  0  0  0
   -4.9907    0.3927   -3.3257 H   0  0  0  0  0  0  0  0  0  0  0  0
   -5.0251    2.1406   -3.0080 H   0  0  0  0  0  0  0  0  0  0  0  0
   -6.0739    1.0449   -2.0747 H   0  0  0  0  0  0  0  0  0  0  0  0
   -4.7168   -2.8322   -1.3068 H   0  0  0  0  0  0  0  0  0  0  0  0
   -5.8976   -1.4912    0.4380 H   0  0  0  0  0  0  0  0  0  0  0  0
   -4.6503   -0.6339    2.4287 H   0  0  0  0  0  0  0  0  0  0  0  0
   -1.1918   -4.0931   -0.9113 H   0  0  0  0  0  0  0  0  0  0  0  0
   -0.9019   -1.1773    2.9299 H   0  0  0  0  0  0  0  0  0  0  0  0
    5.7226    1.2024    1.1316 H   0  0  0  0  0  0  0  0  0  0  0  0
    6.1624    1.5167   -1.3096 H   0  0  0  0  0  0  0  0  0  0  0  0
    4.8649    0.2134   -3.0003 H   0  0  0  0  0  0  0  0  0  0  0  0
    3.0729   -1.1566    2.5218 H   0  0  0  0  0  0  0  0  0  0  0  0
    1.8468   -1.8955   -2.1357 H   0  0  0  0  0  0  0  0  0  0  0  0
   -0.9271   -3.3050   -3.3060 H   0  0  0  0  0  0  0  0  0  0  0  0
   -0.6047   -2.0404   -2.0905 H   0  0  0  0  0  0  0  0  0  0  0  0
   -2.1549   -2.0347   -3.0041 H   0  0  0  0  0  0  0  0  0  0  0  0
   -2.3394   -5.3360   -2.6738 H   0  0  0  0  0  0  0  0  0  0  0  0
   -3.7228   -4.2139   -2.6881 H   0  0  0  0  0  0  0  0  0  0  0  0
   -3.4392   -5.2631   -1.2686 H   0  0  0  0  0  0  0  0  0  0  0  0
   -1.4048    1.0547    3.9168 H   0  0  0  0  0  0  0  0  0  0  0  0
   -3.0509    1.0374    3.2192 H   0  0  0  0  0  0  0  0  0  0  0  0
   -1.6211    1.1078    2.1386 H   0  0  0  0  0  0  0  0  0  0  0  0
   -1.9178   -1.1216    5.2141 H   0  0  0  0  0  0  0  0  0  0  0  0
   -2.4443   -2.5898    4.3446 H   0  0  0  0  0  0  0  0  0  0  0  0
   -3.5626   -1.2081    4.5241 H   0  0  0  0  0  0  0  0  0  0  0  0
    1.8847   -1.4609   -4.5527 H   0  0  0  0  0  0  0  0  0  0  0  0
    3.4887   -0.6879   -4.4737 H   0  0  0  0  0  0  0  0  0  0  0  0
    2.0824    0.1060   -3.7054 H   0  0  0  0  0  0  0  0  0  0  0  0
    3.0386   -3.5662   -3.5998 H   0  0  0  0  0  0  0  0  0  0  0  0
    3.6886   -3.5604   -1.9367 H   0  0  0  0  0  0  0  0  0  0  0  0
    4.5999   -2.7652   -3.2540 H   0  0  0  0  0  0  0  0  0  0  0  0
    3.3909    0.6888    4.1962 H   0  0  0  0  0  0  0  0  0  0  0  0
    2.5396    1.2649    2.7330 H   0  0  0  0  0  0  0  0  0  0  0  0
    4.2664    1.6659    2.9837 H   0  0  0  0  0  0  0  0  0  0  0  0
    5.0064   -1.2783    4.0786 H   0  0  0  0  0  0  0  0  0  0  0  0
    6.0222   -0.3090    2.9770 H   0  0  0  0  0  0  0  0  0  0  0  0
    5.5092   -1.9510    2.5018 H   0  0  0  0  0  0  0  0  0  0  0  0
   -1.7126   -4.8723    1.2047 H   0  0  0  0  0  0  0  0  0  0  0  0
   -0.4133   -5.3059    2.3283 H   0  0  0  0  0  0  0  0  0  0  0  0
   -1.5712   -4.0315    2.7516 H   0  0  0  0  0  0  0  0  0  0  0  0
    4.4916   -3.0286    0.3216 H   0  0  0  0  0  0  0  0  0  0  0  0
    4.0372   -3.6467    1.9208 H   0  0  0  0  0  0  0  0  0  0  0  0
    3.6822   -4.6030    0.4827 H   0  0  0  0  0  0  0  0  0  0  0  0
  1  4  1  0  0  0  0
  1 16  1  0  0  0  0
  2  3  1  0  0  0  0
  2  5  1  0  0  0  0
  2  6  1  0  0  0  0
  2 15  1  0  0  0  0
  2 19  1  0  0  0  0
  3 13  1  0  0  0  0
  4  7  2  0  0  0  0
  4 14  1  0  0  0  0
  5  8  1  0  0  0  0
  5 29  1  0  0  0  0
  6 10  1  0  0  0  0
  6 30  1  0  0  0  0
  8  9  1  0  0  0  0
  8 53  1  0  0  0  0
  9 10  1  0  0  0  0
  9 55  1  0  0  0  0
 10 54  1  0  0  0  0
 11 12  1  0  0  0  0
 11 14  1  0  0  0  0
 12 13  1  0  0  0  0
 12 15  2  0  0  0  0
 13 27  1  0  0  0  0
 13 56  1  0  0  0  0
 14 28  1  0  0  0  0
 14 57  1  0  0  0  0
 16 58  1  0  0  0  0
 16 59  1  0  0  0  0
 16 60  1  0  0  0  0
 17 18  1  0  0  0  0
 17 22  1  0  0  0  0
 18 19  2  0  0  0  0
 18 23  1  0  0  0  0
 20 21  1  0  0  0  0
 20 23  1  0  0  0  0
 21 22  1  0  0  0  0
 21 24  2  0  0  0  0
 22 25  1  0  0  0  0
 22 61  1  0  0  0  0
 23 26  1  0  0  0  0
 23 62  1  0  0  0  0
 25 63  1  0  0  0  0
 25 64  1  0  0  0  0
 25 65  1  0  0  0  0
 26 66  1  0  0  0  0
 26 67  1  0  0  0  0
 26 68  1  0  0  0  0
 27 69  1  0  0  0  0
 27 70  1  0  0  0  0
 27 71  1  0  0  0  0
 28 72  1  0  0  0  0
 28 73  1  0  0  0  0
 28 74  1  0  0  0  0
 29 31  1  0  0  0  0
 29 35  1  0  0  0  0
 30 38  1  0  0  0  0
 30 42  1  0  0  0  0
 31 32  1  0  0  0  0
 31 36  1  0  0  0  0
 32 33  1  0  0  0  0
 32 75  1  0  0  0  0
 33 34  1  0  0  0  0
 33 76  1  0  0  0  0
 34 35  1  0  0  0  0
 34 77  1  0  0  0  0
 35 37  1  0  0  0  0
 36 45  1  0  0  0  0
 36 46  1  0  0  0  0
 36 78  1  0  0  0  0
 37 47  1  0  0  0  0
 37 48  1  0  0  0  0
 37 79  1  0  0  0  0
 38 39  1  0  0  0  0
 38 43  1  0  0  0  0
 39 40  1  0  0  0  0
 39 80  1  0  0  0  0
 40 41  1  0  0  0  0
 40 81  1  0  0  0  0
 41 42  1  0  0  0  0
 41 82  1  0  0  0  0
 42 44  1  0  0  0  0
 43 51  1  0  0  0  0
 43 52  1  0  0  0  0
 43 83  1  0  0  0  0
 44 49  1  0  0  0  0
 44 50  1  0  0  0  0
 44 84  1  0  0  0  0
 45 85  1  0  0  0  0
 45 86  1  0  0  0  0
 45 87  1  0  0  0  0
 46 88  1  0  0  0  0
 46 89  1  0  0  0  0
 46 90  1  0  0  0  0
 47 91  1  0  0  0  0
 47 92  1  0  0  0  0
 47 93  1  0  0  0  0
 48 94  1  0  0  0  0
 48 95  1  0  0  0  0
 48 96  1  0  0  0  0
 49 97  1  0  0  0  0
 49 98  1  0  0  0  0
 49 99  1  0  0  0  0
 50100  1  0  0  0  0
 50101  1  0  0  0  0
 50102  1  0  0  0  0
 51103  1  0  0  0  0
 51104  1  0  0  0  0
 51105  1  0  0  0  0
 52106  1  0  0  0  0
 52107  1  0  0  0  0
 52108  1  0  0  0  0
 53109  1  0  0  0  0
 53110  1  0  0  0  0
 53111  1  0  0  0  0
 54112  1  0  0  0  0
 54113  1  0  0  0  0
 54114  1  0  0  0  0
M  END
