# Supplementary material
Source: publisher figshare collection journal article supplement (https://acs.figshare.com/ndownloader/files/5127205)
Supplement: Supplementary file 1 [file 5127205 › supporting_ja043819b/RRRR_fm-5-ts2-55.xyz]

114
O	-4.077077	-2.540085	-1.622523	0.03	-0.01	0.0
Mg	0.261872	0.186027	-0.002061	0.06	-0.09	-0.04
O	-0.855424	0.229682	3.27516	-0.08	0.09	0.09
C	-3.987049	-2.264389	-0.312105	0.04	0.01	-0.01
N	-0.253912	1.436604	-1.543458	0.0	-0.04	0.01
N	0.738994	-1.303229	-1.33082	0.0	-0.06	-0.06
O	-3.811681	-3.079143	0.563733	0.03	0.02	0.0
C	-0.557386	1.018442	-2.765271	-0.01	-0.02	0.01
C	-0.479889	-0.3343	-3.177726	-0.01	-0.02	-0.02
C	0.193843	-1.395294	-2.540202	-0.01	-0.03	-0.05
O	-3.787508	-0.417056	1.245929	0.01	0.02	-0.02
C	-2.475194	-0.297838	1.465549	0.0	0.05	0.03
C	-2.227858	0.151647	2.90672	-0.07	0.02	0.05
C	-4.210758	-0.768066	-0.089409	0.05	0.01	-0.03
O	-1.645651	-0.507006	0.598079	0.04	0.08	0.06
C	-3.958217	-3.93079	-1.981613	0.01	-0.01	0.01
O	1.274334	-0.152919	1.60488	0.05	0.05	-0.08
C	-0.071142	1.184039	2.677174	-0.15	0.17	0.16
O	-0.474033	1.820317	1.709332	-0.13	0.21	0.21
O	2.247171	2.026571	2.963742	-0.08	0.04	0.05
C	3.152539	1.109158	2.482779	-0.03	0.08	0.04
C	2.641413	-0.187114	1.839227	0.03	0.1	-0.06
C	1.029653	1.671834	3.625814	-0.03	0.01	0.11
O	4.321254	1.418246	2.492066	-0.04	0.12	0.1
C	3.11791	-1.422436	2.632441	0.08	0.07	-0.11
C	1.271362	0.80921	4.862256	0.02	-0.12	0.01
C	-2.883257	-0.805709	3.905695	-0.04	-0.05	0.0
C	-5.693262	-0.417918	-0.187752	0.05	0.02	-0.06
C	-0.246748	2.841071	-1.173731	0.01	-0.04	0.03
C	1.66489	-2.31686	-0.857883	0.0	-0.05	-0.06
C	1.029836	3.459225	-0.947185	0.01	-0.04	0.03
C	1.061066	4.778331	-0.437564	0.01	-0.04	0.02
C	-0.127595	5.477766	-0.156789	0.02	-0.03	0.0
C	-1.370267	4.869536	-0.393115	0.02	-0.02	0.0
C	-1.459193	3.5478	-0.893724	0.01	-0.03	0.01
C	2.347706	2.735345	-1.333168	0.01	-0.04	0.02
C	-2.86401	2.9226	-1.091822	0.0	-0.01	0.0
C	1.221205	-3.326023	0.055568	0.01	-0.03	-0.03
C	2.181806	-4.201902	0.624975	0.01	-0.01	-0.02
C	3.549967	-4.090989	0.303383	0.01	-0.02	-0.03
C	3.973268	-3.109799	-0.61451	0.0	-0.04	-0.05
C	3.055819	-2.214691	-1.211222	0.0	-0.05	-0.06
C	-0.271403	-3.506189	0.423059	0.01	0.0	-0.01
C	3.579224	-1.18411	-2.247666	0.0	-0.06	-0.07
C	3.581123	3.230556	-0.516499	0.01	-0.04	0.01
C	2.61607	2.873157	-2.869129	0.0	-0.05	0.02
C	-3.641825	2.891694	0.262581	-0.01	0.01	0.0
C	-3.701525	3.696954	-2.165647	0.02	0.0	-0.01
C	4.714719	-0.28942	-1.655419	-0.01	-0.05	-0.08
C	4.098707	-1.896535	-3.543218	0.0	-0.07	-0.06
C	-0.510966	-3.291452	1.950272	0.03	0.02	-0.01
C	-0.803212	-4.909134	-0.02265	-0.01	0.0	0.02
C	-1.007911	1.994983	-3.847581	0.0	-0.01	0.02
C	0.31504	-2.698945	-3.319031	-0.02	-0.02	-0.08
H	-0.848678	-0.539422	-4.177697	-0.02	0.01	-0.02
H	-2.676883	1.151014	2.978513	-0.13	-0.01	0.07
H	-3.616685	-0.202696	-0.810333	0.07	0.0	-0.01
H	-3.00102	-4.329151	-1.642019	0.01	-0.02	0.01
H	-4.025527	-3.954654	-3.069053	0.01	-0.02	0.01
H	-4.771321	-4.507968	-1.532656	0.0	0.0	0.02
H	3.203371	-0.222548	0.892363	0.09	0.19	-0.03
H	0.655765	2.649125	3.961458	0.04	-0.01	0.25
H	4.176688	-1.314317	2.894021	0.07	0.1	-0.09
H	2.995324	-2.321361	2.026135	0.12	0.09	-0.14
H	2.540102	-1.550316	3.55334	0.07	0.01	-0.12
H	2.108638	1.230246	5.4273	0.08	-0.22	-0.02
H	1.499971	-0.22386	4.597868	-0.06	-0.11	-0.12
H	0.384537	0.804979	5.502008	0.07	-0.14	0.07
H	-3.959141	-0.866629	3.731062	-0.03	-0.11	-0.03
H	-2.701152	-0.442784	4.920656	-0.09	-0.07	0.02
H	-2.448696	-1.8037	3.804641	0.02	-0.02	-0.02
H	-5.832411	0.650981	-0.008915	0.06	0.02	-0.07
H	-6.271553	-0.979398	0.552556	0.03	0.03	-0.08
H	-6.062183	-0.662081	-1.187589	0.08	0.02	-0.07
H	2.026235	5.271308	-0.2708	0.02	-0.05	0.02
H	-0.081345	6.501731	0.23769	0.02	-0.03	-0.01
H	-2.292791	5.426132	-0.183513	0.02	-0.02	-0.01
H	2.216593	1.648612	-1.128421	0.01	-0.04	0.02
H	-2.728355	1.878374	-1.439228	-0.01	-0.01	0.01
H	1.851141	-4.985048	1.320101	0.01	0.01	0.01
H	4.279181	-4.778994	0.752655	0.01	-0.01	-0.02
H	5.03677	-3.043341	-0.878198	0.0	-0.05	-0.06
H	-0.845153	-2.735466	-0.126716	0.01	-0.01	-0.01
H	2.734531	-0.523922	-2.531619	-0.01	-0.07	-0.08
H	4.444332	2.579907	-0.717032	0.01	-0.04	0.01
H	3.373374	3.212452	0.565893	0.02	-0.02	0.01
H	3.858015	4.257657	-0.799558	0.01	-0.04	-0.01
H	3.558211	2.369458	-3.133684	0.0	-0.04	0.01
H	2.69235	3.934708	-3.153278	-0.01	-0.05	0.01
H	1.800624	2.412834	-3.452216	-0.01	-0.05	0.02
H	-4.613145	2.381293	0.141637	-0.02	0.03	-0.01
H	-3.83753	3.911212	0.628553	0.0	0.02	-0.02
H	-3.048684	2.365769	1.031036	-0.03	0.01	0.01
H	-4.666907	3.192641	-2.327009	0.01	0.0	-0.01
H	-3.168394	3.745431	-3.126589	0.03	-0.01	0.0
H	-3.9003	4.725789	-1.828956	0.02	0.0	-0.01
H	5.032233	0.456538	-2.400743	-0.01	-0.06	-0.08
H	4.36517	0.247796	-0.75604	-0.02	-0.04	-0.09
H	5.59059	-0.89208	-1.372063	-0.01	-0.04	-0.07
H	4.4147	-1.143482	-4.281324	0.0	-0.07	-0.07
H	3.314534	-2.518949	-3.999333	0.01	-0.08	-0.06
H	4.961454	-2.539989	-3.311625	0.01	-0.06	-0.06
H	-1.593179	-3.344191	2.164315	0.04	0.03	0.01
H	-0.120842	-2.304985	2.25694	0.05	0.02	-0.03
H	-0.002013	-4.065233	2.545705	0.03	0.03	0.0
H	-1.869153	-5.001874	0.244854	-0.01	0.01	0.03
H	-0.255332	-5.722464	0.479743	-0.01	0.0	0.01
H	-0.689334	-5.044988	-1.111719	-0.03	-0.01	0.02
H	-0.783244	3.033023	-3.589078	-0.01	-0.01	0.04
H	-0.516983	1.757983	-4.798671	0.01	0.01	0.02
H	-2.089492	1.909947	-4.012366	0.0	-0.01	0.01
H	1.35803	-2.922271	-3.56702	-0.02	0.0	-0.11
H	-0.063194	-3.539184	-2.724584	0.02	-0.03	-0.08
H	-0.251942	-2.655088	-4.255094	-0.05	-0.01	-0.06
114
O	-4.0705876431181265	-2.5422481189606247	-1.622523	0.03	-0.01	0.0
Mg	0.2748507137637478	0.16655892935437833	-0.010713475842498528	0.06	-0.09	-0.04
O	-0.872728951684997	0.24915007064562167	3.2946280706456217	-0.08	0.09	0.09
C	-3.9783965241575014	-2.262225881039375	-0.3142681189606247	0.04	0.01	-0.01
N	-0.253912	1.4279515241575014	-1.5412948810393754	0.0	-0.04	0.01
N	0.738994	-1.3162077137637478	-1.3437987137637477	0.0	-0.06	-0.06
O	-3.805191643118126	-3.074816762078751	0.563733	0.03	0.02	0.0
C	-0.5595491189606246	1.0141157620787509	-2.763107881039375	-0.01	-0.02	0.01
C	-0.48205211896062466	-0.33862623792124924	-3.182052237921249	-0.01	-0.02	-0.02
C	0.19167988103937536	-1.4017833568818738	-2.551017594803123	-0.01	-0.03	-0.05
O	-3.785344881039375	-0.41272976207875073	1.2416027620787509	0.01	0.02	-0.02
C	-2.475194	-0.28702240519687683	1.4720383568818738	0.0	0.05	0.03
C	-2.2429998327243723	0.15597323792124926	2.917535594803123	-0.07	0.02	0.05
C	-4.199942405196877	-0.7659028810393754	-0.0958983568818739	0.05	0.01	-0.03
O	-1.6369985241575014	-0.4897010483150029	0.6110577137637478	0.04	0.08	0.06
C	-3.956053881039375	-3.932953118960625	-1.9794498810393755	0.01	-0.01	0.01
O	1.2851495948031233	-0.14210340519687684	1.587575048315003	0.05	0.05	-0.08
C	-0.10358878440936947	1.2208120223306187	2.711783903369994	-0.15	0.17	0.16
O	-0.5021535464881202	1.8657424981731172	1.7547574981731173	-0.13	0.21	0.21
O	2.2298660483150026	2.0352234758424985	2.974557594803123	-0.08	0.04	0.05
C	3.146049643118126	1.126462951684997	2.4914314758424982	-0.03	0.08	0.04
C	2.647902356881874	-0.16548281039375368	1.8262482862362521	0.03	0.1	-0.06
C	1.0231636431181261	1.6739971189606246	3.649608308566871	-0.03	0.01	0.11
O	4.312601524157501	1.4442034275274955	2.5136971896062463	-0.04	0.12	0.1
C	3.1352149516849974	-1.4072941672756276	2.608646691433129	0.08	0.07	-0.11
C	1.2756882379212493	0.7832525724725043	4.864419118960625	0.02	-0.12	0.01
C	-2.8919094758424984	-0.8165245948031231	3.905695	-0.04	-0.05	0.0
C	-5.682446405196877	-0.41359176207875076	-0.2007307137637478	0.05	0.02	-0.06
C	-0.24458488103937537	2.8324185241575015	-1.1672416431181263	0.01	-0.04	0.03
C	1.66489	-2.3276755948031234	-0.8708617137637478	0.0	-0.05	-0.06
C	1.0319991189606246	3.4505725241575016	-0.9406956431181261	0.01	-0.04	0.03
C	1.0632291189606247	4.769678524157501	-0.43323776207875075	0.01	-0.04	0.02
C	-0.12326876207875072	5.471276643118126	-0.156789	0.02	-0.03	0.0
C	-1.3659407620787507	4.86520976207875	-0.393115	0.02	-0.02	0.0
C	-1.4570298810393754	3.541310643118126	-0.8915608810393754	0.01	-0.03	0.01
C	2.349869118960625	2.7266925241575017	-1.3288417620787507	0.01	-0.04	0.02
C	-2.86401	2.9204368810393753	-1.091822	0.0	-0.01	0.0
C	1.2233681189606247	-3.332512356881874	0.049078643118126104	0.01	-0.03	-0.03
C	2.1839691189606247	-4.204065118960624	0.6206487620787506	0.01	-0.01	-0.02
C	3.552130118960625	-4.09531523792125	0.2968936431181261	0.01	-0.02	-0.03
C	3.973268	-3.1184514758424986	-0.6253255948031231	0.0	-0.04	-0.05
C	3.055819	-2.2255065948031234	-1.2242007137637478	0.0	-0.05	-0.06
C	-0.26923988103937535	-3.506189	0.42089588103937536	0.01	0.0	-0.01
C	3.579224	-1.1970887137637478	-2.2628078327243726	0.0	-0.06	-0.07
C	3.5832861189606247	3.2219035241575016	-0.5143358810393754	0.01	-0.04	0.01
C	2.61607	2.8623414051968767	-2.864802762078751	0.0	-0.05	0.02
C	-3.6439881189606247	2.893857118960625	0.262581	-0.01	0.01	0.0
C	-3.697198762078751	3.696954	-2.1678101189606247	0.02	0.0	-0.01
C	4.712555881039375	-0.3002355948031232	-1.672723951684997	-0.01	-0.05	-0.08
C	4.098707	-1.9116768327243725	-3.5561967137637476	0.0	-0.07	-0.06
C	-0.5044766431181261	-3.287125762078751	1.9481088810393754	0.03	0.02	-0.01
C	-0.8053751189606246	-4.909134	-0.018323762078750735	-0.01	0.0	0.02
C	-1.007911	1.9928198810393754	-3.8432547620787507	0.0	-0.01	0.02
C	0.31071376207875073	-2.7032712379212493	-3.336335951684997	-0.02	-0.02	-0.08
H	-0.8530042379212494	-0.5372588810393754	-4.18202323792125	-0.02	0.01	-0.02
H	-2.70500354648812	1.1488508810393754	2.9936548327243724	-0.13	-0.01	0.07
H	-3.6015431672756275	-0.202696	-0.8124961189606246	0.07	0.0	-0.01
H	-2.998856881039375	-4.33347723792125	-1.6398558810393753	0.01	-0.02	0.01
H	-4.0233638810393755	-3.9589802379212493	-3.066889881039375	0.01	-0.02	0.01
H	-4.771321	-4.507968	-1.5283297620787508	0.0	0.0	0.02
H	3.222839070645622	-0.181448739748132	0.8858736431181261	0.09	0.19	-0.03
H	0.6644174758424986	2.6469618810393754	4.015535974015616	0.04	-0.01	0.25
H	4.191829832724373	-1.2926858103937537	2.8745529293543783	0.07	0.1	-0.09
H	3.0212814275274957	-2.3018929293543784	1.9958513345512552	0.12	0.09	-0.14
H	2.5552438327243725	-1.5481528810393754	3.5273825724725043	0.07	0.01	-0.12
H	2.1259429516849973	1.182657382866258	5.42297376207875	0.08	-0.22	-0.02
H	1.4869922862362521	-0.24765430856687096	4.571910572472505	-0.06	-0.11	-0.12
H	0.39967883272437243	0.7746953345512552	5.517149832724373	0.07	-0.14	0.07
H	-3.965630356881874	-0.8904233085668709	3.724572643118126	-0.03	-0.11	-0.03
H	-2.7206200706456216	-0.45792583272437243	4.92498223792125	-0.09	-0.07	0.02
H	-2.444369762078751	-1.8080262379212493	3.800314762078751	0.02	-0.02	-0.02
H	-5.8194322862362515	0.6553072379212493	-0.024056832724372423	0.06	0.02	-0.07
H	-6.265063643118126	-0.9729086431181261	0.535251048315003	0.03	0.03	-0.08
H	-6.044878048315003	-0.6577547620787507	-1.2027308327243724	0.08	0.02	-0.07
H	2.030561237921249	5.260492405196877	-0.26647376207875073	0.02	-0.05	0.02
H	-0.07701876207875073	6.495241643118127	0.23552688103937539	0.02	-0.03	-0.01
H	-2.2884647620787506	5.42180576207875	-0.18567611896062464	0.02	-0.02	-0.01
H	2.218756118960625	1.6399595241575013	-1.1240947620787507	0.01	-0.04	0.02
H	-2.730518118960625	1.8762108810393754	-1.4370648810393754	-0.01	-0.01	0.01
H	1.8533041189606245	-4.982884881039375	1.3222641189606246	0.01	0.01	0.01
H	4.281344118960625	-4.781157118960625	0.7483287620787507	0.01	-0.01	-0.02
H	5.03677	-3.054156594803123	-0.8911767137637479	0.0	-0.05	-0.06
H	-0.8429898810393754	-2.737629118960625	-0.12887911896062462	0.01	-0.01	-0.01
H	2.7323678810393752	-0.5390638327243724	-2.5489239516849973	-0.01	-0.07	-0.08
H	4.446495118960625	2.5712545241575016	-0.7148688810393754	0.01	-0.04	0.01
H	3.3777002379212493	3.2081257620787507	0.5680561189606246	0.02	-0.02	0.01
H	3.860178118960625	4.249004524157502	-0.8017211189606246	0.01	-0.04	-0.01
H	3.558211	2.3608055241575014	-3.1315208810393753	0.0	-0.04	0.01
H	2.690186881039375	3.923892405196877	-3.151114881039375	-0.01	-0.05	0.01
H	1.7984608810393754	2.402018405196877	-3.4478897620787508	-0.01	-0.05	0.02
H	-4.61747123792125	2.387782356881874	0.13947388103937539	-0.02	0.03	-0.01
H	-3.83753	3.915538237921249	0.6242267620787507	0.0	0.02	-0.02
H	-3.055173356881874	2.3679321189606246	1.0331991189606247	-0.03	0.01	0.01
H	-4.664743881039375	3.192641	-2.3291721189606247	0.01	0.0	-0.01
H	-3.161904643118126	3.743267881039375	-3.126589	0.03	-0.01	0.0
H	-3.895973762078751	4.725789	-1.8311191189606246	0.02	0.0	-0.01
H	5.030069881039375	0.4435592862362522	-2.418047951684997	-0.01	-0.06	-0.08
H	4.36084376207875	0.23914352415750145	-0.7755080706456218	-0.02	-0.04	-0.09
H	5.588426881039375	-0.9007324758424985	-1.3872048327243724	-0.01	-0.04	-0.07
H	4.4147	-1.1586238327243725	-4.2964658327243725	0.0	-0.07	-0.07
H	3.316697118960625	-2.5362539516849973	-4.012311713763748	0.01	-0.08	-0.06
H	4.963617118960625	-2.5529677137637474	-3.3246037137637474	0.01	-0.06	-0.06
H	-1.5845265241575013	-3.337701643118126	2.166478118960625	0.04	0.03	0.01
H	-0.11002640519687684	-2.3006587620787506	2.250450643118126	0.05	0.02	-0.03
H	0.004476356881873895	-4.0587436431181265	2.545705	0.03	0.03	0.0
H	-1.8713161189606247	-4.999710881039375	0.25134335688187387	-0.01	0.01	0.03
H	-0.25749511896062466	-5.722464	0.48190611896062463	-0.01	0.0	0.01
H	-0.6958233568818739	-5.047151118960625	-1.1073927620787507	-0.03	-0.01	0.02
H	-0.7854071189606247	3.030859881039375	-3.580425524157502	-0.01	-0.01	0.04
H	-0.5148198810393754	1.7601461189606247	-4.79434476207875	0.01	0.01	0.02
H	-2.089492	1.9077838810393755	-4.010202881039375	0.0	-0.01	0.01
H	1.3537037620787509	-2.922271	-3.5908143085668707	-0.02	0.0	-0.11
H	-0.05886776207875074	-3.545673356881874	-2.7418889516849974	0.02	-0.03	-0.08
H	-0.26275759480312316	-2.657251118960625	-4.268072713763748	-0.05	-0.01	-0.06
114
O	-4.064733509701858	-2.5441994967660473	-1.622523	0.03	-0.01	0.0
Mg	0.2865589805962839	0.1489965291055742	-0.01851898706418925	0.06	-0.09	-0.04
O	-0.8883399741283785	0.2667124708944258	3.312190470894426	-0.08	0.09	0.09
C	-3.9705910129358104	-2.2602745032339526	-0.3162194967660473	0.04	0.01	-0.01
N	-0.253912	1.4201460129358108	-1.5393435032339526	0.0	-0.04	0.01
N	0.738994	-1.327915980596284	-1.3555069805962838	0.0	-0.06	-0.06
O	-3.799337509701858	-3.0709140064679055	0.563733	0.03	0.02	0.0
C	-0.5615004967660474	1.0102130064679054	-2.7611565032339525	-0.01	-0.02	0.01
C	-0.4840034967660473	-0.3425289935320946	-3.1859549935320945	-0.01	-0.02	-0.02
C	0.18972850323395268	-1.407637490298142	-2.560774483830236	-0.01	-0.03	-0.05
O	-3.7833935032339525	-0.4088270064679054	1.2377000064679053	0.01	0.02	-0.02
C	-2.475194	-0.2772655161697634	1.4778924902981418	0.0	0.05	0.03
C	-2.256659477362331	0.15987599353209464	2.9272924838302363	-0.07	0.02	0.05
C	-4.190185516169763	-0.7639515032339527	-0.10175249029814194	0.05	0.01	-0.03
O	-1.6291930129358108	-0.47409002587162147	0.6227659805962839	0.04	0.08	0.06
C	-3.9541025032339525	-3.9349044967660474	-1.9774985032339527	0.01	-0.01	0.01
O	1.2949064838302367	-0.13234651616976345	1.5719640258716217	0.05	0.05	-0.08
C	-0.13285945149070966	1.2539854450228043	2.743005948256757	-0.15	0.17	0.16
O	-0.527521457958615	1.9067214320869934	1.7957364320869935	-0.13	0.21	0.21
O	2.2142550258716214	2.0430289870641896	2.9843144838302362	-0.08	0.04	0.05
C	3.140195509701858	1.1420739741283785	2.4992369870641893	-0.03	0.08	0.04
C	2.653756490298142	-0.14596903233952688	1.814540019403716	0.03	0.1	-0.06
C	1.017309509701858	1.6759484967660474	3.6710734644265206	-0.03	0.01	0.11
O	4.30479601293581	1.4676199611925675	2.533210967660473	-0.04	0.12	0.1
C	3.1508259741283786	-1.3936345226376687	2.5871815355734795	0.08	0.07	-0.11
C	1.2795909935320948	0.7598360388074322	4.866370496766048	0.02	-0.12	0.01
C	-2.8997149870641894	-0.8262814838302366	3.905695	-0.04	-0.05	0.0
C	-5.672689516169763	-0.4096890064679054	-0.21243898059628388	0.05	0.02	-0.06
C	-0.2426335032339527	2.8246130129358105	-1.1613875097018582	0.01	-0.04	0.03
C	1.66489	-2.3374324838302365	-0.8825699805962838	0.0	-0.05	-0.06
C	1.0339504967660473	3.4427670129358106	-0.9348415097018581	0.01	-0.04	0.03
C	1.0651804967660474	4.76187301293581	-0.4293350064679054	0.01	-0.04	0.02
C	-0.11936600646790536	5.465422509701858	-0.156789	0.02	-0.03	0.0
C	-1.3620380064679052	4.861307006467905	-0.393115	0.02	-0.02	0.0
C	-1.4550785032339526	3.535456509701858	-0.8896095032339526	0.01	-0.03	0.01
C	2.3518204967660474	2.7188870129358107	-1.3249390064679052	0.01	-0.04	0.02
C	-2.86401	2.9184855032339527	-1.091822	0.0	-0.01	0.0
C	1.2253194967660475	-3.3383664902981423	0.043224509701858066	0.01	-0.03	-0.03
C	2.1859204967660473	-4.206016496766047	0.6167460064679053	0.01	-0.01	-0.02
C	3.5540814967660475	-4.099217993532095	0.2910395097018581	0.01	-0.02	-0.03
C	3.973268	-3.1262569870641896	-0.6350824838302366	0.0	-0.04	-0.05
C	3.055819	-2.2352634838302365	-1.235908980596284	0.0	-0.05	-0.06
C	-0.2672885032339527	-3.506189	0.4189445032339527	0.01	0.0	-0.01
C	3.579224	-1.208796980596284	-2.2764674773623312	0.0	-0.06	-0.07
C	3.585237496766047	3.2140980129358105	-0.5123845032339527	0.01	-0.04	0.01
C	2.61607	2.8525845161697636	-2.8609000064679053	0.0	-0.05	0.02
C	-3.6459394967660472	2.8958084967660476	0.262581	-0.01	0.01	0.0
C	-3.6932960064679055	3.696954	-2.1697614967660472	0.02	0.0	-0.01
C	4.710604503233952	-0.3099924838302366	-1.6883349741283784	-0.01	-0.05	-0.08
C	4.098707	-1.9253364773623312	-3.5679049805962837	0.0	-0.07	-0.06
C	-0.4986225097018581	-3.2832230064679053	1.9461575032339526	0.03	0.02	-0.01
C	-0.8073264967660474	-4.909134	-0.014421006467905376	-0.01	0.0	0.02
C	-1.007911	1.9908685032339526	-3.839352006467905	0.0	-0.01	0.02
C	0.3068110064679054	-2.707173993532095	-3.3519469741283783	-0.02	-0.02	-0.08
H	-0.8569069935320947	-0.5353075032339526	-4.185925993532095	-0.02	0.01	-0.02
H	-2.7303714579586154	1.1468995032339526	3.007314477362331	-0.13	-0.01	0.07
H	-3.587883522637669	-0.202696	-0.8144474967660473	0.07	0.0	-0.01
H	-2.9969055032339527	-4.337379993532095	-1.6379045032339525	0.01	-0.02	0.01
H	-4.021412503233953	-3.962882993532095	-3.0649385032339524	0.01	-0.02	0.01
H	-4.771321	-4.507968	-1.5244270064679053	0.0	0.0	0.02
H	3.240401470894426	-0.14437256144510108	0.880019509701858	0.09	0.19	-0.03
H	0.6722229870641893	2.645010503233953	4.064320419151183	0.04	-0.01	0.25
H	4.205489477362332	-1.2731720323395268	2.856990529105574	0.07	0.1	-0.09
H	3.044697961192568	-2.284330529105574	1.9685320452753376	0.12	0.09	-0.14
H	2.568903477362331	-1.5462015032339527	3.503966038807432	0.07	0.01	-0.12
H	2.1415539741283784	1.1397270711469591	5.419071006467905	0.08	-0.22	-0.02
H	1.475284019403716	-0.26911946442652046	4.548494038807433	-0.06	-0.11	-0.12
H	0.4133384773623312	0.7473760452753376	5.5308094773623315	0.07	-0.14	0.07
H	-3.971484490298142	-0.9118884644265204	3.718718509701858	-0.03	-0.11	-0.03
H	-2.738182470894426	-0.4715854773623312	4.928884993532095	-0.09	-0.07	0.02
H	-2.4404670064679053	-1.8119289935320948	3.7964120064679054	0.02	-0.02	-0.02
H	-5.807724019403715	0.6592099935320946	-0.037716477362331184	0.06	0.02	-0.07
H	-6.259209509701858	-0.967054509701858	0.5196400258716215	0.03	0.03	-0.08
H	-6.029267025871621	-0.6538520064679054	-1.216390477362331	0.08	0.02	-0.07
H	2.0344639935320945	5.2507355161697635	-0.2625710064679054	0.02	-0.05	0.02
H	-0.07311600646790538	6.489387509701858	0.2335755032339527	0.02	-0.03	-0.01
H	-2.284562006467905	5.417903006467905	-0.1876274967660473	0.02	-0.02	-0.01
H	2.2207074967660474	1.6321540129358107	-1.1201920064679052	0.01	-0.04	0.02
H	-2.7324694967660474	1.8742595032339526	-1.4351135032339526	-0.01	-0.01	0.01
H	1.8552554967660473	-4.980933503233953	1.3242154967660473	0.01	0.01	0.01
H	4.283295496766048	-4.783108496766047	0.7444260064679054	0.01	-0.01	-0.02
H	5.03677	-3.063913483830236	-0.9028849805962839	0.0	-0.05	-0.06
H	-0.8410385032339527	-2.7395804967660475	-0.1308304967660473	0.01	-0.01	-0.01
H	2.7304165032339527	-0.5527234773623312	-2.5645349741283785	-0.01	-0.07	-0.08
H	4.4484464967660475	2.5634490129358105	-0.7129175032339526	0.01	-0.04	0.01
H	3.381602993532095	3.204223006467905	0.5700074967660473	0.02	-0.02	0.01
H	3.8621294967660473	4.241199012935811	-0.8036724967660474	0.01	-0.04	-0.01
H	3.558211	2.3530000129358104	-3.1295695032339528	0.0	-0.04	0.01
H	2.6882355032339524	3.9141355161697637	-3.1491635032339524	-0.01	-0.05	0.01
H	1.7965095032339526	2.392261516169764	-3.4439870064679052	-0.01	-0.05	0.02
H	-4.621373993532095	2.393636490298142	0.1375225032339527	-0.02	0.03	-0.01
H	-3.83753	3.9194409935320946	0.6203240064679054	0.0	0.02	-0.02
H	-3.0610274902981423	2.369883496766047	1.0351504967660474	-0.03	0.01	0.01
H	-4.662792503233953	3.192641	-2.3311234967660472	0.01	0.0	-0.01
H	-3.156050509701858	3.7413165032339526	-3.126589	0.03	-0.01	0.0
H	-3.8920710064679054	4.725789	-1.8330704967660474	0.02	0.0	-0.01
H	5.028118503233952	0.4318510194037161	-2.4336589741283783	-0.01	-0.06	-0.08
H	4.356941006467905	0.23133801293581074	-0.7930704708944258	-0.02	-0.04	-0.09
H	5.586475503233952	-0.9085379870641892	-1.4008644773623313	-0.01	-0.04	-0.07
H	4.4147	-1.1722834773623312	-4.310125477362331	0.0	-0.07	-0.07
H	3.3186484967660475	-2.5518649741283785	-4.024019980596284	0.01	-0.08	-0.06
H	4.965568496766047	-2.5646759805962835	-3.3363119805962835	0.01	-0.06	-0.06
H	-1.5767210129358107	-3.331847509701858	2.1684294967660476	0.04	0.03	0.01
H	-0.10026951616976344	-2.296756006467905	2.244596509701858	0.05	0.02	-0.03
H	0.010330490298141936	-4.052889509701858	2.545705	0.03	0.03	0.0
H	-1.8732674967660474	-4.997759503233953	0.25719749029814193	-0.01	0.01	0.03
H	-0.2594464967660473	-5.722464	0.4838574967660473	-0.01	0.0	0.01
H	-0.701677490298142	-5.049102496766047	-1.1034900064679052	-0.03	-0.01	0.02
H	-0.7873584967660474	3.0289085032339527	-3.5726200129358108	-0.01	-0.01	0.04
H	-0.5128685032339526	1.7620974967660474	-4.790442006467905	0.01	0.01	0.02
H	-2.089492	1.9058325032339527	-4.008251503233953	0.0	-0.01	0.01
H	1.3498010064679054	-2.922271	-3.6122794644265204	-0.02	0.0	-0.11
H	-0.05496500646790538	-3.551527490298142	-2.7574999741283786	0.02	-0.03	-0.08
H	-0.2725144838302366	-2.6592024967660475	-4.279780980596284	-0.05	-0.01	-0.06
114
O	-4.060087643118126	-2.5457481189606246	-1.622523	0.03	-0.01	0.0
Mg	0.2958507137637478	0.13505892935437833	-0.024713475842498524	0.06	-0.09	-0.04
O	-0.900728951684997	0.2806500706456217	3.3261280706456215	-0.08	0.09	0.09
C	-3.964396524157501	-2.2587258810393753	-0.3177681189606247	0.04	0.01	-0.01
N	-0.253912	1.4139515241575014	-1.5377948810393753	0.0	-0.04	0.01
N	0.738994	-1.3372077137637477	-1.3647987137637476	0.0	-0.06	-0.06
O	-3.794691643118126	-3.067816762078751	0.563733	0.03	0.02	0.0
C	-0.5630491189606247	1.0071157620787508	-2.759607881039375	-0.01	-0.02	0.01
C	-0.48555211896062467	-0.34562623792124925	-3.189052237921249	-0.01	-0.02	-0.02
C	0.18817988103937536	-1.412283356881874	-2.568517594803123	-0.01	-0.03	-0.05
O	-3.781844881039375	-0.4057297620787507	1.2346027620787507	0.01	0.02	-0.02
C	-2.475194	-0.2695224051968768	1.482538356881874	0.0	0.05	0.03
C	-2.2674998327243725	0.16297323792124926	2.9350355948031233	-0.07	0.02	0.05
C	-4.182442405196877	-0.7624028810393754	-0.10639835688187389	0.05	0.01	-0.03
O	-1.6229985241575013	-0.4617010483150029	0.6320577137637479	0.04	0.08	0.06
C	-3.952553881039375	-3.9364531189606247	-1.9759498810393754	0.01	-0.01	0.01
O	1.3026495948031231	-0.12460340519687685	1.559575048315003	0.05	0.05	-0.08
C	-0.15608878440936946	1.2803120223306188	2.767783903369994	-0.15	0.17	0.16
O	-0.5476535464881201	1.9392424981731171	1.8282574981731172	-0.13	0.21	0.21
O	2.2018660483150025	2.0492234758424988	2.992057594803123	-0.08	0.04	0.05
C	3.135549643118126	1.1544629516849971	2.5054314758424985	-0.03	0.08	0.04
C	2.658402356881874	-0.1304828103937537	1.8052482862362522	0.03	0.1	-0.06
C	1.012663643118126	1.6774971189606247	3.688108308566871	-0.03	0.01	0.11
O	4.298601524157501	1.4862034275274956	2.548697189606246	-0.04	0.12	0.1
C	3.1632149516849974	-1.3827941672756277	2.5701466914331292	0.08	0.07	-0.11
C	1.2826882379212494	0.7412525724725044	4.867919118960625	0.02	-0.12	0.01
C	-2.9059094758424986	-0.8340245948031232	3.905695	-0.04	-0.05	0.0
C	-5.6649464051968765	-0.40659176207875075	-0.22173071376374778	0.05	0.02	-0.06
C	-0.24108488103937536	2.8184185241575013	-1.156741643118126	0.01	-0.04	0.03
C	1.66489	-2.3451755948031234	-0.8918617137637478	0.0	-0.05	-0.06
C	1.0354991189606246	3.4365725241575014	-0.9301956431181262	0.01	-0.04	0.03
C	1.0667291189606247	4.755678524157501	-0.42623776207875075	0.01	-0.04	0.02
C	-0.11626876207875073	5.460776643118126	-0.156789	0.02	-0.03	0.0
C	-1.3589407620787506	4.858209762078751	-0.393115	0.02	-0.02	0.0
C	-1.4535298810393753	3.530810643118126	-0.8880608810393753	0.01	-0.03	0.01
C	2.3533691189606247	2.7126925241575015	-1.3218417620787506	0.01	-0.04	0.02
C	-2.86401	2.9169368810393754	-1.091822	0.0	-0.01	0.0
C	1.2268681189606248	-3.343012356881874	0.0385786431181261	0.01	-0.03	-0.03
C	2.1874691189606246	-4.207565118960624	0.6136487620787506	0.01	-0.01	-0.02
C	3.5556301189606248	-4.10231523792125	0.2863936431181261	0.01	-0.02	-0.03
C	3.973268	-3.132451475842499	-0.6428255948031232	0.0	-0.04	-0.05
C	3.055819	-2.2430065948031235	-1.2452007137637477	0.0	-0.05	-0.06
C	-0.26573988103937535	-3.506189	0.41739588103937536	0.01	0.0	-0.01
C	3.579224	-1.2180887137637477	-2.2873078327243728	0.0	-0.06	-0.07
C	3.5867861189606245	3.2079035241575014	-0.5108358810393754	0.01	-0.04	0.01
C	2.61607	2.8448414051968767	-2.8578027620787507	0.0	-0.05	0.02
C	-3.6474881189606245	2.897357118960625	0.262581	-0.01	0.01	0.0
C	-3.690198762078751	3.696954	-2.1713101189606245	0.02	0.0	-0.01
C	4.709055881039375	-0.3177355948031232	-1.700723951684997	-0.01	-0.05	-0.08
C	4.098707	-1.9361768327243725	-3.577196713763748	0.0	-0.07	-0.06
C	-0.4939766431181261	-3.2801257620787507	1.9446088810393753	0.03	0.02	-0.01
C	-0.8088751189606247	-4.909134	-0.011323762078750738	-0.01	0.0	0.02
C	-1.007911	1.9893198810393753	-3.8362547620787506	0.0	-0.01	0.02
C	0.3037137620787507	-2.7102712379212495	-3.364335951684997	-0.02	-0.02	-0.08
H	-0.8600042379212494	-0.5337588810393753	-4.1890232379212495	-0.02	0.01	-0.02
H	-2.7505035464881202	1.1453508810393753	3.0181548327243726	-0.13	-0.01	0.07
H	-3.5770431672756273	-0.202696	-0.8159961189606246	0.07	0.0	-0.01
H	-2.9953568810393754	-4.34047723792125	-1.6363558810393752	0.01	-0.02	0.01
H	-4.019863881039376	-3.9659802379212494	-3.063389881039375	0.01	-0.02	0.01
H	-4.771321	-4.507968	-1.5213297620787507	0.0	0.0	0.02
H	3.2543390706456217	-0.114948739748132	0.8753736431181262	0.09	0.19	-0.03
H	0.6784174758424986	2.6434618810393755	4.103035974015616	0.04	-0.01	0.25
H	4.216329832724373	-1.2576858103937536	2.8430529293543785	0.07	0.1	-0.09
H	3.0632814275274955	-2.2703929293543785	1.9468513345512553	0.12	0.09	-0.14
H	2.5797438327243727	-1.5446528810393754	3.4853825724725045	0.07	0.01	-0.12
H	2.1539429516849973	1.1056573828662581	5.4159737620787505	0.08	-0.22	-0.02
H	1.4659922862362522	-0.28615430856687096	4.529910572472504	-0.06	-0.11	-0.12
H	0.42417883272437246	0.7256953345512551	5.541649832724373	0.07	-0.14	0.07
H	-3.9761303568818738	-0.9289233085668709	3.714072643118126	-0.03	-0.11	-0.03
H	-2.7521200706456215	-0.48242583272437245	4.9319822379212495	-0.09	-0.07	0.02
H	-2.4373697620787507	-1.8150262379212494	3.793314762078751	0.02	-0.02	-0.02
H	-5.798432286236252	0.6623072379212493	-0.048556832724372424	0.06	0.02	-0.07
H	-6.254563643118126	-0.9624086431181261	0.507251048315003	0.03	0.03	-0.08
H	-6.016878048315003	-0.6507547620787507	-1.2272308327243724	0.08	0.02	-0.07
H	2.037561237921249	5.242992405196877	-0.2594737620787507	0.02	-0.05	0.02
H	-0.07001876207875074	6.484741643118126	0.23202688103937538	0.02	-0.03	-0.01
H	-2.2814647620787505	5.414805762078751	-0.18917611896062464	0.02	-0.02	-0.01
H	2.2222561189606247	1.6259595241575013	-1.1170947620787506	0.01	-0.04	0.02
H	-2.7340181189606247	1.8727108810393753	-1.4335648810393753	-0.01	-0.01	0.01
H	1.8568041189606246	-4.979384881039375	1.3257641189606246	0.01	0.01	0.01
H	4.284844118960625	-4.784657118960625	0.7413287620787506	0.01	-0.01	-0.02
H	5.03677	-3.071656594803123	-0.9121767137637479	0.0	-0.05	-0.06
H	-0.8394898810393754	-2.741129118960625	-0.13237911896062463	0.01	-0.01	-0.01
H	2.7288678810393754	-0.5635638327243724	-2.5769239516849973	-0.01	-0.07	-0.08
H	4.449995118960625	2.5572545241575013	-0.7113688810393753	0.01	-0.04	0.01
H	3.3847002379212494	3.2011257620787505	0.5715561189606246	0.02	-0.02	0.01
H	3.8636781189606246	4.235004524157501	-0.8052211189606246	0.01	-0.04	-0.01
H	3.558211	2.346805524157501	-3.1280208810393755	0.0	-0.04	0.01
H	2.686686881039375	3.906392405196877	-3.147614881039375	-0.01	-0.05	0.01
H	1.7949608810393753	2.384518405196877	-3.4408897620787506	-0.01	-0.05	0.02
H	-4.62447123792125	2.398282356881874	0.13597388103937538	-0.02	0.03	-0.01
H	-3.83753	3.9225382379212492	0.6172267620787507	0.0	0.02	-0.02
H	-3.065673356881874	2.3714321189606244	1.0366991189606247	-0.03	0.01	0.01
H	-4.6612438810393755	3.192641	-2.3326721189606245	0.01	0.0	-0.01
H	-3.151404643118126	3.7397678810393753	-3.126589	0.03	-0.01	0.0
H	-3.888973762078751	4.725789	-1.8346191189606247	0.02	0.0	-0.01
H	5.026569881039375	0.4225592862362522	-2.446047951684997	-0.01	-0.06	-0.08
H	4.353843762078751	0.22514352415750147	-0.8070080706456217	-0.02	-0.04	-0.09
H	5.584926881039375	-0.9147324758424985	-1.4117048327243724	-0.01	-0.04	-0.07
H	4.4147	-1.1831238327243725	-4.320965832724372	0.0	-0.07	-0.07
H	3.3201971189606247	-2.5642539516849974	-4.033311713763748	0.01	-0.08	-0.06
H	4.9671171189606245	-2.5739677137637478	-3.3456037137637478	0.01	-0.06	-0.06
H	-1.5705265241575013	-3.327201643118126	2.169978118960625	0.04	0.03	0.01
H	-0.09252640519687685	-2.2936587620787505	2.239950643118126	0.05	0.02	-0.03
H	0.014976356881873893	-4.048243643118126	2.545705	0.03	0.03	0.0
H	-1.8748161189606247	-4.996210881039375	0.2618433568818739	-0.01	0.01	0.03
H	-0.26099511896062466	-5.722464	0.48540611896062463	-0.01	0.0	0.01
H	-0.7063233568818739	-5.050651118960625	-1.1003927620787506	-0.03	-0.01	0.02
H	-0.7889071189606247	3.0273598810393754	-3.5664255241575016	-0.01	-0.01	0.04
H	-0.5113198810393753	1.7636461189606247	-4.78734476207875	0.01	0.01	0.02
H	-2.089492	1.9042838810393754	-4.006702881039375	0.0	-0.01	0.01
H	1.3467037620787508	-2.922271	-3.6293143085668707	-0.02	0.0	-0.11
H	-0.05186776207875074	-3.556173356881874	-2.7698889516849974	0.02	-0.03	-0.08
H	-0.2802575948031232	-2.6607511189606248	-4.289072713763748	-0.05	-0.01	-0.06
114
O	-4.057104813157802	-2.546742395614066	-1.622523	0.03	-0.01	0.0
Mg	0.30181637368439646	0.12611043947340533	-0.028690582456264296	0.06	-0.09	-0.04
O	-0.9086831649125285	0.28959856052659466	3.335076560526595	-0.08	0.09	0.09
C	-3.9604194175437355	-2.257731604385934	-0.3187623956140661	0.04	0.01	-0.01
N	-0.253912	1.4099744175437356	-1.536800604385934	0.0	-0.04	0.01
N	0.738994	-1.3431733736843965	-1.3707643736843964	0.0	-0.06	-0.06
O	-3.791708813157802	-3.065828208771868	0.563733	0.03	0.02	0.0
C	-0.5640433956140661	1.005127208771868	-2.7586136043859337	-0.01	-0.02	0.01
C	-0.4865463956140661	-0.34761479122813216	-3.191040791228132	-0.01	-0.02	-0.02
C	0.1871856043859339	-1.4152661868421983	-2.5734889780703303	-0.01	-0.03	-0.05
O	-3.780850604385934	-0.4037412087718678	1.232614208771868	0.01	0.02	-0.02
C	-2.475194	-0.2645510219296696	1.4855211868421982	0.0	0.05	0.03
C	-2.2744597692984625	0.16496179122813215	2.9400069780703304	-0.07	0.02	0.05
C	-4.17747102192967	-0.7614086043859339	-0.10938118684219822	0.05	0.01	-0.03
O	-1.6190214175437356	-0.4537468350874714	0.6380233736843964	0.04	0.08	0.06
C	-3.951559604385934	-3.937447395614066	-1.974955604385934	0.01	-0.01	0.01
O	1.3076209780703305	-0.11963202192966962	1.5516208350874714	0.05	0.05	-0.08
C	-0.1710029342109911	1.2972147254391233	2.7836923298250573	-0.15	0.17	0.16
O	-0.5605791429828589	1.9601223078953876	1.8491373078953877	-0.13	0.21	0.21
O	2.193911835087471	2.0532005824562645	2.9970289780703303	-0.08	0.04	0.05
C	3.1325668131578017	1.1624171649125288	2.509408582456264	-0.03	0.08	0.04
C	2.6613851868421983	-0.12054004385933927	1.7992826263156034	0.03	0.1	-0.06
C	1.0096808131578017	1.6784913956140661	3.699045351754727	-0.03	0.01	0.11
O	4.294624417543735	1.4981347473687927	2.5586399561406608	-0.04	0.12	0.1
C	3.171169164912529	-1.3758342307015374	2.559209648245273	0.08	0.07	-0.11
C	1.2846767912281323	0.7293212526312071	4.868913395614066	0.02	-0.12	0.01
C	-2.9098865824562643	-0.8389959780703303	3.905695	-0.04	-0.05	0.0
C	-5.65997502192967	-0.40460320877186784	-0.22769637368439644	0.05	0.02	-0.06
C	-0.2400906043859339	2.8144414175437356	-1.1537588131578018	0.01	-0.04	0.03
C	1.66489	-2.3501469780703306	-0.8978273736843964	0.0	-0.05	-0.06
C	1.036493395614066	3.4325954175437356	-0.9272128131578018	0.01	-0.04	0.03
C	1.0677233956140662	4.751701417543735	-0.42424920877186784	0.01	-0.04	0.02
C	-0.11428020877186784	5.457793813157802	-0.156789	0.02	-0.03	0.0
C	-1.3569522087718677	4.856221208771868	-0.393115	0.02	-0.02	0.0
C	-1.4525356043859339	3.527827813157802	-0.8870666043859339	0.01	-0.03	0.01
C	2.354363395614066	2.708715417543736	-1.3198532087718677	0.01	-0.04	0.02
C	-2.86401	2.915942604385934	-1.091822	0.0	-0.01	0.0
C	1.2278623956140662	-3.3459951868421984	0.035595813157801776	0.01	-0.03	-0.03
C	2.188463395614066	-4.208559395614065	0.6116602087718678	0.01	-0.01	-0.02
C	3.556624395614066	-4.104303791228133	0.2834108131578018	0.01	-0.02	-0.03
C	3.973268	-3.1364285824562645	-0.6477969780703303	0.0	-0.04	-0.05
C	3.055819	-2.2479779780703306	-1.2511663736843965	0.0	-0.05	-0.06
C	-0.2647456043859339	-3.506189	0.41640160438593393	0.01	0.0	-0.01
C	3.579224	-1.2240543736843965	-2.2942677692984628	0.0	-0.06	-0.07
C	3.587780395614066	3.2039264175437356	-0.509841604385934	0.01	-0.04	0.01
C	2.61607	2.8398700219296695	-2.855814208771868	0.0	-0.05	0.02
C	-3.648482395614066	2.8983513956140663	0.262581	-0.01	0.01	0.0
C	-3.688210208771868	3.696954	-2.172304395614066	0.02	0.0	-0.01
C	4.708061604385934	-0.3227069780703304	-1.7086781649125287	-0.01	-0.05	-0.08
C	4.098707	-1.9431367692984627	-3.5831623736843965	0.0	-0.07	-0.06
C	-0.49099381315780183	-3.278137208771868	1.943614604385934	0.03	0.02	-0.01
C	-0.8098693956140661	-4.909134	-0.009335208771867852	-0.01	0.0	0.02
C	-1.007911	1.9883256043859339	-3.8342662087718677	0.0	-0.01	0.02
C	0.3017252087718678	-2.7122597912281323	-3.3722901649125285	-0.02	-0.02	-0.08
H	-0.8619927912281322	-0.5327646043859339	-4.191011791228132	-0.02	0.01	-0.02
H	-2.7634291429828592	1.144356604385934	3.0251147692984626	-0.13	-0.01	0.07
H	-3.5700832307015373	-0.202696	-0.8169903956140661	0.07	0.0	-0.01
H	-2.994362604385934	-4.342465791228133	-1.6353616043859338	0.01	-0.02	0.01
H	-4.018869604385935	-3.9679687912281323	-3.0623956043859337	0.01	-0.02	0.01
H	-4.771321	-4.507968	-1.5193412087718678	0.0	0.0	0.02
H	3.263287560526595	-0.09605748333274458	0.8723908131578018	0.09	0.19	-0.03
H	0.6823945824562644	2.642467604385934	4.127892890351652	0.04	-0.01	0.25
H	4.223289769298463	-1.2477430438593393	2.834104439473405	0.07	0.1	-0.09
H	3.075212747368793	-2.2614444394734052	1.932931461403075	0.12	0.09	-0.14
H	2.5867037692984627	-1.543658604385934	3.473451252631207	0.07	0.01	-0.12
H	2.1618971649125287	1.0837832964905463	5.413985208771868	0.08	-0.22	-0.02
H	1.4600266263156034	-0.2970913517547268	4.517979252631207	-0.06	-0.11	-0.12
H	0.4311387692984625	0.7117754614030749	5.548609769298462	0.07	-0.14	0.07
H	-3.979113186842198	-0.9398603517547268	3.711089813157802	-0.03	-0.11	-0.03
H	-2.7610685605265948	-0.48938576929846256	4.933970791228132	-0.09	-0.07	0.02
H	-2.435381208771868	-1.8170147912281323	3.791326208771868	0.02	-0.02	-0.02
H	-5.792466626315603	0.6642957912281322	-0.05551676929846252	0.06	0.02	-0.07
H	-6.251580813157802	-0.9594258131578017	0.49929683508747147	0.03	0.03	-0.08
H	-6.008923835087471	-0.6487662087718679	-1.2341907692984626	0.08	0.02	-0.07
H	2.039549791228132	5.23802102192967	-0.2574852087718678	0.02	-0.05	0.02
H	-0.06803020877186786	6.481758813157803	0.23103260438593393	0.02	-0.03	-0.01
H	-2.2794762087718676	5.412817208771868	-0.1901703956140661	0.02	-0.02	-0.01
H	2.223250395614066	1.6219824175437356	-1.1151062087718677	0.01	-0.04	0.02
H	-2.735012395614066	1.871716604385934	-1.4325706043859339	-0.01	-0.01	0.01
H	1.857798395614066	-4.978390604385934	1.326758395614066	0.01	0.01	0.01
H	4.285838395614066	-4.785651395614066	0.7393402087718678	0.01	-0.01	-0.02
H	5.03677	-3.0766279780703303	-0.9181423736843964	0.0	-0.05	-0.06
H	-0.838495604385934	-2.7421233956140663	-0.13337339561406608	0.01	-0.01	-0.01
H	2.727873604385934	-0.5705237692984625	-2.5848781649125288	-0.01	-0.07	-0.08
H	4.450989395614066	2.5532774175437356	-0.7103746043859339	0.01	-0.04	0.01
H	3.3866887912281323	3.1991372087718677	0.5725503956140661	0.02	-0.02	0.01
H	3.864672395614066	4.231027417543736	-0.8062153956140661	0.01	-0.04	-0.01
H	3.558211	2.3428284175437355	-3.127026604385934	0.0	-0.04	0.01
H	2.6856926043859337	3.9014210219296697	-3.1466206043859337	-0.01	-0.05	0.01
H	1.793966604385934	2.3795470219296697	-3.438901208771868	-0.01	-0.05	0.02
H	-4.6264597912281324	2.401265186842198	0.13497960438593393	-0.02	0.03	-0.01
H	-3.83753	3.924526791228132	0.6152382087718679	0.0	0.02	-0.02
H	-3.0686561868421984	2.372426395614066	1.0376933956140661	-0.03	0.01	0.01
H	-4.6602496043859345	3.192641	-2.333666395614066	0.01	0.0	-0.01
H	-3.148421813157802	3.738773604385934	-3.126589	0.03	-0.01	0.0
H	-3.886985208771868	4.725789	-1.8356133956140661	0.02	0.0	-0.01
H	5.025575604385934	0.41659362631560354	-2.4540021649125285	-0.01	-0.06	-0.08
H	4.351855208771868	0.2211664175437357	-0.8159565605265947	-0.02	-0.04	-0.09
H	5.583932604385934	-0.9187095824562643	-1.4186647692984626	-0.01	-0.04	-0.07
H	4.4147	-1.1900837692984627	-4.327925769298462	0.0	-0.07	-0.07
H	3.321191395614066	-2.572208164912529	-4.0392773736843965	0.01	-0.08	-0.06
H	4.9681113956140655	-2.5799333736843963	-3.3515693736843963	0.01	-0.06	-0.06
H	-1.5665494175437356	-3.3242188131578017	2.1709723956140663	0.04	0.03	0.01
H	-0.08755502192966963	-2.2916702087718677	2.236967813157802	0.05	0.02	-0.03
H	0.01795918684219822	-4.045260813157802	2.545705	0.03	0.03	0.0
H	-1.8758103956140662	-4.995216604385934	0.2648261868421982	-0.01	0.01	0.03
H	-0.2619893956140661	-5.722464	0.48640039561406606	-0.01	0.0	0.01
H	-0.7093061868421983	-5.051645395614066	-1.0984042087718677	-0.03	-0.01	0.02
H	-0.7899013956140661	3.026365604385934	-3.562448417543736	-0.01	-0.01	0.04
H	-0.5103256043859339	1.7646403956140662	-4.7853562087718675	0.01	0.01	0.02
H	-2.089492	1.903289604385934	-4.0057086043859345	0.0	-0.01	0.01
H	1.344715208771868	-2.922271	-3.640251351754727	-0.02	0.0	-0.11
H	-0.049879208771867856	-3.5591561868421984	-2.777843164912529	0.02	-0.03	-0.08
H	-0.2852289780703304	-2.661745395614066	-4.295038373684396	-0.05	-0.01	-0.06
114
O	-4.056077	-2.547085	-1.622523	0.03	-0.01	0.0
Mg	0.303872	0.123027	-0.030060999999999997	0.06	-0.09	-0.04
O	-0.911424	0.292682	3.3381600000000002	-0.08	0.09	0.09
C	-3.959049	-2.257389	-0.319105	0.04	0.01	-0.01
N	-0.253912	1.408604	-1.536458	0.0	-0.04	0.01
N	0.738994	-1.345229	-1.37282	0.0	-0.06	-0.06
O	-3.790681	-3.0651430000000004	0.563733	0.03	0.02	0.0
C	-0.564386	1.004442	-2.7582709999999997	-0.01	-0.02	0.01
C	-0.486889	-0.3483	-3.1917259999999996	-0.01	-0.02	-0.02
C	0.18684299999999998	-1.416294	-2.575202	-0.01	-0.03	-0.05
O	-3.7805079999999998	-0.40305599999999997	1.231929	0.01	0.02	-0.02
C	-2.475194	-0.262838	1.486549	0.0	0.05	0.03
C	-2.276858	0.165647	2.94172	-0.07	0.02	0.05
C	-4.175758	-0.761066	-0.11040900000000001	0.05	0.01	-0.03
O	-1.617651	-0.45100599999999996	0.6400790000000001	0.04	0.08	0.06
C	-3.9512169999999998	-3.93779	-1.9746130000000002	0.01	-0.01	0.01
O	1.309334	-0.117919	1.54888	0.05	0.05	-0.08
C	-0.176142	1.303039	2.789174	-0.15	0.17	0.16
O	-0.565033	1.967317	1.856332	-0.13	0.21	0.21
O	2.1911709999999998	2.054571	2.998742	-0.08	0.04	0.05
C	3.131539	1.1651580000000001	2.510779	-0.03	0.08	0.04
C	2.662413	-0.11711400000000001	1.797227	0.03	0.1	-0.06
C	1.008653	1.678834	3.702814	-0.03	0.01	0.11
O	4.293254	1.502246	2.5620659999999997	-0.04	0.12	0.1
C	3.1739100000000002	-1.373436	2.555441	0.08	0.07	-0.11
C	1.2853620000000001	0.72521	4.869256	0.02	-0.12	0.01
C	-2.911257	-0.840709	3.905695	-0.04	-0.05	0.0
C	-5.658262	-0.403918	-0.229752	0.05	0.02	-0.06
C	-0.239748	2.813071	-1.1527310000000002	0.01	-0.04	0.03
C	1.66489	-2.3518600000000003	-0.899883	0.0	-0.05	-0.06
C	1.0368359999999999	3.431225	-0.926185	0.01	-0.04	0.03
C	1.068066	4.750331	-0.423564	0.01	-0.04	0.02
C	-0.11359499999999999	5.456766	-0.156789	0.02	-0.03	0.0
C	-1.356267	4.855536	-0.393115	0.02	-0.02	0.0
C	-1.452193	3.5268	-0.886724	0.01	-0.03	0.01
C	2.354706	2.707345	-1.319168	0.01	-0.04	0.02
C	-2.86401	2.9156	-1.091822	0.0	-0.01	0.0
C	1.228205	-3.347023	0.034568	0.01	-0.03	-0.03
C	2.188806	-4.208901999999999	0.6109749999999999	0.01	-0.01	-0.02
C	3.556967	-4.104989000000001	0.282383	0.01	-0.02	-0.03
C	3.973268	-3.1377990000000002	-0.64951	0.0	-0.04	-0.05
C	3.055819	-2.2496910000000003	-1.253222	0.0	-0.05	-0.06
C	-0.264403	-3.506189	0.416059	0.01	0.0	-0.01
C	3.579224	-1.22611	-2.296666	0.0	-0.06	-0.07
C	3.588123	3.202556	-0.509499	0.01	-0.04	0.01
C	2.61607	2.838157	-2.8551290000000003	0.0	-0.05	0.02
C	-3.648825	2.8986940000000003	0.262581	-0.01	0.01	0.0
C	-3.6875250000000004	3.696954	-2.172647	0.02	0.0	-0.01
C	4.707719	-0.32442	-1.711419	-0.01	-0.05	-0.08
C	4.098707	-1.945535	-3.585218	0.0	-0.07	-0.06
C	-0.489966	-3.2774520000000003	1.943272	0.03	0.02	-0.01
C	-0.810212	-4.909134	-0.008650000000000001	-0.01	0.0	0.02
C	-1.007911	1.987983	-3.833581	0.0	-0.01	0.02
C	0.30104	-2.712945	-3.375031	-0.02	-0.02	-0.08
H	-0.8626780000000001	-0.532422	-4.1916970000000005	-0.02	0.01	-0.02
H	-2.7678830000000003	1.144014	3.027513	-0.13	-0.01	0.07
H	-3.567685	-0.202696	-0.817333	0.07	0.0	-0.01
H	-2.99402	-4.343151000000001	-1.635019	0.01	-0.02	0.01
H	-4.018527000000001	-3.968654	-3.0620529999999997	0.01	-0.02	0.01
H	-4.771321	-4.507968	-1.518656	0.0	0.0	0.02
H	3.2663710000000004	-0.08954800000000002	0.871363	0.09	0.19	-0.03
H	0.6837650000000001	2.642125	4.136458	0.04	-0.01	0.25
H	4.225688000000001	-1.244317	2.831021	0.07	0.1	-0.09
H	3.079324	-2.258361	1.928135	0.12	0.09	-0.14
H	2.589102	-1.5433160000000001	3.46934	0.07	0.01	-0.12
H	2.164638	1.076246	5.4133	0.08	-0.22	-0.02
H	1.457971	-0.30086	4.513868	-0.06	-0.11	-0.12
H	0.433537	0.706979	5.551008	0.07	-0.14	0.07
H	-3.9801409999999997	-0.9436289999999999	3.710062	-0.03	-0.11	-0.03
H	-2.764152	-0.491784	4.934656	-0.09	-0.07	0.02
H	-2.434696	-1.8177	3.7906410000000004	0.02	-0.02	-0.02
H	-5.790411	0.664981	-0.057915	0.06	0.02	-0.07
H	-6.250553	-0.958398	0.49655600000000005	0.03	0.03	-0.08
H	-6.006183	-0.648081	-1.236589	0.08	0.02	-0.07
H	2.0402349999999996	5.236308	-0.2568	0.02	-0.05	0.02
H	-0.067345	6.4807310000000005	0.23069	0.02	-0.03	-0.01
H	-2.278791	5.412132	-0.19051300000000002	0.02	-0.02	-0.01
H	2.223593	1.620612	-1.1144209999999999	0.01	-0.04	0.02
H	-2.735355	1.871374	-1.432228	-0.01	-0.01	0.01
H	1.8581409999999998	-4.978048	1.3271009999999999	0.01	0.01	0.01
H	4.286181	-4.785994	0.738655	0.01	-0.01	-0.02
H	5.03677	-3.078341	-0.9201980000000001	0.0	-0.05	-0.06
H	-0.838153	-2.7424660000000003	-0.133716	0.01	-0.01	-0.01
H	2.727531	-0.572922	-2.587619	-0.01	-0.07	-0.08
H	4.451332	2.551907	-0.710032	0.01	-0.04	0.01
H	3.387374	3.198452	0.572893	0.02	-0.02	0.01
H	3.865015	4.2296570000000004	-0.806558	0.01	-0.04	-0.01
H	3.558211	2.341458	-3.126684	0.0	-0.04	0.01
H	2.6853499999999997	3.899708	-3.1462779999999997	-0.01	-0.05	0.01
H	1.793624	2.377834	-3.438216	-0.01	-0.05	0.02
H	-4.6271450000000005	2.402293	0.134637	-0.02	0.03	-0.01
H	-3.83753	3.9252119999999997	0.614553	0.0	0.02	-0.02
H	-3.069684	2.372769	1.038036	-0.03	0.01	0.01
H	-4.6599070000000005	3.192641	-2.334009	0.01	0.0	-0.01
H	-3.1473940000000002	3.738431	-3.126589	0.03	-0.01	0.0
H	-3.8863000000000003	4.725789	-1.835956	0.02	0.0	-0.01
H	5.025233	0.414538	-2.456743	-0.01	-0.06	-0.08
H	4.35117	0.219796	-0.81904	-0.02	-0.04	-0.09
H	5.58359	-0.92008	-1.421063	-0.01	-0.04	-0.07
H	4.4147	-1.192482	-4.330324	0.0	-0.07	-0.07
H	3.321534	-2.574949	-4.041333	0.01	-0.08	-0.06
H	4.9684539999999995	-2.5819889999999996	-3.3536249999999996	0.01	-0.06	-0.06
H	-1.5651789999999999	-3.323191	2.1713150000000003	0.04	0.03	0.01
H	-0.085842	-2.290985	2.2359400000000003	0.05	0.02	-0.03
H	0.018986999999999997	-4.044233	2.545705	0.03	0.03	0.0
H	-1.876153	-4.994874	0.265854	-0.01	0.01	0.03
H	-0.262332	-5.722464	0.486743	-0.01	0.0	0.01
H	-0.710334	-5.051988	-1.097719	-0.03	-0.01	0.02
H	-0.7902440000000001	3.026023	-3.561078	-0.01	-0.01	0.04
H	-0.509983	1.764983	-4.7846709999999995	0.01	0.01	0.02
H	-2.089492	1.9029470000000002	-4.005366	0.0	-0.01	0.01
H	1.34403	-2.922271	-3.64402	-0.02	0.0	-0.11
H	-0.049194	-3.560184	-2.780584	0.02	-0.03	-0.08
H	-0.286942	-2.6620880000000002	-4.2970939999999995	-0.05	-0.01	-0.06
114
O	-4.057104813157802	-2.546742395614066	-1.622523	0.03	-0.01	0.0
Mg	0.30181637368439646	0.12611043947340533	-0.0286905824562643	0.06	-0.09	-0.04
O	-0.9086831649125285	0.28959856052659466	3.335076560526595	-0.08	0.09	0.09
C	-3.9604194175437355	-2.257731604385934	-0.3187623956140661	0.04	0.01	-0.01
N	-0.253912	1.4099744175437356	-1.536800604385934	0.0	-0.04	0.01
N	0.738994	-1.3431733736843965	-1.3707643736843964	0.0	-0.06	-0.06
O	-3.791708813157802	-3.065828208771868	0.563733	0.03	0.02	0.0
C	-0.5640433956140661	1.005127208771868	-2.7586136043859337	-0.01	-0.02	0.01
C	-0.4865463956140661	-0.34761479122813216	-3.191040791228132	-0.01	-0.02	-0.02
C	0.1871856043859339	-1.4152661868421983	-2.5734889780703303	-0.01	-0.03	-0.05
O	-3.780850604385934	-0.4037412087718678	1.232614208771868	0.01	0.02	-0.02
C	-2.475194	-0.2645510219296696	1.4855211868421982	0.0	0.05	0.03
C	-2.2744597692984625	0.16496179122813215	2.9400069780703304	-0.07	0.02	0.05
C	-4.17747102192967	-0.7614086043859339	-0.10938118684219822	0.05	0.01	-0.03
O	-1.6190214175437356	-0.4537468350874714	0.6380233736843964	0.04	0.08	0.06
C	-3.951559604385934	-3.937447395614066	-1.974955604385934	0.01	-0.01	0.01
O	1.3076209780703305	-0.11963202192966962	1.5516208350874714	0.05	0.05	-0.08
C	-0.1710029342109911	1.2972147254391233	2.7836923298250573	-0.15	0.17	0.16
O	-0.5605791429828589	1.9601223078953876	1.8491373078953877	-0.13	0.21	0.21
O	2.193911835087471	2.0532005824562645	2.9970289780703303	-0.08	0.04	0.05
C	3.1325668131578017	1.1624171649125288	2.509408582456264	-0.03	0.08	0.04
C	2.6613851868421983	-0.12054004385933925	1.7992826263156034	0.03	0.1	-0.06
C	1.0096808131578017	1.6784913956140661	3.699045351754727	-0.03	0.01	0.11
O	4.294624417543735	1.4981347473687927	2.5586399561406608	-0.04	0.12	0.1
C	3.171169164912529	-1.3758342307015374	2.559209648245273	0.08	0.07	-0.11
C	1.2846767912281323	0.7293212526312071	4.868913395614066	0.02	-0.12	0.01
C	-2.9098865824562643	-0.8389959780703304	3.905695	-0.04	-0.05	0.0
C	-5.65997502192967	-0.40460320877186784	-0.22769637368439644	0.05	0.02	-0.06
C	-0.2400906043859339	2.8144414175437356	-1.1537588131578018	0.01	-0.04	0.03
C	1.66489	-2.3501469780703306	-0.8978273736843964	0.0	-0.05	-0.06
C	1.036493395614066	3.4325954175437356	-0.9272128131578018	0.01	-0.04	0.03
C	1.0677233956140662	4.751701417543735	-0.42424920877186784	0.01	-0.04	0.02
C	-0.11428020877186784	5.457793813157802	-0.156789	0.02	-0.03	0.0
C	-1.3569522087718677	4.856221208771868	-0.393115	0.02	-0.02	0.0
C	-1.4525356043859339	3.527827813157802	-0.8870666043859339	0.01	-0.03	0.01
C	2.354363395614066	2.708715417543736	-1.3198532087718677	0.01	-0.04	0.02
C	-2.86401	2.915942604385934	-1.091822	0.0	-0.01	0.0
C	1.2278623956140662	-3.3459951868421984	0.035595813157801776	0.01	-0.03	-0.03
C	2.188463395614066	-4.208559395614065	0.6116602087718678	0.01	-0.01	-0.02
C	3.556624395614066	-4.104303791228133	0.2834108131578018	0.01	-0.02	-0.03
C	3.973268	-3.1364285824562645	-0.6477969780703303	0.0	-0.04	-0.05
C	3.055819	-2.2479779780703306	-1.2511663736843965	0.0	-0.05	-0.06
C	-0.2647456043859339	-3.506189	0.41640160438593393	0.01	0.0	-0.01
C	3.579224	-1.2240543736843965	-2.2942677692984628	0.0	-0.06	-0.07
C	3.587780395614066	3.2039264175437356	-0.509841604385934	0.01	-0.04	0.01
C	2.61607	2.8398700219296695	-2.855814208771868	0.0	-0.05	0.02
C	-3.648482395614066	2.8983513956140663	0.262581	-0.01	0.01	0.0
C	-3.688210208771868	3.696954	-2.172304395614066	0.02	0.0	-0.01
C	4.708061604385934	-0.3227069780703304	-1.7086781649125287	-0.01	-0.05	-0.08
C	4.098707	-1.9431367692984627	-3.5831623736843965	0.0	-0.07	-0.06
C	-0.49099381315780183	-3.278137208771868	1.943614604385934	0.03	0.02	-0.01
C	-0.8098693956140661	-4.909134	-0.00933520877186785	-0.01	0.0	0.02
C	-1.007911	1.9883256043859339	-3.8342662087718677	0.0	-0.01	0.02
C	0.3017252087718678	-2.7122597912281323	-3.3722901649125285	-0.02	-0.02	-0.08
H	-0.8619927912281322	-0.5327646043859339	-4.191011791228132	-0.02	0.01	-0.02
H	-2.7634291429828592	1.144356604385934	3.0251147692984626	-0.13	-0.01	0.07
H	-3.5700832307015373	-0.202696	-0.8169903956140661	0.07	0.0	-0.01
H	-2.994362604385934	-4.342465791228133	-1.6353616043859338	0.01	-0.02	0.01
H	-4.018869604385935	-3.9679687912281323	-3.0623956043859337	0.01	-0.02	0.01
H	-4.771321	-4.507968	-1.5193412087718678	0.0	0.0	0.02
H	3.263287560526595	-0.09605748333274458	0.8723908131578018	0.09	0.19	-0.03
H	0.6823945824562644	2.642467604385934	4.127892890351652	0.04	-0.01	0.25
H	4.223289769298463	-1.247743043859339	2.834104439473405	0.07	0.1	-0.09
H	3.075212747368793	-2.2614444394734052	1.932931461403075	0.12	0.09	-0.14
H	2.5867037692984627	-1.543658604385934	3.473451252631207	0.07	0.01	-0.12
H	2.1618971649125287	1.0837832964905463	5.413985208771868	0.08	-0.22	-0.02
H	1.4600266263156034	-0.29709135175472684	4.517979252631207	-0.06	-0.11	-0.12
H	0.43113876929846257	0.7117754614030749	5.548609769298462	0.07	-0.14	0.07
H	-3.979113186842198	-0.9398603517547268	3.711089813157802	-0.03	-0.11	-0.03
H	-2.7610685605265948	-0.48938576929846256	4.933970791228132	-0.09	-0.07	0.02
H	-2.435381208771868	-1.8170147912281323	3.791326208771868	0.02	-0.02	-0.02
H	-5.792466626315603	0.6642957912281322	-0.055516769298462526	0.06	0.02	-0.07
H	-6.251580813157802	-0.9594258131578017	0.49929683508747147	0.03	0.03	-0.08
H	-6.008923835087471	-0.6487662087718679	-1.2341907692984626	0.08	0.02	-0.07
H	2.039549791228132	5.23802102192967	-0.2574852087718678	0.02	-0.05	0.02
H	-0.06803020877186786	6.481758813157803	0.23103260438593393	0.02	-0.03	-0.01
H	-2.2794762087718676	5.412817208771868	-0.1901703956140661	0.02	-0.02	-0.01
H	2.223250395614066	1.6219824175437356	-1.1151062087718677	0.01	-0.04	0.02
H	-2.735012395614066	1.871716604385934	-1.4325706043859339	-0.01	-0.01	0.01
H	1.857798395614066	-4.978390604385934	1.326758395614066	0.01	0.01	0.01
H	4.285838395614066	-4.785651395614066	0.7393402087718678	0.01	-0.01	-0.02
H	5.03677	-3.0766279780703303	-0.9181423736843964	0.0	-0.05	-0.06
H	-0.838495604385934	-2.7421233956140663	-0.13337339561406608	0.01	-0.01	-0.01
H	2.727873604385934	-0.5705237692984625	-2.5848781649125288	-0.01	-0.07	-0.08
H	4.450989395614066	2.5532774175437356	-0.7103746043859339	0.01	-0.04	0.01
H	3.3866887912281323	3.1991372087718677	0.5725503956140661	0.02	-0.02	0.01
H	3.864672395614066	4.231027417543736	-0.8062153956140661	0.01	-0.04	-0.01
H	3.558211	2.3428284175437355	-3.127026604385934	0.0	-0.04	0.01
H	2.6856926043859337	3.9014210219296697	-3.1466206043859337	-0.01	-0.05	0.01
H	1.793966604385934	2.3795470219296697	-3.438901208771868	-0.01	-0.05	0.02
H	-4.6264597912281324	2.401265186842198	0.13497960438593393	-0.02	0.03	-0.01
H	-3.83753	3.924526791228132	0.6152382087718679	0.0	0.02	-0.02
H	-3.0686561868421984	2.372426395614066	1.0376933956140661	-0.03	0.01	0.01
H	-4.6602496043859345	3.192641	-2.333666395614066	0.01	0.0	-0.01
H	-3.148421813157802	3.738773604385934	-3.126589	0.03	-0.01	0.0
H	-3.886985208771868	4.725789	-1.8356133956140661	0.02	0.0	-0.01
H	5.025575604385934	0.41659362631560354	-2.4540021649125285	-0.01	-0.06	-0.08
H	4.351855208771868	0.2211664175437357	-0.8159565605265947	-0.02	-0.04	-0.09
H	5.583932604385934	-0.9187095824562643	-1.4186647692984626	-0.01	-0.04	-0.07
H	4.4147	-1.1900837692984627	-4.327925769298462	0.0	-0.07	-0.07
H	3.321191395614066	-2.572208164912529	-4.0392773736843965	0.01	-0.08	-0.06
H	4.9681113956140655	-2.5799333736843963	-3.3515693736843963	0.01	-0.06	-0.06
H	-1.5665494175437356	-3.3242188131578017	2.1709723956140663	0.04	0.03	0.01
H	-0.08755502192966963	-2.2916702087718677	2.236967813157802	0.05	0.02	-0.03
H	0.017959186842198223	-4.045260813157802	2.545705	0.03	0.03	0.0
H	-1.8758103956140662	-4.995216604385934	0.2648261868421982	-0.01	0.01	0.03
H	-0.2619893956140661	-5.722464	0.48640039561406606	-0.01	0.0	0.01
H	-0.7093061868421983	-5.051645395614066	-1.0984042087718677	-0.03	-0.01	0.02
H	-0.7899013956140661	3.026365604385934	-3.562448417543736	-0.01	-0.01	0.04
H	-0.5103256043859339	1.7646403956140662	-4.7853562087718675	0.01	0.01	0.02
H	-2.089492	1.903289604385934	-4.0057086043859345	0.0	-0.01	0.01
H	1.344715208771868	-2.922271	-3.640251351754727	-0.02	0.0	-0.11
H	-0.04987920877186785	-3.5591561868421984	-2.777843164912529	0.02	-0.03	-0.08
H	-0.2852289780703304	-2.661745395614066	-4.295038373684396	-0.05	-0.01	-0.06
114
O	-4.060087643118126	-2.5457481189606246	-1.622523	0.03	-0.01	0.0
Mg	0.2958507137637478	0.13505892935437833	-0.024713475842498524	0.06	-0.09	-0.04
O	-0.900728951684997	0.2806500706456217	3.3261280706456215	-0.08	0.09	0.09
C	-3.964396524157501	-2.2587258810393753	-0.3177681189606247	0.04	0.01	-0.01
N	-0.253912	1.4139515241575014	-1.5377948810393753	0.0	-0.04	0.01
N	0.738994	-1.3372077137637477	-1.3647987137637476	0.0	-0.06	-0.06
O	-3.794691643118126	-3.067816762078751	0.563733	0.03	0.02	0.0
C	-0.5630491189606247	1.0071157620787508	-2.759607881039375	-0.01	-0.02	0.01
C	-0.48555211896062467	-0.34562623792124925	-3.189052237921249	-0.01	-0.02	-0.02
C	0.18817988103937536	-1.412283356881874	-2.568517594803123	-0.01	-0.03	-0.05
O	-3.781844881039375	-0.4057297620787507	1.2346027620787507	0.01	0.02	-0.02
C	-2.475194	-0.2695224051968768	1.482538356881874	0.0	0.05	0.03
C	-2.2674998327243725	0.16297323792124926	2.9350355948031233	-0.07	0.02	0.05
C	-4.182442405196877	-0.7624028810393754	-0.10639835688187389	0.05	0.01	-0.03
O	-1.6229985241575013	-0.4617010483150029	0.6320577137637479	0.04	0.08	0.06
C	-3.952553881039375	-3.9364531189606247	-1.9759498810393754	0.01	-0.01	0.01
O	1.3026495948031231	-0.12460340519687685	1.559575048315003	0.05	0.05	-0.08
C	-0.15608878440936946	1.2803120223306188	2.767783903369994	-0.15	0.17	0.16
O	-0.5476535464881201	1.9392424981731171	1.8282574981731172	-0.13	0.21	0.21
O	2.2018660483150025	2.0492234758424988	2.992057594803123	-0.08	0.04	0.05
C	3.135549643118126	1.1544629516849971	2.5054314758424985	-0.03	0.08	0.04
C	2.658402356881874	-0.1304828103937537	1.8052482862362522	0.03	0.1	-0.06
C	1.012663643118126	1.6774971189606247	3.688108308566871	-0.03	0.01	0.11
O	4.298601524157501	1.4862034275274956	2.548697189606246	-0.04	0.12	0.1
C	3.1632149516849974	-1.3827941672756277	2.5701466914331292	0.08	0.07	-0.11
C	1.2826882379212494	0.7412525724725044	4.867919118960625	0.02	-0.12	0.01
C	-2.9059094758424986	-0.8340245948031232	3.905695	-0.04	-0.05	0.0
C	-5.6649464051968765	-0.40659176207875075	-0.22173071376374778	0.05	0.02	-0.06
C	-0.24108488103937536	2.8184185241575013	-1.156741643118126	0.01	-0.04	0.03
C	1.66489	-2.3451755948031234	-0.8918617137637478	0.0	-0.05	-0.06
C	1.0354991189606246	3.4365725241575014	-0.9301956431181262	0.01	-0.04	0.03
C	1.0667291189606247	4.755678524157501	-0.42623776207875075	0.01	-0.04	0.02
C	-0.11626876207875073	5.460776643118126	-0.156789	0.02	-0.03	0.0
C	-1.3589407620787506	4.858209762078751	-0.393115	0.02	-0.02	0.0
C	-1.4535298810393753	3.530810643118126	-0.8880608810393753	0.01	-0.03	0.01
C	2.3533691189606247	2.7126925241575015	-1.3218417620787506	0.01	-0.04	0.02
C	-2.86401	2.9169368810393754	-1.091822	0.0	-0.01	0.0
C	1.2268681189606248	-3.343012356881874	0.0385786431181261	0.01	-0.03	-0.03
C	2.1874691189606246	-4.207565118960624	0.6136487620787506	0.01	-0.01	-0.02
C	3.5556301189606248	-4.10231523792125	0.2863936431181261	0.01	-0.02	-0.03
C	3.973268	-3.132451475842499	-0.6428255948031232	0.0	-0.04	-0.05
C	3.055819	-2.2430065948031235	-1.2452007137637477	0.0	-0.05	-0.06
C	-0.26573988103937535	-3.506189	0.41739588103937536	0.01	0.0	-0.01
C	3.579224	-1.2180887137637477	-2.2873078327243728	0.0	-0.06	-0.07
C	3.5867861189606245	3.2079035241575014	-0.5108358810393754	0.01	-0.04	0.01
C	2.61607	2.8448414051968767	-2.8578027620787507	0.0	-0.05	0.02
C	-3.6474881189606245	2.897357118960625	0.262581	-0.01	0.01	0.0
C	-3.690198762078751	3.696954	-2.1713101189606245	0.02	0.0	-0.01
C	4.709055881039375	-0.3177355948031232	-1.700723951684997	-0.01	-0.05	-0.08
C	4.098707	-1.9361768327243725	-3.577196713763748	0.0	-0.07	-0.06
C	-0.4939766431181261	-3.2801257620787507	1.9446088810393753	0.03	0.02	-0.01
C	-0.8088751189606247	-4.909134	-0.011323762078750738	-0.01	0.0	0.02
C	-1.007911	1.9893198810393753	-3.8362547620787506	0.0	-0.01	0.02
C	0.3037137620787507	-2.7102712379212495	-3.364335951684997	-0.02	-0.02	-0.08
H	-0.8600042379212494	-0.5337588810393753	-4.1890232379212495	-0.02	0.01	-0.02
H	-2.7505035464881202	1.1453508810393753	3.0181548327243726	-0.13	-0.01	0.07
H	-3.5770431672756273	-0.202696	-0.8159961189606246	0.07	0.0	-0.01
H	-2.9953568810393754	-4.34047723792125	-1.6363558810393752	0.01	-0.02	0.01
H	-4.019863881039376	-3.9659802379212494	-3.063389881039375	0.01	-0.02	0.01
H	-4.771321	-4.507968	-1.5213297620787507	0.0	0.0	0.02
H	3.2543390706456217	-0.114948739748132	0.8753736431181262	0.09	0.19	-0.03
H	0.6784174758424986	2.6434618810393755	4.103035974015616	0.04	-0.01	0.25
H	4.216329832724373	-1.2576858103937536	2.8430529293543785	0.07	0.1	-0.09
H	3.0632814275274955	-2.2703929293543785	1.9468513345512553	0.12	0.09	-0.14
H	2.5797438327243727	-1.5446528810393754	3.4853825724725045	0.07	0.01	-0.12
H	2.1539429516849973	1.1056573828662581	5.4159737620787505	0.08	-0.22	-0.02
H	1.4659922862362522	-0.28615430856687096	4.529910572472504	-0.06	-0.11	-0.12
H	0.42417883272437246	0.7256953345512551	5.541649832724373	0.07	-0.14	0.07
H	-3.9761303568818738	-0.9289233085668709	3.714072643118126	-0.03	-0.11	-0.03
H	-2.7521200706456215	-0.48242583272437245	4.9319822379212495	-0.09	-0.07	0.02
H	-2.4373697620787507	-1.8150262379212494	3.793314762078751	0.02	-0.02	-0.02
H	-5.798432286236252	0.6623072379212493	-0.048556832724372424	0.06	0.02	-0.07
H	-6.254563643118126	-0.9624086431181261	0.507251048315003	0.03	0.03	-0.08
H	-6.016878048315003	-0.6507547620787507	-1.2272308327243724	0.08	0.02	-0.07
H	2.037561237921249	5.242992405196877	-0.2594737620787507	0.02	-0.05	0.02
H	-0.07001876207875074	6.484741643118126	0.23202688103937538	0.02	-0.03	-0.01
H	-2.2814647620787505	5.414805762078751	-0.18917611896062464	0.02	-0.02	-0.01
H	2.2222561189606247	1.6259595241575013	-1.1170947620787506	0.01	-0.04	0.02
H	-2.7340181189606247	1.8727108810393753	-1.4335648810393753	-0.01	-0.01	0.01
H	1.8568041189606246	-4.979384881039375	1.3257641189606246	0.01	0.01	0.01
H	4.284844118960625	-4.784657118960625	0.7413287620787506	0.01	-0.01	-0.02
H	5.03677	-3.071656594803123	-0.9121767137637479	0.0	-0.05	-0.06
H	-0.8394898810393754	-2.741129118960625	-0.13237911896062463	0.01	-0.01	-0.01
H	2.7288678810393754	-0.5635638327243724	-2.5769239516849973	-0.01	-0.07	-0.08
H	4.449995118960625	2.5572545241575013	-0.7113688810393753	0.01	-0.04	0.01
H	3.3847002379212494	3.2011257620787505	0.5715561189606246	0.02	-0.02	0.01
H	3.8636781189606246	4.235004524157501	-0.8052211189606246	0.01	-0.04	-0.01
H	3.558211	2.346805524157501	-3.1280208810393755	0.0	-0.04	0.01
H	2.686686881039375	3.906392405196877	-3.147614881039375	-0.01	-0.05	0.01
H	1.7949608810393753	2.384518405196877	-3.4408897620787506	-0.01	-0.05	0.02
H	-4.62447123792125	2.398282356881874	0.13597388103937538	-0.02	0.03	-0.01
H	-3.83753	3.9225382379212492	0.6172267620787507	0.0	0.02	-0.02
H	-3.065673356881874	2.3714321189606244	1.0366991189606247	-0.03	0.01	0.01
H	-4.6612438810393755	3.192641	-2.3326721189606245	0.01	0.0	-0.01
H	-3.151404643118126	3.7397678810393753	-3.126589	0.03	-0.01	0.0
H	-3.888973762078751	4.725789	-1.8346191189606247	0.02	0.0	-0.01
H	5.026569881039375	0.4225592862362522	-2.446047951684997	-0.01	-0.06	-0.08
H	4.353843762078751	0.22514352415750147	-0.8070080706456217	-0.02	-0.04	-0.09
H	5.584926881039375	-0.9147324758424985	-1.4117048327243724	-0.01	-0.04	-0.07
H	4.4147	-1.1831238327243725	-4.320965832724372	0.0	-0.07	-0.07
H	3.3201971189606247	-2.5642539516849974	-4.033311713763748	0.01	-0.08	-0.06
H	4.9671171189606245	-2.5739677137637478	-3.3456037137637478	0.01	-0.06	-0.06
H	-1.5705265241575013	-3.327201643118126	2.169978118960625	0.04	0.03	0.01
H	-0.09252640519687685	-2.2936587620787505	2.239950643118126	0.05	0.02	-0.03
H	0.014976356881873893	-4.048243643118126	2.545705	0.03	0.03	0.0
H	-1.8748161189606247	-4.996210881039375	0.2618433568818739	-0.01	0.01	0.03
H	-0.26099511896062466	-5.722464	0.48540611896062463	-0.01	0.0	0.01
H	-0.7063233568818739	-5.050651118960625	-1.1003927620787506	-0.03	-0.01	0.02
H	-0.7889071189606247	3.0273598810393754	-3.5664255241575016	-0.01	-0.01	0.04
H	-0.5113198810393753	1.7636461189606247	-4.78734476207875	0.01	0.01	0.02
H	-2.089492	1.9042838810393754	-4.006702881039375	0.0	-0.01	0.01
H	1.3467037620787508	-2.922271	-3.6293143085668707	-0.02	0.0	-0.11
H	-0.05186776207875074	-3.556173356881874	-2.7698889516849974	0.02	-0.03	-0.08
H	-0.2802575948031232	-2.6607511189606248	-4.289072713763748	-0.05	-0.01	-0.06
114
O	-4.064733509701858	-2.5441994967660473	-1.622523	0.03	-0.01	0.0
Mg	0.2865589805962839	0.14899652910557418	-0.018518987064189252	0.06	-0.09	-0.04
O	-0.8883399741283785	0.2667124708944258	3.312190470894426	-0.08	0.09	0.09
C	-3.9705910129358104	-2.2602745032339526	-0.3162194967660473	0.04	0.01	-0.01
N	-0.253912	1.4201460129358108	-1.5393435032339526	0.0	-0.04	0.01
N	0.738994	-1.327915980596284	-1.3555069805962838	0.0	-0.06	-0.06
O	-3.799337509701858	-3.0709140064679055	0.563733	0.03	0.02	0.0
C	-0.5615004967660474	1.0102130064679054	-2.7611565032339525	-0.01	-0.02	0.01
C	-0.4840034967660473	-0.3425289935320946	-3.1859549935320945	-0.01	-0.02	-0.02
C	0.18972850323395268	-1.407637490298142	-2.560774483830236	-0.01	-0.03	-0.05
O	-3.7833935032339525	-0.4088270064679054	1.2377000064679053	0.01	0.02	-0.02
C	-2.475194	-0.2772655161697634	1.4778924902981418	0.0	0.05	0.03
C	-2.256659477362331	0.15987599353209464	2.9272924838302363	-0.07	0.02	0.05
C	-4.190185516169763	-0.7639515032339527	-0.10175249029814194	0.05	0.01	-0.03
O	-1.6291930129358108	-0.47409002587162147	0.6227659805962839	0.04	0.08	0.06
C	-3.9541025032339525	-3.9349044967660474	-1.9774985032339527	0.01	-0.01	0.01
O	1.2949064838302367	-0.13234651616976345	1.5719640258716217	0.05	0.05	-0.08
C	-0.13285945149070968	1.2539854450228043	2.743005948256757	-0.15	0.17	0.16
O	-0.527521457958615	1.9067214320869934	1.7957364320869935	-0.13	0.21	0.21
O	2.2142550258716214	2.0430289870641896	2.9843144838302362	-0.08	0.04	0.05
C	3.140195509701858	1.1420739741283785	2.4992369870641893	-0.03	0.08	0.04
C	2.653756490298142	-0.14596903233952688	1.814540019403716	0.03	0.1	-0.06
C	1.017309509701858	1.6759484967660474	3.6710734644265206	-0.03	0.01	0.11
O	4.30479601293581	1.4676199611925675	2.533210967660473	-0.04	0.12	0.1
C	3.1508259741283786	-1.3936345226376687	2.5871815355734795	0.08	0.07	-0.11
C	1.2795909935320948	0.7598360388074322	4.866370496766048	0.02	-0.12	0.01
C	-2.8997149870641894	-0.8262814838302366	3.905695	-0.04	-0.05	0.0
C	-5.672689516169763	-0.4096890064679054	-0.21243898059628388	0.05	0.02	-0.06
C	-0.2426335032339527	2.8246130129358105	-1.1613875097018582	0.01	-0.04	0.03
C	1.66489	-2.3374324838302365	-0.8825699805962838	0.0	-0.05	-0.06
C	1.0339504967660473	3.4427670129358106	-0.9348415097018581	0.01	-0.04	0.03
C	1.0651804967660474	4.76187301293581	-0.4293350064679054	0.01	-0.04	0.02
C	-0.11936600646790536	5.465422509701858	-0.156789	0.02	-0.03	0.0
C	-1.3620380064679052	4.861307006467905	-0.393115	0.02	-0.02	0.0
C	-1.4550785032339526	3.535456509701858	-0.8896095032339526	0.01	-0.03	0.01
C	2.3518204967660474	2.7188870129358107	-1.3249390064679052	0.01	-0.04	0.02
C	-2.86401	2.9184855032339527	-1.091822	0.0	-0.01	0.0
C	1.2253194967660475	-3.3383664902981423	0.043224509701858066	0.01	-0.03	-0.03
C	2.1859204967660473	-4.206016496766047	0.6167460064679053	0.01	-0.01	-0.02
C	3.5540814967660475	-4.099217993532095	0.2910395097018581	0.01	-0.02	-0.03
C	3.973268	-3.1262569870641896	-0.6350824838302366	0.0	-0.04	-0.05
C	3.055819	-2.2352634838302365	-1.235908980596284	0.0	-0.05	-0.06
C	-0.2672885032339527	-3.506189	0.4189445032339527	0.01	0.0	-0.01
C	3.579224	-1.208796980596284	-2.2764674773623312	0.0	-0.06	-0.07
C	3.585237496766047	3.2140980129358105	-0.5123845032339527	0.01	-0.04	0.01
C	2.61607	2.8525845161697636	-2.8609000064679053	0.0	-0.05	0.02
C	-3.6459394967660472	2.8958084967660476	0.262581	-0.01	0.01	0.0
C	-3.6932960064679055	3.696954	-2.1697614967660472	0.02	0.0	-0.01
C	4.710604503233952	-0.3099924838302366	-1.6883349741283784	-0.01	-0.05	-0.08
C	4.098707	-1.9253364773623314	-3.5679049805962837	0.0	-0.07	-0.06
C	-0.4986225097018581	-3.2832230064679053	1.9461575032339526	0.03	0.02	-0.01
C	-0.8073264967660474	-4.909134	-0.014421006467905374	-0.01	0.0	0.02
C	-1.007911	1.9908685032339526	-3.839352006467905	0.0	-0.01	0.02
C	0.3068110064679054	-2.707173993532095	-3.3519469741283783	-0.02	-0.02	-0.08
H	-0.8569069935320947	-0.5353075032339526	-4.185925993532095	-0.02	0.01	-0.02
H	-2.7303714579586154	1.1468995032339526	3.007314477362331	-0.13	-0.01	0.07
H	-3.587883522637669	-0.202696	-0.8144474967660473	0.07	0.0	-0.01
H	-2.9969055032339527	-4.337379993532095	-1.6379045032339525	0.01	-0.02	0.01
H	-4.021412503233953	-3.962882993532095	-3.0649385032339524	0.01	-0.02	0.01
H	-4.771321	-4.507968	-1.5244270064679053	0.0	0.0	0.02
H	3.240401470894426	-0.14437256144510108	0.880019509701858	0.09	0.19	-0.03
H	0.6722229870641893	2.645010503233953	4.064320419151183	0.04	-0.01	0.25
H	4.205489477362332	-1.2731720323395268	2.856990529105574	0.07	0.1	-0.09
H	3.044697961192568	-2.284330529105574	1.9685320452753376	0.12	0.09	-0.14
H	2.568903477362331	-1.5462015032339527	3.503966038807432	0.07	0.01	-0.12
H	2.1415539741283784	1.1397270711469591	5.419071006467905	0.08	-0.22	-0.02
H	1.475284019403716	-0.26911946442652046	4.548494038807433	-0.06	-0.11	-0.12
H	0.4133384773623312	0.7473760452753376	5.5308094773623315	0.07	-0.14	0.07
H	-3.971484490298142	-0.9118884644265204	3.718718509701858	-0.03	-0.11	-0.03
H	-2.738182470894426	-0.4715854773623312	4.928884993532095	-0.09	-0.07	0.02
H	-2.4404670064679053	-1.8119289935320948	3.7964120064679054	0.02	-0.02	-0.02
H	-5.807724019403715	0.6592099935320946	-0.03771647736233119	0.06	0.02	-0.07
H	-6.259209509701858	-0.967054509701858	0.5196400258716215	0.03	0.03	-0.08
H	-6.029267025871621	-0.6538520064679054	-1.2163904773623313	0.08	0.02	-0.07
H	2.0344639935320945	5.2507355161697635	-0.2625710064679054	0.02	-0.05	0.02
H	-0.07311600646790538	6.489387509701858	0.2335755032339527	0.02	-0.03	-0.01
H	-2.284562006467905	5.417903006467905	-0.1876274967660473	0.02	-0.02	-0.01
H	2.2207074967660474	1.6321540129358107	-1.1201920064679052	0.01	-0.04	0.02
H	-2.7324694967660474	1.8742595032339526	-1.4351135032339526	-0.01	-0.01	0.01
H	1.8552554967660473	-4.980933503233953	1.3242154967660473	0.01	0.01	0.01
H	4.283295496766048	-4.783108496766047	0.7444260064679054	0.01	-0.01	-0.02
H	5.03677	-3.063913483830236	-0.9028849805962839	0.0	-0.05	-0.06
H	-0.8410385032339527	-2.7395804967660475	-0.1308304967660473	0.01	-0.01	-0.01
H	2.7304165032339527	-0.5527234773623312	-2.5645349741283785	-0.01	-0.07	-0.08
H	4.4484464967660475	2.5634490129358105	-0.7129175032339526	0.01	-0.04	0.01
H	3.381602993532095	3.204223006467905	0.5700074967660473	0.02	-0.02	0.01
H	3.8621294967660473	4.241199012935811	-0.8036724967660474	0.01	-0.04	-0.01
H	3.558211	2.3530000129358104	-3.1295695032339528	0.0	-0.04	0.01
H	2.6882355032339524	3.9141355161697637	-3.1491635032339524	-0.01	-0.05	0.01
H	1.7965095032339526	2.392261516169764	-3.4439870064679052	-0.01	-0.05	0.02
H	-4.621373993532095	2.393636490298142	0.1375225032339527	-0.02	0.03	-0.01
H	-3.83753	3.9194409935320946	0.6203240064679054	0.0	0.02	-0.02
H	-3.0610274902981423	2.369883496766047	1.0351504967660474	-0.03	0.01	0.01
H	-4.662792503233953	3.192641	-2.3311234967660472	0.01	0.0	-0.01
H	-3.156050509701858	3.7413165032339526	-3.126589	0.03	-0.01	0.0
H	-3.8920710064679054	4.725789	-1.8330704967660474	0.02	0.0	-0.01
H	5.028118503233952	0.4318510194037161	-2.4336589741283783	-0.01	-0.06	-0.08
H	4.356941006467905	0.23133801293581074	-0.7930704708944258	-0.02	-0.04	-0.09
H	5.586475503233952	-0.9085379870641892	-1.4008644773623313	-0.01	-0.04	-0.07
H	4.4147	-1.1722834773623314	-4.310125477362331	0.0	-0.07	-0.07
H	3.3186484967660475	-2.5518649741283785	-4.024019980596284	0.01	-0.08	-0.06
H	4.965568496766047	-2.5646759805962835	-3.3363119805962835	0.01	-0.06	-0.06
H	-1.5767210129358107	-3.331847509701858	2.1684294967660476	0.04	0.03	0.01
H	-0.10026951616976344	-2.296756006467905	2.244596509701858	0.05	0.02	-0.03
H	0.010330490298141936	-4.052889509701858	2.545705	0.03	0.03	0.0
H	-1.8732674967660474	-4.997759503233953	0.25719749029814193	-0.01	0.01	0.03
H	-0.2594464967660473	-5.722464	0.4838574967660473	-0.01	0.0	0.01
H	-0.701677490298142	-5.049102496766047	-1.1034900064679052	-0.03	-0.01	0.02
H	-0.7873584967660474	3.0289085032339527	-3.5726200129358108	-0.01	-0.01	0.04
H	-0.5128685032339526	1.7620974967660474	-4.790442006467905	0.01	0.01	0.02
H	-2.089492	1.9058325032339527	-4.008251503233953	0.0	-0.01	0.01
H	1.3498010064679054	-2.922271	-3.6122794644265204	-0.02	0.0	-0.11
H	-0.05496500646790538	-3.551527490298142	-2.7574999741283786	0.02	-0.03	-0.08
H	-0.2725144838302366	-2.6592024967660475	-4.279780980596284	-0.05	-0.01	-0.06
114
O	-4.0705876431181265	-2.5422481189606247	-1.622523	0.03	-0.01	0.0
Mg	0.2748507137637478	0.1665589293543783	-0.01071347584249853	0.06	-0.09	-0.04
O	-0.872728951684997	0.2491500706456217	3.2946280706456217	-0.08	0.09	0.09
C	-3.9783965241575014	-2.262225881039375	-0.3142681189606247	0.04	0.01	-0.01
N	-0.253912	1.4279515241575014	-1.5412948810393754	0.0	-0.04	0.01
N	0.738994	-1.3162077137637478	-1.3437987137637477	0.0	-0.06	-0.06
O	-3.805191643118126	-3.074816762078751	0.563733	0.03	0.02	0.0
C	-0.5595491189606246	1.0141157620787509	-2.763107881039375	-0.01	-0.02	0.01
C	-0.48205211896062466	-0.33862623792124924	-3.182052237921249	-0.01	-0.02	-0.02
C	0.19167988103937536	-1.4017833568818738	-2.551017594803123	-0.01	-0.03	-0.05
O	-3.785344881039375	-0.41272976207875073	1.2416027620787509	0.01	0.02	-0.02
C	-2.475194	-0.28702240519687683	1.4720383568818738	0.0	0.05	0.03
C	-2.2429998327243723	0.15597323792124926	2.917535594803123	-0.07	0.02	0.05
C	-4.199942405196877	-0.7659028810393754	-0.0958983568818739	0.05	0.01	-0.03
O	-1.6369985241575014	-0.4897010483150029	0.6110577137637478	0.04	0.08	0.06
C	-3.956053881039375	-3.932953118960625	-1.9794498810393755	0.01	-0.01	0.01
O	1.2851495948031233	-0.14210340519687684	1.587575048315003	0.05	0.05	-0.08
C	-0.10358878440936947	1.220812022330619	2.711783903369994	-0.15	0.17	0.16
O	-0.5021535464881202	1.8657424981731172	1.7547574981731173	-0.13	0.21	0.21
O	2.2298660483150026	2.0352234758424985	2.974557594803123	-0.08	0.04	0.05
C	3.146049643118126	1.126462951684997	2.4914314758424982	-0.03	0.08	0.04
C	2.647902356881874	-0.16548281039375368	1.8262482862362521	0.03	0.1	-0.06
C	1.0231636431181261	1.6739971189606246	3.649608308566871	-0.03	0.01	0.11
O	4.312601524157501	1.4442034275274955	2.5136971896062463	-0.04	0.12	0.1
C	3.1352149516849974	-1.4072941672756276	2.608646691433129	0.08	0.07	-0.11
C	1.2756882379212493	0.7832525724725043	4.864419118960625	0.02	-0.12	0.01
C	-2.8919094758424984	-0.8165245948031232	3.905695	-0.04	-0.05	0.0
C	-5.682446405196877	-0.41359176207875076	-0.2007307137637478	0.05	0.02	-0.06
C	-0.24458488103937537	2.8324185241575015	-1.1672416431181263	0.01	-0.04	0.03
C	1.66489	-2.3276755948031234	-0.8708617137637478	0.0	-0.05	-0.06
C	1.0319991189606246	3.4505725241575016	-0.9406956431181261	0.01	-0.04	0.03
C	1.0632291189606247	4.769678524157501	-0.43323776207875075	0.01	-0.04	0.02
C	-0.12326876207875072	5.471276643118126	-0.156789	0.02	-0.03	0.0
C	-1.3659407620787507	4.86520976207875	-0.393115	0.02	-0.02	0.0
C	-1.4570298810393754	3.541310643118126	-0.8915608810393754	0.01	-0.03	0.01
C	2.349869118960625	2.7266925241575017	-1.3288417620787507	0.01	-0.04	0.02
C	-2.86401	2.9204368810393753	-1.091822	0.0	-0.01	0.0
C	1.2233681189606247	-3.332512356881874	0.049078643118126104	0.01	-0.03	-0.03
C	2.1839691189606247	-4.204065118960624	0.6206487620787506	0.01	-0.01	-0.02
C	3.552130118960625	-4.09531523792125	0.2968936431181261	0.01	-0.02	-0.03
C	3.973268	-3.1184514758424986	-0.6253255948031231	0.0	-0.04	-0.05
C	3.055819	-2.2255065948031234	-1.2242007137637478	0.0	-0.05	-0.06
C	-0.26923988103937535	-3.506189	0.42089588103937536	0.01	0.0	-0.01
C	3.579224	-1.1970887137637478	-2.2628078327243726	0.0	-0.06	-0.07
C	3.5832861189606247	3.2219035241575016	-0.5143358810393754	0.01	-0.04	0.01
C	2.61607	2.8623414051968767	-2.864802762078751	0.0	-0.05	0.02
C	-3.6439881189606247	2.893857118960625	0.262581	-0.01	0.01	0.0
C	-3.697198762078751	3.696954	-2.1678101189606247	0.02	0.0	-0.01
C	4.712555881039375	-0.3002355948031232	-1.672723951684997	-0.01	-0.05	-0.08
C	4.098707	-1.9116768327243725	-3.5561967137637476	0.0	-0.07	-0.06
C	-0.5044766431181261	-3.287125762078751	1.9481088810393754	0.03	0.02	-0.01
C	-0.8053751189606246	-4.909134	-0.018323762078750735	-0.01	0.0	0.02
C	-1.007911	1.9928198810393754	-3.8432547620787507	0.0	-0.01	0.02
C	0.31071376207875073	-2.7032712379212493	-3.336335951684997	-0.02	-0.02	-0.08
H	-0.8530042379212494	-0.5372588810393754	-4.18202323792125	-0.02	0.01	-0.02
H	-2.70500354648812	1.1488508810393754	2.9936548327243724	-0.13	-0.01	0.07
H	-3.6015431672756275	-0.202696	-0.8124961189606246	0.07	0.0	-0.01
H	-2.998856881039375	-4.33347723792125	-1.6398558810393753	0.01	-0.02	0.01
H	-4.0233638810393755	-3.9589802379212493	-3.066889881039375	0.01	-0.02	0.01
H	-4.771321	-4.507968	-1.5283297620787508	0.0	0.0	0.02
H	3.222839070645622	-0.18144873974813197	0.8858736431181261	0.09	0.19	-0.03
H	0.6644174758424986	2.6469618810393754	4.015535974015616	0.04	-0.01	0.25
H	4.191829832724373	-1.2926858103937535	2.8745529293543783	0.07	0.1	-0.09
H	3.0212814275274957	-2.3018929293543784	1.9958513345512552	0.12	0.09	-0.14
H	2.5552438327243725	-1.5481528810393754	3.5273825724725043	0.07	0.01	-0.12
H	2.1259429516849973	1.182657382866258	5.42297376207875	0.08	-0.22	-0.02
H	1.4869922862362521	-0.24765430856687096	4.571910572472505	-0.06	-0.11	-0.12
H	0.39967883272437243	0.7746953345512552	5.517149832724373	0.07	-0.14	0.07
H	-3.965630356881874	-0.8904233085668709	3.724572643118126	-0.03	-0.11	-0.03
H	-2.7206200706456216	-0.45792583272437243	4.92498223792125	-0.09	-0.07	0.02
H	-2.444369762078751	-1.8080262379212493	3.800314762078751	0.02	-0.02	-0.02
H	-5.8194322862362515	0.6553072379212493	-0.024056832724372427	0.06	0.02	-0.07
H	-6.265063643118126	-0.9729086431181261	0.535251048315003	0.03	0.03	-0.08
H	-6.044878048315003	-0.6577547620787507	-1.2027308327243724	0.08	0.02	-0.07
H	2.030561237921249	5.260492405196877	-0.26647376207875073	0.02	-0.05	0.02
H	-0.07701876207875073	6.495241643118127	0.23552688103937539	0.02	-0.03	-0.01
H	-2.2884647620787506	5.42180576207875	-0.18567611896062464	0.02	-0.02	-0.01
H	2.218756118960625	1.6399595241575013	-1.1240947620787507	0.01	-0.04	0.02
H	-2.730518118960625	1.8762108810393754	-1.4370648810393754	-0.01	-0.01	0.01
H	1.8533041189606245	-4.982884881039375	1.3222641189606246	0.01	0.01	0.01
H	4.281344118960625	-4.781157118960625	0.7483287620787507	0.01	-0.01	-0.02
H	5.03677	-3.054156594803123	-0.8911767137637479	0.0	-0.05	-0.06
H	-0.8429898810393754	-2.737629118960625	-0.12887911896062462	0.01	-0.01	-0.01
H	2.7323678810393752	-0.5390638327243724	-2.5489239516849973	-0.01	-0.07	-0.08
H	4.446495118960625	2.5712545241575016	-0.7148688810393754	0.01	-0.04	0.01
H	3.3777002379212493	3.2081257620787507	0.5680561189606246	0.02	-0.02	0.01
H	3.860178118960625	4.249004524157502	-0.8017211189606246	0.01	-0.04	-0.01
H	3.558211	2.3608055241575014	-3.1315208810393753	0.0	-0.04	0.01
H	2.690186881039375	3.923892405196877	-3.151114881039375	-0.01	-0.05	0.01
H	1.7984608810393754	2.402018405196877	-3.4478897620787508	-0.01	-0.05	0.02
H	-4.61747123792125	2.387782356881874	0.13947388103937539	-0.02	0.03	-0.01
H	-3.83753	3.915538237921249	0.6242267620787507	0.0	0.02	-0.02
H	-3.055173356881874	2.3679321189606246	1.0331991189606247	-0.03	0.01	0.01
H	-4.664743881039375	3.192641	-2.3291721189606247	0.01	0.0	-0.01
H	-3.161904643118126	3.743267881039375	-3.126589	0.03	-0.01	0.0
H	-3.895973762078751	4.725789	-1.8311191189606246	0.02	0.0	-0.01
H	5.030069881039375	0.4435592862362522	-2.418047951684997	-0.01	-0.06	-0.08
H	4.36084376207875	0.23914352415750145	-0.7755080706456218	-0.02	-0.04	-0.09
H	5.588426881039375	-0.9007324758424985	-1.3872048327243724	-0.01	-0.04	-0.07
H	4.4147	-1.1586238327243725	-4.2964658327243725	0.0	-0.07	-0.07
H	3.316697118960625	-2.5362539516849973	-4.012311713763748	0.01	-0.08	-0.06
H	4.963617118960625	-2.5529677137637474	-3.3246037137637474	0.01	-0.06	-0.06
H	-1.5845265241575013	-3.337701643118126	2.166478118960625	0.04	0.03	0.01
H	-0.11002640519687684	-2.3006587620787506	2.250450643118126	0.05	0.02	-0.03
H	0.004476356881873897	-4.0587436431181265	2.545705	0.03	0.03	0.0
H	-1.8713161189606247	-4.999710881039375	0.25134335688187387	-0.01	0.01	0.03
H	-0.25749511896062466	-5.722464	0.48190611896062463	-0.01	0.0	0.01
H	-0.6958233568818739	-5.047151118960625	-1.1073927620787507	-0.03	-0.01	0.02
H	-0.7854071189606247	3.030859881039375	-3.580425524157502	-0.01	-0.01	0.04
H	-0.5148198810393754	1.7601461189606247	-4.79434476207875	0.01	0.01	0.02
H	-2.089492	1.9077838810393755	-4.010202881039375	0.0	-0.01	0.01
H	1.3537037620787509	-2.922271	-3.5908143085668707	-0.02	0.0	-0.11
H	-0.05886776207875073	-3.545673356881874	-2.7418889516849974	0.02	-0.03	-0.08
H	-0.26275759480312316	-2.657251118960625	-4.268072713763748	-0.05	-0.01	-0.06
114
O	-4.077077	-2.540085	-1.622523	0.03	-0.01	0.0
Mg	0.261872	0.186027	-0.0020610000000000034	0.06	-0.09	-0.04
O	-0.855424	0.229682	3.27516	-0.08	0.09	0.09
C	-3.987049	-2.264389	-0.312105	0.04	0.01	-0.01
N	-0.253912	1.436604	-1.543458	0.0	-0.04	0.01
N	0.738994	-1.303229	-1.33082	0.0	-0.06	-0.06
O	-3.811681	-3.079143	0.563733	0.03	0.02	0.0
C	-0.557386	1.018442	-2.765271	-0.01	-0.02	0.01
C	-0.479889	-0.3343	-3.177726	-0.01	-0.02	-0.02
C	0.193843	-1.395294	-2.540202	-0.01	-0.03	-0.05
O	-3.787508	-0.417056	1.245929	0.01	0.02	-0.02
C	-2.475194	-0.297838	1.465549	0.0	0.05	0.03
C	-2.227858	0.151647	2.90672	-0.07	0.02	0.05
C	-4.210758	-0.768066	-0.089409	0.05	0.01	-0.03
O	-1.645651	-0.507006	0.598079	0.04	0.08	0.06
C	-3.958217	-3.93079	-1.981613	0.01	-0.01	0.01
O	1.274334	-0.152919	1.60488	0.05	0.05	-0.08
C	-0.07114200000000001	1.184039	2.677174	-0.15	0.17	0.16
O	-0.474033	1.820317	1.709332	-0.13	0.21	0.21
O	2.247171	2.026571	2.963742	-0.08	0.04	0.05
C	3.152539	1.109158	2.482779	-0.03	0.08	0.04
C	2.641413	-0.187114	1.839227	0.03	0.1	-0.06
C	1.029653	1.671834	3.625814	-0.03	0.01	0.11
O	4.321254	1.418246	2.492066	-0.04	0.12	0.1
C	3.11791	-1.422436	2.632441	0.08	0.07	-0.11
C	1.271362	0.80921	4.862256	0.02	-0.12	0.01
C	-2.883257	-0.805709	3.905695	-0.04	-0.05	0.0
C	-5.693262	-0.417918	-0.187752	0.05	0.02	-0.06
C	-0.246748	2.841071	-1.173731	0.01	-0.04	0.03
C	1.66489	-2.31686	-0.857883	0.0	-0.05	-0.06
C	1.029836	3.459225	-0.947185	0.01	-0.04	0.03
C	1.061066	4.778331	-0.437564	0.01	-0.04	0.02
C	-0.127595	5.477766	-0.156789	0.02	-0.03	0.0
C	-1.370267	4.869536	-0.393115	0.02	-0.02	0.0
C	-1.459193	3.5478	-0.893724	0.01	-0.03	0.01
C	2.347706	2.735345	-1.333168	0.01	-0.04	0.02
C	-2.86401	2.9226	-1.091822	0.0	-0.01	0.0
C	1.221205	-3.326023	0.055568	0.01	-0.03	-0.03
C	2.181806	-4.201902	0.624975	0.01	-0.01	-0.02
C	3.549967	-4.090989	0.303383	0.01	-0.02	-0.03
C	3.973268	-3.109799	-0.61451	0.0	-0.04	-0.05
C	3.055819	-2.214691	-1.211222	0.0	-0.05	-0.06
C	-0.271403	-3.506189	0.423059	0.01	0.0	-0.01
C	3.579224	-1.18411	-2.247666	0.0	-0.06	-0.07
C	3.581123	3.230556	-0.516499	0.01	-0.04	0.01
C	2.61607	2.873157	-2.869129	0.0	-0.05	0.02
C	-3.641825	2.891694	0.262581	-0.01	0.01	0.0
C	-3.701525	3.696954	-2.165647	0.02	0.0	-0.01
C	4.714719	-0.28942	-1.655419	-0.01	-0.05	-0.08
C	4.098707	-1.896535	-3.543218	0.0	-0.07	-0.06
C	-0.510966	-3.291452	1.950272	0.03	0.02	-0.01
C	-0.803212	-4.909134	-0.02265	-0.01	0.0	0.02
C	-1.007911	1.994983	-3.847581	0.0	-0.01	0.02
C	0.31504	-2.698945	-3.319031	-0.02	-0.02	-0.08
H	-0.848678	-0.539422	-4.177697	-0.02	0.01	-0.02
H	-2.676883	1.151014	2.978513	-0.13	-0.01	0.07
H	-3.616685	-0.202696	-0.810333	0.07	0.0	-0.01
H	-3.00102	-4.329151	-1.642019	0.01	-0.02	0.01
H	-4.025527	-3.954654	-3.069053	0.01	-0.02	0.01
H	-4.771321	-4.507968	-1.532656	0.0	0.0	0.02
H	3.203371	-0.22254799999999997	0.892363	0.09	0.19	-0.03
H	0.655765	2.649125	3.961458	0.04	-0.01	0.25
H	4.176688	-1.314317	2.894021	0.07	0.1	-0.09
H	2.995324	-2.321361	2.026135	0.12	0.09	-0.14
H	2.540102	-1.550316	3.55334	0.07	0.01	-0.12
H	2.108638	1.230246	5.4273	0.08	-0.22	-0.02
H	1.499971	-0.22386	4.597868	-0.06	-0.11	-0.12
H	0.384537	0.804979	5.502008	0.07	-0.14	0.07
H	-3.959141	-0.866629	3.731062	-0.03	-0.11	-0.03
H	-2.701152	-0.442784	4.920656	-0.09	-0.07	0.02
H	-2.448696	-1.8037	3.804641	0.02	-0.02	-0.02
H	-5.832411	0.650981	-0.008915000000000005	0.06	0.02	-0.07
H	-6.271553	-0.979398	0.552556	0.03	0.03	-0.08
H	-6.062183	-0.662081	-1.187589	0.08	0.02	-0.07
H	2.026235	5.271308	-0.2708	0.02	-0.05	0.02
H	-0.081345	6.501731	0.23769	0.02	-0.03	-0.01
H	-2.292791	5.426132	-0.183513	0.02	-0.02	-0.01
H	2.216593	1.648612	-1.128421	0.01	-0.04	0.02
H	-2.728355	1.878374	-1.439228	-0.01	-0.01	0.01
H	1.851141	-4.985048	1.320101	0.01	0.01	0.01
H	4.279181	-4.778994	0.752655	0.01	-0.01	-0.02
H	5.03677	-3.043341	-0.878198	0.0	-0.05	-0.06
H	-0.845153	-2.735466	-0.126716	0.01	-0.01	-0.01
H	2.734531	-0.523922	-2.531619	-0.01	-0.07	-0.08
H	4.444332	2.579907	-0.717032	0.01	-0.04	0.01
H	3.373374	3.212452	0.565893	0.02	-0.02	0.01
H	3.858015	4.257657	-0.799558	0.01	-0.04	-0.01
H	3.558211	2.369458	-3.133684	0.0	-0.04	0.01
H	2.69235	3.934708	-3.153278	-0.01	-0.05	0.01
H	1.800624	2.412834	-3.452216	-0.01	-0.05	0.02
H	-4.613145	2.381293	0.141637	-0.02	0.03	-0.01
H	-3.83753	3.911212	0.628553	0.0	0.02	-0.02
H	-3.048684	2.365769	1.031036	-0.03	0.01	0.01
H	-4.666907	3.192641	-2.327009	0.01	0.0	-0.01
H	-3.168394	3.745431	-3.126589	0.03	-0.01	0.0
H	-3.9003	4.725789	-1.828956	0.02	0.0	-0.01
H	5.032233	0.456538	-2.400743	-0.01	-0.06	-0.08
H	4.36517	0.247796	-0.75604	-0.02	-0.04	-0.09
H	5.59059	-0.89208	-1.372063	-0.01	-0.04	-0.07
H	4.4147	-1.143482	-4.281324	0.0	-0.07	-0.07
H	3.314534	-2.518949	-3.999333	0.01	-0.08	-0.06
H	4.961454	-2.539989	-3.311625	0.01	-0.06	-0.06
H	-1.593179	-3.344191	2.164315	0.04	0.03	0.01
H	-0.120842	-2.304985	2.25694	0.05	0.02	-0.03
H	-0.0020129999999999974	-4.065233	2.545705	0.03	0.03	0.0
H	-1.869153	-5.001874	0.244854	-0.01	0.01	0.03
H	-0.255332	-5.722464	0.479743	-0.01	0.0	0.01
H	-0.689334	-5.044988	-1.111719	-0.03	-0.01	0.02
H	-0.783244	3.033023	-3.589078	-0.01	-0.01	0.04
H	-0.516983	1.757983	-4.798671	0.01	0.01	0.02
H	-2.089492	1.909947	-4.012366	0.0	-0.01	0.01
H	1.35803	-2.922271	-3.56702	-0.02	0.0	-0.11
H	-0.063194	-3.539184	-2.724584	0.02	-0.03	-0.08
H	-0.251942	-2.655088	-4.255094	-0.05	-0.01	-0.06
114
O	-4.083566356881874	-2.537921881039375	-1.622523	0.03	-0.01	0.0
Mg	0.24889328623625223	0.20549507064562164	0.006591475842498513	0.06	-0.09	-0.04
O	-0.838119048315003	0.21021392935437835	3.2556919293543785	-0.08	0.09	0.09
C	-3.9957014758424982	-2.266552118960625	-0.30994188103937537	0.04	0.01	-0.01
N	-0.253912	1.4452564758424986	-1.5456211189606246	0.0	-0.04	0.01
N	0.738994	-1.2902502862362522	-1.317841286236252	0.0	-0.06	-0.06
O	-3.818170356881874	-3.0834692379212494	0.563733	0.03	0.02	0.0
C	-0.5552228810393754	1.0227682379212493	-2.7674341189606246	-0.01	-0.02	0.01
C	-0.47772588103937536	-0.32997376207875073	-3.1733997620787506	-0.01	-0.02	-0.02
C	0.19600611896062461	-1.3888046431181262	-2.5293864051968766	-0.01	-0.03	-0.05
O	-3.7896711189606247	-0.42138223792124924	1.2502552379212493	0.01	0.02	-0.02
C	-2.475194	-0.30865359480312315	1.4590596431181262	0.0	0.05	0.03
C	-2.2127161672756275	0.14732076207875075	2.8959044051968768	-0.07	0.02	0.05
C	-4.221573594803123	-0.7702291189606246	-0.08291964311812612	0.05	0.01	-0.03
O	-1.6543034758424986	-0.524310951684997	0.5851002862362522	0.04	0.08	0.06
C	-3.9603801189606247	-3.928626881039375	-1.9837761189606247	0.01	-0.01	0.01
O	1.2635184051968769	-0.16373459480312313	1.622184951684997	0.05	0.05	-0.08
C	-0.03869521559063058	1.1472659776693814	2.642564096630006	-0.15	0.17	0.16
O	-0.4459124535118798	1.7748915018268827	1.6639065018268828	-0.13	0.21	0.21
O	2.264475951684997	2.0179185241575017	2.9529264051968767	-0.08	0.04	0.05
C	3.159028356881874	1.091853048315003	2.4741265241575014	-0.03	0.08	0.04
C	2.634923643118126	-0.20874518960624627	1.8522057137637478	0.03	0.1	-0.06
C	1.0361423568818737	1.6696708810393754	3.6020196914331293	-0.03	0.01	0.11
O	4.329906475842498	1.3922885724725043	2.4704348103937535	-0.04	0.12	0.1
C	3.100605048315003	-1.4375778327243725	2.656235308566871	0.08	0.07	-0.11
C	1.267035762078751	0.8351674275274955	4.8600928810393755	0.02	-0.12	0.01
C	-2.8746045241575016	-0.7948934051968769	3.905695	-0.04	-0.05	0.0
C	-5.704077594803123	-0.42224423792124927	-0.17477328623625224	0.05	0.02	-0.06
C	-0.24891111896062462	2.8497234758424983	-1.1802203568818739	0.01	-0.04	0.03
C	1.66489	-2.306044405196877	-0.8449042862362521	0.0	-0.05	-0.06
C	1.0276728810393754	3.4678774758424984	-0.953674356881874	0.01	-0.04	0.03
C	1.0589028810393755	4.786983475842498	-0.44189023792124926	0.01	-0.04	0.02
C	-0.13192123792124924	5.4842553568818735	-0.156789	0.02	-0.03	0.0
C	-1.374593237921249	4.87386223792125	-0.393115	0.02	-0.02	0.0
C	-1.4613561189606246	3.554289356881874	-0.8958871189606246	0.01	-0.03	0.01
C	2.3455428810393752	2.7439974758424985	-1.337494237921249	0.01	-0.04	0.02
C	-2.86401	2.924763118960625	-1.091822	0.0	-0.01	0.0
C	1.2190418810393755	-3.319533643118126	0.06205735688187389	0.01	-0.03	-0.03
C	2.179642881039375	-4.199738881039375	0.6293012379212493	0.01	-0.01	-0.02
C	3.5478038810393753	-4.086662762078751	0.3098723568818739	0.01	-0.02	-0.03
C	3.973268	-3.101146524157502	-0.6036944051968769	0.0	-0.04	-0.05
C	3.055819	-2.203875405196877	-1.1982432862362522	0.0	-0.05	-0.06
C	-0.27356611896062466	-3.506189	0.4252221189606247	0.01	0.0	-0.01
C	3.579224	-1.1711312862362522	-2.2325241672756277	0.0	-0.06	-0.07
C	3.578959881039375	3.2392084758424984	-0.5186621189606246	0.01	-0.04	0.01
C	2.61607	2.883972594803123	-2.8734552379212492	0.0	-0.05	0.02
C	-3.639661881039375	2.8895308810393754	0.262581	-0.01	0.01	0.0
C	-3.7058512379212494	3.696954	-2.163483881039375	0.02	0.0	-0.01
C	4.7168821189606245	-0.27860440519687685	-1.638114048315003	-0.01	-0.05	-0.08
C	4.098707	-1.8813931672756277	-3.5302392862362524	0.0	-0.07	-0.06
C	-0.5174553568818739	-3.2957782379212492	1.9524351189606246	0.03	0.02	-0.01
C	-0.8010488810393754	-4.909134	-0.026976237921249258	-0.01	0.0	0.02
C	-1.007911	1.9971461189606246	-3.851907237921249	0.0	-0.01	0.02
C	0.31936623792124924	-2.694618762078751	-3.3017260483150026	-0.02	-0.02	-0.08
H	-0.8443517620787507	-0.5415851189606246	-4.173370762078751	-0.02	0.01	-0.02
H	-2.64876245351188	1.1531771189606246	2.9633711672756275	-0.13	-0.01	0.07
H	-3.6318268327243723	-0.202696	-0.8081698810393754	0.07	0.0	-0.01
H	-3.003183118960625	-4.324824762078751	-1.6441821189606245	0.01	-0.02	0.01
H	-4.027690118960625	-3.950327762078751	-3.0712161189606246	0.01	-0.02	0.01
H	-4.771321	-4.507968	-1.5369822379212492	0.0	0.0	0.02
H	3.1839029293543786	-0.2636472602518679	0.8988523568818739	0.09	0.19	-0.03
H	0.6471125241575015	2.651288118960625	3.9073800259843843	0.04	-0.01	0.25
H	4.161546167275628	-1.3359481896062462	2.9134890706456216	0.07	0.1	-0.09
H	2.9693665724725045	-2.3408290706456216	2.056418665448745	0.12	0.09	-0.14
H	2.5249601672756277	-1.5524791189606246	3.5792974275274956	0.07	0.01	-0.12
H	2.0913330483150028	1.2778346171337418	5.431626237921249	0.08	-0.22	-0.02
H	1.5129497137637478	-0.20006569143312908	4.623825427527495	-0.06	-0.11	-0.12
H	0.3693951672756276	0.8352626654487448	5.486866167275628	0.07	-0.14	0.07
H	-3.952651643118126	-0.8428346914331291	3.737551356881874	-0.03	-0.11	-0.03
H	-2.6816839293543784	-0.4276421672756276	4.9163297620787505	-0.09	-0.07	0.02
H	-2.453022237921249	-1.7993737620787509	3.8089672379212494	0.02	-0.02	-0.02
H	-5.845389713763748	0.6466547620787507	0.006226832724372399	0.06	0.02	-0.07
H	-6.2780423568818735	-0.9858873568818739	0.5698609516849971	0.03	0.03	-0.08
H	-6.079487951684997	-0.6664072379212493	-1.1724471672756276	0.08	0.02	-0.07
H	2.0219087620787506	5.2821235948031235	-0.27512623792124924	0.02	-0.05	0.02
H	-0.08567123792124925	6.508220356881874	0.23985311896062464	0.02	-0.03	-0.01
H	-2.297117237921249	5.43045823792125	-0.18134988103937538	0.02	-0.02	-0.01
H	2.214429881039375	1.6572644758424986	-1.132747237921249	0.01	-0.04	0.02
H	-2.7261918810393753	1.8805371189606246	-1.4413911189606246	-0.01	-0.01	0.01
H	1.8489778810393753	-4.987211118960625	1.3179378810393754	0.01	0.01	0.01
H	4.2770178810393755	-4.776830881039375	0.7569812379212493	0.01	-0.01	-0.02
H	5.03677	-3.0325254051968766	-0.8652192862362522	0.0	-0.05	-0.06
H	-0.8473161189606246	-2.7333028810393754	-0.12455288103937537	0.01	-0.01	-0.01
H	2.736694118960625	-0.5087801672756276	-2.514314048315003	-0.01	-0.07	-0.08
H	4.442168881039375	2.5885594758424983	-0.7191951189606246	0.01	-0.04	0.01
H	3.369047762078751	3.216778237921249	0.5637298810393754	0.02	-0.02	0.01
H	3.855851881039375	4.266309475842498	-0.7973948810393754	0.01	-0.04	-0.01
H	3.558211	2.3781104758424982	-3.135847118960625	0.0	-0.04	0.01
H	2.6945131189606246	3.9455235948031233	-3.1554411189606246	-0.01	-0.05	0.01
H	1.8027871189606246	2.4236495948031234	-3.456542237921249	-0.01	-0.05	0.02
H	-4.608818762078751	2.374803643118126	0.14380011896062464	-0.02	0.03	-0.01
H	-3.83753	3.9068857620787507	0.6328792379212493	0.0	0.02	-0.02
H	-3.042194643118126	2.363605881039375	1.0288728810393755	-0.03	0.01	0.01
H	-4.669070118960625	3.192641	-2.324845881039375	0.01	0.0	-0.01
H	-3.174883356881874	3.7475941189606248	-3.126589	0.03	-0.01	0.0
H	-3.9046262379212493	4.725789	-1.8267928810393754	0.02	0.0	-0.01
H	5.0343961189606246	0.46951671376374776	-2.3834380483150026	-0.01	-0.06	-0.08
H	4.36949623792125	0.2564484758424985	-0.7365719293543784	-0.02	-0.04	-0.09
H	5.5927531189606245	-0.8834275241575015	-1.3569211672756276	-0.01	-0.04	-0.07
H	4.4147	-1.1283401672756277	-4.266182167275628	0.0	-0.07	-0.07
H	3.3123708810393753	-2.501644048315003	-3.9863542862362524	0.01	-0.08	-0.06
H	4.959290881039375	-2.5270102862362522	-3.2986462862362522	0.01	-0.06	-0.06
H	-1.6018314758424985	-3.350680356881874	2.1621518810393754	0.04	0.03	0.01
H	-0.13165759480312314	-2.309311237921249	2.263429356881874	0.05	0.02	-0.03
H	-0.008502356881873886	-4.071722356881874	2.545705	0.03	0.03	0.0
H	-1.8669898810393755	-5.004037118960625	0.2383646431181261	-0.01	0.01	0.03
H	-0.25316888103937535	-5.722464	0.4775798810393753	-0.01	0.0	0.01
H	-0.6828446431181261	-5.042824881039375	-1.116045237921249	-0.03	-0.01	0.02
H	-0.7810808810393755	3.035186118960625	-3.5977304758424986	-0.01	-0.01	0.04
H	-0.5191461189606246	1.7558198810393755	-4.802997237921249	0.01	0.01	0.02
H	-2.089492	1.9121101189606247	-4.014529118960625	0.0	-0.01	0.01
H	1.3623562379212493	-2.922271	-3.543225691433129	-0.02	0.0	-0.11
H	-0.06752023792124925	-3.532694643118126	-2.707279048315003	0.02	-0.03	-0.08
H	-0.24112640519687686	-2.6529248810393753	-4.242115286236252	-0.05	-0.01	-0.06
114
O	-4.089420490298142	-2.5359705032339526	-1.622523	0.03	-0.01	0.0
Mg	0.23718501940371614	0.2230574708944258	0.014396987064189244	0.06	-0.09	-0.04
O	-0.8225080258716215	0.1926515291055742	3.2381295291055743	-0.08	0.09	0.09
C	-4.003506987064189	-2.2685034967660473	-0.3079905032339527	0.04	0.01	-0.01
N	-0.253912	1.4530619870641892	-1.5475724967660474	0.0	-0.04	0.01
N	0.738994	-1.278542019403716	-1.306133019403716	0.0	-0.06	-0.06
O	-3.824024490298142	-3.087371993532095	0.563733	0.03	0.02	0.0
C	-0.5532715032339527	1.0266709935320948	-2.769385496766047	-0.01	-0.02	0.01
C	-0.4757745032339527	-0.3260710064679054	-3.169497006467905	-0.01	-0.02	-0.02
C	0.1979574967660473	-1.3829505097018582	-2.5196295161697635	-0.01	-0.03	-0.05
O	-3.7916224967660472	-0.4252849935320946	1.2541579935320948	0.01	0.02	-0.02
C	-2.475194	-0.31841048383023657	1.4532055097018581	0.0	0.05	0.03
C	-2.199056522637669	0.14341800646790537	2.8861475161697636	-0.07	0.02	0.05
C	-4.231330483830237	-0.7721804967660474	-0.07706550970185808	0.05	0.01	-0.03
O	-1.6621089870641892	-0.5399219741283785	0.5733920194037162	0.04	0.08	0.06
C	-3.9623314967660472	-3.9266755032339526	-1.9857274967660474	0.01	-0.01	0.01
O	1.2537615161697635	-0.17349148383023655	1.6377959741283785	0.05	0.05	-0.08
C	-0.009424548509290337	1.1140925549771958	2.611342051743243	-0.15	0.17	0.16
O	-0.4205445420413849	1.7339125679130065	1.6229275679130066	-0.13	0.21	0.21
O	2.2800869741283782	2.0101130129358107	2.9431695161697635	-0.08	0.04	0.05
C	3.164882490298142	1.0762420258716217	2.4663210129358104	-0.03	0.08	0.04
C	2.629069509701858	-0.2282589676604731	1.8639139805962839	0.03	0.1	-0.06
C	1.0419964902981418	1.6677195032339527	3.5805545355734796	-0.03	0.01	0.11
O	4.337711987064189	1.3688720388074322	2.4509210323395267	-0.04	0.12	0.1
C	3.0849940258716217	-1.451237477362331	2.6777004644265205	0.08	0.07	-0.11
C	1.2631330064679054	0.8585839611925677	4.858141503233953	0.02	-0.12	0.01
C	-2.8667990129358105	-0.7851365161697634	3.905695	-0.04	-0.05	0.0
C	-5.713834483830237	-0.4261469935320946	-0.16306501940371615	0.05	0.02	-0.06
C	-0.2508624967660473	2.8575289870641893	-1.186074490298142	0.01	-0.04	0.03
C	1.66489	-2.296287516169764	-0.8331960194037161	0.0	-0.05	-0.06
C	1.0257215032339526	3.4756829870641894	-0.959528490298142	0.01	-0.04	0.03
C	1.0569515032339527	4.794788987064189	-0.4457929935320946	0.01	-0.04	0.02
C	-0.13582399353209462	5.490109490298142	-0.156789	0.02	-0.03	0.0
C	-1.3784959935320946	4.877764993532095	-0.393115	0.02	-0.02	0.0
C	-1.4633074967660473	3.560143490298142	-0.8978384967660473	0.01	-0.03	0.01
C	2.3435915032339527	2.7518029870641896	-1.3413969935320946	0.01	-0.04	0.02
C	-2.86401	2.9267144967660474	-1.091822	0.0	-0.01	0.0
C	1.2170905032339527	-3.313679509701858	0.06791149029814193	0.01	-0.03	-0.03
C	2.1776915032339526	-4.197787503233952	0.6332039935320946	0.01	-0.01	-0.02
C	3.5458525032339527	-4.082760006467906	0.3157264902981419	0.01	-0.02	-0.03
C	3.973268	-3.0933410129358108	-0.5939375161697634	0.0	-0.04	-0.05
C	3.055819	-2.194118516169764	-1.186535019403716	0.0	-0.05	-0.06
C	-0.2755174967660473	-3.506189	0.4271734967660473	0.01	0.0	-0.01
C	3.579224	-1.159423019403716	-2.218864522637669	0.0	-0.06	-0.07
C	3.5770085032339525	3.2470139870641894	-0.5206134967660474	0.01	-0.04	0.01
C	2.61607	2.8937294838302363	-2.8773579935320948	0.0	-0.05	0.02
C	-3.6377105032339525	2.887579503233953	0.262581	-0.01	0.01	0.0
C	-3.709753993532095	3.696954	-2.1615325032339525	0.02	0.0	-0.01
C	4.718833496766047	-0.26884751616976343	-1.6225030258716215	-0.01	-0.05	-0.08
C	4.098707	-1.867733522637669	-3.5185310194037163	0.0	-0.07	-0.06
C	-0.523309490298142	-3.2996809935320948	1.9543864967660474	0.03	0.02	-0.01
C	-0.7990975032339527	-4.909134	-0.030878993532094622	-0.01	0.0	0.02
C	-1.007911	1.9990974967660473	-3.8558099935320946	0.0	-0.01	0.02
C	0.3232689935320946	-2.6907160064679054	-3.2861150258716214	-0.02	-0.02	-0.08
H	-0.8404490064679054	-0.5435364967660473	-4.1694680064679055	-0.02	0.01	-0.02
H	-2.623394542041385	1.1551284967660473	2.949711522637669	-0.13	-0.01	0.07
H	-3.645486477362331	-0.202696	-0.8062185032339526	0.07	0.0	-0.01
H	-3.0051344967660474	-4.320922006467906	-1.6461334967660473	0.01	-0.02	0.01
H	-4.029641496766048	-3.9464250064679054	-3.073167496766047	0.01	-0.02	0.01
H	-4.771321	-4.507968	-1.5408849935320947	0.0	0.0	0.02
H	3.1663405291055744	-0.3007234385548989	0.904706490298142	0.09	0.19	-0.03
H	0.6393070129358108	2.6532394967660475	3.8585955808488173	0.04	-0.01	0.25
H	4.147886522637669	-1.355461967660473	2.9310514708944257	0.07	0.1	-0.09
H	2.9459500388074322	-2.358391470894426	2.083737954724662	0.12	0.09	-0.14
H	2.511300522637669	-1.5544304967660474	3.602713961192568	0.07	0.01	-0.12
H	2.0757220258716216	1.3207649288530408	5.4355289935320945	0.08	-0.22	-0.02
H	1.5246579805962839	-0.17860053557347957	4.6472419611925675	-0.06	-0.11	-0.12
H	0.35573552263766883	0.8625819547246624	5.4732065226376685	0.07	-0.14	0.07
H	-3.9467975097018577	-0.8213695355734796	3.743405490298142	-0.03	-0.11	-0.03
H	-2.664121529105574	-0.4139825226376688	4.912427006467905	-0.09	-0.07	0.02
H	-2.4569249935320947	-1.7954710064679054	3.812869993532095	0.02	-0.02	-0.02
H	-5.857097980596284	0.6427520064679054	0.01988647736233118	0.06	0.02	-0.07
H	-6.283896490298142	-0.991741490298142	0.5854719741283785	0.03	0.03	-0.08
H	-6.095098974128379	-0.6703099935320946	-1.158787522637669	0.08	0.02	-0.07
H	2.018006006467905	5.291880483830237	-0.2790289935320946	0.02	-0.05	0.02
H	-0.08957399353209462	6.5140744902981425	0.24180449676604732	0.02	-0.03	-0.01
H	-2.3010199935320945	5.434360993532095	-0.1793985032339527	0.02	-0.02	-0.01
H	2.2124785032339527	1.6650699870641892	-1.1366499935320946	0.01	-0.04	0.02
H	-2.7242405032339527	1.8824884967660473	-1.4433424967660473	-0.01	-0.01	0.01
H	1.8470265032339526	-4.989162496766047	1.3159865032339526	0.01	0.01	0.01
H	4.275066503233953	-4.774879503233953	0.7608839935320946	0.01	-0.01	-0.02
H	5.03677	-3.0227685161697635	-0.8535110194037162	0.0	-0.05	-0.06
H	-0.8492674967660474	-2.731351503233953	-0.12260150323395269	0.01	-0.01	-0.01
H	2.7386454967660474	-0.4951205226376688	-2.4987030258716216	-0.01	-0.07	-0.08
H	4.440217503233953	2.5963649870641894	-0.7211464967660474	0.01	-0.04	0.01
H	3.3651450064679054	3.2206809935320946	0.5617785032339526	0.02	-0.02	0.01
H	3.8539005032339526	4.2741149870641895	-0.7954435032339526	0.01	-0.04	-0.01
H	3.558211	2.3859159870641893	-3.1377984967660475	0.0	-0.04	0.01
H	2.696464496766047	3.9552804838302364	-3.157392496766047	-0.01	-0.05	0.01
H	1.8047384967660474	2.4334064838302365	-3.4604449935320947	-0.01	-0.05	0.02
H	-4.6049160064679056	2.368949509701858	0.14575149676604732	-0.02	0.03	-0.01
H	-3.83753	3.902983006467905	0.6367819935320946	0.0	0.02	-0.02
H	-3.036340509701858	2.3616545032339524	1.0269215032339527	-0.03	0.01	0.01
H	-4.6710214967660475	3.192641	-2.3228945032339525	0.01	0.0	-0.01
H	-3.1807374902981422	3.7495454967660473	-3.126589	0.03	-0.01	0.0
H	-3.908528993532095	4.725789	-1.8248415032339527	0.02	0.0	-0.01
H	5.036347496766047	0.4812249805962839	-2.3678270258716214	-0.01	-0.06	-0.08
H	4.373398993532095	0.26425398706418923	-0.7190095291055743	-0.02	-0.04	-0.09
H	5.594704496766047	-0.8756220129358108	-1.343261522637669	-0.01	-0.04	-0.07
H	4.4147	-1.114680522637669	-4.252522522637668	0.0	-0.07	-0.07
H	3.3104195032339527	-2.4860330258716217	-3.9746460194037163	0.01	-0.08	-0.06
H	4.9573395032339524	-2.515302019403716	-3.286938019403716	0.01	-0.06	-0.06
H	-1.6096369870641891	-3.356534490298142	2.160200503233953	0.04	0.03	0.01
H	-0.14141448383023655	-2.3132139935320946	2.2692834902981422	0.05	0.02	-0.03
H	-0.01435649029814193	-4.077576490298142	2.545705	0.03	0.03	0.0
H	-1.8650385032339527	-5.005988496766047	0.23251050970185805	-0.01	0.01	0.03
H	-0.2512175032339527	-5.722464	0.47562850323395267	-0.01	0.0	0.01
H	-0.676990509701858	-5.040873503233953	-1.1199479935320946	-0.03	-0.01	0.02
H	-0.7791295032339527	3.0371374967660474	-3.6055359870641897	-0.01	-0.01	0.04
H	-0.5210974967660473	1.7538685032339527	-4.806899993532094	0.01	0.01	0.02
H	-2.089492	1.9140614967660474	-4.0164804967660475	0.0	-0.01	0.01
H	1.3662589935320948	-2.922271	-3.5217605355734793	-0.02	0.0	-0.11
H	-0.07142299353209462	-3.526840509701858	-2.6916680258716217	0.02	-0.03	-0.08
H	-0.23136951616976345	-2.6509735032339528	-4.2304070194037156	-0.05	-0.01	-0.06
114
O	-4.094066356881874	-2.5344218810393753	-1.622523	0.03	-0.01	0.0
Mg	0.2278932862362522	0.23699507064562167	0.020591475842498524	0.06	-0.09	-0.04
O	-0.8101190483150029	0.17871392935437833	3.2241919293543786	-0.08	0.09	0.09
C	-4.0097014758424985	-2.2700521189606246	-0.30644188103937536	0.04	0.01	-0.01
N	-0.253912	1.4592564758424986	-1.5491211189606247	0.0	-0.04	0.01
N	0.738994	-1.2692502862362522	-1.2968412862362522	0.0	-0.06	-0.06
O	-3.828670356881874	-3.0904692379212495	0.563733	0.03	0.02	0.0
C	-0.5517228810393754	1.0297682379212494	-2.7709341189606245	-0.01	-0.02	0.01
C	-0.47422588103937535	-0.3229737620787507	-3.1663997620787505	-0.01	-0.02	-0.02
C	0.19950611896062462	-1.378304643118126	-2.5118864051968766	-0.01	-0.03	-0.05
O	-3.7931711189606245	-0.42838223792124924	1.2572552379212494	0.01	0.02	-0.02
C	-2.475194	-0.32615359480312317	1.448559643118126	0.0	0.05	0.03
C	-2.1882161672756273	0.14032076207875074	2.8784044051968767	-0.07	0.02	0.05
C	-4.2390735948031235	-0.7737291189606247	-0.07241964311812611	0.05	0.01	-0.03
O	-1.6683034758424986	-0.552310951684997	0.5641002862362522	0.04	0.08	0.06
C	-3.9638801189606245	-3.9251268810393753	-1.9872761189606247	0.01	-0.01	0.01
O	1.246018405196877	-0.18123459480312315	1.6501849516849971	0.05	0.05	-0.08
C	0.01380478440936947	1.0877659776693813	2.586564096630006	-0.15	0.17	0.16
O	-0.40041245351187976	1.7013915018268828	1.590406501826883	-0.13	0.21	0.21
O	2.292475951684997	2.0039185241575015	2.9354264051968766	-0.08	0.04	0.05
C	3.169528356881874	1.063853048315003	2.460126524157501	-0.03	0.08	0.04
C	2.624423643118126	-0.2437451896062463	1.8732057137637477	0.03	0.1	-0.06
C	1.046642356881874	1.6661708810393754	3.5635196914331293	-0.03	0.01	0.11
O	4.343906475842498	1.3502885724725042	2.4354348103937538	-0.04	0.12	0.1
C	3.072605048315003	-1.4620778327243724	2.694735308566871	0.08	0.07	-0.11
C	1.2600357620787508	0.8771674275274955	4.856592881039376	0.02	-0.12	0.01
C	-2.8606045241575013	-0.7773934051968768	3.905695	-0.04	-0.05	0.0
C	-5.721577594803123	-0.42924423792124927	-0.15377328623625222	0.05	0.02	-0.06
C	-0.2524111189606246	2.8637234758424985	-1.190720356881874	0.01	-0.04	0.03
C	1.66489	-2.288544405196877	-0.8239042862362521	0.0	-0.05	-0.06
C	1.0241728810393753	3.4818774758424986	-0.9641743568818739	0.01	-0.04	0.03
C	1.0554028810393754	4.800983475842498	-0.44889023792124927	0.01	-0.04	0.02
C	-0.13892123792124925	5.494755356881874	-0.156789	0.02	-0.03	0.0
C	-1.3815932379212492	4.880862237921249	-0.393115	0.02	-0.02	0.0
C	-1.4648561189606246	3.564789356881874	-0.8993871189606246	0.01	-0.03	0.01
C	2.3420428810393754	2.7579974758424988	-1.3444942379212492	0.01	-0.04	0.02
C	-2.86401	2.9282631189606247	-1.091822	0.0	-0.01	0.0
C	1.2155418810393754	-3.309033643118126	0.0725573568818739	0.01	-0.03	-0.03
C	2.1761428810393753	-4.196238881039375	0.6363012379212493	0.01	-0.01	-0.02
C	3.5443038810393754	-4.079662762078751	0.32037235688187393	0.01	-0.02	-0.03
C	3.973268	-3.0871465241575016	-0.5861944051968768	0.0	-0.04	-0.05
C	3.055819	-2.186375405196877	-1.1772432862362523	0.0	-0.05	-0.06
C	-0.27706611896062466	-3.506189	0.4287221189606247	0.01	0.0	-0.01
C	3.579224	-1.1501312862362523	-2.2080241672756276	0.0	-0.06	-0.07
C	3.575459881039375	3.2532084758424986	-0.5221621189606247	0.01	-0.04	0.01
C	2.61607	2.9014725948031233	-2.8804552379212494	0.0	-0.05	0.02
C	-3.636161881039375	2.8860308810393756	0.262581	-0.01	0.01	0.0
C	-3.7128512379212495	3.696954	-2.159983881039375	0.02	0.0	-0.01
C	4.720382118960624	-0.26110440519687683	-1.610114048315003	-0.01	-0.05	-0.08
C	4.098707	-1.8568931672756277	-3.509239286236252	0.0	-0.07	-0.06
C	-0.5279553568818739	-3.3027782379212494	1.9559351189606247	0.03	0.02	-0.01
C	-0.7975488810393754	-4.909134	-0.033976237921249264	-0.01	0.0	0.02
C	-1.007911	2.0006461189606246	-3.8589072379212492	0.0	-0.01	0.02
C	0.32636623792124925	-2.687618762078751	-3.2737260483150026	-0.02	-0.02	-0.08
H	-0.8373517620787507	-0.5450851189606246	-4.166370762078751	-0.02	0.01	-0.02
H	-2.60326245351188	1.1566771189606246	2.9388711672756274	-0.13	-0.01	0.07
H	-3.6563268327243725	-0.202696	-0.8046698810393753	0.07	0.0	-0.01
H	-3.0066831189606247	-4.317824762078751	-1.6476821189606246	0.01	-0.02	0.01
H	-4.031190118960625	-3.943327762078751	-3.0747161189606245	0.01	-0.02	0.01
H	-4.771321	-4.507968	-1.5439822379212493	0.0	0.0	0.02
H	3.1524029293543787	-0.330147260251868	0.9093523568818739	0.09	0.19	-0.03
H	0.6331125241575015	2.654788118960625	3.819880025984384	0.04	-0.01	0.25
H	4.137046167275628	-1.3709481896062463	2.9449890706456214	0.07	0.1	-0.09
H	2.9273665724725046	-2.3723290706456215	2.105418665448745	0.12	0.09	-0.14
H	2.5004601672756275	-1.5559791189606247	3.6212974275274954	0.07	0.01	-0.12
H	2.0633330483150027	1.3548346171337418	5.438626237921249	0.08	-0.22	-0.02
H	1.5339497137637477	-0.16156569143312904	4.665825427527496	-0.06	-0.11	-0.12
H	0.3448951672756276	0.8842626654487449	5.462366167275627	0.07	-0.14	0.07
H	-3.942151643118126	-0.8043346914331291	3.748051356881874	-0.03	-0.11	-0.03
H	-2.6501839293543785	-0.40314216727562757	4.909329762078751	-0.09	-0.07	0.02
H	-2.4600222379212493	-1.7923737620787508	3.8159672379212495	0.02	-0.02	-0.02
H	-5.8663897137637475	0.6396547620787507	0.030726832724372426	0.06	0.02	-0.07
H	-6.288542356881874	-0.9963873568818739	0.5978609516849971	0.03	0.03	-0.08
H	-6.107487951684997	-0.6734072379212493	-1.1479471672756276	0.08	0.02	-0.07
H	2.0149087620787505	5.299623594803124	-0.28212623792124925	0.02	-0.05	0.02
H	-0.09267123792124926	6.518720356881874	0.24335311896062464	0.02	-0.03	-0.01
H	-2.304117237921249	5.437458237921249	-0.17784988103937538	0.02	-0.02	-0.01
H	2.2109298810393754	1.6712644758424986	-1.1397472379212492	0.01	-0.04	0.02
H	-2.7226918810393754	1.8840371189606246	-1.4448911189606246	-0.01	-0.01	0.01
H	1.8454778810393753	-4.990711118960625	1.3144378810393753	0.01	0.01	0.01
H	4.273517881039376	-4.773330881039375	0.7639812379212493	0.01	-0.01	-0.02
H	5.03677	-3.0150254051968766	-0.8442192862362522	0.0	-0.05	-0.06
H	-0.8508161189606247	-2.7298028810393755	-0.12105288103937537	0.01	-0.01	-0.01
H	2.7401941189606247	-0.48428016727562756	-2.486314048315003	-0.01	-0.07	-0.08
H	4.4386688810393755	2.6025594758424986	-0.7226951189606247	0.01	-0.04	0.01
H	3.362047762078751	3.223778237921249	0.5602298810393753	0.02	-0.02	0.01
H	3.8523518810393753	4.280309475842499	-0.7938948810393753	0.01	-0.04	-0.01
H	3.558211	2.3921104758424985	-3.139347118960625	0.0	-0.04	0.01
H	2.6980131189606245	3.9630235948031234	-3.1589411189606245	-0.01	-0.05	0.01
H	1.8062871189606247	2.4411495948031234	-3.4635422379212493	-0.01	-0.05	0.02
H	-4.601818762078751	2.364303643118126	0.14730011896062464	-0.02	0.03	-0.01
H	-3.83753	3.8998857620787506	0.6398792379212493	0.0	0.02	-0.02
H	-3.031694643118126	2.360105881039375	1.0253728810393754	-0.03	0.01	0.01
H	-4.672570118960625	3.192641	-2.3213458810393752	0.01	0.0	-0.01
H	-3.185383356881874	3.7510941189606246	-3.126589	0.03	-0.01	0.0
H	-3.9116262379212494	4.725789	-1.8232928810393754	0.02	0.0	-0.01
H	5.037896118960624	0.4905167137637478	-2.3554380483150026	-0.01	-0.06	-0.08
H	4.376496237921249	0.27044847584249854	-0.7050719293543783	-0.02	-0.04	-0.09
H	5.596253118960624	-0.8694275241575015	-1.3324211672756276	-0.01	-0.04	-0.07
H	4.4147	-1.1038401672756277	-4.241682167275627	0.0	-0.07	-0.07
H	3.3088708810393754	-2.473644048315003	-3.965354286236252	0.01	-0.08	-0.06
H	4.955790881039375	-2.506010286236252	-3.277646286236252	0.01	-0.06	-0.06
H	-1.6158314758424985	-3.361180356881874	2.1586518810393756	0.04	0.03	0.01
H	-0.14915759480312316	-2.316311237921249	2.273929356881874	0.05	0.02	-0.03
H	-0.019002356881873895	-4.082222356881874	2.545705	0.03	0.03	0.0
H	-1.8634898810393754	-5.007537118960625	0.2278646431181261	-0.01	0.01	0.03
H	-0.24966888103937537	-5.722464	0.4740798810393753	-0.01	0.0	0.01
H	-0.6723446431181261	-5.039324881039375	-1.1230452379212492	-0.03	-0.01	0.02
H	-0.7775808810393754	3.0386861189606247	-3.611730475842499	-0.01	-0.01	0.04
H	-0.5226461189606246	1.7523198810393754	-4.809997237921249	0.01	0.01	0.02
H	-2.089492	1.9156101189606247	-4.018029118960625	0.0	-0.01	0.01
H	1.3693562379212494	-2.922271	-3.504725691433129	-0.02	0.0	-0.11
H	-0.07452023792124926	-3.522194643118126	-2.679279048315003	0.02	-0.03	-0.08
H	-0.22362640519687685	-2.6494248810393755	-4.221115286236252	-0.05	-0.01	-0.06
114
O	-4.097049186842198	-2.533427604385934	-1.622523	0.03	-0.01	0.0
Mg	0.22192762631560356	0.24594356052659466	0.024568582456264296	0.06	-0.09	-0.04
O	-0.8021648350874714	0.16976543947340533	3.2152434394734053	-0.08	0.09	0.09
C	-4.013678582456264	-2.271046395614066	-0.30544760438593394	0.04	0.01	-0.01
N	-0.253912	1.4632335824562643	-1.550115395614066	0.0	-0.04	0.01
N	0.738994	-1.2632846263156035	-1.2908756263156034	0.0	-0.06	-0.06
O	-3.8316531868421984	-3.0924577912281324	0.563733	0.03	0.02	0.0
C	-0.550728604385934	1.0317567912281322	-2.771928395614066	-0.01	-0.02	0.01
C	-0.4732316043859339	-0.3209852087718678	-3.1644112087718677	-0.01	-0.02	-0.02
C	0.20050039561406607	-1.3753218131578018	-2.5069150219296694	-0.01	-0.03	-0.05
O	-3.794165395614066	-0.43037079122813215	1.2592437912281322	0.01	0.02	-0.02
C	-2.475194	-0.33112497807033037	1.4455768131578017	0.0	0.05	0.03
C	-2.1812562307015373	0.13833220877186786	2.8734330219296695	-0.07	0.02	0.05
C	-4.24404497807033	-0.7747233956140661	-0.06943681315780179	0.05	0.01	-0.03
O	-1.6722805824562643	-0.5602651649125285	0.5581346263156036	0.04	0.08	0.06
C	-3.964874395614066	-3.924132604385934	-1.9882703956140662	0.01	-0.01	0.01
O	1.2410470219296696	-0.18620597807033037	1.6581391649125288	0.05	0.05	-0.08
C	0.028718934210991115	1.0708632745608768	2.5706556701749426	-0.15	0.17	0.16
O	-0.38748685701714103	1.6805116921046124	1.5695266921046125	-0.13	0.21	0.21
O	2.3004301649125285	1.9999414175437358	2.9304550219296694	-0.08	0.04	0.05
C	3.1725111868421982	1.0558988350874714	2.4561494175437355	-0.03	0.08	0.04
C	2.6214408131578018	-0.25368795614066075	1.8791713736843965	0.03	0.1	-0.06
C	1.0496251868421982	1.665176604385934	3.552582648245273	-0.03	0.01	0.11
O	4.347883582456264	1.338357252631207	2.425492043859339	-0.04	0.12	0.1
C	3.0646508350874715	-1.4690377692984626	2.705672351754727	0.08	0.07	-0.11
C	1.258047208771868	0.8890987473687929	4.855598604385935	0.02	-0.12	0.01
C	-2.8566274175437356	-0.7724220219296697	3.905695	-0.04	-0.05	0.0
C	-5.72654897807033	-0.4312327912281322	-0.14780762631560357	0.05	0.02	-0.06
C	-0.25340539561406605	2.8677005824562642	-1.1937031868421983	0.01	-0.04	0.03
C	1.66489	-2.2835730219296697	-0.8179386263156035	0.0	-0.05	-0.06
C	1.0231786043859339	3.4858545824562643	-0.9671571868421983	0.01	-0.04	0.03
C	1.054408604385934	4.804960582456264	-0.4508787912281322	0.01	-0.04	0.02
C	-0.14090979122813213	5.497738186842198	-0.156789	0.02	-0.03	0.0
C	-1.383581791228132	4.882850791228132	-0.393115	0.02	-0.02	0.0
C	-1.465850395614066	3.5677721868421983	-0.900381395614066	0.01	-0.03	0.01
C	2.341048604385934	2.7619745824562645	-1.346482791228132	0.01	-0.04	0.02
C	-2.86401	2.929257395614066	-1.091822	0.0	-0.01	0.0
C	1.214547604385934	-3.306050813157802	0.07554018684219822	0.01	-0.03	-0.03
C	2.175148604385934	-4.195244604385934	0.6382897912281321	0.01	-0.01	-0.02
C	3.543309604385934	-4.077674208771868	0.3233551868421982	0.01	-0.02	-0.03
C	3.973268	-3.083169417543736	-0.5812230219296697	0.0	-0.04	-0.05
C	3.055819	-2.1814040219296698	-1.1712776263156035	0.0	-0.05	-0.06
C	-0.2780603956140661	-3.506189	0.4297163956140661	0.01	0.0	-0.01
C	3.579224	-1.1441656263156035	-2.2010642307015376	0.0	-0.06	-0.07
C	3.5744656043859337	3.2571855824562643	-0.5231563956140661	0.01	-0.04	0.01
C	2.61607	2.9064439780703304	-2.882443791228132	0.0	-0.05	0.02
C	-3.635167604385934	2.885036604385934	0.262581	-0.01	0.01	0.0
C	-3.7148397912281323	3.696954	-2.158989604385934	0.02	0.0	-0.01
C	4.721376395614065	-0.25613302192966964	-1.6021598350874713	-0.01	-0.05	-0.08
C	4.098707	-1.8499332307015375	-3.5032736263156035	0.0	-0.07	-0.06
C	-0.5309381868421983	-3.304766791228132	1.956929395614066	0.03	0.02	-0.01
C	-0.796554604385934	-4.909134	-0.03596479122813215	-0.01	0.0	0.02
C	-1.007911	2.001640395614066	-3.860895791228132	0.0	-0.01	0.02
C	0.32835479122813216	-2.685630208771868	-3.265771835087471	-0.02	-0.02	-0.08
H	-0.8353632087718679	-0.546079395614066	-4.164382208771868	-0.02	0.01	-0.02
H	-2.590336857017141	1.157671395614066	2.9319112307015374	-0.13	-0.01	0.07
H	-3.6632867692984625	-0.202696	-0.8036756043859339	0.07	0.0	-0.01
H	-3.007677395614066	-4.315836208771868	-1.648676395614066	0.01	-0.02	0.01
H	-4.032184395614066	-3.941339208771868	-3.075710395614066	0.01	-0.02	0.01
H	-4.771321	-4.507968	-1.5459707912281322	0.0	0.0	0.02
H	3.1434544394734054	-0.3490385166672554	0.9123351868421983	0.09	0.19	-0.03
H	0.6291354175437357	2.6557823956140663	3.795023109648348	0.04	-0.01	0.25
H	4.130086230701538	-1.3808909561406606	2.9539375605265947	0.07	0.1	-0.09
H	2.915435252631207	-2.381277560526595	2.1193385385969252	0.12	0.09	-0.14
H	2.4935002307015375	-1.5569733956140661	3.633228747368793	0.07	0.01	-0.12
H	2.0553788350874713	1.3767087035094536	5.440614791228132	0.08	-0.22	-0.02
H	1.5399153736843965	-0.1506286482452732	4.677756747368793	-0.06	-0.11	-0.12
H	0.3379352307015375	0.8981825385969251	5.455406230701538	0.07	-0.14	0.07
H	-3.9391688131578015	-0.7933976482452731	3.7510341868421984	-0.03	-0.11	-0.03
H	-2.6412354394734052	-0.39618223070153746	4.907341208771868	-0.09	-0.07	0.02
H	-2.462010791228132	-1.790385208771868	3.8179557912281323	0.02	-0.02	-0.02
H	-5.872355373684396	0.6376662087718679	0.03768676929846252	0.06	0.02	-0.07
H	-6.291525186842198	-0.9993701868421982	0.6058151649125286	0.03	0.03	-0.08
H	-6.115442164912529	-0.6753957912281322	-1.1409872307015374	0.08	0.02	-0.07
H	2.0129202087718676	5.30459497807033	-0.28411479122813216	0.02	-0.05	0.02
H	-0.09465979122813215	6.521703186842198	0.2443473956140661	0.02	-0.03	-0.01
H	-2.306105791228132	5.439446791228132	-0.17685560438593392	0.02	-0.02	-0.01
H	2.209935604385934	1.6752415824562643	-1.141735791228132	0.01	-0.04	0.02
H	-2.721697604385934	1.885031395614066	-1.445885395614066	-0.01	-0.01	0.01
H	1.8444836043859338	-4.991705395614066	1.3134436043859339	0.01	0.01	0.01
H	4.272523604385935	-4.772336604385934	0.7659697912281321	0.01	-0.01	-0.02
H	5.03677	-3.0100540219296694	-0.8382536263156036	0.0	-0.05	-0.06
H	-0.8518103956140661	-2.728808604385934	-0.12005860438593392	0.01	-0.01	-0.01
H	2.741188395614066	-0.4773202307015375	-2.4783598350874714	-0.01	-0.07	-0.08
H	4.4376746043859345	2.6065365824562643	-0.7236893956140661	0.01	-0.04	0.01
H	3.360059208771868	3.225766791228132	0.5592356043859339	0.02	-0.02	0.01
H	3.851357604385934	4.284286582456264	-0.7929006043859339	0.01	-0.04	-0.01
H	3.558211	2.396087582456264	-3.1403413956140662	0.0	-0.04	0.01
H	2.699007395614066	3.9679949780703305	-3.159935395614066	-0.01	-0.05	0.01
H	1.807281395614066	2.4461209780703306	-3.465530791228132	-0.01	-0.05	0.02
H	-4.599830208771868	2.3613208131578016	0.1482943956140661	-0.02	0.03	-0.01
H	-3.83753	3.8978972087718677	0.6418677912281322	0.0	0.02	-0.02
H	-3.028711813157802	2.3591116043859337	1.024378604385934	-0.03	0.01	0.01
H	-4.673564395614066	3.192641	-2.320351604385934	0.01	0.0	-0.01
H	-3.1883661868421984	3.752088395614066	-3.126589	0.03	-0.01	0.0
H	-3.9136147912281323	4.725789	-1.822298604385934	0.02	0.0	-0.01
H	5.038890395614065	0.49648237368439646	-2.347483835087471	-0.01	-0.06	-0.08
H	4.378484791228132	0.2744255824562643	-0.6961234394734054	-0.02	-0.04	-0.09
H	5.597247395614065	-0.8654504175437356	-1.3254612307015374	-0.01	-0.04	-0.07
H	4.4147	-1.0968802307015375	-4.2347222307015375	0.0	-0.07	-0.07
H	3.307876604385934	-2.4656898350874714	-3.9593886263156035	0.01	-0.08	-0.06
H	4.954796604385934	-2.5000446263156033	-3.2716806263156033	0.01	-0.06	-0.06
H	-1.6198085824562642	-3.364163186842198	2.157657604385934	0.04	0.03	0.01
H	-0.15412897807033038	-2.318299791228132	2.2769121868421984	0.05	0.02	-0.03
H	-0.02198518684219822	-4.085205186842198	2.545705	0.03	0.03	0.0
H	-1.862495604385934	-5.008531395614066	0.22488181315780176	-0.01	0.01	0.03
H	-0.24867460438593392	-5.722464	0.4730856043859339	-0.01	0.0	0.01
H	-0.6693618131578017	-5.038330604385934	-1.125033791228132	-0.03	-0.01	0.02
H	-0.776586604385934	3.039680395614066	-3.6157075824562646	-0.01	-0.01	0.04
H	-0.5236403956140661	1.751325604385934	-4.811985791228132	0.01	0.01	0.02
H	-2.089492	1.9166043956140661	-4.019023395614066	0.0	-0.01	0.01
H	1.3713447912281322	-2.922271	-3.493788648245273	-0.02	0.0	-0.11
H	-0.07650879122813214	-3.519211813157802	-2.6713248350874714	0.02	-0.03	-0.08
H	-0.21865502192966962	-2.648430604385934	-4.215149626315603	-0.05	-0.01	-0.06
114
O	-4.098077	-2.533085	-1.622523	0.03	-0.01	0.0
Mg	0.219872	0.249027	0.025938999999999997	0.06	-0.09	-0.04
O	-0.7994239999999999	0.166682	3.21216	-0.08	0.09	0.09
C	-4.015048999999999	-2.271389	-0.305105	0.04	0.01	-0.01
N	-0.253912	1.464604	-1.550458	0.0	-0.04	0.01
N	0.738994	-1.261229	-1.2888199999999999	0.0	-0.06	-0.06
O	-3.832681	-3.093143	0.563733	0.03	0.02	0.0
C	-0.550386	1.032442	-2.772271	-0.01	-0.02	0.01
C	-0.472889	-0.3203	-3.163726	-0.01	-0.02	-0.02
C	0.200843	-1.3742940000000001	-2.5052019999999997	-0.01	-0.03	-0.05
O	-3.794508	-0.431056	1.259929	0.01	0.02	-0.02
C	-2.475194	-0.33283799999999997	1.444549	0.0	0.05	0.03
C	-2.178858	0.13764700000000002	2.87172	-0.07	0.02	0.05
C	-4.245758	-0.775066	-0.068409	0.05	0.01	-0.03
O	-1.673651	-0.5630059999999999	0.556079	0.04	0.08	0.06
C	-3.965217	-3.92379	-1.988613	0.01	-0.01	0.01
O	1.2393340000000002	-0.187919	1.6608800000000001	0.05	0.05	-0.08
C	0.033858	1.065039	2.565174	-0.15	0.17	0.16
O	-0.38303299999999996	1.673317	1.562332	-0.13	0.21	0.21
O	2.303171	1.998571	2.9287419999999997	-0.08	0.04	0.05
C	3.173539	1.053158	2.454779	-0.03	0.08	0.04
C	2.620413	-0.257114	1.881227	0.03	0.1	-0.06
C	1.0506529999999998	1.6648340000000001	3.548814	-0.03	0.01	0.11
O	4.349253999999999	1.3342459999999998	2.422066	-0.04	0.12	0.1
C	3.06191	-1.471436	2.709441	0.08	0.07	-0.11
C	1.257362	0.89321	4.855256000000001	0.02	-0.12	0.01
C	-2.855257	-0.770709	3.905695	-0.04	-0.05	0.0
C	-5.728262	-0.431918	-0.145752	0.05	0.02	-0.06
C	-0.253748	2.869071	-1.194731	0.01	-0.04	0.03
C	1.66489	-2.28186	-0.8158829999999999	0.0	-0.05	-0.06
C	1.022836	3.487225	-0.9681850000000001	0.01	-0.04	0.03
C	1.0540660000000002	4.806330999999999	-0.451564	0.01	-0.04	0.02
C	-0.14159499999999997	5.498766	-0.156789	0.02	-0.03	0.0
C	-1.384267	4.883536	-0.393115	0.02	-0.02	0.0
C	-1.4661929999999999	3.5688	-0.900724	0.01	-0.03	0.01
C	2.340706	2.763345	-1.347168	0.01	-0.04	0.02
C	-2.86401	2.9296	-1.091822	0.0	-0.01	0.0
C	1.2142050000000002	-3.3050230000000003	0.076568	0.01	-0.03	-0.03
C	2.174806	-4.194902	0.638975	0.01	-0.01	-0.02
C	3.542967	-4.076989	0.32438300000000003	0.01	-0.02	-0.03
C	3.973268	-3.081799	-0.57951	0.0	-0.04	-0.05
C	3.055819	-2.179691	-1.169222	0.0	-0.05	-0.06
C	-0.278403	-3.506189	0.430059	0.01	0.0	-0.01
C	3.579224	-1.14211	-2.1986660000000002	0.0	-0.06	-0.07
C	3.5741229999999997	3.258556	-0.523499	0.01	-0.04	0.01
C	2.61607	2.908157	-2.883129	0.0	-0.05	0.02
C	-3.6348249999999998	2.884694	0.262581	-0.01	0.01	0.0
C	-3.715525	3.696954	-2.1586469999999998	0.02	0.0	-0.01
C	4.721718999999999	-0.25442000000000004	-1.599419	-0.01	-0.05	-0.08
C	4.098707	-1.8475350000000001	-3.501218	0.0	-0.07	-0.06
C	-0.531966	-3.305452	1.957272	0.03	0.02	-0.01
C	-0.796212	-4.909134	-0.03665	-0.01	0.0	0.02
C	-1.007911	2.001983	-3.8615809999999997	0.0	-0.01	0.02
C	0.32904	-2.6849450000000004	-3.263031	-0.02	-0.02	-0.08
H	-0.834678	-0.546422	-4.163697	-0.02	0.01	-0.02
H	-2.585883	1.1580139999999999	2.929513	-0.13	-0.01	0.07
H	-3.665685	-0.202696	-0.803333	0.07	0.0	-0.01
H	-3.00802	-4.315151	-1.6490189999999998	0.01	-0.02	0.01
H	-4.032527	-3.9406540000000003	-3.076053	0.01	-0.02	0.01
H	-4.771321	-4.507968	-1.546656	0.0	0.0	0.02
H	3.140371	-0.355548	0.913363	0.09	0.19	-0.03
H	0.627765	2.6561250000000003	3.786458	0.04	-0.01	0.25
H	4.127688	-1.384317	2.957021	0.07	0.1	-0.09
H	2.911324	-2.384361	2.124135	0.12	0.09	-0.14
H	2.491102	-1.557316	3.63734	0.07	0.01	-0.12
H	2.052638	1.3842459999999999	5.4413	0.08	-0.22	-0.02
H	1.541971	-0.14686	4.681868	-0.06	-0.11	-0.12
H	0.33553700000000003	0.902979	5.453008	0.07	-0.14	0.07
H	-3.938141	-0.789629	3.752062	-0.03	-0.11	-0.03
H	-2.638152	-0.393784	4.906656	-0.09	-0.07	0.02
H	-2.4626959999999998	-1.7897	3.818641	0.02	-0.02	-0.02
H	-5.874410999999999	0.636981	0.040085	0.06	0.02	-0.07
H	-6.292553	-1.000398	0.6085560000000001	0.03	0.03	-0.08
H	-6.118183	-0.676081	-1.138589	0.08	0.02	-0.07
H	2.012235	5.3063080000000005	-0.2848	0.02	-0.05	0.02
H	-0.095345	6.522731	0.24469000000000002	0.02	-0.03	-0.01
H	-2.3067909999999996	5.440132	-0.176513	0.02	-0.02	-0.01
H	2.209593	1.676612	-1.142421	0.01	-0.04	0.02
H	-2.721355	1.8853739999999999	-1.4462279999999998	-0.01	-0.01	0.01
H	1.844141	-4.992048	1.313101	0.01	0.01	0.01
H	4.272181000000001	-4.771994	0.766655	0.01	-0.01	-0.02
H	5.03677	-3.0083409999999997	-0.836198	0.0	-0.05	-0.06
H	-0.852153	-2.728466	-0.11971599999999999	0.01	-0.01	-0.01
H	2.741531	-0.474922	-2.475619	-0.01	-0.07	-0.08
H	4.4373320000000005	2.607907	-0.724032	0.01	-0.04	0.01
H	3.3593740000000003	3.2264519999999997	0.558893	0.02	-0.02	0.01
H	3.851015	4.285657	-0.792558	0.01	-0.04	-0.01
H	3.558211	2.397458	-3.1406840000000003	0.0	-0.04	0.01
H	2.69935	3.9697080000000002	-3.160278	-0.01	-0.05	0.01
H	1.807624	2.4478340000000003	-3.4662159999999997	-0.01	-0.05	0.02
H	-4.599145	2.360293	0.14863700000000002	-0.02	0.03	-0.01
H	-3.83753	3.897212	0.642553	0.0	0.02	-0.02
H	-3.0276840000000003	2.3587689999999997	1.0240360000000002	-0.03	0.01	0.01
H	-4.673907	3.192641	-2.3200089999999998	0.01	0.0	-0.01
H	-3.189394	3.752431	-3.126589	0.03	-0.01	0.0
H	-3.9143	4.725789	-1.8219560000000001	0.02	0.0	-0.01
H	5.039232999999999	0.498538	-2.344743	-0.01	-0.06	-0.08
H	4.37917	0.275796	-0.6930400000000001	-0.02	-0.04	-0.09
H	5.597589999999999	-0.86408	-1.323063	-0.01	-0.04	-0.07
H	4.4147	-1.0944820000000002	-4.232323999999999	0.0	-0.07	-0.07
H	3.307534	-2.462949	-3.957333	0.01	-0.08	-0.06
H	4.954454	-2.497989	-3.269625	0.01	-0.06	-0.06
H	-1.621179	-3.365191	2.157315	0.04	0.03	0.01
H	-0.155842	-2.3189849999999996	2.27794	0.05	0.02	-0.03
H	-0.023013	-4.086233	2.545705	0.03	0.03	0.0
H	-1.8621530000000002	-5.008874	0.223854	-0.01	0.01	0.03
H	-0.248332	-5.722464	0.47274299999999997	-0.01	0.0	0.01
H	-0.668334	-5.037988	-1.125719	-0.03	-0.01	0.02
H	-0.776244	3.040023	-3.6170780000000002	-0.01	-0.01	0.04
H	-0.523983	1.7509830000000002	-4.812671	0.01	0.01	0.02
H	-2.089492	1.916947	-4.019366	0.0	-0.01	0.01
H	1.37203	-2.922271	-3.49002	-0.02	0.0	-0.11
H	-0.077194	-3.518184	-2.668584	0.02	-0.03	-0.08
H	-0.216942	-2.648088	-4.213094	-0.05	-0.01	-0.06
114
O	-4.097049186842198	-2.533427604385934	-1.622523	0.03	-0.01	0.0
Mg	0.22192762631560353	0.24594356052659466	0.0245685824562643	0.06	-0.09	-0.04
O	-0.8021648350874714	0.16976543947340533	3.2152434394734053	-0.08	0.09	0.09
C	-4.013678582456264	-2.271046395614066	-0.30544760438593394	0.04	0.01	-0.01
N	-0.253912	1.4632335824562643	-1.550115395614066	0.0	-0.04	0.01
N	0.738994	-1.2632846263156035	-1.2908756263156034	0.0	-0.06	-0.06
O	-3.8316531868421984	-3.0924577912281324	0.563733	0.03	0.02	0.0
C	-0.550728604385934	1.0317567912281322	-2.771928395614066	-0.01	-0.02	0.01
C	-0.4732316043859339	-0.3209852087718678	-3.1644112087718677	-0.01	-0.02	-0.02
C	0.20050039561406607	-1.3753218131578018	-2.5069150219296694	-0.01	-0.03	-0.05
O	-3.794165395614066	-0.43037079122813215	1.2592437912281322	0.01	0.02	-0.02
C	-2.475194	-0.33112497807033037	1.4455768131578017	0.0	0.05	0.03
C	-2.1812562307015373	0.13833220877186786	2.8734330219296695	-0.07	0.02	0.05
C	-4.24404497807033	-0.7747233956140661	-0.06943681315780179	0.05	0.01	-0.03
O	-1.6722805824562643	-0.5602651649125285	0.5581346263156036	0.04	0.08	0.06
C	-3.964874395614066	-3.924132604385934	-1.9882703956140662	0.01	-0.01	0.01
O	1.2410470219296696	-0.18620597807033037	1.6581391649125288	0.05	0.05	-0.08
C	0.02871893421099113	1.0708632745608768	2.5706556701749426	-0.15	0.17	0.16
O	-0.38748685701714103	1.6805116921046124	1.5695266921046125	-0.13	0.21	0.21
O	2.3004301649125285	1.9999414175437358	2.9304550219296694	-0.08	0.04	0.05
C	3.1725111868421982	1.0558988350874714	2.4561494175437355	-0.03	0.08	0.04
C	2.6214408131578018	-0.25368795614066075	1.8791713736843965	0.03	0.1	-0.06
C	1.0496251868421982	1.665176604385934	3.552582648245273	-0.03	0.01	0.11
O	4.347883582456264	1.338357252631207	2.425492043859339	-0.04	0.12	0.1
C	3.0646508350874715	-1.4690377692984626	2.705672351754727	0.08	0.07	-0.11
C	1.258047208771868	0.8890987473687929	4.855598604385935	0.02	-0.12	0.01
C	-2.8566274175437356	-0.7724220219296696	3.905695	-0.04	-0.05	0.0
C	-5.72654897807033	-0.4312327912281322	-0.14780762631560357	0.05	0.02	-0.06
C	-0.25340539561406605	2.8677005824562642	-1.1937031868421983	0.01	-0.04	0.03
C	1.66489	-2.2835730219296697	-0.8179386263156035	0.0	-0.05	-0.06
C	1.0231786043859339	3.4858545824562643	-0.9671571868421983	0.01	-0.04	0.03
C	1.054408604385934	4.804960582456264	-0.4508787912281322	0.01	-0.04	0.02
C	-0.14090979122813213	5.497738186842198	-0.156789	0.02	-0.03	0.0
C	-1.383581791228132	4.882850791228132	-0.393115	0.02	-0.02	0.0
C	-1.465850395614066	3.5677721868421983	-0.900381395614066	0.01	-0.03	0.01
C	2.341048604385934	2.7619745824562645	-1.346482791228132	0.01	-0.04	0.02
C	-2.86401	2.929257395614066	-1.091822	0.0	-0.01	0.0
C	1.214547604385934	-3.306050813157802	0.07554018684219822	0.01	-0.03	-0.03
C	2.175148604385934	-4.195244604385934	0.6382897912281321	0.01	-0.01	-0.02
C	3.543309604385934	-4.077674208771868	0.3233551868421982	0.01	-0.02	-0.03
C	3.973268	-3.083169417543736	-0.5812230219296697	0.0	-0.04	-0.05
C	3.055819	-2.1814040219296698	-1.1712776263156035	0.0	-0.05	-0.06
C	-0.2780603956140661	-3.506189	0.4297163956140661	0.01	0.0	-0.01
C	3.579224	-1.1441656263156035	-2.2010642307015376	0.0	-0.06	-0.07
C	3.5744656043859337	3.2571855824562643	-0.5231563956140661	0.01	-0.04	0.01
C	2.61607	2.9064439780703304	-2.882443791228132	0.0	-0.05	0.02
C	-3.635167604385934	2.885036604385934	0.262581	-0.01	0.01	0.0
C	-3.7148397912281323	3.696954	-2.158989604385934	0.02	0.0	-0.01
C	4.721376395614065	-0.25613302192966964	-1.6021598350874713	-0.01	-0.05	-0.08
C	4.098707	-1.8499332307015375	-3.5032736263156035	0.0	-0.07	-0.06
C	-0.5309381868421983	-3.304766791228132	1.956929395614066	0.03	0.02	-0.01
C	-0.796554604385934	-4.909134	-0.03596479122813215	-0.01	0.0	0.02
C	-1.007911	2.001640395614066	-3.860895791228132	0.0	-0.01	0.02
C	0.32835479122813216	-2.685630208771868	-3.265771835087471	-0.02	-0.02	-0.08
H	-0.8353632087718679	-0.546079395614066	-4.164382208771868	-0.02	0.01	-0.02
H	-2.590336857017141	1.157671395614066	2.9319112307015374	-0.13	-0.01	0.07
H	-3.6632867692984625	-0.202696	-0.8036756043859339	0.07	0.0	-0.01
H	-3.007677395614066	-4.315836208771868	-1.648676395614066	0.01	-0.02	0.01
H	-4.032184395614066	-3.941339208771868	-3.075710395614066	0.01	-0.02	0.01
H	-4.771321	-4.507968	-1.5459707912281322	0.0	0.0	0.02
H	3.1434544394734054	-0.3490385166672554	0.9123351868421983	0.09	0.19	-0.03
H	0.6291354175437357	2.6557823956140663	3.795023109648348	0.04	-0.01	0.25
H	4.130086230701538	-1.3808909561406608	2.9539375605265947	0.07	0.1	-0.09
H	2.915435252631207	-2.381277560526595	2.1193385385969252	0.12	0.09	-0.14
H	2.4935002307015375	-1.5569733956140661	3.633228747368793	0.07	0.01	-0.12
H	2.0553788350874713	1.3767087035094536	5.440614791228132	0.08	-0.22	-0.02
H	1.5399153736843965	-0.15062864824527317	4.677756747368793	-0.06	-0.11	-0.12
H	0.33793523070153747	0.8981825385969251	5.455406230701538	0.07	-0.14	0.07
H	-3.9391688131578015	-0.7933976482452731	3.7510341868421984	-0.03	-0.11	-0.03
H	-2.6412354394734052	-0.39618223070153746	4.907341208771868	-0.09	-0.07	0.02
H	-2.462010791228132	-1.790385208771868	3.8179557912281323	0.02	-0.02	-0.02
H	-5.872355373684396	0.6376662087718679	0.03768676929846253	0.06	0.02	-0.07
H	-6.291525186842198	-0.9993701868421982	0.6058151649125286	0.03	0.03	-0.08
H	-6.115442164912529	-0.6753957912281322	-1.1409872307015374	0.08	0.02	-0.07
H	2.0129202087718676	5.30459497807033	-0.28411479122813216	0.02	-0.05	0.02
H	-0.09465979122813215	6.521703186842198	0.2443473956140661	0.02	-0.03	-0.01
H	-2.306105791228132	5.439446791228132	-0.17685560438593392	0.02	-0.02	-0.01
H	2.209935604385934	1.6752415824562643	-1.141735791228132	0.01	-0.04	0.02
H	-2.721697604385934	1.885031395614066	-1.445885395614066	-0.01	-0.01	0.01
H	1.8444836043859338	-4.991705395614066	1.3134436043859339	0.01	0.01	0.01
H	4.272523604385935	-4.772336604385934	0.7659697912281321	0.01	-0.01	-0.02
H	5.03677	-3.0100540219296694	-0.8382536263156036	0.0	-0.05	-0.06
H	-0.8518103956140661	-2.728808604385934	-0.12005860438593392	0.01	-0.01	-0.01
H	2.741188395614066	-0.47732023070153745	-2.4783598350874714	-0.01	-0.07	-0.08
H	4.4376746043859345	2.6065365824562643	-0.7236893956140661	0.01	-0.04	0.01
H	3.360059208771868	3.225766791228132	0.5592356043859339	0.02	-0.02	0.01
H	3.851357604385934	4.284286582456264	-0.7929006043859339	0.01	-0.04	-0.01
H	3.558211	2.396087582456264	-3.1403413956140662	0.0	-0.04	0.01
H	2.699007395614066	3.9679949780703305	-3.159935395614066	-0.01	-0.05	0.01
H	1.807281395614066	2.4461209780703306	-3.465530791228132	-0.01	-0.05	0.02
H	-4.599830208771868	2.3613208131578016	0.1482943956140661	-0.02	0.03	-0.01
H	-3.83753	3.8978972087718677	0.6418677912281322	0.0	0.02	-0.02
H	-3.028711813157802	2.3591116043859337	1.024378604385934	-0.03	0.01	0.01
H	-4.673564395614066	3.192641	-2.320351604385934	0.01	0.0	-0.01
H	-3.1883661868421984	3.752088395614066	-3.126589	0.03	-0.01	0.0
H	-3.9136147912281323	4.725789	-1.822298604385934	0.02	0.0	-0.01
H	5.038890395614065	0.49648237368439646	-2.347483835087471	-0.01	-0.06	-0.08
H	4.378484791228132	0.2744255824562643	-0.6961234394734054	-0.02	-0.04	-0.09
H	5.597247395614065	-0.8654504175437356	-1.3254612307015374	-0.01	-0.04	-0.07
H	4.4147	-1.0968802307015375	-4.2347222307015375	0.0	-0.07	-0.07
H	3.307876604385934	-2.4656898350874714	-3.9593886263156035	0.01	-0.08	-0.06
H	4.954796604385934	-2.5000446263156033	-3.2716806263156033	0.01	-0.06	-0.06
H	-1.6198085824562642	-3.364163186842198	2.157657604385934	0.04	0.03	0.01
H	-0.15412897807033038	-2.318299791228132	2.2769121868421984	0.05	0.02	-0.03
H	-0.021985186842198225	-4.085205186842198	2.545705	0.03	0.03	0.0
H	-1.862495604385934	-5.008531395614066	0.22488181315780176	-0.01	0.01	0.03
H	-0.24867460438593392	-5.722464	0.4730856043859339	-0.01	0.0	0.01
H	-0.6693618131578017	-5.038330604385934	-1.125033791228132	-0.03	-0.01	0.02
H	-0.776586604385934	3.039680395614066	-3.6157075824562646	-0.01	-0.01	0.04
H	-0.5236403956140661	1.751325604385934	-4.811985791228132	0.01	0.01	0.02
H	-2.089492	1.9166043956140661	-4.019023395614066	0.0	-0.01	0.01
H	1.3713447912281322	-2.922271	-3.493788648245273	-0.02	0.0	-0.11
H	-0.07650879122813214	-3.519211813157802	-2.6713248350874714	0.02	-0.03	-0.08
H	-0.21865502192966962	-2.648430604385934	-4.215149626315603	-0.05	-0.01	-0.06
114
O	-4.094066356881874	-2.5344218810393753	-1.622523	0.03	-0.01	0.0
Mg	0.2278932862362522	0.2369950706456217	0.02059147584249853	0.06	-0.09	-0.04
O	-0.8101190483150029	0.1787139293543783	3.2241919293543786	-0.08	0.09	0.09
C	-4.0097014758424985	-2.2700521189606246	-0.30644188103937536	0.04	0.01	-0.01
N	-0.253912	1.4592564758424986	-1.5491211189606247	0.0	-0.04	0.01
N	0.738994	-1.2692502862362522	-1.2968412862362522	0.0	-0.06	-0.06
O	-3.828670356881874	-3.0904692379212495	0.563733	0.03	0.02	0.0
C	-0.5517228810393754	1.0297682379212494	-2.7709341189606245	-0.01	-0.02	0.01
C	-0.47422588103937535	-0.3229737620787507	-3.1663997620787505	-0.01	-0.02	-0.02
C	0.19950611896062462	-1.378304643118126	-2.5118864051968766	-0.01	-0.03	-0.05
O	-3.7931711189606245	-0.42838223792124924	1.2572552379212494	0.01	0.02	-0.02
C	-2.475194	-0.32615359480312317	1.448559643118126	0.0	0.05	0.03
C	-2.1882161672756273	0.14032076207875074	2.8784044051968767	-0.07	0.02	0.05
C	-4.2390735948031235	-0.7737291189606247	-0.0724196431181261	0.05	0.01	-0.03
O	-1.6683034758424986	-0.552310951684997	0.5641002862362522	0.04	0.08	0.06
C	-3.9638801189606245	-3.9251268810393753	-1.9872761189606247	0.01	-0.01	0.01
O	1.246018405196877	-0.18123459480312315	1.6501849516849971	0.05	0.05	-0.08
C	0.013804784409369483	1.0877659776693813	2.586564096630006	-0.15	0.17	0.16
O	-0.40041245351187976	1.7013915018268826	1.5904065018268827	-0.13	0.21	0.21
O	2.292475951684997	2.0039185241575015	2.9354264051968766	-0.08	0.04	0.05
C	3.169528356881874	1.063853048315003	2.460126524157501	-0.03	0.08	0.04
C	2.624423643118126	-0.24374518960624633	1.8732057137637477	0.03	0.1	-0.06
C	1.046642356881874	1.6661708810393754	3.5635196914331293	-0.03	0.01	0.11
O	4.343906475842498	1.3502885724725042	2.4354348103937538	-0.04	0.12	0.1
C	3.072605048315003	-1.4620778327243724	2.694735308566871	0.08	0.07	-0.11
C	1.2600357620787508	0.8771674275274955	4.856592881039376	0.02	-0.12	0.01
C	-2.8606045241575013	-0.7773934051968768	3.905695	-0.04	-0.05	0.0
C	-5.721577594803123	-0.42924423792124927	-0.1537732862362522	0.05	0.02	-0.06
C	-0.2524111189606246	2.8637234758424985	-1.190720356881874	0.01	-0.04	0.03
C	1.66489	-2.288544405196877	-0.8239042862362521	0.0	-0.05	-0.06
C	1.0241728810393753	3.4818774758424986	-0.9641743568818739	0.01	-0.04	0.03
C	1.0554028810393754	4.800983475842498	-0.44889023792124927	0.01	-0.04	0.02
C	-0.13892123792124925	5.494755356881874	-0.156789	0.02	-0.03	0.0
C	-1.3815932379212492	4.880862237921249	-0.393115	0.02	-0.02	0.0
C	-1.4648561189606246	3.564789356881874	-0.8993871189606246	0.01	-0.03	0.01
C	2.3420428810393754	2.7579974758424988	-1.3444942379212492	0.01	-0.04	0.02
C	-2.86401	2.9282631189606247	-1.091822	0.0	-0.01	0.0
C	1.2155418810393754	-3.309033643118126	0.0725573568818739	0.01	-0.03	-0.03
C	2.1761428810393753	-4.196238881039375	0.6363012379212493	0.01	-0.01	-0.02
C	3.5443038810393754	-4.079662762078751	0.32037235688187393	0.01	-0.02	-0.03
C	3.973268	-3.0871465241575016	-0.5861944051968768	0.0	-0.04	-0.05
C	3.055819	-2.186375405196877	-1.1772432862362523	0.0	-0.05	-0.06
C	-0.27706611896062466	-3.506189	0.4287221189606247	0.01	0.0	-0.01
C	3.579224	-1.1501312862362523	-2.2080241672756276	0.0	-0.06	-0.07
[truncated: 300 more rows]
