# Supplementary material
Source: publisher figshare collection journal article supplement (https://acs.figshare.com/ndownloader/files/5127205)
Supplement: Supplementary file 1 [file 5127205 › supporting_ja043819b/RRRR_fm-5-ts2-freq-54.log]

 Entering Gaussian System, Link 0=/homes/rzepa/g98/g98
 Input=RRRR_fm-5-oco.gjf
 Output=RRRR_fm-5-oco.log
 Initial command:
 /homes/rzepa/g98/l1.exe /scratch/Gau-19298.inp -scrdir=/scratch/
 Entering Link 1 = /homes/rzepa/g98/l1.exe PID=     19299.
  
 Copyright (c) 1988,1990,1992,1993,1995,1998 Gaussian, Inc.
                  All Rights Reserved.
  
 This is part of the Gaussian(R) 98 program.  It is based on
 the Gaussian 94(TM) system (copyright 1995 Gaussian, Inc.),
 the Gaussian 92(TM) system (copyright 1992 Gaussian, Inc.),
 the Gaussian 90(TM) system (copyright 1990 Gaussian, Inc.),
 the Gaussian 88(TM) system (copyright 1988 Gaussian, Inc.),
 the Gaussian 86(TM) system (copyright 1986 Carnegie Mellon
 University), and the Gaussian 82(TM) system (copyright 1983
 Carnegie Mellon University). Gaussian is a federally registered
 trademark of Gaussian, Inc.
  
 This software contains proprietary and confidential information,
 including trade secrets, belonging to Gaussian, Inc.
  
 This software is provided under written license and may be
 used, copied, transmitted, or stored only in accord with that
 written license.
  
 The following legend is applicable only to US Government
 contracts under DFARS:
  
                    RESTRICTED RIGHTS LEGEND
  
 Use, duplication or disclosure by the US Government is subject
 to restrictions as set forth in subparagraph (c)(1)(ii) of the
 Rights in Technical Data and Computer Software clause at DFARS
 252.227-7013.
  
 Gaussian, Inc.
 Carnegie Office Park, Building 6, Pittsburgh, PA 15106 USA
  
 The following legend is applicable only to US Government
 contracts under FAR:
  
                    RESTRICTED RIGHTS LEGEND
  
 Use, reproduction and disclosure by the US Government is subject
 to restrictions as set forth in subparagraph (c) of the
 Commercial Computer Software - Restricted Rights clause at FAR
 52.227-19.
  
 Gaussian, Inc.
 Carnegie Office Park, Building 6, Pittsburgh, PA 15106 USA
  
  
 ---------------------------------------------------------------
 Warning -- This program may not be used in any manner that
 competes with the business of Gaussian, Inc. or will provide
 assistance to any competitor of Gaussian, Inc.  The licensee
 of this program is prohibited from giving any competitor of
 Gaussian, Inc. access to this program.  By using this program,
 the user acknowledges that Gaussian, Inc. is engaged in the
 business of creating and licensing software in the field of
 computational chemistry and represents and warrants to the
 licensee that it is not a competitor of Gaussian, Inc. and that
 it will not use this program in any manner prohibited above.
 ---------------------------------------------------------------
  

 Cite this work as:
 Gaussian 98, Revision A.11.3,
 M. J. Frisch, G. W. Trucks, H. B. Schlegel, G. E. Scuseria, 
 M. A. Robb, J. R. Cheeseman, V. G. Zakrzewski, J. A. Montgomery, Jr., 
 R. E. Stratmann, J. C. Burant, S. Dapprich, J. M. Millam, 
 A. D. Daniels, K. N. Kudin, M. C. Strain, O. Farkas, J. Tomasi, 
 V. Barone, M. Cossi, R. Cammi, B. Mennucci, C. Pomelli, C. Adamo, 
 S. Clifford, J. Ochterski, G. A. Petersson, P. Y. Ayala, Q. Cui, 
 K. Morokuma, N. Rega, P. Salvador, J. J. Dannenberg, D. K. Malick, 
 A. D. Rabuck, K. Raghavachari, J. B. Foresman, J. Cioslowski, 
 J. V. Ortiz, A. G. Baboul, B. B. Stefanov, G. Liu, A. Liashenko, 
 P. Piskorz, I. Komaromi, R. Gomperts, R. L. Martin, D. J. Fox, 
 T. Keith, M. A. Al-Laham, C. Y. Peng, A. Nanayakkara, M. Challacombe, 
 P. M. W. Gill, B. Johnson, W. Chen, M. W. Wong, J. L. Andres, 
 C. Gonzalez, M. Head-Gordon, E. S. Replogle, and J. A. Pople, 
 Gaussian, Inc., Pittsburgh PA, 2002.

 ***********************************************
 Gaussian 98:  x86-Linux-G98RevA.11.3 5-Feb-2002
                   13-Apr-2004 
 ***********************************************
 %mem=500MB
 %nproc=2
 Will use up to    2 processors via shared memory.
 %chk=RRRR_fm-5-oco.chk
 %rwf=/scratch/51.rwf,1800MB,/scratch/52.rwf,1800MB,/scratch/53.rwf,1800MB,/scrat
 ch/54.rwf,1800MB,/scratch/55.rwf,1800MB,/scratch/56.rwf,1800MB,/scratch/57.rwf,1
 800MB,/scratch/58.rwf,1800MB,/scratch/59.rwf,1800MB
 -------------------------------------------
 # b3lyp/Gen freq guess=read geom=checkpoint
 -------------------------------------------
 1/10=4,29=2,30=1,38=1/1,3;
 2/40=1/2;
 3/5=7,11=2,25=1,30=1/1,2,3;
 4/5=1/1;
 5/5=2,42=-5/2;
 8/6=4,11=11/1;
 11/6=1,8=1,9=11,15=111,16=11/1,2,10;
 10/6=1/2;
 6/7=2,8=2,9=2,10=2,18=1,28=1/1;
 7/8=1,10=1,25=1/1,2,3,16;
 1/10=4,30=1/3;
 99//99;
 --------------------
 from RRRR_fm-oco.gjf
 --------------------
 Redundant internal coordinates taken from checkpoint file:
 RRRR_fm-5-oco.chk
 Charge =  0 Multiplicity = 1
 O,0,-4.0770773675,-2.5400852223,-1.6225225986
 Mg,0,0.2618716032,0.1860273717,-0.0020610052
 O,0,-0.8554241547,0.2296822591,3.2751599023
 C,0,-3.9870491976,-2.2643893184,-0.3121046836
 N,0,-0.2539122207,1.4366043258,-1.5434577739
 N,0,0.7389942703,-1.3032290669,-1.3308195594
 O,0,-3.8116811221,-3.0791425281,0.5637334836
 C,0,-0.5573857975,1.0184418351,-2.7652712718
 C,0,-0.4798894363,-0.3343004581,-3.1777264495
 C,0,0.1938430804,-1.3952940359,-2.5402016212
 O,0,-3.7875084937,-0.4170564045,1.2459293765
 C,0,-2.4751938527,-0.2978375785,1.465548874
 C,0,-2.2278575665,0.1516473444,2.9067202709
 C,0,-4.2107583755,-0.7680658539,-0.0894091237
 O,0,-1.6456508678,-0.5070055711,0.5980785659
 C,0,-3.9582173754,-3.9307899002,-1.9816126275
 O,0,1.2743336916,-0.1529194452,1.6048797069
 C,0,-0.0711423177,1.1840387959,2.6771744786
 O,0,-0.4740331649,1.8203170152,1.7093315237
 O,0,2.2471708198,2.0265713985,2.9637423346
 C,0,3.152539339,1.1091579591,2.4827785094
 C,0,2.6414129227,-0.187114344,1.8392272108
 C,0,1.0296529827,1.6718338021,3.6258143837
 O,0,4.3212537044,1.4182464203,2.4920657608
 C,0,3.117909904,-1.4224355748,2.6324413743
 C,0,1.2713616292,0.8092100997,4.8622561025
 C,0,-2.8832574227,-0.8057091795,3.9056954016
 C,0,-5.6932615637,-0.4179178998,-0.1877523869
 C,0,-0.2467479089,2.8410713293,-1.1737312403
 C,0,1.6648904931,-2.3168600307,-0.857883149
 C,0,1.029835773,3.4592251995,-0.947185195
 C,0,1.0610655626,4.7783312485,-0.4375639938
 C,0,-0.1275947284,5.4777658369,-0.1567885753
 C,0,-1.3702667551,4.8695358333,-0.3931148815
 C,0,-1.4591930178,3.5478004294,-0.8937237589
 C,0,2.3477057015,2.7353447116,-1.3331681114
 C,0,-2.8640097572,2.9226003252,-1.0918219709
 C,0,1.2212046867,-3.3260226144,0.0555684107
 C,0,2.1818059798,-4.2019017518,0.6249753676
 C,0,3.5499672942,-4.0909888767,0.3033827463
 C,0,3.9732684652,-3.109798744,-0.6145104735
 C,0,3.0558190215,-2.2146911824,-1.2112221766
 C,0,-0.2714030601,-3.5061892821,0.4230594967
 C,0,3.5792239299,-1.1841100506,-2.2476661748
 C,0,3.5811233956,3.2305560378,-0.51649886
 C,0,2.6160695416,2.873157004,-2.8691286265
 C,0,-3.6418245788,2.8916943595,0.2625807387
 C,0,-3.701525194,3.6969536441,-2.1656471371
 C,0,4.7147186354,-0.2894197831,-1.6554188133
 C,0,4.0987073507,-1.8965347227,-3.5432175137
 C,0,-0.5109655079,-3.2914521641,1.9502720705
 C,0,-0.8032118621,-4.9091342187,-0.0226496787
 C,0,-1.0079105211,1.9949832949,-3.8475813695
 C,0,0.3150398118,-2.6989453151,-3.3190309622
 H,0,-0.848678201,-0.539422316,-4.1776972854
 H,0,-2.6768828047,1.1510139824,2.9785125318
 H,0,-3.6166848959,-0.2026961613,-0.810333111
 H,0,-3.0010202243,-4.3291510943,-1.6420189371
 H,0,-4.0255274342,-3.9546544535,-3.0690529557
 H,0,-4.7713209405,-4.5079678703,-1.5326561926
 H,0,3.2033710271,-0.2225476536,0.892362979
 H,0,0.6557647635,2.6491246978,3.9614580472
 H,0,4.1766881573,-1.3143171778,2.8940213077
 H,0,2.9953243579,-2.3213611757,2.0261354293
 H,0,2.5401023245,-1.5503160466,3.5533397828
 H,0,2.1086379786,1.2302461569,5.4272999046
 H,0,1.4999707207,-0.2238601588,4.5978683465
 H,0,0.3845366065,0.8049785428,5.5020075136
 H,0,-3.9591411453,-0.8666287884,3.7310618305
 H,0,-2.701151794,-0.4427839462,4.920656431
 H,0,-2.4486958415,-1.8036998113,3.8046410287
 H,0,-5.8324109106,0.6509806687,-0.0089153584
 H,0,-6.271552715,-0.9793979868,0.5525560948
 H,0,-6.0621829537,-0.6620810904,-1.1875891025
 H,0,2.026235027,5.2713075509,-0.2708004863
 H,0,-0.0813447693,6.5017310598,0.2376900522
 H,0,-2.2927908553,5.426132469,-0.1835134007
 H,0,2.2165927115,1.6486119211,-1.1284212763
 H,0,-2.72835475,1.8783738019,-1.4392279118
 H,0,1.8511406456,-4.985047992,1.320101353
 H,0,4.2791810014,-4.7789944058,0.752655186
 H,0,5.036769594,-3.0433411435,-0.8781984835
 H,0,-0.8451532739,-2.7354657777,-0.1267160132
 H,0,2.7345312242,-0.5239221852,-2.5316187441
 H,0,4.4443318607,2.5799072647,-0.7170317856
 H,0,3.373374237,3.2124521739,0.565893194
 H,0,3.8580153059,4.257656518,-0.7995581055
 H,0,3.5582113158,2.369457687,-3.1336843061
 H,0,2.6923496078,3.9347084327,-3.1532778004
 H,0,1.8006242424,2.4128336788,-3.4522155447
 H,0,-4.6131449594,2.3812927983,0.1416368662
 H,0,-3.8375302045,3.9112117659,0.6285530988
 H,0,-3.0486842922,2.3657689455,1.0310359963
 H,0,-4.6669068798,3.1926413402,-2.3270088647
 H,0,-3.1683940167,3.7454313024,-3.1265886245
 H,0,-3.9003000613,4.7257891351,-1.8289559557
 H,0,5.0322334322,0.4565375408,-2.4007433888
 H,0,4.3651704966,0.2477963124,-0.7560402072
 H,0,5.5905901823,-0.8920804901,-1.3720632728
 H,0,4.4147002674,-1.1434818869,-4.2813243793
 H,0,3.3145341414,-2.5189486469,-3.9993333399
 H,0,4.961454045,-2.5399888997,-3.3116248127
 H,0,-1.5931790625,-3.3441906187,2.1643150374
 H,0,-0.1208423312,-2.3049850403,2.256939751
 H,0,-0.0020130803,-4.0652333272,2.5457051046
 H,0,-1.8691528817,-5.0018737616,0.2448539974
 H,0,-0.2553319287,-5.7224635358,0.4797432871
 H,0,-0.6893335778,-5.0449879719,-1.111719116
 H,0,-0.7832435905,3.0330232167,-3.5890781316
 H,0,-0.5169827027,1.7579828367,-4.7986710663
 H,0,-2.0894919804,1.9099467688,-4.0123664265
 H,0,1.3580301172,-2.922271183,-3.5670201973
 H,0,-0.0631941865,-3.5391836263,-2.724584047
 H,0,-0.2519423144,-2.6550882595,-4.2550942308
 Recover connectivity data from disk.

 GradGradGradGradGradGradGradGradGradGradGradGradGradGradGradGradGradGrad
 Berny optimization.
 Initialization pass.
                         ----------------------------
                         !    Initial Parameters    !
                         ! (Angstroms and Degrees)  !
 ------------------------                            -------------------------
 ! Name  Definition              Value          Derivative Info.             !
 -----------------------------------------------------------------------------
 ! R1    R(1,4)                  1.3421         calculate D2E/DX2 analyticall!
 ! R2    R(1,16)                 1.4412         calculate D2E/DX2 analyticall!
 ! R3    R(2,5)                  2.0508         calculate D2E/DX2 analyticall!
 ! R4    R(2,6)                  2.0521         calculate D2E/DX2 analyticall!
 ! R5    R(2,15)                 2.1164         calculate D2E/DX2 analyticall!
 ! R6    R(2,17)                 1.9293         calculate D2E/DX2 analyticall!
 ! R7    R(2,19)                 2.4782         calculate D2E/DX2 analyticall!
 ! R8    R(3,13)                 1.4232         calculate D2E/DX2 analyticall!
 ! R9    R(3,18)                 1.3724         calculate D2E/DX2 analyticall!
 ! R10   R(4,7)                  1.209          calculate D2E/DX2 analyticall!
 ! R11   R(4,14)                 1.5293         calculate D2E/DX2 analyticall!
 ! R12   R(5,8)                  1.3266         calculate D2E/DX2 analyticall!
 ! R13   R(5,29)                 1.4523         calculate D2E/DX2 analyticall!
 ! R14   R(6,10)                 1.3298         calculate D2E/DX2 analyticall!
 ! R15   R(6,30)                 1.452          calculate D2E/DX2 analyticall!
 ! R16   R(8,9)                  1.4163         calculate D2E/DX2 analyticall!
 ! R17   R(8,53)                 1.5258         calculate D2E/DX2 analyticall!
 ! R18   R(9,10)                 1.4093         calculate D2E/DX2 analyticall!
 ! R19   R(9,55)                 1.0854         calculate D2E/DX2 analyticall!
 ! R20   R(10,54)                1.5234         calculate D2E/DX2 analyticall!
 ! R21   R(11,12)                1.3359         calculate D2E/DX2 analyticall!
 ! R22   R(11,14)                1.4441         calculate D2E/DX2 analyticall!
 ! R23   R(12,13)                1.5298         calculate D2E/DX2 analyticall!
 ! R24   R(12,15)                1.2184         calculate D2E/DX2 analyticall!
 ! R25   R(13,27)                1.531          calculate D2E/DX2 analyticall!
 ! R26   R(13,56)                1.098          calculate D2E/DX2 analyticall!
 ! R27   R(14,28)                1.5265         calculate D2E/DX2 analyticall!
 ! R28   R(14,57)                1.0919         calculate D2E/DX2 analyticall!
 ! R29   R(16,58)                1.091          calculate D2E/DX2 analyticall!
 ! R30   R(16,59)                1.0898         calculate D2E/DX2 analyticall!
 ! R31   R(16,60)                1.0935         calculate D2E/DX2 analyticall!
 ! R32   R(17,22)                1.3874         calculate D2E/DX2 analyticall!
 ! R33   R(18,19)                1.2263         calculate D2E/DX2 analyticall!
 ! R34   R(18,23)                1.5328         calculate D2E/DX2 analyticall!
 ! R35   R(20,21)                1.3757         calculate D2E/DX2 analyticall!
 ! R36   R(20,23)                1.4306         calculate D2E/DX2 analyticall!
 ! R37   R(21,22)                1.5348         calculate D2E/DX2 analyticall!
 ! R38   R(21,24)                1.2089         calculate D2E/DX2 analyticall!
 ! R39   R(22,25)                1.5435         calculate D2E/DX2 analyticall!
 ! R40   R(22,61)                1.1016         calculate D2E/DX2 analyticall!
 ! R41   R(23,26)                1.5269         calculate D2E/DX2 analyticall!
 ! R42   R(23,62)                1.0989         calculate D2E/DX2 analyticall!
 ! R43   R(25,63)                1.096          calculate D2E/DX2 analyticall!
 ! R44   R(25,64)                1.0912         calculate D2E/DX2 analyticall!
 ! R45   R(25,65)                1.0947         calculate D2E/DX2 analyticall!
 ! R46   R(26,66)                1.0943         calculate D2E/DX2 analyticall!
 ! R47   R(26,67)                1.0906         calculate D2E/DX2 analyticall!
 ! R48   R(26,68)                1.0935         calculate D2E/DX2 analyticall!
 ! R49   R(27,69)                1.0917         calculate D2E/DX2 analyticall!
 ! R50   R(27,70)                1.0932         calculate D2E/DX2 analyticall!
 ! R51   R(27,71)                1.0932         calculate D2E/DX2 analyticall!
 ! R52   R(28,72)                1.0927         calculate D2E/DX2 analyticall!
 ! R53   R(28,73)                1.0944         calculate D2E/DX2 analyticall!
 ! R54   R(28,74)                1.0933         calculate D2E/DX2 analyticall!
 ! R55   R(29,31)                1.4364         calculate D2E/DX2 analyticall!
 ! R56   R(29,35)                1.431          calculate D2E/DX2 analyticall!
 ! R57   R(30,38)                1.4317         calculate D2E/DX2 analyticall!
 ! R58   R(30,42)                1.4387         calculate D2E/DX2 analyticall!
 ! R59   R(31,32)                1.4145         calculate D2E/DX2 analyticall!
 ! R60   R(31,36)                1.5523         calculate D2E/DX2 analyticall!
 ! R61   R(32,33)                1.4075         calculate D2E/DX2 analyticall!
 ! R62   R(32,75)                1.0965         calculate D2E/DX2 analyticall!
 ! R63   R(33,34)                1.4036         calculate D2E/DX2 analyticall!
 ! R64   R(33,76)                1.0983         calculate D2E/DX2 analyticall!
 ! R65   R(34,35)                1.4162         calculate D2E/DX2 analyticall!
 ! R66   R(34,77)                1.0976         calculate D2E/DX2 analyticall!
 ! R67   R(35,37)                1.5504         calculate D2E/DX2 analyticall!
 ! R68   R(36,45)                1.56           calculate D2E/DX2 analyticall!
 ! R69   R(36,46)                1.5653         calculate D2E/DX2 analyticall!
 ! R70   R(36,78)                1.1136         calculate D2E/DX2 analyticall!
 ! R71   R(37,47)                1.5622         calculate D2E/DX2 analyticall!
 ! R72   R(37,48)                1.5666         calculate D2E/DX2 analyticall!
 ! R73   R(37,79)                1.1088         calculate D2E/DX2 analyticall!
 ! R74   R(38,39)                1.4192         calculate D2E/DX2 analyticall!
 ! R75   R(38,43)                1.5477         calculate D2E/DX2 analyticall!
 ! R76   R(39,40)                1.4098         calculate D2E/DX2 analyticall!
 ! R77   R(39,80)                1.0981         calculate D2E/DX2 analyticall!
 ! R78   R(40,41)                1.4087         calculate D2E/DX2 analyticall!
 ! R79   R(40,81)                1.0986         calculate D2E/DX2 analyticall!
 ! R80   R(41,42)                1.4139         calculate D2E/DX2 analyticall!
 ! R81   R(41,82)                1.0977         calculate D2E/DX2 analyticall!
 ! R82   R(42,44)                1.5525         calculate D2E/DX2 analyticall!
 ! R83   R(43,51)                1.5607         calculate D2E/DX2 analyticall!
 ! R84   R(43,52)                1.5652         calculate D2E/DX2 analyticall!
 ! R85   R(43,83)                1.107          calculate D2E/DX2 analyticall!
 ! R86   R(44,49)                1.5622         calculate D2E/DX2 analyticall!
 ! R87   R(44,50)                1.5671         calculate D2E/DX2 analyticall!
 ! R88   R(44,84)                1.109          calculate D2E/DX2 analyticall!
 ! R89   R(45,85)                1.0994         calculate D2E/DX2 analyticall!
 ! R90   R(45,86)                1.1023         calculate D2E/DX2 analyticall!
 ! R91   R(45,87)                1.1008         calculate D2E/DX2 analyticall!
 ! R92   R(46,88)                1.1006         calculate D2E/DX2 analyticall!
 ! R93   R(46,89)                1.1016         calculate D2E/DX2 analyticall!
 ! R94   R(46,90)                1.1031         calculate D2E/DX2 analyticall!
 ! R95   R(47,91)                1.1039         calculate D2E/DX2 analyticall!
 ! R96   R(47,92)                1.1008         calculate D2E/DX2 analyticall!
 ! R97   R(47,93)                1.1041         calculate D2E/DX2 analyticall!
 ! R98   R(48,94)                1.1011         calculate D2E/DX2 analyticall!
 ! R99   R(48,95)                1.1            calculate D2E/DX2 analyticall!
 ! R100  R(48,96)                1.1006         calculate D2E/DX2 analyticall!
 ! R101  R(49,97)                1.1013         calculate D2E/DX2 analyticall!
 ! R102  R(49,98)                1.1044         calculate D2E/DX2 analyticall!
 ! R103  R(49,99)                1.1003         calculate D2E/DX2 analyticall!
 ! R104  R(50,100)               1.1008         calculate D2E/DX2 analyticall!
 ! R105  R(50,101)               1.1002         calculate D2E/DX2 analyticall!
 ! R106  R(50,102)               1.1009         calculate D2E/DX2 analyticall!
 ! R107  R(51,103)               1.1044         calculate D2E/DX2 analyticall!
 ! R108  R(51,104)               1.1042         calculate D2E/DX2 analyticall!
 ! R109  R(51,105)               1.101          calculate D2E/DX2 analyticall!
 ! R110  R(52,106)               1.1029         calculate D2E/DX2 analyticall!
 ! R111  R(52,107)               1.1019         calculate D2E/DX2 analyticall!
 ! R112  R(52,108)               1.1034         calculate D2E/DX2 analyticall!
 ! R113  R(53,109)               1.0931         calculate D2E/DX2 analyticall!
 ! R114  R(53,110)               1.0962         calculate D2E/DX2 analyticall!
 ! R115  R(53,111)               1.0974         calculate D2E/DX2 analyticall!
 ! R116  R(54,112)               1.0951         calculate D2E/DX2 analyticall!
 ! R117  R(54,113)               1.0966         calculate D2E/DX2 analyticall!
 ! R118  R(54,114)               1.0953         calculate D2E/DX2 analyticall!
 ! A1    A(4,1,16)             115.846          calculate D2E/DX2 analyticall!
 ! A2    A(5,2,6)               90.822          calculate D2E/DX2 analyticall!
 ! A3    A(5,2,15)             100.7271         calculate D2E/DX2 analyticall!
 ! A4    A(5,2,17)             149.8973         calculate D2E/DX2 analyticall!
 ! A5    A(5,2,19)              92.4196         calculate D2E/DX2 analyticall!
 ! A6    A(6,2,15)              98.9473         calculate D2E/DX2 analyticall!
 ! A7    A(6,2,17)             106.8465         calculate D2E/DX2 analyticall!
 ! A8    A(15,2,17)            100.3275         calculate D2E/DX2 analyticall!
 ! A9    A(15,2,19)             75.6689         calculate D2E/DX2 analyticall!
 ! A10   A(17,2,19)             72.3319         calculate D2E/DX2 analyticall!
 ! A11   A(13,3,18)            118.452          calculate D2E/DX2 analyticall!
 ! A12   A(1,4,7)              125.3533         calculate D2E/DX2 analyticall!
 ! A13   A(1,4,14)             109.4731         calculate D2E/DX2 analyticall!
 ! A14   A(7,4,14)             125.1081         calculate D2E/DX2 analyticall!
 ! A15   A(2,5,8)              123.8874         calculate D2E/DX2 analyticall!
 ! A16   A(2,5,29)             113.398          calculate D2E/DX2 analyticall!
 ! A17   A(8,5,29)             122.713          calculate D2E/DX2 analyticall!
 ! A18   A(2,6,10)             122.944          calculate D2E/DX2 analyticall!
 ! A19   A(2,6,30)             116.3574         calculate D2E/DX2 analyticall!
 ! A20   A(10,6,30)            120.6175         calculate D2E/DX2 analyticall!
 ! A21   A(5,8,9)              123.8322         calculate D2E/DX2 analyticall!
 ! A22   A(5,8,53)             121.2741         calculate D2E/DX2 analyticall!
 ! A23   A(9,8,53)             114.8897         calculate D2E/DX2 analyticall!
 ! A24   A(8,9,10)             127.8413         calculate D2E/DX2 analyticall!
 ! A25   A(8,9,55)             115.4808         calculate D2E/DX2 analyticall!
 ! A26   A(10,9,55)            115.9089         calculate D2E/DX2 analyticall!
 ! A27   A(6,10,9)             123.7307         calculate D2E/DX2 analyticall!
 ! A28   A(6,10,54)            119.4452         calculate D2E/DX2 analyticall!
 ! A29   A(9,10,54)            116.8092         calculate D2E/DX2 analyticall!
 ! A30   A(12,11,14)           117.4916         calculate D2E/DX2 analyticall!
 ! A31   A(11,12,13)           109.8725         calculate D2E/DX2 analyticall!
 ! A32   A(11,12,15)           122.4442         calculate D2E/DX2 analyticall!
 ! A33   A(13,12,15)           127.6708         calculate D2E/DX2 analyticall!
 ! A34   A(3,13,12)            114.5774         calculate D2E/DX2 analyticall!
 ! A35   A(3,13,27)            106.1519         calculate D2E/DX2 analyticall!
 ! A36   A(3,13,56)            109.12           calculate D2E/DX2 analyticall!
 ! A37   A(12,13,27)           111.2081         calculate D2E/DX2 analyticall!
 ! A38   A(12,13,56)           105.2434         calculate D2E/DX2 analyticall!
 ! A39   A(27,13,56)           110.5743         calculate D2E/DX2 analyticall!
 ! A40   A(4,14,11)            109.2449         calculate D2E/DX2 analyticall!
 ! A41   A(4,14,28)            110.9245         calculate D2E/DX2 analyticall!
 ! A42   A(4,14,57)            109.3228         calculate D2E/DX2 analyticall!
 ! A43   A(11,14,28)           106.766          calculate D2E/DX2 analyticall!
 ! A44   A(11,14,57)           108.9773         calculate D2E/DX2 analyticall!
 ! A45   A(28,14,57)           111.5361         calculate D2E/DX2 analyticall!
 ! A46   A(2,15,12)            139.4074         calculate D2E/DX2 analyticall!
 ! A47   A(1,16,58)            110.3127         calculate D2E/DX2 analyticall!
 ! A48   A(1,16,59)            105.3466         calculate D2E/DX2 analyticall!
 ! A49   A(1,16,60)            110.224          calculate D2E/DX2 analyticall!
 ! A50   A(58,16,59)           110.9037         calculate D2E/DX2 analyticall!
 ! A51   A(58,16,60)           109.3813         calculate D2E/DX2 analyticall!
 ! A52   A(59,16,60)           110.6211         calculate D2E/DX2 analyticall!
 ! A53   A(2,17,22)            131.4596         calculate D2E/DX2 analyticall!
 ! A54   A(3,18,19)            121.1269         calculate D2E/DX2 analyticall!
 ! A55   A(3,18,23)            111.2249         calculate D2E/DX2 analyticall!
 ! A56   A(19,18,23)           124.0038         calculate D2E/DX2 analyticall!
 ! A57   A(2,19,18)             96.0443         calculate D2E/DX2 analyticall!
 ! A58   A(21,20,23)           123.8158         calculate D2E/DX2 analyticall!
 ! A59   A(20,21,22)           119.382          calculate D2E/DX2 analyticall!
 ! A60   A(20,21,24)           117.5823         calculate D2E/DX2 analyticall!
 ! A61   A(22,21,24)           122.7579         calculate D2E/DX2 analyticall!
 ! A62   A(17,22,21)           112.2182         calculate D2E/DX2 analyticall!
 ! A63   A(17,22,25)           114.2501         calculate D2E/DX2 analyticall!
 ! A64   A(17,22,61)           110.9923         calculate D2E/DX2 analyticall!
 ! A65   A(21,22,25)           110.9568         calculate D2E/DX2 analyticall!
 ! A66   A(21,22,61)           102.5726         calculate D2E/DX2 analyticall!
 ! A67   A(25,22,61)           104.9807         calculate D2E/DX2 analyticall!
 ! A68   A(18,23,20)           113.8085         calculate D2E/DX2 analyticall!
 ! A69   A(18,23,26)           115.7888         calculate D2E/DX2 analyticall!
 ! A70   A(18,23,62)           103.1619         calculate D2E/DX2 analyticall!
 ! A71   A(20,23,26)           112.3423         calculate D2E/DX2 analyticall!
 ! A72   A(20,23,62)           102.1458         calculate D2E/DX2 analyticall!
 ! A73   A(26,23,62)           107.997          calculate D2E/DX2 analyticall!
 ! A74   A(22,25,63)           109.9958         calculate D2E/DX2 analyticall!
 ! A75   A(22,25,64)           109.8222         calculate D2E/DX2 analyticall!
 ! A76   A(22,25,65)           111.2777         calculate D2E/DX2 analyticall!
 ! A77   A(63,25,64)           108.8091         calculate D2E/DX2 analyticall!
 ! A78   A(63,25,65)           108.7035         calculate D2E/DX2 analyticall!
 ! A79   A(64,25,65)           108.1739         calculate D2E/DX2 analyticall!
 ! A80   A(23,26,66)           108.7764         calculate D2E/DX2 analyticall!
 ! A81   A(23,26,67)           111.841          calculate D2E/DX2 analyticall!
 ! A82   A(23,26,68)           110.3386         calculate D2E/DX2 analyticall!
 ! A83   A(66,26,67)           109.2227         calculate D2E/DX2 analyticall!
 ! A84   A(66,26,68)           108.6568         calculate D2E/DX2 analyticall!
 ! A85   A(67,26,68)           107.9486         calculate D2E/DX2 analyticall!
 ! A86   A(13,27,69)           110.6346         calculate D2E/DX2 analyticall!
 ! A87   A(13,27,70)           109.0806         calculate D2E/DX2 analyticall!
 ! A88   A(13,27,71)           109.8994         calculate D2E/DX2 analyticall!
 ! A89   A(69,27,70)           109.3433         calculate D2E/DX2 analyticall!
 ! A90   A(69,27,71)           109.0287         calculate D2E/DX2 analyticall!
 ! A91   A(70,27,71)           108.8257         calculate D2E/DX2 analyticall!
 ! A92   A(14,28,72)           109.7268         calculate D2E/DX2 analyticall!
 ! A93   A(14,28,73)           110.6049         calculate D2E/DX2 analyticall!
 ! A94   A(14,28,74)           109.5968         calculate D2E/DX2 analyticall!
 ! A95   A(72,28,73)           108.8979         calculate D2E/DX2 analyticall!
 ! A96   A(72,28,74)           108.9757         calculate D2E/DX2 analyticall!
 ! A97   A(73,28,74)           109.0095         calculate D2E/DX2 analyticall!
 ! A98   A(5,29,31)            117.4333         calculate D2E/DX2 analyticall!
 ! A99   A(5,29,35)            121.5478         calculate D2E/DX2 analyticall!
 ! A100  A(31,29,35)           120.6375         calculate D2E/DX2 analyticall!
 ! A101  A(6,30,38)            120.1498         calculate D2E/DX2 analyticall!
 ! A102  A(6,30,42)            119.1372         calculate D2E/DX2 analyticall!
 ! A103  A(38,30,42)           120.4218         calculate D2E/DX2 analyticall!
 ! A104  A(29,31,32)           118.5417         calculate D2E/DX2 analyticall!
 ! A105  A(29,31,36)           120.9723         calculate D2E/DX2 analyticall!
 ! A106  A(32,31,36)           120.3789         calculate D2E/DX2 analyticall!
 ! A107  A(31,32,33)           121.1091         calculate D2E/DX2 analyticall!
 ! A108  A(31,32,75)           119.5704         calculate D2E/DX2 analyticall!
 ! A109  A(33,32,75)           119.3149         calculate D2E/DX2 analyticall!
 ! A110  A(32,33,34)           119.9197         calculate D2E/DX2 analyticall!
 ! A111  A(32,33,76)           119.9604         calculate D2E/DX2 analyticall!
 ! A112  A(34,33,76)           120.1174         calculate D2E/DX2 analyticall!
 ! A113  A(33,34,35)           121.3031         calculate D2E/DX2 analyticall!
 ! A114  A(33,34,77)           119.4869         calculate D2E/DX2 analyticall!
 ! A115  A(35,34,77)           119.2097         calculate D2E/DX2 analyticall!
 ! A116  A(29,35,34)           118.4827         calculate D2E/DX2 analyticall!
 ! A117  A(29,35,37)           122.9258         calculate D2E/DX2 analyticall!
 ! A118  A(34,35,37)           118.5836         calculate D2E/DX2 analyticall!
 ! A119  A(31,36,45)           113.1438         calculate D2E/DX2 analyticall!
 ! A120  A(31,36,46)           110.3942         calculate D2E/DX2 analyticall!
 ! A121  A(31,36,78)           108.0228         calculate D2E/DX2 analyticall!
 ! A122  A(45,36,46)           110.4993         calculate D2E/DX2 analyticall!
 ! A123  A(45,36,78)           107.8562         calculate D2E/DX2 analyticall!
 ! A124  A(46,36,78)           106.6495         calculate D2E/DX2 analyticall!
 ! A125  A(35,37,47)           110.3871         calculate D2E/DX2 analyticall!
 ! A126  A(35,37,48)           111.8811         calculate D2E/DX2 analyticall!
 ! A127  A(35,37,79)           107.9955         calculate D2E/DX2 analyticall!
 ! A128  A(47,37,48)           109.7482         calculate D2E/DX2 analyticall!
 ! A129  A(47,37,79)           108.2958         calculate D2E/DX2 analyticall!
 ! A130  A(48,37,79)           108.4298         calculate D2E/DX2 analyticall!
 ! A131  A(30,38,39)           118.7674         calculate D2E/DX2 analyticall!
 ! A132  A(30,38,43)           122.1697         calculate D2E/DX2 analyticall!
 ! A133  A(39,38,43)           119.0554         calculate D2E/DX2 analyticall!
 ! A134  A(38,39,40)           121.1168         calculate D2E/DX2 analyticall!
 ! A135  A(38,39,80)           119.3605         calculate D2E/DX2 analyticall!
 ! A136  A(40,39,80)           119.52           calculate D2E/DX2 analyticall!
 ! A137  A(39,40,41)           119.6724         calculate D2E/DX2 analyticall!
 ! A138  A(39,40,81)           120.1055         calculate D2E/DX2 analyticall!
 ! A139  A(41,40,81)           120.2123         calculate D2E/DX2 analyticall!
 ! A140  A(40,41,42)           121.3977         calculate D2E/DX2 analyticall!
 ! A141  A(40,41,82)           119.3283         calculate D2E/DX2 analyticall!
 ! A142  A(42,41,82)           119.2723         calculate D2E/DX2 analyticall!
 ! A143  A(30,42,41)           118.6023         calculate D2E/DX2 analyticall!
 ! A144  A(30,42,44)           122.4815         calculate D2E/DX2 analyticall!
 ! A145  A(41,42,44)           118.8978         calculate D2E/DX2 analyticall!
 ! A146  A(38,43,51)           111.368          calculate D2E/DX2 analyticall!
 ! A147  A(38,43,52)           111.3713         calculate D2E/DX2 analyticall!
 ! A148  A(38,43,83)           107.51           calculate D2E/DX2 analyticall!
 ! A149  A(51,43,52)           110.4767         calculate D2E/DX2 analyticall!
 ! A150  A(51,43,83)           108.0967         calculate D2E/DX2 analyticall!
 ! A151  A(52,43,83)           107.8506         calculate D2E/DX2 analyticall!
 ! A152  A(42,44,49)           111.8468         calculate D2E/DX2 analyticall!
 ! A153  A(42,44,50)           111.2161         calculate D2E/DX2 analyticall!
 ! A154  A(42,44,84)           108.0174         calculate D2E/DX2 analyticall!
 ! A155  A(49,44,50)           109.4401         calculate D2E/DX2 analyticall!
 ! A156  A(49,44,84)           108.0435         calculate D2E/DX2 analyticall!
 ! A157  A(50,44,84)           108.1453         calculate D2E/DX2 analyticall!
 ! A158  A(36,45,85)           109.7209         calculate D2E/DX2 analyticall!
 ! A159  A(36,45,86)           111.0899         calculate D2E/DX2 analyticall!
 ! A160  A(36,45,87)           111.1288         calculate D2E/DX2 analyticall!
 ! A161  A(85,45,86)           108.5037         calculate D2E/DX2 analyticall!
 ! A162  A(85,45,87)           107.9268         calculate D2E/DX2 analyticall!
 ! A163  A(86,45,87)           108.3748         calculate D2E/DX2 analyticall!
 ! A164  A(36,46,88)           110.0191         calculate D2E/DX2 analyticall!
 ! A165  A(36,46,89)           110.4769         calculate D2E/DX2 analyticall!
 ! A166  A(36,46,90)           110.8058         calculate D2E/DX2 analyticall!
 ! A167  A(88,46,89)           108.6478         calculate D2E/DX2 analyticall!
 ! A168  A(88,46,90)           108.3462         calculate D2E/DX2 analyticall!
 ! A169  A(89,46,90)           108.4803         calculate D2E/DX2 analyticall!
 ! A170  A(37,47,91)           110.626          calculate D2E/DX2 analyticall!
 ! A171  A(37,47,92)           111.0055         calculate D2E/DX2 analyticall!
 ! A172  A(37,47,93)           110.2056         calculate D2E/DX2 analyticall!
 ! A173  A(91,47,92)           107.9524         calculate D2E/DX2 analyticall!
 ! A174  A(91,47,93)           109.1912         calculate D2E/DX2 analyticall!
 ! A175  A(92,47,93)           107.7767         calculate D2E/DX2 analyticall!
 ! A176  A(37,48,94)           110.0471         calculate D2E/DX2 analyticall!
 ! A177  A(37,48,95)           111.1913         calculate D2E/DX2 analyticall!
 ! A178  A(37,48,96)           110.4213         calculate D2E/DX2 analyticall!
 ! A179  A(94,48,95)           108.4879         calculate D2E/DX2 analyticall!
 ! A180  A(94,48,96)           108.3387         calculate D2E/DX2 analyticall!
 ! A181  A(95,48,96)           108.2747         calculate D2E/DX2 analyticall!
 ! A182  A(44,49,97)           109.9327         calculate D2E/DX2 analyticall!
 ! A183  A(44,49,98)           110.9321         calculate D2E/DX2 analyticall!
 ! A184  A(44,49,99)           111.2561         calculate D2E/DX2 analyticall!
 ! A185  A(97,49,98)           108.2351         calculate D2E/DX2 analyticall!
 ! A186  A(97,49,99)           108.4087         calculate D2E/DX2 analyticall!
 ! A187  A(98,49,99)           107.9789         calculate D2E/DX2 analyticall!
 ! A188  A(44,50,100)          109.7847         calculate D2E/DX2 analyticall!
 ! A189  A(44,50,101)          111.325          calculate D2E/DX2 analyticall!
 ! A190  A(44,50,102)          110.5836         calculate D2E/DX2 analyticall!
 ! A191  A(100,50,101)         108.279          calculate D2E/DX2 analyticall!
 ! A192  A(100,50,102)         108.4173         calculate D2E/DX2 analyticall!
 ! A193  A(101,50,102)         108.3687         calculate D2E/DX2 analyticall!
 ! A194  A(43,51,103)          109.4799         calculate D2E/DX2 analyticall!
 ! A195  A(43,51,104)          109.9035         calculate D2E/DX2 analyticall!
 ! A196  A(43,51,105)          111.1942         calculate D2E/DX2 analyticall!
 ! A197  A(103,51,104)         109.5738         calculate D2E/DX2 analyticall!
 ! A198  A(103,51,105)         108.3353         calculate D2E/DX2 analyticall!
 ! A199  A(104,51,105)         108.3196         calculate D2E/DX2 analyticall!
 ! A200  A(43,52,106)          109.554          calculate D2E/DX2 analyticall!
 ! A201  A(43,52,107)          111.2755         calculate D2E/DX2 analyticall!
 ! A202  A(43,52,108)          110.8771         calculate D2E/DX2 analyticall!
 ! A203  A(106,52,107)         107.9336         calculate D2E/DX2 analyticall!
 ! A204  A(106,52,108)         109.1953         calculate D2E/DX2 analyticall!
 ! A205  A(107,52,108)         107.9285         calculate D2E/DX2 analyticall!
 ! A206  A(8,53,109)           112.2938         calculate D2E/DX2 analyticall!
 ! A207  A(8,53,110)           110.1709         calculate D2E/DX2 analyticall!
 ! A208  A(8,53,111)           110.3621         calculate D2E/DX2 analyticall!
 ! A209  A(109,53,110)         108.5686         calculate D2E/DX2 analyticall!
 ! A210  A(109,53,111)         108.1606         calculate D2E/DX2 analyticall!
 ! A211  A(110,53,111)         107.1187         calculate D2E/DX2 analyticall!
 ! A212  A(10,54,112)          111.4731         calculate D2E/DX2 analyticall!
 ! A213  A(10,54,113)          110.5565         calculate D2E/DX2 analyticall!
 ! A214  A(10,54,114)          111.1911         calculate D2E/DX2 analyticall!
 ! A215  A(112,54,113)         107.1587         calculate D2E/DX2 analyticall!
 ! A216  A(112,54,114)         107.9187         calculate D2E/DX2 analyticall!
 ! A217  A(113,54,114)         108.3869         calculate D2E/DX2 analyticall!
 ! A218  L(6,2,19,5,-2)        175.1351         calculate D2E/DX2 analyticall!
 ! D1    D(16,1,4,7)             0.3548         calculate D2E/DX2 analyticall!
 ! D2    D(16,1,4,14)         -176.8187         calculate D2E/DX2 analyticall!
 ! D3    D(4,1,16,58)          -58.65           calculate D2E/DX2 analyticall!
 ! D4    D(4,1,16,59)         -178.3934         calculate D2E/DX2 analyticall!
 ! D5    D(4,1,16,60)           62.2457         calculate D2E/DX2 analyticall!
 ! D6    D(6,2,5,8)             20.0081         calculate D2E/DX2 analyticall!
 ! D7    D(6,2,5,29)          -159.5425         calculate D2E/DX2 analyticall!
 ! D8    D(15,2,5,8)           -79.2585         calculate D2E/DX2 analyticall!
 ! D9    D(15,2,5,29)          101.191          calculate D2E/DX2 analyticall!
 ! D10   D(17,2,5,8)           147.0667         calculate D2E/DX2 analyticall!
 ! D11   D(17,2,5,29)          -32.4839         calculate D2E/DX2 analyticall!
 ! D12   D(19,2,5,8)          -155.127          calculate D2E/DX2 analyticall!
 ! D13   D(19,2,5,29)           25.3225         calculate D2E/DX2 analyticall!
 ! D14   D(5,2,6,10)           -26.3014         calculate D2E/DX2 analyticall!
 ! D15   D(5,2,6,30)           156.9603         calculate D2E/DX2 analyticall!
 ! D16   D(15,2,6,10)           74.6924         calculate D2E/DX2 analyticall!
 ! D17   D(15,2,6,30)         -102.0459         calculate D2E/DX2 analyticall!
 ! D18   D(17,2,6,10)          178.4192         calculate D2E/DX2 analyticall!
 ! D19   D(17,2,6,30)            1.681          calculate D2E/DX2 analyticall!
 ! D20   D(10,6,19,18)         157.6683         calculate D2E/DX2 analyticall!
 ! D21   D(30,6,19,18)         -15.464          calculate D2E/DX2 analyticall!
 ! D22   D(5,2,15,12)         -100.6244         calculate D2E/DX2 analyticall!
 ! D23   D(6,2,15,12)          166.8189         calculate D2E/DX2 analyticall!
 ! D24   D(17,2,15,12)          57.7382         calculate D2E/DX2 analyticall!
 ! D25   D(19,2,15,12)         -10.8565         calculate D2E/DX2 analyticall!
 ! D26   D(5,2,17,22)          -60.8641         calculate D2E/DX2 analyticall!
 ! D27   D(6,2,17,22)           62.6534         calculate D2E/DX2 analyticall!
 ! D28   D(15,2,17,22)         165.3833         calculate D2E/DX2 analyticall!
 ! D29   D(19,2,17,22)        -123.4067         calculate D2E/DX2 analyticall!
 ! D30   D(5,2,19,18)         -173.8009         calculate D2E/DX2 analyticall!
 ! D31   D(15,2,19,18)          85.7428         calculate D2E/DX2 analyticall!
 ! D32   D(17,2,19,18)         -20.253          calculate D2E/DX2 analyticall!
 ! D33   D(18,3,13,12)          67.0382         calculate D2E/DX2 analyticall!
 ! D34   D(18,3,13,27)        -169.8275         calculate D2E/DX2 analyticall!
 ! D35   D(18,3,13,56)         -50.6428         calculate D2E/DX2 analyticall!
 ! D36   D(13,3,18,19)         -10.9336         calculate D2E/DX2 analyticall!
 ! D37   D(13,3,18,23)         148.3561         calculate D2E/DX2 analyticall!
 ! D38   D(1,4,14,11)         -165.7008         calculate D2E/DX2 analyticall!
 ! D39   D(1,4,14,28)           76.8738         calculate D2E/DX2 analyticall!
 ! D40   D(1,4,14,57)          -46.5299         calculate D2E/DX2 analyticall!
 ! D41   D(7,4,14,11)           17.1171         calculate D2E/DX2 analyticall!
 ! D42   D(7,4,14,28)         -100.3083         calculate D2E/DX2 analyticall!
 ! D43   D(7,4,14,57)          136.288          calculate D2E/DX2 analyticall!
 ! D44   D(2,5,8,9)             -4.1902         calculate D2E/DX2 analyticall!
 ! D45   D(2,5,8,53)           176.5744         calculate D2E/DX2 analyticall!
 ! D46   D(29,5,8,9)           175.3195         calculate D2E/DX2 analyticall!
 ! D47   D(29,5,8,53)           -3.9159         calculate D2E/DX2 analyticall!
 ! D48   D(2,5,29,31)           71.1933         calculate D2E/DX2 analyticall!
 ! D49   D(2,5,29,35)         -101.759          calculate D2E/DX2 analyticall!
 ! D50   D(8,5,29,31)         -108.3632         calculate D2E/DX2 analyticall!
 ! D51   D(8,5,29,35)           78.6845         calculate D2E/DX2 analyticall!
 ! D52   D(2,6,10,9)            17.2371         calculate D2E/DX2 analyticall!
 ! D53   D(2,6,10,54)         -164.2117         calculate D2E/DX2 analyticall!
 ! D54   D(30,6,10,9)         -166.1592         calculate D2E/DX2 analyticall!
 ! D55   D(30,6,10,54)          12.392          calculate D2E/DX2 analyticall!
 ! D56   D(2,6,30,38)           75.2993         calculate D2E/DX2 analyticall!
 ! D57   D(2,6,30,42)          -98.5304         calculate D2E/DX2 analyticall!
 ! D58   D(10,6,30,38)        -101.5201         calculate D2E/DX2 analyticall!
 ! D59   D(10,6,30,42)          84.6502         calculate D2E/DX2 analyticall!
 ! D60   D(5,8,9,10)           -16.1004         calculate D2E/DX2 analyticall!
 ! D61   D(5,8,9,55)           174.4419         calculate D2E/DX2 analyticall!
 ! D62   D(53,8,9,10)          163.1792         calculate D2E/DX2 analyticall!
 ! D63   D(53,8,9,55)           -6.2785         calculate D2E/DX2 analyticall!
 ! D64   D(5,8,53,109)          15.7488         calculate D2E/DX2 analyticall!
 ! D65   D(5,8,53,110)         136.898          calculate D2E/DX2 analyticall!
 ! D66   D(5,8,53,111)        -105.014          calculate D2E/DX2 analyticall!
 ! D67   D(9,8,53,109)        -163.551          calculate D2E/DX2 analyticall!
 ! D68   D(9,8,53,110)         -42.4018         calculate D2E/DX2 analyticall!
 ! D69   D(9,8,53,111)          75.6862         calculate D2E/DX2 analyticall!
 ! D70   D(8,9,10,6)             8.7085         calculate D2E/DX2 analyticall!
 ! D71   D(8,9,10,54)         -169.8779         calculate D2E/DX2 analyticall!
 ! D72   D(55,9,10,6)          178.1277         calculate D2E/DX2 analyticall!
 ! D73   D(55,9,10,54)          -0.4586         calculate D2E/DX2 analyticall!
 ! D74   D(6,10,54,112)        -64.3856         calculate D2E/DX2 analyticall!
 ! D75   D(6,10,54,113)         54.699          calculate D2E/DX2 analyticall!
 ! D76   D(6,10,54,114)        175.1435         calculate D2E/DX2 analyticall!
 ! D77   D(9,10,54,112)        114.2644         calculate D2E/DX2 analyticall!
 ! D78   D(9,10,54,113)       -126.6511         calculate D2E/DX2 analyticall!
 ! D79   D(9,10,54,114)         -6.2065         calculate D2E/DX2 analyticall!
 ! D80   D(14,11,12,13)        176.8697         calculate D2E/DX2 analyticall!
 ! D81   D(14,11,12,15)         -1.9345         calculate D2E/DX2 analyticall!
 ! D82   D(12,11,14,4)          77.2668         calculate D2E/DX2 analyticall!
 ! D83   D(12,11,14,28)       -162.7168         calculate D2E/DX2 analyticall!
 ! D84   D(12,11,14,57)        -42.1181         calculate D2E/DX2 analyticall!
 ! D85   D(11,12,13,3)         176.2325         calculate D2E/DX2 analyticall!
 ! D86   D(11,12,13,27)         55.8616         calculate D2E/DX2 analyticall!
 ! D87   D(11,12,13,56)        -63.9032         calculate D2E/DX2 analyticall!
 ! D88   D(15,12,13,3)          -5.0425         calculate D2E/DX2 analyticall!
 ! D89   D(15,12,13,27)       -125.4134         calculate D2E/DX2 analyticall!
 ! D90   D(15,12,13,56)        114.8218         calculate D2E/DX2 analyticall!
 ! D91   D(11,12,15,2)         147.0195         calculate D2E/DX2 analyticall!
 ! D92   D(13,12,15,2)         -31.5596         calculate D2E/DX2 analyticall!
 ! D93   D(3,13,27,69)         176.122          calculate D2E/DX2 analyticall!
 ! D94   D(3,13,27,70)          55.8062         calculate D2E/DX2 analyticall!
 ! D95   D(3,13,27,71)         -63.4255         calculate D2E/DX2 analyticall!
 ! D96   D(12,13,27,69)        -58.6484         calculate D2E/DX2 analyticall!
 ! D97   D(12,13,27,70)       -178.9642         calculate D2E/DX2 analyticall!
 ! D98   D(12,13,27,71)         61.8041         calculate D2E/DX2 analyticall!
 ! D99   D(56,13,27,69)         57.8958         calculate D2E/DX2 analyticall!
 ! D100  D(56,13,27,70)        -62.4199         calculate D2E/DX2 analyticall!
 ! D101  D(56,13,27,71)        178.3483         calculate D2E/DX2 analyticall!
 ! D102  D(4,14,28,72)         179.0387         calculate D2E/DX2 analyticall!
 ! D103  D(4,14,28,73)          58.8794         calculate D2E/DX2 analyticall!
 ! D104  D(4,14,28,74)         -61.3349         calculate D2E/DX2 analyticall!
 ! D105  D(11,14,28,72)         60.109          calculate D2E/DX2 analyticall!
 ! D106  D(11,14,28,73)        -60.0503         calculate D2E/DX2 analyticall!
 ! D107  D(11,14,28,74)        179.7354         calculate D2E/DX2 analyticall!
 ! D108  D(57,14,28,72)        -58.8388         calculate D2E/DX2 analyticall!
 ! D109  D(57,14,28,73)       -178.9981         calculate D2E/DX2 analyticall!
 ! D110  D(57,14,28,74)         60.7876         calculate D2E/DX2 analyticall!
 ! D111  D(2,17,22,21)         100.4016         calculate D2E/DX2 analyticall!
 ! D112  D(2,17,22,25)        -132.1721         calculate D2E/DX2 analyticall!
 ! D113  D(2,17,22,61)         -13.7142         calculate D2E/DX2 analyticall!
 ! D114  D(3,18,19,2)          -87.1436         calculate D2E/DX2 analyticall!
 ! D115  D(23,18,19,2)         116.2879         calculate D2E/DX2 analyticall!
 ! D116  D(3,18,23,20)         146.8836         calculate D2E/DX2 analyticall!
 ! D117  D(3,18,23,26)          14.4566         calculate D2E/DX2 analyticall!
 ! D118  D(3,18,23,62)        -103.2789         calculate D2E/DX2 analyticall!
 ! D119  D(19,18,23,20)        -54.5345         calculate D2E/DX2 analyticall!
 ! D120  D(19,18,23,26)        173.0385         calculate D2E/DX2 analyticall!
 ! D121  D(19,18,23,62)         55.303          calculate D2E/DX2 analyticall!
 ! D122  D(23,20,21,22)         37.8253         calculate D2E/DX2 analyticall!
 ! D123  D(23,20,21,24)       -148.0608         calculate D2E/DX2 analyticall!
 ! D124  D(21,20,23,18)        -76.2534         calculate D2E/DX2 analyticall!
 ! D125  D(21,20,23,26)         57.8104         calculate D2E/DX2 analyticall!
 ! D126  D(21,20,23,62)        173.2872         calculate D2E/DX2 analyticall!
 ! D127  D(20,21,22,17)         11.1856         calculate D2E/DX2 analyticall!
 ! D128  D(20,21,22,25)       -117.9775         calculate D2E/DX2 analyticall!
 ! D129  D(20,21,22,61)        130.3672         calculate D2E/DX2 analyticall!
 ! D130  D(24,21,22,17)       -162.6094         calculate D2E/DX2 analyticall!
 ! D131  D(24,21,22,25)         68.2275         calculate D2E/DX2 analyticall!
 ! D132  D(24,21,22,61)        -43.4278         calculate D2E/DX2 analyticall!
 ! D133  D(17,22,25,63)       -172.4311         calculate D2E/DX2 analyticall!
 ! D134  D(17,22,25,64)         67.8414         calculate D2E/DX2 analyticall!
 ! D135  D(17,22,25,65)        -51.906          calculate D2E/DX2 analyticall!
 ! D136  D(21,22,25,63)        -44.3602         calculate D2E/DX2 analyticall!
 ! D137  D(21,22,25,64)       -164.0877         calculate D2E/DX2 analyticall!
 ! D138  D(21,22,25,65)         76.1649         calculate D2E/DX2 analyticall!
 ! D139  D(61,22,25,63)         65.7473         calculate D2E/DX2 analyticall!
 ! D140  D(61,22,25,64)        -53.9802         calculate D2E/DX2 analyticall!
 ! D141  D(61,22,25,65)       -173.7276         calculate D2E/DX2 analyticall!
 ! D142  D(18,23,26,66)        177.1002         calculate D2E/DX2 analyticall!
 ! D143  D(18,23,26,67)         56.3766         calculate D2E/DX2 analyticall!
 ! D144  D(18,23,26,68)        -63.798          calculate D2E/DX2 analyticall!
 ! D145  D(20,23,26,66)         43.9978         calculate D2E/DX2 analyticall!
 ! D146  D(20,23,26,67)        -76.7258         calculate D2E/DX2 analyticall!
 ! D147  D(20,23,26,68)        163.0996         calculate D2E/DX2 analyticall!
 ! D148  D(62,23,26,66)        -67.8841         calculate D2E/DX2 analyticall!
 ! D149  D(62,23,26,67)        171.3923         calculate D2E/DX2 analyticall!
 ! D150  D(62,23,26,68)         51.2177         calculate D2E/DX2 analyticall!
 ! D151  D(5,29,31,32)        -172.8037         calculate D2E/DX2 analyticall!
 ! D152  D(5,29,31,36)          10.9465         calculate D2E/DX2 analyticall!
 ! D153  D(35,29,31,32)          0.2162         calculate D2E/DX2 analyticall!
 ! D154  D(35,29,31,36)       -176.0336         calculate D2E/DX2 analyticall!
 ! D155  D(5,29,35,34)         172.9242         calculate D2E/DX2 analyticall!
 ! D156  D(5,29,35,37)          -6.0319         calculate D2E/DX2 analyticall!
 ! D157  D(31,29,35,34)          0.1954         calculate D2E/DX2 analyticall!
 ! D158  D(31,29,35,37)       -178.7607         calculate D2E/DX2 analyticall!
 ! D159  D(6,30,38,39)        -172.4325         calculate D2E/DX2 analyticall!
 ! D160  D(6,30,38,43)           8.5756         calculate D2E/DX2 analyticall!
 ! D161  D(42,30,38,39)          1.3172         calculate D2E/DX2 analyticall!
 ! D162  D(42,30,38,43)       -177.6746         calculate D2E/DX2 analyticall!
 ! D163  D(6,30,42,41)         172.3803         calculate D2E/DX2 analyticall!
 ! D164  D(6,30,42,44)          -9.1994         calculate D2E/DX2 analyticall!
 ! D165  D(38,30,42,41)         -1.4323         calculate D2E/DX2 analyticall!
 ! D166  D(38,30,42,44)        176.9881         calculate D2E/DX2 analyticall!
 ! D167  D(29,31,32,33)         -0.0515         calculate D2E/DX2 analyticall!
 ! D168  D(29,31,32,75)       -179.1919         calculate D2E/DX2 analyticall!
 ! D169  D(36,31,32,33)        176.2212         calculate D2E/DX2 analyticall!
 ! D170  D(36,31,32,75)         -2.9192         calculate D2E/DX2 analyticall!
 ! D171  D(29,31,36,45)       -155.8917         calculate D2E/DX2 analyticall!
 ! D172  D(29,31,36,46)         79.69           calculate D2E/DX2 analyticall!
 ! D173  D(29,31,36,78)        -36.5679         calculate D2E/DX2 analyticall!
 ! D174  D(32,31,36,45)         27.9272         calculate D2E/DX2 analyticall!
 ! D175  D(32,31,36,46)        -96.4911         calculate D2E/DX2 analyticall!
 ! D176  D(32,31,36,78)        147.251          calculate D2E/DX2 analyticall!
 ! D177  D(31,32,33,34)         -0.5317         calculate D2E/DX2 analyticall!
 ! D178  D(31,32,33,76)       -179.948          calculate D2E/DX2 analyticall!
 ! D179  D(75,32,33,34)        178.6109         calculate D2E/DX2 analyticall!
 ! D180  D(75,32,33,76)         -0.8055         calculate D2E/DX2 analyticall!
 ! D181  D(32,33,34,35)          0.966          calculate D2E/DX2 analyticall!
 ! D182  D(32,33,34,77)       -179.233          calculate D2E/DX2 analyticall!
 ! D183  D(76,33,34,35)       -179.6185         calculate D2E/DX2 analyticall!
 ! D184  D(76,33,34,77)          0.1824         calculate D2E/DX2 analyticall!
 ! D185  D(33,34,35,29)         -0.7916         calculate D2E/DX2 analyticall!
 ! D186  D(33,34,35,37)        178.2106         calculate D2E/DX2 analyticall!
 ! D187  D(77,34,35,29)        179.4069         calculate D2E/DX2 analyticall!
 ! D188  D(77,34,35,37)         -1.5909         calculate D2E/DX2 analyticall!
 ! D189  D(29,35,37,47)        119.9136         calculate D2E/DX2 analyticall!
 ! D190  D(29,35,37,48)       -117.5588         calculate D2E/DX2 analyticall!
 ! D191  D(29,35,37,79)          1.6942         calculate D2E/DX2 analyticall!
 ! D192  D(34,35,37,47)        -59.0415         calculate D2E/DX2 analyticall!
 ! D193  D(34,35,37,48)         63.4861         calculate D2E/DX2 analyticall!
 ! D194  D(34,35,37,79)       -177.2609         calculate D2E/DX2 analyticall!
 ! D195  D(31,36,45,85)        171.1433         calculate D2E/DX2 analyticall!
 ! D196  D(31,36,45,86)         51.1703         calculate D2E/DX2 analyticall!
 ! D197  D(31,36,45,87)        -69.577          calculate D2E/DX2 analyticall!
 ! D198  D(46,36,45,85)        -64.4956         calculate D2E/DX2 analyticall!
 ! D199  D(46,36,45,86)        175.5314         calculate D2E/DX2 analyticall!
 ! D200  D(46,36,45,87)         54.7841         calculate D2E/DX2 analyticall!
 ! D201  D(78,36,45,85)         51.7238         calculate D2E/DX2 analyticall!
 ! D202  D(78,36,45,86)        -68.2492         calculate D2E/DX2 analyticall!
 ! D203  D(78,36,45,87)        171.0035         calculate D2E/DX2 analyticall!
 ! D204  D(31,36,46,88)        179.2511         calculate D2E/DX2 analyticall!
 ! D205  D(31,36,46,89)         59.2959         calculate D2E/DX2 analyticall!
 ! D206  D(31,36,46,90)        -60.9596         calculate D2E/DX2 analyticall!
 ! D207  D(45,36,46,88)         53.3298         calculate D2E/DX2 analyticall!
 ! D208  D(45,36,46,89)        -66.6254         calculate D2E/DX2 analyticall!
 ! D209  D(45,36,46,90)        173.1192         calculate D2E/DX2 analyticall!
 ! D210  D(78,36,46,88)        -63.6381         calculate D2E/DX2 analyticall!
 ! D211  D(78,36,46,89)        176.4067         calculate D2E/DX2 analyticall!
 ! D212  D(78,36,46,90)         56.1512         calculate D2E/DX2 analyticall!
 ! D213  D(35,37,47,91)       -175.8978         calculate D2E/DX2 analyticall!
 ! D214  D(35,37,47,92)         64.2802         calculate D2E/DX2 analyticall!
 ! D215  D(35,37,47,93)        -55.0476         calculate D2E/DX2 analyticall!
 ! D216  D(48,37,47,91)         60.3329         calculate D2E/DX2 analyticall!
 ! D217  D(48,37,47,92)        -59.489          calculate D2E/DX2 analyticall!
 ! D218  D(48,37,47,93)       -178.8168         calculate D2E/DX2 analyticall!
 ! D219  D(79,37,47,91)        -57.8626         calculate D2E/DX2 analyticall!
 ! D220  D(79,37,47,92)       -177.6845         calculate D2E/DX2 analyticall!
 ! D221  D(79,37,47,93)         62.9877         calculate D2E/DX2 analyticall!
 ! D222  D(35,37,48,94)        176.5344         calculate D2E/DX2 analyticall!
 ! D223  D(35,37,48,95)         56.3018         calculate D2E/DX2 analyticall!
 ! D224  D(35,37,48,96)        -63.9114         calculate D2E/DX2 analyticall!
 ! D225  D(47,37,48,94)        -60.5746         calculate D2E/DX2 analyticall!
 ! D226  D(47,37,48,95)        179.1929         calculate D2E/DX2 analyticall!
 ! D227  D(47,37,48,96)         58.9797         calculate D2E/DX2 analyticall!
 ! D228  D(79,37,48,94)         57.5378         calculate D2E/DX2 analyticall!
 ! D229  D(79,37,48,95)        -62.6947         calculate D2E/DX2 analyticall!
 ! D230  D(79,37,48,96)        177.0921         calculate D2E/DX2 analyticall!
 ! D231  D(30,38,39,40)         -0.0782         calculate D2E/DX2 analyticall!
 ! D232  D(30,38,39,80)       -179.476          calculate D2E/DX2 analyticall!
 ! D233  D(43,38,39,40)        178.9456         calculate D2E/DX2 analyticall!
 ! D234  D(43,38,39,80)         -0.4522         calculate D2E/DX2 analyticall!
 ! D235  D(30,38,43,51)       -118.8966         calculate D2E/DX2 analyticall!
 ! D236  D(30,38,43,52)        117.29           calculate D2E/DX2 analyticall!
 ! D237  D(30,38,43,83)         -0.6548         calculate D2E/DX2 analyticall!
 ! D238  D(39,38,43,51)         62.1144         calculate D2E/DX2 analyticall!
 ! D239  D(39,38,43,52)        -61.6991         calculate D2E/DX2 analyticall!
 ! D240  D(39,38,43,83)       -179.6439         calculate D2E/DX2 analyticall!
 ! D241  D(38,39,40,41)         -1.0316         calculate D2E/DX2 analyticall!
 ! D242  D(38,39,40,81)       -179.897          calculate D2E/DX2 analyticall!
 ! D243  D(80,39,40,41)        178.3652         calculate D2E/DX2 analyticall!
 ! D244  D(80,39,40,81)         -0.5002         calculate D2E/DX2 analyticall!
 ! D245  D(39,40,41,42)          0.9115         calculate D2E/DX2 analyticall!
 ! D246  D(39,40,41,82)       -178.6163         calculate D2E/DX2 analyticall!
 ! D247  D(81,40,41,42)        179.7757         calculate D2E/DX2 analyticall!
 ! D248  D(81,40,41,82)          0.2479         calculate D2E/DX2 analyticall!
 ! D249  D(40,41,42,30)          0.3115         calculate D2E/DX2 analyticall!
 ! D250  D(40,41,42,44)       -178.1665         calculate D2E/DX2 analyticall!
 ! D251  D(82,41,42,30)        179.8395         calculate D2E/DX2 analyticall!
 ! D252  D(82,41,42,44)          1.3615         calculate D2E/DX2 analyticall!
 ! D253  D(30,42,44,49)        125.1172         calculate D2E/DX2 analyticall!
 ! D254  D(30,42,44,50)       -112.1802         calculate D2E/DX2 analyticall!
 ! D255  D(30,42,44,84)          6.3459         calculate D2E/DX2 analyticall!
 ! D256  D(41,42,44,49)        -56.4669         calculate D2E/DX2 analyticall!
 ! D257  D(41,42,44,50)         66.2357         calculate D2E/DX2 analyticall!
 ! D258  D(41,42,44,84)       -175.2382         calculate D2E/DX2 analyticall!
 ! D259  D(38,43,51,103)       175.353          calculate D2E/DX2 analyticall!
 ! D260  D(38,43,51,104)        54.9548         calculate D2E/DX2 analyticall!
 ! D261  D(38,43,51,105)       -64.9743         calculate D2E/DX2 analyticall!
 ! D262  D(52,43,51,103)       -60.3277         calculate D2E/DX2 analyticall!
 ! D263  D(52,43,51,104)       179.2741         calculate D2E/DX2 analyticall!
 ! D264  D(52,43,51,105)        59.345          calculate D2E/DX2 analyticall!
 ! D265  D(83,43,51,103)        57.4647         calculate D2E/DX2 analyticall!
 ! D266  D(83,43,51,104)       -62.9335         calculate D2E/DX2 analyticall!
 ! D267  D(83,43,51,105)       177.1373         calculate D2E/DX2 analyticall!
 ! D268  D(38,43,52,106)      -179.4915         calculate D2E/DX2 analyticall!
 ! D269  D(38,43,52,107)        61.2361         calculate D2E/DX2 analyticall!
 ! D270  D(38,43,52,108)       -58.9011         calculate D2E/DX2 analyticall!
 ! D271  D(51,43,52,106)        56.1911         calculate D2E/DX2 analyticall!
 ! D272  D(51,43,52,107)       -63.0813         calculate D2E/DX2 analyticall!
 ! D273  D(51,43,52,108)       176.7815         calculate D2E/DX2 analyticall!
 ! D274  D(83,43,52,106)       -61.7522         calculate D2E/DX2 analyticall!
 ! D275  D(83,43,52,107)       178.9753         calculate D2E/DX2 analyticall!
 ! D276  D(83,43,52,108)        58.8382         calculate D2E/DX2 analyticall!
 ! D277  D(42,44,49,97)       -177.5965         calculate D2E/DX2 analyticall!
 ! D278  D(42,44,49,98)        -57.9209         calculate D2E/DX2 analyticall!
 ! D279  D(42,44,49,99)         62.3039         calculate D2E/DX2 analyticall!
 ! D280  D(50,44,49,97)         58.6955         calculate D2E/DX2 analyticall!
 ! D281  D(50,44,49,98)        178.3711         calculate D2E/DX2 analyticall!
 ! D282  D(50,44,49,99)        -61.404          calculate D2E/DX2 analyticall!
 ! D283  D(84,44,49,97)        -58.8408         calculate D2E/DX2 analyticall!
 ! D284  D(84,44,49,98)         60.8348         calculate D2E/DX2 analyticall!
 ! D285  D(84,44,49,99)       -178.9403         calculate D2E/DX2 analyticall!
 ! D286  D(42,44,50,100)       177.0636         calculate D2E/DX2 analyticall!
 ! D287  D(42,44,50,101)        57.1793         calculate D2E/DX2 analyticall!
 ! D288  D(42,44,50,102)       -63.3495         calculate D2E/DX2 analyticall!
 ! D289  D(49,44,50,100)       -58.8581         calculate D2E/DX2 analyticall!
 ! D290  D(49,44,50,101)      -178.7424         calculate D2E/DX2 analyticall!
 ! D291  D(49,44,50,102)        60.7289         calculate D2E/DX2 analyticall!
 ! D292  D(84,44,50,100)        58.6144         calculate D2E/DX2 analyticall!
 ! D293  D(84,44,50,101)       -61.2699         calculate D2E/DX2 analyticall!
 ! D294  D(84,44,50,102)       178.2013         calculate D2E/DX2 analyticall!
 -----------------------------------------------------------------------------
 Trust Radius=3.00D-01 FncErr=1.00D-07 GrdErr=1.00D-07
 Number of steps in this run= 640 maximum allowed number of steps= 684.
 GradGradGradGradGradGradGradGradGradGradGradGradGradGradGradGradGradGrad

 Stoichiometry    C42H60MgN2O9
 Framework group  C1[X(C42H60MgN2O9)]
 Deg. of freedom  336
 Full point group                 C1      NOp   1
 Largest Abelian subgroup         C1      NOp   1
 Largest concise Abelian subgroup C1      NOp   1
                         Standard orientation:                         
 ---------------------------------------------------------------------
 Center     Atomic     Atomic              Coordinates (Angstroms)
 Number     Number      Type              X           Y           Z
 ---------------------------------------------------------------------
    1          8             0       -4.077077   -2.540085   -1.622523
    2         12             0        0.261872    0.186027   -0.002061
    3          8             0       -0.855424    0.229682    3.275160
    4          6             0       -3.987049   -2.264389   -0.312105
    5          7             0       -0.253912    1.436604   -1.543458
    6          7             0        0.738994   -1.303229   -1.330820
    7          8             0       -3.811681   -3.079143    0.563733
    8          6             0       -0.557386    1.018442   -2.765271
    9          6             0       -0.479889   -0.334300   -3.177726
   10          6             0        0.193843   -1.395294   -2.540202
   11          8             0       -3.787508   -0.417056    1.245929
   12          6             0       -2.475194   -0.297838    1.465549
   13          6             0       -2.227858    0.151647    2.906720
   14          6             0       -4.210758   -0.768066   -0.089409
   15          8             0       -1.645651   -0.507006    0.598079
   16          6             0       -3.958217   -3.930790   -1.981613
   17          8             0        1.274334   -0.152919    1.604880
   18          6             0       -0.071142    1.184039    2.677174
   19          8             0       -0.474033    1.820317    1.709332
   20          8             0        2.247171    2.026571    2.963742
   21          6             0        3.152539    1.109158    2.482779
   22          6             0        2.641413   -0.187114    1.839227
   23          6             0        1.029653    1.671834    3.625814
   24          8             0        4.321254    1.418246    2.492066
   25          6             0        3.117910   -1.422436    2.632441
   26          6             0        1.271362    0.809210    4.862256
   27          6             0       -2.883257   -0.805709    3.905695
   28          6             0       -5.693262   -0.417918   -0.187752
   29          6             0       -0.246748    2.841071   -1.173731
   30          6             0        1.664890   -2.316860   -0.857883
   31          6             0        1.029836    3.459225   -0.947185
   32          6             0        1.061066    4.778331   -0.437564
   33          6             0       -0.127595    5.477766   -0.156789
   34          6             0       -1.370267    4.869536   -0.393115
   35          6             0       -1.459193    3.547800   -0.893724
   36          6             0        2.347706    2.735345   -1.333168
   37          6             0       -2.864010    2.922600   -1.091822
   38          6             0        1.221205   -3.326023    0.055568
   39          6             0        2.181806   -4.201902    0.624975
   40          6             0        3.549967   -4.090989    0.303383
   41          6             0        3.973268   -3.109799   -0.614510
   42          6             0        3.055819   -2.214691   -1.211222
   43          6             0       -0.271403   -3.506189    0.423059
   44          6             0        3.579224   -1.184110   -2.247666
   45          6             0        3.581123    3.230556   -0.516499
   46          6             0        2.616070    2.873157   -2.869129
   47          6             0       -3.641825    2.891694    0.262581
   48          6             0       -3.701525    3.696954   -2.165647
   49          6             0        4.714719   -0.289420   -1.655419
   50          6             0        4.098707   -1.896535   -3.543218
   51          6             0       -0.510966   -3.291452    1.950272
   52          6             0       -0.803212   -4.909134   -0.022650
   53          6             0       -1.007911    1.994983   -3.847581
   54          6             0        0.315040   -2.698945   -3.319031
   55          1             0       -0.848678   -0.539422   -4.177697
   56          1             0       -2.676883    1.151014    2.978513
   57          1             0       -3.616685   -0.202696   -0.810333
   58          1             0       -3.001020   -4.329151   -1.642019
   59          1             0       -4.025527   -3.954654   -3.069053
   60          1             0       -4.771321   -4.507968   -1.532656
   61          1             0        3.203371   -0.222548    0.892363
   62          1             0        0.655765    2.649125    3.961458
   63          1             0        4.176688   -1.314317    2.894021
   64          1             0        2.995324   -2.321361    2.026135
   65          1             0        2.540102   -1.550316    3.553340
   66          1             0        2.108638    1.230246    5.427300
   67          1             0        1.499971   -0.223860    4.597868
   68          1             0        0.384537    0.804979    5.502008
   69          1             0       -3.959141   -0.866629    3.731062
   70          1             0       -2.701152   -0.442784    4.920656
   71          1             0       -2.448696   -1.803700    3.804641
   72          1             0       -5.832411    0.650981   -0.008915
   73          1             0       -6.271553   -0.979398    0.552556
   74          1             0       -6.062183   -0.662081   -1.187589
   75          1             0        2.026235    5.271308   -0.270800
   76          1             0       -0.081345    6.501731    0.237690
   77          1             0       -2.292791    5.426132   -0.183513
   78          1             0        2.216593    1.648612   -1.128421
   79          1             0       -2.728355    1.878374   -1.439228
   80          1             0        1.851141   -4.985048    1.320101
   81          1             0        4.279181   -4.778994    0.752655
   82          1             0        5.036770   -3.043341   -0.878198
   83          1             0       -0.845153   -2.735466   -0.126716
   84          1             0        2.734531   -0.523922   -2.531619
   85          1             0        4.444332    2.579907   -0.717032
   86          1             0        3.373374    3.212452    0.565893
   87          1             0        3.858015    4.257657   -0.799558
   88          1             0        3.558211    2.369458   -3.133684
   89          1             0        2.692350    3.934708   -3.153278
   90          1             0        1.800624    2.412834   -3.452216
   91          1             0       -4.613145    2.381293    0.141637
   92          1             0       -3.837530    3.911212    0.628553
   93          1             0       -3.048684    2.365769    1.031036
   94          1             0       -4.666907    3.192641   -2.327009
   95          1             0       -3.168394    3.745431   -3.126589
   96          1             0       -3.900300    4.725789   -1.828956
   97          1             0        5.032233    0.456538   -2.400743
   98          1             0        4.365170    0.247796   -0.756040
   99          1             0        5.590590   -0.892080   -1.372063
  100          1             0        4.414700   -1.143482   -4.281324
  101          1             0        3.314534   -2.518949   -3.999333
  102          1             0        4.961454   -2.539989   -3.311625
  103          1             0       -1.593179   -3.344191    2.164315
  104          1             0       -0.120842   -2.304985    2.256940
  105          1             0       -0.002013   -4.065233    2.545705
  106          1             0       -1.869153   -5.001874    0.244854
  107          1             0       -0.255332   -5.722464    0.479743
  108          1             0       -0.689334   -5.044988   -1.111719
  109          1             0       -0.783244    3.033023   -3.589078
  110          1             0       -0.516983    1.757983   -4.798671
  111          1             0       -2.089492    1.909947   -4.012366
  112          1             0        1.358030   -2.922271   -3.567020
  113          1             0       -0.063194   -3.539184   -2.724584
  114          1             0       -0.251942   -2.655088   -4.255094
 ---------------------------------------------------------------------
 Rotational constants (GHZ):      0.0608645      0.0576719      0.0485850
 Isotopes: O-16,Mg-24,O-16,C-12,N-14,N-14,O-16,C-12,C-12,C-12,O-16,C-12,C-12,C-12
 ,O-16,C-12,O-16,C-12,O-16,O-16,C-12,C-12,C-12,O-16,C-12,C-12,C-12,C-12,C-12,C-12
 ,C-12,C-12,C-12,C-12,C-12,C-12,C-12,C-12,C-12,C-12,C-12,C-12,C-12,C-12,C-12,C-12
 ,C-12,C-12,C-12,C-12,C-12,C-12,C-12,C-12,H-1,H-1,H-1,H-1,H-1,H-1,H-1,H-1,H-1,H-1
 ,H-1,H-1,H-1,H-1,H-1,H-1,H-1,H-1,H-1,H-1,H-1,H-1,H-1,H-1,H-1,H-1,H-1,H-1,H-1,H-1
 ,H-1,H-1,H-1,H-1,H-1,H-1,H-1,H-1,H-1,H-1,H-1,H-1,H-1,H-1,H-1,H-1,H-1,H-1,H-1,H-1
 ,H-1,H-1,H-1,H-1,H-1,H-1,H-1,H-1,H-1,H-1
 General basis read from cards:  (5D, 7F)
 There are   642 symmetry adapted basis functions of A   symmetry.
 Crude estimate of integral set expansion from redundant integrals=1.000.
 Integral buffers will be    262144 words long.
 Raffenetti 2 integral format.
 Two-electron integral symmetry is turned on.
   642 basis functions     1430 primitive gaussians
   205 alpha electrons      205 beta electrons
       nuclear repulsion energy      9203.4514338470 Hartrees.
 One-electron integrals computed using PRISM.
 NBasis=   642 RedAO= T  NBF=   642
 NBsUse=   642 1.00D-04 NBFU=   642
 Initial guess read from the checkpoint file:
 RRRR_fm-5-oco.chk
 Requested convergence on RMS density matrix=1.00D-08 within  64 cycles.
 Requested convergence on MAX density matrix=1.00D-06.
 SCF Done:  E(RB+HF-LYP) =  -2612.17174258     A.U. after    1 cycles
             Convg  =    0.8184D-08             -V/T =  2.0106
             S**2   =   0.0000
 Range of M.O.s used for correlation:     1   642
 NBasis=   642 NAE=   205 NBE=   205 NFC=     0 NFV=     0
 NROrb=    642 NOA=   205 NOB=   205 NVA=   437 NVB=   437
 PrsmSu:  requested number of processors reduced to:   1 ShMem   1 Linda.
 PrsmSu:  requested number of processors reduced to:   1 ShMem   1 Linda.
 G2DrvN: will do   23 atoms at a time, making    5 passes doing MaxLOS=2.
 FoFDir used for L=0 through L=2.
          Differentiating once with respect to electric field.
                with respect to dipole field.
          Differentiating once with respect to nuclear coordinates.
 Integrals replicated using symmetry in FoFDir.
 MinBra= 0 MaxBra= 2 Meth= 1.
 IRaf=       0 NMat=  69 IRICut=      69 DoRegI=T DoRafI=T ISym2E= 2 JSym2E=2.
 Raff turned off since only 54.90% of shell-pairs survive.
          There are 345 degrees of freedom in the 1st order CPHF.
 345 vectors were produced by pass  0.
 AX will form  69 AO Fock derivatives at one time.
 345 vectors were produced by pass  1.
 345 vectors were produced by pass  2.
 342 vectors were produced by pass  3.
 342 vectors were produced by pass  4.
 208 vectors were produced by pass  5.
  41 vectors were produced by pass  6.
   3 vectors were produced by pass  7.
 Inv2:  IOpt= 1 Iter= 1 AM= 8.60D-15 Conv= 1.00D-12.
 Inverted reduced A of dimension1971 with in-core refinement.

 **********************************************************************

            Population analysis using the SCF density.

 **********************************************************************

 Alpha  occ. eigenvalues --  -46.70867 -19.21985 -19.20524 -19.18393 -19.17391
 Alpha  occ. eigenvalues --  -19.15202 -19.15082 -19.11993 -19.09776 -19.06084
 Alpha  occ. eigenvalues --  -14.28143 -14.27140 -10.34923 -10.32775 -10.31745
 Alpha  occ. eigenvalues --  -10.27426 -10.27336 -10.27181 -10.24322 -10.24198
 Alpha  occ. eigenvalues --  -10.20288 -10.20006 -10.19909 -10.19856 -10.18766
 Alpha  occ. eigenvalues --  -10.16334 -10.15716 -10.15610 -10.12992 -10.12212
 Alpha  occ. eigenvalues --  -10.05043 -10.04913 -10.03769 -10.02642 -10.02585
 Alpha  occ. eigenvalues --  -10.02483 -10.01913 -10.01864 -10.01816 -10.01736
 Alpha  occ. eigenvalues --  -10.01627 -10.01373 -10.01347 -10.01120 -10.00958
 Alpha  occ. eigenvalues --  -10.00565 -10.00517 -10.00505 -10.00348 -10.00258
 Alpha  occ. eigenvalues --  -10.00183 -10.00163  -9.99601  -9.99182  -3.01363
 Alpha  occ. eigenvalues --   -1.76188  -1.75949  -1.75748  -1.14384  -1.11782
 Alpha  occ. eigenvalues --   -1.09887  -1.06177  -1.05260  -1.03111  -1.00808
 Alpha  occ. eigenvalues --   -0.98339  -0.92590  -0.88790  -0.87363  -0.83106
 Alpha  occ. eigenvalues --   -0.80704  -0.80103  -0.79728  -0.76773  -0.76379
 Alpha  occ. eigenvalues --   -0.76149  -0.74239  -0.74154  -0.73940  -0.73811
 Alpha  occ. eigenvalues --   -0.71693  -0.70765  -0.69322  -0.68217  -0.67770
 Alpha  occ. eigenvalues --   -0.67708  -0.67399  -0.66754  -0.65768  -0.65440
 Alpha  occ. eigenvalues --   -0.65189  -0.64462  -0.64450  -0.63874  -0.63211
 Alpha  occ. eigenvalues --   -0.60308  -0.58824  -0.58759  -0.58575  -0.57994
 Alpha  occ. eigenvalues --   -0.56710  -0.56538  -0.55116  -0.55008  -0.54579
 Alpha  occ. eigenvalues --   -0.53989  -0.53489  -0.52029  -0.51945  -0.49891
 Alpha  occ. eigenvalues --   -0.49843  -0.49588  -0.49387  -0.49199  -0.48179
 Alpha  occ. eigenvalues --   -0.47601  -0.46874  -0.46701  -0.46325  -0.45295
 Alpha  occ. eigenvalues --   -0.45084  -0.44420  -0.44345  -0.43900  -0.43812
 Alpha  occ. eigenvalues --   -0.43456  -0.43322  -0.43089  -0.42546  -0.41824
 Alpha  occ. eigenvalues --   -0.41331  -0.41124  -0.41044  -0.40883  -0.40790
 Alpha  occ. eigenvalues --   -0.40644  -0.40577  -0.40185  -0.40146  -0.39976
 Alpha  occ. eigenvalues --   -0.39732  -0.39352  -0.39184  -0.39022  -0.38891
 Alpha  occ. eigenvalues --   -0.38732  -0.38550  -0.38319  -0.38247  -0.38002
 Alpha  occ. eigenvalues --   -0.37634  -0.37410  -0.37167  -0.37058  -0.36802
 Alpha  occ. eigenvalues --   -0.36564  -0.36238  -0.36143  -0.36020  -0.35935
 Alpha  occ. eigenvalues --   -0.35159  -0.35045  -0.34897  -0.34861  -0.34449
 Alpha  occ. eigenvalues --   -0.34324  -0.34089  -0.34029  -0.33930  -0.33757
 Alpha  occ. eigenvalues --   -0.33395  -0.32916  -0.32580  -0.32081  -0.31683
 Alpha  occ. eigenvalues --   -0.31541  -0.31110  -0.31032  -0.30584  -0.30555
 Alpha  occ. eigenvalues --   -0.30324  -0.29963  -0.29623  -0.29430  -0.29381
 Alpha  occ. eigenvalues --   -0.28796  -0.28755  -0.28435  -0.27993  -0.27713
 Alpha  occ. eigenvalues --   -0.27599  -0.27374  -0.26812  -0.26665  -0.26201
 Alpha  occ. eigenvalues --   -0.25439  -0.25030  -0.23880  -0.21931  -0.20208
 Alpha  occ. eigenvalues --   -0.18014  -0.17924  -0.17843  -0.17378  -0.15229
 Alpha virt. eigenvalues --   -0.02665  -0.00566   0.01192   0.01438   0.03365
 Alpha virt. eigenvalues --    0.06731   0.07543   0.07893   0.08113   0.08203
 Alpha virt. eigenvalues --    0.08342   0.08683   0.09620   0.10472   0.10860
 Alpha virt. eigenvalues --    0.11916   0.12132   0.12413   0.12959   0.13273
 Alpha virt. eigenvalues --    0.13600   0.14261   0.14574   0.15157   0.15494
 Alpha virt. eigenvalues --    0.16051   0.16206   0.16481   0.16731   0.17042
 Alpha virt. eigenvalues --    0.17558   0.18261   0.18505   0.19473   0.19754
 Alpha virt. eigenvalues --    0.20029   0.20638   0.21663   0.22055   0.22470
 Alpha virt. eigenvalues --    0.22821   0.22989   0.23526   0.23881   0.24163
 Alpha virt. eigenvalues --    0.24493   0.24994   0.25476   0.25683   0.25766
 Alpha virt. eigenvalues --    0.26535   0.26747   0.27576   0.28020   0.28316
 Alpha virt. eigenvalues --    0.28646   0.29349   0.29812   0.30002   0.30848
 Alpha virt. eigenvalues --    0.31302   0.32451   0.32740   0.33245   0.33776
 Alpha virt. eigenvalues --    0.34510   0.34620   0.35098   0.35542   0.35714
 Alpha virt. eigenvalues --    0.36150   0.36631   0.37547   0.38003   0.38086
 Alpha virt. eigenvalues --    0.38470   0.38709   0.38904   0.38992   0.39355
 Alpha virt. eigenvalues --    0.39436   0.40195   0.40811   0.41112   0.41301
 Alpha virt. eigenvalues --    0.41569   0.41769   0.42036   0.42570   0.43141
 Alpha virt. eigenvalues --    0.43318   0.43639   0.44060   0.44118   0.44875
 Alpha virt. eigenvalues --    0.45197   0.45353   0.45523   0.45676   0.46158
 Alpha virt. eigenvalues --    0.46236   0.46607   0.47003   0.47515   0.47614
 Alpha virt. eigenvalues --    0.47870   0.48056   0.48159   0.48358   0.48514
 Alpha virt. eigenvalues --    0.48881   0.49149   0.49581   0.50112   0.50277
 Alpha virt. eigenvalues --    0.50492   0.51029   0.51101   0.51247   0.51478
 Alpha virt. eigenvalues --    0.51889   0.52546   0.52566   0.52769   0.53388
 Alpha virt. eigenvalues --    0.53861   0.53940   0.54391   0.54449   0.54725
 Alpha virt. eigenvalues --    0.54937   0.55299   0.55665   0.56240   0.56337
 Alpha virt. eigenvalues --    0.57100   0.57314   0.57534   0.57845   0.57994
 Alpha virt. eigenvalues --    0.58414   0.58527   0.58945   0.59373   0.59413
 Alpha virt. eigenvalues --    0.59662   0.59814   0.60566   0.60767   0.61097
 Alpha virt. eigenvalues --    0.61831   0.62163   0.63308   0.63819   0.64008
 Alpha virt. eigenvalues --    0.64551   0.65200   0.65756   0.66034   0.66573
 Alpha virt. eigenvalues --    0.67282   0.68534   0.68635   0.69302   0.69795
 Alpha virt. eigenvalues --    0.69956   0.70328   0.70801   0.71325   0.72111
 Alpha virt. eigenvalues --    0.72536   0.73261   0.73658   0.73735   0.74403
 Alpha virt. eigenvalues --    0.74577   0.74954   0.76171   0.76416   0.76644
 Alpha virt. eigenvalues --    0.77605   0.77926   0.78172   0.78615   0.78808
 Alpha virt. eigenvalues --    0.79855   0.80149   0.80478   0.81122   0.82299
 Alpha virt. eigenvalues --    0.82913   0.83313   0.84111   0.84589   0.85479
 Alpha virt. eigenvalues --    0.85918   0.86733   0.87161   0.88122   0.88527
 Alpha virt. eigenvalues --    0.88679   0.89183   0.89637   0.90123   0.90196
 Alpha virt. eigenvalues --    0.90678   0.91145   0.92158   0.92600   0.93760
 Alpha virt. eigenvalues --    0.94375   0.94549   0.94984   0.95772   0.96324
 Alpha virt. eigenvalues --    0.97011   0.97663   0.98164   0.98217   0.99408
 Alpha virt. eigenvalues --    1.00843   1.01370   1.01862   1.02926   1.03319
 Alpha virt. eigenvalues --    1.05213   1.06693   1.08133   1.08586   1.09147
 Alpha virt. eigenvalues --    1.09936   1.10347   1.10854   1.11150   1.11591
 Alpha virt. eigenvalues --    1.12349   1.13360   1.13885   1.15735   1.16656
 Alpha virt. eigenvalues --    1.17438   1.18334   1.19357   1.20311   1.20639
 Alpha virt. eigenvalues --    1.21854   1.22839   1.23420   1.24733   1.26206
 Alpha virt. eigenvalues --    1.27383   1.28444   1.29273   1.30497   1.31331
 Alpha virt. eigenvalues --    1.32227   1.33169   1.35220   1.36400   1.37540
 Alpha virt. eigenvalues --    1.38069   1.38883   1.40062   1.40339   1.41686
 Alpha virt. eigenvalues --    1.41803   1.43120   1.44277   1.45643   1.46048
 Alpha virt. eigenvalues --    1.46488   1.48885   1.49280   1.50018   1.50712
 Alpha virt. eigenvalues --    1.51621   1.54125   1.55090   1.55999   1.57470
 Alpha virt. eigenvalues --    1.58177   1.58678   1.59947   1.61728   1.61867
 Alpha virt. eigenvalues --    1.62473   1.64222   1.65309   1.66806   1.67475
 Alpha virt. eigenvalues --    1.69741   1.69816   1.70789   1.71414   1.71827
 Alpha virt. eigenvalues --    1.73210   1.74491   1.75027   1.76142   1.76867
 Alpha virt. eigenvalues --    1.77392   1.78434   1.79500   1.80325   1.80636
 Alpha virt. eigenvalues --    1.81881   1.82622   1.82736   1.83417   1.83887
 Alpha virt. eigenvalues --    1.84464   1.84613   1.86145   1.87319   1.87594
 Alpha virt. eigenvalues --    1.88996   1.89701   1.90122   1.90525   1.91439
 Alpha virt. eigenvalues --    1.91896   1.92277   1.92839   1.94045   1.94586
 Alpha virt. eigenvalues --    1.95184   1.95745   1.96486   1.97432   1.97731
 Alpha virt. eigenvalues --    1.98670   1.99525   2.00130   2.00699   2.00913
 Alpha virt. eigenvalues --    2.01286   2.01561   2.02712   2.03315   2.04076
 Alpha virt. eigenvalues --    2.04492   2.05248   2.05860   2.07662   2.09448
 Alpha virt. eigenvalues --    2.10070   2.10232   2.11553   2.12228   2.12716
 Alpha virt. eigenvalues --    2.13749   2.14904   2.15420   2.15523   2.16546
 Alpha virt. eigenvalues --    2.17045   2.17352   2.18489   2.19224   2.19457
 Alpha virt. eigenvalues --    2.20034   2.21867   2.22341   2.22959   2.24196
 Alpha virt. eigenvalues --    2.25797   2.26256   2.26718   2.27847   2.28676
 Alpha virt. eigenvalues --    2.29254   2.30126   2.30664   2.31368   2.31987
 Alpha virt. eigenvalues --    2.32613   2.33967   2.34496   2.35535   2.36528
 Alpha virt. eigenvalues --    2.37391   2.39670   2.39838   2.40491   2.41803
 Alpha virt. eigenvalues --    2.42927   2.43870   2.46400   2.47969   2.48348
 Alpha virt. eigenvalues --    2.48883   2.50321   2.52007   2.58029   2.58338
 Alpha virt. eigenvalues --    2.59493   2.61055   2.61915   2.63285   2.64357
 Alpha virt. eigenvalues --    2.65633   2.66340   2.67343   2.67680   2.69775
 Alpha virt. eigenvalues --    2.70680   2.73665   2.74138   2.75171   2.77921
 Alpha virt. eigenvalues --    2.80065   2.81172   2.82970   2.86968   2.88250
 Alpha virt. eigenvalues --    2.89830   2.92598   2.94209   2.95527   2.98391
 Alpha virt. eigenvalues --    3.02165   3.03941   3.06119   3.06850   3.10907
 Alpha virt. eigenvalues --    3.11964   3.14612   3.16012   3.20047   3.21330
 Alpha virt. eigenvalues --    3.22820   3.25040   3.69591   6.09419   6.13756
 Alpha virt. eigenvalues --    6.31376 103.44678
          Condensed to atoms (all electrons):
 Total atomic charges:
              1
  1  O   -0.444632
  2  Mg   0.886720
  3  O   -0.451398
  4  C    0.594832
  5  N   -0.542605
  6  N   -0.545870
  7  O   -0.436102
  8  C    0.331965
  9  C   -0.247673
 10  C    0.348975
 11  O   -0.444063
 12  C    0.633234
 13  C    0.054776
 14  C    0.039503
 15  O   -0.447168
 16  C   -0.217590
 17  O   -0.685783
 18  C    0.673676
 19  O   -0.467160
 20  O   -0.448519
 21  C    0.525742
 22  C    0.113933
 23  C    0.071289
 24  O   -0.423236
 25  C   -0.478252
 26  C   -0.478900
 27  C   -0.464917
 28  C   -0.468530
 29  C    0.012804
 30  C    0.014629
 31  C   -0.004858
 32  C   -0.076968
 33  C   -0.075717
 34  C   -0.079791
 35  C   -0.000706
 36  C   -0.055418
 37  C   -0.051598
 38  C   -0.002832
 39  C   -0.072978
 40  C   -0.069873
 41  C   -0.080039
 42  C   -0.005854
 43  C   -0.061511
 44  C   -0.055587
 45  C   -0.222512
 46  C   -0.217762
 47  C   -0.215412
 48  C   -0.218269
 49  C   -0.215457
 50  C   -0.215614
 51  C   -0.228858
 52  C   -0.218592
 53  C   -0.449840
 54  C   -0.450275
 55  H    0.073342
 56  H    0.181566
 57  H    0.216024
 58  H    0.170463
 59  H    0.170349
 60  H    0.168476
 61  H    0.129739
 62  H    0.161438
 63  H    0.143891
 64  H    0.123509
 65  H    0.137138
 66  H    0.164766
 67  H    0.188786
 68  H    0.148276
 69  H    0.173353
 70  H    0.168204
 71  H    0.177958
 72  H    0.158086
 73  H    0.173346
 74  H    0.176443
 75  H    0.085375
 76  H    0.080678
 77  H    0.074878
 78  H    0.089646
 79  H    0.087764
 80  H    0.081736
 81  H    0.084829
 82  H    0.080465
 83  H    0.098020
 84  H    0.102713
 85  H    0.079642
 86  H    0.098708
 87  H    0.069530
 88  H    0.075046
 89  H    0.072148
 90  H    0.086154
 91  H    0.071220
 92  H    0.078321
 93  H    0.093173
 94  H    0.071870
 95  H    0.079539
 96  H    0.074096
 97  H    0.073781
 98  H    0.093793
 99  H    0.074445
100  H    0.075607
101  H    0.072296
102  H    0.072153
103  H    0.078752
104  H    0.110634
105  H    0.070028
106  H    0.087358
107  H    0.074807
108  H    0.070938
109  H    0.128023
110  H    0.128588
111  H    0.129183
112  H    0.127892
113  H    0.125461
114  H    0.122197
 Sum of Mulliken charges=   0.00000
 Atomic charges with hydrogens summed into heavy atoms:
              1
  1  O   -0.444632
  2  Mg   0.886720
  3  O   -0.451398
  4  C    0.594832
  5  N   -0.542605
  6  N   -0.545870
  7  O   -0.436102
  8  C    0.331965
  9  C   -0.174331
 10  C    0.348975
 11  O   -0.444063
 12  C    0.633234
 13  C    0.236343
 14  C    0.255527
 15  O   -0.447168
 16  C    0.291698
 17  O   -0.685783
 18  C    0.673676
 19  O   -0.467160
 20  O   -0.448519
 21  C    0.525742
 22  C    0.243672
 23  C    0.232727
 24  O   -0.423236
 25  C   -0.073713
 26  C    0.022928
 27  C    0.054597
 28  C    0.039344
 29  C    0.012804
 30  C    0.014629
 31  C   -0.004858
 32  C    0.008407
 33  C    0.004961
 34  C   -0.004913
 35  C   -0.000706
 36  C    0.034228
 37  C    0.036166
 38  C   -0.002832
 39  C    0.008758
 40  C    0.014956
 41  C    0.000426
 42  C   -0.005854
 43  C    0.036509
 44  C    0.047126
 45  C    0.025369
 46  C    0.015587
 47  C    0.027303
 48  C    0.007236
 49  C    0.026562
 50  C    0.004442
 51  C    0.030557
 52  C    0.014510
 53  C   -0.064046
 54  C   -0.074725
 55  H    0.000000
 56  H    0.000000
 57  H    0.000000
 58  H    0.000000
 59  H    0.000000
 60  H    0.000000
 61  H    0.000000
 62  H    0.000000
 63  H    0.000000
 64  H    0.000000
 65  H    0.000000
 66  H    0.000000
 67  H    0.000000
 68  H    0.000000
 69  H    0.000000
 70  H    0.000000
 71  H    0.000000
 72  H    0.000000
 73  H    0.000000
 74  H    0.000000
 75  H    0.000000
 76  H    0.000000
 77  H    0.000000
 78  H    0.000000
 79  H    0.000000
 80  H    0.000000
 81  H    0.000000
 82  H    0.000000
 83  H    0.000000
 84  H    0.000000
 85  H    0.000000
 86  H    0.000000
 87  H    0.000000
 88  H    0.000000
 89  H    0.000000
 90  H    0.000000
 91  H    0.000000
 92  H    0.000000
 93  H    0.000000
 94  H    0.000000
 95  H    0.000000
 96  H    0.000000
 97  H    0.000000
 98  H    0.000000
 99  H    0.000000
100  H    0.000000
101  H    0.000000
102  H    0.000000
103  H    0.000000
104  H    0.000000
105  H    0.000000
106  H    0.000000
107  H    0.000000
108  H    0.000000
109  H    0.000000
110  H    0.000000
111  H    0.000000
112  H    0.000000
113  H    0.000000
114  H    0.000000
 Sum of Mulliken charges=   0.00000
 Electronic spatial extent (au):  <R**2>= 28121.0959
 Charge=     0.0000 electrons
 Dipole moment (Debye):
    X=    -7.4786    Y=    -1.9892    Z=    -2.9907  Tot=     8.2965
 Quadrupole moment (Debye-Ang):
   XX=  -303.8270   YY=  -296.5792   ZZ=  -305.6338
   XY=   -11.1009   XZ=   -14.0857   YZ=     1.4709
 Octapole moment (Debye-Ang**2):
  XXX=  -187.5059  YYY=   -16.4362  ZZZ=    59.3124  XYY=   -26.2222
  XXY=   -55.3266  XXZ=   -95.0241  XZZ=   -56.5702  YZZ=    -9.0736
  YYZ=   -34.7308  XYZ=   -55.5002
 Hexadecapole moment (Debye-Ang**3):
 XXXX=-13887.8670 YYYY=-12403.6265 ZZZZ= -8808.8216 XXXY=  -139.4872
 XXXZ=  -275.9511 YYYX=    67.4451 YYYZ=    83.0104 ZZZX=   -91.3329
 ZZZY=   114.7405 XXYY= -4357.1135 XXZZ= -3931.2748 YYZZ= -3654.9495
 XXYZ=     4.3375 YYXZ=    84.3636 ZZXY=    14.2501
 N-N= 9.203451433847D+03 E-N=-2.450418029187D+04  KE= 2.584840877862D+03
  Exact polarizability: 427.576 -22.264 429.287   8.232   5.080 362.169
 Approx polarizability: 628.197 -39.798 632.407   4.439  -8.120 526.564
 Full mass-weighted force constant matrix:
 Low frequencies ---  -54.5458   -8.7427   -5.1150   -3.2613   -0.0114   -0.0083
 Low frequencies ---   -0.0053   12.3830   19.9979
 ******    1 imaginary frequencies (negative Signs) ****** 
 Harmonic frequencies (cm**-1), IR intensities (KM/Mole),
 Raman scattering activities (A**4/AMU), Raman depolarization ratios,
 reduced masses (AMU), force constants (mDyne/A) and normal coordinates:
                     1                      2                      3
                    ?A                     ?A                     ?A
 Frequencies --   -54.5415                12.3044                19.8285
 Red. masses --     7.1486                 4.4757                 4.7216
 Frc consts  --     0.0125                 0.0004                 0.0011
 IR Inten    --     2.7523                 0.4772                 0.3306
 Raman Activ --     0.0000                 0.0000                 0.0000
 Depolar     --     0.0000                 0.0000                 0.0000
 Atom AN      X      Y      Z        X      Y      Z        X      Y      Z
   1   8     0.03  -0.01   0.00     0.12   0.16  -0.05    -0.07  -0.08   0.09
   2  12     0.06  -0.09  -0.04    -0.01  -0.01  -0.02     0.02   0.01  -0.03
   3   8    -0.08   0.09   0.09     0.04   0.02   0.02     0.02   0.04   0.00
   4   6     0.04   0.01  -0.01     0.05   0.07  -0.03    -0.02  -0.04   0.08
   5   7     0.00  -0.04   0.01    -0.02  -0.02  -0.02     0.01   0.01  -0.03
   6   7     0.00  -0.06  -0.06    -0.01  -0.02  -0.01     0.00   0.01  -0.03
   7   8     0.03   0.02   0.00     0.03   0.00  -0.08     0.01  -0.01   0.09
   8   6    -0.01  -0.02   0.01     0.00  -0.02  -0.02     0.03   0.02  -0.04
   9   6    -0.01  -0.02  -0.02     0.01  -0.02  -0.02     0.03   0.02  -0.04
  10   6    -0.01  -0.03  -0.05     0.00  -0.02  -0.02     0.02   0.01  -0.04
  11   8     0.01   0.02  -0.02     0.01  -0.01   0.08     0.01   0.00   0.02
  12   6     0.00   0.05   0.03     0.01   0.00   0.05     0.02   0.03   0.01
  13   6    -0.07   0.02   0.05     0.03   0.00   0.05     0.02   0.04   0.00
  14   6     0.05   0.01  -0.03    -0.02   0.04   0.07     0.00  -0.03   0.04
  15   8     0.04   0.08   0.06    -0.01   0.02   0.03     0.01   0.04   0.00
  16   6     0.01  -0.01   0.01     0.17   0.19  -0.16    -0.11  -0.10   0.13
  17   8     0.05   0.05  -0.08     0.00   0.02  -0.02     0.00   0.02  -0.03
  18   6    -0.15   0.17   0.16     0.01   0.03   0.01     0.01   0.05   0.00
  19   8    -0.13   0.21   0.21    -0.01   0.03   0.03     0.01   0.06   0.02
  20   8    -0.08   0.04   0.05     0.03   0.01  -0.03     0.05  -0.02  -0.01
  21   6    -0.03   0.08   0.04     0.02  -0.02  -0.01     0.03  -0.07   0.03
  22   6     0.03   0.10  -0.06     0.00  -0.01  -0.01    -0.01  -0.04   0.00
  23   6    -0.03   0.01   0.11     0.03   0.04  -0.01     0.03   0.03  -0.01
  24   8    -0.04   0.12   0.10     0.03  -0.04  -0.01     0.04  -0.12   0.07
  25   6     0.08   0.07  -0.11    -0.05  -0.02   0.01    -0.09  -0.07   0.01
  26   6     0.02  -0.12   0.01     0.04   0.06   0.01     0.01   0.04   0.01
  27   6    -0.04  -0.05   0.00     0.05   0.00   0.06     0.02   0.05   0.02
  28   6     0.05   0.02  -0.06    -0.05  -0.04   0.16     0.00  -0.03   0.04
  29   6     0.01  -0.04   0.03    -0.03  -0.03  -0.01    -0.01   0.00  -0.01
  30   6     0.00  -0.05  -0.06    -0.01  -0.01   0.00     0.00   0.00  -0.04
  31   6     0.01  -0.04   0.03    -0.03  -0.02   0.02    -0.02   0.01   0.05
  32   6     0.01  -0.04   0.02    -0.05  -0.03   0.04    -0.05   0.00   0.06
  33   6     0.02  -0.03   0.00    -0.05  -0.04   0.03    -0.06  -0.01   0.02
  34   6     0.02  -0.02   0.00    -0.05  -0.04   0.00    -0.05  -0.01  -0.04
  35   6     0.01  -0.03   0.01    -0.04  -0.03  -0.02    -0.02   0.00  -0.05
  36   6     0.01  -0.04   0.02    -0.03  -0.02   0.03     0.00   0.01   0.10
  37   6     0.00  -0.01   0.00    -0.03  -0.03  -0.06    -0.02   0.00  -0.11
  38   6     0.01  -0.03  -0.03    -0.01  -0.01   0.01     0.00   0.00  -0.04
  39   6     0.01  -0.01  -0.02    -0.02  -0.01   0.01     0.00  -0.01  -0.05
  40   6     0.01  -0.02  -0.03    -0.02  -0.01   0.01     0.00  -0.01  -0.06
  41   6     0.00  -0.04  -0.05    -0.01  -0.02   0.01     0.00  -0.01  -0.05
  42   6     0.00  -0.05  -0.06    -0.01  -0.02   0.00     0.00   0.00  -0.04
  43   6     0.01   0.00  -0.01    -0.02   0.00   0.00     0.00   0.01  -0.02
  44   6     0.00  -0.06  -0.07    -0.01  -0.03  -0.01     0.00   0.01  -0.03
  45   6     0.01  -0.04   0.01    -0.04  -0.01   0.04    -0.04   0.00   0.16
  46   6     0.00  -0.05   0.02    -0.01  -0.01   0.03     0.06   0.04   0.11
  47   6    -0.01   0.01   0.00    -0.06  -0.06  -0.08    -0.06  -0.03  -0.14
  48   6     0.02   0.00  -0.01    -0.01  -0.01  -0.06     0.02   0.02  -0.12
  49   6    -0.01  -0.05  -0.08    -0.02  -0.01   0.00    -0.01   0.01  -0.01
  50   6     0.00  -0.07  -0.06     0.02  -0.04   0.01     0.02   0.02  -0.03
  51   6     0.03   0.02  -0.01    -0.02   0.01   0.00     0.02   0.02  -0.02
  52   6    -0.01   0.00   0.02    -0.02   0.00   0.01    -0.01   0.01  -0.01
  53   6     0.00  -0.01   0.02     0.00  -0.02  -0.02     0.06   0.03  -0.04
  54   6    -0.02  -0.02  -0.08     0.02  -0.02  -0.01     0.02   0.02  -0.04
  55   1    -0.02   0.01  -0.02     0.02  -0.02  -0.03     0.05   0.03  -0.05
  56   1    -0.13  -0.01   0.07     0.03   0.00   0.05     0.02   0.04  -0.01
  57   1     0.07   0.00  -0.01    -0.08   0.12   0.09    -0.01  -0.06   0.01
  58   1     0.01  -0.02   0.01     0.17   0.19  -0.14    -0.09  -0.09   0.09
  59   1     0.01  -0.02   0.01     0.23   0.28  -0.16    -0.17  -0.13   0.13
  60   1     0.00   0.00   0.02     0.16   0.14  -0.24    -0.09  -0.07   0.19
  61   1     0.09   0.19  -0.03     0.01  -0.03   0.00     0.02  -0.06   0.02
  62   1     0.04  -0.01   0.25     0.05   0.05  -0.03     0.07   0.04  -0.02
  63   1     0.07   0.10  -0.09    -0.05  -0.04   0.03    -0.09  -0.12   0.05
  64   1     0.12   0.09  -0.14    -0.06  -0.02   0.02    -0.11  -0.06   0.00
  65   1     0.07   0.01  -0.12    -0.07   0.01   0.00    -0.13  -0.04  -0.01
  66   1     0.08  -0.22  -0.02     0.04   0.07  -0.01     0.01   0.03   0.01
  67   1    -0.06  -0.11  -0.12     0.03   0.06   0.03    -0.01   0.03   0.02
  68   1     0.07  -0.14   0.07     0.04   0.08   0.01     0.00   0.06   0.00
  69   1    -0.03  -0.11  -0.03     0.05   0.00   0.08     0.02   0.06   0.02
  70   1    -0.09  -0.07   0.02     0.07   0.01   0.06     0.02   0.07   0.01
  71   1     0.02  -0.02  -0.02     0.06   0.01   0.05     0.01   0.05   0.02
  72   1     0.06   0.02  -0.07    -0.10  -0.06   0.23     0.01  -0.02   0.02
  73   1     0.03   0.03  -0.08     0.02  -0.13   0.14     0.01  -0.01   0.06
  74   1     0.08   0.02  -0.07    -0.07   0.00   0.16    -0.01  -0.05   0.05
  75   1     0.02  -0.05   0.02    -0.05  -0.03   0.06    -0.05   0.00   0.11
  76   1     0.02  -0.03  -0.01    -0.06  -0.04   0.04    -0.08  -0.01   0.03
  77   1     0.02  -0.02  -0.01    -0.05  -0.04  -0.01    -0.06  -0.01  -0.07
  78   1     0.01  -0.04   0.02    -0.02  -0.02   0.03    -0.01   0.01   0.08
  79   1    -0.01  -0.01   0.01    -0.03  -0.02  -0.08    -0.01   0.00  -0.13
  80   1     0.01   0.01   0.01    -0.02   0.00   0.02     0.00  -0.01  -0.05
  81   1     0.01  -0.01  -0.02    -0.02  -0.01   0.02     0.00  -0.02  -0.07
  82   1     0.00  -0.05  -0.06    -0.01  -0.02   0.01     0.00  -0.01  -0.05
  83   1     0.01  -0.01  -0.01    -0.01   0.00   0.00     0.00   0.01  -0.02
  84   1    -0.01  -0.07  -0.08    -0.01  -0.04  -0.03     0.00   0.01  -0.03
  85   1     0.01  -0.04   0.01    -0.03   0.00   0.05    -0.04  -0.01   0.21
  86   1     0.02  -0.02   0.01    -0.05   0.00   0.04    -0.10   0.00   0.15
  87   1     0.01  -0.04  -0.01    -0.04  -0.01   0.04    -0.02   0.00   0.18
  88   1     0.00  -0.04   0.01    -0.01   0.00   0.04     0.08   0.04   0.15
  89   1    -0.01  -0.05   0.01    -0.02  -0.01   0.03     0.07   0.04   0.13
  90   1    -0.01  -0.05   0.02    -0.01  -0.02   0.02     0.09   0.04   0.07
  91   1    -0.02   0.03  -0.01    -0.06  -0.04  -0.11    -0.06  -0.01  -0.18
  92   1     0.00   0.02  -0.02    -0.05  -0.07  -0.05    -0.05  -0.04  -0.11
  93   1    -0.03   0.01   0.01    -0.08  -0.08  -0.08    -0.09  -0.06  -0.13
  94   1     0.01   0.00  -0.01    -0.01   0.00  -0.09     0.02   0.02  -0.17
  95   1     0.03  -0.01   0.00     0.01   0.02  -0.05     0.05   0.04  -0.11
  96   1     0.02   0.00  -0.01    -0.02  -0.01  -0.05     0.00   0.01  -0.11
  97   1    -0.01  -0.06  -0.08    -0.01  -0.02  -0.01     0.00   0.02   0.00
  98   1    -0.02  -0.04  -0.09    -0.05   0.01  -0.02    -0.03   0.01  -0.01
  99   1    -0.01  -0.04  -0.07    -0.03   0.00   0.03    -0.01   0.01   0.00
 100   1     0.00  -0.07  -0.07     0.02  -0.05   0.00     0.02   0.03  -0.02
 101   1     0.01  -0.08  -0.06     0.03  -0.06   0.01     0.03   0.02  -0.04
 102   1     0.01  -0.06  -0.06     0.03  -0.03   0.03     0.02   0.03  -0.03
 103   1     0.04   0.03   0.01    -0.02   0.01   0.00     0.02   0.03  -0.01
 104   1     0.05   0.02  -0.03    -0.02   0.01   0.00     0.03   0.03  -0.03
 105   1     0.03   0.03   0.00    -0.02   0.01   0.01     0.03   0.03  -0.02
 106   1    -0.01   0.01   0.03    -0.02   0.01  -0.01     0.00   0.02   0.02
 107   1    -0.01   0.00   0.01    -0.03   0.00   0.02     0.00   0.01  -0.02
 108   1    -0.03  -0.01   0.02     0.00  -0.01   0.01    -0.04   0.02  -0.01
 109   1    -0.01  -0.01   0.04     0.01  -0.02  -0.03     0.07   0.03  -0.03
 110   1     0.01   0.01   0.02     0.00  -0.03  -0.02     0.09   0.03  -0.03
 111   1     0.00  -0.01   0.01     0.00  -0.01  -0.02     0.07   0.04  -0.07
 112   1    -0.02   0.00  -0.11     0.02   0.00  -0.03     0.02   0.02  -0.05
 113   1     0.02  -0.03  -0.08     0.04  -0.02  -0.01     0.02   0.01  -0.04
 114   1    -0.05  -0.01  -0.06     0.00  -0.03  -0.01     0.01   0.02  -0.04
                     4                      5                      6
                    ?A                     ?A                     ?A
 Frequencies --    25.1647                28.7263                35.3482
 Red. masses --     3.4121                 4.0124                 3.8573
 Frc consts  --     0.0013                 0.0020                 0.0028
 IR Inten    --     0.3322                 0.3084                 0.0550
 Raman Activ --     0.0000                 0.0000                 0.0000
 Depolar     --     0.0000                 0.0000                 0.0000
 Atom AN      X      Y      Z        X      Y      Z        X      Y      Z
   1   8     0.03  -0.02   0.00    -0.09  -0.02   0.03     0.06  -0.04  -0.03
   2  12    -0.01   0.02   0.00    -0.01   0.00  -0.01     0.00   0.03   0.02
   3   8    -0.01   0.00  -0.01     0.02  -0.02  -0.01     0.00  -0.02  -0.04
   4   6     0.02  -0.02   0.00    -0.05  -0.02   0.02     0.02  -0.04  -0.02
   5   7     0.01  -0.01  -0.02     0.02   0.00  -0.02     0.03   0.03   0.01
   6   7    -0.02   0.01   0.01     0.01   0.00  -0.02    -0.03   0.00   0.03
   7   8     0.01  -0.02   0.00    -0.03  -0.03   0.01    -0.01  -0.04  -0.02
   8   6    -0.01  -0.01  -0.01     0.03   0.02  -0.02     0.02   0.03   0.01
   9   6    -0.03  -0.02   0.01     0.05   0.02  -0.04     0.00   0.03   0.02
  10   6    -0.04  -0.01   0.02     0.05   0.02  -0.03    -0.02   0.01   0.02
  11   8    -0.01  -0.01  -0.01    -0.01  -0.04   0.03    -0.01  -0.03  -0.02
  12   6    -0.01   0.00  -0.01     0.00  -0.03   0.01    -0.01   0.00  -0.03
  13   6    -0.01   0.01  -0.02     0.01  -0.04   0.01    -0.01   0.03  -0.04
  14   6     0.00  -0.02  -0.01    -0.04  -0.02   0.04     0.00  -0.04  -0.03
  15   8     0.00   0.00  -0.01    -0.02  -0.01  -0.01    -0.01   0.00  -0.03
  16   6     0.05  -0.03   0.00    -0.11  -0.02   0.02     0.08  -0.03  -0.03
  17   8    -0.01   0.01   0.00     0.00   0.02  -0.01     0.02  -0.01   0.02
  18   6     0.00   0.00  -0.02    -0.01  -0.01  -0.02     0.03  -0.04  -0.03
  19   8     0.00  -0.01  -0.02    -0.03  -0.02  -0.01     0.06  -0.04  -0.04
  20   8    -0.01   0.02  -0.01    -0.03   0.05  -0.04     0.01  -0.01   0.04
  21   6    -0.01   0.02  -0.01    -0.02   0.06  -0.04     0.01   0.02   0.01
  22   6     0.00   0.02  -0.01     0.00   0.05  -0.02     0.02   0.02  -0.01
  23   6    -0.01   0.01  -0.01    -0.02   0.03  -0.03     0.00  -0.04   0.01
  24   8    -0.01   0.03  -0.01    -0.02   0.09  -0.07     0.01   0.03   0.00
  25   6     0.01   0.02  -0.01     0.03   0.07  -0.01     0.08   0.02  -0.05
  26   6    -0.01   0.02  -0.01     0.01   0.05  -0.02    -0.01  -0.08  -0.01
  27   6    -0.01   0.02  -0.01     0.04  -0.05   0.01    -0.06   0.11  -0.01
  28   6     0.00  -0.03  -0.01    -0.04  -0.02   0.07    -0.01  -0.06  -0.03
  29   6     0.02  -0.01   0.00     0.02  -0.01   0.01     0.01   0.03   0.01
  30   6    -0.01   0.02   0.01     0.00   0.00   0.00    -0.03  -0.01   0.01
  31   6     0.03  -0.04   0.05     0.02  -0.01   0.03     0.00   0.04   0.02
  32   6     0.04  -0.08   0.13     0.02  -0.04   0.10    -0.02   0.04   0.03
  33   6     0.05  -0.08   0.16     0.02  -0.06   0.15    -0.03   0.02   0.04
  34   6     0.04  -0.04   0.09     0.02  -0.04   0.11    -0.02   0.00   0.03
  35   6     0.03  -0.01   0.01     0.02  -0.02   0.04     0.00   0.01   0.01
  36   6     0.02  -0.04   0.00     0.02   0.01  -0.02     0.01   0.06   0.02
  37   6     0.02   0.03  -0.06     0.02   0.00  -0.01     0.01  -0.01   0.00
  38   6     0.00   0.01   0.01    -0.02   0.02   0.01    -0.02   0.02   0.05
  39   6     0.02   0.01  -0.01    -0.03   0.03   0.04    -0.02   0.01   0.03
  40   6     0.01   0.02  -0.02    -0.03   0.01   0.06    -0.02  -0.02  -0.02
  41   6     0.00   0.04  -0.01    -0.01  -0.01   0.05    -0.04  -0.05  -0.05
  42   6    -0.01   0.04   0.01     0.01  -0.02   0.01    -0.04  -0.05  -0.04
  43   6     0.01  -0.01   0.02    -0.03   0.02  -0.02    -0.01   0.04   0.09
  44   6    -0.04   0.06   0.02     0.03  -0.06  -0.02    -0.05  -0.09  -0.09
  45   6     0.05  -0.04  -0.04     0.05   0.02  -0.08     0.00   0.04   0.05
  46   6    -0.03  -0.04   0.00    -0.04   0.02  -0.03     0.03   0.12   0.02
  47   6    -0.04  -0.01  -0.10    -0.02  -0.04  -0.04     0.00  -0.02  -0.01
  48   6     0.08   0.10  -0.06     0.06   0.05  -0.01     0.01  -0.02  -0.01
  49   6     0.04  -0.01  -0.02    -0.03   0.00   0.00    -0.10  -0.02  -0.10
  50   6    -0.15   0.10  -0.05     0.13  -0.12   0.05     0.01  -0.14  -0.04
  51   6     0.03   0.02   0.02    -0.06  -0.01  -0.02     0.02   0.07   0.09
  52   6     0.02  -0.02   0.06    -0.02   0.03  -0.07    -0.03   0.03   0.12
  53   6     0.00  -0.01  -0.02     0.03   0.03  -0.01     0.04   0.03   0.00
  54   6    -0.10  -0.05   0.07     0.10   0.04  -0.06    -0.03   0.02   0.02
  55   1    -0.05  -0.03   0.01     0.07   0.03  -0.05     0.00   0.03   0.02
  56   1     0.00   0.01  -0.03     0.00  -0.04   0.02     0.04   0.06  -0.08
  57   1     0.00  -0.02  -0.01    -0.05  -0.02   0.03    -0.01  -0.04  -0.03
  58   1     0.05  -0.02   0.02    -0.10  -0.02  -0.02     0.08  -0.03   0.01
  59   1     0.07  -0.03   0.00    -0.15  -0.01   0.02     0.12  -0.03  -0.03
  60   1     0.04  -0.03  -0.01    -0.09  -0.02   0.04     0.07  -0.04  -0.05
  61   1    -0.01   0.03  -0.01    -0.01   0.05  -0.03     0.00   0.06  -0.03
  62   1    -0.02   0.01  -0.02    -0.04   0.03  -0.04    -0.02  -0.06   0.03
  63   1     0.01   0.03  -0.02     0.03   0.09  -0.02     0.09   0.03  -0.10
  64   1     0.01   0.02  -0.01     0.05   0.06   0.00     0.05   0.02  -0.04
  65   1     0.02   0.02  -0.01     0.03   0.06  -0.01     0.14   0.01  -0.01
  66   1    -0.02   0.02  -0.01     0.00   0.08  -0.03    -0.02  -0.09   0.01
  67   1     0.00   0.02  -0.01     0.03   0.05  -0.01     0.00  -0.07  -0.04
  68   1    -0.01   0.01  -0.02     0.01   0.04  -0.01    -0.01  -0.10  -0.02
  69   1    -0.01   0.03  -0.01     0.04  -0.06   0.03    -0.06   0.15  -0.01
  70   1    -0.01   0.03  -0.01     0.05  -0.06   0.01    -0.05   0.14  -0.02
  71   1    -0.02   0.02   0.00     0.05  -0.05   0.00    -0.10   0.08   0.04
  72   1    -0.01  -0.04  -0.02    -0.03  -0.02   0.09    -0.02  -0.06  -0.03
  73   1     0.00  -0.04  -0.01    -0.02  -0.02   0.08     0.00  -0.06  -0.03
  74   1     0.00  -0.04  -0.01    -0.06  -0.01   0.08     0.00  -0.07  -0.03
  75   1     0.05  -0.10   0.17     0.02  -0.05   0.12    -0.02   0.05   0.04
  76   1     0.06  -0.10   0.22     0.02  -0.08   0.20    -0.04   0.02   0.05
  77   1     0.05  -0.03   0.11     0.02  -0.05   0.13    -0.03  -0.01   0.03
  78   1     0.03  -0.04   0.01     0.04   0.00  -0.02     0.01   0.05  -0.03
  79   1     0.00   0.05  -0.10     0.02   0.01  -0.05     0.03  -0.01   0.00
  80   1     0.03   0.00  -0.01    -0.05   0.04   0.05    -0.01   0.03   0.06
  81   1     0.02   0.03  -0.03    -0.04   0.02   0.09    -0.02  -0.02  -0.02
  82   1     0.00   0.05  -0.02     0.00  -0.02   0.06    -0.05  -0.08  -0.09
  83   1     0.00  -0.02   0.02    -0.01   0.04  -0.02    -0.02   0.03   0.08
  84   1    -0.03   0.11   0.11     0.03  -0.10  -0.10    -0.07  -0.13  -0.15
  85   1     0.04  -0.03  -0.08     0.05   0.04  -0.12     0.00   0.04   0.05
  86   1     0.09  -0.04  -0.03     0.10   0.01  -0.07    -0.03   0.01   0.05
  87   1     0.03  -0.03  -0.05     0.01   0.03  -0.08     0.00   0.04   0.09
  88   1    -0.03  -0.03  -0.03    -0.04   0.04  -0.07     0.04   0.13   0.02
  89   1    -0.05  -0.04   0.00    -0.07   0.02  -0.03     0.04   0.13   0.07
  90   1    -0.04  -0.04   0.02    -0.05   0.01  -0.01     0.04   0.15  -0.01
  91   1    -0.04   0.02  -0.17    -0.02  -0.02  -0.09     0.01  -0.05  -0.02
  92   1    -0.03  -0.02  -0.05    -0.01  -0.05   0.00    -0.04  -0.03  -0.02
  93   1    -0.08  -0.07  -0.10    -0.05  -0.08  -0.04     0.00   0.00   0.00
  94   1     0.08   0.14  -0.13     0.06   0.07  -0.06     0.02  -0.02  -0.02
  95   1     0.13   0.14  -0.04     0.09   0.08   0.01     0.02  -0.01  -0.01
  96   1     0.09   0.09  -0.02     0.06   0.04   0.02     0.00  -0.02  -0.01
  97   1    -0.01   0.04   0.01     0.01  -0.04  -0.03    -0.08  -0.06  -0.14
  98   1     0.14  -0.07   0.06    -0.10   0.06  -0.06    -0.16   0.04  -0.16
  99   1     0.05  -0.05  -0.15    -0.04   0.04   0.11    -0.10   0.03  -0.01
 100   1    -0.14   0.12  -0.02     0.13  -0.15   0.02    -0.03  -0.17  -0.08
 101   1    -0.22   0.19  -0.05     0.19  -0.19   0.06     0.05  -0.22  -0.01
 102   1    -0.19   0.03  -0.13     0.16  -0.06   0.13     0.04  -0.08   0.02
 103   1     0.03   0.01   0.04    -0.06  -0.01  -0.05     0.03   0.08   0.11
 104   1     0.02   0.03   0.00    -0.06  -0.02   0.01     0.03   0.08   0.06
 105   1     0.04   0.04   0.03    -0.08  -0.03  -0.03     0.03   0.08   0.09
 106   1     0.02  -0.02   0.05    -0.02   0.02  -0.07    -0.03   0.05   0.14
 107   1     0.02   0.00   0.08    -0.02   0.02  -0.09    -0.03   0.04   0.13
 108   1     0.03  -0.05   0.06    -0.02   0.07  -0.07    -0.04   0.01   0.12
 109   1     0.00  -0.01  -0.02     0.03   0.02   0.00     0.01   0.03   0.02
 110   1     0.01  -0.02  -0.02     0.03   0.04  -0.02     0.09   0.05   0.02
 111   1     0.00  -0.01  -0.04     0.03   0.03  -0.01     0.05   0.00  -0.05
 112   1    -0.10  -0.18   0.19     0.10   0.15  -0.15    -0.04   0.08  -0.09
 113   1    -0.26   0.02   0.05     0.22  -0.01  -0.05     0.08   0.00   0.05
 114   1     0.01  -0.01   0.01     0.02   0.01  -0.02    -0.12  -0.01   0.07
                     7                      8                      9
                    ?A                     ?A                     ?A
 Frequencies --    38.0695                41.6770                46.2800
 Red. masses --     3.7789                 3.9568                 4.2479
 Frc consts  --     0.0032                 0.0040                 0.0054
 IR Inten    --     0.3639                 0.6518                 0.8624
 Raman Activ --     0.0000                 0.0000                 0.0000
 Depolar     --     0.0000                 0.0000                 0.0000
 Atom AN      X      Y      Z        X      Y      Z        X      Y      Z
   1   8     0.04  -0.02   0.00    -0.05   0.02   0.01     0.01  -0.02  -0.03
   2  12     0.01   0.00  -0.02    -0.01  -0.01   0.00     0.02   0.02  -0.01
   3   8     0.00   0.03   0.00     0.01  -0.04   0.01     0.06  -0.04  -0.03
   4   6     0.03  -0.02   0.00    -0.04  -0.02   0.02     0.01  -0.03  -0.03
   5   7     0.00   0.00  -0.02     0.07   0.01  -0.01    -0.02   0.02   0.01
   6   7    -0.02  -0.01  -0.02    -0.04  -0.01   0.01    -0.02   0.01  -0.01
   7   8     0.02  -0.02   0.00    -0.02  -0.04  -0.01    -0.01  -0.04  -0.04
   8   6    -0.01   0.00  -0.02     0.08   0.02  -0.02    -0.04   0.02   0.01
   9   6    -0.02  -0.01  -0.02     0.03   0.01  -0.02    -0.05   0.01   0.01
  10   6    -0.02  -0.01  -0.02    -0.02  -0.01   0.00    -0.04   0.01   0.00
  11   8     0.02  -0.01  -0.01    -0.01  -0.05   0.05     0.04  -0.05  -0.01
  12   6     0.02   0.00   0.00    -0.01  -0.04   0.02     0.05  -0.05  -0.01
  13   6     0.00   0.00   0.00     0.01  -0.07   0.03     0.05  -0.07  -0.01
  14   6     0.03  -0.02  -0.01    -0.04  -0.02   0.06     0.05  -0.03  -0.02
  15   8     0.02   0.01   0.00    -0.02   0.00   0.00     0.04  -0.05  -0.02
  16   6     0.04  -0.03   0.00    -0.04   0.03  -0.03    -0.02  -0.02  -0.04
  17   8     0.00   0.05  -0.02     0.00   0.02  -0.01     0.05   0.06  -0.01
  18   6    -0.02   0.04   0.00    -0.02  -0.01   0.02     0.02  -0.02  -0.04
  19   8    -0.03   0.04   0.01    -0.04  -0.01   0.03    -0.01  -0.04  -0.04
  20   8     0.01   0.00   0.01    -0.03   0.03   0.01     0.00   0.07  -0.01
  21   6     0.00  -0.04   0.07    -0.02   0.05   0.01     0.02   0.05   0.06
  22   6    -0.02  -0.02   0.06     0.00   0.05  -0.01     0.04   0.06   0.03
  23   6    -0.01   0.06   0.00    -0.02   0.00   0.02    -0.01   0.06  -0.03
  24   8     0.01  -0.09   0.14    -0.02   0.06   0.03     0.02   0.04   0.13
  25   6    -0.15  -0.04   0.10     0.03   0.04  -0.03     0.01   0.05   0.04
  26   6    -0.05   0.12   0.05     0.00  -0.01   0.01    -0.01   0.13   0.01
  27   6     0.02  -0.02  -0.01     0.05  -0.10   0.02     0.09  -0.10  -0.02
  28   6     0.03  -0.02  -0.03    -0.05  -0.03   0.11     0.06   0.01  -0.03
  29   6     0.01  -0.01  -0.01     0.06   0.01  -0.02    -0.01   0.02   0.00
  30   6    -0.02   0.00  -0.02    -0.03  -0.01   0.01    -0.03   0.00  -0.01
  31   6     0.02  -0.01  -0.05     0.05   0.04  -0.04    -0.01  -0.01   0.03
  32   6     0.03  -0.02  -0.01     0.02   0.05  -0.07     0.01   0.00   0.00
  33   6     0.04  -0.03   0.05     0.01   0.04  -0.08     0.02   0.03  -0.04
  34   6     0.03  -0.03   0.07     0.02   0.01  -0.06     0.01   0.05  -0.05
  35   6     0.02  -0.02   0.04     0.05  -0.01  -0.03     0.00   0.04  -0.02
  36   6     0.01   0.02  -0.13     0.06   0.06  -0.03    -0.01  -0.05   0.09
  37   6     0.02  -0.01   0.05     0.06  -0.05  -0.02    -0.01   0.05  -0.01
  38   6    -0.01   0.00   0.00    -0.03  -0.02   0.00    -0.02   0.02   0.01
  39   6     0.00   0.02   0.00    -0.02  -0.01   0.00    -0.02   0.04   0.04
  40   6     0.00   0.02   0.00    -0.02   0.01   0.01    -0.02   0.04   0.04
  41   6    -0.01   0.01  -0.01    -0.03   0.02   0.01    -0.02   0.01   0.01
  42   6    -0.02   0.00  -0.02    -0.03   0.01   0.02    -0.03  -0.01  -0.01
  43   6     0.00   0.00   0.00    -0.03  -0.03  -0.01    -0.02   0.00   0.00
  44   6    -0.03  -0.01  -0.04    -0.05   0.03   0.02    -0.03  -0.05  -0.05
  45   6     0.01  -0.08  -0.08     0.03   0.03   0.04    -0.02  -0.03   0.10
  46   6     0.00   0.18  -0.12     0.11   0.14  -0.01     0.03  -0.14   0.09
  47   6     0.02   0.00   0.06     0.07  -0.06  -0.02     0.03   0.02   0.02
  48   6     0.01  -0.01   0.05     0.04  -0.08  -0.03    -0.04   0.09   0.04
  49   6    -0.06   0.02  -0.03    -0.01   0.00   0.00    -0.02  -0.03  -0.08
  50   6     0.01  -0.02  -0.02    -0.12   0.06  -0.02    -0.04  -0.09  -0.03
  51   6     0.00   0.01   0.00    -0.03  -0.05   0.00    -0.04  -0.03   0.00
  52   6     0.01  -0.01   0.01    -0.01  -0.03  -0.02     0.00   0.00  -0.03
  53   6    -0.02  -0.01  -0.02     0.13   0.03  -0.03    -0.06   0.02   0.02
  54   6    -0.01   0.00  -0.02    -0.08  -0.03   0.02    -0.07   0.01   0.00
  55   1    -0.02  -0.01  -0.02     0.03   0.03  -0.02    -0.06   0.01   0.02
  56   1    -0.02  -0.01   0.01    -0.01  -0.08   0.06     0.03  -0.08   0.01
  57   1     0.04  -0.02  -0.01    -0.07   0.00   0.05     0.07  -0.04  -0.01
  58   1     0.03  -0.03   0.01    -0.04   0.02  -0.03    -0.04  -0.05  -0.04
  59   1     0.04  -0.03   0.00    -0.04   0.05  -0.03    -0.02  -0.02  -0.04
  60   1     0.03  -0.02   0.00    -0.03   0.01  -0.04    -0.04  -0.01  -0.05
  61   1     0.04  -0.06   0.09     0.00   0.08  -0.01     0.07   0.07   0.04
  62   1     0.00   0.09  -0.06    -0.04  -0.01   0.03    -0.05   0.07  -0.09
  63   1    -0.16  -0.10   0.18     0.03   0.06  -0.03     0.00   0.05   0.08
  64   1    -0.15  -0.04   0.09     0.05   0.05  -0.05     0.03   0.06   0.03
  65   1    -0.23  -0.01   0.05     0.03   0.02  -0.04    -0.04   0.05   0.01
  66   1    -0.07   0.15   0.05    -0.01   0.01   0.01    -0.06   0.20   0.03
  67   1    -0.04   0.11   0.10     0.03   0.00   0.00     0.06   0.13   0.07
  68   1    -0.07   0.15   0.02     0.00  -0.03   0.01    -0.04   0.11  -0.02
  69   1     0.03  -0.04  -0.01     0.05  -0.12   0.04     0.09  -0.13  -0.01
  70   1     0.01  -0.03   0.00     0.06  -0.12   0.03     0.09  -0.12  -0.01
  71   1     0.05  -0.01  -0.01     0.07  -0.09  -0.01     0.12  -0.09  -0.04
  72   1     0.03  -0.01  -0.03    -0.06  -0.04   0.13     0.08   0.01  -0.03
  73   1     0.02  -0.01  -0.03    -0.02  -0.06   0.11     0.03   0.02  -0.04
  74   1     0.04  -0.02  -0.03    -0.08  -0.02   0.11     0.06   0.02  -0.04
  75   1     0.04  -0.02  -0.04     0.02   0.08  -0.08     0.02  -0.01   0.01
  76   1     0.05  -0.04   0.07    -0.01   0.05  -0.11     0.03   0.04  -0.06
  77   1     0.04  -0.03   0.11     0.01  -0.01  -0.07     0.02   0.07  -0.07
  78   1    -0.01   0.00  -0.25     0.06   0.05  -0.08    -0.03  -0.04   0.15
  79   1     0.01  -0.01   0.06     0.09  -0.05  -0.01    -0.03   0.06  -0.04
  80   1     0.01   0.02   0.01    -0.01  -0.01   0.00    -0.02   0.05   0.05
  81   1     0.01   0.03   0.01    -0.01   0.02   0.01    -0.02   0.05   0.06
  82   1    -0.01   0.01  -0.02    -0.02   0.04   0.02    -0.03   0.00   0.00
  83   1    -0.01  -0.01   0.00    -0.03  -0.03   0.00    -0.03   0.00   0.00
  84   1    -0.04  -0.04  -0.06    -0.05   0.06   0.08    -0.03  -0.05  -0.07
  85   1     0.01  -0.05  -0.17     0.04   0.03   0.05    -0.03  -0.07   0.17
  86   1     0.02  -0.21  -0.08    -0.01   0.00   0.03    -0.06   0.05   0.09
  87   1     0.01  -0.04   0.04     0.05   0.04   0.08     0.02  -0.06   0.04
  88   1    -0.02   0.18  -0.18     0.12   0.15  -0.01     0.03  -0.16   0.14
  89   1     0.03   0.21   0.00     0.13   0.15   0.04     0.04  -0.16   0.03
  90   1    -0.03   0.28  -0.16     0.13   0.17  -0.06     0.04  -0.17   0.10
  91   1     0.02  -0.01   0.07     0.09  -0.09  -0.01     0.01   0.05   0.03
  92   1     0.00   0.00   0.04     0.05  -0.06  -0.02     0.07   0.01   0.07
  93   1     0.02   0.02   0.06     0.09  -0.03  -0.02     0.04  -0.03  -0.03
  94   1     0.01  -0.01   0.06     0.05  -0.11  -0.01    -0.04   0.09   0.05
  95   1     0.01  -0.03   0.05     0.03  -0.09  -0.03    -0.06   0.12   0.03
  96   1     0.03  -0.01   0.04     0.02  -0.08  -0.04    -0.04   0.08   0.08
  97   1    -0.08   0.03  -0.03    -0.04   0.02   0.00    -0.02  -0.06  -0.11
  98   1    -0.08   0.01  -0.03     0.05  -0.03   0.03    -0.02  -0.01  -0.10
  99   1    -0.04   0.05  -0.03     0.00  -0.03  -0.07    -0.02  -0.03  -0.07
 100   1    -0.01  -0.03  -0.03    -0.12   0.07   0.00    -0.05  -0.12  -0.06
 101   1     0.03  -0.05  -0.01    -0.16   0.11  -0.02    -0.05  -0.11   0.00
 102   1     0.02   0.00   0.00    -0.14   0.01  -0.07    -0.04  -0.09  -0.02
 103   1     0.00   0.00   0.00    -0.03  -0.06  -0.01    -0.04  -0.04  -0.02
 104   1    -0.01   0.01   0.00    -0.04  -0.04   0.00    -0.05  -0.04   0.02
 105   1     0.00   0.01   0.01    -0.03  -0.04  -0.01    -0.04  -0.04  -0.01
 106   1     0.01  -0.02   0.02    -0.02  -0.04  -0.03     0.00  -0.02  -0.04
 107   1     0.01   0.00   0.02    -0.02  -0.03  -0.01     0.00   0.00  -0.04
 108   1     0.00  -0.01   0.01     0.00  -0.03  -0.02     0.01   0.02  -0.03
 109   1    -0.08   0.00   0.01     0.10   0.03   0.00     0.06   0.01  -0.03
 110   1     0.02   0.04  -0.01     0.20   0.05   0.00    -0.17  -0.05  -0.02
 111   1    -0.01  -0.06  -0.05     0.15   0.01  -0.11    -0.08   0.12   0.13
 112   1    -0.01   0.03  -0.06    -0.08  -0.15   0.13    -0.07   0.00  -0.02
 113   1     0.04  -0.02  -0.01    -0.23   0.02   0.00    -0.06   0.01   0.01
 114   1    -0.04  -0.02   0.00     0.02   0.02  -0.03    -0.08   0.01   0.01
                    10                     11                     12
                    ?A                     ?A                     ?A
 Frequencies --    50.3622                51.7937                55.8481
 Red. masses --     5.0298                 5.8212                 4.0558
 Frc consts  --     0.0075                 0.0092                 0.0075
 IR Inten    --     0.2293                 0.9577                 0.0990
 Raman Activ --     0.0000                 0.0000                 0.0000
 Depolar     --     0.0000                 0.0000                 0.0000
 Atom AN      X      Y      Z        X      Y      Z        X      Y      Z
   1   8    -0.07   0.07   0.03    -0.16   0.04  -0.03     0.00   0.02  -0.01
   2  12    -0.04  -0.03   0.02     0.03   0.05  -0.01     0.04  -0.01   0.00
   3   8    -0.02  -0.05   0.00     0.06  -0.09  -0.07     0.03   0.01  -0.01
   4   6    -0.03   0.11   0.02    -0.05   0.03  -0.03     0.03   0.06  -0.02
   5   7     0.00  -0.02   0.02    -0.04  -0.02  -0.04     0.01  -0.01   0.01
   6   7     0.01  -0.02   0.03     0.04   0.03   0.01    -0.03  -0.03   0.00
   7   8     0.04   0.14   0.03     0.03   0.02  -0.06     0.03   0.09   0.01
   8   6     0.01  -0.02   0.02    -0.05  -0.04  -0.03    -0.01  -0.02   0.01
   9   6     0.01  -0.02   0.02    -0.01  -0.05   0.00    -0.03  -0.02   0.01
  10   6     0.01  -0.02   0.02     0.02  -0.02   0.02    -0.04  -0.03   0.01
  11   8    -0.05   0.13  -0.02     0.01   0.00  -0.01     0.04   0.09  -0.05
  12   6    -0.04   0.01  -0.01     0.01   0.01  -0.04     0.04   0.03  -0.03
  13   6    -0.02  -0.06   0.01     0.05  -0.01  -0.04     0.03   0.01  -0.02
  14   6    -0.06   0.11  -0.01    -0.05   0.03   0.01     0.06   0.07  -0.06
  15   8    -0.05  -0.06   0.00    -0.01   0.04  -0.07     0.05  -0.02   0.00
  16   6     0.01   0.07   0.07    -0.15   0.05  -0.05    -0.04   0.01   0.04
  17   8    -0.04  -0.02   0.03     0.07   0.08  -0.01     0.06  -0.01  -0.01
  18   6    -0.03  -0.06  -0.03     0.08  -0.06  -0.01     0.03   0.00  -0.01
  19   8    -0.05  -0.08  -0.05     0.08   0.00   0.02     0.04   0.00  -0.02
  20   8    -0.06   0.01  -0.03     0.04  -0.01   0.17     0.03   0.01  -0.03
  21   6    -0.04   0.00   0.01     0.05   0.03   0.12     0.04   0.01  -0.02
  22   6    -0.03   0.00   0.02     0.07   0.07   0.02     0.06   0.00  -0.01
  23   6    -0.06   0.01  -0.03     0.01  -0.07   0.08     0.04   0.00  -0.02
  24   8    -0.04   0.00   0.04     0.05   0.02   0.18     0.04   0.03  -0.03
  25   6    -0.01   0.00   0.01     0.06   0.03  -0.04     0.06   0.02   0.01
  26   6    -0.05   0.05   0.00    -0.04  -0.12   0.06     0.05   0.00  -0.02
  27   6     0.02  -0.15  -0.04     0.01   0.03  -0.03     0.04  -0.03  -0.05
  28   6    -0.07   0.08   0.01    -0.05   0.03   0.08     0.06   0.09  -0.10
  29   6     0.00  -0.01   0.01    -0.04  -0.02  -0.04    -0.02  -0.01   0.02
  30   6     0.04  -0.01   0.00     0.04   0.03   0.02    -0.03  -0.03   0.01
  31   6     0.01  -0.02   0.01    -0.04  -0.03  -0.04    -0.03   0.01   0.03
  32   6     0.01  -0.01   0.01    -0.03  -0.04  -0.02    -0.06   0.00   0.07
  33   6     0.01  -0.01   0.00    -0.02  -0.04   0.01    -0.07  -0.03   0.07
  34   6     0.01   0.00  -0.01    -0.03  -0.03   0.00    -0.06  -0.05   0.05
  35   6     0.01   0.00   0.00    -0.04  -0.02  -0.02    -0.03  -0.04   0.03
  36   6     0.01  -0.02   0.02    -0.04  -0.03  -0.07    -0.02   0.05   0.01
  37   6     0.00   0.01  -0.02    -0.04  -0.01  -0.03    -0.03  -0.05   0.01
  38   6     0.08   0.00   0.03     0.02   0.03   0.01    -0.03  -0.03   0.01
  39   6     0.11   0.01   0.00     0.01   0.01   0.01    -0.02  -0.01   0.04
  40   6     0.09   0.01  -0.06     0.01  -0.01   0.00    -0.02   0.03   0.08
  41   6     0.05  -0.01  -0.09     0.02  -0.01   0.01    -0.01   0.03   0.08
  42   6     0.02  -0.02  -0.07     0.04   0.01   0.01    -0.02   0.00   0.05
  43   6     0.09  -0.02   0.07     0.02   0.06   0.01    -0.03  -0.07  -0.03
  44   6    -0.01  -0.03  -0.09     0.05   0.00   0.02    -0.03  -0.01   0.03
  45   6     0.00  -0.03   0.04    -0.04  -0.09  -0.03    -0.03   0.04   0.04
  46   6     0.02   0.01   0.02    -0.03   0.05  -0.06    -0.01   0.12   0.02
  47   6    -0.02   0.04  -0.03    -0.04  -0.01  -0.03    -0.07   0.02  -0.01
  48   6     0.04   0.00  -0.05    -0.03   0.00  -0.03     0.01  -0.11  -0.05
  49   6    -0.05   0.03  -0.10     0.07  -0.03   0.01    -0.03   0.01  -0.01
  50   6     0.03  -0.04  -0.07     0.01   0.01   0.00    -0.05  -0.04   0.04
  51   6     0.13  -0.05   0.08     0.03   0.06   0.02    -0.07  -0.10  -0.03
  52   6     0.09  -0.01   0.05    -0.02   0.07   0.01     0.00  -0.07  -0.06
  53   6     0.03  -0.02   0.00    -0.09  -0.07  -0.03     0.01  -0.02   0.00
  54   6     0.04  -0.01   0.01     0.02  -0.04   0.06    -0.07  -0.04   0.02
  55   1     0.01  -0.02   0.02    -0.02  -0.08   0.01    -0.04  -0.01   0.02
  56   1    -0.05  -0.08   0.08     0.11   0.01  -0.04     0.02   0.00   0.01
  57   1    -0.08   0.11  -0.02    -0.07   0.04  -0.01     0.08   0.05  -0.06
  58   1     0.04   0.13   0.06    -0.13   0.06  -0.09    -0.05  -0.01   0.03
  59   1    -0.01   0.03   0.07    -0.19   0.06  -0.04    -0.06  -0.02   0.04
  60   1     0.05   0.03   0.10    -0.12   0.03  -0.02    -0.05   0.05   0.07
  61   1    -0.05   0.01   0.01     0.08   0.14   0.03     0.06  -0.01   0.00
  62   1    -0.09   0.01  -0.07    -0.04  -0.09   0.11     0.04   0.00  -0.01
  63   1     0.00   0.01  -0.03     0.06   0.02  -0.04     0.05   0.04   0.04
  64   1    -0.03   0.00   0.02     0.05   0.06  -0.08     0.11   0.01   0.01
  65   1     0.02   0.02   0.03     0.06  -0.01  -0.05     0.04   0.00   0.00
  66   1    -0.07   0.09   0.00    -0.08  -0.12   0.12     0.05   0.00  -0.03
  67   1    -0.01   0.05   0.03     0.00  -0.10   0.02     0.04   0.00  -0.03
  68   1    -0.06   0.04  -0.01    -0.07  -0.17   0.01     0.05   0.00  -0.02
  69   1     0.02  -0.17  -0.04     0.01   0.09  -0.01     0.04  -0.03  -0.06
  70   1     0.02  -0.21  -0.02     0.05   0.02  -0.03     0.03  -0.06  -0.04
  71   1     0.05  -0.13  -0.12    -0.05   0.00  -0.03     0.05  -0.02  -0.08
  72   1    -0.08   0.08   0.00    -0.05   0.02   0.10     0.07   0.10  -0.12
  73   1    -0.05   0.08   0.02    -0.02   0.01   0.09     0.04   0.11  -0.10
  74   1    -0.07   0.07   0.01    -0.09   0.04   0.09     0.09   0.08  -0.10
  75   1     0.01  -0.02   0.01    -0.02  -0.05  -0.02    -0.07   0.01   0.08
  76   1     0.01   0.00  -0.01    -0.02  -0.05   0.03    -0.09  -0.04   0.10
  77   1     0.01   0.01  -0.02    -0.02  -0.03   0.02    -0.07  -0.07   0.05
  78   1     0.00  -0.02   0.00    -0.06  -0.04  -0.13     0.00   0.04  -0.03
  79   1     0.00   0.00   0.00    -0.04  -0.01  -0.03    -0.01  -0.07   0.07
  80   1     0.14   0.01   0.02     0.00   0.02   0.01    -0.02  -0.01   0.03
  81   1     0.11   0.02  -0.08     0.00  -0.02   0.00    -0.01   0.05   0.10
  82   1     0.04  -0.01  -0.14     0.02  -0.03   0.00    -0.01   0.06   0.11
  83   1     0.07  -0.01   0.10     0.03   0.07   0.02    -0.04  -0.07  -0.03
  84   1    -0.03  -0.06  -0.11     0.06   0.02   0.03    -0.04  -0.02   0.02
  85   1     0.00  -0.04   0.05    -0.05  -0.08  -0.06    -0.02   0.06   0.03
  86   1    -0.02  -0.04   0.04    -0.05  -0.15  -0.03    -0.04   0.00   0.04
  87   1     0.01  -0.03   0.05    -0.03  -0.07   0.04    -0.04   0.05   0.07
  88   1     0.02   0.02   0.02    -0.05   0.03  -0.08    -0.01   0.14   0.00
  89   1     0.03   0.02   0.05     0.00   0.06   0.00    -0.02   0.13   0.07
  90   1     0.03   0.03   0.01    -0.05   0.10  -0.09    -0.01   0.14   0.00
  91   1    -0.03   0.06  -0.05    -0.05   0.00  -0.04    -0.07   0.03  -0.02
  92   1    -0.01   0.05  -0.05    -0.03  -0.01  -0.03    -0.08   0.04  -0.07
  93   1    -0.05   0.04  -0.01    -0.06  -0.03  -0.03    -0.11   0.06   0.04
  94   1     0.03   0.01  -0.06    -0.03   0.01  -0.04     0.01  -0.11  -0.05
  95   1     0.06  -0.02  -0.04    -0.02  -0.01  -0.03     0.03  -0.17  -0.04
  96   1     0.04   0.01  -0.07    -0.02   0.00  -0.03     0.00  -0.09  -0.12
  97   1    -0.08   0.03  -0.10     0.07  -0.02   0.02    -0.05  -0.01  -0.03
  98   1    -0.08   0.02  -0.11     0.10  -0.04   0.03    -0.03   0.04  -0.02
  99   1    -0.03   0.06  -0.08     0.07  -0.04  -0.02    -0.03   0.03   0.00
 100   1    -0.01  -0.04  -0.09     0.03   0.01   0.01    -0.06  -0.05   0.02
 101   1     0.06  -0.09  -0.06    -0.01   0.04   0.00    -0.06  -0.05   0.06
 102   1     0.06   0.02  -0.05    -0.01  -0.03  -0.01    -0.05  -0.03   0.04
 103   1     0.13  -0.09   0.11     0.03   0.06   0.02    -0.08  -0.10  -0.06
 104   1     0.10  -0.04   0.09     0.03   0.06   0.02    -0.09  -0.10   0.00
 105   1     0.17  -0.05   0.05     0.02   0.06   0.01    -0.09  -0.10  -0.03
 106   1     0.09  -0.01   0.06    -0.02   0.11  -0.01     0.00  -0.10  -0.08
 107   1     0.09  -0.02   0.02    -0.05   0.06   0.02     0.01  -0.07  -0.07
 108   1     0.07   0.02   0.04    -0.01   0.07   0.01     0.03  -0.05  -0.06
 109   1     0.00  -0.02   0.02    -0.11  -0.06  -0.05    -0.17  -0.01   0.07
 110   1     0.08  -0.01   0.02    -0.09  -0.07  -0.04     0.18   0.09   0.06
 111   1     0.04  -0.05  -0.04    -0.08  -0.11  -0.02     0.05  -0.18  -0.17
 112   1     0.04   0.08  -0.09     0.03  -0.07   0.11    -0.07  -0.09   0.06
 113   1     0.16  -0.04   0.04    -0.02  -0.01   0.06    -0.13  -0.01   0.00
 114   1    -0.05  -0.04   0.06     0.06  -0.05   0.03    -0.03  -0.01  -0.01
                    13                     14                     15
                    ?A                     ?A                     ?A
 Frequencies --    62.8551                69.2207                71.5605
 Red. masses --     3.7838                 4.7631                 4.5041
 Frc consts  --     0.0088                 0.0134                 0.0136
 IR Inten    --     0.7529                 1.8924                 1.0571
 Raman Activ --     0.0000                 0.0000                 0.0000
 Depolar     --     0.0000                 0.0000                 0.0000
 Atom AN      X      Y      Z        X      Y      Z        X      Y      Z
   1   8     0.05  -0.02   0.03    -0.17   0.00  -0.03     0.11   0.00   0.07
   2  12     0.00   0.01   0.01     0.02   0.00  -0.01    -0.01  -0.02  -0.02
   3   8     0.01  -0.06   0.03    -0.01   0.01  -0.01     0.01  -0.04  -0.06
   4   6     0.04   0.00   0.03     0.05   0.00  -0.05    -0.02   0.02   0.07
   5   7    -0.01   0.02   0.00     0.04   0.00   0.00     0.00  -0.02  -0.02
   6   7    -0.04  -0.01   0.02    -0.03  -0.01  -0.01    -0.02   0.00  -0.04
   7   8     0.03   0.01   0.04     0.28   0.01  -0.08    -0.09   0.04   0.10
   8   6    -0.02   0.00   0.01     0.01   0.00   0.01     0.01   0.01  -0.03
   9   6    -0.03   0.00   0.02    -0.03   0.00   0.01     0.00   0.01  -0.04
  10   6    -0.03   0.00   0.01    -0.04  -0.01   0.00    -0.01   0.01  -0.05
  11   8     0.01   0.01   0.01     0.00  -0.03  -0.01    -0.04   0.08   0.00
  12   6     0.01  -0.01   0.02     0.00   0.02  -0.02    -0.03   0.04  -0.03
  13   6     0.01  -0.04   0.03    -0.01   0.03  -0.02     0.00   0.05  -0.04
  14   6     0.03   0.00   0.01    -0.01  -0.01  -0.01    -0.07   0.02   0.02
  15   8     0.02   0.00   0.03     0.00   0.06  -0.03    -0.05   0.00  -0.03
  16   6     0.05  -0.02   0.04    -0.08   0.01  -0.05     0.15  -0.01   0.10
  17   8     0.01  -0.01   0.01    -0.02   0.00   0.00     0.01   0.03  -0.01
  18   6     0.02  -0.05   0.05     0.00   0.02   0.02     0.04  -0.03  -0.03
  19   8     0.01  -0.02   0.07     0.02   0.05   0.04     0.05  -0.01  -0.02
  20   8     0.01  -0.05   0.09     0.03  -0.04   0.06     0.01   0.00   0.10
  21   6     0.01  -0.02   0.02     0.00  -0.03  -0.01     0.00   0.03   0.05
  22   6     0.01  -0.02   0.02    -0.02  -0.04   0.03     0.01   0.04   0.01
  23   6     0.01  -0.07   0.07     0.01  -0.01   0.04    -0.02  -0.03   0.03
  24   8     0.00   0.00  -0.03    -0.01  -0.01  -0.09     0.00   0.03   0.07
  25   6    -0.01  -0.02   0.02    -0.08  -0.02   0.10     0.00   0.03   0.01
  26   6     0.00  -0.10   0.05    -0.04  -0.01   0.05    -0.06  -0.04   0.03
  27   6     0.01  -0.07   0.01    -0.03   0.06  -0.01    -0.05   0.11  -0.01
  28   6     0.03   0.00  -0.01    -0.02  -0.06   0.03    -0.09  -0.04   0.07
  29   6     0.00   0.02  -0.02     0.04   0.00   0.00     0.01  -0.02   0.00
  30   6    -0.03   0.00   0.01    -0.02   0.00   0.00    -0.01   0.01  -0.03
  31   6     0.00   0.02  -0.03     0.03   0.01   0.02     0.01  -0.03   0.00
  32   6     0.01   0.03  -0.05     0.01   0.01   0.02     0.02  -0.03   0.00
  33   6     0.01   0.04  -0.06     0.01   0.00   0.00     0.03  -0.03   0.00
  34   6     0.01   0.05  -0.07     0.01  -0.01  -0.01     0.02  -0.02   0.01
  35   6     0.00   0.05  -0.06     0.03  -0.01   0.00     0.01  -0.02   0.01
  36   6    -0.01   0.03  -0.05     0.04   0.00   0.04     0.01  -0.05   0.02
  37   6    -0.01   0.09  -0.11     0.04  -0.04   0.01     0.02  -0.03   0.04
  38   6    -0.02  -0.01   0.01     0.01   0.01   0.02     0.00   0.01  -0.03
  39   6    -0.01   0.01   0.01     0.03   0.05   0.04     0.01   0.05   0.01
  40   6     0.00   0.03   0.03     0.02   0.07   0.04     0.01   0.08   0.04
  41   6    -0.02   0.04   0.03     0.00   0.06   0.01     0.00   0.07   0.03
  42   6    -0.03   0.02   0.02    -0.02   0.02  -0.01    -0.01   0.03  -0.01
  43   6    -0.02  -0.04  -0.01     0.01  -0.01   0.02    -0.01  -0.04  -0.09
  44   6    -0.04   0.00   0.00    -0.05   0.00  -0.04    -0.01   0.01  -0.04
  45   6     0.01   0.03  -0.08     0.05   0.10  -0.04     0.01  -0.04   0.01
  46   6    -0.04   0.04  -0.06    -0.01  -0.13   0.02     0.01  -0.11   0.02
  47   6    -0.03   0.02  -0.13     0.05  -0.04   0.02     0.03   0.00   0.05
  48   6     0.04   0.18  -0.09     0.01  -0.07   0.02    -0.01  -0.07   0.03
  49   6    -0.09   0.07   0.00    -0.08   0.05  -0.07    -0.02   0.03  -0.06
  50   6     0.03  -0.02   0.04    -0.03  -0.03  -0.02     0.00  -0.02  -0.02
  51   6    -0.04  -0.08  -0.01     0.00  -0.03   0.02    -0.09  -0.04  -0.10
  52   6     0.02  -0.05  -0.04     0.03  -0.01  -0.01     0.07  -0.08  -0.09
  53   6    -0.03   0.00   0.01     0.02   0.01   0.00     0.02   0.02  -0.02
  54   6     0.00   0.01  -0.01    -0.05  -0.01   0.00     0.01   0.01  -0.06
  55   1    -0.03   0.00   0.02    -0.05   0.00   0.01     0.01   0.02  -0.05
  56   1     0.02  -0.04   0.06     0.01   0.04  -0.04     0.07   0.08  -0.05
  57   1     0.04   0.00   0.01    -0.04   0.02  -0.01    -0.12   0.02  -0.01
  58   1     0.06  -0.01   0.03     0.02   0.11  -0.20     0.15   0.02   0.13
  59   1     0.04  -0.03   0.04    -0.25   0.00  -0.04     0.18  -0.03   0.10
  60   1     0.06  -0.02   0.06     0.05  -0.08   0.07     0.15  -0.02   0.09
  61   1     0.01  -0.03   0.02     0.00  -0.10   0.05     0.03   0.06   0.02
  62   1     0.01  -0.08   0.09     0.03   0.00   0.03    -0.05  -0.04   0.03
  63   1    -0.01  -0.02   0.04    -0.09  -0.05   0.13    -0.01   0.04   0.04
  64   1     0.01  -0.02   0.02    -0.08  -0.03   0.11     0.03   0.04  -0.01
  65   1    -0.02  -0.03   0.01    -0.13   0.02   0.07    -0.02   0.01  -0.01
  66   1     0.01  -0.12   0.06    -0.04  -0.03   0.06    -0.09  -0.04   0.07
  67   1    -0.01  -0.10   0.03    -0.07  -0.02   0.07    -0.03  -0.04   0.03
  68   1     0.00  -0.11   0.05    -0.05   0.03   0.03    -0.09  -0.06  -0.01
  69   1     0.01  -0.06   0.01    -0.03   0.08  -0.01    -0.06   0.19   0.00
  70   1     0.02  -0.09   0.02    -0.03   0.07  -0.02    -0.01   0.12  -0.02
  71   1     0.01  -0.07  -0.02    -0.06   0.05   0.00    -0.13   0.08   0.00
  72   1     0.03   0.00  -0.02    -0.05  -0.06   0.06    -0.13  -0.04   0.04
  73   1     0.02   0.00  -0.02     0.01  -0.09   0.02    -0.03  -0.05   0.11
  74   1     0.05  -0.01  -0.01    -0.03  -0.04   0.03    -0.12  -0.09   0.09
  75   1     0.01   0.02  -0.06     0.01   0.01   0.03     0.03  -0.04   0.00
  76   1     0.02   0.04  -0.07     0.00   0.00   0.00     0.03  -0.03   0.00
  77   1     0.01   0.06  -0.09     0.01  -0.02  -0.01     0.03  -0.02   0.02
  78   1     0.00   0.02  -0.06     0.07   0.02   0.15     0.00  -0.05   0.06
  79   1    -0.03   0.10  -0.17     0.05  -0.04   0.02     0.02  -0.04   0.06
  80   1     0.00   0.00   0.01     0.04   0.05   0.05     0.01   0.05   0.01
  81   1     0.00   0.05   0.04     0.04   0.10   0.05     0.02   0.11   0.07
  82   1    -0.02   0.05   0.03     0.00   0.08   0.01     0.01   0.09   0.04
  83   1    -0.03  -0.05   0.00     0.00  -0.01   0.03    -0.02  -0.07  -0.12
  84   1    -0.06  -0.04  -0.05    -0.07  -0.03  -0.07    -0.02   0.00  -0.06
  85   1     0.01   0.05  -0.12     0.06   0.11  -0.03     0.01  -0.04   0.03
  86   1     0.04   0.00  -0.07     0.10   0.16  -0.03     0.01  -0.01   0.01
  87   1    -0.02   0.04  -0.06     0.01   0.09  -0.12     0.02  -0.04  -0.02
  88   1    -0.04   0.04  -0.08     0.00  -0.12   0.04     0.02  -0.11   0.04
  89   1    -0.06   0.04  -0.06    -0.07  -0.16  -0.08     0.01  -0.12  -0.02
  90   1    -0.05   0.03  -0.05    -0.01  -0.22   0.09     0.02  -0.13   0.03
  91   1    -0.07   0.10  -0.20     0.08  -0.09   0.05     0.06  -0.06   0.09
  92   1     0.03   0.00  -0.04     0.01  -0.04   0.00    -0.02   0.01   0.00
  93   1    -0.08  -0.09  -0.17     0.09   0.01   0.03     0.07   0.07   0.07
  94   1     0.04   0.20  -0.16     0.01  -0.08   0.04    -0.01  -0.07   0.06
  95   1     0.07   0.24  -0.06    -0.01  -0.07   0.01    -0.03  -0.10   0.02
  96   1     0.03   0.15  -0.02     0.00  -0.06   0.00     0.00  -0.06   0.00
  97   1    -0.09   0.04  -0.02    -0.09   0.04  -0.09    -0.03   0.03  -0.07
  98   1    -0.14   0.09  -0.04    -0.10   0.07  -0.09    -0.02   0.04  -0.06
  99   1    -0.08   0.11   0.06    -0.06   0.09  -0.04    -0.01   0.05  -0.07
 100   1     0.00  -0.04   0.01    -0.06  -0.05  -0.05    -0.01  -0.04  -0.04
 101   1     0.07  -0.09   0.05    -0.01  -0.08   0.01     0.00  -0.04   0.00
 102   1     0.06   0.04   0.08     0.00   0.01   0.00     0.00  -0.01   0.00
 103   1    -0.04  -0.10  -0.02     0.00  -0.04   0.01    -0.09  -0.05  -0.15
 104   1    -0.06  -0.08   0.02    -0.02  -0.02   0.03    -0.12  -0.03  -0.09
 105   1    -0.03  -0.08  -0.02     0.01  -0.02   0.01    -0.10  -0.03  -0.07
 106   1     0.03  -0.09  -0.04     0.02  -0.02  -0.04     0.08  -0.14  -0.10
 107   1     0.05  -0.04  -0.05     0.03  -0.01   0.00     0.11  -0.04  -0.08
 108   1     0.03  -0.03  -0.04     0.05   0.00  -0.01     0.10  -0.08  -0.09
 109   1     0.09  -0.01  -0.05    -0.03   0.01   0.03    -0.01   0.02   0.01
 110   1    -0.14  -0.08  -0.03     0.07   0.04   0.02     0.06   0.05  -0.01
 111   1    -0.05   0.10   0.11     0.03  -0.03  -0.05     0.03   0.00  -0.06
 112   1    -0.01   0.11  -0.11    -0.06   0.02  -0.06     0.01   0.02  -0.05
 113   1     0.12  -0.02   0.01     0.01  -0.02   0.02     0.00   0.01  -0.08
 114   1    -0.09  -0.02   0.04    -0.10  -0.02   0.03     0.02   0.03  -0.07
                    16                     17                     18
                    ?A                     ?A                     ?A
 Frequencies --    73.8599                76.2835                80.7260
 Red. masses --     3.8994                 4.1949                 3.2309
 Frc consts  --     0.0125                 0.0144                 0.0124
 IR Inten    --     1.6553                 1.4662                 0.5530
 Raman Activ --     0.0000                 0.0000                 0.0000
 Depolar     --     0.0000                 0.0000                 0.0000
 Atom AN      X      Y      Z        X      Y      Z        X      Y      Z
   1   8    -0.07   0.01  -0.02    -0.01  -0.03   0.04     0.00   0.00   0.00
   2  12    -0.01  -0.03   0.04    -0.02   0.02  -0.01     0.00   0.01   0.02
   3   8    -0.04   0.08   0.02     0.00   0.00  -0.03     0.01   0.02  -0.01
   4   6    -0.01  -0.02  -0.02     0.10   0.02   0.02     0.01   0.00   0.00
   5   7    -0.02  -0.01   0.04    -0.02   0.02  -0.01     0.02   0.01   0.02
   6   7     0.01  -0.02   0.02     0.00   0.01   0.00    -0.03  -0.01   0.03
   7   8     0.06  -0.04  -0.05     0.29   0.08   0.03     0.02  -0.01   0.00
   8   6    -0.02  -0.02   0.04     0.00   0.02  -0.01     0.00   0.00   0.02
   9   6    -0.03  -0.02   0.04     0.02   0.02  -0.01    -0.03   0.00   0.03
  10   6     0.00  -0.01   0.03     0.01   0.02   0.00    -0.03   0.00   0.02
  11   8    -0.02  -0.04   0.03    -0.02   0.06  -0.02     0.00   0.00   0.00
  12   6    -0.02  -0.02   0.03    -0.02   0.03  -0.03     0.01  -0.01   0.00
  13   6    -0.04   0.08   0.01     0.00  -0.01  -0.02     0.01   0.02  -0.01
  14   6    -0.01  -0.03   0.02    -0.02   0.01  -0.01     0.00  -0.01   0.00
  15   8    -0.01  -0.05   0.05    -0.03   0.02  -0.04     0.01  -0.03   0.01
  16   6    -0.05   0.02  -0.06     0.12  -0.03   0.08     0.00   0.00  -0.01
  17   8     0.01  -0.04   0.04    -0.01   0.01  -0.01     0.02   0.02   0.02
  18   6    -0.02   0.03  -0.01     0.00   0.00  -0.03     0.01   0.01  -0.02
  19   8     0.01  -0.01  -0.05    -0.01   0.00  -0.03     0.01  -0.02  -0.04
  20   8    -0.02   0.03  -0.06    -0.02   0.02  -0.03    -0.01   0.04  -0.01
  21   6     0.00   0.01   0.00    -0.01   0.02  -0.01     0.01   0.02   0.07
  22   6     0.01   0.00   0.00    -0.01   0.03  -0.03     0.03   0.04   0.01
  23   6    -0.01   0.03  -0.03    -0.01   0.01  -0.03    -0.01   0.04  -0.02
  24   8     0.00   0.00   0.05    -0.01   0.01   0.03     0.02  -0.01   0.16
  25   6     0.08   0.02  -0.02     0.03   0.02  -0.08     0.05   0.01  -0.05
  26   6     0.02   0.02  -0.04     0.00   0.00  -0.04     0.00   0.04  -0.02
  27   6    -0.09   0.19   0.07     0.02  -0.06  -0.05     0.01   0.04   0.01
  28   6    -0.01  -0.03   0.03    -0.05  -0.10   0.02     0.00  -0.01   0.01
  29   6     0.00  -0.01   0.02    -0.01   0.02  -0.01     0.02   0.01   0.01
  30   6     0.02  -0.01   0.00    -0.02  -0.01   0.01    -0.03  -0.02   0.00
  31   6     0.00  -0.01  -0.01    -0.01   0.01  -0.01     0.01   0.02   0.00
  32   6     0.02   0.00  -0.03     0.00   0.01  -0.01     0.00   0.02   0.00
  33   6     0.03   0.01  -0.03     0.01   0.01   0.01     0.00   0.01   0.00
  34   6     0.02   0.02  -0.01     0.00   0.02   0.02     0.00   0.00   0.00
  35   6     0.00   0.01   0.01    -0.01   0.02   0.01     0.01   0.00   0.01
  36   6     0.00  -0.01  -0.02    -0.01   0.00  -0.01     0.01   0.02   0.00
  37   6    -0.01   0.04  -0.01    -0.01   0.03   0.02     0.02  -0.01   0.00
  38   6     0.03  -0.03   0.00    -0.04  -0.02  -0.01    -0.02  -0.05  -0.02
  39   6     0.04  -0.01   0.00    -0.06  -0.05  -0.02    -0.02  -0.07  -0.06
  40   6     0.04   0.01   0.01    -0.06  -0.07  -0.01    -0.03  -0.08  -0.09
  41   6     0.03   0.02   0.01    -0.04  -0.07   0.01    -0.03  -0.06  -0.07
  42   6     0.02   0.00   0.00    -0.01  -0.03   0.03    -0.03  -0.02  -0.02
  43   6     0.03  -0.07  -0.04    -0.04  -0.01  -0.02    -0.02  -0.04   0.00
  44   6     0.00  -0.01  -0.02     0.03  -0.02   0.05    -0.04   0.03   0.03
  45   6    -0.02  -0.09   0.06    -0.02  -0.05   0.04     0.04   0.09  -0.09
  46   6     0.04   0.11   0.00     0.02   0.05   0.00    -0.06  -0.10  -0.02
  47   6    -0.02   0.03  -0.02     0.01  -0.01   0.03    -0.02   0.02  -0.02
  48   6     0.02   0.09   0.00    -0.03   0.06   0.06     0.04  -0.05  -0.05
  49   6     0.01   0.01  -0.04     0.05  -0.08   0.08    -0.09   0.04   0.10
  50   6     0.00  -0.02  -0.01     0.01  -0.01   0.04     0.04   0.09   0.03
  51   6    -0.02  -0.13  -0.04    -0.04   0.01  -0.02     0.01  -0.06   0.01
  52   6     0.07  -0.06  -0.12    -0.03  -0.03   0.00    -0.04  -0.03  -0.01
  53   6    -0.03  -0.02   0.05    -0.02   0.02   0.00     0.02  -0.01   0.01
  54   6     0.01   0.00   0.01     0.01   0.01   0.00     0.02   0.02  -0.01
  55   1    -0.03  -0.02   0.04     0.03   0.01  -0.01    -0.04   0.00   0.03
  56   1    -0.01   0.10  -0.09    -0.02  -0.02   0.02     0.01   0.02  -0.02
  57   1    -0.01  -0.01   0.03    -0.08   0.04  -0.03     0.00   0.00   0.00
  58   1    -0.03   0.04  -0.11     0.24   0.12  -0.10     0.01   0.01  -0.03
  59   1    -0.09   0.05  -0.06    -0.09  -0.09   0.09    -0.01   0.01  -0.01
  60   1    -0.02  -0.01  -0.04     0.30  -0.13   0.26     0.01   0.00   0.00
  61   1    -0.01   0.03  -0.01    -0.03   0.07  -0.05     0.02   0.10   0.01
  62   1     0.00   0.03  -0.02    -0.02   0.00  -0.02    -0.03   0.03  -0.03
  63   1     0.08   0.05  -0.05     0.03   0.02  -0.11     0.05   0.01  -0.07
  64   1     0.09   0.01  -0.01     0.02   0.02  -0.08     0.04   0.03  -0.08
  65   1     0.11   0.00   0.00     0.06   0.00  -0.06     0.07  -0.03  -0.04
  66   1     0.04   0.01  -0.06     0.00   0.00  -0.04    -0.02   0.07   0.00
  67   1     0.01   0.02  -0.06     0.02   0.01  -0.05     0.04   0.05  -0.02
  68   1     0.04   0.02  -0.02     0.00  -0.02  -0.04    -0.01   0.00  -0.03
  69   1    -0.09   0.21   0.06     0.02  -0.06  -0.03     0.01   0.04   0.01
  70   1    -0.09   0.27   0.05     0.04  -0.10  -0.04     0.01   0.06   0.00
  71   1    -0.12   0.17   0.17     0.03  -0.05  -0.10     0.00   0.03   0.03
  72   1    -0.01  -0.03   0.06    -0.12  -0.11   0.01     0.00  -0.01   0.01
  73   1    -0.01  -0.04   0.02     0.01  -0.13   0.05     0.01  -0.02   0.01
  74   1    -0.01   0.00   0.03    -0.06  -0.14   0.04     0.00  -0.01   0.01
  75   1     0.03  -0.01  -0.05     0.01   0.00  -0.01     0.00   0.03   0.00
  76   1     0.04   0.02  -0.04     0.01   0.01   0.02    -0.01   0.01   0.00
  77   1     0.03   0.03  -0.01     0.01   0.02   0.03     0.00   0.00   0.00
  78   1    -0.04  -0.03  -0.11    -0.04   0.00  -0.05     0.04   0.03   0.09
  79   1    -0.03   0.05  -0.03    -0.02   0.04  -0.02     0.03  -0.02   0.03
  80   1     0.05  -0.02  -0.01    -0.09  -0.05  -0.03    -0.01  -0.09  -0.08
  81   1     0.05   0.03   0.02    -0.08  -0.10  -0.01    -0.03  -0.10  -0.13
  82   1     0.03   0.03   0.01    -0.03  -0.08   0.02    -0.04  -0.06  -0.09
  83   1     0.03  -0.05  -0.02    -0.05  -0.02  -0.03    -0.02  -0.03   0.02
  84   1     0.00  -0.02  -0.02     0.05   0.01   0.06    -0.05   0.01   0.02
  85   1    -0.03  -0.11   0.06    -0.03  -0.06   0.05     0.05   0.12  -0.12
  86   1    -0.07  -0.14   0.05    -0.06  -0.06   0.03     0.11   0.12  -0.08
  87   1     0.02  -0.09   0.12     0.01  -0.05   0.07    -0.01   0.09  -0.15
  88   1     0.03   0.09  -0.02     0.02   0.03   0.00    -0.05  -0.09  -0.02
  89   1     0.09   0.13   0.09     0.06   0.06   0.04    -0.10  -0.12  -0.11
  90   1     0.04   0.19  -0.06     0.02   0.09  -0.03    -0.07  -0.17   0.05
  91   1    -0.03   0.05  -0.04     0.03  -0.05   0.04    -0.01   0.01  -0.03
  92   1     0.01   0.02   0.01    -0.02  -0.02   0.04    -0.04   0.03  -0.06
  93   1    -0.04  -0.01  -0.03     0.05   0.00   0.01    -0.03   0.05   0.01
  94   1     0.01   0.11  -0.02    -0.04   0.07   0.06     0.04  -0.06  -0.05
  95   1     0.03   0.11   0.01    -0.05   0.09   0.05     0.06  -0.09  -0.04
  96   1     0.03   0.08   0.03    -0.03   0.05   0.09     0.03  -0.04  -0.09
  97   1    -0.03   0.02  -0.04     0.09  -0.08   0.09    -0.04   0.04   0.12
  98   1     0.02  -0.01  -0.03     0.07  -0.07   0.08    -0.16   0.06   0.07
  99   1     0.02   0.02  -0.07     0.03  -0.11   0.08    -0.10   0.06   0.18
 100   1    -0.02  -0.03  -0.03     0.05   0.00   0.06     0.01   0.13   0.05
 101   1     0.00  -0.04   0.01    -0.01   0.03   0.02     0.09   0.06  -0.01
 102   1     0.01  -0.01  -0.01    -0.02  -0.05   0.03     0.07   0.14   0.03
 103   1    -0.02  -0.13  -0.07    -0.04   0.00  -0.02     0.02  -0.06   0.03
 104   1    -0.02  -0.15   0.01    -0.05   0.02  -0.04     0.02  -0.07   0.02
 105   1    -0.04  -0.16  -0.06    -0.03   0.02  -0.01     0.02  -0.07  -0.01
 106   1     0.06  -0.09  -0.15    -0.03  -0.03   0.01    -0.03  -0.03   0.01
 107   1     0.07  -0.07  -0.14    -0.02  -0.01   0.02    -0.03  -0.04  -0.04
 108   1     0.10   0.00  -0.12    -0.03  -0.05   0.01    -0.06  -0.01  -0.02
 109   1     0.02  -0.02   0.02     0.11   0.01  -0.06    -0.15   0.01   0.07
 110   1    -0.09  -0.06   0.03    -0.16  -0.06  -0.05     0.17   0.09   0.06
 111   1    -0.04   0.02   0.10    -0.05   0.13   0.13     0.05  -0.15  -0.14
 112   1     0.01   0.03  -0.02     0.01  -0.01   0.04     0.01   0.18  -0.20
 113   1     0.05  -0.02   0.01    -0.04   0.02  -0.01     0.24  -0.05   0.03
 114   1    -0.02   0.00   0.02     0.04   0.03  -0.02    -0.14  -0.04   0.08
                    19                     20                     21
                    ?A                     ?A                     ?A
 Frequencies --    87.5905                91.1370                92.2664
 Red. masses --     2.5009                 2.5556                 3.0625
 Frc consts  --     0.0113                 0.0125                 0.0154
 IR Inten    --     0.3825                 0.0856                 1.6208
 Raman Activ --     0.0000                 0.0000                 0.0000
 Depolar     --     0.0000                 0.0000                 0.0000
 Atom AN      X      Y      Z        X      Y      Z        X      Y      Z
   1   8    -0.02   0.01  -0.01     0.01   0.01   0.00     0.00   0.01   0.00
   2  12     0.01  -0.02  -0.02    -0.02   0.00   0.01     0.04   0.00   0.00
   3   8     0.00   0.02  -0.02     0.02  -0.02   0.01    -0.02   0.04  -0.01
   4   6    -0.02   0.02  -0.01     0.03   0.02   0.00    -0.04   0.01   0.00
   5   7     0.02  -0.03  -0.03    -0.01  -0.01  -0.01     0.05   0.02   0.02
   6   7    -0.04  -0.04  -0.01    -0.01  -0.01   0.01     0.05  -0.01   0.01
   7   8    -0.03   0.02  -0.01     0.03   0.02   0.00    -0.07   0.01   0.01
   8   6     0.00  -0.03  -0.02     0.07   0.01  -0.04     0.02   0.01   0.03
   9   6     0.00  -0.03  -0.02     0.11   0.02  -0.06     0.03   0.00   0.03
  10   6    -0.02  -0.03  -0.02     0.05   0.01  -0.02     0.02  -0.01   0.03
  11   8    -0.01   0.02  -0.02     0.01   0.02   0.00    -0.01   0.02  -0.02
  12   6    -0.01   0.01  -0.02     0.01  -0.01   0.03    -0.01   0.03  -0.04
  13   6    -0.01   0.01  -0.02     0.01   0.02   0.02    -0.02   0.02  -0.03
  14   6    -0.01   0.02  -0.01     0.05   0.02  -0.01    -0.05   0.01   0.00
  15   8    -0.01   0.01  -0.02     0.02  -0.04   0.04    -0.01   0.03  -0.04
  16   6    -0.02   0.01   0.00    -0.03   0.01   0.01    -0.01   0.01   0.01
  17   8     0.03  -0.01  -0.04    -0.02   0.03   0.02     0.02  -0.02   0.00
  18   6    -0.01   0.01  -0.01     0.03  -0.02   0.00    -0.02   0.04   0.00
  19   8     0.01   0.01  -0.02     0.02  -0.02   0.00     0.00   0.03  -0.01
  20   8     0.00   0.00  -0.04     0.01   0.02   0.06     0.00  -0.01  -0.02
  21   6     0.02  -0.01  -0.01    -0.01   0.03   0.02     0.01  -0.03   0.03
  22   6     0.03  -0.01  -0.02    -0.01   0.03   0.02     0.01  -0.02   0.01
  23   6     0.01  -0.01  -0.03    -0.01   0.01   0.03     0.00   0.02  -0.01
  24   8     0.02  -0.01   0.03    -0.01   0.03  -0.01     0.01  -0.05   0.08
  25   6     0.04   0.00  -0.01    -0.02   0.02   0.00    -0.01  -0.03   0.01
  26   6     0.03  -0.03  -0.04    -0.02   0.04   0.05    -0.02   0.01  -0.02
  27   6     0.00   0.00  -0.02    -0.02   0.07   0.04     0.00  -0.02  -0.05
  28   6    -0.01   0.03  -0.01     0.05   0.05  -0.06    -0.06  -0.02   0.05
  29   6     0.02  -0.03  -0.02    -0.02  -0.01   0.00     0.01   0.03   0.01
  30   6    -0.03  -0.01   0.00    -0.02  -0.01   0.01     0.04  -0.02   0.01
  31   6     0.01  -0.03   0.00    -0.02  -0.01  -0.01     0.00   0.06   0.02
  32   6     0.00  -0.03   0.03    -0.03  -0.01   0.00    -0.03   0.05   0.03
  33   6     0.00  -0.04   0.02    -0.03  -0.02   0.01    -0.05   0.03   0.02
  34   6     0.01  -0.03  -0.01    -0.03  -0.02   0.01    -0.03   0.01   0.00
  35   6     0.01  -0.03  -0.03    -0.02  -0.02   0.00     0.00   0.01  -0.01
  36   6     0.02  -0.01   0.01    -0.02   0.00  -0.02     0.01   0.08   0.00
  37   6     0.01  -0.02  -0.02    -0.02  -0.02   0.00     0.00   0.00  -0.02
  38   6    -0.01  -0.02   0.01    -0.01  -0.01   0.02     0.03  -0.04  -0.01
  39   6     0.01   0.00   0.01     0.00  -0.01   0.00     0.03  -0.04  -0.01
  40   6     0.01   0.04   0.02    -0.01  -0.03  -0.04     0.03  -0.03   0.01
  41   6    -0.01   0.05   0.03    -0.02  -0.04  -0.05     0.03  -0.03   0.01
  42   6    -0.03   0.03   0.02    -0.02  -0.03  -0.02     0.04  -0.03   0.01
  43   6     0.00  -0.02   0.03     0.00  -0.01   0.03     0.03  -0.04  -0.02
  44   6    -0.04   0.05   0.03    -0.03  -0.01  -0.01     0.03  -0.05  -0.01
  45   6     0.00   0.00   0.04    -0.01   0.01  -0.04     0.03   0.16  -0.08
  46   6     0.04   0.02   0.02    -0.03  -0.02  -0.02    -0.06   0.01  -0.02
  47   6     0.08  -0.10   0.02     0.00  -0.05   0.01     0.02  -0.07  -0.01
  48   6    -0.04   0.04   0.07    -0.04   0.00   0.03    -0.02   0.05   0.03
  49   6    -0.10   0.10   0.05    -0.02  -0.03  -0.01     0.05  -0.05  -0.05
  50   6     0.02   0.07   0.04    -0.05   0.02  -0.04    -0.02  -0.08  -0.01
  51   6     0.02   0.02   0.03     0.00  -0.09   0.04     0.01  -0.02  -0.03
  52   6    -0.01  -0.03   0.08    -0.01   0.01  -0.04     0.04  -0.05  -0.01
  53   6    -0.04  -0.02   0.01     0.09   0.04  -0.02    -0.03   0.00   0.05
  54   6     0.02  -0.02  -0.03     0.05   0.00  -0.01    -0.06  -0.03   0.05
  55   1     0.00  -0.03  -0.03     0.17   0.03  -0.08     0.00   0.00   0.04
  56   1    -0.01   0.01  -0.01     0.05   0.04  -0.01    -0.04   0.00  -0.01
  57   1    -0.01   0.02  -0.02     0.08   0.01   0.01    -0.08   0.01  -0.03
  58   1    -0.04   0.00   0.04    -0.04  -0.02   0.01    -0.03  -0.01   0.06
  59   1     0.02   0.01   0.00    -0.04   0.00   0.01     0.06   0.01   0.00
  60   1    -0.05   0.02  -0.03    -0.05   0.04   0.01    -0.04   0.02  -0.04
  61   1     0.05   0.00  -0.01    -0.03   0.04   0.01     0.03  -0.02   0.02
  62   1     0.02  -0.01   0.00    -0.03   0.01   0.00     0.02   0.02  -0.01
  63   1     0.03   0.02   0.02    -0.01   0.00  -0.02    -0.01  -0.04   0.03
  64   1     0.08   0.00  -0.02    -0.05   0.02   0.01     0.00  -0.03   0.01
  65   1     0.01  -0.03  -0.03     0.00   0.04   0.02    -0.02  -0.03   0.00
  66   1     0.04  -0.05  -0.06    -0.06   0.07   0.07     0.00  -0.02  -0.02
  67   1     0.01  -0.03  -0.07     0.02   0.04   0.07    -0.04   0.00  -0.03
  68   1     0.04  -0.03  -0.03    -0.05   0.02   0.02    -0.01   0.02  -0.01
  69   1     0.00   0.00  -0.02    -0.02   0.10   0.04     0.00  -0.04  -0.05
  70   1     0.00   0.00  -0.02    -0.02   0.10   0.03    -0.01  -0.04  -0.04
  71   1     0.01   0.01  -0.02    -0.05   0.05   0.08     0.02  -0.01  -0.07
  72   1    -0.01   0.03  -0.01     0.06   0.05  -0.06    -0.08  -0.03   0.05
  73   1    -0.01   0.03  -0.01     0.02   0.05  -0.09    -0.01  -0.03   0.08
  74   1    -0.02   0.03  -0.01     0.09   0.06  -0.08    -0.09  -0.04   0.07
  75   1     0.00  -0.04   0.05    -0.03  -0.01   0.00    -0.04   0.07   0.03
  76   1     0.00  -0.04   0.04    -0.04  -0.02   0.02    -0.07   0.03   0.03
  77   1     0.00  -0.04  -0.01    -0.03  -0.03   0.01    -0.04  -0.01  -0.01
  78   1     0.03  -0.01  -0.01    -0.01   0.00  -0.01     0.06   0.09   0.06
  79   1     0.00   0.00  -0.08    -0.02  -0.01  -0.03     0.01   0.02  -0.07
  80   1     0.02   0.00   0.01     0.01  -0.01   0.01     0.02  -0.05  -0.02
  81   1     0.02   0.05   0.02     0.00  -0.04  -0.05     0.03  -0.04   0.01
  82   1    -0.01   0.08   0.04    -0.03  -0.06  -0.08     0.04  -0.03   0.01
  83   1    -0.01  -0.03   0.02     0.00   0.01   0.07     0.03  -0.05  -0.04
  84   1    -0.07   0.01   0.01    -0.03   0.00   0.01     0.03  -0.04   0.00
  85   1     0.02   0.01   0.05    -0.01   0.02  -0.04     0.05   0.19  -0.13
  86   1    -0.02  -0.02   0.04     0.00   0.02  -0.03     0.10   0.16  -0.07
  87   1     0.00   0.00   0.06    -0.03   0.01  -0.05    -0.03   0.17  -0.12
  88   1     0.06   0.05   0.03    -0.02   0.01  -0.02    -0.05   0.05  -0.03
  89   1     0.02   0.03   0.04    -0.07  -0.02  -0.04    -0.13   0.00  -0.08
  90   1     0.06   0.01   0.00    -0.02  -0.06  -0.01    -0.06  -0.06   0.04
  91   1     0.08  -0.10   0.05    -0.01  -0.03   0.01     0.03  -0.08  -0.02
  92   1     0.09  -0.12   0.08     0.02  -0.06   0.04     0.00  -0.08   0.03
  93   1     0.13  -0.13  -0.04     0.01  -0.08  -0.02     0.04  -0.08  -0.04
  94   1    -0.04   0.03   0.07    -0.03  -0.01   0.02    -0.01   0.03   0.00
  95   1    -0.08   0.12   0.06    -0.04   0.05   0.03    -0.02   0.12   0.03
  96   1    -0.05   0.01   0.15    -0.06  -0.01   0.07    -0.05   0.02   0.09
  97   1    -0.10   0.10   0.05    -0.03  -0.01   0.01     0.05  -0.07  -0.08
  98   1    -0.15   0.10   0.03    -0.01  -0.05   0.01     0.06  -0.01  -0.06
  99   1    -0.09   0.13   0.10    -0.02  -0.04  -0.03     0.05  -0.05  -0.04
 100   1    -0.01   0.09   0.04    -0.04   0.04  -0.01    -0.01  -0.11  -0.03
 101   1     0.07   0.02   0.03    -0.06   0.05  -0.06    -0.05  -0.07   0.02
 102   1     0.06   0.13   0.06    -0.06   0.00  -0.07    -0.03  -0.11  -0.02
 103   1     0.03   0.02   0.05     0.00  -0.09   0.04     0.00  -0.03  -0.04
 104   1     0.02   0.03  -0.01     0.00  -0.10   0.09    -0.01  -0.01  -0.04
 105   1     0.04   0.04   0.04     0.00  -0.12   0.00     0.01   0.00  -0.01
 106   1    -0.01  -0.02   0.09     0.00  -0.01  -0.03     0.03  -0.05  -0.03
 107   1    -0.01  -0.02   0.10     0.00  -0.02  -0.09     0.03  -0.04   0.02
 108   1    -0.02  -0.06   0.08    -0.02   0.07  -0.05     0.07  -0.08   0.00
 109   1     0.26  -0.05  -0.12     0.41   0.00  -0.13     0.16  -0.02  -0.05
 110   1    -0.33  -0.20  -0.10    -0.17  -0.14  -0.11    -0.24  -0.13  -0.03
 111   1    -0.10   0.23   0.28     0.04   0.32   0.22    -0.07   0.15   0.25
 112   1     0.02   0.08  -0.14     0.07  -0.13   0.17    -0.05  -0.20   0.22
 113   1     0.16  -0.06   0.00    -0.15   0.05  -0.07    -0.28   0.04   0.01
 114   1    -0.07  -0.06   0.02     0.22   0.06  -0.11     0.09   0.04  -0.03
                    22                     23                     24
                    ?A                     ?A                     ?A
 Frequencies --    96.4072               105.2240               107.4351
 Red. masses --     4.4495                 3.1645                 3.8879
 Frc consts  --     0.0244                 0.0206                 0.0264
 IR Inten    --     1.5107                 0.3137                 0.7410
 Raman Activ --     0.0000                 0.0000                 0.0000
 Depolar     --     0.0000                 0.0000                 0.0000
 Atom AN      X      Y      Z        X      Y      Z        X      Y      Z
   1   8    -0.03   0.00   0.01     0.07   0.00   0.01    -0.01  -0.03  -0.02
   2  12     0.01  -0.02   0.02     0.01   0.05   0.02     0.00   0.00  -0.02
   3   8    -0.04   0.01   0.05    -0.04   0.05   0.02     0.01   0.04  -0.06
   4   6     0.02   0.01   0.00     0.02   0.00   0.01    -0.04  -0.04  -0.02
   5   7    -0.03  -0.01   0.02     0.02   0.00  -0.03    -0.04   0.01   0.02
   6   7    -0.02   0.02  -0.03     0.00   0.04   0.02    -0.03  -0.03   0.03
   7   8     0.07   0.01   0.00    -0.02   0.00   0.03    -0.05  -0.04  -0.02
   8   6     0.05   0.04  -0.02    -0.02  -0.01  -0.02     0.03   0.02   0.00
   9   6     0.07   0.05  -0.06    -0.03  -0.01   0.01     0.07   0.02  -0.02
  10   6     0.03   0.03  -0.05    -0.01   0.01   0.02     0.03   0.00   0.00
  11   8    -0.01  -0.01   0.02    -0.01   0.02   0.00     0.00  -0.02  -0.03
  12   6    -0.01  -0.03   0.03    -0.02   0.04   0.01     0.00   0.03  -0.06
  13   6    -0.04  -0.02   0.03    -0.03   0.02   0.01     0.01   0.01  -0.05
  14   6     0.00   0.00   0.01     0.00   0.00   0.00    -0.05  -0.04  -0.01
  15   8     0.00  -0.05   0.05    -0.01   0.05   0.01    -0.01   0.06  -0.08
  16   6     0.00   0.01   0.00     0.02  -0.01   0.02     0.01  -0.02  -0.03
  17   8     0.06  -0.09  -0.02     0.00  -0.03   0.01     0.01   0.03  -0.04
  18   6    -0.04  -0.03   0.01    -0.02   0.02   0.01     0.00   0.07  -0.01
  19   8    -0.02  -0.08  -0.04     0.01   0.00  -0.02     0.01   0.11   0.01
  20   8    -0.04  -0.02  -0.11    -0.01  -0.01  -0.03     0.04  -0.01  -0.01
  21   6     0.02  -0.05   0.04     0.00  -0.03   0.01     0.03  -0.02  -0.02
  22   6     0.06  -0.05   0.00     0.00  -0.02   0.00     0.01   0.00  -0.03
  23   6     0.01  -0.04  -0.05     0.00  -0.01  -0.01     0.03   0.01  -0.01
  24   8     0.02  -0.08   0.18     0.00  -0.04   0.05     0.03  -0.03  -0.03
  25   6     0.09  -0.04   0.01     0.03  -0.02  -0.01    -0.02  -0.01  -0.03
  26   6     0.07  -0.06  -0.07     0.02  -0.05  -0.04     0.01  -0.05  -0.04
  27   6    -0.03  -0.02   0.04     0.01  -0.05  -0.02     0.06  -0.04  -0.08
  28   6     0.00   0.00  -0.01    -0.01  -0.04  -0.02    -0.06  -0.06   0.06
  29   6    -0.02  -0.01   0.02     0.02   0.00  -0.03    -0.03   0.01   0.02
  30   6    -0.02   0.03  -0.01     0.00   0.05   0.03    -0.02  -0.02   0.04
  31   6    -0.02  -0.01  -0.02     0.01  -0.01   0.00    -0.02   0.00  -0.02
  32   6    -0.01   0.00  -0.04     0.00  -0.02   0.02     0.01   0.01  -0.04
  33   6     0.00   0.01  -0.03     0.00  -0.02   0.01     0.02   0.02   0.00
  34   6    -0.01   0.00   0.01     0.00  -0.02  -0.02     0.01   0.03   0.05
  35   6    -0.02  -0.01   0.03     0.01  -0.01  -0.04    -0.02   0.03   0.06
  36   6    -0.03  -0.02  -0.03     0.02  -0.01   0.00    -0.04  -0.03  -0.01
  37   6    -0.02   0.00   0.01     0.02  -0.03  -0.03    -0.03   0.06   0.07
  38   6    -0.02   0.04   0.01     0.00   0.07   0.05     0.01  -0.01   0.06
  39   6    -0.02   0.07   0.04    -0.01   0.05   0.04     0.03   0.00   0.05
  40   6    -0.01   0.09   0.07    -0.02   0.02   0.01     0.02   0.01   0.02
  41   6    -0.01   0.09   0.07    -0.01   0.01  -0.01     0.00   0.01   0.02
  42   6    -0.01   0.05   0.02     0.00   0.02   0.00    -0.02  -0.01   0.03
  43   6    -0.02   0.06   0.01    -0.01   0.08   0.05     0.02  -0.04   0.09
  44   6    -0.01   0.02  -0.01     0.00   0.01  -0.01    -0.04   0.00   0.03
  45   6    -0.01  -0.01  -0.08     0.02   0.00  -0.01    -0.04  -0.06   0.02
  46   6    -0.07  -0.07  -0.04     0.01  -0.01   0.00    -0.01  -0.04   0.00
  47   6    -0.06   0.03  -0.01     0.06  -0.08  -0.01    -0.09   0.14   0.04
  48   6     0.02  -0.01  -0.03    -0.03  -0.04   0.00     0.03   0.03   0.00
  49   6     0.00   0.03  -0.05     0.02  -0.01  -0.03    -0.07   0.03   0.03
  50   6    -0.03  -0.02   0.00    -0.03   0.00  -0.02    -0.02   0.02   0.03
  51   6    -0.01   0.11   0.01     0.00  -0.14   0.08     0.05  -0.15   0.11
  52   6    -0.02   0.04   0.06    -0.05   0.17  -0.16     0.02  -0.02   0.01
  53   6     0.11   0.08  -0.01    -0.04  -0.03  -0.02     0.07   0.03  -0.01
  54   6     0.01   0.03  -0.04     0.02   0.00   0.04     0.04   0.01  -0.01
  55   1     0.11   0.08  -0.08    -0.04  -0.04   0.02     0.12   0.04  -0.04
  56   1    -0.05  -0.02   0.02    -0.07   0.00   0.05    -0.02   0.00  -0.02
  57   1     0.01   0.01   0.02     0.00   0.00  -0.01    -0.09  -0.03  -0.04
  58   1     0.04   0.04  -0.05     0.04  -0.02  -0.05    -0.03  -0.04   0.04
  59   1    -0.05   0.00   0.00    -0.05  -0.02   0.02     0.10   0.00  -0.04
  60   1     0.05  -0.02   0.05     0.05   0.01   0.08    -0.04  -0.02  -0.11
  61   1     0.08  -0.03   0.02    -0.01  -0.01  -0.01     0.02  -0.01  -0.03
  62   1     0.01  -0.04  -0.01     0.02  -0.01   0.02     0.07   0.01   0.03
  63   1     0.07   0.02   0.07     0.04  -0.01  -0.06    -0.01  -0.03  -0.04
  64   1     0.18  -0.04  -0.01     0.01  -0.02   0.00    -0.05  -0.01  -0.02
  65   1     0.04  -0.09  -0.02     0.07  -0.01   0.01    -0.01   0.01  -0.02
  66   1     0.11  -0.08  -0.12     0.06  -0.09  -0.06     0.04  -0.11  -0.04
  67   1     0.04  -0.06  -0.11    -0.03  -0.05  -0.07    -0.06  -0.05  -0.08
  68   1     0.11  -0.06  -0.02     0.04  -0.03   0.00     0.02  -0.01  -0.02
  69   1    -0.03  -0.03   0.02     0.01  -0.08  -0.02     0.06  -0.07  -0.06
  70   1    -0.05   0.00   0.04    -0.01  -0.08  -0.01     0.07  -0.08  -0.07
  71   1    -0.02  -0.01   0.05     0.05  -0.02  -0.06     0.09  -0.02  -0.13
  72   1     0.00   0.00   0.00    -0.03  -0.04  -0.03    -0.06  -0.06   0.06
  73   1    -0.01  -0.01  -0.02     0.00  -0.05  -0.02     0.00  -0.06   0.10
  74   1     0.02   0.01  -0.01     0.01  -0.05  -0.02    -0.11  -0.08   0.09
  75   1    -0.01   0.01  -0.07     0.00  -0.02   0.05     0.02   0.00  -0.07
  76   1     0.00   0.01  -0.05    -0.01  -0.03   0.04     0.05   0.03  -0.02
  77   1    -0.01   0.01   0.01     0.00  -0.02  -0.02     0.02   0.04   0.08
  78   1    -0.03  -0.02   0.00     0.02   0.00   0.00    -0.07  -0.02   0.00
  79   1    -0.02  -0.01   0.03     0.04  -0.03  -0.05    -0.05   0.04   0.12
  80   1    -0.02   0.07   0.05    -0.02   0.06   0.04     0.05   0.00   0.06
  81   1    -0.01   0.11   0.10    -0.02   0.01  -0.01     0.04   0.02   0.02
  82   1     0.00   0.10   0.09    -0.02  -0.02  -0.03    -0.01   0.02   0.00
  83   1    -0.02   0.04  -0.01     0.02   0.18   0.17     0.00  -0.01   0.15
  84   1    -0.01   0.02  -0.02     0.01   0.02   0.00    -0.05  -0.01   0.02
  85   1    -0.01   0.00  -0.11     0.02   0.00  -0.02    -0.05  -0.08   0.04
  86   1     0.03  -0.02  -0.07     0.02  -0.01  -0.01    -0.07  -0.04   0.01
  87   1    -0.03  -0.01  -0.08     0.01   0.00   0.00     0.00  -0.07   0.01
  88   1    -0.06  -0.07  -0.04     0.01  -0.02   0.00    -0.01  -0.06   0.02
  89   1    -0.09  -0.08  -0.09     0.02  -0.02  -0.01     0.02  -0.05  -0.01
  90   1    -0.07  -0.11  -0.01     0.01  -0.01   0.00    -0.01  -0.03  -0.01
  91   1    -0.07   0.06  -0.04     0.08  -0.12   0.02    -0.08   0.13   0.03
  92   1    -0.04   0.04  -0.02     0.02  -0.09   0.00    -0.11   0.16  -0.03
  93   1    -0.10   0.01   0.01     0.11  -0.05  -0.03    -0.12   0.19   0.10
  94   1     0.02  -0.01  -0.05    -0.02  -0.06   0.03     0.01   0.06   0.00
  95   1     0.05  -0.02  -0.01    -0.06  -0.02  -0.01     0.06  -0.03   0.02
  96   1     0.01  -0.01  -0.04    -0.04  -0.05   0.02     0.05   0.06  -0.05
  97   1    -0.02   0.02  -0.08     0.02  -0.01  -0.03    -0.07   0.03   0.03
  98   1     0.01   0.05  -0.06     0.05  -0.01  -0.02    -0.08   0.02   0.03
  99   1     0.01   0.04  -0.06     0.02  -0.03  -0.05    -0.06   0.04   0.04
 100   1    -0.02  -0.05  -0.02    -0.03  -0.01  -0.02    -0.03   0.03   0.03
 101   1    -0.04  -0.02   0.02    -0.04   0.01   0.00     0.00   0.01   0.02
 102   1    -0.04  -0.03   0.02    -0.04  -0.01  -0.03    -0.01   0.04   0.03
 103   1    -0.01   0.13   0.01     0.00  -0.17   0.07     0.05  -0.21   0.13
 104   1     0.01   0.11  -0.03     0.00  -0.19   0.22     0.01  -0.15   0.16
 105   1    -0.02   0.11   0.03    -0.01  -0.23  -0.03     0.09  -0.16   0.05
 106   1    -0.02   0.06   0.06    -0.04   0.14  -0.11     0.03  -0.05   0.02
 107   1    -0.03   0.06   0.09    -0.03   0.07  -0.35     0.04  -0.05  -0.06
 108   1    -0.02   0.01   0.07    -0.12   0.36  -0.20     0.00   0.06  -0.01
 109   1     0.15   0.06   0.02    -0.08  -0.02  -0.03     0.10   0.02  -0.01
 110   1     0.13   0.08   0.00    -0.03  -0.02  -0.02     0.06   0.01  -0.01
 111   1     0.12   0.12  -0.04    -0.04  -0.06  -0.03     0.07   0.06  -0.01
 112   1     0.03  -0.12   0.17     0.01   0.07  -0.04     0.06  -0.07   0.13
 113   1    -0.23   0.08  -0.12     0.12  -0.01   0.08    -0.10   0.03  -0.07
 114   1     0.20   0.11  -0.16    -0.06  -0.05   0.08     0.17   0.06  -0.09
                    25                     26                     27
                    ?A                     ?A                     ?A
 Frequencies --   114.2656               121.3203               125.8237
 Red. masses --     3.1483                 1.4588                 3.0318
 Frc consts  --     0.0242                 0.0127                 0.0283
 IR Inten    --     1.3976                 0.9501                 1.7882
 Raman Activ --     0.0000                 0.0000                 0.0000
 Depolar     --     0.0000                 0.0000                 0.0000
 Atom AN      X      Y      Z        X      Y      Z        X      Y      Z
   1   8     0.01   0.00   0.00    -0.01   0.00   0.00     0.04   0.01  -0.01
   2  12     0.06  -0.08   0.00    -0.02   0.02   0.00     0.03   0.05   0.06
   3   8    -0.01   0.00  -0.01     0.01   0.00  -0.01    -0.04   0.09   0.05
   4   6     0.00   0.01   0.00    -0.01   0.00   0.00     0.04   0.00  -0.01
   5   7     0.01  -0.02   0.05    -0.01   0.01   0.00    -0.01  -0.01   0.01
   6   7    -0.01  -0.04  -0.05     0.00   0.01   0.02     0.01   0.04   0.03
   7   8    -0.02   0.01   0.01    -0.01  -0.01  -0.01     0.02   0.00   0.00
   8   6     0.00   0.00   0.04     0.03   0.01  -0.01     0.01  -0.01   0.00
   9   6    -0.01   0.02   0.00     0.00   0.00   0.01     0.00  -0.01   0.01
  10   6    -0.01  -0.01  -0.05    -0.01   0.00   0.02    -0.01   0.01   0.04
  11   8     0.01   0.03  -0.03     0.00  -0.01   0.00     0.01   0.02  -0.02
  12   6     0.01   0.00  -0.03     0.00   0.00   0.00     0.01   0.04  -0.01
  13   6     0.00   0.00  -0.03     0.00   0.00   0.00    -0.02   0.02   0.00
  14   6    -0.02   0.00  -0.01     0.00   0.00   0.00     0.01   0.00  -0.01
  15   8     0.01  -0.03  -0.02    -0.01   0.01   0.00     0.02   0.04  -0.01
  16   6     0.01  -0.01   0.01     0.00   0.00  -0.01    -0.08  -0.01   0.00
  17   8     0.08  -0.05  -0.01    -0.02   0.02   0.00     0.00  -0.06   0.08
  18   6     0.00   0.00   0.00     0.00   0.01   0.00     0.00   0.03   0.02
  19   8     0.03  -0.02  -0.02    -0.01   0.02   0.01     0.06  -0.01  -0.03
  20   8     0.00  -0.01   0.01     0.01   0.00   0.00     0.00   0.01   0.02
  21   6     0.02   0.01   0.01     0.00  -0.01   0.00     0.00   0.01   0.01
  22   6     0.06  -0.03   0.06    -0.01   0.01  -0.02     0.01  -0.02   0.06
  23   6    -0.01   0.00   0.00     0.01   0.00   0.00     0.00   0.02   0.02
  24   8     0.00   0.08  -0.04     0.01  -0.03   0.02    -0.01   0.04  -0.04
  25   6     0.03   0.01   0.15    -0.01   0.00  -0.04     0.06   0.00   0.06
  26   6    -0.04   0.04   0.03     0.01  -0.01  -0.01    -0.02   0.01   0.02
  27   6    -0.02   0.01  -0.04     0.01  -0.01   0.00     0.03  -0.08  -0.05
  28   6    -0.04  -0.05   0.06     0.01   0.02  -0.02    -0.02  -0.08   0.04
  29   6     0.00  -0.02   0.04    -0.01   0.01   0.00    -0.01  -0.02   0.00
  30   6    -0.01  -0.04  -0.04     0.01   0.01   0.01     0.00   0.03   0.01
  31   6     0.00   0.00   0.01    -0.01   0.01  -0.01     0.00  -0.02  -0.03
  32   6    -0.01   0.02  -0.03    -0.01   0.01   0.00     0.01  -0.01  -0.04
  33   6    -0.01   0.01  -0.04    -0.01   0.00   0.01     0.01  -0.02  -0.01
  34   6    -0.01   0.00  -0.01    -0.01   0.00   0.02     0.00  -0.02   0.03
  35   6     0.00  -0.02   0.03    -0.01   0.00   0.01    -0.01  -0.02   0.02
  36   6     0.00   0.01   0.00    -0.01   0.00  -0.01    -0.01  -0.04  -0.02
  37   6    -0.01   0.00   0.00    -0.01  -0.01   0.01     0.00  -0.02   0.01
  38   6    -0.01   0.00   0.00     0.01   0.00   0.01    -0.01   0.01  -0.02
  39   6    -0.01   0.02   0.04     0.01   0.00   0.01    -0.01   0.00  -0.04
  40   6    -0.01   0.00   0.03     0.01   0.01   0.02    -0.01  -0.02  -0.05
  41   6    -0.01  -0.03  -0.01     0.01   0.01   0.03    -0.01  -0.02  -0.06
  42   6    -0.01  -0.04  -0.03     0.01   0.01   0.02    -0.01   0.01  -0.03
  43   6    -0.01   0.03   0.03     0.00  -0.02  -0.01    -0.02   0.01  -0.06
  44   6     0.00   0.00   0.01     0.01   0.00   0.01    -0.02   0.01  -0.03
  45   6     0.00   0.01  -0.01    -0.01   0.00  -0.01    -0.02  -0.08   0.01
  46   6    -0.02   0.04  -0.01    -0.01  -0.01  -0.01     0.02  -0.04  -0.02
  47   6    -0.05  -0.01  -0.03    -0.02   0.01   0.01    -0.05   0.00  -0.01
  48   6     0.03   0.02  -0.01     0.00  -0.02   0.00     0.02  -0.04  -0.02
  49   6     0.06  -0.08   0.04     0.07  -0.04  -0.03    -0.06   0.05  -0.01
  50   6    -0.07   0.09  -0.06    -0.06  -0.01  -0.01     0.03   0.01  -0.01
  51   6     0.02   0.00   0.03    -0.02   0.01  -0.01    -0.07   0.07  -0.08
  52   6    -0.06   0.06   0.00     0.03  -0.03   0.01     0.01  -0.01  -0.02
  53   6    -0.02   0.03   0.07     0.08   0.02  -0.02     0.06   0.01   0.00
  54   6     0.01   0.03  -0.11    -0.01   0.01   0.01    -0.01  -0.01   0.08
  55   1    -0.02   0.05  -0.01     0.01  -0.01   0.01     0.01  -0.02   0.01
  56   1     0.00   0.01  -0.04     0.00   0.00   0.01    -0.09  -0.02   0.04
  57   1    -0.07   0.01  -0.04     0.02  -0.01   0.01    -0.04   0.02  -0.02
  58   1     0.02   0.00  -0.02     0.02   0.02  -0.02    -0.21  -0.15   0.18
  59   1    -0.03  -0.02   0.01    -0.02   0.00  -0.01     0.13   0.02  -0.02
  60   1     0.02   0.00   0.04     0.02  -0.01   0.01    -0.26   0.11  -0.18
  61   1     0.11  -0.08   0.09    -0.03   0.01  -0.03    -0.01  -0.02   0.04
  62   1    -0.01   0.01  -0.02     0.01   0.00   0.01     0.01   0.02   0.03
  63   1     0.00   0.05   0.25    -0.01  -0.02  -0.06     0.08   0.02   0.00
  64   1     0.12  -0.01   0.15    -0.04   0.00  -0.03     0.05  -0.01   0.07
  65   1    -0.06   0.01   0.09     0.01   0.00  -0.02     0.11   0.01   0.09
  66   1    -0.05   0.05   0.04     0.02  -0.02  -0.01     0.00  -0.01   0.02
  67   1    -0.03   0.03   0.07     0.00  -0.01  -0.02    -0.05   0.01   0.01
  68   1    -0.05   0.06   0.01     0.01  -0.01   0.00    -0.01   0.03   0.03
  69   1    -0.02   0.01  -0.05     0.01  -0.01   0.01     0.04  -0.15  -0.07
  70   1    -0.03   0.01  -0.04     0.02  -0.01   0.00     0.00  -0.12  -0.03
  71   1    -0.02   0.00  -0.03     0.02   0.00   0.00     0.10  -0.04  -0.11
  72   1    -0.07  -0.05   0.06     0.02   0.02  -0.02    -0.07  -0.08   0.05
  73   1     0.02  -0.06   0.09    -0.01   0.03  -0.03     0.04  -0.11   0.06
  74   1    -0.09  -0.07   0.08     0.02   0.03  -0.02    -0.04  -0.10   0.05
  75   1    -0.01   0.03  -0.06    -0.01   0.01  -0.01     0.01  -0.01  -0.07
  76   1    -0.02   0.03  -0.07    -0.01   0.00   0.02     0.02  -0.02  -0.01
  77   1    -0.01   0.00  -0.02    -0.01  -0.01   0.04     0.01  -0.02   0.05
  78   1     0.00   0.01  -0.02    -0.02   0.01   0.00    -0.04  -0.04  -0.04
  79   1    -0.01   0.00  -0.01     0.00  -0.01   0.02     0.01  -0.03   0.03
  80   1    -0.01   0.05   0.07     0.01   0.00   0.00    -0.01  -0.01  -0.05
  81   1    -0.01   0.01   0.05     0.01   0.01   0.03    -0.02  -0.03  -0.07
  82   1    -0.01  -0.04  -0.01     0.01   0.02   0.03    -0.02  -0.04  -0.08
  83   1     0.00   0.06   0.05     0.00  -0.03  -0.03     0.00  -0.01  -0.11
  84   1     0.02   0.05   0.09     0.02   0.03   0.05    -0.03  -0.02  -0.06
  85   1     0.00   0.00  -0.02    -0.01   0.00  -0.01    -0.03  -0.09   0.03
  86   1     0.01   0.00  -0.01    -0.01   0.01  -0.01    -0.05  -0.08   0.01
  87   1     0.00   0.01   0.00    -0.01   0.00  -0.02     0.00  -0.08   0.03
  88   1    -0.02   0.05  -0.02     0.00   0.00   0.00     0.02  -0.05   0.00
  89   1    -0.03   0.04   0.01    -0.02  -0.02  -0.03     0.04  -0.03  -0.01
  90   1    -0.02   0.05  -0.01     0.00  -0.03  -0.01     0.03  -0.02  -0.04
  91   1    -0.05   0.01  -0.07    -0.02   0.01   0.00    -0.03  -0.03  -0.03
  92   1    -0.04  -0.01  -0.02    -0.02   0.01  -0.01    -0.08   0.00  -0.04
  93   1    -0.08  -0.03  -0.01    -0.03   0.01   0.02    -0.06   0.03   0.02
  94   1     0.04   0.02  -0.07     0.01  -0.03  -0.02     0.04  -0.06  -0.07
  95   1     0.06   0.06   0.01     0.01  -0.02   0.01     0.06  -0.02   0.00
  96   1     0.00   0.01   0.01    -0.02  -0.02  -0.01    -0.02  -0.05  -0.02
  97   1     0.03  -0.02   0.09     0.04  -0.03  -0.03    -0.06   0.05  -0.01
  98   1     0.12  -0.16   0.11     0.14  -0.05   0.01    -0.11   0.05  -0.03
  99   1     0.06  -0.13  -0.07     0.07  -0.07  -0.10    -0.06   0.08   0.03
 100   1    -0.06   0.14   0.00    -0.09  -0.02  -0.03     0.00   0.01  -0.02
 101   1    -0.10   0.16  -0.09    -0.08  -0.01   0.04     0.06  -0.03  -0.01
 102   1    -0.08   0.04  -0.14    -0.05  -0.01  -0.04     0.05   0.05   0.00
 103   1     0.02   0.02   0.05    -0.02   0.00  -0.03    -0.08   0.09  -0.12
 104   1     0.05  -0.02   0.05    -0.03   0.01  -0.02    -0.07   0.08  -0.10
 105   1     0.01  -0.03   0.01    -0.02   0.02   0.00    -0.10   0.09  -0.03
 106   1    -0.05   0.07   0.04     0.03  -0.04  -0.01     0.00   0.00  -0.05
 107   1    -0.05   0.03  -0.06     0.03  -0.01   0.04    -0.01   0.02   0.04
 108   1    -0.11   0.10  -0.01     0.05  -0.05   0.01     0.05  -0.06  -0.01
 109   1     0.03   0.02   0.07     0.26   0.00  -0.08     0.28  -0.02  -0.08
 110   1    -0.07   0.02   0.05    -0.03  -0.10  -0.05    -0.10  -0.13  -0.05
 111   1    -0.03   0.07   0.12     0.05   0.18   0.07     0.02   0.20   0.14
 112   1    -0.01   0.19  -0.33    -0.05   0.28  -0.41    -0.02  -0.01   0.05
 113   1     0.25  -0.04  -0.07     0.45  -0.09   0.17     0.01   0.00   0.11
 114   1    -0.18   0.00   0.00    -0.39  -0.14   0.24    -0.04  -0.04   0.09
                    28                     29                     30
                    ?A                     ?A                     ?A
 Frequencies --   128.6705               131.4898               138.0104
 Red. masses --     1.5104                 2.5678                 2.3582
 Frc consts  --     0.0147                 0.0262                 0.0265
 IR Inten    --     0.8264                 0.0602                 0.4672
 Raman Activ --     0.0000                 0.0000                 0.0000
 Depolar     --     0.0000                 0.0000                 0.0000
 Atom AN      X      Y      Z        X      Y      Z        X      Y      Z
   1   8    -0.05  -0.01   0.00     0.04   0.00   0.00     0.00   0.00  -0.01
   2  12     0.02   0.01   0.01     0.00  -0.02  -0.02     0.02   0.00   0.01
   3   8     0.00   0.02   0.00     0.01  -0.04  -0.01    -0.01   0.04   0.00
   4   6    -0.05  -0.02   0.00     0.02   0.01   0.00    -0.01   0.01  -0.01
   5   7     0.00  -0.01   0.00     0.00  -0.01   0.00    -0.04   0.00   0.01
   6   7     0.00   0.00   0.01     0.02   0.00  -0.03     0.01   0.01   0.00
   7   8    -0.06  -0.03   0.00     0.00   0.01   0.01    -0.04   0.00   0.00
   8   6     0.00  -0.01   0.00     0.00  -0.01   0.00     0.02   0.02  -0.01
   9   6     0.01  -0.01   0.00    -0.05  -0.02   0.01     0.00   0.02   0.00
  10   6     0.01   0.00   0.01    -0.05  -0.02   0.00    -0.03   0.01   0.01
  11   8     0.00  -0.03   0.01     0.01   0.01  -0.01     0.00   0.01  -0.01
  12   6     0.00   0.00   0.00     0.01  -0.02   0.00     0.00   0.01  -0.01
  13   6     0.00   0.00   0.00     0.01  -0.01   0.00    -0.01   0.01  -0.01
  14   6    -0.01  -0.01   0.00     0.00   0.00   0.00    -0.01   0.01  -0.01
  15   8     0.00   0.02  -0.01     0.01  -0.04   0.01     0.01  -0.01   0.00
  16   6     0.09   0.00  -0.01     0.00   0.00   0.01     0.00   0.00   0.00
  17   8     0.01  -0.01   0.01     0.00   0.02  -0.03     0.02  -0.01   0.01
  18   6     0.00   0.02   0.01     0.00  -0.02   0.00     0.00   0.02   0.00
  19   8     0.02   0.01   0.00    -0.03  -0.01   0.02     0.03   0.01  -0.02
  20   8     0.01   0.00   0.00    -0.01   0.00   0.00     0.01   0.00   0.02
  21   6     0.01   0.00   0.00    -0.01   0.01   0.00     0.01   0.01   0.00
  22   6     0.01  -0.01   0.02     0.00   0.01  -0.01     0.02   0.00   0.02
  23   6     0.00   0.01   0.00    -0.01  -0.01   0.00     0.00   0.01   0.01
  24   8     0.00   0.01  -0.01    -0.01   0.01   0.00     0.00   0.03  -0.03
  25   6     0.02   0.00   0.03    -0.03   0.00  -0.01     0.02   0.00   0.03
  26   6     0.00   0.00   0.00     0.00   0.02   0.01    -0.03   0.01   0.01
  27   6     0.02  -0.02   0.00    -0.03   0.04   0.01     0.01  -0.01  -0.02
  28   6     0.01   0.06  -0.01     0.00  -0.02   0.01    -0.01   0.00   0.01
  29   6     0.00  -0.01   0.00     0.01  -0.01   0.00    -0.03   0.00   0.01
  30   6     0.00   0.00   0.01     0.01   0.00  -0.03     0.00  -0.01  -0.01
  31   6     0.00  -0.01   0.00     0.00   0.01  -0.04    -0.02  -0.01   0.01
  32   6     0.00  -0.01   0.00     0.00   0.02  -0.06    -0.01  -0.01   0.01
  33   6     0.00  -0.01   0.00     0.00   0.00   0.00    -0.01   0.00  -0.01
  34   6     0.00  -0.01   0.00     0.00  -0.03   0.07    -0.01   0.01  -0.02
  35   6     0.00  -0.01   0.00     0.00  -0.03   0.06    -0.02   0.01  -0.02
  36   6     0.00   0.00   0.00     0.02   0.01  -0.01    -0.04  -0.03  -0.01
  37   6     0.00  -0.01   0.01     0.00  -0.01   0.04    -0.02   0.01  -0.03
  38   6     0.00   0.01   0.01     0.00  -0.01  -0.05     0.00  -0.03  -0.04
  39   6     0.00   0.00   0.00     0.00  -0.03  -0.06     0.00  -0.04  -0.05
  40   6     0.00  -0.01  -0.02     0.00   0.00  -0.01     0.01  -0.01  -0.01
  41   6     0.00  -0.02  -0.03     0.02   0.04   0.04     0.01   0.02   0.02
  42   6     0.00  -0.01  -0.01     0.02   0.03   0.02     0.01   0.01   0.02
  43   6     0.00   0.01  -0.01     0.01   0.03  -0.01     0.01  -0.02  -0.01
  44   6    -0.01   0.00  -0.01     0.03   0.01   0.01     0.02   0.00   0.01
  45   6     0.00   0.00   0.00    -0.01   0.04   0.02    -0.03  -0.07  -0.01
  46   6     0.00   0.00   0.00     0.07  -0.02   0.00    -0.05  -0.01  -0.01
  47   6    -0.01   0.03   0.00    -0.07   0.04   0.00     0.05  -0.10   0.01
  48   6     0.01  -0.03  -0.02     0.06  -0.02  -0.01    -0.07   0.08   0.06
  49   6    -0.03   0.02   0.00     0.01   0.05   0.00     0.01   0.02   0.01
  50   6     0.00   0.02  -0.01     0.06  -0.04   0.05     0.04  -0.03   0.04
  51   6    -0.04   0.02  -0.02     0.10  -0.02   0.01     0.08  -0.03   0.01
  52   6     0.00   0.01  -0.01    -0.09   0.08  -0.04    -0.03  -0.01   0.01
  53   6     0.00  -0.01   0.01     0.02   0.01   0.00     0.15   0.05  -0.04
  54   6     0.01  -0.01   0.02    -0.13  -0.05   0.04    -0.09  -0.01   0.03
  55   1     0.01  -0.01   0.00    -0.08  -0.02   0.02     0.00   0.02   0.00
  56   1    -0.02  -0.01   0.01     0.04   0.01  -0.03    -0.03   0.00  -0.01
  57   1     0.02  -0.04   0.01    -0.01   0.01  -0.01    -0.01   0.01  -0.01
  58   1     0.33   0.23  -0.41     0.03   0.00  -0.08     0.09   0.06  -0.17
  59   1    -0.36  -0.04   0.02    -0.10  -0.01   0.02    -0.20  -0.03   0.01
  60   1     0.42  -0.17   0.36     0.04   0.01   0.09     0.12  -0.03   0.17
  61   1     0.01  -0.02   0.02     0.01   0.01   0.00     0.03  -0.01   0.02
  62   1     0.01   0.01   0.01    -0.02  -0.01  -0.02     0.01   0.02   0.01
  63   1     0.02   0.00   0.02    -0.05   0.00   0.05     0.01   0.02   0.06
  64   1     0.01   0.00   0.03     0.01   0.01  -0.03     0.05   0.00   0.02
  65   1     0.02   0.00   0.03    -0.09  -0.02  -0.05    -0.01  -0.01   0.01
  66   1     0.01  -0.01   0.00    -0.03   0.05   0.02    -0.03   0.00   0.02
  67   1    -0.02   0.00   0.00     0.04   0.02   0.03    -0.03   0.01   0.02
  68   1     0.00   0.02   0.01    -0.02  -0.01  -0.01    -0.03   0.02   0.00
  69   1     0.02  -0.05   0.00    -0.03   0.07   0.00     0.01  -0.04  -0.03
  70   1     0.01  -0.02   0.00    -0.03   0.06   0.00    -0.01  -0.01  -0.01
  71   1     0.04  -0.01  -0.01    -0.07   0.02   0.04     0.04   0.01  -0.02
  72   1     0.06   0.07  -0.02    -0.02  -0.02   0.02    -0.01   0.00   0.01
  73   1    -0.03   0.09  -0.01     0.02  -0.03   0.02     0.00  -0.01   0.01
  74   1     0.00   0.07  -0.01    -0.01  -0.03   0.02    -0.02   0.00   0.01
  75   1     0.00  -0.01   0.01     0.00   0.04  -0.11    -0.01  -0.02   0.02
  76   1     0.00  -0.01   0.00     0.00   0.00   0.00     0.00   0.00  -0.01
  77   1     0.00  -0.01   0.00     0.00  -0.05   0.12    -0.01   0.02  -0.04
  78   1     0.01   0.00   0.00     0.01   0.02   0.01    -0.06  -0.03  -0.03
  79   1     0.00  -0.02   0.03     0.00  -0.02   0.07    -0.02   0.04  -0.11
  80   1     0.00   0.00   0.00    -0.02  -0.05  -0.09     0.00  -0.06  -0.08
  81   1     0.00  -0.02  -0.03     0.00   0.00  -0.01     0.01  -0.01  -0.02
  82   1    -0.01  -0.03  -0.04     0.03   0.07   0.08     0.02   0.04   0.05
  83   1     0.01   0.01  -0.03     0.02   0.08   0.05     0.01   0.00   0.02
  84   1    -0.02  -0.01  -0.01     0.03  -0.01  -0.03     0.02  -0.01  -0.02
  85   1     0.00   0.00   0.00    -0.01   0.03   0.08    -0.03  -0.07  -0.04
  86   1     0.00   0.00   0.00    -0.06   0.07   0.02    -0.01  -0.10  -0.01
  87   1     0.00   0.00   0.01     0.00   0.03   0.00    -0.02  -0.06   0.01
  88   1     0.01   0.02   0.00     0.09  -0.01   0.05    -0.07  -0.03  -0.03
  89   1    -0.01   0.01   0.00     0.06  -0.03  -0.03    -0.03  -0.01   0.01
  90   1     0.01   0.00   0.00     0.10  -0.06  -0.02    -0.07   0.02  -0.01
  91   1    -0.03   0.06   0.00    -0.07   0.06  -0.04     0.04  -0.10   0.02
  92   1     0.01   0.05  -0.02    -0.07   0.06  -0.04     0.07  -0.13   0.11
  93   1    -0.04   0.03   0.02    -0.13   0.05   0.06     0.10  -0.16  -0.07
  94   1     0.02  -0.04  -0.03     0.09  -0.04  -0.10    -0.11   0.14   0.13
  95   1     0.03  -0.03  -0.01     0.14   0.01   0.03    -0.14   0.06   0.02
  96   1    -0.01  -0.03  -0.03     0.02  -0.03  -0.01     0.01   0.09   0.09
  97   1    -0.03   0.02   0.00     0.03   0.01  -0.03     0.01   0.01   0.00
  98   1    -0.05   0.02  -0.01    -0.03   0.10  -0.05    -0.01   0.03   0.00
  99   1    -0.03   0.03   0.01     0.00   0.07   0.07     0.01   0.03   0.03
 100   1    -0.01   0.03  -0.01     0.06  -0.08   0.02     0.04  -0.06   0.02
 101   1     0.01   0.01  -0.02     0.07  -0.08   0.08     0.04  -0.05   0.06
 102   1     0.01   0.03  -0.02     0.06  -0.03   0.10     0.04  -0.02   0.07
 103   1    -0.04   0.03  -0.05     0.11   0.00   0.07     0.09  -0.02   0.06
 104   1    -0.04   0.02  -0.02     0.14  -0.04   0.03     0.10  -0.03  -0.01
 105   1    -0.05   0.02   0.00     0.11  -0.06  -0.04     0.10  -0.03  -0.02
 106   1    -0.01   0.02  -0.07    -0.07   0.12   0.03    -0.03   0.02   0.04
 107   1    -0.02   0.01   0.03    -0.09   0.02  -0.13    -0.04  -0.02  -0.01
 108   1     0.06  -0.02  -0.01    -0.18   0.13  -0.06    -0.07  -0.01   0.00
 109   1     0.11  -0.02  -0.05     0.29  -0.03  -0.10    -0.05   0.06   0.09
 110   1    -0.11  -0.09  -0.03    -0.19  -0.17  -0.06     0.42   0.18   0.06
 111   1    -0.03   0.08   0.11    -0.02   0.24   0.19     0.20  -0.09  -0.31
 112   1     0.01  -0.05   0.08    -0.14  -0.11   0.03    -0.10  -0.02  -0.05
 113   1    -0.04   0.00   0.01    -0.16  -0.01   0.07    -0.04   0.00   0.07
 114   1     0.06   0.00   0.00    -0.14  -0.05   0.05    -0.16  -0.03   0.07
                    31                     32                     33
                    ?A                     ?A                     ?A
 Frequencies --   139.3247               144.7208               149.3449
 Red. masses --     2.6380                 3.2507                 2.6724
 Frc consts  --     0.0302                 0.0401                 0.0351
 IR Inten    --     0.1557                 2.8489                 0.5027
 Raman Activ --     0.0000                 0.0000                 0.0000
 Depolar     --     0.0000                 0.0000                 0.0000
 Atom AN      X      Y      Z        X      Y      Z        X      Y      Z
   1   8     0.00  -0.01   0.00    -0.05   0.00   0.02    -0.11  -0.02   0.04
   2  12     0.00   0.00   0.00     0.05   0.08  -0.03     0.00   0.00   0.00
   3   8     0.00  -0.01   0.00    -0.02  -0.03   0.03    -0.02   0.08  -0.01
   4   6     0.01  -0.01   0.00    -0.02   0.00   0.01    -0.05  -0.03   0.04
   5   7    -0.01   0.00   0.01    -0.01   0.03  -0.06     0.00   0.00  -0.01
   6   7     0.00   0.00  -0.01     0.01   0.02   0.00    -0.01   0.00  -0.03
   7   8     0.02  -0.01   0.00     0.01   0.00   0.01     0.05  -0.02   0.02
   8   6     0.00   0.01   0.00     0.01   0.01  -0.06    -0.01   0.01  -0.01
   9   6     0.00   0.01   0.00     0.01   0.00  -0.02    -0.03   0.01  -0.01
  10   6    -0.01   0.01   0.00    -0.01   0.00   0.01    -0.02   0.01  -0.02
  11   8     0.01   0.00   0.00     0.00  -0.01   0.01    -0.03  -0.04   0.04
  12   6     0.01  -0.01   0.00     0.01  -0.01   0.01    -0.03   0.00   0.03
  13   6     0.00   0.00  -0.01    -0.02  -0.01   0.01    -0.02   0.02   0.02
  14   6     0.00  -0.01   0.01    -0.01   0.00   0.02    -0.02  -0.02   0.03
  15   8     0.01  -0.02   0.00     0.02   0.01   0.01    -0.03   0.01   0.03
  16   6     0.01   0.00  -0.01     0.05   0.01   0.00     0.12   0.02  -0.03
  17   8     0.00   0.00   0.00     0.08   0.00  -0.08     0.02  -0.02   0.00
  18   6     0.00  -0.01   0.00    -0.03  -0.04   0.02     0.00   0.04  -0.04
  19   8    -0.01  -0.01   0.00    -0.03  -0.05   0.01     0.06   0.01  -0.08
  20   8     0.00   0.00   0.00    -0.06   0.01  -0.07     0.02  -0.02   0.07
  21   6     0.00   0.00   0.00     0.00   0.02   0.00     0.01   0.00   0.01
  22   6     0.00   0.00   0.00     0.05  -0.02   0.04     0.02   0.00   0.00
  23   6    -0.01   0.00   0.00     0.00  -0.04  -0.01    -0.02   0.01   0.00
  24   8    -0.01   0.01  -0.01    -0.02   0.09   0.00     0.01   0.01  -0.01
  25   6     0.00   0.00   0.00    -0.06  -0.01   0.13     0.04   0.01   0.01
  26   6     0.00   0.01   0.00     0.08  -0.07  -0.04    -0.12  -0.02   0.00
  27   6    -0.01   0.00   0.00    -0.07   0.03   0.02     0.08  -0.03   0.04
  28   6    -0.01  -0.02   0.03     0.00   0.04   0.03     0.02   0.09  -0.06
  29   6     0.00   0.00   0.01    -0.01   0.03  -0.05     0.00   0.00  -0.01
  30   6     0.00   0.00  -0.01     0.00   0.01   0.00    -0.01   0.00  -0.03
  31   6     0.01  -0.04   0.10    -0.01   0.02  -0.03     0.00   0.00  -0.02
  32   6     0.02  -0.06   0.14    -0.01   0.00   0.02     0.00   0.00  -0.01
  33   6     0.02   0.00   0.00     0.00   0.00   0.05    -0.01  -0.01   0.01
  34   6     0.02   0.06  -0.13     0.00   0.01   0.02     0.00  -0.02   0.02
  35   6     0.00   0.04  -0.08    -0.01   0.03  -0.02     0.00  -0.01   0.00
  36   6    -0.01  -0.03   0.02    -0.01   0.01  -0.01     0.01   0.01  -0.01
  37   6     0.01   0.02  -0.02    -0.01   0.02   0.01     0.00  -0.01   0.00
  38   6     0.00  -0.01  -0.03     0.01   0.02   0.02    -0.01   0.00  -0.03
  39   6    -0.01  -0.02  -0.03     0.00   0.01   0.01    -0.02   0.00  -0.03
  40   6     0.00   0.00   0.00     0.00  -0.03  -0.03    -0.01   0.01   0.00
  41   6     0.01   0.02   0.02    -0.01  -0.06  -0.07    -0.01   0.02   0.02
  42   6     0.00   0.01   0.01     0.00  -0.03  -0.03     0.00   0.01   0.00
  43   6     0.00   0.00   0.00     0.01  -0.01   0.01     0.00  -0.01   0.00
  44   6     0.01   0.00   0.01     0.02  -0.02  -0.01     0.02   0.00   0.00
  45   6     0.04  -0.06  -0.04    -0.02   0.01   0.01     0.00   0.01   0.00
  46   6    -0.11   0.07   0.01     0.03  -0.01   0.00     0.02  -0.01   0.00
  47   6     0.05   0.13   0.01     0.02   0.05   0.03    -0.01   0.00  -0.01
  48   6    -0.06  -0.11  -0.06    -0.04   0.00   0.01     0.01  -0.02  -0.01
  49   6     0.00   0.02  -0.01     0.00  -0.04   0.06     0.04  -0.02   0.01
  50   6     0.01  -0.02   0.02     0.05   0.01  -0.01     0.03  -0.03   0.02
  51   6     0.05  -0.01   0.00    -0.02  -0.04   0.01     0.05  -0.03   0.01
  52   6    -0.04   0.02   0.00     0.07  -0.03  -0.01    -0.02   0.00   0.00
  53   6     0.02   0.02   0.01     0.03  -0.01  -0.08    -0.02   0.02   0.00
  54   6    -0.03   0.00   0.00    -0.05  -0.03   0.06    -0.03   0.01  -0.03
  55   1     0.00   0.02   0.00     0.01  -0.03  -0.01    -0.03   0.02  -0.01
  56   1     0.01   0.00  -0.01     0.01   0.00  -0.01    -0.08  -0.01   0.04
  57   1    -0.02  -0.01   0.00     0.00  -0.01   0.01     0.05  -0.06   0.05
  58   1    -0.03  -0.03   0.05    -0.01   0.02   0.16     0.02   0.06   0.29
  59   1     0.08   0.01  -0.01     0.24   0.04  -0.01     0.51   0.10  -0.05
  60   1    -0.04   0.01  -0.08    -0.02  -0.02  -0.16    -0.01  -0.07  -0.37
  61   1     0.00   0.00   0.00     0.14  -0.08   0.10     0.02   0.00   0.01
  62   1    -0.01   0.00  -0.01    -0.02  -0.06   0.04     0.00   0.02  -0.01
  63   1     0.00   0.01   0.02    -0.13   0.03   0.40     0.05   0.01  -0.03
  64   1     0.02   0.00  -0.01     0.13   0.00   0.07     0.01   0.00   0.03
  65   1    -0.01  -0.01  -0.01    -0.29  -0.08  -0.02     0.07   0.03   0.04
  66   1    -0.01   0.02   0.01     0.11  -0.08  -0.09    -0.10  -0.08   0.03
  67   1     0.01   0.01   0.01     0.06  -0.06  -0.07    -0.18  -0.03   0.00
  68   1    -0.01   0.00   0.00     0.12  -0.07   0.02    -0.14   0.04  -0.03
  69   1    -0.01   0.01  -0.01    -0.07   0.07   0.00     0.08  -0.12   0.07
  70   1    -0.01   0.01  -0.01    -0.07   0.04   0.01     0.08  -0.02   0.03
  71   1    -0.01   0.00   0.00    -0.12   0.01   0.04     0.16   0.00   0.02
  72   1    -0.01  -0.02   0.02     0.03   0.04   0.02     0.09   0.11  -0.09
  73   1     0.01  -0.01   0.06    -0.01   0.06   0.04    -0.08   0.15  -0.09
  74   1    -0.03  -0.04   0.05    -0.02   0.04   0.04     0.06   0.10  -0.08
  75   1     0.02  -0.10   0.23     0.00  -0.01   0.05    -0.01   0.01  -0.01
  76   1     0.02   0.00   0.00     0.00  -0.02   0.09    -0.01  -0.01   0.02
  77   1     0.02   0.11  -0.23     0.00   0.00   0.05    -0.01  -0.02   0.03
  78   1     0.01  -0.04  -0.03    -0.02   0.01   0.00     0.01   0.01   0.00
  79   1     0.02  -0.01   0.08    -0.02   0.02   0.03     0.00  -0.02   0.01
  80   1    -0.01  -0.03  -0.05     0.00   0.03   0.03    -0.02  -0.01  -0.04
  81   1     0.00   0.00   0.00    -0.01  -0.05  -0.05    -0.01   0.01   0.01
  82   1     0.01   0.04   0.05    -0.02  -0.09  -0.11     0.00   0.03   0.03
  83   1     0.00   0.02   0.02    -0.01  -0.03   0.01    -0.02   0.00   0.03
  84   1     0.01   0.00  -0.01     0.03  -0.01  -0.01     0.04   0.02  -0.01
  85   1     0.04  -0.03  -0.16    -0.03   0.00   0.05     0.00   0.01   0.02
  86   1     0.14  -0.15  -0.02    -0.05   0.04   0.01    -0.01   0.02   0.00
  87   1     0.00  -0.03   0.02     0.00   0.00   0.00     0.00   0.01   0.00
  88   1    -0.12   0.11  -0.08     0.03  -0.03   0.03     0.03  -0.01   0.01
  89   1    -0.16   0.10   0.08     0.05  -0.02  -0.02     0.03  -0.01  -0.01
  90   1    -0.14   0.09   0.04     0.04  -0.01  -0.02     0.03  -0.01  -0.01
  91   1     0.08   0.05   0.11     0.02   0.04   0.06    -0.03   0.04  -0.02
  92   1     0.00   0.16  -0.10     0.01   0.06   0.01     0.03   0.00   0.01
  93   1     0.11   0.26   0.06     0.04   0.08   0.03    -0.04  -0.04  -0.01
  94   1    -0.04  -0.17   0.02    -0.06   0.02   0.07     0.02  -0.03  -0.04
  95   1    -0.10  -0.18  -0.09    -0.08  -0.06  -0.02     0.03   0.00   0.00
  96   1    -0.09  -0.09  -0.15     0.01   0.02  -0.03    -0.02  -0.02  -0.01
  97   1    -0.02   0.03  -0.01     0.07  -0.05   0.07     0.07  -0.04   0.01
  98   1     0.01   0.01   0.00    -0.05  -0.02   0.03     0.04   0.00   0.00
  99   1     0.02   0.03  -0.02    -0.03  -0.06   0.12     0.02  -0.04   0.03
 100   1     0.02  -0.04   0.01     0.09   0.03   0.02     0.08  -0.04   0.02
 101   1     0.02  -0.03   0.04     0.05   0.05  -0.06     0.01   0.01   0.00
 102   1     0.01  -0.02   0.04     0.02  -0.01   0.00    -0.01  -0.06   0.05
 103   1     0.05   0.00   0.04    -0.02  -0.08  -0.01     0.06  -0.04   0.05
 104   1     0.06  -0.01   0.00    -0.06  -0.03   0.03     0.06  -0.03   0.01
 105   1     0.06  -0.02  -0.02    -0.01  -0.03   0.01     0.08  -0.03  -0.02
 106   1    -0.03   0.03   0.04     0.07  -0.08  -0.03     0.00  -0.02   0.07
 107   1    -0.03   0.00  -0.04     0.09  -0.01   0.00     0.03  -0.01  -0.06
 108   1    -0.09   0.03  -0.01     0.10  -0.02  -0.01    -0.09   0.03  -0.01
 109   1     0.25   0.00  -0.08     0.05  -0.01  -0.11     0.02   0.01  -0.01
 110   1    -0.18  -0.12  -0.05     0.03  -0.04  -0.08    -0.05   0.00  -0.01
 111   1    -0.02   0.22   0.19     0.03   0.01  -0.09    -0.02   0.05   0.03
 112   1    -0.04  -0.01  -0.01    -0.07  -0.02  -0.02    -0.03  -0.01  -0.01
 113   1    -0.03   0.01   0.01     0.01  -0.01   0.12    -0.07   0.02  -0.05
 114   1    -0.05   0.01   0.01    -0.13  -0.08   0.10     0.00   0.04  -0.05
                    34                     35                     36
                    ?A                     ?A                     ?A
 Frequencies --   150.8685               156.8993               161.9310
 Red. masses --     3.3711                 3.0686                 2.8075
 Frc consts  --     0.0452                 0.0445                 0.0434
 IR Inten    --     1.8804                 2.0738                 0.2474
 Raman Activ --     0.0000                 0.0000                 0.0000
 Depolar     --     0.0000                 0.0000                 0.0000
 Atom AN      X      Y      Z        X      Y      Z        X      Y      Z
   1   8     0.03   0.01   0.00    -0.08  -0.04   0.01     0.00   0.01  -0.02
   2  12     0.03   0.07   0.00     0.00   0.00   0.04     0.00   0.05   0.01
   3   8    -0.04   0.05   0.04     0.03  -0.08  -0.01     0.00   0.00   0.02
   4   6     0.02   0.00   0.00    -0.05  -0.02   0.01    -0.01   0.01  -0.02
   5   7     0.01   0.02  -0.05     0.00  -0.02   0.04     0.01   0.04   0.00
   6   7    -0.01   0.00   0.03     0.01   0.01   0.04    -0.03   0.03   0.00
   7   8    -0.01  -0.01   0.00     0.02   0.00   0.01    -0.04   0.00  -0.02
   8   6     0.01  -0.01  -0.04     0.01  -0.01   0.04    -0.03   0.06   0.01
   9   6     0.08   0.00  -0.04     0.02  -0.01   0.03    -0.03   0.07   0.00
  10   6     0.07   0.01  -0.01     0.03   0.00   0.03    -0.03   0.06  -0.01
  11   8     0.02   0.00   0.00    -0.03  -0.01  -0.01     0.01   0.00  -0.01
  12   6     0.01   0.00   0.01    -0.03   0.03  -0.03     0.01   0.01  -0.01
  13   6    -0.03   0.01   0.01     0.01  -0.01  -0.02     0.00   0.01   0.00
  14   6     0.01   0.00   0.01    -0.03  -0.01  -0.01     0.00   0.01  -0.01
  15   8     0.03  -0.01   0.03    -0.04   0.10  -0.06     0.01   0.02   0.00
  16   6    -0.03   0.01   0.00     0.10  -0.02  -0.01    -0.02   0.00   0.00
  17   8     0.02  -0.01  -0.01     0.02   0.01   0.01    -0.01   0.01   0.02
  18   6    -0.01   0.00   0.00     0.01  -0.03   0.05     0.01  -0.01   0.02
  19   8     0.03  -0.04  -0.04    -0.02   0.01   0.09     0.01   0.00   0.02
  20   8    -0.02   0.00   0.02     0.00   0.02  -0.06    -0.01   0.02  -0.02
  21   6    -0.01   0.01   0.01     0.01   0.01  -0.01     0.00   0.01   0.00
  22   6     0.01  -0.01   0.02     0.02   0.00   0.01    -0.01   0.00   0.01
  23   6    -0.02  -0.01   0.01     0.03   0.01   0.01     0.01   0.00   0.01
  24   8    -0.02   0.05  -0.01     0.01   0.02  -0.01     0.00   0.01  -0.01
  25   6    -0.01  -0.01   0.04     0.00  -0.01   0.02    -0.01   0.00   0.01
  26   6    -0.03  -0.02   0.01     0.12   0.09   0.04     0.06   0.00   0.00
  27   6    -0.01  -0.01   0.00    -0.05   0.02  -0.03    -0.02   0.00  -0.02
  28   6     0.00  -0.02   0.04    -0.02   0.04  -0.06     0.00   0.00  -0.01
  29   6     0.00   0.02  -0.05     0.00  -0.02   0.04     0.01   0.02   0.01
  30   6    -0.01   0.00   0.02     0.01   0.01   0.03    -0.03   0.02  -0.01
  31   6     0.00   0.02  -0.03     0.00  -0.02   0.02     0.01   0.02  -0.01
  32   6     0.00   0.00   0.00     0.00   0.00  -0.03     0.01   0.02  -0.02
  33   6     0.01   0.00   0.03     0.00   0.00  -0.04     0.01   0.01   0.00
  34   6     0.01   0.00   0.03     0.00  -0.01  -0.01     0.00   0.00   0.02
  35   6     0.00   0.02  -0.01     0.00  -0.02   0.02     0.01   0.01   0.02
  36   6     0.01   0.02   0.00    -0.01  -0.02   0.00    -0.01  -0.03  -0.02
  37   6     0.00   0.02   0.01     0.00  -0.02  -0.01     0.04  -0.05  -0.02
  38   6    -0.02  -0.07  -0.05    -0.01  -0.02  -0.02    -0.01   0.01  -0.01
  39   6    -0.02  -0.10  -0.10    -0.01  -0.06  -0.06    -0.01   0.01  -0.02
  40   6    -0.01  -0.02  -0.02    -0.01  -0.03  -0.03    -0.01   0.02  -0.02
  41   6     0.00   0.05   0.06     0.01   0.02   0.02    -0.02   0.02  -0.01
  42   6    -0.01   0.04   0.06     0.01   0.03   0.03    -0.03   0.02   0.00
  43   6    -0.01  -0.06  -0.01    -0.01   0.01  -0.02     0.00  -0.05   0.03
  44   6    -0.04   0.01   0.01    -0.02   0.01   0.00     0.02   0.00   0.00
  45   6    -0.01   0.04   0.02     0.00  -0.04   0.00     0.00  -0.10  -0.01
  46   6     0.05  -0.02   0.00    -0.03   0.00   0.00     0.00  -0.04  -0.02
  47   6     0.00   0.06   0.01    -0.01  -0.06  -0.02    -0.01  -0.10  -0.06
  48   6    -0.01   0.00   0.00     0.02   0.01   0.01     0.03  -0.11  -0.06
  49   6     0.02   0.01  -0.11    -0.02   0.04  -0.06     0.05  -0.05   0.03
  50   6    -0.12  -0.06   0.01    -0.06  -0.02   0.01     0.04  -0.05   0.03
  51   6     0.08  -0.02   0.00     0.01   0.01  -0.02     0.06  -0.07   0.05
  52   6    -0.09  -0.05   0.05    -0.07   0.04  -0.04     0.06  -0.09   0.07
  53   6    -0.09  -0.05  -0.04     0.02   0.00   0.04    -0.08   0.07   0.04
  54   6     0.16   0.03  -0.02     0.07   0.01   0.03    -0.02   0.09  -0.04
  55   1     0.11  -0.02  -0.05     0.03   0.00   0.02    -0.04   0.07   0.00
  56   1    -0.06   0.00   0.01     0.07   0.01   0.00     0.00   0.01   0.00
  57   1    -0.01   0.01   0.00     0.00  -0.04  -0.01     0.00   0.01  -0.01
  58   1     0.01   0.01  -0.13     0.03   0.03   0.23     0.02   0.03  -0.09
  59   1    -0.17   0.00   0.00     0.39   0.02  -0.03    -0.14  -0.03   0.01
  60   1     0.02   0.02   0.11     0.01  -0.08  -0.25     0.04   0.00   0.11
  61   1     0.04  -0.02   0.04     0.02  -0.02   0.02    -0.02   0.00   0.01
  62   1    -0.03  -0.01   0.02     0.02   0.02  -0.02     0.01  -0.01   0.02
  63   1    -0.04   0.03   0.16    -0.04   0.03   0.15    -0.03   0.02   0.06
  64   1     0.10   0.00   0.00     0.11   0.00  -0.02     0.03   0.01  -0.01
  65   1    -0.11  -0.06  -0.03    -0.11  -0.07  -0.05    -0.05  -0.03  -0.02
  66   1    -0.04  -0.02   0.02     0.06   0.22   0.03     0.06   0.03  -0.01
  67   1    -0.03  -0.02   0.00     0.27   0.11   0.08     0.10   0.01  -0.01
  68   1    -0.04  -0.02   0.00     0.11  -0.01   0.02     0.08  -0.04   0.02
  69   1    -0.01  -0.05  -0.02    -0.06   0.11  -0.02    -0.02   0.02  -0.03
  70   1    -0.05  -0.01   0.01     0.00  -0.03  -0.03    -0.02  -0.01  -0.01
  71   1     0.02   0.00   0.01    -0.14  -0.02  -0.07    -0.03   0.00  -0.02
  72   1    -0.01  -0.02   0.05     0.01   0.05  -0.10    -0.01   0.00   0.01
  73   1     0.03  -0.03   0.05    -0.06   0.08  -0.07     0.01  -0.01  -0.02
  74   1    -0.02  -0.02   0.05     0.01   0.02  -0.07     0.00   0.01  -0.01
  75   1     0.00   0.00   0.02     0.00   0.01  -0.05     0.01   0.03  -0.04
  76   1     0.01  -0.02   0.07     0.00   0.01  -0.07     0.00   0.01   0.00
  77   1     0.01  -0.01   0.06     0.00   0.00  -0.02     0.00   0.00   0.04
  78   1     0.01   0.02   0.02    -0.02  -0.02  -0.01    -0.07  -0.02  -0.03
  79   1    -0.01   0.01   0.03     0.01  -0.01  -0.03     0.11  -0.05  -0.01
  80   1    -0.02  -0.16  -0.17    -0.02  -0.09  -0.10     0.00   0.00  -0.03
  81   1    -0.01  -0.03  -0.04    -0.01  -0.05  -0.05     0.00   0.02  -0.02
  82   1     0.01   0.10   0.11     0.01   0.03   0.04    -0.02   0.03  -0.01
  83   1    -0.02  -0.05   0.00     0.01   0.04  -0.01    -0.06  -0.08   0.05
  84   1    -0.04   0.01   0.03    -0.04  -0.01   0.01     0.06   0.03  -0.03
  85   1    -0.01   0.02   0.07     0.00  -0.04  -0.02    -0.02  -0.12  -0.03
  86   1    -0.04   0.07   0.02     0.01  -0.06   0.00     0.00  -0.13  -0.01
  87   1     0.01   0.02  -0.01     0.00  -0.04   0.01     0.04  -0.10   0.04
  88   1     0.05  -0.03   0.04    -0.03  -0.01  -0.02    -0.07  -0.16  -0.03
  89   1     0.06  -0.03  -0.02    -0.02   0.00   0.02     0.14  -0.04   0.00
  90   1     0.06  -0.02  -0.01    -0.04   0.01   0.00    -0.06   0.08  -0.02
  91   1     0.01   0.03   0.04    -0.02  -0.03  -0.05     0.01  -0.14  -0.10
  92   1    -0.02   0.07  -0.02     0.02  -0.07   0.03    -0.07  -0.12  -0.05
  93   1     0.01   0.09   0.03    -0.03  -0.11  -0.04    -0.02  -0.09  -0.04
  94   1    -0.02   0.02   0.04     0.03   0.00  -0.04     0.12  -0.26  -0.19
  95   1    -0.03  -0.05  -0.02     0.04   0.06   0.02     0.11   0.04   0.00
  96   1     0.03   0.02  -0.04    -0.01  -0.01   0.04    -0.17  -0.17   0.00
  97   1    -0.05   0.00  -0.15    -0.07   0.04  -0.09     0.09  -0.05   0.04
  98   1     0.11   0.03  -0.08     0.02   0.05  -0.05     0.05  -0.04   0.03
  99   1     0.05   0.01  -0.18     0.01   0.07  -0.10     0.02  -0.08   0.04
 100   1    -0.21  -0.10  -0.06    -0.14  -0.04  -0.05     0.16  -0.08   0.05
 101   1    -0.13  -0.12   0.12    -0.04  -0.09   0.08     0.01   0.03  -0.02
 102   1    -0.08  -0.01  -0.01     0.00   0.05  -0.01    -0.03  -0.13   0.09
 103   1     0.10   0.00   0.07     0.01   0.02  -0.01     0.08  -0.14   0.11
 104   1     0.11  -0.01  -0.06     0.02   0.00  -0.02     0.01  -0.04   0.03
 105   1     0.12  -0.01  -0.02     0.00   0.00  -0.03     0.15  -0.03   0.02
 106   1    -0.08   0.01   0.10    -0.05   0.05   0.03     0.06  -0.13   0.06
 107   1    -0.10  -0.06   0.03    -0.06   0.00  -0.10     0.10  -0.05   0.09
 108   1    -0.15  -0.07   0.04    -0.14   0.07  -0.05     0.07  -0.11   0.07
 109   1    -0.18  -0.03  -0.05    -0.01   0.00   0.06    -0.02   0.07   0.02
 110   1    -0.08  -0.01  -0.05     0.05   0.02   0.05    -0.17   0.05   0.00
 111   1    -0.09  -0.15  -0.03     0.03  -0.03   0.01    -0.10   0.12   0.13
 112   1     0.17   0.11  -0.05     0.08   0.04   0.05    -0.01   0.06   0.02
 113   1     0.23  -0.01  -0.03     0.08   0.00   0.01    -0.09   0.08  -0.09
 114   1     0.14   0.00  -0.02     0.09   0.01   0.02     0.04   0.13  -0.08
                    37                     38                     39
                    ?A                     ?A                     ?A
 Frequencies --   166.1869               173.7660               178.3721
 Red. masses --     3.3741                 3.8672                 4.3307
 Frc consts  --     0.0549                 0.0688                 0.0812
 IR Inten    --     3.9307                 4.6564                 7.1486
 Raman Activ --     0.0000                 0.0000                 0.0000
 Depolar     --     0.0000                 0.0000                 0.0000
 Atom AN      X      Y      Z        X      Y      Z        X      Y      Z
   1   8    -0.07  -0.02   0.00     0.07   0.02   0.00     0.03   0.01   0.01
   2  12     0.05   0.02  -0.02     0.01   0.00  -0.01    -0.02  -0.03   0.01
   3   8    -0.03   0.01   0.10    -0.01  -0.05   0.01     0.03   0.00  -0.01
   4   6    -0.04  -0.01  -0.01     0.03  -0.01   0.01     0.02  -0.02   0.02
   5   7     0.01   0.00  -0.05     0.00   0.01  -0.02     0.01  -0.02  -0.02
   6   7     0.00   0.01  -0.03    -0.02  -0.02  -0.01    -0.01  -0.03  -0.04
   7   8    -0.01   0.00   0.00    -0.01  -0.03  -0.01     0.00  -0.04   0.01
   8   6     0.00   0.00  -0.05     0.00   0.00  -0.02     0.00  -0.01  -0.02
   9   6     0.01   0.00  -0.05    -0.01  -0.01  -0.01    -0.01  -0.01  -0.03
  10   6    -0.01   0.00  -0.03    -0.01  -0.01  -0.01    -0.02  -0.02  -0.04
  11   8     0.08   0.01  -0.04    -0.10  -0.02   0.05     0.01  -0.02   0.03
  12   6     0.08  -0.01  -0.04    -0.10   0.08   0.04     0.00   0.07  -0.01
  13   6     0.00  -0.01  -0.02    -0.04   0.00   0.06     0.04   0.03   0.00
  14   6     0.01   0.00  -0.01    -0.02  -0.02   0.02     0.02  -0.02   0.03
  15   8     0.08  -0.03  -0.03    -0.10   0.20   0.00    -0.03   0.15  -0.06
  16   6     0.07  -0.01   0.00    -0.08   0.01  -0.01    -0.02   0.01  -0.02
  17   8    -0.05  -0.07   0.05     0.08  -0.06  -0.07    -0.14  -0.06   0.16
  18   6    -0.01  -0.02   0.07    -0.01  -0.04   0.02     0.07  -0.03  -0.02
  19   8     0.00  -0.04   0.06     0.01  -0.05   0.01     0.10   0.00  -0.02
  20   8     0.00  -0.03   0.01     0.02  -0.06   0.01    -0.05   0.10  -0.02
  21   6    -0.02  -0.03  -0.01     0.04  -0.03  -0.02    -0.09   0.04   0.05
  22   6    -0.03  -0.01  -0.03     0.08  -0.03  -0.05    -0.12   0.02   0.11
  23   6     0.00   0.02   0.04     0.00   0.00   0.00     0.00   0.00   0.03
  24   8    -0.02  -0.06   0.01     0.03   0.00   0.00    -0.07  -0.03   0.05
  25   6     0.10   0.00  -0.09     0.11   0.00  -0.02     0.00   0.03   0.06
  26   6     0.02   0.13   0.11    -0.04   0.14   0.10     0.15  -0.07  -0.04
  27   6    -0.11   0.01  -0.08    -0.03  -0.03   0.04     0.05  -0.01  -0.03
  28   6     0.01   0.04   0.11    -0.02  -0.06  -0.11     0.04   0.02  -0.01
  29   6    -0.01   0.00  -0.04    -0.01   0.01  -0.02     0.00  -0.02  -0.02
  30   6    -0.02   0.00  -0.01    -0.01  -0.01  -0.01    -0.01  -0.04  -0.05
  31   6    -0.01   0.00  -0.03     0.00   0.01  -0.01    -0.01  -0.01  -0.01
  32   6    -0.01  -0.01   0.00     0.00   0.00   0.01    -0.01  -0.02   0.00
  33   6    -0.01  -0.01   0.02     0.00   0.00   0.02    -0.01  -0.02   0.01
  34   6    -0.01  -0.01   0.01     0.00   0.01   0.00    -0.01  -0.02  -0.01
  35   6    -0.01   0.00  -0.02     0.00   0.01  -0.01    -0.01  -0.02  -0.02
  36   6     0.00   0.01  -0.01     0.00   0.01   0.00     0.01   0.02   0.00
  37   6    -0.02   0.01   0.00    -0.01   0.02   0.00    -0.03   0.02   0.00
  38   6    -0.01   0.02   0.00     0.01  -0.01   0.00     0.00  -0.03  -0.04
  39   6    -0.01   0.03   0.02     0.02   0.01   0.01     0.01   0.01   0.00
  40   6    -0.01   0.02   0.02     0.01   0.01   0.00     0.01   0.04   0.04
  41   6    -0.01   0.01   0.01     0.00   0.00  -0.01     0.01   0.02   0.01
  42   6    -0.01   0.01   0.00     0.00   0.00  -0.01     0.00  -0.03  -0.04
  43   6    -0.01   0.00   0.02     0.01  -0.02   0.01     0.01  -0.02  -0.01
  44   6     0.00   0.00   0.00     0.02   0.00   0.00     0.01  -0.02  -0.02
  45   6    -0.01   0.03   0.00    -0.01   0.02   0.00    -0.01   0.06   0.00
  46   6     0.03  -0.01  -0.01     0.01   0.00   0.00     0.02   0.02   0.00
  47   6     0.01   0.03   0.01     0.00   0.06   0.01    -0.01   0.07   0.02
  48   6    -0.02   0.02   0.01    -0.01   0.01  -0.01    -0.01   0.05   0.01
  49   6     0.00  -0.01   0.02     0.02  -0.02   0.03     0.01  -0.04   0.02
  50   6     0.01   0.00   0.01     0.03   0.00   0.01     0.03   0.00  -0.03
  51   6     0.01  -0.03   0.02     0.02  -0.03   0.01     0.07  -0.01   0.00
  52   6     0.02  -0.01   0.01     0.04  -0.04   0.02    -0.03  -0.01   0.01
  53   6    -0.02   0.00  -0.04     0.00  -0.01  -0.03     0.01  -0.01  -0.02
  54   6    -0.03  -0.01  -0.02    -0.02  -0.01  -0.02    -0.04  -0.02  -0.06
  55   1     0.01   0.00  -0.05    -0.01  -0.01  -0.01    -0.02   0.00  -0.03
  56   1    -0.01   0.00  -0.07    -0.01   0.01   0.13     0.04   0.03   0.03
  57   1    -0.03  -0.02  -0.06     0.02   0.01   0.07     0.05  -0.03   0.04
  58   1     0.06   0.06   0.09    -0.06  -0.06  -0.15    -0.01  -0.01  -0.08
  59   1     0.18  -0.01  -0.01    -0.24   0.01   0.00    -0.07   0.04  -0.02
  60   1     0.07  -0.08  -0.09    -0.06   0.08   0.11    -0.01   0.02   0.01
  61   1    -0.09   0.04  -0.07     0.09  -0.02  -0.04    -0.17   0.04   0.07
  62   1     0.00   0.05  -0.03    -0.01   0.03  -0.11    -0.06  -0.05   0.10
  63   1     0.16  -0.01  -0.34     0.11   0.04  -0.03    -0.04   0.16   0.14
  64   1    -0.06  -0.02  -0.03     0.13  -0.02   0.01     0.17   0.04   0.00
  65   1     0.31   0.06   0.05     0.12   0.03  -0.01    -0.05  -0.12   0.01
  66   1    -0.06   0.26   0.13    -0.16   0.31   0.16     0.14  -0.03  -0.06
  67   1     0.15   0.13   0.19     0.14   0.15   0.23     0.23  -0.02  -0.13
  68   1    -0.02   0.07   0.06    -0.12   0.08  -0.01     0.18  -0.20   0.00
  69   1    -0.09   0.03  -0.18    -0.05   0.06   0.11     0.04   0.02   0.02
  70   1    -0.19   0.00  -0.06     0.07  -0.11   0.05     0.11  -0.07  -0.02
  71   1    -0.12  -0.01  -0.04    -0.11  -0.05  -0.06     0.03  -0.01  -0.10
  72   1     0.06   0.05   0.08    -0.08  -0.07  -0.08     0.06   0.02  -0.02
  73   1     0.07   0.09   0.20    -0.09  -0.12  -0.20     0.00   0.04  -0.03
  74   1    -0.11   0.01   0.16     0.11  -0.03  -0.16     0.06   0.02  -0.02
  75   1    -0.01  -0.01   0.01     0.00  -0.01   0.03    -0.02  -0.02   0.01
  76   1    -0.01  -0.02   0.04     0.00  -0.01   0.04    -0.02  -0.03   0.02
  77   1    -0.01  -0.02   0.03     0.00   0.01   0.01    -0.01  -0.03   0.00
  78   1     0.01   0.01   0.00     0.00   0.01   0.00     0.04   0.01   0.01
  79   1    -0.04   0.01   0.00    -0.02   0.02   0.03    -0.07   0.01   0.01
  80   1    -0.01   0.04   0.03     0.02   0.01   0.02     0.01   0.02   0.02
  81   1    -0.01   0.03   0.03     0.02   0.01   0.00     0.02   0.08   0.09
  82   1    -0.01   0.01   0.01     0.00   0.01  -0.02     0.01   0.04   0.04
  83   1    -0.03  -0.01   0.03     0.00  -0.03   0.01     0.00  -0.01   0.01
  84   1     0.01   0.01   0.00     0.03   0.01  -0.01     0.02  -0.01  -0.03
  85   1    -0.01   0.03   0.03     0.00   0.02   0.01     0.00   0.06   0.04
  86   1    -0.03   0.04   0.00    -0.01   0.03   0.00    -0.02   0.10   0.00
  87   1    -0.01   0.03  -0.01    -0.01   0.02  -0.01    -0.01   0.05  -0.04
  88   1     0.04   0.00   0.02     0.02   0.01   0.01     0.07   0.10   0.02
  89   1     0.02  -0.01  -0.02     0.01   0.00  -0.01    -0.08   0.02  -0.02
  90   1     0.04  -0.03  -0.02     0.02  -0.01  -0.01     0.07  -0.07   0.00
  91   1    -0.01   0.06   0.03     0.02   0.00   0.05    -0.02   0.09   0.05
  92   1     0.03   0.04   0.01    -0.05   0.07  -0.04     0.03   0.08   0.00
  93   1     0.01   0.02   0.01     0.03   0.13   0.04    -0.01   0.07   0.02
  94   1    -0.05   0.06   0.06    -0.04   0.05   0.05    -0.07   0.13   0.09
  95   1    -0.06  -0.03  -0.01    -0.04  -0.06  -0.03    -0.06  -0.05  -0.02
  96   1     0.03   0.04  -0.01     0.05   0.04  -0.05     0.10   0.08  -0.02
  97   1     0.03  -0.02   0.02     0.08  -0.05   0.02    -0.04   0.04   0.08
  98   1     0.00   0.01   0.01     0.01   0.01   0.00     0.02  -0.14   0.09
  99   1    -0.01  -0.01   0.04    -0.01  -0.04   0.08     0.04  -0.04  -0.07
 100   1     0.04   0.00   0.02     0.09   0.00   0.03     0.18   0.01   0.04
 101   1     0.00   0.02  -0.01     0.02   0.05  -0.03    -0.01   0.12  -0.13
 102   1    -0.01  -0.02   0.02    -0.01  -0.04   0.03    -0.06  -0.12   0.00
 103   1     0.01  -0.03   0.03     0.02  -0.08   0.03     0.08  -0.03   0.05
 104   1     0.01  -0.03   0.04    -0.03   0.00   0.00     0.07   0.00  -0.03
 105   1     0.01  -0.04   0.01     0.07   0.01   0.01     0.11   0.00  -0.02
 106   1     0.03  -0.05   0.04     0.03  -0.04  -0.03    -0.02   0.00   0.06
 107   1     0.05   0.00  -0.01     0.03  -0.02   0.05    -0.02  -0.02  -0.02
 108   1    -0.01   0.00   0.01     0.08  -0.05   0.02    -0.09  -0.01   0.00
 109   1    -0.05   0.00  -0.04     0.03  -0.01  -0.05     0.01  -0.01  -0.01
 110   1     0.00   0.02  -0.04    -0.01  -0.03  -0.03     0.02   0.00  -0.02
 111   1    -0.01  -0.03  -0.05     0.00   0.01  -0.01     0.01  -0.01  -0.03
 112   1    -0.04  -0.01  -0.06    -0.02  -0.01  -0.02    -0.04  -0.03  -0.06
 113   1     0.00   0.00   0.01    -0.02  -0.01  -0.02    -0.04  -0.02  -0.06
 114   1    -0.07  -0.03   0.00    -0.02   0.00  -0.02    -0.04   0.00  -0.05
                    40                     41                     42
                    ?A                     ?A                     ?A
 Frequencies --   189.5524               199.8333               204.7706
 Red. masses --     2.7837                 2.3936                 1.4015
 Frc consts  --     0.0589                 0.0563                 0.0346
 IR Inten    --     0.5044                 0.9392                 1.0896
 Raman Activ --     0.0000                 0.0000                 0.0000
 Depolar     --     0.0000                 0.0000                 0.0000
 Atom AN      X      Y      Z        X      Y      Z        X      Y      Z
   1   8     0.03   0.02   0.02    -0.04  -0.01   0.01     0.01   0.00   0.00
   2  12     0.06   0.00  -0.05    -0.04  -0.03   0.00     0.01   0.01   0.00
   3   8     0.02  -0.04  -0.03    -0.02   0.04   0.03     0.01  -0.02  -0.01
   4   6     0.02   0.01   0.02    -0.02  -0.02   0.01     0.00   0.01  -0.01
   5   7     0.04   0.04  -0.01    -0.01   0.04   0.01     0.00   0.02   0.01
   6   7     0.06  -0.02  -0.02     0.01  -0.04   0.00    -0.01  -0.02   0.02
   7   8     0.02   0.00   0.02    -0.01  -0.01   0.01     0.00   0.01   0.00
   8   6     0.05   0.03  -0.01    -0.01   0.00   0.02    -0.01  -0.01   0.02
   9   6     0.11   0.04  -0.02    -0.03  -0.01   0.05    -0.03  -0.02   0.04
  10   6     0.04   0.00  -0.01    -0.01  -0.01   0.01    -0.01  -0.01   0.03
  11   8     0.02  -0.04   0.04    -0.02   0.05  -0.02     0.01  -0.02   0.00
  12   6     0.02   0.01   0.00    -0.02   0.00   0.01     0.01  -0.01   0.00
  13   6     0.02  -0.01   0.00    -0.02   0.01   0.01     0.01  -0.01   0.00
  14   6     0.03   0.00   0.03    -0.01  -0.01  -0.01     0.00   0.01   0.00
  15   8     0.01   0.10  -0.03    -0.01  -0.08   0.03     0.01   0.02  -0.01
  16   6     0.00   0.02   0.02     0.01   0.01  -0.04     0.01  -0.01   0.02
  17   8    -0.03  -0.04   0.01    -0.01   0.01  -0.01     0.01   0.00   0.00
  18   6    -0.01  -0.02  -0.03     0.02   0.00   0.02    -0.01   0.00   0.00
  19   8    -0.03  -0.02  -0.02     0.05   0.00   0.00    -0.03   0.00   0.01
  20   8    -0.04   0.00  -0.02     0.03   0.01   0.03     0.00  -0.01  -0.02
  21   6    -0.04   0.00   0.00     0.01   0.00   0.00     0.01  -0.01  -0.01
  22   6    -0.02  -0.01   0.00    -0.01   0.02  -0.01     0.01  -0.01   0.00
  23   6    -0.04  -0.01  -0.02     0.03   0.00   0.03    -0.01   0.00  -0.01
  24   8    -0.04   0.00   0.01     0.01  -0.02   0.00     0.00   0.00   0.00
  25   6     0.02   0.01  -0.01    -0.01   0.01  -0.02     0.02   0.00   0.01
  26   6    -0.07  -0.01  -0.02     0.07   0.01   0.03    -0.03   0.00  -0.01
  27   6     0.00   0.02   0.02     0.01  -0.03  -0.01    -0.01   0.01   0.01
  28   6     0.04   0.06   0.02    -0.02  -0.05  -0.05     0.01   0.02   0.02
  29   6     0.00   0.04   0.00     0.00   0.06  -0.04     0.00   0.03  -0.01
  30   6     0.03  -0.05  -0.01     0.02  -0.04  -0.01     0.00  -0.02   0.00
  31   6     0.00   0.04   0.00     0.00   0.06  -0.04     0.00   0.03  -0.01
  32   6     0.00   0.04   0.00     0.00   0.04   0.02     0.00   0.02   0.00
  33   6    -0.01   0.03   0.01     0.00   0.01   0.09     0.00   0.01   0.03
  34   6    -0.01   0.02   0.02    -0.01   0.03   0.04     0.00   0.01   0.02
  35   6     0.00   0.02   0.01     0.00   0.06  -0.03     0.00   0.02  -0.01
  36   6    -0.04  -0.01   0.00    -0.02   0.02  -0.03    -0.01   0.01  -0.01
  37   6     0.01   0.00   0.00     0.01   0.02  -0.03     0.01   0.01  -0.01
  38   6     0.02  -0.04   0.00     0.02  -0.03   0.00     0.00  -0.03  -0.01
  39   6     0.02  -0.02   0.03     0.02   0.00   0.04     0.01  -0.01   0.00
  40   6     0.03  -0.01   0.05     0.03   0.01   0.06     0.02   0.02   0.02
  41   6     0.03  -0.03   0.03     0.03  -0.02   0.02     0.01   0.02   0.01
  42   6     0.03  -0.05   0.01     0.02  -0.05  -0.01    -0.01  -0.01  -0.01
  43   6     0.02   0.00  -0.01     0.01   0.01  -0.02     0.00  -0.01  -0.02
  44   6    -0.02  -0.02   0.02    -0.01  -0.03   0.00    -0.01  -0.01  -0.02
  45   6    -0.01  -0.09   0.00    -0.02  -0.02  -0.01    -0.01  -0.01   0.00
  46   6    -0.04  -0.04   0.00     0.03  -0.05  -0.02     0.00  -0.02  -0.01
  47   6     0.00  -0.03  -0.01     0.04  -0.01  -0.02     0.02  -0.01   0.00
  48   6     0.00  -0.03  -0.01    -0.03  -0.02  -0.03    -0.01  -0.01  -0.01
  49   6    -0.07   0.03   0.01    -0.03  -0.01   0.01    -0.03   0.01  -0.01
  50   6    -0.03   0.04  -0.02     0.00   0.04  -0.04     0.02   0.00  -0.01
  51   6     0.01   0.01  -0.01     0.01   0.03  -0.02     0.00   0.01  -0.02
  52   6    -0.03   0.02  -0.02    -0.04   0.03  -0.02    -0.05   0.00  -0.01
  53   6    -0.06   0.01   0.01     0.02  -0.02  -0.02     0.03  -0.03  -0.01
  54   6    -0.08  -0.02   0.01     0.00   0.01  -0.03     0.05   0.01   0.00
  55   1     0.08   0.04  -0.02    -0.04  -0.01   0.05    -0.03  -0.02   0.04
  56   1     0.04   0.00   0.00    -0.04   0.00   0.02     0.02  -0.01  -0.01
  57   1     0.05   0.00   0.05    -0.02  -0.03  -0.03     0.00   0.01   0.00
  58   1    -0.01  -0.01   0.02     0.02   0.03  -0.04     0.00  -0.01   0.03
  59   1     0.00   0.02   0.02     0.03   0.05  -0.04     0.02  -0.02   0.02
  60   1    -0.01   0.03   0.01     0.02  -0.03  -0.07     0.00   0.00   0.01
  61   1    -0.03   0.00  -0.01    -0.01   0.03  -0.01     0.01  -0.02   0.00
  62   1    -0.05  -0.01  -0.03     0.02  -0.01   0.03     0.00   0.01  -0.02
  63   1     0.05   0.00  -0.12    -0.05   0.07   0.12     0.04  -0.04  -0.10
  64   1    -0.05  -0.01   0.03     0.14   0.03  -0.08    -0.08  -0.01   0.05
  65   1     0.12   0.05   0.06    -0.13  -0.08  -0.11     0.10   0.07   0.07
  66   1    -0.04  -0.06  -0.03    -0.02   0.13   0.08     0.03  -0.06  -0.04
  67   1    -0.13  -0.03  -0.03     0.24   0.05   0.03    -0.14  -0.02   0.00
  68   1    -0.06   0.04  -0.01     0.04  -0.13  -0.02    -0.01   0.09   0.03
  69   1    -0.01   0.07   0.05     0.02  -0.09  -0.04    -0.01   0.03   0.01
  70   1     0.04   0.02   0.01    -0.04  -0.02   0.00     0.00   0.02   0.00
  71   1    -0.05   0.00   0.02     0.07   0.00  -0.01    -0.03   0.00   0.02
  72   1     0.08   0.05   0.05    -0.06  -0.04  -0.12     0.02   0.01   0.04
  73   1     0.01   0.05  -0.01    -0.02  -0.02  -0.02     0.01   0.00   0.01
  74   1     0.05   0.10   0.00     0.00  -0.12  -0.04     0.00   0.05   0.01
  75   1     0.00   0.05  -0.01     0.00   0.03   0.04     0.00   0.02   0.01
  76   1    -0.01   0.03   0.01     0.00  -0.02   0.16     0.00   0.00   0.05
  77   1    -0.01   0.01   0.04    -0.01   0.02   0.08    -0.01   0.01   0.04
  78   1    -0.10   0.00   0.00    -0.08   0.03   0.00    -0.04   0.01   0.00
  79   1     0.04   0.00   0.00     0.05   0.03  -0.02     0.02   0.01  -0.01
  80   1     0.02  -0.01   0.04     0.02   0.02   0.07     0.02  -0.02   0.00
  81   1     0.03   0.00   0.07     0.03   0.04   0.10     0.03   0.05   0.04
  82   1     0.04  -0.02   0.04     0.03  -0.01   0.03     0.01   0.04   0.03
  83   1     0.04   0.02  -0.01     0.05   0.02  -0.03     0.02   0.00  -0.02
  84   1    -0.06  -0.05   0.05    -0.03  -0.04   0.03    -0.02  -0.02  -0.03
  85   1    -0.03  -0.10  -0.04    -0.04  -0.04   0.01    -0.03  -0.04   0.02
  86   1     0.00  -0.13   0.00    -0.04  -0.02  -0.01    -0.02   0.01   0.00
  87   1     0.01  -0.08   0.05     0.01  -0.03   0.00     0.02  -0.02  -0.01
  88   1    -0.16  -0.26  -0.03    -0.09  -0.29   0.00    -0.04  -0.10   0.00
  89   1     0.20  -0.05   0.02     0.32  -0.07  -0.02     0.09  -0.03  -0.01
  90   1    -0.16   0.16   0.01    -0.08   0.17  -0.04    -0.04   0.05  -0.01
  91   1    -0.02   0.00  -0.04     0.12  -0.18   0.03     0.03  -0.03   0.00
  92   1     0.02  -0.04   0.02    -0.13  -0.01  -0.09    -0.01  -0.02   0.00
  93   1    -0.03  -0.07  -0.02     0.14   0.14   0.01     0.03   0.00  -0.01
  94   1     0.06  -0.11  -0.09    -0.04  -0.04   0.03     0.00  -0.03   0.00
  95   1     0.05   0.06   0.02    -0.07  -0.06  -0.05    -0.01  -0.01  -0.01
  96   1    -0.11  -0.06   0.02    -0.03  -0.01  -0.07    -0.03  -0.01  -0.01
  97   1    -0.11   0.06   0.02    -0.04   0.01   0.03    -0.18   0.14   0.06
  98   1    -0.09   0.00   0.02    -0.05  -0.03   0.02     0.01  -0.15   0.10
  99   1    -0.03   0.08   0.00    -0.02   0.01   0.01     0.05   0.04  -0.19
 100   1    -0.29   0.08  -0.09    -0.16   0.09  -0.06     0.45   0.00   0.17
 101   1     0.04  -0.15   0.11     0.05  -0.06   0.01    -0.10   0.35  -0.29
 102   1     0.13   0.23  -0.10     0.10   0.15  -0.10    -0.26  -0.34   0.08
 103   1     0.00   0.04  -0.03     0.00   0.09  -0.04     0.00   0.06  -0.02
 104   1     0.03   0.00  -0.02     0.05   0.02  -0.03     0.05   0.00  -0.03
 105   1    -0.03  -0.01  -0.01    -0.04   0.01  -0.01    -0.03  -0.01  -0.01
 106   1    -0.03   0.04  -0.01    -0.04   0.07  -0.01    -0.04   0.03   0.04
 107   1    -0.04  -0.01  -0.03    -0.06   0.00  -0.03    -0.05  -0.01  -0.04
 108   1    -0.04   0.02  -0.02    -0.05   0.03  -0.02    -0.10   0.01  -0.02
 109   1    -0.15   0.03   0.02     0.08  -0.02  -0.07     0.08  -0.03  -0.04
 110   1    -0.08   0.06  -0.01    -0.01  -0.09  -0.02     0.03  -0.08   0.00
 111   1    -0.06  -0.09   0.05     0.01   0.03   0.01     0.03   0.02  -0.02
 112   1    -0.12  -0.06  -0.11     0.01  -0.01   0.03     0.06   0.04   0.03
 113   1    -0.04   0.01   0.08    -0.06   0.00  -0.09     0.06  -0.02  -0.03
 114   1    -0.20  -0.03   0.08     0.06   0.07  -0.07     0.07   0.01  -0.01
                    43                     44                     45
                    ?A                     ?A                     ?A
 Frequencies --   206.3870               210.1331               211.4415
 Red. masses --     1.8638                 1.9735                 1.8589
 Frc consts  --     0.0468                 0.0513                 0.0490
 IR Inten    --     2.7206                 3.7533                 1.5235
 Raman Activ --     0.0000                 0.0000                 0.0000
 Depolar     --     0.0000                 0.0000                 0.0000
 Atom AN      X      Y      Z        X      Y      Z        X      Y      Z
   1   8    -0.02   0.00   0.02    -0.02   0.02   0.07    -0.02  -0.01  -0.02
   2  12     0.00   0.01  -0.02     0.01   0.01   0.00     0.00  -0.02   0.02
   3   8    -0.02   0.04   0.03     0.00  -0.02   0.02     0.02  -0.03  -0.01
   4   6    -0.01  -0.01   0.02     0.00  -0.05   0.08    -0.01   0.01  -0.02
   5   7     0.02   0.00  -0.01     0.00   0.00   0.00     0.03  -0.01  -0.01
   6   7     0.02   0.01   0.00     0.00  -0.01   0.00     0.00   0.02  -0.01
   7   8     0.00  -0.02   0.01     0.00  -0.07   0.06    -0.01   0.01  -0.01
   8   6     0.05   0.01  -0.03    -0.01   0.00   0.00     0.04   0.01  -0.02
   9   6     0.11   0.02  -0.05    -0.01   0.00   0.00     0.09   0.03  -0.06
  10   6     0.04   0.00  -0.01    -0.01   0.00   0.00     0.03   0.01  -0.02
  11   8    -0.01   0.03  -0.01     0.01   0.07   0.00    -0.04   0.02  -0.01
  12   6    -0.01   0.01   0.01     0.01   0.05   0.00    -0.03  -0.02   0.01
  13   6    -0.02   0.02   0.01     0.00   0.02   0.00     0.01  -0.01   0.01
  14   6    -0.01  -0.01   0.00     0.02  -0.03   0.03    -0.03   0.00  -0.02
  15   8     0.00  -0.04   0.03     0.01  -0.01   0.02    -0.03  -0.05   0.01
  16   6     0.00   0.02  -0.03    -0.02   0.08  -0.10     0.01  -0.01   0.01
  17   8     0.00   0.02  -0.03     0.01   0.05   0.00     0.00   0.01   0.05
  18   6     0.01   0.00   0.00     0.01  -0.03   0.00     0.01   0.01   0.02
  19   8     0.03  -0.02  -0.02    -0.02  -0.04   0.00    -0.01   0.03   0.04
  20   8     0.02   0.00   0.03     0.01   0.00  -0.02     0.02   0.01  -0.01
  21   6     0.00   0.00   0.00     0.02   0.01   0.00     0.02   0.01   0.01
  22   6     0.00   0.01  -0.03     0.01   0.01   0.01     0.01   0.00   0.04
  23   6     0.01  -0.01   0.01     0.01  -0.01  -0.02     0.02   0.01   0.01
  24   8     0.01  -0.01  -0.01     0.02   0.02   0.01     0.02   0.00   0.00
  25   6    -0.02  -0.01  -0.05    -0.03   0.01   0.02     0.02   0.01   0.06
  26   6     0.02   0.01   0.01     0.00  -0.01  -0.02     0.04   0.00   0.00
  27   6     0.00  -0.02  -0.01    -0.06  -0.02  -0.08     0.03   0.00   0.04
  28   6    -0.01  -0.03  -0.03     0.03  -0.04  -0.04    -0.04  -0.04  -0.05
  29   6     0.00  -0.01   0.02     0.00   0.00   0.00     0.00  -0.01  -0.01
  30   6     0.00   0.00   0.00     0.00  -0.01   0.00    -0.01   0.01   0.00
  31   6     0.00  -0.01   0.03     0.00  -0.01   0.00     0.00   0.00  -0.01
  32   6     0.00   0.01  -0.01     0.00   0.00  -0.01    -0.01  -0.01   0.00
  33   6     0.00   0.02  -0.05     0.00   0.00  -0.01    -0.01  -0.02   0.01
  34   6     0.01   0.00  -0.01     0.00   0.00   0.00    -0.01  -0.02  -0.01
  35   6     0.01  -0.01   0.03     0.00   0.00   0.00     0.00  -0.02  -0.02
  36   6     0.00  -0.01   0.03     0.00   0.00   0.00     0.01   0.00  -0.01
  37   6     0.01  -0.01   0.02     0.00   0.00   0.00    -0.02   0.00  -0.01
  38   6     0.00   0.00   0.01     0.00  -0.01   0.00    -0.01   0.00  -0.01
  39   6     0.00   0.00   0.01     0.01  -0.01   0.00    -0.01   0.00  -0.02
  40   6     0.00   0.01   0.01     0.01   0.00   0.00    -0.01   0.01  -0.02
  41   6     0.00   0.00   0.00     0.00   0.00   0.01    -0.01   0.01  -0.01
  42   6     0.00  -0.01  -0.01     0.00   0.00   0.00    -0.01   0.02   0.00
  43   6     0.00   0.00   0.00     0.00  -0.01   0.00    -0.01   0.00  -0.01
  44   6    -0.01  -0.01  -0.01     0.00   0.00   0.00     0.00   0.01   0.00
  45   6     0.01  -0.01   0.01     0.00   0.00   0.00     0.01   0.02  -0.01
  46   6    -0.05   0.01   0.02     0.00   0.00   0.00     0.04  -0.02   0.00
  47   6    -0.02  -0.01   0.01     0.00  -0.01   0.00    -0.01   0.03  -0.01
  48   6     0.04   0.01   0.01     0.00   0.00   0.00    -0.02   0.02   0.00
  49   6    -0.04   0.02   0.00     0.00   0.00   0.00     0.00   0.01   0.00
  50   6     0.02   0.00   0.00     0.00   0.00   0.00    -0.01  -0.01   0.01
  51   6    -0.01   0.00   0.00     0.01   0.00   0.00     0.01  -0.01   0.00
  52   6    -0.01   0.00   0.00    -0.01  -0.01   0.01    -0.01  -0.01   0.00
  53   6    -0.06   0.00   0.01     0.00   0.01   0.00    -0.06   0.01   0.02
  54   6    -0.05  -0.05   0.06     0.00   0.01  -0.01    -0.04  -0.02   0.03
  55   1     0.11   0.01  -0.05    -0.01   0.00   0.00     0.08   0.03  -0.05
  56   1    -0.04   0.01   0.02     0.02   0.03   0.04     0.02  -0.01   0.01
  57   1    -0.01  -0.03  -0.01     0.03  -0.10  -0.01    -0.04   0.02  -0.02
  58   1     0.00   0.02  -0.05     0.00   0.05  -0.20     0.01   0.01   0.03
  59   1     0.00   0.06  -0.03    -0.06   0.21  -0.10     0.02  -0.03   0.00
  60   1     0.01  -0.01  -0.05     0.01   0.00  -0.14     0.01  -0.02   0.00
  61   1     0.00   0.04  -0.02     0.00  -0.01   0.01    -0.01  -0.03   0.03
  62   1     0.00  -0.01   0.01     0.01  -0.01  -0.02     0.04   0.01   0.01
  63   1    -0.07   0.05   0.13     0.04  -0.13  -0.21     0.08  -0.07  -0.15
  64   1     0.13   0.02  -0.12    -0.29  -0.01   0.10    -0.18  -0.02   0.14
  65   1    -0.18  -0.11  -0.16     0.15   0.16   0.15     0.19   0.13   0.18
  66   1    -0.09   0.12   0.09     0.13  -0.14  -0.12     0.16  -0.10  -0.10
  67   1     0.21   0.05   0.01    -0.21  -0.06  -0.01    -0.14  -0.04   0.00
  68   1    -0.03  -0.15  -0.06     0.07   0.16   0.08     0.11   0.14   0.10
  69   1     0.00  -0.06  -0.03    -0.08   0.17  -0.01     0.03  -0.02   0.05
  70   1    -0.04  -0.02   0.00     0.07  -0.19  -0.04     0.03   0.04   0.03
  71   1     0.04   0.00  -0.02    -0.23  -0.08  -0.25     0.05   0.01   0.07
  72   1    -0.03  -0.02  -0.09     0.03   0.00  -0.27    -0.09  -0.05  -0.03
  73   1    -0.01   0.00  -0.01     0.02   0.13   0.08    -0.04  -0.08  -0.08
  74   1     0.01  -0.09  -0.02     0.02  -0.25   0.01     0.00  -0.04  -0.07
  75   1     0.01   0.01  -0.02     0.00   0.00  -0.01    -0.01   0.00   0.01
  76   1     0.00   0.04  -0.09     0.00   0.00  -0.01    -0.02  -0.02   0.02
  77   1     0.00   0.01  -0.03     0.00   0.00   0.00    -0.01  -0.02  -0.01
  78   1     0.00  -0.01   0.02     0.00   0.00   0.00     0.01   0.01   0.00
  79   1     0.01  -0.01   0.02     0.00   0.00  -0.01    -0.04   0.00  -0.01
  80   1     0.01   0.01   0.01     0.01  -0.01   0.00     0.00  -0.01  -0.03
  81   1     0.01   0.02   0.02     0.01   0.01   0.01    -0.01   0.00  -0.03
  82   1     0.00   0.01   0.01     0.00   0.01   0.01    -0.01   0.01  -0.01
  83   1     0.00   0.01   0.00     0.01  -0.01  -0.01    -0.02  -0.01   0.00
  84   1    -0.01  -0.02  -0.03     0.00   0.00   0.01     0.01   0.02  -0.02
  85   1     0.01  -0.02   0.00     0.00  -0.01   0.02     0.03   0.04  -0.04
  86   1     0.03  -0.01   0.01    -0.01   0.01   0.00     0.03  -0.01  -0.01
  87   1     0.01  -0.01   0.01     0.01  -0.01  -0.01    -0.02   0.03   0.01
  88   1    -0.03   0.07  -0.01     0.04   0.08   0.01    -0.09  -0.26  -0.02
  89   1    -0.12   0.02   0.03    -0.09   0.01  -0.01     0.32  -0.03   0.03
  90   1    -0.05  -0.03   0.05     0.04  -0.07   0.00    -0.08   0.22  -0.02
  91   1    -0.03   0.01  -0.02     0.02  -0.05   0.00     0.03  -0.05   0.03
  92   1     0.00  -0.01   0.02    -0.03  -0.02  -0.02    -0.09   0.04  -0.08
  93   1    -0.05  -0.03   0.01     0.01   0.01   0.00     0.03   0.13   0.03
  94   1     0.07  -0.02  -0.08     0.01   0.00  -0.01    -0.11   0.14   0.15
  95   1     0.09   0.09   0.05     0.01   0.02   0.01    -0.12  -0.15  -0.07
  96   1    -0.03  -0.02   0.06     0.00   0.00   0.01     0.16   0.08  -0.08
  97   1    -0.14   0.11   0.05    -0.02   0.01   0.01     0.07  -0.05  -0.02
  98   1    -0.02  -0.09   0.07     0.01  -0.02   0.02    -0.03   0.07  -0.05
  99   1     0.03   0.06  -0.11     0.01   0.00  -0.02    -0.04  -0.01   0.09
 100   1     0.32   0.00   0.12    -0.03   0.00  -0.01     0.08  -0.03   0.03
 101   1    -0.07   0.24  -0.19     0.01  -0.02   0.02    -0.04   0.05  -0.02
 102   1    -0.17  -0.24   0.07     0.02   0.02   0.00    -0.06  -0.08   0.03
 103   1    -0.02   0.00  -0.01     0.01  -0.01   0.01     0.01   0.00   0.01
 104   1    -0.02   0.00   0.01     0.00   0.01  -0.01     0.02  -0.01   0.00
 105   1    -0.02   0.00   0.00     0.03   0.02   0.00     0.01  -0.01  -0.01
 106   1    -0.02   0.02  -0.02    -0.03   0.04  -0.05     0.00  -0.01   0.03
 107   1    -0.03   0.00   0.02    -0.06  -0.01   0.06     0.01   0.00  -0.01
 108   1     0.01  -0.01   0.00     0.05  -0.04   0.02    -0.04  -0.01   0.00
 109   1    -0.17   0.01   0.04     0.00   0.01   0.01    -0.12   0.02   0.04
 110   1    -0.06   0.08  -0.01     0.01   0.01   0.01    -0.09   0.07   0.00
 111   1    -0.06  -0.11   0.03     0.00   0.01  -0.01    -0.06  -0.06   0.07
 112   1    -0.08  -0.05  -0.09     0.00   0.01  -0.01    -0.07  -0.04  -0.08
 113   1     0.06  -0.01   0.17    -0.01   0.00  -0.03     0.02   0.01   0.11
 114   1    -0.19  -0.12   0.14     0.01   0.02  -0.02    -0.14  -0.07   0.09
                    46                     47                     48
                    ?A                     ?A                     ?A
 Frequencies --   214.6266               223.2759               229.5936
 Red. masses --     1.3777                 2.1105                 1.4049
 Frc consts  --     0.0374                 0.0620                 0.0436
 IR Inten    --     0.1891                 0.2453                 0.1136
 Raman Activ --     0.0000                 0.0000                 0.0000
 Depolar     --     0.0000                 0.0000                 0.0000
 Atom AN      X      Y      Z        X      Y      Z        X      Y      Z
   1   8     0.01   0.01   0.02     0.00  -0.01  -0.03     0.00   0.00   0.01
   2  12    -0.01  -0.02   0.00    -0.02   0.03  -0.01    -0.01  -0.01   0.01
   3   8     0.00   0.00  -0.01    -0.04   0.04   0.07     0.02  -0.02  -0.03
   4   6     0.01  -0.01   0.03    -0.01   0.01  -0.04     0.00   0.00   0.01
   5   7     0.01  -0.02   0.01     0.00  -0.01  -0.02    -0.03   0.00  -0.01
   6   7    -0.02   0.00   0.00    -0.01  -0.02   0.00     0.00   0.00   0.00
   7   8     0.01  -0.02   0.02    -0.01   0.02  -0.03     0.00   0.00   0.01
   8   6     0.00  -0.02   0.01     0.00  -0.02  -0.02     0.00  -0.01  -0.01
   9   6    -0.02  -0.02   0.01    -0.02  -0.03  -0.01     0.02  -0.01  -0.01
  10   6    -0.01  -0.02   0.00    -0.01  -0.02   0.00     0.01  -0.01   0.00
  11   8     0.02   0.00   0.00    -0.02  -0.03   0.01    -0.01   0.02  -0.01
  12   6     0.02   0.02  -0.01    -0.02   0.01   0.01    -0.01  -0.01  -0.01
  13   6     0.01   0.01  -0.01    -0.03   0.01   0.02     0.01  -0.01  -0.01
  14   6     0.02  -0.01   0.02    -0.02   0.01  -0.01    -0.01   0.00   0.00
  15   8     0.01   0.01  -0.01    -0.02   0.03   0.01    -0.01  -0.03   0.00
  16   6    -0.01   0.02  -0.02     0.01  -0.04   0.04    -0.01   0.01  -0.02
  17   8     0.00  -0.01  -0.01     0.01   0.07  -0.01    -0.01  -0.04   0.02
  18   6     0.00   0.00  -0.01     0.02  -0.03   0.01     0.00   0.02   0.01
  19   8     0.00   0.00  -0.02     0.05  -0.07  -0.03    -0.01   0.05   0.03
  20   8    -0.01   0.00   0.00     0.02   0.01   0.01    -0.01   0.00  -0.01
  21   6    -0.01   0.00   0.00     0.03   0.02   0.00    -0.01  -0.01   0.00
  22   6     0.00   0.00  -0.01     0.01   0.03   0.00     0.00  -0.02   0.01
  23   6    -0.01   0.00  -0.01     0.03  -0.01   0.01     0.00   0.01   0.01
  24   8    -0.02   0.00   0.00     0.03   0.02   0.01    -0.01  -0.02   0.01
  25   6    -0.01  -0.01  -0.02    -0.06   0.01   0.00     0.05   0.02   0.04
  26   6    -0.03   0.00  -0.01     0.06   0.00   0.01    -0.01   0.01   0.01
  27   6    -0.01   0.00  -0.04    -0.04  -0.03  -0.01     0.03   0.01   0.02
  28   6     0.03   0.02   0.03    -0.02   0.00   0.01    -0.01  -0.01  -0.01
  29   6     0.01  -0.02   0.01     0.00  -0.01   0.01    -0.01   0.01  -0.02
  30   6    -0.01   0.02   0.01     0.00  -0.02  -0.02     0.00   0.00   0.00
  31   6     0.00   0.00   0.02     0.00  -0.01   0.04    -0.01   0.00  -0.01
  32   6    -0.01   0.00   0.01     0.00   0.00   0.01     0.01  -0.01   0.02
  33   6    -0.02   0.00  -0.02     0.00   0.02  -0.05     0.02   0.01   0.02
  34   6    -0.01  -0.02  -0.02     0.00   0.01  -0.02     0.01   0.03   0.00
  35   6     0.00  -0.03   0.00     0.01  -0.01   0.03     0.00   0.03  -0.01
  36   6     0.01   0.01   0.01     0.00   0.00   0.04    -0.01   0.00  -0.01
  37   6    -0.01  -0.01   0.01     0.00   0.00   0.04     0.00   0.02   0.01
  38   6     0.00   0.02   0.01     0.00  -0.02  -0.02     0.00   0.00  -0.01
  39   6     0.00   0.01  -0.01     0.01   0.01   0.01     0.00   0.01   0.00
  40   6    -0.01   0.00  -0.03     0.01   0.03   0.04     0.00   0.02   0.00
  41   6    -0.01   0.02  -0.02     0.00   0.01   0.01     0.00   0.01  -0.01
  42   6    -0.01   0.03   0.01     0.00  -0.02  -0.02    -0.01   0.01  -0.01
  43   6     0.00   0.01   0.01     0.00  -0.01  -0.02     0.00  -0.01  -0.01
  44   6     0.00   0.02   0.00     0.00  -0.01  -0.01     0.00   0.00  -0.01
  45   6     0.02   0.02  -0.02     0.02   0.02   0.00    -0.02   0.02   0.00
  46   6     0.00  -0.01   0.01    -0.05   0.02   0.03     0.01   0.00  -0.01
  47   6    -0.01   0.01   0.01    -0.01   0.01   0.03     0.02   0.02   0.02
  48   6     0.01   0.02   0.02     0.04   0.01   0.02    -0.02  -0.01   0.00
  49   6     0.02   0.00  -0.01     0.01  -0.03   0.02     0.00  -0.02   0.01
  50   6    -0.01  -0.01   0.01     0.01   0.02  -0.03    -0.02   0.01  -0.02
  51   6    -0.02   0.00   0.01     0.03   0.00  -0.02     0.01   0.00  -0.01
  52   6     0.02   0.01   0.00    -0.03  -0.01  -0.01    -0.02  -0.01   0.00
  53   6     0.03  -0.01   0.01     0.02  -0.03  -0.05     0.00  -0.02  -0.03
  54   6     0.03  -0.01   0.00     0.01  -0.02  -0.01     0.02  -0.02   0.02
  55   1    -0.02  -0.01   0.01    -0.01  -0.03  -0.01     0.03  -0.01  -0.02
  56   1     0.01   0.01  -0.01    -0.06   0.00   0.03     0.03   0.00  -0.01
  57   1     0.02  -0.03   0.00    -0.02   0.04   0.01    -0.01  -0.01  -0.02
  58   1    -0.01   0.00  -0.06     0.01  -0.02   0.07     0.00   0.00  -0.04
  59   1    -0.03   0.06  -0.02     0.03  -0.09   0.04    -0.02   0.03  -0.02
  60   1    -0.01   0.02  -0.03     0.01  -0.01   0.05     0.00   0.00  -0.02
  61   1     0.00   0.01  -0.01     0.01   0.01   0.00    -0.01  -0.02   0.01
  62   1    -0.02   0.00  -0.01     0.01  -0.02   0.01     0.01   0.01   0.01
  63   1    -0.04   0.04   0.11     0.00  -0.13  -0.18     0.04   0.09   0.05
  64   1     0.12   0.01  -0.07    -0.28   0.00   0.05     0.12   0.00   0.04
  65   1    -0.11  -0.08  -0.09     0.08   0.14   0.10     0.04  -0.01   0.03
  66   1    -0.09   0.04   0.04     0.15  -0.06  -0.08     0.02  -0.02  -0.01
  67   1     0.05   0.01  -0.02    -0.07  -0.03   0.03    -0.04   0.00   0.01
  68   1    -0.07  -0.07  -0.06     0.12   0.10   0.10     0.00   0.04   0.02
  69   1    -0.02   0.06  -0.01    -0.03  -0.07  -0.07     0.02   0.01   0.04
  70   1     0.03  -0.05  -0.02    -0.10  -0.03   0.00     0.04   0.04   0.01
  71   1    -0.06  -0.02  -0.08     0.00  -0.01  -0.01     0.02   0.01   0.03
  72   1     0.07   0.04  -0.05    -0.03  -0.03   0.16    -0.01   0.01  -0.16
  73   1     0.03   0.09   0.09    -0.03  -0.11  -0.08     0.01   0.09   0.08
  74   1    -0.01  -0.04   0.05     0.00   0.14  -0.03    -0.04  -0.16   0.03
  75   1    -0.02   0.01   0.01     0.00   0.00   0.02     0.01  -0.03   0.04
  76   1    -0.04   0.01  -0.03    -0.01   0.04  -0.10     0.03   0.00   0.04
  77   1    -0.02  -0.02  -0.03     0.00   0.01  -0.05     0.02   0.04  -0.01
  78   1     0.01   0.01   0.02     0.02   0.00   0.03     0.00   0.00  -0.01
  79   1    -0.03  -0.01   0.00    -0.01  -0.01   0.04     0.02   0.02   0.01
  80   1     0.00   0.00  -0.02     0.01   0.01   0.02     0.00   0.01   0.00
  81   1     0.00  -0.02  -0.06     0.02   0.06   0.07     0.00   0.03   0.01
  82   1    -0.01   0.01  -0.03     0.00   0.01   0.02    -0.01   0.01  -0.01
  83   1     0.00   0.01   0.01     0.00  -0.01  -0.02     0.00  -0.01  -0.01
  84   1     0.01   0.03  -0.01     0.01   0.00   0.00     0.01   0.02  -0.01
  85   1     0.05   0.08  -0.11     0.03   0.05  -0.06    -0.01   0.02   0.02
  86   1     0.09  -0.07  -0.01     0.07  -0.02   0.01    -0.03   0.02   0.00
  87   1    -0.05   0.05   0.04    -0.03   0.04   0.01    -0.02   0.02  -0.01
  88   1    -0.22  -0.38  -0.05    -0.15  -0.14  -0.04     0.03   0.03   0.01
  89   1     0.45  -0.02   0.09     0.13   0.02   0.08    -0.02   0.00  -0.01
  90   1    -0.21   0.38   0.01    -0.16   0.20   0.05     0.03  -0.03  -0.01
  91   1    -0.05   0.09   0.00    -0.08   0.15   0.00    -0.02   0.09   0.02
  92   1     0.08   0.02   0.04     0.13   0.01   0.10     0.10   0.01   0.06
  93   1    -0.05  -0.06  -0.01    -0.08  -0.12   0.00     0.00  -0.05  -0.01
  94   1    -0.02   0.07   0.04     0.13  -0.09  -0.18     0.17  -0.27  -0.30
  95   1     0.00  -0.02   0.01     0.18   0.20   0.10     0.16   0.35   0.12
  96   1     0.07   0.03   0.01    -0.14  -0.05   0.12    -0.40  -0.14   0.17
  97   1     0.14  -0.10  -0.06     0.09  -0.08   0.00     0.20  -0.17  -0.06
  98   1    -0.01   0.12  -0.09    -0.03   0.03  -0.03    -0.09   0.17  -0.14
  99   1    -0.05  -0.03   0.13    -0.04  -0.06   0.11    -0.10  -0.06   0.25
 100   1     0.08  -0.04   0.03    -0.07   0.04  -0.04     0.03   0.01   0.00
 101   1    -0.05   0.06  -0.02     0.04  -0.03   0.00    -0.04   0.05  -0.04
 102   1    -0.07  -0.09   0.04     0.06   0.08  -0.06    -0.05  -0.04  -0.02
 103   1    -0.02  -0.03   0.00     0.03   0.03   0.00     0.01   0.01   0.00
 104   1    -0.05   0.01   0.02     0.06   0.00  -0.04     0.03   0.00  -0.02
 105   1    -0.01   0.01   0.01     0.02   0.00  -0.02     0.01   0.00  -0.01
 106   1     0.00   0.01  -0.05     0.00  -0.02   0.09    -0.01   0.00   0.02
 107   1    -0.01   0.01   0.04     0.03  -0.02  -0.09    -0.01  -0.01  -0.01
 108   1     0.07   0.00   0.01    -0.14   0.02  -0.02    -0.04  -0.01   0.00
 109   1     0.07  -0.02   0.00     0.04  -0.03  -0.06    -0.06  -0.01  -0.02
 110   1     0.02  -0.03   0.01     0.03  -0.06  -0.03     0.06   0.00  -0.01
 111   1     0.03   0.03   0.01     0.02  -0.01  -0.06     0.01  -0.07  -0.08
 112   1     0.04   0.01   0.02     0.02  -0.02   0.03     0.02  -0.01   0.01
 113   1     0.04  -0.02  -0.01    -0.01  -0.02  -0.03     0.04  -0.01   0.05
 114   1     0.04  -0.02  -0.01     0.04  -0.01  -0.03     0.00  -0.05   0.03
                    49                     50                     51
                    ?A                     ?A                     ?A
 Frequencies --   233.0003               234.9528               236.1348
 Red. masses --     1.3042                 2.3072                 1.4619
 Frc consts  --     0.0417                 0.0750                 0.0480
 IR Inten    --     0.0257                 1.5730                 2.3088
 Raman Activ --     0.0000                 0.0000                 0.0000
 Depolar     --     0.0000                 0.0000                 0.0000
 Atom AN      X      Y      Z        X      Y      Z        X      Y      Z
   1   8     0.00   0.00   0.00    -0.01   0.01   0.00    -0.01   0.00   0.01
   2  12    -0.01   0.01   0.01     0.02   0.07   0.02     0.03   0.01  -0.02
   3   8    -0.01   0.01   0.01     0.02  -0.03  -0.03     0.01  -0.01   0.00
   4   6     0.00   0.00   0.00     0.00   0.00   0.00     0.00   0.00   0.01
   5   7     0.01   0.00   0.02     0.01   0.00  -0.02     0.01   0.01  -0.01
   6   7     0.00   0.00   0.02     0.02   0.05   0.01    -0.02  -0.02  -0.01
   7   8     0.00   0.00   0.00    -0.01   0.00   0.00    -0.01   0.01   0.01
   8   6     0.01   0.00   0.02    -0.01  -0.01  -0.01     0.00  -0.01  -0.01
   9   6     0.02   0.01   0.01    -0.02  -0.01   0.01    -0.02  -0.02   0.01
  10   6     0.01   0.01   0.02     0.00   0.02   0.03    -0.01  -0.02  -0.01
  11   8     0.01  -0.01   0.01     0.00   0.02  -0.01     0.00   0.02  -0.01
  12   6     0.01   0.00   0.00     0.00   0.00   0.00     0.01   0.00  -0.01
  13   6     0.00   0.00   0.00     0.01  -0.01   0.00     0.01  -0.02   0.00
  14   6     0.01   0.00   0.01     0.00   0.00  -0.01     0.00   0.00  -0.01
  15   8     0.01   0.01   0.00     0.01  -0.01   0.02     0.00   0.04  -0.02
  16   6     0.01   0.00   0.01     0.00   0.01  -0.01     0.00   0.01  -0.02
  17   8     0.00   0.02   0.00    -0.01  -0.01   0.01     0.00  -0.01  -0.01
  18   6     0.00   0.00  -0.01    -0.02   0.01   0.00     0.00  -0.02   0.00
  19   8    -0.01  -0.01  -0.01    -0.05   0.04   0.03     0.01  -0.02   0.00
  20   8     0.01  -0.01   0.00     0.00  -0.02  -0.01    -0.03   0.00  -0.01
  21   6     0.01   0.00  -0.01     0.00  -0.02  -0.01    -0.02   0.00   0.01
  22   6     0.00   0.01  -0.02     0.00  -0.01  -0.01    -0.01  -0.01   0.01
  23   6     0.00   0.00  -0.01    -0.01   0.01  -0.01    -0.01  -0.01   0.01
  24   8     0.01  -0.01  -0.01     0.00  -0.03  -0.01    -0.02   0.02   0.00
  25   6    -0.01   0.00  -0.02     0.04   0.01   0.00    -0.01  -0.01   0.00
  26   6    -0.02   0.00  -0.01    -0.04   0.00  -0.01     0.02   0.00   0.01
  27   6    -0.02  -0.01  -0.02     0.02   0.02   0.03     0.04   0.02   0.06
  28   6     0.01   0.02   0.02    -0.01  -0.02  -0.01    -0.01  -0.02  -0.02
  29   6     0.00   0.00   0.01     0.01  -0.01   0.01     0.00   0.01   0.00
  30   6     0.00  -0.01   0.00    -0.01   0.01  -0.02     0.00   0.00   0.00
  31   6     0.00   0.00   0.00     0.00  -0.01   0.03     0.00   0.01   0.02
  32   6     0.00   0.01  -0.01    -0.01   0.01  -0.01     0.00   0.03  -0.01
  33   6     0.00   0.00   0.00    -0.01   0.01  -0.04    -0.01   0.03  -0.02
  34   6     0.00   0.00   0.01    -0.01  -0.01  -0.01     0.00   0.00   0.01
  35   6     0.00   0.00   0.00     0.00  -0.03   0.02     0.01   0.00   0.02
  36   6    -0.01  -0.01  -0.01     0.01   0.00   0.03    -0.02   0.00   0.02
  37   6     0.01  -0.01  -0.01     0.00  -0.02   0.02     0.02  -0.01   0.01
  38   6     0.01  -0.02  -0.01    -0.04   0.00  -0.05     0.01   0.00   0.01
  39   6     0.02   0.01   0.01    -0.05   0.04   0.01     0.01   0.00   0.00
  40   6     0.02   0.04   0.04    -0.04   0.06   0.07     0.01   0.00  -0.02
  41   6     0.00   0.02   0.01    -0.02   0.00   0.01     0.00   0.01   0.00
  42   6    -0.01  -0.01  -0.02    -0.01  -0.03  -0.05     0.00   0.01   0.01
  43   6     0.01  -0.01  -0.02    -0.04  -0.04  -0.03     0.01   0.00   0.01
  44   6    -0.01  -0.01  -0.02     0.02  -0.03  -0.05     0.00   0.01   0.01
  45   6    -0.01  -0.03   0.01     0.03   0.01   0.00    -0.01  -0.03   0.02
  46   6    -0.01   0.00  -0.01    -0.03   0.01   0.02    -0.06   0.01   0.02
  47   6     0.00  -0.02  -0.02    -0.02  -0.02   0.01     0.01  -0.02   0.00
  48   6     0.00  -0.01  -0.01     0.04   0.02   0.02     0.05   0.01   0.00
  49   6    -0.01  -0.03   0.03     0.01  -0.04   0.00     0.01   0.00   0.01
  50   6    -0.03   0.02  -0.04     0.07   0.06  -0.08    -0.02  -0.01   0.01
  51   6     0.03   0.01  -0.02     0.05  -0.04  -0.01    -0.01   0.00   0.00
  52   6    -0.03   0.00  -0.01    -0.04  -0.06   0.03     0.01   0.01  -0.01
  53   6    -0.01   0.01   0.03     0.01  -0.01  -0.03     0.01  -0.03  -0.03
  54   6     0.01   0.00   0.02     0.04  -0.01   0.08     0.01   0.00  -0.03
  55   1     0.03   0.01   0.01    -0.02  -0.03   0.01    -0.02  -0.01   0.01
  56   1    -0.01   0.00   0.00     0.03   0.00   0.00     0.01  -0.02  -0.02
  57   1     0.01   0.00   0.01    -0.01  -0.01  -0.02     0.00  -0.01  -0.02
  58   1     0.01   0.00   0.01     0.01   0.02  -0.04     0.00   0.01  -0.03
  59   1     0.01  -0.01   0.01    -0.03   0.02  -0.01     0.00   0.03  -0.02
  60   1     0.01   0.00   0.01     0.01   0.00   0.00     0.00   0.00  -0.03
  61   1    -0.01   0.01  -0.02    -0.01  -0.01  -0.02     0.00  -0.01   0.01
  62   1     0.00   0.00  -0.01     0.01   0.02  -0.02    -0.02  -0.02   0.01
  63   1    -0.03   0.02   0.05     0.01   0.11   0.09     0.02  -0.07  -0.11
  64   1     0.04   0.01  -0.04     0.19   0.01  -0.02    -0.13  -0.02   0.03
  65   1    -0.07  -0.02  -0.05    -0.03  -0.05  -0.05     0.07   0.04   0.06
  66   1    -0.02  -0.01   0.00    -0.05  -0.01   0.01     0.00   0.03   0.01
  67   1    -0.02   0.00  -0.01    -0.06   0.00   0.00     0.06   0.01   0.01
  68   1    -0.03   0.00  -0.02    -0.06   0.02  -0.03     0.01  -0.04   0.00
  69   1    -0.03   0.06   0.00     0.01   0.02   0.06     0.09  -0.30  -0.15
  70   1     0.03  -0.07  -0.01     0.04   0.04   0.02    -0.26   0.27   0.02
  71   1    -0.09  -0.03  -0.08     0.01   0.01   0.05     0.33   0.12   0.34
  72   1     0.02   0.01   0.11    -0.01   0.01  -0.19    -0.02   0.02  -0.25
  73   1     0.00  -0.04  -0.04     0.03   0.10   0.11     0.03   0.13   0.12
  74   1     0.03   0.11  -0.01    -0.04  -0.20   0.04    -0.05  -0.24   0.05
  75   1     0.00   0.01  -0.02    -0.01   0.02  -0.03     0.00   0.03  -0.03
  76   1     0.00   0.00   0.00    -0.02   0.03  -0.09    -0.01   0.04  -0.05
  77   1     0.00   0.00   0.01    -0.01  -0.02  -0.01    -0.01  -0.01   0.02
  78   1    -0.02  -0.01  -0.02     0.02   0.00   0.02    -0.03   0.00   0.01
  79   1     0.01   0.00  -0.01    -0.01  -0.02   0.01     0.02   0.00   0.00
  80   1     0.02   0.01   0.03    -0.05   0.06   0.03     0.02  -0.01  -0.01
  81   1     0.03   0.07   0.06    -0.04   0.11   0.15     0.02  -0.01  -0.03
  82   1     0.00   0.02   0.00    -0.02  -0.01   0.03     0.00   0.02  -0.01
  83   1     0.02   0.00  -0.02    -0.08  -0.05   0.00     0.02   0.01   0.00
  84   1     0.00   0.01  -0.01     0.02  -0.02  -0.04     0.00   0.02   0.01
  85   1     0.00  -0.01  -0.03     0.02   0.01  -0.03    -0.01  -0.02  -0.02
  86   1     0.00  -0.08   0.01     0.06  -0.01   0.01     0.01  -0.07   0.02
  87   1    -0.02  -0.02   0.05     0.01   0.01   0.00    -0.01  -0.02   0.05
  88   1     0.07   0.14   0.02    -0.08  -0.05  -0.03    -0.05   0.05  -0.02
  89   1    -0.17   0.00  -0.03     0.03   0.02   0.05    -0.12   0.01   0.01
  90   1     0.07  -0.14   0.00    -0.09   0.09   0.04    -0.06  -0.03   0.04
  91   1     0.03  -0.08  -0.01    -0.01  -0.03  -0.01     0.07  -0.14   0.02
  92   1    -0.07  -0.02  -0.04    -0.04  -0.02  -0.01    -0.11  -0.02  -0.05
  93   1     0.03   0.03   0.00    -0.03  -0.01   0.02     0.06   0.08   0.04
  94   1    -0.08   0.10   0.14    -0.03   0.14   0.10     0.01   0.09   0.04
  95   1    -0.09  -0.17  -0.07     0.00  -0.12  -0.02     0.04  -0.07  -0.01
  96   1     0.17   0.05  -0.10     0.21   0.06  -0.04     0.15   0.05  -0.03
  97   1     0.31  -0.28  -0.09    -0.07   0.06   0.07     0.11  -0.09  -0.04
  98   1    -0.18   0.27  -0.22     0.04  -0.17   0.09    -0.03   0.10  -0.07
  99   1    -0.19  -0.09   0.44     0.05  -0.04  -0.13    -0.05  -0.03   0.13
 100   1     0.06   0.03   0.02    -0.12   0.13  -0.09     0.02  -0.03   0.02
 101   1    -0.07   0.12  -0.10     0.17  -0.10  -0.03    -0.05   0.02   0.01
 102   1    -0.09  -0.07  -0.05     0.22   0.24  -0.13    -0.06  -0.06   0.02
 103   1     0.03   0.05  -0.01     0.07  -0.07   0.07    -0.01   0.03  -0.01
 104   1     0.06   0.00  -0.04     0.05  -0.02  -0.04     0.01   0.00   0.01
 105   1     0.01   0.00  -0.02     0.12  -0.02  -0.05    -0.04  -0.01   0.01
 106   1    -0.01   0.00   0.07     0.01  -0.11   0.21     0.00   0.02  -0.05
 107   1     0.01  -0.02  -0.07     0.09  -0.04  -0.08    -0.02   0.00   0.02
 108   1    -0.12   0.02  -0.02    -0.22  -0.04   0.01     0.05   0.00   0.00
 109   1    -0.01   0.01   0.03     0.06  -0.02  -0.05     0.05  -0.03  -0.06
 110   1    -0.03   0.01   0.02    -0.02  -0.06  -0.03    -0.01  -0.07  -0.03
 111   1    -0.02   0.00   0.05     0.00   0.03  -0.01     0.01   0.01  -0.01
 112   1     0.01   0.01   0.00     0.06  -0.01   0.14     0.02   0.01  -0.01
 113   1     0.03   0.00   0.03     0.02   0.01   0.09     0.01  -0.02  -0.06
 114   1    -0.01  -0.01   0.03     0.09  -0.05   0.05     0.03   0.02  -0.04
                    52                     53                     54
                    ?A                     ?A                     ?A
 Frequencies --   238.4915               243.2174               247.3189
 Red. masses --     1.5833                 1.6276                 1.8602
 Frc consts  --     0.0531                 0.0567                 0.0670
 IR Inten    --     2.4697                 2.6593                 9.4174
 Raman Activ --     0.0000                 0.0000                 0.0000
 Depolar     --     0.0000                 0.0000                 0.0000
 Atom AN      X      Y      Z        X      Y      Z        X      Y      Z
   1   8    -0.04   0.01   0.02     0.00  -0.02  -0.06    -0.04  -0.01  -0.02
   2  12     0.02  -0.01  -0.02    -0.03  -0.03   0.00     0.09   0.04  -0.01
   3   8     0.01  -0.01  -0.01     0.00   0.01   0.01     0.01  -0.01  -0.03
   4   6    -0.01   0.00   0.02    -0.01   0.01  -0.06    -0.01   0.01  -0.02
   5   7     0.00   0.01  -0.02     0.01   0.01  -0.01    -0.01  -0.01   0.00
   6   7    -0.01   0.00  -0.02    -0.01  -0.02  -0.01     0.01   0.00   0.00
   7   8    -0.02   0.00   0.02     0.00   0.01  -0.06    -0.03   0.01  -0.02
   8   6     0.00  -0.02  -0.02     0.01  -0.01  -0.01    -0.02   0.00   0.00
   9   6    -0.01  -0.02  -0.01     0.01  -0.01  -0.01    -0.03   0.00   0.01
  10   6    -0.01  -0.02  -0.01     0.00  -0.02  -0.02    -0.01   0.00   0.00
  11   8     0.01   0.01   0.00     0.00  -0.01   0.00     0.00   0.03  -0.02
  12   6     0.02   0.00   0.00    -0.01   0.01   0.03     0.00   0.02   0.03
  13   6     0.02   0.01  -0.01    -0.01   0.01   0.03    -0.01   0.01   0.03
  14   6     0.01   0.00   0.01     0.00   0.01  -0.02     0.00   0.01  -0.02
  15   8     0.02  -0.04   0.01     0.01   0.01   0.05     0.04   0.01   0.08
  16   6     0.01   0.02  -0.01     0.01  -0.05   0.04     0.02  -0.01   0.01
  17   8    -0.02  -0.04   0.01    -0.01  -0.01   0.00     0.00   0.00   0.02
  18   6     0.00   0.01   0.00     0.01   0.00   0.00    -0.01   0.00  -0.02
  19   8     0.01   0.03   0.01     0.03   0.00  -0.01    -0.01   0.02  -0.01
  20   8    -0.01   0.01   0.00     0.01   0.01   0.01    -0.03   0.00  -0.01
  21   6    -0.02   0.00   0.00     0.00   0.01   0.00    -0.01   0.00   0.02
  22   6    -0.01  -0.01   0.01     0.00   0.01   0.00     0.00  -0.02   0.03
  23   6     0.00   0.01   0.01     0.00   0.00   0.00    -0.02  -0.01  -0.01
  24   8    -0.02  -0.01   0.00     0.00  -0.01   0.01    -0.02   0.03  -0.01
  25   6     0.03   0.01   0.02     0.01   0.02   0.01    -0.04  -0.06  -0.03
  26   6     0.00   0.00   0.01     0.01   0.00   0.01     0.00  -0.02  -0.03
  27   6     0.01   0.00  -0.02     0.01  -0.01   0.02     0.04   0.00   0.06
  28   6     0.01  -0.04  -0.03     0.00   0.03   0.04    -0.01  -0.05  -0.01
  29   6     0.00   0.01   0.00     0.00   0.01  -0.01     0.00  -0.01   0.00
  30   6    -0.01   0.01   0.00     0.00   0.00   0.00     0.01  -0.01   0.00
  31   6    -0.01   0.02   0.02    -0.01   0.02   0.01     0.00  -0.02   0.00
  32   6     0.00   0.03  -0.01    -0.01   0.03  -0.01     0.00  -0.02   0.00
  33   6     0.00   0.04  -0.02    -0.01   0.02   0.00     0.00  -0.01  -0.01
  34   6     0.00   0.02   0.02     0.00   0.01   0.02     0.00  -0.01  -0.02
  35   6     0.01   0.01   0.02     0.01   0.01   0.01    -0.01  -0.01   0.00
  36   6    -0.02   0.01   0.03    -0.02   0.01   0.01     0.02  -0.01   0.00
  37   6     0.03   0.00   0.02     0.03   0.00   0.00    -0.02   0.00   0.01
  38   6    -0.01   0.02   0.00     0.00   0.01   0.01     0.01  -0.01   0.00
  39   6    -0.01   0.01  -0.01     0.00   0.00  -0.01     0.01   0.00   0.01
  40   6    -0.02   0.00  -0.03     0.00  -0.01  -0.03     0.01   0.00   0.02
  41   6    -0.01   0.01  -0.01     0.00   0.00  -0.01     0.01   0.00   0.02
  42   6     0.00   0.02   0.00     0.00   0.02   0.01     0.01  -0.01   0.01
  43   6    -0.01   0.01   0.01     0.00   0.01   0.01     0.01   0.00   0.00
  44   6     0.01   0.01   0.00     0.00   0.01   0.01    -0.01  -0.01   0.01
  45   6    -0.01  -0.01   0.02    -0.02  -0.02   0.02     0.02   0.01  -0.01
  46   6    -0.07   0.01   0.02    -0.06   0.00   0.01     0.03   0.00   0.00
  47   6     0.02  -0.02   0.01     0.03  -0.01   0.00    -0.03   0.01   0.00
  48   6     0.06   0.02   0.00     0.05   0.00  -0.01    -0.02   0.01   0.01
  49   6     0.02   0.01  -0.01     0.01   0.01   0.00    -0.02   0.00   0.01
  50   6     0.00  -0.01   0.01     0.00  -0.01   0.02    -0.03   0.00   0.00
  51   6    -0.01  -0.01   0.01    -0.02   0.01   0.00     0.01   0.01   0.00
  52   6     0.01   0.00   0.01     0.01   0.01   0.00     0.01   0.00   0.00
  53   6     0.01  -0.05  -0.05    -0.01  -0.03  -0.02     0.02   0.02   0.00
  54   6     0.02  -0.02  -0.01    -0.01  -0.02  -0.02     0.01   0.02  -0.02
  55   1    -0.01  -0.02  -0.01     0.01   0.00  -0.01    -0.02   0.00   0.01
  56   1     0.02   0.01  -0.01    -0.01   0.01   0.06     0.00   0.01   0.06
  57   1     0.01   0.00   0.01    -0.01   0.03  -0.01    -0.01   0.02  -0.03
  58   1     0.02   0.04  -0.01     0.01  -0.02   0.09     0.02   0.03   0.04
  59   1     0.02   0.05  -0.01     0.03  -0.13   0.04     0.04  -0.03   0.01
  60   1     0.02  -0.02  -0.04     0.01  -0.02   0.06     0.03  -0.04   0.00
  61   1    -0.01  -0.01   0.01     0.00   0.00   0.00     0.00   0.00   0.03
  62   1     0.00   0.01   0.01     0.00   0.00   0.00    -0.04  -0.02   0.00
  63   1     0.02   0.06   0.02     0.00   0.05   0.05     0.02  -0.20  -0.21
  64   1     0.07   0.00   0.02     0.05   0.01   0.01    -0.25  -0.04  -0.01
  65   1     0.03  -0.01   0.02    -0.02   0.01   0.00     0.11  -0.01   0.07
  66   1     0.02  -0.02  -0.01     0.06  -0.04  -0.04    -0.22   0.19   0.15
  67   1    -0.04  -0.01   0.00    -0.08  -0.02   0.02     0.36   0.07  -0.07
  68   1     0.01   0.03   0.03     0.04   0.08   0.05    -0.11  -0.34  -0.20
  69   1    -0.01   0.12   0.07    -0.04   0.25   0.26     0.00   0.17   0.25
  70   1     0.13  -0.08  -0.01     0.32  -0.20   0.04     0.28  -0.11   0.05
  71   1    -0.10  -0.03  -0.11    -0.23  -0.09  -0.22    -0.12  -0.05  -0.11
  72   1    -0.07  -0.11   0.37     0.04   0.08  -0.28    -0.07  -0.06  -0.01
  73   1    -0.07  -0.35  -0.32     0.09   0.27   0.29     0.02  -0.08  -0.01
  74   1     0.15   0.34  -0.17    -0.14  -0.28   0.16    -0.01  -0.07  -0.01
  75   1     0.00   0.02  -0.02     0.00   0.03  -0.02     0.00  -0.02   0.01
  76   1     0.00   0.04  -0.04    -0.01   0.03   0.00     0.01  -0.01  -0.02
  77   1     0.00   0.00   0.03    -0.01  -0.01   0.04     0.00   0.00  -0.03
  78   1    -0.03   0.01   0.02    -0.05   0.01   0.01     0.04  -0.01  -0.01
  79   1     0.04   0.01   0.01     0.04   0.00   0.00    -0.03   0.00   0.00
  80   1    -0.01   0.00  -0.02     0.01  -0.01  -0.01     0.00   0.00   0.01
  81   1    -0.02  -0.02  -0.04     0.00  -0.03  -0.05     0.01   0.01   0.03
  82   1    -0.01   0.00  -0.01     0.00   0.00  -0.02     0.01   0.00   0.02
  83   1    -0.02   0.00   0.01     0.01   0.01   0.00     0.01   0.00  -0.01
  84   1     0.01   0.02  -0.01     0.01   0.02   0.00    -0.02  -0.01   0.02
  85   1    -0.02  -0.02   0.02    -0.04  -0.05   0.04     0.04   0.05  -0.06
  86   1    -0.01  -0.01   0.02    -0.04   0.00   0.02     0.05  -0.03  -0.01
  87   1    -0.01  -0.01   0.03     0.01  -0.03   0.02    -0.03   0.03   0.02
  88   1    -0.09   0.01  -0.03    -0.05   0.02  -0.02     0.02  -0.01   0.01
  89   1    -0.08   0.01   0.03    -0.09   0.00   0.00     0.06   0.00   0.01
  90   1    -0.10   0.03   0.05    -0.06  -0.02   0.03     0.03   0.03  -0.01
  91   1     0.13  -0.24   0.05     0.07  -0.09   0.03    -0.01  -0.03   0.00
  92   1    -0.21  -0.02  -0.10    -0.04  -0.02  -0.03    -0.07   0.01  -0.03
  93   1     0.13   0.19   0.07     0.08   0.06   0.02    -0.02   0.05   0.02
  94   1     0.07   0.02  -0.06     0.02   0.05   0.01     0.01  -0.04  -0.04
  95   1     0.11   0.05   0.03     0.05  -0.05  -0.02     0.01   0.09   0.04
  96   1     0.05   0.01   0.02     0.11   0.03  -0.04    -0.10  -0.02   0.06
  97   1     0.04  -0.02  -0.02     0.01   0.01  -0.01     0.01  -0.03  -0.01
  98   1     0.03   0.03  -0.02     0.03   0.01   0.00    -0.05   0.03  -0.02
  99   1     0.01  -0.01   0.00     0.01   0.00  -0.01    -0.03   0.00   0.06
 100   1    -0.01  -0.02  -0.01     0.00  -0.03   0.00     0.01   0.00   0.01
 101   1     0.01  -0.02   0.03    -0.01  -0.02   0.04    -0.05   0.04  -0.02
 102   1     0.01   0.00   0.02     0.00  -0.01   0.04    -0.05  -0.04  -0.01
 103   1    -0.01  -0.04   0.01    -0.02   0.01  -0.02     0.00   0.05  -0.01
 104   1    -0.04   0.00   0.02    -0.02   0.01   0.01     0.03   0.00  -0.01
 105   1     0.01   0.00   0.01    -0.03   0.01   0.01    -0.02   0.00   0.00
 106   1     0.00   0.00  -0.02     0.02  -0.02   0.03     0.02  -0.02   0.04
 107   1    -0.01   0.01   0.04     0.04   0.01  -0.04     0.04   0.00  -0.04
 108   1     0.04  -0.02   0.02    -0.02   0.04  -0.01    -0.03   0.02  -0.01
 109   1     0.04  -0.04  -0.09     0.00  -0.02  -0.06     0.02   0.01   0.03
 110   1    -0.01  -0.10  -0.05    -0.04  -0.06  -0.03     0.05   0.03   0.02
 111   1     0.01  -0.02  -0.04    -0.02  -0.03   0.01     0.02   0.03  -0.03
 112   1     0.02  -0.01   0.01    -0.01  -0.02  -0.03     0.01   0.03  -0.01
 113   1     0.02  -0.03  -0.01    -0.01  -0.02  -0.02     0.00   0.00  -0.04
 114   1     0.03  -0.04  -0.02    -0.02  -0.01  -0.01     0.02   0.04  -0.03
                    55                     56                     57
                    ?A                     ?A                     ?A
 Frequencies --   254.8126               255.8167               256.9315
 Red. masses --     1.4252                 1.8448                 1.4508
 Frc consts  --     0.0545                 0.0711                 0.0564
 IR Inten    --     0.5947                 5.6898                 0.6029
 Raman Activ --     0.0000                 0.0000                 0.0000
 Depolar     --     0.0000                 0.0000                 0.0000
 Atom AN      X      Y      Z        X      Y      Z        X      Y      Z
   1   8     0.03   0.00   0.01     0.04   0.01   0.01     0.01   0.02   0.01
   2  12     0.01   0.02  -0.01    -0.01  -0.05   0.02     0.00   0.00  -0.01
   3   8     0.00   0.01  -0.02    -0.01   0.01  -0.01     0.00   0.00   0.00
   4   6     0.00   0.00   0.01     0.01  -0.01   0.02     0.00   0.00   0.02
   5   7     0.02   0.02  -0.02     0.01  -0.01   0.02     0.00   0.01  -0.01
   6   7    -0.01   0.00   0.00    -0.02   0.00   0.00     0.01   0.01  -0.01
   7   8     0.02   0.00   0.01     0.03  -0.02   0.01     0.00  -0.02   0.01
   8   6     0.00   0.01  -0.01     0.03  -0.01   0.02    -0.01   0.00  -0.01
   9   6    -0.01   0.00   0.01     0.03  -0.01  -0.01    -0.01   0.00   0.00
  10   6    -0.01   0.00   0.00     0.01  -0.02  -0.01     0.00   0.00   0.00
  11   8    -0.03   0.00   0.00    -0.01  -0.03   0.02    -0.01   0.01   0.01
  12   6    -0.02  -0.03  -0.01    -0.01  -0.01  -0.01     0.00  -0.01  -0.01
  13   6    -0.01   0.00  -0.02    -0.01   0.00  -0.02     0.00   0.00  -0.01
  14   6    -0.03  -0.01   0.00     0.00  -0.01   0.02    -0.01  -0.01   0.01
  15   8    -0.02  -0.07   0.00    -0.03  -0.02  -0.03    -0.01  -0.03  -0.01
  16   6    -0.01   0.00   0.00    -0.02   0.01   0.00    -0.02   0.03  -0.01
  17   8     0.00  -0.01   0.00     0.03   0.01   0.00     0.00  -0.01  -0.01
  18   6    -0.01   0.03   0.01    -0.01   0.02   0.00     0.00   0.01   0.01
  19   8     0.02   0.04   0.02     0.00   0.02  -0.01     0.01   0.01   0.01
  20   8    -0.01   0.00   0.00     0.00   0.00  -0.01     0.00   0.00   0.00
  21   6     0.00   0.00   0.01     0.02   0.00   0.02    -0.01   0.00   0.00
  22   6     0.00  -0.01   0.02     0.02  -0.01   0.03     0.00   0.00   0.00
  23   6     0.00   0.00   0.02     0.00   0.00  -0.01     0.00   0.00   0.01
  24   8    -0.01   0.01   0.00     0.01   0.04   0.00     0.00   0.00   0.00
  25   6     0.01  -0.01   0.02    -0.03  -0.05   0.01     0.01   0.01   0.01
  26   6     0.03   0.00   0.01     0.02  -0.02  -0.02     0.01   0.00   0.01
  27   6     0.01   0.00  -0.01    -0.02  -0.01  -0.04     0.00   0.00  -0.01
  28   6    -0.03   0.00  -0.01     0.01   0.05   0.02     0.00  -0.01  -0.02
  29   6     0.01   0.02  -0.02     0.00   0.01   0.00     0.00   0.00  -0.01
  30   6     0.00   0.00   0.00    -0.01   0.02   0.00     0.01   0.01   0.01
  31   6     0.00   0.03   0.00    -0.01   0.02  -0.02     0.00   0.00   0.00
  32   6     0.00   0.03   0.01    -0.01   0.02   0.00     0.00   0.00   0.00
  33   6    -0.01   0.02   0.01    -0.01   0.01   0.03     0.00   0.00   0.00
  34   6     0.00   0.00   0.01     0.00   0.01   0.02     0.00   0.00   0.00
  35   6     0.01   0.00   0.00     0.01   0.02  -0.01     0.00   0.00   0.00
  36   6    -0.01   0.01   0.01    -0.03   0.01  -0.01     0.00   0.00   0.00
  37   6     0.01  -0.01   0.01     0.02   0.01  -0.02     0.00  -0.01   0.01
  38   6     0.00   0.00   0.00    -0.02   0.01   0.00     0.01   0.02   0.00
  39   6     0.01   0.00   0.00    -0.01   0.02  -0.01    -0.01   0.00   0.01
  40   6     0.01   0.01   0.00    -0.01   0.03  -0.02    -0.01  -0.04   0.00
  41   6     0.00   0.01   0.00    -0.01   0.03  -0.02     0.00  -0.04   0.00
  42   6     0.00   0.00   0.00    -0.01   0.03  -0.02     0.01  -0.01   0.03
  43   6     0.00   0.00   0.00    -0.03  -0.01   0.01     0.01   0.01  -0.01
  44   6     0.00   0.00   0.00     0.02   0.02  -0.02    -0.02  -0.01   0.03
  45   6     0.00  -0.04   0.01    -0.04  -0.01   0.01     0.00  -0.01   0.00
  46   6    -0.03  -0.01   0.00    -0.03  -0.01  -0.01    -0.01   0.00   0.00
  47   6     0.02   0.00   0.01     0.05   0.01   0.00     0.00   0.00   0.00
  48   6     0.02  -0.03  -0.01     0.01   0.00  -0.02     0.01  -0.01   0.00
  49   6     0.00  -0.01   0.00     0.05  -0.01  -0.02    -0.04   0.02   0.02
  50   6     0.00   0.00   0.00     0.05   0.01  -0.01    -0.06  -0.03   0.04
  51   6     0.00  -0.01   0.00    -0.05  -0.02   0.01     0.04   0.06  -0.02
  52   6    -0.02   0.01   0.00    -0.03  -0.03   0.04     0.09  -0.01  -0.03
  53   6    -0.01  -0.03  -0.04     0.00  -0.02   0.03     0.00  -0.01  -0.02
  54   6     0.00   0.01  -0.01     0.01  -0.04   0.04     0.00   0.01  -0.02
  55   1    -0.02  -0.01   0.01     0.03   0.01  -0.01    -0.02  -0.01   0.01
  56   1    -0.01   0.00  -0.02    -0.02   0.00  -0.03     0.00   0.00  -0.02
  57   1    -0.03   0.00   0.00     0.01  -0.02   0.03     0.00  -0.01   0.01
  58   1    -0.02  -0.03  -0.01    -0.02  -0.02  -0.04     0.00   0.02  -0.06
  59   1    -0.01   0.01   0.00    -0.06   0.02   0.00    -0.07   0.04  -0.01
  60   1    -0.03   0.02  -0.01    -0.02   0.04   0.03     0.00   0.02   0.02
  61   1     0.01  -0.02   0.02     0.04  -0.03   0.04     0.00   0.00   0.00
  62   1     0.01   0.00   0.03     0.00  -0.01   0.02     0.00   0.00   0.01
  63   1     0.04  -0.04  -0.08     0.03  -0.19  -0.17     0.01   0.02   0.01
  64   1    -0.07  -0.02   0.05    -0.26  -0.04   0.05     0.03   0.00   0.01
  65   1     0.09   0.03   0.07     0.12   0.05   0.11     0.01   0.00   0.01
  66   1    -0.03   0.07   0.05    -0.17   0.15   0.13     0.02   0.00   0.00
  67   1     0.14   0.03   0.00     0.31   0.06  -0.06    -0.01   0.00   0.01
  68   1     0.01  -0.09  -0.03    -0.08  -0.28  -0.16     0.02   0.02   0.02
  69   1    -0.01   0.07   0.07    -0.01  -0.04  -0.08     0.00   0.00  -0.02
  70   1     0.10  -0.04  -0.01    -0.07   0.00  -0.03     0.00   0.00  -0.01
  71   1    -0.06  -0.02  -0.07     0.01   0.00  -0.03     0.00   0.00  -0.01
  72   1    -0.01   0.00   0.02     0.07   0.06   0.00    -0.01  -0.01  -0.02
  73   1    -0.05  -0.02  -0.05    -0.02   0.10   0.03    -0.03  -0.02  -0.04
  74   1     0.00   0.04  -0.03     0.00   0.06   0.02     0.03   0.00  -0.03
  75   1     0.00   0.03   0.01     0.00   0.02  -0.01     0.00   0.00   0.00
  76   1    -0.02   0.02   0.01    -0.01   0.00   0.06     0.00   0.01  -0.01
  77   1    -0.01  -0.01   0.02    -0.01   0.00   0.03     0.00   0.00   0.00
  78   1    -0.04   0.01   0.01    -0.05   0.01  -0.01     0.00   0.00   0.00
  79   1     0.01  -0.02   0.02     0.02   0.01  -0.01     0.00  -0.01   0.01
  80   1     0.01  -0.01  -0.01     0.01   0.02  -0.01    -0.03   0.02   0.02
  81   1     0.01   0.02   0.00    -0.01   0.04  -0.02    -0.03  -0.06  -0.02
  82   1     0.00   0.02   0.00    -0.02   0.03  -0.03    -0.01  -0.06  -0.01
  83   1     0.01   0.01   0.00    -0.05  -0.03   0.01     0.00  -0.01  -0.02
  84   1     0.00   0.00  -0.01     0.04   0.04  -0.04    -0.04  -0.02   0.04
  85   1    -0.01  -0.04  -0.01    -0.06  -0.07   0.11     0.00   0.00  -0.01
  86   1     0.00  -0.07   0.01    -0.10   0.08   0.00     0.01  -0.02   0.00
  87   1     0.01  -0.03   0.05     0.04  -0.04  -0.04     0.00   0.00   0.01
  88   1    -0.01   0.04   0.00    -0.02   0.00  -0.01    -0.01   0.00   0.00
  89   1    -0.10  -0.01  -0.03    -0.03  -0.01  -0.03    -0.01   0.00   0.00
  90   1    -0.02  -0.07   0.03    -0.02  -0.02   0.00    -0.01   0.00   0.01
  91   1    -0.17   0.38  -0.08     0.08  -0.07   0.05    -0.05   0.11  -0.02
  92   1     0.40   0.00   0.23    -0.02   0.01  -0.03     0.11   0.00   0.07
  93   1    -0.16  -0.37  -0.11     0.11   0.08   0.00    -0.05  -0.11  -0.03
  94   1    -0.04   0.06   0.12     0.03  -0.02  -0.05    -0.01   0.02   0.04
  95   1    -0.04  -0.20  -0.05     0.03   0.04  -0.01    -0.01  -0.06  -0.01
  96   1     0.17   0.03  -0.11    -0.03  -0.01  -0.01     0.06   0.01  -0.03
  97   1     0.03  -0.02   0.00     0.05   0.00  -0.02    -0.07   0.04   0.03
  98   1    -0.01   0.01  -0.01     0.09  -0.01  -0.01    -0.05  -0.01   0.03
  99   1    -0.01  -0.02   0.03     0.05  -0.03  -0.06    -0.02   0.04   0.01
 100   1    -0.01   0.00  -0.01     0.00   0.01  -0.03    -0.01  -0.06   0.03
 101   1     0.01  -0.01   0.00     0.10  -0.06   0.02    -0.10   0.02   0.04
 102   1     0.01   0.01   0.00     0.10   0.08   0.01    -0.10  -0.09   0.04
 103   1     0.01  -0.03   0.01    -0.06   0.03  -0.03     0.04   0.08   0.01
 104   1    -0.01   0.00   0.00    -0.01  -0.04   0.04     0.05   0.08  -0.07
 105   1     0.02   0.00  -0.01    -0.11  -0.06   0.01     0.05   0.09   0.01
 106   1    -0.07   0.10  -0.17     0.04  -0.12   0.28     0.21  -0.26   0.36
 107   1    -0.17   0.00   0.15     0.15  -0.02  -0.14     0.45   0.00  -0.41
 108   1     0.15  -0.07   0.03    -0.28   0.05   0.00    -0.31   0.22  -0.10
 109   1     0.03  -0.02  -0.09    -0.03  -0.01   0.03     0.02  -0.01  -0.04
 110   1    -0.04  -0.08  -0.04    -0.01   0.00   0.02    -0.01  -0.03  -0.02
 111   1    -0.01  -0.01   0.00     0.00  -0.05   0.04     0.00   0.01  -0.01
 112   1     0.01   0.02   0.00     0.01  -0.05   0.04     0.00   0.01  -0.02
 113   1    -0.01   0.00  -0.03     0.01  -0.02   0.07    -0.01   0.01  -0.04
 114   1     0.01   0.02  -0.02     0.00  -0.08   0.04     0.00   0.03  -0.02
                    58                     59                     60
                    ?A                     ?A                     ?A
 Frequencies --   262.2738               266.4334               268.9308
 Red. masses --     1.8458                 2.4595                 1.4343
 Frc consts  --     0.0748                 0.1029                 0.0611
 IR Inten    --     0.8996                 1.6412                 0.1983
 Raman Activ --     0.0000                 0.0000                 0.0000
 Depolar     --     0.0000                 0.0000                 0.0000
 Atom AN      X      Y      Z        X      Y      Z        X      Y      Z
   1   8     0.04   0.00   0.00     0.01   0.01   0.00    -0.02   0.00   0.00
   2  12     0.00  -0.01   0.01     0.03  -0.03  -0.04     0.01   0.00  -0.01
   3   8    -0.01   0.01   0.00     0.00   0.02   0.00     0.01   0.00  -0.01
   4   6     0.00   0.00   0.00     0.00   0.00   0.00     0.00   0.00   0.00
   5   7    -0.02  -0.01   0.00     0.00   0.01   0.02    -0.04  -0.01   0.02
   6   7     0.04   0.04  -0.02     0.07   0.03  -0.03     0.01   0.01   0.00
   7   8     0.03   0.00   0.00     0.01   0.00  -0.01    -0.01   0.00   0.00
   8   6    -0.02   0.00   0.00    -0.01  -0.01   0.03    -0.01   0.00   0.01
   9   6    -0.01   0.00  -0.01    -0.02  -0.01   0.03     0.01   0.00   0.00
  10   6     0.01   0.01  -0.01     0.02   0.00   0.00     0.01   0.00   0.00
  11   8    -0.01  -0.04   0.02    -0.01  -0.01   0.01     0.01   0.02  -0.01
  12   6    -0.01  -0.03  -0.01     0.00  -0.01  -0.01     0.01   0.01   0.00
  13   6    -0.01  -0.01  -0.02     0.01   0.01  -0.01     0.01   0.01   0.00
  14   6    -0.02   0.00   0.02    -0.01   0.00   0.01     0.01   0.00  -0.01
  15   8    -0.03  -0.03  -0.02    -0.02  -0.02  -0.02     0.01   0.01   0.01
  16   6    -0.01  -0.01   0.02    -0.01   0.01   0.01     0.00   0.00  -0.01
  17   8     0.01   0.02   0.01     0.00  -0.04  -0.06     0.00  -0.03  -0.03
  18   6    -0.01   0.01   0.00     0.02   0.00   0.02     0.01   0.00   0.00
  19   8    -0.01   0.01   0.00     0.10  -0.01  -0.02     0.04   0.00  -0.01
  20   8     0.01   0.00   0.00    -0.05   0.00   0.00    -0.03   0.00  -0.01
  21   6     0.02   0.00   0.01    -0.05   0.01   0.00    -0.03   0.00   0.00
  22   6     0.01   0.00   0.02    -0.01   0.00  -0.03     0.00  -0.01  -0.02
  23   6     0.01   0.00   0.00    -0.01  -0.01   0.04    -0.01  -0.01   0.01
  24   8     0.02   0.01   0.00    -0.06   0.04   0.02    -0.03   0.01   0.02
  25   6     0.00  -0.01   0.01    -0.06  -0.02  -0.05    -0.03  -0.01  -0.02
  26   6     0.01  -0.01  -0.01     0.04   0.02   0.06     0.00   0.01   0.03
  27   6    -0.02   0.00  -0.02     0.04   0.01   0.01     0.02   0.01   0.01
  28   6     0.00   0.06   0.01    -0.01   0.00  -0.02     0.00  -0.02   0.00
  29   6    -0.01  -0.01   0.00     0.00   0.01   0.01    -0.01  -0.01   0.02
  30   6     0.01   0.01  -0.01     0.03   0.01   0.00     0.01   0.00   0.00
  31   6    -0.01  -0.02   0.00     0.00   0.01  -0.01    -0.01  -0.03   0.01
  32   6     0.00  -0.01  -0.01     0.00   0.01   0.00     0.03  -0.03   0.00
  33   6     0.00  -0.01   0.00     0.00   0.01   0.01     0.05  -0.01   0.00
  34   6     0.00  -0.01   0.00    -0.01   0.01   0.01     0.04   0.02   0.00
  35   6     0.01   0.00   0.00    -0.01   0.01   0.00     0.00   0.02   0.01
  36   6    -0.01   0.00   0.00     0.01   0.00   0.00    -0.01  -0.01  -0.01
  37   6     0.01   0.00   0.00    -0.01   0.01  -0.01     0.01   0.00   0.00
  38   6    -0.02   0.03  -0.03    -0.04   0.03  -0.01     0.00   0.00   0.00
  39   6    -0.06   0.00   0.00    -0.07   0.00   0.00     0.00   0.00   0.00
  40   6    -0.05  -0.02   0.05    -0.06  -0.03   0.03     0.00   0.00   0.01
  41   6    -0.01  -0.04   0.05     0.00  -0.03   0.05     0.00   0.00   0.01
  42   6     0.02  -0.03   0.01     0.04  -0.01   0.01     0.01   0.00   0.00
  43   6     0.00   0.02  -0.03    -0.04   0.00   0.02     0.00   0.00   0.00
  44   6    -0.02  -0.03   0.01     0.03   0.00  -0.01     0.00   0.00   0.00
  45   6    -0.03   0.03   0.01     0.02  -0.02   0.00    -0.03   0.05   0.00
  46   6    -0.02   0.01   0.00     0.04  -0.02   0.00    -0.03   0.04  -0.01
  47   6     0.03  -0.01   0.00    -0.02   0.00  -0.01     0.00  -0.03  -0.01
  48   6     0.04   0.01  -0.01    -0.03   0.00   0.00    -0.01  -0.03  -0.02
  49   6    -0.05   0.01   0.01     0.02   0.07  -0.09     0.00   0.01  -0.01
  50   6    -0.05   0.01  -0.02     0.03   0.07  -0.05     0.00   0.01  -0.01
  51   6     0.11   0.01  -0.01    -0.03  -0.05   0.03    -0.01  -0.01   0.00
  52   6     0.06   0.01  -0.05     0.00  -0.03   0.06     0.00  -0.01   0.01
  53   6     0.00   0.00  -0.01     0.02   0.00   0.03     0.00   0.01   0.02
  54   6     0.02   0.01   0.01     0.03  -0.02   0.03     0.00   0.00   0.01
  55   1    -0.02  -0.01   0.00    -0.05  -0.01   0.04     0.01   0.00   0.00
  56   1    -0.02  -0.01  -0.03     0.00   0.00  -0.02     0.01   0.01   0.01
  57   1     0.00   0.00   0.03     0.00   0.00   0.01     0.00   0.00  -0.01
  58   1    -0.03  -0.04   0.02    -0.01   0.00   0.00     0.01   0.01  -0.01
  59   1    -0.01  -0.02   0.02    -0.02   0.00   0.01     0.01   0.01  -0.01
  60   1    -0.03   0.04   0.03    -0.01   0.02   0.02     0.01  -0.01  -0.01
  61   1     0.01  -0.02   0.02     0.03   0.02  -0.02     0.01   0.01  -0.01
  62   1     0.01   0.00   0.01    -0.03  -0.01   0.04    -0.02  -0.01   0.01
  63   1     0.03  -0.06  -0.07    -0.04  -0.10  -0.08    -0.02  -0.05  -0.03
  64   1    -0.08  -0.01   0.03    -0.15  -0.01  -0.04    -0.06  -0.01  -0.02
  65   1     0.07   0.03   0.06    -0.04   0.03  -0.03    -0.02   0.01  -0.02
  66   1    -0.07   0.06   0.05     0.17  -0.05  -0.08     0.04  -0.02  -0.02
  67   1     0.13   0.02  -0.03    -0.12  -0.02   0.09    -0.06  -0.01   0.04
  68   1    -0.03  -0.12  -0.07     0.13   0.18   0.19     0.03   0.07   0.06
  69   1    -0.02   0.00  -0.03     0.02   0.05   0.09     0.02   0.01   0.04
  70   1    -0.03  -0.01  -0.02     0.13  -0.01   0.00     0.05   0.01   0.01
  71   1    -0.03  -0.01  -0.02     0.00   0.00  -0.03     0.02   0.01   0.01
  72   1     0.06   0.08  -0.05     0.00   0.01  -0.06    -0.02  -0.03   0.02
  73   1    -0.02   0.14   0.06    -0.02   0.04   0.00     0.01  -0.05  -0.01
  74   1    -0.03   0.03   0.03     0.00  -0.03  -0.01     0.01  -0.01  -0.01
  75   1     0.00  -0.02  -0.02    -0.01   0.02   0.00     0.05  -0.06  -0.02
  76   1     0.01  -0.01  -0.01     0.00   0.00   0.02     0.08   0.00  -0.01
  77   1     0.00  -0.01   0.00    -0.01   0.01   0.01     0.05   0.05   0.00
  78   1     0.01  -0.01   0.00    -0.01   0.00   0.00     0.02  -0.02  -0.02
  79   1     0.02   0.00  -0.01     0.00   0.01  -0.01     0.04   0.01   0.00
  80   1    -0.10   0.01  -0.01    -0.09   0.01  -0.01    -0.01   0.00   0.00
  81   1    -0.08  -0.03   0.08    -0.09  -0.05   0.05     0.00   0.00   0.01
  82   1     0.00  -0.06   0.07     0.02  -0.06   0.08     0.01   0.00   0.01
  83   1    -0.04   0.01   0.00    -0.08  -0.02   0.03    -0.01   0.00   0.00
  84   1    -0.04  -0.05   0.04     0.00  -0.03   0.01     0.00   0.00   0.00
  85   1    -0.03  -0.01   0.10     0.08   0.13  -0.24    -0.12  -0.20   0.40
  86   1    -0.07   0.12   0.00     0.12  -0.30   0.01    -0.21   0.52  -0.03
  87   1     0.01   0.00  -0.07    -0.14   0.07   0.21     0.21  -0.11  -0.37
  88   1    -0.06  -0.04  -0.03     0.08   0.03   0.05    -0.10  -0.05  -0.07
  89   1     0.04   0.01   0.03    -0.02  -0.03  -0.03     0.08   0.05   0.06
  90   1    -0.06   0.07   0.00     0.09  -0.09  -0.01    -0.10   0.17  -0.01
  91   1     0.11  -0.17   0.06    -0.01   0.00  -0.02    -0.04   0.05  -0.06
  92   1    -0.13   0.00  -0.08    -0.02   0.00  -0.01     0.08  -0.04   0.07
  93   1     0.13   0.15   0.04    -0.02   0.00  -0.01    -0.04  -0.14  -0.05
  94   1     0.04   0.02  -0.05    -0.03  -0.02   0.02    -0.04   0.00   0.07
  95   1     0.07   0.04   0.01    -0.05   0.00  -0.01    -0.06  -0.13  -0.05
  96   1     0.03   0.01   0.01    -0.04  -0.01   0.00     0.06   0.00  -0.09
  97   1    -0.05   0.00   0.00     0.01  -0.01  -0.18     0.05  -0.04  -0.03
  98   1    -0.10   0.03  -0.02     0.00   0.18  -0.16    -0.03   0.06  -0.05
  99   1    -0.05   0.05   0.06     0.02   0.12  -0.01    -0.03   0.01   0.06
 100   1    -0.01   0.02   0.02     0.10   0.12   0.03     0.01   0.02   0.00
 101   1    -0.08   0.07  -0.05     0.01   0.16  -0.14    -0.01   0.03  -0.02
 102   1    -0.09  -0.06  -0.05    -0.01   0.00  -0.08    -0.01   0.00  -0.02
 103   1     0.15  -0.27   0.14    -0.02  -0.20   0.05    -0.01   0.00   0.00
 104   1    -0.11   0.12  -0.10    -0.16  -0.01   0.05    -0.01  -0.01   0.01
 105   1     0.40   0.17  -0.05     0.09   0.00   0.00    -0.02  -0.02   0.00
 106   1     0.00   0.04  -0.27     0.02  -0.08   0.12     0.00  -0.01   0.03
 107   1    -0.07   0.03   0.13     0.07   0.00   0.03     0.01   0.00   0.00
 108   1     0.29  -0.06  -0.01    -0.07  -0.04   0.05    -0.02  -0.01   0.01
 109   1     0.02   0.00  -0.01     0.03   0.00   0.04     0.03   0.01   0.02
 110   1     0.00  -0.01  -0.01     0.03   0.00   0.04    -0.01   0.01   0.01
 111   1     0.00   0.02  -0.01     0.02   0.02   0.01     0.00   0.04   0.03
 112   1     0.01   0.02  -0.01     0.03  -0.01   0.03     0.00  -0.01   0.01
 113   1     0.04   0.01   0.03     0.04   0.00   0.05     0.01   0.00   0.03
 114   1     0.00  -0.01   0.02     0.02  -0.05   0.03    -0.01  -0.02   0.02
                    61                     62                     63
                    ?A                     ?A                     ?A
 Frequencies --   269.3932               277.5097               278.2872
 Red. masses --     2.9026                 2.8546                 2.7934
 Frc consts  --     0.1241                 0.1295                 0.1275
 IR Inten    --    10.1038                 5.9107                 9.6894
 Raman Activ --     0.0000                 0.0000                 0.0000
 Depolar     --     0.0000                 0.0000                 0.0000
 Atom AN      X      Y      Z        X      Y      Z        X      Y      Z
   1   8    -0.06  -0.02  -0.01     0.01   0.02   0.00     0.04   0.02   0.01
   2  12     0.03  -0.06   0.00     0.02  -0.01  -0.03     0.13   0.06   0.00
   3   8     0.01  -0.03   0.02    -0.01   0.01   0.02    -0.01   0.01   0.01
   4   6    -0.01   0.00  -0.02     0.00   0.01   0.00     0.00   0.01   0.01
   5   7     0.06   0.00   0.02    -0.07   0.01  -0.02     0.05  -0.02  -0.01
   6   7     0.03   0.01  -0.03     0.06   0.01  -0.03     0.02   0.00   0.00
   7   8    -0.04  -0.01  -0.01     0.01   0.00  -0.01     0.03   0.00   0.00
   8   6     0.03  -0.02   0.03    -0.04   0.01  -0.03    -0.01   0.00   0.00
   9   6     0.00  -0.02   0.01    -0.03   0.01   0.00    -0.04   0.01   0.01
  10   6     0.01  -0.02  -0.02     0.01   0.02  -0.01    -0.01   0.02   0.00
  11   8     0.01   0.06  -0.03    -0.02  -0.03   0.03    -0.04  -0.04   0.03
  12   6     0.00   0.06   0.03    -0.01  -0.01   0.01    -0.02  -0.06  -0.02
  13   6     0.00   0.01   0.05    -0.01  -0.01   0.01    -0.01  -0.03  -0.02
  14   6     0.02   0.01  -0.03    -0.01   0.00   0.02    -0.05  -0.01   0.02
  15   8     0.04   0.08   0.06    -0.02   0.00   0.00    -0.04  -0.05  -0.04
  16   6     0.02  -0.02  -0.02     0.00   0.01   0.02    -0.01   0.02   0.02
  17   8    -0.02   0.06   0.07    -0.03   0.04   0.06    -0.02   0.03   0.07
  18   6     0.00  -0.04  -0.04     0.00   0.00  -0.02    -0.01   0.01   0.01
  19   8    -0.08  -0.05  -0.01    -0.06   0.00   0.00    -0.01  -0.01   0.00
  20   8     0.05   0.01   0.01     0.07   0.02   0.03     0.02   0.00   0.01
  21   6     0.04   0.01   0.00     0.04   0.01   0.00     0.01   0.00   0.01
  22   6    -0.01   0.03   0.02    -0.01   0.02   0.04    -0.01   0.01   0.01
  23   6     0.01   0.00  -0.05     0.02   0.01  -0.03     0.00   0.02   0.01
  24   8     0.05  -0.02  -0.02     0.06  -0.06  -0.01     0.01  -0.01  -0.03
  25   6    -0.01   0.02   0.00     0.05   0.07   0.08    -0.02  -0.04  -0.08
  26   6    -0.04  -0.02  -0.05     0.00  -0.03  -0.05     0.00   0.02   0.01
  27   6    -0.02  -0.01   0.03    -0.05  -0.02  -0.03    -0.01   0.00   0.01
  28   6     0.00  -0.08   0.00    -0.01   0.01  -0.02    -0.04   0.01  -0.04
  29   6     0.01   0.01  -0.01    -0.02   0.01   0.00     0.01  -0.03  -0.01
  30   6     0.01   0.02  -0.01     0.04  -0.01   0.00     0.01  -0.01   0.00
  31   6    -0.01   0.05  -0.03     0.00  -0.03   0.02    -0.01  -0.01  -0.02
  32   6    -0.02   0.03   0.01     0.04  -0.02  -0.01    -0.04  -0.02   0.01
  33   6    -0.03   0.00   0.05     0.06   0.02  -0.03    -0.05  -0.04   0.00
  34   6    -0.01  -0.01   0.01     0.04   0.04   0.02    -0.03  -0.06  -0.04
  35   6     0.01   0.00  -0.03     0.00   0.03   0.03     0.00  -0.06  -0.03
  36   6    -0.04   0.02  -0.03     0.02  -0.02   0.02    -0.02   0.00  -0.03
  37   6     0.01   0.00  -0.01     0.00   0.01   0.02     0.00  -0.03  -0.01
  38   6    -0.03   0.04  -0.01     0.00   0.00   0.01     0.01  -0.01   0.02
  39   6    -0.06   0.01  -0.01    -0.01  -0.03   0.00     0.02  -0.01   0.00
  40   6    -0.06  -0.02   0.00    -0.01  -0.06  -0.01     0.02  -0.01   0.00
  41   6    -0.01  -0.01   0.02     0.03  -0.05   0.02     0.02   0.00   0.01
  42   6     0.02   0.01   0.01     0.06  -0.01   0.02     0.02  -0.01   0.01
  43   6    -0.03   0.02   0.00    -0.01  -0.01   0.03     0.01  -0.01   0.02
  44   6     0.02   0.01  -0.01     0.03   0.01   0.01     0.01   0.00   0.00
  45   6    -0.05  -0.04   0.02     0.02   0.04   0.00    -0.05  -0.01   0.01
  46   6    -0.03  -0.02  -0.03     0.00   0.02   0.02    -0.03  -0.01  -0.03
  47   6     0.08   0.05   0.02    -0.06  -0.06  -0.02     0.08   0.06   0.04
  48   6     0.02   0.00  -0.02    -0.02  -0.03   0.01     0.07   0.05  -0.01
  49   6     0.01   0.04  -0.05     0.02   0.08  -0.08     0.00   0.01  -0.01
  50   6     0.01   0.03  -0.02     0.00   0.04  -0.02     0.00   0.01  -0.01
  51   6     0.01  -0.02   0.02    -0.07  -0.05   0.03    -0.05  -0.02   0.02
  52   6     0.03  -0.01   0.01    -0.03  -0.02   0.07    -0.01   0.00   0.03
  53   6     0.02  -0.02   0.04     0.00  -0.02  -0.08     0.02   0.04   0.03
  54   6     0.01  -0.03  -0.01    -0.03   0.03  -0.05    -0.02   0.05  -0.04
  55   1    -0.03   0.00   0.02    -0.03  -0.01   0.01    -0.05   0.00   0.02
  56   1     0.01   0.02   0.09    -0.02  -0.01   0.00    -0.02  -0.04  -0.05
  57   1    -0.01   0.01  -0.05     0.00   0.01   0.03    -0.03   0.00   0.04
  58   1     0.03   0.03   0.00    -0.01   0.00   0.03    -0.02  -0.01   0.01
  59   1     0.04  -0.02  -0.02    -0.01  -0.01   0.02    -0.03   0.01   0.02
  60   1     0.04  -0.06  -0.03    -0.01   0.03   0.04    -0.03   0.05   0.04
  61   1    -0.05   0.02   0.00    -0.05  -0.02   0.02    -0.05   0.06  -0.02
  62   1     0.00   0.00  -0.06     0.02   0.00  -0.02     0.02   0.03  -0.01
  63   1    -0.03   0.05   0.07     0.05   0.15   0.06    -0.07   0.01   0.11
  64   1     0.07   0.03  -0.04     0.11   0.03   0.11     0.15   0.02  -0.18
  65   1    -0.06  -0.04  -0.05     0.08   0.06   0.09    -0.16  -0.17  -0.19
  66   1    -0.06  -0.03  -0.01    -0.10   0.03   0.06     0.13  -0.08  -0.10
  67   1    -0.04  -0.01  -0.07     0.14   0.02  -0.09    -0.18  -0.02   0.01
  68   1    -0.06  -0.03  -0.09    -0.06  -0.17  -0.14     0.07   0.17   0.11
  69   1     0.00  -0.11  -0.08    -0.04  -0.02  -0.09    -0.03   0.07   0.07
  70   1    -0.17   0.04   0.04    -0.11  -0.04  -0.01     0.07  -0.02   0.00
  71   1     0.07   0.03   0.11    -0.05  -0.02  -0.02    -0.09  -0.04  -0.02
  72   1    -0.08  -0.11   0.11     0.00   0.03  -0.10    -0.03   0.03  -0.13
  73   1     0.05  -0.20  -0.05    -0.02   0.08   0.02    -0.09   0.07  -0.03
  74   1     0.01  -0.02  -0.02     0.00  -0.06   0.00     0.00  -0.05  -0.05
  75   1    -0.02   0.04   0.02     0.05  -0.05  -0.02    -0.05   0.00   0.02
  76   1    -0.05  -0.02   0.10     0.10   0.03  -0.06    -0.08  -0.05   0.02
  77   1    -0.02  -0.03   0.01     0.06   0.07   0.03    -0.05  -0.08  -0.05
  78   1    -0.09   0.02  -0.02     0.05  -0.02   0.02    -0.03   0.00  -0.04
  79   1    -0.01   0.00   0.00     0.05   0.02   0.01    -0.06  -0.04   0.00
  80   1    -0.09   0.01  -0.02    -0.02  -0.03  -0.01     0.03  -0.01   0.01
  81   1    -0.09  -0.05   0.00    -0.03  -0.09  -0.02     0.02  -0.01   0.00
  82   1    -0.01  -0.04   0.05     0.04  -0.06   0.04     0.02   0.01   0.02
  83   1    -0.07   0.00   0.02    -0.02  -0.01   0.03     0.02   0.00   0.02
  84   1     0.00   0.00   0.00     0.00  -0.02   0.04     0.00  -0.01   0.01
  85   1    -0.08  -0.10   0.10     0.04   0.07  -0.02    -0.08  -0.09   0.18
  86   1    -0.13   0.00   0.01     0.05   0.04   0.00    -0.16   0.14   0.00
  87   1     0.03  -0.06   0.01    -0.03   0.04  -0.02     0.05  -0.06  -0.08
  88   1    -0.01   0.00  -0.01    -0.02   0.00  -0.01    -0.05  -0.04  -0.04
  89   1    -0.07  -0.03  -0.07     0.04   0.03   0.07     0.00  -0.01  -0.03
  90   1    -0.02  -0.08  -0.01    -0.03   0.08   0.02    -0.05   0.02  -0.02
  91   1    -0.05   0.29   0.03    -0.04  -0.08  -0.11     0.08   0.02   0.16
  92   1     0.36   0.05   0.14    -0.12  -0.08   0.01     0.08   0.09  -0.04
  93   1     0.01  -0.17  -0.08    -0.10  -0.08  -0.01     0.15   0.14   0.04
  94   1     0.03  -0.01  -0.04    -0.05  -0.01   0.10     0.09   0.06  -0.14
  95   1     0.03   0.00  -0.01    -0.07  -0.12  -0.02     0.16   0.14   0.04
  96   1     0.00   0.00  -0.03     0.03   0.00  -0.05     0.04   0.01   0.06
  97   1     0.03  -0.02  -0.10     0.04  -0.03  -0.18     0.03  -0.03  -0.04
  98   1    -0.01   0.12  -0.10    -0.01   0.22  -0.17    -0.02   0.07  -0.05
  99   1     0.00   0.06   0.02     0.01   0.13   0.04    -0.01   0.02   0.05
 100   1     0.04   0.05   0.01     0.08   0.07   0.04     0.02   0.02   0.01
 101   1    -0.01   0.07  -0.05    -0.04   0.14  -0.08    -0.02   0.04  -0.02
 102   1    -0.02  -0.01  -0.03    -0.05  -0.05  -0.05    -0.02  -0.02  -0.02
 103   1     0.03  -0.24   0.09    -0.10   0.10  -0.07    -0.08   0.14  -0.07
 104   1    -0.17   0.06  -0.01     0.05  -0.13   0.13     0.07  -0.09   0.09
 105   1     0.21   0.10  -0.01    -0.26  -0.18   0.02    -0.22  -0.12   0.03
 106   1     0.04  -0.07   0.02    -0.01  -0.01   0.13     0.00   0.00   0.07
 107   1     0.09   0.02   0.01     0.00  -0.01   0.05     0.00  -0.01   0.01
 108   1     0.03  -0.01   0.01    -0.09  -0.04   0.06    -0.06   0.00   0.03
 109   1     0.01  -0.02   0.03     0.05  -0.01  -0.14     0.02   0.03   0.08
 110   1     0.01  -0.02   0.04    -0.02  -0.10  -0.07     0.04   0.08   0.04
 111   1     0.02  -0.03   0.05    -0.01   0.03  -0.07     0.02   0.06   0.00
 112   1     0.01  -0.03  -0.01    -0.04   0.02  -0.07    -0.01   0.05  -0.03
 113   1     0.02  -0.02   0.00    -0.04   0.03  -0.07    -0.04   0.02  -0.09
 114   1     0.00  -0.04   0.00    -0.04   0.07  -0.04     0.00   0.10  -0.05
                    64                     65                     66
                    ?A                     ?A                     ?A
 Frequencies --   283.2243               296.8575               299.4520
 Red. masses --     2.7746                 2.3532                 1.4819
 Frc consts  --     0.1311                 0.1222                 0.0783
 IR Inten    --    13.9778                 5.6002                 2.5881
 Raman Activ --     0.0000                 0.0000                 0.0000
 Depolar     --     0.0000                 0.0000                 0.0000
 Atom AN      X      Y      Z        X      Y      Z        X      Y      Z
   1   8     0.01   0.02   0.00     0.01   0.00   0.00     0.00   0.00   0.00
   2  12     0.10   0.00  -0.02    -0.03   0.00  -0.03     0.00  -0.03   0.01
   3   8    -0.01   0.02   0.03    -0.01   0.01   0.00     0.00   0.00   0.00
   4   6    -0.01   0.02   0.00     0.00  -0.01   0.00     0.00   0.00   0.00
   5   7     0.04   0.01   0.02     0.13   0.02  -0.04     0.02   0.00   0.00
   6   7    -0.05  -0.04  -0.01     0.02   0.01   0.00     0.01   0.02  -0.02
   7   8     0.01   0.01   0.00     0.01  -0.01   0.00     0.00   0.00   0.00
   8   6     0.04  -0.04   0.03     0.02   0.01   0.00     0.01  -0.01   0.00
   9   6     0.02  -0.04   0.01    -0.05  -0.01   0.03    -0.01  -0.01  -0.01
  10   6    -0.01  -0.06  -0.02    -0.01   0.00   0.02     0.00  -0.01  -0.02
  11   8    -0.02  -0.04   0.03     0.00   0.00   0.00     0.00   0.00   0.00
  12   6     0.00  -0.05  -0.01    -0.01   0.00   0.01     0.00   0.01   0.00
  13   6     0.00  -0.03  -0.01    -0.01   0.01   0.00     0.01   0.00   0.00
  14   6    -0.02   0.00   0.02     0.00   0.00   0.00     0.00   0.00   0.00
  15   8    -0.03  -0.03  -0.04     0.00  -0.02   0.02    -0.01   0.02  -0.01
  16   6     0.00   0.02   0.03     0.00  -0.01   0.00     0.00   0.00   0.00
  17   8    -0.02   0.03   0.06    -0.01  -0.01  -0.06     0.01   0.01   0.02
  18   6    -0.01   0.00   0.00     0.01  -0.01   0.00     0.00   0.00   0.00
  19   8    -0.02  -0.03  -0.01     0.02   0.01   0.00    -0.01  -0.01   0.00
  20   8     0.03   0.01   0.02     0.00   0.00   0.00     0.00   0.00   0.00
  21   6     0.01   0.00   0.02    -0.02   0.00  -0.03     0.01   0.00   0.02
  22   6    -0.01   0.01   0.02    -0.02   0.01  -0.03     0.01  -0.01   0.02
  23   6     0.00   0.02   0.00     0.01  -0.02   0.00     0.00   0.01   0.00
  24   8     0.02  -0.01  -0.02     0.00  -0.05   0.02     0.00   0.03  -0.01
  25   6    -0.01  -0.03  -0.05     0.01   0.09   0.07    -0.01  -0.05  -0.03
  26   6     0.00   0.01  -0.01     0.02  -0.02   0.01     0.00   0.01   0.00
  27   6    -0.02   0.00   0.01     0.00  -0.01   0.00     0.00   0.00  -0.01
  28   6    -0.02   0.00  -0.04     0.00   0.02   0.01     0.00   0.00  -0.01
  29   6     0.01   0.03   0.01     0.05   0.01  -0.02     0.01   0.01   0.00
  30   6    -0.03   0.00  -0.01     0.01   0.01   0.01    -0.01   0.02  -0.02
  31   6     0.02   0.03   0.02     0.03   0.05   0.01     0.00   0.02   0.00
  32   6     0.04   0.04   0.00    -0.02   0.04   0.02     0.01   0.02  -0.01
  33   6     0.04   0.04   0.01    -0.06  -0.01  -0.01     0.01   0.01   0.01
  34   6     0.03   0.04   0.03    -0.04  -0.06  -0.03     0.01   0.01   0.02
  35   6    -0.01   0.04   0.01     0.00  -0.06  -0.02     0.00   0.01   0.00
  36   6     0.02   0.01   0.02     0.02   0.01   0.01     0.00   0.01   0.01
  37   6    -0.03   0.03   0.00    -0.03  -0.03   0.00     0.00   0.01   0.00
  38   6    -0.01   0.01   0.00     0.00   0.00   0.00    -0.02   0.03  -0.03
  39   6     0.00   0.02  -0.01    -0.01  -0.01   0.00    -0.05   0.01  -0.02
  40   6    -0.01   0.04  -0.03    -0.01  -0.02   0.00    -0.05   0.00   0.02
  41   6    -0.02   0.05  -0.02     0.00  -0.02   0.01    -0.03   0.00   0.02
  42   6    -0.03   0.03  -0.02     0.01   0.00   0.01    -0.01   0.00   0.00
  43   6    -0.01   0.02   0.00     0.00   0.00   0.00     0.00   0.02  -0.01
  44   6    -0.01   0.02  -0.01     0.00   0.00   0.00    -0.01  -0.01   0.00
  45   6     0.06  -0.03  -0.02     0.09  -0.10  -0.03     0.02  -0.01   0.00
  46   6     0.00   0.01   0.01    -0.01   0.00   0.00    -0.01   0.00   0.01
  47   6    -0.12  -0.03  -0.04    -0.07   0.05  -0.01    -0.02   0.00  -0.01
  48   6    -0.13  -0.02   0.03    -0.05   0.04   0.05    -0.03  -0.01   0.00
  49   6     0.01  -0.03   0.02    -0.01   0.02  -0.02    -0.02  -0.01   0.01
  50   6     0.01  -0.02   0.02    -0.01   0.01   0.00    -0.01   0.00  -0.01
  51   6     0.00   0.02   0.00     0.01  -0.01   0.00     0.07  -0.01   0.01
  52   6     0.01   0.02  -0.03     0.00  -0.01   0.01     0.08  -0.01  -0.01
  53   6     0.03  -0.07   0.01     0.01   0.03   0.02     0.01  -0.02  -0.01
  54   6     0.02  -0.07  -0.02     0.03   0.01   0.02     0.03  -0.03   0.02
  55   1     0.01   0.00   0.00    -0.09  -0.02   0.05    -0.02  -0.01  -0.01
  56   1    -0.01  -0.03  -0.04    -0.01   0.01   0.01     0.01   0.00   0.00
  57   1    -0.01   0.01   0.04     0.00  -0.01   0.00     0.00   0.00   0.00
  58   1    -0.01   0.02   0.04     0.00  -0.01  -0.01     0.00   0.00   0.01
  59   1     0.00  -0.01   0.03    -0.01   0.00   0.00     0.00   0.00   0.00
  60   1    -0.01   0.04   0.04     0.00   0.00   0.00     0.00   0.00   0.00
  61   1    -0.04   0.05   0.00     0.00  -0.04  -0.02     0.00   0.02   0.01
  62   1     0.01   0.03  -0.01    -0.01  -0.03   0.02     0.00   0.01  -0.01
  63   1    -0.03  -0.02   0.03     0.03   0.11  -0.01    -0.02  -0.07   0.00
  64   1     0.06   0.01  -0.12    -0.04   0.03   0.17     0.00  -0.02  -0.08
  65   1    -0.08  -0.11  -0.10     0.08   0.19   0.12    -0.04  -0.09  -0.06
  66   1     0.07  -0.05  -0.06    -0.05   0.05   0.05     0.03  -0.02  -0.03
  67   1    -0.08  -0.01  -0.03     0.11   0.00   0.02    -0.05   0.00  -0.01
  68   1     0.04   0.07   0.04    -0.02  -0.09  -0.04     0.02   0.05   0.02
  69   1    -0.03   0.06   0.04     0.00  -0.01   0.00     0.00   0.01   0.00
  70   1     0.03  -0.01   0.00     0.00  -0.02   0.00     0.01  -0.01   0.00
  71   1    -0.08  -0.03   0.00     0.01   0.00  -0.01    -0.01  -0.01  -0.02
  72   1    -0.03   0.02  -0.15     0.02   0.02   0.03    -0.01   0.00  -0.01
  73   1    -0.04   0.07  -0.01     0.00   0.02   0.01     0.00   0.00  -0.01
  74   1     0.01  -0.10  -0.03    -0.01   0.04   0.01     0.01  -0.01  -0.01
  75   1     0.05   0.02  -0.02    -0.03   0.07   0.04     0.01   0.02  -0.02
  76   1     0.05   0.04   0.00    -0.12   0.00  -0.02     0.01   0.01   0.01
  77   1     0.04   0.05   0.05    -0.05  -0.08  -0.04     0.01   0.00   0.04
  78   1     0.00   0.01   0.01    -0.04   0.02   0.00    -0.01   0.01   0.01
  79   1     0.01   0.04  -0.01    -0.09  -0.03  -0.01     0.01   0.01  -0.01
  80   1     0.01   0.01  -0.01    -0.02  -0.01  -0.02    -0.08   0.02  -0.02
  81   1     0.00   0.04  -0.04    -0.02  -0.04  -0.01    -0.06   0.00   0.03
  82   1    -0.03   0.06  -0.02     0.00  -0.03   0.00    -0.02  -0.01   0.04
  83   1    -0.02   0.01   0.00    -0.01  -0.01   0.00    -0.04   0.01   0.02
  84   1     0.01   0.04  -0.04    -0.01  -0.01   0.01    -0.01  -0.01   0.00
  85   1    -0.01  -0.14   0.05    -0.07  -0.37   0.18     0.00  -0.02  -0.01
  86   1     0.06   0.09  -0.01     0.02   0.21  -0.04     0.03  -0.01   0.00
  87   1     0.17  -0.09  -0.12     0.37  -0.24  -0.25     0.03  -0.01   0.00
  88   1     0.01   0.04   0.01     0.01   0.04  -0.01    -0.01   0.01   0.00
  89   1    -0.03   0.01   0.01    -0.06   0.00  -0.02    -0.03   0.00   0.00
  90   1     0.01  -0.01   0.02     0.00  -0.05   0.02    -0.01  -0.01   0.02
  91   1    -0.08  -0.06  -0.15    -0.04   0.00  -0.01    -0.02   0.01  -0.03
  92   1    -0.20  -0.04  -0.04    -0.13   0.07  -0.12    -0.02   0.00   0.00
  93   1    -0.17  -0.02   0.00    -0.08   0.14   0.07    -0.03  -0.01  -0.01
  94   1    -0.10  -0.10   0.12    -0.03   0.01   0.00    -0.02  -0.03   0.03
  95   1    -0.20  -0.01  -0.01    -0.05   0.16   0.06    -0.06   0.00  -0.01
  96   1    -0.18  -0.03   0.03    -0.10  -0.01   0.16    -0.05  -0.01   0.00
  97   1     0.05  -0.02   0.05     0.03  -0.03  -0.05    -0.02   0.01   0.03
  98   1     0.03  -0.05   0.03    -0.03   0.08  -0.06    -0.03  -0.03   0.02
  99   1    -0.01  -0.07   0.01    -0.02   0.03   0.05    -0.02   0.00   0.01
 100   1    -0.02  -0.04  -0.02     0.02   0.02   0.01    -0.02   0.00  -0.01
 101   1     0.04  -0.07   0.05    -0.02   0.04  -0.02    -0.02  -0.01   0.00
 102   1     0.04   0.03   0.05    -0.02  -0.01  -0.01    -0.01   0.00  -0.02
 103   1     0.03  -0.27   0.07     0.00   0.06  -0.01     0.04   0.48  -0.02
 104   1    -0.26   0.15  -0.08     0.07  -0.04   0.01     0.53  -0.22   0.11
 105   1     0.27   0.21   0.01    -0.05  -0.05  -0.01    -0.32  -0.32  -0.05
 106   1     0.01  -0.01  -0.03     0.00   0.00   0.00     0.05  -0.03  -0.13
 107   1     0.03   0.01  -0.06    -0.01   0.00   0.02     0.04   0.04   0.10
 108   1     0.01   0.06  -0.04     0.00  -0.02   0.01     0.22  -0.06   0.02
 109   1     0.01  -0.06  -0.02    -0.01   0.02   0.05     0.01  -0.02  -0.02
 110   1     0.03  -0.09   0.01     0.03   0.07   0.02     0.00  -0.04  -0.01
 111   1     0.03  -0.09   0.01     0.02   0.02   0.00     0.01  -0.02   0.00
 112   1     0.03  -0.05   0.00     0.04   0.04   0.06     0.03  -0.01   0.03
 113   1     0.03  -0.07  -0.02     0.03   0.00   0.00     0.04  -0.02   0.05
 114   1     0.04  -0.08  -0.03     0.06   0.00   0.00     0.03  -0.07   0.02
                    67                     68                     69
                    ?A                     ?A                     ?A
 Frequencies --   304.9898               308.0510               315.2078
 Red. masses --     3.3666                 3.8718                 3.1503
 Frc consts  --     0.1845                 0.2165                 0.1844
 IR Inten    --    13.9438                 3.3846                 1.1091
 Raman Activ --     0.0000                 0.0000                 0.0000
 Depolar     --     0.0000                 0.0000                 0.0000
 Atom AN      X      Y      Z        X      Y      Z        X      Y      Z
   1   8    -0.01   0.03   0.00     0.08  -0.06  -0.01    -0.03   0.05  -0.01
   2  12     0.10   0.00  -0.10     0.08   0.04   0.00     0.01  -0.01   0.00
   3   8    -0.01   0.00   0.00     0.00  -0.09  -0.13     0.02  -0.05  -0.07
   4   6    -0.01   0.02   0.00     0.00  -0.06   0.00     0.00   0.02  -0.01
   5   7    -0.04  -0.02   0.05     0.00  -0.01   0.01    -0.04   0.01   0.02
   6   7     0.01   0.01  -0.02    -0.01  -0.01  -0.01     0.00   0.00   0.00
   7   8     0.00   0.00  -0.01     0.06  -0.07  -0.02    -0.02  -0.03  -0.05
   8   6    -0.02  -0.02   0.04     0.01  -0.01   0.01     0.01   0.00   0.02
   9   6    -0.02  -0.02   0.00     0.00  -0.01   0.00     0.03   0.01   0.01
  10   6     0.00  -0.02  -0.01     0.00  -0.02  -0.01     0.01   0.00   0.00
  11   8    -0.01  -0.04   0.03    -0.07   0.08  -0.03     0.00  -0.05   0.05
  12   6     0.00  -0.02   0.01    -0.08   0.07   0.05    -0.01   0.01   0.05
  13   6    -0.02  -0.01   0.01    -0.06   0.04   0.03     0.00   0.02   0.01
  14   6    -0.01   0.00   0.02    -0.06  -0.03  -0.01     0.02   0.00   0.04
  15   8     0.01   0.00   0.02     0.02  -0.03   0.18     0.02  -0.01   0.09
  16   6     0.00   0.02   0.04    -0.02  -0.07  -0.07     0.01   0.03   0.09
  17   8    -0.04   0.00  -0.06    -0.02   0.02   0.04     0.00  -0.01   0.01
  18   6     0.01  -0.02  -0.02     0.02  -0.04  -0.04     0.03   0.00  -0.03
  19   8     0.04   0.00  -0.02     0.07   0.08   0.01     0.07   0.07   0.00
  20   8     0.02   0.02   0.02    -0.01  -0.01  -0.03    -0.01   0.01  -0.03
  21   6    -0.03   0.02  -0.05     0.00   0.00  -0.01    -0.01   0.00   0.00
  22   6    -0.05   0.05  -0.05    -0.01   0.01   0.00     0.00  -0.01   0.01
  23   6     0.01  -0.03   0.00     0.00  -0.03  -0.01     0.00   0.00  -0.01
  24   8     0.00  -0.10   0.01     0.00   0.00   0.00    -0.01   0.01   0.01
  25   6    -0.01   0.15   0.06     0.00   0.00  -0.03    -0.01  -0.02  -0.02
  26   6     0.02  -0.02   0.00     0.02   0.04   0.02    -0.01   0.01   0.00
  27   6    -0.04  -0.02  -0.01    -0.05  -0.04  -0.04    -0.08  -0.03  -0.10
  28   6    -0.02  -0.02  -0.03    -0.04   0.15   0.09     0.02  -0.04  -0.02
  29   6    -0.02  -0.01   0.03     0.00   0.00   0.00    -0.02   0.02   0.01
  30   6    -0.01   0.02  -0.01     0.00  -0.01   0.00     0.00   0.00   0.00
  31   6    -0.02  -0.01  -0.01     0.00  -0.01   0.01    -0.01   0.02   0.00
  32   6     0.00  -0.01  -0.01     0.02   0.01  -0.05    -0.04  -0.02   0.13
  33   6     0.02   0.00   0.02     0.03   0.00   0.00    -0.05   0.03   0.00
  34   6     0.01   0.02   0.02     0.02  -0.01   0.05    -0.05   0.07  -0.12
  35   6     0.00   0.02   0.00     0.00   0.01   0.00    -0.02   0.02   0.02
  36   6    -0.02   0.00  -0.02     0.01   0.00   0.02    -0.01   0.02  -0.05
  37   6     0.01   0.02  -0.02     0.00   0.01  -0.02     0.00  -0.02   0.06
  38   6    -0.01   0.01  -0.02     0.00   0.00   0.00    -0.01   0.01   0.00
  39   6     0.00   0.04   0.00     0.00   0.00   0.00    -0.01  -0.01  -0.02
  40   6     0.00   0.03  -0.03     0.00   0.00   0.00    -0.01   0.01   0.00
  41   6    -0.02   0.00  -0.06     0.00   0.00   0.00    -0.01   0.02   0.02
  42   6    -0.03   0.02  -0.01     0.00   0.00   0.00    -0.01   0.01  -0.01
  43   6    -0.01  -0.01  -0.03     0.00   0.00   0.00     0.00   0.02   0.00
  44   6    -0.03   0.02   0.01     0.00   0.00   0.00     0.00   0.00  -0.01
  45   6    -0.05   0.04   0.01     0.01   0.01   0.01     0.02  -0.04  -0.06
  46   6     0.01  -0.01  -0.01    -0.03   0.01   0.02     0.11  -0.02  -0.04
  47   6     0.05   0.00   0.00     0.00  -0.01  -0.03    -0.04  -0.05   0.04
  48   6     0.01  -0.02  -0.04    -0.05  -0.01   0.00     0.10   0.01   0.02
  49   6    -0.02  -0.02   0.05     0.01   0.00   0.00    -0.01  -0.01   0.01
  50   6    -0.05  -0.05   0.04     0.00   0.00   0.00     0.01   0.00  -0.01
  51   6     0.04  -0.01  -0.02     0.00   0.01   0.00     0.00   0.01   0.01
  52   6    -0.02  -0.01   0.00     0.01   0.00   0.00     0.02   0.01   0.00
  53   6     0.03   0.07   0.12     0.01  -0.01   0.01    -0.01  -0.05  -0.02
  54   6     0.09  -0.07   0.09    -0.01  -0.01  -0.03    -0.01   0.00  -0.01
  55   1    -0.02   0.00  -0.01     0.01   0.00  -0.01     0.04   0.02   0.00
  56   1    -0.02  -0.01   0.00     0.00   0.06   0.14     0.03   0.03   0.05
  57   1     0.00   0.02   0.04    -0.06  -0.07  -0.04     0.04   0.03   0.07
  58   1     0.00   0.03   0.07    -0.03  -0.15  -0.12     0.01   0.09   0.16
  59   1     0.02  -0.02   0.04    -0.07  -0.02  -0.06     0.05  -0.06   0.09
  60   1     0.00   0.03   0.05    -0.04  -0.02  -0.06     0.02   0.05   0.11
  61   1    -0.04   0.00  -0.04    -0.04   0.02  -0.02     0.00   0.01   0.00
  62   1    -0.02  -0.04   0.00    -0.02  -0.02  -0.05    -0.01   0.00  -0.02
  63   1     0.00   0.20   0.00    -0.02   0.03   0.03    -0.01  -0.03  -0.01
  64   1    -0.02   0.08   0.17     0.06   0.01  -0.06    -0.01  -0.01  -0.04
  65   1     0.04   0.24   0.10    -0.05  -0.04  -0.06    -0.02  -0.04  -0.03
  66   1    -0.02   0.04   0.03     0.10   0.01  -0.07     0.01  -0.01  -0.02
  67   1     0.10   0.00   0.01    -0.10  -0.01   0.09    -0.06   0.00   0.01
  68   1     0.00  -0.08  -0.04     0.07   0.17   0.09    -0.01   0.07   0.01
  69   1    -0.03  -0.01  -0.05    -0.01  -0.22  -0.21    -0.04  -0.11  -0.30
  70   1    -0.07  -0.03   0.00    -0.27  -0.03   0.00    -0.31  -0.06  -0.05
  71   1    -0.04  -0.02  -0.01     0.14   0.03   0.01     0.01   0.00  -0.05
  72   1    -0.05  -0.02  -0.09     0.16   0.15   0.27    -0.03  -0.03  -0.12
  73   1    -0.03   0.00  -0.02    -0.08   0.14   0.05     0.02   0.00   0.01
  74   1     0.02  -0.09  -0.03    -0.14   0.38   0.08     0.06  -0.14  -0.01
  75   1     0.01  -0.01  -0.03     0.02   0.02  -0.10    -0.04  -0.05   0.26
  76   1     0.04  -0.01   0.04     0.03   0.00   0.00    -0.05   0.03  -0.01
  77   1     0.02   0.03   0.02     0.03  -0.02   0.09    -0.05   0.10  -0.23
  78   1     0.01   0.00  -0.01     0.02  -0.01   0.02    -0.04   0.02  -0.05
  79   1     0.03   0.02   0.00     0.01   0.02  -0.03     0.02  -0.02   0.06
  80   1     0.02   0.05   0.01     0.00   0.01   0.01    -0.02  -0.02  -0.04
  81   1     0.00   0.03  -0.04     0.00   0.00   0.00    -0.01   0.01   0.00
  82   1    -0.03  -0.01  -0.10     0.00   0.00   0.00     0.00   0.04   0.04
  83   1    -0.02  -0.01  -0.01     0.00   0.00   0.00    -0.01   0.01   0.01
  84   1    -0.01   0.03  -0.01     0.00   0.00   0.00     0.00   0.00  -0.02
  85   1     0.01   0.15  -0.07     0.02   0.05  -0.02    -0.04  -0.13  -0.01
  86   1    -0.04  -0.11   0.01     0.02  -0.03   0.02     0.01   0.06  -0.06
  87   1    -0.17   0.10   0.13    -0.03   0.03   0.04     0.11  -0.08  -0.14
  88   1     0.00  -0.03   0.00    -0.05   0.00  -0.03     0.16   0.00   0.10
  89   1     0.03  -0.01  -0.02    -0.03   0.02   0.04     0.10  -0.03  -0.08
  90   1     0.00   0.01  -0.02    -0.06   0.04   0.04     0.20  -0.08  -0.11
  91   1     0.03   0.03   0.02     0.02  -0.06  -0.03    -0.03  -0.07   0.00
  92   1     0.10  -0.01   0.05    -0.06  -0.01  -0.05    -0.08  -0.06   0.05
  93   1     0.07  -0.05  -0.05     0.02   0.04  -0.01    -0.06  -0.05   0.06
  94   1     0.01  -0.01  -0.01    -0.04  -0.05   0.03     0.07   0.10  -0.03
  95   1     0.01  -0.07  -0.05    -0.09   0.01  -0.02     0.17  -0.05   0.06
  96   1     0.03   0.00  -0.09    -0.08  -0.02   0.00     0.18   0.04  -0.01
  97   1    -0.04   0.05   0.12     0.01   0.00  -0.01     0.01   0.00   0.02
  98   1     0.00  -0.11   0.11     0.01   0.01  -0.01    -0.02  -0.02   0.01
  99   1    -0.01  -0.05  -0.02     0.00   0.00   0.00    -0.01  -0.02   0.01
 100   1    -0.06  -0.11  -0.02     0.00   0.00   0.00     0.00   0.01  -0.01
 101   1    -0.05  -0.09   0.11     0.00   0.00   0.01     0.02   0.00  -0.02
 102   1    -0.04  -0.04   0.07     0.00   0.00   0.01     0.02   0.01  -0.01
 103   1     0.04   0.12   0.00    -0.01   0.04  -0.01     0.00   0.03   0.00
 104   1     0.17  -0.07   0.00     0.01   0.00   0.00     0.02  -0.01   0.02
 105   1    -0.06  -0.10  -0.05    -0.03   0.00   0.00    -0.02  -0.01   0.00
 106   1    -0.03   0.03  -0.05     0.02  -0.02   0.02     0.01   0.00  -0.04
 107   1    -0.06   0.00   0.06     0.03   0.00  -0.02     0.01   0.02   0.02
 108   1     0.03  -0.07   0.01    -0.01   0.01   0.00     0.06   0.01   0.00
 109   1     0.05   0.04   0.23     0.01  -0.01   0.01    -0.01  -0.04  -0.08
 110   1     0.05   0.15   0.11     0.02  -0.01   0.01    -0.02  -0.10  -0.02
 111   1     0.03   0.12   0.08     0.01  -0.01   0.00    -0.01  -0.07   0.00
 112   1     0.11  -0.02   0.14    -0.01  -0.01  -0.03    -0.02  -0.02  -0.03
 113   1     0.14  -0.04   0.16    -0.01  -0.02  -0.04    -0.02   0.00  -0.01
 114   1     0.11  -0.20   0.07    -0.01   0.01  -0.03    -0.03   0.01   0.00
                    70                     71                     72
                    ?A                     ?A                     ?A
 Frequencies --   318.1998               319.2513               328.1169
 Red. masses --     3.4327                 3.4703                 3.2522
 Frc consts  --     0.2048                 0.2084                 0.2063
 IR Inten    --     7.5441                 2.5298                 2.0119
 Raman Activ --     0.0000                 0.0000                 0.0000
 Depolar     --     0.0000                 0.0000                 0.0000
 Atom AN      X      Y      Z        X      Y      Z        X      Y      Z
   1   8    -0.06   0.07   0.00     0.03  -0.04   0.01    -0.01   0.00   0.00
   2  12    -0.04   0.08   0.04     0.01   0.11   0.02    -0.01   0.02   0.04
   3   8     0.02  -0.02  -0.05    -0.02   0.02   0.02     0.00  -0.01  -0.02
   4   6     0.00   0.04  -0.01     0.00  -0.01   0.01     0.00   0.01   0.00
   5   7     0.05  -0.02  -0.01    -0.01  -0.01   0.05     0.02   0.00   0.01
   6   7    -0.07  -0.05   0.04    -0.10  -0.08   0.03     0.02   0.01  -0.01
   7   8    -0.03   0.00  -0.04     0.01   0.03   0.05    -0.01   0.02   0.01
   8   6     0.03  -0.01   0.00     0.05  -0.04   0.05     0.02  -0.02   0.02
   9   6     0.02  -0.01  -0.01     0.07  -0.02   0.00     0.01  -0.01   0.01
  10   6    -0.03  -0.03   0.01    -0.02  -0.07   0.00     0.02  -0.01  -0.01
  11   8     0.02  -0.07   0.06     0.00   0.02  -0.04     0.01  -0.03   0.01
  12   6     0.01  -0.02   0.03     0.00  -0.02  -0.03     0.00  -0.01   0.01
  13   6     0.01   0.00  -0.01    -0.01  -0.02  -0.01     0.00   0.00   0.00
  14   6     0.04   0.01   0.04    -0.02   0.00  -0.03     0.01   0.00   0.00
  15   8     0.02  -0.03   0.04     0.00   0.00  -0.04     0.01   0.01   0.01
  16   6     0.02   0.05   0.10    -0.01  -0.02  -0.07     0.01   0.01   0.00
  17   8     0.00  -0.01  -0.02    -0.02   0.02  -0.02     0.01   0.00   0.01
  18   6     0.01   0.02   0.00    -0.01  -0.01   0.01     0.00   0.01   0.00
  19   8     0.05   0.07   0.01    -0.01  -0.02   0.00     0.02   0.02   0.00
  20   8    -0.03   0.00  -0.04     0.00  -0.01   0.00    -0.01  -0.01  -0.02
  21   6    -0.01   0.00  -0.02    -0.01   0.00  -0.03     0.00  -0.01   0.00
  22   6     0.00  -0.01  -0.02    -0.02   0.02  -0.03     0.01  -0.01  -0.01
  23   6     0.00   0.00   0.00     0.00  -0.02   0.01     0.00   0.00   0.00
  24   8    -0.02   0.00   0.01     0.00  -0.05   0.01     0.00   0.02   0.00
  25   6     0.00   0.01   0.02     0.00   0.08   0.04    -0.02  -0.03  -0.03
  26   6    -0.02   0.00   0.00     0.01  -0.02   0.01    -0.01   0.00   0.00
  27   6    -0.06  -0.02  -0.08     0.04   0.01   0.06    -0.01   0.00  -0.01
  28   6     0.03  -0.09  -0.04    -0.02   0.04   0.01     0.01  -0.02   0.00
  29   6     0.02  -0.02  -0.01    -0.02   0.00   0.02     0.01   0.00   0.00
  30   6    -0.01  -0.02   0.01    -0.03  -0.02   0.01     0.01   0.01  -0.01
  31   6     0.01  -0.02   0.00    -0.01   0.00  -0.01     0.00   0.01   0.00
  32   6     0.03   0.01  -0.10    -0.01  -0.03   0.07     0.01   0.00   0.01
  33   6     0.03  -0.03   0.00     0.00   0.01   0.00     0.00   0.00   0.00
  34   6     0.03  -0.07   0.08    -0.01   0.05  -0.07     0.00   0.00  -0.01
  35   6     0.01  -0.02  -0.03    -0.01   0.02   0.02     0.00   0.00   0.00
  36   6     0.01  -0.01   0.03    -0.02   0.00  -0.04     0.00   0.00  -0.01
  37   6    -0.01   0.02  -0.05     0.01   0.00   0.03     0.00   0.00   0.00
  38   6     0.00  -0.02   0.02    -0.02  -0.01   0.01    -0.01   0.01  -0.02
  39   6    -0.02  -0.05   0.01    -0.05  -0.04   0.02     0.01   0.16   0.17
  40   6    -0.02  -0.04   0.02    -0.06  -0.04   0.01    -0.01   0.01   0.01
  41   6    -0.02  -0.01   0.04    -0.06  -0.02   0.03    -0.03  -0.14  -0.16
  42   6    -0.01  -0.01   0.01    -0.02   0.01   0.01     0.01   0.01   0.01
  43   6     0.01   0.01   0.01     0.00   0.01   0.01    -0.02  -0.05  -0.08
  44   6     0.02  -0.01   0.00     0.02   0.01   0.00     0.02   0.07   0.06
  45   6    -0.02   0.03   0.05    -0.04   0.01  -0.02    -0.01  -0.01   0.00
  46   6    -0.09   0.02   0.02     0.05  -0.02  -0.04     0.00   0.00  -0.01
  47   6     0.04   0.06  -0.03    -0.02  -0.04   0.01    -0.02   0.00   0.00
  48   6    -0.08   0.00  -0.02     0.05   0.00   0.01    -0.01   0.00   0.01
  49   6     0.04   0.01  -0.07     0.06   0.03  -0.10     0.05   0.11  -0.04
  50   6     0.06   0.05  -0.03     0.08   0.07  -0.01    -0.04  -0.03   0.10
  51   6     0.02   0.04   0.01     0.07   0.05   0.01     0.09  -0.04  -0.07
  52   6     0.04   0.02  -0.04     0.08   0.00  -0.06    -0.11  -0.06   0.01
  53   6     0.00   0.02   0.04     0.01  -0.04   0.07     0.01  -0.06  -0.01
  54   6    -0.04   0.00  -0.05    -0.05  -0.05  -0.08    -0.02   0.01  -0.05
  55   1     0.03   0.01  -0.01     0.10   0.04  -0.02     0.01   0.01   0.01
  56   1     0.03   0.01  -0.01    -0.03  -0.03  -0.03     0.00   0.00  -0.01
  57   1     0.06   0.05   0.08    -0.03  -0.02  -0.05     0.01   0.02   0.01
  58   1     0.02   0.13   0.18    -0.01  -0.06  -0.13     0.01   0.01   0.01
  59   1     0.07  -0.04   0.10    -0.05   0.05  -0.07     0.02   0.00   0.00
  60   1     0.03   0.05   0.12    -0.02  -0.02  -0.09     0.01   0.00   0.00
  61   1     0.01  -0.03  -0.01    -0.02  -0.03  -0.03     0.00   0.01  -0.02
  62   1     0.00   0.00   0.00     0.00  -0.02   0.02     0.01   0.00   0.00
  63   1     0.01   0.02   0.00     0.00   0.11   0.01    -0.03  -0.05   0.03
  64   1    -0.01  -0.01   0.05    -0.01   0.03   0.11     0.00  -0.01  -0.06
  65   1     0.01   0.04   0.03     0.02   0.14   0.07    -0.07  -0.05  -0.07
  66   1    -0.05   0.00   0.04    -0.03   0.03   0.04    -0.01  -0.01   0.00
  67   1    -0.01   0.00   0.01     0.08   0.00   0.01    -0.03   0.00   0.01
  68   1    -0.05  -0.02  -0.04    -0.01  -0.07  -0.02    -0.01   0.02   0.00
  69   1    -0.03  -0.05  -0.22     0.01   0.06   0.18    -0.01   0.00  -0.03
  70   1    -0.20  -0.04  -0.05     0.17   0.03   0.03    -0.03   0.00  -0.01
  71   1    -0.02  -0.01  -0.06    -0.02  -0.01   0.03    -0.01   0.00   0.00
  72   1    -0.08  -0.08  -0.16     0.02   0.04   0.07    -0.01  -0.01  -0.03
  73   1     0.05  -0.07  -0.01    -0.02   0.03   0.01     0.02  -0.01   0.01
  74   1     0.10  -0.24  -0.03    -0.06   0.10   0.01     0.01  -0.05   0.00
  75   1     0.03   0.04  -0.19     0.00  -0.05   0.12     0.00   0.00   0.02
  76   1     0.03  -0.04   0.01     0.01   0.01   0.00     0.00   0.00   0.01
  77   1     0.04  -0.09   0.16     0.00   0.08  -0.13     0.00   0.00  -0.02
  78   1     0.03  -0.02   0.04    -0.02   0.00  -0.05    -0.01   0.00  -0.01
  79   1    -0.03   0.01  -0.04     0.03   0.00   0.03    -0.01   0.00   0.00
  80   1    -0.03  -0.06  -0.01    -0.07  -0.03   0.02     0.03   0.28   0.32
  81   1    -0.01  -0.04   0.01    -0.06  -0.05  -0.01    -0.02   0.02   0.03
  82   1    -0.01   0.00   0.07    -0.05  -0.03   0.05    -0.05  -0.26  -0.29
  83   1     0.03   0.01   0.00    -0.01   0.00   0.01    -0.03  -0.05  -0.07
  84   1     0.01  -0.01   0.00     0.02   0.01  -0.01     0.01   0.06   0.07
  85   1     0.03   0.10   0.02    -0.03   0.02   0.00    -0.01  -0.02   0.03
  86   1    -0.03  -0.05   0.05    -0.07   0.00  -0.02    -0.03   0.01   0.00
  87   1    -0.09   0.06   0.12    -0.05   0.01  -0.01     0.01  -0.02   0.00
  88   1    -0.13  -0.01  -0.08     0.07  -0.02   0.03    -0.01  -0.01  -0.01
  89   1    -0.09   0.02   0.05     0.07  -0.02  -0.05     0.00  -0.01  -0.01
  90   1    -0.16   0.06   0.09     0.09  -0.03  -0.08    -0.01  -0.01   0.00
  91   1     0.01   0.11   0.02     0.00  -0.07  -0.01    -0.01   0.00  -0.01
  92   1     0.10   0.07  -0.03    -0.06  -0.05   0.02    -0.02   0.00  -0.01
  93   1     0.04   0.04  -0.04    -0.02  -0.03   0.02    -0.03   0.01   0.01
  94   1    -0.05  -0.08   0.01     0.03   0.04  -0.01     0.00   0.00   0.01
  95   1    -0.12   0.06  -0.04     0.07  -0.04   0.02    -0.01   0.02   0.01
  96   1    -0.15  -0.03   0.01     0.08   0.02  -0.02    -0.02   0.00   0.03
  97   1     0.03  -0.05  -0.13     0.04  -0.05  -0.19    -0.01   0.06  -0.11
  98   1     0.07   0.08  -0.09     0.14   0.12  -0.12     0.11   0.16  -0.05
  99   1     0.03   0.01  -0.05     0.06   0.02  -0.11     0.08   0.13  -0.07
 100   1     0.07   0.11   0.03     0.10   0.12   0.05     0.00  -0.11   0.04
 101   1     0.09   0.06  -0.09     0.13   0.07  -0.09    -0.09  -0.01   0.17
 102   1     0.07   0.07  -0.03     0.09   0.09   0.00    -0.09  -0.07   0.14
 103   1     0.02   0.06   0.02     0.07   0.22   0.06     0.11   0.00   0.03
 104   1     0.04   0.04  -0.03     0.23   0.00  -0.04     0.16  -0.06  -0.10
 105   1     0.02   0.05   0.03    -0.03  -0.01   0.01     0.11  -0.06  -0.12
 106   1     0.03  -0.01  -0.10     0.06  -0.08  -0.13    -0.12   0.07   0.02
 107   1     0.02   0.00  -0.04     0.10   0.01  -0.07    -0.19  -0.06   0.10
 108   1     0.09   0.06  -0.04     0.15   0.07  -0.06    -0.11  -0.17   0.03
 109   1    -0.03   0.01   0.09    -0.03  -0.04   0.09     0.00  -0.04  -0.05
 110   1     0.01   0.08   0.02     0.00   0.00   0.06     0.01  -0.09   0.00
 111   1     0.01  -0.01   0.04     0.01  -0.09   0.09     0.01  -0.08   0.01
 112   1    -0.04   0.00  -0.06    -0.06  -0.06  -0.11    -0.03  -0.01  -0.08
 113   1    -0.06  -0.03  -0.09    -0.06  -0.08  -0.12    -0.04   0.00  -0.08
 114   1    -0.04   0.06  -0.04    -0.07   0.03  -0.06    -0.03   0.07  -0.04
                    73                     74                     75
                    ?A                     ?A                     ?A
 Frequencies --   337.1382               339.4551               343.3254
 Red. masses --     6.2888                 3.2091                 3.4705
 Frc consts  --     0.4211                 0.2179                 0.2410
 IR Inten    --    25.7141                 2.0618                12.2684
 Raman Activ --     0.0000                 0.0000                 0.0000
 Depolar     --     0.0000                 0.0000                 0.0000
 Atom AN      X      Y      Z        X      Y      Z        X      Y      Z
   1   8     0.00  -0.07   0.03     0.00  -0.01   0.00     0.00   0.01   0.00
   2  12    -0.02  -0.03   0.03     0.00  -0.07  -0.03    -0.04   0.08   0.06
   3   8    -0.04  -0.02  -0.08     0.00  -0.01  -0.01     0.00   0.01   0.01
   4   6     0.01   0.06   0.00     0.00   0.00   0.00     0.00   0.00   0.00
   5   7     0.00  -0.01   0.00     0.12   0.02  -0.08     0.09  -0.01   0.04
   6   7     0.04   0.02  -0.02    -0.04  -0.02   0.03     0.10   0.06  -0.06
   7   8    -0.04   0.30   0.23     0.00   0.02   0.01     0.00  -0.02  -0.02
   8   6     0.00   0.00   0.00     0.01   0.04  -0.05     0.07  -0.06   0.06
   9   6     0.00   0.00   0.00    -0.06   0.01   0.00     0.01  -0.03   0.04
  10   6     0.02   0.01  -0.01    -0.05   0.02   0.03     0.05  -0.02  -0.02
  11   8     0.02  -0.21  -0.02     0.00  -0.01   0.00     0.01   0.01   0.00
  12   6    -0.01  -0.13   0.03    -0.01  -0.01   0.01     0.00   0.01  -0.01
  13   6    -0.07  -0.12   0.01    -0.01  -0.01   0.01     0.00   0.01  -0.01
  14   6     0.03   0.03  -0.08     0.00   0.00  -0.01     0.01   0.00   0.00
  15   8     0.07   0.07   0.06     0.00   0.00   0.02     0.00  -0.01  -0.01
  16   6    -0.02  -0.01  -0.20     0.00  -0.01  -0.01     0.00   0.01   0.02
  17   8     0.00   0.02   0.03     0.00  -0.01   0.01     0.01   0.01  -0.03
  18   6     0.01   0.02  -0.04     0.00   0.00  -0.01     0.00   0.00   0.02
  19   8     0.14   0.10  -0.04     0.00   0.01  -0.01     0.01   0.00   0.01
  20   8     0.01   0.01  -0.02     0.01   0.01   0.02    -0.02  -0.02  -0.03
  21   6     0.02   0.01  -0.01     0.01   0.00   0.02     0.00   0.00  -0.04
  22   6     0.00   0.02   0.00     0.00  -0.01   0.02     0.00   0.01  -0.04
  23   6     0.00   0.00  -0.01     0.00   0.01   0.00     0.00  -0.02   0.01
  24   8     0.03  -0.01   0.00     0.00   0.02  -0.01     0.00  -0.01   0.02
  25   6    -0.02   0.02  -0.01     0.01  -0.03  -0.01    -0.01   0.05   0.02
  26   6     0.01   0.02  -0.01     0.01   0.01  -0.01    -0.02  -0.02   0.02
  27   6    -0.13  -0.07   0.05    -0.02  -0.01   0.00     0.02   0.01   0.00
  28   6     0.01  -0.05   0.01     0.00   0.01   0.01     0.01   0.00   0.00
  29   6     0.00   0.00   0.00     0.04   0.01  -0.05     0.03  -0.01   0.00
  30   6     0.01   0.01  -0.01    -0.01  -0.01   0.01     0.03   0.03  -0.03
  31   6     0.00   0.00   0.00     0.02   0.01  -0.03     0.02   0.01  -0.02
  32   6     0.00   0.01  -0.01     0.06  -0.04   0.09     0.04  -0.02   0.04
  33   6     0.00   0.00   0.00     0.07   0.00  -0.01     0.04  -0.01   0.01
  34   6     0.00  -0.01   0.01     0.07   0.02  -0.10     0.04   0.00  -0.05
  35   6     0.00   0.00  -0.01     0.04  -0.01  -0.01     0.02  -0.01  -0.01
  36   6     0.00   0.00   0.01    -0.02   0.01  -0.06    -0.01   0.01  -0.04
  37   6    -0.01   0.01   0.00     0.02  -0.03   0.05     0.01  -0.01   0.01
  38   6     0.00   0.02  -0.01     0.01  -0.02   0.02    -0.01   0.05  -0.04
  39   6     0.00  -0.01  -0.05     0.01  -0.01   0.03    -0.01   0.02  -0.09
  40   6     0.00   0.01  -0.01     0.01  -0.01   0.01     0.00   0.03  -0.02
  41   6     0.02   0.03   0.02    -0.01  -0.02   0.00     0.04   0.04   0.02
  42   6     0.01   0.00  -0.01    -0.01  -0.01   0.01     0.03   0.00  -0.02
  43   6     0.00   0.01   0.01     0.01  -0.01   0.00    -0.01   0.03   0.00
  44   6     0.00  -0.01  -0.01     0.00   0.00   0.01     0.00  -0.02  -0.02
  45   6     0.02  -0.01  -0.01    -0.15   0.06   0.09    -0.10   0.04   0.06
  46   6     0.00   0.00   0.01    -0.07  -0.03  -0.08    -0.05  -0.02  -0.05
  47   6     0.00   0.02   0.00    -0.11  -0.02  -0.02    -0.06   0.00  -0.02
  48   6    -0.01   0.00  -0.01     0.01  -0.01   0.08    -0.03   0.00   0.05
  49   6    -0.03  -0.02   0.04     0.02   0.00  -0.03    -0.06  -0.03   0.10
  50   6    -0.02  -0.02  -0.02     0.02   0.02   0.00    -0.06  -0.06  -0.03
  51   6    -0.03  -0.01   0.01     0.02   0.03   0.00    -0.05  -0.06   0.01
  52   6     0.02   0.00   0.03     0.00   0.00  -0.03     0.00   0.01   0.07
  53   6     0.00  -0.02  -0.02    -0.02   0.09  -0.01     0.05  -0.11   0.05
  54   6    -0.01   0.01  -0.01     0.04   0.01   0.08    -0.04   0.01  -0.11
  55   1    -0.01   0.00   0.00    -0.08  -0.03   0.01    -0.03   0.01   0.05
  56   1    -0.11  -0.13  -0.04    -0.01  -0.01   0.01     0.01   0.02  -0.01
  57   1     0.03   0.12  -0.01     0.00   0.01   0.00     0.01  -0.01   0.00
  58   1     0.01  -0.07  -0.34     0.00  -0.01  -0.02     0.00   0.01   0.02
  59   1    -0.09   0.19  -0.20     0.00   0.01  -0.01     0.00  -0.01   0.02
  60   1     0.00  -0.10  -0.27     0.00  -0.01  -0.02     0.00   0.01   0.02
  61   1    -0.02   0.01  -0.02     0.00   0.01   0.02     0.00  -0.03  -0.04
  62   1     0.01   0.00  -0.02    -0.01   0.01  -0.01     0.01  -0.02   0.01
  63   1    -0.02   0.00   0.02     0.01  -0.04  -0.01    -0.01   0.06   0.02
  64   1    -0.02   0.02  -0.01     0.01  -0.01  -0.04    -0.02   0.02   0.07
  65   1    -0.04   0.02  -0.02     0.01  -0.06  -0.01    -0.01   0.11   0.02
  66   1     0.03   0.02  -0.03     0.04   0.00  -0.04    -0.06   0.01   0.06
  67   1    -0.01   0.01   0.01    -0.01   0.01  -0.01     0.02  -0.01   0.04
  68   1     0.02   0.05   0.00     0.04   0.03   0.03    -0.05  -0.03  -0.03
  69   1    -0.13   0.03   0.02    -0.02  -0.01  -0.03     0.02   0.00   0.02
  70   1    -0.13  -0.06   0.04    -0.05  -0.02   0.00     0.04   0.01  -0.01
  71   1    -0.23  -0.11   0.08    -0.02  -0.01   0.00     0.04   0.02  -0.01
  72   1    -0.07  -0.05  -0.04     0.01   0.01   0.00     0.01   0.00   0.00
  73   1     0.14  -0.06   0.11     0.01   0.01   0.02     0.00   0.00   0.00
  74   1    -0.07  -0.16   0.07    -0.01   0.00   0.01     0.01   0.01   0.00
  75   1     0.00   0.01  -0.03     0.06  -0.08   0.18     0.04  -0.03   0.07
  76   1    -0.01   0.00   0.01     0.06  -0.01   0.00     0.04  -0.02   0.02
  77   1     0.00  -0.02   0.03     0.07   0.05  -0.15     0.05   0.02  -0.09
  78   1     0.00   0.00   0.01    -0.01   0.01  -0.05     0.00   0.01  -0.04
  79   1    -0.01   0.01   0.00     0.03  -0.02   0.04     0.00  -0.01   0.00
  80   1    -0.01  -0.03  -0.07     0.01  -0.01   0.04    -0.02  -0.01  -0.13
  81   1     0.00   0.00   0.00     0.02  -0.01   0.01    -0.02   0.02   0.00
  82   1     0.02   0.05   0.05    -0.01  -0.02  -0.01     0.05   0.06   0.05
  83   1    -0.02   0.00   0.01     0.03  -0.01  -0.01    -0.04   0.02   0.01
  84   1     0.00  -0.01  -0.01     0.00   0.00   0.01     0.00  -0.02  -0.02
  85   1     0.01  -0.01  -0.02    -0.04   0.19   0.14    -0.02   0.14   0.08
  86   1     0.04   0.00   0.00    -0.31  -0.10   0.06    -0.20  -0.08   0.04
  87   1     0.02  -0.01  -0.01    -0.24   0.13   0.26    -0.18   0.09   0.19
  88   1     0.00   0.01   0.01    -0.11  -0.08  -0.12    -0.07  -0.06  -0.08
  89   1    -0.01   0.01   0.02    -0.05  -0.05  -0.13    -0.03  -0.03  -0.09
  90   1     0.00   0.00   0.01    -0.13  -0.03   0.00    -0.08  -0.02   0.00
  91   1     0.01   0.01   0.02    -0.09  -0.03  -0.17    -0.05  -0.01  -0.09
  92   1     0.00   0.02   0.00    -0.19  -0.02  -0.07    -0.10   0.00  -0.05
  93   1     0.02   0.03   0.00    -0.23  -0.01   0.08    -0.11   0.01   0.04
  94   1     0.00  -0.01  -0.02    -0.01   0.01   0.12    -0.02  -0.02   0.06
  95   1     0.00   0.01  -0.01    -0.04   0.01   0.06    -0.06   0.05   0.03
  96   1    -0.02   0.00  -0.01     0.03  -0.02   0.12    -0.05  -0.02   0.09
  97   1    -0.01   0.02   0.08     0.01  -0.02  -0.06    -0.05   0.08   0.21
  98   1    -0.07  -0.06   0.04     0.06   0.03  -0.03    -0.15  -0.15   0.14
  99   1    -0.03  -0.01   0.04     0.03  -0.01  -0.05    -0.04  -0.01   0.09
 100   1    -0.03  -0.02  -0.03     0.02   0.04   0.03    -0.09  -0.09  -0.08
 101   1    -0.03  -0.01   0.00     0.04   0.02  -0.03    -0.10  -0.05   0.05
 102   1    -0.01  -0.02  -0.03     0.03   0.03   0.01    -0.06  -0.08  -0.06
 103   1    -0.03  -0.04  -0.01     0.02   0.03   0.01    -0.06  -0.11  -0.04
 104   1    -0.06  -0.01   0.04     0.01   0.04  -0.05    -0.09  -0.08   0.12
 105   1    -0.02  -0.01   0.01     0.03   0.05   0.02    -0.06  -0.10  -0.04
 106   1     0.04  -0.05   0.08     0.00   0.00  -0.04     0.01   0.00   0.12
 107   1     0.08   0.01  -0.01    -0.01  -0.02  -0.05     0.03   0.05   0.11
 108   1    -0.03   0.01   0.02     0.01   0.03  -0.03    -0.04  -0.06   0.08
 109   1     0.00  -0.02  -0.05    -0.02   0.08   0.05     0.02  -0.09  -0.01
 110   1     0.00  -0.05  -0.01    -0.02   0.15  -0.03     0.04  -0.15   0.05
 111   1     0.00  -0.03  -0.01    -0.02   0.09  -0.01     0.05  -0.14   0.06
 112   1    -0.02  -0.01  -0.02     0.08   0.08   0.15    -0.07  -0.06  -0.17
 113   1    -0.02   0.02   0.00     0.07   0.01   0.09    -0.09  -0.01  -0.17
 114   1    -0.02   0.02   0.00     0.10  -0.07   0.04    -0.08   0.14  -0.08
                    76                     77                     78
                    ?A                     ?A                     ?A
 Frequencies --   357.5867               374.0248               388.9023
 Red. masses --     3.9779                 5.2326                 4.0062
 Frc consts  --     0.2997                 0.4313                 0.3570
 IR Inten    --     3.4421                 9.9603                16.0077
 Raman Activ --     0.0000                 0.0000                 0.0000
 Depolar     --     0.0000                 0.0000                 0.0000
 Atom AN      X      Y      Z        X      Y      Z        X      Y      Z
   1   8     0.00  -0.01   0.00     0.00  -0.02  -0.01    -0.03   0.03   0.01
   2  12    -0.11   0.14   0.00    -0.02   0.05  -0.05     0.01  -0.02  -0.04
   3   8     0.01   0.00  -0.01     0.05  -0.02  -0.05    -0.10   0.02  -0.09
   4   6     0.00   0.00  -0.01     0.00   0.00  -0.01     0.02   0.02   0.00
   5   7    -0.02  -0.01  -0.03     0.01   0.01   0.04     0.00   0.00   0.01
   6   7     0.00  -0.03  -0.11     0.02   0.01   0.03     0.00   0.00   0.01
   7   8    -0.01   0.02   0.01     0.00   0.03   0.01    -0.02   0.04   0.03
   8   6    -0.04  -0.05  -0.03     0.04  -0.01   0.05     0.01   0.00   0.01
   9   6    -0.07  -0.07  -0.08     0.04   0.01   0.05     0.01   0.01   0.02
  10   6    -0.02  -0.10  -0.10     0.03   0.01   0.04     0.00   0.01   0.01
  11   8     0.00  -0.01   0.01    -0.01  -0.01   0.02     0.00  -0.09   0.01
  12   6    -0.01   0.00   0.01    -0.01   0.01   0.03    -0.02   0.04  -0.02
  13   6     0.01   0.01   0.00     0.01   0.00   0.01    -0.08   0.13  -0.07
  14   6     0.01   0.00  -0.01     0.00   0.01   0.00     0.06  -0.01   0.00
  15   8    -0.01  -0.01   0.01     0.00   0.01   0.05     0.01  -0.02   0.02
  16   6     0.00  -0.01  -0.02     0.00  -0.02  -0.02     0.00   0.04   0.02
  17   8     0.01   0.01   0.01     0.04  -0.16  -0.17    -0.02   0.15   0.03
  18   6     0.00   0.01   0.00    -0.04   0.04  -0.06    -0.05  -0.06  -0.08
  19   8    -0.04   0.02   0.01    -0.13  -0.03  -0.07    -0.12   0.00  -0.03
  20   8     0.01   0.00   0.02     0.09   0.12   0.26    -0.04  -0.15   0.04
  21   6     0.01  -0.02   0.06    -0.07   0.01   0.11     0.00  -0.06   0.02
  22   6     0.01  -0.05   0.08    -0.02  -0.02   0.06     0.00  -0.02   0.02
  23   6     0.00   0.03   0.00    -0.04   0.11   0.00    -0.06  -0.14  -0.02
  24   8    -0.01   0.04  -0.02    -0.05  -0.06  -0.07    -0.02   0.02   0.00
  25   6     0.07  -0.09   0.00     0.03  -0.06   0.00     0.07   0.00   0.03
  26   6     0.01   0.02  -0.01     0.14   0.05  -0.09     0.13   0.04   0.09
  27   6     0.00   0.00  -0.02    -0.04   0.00  -0.03     0.12   0.04  -0.05
  28   6     0.01   0.00   0.01     0.00   0.00   0.01     0.07  -0.03   0.03
  29   6     0.00   0.02  -0.03     0.00  -0.01   0.02     0.00   0.00   0.01
  30   6     0.02  -0.02  -0.04     0.01   0.02   0.03     0.00   0.00   0.01
  31   6    -0.01   0.04   0.00     0.01  -0.02   0.00     0.00  -0.01   0.00
  32   6    -0.01   0.03   0.03     0.01  -0.02  -0.02     0.00   0.00   0.00
  33   6    -0.01   0.05   0.01     0.00  -0.03  -0.01     0.00  -0.01   0.00
  34   6    -0.01   0.04   0.00     0.00  -0.03   0.00     0.00   0.00   0.00
  35   6     0.01   0.03   0.01     0.00  -0.02  -0.01     0.00   0.00   0.00
  36   6    -0.01   0.03   0.01     0.01  -0.02  -0.01     0.00   0.00   0.00
  37   6     0.02   0.01   0.02    -0.01  -0.01  -0.01     0.00   0.00   0.00
  38   6     0.03   0.01  -0.01    -0.01   0.01   0.00     0.00   0.00   0.00
  39   6     0.02   0.01   0.01    -0.02   0.01   0.00    -0.01   0.00   0.00
  40   6     0.03  -0.04   0.01    -0.02   0.02   0.00    -0.01   0.00   0.00
  41   6     0.04  -0.03   0.02    -0.01   0.01  -0.01    -0.01   0.01   0.00
  42   6     0.04  -0.03   0.01     0.00   0.01   0.00     0.00   0.01   0.00
  43   6     0.02   0.01   0.00    -0.01   0.00  -0.01    -0.01   0.00   0.00
  44   6     0.03  -0.02   0.02     0.00   0.00  -0.01     0.00   0.00  -0.01
  45   6     0.03  -0.02  -0.01    -0.02   0.01   0.01     0.00   0.00   0.00
  46   6     0.01   0.00   0.01    -0.01   0.00  -0.01     0.00   0.00   0.00
  47   6    -0.01  -0.02   0.00     0.01   0.01   0.00     0.00   0.00   0.00
  48   6     0.02  -0.01   0.00    -0.01   0.01   0.00     0.00   0.00   0.00
  49   6    -0.01   0.03   0.01     0.00  -0.01   0.00     0.00   0.00   0.00
  50   6    -0.04  -0.02   0.00     0.01   0.00  -0.01     0.00   0.00   0.00
  51   6    -0.04  -0.03   0.00     0.01   0.00  -0.01     0.00   0.00   0.00
  52   6    -0.01   0.01   0.03     0.00  -0.01   0.00     0.00   0.00   0.00
  53   6     0.01   0.14   0.13     0.02  -0.07   0.02     0.00  -0.01   0.00
  54   6     0.06  -0.18  -0.03    -0.04   0.05  -0.03     0.00   0.02   0.00
  55   1    -0.10  -0.04  -0.08     0.05   0.02   0.05     0.01   0.01   0.02
  56   1     0.01   0.02   0.01     0.05   0.01   0.04    -0.08   0.12  -0.06
  57   1     0.01   0.01   0.01     0.01   0.02   0.02     0.08   0.02   0.03
  58   1     0.00  -0.01  -0.03     0.00  -0.02  -0.03     0.01   0.06   0.04
  59   1    -0.01   0.00  -0.02    -0.01   0.00  -0.02     0.02   0.02   0.02
  60   1     0.00  -0.01  -0.02     0.00  -0.03  -0.03     0.01   0.02   0.02
  61   1     0.02  -0.02   0.08     0.14   0.08   0.15    -0.04  -0.05   0.00
  62   1     0.00   0.03  -0.01    -0.12   0.08   0.00    -0.07  -0.13  -0.05
  63   1     0.08  -0.03  -0.03     0.06  -0.09  -0.13     0.06   0.13   0.00
  64   1     0.13  -0.06  -0.05    -0.06  -0.03  -0.04     0.17  -0.03   0.04
  65   1     0.12  -0.20   0.02     0.15  -0.11   0.07     0.11  -0.04   0.05
  66   1     0.05  -0.01  -0.05     0.30   0.02  -0.30     0.21   0.22  -0.17
  67   1    -0.03   0.02  -0.04     0.08   0.08  -0.24     0.18   0.00   0.25
  68   1     0.05   0.04   0.03     0.32  -0.01   0.17     0.27   0.11   0.28
  69   1     0.00  -0.01  -0.05    -0.03   0.00  -0.14     0.10  -0.13   0.10
  70   1    -0.04  -0.01  -0.01    -0.14  -0.03  -0.01     0.23   0.03  -0.07
  71   1     0.01   0.01  -0.02    -0.04  -0.01  -0.01     0.28   0.12  -0.16
  72   1     0.00   0.00   0.00     0.00   0.00   0.00     0.06  -0.03   0.03
  73   1     0.03   0.00   0.02     0.01   0.00   0.02     0.13  -0.03   0.07
  74   1     0.00  -0.01   0.01    -0.01  -0.01   0.01     0.03  -0.05   0.05
  75   1    -0.01   0.01   0.06     0.00   0.00  -0.03     0.00   0.00  -0.01
  76   1    -0.01   0.05   0.01     0.00  -0.03  -0.01     0.00  -0.01   0.00
  77   1    -0.01   0.03  -0.01     0.00  -0.02   0.00     0.00   0.00   0.00
  78   1    -0.04   0.03   0.01     0.02  -0.02  -0.01     0.01   0.00   0.00
  79   1     0.04   0.01   0.02    -0.03  -0.01  -0.02    -0.01   0.00   0.00
  80   1     0.01   0.03   0.02    -0.01   0.00  -0.01     0.00   0.00  -0.01
  81   1     0.01  -0.06   0.01    -0.02   0.02   0.01    -0.01   0.00  -0.01
  82   1     0.05  -0.03   0.03    -0.01  -0.01  -0.02    -0.01   0.00  -0.01
  83   1     0.03   0.01   0.00    -0.02   0.00  -0.01    -0.01   0.00   0.00
  84   1     0.00  -0.03   0.05     0.01   0.01  -0.02     0.00   0.01  -0.01
  85   1    -0.02  -0.08  -0.02     0.00   0.02   0.04     0.00   0.00   0.01
  86   1     0.05   0.00  -0.01    -0.04   0.02   0.00    -0.01   0.01   0.00
  87   1     0.08  -0.04  -0.03    -0.03   0.01   0.00     0.00   0.00  -0.01
  88   1     0.01   0.00   0.03    -0.01   0.00  -0.03     0.00   0.00   0.00
  89   1     0.01  -0.01  -0.02     0.00   0.00   0.00     0.00   0.00   0.00
  90   1     0.02  -0.02   0.01    -0.02   0.01  -0.01     0.00   0.00  -0.01
  91   1    -0.01  -0.01  -0.04     0.01   0.01   0.03     0.00   0.01   0.01
  92   1    -0.02  -0.03   0.02     0.02   0.02  -0.02     0.02   0.00   0.01
  93   1    -0.03  -0.04   0.00     0.03   0.03   0.00     0.01   0.00  -0.01
  94   1     0.01   0.00   0.03    -0.01   0.01  -0.01     0.00   0.00   0.00
  95   1     0.01  -0.06  -0.01     0.00   0.03   0.00     0.00   0.00   0.00
  96   1     0.05   0.00  -0.04    -0.02   0.00   0.02     0.00   0.00   0.00
  97   1    -0.03   0.03  -0.01     0.02   0.00   0.02     0.01   0.00   0.00
  98   1    -0.05   0.05  -0.01    -0.01  -0.02   0.01     0.01  -0.01   0.00
  99   1     0.01   0.08   0.05    -0.01  -0.02   0.00     0.00  -0.01   0.00
 100   1    -0.04  -0.02  -0.01     0.01   0.00  -0.01     0.01   0.00   0.00
 101   1    -0.08   0.02   0.03     0.01  -0.01  -0.01     0.01   0.00   0.00
 102   1    -0.05  -0.05  -0.05     0.01   0.00   0.00     0.00   0.00   0.01
 103   1    -0.04  -0.10  -0.06     0.02   0.02   0.02     0.00   0.01   0.00
 104   1    -0.11  -0.02   0.04     0.04  -0.01  -0.01     0.01   0.00   0.00
 105   1    -0.02  -0.02   0.00     0.01  -0.02  -0.02     0.00   0.00  -0.01
 106   1     0.00   0.04   0.08     0.00  -0.02   0.00     0.00  -0.01  -0.01
 107   1     0.00   0.01   0.03     0.00   0.00   0.01     0.00   0.00   0.00
 108   1    -0.06  -0.02   0.03     0.00  -0.02   0.00     0.00   0.00   0.00
 109   1     0.05   0.07   0.38    -0.01  -0.05  -0.04     0.00  -0.01  -0.02
 110   1     0.03   0.35   0.08     0.01  -0.12   0.03     0.00  -0.03   0.00
 111   1     0.01   0.23   0.08     0.02  -0.11   0.04     0.00  -0.02   0.01
 112   1     0.08  -0.14   0.02    -0.05   0.02  -0.07    -0.01   0.01   0.00
 113   1     0.10  -0.15   0.04    -0.07   0.03  -0.08    -0.01   0.01  -0.01
 114   1     0.08  -0.30  -0.05    -0.06   0.15  -0.01    -0.01   0.03   0.01
                    79                     80                     81
                    ?A                     ?A                     ?A
 Frequencies --   393.7112               409.3248               411.6701
 Red. masses --     4.8020                 5.5605                 5.1627
 Frc consts  --     0.4386                 0.5489                 0.5155
 IR Inten    --    21.7506                17.9362                30.1750
 Raman Activ --     0.0000                 0.0000                 0.0000
 Depolar     --     0.0000                 0.0000                 0.0000
 Atom AN      X      Y      Z        X      Y      Z        X      Y      Z
   1   8     0.00  -0.10  -0.06    -0.04  -0.06  -0.03     0.08   0.02   0.01
   2  12     0.05   0.01  -0.01     0.00   0.01  -0.15    -0.08  -0.02  -0.08
   3   8     0.09  -0.01   0.08     0.03   0.01   0.05     0.03   0.02   0.07
   4   6     0.00   0.03  -0.06     0.05   0.01  -0.03    -0.09  -0.01   0.02
   5   7     0.01   0.00   0.00     0.01   0.02   0.03     0.01   0.01   0.01
   6   7     0.00   0.00   0.00     0.02   0.00   0.03     0.01   0.00   0.02
   7   8    -0.02   0.16   0.05    -0.04   0.01  -0.01     0.06   0.01   0.01
   8   6     0.00   0.00   0.00     0.02   0.00   0.04     0.02   0.00   0.03
   9   6     0.00   0.00   0.00     0.03   0.01   0.06     0.02   0.00   0.04
  10   6    -0.01   0.00   0.00     0.02   0.00   0.03     0.01   0.00   0.02
  11   8    -0.05  -0.10   0.13    -0.05   0.10   0.05     0.07  -0.09  -0.03
  12   6    -0.03   0.10   0.04    -0.04   0.00   0.04     0.09   0.00  -0.01
  13   6     0.09   0.21   0.00     0.03  -0.04   0.06     0.05   0.02   0.00
  14   6    -0.01   0.03   0.04     0.11   0.04   0.00    -0.20  -0.03   0.03
  15   8    -0.07  -0.08   0.05    -0.17  -0.05  -0.08     0.21   0.06   0.09
  16   6     0.00  -0.11  -0.12     0.01  -0.06  -0.05    -0.01   0.02   0.01
  17   8    -0.01  -0.07   0.00     0.01   0.23  -0.05     0.00   0.15  -0.05
  18   6     0.05  -0.03   0.06     0.04   0.02   0.03     0.05  -0.02   0.01
  19   8    -0.08  -0.09   0.08     0.12   0.02   0.00     0.02  -0.03   0.01
  20   8    -0.01   0.04  -0.05    -0.06   0.01  -0.09    -0.05   0.00  -0.05
  21   6    -0.01   0.02  -0.02    -0.05  -0.06   0.05    -0.04  -0.04   0.04
  22   6     0.00   0.00  -0.03    -0.03  -0.06   0.11    -0.02  -0.05   0.08
  23   6     0.04   0.01   0.01     0.00   0.05   0.03     0.00   0.01   0.01
  24   8    -0.01   0.02   0.03    -0.06  -0.05  -0.06    -0.05  -0.02  -0.03
  25   6    -0.03   0.01  -0.01     0.14  -0.10   0.03     0.10  -0.07   0.02
  26   6    -0.08  -0.04   0.01    -0.06  -0.01   0.00    -0.04  -0.01   0.01
  27   6     0.12   0.07  -0.18    -0.06  -0.03   0.03     0.03   0.02  -0.03
  28   6    -0.02  -0.01  -0.02     0.12  -0.02   0.06    -0.23   0.04  -0.12
  29   6     0.00   0.00   0.01     0.00   0.00   0.03     0.00   0.00   0.02
  30   6     0.00   0.00   0.00     0.01   0.01   0.03     0.01   0.02   0.03
  31   6     0.00   0.00   0.00     0.01  -0.02   0.01     0.01  -0.01   0.01
  32   6     0.00   0.00   0.00     0.01  -0.02  -0.01     0.01  -0.01  -0.01
  33   6     0.00   0.00   0.00     0.00  -0.02  -0.01     0.00  -0.02  -0.01
  34   6     0.00   0.00   0.00     0.00  -0.02   0.00     0.00  -0.01   0.00
  35   6     0.00   0.00   0.00    -0.01  -0.02   0.01    -0.01  -0.01   0.00
  36   6     0.00   0.00  -0.01     0.00  -0.02  -0.01     0.00  -0.01   0.00
  37   6     0.00   0.00   0.00    -0.01  -0.01  -0.01    -0.01   0.00  -0.01
  38   6     0.00   0.00   0.00    -0.02   0.01   0.01    -0.01   0.01   0.01
  39   6     0.00   0.00   0.00    -0.02   0.01   0.00    -0.01   0.01   0.00
  40   6     0.00   0.00   0.00    -0.02   0.02  -0.01    -0.01   0.01  -0.01
  41   6     0.00   0.00   0.00    -0.01   0.02  -0.01    -0.01   0.01  -0.01
  42   6     0.00   0.00   0.00    -0.01   0.02   0.00     0.00   0.02   0.00
  43   6     0.00   0.00   0.00    -0.02  -0.01   0.00    -0.01   0.00  -0.01
  44   6    -0.01   0.00   0.00     0.00   0.01  -0.02     0.00   0.01  -0.01
  45   6     0.00   0.00   0.00    -0.01   0.01   0.00    -0.01   0.01   0.00
  46   6     0.00   0.00  -0.01     0.00   0.00  -0.01     0.00   0.00   0.00
  47   6     0.00   0.00   0.00     0.01   0.00   0.00     0.01   0.01   0.00
  48   6     0.00   0.00   0.00    -0.01   0.01  -0.01    -0.01   0.00  -0.01
  49   6     0.00   0.00   0.00     0.00  -0.01   0.00     0.00  -0.01   0.00
  50   6     0.00   0.00   0.00     0.01   0.00  -0.01     0.01   0.00  -0.01
  51   6     0.00   0.01   0.00     0.01   0.00   0.00     0.01   0.00  -0.01
  52   6     0.01   0.00   0.00    -0.01  -0.02  -0.01    -0.01  -0.01   0.00
  53   6     0.00   0.00  -0.01     0.02  -0.04   0.03     0.01  -0.02   0.02
  54   6     0.00   0.00   0.00    -0.01   0.03   0.00    -0.01   0.02   0.00
  55   1     0.00   0.00   0.00     0.01   0.01   0.06     0.01   0.01   0.04
  56   1     0.19   0.24   0.07     0.02  -0.05   0.07     0.05   0.02  -0.03
  57   1     0.02   0.13   0.14     0.13   0.07   0.04    -0.24  -0.06  -0.03
  58   1     0.01  -0.13  -0.17     0.02  -0.03  -0.05    -0.03  -0.05  -0.01
  59   1    -0.02  -0.04  -0.12     0.03  -0.04  -0.05    -0.05   0.01   0.01
  60   1     0.00  -0.13  -0.15     0.03  -0.11  -0.08    -0.04   0.08   0.04
  61   1     0.00   0.01  -0.03     0.02  -0.05   0.14     0.01  -0.04   0.10
  62   1     0.02   0.00   0.02     0.02   0.06   0.04    -0.01   0.01   0.01
  63   1    -0.03  -0.03   0.01     0.15   0.13  -0.09     0.11   0.09  -0.07
  64   1    -0.06   0.01  -0.01     0.30  -0.09  -0.02     0.21  -0.06  -0.02
  65   1    -0.06   0.05  -0.03     0.30  -0.30   0.11     0.21  -0.21   0.08
  66   1    -0.14  -0.10   0.14    -0.07  -0.08   0.08    -0.05  -0.04   0.05
  67   1    -0.09  -0.04   0.00    -0.09   0.00  -0.06    -0.06  -0.01  -0.01
  68   1    -0.17  -0.03  -0.12    -0.10  -0.01  -0.06    -0.06   0.01  -0.03
  69   1     0.14  -0.07  -0.28    -0.05   0.03  -0.06     0.03   0.03  -0.05
  70   1    -0.01  -0.09  -0.10    -0.13  -0.04   0.05     0.03  -0.01  -0.02
  71   1     0.27   0.15  -0.32    -0.12  -0.06   0.07     0.02   0.02  -0.05
  72   1    -0.07   0.00  -0.10     0.09  -0.03   0.10    -0.21   0.06  -0.21
  73   1    -0.02   0.02   0.00     0.22  -0.06   0.12    -0.42   0.10  -0.23
  74   1     0.03  -0.10  -0.01     0.04  -0.03   0.10    -0.04   0.03  -0.19
  75   1     0.00   0.00   0.00     0.00   0.00  -0.02     0.00   0.00  -0.01
  76   1     0.00   0.00  -0.01     0.00  -0.02  -0.03     0.00  -0.02  -0.01
  77   1     0.00   0.00   0.00     0.00  -0.01  -0.01     0.00  -0.01   0.00
  78   1     0.00   0.00  -0.01     0.02  -0.02  -0.01     0.01  -0.01   0.00
  79   1     0.00   0.00   0.00    -0.03  -0.01  -0.01    -0.02  -0.01  -0.01
  80   1     0.00   0.00   0.00     0.00   0.00   0.00     0.00   0.00  -0.01
  81   1     0.00   0.00   0.00    -0.02   0.01  -0.03    -0.01   0.00  -0.02
  82   1     0.00   0.00   0.00    -0.01  -0.01  -0.03    -0.01  -0.01  -0.02
  83   1     0.00   0.00   0.00    -0.03  -0.01   0.00    -0.02  -0.01  -0.01
  84   1     0.00   0.00   0.00     0.00   0.02  -0.03     0.00   0.01  -0.02
  85   1     0.00   0.00   0.00     0.00   0.02   0.03     0.00   0.01   0.02
  86   1    -0.01  -0.01   0.00    -0.03   0.02   0.00    -0.02   0.01   0.00
  87   1    -0.01   0.00   0.01    -0.02   0.01  -0.01    -0.02   0.01  -0.01
  88   1     0.00  -0.01   0.00     0.00   0.00  -0.02     0.00   0.00  -0.01
  89   1     0.00   0.00  -0.01     0.01   0.00   0.00     0.00   0.00   0.00
  90   1     0.00   0.00   0.00     0.00   0.01  -0.02     0.00   0.01  -0.01
  91   1     0.00   0.01   0.01     0.00   0.00   0.03     0.00   0.01   0.03
  92   1     0.01   0.00   0.01     0.01   0.01  -0.01     0.02   0.01   0.00
  93   1     0.01   0.00   0.00     0.03   0.02   0.00     0.02   0.01  -0.01
  94   1     0.00   0.00   0.00    -0.01   0.01  -0.02    -0.01   0.01  -0.02
  95   1     0.00   0.00   0.00     0.00   0.01  -0.01     0.00   0.01   0.00
  96   1    -0.01   0.00  -0.01    -0.01   0.00   0.00    -0.01   0.00  -0.01
  97   1     0.00  -0.01  -0.01     0.03   0.00   0.01     0.02   0.00   0.01
  98   1     0.01   0.00   0.00     0.00  -0.02   0.00    -0.01  -0.02   0.00
  99   1     0.00  -0.01  -0.01    -0.01  -0.03   0.00    -0.01  -0.02   0.00
 100   1     0.00   0.01   0.01     0.01  -0.01  -0.01     0.01   0.00  -0.01
 101   1     0.01   0.00   0.00     0.01  -0.01  -0.01     0.01  -0.01  -0.01
 102   1     0.00   0.01   0.01     0.01   0.01   0.01     0.01   0.00   0.00
 103   1     0.00   0.02  -0.01     0.02   0.05   0.03     0.01   0.00   0.02
 104   1     0.01   0.01  -0.01     0.06  -0.01  -0.01     0.01   0.00  -0.01
 105   1    -0.01   0.01   0.01     0.00  -0.01  -0.01     0.02   0.01  -0.01
 106   1     0.01  -0.01   0.00    -0.01  -0.02  -0.02    -0.01  -0.01   0.00
 107   1     0.02   0.00  -0.02    -0.01  -0.02  -0.01    -0.01  -0.01   0.00
 108   1     0.00   0.01   0.00     0.00  -0.01  -0.01    -0.01  -0.01   0.00
 109   1     0.00   0.00  -0.01     0.00  -0.03   0.00     0.00  -0.02   0.00
 110   1     0.00  -0.01   0.00     0.01  -0.06   0.03     0.00  -0.03   0.02
 111   1     0.00   0.00  -0.01     0.02  -0.06   0.04     0.01  -0.04   0.03
 112   1     0.01   0.01   0.01    -0.02   0.02  -0.02    -0.02   0.01  -0.02
 113   1     0.01   0.00   0.00    -0.03   0.02  -0.03    -0.02   0.01  -0.02
 114   1     0.01   0.00   0.00    -0.02   0.09   0.01    -0.02   0.06   0.01
                    82                     83                     84
                    ?A                     ?A                     ?A
 Frequencies --   428.3544               439.3340               442.5732
 Red. masses --     3.2432                 5.0056                 3.8337
 Frc consts  --     0.3506                 0.5692                 0.4424
 IR Inten    --     3.0548                22.9779                 2.5001
 Raman Activ --     0.0000                 0.0000                 0.0000
 Depolar     --     0.0000                 0.0000                 0.0000
 Atom AN      X      Y      Z        X      Y      Z        X      Y      Z
   1   8     0.00   0.00   0.00     0.00   0.00   0.00     0.00   0.00   0.00
   2  12    -0.01   0.00  -0.01     0.06  -0.02   0.15     0.04  -0.04   0.01
   3   8     0.00   0.00   0.00     0.02  -0.03  -0.03     0.00  -0.01   0.00
   4   6     0.00   0.00   0.00     0.00   0.00   0.00     0.00   0.00   0.00
   5   7     0.21   0.03  -0.07    -0.02  -0.02   0.01    -0.04  -0.01  -0.01
   6   7    -0.02  -0.01   0.02    -0.13  -0.08   0.04    -0.12  -0.03   0.07
   7   8     0.00   0.00   0.00     0.00   0.00   0.00     0.00   0.00   0.00
   8   6     0.09   0.02  -0.03     0.00   0.04  -0.03     0.01  -0.01  -0.02
   9   6    -0.04  -0.01   0.03     0.01   0.04  -0.05     0.03  -0.01  -0.03
  10   6    -0.05  -0.02   0.03    -0.08   0.01   0.01    -0.04  -0.04   0.02
  11   8     0.00   0.00   0.00     0.00  -0.01   0.00     0.00   0.00   0.00
  12   6     0.00   0.00   0.00     0.00   0.01   0.00     0.00   0.00   0.00
  13   6     0.00   0.00   0.00     0.01   0.01  -0.01     0.00   0.00   0.00
  14   6     0.00   0.00   0.00     0.00   0.00   0.00     0.00   0.00   0.00
  15   8     0.00  -0.01   0.00     0.01   0.01   0.02     0.00   0.00   0.00
  16   6     0.00   0.00   0.00     0.00   0.00   0.00     0.00   0.00   0.00
  17   8     0.00  -0.02   0.00     0.07   0.13  -0.05     0.01   0.01   0.00
  18   6     0.00   0.00   0.00    -0.04   0.05   0.05    -0.01   0.01   0.01
  19   8     0.00   0.01   0.01     0.02  -0.07  -0.04     0.00  -0.01  -0.01
  20   8     0.01   0.00   0.00    -0.06   0.02   0.01    -0.01   0.00   0.00
  21   6     0.01   0.00   0.00    -0.09  -0.03  -0.01    -0.01   0.00  -0.01
  22   6     0.00   0.00   0.00     0.01   0.01  -0.02     0.00   0.01  -0.01
  23   6     0.01   0.00  -0.01    -0.05   0.07   0.07    -0.01   0.01   0.01
  24   8     0.01   0.01   0.01    -0.07  -0.15  -0.07    -0.01  -0.02  -0.01
  25   6     0.00   0.00   0.00     0.02   0.03   0.01    -0.01   0.01  -0.01
  26   6     0.00   0.00   0.00     0.01  -0.01   0.00     0.00   0.00   0.00
  27   6     0.00   0.00   0.00     0.01   0.02  -0.02     0.00   0.01   0.00
  28   6     0.00   0.00   0.00     0.00   0.00   0.00     0.00   0.00   0.00
  29   6    -0.03   0.00   0.02     0.01  -0.03   0.06    -0.01   0.02  -0.07
  30   6     0.01   0.01   0.00    -0.01  -0.08  -0.14     0.04   0.16   0.16
  31   6    -0.06  -0.03   0.06     0.00   0.00   0.03     0.00   0.01  -0.05
  32   6     0.03  -0.02   0.01    -0.01   0.02   0.02     0.00  -0.01  -0.02
  33   6     0.05   0.02  -0.04    -0.01   0.03   0.00     0.00  -0.01   0.02
  34   6     0.03   0.00   0.05     0.00   0.01   0.01     0.00   0.01  -0.02
  35   6    -0.04   0.00   0.04     0.02   0.00   0.03    -0.01   0.02  -0.04
  36   6    -0.14  -0.10   0.02    -0.01   0.01  -0.02     0.03   0.02   0.02
  37   6    -0.07   0.05   0.00     0.04   0.00  -0.02    -0.01   0.01   0.03
  38   6     0.01   0.01  -0.01     0.03  -0.03  -0.08     0.06   0.10   0.08
  39   6    -0.01   0.01   0.00    -0.02  -0.02  -0.01     0.00   0.02   0.05
  40   6    -0.01  -0.01   0.00    -0.01  -0.01   0.04    -0.02  -0.08  -0.02
  41   6     0.00  -0.01   0.01    -0.01  -0.04   0.00     0.00   0.00   0.07
  42   6     0.01   0.00   0.00     0.02  -0.05  -0.07     0.04   0.09   0.10
  43   6     0.01   0.02  -0.02     0.04   0.09  -0.03     0.05   0.04  -0.13
  44   6     0.02   0.00  -0.01     0.10   0.02   0.02     0.03  -0.06  -0.05
  45   6    -0.13   0.01  -0.14    -0.01  -0.01  -0.01     0.05   0.00   0.03
  46   6     0.07   0.03   0.09     0.02  -0.01  -0.02    -0.03   0.01   0.01
  47   6     0.01  -0.03   0.06     0.02   0.02  -0.04    -0.02  -0.02   0.03
  48   6    -0.02   0.01  -0.08    -0.02   0.00   0.02     0.02   0.00   0.00
  49   6     0.00   0.01   0.02     0.05   0.10   0.04    -0.05  -0.04   0.03
  50   6    -0.01  -0.01  -0.02    -0.05  -0.04  -0.01     0.02  -0.01  -0.11
  51   6     0.00  -0.02  -0.02    -0.03  -0.06  -0.03     0.06  -0.08  -0.14
  52   6     0.00   0.01   0.02     0.06   0.08   0.07    -0.03   0.02   0.08
  53   6     0.00   0.01   0.01    -0.03   0.01  -0.08    -0.01   0.04   0.02
  54   6     0.01   0.01   0.00     0.04   0.00   0.06    -0.04   0.00  -0.05
  55   1    -0.08  -0.02   0.05     0.05   0.04  -0.06     0.05  -0.01  -0.03
  56   1    -0.01   0.00   0.00     0.05   0.02   0.00     0.01   0.00   0.00
  57   1     0.00   0.00   0.00     0.00   0.00   0.01     0.00   0.00   0.00
  58   1     0.00   0.00   0.00     0.00   0.00  -0.01     0.00   0.00  -0.01
  59   1     0.00   0.00   0.00    -0.01   0.00   0.00     0.00   0.00   0.00
  60   1     0.00   0.00   0.00     0.00   0.00   0.00     0.00   0.00   0.00
  61   1     0.00   0.00   0.00     0.08   0.02   0.02     0.01   0.01  -0.01
  62   1     0.00   0.00  -0.01    -0.03   0.07   0.10     0.00   0.01   0.01
  63   1     0.00  -0.01   0.00     0.02   0.06  -0.03    -0.01   0.00   0.01
  64   1    -0.01   0.00   0.00     0.02   0.01   0.03    -0.01   0.01   0.00
  65   1    -0.01   0.00   0.00     0.05   0.04   0.03    -0.02   0.02  -0.02
  66   1     0.00   0.00   0.00     0.04  -0.05  -0.02     0.00  -0.01   0.00
  67   1     0.00   0.00   0.01     0.03   0.03  -0.13     0.00   0.00  -0.01
  68   1     0.00   0.01   0.00     0.06  -0.11   0.06     0.00  -0.01   0.01
  69   1     0.00   0.00   0.00     0.02   0.00  -0.03     0.00   0.00   0.00
  70   1     0.00   0.00   0.00     0.00   0.02  -0.02     0.00   0.01   0.00
  71   1     0.00   0.00   0.00     0.02   0.02  -0.02     0.00   0.01   0.00
  72   1     0.00   0.00   0.00     0.00   0.00   0.00     0.00   0.00   0.00
  73   1     0.01   0.00   0.00     0.00   0.00   0.00     0.01   0.00   0.00
  74   1     0.00   0.00   0.00     0.00   0.00   0.00     0.00   0.00   0.00
  75   1     0.05  -0.04  -0.03    -0.01   0.03  -0.02     0.00  -0.03   0.03
  76   1     0.06   0.05  -0.12    -0.02   0.04  -0.04     0.02  -0.04   0.09
  77   1     0.05   0.03   0.06    -0.01   0.00  -0.03     0.00   0.00   0.03
  78   1    -0.14  -0.10   0.01    -0.02   0.01  -0.03     0.03   0.02   0.03
  79   1    -0.06   0.05  -0.01     0.04   0.00  -0.02    -0.01   0.00   0.03
  80   1    -0.02   0.01  -0.01    -0.04   0.05   0.05    -0.06  -0.06  -0.07
  81   1    -0.01  -0.01   0.00     0.00   0.05   0.13    -0.05  -0.21  -0.17
  82   1     0.01  -0.02   0.01     0.01   0.01   0.09    -0.02  -0.10  -0.03
  83   1     0.01   0.02  -0.02     0.06   0.10  -0.02     0.07   0.04  -0.15
  84   1     0.01  -0.01   0.00     0.09   0.02   0.03     0.02  -0.07  -0.07
  85   1    -0.09   0.09  -0.23    -0.02  -0.02   0.01     0.03  -0.02   0.00
  86   1     0.05   0.10  -0.11    -0.04   0.00  -0.01     0.06  -0.02   0.03
  87   1    -0.27   0.01  -0.30     0.01  -0.01   0.00     0.07   0.00   0.05
  88   1     0.16   0.11   0.25     0.02  -0.02   0.02    -0.04   0.00  -0.04
  89   1     0.12   0.07   0.26     0.03  -0.02  -0.05    -0.05   0.00   0.00
  90   1     0.23   0.08  -0.17     0.03  -0.03  -0.03    -0.06   0.01   0.07
  91   1     0.03  -0.08   0.13     0.02   0.04  -0.05    -0.02  -0.03   0.00
  92   1     0.01  -0.06   0.14     0.03   0.04  -0.07    -0.04  -0.03   0.06
  93   1     0.13  -0.04  -0.04     0.00   0.04  -0.01    -0.03  -0.04   0.02
  94   1     0.00   0.00  -0.13    -0.01  -0.03   0.07     0.02   0.02  -0.04
  95   1     0.06  -0.07  -0.05    -0.08   0.03  -0.01     0.06  -0.03   0.02
  96   1    -0.04   0.04  -0.18    -0.03  -0.02   0.05     0.03   0.01  -0.03
  97   1    -0.01   0.03   0.04    -0.01   0.13   0.04    -0.03   0.05   0.12
  98   1    -0.03  -0.02   0.02    -0.05   0.09   0.02    -0.15  -0.14   0.05
  99   1     0.01   0.03   0.02     0.10   0.20   0.09    -0.04  -0.01   0.06
 100   1    -0.02  -0.02  -0.03    -0.09  -0.11  -0.10    -0.01   0.06  -0.05
 101   1    -0.03   0.00   0.00    -0.16   0.00   0.13     0.01   0.03  -0.14
 102   1    -0.01  -0.03  -0.04    -0.08  -0.11  -0.09     0.04  -0.01  -0.20
 103   1     0.00  -0.05  -0.03    -0.05  -0.17  -0.12     0.07  -0.14  -0.11
 104   1    -0.01  -0.03   0.02    -0.14  -0.07   0.15     0.05  -0.12  -0.02
 105   1     0.01  -0.04  -0.05    -0.03  -0.10  -0.10     0.09  -0.16  -0.27
 106   1     0.01   0.02   0.06     0.08   0.06   0.14     0.00   0.13   0.25
 107   1     0.02   0.04   0.05     0.13   0.16   0.12    -0.02   0.08   0.16
 108   1    -0.02  -0.03   0.03     0.02  -0.02   0.08    -0.19  -0.19   0.09
 109   1    -0.04   0.02   0.01    -0.05   0.03  -0.15    -0.02   0.02   0.09
 110   1    -0.05   0.05  -0.02    -0.04  -0.04  -0.08    -0.02   0.11   0.00
 111   1    -0.01  -0.05   0.07    -0.03  -0.04  -0.06    -0.01   0.03   0.03
 112   1     0.03   0.07   0.04     0.07   0.07   0.14    -0.03   0.02  -0.07
 113   1     0.02  -0.04  -0.06     0.08   0.00   0.09    -0.04  -0.05  -0.12
 114   1     0.06   0.02  -0.03     0.09  -0.11   0.03    -0.03   0.07  -0.05
                    85                     86                     87
                    ?A                     ?A                     ?A
 Frequencies --   446.5681               448.6201               454.1620
 Red. masses --     4.5058                 3.3372                 3.0517
 Frc consts  --     0.5294                 0.3957                 0.3709
 IR Inten    --    25.6679                13.2635                 1.8424
 Raman Activ --     0.0000                 0.0000                 0.0000
 Depolar     --     0.0000                 0.0000                 0.0000
 Atom AN      X      Y      Z        X      Y      Z        X      Y      Z
   1   8     0.00   0.00   0.00     0.00   0.00   0.00     0.00   0.00   0.00
   2  12     0.04  -0.03   0.14    -0.01   0.02  -0.06    -0.01   0.01   0.01
   3   8     0.02  -0.03  -0.03    -0.02   0.01   0.01    -0.01   0.00  -0.01
   4   6     0.00   0.00   0.00     0.00   0.00   0.00     0.00   0.00   0.00
   5   7     0.03  -0.04  -0.03    -0.04  -0.02   0.02     0.06  -0.01  -0.01
   6   7     0.10   0.10  -0.09    -0.03  -0.01   0.00     0.01   0.03  -0.04
   7   8     0.00   0.00   0.00     0.00   0.00   0.00     0.00   0.00   0.00
   8   6    -0.03  -0.03  -0.02    -0.02   0.01  -0.01     0.00   0.02  -0.01
   9   6    -0.06  -0.03  -0.05     0.00   0.01  -0.01    -0.03   0.01  -0.03
  10   6     0.04   0.01  -0.07    -0.01  -0.01  -0.01    -0.02   0.00  -0.04
  11   8     0.00  -0.01   0.01     0.00  -0.01  -0.01     0.00   0.00  -0.01
  12   6    -0.01   0.01   0.00     0.00  -0.01   0.00     0.00   0.00   0.00
  13   6     0.01   0.01  -0.01    -0.01   0.00   0.00    -0.01   0.00   0.00
  14   6     0.00   0.00   0.00     0.00   0.00   0.00     0.00   0.00  -0.01
  15   8     0.00   0.01   0.02     0.00   0.00  -0.01     0.00   0.00   0.00
  16   6     0.00   0.00   0.00     0.00   0.01   0.00     0.00   0.01   0.00
  17   8     0.06   0.10  -0.03    -0.03  -0.04   0.01     0.00   0.00   0.00
  18   6    -0.04   0.05   0.05     0.02  -0.03  -0.02     0.00   0.00   0.00
  19   8     0.02  -0.06  -0.04     0.00   0.02   0.02     0.01   0.00   0.00
  20   8    -0.05   0.01   0.02     0.02   0.01  -0.01     0.00   0.01   0.00
  21   6    -0.07  -0.03  -0.01     0.03   0.01   0.01     0.00   0.00   0.00
  22   6     0.02   0.01  -0.03    -0.01   0.00   0.02     0.00   0.00   0.00
  23   6    -0.05   0.06   0.06     0.02  -0.02  -0.03     0.00   0.01   0.00
  24   8    -0.05  -0.11  -0.05     0.02   0.04   0.02     0.00  -0.01  -0.01
  25   6     0.00   0.03   0.00     0.00  -0.01   0.00     0.00   0.00   0.00
  26   6     0.02  -0.01   0.00    -0.01   0.00   0.00     0.00   0.00  -0.01
  27   6     0.01   0.01  -0.02     0.00  -0.01   0.01     0.00   0.00   0.00
  28   6     0.00   0.00   0.00     0.00  -0.01   0.00     0.00   0.00   0.00
  29   6     0.00  -0.01  -0.03     0.03  -0.05   0.15     0.01  -0.04   0.15
  30   6    -0.01   0.07   0.08     0.01   0.04   0.04    -0.01   0.02   0.01
  31   6    -0.03   0.02   0.00     0.00  -0.01   0.11     0.03  -0.02   0.09
  32   6    -0.01   0.03   0.01    -0.04   0.03   0.04     0.01   0.01   0.06
  33   6     0.01   0.05   0.02    -0.04   0.06  -0.02    -0.01   0.03  -0.04
  34   6     0.02   0.02   0.01    -0.02  -0.01   0.05    -0.01   0.00   0.04
  35   6     0.03   0.02  -0.01     0.06  -0.02   0.09    -0.03  -0.03   0.11
  36   6    -0.08  -0.01   0.03    -0.06  -0.01  -0.04     0.08   0.07  -0.08
  37   6     0.06   0.00   0.00     0.15  -0.05  -0.08    -0.10   0.08  -0.02
  38   6     0.00   0.02   0.06     0.02   0.03   0.03     0.02   0.02   0.01
  39   6     0.05   0.02   0.01     0.00   0.01   0.02     0.02   0.01   0.01
  40   6     0.05  -0.02  -0.03     0.00  -0.03  -0.01     0.03  -0.03  -0.01
  41   6     0.02   0.02   0.01     0.00   0.00   0.02     0.01   0.00   0.02
  42   6    -0.02   0.01   0.08     0.01   0.02   0.03    -0.01  -0.01   0.04
  43   6    -0.01  -0.08   0.03     0.02   0.01  -0.03     0.03   0.01  -0.03
  44   6    -0.12  -0.04   0.02     0.00  -0.02  -0.01    -0.07  -0.02   0.02
  45   6    -0.05   0.00  -0.07    -0.09   0.00  -0.05     0.02   0.00   0.07
  46   6     0.02   0.01   0.06     0.05  -0.01  -0.03     0.01  -0.04  -0.13
  47   6     0.00   0.02  -0.04     0.07   0.09  -0.16     0.02  -0.03   0.06
  48   6     0.01  -0.01   0.05    -0.03  -0.02   0.11    -0.07   0.02  -0.13
  49   6    -0.05  -0.11  -0.06    -0.01  -0.02   0.00    -0.03  -0.07  -0.04
  50   6     0.05   0.06   0.05     0.01   0.00  -0.02     0.02   0.04   0.04
  51   6     0.02   0.04   0.02     0.02  -0.02  -0.04     0.01  -0.02  -0.04
  52   6    -0.05  -0.06  -0.06    -0.01   0.00   0.02     0.00   0.01   0.02
  53   6     0.00   0.01  -0.01    -0.01  -0.02  -0.05    -0.01  -0.01  -0.05
  54   6    -0.02  -0.02  -0.04     0.00  -0.01  -0.01     0.01  -0.02   0.00
  55   1    -0.09  -0.04  -0.04     0.02   0.01  -0.02    -0.05   0.01  -0.02
  56   1     0.04   0.02   0.01    -0.02  -0.01  -0.01    -0.01   0.00  -0.01
  57   1     0.00   0.00   0.01     0.00   0.00   0.00     0.00  -0.01  -0.01
  58   1     0.00   0.00   0.01     0.00   0.01   0.00     0.00   0.01   0.00
  59   1     0.01   0.00   0.00     0.00   0.00   0.00     0.00   0.01   0.00
  60   1     0.00   0.00   0.00     0.00   0.00   0.00     0.00   0.01   0.01
  61   1     0.06   0.01  -0.01    -0.02   0.00   0.01     0.01   0.00   0.00
  62   1    -0.01   0.07   0.09     0.00  -0.03  -0.04     0.00   0.01   0.00
  63   1     0.00   0.04   0.00     0.00  -0.02   0.00     0.00   0.00   0.00
  64   1     0.00   0.01   0.03     0.00   0.00  -0.02     0.00   0.00   0.00
  65   1     0.00   0.05   0.01     0.00  -0.04  -0.01     0.00  -0.01   0.00
  66   1     0.04  -0.04  -0.02    -0.02   0.01   0.01     0.00  -0.01   0.00
  67   1     0.04   0.03  -0.11    -0.02  -0.01   0.04    -0.01   0.00  -0.02
  68   1     0.06  -0.10   0.06    -0.03   0.05  -0.03     0.00   0.00   0.00
  69   1     0.01   0.00  -0.03    -0.01  -0.01   0.02     0.00  -0.01   0.01
  70   1    -0.01   0.01  -0.01     0.01   0.00   0.01     0.01   0.00   0.00
  71   1     0.02   0.01  -0.02     0.00   0.00   0.01     0.01   0.00   0.00
  72   1     0.00   0.00   0.00     0.00  -0.01   0.00     0.01   0.00   0.01
  73   1     0.00   0.00   0.00     0.00  -0.01   0.00     0.01   0.00   0.01
  74   1     0.00  -0.01   0.00     0.00  -0.01   0.00    -0.01   0.01   0.01
  75   1     0.01   0.00   0.01    -0.04   0.08  -0.06     0.00   0.06  -0.04
  76   1     0.00   0.04   0.03    -0.06   0.11  -0.16    -0.01   0.09  -0.20
  77   1     0.01  -0.01   0.01    -0.04  -0.02  -0.06    -0.01   0.05  -0.07
  78   1    -0.11  -0.01   0.03    -0.06  -0.02  -0.06     0.11   0.06  -0.10
  79   1     0.08   0.00   0.00     0.17  -0.04  -0.08    -0.12   0.08  -0.04
  80   1     0.05  -0.04  -0.05    -0.01  -0.01  -0.01     0.01   0.00  -0.01
  81   1     0.04  -0.09  -0.11    -0.01  -0.07  -0.06     0.02  -0.06  -0.04
  82   1     0.00   0.01  -0.07    -0.01  -0.02  -0.01     0.00   0.00  -0.01
  83   1    -0.01  -0.09   0.02     0.02   0.01  -0.04     0.04   0.02  -0.04
  84   1    -0.12  -0.05   0.03     0.00  -0.02  -0.02    -0.08  -0.04   0.04
  85   1    -0.06   0.00  -0.14    -0.06   0.02  -0.02     0.03  -0.03   0.19
  86   1     0.06   0.03  -0.04    -0.11   0.03  -0.05    -0.16  -0.06   0.04
  87   1    -0.09  -0.01  -0.13    -0.12   0.00  -0.08     0.12   0.01   0.20
  88   1     0.06   0.04   0.14     0.09  -0.01   0.10    -0.02  -0.12  -0.12
  89   1     0.04   0.03   0.11     0.09  -0.02  -0.04     0.03  -0.08  -0.29
  90   1     0.09   0.02  -0.05     0.13  -0.03  -0.13    -0.04  -0.10  -0.01
  91   1     0.00   0.04  -0.11     0.03   0.18  -0.20     0.04  -0.11   0.19
  92   1     0.00   0.03  -0.08     0.13   0.16  -0.33     0.00  -0.07   0.18
  93   1    -0.07   0.02   0.01    -0.06   0.14  -0.02     0.19  -0.04  -0.08
  94   1     0.01  -0.03   0.10    -0.03  -0.07   0.29    -0.04  -0.03  -0.15
  95   1    -0.05   0.02   0.02    -0.26   0.13  -0.01     0.00  -0.08  -0.09
  96   1     0.01  -0.03   0.09    -0.04  -0.08   0.28    -0.13   0.06  -0.27
  97   1    -0.02  -0.18  -0.11    -0.01   0.00   0.02    -0.01  -0.12  -0.09
  98   1     0.08  -0.05  -0.05    -0.03  -0.04   0.01     0.06  -0.01  -0.04
  99   1    -0.10  -0.20  -0.12    -0.01  -0.02   0.00    -0.06  -0.12  -0.08
 100   1     0.09   0.15   0.16     0.00   0.03   0.00     0.05   0.09   0.11
 101   1     0.18   0.02  -0.13     0.02   0.01  -0.05     0.10   0.01  -0.06
 102   1     0.08   0.13   0.12     0.02   0.01  -0.04     0.04   0.08   0.10
 103   1     0.02   0.12   0.06     0.02  -0.03  -0.03     0.01  -0.05  -0.05
 104   1     0.07   0.06  -0.11     0.02  -0.03  -0.01    -0.01  -0.03   0.00
 105   1     0.00   0.10   0.10     0.02  -0.04  -0.07     0.01  -0.03  -0.06
 106   1    -0.07  -0.01  -0.10     0.00   0.04   0.07     0.01   0.05   0.07
 107   1    -0.12  -0.14  -0.11    -0.01   0.02   0.04     0.00   0.03   0.04
 108   1    -0.03   0.02  -0.07    -0.06  -0.05   0.02    -0.04  -0.04   0.02
 109   1     0.04   0.00   0.03    -0.01  -0.01  -0.09     0.01   0.00  -0.11
 110   1     0.02   0.03  -0.01     0.00  -0.06  -0.03    -0.02  -0.07  -0.04
 111   1     0.00   0.06  -0.04    -0.01  -0.02  -0.05    -0.01  -0.01  -0.04
 112   1    -0.03  -0.08  -0.07     0.00   0.00   0.00     0.02   0.00   0.03
 113   1    -0.04   0.01  -0.01     0.00  -0.01   0.00     0.02  -0.01   0.03
 114   1    -0.05  -0.03  -0.02     0.00  -0.02  -0.01     0.02  -0.07  -0.01
                    88                     89                     90
                    ?A                     ?A                     ?A
 Frequencies --   458.5587               470.7189               507.2693
 Red. masses --     2.6645                 4.9775                 3.4318
 Frc consts  --     0.3301                 0.6498                 0.5203
 IR Inten    --     0.0095                 3.8260                 0.6114
 Raman Activ --     0.0000                 0.0000                 0.0000
 Depolar     --     0.0000                 0.0000                 0.0000
 Atom AN      X      Y      Z        X      Y      Z        X      Y      Z
   1   8     0.00   0.00   0.00    -0.01   0.07   0.04     0.00   0.01   0.00
   2  12     0.01  -0.01   0.02    -0.01   0.00  -0.02     0.00  -0.03  -0.01
   3   8     0.00  -0.01  -0.01    -0.12  -0.07  -0.02     0.01  -0.03  -0.02
   4   6     0.00   0.00   0.00     0.01  -0.01   0.03     0.00   0.00   0.00
   5   7     0.02  -0.01  -0.02     0.00   0.01   0.00    -0.02  -0.04  -0.11
   6   7    -0.02   0.01   0.00     0.01   0.00   0.00     0.09  -0.03   0.11
   7   8     0.00   0.00   0.00     0.00  -0.01   0.03     0.00   0.00   0.00
   8   6    -0.01   0.00  -0.02     0.00   0.00   0.00    -0.02  -0.07  -0.11
   9   6    -0.01  -0.01  -0.02     0.00   0.00   0.01     0.04  -0.12   0.04
  10   6    -0.01  -0.01  -0.01     0.01   0.00   0.01     0.07  -0.06   0.13
  11   8     0.00   0.00   0.00    -0.03  -0.10  -0.11    -0.01  -0.01  -0.01
  12   6     0.00   0.00   0.00    -0.07   0.01  -0.05    -0.01   0.00   0.00
  13   6     0.00   0.00   0.00    -0.14   0.07  -0.07     0.00   0.00  -0.01
  14   6     0.00   0.00   0.00     0.04  -0.05  -0.09     0.00  -0.01  -0.01
  15   8     0.00   0.00   0.00     0.00  -0.01   0.03     0.00   0.00   0.02
  16   6     0.00   0.00   0.01     0.00   0.10   0.06     0.00   0.01   0.01
  17   8     0.01   0.00   0.00     0.04  -0.04  -0.06     0.01   0.00   0.03
  18   6    -0.01   0.00   0.01     0.01  -0.11   0.08    -0.02   0.03   0.04
  19   8     0.00  -0.01   0.00     0.04  -0.05   0.12     0.01  -0.04  -0.01
  20   8     0.00   0.01   0.00     0.02   0.23  -0.08     0.00  -0.02   0.01
  21   6    -0.01   0.00   0.00     0.01   0.09   0.06     0.01  -0.01  -0.02
  22   6     0.00   0.01  -0.01     0.00   0.05   0.11     0.01  -0.01  -0.03
  23   6     0.00   0.01   0.01     0.05   0.01   0.01    -0.01   0.05   0.03
  24   8     0.00  -0.02  -0.01     0.07  -0.13  -0.09     0.00   0.01   0.01
  25   6    -0.01   0.01   0.00     0.01  -0.04  -0.03    -0.01   0.01   0.00
  26   6     0.00   0.00   0.00    -0.07  -0.01   0.02     0.00   0.00  -0.01
  27   6     0.01   0.00   0.00     0.07   0.02   0.00     0.01   0.01  -0.01
  28   6     0.00   0.00   0.00     0.06  -0.01   0.03     0.00   0.00   0.00
  29   6     0.00  -0.02   0.05     0.00   0.01  -0.02    -0.01  -0.03  -0.05
  30   6     0.01   0.04   0.05     0.00   0.00   0.00     0.05  -0.02   0.06
  31   6     0.01   0.00   0.04     0.00   0.00  -0.02    -0.02  -0.02   0.03
  32   6     0.00   0.01   0.02     0.00   0.00  -0.01    -0.05  -0.02   0.06
  33   6     0.00   0.02  -0.01     0.00  -0.01   0.00    -0.02   0.08  -0.06
  34   6     0.00   0.00   0.02     0.00   0.00  -0.01    -0.01   0.02   0.07
  35   6     0.00  -0.01   0.04     0.00   0.00  -0.01     0.02   0.01   0.06
  36   6     0.02   0.02  -0.02     0.00  -0.01   0.01     0.01   0.04  -0.02
  37   6    -0.02   0.03  -0.01     0.00  -0.01   0.00     0.03   0.05   0.00
  38   6    -0.02   0.01   0.05     0.00   0.00   0.00    -0.04  -0.03  -0.01
  39   6     0.00   0.01   0.02     0.00   0.00   0.00    -0.05  -0.04  -0.03
  40   6    -0.01  -0.01  -0.02     0.00   0.01   0.00    -0.04   0.10   0.03
  41   6     0.01   0.01   0.01     0.00   0.00   0.00    -0.01   0.00  -0.07
  42   6     0.04   0.05   0.01     0.00   0.00   0.00     0.01   0.01  -0.05
  43   6    -0.04  -0.12   0.07     0.00   0.00   0.00    -0.05   0.04  -0.01
  44   6     0.14  -0.01  -0.06    -0.01   0.00   0.00    -0.02   0.06  -0.03
  45   6     0.00   0.00   0.02     0.00   0.00   0.00     0.02  -0.01   0.01
  46   6     0.01  -0.01  -0.04     0.00   0.00   0.01     0.01  -0.01  -0.03
  47   6     0.01  -0.01   0.01    -0.01   0.00   0.00     0.02   0.01  -0.02
  48   6    -0.02   0.00  -0.03     0.01   0.00   0.00    -0.01  -0.01  -0.01
  49   6     0.03   0.09   0.08     0.00   0.00  -0.01     0.01   0.00   0.00
  50   6    -0.02  -0.06  -0.14     0.00   0.00   0.01     0.00   0.00   0.02
  51   6     0.00   0.07   0.08     0.00   0.00   0.00     0.00  -0.01   0.01
  52   6    -0.07  -0.10  -0.09     0.00   0.00   0.00     0.02   0.02   0.01
  53   6    -0.01   0.01  -0.02     0.00   0.00   0.01    -0.01   0.09   0.02
  54   6     0.00  -0.01  -0.02     0.00   0.00   0.00    -0.04   0.03  -0.06
  55   1    -0.01  -0.01  -0.02     0.00   0.00   0.01     0.04  -0.24   0.07
  56   1     0.00   0.01   0.00    -0.11   0.09  -0.06     0.02   0.01   0.00
  57   1     0.00   0.00   0.00     0.06  -0.09  -0.10     0.01  -0.01  -0.02
  58   1     0.00   0.00   0.01     0.00   0.11   0.09     0.00   0.01   0.01
  59   1     0.01   0.00   0.01     0.01   0.06   0.07     0.00   0.01   0.01
  60   1     0.00   0.00   0.00     0.00   0.10   0.08     0.00   0.01   0.01
  61   1     0.01   0.00   0.00     0.09   0.15   0.16    -0.01  -0.03  -0.04
  62   1     0.00   0.01   0.01    -0.05  -0.03   0.00     0.04   0.07   0.03
  63   1    -0.01   0.00   0.00     0.02  -0.11  -0.07    -0.01  -0.01   0.02
  64   1    -0.01   0.01   0.00    -0.04   0.05  -0.15    -0.02  -0.01   0.03
  65   1    -0.01   0.01  -0.01     0.04  -0.17  -0.02    -0.03   0.05   0.00
  66   1     0.00  -0.01   0.00    -0.12  -0.13   0.17     0.02  -0.04   0.00
  67   1     0.00   0.00  -0.01    -0.19  -0.05   0.05     0.01   0.03  -0.11
  68   1     0.00  -0.01   0.00    -0.18   0.10  -0.12     0.02  -0.06   0.00
  69   1     0.00  -0.01   0.00     0.05  -0.16   0.23     0.01  -0.01   0.00
  70   1     0.01   0.00   0.00     0.25   0.04  -0.04     0.01   0.00  -0.01
  71   1     0.01   0.00  -0.01     0.23   0.10  -0.09     0.02   0.01  -0.01
  72   1     0.00   0.00   0.00     0.15  -0.02   0.12     0.02   0.00   0.02
  73   1     0.01   0.00   0.00     0.15  -0.02   0.10     0.02   0.00   0.01
  74   1     0.00   0.00   0.00    -0.10   0.06   0.08    -0.02   0.01   0.01
  75   1     0.00   0.02  -0.01     0.00  -0.01   0.01    -0.03  -0.05   0.07
  76   1    -0.01   0.05  -0.07     0.00  -0.02   0.03     0.01   0.13  -0.18
  77   1     0.00   0.01  -0.02     0.00   0.00   0.01    -0.03  -0.01   0.06
  78   1     0.02   0.02  -0.03     0.00  -0.01   0.01     0.03   0.04  -0.03
  79   1    -0.02   0.03  -0.01     0.00  -0.01   0.01     0.06   0.05   0.00
  80   1     0.00  -0.03  -0.01     0.00   0.01   0.01     0.00  -0.06  -0.04
  81   1    -0.02  -0.06  -0.08     0.00   0.02   0.01    -0.03   0.17   0.11
  82   1     0.01  -0.03  -0.02     0.00   0.00   0.00     0.00  -0.05  -0.05
  83   1    -0.07  -0.13   0.08     0.00   0.00   0.00    -0.06   0.04  -0.01
  84   1     0.16   0.00  -0.08    -0.01   0.00   0.00    -0.02   0.07  -0.03
  85   1     0.00  -0.02   0.05     0.00   0.01  -0.01    -0.01  -0.04   0.02
  86   1    -0.04  -0.02   0.01     0.01   0.00   0.00    -0.01  -0.03   0.01
  87   1     0.04   0.00   0.05    -0.01   0.00  -0.01     0.08  -0.01   0.05
  88   1     0.00  -0.04  -0.02     0.00   0.01   0.00     0.00  -0.05   0.00
  89   1     0.02  -0.03  -0.09    -0.01   0.01   0.03     0.03  -0.03  -0.11
  90   1     0.00  -0.04  -0.01    -0.01   0.01   0.01     0.00  -0.04   0.00
  91   1     0.02  -0.03   0.04    -0.01   0.00   0.00     0.03  -0.01  -0.05
  92   1     0.00  -0.02   0.04    -0.01   0.00   0.00     0.00  -0.01   0.01
  93   1     0.05  -0.01  -0.03    -0.01   0.00   0.01     0.02  -0.01  -0.03
  94   1    -0.01  -0.02  -0.03     0.00   0.01  -0.01     0.01  -0.06   0.06
  95   1    -0.01  -0.02  -0.03     0.02   0.00   0.01    -0.06  -0.03  -0.03
  96   1    -0.05   0.01  -0.08     0.01   0.00   0.01    -0.05   0.00  -0.05
  97   1    -0.01   0.21   0.19     0.01  -0.01  -0.01     0.06   0.01   0.04
  98   1    -0.18  -0.04   0.08     0.01   0.01  -0.01     0.04  -0.01   0.02
  99   1     0.10   0.22   0.16    -0.01  -0.01  -0.01    -0.03  -0.06  -0.01
 100   1    -0.10  -0.08  -0.20     0.01   0.00   0.01     0.03  -0.07  -0.03
 101   1    -0.16   0.01   0.00     0.01   0.00   0.00     0.01  -0.04   0.05
 102   1    -0.03  -0.14  -0.30     0.00   0.01   0.02    -0.02   0.01   0.11
 103   1     0.00   0.20   0.13     0.00   0.01   0.00     0.01  -0.02   0.06
 104   1     0.08   0.11  -0.13     0.01   0.00   0.00     0.02  -0.02   0.04
 105   1    -0.02   0.16   0.21     0.00   0.00   0.00     0.03  -0.04  -0.06
 106   1    -0.10  -0.07  -0.19     0.00  -0.01  -0.01     0.03  -0.07   0.00
 107   1    -0.15  -0.21  -0.18     0.00   0.00   0.00     0.09   0.08   0.04
 108   1     0.01   0.07  -0.10     0.01   0.00   0.00     0.06   0.00   0.02
 109   1     0.01   0.01  -0.01     0.00   0.00   0.02     0.04   0.01   0.29
 110   1    -0.01   0.01  -0.02     0.00   0.01   0.01    -0.02   0.30  -0.04
 111   1    -0.01   0.02  -0.02     0.00   0.00   0.01    -0.02   0.19   0.02
 112   1     0.00  -0.01  -0.02    -0.01   0.00  -0.01    -0.08  -0.02  -0.18
 113   1     0.01  -0.02  -0.02    -0.01   0.00  -0.01    -0.10  -0.07  -0.24
 114   1     0.00  -0.01  -0.01    -0.01   0.02   0.00    -0.08   0.31  -0.02
                    91                     92                     93
                    ?A                     ?A                     ?A
 Frequencies --   515.0323               530.1972               532.1500
 Red. masses --     4.4339                 4.5116                 3.8122
 Frc consts  --     0.6930                 0.7472                 0.6360
 IR Inten    --    15.8024                11.8855                 4.5422
 Raman Activ --     0.0000                 0.0000                 0.0000
 Depolar     --     0.0000                 0.0000                 0.0000
 Atom AN      X      Y      Z        X      Y      Z        X      Y      Z
   1   8     0.00   0.04   0.02     0.00  -0.02  -0.01     0.00  -0.01   0.00
   2  12    -0.03   0.02  -0.08     0.00  -0.01   0.06     0.00   0.01   0.03
   3   8     0.02  -0.09  -0.04     0.00   0.03  -0.03     0.00   0.01  -0.01
   4   6     0.00  -0.01   0.01     0.00   0.01  -0.01     0.00   0.00   0.00
   5   7    -0.01   0.09   0.04    -0.03   0.15   0.00     0.03   0.06  -0.01
   6   7     0.00  -0.04  -0.04     0.04  -0.06  -0.02     0.03  -0.08   0.01
   7   8     0.00   0.00   0.02     0.00   0.00  -0.01     0.00   0.00  -0.01
   8   6     0.02   0.06   0.05     0.11   0.09   0.00    -0.21   0.02   0.07
   9   6     0.00   0.05   0.06     0.01   0.03   0.10     0.00   0.01   0.07
  10   6     0.00  -0.01  -0.03    -0.06  -0.09   0.03     0.23   0.04  -0.08
  11   8    -0.04  -0.06  -0.07     0.02   0.03   0.04     0.01   0.02   0.02
  12   6    -0.06   0.01  -0.01     0.03   0.00   0.01     0.01   0.00   0.00
  13   6    -0.02   0.02  -0.02     0.01  -0.02   0.00     0.00  -0.01   0.00
  14   6     0.01  -0.04  -0.08    -0.01   0.02   0.04     0.00   0.01   0.02
  15   8     0.00   0.01   0.06     0.01   0.00  -0.01     0.00   0.00   0.00
  16   6     0.00   0.06   0.03     0.00  -0.03  -0.02     0.00  -0.01  -0.01
  17   8    -0.03   0.02   0.09     0.04  -0.01   0.01     0.02  -0.01   0.00
  18   6    -0.05   0.09   0.15    -0.02   0.02  -0.04    -0.01   0.01  -0.02
  19   8     0.05  -0.12  -0.01    -0.04   0.02  -0.04    -0.02   0.01  -0.02
  20   8     0.03  -0.09   0.03    -0.03   0.05  -0.03    -0.01   0.02  -0.01
  21   6     0.04  -0.05  -0.07    -0.01   0.03   0.01     0.00   0.01   0.01
  22   6     0.00  -0.06  -0.10     0.03   0.04   0.03     0.01   0.02   0.01
  23   6    -0.01   0.21   0.09     0.00  -0.06   0.01     0.00  -0.03   0.01
  24   8     0.00   0.08   0.06     0.02  -0.07  -0.04     0.01  -0.03  -0.02
  25   6    -0.01   0.00   0.02    -0.01   0.01  -0.01     0.00   0.00  -0.01
  26   6     0.01   0.03  -0.08     0.01  -0.03   0.08     0.00  -0.02   0.04
  27   6     0.03   0.02  -0.02    -0.01  -0.01   0.00    -0.01   0.00   0.00
  28   6     0.03  -0.01   0.01    -0.01   0.00  -0.01     0.00   0.00   0.00
  29   6     0.00   0.07   0.00    -0.02   0.13  -0.08     0.03   0.04  -0.02
  30   6     0.00  -0.02  -0.02     0.03  -0.04  -0.03     0.00  -0.07   0.01
  31   6     0.04  -0.02   0.01     0.05  -0.09   0.02     0.03   0.04   0.03
  32   6     0.02  -0.02  -0.01    -0.04  -0.10   0.03     0.07   0.03   0.05
  33   6    -0.01  -0.05  -0.03    -0.06  -0.03  -0.12     0.02  -0.01  -0.05
  34   6    -0.03  -0.02   0.01    -0.12   0.02   0.11     0.03  -0.07   0.01
  35   6    -0.03   0.00  -0.01    -0.05   0.06   0.02    -0.01  -0.05  -0.01
  36   6     0.03  -0.06  -0.01     0.09  -0.12  -0.03    -0.02  -0.01   0.00
  37   6    -0.02  -0.05  -0.01     0.02  -0.04  -0.02    -0.04  -0.04  -0.02
  38   6     0.00   0.02   0.02    -0.04   0.04   0.00     0.02  -0.04   0.07
  39   6     0.00   0.03   0.03    -0.01   0.08   0.00    -0.03  -0.06   0.11
  40   6    -0.01  -0.03  -0.05    -0.01   0.00  -0.08    -0.07  -0.03  -0.04
  41   6     0.01   0.03   0.03     0.08   0.04   0.02    -0.09   0.06   0.03
  42   6     0.01   0.02   0.01     0.05   0.01   0.02    -0.04   0.06  -0.03
  43   6    -0.01   0.00  -0.01    -0.07   0.00   0.00     0.02   0.02  -0.03
  44   6     0.00   0.00  -0.01    -0.03   0.00   0.00    -0.01   0.07  -0.07
  45   6    -0.01   0.01   0.00     0.02   0.01   0.03    -0.04   0.00  -0.02
  46   6     0.00   0.00  -0.01     0.00   0.00  -0.05     0.01   0.00   0.00
  47   6     0.00   0.01   0.00     0.03   0.02  -0.03    -0.01   0.00   0.02
  48   6     0.01   0.00   0.01     0.02   0.00   0.02    -0.01   0.01  -0.02
  49   6    -0.01  -0.01   0.01    -0.02  -0.03   0.00     0.01   0.01   0.01
  50   6     0.00   0.00  -0.01     0.00   0.00   0.01     0.01  -0.01  -0.03
  51   6     0.01   0.00  -0.01     0.00   0.01   0.02     0.02  -0.02  -0.04
  52   6    -0.01  -0.01   0.00    -0.02  -0.03  -0.01     0.01   0.02   0.01
  53   6     0.00   0.00  -0.01    -0.02   0.06  -0.02    -0.01   0.05  -0.04
  54   6     0.02  -0.05   0.01     0.02  -0.09  -0.03     0.01  -0.06  -0.02
  55   1    -0.04   0.09   0.06    -0.08   0.04   0.13    -0.02  -0.01   0.08
  56   1     0.05   0.05   0.02    -0.01  -0.03  -0.01    -0.01  -0.01  -0.01
  57   1     0.03  -0.07  -0.08    -0.01   0.04   0.05     0.00   0.02   0.02
  58   1     0.00   0.06   0.05     0.00  -0.03  -0.02     0.00  -0.01  -0.01
  59   1     0.00   0.03   0.03     0.00  -0.02  -0.02     0.00  -0.01  -0.01
  60   1     0.00   0.06   0.04     0.00  -0.03  -0.02     0.00  -0.01  -0.01
  61   1    -0.08  -0.15  -0.14     0.05   0.08   0.04     0.02   0.03   0.02
  62   1     0.15   0.28   0.07    -0.02  -0.09   0.07    -0.01  -0.04   0.03
  63   1    -0.02   0.03   0.07     0.00  -0.06   0.00     0.00  -0.03   0.00
  64   1     0.02  -0.07   0.12    -0.06   0.05  -0.06    -0.03   0.02  -0.02
  65   1    -0.06   0.11   0.00    -0.03   0.00  -0.03    -0.01   0.00  -0.01
  66   1     0.05  -0.16  -0.01    -0.01   0.04   0.06    -0.01   0.02   0.03
  67   1     0.00   0.12  -0.44     0.02  -0.06   0.20     0.01  -0.03   0.09
  68   1     0.04  -0.21  -0.05     0.00   0.04   0.07     0.00   0.02   0.03
  69   1     0.02  -0.04   0.02    -0.01   0.02  -0.02    -0.01   0.01  -0.01
  70   1     0.06   0.01  -0.02    -0.03   0.00   0.00    -0.01   0.00   0.00
  71   1     0.08   0.04  -0.05    -0.04  -0.02   0.03    -0.02  -0.01   0.01
  72   1     0.09  -0.01   0.08    -0.05   0.00  -0.04    -0.02   0.00  -0.02
  73   1     0.09  -0.01   0.07    -0.05   0.00  -0.03    -0.02   0.00  -0.01
  74   1    -0.10   0.05   0.05     0.06  -0.03  -0.02     0.03  -0.01  -0.01
  75   1     0.00   0.01   0.01    -0.08  -0.05   0.11     0.06   0.04   0.08
  76   1     0.00  -0.05  -0.03     0.03   0.01  -0.23    -0.04   0.01  -0.10
  77   1    -0.01   0.00   0.04    -0.09   0.02   0.21     0.05  -0.06   0.04
  78   1     0.04  -0.06  -0.01     0.15  -0.13  -0.06    -0.05  -0.01  -0.01
  79   1    -0.02  -0.05  -0.01     0.06  -0.03  -0.01    -0.09  -0.04  -0.02
  80   1     0.01   0.03   0.03     0.02   0.09   0.02     0.00  -0.06   0.12
  81   1    -0.02  -0.08  -0.11    -0.07  -0.08  -0.10    -0.01  -0.03  -0.14
  82   1     0.01   0.03   0.04     0.09   0.03   0.04    -0.08   0.05   0.08
  83   1    -0.01   0.00  -0.01    -0.10  -0.01   0.01     0.06   0.03  -0.05
  84   1     0.00   0.00  -0.02    -0.05  -0.03   0.01     0.03   0.10  -0.11
  85   1     0.04   0.06   0.05     0.12   0.11   0.15    -0.02   0.03  -0.01
  86   1    -0.04   0.03   0.00    -0.08   0.06   0.01    -0.04   0.01  -0.02
  87   1    -0.07   0.02  -0.03    -0.09   0.03   0.00    -0.07   0.01  -0.03
  88   1     0.00   0.03  -0.06    -0.01   0.03  -0.19     0.02   0.01   0.03
  89   1    -0.02   0.02   0.06    -0.04   0.03   0.05     0.01   0.01   0.02
  90   1    -0.01   0.03  -0.02    -0.05   0.05  -0.03     0.03   0.00  -0.03
  91   1    -0.01   0.03   0.04     0.00   0.06   0.00    -0.02   0.00   0.09
  92   1     0.04   0.03  -0.05     0.07   0.05  -0.08     0.03   0.01  -0.01
  93   1     0.01   0.04   0.01     0.01   0.04   0.00     0.03   0.02   0.00
  94   1    -0.01   0.05  -0.02     0.00   0.04   0.03    -0.03   0.04  -0.06
  95   1     0.02   0.04   0.02    -0.01   0.04   0.01     0.01   0.02  -0.01
  96   1     0.05  -0.01   0.06     0.06  -0.02   0.09     0.01   0.01   0.00
  97   1     0.00   0.00   0.02     0.01  -0.04   0.01     0.08   0.06   0.09
  98   1    -0.01  -0.03   0.01     0.00  -0.03   0.00     0.00  -0.04   0.04
  99   1    -0.02  -0.02   0.00    -0.04  -0.07  -0.01    -0.03  -0.05   0.01
 100   1     0.00   0.00  -0.01     0.02   0.01   0.02     0.02  -0.08  -0.09
 101   1     0.01   0.00  -0.02     0.03  -0.01  -0.02     0.00  -0.04   0.02
 102   1     0.00   0.00  -0.01     0.00   0.02   0.04     0.00   0.00   0.04
 103   1     0.01   0.01   0.01     0.02   0.03   0.10     0.03  -0.04  -0.02
 104   1     0.02   0.00  -0.02     0.05   0.00  -0.01     0.02  -0.03  -0.01
 105   1     0.01  -0.01  -0.02     0.03   0.00  -0.02     0.04  -0.03  -0.09
 106   1    -0.01  -0.01   0.00    -0.02  -0.08  -0.04     0.02   0.02   0.05
 107   1    -0.01   0.00   0.00     0.01   0.00   0.00     0.04   0.05   0.03
 108   1    -0.01  -0.02   0.00     0.02  -0.02  -0.01    -0.02  -0.03   0.02
 109   1    -0.03   0.03  -0.10    -0.11   0.08  -0.06     0.16   0.01  -0.05
 110   1     0.00  -0.08   0.01    -0.09   0.09  -0.07     0.15  -0.09   0.07
 111   1     0.00  -0.05   0.00    -0.03  -0.07   0.10     0.01   0.27  -0.28
 112   1     0.03  -0.04   0.04     0.07   0.03   0.04    -0.09  -0.36  -0.17
 113   1     0.04  -0.02   0.06     0.07  -0.17  -0.10    -0.09   0.13   0.19
 114   1     0.03  -0.13   0.00     0.10  -0.09  -0.07    -0.17  -0.09   0.09
                    94                     95                     96
                    ?A                     ?A                     ?A
 Frequencies --   547.3628               550.4706               555.9947
 Red. masses --     4.2838                 5.3458                 4.7079
 Frc consts  --     0.7562                 0.9544                 0.8575
 IR Inten    --     0.7281                 7.3602                 0.4776
 Raman Activ --     0.0000                 0.0000                 0.0000
 Depolar     --     0.0000                 0.0000                 0.0000
 Atom AN      X      Y      Z        X      Y      Z        X      Y      Z
   1   8     0.00   0.00   0.00     0.00   0.00   0.00     0.00   0.01   0.00
   2  12     0.00  -0.02  -0.03    -0.04   0.02  -0.09    -0.01   0.01  -0.01
   3   8     0.01   0.00  -0.02     0.06   0.03  -0.13     0.03   0.01  -0.01
   4   6     0.00   0.00   0.00     0.00   0.00   0.00     0.00   0.00   0.00
   5   7     0.04   0.06   0.01    -0.03  -0.02   0.01     0.10  -0.06  -0.03
   6   7    -0.07   0.11  -0.03    -0.01   0.00   0.01     0.08   0.05  -0.05
   7   8     0.00   0.00   0.00     0.00  -0.01   0.00     0.00   0.00   0.01
   8   6    -0.02  -0.03   0.07     0.01   0.00  -0.01     0.06  -0.06  -0.02
   9   6    -0.03   0.01  -0.04     0.01   0.00  -0.01    -0.05  -0.02  -0.03
  10   6     0.03   0.05  -0.10    -0.03  -0.01   0.02     0.00   0.07   0.00
  11   8     0.00   0.00   0.00    -0.02   0.01  -0.01    -0.01  -0.01  -0.02
  12   6     0.00   0.00   0.00    -0.02  -0.03   0.02    -0.02  -0.01   0.01
  13   6     0.00  -0.01   0.00     0.04  -0.05  -0.01     0.02  -0.01   0.01
  14   6     0.00   0.00   0.00     0.01   0.00  -0.01     0.00  -0.01  -0.03
  15   8     0.00   0.00   0.01     0.01   0.04   0.05    -0.01   0.01   0.02
  16   6     0.00   0.00   0.00     0.00   0.00   0.00     0.00   0.02   0.01
  17   8     0.00   0.00   0.02    -0.01  -0.04   0.06    -0.01   0.00  -0.01
  18   6    -0.01   0.03   0.01    -0.08   0.19   0.00     0.00   0.04  -0.01
  19   8    -0.01  -0.02  -0.02    -0.13  -0.10  -0.18    -0.03  -0.02  -0.03
  20   8     0.00   0.01  -0.02    -0.02   0.09  -0.11     0.01   0.02  -0.02
  21   6     0.01   0.00   0.00     0.06   0.03  -0.03     0.01   0.01  -0.01
  22   6     0.00   0.00   0.00     0.00   0.00   0.01    -0.02  -0.01   0.00
  23   6     0.01   0.01   0.02     0.08   0.01   0.16     0.03   0.00   0.03
  24   8     0.01   0.00   0.00     0.08  -0.02  -0.01     0.00   0.01   0.01
  25   6     0.00   0.00   0.00     0.00  -0.02   0.00     0.00  -0.01   0.00
  26   6     0.00  -0.01   0.03     0.03  -0.12   0.27     0.01  -0.03   0.05
  27   6     0.00   0.00   0.00    -0.02   0.00  -0.01    -0.01   0.00   0.00
  28   6     0.00   0.00   0.00     0.00   0.00   0.00     0.00   0.00   0.00
  29   6     0.00   0.09  -0.11     0.01  -0.04   0.08    -0.02  -0.05  -0.02
  30   6    -0.05   0.15   0.09     0.01   0.02   0.02    -0.04  -0.10  -0.10
  31   6     0.03  -0.05   0.02    -0.01   0.04   0.00    -0.03  -0.09  -0.02
  32   6    -0.03  -0.06   0.06     0.04   0.05  -0.03    -0.14  -0.07  -0.06
  33   6    -0.04   0.02  -0.12     0.03  -0.02   0.06    -0.07   0.03   0.04
  34   6    -0.07   0.00   0.11     0.05  -0.02  -0.06    -0.09   0.10   0.03
  35   6    -0.01   0.04   0.01     0.00  -0.04  -0.01     0.03   0.10   0.00
  36   6     0.05  -0.07  -0.02    -0.03   0.05   0.01     0.05  -0.05  -0.01
  37   6     0.02   0.00   0.00    -0.02  -0.02   0.00     0.08   0.11   0.04
  38   6     0.07  -0.03  -0.03    -0.01   0.01  -0.01     0.06  -0.05   0.05
  39   6     0.01  -0.13  -0.07     0.00   0.01  -0.04     0.00  -0.03   0.17
  40   6     0.05   0.05   0.18     0.01   0.02   0.02    -0.06  -0.12  -0.08
  41   6    -0.11  -0.11  -0.07     0.02  -0.02  -0.02    -0.12   0.08   0.09
  42   6    -0.07  -0.02  -0.02     0.01  -0.01   0.01    -0.06   0.06  -0.03
  43   6     0.12  -0.03   0.02    -0.02   0.01   0.00     0.09  -0.02   0.00
  44   6     0.04  -0.02   0.03     0.00  -0.01   0.01    -0.01   0.07  -0.06
  45   6     0.00   0.00   0.01    -0.01   0.00  -0.01     0.04   0.00   0.02
  46   6     0.00   0.00  -0.03     0.00   0.00   0.02     0.00   0.00  -0.02
  47   6     0.01   0.01  -0.01    -0.01  -0.01   0.01     0.00   0.00  -0.01
  48   6     0.00   0.00   0.01    -0.01   0.00  -0.01     0.02  -0.01   0.03
  49   6     0.02   0.04   0.00     0.00   0.00   0.00     0.01   0.01   0.01
  50   6     0.00   0.00   0.00     0.00   0.00   0.01     0.01  -0.01  -0.03
  51   6    -0.01   0.00   0.00     0.00   0.00   0.01     0.01  -0.01  -0.04
  52   6     0.02   0.03   0.01     0.00   0.00   0.00     0.00   0.01   0.01
  53   6     0.04  -0.07   0.07     0.00   0.00  -0.01     0.03  -0.06   0.06
  54   6     0.00  -0.01  -0.02     0.00   0.01   0.00    -0.01   0.11   0.06
  55   1    -0.03   0.08  -0.06     0.03   0.00  -0.01    -0.02  -0.03  -0.04
  56   1     0.00   0.00   0.00     0.02  -0.06  -0.01     0.02  -0.01   0.01
  57   1     0.00   0.00   0.00     0.01   0.00  -0.01     0.01  -0.02  -0.03
  58   1     0.00   0.00   0.00     0.00   0.00   0.00     0.00   0.02   0.01
  59   1     0.00   0.00   0.00     0.00   0.00   0.00     0.00   0.01   0.01
  60   1     0.00   0.00   0.00     0.00   0.00   0.00     0.00   0.02   0.01
  61   1     0.00   0.01   0.00    -0.01  -0.01   0.01    -0.02  -0.03   0.00
  62   1     0.03   0.01   0.05     0.22  -0.01   0.37     0.05  -0.01   0.07
  63   1     0.00  -0.01   0.00     0.00  -0.07   0.02     0.01   0.01  -0.01
  64   1     0.00   0.00   0.00    -0.02   0.00  -0.03     0.02  -0.01   0.00
  65   1     0.00   0.00   0.00    -0.02  -0.03  -0.02     0.02  -0.03   0.01
  66   1     0.00  -0.02   0.05    -0.03  -0.11   0.36    -0.01  -0.03   0.08
  67   1     0.00  -0.01   0.03     0.03  -0.14   0.35     0.00  -0.03   0.08
  68   1     0.00  -0.01   0.02    -0.04  -0.05   0.17    -0.02   0.00   0.02
  69   1     0.00   0.01  -0.01    -0.01   0.09  -0.10     0.00   0.03  -0.04
  70   1    -0.01   0.00   0.00    -0.09   0.01   0.00    -0.04  -0.01   0.01
  71   1    -0.01   0.00   0.00    -0.11  -0.05   0.05    -0.03  -0.01   0.01
  72   1     0.00   0.00   0.00     0.01   0.00   0.02     0.03   0.00   0.02
  73   1     0.00   0.00   0.00     0.03   0.00   0.02     0.03   0.00   0.02
  74   1     0.00   0.00   0.00    -0.02   0.01   0.01    -0.04   0.02   0.01
  75   1    -0.05  -0.05   0.16     0.05   0.05  -0.09    -0.13  -0.07  -0.08
  76   1     0.01   0.06  -0.22    -0.02  -0.03   0.11     0.06   0.01   0.07
  77   1    -0.06  -0.03   0.21     0.05   0.01  -0.13    -0.12   0.05   0.02
  78   1     0.08  -0.08  -0.04    -0.06   0.05   0.02     0.10  -0.06  -0.02
  79   1     0.03   0.01   0.00    -0.04  -0.02  -0.01     0.13   0.12   0.05
  80   1    -0.07  -0.18  -0.17     0.00  -0.01  -0.05    -0.01   0.04   0.26
  81   1     0.12   0.20   0.29     0.00   0.04   0.06     0.01  -0.15  -0.24
  82   1    -0.14  -0.13  -0.18     0.02  -0.03  -0.04    -0.10   0.14   0.20
  83   1     0.14  -0.01   0.02    -0.02   0.00   0.01     0.13  -0.01  -0.03
  84   1     0.05   0.00   0.01     0.00  -0.02   0.02     0.02   0.09  -0.10
  85   1     0.06   0.06   0.08    -0.04  -0.03  -0.05     0.06   0.01   0.06
  86   1    -0.05   0.04   0.00     0.02  -0.03   0.00     0.01   0.01   0.01
  87   1    -0.07   0.01  -0.02     0.03  -0.01   0.01     0.01   0.00   0.01
  88   1     0.00   0.02  -0.10     0.00  -0.01   0.07    -0.01   0.01  -0.09
  89   1    -0.02   0.02   0.03     0.02  -0.01  -0.02    -0.02   0.01   0.02
  90   1    -0.02   0.03  -0.03     0.02  -0.02   0.01    -0.03   0.02   0.01
  91   1     0.01   0.02  -0.02    -0.01  -0.01   0.04     0.04  -0.03  -0.18
  92   1     0.02   0.01  -0.02     0.00   0.00   0.00    -0.09  -0.05   0.08
  93   1     0.00   0.01  -0.01     0.01   0.01   0.01    -0.06  -0.06  -0.01
  94   1     0.00  -0.01   0.02    -0.01   0.02  -0.03     0.06  -0.11   0.11
  95   1    -0.02   0.01   0.00     0.01   0.00   0.00    -0.02  -0.06   0.00
  96   1     0.00   0.00   0.02     0.00   0.00   0.00    -0.06   0.00  -0.06
  97   1    -0.04   0.03  -0.04    -0.02  -0.01  -0.02     0.08   0.05   0.08
  98   1     0.01   0.06  -0.02     0.00   0.01  -0.01    -0.01  -0.04   0.03
  99   1     0.07   0.11   0.01     0.01   0.01   0.00    -0.03  -0.04   0.01
 100   1    -0.04   0.01   0.00     0.00   0.02   0.02     0.02  -0.07  -0.09
 101   1    -0.04   0.02   0.02     0.00   0.01   0.00     0.00  -0.04   0.00
 102   1     0.00  -0.02  -0.06     0.00   0.00  -0.01    -0.01   0.00   0.03
 103   1    -0.04  -0.03  -0.16     0.00   0.00   0.02     0.00  -0.03  -0.11
 104   1    -0.10   0.03   0.01     0.00   0.00   0.00    -0.03   0.00  -0.03
 105   1    -0.07   0.04   0.10     0.00   0.00   0.00    -0.01   0.01   0.01
 106   1     0.02   0.13   0.04     0.00  -0.02  -0.01     0.01   0.10   0.06
 107   1    -0.06  -0.05  -0.03     0.01   0.01   0.00    -0.04  -0.03  -0.01
 108   1    -0.04   0.05   0.00     0.01   0.00   0.00    -0.06   0.00   0.01
 109   1     0.07  -0.07   0.04    -0.01   0.00  -0.01     0.01  -0.06   0.09
 110   1     0.07  -0.12   0.10    -0.01   0.00  -0.01     0.00  -0.01   0.03
 111   1     0.04  -0.04   0.03     0.00  -0.02   0.01     0.03  -0.09   0.10
 112   1    -0.03  -0.10  -0.04     0.01   0.04   0.01     0.00   0.11   0.08
 113   1    -0.02   0.08   0.09     0.01  -0.02  -0.03     0.00   0.12   0.07
 114   1    -0.06  -0.07   0.01     0.01   0.02  -0.01     0.01   0.08   0.05
                    97                     98                     99
                    ?A                     ?A                     ?A
 Frequencies --   562.6441               566.9288               571.8179
 Red. masses --     4.0952                 4.9186                 4.0789
 Frc consts  --     0.7638                 0.9314                 0.7858
 IR Inten    --     1.2647                12.1527                 4.4446
 Raman Activ --     0.0000                 0.0000                 0.0000
 Depolar     --     0.0000                 0.0000                 0.0000
 Atom AN      X      Y      Z        X      Y      Z        X      Y      Z
   1   8     0.00  -0.01  -0.01     0.00  -0.06  -0.02     0.00   0.02   0.01
   2  12    -0.01   0.01   0.01    -0.06   0.01  -0.08     0.02  -0.01   0.04
   3   8    -0.03  -0.02  -0.01    -0.14  -0.09  -0.09     0.05   0.03   0.04
   4   6     0.00   0.01   0.00     0.01   0.03  -0.01    -0.01  -0.01   0.00
   5   7     0.06   0.03  -0.01    -0.06  -0.02   0.01    -0.13   0.02   0.04
   6   7     0.06   0.00  -0.02     0.04   0.04  -0.03     0.13   0.07  -0.07
   7   8     0.00   0.00  -0.01    -0.01   0.00  -0.04     0.00   0.00   0.01
   8   6     0.02   0.08  -0.03     0.07  -0.02  -0.01     0.15   0.05  -0.04
   9   6    -0.03   0.00   0.06    -0.01   0.00  -0.02    -0.01   0.00   0.02
  10   6     0.02  -0.07   0.00    -0.06   0.01   0.02    -0.12  -0.07   0.04
  11   8     0.02   0.02   0.04     0.07   0.09   0.15    -0.02  -0.03  -0.05
  12   6     0.02   0.01   0.00     0.09   0.03  -0.02    -0.03  -0.01   0.01
  13   6    -0.02   0.00  -0.01    -0.10   0.00  -0.07     0.03   0.00   0.03
  14   6     0.00   0.02   0.04     0.00   0.09   0.19     0.00  -0.03  -0.06
  15   8     0.01   0.00  -0.01     0.07   0.00  -0.04    -0.03   0.00   0.01
  16   6     0.00  -0.02  -0.01     0.01  -0.10  -0.06     0.00   0.03   0.02
  17   8     0.02   0.00   0.02     0.03  -0.03   0.07     0.00   0.01  -0.02
  18   6    -0.02  -0.01   0.01    -0.11  -0.01   0.09     0.04   0.00  -0.03
  19   8     0.02   0.00   0.01     0.07  -0.03   0.01    -0.02   0.02   0.00
  20   8    -0.01   0.00   0.00    -0.03   0.00  -0.01     0.00   0.00   0.01
  21   6     0.01   0.00   0.01     0.06   0.02   0.01    -0.03  -0.01   0.00
  22   6     0.02   0.01   0.00     0.05   0.04   0.01    -0.01  -0.01   0.00
  23   6    -0.03   0.01   0.00    -0.09   0.06   0.04     0.02  -0.02  -0.02
  24   8     0.01  -0.02  -0.01     0.09  -0.05  -0.04    -0.03   0.01   0.01
  25   6    -0.01   0.01   0.00    -0.01   0.02  -0.01     0.00   0.00   0.00
  26   6     0.00   0.01  -0.02     0.00   0.02  -0.04     0.00  -0.01   0.00
  27   6     0.00   0.00   0.00     0.01   0.00   0.01     0.00   0.00   0.00
  28   6     0.00   0.00   0.00    -0.01   0.01   0.00     0.00   0.00   0.00
  29   6     0.00  -0.03   0.18    -0.01   0.00  -0.03    -0.02   0.03  -0.01
  30   6     0.03   0.06   0.10    -0.01  -0.02  -0.04     0.02   0.01   0.01
  31   6     0.02  -0.05   0.01    -0.02   0.03  -0.01    -0.01   0.06  -0.02
  32   6    -0.04   0.02  -0.16     0.03   0.01   0.04     0.09   0.02   0.05
  33   6    -0.04  -0.08   0.17     0.03   0.02  -0.03     0.06  -0.01  -0.04
  34   6    -0.07   0.09  -0.11     0.04  -0.03   0.01     0.06  -0.06   0.00
  35   6    -0.01   0.06  -0.03     0.00  -0.04   0.02    -0.04  -0.06   0.03
  36   6     0.04  -0.08   0.00    -0.03   0.06   0.01    -0.03   0.08   0.01
  37   6     0.02   0.02   0.02    -0.02  -0.03  -0.02    -0.05  -0.10  -0.04
  38   6     0.02  -0.03   0.02     0.03  -0.02   0.01     0.06  -0.04   0.02
  39   6    -0.03  -0.11  -0.02     0.00  -0.02   0.05    -0.03  -0.10   0.07
  40   6    -0.02   0.06   0.09    -0.02  -0.04  -0.01    -0.05  -0.02   0.05
  41   6    -0.07  -0.04  -0.06    -0.05   0.02   0.03    -0.12  -0.01   0.01
  42   6    -0.01   0.03  -0.03    -0.02   0.02  -0.01    -0.03   0.06  -0.04
  43   6     0.03   0.00   0.00     0.06  -0.02   0.01     0.10  -0.04   0.02
  44   6    -0.02   0.06  -0.04     0.00   0.03  -0.02    -0.03   0.10  -0.08
  45   6     0.01   0.00   0.01     0.00   0.00   0.00     0.00   0.00   0.00
  46   6     0.00   0.00  -0.01     0.00   0.00   0.01     0.00   0.00   0.02
  47   6    -0.02   0.00   0.01     0.01   0.00  -0.01     0.01   0.00  -0.01
  48   6     0.03  -0.01   0.02    -0.01   0.00  -0.01    -0.01   0.00  -0.01
  49   6     0.01   0.01   0.01     0.00   0.01   0.00     0.00   0.01   0.01
  50   6     0.00   0.00   0.00     0.00   0.00  -0.01     0.00  -0.01  -0.01
  51   6     0.00   0.00   0.00     0.00   0.00  -0.01     0.00   0.00  -0.01
  52   6     0.01   0.01   0.01     0.00   0.00   0.00     0.01   0.01   0.01
  53   6    -0.04   0.08  -0.10     0.02  -0.04   0.05    -0.01   0.03  -0.02
  54   6     0.02  -0.11  -0.06    -0.01   0.05   0.02     0.01  -0.05  -0.03
  55   1    -0.12  -0.02   0.10     0.01   0.00  -0.03    -0.06   0.00   0.04
  56   1    -0.03   0.00  -0.02    -0.12   0.00  -0.10     0.04   0.00   0.04
  57   1    -0.01   0.03   0.05    -0.03   0.16   0.22     0.01  -0.05  -0.07
  58   1     0.00  -0.03  -0.02     0.01  -0.11  -0.08     0.00   0.04   0.03
  59   1     0.00  -0.01  -0.01     0.00  -0.05  -0.06     0.00   0.02   0.02
  60   1     0.00  -0.03  -0.02     0.00  -0.11  -0.08     0.00   0.04   0.03
  61   1     0.02   0.03   0.00     0.03   0.05   0.00     0.00  -0.01   0.00
  62   1    -0.03   0.01  -0.02    -0.03   0.09   0.01     0.00  -0.04  -0.02
  63   1     0.00  -0.03   0.01    -0.01  -0.10   0.05     0.00   0.02  -0.02
  64   1    -0.03   0.02  -0.01    -0.08   0.05  -0.03     0.01  -0.01   0.01
  65   1    -0.02   0.02  -0.01    -0.08   0.05  -0.04     0.02   0.00   0.01
  66   1     0.01   0.01  -0.04     0.04  -0.02  -0.07    -0.01   0.02   0.00
  67   1     0.00   0.02  -0.05     0.01   0.06  -0.18     0.00  -0.02   0.06
  68   1     0.02  -0.01   0.01     0.05  -0.08   0.04    -0.01   0.03  -0.01
[truncated: 1,589,063 more chars]
