# Supplementary material
Source: publisher figshare collection journal article supplement (https://acs.figshare.com/ndownloader/files/5127205)
Supplement: Supplementary file 1 [file 5127205 › supporting_ja043819b/RRRR_fm-5-ts2.mol]

  MacMolPlt                       

114118  0  0  0  0  0  0  0  0  0 v2000
   -4.0771   -2.5401   -1.6225 O   0  0  0  0  0  0  0  0  0  0  0  0
    0.2619    0.1860   -0.0021 Mg  0  0  0  0  0  0  0  0  0  0  0  0
   -0.8554    0.2297    3.2752 O   0  0  0  0  0  0  0  0  0  0  0  0
   -3.9870   -2.2644   -0.3121 C   0  0  0  0  0  0  0  0  0  0  0  0
   -0.2539    1.4366   -1.5435 N   0  0  0  0  0  0  0  0  0  0  0  0
    0.7390   -1.3032   -1.3308 N   0  0  0  0  0  0  0  0  0  0  0  0
   -3.8117   -3.0791    0.5637 O   0  0  0  0  0  0  0  0  0  0  0  0
   -0.5574    1.0184   -2.7653 C   0  0  0  0  0  0  0  0  0  0  0  0
   -0.4799   -0.3343   -3.1777 C   0  0  0  0  0  0  0  0  0  0  0  0
    0.1938   -1.3953   -2.5402 C   0  0  0  0  0  0  0  0  0  0  0  0
   -3.7875   -0.4171    1.2459 O   0  0  0  0  0  0  0  0  0  0  0  0
   -2.4752   -0.2978    1.4655 C   0  0  0  0  0  0  0  0  0  0  0  0
   -2.2279    0.1516    2.9067 C   0  0  0  0  0  0  0  0  0  0  0  0
   -4.2108   -0.7681   -0.0894 C   0  0  0  0  0  0  0  0  0  0  0  0
   -1.6457   -0.5070    0.5981 O   0  0  0  0  0  0  0  0  0  0  0  0
   -3.9582   -3.9308   -1.9816 C   0  0  0  0  0  0  0  0  0  0  0  0
    1.2743   -0.1529    1.6049 O   0  0  0  0  0  0  0  0  0  0  0  0
   -0.0711    1.1840    2.6772 C   0  0  0  0  0  0  0  0  0  0  0  0
   -0.4740    1.8203    1.7093 O   0  0  0  0  0  0  0  0  0  0  0  0
    2.2472    2.0266    2.9637 O   0  0  0  0  0  0  0  0  0  0  0  0
    3.1525    1.1092    2.4828 C   0  0  0  0  0  0  0  0  0  0  0  0
    2.6414   -0.1871    1.8392 C   0  0  0  0  0  0  0  0  0  0  0  0
    1.0297    1.6718    3.6258 C   0  0  0  0  0  0  0  0  0  0  0  0
    4.3213    1.4182    2.4921 O   0  0  0  0  0  0  0  0  0  0  0  0
    3.1179   -1.4224    2.6324 C   0  0  0  0  0  0  0  0  0  0  0  0
    1.2714    0.8092    4.8623 C   0  0  0  0  0  0  0  0  0  0  0  0
   -2.8833   -0.8057    3.9057 C   0  0  0  0  0  0  0  0  0  0  0  0
   -5.6933   -0.4179   -0.1878 C   0  0  0  0  0  0  0  0  0  0  0  0
   -0.2467    2.8411   -1.1737 C   0  0  0  0  0  0  0  0  0  0  0  0
    1.6649   -2.3169   -0.8579 C   0  0  0  0  0  0  0  0  0  0  0  0
    1.0298    3.4592   -0.9472 C   0  0  0  0  0  0  0  0  0  0  0  0
    1.0611    4.7783   -0.4376 C   0  0  0  0  0  0  0  0  0  0  0  0
   -0.1276    5.4778   -0.1568 C   0  0  0  0  0  0  0  0  0  0  0  0
   -1.3703    4.8695   -0.3931 C   0  0  0  0  0  0  0  0  0  0  0  0
   -1.4592    3.5478   -0.8937 C   0  0  0  0  0  0  0  0  0  0  0  0
    2.3477    2.7353   -1.3332 C   0  0  0  0  0  0  0  0  0  0  0  0
   -2.8640    2.9226   -1.0918 C   0  0  0  0  0  0  0  0  0  0  0  0
    1.2212   -3.3260    0.0556 C   0  0  0  0  0  0  0  0  0  0  0  0
    2.1818   -4.2019    0.6250 C   0  0  0  0  0  0  0  0  0  0  0  0
    3.5500   -4.0910    0.3034 C   0  0  0  0  0  0  0  0  0  0  0  0
    3.9733   -3.1098   -0.6145 C   0  0  0  0  0  0  0  0  0  0  0  0
    3.0558   -2.2147   -1.2112 C   0  0  0  0  0  0  0  0  0  0  0  0
   -0.2714   -3.5062    0.4231 C   0  0  0  0  0  0  0  0  0  0  0  0
    3.5792   -1.1841   -2.2477 C   0  0  0  0  0  0  0  0  0  0  0  0
    3.5811    3.2306   -0.5165 C   0  0  0  0  0  0  0  0  0  0  0  0
    2.6161    2.8732   -2.8691 C   0  0  0  0  0  0  0  0  0  0  0  0
   -3.6418    2.8917    0.2626 C   0  0  0  0  0  0  0  0  0  0  0  0
   -3.7015    3.6970   -2.1656 C   0  0  0  0  0  0  0  0  0  0  0  0
    4.7147   -0.2894   -1.6554 C   0  0  0  0  0  0  0  0  0  0  0  0
    4.0987   -1.8965   -3.5432 C   0  0  0  0  0  0  0  0  0  0  0  0
   -0.5110   -3.2915    1.9503 C   0  0  0  0  0  0  0  0  0  0  0  0
   -0.8032   -4.9091   -0.0226 C   0  0  0  0  0  0  0  0  0  0  0  0
   -1.0079    1.9950   -3.8476 C   0  0  0  0  0  0  0  0  0  0  0  0
    0.3150   -2.6989   -3.3190 C   0  0  0  0  0  0  0  0  0  0  0  0
   -0.8487   -0.5394   -4.1777 H   0  0  0  0  0  0  0  0  0  0  0  0
   -2.6769    1.1510    2.9785 H   0  0  0  0  0  0  0  0  0  0  0  0
   -3.6167   -0.2027   -0.8103 H   0  0  0  0  0  0  0  0  0  0  0  0
   -3.0010   -4.3292   -1.6420 H   0  0  0  0  0  0  0  0  0  0  0  0
   -4.0255   -3.9547   -3.0691 H   0  0  0  0  0  0  0  0  0  0  0  0
   -4.7713   -4.5080   -1.5327 H   0  0  0  0  0  0  0  0  0  0  0  0
    3.2034   -0.2225    0.8924 H   0  0  0  0  0  0  0  0  0  0  0  0
    0.6558    2.6491    3.9615 H   0  0  0  0  0  0  0  0  0  0  0  0
    4.1767   -1.3143    2.8940 H   0  0  0  0  0  0  0  0  0  0  0  0
    2.9953   -2.3214    2.0261 H   0  0  0  0  0  0  0  0  0  0  0  0
    2.5401   -1.5503    3.5533 H   0  0  0  0  0  0  0  0  0  0  0  0
    2.1086    1.2302    5.4273 H   0  0  0  0  0  0  0  0  0  0  0  0
    1.5000   -0.2239    4.5979 H   0  0  0  0  0  0  0  0  0  0  0  0
    0.3845    0.8050    5.5020 H   0  0  0  0  0  0  0  0  0  0  0  0
   -3.9591   -0.8666    3.7311 H   0  0  0  0  0  0  0  0  0  0  0  0
   -2.7012   -0.4428    4.9207 H   0  0  0  0  0  0  0  0  0  0  0  0
   -2.4487   -1.8037    3.8046 H   0  0  0  0  0  0  0  0  0  0  0  0
   -5.8324    0.6510   -0.0089 H   0  0  0  0  0  0  0  0  0  0  0  0
   -6.2716   -0.9794    0.5526 H   0  0  0  0  0  0  0  0  0  0  0  0
   -6.0622   -0.6621   -1.1876 H   0  0  0  0  0  0  0  0  0  0  0  0
    2.0262    5.2713   -0.2708 H   0  0  0  0  0  0  0  0  0  0  0  0
   -0.0813    6.5017    0.2377 H   0  0  0  0  0  0  0  0  0  0  0  0
   -2.2928    5.4261   -0.1835 H   0  0  0  0  0  0  0  0  0  0  0  0
    2.2166    1.6486   -1.1284 H   0  0  0  0  0  0  0  0  0  0  0  0
   -2.7284    1.8784   -1.4392 H   0  0  0  0  0  0  0  0  0  0  0  0
    1.8511   -4.9850    1.3201 H   0  0  0  0  0  0  0  0  0  0  0  0
    4.2792   -4.7790    0.7527 H   0  0  0  0  0  0  0  0  0  0  0  0
    5.0368   -3.0433   -0.8782 H   0  0  0  0  0  0  0  0  0  0  0  0
   -0.8452   -2.7355   -0.1267 H   0  0  0  0  0  0  0  0  0  0  0  0
    2.7345   -0.5239   -2.5316 H   0  0  0  0  0  0  0  0  0  0  0  0
    4.4443    2.5799   -0.7170 H   0  0  0  0  0  0  0  0  0  0  0  0
    3.3734    3.2125    0.5659 H   0  0  0  0  0  0  0  0  0  0  0  0
    3.8580    4.2577   -0.7996 H   0  0  0  0  0  0  0  0  0  0  0  0
    3.5582    2.3695   -3.1337 H   0  0  0  0  0  0  0  0  0  0  0  0
    2.6923    3.9347   -3.1533 H   0  0  0  0  0  0  0  0  0  0  0  0
    1.8006    2.4128   -3.4522 H   0  0  0  0  0  0  0  0  0  0  0  0
   -4.6131    2.3813    0.1416 H   0  0  0  0  0  0  0  0  0  0  0  0
   -3.8375    3.9112    0.6286 H   0  0  0  0  0  0  0  0  0  0  0  0
   -3.0487    2.3658    1.0310 H   0  0  0  0  0  0  0  0  0  0  0  0
   -4.6669    3.1926   -2.3270 H   0  0  0  0  0  0  0  0  0  0  0  0
   -3.1684    3.7454   -3.1266 H   0  0  0  0  0  0  0  0  0  0  0  0
   -3.9003    4.7258   -1.8290 H   0  0  0  0  0  0  0  0  0  0  0  0
    5.0322    0.4565   -2.4007 H   0  0  0  0  0  0  0  0  0  0  0  0
    4.3652    0.2478   -0.7560 H   0  0  0  0  0  0  0  0  0  0  0  0
    5.5906   -0.8921   -1.3721 H   0  0  0  0  0  0  0  0  0  0  0  0
    4.4147   -1.1435   -4.2813 H   0  0  0  0  0  0  0  0  0  0  0  0
    3.3145   -2.5189   -3.9993 H   0  0  0  0  0  0  0  0  0  0  0  0
    4.9615   -2.5400   -3.3116 H   0  0  0  0  0  0  0  0  0  0  0  0
   -1.5932   -3.3442    2.1643 H   0  0  0  0  0  0  0  0  0  0  0  0
   -0.1208   -2.3050    2.2569 H   0  0  0  0  0  0  0  0  0  0  0  0
   -0.0020   -4.0652    2.5457 H   0  0  0  0  0  0  0  0  0  0  0  0
   -1.8692   -5.0019    0.2449 H   0  0  0  0  0  0  0  0  0  0  0  0
   -0.2553   -5.7225    0.4797 H   0  0  0  0  0  0  0  0  0  0  0  0
   -0.6893   -5.0450   -1.1117 H   0  0  0  0  0  0  0  0  0  0  0  0
   -0.7832    3.0330   -3.5891 H   0  0  0  0  0  0  0  0  0  0  0  0
   -0.5170    1.7580   -4.7987 H   0  0  0  0  0  0  0  0  0  0  0  0
   -2.0895    1.9099   -4.0124 H   0  0  0  0  0  0  0  0  0  0  0  0
    1.3580   -2.9223   -3.5670 H   0  0  0  0  0  0  0  0  0  0  0  0
   -0.0632   -3.5392   -2.7246 H   0  0  0  0  0  0  0  0  0  0  0  0
   -0.2519   -2.6551   -4.2551 H   0  0  0  0  0  0  0  0  0  0  0  0
  1  4  1  0  0  0  0
  1 16  1  0  0  0  0
  2  5  1  0  0  0  0
  2  6  1  0  0  0  0
  2 15  1  0  0  0  0
  2 17  2  0  0  0  0
  2 19  1  0  0  0  0
  3 13  1  0  0  0  0
  3 18  1  0  0  0  0
  4  7  2  0  0  0  0
  4 14  1  0  0  0  0
  5  8  1  0  0  0  0
  5 29  1  0  0  0  0
  6 10  1  0  0  0  0
  6 30  1  0  0  0  0
  8  9  1  0  0  0  0
  8 53  1  0  0  0  0
  9 10  1  0  0  0  0
  9 55  1  0  0  0  0
 10 54  1  0  0  0  0
 11 12  1  0  0  0  0
 11 14  1  0  0  0  0
 12 13  1  0  0  0  0
 12 15  2  0  0  0  0
 13 27  1  0  0  0  0
 13 56  1  0  0  0  0
 14 28  1  0  0  0  0
 14 57  1  0  0  0  0
 16 58  1  0  0  0  0
 16 59  1  0  0  0  0
 16 60  1  0  0  0  0
 17 22  1  0  0  0  0
 18 19  2  0  0  0  0
 18 23  1  0  0  0  0
 20 21  1  0  0  0  0
 20 23  1  0  0  0  0
 21 22  1  0  0  0  0
 21 24  2  0  0  0  0
 22 25  1  0  0  0  0
 22 61  1  0  0  0  0
 23 26  1  0  0  0  0
 23 62  1  0  0  0  0
 25 63  1  0  0  0  0
 25 64  1  0  0  0  0
 25 65  1  0  0  0  0
 26 66  1  0  0  0  0
 26 67  1  0  0  0  0
 26 68  1  0  0  0  0
 27 69  1  0  0  0  0
 27 70  1  0  0  0  0
 27 71  1  0  0  0  0
 28 72  1  0  0  0  0
 28 73  1  0  0  0  0
 28 74  1  0  0  0  0
 29 31  1  0  0  0  0
 29 35  1  0  0  0  0
 30 38  1  0  0  0  0
 30 42  1  0  0  0  0
 31 32  1  0  0  0  0
 31 36  1  0  0  0  0
 32 33  1  0  0  0  0
 32 75  1  0  0  0  0
 33 34  1  0  0  0  0
 33 76  1  0  0  0  0
 34 35  1  0  0  0  0
 34 77  1  0  0  0  0
 35 37  1  0  0  0  0
 36 45  1  0  0  0  0
 36 46  1  0  0  0  0
 36 78  1  0  0  0  0
 37 47  1  0  0  0  0
 37 48  1  0  0  0  0
 37 79  1  0  0  0  0
 38 39  1  0  0  0  0
 38 43  1  0  0  0  0
 39 40  1  0  0  0  0
 39 80  1  0  0  0  0
 40 41  1  0  0  0  0
 40 81  1  0  0  0  0
 41 42  1  0  0  0  0
 41 82  1  0  0  0  0
 42 44  1  0  0  0  0
 43 51  1  0  0  0  0
 43 52  1  0  0  0  0
 43 83  1  0  0  0  0
 44 49  1  0  0  0  0
 44 50  1  0  0  0  0
 44 84  1  0  0  0  0
 45 85  1  0  0  0  0
 45 86  1  0  0  0  0
 45 87  1  0  0  0  0
 46 88  1  0  0  0  0
 46 89  1  0  0  0  0
 46 90  1  0  0  0  0
 47 91  1  0  0  0  0
 47 92  1  0  0  0  0
 47 93  1  0  0  0  0
 48 94  1  0  0  0  0
 48 95  1  0  0  0  0
 48 96  1  0  0  0  0
 49 97  1  0  0  0  0
 49 98  1  0  0  0  0
 49 99  1  0  0  0  0
 50100  1  0  0  0  0
 50101  1  0  0  0  0
 50102  1  0  0  0  0
 51103  1  0  0  0  0
 51104  1  0  0  0  0
 51105  1  0  0  0  0
 52106  1  0  0  0  0
 52107  1  0  0  0  0
 52108  1  0  0  0  0
 53109  1  0  0  0  0
 53110  1  0  0  0  0
 53111  1  0  0  0  0
 54112  1  0  0  0  0
 54113  1  0  0  0  0
 54114  1  0  0  0  0
M  END
