# Supplementary material
Source: publisher figshare collection journal article supplement (https://acs.figshare.com/ndownloader/files/5127205)
Supplement: Supplementary file 1 [file 5127205 › supporting_ja043819b/RRRR_fm-ts2.mol]

  MacMolPlt                       

114118  0  0  0  0  0  0  0  0  0 v2000
   -1.6715   -3.1543   -2.7385 O   0  0  0  0  0  0  0  0  0  0  0  0
    0.0947   -0.0036   -0.2751 Mg  0  0  0  0  0  0  0  0  0  0  0  0
   -1.7906   -0.9480    2.9027 O   0  0  0  0  0  0  0  0  0  0  0  0
   -1.5688   -2.5693   -1.5529 C   0  0  0  0  0  0  0  0  0  0  0  0
   -0.4792    1.6303   -1.4807 N   0  0  0  0  0  0  0  0  0  0  0  0
    1.8575   -0.0698   -1.3717 N   0  0  0  0  0  0  0  0  0  0  0  0
   -0.9431   -1.5534   -1.3554 O   0  0  0  0  0  0  0  0  0  0  0  0
   -0.0753    1.7828   -2.7269 C   0  0  0  0  0  0  0  0  0  0  0  0
    0.9792    1.0396   -3.3186 C   0  0  0  0  0  0  0  0  0  0  0  0
    1.9326    0.2397   -2.6542 C   0  0  0  0  0  0  0  0  0  0  0  0
   -2.2299   -2.7091    0.7512 O   0  0  0  0  0  0  0  0  0  0  0  0
   -3.3259   -2.1827    1.3142 C   0  0  0  0  0  0  0  0  0  0  0  0
   -3.0952   -1.4493    2.6310 C   0  0  0  0  0  0  0  0  0  0  0  0
   -2.4069   -3.3232   -0.5225 C   0  0  0  0  0  0  0  0  0  0  0  0
   -4.4477   -2.3280    0.8988 O   0  0  0  0  0  0  0  0  0  0  0  0
   -1.0748   -2.5204   -3.8885 C   0  0  0  0  0  0  0  0  0  0  0  0
    0.5499   -0.8784    1.4762 O   0  0  0  0  0  0  0  0  0  0  0  0
   -1.2610    0.0112    2.1139 C   0  0  0  0  0  0  0  0  0  0  0  0
   -1.6761    0.2135    0.9695 O   0  0  0  0  0  0  0  0  0  0  0  0
    0.7825    1.3615    2.7869 O   0  0  0  0  0  0  0  0  0  0  0  0
    1.6706    0.3872    3.1814 C   0  0  0  0  0  0  0  0  0  0  0  0
    1.5623   -0.9378    2.4173 C   0  0  0  0  0  0  0  0  0  0  0  0
   -0.6222    1.1828    2.9153 C   0  0  0  0  0  0  0  0  0  0  0  0
    2.5466    0.6600    3.9541 O   0  0  0  0  0  0  0  0  0  0  0  0
    1.4084   -2.1288    3.3748 C   0  0  0  0  0  0  0  0  0  0  0  0
   -1.0208    1.1945    4.3915 C   0  0  0  0  0  0  0  0  0  0  0  0
   -3.4483   -2.3766    3.7968 C   0  0  0  0  0  0  0  0  0  0  0  0
   -2.1038   -4.8179   -0.4202 C   0  0  0  0  0  0  0  0  0  0  0  0
   -1.5189    2.4524   -0.8803 C   0  0  0  0  0  0  0  0  0  0  0  0
    2.9919   -0.6468   -0.6697 C   0  0  0  0  0  0  0  0  0  0  0  0
   -1.1389    3.4598    0.0745 C   0  0  0  0  0  0  0  0  0  0  0  0
   -2.1580    4.0815    0.8292 C   0  0  0  0  0  0  0  0  0  0  0  0
   -3.5116    3.7387    0.6493 C   0  0  0  0  0  0  0  0  0  0  0  0
   -3.8700    2.7938   -0.3172 C   0  0  0  0  0  0  0  0  0  0  0  0
   -2.8877    2.1306   -1.0957 C   0  0  0  0  0  0  0  0  0  0  0  0
    0.3410    3.8999    0.2617 C   0  0  0  0  0  0  0  0  0  0  0  0
   -3.3544    1.1368   -2.1914 C   0  0  0  0  0  0  0  0  0  0  0  0
    3.0912   -2.0583   -0.4888 C   0  0  0  0  0  0  0  0  0  0  0  0
    4.0932   -2.5689    0.3708 C   0  0  0  0  0  0  0  0  0  0  0  0
    4.9770   -1.7120    1.0427 C   0  0  0  0  0  0  0  0  0  0  0  0
    4.8955   -0.3204    0.8352 C   0  0  0  0  0  0  0  0  0  0  0  0
    3.9216    0.2367   -0.0243 C   0  0  0  0  0  0  0  0  0  0  0  0
    2.1726   -3.0539   -1.2357 C   0  0  0  0  0  0  0  0  0  0  0  0
    3.8720    1.7730   -0.2392 C   0  0  0  0  0  0  0  0  0  0  0  0
    0.5692    4.7466    1.5547 C   0  0  0  0  0  0  0  0  0  0  0  0
    0.8606    4.7073   -0.9761 C   0  0  0  0  0  0  0  0  0  0  0  0
   -4.1014   -0.0873   -1.5828 C   0  0  0  0  0  0  0  0  0  0  0  0
   -4.2568    1.8469   -3.2590 C   0  0  0  0  0  0  0  0  0  0  0  0
    4.1124    2.5830    1.0747 C   0  0  0  0  0  0  0  0  0  0  0  0
    4.9061    2.2262   -1.3271 C   0  0  0  0  0  0  0  0  0  0  0  0
    1.2894   -3.8729   -0.2435 C   0  0  0  0  0  0  0  0  0  0  0  0
    3.0038   -4.0202   -2.1467 C   0  0  0  0  0  0  0  0  0  0  0  0
   -0.7131    2.8066   -3.6681 C   0  0  0  0  0  0  0  0  0  0  0  0
    1.1678    1.2393   -4.3662 H   0  0  0  0  0  0  0  0  0  0  0  0
    3.0907   -0.2781   -3.5054 C   0  0  0  0  0  0  0  0  0  0  0  0
   -3.7957   -0.6104    2.5967 H   0  0  0  0  0  0  0  0  0  0  0  0
   -3.4484   -3.1926   -0.8278 H   0  0  0  0  0  0  0  0  0  0  0  0
   -0.3861   -1.7315   -3.5903 H   0  0  0  0  0  0  0  0  0  0  0  0
   -1.8808   -2.1040   -4.4947 H   0  0  0  0  0  0  0  0  0  0  0  0
   -0.5597   -3.3030   -4.4445 H   0  0  0  0  0  0  0  0  0  0  0  0
    2.5534   -1.0253    1.9585 H   0  0  0  0  0  0  0  0  0  0  0  0
   -1.0446    2.0601    2.4177 H   0  0  0  0  0  0  0  0  0  0  0  0
    2.1440   -2.0823    4.1833 H   0  0  0  0  0  0  0  0  0  0  0  0
    1.5630   -3.0537    2.8131 H   0  0  0  0  0  0  0  0  0  0  0  0
    0.4031   -2.1519    3.8023 H   0  0  0  0  0  0  0  0  0  0  0  0
   -0.6582    0.3088    4.9174 H   0  0  0  0  0  0  0  0  0  0  0  0
   -2.1090    1.2331    4.4965 H   0  0  0  0  0  0  0  0  0  0  0  0
   -0.5930    2.0818    4.8644 H   0  0  0  0  0  0  0  0  0  0  0  0
   -4.4666   -2.7522    3.6792 H   0  0  0  0  0  0  0  0  0  0  0  0
   -3.3752   -1.8279    4.7381 H   0  0  0  0  0  0  0  0  0  0  0  0
   -2.7546   -3.2205    3.8328 H   0  0  0  0  0  0  0  0  0  0  0  0
   -2.8185   -5.2782    0.2661 H   0  0  0  0  0  0  0  0  0  0  0  0
   -1.0961   -4.9798   -0.0402 H   0  0  0  0  0  0  0  0  0  0  0  0
   -2.2010   -5.2941   -1.3972 H   0  0  0  0  0  0  0  0  0  0  0  0
   -1.8968    4.8539    1.5610 H   0  0  0  0  0  0  0  0  0  0  0  0
   -4.2840    4.2336    1.2516 H   0  0  0  0  0  0  0  0  0  0  0  0
   -4.9293    2.5668   -0.4884 H   0  0  0  0  0  0  0  0  0  0  0  0
    0.9563    2.9819    0.3449 H   0  0  0  0  0  0  0  0  0  0  0  0
   -2.4528    0.7497   -2.7012 H   0  0  0  0  0  0  0  0  0  0  0  0
    4.1854   -3.6537    0.5051 H   0  0  0  0  0  0  0  0  0  0  0  0
    5.7385   -2.1218    1.7191 H   0  0  0  0  0  0  0  0  0  0  0  0
    5.5940    0.3409    1.3616 H   0  0  0  0  0  0  0  0  0  0  0  0
    1.5021   -2.4608   -1.8868 H   0  0  0  0  0  0  0  0  0  0  0  0
    2.8597    2.0158   -0.6149 H   0  0  0  0  0  0  0  0  0  0  0  0
    1.6482    4.8794    1.7130 H   0  0  0  0  0  0  0  0  0  0  0  0
    0.1551    4.2521    2.4453 H   0  0  0  0  0  0  0  0  0  0  0  0
    0.1110    5.7431    1.4630 H   0  0  0  0  0  0  0  0  0  0  0  0
    1.8565    5.1201   -0.7588 H   0  0  0  0  0  0  0  0  0  0  0  0
    0.1818    5.5408   -1.2123 H   0  0  0  0  0  0  0  0  0  0  0  0
    0.9486    4.0631   -1.8627 H   0  0  0  0  0  0  0  0  0  0  0  0
   -4.3912   -0.7962   -2.3739 H   0  0  0  0  0  0  0  0  0  0  0  0
   -5.0076    0.2215   -1.0428 H   0  0  0  0  0  0  0  0  0  0  0  0
   -3.4389   -0.5972   -0.8668 H   0  0  0  0  0  0  0  0  0  0  0  0
   -4.4513    1.1640   -4.0993 H   0  0  0  0  0  0  0  0  0  0  0  0
   -3.7729    2.7528   -3.6515 H   0  0  0  0  0  0  0  0  0  0  0  0
   -5.2232    2.1363   -2.8208 H   0  0  0  0  0  0  0  0  0  0  0  0
    3.9281    3.6494    0.8825 H   0  0  0  0  0  0  0  0  0  0  0  0
    3.4380    2.2530    1.8805 H   0  0  0  0  0  0  0  0  0  0  0  0
    5.1481    2.4763    1.4285 H   0  0  0  0  0  0  0  0  0  0  0  0
    4.8907    3.3222   -1.4186 H   0  0  0  0  0  0  0  0  0  0  0  0
    4.6648    1.7991   -2.3105 H   0  0  0  0  0  0  0  0  0  0  0  0
    5.9244    1.9145   -1.0490 H   0  0  0  0  0  0  0  0  0  0  0  0
    0.6472   -4.5690   -0.8082 H   0  0  0  0  0  0  0  0  0  0  0  0
    0.6636   -3.1924    0.3579 H   0  0  0  0  0  0  0  0  0  0  0  0
    1.9090   -4.4672    0.4443 H   0  0  0  0  0  0  0  0  0  0  0  0
    2.3289   -4.6392   -2.7567 H   0  0  0  0  0  0  0  0  0  0  0  0
    3.6275   -4.6896   -1.5361 H   0  0  0  0  0  0  0  0  0  0  0  0
    3.6640   -3.4553   -2.8211 H   0  0  0  0  0  0  0  0  0  0  0  0
   -1.2480    3.5911   -3.1307 H   0  0  0  0  0  0  0  0  0  0  0  0
    0.0488    3.2753   -4.2984 H   0  0  0  0  0  0  0  0  0  0  0  0
   -1.4255    2.3104   -4.3359 H   0  0  0  0  0  0  0  0  0  0  0  0
    4.0456   -0.2272   -2.9772 H   0  0  0  0  0  0  0  0  0  0  0  0
    2.9198   -1.3290   -3.7658 H   0  0  0  0  0  0  0  0  0  0  0  0
    3.1821    0.2866   -4.4375 H   0  0  0  0  0  0  0  0  0  0  0  0
  1  4  1  0  0  0  0
  1 16  1  0  0  0  0
  2  5  1  0  0  0  0
  2  6  1  0  0  0  0
  2  7  1  0  0  0  0
  2 17  2  0  0  0  0
  2 19  1  0  0  0  0
  3 13  1  0  0  0  0
  3 18  1  0  0  0  0
  4  7  2  0  0  0  0
  4 14  1  0  0  0  0
  5  8  1  0  0  0  0
  5 29  1  0  0  0  0
  6 10  1  0  0  0  0
  6 30  1  0  0  0  0
  8  9  1  0  0  0  0
  8 53  1  0  0  0  0
  9 10  1  0  0  0  0
  9 54  1  0  0  0  0
 10 55  1  0  0  0  0
 11 12  1  0  0  0  0
 11 14  1  0  0  0  0
 12 13  1  0  0  0  0
 12 15  2  0  0  0  0
 13 27  1  0  0  0  0
 13 56  1  0  0  0  0
 14 28  1  0  0  0  0
 14 57  1  0  0  0  0
 16 58  1  0  0  0  0
 16 59  1  0  0  0  0
 16 60  1  0  0  0  0
 17 22  1  0  0  0  0
 18 19  2  0  0  0  0
 18 23  1  0  0  0  0
 20 21  1  0  0  0  0
 20 23  1  0  0  0  0
 21 22  1  0  0  0  0
 21 24  2  0  0  0  0
 22 25  1  0  0  0  0
 22 61  1  0  0  0  0
 23 26  1  0  0  0  0
 23 62  1  0  0  0  0
 25 63  1  0  0  0  0
 25 64  1  0  0  0  0
 25 65  1  0  0  0  0
 26 66  1  0  0  0  0
 26 67  1  0  0  0  0
 26 68  1  0  0  0  0
 27 69  1  0  0  0  0
 27 70  1  0  0  0  0
 27 71  1  0  0  0  0
 28 72  1  0  0  0  0
 28 73  1  0  0  0  0
 28 74  1  0  0  0  0
 29 31  1  0  0  0  0
 29 35  1  0  0  0  0
 30 38  1  0  0  0  0
 30 42  1  0  0  0  0
 31 32  1  0  0  0  0
 31 36  1  0  0  0  0
 32 33  1  0  0  0  0
 32 75  1  0  0  0  0
 33 34  1  0  0  0  0
 33 76  1  0  0  0  0
 34 35  1  0  0  0  0
 34 77  1  0  0  0  0
 35 37  1  0  0  0  0
 36 45  1  0  0  0  0
 36 46  1  0  0  0  0
 36 78  1  0  0  0  0
 37 47  1  0  0  0  0
 37 48  1  0  0  0  0
 37 79  1  0  0  0  0
 38 39  1  0  0  0  0
 38 43  1  0  0  0  0
 39 40  1  0  0  0  0
 39 80  1  0  0  0  0
 40 41  1  0  0  0  0
 40 81  1  0  0  0  0
 41 42  1  0  0  0  0
 41 82  1  0  0  0  0
 42 44  1  0  0  0  0
 43 51  1  0  0  0  0
 43 52  1  0  0  0  0
 43 83  1  0  0  0  0
 44 49  1  0  0  0  0
 44 50  1  0  0  0  0
 44 84  1  0  0  0  0
 45 85  1  0  0  0  0
 45 86  1  0  0  0  0
 45 87  1  0  0  0  0
 46 88  1  0  0  0  0
 46 89  1  0  0  0  0
 46 90  1  0  0  0  0
 47 91  1  0  0  0  0
 47 92  1  0  0  0  0
 47 93  1  0  0  0  0
 48 94  1  0  0  0  0
 48 95  1  0  0  0  0
 48 96  1  0  0  0  0
 49 97  1  0  0  0  0
 49 98  1  0  0  0  0
 49 99  1  0  0  0  0
 50100  1  0  0  0  0
 50101  1  0  0  0  0
 50102  1  0  0  0  0
 51103  1  0  0  0  0
 51104  1  0  0  0  0
 51105  1  0  0  0  0
 52106  1  0  0  0  0
 52107  1  0  0  0  0
 52108  1  0  0  0  0
 53109  1  0  0  0  0
 53110  1  0  0  0  0
 53111  1  0  0  0  0
 55112  1  0  0  0  0
 55113  1  0  0  0  0
 55114  1  0  0  0  0
M  END
