# Supplementary material
Source: publisher figshare collection journal article supplement (https://acs.figshare.com/ndownloader/files/5127205)
Supplement: Supplementary file 1 [file 5127205 › supporting_ja043819b/RRSS_fm-5-product-thf-anti.mol]

  MacMolPlt                       

127130  0  0  0  0  0  0  0  0  0 v2000
   -0.4321    1.7696   -1.5403 C   0  0  0  0  0  0  0  0  0  0  0  0
   -0.5428    0.7742   -2.5384 C   0  0  0  0  0  0  0  0  0  0  0  0
   -1.3908   -0.3542   -2.5497 C   0  0  0  0  0  0  0  0  0  0  0  0
   -4.5526   -0.6113    2.9588 C   0  0  0  0  0  0  0  0  0  0  0  0
   -3.7991    0.5128    3.7160 C   0  0  0  0  0  0  0  0  0  0  0  0
   -3.3152    1.4702    2.6101 C   0  0  0  0  0  0  0  0  0  0  0  0
   -3.5132    0.7667    1.3537 O   0  0  0  0  0  0  0  0  0  0  0  0
   -4.6913   -0.0461    1.5469 C   0  0  0  0  0  0  0  0  0  0  0  0
   -1.0349    2.7360    0.6174 C   0  0  0  0  0  0  0  0  0  0  0  0
   -3.1259   -1.7749   -1.5270 C   0  0  0  0  0  0  0  0  0  0  0  0
   -0.1937    2.7233    1.7844 C   0  0  0  0  0  0  0  0  0  0  0  0
   -0.4667    3.6480    2.8243 C   0  0  0  0  0  0  0  0  0  0  0  0
   -1.5252    4.5723    2.7174 C   0  0  0  0  0  0  0  0  0  0  0  0
   -2.3129    4.6041    1.5543 C   0  0  0  0  0  0  0  0  0  0  0  0
   -2.0919    3.6962    0.4874 C   0  0  0  0  0  0  0  0  0  0  0  0
    1.0277    1.7731    1.8714 C   0  0  0  0  0  0  0  0  0  0  0  0
   -2.9873    3.7918   -0.7751 C   0  0  0  0  0  0  0  0  0  0  0  0
   -4.5011   -1.3373   -1.5700 C   0  0  0  0  0  0  0  0  0  0  0  0
   -5.5196   -2.2869   -1.3042 C   0  0  0  0  0  0  0  0  0  0  0  0
   -5.2089   -3.6324   -1.0223 C   0  0  0  0  0  0  0  0  0  0  0  0
   -3.8742   -4.0639   -1.0638 C   0  0  0  0  0  0  0  0  0  0  0  0
   -2.8108   -3.1594   -1.3275 C   0  0  0  0  0  0  0  0  0  0  0  0
   -4.8651    0.1235   -1.9633 C   0  0  0  0  0  0  0  0  0  0  0  0
   -1.3744   -3.7226   -1.4947 C   0  0  0  0  0  0  0  0  0  0  0  0
    1.3672    1.3442    3.3318 C   0  0  0  0  0  0  0  0  0  0  0  0
    2.2840    2.4277    1.2011 C   0  0  0  0  0  0  0  0  0  0  0  0
   -4.5013    3.6538   -0.4188 C   0  0  0  0  0  0  0  0  0  0  0  0
   -2.7339    5.1365   -1.5383 C   0  0  0  0  0  0  0  0  0  0  0  0
   -0.9707   -4.6942   -0.3414 C   0  0  0  0  0  0  0  0  0  0  0  0
   -1.2437   -4.4862   -2.8597 C   0  0  0  0  0  0  0  0  0  0  0  0
   -6.3202    0.5341   -1.5694 C   0  0  0  0  0  0  0  0  0  0  0  0
   -4.6858    0.3580   -3.5021 C   0  0  0  0  0  0  0  0  0  0  0  0
    0.2689    3.0526   -1.9759 C   0  0  0  0  0  0  0  0  0  0  0  0
   -1.4545   -1.1087   -3.8733 C   0  0  0  0  0  0  0  0  0  0  0  0
    6.6366    2.5580   -2.5617 O   0  0  0  0  0  0  0  0  0  0  0  0
   -1.7480   -0.0998    0.4138 Mg  0  0  0  0  0  0  0  0  0  0  0  0
    4.7341   -2.4170    0.6312 O   0  0  0  0  0  0  0  0  0  0  0  0
    6.1851    1.9431   -1.4517 C   0  0  0  0  0  0  0  0  0  0  0  0
   -2.0972   -0.7541   -1.4988 N   0  0  0  0  0  0  0  0  0  0  0  0
   -0.9233    1.6385   -0.3179 N   0  0  0  0  0  0  0  0  0  0  0  0
    6.4310    2.2938   -0.3217 O   0  0  0  0  0  0  0  0  0  0  0  0
    5.1054   -0.0944   -0.7123 O   0  0  0  0  0  0  0  0  0  0  0  0
    6.1989   -0.7751   -0.3181 C   0  0  0  0  0  0  0  0  0  0  0  0
    5.8962   -1.6060    0.9286 C   0  0  0  0  0  0  0  0  0  0  0  0
    5.2742    0.7758   -1.8415 C   0  0  0  0  0  0  0  0  0  0  0  0
    7.2750   -0.7226   -0.8703 O   0  0  0  0  0  0  0  0  0  0  0  0
    7.4763    3.7032   -2.3332 C   0  0  0  0  0  0  0  0  0  0  0  0
   -1.6637   -1.1605    2.0025 O   0  0  0  0  0  0  0  0  0  0  0  0
    3.6173   -2.2228    1.3757 C   0  0  0  0  0  0  0  0  0  0  0  0
    3.5194   -1.4390    2.2877 O   0  0  0  0  0  0  0  0  0  0  0  0
    1.3757   -3.0359    1.7364 O   0  0  0  0  0  0  0  0  0  0  0  0
    0.4401   -2.1066    1.4304 C   0  0  0  0  0  0  0  0  0  0  0  0
   -0.7656   -2.1160    2.3784 C   0  0  0  0  0  0  0  0  0  0  0  0
    2.5122   -3.1575    0.8780 C   0  0  0  0  0  0  0  0  0  0  0  0
    0.5253   -1.3700    0.4617 O   0  0  0  0  0  0  0  0  0  0  0  0
   -0.3101   -1.9936    3.8482 C   0  0  0  0  0  0  0  0  0  0  0  0
    2.9322   -4.6269    0.8828 C   0  0  0  0  0  0  0  0  0  0  0  0
    7.0521   -2.5103    1.3192 C   0  0  0  0  0  0  0  0  0  0  0  0
    3.8827    1.2668   -2.2316 C   0  0  0  0  0  0  0  0  0  0  0  0
   -0.0260    0.9839   -3.4706 H   0  0  0  0  0  0  0  0  0  0  0  0
   -5.5260   -0.8486    3.4012 H   0  0  0  0  0  0  0  0  0  0  0  0
   -3.9351   -1.5096    2.9246 H   0  0  0  0  0  0  0  0  0  0  0  0
   -2.9505    0.0998    4.2641 H   0  0  0  0  0  0  0  0  0  0  0  0
   -4.4478    1.0387    4.4251 H   0  0  0  0  0  0  0  0  0  0  0  0
   -2.2660    1.7479    2.6762 H   0  0  0  0  0  0  0  0  0  0  0  0
   -3.9076    2.3911    2.5680 H   0  0  0  0  0  0  0  0  0  0  0  0
   -5.5691    0.6127    1.4675 H   0  0  0  0  0  0  0  0  0  0  0  0
   -4.7263   -0.7787    0.7392 H   0  0  0  0  0  0  0  0  0  0  0  0
    0.1668    3.6541    3.7204 H   0  0  0  0  0  0  0  0  0  0  0  0
   -1.7203    5.2796    3.5348 H   0  0  0  0  0  0  0  0  0  0  0  0
   -3.1130    5.3505    1.4651 H   0  0  0  0  0  0  0  0  0  0  0  0
    0.7891    0.8635    1.2862 H   0  0  0  0  0  0  0  0  0  0  0  0
   -2.7209    2.9543   -1.4505 H   0  0  0  0  0  0  0  0  0  0  0  0
   -6.5704   -1.9755   -1.3357 H   0  0  0  0  0  0  0  0  0  0  0  0
   -6.0140   -4.3480   -0.8086 H   0  0  0  0  0  0  0  0  0  0  0  0
   -3.6455   -5.1261   -0.9084 H   0  0  0  0  0  0  0  0  0  0  0  0
   -4.1548    0.7975   -1.4394 H   0  0  0  0  0  0  0  0  0  0  0  0
   -0.6697   -2.8670   -1.4967 H   0  0  0  0  0  0  0  0  0  0  0  0
    2.0857    0.5091    3.3103 H   0  0  0  0  0  0  0  0  0  0  0  0
    0.4550    1.0205    3.8634 H   0  0  0  0  0  0  0  0  0  0  0  0
    1.8189    2.1713    3.9026 H   0  0  0  0  0  0  0  0  0  0  0  0
    3.1322    1.7257    1.2423 H   0  0  0  0  0  0  0  0  0  0  0  0
    2.5699    3.3571    1.7195 H   0  0  0  0  0  0  0  0  0  0  0  0
    2.0723    2.6717    0.1455 H   0  0  0  0  0  0  0  0  0  0  0  0
   -5.1079    3.6809   -1.3371 H   0  0  0  0  0  0  0  0  0  0  0  0
   -4.8312    4.4711    0.2398 H   0  0  0  0  0  0  0  0  0  0  0  0
   -4.6837    2.6946    0.0961 H   0  0  0  0  0  0  0  0  0  0  0  0
   -3.3174    5.1533   -2.4717 H   0  0  0  0  0  0  0  0  0  0  0  0
   -1.6691    5.2537   -1.7902 H   0  0  0  0  0  0  0  0  0  0  0  0
   -3.0403    5.9955   -0.9217 H   0  0  0  0  0  0  0  0  0  0  0  0
    0.0988   -4.9501   -0.4284 H   0  0  0  0  0  0  0  0  0  0  0  0
   -1.5475   -5.6307   -0.3886 H   0  0  0  0  0  0  0  0  0  0  0  0
   -1.1484   -4.2376    0.6456 H   0  0  0  0  0  0  0  0  0  0  0  0
   -0.2021   -4.8108   -3.0075 H   0  0  0  0  0  0  0  0  0  0  0  0
   -1.5345   -3.8517   -3.7090 H   0  0  0  0  0  0  0  0  0  0  0  0
   -1.8891   -5.3783   -2.8596 H   0  0  0  0  0  0  0  0  0  0  0  0
   -6.4546    1.6098   -1.7547 H   0  0  0  0  0  0  0  0  0  0  0  0
   -6.5311    0.3376   -0.5073 H   0  0  0  0  0  0  0  0  0  0  0  0
   -7.0606   -0.0101   -2.1759 H   0  0  0  0  0  0  0  0  0  0  0  0
   -5.0163    1.3756   -3.7608 H   0  0  0  0  0  0  0  0  0  0  0  0
   -5.2887   -0.3625   -4.0772 H   0  0  0  0  0  0  0  0  0  0  0  0
   -3.6330    0.2556   -3.8026 H   0  0  0  0  0  0  0  0  0  0  0  0
    1.2261    2.8091   -2.4548 H   0  0  0  0  0  0  0  0  0  0  0  0
   -0.3340    3.5875   -2.7200 H   0  0  0  0  0  0  0  0  0  0  0  0
    0.4609    3.7290   -1.1387 H   0  0  0  0  0  0  0  0  0  0  0  0
   -2.3530   -1.7262   -3.9519 H   0  0  0  0  0  0  0  0  0  0  0  0
   -1.4285   -0.4167   -4.7225 H   0  0  0  0  0  0  0  0  0  0  0  0
   -0.5805   -1.7668   -3.9636 H   0  0  0  0  0  0  0  0  0  0  0  0
    5.6278   -0.9203    1.7383 H   0  0  0  0  0  0  0  0  0  0  0  0
    5.7498    0.2242   -2.6571 H   0  0  0  0  0  0  0  0  0  0  0  0
    6.9359    4.4689   -1.7702 H   0  0  0  0  0  0  0  0  0  0  0  0
    8.3696    3.4125   -1.7747 H   0  0  0  0  0  0  0  0  0  0  0  0
    7.7445    4.0711   -3.3237 H   0  0  0  0  0  0  0  0  0  0  0  0
   -1.1806   -3.1411    2.2758 H   0  0  0  0  0  0  0  0  0  0  0  0
    2.2405   -2.8301   -0.1309 H   0  0  0  0  0  0  0  0  0  0  0  0
    0.3658   -2.8068    4.1331 H   0  0  0  0  0  0  0  0  0  0  0  0
    0.1941   -1.0400    4.0179 H   0  0  0  0  0  0  0  0  0  0  0  0
   -1.1995   -2.0328    4.4856 H   0  0  0  0  0  0  0  0  0  0  0  0
    2.1006   -5.2378    0.5213 H   0  0  0  0  0  0  0  0  0  0  0  0
    3.7982   -4.7780    0.2344 H   0  0  0  0  0  0  0  0  0  0  0  0
    3.1854   -4.9530    1.8967 H   0  0  0  0  0  0  0  0  0  0  0  0
    7.9463   -1.9105    1.5090 H   0  0  0  0  0  0  0  0  0  0  0  0
    6.7984   -3.0662    2.2266 H   0  0  0  0  0  0  0  0  0  0  0  0
    7.2805   -3.2174    0.5168 H   0  0  0  0  0  0  0  0  0  0  0  0
    3.2389    0.4197   -2.4851 H   0  0  0  0  0  0  0  0  0  0  0  0
    3.4262    1.8037   -1.3961 H   0  0  0  0  0  0  0  0  0  0  0  0
    3.9536    1.9327   -3.0966 H   0  0  0  0  0  0  0  0  0  0  0  0
  1  2  1  0  0  0  0
  1 33  1  0  0  0  0
  1 40  1  0  0  0  0
  2  3  1  0  0  0  0
  2 60  1  0  0  0  0
  3 34  1  0  0  0  0
  3 39  1  0  0  0  0
  4  5  1  0  0  0  0
  4  8  1  0  0  0  0
  4 61  1  0  0  0  0
  4 62  1  0  0  0  0
  5  6  1  0  0  0  0
  5 63  1  0  0  0  0
  5 64  1  0  0  0  0
  6  7  1  0  0  0  0
  6 65  1  0  0  0  0
  6 66  1  0  0  0  0
  7  8  1  0  0  0  0
  7 36  1  0  0  0  0
  8 67  1  0  0  0  0
  8 68  1  0  0  0  0
  9 11  1  0  0  0  0
  9 15  1  0  0  0  0
  9 40  1  0  0  0  0
 10 18  1  0  0  0  0
 10 22  1  0  0  0  0
 10 39  1  0  0  0  0
 11 12  1  0  0  0  0
 11 16  1  0  0  0  0
 12 13  1  0  0  0  0
 12 69  1  0  0  0  0
 13 14  1  0  0  0  0
 13 70  1  0  0  0  0
 14 15  1  0  0  0  0
 14 71  1  0  0  0  0
 15 17  1  0  0  0  0
 16 25  1  0  0  0  0
 16 26  1  0  0  0  0
 16 72  1  0  0  0  0
 17 27  1  0  0  0  0
 17 28  1  0  0  0  0
 17 73  1  0  0  0  0
 18 19  1  0  0  0  0
 18 23  1  0  0  0  0
 19 20  1  0  0  0  0
 19 74  1  0  0  0  0
 20 21  1  0  0  0  0
 20 75  1  0  0  0  0
 21 22  1  0  0  0  0
 21 76  1  0  0  0  0
 22 24  1  0  0  0  0
 23 31  1  0  0  0  0
 23 32  1  0  0  0  0
 23 77  1  0  0  0  0
 24 29  1  0  0  0  0
 24 30  1  0  0  0  0
 24 78  1  0  0  0  0
 25 79  1  0  0  0  0
 25 80  1  0  0  0  0
 25 81  1  0  0  0  0
 26 82  1  0  0  0  0
 26 83  1  0  0  0  0
 26 84  1  0  0  0  0
 27 85  1  0  0  0  0
 27 86  1  0  0  0  0
 27 87  1  0  0  0  0
 28 88  1  0  0  0  0
 28 89  1  0  0  0  0
 28 90  1  0  0  0  0
 29 91  1  0  0  0  0
 29 92  1  0  0  0  0
 29 93  1  0  0  0  0
 30 94  1  0  0  0  0
 30 95  1  0  0  0  0
 30 96  1  0  0  0  0
 31 97  1  0  0  0  0
 31 98  1  0  0  0  0
 31 99  1  0  0  0  0
 32100  1  0  0  0  0
 32101  1  0  0  0  0
 32102  1  0  0  0  0
 33103  1  0  0  0  0
 33104  1  0  0  0  0
 33105  1  0  0  0  0
 34106  1  0  0  0  0
 34107  1  0  0  0  0
 34108  1  0  0  0  0
 35 38  1  0  0  0  0
 35 47  1  0  0  0  0
 36 39  1  0  0  0  0
 36 40  1  0  0  0  0
 36 48  2  0  0  0  0
 37 44  1  0  0  0  0
 37 49  1  0  0  0  0
 38 41  2  0  0  0  0
 38 45  1  0  0  0  0
 42 43  1  0  0  0  0
 42 45  1  0  0  0  0
 43 44  1  0  0  0  0
 43 46  2  0  0  0  0
 44 58  1  0  0  0  0
 44109  1  0  0  0  0
 45 59  1  0  0  0  0
 45110  1  0  0  0  0
 47111  1  0  0  0  0
 47112  1  0  0  0  0
 47113  1  0  0  0  0
 48 53  1  0  0  0  0
 49 50  2  0  0  0  0
 49 54  1  0  0  0  0
 51 52  1  0  0  0  0
 51 54  1  0  0  0  0
 52 53  1  0  0  0  0
 52 55  2  0  0  0  0
 53 56  1  0  0  0  0
 53114  1  0  0  0  0
 54 57  1  0  0  0  0
 54115  1  0  0  0  0
 56116  1  0  0  0  0
 56117  1  0  0  0  0
 56118  1  0  0  0  0
 57119  1  0  0  0  0
 57120  1  0  0  0  0
 57121  1  0  0  0  0
 58122  1  0  0  0  0
 58123  1  0  0  0  0
 58124  1  0  0  0  0
 59125  1  0  0  0  0
 59126  1  0  0  0  0
 59127  1  0  0  0  0
M  END
