# Supplementary material
Source: publisher figshare collection journal article supplement (https://acs.figshare.com/ndownloader/files/5127205)
Supplement: Supplementary file 1 [file 5127205 › supporting_ja043819b/RRSS_fm-5-product-thf-freq.log]

 Entering Gaussian System, Link 0=g03
 Input=RRSS_fm-5-product-thf.gjf
 Output=RRSS_fm-5-product-thf.log
 Initial command:
 /usr/local/g03/l1.exe /home/rzepa/Gau-6647.inp -scrdir=/home/rzepa/
 Entering Link 1 = /usr/local/g03/l1.exe PID=      6648.
  
 Copyright (c) 1988,1990,1992,1993,1995,1998,2003,2004, Gaussian, Inc.
                  All Rights Reserved.
  
 This is the Gaussian(R) 03 program.  It is based on the
 the Gaussian(R) 98 system (copyright 1998, Gaussian, Inc.),
 the Gaussian(R) 94 system (copyright 1995, Gaussian, Inc.),
 the Gaussian 92(TM) system (copyright 1992, Gaussian, Inc.),
 the Gaussian 90(TM) system (copyright 1990, Gaussian, Inc.),
 the Gaussian 88(TM) system (copyright 1988, Gaussian, Inc.),
 the Gaussian 86(TM) system (copyright 1986, Carnegie Mellon
 University), and the Gaussian 82(TM) system (copyright 1983,
 Carnegie Mellon University). Gaussian is a federally registered
 trademark of Gaussian, Inc.
  
 This software contains proprietary and confidential information,
 including trade secrets, belonging to Gaussian, Inc.
  
 This software is provided under written license and may be
 used, copied, transmitted, or stored only in accord with that
 written license.
  
 The following legend is applicable only to US Government
 contracts under FAR:
  
                    RESTRICTED RIGHTS LEGEND
  
 Use, reproduction and disclosure by the US Government is
 subject to restrictions as set forth in subparagraphs (a)
 and (c) of the Commercial Computer Software - Restricted
 Rights clause in FAR 52.227-19.
  
 Gaussian, Inc.
 340 Quinnipiac St., Bldg. 40, Wallingford CT 06492
  
  
 ---------------------------------------------------------------
 Warning -- This program may not be used in any manner that
 competes with the business of Gaussian, Inc. or will provide
 assistance to any competitor of Gaussian, Inc.  The licensee
 of this program is prohibited from giving any competitor of
 Gaussian, Inc. access to this program.  By using this program,
 the user acknowledges that Gaussian, Inc. is engaged in the
 business of creating and licensing software in the field of
 computational chemistry and represents and warrants to the
 licensee that it is not a competitor of Gaussian, Inc. and that
 it will not use this program in any manner prohibited above.
 ---------------------------------------------------------------
  

 Cite this work as:
 Gaussian 03, Revision C.01,
 M. J. Frisch, G. W. Trucks, H. B. Schlegel, G. E. Scuseria, 
 M. A. Robb, J. R. Cheeseman, J. A. Montgomery, Jr., T. Vreven, 
 K. N. Kudin, J. C. Burant, J. M. Millam, S. S. Iyengar, J. Tomasi, 
 V. Barone, B. Mennucci, M. Cossi, G. Scalmani, N. Rega, 
 G. A. Petersson, H. Nakatsuji, M. Hada, M. Ehara, K. Toyota, 
 R. Fukuda, J. Hasegawa, M. Ishida, T. Nakajima, Y. Honda, O. Kitao, 
 H. Nakai, M. Klene, X. Li, J. E. Knox, H. P. Hratchian, J. B. Cross, 
 C. Adamo, J. Jaramillo, R. Gomperts, R. E. Stratmann, O. Yazyev, 
 A. J. Austin, R. Cammi, C. Pomelli, J. W. Ochterski, P. Y. Ayala, 
 K. Morokuma, G. A. Voth, P. Salvador, J. J. Dannenberg, 
 V. G. Zakrzewski, S. Dapprich, A. D. Daniels, M. C. Strain, 
 O. Farkas, D. K. Malick, A. D. Rabuck, K. Raghavachari, 
 J. B. Foresman, J. V. Ortiz, Q. Cui, A. G. Baboul, S. Clifford, 
 J. Cioslowski, B. B. Stefanov, G. Liu, A. Liashenko, P. Piskorz, 
 I. Komaromi, R. L. Martin, D. J. Fox, T. Keith, M. A. Al-Laham, 
 C. Y. Peng, A. Nanayakkara, M. Challacombe, P. M. W. Gill, 
 B. Johnson, W. Chen, M. W. Wong, C. Gonzalez, and J. A. Pople, 
 Gaussian, Inc., Wallingford CT, 2004.
 
 ******************************************
 Gaussian 03:  AM64L-G03RevC.01  3-Apr-2004
                 5-Dec-2004 
 ******************************************
 %mem=3GB
 %nprocshared=2
 Will use up to    2 processors via shared memory.
 %chk=RRSS_fm-5-prod-thf.chk
 -------------------------------------------
 # b3lyp/Gen geom=checkpoint guess=read freq
 -------------------------------------------
 1/10=4,29=2,30=1,38=1/1,3;
 2/40=1/2;
 3/5=7,11=2,16=1,25=1,30=1,74=-5/1,2,3;
 4/5=1/1;
 5/5=2,38=6/2;
 8/6=4,10=90,11=11/1;
 11/6=1,8=1,9=11,15=111,16=1/1,2,10;
 10/6=1/2;
 6/7=2,8=2,9=2,10=2,18=1,28=1/1;
 7/8=1,10=1,25=1/1,2,3,16;
 1/10=4,30=1/3;
 99//99;
 ----------------
 from RRSS_fm.gjf
 ----------------
 Redundant internal coordinates taken from checkpoint file:
 RRSS_fm-5-prod-thf.chk
 Charge =  0 Multiplicity = 1
 C,0,4.3311976641,1.078278086,-0.3155857776
 C,0,4.9873142572,-0.1572487851,-0.1803195741
 C,0,4.4190043996,-1.4297134494,0.0287314781
 C,0,-1.2538665614,-3.3068177518,-1.193004177
 C,0,-1.453003929,-2.2712322623,-2.329747011
 C,0,-0.7601256046,-1.0003788619,-1.7933655012
 O,0,0.067480377,-1.4394678945,-0.6980650487
 C,0,-0.6991142411,-2.4729169304,-0.0368368866
 C,0,2.5011929933,2.6040271591,-0.2289276757
 C,0,2.6094376976,-3.0036244559,0.1528064635
 C,0,2.6258502019,3.4743522293,0.9071740682
 C,0,2.0338146254,4.765354483,0.8322516516
 C,0,1.3725286736,5.1999142814,-0.3331028596
 C,0,1.2525554637,4.3321707971,-1.4469241478
 C,0,1.8040109992,3.0260606006,-1.4126388621
 C,0,3.4368384566,3.0713737654,2.1726915975
 C,0,1.6982866984,2.0936945857,-2.6480407959
 C,0,2.4798171319,-3.7006889967,-1.0947149524
 C,0,1.8052978257,-4.9520635561,-1.102461377
 C,0,1.2863031216,-5.5064830152,0.084778708
 C,0,1.4636232173,-4.8359006839,1.3146320162
 C,0,2.1299346746,-3.5824836058,1.379978266
 C,0,3.0960282239,-3.1643066184,-2.4171694419
 C,0,2.3873174985,-2.8934026853,2.7464089784
 C,0,2.5088057047,2.6461381981,3.354799555
 C,0,4.4109869911,4.2128460579,2.621107154
 C,0,0.3059776481,2.1791687236,-3.3470467064
 C,0,2.842469558,2.379899549,-3.6784057041
 C,0,1.1921671019,-3.0413686496,3.7349143716
 C,0,3.7072415891,-3.4358764933,3.3918970252
 C,0,2.0056652466,-2.7843358092,-3.468906855
 C,0,4.0993894208,-4.2007241707,-3.0285229147
 C,0,5.2327418873,2.2686992412,-0.6383705936
 C,0,5.421832901,-2.581048653,0.0429055906
 O,0,-7.2756496548,-2.507747299,0.9137341029
 Mg,0,1.5967964174,-0.206670524,0.3729597627
 O,0,-3.1375763067,1.9268069314,-0.6418034106
 C,0,-6.9827296552,-1.2636557587,0.4901471045
 N,0,3.1172148179,-1.6484933073,0.1699068248
 N,0,3.0175533898,1.2531973683,-0.1652888119
 O,0,-7.6710935888,-0.6099876117,-0.2575259672
 O,0,-5.2155136175,0.3854826843,0.4524590779
 C,0,-4.736412084,0.2049055824,-0.7930519992
 C,0,-4.3107039269,1.5399054746,-1.4044593212
 C,0,-5.6737969256,-0.793444223,1.1312952873
 O,0,-4.6493593498,-0.8718175037,-1.3418197056
 C,0,-8.5040570599,-3.0588162634,0.4059324902
 O,0,0.7326851065,-0.144827229,2.0977092936
 C,0,-2.8712705233,3.2495436672,-0.5770227564
 O,0,-3.5286093069,4.1002748203,-1.1364144301
 O,0,-1.4317070739,2.5741978004,1.2861667206
 C,0,-0.5907068543,1.5497810747,1.0954505167
 C,0,-0.2883454002,0.7257080165,2.3519627053
 C,0,-1.6123843976,3.5475918237,0.2322821849
 O,0,-0.0583743386,1.3134418976,0.016381604
 C,0,-1.5854212718,0.0516472931,2.8586155803
 C,0,-1.6553887137,4.9169896221,0.8947813798
 C,0,-3.9988290603,1.4317998184,-2.8873155076
 C,0,-5.8638996751,-0.4211407879,2.5992673329
 H,0,6.0661794552,-0.1382520863,-0.2942199663
 H,0,-0.4972788946,-4.0529085212,-1.4427496193
 H,0,-2.18168243,-3.8210736762,-0.92280649
 H,0,-2.5109058901,-2.0754075545,-2.5251250272
 H,0,-0.9870805759,-2.6144801259,-3.2574768787
 H,0,-1.4868365427,-0.274333817,-1.4137230951
 H,0,-0.1116836194,-0.4979506648,-2.5118700813
 H,0,-0.0296577157,-3.0260827554,0.614603278
 H,0,-1.4949932998,-1.9972233832,0.5510408617
 H,0,2.1464354218,5.4582512089,1.6761624065
 H,0,0.9828209322,6.2254697368,-0.3944561497
 H,0,0.7683858983,4.695472942,-2.3624242677
 H,0,4.0490875659,2.1865189132,1.9172390322
 H,0,1.8401534371,1.054115564,-2.2842396372
 H,0,1.7184833388,-5.5113978979,-2.0434376554
 H,0,0.7745020386,-6.4783470408,0.0584778813
 H,0,1.0943524464,-5.2981522605,2.2392678944
 H,0,3.6574755718,-2.2395645471,-2.1851892709
 H,0,2.5259328931,-1.8116450148,2.5561721833
 H,0,3.1066580607,2.4981589648,4.2681981871
 H,0,2.019544852,1.6876422468,3.1077815968
 H,0,1.7441526131,3.4128784948,3.556398304
 H,0,5.0779722695,3.8358868923,3.4113517387
 H,0,3.8558392217,5.073070782,3.024260711
 H,0,5.0298336338,4.5611611616,1.7797526116
 H,0,0.2386470274,1.4134211074,-4.1367755128
 H,0,0.151940476,3.1626789385,-3.8176792841
 H,0,-0.503087806,2.0094274667,-2.6185017569
 H,0,2.7299991606,1.7196858897,-4.5522727423
 H,0,3.8300580678,2.1920352937,-3.2287614405
 H,0,2.8047890228,3.425839308,-4.0217852869
 H,0,1.3796694605,-2.4226564939,4.6254551405
 H,0,1.0556368413,-4.0846981841,4.0600426024
 H,0,0.2607377194,-2.6888688323,3.2619631631
 H,0,3.8834555724,-2.9303401756,4.3536973344
 H,0,4.5722743881,-3.2433087372,2.7371971202
 H,0,3.6393042416,-4.5204422971,3.5723748453
 H,0,2.4815867124,-2.4546659617,-4.4061517555
 H,0,1.3891720572,-1.9536859767,-3.0839093354
 H,0,1.3485778032,-3.6401661101,-3.6904542103
 H,0,4.6152641743,-3.754149088,-3.8923305954
 H,0,3.5704742272,-5.1029821338,-3.3709600336
 H,0,4.8551900468,-4.5018031279,-2.2874028499
 H,0,5.4298245755,2.8719858069,0.2552692071
 H,0,6.1995405378,1.9240723245,-1.0207998469
 H,0,4.7849368208,2.9302278324,-1.3860666506
 H,0,5.0034980892,-3.4999635473,0.4602735792
 H,0,5.7752894365,-2.798990018,-0.9725013916
 H,0,6.3007270038,-2.2985376456,0.6352489533
 H,0,-5.0916301865,2.2829576295,-1.2211086172
 H,0,-4.9315433714,-1.5884555326,1.0195190649
 H,0,-9.353849051,-2.4391031505,0.7039233757
 H,0,-8.4698790701,-3.1188178782,-0.6847520868
 H,0,-8.5806553785,-4.0539454922,0.8442718366
 H,0,-0.0230642031,1.4844443799,3.1159269055
 H,0,-0.7485729699,3.5135450973,-0.4447054391
 H,0,-2.3462648158,0.7935188574,3.129506021
 H,0,-2.0002088262,-0.6191733936,2.0982873524
 H,0,-1.3370132653,-0.5463139674,3.7405530349
 H,0,-0.6403812999,5.1582322923,1.2151917701
 H,0,-1.9896533806,5.6662416765,0.1730480521
 H,0,-2.337957552,4.9199958599,1.7496441906
 H,0,-4.8853493116,1.0848093051,-3.4271877855
 H,0,-3.7136117476,2.4129165713,-3.2739672522
 H,0,-3.1906435695,0.717949229,-3.0642176201
 H,0,-4.9131712318,-0.0829858459,3.0208631661
 H,0,-6.5986897663,0.3839096254,2.6984027696
 H,0,-6.2117057091,-1.2924493477,3.1610016771
 Recover connectivity data from disk.

 GradGradGradGradGradGradGradGradGradGradGradGradGradGradGradGradGradGrad
 Berny optimization.
 Initialization pass.
                           ----------------------------
                           !    Initial Parameters    !
                           ! (Angstroms and Degrees)  !
 --------------------------                            --------------------------
 ! Name  Definition              Value          Derivative Info.                !
 --------------------------------------------------------------------------------
 ! R1    R(1,2)                  1.4055         calculate D2E/DX2 analytically  !
 ! R2    R(1,33)                 1.5278         calculate D2E/DX2 analytically  !
 ! R3    R(1,40)                 1.3337         calculate D2E/DX2 analytically  !
 ! R4    R(2,3)                  1.4092         calculate D2E/DX2 analytically  !
 ! R5    R(2,60)                 1.085          calculate D2E/DX2 analytically  !
 ! R6    R(3,34)                 1.5269         calculate D2E/DX2 analytically  !
 ! R7    R(3,39)                 1.3276         calculate D2E/DX2 analytically  !
 ! R8    R(4,5)                  1.5506         calculate D2E/DX2 analytically  !
 ! R9    R(4,8)                  1.5297         calculate D2E/DX2 analytically  !
 ! R10   R(4,61)                 1.0915         calculate D2E/DX2 analytically  !
 ! R11   R(4,62)                 1.0947         calculate D2E/DX2 analytically  !
 ! R12   R(5,6)                  1.5436         calculate D2E/DX2 analytically  !
 ! R13   R(5,63)                 1.0935         calculate D2E/DX2 analytically  !
 ! R14   R(5,64)                 1.0934         calculate D2E/DX2 analytically  !
 ! R15   R(6,7)                  1.4413         calculate D2E/DX2 analytically  !
 ! R16   R(6,65)                 1.0952         calculate D2E/DX2 analytically  !
 ! R17   R(6,66)                 1.0905         calculate D2E/DX2 analytically  !
 ! R18   R(7,8)                  1.4467         calculate D2E/DX2 analytically  !
 ! R19   R(7,36)                 2.2373         calculate D2E/DX2 analytically  !
 ! R20   R(8,67)                 1.0856         calculate D2E/DX2 analytically  !
 ! R21   R(8,68)                 1.0979         calculate D2E/DX2 analytically  !
 ! R22   R(9,11)                 1.4366         calculate D2E/DX2 analytically  !
 ! R23   R(9,15)                 1.4371         calculate D2E/DX2 analytically  !
 ! R24   R(9,40)                 1.4476         calculate D2E/DX2 analytically  !
 ! R25   R(10,18)                1.4349         calculate D2E/DX2 analytically  !
 ! R26   R(10,22)                1.4391         calculate D2E/DX2 analytically  !
 ! R27   R(10,39)                1.4472         calculate D2E/DX2 analytically  !
 ! R28   R(11,12)                1.4223         calculate D2E/DX2 analytically  !
 ! R29   R(11,16)                1.5562         calculate D2E/DX2 analytically  !
 ! R30   R(12,13)                1.4086         calculate D2E/DX2 analytically  !
 ! R31   R(12,69)                1.0977         calculate D2E/DX2 analytically  !
 ! R32   R(13,14)                1.417          calculate D2E/DX2 analytically  !
 ! R33   R(13,70)                1.0988         calculate D2E/DX2 analytically  !
 ! R34   R(14,15)                1.4182         calculate D2E/DX2 analytically  !
 ! R35   R(14,71)                1.0975         calculate D2E/DX2 analytically  !
 ! R36   R(15,17)                1.5514         calculate D2E/DX2 analytically  !
 ! R37   R(16,25)                1.5619         calculate D2E/DX2 analytically  !
 ! R38   R(16,26)                1.5662         calculate D2E/DX2 analytically  !
 ! R39   R(16,72)                1.1059         calculate D2E/DX2 analytically  !
 ! R40   R(17,27)                1.5603         calculate D2E/DX2 analytically  !
 ! R41   R(17,28)                1.5661         calculate D2E/DX2 analytically  !
 ! R42   R(17,73)                1.1105         calculate D2E/DX2 analytically  !
 ! R43   R(18,19)                1.4216         calculate D2E/DX2 analytically  !
 ! R44   R(18,23)                1.5544         calculate D2E/DX2 analytically  !
 ! R45   R(19,20)                1.4094         calculate D2E/DX2 analytically  !
 ! R46   R(19,74)                1.0981         calculate D2E/DX2 analytically  !
 ! R47   R(20,21)                1.412          calculate D2E/DX2 analytically  !
 ! R48   R(20,75)                1.0987         calculate D2E/DX2 analytically  !
 ! R49   R(21,22)                1.421          calculate D2E/DX2 analytically  !
 ! R50   R(21,76)                1.0977         calculate D2E/DX2 analytically  !
 ! R51   R(22,24)                1.5518         calculate D2E/DX2 analytically  !
 ! R52   R(23,31)                1.5619         calculate D2E/DX2 analytically  !
 ! R53   R(23,32)                1.5667         calculate D2E/DX2 analytically  !
 ! R54   R(23,77)                1.1064         calculate D2E/DX2 analytically  !
 ! R55   R(24,29)                1.558          calculate D2E/DX2 analytically  !
 ! R56   R(24,30)                1.5662         calculate D2E/DX2 analytically  !
 ! R57   R(24,78)                1.1071         calculate D2E/DX2 analytically  !
 ! R58   R(25,79)                1.1016         calculate D2E/DX2 analytically  !
 ! R59   R(25,80)                1.1041         calculate D2E/DX2 analytically  !
 ! R60   R(25,81)                1.1015         calculate D2E/DX2 analytically  !
 ! R61   R(26,82)                1.1007         calculate D2E/DX2 analytically  !
 ! R62   R(26,83)                1.1003         calculate D2E/DX2 analytically  !
 ! R63   R(26,84)                1.101          calculate D2E/DX2 analytically  !
 ! R64   R(27,85)                1.1021         calculate D2E/DX2 analytically  !
 ! R65   R(27,86)                1.1011         calculate D2E/DX2 analytically  !
 ! R66   R(27,87)                1.1019         calculate D2E/DX2 analytically  !
 ! R67   R(28,88)                1.101          calculate D2E/DX2 analytically  !
 ! R68   R(28,89)                1.1013         calculate D2E/DX2 analytically  !
 ! R69   R(28,90)                1.1015         calculate D2E/DX2 analytically  !
 ! R70   R(29,91)                1.1005         calculate D2E/DX2 analytically  !
 ! R71   R(29,92)                1.1013         calculate D2E/DX2 analytically  !
 ! R72   R(29,93)                1.1025         calculate D2E/DX2 analytically  !
 ! R73   R(30,94)                1.1008         calculate D2E/DX2 analytically  !
 ! R74   R(30,95)                1.1018         calculate D2E/DX2 analytically  !
 ! R75   R(30,96)                1.1016         calculate D2E/DX2 analytically  !
 ! R76   R(31,97)                1.1016         calculate D2E/DX2 analytically  !
 ! R77   R(31,98)                1.1038         calculate D2E/DX2 analytically  !
 ! R78   R(31,99)                1.1015         calculate D2E/DX2 analytically  !
 ! R79   R(32,100)               1.1008         calculate D2E/DX2 analytically  !
 ! R80   R(32,101)               1.1005         calculate D2E/DX2 analytically  !
 ! R81   R(32,102)               1.1005         calculate D2E/DX2 analytically  !
 ! R82   R(33,103)               1.0961         calculate D2E/DX2 analytically  !
 ! R83   R(33,104)               1.0953         calculate D2E/DX2 analytically  !
 ! R84   R(33,105)               1.0942         calculate D2E/DX2 analytically  !
 ! R85   R(34,106)               1.0925         calculate D2E/DX2 analytically  !
 ! R86   R(34,107)               1.097          calculate D2E/DX2 analytically  !
 ! R87   R(34,108)               1.0969         calculate D2E/DX2 analytically  !
 ! R88   R(35,38)                1.3465         calculate D2E/DX2 analytically  !
 ! R89   R(35,47)                1.4389         calculate D2E/DX2 analytically  !
 ! R90   R(36,39)                2.1052         calculate D2E/DX2 analytically  !
 ! R91   R(36,40)                2.107          calculate D2E/DX2 analytically  !
 ! R92   R(36,48)                1.9301         calculate D2E/DX2 analytically  !
 ! R93   R(36,55)                2.2754         calculate D2E/DX2 analytically  !
 ! R94   R(37,44)                1.4517         calculate D2E/DX2 analytically  !
 ! R95   R(37,49)                1.3508         calculate D2E/DX2 analytically  !
 ! R96   R(38,41)                1.2084         calculate D2E/DX2 analytically  !
 ! R97   R(38,45)                1.5315         calculate D2E/DX2 analytically  !
 ! R98   R(42,43)                1.3466         calculate D2E/DX2 analytically  !
 ! R99   R(42,45)                1.4355         calculate D2E/DX2 analytically  !
 ! R100  R(43,44)                1.5288         calculate D2E/DX2 analytically  !
 ! R101  R(43,46)                1.2116         calculate D2E/DX2 analytically  !
 ! R102  R(44,58)                1.5191         calculate D2E/DX2 analytically  !
 ! R103  R(44,109)               1.0934         calculate D2E/DX2 analytically  !
 ! R104  R(45,59)                1.5263         calculate D2E/DX2 analytically  !
 ! R105  R(45,110)               1.0934         calculate D2E/DX2 analytically  !
 ! R106  R(47,111)               1.0932         calculate D2E/DX2 analytically  !
 ! R107  R(47,112)               1.0929         calculate D2E/DX2 analytically  !
 ! R108  R(47,113)               1.0901         calculate D2E/DX2 analytically  !
 ! R109  R(48,53)                1.3656         calculate D2E/DX2 analytically  !
 ! R110  R(48,78)                2.4908         calculate D2E/DX2 analytically  !
 ! R111  R(48,80)                2.4565         calculate D2E/DX2 analytically  !
 ! R112  R(49,50)                1.2119         calculate D2E/DX2 analytically  !
 ! R113  R(49,54)                1.526          calculate D2E/DX2 analytically  !
 ! R114  R(51,52)                1.3391         calculate D2E/DX2 analytically  !
 ! R115  R(51,54)                1.446          calculate D2E/DX2 analytically  !
 ! R116  R(52,53)                1.5328         calculate D2E/DX2 analytically  !
 ! R117  R(52,55)                1.2262         calculate D2E/DX2 analytically  !
 ! R118  R(53,56)                1.5471         calculate D2E/DX2 analytically  !
 ! R119  R(53,114)               1.1089         calculate D2E/DX2 analytically  !
 ! R120  R(54,57)                1.5218         calculate D2E/DX2 analytically  !
 ! R121  R(54,115)               1.098          calculate D2E/DX2 analytically  !
 ! R122  R(56,116)               1.0966         calculate D2E/DX2 analytically  !
 ! R123  R(56,117)               1.0955         calculate D2E/DX2 analytically  !
 ! R124  R(56,118)               1.0941         calculate D2E/DX2 analytically  !
 ! R125  R(57,119)               1.0914         calculate D2E/DX2 analytically  !
 ! R126  R(57,120)               1.0927         calculate D2E/DX2 analytically  !
 ! R127  R(57,121)               1.0939         calculate D2E/DX2 analytically  !
 ! R128  R(58,122)               1.0944         calculate D2E/DX2 analytically  !
 ! R129  R(58,123)               1.0924         calculate D2E/DX2 analytically  !
 ! R130  R(58,124)               1.0927         calculate D2E/DX2 analytically  !
 ! R131  R(59,125)               1.0936         calculate D2E/DX2 analytically  !
 ! R132  R(59,126)               1.0945         calculate D2E/DX2 analytically  !
 ! R133  R(59,127)               1.0935         calculate D2E/DX2 analytically  !
 ! A1    A(2,1,33)             115.4569         calculate D2E/DX2 analytically  !
 ! A2    A(2,1,40)             124.3502         calculate D2E/DX2 analytically  !
 ! A3    A(33,1,40)            120.1877         calculate D2E/DX2 analytically  !
 ! A4    A(1,2,3)              128.3018         calculate D2E/DX2 analytically  !
 ! A5    A(1,2,60)             116.0203         calculate D2E/DX2 analytically  !
 ! A6    A(3,2,60)             115.6185         calculate D2E/DX2 analytically  !
 ! A7    A(2,3,34)             114.6692         calculate D2E/DX2 analytically  !
 ! A8    A(2,3,39)             124.0582         calculate D2E/DX2 analytically  !
 ! A9    A(34,3,39)            121.2496         calculate D2E/DX2 analytically  !
 ! A10   A(5,4,8)              103.6855         calculate D2E/DX2 analytically  !
 ! A11   A(5,4,61)             112.1968         calculate D2E/DX2 analytically  !
 ! A12   A(5,4,62)             112.6968         calculate D2E/DX2 analytically  !
 ! A13   A(8,4,61)             107.1087         calculate D2E/DX2 analytically  !
 ! A14   A(8,4,62)             112.1433         calculate D2E/DX2 analytically  !
 ! A15   A(61,4,62)            108.8358         calculate D2E/DX2 analytically  !
 ! A16   A(4,5,6)              103.7367         calculate D2E/DX2 analytically  !
 ! A17   A(4,5,63)             112.0149         calculate D2E/DX2 analytically  !
 ! A18   A(4,5,64)             110.9549         calculate D2E/DX2 analytically  !
 ! A19   A(6,5,63)             110.4204         calculate D2E/DX2 analytically  !
 ! A20   A(6,5,64)             111.223          calculate D2E/DX2 analytically  !
 ! A21   A(63,5,64)            108.4737         calculate D2E/DX2 analytically  !
 ! A22   A(5,6,7)              105.7228         calculate D2E/DX2 analytically  !
 ! A23   A(5,6,65)             111.6174         calculate D2E/DX2 analytically  !
 ! A24   A(5,6,66)             114.6627         calculate D2E/DX2 analytically  !
 ! A25   A(7,6,65)             108.6358         calculate D2E/DX2 analytically  !
 ! A26   A(7,6,66)             107.4351         calculate D2E/DX2 analytically  !
 ! A27   A(65,6,66)            108.5139         calculate D2E/DX2 analytically  !
 ! A28   A(6,7,8)              105.1111         calculate D2E/DX2 analytically  !
 ! A29   A(6,7,36)             126.0441         calculate D2E/DX2 analytically  !
 ! A30   A(8,7,36)             122.4813         calculate D2E/DX2 analytically  !
 ! A31   A(4,8,7)              103.6591         calculate D2E/DX2 analytically  !
 ! A32   A(4,8,67)             113.5416         calculate D2E/DX2 analytically  !
 ! A33   A(4,8,68)             112.2118         calculate D2E/DX2 analytically  !
 ! A34   A(7,8,67)             108.1495         calculate D2E/DX2 analytically  !
 ! A35   A(7,8,68)             108.6244         calculate D2E/DX2 analytically  !
 ! A36   A(67,8,68)            110.2735         calculate D2E/DX2 analytically  !
 ! A37   A(11,9,15)            121.0357         calculate D2E/DX2 analytically  !
 ! A38   A(11,9,40)            119.9757         calculate D2E/DX2 analytically  !
 ! A39   A(15,9,40)            118.9011         calculate D2E/DX2 analytically  !
 ! A40   A(18,10,22)           121.056          calculate D2E/DX2 analytically  !
 ! A41   A(18,10,39)           119.7907         calculate D2E/DX2 analytically  !
 ! A42   A(22,10,39)           118.9124         calculate D2E/DX2 analytically  !
 ! A43   A(9,11,12)            118.1736         calculate D2E/DX2 analytically  !
 ! A44   A(9,11,16)            122.1052         calculate D2E/DX2 analytically  !
 ! A45   A(12,11,16)           119.6589         calculate D2E/DX2 analytically  !
 ! A46   A(11,12,13)           121.2674         calculate D2E/DX2 analytically  !
 ! A47   A(11,12,69)           119.3249         calculate D2E/DX2 analytically  !
 ! A48   A(13,12,69)           119.3049         calculate D2E/DX2 analytically  !
 ! A49   A(12,13,14)           120.0737         calculate D2E/DX2 analytically  !
 ! A50   A(12,13,70)           120.0413         calculate D2E/DX2 analytically  !
 ! A51   A(14,13,70)           119.8429         calculate D2E/DX2 analytically  !
 ! A52   A(13,14,15)           120.8009         calculate D2E/DX2 analytically  !
 ! A53   A(13,14,71)           119.3609         calculate D2E/DX2 analytically  !
 ! A54   A(15,14,71)           119.7735         calculate D2E/DX2 analytically  !
 ! A55   A(9,15,14)            118.6209         calculate D2E/DX2 analytically  !
 ! A56   A(9,15,17)            120.8293         calculate D2E/DX2 analytically  !
 ! A57   A(14,15,17)           120.5147         calculate D2E/DX2 analytically  !
 ! A58   A(11,16,25)           112.1075         calculate D2E/DX2 analytically  !
 ! A59   A(11,16,26)           111.6075         calculate D2E/DX2 analytically  !
 ! A60   A(11,16,72)           107.9303         calculate D2E/DX2 analytically  !
 ! A61   A(25,16,26)           110.567          calculate D2E/DX2 analytically  !
 ! A62   A(25,16,72)           106.6143         calculate D2E/DX2 analytically  !
 ! A63   A(26,16,72)           107.7537         calculate D2E/DX2 analytically  !
 ! A64   A(15,17,27)           112.6221         calculate D2E/DX2 analytically  !
 ! A65   A(15,17,28)           111.3644         calculate D2E/DX2 analytically  !
 ! A66   A(15,17,73)           107.0396         calculate D2E/DX2 analytically  !
 ! A67   A(27,17,28)           110.3151         calculate D2E/DX2 analytically  !
 ! A68   A(27,17,73)           108.1827         calculate D2E/DX2 analytically  !
 ! A69   A(28,17,73)           107.0543         calculate D2E/DX2 analytically  !
 ! A70   A(10,18,19)           118.3731         calculate D2E/DX2 analytically  !
 ! A71   A(10,18,23)           122.426          calculate D2E/DX2 analytically  !
 ! A72   A(19,18,23)           119.1565         calculate D2E/DX2 analytically  !
 ! A73   A(18,19,20)           121.092          calculate D2E/DX2 analytically  !
 ! A74   A(18,19,74)           119.3767         calculate D2E/DX2 analytically  !
 ! A75   A(20,19,74)           119.4967         calculate D2E/DX2 analytically  !
 ! A76   A(19,20,21)           120.0444         calculate D2E/DX2 analytically  !
 ! A77   A(19,20,75)           119.9567         calculate D2E/DX2 analytically  !
 ! A78   A(21,20,75)           119.9635         calculate D2E/DX2 analytically  !
 ! A79   A(20,21,22)           121.1882         calculate D2E/DX2 analytically  !
 ! A80   A(20,21,76)           119.4354         calculate D2E/DX2 analytically  !
 ! A81   A(22,21,76)           119.3692         calculate D2E/DX2 analytically  !
 ! A82   A(10,22,21)           118.1527         calculate D2E/DX2 analytically  !
 ! A83   A(10,22,24)           121.1304         calculate D2E/DX2 analytically  !
 ! A84   A(21,22,24)           120.6591         calculate D2E/DX2 analytically  !
 ! A85   A(18,23,31)           112.3391         calculate D2E/DX2 analytically  !
 ! A86   A(18,23,32)           110.9517         calculate D2E/DX2 analytically  !
 ! A87   A(18,23,77)           108.1306         calculate D2E/DX2 analytically  !
 ! A88   A(31,23,32)           110.1975         calculate D2E/DX2 analytically  !
 ! A89   A(31,23,77)           106.9842         calculate D2E/DX2 analytically  !
 ! A90   A(32,23,77)           108.0428         calculate D2E/DX2 analytically  !
 ! A91   A(22,24,29)           112.9085         calculate D2E/DX2 analytically  !
 ! A92   A(22,24,30)           110.4177         calculate D2E/DX2 analytically  !
 ! A93   A(22,24,78)           107.6588         calculate D2E/DX2 analytically  !
 ! A94   A(29,24,30)           110.6149         calculate D2E/DX2 analytically  !
 ! A95   A(29,24,78)           107.3298         calculate D2E/DX2 analytically  !
 ! A96   A(30,24,78)           107.682          calculate D2E/DX2 analytically  !
 ! A97   A(16,25,79)           109.9768         calculate D2E/DX2 analytically  !
 ! A98   A(16,25,80)           109.2879         calculate D2E/DX2 analytically  !
 ! A99   A(16,25,81)           111.1917         calculate D2E/DX2 analytically  !
 ! A100  A(79,25,80)           108.0207         calculate D2E/DX2 analytically  !
 ! A101  A(79,25,81)           108.572          calculate D2E/DX2 analytically  !
 ! A102  A(80,25,81)           109.7319         calculate D2E/DX2 analytically  !
 ! A103  A(16,26,82)           109.4427         calculate D2E/DX2 analytically  !
 ! A104  A(16,26,83)           111.1539         calculate D2E/DX2 analytically  !
 ! A105  A(16,26,84)           111.1853         calculate D2E/DX2 analytically  !
 ! A106  A(82,26,83)           108.0851         calculate D2E/DX2 analytically  !
 ! A107  A(82,26,84)           108.4452         calculate D2E/DX2 analytically  !
 ! A108  A(83,26,84)           108.4363         calculate D2E/DX2 analytically  !
 ! A109  A(17,27,85)           109.7237         calculate D2E/DX2 analytically  !
 ! A110  A(17,27,86)           111.4222         calculate D2E/DX2 analytically  !
 ! A111  A(17,27,87)           110.5216         calculate D2E/DX2 analytically  !
 ! A112  A(85,27,86)           107.8051         calculate D2E/DX2 analytically  !
 ! A113  A(85,27,87)           108.7774         calculate D2E/DX2 analytically  !
 ! A114  A(86,27,87)           108.5096         calculate D2E/DX2 analytically  !
 ! A115  A(17,28,88)           109.7534         calculate D2E/DX2 analytically  !
 ! A116  A(17,28,89)           110.8162         calculate D2E/DX2 analytically  !
 ! A117  A(17,28,90)           110.7096         calculate D2E/DX2 analytically  !
 ! A118  A(88,28,89)           108.2632         calculate D2E/DX2 analytically  !
 ! A119  A(88,28,90)           108.5711         calculate D2E/DX2 analytically  !
 ! A120  A(89,28,90)           108.6593         calculate D2E/DX2 analytically  !
 ! A121  A(24,29,91)           109.2285         calculate D2E/DX2 analytically  !
 ! A122  A(24,29,92)           111.8621         calculate D2E/DX2 analytically  !
 ! A123  A(24,29,93)           110.2143         calculate D2E/DX2 analytically  !
 ! A124  A(91,29,92)           108.3516         calculate D2E/DX2 analytically  !
 ! A125  A(91,29,93)           108.1398         calculate D2E/DX2 analytically  !
 ! A126  A(92,29,93)           108.9537         calculate D2E/DX2 analytically  !
 ! A127  A(24,30,94)           109.6296         calculate D2E/DX2 analytically  !
 ! A128  A(24,30,95)           110.8675         calculate D2E/DX2 analytically  !
 ! A129  A(24,30,96)           110.8885         calculate D2E/DX2 analytically  !
 ! A130  A(94,30,95)           108.2546         calculate D2E/DX2 analytically  !
 ! A131  A(94,30,96)           108.5957         calculate D2E/DX2 analytically  !
 ! A132  A(95,30,96)           108.5327         calculate D2E/DX2 analytically  !
 ! A133  A(23,31,97)           110.1272         calculate D2E/DX2 analytically  !
 ! A134  A(23,31,98)           109.7631         calculate D2E/DX2 analytically  !
 ! A135  A(23,31,99)           111.2768         calculate D2E/DX2 analytically  !
 ! A136  A(97,31,98)           108.2307         calculate D2E/DX2 analytically  !
 ! A137  A(97,31,99)           108.6088         calculate D2E/DX2 analytically  !
 ! A138  A(98,31,99)           108.765          calculate D2E/DX2 analytically  !
 ! A139  A(23,32,100)          109.7529         calculate D2E/DX2 analytically  !
 ! A140  A(23,32,101)          110.8535         calculate D2E/DX2 analytically  !
 ! A141  A(23,32,102)          110.9784         calculate D2E/DX2 analytically  !
 ! A142  A(100,32,101)         108.2805         calculate D2E/DX2 analytically  !
 ! A143  A(100,32,102)         108.5174         calculate D2E/DX2 analytically  !
 ! A144  A(101,32,102)         108.3803         calculate D2E/DX2 analytically  !
 ! A145  A(1,33,103)           111.2672         calculate D2E/DX2 analytically  !
 ! A146  A(1,33,104)           110.455          calculate D2E/DX2 analytically  !
 ! A147  A(1,33,105)           111.9602         calculate D2E/DX2 analytically  !
 ! A148  A(103,33,104)         107.4055         calculate D2E/DX2 analytically  !
 ! A149  A(103,33,105)         107.3348         calculate D2E/DX2 analytically  !
 ! A150  A(104,33,105)         108.233          calculate D2E/DX2 analytically  !
 ! A151  A(3,34,106)           112.723          calculate D2E/DX2 analytically  !
 ! A152  A(3,34,107)           110.6596         calculate D2E/DX2 analytically  !
 ! A153  A(3,34,108)           109.6976         calculate D2E/DX2 analytically  !
 ! A154  A(106,34,107)         108.0515         calculate D2E/DX2 analytically  !
 ! A155  A(106,34,108)         108.4902         calculate D2E/DX2 analytically  !
 ! A156  A(107,34,108)         107.0287         calculate D2E/DX2 analytically  !
 ! A157  A(38,35,47)           115.3755         calculate D2E/DX2 analytically  !
 ! A158  A(7,36,39)             94.0207         calculate D2E/DX2 analytically  !
 ! A159  A(7,36,40)            136.0875         calculate D2E/DX2 analytically  !
 ! A160  A(7,36,48)             98.0134         calculate D2E/DX2 analytically  !
 ! A161  A(7,36,55)             78.2215         calculate D2E/DX2 analytically  !
 ! A162  A(39,36,40)            87.8738         calculate D2E/DX2 analytically  !
 ! A163  A(39,36,48)           115.5617         calculate D2E/DX2 analytically  !
 ! A164  A(39,36,55)           165.4204         calculate D2E/DX2 analytically  !
 ! A165  A(40,36,48)           120.5283         calculate D2E/DX2 analytically  !
 ! A166  A(40,36,55)            89.289          calculate D2E/DX2 analytically  !
 ! A167  A(48,36,55)            78.0513         calculate D2E/DX2 analytically  !
 ! A168  A(44,37,49)           116.4531         calculate D2E/DX2 analytically  !
 ! A169  A(35,38,41)           124.7882         calculate D2E/DX2 analytically  !
 ! A170  A(35,38,45)           109.7498         calculate D2E/DX2 analytically  !
 ! A171  A(41,38,45)           125.4384         calculate D2E/DX2 analytically  !
 ! A172  A(3,39,10)            119.808          calculate D2E/DX2 analytically  !
 ! A173  A(3,39,36)            127.2714         calculate D2E/DX2 analytically  !
 ! A174  A(10,39,36)           112.895          calculate D2E/DX2 analytically  !
 ! A175  A(1,40,9)             117.9546         calculate D2E/DX2 analytically  !
 ! A176  A(1,40,36)            127.0177         calculate D2E/DX2 analytically  !
 ! A177  A(9,40,36)            114.6621         calculate D2E/DX2 analytically  !
 ! A178  A(43,42,45)           116.1567         calculate D2E/DX2 analytically  !
 ! A179  A(42,43,44)           110.6013         calculate D2E/DX2 analytically  !
 ! A180  A(42,43,46)           124.307          calculate D2E/DX2 analytically  !
 ! A181  A(44,43,46)           125.0897         calculate D2E/DX2 analytically  !
 ! A182  A(37,44,43)           104.3381         calculate D2E/DX2 analytically  !
 ! A183  A(37,44,58)           111.4603         calculate D2E/DX2 analytically  !
 ! A184  A(37,44,109)          107.9346         calculate D2E/DX2 analytically  !
 ! A185  A(43,44,58)           112.6682         calculate D2E/DX2 analytically  !
 ! A186  A(43,44,109)          109.1157         calculate D2E/DX2 analytically  !
 ! A187  A(58,44,109)          111.0178         calculate D2E/DX2 analytically  !
 ! A188  A(38,45,42)           109.0886         calculate D2E/DX2 analytically  !
 ! A189  A(38,45,59)           111.782          calculate D2E/DX2 analytically  !
 ! A190  A(38,45,110)          108.3104         calculate D2E/DX2 analytically  !
 ! A191  A(42,45,59)           107.1123         calculate D2E/DX2 analytically  !
 ! A192  A(42,45,110)          109.395          calculate D2E/DX2 analytically  !
 ! A193  A(59,45,110)          111.1144         calculate D2E/DX2 analytically  !
 ! A194  A(35,47,111)          110.5077         calculate D2E/DX2 analytically  !
 ! A195  A(35,47,112)          110.2749         calculate D2E/DX2 analytically  !
 ! A196  A(35,47,113)          105.5269         calculate D2E/DX2 analytically  !
 ! A197  A(111,47,112)         109.1164         calculate D2E/DX2 analytically  !
 ! A198  A(111,47,113)         110.6881         calculate D2E/DX2 analytically  !
 ! A199  A(112,47,113)         110.6947         calculate D2E/DX2 analytically  !
 ! A200  A(36,48,53)           121.4345         calculate D2E/DX2 analytically  !
 ! A201  A(37,49,50)           123.9386         calculate D2E/DX2 analytically  !
 ! A202  A(37,49,54)           112.2918         calculate D2E/DX2 analytically  !
 ! A203  A(50,49,54)           123.721          calculate D2E/DX2 analytically  !
 ! A204  A(52,51,54)           119.319          calculate D2E/DX2 analytically  !
 ! A205  A(51,52,53)           114.7366         calculate D2E/DX2 analytically  !
 ! A206  A(51,52,55)           123.0544         calculate D2E/DX2 analytically  !
 ! A207  A(53,52,55)           122.1497         calculate D2E/DX2 analytically  !
 ! A208  A(48,53,52)           109.7298         calculate D2E/DX2 analytically  !
 ! A209  A(48,53,56)           114.2092         calculate D2E/DX2 analytically  !
 ! A210  A(48,53,114)          112.6786         calculate D2E/DX2 analytically  !
 ! A211  A(52,53,56)           109.7142         calculate D2E/DX2 analytically  !
 ! A212  A(52,53,114)          104.1283         calculate D2E/DX2 analytically  !
 ! A213  A(56,53,114)          105.8465         calculate D2E/DX2 analytically  !
 ! A214  A(49,54,51)           110.9863         calculate D2E/DX2 analytically  !
 ! A215  A(49,54,57)           112.5392         calculate D2E/DX2 analytically  !
 ! A216  A(49,54,115)          108.4187         calculate D2E/DX2 analytically  !
 ! A217  A(51,54,57)           106.9772         calculate D2E/DX2 analytically  !
 ! A218  A(51,54,115)          109.2809         calculate D2E/DX2 analytically  !
 ! A219  A(57,54,115)          108.5743         calculate D2E/DX2 analytically  !
 ! A220  A(36,55,52)           107.8572         calculate D2E/DX2 analytically  !
 ! A221  A(53,56,116)          111.5815         calculate D2E/DX2 analytically  !
 ! A222  A(53,56,117)          110.9125         calculate D2E/DX2 analytically  !
 ! A223  A(53,56,118)          108.1648         calculate D2E/DX2 analytically  !
 ! A224  A(116,56,117)         108.844          calculate D2E/DX2 analytically  !
 ! A225  A(116,56,118)         109.155          calculate D2E/DX2 analytically  !
 ! A226  A(117,56,118)         108.1047         calculate D2E/DX2 analytically  !
 ! A227  A(54,57,119)          107.4832         calculate D2E/DX2 analytically  !
 ! A228  A(54,57,120)          109.7617         calculate D2E/DX2 analytically  !
 ! A229  A(54,57,121)          111.1182         calculate D2E/DX2 analytically  !
 ! A230  A(119,57,120)         109.0774         calculate D2E/DX2 analytically  !
 ! A231  A(119,57,121)         110.5035         calculate D2E/DX2 analytically  !
 ! A232  A(120,57,121)         108.8684         calculate D2E/DX2 analytically  !
 ! A233  A(44,58,122)          109.7412         calculate D2E/DX2 analytically  !
 ! A234  A(44,58,123)          109.5826         calculate D2E/DX2 analytically  !
 ! A235  A(44,58,124)          110.8762         calculate D2E/DX2 analytically  !
 ! A236  A(122,58,123)         108.7617         calculate D2E/DX2 analytically  !
 ! A237  A(122,58,124)         108.1871         calculate D2E/DX2 analytically  !
 ! A238  A(123,58,124)         109.652          calculate D2E/DX2 analytically  !
 ! A239  A(45,59,125)          109.7499         calculate D2E/DX2 analytically  !
 ! A240  A(45,59,126)          110.4967         calculate D2E/DX2 analytically  !
 ! A241  A(45,59,127)          109.8358         calculate D2E/DX2 analytically  !
 ! A242  A(125,59,126)         108.7411         calculate D2E/DX2 analytically  !
 ! A243  A(125,59,127)         108.9572         calculate D2E/DX2 analytically  !
 ! A244  A(126,59,127)         109.0286         calculate D2E/DX2 analytically  !
 ! D1    D(33,1,2,3)          -175.6221         calculate D2E/DX2 analytically  !
 ! D2    D(33,1,2,60)            1.426          calculate D2E/DX2 analytically  !
 ! D3    D(40,1,2,3)             5.2049         calculate D2E/DX2 analytically  !
 ! D4    D(40,1,2,60)         -177.7469         calculate D2E/DX2 analytically  !
 ! D5    D(2,1,33,103)        -101.3463         calculate D2E/DX2 analytically  !
 ! D6    D(2,1,33,104)          17.8478         calculate D2E/DX2 analytically  !
 ! D7    D(2,1,33,105)         138.5422         calculate D2E/DX2 analytically  !
 ! D8    D(40,1,33,103)         77.8637         calculate D2E/DX2 analytically  !
 ! D9    D(40,1,33,104)       -162.9422         calculate D2E/DX2 analytically  !
 ! D10   D(40,1,33,105)        -42.2477         calculate D2E/DX2 analytically  !
 ! D11   D(2,1,40,9)           175.0964         calculate D2E/DX2 analytically  !
 ! D12   D(2,1,40,36)            2.4438         calculate D2E/DX2 analytically  !
 ! D13   D(33,1,40,9)           -4.0397         calculate D2E/DX2 analytically  !
 ! D14   D(33,1,40,36)        -176.6923         calculate D2E/DX2 analytically  !
 ! D15   D(1,2,3,34)           176.3251         calculate D2E/DX2 analytically  !
 ! D16   D(1,2,3,39)            -1.9442         calculate D2E/DX2 analytically  !
 ! D17   D(60,2,3,34)           -0.7331         calculate D2E/DX2 analytically  !
 ! D18   D(60,2,3,39)         -179.0024         calculate D2E/DX2 analytically  !
 ! D19   D(2,3,34,106)         164.9246         calculate D2E/DX2 analytically  !
 ! D20   D(2,3,34,107)         -73.948          calculate D2E/DX2 analytically  !
 ! D21   D(2,3,34,108)          43.9189         calculate D2E/DX2 analytically  !
 ! D22   D(39,3,34,106)        -16.7525         calculate D2E/DX2 analytically  !
 ! D23   D(39,3,34,107)        104.3748         calculate D2E/DX2 analytically  !
 ! D24   D(39,3,34,108)       -137.7583         calculate D2E/DX2 analytically  !
 ! D25   D(2,3,39,10)          169.513          calculate D2E/DX2 analytically  !
 ! D26   D(2,3,39,36)           -8.5096         calculate D2E/DX2 analytically  !
 ! D27   D(34,3,39,10)          -8.6473         calculate D2E/DX2 analytically  !
 ! D28   D(34,3,39,36)         173.3301         calculate D2E/DX2 analytically  !
 ! D29   D(8,4,5,6)              9.6684         calculate D2E/DX2 analytically  !
 ! D30   D(8,4,5,63)          -109.4271         calculate D2E/DX2 analytically  !
 ! D31   D(8,4,5,64)           129.1843         calculate D2E/DX2 analytically  !
 ! D32   D(61,4,5,6)          -105.5692         calculate D2E/DX2 analytically  !
 ! D33   D(61,4,5,63)          135.3353         calculate D2E/DX2 analytically  !
 ! D34   D(61,4,5,64)           13.9467         calculate D2E/DX2 analytically  !
 ! D35   D(62,4,5,6)           131.1582         calculate D2E/DX2 analytically  !
 ! D36   D(62,4,5,63)           12.0627         calculate D2E/DX2 analytically  !
 ! D37   D(62,4,5,64)         -109.3258         calculate D2E/DX2 analytically  !
 ! D38   D(5,4,8,7)            -32.0772         calculate D2E/DX2 analytically  !
 ! D39   D(5,4,8,67)          -149.1771         calculate D2E/DX2 analytically  !
 ! D40   D(5,4,8,68)            84.9383         calculate D2E/DX2 analytically  !
 ! D41   D(61,4,8,7)            86.7247         calculate D2E/DX2 analytically  !
 ! D42   D(61,4,8,67)          -30.3752         calculate D2E/DX2 analytically  !
 ! D43   D(61,4,8,68)         -156.2597         calculate D2E/DX2 analytically  !
 ! D44   D(62,4,8,7)          -153.9372         calculate D2E/DX2 analytically  !
 ! D45   D(62,4,8,67)           88.9629         calculate D2E/DX2 analytically  !
 ! D46   D(62,4,8,68)          -36.9216         calculate D2E/DX2 analytically  !
 ! D47   D(4,5,6,7)             16.0365         calculate D2E/DX2 analytically  !
 ! D48   D(4,5,6,65)          -101.9101         calculate D2E/DX2 analytically  !
 ! D49   D(4,5,6,66)           134.1862         calculate D2E/DX2 analytically  !
 ! D50   D(63,5,6,7)           136.2199         calculate D2E/DX2 analytically  !
 ! D51   D(63,5,6,65)           18.2734         calculate D2E/DX2 analytically  !
 ! D52   D(63,5,6,66)         -105.6303         calculate D2E/DX2 analytically  !
 ! D53   D(64,5,6,7)          -103.2962         calculate D2E/DX2 analytically  !
 ! D54   D(64,5,6,65)          138.7573         calculate D2E/DX2 analytically  !
 ! D55   D(64,5,6,66)           14.8536         calculate D2E/DX2 analytically  !
 ! D56   D(5,6,7,8)            -37.447          calculate D2E/DX2 analytically  !
 ! D57   D(5,6,7,36)           170.3672         calculate D2E/DX2 analytically  !
 ! D58   D(65,6,7,8)            82.4763         calculate D2E/DX2 analytically  !
 ! D59   D(65,6,7,36)          -69.7095         calculate D2E/DX2 analytically  !
 ! D60   D(66,6,7,8)          -160.3203         calculate D2E/DX2 analytically  !
 ! D61   D(66,6,7,36)           47.494          calculate D2E/DX2 analytically  !
 ! D62   D(6,7,8,4)             43.7112         calculate D2E/DX2 analytically  !
 ! D63   D(6,7,8,67)           164.5233         calculate D2E/DX2 analytically  !
 ! D64   D(6,7,8,68)           -75.7893         calculate D2E/DX2 analytically  !
 ! D65   D(36,7,8,4)          -162.8559         calculate D2E/DX2 analytically  !
 ! D66   D(36,7,8,67)          -42.0439         calculate D2E/DX2 analytically  !
 ! D67   D(36,7,8,68)           77.6436         calculate D2E/DX2 analytically  !
 ! D68   D(6,7,36,39)         -129.11           calculate D2E/DX2 analytically  !
 ! D69   D(6,7,36,40)          -37.9993         calculate D2E/DX2 analytically  !
 ! D70   D(6,7,36,48)          114.3574         calculate D2E/DX2 analytically  !
 ! D71   D(6,7,36,55)           38.4169         calculate D2E/DX2 analytically  !
 ! D72   D(8,7,36,39)           83.1668         calculate D2E/DX2 analytically  !
 ! D73   D(8,7,36,40)          174.2775         calculate D2E/DX2 analytically  !
 ! D74   D(8,7,36,48)          -33.3659         calculate D2E/DX2 analytically  !
 ! D75   D(8,7,36,55)         -109.3063         calculate D2E/DX2 analytically  !
 ! D76   D(15,9,11,12)           0.3183         calculate D2E/DX2 analytically  !
 ! D77   D(15,9,11,16)        -176.8004         calculate D2E/DX2 analytically  !
 ! D78   D(40,9,11,12)        -176.2431         calculate D2E/DX2 analytically  !
 ! D79   D(40,9,11,16)           6.6382         calculate D2E/DX2 analytically  !
 ! D80   D(11,9,15,14)           0.8296         calculate D2E/DX2 analytically  !
 ! D81   D(11,9,15,17)         178.6852         calculate D2E/DX2 analytically  !
 ! D82   D(40,9,15,14)         177.4272         calculate D2E/DX2 analytically  !
 ! D83   D(40,9,15,17)          -4.7172         calculate D2E/DX2 analytically  !
 ! D84   D(11,9,40,1)          -78.6103         calculate D2E/DX2 analytically  !
 ! D85   D(11,9,40,36)          94.9384         calculate D2E/DX2 analytically  !
 ! D86   D(15,9,40,1)          104.7552         calculate D2E/DX2 analytically  !
 ! D87   D(15,9,40,36)         -81.6961         calculate D2E/DX2 analytically  !
 ! D88   D(22,10,18,19)          3.0696         calculate D2E/DX2 analytically  !
 ! D89   D(22,10,18,23)       -174.4834         calculate D2E/DX2 analytically  !
 ! D90   D(39,10,18,19)       -171.2296         calculate D2E/DX2 analytically  !
 ! D91   D(39,10,18,23)         11.2174         calculate D2E/DX2 analytically  !
 ! D92   D(18,10,22,21)         -3.0758         calculate D2E/DX2 analytically  !
 ! D93   D(18,10,22,24)        174.1767         calculate D2E/DX2 analytically  !
 ! D94   D(39,10,22,21)        171.2725         calculate D2E/DX2 analytically  !
 ! D95   D(39,10,22,24)        -11.4751         calculate D2E/DX2 analytically  !
 ! D96   D(18,10,39,3)         -76.8908         calculate D2E/DX2 analytically  !
 ! D97   D(18,10,39,36)        101.4011         calculate D2E/DX2 analytically  !
 ! D98   D(22,10,39,3)         108.6879         calculate D2E/DX2 analytically  !
 ! D99   D(22,10,39,36)        -73.0202         calculate D2E/DX2 analytically  !
 ! D100  D(9,11,12,13)          -1.6702         calculate D2E/DX2 analytically  !
 ! D101  D(9,11,12,69)        -177.9568         calculate D2E/DX2 analytically  !
 ! D102  D(16,11,12,13)        175.5212         calculate D2E/DX2 analytically  !
 ! D103  D(16,11,12,69)         -0.7654         calculate D2E/DX2 analytically  !
 ! D104  D(9,11,16,25)        -103.4116         calculate D2E/DX2 analytically  !
 ! D105  D(9,11,16,26)         131.9267         calculate D2E/DX2 analytically  !
 ! D106  D(9,11,16,72)          13.7055         calculate D2E/DX2 analytically  !
 ! D107  D(12,11,16,25)         79.5113         calculate D2E/DX2 analytically  !
 ! D108  D(12,11,16,26)        -45.1504         calculate D2E/DX2 analytically  !
 ! D109  D(12,11,16,72)       -163.3715         calculate D2E/DX2 analytically  !
 ! D110  D(11,12,13,14)          1.8543         calculate D2E/DX2 analytically  !
 ! D111  D(11,12,13,70)       -175.7847         calculate D2E/DX2 analytically  !
 ! D112  D(69,12,13,14)        178.1416         calculate D2E/DX2 analytically  !
 ! D113  D(69,12,13,70)          0.5026         calculate D2E/DX2 analytically  !
 ! D114  D(12,13,14,15)         -0.6451         calculate D2E/DX2 analytically  !
 ! D115  D(12,13,14,71)       -177.7138         calculate D2E/DX2 analytically  !
 ! D116  D(70,13,14,15)        176.9986         calculate D2E/DX2 analytically  !
 ! D117  D(70,13,14,71)         -0.0701         calculate D2E/DX2 analytically  !
 ! D118  D(13,14,15,9)          -0.6731         calculate D2E/DX2 analytically  !
 ! D119  D(13,14,15,17)       -178.5356         calculate D2E/DX2 analytically  !
 ! D120  D(71,14,15,9)         176.3836         calculate D2E/DX2 analytically  !
 ! D121  D(71,14,15,17)         -1.4789         calculate D2E/DX2 analytically  !
 ! D122  D(9,15,17,27)         141.563          calculate D2E/DX2 analytically  !
 ! D123  D(9,15,17,28)         -93.9038         calculate D2E/DX2 analytically  !
 ! D124  D(9,15,17,73)          22.7929         calculate D2E/DX2 analytically  !
 ! D125  D(14,15,17,27)        -40.622          calculate D2E/DX2 analytically  !
 ! D126  D(14,15,17,28)         83.9111         calculate D2E/DX2 analytically  !
 ! D127  D(14,15,17,73)       -159.3921         calculate D2E/DX2 analytically  !
 ! D128  D(11,16,25,79)       -172.508          calculate D2E/DX2 analytically  !
 ! D129  D(11,16,25,80)         69.0705         calculate D2E/DX2 analytically  !
 ! D130  D(11,16,25,81)        -52.2163         calculate D2E/DX2 analytically  !
 ! D131  D(26,16,25,79)        -47.2721         calculate D2E/DX2 analytically  !
 ! D132  D(26,16,25,80)       -165.6937         calculate D2E/DX2 analytically  !
 ! D133  D(26,16,25,81)         73.0195         calculate D2E/DX2 analytically  !
 ! D134  D(72,16,25,79)         69.5892         calculate D2E/DX2 analytically  !
 ! D135  D(72,16,25,80)        -48.8323         calculate D2E/DX2 analytically  !
 ! D136  D(72,16,25,81)       -170.1191         calculate D2E/DX2 analytically  !
 ! D137  D(11,16,26,82)       -170.9513         calculate D2E/DX2 analytically  !
 ! D138  D(11,16,26,83)         69.7358         calculate D2E/DX2 analytically  !
 ! D139  D(11,16,26,84)        -51.1717         calculate D2E/DX2 analytically  !
 ! D140  D(25,16,26,82)         63.5304         calculate D2E/DX2 analytically  !
 ! D141  D(25,16,26,83)        -55.7825         calculate D2E/DX2 analytically  !
 ! D142  D(25,16,26,84)       -176.69           calculate D2E/DX2 analytically  !
 ! D143  D(72,16,26,82)        -52.6245         calculate D2E/DX2 analytically  !
 ! D144  D(72,16,26,83)       -171.9374         calculate D2E/DX2 analytically  !
 ! D145  D(72,16,26,84)         67.1551         calculate D2E/DX2 analytically  !
 ! D146  D(15,17,27,85)       -173.0813         calculate D2E/DX2 analytically  !
 ! D147  D(15,17,27,86)         67.6039         calculate D2E/DX2 analytically  !
 ! D148  D(15,17,27,87)        -53.1259         calculate D2E/DX2 analytically  !
 ! D149  D(28,17,27,85)         61.8113         calculate D2E/DX2 analytically  !
 ! D150  D(28,17,27,86)        -57.5035         calculate D2E/DX2 analytically  !
 ! D151  D(28,17,27,87)       -178.2333         calculate D2E/DX2 analytically  !
 ! D152  D(73,17,27,85)        -54.9813         calculate D2E/DX2 analytically  !
 ! D153  D(73,17,27,86)       -174.2961         calculate D2E/DX2 analytically  !
 ! D154  D(73,17,27,87)         64.974          calculate D2E/DX2 analytically  !
 ! D155  D(15,17,28,88)       -178.8156         calculate D2E/DX2 analytically  !
 ! D156  D(15,17,28,89)         61.6625         calculate D2E/DX2 analytically  !
 ! D157  D(15,17,28,90)        -58.9787         calculate D2E/DX2 analytically  !
 ! D158  D(27,17,28,88)        -52.9951         calculate D2E/DX2 analytically  !
 ! D159  D(27,17,28,89)       -172.517          calculate D2E/DX2 analytically  !
 ! D160  D(27,17,28,90)         66.8419         calculate D2E/DX2 analytically  !
 ! D161  D(73,17,28,88)         64.4966         calculate D2E/DX2 analytically  !
 ! D162  D(73,17,28,89)        -55.0253         calculate D2E/DX2 analytically  !
 ! D163  D(73,17,28,90)       -175.6665         calculate D2E/DX2 analytically  !
 ! D164  D(10,18,19,20)         -0.6404         calculate D2E/DX2 analytically  !
 ! D165  D(10,18,19,74)       -178.4904         calculate D2E/DX2 analytically  !
 ! D166  D(23,18,19,20)        176.9945         calculate D2E/DX2 analytically  !
 ! D167  D(23,18,19,74)         -0.8555         calculate D2E/DX2 analytically  !
 ! D168  D(10,18,23,31)       -114.7219         calculate D2E/DX2 analytically  !
 ! D169  D(10,18,23,32)        121.4267         calculate D2E/DX2 analytically  !
 ! D170  D(10,18,23,77)          3.109          calculate D2E/DX2 analytically  !
 ! D171  D(19,18,23,31)         67.7436         calculate D2E/DX2 analytically  !
 ! D172  D(19,18,23,32)        -56.1079         calculate D2E/DX2 analytically  !
 ! D173  D(19,18,23,77)       -174.4256         calculate D2E/DX2 analytically  !
 ! D174  D(18,19,20,21)         -1.7299         calculate D2E/DX2 analytically  !
 ! D175  D(18,19,20,75)       -179.5659         calculate D2E/DX2 analytically  !
 ! D176  D(74,19,20,21)        176.1176         calculate D2E/DX2 analytically  !
 ! D177  D(74,19,20,75)         -1.7184         calculate D2E/DX2 analytically  !
 ! D178  D(19,20,21,22)          1.7182         calculate D2E/DX2 analytically  !
 ! D179  D(19,20,21,76)       -177.3033         calculate D2E/DX2 analytically  !
 ! D180  D(75,20,21,22)        179.554          calculate D2E/DX2 analytically  !
 ! D181  D(75,20,21,76)          0.5325         calculate D2E/DX2 analytically  !
 ! D182  D(20,21,22,10)          0.6596         calculate D2E/DX2 analytically  !
 ! D183  D(20,21,22,24)       -176.6064         calculate D2E/DX2 analytically  !
 ! D184  D(76,21,22,10)        179.6817         calculate D2E/DX2 analytically  !
 ! D185  D(76,21,22,24)          2.4157         calculate D2E/DX2 analytically  !
 ! D186  D(10,22,24,29)        143.4717         calculate D2E/DX2 analytically  !
 ! D187  D(10,22,24,30)        -92.1145         calculate D2E/DX2 analytically  !
 ! D188  D(10,22,24,78)         25.184          calculate D2E/DX2 analytically  !
 ! D189  D(21,22,24,29)        -39.3445         calculate D2E/DX2 analytically  !
 ! D190  D(21,22,24,30)         85.0693         calculate D2E/DX2 analytically  !
 ! D191  D(21,22,24,78)       -157.6322         calculate D2E/DX2 analytically  !
 ! D192  D(18,23,31,97)       -177.3373         calculate D2E/DX2 analytically  !
 ! D193  D(18,23,31,98)         63.6028         calculate D2E/DX2 analytically  !
 ! D194  D(18,23,31,99)        -56.8441         calculate D2E/DX2 analytically  !
 ! D195  D(32,23,31,97)        -53.0671         calculate D2E/DX2 analytically  !
 ! D196  D(32,23,31,98)       -172.1269         calculate D2E/DX2 analytically  !
 ! D197  D(32,23,31,99)         67.4261         calculate D2E/DX2 analytically  !
 ! D198  D(77,23,31,97)         64.1544         calculate D2E/DX2 analytically  !
 ! D199  D(77,23,31,98)        -54.9054         calculate D2E/DX2 analytically  !
 ! D200  D(77,23,31,99)       -175.3523         calculate D2E/DX2 analytically  !
 ! D201  D(18,23,32,100)      -173.0775         calculate D2E/DX2 analytically  !
 ! D202  D(18,23,32,101)        67.356          calculate D2E/DX2 analytically  !
 ! D203  D(18,23,32,102)       -53.1376         calculate D2E/DX2 analytically  !
 ! D204  D(31,23,32,100)        61.8562         calculate D2E/DX2 analytically  !
 ! D205  D(31,23,32,101)       -57.7103         calculate D2E/DX2 analytically  !
 ! D206  D(31,23,32,102)      -178.2039         calculate D2E/DX2 analytically  !
 ! D207  D(77,23,32,100)       -54.7066         calculate D2E/DX2 analytically  !
 ! D208  D(77,23,32,101)      -174.2731         calculate D2E/DX2 analytically  !
 ! D209  D(77,23,32,102)        65.2333         calculate D2E/DX2 analytically  !
 ! D210  D(22,24,29,91)       -172.4837         calculate D2E/DX2 analytically  !
 ! D211  D(22,24,29,92)         67.5669         calculate D2E/DX2 analytically  !
 ! D212  D(22,24,29,93)        -53.8112         calculate D2E/DX2 analytically  !
 ! D213  D(30,24,29,91)         63.2104         calculate D2E/DX2 analytically  !
 ! D214  D(30,24,29,92)        -56.739          calculate D2E/DX2 analytically  !
 ! D215  D(30,24,29,93)       -178.117          calculate D2E/DX2 analytically  !
 ! D216  D(78,24,29,91)        -54.0041         calculate D2E/DX2 analytically  !
 ! D217  D(78,24,29,92)       -173.9535         calculate D2E/DX2 analytically  !
 ! D218  D(78,24,29,93)         64.6684         calculate D2E/DX2 analytically  !
 ! D219  D(22,24,30,94)        179.3278         calculate D2E/DX2 analytically  !
 ! D220  D(22,24,30,95)         59.8636         calculate D2E/DX2 analytically  !
 ! D221  D(22,24,30,96)        -60.7716         calculate D2E/DX2 analytically  !
 ! D222  D(29,24,30,94)        -54.9539         calculate D2E/DX2 analytically  !
 ! D223  D(29,24,30,95)       -174.4181         calculate D2E/DX2 analytically  !
 ! D224  D(29,24,30,96)         64.9467         calculate D2E/DX2 analytically  !
 ! D225  D(78,24,30,94)         62.0436         calculate D2E/DX2 analytically  !
 ! D226  D(78,24,30,95)        -57.4206         calculate D2E/DX2 analytically  !
 ! D227  D(78,24,30,96)       -178.0558         calculate D2E/DX2 analytically  !
 ! D228  D(47,35,38,41)          0.3618         calculate D2E/DX2 analytically  !
 ! D229  D(47,35,38,45)        178.6717         calculate D2E/DX2 analytically  !
 ! D230  D(38,35,47,111)       -60.3175         calculate D2E/DX2 analytically  !
 ! D231  D(38,35,47,112)        60.4074         calculate D2E/DX2 analytically  !
 ! D232  D(38,35,47,113)       179.987          calculate D2E/DX2 analytically  !
 ! D233  D(7,36,39,3)          147.2596         calculate D2E/DX2 analytically  !
 ! D234  D(7,36,39,10)         -30.878          calculate D2E/DX2 analytically  !
 ! D235  D(40,36,39,3)          11.1997         calculate D2E/DX2 analytically  !
 ! D236  D(40,36,39,10)       -166.9378         calculate D2E/DX2 analytically  !
 ! D237  D(48,36,39,3)        -111.8734         calculate D2E/DX2 analytically  !
 ! D238  D(48,36,39,10)         69.9891         calculate D2E/DX2 analytically  !
 ! D239  D(55,36,39,3)          90.1259         calculate D2E/DX2 analytically  !
 ! D240  D(55,36,39,10)        -88.0116         calculate D2E/DX2 analytically  !
 ! D241  D(7,36,40,1)         -101.807          calculate D2E/DX2 analytically  !
 ! D242  D(7,36,40,9)           85.3334         calculate D2E/DX2 analytically  !
 ! D243  D(39,36,40,1)          -8.2178         calculate D2E/DX2 analytically  !
 ! D244  D(39,36,40,9)         178.9226         calculate D2E/DX2 analytically  !
 ! D245  D(48,36,40,1)         110.4266         calculate D2E/DX2 analytically  !
 ! D246  D(48,36,40,9)         -62.433          calculate D2E/DX2 analytically  !
 ! D247  D(55,36,40,1)        -173.9144         calculate D2E/DX2 analytically  !
 ! D248  D(55,36,40,9)          13.2261         calculate D2E/DX2 analytically  !
 ! D249  D(7,36,48,53)         -80.2291         calculate D2E/DX2 analytically  !
 ! D250  D(39,36,48,53)       -178.6141         calculate D2E/DX2 analytically  !
 ! D251  D(40,36,48,53)         77.8348         calculate D2E/DX2 analytically  !
 ! D252  D(55,36,48,53)         -4.1451         calculate D2E/DX2 analytically  !
 ! D253  D(7,36,55,52)         108.3478         calculate D2E/DX2 analytically  !
 ! D254  D(39,36,55,52)        167.2064         calculate D2E/DX2 analytically  !
 ! D255  D(40,36,55,52)       -114.045          calculate D2E/DX2 analytically  !
 ! D256  D(48,36,55,52)          7.4135         calculate D2E/DX2 analytically  !
 ! D257  D(49,37,44,43)       -154.1268         calculate D2E/DX2 analytically  !
 ! D258  D(49,37,44,58)         84.0097         calculate D2E/DX2 analytically  !
 ! D259  D(49,37,44,109)       -38.1508         calculate D2E/DX2 analytically  !
 ! D260  D(44,37,49,50)         -1.8055         calculate D2E/DX2 analytically  !
 ! D261  D(44,37,49,54)       -179.3511         calculate D2E/DX2 analytically  !
 ! D262  D(35,38,45,42)        166.9679         calculate D2E/DX2 analytically  !
 ! D263  D(35,38,45,59)        -74.7642         calculate D2E/DX2 analytically  !
 ! D264  D(35,38,45,110)        47.9777         calculate D2E/DX2 analytically  !
 ! D265  D(41,38,45,42)        -14.7358         calculate D2E/DX2 analytically  !
 ! D266  D(41,38,45,59)        103.5321         calculate D2E/DX2 analytically  !
 ! D267  D(41,38,45,110)      -133.7261         calculate D2E/DX2 analytically  !
 ! D268  D(45,42,43,44)        178.9273         calculate D2E/DX2 analytically  !
 ! D269  D(45,42,43,46)         -1.5684         calculate D2E/DX2 analytically  !
 ! D270  D(43,42,45,38)        -71.5488         calculate D2E/DX2 analytically  !
 ! D271  D(43,42,45,59)        167.2932         calculate D2E/DX2 analytically  !
 ! D272  D(43,42,45,110)        46.7637         calculate D2E/DX2 analytically  !
 ! D273  D(42,43,44,37)         69.2528         calculate D2E/DX2 analytically  !
 ! D274  D(42,43,44,58)       -169.6839         calculate D2E/DX2 analytically  !
 ! D275  D(42,43,44,109)       -45.8959         calculate D2E/DX2 analytically  !
 ! D276  D(46,43,44,37)       -110.2468         calculate D2E/DX2 analytically  !
 ! D277  D(46,43,44,58)         10.8165         calculate D2E/DX2 analytically  !
 ! D278  D(46,43,44,109)       134.6045         calculate D2E/DX2 analytically  !
 ! D279  D(37,44,58,122)       176.8274         calculate D2E/DX2 analytically  !
 ! D280  D(37,44,58,123)       -63.8086         calculate D2E/DX2 analytically  !
 ! D281  D(37,44,58,124)        57.37           calculate D2E/DX2 analytically  !
 ! D282  D(43,44,58,122)        59.9199         calculate D2E/DX2 analytically  !
 ! D283  D(43,44,58,123)       179.2839         calculate D2E/DX2 analytically  !
 ! D284  D(43,44,58,124)       -59.5374         calculate D2E/DX2 analytically  !
 ! D285  D(109,44,58,122)      -62.8085         calculate D2E/DX2 analytically  !
 ! D286  D(109,44,58,123)       56.5555         calculate D2E/DX2 analytically  !
 ! D287  D(109,44,58,124)      177.7341         calculate D2E/DX2 analytically  !
 ! D288  D(38,45,59,125)      -179.5249         calculate D2E/DX2 analytically  !
 ! D289  D(38,45,59,126)       -59.6135         calculate D2E/DX2 analytically  !
 ! D290  D(38,45,59,127)        60.7097         calculate D2E/DX2 analytically  !
 ! D291  D(42,45,59,125)       -60.0845         calculate D2E/DX2 analytically  !
 ! D292  D(42,45,59,126)        59.8269         calculate D2E/DX2 analytically  !
 ! D293  D(42,45,59,127)      -179.85           calculate D2E/DX2 analytically  !
 ! D294  D(110,45,59,125)       59.3452         calculate D2E/DX2 analytically  !
 ! D295  D(110,45,59,126)      179.2566         calculate D2E/DX2 analytically  !
 ! D296  D(110,45,59,127)      -60.4202         calculate D2E/DX2 analytically  !
 ! D297  D(36,48,53,52)          0.7933         calculate D2E/DX2 analytically  !
 ! D298  D(36,48,53,56)        124.4468         calculate D2E/DX2 analytically  !
 ! D299  D(36,48,53,114)      -114.7321         calculate D2E/DX2 analytically  !
 ! D300  D(37,49,54,51)        -31.6444         calculate D2E/DX2 analytically  !
 ! D301  D(37,49,54,57)       -151.4986         calculate D2E/DX2 analytically  !
 ! D302  D(37,49,54,115)        88.3884         calculate D2E/DX2 analytically  !
 ! D303  D(50,49,54,51)        150.8038         calculate D2E/DX2 analytically  !
 ! D304  D(50,49,54,57)         30.9495         calculate D2E/DX2 analytically  !
 ! D305  D(50,49,54,115)       -89.1634         calculate D2E/DX2 analytically  !
 ! D306  D(54,51,52,53)        169.7098         calculate D2E/DX2 analytically  !
 ! D307  D(54,51,52,55)         -7.541          calculate D2E/DX2 analytically  !
 ! D308  D(52,51,54,49)         98.3198         calculate D2E/DX2 analytically  !
 ! D309  D(52,51,54,57)       -138.5623         calculate D2E/DX2 analytically  !
 ! D310  D(52,51,54,115)       -21.1985         calculate D2E/DX2 analytically  !
 ! D311  D(51,52,53,48)       -170.2173         calculate D2E/DX2 analytically  !
 ! D312  D(51,52,53,56)         63.5349         calculate D2E/DX2 analytically  !
 ! D313  D(51,52,53,114)       -49.3764         calculate D2E/DX2 analytically  !
 ! D314  D(55,52,53,48)          7.0612         calculate D2E/DX2 analytically  !
 ! D315  D(55,52,53,56)       -119.1867         calculate D2E/DX2 analytically  !
 ! D316  D(55,52,53,114)       127.902          calculate D2E/DX2 analytically  !
 ! D317  D(51,52,55,36)        167.3359         calculate D2E/DX2 analytically  !
 ! D318  D(53,52,55,36)         -9.7147         calculate D2E/DX2 analytically  !
 ! D319  D(48,53,56,116)       175.1699         calculate D2E/DX2 analytically  !
 ! D320  D(48,53,56,117)       -63.2975         calculate D2E/DX2 analytically  !
 ! D321  D(48,53,56,118)        55.0937         calculate D2E/DX2 analytically  !
 ! D322  D(52,53,56,116)       -61.1681         calculate D2E/DX2 analytically  !
 ! D323  D(52,53,56,117)        60.3645         calculate D2E/DX2 analytically  !
 ! D324  D(52,53,56,118)       178.7557         calculate D2E/DX2 analytically  !
 ! D325  D(114,53,56,116)       50.6245         calculate D2E/DX2 analytically  !
 ! D326  D(114,53,56,117)      172.157          calculate D2E/DX2 analytically  !
 ! D327  D(114,53,56,118)      -69.4518         calculate D2E/DX2 analytically  !
 ! D328  D(49,54,57,119)      -165.0075         calculate D2E/DX2 analytically  !
 ! D329  D(49,54,57,120)       -46.4996         calculate D2E/DX2 analytically  !
 ! D330  D(49,54,57,121)        73.9735         calculate D2E/DX2 analytically  !
 ! D331  D(51,54,57,119)        72.8428         calculate D2E/DX2 analytically  !
 ! D332  D(51,54,57,120)      -168.6494         calculate D2E/DX2 analytically  !
 ! D333  D(51,54,57,121)       -48.1763         calculate D2E/DX2 analytically  !
 ! D334  D(115,54,57,119)      -44.9845         calculate D2E/DX2 analytically  !
 ! D335  D(115,54,57,120)       73.5234         calculate D2E/DX2 analytically  !
 ! D336  D(115,54,57,121)     -166.0035         calculate D2E/DX2 analytically  !
 --------------------------------------------------------------------------------
 Trust Radius=3.00D-01 FncErr=1.00D-07 GrdErr=1.00D-07
 Number of steps in this run=   2 maximum allowed number of steps=   2.
 GradGradGradGradGradGradGradGradGradGradGradGradGradGradGradGradGradGrad

 Stoichiometry    C46H68MgN2O10
 Framework group  C1[X(C46H68MgN2O10)]
 Deg. of freedom   375
 Full point group                 C1      NOp   1
 Largest Abelian subgroup         C1      NOp   1
 Largest concise Abelian subgroup C1      NOp   1
                         Standard orientation:                         
 ---------------------------------------------------------------------
 Center     Atomic     Atomic              Coordinates (Angstroms)
 Number     Number      Type              X           Y           Z
 ---------------------------------------------------------------------
    1          6             0        4.331198    1.078278   -0.315586
    2          6             0        4.987314   -0.157249   -0.180320
    3          6             0        4.419004   -1.429713    0.028731
    4          6             0       -1.253867   -3.306818   -1.193004
    5          6             0       -1.453004   -2.271232   -2.329747
    6          6             0       -0.760126   -1.000379   -1.793366
    7          8             0        0.067480   -1.439468   -0.698065
    8          6             0       -0.699114   -2.472917   -0.036837
    9          6             0        2.501193    2.604027   -0.228928
   10          6             0        2.609438   -3.003624    0.152806
   11          6             0        2.625850    3.474352    0.907174
   12          6             0        2.033815    4.765354    0.832252
   13          6             0        1.372529    5.199914   -0.333103
   14          6             0        1.252555    4.332171   -1.446924
   15          6             0        1.804011    3.026061   -1.412639
   16          6             0        3.436838    3.071374    2.172692
   17          6             0        1.698287    2.093695   -2.648041
   18          6             0        2.479817   -3.700689   -1.094715
   19          6             0        1.805298   -4.952064   -1.102461
   20          6             0        1.286303   -5.506483    0.084779
   21          6             0        1.463623   -4.835901    1.314632
   22          6             0        2.129935   -3.582484    1.379978
   23          6             0        3.096028   -3.164307   -2.417169
   24          6             0        2.387317   -2.893403    2.746409
   25          6             0        2.508806    2.646138    3.354800
   26          6             0        4.410987    4.212846    2.621107
   27          6             0        0.305978    2.179169   -3.347047
   28          6             0        2.842470    2.379900   -3.678406
   29          6             0        1.192167   -3.041369    3.734914
   30          6             0        3.707242   -3.435876    3.391897
   31          6             0        2.005665   -2.784336   -3.468907
   32          6             0        4.099389   -4.200724   -3.028523
   33          6             0        5.232742    2.268699   -0.638371
   34          6             0        5.421833   -2.581049    0.042906
   35          8             0       -7.275650   -2.507747    0.913734
   36         12             0        1.596796   -0.206671    0.372960
   37          8             0       -3.137576    1.926807   -0.641803
   38          6             0       -6.982730   -1.263656    0.490147
   39          7             0        3.117215   -1.648493    0.169907
   40          7             0        3.017553    1.253197   -0.165289
   41          8             0       -7.671094   -0.609988   -0.257526
   42          8             0       -5.215514    0.385483    0.452459
   43          6             0       -4.736412    0.204906   -0.793052
   44          6             0       -4.310704    1.539905   -1.404459
   45          6             0       -5.673797   -0.793444    1.131295
   46          8             0       -4.649359   -0.871818   -1.341820
   47          6             0       -8.504057   -3.058816    0.405932
   48          8             0        0.732685   -0.144827    2.097709
   49          6             0       -2.871271    3.249544   -0.577023
   50          8             0       -3.528609    4.100275   -1.136414
   51          8             0       -1.431707    2.574198    1.286167
   52          6             0       -0.590707    1.549781    1.095451
   53          6             0       -0.288345    0.725708    2.351963
   54          6             0       -1.612384    3.547592    0.232282
   55          8             0       -0.058374    1.313442    0.016382
   56          6             0       -1.585421    0.051647    2.858616
   57          6             0       -1.655389    4.916990    0.894781
   58          6             0       -3.998829    1.431800   -2.887316
   59          6             0       -5.863900   -0.421141    2.599267
   60          1             0        6.066179   -0.138252   -0.294220
   61          1             0       -0.497279   -4.052909   -1.442750
   62          1             0       -2.181682   -3.821074   -0.922806
   63          1             0       -2.510906   -2.075408   -2.525125
   64          1             0       -0.987081   -2.614480   -3.257477
   65          1             0       -1.486837   -0.274334   -1.413723
   66          1             0       -0.111684   -0.497951   -2.511870
   67          1             0       -0.029658   -3.026083    0.614603
   68          1             0       -1.494993   -1.997223    0.551041
   69          1             0        2.146435    5.458251    1.676162
   70          1             0        0.982821    6.225470   -0.394456
   71          1             0        0.768386    4.695473   -2.362424
   72          1             0        4.049088    2.186519    1.917239
   73          1             0        1.840153    1.054116   -2.284240
   74          1             0        1.718483   -5.511398   -2.043438
   75          1             0        0.774502   -6.478347    0.058478
   76          1             0        1.094352   -5.298152    2.239268
   77          1             0        3.657476   -2.239565   -2.185189
   78          1             0        2.525933   -1.811645    2.556172
   79          1             0        3.106658    2.498159    4.268198
   80          1             0        2.019545    1.687642    3.107782
   81          1             0        1.744153    3.412878    3.556398
   82          1             0        5.077972    3.835887    3.411352
   83          1             0        3.855839    5.073071    3.024261
   84          1             0        5.029834    4.561161    1.779753
   85          1             0        0.238647    1.413421   -4.136776
   86          1             0        0.151940    3.162679   -3.817679
   87          1             0       -0.503088    2.009427   -2.618502
   88          1             0        2.729999    1.719686   -4.552273
   89          1             0        3.830058    2.192035   -3.228761
   90          1             0        2.804789    3.425839   -4.021785
   91          1             0        1.379669   -2.422656    4.625455
   92          1             0        1.055637   -4.084698    4.060043
   93          1             0        0.260738   -2.688869    3.261963
   94          1             0        3.883456   -2.930340    4.353697
   95          1             0        4.572274   -3.243309    2.737197
   96          1             0        3.639304   -4.520442    3.572375
   97          1             0        2.481587   -2.454666   -4.406152
   98          1             0        1.389172   -1.953686   -3.083909
   99          1             0        1.348578   -3.640166   -3.690454
  100          1             0        4.615264   -3.754149   -3.892331
  101          1             0        3.570474   -5.102982   -3.370960
  102          1             0        4.855190   -4.501803   -2.287403
  103          1             0        5.429825    2.871986    0.255269
  104          1             0        6.199541    1.924072   -1.020800
  105          1             0        4.784937    2.930228   -1.386067
  106          1             0        5.003498   -3.499964    0.460274
  107          1             0        5.775289   -2.798990   -0.972501
  108          1             0        6.300727   -2.298538    0.635249
  109          1             0       -5.091630    2.282958   -1.221109
  110          1             0       -4.931543   -1.588456    1.019519
  111          1             0       -9.353849   -2.439103    0.703923
  112          1             0       -8.469879   -3.118818   -0.684752
  113          1             0       -8.580655   -4.053945    0.844272
  114          1             0       -0.023064    1.484444    3.115927
  115          1             0       -0.748573    3.513545   -0.444705
  116          1             0       -2.346265    0.793519    3.129506
  117          1             0       -2.000209   -0.619173    2.098287
  118          1             0       -1.337013   -0.546314    3.740553
  119          1             0       -0.640381    5.158232    1.215192
  120          1             0       -1.989653    5.666242    0.173048
  121          1             0       -2.337958    4.919996    1.749644
  122          1             0       -4.885349    1.084809   -3.427188
  123          1             0       -3.713612    2.412917   -3.273967
  124          1             0       -3.190644    0.717949   -3.064218
  125          1             0       -4.913171   -0.082986    3.020863
  126          1             0       -6.598690    0.383910    2.698403
  127          1             0       -6.211706   -1.292449    3.161002
 ---------------------------------------------------------------------
 Rotational constants (GHZ):      0.0543416      0.0376008      0.0292994
 General basis read from cards:  (5D, 7F)
 There are   728 symmetry adapted basis functions of A   symmetry.
 Integral buffers will be    131072 words long.
 Raffenetti 2 integral format.
 Two-electron integral symmetry is turned on.
   728 basis functions,  1602 primitive gaussians,   765 cartesian basis functions
   225 alpha electrons      225 beta electrons
       nuclear repulsion energy     10236.2964543174 Hartrees.
 NAtoms=  127 NActive=  127 NUniq=  127 SFac= 1.00D+00 NAtFMM=   60 Big=T
 One-electron integrals computed using PRISM.
 NBasis=   728 RedAO= T  NBF=   728
 NBsUse=   728 1.00D-06 NBFU=   728
 Initial guess read from the checkpoint file:
 RRSS_fm-5-prod-thf.chk
 Initial guess orbital symmetries:
       Occupied  (A) (A) (A) (A) (A) (A) (A) (A) (A) (A) (A) (A)
                 (A) (A) (A) (A) (A) (A) (A) (A) (A) (A) (A) (A)
                 (A) (A) (A) (A) (A) (A) (A) (A) (A) (A) (A) (A)
                 (A) (A) (A) (A) (A) (A) (A) (A) (A) (A) (A) (A)
                 (A) (A) (A) (A) (A) (A) (A) (A) (A) (A) (A) (A)
                 (A) (A) (A) (A) (A) (A) (A) (A) (A) (A) (A) (A)
                 (A) (A) (A) (A) (A) (A) (A) (A) (A) (A) (A) (A)
                 (A) (A) (A) (A) (A) (A) (A) (A) (A) (A) (A) (A)
                 (A) (A) (A) (A) (A) (A) (A) (A) (A) (A) (A) (A)
                 (A) (A) (A) (A) (A) (A) (A) (A) (A) (A) (A) (A)
                 (A) (A) (A) (A) (A) (A) (A) (A) (A) (A) (A) (A)
                 (A) (A) (A) (A) (A) (A) (A) (A) (A) (A) (A) (A)
                 (A) (A) (A) (A) (A) (A) (A) (A) (A) (A) (A) (A)
                 (A) (A) (A) (A) (A) (A) (A) (A) (A) (A) (A) (A)
                 (A) (A) (A) (A) (A) (A) (A) (A) (A) (A) (A) (A)
                 (A) (A) (A) (A) (A) (A) (A) (A) (A) (A) (A) (A)
                 (A) (A) (A) (A) (A) (A) (A) (A) (A) (A) (A) (A)
                 (A) (A) (A) (A) (A) (A) (A) (A) (A) (A) (A) (A)
                 (A) (A) (A) (A) (A) (A) (A) (A) (A)
       Virtual   (A) (A) (A) (A) (A) (A) (A) (A) (A) (A) (A) (A)
                 (A) (A) (A) (A) (A) (A) (A) (A) (A) (A) (A) (A)
                 (A) (A) (A) (A) (A) (A) (A) (A) (A) (A) (A) (A)
                 (A) (A) (A) (A) (A) (A) (A) (A) (A) (A) (A) (A)
                 (A) (A) (A) (A) (A) (A) (A) (A) (A) (A) (A) (A)
                 (A) (A) (A) (A) (A) (A) (A) (A) (A) (A) (A) (A)
                 (A) (A) (A) (A) (A) (A) (A) (A) (A) (A) (A) (A)
                 (A) (A) (A) (A) (A) (A) (A) (A) (A) (A) (A) (A)
                 (A) (A) (A) (A) (A) (A) (A) (A) (A) (A) (A) (A)
                 (A) (A) (A) (A) (A) (A) (A) (A) (A) (A) (A) (A)
                 (A) (A) (A) (A) (A) (A) (A) (A) (A) (A) (A) (A)
                 (A) (A) (A) (A) (A) (A) (A) (A) (A) (A) (A) (A)
                 (A) (A) (A) (A) (A) (A) (A) (A) (A) (A) (A) (A)
                 (A) (A) (A) (A) (A) (A) (A) (A) (A) (A) (A) (A)
                 (A) (A) (A) (A) (A) (A) (A) (A) (A) (A) (A) (A)
                 (A) (A) (A) (A) (A) (A) (A) (A) (A) (A) (A) (A)
                 (A) (A) (A) (A) (A) (A) (A) (A) (A) (A) (A) (A)
                 (A) (A) (A) (A) (A) (A) (A) (A) (A) (A) (A) (A)
                 (A) (A) (A) (A) (A) (A) (A) (A) (A) (A) (A) (A)
                 (A) (A) (A) (A) (A) (A) (A) (A) (A) (A) (A) (A)
                 (A) (A) (A) (A) (A) (A) (A) (A) (A) (A) (A) (A)
                 (A) (A) (A) (A) (A) (A) (A) (A) (A) (A) (A) (A)
                 (A) (A) (A) (A) (A) (A) (A) (A) (A) (A) (A) (A)
                 (A) (A) (A) (A) (A) (A) (A) (A) (A) (A) (A) (A)
                 (A) (A) (A) (A) (A) (A) (A) (A) (A) (A) (A) (A)
                 (A) (A) (A) (A) (A) (A) (A) (A) (A) (A) (A) (A)
                 (A) (A) (A) (A) (A) (A) (A) (A) (A) (A) (A) (A)
                 (A) (A) (A) (A) (A) (A) (A) (A) (A) (A) (A) (A)
                 (A) (A) (A) (A) (A) (A) (A) (A) (A) (A) (A) (A)
                 (A) (A) (A) (A) (A) (A) (A) (A) (A) (A) (A) (A)
                 (A) (A) (A) (A) (A) (A) (A) (A) (A) (A) (A) (A)
                 (A) (A) (A) (A) (A) (A) (A) (A) (A) (A) (A) (A)
                 (A) (A) (A) (A) (A) (A) (A) (A) (A) (A) (A) (A)
                 (A) (A) (A) (A) (A) (A) (A) (A) (A) (A) (A) (A)
                 (A) (A) (A) (A) (A) (A) (A) (A) (A) (A) (A) (A)
                 (A) (A) (A) (A) (A) (A) (A) (A) (A) (A) (A) (A)
                 (A) (A) (A) (A) (A) (A) (A) (A) (A) (A) (A) (A)
                 (A) (A) (A) (A) (A) (A) (A) (A) (A) (A) (A) (A)
                 (A) (A) (A) (A) (A) (A) (A) (A) (A) (A) (A) (A)
                 (A) (A) (A) (A) (A) (A) (A) (A) (A) (A) (A) (A)
                 (A) (A) (A) (A) (A) (A) (A) (A) (A) (A) (A) (A)
                 (A) (A) (A) (A) (A) (A) (A) (A) (A) (A) (A)
 Requested convergence on RMS density matrix=1.00D-08 within 128 cycles.
 Requested convergence on MAX density matrix=1.00D-06.
 Requested convergence on             energy=1.00D-06.
 No special actions if energy rises.
 SCF Done:  E(RB+HF-LYP) =  -2844.66752855     A.U. after    1 cycles
             Convg  =    0.4988D-08             -V/T =  2.0103
             S**2   =   0.0000
 Range of M.O.s used for correlation:     1   728
 NBasis=   728 NAE=   225 NBE=   225 NFC=     0 NFV=     0
 NROrb=    728 NOA=   225 NOB=   225 NVA=   503 NVB=   503
 Symmetrizing basis deriv contribution to polar:
 IMax=3 JMax=2 DiffMx= 0.00D+00
 G2DrvN: will do  128 centers at a time, making    1 passes doing MaxLOS=2.
 Calling FoFCou, ICntrl=  3107 FMM=T I1Cent=   0.
 FoFDir/FoFCou used for L=0 through L=2.
 DoAtom=TTTTTTTTTTTTTTTTTTTTTTTTTTTTTTTTTTTTTTTTTTTTTTTTTT
 DoAtom=TTTTTTTTTTTTTTTTTTTTTTTTTTTTTTTTTTTTTTTTTTTTTTTTTT
 DoAtom=TTTTTTTTTTTTTTTTTTTTTTTTTTT
          Differentiating once with respect to electric field.
                with respect to dipole field.
          Differentiating once with respect to nuclear coordinates.
 FoFCou: FMM=T IPFlag=           0 FMFlag=      100000 FMFlg1=        8193
 NFxFlg=           0 DoJE=F BraDBF=F KetDBF=F FulRan=T.
 Symmetry not used in FoFCou.
 FMM levels:  10  Number of levels for PrismC:   9
 PrismC:  NFx=      2048 NFxT=         6 NFxU=         6.
 PrismC:  NFx=      2048 NFxT=         6 NFxU=         6.
          There are 384 degrees of freedom in the 1st order CPHF.
   381 vectors were produced by pass  0.
 AX will form 381 AO Fock derivatives at one time.
 PrismC:  NFx=      2048 NFxT=         6 NFxU=         6.
 PrismC:  NFx=      2048 NFxT=         6 NFxU=         6.
   381 vectors were produced by pass  1.
 PrismC:  NFx=      2048 NFxT=         6 NFxU=         6.
 PrismC:  NFx=      2048 NFxT=         6 NFxU=         6.
   381 vectors were produced by pass  2.
 PrismC:  NFx=      2048 NFxT=         6 NFxU=         6.
 PrismC:  NFx=      2048 NFxT=         6 NFxU=         6.
   381 vectors were produced by pass  3.
 PrismC:  NFx=      2048 NFxT=         6 NFxU=         6.
 PrismC:  NFx=      2048 NFxT=         6 NFxU=         6.
   381 vectors were produced by pass  4.
 PrismC:  NFx=      2048 NFxT=         6 NFxU=         6.
 PrismC:  NFx=      2048 NFxT=         6 NFxU=         6.
   242 vectors were produced by pass  5.
 PrismC:  NFx=      2048 NFxT=         6 NFxU=         5.
 PrismC:  NFx=      2048 NFxT=         6 NFxU=         5.
    32 vectors were produced by pass  6.
 PrismC:  NFx=      2048 NFxT=         6 NFxU=         4.
 PrismC:  NFx=      2048 NFxT=         6 NFxU=         3.
     3 vectors were produced by pass  7.
 PrismC:  NFx=      2048 NFxT=         6 NFxU=         3.
 PrismC:  NFx=      2048 NFxT=         6 NFxU=         4.
 Inv2:  IOpt= 1 Iter= 1 AM= 9.27D-15 Conv= 1.00D-12.
 Inverted reduced A of dimension 2182 with in-core refinement.
 PrismC:  NFx=      2048 NFxT=         6 NFxU=         6.
 PrismC:  NFx=      2048 NFxT=         6 NFxU=         6.
 Isotropic polarizability for W=    0.000000      455.37 Bohr**3.
 End of Minotr Frequency-dependent properties file   721 does not exist.

 **********************************************************************

            Population analysis using the SCF density.

 **********************************************************************

 Orbital symmetries:
       Occupied  (A) (A) (A) (A) (A) (A) (A) (A) (A) (A) (A) (A)
                 (A) (A) (A) (A) (A) (A) (A) (A) (A) (A) (A) (A)
                 (A) (A) (A) (A) (A) (A) (A) (A) (A) (A) (A) (A)
                 (A) (A) (A) (A) (A) (A) (A) (A) (A) (A) (A) (A)
                 (A) (A) (A) (A) (A) (A) (A) (A) (A) (A) (A) (A)
                 (A) (A) (A) (A) (A) (A) (A) (A) (A) (A) (A) (A)
                 (A) (A) (A) (A) (A) (A) (A) (A) (A) (A) (A) (A)
                 (A) (A) (A) (A) (A) (A) (A) (A) (A) (A) (A) (A)
                 (A) (A) (A) (A) (A) (A) (A) (A) (A) (A) (A) (A)
                 (A) (A) (A) (A) (A) (A) (A) (A) (A) (A) (A) (A)
                 (A) (A) (A) (A) (A) (A) (A) (A) (A) (A) (A) (A)
                 (A) (A) (A) (A) (A) (A) (A) (A) (A) (A) (A) (A)
                 (A) (A) (A) (A) (A) (A) (A) (A) (A) (A) (A) (A)
                 (A) (A) (A) (A) (A) (A) (A) (A) (A) (A) (A) (A)
                 (A) (A) (A) (A) (A) (A) (A) (A) (A) (A) (A) (A)
                 (A) (A) (A) (A) (A) (A) (A) (A) (A) (A) (A) (A)
                 (A) (A) (A) (A) (A) (A) (A) (A) (A) (A) (A) (A)
                 (A) (A) (A) (A) (A) (A) (A) (A) (A) (A) (A) (A)
                 (A) (A) (A) (A) (A) (A) (A) (A) (A)
       Virtual   (A) (A) (A) (A) (A) (A) (A) (A) (A) (A) (A) (A)
                 (A) (A) (A) (A) (A) (A) (A) (A) (A) (A) (A) (A)
                 (A) (A) (A) (A) (A) (A) (A) (A) (A) (A) (A) (A)
                 (A) (A) (A) (A) (A) (A) (A) (A) (A) (A) (A) (A)
                 (A) (A) (A) (A) (A) (A) (A) (A) (A) (A) (A) (A)
                 (A) (A) (A) (A) (A) (A) (A) (A) (A) (A) (A) (A)
                 (A) (A) (A) (A) (A) (A) (A) (A) (A) (A) (A) (A)
                 (A) (A) (A) (A) (A) (A) (A) (A) (A) (A) (A) (A)
                 (A) (A) (A) (A) (A) (A) (A) (A) (A) (A) (A) (A)
                 (A) (A) (A) (A) (A) (A) (A) (A) (A) (A) (A) (A)
                 (A) (A) (A) (A) (A) (A) (A) (A) (A) (A) (A) (A)
                 (A) (A) (A) (A) (A) (A) (A) (A) (A) (A) (A) (A)
                 (A) (A) (A) (A) (A) (A) (A) (A) (A) (A) (A) (A)
                 (A) (A) (A) (A) (A) (A) (A) (A) (A) (A) (A) (A)
                 (A) (A) (A) (A) (A) (A) (A) (A) (A) (A) (A) (A)
                 (A) (A) (A) (A) (A) (A) (A) (A) (A) (A) (A) (A)
                 (A) (A) (A) (A) (A) (A) (A) (A) (A) (A) (A) (A)
                 (A) (A) (A) (A) (A) (A) (A) (A) (A) (A) (A) (A)
                 (A) (A) (A) (A) (A) (A) (A) (A) (A) (A) (A) (A)
                 (A) (A) (A) (A) (A) (A) (A) (A) (A) (A) (A) (A)
                 (A) (A) (A) (A) (A) (A) (A) (A) (A) (A) (A) (A)
                 (A) (A) (A) (A) (A) (A) (A) (A) (A) (A) (A) (A)
                 (A) (A) (A) (A) (A) (A) (A) (A) (A) (A) (A) (A)
                 (A) (A) (A) (A) (A) (A) (A) (A) (A) (A) (A) (A)
                 (A) (A) (A) (A) (A) (A) (A) (A) (A) (A) (A) (A)
                 (A) (A) (A) (A) (A) (A) (A) (A) (A) (A) (A) (A)
                 (A) (A) (A) (A) (A) (A) (A) (A) (A) (A) (A) (A)
                 (A) (A) (A) (A) (A) (A) (A) (A) (A) (A) (A) (A)
                 (A) (A) (A) (A) (A) (A) (A) (A) (A) (A) (A) (A)
                 (A) (A) (A) (A) (A) (A) (A) (A) (A) (A) (A) (A)
                 (A) (A) (A) (A) (A) (A) (A) (A) (A) (A) (A) (A)
                 (A) (A) (A) (A) (A) (A) (A) (A) (A) (A) (A) (A)
                 (A) (A) (A) (A) (A) (A) (A) (A) (A) (A) (A) (A)
                 (A) (A) (A) (A) (A) (A) (A) (A) (A) (A) (A) (A)
                 (A) (A) (A) (A) (A) (A) (A) (A) (A) (A) (A) (A)
                 (A) (A) (A) (A) (A) (A) (A) (A) (A) (A) (A) (A)
                 (A) (A) (A) (A) (A) (A) (A) (A) (A) (A) (A) (A)
                 (A) (A) (A) (A) (A) (A) (A) (A) (A) (A) (A) (A)
                 (A) (A) (A) (A) (A) (A) (A) (A) (A) (A) (A) (A)
                 (A) (A) (A) (A) (A) (A) (A) (A) (A) (A) (A) (A)
                 (A) (A) (A) (A) (A) (A) (A) (A) (A) (A) (A) (A)
                 (A) (A) (A) (A) (A) (A) (A) (A) (A) (A) (A)
 The electronic state is 1-A.
 Alpha  occ. eigenvalues --  -46.70030 -19.19851 -19.19789 -19.19678 -19.18471
 Alpha  occ. eigenvalues --  -19.15041 -19.14823 -19.14201 -19.14025 -19.13499
 Alpha  occ. eigenvalues --  -19.03283 -14.27757 -14.27605 -10.32260 -10.31839
 Alpha  occ. eigenvalues --  -10.31693 -10.29706 -10.26203 -10.25796 -10.24533
 Alpha  occ. eigenvalues --  -10.23983 -10.21234 -10.20203 -10.20122 -10.19775
 Alpha  occ. eigenvalues --  -10.19702 -10.18746 -10.17625 -10.16536 -10.16456
 Alpha  occ. eigenvalues --  -10.15934 -10.15393 -10.15339 -10.14632 -10.11773
 Alpha  occ. eigenvalues --  -10.05839 -10.05589 -10.03507 -10.03339 -10.03125
 Alpha  occ. eigenvalues --  -10.02973 -10.02861 -10.02783 -10.02709 -10.02558
 Alpha  occ. eigenvalues --  -10.02305 -10.02089 -10.01923 -10.01887 -10.01819
 Alpha  occ. eigenvalues --  -10.01768 -10.01107 -10.01049 -10.01045 -10.01043
 Alpha  occ. eigenvalues --  -10.00655  -9.99915  -9.99421  -9.99135  -3.00394
 Alpha  occ. eigenvalues --   -1.75138  -1.75051  -1.74778  -1.12343  -1.11262
 Alpha  occ. eigenvalues --   -1.10549  -1.09512  -1.03137  -1.03014  -1.02165
 Alpha  occ. eigenvalues --   -1.02121  -1.01385  -0.91102  -0.88836  -0.87617
 Alpha  occ. eigenvalues --   -0.81560  -0.81327  -0.80740  -0.79493  -0.77491
 Alpha  occ. eigenvalues --   -0.76892  -0.76621  -0.76431  -0.74609  -0.74230
 Alpha  occ. eigenvalues --   -0.73771  -0.73421  -0.72312  -0.71697  -0.71212
 Alpha  occ. eigenvalues --   -0.69063  -0.68622  -0.68430  -0.68254  -0.67836
 Alpha  occ. eigenvalues --   -0.66784  -0.65533  -0.65208  -0.65142  -0.64552
 Alpha  occ. eigenvalues --   -0.64265  -0.63672  -0.62425  -0.59616  -0.59228
 Alpha  occ. eigenvalues --   -0.59083  -0.58858  -0.58262  -0.57704  -0.56783
 Alpha  occ. eigenvalues --   -0.56723  -0.56006  -0.55503  -0.55187  -0.54735
 Alpha  occ. eigenvalues --   -0.53486  -0.53075  -0.52428  -0.50572  -0.50310
 Alpha  occ. eigenvalues --   -0.49939  -0.49778  -0.49353  -0.49024  -0.48957
 Alpha  occ. eigenvalues --   -0.48552  -0.48029  -0.47427  -0.46889  -0.46860
 Alpha  occ. eigenvalues --   -0.46108  -0.45708  -0.44976  -0.44733  -0.44694
 Alpha  occ. eigenvalues --   -0.44363  -0.44230  -0.43993  -0.43782  -0.43538
 Alpha  occ. eigenvalues --   -0.43315  -0.41899  -0.41512  -0.41240  -0.41117
 Alpha  occ. eigenvalues --   -0.40991  -0.40799  -0.40681  -0.40505  -0.40371
 Alpha  occ. eigenvalues --   -0.40158  -0.39991  -0.39872  -0.39764  -0.39584
 Alpha  occ. eigenvalues --   -0.39402  -0.39372  -0.39221  -0.39110  -0.39038
 Alpha  occ. eigenvalues --   -0.38776  -0.38562  -0.38284  -0.38159  -0.38067
 Alpha  occ. eigenvalues --   -0.37359  -0.37246  -0.37033  -0.36733  -0.36456
 Alpha  occ. eigenvalues --   -0.36210  -0.36139  -0.36121  -0.35866  -0.35801
 Alpha  occ. eigenvalues --   -0.35592  -0.35386  -0.35317  -0.35095  -0.34976
 Alpha  occ. eigenvalues --   -0.34893  -0.34642  -0.34341  -0.34261  -0.34129
 Alpha  occ. eigenvalues --   -0.33853  -0.33722  -0.33623  -0.33230  -0.32668
 Alpha  occ. eigenvalues --   -0.32298  -0.32065  -0.31681  -0.31412  -0.30998
 Alpha  occ. eigenvalues --   -0.30964  -0.30915  -0.30762  -0.30731  -0.30553
 Alpha  occ. eigenvalues --   -0.30255  -0.30046  -0.29836  -0.29436  -0.28667
 Alpha  occ. eigenvalues --   -0.28532  -0.28355  -0.28290  -0.28034  -0.27947
 Alpha  occ. eigenvalues --   -0.27824  -0.27426  -0.27131  -0.27019  -0.26938
 Alpha  occ. eigenvalues --   -0.25850  -0.24949  -0.24516  -0.20919  -0.19301
 Alpha  occ. eigenvalues --   -0.19230  -0.18935  -0.18562  -0.18075  -0.14990
 Alpha virt. eigenvalues --   -0.01201   0.00287   0.00418   0.01333   0.01722
 Alpha virt. eigenvalues --    0.06114   0.06545   0.06793   0.06952   0.07166
 Alpha virt. eigenvalues --    0.07762   0.09632   0.10109   0.10160   0.10758
 Alpha virt. eigenvalues --    0.11311   0.11720   0.12280   0.12490   0.12872
 Alpha virt. eigenvalues --    0.13338   0.13664   0.13835   0.14482   0.14809
 Alpha virt. eigenvalues --    0.14958   0.15251   0.15516   0.15772   0.16149
 Alpha virt. eigenvalues --    0.16270   0.16696   0.17088   0.17225   0.17757
 Alpha virt. eigenvalues --    0.17799   0.18126   0.18423   0.18810   0.19343
 Alpha virt. eigenvalues --    0.19923   0.20471   0.20819   0.21204   0.21337
 Alpha virt. eigenvalues --    0.21617   0.21823   0.22097   0.22408   0.23019
 Alpha virt. eigenvalues --    0.23195   0.23366   0.24035   0.24308   0.24704
 Alpha virt. eigenvalues --    0.25179   0.25435   0.25506   0.25610   0.25885
 Alpha virt. eigenvalues --    0.26520   0.26591   0.27919   0.28776   0.29031
 Alpha virt. eigenvalues --    0.29659   0.29679   0.29980   0.30489   0.31037
 Alpha virt. eigenvalues --    0.31173   0.31555   0.31751   0.32058   0.32459
 Alpha virt. eigenvalues --    0.32739   0.32988   0.33337   0.33967   0.34441
 Alpha virt. eigenvalues --    0.34517   0.34823   0.35291   0.35972   0.36287
 Alpha virt. eigenvalues --    0.36539   0.36931   0.37779   0.38014   0.38311
 Alpha virt. eigenvalues --    0.38493   0.38818   0.39174   0.39321   0.39567
 Alpha virt. eigenvalues --    0.39798   0.40289   0.40502   0.41141   0.41294
 Alpha virt. eigenvalues --    0.41417   0.42146   0.42660   0.42739   0.43490
 Alpha virt. eigenvalues --    0.43562   0.43825   0.44873   0.44952   0.45382
 Alpha virt. eigenvalues --    0.45652   0.45945   0.46296   0.46557   0.46628
 Alpha virt. eigenvalues --    0.46742   0.46973   0.47556   0.47996   0.48129
 Alpha virt. eigenvalues --    0.48512   0.48563   0.48741   0.49030   0.49166
 Alpha virt. eigenvalues --    0.49219   0.49566   0.49850   0.50137   0.50278
 Alpha virt. eigenvalues --    0.50534   0.50841   0.51100   0.51294   0.51466
 Alpha virt. eigenvalues --    0.51688   0.52574   0.52991   0.53300   0.53433
 Alpha virt. eigenvalues --    0.53730   0.54078   0.54253   0.54502   0.54929
 Alpha virt. eigenvalues --    0.55147   0.55319   0.55708   0.56036   0.56420
 Alpha virt. eigenvalues --    0.56622   0.56760   0.56953   0.57266   0.57532
 Alpha virt. eigenvalues --    0.57662   0.58188   0.58393   0.58939   0.59056
 Alpha virt. eigenvalues --    0.59259   0.59441   0.59603   0.59839   0.60224
 Alpha virt. eigenvalues --    0.60577   0.60751   0.61193   0.61546   0.62129
 Alpha virt. eigenvalues --    0.62622   0.63138   0.63234   0.64028   0.64318
 Alpha virt. eigenvalues --    0.64522   0.64894   0.65200   0.65690   0.65864
 Alpha virt. eigenvalues --    0.66058   0.66868   0.67418   0.67697   0.67999
 Alpha virt. eigenvalues --    0.68760   0.69291   0.69722   0.70568   0.70901
 Alpha virt. eigenvalues --    0.71130   0.71502   0.71616   0.71951   0.72109
 Alpha virt. eigenvalues --    0.72670   0.73101   0.73549   0.73985   0.74345
 Alpha virt. eigenvalues --    0.75066   0.75404   0.75457   0.76298   0.76452
 Alpha virt. eigenvalues --    0.77153   0.77380   0.77894   0.78300   0.78749
 Alpha virt. eigenvalues --    0.79223   0.80117   0.80303   0.80995   0.82237
 Alpha virt. eigenvalues --    0.82791   0.83522   0.83650   0.84039   0.84539
 Alpha virt. eigenvalues --    0.85029   0.85632   0.86023   0.86334   0.87362
 Alpha virt. eigenvalues --    0.87484   0.87746   0.88515   0.88950   0.89278
 Alpha virt. eigenvalues --    0.89521   0.90194   0.90941   0.91113   0.91380
 Alpha virt. eigenvalues --    0.91452   0.92062   0.92423   0.92949   0.93059
 Alpha virt. eigenvalues --    0.93532   0.94110   0.94760   0.94981   0.95641
 Alpha virt. eigenvalues --    0.95903   0.96777   0.97483   0.98028   0.98258
 Alpha virt. eigenvalues --    0.98788   0.99527   0.99620   1.00543   1.00830
 Alpha virt. eigenvalues --    1.01546   1.02982   1.03969   1.04742   1.05671
 Alpha virt. eigenvalues --    1.05854   1.06597   1.07112   1.07733   1.08505
 Alpha virt. eigenvalues --    1.09637   1.10055   1.11588   1.12383   1.12707
 Alpha virt. eigenvalues --    1.13505   1.14002   1.14126   1.15006   1.16576
 Alpha virt. eigenvalues --    1.17295   1.18180   1.18479   1.19401   1.19780
 Alpha virt. eigenvalues --    1.20804   1.21696   1.22100   1.23196   1.23402
 Alpha virt. eigenvalues --    1.24274   1.24629   1.26514   1.27481   1.28466
 Alpha virt. eigenvalues --    1.30918   1.32882   1.33114   1.33807   1.34925
 Alpha virt. eigenvalues --    1.36474   1.36758   1.36930   1.37566   1.38150
 Alpha virt. eigenvalues --    1.39328   1.40043   1.41278   1.42389   1.43839
 Alpha virt. eigenvalues --    1.44449   1.45191   1.46463   1.47012   1.47348
 Alpha virt. eigenvalues --    1.48084   1.48541   1.49252   1.50140   1.50637
 Alpha virt. eigenvalues --    1.51002   1.51593   1.52514   1.52962   1.55045
 Alpha virt. eigenvalues --    1.56566   1.57238   1.58109   1.60399   1.61450
 Alpha virt. eigenvalues --    1.62011   1.63104   1.63984   1.64432   1.65661
 Alpha virt. eigenvalues --    1.67162   1.67426   1.68109   1.68824   1.70231
 Alpha virt. eigenvalues --    1.70465   1.71157   1.72797   1.73199   1.73409
 Alpha virt. eigenvalues --    1.74608   1.76345   1.76918   1.78076   1.78461
 Alpha virt. eigenvalues --    1.78879   1.79007   1.79476   1.80773   1.81003
 Alpha virt. eigenvalues --    1.82612   1.82938   1.83756   1.83895   1.84281
 Alpha virt. eigenvalues --    1.84360   1.85034   1.85498   1.85647   1.86397
 Alpha virt. eigenvalues --    1.87459   1.88180   1.88443   1.88853   1.89422
 Alpha virt. eigenvalues --    1.90067   1.90476   1.91434   1.91802   1.92152
 Alpha virt. eigenvalues --    1.92321   1.92670   1.93190   1.95263   1.95855
 Alpha virt. eigenvalues --    1.96108   1.96873   1.97582   1.97949   1.98377
 Alpha virt. eigenvalues --    1.99095   2.00289   2.00759   2.00890   2.01327
 Alpha virt. eigenvalues --    2.01638   2.01712   2.02422   2.02717   2.02925
 Alpha virt. eigenvalues --    2.04038   2.04922   2.05339   2.06156   2.07239
 Alpha virt. eigenvalues --    2.08220   2.08742   2.09310   2.09652   2.10060
 Alpha virt. eigenvalues --    2.10860   2.12017   2.12788   2.13569   2.14791
 Alpha virt. eigenvalues --    2.15114   2.15836   2.15908   2.16054   2.17132
 Alpha virt. eigenvalues --    2.17374   2.17713   2.18331   2.18872   2.19635
 Alpha virt. eigenvalues --    2.19778   2.20529   2.21148   2.22141   2.23491
 Alpha virt. eigenvalues --    2.24814   2.25381   2.26858   2.27763   2.28252
 Alpha virt. eigenvalues --    2.28683   2.29191   2.29830   2.30775   2.31157
 Alpha virt. eigenvalues --    2.31499   2.31698   2.32740   2.33804   2.34194
 Alpha virt. eigenvalues --    2.34986   2.35591   2.36424   2.37031   2.38272
 Alpha virt. eigenvalues --    2.40602   2.41014   2.41827   2.42718   2.43986
 Alpha virt. eigenvalues --    2.45091   2.45406   2.46402   2.48108   2.48180
 Alpha virt. eigenvalues --    2.49950   2.51975   2.52602   2.55015   2.55759
 Alpha virt. eigenvalues --    2.57528   2.58315   2.58833   2.59677   2.60900
 Alpha virt. eigenvalues --    2.63253   2.65126   2.65702   2.66800   2.67164
 Alpha virt. eigenvalues --    2.67886   2.68174   2.69835   2.71989   2.72052
 Alpha virt. eigenvalues --    2.75525   2.75652   2.75746   2.76922   2.77426
 Alpha virt. eigenvalues --    2.80013   2.80822   2.81628   2.87008   2.87724
 Alpha virt. eigenvalues --    2.88281   2.91898   2.94874   2.96417   2.97757
 Alpha virt. eigenvalues --    2.98332   2.99171   3.03401   3.03700   3.04577
 Alpha virt. eigenvalues --    3.08087   3.11355   3.15481   3.17125   3.17682
 Alpha virt. eigenvalues --    3.19799   3.21298   3.26853   3.76777   6.06080
 Alpha virt. eigenvalues --    6.13985   6.29342 103.47592
          Condensed to atoms (all electrons):
 Mulliken atomic charges:
              1
     1  C    0.334337
     2  C   -0.234915
     3  C    0.334448
     4  C   -0.280980
     5  C   -0.318965
     6  C   -0.030189
     7  O   -0.513699
     8  C   -0.033870
     9  C    0.024576
    10  C    0.016275
    11  C    0.004402
    12  C   -0.077443
    13  C   -0.069228
    14  C   -0.077518
    15  C    0.006069
    16  C   -0.054555
    17  C   -0.056099
    18  C    0.006667
    19  C   -0.074971
    20  C   -0.071991
    21  C   -0.076000
    22  C    0.001355
    23  C   -0.050930
    24  C   -0.061158
    25  C   -0.223644
    26  C   -0.217918
    27  C   -0.221451
    28  C   -0.217703
    29  C   -0.216355
    30  C   -0.217641
    31  C   -0.213749
    32  C   -0.217436
    33  C   -0.454549
    34  C   -0.452279
    35  O   -0.449434
    36  Mg   0.880586
    37  O   -0.458584
    38  C    0.579227
    39  N   -0.525626
    40  N   -0.539374
    41  O   -0.432344
    42  O   -0.447676
    43  C    0.599571
    44  C    0.055240
    45  C    0.058759
    46  O   -0.435093
    47  C   -0.214950
    48  O   -0.663689
    49  C    0.594897
    50  O   -0.438230
    51  O   -0.454706
    52  C    0.612041
    53  C    0.140274
    54  C    0.026042
    55  O   -0.460236
    56  C   -0.478621
    57  C   -0.454651
    58  C   -0.470215
    59  C   -0.476556
    60  H    0.074457
    61  H    0.111259
    62  H    0.135775
    63  H    0.169616
    64  H    0.133688
    65  H    0.169147
    66  H    0.143273
    67  H    0.116159
    68  H    0.146525
    69  H    0.085906
    70  H    0.089086
    71  H    0.086358
    72  H    0.098476
    73  H    0.095266
    74  H    0.083864
    75  H    0.085327
    76  H    0.086525
    77  H    0.100499
    78  H    0.115332
    79  H    0.074164
    80  H    0.116719
    81  H    0.070992
    82  H    0.077199
    83  H    0.071497
    84  H    0.072306
    85  H    0.074062
    86  H    0.072073
    87  H    0.089206
    88  H    0.076440
    89  H    0.083912
    90  H    0.072300
    91  H    0.078309
    92  H    0.061963
    93  H    0.094383
    94  H    0.077177
    95  H    0.079217
    96  H    0.068415
    97  H    0.075539
    98  H    0.093034
    99  H    0.074818
   100  H    0.075853
   101  H    0.072019
   102  H    0.076655
   103  H    0.129779
   104  H    0.124275
   105  H    0.125886
   106  H    0.125268
   107  H    0.129781
   108  H    0.129002
   109  H    0.192101
   110  H    0.184146
   111  H    0.172045
   112  H    0.178139
   113  H    0.167031
   114  H    0.108741
   115  H    0.146190
   116  H    0.138356
   117  H    0.148439
   118  H    0.157780
   119  H    0.130298
   120  H    0.168891
   121  H    0.158048
   122  H    0.167742
   123  H    0.173814
   124  H    0.172786
   125  H    0.185698
   126  H    0.171422
   127  H    0.170010
 Sum of Mulliken charges=   0.00000
 Atomic charges with hydrogens summed into heavy atoms:
              1
     1  C    0.334337
     2  C   -0.160458
     3  C    0.334448
     4  C   -0.033947
     5  C   -0.015661
     6  C    0.282230
     7  O   -0.513699
     8  C    0.228815
     9  C    0.024576
    10  C    0.016275
    11  C    0.004402
    12  C    0.008463
    13  C    0.019858
    14  C    0.008840
    15  C    0.006069
    16  C    0.043921
    17  C    0.039168
    18  C    0.006667
    19  C    0.008894
    20  C    0.013337
    21  C    0.010525
    22  C    0.001355
    23  C    0.049569
    24  C    0.054174
    25  C    0.038232
    26  C    0.003084
    27  C    0.013889
    28  C    0.014949
    29  C    0.018299
    30  C    0.007168
    31  C    0.029641
    32  C    0.007091
    33  C   -0.074609
    34  C   -0.068228
    35  O   -0.449434
    36  Mg   0.880586
    37  O   -0.458584
    38  C    0.579227
    39  N   -0.525626
    40  N   -0.539374
    41  O   -0.432344
    42  O   -0.447676
    43  C    0.599571
    44  C    0.247341
    45  C    0.242905
    46  O   -0.435093
    47  C    0.302263
    48  O   -0.663689
    49  C    0.594897
    50  O   -0.438230
    51  O   -0.454706
    52  C    0.612041
    53  C    0.249015
    54  C    0.172232
    55  O   -0.460236
    56  C   -0.034045
    57  C    0.002587
    58  C    0.044127
    59  C    0.050573
    60  H    0.000000
    61  H    0.000000
    62  H    0.000000
    63  H    0.000000
    64  H    0.000000
    65  H    0.000000
    66  H    0.000000
    67  H    0.000000
    68  H    0.000000
    69  H    0.000000
    70  H    0.000000
    71  H    0.000000
    72  H    0.000000
    73  H    0.000000
    74  H    0.000000
    75  H    0.000000
    76  H    0.000000
    77  H    0.000000
    78  H    0.000000
    79  H    0.000000
    80  H    0.000000
    81  H    0.000000
    82  H    0.000000
    83  H    0.000000
    84  H    0.000000
    85  H    0.000000
    86  H    0.000000
    87  H    0.000000
    88  H    0.000000
    89  H    0.000000
    90  H    0.000000
    91  H    0.000000
    92  H    0.000000
    93  H    0.000000
    94  H    0.000000
    95  H    0.000000
    96  H    0.000000
    97  H    0.000000
    98  H    0.000000
    99  H    0.000000
   100  H    0.000000
   101  H    0.000000
   102  H    0.000000
   103  H    0.000000
   104  H    0.000000
   105  H    0.000000
   106  H    0.000000
   107  H    0.000000
   108  H    0.000000
   109  H    0.000000
   110  H    0.000000
   111  H    0.000000
   112  H    0.000000
   113  H    0.000000
   114  H    0.000000
   115  H    0.000000
   116  H    0.000000
   117  H    0.000000
   118  H    0.000000
   119  H    0.000000
   120  H    0.000000
   121  H    0.000000
   122  H    0.000000
   123  H    0.000000
   124  H    0.000000
   125  H    0.000000
   126  H    0.000000
   127  H    0.000000
 Sum of Mulliken charges=   0.00000
 APT atomic charges:
              1
     1  C    0.949152
     2  C   -0.905512
     3  C    0.942679
     4  C    0.025370
     5  C    0.035632
     6  C    0.424811
     7  O   -0.726430
     8  C    0.376691
     9  C    0.323175
    10  C    0.304217
    11  C   -0.032944
    12  C   -0.139164
    13  C   -0.106376
    14  C   -0.172813
    15  C   -0.045434
    16  C    0.170752
    17  C    0.191776
    18  C   -0.055303
    19  C   -0.145922
    20  C   -0.076248
    21  C   -0.140329
    22  C   -0.037780
    23  C    0.168043
    24  C    0.171082
    25  C   -0.029811
    26  C   -0.050783
    27  C   -0.039797
    28  C   -0.048157
    29  C   -0.011181
    30  C   -0.041643
    31  C   -0.010103
    32  C   -0.048292
    33  C   -0.213898
    34  C   -0.230728
    35  O   -0.851038
    36  Mg   1.282270
    37  O   -0.869059
    38  C    1.039357
    39  N   -0.918320
    40  N   -0.953498
    41  O   -0.659314
    42  O   -0.845580
    43  C    1.025199
    44  C    0.465793
    45  C    0.429195
    46  O   -0.666571
    47  C    0.502609
    48  O   -0.932689
    49  C    1.066948
    50  O   -0.705495
    51  O   -0.808947
    52  C    0.957048
    53  C    0.528233
    54  C    0.318643
    55  O   -0.731053
    56  C    0.023607
    57  C    0.000909
    58  C   -0.016071
    59  C    0.032335
    60  H   -0.022234
    61  H    0.032014
    62  H   -0.027986
    63  H    0.000302
    64  H   -0.023088
    65  H   -0.045157
    66  H   -0.006126
    67  H    0.054023
    68  H   -0.062939
    69  H    0.070852
    70  H    0.080368
    71  H    0.076769
    72  H   -0.035442
    73  H   -0.071827
    74  H    0.071887
    75  H    0.073754
    76  H    0.070638
    77  H   -0.036061
    78  H   -0.028886
    79  H   -0.003560
    80  H    0.020200
    81  H    0.009186
    82  H    0.005203
    83  H    0.008787
    84  H    0.004084
    85  H    0.001861
    86  H    0.008323
    87  H   -0.009960
    88  H    0.003072
    89  H    0.006576
    90  H    0.006597
    91  H    0.007192
    92  H   -0.009054
    93  H   -0.010739
    94  H    0.002704
    95  H    0.000951
    96  H   -0.000723
    97  H   -0.000805
    98  H   -0.027356
    99  H    0.007276
   100  H    0.003569
   101  H    0.009439
   102  H    0.009175
   103  H    0.051259
   104  H    0.046794
   105  H    0.047458
   106  H    0.044525
   107  H    0.051146
   108  H    0.048185
   109  H    0.000889
   110  H   -0.015724
   111  H   -0.022464
   112  H   -0.017214
   113  H   -0.007290
   114  H   -0.087530
   115  H    0.082292
   116  H   -0.034613
   117  H   -0.029716
   118  H   -0.013918
   119  H    0.052991
   120  H    0.027107
   121  H   -0.001509
   122  H    0.008040
   123  H    0.019084
   124  H    0.012246
   125  H    0.009641
   126  H    0.005960
   127  H    0.010258
 Sum of APT charges=   0.00000
 APT Atomic charges with hydrogens summed into heavy atoms:
              1
     1  C    0.949152
     2  C   -0.927746
     3  C    0.942679
     4  C    0.029398
     5  C    0.012846
     6  C    0.373528
     7  O   -0.726430
     8  C    0.367775
     9  C    0.323175
    10  C    0.304217
    11  C   -0.032944
    12  C   -0.068312
    13  C   -0.026008
    14  C   -0.096044
    15  C   -0.045434
    16  C    0.135310
    17  C    0.119949
    18  C   -0.055303
    19  C   -0.074035
    20  C   -0.002494
    21  C   -0.069692
    22  C   -0.037780
    23  C    0.131983
    24  C    0.142196
    25  C   -0.003985
    26  C   -0.032709
    27  C   -0.039573
    28  C   -0.031910
    29  C   -0.023783
    30  C   -0.038712
    31  C   -0.030988
    32  C   -0.026109
    33  C   -0.068386
    34  C   -0.086873
    35  O   -0.851038
    36  Mg   1.282270
    37  O   -0.869059
    38  C    1.039357
    39  N   -0.918320
    40  N   -0.953498
    41  O   -0.659314
    42  O   -0.845580
    43  C    1.025199
    44  C    0.466682
    45  C    0.413471
    46  O   -0.666571
    47  C    0.455641
    48  O   -0.932689
    49  C    1.066948
    50  O   -0.705495
    51  O   -0.808947
    52  C    0.957048
    53  C    0.440703
    54  C    0.400936
    55  O   -0.731053
    56  C   -0.054640
    57  C    0.079499
    58  C    0.023299
    59  C    0.058195
    60  H    0.000000
    61  H    0.000000
    62  H    0.000000
    63  H    0.000000
    64  H    0.000000
    65  H    0.000000
    66  H    0.000000
    67  H    0.000000
    68  H    0.000000
    69  H    0.000000
    70  H    0.000000
    71  H    0.000000
    72  H    0.000000
    73  H    0.000000
    74  H    0.000000
    75  H    0.000000
    76  H    0.000000
    77  H    0.000000
    78  H    0.000000
    79  H    0.000000
    80  H    0.000000
    81  H    0.000000
    82  H    0.000000
    83  H    0.000000
    84  H    0.000000
    85  H    0.000000
    86  H    0.000000
    87  H    0.000000
    88  H    0.000000
    89  H    0.000000
    90  H    0.000000
    91  H    0.000000
    92  H    0.000000
    93  H    0.000000
    94  H    0.000000
    95  H    0.000000
    96  H    0.000000
    97  H    0.000000
    98  H    0.000000
    99  H    0.000000
   100  H    0.000000
   101  H    0.000000
   102  H    0.000000
   103  H    0.000000
   104  H    0.000000
   105  H    0.000000
   106  H    0.000000
   107  H    0.000000
   108  H    0.000000
   109  H    0.000000
   110  H    0.000000
   111  H    0.000000
   112  H    0.000000
   113  H    0.000000
   114  H    0.000000
   115  H    0.000000
   116  H    0.000000
   117  H    0.000000
   118  H    0.000000
   119  H    0.000000
   120  H    0.000000
   121  H    0.000000
   122  H    0.000000
   123  H    0.000000
   124  H    0.000000
   125  H    0.000000
   126  H    0.000000
   127  H    0.000000
 Sum of APT charges=   0.00000
 Electronic spatial extent (au):  <R**2>= 40336.6239
 Charge=     0.0000 electrons
 Dipole moment (field-independent basis, Debye):
    X=     0.0340    Y=    -2.2753    Z=    -1.0314  Tot=     2.4984
 Quadrupole moment (field-independent basis, Debye-Ang):
   XX=  -333.4238   YY=  -318.7152   ZZ=  -336.5310
   XY=    21.0766   XZ=   -15.5579   YZ=     0.0450
 Traceless Quadrupole moment (field-independent basis, Debye-Ang):
   XX=    -3.8671   YY=    10.8414   ZZ=    -6.9743
   XY=    21.0766   XZ=   -15.5579   YZ=     0.0450
 Octapole moment (field-independent basis, Debye-Ang**2):
  XXX=  -176.1982  YYY=   -61.2987  ZZZ=   -23.5417  XYY=    20.3835
  XXY=  -162.4958  XXZ=    88.8946  XZZ=   -20.9971  YZZ=     2.0719
  YYZ=    21.6464  XYZ=    19.2162
 Hexadecapole moment (field-independent basis, Debye-Ang**3):
 XXXX=-25463.7280 YYYY=-16539.2101 ZZZZ= -7682.6678 XXXY=  1412.3190
 XXXZ=  -620.2375 YYYX=   435.3860 YYYZ=    70.5990 ZZZX=     1.2764
 ZZZY=   -31.7521 XXYY= -6945.7465 XXZZ= -5649.5959 YYZZ= -4027.9047
 XXYZ=   -12.3909 YYXZ=   -61.8846 ZZXY=   -15.3166
 N-N= 1.023629645432D+04 E-N=-2.711134273822D+04  KE= 2.815707756071D+03
  Exact polarizability: 450.501   3.873 513.579   5.060  -0.714 402.017
 Approx polarizability: 592.125  -8.837 749.502  10.310  -0.990 629.480
 Full mass-weighted force constant matrix:
 Low frequencies ---  -10.6093   -4.5953   -2.7854   -0.0009   -0.0003    0.0009
 Low frequencies ---    6.4752   10.1005   14.8092
 ******    1 imaginary frequencies (negative Signs) ****** 
 Diagonal vibrational polarizability:
      289.1219473     153.5148708     165.7428627
 Harmonic frequencies (cm**-1), IR intensities (KM/Mole), Raman scattering
 activities (A**4/AMU), depolarization ratios for plane and unpolarized
 incident light, reduced masses (AMU), force constants (mDyne/A),
 and normal coordinates:
                     1                      2                      3
                     A                      A                      A
 Frequencies --    -6.8914                10.0192                14.6774
 Red. masses --     2.7600                 5.3369                 4.3021
 Frc consts  --     0.0001                 0.0003                 0.0005
 IR Inten    --     0.2190                 0.1252                 0.3333
 Atom AN      X      Y      Z        X      Y      Z        X      Y      Z
   1   6     0.01   0.00   0.04     0.01   0.02   0.00     0.00   0.00   0.02
   2   6     0.01   0.00   0.06     0.02   0.03   0.00     0.00   0.00   0.01
   3   6     0.00   0.00   0.05     0.03   0.02  -0.01     0.00   0.00   0.00
   4   6     0.02  -0.03  -0.02     0.05  -0.05   0.02     0.00   0.04  -0.09
   5   6    -0.01  -0.01   0.00     0.01  -0.04   0.03     0.04   0.04  -0.09
   6   6    -0.04   0.00   0.02     0.01  -0.04   0.02     0.06   0.03  -0.08
   7   8    -0.02   0.00   0.00     0.02  -0.03   0.01     0.02   0.01  -0.06
   8   6     0.01  -0.03  -0.01     0.04  -0.04   0.02    -0.01   0.03  -0.08
   9   6     0.01   0.00  -0.01    -0.01   0.00   0.01     0.01   0.00   0.02
  10   6     0.01   0.00  -0.01     0.05   0.00  -0.01    -0.02   0.00  -0.01
  11   6     0.00   0.01  -0.01    -0.02   0.00   0.01    -0.01  -0.01   0.04
  12   6     0.00   0.01  -0.03    -0.03   0.00   0.02    -0.01  -0.01   0.05
  13   6     0.00  -0.01  -0.04    -0.03  -0.01   0.02     0.01   0.01   0.05
  14   6     0.01  -0.02  -0.03    -0.02   0.00   0.02     0.03   0.03   0.03
  15   6     0.02  -0.02  -0.02    -0.01   0.00   0.01     0.03   0.02   0.02
  16   6    -0.02   0.02   0.00    -0.01   0.01   0.01    -0.03  -0.03   0.04
  17   6     0.03  -0.03   0.00     0.00   0.00   0.01     0.05   0.04   0.00
  18   6     0.03   0.01  -0.02     0.05   0.01  -0.01    -0.01   0.00  -0.01
  19   6     0.05   0.01  -0.04     0.07   0.00  -0.01    -0.02   0.01  -0.02
  20   6     0.05  -0.02  -0.06     0.09  -0.02  -0.01    -0.05   0.02  -0.02
  21   6     0.03  -0.04  -0.05     0.09  -0.02  -0.01    -0.06   0.02  -0.02
  22   6     0.01  -0.03  -0.02     0.07  -0.01  -0.01    -0.04   0.01  -0.02
  23   6     0.02   0.05  -0.01     0.03   0.02  -0.02     0.03  -0.02   0.00
  24   6    -0.04  -0.04  -0.01     0.06  -0.01  -0.01    -0.04   0.01  -0.02
  25   6    -0.03   0.03  -0.01    -0.01   0.00   0.01    -0.04  -0.04   0.03
  26   6    -0.03   0.03   0.00    -0.02   0.01   0.02    -0.02  -0.04   0.07
  27   6     0.04  -0.03  -0.03    -0.01  -0.02   0.02     0.06   0.05  -0.01
  28   6     0.05  -0.06   0.01    -0.01   0.02   0.01     0.06   0.07   0.02
  29   6    -0.09  -0.02  -0.06     0.06  -0.02  -0.01    -0.03   0.00  -0.01
  30   6    -0.08  -0.06   0.06     0.07   0.01  -0.01    -0.03   0.01  -0.03
  31   6     0.01   0.16   0.04     0.02   0.01   0.00     0.06  -0.06  -0.05
  32   6    -0.04   0.04  -0.10     0.04   0.04  -0.03     0.07  -0.01   0.06
  33   6     0.02   0.00   0.04    -0.01   0.03   0.01     0.01   0.00   0.05
  34   6    -0.02  -0.01   0.06     0.04   0.03  -0.02     0.00   0.00   0.01
  35   8     0.01   0.00   0.05    -0.21   0.14   0.04     0.01   0.02   0.15
  36  12     0.00   0.00   0.00     0.02  -0.01   0.00    -0.01   0.00  -0.02
  37   8    -0.01   0.00   0.00     0.00  -0.05  -0.02     0.00  -0.03  -0.04
  38   6     0.00   0.00   0.04    -0.11   0.10   0.00     0.01   0.00   0.09
  39   7     0.00   0.00   0.01     0.03   0.01  -0.01     0.00   0.00   0.00
  40   7     0.01   0.00   0.01     0.01   0.01   0.01     0.00   0.00   0.01
  41   8     0.00  -0.01   0.03    -0.06   0.13  -0.01     0.00  -0.03   0.07
  42   8    -0.01   0.01   0.02    -0.01  -0.01  -0.02     0.00   0.01   0.02
  43   6    -0.01   0.00   0.03    -0.03  -0.03  -0.02     0.00  -0.03   0.02
  44   6    -0.01   0.00   0.01     0.01  -0.05  -0.03    -0.01  -0.04  -0.02
  45   6     0.00   0.02   0.03    -0.07   0.02  -0.02     0.01   0.03   0.06
  46   8     0.00   0.00   0.04    -0.06  -0.04  -0.02     0.01  -0.05   0.06
  47   6     0.02  -0.01   0.05    -0.25   0.22   0.06     0.01   0.00   0.19
  48   8     0.00   0.01   0.00     0.02  -0.02   0.01    -0.03  -0.01  -0.03
  49   6     0.00   0.00  -0.01     0.00  -0.05  -0.02     0.00  -0.03  -0.07
  50   8     0.00   0.00  -0.02     0.01  -0.05  -0.04     0.01  -0.04  -0.09
  51   8     0.01   0.01  -0.02    -0.01  -0.05   0.00    -0.01   0.00  -0.05
  52   6     0.00   0.01  -0.01     0.00  -0.03   0.00    -0.01   0.00  -0.04
  53   6    -0.01   0.00  -0.01     0.01  -0.03   0.00    -0.03   0.00  -0.04
  54   6     0.01   0.01  -0.02    -0.01  -0.04   0.00    -0.01  -0.01  -0.06
  55   8     0.01   0.00  -0.01     0.01  -0.03   0.00     0.00   0.00  -0.03
  56   6    -0.02  -0.01  -0.04     0.02  -0.04   0.01    -0.04   0.00  -0.06
  57   6     0.01   0.01  -0.03    -0.03  -0.05   0.00    -0.03   0.00  -0.07
  58   6    -0.02  -0.01   0.01     0.04  -0.07  -0.03    -0.02  -0.08  -0.02
  59   6    -0.01   0.03   0.03    -0.01   0.02  -0.01     0.02   0.08   0.05
  60   1     0.01   0.00   0.09     0.02   0.04   0.00     0.00  -0.01   0.02
  61   1     0.04  -0.01  -0.04     0.06  -0.03   0.01     0.00   0.03  -0.08
  62   1     0.04  -0.05  -0.02     0.06  -0.06   0.03    -0.01   0.05  -0.12
  63   1    -0.01  -0.04   0.00     0.01  -0.06   0.04     0.04   0.06  -0.10
  64   1     0.01   0.02  -0.01     0.00  -0.03   0.02     0.04   0.04  -0.09
  65   1    -0.06  -0.04   0.05     0.00  -0.05   0.03     0.07   0.05  -0.10
  66   1    -0.07   0.04   0.03    -0.01  -0.02   0.02     0.09   0.01  -0.07
  67   1     0.03  -0.03  -0.02     0.06  -0.04   0.01    -0.04   0.02  -0.06
  68   1     0.00  -0.06   0.00     0.04  -0.06   0.03    -0.02   0.04  -0.10
  69   1    -0.01   0.02  -0.04    -0.04  -0.01   0.02    -0.02  -0.02   0.06
  70   1     0.00  -0.01  -0.06    -0.04  -0.01   0.02     0.02   0.01   0.05
  71   1     0.02  -0.03  -0.04    -0.02  -0.01   0.02     0.05   0.04   0.03
  72   1    -0.01   0.02   0.02     0.00   0.01   0.01    -0.03  -0.03   0.04
  73   1     0.01  -0.03   0.01     0.01   0.00   0.01     0.05   0.04  -0.01
  74   1     0.06   0.02  -0.05     0.07   0.00  -0.01    -0.01   0.00  -0.02
  75   1     0.07  -0.03  -0.08     0.10  -0.02  -0.01    -0.06   0.03  -0.03
  76   1     0.03  -0.06  -0.06     0.10  -0.03  -0.01    -0.08   0.03  -0.03
  77   1     0.07   0.01   0.02     0.02   0.03  -0.02     0.00   0.00   0.00
  78   1    -0.01  -0.04   0.00     0.05   0.00  -0.01    -0.04   0.01  -0.01
  79   1    -0.04   0.04   0.00    -0.01   0.00   0.01    -0.05  -0.05   0.04
  80   1    -0.03   0.03   0.00     0.00  -0.01   0.01    -0.04  -0.03   0.02
  81   1    -0.04   0.03  -0.02    -0.01  -0.01   0.02    -0.04  -0.04   0.03
  82   1    -0.03   0.04   0.01    -0.02   0.02   0.01    -0.04  -0.05   0.07
  83   1    -0.03   0.03  -0.01    -0.03   0.01   0.02    -0.02  -0.04   0.07
  84   1    -0.02   0.02   0.01    -0.03   0.02   0.02    -0.01  -0.04   0.08
  85   1     0.05  -0.04  -0.02     0.00  -0.01   0.01     0.07   0.07  -0.03
  86   1     0.07  -0.03  -0.06    -0.02  -0.02   0.02     0.06   0.06   0.00
  87   1     0.03   0.00  -0.05     0.00  -0.03   0.02     0.05   0.03  -0.03
  88   1     0.06  -0.07   0.02     0.00   0.02   0.01     0.07   0.08   0.01
  89   1     0.04  -0.07   0.04    -0.01   0.04   0.00     0.05   0.07   0.03
  90   1     0.07  -0.07   0.00    -0.03   0.02   0.01     0.06   0.08   0.04
  91   1    -0.12  -0.04  -0.05     0.06  -0.02  -0.01    -0.02   0.00  -0.01
  92   1    -0.12  -0.03  -0.08     0.07  -0.02  -0.01    -0.02   0.00  -0.01
  93   1    -0.06   0.00  -0.10     0.06  -0.03  -0.01    -0.03  -0.01   0.00
  94   1    -0.13  -0.07   0.08     0.06   0.01  -0.01    -0.01   0.01  -0.04
  95   1    -0.04  -0.05   0.11     0.07   0.02  -0.01    -0.04   0.01  -0.05
  96   1    -0.10  -0.06   0.04     0.08   0.01  -0.01    -0.02   0.01  -0.03
  97   1     0.00   0.20   0.05     0.00   0.02  -0.01     0.09  -0.08  -0.04
  98   1     0.06   0.16   0.12     0.01   0.00   0.01     0.03  -0.06  -0.09
  99   1    -0.03   0.20   0.01     0.02   0.01   0.00     0.08  -0.08  -0.05
 100   1    -0.03   0.07  -0.07     0.02   0.05  -0.03     0.09  -0.03   0.06
 101   1    -0.10   0.10  -0.16     0.04   0.03  -0.03     0.11  -0.04   0.08
 102   1    -0.05  -0.06  -0.13     0.05   0.04  -0.04     0.06   0.04   0.10
 103   1     0.01   0.00   0.04    -0.02   0.04   0.01     0.00  -0.01   0.07
 104   1     0.02  -0.01   0.05     0.00   0.05   0.01     0.01   0.01   0.06
 105   1     0.03  -0.01   0.04    -0.01   0.03   0.01     0.02   0.02   0.06
 106   1     0.06   0.09   0.35     0.06   0.03   0.01    -0.05  -0.06  -0.19
 107   1    -0.27  -0.25   0.02     0.01   0.01  -0.03     0.17   0.15   0.03
 108   1     0.13   0.08  -0.21     0.06   0.05  -0.05    -0.10  -0.06   0.19
 109   1    -0.01   0.00   0.01     0.02  -0.03  -0.06    -0.01  -0.04  -0.03
 110   1     0.00   0.02   0.05    -0.12  -0.03  -0.04     0.02   0.03   0.08
 111   1     0.01  -0.02   0.04    -0.20   0.30   0.04     0.01   0.01   0.16
 112   1     0.02  -0.02   0.05    -0.26   0.18   0.07     0.00  -0.05   0.19
 113   1     0.03  -0.01   0.06    -0.33   0.24   0.10     0.01   0.02   0.23
 114   1    -0.03   0.00   0.00     0.00  -0.02   0.00    -0.04  -0.01  -0.03
 115   1     0.00   0.00  -0.02    -0.01  -0.03   0.01     0.00   0.00  -0.05
 116   1    -0.02  -0.01  -0.04     0.01  -0.05   0.00    -0.04   0.00  -0.07
 117   1     0.00   0.00  -0.06     0.03  -0.05   0.01    -0.03   0.00  -0.06
 118   1    -0.03  -0.02  -0.04     0.03  -0.03   0.01    -0.05   0.00  -0.05
 119   1     0.01   0.01  -0.03    -0.04  -0.04   0.01    -0.04   0.01  -0.05
 120   1     0.01   0.01  -0.03    -0.04  -0.05   0.00    -0.03  -0.01  -0.08
 121   1     0.01   0.01  -0.03    -0.04  -0.06   0.00    -0.05   0.00  -0.08
 122   1    -0.03  -0.02   0.02     0.05  -0.07  -0.04    -0.03  -0.09   0.00
 123   1    -0.02  -0.02   0.00     0.06  -0.08  -0.03    -0.02  -0.10  -0.05
 124   1    -0.02  -0.02   0.01     0.04  -0.09   0.00    -0.03  -0.09  -0.01
 125   1    -0.02   0.05   0.03     0.02  -0.04  -0.03     0.03   0.10   0.03
 126   1    -0.02   0.03   0.02     0.04   0.06   0.01     0.02   0.08   0.03
 127   1    -0.01   0.04   0.04    -0.05   0.03  -0.01     0.03   0.10   0.09
                     4                      5                      6
                     A                      A                      A
 Frequencies --    18.1081                22.6899                27.9558
 Red. masses --     4.2712                 3.7500                 4.2122
 Frc consts  --     0.0008                 0.0011                 0.0019
 IR Inten    --     0.2227                 0.2109                 0.1374
 Atom AN      X      Y      Z        X      Y      Z        X      Y      Z
   1   6     0.00   0.00   0.01     0.00   0.00  -0.01     0.04   0.00   0.03
   2   6    -0.01  -0.01   0.02    -0.01  -0.01  -0.03     0.02  -0.01   0.00
   3   6    -0.01   0.00   0.02    -0.01   0.00  -0.02     0.00  -0.01  -0.03
   4   6    -0.03   0.03   0.00    -0.02  -0.03   0.07    -0.06   0.07   0.07
   5   6     0.00   0.03  -0.01    -0.04  -0.04   0.07    -0.03   0.05   0.06
   6   6     0.00   0.02  -0.01    -0.06  -0.03   0.06    -0.01   0.04   0.04
   7   8    -0.01   0.02   0.00    -0.03  -0.01   0.04    -0.01   0.04   0.04
   8   6    -0.02   0.03   0.00    -0.01  -0.02   0.06    -0.02   0.06   0.05
   9   6     0.00   0.00   0.00     0.01   0.01   0.03     0.04   0.01   0.03
  10   6    -0.02   0.01   0.01    -0.01   0.00  -0.01    -0.02   0.01  -0.03
  11   6     0.00   0.01  -0.01     0.01  -0.02   0.05     0.02   0.02   0.02
  12   6    -0.01   0.00  -0.01     0.02  -0.01   0.08     0.00   0.01   0.01
  13   6    -0.01  -0.01  -0.01     0.02   0.02   0.09    -0.01  -0.01   0.00
  14   6    -0.01  -0.01  -0.01     0.02   0.04   0.07     0.02  -0.02   0.01
  15   6     0.00  -0.01   0.00     0.01   0.04   0.04     0.04  -0.01   0.02
  16   6     0.00   0.02   0.00     0.02  -0.05   0.03     0.03   0.04   0.02
  17   6     0.01  -0.01   0.00     0.00   0.07   0.01     0.06  -0.03   0.03
  18   6    -0.02   0.01   0.00    -0.02  -0.01   0.00    -0.06   0.03  -0.04
  19   6    -0.03   0.02   0.00    -0.01  -0.01   0.02    -0.08   0.04  -0.04
  20   6    -0.04   0.02  -0.01     0.02  -0.01   0.03    -0.07   0.04  -0.03
  21   6    -0.05   0.01  -0.01     0.03  -0.01   0.02    -0.03   0.02  -0.03
  22   6    -0.04   0.01   0.00     0.02   0.00   0.00    -0.01   0.01  -0.03
  23   6     0.00   0.01   0.01    -0.05   0.00  -0.02    -0.06   0.03  -0.04
  24   6    -0.04   0.00   0.01     0.01   0.02   0.00     0.03  -0.01  -0.03
  25   6     0.00   0.03   0.00     0.03  -0.05   0.04     0.04   0.08   0.05
  26   6     0.00   0.02  -0.02     0.04  -0.06   0.04     0.04   0.05  -0.02
  27   6     0.02   0.00  -0.02    -0.03   0.03   0.07     0.10   0.00  -0.04
  28   6     0.02  -0.03   0.01    -0.05   0.16  -0.02     0.13  -0.10   0.09
  29   6    -0.05   0.01   0.00     0.00   0.03  -0.01     0.05   0.00   0.00
  30   6    -0.05  -0.02   0.02     0.01   0.03   0.02     0.03  -0.04  -0.06
  31   6     0.01   0.03   0.01    -0.08   0.05   0.03    -0.06   0.00  -0.05
  32   6    -0.01   0.00   0.01    -0.11  -0.02  -0.08    -0.05   0.04  -0.03
  33   6     0.01  -0.01   0.01     0.00   0.00  -0.01     0.06  -0.01   0.06
  34   6    -0.02  -0.01   0.03    -0.03  -0.02  -0.04    -0.01  -0.02  -0.06
  35   8     0.00   0.00   0.00     0.06  -0.01   0.00    -0.04  -0.04  -0.02
  36  12    -0.01   0.01   0.00    -0.01   0.01   0.00     0.03   0.02   0.02
  37   8     0.00  -0.01  -0.02     0.01  -0.02  -0.06    -0.02  -0.05   0.00
  38   6     0.05  -0.01   0.03     0.04   0.00   0.00    -0.04  -0.04  -0.01
  39   7    -0.01   0.00   0.01    -0.01   0.00  -0.02     0.00   0.01  -0.02
  40   7     0.00   0.00   0.00     0.00   0.00   0.00     0.04   0.01   0.04
  41   8     0.04   0.06   0.10     0.01  -0.01   0.02    -0.03  -0.04  -0.02
  42   8     0.13  -0.10  -0.01     0.03   0.00  -0.05    -0.04  -0.04   0.00
  43   6     0.03  -0.04  -0.06     0.01  -0.02  -0.05    -0.03  -0.05   0.01
  44   6     0.01  -0.02  -0.02     0.02  -0.03  -0.07    -0.02  -0.05   0.00
  45   6     0.12  -0.12  -0.05     0.04   0.01  -0.02    -0.05  -0.03   0.00
  46   8    -0.04  -0.01  -0.12    -0.02  -0.02  -0.05    -0.03  -0.05   0.02
  47   6    -0.08   0.09   0.07     0.06  -0.03   0.03    -0.03  -0.04  -0.04
  48   8     0.00   0.02   0.01     0.00   0.03   0.01     0.05   0.05   0.03
  49   6    -0.02   0.00   0.01     0.01  -0.02  -0.08    -0.01  -0.05  -0.03
  50   8    -0.05   0.00   0.03     0.03  -0.03  -0.11     0.00  -0.06  -0.06
  51   8    -0.01   0.01   0.00    -0.02   0.00  -0.04    -0.01   0.00  -0.01
  52   6    -0.01   0.01   0.00     0.00   0.01  -0.02     0.02   0.02   0.01
  53   6     0.00   0.02   0.01     0.00   0.03  -0.01     0.05   0.05   0.03
  54   6    -0.02   0.00   0.00    -0.01  -0.01  -0.05    -0.02  -0.02  -0.03
  55   8     0.00   0.01   0.00     0.00   0.00  -0.01     0.03   0.01   0.01
  56   6     0.01   0.03   0.02     0.01   0.04   0.02     0.06   0.06   0.08
  57   6    -0.02   0.01  -0.01    -0.03   0.00  -0.06    -0.04  -0.01  -0.05
  58   6     0.00   0.03  -0.03     0.04  -0.06  -0.07    -0.01  -0.07   0.00
  59   6     0.27  -0.21  -0.01     0.05   0.04  -0.03    -0.07  -0.02   0.00
  60   1     0.00  -0.01   0.03    -0.01  -0.01  -0.03     0.02  -0.03   0.00
  61   1    -0.03   0.02   0.01    -0.02  -0.03   0.07    -0.09   0.04   0.08
  62   1    -0.04   0.05  -0.01    -0.01  -0.03   0.09    -0.08   0.10   0.09
  63   1     0.01   0.03  -0.03    -0.05  -0.05   0.07    -0.03   0.08   0.05
  64   1     0.01   0.02   0.00    -0.04  -0.04   0.07    -0.04   0.03   0.06
  65   1     0.00   0.03  -0.02    -0.07  -0.04   0.07     0.01   0.06   0.04
  66   1     0.01   0.02  -0.01    -0.08  -0.01   0.05     0.00   0.03   0.03
  67   1    -0.03   0.03   0.00     0.01  -0.01   0.05    -0.03   0.05   0.05
  68   1    -0.02   0.04  -0.01     0.00  -0.03   0.07     0.00   0.09   0.06
  69   1    -0.01   0.01  -0.01     0.02  -0.03   0.09    -0.02   0.01   0.00
  70   1    -0.02  -0.01  -0.01     0.03   0.02   0.11    -0.02  -0.02  -0.01
  71   1    -0.01  -0.01  -0.01     0.03   0.07   0.07     0.02  -0.04   0.00
  72   1     0.00   0.01   0.00     0.01  -0.05   0.01     0.02   0.03   0.04
  73   1    -0.01  -0.01   0.01     0.06   0.07  -0.02     0.01  -0.03   0.06
  74   1    -0.03   0.02  -0.01    -0.02  -0.02   0.02    -0.10   0.05  -0.04
  75   1    -0.05   0.02  -0.02     0.03  -0.02   0.04    -0.08   0.05  -0.04
  76   1    -0.06   0.01  -0.01     0.05  -0.01   0.03    -0.03   0.02  -0.03
  77   1     0.01   0.00   0.02    -0.02  -0.02  -0.02    -0.07   0.04  -0.05
  78   1    -0.02   0.00   0.01     0.01   0.02  -0.01     0.04  -0.01  -0.02
  79   1     0.01   0.03   0.00     0.04  -0.07   0.03     0.05   0.11   0.04
  80   1     0.00   0.02   0.01     0.02  -0.04   0.04     0.04   0.08   0.08
  81   1     0.00   0.03   0.00     0.04  -0.04   0.06     0.05   0.09   0.03
  82   1     0.00   0.03  -0.02     0.04  -0.08   0.03     0.05   0.07  -0.02
  83   1     0.00   0.02  -0.02     0.06  -0.06   0.05     0.05   0.07  -0.05
  84   1     0.00   0.01  -0.02     0.04  -0.06   0.04     0.03   0.02  -0.04
  85   1     0.02  -0.01  -0.01    -0.03   0.06   0.04     0.11  -0.02  -0.02
  86   1     0.04   0.00  -0.03    -0.10   0.05   0.12     0.17  -0.01  -0.08
  87   1     0.01   0.02  -0.03     0.01  -0.04   0.10     0.06   0.06  -0.08
  88   1     0.03  -0.03   0.02    -0.05   0.17  -0.03     0.14  -0.11   0.09
  89   1     0.02  -0.04   0.03    -0.02   0.20  -0.07     0.10  -0.14   0.14
  90   1     0.04  -0.03   0.01    -0.12   0.16   0.01     0.19  -0.10   0.07
  91   1    -0.05   0.00   0.00     0.00   0.04  -0.01     0.08  -0.01   0.00
  92   1    -0.07   0.01  -0.01     0.00   0.03   0.00     0.03   0.00  -0.01
  93   1    -0.04   0.02  -0.01     0.01   0.02  -0.02     0.04   0.03   0.02
  94   1    -0.06  -0.03   0.02    -0.01   0.03   0.02     0.07  -0.04  -0.07
  95   1    -0.04  -0.03   0.03     0.01   0.03   0.03     0.02  -0.05  -0.08
  96   1    -0.07  -0.02   0.01     0.01   0.03   0.02     0.02  -0.04  -0.07
  97   1     0.02   0.03   0.01    -0.11   0.05   0.02    -0.06  -0.01  -0.05
  98   1     0.02   0.03   0.01    -0.04   0.06   0.07    -0.07   0.01  -0.07
  99   1     0.00   0.04   0.00    -0.12   0.07   0.04    -0.06   0.00  -0.04
 100   1     0.00   0.00   0.02    -0.12  -0.01  -0.08    -0.06   0.03  -0.04
 101   1    -0.02   0.01   0.00    -0.15   0.01  -0.10    -0.04   0.02  -0.01
 102   1    -0.02  -0.02   0.02    -0.10  -0.08  -0.11    -0.04   0.06  -0.03
 103   1     0.03  -0.02   0.02    -0.01   0.00  -0.01     0.13  -0.08   0.10
 104   1     0.00  -0.02   0.00     0.00   0.00  -0.01     0.03  -0.01  -0.01
 105   1     0.01   0.00   0.03     0.00  -0.01  -0.02     0.05   0.06   0.14
 106   1    -0.02   0.00   0.04     0.03   0.06   0.18    -0.04  -0.05  -0.16
 107   1    -0.02  -0.02   0.03    -0.22  -0.18  -0.07     0.05   0.06  -0.06
 108   1    -0.02  -0.01   0.02     0.09   0.05  -0.24    -0.04  -0.08   0.01
 109   1    -0.01  -0.04   0.00     0.02  -0.02  -0.09    -0.02  -0.05  -0.02
 110   1     0.07  -0.15  -0.17     0.04   0.01  -0.01    -0.05  -0.03   0.02
 111   1    -0.01   0.14   0.15     0.06  -0.04   0.05    -0.04  -0.05  -0.05
 112   1    -0.16   0.13   0.06     0.03  -0.02   0.03    -0.01  -0.04  -0.04
 113   1    -0.11   0.08   0.04     0.08  -0.03   0.03    -0.03  -0.05  -0.04
 114   1     0.01   0.03   0.00     0.01   0.05  -0.02     0.06   0.08  -0.01
 115   1    -0.02   0.00  -0.01     0.01   0.00  -0.03    -0.01  -0.02  -0.02
 116   1     0.01   0.03   0.03     0.01   0.05   0.01     0.07   0.07   0.07
 117   1     0.00   0.02   0.03     0.00   0.02   0.03     0.05   0.03   0.12
 118   1     0.02   0.03   0.03     0.01   0.06   0.03     0.09   0.10   0.10
 119   1    -0.02   0.01  -0.01    -0.04   0.01  -0.04    -0.04   0.00  -0.05
 120   1    -0.02   0.00  -0.01    -0.03  -0.01  -0.07    -0.03  -0.03  -0.07
 121   1    -0.02   0.01  -0.01    -0.05  -0.01  -0.07    -0.04  -0.01  -0.06
 122   1     0.00   0.02  -0.03     0.04  -0.06  -0.07     0.00  -0.08   0.00
 123   1    -0.03   0.05   0.00     0.05  -0.07  -0.08     0.00  -0.08  -0.01
 124   1     0.02   0.06  -0.05     0.04  -0.06  -0.04    -0.01  -0.08   0.01
 125   1     0.32  -0.29  -0.07     0.06   0.05  -0.04    -0.08  -0.01   0.01
 126   1     0.32  -0.18   0.11     0.05   0.04  -0.03    -0.08  -0.02  -0.02
 127   1     0.27  -0.23  -0.04     0.06   0.05  -0.01    -0.08  -0.01   0.00
                     7                      8                      9
                     A                      A                      A
 Frequencies --    29.6691                33.6860                38.0837
 Red. masses --     4.1043                 3.8126                 5.4743
 Frc consts  --     0.0021                 0.0025                 0.0047
 IR Inten    --     1.4815                 0.0670                 0.6957
 Atom AN      X      Y      Z        X      Y      Z        X      Y      Z
   1   6    -0.02   0.01   0.04     0.02   0.00   0.02     0.00   0.00   0.00
   2   6    -0.02   0.02   0.02     0.02   0.00  -0.01     0.00   0.00  -0.01
   3   6    -0.01   0.01  -0.01     0.02   0.00  -0.03     0.00   0.00  -0.02
   4   6    -0.02  -0.04   0.05     0.03  -0.01  -0.05     0.00   0.00   0.00
   5   6    -0.04  -0.04   0.05    -0.03   0.01  -0.02     0.00   0.00   0.00
   6   6    -0.03  -0.04   0.04    -0.02   0.01  -0.02    -0.01   0.00   0.01
   7   8    -0.02  -0.04   0.03     0.01   0.00  -0.05    -0.01   0.01   0.00
   8   6    -0.01  -0.04   0.04     0.03  -0.02  -0.05     0.00   0.00   0.00
   9   6    -0.03   0.00   0.03     0.02   0.00   0.02     0.00  -0.01   0.01
  10   6    -0.01  -0.01  -0.03     0.02   0.00   0.00     0.00   0.00  -0.01
  11   6    -0.05   0.02   0.01    -0.01  -0.01   0.02     0.00   0.00   0.01
  12   6    -0.04   0.02  -0.03    -0.01  -0.01   0.02    -0.01  -0.01   0.01
  13   6    -0.03   0.00  -0.04     0.01  -0.01   0.01    -0.01  -0.01   0.01
  14   6    -0.02  -0.03  -0.03     0.03  -0.01   0.00    -0.02  -0.02   0.01
  15   6    -0.02  -0.03   0.01     0.03  -0.01   0.01    -0.01  -0.01   0.02
  16   6    -0.06   0.04   0.03    -0.03  -0.02   0.04     0.00   0.00   0.01
  17   6    -0.02  -0.06   0.03     0.06  -0.01   0.01    -0.01  -0.03   0.03
  18   6    -0.02   0.01  -0.03     0.00  -0.03   0.02    -0.01  -0.01   0.00
  19   6     0.00   0.00  -0.03     0.01  -0.03   0.06    -0.01  -0.01   0.01
  20   6     0.02  -0.02  -0.03     0.03   0.00   0.08     0.00   0.00   0.02
  21   6     0.03  -0.03  -0.03     0.04   0.03   0.06     0.01   0.01   0.01
  22   6     0.02  -0.02  -0.02     0.04   0.03   0.02     0.01   0.01   0.00
  23   6    -0.04   0.03  -0.03    -0.03  -0.06   0.00    -0.02  -0.02  -0.01
  24   6     0.04  -0.04  -0.02     0.05   0.07   0.00     0.02   0.02   0.00
  25   6    -0.08   0.03   0.01    -0.05  -0.03   0.01     0.01   0.00   0.01
  26   6    -0.09   0.06   0.04    -0.05  -0.02   0.07     0.00   0.00   0.00
  27   6     0.00  -0.05   0.00     0.09   0.02  -0.05     0.01   0.01  -0.01
  28   6     0.01  -0.11   0.05     0.11  -0.04   0.05     0.02  -0.09   0.05
  29   6     0.06  -0.06   0.00     0.08   0.06   0.03     0.03   0.01   0.01
  30   6     0.06  -0.02  -0.07     0.08   0.14  -0.01     0.03   0.04  -0.02
  31   6    -0.05  -0.07  -0.06    -0.06  -0.03   0.04    -0.03   0.01   0.01
  32   6     0.04   0.07   0.00    -0.08  -0.08  -0.04    -0.05  -0.03  -0.03
  33   6    -0.03   0.02   0.06     0.03   0.01   0.06     0.01   0.00   0.02
  34   6     0.00   0.02  -0.04     0.01  -0.01  -0.05     0.00  -0.01  -0.04
  35   8     0.12   0.02  -0.01     0.01  -0.03  -0.04    -0.05   0.03   0.18
  36  12    -0.02  -0.02   0.02     0.01   0.00  -0.03     0.00   0.00   0.00
  37   8     0.03   0.02  -0.04    -0.04   0.02   0.00     0.00   0.04  -0.05
  38   6     0.06   0.05   0.03    -0.02   0.00   0.02     0.01  -0.05  -0.05
  39   7    -0.01   0.00  -0.01     0.02   0.00  -0.03     0.00   0.00  -0.01
  40   7    -0.03   0.00   0.05     0.02   0.00   0.01     0.01   0.00   0.01
  41   8     0.01   0.05   0.08    -0.05   0.04   0.08     0.06  -0.18  -0.21
  42   8     0.05   0.06  -0.03    -0.02   0.00   0.02    -0.08   0.03  -0.12
  43   6     0.01   0.04  -0.05    -0.05   0.03   0.01     0.02   0.04  -0.08
  44   6     0.03   0.03  -0.06    -0.06   0.04   0.02     0.00   0.06  -0.06
  45   6     0.07   0.07   0.00    -0.01  -0.01   0.00     0.00   0.02  -0.09
  46   8    -0.05   0.04  -0.05    -0.08   0.04  -0.02     0.14   0.03  -0.06
  47   6     0.11   0.00   0.03     0.00  -0.01  -0.03    -0.04  -0.03   0.25
  48   8    -0.03  -0.03   0.02    -0.02  -0.02  -0.05     0.01   0.00   0.00
  49   6     0.03   0.01  -0.02    -0.03   0.02   0.01    -0.02   0.04   0.03
  50   8     0.04   0.02  -0.02    -0.03   0.03   0.02    -0.05   0.06   0.10
  51   8    -0.01  -0.01   0.00    -0.01  -0.01  -0.02    -0.03  -0.02   0.01
  52   6    -0.02  -0.02   0.01    -0.01  -0.01  -0.04    -0.01  -0.01   0.01
  53   6    -0.03  -0.03   0.01    -0.02  -0.03  -0.05     0.00  -0.01   0.01
  54   6     0.01   0.00   0.01    -0.01   0.00  -0.01    -0.01   0.00   0.03
  55   8    -0.01  -0.02   0.01     0.00   0.01  -0.03    -0.01   0.00   0.01
  56   6    -0.04  -0.02   0.00    -0.03  -0.04  -0.08     0.01  -0.01   0.02
  57   6     0.01  -0.01   0.02     0.01  -0.01   0.00     0.01  -0.01   0.06
  58   6     0.06   0.01  -0.05    -0.09   0.06   0.01     0.00   0.10  -0.06
  59   6     0.08   0.10  -0.01     0.02  -0.05   0.02     0.04   0.03  -0.09
  60   1    -0.02   0.02   0.02     0.02   0.00  -0.01     0.00   0.00  -0.02
  61   1    -0.02  -0.04   0.04     0.05   0.02  -0.08     0.00   0.00   0.01
  62   1    -0.02  -0.04   0.06     0.05  -0.05  -0.04     0.00   0.01   0.01
  63   1    -0.04  -0.04   0.06    -0.04   0.01   0.03     0.01  -0.01  -0.01
  64   1    -0.05  -0.04   0.04    -0.07   0.04  -0.05     0.02   0.00   0.01
  65   1    -0.02  -0.04   0.04    -0.01   0.00   0.00    -0.02  -0.01   0.01
  66   1    -0.03  -0.05   0.03    -0.04   0.02  -0.03    -0.02   0.02   0.01
  67   1     0.00  -0.04   0.03     0.04  -0.01  -0.05     0.00   0.00   0.00
  68   1     0.00  -0.04   0.05     0.03  -0.04  -0.03     0.00   0.00   0.01
  69   1    -0.05   0.04  -0.04    -0.03  -0.01   0.02    -0.01   0.00   0.01
  70   1    -0.03   0.00  -0.07     0.00  -0.01   0.00    -0.02  -0.02   0.01
  71   1    -0.01  -0.05  -0.04     0.04  -0.01   0.00    -0.02  -0.02   0.02
  72   1    -0.04   0.05   0.04    -0.02  -0.01   0.04     0.00   0.00   0.01
  73   1    -0.04  -0.05   0.06     0.02  -0.01   0.01    -0.06  -0.03   0.04
  74   1    -0.01   0.01  -0.04     0.00  -0.06   0.08    -0.02  -0.01   0.02
  75   1     0.03  -0.03  -0.04     0.03   0.00   0.12     0.00   0.00   0.03
  76   1     0.05  -0.04  -0.03     0.05   0.05   0.08     0.01   0.01   0.02
  77   1    -0.10   0.06  -0.04     0.00  -0.07  -0.03     0.01  -0.03  -0.01
  78   1     0.02  -0.03  -0.01     0.00   0.07  -0.03     0.00   0.02  -0.01
  79   1    -0.10   0.05   0.02    -0.07  -0.04   0.02     0.01   0.00   0.01
  80   1    -0.06   0.02   0.01    -0.04  -0.03  -0.01     0.00   0.00   0.02
  81   1    -0.10   0.02  -0.01    -0.06  -0.04   0.00     0.01   0.01   0.01
  82   1    -0.10   0.08   0.06    -0.06  -0.02   0.08     0.00   0.01   0.00
  83   1    -0.12   0.05   0.03    -0.06  -0.02   0.06     0.00   0.00   0.00
  84   1    -0.08   0.07   0.05    -0.03  -0.01   0.08     0.00   0.00   0.00
  85   1     0.00  -0.08   0.02     0.11   0.01  -0.05     0.00   0.00   0.00
  86   1     0.03  -0.06  -0.03     0.13   0.02  -0.07     0.05   0.01  -0.03
  87   1    -0.02  -0.02  -0.01     0.06   0.04  -0.08    -0.02   0.05  -0.03
  88   1     0.01  -0.13   0.06     0.13  -0.04   0.05     0.01  -0.09   0.05
  89   1     0.00  -0.12   0.07     0.09  -0.07   0.09     0.00  -0.13   0.08
  90   1     0.04  -0.12   0.02     0.15  -0.04   0.05     0.08  -0.09   0.04
  91   1     0.08  -0.08   0.01     0.07   0.10   0.01     0.03   0.02   0.00
  92   1     0.08  -0.07  -0.01     0.13   0.06   0.08     0.05   0.01   0.02
  93   1     0.05  -0.07   0.03     0.05   0.00   0.04     0.02  -0.01   0.02
  94   1     0.09  -0.02  -0.07     0.07   0.16  -0.02     0.03   0.04  -0.02
  95   1     0.04  -0.01  -0.09     0.06   0.18  -0.02     0.03   0.06  -0.02
  96   1     0.08  -0.02  -0.07     0.14   0.14   0.00     0.06   0.04  -0.02
  97   1    -0.05  -0.07  -0.06    -0.09  -0.03   0.02    -0.04   0.01   0.01
  98   1    -0.10  -0.09  -0.09    -0.03  -0.02   0.07     0.00   0.03   0.03
  99   1     0.01  -0.11  -0.04    -0.09  -0.01   0.06    -0.05   0.03   0.02
 100   1     0.01   0.08  -0.01    -0.10  -0.10  -0.06    -0.05  -0.04  -0.04
 101   1     0.10   0.03   0.03    -0.12  -0.07  -0.03    -0.08  -0.02  -0.04
 102   1     0.05   0.15   0.02    -0.07  -0.11  -0.07    -0.05  -0.06  -0.05
 103   1    -0.07   0.04   0.06     0.04  -0.03   0.09     0.03  -0.03   0.03
 104   1    -0.02   0.03   0.09     0.02   0.02   0.04    -0.01   0.00  -0.02
 105   1    -0.02   0.01   0.04     0.03   0.05   0.09    -0.01   0.03   0.05
 106   1    -0.03  -0.05  -0.24     0.05   0.04   0.10     0.02   0.01   0.03
 107   1     0.15   0.19  -0.03    -0.15  -0.13  -0.08    -0.08  -0.06  -0.05
 108   1    -0.09  -0.05   0.12     0.10   0.03  -0.21     0.04   0.01  -0.11
 109   1     0.04   0.04  -0.08    -0.05   0.04   0.05     0.00   0.05  -0.03
 110   1     0.07   0.07   0.01    -0.01  -0.01  -0.03     0.03   0.05  -0.11
 111   1     0.10  -0.04   0.09     0.00  -0.05   0.03    -0.03   0.06   0.08
 112   1     0.07   0.05   0.02    -0.04   0.06  -0.04     0.00  -0.27   0.26
 113   1     0.17  -0.02  -0.01     0.03  -0.04  -0.09    -0.10   0.07   0.46
 114   1    -0.04  -0.03   0.01    -0.04  -0.04  -0.03     0.01   0.00   0.00
 115   1     0.02   0.00   0.02    -0.02   0.00  -0.02    -0.02   0.00   0.03
 116   1    -0.04  -0.02   0.00    -0.03  -0.04  -0.07     0.01  -0.02   0.02
 117   1    -0.04  -0.01  -0.01    -0.02  -0.02  -0.10     0.01  -0.03   0.03
 118   1    -0.05  -0.03   0.00    -0.04  -0.06  -0.09     0.03   0.00   0.03
 119   1     0.01  -0.01   0.03     0.01  -0.02   0.00     0.02  -0.03   0.06
 120   1     0.02   0.00   0.02     0.01   0.00   0.01     0.02   0.01   0.08
 121   1     0.00  -0.01   0.01     0.01  -0.01   0.01     0.02  -0.02   0.06
 122   1     0.06   0.01  -0.06    -0.10   0.07   0.03     0.00   0.11  -0.07
 123   1     0.07   0.00  -0.06    -0.09   0.07   0.02     0.00   0.11  -0.03
 124   1     0.05   0.00  -0.03    -0.09   0.06  -0.01     0.00   0.10  -0.08
 125   1     0.08   0.12  -0.03     0.02  -0.06   0.01     0.05   0.07  -0.13
 126   1     0.07   0.10  -0.02     0.02  -0.05   0.05     0.02   0.00  -0.06
 127   1     0.09   0.11   0.01     0.02  -0.06   0.00     0.10   0.02  -0.06
                    10                     11                     12
                     A                      A                      A
 Frequencies --    39.9266                43.3780                47.7100
 Red. masses --     5.4498                 3.8163                 3.4044
 Frc consts  --     0.0051                 0.0042                 0.0046
 IR Inten    --     1.5586                 0.5019                 0.1608
 Atom AN      X      Y      Z        X      Y      Z        X      Y      Z
   1   6    -0.03   0.01   0.03    -0.01   0.00  -0.02     0.02  -0.01   0.01
   2   6    -0.03   0.01   0.01    -0.01   0.00  -0.03     0.01  -0.01   0.02
   3   6    -0.03   0.00  -0.02    -0.01   0.00  -0.02     0.00  -0.01   0.00
   4   6    -0.02  -0.04   0.02     0.00   0.04  -0.08    -0.02   0.01   0.05
   5   6    -0.03  -0.04   0.02     0.01   0.06  -0.06    -0.01  -0.01   0.03
   6   6    -0.04  -0.03   0.02     0.01   0.05  -0.03     0.01  -0.01   0.00
   7   8    -0.04  -0.02   0.02     0.00   0.02  -0.03     0.01   0.00   0.01
   8   6    -0.02  -0.04   0.02    -0.01   0.01  -0.06     0.00   0.02   0.03
   9   6    -0.01   0.02   0.02    -0.02  -0.01  -0.01     0.01  -0.01  -0.03
  10   6    -0.03   0.00  -0.03    -0.01   0.01   0.00     0.00  -0.01  -0.01
  11   6    -0.01   0.03   0.01    -0.03  -0.01   0.00    -0.05  -0.02  -0.01
  12   6     0.03   0.05  -0.02    -0.06  -0.02   0.01    -0.11  -0.04  -0.01
  13   6     0.07   0.05  -0.04    -0.08  -0.03   0.02    -0.10  -0.05  -0.02
  14   6     0.06   0.04  -0.03    -0.06  -0.02   0.01    -0.02  -0.04  -0.04
  15   6     0.02   0.02   0.00    -0.04  -0.01   0.00     0.04  -0.01  -0.05
  16   6    -0.05   0.02   0.03    -0.02   0.00  -0.01    -0.05   0.01  -0.01
  17   6     0.02   0.01   0.01    -0.04  -0.02   0.01     0.13   0.02  -0.08
  18   6    -0.04  -0.01  -0.02    -0.01  -0.01   0.01    -0.02  -0.01   0.00
  19   6    -0.02  -0.02  -0.01    -0.03   0.00   0.02    -0.02   0.00   0.00
  20   6     0.01  -0.02   0.01    -0.04   0.02   0.03    -0.02   0.00   0.01
  21   6     0.01  -0.01   0.00    -0.03   0.03   0.02     0.00   0.00   0.00
  22   6     0.00   0.00  -0.02    -0.02   0.03   0.01     0.01  -0.01   0.00
  23   6    -0.06  -0.01  -0.03    -0.01  -0.02   0.00    -0.02  -0.02  -0.01
  24   6     0.00   0.02  -0.03    -0.02   0.04   0.00     0.02  -0.02   0.00
  25   6    -0.09   0.01  -0.01     0.00   0.00   0.00    -0.03   0.00   0.00
  26   6    -0.07   0.02   0.08    -0.02   0.01  -0.03    -0.08   0.04  -0.02
  27   6     0.01  -0.01   0.02    -0.02   0.03  -0.04     0.11  -0.11  -0.05
  28   6     0.00   0.02  -0.01     0.01  -0.09   0.04     0.08   0.22  -0.09
  29   6     0.02  -0.02   0.00    -0.01   0.02   0.02     0.01   0.03  -0.01
  30   6     0.03   0.07  -0.05     0.00   0.09  -0.01    -0.01  -0.08   0.01
  31   6    -0.08  -0.05  -0.03    -0.01   0.06   0.04    -0.02  -0.03  -0.01
  32   6    -0.05   0.01  -0.03    -0.08  -0.07  -0.04    -0.02  -0.02   0.00
  33   6    -0.03   0.01   0.04    -0.01   0.01  -0.01     0.02  -0.01   0.03
  34   6    -0.03   0.00  -0.05    -0.02   0.00  -0.03     0.00  -0.02   0.00
  35   8    -0.08   0.02   0.02     0.03   0.04  -0.01     0.00   0.01   0.01
  36  12    -0.03   0.00   0.00    -0.01   0.00  -0.01     0.01   0.00  -0.01
  37   8     0.05   0.01   0.06     0.06  -0.04   0.01     0.00   0.01   0.02
  38   6     0.04  -0.03  -0.03     0.05   0.04   0.00     0.01   0.01   0.00
  39   7    -0.03   0.00  -0.03    -0.01   0.01  -0.01     0.00  -0.01  -0.01
  40   7    -0.03   0.01   0.04    -0.01   0.00  -0.02     0.02  -0.01  -0.01
  41   8     0.14  -0.03  -0.13     0.07   0.04  -0.02     0.02   0.00  -0.02
  42   8     0.07  -0.07   0.07     0.08   0.00   0.01     0.01   0.01   0.00
  43   6     0.11  -0.05   0.09     0.07  -0.04   0.01     0.02   0.01   0.00
  44   6     0.05  -0.03   0.08     0.09  -0.07  -0.02     0.02   0.01   0.01
  45   6     0.03  -0.08   0.03     0.03   0.03   0.03     0.01   0.01   0.00
  46   8     0.17  -0.04   0.09     0.04  -0.06   0.04     0.02   0.01   0.01
  47   6    -0.07   0.07  -0.05     0.04   0.05  -0.05     0.01   0.01   0.01
  48   8    -0.05  -0.01   0.00     0.01  -0.01   0.00     0.01   0.00  -0.01
  49   6     0.05   0.01  -0.01     0.02  -0.03   0.02    -0.01   0.01   0.04
  50   8     0.05  -0.01  -0.05     0.02  -0.05   0.00    -0.01   0.01   0.04
  51   8     0.07   0.08   0.00    -0.01  -0.01   0.06    -0.01   0.00   0.03
  52   6     0.01   0.04  -0.01    -0.01  -0.01   0.04     0.00   0.01   0.01
  53   6    -0.05   0.00  -0.02     0.00  -0.03   0.02     0.01   0.00   0.00
  54   6     0.06   0.05  -0.03    -0.01   0.00   0.07    -0.02   0.02   0.05
  55   8     0.00   0.01  -0.01    -0.02   0.01   0.03     0.00   0.02   0.00
  56   6    -0.08   0.02  -0.09     0.01  -0.05   0.01     0.01   0.00   0.01
  57   6     0.06   0.07  -0.07    -0.08  -0.01   0.09    -0.07   0.00   0.09
  58   6     0.03  -0.02   0.08     0.16  -0.11  -0.01     0.04   0.01   0.01
  59   6     0.00  -0.12   0.04    -0.02   0.08   0.01     0.00   0.02   0.00
  60   1    -0.03   0.00   0.01    -0.01   0.01  -0.03     0.01  -0.02   0.03
  61   1    -0.01  -0.03   0.01     0.01   0.04  -0.09    -0.03  -0.01   0.05
  62   1    -0.01  -0.04   0.02     0.00   0.03  -0.10    -0.02   0.03   0.06
  63   1    -0.03  -0.04   0.02     0.02   0.07  -0.06    -0.01   0.00   0.03
  64   1    -0.03  -0.03   0.02     0.02   0.08  -0.06    -0.02  -0.03   0.03
  65   1    -0.05  -0.04   0.03     0.01   0.04  -0.01     0.02   0.01  -0.01
  66   1    -0.05  -0.02   0.03     0.02   0.06  -0.01     0.01  -0.03  -0.01
  67   1    -0.01  -0.03   0.01    -0.02   0.00  -0.06     0.00   0.02   0.03
  68   1    -0.03  -0.05   0.02    -0.01   0.01  -0.06     0.02   0.04   0.03
  69   1     0.04   0.06  -0.03    -0.08  -0.03   0.02    -0.16  -0.05   0.00
  70   1     0.10   0.06  -0.07    -0.11  -0.04   0.03    -0.15  -0.07  -0.01
  71   1     0.08   0.03  -0.04    -0.08  -0.03   0.02     0.00  -0.04  -0.05
  72   1    -0.04   0.03   0.04    -0.02   0.00  -0.02    -0.03   0.02   0.00
  73   1     0.04   0.01   0.01    -0.10  -0.02   0.02     0.27   0.02  -0.13
  74   1    -0.02  -0.02   0.00    -0.03  -0.01   0.03    -0.03   0.00   0.00
  75   1     0.02  -0.03   0.02    -0.05   0.03   0.04    -0.02   0.00   0.01
  76   1     0.03  -0.01   0.01    -0.04   0.05   0.02     0.00   0.00   0.01
  77   1    -0.09   0.01  -0.05     0.05  -0.06   0.00    -0.02  -0.01  -0.02
  78   1    -0.04   0.02  -0.03    -0.05   0.05  -0.01     0.07  -0.02   0.00
  79   1    -0.12   0.01   0.02     0.01   0.01  -0.01    -0.03   0.03   0.00
  80   1    -0.07   0.00  -0.03     0.00   0.00   0.01     0.00  -0.02   0.01
  81   1    -0.11   0.00  -0.03     0.00   0.00   0.01    -0.06  -0.02  -0.01
  82   1    -0.09   0.01   0.10     0.00   0.02  -0.04    -0.07   0.07  -0.02
  83   1    -0.08   0.01   0.08    -0.01   0.01  -0.04    -0.10   0.03  -0.03
  84   1    -0.04   0.04   0.11    -0.03   0.00  -0.05    -0.09   0.05  -0.03
  85   1     0.01  -0.01   0.02    -0.03   0.02  -0.03     0.18  -0.09  -0.07
  86   1    -0.01  -0.01   0.03     0.05   0.03  -0.07     0.00  -0.11  -0.02
  87   1     0.02  -0.03   0.03    -0.05   0.10  -0.07     0.14  -0.21  -0.04
  88   1     0.00   0.01   0.00    -0.01  -0.09   0.04     0.16   0.24  -0.11
  89   1     0.01   0.04  -0.02    -0.02  -0.15   0.07     0.11   0.34  -0.11
  90   1    -0.02   0.01  -0.02     0.08  -0.09   0.03    -0.07   0.23  -0.05
  91   1     0.02   0.00  -0.01    -0.02   0.05   0.00     0.03   0.02  -0.01
  92   1     0.06  -0.02   0.01     0.04   0.02   0.04    -0.04   0.04  -0.02
  93   1     0.00  -0.05   0.01    -0.02  -0.03   0.02     0.03   0.08  -0.02
  94   1     0.03   0.08  -0.05    -0.02   0.09   0.00     0.01  -0.08   0.01
  95   1     0.01   0.10  -0.06    -0.01   0.12  -0.01     0.01  -0.12   0.02
  96   1     0.07   0.07  -0.04     0.04   0.08  -0.01    -0.06  -0.07   0.01
  97   1    -0.10  -0.06  -0.04    -0.01   0.06   0.03    -0.02  -0.04  -0.02
  98   1    -0.10  -0.05  -0.04     0.05   0.09   0.07    -0.03  -0.03  -0.03
  99   1    -0.07  -0.07  -0.01    -0.06   0.10   0.03    -0.02  -0.04   0.00
 100   1    -0.06   0.01  -0.04    -0.06  -0.08  -0.03    -0.02  -0.03   0.00
 101   1    -0.03  -0.01  -0.01    -0.14  -0.03  -0.05    -0.01  -0.02   0.01
 102   1    -0.03   0.04  -0.04    -0.09  -0.14  -0.05    -0.02  -0.01   0.00
 103   1    -0.10   0.06   0.03     0.04  -0.04   0.01    -0.01   0.00   0.03
 104   1     0.00   0.02   0.12    -0.03   0.01  -0.07     0.04  -0.01   0.06
 105   1     0.01  -0.03  -0.01    -0.04   0.05   0.04     0.04  -0.02   0.01
 106   1    -0.03  -0.01  -0.08     0.02   0.04   0.12     0.00  -0.01   0.03
 107   1    -0.04   0.03  -0.06    -0.15  -0.12  -0.05    -0.03  -0.04   0.00
 108   1    -0.03  -0.01  -0.05     0.06   0.04  -0.17     0.01  -0.02  -0.02
 109   1     0.03  -0.06   0.09     0.08  -0.06  -0.08     0.01   0.00   0.00
 110   1     0.02  -0.09   0.03     0.02   0.01   0.08     0.01   0.01   0.01
 111   1    -0.05   0.15  -0.17     0.04   0.05  -0.07     0.01   0.02  -0.02
 112   1     0.02  -0.02  -0.04     0.07   0.05  -0.05     0.02  -0.01   0.01
 113   1    -0.18   0.11   0.02     0.02   0.05  -0.05     0.00   0.02   0.02
 114   1    -0.06  -0.02   0.02     0.00  -0.04   0.04     0.02  -0.01   0.00
 115   1     0.05   0.03  -0.04     0.00   0.04   0.09    -0.02   0.06   0.05
 116   1    -0.07   0.03  -0.09     0.00  -0.06   0.02     0.02   0.00   0.02
 117   1    -0.08   0.07  -0.14     0.01  -0.03   0.00     0.00   0.01   0.01
 118   1    -0.13  -0.03  -0.11     0.01  -0.06   0.00     0.02  -0.01   0.00
 119   1     0.06   0.08  -0.09    -0.10   0.02   0.13    -0.08   0.00   0.14
 120   1     0.05   0.04  -0.09    -0.08  -0.01   0.09    -0.05   0.02   0.10
 121   1     0.07   0.09  -0.07    -0.11  -0.05   0.07    -0.10  -0.04   0.06
 122   1     0.03  -0.06   0.10     0.18  -0.13  -0.03     0.05   0.00   0.00
 123   1    -0.02  -0.01   0.07     0.17  -0.12  -0.02     0.03   0.01   0.01
 124   1     0.05   0.01   0.07     0.17  -0.11   0.05     0.05   0.02   0.02
 125   1    -0.01  -0.15   0.07    -0.03   0.08   0.03     0.00   0.02   0.00
 126   1     0.01  -0.11   0.05    -0.01   0.10  -0.05     0.00   0.02  -0.01
 127   1    -0.04  -0.13   0.00    -0.05   0.11   0.03     0.00   0.02   0.00
                    13                     14                     15
                     A                      A                      A
 Frequencies --    51.9965                54.4384                55.8513
 Red. masses --     3.1754                 5.3463                 3.2598
 Frc consts  --     0.0051                 0.0093                 0.0060
 IR Inten    --     0.1922                 0.4882                 0.3727
 Atom AN      X      Y      Z        X      Y      Z        X      Y      Z
   1   6    -0.01  -0.01   0.01     0.00   0.01   0.00     0.02  -0.02   0.01
   2   6    -0.02  -0.02   0.00     0.00   0.01  -0.01     0.02  -0.01   0.02
   3   6    -0.03  -0.02  -0.01     0.00   0.01  -0.01     0.01  -0.01   0.02
   4   6     0.05  -0.05  -0.03     0.01  -0.01   0.04    -0.04   0.01   0.05
   5   6     0.03  -0.03  -0.01    -0.01  -0.03   0.02     0.00  -0.01   0.02
   6   6     0.01  -0.03   0.01     0.00  -0.02  -0.02     0.00  -0.01   0.01
   7   8    -0.02  -0.02   0.04     0.02   0.00  -0.02    -0.01   0.00   0.01
   8   6    -0.01  -0.05   0.00     0.02   0.01   0.01    -0.02   0.03   0.03
   9   6     0.00   0.01   0.02     0.00   0.01   0.02     0.02  -0.01  -0.01
  10   6    -0.02  -0.02  -0.03     0.01   0.00  -0.01     0.00   0.01   0.00
  11   6    -0.01   0.01   0.02     0.01   0.01   0.02     0.02  -0.01  -0.01
  12   6    -0.02   0.00   0.02     0.02   0.01   0.02     0.02  -0.01  -0.02
  13   6    -0.01   0.00   0.02     0.02   0.02   0.02     0.03  -0.01  -0.03
  14   6    -0.01   0.00   0.01     0.00   0.02   0.03     0.03  -0.02  -0.02
  15   6     0.00   0.01   0.01    -0.01   0.02   0.02     0.03  -0.02  -0.01
  16   6     0.00   0.02   0.01     0.01  -0.01   0.02     0.01  -0.01  -0.01
  17   6     0.02   0.02   0.01    -0.02   0.01   0.03     0.03  -0.02  -0.01
  18   6     0.02  -0.04  -0.02     0.00  -0.01  -0.01     0.01   0.02   0.00
  19   6     0.05  -0.06  -0.01     0.01  -0.02   0.01    -0.01   0.03  -0.03
  20   6     0.06  -0.06  -0.01     0.03  -0.02   0.02    -0.03   0.03  -0.04
  21   6     0.02  -0.04  -0.02     0.04  -0.01   0.01    -0.05   0.02  -0.03
  22   6    -0.02  -0.02  -0.03     0.03  -0.01  -0.01    -0.03   0.01  -0.01
  23   6     0.01  -0.04  -0.02    -0.02  -0.02  -0.02     0.03   0.03   0.01
  24   6    -0.09   0.02  -0.04     0.05  -0.02   0.00    -0.06   0.02  -0.01
  25   6     0.00   0.19   0.08     0.00  -0.01   0.01     0.01  -0.09  -0.04
  26   6     0.11  -0.02  -0.10     0.01  -0.02   0.03    -0.04   0.02   0.05
  27   6     0.02  -0.01   0.00     0.00   0.05   0.00     0.01  -0.07   0.02
  28   6     0.02   0.06   0.02     0.01  -0.05   0.05    -0.01   0.04  -0.05
  29   6    -0.08  -0.06  -0.04    -0.01   0.11  -0.05     0.00  -0.13   0.04
  30   6    -0.04   0.16  -0.02    -0.04  -0.16   0.05     0.04   0.20  -0.07
  31   6     0.00  -0.09  -0.04    -0.03  -0.10  -0.03     0.06   0.11   0.02
  32   6     0.04  -0.01  -0.01     0.01  -0.01   0.00     0.00   0.01  -0.01
  33   6     0.01  -0.02   0.03     0.01   0.01   0.02     0.01  -0.02  -0.01
  34   6    -0.03  -0.02  -0.01     0.00   0.01   0.00     0.01  -0.02   0.00
  35   8     0.01   0.00  -0.01     0.01   0.05  -0.02     0.00   0.01  -0.01
  36  12    -0.01   0.01   0.01     0.00   0.01  -0.02     0.00   0.00   0.01
  37   8     0.00   0.01  -0.01     0.04  -0.02  -0.12     0.02  -0.02  -0.06
  38   6     0.00   0.01   0.00     0.05   0.04   0.00     0.01   0.01   0.00
  39   7    -0.03  -0.02  -0.03     0.00   0.00  -0.03     0.01   0.00   0.02
  40   7    -0.01   0.00   0.01     0.00   0.01   0.00     0.02  -0.02   0.01
  41   8     0.00   0.01   0.01     0.09   0.05  -0.03     0.01   0.02   0.00
  42   8     0.00   0.01   0.00     0.08   0.00   0.03     0.02   0.00   0.00
  43   6     0.00   0.00   0.00     0.04  -0.04   0.02     0.01  -0.02   0.00
  44   6     0.00   0.00   0.00     0.00  -0.05  -0.03     0.00  -0.03  -0.02
  45   6     0.00   0.01   0.00     0.03   0.03   0.04     0.00   0.01   0.01
  46   8     0.00   0.00   0.00     0.03  -0.06   0.05     0.00  -0.03   0.01
  47   6     0.01   0.01  -0.01     0.03   0.06  -0.08     0.01   0.01  -0.02
  48   8     0.04   0.05   0.03    -0.01   0.02  -0.03    -0.01  -0.02   0.01
  49   6    -0.02   0.01   0.02    -0.10   0.00   0.04    -0.04  -0.01   0.02
  50   8    -0.04   0.01   0.04    -0.26   0.00   0.24    -0.11  -0.01   0.12
  51   8    -0.01   0.01   0.01    -0.03   0.00  -0.04    -0.01  -0.02  -0.01
  52   6     0.00   0.01   0.01    -0.01   0.01  -0.04     0.00  -0.01   0.00
  53   6     0.01   0.03   0.02     0.00   0.02  -0.03     0.00   0.00   0.01
  54   6    -0.01   0.01   0.01    -0.05   0.00  -0.04    -0.01  -0.02  -0.02
  55   8    -0.01   0.00   0.00    -0.01   0.01  -0.04     0.02  -0.01   0.01
  56   6     0.02  -0.01   0.00     0.00   0.03  -0.02     0.00   0.03   0.04
  57   6    -0.01   0.01   0.01     0.01   0.01  -0.05     0.03  -0.02  -0.04
  58   6    -0.01   0.01   0.00    -0.08  -0.07  -0.05    -0.04  -0.03  -0.03
  59   6     0.00   0.01   0.00    -0.04   0.08   0.02    -0.02   0.04   0.00
  60   1    -0.02  -0.02   0.00     0.00   0.01   0.00     0.02  -0.02   0.02
  61   1     0.09  -0.01  -0.03     0.01  -0.01   0.04    -0.07  -0.02   0.08
  62   1     0.07  -0.10  -0.07     0.02  -0.01   0.06    -0.07   0.06   0.06
  63   1     0.03  -0.05   0.00    -0.01  -0.04   0.04     0.01  -0.01  -0.03
  64   1     0.03   0.00  -0.02    -0.02  -0.05   0.02     0.04  -0.04   0.04
  65   1    -0.01  -0.03  -0.01     0.01  -0.01  -0.03    -0.01  -0.01   0.00
  66   1     0.03  -0.02   0.03     0.00  -0.04  -0.03    -0.01  -0.01   0.01
  67   1    -0.02  -0.04   0.01     0.03   0.03   0.02    -0.03   0.02   0.03
  68   1    -0.05  -0.09  -0.02     0.03   0.02   0.01    -0.01   0.05   0.03
  69   1    -0.02   0.00   0.02     0.03   0.01   0.02     0.03   0.00  -0.03
  70   1    -0.02   0.00   0.01     0.04   0.03   0.02     0.03  -0.01  -0.03
  71   1     0.00   0.00   0.01     0.00   0.03   0.03     0.03  -0.02  -0.02
  72   1    -0.09  -0.05   0.05     0.00  -0.01   0.01     0.06   0.02  -0.02
  73   1     0.05   0.01   0.00    -0.07   0.01   0.04     0.08  -0.02  -0.02
  74   1     0.08  -0.07  -0.01     0.01  -0.03   0.01    -0.01   0.04  -0.03
  75   1     0.09  -0.08  -0.01     0.04  -0.02   0.03    -0.04   0.03  -0.05
  76   1     0.02  -0.04  -0.02     0.06  -0.01   0.02    -0.07   0.01  -0.04
  77   1    -0.03  -0.02  -0.04    -0.05   0.00  -0.04     0.07   0.00   0.04
  78   1    -0.18   0.03  -0.05     0.17  -0.03  -0.01    -0.20   0.04   0.00
  79   1     0.02   0.21   0.07     0.00  -0.02   0.01     0.00  -0.09  -0.03
  80   1    -0.08   0.21   0.17     0.00  -0.01   0.00     0.05  -0.10  -0.07
  81   1     0.07   0.26   0.04     0.01  -0.01   0.01    -0.02  -0.12  -0.03
  82   1     0.10  -0.01  -0.10     0.01  -0.03   0.03    -0.04   0.02   0.05
  83   1     0.19   0.05  -0.15     0.02  -0.02   0.03    -0.08  -0.02   0.07
  84   1     0.10  -0.13  -0.15     0.02  -0.01   0.03    -0.04   0.07   0.07
  85   1     0.05   0.00  -0.01    -0.01   0.05   0.00     0.02  -0.06   0.02
  86   1     0.00  -0.01   0.01     0.04   0.05  -0.01    -0.04  -0.07   0.03
  87   1     0.03  -0.04   0.00    -0.02   0.08  -0.02     0.04  -0.10   0.04
  88   1     0.05   0.06   0.01     0.00  -0.05   0.05     0.00   0.03  -0.04
  89   1     0.03   0.09   0.02     0.00  -0.09   0.07     0.01   0.08  -0.07
  90   1    -0.01   0.06   0.02     0.07  -0.05   0.04    -0.06   0.04  -0.04
  91   1    -0.14  -0.03  -0.05     0.03   0.09  -0.04    -0.04  -0.10   0.03
  92   1     0.02  -0.07  -0.01    -0.14   0.13  -0.07     0.15  -0.14   0.06
  93   1    -0.11  -0.16  -0.05     0.05   0.22  -0.09    -0.07  -0.25   0.08
  94   1    -0.10   0.18  -0.02    -0.01  -0.15   0.05     0.00   0.20  -0.06
  95   1    -0.05   0.24  -0.01     0.01  -0.28   0.08    -0.01   0.34  -0.09
  96   1     0.07   0.15  -0.02    -0.17  -0.14   0.08     0.20   0.18  -0.09
  97   1    -0.01  -0.10  -0.04    -0.05  -0.11  -0.04     0.07   0.13   0.03
  98   1    -0.03  -0.10  -0.06    -0.06  -0.10  -0.06     0.09   0.12   0.05
  99   1     0.02  -0.12  -0.02     0.00  -0.13   0.00     0.02   0.15  -0.01
 100   1     0.04  -0.01  -0.01     0.00  -0.01  -0.01     0.02   0.02   0.00
 101   1     0.07  -0.03  -0.01     0.04  -0.03   0.02    -0.03   0.04  -0.04
 102   1     0.04   0.01   0.00     0.02   0.03   0.01    -0.02  -0.03  -0.02
 103   1     0.10  -0.10   0.06     0.04  -0.02   0.04    -0.06   0.06  -0.04
 104   1    -0.03  -0.03  -0.06    -0.01   0.01  -0.02     0.05  -0.02   0.08
 105   1    -0.02   0.06   0.11     0.00   0.04   0.05     0.04  -0.08  -0.08
 106   1    -0.02  -0.01   0.00     0.02   0.03   0.08    -0.02  -0.04  -0.08
 107   1    -0.04  -0.03  -0.02    -0.05  -0.05   0.00     0.06   0.05   0.00
 108   1    -0.02  -0.01  -0.03     0.03   0.04  -0.06    -0.02  -0.05   0.06
 109   1     0.00   0.00   0.00     0.00  -0.06   0.00     0.00  -0.02   0.00
 110   1     0.00   0.01   0.01     0.02   0.01   0.11     0.00   0.01   0.04
 111   1     0.01   0.00   0.00     0.02   0.08  -0.12     0.01   0.01  -0.03
 112   1     0.01   0.02  -0.01     0.09   0.06  -0.07     0.02   0.02  -0.02
 113   1     0.01   0.00  -0.02    -0.01   0.07  -0.08     0.00   0.01  -0.03
 114   1    -0.02   0.04   0.01     0.00   0.03  -0.04     0.02   0.01  -0.01
 115   1    -0.02   0.01   0.00    -0.08  -0.03  -0.07    -0.02  -0.05  -0.04
 116   1    -0.01  -0.03  -0.02     0.00   0.04  -0.02     0.01   0.04   0.04
 117   1     0.06  -0.03   0.00    -0.01   0.03  -0.01    -0.02   0.02   0.05
 118   1     0.03   0.01   0.01     0.00   0.04  -0.02     0.00   0.04   0.04
 119   1    -0.01   0.00   0.01     0.03  -0.01  -0.10     0.05  -0.03  -0.06
 120   1    -0.01   0.01   0.01    -0.01   0.01  -0.04     0.03  -0.02  -0.04
 121   1    -0.01   0.00   0.01     0.04   0.03  -0.02     0.05   0.01  -0.02
 122   1    -0.01   0.01   0.00    -0.10  -0.06  -0.01    -0.06  -0.02  -0.01
 123   1    -0.01   0.01   0.00    -0.09  -0.07  -0.07    -0.04  -0.03  -0.03
 124   1    -0.01   0.01   0.00    -0.09  -0.07  -0.08    -0.06  -0.04  -0.05
 125   1     0.00   0.01   0.00    -0.05   0.08   0.06    -0.03   0.04   0.01
 126   1     0.00   0.01   0.00    -0.03   0.10  -0.04    -0.02   0.05  -0.03
 127   1     0.00   0.01   0.00    -0.08   0.11   0.04    -0.04   0.05   0.01
                    16                     17                     18
                     A                      A                      A
 Frequencies --    58.7092                65.7319                67.1238
 Red. masses --     3.6433                 3.2156                 3.2521
 Frc consts  --     0.0074                 0.0082                 0.0086
 IR Inten    --     0.3481                 0.2289                 0.3094
 Atom AN      X      Y      Z        X      Y      Z        X      Y      Z
   1   6    -0.01   0.01   0.01     0.00   0.02   0.04    -0.01   0.00   0.00
   2   6    -0.01   0.00   0.01     0.00   0.01   0.01     0.00   0.01  -0.02
   3   6    -0.01   0.00   0.01     0.00   0.01  -0.03     0.01   0.00  -0.03
   4   6     0.00   0.00  -0.13    -0.01   0.00   0.00    -0.04  -0.03   0.07
   5   6    -0.01   0.07  -0.06     0.05  -0.02  -0.04     0.06  -0.10  -0.01
   6   6    -0.02   0.04   0.02     0.05  -0.02  -0.05     0.00  -0.07  -0.03
   7   8    -0.03  -0.01   0.01     0.01  -0.01  -0.01     0.00  -0.03   0.00
   8   6    -0.03  -0.06  -0.07    -0.03   0.02  -0.01    -0.02   0.01   0.03
   9   6     0.00   0.02   0.00     0.01   0.03   0.03    -0.03  -0.01   0.02
  10   6    -0.01   0.01   0.03     0.00   0.00  -0.04     0.02  -0.01  -0.01
  11   6     0.01   0.03  -0.01     0.02   0.06   0.01    -0.04  -0.02   0.03
  12   6     0.04   0.05  -0.03     0.03   0.06  -0.03    -0.04  -0.02   0.03
  13   6     0.05   0.04  -0.04     0.03   0.04  -0.03    -0.03  -0.02   0.02
  14   6     0.03   0.03  -0.03     0.01   0.01  -0.01    -0.02  -0.01   0.02
  15   6     0.02   0.02  -0.01     0.01   0.01   0.03    -0.02  -0.01   0.02
  16   6    -0.02   0.04   0.01     0.01   0.09   0.03    -0.03  -0.01   0.03
  17   6     0.02   0.03  -0.01    -0.01  -0.02   0.04    -0.01  -0.01   0.02
  18   6    -0.04   0.02   0.03     0.00  -0.03  -0.03     0.02  -0.01  -0.01
  19   6    -0.05   0.03   0.02    -0.02  -0.02  -0.01    -0.02   0.01  -0.01
  20   6    -0.05   0.03   0.03    -0.04   0.01   0.00    -0.05   0.03  -0.02
  21   6    -0.03   0.01   0.03    -0.03   0.03  -0.01    -0.04   0.02  -0.01
  22   6     0.00   0.00   0.03    -0.02   0.02  -0.03     0.00   0.01  -0.01
  23   6    -0.03   0.02   0.03     0.03  -0.08  -0.04     0.09  -0.04   0.01
  24   6     0.06  -0.03   0.04    -0.02   0.03  -0.04     0.04  -0.01  -0.01
  25   6    -0.06   0.16   0.02     0.00   0.01  -0.01    -0.03   0.09   0.07
  26   6     0.05   0.00  -0.04    -0.07   0.14   0.08     0.03  -0.03  -0.05
  27   6     0.00  -0.02   0.03    -0.04  -0.06   0.09    -0.01  -0.02   0.02
  28   6    -0.02   0.09  -0.04    -0.06   0.01   0.00    -0.01  -0.01   0.03
  29   6     0.08  -0.01   0.07    -0.05   0.08  -0.06     0.07   0.01   0.02
  30   6     0.06  -0.10  -0.01    -0.05   0.00   0.00     0.05  -0.06  -0.05
  31   6    -0.03   0.08   0.05     0.05  -0.06  -0.05     0.14   0.12   0.02
  32   6    -0.07   0.00   0.00    -0.02  -0.14  -0.02    -0.01  -0.13   0.00
  33   6    -0.01   0.00   0.01     0.00   0.02   0.04    -0.02   0.02   0.02
  34   6     0.00   0.00  -0.01    -0.01   0.00  -0.04     0.02   0.01  -0.04
  35   8     0.00   0.00   0.00     0.00  -0.02  -0.01     0.00   0.02  -0.01
  36  12     0.00  -0.01   0.04     0.01   0.00   0.00    -0.01  -0.02  -0.01
  37   8     0.03  -0.04  -0.04     0.01  -0.02   0.01    -0.01   0.03  -0.02
  38   6     0.00   0.00   0.00    -0.03   0.00   0.01     0.02   0.02   0.00
  39   7     0.00   0.00   0.03     0.00   0.00  -0.06     0.02  -0.01  -0.01
  40   7    -0.01   0.01   0.02     0.01   0.03   0.05    -0.01  -0.01   0.01
  41   8    -0.01   0.00   0.00    -0.05   0.00   0.03     0.05   0.02  -0.02
  42   8     0.00   0.00  -0.02    -0.03   0.00  -0.02     0.02   0.01   0.03
  43   6     0.00  -0.01  -0.02    -0.01   0.00  -0.01     0.01   0.02   0.03
  44   6     0.01  -0.02  -0.02     0.01   0.00   0.00    -0.04   0.03   0.02
  45   6     0.00   0.00  -0.01    -0.02   0.00  -0.01     0.02   0.01   0.02
  46   8    -0.02  -0.02  -0.01    -0.01   0.00  -0.01     0.04   0.02   0.03
  47   6     0.00  -0.01   0.01    -0.01  -0.02   0.02     0.01   0.03  -0.04
  48   8     0.02  -0.02   0.05     0.04  -0.01   0.01    -0.02   0.00  -0.02
  49   6     0.01  -0.03   0.01     0.02  -0.02   0.02     0.00   0.02  -0.04
  50   8    -0.03  -0.02   0.07     0.02  -0.01   0.02     0.02   0.03  -0.05
  51   8     0.01  -0.05  -0.01     0.02  -0.02   0.01    -0.01   0.00  -0.03
  52   6     0.02  -0.04   0.02     0.02  -0.02   0.02    -0.02  -0.01  -0.03
  53   6    -0.01  -0.05   0.02     0.04  -0.01   0.02    -0.01   0.01  -0.02
  54   6     0.03  -0.05  -0.02     0.03  -0.03   0.01    -0.01   0.01  -0.02
  55   8     0.05  -0.04   0.03     0.02  -0.03   0.02    -0.04  -0.02  -0.04
  56   6    -0.02  -0.10  -0.06     0.05   0.00   0.06     0.00   0.03   0.01
  57   6     0.08  -0.04  -0.04     0.06  -0.02  -0.01    -0.03   0.00   0.00
  58   6    -0.02  -0.02  -0.03     0.03   0.00   0.00    -0.09   0.04   0.01
  59   6    -0.01   0.02  -0.01    -0.01   0.01  -0.01     0.01  -0.01   0.02
  60   1    -0.01   0.00   0.00     0.00   0.02   0.03     0.00   0.02  -0.03
  61   1     0.03   0.04  -0.17    -0.02  -0.02   0.04    -0.08  -0.09   0.14
  62   1     0.01  -0.05  -0.17    -0.03   0.03  -0.02    -0.08   0.05   0.08
  63   1    -0.02   0.08  -0.04     0.06  -0.01  -0.08     0.07  -0.11  -0.13
  64   1    -0.02   0.13  -0.09     0.07  -0.05  -0.01     0.15  -0.15   0.06
  65   1    -0.02   0.02   0.04     0.05   0.00  -0.09    -0.03  -0.08  -0.05
  66   1     0.00   0.07   0.05     0.08  -0.05  -0.04     0.00  -0.06  -0.02
  67   1    -0.05  -0.09  -0.07    -0.05   0.02   0.01    -0.03   0.02   0.05
  68   1    -0.06  -0.11  -0.06    -0.03   0.04  -0.04    -0.01   0.05   0.02
  69   1     0.05   0.06  -0.04     0.04   0.09  -0.05    -0.05  -0.02   0.03
  70   1     0.07   0.05  -0.06     0.04   0.04  -0.06    -0.03  -0.02   0.02
  71   1     0.04   0.02  -0.03     0.01  -0.01  -0.02    -0.01  -0.01   0.01
  72   1    -0.08  -0.01   0.05     0.07   0.13   0.03    -0.08  -0.05   0.05
  73   1     0.08   0.03  -0.03     0.04  -0.01   0.05    -0.01  -0.01   0.02
  74   1    -0.06   0.03   0.02    -0.02  -0.04   0.00    -0.02   0.01  -0.01
  75   1    -0.07   0.04   0.02    -0.05   0.01   0.01    -0.08   0.05  -0.02
  76   1    -0.02   0.01   0.03    -0.04   0.05  -0.01    -0.05   0.03  -0.01
  77   1     0.00  -0.01   0.04     0.07  -0.10  -0.06     0.19  -0.11   0.04
  78   1     0.09  -0.03   0.05     0.02   0.02  -0.05     0.07  -0.01  -0.01
  79   1    -0.07   0.17   0.03    -0.02   0.03   0.01    -0.01   0.12   0.06
  80   1    -0.11   0.18   0.07     0.06  -0.01  -0.04    -0.07   0.10   0.13
  81   1    -0.01   0.22  -0.03    -0.05  -0.03  -0.02     0.01   0.13   0.04
  82   1     0.02   0.00  -0.02    -0.07   0.15   0.08     0.03  -0.03  -0.04
  83   1     0.10   0.06  -0.09    -0.13   0.09   0.09     0.08   0.01  -0.07
  84   1     0.07  -0.07  -0.06    -0.07   0.19   0.10     0.03  -0.10  -0.07
  85   1     0.01  -0.01   0.02    -0.04  -0.07   0.10     0.00  -0.02   0.01
  86   1    -0.05  -0.02   0.04    -0.09  -0.07   0.10    -0.02  -0.02   0.02
  87   1     0.02  -0.06   0.05    -0.01  -0.09   0.12    -0.01  -0.03   0.01
  88   1    -0.01   0.09  -0.04    -0.06  -0.01   0.01     0.00  -0.01   0.03
  89   1     0.00   0.15  -0.07    -0.03   0.06  -0.04    -0.01   0.00   0.04
  90   1    -0.09   0.09  -0.04    -0.12   0.00  -0.03    -0.01  -0.01   0.02
  91   1     0.13  -0.03   0.08    -0.05   0.10  -0.07     0.11   0.00   0.02
  92   1     0.06  -0.01   0.05    -0.08   0.09  -0.04     0.04   0.01   0.01
  93   1     0.08   0.04   0.11    -0.03   0.09  -0.09     0.07   0.05   0.05
  94   1     0.11  -0.12  -0.01    -0.07   0.00   0.00     0.09  -0.07  -0.05
  95   1     0.04  -0.13  -0.04    -0.03  -0.03   0.02     0.03  -0.08  -0.07
  96   1     0.01  -0.10  -0.03    -0.09   0.00   0.00     0.01  -0.06  -0.06
  97   1    -0.02   0.08   0.05     0.06  -0.10  -0.05     0.19   0.12   0.04
  98   1     0.01   0.09   0.07     0.08  -0.02  -0.07     0.23   0.18   0.05
  99   1    -0.06   0.11   0.03     0.01  -0.03  -0.03     0.05   0.21  -0.03
 100   1    -0.07  -0.01   0.00     0.02  -0.18  -0.01     0.04  -0.16   0.01
 101   1    -0.10   0.01   0.00    -0.07  -0.11  -0.02    -0.10  -0.06  -0.04
 102   1    -0.07  -0.03  -0.01    -0.05  -0.18  -0.01    -0.05  -0.22   0.00
 103   1    -0.03   0.02   0.00    -0.11   0.11   0.00     0.02  -0.04   0.05
 104   1     0.00   0.00   0.03     0.05   0.03   0.16    -0.04   0.03  -0.04
 105   1     0.00  -0.01  -0.01     0.05  -0.06  -0.06    -0.05   0.06   0.08
 106   1    -0.02  -0.02  -0.08     0.04   0.06   0.15     0.02  -0.01  -0.09
 107   1     0.04   0.07  -0.01    -0.19  -0.15  -0.07     0.07   0.05  -0.03
 108   1    -0.03  -0.03   0.05     0.09   0.06  -0.23     0.00  -0.01   0.01
 109   1     0.02  -0.01   0.00     0.02   0.00  -0.01    -0.04   0.02   0.05
 110   1     0.00   0.00   0.01    -0.02   0.00  -0.02     0.02   0.01   0.02
 111   1     0.00  -0.01   0.01    -0.01  -0.04   0.06     0.01   0.04  -0.07
 112   1    -0.01  -0.01   0.01    -0.04   0.01   0.02     0.05   0.03  -0.04
 113   1     0.01   0.00   0.01     0.02  -0.03  -0.01    -0.01   0.03  -0.04
 114   1    -0.07  -0.06   0.05     0.05   0.01   0.01     0.00   0.03  -0.04
 115   1     0.02  -0.09  -0.03     0.02  -0.05   0.00     0.00   0.03  -0.01
 116   1    -0.05  -0.13  -0.08     0.05   0.00   0.05     0.00   0.04   0.00
 117   1     0.04  -0.10  -0.09     0.05  -0.03   0.08    -0.02   0.01   0.03
 118   1    -0.05  -0.11  -0.05     0.07   0.02   0.07     0.01   0.05   0.02
 119   1     0.10  -0.06  -0.08     0.07  -0.02  -0.04    -0.04   0.00   0.03
 120   1     0.07  -0.05  -0.04     0.04  -0.03  -0.01    -0.01   0.02   0.01
 121   1     0.11  -0.01  -0.01     0.08  -0.01   0.01    -0.05  -0.01  -0.01
 122   1    -0.03   0.01  -0.01     0.03   0.01  -0.01    -0.11   0.04   0.04
 123   1     0.00  -0.02  -0.02     0.04  -0.01   0.01    -0.12   0.05   0.00
 124   1    -0.04  -0.03  -0.04     0.02  -0.01   0.01    -0.09   0.05  -0.03
 125   1    -0.01   0.02  -0.01     0.00   0.01  -0.02     0.01  -0.02   0.03
 126   1    -0.01   0.02  -0.02    -0.01   0.01  -0.01     0.01  -0.01   0.03
 127   1    -0.01   0.03   0.00     0.00   0.01   0.00     0.01  -0.02   0.01
                    19                     20                     21
                     A                      A                      A
 Frequencies --    75.8525                77.8484                81.4969
 Red. masses --     4.0401                 4.6447                 3.3003
 Frc consts  --     0.0137                 0.0166                 0.0129
 IR Inten    --     3.2388                 1.6211                 0.9646
 Atom AN      X      Y      Z        X      Y      Z        X      Y      Z
   1   6    -0.02   0.00  -0.02    -0.01  -0.03  -0.02     0.02  -0.01   0.04
   2   6    -0.02   0.00  -0.03    -0.01  -0.03  -0.04     0.02  -0.01   0.07
   3   6    -0.01   0.00  -0.02    -0.01  -0.03  -0.04     0.02  -0.01   0.04
   4   6    -0.02  -0.02   0.08     0.12   0.05  -0.09    -0.02   0.10   0.06
   5   6     0.03  -0.06   0.02     0.13   0.13  -0.02    -0.05   0.06   0.03
   6   6    -0.01  -0.04   0.01     0.11   0.10   0.08     0.06   0.04  -0.07
   7   8     0.00  -0.01   0.01     0.03   0.05   0.12     0.11   0.04  -0.11
   8   6     0.00   0.01   0.05     0.02  -0.01   0.00     0.10   0.12  -0.01
   9   6    -0.01   0.01  -0.01     0.00  -0.02   0.00     0.02  -0.01   0.01
  10   6     0.00  -0.01  -0.01     0.00  -0.03  -0.01     0.03  -0.02   0.00
  11   6     0.00   0.00  -0.01    -0.02  -0.02   0.00     0.01   0.00   0.00
  12   6     0.04   0.02  -0.01    -0.03  -0.03   0.00     0.01  -0.01   0.00
  13   6     0.05   0.03  -0.01    -0.01  -0.03  -0.01     0.00  -0.02   0.00
  14   6     0.03   0.03  -0.01     0.01  -0.03  -0.01     0.00  -0.03   0.01
  15   6     0.01   0.02  -0.01     0.01  -0.03  -0.01     0.00  -0.02   0.01
  16   6    -0.02  -0.02   0.00    -0.02  -0.02   0.01     0.00   0.01   0.02
  17   6     0.01   0.03  -0.02     0.00  -0.03   0.00    -0.03  -0.04   0.02
  18   6     0.01  -0.01   0.00     0.02  -0.04  -0.01     0.01   0.00   0.00
  19   6     0.00   0.00  -0.01     0.04  -0.05   0.00    -0.01   0.00  -0.01
  20   6    -0.01   0.00  -0.01     0.04  -0.05   0.00     0.00   0.00  -0.01
  21   6    -0.01   0.00  -0.01     0.03  -0.05   0.00     0.02  -0.02  -0.01
  22   6     0.00  -0.01  -0.01     0.02  -0.04  -0.01     0.03  -0.03   0.00
  23   6     0.04  -0.02   0.01     0.02  -0.05  -0.01    -0.02   0.00  -0.01
  24   6     0.01  -0.01  -0.01     0.04  -0.05  -0.01     0.02  -0.03   0.00
  25   6    -0.05   0.03   0.00    -0.02  -0.06   0.00    -0.03   0.12   0.04
  26   6     0.03  -0.06   0.00    -0.06   0.00   0.03     0.06  -0.03  -0.04
  27   6     0.03   0.06  -0.05    -0.02  -0.04   0.03    -0.07  -0.07   0.09
  28   6     0.05   0.00   0.01    -0.04  -0.03  -0.04    -0.09  -0.01  -0.03
  29   6     0.02   0.00   0.00     0.06  -0.06   0.01     0.03  -0.07   0.01
  30   6     0.01  -0.02  -0.02     0.05  -0.07  -0.04     0.04   0.01   0.00
  31   6     0.06   0.05   0.00     0.02   0.00   0.00    -0.04  -0.04  -0.01
  32   6     0.00  -0.05   0.00    -0.02  -0.08  -0.03    -0.01   0.01  -0.02
  33   6    -0.01   0.00   0.00    -0.02  -0.03  -0.04     0.01  -0.01   0.03
  34   6     0.00   0.01  -0.02    -0.01  -0.03  -0.08     0.01  -0.02   0.03
  35   8     0.00  -0.05  -0.03     0.00  -0.01  -0.01     0.00   0.00   0.00
  36  12    -0.02   0.00  -0.01     0.01   0.01   0.10     0.01  -0.01  -0.02
  37   8     0.00   0.01   0.08    -0.02   0.02  -0.02    -0.01   0.01   0.01
  38   6    -0.06  -0.02   0.01    -0.01   0.00   0.00     0.00   0.00   0.00
  39   7    -0.01   0.00  -0.01    -0.01  -0.03   0.00     0.02  -0.02   0.01
  40   7    -0.02   0.00  -0.01     0.00  -0.02   0.02     0.02  -0.01   0.02
  41   8    -0.14   0.00   0.09    -0.02   0.01   0.02     0.00  -0.01   0.00
  42   8    -0.05  -0.01  -0.05    -0.01   0.00  -0.01     0.00   0.00   0.00
  43   6     0.01  -0.02  -0.03     0.00   0.00   0.00     0.00   0.00   0.00
  44   6     0.07  -0.03  -0.01    -0.02   0.01  -0.01     0.00  -0.01   0.00
  45   6    -0.04  -0.01  -0.04     0.00   0.00  -0.01     0.00   0.00   0.00
  46   8     0.01  -0.02  -0.03     0.02   0.00   0.00    -0.02   0.00  -0.01
  47   6    -0.03  -0.05   0.07     0.00   0.00   0.00     0.00   0.00   0.01
  48   8    -0.05  -0.01  -0.03    -0.02   0.10   0.08    -0.08  -0.06  -0.06
  49   6    -0.03   0.02   0.08    -0.04   0.03  -0.02    -0.01   0.01   0.00
  50   8    -0.08   0.00   0.10    -0.05   0.01  -0.02    -0.01   0.00  -0.01
  51   8     0.04   0.07   0.03    -0.03   0.08   0.00    -0.01   0.02   0.00
  52   6     0.00   0.04   0.00    -0.02   0.08   0.03    -0.02   0.01  -0.01
  53   6    -0.03   0.01  -0.02    -0.04   0.10   0.04    -0.04  -0.02  -0.03
  54   6     0.00   0.05   0.02    -0.04   0.05  -0.03    -0.02   0.02   0.00
  55   8    -0.03   0.03  -0.01     0.00   0.07   0.04    -0.01   0.03  -0.01
  56   6    -0.07   0.03  -0.07    -0.05   0.08   0.00    -0.07   0.03  -0.03
  57   6     0.03   0.07  -0.02    -0.06   0.07  -0.06    -0.03   0.02   0.00
  58   6     0.23  -0.06   0.03    -0.03   0.00  -0.01     0.02  -0.01   0.00
  59   6    -0.01   0.00  -0.04     0.00  -0.01   0.00     0.00   0.00   0.00
  60   1    -0.02   0.01  -0.03    -0.01  -0.03  -0.06     0.03   0.00   0.08
  61   1    -0.05  -0.06   0.12     0.17   0.11  -0.11    -0.07   0.05   0.04
  62   1    -0.04   0.03   0.10     0.14  -0.02  -0.18    -0.03   0.15   0.14
  63   1     0.04  -0.08  -0.04     0.13   0.14  -0.01    -0.05   0.10   0.10
  64   1     0.09  -0.10   0.07     0.15   0.20  -0.04    -0.13  -0.01   0.01
  65   1    -0.03  -0.06   0.00     0.10   0.10   0.06     0.12   0.10  -0.05
  66   1    -0.02  -0.03   0.00     0.17   0.12   0.15     0.04  -0.02  -0.14
  67   1     0.01   0.03   0.05    -0.01  -0.04   0.01     0.11   0.11  -0.03
  68   1     0.02   0.04   0.05    -0.04  -0.08  -0.02     0.17   0.19   0.02
  69   1     0.05   0.02  -0.01    -0.05  -0.03   0.00     0.00  -0.01   0.00
  70   1     0.08   0.04  -0.02    -0.02  -0.03  -0.02     0.00  -0.02  -0.01
  71   1     0.05   0.04  -0.01     0.02  -0.03  -0.02     0.00  -0.03   0.01
  72   1    -0.06  -0.05   0.01     0.00   0.00   0.00    -0.06  -0.04   0.06
  73   1    -0.02   0.02  -0.01     0.01  -0.03   0.00     0.01  -0.03   0.02
  74   1     0.00   0.00  -0.01     0.05  -0.06   0.00    -0.03   0.02  -0.02
  75   1    -0.01   0.00  -0.01     0.05  -0.06   0.00    -0.02   0.00  -0.02
  76   1    -0.01   0.00  -0.01     0.04  -0.06   0.00     0.01  -0.02  -0.01
  77   1     0.08  -0.05   0.02     0.05  -0.07  -0.01    -0.04   0.02  -0.02
  78   1     0.02  -0.01  -0.01     0.04  -0.05   0.00    -0.01  -0.02   0.01
  79   1    -0.06   0.02   0.01    -0.02  -0.05   0.00    -0.04   0.13   0.05
  80   1    -0.07   0.04   0.01     0.00  -0.07  -0.01    -0.08   0.14   0.08
  81   1    -0.03   0.05  -0.03    -0.04  -0.07   0.00     0.01   0.17   0.00
  82   1     0.00  -0.09   0.01    -0.06   0.01   0.03     0.04  -0.02  -0.02
  83   1     0.07  -0.04  -0.01    -0.08  -0.02   0.04     0.11   0.03  -0.08
  84   1     0.05  -0.10   0.00    -0.06   0.03   0.04     0.08  -0.10  -0.06
  85   1     0.04   0.06  -0.05    -0.04  -0.05   0.04    -0.09  -0.07   0.10
  86   1     0.06   0.06  -0.05    -0.03  -0.05   0.02    -0.11  -0.07   0.10
  87   1     0.01   0.07  -0.07     0.00  -0.03   0.05    -0.02  -0.08   0.13
  88   1     0.05   0.01   0.00    -0.06  -0.03  -0.03    -0.10  -0.03  -0.02
  89   1     0.03  -0.03   0.03    -0.02  -0.03  -0.07    -0.06   0.04  -0.08
  90   1     0.08   0.01   0.02    -0.05  -0.03  -0.04    -0.15  -0.02  -0.06
  91   1     0.04  -0.01   0.01     0.09  -0.08   0.03     0.01  -0.06   0.01
  92   1     0.01   0.00   0.00     0.04  -0.06  -0.01     0.06  -0.07   0.01
  93   1     0.02   0.01   0.02     0.05  -0.03   0.04     0.02  -0.09   0.01
  94   1     0.03  -0.02  -0.03     0.08  -0.08  -0.04     0.01  -0.01   0.02
  95   1     0.01  -0.04  -0.04     0.04  -0.07  -0.06     0.04   0.07   0.02
  96   1     0.00  -0.02  -0.02     0.04  -0.07  -0.05     0.08   0.00  -0.03
  97   1     0.09   0.05   0.01     0.03  -0.02   0.00    -0.06  -0.04  -0.01
  98   1     0.10   0.07   0.02     0.06   0.03   0.01    -0.06  -0.06  -0.01
  99   1     0.03   0.08  -0.02    -0.01   0.03   0.01    -0.02  -0.06   0.01
 100   1     0.02  -0.07   0.01     0.00  -0.08  -0.02    -0.02   0.02  -0.02
 101   1    -0.03  -0.03  -0.01    -0.06  -0.05  -0.05     0.00   0.01  -0.02
 102   1    -0.02  -0.09   0.01    -0.03  -0.13  -0.04     0.00   0.02  -0.02
 103   1     0.04  -0.05   0.02    -0.11   0.06  -0.08    -0.09   0.08  -0.01
 104   1    -0.04   0.00  -0.06     0.02  -0.02   0.05     0.06  -0.01   0.15
 105   1    -0.03   0.05   0.05     0.01  -0.10  -0.13     0.05  -0.10  -0.07
 106   1    -0.01  -0.01  -0.08     0.00  -0.03  -0.07     0.07   0.04   0.21
 107   1     0.06   0.06  -0.01    -0.05  -0.03  -0.10    -0.16  -0.16  -0.01
 108   1    -0.03  -0.01   0.04     0.01  -0.04  -0.11     0.12   0.04  -0.16
 109   1     0.05  -0.03  -0.10    -0.03   0.00  -0.01     0.00  -0.01  -0.02
 110   1    -0.05  -0.01  -0.05     0.00   0.00  -0.01     0.00   0.00   0.00
 111   1    -0.02  -0.11   0.21     0.00  -0.02   0.03     0.00   0.00   0.00
 112   1    -0.15   0.04   0.06    -0.02   0.03   0.00     0.00  -0.01   0.01
 113   1     0.06  -0.09  -0.01     0.01  -0.01  -0.03    -0.01   0.00   0.02
 114   1    -0.03  -0.03   0.01    -0.07   0.10   0.05     0.00  -0.05  -0.02
 115   1    -0.03   0.03  -0.02    -0.03   0.04  -0.02    -0.01   0.02   0.00
 116   1    -0.04   0.05  -0.04    -0.07   0.07  -0.05    -0.02   0.06   0.02
 117   1    -0.09   0.09  -0.11     0.00   0.06  -0.01    -0.13   0.09  -0.05
 118   1    -0.10  -0.03  -0.10    -0.08   0.10   0.02    -0.08  -0.02  -0.06
 119   1     0.05   0.07  -0.07    -0.07   0.08  -0.03    -0.03   0.02   0.00
 120   1     0.00   0.05  -0.02    -0.03   0.05  -0.09    -0.03   0.01   0.00
 121   1     0.07   0.09   0.01    -0.08   0.09  -0.08    -0.03   0.01   0.00
 122   1     0.30  -0.09  -0.06    -0.02  -0.01   0.00     0.03  -0.02  -0.01
 123   1     0.25  -0.06   0.04    -0.04   0.01  -0.01     0.02  -0.01   0.00
 124   1     0.27  -0.04   0.13    -0.02   0.02  -0.01     0.03  -0.01   0.01
 125   1    -0.01   0.01  -0.06     0.01  -0.01  -0.01    -0.01   0.00   0.00
 126   1    -0.01   0.01  -0.03     0.01  -0.01   0.00     0.00   0.00   0.00
 127   1     0.00   0.01  -0.03     0.01  -0.01   0.00     0.00   0.00   0.00
                    22                     23                     24
                     A                      A                      A
 Frequencies --    85.3041                89.7572                94.3887
 Red. masses --     3.4648                 3.7760                 5.1210
 Frc consts  --     0.0149                 0.0179                 0.0269
 IR Inten    --     0.4221                 0.3853                 1.7056
 Atom AN      X      Y      Z        X      Y      Z        X      Y      Z
   1   6    -0.06   0.01  -0.01     0.01  -0.01   0.05    -0.01   0.00   0.01
   2   6    -0.06   0.01  -0.01    -0.02  -0.02   0.05     0.00   0.01   0.03
   3   6    -0.04   0.00   0.01    -0.04  -0.02   0.04     0.00   0.01   0.03
   4   6     0.00   0.04   0.05     0.04  -0.06  -0.09    -0.01   0.01   0.00
   5   6     0.01   0.01   0.02    -0.02  -0.06  -0.08     0.04  -0.01  -0.03
   6   6     0.04   0.02  -0.03    -0.07  -0.04  -0.08     0.01  -0.01  -0.02
   7   8     0.06   0.02  -0.04    -0.03  -0.01  -0.09     0.01   0.00  -0.01
   8   6     0.05   0.06   0.01     0.01  -0.04  -0.09    -0.01   0.01  -0.01
   9   6    -0.04   0.04  -0.01     0.02   0.02   0.02    -0.01  -0.01  -0.01
  10   6     0.00  -0.04   0.02    -0.03  -0.02   0.02     0.00   0.01   0.01
  11   6    -0.02   0.04  -0.02     0.03   0.04   0.01    -0.03  -0.02   0.00
  12   6     0.01   0.06  -0.02     0.01   0.03   0.01    -0.04  -0.02   0.01
  13   6     0.01   0.07  -0.02    -0.03   0.00   0.02    -0.03  -0.02   0.01
  14   6    -0.01   0.07  -0.02    -0.03   0.00   0.03    -0.01  -0.01   0.00
  15   6    -0.03   0.06  -0.02    -0.01   0.00   0.03    -0.01  -0.01  -0.01
  16   6    -0.01   0.04  -0.03     0.09   0.08  -0.01    -0.02  -0.02   0.00
  17   6     0.00   0.08  -0.04     0.00   0.00   0.04    -0.01   0.00  -0.01
  18   6     0.01  -0.04   0.02    -0.02  -0.03   0.02    -0.02   0.02   0.00
  19   6     0.01  -0.04   0.01     0.01  -0.04   0.02    -0.02   0.02   0.00
  20   6     0.02  -0.06   0.00     0.02  -0.05   0.02    -0.01   0.01   0.00
  21   6     0.02  -0.06   0.00     0.02  -0.05   0.02     0.01   0.01   0.01
  22   6     0.01  -0.06   0.01    -0.01  -0.04   0.02     0.01   0.00   0.01
  23   6     0.01  -0.05   0.01    -0.02  -0.01   0.03    -0.05   0.04   0.00
  24   6     0.00  -0.08   0.02     0.03  -0.05   0.02     0.01   0.00   0.01
  25   6     0.00   0.00  -0.03     0.14  -0.03  -0.01    -0.01   0.00   0.01
  26   6    -0.03   0.05  -0.01     0.00   0.15  -0.01    -0.01  -0.02  -0.02
  27   6     0.04   0.14  -0.11    -0.01  -0.03   0.05    -0.01   0.01  -0.01
  28   6     0.07   0.06   0.03    -0.01   0.03   0.03    -0.01  -0.01  -0.01
  29   6     0.01  -0.15   0.04     0.07  -0.08   0.06     0.02  -0.01   0.01
  30   6     0.03  -0.04   0.00     0.06  -0.04  -0.04     0.02   0.01   0.01
  31   6     0.00  -0.03   0.02    -0.03   0.04   0.05    -0.06  -0.02  -0.01
  32   6    -0.02  -0.06   0.00    -0.04   0.00   0.00    -0.01   0.07   0.00
  33   6    -0.04   0.01  -0.01     0.04  -0.03   0.04    -0.01   0.00   0.01
  34   6    -0.02   0.02   0.00    -0.03  -0.02   0.05    -0.01   0.00   0.03
  35   8     0.00   0.01   0.01     0.00   0.00  -0.01     0.01  -0.04  -0.08
  36  12    -0.02  -0.01   0.01    -0.02   0.01  -0.05    -0.01  -0.01   0.00
  37   8     0.01  -0.01  -0.02    -0.02   0.02   0.02     0.09   0.00  -0.10
  38   6     0.01   0.00   0.00    -0.01   0.00   0.00    -0.06   0.01   0.02
  39   7    -0.03  -0.03   0.02    -0.04  -0.02   0.01     0.00   0.01   0.01
  40   7    -0.06   0.03  -0.01     0.01   0.02   0.03    -0.01  -0.01  -0.01
  41   8     0.02   0.00  -0.01    -0.01   0.00   0.01    -0.15   0.07   0.14
  42   8     0.01   0.00   0.01    -0.01   0.00  -0.01    -0.08   0.01  -0.06
  43   6    -0.01   0.00   0.00     0.01   0.00   0.00     0.12  -0.01   0.02
  44   6    -0.01   0.00   0.00     0.01   0.00   0.00     0.03   0.00  -0.01
  45   6     0.01   0.00   0.01     0.00   0.00   0.00    -0.03   0.00  -0.04
  46   8    -0.01   0.00   0.00     0.03  -0.01   0.01     0.35  -0.04   0.11
  47   6     0.01   0.01  -0.01     0.00   0.00   0.00    -0.04  -0.01   0.01
  48   8    -0.03  -0.05   0.01     0.00   0.02  -0.05     0.01   0.00   0.01
  49   6     0.02  -0.02  -0.01    -0.03   0.02   0.00     0.05   0.01  -0.04
  50   8     0.03  -0.01  -0.01    -0.04   0.01  -0.01     0.02   0.01   0.01
  51   8    -0.01  -0.03   0.01     0.01   0.04  -0.01     0.00  -0.02  -0.01
  52   6    -0.01  -0.03   0.02     0.00   0.04  -0.04     0.00  -0.02   0.00
  53   6     0.00  -0.02   0.03     0.03   0.05  -0.03     0.01   0.00   0.00
  54   6     0.02  -0.03  -0.01    -0.03   0.04   0.00     0.03   0.00  -0.01
  55   8    -0.01  -0.04   0.03    -0.04   0.02  -0.05     0.01  -0.02   0.00
  56   6     0.01   0.04   0.11     0.04   0.08   0.02     0.03   0.01   0.04
  57   6     0.05  -0.02  -0.03    -0.06   0.04   0.01     0.00  -0.01   0.02
  58   6    -0.04   0.01  -0.01     0.05  -0.02   0.01    -0.10   0.03  -0.04
  59   6     0.00   0.01   0.00     0.00   0.00   0.00     0.03  -0.01  -0.03
  60   1    -0.06   0.02  -0.01    -0.02  -0.04   0.06     0.00   0.01   0.04
  61   1    -0.03   0.01   0.06     0.07  -0.03  -0.10    -0.04  -0.02   0.03
  62   1    -0.01   0.08   0.09     0.06  -0.11  -0.08    -0.04   0.05   0.00
  63   1     0.01   0.03   0.02    -0.04  -0.10  -0.06     0.05  -0.02  -0.09
  64   1     0.00  -0.03   0.03    -0.03  -0.03  -0.09     0.09  -0.03   0.00
  65   1     0.06   0.03  -0.02    -0.10  -0.07  -0.05     0.00  -0.02  -0.03
  66   1     0.03  -0.01  -0.05    -0.11   0.00  -0.08     0.01   0.01  -0.01
  67   1     0.06   0.06   0.01     0.03  -0.02  -0.09    -0.01   0.01   0.00
  68   1     0.09   0.11   0.02    -0.01  -0.07  -0.09     0.00   0.03  -0.01
  69   1     0.03   0.06  -0.03     0.01   0.04   0.00    -0.05  -0.03   0.02
  70   1     0.03   0.07  -0.02    -0.05   0.00   0.02    -0.03  -0.02   0.02
  71   1     0.00   0.07  -0.02    -0.04  -0.02   0.03    -0.01   0.00   0.00
  72   1     0.01   0.05  -0.04     0.15   0.13  -0.04    -0.03  -0.03   0.00
  73   1    -0.06   0.07  -0.05     0.02   0.00   0.03    -0.02   0.00  -0.01
  74   1     0.02  -0.04   0.00     0.02  -0.05   0.02    -0.03   0.03   0.00
  75   1     0.02  -0.06  -0.01     0.04  -0.06   0.02    -0.01   0.01   0.00
  76   1     0.02  -0.07   0.00     0.03  -0.06   0.02     0.01   0.00   0.01
  77   1     0.02  -0.06   0.01    -0.01  -0.02   0.04    -0.08   0.06  -0.01
  78   1    -0.05  -0.07   0.05     0.00  -0.04   0.02     0.00   0.00   0.01
  79   1     0.00   0.01  -0.03     0.18  -0.05  -0.03     0.00   0.02   0.01
  80   1     0.03  -0.02  -0.04     0.17  -0.03  -0.04     0.00  -0.01   0.04
  81   1    -0.03  -0.03  -0.03     0.12  -0.07   0.06    -0.01  -0.01   0.01
  82   1    -0.02   0.05  -0.03     0.06   0.19  -0.04     0.00  -0.02  -0.03
  83   1    -0.05   0.03   0.01    -0.06   0.09   0.03     0.00  -0.02  -0.02
  84   1    -0.05   0.08  -0.01    -0.05   0.22  -0.02    -0.02  -0.03  -0.03
  85   1     0.06   0.15  -0.13     0.00  -0.03   0.05    -0.01   0.01  -0.01
  86   1     0.10   0.15  -0.10    -0.03  -0.03   0.05     0.00   0.01  -0.01
  87   1    -0.01   0.15  -0.16     0.00  -0.05   0.05    -0.01   0.01  -0.02
  88   1     0.08   0.10   0.00     0.00   0.02   0.04    -0.01  -0.01  -0.01
  89   1     0.03   0.00   0.08    -0.01   0.06   0.03    -0.01  -0.02   0.00
  90   1     0.13   0.08   0.07    -0.05   0.02   0.02     0.00  -0.01   0.00
  91   1     0.00  -0.16   0.05     0.10  -0.10   0.07     0.01  -0.01   0.01
  92   1     0.07  -0.17   0.02     0.08  -0.09   0.04     0.03  -0.01   0.02
  93   1    -0.01  -0.19   0.06     0.05  -0.07   0.10     0.01  -0.02   0.02
  94   1     0.00  -0.07   0.02     0.09  -0.05  -0.04     0.00   0.00   0.02
  95   1     0.02   0.04   0.01     0.03  -0.02  -0.07     0.02   0.04   0.02
  96   1     0.08  -0.05  -0.05     0.08  -0.05  -0.05     0.03   0.01  -0.01
  97   1     0.00  -0.03   0.02    -0.03   0.07   0.06    -0.07  -0.04  -0.02
  98   1     0.02  -0.02   0.04    -0.01   0.03   0.09    -0.08  -0.03  -0.04
  99   1    -0.01  -0.02   0.03    -0.04   0.05   0.02    -0.04  -0.05   0.01
 100   1     0.00  -0.06   0.01    -0.05   0.01  -0.01    -0.03   0.08   0.00
 101   1    -0.04  -0.04  -0.02    -0.04   0.00   0.00     0.01   0.05   0.00
 102   1    -0.03  -0.10   0.00    -0.02   0.00  -0.02    -0.01   0.09   0.00
 103   1     0.09  -0.10   0.03     0.08  -0.04   0.04    -0.02   0.01   0.01
 104   1    -0.10  -0.01  -0.15     0.02  -0.06   0.02    -0.01   0.01   0.02
 105   1    -0.09   0.11   0.11     0.04  -0.01   0.06    -0.01   0.00   0.00
 106   1     0.05   0.07   0.17    -0.09  -0.08  -0.13     0.02   0.04   0.15
 107   1    -0.17  -0.11  -0.03     0.12   0.11   0.07    -0.12  -0.10   0.01
 108   1     0.07   0.10  -0.17    -0.12  -0.09   0.21     0.06   0.04  -0.09
 109   1     0.00   0.01   0.02    -0.01  -0.01  -0.03     0.04  -0.01   0.07
 110   1     0.01   0.00   0.01     0.00   0.00  -0.01    -0.03   0.01  -0.09
 111   1     0.00   0.02  -0.04     0.00  -0.01   0.02    -0.04  -0.16   0.36
 112   1     0.03  -0.01  -0.01    -0.02   0.02   0.00    -0.26   0.30  -0.01
 113   1    -0.01   0.01   0.01     0.01  -0.01  -0.02     0.13  -0.13  -0.24
 114   1     0.05   0.00   0.00     0.08   0.06  -0.06     0.02   0.01  -0.01
 115   1     0.02  -0.06  -0.01    -0.03   0.07  -0.01     0.05   0.01   0.02
 116   1     0.04   0.07   0.11     0.04   0.09   0.00     0.02   0.01   0.02
 117   1    -0.04   0.01   0.16     0.03   0.05   0.05     0.03  -0.03   0.07
 118   1     0.03   0.07   0.13     0.05   0.11   0.04     0.04   0.04   0.06
 119   1     0.06  -0.03  -0.05    -0.06   0.06   0.01    -0.02  -0.02   0.07
 120   1     0.05  -0.03  -0.03    -0.07   0.04   0.01     0.03   0.00   0.02
 121   1     0.07   0.00  -0.02    -0.06   0.02   0.01    -0.04  -0.03  -0.01
 122   1    -0.06   0.03   0.01     0.07  -0.04  -0.01    -0.16   0.05   0.03
 123   1    -0.03   0.01  -0.01     0.04  -0.01   0.00    -0.12   0.03  -0.05
 124   1    -0.06   0.00  -0.03     0.07   0.00   0.04    -0.13   0.01  -0.12
 125   1     0.00   0.01   0.01     0.00   0.00  -0.01     0.06  -0.02  -0.07
 126   1     0.00   0.01   0.00     0.00   0.00   0.00     0.04  -0.01   0.01
 127   1     0.00   0.01   0.00     0.00   0.00   0.00     0.05  -0.02  -0.02
                    25                     26                     27
                     A                      A                      A
 Frequencies --   101.4188               104.7141               106.9635
 Red. masses --     3.0299                 2.7457                 2.5505
 Frc consts  --     0.0184                 0.0177                 0.0172
 IR Inten    --     0.9848                 0.0259                 1.9483
 Atom AN      X      Y      Z        X      Y      Z        X      Y      Z
   1   6    -0.01   0.00   0.05    -0.02   0.00  -0.02     0.03  -0.01   0.03
   2   6     0.01   0.02   0.12    -0.01   0.00  -0.06     0.00  -0.02   0.05
   3   6     0.01   0.01   0.08     0.01  -0.01  -0.05    -0.01  -0.02   0.02
   4   6    -0.03  -0.02  -0.05     0.01   0.02  -0.02     0.02   0.01   0.05
   5   6     0.01   0.00  -0.05    -0.07   0.03   0.00    -0.02   0.00   0.05
   6   6     0.01  -0.02  -0.01    -0.01   0.02  -0.04    -0.04   0.02   0.03
   7   8    -0.02  -0.04   0.00     0.04   0.00  -0.08    -0.01   0.05   0.02
   8   6    -0.04  -0.04  -0.03     0.05   0.02  -0.05     0.03   0.03   0.03
   9   6    -0.03  -0.03  -0.02    -0.03  -0.03   0.02     0.03   0.02  -0.04
  10   6     0.00   0.01  -0.01     0.02  -0.02   0.02    -0.02  -0.02  -0.01
  11   6    -0.03  -0.05  -0.01    -0.05  -0.03   0.03     0.01   0.01  -0.02
  12   6    -0.01  -0.03   0.00    -0.03  -0.02   0.01    -0.01   0.00   0.00
  13   6     0.02  -0.01  -0.01     0.02  -0.01  -0.02    -0.01   0.02   0.01
  14   6     0.01   0.00  -0.02     0.03  -0.01  -0.02     0.00   0.03   0.00
  15   6    -0.02  -0.01  -0.02     0.00  -0.02   0.00     0.02   0.04  -0.02
  16   6    -0.05  -0.06   0.00    -0.07  -0.03   0.04    -0.03   0.00   0.01
  17   6    -0.03   0.00  -0.03     0.01  -0.02   0.00    -0.04   0.04  -0.03
  18   6    -0.02   0.02  -0.02     0.03  -0.02   0.02    -0.01  -0.04   0.00
  19   6    -0.03   0.03  -0.01     0.04  -0.03   0.02     0.00  -0.04   0.00
  20   6    -0.03   0.03  -0.01     0.04  -0.03   0.02     0.01  -0.04   0.01
  21   6     0.00   0.02  -0.01     0.01  -0.01   0.01     0.00  -0.03   0.00
  22   6     0.02   0.01  -0.01     0.00  -0.01   0.01    -0.01  -0.03  -0.01
  23   6    -0.01   0.01  -0.02     0.00   0.01   0.02     0.01  -0.04   0.00
  24   6     0.05   0.00  -0.01    -0.03   0.01   0.01    -0.01  -0.02  -0.01
  25   6    -0.05  -0.02   0.01    -0.07   0.02   0.06    -0.08   0.04  -0.02
  26   6    -0.02  -0.09  -0.01    -0.04  -0.04   0.01    -0.03  -0.01   0.03
  27   6    -0.02   0.03  -0.04     0.00  -0.04   0.01    -0.04   0.12  -0.01
  28   6    -0.02   0.00  -0.03     0.00   0.00  -0.01    -0.04  -0.03  -0.04
  29   6     0.08  -0.01   0.02    -0.05   0.04  -0.02    -0.01  -0.03   0.00
  30   6     0.07   0.01  -0.03    -0.04   0.01   0.04     0.00   0.00  -0.02
  31   6     0.00  -0.04  -0.05    -0.04   0.06   0.08     0.01   0.02   0.02
  32   6     0.02   0.02   0.02    -0.02   0.03  -0.05    -0.03  -0.07  -0.01
  33   6    -0.02   0.01   0.07    -0.05   0.02   0.00     0.04  -0.01   0.05
  34   6    -0.01   0.00   0.10     0.04   0.01  -0.06    -0.01  -0.02   0.05
  35   8     0.00   0.01   0.01     0.00   0.00   0.00     0.00   0.00   0.00
  36  12    -0.01  -0.02  -0.02     0.00  -0.03  -0.01     0.03   0.03  -0.05
  37   8    -0.02   0.01   0.04     0.01   0.00   0.01     0.01  -0.01  -0.02
  38   6     0.01   0.00   0.00     0.00   0.00   0.00     0.00   0.00   0.00
  39   7     0.00   0.01  -0.01     0.02  -0.02   0.01    -0.02  -0.02  -0.02
  40   7    -0.02  -0.02  -0.03    -0.02  -0.02   0.01     0.02   0.02  -0.04
  41   8     0.02  -0.01  -0.02    -0.01   0.00   0.00     0.00   0.00   0.00
  42   8     0.01   0.00   0.01    -0.01   0.00   0.00     0.00   0.00   0.00
  43   6    -0.02   0.01   0.00     0.00   0.00   0.00     0.00   0.00   0.00
  44   6     0.00   0.00   0.01     0.01   0.00   0.01     0.00   0.00   0.00
  45   6     0.00   0.00   0.00     0.00   0.00   0.00     0.00   0.00   0.00
  46   8    -0.05   0.01  -0.02     0.00   0.00   0.00     0.01   0.00   0.01
  47   6     0.01   0.00  -0.01     0.00   0.00   0.00     0.00   0.00   0.00
  48   8     0.07   0.07   0.02     0.03   0.02   0.00     0.09   0.05  -0.02
  49   6    -0.01   0.01   0.01     0.01   0.00   0.01     0.00  -0.01   0.00
  50   8    -0.02   0.01   0.01     0.00   0.00   0.02     0.01  -0.01  -0.01
  51   8     0.03   0.03  -0.01     0.03   0.02   0.00     0.00  -0.02   0.00
  52   6     0.00   0.01  -0.01     0.00  -0.01   0.00     0.03   0.01  -0.01
  53   6     0.05   0.06   0.01     0.05   0.04   0.02     0.05   0.00  -0.02
  54   6     0.01   0.01  -0.02     0.03   0.00  -0.02    -0.01   0.00   0.01
  55   8    -0.05  -0.04  -0.03    -0.04  -0.04  -0.01     0.04   0.04  -0.02
  56   6     0.10   0.05   0.09     0.08   0.07   0.13     0.07  -0.06  -0.05
  57   6     0.03   0.02  -0.04     0.06   0.01  -0.05    -0.04  -0.02   0.05
  58   6     0.06   0.00   0.02     0.03   0.00   0.01    -0.02   0.00  -0.01
  59   6     0.00   0.00   0.00     0.00   0.00   0.00     0.00   0.00   0.00
  60   1     0.01   0.03   0.18    -0.01   0.01  -0.10     0.01  -0.03   0.09
  61   1    -0.03  -0.02  -0.04     0.01   0.03  -0.07     0.03   0.02   0.04
  62   1    -0.04  -0.01  -0.08     0.03   0.00   0.02     0.04   0.00   0.07
  63   1     0.02   0.01  -0.08    -0.08   0.05   0.09    -0.03  -0.02   0.07
  64   1     0.04   0.00  -0.04    -0.15   0.03  -0.04    -0.03   0.01   0.04
  65   1     0.00  -0.02  -0.02     0.03   0.04  -0.01    -0.05   0.01   0.04
  66   1     0.03  -0.01   0.01    -0.03   0.00  -0.08    -0.07   0.03   0.01
  67   1    -0.06  -0.06  -0.03     0.06   0.02  -0.06     0.05   0.05   0.03
  68   1    -0.05  -0.05  -0.03     0.07   0.04  -0.03     0.02   0.02   0.04
  69   1    -0.01  -0.04   0.01    -0.03  -0.02   0.01    -0.03  -0.02   0.02
  70   1     0.05   0.00  -0.01     0.05   0.00  -0.03    -0.03   0.01   0.03
  71   1     0.02   0.02  -0.02     0.06   0.00  -0.03    -0.01   0.04   0.01
  72   1    -0.08  -0.09   0.01    -0.09  -0.05   0.05    -0.04  -0.01   0.04
  73   1    -0.04   0.00  -0.04     0.03  -0.02   0.00    -0.09   0.03  -0.02
  74   1    -0.05   0.03  -0.02     0.05  -0.03   0.02     0.01  -0.05   0.01
  75   1    -0.04   0.04  -0.01     0.05  -0.03   0.02     0.01  -0.04   0.01
  76   1     0.01   0.02  -0.01     0.00  -0.01   0.01     0.01  -0.03   0.00
  77   1    -0.04   0.03  -0.02     0.02   0.00   0.03     0.04  -0.07   0.02
  78   1     0.04   0.00  -0.01    -0.01   0.01  -0.01    -0.03  -0.02  -0.01
  79   1    -0.06   0.05   0.03    -0.08   0.11   0.07    -0.12   0.08   0.01
  80   1    -0.02  -0.05   0.06    -0.03  -0.02   0.12    -0.05   0.02   0.00
  81   1    -0.08  -0.03  -0.04    -0.10   0.01  -0.01    -0.10   0.04  -0.08
  82   1    -0.02  -0.11  -0.01    -0.05  -0.04   0.02    -0.07  -0.01   0.06
  83   1     0.01  -0.08   0.01    -0.03  -0.03   0.01    -0.03   0.00   0.01
  84   1    -0.02  -0.10  -0.01    -0.04  -0.06   0.01     0.00  -0.02   0.05
  85   1    -0.03   0.05  -0.05     0.01  -0.03   0.01    -0.10   0.11   0.00
  86   1    -0.01   0.04  -0.02    -0.01  -0.04   0.02     0.01   0.12  -0.02
  87   1    -0.03   0.03  -0.04     0.01  -0.05   0.01    -0.05   0.17   0.00
  88   1    -0.02   0.00  -0.03     0.00   0.00  -0.01    -0.09  -0.02  -0.04
  89   1    -0.02  -0.02  -0.02     0.00   0.01  -0.02    -0.04  -0.10  -0.06
  90   1     0.00   0.00  -0.02    -0.02   0.00  -0.01     0.03  -0.03  -0.04
  91   1     0.10  -0.01   0.02    -0.07   0.05  -0.02    -0.01  -0.03  -0.01
  92   1     0.10  -0.01   0.02    -0.08   0.05  -0.01     0.01  -0.03   0.00
  93   1     0.06  -0.02   0.05    -0.04   0.05  -0.05    -0.01  -0.04   0.00
  94   1     0.05  -0.03  -0.01    -0.02   0.07   0.01     0.01   0.01  -0.03
  95   1     0.07   0.07  -0.02    -0.04  -0.06   0.02    -0.01  -0.01  -0.03
  96   1     0.10   0.00  -0.08    -0.08   0.03   0.10     0.01   0.00   0.00
  97   1     0.02  -0.07  -0.05    -0.08   0.12   0.08     0.01   0.04   0.03
  98   1    -0.02  -0.03  -0.10    -0.03   0.03   0.16     0.04   0.02   0.05
  99   1     0.02  -0.06  -0.04    -0.04   0.06   0.05    -0.01   0.04   0.00
 100   1     0.05   0.02   0.04    -0.09   0.04  -0.09    -0.04  -0.09  -0.02
 101   1     0.04   0.02   0.01    -0.02   0.02  -0.02    -0.05  -0.07   0.02
 102   1    -0.01   0.02   0.05     0.04   0.05  -0.10    -0.01  -0.07  -0.02
 103   1    -0.14   0.09   0.04    -0.10   0.03   0.00    -0.23   0.17  -0.02
 104   1     0.03   0.02   0.19    -0.02   0.04   0.04     0.16  -0.02   0.35
 105   1     0.03  -0.06  -0.03    -0.04   0.00  -0.02     0.18  -0.19  -0.19
 106   1     0.06   0.10   0.38    -0.03  -0.09  -0.35    -0.08  -0.08  -0.17
 107   1    -0.24  -0.22   0.06     0.28   0.25  -0.03     0.19   0.14   0.08
 108   1     0.13   0.10  -0.16    -0.11  -0.08   0.20    -0.12  -0.09   0.26
 109   1    -0.01   0.00  -0.02     0.02   0.00   0.00     0.00   0.00   0.01
 110   1     0.00   0.00   0.01     0.00   0.00  -0.01     0.00   0.00   0.00
 111   1     0.01   0.02  -0.07     0.00  -0.01   0.01     0.00  -0.01   0.00
 112   1     0.05  -0.05   0.00     0.00   0.00   0.00     0.00   0.01   0.00
 113   1    -0.02   0.02   0.04     0.00  -0.01   0.00     0.00  -0.01  -0.01
 114   1     0.06   0.10  -0.04     0.09   0.07  -0.03     0.00   0.00  -0.01
 115   1    -0.01  -0.01  -0.04     0.02  -0.03  -0.03     0.00   0.03   0.02
 116   1     0.07   0.03   0.04     0.08   0.08   0.10     0.04  -0.10  -0.03
 117   1     0.12  -0.04   0.16     0.06   0.00   0.20     0.09  -0.05  -0.07
 118   1     0.14   0.14   0.14     0.12   0.15   0.16     0.09  -0.08  -0.06
 119   1     0.04   0.01  -0.06     0.06  -0.01  -0.05    -0.05   0.00   0.06
 120   1     0.04   0.02  -0.05     0.08   0.00  -0.07    -0.06  -0.01   0.07
 121   1     0.04   0.05  -0.03     0.06   0.05  -0.05    -0.04  -0.06   0.05
 122   1     0.08  -0.02  -0.01     0.03   0.00   0.00    -0.04   0.01   0.00
 123   1     0.06   0.00   0.02     0.03   0.00   0.01    -0.01   0.00  -0.01
 124   1     0.08   0.01   0.06     0.03   0.00   0.02    -0.04  -0.01  -0.02
 125   1     0.00   0.00   0.01     0.00   0.00  -0.01     0.00   0.00   0.00
 126   1     0.00   0.00   0.00     0.00   0.00   0.00     0.00   0.00   0.00
 127   1     0.00   0.00   0.00     0.00   0.00   0.00     0.00   0.00   0.00
                    28                     29                     30
                     A                      A                      A
 Frequencies --   113.8353               120.0734               121.3241
 Red. masses --     3.5060                 2.8276                 1.8133
 Frc consts  --     0.0268                 0.0240                 0.0157
 IR Inten    --     0.3658                 1.1446                 1.1287
 Atom AN      X      Y      Z        X      Y      Z        X      Y      Z
   1   6     0.01  -0.02   0.02    -0.01   0.00   0.06     0.00   0.00  -0.02
   2   6    -0.01  -0.02   0.03    -0.01   0.01   0.10     0.00   0.00  -0.03
   3   6    -0.04  -0.01   0.01    -0.01   0.00   0.05     0.00   0.00  -0.02
   4   6     0.09  -0.01   0.03    -0.01   0.02  -0.02     0.01  -0.02   0.01
   5   6     0.19  -0.11  -0.08    -0.09   0.07   0.04     0.04  -0.04  -0.03
   6   6     0.04  -0.03  -0.08    -0.03   0.04   0.04     0.00  -0.02  -0.03
   7   8     0.02   0.06  -0.03    -0.02   0.01   0.02     0.00   0.00  -0.01
   8   6     0.02   0.08   0.00    -0.01  -0.01   0.00     0.00   0.01   0.00
   9   6     0.02   0.00  -0.02    -0.02  -0.01  -0.01     0.01   0.00   0.00
  10   6    -0.05   0.02  -0.01     0.00  -0.01  -0.04     0.00   0.01   0.01
  11   6     0.04   0.01  -0.03     0.01  -0.01  -0.02    -0.01   0.00   0.01
  12   6     0.07   0.02  -0.03     0.03   0.00  -0.02    -0.02  -0.01   0.01
  13   6     0.05   0.01  -0.03     0.01   0.00  -0.01    -0.01   0.00   0.01
  14   6     0.02   0.00  -0.01    -0.02  -0.01   0.00     0.01   0.00   0.00
  15   6     0.01   0.00  -0.02    -0.02  -0.01  -0.01     0.02   0.01   0.00
  16   6     0.01  -0.02  -0.01     0.03  -0.01  -0.03    -0.01   0.00   0.01
  17   6     0.01  -0.01  -0.01    -0.01   0.00  -0.02     0.01   0.00   0.00
  18   6    -0.04   0.02  -0.01     0.02  -0.03  -0.03    -0.01   0.01   0.01
  19   6     0.01  -0.01   0.01     0.03  -0.03  -0.01     0.00   0.01   0.01
  20   6     0.06  -0.03   0.03     0.04  -0.02   0.00     0.00   0.00   0.00
  21   6     0.04  -0.01   0.02     0.04  -0.01  -0.01    -0.01   0.00   0.00
  22   6    -0.01   0.02   0.00     0.02   0.01  -0.03    -0.01   0.00   0.01
  23   6    -0.06   0.04  -0.01     0.04  -0.04  -0.03    -0.01   0.02   0.01
  24   6     0.02   0.03  -0.01     0.04   0.04  -0.06    -0.01  -0.01   0.02
  25   6    -0.05   0.00  -0.05     0.04  -0.02  -0.02    -0.01   0.01   0.02
  26   6     0.04  -0.07   0.03     0.04  -0.02  -0.04    -0.01   0.01   0.00
  27   6     0.01  -0.02  -0.01     0.00  -0.01  -0.03     0.01   0.01   0.01
  28   6     0.01   0.00  -0.02     0.00   0.03   0.01     0.01  -0.02  -0.01
  29   6     0.02   0.08   0.00     0.03   0.12  -0.05    -0.01  -0.03   0.02
  30   6     0.01   0.01  -0.01     0.02   0.04  -0.04    -0.01  -0.01   0.01
  31   6    -0.06   0.05  -0.01     0.05   0.02  -0.02    -0.02  -0.01   0.00
  32   6    -0.06   0.06  -0.04     0.01  -0.06  -0.03     0.00   0.03   0.01
  33   6     0.03  -0.03   0.02    -0.01  -0.01   0.07    -0.01   0.00  -0.03
  34   6    -0.06  -0.03   0.01     0.00   0.01   0.09    -0.01   0.00  -0.03
  35   8     0.00   0.01   0.01     0.02  -0.01  -0.02     0.03  -0.02  -0.03
  36  12    -0.03   0.05   0.01    -0.04  -0.01   0.01     0.01   0.01   0.00
  37   8    -0.04   0.00   0.01     0.02  -0.01  -0.02     0.01  -0.01   0.01
  38   6     0.01   0.01   0.01     0.02  -0.01  -0.02     0.04  -0.03  -0.03
  39   7    -0.05   0.02  -0.01    -0.02   0.00  -0.05     0.00   0.00   0.01
  40   7     0.01   0.00  -0.01    -0.02  -0.02   0.00     0.01   0.00   0.00
  41   8     0.01   0.01   0.00     0.02  -0.01  -0.02     0.05  -0.02  -0.04
  42   8     0.01   0.00   0.00     0.03  -0.01   0.00     0.06  -0.03   0.02
  43   6    -0.01  -0.01   0.00     0.01  -0.01   0.00     0.00  -0.01  -0.01
  44   6    -0.02   0.00  -0.01     0.00   0.00   0.00     0.00   0.00   0.02
  45   6     0.01   0.00   0.01     0.01  -0.01   0.00     0.01  -0.02   0.01
  46   8    -0.01  -0.01   0.00     0.00  -0.01  -0.01    -0.06   0.00  -0.04
  47   6     0.01   0.01  -0.02    -0.03   0.02   0.05    -0.05   0.04   0.09
  48   8    -0.04  -0.01   0.01    -0.07  -0.05   0.00     0.01   0.01   0.00
  49   6    -0.02   0.00   0.00     0.02  -0.01   0.00     0.01  -0.01   0.00
  50   8     0.02   0.00  -0.03     0.02  -0.01  -0.01     0.01  -0.01   0.00
  51   8    -0.08  -0.04   0.03    -0.02   0.00   0.03     0.02   0.01   0.00
  52   6    -0.06  -0.02   0.05    -0.02   0.00   0.04     0.01   0.01   0.00
  53   6    -0.04  -0.03   0.04    -0.03  -0.02   0.03     0.01   0.01   0.00
  54   6    -0.03  -0.03   0.03     0.01  -0.01   0.01     0.01   0.01   0.00
  55   8    -0.04   0.01   0.05    -0.01   0.00   0.04     0.01   0.00   0.00
  56   6    -0.01  -0.04   0.10    -0.05   0.03   0.06     0.01   0.01  -0.01
  57   6     0.01  -0.02   0.02     0.01   0.00  -0.01    -0.01   0.01   0.00
  58   6     0.00  -0.01   0.00    -0.03   0.01  -0.01    -0.02   0.03   0.01
  59   6     0.01   0.01   0.01    -0.05   0.02  -0.01    -0.10   0.03  -0.02
  60   1    -0.01  -0.04   0.04     0.00   0.02   0.16     0.00  -0.01  -0.05
  61   1     0.09  -0.05   0.15     0.02   0.07  -0.08     0.00  -0.03   0.04
  62   1     0.06   0.03   0.01     0.02  -0.03  -0.02     0.00   0.00   0.00
  63   1     0.20  -0.18  -0.25    -0.10   0.09   0.14     0.05  -0.06  -0.08
  64   1     0.34  -0.16   0.02    -0.17   0.10  -0.02     0.09  -0.06   0.00
  65   1    -0.04  -0.09  -0.13     0.00   0.07   0.05    -0.02  -0.04  -0.04
  66   1     0.04   0.00  -0.06    -0.02   0.02   0.02     0.00  -0.01  -0.02
  67   1     0.02   0.13   0.05     0.00  -0.02  -0.02     0.00   0.02   0.01
  68   1    -0.01   0.09  -0.05    -0.01  -0.03   0.02    -0.01   0.01  -0.02
  69   1     0.09   0.03  -0.04     0.05   0.01  -0.03    -0.04  -0.01   0.02
  70   1     0.05   0.01  -0.03     0.02   0.00  -0.01    -0.01  -0.01   0.01
  71   1     0.00  -0.01  -0.01    -0.03  -0.01   0.00     0.02   0.01   0.00
  72   1    -0.02  -0.05   0.00     0.02  -0.01  -0.04    -0.01   0.00   0.02
  73   1     0.03  -0.01  -0.01     0.00   0.00  -0.03     0.00   0.00   0.01
  74   1     0.03  -0.03   0.02     0.03  -0.05   0.00     0.00   0.01   0.00
  75   1     0.10  -0.05   0.04     0.05  -0.03   0.01     0.00   0.00   0.00
  76   1     0.07  -0.02   0.03     0.06   0.00   0.00    -0.01   0.00   0.00
  77   1    -0.07   0.04   0.00     0.07  -0.06  -0.01    -0.03   0.03   0.00
  78   1     0.04   0.02  -0.03     0.07   0.03  -0.09    -0.02  -0.01   0.03
  79   1    -0.09  -0.02  -0.02     0.06  -0.05  -0.04     0.00   0.03   0.02
  80   1    -0.07   0.02  -0.07     0.02  -0.01  -0.04     0.00   0.01   0.03
  81   1    -0.03   0.03  -0.07     0.06  -0.02   0.00    -0.01   0.01   0.01
  82   1    -0.01  -0.10   0.06     0.06  -0.03  -0.06    -0.01   0.01   0.01
  83   1     0.06  -0.04   0.00     0.05  -0.02  -0.02    -0.01   0.01   0.00
  84   1     0.09  -0.10   0.05     0.02  -0.01  -0.05    -0.01   0.00   0.00
  85   1     0.02  -0.02  -0.01     0.01   0.00  -0.04     0.00   0.01   0.01
  86   1     0.00  -0.02  -0.01     0.00   0.00  -0.02     0.02   0.01   0.00
  87   1     0.02  -0.03  -0.01    -0.01  -0.02  -0.04     0.01   0.02   0.01
  88   1     0.02  -0.02  -0.01     0.03   0.04   0.00    -0.02  -0.01  -0.01
  89   1     0.01   0.02  -0.01     0.00   0.06   0.02     0.01  -0.05  -0.02
  90   1    -0.01  -0.01  -0.03    -0.02   0.03   0.01     0.03  -0.02   0.00
  91   1     0.05   0.07  -0.01     0.05   0.14  -0.07    -0.01  -0.04   0.03
  92   1    -0.02   0.08   0.00     0.00   0.13  -0.02     0.00  -0.04   0.01
  93   1     0.03   0.11   0.00     0.05   0.13  -0.07    -0.01  -0.03   0.03
  94   1     0.04   0.04  -0.04     0.05   0.08  -0.06    -0.01  -0.03   0.02
  95   1     0.00  -0.05  -0.04     0.03  -0.03  -0.05    -0.01   0.00   0.01
  96   1    -0.03   0.02   0.02    -0.01   0.05   0.02     0.00  -0.02  -0.01
  97   1    -0.06   0.01  -0.02     0.07   0.06   0.00    -0.02  -0.02   0.00
  98   1    -0.03   0.08  -0.03     0.06   0.01   0.02    -0.02   0.00  -0.01
  99   1    -0.09   0.06   0.01     0.04   0.04  -0.06    -0.01  -0.01   0.02
 100   1    -0.07   0.09  -0.03     0.00  -0.09  -0.05     0.00   0.04   0.02
 101   1    -0.05   0.06  -0.05    -0.01  -0.06  -0.01     0.01   0.03   0.00
 102   1    -0.05   0.06  -0.05     0.02  -0.06  -0.04    -0.01   0.02   0.01
 103   1    -0.01   0.00   0.01     0.03  -0.03   0.08    -0.10   0.08  -0.06
 104   1     0.04  -0.04   0.08    -0.02  -0.01   0.04     0.03   0.01   0.06
 105   1     0.06  -0.05  -0.02    -0.01   0.02   0.09     0.03  -0.07  -0.12
 106   1    -0.12  -0.07  -0.14    -0.05  -0.03  -0.05     0.01   0.01   0.02
 107   1     0.05   0.08   0.02     0.15   0.10   0.12    -0.06  -0.04  -0.04
 108   1    -0.13  -0.10   0.14    -0.09  -0.03   0.25     0.03   0.01  -0.09
 109   1    -0.03  -0.01  -0.02     0.01  -0.01   0.03     0.00   0.00   0.04
 110   1     0.00   0.00   0.01     0.01  -0.01   0.04     0.02  -0.02   0.08
 111   1     0.01   0.03  -0.09    -0.02  -0.10   0.34    -0.03  -0.15   0.54
 112   1     0.06  -0.04  -0.02    -0.21   0.28   0.03    -0.33   0.44   0.06
 113   1    -0.02   0.03   0.02     0.11  -0.08  -0.17     0.16  -0.12  -0.24
 114   1    -0.03  -0.01   0.03     0.01  -0.03   0.03     0.01   0.01   0.00
 115   1    -0.02  -0.06   0.04     0.01  -0.03   0.02     0.01   0.02   0.00
 116   1    -0.02  -0.04   0.10    -0.01   0.06   0.07     0.01   0.01  -0.01
 117   1    -0.02  -0.07   0.13    -0.09   0.04   0.07     0.01   0.01  -0.01
 118   1     0.03   0.00   0.11    -0.05   0.02   0.05     0.01   0.00  -0.01
 119   1     0.03  -0.03  -0.02     0.01   0.00  -0.02    -0.02   0.01   0.02
 120   1     0.00  -0.03   0.02     0.02  -0.01  -0.03    -0.01   0.00   0.00
 121   1     0.05   0.00   0.05     0.01   0.03  -0.02    -0.03   0.00  -0.01
 122   1     0.01  -0.03  -0.01    -0.05   0.03   0.01    -0.03   0.04   0.02
 123   1    -0.01  -0.01   0.00    -0.04   0.02   0.00    -0.04   0.04   0.03
 124   1     0.01   0.00   0.02    -0.04   0.01  -0.04    -0.02   0.04  -0.02
 125   1     0.01   0.01   0.01    -0.07   0.03   0.02    -0.14   0.06   0.04
 126   1     0.01   0.01   0.01    -0.06   0.01  -0.06    -0.12   0.02  -0.11
 127   1     0.01   0.02   0.01    -0.06   0.02  -0.01    -0.13   0.05  -0.01
                    31                     32                     33
                     A                      A                      A
 Frequencies --   122.3476               126.7859               128.5580
 Red. masses --     1.5926                 2.7046                 2.8536
 Frc consts  --     0.0140                 0.0256                 0.0278
 IR Inten    --     0.1292                 1.4817                 1.9760
 Atom AN      X      Y      Z        X      Y      Z        X      Y      Z
   1   6     0.01   0.00   0.00     0.01   0.00  -0.03    -0.01   0.00   0.03
   2   6     0.00   0.00   0.00     0.01   0.00  -0.05     0.01   0.01   0.04
   3   6     0.00   0.00   0.00     0.00   0.01  -0.03     0.03  -0.01   0.02
   4   6     0.01   0.02   0.02    -0.01  -0.01  -0.02    -0.03   0.02   0.00
   5   6     0.00   0.01   0.02    -0.11   0.01   0.03     0.10   0.04   0.00
   6   6     0.01   0.01   0.00    -0.06   0.00  -0.01     0.09   0.00   0.07
   7   8     0.02   0.02   0.00    -0.04   0.01  -0.02     0.08  -0.07   0.05
   8   6     0.02   0.02   0.01    -0.02  -0.01  -0.02     0.03  -0.05   0.02
   9   6    -0.01   0.00  -0.01     0.03   0.01   0.00    -0.02  -0.01   0.00
  10   6     0.00   0.00   0.00     0.01   0.01   0.01     0.02  -0.02   0.00
  11   6     0.01   0.01  -0.01     0.04   0.02  -0.01     0.00   0.00  -0.01
  12   6     0.02   0.01  -0.02     0.06   0.03  -0.02     0.01   0.00  -0.01
  13   6     0.00   0.01  -0.01     0.04   0.01  -0.02     0.00   0.00   0.00
  14   6    -0.03  -0.01   0.00     0.03   0.00  -0.01    -0.02   0.00   0.01
  15   6    -0.03  -0.01   0.01     0.03   0.01   0.00    -0.03  -0.01   0.01
  16   6    -0.02  -0.01   0.00     0.01   0.00   0.01     0.02   0.02  -0.01
  17   6    -0.03  -0.02   0.01     0.04  -0.01   0.00    -0.03   0.02  -0.01
  18   6    -0.01   0.00   0.00     0.03   0.00   0.01    -0.03   0.00   0.00
  19   6    -0.01   0.00   0.00     0.03   0.00   0.00    -0.06   0.02  -0.01
  20   6    -0.01   0.00   0.00     0.00   0.01  -0.01    -0.03   0.00   0.00
  21   6    -0.01   0.00   0.00    -0.02   0.01  -0.01     0.01  -0.01   0.01
  22   6     0.00  -0.01   0.00    -0.01   0.01   0.00     0.02  -0.02   0.00
  23   6     0.00   0.00   0.00     0.05  -0.01   0.01    -0.05   0.01  -0.01
  24   6     0.00  -0.01   0.00     0.00  -0.01   0.01    -0.01   0.00   0.00
  25   6    -0.06  -0.03  -0.04    -0.04   0.02  -0.02     0.05   0.00   0.00
  26   6    -0.02  -0.03   0.04     0.03  -0.03   0.05     0.00   0.05  -0.03
  27   6    -0.04  -0.06   0.03     0.03  -0.02   0.01    -0.01   0.05  -0.03
  28   6    -0.04   0.02   0.02     0.03  -0.01  -0.01    -0.01   0.03   0.01
  29   6     0.00  -0.03   0.01     0.01  -0.03   0.02    -0.04   0.01  -0.03
  30   6     0.00   0.00   0.00     0.00  -0.03  -0.02    -0.02   0.04   0.05
  31   6     0.00   0.00   0.00     0.04  -0.03   0.01    -0.06   0.02   0.00
  32   6    -0.01  -0.01   0.01     0.05  -0.01   0.03    -0.06   0.00  -0.03
  33   6     0.05  -0.01   0.05     0.00   0.01  -0.05    -0.01   0.01   0.04
  34   6     0.00   0.00   0.01    -0.01   0.00  -0.04     0.05   0.01   0.00
  35   8     0.00   0.00   0.00    -0.02   0.03   0.03    -0.02   0.03   0.04
  36  12     0.02   0.02  -0.02     0.00   0.02   0.00     0.03  -0.05   0.01
  37   8    -0.01   0.01   0.01    -0.08   0.04   0.02    -0.07   0.03   0.04
  38   6     0.01   0.00  -0.01     0.00   0.01   0.01     0.00   0.01   0.01
  39   7     0.00   0.00   0.00     0.00   0.01   0.01     0.04  -0.03   0.01
  40   7     0.01   0.01  -0.02     0.02   0.01   0.01    -0.01  -0.01   0.00
  41   8     0.01   0.00  -0.01     0.03   0.00  -0.03     0.04  -0.01  -0.04
  42   8     0.01   0.00   0.00    -0.03   0.02   0.00    -0.02   0.02   0.01
  43   6     0.00   0.00   0.00     0.00   0.00   0.01    -0.02   0.01   0.01
  44   6     0.00   0.00   0.00    -0.03   0.00  -0.02    -0.03   0.01  -0.01
  45   6     0.00   0.00   0.00     0.01   0.01   0.00     0.00   0.01   0.01
  46   8     0.01   0.00   0.00     0.06  -0.01   0.05     0.01   0.01   0.03
  47   6    -0.01   0.01   0.01     0.02   0.01  -0.04     0.02   0.00  -0.04
  48   8     0.06   0.06   0.00    -0.01   0.02   0.00     0.00  -0.01  -0.02
  49   6    -0.01   0.01   0.00    -0.06   0.03  -0.01    -0.04   0.03   0.00
  50   8     0.00   0.01  -0.01    -0.02   0.04  -0.04    -0.02   0.03  -0.01
  51   8     0.00   0.00   0.00    -0.10  -0.04  -0.01    -0.02  -0.04  -0.05
  52   6     0.00   0.00  -0.01    -0.06  -0.02   0.00    -0.02  -0.04  -0.05
  53   6     0.02   0.01  -0.01    -0.03   0.00   0.01    -0.01  -0.01  -0.04
  54   6     0.00   0.00  -0.01    -0.06  -0.01   0.02    -0.02  -0.01  -0.02
  55   8    -0.01   0.00  -0.01    -0.03   0.01   0.01    -0.03  -0.05  -0.05
  56   6     0.04  -0.06  -0.03     0.02  -0.03   0.07     0.00  -0.01  -0.03
  57   6     0.02   0.01  -0.02    -0.01  -0.02   0.04     0.03  -0.02   0.00
  58   6     0.01   0.00   0.00     0.05  -0.05   0.00     0.06  -0.03   0.01
  59   6    -0.01   0.00   0.00     0.06  -0.02   0.02     0.05  -0.02   0.02
  60   1     0.00  -0.01   0.00     0.00  -0.01  -0.07     0.01   0.02   0.05
  61   1     0.01   0.02   0.01     0.03   0.04  -0.07    -0.10  -0.05   0.01
  62   1     0.02   0.01   0.03     0.03  -0.08   0.00    -0.09   0.11  -0.02
  63   1    -0.01   0.02   0.04    -0.13   0.02   0.14     0.12   0.07  -0.10
  64   1    -0.03   0.01   0.01    -0.21   0.04  -0.03     0.18   0.03   0.04
  65   1     0.03   0.02   0.00    -0.03   0.03  -0.01     0.09  -0.02   0.11
  66   1     0.01   0.00  -0.01    -0.06  -0.03  -0.03     0.10   0.05   0.11
  67   1     0.02   0.02   0.01    -0.01   0.00  -0.02     0.01  -0.10   0.00
  68   1     0.02   0.02   0.01    -0.03  -0.03  -0.01     0.06  -0.02   0.04
  69   1     0.04   0.02  -0.03     0.07   0.04  -0.03     0.03   0.01  -0.01
  70   1     0.02   0.01  -0.02     0.04   0.01  -0.02     0.01   0.01   0.00
  71   1    -0.05  -0.02   0.01     0.02   0.00   0.00    -0.03   0.00   0.01
  72   1    -0.02  -0.01  -0.01     0.00  -0.01   0.02     0.04   0.03  -0.01
  73   1     0.00  -0.01   0.02     0.04   0.00   0.01    -0.04   0.01  -0.03
  74   1    -0.01   0.00   0.00     0.05   0.00   0.00    -0.10   0.03  -0.01
  75   1    -0.01   0.00   0.00     0.00   0.01  -0.01    -0.05   0.01   0.00
  76   1    -0.01  -0.01   0.00    -0.03   0.02  -0.01     0.02  -0.02   0.01
  77   1     0.00   0.00   0.00     0.04  -0.01   0.01    -0.04   0.00  -0.01
  78   1    -0.01  -0.01   0.01     0.00  -0.01   0.03    -0.02   0.00  -0.02
  79   1    -0.09  -0.02  -0.02    -0.07   0.00   0.00     0.07  -0.02  -0.02
  80   1    -0.03  -0.03  -0.06    -0.05   0.03  -0.04     0.03   0.01  -0.01
  81   1    -0.07  -0.04  -0.07    -0.03   0.04  -0.05     0.06   0.00   0.03
  82   1    -0.06  -0.05   0.06    -0.02  -0.05   0.08     0.04   0.07  -0.05
  83   1    -0.02  -0.02   0.03     0.04  -0.01   0.02    -0.02   0.03   0.00
  84   1     0.01  -0.03   0.07     0.08  -0.05   0.08    -0.04   0.08  -0.04
  85   1    -0.02  -0.06   0.02     0.04  -0.03   0.02    -0.01   0.06  -0.04
  86   1    -0.08  -0.06   0.03     0.03  -0.03  -0.01     0.01   0.06  -0.02
  87   1    -0.02  -0.09   0.03     0.04  -0.02   0.01    -0.03   0.04  -0.05
  88   1     0.04  -0.04   0.06     0.01   0.00  -0.01    -0.01   0.07  -0.01
  89   1    -0.03   0.14   0.06     0.03  -0.03  -0.02    -0.02   0.00   0.02
  90   1    -0.12   0.00  -0.05     0.04  -0.01   0.00     0.01   0.05   0.06
  91   1     0.00  -0.03   0.01     0.02  -0.05   0.03    -0.07   0.04  -0.05
  92   1     0.01  -0.03   0.00     0.01  -0.04   0.00    -0.03   0.02  -0.01
  93   1    -0.01  -0.03   0.01     0.00  -0.02   0.04    -0.03  -0.02  -0.07
  94   1     0.00  -0.01   0.00     0.00  -0.07   0.00    -0.04   0.09   0.02
  95   1     0.00   0.01   0.00     0.00   0.00  -0.01    -0.01   0.01   0.05
  96   1     0.01  -0.01  -0.01     0.00  -0.04  -0.06    -0.02   0.05   0.10
  97   1     0.00   0.00   0.00     0.04   0.01   0.02    -0.06  -0.02  -0.02
  98   1     0.00   0.01   0.00     0.01  -0.06   0.02    -0.02   0.05  -0.01
  99   1     0.00   0.01   0.00     0.07  -0.04  -0.01    -0.09   0.03   0.03
 100   1     0.00  -0.01   0.01     0.08  -0.01   0.04    -0.11  -0.01  -0.06
 101   1    -0.01   0.00   0.01     0.05   0.00   0.00    -0.07  -0.01   0.02
 102   1    -0.01  -0.01   0.01     0.03  -0.03   0.04    -0.03   0.04  -0.05
 103   1     0.43  -0.33   0.18    -0.12   0.10  -0.09    -0.08   0.05   0.02
 104   1    -0.12  -0.03  -0.36     0.05   0.01   0.08     0.01   0.02   0.10
 105   1    -0.09   0.29   0.40     0.04  -0.09  -0.16     0.01  -0.04  -0.02
 106   1    -0.01   0.00   0.00     0.03   0.04   0.08     0.02  -0.05  -0.15
 107   1     0.01   0.00   0.01    -0.12  -0.09  -0.06     0.17   0.13   0.01
 108   1    -0.01   0.00   0.02     0.06   0.04  -0.16    -0.02  -0.04   0.13
 109   1    -0.01   0.00  -0.01    -0.06  -0.02  -0.08    -0.05   0.00  -0.07
 110   1     0.01   0.00   0.01     0.01   0.02  -0.03     0.01   0.02  -0.03
 111   1    -0.01  -0.05   0.14    -0.04  -0.19   0.20    -0.04  -0.19   0.20
 112   1    -0.08   0.13   0.00    -0.05   0.32  -0.06    -0.05   0.31  -0.05
 113   1     0.06  -0.04  -0.09     0.18  -0.13  -0.31     0.18  -0.13  -0.30
 114   1    -0.03   0.01   0.00    -0.03   0.02  -0.02    -0.01   0.00  -0.05
 115   1    -0.01  -0.01  -0.01    -0.06  -0.03   0.02    -0.04  -0.02  -0.05
 116   1     0.01  -0.09  -0.03    -0.01  -0.05   0.04    -0.01  -0.01  -0.04
 117   1     0.08  -0.06  -0.04     0.04  -0.10   0.12     0.00  -0.02  -0.02
 118   1     0.06  -0.06  -0.04     0.06   0.03   0.10     0.00   0.00  -0.02
 119   1     0.02   0.00  -0.04     0.01  -0.03  -0.02     0.05  -0.05  -0.03
 120   1     0.01   0.00  -0.02    -0.05  -0.01   0.07     0.02   0.00   0.03
 121   1     0.03   0.02   0.00     0.05  -0.03   0.09     0.07  -0.03   0.03
 122   1     0.02  -0.01   0.00     0.10  -0.12  -0.04     0.11  -0.09  -0.03
 123   1     0.00   0.00   0.00     0.02  -0.05  -0.03     0.04  -0.03  -0.01
 124   1     0.02   0.01   0.01     0.10  -0.01   0.07     0.10   0.00   0.09
 125   1    -0.01   0.01   0.01     0.08  -0.03  -0.01     0.07  -0.03   0.00
 126   1    -0.01   0.00  -0.01     0.07  -0.02   0.07     0.05  -0.02   0.07
 127   1    -0.01   0.01   0.00     0.08  -0.03   0.01     0.07  -0.03   0.01
                    34                     35                     36
                     A                      A                      A
 Frequencies --   135.7656               142.7783               144.0228
 Red. masses --     2.8216                 3.4125                 2.9103
 Frc consts  --     0.0306                 0.0410                 0.0356
 IR Inten    --     2.4321                 0.5801                 2.2143
 Atom AN      X      Y      Z        X      Y      Z        X      Y      Z
   1   6     0.00   0.00  -0.01     0.02   0.01   0.04     0.00  -0.01  -0.05
   2   6    -0.01   0.00   0.00     0.03   0.01   0.04     0.00  -0.02  -0.06
   3   6    -0.02   0.00   0.01     0.04   0.00   0.00    -0.01  -0.01   0.00
   4   6     0.03   0.00   0.01     0.02   0.00  -0.02    -0.04   0.02  -0.04
   5   6     0.02  -0.03  -0.01     0.06  -0.01  -0.03     0.04   0.05  -0.04
   6   6    -0.02   0.00  -0.04    -0.03   0.02   0.02    -0.03   0.04   0.06
   7   8    -0.02   0.04  -0.01    -0.08   0.04   0.07    -0.03  -0.01   0.04
   8   6    -0.01   0.04   0.00    -0.09   0.03   0.02    -0.02  -0.04  -0.01
   9   6     0.00   0.00   0.00     0.01   0.00  -0.02     0.03   0.02   0.00
  10   6    -0.02   0.01  -0.01     0.04  -0.01   0.01    -0.01   0.00  -0.01
  11   6    -0.03  -0.01   0.01     0.01   0.00  -0.03     0.00   0.01   0.01
  12   6    -0.05  -0.02   0.02     0.01   0.00  -0.02    -0.01   0.01   0.01
  13   6    -0.03  -0.01   0.01     0.00   0.00  -0.01     0.02   0.02  -0.01
  14   6     0.01   0.00   0.00    -0.01   0.00  -0.01     0.05   0.03  -0.02
  15   6     0.01   0.00  -0.01    -0.01   0.00  -0.01     0.05   0.02  -0.01
  16   6    -0.02  -0.01   0.01     0.00   0.00  -0.02    -0.04   0.01   0.03
  17   6     0.00   0.00   0.00    -0.04   0.01  -0.02     0.02   0.01   0.01
  18   6    -0.01   0.00   0.00     0.10  -0.05   0.03    -0.04   0.01  -0.01
  19   6     0.01  -0.01   0.00     0.10  -0.05   0.03    -0.04   0.01  -0.01
  20   6     0.02  -0.01   0.01    -0.02   0.01   0.00     0.03  -0.02   0.01
  21   6     0.00   0.00   0.00    -0.11   0.06  -0.01     0.08  -0.04   0.01
  22   6    -0.01   0.01   0.00    -0.06   0.03   0.00     0.05  -0.02   0.00
  23   6     0.00   0.00   0.00     0.04  -0.02   0.01    -0.02   0.01   0.00
  24   6     0.01   0.01  -0.01    -0.03   0.01   0.01     0.03   0.00   0.00
  25   6     0.01  -0.01   0.03    -0.03   0.02  -0.03    -0.08   0.05   0.01
  26   6    -0.02   0.00  -0.02     0.00  -0.01  -0.01    -0.03   0.00   0.05
  27   6    -0.01   0.00   0.02    -0.04   0.04  -0.01     0.00   0.01   0.06
  28   6    -0.01  -0.02  -0.01    -0.04   0.02  -0.02    -0.01  -0.04  -0.04
  29   6     0.02   0.02   0.01     0.00   0.01   0.04     0.01   0.00  -0.03
  30   6     0.01   0.00  -0.02    -0.02  -0.04  -0.06     0.02   0.03   0.05
  31   6     0.01   0.00  -0.01    -0.07  -0.06   0.10     0.03   0.02  -0.05
  32   6     0.01   0.01   0.00     0.05   0.06  -0.09    -0.01  -0.01   0.05
  33   6     0.00  -0.01  -0.01     0.04   0.01   0.11     0.02  -0.03  -0.09
  34   6    -0.03  -0.01   0.03     0.05   0.00  -0.08    -0.01  -0.01   0.09
  35   8    -0.08   0.06   0.11     0.00   0.00   0.00     0.00  -0.01  -0.01
  36  12    -0.01   0.01   0.00     0.02  -0.04   0.00     0.00  -0.01  -0.03
  37   8     0.07  -0.04  -0.04    -0.01   0.01   0.01    -0.01   0.01   0.00
  38   6    -0.05   0.03   0.03     0.00   0.00   0.00     0.00  -0.01   0.00
  39   7    -0.02   0.01  -0.01     0.05  -0.02   0.02    -0.01   0.00  -0.03
  40   7     0.00   0.00   0.00     0.01   0.00  -0.02     0.02   0.01   0.01
  41   8     0.00  -0.03  -0.08     0.00   0.00   0.00     0.00   0.00   0.00
  42   8    -0.06   0.04   0.00     0.00   0.00   0.00     0.00   0.00   0.01
  43   6    -0.04   0.03   0.01     0.00   0.00   0.00     0.00   0.00   0.01
  44   6     0.03   0.00   0.00     0.00   0.00   0.00     0.00   0.00   0.00
  45   6    -0.03   0.03   0.00     0.00   0.00   0.00     0.00   0.00   0.00
  46   8    -0.07   0.02   0.01    -0.01   0.00   0.00    -0.01   0.00   0.00
  47   6     0.06  -0.06  -0.09     0.00   0.00   0.00    -0.01   0.00   0.01
  48   8    -0.01  -0.03   0.01    -0.05  -0.08  -0.04    -0.05  -0.09  -0.05
  49   6     0.04  -0.04   0.01     0.00   0.00   0.00    -0.01   0.01   0.00
  50   8     0.01  -0.04   0.05     0.00   0.01   0.00     0.00   0.01   0.00
  51   8     0.06   0.03   0.02     0.01  -0.03  -0.03     0.00  -0.04  -0.03
  52   6     0.05   0.02   0.02     0.03  -0.01  -0.03     0.03  -0.01  -0.04
  53   6     0.02   0.00   0.01     0.01  -0.01  -0.03     0.02  -0.01  -0.04
  54   6     0.04   0.00  -0.01     0.00   0.00   0.00    -0.01   0.00   0.01
  55   8     0.06   0.02   0.03     0.07   0.02  -0.02     0.06   0.02  -0.03
  56   6    -0.02   0.03  -0.03    -0.02   0.11   0.04     0.01   0.12   0.08
  57   6     0.00   0.01  -0.04    -0.01  -0.03   0.05    -0.04  -0.04   0.09
  58   6    -0.01  -0.04  -0.01     0.01  -0.01   0.00     0.01  -0.02   0.00
  59   6     0.11  -0.05   0.03    -0.01   0.00   0.00    -0.01  -0.01   0.00
  60   1    -0.01  -0.01   0.00     0.03   0.02   0.06    -0.01  -0.03  -0.07
  61   1     0.05   0.01   0.03     0.07   0.03   0.04    -0.07  -0.02  -0.04
  62   1     0.04  -0.02   0.01     0.02  -0.04  -0.08    -0.08   0.06  -0.08
  63   1     0.01  -0.06  -0.03     0.06  -0.05  -0.10     0.05   0.03  -0.14
  64   1     0.03  -0.04   0.00     0.13   0.01   0.00     0.14   0.08   0.00
  65   1    -0.04  -0.01  -0.06    -0.08  -0.01  -0.02    -0.07  -0.02   0.10
  66   1    -0.02  -0.01  -0.04     0.00   0.05   0.06    -0.04   0.12   0.11
  67   1     0.00   0.07   0.02    -0.12   0.05   0.06    -0.02  -0.07  -0.04
  68   1    -0.03   0.03  -0.02    -0.15   0.00  -0.03    -0.01  -0.06   0.03
  69   1    -0.08  -0.03   0.04     0.02   0.00  -0.02    -0.04   0.00   0.02
  70   1    -0.03  -0.01   0.02    -0.01   0.00   0.00     0.01   0.01   0.00
  71   1     0.02   0.01  -0.01    -0.03   0.00   0.00     0.07   0.03  -0.02
  72   1    -0.02  -0.01   0.00    -0.01  -0.01   0.00    -0.04   0.00   0.05
  73   1     0.00   0.00   0.01    -0.04   0.01  -0.03     0.02   0.01   0.03
  74   1     0.03  -0.02   0.01     0.15  -0.07   0.04    -0.07   0.02  -0.01
  75   1     0.03  -0.02   0.01    -0.04   0.02   0.00     0.05  -0.03   0.02
  76   1     0.01   0.00   0.00    -0.19   0.10  -0.02     0.13  -0.06   0.02
  77   1     0.00   0.00   0.00     0.00   0.01  -0.01    -0.01   0.00   0.01
  78   1     0.01   0.01  -0.01    -0.02   0.01   0.02     0.02  -0.01  -0.02
  79   1     0.02   0.01   0.02    -0.06   0.06  -0.01    -0.12   0.13   0.05
  80   1     0.02  -0.02   0.05     0.00   0.00  -0.01    -0.02   0.01   0.05
  81   1    -0.01  -0.02   0.03    -0.06   0.00  -0.08    -0.12   0.03  -0.08
  82   1     0.00   0.01  -0.03    -0.01  -0.02   0.00    -0.09   0.01   0.10
  83   1    -0.02   0.00  -0.02     0.01   0.00  -0.02    -0.03   0.03  -0.01
  84   1    -0.04   0.00  -0.04     0.02  -0.02   0.00     0.03  -0.05   0.07
  85   1    -0.02  -0.01   0.02    -0.06   0.04  -0.01    -0.05  -0.01   0.08
  86   1    -0.01   0.00   0.01    -0.03   0.04   0.00    -0.01   0.00   0.04
  87   1     0.00   0.00   0.03    -0.04   0.04   0.00     0.02   0.04   0.09
  88   1    -0.01  -0.04   0.00    -0.01  -0.01   0.00    -0.03  -0.09   0.00
  89   1    -0.01   0.00  -0.01    -0.04   0.06   0.00     0.00  -0.01  -0.06
  90   1    -0.02  -0.03  -0.04    -0.07   0.01  -0.05    -0.03  -0.06  -0.09
  91   1     0.03   0.01   0.01     0.05  -0.02   0.05    -0.02   0.01  -0.03
  92   1     0.01   0.02   0.00    -0.01   0.00   0.02     0.01   0.00  -0.02
  93   1     0.01   0.03   0.02    -0.01   0.04   0.09     0.01  -0.02  -0.06
  94   1     0.02  -0.01  -0.02     0.03  -0.08  -0.05    -0.02   0.06   0.04
  95   1     0.00   0.00  -0.02    -0.04  -0.04  -0.09     0.04   0.04   0.08
  96   1     0.00   0.00  -0.03    -0.04  -0.05  -0.10     0.03   0.04   0.07
  97   1     0.01   0.01   0.00    -0.17   0.00   0.08     0.07  -0.02  -0.04
  98   1     0.00   0.00  -0.01    -0.10  -0.13   0.19     0.03   0.04  -0.09
  99   1     0.01   0.00  -0.01    -0.02  -0.11   0.13     0.01   0.03  -0.06
 100   1     0.02   0.02   0.01    -0.09   0.09  -0.15     0.04  -0.03   0.07
 101   1     0.01   0.01  -0.01     0.09   0.01  -0.03    -0.01  -0.01   0.03
 102   1    -0.01   0.00   0.01     0.16   0.12  -0.18    -0.05  -0.02   0.08
 103   1     0.07  -0.06   0.01     0.11  -0.09   0.16     0.22  -0.16  -0.04
 104   1    -0.03  -0.01  -0.08     0.01   0.02   0.03    -0.07  -0.05  -0.30
 105   1    -0.02   0.04   0.05     0.03   0.10   0.19    -0.07   0.09   0.08
 106   1    -0.03   0.01   0.05     0.09   0.00  -0.05    -0.04   0.01   0.10
 107   1    -0.04  -0.03   0.03    -0.02   0.01  -0.11     0.05  -0.05   0.12
 108   1    -0.03   0.00   0.02     0.10   0.00  -0.15    -0.05   0.01   0.14
 109   1     0.08   0.05   0.00     0.00   0.00  -0.01    -0.01   0.00  -0.01
 110   1    -0.04   0.03  -0.10     0.00   0.00   0.01     0.00   0.00   0.01
 111   1    -0.09  -0.36   0.11     0.00   0.01   0.00     0.00   0.02   0.01
 112   1     0.09   0.30  -0.10    -0.01   0.00   0.00    -0.02  -0.01   0.01
 113   1     0.28  -0.22  -0.40    -0.01   0.00   0.01    -0.02   0.01   0.02
 114   1     0.03  -0.03   0.04     0.08   0.00  -0.06     0.11   0.01  -0.09
 115   1     0.05   0.00   0.00     0.00   0.03   0.00    -0.01   0.05   0.01
 116   1     0.01   0.06  -0.01     0.04   0.18   0.02     0.07   0.19   0.06
 117   1    -0.04   0.08  -0.06    -0.09   0.10   0.08    -0.08   0.09   0.15
 118   1    -0.05  -0.01  -0.05    -0.04   0.13   0.06     0.01   0.17   0.11
 119   1    -0.02   0.02   0.02    -0.01  -0.02   0.03    -0.03  -0.02   0.07
 120   1     0.04   0.00  -0.07    -0.05  -0.01   0.09    -0.09  -0.01   0.15
 121   1    -0.05   0.03  -0.08     0.02  -0.08   0.08     0.00  -0.12   0.11
 122   1    -0.06   0.06   0.01     0.02  -0.02   0.00     0.01  -0.03   0.00
 123   1     0.09  -0.07  -0.01     0.01  -0.01   0.00     0.00  -0.02  -0.01
 124   1    -0.09  -0.12  -0.02     0.02  -0.01   0.02     0.01  -0.01   0.02
 125   1     0.16  -0.10  -0.04    -0.01   0.00   0.01    -0.02   0.00   0.01
 126   1     0.14  -0.04   0.16    -0.01   0.00   0.00    -0.02  -0.01   0.00
 127   1     0.15  -0.08   0.01    -0.01   0.00   0.00    -0.01  -0.01   0.00
                    37                     38                     39
                     A                      A                      A
 Frequencies --   149.6063               153.7762               155.4238
 Red. masses --     3.5498                 2.9518                 3.0238
 Frc consts  --     0.0468                 0.0411                 0.0430
 IR Inten    --     0.4866                 0.2772                 0.5857
 Atom AN      X      Y      Z        X      Y      Z        X      Y      Z
   1   6    -0.03  -0.01  -0.04    -0.01   0.03  -0.02     0.00   0.02  -0.01
   2   6    -0.02   0.00  -0.02     0.01   0.05   0.00     0.00   0.02   0.02
   3   6    -0.02   0.00   0.03     0.04   0.04   0.03     0.01   0.02   0.03
   4   6     0.02   0.06   0.04    -0.06   0.00  -0.01     0.07  -0.06  -0.01
   5   6     0.03   0.02   0.00     0.03  -0.01  -0.04    -0.03  -0.04   0.04
   6   6    -0.02   0.05  -0.01    -0.02  -0.01   0.00     0.11  -0.07  -0.05
   7   8    -0.05   0.10   0.03    -0.01  -0.02  -0.01     0.05  -0.06   0.01
   8   6    -0.04   0.10   0.03    -0.02  -0.01  -0.01     0.01  -0.04   0.00
   9   6    -0.03  -0.01   0.04     0.00   0.02   0.01     0.01   0.02  -0.01
  10   6    -0.01  -0.01  -0.02     0.05  -0.01  -0.01     0.00   0.01  -0.01
  11   6    -0.06  -0.02   0.05     0.03   0.03   0.00     0.00   0.02   0.00
  12   6    -0.06  -0.02   0.04     0.05   0.03  -0.02     0.00   0.01   0.00
  13   6     0.00   0.00   0.01     0.03   0.02  -0.01     0.00   0.01   0.00
  14   6     0.04   0.01   0.00     0.01   0.01   0.00     0.01   0.02  -0.01
  15   6     0.02   0.00   0.01     0.00   0.01   0.01     0.02   0.02  -0.01
  16   6    -0.02   0.00   0.03     0.01   0.00   0.00     0.00  -0.01  -0.01
  17   6     0.03  -0.01   0.02     0.03  -0.01   0.02     0.01   0.01   0.00
  18   6     0.04  -0.04  -0.01     0.04  -0.02   0.00     0.00   0.01  -0.01
  19   6     0.05  -0.05   0.00     0.00   0.00   0.00    -0.01   0.01  -0.01
  20   6     0.01  -0.02   0.00    -0.03   0.02  -0.01    -0.04   0.03  -0.02
  21   6    -0.04   0.01  -0.01    -0.02   0.02  -0.02    -0.05   0.04  -0.02
  22   6    -0.03   0.01  -0.02     0.02   0.00  -0.01    -0.02   0.02  -0.02
  23   6     0.01  -0.02  -0.01     0.00  -0.04  -0.03    -0.02  -0.01  -0.03
  24   6     0.01   0.01  -0.03     0.00  -0.02   0.00    -0.01   0.00  -0.01
  25   6     0.05  -0.01   0.09    -0.02   0.00  -0.03    -0.02  -0.01  -0.02
  26   6    -0.04   0.05  -0.03     0.04  -0.05   0.04     0.01  -0.03   0.01
  27   6     0.02  -0.02   0.03     0.04  -0.06   0.00     0.01   0.00   0.01
  28   6     0.01  -0.02   0.00     0.03  -0.01   0.02     0.01  -0.03  -0.01
  29   6     0.04   0.02   0.01    -0.01  -0.06  -0.02     0.00  -0.02   0.00
  30   6     0.02  -0.01  -0.06     0.00  -0.01   0.01    -0.01  -0.01  -0.04
  31   6    -0.03  -0.02   0.04    -0.07  -0.06   0.04    -0.05   0.00   0.01
  32   6     0.02   0.02  -0.07    -0.04  -0.05  -0.08    -0.06  -0.03  -0.06
  33   6    -0.06  -0.01  -0.12    -0.04   0.04  -0.08    -0.01   0.01  -0.06
  34   6    -0.01   0.01   0.18     0.08   0.07   0.12     0.02   0.03   0.09
  35   8     0.02  -0.01  -0.02    -0.04   0.02   0.05     0.04  -0.02  -0.05
  36  12    -0.01   0.00  -0.02     0.01  -0.01   0.00     0.01   0.01   0.03
  37   8    -0.06   0.03   0.04     0.01  -0.03   0.02     0.05   0.02  -0.07
  38   6     0.02  -0.01   0.00    -0.02   0.01   0.03     0.01   0.00  -0.04
  39   7    -0.02   0.00  -0.04     0.04   0.00  -0.02     0.01   0.01   0.00
  40   7    -0.02  -0.01   0.03    -0.01   0.01   0.02     0.00   0.02   0.00
  41   8     0.01   0.01   0.01    -0.01   0.00   0.01    -0.01  -0.01  -0.03
  42   8     0.00   0.00   0.00     0.02  -0.03  -0.03    -0.03   0.06   0.04
  43   6     0.00   0.00   0.00     0.01  -0.03  -0.03    -0.02   0.05   0.04
  44   6    -0.02   0.00   0.00     0.00  -0.01   0.01     0.02   0.01  -0.02
  45   6     0.01   0.00   0.01    -0.01   0.00   0.01     0.00   0.01  -0.02
  46   8     0.03   0.00   0.01     0.01  -0.02  -0.05    -0.05   0.04   0.06
  47   6    -0.01   0.02   0.01     0.02  -0.02  -0.05    -0.02   0.01   0.06
  48   8     0.04   0.01   0.00     0.01   0.02   0.00    -0.01   0.02   0.03
  49   6    -0.03   0.02   0.00     0.00  -0.03   0.01     0.02   0.03  -0.02
  50   8    -0.01   0.04   0.00     0.00  -0.05  -0.02     0.00   0.03   0.02
  51   8    -0.02  -0.05  -0.04     0.01   0.05   0.05    -0.01  -0.01  -0.02
  52   6     0.00  -0.03  -0.03     0.00   0.03   0.03     0.00   0.00  -0.01
  53   6     0.00  -0.03  -0.02     0.01   0.01   0.02    -0.01   0.02   0.01
  54   6     0.01  -0.03  -0.04    -0.02   0.02   0.03     0.00   0.02   0.01
  55   8     0.01  -0.02  -0.02    -0.04   0.02   0.02     0.02   0.00   0.00
  56   6     0.02  -0.08  -0.05     0.01  -0.01   0.00    -0.02   0.03   0.02
  57   6     0.12  -0.03  -0.04    -0.09   0.03   0.01    -0.03  -0.01   0.07
  58   6     0.06  -0.02   0.01    -0.05   0.08   0.00     0.01  -0.11  -0.01
  59   6    -0.01   0.00   0.00     0.02   0.07  -0.01    -0.03  -0.12   0.01
  60   1    -0.02   0.00  -0.02     0.01   0.06   0.01     0.01   0.03   0.03
  61   1     0.04   0.06   0.09    -0.10  -0.05   0.02     0.14   0.02  -0.03
  62   1     0.02   0.05   0.03    -0.10   0.07  -0.01     0.13  -0.15  -0.02
  63   1     0.03  -0.02  -0.04     0.04  -0.01  -0.13    -0.05   0.02   0.21
  64   1     0.08   0.00   0.03     0.11  -0.02   0.01    -0.20  -0.05  -0.05
  65   1    -0.05   0.04  -0.06    -0.04  -0.04   0.02     0.19   0.05  -0.13
  66   1    -0.01   0.05   0.00    -0.03   0.04   0.02     0.18  -0.20  -0.08
  67   1    -0.04   0.14   0.07    -0.02  -0.03  -0.02    -0.02  -0.02   0.04
  68   1    -0.08   0.09  -0.01     0.00   0.00   0.01    -0.02  -0.02  -0.05
  69   1    -0.09  -0.02   0.04     0.07   0.05  -0.03    -0.01   0.01   0.01
  70   1     0.02   0.00   0.00     0.03   0.02  -0.02    -0.01   0.01   0.01
  71   1     0.08   0.02  -0.02     0.00   0.00   0.00     0.02   0.02  -0.01
  72   1     0.00   0.02   0.01    -0.01  -0.02  -0.01    -0.01  -0.01  -0.01
  73   1     0.03  -0.01   0.03     0.05   0.00   0.04     0.01   0.01   0.02
  74   1     0.08  -0.07   0.01    -0.02   0.01  -0.01     0.00   0.01  -0.01
  75   1     0.01  -0.02   0.00    -0.07   0.04  -0.02    -0.07   0.04  -0.02
  76   1    -0.06   0.03  -0.01    -0.04   0.04  -0.02    -0.08   0.05  -0.02
  77   1     0.00  -0.02  -0.01     0.02  -0.04  -0.07     0.01  -0.02  -0.05
  78   1     0.01   0.01  -0.03    -0.01  -0.01   0.02    -0.02   0.01   0.01
  79   1     0.12  -0.03   0.04    -0.05  -0.02  -0.01    -0.02  -0.02  -0.01
  80   1     0.03  -0.01   0.10    -0.03   0.01  -0.05    -0.02   0.00  -0.03
  81   1     0.07  -0.01   0.15    -0.02   0.01  -0.04    -0.01   0.00  -0.01
  82   1     0.03   0.08  -0.07    -0.01  -0.08   0.07    -0.01  -0.05   0.03
  83   1    -0.06   0.02   0.00     0.06  -0.02   0.02     0.03  -0.01   0.00
  84   1    -0.12   0.07  -0.08     0.09  -0.07   0.07     0.04  -0.05   0.03
  85   1     0.01  -0.03   0.04     0.06  -0.07   0.02     0.01  -0.01   0.01
  86   1     0.01  -0.03   0.03     0.01  -0.07  -0.01     0.01   0.00   0.00
  87   1     0.03  -0.02   0.04     0.03  -0.07   0.00     0.02  -0.01   0.01
  88   1    -0.03  -0.01  -0.01     0.04  -0.01   0.02     0.00  -0.05   0.01
  89   1     0.02  -0.05  -0.03     0.03   0.00   0.02     0.01  -0.03  -0.01
  90   1     0.03  -0.02   0.01     0.03  -0.01   0.02     0.03  -0.04  -0.03
  91   1     0.08   0.02   0.00    -0.05  -0.05  -0.02     0.01  -0.03   0.01
  92   1     0.04   0.02   0.02     0.03  -0.06  -0.01     0.01  -0.02   0.00
  93   1     0.03   0.03   0.04    -0.02  -0.10  -0.03    -0.01  -0.02   0.02
  94   1     0.03  -0.04  -0.05    -0.04  -0.05   0.04    -0.01  -0.06  -0.01
  95   1     0.01   0.03  -0.06     0.01   0.04   0.04    -0.01   0.02  -0.03
  96   1     0.03  -0.01  -0.11     0.02  -0.02  -0.04     0.00  -0.02  -0.09
  97   1    -0.08   0.03   0.03    -0.15  -0.07   0.00    -0.08  -0.04  -0.02
  98   1    -0.05  -0.06   0.10    -0.04  -0.05   0.08    -0.01   0.03   0.01
  99   1    -0.01  -0.04   0.03    -0.09  -0.06   0.10    -0.08   0.01   0.06
 100   1    -0.08   0.03  -0.12    -0.21  -0.12  -0.21    -0.14  -0.07  -0.13
 101   1     0.04  -0.02   0.00    -0.04  -0.12   0.11    -0.08  -0.05   0.03
 102   1     0.09   0.08  -0.12     0.09   0.08  -0.17     0.01   0.01  -0.11
 103   1     0.01   0.00  -0.14    -0.03   0.07  -0.10     0.06   0.00  -0.06
 104   1    -0.09  -0.01  -0.19    -0.05   0.05  -0.09    -0.04   0.00  -0.12
 105   1    -0.12  -0.02  -0.10    -0.08   0.01  -0.08    -0.05   0.02  -0.02
 106   1    -0.02   0.05   0.23     0.06   0.05   0.06    -0.01   0.02   0.03
 107   1     0.05  -0.07   0.21     0.21   0.10   0.16     0.11   0.06   0.12
 108   1    -0.04   0.07   0.20     0.00   0.10   0.23    -0.04   0.03   0.17
 109   1    -0.05  -0.01  -0.05     0.00  -0.03   0.07     0.06   0.06  -0.06
 110   1     0.02   0.00   0.02    -0.03  -0.02   0.03     0.02   0.04  -0.06
 111   1     0.02   0.07   0.01    -0.03  -0.09  -0.06     0.03   0.07   0.09
 112   1    -0.03  -0.01   0.01     0.08   0.04  -0.05    -0.10  -0.06   0.06
 113   1    -0.04   0.04   0.04     0.05  -0.05  -0.10    -0.03   0.04   0.13
 114   1    -0.04  -0.02  -0.02     0.00   0.00   0.03    -0.02   0.03  -0.01
 115   1    -0.01  -0.09  -0.06    -0.01   0.05   0.04     0.02   0.06   0.02
 116   1    -0.02  -0.11  -0.05     0.01  -0.02   0.03    -0.03   0.04  -0.04
 117   1     0.05  -0.08  -0.07     0.01   0.02  -0.03     0.01  -0.02   0.04
 118   1     0.03  -0.09  -0.06     0.02  -0.04  -0.03    -0.03   0.08   0.06
 119   1     0.14  -0.11  -0.05    -0.10   0.10  -0.02    -0.04   0.01   0.08
 120   1     0.17  -0.01  -0.05    -0.16   0.00   0.00    -0.05   0.02   0.10
 121   1     0.12   0.03  -0.04    -0.07   0.01   0.02    -0.04  -0.07   0.07
 122   1     0.11  -0.09  -0.03    -0.06   0.09   0.01    -0.03  -0.07   0.01
 123   1     0.02  -0.01   0.00    -0.08   0.10   0.04     0.09  -0.16  -0.08
 124   1     0.11   0.03   0.08    -0.04   0.10  -0.07    -0.06  -0.20   0.03
 125   1    -0.02   0.02   0.01     0.04   0.05  -0.03    -0.05  -0.10   0.04
 126   1    -0.02  -0.01  -0.01     0.06   0.11  -0.04    -0.08  -0.17   0.09
 127   1    -0.01   0.00   0.00    -0.02   0.12   0.04     0.03  -0.19  -0.07
                    40                     41                     42
                     A                      A                      A
 Frequencies --   157.0439               160.6087               164.9043
 Red. masses --     3.1715                 2.9873                 3.4487
 Frc consts  --     0.0461                 0.0454                 0.0553
 IR Inten    --     0.3268                 0.1906                 0.2402
 Atom AN      X      Y      Z        X      Y      Z        X      Y      Z
   1   6     0.01  -0.07  -0.03     0.02   0.01   0.00    -0.06   0.00   0.00
   2   6     0.00  -0.07  -0.01     0.01   0.01   0.02    -0.06   0.00  -0.02
   3   6     0.00  -0.07   0.02     0.00   0.02   0.01    -0.06   0.00  -0.01
   4   6    -0.05  -0.02   0.01     0.13  -0.06  -0.01     0.05   0.03   0.01
   5   6    -0.03  -0.01   0.01    -0.05  -0.03   0.06     0.01   0.07   0.06
   6   6     0.07  -0.05  -0.02     0.08  -0.05  -0.04     0.13   0.02   0.01
   7   8     0.05  -0.08  -0.02     0.03  -0.02   0.01     0.02   0.00   0.09
   8   6     0.00  -0.03   0.00     0.03  -0.03   0.00    -0.04   0.02   0.05
   9   6     0.03  -0.02   0.00     0.01   0.01  -0.01    -0.04   0.01   0.02
  10   6     0.00  -0.04   0.00    -0.02   0.03  -0.01    -0.05   0.00   0.01
  11   6     0.03   0.00  -0.01    -0.03  -0.01   0.01     0.01   0.03   0.00
  12   6     0.02   0.00   0.00    -0.05  -0.02   0.02     0.06   0.05  -0.02
  13   6     0.01   0.00   0.01    -0.02   0.00   0.01     0.03   0.03  -0.02
  14   6     0.02  -0.01   0.01     0.02   0.02  -0.01    -0.01   0.01   0.00
  15   6     0.02  -0.01   0.01     0.02   0.02  -0.02    -0.03   0.00   0.02
  16   6     0.00   0.05   0.02    -0.02  -0.01   0.00     0.01   0.00   0.00
  17   6    -0.02   0.03  -0.01     0.00   0.01  -0.01     0.01  -0.02   0.03
  18   6     0.03  -0.04  -0.01    -0.03   0.03  -0.01    -0.02  -0.01   0.01
  19   6     0.02  -0.03  -0.01    -0.02   0.03  -0.01     0.02  -0.03   0.01
  20   6    -0.03   0.00  -0.01    -0.02   0.03  -0.01     0.02  -0.03   0.02
  21   6    -0.06   0.00  -0.01    -0.02   0.03  -0.01    -0.02  -0.01   0.01
  22   6    -0.03  -0.01  -0.01    -0.02   0.02  -0.01    -0.04   0.00   0.01
  23   6     0.02   0.02   0.01    -0.02   0.01  -0.01    -0.01   0.03   0.03
  24   6     0.02   0.03  -0.04    -0.02   0.01   0.00    -0.01   0.01   0.00
  25   6    -0.06   0.06  -0.01     0.01  -0.01   0.02     0.01  -0.01  -0.01
  26   6    -0.06   0.09   0.05    -0.01  -0.01  -0.03     0.05  -0.04   0.02
  27   6    -0.02   0.12  -0.01    -0.01   0.03   0.01     0.03  -0.10  -0.01
  28   6    -0.01   0.03  -0.01    -0.01  -0.04  -0.04     0.03   0.00   0.06
  29   6     0.05   0.12   0.01    -0.01  -0.02   0.00     0.02   0.03   0.04
  30   6     0.03   0.03  -0.06    -0.02  -0.01  -0.02     0.00   0.00  -0.04
  31   6     0.00   0.03   0.03     0.00   0.02  -0.03     0.02   0.06   0.01
  32   6     0.06   0.10  -0.05    -0.05  -0.03   0.00     0.02   0.07   0.01
  33   6     0.03  -0.10  -0.08     0.03   0.01   0.00    -0.07   0.01   0.00
  34   6    -0.01  -0.08   0.05    -0.01   0.01   0.01    -0.06   0.00   0.00
  35   8    -0.02   0.01   0.02    -0.04   0.00   0.04    -0.03   0.01   0.03
  36  12     0.01  -0.03   0.04     0.01   0.02   0.02    -0.04  -0.03  -0.07
  37   8     0.00  -0.01   0.01    -0.07   0.00   0.08     0.04  -0.02  -0.01
  38   6    -0.01   0.00   0.01    -0.01   0.00   0.04    -0.02   0.00   0.01
  39   7     0.00  -0.04   0.01     0.00   0.02   0.00    -0.05   0.00  -0.01
  40   7     0.01  -0.03   0.01     0.01   0.02  -0.01    -0.06   0.00   0.02
  41   8     0.00   0.00   0.00     0.01   0.00   0.03    -0.01  -0.01   0.00
  42   8     0.01  -0.01  -0.01     0.03  -0.06  -0.04     0.02  -0.02  -0.01
  43   6     0.01  -0.01  -0.01     0.02  -0.05  -0.04     0.01  -0.02  -0.01
  44   6     0.00   0.00   0.01    -0.03  -0.01   0.02     0.02  -0.01   0.01
  45   6     0.00   0.00   0.00     0.01  -0.02   0.02    -0.01  -0.01   0.00
  46   8     0.01  -0.01  -0.02     0.06  -0.04  -0.05    -0.01  -0.01  -0.03
  47   6     0.01  -0.01  -0.02     0.01  -0.01  -0.05     0.01  -0.02  -0.02
  48   8     0.00   0.03   0.03    -0.03  -0.04   0.02     0.03  -0.01  -0.06
  49   6     0.00  -0.01   0.00    -0.03  -0.01   0.02     0.02  -0.01   0.00
  50   8     0.00  -0.02  -0.01     0.00   0.00  -0.01     0.01  -0.02   0.00
  51   8     0.00   0.03   0.02     0.00  -0.04  -0.03     0.06  -0.01  -0.02
  52   6    -0.02   0.01   0.02     0.03  -0.01  -0.01     0.02  -0.02  -0.08
  53   6    -0.02   0.01   0.02     0.00   0.00   0.00     0.04  -0.01  -0.07
  54   6    -0.01   0.01   0.01     0.00  -0.03  -0.02     0.01   0.02   0.02
  55   8    -0.05  -0.02   0.01     0.08   0.01   0.01    -0.05  -0.04  -0.10
  56   6    -0.01  -0.02   0.00    -0.03   0.06   0.01     0.05   0.01  -0.04
  57   6    -0.05   0.02   0.00     0.03  -0.03  -0.01    -0.06  -0.02   0.09
  58   6    -0.02   0.04   0.00     0.01   0.11   0.02    -0.02   0.03   0.00
  59   6     0.01   0.03   0.00     0.01   0.11  -0.01     0.00   0.02   0.00
  60   1     0.00  -0.08  -0.03     0.01   0.01   0.03    -0.06   0.00  -0.03
  61   1    -0.07  -0.04   0.00     0.23   0.07  -0.06     0.11   0.09   0.00
  62   1    -0.06   0.01   0.02     0.21  -0.22  -0.02     0.08  -0.04  -0.04
  63   1    -0.03   0.05   0.06    -0.09   0.00   0.28     0.00   0.14   0.17
  64   1    -0.10  -0.04  -0.01    -0.26  -0.02  -0.05    -0.12   0.06   0.00
  65   1     0.13   0.01  -0.03     0.14   0.06  -0.12     0.20   0.14  -0.08
  66   1     0.09  -0.10  -0.04     0.13  -0.18  -0.08     0.24  -0.11   0.02
  67   1    -0.02  -0.06   0.00     0.01   0.01   0.04    -0.08   0.02   0.09
  68   1     0.03   0.02  -0.01    -0.02  -0.04  -0.05    -0.07   0.03  -0.01
  69   1     0.02  -0.01   0.00    -0.08  -0.03   0.04     0.09   0.07  -0.04
  70   1     0.00  -0.01   0.01    -0.02   0.00   0.02     0.05   0.04  -0.03
  71   1     0.02  -0.01   0.01     0.04   0.04  -0.02    -0.01   0.00   0.00
  72   1     0.04   0.06   0.07    -0.03  -0.01  -0.01    -0.01  -0.01  -0.02
  73   1    -0.06   0.01  -0.05    -0.02   0.02   0.00     0.04  -0.01   0.05
  74   1     0.04  -0.04   0.00    -0.02   0.02   0.00     0.05  -0.05   0.02
  75   1    -0.05   0.01  -0.02    -0.02   0.03  -0.01     0.05  -0.05   0.02
  76   1    -0.10   0.02  -0.02    -0.02   0.03  -0.01    -0.01  -0.02   0.01
  77   1    -0.01   0.03   0.05     0.00   0.00  -0.03    -0.02   0.03   0.07
  78   1     0.04   0.02  -0.09    -0.02   0.01   0.02    -0.01   0.01  -0.01
  79   1    -0.11   0.11   0.03     0.03   0.00   0.01     0.01  -0.03  -0.01
  80   1    -0.02   0.05  -0.01     0.01  -0.02   0.04     0.01  -0.01  -0.03
  81   1    -0.08   0.06  -0.09     0.00  -0.02   0.03     0.01  -0.01   0.00
  82   1    -0.09   0.13   0.10     0.01   0.00  -0.05     0.03  -0.08   0.02
  83   1    -0.10   0.09  -0.01    -0.01  -0.01  -0.02     0.07  -0.03   0.04
  84   1    -0.02   0.08   0.07    -0.04  -0.01  -0.05     0.06  -0.04   0.03
  85   1    -0.06   0.14  -0.02    -0.04   0.03   0.01     0.09  -0.10  -0.01
  86   1     0.03   0.13   0.02    -0.01   0.03   0.02    -0.01  -0.10  -0.01
  87   1    -0.02   0.14  -0.01     0.00   0.03   0.03     0.02  -0.14  -0.03
  88   1    -0.08   0.12  -0.07    -0.02  -0.09   0.00     0.07  -0.01   0.06
  89   1    -0.02  -0.09  -0.04    -0.01  -0.01  -0.04     0.03   0.02   0.08
  90   1     0.06   0.06   0.09    -0.02  -0.06  -0.10     0.02   0.00   0.05
  91   1     0.11   0.15  -0.02    -0.01  -0.03   0.01     0.07   0.01   0.04
  92   1     0.01   0.14   0.05    -0.01  -0.02  -0.01    -0.01   0.03   0.02
  93   1     0.05   0.15   0.03    -0.02  -0.01   0.01     0.01   0.07   0.08
  94   1     0.08   0.09  -0.09    -0.02  -0.05   0.00     0.04   0.00  -0.05
  95   1     0.01  -0.03  -0.10    -0.02   0.02  -0.01    -0.02  -0.01  -0.07
  96   1     0.01   0.05   0.01    -0.01  -0.02  -0.06     0.00   0.00  -0.03
  97   1    -0.01   0.12   0.06     0.01  -0.03  -0.04     0.05   0.07   0.03
  98   1    -0.04  -0.03   0.09     0.03   0.06  -0.07     0.02   0.05   0.01
  99   1     0.05   0.01  -0.03    -0.04   0.04   0.00     0.02   0.07  -0.03
 100   1     0.03   0.17  -0.03    -0.03  -0.06   0.01     0.09   0.14   0.10
 101   1     0.10   0.09  -0.10    -0.08  -0.02   0.01     0.03   0.11  -0.11
 102   1     0.08   0.09  -0.08    -0.07  -0.06   0.02    -0.05  -0.02   0.04
 103   1     0.16  -0.16  -0.07     0.09  -0.04   0.02    -0.20   0.10  -0.03
 104   1    -0.04  -0.13  -0.22     0.00   0.00  -0.06    -0.02   0.02   0.13
 105   1    -0.03  -0.04   0.00     0.01   0.05   0.05    -0.02  -0.07  -0.10
 106   1    -0.01  -0.05   0.13    -0.03   0.00  -0.03    -0.04   0.03   0.07
 107   1    -0.07  -0.16   0.05     0.03   0.04   0.02    -0.12  -0.05  -0.01
 108   1     0.02  -0.06  -0.02    -0.03  -0.02   0.06    -0.03   0.03  -0.07
 109   1     0.00  -0.01   0.03    -0.08  -0.06   0.04     0.03  -0.01   0.05
 110   1    -0.01  -0.01   0.01    -0.01  -0.04   0.07    -0.02  -0.02   0.01
 111   1    -0.01  -0.03  -0.03    -0.03  -0.04  -0.08    -0.02  -0.06  -0.03
 112   1     0.03   0.01  -0.02     0.08   0.05  -0.05     0.04   0.00  -0.02
 113   1     0.02  -0.02  -0.04     0.00  -0.03  -0.10     0.03  -0.04  -0.04
 114   1    -0.04   0.01   0.03     0.03   0.00  -0.01     0.05   0.01  -0.09
 115   1    -0.01   0.03   0.02    -0.02  -0.03  -0.04     0.01   0.09   0.01
 116   1    -0.03  -0.03  -0.01     0.00   0.10  -0.03     0.06   0.02  -0.03
 117   1     0.02  -0.02  -0.01    -0.04   0.05   0.03     0.03   0.00  -0.02
 118   1    -0.01  -0.02   0.00    -0.07   0.09   0.04     0.06   0.02  -0.03
 119   1    -0.06   0.05   0.01     0.04  -0.06  -0.02    -0.05   0.05   0.02
 120   1    -0.07   0.00   0.00     0.03  -0.02   0.01    -0.19  -0.01   0.17
 121   1    -0.06   0.01   0.00     0.04  -0.03   0.00     0.02  -0.14   0.16
 122   1    -0.03   0.05   0.01     0.07   0.02  -0.02    -0.05   0.06   0.02
 123   1    -0.04   0.05   0.02    -0.10   0.16   0.08    -0.02   0.03   0.02
 124   1    -0.02   0.05  -0.03     0.11   0.22   0.01    -0.04   0.02  -0.05
 125   1     0.02   0.02  -0.01     0.03   0.09  -0.03     0.01   0.00  -0.01
 126   1     0.03   0.05  -0.02     0.06   0.16  -0.09     0.03   0.05  -0.02
 127   1    -0.01   0.05   0.02    -0.04   0.18   0.06    -0.03   0.05   0.01
                    43                     44                     45
                     A                      A                      A
 Frequencies --   168.9295               170.0741               179.3107
 Red. masses --     2.9278                 3.5967                 3.6431
 Frc consts  --     0.0492                 0.0613                 0.0690
 IR Inten    --     2.4096                 3.4056                 0.9728
 Atom AN      X      Y      Z        X      Y      Z        X      Y      Z
   1   6    -0.03   0.01   0.04    -0.02  -0.02   0.00    -0.06   0.00   0.03
   2   6    -0.02   0.02   0.05     0.00  -0.01   0.00    -0.05   0.01   0.06
   3   6    -0.01   0.01   0.01     0.03  -0.01   0.00    -0.02  -0.01   0.03
   4   6    -0.08   0.02   0.01     0.22  -0.05   0.00     0.03  -0.01   0.01
   5   6    -0.01   0.01  -0.01     0.05  -0.02   0.06     0.01  -0.04  -0.01
   6   6     0.02  -0.01   0.00    -0.10   0.04   0.10    -0.10   0.01   0.00
   7   8     0.02  -0.04  -0.02     0.03   0.07   0.02     0.04   0.03  -0.10
   8   6    -0.01  -0.01   0.00     0.15  -0.03   0.01     0.12   0.01  -0.04
   9   6    -0.01   0.01  -0.01    -0.02  -0.02   0.02    -0.04   0.01   0.01
  10   6     0.00  -0.01   0.00     0.02  -0.02   0.00     0.00  -0.05   0.00
  11   6    -0.05  -0.01   0.02    -0.01  -0.02   0.01    -0.01   0.02  -0.01
  12   6    -0.03   0.00   0.01     0.02   0.00  -0.01     0.02   0.04  -0.02
  13   6     0.09   0.05  -0.04     0.06   0.01  -0.02     0.01   0.02  -0.02
  14   6     0.16   0.08  -0.08     0.06   0.01  -0.02    -0.02   0.01  -0.01
  15   6     0.09   0.05  -0.05     0.02  -0.01   0.00    -0.03   0.00   0.00
  16   6    -0.02  -0.02  -0.01     0.00   0.01   0.02    -0.01  -0.01  -0.02
  17   6     0.05   0.02  -0.03     0.01   0.00   0.00     0.00  -0.01   0.01
  18   6     0.02  -0.01   0.01    -0.02   0.00  -0.01    -0.01  -0.03  -0.01
  19   6     0.02  -0.02   0.01    -0.08   0.03  -0.02    -0.04  -0.02  -0.02
  20   6     0.02  -0.02   0.00    -0.14   0.06  -0.03    -0.07  -0.01  -0.02
  21   6     0.01  -0.01   0.00    -0.10   0.04  -0.02    -0.04  -0.03  -0.01
  22   6     0.00  -0.01   0.00    -0.01  -0.01   0.00     0.00  -0.05  -0.01
  23   6     0.01   0.00   0.01    -0.01   0.00   0.00     0.00  -0.01   0.01
  24   6     0.00   0.00   0.00     0.00   0.00  -0.01     0.01   0.00  -0.03
  25   6     0.08  -0.06   0.05     0.02   0.01   0.04     0.00  -0.03  -0.02
  26   6    -0.01   0.00  -0.07    -0.02   0.04  -0.01     0.02  -0.05   0.01
  27   6     0.00   0.03   0.06     0.00   0.02   0.01     0.01  -0.05  -0.02
  28   6    -0.01  -0.09  -0.12     0.00   0.01  -0.02     0.01   0.01   0.03
  29   6     0.00   0.02   0.00     0.00   0.02  -0.01     0.02   0.08  -0.02
  30   6     0.00   0.00   0.00     0.00   0.01   0.00     0.02   0.04  -0.02
  31   6     0.00   0.00   0.02     0.00  -0.01  -0.02     0.02   0.00   0.00
  32   6     0.01   0.01  -0.01     0.01   0.01   0.03     0.03   0.02   0.01
  33   6    -0.01   0.01   0.07    -0.03  -0.01   0.00    -0.08   0.00  -0.03
  34   6     0.00   0.02  -0.06     0.04   0.00   0.00     0.00   0.01  -0.03
  35   8    -0.01   0.00   0.01     0.00   0.00   0.00     0.00  -0.01   0.00
  36  12    -0.01   0.00   0.01    -0.01  -0.03  -0.06     0.01  -0.01   0.07
  37   8     0.00   0.00  -0.01     0.03  -0.01  -0.02    -0.04   0.01   0.01
  38   6     0.00   0.00   0.00     0.00   0.00   0.00     0.01  -0.01   0.00
  39   7    -0.01   0.00   0.01     0.03  -0.03   0.00    -0.02  -0.04   0.02
  40   7    -0.03   0.01   0.01    -0.02  -0.02   0.01    -0.06   0.00   0.03
  41   8     0.00   0.00   0.00     0.00   0.00   0.00     0.01   0.00   0.00
  42   8     0.01  -0.01   0.00     0.00   0.00   0.00     0.00   0.00   0.00
  43   6     0.00  -0.01   0.00     0.00   0.00   0.00    -0.01   0.00   0.00
  44   6     0.00  -0.01  -0.01     0.01   0.00   0.00    -0.02   0.00  -0.01
  45   6     0.00   0.00   0.00     0.00   0.00   0.00     0.00   0.00   0.00
  46   8    -0.01  -0.01  -0.01    -0.01   0.00   0.00     0.01  -0.01   0.00
  47   6     0.00  -0.01   0.00     0.00   0.00   0.00    -0.01   0.01   0.00
  48   8     0.02   0.03   0.01    -0.03  -0.03  -0.08     0.06   0.05   0.11
  49   6    -0.01   0.00   0.00     0.01  -0.01   0.00    -0.02   0.01   0.00
  50   8     0.00   0.00  -0.01     0.01  -0.02  -0.01    -0.01   0.02  -0.01
  51   8    -0.03   0.00   0.02    -0.02   0.03   0.05     0.02  -0.05  -0.06
  52   6    -0.03   0.00   0.01    -0.05   0.00   0.01     0.10   0.02  -0.01
  53   6    -0.01   0.00   0.01     0.00  -0.03  -0.02     0.04   0.06   0.02
  54   6    -0.03   0.02   0.03    -0.01   0.01   0.03    -0.01  -0.01  -0.01
  55   8    -0.03   0.00   0.01    -0.10   0.02  -0.02     0.15   0.01   0.02
  56   6     0.01  -0.06  -0.01     0.03  -0.04   0.06    -0.02   0.09  -0.08
  57   6    -0.07   0.00   0.07    -0.02   0.03  -0.01    -0.03  -0.06   0.10
  58   6    -0.02  -0.01  -0.01    -0.03  -0.01  -0.01     0.00  -0.01   0.00
  59   6     0.00   0.00   0.00     0.00   0.00   0.00     0.00   0.01   0.00
  60   1    -0.02   0.03   0.06     0.00   0.01  -0.01    -0.05   0.03   0.06
  61   1    -0.14  -0.05   0.02     0.31   0.06  -0.05    -0.02  -0.05   0.00
  62   1    -0.12   0.10   0.02     0.30  -0.19   0.01     0.02   0.04   0.09
  63   1     0.01   0.05  -0.05     0.02  -0.15   0.10     0.00  -0.11  -0.08
  64   1     0.02  -0.02   0.01     0.07   0.09   0.03     0.09  -0.02   0.02
  65   1     0.04   0.00   0.01    -0.18  -0.09   0.20    -0.16  -0.10   0.11
  66   1     0.03  -0.01   0.00    -0.21   0.18   0.10    -0.22   0.13  -0.02
  67   1    -0.02  -0.04  -0.02     0.19   0.02   0.00     0.16   0.02  -0.08
  68   1     0.03   0.03   0.02     0.10  -0.11   0.03     0.15   0.00   0.02
  69   1    -0.07  -0.02   0.03     0.02   0.00  -0.01     0.05   0.05  -0.04
  70   1     0.12   0.06  -0.05     0.09   0.02  -0.04     0.02   0.03  -0.03
  71   1     0.25   0.12  -0.11     0.09   0.02  -0.03    -0.02   0.00  -0.01
  72   1    -0.01   0.00  -0.05     0.01   0.01   0.02    -0.03  -0.02  -0.04
  73   1     0.03   0.03   0.02     0.01   0.00  -0.02     0.01   0.00   0.02
  74   1     0.02  -0.02   0.01    -0.10   0.04  -0.02    -0.06  -0.01  -0.02
  75   1     0.03  -0.02   0.00    -0.21   0.10  -0.04    -0.10   0.01  -0.03
  76   1     0.01  -0.01   0.00    -0.15   0.06  -0.03    -0.07  -0.02  -0.01
  77   1     0.01   0.00   0.01    -0.02   0.01   0.01    -0.02   0.00   0.04
  78   1     0.00   0.00  -0.01     0.00   0.00  -0.03     0.02  -0.01  -0.09
  79   1     0.17  -0.12  -0.02     0.03   0.03   0.03     0.00  -0.03  -0.02
  80   1     0.04  -0.04   0.05     0.02   0.01   0.05     0.02  -0.04  -0.02
  81   1     0.12  -0.05   0.17     0.01   0.01   0.04    -0.01  -0.05  -0.01
  82   1     0.09   0.00  -0.16     0.02   0.06  -0.04     0.01  -0.09   0.00
  83   1     0.00  -0.04   0.02    -0.03   0.02   0.01     0.05  -0.04   0.03
  84   1    -0.12   0.06  -0.13    -0.07   0.06  -0.04     0.04  -0.06   0.02
  85   1    -0.06   0.02   0.07    -0.02   0.02   0.01     0.05  -0.07  -0.01
  86   1    -0.02   0.03   0.06     0.01   0.02   0.02     0.00  -0.06  -0.04
  87   1     0.05   0.05   0.12     0.01   0.03   0.03     0.00  -0.05  -0.04
  88   1     0.00  -0.26   0.01    -0.02   0.02  -0.03     0.03   0.02   0.02
  89   1     0.02   0.06  -0.12     0.00  -0.01  -0.04     0.01   0.02   0.04
  90   1    -0.09  -0.16  -0.32     0.00   0.01   0.00     0.01   0.02   0.04
  91   1     0.01   0.01   0.00    -0.02   0.06  -0.03     0.03   0.12  -0.06
  92   1    -0.01   0.02   0.00     0.02   0.03   0.04     0.00   0.10   0.04
  93   1     0.00   0.03   0.01    -0.01  -0.02  -0.02     0.02   0.07  -0.03
  94   1     0.02   0.03  -0.02    -0.01   0.03  -0.01     0.07   0.16  -0.09
  95   1    -0.01  -0.03  -0.03     0.00   0.01   0.00     0.00  -0.07  -0.07
  96   1    -0.01   0.01   0.03     0.00   0.02   0.01    -0.01   0.06   0.12
  97   1    -0.01   0.02   0.02     0.02   0.03   0.00     0.03   0.11   0.04
  98   1     0.00  -0.01   0.04    -0.04  -0.04  -0.02    -0.05  -0.07   0.05
  99   1     0.00   0.00   0.02     0.04  -0.03  -0.06     0.08  -0.02  -0.09
 100   1     0.01   0.03   0.00     0.02   0.00   0.03     0.05   0.05   0.04
 101   1     0.02   0.01  -0.02     0.03   0.00   0.04     0.06   0.02  -0.02
 102   1     0.02   0.00  -0.02     0.01   0.03   0.04     0.02   0.02   0.03
 103   1     0.11  -0.10   0.12     0.01  -0.04   0.01    -0.06   0.03  -0.06
 104   1    -0.07   0.01  -0.06    -0.06   0.01  -0.06    -0.08  -0.01  -0.04
 105   1    -0.06   0.12   0.19    -0.07   0.02   0.05    -0.10  -0.03  -0.04
 106   1     0.02   0.00  -0.08     0.07   0.01   0.06     0.05   0.01   0.02
 107   1    -0.04   0.06  -0.08    -0.01  -0.04  -0.01    -0.08   0.01  -0.05
 108   1     0.02   0.00  -0.09     0.07   0.03  -0.06     0.04   0.04  -0.10
 109   1     0.00  -0.01   0.00     0.02   0.00   0.01    -0.03  -0.01  -0.03
 110   1    -0.01  -0.01   0.00     0.00   0.00  -0.01     0.01   0.00   0.01
 111   1    -0.01  -0.02  -0.01     0.00  -0.01   0.00     0.00   0.02   0.00
 112   1     0.01   0.00  -0.01     0.00  -0.01   0.00    -0.01   0.01   0.00
 113   1     0.00  -0.01  -0.01     0.01  -0.01   0.00    -0.02   0.01  -0.01
 114   1    -0.05   0.00   0.02     0.04  -0.04  -0.02    -0.01   0.07   0.03
 115   1    -0.01   0.05   0.04     0.00   0.00   0.04    -0.02   0.04  -0.02
 116   1    -0.03  -0.10   0.00     0.04  -0.05   0.11    -0.03   0.11  -0.17
 117   1     0.04  -0.06  -0.03    -0.01  -0.04   0.08     0.04   0.09  -0.11
 118   1     0.03  -0.07  -0.02     0.10  -0.04   0.04    -0.12   0.10  -0.05
 119   1    -0.07   0.04   0.03    -0.02   0.05  -0.02     0.00  -0.02   0.00
 120   1    -0.15   0.00   0.11    -0.03   0.00  -0.04    -0.17  -0.02   0.21
 121   1    -0.03  -0.07   0.11    -0.02   0.06  -0.01     0.08  -0.19   0.19
 122   1    -0.02  -0.02   0.00    -0.06   0.04   0.01     0.03  -0.06  -0.01
 123   1    -0.03  -0.01  -0.02     0.01  -0.02  -0.01    -0.03  -0.01  -0.02
 124   1    -0.02  -0.01  -0.02    -0.07  -0.05  -0.04     0.04   0.02   0.02
 125   1     0.00  -0.01   0.00     0.00  -0.01   0.00     0.00   0.02   0.00
 126   1     0.01   0.01   0.00     0.00   0.00   0.00    -0.01   0.00  -0.01
 127   1    -0.01   0.01   0.00     0.00   0.00   0.00     0.01   0.01   0.01
                    46                     47                     48
                     A                      A                      A
 Frequencies --   183.8411               191.3033               199.3910
 Red. masses --     3.0564                 3.8833                 2.8698
 Frc consts  --     0.0609                 0.0837                 0.0672
 IR Inten    --     3.2601                 0.4924                 2.2941
 Atom AN      X      Y      Z        X      Y      Z        X      Y      Z
   1   6     0.02   0.02  -0.02     0.03   0.00   0.01    -0.01   0.00  -0.04
   2   6    -0.02   0.00  -0.02     0.03   0.00   0.04    -0.03  -0.02  -0.09
   3   6    -0.05   0.02  -0.01     0.01   0.01   0.02    -0.01  -0.02  -0.04
   4   6    -0.04   0.00   0.00     0.00   0.02   0.01     0.00  -0.02  -0.01
   5   6     0.04   0.04   0.01     0.00   0.01   0.00     0.00  -0.02  -0.01
   6   6    -0.01   0.01   0.12    -0.06   0.03   0.03     0.05  -0.03  -0.03
   7   8     0.12  -0.10  -0.03     0.01   0.02  -0.03    -0.02  -0.02   0.02
   8   6     0.12  -0.09  -0.01     0.04   0.02  -0.01    -0.03  -0.02   0.00
   9   6     0.02   0.05  -0.02     0.01  -0.02   0.00     0.00   0.02  -0.01
  10   6    -0.04   0.02  -0.01     0.00   0.03   0.00     0.02  -0.06   0.01
  11   6    -0.01   0.03   0.00     0.01  -0.01   0.00    -0.01   0.01   0.00
  12   6    -0.06   0.01   0.03     0.00  -0.01   0.00    -0.02   0.01   0.01
  13   6    -0.07   0.01   0.03    -0.01  -0.02   0.00    -0.03   0.02   0.02
  14   6    -0.04   0.03   0.01     0.00  -0.03   0.00    -0.03   0.02   0.01
  15   6     0.01   0.04  -0.01     0.00  -0.03   0.00    -0.01   0.03   0.00
  16   6     0.00   0.00  -0.01     0.01   0.00   0.00     0.00   0.00  -0.01
  17   6     0.02   0.01   0.02    -0.01  -0.01  -0.01     0.00   0.01   0.01
  18   6     0.02  -0.02   0.01     0.01   0.03   0.00     0.00  -0.04   0.00
  19   6     0.04  -0.03   0.01     0.03   0.02   0.00    -0.06  -0.01  -0.01
  20   6    -0.01   0.00   0.00     0.04   0.01   0.00    -0.08   0.00  -0.01
  21   6    -0.06   0.03  -0.01     0.01   0.02  -0.01    -0.02  -0.03   0.00
  22   6    -0.07   0.03  -0.01    -0.01   0.03  -0.01     0.04  -0.06   0.01
  23   6     0.02  -0.01   0.01     0.01  -0.01  -0.02     0.00  -0.01   0.02
  24   6    -0.04   0.02  -0.01    -0.01   0.01   0.00     0.04  -0.03   0.00
  25   6     0.00  -0.02  -0.02     0.00   0.00   0.00     0.01   0.00   0.00
  26   6     0.03  -0.04   0.00    -0.01   0.01   0.00     0.00   0.00  -0.01
  27   6     0.02  -0.05   0.02    -0.01   0.02   0.00     0.01  -0.03  -0.01
  28   6     0.01  -0.04  -0.01    -0.01   0.02  -0.01     0.01  -0.02   0.02
  29   6     0.00   0.02   0.04    -0.01  -0.01   0.00     0.02   0.00  -0.02
  30   6    -0.02  -0.04  -0.10    -0.01  -0.02  -0.03     0.03   0.04   0.07
  31   6     0.00  -0.02   0.04     0.00  -0.03  -0.01     0.01   0.02   0.03
  32   6     0.03   0.01  -0.02    -0.02  -0.05   0.01     0.03   0.05  -0.02
  33   6     0.05   0.00   0.00     0.02  -0.01  -0.04     0.01   0.01   0.07
  34   6    -0.07   0.00   0.03    -0.01  -0.01  -0.01     0.02   0.01   0.04
  35   8     0.00   0.00   0.00    -0.09   0.01   0.09    -0.04   0.01   0.04
  36  12    -0.01   0.06  -0.03     0.00   0.03   0.04     0.00   0.00  -0.02
  37   8     0.00   0.00   0.01     0.10   0.06  -0.08     0.02   0.06  -0.06
  38   6     0.00   0.00   0.00    -0.06   0.00   0.03    -0.03   0.00   0.02
  39   7    -0.05   0.03  -0.02     0.00   0.03   0.01     0.00  -0.04  -0.02
  40   7     0.02   0.05  -0.03     0.02  -0.01   0.01    -0.01   0.02  -0.04
  41   8     0.00   0.00   0.00    -0.06  -0.01   0.03    -0.03   0.00   0.02
  42   8     0.00   0.00   0.00     0.11  -0.08   0.03     0.06  -0.04   0.02
  43   6     0.00   0.00   0.00     0.06  -0.03   0.01     0.03  -0.02   0.00
  44   6     0.00   0.01   0.01     0.07  -0.01   0.01     0.02   0.00  -0.01
  45   6     0.00   0.00   0.00    -0.03  -0.05   0.02    -0.01  -0.03   0.01
  46   8     0.01   0.01   0.00    -0.05   0.00  -0.07    -0.02   0.00  -0.03
  47   6     0.00   0.00   0.00     0.01  -0.09  -0.02     0.00  -0.05  -0.01
  48   8    -0.02  -0.02  -0.02    -0.01   0.06   0.04    -0.01   0.01  -0.03
  49   6     0.01  -0.01   0.00     0.05   0.08  -0.03     0.01   0.06  -0.02
  50   8     0.00   0.00   0.01     0.03   0.09   0.02     0.02   0.08  -0.01
  51   8     0.01   0.00  -0.01    -0.02  -0.02  -0.06    -0.06   0.00   0.01
  52   6    -0.01  -0.01   0.01    -0.06  -0.04  -0.06    -0.01   0.04   0.03
  53   6    -0.01  -0.01   0.00    -0.06   0.03  -0.02     0.00   0.00   0.01
  54   6     0.02  -0.01  -0.02     0.05   0.04  -0.01     0.00   0.02   0.01
  55   8     0.00  -0.01   0.01    -0.08  -0.08  -0.06     0.06   0.10   0.05
  56   6     0.00   0.00   0.04    -0.04   0.01   0.00     0.01  -0.02   0.02
  57   6     0.04   0.00  -0.05     0.08  -0.01   0.11     0.08   0.02   0.00
  58   6     0.01   0.02   0.01     0.01  -0.03  -0.01    -0.01  -0.05  -0.02
  59   6     0.00   0.00   0.00    -0.07  -0.01   0.00    -0.04  -0.01   0.00
  60   1    -0.02  -0.03  -0.01     0.03  -0.01   0.03    -0.03  -0.01  -0.08
  61   1    -0.15  -0.10  -0.05    -0.02   0.00   0.00     0.01  -0.01   0.00
  62   1    -0.10   0.12   0.04    -0.01   0.04   0.03     0.00  -0.03  -0.03
  63   1     0.06   0.04  -0.09     0.00  -0.03  -0.04     0.00   0.01   0.02
  64   1     0.14   0.08   0.05     0.05   0.03   0.02    -0.04  -0.03  -0.02
  65   1    -0.03  -0.11   0.30    -0.09  -0.04   0.09     0.07   0.03  -0.09
  66   1    -0.12   0.17   0.13    -0.12   0.10   0.02     0.10  -0.09  -0.03
  67   1     0.13  -0.16  -0.09     0.06   0.02  -0.03    -0.04  -0.02   0.01
  68   1     0.20  -0.06   0.08     0.05   0.01   0.02    -0.05  -0.02  -0.01
  69   1    -0.09   0.00   0.05     0.00  -0.01  -0.01    -0.02   0.00   0.02
  70   1    -0.11  -0.01   0.06    -0.02  -0.03   0.00    -0.04   0.01   0.03
  71   1    -0.06   0.02   0.02    -0.01  -0.03   0.00    -0.05   0.03   0.02
  72   1    -0.03  -0.01  -0.04     0.02   0.01   0.01    -0.01   0.00  -0.02
  73   1     0.04   0.03   0.06    -0.01  -0.02  -0.03     0.00   0.02   0.04
  74   1     0.09  -0.05   0.02     0.04   0.01   0.00    -0.09   0.00  -0.02
  75   1     0.00  -0.01   0.00     0.06   0.00   0.00    -0.14   0.03  -0.03
  76   1    -0.10   0.05  -0.01     0.02   0.02  -0.01    -0.03  -0.03  -0.01
  77   1     0.01  -0.01   0.01     0.02  -0.01  -0.05    -0.01   0.00   0.05
  78   1    -0.03   0.02   0.00    -0.01   0.02   0.03     0.03  -0.04  -0.05
  79   1     0.00  -0.06  -0.03     0.00  -0.05  -0.01     0.02  -0.02  -0.01
  80   1    -0.02   0.00  -0.05    -0.04   0.03  -0.03     0.00   0.00  -0.01
  81   1     0.01  -0.01   0.01     0.03   0.03   0.02     0.01   0.00   0.01
  82   1    -0.01  -0.06   0.03    -0.02   0.03   0.02     0.03  -0.02  -0.04
  83   1     0.06  -0.01  -0.02    -0.02   0.02  -0.02     0.01  -0.02   0.03
  84   1     0.07  -0.08   0.02     0.01   0.00   0.01    -0.02   0.02  -0.02
  85   1     0.03  -0.08   0.06    -0.03   0.02   0.00     0.04  -0.03  -0.01
  86   1    -0.01  -0.07  -0.02     0.01   0.03  -0.01    -0.02  -0.03  -0.01
  87   1     0.02  -0.03   0.03    -0.01   0.04   0.00     0.00  -0.05  -0.02
  88   1     0.07  -0.18   0.09    -0.07   0.11  -0.07     0.13  -0.17   0.12
  89   1     0.02   0.10   0.03    -0.01  -0.08  -0.04     0.01   0.17   0.09
  90   1    -0.07  -0.10  -0.16     0.04   0.05   0.09    -0.10  -0.07  -0.15
  91   1     0.06   0.00   0.04     0.01  -0.06   0.03    -0.01   0.08  -0.06
  92   1     0.00   0.02   0.03    -0.03  -0.03  -0.05     0.05   0.02   0.06
  93   1    -0.01   0.05   0.09    -0.01   0.03   0.03     0.02  -0.06  -0.06
  94   1     0.01  -0.13  -0.06    -0.02  -0.10   0.01     0.05   0.21  -0.02
  95   1    -0.04   0.02  -0.11    -0.01   0.04  -0.01     0.03  -0.10   0.04
  96   1    -0.02  -0.05  -0.19     0.00  -0.04  -0.12     0.00   0.07   0.27
  97   1    -0.03   0.03   0.04    -0.01  -0.08  -0.04     0.01   0.15   0.07
  98   1    -0.02  -0.05   0.07     0.02   0.00  -0.04    -0.05  -0.06   0.10
  99   1     0.02  -0.03   0.02    -0.02  -0.03   0.03     0.06   0.00  -0.07
 100   1     0.00   0.03  -0.02    -0.03  -0.09  -0.02    -0.04   0.07  -0.05
 101   1     0.05   0.00  -0.01    -0.04  -0.05   0.05     0.07   0.01   0.02
 102   1     0.05   0.02  -0.03    -0.01  -0.03   0.00     0.09   0.11  -0.06
 103   1    -0.03   0.05  -0.01     0.08  -0.02  -0.04    -0.13   0.03   0.08
 104   1     0.08  -0.02   0.11    -0.01  -0.02  -0.10     0.07   0.02   0.21
 105   1     0.12  -0.03  -0.07    -0.02   0.00   0.00     0.11  -0.01  -0.01
 106   1    -0.08   0.03   0.07    -0.03  -0.02  -0.06     0.04   0.03   0.12
 107   1    -0.09  -0.05   0.04     0.00   0.03  -0.02     0.02  -0.07   0.05
 108   1    -0.06   0.01   0.01    -0.01  -0.05   0.01     0.02   0.08   0.01
 109   1     0.00   0.01   0.01     0.06  -0.03   0.03     0.00  -0.02  -0.02
 110   1     0.00   0.00   0.00    -0.08  -0.11   0.06    -0.04  -0.06   0.03
 111   1     0.00   0.01   0.00    -0.08  -0.20  -0.07    -0.04  -0.10  -0.03
 112   1     0.00   0.00   0.00     0.11  -0.06  -0.02     0.05  -0.03  -0.01
 113   1     0.00   0.00   0.00     0.08  -0.12  -0.06     0.04  -0.06  -0.02
 114   1     0.02  -0.01   0.00    -0.10   0.09  -0.06     0.01  -0.02   0.03
 115   1     0.01  -0.04  -0.02     0.06   0.06   0.01     0.01  -0.03   0.02
 116   1     0.01   0.01   0.05    -0.12   0.00  -0.18     0.03  -0.03   0.10
 117   1    -0.02   0.00   0.05     0.07  -0.15   0.09    -0.03   0.03   0.00
 118   1     0.02   0.01   0.04    -0.06   0.18   0.13     0.05  -0.07  -0.03
 119   1     0.02  -0.05   0.03     0.08  -0.08   0.15     0.08  -0.07   0.06
 120   1     0.15   0.00  -0.10     0.12   0.07   0.17     0.21   0.05  -0.03
 121   1    -0.04   0.06  -0.12     0.06  -0.07   0.09     0.02   0.10  -0.05
 122   1     0.02   0.00   0.00     0.01  -0.09   0.04     0.02  -0.18   0.02
 123   1    -0.01   0.02   0.01    -0.07  -0.01  -0.04    -0.12  -0.04  -0.08
 124   1     0.02   0.03   0.01     0.05   0.02  -0.03     0.07   0.03   0.00
 125   1     0.00   0.01   0.00    -0.05  -0.17   0.08    -0.03  -0.10   0.05
 126   1    -0.01   0.00   0.00     0.06   0.12  -0.08     0.03   0.06  -0.04
 127   1     0.01   0.00   0.00    -0.28   0.06  -0.02    -0.16   0.03  -0.02
                    49                     50                     51
                     A                      A                      A
 Frequencies --   202.6306               208.1651               216.2175
 Red. masses --     2.3549                 2.1759                 1.7920
 Frc consts  --     0.0570                 0.0556                 0.0494
 IR Inten    --     2.2858                 3.8931                 1.0994
 Atom AN      X      Y      Z        X      Y      Z        X      Y      Z
   1   6     0.00   0.01   0.03    -0.01   0.01   0.04     0.01   0.00   0.00
   2   6     0.00   0.02   0.11     0.01   0.03   0.12     0.00   0.00   0.00
   3   6     0.01   0.00   0.05     0.01   0.01   0.06    -0.01   0.00   0.00
   4   6     0.02   0.01   0.00    -0.02  -0.01  -0.01     0.00   0.00   0.00
   5   6     0.00   0.00   0.00     0.00   0.00   0.00     0.00   0.00   0.00
   6   6    -0.01   0.01  -0.01     0.02  -0.01   0.01     0.01   0.00   0.00
   7   8    -0.04   0.04   0.02     0.01  -0.04   0.01     0.00  -0.01   0.01
   8   6    -0.04   0.03   0.01     0.00  -0.03   0.00     0.00  -0.01   0.00
   9   6     0.02   0.05  -0.01    -0.01   0.00   0.01     0.00   0.00   0.00
  10   6     0.01  -0.04   0.01    -0.01   0.00   0.00     0.00   0.00   0.00
  11   6     0.01   0.05   0.00    -0.01   0.00   0.01     0.00   0.00   0.00
  12   6    -0.06   0.02   0.03    -0.01   0.00   0.00    -0.01   0.00   0.00
  13   6    -0.08   0.01   0.04     0.00   0.00  -0.01     0.00   0.00   0.00
  14   6    -0.03   0.03   0.01     0.00  -0.01  -0.01     0.00   0.00   0.00
  15   6     0.02   0.05  -0.01     0.00  -0.01   0.00     0.00   0.00   0.00
  16   6     0.01   0.02  -0.02    -0.01  -0.01   0.00     0.00   0.00   0.00
  17   6     0.03   0.02   0.01     0.01  -0.01   0.01     0.00   0.00   0.00
  18   6     0.00  -0.02   0.00    -0.01   0.00   0.01     0.01   0.01   0.00
  19   6    -0.03  -0.01  -0.01     0.02  -0.01   0.01     0.00   0.01  -0.01
  20   6    -0.03  -0.02  -0.02     0.03  -0.02   0.00    -0.01   0.01  -0.01
  21   6     0.00  -0.04  -0.01    -0.01  -0.01   0.00     0.00  -0.01  -0.01
  22   6     0.02  -0.05   0.00    -0.03   0.00   0.00     0.00  -0.01   0.00
  23   6     0.00  -0.01   0.01    -0.01   0.00   0.01     0.01   0.00   0.00
  24   6     0.01  -0.02  -0.01    -0.03   0.01  -0.01     0.00  -0.01   0.01
  25   6    -0.01  -0.01  -0.05    -0.01  -0.01   0.01     0.00   0.00   0.00
  26   6     0.04  -0.03   0.02     0.00  -0.02   0.00     0.00   0.00   0.00
  27   6     0.02   0.00   0.02     0.00  -0.01   0.02     0.00  -0.01   0.01
  28   6     0.01  -0.04  -0.03     0.01   0.01   0.01     0.00   0.00   0.00
  29   6     0.01   0.02  -0.02    -0.01   0.01   0.01     0.01  -0.01   0.01
  30   6     0.01   0.03   0.03    -0.01  -0.01  -0.04     0.00   0.01   0.02
  31   6     0.00   0.00   0.01    -0.01  -0.01   0.00     0.01   0.00   0.00
  32   6     0.00   0.00   0.00    -0.02   0.00   0.01     0.00  -0.01   0.00
  33   6     0.01  -0.03  -0.09    -0.03   0.00  -0.09     0.01   0.00   0.00
  34   6     0.03   0.02  -0.07     0.01   0.02  -0.06    -0.02   0.00  -0.01
  35   8     0.01   0.01   0.00    -0.01   0.00   0.01    -0.03  -0.08   0.02
  36  12     0.02   0.00   0.02     0.00  -0.01  -0.05    -0.01   0.02  -0.01
  37   8     0.02  -0.01   0.02    -0.01   0.03  -0.03     0.01   0.01  -0.02
  38   6     0.00   0.01   0.00    -0.01   0.00   0.01     0.03  -0.08   0.05
  39   7     0.01  -0.03   0.04     0.01   0.00   0.03    -0.01   0.01   0.01
  40   7     0.00   0.04   0.03    -0.01   0.00   0.03     0.01   0.00   0.00
  41   8     0.00   0.01  -0.01    -0.01   0.00   0.01     0.04  -0.06   0.05
  42   8     0.00   0.01   0.00     0.02  -0.01   0.00    -0.05  -0.02  -0.02
  43   6     0.00   0.01   0.01     0.01  -0.01   0.00    -0.02   0.00  -0.01
  44   6     0.01   0.01   0.02    -0.01   0.00  -0.02     0.00   0.01  -0.01
  45   6     0.00   0.01   0.00     0.00  -0.01   0.00     0.02  -0.02   0.03
  46   8     0.00   0.01   0.00    -0.01   0.00  -0.01     0.00   0.01  -0.02
  47   6     0.01   0.00   0.01     0.00  -0.01   0.00    -0.07   0.06  -0.07
  48   8    -0.01  -0.01  -0.01     0.01  -0.02  -0.07     0.00   0.01  -0.01
  49   6     0.01  -0.01   0.00    -0.01   0.03  -0.01     0.01   0.02   0.00
  50   8    -0.01  -0.02   0.02     0.01   0.04  -0.01     0.02   0.03   0.01
  51   8     0.02   0.01  -0.02    -0.03   0.01   0.03     0.00   0.00   0.01
  52   6    -0.03  -0.03  -0.04     0.02   0.04   0.03    -0.01   0.00   0.00
  53   6    -0.02  -0.02  -0.02     0.04  -0.01   0.00     0.00   0.01  -0.01
  54   6     0.02   0.00  -0.03    -0.01   0.01   0.01     0.01   0.01   0.01
  55   8    -0.05  -0.05  -0.04     0.06   0.10   0.03    -0.02   0.00  -0.01
  56   6     0.01  -0.03   0.03     0.06  -0.03   0.01    -0.01   0.01  -0.01
  57   6    -0.01   0.01  -0.05     0.04   0.02  -0.02     0.04   0.00   0.03
  58   6     0.03   0.04   0.02    -0.02  -0.04  -0.02     0.00  -0.04  -0.01
  59   6     0.00  -0.01   0.00    -0.01   0.00   0.00     0.03   0.07   0.00
  60   1    -0.01   0.02   0.10     0.01   0.03   0.12     0.00  -0.01   0.00
  61   1     0.05   0.04   0.01    -0.04  -0.03  -0.01    -0.01   0.00   0.00
  62   1     0.03  -0.03  -0.02    -0.04   0.01  -0.01    -0.01   0.00  -0.01
  63   1    -0.01  -0.01   0.02     0.01   0.02  -0.01     0.00   0.01   0.00
  64   1    -0.02   0.00  -0.01     0.00   0.00   0.00     0.00   0.00   0.00
  65   1    -0.01   0.03  -0.05     0.03   0.00   0.01     0.01   0.01   0.00
  66   1     0.01  -0.01  -0.01     0.03  -0.02   0.01     0.02  -0.01   0.00
  67   1    -0.04   0.05   0.03    -0.01  -0.05  -0.01     0.00  -0.01   0.00
  68   1    -0.07   0.01  -0.02     0.01  -0.02   0.01     0.00  -0.01   0.00
  69   1    -0.09   0.01   0.04    -0.02   0.01  -0.01    -0.01   0.00   0.00
  70   1    -0.14  -0.01   0.06     0.00   0.00  -0.02    -0.01   0.00  -0.01
  71   1    -0.04   0.03   0.02     0.01  -0.01  -0.01     0.00  -0.01  -0.01
  72   1    -0.01   0.01  -0.04    -0.02  -0.01  -0.01    -0.01   0.00   0.00
  73   1     0.03   0.03   0.04     0.01  -0.01   0.00     0.01   0.00   0.00
  74   1    -0.04   0.01  -0.02     0.04  -0.01   0.01    -0.01   0.02  -0.01
  75   1    -0.05  -0.01  -0.03     0.05  -0.04   0.01    -0.01   0.01  -0.02
  76   1    -0.01  -0.05  -0.01    -0.01   0.00   0.00     0.01  -0.01  -0.01
  77   1    -0.01  -0.01   0.02    -0.01   0.00   0.01     0.02   0.00  -0.01
  78   1     0.01  -0.03  -0.05    -0.02   0.00  -0.01    -0.01  -0.01   0.00
  79   1    -0.03  -0.10  -0.05    -0.02   0.04   0.02     0.00  -0.01   0.00
  80   1    -0.05   0.03  -0.11     0.03  -0.03   0.02     0.00   0.00   0.00
  81   1     0.02   0.01  -0.01    -0.04  -0.03  -0.02     0.00   0.00   0.01
  82   1    -0.08  -0.04   0.12    -0.03  -0.02   0.02    -0.01   0.00   0.00
  83   1     0.07   0.04  -0.09     0.02   0.01  -0.04     0.00   0.00  -0.01
  84   1     0.17  -0.14   0.07     0.03  -0.06   0.00     0.01  -0.01   0.00
  85   1     0.02  -0.03   0.05    -0.02  -0.03   0.04    -0.01  -0.02   0.02
  86   1     0.02  -0.02  -0.02     0.00  -0.02   0.00     0.00  -0.01   0.00
  87   1     0.03   0.02   0.03     0.01   0.01   0.03     0.00   0.01   0.02
  88   1     0.05  -0.18   0.07    -0.16   0.25  -0.14    -0.05   0.08  -0.05
  89   1     0.03   0.09  -0.01    -0.01  -0.29  -0.08     0.00  -0.10  -0.03
  90   1    -0.06  -0.09  -0.18     0.20   0.10   0.27     0.06   0.03   0.09
  91   1     0.01   0.02  -0.02     0.02  -0.02   0.03     0.04  -0.07   0.04
  92   1    -0.02   0.02  -0.01    -0.04   0.01  -0.02    -0.03  -0.02  -0.04
  93   1     0.02   0.03  -0.03    -0.01   0.05   0.04     0.02   0.05   0.04
  94   1     0.12   0.27  -0.11     0.05   0.03  -0.08     0.07   0.14  -0.06
  95   1    -0.01  -0.20  -0.08    -0.04  -0.07  -0.10    -0.01  -0.13  -0.05
  96   1    -0.06   0.09   0.31    -0.04   0.00   0.01    -0.05   0.04   0.18
  97   1     0.01   0.04   0.02    -0.02  -0.10  -0.03     0.01   0.03   0.01
  98   1    -0.02  -0.03   0.02     0.04   0.06  -0.05    -0.01  -0.02   0.02
  99   1     0.02  -0.01  -0.03    -0.07   0.02   0.08     0.03  -0.01  -0.02
 100   1     0.02   0.01   0.02     0.12   0.05   0.12    -0.15  -0.09  -0.13
 101   1     0.00   0.01  -0.02    -0.04   0.07  -0.14     0.02  -0.09   0.18
 102   1    -0.01  -0.02   0.01    -0.12  -0.14   0.07     0.13   0.14  -0.07
 103   1     0.09   0.02  -0.14     0.11   0.00  -0.12     0.02  -0.01   0.00
 104   1    -0.03  -0.07  -0.15    -0.09  -0.02  -0.22     0.01  -0.01  -0.01
 105   1    -0.03  -0.06  -0.10    -0.13  -0.01  -0.03     0.01   0.00   0.00
 106   1     0.07  -0.02  -0.10     0.04  -0.02  -0.12    -0.02   0.00   0.01
 107   1    -0.04   0.08  -0.11    -0.03   0.10  -0.10    -0.05  -0.02  -0.02
 108   1     0.07  -0.01  -0.12     0.04  -0.03  -0.08     0.00   0.00  -0.04
 109   1     0.02   0.01   0.03    -0.02  -0.01  -0.03     0.02   0.02  -0.03
 110   1     0.00   0.01  -0.01    -0.01  -0.02   0.01     0.07   0.01   0.05
 111   1     0.00  -0.01   0.01    -0.01  -0.02  -0.01    -0.02   0.13  -0.07
 112   1     0.00  -0.01   0.01     0.01  -0.01   0.00    -0.03   0.13  -0.07
 113   1     0.02   0.00   0.01     0.00  -0.01  -0.01    -0.18   0.04  -0.14
 114   1    -0.03   0.01  -0.05     0.07  -0.05   0.02     0.00   0.01  -0.01
 115   1     0.02   0.00  -0.02    -0.01  -0.02   0.02     0.01   0.00   0.01
 116   1    -0.05  -0.05  -0.08     0.12  -0.04   0.21     0.00   0.02   0.00
 117   1     0.07  -0.16   0.11    -0.06   0.11  -0.05    -0.01   0.02  -0.01
 118   1     0.02   0.10   0.12     0.13  -0.18  -0.11    -0.01   0.01  -0.01
 119   1    -0.05  -0.03   0.09     0.04  -0.02   0.01     0.04  -0.04   0.04
 120   1     0.13   0.01  -0.12     0.11   0.02  -0.05     0.08   0.02   0.03
 121   1    -0.14   0.06  -0.16     0.00   0.09  -0.05     0.03   0.01   0.02
 122   1     0.03   0.08   0.00     0.01  -0.15   0.01    -0.11   0.28  -0.03
 123   1     0.05   0.04   0.05    -0.11  -0.03  -0.06     0.33  -0.12   0.03
 124   1     0.02   0.03   0.01     0.05   0.03   0.01    -0.24  -0.31  -0.02
 125   1     0.00  -0.01   0.01    -0.01  -0.03   0.01    -0.01   0.29  -0.08
 126   1     0.00  -0.01   0.01     0.01   0.02  -0.02    -0.12  -0.06  -0.03
 127   1     0.00  -0.01  -0.01    -0.05   0.01   0.00     0.22   0.06   0.11
                    52                     53                     54
                     A                      A                      A
 Frequencies --   217.1329               219.5246               221.3565
 Red. masses --     1.3185                 1.2173                 1.3635
 Frc consts  --     0.0366                 0.0346                 0.0394
 IR Inten    --     1.2817                 0.0993                 1.8212
 Atom AN      X      Y      Z        X      Y      Z        X      Y      Z
   1   6     0.00   0.00   0.00     0.01   0.00  -0.02    -0.01  -0.02   0.01
   2   6    -0.01   0.00  -0.01     0.01   0.00  -0.03     0.00   0.00   0.05
   3   6    -0.03   0.00  -0.01     0.00   0.01   0.00     0.00   0.00   0.02
   4   6     0.00   0.00   0.00     0.00   0.00   0.00     0.01   0.00   0.00
   5   6     0.00   0.00   0.00     0.00   0.00   0.00     0.00   0.00   0.00
   6   6     0.01   0.00   0.00    -0.01   0.00   0.01     0.00   0.00   0.00
   7   8     0.01  -0.01   0.01     0.01   0.00  -0.01     0.00   0.00   0.00
   8   6     0.00  -0.01   0.00     0.01   0.00   0.00     0.00   0.00   0.00
   9   6     0.00   0.00   0.00     0.00  -0.01   0.00     0.00  -0.02   0.00
  10   6    -0.01   0.01   0.00     0.00   0.01   0.01    -0.01   0.02   0.00
  11   6    -0.01   0.01   0.00     0.00  -0.01   0.00     0.02  -0.02   0.00
  12   6    -0.01   0.00  -0.01     0.02  -0.01   0.00     0.03  -0.01   0.01
  13   6     0.00   0.00  -0.02     0.02   0.00   0.00     0.01  -0.01   0.02
  14   6     0.01   0.00  -0.02     0.00   0.00   0.00    -0.01  -0.01   0.02
  15   6     0.01   0.00   0.00    -0.01  -0.01   0.00    -0.01  -0.01   0.01
  16   6    -0.01   0.00  -0.01     0.00   0.00   0.01     0.01   0.00   0.02
  17   6     0.00  -0.01   0.00    -0.01   0.00   0.00     0.00   0.00  -0.01
  18   6     0.01   0.01   0.00     0.02   0.02   0.00     0.00   0.03   0.00
  19   6    -0.01   0.01  -0.01     0.03   0.02  -0.02     0.01   0.02   0.00
  20   6    -0.01   0.01  -0.01     0.01   0.01  -0.03     0.03   0.01   0.00
  21   6     0.01   0.00   0.00    -0.02   0.00  -0.03     0.02   0.00   0.00
  22   6     0.01   0.00   0.00    -0.02   0.00   0.00    -0.01   0.01   0.00
  23   6     0.02   0.00   0.00     0.01   0.01  -0.01     0.01   0.01  -0.01
  24   6     0.01  -0.01   0.01    -0.02   0.00   0.01    -0.01   0.01   0.01
  25   6     0.00  -0.01   0.00     0.00   0.01   0.02    -0.01   0.02   0.01
  26   6     0.00  -0.01  -0.01    -0.01   0.01   0.00    -0.01   0.02   0.02
  27   6    -0.01  -0.01   0.03     0.00   0.00  -0.01     0.01   0.02  -0.04
  28   6     0.00   0.01   0.01     0.00   0.00   0.01    -0.01  -0.01  -0.01
  29   6     0.01  -0.01   0.01     0.01  -0.02   0.03    -0.01   0.00   0.01
  30   6     0.00   0.01   0.03     0.00   0.02   0.00     0.00   0.00  -0.01
  31   6     0.02   0.01   0.00    -0.02  -0.03   0.00     0.02   0.01  -0.02
  32   6     0.01  -0.01   0.00    -0.01  -0.02  -0.01    -0.01  -0.02   0.01
  33   6     0.02   0.00   0.02     0.01   0.01   0.01    -0.03  -0.02  -0.05
  34   6    -0.04  -0.01  -0.02     0.00   0.00   0.04    -0.02  -0.02  -0.04
  35   8     0.01   0.03  -0.01     0.01   0.01   0.00     0.00   0.00   0.00
  36  12    -0.01   0.03  -0.01     0.00   0.01   0.00    -0.02  -0.01  -0.02
  37   8     0.00  -0.01   0.02     0.00  -0.01   0.01    -0.01   0.00  -0.01
  38   6    -0.01   0.03  -0.02     0.00   0.01  -0.01     0.00   0.00   0.00
  39   7    -0.03   0.01   0.00     0.00   0.01   0.01     0.00   0.01   0.02
  40   7     0.00   0.01   0.00     0.01  -0.01  -0.02    -0.01  -0.02   0.01
  41   8    -0.01   0.03  -0.02     0.00   0.01  -0.01     0.00   0.00   0.00
  42   8     0.01   0.01   0.01     0.00   0.00   0.00     0.00   0.00   0.00
  43   6     0.01   0.00   0.00     0.00   0.00   0.00     0.00   0.00   0.00
  44   6     0.00   0.00   0.01     0.00   0.00   0.00    -0.01   0.00  -0.01
  45   6    -0.01   0.01  -0.01     0.00   0.00   0.00     0.00   0.00   0.00
  46   8     0.00   0.00   0.01     0.00   0.00   0.00     0.00  -0.01   0.00
  47   6     0.03  -0.02   0.03     0.01  -0.01   0.01     0.00   0.00   0.00
  48   8     0.00  -0.01   0.00     0.00   0.00   0.00     0.01   0.00  -0.01
  49   6     0.00  -0.02   0.00     0.00  -0.01   0.00     0.00   0.00   0.00
  50   8    -0.01  -0.03   0.00     0.00  -0.01   0.00     0.01   0.01   0.00
  51   8     0.00  -0.01  -0.01     0.00   0.00   0.00     0.01   0.00   0.01
  52   6     0.00  -0.01  -0.01     0.00   0.00   0.00     0.01   0.01   0.01
  53   6     0.00  -0.01   0.00     0.00   0.00   0.00     0.03   0.01   0.01
  54   6     0.00  -0.01  -0.01     0.00   0.00   0.00     0.00   0.00   0.01
  55   8     0.02   0.00   0.00     0.00   0.00   0.00    -0.01  -0.01   0.00
  56   6     0.00  -0.01   0.01    -0.01   0.01  -0.01     0.01   0.01  -0.02
  57   6    -0.02  -0.01  -0.01     0.00   0.00   0.01     0.01   0.00   0.01
  58   6     0.00   0.03   0.01     0.00   0.01   0.00    -0.02  -0.02  -0.01
  59   6    -0.01  -0.03   0.00     0.00  -0.01   0.00     0.00   0.00   0.00
  60   1    -0.01  -0.02  -0.01     0.01   0.00  -0.03     0.00   0.00   0.04
  61   1     0.00   0.00   0.00    -0.01  -0.01  -0.01     0.01   0.00   0.00
  62   1     0.00   0.00   0.00     0.00   0.01   0.01     0.01  -0.01   0.00
  63   1     0.01   0.01   0.00     0.00   0.00   0.00     0.00   0.00   0.01
  64   1     0.00   0.00   0.00     0.00   0.01   0.00     0.00   0.00   0.00
  65   1     0.02   0.00   0.00    -0.01  -0.01   0.03     0.01   0.00   0.00
  66   1     0.02  -0.01   0.01    -0.02   0.02   0.01     0.00   0.00   0.00
  67   1     0.00  -0.01   0.00     0.01  -0.01  -0.01     0.00   0.00   0.00
  68   1     0.00  -0.01   0.01     0.01   0.00   0.00     0.00   0.00   0.00
  69   1    -0.02   0.01  -0.01     0.03  -0.01   0.00     0.04  -0.02   0.01
  70   1     0.01   0.00  -0.03     0.04   0.00   0.00     0.01  -0.01   0.03
  71   1     0.02  -0.01  -0.02     0.00   0.00   0.01    -0.02   0.00   0.03
  72   1    -0.02  -0.01  -0.02     0.00   0.00   0.02     0.03   0.00   0.04
  73   1     0.01  -0.01   0.00    -0.01   0.00   0.00    -0.01   0.00  -0.01
  74   1    -0.02   0.02  -0.01     0.05   0.02  -0.02     0.01   0.03   0.00
  75   1    -0.02   0.02  -0.02     0.02   0.00  -0.05     0.04   0.00  -0.01
  76   1     0.02  -0.02   0.00    -0.03  -0.01  -0.04     0.03  -0.01   0.00
  77   1     0.03   0.00  -0.01     0.02   0.01  -0.04     0.02   0.01  -0.02
  78   1     0.00  -0.01   0.01    -0.03   0.00   0.00    -0.01   0.01   0.02
  79   1     0.02  -0.03  -0.01     0.00   0.04   0.02    -0.03   0.10   0.04
  80   1    -0.01  -0.01  -0.01     0.01   0.00   0.04     0.04  -0.01   0.05
  81   1     0.01  -0.01   0.02    -0.01   0.01   0.00    -0.05   0.00  -0.06
  82   1     0.01  -0.02  -0.02     0.04   0.01  -0.05    -0.02   0.04   0.03
  83   1     0.01  -0.01  -0.01    -0.02  -0.02   0.06    -0.03   0.02   0.00
  84   1     0.00  -0.02  -0.02    -0.07   0.06  -0.02     0.00   0.02   0.03
  85   1    -0.04  -0.03   0.05     0.01   0.01  -0.03     0.04   0.05  -0.08
  86   1    -0.02  -0.02   0.01    -0.01   0.01   0.01     0.02   0.04  -0.01
  87   1     0.01   0.01   0.06    -0.01  -0.02  -0.02    -0.01  -0.01  -0.08
  88   1    -0.16   0.24  -0.14     0.04  -0.04   0.03     0.16  -0.24   0.14
  89   1    -0.01  -0.29  -0.08     0.00   0.07   0.03     0.01   0.30   0.07
  90   1     0.19   0.10   0.26    -0.04  -0.01  -0.04    -0.20  -0.10  -0.26
  91   1     0.03  -0.06   0.04     0.13  -0.20   0.13     0.04  -0.07   0.05
  92   1    -0.02  -0.02  -0.03    -0.11  -0.06  -0.14    -0.06  -0.01  -0.06
  93   1     0.01   0.03   0.03     0.04   0.19   0.13     0.01   0.08   0.04
  94   1     0.06   0.13  -0.04     0.21   0.34  -0.20     0.01  -0.01  -0.01
  95   1    -0.01  -0.12  -0.02    -0.06  -0.34  -0.18    -0.01   0.00  -0.02
  96   1    -0.04   0.04   0.17    -0.14   0.10   0.39    -0.01   0.00  -0.01
  97   1     0.03   0.12   0.04    -0.05  -0.23  -0.09     0.03   0.01  -0.01
  98   1    -0.04  -0.06   0.05     0.10   0.10  -0.09     0.02   0.01  -0.02
  99   1     0.08  -0.01  -0.09    -0.13   0.01   0.18     0.02   0.01  -0.02
 100   1    -0.26  -0.14  -0.23     0.09   0.01   0.07    -0.24  -0.16  -0.20
 101   1     0.05  -0.16   0.33    -0.05   0.04  -0.12     0.02  -0.15   0.33
 102   1     0.23   0.27  -0.12    -0.10  -0.13   0.03     0.18   0.23  -0.08
 103   1     0.03  -0.03   0.04    -0.03   0.01   0.02     0.00   0.01  -0.08
 104   1     0.01  -0.01   0.01     0.02   0.02   0.04    -0.04  -0.03  -0.08
 105   1     0.02   0.02   0.04     0.02   0.01   0.00    -0.06  -0.05  -0.06
 106   1    -0.04   0.01   0.02    -0.01   0.02   0.07    -0.01  -0.02  -0.04
 107   1    -0.08  -0.04  -0.02     0.01  -0.04   0.05    -0.07   0.00  -0.06
 108   1    -0.01   0.00  -0.06    -0.01   0.02   0.04     0.01  -0.05  -0.08
 109   1     0.00  -0.01   0.02     0.00   0.00   0.01    -0.01  -0.01  -0.01
 110   1    -0.02   0.00  -0.02    -0.01   0.00  -0.01     0.00   0.00   0.00
 111   1     0.01  -0.04   0.03     0.00  -0.02   0.01     0.00   0.00   0.00
 112   1     0.01  -0.05   0.03     0.00  -0.02   0.01     0.00  -0.01   0.00
 113   1     0.07  -0.01   0.06     0.03   0.00   0.02     0.00   0.00   0.01
 114   1     0.00   0.00  -0.01     0.00   0.00   0.00     0.03  -0.01   0.02
 115   1     0.00   0.00  -0.01    -0.01  -0.01   0.00    -0.01  -0.01   0.00
 116   1    -0.01  -0.01  -0.03    -0.01   0.01  -0.03     0.08   0.02   0.14
 117   1     0.02  -0.05   0.03     0.00   0.00   0.00    -0.08   0.15  -0.09
 118   1     0.00   0.03   0.03    -0.02   0.02   0.01     0.03  -0.13  -0.12
 119   1    -0.02   0.02  -0.03     0.01   0.01  -0.04     0.02  -0.01  -0.01
 120   1    -0.05  -0.02   0.00    -0.05  -0.01   0.03     0.00   0.00   0.02
 121   1     0.00  -0.02   0.00     0.05  -0.02   0.04     0.03   0.00   0.02
 122   1     0.04  -0.06   0.01     0.00   0.00   0.00     0.03  -0.18   0.02
 123   1    -0.09   0.06   0.01    -0.01   0.01   0.00    -0.16   0.00  -0.06
 124   1     0.08   0.11   0.01     0.00   0.01  -0.01     0.09   0.09   0.01
 125   1     0.01  -0.10   0.03     0.01  -0.04   0.01     0.00   0.00   0.00
 126   1     0.04   0.02   0.02     0.02   0.01   0.00     0.00   0.00   0.00
 127   1    -0.07  -0.03  -0.04    -0.03  -0.01  -0.02     0.00   0.00   0.00
                    55                     56                     57
                     A                      A                      A
 Frequencies --   225.1125               230.8126               234.7611
 Red. masses --     1.2921                 1.4747                 1.2789
 Frc consts  --     0.0386                 0.0463                 0.0415
 IR Inten    --     1.0250                 0.2580                 2.2387
 Atom AN      X      Y      Z        X      Y      Z        X      Y      Z
   1   6     0.00   0.00   0.00     0.01   0.01   0.00     0.02   0.00   0.00
   2   6     0.00   0.00   0.02     0.00   0.00   0.00     0.01  -0.01   0.03
   3   6     0.00   0.00   0.01    -0.01   0.01  -0.01     0.00   0.00   0.02
   4   6    -0.01   0.00   0.00     0.01   0.00  -0.01    -0.01   0.00   0.00
   5   6     0.00   0.00   0.00     0.00   0.00   0.00     0.00   0.00   0.00
   6   6     0.01   0.00   0.00     0.00   0.00   0.00     0.00   0.00   0.00
   7   8     0.00  -0.01   0.00    -0.01   0.00   0.00     0.00   0.00   0.00
   8   6     0.00  -0.01   0.00     0.00   0.00   0.00    -0.01   0.00   0.00
   9   6     0.00   0.00   0.00     0.01   0.01   0.00     0.00   0.01  -0.01
  10   6     0.00   0.00   0.00     0.00   0.00   0.00     0.00   0.00   0.00
  11   6    -0.01  -0.01   0.00     0.00   0.01   0.00    -0.02   0.00   0.00
  12   6     0.01   0.00   0.00    -0.02   0.00   0.00     0.01   0.01   0.01
  13   6     0.01   0.00   0.00    -0.02  -0.01   0.00     0.02   0.02   0.01
  14   6    -0.01   0.00   0.01     0.00   0.00  -0.01    -0.01   0.01   0.01
  15   6    -0.01   0.00   0.00     0.02   0.00  -0.01    -0.02   0.01   0.01
  16   6    -0.01   0.00   0.01     0.00   0.00   0.00    -0.03  -0.02  -0.01
  17   6    -0.01   0.00   0.00     0.01   0.00  -0.01    -0.01   0.00   0.02
  18   6     0.00   0.00   0.00     0.01   0.00   0.00     0.01   0.00   0.00
  19   6     0.00   0.00   0.00     0.01   0.00   0.00     0.01   0.00   0.00
  20   6     0.01   0.00   0.00    -0.02   0.01   0.00     0.00   0.01  -0.01
  21   6     0.01   0.00   0.00    -0.01   0.01   0.00     0.00   0.00   0.00
  22   6     0.00   0.00   0.00     0.01   0.00   0.00     0.01   0.00   0.00
  23   6     0.00   0.00   0.00     0.01   0.00   0.00     0.01   0.00   0.00
  24   6     0.00   0.00   0.00     0.01  -0.01   0.00     0.01   0.00   0.00
  25   6     0.00   0.00   0.01     0.01  -0.01   0.00    -0.03   0.01   0.00
  26   6    -0.01   0.00   0.00     0.01  -0.01   0.01    -0.02  -0.01  -0.03
  27   6     0.00   0.00  -0.01     0.00   0.01   0.01     0.00  -0.02   0.00
  28   6     0.00   0.00   0.01     0.00  -0.01  -0.03     0.01   0.01   0.04
  29   6     0.00   0.01   0.00     0.01  -0.02   0.00     0.01   0.00   0.00
  30   6     0.00   0.00  -0.01     0.00  -0.01   0.03     0.00  -0.02   0.01
  31   6     0.00   0.00   0.00     0.00  -0.01   0.01     0.00  -0.01   0.00
  32   6     0.00   0.00   0.01     0.01   0.00  -0.02     0.00   0.00  -0.01
  33   6    -0.01  -0.01  -0.03     0.02   0.00   0.01     0.04  -0.03  -0.05
  34   6     0.00   0.00  -0.02    -0.02   0.00   0.00    -0.02  -0.02  -0.02
  35   8     0.01   0.03   0.00     0.01   0.01  -0.01     0.00   0.00   0.00
  36  12     0.00   0.00  -0.01    -0.01   0.02   0.00     0.01   0.03   0.00
  37   8    -0.02   0.00   0.03    -0.03   0.00   0.01     0.02  -0.01   0.00
  38   6    -0.01   0.03  -0.02     0.00   0.01  -0.01     0.00   0.00   0.00
  39   7     0.00   0.00   0.01    -0.01   0.01  -0.01     0.00   0.01   0.01
  40   7     0.00   0.00   0.00     0.01   0.01   0.00     0.02   0.01  -0.01
  41   8    -0.01   0.03  -0.02     0.00   0.01  -0.01     0.00   0.00   0.00
  42   8     0.04  -0.01   0.01     0.01   0.00   0.00     0.00   0.00   0.00
  43   6     0.01  -0.01   0.00     0.00  -0.01   0.00     0.00   0.00   0.00
  44   6     0.00   0.00   0.01    -0.02  -0.01  -0.01     0.01   0.00   0.00
  45   6    -0.01   0.00  -0.01     0.00   0.00  -0.01     0.00   0.00   0.00
  46   8     0.02   0.00   0.00     0.01  -0.01   0.01     0.00   0.00   0.00
  47   6     0.03  -0.03   0.03     0.01  -0.01   0.02     0.00   0.00   0.00
  48   8     0.00   0.01  -0.01     0.02   0.02   0.02    -0.01  -0.01  -0.01
  49   6    -0.02   0.00   0.01    -0.01   0.00   0.01     0.00   0.00   0.00
  50   8    -0.01  -0.01  -0.02     0.02   0.01   0.00     0.00  -0.01   0.00
  51   8    -0.04  -0.02  -0.01     0.01  -0.01   0.01     0.00   0.00   0.00
  52   6     0.00   0.01   0.00     0.00  -0.01   0.01    -0.01   0.00  -0.01
  53   6     0.00   0.00  -0.01     0.02   0.03   0.02    -0.01   0.00  -0.01
  54   6    -0.02  -0.01   0.00     0.00  -0.02   0.01     0.00   0.00   0.00
  55   8     0.03   0.04   0.00    -0.07  -0.07  -0.01    -0.01   0.00  -0.01
  56   6     0.01   0.00   0.00    -0.02   0.06  -0.03     0.00   0.00   0.01
  57   6     0.02   0.00   0.00     0.03  -0.03   0.02     0.00   0.00   0.00
  58   6     0.01   0.01   0.01    -0.02  -0.02  -0.01     0.00   0.01   0.00
  59   6    -0.01  -0.02  -0.01     0.01   0.00   0.00     0.00   0.00   0.00
  60   1     0.00   0.00   0.02     0.00  -0.01   0.00     0.01  -0.02   0.03
  61   1    -0.02  -0.01   0.00     0.02   0.02  -0.01    -0.01   0.00   0.00
  62   1    -0.01   0.01   0.00     0.02  -0.02  -0.01    -0.01   0.00  -0.01
  63   1     0.00   0.00   0.00     0.00   0.00   0.01     0.00   0.01   0.00
  64   1     0.00   0.00   0.00    -0.01   0.01  -0.01     0.00   0.00   0.00
  65   1     0.01   0.00   0.00     0.00   0.00   0.00     0.00   0.00   0.00
  66   1     0.01  -0.01   0.00     0.00   0.00   0.00     0.00   0.00   0.01
  67   1     0.00  -0.01  -0.01     0.00   0.00   0.00    -0.01  -0.01   0.00
  68   1     0.01  -0.01   0.00    -0.01   0.00   0.00    -0.01  -0.01   0.00
  69   1     0.02   0.00   0.00    -0.03   0.00   0.00     0.03   0.00   0.01
  70   1     0.02   0.01   0.00    -0.03  -0.01   0.00     0.04   0.03   0.00
  71   1    -0.01   0.00   0.01     0.01   0.00  -0.01    -0.02   0.01   0.02
  72   1     0.00   0.00   0.01     0.00   0.01   0.00    -0.04  -0.02  -0.01
  73   1    -0.01   0.00   0.00     0.01   0.00  -0.01     0.00   0.01   0.03
  74   1    -0.01   0.00   0.00     0.02  -0.01   0.00     0.02   0.00   0.00
  75   1     0.01  -0.01   0.00    -0.03   0.02   0.00    -0.01   0.01  -0.01
  76   1     0.01  -0.01   0.00    -0.02   0.02   0.00    -0.01   0.01   0.00
  77   1     0.00   0.00   0.00     0.01   0.00  -0.01     0.01   0.00  -0.01
  78   1     0.00   0.00   0.00     0.02  -0.01   0.00     0.02  -0.01  -0.01
  79   1     0.00   0.02   0.01     0.01  -0.01   0.00    -0.04   0.08   0.02
  80   1     0.01   0.00   0.03     0.01  -0.01  -0.01     0.01  -0.02   0.05
  81   1    -0.01   0.00   0.00     0.00  -0.02   0.00    -0.06  -0.01  -0.05
  82   1     0.03   0.00  -0.04    -0.09   0.02   0.11     0.25  -0.11  -0.31
  83   1    -0.01  -0.02   0.04     0.01   0.05  -0.11    -0.01  -0.17   0.32
  84   1    -0.05   0.04  -0.02     0.12  -0.10   0.05    -0.31   0.25  -0.14
  85   1     0.02   0.00  -0.02    -0.02  -0.01   0.03     0.03  -0.01  -0.01
  86   1     0.01   0.00  -0.01     0.01   0.00  -0.01    -0.02  -0.02   0.01
  87   1    -0.01  -0.01  -0.03     0.01   0.04   0.03    -0.01  -0.06  -0.02
  88   1     0.05  -0.05   0.04    -0.06   0.03  -0.05     0.04  -0.01   0.05
  89   1     0.00   0.08   0.03     0.00  -0.08  -0.06     0.00   0.03   0.07
  90   1    -0.05  -0.02  -0.05     0.04   0.01   0.02     0.00   0.00   0.03
  91   1     0.01  -0.01   0.00    -0.10   0.17  -0.11    -0.13   0.26  -0.15
  92   1    -0.02   0.01  -0.01     0.19   0.02   0.19     0.22   0.05   0.25
  93   1     0.00   0.03   0.00    -0.04  -0.26  -0.07    -0.05  -0.31  -0.10
  94   1    -0.02  -0.04   0.02     0.04   0.07  -0.03     0.02   0.02  -0.01
  95   1     0.00   0.05   0.01     0.00  -0.13   0.00     0.00  -0.09   0.00
  96   1     0.02  -0.01  -0.06    -0.06   0.01   0.14    -0.05  -0.01   0.06
  97   1     0.01   0.02   0.01    -0.01  -0.02   0.00    -0.01  -0.06  -0.02
  98   1     0.00   0.00   0.00     0.00  -0.01   0.01     0.04   0.03  -0.02
  99   1     0.01   0.00  -0.01    -0.01  -0.01   0.02    -0.03   0.00   0.05
 100   1    -0.04  -0.03  -0.03     0.06   0.04   0.03     0.00  -0.01  -0.01
 101   1     0.01  -0.03   0.06     0.00   0.04  -0.10     0.00   0.00   0.00
 102   1     0.03   0.05  -0.01    -0.03  -0.06   0.00     0.01   0.00  -0.02
 103   1     0.00   0.01  -0.04     0.03  -0.01   0.02     0.04   0.01  -0.08
 104   1    -0.01  -0.01  -0.03     0.01   0.00   0.00     0.04  -0.06  -0.03
 105   1    -0.02  -0.02  -0.03     0.02   0.02   0.02     0.05  -0.06  -0.08
 106   1     0.01  -0.01  -0.02    -0.03   0.00  -0.01    -0.03  -0.03  -0.05
 107   1    -0.01   0.01  -0.02     0.00   0.01   0.01    -0.03   0.01  -0.03
 108   1     0.01  -0.01  -0.03    -0.03   0.00   0.02    -0.01  -0.05  -0.01
 109   1    -0.01   0.00   0.01    -0.03  -0.01  -0.01     0.01   0.00   0.01
 110   1    -0.03  -0.03  -0.01    -0.02  -0.01  -0.01     0.00   0.01   0.00
 111   1     0.00  -0.06   0.03     0.01  -0.02   0.02     0.00   0.00   0.00
 112   1     0.01  -0.06   0.03    -0.01  -0.03   0.02     0.00   0.01   0.00
 113   1     0.08  -0.02   0.06     0.03  -0.01   0.03     0.00   0.00  -0.01
 114   1     0.00   0.01  -0.01     0.02   0.02   0.02    -0.01   0.00  -0.01
 115   1    -0.02  -0.03   0.00    -0.01  -0.03   0.00     0.00   0.01   0.00
 116   1     0.00   0.00  -0.01     0.14   0.10   0.32     0.00   0.00   0.01
 117   1     0.01  -0.01   0.01    -0.25   0.38  -0.19    -0.01  -0.01   0.02
 118   1     0.01   0.01   0.01     0.01  -0.27  -0.26     0.01   0.01   0.01
 119   1     0.04  -0.01  -0.06     0.04  -0.06   0.01     0.02   0.04  -0.08
 120   1    -0.02  -0.01   0.01     0.04  -0.01   0.04    -0.10  -0.01   0.03
 121   1     0.07   0.00   0.04     0.05  -0.03   0.03     0.08  -0.03   0.06
 122   1    -0.14   0.49  -0.05    -0.04   0.04  -0.01     0.01  -0.02   0.01
 123   1     0.46  -0.08   0.12     0.05  -0.04  -0.01    -0.04   0.02   0.00
 124   1    -0.32  -0.35  -0.05    -0.07  -0.08  -0.01     0.03   0.04   0.00
 125   1     0.03  -0.22   0.07     0.04  -0.11   0.02    -0.02   0.08  -0.02
 126   1     0.14   0.13  -0.03     0.10   0.08  -0.01    -0.07  -0.06   0.01
 127   1    -0.22   0.04  -0.06    -0.10   0.03  -0.02     0.08  -0.03   0.01
                    58                     59                     60
                     A                      A                      A
 Frequencies --   235.9612               239.3762               240.3870
 Red. masses --     1.3443                 1.4027                 1.4254
 Frc consts  --     0.0441                 0.0474                 0.0485
 IR Inten    --     3.7082                 0.5124                 0.9851
 Atom AN      X      Y      Z        X      Y      Z        X      Y      Z
   1   6     0.02   0.01  -0.01     0.01   0.01   0.01     0.00   0.00   0.00
   2   6     0.01   0.00   0.01     0.02   0.02   0.02     0.00   0.00  -0.01
   3   6     0.02   0.00   0.00     0.00   0.02   0.00     0.00   0.00   0.00
   4   6     0.00   0.00  -0.01    -0.01   0.00   0.00     0.00   0.00   0.00
   5   6     0.00   0.00  -0.01     0.01   0.00   0.00     0.00   0.00   0.00
   6   6     0.00   0.00   0.00     0.01   0.00   0.01     0.00   0.00   0.00
   7   8    -0.01   0.00   0.00     0.01  -0.01   0.00     0.00   0.00   0.00
   8   6    -0.01   0.00   0.00     0.00  -0.01   0.00     0.00   0.00   0.00
   9   6     0.01   0.02  -0.01     0.00  -0.02   0.00     0.00   0.00   0.00
  10   6     0.00  -0.01   0.00    -0.01   0.02  -0.02     0.00   0.00   0.00
  11   6    -0.02   0.01   0.00     0.02  -0.02   0.00     0.00   0.00   0.00
  12   6    -0.01   0.01   0.00     0.03  -0.02   0.00     0.00   0.00   0.00
  13   6     0.00   0.02   0.00     0.02  -0.03   0.00     0.00   0.00  -0.01
  14   6    -0.01   0.02   0.00     0.00  -0.03   0.01     0.00   0.00   0.00
  15   6     0.00   0.02   0.00     0.00  -0.03   0.00     0.00   0.00   0.00
  16   6    -0.02  -0.01  -0.01     0.02   0.00   0.02     0.00   0.00   0.00
  17   6     0.00   0.01   0.01    -0.01  -0.01  -0.02     0.00   0.00   0.00
  18   6    -0.02  -0.02   0.00    -0.01   0.00  -0.01     0.00   0.00   0.00
  19   6    -0.03  -0.01   0.01     0.01  -0.02   0.02     0.00   0.00   0.00
  20   6     0.00  -0.02   0.02     0.01   0.00   0.04     0.00   0.00  -0.01
  21   6     0.01  -0.01   0.01     0.00   0.03   0.02     0.00  -0.01   0.00
  22   6     0.00   0.00   0.00    -0.01   0.04   0.00     0.00  -0.01   0.00
  23   6    -0.02  -0.01   0.00    -0.02  -0.01  -0.02     0.00   0.00   0.00
  24   6    -0.01   0.00   0.00    -0.01   0.01   0.01     0.00   0.00   0.00
  25   6    -0.02   0.00   0.00     0.01   0.02   0.02     0.01   0.00   0.01
  26   6     0.00  -0.02  -0.02    -0.01   0.02   0.02     0.00   0.00   0.00
  27   6     0.00  -0.02   0.01     0.00   0.02  -0.03     0.00   0.00   0.00
  28   6     0.01   0.00   0.02    -0.01   0.00  -0.02     0.00   0.00   0.00
  29   6    -0.02  -0.01  -0.01     0.00  -0.05   0.03     0.00   0.01  -0.01
  30   6     0.00   0.02  -0.02    -0.03  -0.03   0.01     0.01   0.01   0.00
  31   6     0.00   0.01  -0.01     0.01   0.00  -0.04     0.00   0.00   0.01
  32   6    -0.01   0.00   0.01    -0.02  -0.01  -0.03     0.00   0.00   0.01
  33   6     0.04   0.00  -0.02    -0.02   0.03  -0.02     0.00   0.00   0.00
  34   6     0.03   0.01   0.01    -0.01   0.02   0.00     0.00   0.00   0.00
  35   8     0.00   0.00  -0.01     0.00   0.01   0.01    -0.02   0.05   0.05
  36  12     0.04   0.01   0.02    -0.01   0.00  -0.01     0.00   0.00   0.00
  37   8     0.00   0.00   0.00     0.01   0.00   0.00     0.01  -0.01   0.00
  38   6     0.00   0.00   0.00     0.00   0.00   0.00     0.00   0.03   0.00
  39   7     0.02  -0.01  -0.01    -0.01   0.02  -0.04     0.00   0.00   0.00
  40   7     0.02   0.02  -0.01     0.00  -0.02   0.00     0.00   0.00   0.00
  41   8     0.00   0.00  -0.01     0.00   0.00   0.01    -0.01   0.05   0.02
  42   8     0.00   0.00   0.00     0.00   0.00   0.00     0.04  -0.01   0.01
  43   6     0.00   0.00   0.00     0.00   0.00   0.00     0.02  -0.01  -0.01
  44   6     0.00   0.00   0.00     0.00   0.00   0.00     0.02   0.00   0.00
  45   6     0.00   0.00   0.00     0.00   0.00   0.00     0.01   0.00  -0.01
  46   8     0.00  -0.01   0.00     0.00   0.00   0.00     0.01   0.00  -0.02
  47   6     0.00   0.00   0.00     0.00   0.00   0.00     0.04  -0.02   0.01
  48   8     0.00   0.00   0.00     0.00   0.00   0.00     0.00   0.02   0.00
  49   6     0.00   0.00   0.01     0.00   0.00   0.00     0.00  -0.01  -0.01
  50   8     0.01   0.00   0.00    -0.01   0.00   0.00    -0.02  -0.02  -0.01
  51   8     0.00   0.00   0.02    -0.01   0.00  -0.01    -0.04  -0.02  -0.02
  52   6    -0.01  -0.01   0.00     0.00   0.00   0.00    -0.01   0.00  -0.01
  53   6     0.00   0.01   0.00     0.00   0.00   0.00     0.00   0.01   0.00
  54   6     0.00  -0.01   0.01     0.00   0.00   0.00    -0.01  -0.01  -0.01
  55   8    -0.05  -0.03  -0.01     0.02   0.02   0.01     0.00   0.00   0.00
  56   6    -0.02   0.03  -0.01     0.00  -0.01   0.00     0.00   0.01   0.00
  57   6     0.02   0.00   0.01    -0.01   0.00   0.00     0.00  -0.02   0.00
  58   6    -0.01  -0.01   0.00     0.01   0.01   0.00     0.03   0.05   0.00
  59   6     0.01   0.01   0.00    -0.01  -0.01   0.00    -0.08  -0.07   0.00
  60   1     0.01   0.00   0.01     0.02   0.02   0.03     0.00   0.00  -0.01
  61   1     0.02   0.01   0.00    -0.02  -0.01   0.01     0.00   0.00  -0.01
  62   1     0.01  -0.02  -0.02    -0.02   0.02   0.01     0.00  -0.01  -0.01
  63   1     0.00  -0.01  -0.01     0.01   0.01  -0.01     0.00   0.00   0.00
  64   1     0.00   0.00  -0.01     0.02  -0.01   0.01    -0.01   0.00   0.00
  65   1    -0.01  -0.01  -0.01     0.01  -0.01   0.01     0.00   0.00   0.00
  66   1     0.00   0.00   0.00     0.01   0.00   0.01     0.00   0.00   0.00
  67   1    -0.02   0.01   0.01     0.00  -0.01   0.00     0.00   0.00   0.00
  68   1    -0.02   0.01  -0.02     0.01   0.00   0.00     0.00  -0.01   0.00
  69   1    -0.01   0.01   0.01     0.03  -0.02  -0.01     0.00   0.00  -0.01
  70   1     0.01   0.02   0.00     0.02  -0.02   0.00     0.00   0.00  -0.01
  71   1    -0.01   0.01   0.00     0.00  -0.02   0.01     0.00   0.00  -0.01
  72   1    -0.03  -0.01  -0.02     0.03   0.00   0.04     0.00   0.00   0.00
  73   1     0.01   0.01   0.02    -0.01  -0.02  -0.04     0.00   0.00   0.00
  74   1    -0.04  -0.01   0.01     0.02  -0.04   0.04    -0.01   0.01  -0.01
  75   1     0.00  -0.02   0.03     0.03  -0.01   0.06    -0.01   0.00  -0.01
  76   1     0.02  -0.01   0.01     0.00   0.05   0.03     0.00  -0.01   0.00
  77   1    -0.03  -0.01   0.02    -0.02  -0.01   0.00     0.00   0.00   0.00
  78   1    -0.02   0.00   0.01    -0.02   0.02   0.05     0.00   0.00  -0.01
  79   1    -0.02   0.03   0.00     0.01   0.03   0.03     0.02  -0.03   0.00
  80   1     0.01  -0.02   0.02     0.01   0.01   0.04    -0.01   0.01   0.00
  81   1    -0.04  -0.02  -0.03     0.01   0.02   0.01     0.02   0.00   0.03
  82   1     0.15  -0.09  -0.18    -0.05   0.05   0.07    -0.04   0.01   0.04
  83   1     0.01  -0.10   0.19    -0.03   0.03  -0.04     0.00   0.02  -0.05
  84   1    -0.17   0.13  -0.08     0.03  -0.01   0.04     0.04  -0.04   0.02
  85   1     0.00  -0.03   0.02     0.01   0.04  -0.05     0.00   0.00   0.00
  86   1    -0.01  -0.02   0.00     0.01   0.03   0.00     0.00   0.00   0.00
  87   1     0.00  -0.01   0.02    -0.01   0.00  -0.05     0.00   0.00   0.00
  88   1    -0.01   0.02   0.00     0.02  -0.04   0.01     0.00   0.00   0.00
  89   1     0.00  -0.03   0.02     0.00   0.07  -0.01     0.00   0.00   0.00
  90   1     0.03   0.01   0.04    -0.06  -0.01  -0.06     0.00   0.00   0.00
  91   1     0.12  -0.27   0.14    -0.07   0.03  -0.02     0.02  -0.04   0.02
  92   1    -0.23  -0.06  -0.27     0.13  -0.05   0.10    -0.05   0.00  -0.05
  93   1     0.06   0.31   0.08    -0.05  -0.20   0.01     0.01   0.07   0.01
  94   1    -0.01  -0.01   0.00     0.09   0.11  -0.08    -0.01  -0.01   0.01
  95   1     0.00   0.08  -0.01    -0.04  -0.23  -0.07     0.01   0.04   0.01
  96   1     0.05   0.01  -0.06    -0.14   0.01   0.19     0.03   0.00  -0.03
  97   1     0.03   0.30   0.11     0.06   0.39   0.12    -0.01  -0.03  -0.01
  98   1    -0.19  -0.20   0.12    -0.26  -0.28   0.12     0.02   0.02   0.00
  99   1     0.18  -0.07  -0.26     0.27  -0.11  -0.37    -0.02   0.01   0.04
 100   1     0.04   0.02   0.05     0.06   0.04   0.04     0.00   0.00   0.00
 101   1    -0.02   0.03  -0.06    -0.04   0.05  -0.14     0.00   0.00   0.01
 102   1    -0.06  -0.06   0.03    -0.08  -0.10  -0.01     0.00   0.01   0.01
 103   1     0.03   0.01  -0.03     0.01   0.02  -0.02    -0.01   0.00   0.01
 104   1     0.04  -0.02   0.00    -0.04   0.05  -0.06     0.00   0.00   0.01
 105   1     0.05  -0.01  -0.04    -0.06   0.03   0.01     0.00   0.00   0.00
 106   1     0.04   0.01   0.02    -0.02   0.02  -0.01     0.01   0.00   0.01
 107   1     0.03   0.00   0.01     0.00   0.03   0.01     0.00   0.00   0.00
 108   1     0.03   0.02   0.00    -0.01   0.01   0.02     0.00   0.01   0.00
 109   1     0.00  -0.01   0.00     0.01   0.00   0.00     0.02  -0.01   0.01
 110   1     0.00   0.00  -0.01     0.00   0.00   0.00     0.00  -0.01   0.00
 111   1     0.00   0.00   0.01     0.00  -0.01  -0.01    -0.02  -0.08  -0.03
 112   1    -0.01  -0.01   0.00     0.01   0.00   0.00     0.08  -0.02   0.01
 113   1     0.00   0.00   0.01     0.01   0.00   0.00     0.08  -0.03   0.00
 114   1     0.01   0.00   0.01    -0.01   0.00   0.00     0.00   0.02  -0.01
 115   1    -0.01  -0.02   0.01     0.00   0.00   0.00     0.00  -0.02   0.00
 116   1     0.06   0.05   0.14    -0.04  -0.02  -0.08     0.06   0.02   0.17
 117   1    -0.12   0.16  -0.07     0.06  -0.08   0.03    -0.11   0.14  -0.05
 118   1     0.00  -0.11  -0.10    -0.01   0.06   0.06     0.04  -0.13  -0.10
 119   1     0.03  -0.01  -0.03     0.00   0.02  -0.03     0.01  -0.02  -0.01
 120   1    -0.01   0.00   0.02    -0.04   0.00   0.00     0.00  -0.01   0.01
 121   1     0.05   0.00   0.04     0.01  -0.01   0.01     0.01  -0.02   0.01
 122   1    -0.01  -0.04   0.01     0.01   0.02   0.00     0.02   0.14  -0.04
 123   1    -0.04  -0.01  -0.02     0.01   0.01   0.01     0.10   0.06   0.06
 124   1     0.00   0.00  -0.01     0.00   0.01   0.00    -0.01   0.01  -0.03
 125   1     0.02  -0.01  -0.01    -0.03   0.06  -0.01    -0.21   0.38  -0.07
 126   1     0.03   0.02   0.00    -0.07  -0.06   0.01    -0.46  -0.42   0.05
 127   1    -0.01   0.01   0.00     0.05  -0.03   0.00     0.37  -0.23   0.01
                    61                     62                     63
                     A                      A                      A
 Frequencies --   244.9504               246.5341               249.4439
 Red. masses --     2.3452                 1.7067                 2.7076
 Frc consts  --     0.0829                 0.0611                 0.0993
 IR Inten    --     1.6179                 8.9522                 0.8302
 Atom AN      X      Y      Z        X      Y      Z        X      Y      Z
   1   6     0.00  -0.01   0.02    -0.03   0.00   0.01     0.01   0.02  -0.01
   2   6    -0.01  -0.01   0.06    -0.02   0.01   0.01     0.00   0.02  -0.01
   3   6    -0.03   0.00   0.01    -0.02   0.01  -0.01     0.01   0.02   0.00
   4   6    -0.01   0.00   0.00     0.01   0.01   0.01    -0.01   0.00   0.00
   5   6     0.01   0.00   0.00     0.00   0.00   0.00     0.00   0.00   0.00
   6   6     0.02   0.00   0.00     0.00   0.01   0.00     0.01  -0.01  -0.01
   7   8     0.00  -0.01   0.01     0.01   0.01   0.00     0.00  -0.01   0.01
   8   6     0.00  -0.02   0.01     0.01   0.00   0.00     0.00  -0.01   0.00
   9   6     0.00   0.00   0.00     0.01  -0.01   0.00     0.01   0.00  -0.01
  10   6     0.02   0.00   0.00     0.00   0.00   0.00     0.00  -0.02   0.01
  11   6    -0.01  -0.01   0.01     0.06  -0.01  -0.02     0.03  -0.01   0.00
  12   6    -0.01   0.00   0.00     0.04  -0.02   0.02     0.02  -0.02   0.01
  13   6     0.00   0.00   0.00    -0.02  -0.03   0.05    -0.01  -0.03   0.02
  14   6    -0.01   0.00   0.00     0.01  -0.01   0.02    -0.01  -0.02   0.01
  15   6    -0.01   0.00   0.00     0.04   0.00  -0.01     0.02   0.00  -0.01
  16   6    -0.01   0.00   0.01     0.05   0.00  -0.01     0.02   0.00   0.02
  17   6    -0.01   0.00   0.00     0.04   0.00  -0.01     0.02   0.00  -0.02
  18   6     0.05  -0.02   0.00     0.01   0.00   0.00    -0.03  -0.01   0.01
  19   6     0.00   0.02  -0.01     0.00   0.00   0.00    -0.02  -0.02   0.00
  20   6    -0.07   0.07  -0.01    -0.02   0.02   0.00     0.01  -0.05   0.00
  21   6     0.00   0.03   0.00     0.00   0.02   0.00     0.01  -0.05   0.00
  22   6     0.06   0.00   0.01     0.02   0.01   0.00    -0.02  -0.03  -0.01
  23   6     0.05  -0.02  -0.01     0.01  -0.01  -0.01    -0.03   0.01   0.03
  24   6     0.06  -0.01   0.03     0.01   0.00   0.01    -0.02  -0.01  -0.04
  25   6     0.01  -0.01   0.03    -0.03   0.04  -0.06     0.01   0.02   0.02
  26   6    -0.01   0.00   0.00     0.03   0.01   0.02     0.00   0.01   0.04
  27   6     0.00   0.00  -0.01     0.02   0.00   0.03     0.01   0.00  -0.01
  28   6     0.00   0.00   0.00     0.01  -0.03  -0.05    -0.01  -0.02  -0.05
  29   6     0.01  -0.03  -0.03     0.00  -0.01   0.00    -0.01   0.02  -0.02
  30   6     0.03   0.03   0.12     0.01   0.01   0.04    -0.01  -0.01  -0.09
  31   6     0.00  -0.05   0.03     0.00  -0.01   0.00    -0.02   0.03   0.04
  32   6     0.04   0.01  -0.09     0.01   0.00  -0.03    -0.01   0.00   0.08
  33   6     0.01  -0.04  -0.04    -0.05   0.02   0.02    -0.01   0.04   0.01
  34   6    -0.06  -0.03  -0.05    -0.02   0.01  -0.01     0.06   0.06   0.00
  35   8     0.01   0.00  -0.02     0.00   0.00   0.01     0.02   0.01  -0.03
  36  12    -0.06   0.05  -0.05    -0.06  -0.03  -0.02     0.00   0.01  -0.03
  37   8     0.02  -0.03   0.01    -0.02   0.01   0.00     0.02  -0.05   0.02
  38   6     0.00   0.01  -0.01     0.00   0.00   0.01     0.00   0.02  -0.02
  39   7    -0.03   0.02  -0.01    -0.02   0.01  -0.02     0.01  -0.01   0.01
  40   7     0.00   0.00   0.00    -0.03  -0.02   0.00     0.01   0.00  -0.03
  41   8     0.00   0.00  -0.02     0.00   0.01   0.01     0.00   0.01  -0.03
  42   8    -0.01   0.01  -0.01     0.01   0.00   0.00    -0.02   0.01  -0.01
  43   6     0.00  -0.01   0.00     0.00   0.00   0.00     0.00  -0.02   0.00
  44   6     0.01  -0.02   0.01    -0.01   0.01   0.00     0.01  -0.03   0.02
  45   6    -0.01   0.01   0.00     0.00   0.00   0.00    -0.01   0.02  -0.01
  46   8    -0.02  -0.02   0.01     0.01   0.01   0.00    -0.02  -0.04   0.02
  47   6     0.00   0.00   0.01     0.00   0.00   0.00     0.01   0.00   0.02
  48   8     0.01   0.03  -0.01     0.02   0.01   0.02     0.01   0.06  -0.02
  49   6     0.01  -0.02   0.02     0.00   0.00  -0.01     0.01  -0.04   0.03
  50   8     0.02  -0.04  -0.01     0.00   0.02   0.02     0.04  -0.05   0.00
  51   8    -0.03  -0.01   0.02    -0.01  -0.02  -0.02    -0.07  -0.03   0.05
  52   6    -0.01   0.01   0.01     0.01  -0.01   0.00    -0.03   0.02   0.01
  53   6     0.00   0.02  -0.01     0.01   0.01   0.01     0.00   0.04  -0.02
  54   6     0.00  -0.02   0.02     0.00  -0.01  -0.01    -0.01  -0.04   0.06
  55   8    -0.01   0.04   0.00     0.01  -0.02   0.01    -0.06   0.06  -0.02
  56   6    -0.02   0.04  -0.03     0.00   0.01  -0.02    -0.05   0.09  -0.07
  57   6     0.07  -0.02   0.03    -0.03  -0.02  -0.01     0.11  -0.03   0.05
  58   6    -0.02   0.01   0.00     0.02   0.01   0.00    -0.04   0.01   0.01
  59   6     0.02   0.01   0.00    -0.02  -0.01   0.00     0.04   0.02   0.00
  60   1    -0.01  -0.02   0.05    -0.02   0.02   0.01     0.00   0.03   0.00
  61   1    -0.02  -0.01   0.00     0.00   0.00   0.00    -0.02  -0.01   0.00
  62   1    -0.02   0.01   0.00     0.01   0.01   0.01    -0.02   0.01   0.00
  63   1     0.01   0.02   0.00     0.00   0.00   0.01     0.00   0.01   0.00
  64   1     0.01   0.00   0.00     0.00   0.00   0.00    -0.01  -0.01   0.00
  65   1     0.03   0.01  -0.01     0.01   0.01   0.00     0.02   0.01  -0.02
  66   1     0.04  -0.02   0.01     0.00   0.00   0.00     0.03  -0.02  -0.01
  67   1     0.01  -0.03  -0.01     0.02   0.00   0.00     0.00  -0.01   0.00
  68   1     0.01  -0.03   0.02     0.02   0.00   0.01     0.00  -0.01   0.00
  69   1    -0.01   0.00   0.00     0.05  -0.03   0.03     0.03  -0.01   0.00
  70   1     0.02   0.01  -0.01    -0.08  -0.05   0.08    -0.03  -0.03   0.03
  71   1    -0.01   0.00   0.00    -0.01   0.01   0.04    -0.03  -0.01   0.02
  72   1    -0.01   0.00   0.01     0.05   0.00   0.02     0.03   0.00   0.04
  73   1    -0.01   0.00   0.00     0.04   0.01   0.00     0.02   0.00  -0.02
  74   1    -0.01   0.01   0.00     0.00   0.00   0.00    -0.03   0.00  -0.01
  75   1    -0.15   0.11  -0.02    -0.04   0.03   0.00     0.04  -0.06   0.00
  76   1    -0.02   0.03  -0.01    -0.01   0.02   0.00     0.02  -0.05   0.00
  77   1     0.04  -0.02  -0.02     0.01   0.00  -0.01    -0.03   0.00   0.05
  78   1     0.04  -0.01   0.04     0.01   0.00   0.02    -0.02  -0.01  -0.06
  79   1     0.03  -0.02   0.01    -0.13   0.21   0.03     0.00   0.04   0.02
  80   1     0.00   0.00   0.03     0.08  -0.03  -0.01     0.00   0.03   0.03
  81   1     0.02   0.00   0.06    -0.13  -0.01  -0.24     0.02   0.04   0.00
  82   1    -0.07   0.03   0.06     0.23  -0.08  -0.20     0.03  -0.01   0.00
  83   1    -0.02   0.04  -0.08     0.01  -0.13   0.32    -0.02  -0.03   0.10
  84   1     0.04  -0.07   0.01    -0.19   0.26  -0.03    -0.04   0.08   0.04
  85   1     0.02   0.00  -0.02    -0.02  -0.02   0.05    -0.02  -0.04   0.03
  86   1     0.00   0.00  -0.01     0.02  -0.01   0.00     0.03  -0.02  -0.05
  87   1    -0.01  -0.01  -0.03     0.04   0.04   0.06     0.01   0.05   0.01
  88   1     0.01  -0.02   0.02    -0.08   0.01  -0.07    -0.07   0.02  -0.07
  89   1     0.00   0.03   0.01     0.02  -0.11  -0.11     0.00  -0.08  -0.10
  90   1    -0.02  -0.01  -0.01     0.06  -0.01  -0.02     0.03   0.00  -0.02
  91   1     0.04  -0.18   0.07     0.02  -0.08   0.04    -0.06   0.14  -0.09
  92   1    -0.12  -0.06  -0.18    -0.04  -0.03  -0.07     0.06   0.05   0.10
  93   1     0.07   0.14  -0.01     0.02   0.05   0.01    -0.04  -0.10  -0.06
  94   1    -0.13  -0.06   0.20    -0.03  -0.01   0.05     0.07   0.01  -0.11
  95   1     0.10   0.18   0.25     0.02   0.04   0.07    -0.04  -0.05  -0.14
  96   1     0.12   0.00  -0.01     0.02   0.00   0.01    -0.02  -0.01  -0.05
  97   1    -0.06  -0.04   0.01    -0.01  -0.03  -0.01    -0.02   0.01   0.03
  98   1     0.00  -0.06   0.06     0.01   0.00   0.00     0.02   0.06   0.04
  99   1     0.01  -0.06   0.07    -0.01  -0.01   0.03    -0.05   0.06   0.05
 100   1     0.13   0.12   0.02     0.03   0.04   0.00    -0.04  -0.05   0.04
 101   1     0.01   0.09  -0.28     0.01   0.03  -0.08     0.02  -0.04   0.16
 102   1    -0.03  -0.16  -0.08     0.00  -0.04  -0.03     0.01   0.09   0.09
 103   1     0.05   0.00  -0.07     0.00  -0.03   0.04     0.02   0.00   0.03
 104   1    -0.01  -0.07  -0.06    -0.08   0.04  -0.05    -0.02   0.06  -0.03
 105   1     0.00  -0.06  -0.06    -0.10   0.06   0.08    -0.03   0.07   0.05
 106   1    -0.11  -0.07  -0.19    -0.03   0.00  -0.04     0.12   0.07   0.09
 107   1     0.00   0.09  -0.05     0.00   0.04  -0.01    -0.01   0.01  -0.01
 108   1    -0.10  -0.13   0.05    -0.03   0.00   0.02     0.09   0.13  -0.08
 109   1     0.01  -0.01   0.03    -0.01   0.01  -0.01     0.02  -0.03   0.05
 110   1    -0.01   0.01  -0.01     0.00  -0.01   0.01    -0.02   0.01  -0.02
 111   1     0.01   0.01   0.02     0.00  -0.01  -0.01     0.01   0.00   0.03
 112   1    -0.02  -0.01   0.01     0.02   0.00   0.00    -0.03  -0.03   0.02
 113   1     0.01   0.01   0.02     0.01   0.00  -0.01     0.02   0.01   0.04
 114   1    -0.01   0.02   0.00     0.00   0.01   0.01    -0.01   0.05  -0.02
 115   1    -0.01  -0.05   0.02     0.02   0.00   0.00    -0.01  -0.09   0.06
 116   1    -0.07   0.05  -0.20     0.00   0.00  -0.02    -0.10   0.13  -0.33
 117   1     0.08  -0.07   0.01     0.01   0.02  -0.04     0.09  -0.05  -0.01
 118   1    -0.09   0.16   0.07    -0.02  -0.01  -0.03    -0.18   0.26   0.09
 119   1     0.12  -0.03  -0.10    -0.10  -0.12   0.27     0.13  -0.18   0.12
 120   1    -0.02  -0.01   0.08     0.25   0.02  -0.10     0.30   0.02   0.01
 121   1     0.19  -0.03   0.12    -0.28   0.06  -0.21     0.04   0.08  -0.01
 122   1    -0.02  -0.06   0.03     0.02   0.06  -0.03    -0.03  -0.06   0.05
 123   1    -0.10   0.02  -0.01     0.08   0.00   0.02    -0.13   0.03   0.00
 124   1     0.02   0.06  -0.02     0.00  -0.02   0.02     0.01   0.08  -0.04
 125   1     0.03   0.05  -0.04    -0.03  -0.03   0.03     0.04   0.09  -0.07
 126   1     0.00  -0.02   0.03    -0.02  -0.01  -0.01    -0.01  -0.04   0.04
 127   1     0.08   0.00   0.02    -0.04  -0.02  -0.01     0.15  -0.01   0.03
                    64                     65                     66
                     A                      A                      A
 Frequencies --   255.4262               256.8199               261.1497
 Red. masses --     2.1862                 1.6493                 2.6233
 Frc consts  --     0.0840                 0.0641                 0.1054
 IR Inten    --     6.2062                 1.7711                 5.7320
 Atom AN      X      Y      Z        X      Y      Z        X      Y      Z
   1   6     0.00   0.00   0.01     0.00   0.00   0.01    -0.03  -0.04   0.01
   2   6     0.00   0.00  -0.01     0.00  -0.01  -0.01     0.00  -0.03  -0.01
   3   6    -0.01   0.00   0.00     0.00  -0.01  -0.01     0.03  -0.04   0.00
   4   6     0.00  -0.01  -0.01     0.00   0.00   0.00    -0.01   0.00   0.00
   5   6     0.00   0.00   0.00     0.00   0.00   0.00    -0.01   0.00   0.00
   6   6     0.01  -0.01   0.00     0.00   0.00   0.00    -0.02   0.00   0.00
   7   8     0.00  -0.01   0.00     0.00   0.00   0.00     0.00   0.00  -0.01
   8   6     0.00  -0.01   0.00     0.00   0.01   0.00     0.01   0.00  -0.01
   9   6    -0.01  -0.01   0.01     0.00   0.01   0.02    -0.02   0.01   0.01
  10   6     0.00   0.00   0.00     0.00   0.00   0.00     0.00   0.01   0.00
  11   6     0.00   0.01   0.01    -0.01   0.03   0.01    -0.03   0.04  -0.01
  12   6     0.02   0.02  -0.03    -0.01   0.03  -0.02    -0.02   0.05  -0.03
  13   6     0.00  -0.02  -0.04    -0.04  -0.01  -0.03     0.00   0.04  -0.04
  14   6    -0.02  -0.04  -0.01    -0.04  -0.04  -0.01     0.02   0.03  -0.03
  15   6    -0.01  -0.04   0.00     0.01  -0.01   0.00    -0.01   0.02   0.01
  16   6    -0.01   0.01   0.03    -0.01   0.01   0.02    -0.03   0.01  -0.03
  17   6    -0.02  -0.02  -0.03     0.01   0.00  -0.02    -0.01   0.01   0.03
  18   6     0.00   0.00   0.00     0.00   0.00   0.00     0.00   0.02  -0.02
  19   6    -0.01   0.00  -0.01     0.00   0.00   0.00     0.04   0.00   0.01
  20   6    -0.01   0.00  -0.01     0.00   0.00   0.01     0.04   0.01   0.03
  21   6     0.00  -0.01  -0.01     0.00   0.01   0.01    -0.02   0.04   0.02
  22   6     0.01  -0.01   0.00     0.00   0.01   0.00    -0.02   0.04   0.02
  23   6     0.01   0.00   0.01     0.00   0.00  -0.01    -0.01   0.01  -0.06
  24   6     0.01  -0.01  -0.01     0.00   0.00   0.01    -0.02   0.02   0.05
  25   6     0.03   0.02   0.07     0.02   0.01   0.04    -0.01  -0.03  -0.03
  26   6     0.01  -0.02   0.08     0.03  -0.04   0.06     0.01  -0.03  -0.04
  27   6     0.00   0.02  -0.06     0.01   0.02  -0.03    -0.01   0.01   0.03
  28   6    -0.04   0.01  -0.04    -0.03   0.02  -0.06     0.01   0.02   0.06
  29   6     0.00   0.00  -0.01     0.00   0.00   0.02     0.02  -0.01   0.10
  30   6     0.01   0.01   0.00     0.00   0.00   0.02    -0.03  -0.01   0.05
  31   6    -0.01   0.00   0.02     0.01   0.00  -0.02     0.05   0.00  -0.14
  32   6     0.01   0.00   0.01     0.00   0.01  -0.02    -0.02   0.01  -0.09
  33   6    -0.01   0.01   0.00     0.00  -0.01   0.00    -0.02  -0.05   0.01
  34   6    -0.01   0.00   0.00    -0.01  -0.01   0.01     0.01  -0.06   0.02
  35   8     0.00  -0.04   0.00     0.00   0.02   0.00     0.01   0.00  -0.02
  36  12     0.01   0.03   0.01     0.01  -0.02   0.01     0.05  -0.05   0.02
  37   8     0.08  -0.02  -0.01    -0.04   0.02   0.01     0.02  -0.02   0.01
  38   6     0.01  -0.03   0.02    -0.01   0.02  -0.01     0.00   0.00  -0.01
  39   7    -0.01   0.00   0.00     0.00   0.00  -0.01     0.03  -0.02   0.01
  40   7     0.01   0.00   0.03     0.00   0.01   0.04    -0.02   0.00   0.04
  41   8     0.00  -0.05   0.01     0.00   0.03  -0.01     0.00   0.00  -0.02
  42   8    -0.03   0.03   0.01     0.02  -0.02  -0.01    -0.01   0.00   0.00
  43   6     0.00   0.03   0.02     0.00  -0.02  -0.01     0.00  -0.01   0.01
  44   6     0.05   0.01   0.03    -0.03  -0.01  -0.02     0.01  -0.01   0.01
  45   6     0.00   0.01   0.02     0.00  -0.01  -0.01    -0.01   0.01   0.00
  46   8    -0.02   0.03   0.02     0.01  -0.02  -0.01    -0.01  -0.02   0.01
  47   6    -0.03   0.03  -0.02     0.01  -0.02   0.01     0.00   0.00   0.01
  48   8     0.00   0.03  -0.01     0.00  -0.03   0.00     0.02   0.03  -0.02
  49   6     0.03  -0.02  -0.03    -0.02   0.01   0.02     0.01  -0.02   0.01
  50   8    -0.03  -0.04   0.00     0.02   0.03   0.00     0.01  -0.02   0.00
  51   8    -0.06  -0.04  -0.05     0.05   0.03   0.03    -0.07  -0.03   0.02
  52   6    -0.02  -0.01  -0.03     0.02   0.01   0.01    -0.01   0.01  -0.01
  53   6    -0.02   0.01  -0.02     0.02  -0.01   0.00     0.01   0.03  -0.03
  54   6     0.01  -0.01  -0.03     0.00   0.01   0.01    -0.01  -0.02   0.03
  55   8     0.04   0.03  -0.01    -0.01  -0.01   0.00    -0.02   0.06  -0.02
  56   6     0.01  -0.01   0.03     0.01  -0.01   0.00     0.01   0.04  -0.03
  57   6    -0.02  -0.02   0.00     0.01   0.02  -0.01     0.02  -0.02   0.02
  58   6     0.06   0.08   0.03    -0.04  -0.05  -0.02     0.00   0.02   0.01
  59   6     0.01   0.01   0.02     0.00   0.00  -0.01     0.02   0.01   0.00
  60   1     0.00   0.00  -0.02     0.00  -0.01  -0.02     0.00  -0.01  -0.03
  61   1     0.00  -0.01  -0.01     0.01   0.00   0.01    -0.01  -0.01  -0.01
  62   1     0.00  -0.01  -0.01     0.01  -0.01   0.00    -0.01   0.00   0.01
  63   1     0.00   0.00   0.00    -0.01   0.00   0.01    -0.01  -0.01   0.00
  64   1     0.00  -0.01  -0.01    -0.01   0.00   0.00    -0.01   0.00   0.00
  65   1     0.01   0.00  -0.01     0.00   0.00   0.00    -0.03  -0.01   0.02
  66   1     0.01  -0.01   0.00     0.00   0.00   0.00    -0.04   0.02   0.00
  67   1     0.00  -0.01  -0.01    -0.01   0.01   0.01     0.01   0.00  -0.01
  68   1     0.00  -0.01   0.00    -0.01   0.01  -0.01     0.01   0.00   0.00
  69   1     0.04   0.05  -0.06     0.00   0.06  -0.05    -0.02   0.05  -0.03
  70   1     0.00  -0.02  -0.06    -0.06  -0.02  -0.05     0.00   0.04  -0.06
  71   1    -0.04  -0.07  -0.01    -0.07  -0.07  -0.01     0.04   0.01  -0.05
  72   1    -0.02   0.00   0.02    -0.04   0.00  -0.01    -0.05   0.01  -0.06
  73   1    -0.02  -0.03  -0.06     0.01  -0.01  -0.03    -0.01   0.01   0.03
  74   1    -0.01   0.01  -0.01     0.01  -0.01   0.01     0.05  -0.03   0.03
  75   1    -0.03   0.01  -0.01     0.00   0.00   0.01     0.07   0.00   0.04
  76   1     0.00  -0.01  -0.01    -0.01   0.01   0.01    -0.04   0.05   0.02
  77   1     0.00   0.00   0.01     0.00   0.00   0.00     0.00   0.01  -0.06
  78   1     0.01  -0.01  -0.01     0.00   0.00   0.02    -0.02   0.02   0.08
  79   1     0.12  -0.21  -0.02     0.07  -0.12  -0.02     0.01  -0.11  -0.06
  80   1    -0.16   0.14   0.01    -0.08   0.07   0.00    -0.04   0.00  -0.08
  81   1     0.20   0.13   0.26     0.10   0.06   0.15     0.01  -0.03   0.04
  82   1     0.07  -0.11  -0.01     0.10  -0.14  -0.05     0.01  -0.05  -0.04
  83   1     0.01  -0.09   0.23     0.06  -0.10   0.23     0.04   0.00  -0.03
  84   1    -0.06   0.10   0.08    -0.05   0.08   0.05     0.01  -0.05  -0.05
  85   1    -0.04  -0.04   0.00    -0.15  -0.25   0.25    -0.02   0.00   0.04
  86   1     0.09  -0.01  -0.16     0.22  -0.11  -0.39     0.00   0.01   0.02
  87   1    -0.04   0.15  -0.08    -0.03   0.45   0.03     0.00   0.04   0.04
  88   1    -0.03   0.00  -0.04    -0.05   0.00  -0.05     0.08  -0.01   0.08
  89   1    -0.02   0.06  -0.06     0.00   0.05  -0.10     0.00   0.09   0.10
  90   1    -0.09   0.01  -0.05    -0.08   0.01  -0.07    -0.03   0.01   0.02
  91   1     0.01  -0.02   0.00     0.01  -0.01   0.02     0.05   0.01   0.08
  92   1    -0.03   0.00  -0.03     0.01  -0.01   0.01     0.08  -0.01   0.12
  93   1     0.01   0.03  -0.02     0.00   0.00   0.03    -0.02  -0.05   0.15
  94   1    -0.01   0.00   0.01    -0.01   0.00   0.02    -0.03  -0.02   0.06
  95   1     0.01   0.03   0.01     0.00   0.00   0.03    -0.02  -0.03   0.06
  96   1     0.03   0.00  -0.01    -0.01   0.00   0.02    -0.06  -0.01   0.05
  97   1    -0.03   0.00   0.02     0.03  -0.05  -0.03     0.14  -0.06  -0.11
  98   1     0.00  -0.01   0.04     0.04   0.04  -0.06     0.04   0.04  -0.24
  99   1    -0.01   0.00   0.03    -0.02   0.02   0.01     0.06   0.00  -0.15
 100   1     0.01   0.00   0.01    -0.02   0.01  -0.03    -0.07   0.02  -0.12
 101   1     0.01   0.00  -0.01     0.01   0.00   0.00    -0.03   0.01  -0.07
 102   1     0.00  -0.01   0.01     0.02   0.02  -0.03     0.02   0.01  -0.13
 103   1     0.02  -0.01   0.00     0.03  -0.02   0.01    -0.06  -0.02   0.00
 104   1    -0.02   0.02  -0.04    -0.01  -0.01  -0.03    -0.01  -0.05   0.05
 105   1    -0.04   0.03   0.03    -0.01   0.01   0.03     0.00  -0.07  -0.02
 106   1    -0.02   0.00   0.00    -0.02  -0.01   0.01    -0.02  -0.06  -0.01
 107   1    -0.01   0.00   0.01     0.00  -0.02   0.01     0.05  -0.06   0.03
 108   1    -0.02   0.00   0.01    -0.01  -0.02   0.02     0.00  -0.08   0.06
 109   1     0.08   0.04   0.05    -0.04  -0.02  -0.03     0.02  -0.01   0.03
 110   1     0.01   0.03   0.01    -0.01  -0.02  -0.01    -0.01   0.01   0.00
 111   1     0.01   0.07  -0.01     0.00  -0.04   0.01     0.01   0.00   0.01
 112   1    -0.03   0.05  -0.02     0.01  -0.03   0.01    -0.02  -0.01   0.01
 113   1    -0.08   0.03  -0.04     0.05  -0.02   0.02     0.00   0.00   0.02
 114   1    -0.03   0.04  -0.04     0.02  -0.03   0.01     0.01   0.03  -0.03
 115   1     0.03   0.00   0.00    -0.02   0.01  -0.01     0.00  -0.03   0.05
 116   1     0.10  -0.01   0.30    -0.02  -0.01  -0.10     0.02   0.06  -0.04
 117   1    -0.17   0.17  -0.02     0.07  -0.08   0.03     0.00   0.05  -0.03
 118   1     0.12  -0.19  -0.12    -0.01   0.07   0.06    -0.01   0.04  -0.03
 119   1    -0.05  -0.03   0.08     0.03   0.05  -0.08    -0.04  -0.19   0.33
 120   1     0.04  -0.01  -0.02    -0.06   0.01   0.00     0.40   0.04  -0.09
 121   1    -0.10  -0.03  -0.06     0.07   0.02   0.04    -0.26   0.13  -0.20
 122   1     0.10   0.04  -0.01    -0.06  -0.04   0.01     0.00   0.01   0.01
 123   1     0.00   0.12   0.08    -0.02  -0.08  -0.06    -0.02   0.03   0.03
 124   1     0.12   0.15   0.02    -0.07  -0.09  -0.01     0.01   0.04  -0.01
 125   1     0.05  -0.16   0.06    -0.03   0.10  -0.04     0.03   0.02  -0.03
 126   1     0.14   0.13   0.01    -0.08  -0.07  -0.01     0.01   0.00   0.02
 127   1    -0.15   0.05  -0.01     0.09  -0.02   0.01     0.05   0.01   0.02
                    67                     68                     69
                     A                      A                      A
 Frequencies --   265.0226               270.9826               273.0575
 Red. masses --     1.3446                 1.9563                 2.5090
 Frc consts  --     0.0556                 0.0846                 0.1102
 IR Inten    --     0.6365                 4.6629                 1.8893
 Atom AN      X      Y      Z        X      Y      Z        X      Y      Z
   1   6    -0.01  -0.01  -0.01     0.00  -0.01  -0.01     0.03   0.01   0.00
   2   6     0.00   0.00   0.00     0.00  -0.01  -0.02     0.02   0.01   0.04
   3   6     0.01   0.00   0.00     0.00   0.00   0.02     0.00   0.01  -0.01
   4   6     0.00   0.00   0.00     0.00   0.00   0.00     0.00   0.00   0.00
   5   6     0.00   0.00   0.00     0.01   0.00   0.00     0.00   0.00   0.00
   6   6     0.00   0.00   0.00     0.02  -0.01   0.00     0.00   0.00   0.00
   7   8     0.00   0.00   0.00     0.00   0.00   0.01     0.00   0.00   0.00
   8   6     0.00   0.00   0.00    -0.01   0.00   0.00     0.00   0.00   0.00
   9   6     0.00  -0.01  -0.01    -0.01  -0.01   0.01     0.00   0.00   0.00
  10   6     0.00   0.00   0.00     0.01   0.03   0.02    -0.01  -0.01  -0.03
  11   6     0.01  -0.02   0.00    -0.01   0.00   0.00    -0.02  -0.01   0.01
  12   6     0.00  -0.02   0.02     0.01   0.01  -0.03     0.02   0.01  -0.02
  13   6     0.01   0.01   0.04     0.04   0.02  -0.04     0.06   0.02  -0.04
  14   6     0.00   0.02   0.02     0.03   0.01  -0.02     0.02   0.01  -0.02
  15   6     0.00   0.02   0.01    -0.01  -0.01   0.01    -0.02  -0.01   0.01
  16   6     0.01  -0.01  -0.01    -0.02  -0.01   0.00    -0.03  -0.01   0.01
  17   6     0.01   0.01   0.02    -0.02  -0.01   0.02    -0.03  -0.01   0.01
  18   6     0.00   0.01   0.00     0.04   0.06   0.02    -0.02  -0.05   0.00
  19   6     0.00   0.01   0.00     0.03   0.07  -0.05    -0.03  -0.04   0.04
  20   6     0.01   0.00   0.00     0.02   0.02  -0.08    -0.03  -0.01   0.06
  21   6     0.00   0.00   0.00     0.02  -0.02  -0.05     0.00   0.03   0.03
  22   6     0.00   0.00   0.00     0.01  -0.02  -0.01     0.01   0.02  -0.01
  23   6     0.00   0.00   0.00     0.03   0.02   0.02    -0.01  -0.02   0.02
  24   6     0.00   0.00   0.00     0.01  -0.01  -0.02     0.01   0.01  -0.01
  25   6    -0.02  -0.01  -0.04     0.00  -0.02   0.02     0.01  -0.02   0.05
  26   6    -0.01   0.03  -0.06    -0.01  -0.01  -0.02    -0.02  -0.01  -0.01
  27   6     0.01  -0.02   0.03    -0.01   0.00   0.00    -0.01  -0.01  -0.03
  28   6     0.01   0.02   0.02    -0.01   0.03   0.05    -0.01   0.03   0.04
  29   6     0.00   0.00   0.01     0.00   0.04  -0.03    -0.01  -0.05  -0.05
  30   6     0.00   0.00  -0.01     0.02   0.01  -0.03     0.00  -0.01  -0.01
  31   6     0.00   0.00  -0.01    -0.05  -0.05   0.08     0.01   0.04   0.02
  32   6    -0.01  -0.01   0.00    -0.04  -0.07   0.06     0.04   0.04   0.01
  33   6    -0.01   0.00   0.01     0.00  -0.01   0.00     0.05  -0.01  -0.04
  34   6     0.02   0.00   0.00    -0.04  -0.03   0.01     0.00   0.01  -0.01
  35   8     0.00  -0.01   0.01     0.00   0.01   0.00     0.00   0.00   0.07
  36  12    -0.02  -0.01   0.00    -0.01   0.02  -0.01     0.02   0.02  -0.02
  37   8     0.04  -0.01  -0.01    -0.03   0.00   0.01    -0.03  -0.01  -0.03
  38   6     0.00  -0.01   0.01     0.00   0.01   0.00     0.03  -0.02   0.04
  39   7     0.01   0.00   0.01     0.00   0.02   0.07    -0.01   0.00  -0.08
  40   7    -0.01  -0.01  -0.03     0.00  -0.01   0.01     0.03   0.01  -0.01
  41   8     0.00  -0.02   0.01     0.00   0.01   0.00     0.02   0.00   0.06
  42   8    -0.01   0.01   0.00     0.01  -0.01   0.00    -0.01   0.02  -0.01
  43   6     0.00   0.01   0.01     0.00  -0.01  -0.01    -0.02   0.03  -0.02
  44   6     0.02   0.00   0.01    -0.02   0.00  -0.01    -0.03   0.02  -0.05
  45   6     0.00   0.00   0.01     0.00   0.00   0.00     0.03  -0.01   0.00
  46   8    -0.01   0.01   0.01     0.01  -0.01   0.00     0.04   0.03  -0.02
  47   6    -0.01   0.01  -0.01     0.01  -0.01   0.01     0.02   0.04  -0.03
  48   8     0.00   0.02   0.00     0.01  -0.02  -0.01     0.02  -0.02   0.00
  49   6     0.01  -0.01  -0.01     0.00   0.00   0.01     0.00  -0.03   0.01
  50   8    -0.02  -0.02  -0.01     0.02   0.02   0.02     0.02   0.00   0.02
  51   8    -0.03  -0.01  -0.01     0.01  -0.01   0.01    -0.01  -0.02   0.04
  52   6    -0.02   0.00   0.00     0.01   0.00   0.00     0.01  -0.01   0.03
  53   6    -0.01   0.01   0.00     0.02  -0.01  -0.01     0.03   0.00   0.02
  54   6     0.00   0.00  -0.01     0.00  -0.01   0.01    -0.01  -0.04   0.03
  55   8     0.00   0.01   0.00     0.00   0.00  -0.01    -0.04  -0.03   0.01
  56   6    -0.01  -0.01   0.00     0.01   0.01  -0.01    -0.03   0.05  -0.05
  57   6     0.02   0.00   0.00    -0.04  -0.01   0.01    -0.06  -0.02  -0.02
  58   6     0.02   0.04   0.00    -0.01  -0.02   0.00     0.03   0.01  -0.04
  59   6     0.00  -0.01   0.01     0.00   0.00   0.00    -0.10  -0.07   0.00
  60   1     0.00   0.01   0.01     0.00  -0.02  -0.05     0.02   0.00   0.06
  61   1     0.00   0.00   0.00     0.00   0.00   0.01     0.01   0.01   0.00
  62   1     0.00   0.00   0.00    -0.01   0.00  -0.01     0.00  -0.01   0.00
  63   1     0.00   0.00   0.00     0.01   0.00  -0.01    -0.01   0.01   0.01
  64   1     0.00  -0.01   0.00     0.01  -0.01   0.00    -0.01   0.00   0.00
  65   1     0.01   0.00  -0.01     0.02   0.00  -0.02     0.01   0.00   0.00
  66   1     0.01  -0.01  -0.01     0.03  -0.02   0.00     0.00   0.00   0.00
  67   1     0.00   0.00   0.00    -0.01  -0.01   0.01    -0.01   0.00   0.01
  68   1     0.00   0.00   0.00    -0.01   0.00   0.00    -0.01   0.00  -0.01
  69   1     0.00  -0.04   0.04     0.02   0.02  -0.03     0.02   0.02  -0.03
  70   1     0.02   0.01   0.05     0.06   0.02  -0.05     0.09   0.04  -0.05
  71   1     0.00   0.03   0.02     0.04   0.00  -0.04     0.03   0.00  -0.03
  72   1     0.03   0.00   0.00    -0.02   0.00  -0.01    -0.03  -0.01   0.00
  73   1     0.03   0.03   0.05    -0.02  -0.01   0.01    -0.03  -0.01   0.00
  74   1     0.01   0.01   0.00     0.03   0.11  -0.07    -0.04  -0.07   0.05
  75   1     0.02   0.00   0.00     0.02   0.03  -0.12    -0.04   0.00   0.10
  76   1     0.00   0.00   0.00     0.03  -0.06  -0.06     0.02   0.06   0.05
  77   1     0.00   0.00  -0.01     0.05   0.02  -0.05    -0.03  -0.02   0.06
  78   1     0.00   0.00   0.00     0.02  -0.02  -0.05     0.00   0.02   0.02
  79   1    -0.08   0.16   0.03     0.02   0.01   0.01     0.04   0.07   0.05
  80   1     0.12  -0.10   0.02     0.02  -0.03   0.03     0.07  -0.06   0.11
  81   1    -0.13  -0.09  -0.18    -0.01  -0.03   0.02    -0.03  -0.06   0.03
  82   1    -0.05   0.10   0.01    -0.03   0.01   0.01    -0.06   0.02   0.03
  83   1    -0.03   0.07  -0.17     0.00   0.02  -0.06    -0.02   0.02  -0.08
  84   1     0.03  -0.06  -0.06     0.01  -0.05  -0.02     0.01  -0.07  -0.01
  85   1    -0.15  -0.34   0.34    -0.06  -0.09   0.09    -0.03  -0.08   0.05
  86   1     0.19  -0.19  -0.38     0.07  -0.04  -0.14     0.05  -0.05  -0.13
  87   1     0.00   0.42   0.11    -0.03   0.16   0.01    -0.04   0.10  -0.03
  88   1     0.02   0.01   0.03     0.08   0.01   0.06     0.06   0.01   0.05
  89   1     0.01   0.05   0.02    -0.01   0.12   0.10    -0.02   0.09   0.08
  90   1    -0.02   0.01   0.01    -0.07   0.02   0.03    -0.06   0.02   0.03
  91   1     0.00   0.01   0.00    -0.03   0.11  -0.07    -0.05  -0.11   0.00
  92   1     0.01   0.01   0.02     0.01   0.06   0.04    -0.01  -0.07  -0.11
  93   1    -0.01  -0.01   0.01     0.01  -0.01  -0.08     0.00  -0.04  -0.06
  94   1     0.00   0.00  -0.01     0.02   0.00  -0.02     0.04   0.03  -0.04
  95   1    -0.01   0.00  -0.01     0.01   0.04  -0.03     0.00  -0.08  -0.04
  96   1    -0.01   0.00  -0.01     0.05   0.01  -0.04    -0.05   0.00   0.04
  97   1     0.01   0.02   0.00    -0.15   0.18   0.12     0.02  -0.09  -0.02
  98   1    -0.02  -0.02  -0.01    -0.21  -0.24   0.23     0.13   0.15  -0.02
  99   1     0.02  -0.01  -0.03     0.11  -0.15  -0.01    -0.11   0.11   0.10
 100   1     0.00  -0.01   0.00     0.06  -0.12   0.09     0.00   0.07   0.00
 101   1    -0.02   0.00   0.00    -0.11  -0.01   0.02     0.11   0.00   0.03
 102   1    -0.02  -0.01   0.00    -0.11  -0.15   0.10     0.08   0.11   0.00
 103   1    -0.03   0.00   0.01    -0.03   0.00   0.00     0.05   0.03  -0.07
 104   1     0.00   0.00   0.03     0.02  -0.01   0.04     0.04  -0.04  -0.03
 105   1     0.00  -0.01   0.00     0.02  -0.02  -0.02     0.05  -0.04  -0.07
 106   1     0.02   0.00   0.00    -0.07  -0.03  -0.02     0.01   0.02   0.01
 107   1     0.01   0.01   0.00    -0.02  -0.02   0.01    -0.03   0.00  -0.02
 108   1     0.02   0.01   0.00    -0.04  -0.07   0.03     0.02   0.02  -0.04
 109   1     0.03   0.01   0.02    -0.03  -0.01  -0.02    -0.01   0.04  -0.07
 110   1     0.01   0.01   0.00     0.00  -0.01   0.00     0.06   0.02   0.01
 111   1     0.00   0.03  -0.01     0.00  -0.02   0.01     0.01   0.04  -0.06
 112   1     0.00   0.03  -0.01     0.00  -0.02   0.01     0.09   0.09  -0.03
 113   1    -0.03   0.01  -0.02     0.02  -0.01   0.01    -0.03   0.02  -0.07
 114   1    -0.02   0.02   0.00     0.02  -0.01  -0.01     0.04  -0.02   0.03
 115   1     0.00  -0.02  -0.01     0.01   0.02   0.02     0.00  -0.04   0.04
 116   1     0.00  -0.02   0.04     0.00   0.02  -0.06    -0.04   0.10  -0.21
 117   1    -0.02   0.02  -0.01     0.03  -0.02   0.00     0.05   0.00  -0.04
 118   1     0.01  -0.04  -0.03    -0.02   0.04   0.01    -0.15   0.13   0.04
 119   1     0.05   0.04  -0.15    -0.11  -0.10   0.29    -0.10  -0.04   0.14
 120   1    -0.13  -0.02   0.05     0.25   0.02  -0.10     0.11  -0.04  -0.12
 121   1     0.15  -0.05   0.10    -0.29   0.08  -0.20    -0.21   0.06  -0.15
 122   1     0.04   0.03  -0.01    -0.01  -0.02   0.00     0.07  -0.01  -0.08
 123   1     0.00   0.05   0.03     0.01  -0.03  -0.01     0.04   0.02  -0.03
 124   1     0.05   0.07  -0.01    -0.02  -0.03   0.01     0.06   0.03   0.01
 125   1     0.00  -0.06   0.03    -0.01   0.02  -0.01    -0.12  -0.23   0.18
 126   1     0.03   0.03   0.01    -0.02  -0.01  -0.01    -0.02   0.00  -0.05
 127   1    -0.06   0.00  -0.01     0.02   0.00   0.00    -0.29  -0.08  -0.13
                    70                     71                     72
                     A                      A                      A
 Frequencies --   276.0824               278.7765               286.0623
 Red. masses --     2.5406                 2.7034                 2.0584
 Frc consts  --     0.1141                 0.1238                 0.0992
 IR Inten    --     3.0579                 3.4896                21.7266
 Atom AN      X      Y      Z        X      Y      Z        X      Y      Z
   1   6    -0.02  -0.01  -0.02     0.00  -0.01   0.04     0.01   0.04   0.01
   2   6    -0.01  -0.01  -0.02     0.01  -0.01  -0.04    -0.02   0.02  -0.02
   3   6     0.01  -0.02   0.02     0.01  -0.01  -0.02    -0.04   0.03  -0.01
   4   6     0.00   0.00   0.00     0.00   0.00   0.00    -0.01   0.00   0.00
   5   6     0.00   0.00   0.00     0.01   0.00   0.00    -0.01   0.00   0.00
   6   6     0.00   0.00   0.00     0.01   0.00   0.00    -0.01   0.00   0.01
   7   8    -0.01   0.01   0.01     0.00   0.00   0.00     0.00   0.00   0.00
   8   6     0.00   0.00   0.00     0.00   0.00   0.00     0.00   0.00   0.00
   9   6     0.00   0.02  -0.02     0.00  -0.01   0.05    -0.01   0.00   0.02
  10   6     0.01  -0.01   0.04     0.00   0.02   0.00    -0.02  -0.02   0.01
  11   6     0.01   0.01   0.00    -0.03   0.05   0.00     0.00   0.00   0.02
  12   6     0.00   0.01   0.01    -0.07   0.04  -0.04     0.02   0.01  -0.01
  13   6    -0.03   0.01   0.03    -0.08  -0.03  -0.06     0.01  -0.02  -0.01
  14   6    -0.03   0.03   0.01    -0.02  -0.08  -0.02     0.00  -0.04   0.00
  15   6     0.00   0.04  -0.02     0.04  -0.05   0.03     0.00  -0.04   0.00
  16   6     0.00   0.01   0.01    -0.01   0.02  -0.04     0.02  -0.01   0.02
  17   6     0.01   0.02  -0.02     0.04  -0.01   0.02     0.00  -0.02  -0.02
  18   6     0.02   0.04   0.00     0.01   0.02   0.01     0.00  -0.01   0.00
  19   6     0.04   0.04  -0.04     0.00   0.02   0.00     0.00  -0.01  -0.02
  20   6     0.03  -0.01  -0.06     0.01   0.02  -0.01    -0.02  -0.02  -0.03
  21   6    -0.01  -0.04  -0.03     0.02   0.01  -0.01    -0.02  -0.04  -0.02
  22   6    -0.02  -0.03   0.02     0.01   0.02  -0.01    -0.01  -0.04   0.01
  23   6     0.00   0.02  -0.03     0.01   0.01   0.02     0.00  -0.01  -0.01
  24   6    -0.02  -0.01   0.02     0.01   0.01  -0.01     0.00  -0.02   0.01
  25   6     0.02   0.02   0.03    -0.03  -0.05  -0.08     0.03  -0.03   0.03
  26   6     0.00   0.00   0.06     0.07  -0.04  -0.04     0.04  -0.01  -0.01
  27   6     0.01  -0.04  -0.02     0.01   0.14   0.10     0.01   0.02  -0.04
  28   6     0.00  -0.04  -0.05     0.02   0.01   0.00    -0.03   0.00  -0.05
  29   6     0.02   0.07   0.09    -0.01  -0.02  -0.04     0.02   0.04   0.05
  30   6    -0.01   0.01   0.02     0.01  -0.01  -0.03     0.00   0.02   0.04
  31   6     0.01  -0.03  -0.06    -0.03   0.00   0.05     0.01  -0.01  -0.02
  32   6    -0.05  -0.04  -0.03     0.00  -0.01   0.05     0.00   0.00  -0.03
  33   6     0.01  -0.02   0.02    -0.03   0.00   0.01    -0.01   0.06   0.01
  34   6     0.03  -0.01   0.00    -0.01  -0.03   0.02    -0.05   0.03   0.01
  35   8     0.00   0.00   0.07     0.00   0.00   0.03     0.00   0.00   0.00
  36  12    -0.01  -0.02  -0.03    -0.02  -0.03  -0.01     0.09   0.06   0.06
  37   8    -0.01  -0.02  -0.03     0.02  -0.02  -0.02     0.01   0.00   0.00
  38   6     0.03  -0.02   0.04     0.02  -0.01   0.02     0.00   0.00   0.00
  39   7     0.02  -0.02   0.09     0.01   0.01  -0.02    -0.04   0.00   0.02
  40   7    -0.02   0.01  -0.04     0.01   0.00   0.13     0.02   0.02   0.05
  41   8     0.02  -0.01   0.06     0.01  -0.01   0.03     0.00   0.00   0.00
  42   8    -0.02   0.02  -0.01    -0.02   0.02  -0.01     0.00   0.00   0.00
  43   6    -0.02   0.03  -0.02    -0.01   0.01  -0.01     0.00   0.00   0.00
  44   6    -0.01   0.02  -0.05     0.01   0.01  -0.02     0.01   0.00   0.00
  45   6     0.03   0.00   0.00     0.01   0.00   0.00     0.00   0.00   0.00
  46   8     0.03   0.03  -0.01     0.01   0.01   0.00     0.00   0.00   0.00
  47   6     0.02   0.05  -0.03     0.01   0.03  -0.02     0.00   0.00   0.00
  48   8     0.01   0.00  -0.01     0.01   0.01  -0.01    -0.02  -0.04  -0.03
  49   6     0.00  -0.03   0.01     0.00  -0.01   0.00     0.00   0.00   0.00
  50   8     0.02  -0.02   0.00     0.00  -0.03  -0.02     0.00   0.00   0.00
  51   8     0.00   0.00   0.04    -0.02   0.00   0.02    -0.01   0.00   0.01
  52   6     0.01   0.01   0.03     0.00   0.02   0.01    -0.01  -0.01  -0.02
  53   6     0.03   0.00   0.01     0.02   0.01   0.00     0.01  -0.02  -0.03
  54   6    -0.01  -0.03   0.02    -0.01  -0.01   0.01    -0.01   0.00   0.01
  55   8    -0.03   0.00   0.01    -0.02   0.03   0.00    -0.03   0.02  -0.03
  56   6    -0.01   0.03  -0.03     0.01   0.01  -0.02     0.01  -0.02  -0.02
  57   6     0.02  -0.01  -0.02     0.05   0.00  -0.01     0.00   0.01  -0.01
  58   6     0.02   0.01  -0.04     0.02   0.02  -0.02     0.00   0.00   0.00
  59   6    -0.09  -0.07   0.00    -0.04  -0.04   0.00     0.00   0.00   0.00
  60   1    -0.02   0.00  -0.03     0.01  -0.01  -0.07    -0.02  -0.01  -0.04
  61   1     0.00   0.00   0.00     0.00  -0.01   0.01    -0.01   0.00   0.00
  62   1     0.00   0.00   0.00     0.00   0.00   0.00    -0.01   0.00   0.00
  63   1     0.00   0.00  -0.01     0.01   0.00   0.00    -0.01   0.00   0.00
  64   1     0.01   0.00   0.00     0.00  -0.01   0.00    -0.01   0.00   0.00
  65   1     0.00   0.00   0.00     0.01   0.00  -0.01    -0.01  -0.01   0.01
  66   1     0.00   0.00   0.00     0.02  -0.01   0.00    -0.01   0.00   0.00
  67   1     0.00   0.00   0.00     0.00   0.00   0.00    -0.01   0.00   0.00
  68   1     0.00   0.00   0.00     0.00   0.00   0.00    -0.01   0.00  -0.01
  69   1     0.00   0.00   0.02    -0.08   0.07  -0.06     0.02   0.03  -0.03
  70   1    -0.03   0.01   0.04    -0.12  -0.05  -0.11     0.02  -0.02  -0.03
  71   1    -0.05   0.04   0.03     0.00  -0.13  -0.04    -0.01  -0.04   0.00
  72   1     0.00   0.01   0.01    -0.04   0.02  -0.09     0.02   0.00   0.00
  73   1     0.02   0.03   0.01     0.01  -0.04  -0.04    -0.01  -0.03  -0.05
  74   1     0.05   0.06  -0.05     0.00   0.03  -0.01     0.01  -0.01  -0.03
  75   1     0.05  -0.02  -0.10     0.01   0.01   0.00    -0.03  -0.02  -0.05
  76   1    -0.04  -0.07  -0.05     0.03   0.01  -0.01    -0.03  -0.05  -0.02
  77   1     0.02   0.02  -0.07     0.01   0.01   0.00     0.01  -0.01   0.00
  78   1    -0.01  -0.02  -0.02     0.01   0.01   0.00     0.00  -0.03  -0.03
  79   1     0.06  -0.06  -0.01    -0.08   0.02  -0.04    -0.03   0.45   0.15
  80   1    -0.06   0.07   0.01     0.08  -0.09  -0.12     0.39  -0.27   0.23
  81   1     0.09   0.08   0.10    -0.12  -0.12  -0.14    -0.28  -0.26  -0.27
  82   1    -0.01  -0.03   0.05     0.12  -0.13  -0.13     0.00   0.00   0.03
  83   1    -0.01  -0.02   0.09     0.14  -0.04   0.06     0.06   0.03  -0.06
  84   1     0.01   0.04   0.08     0.01  -0.02  -0.08     0.07  -0.07  -0.01
  85   1     0.08   0.01  -0.08    -0.07   0.27  -0.03     0.02   0.05  -0.08
  86   1    -0.08  -0.02   0.05     0.02   0.22   0.28     0.03   0.04  -0.01
  87   1     0.02  -0.17  -0.03     0.05   0.05   0.12    -0.02   0.00  -0.07
  88   1    -0.11   0.01  -0.08     0.09  -0.06   0.05    -0.06   0.01  -0.05
  89   1     0.00  -0.17  -0.10     0.04   0.15   0.02    -0.01   0.00  -0.09
  90   1     0.10  -0.02   0.00    -0.08  -0.01  -0.08    -0.05   0.00  -0.04
  91   1     0.08   0.15   0.02    -0.05  -0.02  -0.03     0.08   0.06   0.02
  92   1     0.03   0.10   0.18     0.01  -0.02  -0.04     0.00   0.06   0.09
  93   1     0.00   0.05   0.11    -0.01  -0.05  -0.06     0.02   0.06   0.08
  94   1    -0.07  -0.05   0.07     0.05   0.02  -0.05    -0.08  -0.01   0.07
  95   1     0.00   0.12   0.07    -0.01  -0.06  -0.06     0.02   0.10   0.09
  96   1     0.05   0.00  -0.06    -0.03   0.00   0.01     0.06   0.01  -0.01
  97   1     0.03   0.06  -0.02    -0.07   0.06   0.05     0.03  -0.04  -0.03
  98   1    -0.11  -0.12  -0.06    -0.05  -0.05   0.11     0.03   0.02  -0.05
  99   1     0.12  -0.10  -0.13     0.00  -0.02   0.04     0.00   0.00  -0.01
 100   1    -0.03  -0.06  -0.03     0.03  -0.04   0.05    -0.02   0.02  -0.04
 101   1    -0.12   0.01  -0.04    -0.01  -0.01   0.05     0.00   0.00  -0.04
 102   1    -0.07  -0.10  -0.04    -0.03  -0.01   0.07     0.02   0.00  -0.05
 103   1     0.01  -0.05   0.04    -0.04   0.02   0.00     0.00   0.05   0.02
 104   1     0.01  -0.03   0.03    -0.03   0.02   0.00    -0.01   0.08  -0.02
 105   1     0.03   0.01   0.03    -0.06  -0.02   0.01    -0.04   0.07   0.03
 106   1     0.04  -0.02  -0.03    -0.04  -0.01   0.04    -0.06   0.03   0.00
 107   1     0.04   0.03   0.00     0.00  -0.07   0.03    -0.03   0.03   0.02
 108   1     0.01  -0.01   0.02    -0.01  -0.03   0.02    -0.06   0.03   0.03
 109   1     0.00   0.04  -0.06     0.02   0.02  -0.02     0.01   0.00   0.01
 110   1     0.06   0.03   0.00     0.03   0.02   0.00     0.00   0.00   0.00
 111   1     0.01   0.05  -0.06     0.01   0.04  -0.03     0.00   0.00   0.00
 112   1     0.09   0.10  -0.03     0.04   0.06  -0.02     0.00   0.00   0.00
 113   1    -0.03   0.03  -0.08    -0.03   0.02  -0.04     0.00   0.00   0.00
 114   1     0.03  -0.01   0.02     0.02   0.01   0.00     0.04  -0.02  -0.04
 115   1    -0.02  -0.06   0.01    -0.02  -0.05   0.00    -0.01  -0.01   0.02
 116   1    -0.02   0.06  -0.13    -0.01   0.00  -0.07     0.00  -0.03  -0.02
 117   1     0.05  -0.01  -0.02     0.05  -0.02  -0.02     0.03  -0.03  -0.01
 118   1    -0.08   0.09   0.03    -0.01   0.04   0.00     0.02  -0.01  -0.01
 119   1     0.05   0.05  -0.18     0.11   0.04  -0.21     0.00   0.01   0.00
 120   1    -0.13  -0.05   0.00    -0.13  -0.02   0.06     0.02   0.00  -0.03
 121   1     0.15  -0.02   0.08     0.23  -0.03   0.14    -0.02   0.04  -0.02
 122   1     0.05  -0.01  -0.07     0.03   0.01  -0.03     0.00   0.00   0.01
 123   1     0.01   0.02  -0.04    -0.01   0.04   0.00    -0.01   0.00   0.00
 124   1     0.05   0.04  -0.01     0.04   0.05  -0.02     0.00   0.00  -0.01
 125   1    -0.12  -0.22   0.18    -0.05  -0.12   0.09     0.00   0.00   0.00
 126   1    -0.01   0.00  -0.04     0.00   0.00  -0.01     0.00   0.00   0.00
 127   1    -0.28  -0.08  -0.13    -0.14  -0.04  -0.07     0.00   0.00   0.00
                    73                     74                     75
                     A                      A                      A
 Frequencies --   294.3692               302.0701               316.9397
 Red. masses --     3.6128                 2.5936                 4.3341
 Frc consts  --     0.1844                 0.1394                 0.2565
 IR Inten    --    22.3732                 7.3930                 3.0385
 Atom AN      X      Y      Z        X      Y      Z        X      Y      Z
   1   6    -0.06  -0.04   0.01     0.01   0.03   0.00    -0.02  -0.02   0.01
   2   6    -0.01  -0.03   0.00     0.00   0.03   0.02     0.00  -0.02  -0.01
   3   6     0.01  -0.04  -0.02    -0.04   0.03   0.00     0.02  -0.02   0.01
   4   6     0.01   0.00   0.00     0.00  -0.01  -0.01    -0.01   0.00   0.00
   5   6     0.00  -0.01   0.00    -0.01   0.00   0.00     0.00   0.00   0.00
   6   6    -0.01   0.00   0.00     0.00  -0.01   0.00     0.00   0.00   0.00
   7   8     0.01   0.00  -0.01     0.00  -0.01   0.00    -0.01   0.00   0.01
   8   6     0.00   0.01  -0.01     0.00   0.00  -0.01     0.00  -0.01   0.00
   9   6    -0.03   0.03  -0.01     0.00  -0.04  -0.01    -0.01   0.00   0.01
  10   6    -0.01   0.05  -0.02    -0.02  -0.01   0.00     0.01   0.00   0.01
  11   6     0.00   0.01   0.00     0.03  -0.06  -0.02     0.00   0.01   0.00
  12   6     0.01   0.02   0.04     0.03  -0.07   0.02     0.01   0.01   0.00
  13   6    -0.02   0.05   0.07     0.03  -0.05   0.04     0.00   0.00   0.01
  14   6    -0.03   0.08   0.04     0.03  -0.02   0.02    -0.01   0.00   0.01
  15   6    -0.02   0.07  -0.02     0.01  -0.03   0.01     0.00   0.00   0.00
  16   6     0.01   0.01   0.00     0.02  -0.02  -0.02     0.00   0.00   0.00
  17   6     0.00   0.04  -0.03     0.01  -0.01   0.01     0.01   0.00   0.00
  18   6     0.01   0.03   0.00    -0.01  -0.02   0.00     0.00   0.00   0.01
  19   6     0.02   0.04   0.02    -0.01  -0.02  -0.01    -0.02   0.01   0.01
  20   6     0.01   0.06   0.03    -0.02  -0.02  -0.01     0.00   0.01   0.02
  21   6     0.03   0.08   0.01    -0.01  -0.02  -0.01     0.01   0.00   0.02
  22   6     0.03   0.07  -0.02    -0.01  -0.02   0.00     0.00   0.00   0.01
  23   6     0.02   0.01   0.01     0.01  -0.01   0.00     0.01   0.00   0.00
  24   6     0.04   0.03  -0.02     0.00  -0.02   0.00     0.00   0.00   0.00
  25   6     0.02   0.01   0.00    -0.06   0.03  -0.08     0.00  -0.01  -0.01
  26   6     0.01   0.01   0.02    -0.04   0.04  -0.06     0.00   0.00  -0.01
  27   6     0.01  -0.09  -0.08     0.00   0.02   0.05     0.01   0.00   0.00
  28   6    -0.02  -0.05  -0.08     0.03   0.02   0.03     0.00  -0.01  -0.02
  29   6    -0.02  -0.07  -0.11     0.01   0.01   0.02    -0.01  -0.01  -0.02
  30   6     0.02  -0.02  -0.03     0.00   0.01   0.03     0.00  -0.01  -0.03
  31   6    -0.03   0.00   0.07     0.01   0.00   0.01     0.01  -0.01  -0.01
  32   6     0.02  -0.01   0.05     0.01   0.00  -0.01     0.00   0.01  -0.02
  33   6    -0.07  -0.03   0.04    -0.08   0.09   0.00    -0.04  -0.01   0.02
  34   6    -0.10  -0.13   0.02    -0.07   0.01   0.00     0.02  -0.03   0.01
  35   8     0.00   0.00   0.01     0.01   0.02   0.03    -0.04   0.01   0.00
  36  12     0.11  -0.07   0.10     0.09   0.05   0.06     0.01   0.05  -0.02
  37   8     0.01  -0.01   0.00    -0.02  -0.02   0.02     0.02  -0.03   0.07
  38   6     0.01   0.00   0.01     0.02   0.00   0.01     0.00   0.00  -0.01
  39   7     0.01   0.02  -0.03    -0.04   0.01  -0.01     0.02  -0.01   0.02
  40   7    -0.06   0.00  -0.01     0.00  -0.02  -0.02    -0.01   0.00   0.02
  41   8     0.00  -0.01   0.01     0.01   0.01   0.03     0.03   0.05   0.01
  42   8    -0.01   0.01  -0.01    -0.03   0.01  -0.03     0.03  -0.03   0.03
  43   6     0.00   0.00   0.00    -0.02   0.00  -0.03     0.00   0.13   0.02
  44   6     0.01   0.00  -0.01    -0.02   0.00  -0.02    -0.01   0.10   0.09
  45   6     0.00   0.00   0.00     0.02   0.00  -0.02     0.02  -0.05  -0.02
  46   8     0.00   0.00   0.00     0.02   0.00  -0.02     0.12   0.23  -0.16
  47   6     0.01   0.02  -0.01     0.03   0.03  -0.01    -0.02  -0.06   0.01
  48   8     0.00  -0.03  -0.02    -0.01   0.00  -0.03     0.02   0.03  -0.01
  49   6    -0.01   0.00   0.01     0.00  -0.03   0.03     0.04  -0.05   0.03
  50   8     0.00  -0.02  -0.02     0.02  -0.02   0.01     0.00  -0.08   0.04
  51   8    -0.02   0.00   0.03     0.05   0.02   0.02    -0.07  -0.07  -0.01
  52   6    -0.01   0.01  -0.03     0.00   0.00  -0.04    -0.02  -0.02  -0.01
  53   6     0.01   0.00  -0.04    -0.01   0.00  -0.04    -0.01   0.00  -0.02
  54   6    -0.02   0.00   0.03     0.00   0.00   0.02     0.02  -0.05   0.00
  55   8    -0.03   0.06  -0.04     0.00   0.04  -0.05     0.00   0.02  -0.01
  56   6     0.03  -0.01  -0.01     0.02   0.01   0.03    -0.02   0.03  -0.01
  57   6     0.04   0.02   0.00     0.03   0.00   0.02    -0.05  -0.03  -0.07
  58   6    -0.01   0.01  -0.01    -0.03  -0.04  -0.02    -0.05  -0.18   0.11
  59   6    -0.01  -0.01   0.00    -0.04  -0.03  -0.02     0.01   0.06  -0.05
  60   1    -0.01   0.00   0.02     0.00   0.01   0.03     0.00   0.00  -0.02
  61   1     0.01   0.00   0.01     0.00   0.00  -0.01    -0.01  -0.01  -0.01
  62   1     0.01  -0.01   0.00     0.00  -0.01   0.00    -0.01   0.00   0.00
  63   1     0.00  -0.02  -0.01    -0.01   0.00   0.00     0.00   0.01   0.00
  64   1     0.00  -0.01   0.00    -0.01   0.00  -0.01    -0.01   0.00   0.00
  65   1    -0.02  -0.02   0.02    -0.01  -0.01   0.01     0.00   0.00  -0.01
  66   1    -0.03   0.02   0.00    -0.01   0.00   0.00     0.01  -0.01   0.00
  67   1    -0.02   0.02   0.01    -0.01   0.00   0.00     0.01  -0.01  -0.01
  68   1    -0.01   0.03  -0.03     0.00   0.00  -0.01     0.01  -0.02   0.01
  69   1     0.03   0.00   0.06     0.03  -0.08   0.04     0.01   0.01   0.00
  70   1    -0.02   0.05   0.10     0.03  -0.04   0.06     0.00   0.01   0.00
  71   1    -0.05   0.10   0.05     0.04   0.00   0.02    -0.02   0.00   0.01
  72   1     0.02   0.01   0.00     0.04  -0.03   0.04     0.00   0.00   0.00
  73   1     0.01   0.06   0.04     0.01  -0.02   0.00     0.01   0.00   0.00
  74   1     0.02   0.01   0.03     0.00  -0.01  -0.01    -0.03   0.02   0.01
  75   1     0.01   0.07   0.05    -0.03  -0.01  -0.02     0.00   0.01   0.02
  76   1     0.06   0.08   0.02    -0.01  -0.03  -0.01     0.03   0.00   0.02
  77   1     0.02   0.01  -0.01     0.00  -0.01   0.01     0.01   0.00   0.00
  78   1     0.04   0.05   0.05     0.00  -0.02  -0.01    -0.01   0.01   0.00
  79   1     0.01   0.08   0.02    -0.09  -0.36  -0.13    -0.01   0.00   0.00
  80   1     0.06  -0.02   0.04    -0.36   0.23  -0.28     0.01  -0.02  -0.02
  81   1    -0.03  -0.02  -0.04     0.18   0.23   0.09    -0.02  -0.02  -0.02
  82   1    -0.03   0.01   0.05    -0.01   0.11  -0.05     0.01   0.01  -0.01
  83   1     0.00   0.02   0.00    -0.10   0.01  -0.08     0.01   0.01  -0.02
  84   1     0.04   0.00   0.04    -0.08   0.06  -0.08     0.00  -0.01  -0.02
  85   1     0.14  -0.10  -0.07    -0.08  -0.01   0.09     0.01   0.00   0.00
  86   1    -0.07  -0.11  -0.09     0.04   0.01   0.02     0.01   0.00   0.00
  87   1     0.00  -0.18  -0.11     0.02   0.10   0.10     0.01   0.00   0.00
  88   1    -0.18   0.01  -0.10     0.09  -0.01   0.05    -0.03  -0.01  -0.01
  89   1    -0.01  -0.22  -0.16     0.02   0.08   0.07     0.00  -0.02  -0.04
  90   1     0.11  -0.03  -0.03    -0.02   0.01   0.01     0.00  -0.01  -0.02
  91   1    -0.14  -0.11  -0.06     0.04   0.02   0.01    -0.04   0.00  -0.01
  92   1     0.02  -0.09  -0.18     0.00   0.02   0.03    -0.01  -0.01  -0.02
  93   1     0.00  -0.11  -0.18     0.01   0.03   0.03    -0.01  -0.01  -0.03
  94   1     0.11   0.04  -0.08    -0.04   0.01   0.04     0.04   0.00  -0.04
  95   1     0.01  -0.14  -0.08     0.02   0.05   0.06    -0.02  -0.02  -0.06
  96   1    -0.06   0.00   0.05     0.03   0.01   0.01    -0.01  -0.01  -0.02
  97   1    -0.10   0.04   0.05     0.00  -0.02   0.00     0.02  -0.02  -0.01
  98   1    -0.03  -0.04   0.14     0.03   0.02   0.00     0.01   0.00  -0.03
  99   1    -0.02  -0.02   0.09    -0.02   0.01   0.02     0.02  -0.01  -0.01
 100   1     0.05  -0.04   0.05     0.00   0.02  -0.01    -0.01   0.02  -0.02
 101   1     0.02  -0.02   0.06     0.03   0.00  -0.02    -0.01   0.01  -0.03
 102   1     0.00   0.00   0.07     0.03   0.01  -0.02     0.01  -0.01  -0.04
 103   1    -0.06  -0.07   0.07    -0.08   0.07   0.01    -0.04  -0.02   0.02
 104   1    -0.08   0.00   0.01    -0.07   0.17  -0.05    -0.04   0.02   0.00
 105   1    -0.10   0.00   0.08    -0.16   0.09   0.04    -0.06   0.00   0.03
 106   1    -0.22  -0.09   0.00    -0.11   0.02  -0.03     0.02  -0.02   0.01
 107   1    -0.07  -0.17   0.04    -0.06   0.02   0.00     0.02  -0.03   0.01
 108   1    -0.10  -0.23   0.07    -0.07  -0.03   0.02     0.02  -0.02   0.00
 109   1     0.02   0.00   0.00    -0.01   0.00  -0.02     0.06   0.18   0.05
 110   1     0.01   0.01  -0.01     0.04   0.02  -0.02     0.02  -0.05  -0.01
 111   1     0.01   0.02  -0.01     0.02   0.03  -0.02    -0.05  -0.10   0.00
 112   1     0.02   0.03  -0.01     0.06   0.05  -0.01    -0.01  -0.09   0.01
 113   1    -0.01   0.01  -0.02     0.01   0.02  -0.03     0.04  -0.06   0.03
 114   1     0.03   0.00  -0.05    -0.01   0.01  -0.06    -0.02   0.03  -0.03
 115   1    -0.03  -0.02   0.02    -0.01   0.01   0.00     0.04  -0.08   0.03
 116   1     0.03  -0.02   0.00     0.05   0.01   0.10     0.01   0.06  -0.01
 117   1     0.03  -0.01   0.00    -0.06   0.02   0.06    -0.05   0.05  -0.01
 118   1     0.06   0.00  -0.02     0.08   0.00   0.00    -0.04   0.02  -0.01
 119   1     0.06   0.00  -0.06     0.04  -0.03   0.02    -0.06   0.10  -0.15
 120   1     0.03   0.01  -0.01     0.06   0.02   0.02    -0.18  -0.12  -0.11
 121   1     0.08   0.07   0.03     0.03   0.02   0.02     0.00  -0.04  -0.03
 122   1    -0.01   0.00   0.00    -0.04  -0.07   0.02    -0.04  -0.38   0.24
 123   1    -0.02   0.01  -0.01    -0.06  -0.04  -0.06    -0.10  -0.27  -0.16
 124   1     0.00   0.01  -0.03    -0.03  -0.03  -0.01    -0.03  -0.20   0.28
 125   1    -0.02  -0.04   0.03    -0.06  -0.09   0.06     0.00   0.14  -0.10
 126   1     0.00   0.00   0.00    -0.02  -0.01  -0.05     0.00   0.07  -0.16
 127   1    -0.04  -0.02  -0.03    -0.12  -0.04  -0.08     0.02   0.13   0.05
                    76                     77                     78
                     A                      A                      A
 Frequencies --   318.6698               322.4631               328.1234
 Red. masses --     3.3754                 3.4528                 4.2666
 Frc consts  --     0.2020                 0.2115                 0.2706
 IR Inten    --     6.6535                 1.5624                 9.5163
 Atom AN      X      Y      Z        X      Y      Z        X      Y      Z
   1   6    -0.02  -0.03   0.00    -0.02  -0.02  -0.01    -0.02  -0.06   0.06
   2   6    -0.01  -0.03  -0.04     0.00  -0.01  -0.01     0.01  -0.05  -0.02
   3   6     0.02  -0.03   0.03     0.02  -0.02   0.03     0.06  -0.07  -0.03
   4   6    -0.01   0.00   0.00    -0.01   0.00  -0.01    -0.01   0.00  -0.01
   5   6     0.00   0.00   0.00     0.00   0.00   0.00     0.00   0.01   0.00
   6   6     0.00   0.00  -0.01     0.00   0.00   0.00     0.01  -0.01   0.02
   7   8    -0.02   0.02   0.02    -0.02   0.01   0.02     0.01  -0.03   0.00
   8   6     0.02  -0.02   0.00     0.00  -0.01   0.00    -0.03   0.00   0.00
   9   6    -0.01   0.00   0.01    -0.01  -0.01   0.00    -0.02   0.00   0.06
  10   6     0.03   0.00   0.04     0.01   0.00   0.03     0.02  -0.01  -0.02
  11   6     0.00   0.01   0.01     0.00  -0.01   0.00    -0.01   0.02   0.03
  12   6    -0.01   0.01   0.00     0.02   0.00   0.00     0.00   0.02   0.07
  13   6     0.00   0.00   0.00    -0.01  -0.01   0.01     0.03   0.03   0.05
  14   6     0.01   0.00  -0.01    -0.02  -0.01   0.01     0.04   0.02   0.05
  15   6     0.00   0.00   0.00     0.01   0.00   0.00    -0.01  -0.01   0.03
  16   6     0.01   0.01   0.01     0.00   0.00  -0.01     0.00   0.01   0.00
  17   6    -0.02   0.00   0.00     0.03   0.01   0.00    -0.02   0.00   0.00
  18   6     0.01   0.01   0.03     0.01   0.01   0.02    -0.01  -0.01  -0.01
  19   6    -0.07   0.05   0.06    -0.07   0.05   0.03     0.10  -0.07  -0.01
  20   6    -0.02   0.02   0.07    -0.02   0.01   0.05     0.02  -0.02  -0.02
  21   6     0.05  -0.02   0.07     0.06  -0.04   0.06    -0.09   0.05  -0.04
  22   6     0.01   0.00   0.02     0.00  -0.01   0.02     0.00   0.01  -0.02
  23   6     0.02  -0.01   0.00     0.03  -0.02   0.01    -0.05   0.03  -0.01
  24   6    -0.01   0.01   0.00    -0.02   0.00   0.00     0.03  -0.01  -0.01
  25   6     0.01  -0.01   0.01    -0.02   0.00  -0.02    -0.06  -0.03  -0.07
  26   6     0.02   0.00   0.01    -0.01   0.01  -0.02     0.02   0.02  -0.08
  27   6     0.00  -0.01  -0.03     0.01   0.02   0.04     0.03  -0.04  -0.12
  28   6    -0.02   0.00  -0.01     0.02  -0.01  -0.01    -0.07  -0.02  -0.06
  29   6    -0.06  -0.01  -0.07    -0.05   0.00  -0.04     0.04  -0.01   0.00
  30   6     0.02  -0.02  -0.11     0.01  -0.01  -0.09     0.00   0.01   0.07
  31   6     0.05  -0.04  -0.04     0.05  -0.04  -0.02    -0.04   0.05  -0.02
  32   6     0.00   0.02  -0.11     0.01   0.02  -0.10    -0.03  -0.01   0.10
  33   6    -0.02  -0.04   0.03    -0.09   0.04   0.02    -0.08  -0.05   0.03
  34   6     0.06   0.00   0.02    -0.01  -0.06   0.01     0.12  -0.04   0.00
  35   8     0.03   0.02   0.04    -0.02  -0.02  -0.04     0.00   0.00   0.00
  36  12    -0.05   0.10   0.00     0.05   0.10  -0.02    -0.01   0.19  -0.05
  37   8    -0.02  -0.02   0.05    -0.01   0.03  -0.07    -0.02   0.00  -0.01
  38   6     0.03   0.01   0.01    -0.03   0.00   0.00     0.00   0.00   0.00
  39   7     0.03  -0.01   0.10     0.02   0.00   0.08     0.05  -0.03  -0.05
  40   7    -0.02   0.00   0.03    -0.02  -0.01  -0.01    -0.02  -0.01   0.13
  41   8     0.01   0.01   0.02     0.00  -0.01  -0.03     0.01   0.01   0.00
  42   8    -0.05   0.01  -0.05     0.04  -0.01   0.04    -0.01   0.00  -0.01
  43   6    -0.02  -0.02  -0.03     0.00  -0.02   0.02    -0.01  -0.02  -0.01
  44   6    -0.01  -0.02   0.00    -0.01   0.00  -0.04    -0.02  -0.01  -0.02
  45   6     0.02   0.01  -0.03    -0.02   0.00   0.04     0.00   0.00   0.01
  46   8     0.00  -0.04  -0.01    -0.02  -0.04   0.06    -0.01  -0.04   0.02
  47   6     0.04   0.05  -0.01    -0.04  -0.05   0.01     0.00   0.00   0.00
  48   8    -0.04   0.02   0.00     0.03  -0.04  -0.02     0.00   0.02  -0.01
  49   6    -0.01  -0.01   0.01     0.02   0.01  -0.01     0.02  -0.01   0.00
  50   8    -0.02  -0.04  -0.02     0.07   0.10   0.05     0.04   0.04   0.04
  51   8     0.08   0.05  -0.03    -0.03  -0.04   0.03     0.03   0.00  -0.01
  52   6     0.00   0.01  -0.04     0.01  -0.02   0.03     0.00   0.00   0.01
  53   6    -0.05   0.01  -0.02     0.05  -0.02   0.01    -0.01   0.00   0.01
  54   6     0.02   0.04  -0.02     0.00  -0.05   0.01     0.03  -0.01  -0.02
  55   8     0.04   0.01  -0.03    -0.03  -0.02   0.01     0.02  -0.01   0.01
  56   6     0.00  -0.06   0.05     0.00   0.05  -0.04    -0.02   0.01   0.01
  57   6     0.06   0.00   0.09    -0.07  -0.01  -0.09    -0.02  -0.02  -0.01
  58   6    -0.05  -0.03  -0.01     0.06   0.08  -0.03     0.01   0.02  -0.01
  59   6    -0.04  -0.04  -0.03     0.03   0.02   0.05     0.00  -0.01   0.01
  60   1    -0.02  -0.01  -0.08     0.00   0.00  -0.04     0.01   0.01  -0.05
  61   1    -0.03  -0.02  -0.02    -0.01  -0.01  -0.01    -0.01   0.00   0.00
  62   1    -0.02   0.02   0.01    -0.01   0.00  -0.01    -0.02  -0.01  -0.02
  63   1     0.00   0.01   0.00     0.00   0.00   0.00     0.00   0.02  -0.01
  64   1    -0.01  -0.01   0.00    -0.01   0.00   0.00     0.00   0.01   0.00
  65   1     0.01   0.02  -0.05     0.00   0.01  -0.03     0.01  -0.01   0.04
  66   1     0.03  -0.03  -0.01     0.02  -0.02   0.00     0.00   0.01   0.02
  67   1     0.05  -0.03  -0.04     0.02  -0.01  -0.01    -0.05   0.00   0.02
  68   1     0.03  -0.06   0.05     0.00  -0.04   0.02    -0.03   0.03  -0.03
  69   1    -0.01   0.01   0.00     0.04   0.00  -0.01     0.00   0.01   0.08
  70   1    -0.01   0.00   0.00     0.00  -0.01   0.01     0.04   0.03   0.04
  71   1     0.02   0.01  -0.01    -0.03  -0.01   0.02     0.06   0.04   0.04
  72   1     0.01   0.01  -0.01     0.00  -0.01   0.01     0.00   0.02  -0.01
  73   1    -0.01  -0.01   0.00     0.03   0.00   0.00    -0.02  -0.01   0.00
  74   1    -0.13   0.06   0.05    -0.14   0.07   0.03     0.17  -0.10   0.00
  75   1    -0.04   0.03   0.06    -0.03   0.02   0.03     0.04  -0.03  -0.01
  76   1     0.10  -0.03   0.09     0.12  -0.06   0.07    -0.18   0.10  -0.06
  77   1     0.02  -0.01   0.00     0.03  -0.02   0.01    -0.05   0.03   0.00
  78   1    -0.02   0.01   0.00    -0.03   0.00   0.00     0.03  -0.01  -0.01
  79   1     0.00   0.13   0.04    -0.01  -0.11  -0.04    -0.12  -0.15  -0.05
  80   1     0.12  -0.08   0.06    -0.09   0.06  -0.07    -0.08   0.01  -0.20
  81   1    -0.08  -0.08  -0.08     0.05   0.06   0.04    -0.04  -0.02  -0.05
  82   1     0.02  -0.01   0.01    -0.01   0.02  -0.01     0.06   0.06  -0.09
  83   1     0.04   0.01   0.01    -0.02   0.00  -0.03     0.05   0.06  -0.10
  84   1     0.03  -0.01   0.01    -0.01   0.00  -0.02    -0.02  -0.03  -0.13
  85   1     0.03  -0.01  -0.04    -0.03   0.01   0.04     0.15  -0.05  -0.12
  86   1     0.01  -0.01  -0.04     0.01   0.02   0.04     0.06  -0.05  -0.15
  87   1    -0.03  -0.02  -0.06     0.04   0.03   0.07    -0.06  -0.06  -0.22
  88   1    -0.03   0.01  -0.01     0.01  -0.02   0.00    -0.18   0.01  -0.07
  89   1    -0.02  -0.01  -0.02     0.02   0.00  -0.01    -0.04  -0.06  -0.16
  90   1    -0.02   0.00   0.01     0.02  -0.01  -0.03    -0.07  -0.01  -0.04
  91   1    -0.14  -0.01  -0.05    -0.10   0.02  -0.04     0.06  -0.04   0.01
  92   1    -0.08  -0.01  -0.08    -0.06   0.01  -0.03     0.04  -0.02  -0.02
  93   1    -0.03  -0.02  -0.14    -0.03  -0.01  -0.09     0.03   0.00   0.02
  94   1     0.16  -0.02  -0.14     0.12  -0.01  -0.11    -0.09   0.02   0.08
  95   1    -0.06  -0.07  -0.22    -0.05  -0.04  -0.18     0.05   0.02   0.14
  96   1     0.00  -0.02  -0.09     0.01  -0.01  -0.08     0.00   0.01   0.07
  97   1     0.10  -0.08  -0.03     0.07  -0.08  -0.02    -0.02   0.07   0.00
  98   1     0.03  -0.01  -0.12     0.04  -0.02  -0.07    -0.04   0.04  -0.01
  99   1     0.06  -0.04  -0.04     0.05  -0.05   0.00    -0.04   0.06  -0.06
 100   1    -0.05   0.11  -0.09    -0.04   0.10  -0.09     0.01  -0.09   0.08
 101   1    -0.02   0.06  -0.16     0.00   0.05  -0.15    -0.01  -0.04   0.16
 102   1     0.05  -0.05  -0.18     0.06  -0.04  -0.17    -0.07   0.06   0.17
 103   1    -0.04  -0.06   0.04    -0.11   0.00   0.05    -0.05  -0.05   0.02
 104   1    -0.01  -0.04   0.05    -0.08   0.12  -0.02    -0.09  -0.01  -0.03
 105   1     0.01  -0.02   0.03    -0.16   0.05   0.07    -0.14  -0.06   0.06
 106   1     0.12  -0.01   0.04    -0.05  -0.05   0.00     0.17  -0.04   0.05
 107   1     0.05   0.00   0.01    -0.02  -0.06   0.01     0.13  -0.07   0.01
 108   1     0.07   0.05  -0.01     0.00  -0.10   0.02     0.11   0.04  -0.01
 109   1    -0.01  -0.03   0.00    -0.03  -0.02  -0.04    -0.03  -0.02  -0.02
 110   1     0.04   0.03  -0.04    -0.05  -0.02   0.05     0.00   0.00   0.01
 111   1     0.04   0.06  -0.02    -0.04  -0.05   0.03     0.00  -0.01   0.01
 112   1     0.08   0.08  -0.01    -0.08  -0.08   0.01     0.00  -0.01   0.00
 113   1     0.01   0.04  -0.04    -0.01  -0.04   0.04     0.01   0.00   0.01
 114   1    -0.06   0.03  -0.03     0.07  -0.04   0.02    -0.03   0.00   0.01
 115   1     0.00   0.08  -0.05     0.02  -0.08   0.03     0.03   0.00  -0.01
 116   1    -0.01  -0.11   0.16     0.02   0.11  -0.14    -0.01   0.03   0.01
 117   1    -0.03  -0.05   0.06     0.02   0.04  -0.04    -0.04   0.01   0.02
 118   1     0.12  -0.08   0.00    -0.11   0.08   0.02    -0.03   0.02   0.02
 119   1     0.05  -0.14   0.22    -0.07   0.16  -0.21    -0.03   0.02   0.00
 120   1     0.22   0.11   0.13    -0.26  -0.13  -0.13    -0.06  -0.03   0.01
 121   1    -0.03  -0.02   0.02     0.02  -0.02  -0.02    -0.02  -0.07  -0.01
 122   1    -0.07  -0.05   0.05     0.10   0.15  -0.14     0.02   0.04  -0.05
 123   1    -0.08  -0.03  -0.04     0.12   0.11   0.08     0.02   0.02   0.02
 124   1    -0.05  -0.03  -0.04     0.07   0.08  -0.03     0.01   0.02  -0.01
 125   1    -0.06  -0.10   0.05     0.05   0.06  -0.02     0.00  -0.01   0.01
 126   1    -0.02  -0.02  -0.04     0.01   0.00   0.09     0.00  -0.01   0.02
 127   1    -0.11  -0.06  -0.10     0.10   0.02   0.09     0.00  -0.01   0.00
                    79                     80                     81
                     A                      A                      A
 Frequencies --   331.0007               333.1963               338.1130
 Red. masses --     3.2528                 3.0597                 3.5864
 Frc consts  --     0.2100                 0.2001                 0.2416
 IR Inten    --     4.5549                 0.1672                10.8710
 Atom AN      X      Y      Z        X      Y      Z        X      Y      Z
   1   6    -0.03  -0.02  -0.04     0.00   0.00   0.01    -0.05  -0.06  -0.01
   2   6    -0.02  -0.01   0.01    -0.01   0.00  -0.01     0.02  -0.03   0.06
   3   6    -0.01  -0.01   0.04     0.00   0.00  -0.01     0.06  -0.07  -0.02
   4   6    -0.01   0.00   0.00     0.00   0.00   0.00     0.00   0.00  -0.01
   5   6    -0.01   0.01   0.00     0.00   0.00   0.00     0.00   0.00   0.00
   6   6    -0.01   0.00   0.03     0.00   0.00  -0.01     0.01  -0.01   0.00
   7   8     0.03  -0.04  -0.02     0.00   0.01   0.00    -0.01   0.00   0.01
   8   6    -0.05   0.03   0.00     0.01  -0.01   0.00     0.00  -0.01   0.00
   9   6     0.00   0.00  -0.03     0.00   0.01   0.01    -0.01   0.00  -0.04
  10   6     0.01  -0.01   0.02     0.00   0.00  -0.01     0.00   0.00  -0.05
  11   6     0.01  -0.01  -0.02    -0.01   0.00   0.01     0.01   0.00  -0.03
  12   6     0.04   0.00  -0.06     0.19   0.09  -0.05     0.01   0.00  -0.06
  13   6    -0.03  -0.02  -0.03     0.01   0.03   0.03    -0.05   0.00  -0.04
  14   6    -0.07  -0.03  -0.02    -0.18  -0.05   0.11    -0.05   0.01  -0.04
  15   6     0.01   0.01  -0.02     0.01   0.02   0.02     0.00   0.03  -0.03
  16   6    -0.01  -0.01   0.00    -0.09  -0.05   0.02     0.00   0.00   0.00
  17   6     0.04   0.01  -0.01     0.08   0.03  -0.01     0.03   0.03  -0.01
  18   6     0.01   0.01   0.02     0.00   0.00   0.00    -0.02  -0.01  -0.04
  19   6     0.15  -0.07   0.06    -0.02   0.01  -0.01    -0.07   0.02  -0.06
  20   6     0.00   0.00   0.02     0.00   0.01   0.00     0.02   0.00  -0.03
  21   6    -0.14   0.07   0.00     0.02   0.00   0.00     0.07   0.00  -0.03
  22   6     0.02  -0.02   0.01     0.00   0.01   0.00    -0.01   0.04  -0.03
  23   6    -0.05   0.04   0.00     0.01   0.00   0.00     0.02  -0.02  -0.01
  24   6     0.08  -0.03  -0.02    -0.01   0.01   0.00    -0.04   0.04   0.00
  25   6     0.05   0.02   0.06    -0.04  -0.07   0.07     0.07   0.02   0.06
  26   6    -0.02  -0.01   0.04    -0.10   0.00  -0.14     0.00  -0.02   0.07
  27   6    -0.01   0.04   0.11     0.06   0.03   0.06    -0.02   0.02   0.10
  28   6     0.07   0.00   0.03     0.03  -0.04  -0.10     0.07   0.00   0.04
  29   6    -0.01  -0.03  -0.14     0.00   0.00   0.02     0.04   0.00   0.11
  30   6     0.09   0.01   0.02    -0.01   0.00   0.00    -0.08   0.00   0.04
  31   6     0.01   0.03  -0.09     0.00   0.00   0.01    -0.04   0.01   0.07
  32   6    -0.07   0.00   0.04     0.01   0.00   0.00     0.05  -0.01   0.03
  33   6    -0.04   0.00   0.01     0.04  -0.03   0.00    -0.12  -0.02   0.01
  34   6     0.00   0.00   0.00     0.02   0.02   0.00     0.07  -0.08  -0.01
  35   8     0.00   0.00   0.00     0.01   0.00   0.00     0.01   0.01   0.01
  36  12     0.01   0.05   0.01    -0.02  -0.01   0.00     0.03   0.12   0.00
  37   8     0.00   0.00   0.00     0.00   0.00   0.01     0.00   0.00   0.01
  38   6     0.00   0.00   0.00     0.00   0.00   0.00     0.00   0.00   0.00
  39   7     0.00  -0.01   0.08     0.00   0.00  -0.02     0.05  -0.02  -0.12
  40   7    -0.03  -0.01  -0.09     0.00   0.01   0.03    -0.06  -0.03  -0.10
  41   8     0.00   0.00   0.00    -0.01  -0.01   0.00    -0.01  -0.01   0.00
  42   8     0.00   0.00   0.00     0.00   0.00   0.00    -0.01   0.00  -0.01
  43   6     0.00   0.00   0.00     0.00   0.00   0.00     0.00  -0.01   0.00
  44   6     0.00   0.00   0.00     0.00   0.00   0.00     0.00  -0.01   0.01
  45   6     0.00   0.00   0.00     0.00   0.00   0.00     0.00   0.00  -0.01
  46   8     0.00   0.00   0.00     0.00  -0.01   0.00     0.00  -0.01   0.00
  47   6     0.00   0.00   0.00     0.01   0.01   0.00     0.01   0.02   0.00
  48   8    -0.01  -0.01  -0.01     0.00   0.00   0.01    -0.02   0.00   0.00
  49   6     0.00   0.00   0.00     0.00   0.00   0.00     0.00   0.00   0.00
  50   8     0.00   0.00   0.00     0.00   0.00  -0.01    -0.01  -0.01  -0.01
  51   8     0.01   0.00   0.00     0.02   0.00  -0.01     0.02   0.02  -0.02
  52   6     0.00   0.00   0.00     0.01   0.00  -0.02    -0.01  -0.01   0.00
  53   6     0.00  -0.01   0.00    -0.01   0.00  -0.01    -0.02  -0.01   0.01
  54   6     0.00   0.00   0.00    -0.01   0.01   0.01     0.01   0.01  -0.02
  55   8     0.00  -0.01   0.00     0.02  -0.01  -0.01     0.00  -0.03   0.01
  56   6     0.00  -0.01   0.00     0.00   0.00   0.01    -0.03  -0.01   0.02
  57   6     0.00   0.00   0.00    -0.01   0.01   0.01     0.01   0.00   0.02
  58   6     0.00   0.00   0.00    -0.01   0.00   0.00    -0.01  -0.01   0.01
  59   6     0.00   0.00   0.00     0.00   0.00   0.00     0.00  -0.01  -0.01
  60   1    -0.02   0.00   0.01    -0.01   0.00  -0.01     0.02   0.05   0.11
  61   1     0.02   0.02   0.02    -0.01  -0.01   0.00     0.00   0.00  -0.01
  62   1     0.00  -0.02  -0.02     0.00   0.01   0.01     0.00   0.00  -0.01
  63   1    -0.01   0.01   0.00     0.00   0.00   0.00     0.00   0.00   0.00
  64   1     0.00   0.02   0.00     0.00   0.00   0.00     0.00   0.00  -0.01
  65   1    -0.02  -0.04   0.09     0.00   0.01  -0.02     0.01   0.00  -0.02
  66   1    -0.05   0.05   0.03     0.01  -0.01  -0.01     0.02  -0.02   0.00
  67   1    -0.10   0.03   0.06     0.02  -0.01  -0.01     0.01  -0.01  -0.01
  68   1    -0.06   0.09  -0.07     0.02  -0.02   0.02     0.00  -0.02   0.01
  69   1     0.07   0.02  -0.09     0.34   0.14  -0.12     0.02   0.01  -0.07
  70   1    -0.05  -0.03  -0.02     0.01   0.03   0.02    -0.07  -0.01  -0.01
  71   1    -0.11  -0.05  -0.01    -0.33  -0.10   0.17    -0.08   0.00  -0.03
  72   1     0.00  -0.02   0.01    -0.08  -0.05   0.03     0.01   0.00  -0.01
  73   1     0.04   0.01   0.00     0.08   0.03   0.00     0.03   0.03   0.01
  74   1     0.26  -0.13   0.08    -0.03   0.02  -0.01    -0.12   0.04  -0.06
  75   1     0.00   0.00   0.01     0.00   0.01   0.00     0.04  -0.01   0.00
  76   1    -0.27   0.13  -0.02     0.04  -0.01   0.00     0.13  -0.03  -0.02
  77   1    -0.05   0.04  -0.01     0.01   0.00   0.00     0.01  -0.02   0.00
  78   1     0.08  -0.03  -0.02    -0.01   0.01   0.01    -0.04   0.04   0.02
  79   1     0.10   0.13   0.05     0.03  -0.13   0.01     0.12   0.21   0.06
  80   1     0.08  -0.03   0.17    -0.07  -0.04   0.06     0.15  -0.06   0.21
  81   1     0.01  -0.01   0.03     0.00  -0.06   0.16     0.00  -0.03   0.00
  82   1    -0.05  -0.02   0.06    -0.07   0.16  -0.09    -0.05  -0.07   0.09
  83   1    -0.05  -0.03   0.04    -0.10   0.07  -0.29    -0.02  -0.04   0.09
  84   1     0.01   0.01   0.07    -0.12  -0.14  -0.22     0.05   0.02   0.13
  85   1    -0.12   0.05   0.11     0.03   0.07   0.03    -0.12   0.01   0.12
  86   1    -0.05   0.05   0.14     0.02   0.05   0.11    -0.08   0.02   0.11
  87   1     0.08   0.05   0.21     0.10  -0.01   0.09     0.06   0.03   0.20
  88   1     0.13  -0.03   0.04    -0.11  -0.06  -0.07     0.14  -0.03   0.06
  89   1     0.05   0.03   0.09     0.06  -0.11  -0.19     0.04   0.02   0.12
  90   1     0.08  -0.01  -0.01     0.07  -0.05  -0.13     0.10  -0.01   0.00
  91   1    -0.13  -0.05  -0.11     0.02   0.00   0.02     0.15  -0.01   0.10
  92   1    -0.07  -0.03  -0.18     0.01   0.00   0.02     0.12  -0.01   0.12
  93   1     0.06  -0.01  -0.27    -0.01   0.00   0.04    -0.03  -0.02   0.25
  94   1     0.05   0.05   0.01    -0.01  -0.01   0.00    -0.12  -0.04   0.06
  95   1     0.09   0.03   0.03    -0.01  -0.01   0.00    -0.03  -0.03   0.10
  96   1     0.13   0.01   0.06    -0.03   0.00  -0.01    -0.14   0.00   0.01
  97   1     0.10   0.00  -0.05    -0.02   0.01   0.01    -0.12   0.05   0.04
  98   1    -0.03   0.04  -0.17     0.00  -0.01   0.03     0.01   0.00   0.17
  99   1     0.03   0.02  -0.14     0.00   0.00   0.02    -0.07   0.03   0.09
 100   1    -0.07  -0.06   0.01     0.02   0.00   0.00     0.09  -0.02   0.05
 101   1    -0.09  -0.01   0.10     0.01   0.00  -0.01     0.09  -0.03   0.03
 102   1    -0.07   0.03   0.06     0.00  -0.01   0.00     0.02   0.02   0.08
 103   1    -0.07  -0.03   0.04     0.05  -0.03   0.00    -0.13  -0.04   0.02
 104   1    -0.03   0.02   0.03     0.03  -0.07   0.01    -0.11   0.06  -0.04
 105   1    -0.03   0.02   0.02     0.07  -0.03  -0.02    -0.19  -0.02   0.05
 106   1     0.02  -0.02  -0.03     0.04   0.02   0.01     0.07  -0.07   0.00
 107   1    -0.02   0.04  -0.02     0.02   0.02   0.00     0.07  -0.08  -0.01
 108   1     0.01  -0.01  -0.01     0.01   0.05  -0.01     0.07  -0.07  -0.01
 109   1     0.00   0.00   0.00     0.00  -0.01   0.00     0.00  -0.01   0.01
 110   1     0.00   0.00   0.00     0.00   0.00  -0.01     0.00   0.01  -0.01
 111   1     0.00   0.00   0.00     0.01   0.01   0.00     0.01   0.02  -0.01
 112   1     0.00   0.00   0.00     0.01   0.02   0.00     0.02   0.03   0.00
 113   1     0.00   0.00   0.00     0.00   0.01  -0.01     0.00   0.02  -0.01
 114   1     0.01  -0.01   0.00    -0.01   0.01  -0.02    -0.02  -0.01   0.01
 115   1     0.00   0.01   0.00     0.00   0.03   0.01     0.00   0.03  -0.03
 116   1    -0.01  -0.01  -0.01     0.01  -0.01   0.04    -0.02  -0.01   0.03
 117   1     0.01  -0.01   0.00    -0.02   0.00   0.01    -0.03  -0.01   0.01
 118   1     0.00   0.00   0.00     0.03  -0.01   0.00    -0.02  -0.02   0.01
 119   1     0.00   0.00   0.01    -0.03  -0.03   0.10     0.01  -0.02   0.04
 120   1     0.01   0.01   0.00     0.10   0.02  -0.03     0.02   0.03   0.04
 121   1     0.00   0.00   0.00    -0.10   0.05  -0.06     0.00  -0.03   0.01
 122   1     0.00   0.00   0.00    -0.01   0.00   0.01    -0.02  -0.01   0.02
 123   1     0.00   0.00   0.00    -0.01   0.00   0.00    -0.02  -0.01   0.00
 124   1     0.00   0.00   0.00    -0.01   0.00  -0.01    -0.02  -0.01   0.00
 125   1     0.00   0.00   0.00     0.00  -0.01   0.00    -0.01  -0.01   0.00
 126   1     0.00   0.00   0.00     0.00   0.00   0.00     0.00   0.00  -0.01
 127   1     0.00   0.00   0.00    -0.01  -0.01  -0.01    -0.01  -0.01  -0.02
                    82                     83                     84
                     A                      A                      A
 Frequencies --   346.6536               349.5975               354.0852
 Red. masses --     4.2565                 4.0575                 2.7622
 Frc consts  --     0.3014                 0.2922                 0.2040
 IR Inten    --    24.5455                 9.3935                 0.9274
 Atom AN      X      Y      Z        X      Y      Z        X      Y      Z
   1   6    -0.04  -0.02  -0.01     0.02   0.01   0.00     0.03   0.01   0.00
   2   6    -0.05   0.00   0.00     0.02   0.00   0.00     0.04   0.00   0.00
   3   6    -0.03   0.01  -0.01     0.01   0.00   0.00     0.03  -0.01   0.00
   4   6    -0.03   0.00   0.00     0.04   0.00   0.00    -0.05   0.00   0.01
   5   6     0.00  -0.01   0.00     0.00   0.00   0.00     0.00   0.00   0.00
   6   6     0.02   0.00  -0.05    -0.03   0.00   0.05     0.04   0.00  -0.07
   7   8    -0.05   0.07   0.03     0.06  -0.08  -0.05    -0.09   0.11   0.07
   8   6     0.10  -0.07  -0.01    -0.10   0.07   0.01     0.14  -0.10   0.00
   9   6     0.00   0.00  -0.01     0.00   0.00   0.00     0.01   0.00   0.00
  10   6     0.00   0.01  -0.02     0.00   0.00   0.00     0.01  -0.01   0.00
  11   6     0.01  -0.01  -0.01     0.00   0.00   0.00    -0.01   0.00   0.00
  12   6     0.00  -0.01  -0.01     0.01   0.01   0.00     0.00   0.01   0.00
  13   6    -0.02  -0.02  -0.01     0.00   0.01   0.00     0.00   0.01   0.00
  14   6    -0.01  -0.01  -0.02    -0.01   0.00   0.01     0.00   0.01   0.01
  15   6     0.00   0.00  -0.01     0.00   0.00   0.00     0.00   0.01   0.00
  16   6     0.01   0.00   0.00    -0.01   0.00   0.00    -0.01   0.00   0.00
  17   6     0.00   0.00   0.00     0.00   0.00   0.00     0.00   0.01   0.00
  18   6     0.00   0.00  -0.01     0.00   0.00   0.00     0.00  -0.01   0.01
  19   6     0.03   0.00   0.00    -0.04   0.01  -0.01     0.04  -0.04   0.01
  20   6     0.01   0.02   0.00     0.00  -0.01   0.00    -0.01  -0.02   0.00
  21   6    -0.01   0.03  -0.01     0.03  -0.03   0.00    -0.06   0.01  -0.01
  22   6     0.01   0.02  -0.01    -0.01  -0.01   0.00     0.00  -0.01   0.00
  23   6     0.00   0.01  -0.01     0.01  -0.01   0.00    -0.03   0.01   0.01
  24   6     0.00   0.02   0.00    -0.01  -0.01   0.00     0.00  -0.01   0.00
  25   6     0.02   0.01   0.02     0.00  -0.01   0.01     0.00   0.00   0.00
  26   6     0.00   0.00   0.03     0.00   0.00  -0.01    -0.01   0.00  -0.01
  27   6    -0.01   0.01   0.02     0.00   0.00   0.00     0.00   0.00   0.00
[truncated: 2,031,691 more chars]
