# Supplementary material
Source: publisher figshare collection journal article supplement (https://acs.figshare.com/ndownloader/files/5127205)
Supplement: Supplementary file 1 [file 5127205 › supporting_ja043819b/RRSS_fm-5-product-thf-solv.log]

 Entering Gaussian System, Link 0=g03
 Input=RRSS_fm-5-product-thf.gjf
 Output=RRSS_fm-5-product-thf.log
 Initial command:
 /usr/local/g03/l1.exe /home/rzepa/Gau-8697.inp -scrdir=/home/rzepa/
 Entering Link 1 = /usr/local/g03/l1.exe PID=      8698.
  
 Copyright (c) 1988,1990,1992,1993,1995,1998,2003,2004, Gaussian, Inc.
                  All Rights Reserved.
  
 This is the Gaussian(R) 03 program.  It is based on the
 the Gaussian(R) 98 system (copyright 1998, Gaussian, Inc.),
 the Gaussian(R) 94 system (copyright 1995, Gaussian, Inc.),
 the Gaussian 92(TM) system (copyright 1992, Gaussian, Inc.),
 the Gaussian 90(TM) system (copyright 1990, Gaussian, Inc.),
 the Gaussian 88(TM) system (copyright 1988, Gaussian, Inc.),
 the Gaussian 86(TM) system (copyright 1986, Carnegie Mellon
 University), and the Gaussian 82(TM) system (copyright 1983,
 Carnegie Mellon University). Gaussian is a federally registered
 trademark of Gaussian, Inc.
  
 This software contains proprietary and confidential information,
 including trade secrets, belonging to Gaussian, Inc.
  
 This software is provided under written license and may be
 used, copied, transmitted, or stored only in accord with that
 written license.
  
 The following legend is applicable only to US Government
 contracts under FAR:
  
                    RESTRICTED RIGHTS LEGEND
  
 Use, reproduction and disclosure by the US Government is
 subject to restrictions as set forth in subparagraphs (a)
 and (c) of the Commercial Computer Software - Restricted
 Rights clause in FAR 52.227-19.
  
 Gaussian, Inc.
 340 Quinnipiac St., Bldg. 40, Wallingford CT 06492
  
  
 ---------------------------------------------------------------
 Warning -- This program may not be used in any manner that
 competes with the business of Gaussian, Inc. or will provide
 assistance to any competitor of Gaussian, Inc.  The licensee
 of this program is prohibited from giving any competitor of
 Gaussian, Inc. access to this program.  By using this program,
 the user acknowledges that Gaussian, Inc. is engaged in the
 business of creating and licensing software in the field of
 computational chemistry and represents and warrants to the
 licensee that it is not a competitor of Gaussian, Inc. and that
 it will not use this program in any manner prohibited above.
 ---------------------------------------------------------------
  

 Cite this work as:
 Gaussian 03, Revision C.01,
 M. J. Frisch, G. W. Trucks, H. B. Schlegel, G. E. Scuseria, 
 M. A. Robb, J. R. Cheeseman, J. A. Montgomery, Jr., T. Vreven, 
 K. N. Kudin, J. C. Burant, J. M. Millam, S. S. Iyengar, J. Tomasi, 
 V. Barone, B. Mennucci, M. Cossi, G. Scalmani, N. Rega, 
 G. A. Petersson, H. Nakatsuji, M. Hada, M. Ehara, K. Toyota, 
 R. Fukuda, J. Hasegawa, M. Ishida, T. Nakajima, Y. Honda, O. Kitao, 
 H. Nakai, M. Klene, X. Li, J. E. Knox, H. P. Hratchian, J. B. Cross, 
 C. Adamo, J. Jaramillo, R. Gomperts, R. E. Stratmann, O. Yazyev, 
 A. J. Austin, R. Cammi, C. Pomelli, J. W. Ochterski, P. Y. Ayala, 
 K. Morokuma, G. A. Voth, P. Salvador, J. J. Dannenberg, 
 V. G. Zakrzewski, S. Dapprich, A. D. Daniels, M. C. Strain, 
 O. Farkas, D. K. Malick, A. D. Rabuck, K. Raghavachari, 
 J. B. Foresman, J. V. Ortiz, Q. Cui, A. G. Baboul, S. Clifford, 
 J. Cioslowski, B. B. Stefanov, G. Liu, A. Liashenko, P. Piskorz, 
 I. Komaromi, R. L. Martin, D. J. Fox, T. Keith, M. A. Al-Laham, 
 C. Y. Peng, A. Nanayakkara, M. Challacombe, P. M. W. Gill, 
 B. Johnson, W. Chen, M. W. Wong, C. Gonzalez, and J. A. Pople, 
 Gaussian, Inc., Wallingford CT, 2004.
 
 ******************************************
 Gaussian 03:  AM64L-G03RevC.01  3-Apr-2004
                 8-Dec-2004 
 ******************************************
 %mem=3GB
 %nprocshared=2
 Will use up to    2 processors via shared memory.
 %chk=RRSS_fm-5-prod-thf.chk
 ---------------------------------------------------------------
 # b3lyp/Gen geom=checkpoint guess=read scrf(IEFPCM,solvent=thf)
 ---------------------------------------------------------------
 1/29=2,38=1/1;
 2/40=1/2;
 3/5=7,11=2,16=1,25=1,30=1,70=2201,72=20,74=-5/1,2,3;
 4/5=1/1;
 5/5=2,32=1,38=6,53=20/2;
 6/7=2,8=2,9=2,10=2,28=1/1;
 99/5=1,9=1/99;
 ----------------
 from RRSS_fm.gjf
 ----------------
 Redundant internal coordinates taken from checkpoint file:
 RRSS_fm-5-prod-thf.chk
 Charge =  0 Multiplicity = 1
 C,0,4.3311976641,1.078278086,-0.3155857776
 C,0,4.9873142572,-0.1572487851,-0.1803195741
 C,0,4.4190043996,-1.4297134494,0.0287314781
 C,0,-1.2538665614,-3.3068177518,-1.193004177
 C,0,-1.453003929,-2.2712322623,-2.329747011
 C,0,-0.7601256046,-1.0003788619,-1.7933655012
 O,0,0.067480377,-1.4394678945,-0.6980650487
 C,0,-0.6991142411,-2.4729169304,-0.0368368866
 C,0,2.5011929933,2.6040271591,-0.2289276757
 C,0,2.6094376976,-3.0036244559,0.1528064635
 C,0,2.6258502019,3.4743522293,0.9071740682
 C,0,2.0338146254,4.765354483,0.8322516516
 C,0,1.3725286736,5.1999142814,-0.3331028596
 C,0,1.2525554637,4.3321707971,-1.4469241478
 C,0,1.8040109992,3.0260606006,-1.4126388621
 C,0,3.4368384566,3.0713737654,2.1726915975
 C,0,1.6982866984,2.0936945857,-2.6480407959
 C,0,2.4798171319,-3.7006889967,-1.0947149524
 C,0,1.8052978257,-4.9520635561,-1.102461377
 C,0,1.2863031216,-5.5064830152,0.084778708
 C,0,1.4636232173,-4.8359006839,1.3146320162
 C,0,2.1299346746,-3.5824836058,1.379978266
 C,0,3.0960282239,-3.1643066184,-2.4171694419
 C,0,2.3873174985,-2.8934026853,2.7464089784
 C,0,2.5088057047,2.6461381981,3.354799555
 C,0,4.4109869911,4.2128460579,2.621107154
 C,0,0.3059776481,2.1791687236,-3.3470467064
 C,0,2.842469558,2.379899549,-3.6784057041
 C,0,1.1921671019,-3.0413686496,3.7349143716
 C,0,3.7072415891,-3.4358764933,3.3918970252
 C,0,2.0056652466,-2.7843358092,-3.468906855
 C,0,4.0993894208,-4.2007241707,-3.0285229147
 C,0,5.2327418873,2.2686992412,-0.6383705936
 C,0,5.421832901,-2.581048653,0.0429055906
 O,0,-7.2756496548,-2.507747299,0.9137341029
 Mg,0,1.5967964174,-0.206670524,0.3729597627
 O,0,-3.1375763067,1.9268069314,-0.6418034106
 C,0,-6.9827296552,-1.2636557587,0.4901471045
 N,0,3.1172148179,-1.6484933073,0.1699068248
 N,0,3.0175533898,1.2531973683,-0.1652888119
 O,0,-7.6710935888,-0.6099876117,-0.2575259672
 O,0,-5.2155136175,0.3854826843,0.4524590779
 C,0,-4.736412084,0.2049055824,-0.7930519992
 C,0,-4.3107039269,1.5399054746,-1.4044593212
 C,0,-5.6737969256,-0.793444223,1.1312952873
 O,0,-4.6493593498,-0.8718175037,-1.3418197056
 C,0,-8.5040570599,-3.0588162634,0.4059324902
 O,0,0.7326851065,-0.144827229,2.0977092936
 C,0,-2.8712705233,3.2495436672,-0.5770227564
 O,0,-3.5286093069,4.1002748203,-1.1364144301
 O,0,-1.4317070739,2.5741978004,1.2861667206
 C,0,-0.5907068543,1.5497810747,1.0954505167
 C,0,-0.2883454002,0.7257080165,2.3519627053
 C,0,-1.6123843976,3.5475918237,0.2322821849
 O,0,-0.0583743386,1.3134418976,0.016381604
 C,0,-1.5854212718,0.0516472931,2.8586155803
 C,0,-1.6553887137,4.9169896221,0.8947813798
 C,0,-3.9988290603,1.4317998184,-2.8873155076
 C,0,-5.8638996751,-0.4211407879,2.5992673329
 H,0,6.0661794552,-0.1382520863,-0.2942199663
 H,0,-0.4972788946,-4.0529085212,-1.4427496193
 H,0,-2.18168243,-3.8210736762,-0.92280649
 H,0,-2.5109058901,-2.0754075545,-2.5251250272
 H,0,-0.9870805759,-2.6144801259,-3.2574768787
 H,0,-1.4868365427,-0.274333817,-1.4137230951
 H,0,-0.1116836194,-0.4979506648,-2.5118700813
 H,0,-0.0296577157,-3.0260827554,0.614603278
 H,0,-1.4949932998,-1.9972233832,0.5510408617
 H,0,2.1464354218,5.4582512089,1.6761624065
 H,0,0.9828209322,6.2254697368,-0.3944561497
 H,0,0.7683858983,4.695472942,-2.3624242677
 H,0,4.0490875659,2.1865189132,1.9172390322
 H,0,1.8401534371,1.054115564,-2.2842396372
 H,0,1.7184833388,-5.5113978979,-2.0434376554
 H,0,0.7745020386,-6.4783470408,0.0584778813
 H,0,1.0943524464,-5.2981522605,2.2392678944
 H,0,3.6574755718,-2.2395645471,-2.1851892709
 H,0,2.5259328931,-1.8116450148,2.5561721833
 H,0,3.1066580607,2.4981589648,4.2681981871
 H,0,2.019544852,1.6876422468,3.1077815968
 H,0,1.7441526131,3.4128784948,3.556398304
 H,0,5.0779722695,3.8358868923,3.4113517387
 H,0,3.8558392217,5.073070782,3.024260711
 H,0,5.0298336338,4.5611611616,1.7797526116
 H,0,0.2386470274,1.4134211074,-4.1367755128
 H,0,0.151940476,3.1626789385,-3.8176792841
 H,0,-0.503087806,2.0094274667,-2.6185017569
 H,0,2.7299991606,1.7196858897,-4.5522727423
 H,0,3.8300580678,2.1920352937,-3.2287614405
 H,0,2.8047890228,3.425839308,-4.0217852869
 H,0,1.3796694605,-2.4226564939,4.6254551405
 H,0,1.0556368413,-4.0846981841,4.0600426024
 H,0,0.2607377194,-2.6888688323,3.2619631631
 H,0,3.8834555724,-2.9303401756,4.3536973344
 H,0,4.5722743881,-3.2433087372,2.7371971202
 H,0,3.6393042416,-4.5204422971,3.5723748453
 H,0,2.4815867124,-2.4546659617,-4.4061517555
 H,0,1.3891720572,-1.9536859767,-3.0839093354
 H,0,1.3485778032,-3.6401661101,-3.6904542103
 H,0,4.6152641743,-3.754149088,-3.8923305954
 H,0,3.5704742272,-5.1029821338,-3.3709600336
 H,0,4.8551900468,-4.5018031279,-2.2874028499
 H,0,5.4298245755,2.8719858069,0.2552692071
 H,0,6.1995405378,1.9240723245,-1.0207998469
 H,0,4.7849368208,2.9302278324,-1.3860666506
 H,0,5.0034980892,-3.4999635473,0.4602735792
 H,0,5.7752894365,-2.798990018,-0.9725013916
 H,0,6.3007270038,-2.2985376456,0.6352489533
 H,0,-5.0916301865,2.2829576295,-1.2211086172
 H,0,-4.9315433714,-1.5884555326,1.0195190649
 H,0,-9.353849051,-2.4391031505,0.7039233757
 H,0,-8.4698790701,-3.1188178782,-0.6847520868
 H,0,-8.5806553785,-4.0539454922,0.8442718366
 H,0,-0.0230642031,1.4844443799,3.1159269055
 H,0,-0.7485729699,3.5135450973,-0.4447054391
 H,0,-2.3462648158,0.7935188574,3.129506021
 H,0,-2.0002088262,-0.6191733936,2.0982873524
 H,0,-1.3370132653,-0.5463139674,3.7405530349
 H,0,-0.6403812999,5.1582322923,1.2151917701
 H,0,-1.9896533806,5.6662416765,0.1730480521
 H,0,-2.337957552,4.9199958599,1.7496441906
 H,0,-4.8853493116,1.0848093051,-3.4271877855
 H,0,-3.7136117476,2.4129165713,-3.2739672522
 H,0,-3.1906435695,0.717949229,-3.0642176201
 H,0,-4.9131712318,-0.0829858459,3.0208631661
 H,0,-6.5986897663,0.3839096254,2.6984027696
 H,0,-6.2117057091,-1.2924493477,3.1610016771
 Recover connectivity data from disk.
 Stoichiometry    C46H68MgN2O10
 Framework group  C1[X(C46H68MgN2O10)]
 Deg. of freedom   375
 Full point group                 C1      NOp   1
 Largest Abelian subgroup         C1      NOp   1
 Largest concise Abelian subgroup C1      NOp   1
                         Standard orientation:                         
 ---------------------------------------------------------------------
 Center     Atomic     Atomic              Coordinates (Angstroms)
 Number     Number      Type              X           Y           Z
 ---------------------------------------------------------------------
    1          6             0        4.331198    1.078278   -0.315586
    2          6             0        4.987314   -0.157249   -0.180320
    3          6             0        4.419004   -1.429713    0.028731
    4          6             0       -1.253867   -3.306818   -1.193004
    5          6             0       -1.453004   -2.271232   -2.329747
    6          6             0       -0.760126   -1.000379   -1.793366
    7          8             0        0.067480   -1.439468   -0.698065
    8          6             0       -0.699114   -2.472917   -0.036837
    9          6             0        2.501193    2.604027   -0.228928
   10          6             0        2.609438   -3.003624    0.152806
   11          6             0        2.625850    3.474352    0.907174
   12          6             0        2.033815    4.765354    0.832252
   13          6             0        1.372529    5.199914   -0.333103
   14          6             0        1.252555    4.332171   -1.446924
   15          6             0        1.804011    3.026061   -1.412639
   16          6             0        3.436838    3.071374    2.172692
   17          6             0        1.698287    2.093695   -2.648041
   18          6             0        2.479817   -3.700689   -1.094715
   19          6             0        1.805298   -4.952064   -1.102461
   20          6             0        1.286303   -5.506483    0.084779
   21          6             0        1.463623   -4.835901    1.314632
   22          6             0        2.129935   -3.582484    1.379978
   23          6             0        3.096028   -3.164307   -2.417169
   24          6             0        2.387317   -2.893403    2.746409
   25          6             0        2.508806    2.646138    3.354800
   26          6             0        4.410987    4.212846    2.621107
   27          6             0        0.305978    2.179169   -3.347047
   28          6             0        2.842470    2.379900   -3.678406
   29          6             0        1.192167   -3.041369    3.734914
   30          6             0        3.707242   -3.435876    3.391897
   31          6             0        2.005665   -2.784336   -3.468907
   32          6             0        4.099389   -4.200724   -3.028523
   33          6             0        5.232742    2.268699   -0.638371
   34          6             0        5.421833   -2.581049    0.042906
   35          8             0       -7.275650   -2.507747    0.913734
   36         12             0        1.596796   -0.206671    0.372960
   37          8             0       -3.137576    1.926807   -0.641803
   38          6             0       -6.982730   -1.263656    0.490147
   39          7             0        3.117215   -1.648493    0.169907
   40          7             0        3.017553    1.253197   -0.165289
   41          8             0       -7.671094   -0.609988   -0.257526
   42          8             0       -5.215514    0.385483    0.452459
   43          6             0       -4.736412    0.204906   -0.793052
   44          6             0       -4.310704    1.539905   -1.404459
   45          6             0       -5.673797   -0.793444    1.131295
   46          8             0       -4.649359   -0.871818   -1.341820
   47          6             0       -8.504057   -3.058816    0.405932
   48          8             0        0.732685   -0.144827    2.097709
   49          6             0       -2.871271    3.249544   -0.577023
   50          8             0       -3.528609    4.100275   -1.136414
   51          8             0       -1.431707    2.574198    1.286167
   52          6             0       -0.590707    1.549781    1.095451
   53          6             0       -0.288345    0.725708    2.351963
   54          6             0       -1.612384    3.547592    0.232282
   55          8             0       -0.058374    1.313442    0.016382
   56          6             0       -1.585421    0.051647    2.858616
   57          6             0       -1.655389    4.916990    0.894781
   58          6             0       -3.998829    1.431800   -2.887316
   59          6             0       -5.863900   -0.421141    2.599267
   60          1             0        6.066179   -0.138252   -0.294220
   61          1             0       -0.497279   -4.052909   -1.442750
   62          1             0       -2.181682   -3.821074   -0.922806
   63          1             0       -2.510906   -2.075408   -2.525125
   64          1             0       -0.987081   -2.614480   -3.257477
   65          1             0       -1.486837   -0.274334   -1.413723
   66          1             0       -0.111684   -0.497951   -2.511870
   67          1             0       -0.029658   -3.026083    0.614603
   68          1             0       -1.494993   -1.997223    0.551041
   69          1             0        2.146435    5.458251    1.676162
   70          1             0        0.982821    6.225470   -0.394456
   71          1             0        0.768386    4.695473   -2.362424
   72          1             0        4.049088    2.186519    1.917239
   73          1             0        1.840153    1.054116   -2.284240
   74          1             0        1.718483   -5.511398   -2.043438
   75          1             0        0.774502   -6.478347    0.058478
   76          1             0        1.094352   -5.298152    2.239268
   77          1             0        3.657476   -2.239565   -2.185189
   78          1             0        2.525933   -1.811645    2.556172
   79          1             0        3.106658    2.498159    4.268198
   80          1             0        2.019545    1.687642    3.107782
   81          1             0        1.744153    3.412878    3.556398
   82          1             0        5.077972    3.835887    3.411352
   83          1             0        3.855839    5.073071    3.024261
   84          1             0        5.029834    4.561161    1.779753
   85          1             0        0.238647    1.413421   -4.136776
   86          1             0        0.151940    3.162679   -3.817679
   87          1             0       -0.503088    2.009427   -2.618502
   88          1             0        2.729999    1.719686   -4.552273
   89          1             0        3.830058    2.192035   -3.228761
   90          1             0        2.804789    3.425839   -4.021785
   91          1             0        1.379669   -2.422656    4.625455
   92          1             0        1.055637   -4.084698    4.060043
   93          1             0        0.260738   -2.688869    3.261963
   94          1             0        3.883456   -2.930340    4.353697
   95          1             0        4.572274   -3.243309    2.737197
   96          1             0        3.639304   -4.520442    3.572375
   97          1             0        2.481587   -2.454666   -4.406152
   98          1             0        1.389172   -1.953686   -3.083909
   99          1             0        1.348578   -3.640166   -3.690454
  100          1             0        4.615264   -3.754149   -3.892331
  101          1             0        3.570474   -5.102982   -3.370960
  102          1             0        4.855190   -4.501803   -2.287403
  103          1             0        5.429825    2.871986    0.255269
  104          1             0        6.199541    1.924072   -1.020800
  105          1             0        4.784937    2.930228   -1.386067
  106          1             0        5.003498   -3.499964    0.460274
  107          1             0        5.775289   -2.798990   -0.972501
  108          1             0        6.300727   -2.298538    0.635249
  109          1             0       -5.091630    2.282958   -1.221109
  110          1             0       -4.931543   -1.588456    1.019519
  111          1             0       -9.353849   -2.439103    0.703923
  112          1             0       -8.469879   -3.118818   -0.684752
  113          1             0       -8.580655   -4.053945    0.844272
  114          1             0       -0.023064    1.484444    3.115927
  115          1             0       -0.748573    3.513545   -0.444705
  116          1             0       -2.346265    0.793519    3.129506
  117          1             0       -2.000209   -0.619173    2.098287
  118          1             0       -1.337013   -0.546314    3.740553
  119          1             0       -0.640381    5.158232    1.215192
  120          1             0       -1.989653    5.666242    0.173048
  121          1             0       -2.337958    4.919996    1.749644
  122          1             0       -4.885349    1.084809   -3.427188
  123          1             0       -3.713612    2.412917   -3.273967
  124          1             0       -3.190644    0.717949   -3.064218
  125          1             0       -4.913171   -0.082986    3.020863
  126          1             0       -6.598690    0.383910    2.698403
  127          1             0       -6.211706   -1.292449    3.161002
 ---------------------------------------------------------------------
 Rotational constants (GHZ):      0.0543416      0.0376008      0.0292994
 General basis read from cards:  (5D, 7F)
 There are   728 symmetry adapted basis functions of A   symmetry.
 Integral buffers will be    131072 words long.
 Raffenetti 2 integral format.
 Two-electron integral symmetry is turned on.
   728 basis functions,  1602 primitive gaussians,   765 cartesian basis functions
   225 alpha electrons      225 beta electrons
       nuclear repulsion energy     10236.2964543174 Hartrees.
 NAtoms=  127 NActive=  127 NUniq=  127 SFac= 1.00D+00 NAtFMM=   60 Big=T
 ------------------------------------------------------------------------------
 United Atom Topological Model (UA0  parameters set).
  Nord Group  Hybr  Charge Alpha Radius          Bonded to
    1   C     *     0.00   1.00  1.925   C2   [s]  C33  [s]  N40  [d]
    2   CH    *     0.00   1.00  2.125   C1   [s]  C3   [s]
    3   C     *     0.00   1.00  1.925   C2   [s]  C34  [s]  N39  [d]
    4   CH2   *     0.00   1.00  2.325   C5   [s]  C8   [s]
    5   CH2   *     0.00   1.00  2.325   C4   [s]  C6   [s]
    6   CH2   *     0.00   1.00  2.325   C5   [s]  O7   [s]
    7   O     *     0.00   1.00  1.750   C6   [s]  C8   [s] Mg36  [s]
    8   CH2   *     0.00   1.00  2.325   C4   [s]  O7   [s]
    9   C     *     0.00   1.00  1.925   C11  [s]  C15  [s]  N40  [s]
   10   C     *     0.00   1.00  1.925   C18  [s]  C22  [s]  N39  [s]
   11   C     *     0.00   1.00  1.925   C9   [s]  C12  [s]  C16  [s]
   12   CH    *     0.00   1.00  2.125   C11  [s]  C13  [s]
   13   CH    *     0.00   1.00  2.125   C12  [s]  C14  [s]
   14   CH    *     0.00   1.00  2.125   C13  [s]  C15  [s]
   15   C     *     0.00   1.00  1.925   C9   [s]  C14  [s]  C17  [s]
   16   CH    *     0.00   1.00  2.125   C11  [s]  C25  [s]  C26  [s]
   17   CH    *     0.00   1.00  2.125   C15  [s]  C27  [s]  C28  [s]
   18   C     *     0.00   1.00  1.925   C10  [s]  C19  [s]  C23  [s]
   19   CH    *     0.00   1.00  2.125   C18  [s]  C20  [s]
   20   CH    *     0.00   1.00  2.125   C19  [s]  C21  [s]
   21   CH    *     0.00   1.00  2.125   C20  [s]  C22  [s]
   22   C     *     0.00   1.00  1.925   C10  [s]  C21  [s]  C24  [s]
   23   CH    *     0.00   1.00  2.125   C18  [s]  C31  [s]  C32  [s]
   24   CH    *     0.00   1.00  2.125   C22  [s]  C29  [s]  C30  [s]
   25   CH3   *     0.00   1.00  2.525   C16  [s]
   26   CH3   *     0.00   1.00  2.525   C16  [s]
   27   CH3   *     0.00   1.00  2.525   C17  [s]
   28   CH3   *     0.00   1.00  2.525   C17  [s]
   29   CH3   *     0.00   1.00  2.525   C24  [s]
   30   CH3   *     0.00   1.00  2.525   C24  [s]
   31   CH3   *     0.00   1.00  2.525   C23  [s]
   32   CH3   *     0.00   1.00  2.525   C23  [s]
   33   CH3   *     0.00   1.00  2.525   C1   [s]
   34   CH3   *     0.00   1.00  2.525   C3   [s]
   35   O     *     0.00   1.00  1.750   C38  [s]  C47  [s]
   36  Mg     *     0.00   1.00  1.511   O7   [s]  N39  [s]  N40  [s]  O48  [d]
                                         O55  [s]
   37   O     *     0.00   1.00  1.750   C44  [s]  C49  [s]
   38   C     *     0.00   1.00  1.925   O35  [s]  O41  [d]  C45  [s]
   39   N     *     0.00   1.00  1.830   C3   [d]  C10  [s] Mg36  [s]
   40   N     *     0.00   1.00  1.830   C1   [d]  C9   [s] Mg36  [s]
   41   O     *     0.00   1.00  1.750   C38  [d]
   42   O     *     0.00   1.00  1.750   C43  [s]  C45  [s]
   43   C     *     0.00   1.00  1.925   O42  [s]  C44  [s]  O46  [d]
   44   CH    *     0.00   1.00  2.125   O37  [s]  C43  [s]  C58  [s]
   45   CH    *     0.00   1.00  2.125   C38  [s]  O42  [s]  C59  [s]
   46   O     *     0.00   1.00  1.750   C43  [d]
   47   CH3   *     0.00   1.00  2.525   O35  [s]
   48   O     *     0.00   1.00  1.750  Mg36  [d]  C53  [s]
   49   C     *     0.00   1.00  1.925   O37  [s]  O50  [d]  C54  [s]
   50   O     *     0.00   1.00  1.750   C49  [d]
   51   O     *     0.00   1.00  1.750   C52  [s]  C54  [s]
   52   C     *     0.00   1.00  1.925   O51  [s]  C53  [s]  O55  [d]
   53   CH    *     0.00   1.00  2.125   O48  [s]  C52  [s]  C56  [s]
   54   CH    *     0.00   1.00  2.125   C49  [s]  O51  [s]  C57  [s]
   55   O     *     0.00   1.00  1.750  Mg36  [s]  C52  [d]
   56   CH3   *     0.00   1.00  2.525   C53  [s]
   57   CH3   *     0.00   1.00  2.525   C54  [s]
   58   CH3   *     0.00   1.00  2.525   C44  [s]
   59   CH3   *     0.00   1.00  2.525   C45  [s]
 ------------------------------------------------------------------------------
 Polarizable Continuum Model (PCM)
 =================================
 Model                : PCM.
 Atomic radii         : UA0 (Simple United Atom Topological Model).
 Polarization charges : Total charges.
 Charge compensation  : None.
 Solution method      : Matrix inversion.
 Cavity               : GePol (RMin=0.200 OFac=0.890).
                        Default sphere list used, NSphG=   59.
                        Tesserae with average area of 0.200 Ang**2.
 Solvent              : THF, Eps     =   7.580000
                               Eps(inf)=   1.971000
                               RSolv   =   2.560000 Ang.
 ------------------------------------------------------------------------------
 DisRep: Neglecting contributions from atom   36
 One-electron integrals computed using PRISM.
 NBasis=   728 RedAO= T  NBF=   728
 NBsUse=   728 1.00D-06 NBFU=   728
 Initial guess read from the checkpoint file:
 RRSS_fm-5-prod-thf.chk
 Initial guess orbital symmetries:
       Occupied  (A) (A) (A) (A) (A) (A) (A) (A) (A) (A) (A) (A)
                 (A) (A) (A) (A) (A) (A) (A) (A) (A) (A) (A) (A)
                 (A) (A) (A) (A) (A) (A) (A) (A) (A) (A) (A) (A)
                 (A) (A) (A) (A) (A) (A) (A) (A) (A) (A) (A) (A)
                 (A) (A) (A) (A) (A) (A) (A) (A) (A) (A) (A) (A)
                 (A) (A) (A) (A) (A) (A) (A) (A) (A) (A) (A) (A)
                 (A) (A) (A) (A) (A) (A) (A) (A) (A) (A) (A) (A)
                 (A) (A) (A) (A) (A) (A) (A) (A) (A) (A) (A) (A)
                 (A) (A) (A) (A) (A) (A) (A) (A) (A) (A) (A) (A)
                 (A) (A) (A) (A) (A) (A) (A) (A) (A) (A) (A) (A)
                 (A) (A) (A) (A) (A) (A) (A) (A) (A) (A) (A) (A)
                 (A) (A) (A) (A) (A) (A) (A) (A) (A) (A) (A) (A)
                 (A) (A) (A) (A) (A) (A) (A) (A) (A) (A) (A) (A)
                 (A) (A) (A) (A) (A) (A) (A) (A) (A) (A) (A) (A)
                 (A) (A) (A) (A) (A) (A) (A) (A) (A) (A) (A) (A)
                 (A) (A) (A) (A) (A) (A) (A) (A) (A) (A) (A) (A)
                 (A) (A) (A) (A) (A) (A) (A) (A) (A) (A) (A) (A)
                 (A) (A) (A) (A) (A) (A) (A) (A) (A) (A) (A) (A)
                 (A) (A) (A) (A) (A) (A) (A) (A) (A)
       Virtual   (A) (A) (A) (A) (A) (A) (A) (A) (A) (A) (A) (A)
                 (A) (A) (A) (A) (A) (A) (A) (A) (A) (A) (A) (A)
                 (A) (A) (A) (A) (A) (A) (A) (A) (A) (A) (A) (A)
                 (A) (A) (A) (A) (A) (A) (A) (A) (A) (A) (A) (A)
                 (A) (A) (A) (A) (A) (A) (A) (A) (A) (A) (A) (A)
                 (A) (A) (A) (A) (A) (A) (A) (A) (A) (A) (A) (A)
                 (A) (A) (A) (A) (A) (A) (A) (A) (A) (A) (A) (A)
                 (A) (A) (A) (A) (A) (A) (A) (A) (A) (A) (A) (A)
                 (A) (A) (A) (A) (A) (A) (A) (A) (A) (A) (A) (A)
                 (A) (A) (A) (A) (A) (A) (A) (A) (A) (A) (A) (A)
                 (A) (A) (A) (A) (A) (A) (A) (A) (A) (A) (A) (A)
                 (A) (A) (A) (A) (A) (A) (A) (A) (A) (A) (A) (A)
                 (A) (A) (A) (A) (A) (A) (A) (A) (A) (A) (A) (A)
                 (A) (A) (A) (A) (A) (A) (A) (A) (A) (A) (A) (A)
                 (A) (A) (A) (A) (A) (A) (A) (A) (A) (A) (A) (A)
                 (A) (A) (A) (A) (A) (A) (A) (A) (A) (A) (A) (A)
                 (A) (A) (A) (A) (A) (A) (A) (A) (A) (A) (A) (A)
                 (A) (A) (A) (A) (A) (A) (A) (A) (A) (A) (A) (A)
                 (A) (A) (A) (A) (A) (A) (A) (A) (A) (A) (A) (A)
                 (A) (A) (A) (A) (A) (A) (A) (A) (A) (A) (A) (A)
                 (A) (A) (A) (A) (A) (A) (A) (A) (A) (A) (A) (A)
                 (A) (A) (A) (A) (A) (A) (A) (A) (A) (A) (A) (A)
                 (A) (A) (A) (A) (A) (A) (A) (A) (A) (A) (A) (A)
                 (A) (A) (A) (A) (A) (A) (A) (A) (A) (A) (A) (A)
                 (A) (A) (A) (A) (A) (A) (A) (A) (A) (A) (A) (A)
                 (A) (A) (A) (A) (A) (A) (A) (A) (A) (A) (A) (A)
                 (A) (A) (A) (A) (A) (A) (A) (A) (A) (A) (A) (A)
                 (A) (A) (A) (A) (A) (A) (A) (A) (A) (A) (A) (A)
                 (A) (A) (A) (A) (A) (A) (A) (A) (A) (A) (A) (A)
                 (A) (A) (A) (A) (A) (A) (A) (A) (A) (A) (A) (A)
                 (A) (A) (A) (A) (A) (A) (A) (A) (A) (A) (A) (A)
                 (A) (A) (A) (A) (A) (A) (A) (A) (A) (A) (A) (A)
                 (A) (A) (A) (A) (A) (A) (A) (A) (A) (A) (A) (A)
                 (A) (A) (A) (A) (A) (A) (A) (A) (A) (A) (A) (A)
                 (A) (A) (A) (A) (A) (A) (A) (A) (A) (A) (A) (A)
                 (A) (A) (A) (A) (A) (A) (A) (A) (A) (A) (A) (A)
                 (A) (A) (A) (A) (A) (A) (A) (A) (A) (A) (A) (A)
                 (A) (A) (A) (A) (A) (A) (A) (A) (A) (A) (A) (A)
                 (A) (A) (A) (A) (A) (A) (A) (A) (A) (A) (A) (A)
                 (A) (A) (A) (A) (A) (A) (A) (A) (A) (A) (A) (A)
                 (A) (A) (A) (A) (A) (A) (A) (A) (A) (A) (A) (A)
                 (A) (A) (A) (A) (A) (A) (A) (A) (A) (A) (A)
 Requested convergence on RMS density matrix=1.00D-04 within 128 cycles.
 Requested convergence on MAX density matrix=1.00D-02.
 Requested convergence on             energy=1.00D-02.
 No special actions if energy rises.
 Error on total polarization charges =  0.00824
 SCF Done:  E(RB+HF-LYP) =  -2844.67934871     A.U. after    2 cycles
             Convg  =    0.5833D-04             -V/T =  2.0103
             S**2   =   0.0000
 --------------------------------------------------------------------
 Variational PCM results
 =======================
 <psi(f)|   H    |psi(f)>                     (a.u.) =   -2844.666655
 <psi(f)|H+V(f)/2|psi(f)>                     (a.u.) =   -2844.679349
 Total free energy in solution:
  with all non electrostatic terms            (a.u.) =   -2844.607431
 --------------------------------------------------------------------
 (Polarized solute)-Solvent               (kcal/mol) =      -7.97
 --------------------------------------------------------------------
 Cavitation energy                        (kcal/mol) =      85.11
 Dispersion energy                        (kcal/mol) =     -41.39
 Repulsion energy                         (kcal/mol) =       1.41
 Total non electrostatic                  (kcal/mol) =      45.13
 --------------------------------------------------------------------
 Partition over spheres:
 Sphere  on Atom  Surface  Charge   GEl     GCav    GDR
    1      C1       0.00   0.000    0.00    0.11    0.00
    2      C2       3.50   0.000   -0.11    1.41   -0.31
    3      C3       0.00   0.000    0.00    0.12    0.00
    4      C4       9.83   0.004   -0.02    1.87   -1.17
    5      C5      11.58   0.000   -0.02    1.84   -0.97
    6      C6       0.00   0.000    0.00    0.79    0.00
    7      O7       0.00   0.000    0.00    0.06    0.00
    8      C8       0.96   0.000    0.00    0.95   -0.16
    9      C9       0.00   0.000    0.00    0.05    0.00
   10      C10      0.00   0.000    0.00    0.03    0.00
   11      C11      0.00   0.000    0.00    0.04    0.00
   12      C12      3.01  -0.008   -0.07    1.18   -0.45
   13      C13      9.16  -0.021   -0.25    1.37   -1.16
   14      C14      5.12  -0.017   -0.19    1.13   -0.62
   15      C15      0.00   0.000    0.00    0.02    0.00
   16      C16      0.00   0.000    0.00    0.16    0.00
   17      C17      0.00   0.000    0.00    0.27    0.00
   18      C18      0.00   0.000    0.00    0.03    0.00
   19      C19      6.21  -0.017   -0.21    1.10   -0.59
   20      C20     12.54  -0.025   -0.28    1.75   -1.58
   21      C21      7.52  -0.018   -0.21    1.23   -0.70
   22      C22      0.00   0.000    0.00    0.03    0.00
   23      C23      0.00   0.000    0.00    0.18    0.00
   24      C24      0.00   0.000    0.00    0.22    0.00
   25      C25     20.71   0.000   -0.05    3.65   -1.55
   26      C26     34.28  -0.016   -0.06    3.93   -2.40
   27      C27     13.75  -0.013   -0.07    2.78   -1.21
   28      C28     24.38  -0.009   -0.05    3.90   -1.90
   29      C29     23.04   0.003   -0.05    3.35   -1.73
   30      C30     28.15  -0.005   -0.03    3.87   -2.05
   31      C31     17.28  -0.012   -0.05    3.36   -1.37
   32      C32     31.56  -0.013   -0.07    3.83   -2.32
   33      C33     24.23   0.001   -0.03    3.39   -1.85
   34      C34     22.02  -0.006   -0.02    3.32   -1.82
   35      O35      0.14   0.001   -0.01    0.39   -0.08
   36     Mg36      0.00   0.000    0.00    0.22    0.00
   37      O37      0.00   0.000    0.00    0.53    0.00
   38      C38      0.00   0.000    0.00    0.21    0.00
   39      N39      0.00   0.000    0.00    0.34    0.00
   40      N40      0.00   0.000    0.00    0.32    0.00
   41      O41      7.82   0.065   -0.95    1.79   -0.99
   42      O42      0.00   0.000    0.00    0.64   -0.08
   43      C43      0.00   0.000    0.00    0.43    0.00
   44      C44      2.83  -0.036   -0.26    0.69   -0.36
   45      C45      0.00   0.000    0.00    0.66   -0.06
   46      O46      2.56   0.022   -0.31    1.41   -0.32
   47      C47     52.17  -0.101   -0.53    5.59   -3.17
   48      O48      0.00   0.000    0.00    0.40    0.00
   49      C49      0.00   0.000    0.00    0.39   -0.03
   50      O50      7.44   0.062   -0.88    1.67   -1.09
   51      O51      0.00   0.000    0.00    0.42    0.00
   52      C52      0.00   0.000    0.00    0.20    0.00
   53      C53      0.00   0.000    0.00    0.33    0.00
   54      C54      0.00   0.000    0.00    0.15    0.00
   55      O55      0.00   0.000    0.00    0.11    0.00
   56      C56     11.88   0.006   -0.03    4.63   -1.14
   57      C57     28.79  -0.014    0.00    4.03   -2.35
   58      C58     26.99  -0.035   -0.04    3.76   -2.05
   59      C59     29.85  -0.048   -0.15    4.47   -2.36
 Added spheres:   256.16   0.241   -2.99    0.00    0.00
 --------------------------------------------------------------------
 After PCM corrections, the SCF energy is  -2844.67934871     a.u.
 --------------------------------------------------------------------

 **********************************************************************

            Population analysis using the SCF density.

 **********************************************************************

 Orbital symmetries:
       Occupied  (A) (A) (A) (A) (A) (A) (A) (A) (A) (A) (A) (A)
                 (A) (A) (A) (A) (A) (A) (A) (A) (A) (A) (A) (A)
                 (A) (A) (A) (A) (A) (A) (A) (A) (A) (A) (A) (A)
                 (A) (A) (A) (A) (A) (A) (A) (A) (A) (A) (A) (A)
                 (A) (A) (A) (A) (A) (A) (A) (A) (A) (A) (A) (A)
                 (A) (A) (A) (A) (A) (A) (A) (A) (A) (A) (A) (A)
                 (A) (A) (A) (A) (A) (A) (A) (A) (A) (A) (A) (A)
                 (A) (A) (A) (A) (A) (A) (A) (A) (A) (A) (A) (A)
                 (A) (A) (A) (A) (A) (A) (A) (A) (A) (A) (A) (A)
                 (A) (A) (A) (A) (A) (A) (A) (A) (A) (A) (A) (A)
                 (A) (A) (A) (A) (A) (A) (A) (A) (A) (A) (A) (A)
                 (A) (A) (A) (A) (A) (A) (A) (A) (A) (A) (A) (A)
                 (A) (A) (A) (A) (A) (A) (A) (A) (A) (A) (A) (A)
                 (A) (A) (A) (A) (A) (A) (A) (A) (A) (A) (A) (A)
                 (A) (A) (A) (A) (A) (A) (A) (A) (A) (A) (A) (A)
                 (A) (A) (A) (A) (A) (A) (A) (A) (A) (A) (A) (A)
                 (A) (A) (A) (A) (A) (A) (A) (A) (A) (A) (A) (A)
                 (A) (A) (A) (A) (A) (A) (A) (A) (A) (A) (A) (A)
                 (A) (A) (A) (A) (A) (A) (A) (A) (A)
       Virtual   (A) (A) (A) (A) (A) (A) (A) (A) (A) (A) (A) (A)
                 (A) (A) (A) (A) (A) (A) (A) (A) (A) (A) (A) (A)
                 (A) (A) (A) (A) (A) (A) (A) (A) (A) (A) (A) (A)
                 (A) (A) (A) (A) (A) (A) (A) (A) (A) (A) (A) (A)
                 (A) (A) (A) (A) (A) (A) (A) (A) (A) (A) (A) (A)
                 (A) (A) (A) (A) (A) (A) (A) (A) (A) (A) (A) (A)
                 (A) (A) (A) (A) (A) (A) (A) (A) (A) (A) (A) (A)
                 (A) (A) (A) (A) (A) (A) (A) (A) (A) (A) (A) (A)
                 (A) (A) (A) (A) (A) (A) (A) (A) (A) (A) (A) (A)
                 (A) (A) (A) (A) (A) (A) (A) (A) (A) (A) (A) (A)
                 (A) (A) (A) (A) (A) (A) (A) (A) (A) (A) (A) (A)
                 (A) (A) (A) (A) (A) (A) (A) (A) (A) (A) (A) (A)
                 (A) (A) (A) (A) (A) (A) (A) (A) (A) (A) (A) (A)
                 (A) (A) (A) (A) (A) (A) (A) (A) (A) (A) (A) (A)
                 (A) (A) (A) (A) (A) (A) (A) (A) (A) (A) (A) (A)
                 (A) (A) (A) (A) (A) (A) (A) (A) (A) (A) (A) (A)
                 (A) (A) (A) (A) (A) (A) (A) (A) (A) (A) (A) (A)
                 (A) (A) (A) (A) (A) (A) (A) (A) (A) (A) (A) (A)
                 (A) (A) (A) (A) (A) (A) (A) (A) (A) (A) (A) (A)
                 (A) (A) (A) (A) (A) (A) (A) (A) (A) (A) (A) (A)
                 (A) (A) (A) (A) (A) (A) (A) (A) (A) (A) (A) (A)
                 (A) (A) (A) (A) (A) (A) (A) (A) (A) (A) (A) (A)
                 (A) (A) (A) (A) (A) (A) (A) (A) (A) (A) (A) (A)
                 (A) (A) (A) (A) (A) (A) (A) (A) (A) (A) (A) (A)
                 (A) (A) (A) (A) (A) (A) (A) (A) (A) (A) (A) (A)
                 (A) (A) (A) (A) (A) (A) (A) (A) (A) (A) (A) (A)
                 (A) (A) (A) (A) (A) (A) (A) (A) (A) (A) (A) (A)
                 (A) (A) (A) (A) (A) (A) (A) (A) (A) (A) (A) (A)
                 (A) (A) (A) (A) (A) (A) (A) (A) (A) (A) (A) (A)
                 (A) (A) (A) (A) (A) (A) (A) (A) (A) (A) (A) (A)
                 (A) (A) (A) (A) (A) (A) (A) (A) (A) (A) (A) (A)
                 (A) (A) (A) (A) (A) (A) (A) (A) (A) (A) (A) (A)
                 (A) (A) (A) (A) (A) (A) (A) (A) (A) (A) (A) (A)
                 (A) (A) (A) (A) (A) (A) (A) (A) (A) (A) (A) (A)
                 (A) (A) (A) (A) (A) (A) (A) (A) (A) (A) (A) (A)
                 (A) (A) (A) (A) (A) (A) (A) (A) (A) (A) (A) (A)
                 (A) (A) (A) (A) (A) (A) (A) (A) (A) (A) (A) (A)
                 (A) (A) (A) (A) (A) (A) (A) (A) (A) (A) (A) (A)
                 (A) (A) (A) (A) (A) (A) (A) (A) (A) (A) (A) (A)
                 (A) (A) (A) (A) (A) (A) (A) (A) (A) (A) (A) (A)
                 (A) (A) (A) (A) (A) (A) (A) (A) (A) (A) (A) (A)
                 (A) (A) (A) (A) (A) (A) (A) (A) (A) (A) (A)
 The electronic state is 1-A.
 Alpha  occ. eigenvalues --  -46.70229 -19.20788 -19.20634 -19.20538 -19.18956
 Alpha  occ. eigenvalues --  -19.15226 -19.15135 -19.14114 -19.14024 -19.13821
 Alpha  occ. eigenvalues --  -19.03653 -14.27767 -14.27665 -10.33067 -10.32884
 Alpha  occ. eigenvalues --  -10.32784 -10.30167 -10.26647 -10.26242 -10.25144
 Alpha  occ. eigenvalues --  -10.23717 -10.21430 -10.20580 -10.20375 -10.19727
 Alpha  occ. eigenvalues --  -10.19687 -10.18876 -10.17948 -10.16939 -10.16657
 Alpha  occ. eigenvalues --  -10.16074 -10.15426 -10.15386 -10.15138 -10.11665
 Alpha  occ. eigenvalues --  -10.05598 -10.05320 -10.03409 -10.03192 -10.03007
 Alpha  occ. eigenvalues --  -10.02838 -10.02735 -10.02725 -10.02530 -10.02416
 Alpha  occ. eigenvalues --  -10.02190 -10.01923 -10.01858 -10.01751 -10.01697
 Alpha  occ. eigenvalues --  -10.01565 -10.00869 -10.00865 -10.00841 -10.00702
 Alpha  occ. eigenvalues --  -10.00562 -10.00087  -9.99702  -9.99411  -3.00592
 Alpha  occ. eigenvalues --   -1.75337  -1.75247  -1.74977  -1.13026  -1.11963
 Alpha  occ. eigenvalues --   -1.11151  -1.10105  -1.03636  -1.03321  -1.02925
 Alpha  occ. eigenvalues --   -1.02655  -1.01881  -0.91529  -0.88834  -0.87598
 Alpha  occ. eigenvalues --   -0.82064  -0.81226  -0.80624  -0.79979  -0.77968
 Alpha  occ. eigenvalues --   -0.76808  -0.76656  -0.76461  -0.74563  -0.74189
 Alpha  occ. eigenvalues --   -0.73792  -0.73517  -0.72484  -0.71761  -0.71658
 Alpha  occ. eigenvalues --   -0.69486  -0.68498  -0.68349  -0.68160  -0.67773
 Alpha  occ. eigenvalues --   -0.67230  -0.65510  -0.65033  -0.64939  -0.64885
 Alpha  occ. eigenvalues --   -0.64401  -0.63924  -0.62913  -0.60070  -0.59151
 Alpha  occ. eigenvalues --   -0.59086  -0.58860  -0.58193  -0.57887  -0.57255
 Alpha  occ. eigenvalues --   -0.56700  -0.56529  -0.55917  -0.55137  -0.54649
 Alpha  occ. eigenvalues --   -0.54058  -0.53553  -0.52311  -0.51205  -0.50234
 Alpha  occ. eigenvalues --   -0.49972  -0.49837  -0.49471  -0.49356  -0.49284
 Alpha  occ. eigenvalues --   -0.49028  -0.48337  -0.48031  -0.47550  -0.46806
 Alpha  occ. eigenvalues --   -0.46459  -0.46359  -0.45044  -0.44984  -0.44672
 Alpha  occ. eigenvalues --   -0.44564  -0.44272  -0.44156  -0.43751  -0.43698
 Alpha  occ. eigenvalues --   -0.43456  -0.42310  -0.41604  -0.41410  -0.41309
 Alpha  occ. eigenvalues --   -0.41049  -0.40811  -0.40775  -0.40627  -0.40493
 Alpha  occ. eigenvalues --   -0.40353  -0.40147  -0.39966  -0.39843  -0.39812
 Alpha  occ. eigenvalues --   -0.39621  -0.39382  -0.39292  -0.39246  -0.39206
 Alpha  occ. eigenvalues --   -0.39028  -0.38770  -0.38656  -0.38276  -0.38145
 Alpha  occ. eigenvalues --   -0.37685  -0.37173  -0.36908  -0.36815  -0.36794
 Alpha  occ. eigenvalues --   -0.36639  -0.36342  -0.36105  -0.36064  -0.35896
 Alpha  occ. eigenvalues --   -0.35672  -0.35542  -0.35481  -0.35287  -0.35158
 Alpha  occ. eigenvalues --   -0.34942  -0.34630  -0.34481  -0.34273  -0.34141
 Alpha  occ. eigenvalues --   -0.33982  -0.33968  -0.33725  -0.33409  -0.32847
 Alpha  occ. eigenvalues --   -0.32711  -0.32489  -0.31760  -0.31558  -0.31447
 Alpha  occ. eigenvalues --   -0.31377  -0.31160  -0.30872  -0.30720  -0.30465
 Alpha  occ. eigenvalues --   -0.30232  -0.30088  -0.29782  -0.29450  -0.29139
 Alpha  occ. eigenvalues --   -0.28745  -0.28506  -0.28402  -0.28328  -0.28256
 Alpha  occ. eigenvalues --   -0.28016  -0.27571  -0.27410  -0.27127  -0.26965
 Alpha  occ. eigenvalues --   -0.26053  -0.24947  -0.24498  -0.21337  -0.19628
 Alpha  occ. eigenvalues --   -0.19205  -0.18809  -0.18500  -0.18014  -0.15074
 Alpha virt. eigenvalues --   -0.01895  -0.00487  -0.00203   0.01196   0.01307
 Alpha virt. eigenvalues --    0.06159   0.06528   0.06789   0.07013   0.07131
 Alpha virt. eigenvalues --    0.07720   0.09237   0.09698   0.10060   0.10622
 Alpha virt. eigenvalues --    0.11047   0.11700   0.11938   0.12375   0.12665
 Alpha virt. eigenvalues --    0.13184   0.13436   0.13635   0.14159   0.14634
 Alpha virt. eigenvalues --    0.14837   0.15291   0.15534   0.15742   0.15904
 Alpha virt. eigenvalues --    0.16067   0.16896   0.16923   0.17089   0.17441
 Alpha virt. eigenvalues --    0.17551   0.17924   0.18136   0.18410   0.18967
 Alpha virt. eigenvalues --    0.19701   0.20212   0.20585   0.20885   0.21137
 Alpha virt. eigenvalues --    0.21540   0.21670   0.21790   0.22179   0.22762
 Alpha virt. eigenvalues --    0.22840   0.23002   0.23738   0.23905   0.24353
 Alpha virt. eigenvalues --    0.24863   0.25069   0.25216   0.25428   0.25685
 Alpha virt. eigenvalues --    0.26213   0.26334   0.27640   0.28440   0.28889
 Alpha virt. eigenvalues --    0.29275   0.29589   0.29817   0.30092   0.30884
 Alpha virt. eigenvalues --    0.31021   0.31110   0.31360   0.31685   0.31984
 Alpha virt. eigenvalues --    0.32738   0.32800   0.33186   0.33854   0.34475
 Alpha virt. eigenvalues --    0.34612   0.34913   0.35332   0.35810   0.36278
 Alpha virt. eigenvalues --    0.36295   0.36595   0.37564   0.38004   0.38376
 Alpha virt. eigenvalues --    0.38516   0.38819   0.38989   0.39275   0.39613
 Alpha virt. eigenvalues --    0.39922   0.40339   0.40445   0.40574   0.41340
 Alpha virt. eigenvalues --    0.41554   0.42288   0.42758   0.42867   0.43418
 Alpha virt. eigenvalues --    0.43536   0.43803   0.44858   0.45072   0.45551
 Alpha virt. eigenvalues --    0.45701   0.46034   0.46300   0.46491   0.46588
 Alpha virt. eigenvalues --    0.46693   0.46950   0.47568   0.48139   0.48188
 Alpha virt. eigenvalues --    0.48498   0.48509   0.48675   0.48986   0.49157
 Alpha virt. eigenvalues --    0.49203   0.49511   0.49963   0.50098   0.50204
 Alpha virt. eigenvalues --    0.50431   0.50758   0.50895   0.51021   0.51387
 Alpha virt. eigenvalues --    0.51628   0.52289   0.52724   0.53024   0.53280
 Alpha virt. eigenvalues --    0.53485   0.53918   0.54009   0.54448   0.54718
 Alpha virt. eigenvalues --    0.55107   0.55163   0.55818   0.55836   0.56260
 Alpha virt. eigenvalues --    0.56580   0.56664   0.57041   0.57105   0.57236
 Alpha virt. eigenvalues --    0.57596   0.58022   0.58214   0.58624   0.58873
 Alpha virt. eigenvalues --    0.59074   0.59372   0.59492   0.59632   0.59985
 Alpha virt. eigenvalues --    0.60335   0.60478   0.60951   0.61232   0.61948
 Alpha virt. eigenvalues --    0.62403   0.62672   0.62988   0.63594   0.64012
 Alpha virt. eigenvalues --    0.64137   0.64540   0.64766   0.65188   0.65609
 Alpha virt. eigenvalues --    0.65783   0.66447   0.67118   0.67308   0.67792
 Alpha virt. eigenvalues --    0.68554   0.68986   0.69444   0.70437   0.70553
 Alpha virt. eigenvalues --    0.70936   0.71224   0.71444   0.71778   0.71975
 Alpha virt. eigenvalues --    0.72370   0.72849   0.73162   0.73711   0.74042
 Alpha virt. eigenvalues --    0.74754   0.75179   0.75582   0.76107   0.76326
 Alpha virt. eigenvalues --    0.76889   0.77207   0.77575   0.77847   0.78406
 Alpha virt. eigenvalues --    0.78820   0.79785   0.80021   0.80581   0.81732
 Alpha virt. eigenvalues --    0.82255   0.83299   0.83447   0.83808   0.84500
 Alpha virt. eigenvalues --    0.84850   0.85363   0.85526   0.86048   0.86981
 Alpha virt. eigenvalues --    0.87140   0.87344   0.88265   0.88713   0.88952
 Alpha virt. eigenvalues --    0.89257   0.89957   0.90634   0.90786   0.91091
 Alpha virt. eigenvalues --    0.91178   0.91700   0.92087   0.92650   0.92914
 Alpha virt. eigenvalues --    0.93427   0.93742   0.94387   0.94573   0.95283
 Alpha virt. eigenvalues --    0.95504   0.96367   0.97163   0.97678   0.97965
 Alpha virt. eigenvalues --    0.98471   0.99102   0.99268   1.00171   1.00458
 Alpha virt. eigenvalues --    1.01072   1.02593   1.03550   1.04254   1.05198
 Alpha virt. eigenvalues --    1.05488   1.06211   1.06753   1.07335   1.08232
 Alpha virt. eigenvalues --    1.09128   1.09511   1.11183   1.11966   1.12235
 Alpha virt. eigenvalues --    1.13072   1.13453   1.13868   1.14554   1.16063
 Alpha virt. eigenvalues --    1.16822   1.17672   1.18124   1.18953   1.19386
 Alpha virt. eigenvalues --    1.20399   1.21176   1.21619   1.22793   1.23048
 Alpha virt. eigenvalues --    1.23855   1.24212   1.26038   1.27171   1.28011
 Alpha virt. eigenvalues --    1.30347   1.32595   1.32748   1.33343   1.34543
 Alpha virt. eigenvalues --    1.36148   1.36303   1.36664   1.37413   1.37753
 Alpha virt. eigenvalues --    1.39040   1.39689   1.40900   1.42047   1.43618
 Alpha virt. eigenvalues --    1.43925   1.45030   1.46039   1.46739   1.46889
 Alpha virt. eigenvalues --    1.47618   1.48174   1.48992   1.49710   1.50297
 Alpha virt. eigenvalues --    1.50675   1.51096   1.52270   1.52731   1.54534
 Alpha virt. eigenvalues --    1.55999   1.56877   1.57880   1.59909   1.61050
 Alpha virt. eigenvalues --    1.61489   1.62737   1.63566   1.64028   1.65334
 Alpha virt. eigenvalues --    1.66782   1.66928   1.67771   1.68419   1.69723
 Alpha virt. eigenvalues --    1.70024   1.70592   1.72414   1.72838   1.72985
 Alpha virt. eigenvalues --    1.74140   1.75783   1.76653   1.77672   1.77910
 Alpha virt. eigenvalues --    1.78368   1.78538   1.79116   1.80340   1.80677
 Alpha virt. eigenvalues --    1.82155   1.82631   1.83321   1.83467   1.83677
 Alpha virt. eigenvalues --    1.83925   1.84484   1.84909   1.85305   1.86166
 Alpha virt. eigenvalues --    1.87145   1.87570   1.88105   1.88758   1.89207
 Alpha virt. eigenvalues --    1.89558   1.90279   1.91117   1.91436   1.91729
 Alpha virt. eigenvalues --    1.92124   1.92309   1.92815   1.94814   1.95569
 Alpha virt. eigenvalues --    1.95761   1.96537   1.97148   1.97724   1.97994
 Alpha virt. eigenvalues --    1.98847   1.99864   2.00369   2.00578   2.01008
 Alpha virt. eigenvalues --    2.01236   2.01370   2.02029   2.02376   2.02489
 Alpha virt. eigenvalues --    2.03542   2.04447   2.04999   2.05735   2.06869
 Alpha virt. eigenvalues --    2.07862   2.08405   2.09028   2.09464   2.09610
 Alpha virt. eigenvalues --    2.10726   2.11516   2.12498   2.13206   2.14329
 Alpha virt. eigenvalues --    2.14821   2.15529   2.15551   2.15801   2.16747
 Alpha virt. eigenvalues --    2.17021   2.17386   2.18185   2.18618   2.19260
 Alpha virt. eigenvalues --    2.19519   2.20090   2.20694   2.21860   2.23167
 Alpha virt. eigenvalues --    2.24607   2.24891   2.26734   2.27493   2.27864
 Alpha virt. eigenvalues --    2.28451   2.28791   2.29727   2.30298   2.30883
 Alpha virt. eigenvalues --    2.31293   2.31429   2.32409   2.33285   2.34097
 Alpha virt. eigenvalues --    2.34868   2.35506   2.36349   2.36562   2.37832
 Alpha virt. eigenvalues --    2.40350   2.40882   2.41341   2.42116   2.43468
 Alpha virt. eigenvalues --    2.44608   2.45128   2.46028   2.47655   2.48041
 Alpha virt. eigenvalues --    2.49398   2.51564   2.52192   2.54516   2.55249
 Alpha virt. eigenvalues --    2.57239   2.58071   2.58276   2.59282   2.60594
 Alpha virt. eigenvalues --    2.63060   2.64536   2.65178   2.66291   2.66951
 Alpha virt. eigenvalues --    2.67552   2.67726   2.69263   2.71399   2.71460
 Alpha virt. eigenvalues --    2.75095   2.75414   2.75456   2.76533   2.77208
 Alpha virt. eigenvalues --    2.79450   2.80530   2.81001   2.86364   2.87658
 Alpha virt. eigenvalues --    2.88187   2.91396   2.94136   2.95718   2.96997
 Alpha virt. eigenvalues --    2.97555   2.98903   3.02877   3.03411   3.03937
 Alpha virt. eigenvalues --    3.07520   3.10685   3.14767   3.16604   3.16971
 Alpha virt. eigenvalues --    3.19100   3.20806   3.26817   3.76560   6.05876
 Alpha virt. eigenvalues --    6.13794   6.29144 103.47393
          Condensed to atoms (all electrons):
 Mulliken atomic charges:
              1
     1  C    0.337441
     2  C   -0.250465
     3  C    0.337146
     4  C   -0.284291
     5  C   -0.318939
     6  C   -0.030193
     7  O   -0.513315
     8  C   -0.033431
     9  C    0.028023
    10  C    0.019799
    11  C    0.007512
    12  C   -0.080758
    13  C   -0.075401
    14  C   -0.083188
    15  C    0.005014
    16  C   -0.054140
    17  C   -0.056448
    18  C    0.004779
    19  C   -0.080918
    20  C   -0.077717
    21  C   -0.079402
    22  C    0.004289
    23  C   -0.051174
    24  C   -0.060647
    25  C   -0.223816
    26  C   -0.219386
    27  C   -0.222510
    28  C   -0.218359
    29  C   -0.216853
    30  C   -0.218197
    31  C   -0.214585
    32  C   -0.218696
    33  C   -0.455461
    34  C   -0.452530
    35  O   -0.457497
    36  Mg   0.867116
    37  O   -0.464173
    38  C    0.570295
    39  N   -0.524073
    40  N   -0.539107
    41  O   -0.435116
    42  O   -0.450173
    43  C    0.592404
    44  C    0.048008
    45  C    0.051916
    46  O   -0.435850
    47  C   -0.225991
    48  O   -0.662117
    49  C    0.587314
    50  O   -0.440552
    51  O   -0.455956
    52  C    0.614148
    53  C    0.141504
    54  C    0.023087
    55  O   -0.460967
    56  C   -0.477917
    57  C   -0.457139
    58  C   -0.473209
    59  C   -0.480761
    60  H    0.077993
    61  H    0.112726
    62  H    0.137788
    63  H    0.162017
    64  H    0.139739
    65  H    0.165685
    66  H    0.147214
    67  H    0.116352
    68  H    0.144526
    69  H    0.092050
    70  H    0.098463
    71  H    0.094964
    72  H    0.096259
    73  H    0.094419
    74  H    0.092592
    75  H    0.094322
    76  H    0.092823
    77  H    0.098971
    78  H    0.113388
    79  H    0.073209
    80  H    0.114715
    81  H    0.071641
    82  H    0.077246
    83  H    0.074341
    84  H    0.073482
    85  H    0.075870
    86  H    0.075723
    87  H    0.086640
    88  H    0.077785
    89  H    0.082211
    90  H    0.074984
    91  H    0.075113
    92  H    0.065405
    93  H    0.093167
    94  H    0.075503
    95  H    0.078480
    96  H    0.070747
    97  H    0.077352
    98  H    0.091850
    99  H    0.076774
   100  H    0.076985
   101  H    0.074901
   102  H    0.076324
   103  H    0.129849
   104  H    0.124595
   105  H    0.126794
   106  H    0.125791
   107  H    0.130450
   108  H    0.128648
   109  H    0.207387
   110  H    0.189957
   111  H    0.179486
   112  H    0.182074
   113  H    0.181398
   114  H    0.102906
   115  H    0.149447
   116  H    0.137699
   117  H    0.150982
   118  H    0.154414
   119  H    0.135317
   120  H    0.167343
   121  H    0.160011
   122  H    0.173223
   123  H    0.174652
   124  H    0.174115
   125  H    0.184915
   126  H    0.177192
   127  H    0.180236
 Sum of Mulliken charges=   0.00000
 Atomic charges with hydrogens summed into heavy atoms:
              1
     1  C    0.337441
     2  C   -0.172472
     3  C    0.337146
     4  C   -0.033777
     5  C   -0.017184
     6  C    0.282706
     7  O   -0.513315
     8  C    0.227447
     9  C    0.028023
    10  C    0.019799
    11  C    0.007512
    12  C    0.011293
    13  C    0.023062
    14  C    0.011776
    15  C    0.005014
    16  C    0.042119
    17  C    0.037970
    18  C    0.004779
    19  C    0.011674
    20  C    0.016605
    21  C    0.013421
    22  C    0.004289
    23  C    0.047798
    24  C    0.052741
    25  C    0.035750
    26  C    0.005683
    27  C    0.015723
    28  C    0.016622
    29  C    0.016832
    30  C    0.006534
    31  C    0.031391
    32  C    0.009515
    33  C   -0.074224
    34  C   -0.067641
    35  O   -0.457497
    36  Mg   0.867116
    37  O   -0.464173
    38  C    0.570295
    39  N   -0.524073
    40  N   -0.539107
    41  O   -0.435116
    42  O   -0.450173
    43  C    0.592404
    44  C    0.255395
    45  C    0.241874
    46  O   -0.435850
    47  C    0.316967
    48  O   -0.662117
    49  C    0.587314
    50  O   -0.440552
    51  O   -0.455956
    52  C    0.614148
    53  C    0.244410
    54  C    0.172534
    55  O   -0.460967
    56  C   -0.034821
    57  C    0.005532
    58  C    0.048780
    59  C    0.061581
    60  H    0.000000
    61  H    0.000000
    62  H    0.000000
    63  H    0.000000
    64  H    0.000000
    65  H    0.000000
    66  H    0.000000
    67  H    0.000000
    68  H    0.000000
    69  H    0.000000
    70  H    0.000000
    71  H    0.000000
    72  H    0.000000
    73  H    0.000000
    74  H    0.000000
    75  H    0.000000
    76  H    0.000000
    77  H    0.000000
    78  H    0.000000
    79  H    0.000000
    80  H    0.000000
    81  H    0.000000
    82  H    0.000000
    83  H    0.000000
    84  H    0.000000
    85  H    0.000000
    86  H    0.000000
    87  H    0.000000
    88  H    0.000000
    89  H    0.000000
    90  H    0.000000
    91  H    0.000000
    92  H    0.000000
    93  H    0.000000
    94  H    0.000000
    95  H    0.000000
    96  H    0.000000
    97  H    0.000000
    98  H    0.000000
    99  H    0.000000
   100  H    0.000000
   101  H    0.000000
   102  H    0.000000
   103  H    0.000000
   104  H    0.000000
   105  H    0.000000
   106  H    0.000000
   107  H    0.000000
   108  H    0.000000
   109  H    0.000000
   110  H    0.000000
   111  H    0.000000
   112  H    0.000000
   113  H    0.000000
   114  H    0.000000
   115  H    0.000000
   116  H    0.000000
   117  H    0.000000
   118  H    0.000000
   119  H    0.000000
   120  H    0.000000
   121  H    0.000000
   122  H    0.000000
   123  H    0.000000
   124  H    0.000000
   125  H    0.000000
   126  H    0.000000
   127  H    0.000000
 Sum of Mulliken charges=   0.00000
 Electronic spatial extent (au):  <R**2>= 40331.7726
 Charge=     0.0000 electrons
 Dipole moment (field-independent basis, Debye):
    X=    -0.0382    Y=    -2.5491    Z=    -1.2564  Tot=     2.8422
 Quadrupole moment (field-independent basis, Debye-Ang):
   XX=  -332.7770   YY=  -313.7367   ZZ=  -335.6311
   XY=    23.1066   XZ=   -17.2983   YZ=    -0.2200
 Traceless Quadrupole moment (field-independent basis, Debye-Ang):
   XX=    -5.3954   YY=    13.6449   ZZ=    -8.2495
   XY=    23.1066   XZ=   -17.2983   YZ=    -0.2200
 Octapole moment (field-independent basis, Debye-Ang**2):
  XXX=  -206.0441  YYY=   -68.1715  ZZZ=   -29.9288  XYY=    22.2292
  XXY=  -177.7335  XXZ=    95.1239  XZZ=   -24.3270  YZZ=     1.3361
  YYZ=    21.6386  XYZ=    22.7406
 Hexadecapole moment (field-independent basis, Debye-Ang**3):
 XXXX=-25243.9481 YYYY=-16357.7780 ZZZZ= -7669.5231 XXXY=  1559.7543
 XXXZ=  -693.9168 YYYX=   480.5522 YYYZ=    74.9770 ZZZX=   -17.3669
 ZZZY=   -35.2666 XXYY= -6869.7390 XXZZ= -5626.1371 YYZZ= -3999.7422
 XXYZ=   -26.2934 YYXZ=   -72.2277 ZZXY=   -13.5579
 N-N= 1.023629645432D+04 E-N=-2.711175788931D+04  KE= 2.815616009437D+03
 1\1\GINC-LOSCHMIDT\SP\RB3LYP\Gen\C46H68Mg1N2O10\RZEPA\09-Dec-2004\0\\#
  B3LYP/GEN GEOM=CHECKPOINT GUESS=READ SCRF(IEFPCM,SOLVENT=THF)\\from R
 RSS_fm.gjf\\0,1\C,0,4.3311976641,1.078278086,-0.3155857776\C,0,4.98731
 42572,-0.1572487851,-0.1803195741\C,0,4.4190043996,-1.4297134494,0.028
 7314781\C,0,-1.2538665614,-3.3068177518,-1.193004177\C,0,-1.453003929,
 -2.2712322623,-2.329747011\C,0,-0.7601256046,-1.0003788619,-1.79336550
 12\O,0,0.067480377,-1.4394678945,-0.6980650487\C,0,-0.6991142411,-2.47
 29169304,-0.0368368866\C,0,2.5011929933,2.6040271591,-0.2289276757\C,0
 ,2.6094376976,-3.0036244559,0.1528064635\C,0,2.6258502019,3.4743522293
 ,0.9071740682\C,0,2.0338146254,4.765354483,0.8322516516\C,0,1.37252867
 36,5.1999142814,-0.3331028596\C,0,1.2525554637,4.3321707971,-1.4469241
 478\C,0,1.8040109992,3.0260606006,-1.4126388621\C,0,3.4368384566,3.071
 3737654,2.1726915975\C,0,1.6982866984,2.0936945857,-2.6480407959\C,0,2
 .4798171319,-3.7006889967,-1.0947149524\C,0,1.8052978257,-4.9520635561
 ,-1.102461377\C,0,1.2863031216,-5.5064830152,0.084778708\C,0,1.4636232
 173,-4.8359006839,1.3146320162\C,0,2.1299346746,-3.5824836058,1.379978
 266\C,0,3.0960282239,-3.1643066184,-2.4171694419\C,0,2.3873174985,-2.8
 934026853,2.7464089784\C,0,2.5088057047,2.6461381981,3.354799555\C,0,4
 .4109869911,4.2128460579,2.621107154\C,0,0.3059776481,2.1791687236,-3.
 3470467064\C,0,2.842469558,2.379899549,-3.6784057041\C,0,1.1921671019,
 -3.0413686496,3.7349143716\C,0,3.7072415891,-3.4358764933,3.3918970252
 \C,0,2.0056652466,-2.7843358092,-3.468906855\C,0,4.0993894208,-4.20072
 41707,-3.0285229147\C,0,5.2327418873,2.2686992412,-0.6383705936\C,0,5.
 421832901,-2.581048653,0.0429055906\O,0,-7.2756496548,-2.507747299,0.9
 137341029\Mg,0,1.5967964174,-0.206670524,0.3729597627\O,0,-3.137576306
 7,1.9268069314,-0.6418034106\C,0,-6.9827296552,-1.2636557587,0.4901471
 045\N,0,3.1172148179,-1.6484933073,0.1699068248\N,0,3.0175533898,1.253
 1973683,-0.1652888119\O,0,-7.6710935888,-0.6099876117,-0.2575259672\O,
 0,-5.2155136175,0.3854826843,0.4524590779\C,0,-4.736412084,0.204905582
 4,-0.7930519992\C,0,-4.3107039269,1.5399054746,-1.4044593212\C,0,-5.67
 37969256,-0.793444223,1.1312952873\O,0,-4.6493593498,-0.8718175037,-1.
 3418197056\C,0,-8.5040570599,-3.0588162634,0.4059324902\O,0,0.73268510
 65,-0.144827229,2.0977092936\C,0,-2.8712705233,3.2495436672,-0.5770227
 564\O,0,-3.5286093069,4.1002748203,-1.1364144301\O,0,-1.4317070739,2.5
 741978004,1.2861667206\C,0,-0.5907068543,1.5497810747,1.0954505167\C,0
 ,-0.2883454002,0.7257080165,2.3519627053\C,0,-1.6123843976,3.547591823
 7,0.2322821849\O,0,-0.0583743386,1.3134418976,0.016381604\C,0,-1.58542
 12718,0.0516472931,2.8586155803\C,0,-1.6553887137,4.9169896221,0.89478
 13798\C,0,-3.9988290603,1.4317998184,-2.8873155076\C,0,-5.8638996751,-
 0.4211407879,2.5992673329\H,0,6.0661794552,-0.1382520863,-0.2942199663
 \H,0,-0.4972788946,-4.0529085212,-1.4427496193\H,0,-2.18168243,-3.8210
 736762,-0.92280649\H,0,-2.5109058901,-2.0754075545,-2.5251250272\H,0,-
 0.9870805759,-2.6144801259,-3.2574768787\H,0,-1.4868365427,-0.27433381
 7,-1.4137230951\H,0,-0.1116836194,-0.4979506648,-2.5118700813\H,0,-0.0
 296577157,-3.0260827554,0.614603278\H,0,-1.4949932998,-1.9972233832,0.
 5510408617\H,0,2.1464354218,5.4582512089,1.6761624065\H,0,0.9828209322
 ,6.2254697368,-0.3944561497\H,0,0.7683858983,4.695472942,-2.3624242677
 \H,0,4.0490875659,2.1865189132,1.9172390322\H,0,1.8401534371,1.0541155
 64,-2.2842396372\H,0,1.7184833388,-5.5113978979,-2.0434376554\H,0,0.77
 45020386,-6.4783470408,0.0584778813\H,0,1.0943524464,-5.2981522605,2.2
 392678944\H,0,3.6574755718,-2.2395645471,-2.1851892709\H,0,2.525932893
 1,-1.8116450148,2.5561721833\H,0,3.1066580607,2.4981589648,4.268198187
 1\H,0,2.019544852,1.6876422468,3.1077815968\H,0,1.7441526131,3.4128784
 948,3.556398304\H,0,5.0779722695,3.8358868923,3.4113517387\H,0,3.85583
 92217,5.073070782,3.024260711\H,0,5.0298336338,4.5611611616,1.77975261
 16\H,0,0.2386470274,1.4134211074,-4.1367755128\H,0,0.151940476,3.16267
 89385,-3.8176792841\H,0,-0.503087806,2.0094274667,-2.6185017569\H,0,2.
 7299991606,1.7196858897,-4.5522727423\H,0,3.8300580678,2.1920352937,-3
 .2287614405\H,0,2.8047890228,3.425839308,-4.0217852869\H,0,1.379669460
 5,-2.4226564939,4.6254551405\H,0,1.0556368413,-4.0846981841,4.06004260
 24\H,0,0.2607377194,-2.6888688323,3.2619631631\H,0,3.8834555724,-2.930
 3401756,4.3536973344\H,0,4.5722743881,-3.2433087372,2.7371971202\H,0,3
 .6393042416,-4.5204422971,3.5723748453\H,0,2.4815867124,-2.4546659617,
 -4.4061517555\H,0,1.3891720572,-1.9536859767,-3.0839093354\H,0,1.34857
 78032,-3.6401661101,-3.6904542103\H,0,4.6152641743,-3.754149088,-3.892
 3305954\H,0,3.5704742272,-5.1029821338,-3.3709600336\H,0,4.8551900468,
 -4.5018031279,-2.2874028499\H,0,5.4298245755,2.8719858069,0.2552692071
 \H,0,6.1995405378,1.9240723245,-1.0207998469\H,0,4.7849368208,2.930227
 8324,-1.3860666506\H,0,5.0034980892,-3.4999635473,0.4602735792\H,0,5.7
 752894365,-2.798990018,-0.9725013916\H,0,6.3007270038,-2.2985376456,0.
 6352489533\H,0,-5.0916301865,2.2829576295,-1.2211086172\H,0,-4.9315433
 714,-1.5884555326,1.0195190649\H,0,-9.353849051,-2.4391031505,0.703923
 3757\H,0,-8.4698790701,-3.1188178782,-0.6847520868\H,0,-8.5806553785,-
 4.0539454922,0.8442718366\H,0,-0.0230642031,1.4844443799,3.1159269055\
 H,0,-0.7485729699,3.5135450973,-0.4447054391\H,0,-2.3462648158,0.79351
 88574,3.129506021\H,0,-2.0002088262,-0.6191733936,2.0982873524\H,0,-1.
 3370132653,-0.5463139674,3.7405530349\H,0,-0.6403812999,5.1582322923,1
 .2151917701\H,0,-1.9896533806,5.6662416765,0.1730480521\H,0,-2.3379575
 52,4.9199958599,1.7496441906\H,0,-4.8853493116,1.0848093051,-3.4271877
 855\H,0,-3.7136117476,2.4129165713,-3.2739672522\H,0,-3.1906435695,0.7
 17949229,-3.0642176201\H,0,-4.9131712318,-0.0829858459,3.0208631661\H,
 0,-6.5986897663,0.3839096254,2.6984027696\H,0,-6.2117057091,-1.2924493
 477,3.1610016771\\Version=AM64L-G03RevC.01\State=1-A\HF=-2844.6793487\
 RMSD=5.833e-05\Dipole=-0.0150232,-1.0029118,-0.4942935\PG=C01 [X(C46H6
 8Mg1N2O10)]\\@


 SUPPORT THE RIGHT TO ARM BEARS!
 (ADD A CLAWS TO THE BILL OF RIGHTS)
 Job cpu time:  0 days  1 hours 15 minutes 29.4 seconds.
 File lengths (MBytes):  RWF=   1418 Int=      0 D2E=      0 Chk=     50 Scr=      1
 Normal termination of Gaussian 03 at Thu Dec  9 00:52:11 2004.
