# Supplementary material
Source: publisher figshare collection journal article supplement (https://acs.figshare.com/ndownloader/files/5127205)
Supplement: Supplementary file 1 [file 5127205 › supporting_ja043819b/RRSS_fm-5-product-thf.log]

 Entering Gaussian System, Link 0=g03
 Input=RRSS_fm-5-product-thf.gjf
 Output=RRSS_fm-5-product-thf.log
 Initial command:
 /usr/local/g03/l1.exe /home/rzepa/Gau-1330.inp -scrdir=/home/rzepa/
 Entering Link 1 = /usr/local/g03/l1.exe PID=      1331.
  
 Copyright (c) 1988,1990,1992,1993,1995,1998,2003,2004, Gaussian, Inc.
                  All Rights Reserved.
  
 This is the Gaussian(R) 03 program.  It is based on the
 the Gaussian(R) 98 system (copyright 1998, Gaussian, Inc.),
 the Gaussian(R) 94 system (copyright 1995, Gaussian, Inc.),
 the Gaussian 92(TM) system (copyright 1992, Gaussian, Inc.),
 the Gaussian 90(TM) system (copyright 1990, Gaussian, Inc.),
 the Gaussian 88(TM) system (copyright 1988, Gaussian, Inc.),
 the Gaussian 86(TM) system (copyright 1986, Carnegie Mellon
 University), and the Gaussian 82(TM) system (copyright 1983,
 Carnegie Mellon University). Gaussian is a federally registered
 trademark of Gaussian, Inc.
  
 This software contains proprietary and confidential information,
 including trade secrets, belonging to Gaussian, Inc.
  
 This software is provided under written license and may be
 used, copied, transmitted, or stored only in accord with that
 written license.
  
 The following legend is applicable only to US Government
 contracts under FAR:
  
                    RESTRICTED RIGHTS LEGEND
  
 Use, reproduction and disclosure by the US Government is
 subject to restrictions as set forth in subparagraphs (a)
 and (c) of the Commercial Computer Software - Restricted
 Rights clause in FAR 52.227-19.
  
 Gaussian, Inc.
 340 Quinnipiac St., Bldg. 40, Wallingford CT 06492
  
  
 ---------------------------------------------------------------
 Warning -- This program may not be used in any manner that
 competes with the business of Gaussian, Inc. or will provide
 assistance to any competitor of Gaussian, Inc.  The licensee
 of this program is prohibited from giving any competitor of
 Gaussian, Inc. access to this program.  By using this program,
 the user acknowledges that Gaussian, Inc. is engaged in the
 business of creating and licensing software in the field of
 computational chemistry and represents and warrants to the
 licensee that it is not a competitor of Gaussian, Inc. and that
 it will not use this program in any manner prohibited above.
 ---------------------------------------------------------------
  

 Cite this work as:
 Gaussian 03, Revision C.01,
 M. J. Frisch, G. W. Trucks, H. B. Schlegel, G. E. Scuseria, 
 M. A. Robb, J. R. Cheeseman, J. A. Montgomery, Jr., T. Vreven, 
 K. N. Kudin, J. C. Burant, J. M. Millam, S. S. Iyengar, J. Tomasi, 
 V. Barone, B. Mennucci, M. Cossi, G. Scalmani, N. Rega, 
 G. A. Petersson, H. Nakatsuji, M. Hada, M. Ehara, K. Toyota, 
 R. Fukuda, J. Hasegawa, M. Ishida, T. Nakajima, Y. Honda, O. Kitao, 
 H. Nakai, M. Klene, X. Li, J. E. Knox, H. P. Hratchian, J. B. Cross, 
 C. Adamo, J. Jaramillo, R. Gomperts, R. E. Stratmann, O. Yazyev, 
 A. J. Austin, R. Cammi, C. Pomelli, J. W. Ochterski, P. Y. Ayala, 
 K. Morokuma, G. A. Voth, P. Salvador, J. J. Dannenberg, 
 V. G. Zakrzewski, S. Dapprich, A. D. Daniels, M. C. Strain, 
 O. Farkas, D. K. Malick, A. D. Rabuck, K. Raghavachari, 
 J. B. Foresman, J. V. Ortiz, Q. Cui, A. G. Baboul, S. Clifford, 
 J. Cioslowski, B. B. Stefanov, G. Liu, A. Liashenko, P. Piskorz, 
 I. Komaromi, R. L. Martin, D. J. Fox, T. Keith, M. A. Al-Laham, 
 C. Y. Peng, A. Nanayakkara, M. Challacombe, P. M. W. Gill, 
 B. Johnson, W. Chen, M. W. Wong, C. Gonzalez, and J. A. Pople, 
 Gaussian, Inc., Wallingford CT, 2004.
 
 ******************************************
 Gaussian 03:  AM64L-G03RevC.01  3-Apr-2004
                12-Jan-2005 
 ******************************************
 %mem=3500MB
 %nprocshared=2
 Will use up to    2 processors via shared memory.
 %chk=RRSS_fm-5-prod-thf.chk
 ----------------
 # b3lyp/Gen freq
 ----------------
 1/10=4,30=1,38=1/1,3;
 2/17=6,18=5,40=1/2;
 3/5=7,11=2,16=1,25=1,30=1,74=-5/1,2,3;
 4//1;
 5/5=2,38=5/2;
 8/6=4,10=90,11=11/1;
 11/6=1,8=1,9=11,15=111,16=1/1,2,10;
 10/6=1/2;
 6/7=2,8=2,9=2,10=2,18=1,28=1/1;
 7/8=1,10=1,25=1/1,2,3,16;
 1/10=4,30=1/3;
 99//99;
 ----------------
 from RRSS_fm.gjf
 ----------------
 Symbolic Z-matrix:
 Charge =  0 Multiplicity = 1
 6                    0    -2.10388   1.34062   2.8492 
 6                    0    -3.30621   0.64554   3.05461 
 6                    0    -3.96939  -0.22678   2.16751 
 6                    0    -1.77354  -3.41576  -2.55721 
 6                    0    -0.36766  -3.55038  -1.91574 
 6                    0    -0.10496  -2.15545  -1.31195 
 8                    0    -1.40347  -1.53809  -1.20272 
 6                    0    -2.10131  -1.92694  -2.40831 
 6                    0    -0.28496   2.22867   1.58089 
 6                    0    -4.17807  -1.58809   0.20814 
 6                    0    -0.51921   3.59257   1.18215 
 6                    0     0.60432   4.40594   0.87909 
 6                    0     1.91981   3.92329   1.03029 
 6                    0     2.13946   2.59981   1.48344 
 6                    0     1.04794   1.73123   1.75496 
 6                    0    -1.94429   4.21919   1.18711 
 6                    0     1.31376   0.29378   2.27347 
 6                    0    -3.88835  -2.95578   0.53026 
 6                    0    -4.38986  -3.97194  -0.32833 
 6                    0    -5.16859  -3.6517   -1.45874 
 6                    0    -5.49054  -2.30516  -1.73663 
 6                    0    -5.01307  -1.24971  -0.91431 
 6                    0    -3.09404  -3.36291   1.80351 
 6                    0    -5.43289   0.21864  -1.19168 
 6                    0    -2.48698   4.52314  -0.24428 
 6                    0    -1.97424   5.51485   2.06907 
 6                    0     2.18691  -0.53251   1.2793 
 6                    0     1.98482   0.31393   3.68811 
 6                    0    -5.4449    0.56675  -2.71029 
 6                    0    -6.82721   0.52298  -0.54614 
 6                    0    -1.69878  -3.97573   1.46173 
 6                    0    -3.91883  -4.35931   2.6881 
 6                    0    -1.58824   2.15365   4.03165 
 6                    0    -5.24273  -0.85887   2.725 
 8                    0     7.21     -2.58684   2.14945 
 12                   0    -1.92901   0.36913  -0.09708 
 8                    0     4.19902   0.79254  -1.96378 
 6                    0     6.25326  -2.14524   1.31119 
 7                    0    -3.53368  -0.52463   0.94918 
 7                    0    -1.41517   1.331     1.70756 
 8                    0     5.35036  -2.82145   0.8784 
 8                    0     5.60759  -0.25915  -0.05679 
 6                    0     5.95495  -0.71636  -1.27669 
 6                    0     4.92023  -0.39445  -2.35124 
 6                    0     6.4676   -0.65616   1.02142 
 8                    0     6.95966  -1.35441  -1.50173 
 6                    0     7.11569  -3.97506   2.51707 
 8                    0    -2.40077   1.41563  -1.64806 
 6                    0     2.91101   0.87775  -2.37669 
 8                    0     2.35992   0.04218  -3.05677 
 8                    0     0.96946   2.31388  -2.42229 
 6                    0    -0.05244   1.65157  -1.86422 
 6                    0    -1.43512   2.00815  -2.41352 
 6                    0     2.27548   2.15406  -1.83959 
 8                    0     0.10063   0.85723  -0.94162 
 6                    0    -1.51061   1.65579  -3.91678 
 6                    0     3.05226   3.42602  -2.16508 
 6                    0     5.56047  -0.21878  -3.72359 
 6                    0     6.11514   0.21596   2.22421 
 1                    0    -3.77359   0.77585   4.02461 
 1                    0    -2.53039  -3.97101  -2.0001 
 1                    0    -1.79776  -3.73965  -3.60279 
 1                    0     0.40459  -3.80947  -2.64668 
 1                    0    -0.3672   -4.31945  -1.13898 
 1                    0     0.52757  -1.54301  -1.96437 
 1                    0     0.33592  -2.17389  -0.31475 
 1                    0    -3.15932  -1.73467  -2.26283 
 1                    0    -1.7173   -1.32876  -3.24394 
 1                    0     0.44416   5.44948   0.57747 
 1                    0     2.77558   4.59077   0.85562 
 1                    0     3.16589   2.2531    1.6631 
 1                    0    -2.63422   3.48395   1.64382 
 1                    0     0.32898  -0.20844   2.36915 
 1                    0    -4.19642  -5.02527  -0.08626 
 1                    0    -5.5552   -4.45292  -2.10349 
 1                    0    -6.13323  -2.06984  -2.59501 
 1                    0    -2.90834  -2.44982   2.39961 
 1                    0    -4.68674   0.87783  -0.70707 
 1                    0    -3.42533   5.09631  -0.17472 
 1                    0    -2.70188   3.57402  -0.76545 
 1                    0    -1.76183   5.11259  -0.82736 
 1                    0    -3.01337   5.86049   2.17886 
 1                    0    -1.39022   6.32322   1.60373 
 1                    0    -1.56389   5.32357   3.07269 
 1                    0     2.2939   -1.56973   1.63477 
 1                    0     3.19404  -0.09583   1.17505 
 1                    0     1.72421  -0.54038   0.27903 
 1                    0     2.10584  -0.71547   4.05898 
 1                    0     1.37314   0.87451   4.41204 
 1                    0     2.9805    0.78712   3.64027 
 1                    0    -5.63262   1.64411  -2.83381 
 1                    0    -6.22849   0.01359  -3.25126 
 1                    0    -4.46568   0.33553  -3.16023 
 1                    0    -7.10586   1.569    -0.74567 
 1                    0    -6.7964    0.37652   0.54532 
 1                    0    -7.60567  -0.13371  -0.96588 
 1                    0    -1.18898  -4.29802   2.38368 
 1                    0    -1.06941  -3.21637   0.96625 
 1                    0    -1.8001   -4.84611   0.79375 
 1                    0    -3.39666  -4.52771   3.64241 
 1                    0    -4.03412  -5.33002   2.18275 
 1                    0    -4.92142  -3.96007   2.90417 
 1                    0    -1.58479   3.22691   3.81352 
 1                    0    -2.21224   1.99317   4.91721 
 1                    0    -0.56098   1.86733   4.2836 
 1                    0    -5.92174  -1.19901   1.93899 
 1                    0    -5.00404  -1.72117   3.35949 
 1                    0    -5.77386  -0.13371   3.35279 
 1                    0     4.21068  -1.22997  -2.37392 
 1                    0     7.51092  -0.51608   0.72574 
 1                    0     6.16717  -4.17325   3.02297 
 1                    0     7.18686  -4.60763   1.62876 
 1                    0     7.95552  -4.15699   3.18772 
 1                    0    -1.46909   3.11565  -2.35748 
 1                    0     2.17935   2.07043  -0.7508 
 1                    0    -0.77359   2.21683  -4.50255 
 1                    0    -1.34383   0.58602  -4.07842 
 1                    0    -2.5149    1.90263  -4.2741 
 1                    0     2.58739   4.24903  -1.61635 
 1                    0     4.09119   3.32851  -1.841 
 1                    0     3.02859   3.64176  -3.23762 
 1                    0     6.16008  -1.09898  -3.96663 
 1                    0     4.77938  -0.09506  -4.47764 
 1                    0     6.21367   0.65959  -3.7337 
 1                    0     6.29247   1.26821   1.98267 
 1                    0     5.06205   0.0928    2.49398 
 1                    0     6.73854  -0.06016   3.07888 
 

 GradGradGradGradGradGradGradGradGradGradGradGradGradGradGradGradGradGrad
 Berny optimization.
 Initialization pass.
 Trust Radius=3.00D-01 FncErr=1.00D-07 GrdErr=1.00D-07
 Number of steps in this run=   2 maximum allowed number of steps=   2.
 GradGradGradGradGradGradGradGradGradGradGradGradGradGradGradGradGradGrad

 Stoichiometry    C46H68MgN2O10
 Framework group  C1[X(C46H68MgN2O10)]
 Deg. of freedom   375
 Full point group                 C1      NOp   1
 Largest Abelian subgroup         C1      NOp   1
 Largest concise Abelian subgroup C1      NOp   1
                         Standard orientation:                         
 ---------------------------------------------------------------------
 Center     Atomic     Atomic              Coordinates (Angstroms)
 Number     Number      Type              X           Y           Z
 ---------------------------------------------------------------------
    1          6             0       -2.103877    1.340621    2.849196
    2          6             0       -3.306211    0.645535    3.054612
    3          6             0       -3.969392   -0.226780    2.167510
    4          6             0       -1.773536   -3.415760   -2.557209
    5          6             0       -0.367661   -3.550377   -1.915743
    6          6             0       -0.104956   -2.155445   -1.311952
    7          8             0       -1.403468   -1.538094   -1.202722
    8          6             0       -2.101310   -1.926937   -2.408309
    9          6             0       -0.284959    2.228671    1.580889
   10          6             0       -4.178075   -1.588093    0.208140
   11          6             0       -0.519211    3.592567    1.182150
   12          6             0        0.604320    4.405936    0.879092
   13          6             0        1.919810    3.923285    1.030290
   14          6             0        2.139460    2.599807    1.483436
   15          6             0        1.047941    1.731226    1.754957
   16          6             0       -1.944292    4.219193    1.187107
   17          6             0        1.313757    0.293777    2.273475
   18          6             0       -3.888350   -2.955775    0.530260
   19          6             0       -4.389859   -3.971939   -0.328333
   20          6             0       -5.168587   -3.651699   -1.458737
   21          6             0       -5.490544   -2.305161   -1.736631
   22          6             0       -5.013073   -1.249713   -0.914314
   23          6             0       -3.094036   -3.362907    1.803505
   24          6             0       -5.432888    0.218641   -1.191679
   25          6             0       -2.486976    4.523136   -0.244282
   26          6             0       -1.974236    5.514850    2.069074
   27          6             0        2.186909   -0.532507    1.279296
   28          6             0        1.984821    0.313927    3.688105
   29          6             0       -5.444900    0.566753   -2.710290
   30          6             0       -6.827212    0.522978   -0.546144
   31          6             0       -1.698780   -3.975733    1.461727
   32          6             0       -3.918825   -4.359306    2.688097
   33          6             0       -1.588241    2.153650    4.031651
   34          6             0       -5.242726   -0.858867    2.724997
   35          8             0        7.210003   -2.586842    2.149445
   36         12             0       -1.929011    0.369130   -0.097083
   37          8             0        4.199022    0.792540   -1.963777
   38          6             0        6.253265   -2.145242    1.311194
   39          7             0       -3.533681   -0.524629    0.949176
   40          7             0       -1.415167    1.330997    1.707555
   41          8             0        5.350363   -2.821446    0.878395
   42          8             0        5.607587   -0.259145   -0.056786
   43          6             0        5.954945   -0.716359   -1.276688
   44          6             0        4.920232   -0.394451   -2.351237
   45          6             0        6.467601   -0.656164    1.021424
   46          8             0        6.959659   -1.354410   -1.501732
   47          6             0        7.115685   -3.975058    2.517071
   48          8             0       -2.400771    1.415626   -1.648064
   49          6             0        2.911014    0.877754   -2.376686
   50          8             0        2.359916    0.042184   -3.056771
   51          8             0        0.969459    2.313882   -2.422290
   52          6             0       -0.052436    1.651565   -1.864220
   53          6             0       -1.435124    2.008155   -2.413515
   54          6             0        2.275481    2.154060   -1.839585
   55          8             0        0.100634    0.857231   -0.941624
   56          6             0       -1.510606    1.655790   -3.916782
   57          6             0        3.052262    3.426019   -2.165084
   58          6             0        5.560469   -0.218781   -3.723590
   59          6             0        6.115138    0.215963    2.224206
   60          1             0       -3.773588    0.775848    4.024608
   61          1             0       -2.530390   -3.971010   -2.000099
   62          1             0       -1.797759   -3.739650   -3.602789
   63          1             0        0.404587   -3.809465   -2.646679
   64          1             0       -0.367198   -4.319449   -1.138978
   65          1             0        0.527572   -1.543005   -1.964372
   66          1             0        0.335918   -2.173892   -0.314754
   67          1             0       -3.159324   -1.734672   -2.262832
   68          1             0       -1.717302   -1.328756   -3.243935
   69          1             0        0.444160    5.449475    0.577465
   70          1             0        2.775577    4.590774    0.855616
   71          1             0        3.165887    2.253104    1.663103
   72          1             0       -2.634216    3.483945    1.643822
   73          1             0        0.328983   -0.208435    2.369149
   74          1             0       -4.196420   -5.025272   -0.086256
   75          1             0       -5.555201   -4.452918   -2.103492
   76          1             0       -6.133229   -2.069841   -2.595011
   77          1             0       -2.908336   -2.449822    2.399613
   78          1             0       -4.686737    0.877833   -0.707067
   79          1             0       -3.425332    5.096308   -0.174719
   80          1             0       -2.701884    3.574024   -0.765453
   81          1             0       -1.761834    5.112589   -0.827361
   82          1             0       -3.013372    5.860493    2.178862
   83          1             0       -1.390224    6.323216    1.603730
   84          1             0       -1.563888    5.323568    3.072690
   85          1             0        2.293902   -1.569727    1.634770
   86          1             0        3.194041   -0.095827    1.175052
   87          1             0        1.724211   -0.540380    0.279032
   88          1             0        2.105840   -0.715473    4.058980
   89          1             0        1.373137    0.874506    4.412037
   90          1             0        2.980496    0.787123    3.640266
   91          1             0       -5.632620    1.644110   -2.833813
   92          1             0       -6.228491    0.013593   -3.251260
   93          1             0       -4.465682    0.335527   -3.160225
   94          1             0       -7.105858    1.569001   -0.745674
   95          1             0       -6.796396    0.376520    0.545315
   96          1             0       -7.605672   -0.133712   -0.965878
   97          1             0       -1.188980   -4.298021    2.383679
   98          1             0       -1.069407   -3.216369    0.966245
   99          1             0       -1.800100   -4.846107    0.793747
  100          1             0       -3.396660   -4.527710    3.642414
  101          1             0       -4.034120   -5.330018    2.182745
  102          1             0       -4.921424   -3.960074    2.904173
  103          1             0       -1.584794    3.226913    3.813517
  104          1             0       -2.212235    1.993165    4.917214
  105          1             0       -0.560981    1.867326    4.283598
  106          1             0       -5.921737   -1.199009    1.938989
  107          1             0       -5.004040   -1.721169    3.359490
  108          1             0       -5.773861   -0.133711    3.352790
  109          1             0        4.210682   -1.229968   -2.373918
  110          1             0        7.510916   -0.516077    0.725744
  111          1             0        6.167166   -4.173250    3.022966
  112          1             0        7.186858   -4.607628    1.628761
  113          1             0        7.955515   -4.156992    3.187725
  114          1             0       -1.469090    3.115652   -2.357477
  115          1             0        2.179349    2.070430   -0.750795
  116          1             0       -0.773587    2.216829   -4.502548
  117          1             0       -1.343832    0.586016   -4.078417
  118          1             0       -2.514895    1.902631   -4.274101
  119          1             0        2.587385    4.249028   -1.616354
  120          1             0        4.091192    3.328510   -1.841004
  121          1             0        3.028592    3.641760   -3.237618
  122          1             0        6.160082   -1.098977   -3.966632
  123          1             0        4.779381   -0.095064   -4.477636
  124          1             0        6.213669    0.659593   -3.733703
  125          1             0        6.292467    1.268214    1.982671
  126          1             0        5.062051    0.092800    2.493982
  127          1             0        6.738537   -0.060155    3.078881
 ---------------------------------------------------------------------
 Rotational constants (GHZ):      0.0603952      0.0318220      0.0292198
 General basis read from cards:  (5D, 7F)
 There are   728 symmetry adapted basis functions of A   symmetry.
 Integral buffers will be    131072 words long.
 Raffenetti 2 integral format.
 Two-electron integral symmetry is turned on.
   728 basis functions,  1602 primitive gaussians,   765 cartesian basis functions
   225 alpha electrons      225 beta electrons
       nuclear repulsion energy     10150.8078759978 Hartrees.
 NAtoms=  127 NActive=  127 NUniq=  127 SFac= 1.00D+00 NAtFMM=   60 Big=T
 One-electron integrals computed using PRISM.
 NBasis=   728 RedAO= T  NBF=   728
 NBsUse=   728 1.00D-06 NBFU=   728
 Harris functional with IExCor=  402 diagonalized for initial guess.
 ExpMin= 3.48D-02 ExpMax= 4.39D+04 ExpMxC= 1.51D+03 IAcc=3 IRadAn=         5 AccDes= 0.00D+00
 HarFok:  IExCor= 402 AccDes= 0.00D+00 IRadAn=         5 IDoV=1
 ScaDFX=  1.000000  1.000000  1.000000  1.000000
 Initial guess orbital symmetries:
       Occupied  (A) (A) (A) (A) (A) (A) (A) (A) (A) (A) (A) (A)
                 (A) (A) (A) (A) (A) (A) (A) (A) (A) (A) (A) (A)
                 (A) (A) (A) (A) (A) (A) (A) (A) (A) (A) (A) (A)
                 (A) (A) (A) (A) (A) (A) (A) (A) (A) (A) (A) (A)
                 (A) (A) (A) (A) (A) (A) (A) (A) (A) (A) (A) (A)
                 (A) (A) (A) (A) (A) (A) (A) (A) (A) (A) (A) (A)
                 (A) (A) (A) (A) (A) (A) (A) (A) (A) (A) (A) (A)
                 (A) (A) (A) (A) (A) (A) (A) (A) (A) (A) (A) (A)
                 (A) (A) (A) (A) (A) (A) (A) (A) (A) (A) (A) (A)
                 (A) (A) (A) (A) (A) (A) (A) (A) (A) (A) (A) (A)
                 (A) (A) (A) (A) (A) (A) (A) (A) (A) (A) (A) (A)
                 (A) (A) (A) (A) (A) (A) (A) (A) (A) (A) (A) (A)
                 (A) (A) (A) (A) (A) (A) (A) (A) (A) (A) (A) (A)
                 (A) (A) (A) (A) (A) (A) (A) (A) (A) (A) (A) (A)
                 (A) (A) (A) (A) (A) (A) (A) (A) (A) (A) (A) (A)
                 (A) (A) (A) (A) (A) (A) (A) (A) (A) (A) (A) (A)
                 (A) (A) (A) (A) (A) (A) (A) (A) (A) (A) (A) (A)
                 (A) (A) (A) (A) (A) (A) (A) (A) (A) (A) (A) (A)
                 (A) (A) (A) (A) (A) (A) (A) (A) (A)
       Virtual   (A) (A) (A) (A) (A) (A) (A) (A) (A) (A) (A) (A)
                 (A) (A) (A) (A) (A) (A) (A) (A) (A) (A) (A) (A)
                 (A) (A) (A) (A) (A) (A) (A) (A) (A) (A) (A) (A)
                 (A) (A) (A) (A) (A) (A) (A) (A) (A) (A) (A) (A)
                 (A) (A) (A) (A) (A) (A) (A) (A) (A) (A) (A) (A)
                 (A) (A) (A) (A) (A) (A) (A) (A) (A) (A) (A) (A)
                 (A) (A) (A) (A) (A) (A) (A) (A) (A) (A) (A) (A)
                 (A) (A) (A) (A) (A) (A) (A) (A) (A) (A) (A) (A)
                 (A) (A) (A) (A) (A) (A) (A) (A) (A) (A) (A) (A)
                 (A) (A) (A) (A) (A) (A) (A) (A) (A) (A) (A) (A)
                 (A) (A) (A) (A) (A) (A) (A) (A) (A) (A) (A) (A)
                 (A) (A) (A) (A) (A) (A) (A) (A) (A) (A) (A) (A)
                 (A) (A) (A) (A) (A) (A) (A) (A) (A) (A) (A) (A)
                 (A) (A) (A) (A) (A) (A) (A) (A) (A) (A) (A) (A)
                 (A) (A) (A) (A) (A) (A) (A) (A) (A) (A) (A) (A)
                 (A) (A) (A) (A) (A) (A) (A) (A) (A) (A) (A) (A)
                 (A) (A) (A) (A) (A) (A) (A) (A) (A) (A) (A) (A)
                 (A) (A) (A) (A) (A) (A) (A) (A) (A) (A) (A) (A)
                 (A) (A) (A) (A) (A) (A) (A) (A) (A) (A) (A) (A)
                 (A) (A) (A) (A) (A) (A) (A) (A) (A) (A) (A) (A)
                 (A) (A) (A) (A) (A) (A) (A) (A) (A) (A) (A) (A)
                 (A) (A) (A) (A) (A) (A) (A) (A) (A) (A) (A) (A)
                 (A) (A) (A) (A) (A) (A) (A) (A) (A) (A) (A) (A)
                 (A) (A) (A) (A) (A) (A) (A) (A) (A) (A) (A) (A)
                 (A) (A) (A) (A) (A) (A) (A) (A) (A) (A) (A) (A)
                 (A) (A) (A) (A) (A) (A) (A) (A) (A) (A) (A) (A)
                 (A) (A) (A) (A) (A) (A) (A) (A) (A) (A) (A) (A)
                 (A) (A) (A) (A) (A) (A) (A) (A) (A) (A) (A) (A)
                 (A) (A) (A) (A) (A) (A) (A) (A) (A) (A) (A) (A)
                 (A) (A) (A) (A) (A) (A) (A) (A) (A) (A) (A) (A)
                 (A) (A) (A) (A) (A) (A) (A) (A) (A) (A) (A) (A)
                 (A) (A) (A) (A) (A) (A) (A) (A) (A) (A) (A) (A)
                 (A) (A) (A) (A) (A) (A) (A) (A) (A) (A) (A) (A)
                 (A) (A) (A) (A) (A) (A) (A) (A) (A) (A) (A) (A)
                 (A) (A) (A) (A) (A) (A) (A) (A) (A) (A) (A) (A)
                 (A) (A) (A) (A) (A) (A) (A) (A) (A) (A) (A) (A)
                 (A) (A) (A) (A) (A) (A) (A) (A) (A) (A) (A) (A)
                 (A) (A) (A) (A) (A) (A) (A) (A) (A) (A) (A) (A)
                 (A) (A) (A) (A) (A) (A) (A) (A) (A) (A) (A) (A)
                 (A) (A) (A) (A) (A) (A) (A) (A) (A) (A) (A) (A)
                 (A) (A) (A) (A) (A) (A) (A) (A) (A) (A) (A) (A)
                 (A) (A) (A) (A) (A) (A) (A) (A) (A) (A) (A)
 The electronic state of the initial guess is 1-A.
 Requested convergence on RMS density matrix=1.00D-08 within 128 cycles.
 Requested convergence on MAX density matrix=1.00D-06.
 Requested convergence on             energy=1.00D-06.
 No special actions if energy rises.
 SCF Done:  E(RB+HF-LYP) =  -2844.66852422     A.U. after   14 cycles
             Convg  =    0.7208D-08             -V/T =  2.0103
             S**2   =   0.0000
 Range of M.O.s used for correlation:     1   728
 NBasis=   728 NAE=   225 NBE=   225 NFC=     0 NFV=     0
 NROrb=    728 NOA=   225 NOB=   225 NVA=   503 NVB=   503
 Symmetrizing basis deriv contribution to polar:
 IMax=3 JMax=2 DiffMx= 0.00D+00
 G2DrvN: will do  128 centers at a time, making    1 passes doing MaxLOS=2.
 Calling FoFCou, ICntrl=  3107 FMM=T I1Cent=   0.
 FoFDir/FoFCou used for L=0 through L=2.
 DoAtom=TTTTTTTTTTTTTTTTTTTTTTTTTTTTTTTTTTTTTTTTTTTTTTTTTT
 DoAtom=TTTTTTTTTTTTTTTTTTTTTTTTTTTTTTTTTTTTTTTTTTTTTTTTTT
 DoAtom=TTTTTTTTTTTTTTTTTTTTTTTTTTT
          Differentiating once with respect to electric field.
                with respect to dipole field.
          Differentiating once with respect to nuclear coordinates.
 FoFCou: FMM=T IPFlag=           0 FMFlag=      100000 FMFlg1=        8193
 NFxFlg=           0 DoJE=F BraDBF=F KetDBF=F FulRan=T.
 Symmetry not used in FoFCou.
 FMM levels:  10  Number of levels for PrismC:   9
 PrismC:  NFx=      2048 NFxT=         6 NFxU=         6.
 PrismC:  NFx=      2048 NFxT=         6 NFxU=         6.
          There are 384 degrees of freedom in the 1st order CPHF.
   381 vectors were produced by pass  0.
 AX will form 381 AO Fock derivatives at one time.
 PrismC:  NFx=      2048 NFxT=         6 NFxU=         6.
 PrismC:  NFx=      2048 NFxT=         6 NFxU=         6.
   381 vectors were produced by pass  1.
 PrismC:  NFx=      2048 NFxT=         6 NFxU=         6.
 PrismC:  NFx=      2048 NFxT=         6 NFxU=         6.
   381 vectors were produced by pass  2.
 PrismC:  NFx=      2048 NFxT=         6 NFxU=         6.
 PrismC:  NFx=      2048 NFxT=         6 NFxU=         6.
   381 vectors were produced by pass  3.
 PrismC:  NFx=      2048 NFxT=         6 NFxU=         6.
 PrismC:  NFx=      2048 NFxT=         6 NFxU=         6.
   381 vectors were produced by pass  4.
 PrismC:  NFx=      2048 NFxT=         6 NFxU=         6.
 PrismC:  NFx=      2048 NFxT=         6 NFxU=         6.
   236 vectors were produced by pass  5.
 PrismC:  NFx=      2048 NFxT=         6 NFxU=         5.
 PrismC:  NFx=      2048 NFxT=         6 NFxU=         5.
    37 vectors were produced by pass  6.
 PrismC:  NFx=      2048 NFxT=         6 NFxU=         3.
 PrismC:  NFx=      2048 NFxT=         6 NFxU=         4.
     3 vectors were produced by pass  7.
 PrismC:  NFx=      2048 NFxT=         6 NFxU=         2.
 PrismC:  NFx=      2048 NFxT=         6 NFxU=         3.
 Inv2:  IOpt= 1 Iter= 1 AM= 9.85D-15 Conv= 1.00D-12.
 Inverted reduced A of dimension 2181 with in-core refinement.
 PrismC:  NFx=      2048 NFxT=         6 NFxU=         6.
 PrismC:  NFx=      2048 NFxT=         6 NFxU=         6.
 Isotropic polarizability for W=    0.000000      457.70 Bohr**3.
 End of Minotr Frequency-dependent properties file   721 does not exist.

 **********************************************************************

            Population analysis using the SCF density.

 **********************************************************************

 Orbital symmetries:
       Occupied  (A) (A) (A) (A) (A) (A) (A) (A) (A) (A) (A) (A)
                 (A) (A) (A) (A) (A) (A) (A) (A) (A) (A) (A) (A)
                 (A) (A) (A) (A) (A) (A) (A) (A) (A) (A) (A) (A)
                 (A) (A) (A) (A) (A) (A) (A) (A) (A) (A) (A) (A)
                 (A) (A) (A) (A) (A) (A) (A) (A) (A) (A) (A) (A)
                 (A) (A) (A) (A) (A) (A) (A) (A) (A) (A) (A) (A)
                 (A) (A) (A) (A) (A) (A) (A) (A) (A) (A) (A) (A)
                 (A) (A) (A) (A) (A) (A) (A) (A) (A) (A) (A) (A)
                 (A) (A) (A) (A) (A) (A) (A) (A) (A) (A) (A) (A)
                 (A) (A) (A) (A) (A) (A) (A) (A) (A) (A) (A) (A)
                 (A) (A) (A) (A) (A) (A) (A) (A) (A) (A) (A) (A)
                 (A) (A) (A) (A) (A) (A) (A) (A) (A) (A) (A) (A)
                 (A) (A) (A) (A) (A) (A) (A) (A) (A) (A) (A) (A)
                 (A) (A) (A) (A) (A) (A) (A) (A) (A) (A) (A) (A)
                 (A) (A) (A) (A) (A) (A) (A) (A) (A) (A) (A) (A)
                 (A) (A) (A) (A) (A) (A) (A) (A) (A) (A) (A) (A)
                 (A) (A) (A) (A) (A) (A) (A) (A) (A) (A) (A) (A)
                 (A) (A) (A) (A) (A) (A) (A) (A) (A) (A) (A) (A)
                 (A) (A) (A) (A) (A) (A) (A) (A) (A)
       Virtual   (A) (A) (A) (A) (A) (A) (A) (A) (A) (A) (A) (A)
                 (A) (A) (A) (A) (A) (A) (A) (A) (A) (A) (A) (A)
                 (A) (A) (A) (A) (A) (A) (A) (A) (A) (A) (A) (A)
                 (A) (A) (A) (A) (A) (A) (A) (A) (A) (A) (A) (A)
                 (A) (A) (A) (A) (A) (A) (A) (A) (A) (A) (A) (A)
                 (A) (A) (A) (A) (A) (A) (A) (A) (A) (A) (A) (A)
                 (A) (A) (A) (A) (A) (A) (A) (A) (A) (A) (A) (A)
                 (A) (A) (A) (A) (A) (A) (A) (A) (A) (A) (A) (A)
                 (A) (A) (A) (A) (A) (A) (A) (A) (A) (A) (A) (A)
                 (A) (A) (A) (A) (A) (A) (A) (A) (A) (A) (A) (A)
                 (A) (A) (A) (A) (A) (A) (A) (A) (A) (A) (A) (A)
                 (A) (A) (A) (A) (A) (A) (A) (A) (A) (A) (A) (A)
                 (A) (A) (A) (A) (A) (A) (A) (A) (A) (A) (A) (A)
                 (A) (A) (A) (A) (A) (A) (A) (A) (A) (A) (A) (A)
                 (A) (A) (A) (A) (A) (A) (A) (A) (A) (A) (A) (A)
                 (A) (A) (A) (A) (A) (A) (A) (A) (A) (A) (A) (A)
                 (A) (A) (A) (A) (A) (A) (A) (A) (A) (A) (A) (A)
                 (A) (A) (A) (A) (A) (A) (A) (A) (A) (A) (A) (A)
                 (A) (A) (A) (A) (A) (A) (A) (A) (A) (A) (A) (A)
                 (A) (A) (A) (A) (A) (A) (A) (A) (A) (A) (A) (A)
                 (A) (A) (A) (A) (A) (A) (A) (A) (A) (A) (A) (A)
                 (A) (A) (A) (A) (A) (A) (A) (A) (A) (A) (A) (A)
                 (A) (A) (A) (A) (A) (A) (A) (A) (A) (A) (A) (A)
                 (A) (A) (A) (A) (A) (A) (A) (A) (A) (A) (A) (A)
                 (A) (A) (A) (A) (A) (A) (A) (A) (A) (A) (A) (A)
                 (A) (A) (A) (A) (A) (A) (A) (A) (A) (A) (A) (A)
                 (A) (A) (A) (A) (A) (A) (A) (A) (A) (A) (A) (A)
                 (A) (A) (A) (A) (A) (A) (A) (A) (A) (A) (A) (A)
                 (A) (A) (A) (A) (A) (A) (A) (A) (A) (A) (A) (A)
                 (A) (A) (A) (A) (A) (A) (A) (A) (A) (A) (A) (A)
                 (A) (A) (A) (A) (A) (A) (A) (A) (A) (A) (A) (A)
                 (A) (A) (A) (A) (A) (A) (A) (A) (A) (A) (A) (A)
                 (A) (A) (A) (A) (A) (A) (A) (A) (A) (A) (A) (A)
                 (A) (A) (A) (A) (A) (A) (A) (A) (A) (A) (A) (A)
                 (A) (A) (A) (A) (A) (A) (A) (A) (A) (A) (A) (A)
                 (A) (A) (A) (A) (A) (A) (A) (A) (A) (A) (A) (A)
                 (A) (A) (A) (A) (A) (A) (A) (A) (A) (A) (A) (A)
                 (A) (A) (A) (A) (A) (A) (A) (A) (A) (A) (A) (A)
                 (A) (A) (A) (A) (A) (A) (A) (A) (A) (A) (A) (A)
                 (A) (A) (A) (A) (A) (A) (A) (A) (A) (A) (A) (A)
                 (A) (A) (A) (A) (A) (A) (A) (A) (A) (A) (A) (A)
                 (A) (A) (A) (A) (A) (A) (A) (A) (A) (A) (A)
 The electronic state is 1-A.
 Alpha  occ. eigenvalues --  -46.69815 -19.20070 -19.19988 -19.19475 -19.18170
 Alpha  occ. eigenvalues --  -19.14506 -19.14485 -19.14484 -19.14072 -19.13149
 Alpha  occ. eigenvalues --  -19.02838 -14.27671 -14.27367 -10.32319 -10.32138
 Alpha  occ. eigenvalues --  -10.31613 -10.29372 -10.26529 -10.26011 -10.24368
 Alpha  occ. eigenvalues --  -10.24235 -10.20679 -10.19662 -10.19654 -10.19579
 Alpha  occ. eigenvalues --  -10.19528 -10.19317 -10.17823 -10.17498 -10.16386
 Alpha  occ. eigenvalues --  -10.15662 -10.15299 -10.15251 -10.13759 -10.11707
 Alpha  occ. eigenvalues --  -10.05697 -10.05414 -10.03196 -10.03184 -10.02909
 Alpha  occ. eigenvalues --  -10.02869 -10.02671 -10.02587 -10.02454 -10.02449
 Alpha  occ. eigenvalues --  -10.02365 -10.01915 -10.01751 -10.01723 -10.01608
 Alpha  occ. eigenvalues --  -10.01589 -10.01374 -10.00932 -10.00904 -10.00491
 Alpha  occ. eigenvalues --  -10.00329  -9.99754  -9.98963  -9.98770  -3.00163
 Alpha  occ. eigenvalues --   -1.74905  -1.74824  -1.74543  -1.12465  -1.11308
 Alpha  occ. eigenvalues --   -1.10626  -1.09517  -1.03048  -1.02578  -1.02373
 Alpha  occ. eigenvalues --   -1.02184  -1.00971  -0.90617  -0.88697  -0.87459
 Alpha  occ. eigenvalues --   -0.81819  -0.81196  -0.80581  -0.79917  -0.77323
 Alpha  occ. eigenvalues --   -0.76695  -0.76432  -0.76134  -0.74440  -0.74033
 Alpha  occ. eigenvalues --   -0.73709  -0.73587  -0.71820  -0.71551  -0.70735
 Alpha  occ. eigenvalues --   -0.69003  -0.68456  -0.68265  -0.68078  -0.67665
 Alpha  occ. eigenvalues --   -0.66691  -0.65474  -0.65115  -0.64994  -0.64945
 Alpha  occ. eigenvalues --   -0.63976  -0.63412  -0.62631  -0.59671  -0.59120
 Alpha  occ. eigenvalues --   -0.58890  -0.58463  -0.58098  -0.57381  -0.57256
 Alpha  occ. eigenvalues --   -0.56624  -0.55863  -0.55070  -0.54965  -0.54558
 Alpha  occ. eigenvalues --   -0.53392  -0.53242  -0.52312  -0.51028  -0.50098
 Alpha  occ. eigenvalues --   -0.49754  -0.49561  -0.49152  -0.48965  -0.48680
 Alpha  occ. eigenvalues --   -0.48332  -0.47948  -0.47351  -0.46944  -0.46717
 Alpha  occ. eigenvalues --   -0.46319  -0.45712  -0.45009  -0.44813  -0.44594
 Alpha  occ. eigenvalues --   -0.44185  -0.43957  -0.43715  -0.43554  -0.43379
 Alpha  occ. eigenvalues --   -0.42984  -0.42550  -0.41709  -0.41403  -0.40930
 Alpha  occ. eigenvalues --   -0.40884  -0.40670  -0.40556  -0.40491  -0.40204
 Alpha  occ. eigenvalues --   -0.40075  -0.39854  -0.39795  -0.39705  -0.39677
 Alpha  occ. eigenvalues --   -0.39611  -0.39401  -0.39214  -0.39096  -0.38791
 Alpha  occ. eigenvalues --   -0.38652  -0.38372  -0.38189  -0.38007  -0.37794
 Alpha  occ. eigenvalues --   -0.37442  -0.37187  -0.37120  -0.36737  -0.36453
 Alpha  occ. eigenvalues --   -0.36016  -0.35957  -0.35855  -0.35777  -0.35657
 Alpha  occ. eigenvalues --   -0.35506  -0.35182  -0.34999  -0.34849  -0.34719
 Alpha  occ. eigenvalues --   -0.34572  -0.34389  -0.34360  -0.34202  -0.33977
 Alpha  occ. eigenvalues --   -0.33717  -0.33421  -0.33290  -0.32799  -0.32288
 Alpha  occ. eigenvalues --   -0.32052  -0.32017  -0.31540  -0.31302  -0.31170
 Alpha  occ. eigenvalues --   -0.30836  -0.30651  -0.30607  -0.30355  -0.30215
 Alpha  occ. eigenvalues --   -0.30013  -0.29819  -0.29557  -0.29214  -0.28526
 Alpha  occ. eigenvalues --   -0.28456  -0.28186  -0.28073  -0.27948  -0.27752
 Alpha  occ. eigenvalues --   -0.27660  -0.27190  -0.27078  -0.26916  -0.26797
 Alpha  occ. eigenvalues --   -0.25345  -0.24672  -0.24349  -0.20544  -0.19113
 Alpha  occ. eigenvalues --   -0.18801  -0.18717  -0.18379  -0.17827  -0.14989
 Alpha virt. eigenvalues --   -0.00408   0.00223   0.00607   0.01409   0.02016
 Alpha virt. eigenvalues --    0.06103   0.06674   0.07007   0.07112   0.07783
 Alpha virt. eigenvalues --    0.08959   0.09480   0.09862   0.10438   0.11042
 Alpha virt. eigenvalues --    0.11305   0.11796   0.12352   0.12827   0.13081
 Alpha virt. eigenvalues --    0.13452   0.13672   0.13933   0.14246   0.14465
 Alpha virt. eigenvalues --    0.14845   0.15207   0.15637   0.15920   0.16042
 Alpha virt. eigenvalues --    0.16308   0.16646   0.16812   0.17065   0.17391
 Alpha virt. eigenvalues --    0.17708   0.17968   0.18126   0.18679   0.18912
 Alpha virt. eigenvalues --    0.19643   0.19944   0.20273   0.20609   0.20882
 Alpha virt. eigenvalues --    0.21064   0.21370   0.21844   0.22465   0.23041
 Alpha virt. eigenvalues --    0.23333   0.23536   0.23600   0.23914   0.24461
 Alpha virt. eigenvalues --    0.25020   0.25132   0.25664   0.25886   0.26668
 Alpha virt. eigenvalues --    0.26874   0.27181   0.28370   0.28622   0.29237
 Alpha virt. eigenvalues --    0.29910   0.30093   0.30214   0.30828   0.30934
 Alpha virt. eigenvalues --    0.31205   0.31223   0.31793   0.32340   0.32740
 Alpha virt. eigenvalues --    0.33161   0.33440   0.33669   0.34451   0.34537
 Alpha virt. eigenvalues --    0.34860   0.35140   0.35600   0.35902   0.36578
 Alpha virt. eigenvalues --    0.36736   0.37007   0.38035   0.38328   0.38492
 Alpha virt. eigenvalues --    0.38735   0.39039   0.39272   0.39583   0.39742
 Alpha virt. eigenvalues --    0.40287   0.40666   0.40916   0.41276   0.41484
 Alpha virt. eigenvalues --    0.42011   0.42258   0.42829   0.42836   0.43315
 Alpha virt. eigenvalues --    0.43819   0.44401   0.44995   0.45210   0.45888
 Alpha virt. eigenvalues --    0.45951   0.46329   0.46700   0.46882   0.47158
 Alpha virt. eigenvalues --    0.47529   0.47579   0.47876   0.48110   0.48352
 Alpha virt. eigenvalues --    0.48442   0.48649   0.49005   0.49132   0.49339
 Alpha virt. eigenvalues --    0.49549   0.49672   0.49818   0.50134   0.50303
 Alpha virt. eigenvalues --    0.50693   0.50880   0.51061   0.51214   0.51447
 Alpha virt. eigenvalues --    0.51908   0.52151   0.52571   0.53027   0.53468
 Alpha virt. eigenvalues --    0.53828   0.54245   0.54441   0.54634   0.54759
 Alpha virt. eigenvalues --    0.55162   0.55820   0.55917   0.56320   0.56540
 Alpha virt. eigenvalues --    0.56630   0.56805   0.56965   0.57096   0.57566
 Alpha virt. eigenvalues --    0.57664   0.58081   0.58346   0.58493   0.58701
 Alpha virt. eigenvalues --    0.59018   0.59170   0.59481   0.59569   0.60114
 Alpha virt. eigenvalues --    0.60356   0.60708   0.61264   0.61701   0.62280
 Alpha virt. eigenvalues --    0.62680   0.62792   0.63086   0.63563   0.64162
 Alpha virt. eigenvalues --    0.64581   0.64891   0.65002   0.65226   0.65756
 Alpha virt. eigenvalues --    0.66719   0.67198   0.67389   0.67956   0.68273
 Alpha virt. eigenvalues --    0.69136   0.69538   0.70090   0.70284   0.70900
 Alpha virt. eigenvalues --    0.71227   0.71408   0.71662   0.71834   0.72085
 Alpha virt. eigenvalues --    0.72718   0.73351   0.73741   0.73918   0.74680
 Alpha virt. eigenvalues --    0.75432   0.75667   0.76013   0.76167   0.76706
 Alpha virt. eigenvalues --    0.77045   0.77217   0.77821   0.78452   0.78636
 Alpha virt. eigenvalues --    0.79257   0.79848   0.80383   0.81095   0.81970
 Alpha virt. eigenvalues --    0.83283   0.83717   0.83941   0.84035   0.85139
 Alpha virt. eigenvalues --    0.85310   0.85730   0.85845   0.86286   0.87347
 Alpha virt. eigenvalues --    0.87515   0.87907   0.88053   0.88103   0.88369
 Alpha virt. eigenvalues --    0.89165   0.89478   0.90094   0.90296   0.91080
 Alpha virt. eigenvalues --    0.91358   0.91714   0.92119   0.92237   0.92877
 Alpha virt. eigenvalues --    0.93384   0.94350   0.94468   0.94527   0.95211
 Alpha virt. eigenvalues --    0.95529   0.96082   0.96503   0.97067   0.97611
 Alpha virt. eigenvalues --    0.97820   0.98807   0.99478   0.99839   0.99895
 Alpha virt. eigenvalues --    1.00191   1.01178   1.01665   1.03116   1.03358
 Alpha virt. eigenvalues --    1.04677   1.05354   1.06736   1.07639   1.08315
 Alpha virt. eigenvalues --    1.08451   1.09131   1.10042   1.11409   1.12228
 Alpha virt. eigenvalues --    1.12672   1.13126   1.13615   1.15144   1.15474
 Alpha virt. eigenvalues --    1.16801   1.16964   1.18056   1.18372   1.19920
 Alpha virt. eigenvalues --    1.20302   1.20965   1.21683   1.22527   1.23516
 Alpha virt. eigenvalues --    1.24368   1.25556   1.26329   1.26832   1.29551
 Alpha virt. eigenvalues --    1.30830   1.31483   1.32707   1.33724   1.34308
 Alpha virt. eigenvalues --    1.35671   1.36651   1.36848   1.38045   1.38157
 Alpha virt. eigenvalues --    1.39754   1.40389   1.41180   1.42415   1.42500
 Alpha virt. eigenvalues --    1.43894   1.44864   1.45292   1.46944   1.47283
 Alpha virt. eigenvalues --    1.48001   1.48907   1.49440   1.49818   1.50261
 Alpha virt. eigenvalues --    1.50582   1.51456   1.52717   1.53613   1.54340
 Alpha virt. eigenvalues --    1.56189   1.57348   1.58092   1.59833   1.60481
 Alpha virt. eigenvalues --    1.62081   1.62986   1.63803   1.64940   1.65624
 Alpha virt. eigenvalues --    1.66761   1.67362   1.67980   1.68553   1.69003
 Alpha virt. eigenvalues --    1.70912   1.71752   1.72285   1.73158   1.73760
 Alpha virt. eigenvalues --    1.74147   1.76376   1.76820   1.77518   1.78101
 Alpha virt. eigenvalues --    1.78549   1.79225   1.79361   1.80934   1.81832
 Alpha virt. eigenvalues --    1.82137   1.82305   1.82928   1.83945   1.84065
 Alpha virt. eigenvalues --    1.84796   1.85225   1.85717   1.86061   1.86888
 Alpha virt. eigenvalues --    1.87304   1.87816   1.88305   1.88862   1.89535
 Alpha virt. eigenvalues --    1.90552   1.91183   1.91397   1.91911   1.92204
 Alpha virt. eigenvalues --    1.93125   1.93847   1.93955   1.94739   1.95428
 Alpha virt. eigenvalues --    1.96028   1.96976   1.97477   1.98523   1.98901
 Alpha virt. eigenvalues --    1.99498   2.00126   2.00663   2.00761   2.01277
 Alpha virt. eigenvalues --    2.01443   2.01629   2.02495   2.02741   2.03009
 Alpha virt. eigenvalues --    2.03389   2.04717   2.05333   2.05562   2.07344
 Alpha virt. eigenvalues --    2.08191   2.08996   2.09771   2.10020   2.10278
 Alpha virt. eigenvalues --    2.10650   2.11845   2.13061   2.14045   2.14500
 Alpha virt. eigenvalues --    2.14771   2.15487   2.15515   2.15716   2.16489
 Alpha virt. eigenvalues --    2.16868   2.17239   2.17794   2.19247   2.19582
 Alpha virt. eigenvalues --    2.19958   2.20436   2.21568   2.22190   2.23217
 Alpha virt. eigenvalues --    2.24349   2.25483   2.26693   2.27653   2.28259
 Alpha virt. eigenvalues --    2.28309   2.29600   2.29655   2.29867   2.30283
 Alpha virt. eigenvalues --    2.30901   2.31840   2.32754   2.33125   2.34115
 Alpha virt. eigenvalues --    2.34562   2.34828   2.35923   2.36146   2.38673
 Alpha virt. eigenvalues --    2.40762   2.41171   2.41302   2.42043   2.45062
 Alpha virt. eigenvalues --    2.45868   2.46214   2.46655   2.47900   2.48473
 Alpha virt. eigenvalues --    2.49831   2.51619   2.52086   2.55038   2.56186
 Alpha virt. eigenvalues --    2.57257   2.58374   2.59163   2.60300   2.60585
 Alpha virt. eigenvalues --    2.63293   2.64075   2.64946   2.66585   2.67285
 Alpha virt. eigenvalues --    2.68004   2.68155   2.69190   2.69971   2.73641
 Alpha virt. eigenvalues --    2.75249   2.76080   2.76332   2.77316   2.79201
 Alpha virt. eigenvalues --    2.79499   2.80105   2.82657   2.85212   2.87867
 Alpha virt. eigenvalues --    2.88290   2.90826   2.94479   2.96365   2.96622
 Alpha virt. eigenvalues --    2.98487   3.00198   3.02430   3.03502   3.04504
 Alpha virt. eigenvalues --    3.06476   3.11044   3.15725   3.17626   3.19722
 Alpha virt. eigenvalues --    3.21022   3.22728   3.27148   3.78151   6.05259
 Alpha virt. eigenvalues --    6.13686   6.29707 103.48821
          Condensed to atoms (all electrons):
 Mulliken atomic charges:
              1
     1  C    0.334094
     2  C   -0.233877
     3  C    0.334481
     4  C   -0.284330
     5  C   -0.299566
     6  C   -0.042490
     7  O   -0.509653
     8  C   -0.033220
     9  C    0.024587
    10  C    0.017369
    11  C    0.005429
    12  C   -0.078070
    13  C   -0.072595
    14  C   -0.074007
    15  C    0.006005
    16  C   -0.056350
    17  C   -0.056551
    18  C    0.006894
    19  C   -0.074226
    20  C   -0.071558
    21  C   -0.075459
    22  C    0.001295
    23  C   -0.050713
    24  C   -0.061010
    25  C   -0.225623
    26  C   -0.217156
    27  C   -0.224362
    28  C   -0.215334
    29  C   -0.216999
    30  C   -0.217499
    31  C   -0.213543
    32  C   -0.217490
    33  C   -0.451588
    34  C   -0.451827
    35  O   -0.449883
    36  Mg   0.870111
    37  O   -0.465770
    38  C    0.580003
    39  N   -0.521628
    40  N   -0.540415
    41  O   -0.431383
    42  O   -0.447359
    43  C    0.590027
    44  C    0.037688
    45  C    0.058174
    46  O   -0.438510
    47  C   -0.215082
    48  O   -0.667363
    49  C    0.600844
    50  O   -0.430218
    51  O   -0.450611
    52  C    0.616538
    53  C    0.138888
    54  C    0.034344
    55  O   -0.468165
    56  C   -0.470675
    57  C   -0.461294
    58  C   -0.463520
    59  C   -0.469715
    60  H    0.073255
    61  H    0.110429
    62  H    0.132752
    63  H    0.142190
    64  H    0.135402
    65  H    0.187690
    66  H    0.146297
    67  H    0.112984
    68  H    0.154752
    69  H    0.084307
    70  H    0.086466
    71  H    0.085528
    72  H    0.099886
    73  H    0.101507
    74  H    0.083691
    75  H    0.085580
    76  H    0.086687
    77  H    0.099909
    78  H    0.113652
    79  H    0.072505
    80  H    0.121301
    81  H    0.069185
    82  H    0.077074
    83  H    0.070882
    84  H    0.070736
    85  H    0.077715
    86  H    0.080231
    87  H    0.099971
    88  H    0.077634
    89  H    0.076050
    90  H    0.071347
    91  H    0.077940
    92  H    0.061658
    93  H    0.097328
    94  H    0.077145
    95  H    0.078027
    96  H    0.068503
    97  H    0.075640
    98  H    0.094747
    99  H    0.075158
   100  H    0.075661
   101  H    0.072035
   102  H    0.075819
   103  H    0.127927
   104  H    0.123286
   105  H    0.125205
   106  H    0.125885
   107  H    0.129549
   108  H    0.127654
   109  H    0.203810
   110  H    0.185976
   111  H    0.171423
   112  H    0.179444
   113  H    0.167649
   114  H    0.105756
   115  H    0.137796
   116  H    0.136963
   117  H    0.157090
   118  H    0.154447
   119  H    0.148652
   120  H    0.164287
   121  H    0.161962
   122  H    0.180510
   123  H    0.174596
   124  H    0.158731
   125  H    0.168650
   126  H    0.153244
   127  H    0.172167
 Sum of Mulliken charges=   0.00000
 Atomic charges with hydrogens summed into heavy atoms:
              1
     1  C    0.334094
     2  C   -0.160622
     3  C    0.334481
     4  C   -0.041149
     5  C   -0.021974
     6  C    0.291497
     7  O   -0.509653
     8  C    0.234516
     9  C    0.024587
    10  C    0.017369
    11  C    0.005429
    12  C    0.006236
    13  C    0.013870
    14  C    0.011522
    15  C    0.006005
    16  C    0.043536
    17  C    0.044956
    18  C    0.006894
    19  C    0.009464
    20  C    0.014022
    21  C    0.011228
    22  C    0.001295
    23  C    0.049196
    24  C    0.052642
    25  C    0.037369
    26  C    0.001537
    27  C    0.033556
    28  C    0.009697
    29  C    0.019927
    30  C    0.006175
    31  C    0.032002
    32  C    0.006026
    33  C   -0.075170
    34  C   -0.068739
    35  O   -0.449883
    36  Mg   0.870111
    37  O   -0.465770
    38  C    0.580003
    39  N   -0.521628
    40  N   -0.540415
    41  O   -0.431383
    42  O   -0.447359
    43  C    0.590027
    44  C    0.241497
    45  C    0.244151
    46  O   -0.438510
    47  C    0.303434
    48  O   -0.667363
    49  C    0.600844
    50  O   -0.430218
    51  O   -0.450611
    52  C    0.616538
    53  C    0.244644
    54  C    0.172140
    55  O   -0.468165
    56  C   -0.022175
    57  C    0.013607
    58  C    0.050317
    59  C    0.024345
    60  H    0.000000
    61  H    0.000000
    62  H    0.000000
    63  H    0.000000
    64  H    0.000000
    65  H    0.000000
    66  H    0.000000
    67  H    0.000000
    68  H    0.000000
    69  H    0.000000
    70  H    0.000000
    71  H    0.000000
    72  H    0.000000
    73  H    0.000000
    74  H    0.000000
    75  H    0.000000
    76  H    0.000000
    77  H    0.000000
    78  H    0.000000
    79  H    0.000000
    80  H    0.000000
    81  H    0.000000
    82  H    0.000000
    83  H    0.000000
    84  H    0.000000
    85  H    0.000000
    86  H    0.000000
    87  H    0.000000
    88  H    0.000000
    89  H    0.000000
    90  H    0.000000
    91  H    0.000000
    92  H    0.000000
    93  H    0.000000
    94  H    0.000000
    95  H    0.000000
    96  H    0.000000
    97  H    0.000000
    98  H    0.000000
    99  H    0.000000
   100  H    0.000000
   101  H    0.000000
   102  H    0.000000
   103  H    0.000000
   104  H    0.000000
   105  H    0.000000
   106  H    0.000000
   107  H    0.000000
   108  H    0.000000
   109  H    0.000000
   110  H    0.000000
   111  H    0.000000
   112  H    0.000000
   113  H    0.000000
   114  H    0.000000
   115  H    0.000000
   116  H    0.000000
   117  H    0.000000
   118  H    0.000000
   119  H    0.000000
   120  H    0.000000
   121  H    0.000000
   122  H    0.000000
   123  H    0.000000
   124  H    0.000000
   125  H    0.000000
   126  H    0.000000
   127  H    0.000000
 Sum of Mulliken charges=   0.00000
 APT atomic charges:
              1
     1  C    0.956426
     2  C   -0.911798
     3  C    0.932800
     4  C    0.028157
     5  C    0.043949
     6  C    0.421780
     7  O   -0.737687
     8  C    0.375848
     9  C    0.338343
    10  C    0.305214
    11  C   -0.039943
    12  C   -0.115856
    13  C   -0.105453
    14  C   -0.166672
    15  C   -0.044893
    16  C    0.173666
    17  C    0.167973
    18  C   -0.057204
    19  C   -0.142003
    20  C   -0.079625
    21  C   -0.134481
    22  C   -0.040130
    23  C    0.168053
    24  C    0.175521
    25  C   -0.036118
    26  C   -0.053472
    27  C   -0.011603
    28  C   -0.036870
    29  C   -0.012805
    30  C   -0.044032
    31  C   -0.011180
    32  C   -0.049890
    33  C   -0.204942
    34  C   -0.226737
    35  O   -0.861489
    36  Mg   1.270437
    37  O   -0.935784
    38  C    1.045868
    39  N   -0.908373
    40  N   -0.972820
    41  O   -0.652905
    42  O   -0.865304
    43  C    1.099867
    44  C    0.450509
    45  C    0.444516
    46  O   -0.721912
    47  C    0.484569
    48  O   -0.932564
    49  C    1.105491
    50  O   -0.685794
    51  O   -0.842536
    52  C    0.995389
    53  C    0.499922
    54  C    0.327624
    55  O   -0.747903
    56  C    0.037146
    57  C    0.026778
    58  C   -0.008171
    59  C    0.043868
    60  H   -0.022548
    61  H    0.029431
    62  H   -0.036111
    63  H   -0.032435
    64  H   -0.020027
    65  H   -0.024433
    66  H   -0.003879
    67  H    0.050947
    68  H   -0.050407
    69  H    0.062529
    70  H    0.071343
    71  H    0.067954
    72  H   -0.037878
    73  H   -0.048316
    74  H    0.070722
    75  H    0.074890
    76  H    0.070949
    77  H   -0.035920
    78  H   -0.035161
    79  H   -0.005637
    80  H    0.036988
    81  H    0.008058
    82  H    0.004303
    83  H    0.008032
    84  H    0.002406
    85  H    0.006332
    86  H   -0.015030
    87  H   -0.000717
    88  H    0.006125
    89  H    0.003764
    90  H   -0.018332
    91  H    0.006616
    92  H   -0.009180
    93  H   -0.004132
    94  H    0.002956
    95  H    0.001126
    96  H   -0.000272
    97  H   -0.000788
    98  H   -0.023751
    99  H    0.004724
   100  H    0.003646
   101  H    0.009490
   102  H    0.008759
   103  H    0.051203
   104  H    0.045685
   105  H    0.048053
   106  H    0.045650
   107  H    0.051495
   108  H    0.048286
   109  H    0.010521
   110  H   -0.014135
   111  H   -0.018544
   112  H   -0.012377
   113  H   -0.008724
   114  H   -0.086209
   115  H    0.079264
   116  H   -0.032937
   117  H   -0.020686
   118  H   -0.017719
   119  H    0.038236
   120  H    0.009687
   121  H   -0.001082
   122  H    0.027199
   123  H    0.016148
   124  H    0.001443
   125  H    0.004394
   126  H    0.023144
   127  H    0.004101
 Sum of APT charges=   0.00000
 APT Atomic charges with hydrogens summed into heavy atoms:
              1
     1  C    0.956426
     2  C   -0.934346
     3  C    0.932800
     4  C    0.021478
     5  C   -0.008513
     6  C    0.393469
     7  O   -0.737687
     8  C    0.376389
     9  C    0.338343
    10  C    0.305214
    11  C   -0.039943
    12  C   -0.053327
    13  C   -0.034110
    14  C   -0.098718
    15  C   -0.044893
    16  C    0.135788
    17  C    0.119656
    18  C   -0.057204
    19  C   -0.071280
    20  C   -0.004735
    21  C   -0.063532
    22  C   -0.040130
    23  C    0.132133
    24  C    0.140360
    25  C    0.003292
    26  C   -0.038731
    27  C   -0.021018
    28  C   -0.045313
    29  C   -0.019500
    30  C   -0.040223
    31  C   -0.030996
    32  C   -0.027995
    33  C   -0.060000
    34  C   -0.081306
    35  O   -0.861489
    36  Mg   1.270437
    37  O   -0.935784
    38  C    1.045868
    39  N   -0.908373
    40  N   -0.972820
    41  O   -0.652905
    42  O   -0.865304
    43  C    1.099867
    44  C    0.461030
    45  C    0.430381
    46  O   -0.721912
    47  C    0.444924
    48  O   -0.932564
    49  C    1.105491
    50  O   -0.685794
    51  O   -0.842536
    52  C    0.995389
    53  C    0.413713
    54  C    0.406888
    55  O   -0.747903
    56  C   -0.034196
    57  C    0.073619
    58  C    0.036619
    59  C    0.075507
    60  H    0.000000
    61  H    0.000000
    62  H    0.000000
    63  H    0.000000
    64  H    0.000000
    65  H    0.000000
    66  H    0.000000
    67  H    0.000000
    68  H    0.000000
    69  H    0.000000
    70  H    0.000000
    71  H    0.000000
    72  H    0.000000
    73  H    0.000000
    74  H    0.000000
    75  H    0.000000
    76  H    0.000000
    77  H    0.000000
    78  H    0.000000
    79  H    0.000000
    80  H    0.000000
    81  H    0.000000
    82  H    0.000000
    83  H    0.000000
    84  H    0.000000
    85  H    0.000000
    86  H    0.000000
    87  H    0.000000
    88  H    0.000000
    89  H    0.000000
    90  H    0.000000
    91  H    0.000000
    92  H    0.000000
    93  H    0.000000
    94  H    0.000000
    95  H    0.000000
    96  H    0.000000
    97  H    0.000000
    98  H    0.000000
    99  H    0.000000
   100  H    0.000000
   101  H    0.000000
   102  H    0.000000
   103  H    0.000000
   104  H    0.000000
   105  H    0.000000
   106  H    0.000000
   107  H    0.000000
   108  H    0.000000
   109  H    0.000000
   110  H    0.000000
   111  H    0.000000
   112  H    0.000000
   113  H    0.000000
   114  H    0.000000
   115  H    0.000000
   116  H    0.000000
   117  H    0.000000
   118  H    0.000000
   119  H    0.000000
   120  H    0.000000
   121  H    0.000000
   122  H    0.000000
   123  H    0.000000
   124  H    0.000000
   125  H    0.000000
   126  H    0.000000
   127  H    0.000000
 Sum of APT charges=   0.00000
 Electronic spatial extent (au):  <R**2>= 41837.9835
 Charge=     0.0000 electrons
 Dipole moment (field-independent basis, Debye):
    X=     2.9922    Y=    -1.1611    Z=     4.0346  Tot=     5.1555
 Quadrupole moment (field-independent basis, Debye-Ang):
   XX=  -322.6414   YY=  -320.8477   ZZ=  -338.9466
   XY=    14.4429   XZ=    16.0750   YZ=    -3.0295
 Traceless Quadrupole moment (field-independent basis, Debye-Ang):
   XX=     4.8372   YY=     6.6308   ZZ=   -11.4680
   XY=    14.4429   XZ=    16.0750   YZ=    -3.0295
 Octapole moment (field-independent basis, Debye-Ang**2):
  XXX=    59.5796  YYY=   -22.5900  ZZZ=    12.4964  XYY=    43.1980
  XXY=   -62.1858  XXZ=    92.3293  XZZ=    65.2227  YZZ=   -36.3087
  YYZ=    38.6681  XYZ=   -68.9321
 Hexadecapole moment (field-independent basis, Debye-Ang**3):
 XXXX=-30514.6526 YYYY=-12481.7151 ZZZZ= -9548.4864 XXXY=   -84.1673
 XXXZ=  1081.8516 YYYX=  -244.4326 YYYZ=  -173.8562 ZZZX=    66.4200
 ZZZY=   -79.8813 XXYY= -6806.4451 XXZZ= -6387.8920 YYZZ= -3667.1961
 XXYZ=  -382.3674 YYXZ=   227.0408 ZZXY=  -110.0934
 N-N= 1.015080787600D+04 E-N=-2.694093183818D+04  KE= 2.815700960614D+03
  Exact polarizability: 499.158  24.358 455.621  12.454   5.108 418.307
 Approx polarizability: 684.497  42.000 674.516  38.335   7.888 606.027
 Full mass-weighted force constant matrix:
 Low frequencies ---   -0.0008    0.0006    0.0008    0.6880    3.0837    7.1636
 Low frequencies ---    9.4888   12.6296   17.0932
 Diagonal vibrational polarizability:
      203.6167652     130.2669994     145.2296587
 Harmonic frequencies (cm**-1), IR intensities (KM/Mole), Raman scattering
 activities (A**4/AMU), depolarization ratios for plane and unpolarized
 incident light, reduced masses (AMU), force constants (mDyne/A),
 and normal coordinates:
                     1                      2                      3
                     A                      A                      A
 Frequencies --     8.9160                12.4182                17.0784
 Red. masses --     5.5317                 4.9820                 4.4240
 Frc consts  --     0.0003                 0.0005                 0.0008
 IR Inten    --     0.0209                 0.1490                 0.3780
 Atom AN      X      Y      Z        X      Y      Z        X      Y      Z
   1   6    -0.03   0.01  -0.01     0.05  -0.05   0.01     0.01  -0.02   0.02
   2   6    -0.04   0.02  -0.01     0.04  -0.05   0.02     0.02  -0.04   0.03
   3   6    -0.05   0.03  -0.01     0.02  -0.02   0.01     0.02  -0.03   0.02
   4   6    -0.04  -0.02   0.02    -0.04   0.01  -0.03     0.03   0.02   0.00
   5   6    -0.04  -0.02   0.03    -0.04   0.00  -0.05     0.03   0.02   0.01
   6   6    -0.04  -0.02   0.03    -0.02  -0.02  -0.02     0.02   0.00   0.04
   7   8    -0.03  -0.01   0.02    -0.02  -0.01  -0.01     0.02   0.01   0.02
   8   6    -0.03  -0.01   0.01    -0.02   0.02  -0.02     0.03   0.02   0.01
   9   6    -0.01  -0.02   0.01     0.03  -0.04   0.00    -0.03   0.02   0.00
  10   6    -0.05   0.02  -0.01    -0.01   0.01  -0.01     0.00   0.01  -0.01
  11   6     0.01  -0.02   0.01     0.03  -0.04   0.01    -0.07   0.01  -0.03
  12   6     0.03  -0.03   0.02     0.02  -0.04   0.00    -0.10   0.03  -0.07
  13   6     0.02  -0.05   0.03     0.03  -0.04  -0.02    -0.08   0.08  -0.07
  14   6     0.00  -0.06   0.02     0.03  -0.04  -0.03    -0.04   0.10  -0.03
  15   6    -0.02  -0.04   0.01     0.03  -0.04  -0.02    -0.01   0.07   0.00
  16   6     0.02   0.00   0.00     0.03  -0.04   0.03    -0.09  -0.03  -0.01
  17   6    -0.04  -0.05   0.00     0.04  -0.05  -0.04     0.04   0.10   0.05
  18   6    -0.07   0.02   0.00    -0.03   0.00  -0.03    -0.01   0.00  -0.04
  19   6    -0.07   0.02   0.00    -0.05   0.02  -0.05    -0.01   0.02  -0.07
  20   6    -0.06   0.03  -0.01    -0.05   0.05  -0.04     0.01   0.05  -0.07
  21   6    -0.04   0.03  -0.02    -0.03   0.06  -0.01     0.02   0.06  -0.04
  22   6    -0.04   0.03  -0.02    -0.02   0.04   0.00     0.01   0.04  -0.01
  23   6    -0.08   0.02   0.00    -0.03  -0.03  -0.04    -0.03  -0.04  -0.04
  24   6    -0.02   0.03  -0.02     0.00   0.05   0.03     0.02   0.04   0.02
  25   6     0.04   0.00  -0.01     0.01  -0.02   0.04    -0.11  -0.03   0.00
  26   6     0.03   0.01  -0.01     0.04  -0.05   0.05    -0.11  -0.04   0.00
  27   6    -0.03  -0.05   0.01     0.03  -0.04  -0.06     0.03   0.08   0.04
  28   6    -0.07  -0.07   0.01     0.06  -0.06  -0.05     0.09   0.16   0.02
  29   6    -0.01   0.03  -0.03    -0.02   0.07   0.04     0.00   0.08   0.03
  30   6    -0.02   0.05  -0.03     0.01   0.05   0.06     0.03   0.04   0.05
  31   6    -0.08   0.00   0.02    -0.04  -0.05  -0.06    -0.04  -0.06  -0.03
  32   6    -0.10   0.03   0.00    -0.04  -0.03  -0.05    -0.06  -0.03  -0.06
  33   6    -0.03   0.00   0.00     0.07  -0.07   0.02     0.00  -0.02   0.02
  34   6    -0.06   0.04  -0.02     0.02  -0.02   0.02     0.02  -0.03   0.02
  35   8     0.20   0.08  -0.04    -0.01   0.14   0.10     0.09  -0.03  -0.04
  36  12    -0.02  -0.01   0.00     0.01  -0.01   0.00     0.01   0.00   0.01
  37   8     0.01   0.00   0.00    -0.01  -0.02  -0.03    -0.01  -0.05   0.02
  38   6     0.16   0.03  -0.02    -0.01   0.11   0.08     0.05  -0.03   0.01
  39   7    -0.04   0.02  -0.01     0.01  -0.01   0.00     0.01  -0.01   0.01
  40   7    -0.02  -0.01   0.00     0.03  -0.04   0.00     0.00  -0.01   0.02
  41   8     0.20  -0.02  -0.02    -0.03   0.10   0.12     0.03  -0.04   0.05
  42   8     0.02   0.01   0.01     0.01   0.05  -0.01     0.01  -0.04   0.01
  43   6     0.05   0.04   0.00    -0.01  -0.01   0.01    -0.01  -0.05   0.01
  44   6     0.02   0.00   0.01    -0.01  -0.04   0.00    -0.03  -0.06   0.02
  45   6     0.05   0.05   0.00     0.01   0.09   0.00     0.02  -0.03   0.00
  46   8     0.09   0.11  -0.01    -0.03  -0.04   0.03    -0.02  -0.06   0.00
  47   6     0.30   0.07  -0.06    -0.04   0.16   0.17     0.12  -0.03  -0.03
  48   8    -0.01  -0.01  -0.01     0.00   0.00   0.01     0.01   0.00   0.01
  49   6     0.01  -0.03   0.02    -0.01  -0.03  -0.03    -0.01  -0.03   0.01
  50   8     0.01  -0.04   0.03    -0.01  -0.03  -0.02    -0.02  -0.03   0.02
  51   8     0.00  -0.03   0.01    -0.01  -0.02  -0.03     0.01  -0.01  -0.01
  52   6    -0.01  -0.03   0.00     0.00  -0.01  -0.02     0.01   0.00   0.01
  53   6     0.00  -0.02  -0.01    -0.01   0.00   0.00     0.01   0.01   0.02
  54   6     0.00  -0.03   0.02     0.00  -0.02  -0.04     0.01  -0.01  -0.01
  55   8    -0.02  -0.02   0.01     0.00  -0.01  -0.02     0.01   0.01   0.01
  56   6     0.01  -0.03  -0.01    -0.03   0.02   0.00     0.00   0.03   0.01
  57   6    -0.01  -0.02   0.03     0.00  -0.02  -0.05     0.03  -0.03  -0.05
  58   6    -0.01  -0.02   0.00    -0.01  -0.08   0.00    -0.05  -0.09   0.01
  59   6    -0.01   0.01   0.02     0.04   0.16  -0.04     0.02  -0.04   0.01
  60   1    -0.05   0.03  -0.01     0.06  -0.05   0.03     0.03  -0.06   0.03
  61   1    -0.05  -0.01   0.02    -0.04   0.02  -0.03     0.02   0.02  -0.01
  62   1    -0.03  -0.02   0.02    -0.05   0.02  -0.04     0.04   0.03  -0.01
  63   1    -0.04  -0.03   0.04    -0.04   0.00  -0.06     0.03   0.03   0.01
  64   1    -0.06  -0.02   0.04    -0.03  -0.02  -0.06     0.02   0.00  -0.01
  65   1    -0.03  -0.03   0.03    -0.02  -0.01  -0.02     0.03   0.01   0.06
  66   1    -0.05  -0.02   0.03    -0.02  -0.04  -0.03     0.00  -0.02   0.05
  67   1    -0.03   0.00   0.00    -0.02   0.03  -0.01     0.03   0.03  -0.01
  68   1    -0.02  -0.02   0.01    -0.02   0.02  -0.01     0.05   0.03   0.02
  69   1     0.04  -0.03   0.03     0.02  -0.04   0.00    -0.14   0.02  -0.09
  70   1     0.03  -0.06   0.04     0.02  -0.04  -0.04    -0.11   0.10  -0.10
  71   1    -0.01  -0.08   0.02     0.03  -0.05  -0.05    -0.03   0.14  -0.03
  72   1     0.01   0.01  -0.01     0.03  -0.04   0.03    -0.06  -0.06  -0.01
  73   1    -0.05  -0.04  -0.02     0.04  -0.05  -0.03     0.06   0.08   0.10
  74   1    -0.08   0.02   0.00    -0.06   0.01  -0.06    -0.02   0.01  -0.08
  75   1    -0.06   0.03  -0.01    -0.06   0.07  -0.05     0.01   0.07  -0.09
  76   1    -0.03   0.03  -0.02    -0.03   0.08  -0.01     0.03   0.08  -0.04
  77   1    -0.07   0.02   0.00    -0.01  -0.04  -0.03    -0.01  -0.05  -0.02
  78   1    -0.01   0.02  -0.02     0.01   0.03   0.03     0.03   0.03   0.02
  79   1     0.05   0.02  -0.02     0.01  -0.02   0.06    -0.13  -0.07   0.01
  80   1     0.03   0.00  -0.01     0.01  -0.01   0.03    -0.09  -0.03  -0.01
  81   1     0.05  -0.01  -0.01     0.00  -0.01   0.04    -0.14   0.00   0.00
  82   1     0.03   0.02  -0.02     0.04  -0.05   0.07    -0.12  -0.07   0.01
  83   1     0.05   0.00  -0.01     0.04  -0.04   0.05    -0.14  -0.02   0.00
  84   1     0.02   0.00   0.00     0.05  -0.06   0.04    -0.10  -0.04  -0.01
  85   1    -0.06  -0.06  -0.01     0.03  -0.04  -0.07     0.08   0.10   0.09
  86   1    -0.02  -0.07   0.05     0.03  -0.04  -0.06     0.00   0.12  -0.03
  87   1     0.00  -0.02   0.00     0.02  -0.03  -0.05    -0.02   0.01   0.07
  88   1    -0.08  -0.08   0.00     0.07  -0.06  -0.06     0.12   0.18   0.06
  89   1    -0.08  -0.08   0.01     0.07  -0.07  -0.03     0.11   0.19   0.02
  90   1    -0.06  -0.08   0.04     0.06  -0.06  -0.06     0.09   0.17  -0.03
  91   1     0.00   0.03  -0.03    -0.01   0.08   0.06     0.01   0.08   0.06
  92   1    -0.01   0.03  -0.03    -0.04   0.09   0.04    -0.02   0.10   0.03
  93   1    -0.01   0.01  -0.02    -0.04   0.07   0.02    -0.01   0.07   0.01
  94   1    -0.01   0.05  -0.04     0.02   0.06   0.08     0.04   0.05   0.08
  95   1    -0.03   0.05  -0.03     0.03   0.04   0.06     0.05   0.02   0.05
  96   1    -0.02   0.05  -0.03     0.00   0.07   0.06     0.02   0.05   0.05
  97   1    -0.09   0.00   0.02    -0.04  -0.07  -0.06    -0.06  -0.09  -0.03
  98   1    -0.07  -0.01   0.02    -0.03  -0.05  -0.05    -0.02  -0.07  -0.01
  99   1    -0.09   0.00   0.02    -0.06  -0.04  -0.07    -0.05  -0.05  -0.05
 100   1    -0.11   0.02   0.01    -0.04  -0.05  -0.06    -0.07  -0.06  -0.06
 101   1    -0.11   0.03   0.00    -0.06  -0.02  -0.07    -0.08  -0.02  -0.08
 102   1    -0.09   0.04  -0.01    -0.03  -0.02  -0.04    -0.05  -0.01  -0.06
 103   1    -0.02   0.00  -0.01     0.07  -0.06   0.03    -0.01  -0.02   0.02
 104   1    -0.03   0.01  -0.01     0.08  -0.08   0.02     0.01  -0.02   0.02
 105   1    -0.03  -0.01   0.00     0.07  -0.07   0.00     0.01   0.00   0.01
 106   1    -0.05   0.05  -0.02     0.02  -0.02   0.02     0.04  -0.07   0.02
 107   1    -0.07   0.04  -0.01     0.02  -0.01   0.02     0.02  -0.01   0.05
 108   1    -0.05   0.05  -0.03     0.03  -0.01   0.02     0.00  -0.02  -0.02
 109   1     0.03  -0.01   0.05    -0.02  -0.03   0.02    -0.04  -0.05   0.05
 110   1     0.04   0.13   0.00     0.01   0.06  -0.01     0.02  -0.01  -0.01
 111   1     0.32  -0.01  -0.06    -0.04   0.21   0.19     0.14  -0.04   0.00
 112   1     0.34   0.09  -0.08    -0.06   0.11   0.21     0.09  -0.03  -0.04
 113   1     0.32   0.12  -0.07    -0.04   0.18   0.18     0.15  -0.02  -0.07
 114   1     0.01  -0.02  -0.01     0.00   0.00   0.02     0.01   0.01   0.03
 115   1    -0.01  -0.04   0.01     0.01  -0.01  -0.04     0.01   0.02  -0.01
 116   1     0.01  -0.04   0.00    -0.03   0.02   0.00     0.00   0.04   0.02
 117   1     0.00  -0.03   0.00    -0.04   0.02  -0.01     0.00   0.04   0.00
 118   1     0.01  -0.02  -0.01    -0.03   0.03   0.02     0.00   0.04   0.02
 119   1    -0.02  -0.03   0.03     0.01  -0.02  -0.06     0.04  -0.01  -0.08
 120   1    -0.01  -0.02   0.04     0.00  -0.02  -0.06     0.03  -0.03  -0.05
 121   1     0.00  -0.02   0.03     0.00  -0.03  -0.06     0.03  -0.07  -0.06
 122   1     0.00  -0.02   0.00    -0.01  -0.08   0.02    -0.06  -0.10   0.02
 123   1    -0.02  -0.05   0.01    -0.01  -0.10  -0.01    -0.06  -0.09   0.02
 124   1    -0.02  -0.01  -0.04    -0.01  -0.08  -0.03    -0.04  -0.09  -0.01
 125   1    -0.08   0.02   0.03     0.04   0.14  -0.10     0.01  -0.03   0.01
 126   1    -0.01  -0.07   0.01     0.04   0.18  -0.02     0.03  -0.05   0.01
 127   1     0.00   0.03   0.01     0.04   0.20  -0.03     0.03  -0.03   0.00
                     4                      5                      6
                     A                      A                      A
 Frequencies --    19.4210                23.1126                29.1277
 Red. masses --     4.4819                 5.5933                 5.3611
 Frc consts  --     0.0010                 0.0018                 0.0027
 IR Inten    --     0.1870                 1.6274                 0.4099
 Atom AN      X      Y      Z        X      Y      Z        X      Y      Z
   1   6    -0.01   0.02  -0.01     0.03   0.00   0.00    -0.03   0.00   0.02
   2   6     0.00   0.01  -0.01     0.04  -0.02   0.02    -0.03   0.00   0.00
   3   6     0.02   0.00   0.00     0.03  -0.02   0.03    -0.02   0.00  -0.01
   4   6    -0.07   0.04  -0.10    -0.08   0.00  -0.03     0.04   0.04  -0.02
   5   6    -0.05   0.04  -0.15    -0.06  -0.02  -0.08     0.03   0.03   0.01
   6   6    -0.03   0.04  -0.16    -0.04  -0.03  -0.07     0.02   0.03   0.01
   7   8    -0.03   0.03  -0.09    -0.03  -0.02  -0.03     0.02   0.03   0.00
   8   6    -0.08   0.04  -0.07    -0.07   0.00  -0.01     0.03   0.04  -0.01
   9   6     0.00   0.02  -0.01     0.00   0.01  -0.03    -0.02   0.00   0.03
  10   6     0.02  -0.01   0.01    -0.01   0.00   0.02     0.01   0.00  -0.01
  11   6     0.01   0.02  -0.01    -0.01   0.00  -0.04    -0.01   0.00   0.02
  12   6     0.02   0.01  -0.01    -0.02   0.01  -0.05    -0.01  -0.01   0.00
  13   6     0.01   0.00  -0.01    -0.01   0.02  -0.04    -0.01  -0.01  -0.01
  14   6     0.00   0.00   0.00     0.00   0.03  -0.02    -0.01  -0.01   0.01
  15   6    -0.01   0.01   0.00     0.00   0.02  -0.01    -0.02   0.00   0.03
  16   6     0.01   0.04  -0.01    -0.02  -0.01  -0.05    -0.01   0.01   0.03
  17   6    -0.03   0.01   0.01     0.01   0.03   0.02    -0.02   0.01   0.05
  18   6     0.05  -0.01   0.00    -0.02  -0.01   0.00     0.03   0.00  -0.01
  19   6     0.04  -0.02   0.02    -0.05   0.01   0.00     0.05   0.00  -0.01
  20   6    -0.01  -0.03   0.05    -0.08   0.04   0.02     0.05  -0.01  -0.02
  21   6    -0.04  -0.04   0.06    -0.07   0.04   0.05     0.04  -0.02  -0.02
  22   6    -0.02  -0.03   0.03    -0.03   0.03   0.05     0.02  -0.01  -0.02
  23   6     0.10   0.01  -0.02     0.01  -0.03  -0.03     0.02   0.01   0.00
  24   6    -0.04  -0.03   0.03    -0.02   0.04   0.08     0.01  -0.02  -0.03
  25   6     0.01   0.04  -0.01    -0.02  -0.03  -0.05    -0.02   0.03   0.04
  26   6     0.03   0.03   0.00    -0.03  -0.01  -0.06     0.01   0.00   0.05
  27   6    -0.05  -0.02   0.00    -0.02   0.00   0.01    -0.03  -0.01   0.06
  28   6    -0.01   0.01   0.00     0.05   0.07   0.00    -0.02   0.02   0.05
  29   6    -0.03  -0.03   0.03    -0.06   0.06   0.08     0.04  -0.02  -0.03
  30   6    -0.05  -0.05   0.02     0.00   0.05   0.12    -0.01  -0.04  -0.06
  31   6     0.12   0.07  -0.07    -0.01  -0.04  -0.07     0.03   0.03   0.02
  32   6     0.17  -0.03  -0.01     0.02  -0.04  -0.02     0.02   0.00  -0.01
  33   6    -0.01   0.02  -0.01     0.03   0.01  -0.01    -0.04   0.00   0.03
  34   6     0.03  -0.03   0.00     0.04  -0.03   0.05    -0.02  -0.01  -0.03
  35   8     0.08   0.01   0.01    -0.10  -0.01   0.11    -0.09   0.06   0.15
  36  12    -0.01   0.03  -0.02     0.00  -0.02   0.00     0.00   0.02   0.02
  37   8    -0.03  -0.04   0.03     0.05   0.03   0.01    -0.01  -0.04  -0.05
  38   6     0.03  -0.02   0.05     0.00  -0.03  -0.01     0.03  -0.03  -0.03
  39   7     0.02   0.00   0.00     0.01  -0.02   0.02     0.00   0.01   0.00
  40   7    -0.01   0.03  -0.01     0.01   0.00  -0.01    -0.02   0.01   0.03
  41   8     0.03  -0.04   0.09     0.09  -0.06  -0.16     0.15  -0.10  -0.16
  42   8    -0.04  -0.04   0.05     0.01   0.00   0.03    -0.02  -0.08  -0.06
  43   6    -0.04  -0.04   0.05     0.09   0.09   0.02     0.01  -0.01  -0.07
  44   6    -0.04  -0.06   0.05     0.09   0.06   0.01    -0.04  -0.07  -0.04
  45   6    -0.02  -0.01   0.05    -0.02  -0.02   0.05     0.00  -0.03  -0.06
  46   8    -0.03  -0.04   0.06     0.15   0.18   0.02     0.08   0.11  -0.10
  47   6     0.13   0.01   0.01    -0.08  -0.03   0.05    -0.07   0.07   0.19
  48   8    -0.01   0.04   0.00     0.01  -0.03  -0.01     0.00   0.04   0.03
  49   6    -0.02  -0.02   0.01     0.04  -0.01   0.01    -0.02  -0.04   0.00
  50   8    -0.02  -0.01   0.00     0.07  -0.04   0.02    -0.06  -0.04   0.04
  51   8     0.00   0.01   0.00     0.01  -0.06  -0.02     0.01   0.01   0.01
  52   6    -0.01   0.02   0.00     0.01  -0.05  -0.01     0.00   0.03   0.02
  53   6    -0.01   0.04   0.00     0.01  -0.04  -0.01     0.00   0.04   0.03
  54   6     0.00  -0.01   0.00     0.01  -0.03  -0.01     0.01  -0.02  -0.01
  55   8    -0.02   0.02   0.00     0.00  -0.04   0.00     0.00   0.03   0.03
  56   6    -0.01   0.05   0.00     0.01  -0.04  -0.01    -0.01   0.07   0.03
  57   6     0.01  -0.02  -0.01    -0.02  -0.01   0.00     0.04  -0.04  -0.03
  58   6    -0.04  -0.09   0.04     0.10   0.09   0.02    -0.12  -0.15  -0.09
  59   6    -0.05  -0.02   0.05    -0.08  -0.06   0.07     0.01   0.00  -0.08
  60   1     0.00   0.01  -0.01     0.05  -0.02   0.03    -0.05   0.00   0.00
  61   1    -0.05   0.03  -0.08    -0.07   0.00  -0.01     0.03   0.03  -0.03
  62   1    -0.11   0.06  -0.10    -0.12   0.00  -0.04     0.05   0.05  -0.02
  63   1    -0.07   0.04  -0.18    -0.09  -0.01  -0.12     0.04   0.03   0.02
  64   1    -0.02   0.04  -0.15    -0.04  -0.03  -0.10     0.01   0.03   0.00
  65   1    -0.06   0.05  -0.18    -0.05  -0.02  -0.08     0.02   0.03   0.02
  66   1     0.02   0.04  -0.18    -0.01  -0.04  -0.08     0.01   0.03   0.02
  67   1    -0.07   0.03  -0.02    -0.06   0.01   0.02     0.03   0.03  -0.01
  68   1    -0.12   0.05  -0.08    -0.09   0.00  -0.02     0.04   0.04   0.00
  69   1     0.03   0.01  -0.01    -0.02   0.00  -0.06    -0.01  -0.01  -0.01
  70   1     0.02  -0.01  -0.01    -0.02   0.02  -0.04    -0.01  -0.02  -0.03
  71   1     0.00  -0.01   0.00     0.00   0.04  -0.01    -0.01  -0.01   0.01
  72   1     0.01   0.04  -0.01    -0.01  -0.01  -0.04    -0.01   0.01   0.03
  73   1    -0.03   0.02   0.02     0.01   0.04   0.06    -0.02   0.01   0.06
  74   1     0.06  -0.01   0.02    -0.06   0.01  -0.02     0.06   0.00  -0.01
  75   1    -0.02  -0.04   0.07    -0.10   0.05   0.02     0.07  -0.02  -0.02
  76   1    -0.07  -0.05   0.08    -0.08   0.06   0.06     0.05  -0.03  -0.03
  77   1     0.09   0.02  -0.02     0.02  -0.04  -0.02     0.00   0.02   0.00
  78   1    -0.05  -0.02   0.04     0.00   0.02   0.07    -0.01  -0.01  -0.01
  79   1     0.02   0.06   0.00    -0.02  -0.03  -0.05    -0.01   0.03   0.05
  80   1     0.00   0.05  -0.01    -0.01  -0.03  -0.04    -0.02   0.03   0.03
  81   1     0.02   0.04  -0.01    -0.02  -0.02  -0.06    -0.02   0.03   0.04
  82   1     0.03   0.04   0.00    -0.03  -0.01  -0.06     0.01   0.01   0.05
  83   1     0.04   0.03   0.00    -0.03   0.00  -0.06     0.01   0.00   0.05
  84   1     0.03   0.03   0.00    -0.02   0.00  -0.06     0.01  -0.01   0.04
  85   1    -0.06  -0.01   0.02     0.00   0.02   0.05    -0.05  -0.01   0.06
  86   1    -0.05  -0.03  -0.02    -0.03   0.01  -0.05    -0.02  -0.03   0.07
  87   1    -0.07  -0.02   0.01    -0.07  -0.05   0.03    -0.02   0.00   0.06
  88   1    -0.02   0.01   0.01     0.05   0.07   0.02    -0.03   0.03   0.07
  89   1     0.01   0.03   0.00     0.08   0.09   0.00    -0.01   0.04   0.04
  90   1     0.00  -0.01  -0.02     0.06   0.05  -0.04    -0.02   0.01   0.04
  91   1    -0.06  -0.04   0.03    -0.05   0.06   0.10     0.02  -0.02  -0.03
  92   1     0.00  -0.06   0.02    -0.08   0.07   0.10     0.06  -0.03  -0.05
  93   1    -0.01   0.00   0.04    -0.07   0.05   0.05     0.06   0.00   0.00
  94   1    -0.06  -0.05   0.01     0.01   0.06   0.14    -0.02  -0.04  -0.07
  95   1    -0.06  -0.04   0.02     0.03   0.04   0.12    -0.04  -0.04  -0.06
  96   1    -0.03  -0.06   0.01    -0.02   0.07   0.14     0.01  -0.05  -0.09
  97   1     0.16   0.08  -0.09     0.01  -0.05  -0.08     0.03   0.04   0.02
  98   1     0.07   0.10  -0.08    -0.01  -0.03  -0.07     0.02   0.04   0.02
  99   1     0.13   0.07  -0.07    -0.02  -0.02  -0.08     0.05   0.03   0.02
 100   1     0.20  -0.01  -0.02     0.04  -0.06  -0.04     0.02   0.01   0.00
 101   1     0.20  -0.03  -0.01     0.00  -0.03  -0.03     0.04   0.00  -0.01
 102   1     0.16  -0.07   0.02     0.03  -0.04   0.00     0.02  -0.01  -0.02
 103   1     0.00   0.02  -0.01     0.02   0.01  -0.02    -0.02   0.00   0.03
 104   1    -0.01   0.03  -0.01     0.04   0.02  -0.01    -0.06   0.00   0.02
 105   1    -0.01   0.02   0.00     0.04   0.03  -0.02    -0.05  -0.02   0.05
 106   1    -0.01   0.04   0.00     0.02  -0.01   0.06    -0.02   0.01  -0.04
 107   1     0.05  -0.09  -0.09     0.06  -0.04   0.03    -0.03  -0.01  -0.04
 108   1     0.07  -0.08   0.08     0.06  -0.04   0.08    -0.03  -0.01  -0.02
 109   1    -0.05  -0.05   0.07     0.12   0.03   0.00    -0.05  -0.07   0.05
 110   1    -0.03   0.03   0.04    -0.02   0.01   0.09    -0.01  -0.03  -0.08
 111   1     0.16  -0.02   0.05    -0.14  -0.09  -0.07    -0.13   0.03   0.05
 112   1     0.12   0.01   0.01     0.06   0.00   0.04     0.11   0.04   0.22
 113   1     0.16   0.03  -0.02    -0.16  -0.01   0.15    -0.16   0.14   0.33
 114   1     0.01   0.04   0.01     0.02  -0.04  -0.02     0.01   0.04   0.05
 115   1    -0.01   0.00   0.00     0.00  -0.02  -0.01     0.02   0.00   0.00
 116   1    -0.01   0.04   0.00     0.01  -0.04  -0.01     0.00   0.07   0.03
 117   1    -0.02   0.05  -0.01     0.00  -0.04  -0.01    -0.02   0.07   0.01
 118   1    -0.01   0.06   0.00     0.01  -0.04  -0.01    -0.01   0.08   0.04
 119   1     0.02  -0.01  -0.02    -0.04  -0.02  -0.01     0.05  -0.02  -0.04
 120   1     0.01  -0.03  -0.01    -0.02   0.02   0.01     0.03  -0.05  -0.03
 121   1     0.02  -0.03  -0.01    -0.01  -0.01  -0.01     0.04  -0.05  -0.03
 122   1    -0.05  -0.10   0.06     0.13   0.11   0.02    -0.15  -0.17  -0.08
 123   1    -0.04  -0.09   0.05     0.11   0.07   0.01    -0.17  -0.18  -0.04
 124   1    -0.03  -0.09   0.03     0.08   0.11   0.03    -0.11  -0.16  -0.17
 125   1    -0.09  -0.02   0.05    -0.08  -0.05   0.10     0.00   0.00  -0.12
 126   1    -0.05  -0.06   0.05    -0.08  -0.08   0.03     0.02   0.00  -0.06
 127   1    -0.04   0.00   0.05    -0.10  -0.07   0.08     0.03   0.03  -0.08
                     7                      8                      9
                     A                      A                      A
 Frequencies --    36.3844                38.9936                43.4503
 Red. masses --     4.3180                 3.8546                 3.9764
 Frc consts  --     0.0034                 0.0035                 0.0044
 IR Inten    --     0.0280                 0.2140                 0.8210
 Atom AN      X      Y      Z        X      Y      Z        X      Y      Z
   1   6    -0.02  -0.01   0.00     0.04  -0.05   0.01    -0.03  -0.01   0.04
   2   6    -0.02   0.00  -0.01     0.02  -0.01   0.00    -0.04   0.00   0.02
   3   6    -0.02   0.01  -0.01    -0.01   0.03  -0.02    -0.03   0.01   0.00
   4   6    -0.07  -0.02  -0.01    -0.04   0.01   0.00    -0.01   0.04  -0.02
   5   6    -0.06  -0.01  -0.05    -0.05  -0.01   0.02    -0.01   0.01  -0.02
   6   6    -0.04   0.00  -0.08    -0.03   0.00  -0.01     0.01  -0.01   0.00
   7   8    -0.03  -0.01  -0.04    -0.02   0.01  -0.01     0.02   0.01   0.01
   8   6    -0.07  -0.02  -0.01    -0.03   0.01  -0.01     0.01   0.04   0.01
   9   6    -0.02   0.00   0.01     0.02  -0.03  -0.01     0.00  -0.03   0.04
  10   6    -0.03   0.00   0.00    -0.02   0.02   0.00     0.00   0.01   0.00
  11   6    -0.03   0.00   0.01    -0.02  -0.03   0.02     0.00  -0.04  -0.02
  12   6    -0.04   0.02   0.03    -0.04   0.00   0.00     0.01  -0.08  -0.08
  13   6    -0.03   0.04   0.05    -0.03   0.03  -0.04     0.01  -0.09  -0.09
  14   6    -0.02   0.04   0.05     0.01   0.03  -0.05     0.00  -0.06  -0.01
  15   6    -0.01   0.03   0.03     0.04   0.00  -0.04    -0.01  -0.03   0.06
  16   6    -0.04  -0.02  -0.01    -0.03  -0.06   0.06     0.01  -0.02   0.01
  17   6     0.01   0.03   0.05     0.08   0.00  -0.06    -0.02   0.00   0.14
  18   6    -0.03   0.00   0.01    -0.02   0.03   0.03     0.00   0.01   0.00
  19   6    -0.05   0.00   0.03    -0.02   0.00   0.06     0.00   0.01   0.00
  20   6    -0.07  -0.01   0.04    -0.02  -0.03   0.05     0.01   0.01   0.00
  21   6    -0.07  -0.01   0.03    -0.02  -0.03   0.01     0.00   0.00   0.00
  22   6    -0.04   0.00   0.01    -0.02  -0.01  -0.01     0.00   0.01   0.00
  23   6     0.00   0.02   0.00    -0.02   0.06   0.04     0.00   0.01   0.00
  24   6    -0.02   0.00  -0.01    -0.02  -0.02  -0.06     0.00   0.00  -0.01
  25   6    -0.02  -0.01  -0.02    -0.06  -0.02   0.07    -0.01  -0.01   0.02
  26   6    -0.08  -0.03   0.00    -0.04  -0.09   0.10     0.06  -0.02   0.01
  27   6     0.01   0.03   0.06     0.06   0.03  -0.10    -0.08  -0.08   0.16
  28   6     0.02   0.07   0.05     0.13   0.00  -0.09     0.03   0.08   0.11
  29   6     0.04  -0.01  -0.02     0.06  -0.05  -0.07     0.06   0.01  -0.01
  30   6    -0.05   0.01  -0.08    -0.06  -0.02  -0.14    -0.03  -0.01  -0.07
  31   6     0.01   0.06  -0.03     0.00   0.08   0.05     0.01   0.04   0.01
  32   6     0.04  -0.02   0.00     0.00   0.05   0.05     0.01  -0.01  -0.01
  33   6    -0.02  -0.01   0.00     0.08  -0.10   0.02    -0.03  -0.02   0.04
  34   6    -0.03   0.02  -0.03    -0.04   0.07  -0.03    -0.04   0.01  -0.02
  35   8     0.02   0.01  -0.02     0.00  -0.02   0.02    -0.01   0.01  -0.07
  36  12    -0.01  -0.01   0.00     0.00   0.01  -0.01     0.02   0.00   0.04
  37   8     0.06  -0.01  -0.02     0.00   0.00   0.03     0.03   0.01  -0.05
  38   6     0.03   0.02  -0.02     0.01  -0.02   0.01    -0.04   0.04  -0.02
  39   7    -0.02   0.00  -0.01    -0.02   0.03  -0.02    -0.01   0.01   0.01
  40   7    -0.01  -0.01   0.01     0.04  -0.05   0.00    -0.01  -0.02   0.05
  41   8    -0.02   0.05   0.03     0.03  -0.02  -0.02    -0.07   0.06   0.01
  42   8     0.09   0.01  -0.07     0.00   0.00   0.04    -0.01   0.05  -0.01
  43   6     0.05  -0.04  -0.06     0.02   0.02   0.04     0.01   0.02   0.00
  44   6     0.06   0.00  -0.06     0.01   0.01   0.04     0.04   0.02  -0.03
  45   6     0.09   0.00  -0.07     0.00  -0.01   0.04    -0.04   0.04   0.01
  46   8     0.01  -0.10  -0.06     0.03   0.05   0.03     0.01   0.00   0.04
  47   6    -0.04   0.03   0.04     0.01  -0.03   0.00    -0.01   0.00  -0.10
  48   8     0.02   0.00   0.00     0.00   0.03   0.01     0.02   0.00   0.04
  49   6     0.04  -0.02   0.02     0.00   0.00   0.00     0.02  -0.02  -0.04
  50   8     0.03  -0.02   0.02     0.02  -0.01   0.00     0.02  -0.04  -0.01
  51   8     0.04  -0.03   0.06     0.00   0.00  -0.03     0.01  -0.03  -0.05
  52   6     0.03  -0.03   0.04     0.00   0.01  -0.02     0.02  -0.01   0.00
  53   6     0.04  -0.01   0.02    -0.01   0.03   0.01     0.01   0.01   0.03
  54   6     0.03  -0.05   0.08     0.00   0.01  -0.03     0.02   0.00  -0.07
  55   8     0.00  -0.04   0.04     0.00   0.00  -0.02     0.04   0.01   0.01
  56   6     0.07  -0.02   0.02    -0.03   0.06   0.00    -0.03   0.03   0.03
  57   6     0.03  -0.03   0.15     0.00   0.00  -0.05     0.01  -0.02  -0.16
  58   6     0.06   0.04  -0.05     0.01   0.01   0.04     0.08   0.02  -0.01
  59   6     0.14   0.06  -0.10    -0.01  -0.03   0.05    -0.08   0.02   0.01
  60   1    -0.03   0.01  -0.01     0.03  -0.01   0.00    -0.05   0.01   0.01
  61   1    -0.06  -0.02   0.01    -0.05   0.02  -0.01    -0.02   0.04  -0.03
  62   1    -0.10  -0.03  -0.01    -0.03   0.01   0.00    -0.02   0.06  -0.02
  63   1    -0.08  -0.02  -0.07    -0.05  -0.04   0.04    -0.02   0.00  -0.02
  64   1    -0.03   0.00  -0.04    -0.08   0.01   0.04    -0.03   0.00  -0.03
  65   1    -0.06  -0.01  -0.11    -0.03  -0.02  -0.02     0.01   0.00   0.00
  66   1     0.00   0.01  -0.09    -0.02   0.01  -0.01     0.01  -0.03  -0.01
  67   1    -0.07  -0.02   0.01    -0.02   0.02   0.00     0.01   0.05   0.02
  68   1    -0.10  -0.03  -0.03    -0.02   0.00  -0.01     0.01   0.05   0.02
  69   1    -0.05   0.02   0.03    -0.07   0.00   0.01     0.02  -0.09  -0.13
  70   1    -0.04   0.06   0.08    -0.05   0.05  -0.05     0.01  -0.11  -0.15
  71   1    -0.02   0.06   0.07     0.02   0.05  -0.08     0.00  -0.06  -0.01
  72   1    -0.04  -0.04  -0.03    -0.01  -0.08   0.05     0.01  -0.01   0.02
  73   1     0.02   0.03   0.07     0.10  -0.02  -0.03    -0.03   0.02   0.21
  74   1    -0.05   0.00   0.04    -0.02   0.01   0.08     0.01   0.01   0.00
  75   1    -0.09  -0.01   0.06    -0.02  -0.04   0.07     0.01   0.00   0.00
  76   1    -0.08  -0.01   0.04    -0.02  -0.06   0.01     0.01   0.00   0.00
  77   1    -0.02   0.02   0.00    -0.04   0.07   0.03    -0.02   0.01   0.01
  78   1    -0.04   0.00   0.01    -0.05  -0.01  -0.03    -0.03   0.01   0.03
  79   1    -0.03  -0.02  -0.03    -0.08  -0.06   0.11    -0.01  -0.01   0.04
  80   1     0.00  -0.01  -0.03    -0.03  -0.01   0.04    -0.03  -0.01   0.02
  81   1    -0.01   0.00   0.00    -0.09   0.02   0.09    -0.02  -0.02   0.01
  82   1    -0.09  -0.05  -0.02    -0.05  -0.11   0.12     0.07   0.01   0.02
  83   1    -0.08  -0.02   0.02    -0.07  -0.06   0.12     0.07  -0.04   0.00
  84   1    -0.09  -0.03   0.00    -0.03  -0.11   0.09     0.07  -0.03   0.00
  85   1     0.04   0.04   0.09     0.12   0.03  -0.11    -0.09  -0.07   0.21
  86   1     0.00   0.05   0.03     0.04   0.06  -0.15    -0.07  -0.12   0.09
  87   1    -0.01  -0.02   0.07     0.02   0.01  -0.08    -0.11  -0.12   0.17
  88   1     0.02   0.07   0.07     0.17   0.00  -0.11     0.01   0.10   0.18
  89   1     0.03   0.09   0.04     0.15  -0.02  -0.06     0.08   0.15   0.09
  90   1     0.03   0.05   0.03     0.12   0.03  -0.12     0.05   0.04   0.04
  91   1     0.03  -0.02  -0.04     0.04  -0.06  -0.10     0.05   0.01  -0.01
  92   1     0.07  -0.03  -0.05     0.10  -0.08  -0.10     0.10   0.00  -0.05
  93   1     0.06  -0.01   0.03     0.09  -0.04  -0.01     0.09   0.03   0.04
  94   1    -0.04   0.01  -0.10    -0.05  -0.03  -0.17    -0.03  -0.01  -0.07
  95   1    -0.10   0.02  -0.08    -0.11  -0.01  -0.14    -0.09  -0.02  -0.07
  96   1    -0.04   0.01  -0.11    -0.03  -0.03  -0.18    -0.01  -0.02  -0.12
  97   1     0.03   0.07  -0.04     0.00   0.11   0.06     0.01   0.04   0.01
  98   1    -0.02   0.08  -0.03    -0.02   0.09   0.04     0.00   0.06   0.02
  99   1     0.03   0.06  -0.04     0.02   0.07   0.07     0.03   0.04   0.00
 100   1     0.06   0.00   0.00     0.00   0.08   0.06     0.01  -0.01  -0.01
 101   1     0.07  -0.02   0.00     0.03   0.04   0.07     0.04  -0.01  -0.01
 102   1     0.03  -0.05   0.01    -0.01   0.03   0.04     0.00  -0.03  -0.01
 103   1    -0.02  -0.01   0.00     0.12  -0.09   0.05     0.04  -0.02   0.02
 104   1    -0.03  -0.01   0.00     0.08  -0.10   0.02    -0.08   0.04   0.02
 105   1    -0.02  -0.01   0.01     0.07  -0.14   0.01    -0.06  -0.07   0.09
 106   1    -0.09   0.15  -0.04    -0.07   0.15  -0.04    -0.06   0.08  -0.04
 107   1    -0.06  -0.08  -0.15    -0.08   0.01  -0.09    -0.06  -0.05  -0.09
 108   1     0.03  -0.03   0.08     0.01   0.06   0.02    -0.01  -0.02   0.03
 109   1     0.06   0.00  -0.09     0.02   0.00   0.04     0.05   0.01  -0.05
 110   1     0.09  -0.05  -0.09     0.00   0.00   0.05    -0.03   0.05   0.04
 111   1    -0.04   0.10   0.07     0.00  -0.05  -0.03     0.01   0.00  -0.06
 112   1    -0.10  -0.01   0.06     0.03  -0.01  -0.02    -0.05   0.02  -0.11
 113   1    -0.04   0.01   0.02    -0.01  -0.03   0.01     0.02  -0.02  -0.13
 114   1     0.05  -0.01   0.01     0.00   0.03   0.03     0.02   0.00   0.05
 115   1     0.02  -0.10   0.07     0.00   0.03  -0.03     0.05   0.04  -0.07
 116   1     0.08  -0.03   0.03    -0.03   0.05   0.00    -0.03   0.04   0.03
 117   1     0.06  -0.03   0.03    -0.06   0.06  -0.01    -0.04   0.04   0.00
 118   1     0.08  -0.02   0.00    -0.03   0.08   0.02    -0.03   0.05   0.06
 119   1     0.02  -0.07   0.20     0.00   0.01  -0.07     0.00   0.02  -0.22
 120   1     0.03  -0.04   0.15     0.00   0.01  -0.05     0.01   0.02  -0.15
 121   1     0.04   0.03   0.16     0.00  -0.02  -0.06     0.01  -0.09  -0.17
 122   1     0.07   0.05  -0.07     0.02   0.01   0.04     0.10   0.02   0.01
 123   1     0.07   0.06  -0.05     0.01   0.00   0.03     0.11   0.01  -0.03
 124   1     0.06   0.05  -0.02     0.00   0.02   0.03     0.08   0.03   0.01
 125   1     0.19   0.04  -0.13    -0.01  -0.03   0.07    -0.08   0.03   0.03
 126   1     0.14   0.11  -0.09    -0.01  -0.04   0.05    -0.08   0.01  -0.02
 127   1     0.13   0.06  -0.09    -0.01  -0.04   0.05    -0.09   0.02   0.02
                    10                     11                     12
                     A                      A                      A
 Frequencies --    48.9524                51.5513                53.6817
 Red. masses --     4.1924                 4.2458                 2.8996
 Frc consts  --     0.0059                 0.0066                 0.0049
 IR Inten    --     0.0220                 0.8206                 0.0337
 Atom AN      X      Y      Z        X      Y      Z        X      Y      Z
   1   6     0.03  -0.02  -0.01     0.00   0.00   0.00    -0.01   0.00   0.00
   2   6     0.02  -0.01  -0.01     0.00   0.00   0.00    -0.01  -0.01  -0.01
   3   6     0.02   0.00  -0.02     0.00   0.00   0.00     0.00  -0.01  -0.01
   4   6    -0.03  -0.07   0.05    -0.01   0.03  -0.03    -0.04   0.03  -0.05
   5   6     0.00  -0.05  -0.01    -0.03   0.00   0.01    -0.06  -0.02  -0.01
   6   6     0.02  -0.04  -0.04    -0.01  -0.02   0.02    -0.03  -0.02  -0.01
   7   8     0.02  -0.03  -0.02     0.00   0.00   0.01    -0.01   0.01  -0.03
   8   6    -0.02  -0.07   0.01     0.01   0.03  -0.01    -0.01   0.04  -0.04
   9   6     0.03  -0.01   0.01    -0.01   0.00   0.00    -0.01   0.01   0.00
  10   6     0.00   0.00  -0.01     0.00  -0.01   0.00     0.01  -0.02  -0.01
  11   6     0.03  -0.02  -0.01    -0.01   0.00  -0.01    -0.01   0.01   0.01
  12   6     0.03  -0.01   0.01     0.00   0.00  -0.01    -0.01   0.01   0.01
  13   6     0.03   0.00   0.03     0.00  -0.01  -0.02    -0.01   0.01   0.00
  14   6     0.03   0.01   0.05    -0.01   0.00  -0.01    -0.01   0.01   0.00
  15   6     0.03   0.00   0.05    -0.01   0.00   0.00    -0.01   0.01   0.00
  16   6     0.02  -0.03  -0.02     0.00   0.00   0.01    -0.01   0.01   0.02
  17   6     0.04   0.02   0.09    -0.01   0.00   0.01    -0.01   0.01   0.00
  18   6    -0.03   0.00   0.00     0.00   0.00   0.01     0.00  -0.02   0.02
  19   6    -0.07   0.00   0.02     0.02  -0.01   0.01     0.00  -0.03   0.04
  20   6    -0.08   0.00   0.03     0.03  -0.01   0.00     0.01  -0.04   0.03
  21   6    -0.04   0.01   0.01     0.02  -0.01  -0.01     0.03  -0.04   0.00
  22   6     0.00   0.01  -0.01     0.01  -0.01   0.00     0.03  -0.03  -0.02
  23   6    -0.01  -0.01  -0.01    -0.01   0.00   0.02     0.00   0.00   0.03
  24   6     0.06   0.02  -0.05    -0.01  -0.01   0.00     0.10  -0.02  -0.07
  25   6     0.04  -0.02  -0.03    -0.02   0.01   0.01    -0.01   0.04   0.02
  26   6     0.00  -0.03  -0.02     0.01   0.00   0.01    -0.01  -0.01   0.05
  27   6    -0.03  -0.03   0.07    -0.03  -0.02   0.01    -0.03   0.00   0.00
  28   6     0.11   0.06   0.05     0.01   0.02   0.00     0.00   0.01   0.00
  29   6     0.06  -0.03  -0.06    -0.02  -0.01   0.00    -0.06  -0.11  -0.09
  30   6     0.09   0.11  -0.04     0.00  -0.03   0.02     0.20   0.13   0.09
  31   6     0.00   0.02  -0.04    -0.02  -0.03   0.04    -0.01  -0.02   0.04
  32   6     0.02  -0.03  -0.01    -0.04   0.03   0.03    -0.01   0.02   0.05
  33   6     0.04  -0.04   0.00     0.00   0.00   0.00    -0.02  -0.01   0.00
  34   6     0.00   0.02  -0.03     0.00   0.00   0.01     0.00  -0.02  -0.01
  35   8    -0.01   0.03   0.02     0.04   0.03   0.06    -0.01   0.01  -0.02
  36  12     0.03  -0.02  -0.01     0.00   0.00   0.00     0.00   0.01  -0.01
  37   8    -0.05   0.03   0.02     0.00   0.00   0.00     0.02  -0.01  -0.03
  38   6    -0.02  -0.01   0.00     0.02  -0.06   0.04    -0.01   0.02  -0.01
  39   7     0.02  -0.01  -0.02    -0.01   0.00   0.00     0.00  -0.01  -0.01
  40   7     0.04  -0.02   0.00     0.00   0.00   0.00    -0.01   0.00   0.00
  41   8     0.01  -0.04  -0.01     0.05  -0.12   0.07    -0.02   0.02   0.00
  42   8    -0.08  -0.03   0.00    -0.07  -0.12  -0.03     0.01   0.02  -0.01
  43   6    -0.07   0.01  -0.01    -0.04  -0.07  -0.04     0.02   0.00   0.00
  44   6    -0.08   0.02   0.01     0.04   0.05  -0.08     0.02  -0.01  -0.01
  45   6    -0.06   0.00  -0.01    -0.04  -0.07  -0.03    -0.01   0.02   0.00
  46   8    -0.06   0.03  -0.02    -0.05  -0.09  -0.04     0.02   0.00   0.01
  47   6     0.04   0.03   0.02     0.10   0.05   0.16    -0.01   0.01  -0.03
  48   8     0.01  -0.04  -0.01     0.00   0.01   0.01     0.00   0.03   0.00
  49   6    -0.04   0.08  -0.01     0.02   0.03  -0.06     0.01  -0.02   0.00
  50   8    -0.05   0.12  -0.04     0.05   0.07  -0.14     0.00  -0.04   0.02
  51   8    -0.02   0.09   0.04     0.00   0.01  -0.01     0.02  -0.02   0.00
  52   6     0.01   0.03   0.01     0.00   0.00  -0.01     0.00   0.00   0.00
  53   6     0.00  -0.04  -0.02     0.00   0.02   0.01     0.01   0.03   0.01
  54   6    -0.01   0.08   0.02     0.00   0.00  -0.02     0.01  -0.03   0.01
  55   8     0.03   0.01  -0.01     0.01  -0.01  -0.02    -0.01   0.00   0.00
  56   6     0.05  -0.12  -0.01    -0.02   0.06   0.01    -0.01   0.07   0.01
  57   6    -0.01   0.08   0.01    -0.01   0.02   0.00     0.01  -0.02   0.03
  58   6    -0.10  -0.01   0.00     0.15   0.22   0.00     0.03  -0.03  -0.01
  59   6    -0.06  -0.01   0.00    -0.05  -0.03  -0.06    -0.04   0.01   0.00
  60   1     0.02  -0.01  -0.01     0.00   0.00   0.00    -0.02  -0.01  -0.01
  61   1     0.00  -0.05   0.10    -0.03   0.03  -0.06    -0.07   0.04  -0.07
  62   1    -0.07  -0.11   0.06     0.01   0.05  -0.04    -0.03   0.05  -0.05
  63   1    -0.03  -0.05  -0.04    -0.01  -0.02   0.03    -0.05  -0.05   0.01
  64   1     0.05  -0.04   0.00    -0.07  -0.01   0.00    -0.11  -0.01  -0.01
  65   1     0.00  -0.05  -0.07     0.01  -0.02   0.04     0.00  -0.04   0.00
  66   1     0.04  -0.02  -0.05    -0.03  -0.03   0.03    -0.04  -0.04  -0.01
  67   1    -0.01  -0.06   0.03     0.01   0.04  -0.02     0.00   0.06  -0.04
  68   1    -0.04  -0.10  -0.01     0.03   0.04   0.01     0.02   0.04  -0.03
  69   1     0.02  -0.01   0.00     0.00   0.00  -0.01    -0.01   0.01   0.01
  70   1     0.02   0.00   0.03     0.00  -0.01  -0.02    -0.01   0.01   0.01
  71   1     0.03   0.02   0.07    -0.01   0.00  -0.01    -0.01   0.01   0.00
  72   1     0.02  -0.04  -0.04     0.00   0.00   0.01    -0.02   0.00   0.00
  73   1     0.03   0.04   0.16    -0.01   0.01   0.04    -0.01   0.01   0.02
  74   1    -0.09   0.00   0.03     0.02  -0.01   0.01    -0.01  -0.03   0.06
  75   1    -0.10   0.00   0.05     0.04  -0.02   0.00     0.00  -0.05   0.04
  76   1    -0.04   0.01   0.01     0.02  -0.02  -0.01     0.04  -0.05  -0.02
  77   1    -0.01  -0.01   0.00     0.00   0.01   0.01     0.01   0.01   0.01
  78   1     0.10   0.00  -0.08    -0.01  -0.01   0.00     0.20  -0.04  -0.20
  79   1     0.05  -0.02  -0.04    -0.02   0.01   0.03    -0.01   0.04   0.03
  80   1     0.04  -0.02  -0.03    -0.03   0.01   0.01    -0.01   0.05   0.00
  81   1     0.05  -0.03  -0.02    -0.03   0.01   0.01     0.00   0.05   0.04
  82   1     0.00  -0.04  -0.03     0.01   0.00   0.02    -0.01  -0.01   0.05
  83   1     0.01  -0.03   0.00     0.01   0.00   0.01    -0.01   0.00   0.07
  84   1    -0.01  -0.04  -0.01     0.02   0.00   0.01    -0.02  -0.03   0.04
  85   1    -0.01  -0.01   0.11    -0.03  -0.01   0.03    -0.02   0.00   0.01
  86   1    -0.04  -0.04  -0.02    -0.03  -0.02  -0.01    -0.03   0.00  -0.02
  87   1    -0.10  -0.07   0.10    -0.05  -0.03   0.02    -0.05  -0.02   0.01
  88   1     0.10   0.08   0.09     0.01   0.03   0.02     0.00   0.01   0.01
  89   1     0.17   0.12   0.06     0.03   0.04   0.00     0.01   0.02   0.00
  90   1     0.12   0.03  -0.02     0.02   0.01  -0.02     0.00   0.00  -0.01
  91   1     0.13  -0.02  -0.09    -0.04  -0.01   0.01     0.05  -0.10  -0.12
  92   1     0.00   0.01  -0.03    -0.02  -0.02   0.01    -0.20  -0.05   0.05
  93   1     0.03  -0.12  -0.07    -0.02   0.01   0.00    -0.15  -0.26  -0.21
  94   1     0.14   0.12  -0.08    -0.02  -0.03   0.02     0.25   0.13   0.03
  95   1     0.10   0.17  -0.03     0.00  -0.04   0.01     0.34   0.22   0.10
  96   1     0.05   0.13   0.01     0.00  -0.04   0.02     0.10   0.14   0.26
  97   1     0.01   0.02  -0.05    -0.03  -0.03   0.05    -0.01   0.00   0.04
  98   1    -0.02   0.04  -0.03     0.00  -0.05   0.03    -0.01  -0.04   0.01
  99   1     0.00   0.03  -0.05    -0.04  -0.04   0.06    -0.02  -0.04   0.06
 100   1     0.03  -0.02  -0.01    -0.05   0.03   0.03    -0.01   0.04   0.05
 101   1     0.04  -0.03  -0.01    -0.06   0.03   0.04    -0.02   0.02   0.07
 102   1     0.01  -0.05   0.00    -0.03   0.06   0.02    -0.01   0.04   0.05
 103   1     0.09  -0.04   0.00     0.02   0.00   0.00     0.00  -0.01   0.01
 104   1     0.01  -0.01  -0.01    -0.01   0.01   0.00    -0.03  -0.01   0.00
 105   1     0.02  -0.08   0.02    -0.01  -0.02   0.01    -0.02  -0.02   0.01
 106   1    -0.05   0.15  -0.05     0.03  -0.08   0.02     0.04  -0.11   0.00
 107   1    -0.03  -0.08  -0.15     0.00   0.07   0.09     0.01   0.05   0.08
 108   1     0.07  -0.03   0.07    -0.05   0.04  -0.07    -0.05   0.02  -0.09
 109   1    -0.10   0.03   0.02     0.04   0.05  -0.24     0.02  -0.01  -0.01
 110   1    -0.07   0.02  -0.02    -0.05  -0.05  -0.06    -0.01   0.03   0.02
 111   1     0.04   0.00   0.01     0.11   0.05   0.17     0.00   0.00  -0.02
 112   1     0.07   0.03   0.03     0.13   0.00   0.20    -0.02   0.01  -0.04
 113   1     0.03   0.07   0.04     0.11   0.14   0.17     0.00   0.00  -0.04
 114   1    -0.04  -0.04  -0.08     0.00   0.02   0.04     0.03   0.03   0.04
 115   1     0.01   0.08   0.02     0.01  -0.02  -0.02     0.00  -0.04   0.01
 116   1     0.02  -0.10  -0.02    -0.02   0.06   0.01     0.00   0.06   0.02
 117   1     0.11  -0.11   0.04    -0.04   0.06  -0.02    -0.03   0.07  -0.02
 118   1     0.04  -0.19  -0.04    -0.02   0.08   0.02     0.00   0.10   0.02
 119   1     0.01   0.08   0.01    -0.02   0.00   0.02     0.01  -0.03   0.04
 120   1     0.00   0.07  -0.01    -0.01   0.02   0.00     0.01  -0.03   0.03
 121   1    -0.02   0.08   0.01    -0.02   0.04   0.01     0.02  -0.01   0.03
 122   1    -0.13  -0.02  -0.01     0.17   0.26  -0.07     0.03  -0.03   0.00
 123   1    -0.11   0.01   0.01     0.21   0.31  -0.05     0.03  -0.04  -0.02
 124   1    -0.07  -0.03  -0.02     0.14   0.23   0.16     0.03  -0.03  -0.02
 125   1    -0.09  -0.01  -0.01    -0.09  -0.03  -0.10    -0.04   0.01   0.01
 126   1    -0.05  -0.03   0.02    -0.04  -0.05  -0.03    -0.04   0.01  -0.02
 127   1    -0.04   0.01  -0.01    -0.02   0.02  -0.06    -0.05   0.01   0.01
                    13                     14                     15
                     A                      A                      A
 Frequencies --    57.0876                59.6789                62.8688
 Red. masses --     2.8927                 3.7067                 3.7209
 Frc consts  --     0.0056                 0.0078                 0.0087
 IR Inten    --     1.2390                 0.3347                 0.1693
 Atom AN      X      Y      Z        X      Y      Z        X      Y      Z
   1   6    -0.03   0.00   0.02    -0.01  -0.02   0.00     0.00   0.01  -0.02
   2   6    -0.03   0.00   0.02    -0.03   0.01  -0.01     0.01  -0.02  -0.02
   3   6    -0.02   0.00   0.01    -0.03   0.02  -0.02     0.02  -0.03  -0.01
   4   6     0.04  -0.04   0.08     0.00   0.05  -0.04    -0.01  -0.04   0.05
   5   6     0.07   0.03   0.03    -0.01   0.03  -0.03     0.00   0.00   0.03
   6   6     0.04   0.06  -0.01     0.00   0.02  -0.02    -0.02   0.01   0.01
   7   8     0.02   0.01   0.02     0.00   0.02   0.00    -0.03   0.01  -0.02
   8   6     0.00  -0.04   0.04    -0.01   0.04  -0.01    -0.02  -0.04  -0.01
   9   6    -0.03  -0.01   0.01     0.01  -0.04   0.01     0.00   0.02  -0.02
  10   6    -0.01   0.01   0.01    -0.02   0.02  -0.02     0.00  -0.04   0.00
  11   6    -0.03  -0.01   0.01     0.01  -0.04  -0.01     0.02   0.02  -0.03
  12   6    -0.03  -0.01  -0.01     0.01  -0.05  -0.03     0.03   0.01  -0.05
  13   6    -0.03  -0.02  -0.03     0.01  -0.05  -0.02     0.02   0.00  -0.04
  14   6    -0.03  -0.02  -0.03     0.01  -0.04   0.01     0.01   0.00  -0.02
  15   6    -0.03  -0.02  -0.02     0.01  -0.03   0.03     0.00   0.02  -0.01
  16   6    -0.03   0.00   0.02     0.01  -0.04  -0.01     0.03   0.05  -0.03
  17   6    -0.03  -0.03  -0.05     0.01  -0.02   0.05    -0.01   0.03   0.02
  18   6    -0.01   0.01   0.00     0.01   0.03  -0.01    -0.02  -0.05  -0.01
  19   6    -0.03   0.02   0.01     0.03   0.01   0.00    -0.05  -0.04   0.00
  20   6    -0.04   0.03   0.01     0.03  -0.01  -0.01    -0.06  -0.03   0.01
  21   6    -0.02   0.03   0.01     0.00  -0.02  -0.02    -0.03  -0.03   0.01
  22   6     0.00   0.03   0.01    -0.02   0.00  -0.02     0.00  -0.03   0.00
  23   6     0.01   0.01  -0.01     0.01   0.05   0.00    -0.02  -0.07  -0.02
  24   6     0.05   0.04  -0.01    -0.04  -0.01  -0.02     0.01  -0.03  -0.01
  25   6    -0.03   0.00   0.02    -0.02  -0.09  -0.01     0.10   0.22  -0.02
  26   6    -0.02   0.00   0.02     0.02  -0.02  -0.05     0.05  -0.03   0.10
  27   6     0.03   0.02  -0.04     0.00  -0.04   0.06     0.00   0.01   0.04
  28   6    -0.10  -0.06  -0.02     0.02   0.01   0.05    -0.01   0.06   0.02
  29   6     0.03   0.00  -0.02    -0.15  -0.03  -0.02     0.06  -0.03  -0.01
  30   6     0.08   0.13   0.01     0.01   0.01   0.09     0.00  -0.02  -0.04
  31   6     0.06   0.12  -0.04     0.01   0.06   0.02    -0.05  -0.13  -0.04
  32   6     0.09  -0.09  -0.05     0.01   0.07   0.02    -0.04  -0.04   0.00
  33   6    -0.04   0.01   0.02     0.00  -0.03   0.00    -0.02   0.01  -0.02
  34   6    -0.02  -0.02  -0.01    -0.03   0.02  -0.01     0.03  -0.04   0.00
  35   8     0.01  -0.01   0.02     0.02  -0.05   0.02     0.01  -0.03   0.02
  36  12    -0.01   0.01   0.02    -0.01   0.00  -0.01    -0.02   0.02  -0.01
  37   8     0.00  -0.01   0.01    -0.04   0.00   0.10    -0.03  -0.01   0.06
  38   6     0.01  -0.02   0.01     0.05  -0.02   0.01     0.03  -0.01   0.01
  39   7     0.00   0.01   0.02    -0.04   0.03  -0.02     0.02  -0.04  -0.01
  40   7    -0.03   0.00   0.02     0.00  -0.03   0.00     0.00   0.03  -0.02
  41   8     0.02  -0.02   0.01     0.04   0.01   0.00     0.02   0.01   0.00
  42   8     0.01  -0.02   0.00     0.08   0.01   0.03     0.05   0.01   0.03
  43   6     0.01  -0.01   0.00     0.01   0.01   0.01     0.01   0.01   0.02
  44   6     0.02   0.01  -0.01    -0.03   0.02   0.06    -0.01   0.02   0.04
  45   6     0.02  -0.02   0.00     0.11  -0.03  -0.01     0.07  -0.01   0.00
  46   8     0.00  -0.02  -0.01    -0.01   0.00  -0.04     0.00   0.00  -0.01
  47   6     0.01  -0.01   0.03    -0.04  -0.04   0.04    -0.03  -0.03   0.02
  48   8    -0.01   0.01   0.02    -0.01  -0.04  -0.04    -0.03   0.09   0.04
  49   6     0.00  -0.01  -0.02    -0.02   0.03   0.03    -0.02   0.00   0.01
  50   8     0.02  -0.02  -0.02     0.00   0.04   0.00     0.01   0.00  -0.01
  51   8    -0.01  -0.02  -0.04    -0.02   0.02  -0.02    -0.02   0.00  -0.02
  52   6    -0.01   0.00  -0.01    -0.01   0.01  -0.02    -0.02   0.02  -0.01
  53   6    -0.01  -0.01   0.00    -0.02  -0.02  -0.03    -0.03   0.05   0.01
  54   6    -0.01  -0.01  -0.04    -0.02   0.04  -0.01    -0.02   0.01  -0.02
  55   8     0.00   0.02   0.01     0.00   0.02  -0.01    -0.02   0.01  -0.02
  56   6    -0.03  -0.03   0.01     0.00  -0.01  -0.03    -0.07   0.02   0.02
  57   6    -0.01  -0.01  -0.08    -0.01   0.02  -0.09    -0.02   0.00  -0.07
  58   6     0.04   0.06   0.01    -0.07   0.07   0.04    -0.02   0.06   0.03
  59   6     0.03  -0.01   0.00     0.20   0.00   0.01     0.13   0.00   0.01
  60   1    -0.03   0.00   0.02    -0.03   0.01  -0.01     0.01  -0.02  -0.02
  61   1     0.08  -0.04   0.13    -0.01   0.03  -0.06     0.00  -0.02   0.08
  62   1     0.01  -0.08   0.10     0.01   0.07  -0.05    -0.03  -0.08   0.06
  63   1     0.05   0.05   0.00    -0.01   0.02  -0.02    -0.01   0.01   0.02
  64   1     0.13   0.05   0.04    -0.03   0.02  -0.03     0.03   0.00   0.04
  65   1     0.00   0.06  -0.04    -0.01   0.03  -0.02    -0.01   0.00   0.02
  66   1     0.06   0.09  -0.02     0.01   0.01  -0.02    -0.04   0.03   0.02
  67   1     0.00  -0.06   0.05     0.00   0.04   0.00    -0.02  -0.04  -0.02
  68   1    -0.03  -0.06   0.02    -0.01   0.06   0.00    -0.02  -0.07  -0.03
  69   1    -0.03  -0.01  -0.02     0.01  -0.06  -0.05     0.03   0.00  -0.06
  70   1    -0.03  -0.03  -0.05     0.01  -0.06  -0.05     0.03  -0.01  -0.06
  71   1    -0.03  -0.02  -0.05     0.01  -0.03   0.01     0.00   0.00  -0.02
  72   1    -0.03   0.00   0.02     0.01  -0.03   0.02     0.00   0.03  -0.13
  73   1    -0.03  -0.04  -0.11     0.01  -0.02   0.07    -0.01   0.03   0.03
  74   1    -0.04   0.01   0.00     0.05   0.02   0.00    -0.07  -0.04   0.01
  75   1    -0.05   0.03   0.01     0.04  -0.02   0.00    -0.08  -0.03   0.02
  76   1    -0.02   0.04   0.01     0.00  -0.03  -0.02    -0.04  -0.02   0.02
  77   1    -0.05  -0.01   0.03     0.00   0.06  -0.01     0.03  -0.07  -0.02
  78   1     0.09   0.02  -0.05     0.00   0.00  -0.08     0.00  -0.03   0.01
  79   1    -0.04  -0.02   0.02    -0.02  -0.09  -0.01     0.14   0.28   0.00
  80   1    -0.02   0.00   0.01    -0.03  -0.10   0.02     0.05   0.27  -0.10
  81   1    -0.04   0.01   0.02    -0.04  -0.10  -0.04     0.16   0.21   0.05
  82   1    -0.02   0.00   0.02     0.02  -0.01  -0.04     0.06   0.00   0.09
  83   1    -0.02  -0.01   0.02     0.01  -0.03  -0.08     0.09  -0.01   0.20
  84   1    -0.02   0.00   0.02     0.04   0.01  -0.05     0.00  -0.14   0.09
  85   1     0.00   0.00  -0.08    -0.02  -0.04   0.07    -0.02   0.01   0.06
  86   1     0.04   0.01   0.05     0.02  -0.06   0.08     0.01  -0.01   0.05
  87   1     0.10   0.07  -0.07     0.02  -0.03   0.06     0.01   0.00   0.04
  88   1    -0.08  -0.08  -0.06     0.01   0.02   0.07    -0.02   0.07   0.05
  89   1    -0.15  -0.11  -0.02     0.03   0.03   0.04     0.00   0.09   0.01
  90   1    -0.11  -0.03   0.04     0.03  -0.01   0.03     0.00   0.04   0.01
  91   1     0.11   0.01  -0.04    -0.15  -0.03  -0.02     0.07  -0.03  -0.01
  92   1    -0.04   0.04   0.02    -0.20  -0.03   0.05     0.07  -0.03  -0.03
  93   1    -0.01  -0.09  -0.05    -0.19  -0.05  -0.10     0.07  -0.04   0.02
  94   1     0.12   0.13  -0.03    -0.01   0.00   0.08     0.01  -0.02  -0.04
  95   1     0.11   0.18   0.02     0.10   0.04   0.09    -0.03  -0.03  -0.04
  96   1     0.04   0.14   0.07    -0.02   0.00   0.17     0.01  -0.01  -0.07
  97   1     0.08   0.11  -0.06     0.01   0.08   0.03    -0.05  -0.15  -0.05
  98   1     0.00   0.19   0.00     0.01   0.06   0.01    -0.03  -0.16  -0.05
  99   1     0.12   0.14  -0.08     0.02   0.05   0.03    -0.10  -0.13  -0.03
 100   1     0.10  -0.08  -0.05     0.01   0.08   0.02    -0.04  -0.05   0.00
 101   1     0.17  -0.08  -0.08     0.00   0.06   0.03    -0.08  -0.04   0.01
 102   1     0.06  -0.17  -0.04     0.01   0.07   0.02    -0.03  -0.01   0.01
 103   1    -0.09   0.02   0.02     0.08  -0.03  -0.01    -0.04   0.01  -0.02
 104   1    -0.02  -0.02   0.03    -0.04   0.02  -0.01    -0.01   0.00  -0.02
 105   1    -0.02   0.06   0.00    -0.02  -0.09   0.04    -0.01   0.03  -0.02
 106   1    -0.10   0.18  -0.03     0.03  -0.13   0.01     0.00   0.00   0.00
 107   1    -0.03  -0.17  -0.20    -0.01   0.12   0.13     0.03  -0.07  -0.05
 108   1     0.08  -0.11   0.18    -0.10   0.08  -0.13     0.05  -0.06   0.04
 109   1     0.03   0.00  -0.04    -0.01   0.01   0.06     0.01   0.00   0.03
 110   1     0.02  -0.03  -0.01     0.10  -0.08  -0.06     0.07  -0.04  -0.02
 111   1     0.01   0.00   0.03    -0.05   0.01   0.03    -0.04   0.00   0.01
 112   1     0.01  -0.02   0.04    -0.06  -0.05   0.05    -0.04  -0.03   0.02
 113   1     0.01   0.00   0.04    -0.06  -0.07   0.05    -0.04  -0.05   0.03
 114   1    -0.01   0.00  -0.01    -0.04  -0.02  -0.03     0.01   0.05  -0.01
 115   1     0.00   0.02  -0.04    -0.01   0.09  -0.01    -0.02   0.04  -0.02
 116   1    -0.04  -0.04  -0.01    -0.01   0.01  -0.02    -0.06  -0.02  -0.01
 117   1    -0.04  -0.03   0.03     0.04  -0.01  -0.04    -0.13   0.01   0.04
 118   1    -0.04  -0.03   0.02     0.00  -0.05  -0.03    -0.07   0.06   0.03
 119   1    -0.01   0.01  -0.11    -0.01   0.06  -0.14    -0.02   0.02  -0.10
 120   1    -0.01   0.00  -0.08    -0.02   0.04  -0.07    -0.02   0.01  -0.06
 121   1    -0.01  -0.05  -0.09    -0.01  -0.04  -0.10    -0.01  -0.04  -0.08
 122   1     0.06   0.07   0.00    -0.05   0.09   0.01     0.00   0.08   0.01
 123   1     0.05   0.07   0.00    -0.09   0.07   0.07    -0.03   0.06   0.04
 124   1     0.03   0.06   0.05    -0.09   0.08   0.05    -0.05   0.08   0.05
 125   1     0.04  -0.02  -0.01     0.26  -0.02   0.00     0.16  -0.01   0.01
 126   1     0.04  -0.01   0.01     0.21   0.06   0.04     0.13   0.04   0.03
 127   1     0.04  -0.01  -0.01     0.22  -0.04  -0.02     0.13  -0.03   0.00
                    16                     17                     18
                     A                      A                      A
 Frequencies --    65.0090                70.8901                78.5771
 Red. masses --     3.5455                 4.0940                 3.0621
 Frc consts  --     0.0088                 0.0121                 0.0111
 IR Inten    --     0.1224                 0.6267                 1.5156
 Atom AN      X      Y      Z        X      Y      Z        X      Y      Z
   1   6     0.02  -0.02   0.00     0.01   0.04   0.00     0.01  -0.01   0.00
   2   6     0.01   0.00   0.00     0.01   0.03   0.00     0.02  -0.01   0.03
   3   6    -0.01   0.02  -0.01     0.01   0.02   0.01     0.01  -0.01   0.04
   4   6     0.07  -0.07   0.02     0.00  -0.03  -0.08    -0.03   0.04  -0.07
   5   6     0.08   0.00   0.03    -0.02  -0.08  -0.04    -0.10  -0.05   0.05
   6   6     0.02   0.03  -0.01     0.00  -0.08  -0.04    -0.04  -0.05   0.01
   7   8     0.00  -0.01  -0.03     0.01  -0.06  -0.04    -0.02   0.00  -0.01
   8   6     0.02  -0.08  -0.02     0.02  -0.03  -0.05     0.00   0.04  -0.04
   9   6     0.01  -0.01   0.00     0.02   0.03   0.00    -0.01  -0.01  -0.03
  10   6    -0.01   0.04  -0.02     0.02   0.01   0.00     0.00   0.00   0.03
  11   6     0.01  -0.01   0.00     0.03   0.04   0.03    -0.01  -0.02  -0.05
  12   6     0.01   0.00   0.01     0.03   0.03   0.03    -0.01  -0.02  -0.04
  13   6     0.01   0.01   0.01     0.03   0.02   0.01    -0.01  -0.01   0.00
  14   6     0.01   0.01   0.02     0.02   0.01  -0.01    -0.01  -0.01   0.00
  15   6     0.01   0.01   0.02     0.02   0.02  -0.01    -0.01  -0.01  -0.01
  16   6     0.01  -0.01  -0.02     0.03   0.05   0.05    -0.01  -0.02  -0.07
  17   6     0.03   0.02   0.04     0.01   0.02   0.01    -0.02  -0.01  -0.01
  18   6     0.02   0.04  -0.03     0.01   0.01  -0.01    -0.01  -0.01   0.03
  19   6     0.05   0.04  -0.04     0.03   0.01  -0.03     0.03   0.00   0.00
  20   6     0.06   0.03  -0.05     0.05   0.03  -0.04     0.07   0.01  -0.03
  21   6     0.03   0.02  -0.04     0.06   0.03  -0.03     0.06   0.02  -0.02
  22   6     0.00   0.03  -0.03     0.05   0.02  -0.01     0.03   0.01   0.01
  23   6     0.01   0.06  -0.02    -0.01  -0.01   0.00    -0.06  -0.01   0.06
  24   6    -0.04   0.02  -0.01     0.06   0.02  -0.03     0.03   0.01   0.03
  25   6     0.09   0.13  -0.02    -0.05  -0.07   0.06     0.04   0.07  -0.07
  26   6    -0.02  -0.09   0.10     0.09   0.13  -0.06    -0.04  -0.06  -0.01
  27   6    -0.01  -0.01   0.03    -0.03  -0.01   0.00    -0.01  -0.01   0.00
  28   6     0.08   0.05   0.02     0.05   0.05  -0.01    -0.02  -0.01   0.00
  29   6    -0.11   0.02  -0.01     0.11   0.02  -0.03     0.04   0.04   0.03
  30   6    -0.02  -0.01   0.05     0.05   0.04  -0.07     0.02  -0.01   0.02
  31   6     0.04   0.11   0.01     0.01   0.02   0.02     0.03   0.15   0.13
  32   6     0.03   0.04  -0.03    -0.01  -0.04  -0.03    -0.03  -0.13  -0.05
  33   6     0.04  -0.05   0.01     0.01   0.04   0.00     0.01   0.02  -0.02
  34   6    -0.01   0.02   0.00     0.01   0.03   0.00     0.01  -0.02   0.04
  35   8    -0.01   0.01  -0.01     0.01  -0.01   0.00     0.00   0.00   0.01
  36  12    -0.03   0.02  -0.01     0.01  -0.02   0.02    -0.01  -0.02   0.00
  37   8    -0.01  -0.02  -0.02    -0.06  -0.03   0.05    -0.01   0.00   0.02
  38   6    -0.02   0.00   0.00     0.01   0.00   0.00     0.01   0.01   0.00
  39   7    -0.03   0.04  -0.02     0.02   0.00   0.02     0.00  -0.01   0.03
  40   7     0.01  -0.01   0.00     0.01   0.03   0.00    -0.01  -0.01  -0.01
  41   8    -0.01   0.00   0.01     0.01   0.01   0.00     0.01   0.01  -0.02
  42   8    -0.02  -0.01  -0.01     0.01   0.01   0.01     0.01   0.02   0.01
  43   6     0.00   0.00  -0.01     0.00   0.01   0.00     0.00   0.00   0.01
  44   6     0.01   0.00  -0.02    -0.02   0.01   0.02    -0.02  -0.01   0.02
  45   6    -0.03   0.00   0.00     0.03   0.00   0.00     0.02   0.01   0.00
  46   8     0.00   0.00   0.01    -0.01   0.01  -0.01    -0.01   0.00   0.00
  47   6     0.01   0.01  -0.01    -0.01  -0.01   0.01    -0.01   0.00  -0.01
  48   8    -0.05   0.02  -0.01    -0.07  -0.03   0.03     0.01   0.00   0.01
  49   6    -0.02  -0.05   0.01    -0.06  -0.05   0.03     0.01   0.03  -0.02
  50   8    -0.02  -0.07   0.03    -0.03  -0.06   0.03     0.02   0.06  -0.08
  51   8    -0.03  -0.06  -0.01    -0.07  -0.07   0.00     0.00   0.02   0.02
  52   6    -0.04  -0.03  -0.01    -0.07  -0.05   0.01     0.01  -0.01   0.00
  53   6    -0.04  -0.03  -0.03    -0.08  -0.02   0.03     0.01   0.00   0.01
  54   6    -0.04  -0.06   0.02    -0.08  -0.06   0.03     0.01   0.01   0.01
  55   8    -0.06  -0.01   0.01    -0.07  -0.05   0.01     0.02  -0.03  -0.02
  56   6    -0.04  -0.08  -0.01    -0.12   0.03   0.02     0.00   0.02   0.00
  57   6    -0.05  -0.05   0.07    -0.09  -0.05   0.05     0.00   0.02   0.03
  58   6     0.04   0.03  -0.01    -0.02   0.09   0.02    -0.04  -0.03   0.01
  59   6    -0.05   0.00  -0.01     0.05   0.00   0.00     0.02   0.00   0.01
  60   1     0.02  -0.01   0.01     0.01   0.04   0.00     0.03   0.00   0.03
  61   1     0.09  -0.08   0.04    -0.03  -0.03  -0.12    -0.10   0.03  -0.17
  62   1     0.09  -0.10   0.03     0.02  -0.01  -0.09     0.05   0.09  -0.09
  63   1     0.09   0.01   0.04    -0.01  -0.10  -0.02    -0.05  -0.15   0.14
  64   1     0.10   0.03   0.06    -0.07  -0.07  -0.04    -0.23  -0.01   0.09
  65   1     0.00   0.03  -0.03     0.01  -0.09  -0.03    -0.02  -0.09   0.00
  66   1     0.02   0.08  -0.01     0.00  -0.10  -0.03    -0.04  -0.04   0.01
  67   1     0.01  -0.11  -0.04     0.02  -0.02  -0.06     0.00   0.06  -0.05
  68   1     0.00  -0.09  -0.04     0.04  -0.02  -0.04     0.03   0.06  -0.01
  69   1     0.00   0.00   0.01     0.04   0.04   0.04    -0.01  -0.02  -0.04
  70   1     0.01   0.01   0.02     0.03   0.02   0.01    -0.01  -0.01   0.01
  71   1     0.01   0.01   0.02     0.02   0.00  -0.02    -0.01   0.00   0.02
  72   1    -0.01  -0.05  -0.12     0.05   0.09   0.16    -0.03  -0.04  -0.14
  73   1     0.03   0.02   0.09     0.01   0.04   0.05    -0.02  -0.01  -0.01
  74   1     0.07   0.04  -0.04     0.03   0.01  -0.04     0.03   0.00  -0.02
  75   1     0.09   0.02  -0.06     0.07   0.03  -0.05     0.09   0.02  -0.05
  76   1     0.04   0.01  -0.05     0.08   0.04  -0.04     0.08   0.02  -0.03
  77   1    -0.03   0.07  -0.01    -0.03  -0.02   0.02    -0.18  -0.03   0.13
  78   1    -0.03   0.03  -0.04     0.06   0.02  -0.01     0.01   0.01   0.05
  79   1     0.11   0.16  -0.02    -0.07  -0.09   0.07     0.07   0.11  -0.08
  80   1     0.08   0.18  -0.10    -0.06  -0.12   0.14     0.01   0.10  -0.11
  81   1     0.15   0.14   0.06    -0.10  -0.10  -0.02     0.09   0.05  -0.03
  82   1    -0.03  -0.09   0.07     0.10   0.13  -0.01    -0.04  -0.06  -0.03
  83   1     0.01  -0.05   0.21     0.05   0.09  -0.16    -0.02  -0.04   0.06
  84   1    -0.08  -0.19   0.11     0.16   0.21  -0.07    -0.07  -0.11   0.00
  85   1     0.00   0.00   0.05    -0.02   0.00   0.02    -0.02  -0.01   0.00
  86   1    -0.02  -0.01  -0.02    -0.03  -0.01  -0.05    -0.01  -0.02   0.00
  87   1    -0.05  -0.02   0.05    -0.06  -0.03   0.02    -0.01  -0.02   0.00
  88   1     0.08   0.06   0.04     0.04   0.05   0.01    -0.03  -0.01   0.00
  89   1     0.11   0.08   0.03     0.09   0.08  -0.01    -0.03  -0.01  -0.01
  90   1     0.08   0.03  -0.03     0.06   0.02  -0.05    -0.02  -0.02   0.00
  91   1    -0.13   0.02   0.01     0.14   0.02  -0.04     0.03   0.04   0.05
  92   1    -0.14   0.02   0.03     0.10   0.04  -0.04     0.05   0.04   0.02
  93   1    -0.13   0.03  -0.05     0.11  -0.02  -0.01     0.04   0.06   0.04
  94   1    -0.05  -0.02   0.06     0.06   0.04  -0.08     0.01  -0.01   0.03
  95   1     0.03  -0.01   0.05     0.02   0.05  -0.07     0.01  -0.03   0.02
  96   1    -0.02  -0.03   0.09     0.06   0.04  -0.09     0.03  -0.01   0.00
  97   1     0.04   0.13   0.02     0.00   0.01   0.02     0.00   0.16   0.15
  98   1     0.03   0.14   0.02     0.01   0.03   0.03    -0.02   0.23   0.20
  99   1     0.09   0.11   0.00     0.03   0.02   0.01     0.16   0.16   0.09
 100   1     0.02   0.04  -0.03    -0.03  -0.05  -0.03    -0.08  -0.14  -0.03
 101   1     0.06   0.04  -0.04     0.01  -0.03  -0.06     0.09  -0.12  -0.11
 102   1     0.02   0.01  -0.04    -0.02  -0.05  -0.05    -0.08  -0.23  -0.10
 103   1     0.09  -0.05   0.02     0.03   0.04  -0.01    -0.05   0.02  -0.02
 104   1     0.03  -0.03   0.01     0.00   0.06  -0.01     0.05  -0.01   0.00
 105   1     0.03  -0.10   0.02     0.00   0.03   0.01     0.04   0.08  -0.06
 106   1     0.04  -0.08   0.01    -0.03   0.14  -0.02    -0.03   0.08   0.03
 107   1     0.01   0.09   0.10    -0.01  -0.05  -0.10     0.00  -0.08  -0.05
 108   1    -0.06   0.06  -0.09     0.06  -0.01   0.08     0.06  -0.05   0.12
 109   1     0.03  -0.01  -0.05     0.02  -0.01  -0.01    -0.02  -0.01   0.04
 110   1    -0.03   0.02   0.01     0.02  -0.01  -0.02     0.02   0.00   0.00
 111   1     0.02   0.00   0.00    -0.01   0.01   0.01    -0.02  -0.01  -0.03
 112   1     0.01   0.01  -0.01    -0.02  -0.01   0.01     0.00   0.00  -0.01
 113   1     0.02   0.02  -0.02    -0.01  -0.01   0.01    -0.02  -0.01   0.00
 114   1    -0.01  -0.02  -0.07    -0.06  -0.02   0.07     0.02   0.00   0.02
 115   1    -0.06  -0.09   0.02    -0.09  -0.07   0.02     0.01  -0.01   0.01
 116   1    -0.02  -0.13  -0.03    -0.11   0.03   0.03     0.00   0.03   0.01
 117   1    -0.07  -0.09   0.03    -0.15   0.03  -0.02     0.00   0.02  -0.01
 118   1    -0.03  -0.07  -0.03    -0.12   0.07   0.05     0.00   0.03   0.01
 119   1    -0.06  -0.07   0.10    -0.10  -0.07   0.07     0.00   0.01   0.05
 120   1    -0.05  -0.05   0.08    -0.09  -0.04   0.05     0.00   0.02   0.03
 121   1    -0.04  -0.01   0.08    -0.09  -0.02   0.06     0.00   0.05   0.04
 122   1     0.06   0.05  -0.01     0.02   0.13   0.00    -0.04  -0.04   0.02
 123   1     0.05   0.03  -0.02    -0.02   0.08   0.03    -0.05  -0.04   0.02
 124   1     0.02   0.05   0.02    -0.06   0.12   0.06    -0.03  -0.04  -0.01
 125   1    -0.06   0.00  -0.01     0.07   0.00   0.00     0.03   0.00   0.02
 126   1    -0.05  -0.01  -0.01     0.05   0.02   0.01     0.02   0.01   0.01
 127   1    -0.05   0.01   0.00     0.05  -0.01   0.00     0.02  -0.01   0.01
                    19                     20                     21
                     A                      A                      A
 Frequencies --    83.7088                84.7224                87.7745
 Red. masses --     4.9110                 3.7429                 5.5287
 Frc consts  --     0.0203                 0.0158                 0.0251
 IR Inten    --     0.9027                 2.3256                 1.3574
 Atom AN      X      Y      Z        X      Y      Z        X      Y      Z
   1   6     0.03  -0.03  -0.01    -0.01   0.01   0.03    -0.02   0.02  -0.01
   2   6     0.04  -0.04   0.00    -0.01   0.01   0.04    -0.02   0.02  -0.02
   3   6     0.02  -0.03   0.01     0.00   0.02   0.03    -0.01   0.01  -0.02
   4   6     0.00   0.07   0.03    -0.03   0.04  -0.09    -0.01  -0.06   0.01
   5   6    -0.03   0.06   0.08    -0.03  -0.01  -0.10    -0.01  -0.07   0.01
   6   6    -0.04   0.06   0.08     0.00  -0.04  -0.05     0.02  -0.05  -0.04
   7   8    -0.04   0.07   0.03     0.02  -0.02  -0.01     0.02  -0.04  -0.02
   8   6    -0.01   0.07   0.01     0.00   0.04  -0.03     0.00  -0.06  -0.01
   9   6     0.02   0.00  -0.02    -0.02  -0.01   0.01     0.00   0.01   0.00
  10   6    -0.02  -0.02   0.00     0.03   0.02   0.02     0.00   0.00  -0.02
  11   6     0.03   0.00  -0.03    -0.03  -0.02  -0.01     0.00   0.02   0.03
  12   6     0.03  -0.01  -0.03    -0.03  -0.02  -0.01     0.00   0.02   0.02
  13   6     0.03   0.00   0.00    -0.03  -0.01   0.00     0.00   0.01  -0.01
  14   6     0.02   0.00   0.02    -0.02  -0.01   0.00     0.00   0.00  -0.02
  15   6     0.02   0.00   0.01    -0.02  -0.01   0.00     0.00   0.01  -0.02
  16   6     0.03   0.01  -0.04    -0.03  -0.03  -0.05     0.00   0.02   0.05
  17   6     0.02   0.00   0.01    -0.02  -0.02  -0.03     0.00   0.01   0.00
  18   6    -0.03  -0.03   0.01     0.04   0.02   0.02     0.00   0.00  -0.01
  19   6    -0.02  -0.03   0.00     0.04   0.02   0.01    -0.01   0.00  -0.01
  20   6    -0.01  -0.03  -0.01     0.05   0.03   0.01    -0.01   0.00  -0.01
  21   6    -0.01  -0.03  -0.01     0.05   0.03   0.01    -0.01   0.00  -0.01
  22   6    -0.01  -0.03   0.00     0.04   0.03   0.02    -0.01   0.00  -0.01
  23   6    -0.05  -0.05   0.01     0.04   0.02   0.01    -0.01   0.01  -0.01
  24   6    -0.01  -0.03  -0.02     0.06   0.03   0.01    -0.03   0.00   0.01
  25   6     0.02  -0.04  -0.04     0.06   0.06  -0.07    -0.03   0.02   0.06
  26   6     0.05   0.04  -0.08    -0.10  -0.09   0.03     0.02   0.03   0.05
  27   6    -0.02   0.00  -0.02    -0.01   0.00  -0.04     0.01   0.00   0.02
  28   6     0.07  -0.01  -0.01    -0.04  -0.07  -0.02    -0.02   0.04   0.01
  29   6    -0.02  -0.04  -0.02     0.12   0.04   0.01    -0.06   0.01   0.01
  30   6    -0.01  -0.02  -0.01     0.03   0.03  -0.04    -0.02  -0.02   0.04
  31   6     0.00   0.05   0.03     0.00  -0.07   0.00     0.01   0.04   0.01
  32   6    -0.02  -0.14  -0.06     0.01   0.10   0.06     0.00   0.00  -0.02
  33   6     0.06  -0.05  -0.01    -0.01   0.03   0.02    -0.04   0.03  -0.01
  34   6     0.04  -0.05   0.02    -0.02   0.03   0.01    -0.02   0.01  -0.03
  35   8     0.03  -0.02  -0.03     0.02  -0.02  -0.02     0.06  -0.07  -0.06
  36  12    -0.03   0.03  -0.03     0.02  -0.02   0.03     0.02  -0.02   0.01
  37   8     0.02   0.05  -0.03    -0.01   0.03   0.00     0.03   0.02  -0.03
  38   6    -0.03  -0.03   0.03    -0.01  -0.02   0.01    -0.04  -0.04   0.07
  39   7    -0.01  -0.02  -0.01     0.02   0.01   0.04     0.00   0.00  -0.02
  40   7     0.01   0.01  -0.03    -0.01  -0.01   0.03     0.00   0.01   0.00
  41   8    -0.07  -0.03   0.11    -0.04  -0.02   0.07    -0.15   0.00   0.23
  42   8    -0.04  -0.06  -0.02    -0.02  -0.04  -0.01    -0.03  -0.09   0.00
  43   6     0.01   0.02  -0.04     0.00   0.02  -0.02     0.06   0.08  -0.03
  44   6     0.02   0.05  -0.04    -0.01   0.03  -0.01     0.01   0.00  -0.01
  45   6    -0.03  -0.04  -0.02    -0.01  -0.03  -0.02     0.00  -0.06  -0.01
  46   8     0.04   0.08  -0.05     0.01   0.05  -0.04     0.17   0.25  -0.07
  47   6     0.02   0.00   0.05     0.01   0.00   0.03     0.00  -0.04   0.05
  48   8    -0.01   0.02  -0.06     0.01  -0.05   0.01     0.01   0.00   0.03
  49   6    -0.03  -0.02   0.10    -0.03   0.00   0.05     0.04   0.03  -0.06
  50   8    -0.08  -0.10   0.24    -0.05  -0.05   0.13     0.06   0.06  -0.11
  51   8     0.01   0.02   0.00    -0.02   0.00   0.00     0.01  -0.01  -0.01
  52   6    -0.01   0.04   0.00     0.00  -0.01   0.01     0.01  -0.01   0.00
  53   6     0.00   0.03  -0.04     0.00  -0.06  -0.01     0.01   0.00   0.03
  54   6     0.00   0.02   0.03    -0.01   0.03   0.00     0.01   0.00  -0.02
  55   8    -0.03   0.06   0.02     0.01   0.01   0.03     0.03  -0.03  -0.02
  56   6     0.04   0.03  -0.04     0.02  -0.10   0.00    -0.03   0.02   0.03
  57   6     0.02  -0.01  -0.02    -0.01   0.01  -0.09    -0.02   0.03   0.01
  58   6     0.01   0.08  -0.03    -0.02   0.06  -0.01    -0.06  -0.09  -0.06
  59   6    -0.01  -0.01  -0.04     0.02  -0.01  -0.02     0.05  -0.01  -0.03
  60   1     0.06  -0.05   0.01    -0.02   0.02   0.03    -0.04   0.03  -0.03
  61   1    -0.02   0.07   0.00    -0.04   0.03  -0.11    -0.01  -0.05   0.02
  62   1     0.04   0.07   0.03    -0.04   0.09  -0.11    -0.01  -0.08   0.02
  63   1     0.00   0.06   0.11    -0.04   0.00  -0.12    -0.02  -0.11   0.02
  64   1    -0.06   0.07   0.08    -0.04  -0.05  -0.13    -0.02  -0.04   0.04
  65   1    -0.01   0.06   0.11     0.01  -0.03  -0.03     0.00  -0.08  -0.07
  66   1    -0.08   0.06   0.10     0.01  -0.09  -0.05     0.05  -0.02  -0.05
  67   1    -0.01   0.06  -0.01     0.01   0.05  -0.01     0.01  -0.05   0.00
  68   1     0.02   0.07   0.03     0.01   0.06   0.00     0.00  -0.08  -0.02
  69   1     0.04  -0.01  -0.04    -0.04  -0.02  -0.03    -0.01   0.02   0.04
  70   1     0.04  -0.01   0.00    -0.03  -0.01  -0.02     0.00   0.01  -0.01
  71   1     0.02   0.00   0.04    -0.02   0.00   0.00     0.00   0.00  -0.03
  72   1     0.04   0.03   0.00    -0.06  -0.07  -0.14     0.00   0.03   0.07
  73   1     0.02   0.01   0.04    -0.02  -0.03  -0.06     0.00   0.01   0.00
  74   1    -0.02  -0.03   0.00     0.05   0.02   0.00    -0.01   0.00  -0.01
  75   1    -0.01  -0.03  -0.01     0.05   0.03   0.00    -0.02   0.00   0.00
  76   1    -0.01  -0.02  -0.01     0.06   0.03   0.00    -0.02   0.00   0.00
  77   1    -0.11  -0.07   0.06     0.10   0.03  -0.02    -0.03   0.01  -0.01
  78   1    -0.01  -0.02  -0.03     0.04   0.02   0.05    -0.02   0.00   0.00
  79   1     0.02  -0.02  -0.05     0.08   0.10  -0.09    -0.04  -0.01   0.08
  80   1     0.00  -0.05  -0.01     0.05   0.10  -0.12    -0.01   0.01   0.06
  81   1     0.01  -0.06  -0.07     0.12   0.06   0.00    -0.05   0.04   0.05
  82   1     0.06   0.05  -0.08    -0.11  -0.10  -0.02     0.03   0.03   0.08
  83   1     0.05   0.02  -0.11    -0.07  -0.06   0.13     0.01   0.03   0.03
  84   1     0.06   0.06  -0.08    -0.18  -0.16   0.05     0.05   0.03   0.04
  85   1    -0.03  -0.01  -0.04    -0.01   0.00  -0.07     0.02   0.01   0.04
  86   1    -0.01  -0.01  -0.03    -0.01   0.01  -0.02     0.01   0.01   0.02
  87   1    -0.04   0.03  -0.01     0.00   0.02  -0.05     0.02  -0.02   0.02
  88   1     0.07  -0.01  -0.02    -0.03  -0.08  -0.06    -0.02   0.04   0.03
  89   1     0.10   0.00   0.01    -0.06  -0.11  -0.01    -0.03   0.05  -0.01
  90   1     0.07  -0.02  -0.05    -0.05  -0.06   0.01    -0.02   0.04   0.01
  91   1    -0.02  -0.04  -0.03     0.13   0.04   0.01    -0.07   0.01   0.03
  92   1    -0.03  -0.04  -0.01     0.15   0.05  -0.02    -0.06   0.01   0.02
  93   1    -0.03  -0.05  -0.03     0.14   0.04   0.06    -0.06   0.03  -0.01
  94   1    -0.01  -0.02  -0.03     0.05   0.04  -0.03    -0.03  -0.02   0.05
  95   1     0.01   0.00  -0.01    -0.02   0.01  -0.05     0.01  -0.02   0.04
  96   1    -0.01  -0.03   0.01     0.04   0.05  -0.09    -0.02  -0.03   0.05
  97   1    -0.02   0.03   0.03     0.01  -0.06   0.00     0.00   0.05   0.01
  98   1    -0.03   0.11   0.09     0.03  -0.12  -0.05     0.00   0.05   0.01
  99   1     0.07   0.08  -0.01    -0.06  -0.09   0.04     0.03   0.03   0.01
 100   1    -0.05  -0.14  -0.05     0.02   0.09   0.06     0.00   0.00  -0.01
 101   1     0.07  -0.12  -0.10    -0.06   0.09   0.09     0.01   0.00  -0.02
 102   1    -0.06  -0.21  -0.09     0.04   0.16   0.08    -0.01  -0.01  -0.02
 103   1     0.12  -0.05  -0.01    -0.08   0.03   0.02    -0.06   0.03   0.00
 104   1     0.03  -0.01  -0.02     0.02  -0.01   0.04    -0.04   0.01  -0.01
 105   1     0.04  -0.11   0.01     0.01   0.08  -0.01    -0.04   0.04   0.00
 106   1    -0.05   0.12   0.02     0.02  -0.03   0.00     0.02  -0.06  -0.03
 107   1     0.03  -0.17  -0.14    -0.02   0.07   0.07    -0.01   0.06   0.04
 108   1     0.13  -0.12   0.18    -0.05   0.06  -0.05    -0.06   0.04  -0.09
 109   1     0.01   0.05  -0.05    -0.01   0.03  -0.02     0.01   0.00   0.08
 110   1    -0.03  -0.05  -0.04    -0.01  -0.04  -0.04    -0.01  -0.10  -0.04
 111   1     0.07   0.07   0.18     0.04   0.05   0.12     0.12   0.11   0.34
 112   1    -0.12  -0.04   0.07    -0.09  -0.03   0.05    -0.34  -0.11   0.08
 113   1     0.09   0.00  -0.05     0.05   0.00  -0.03     0.17  -0.10  -0.17
 114   1    -0.01   0.03  -0.04    -0.02  -0.05  -0.05     0.02   0.00   0.04
 115   1    -0.02   0.06   0.03     0.00   0.08   0.00     0.02  -0.03  -0.03
 116   1     0.05   0.04  -0.02    -0.01  -0.08  -0.01    -0.02   0.01   0.02
 117   1     0.06   0.03  -0.04     0.09  -0.10   0.02    -0.06   0.02   0.02
 118   1     0.05   0.02  -0.06     0.00  -0.17  -0.01    -0.02   0.05   0.04
 119   1     0.02   0.03  -0.07    -0.01   0.05  -0.14    -0.02   0.00   0.04
 120   1     0.01  -0.01   0.01    -0.01   0.03  -0.09    -0.01   0.04  -0.01
 121   1     0.05  -0.06  -0.03    -0.02  -0.06  -0.10    -0.04   0.07   0.01
 122   1     0.01   0.08  -0.06    -0.02   0.07  -0.04    -0.08  -0.12  -0.03
 123   1     0.01   0.11  -0.02    -0.03   0.08   0.00    -0.10  -0.13  -0.02
 124   1     0.02   0.08  -0.01    -0.02   0.06   0.00    -0.05  -0.11  -0.15
 125   1    -0.01  -0.02  -0.06     0.02  -0.01  -0.04     0.07  -0.03  -0.06
 126   1    -0.01   0.00  -0.02     0.02   0.00  -0.01     0.05   0.02   0.00
 127   1     0.00   0.01  -0.04     0.02   0.00  -0.03     0.06   0.00  -0.03
                    22                     23                     24
                     A                      A                      A
 Frequencies --    90.5240                92.8663                99.0523
 Red. masses --     4.0576                 3.3197                 1.8107
 Frc consts  --     0.0196                 0.0169                 0.0105
 IR Inten    --     0.9951                 0.6213                 0.4823
 Atom AN      X      Y      Z        X      Y      Z        X      Y      Z
   1   6     0.03  -0.03   0.01    -0.01   0.02  -0.01    -0.03   0.02   0.00
   2   6     0.03  -0.02   0.04    -0.02   0.03  -0.02    -0.04   0.03   0.00
   3   6     0.01   0.00   0.05    -0.02   0.02  -0.01    -0.02   0.01   0.00
   4   6     0.06   0.04   0.01     0.00   0.14  -0.05     0.01   0.00   0.01
   5   6     0.08   0.12  -0.02     0.02   0.05  -0.10     0.01   0.00   0.00
   6   6    -0.02   0.12   0.04     0.04  -0.03   0.08     0.01  -0.01   0.03
   7   8    -0.06   0.04   0.02     0.05  -0.02   0.16     0.01   0.00   0.02
   8   6    -0.01   0.02   0.00     0.04   0.13   0.11     0.01   0.00   0.02
   9   6     0.00  -0.04  -0.03     0.02   0.01   0.01    -0.03   0.01   0.01
  10   6    -0.01   0.01   0.03    -0.03  -0.01   0.00     0.01   0.00   0.01
  11   6     0.00  -0.06  -0.07     0.02   0.01   0.02    -0.02   0.02   0.01
  12   6     0.00  -0.05  -0.06     0.02   0.02   0.03    -0.01   0.01   0.02
  13   6     0.00  -0.04  -0.01     0.02   0.03   0.02    -0.02   0.00   0.01
  14   6     0.00  -0.03   0.02     0.02   0.02   0.00    -0.02  -0.01   0.00
  15   6     0.00  -0.03   0.00     0.02   0.01  -0.01    -0.03   0.00   0.01
  16   6    -0.01  -0.06  -0.09     0.02   0.01   0.00    -0.02   0.02   0.01
  17   6     0.00  -0.03   0.03     0.04   0.02  -0.01    -0.04   0.00   0.00
  18   6     0.01   0.01   0.02    -0.02  -0.01  -0.01     0.01  -0.01   0.01
  19   6     0.02   0.01   0.02     0.00  -0.01  -0.01     0.01   0.00   0.00
  20   6     0.02   0.01   0.02    -0.01  -0.02  -0.01     0.01   0.00   0.00
  21   6     0.02   0.01   0.01    -0.03  -0.02   0.00     0.01   0.01   0.01
  22   6     0.01   0.01   0.02    -0.04  -0.02   0.00     0.01   0.00   0.01
  23   6     0.03   0.01   0.01     0.00  -0.02  -0.02     0.01  -0.01   0.00
  24   6     0.04   0.01  -0.01    -0.04  -0.02  -0.03     0.01   0.00   0.02
  25   6    -0.02  -0.06  -0.08     0.08   0.06  -0.01     0.00   0.02   0.00
  26   6    -0.01  -0.06  -0.09    -0.01  -0.01   0.04    -0.02   0.02   0.01
  27   6     0.01  -0.03   0.04     0.05   0.03  -0.01    -0.14  -0.04  -0.06
  28   6    -0.01  -0.02   0.03     0.03   0.03  -0.01     0.07  -0.02  -0.06
  29   6     0.09  -0.01  -0.02    -0.06  -0.07  -0.04     0.03   0.01   0.02
  30   6     0.03   0.06  -0.06    -0.02   0.02  -0.02     0.01   0.00   0.01
  31   6    -0.01  -0.07  -0.04     0.00  -0.01  -0.04     0.01  -0.02   0.00
  32   6     0.02   0.06   0.06     0.01  -0.04  -0.03     0.01  -0.01   0.00
  33   6     0.07  -0.03  -0.01    -0.03   0.03  -0.01     0.02  -0.05   0.03
  34   6     0.01   0.00   0.06    -0.03   0.03  -0.02    -0.01  -0.01   0.00
  35   8     0.01  -0.01  -0.01     0.00   0.00   0.00     0.01  -0.01   0.00
  36  12    -0.05   0.02  -0.01     0.02  -0.04   0.03    -0.01   0.02   0.00
  37   8    -0.02  -0.03   0.01    -0.01  -0.01   0.00     0.01  -0.01   0.01
  38   6    -0.01   0.00   0.02     0.00   0.00   0.00     0.01   0.00   0.00
  39   7    -0.02   0.01   0.03    -0.02   0.00   0.00     0.00   0.00   0.01
  40   7     0.00  -0.03  -0.01     0.02   0.00   0.00    -0.04   0.03   0.00
  41   8    -0.03   0.01   0.04     0.00   0.00   0.00     0.00   0.01   0.00
  42   8    -0.01  -0.01   0.01    -0.01   0.00   0.00     0.02   0.00   0.00
  43   6     0.01   0.02   0.00     0.00   0.00   0.00     0.02   0.00   0.00
  44   6    -0.01  -0.02   0.01     0.00  -0.01   0.00     0.01  -0.01   0.01
  45   6     0.00   0.00   0.01     0.00   0.00   0.00     0.02   0.00   0.00
  46   8     0.04   0.07  -0.01     0.01   0.01   0.00     0.01   0.00   0.00
  47   6     0.00  -0.01   0.00     0.00   0.00   0.00    -0.01  -0.01   0.01
  48   8    -0.04   0.05   0.00     0.00  -0.10  -0.01     0.00  -0.01  -0.03
  49   6     0.00  -0.01  -0.04     0.00  -0.01  -0.03     0.01   0.00  -0.01
  50   8     0.03   0.03  -0.11     0.01   0.00  -0.05     0.02   0.01  -0.04
  51   8    -0.02  -0.03   0.00    -0.02  -0.04  -0.02     0.01   0.00  -0.02
  52   6    -0.03  -0.01  -0.01    -0.01  -0.04  -0.01     0.00   0.01  -0.02
  53   6    -0.03   0.04   0.00    -0.02  -0.06   0.00     0.00  -0.01  -0.03
  54   6    -0.03  -0.05   0.03    -0.02  -0.03  -0.01     0.00   0.00  -0.01
  55   8    -0.05  -0.02  -0.02     0.00  -0.02   0.00    -0.01   0.02   0.00
  56   6    -0.06   0.07  -0.01    -0.02  -0.02  -0.01     0.02  -0.03  -0.03
  57   6    -0.04  -0.02   0.16    -0.04  -0.01   0.03     0.01   0.00   0.01
  58   6    -0.03  -0.03   0.00    -0.01  -0.02   0.00     0.00  -0.02   0.00
  59   6     0.01   0.00   0.00     0.00   0.00   0.00     0.02   0.00   0.00
  60   1     0.06  -0.02   0.05    -0.03   0.05  -0.03    -0.04   0.03   0.00
  61   1     0.10   0.01   0.03     0.00   0.10  -0.08     0.01   0.00   0.02
  62   1     0.06   0.02   0.01    -0.04   0.25  -0.08     0.00   0.00   0.01
  63   1     0.09   0.23  -0.05    -0.01   0.15  -0.16     0.01   0.02  -0.01
  64   1     0.17   0.08  -0.07     0.04  -0.06  -0.21     0.02  -0.01  -0.01
  65   1    -0.03   0.17   0.09     0.05   0.04   0.16     0.01   0.00   0.04
  66   1    -0.06   0.10   0.06     0.04  -0.16   0.08    -0.01  -0.03   0.03
  67   1    -0.03  -0.03  -0.02     0.04   0.14   0.13     0.01   0.01   0.01
  68   1    -0.03   0.04   0.01     0.05   0.21   0.18     0.02   0.00   0.02
  69   1     0.00  -0.06  -0.08     0.01   0.03   0.05     0.00   0.01   0.02
  70   1     0.00  -0.03   0.03     0.02   0.03   0.03    -0.01  -0.01   0.01
  71   1     0.00  -0.02   0.04     0.02   0.01  -0.01    -0.03  -0.02  -0.01
  72   1     0.00  -0.07  -0.08     0.00   0.00  -0.05    -0.02   0.02   0.01
  73   1     0.00  -0.03   0.02     0.04   0.00  -0.01    -0.05   0.03   0.07
  74   1     0.03   0.01   0.01     0.02  -0.01  -0.02     0.01   0.00   0.00
  75   1     0.03   0.01   0.01     0.00  -0.02  -0.01     0.01   0.01   0.00
  76   1     0.03   0.01   0.01    -0.03  -0.03   0.00     0.01   0.01   0.01
  77   1     0.10   0.01  -0.02     0.00  -0.03   0.00     0.02  -0.02   0.01
  78   1     0.04   0.01   0.00    -0.02  -0.01  -0.06     0.01   0.00   0.03
  79   1     0.00  -0.02  -0.07     0.10   0.10  -0.04    -0.01   0.00  -0.01
  80   1    -0.07  -0.06  -0.07     0.06   0.08  -0.04     0.02   0.02   0.00
  81   1    -0.01  -0.09  -0.10     0.12   0.04   0.02     0.00   0.03   0.02
  82   1    -0.02  -0.07  -0.09    -0.01  -0.02   0.01    -0.02   0.03  -0.02
  83   1    -0.02  -0.06  -0.10     0.01   0.00   0.09     0.00   0.02   0.03
  84   1    -0.01  -0.05  -0.09    -0.04  -0.05   0.05    -0.06   0.01   0.02
  85   1    -0.02  -0.04   0.03     0.09   0.04   0.01    -0.22  -0.06  -0.10
  86   1     0.01  -0.05   0.06     0.03   0.06  -0.03    -0.10  -0.12  -0.07
  87   1     0.03  -0.02   0.03     0.03  -0.01   0.00    -0.17   0.04  -0.05
  88   1    -0.02  -0.02   0.04     0.05   0.03   0.00     0.04  -0.02  -0.05
  89   1    -0.01  -0.01   0.03     0.02   0.02  -0.01     0.17   0.03  -0.02
  90   1    -0.01  -0.02   0.03     0.02   0.05  -0.01     0.10  -0.08  -0.14
  91   1     0.14  -0.01  -0.04    -0.03  -0.06  -0.06     0.03   0.02   0.03
  92   1     0.09   0.01  -0.03    -0.10  -0.05   0.00     0.03   0.02   0.01
  93   1     0.10  -0.05   0.01    -0.08  -0.11  -0.06     0.03   0.02   0.03
  94   1     0.07   0.06  -0.07    -0.03   0.01  -0.08     0.01   0.01   0.01
  95   1     0.00   0.06  -0.05    -0.01   0.08  -0.01     0.00   0.00   0.01
  96   1     0.03   0.08  -0.07    -0.03  -0.01   0.03     0.01   0.01   0.00
  97   1     0.01  -0.08  -0.05    -0.01  -0.04  -0.05     0.00  -0.03   0.00
  98   1     0.01  -0.11  -0.07     0.00   0.01  -0.01     0.01  -0.02   0.01
  99   1    -0.08  -0.07  -0.02     0.00   0.02  -0.07     0.00  -0.02  -0.01
 100   1     0.05   0.06   0.04     0.01  -0.04  -0.03     0.01  -0.02   0.00
 101   1    -0.04   0.06   0.08     0.03  -0.04  -0.04     0.01  -0.01   0.00
 102   1     0.05   0.10   0.08     0.00  -0.06  -0.03     0.01  -0.02   0.00
 103   1     0.08  -0.03  -0.02    -0.06   0.03  -0.01     0.50  -0.07  -0.07
 104   1     0.08  -0.01   0.01    -0.02   0.01  -0.01    -0.22   0.27  -0.08
 105   1     0.07  -0.03  -0.02    -0.02   0.06  -0.02    -0.14  -0.44   0.26
 106   1    -0.02   0.06   0.06    -0.13   0.25  -0.03    -0.02   0.03  -0.01
 107   1     0.01  -0.05   0.00    -0.05  -0.13  -0.23     0.00  -0.04  -0.05
 108   1     0.05  -0.02   0.11     0.09  -0.06   0.18     0.01  -0.04   0.04
 109   1     0.01  -0.03   0.03     0.00  -0.01   0.01     0.01  -0.01   0.02
 110   1    -0.01  -0.01   0.00     0.00   0.00   0.00     0.02  -0.01   0.00
 111   1     0.02   0.01   0.05     0.00  -0.01   0.00    -0.01   0.02   0.02
 112   1    -0.07  -0.01  -0.01     0.00   0.00   0.00    -0.04  -0.01   0.01
 113   1     0.03  -0.03  -0.05     0.00   0.00  -0.01    -0.01  -0.02   0.00
 114   1     0.01   0.04   0.02    -0.04  -0.06   0.02    -0.01  -0.01  -0.04
 115   1    -0.06  -0.13   0.02    -0.03  -0.05  -0.01    -0.01  -0.01  -0.01
 116   1    -0.04   0.05   0.00    -0.06   0.04   0.00     0.02  -0.02  -0.03
 117   1    -0.11   0.07  -0.03     0.03   0.00  -0.06     0.04  -0.03  -0.01
 118   1    -0.05   0.13   0.01    -0.04  -0.05   0.01     0.02  -0.05  -0.04
 119   1    -0.06  -0.08   0.23    -0.05  -0.04   0.07     0.00   0.00   0.02
 120   1    -0.05  -0.03   0.18    -0.04   0.00   0.02     0.00   0.00   0.02
 121   1    -0.01   0.08   0.18    -0.05   0.04   0.04     0.02   0.01   0.01
 122   1    -0.01  -0.02   0.01     0.00  -0.02   0.01     0.00  -0.02   0.01
 123   1    -0.04  -0.06   0.00    -0.01  -0.03   0.00    -0.01  -0.03   0.01
 124   1    -0.04  -0.02  -0.03    -0.01  -0.02  -0.01    -0.01  -0.02  -0.01
 125   1     0.01   0.00   0.00     0.00   0.00   0.00     0.04   0.00   0.00
 126   1     0.01   0.01   0.01     0.00   0.00   0.01     0.02   0.01  -0.01
 127   1     0.02   0.01   0.00     0.00   0.00   0.00     0.01  -0.01   0.01
                    25                     26                     27
                     A                      A                      A
 Frequencies --   101.6097               107.6438               111.9198
 Red. masses --     3.5798                 2.1581                 3.1027
 Frc consts  --     0.0218                 0.0147                 0.0229
 IR Inten    --     0.1515                 0.5383                 0.4253
 Atom AN      X      Y      Z        X      Y      Z        X      Y      Z
   1   6    -0.03   0.04  -0.04    -0.02   0.03  -0.01     0.01  -0.01  -0.02
   2   6    -0.05   0.08  -0.05    -0.04   0.06  -0.03     0.01   0.00  -0.02
   3   6    -0.03   0.04  -0.03    -0.02   0.02  -0.01     0.03  -0.01  -0.03
   4   6     0.03  -0.05   0.01     0.00   0.01  -0.04    -0.05   0.03   0.03
   5   6     0.04  -0.05  -0.02     0.00   0.05  -0.01    -0.10  -0.08   0.12
   6   6     0.04  -0.06   0.01    -0.04   0.07  -0.04     0.00  -0.07   0.05
   7   8     0.03  -0.07   0.04    -0.05   0.04  -0.06     0.04   0.01   0.03
   8   6     0.03  -0.05   0.03    -0.04   0.00  -0.05     0.04   0.05   0.02
   9   6     0.01  -0.03  -0.04     0.02  -0.01   0.01     0.01   0.00   0.00
  10   6    -0.01   0.00   0.00     0.00  -0.02   0.01     0.04   0.01  -0.02
  11   6     0.00  -0.05  -0.09     0.01  -0.01   0.01     0.00   0.00   0.02
  12   6    -0.01  -0.04  -0.10     0.01   0.00   0.01     0.00   0.01   0.05
  13   6     0.00  -0.02  -0.04     0.01   0.01   0.00     0.00   0.01   0.04
  14   6     0.00  -0.01  -0.01     0.02   0.01   0.00     0.01   0.00   0.02
  15   6     0.01  -0.02  -0.02     0.03   0.00   0.00     0.01   0.00   0.01
  16   6     0.00  -0.04  -0.07     0.01  -0.01   0.01    -0.01  -0.03   0.01
  17   6     0.02  -0.02  -0.03     0.05   0.00  -0.01    -0.01   0.00   0.02
  18   6     0.00   0.00  -0.01     0.00  -0.02   0.00     0.03   0.01  -0.02
  19   6     0.00   0.00  -0.01     0.02  -0.02  -0.01    -0.02   0.01   0.01
  20   6    -0.02   0.00   0.00     0.03  -0.01  -0.02    -0.05   0.02   0.03
  21   6    -0.02   0.00   0.01     0.02  -0.01   0.00    -0.03   0.02   0.02
  22   6    -0.02   0.00   0.01     0.01  -0.01   0.01     0.01   0.02   0.00
  23   6     0.02   0.00  -0.02    -0.03  -0.03   0.02     0.06   0.02  -0.03
  24   6    -0.02   0.00   0.03     0.01  -0.01   0.01     0.01   0.02   0.02
  25   6    -0.03   0.03  -0.05     0.02  -0.02   0.01     0.01  -0.03   0.00
  26   6     0.03  -0.07  -0.03     0.01   0.00   0.00    -0.06  -0.04   0.02
  27   6     0.03   0.00  -0.04     0.15   0.06   0.03     0.07   0.01   0.08
  28   6     0.01  -0.03  -0.03    -0.03   0.01   0.03    -0.12   0.00   0.07
  29   6    -0.04   0.01   0.03     0.02  -0.01   0.01     0.03   0.05   0.03
  30   6    -0.01   0.02   0.05     0.02   0.00   0.01     0.00   0.01   0.01
  31   6     0.02   0.01  -0.03    -0.02  -0.03   0.04     0.05  -0.01  -0.04
  32   6     0.03   0.00   0.00    -0.05  -0.04  -0.01     0.08   0.03   0.00
  33   6    -0.01   0.04  -0.05    -0.01   0.01   0.00     0.02  -0.04   0.00
  34   6    -0.04   0.06  -0.04    -0.02   0.03  -0.01     0.03  -0.02  -0.04
  35   8    -0.01   0.01   0.00    -0.01   0.01   0.00    -0.01   0.01   0.00
  36  12     0.02  -0.06   0.00    -0.01   0.00   0.01     0.03   0.02  -0.04
  37   8     0.00   0.02   0.01     0.00   0.00  -0.02    -0.03  -0.02   0.01
  38   6    -0.01   0.00   0.00    -0.01   0.00   0.00    -0.01   0.00   0.00
  39   7     0.00  -0.01   0.00     0.00  -0.02   0.01     0.04   0.01  -0.03
  40   7     0.01  -0.03  -0.02     0.02  -0.01   0.01     0.01   0.00  -0.02
  41   8     0.00   0.00  -0.01     0.00  -0.01   0.00    -0.01   0.00   0.00
  42   8    -0.01   0.00   0.00    -0.02   0.00   0.00    -0.02   0.00   0.00
  43   6    -0.01   0.00   0.00    -0.01   0.00   0.00    -0.01   0.00   0.00
  44   6    -0.01   0.02   0.00     0.00   0.00  -0.01    -0.01  -0.01   0.00
  45   6    -0.01   0.00   0.00    -0.02   0.00   0.00    -0.01   0.00   0.00
  46   8    -0.02  -0.01  -0.01     0.00   0.01   0.01     0.00   0.02   0.00
  47   6     0.01   0.01   0.00     0.01   0.00  -0.01     0.01   0.00  -0.01
  48   8     0.01   0.03   0.07    -0.01   0.00   0.02    -0.01  -0.02  -0.07
  49   6    -0.01   0.01   0.06     0.00   0.00  -0.02    -0.02  -0.03   0.00
  50   8    -0.04   0.00   0.10     0.00   0.00  -0.02    -0.02  -0.03   0.00
  51   8     0.01   0.04   0.08    -0.01  -0.01   0.01    -0.01  -0.01  -0.06
  52   6     0.01   0.01   0.05     0.00  -0.01   0.02    -0.02   0.00  -0.07
  53   6     0.01   0.06   0.09     0.00  -0.02   0.01    -0.02   0.01  -0.06
  54   6     0.01   0.02   0.05     0.00   0.00  -0.01    -0.03  -0.02  -0.02
  55   8     0.02  -0.06  -0.01     0.00   0.00   0.02    -0.02   0.01  -0.05
  56   6    -0.04   0.17   0.08     0.01  -0.08   0.02    -0.04   0.07  -0.07
  57   6     0.03   0.01   0.04    -0.02   0.00  -0.03    -0.01  -0.02   0.02
  58   6    -0.01   0.03   0.00     0.01  -0.01   0.00    -0.01   0.03   0.00
  59   6    -0.02   0.00   0.00    -0.01   0.00   0.00     0.00   0.01   0.00
  60   1    -0.07   0.12  -0.07    -0.06   0.09  -0.04     0.00  -0.01  -0.03
  61   1     0.04  -0.05   0.03     0.01  -0.01  -0.05    -0.12   0.07  -0.03
  62   1     0.00  -0.04   0.01     0.03   0.01  -0.03     0.00   0.04   0.02
  63   1     0.03  -0.02  -0.05     0.01   0.05   0.01    -0.08  -0.20   0.18
  64   1     0.07  -0.07  -0.04    -0.01   0.08   0.01    -0.23  -0.02   0.17
  65   1     0.03  -0.04   0.02    -0.05   0.07  -0.05     0.04  -0.14   0.02
  66   1     0.05  -0.08   0.00    -0.04   0.11  -0.04     0.01  -0.05   0.05
  67   1     0.03  -0.05   0.04    -0.05  -0.03  -0.05     0.05   0.11   0.00
  68   1     0.02  -0.04   0.04    -0.06   0.00  -0.06     0.09   0.03   0.02
  69   1    -0.01  -0.05  -0.13     0.00   0.00   0.01     0.00   0.02   0.07
  70   1    -0.01  -0.01  -0.03     0.01   0.02   0.00     0.00   0.02   0.06
  71   1     0.00   0.01   0.02     0.02   0.02   0.00     0.01   0.01   0.02
  72   1    -0.01  -0.04  -0.09     0.01  -0.01   0.02     0.00  -0.05  -0.02
  73   1     0.02  -0.03  -0.04     0.07  -0.04  -0.08    -0.01  -0.01  -0.05
  74   1     0.00   0.00  -0.01     0.02  -0.02  -0.02    -0.03   0.01   0.01
  75   1    -0.02   0.01   0.00     0.04  -0.01  -0.03    -0.09   0.02   0.06
  76   1    -0.03   0.00   0.02     0.02   0.00   0.00    -0.05   0.02   0.04
  77   1     0.02   0.01  -0.02    -0.04  -0.04   0.03     0.08   0.02  -0.05
  78   1    -0.01   0.00   0.02     0.02  -0.02   0.01     0.00   0.01   0.04
  79   1     0.01   0.09   0.00     0.01  -0.03   0.00     0.00  -0.04  -0.01
  80   1    -0.12   0.06  -0.06     0.03  -0.03   0.01     0.03  -0.03  -0.01
  81   1    -0.01  -0.01  -0.06     0.01  -0.02   0.01     0.01  -0.01   0.01
  82   1     0.03  -0.07   0.02     0.01   0.00   0.00    -0.07  -0.07   0.00
  83   1     0.02  -0.05  -0.02     0.01  -0.01   0.00    -0.06  -0.02   0.06
  84   1     0.05  -0.10  -0.04     0.00   0.00   0.01    -0.09  -0.05   0.03
  85   1     0.05   0.00  -0.04     0.25   0.08   0.05     0.11   0.03   0.11
  86   1     0.02   0.02  -0.04     0.11   0.16   0.03     0.06   0.06   0.11
  87   1     0.03  -0.01  -0.04     0.17  -0.01   0.02     0.11  -0.04   0.06
  88   1     0.02  -0.03  -0.04    -0.01   0.01   0.02    -0.15   0.00   0.09
  89   1     0.01  -0.04  -0.03    -0.10  -0.03   0.00    -0.17   0.01   0.02
  90   1     0.01  -0.02  -0.02    -0.05   0.06   0.10    -0.11   0.00   0.15
  91   1    -0.03   0.01   0.04     0.03  -0.01   0.02     0.00   0.05   0.04
  92   1    -0.05   0.02   0.04     0.01   0.00   0.02     0.06   0.03   0.00
  93   1    -0.05   0.00   0.01     0.01  -0.02   0.01     0.05   0.09   0.05
  94   1    -0.01   0.01   0.04     0.02   0.00   0.01     0.01   0.01   0.03
  95   1     0.01   0.03   0.05     0.02   0.01   0.01    -0.02  -0.03   0.00
  96   1    -0.02   0.01   0.07     0.01   0.00   0.02     0.01   0.02  -0.03
  97   1     0.02   0.01  -0.03    -0.03  -0.02   0.04     0.05  -0.02  -0.04
  98   1     0.01   0.02  -0.03    -0.02  -0.03   0.04     0.06  -0.02  -0.04
  99   1     0.02   0.01  -0.03    -0.01  -0.03   0.04     0.03  -0.01  -0.04
 100   1     0.05   0.00  -0.01    -0.07  -0.06  -0.01     0.10   0.06   0.00
 101   1     0.03   0.00   0.00    -0.05  -0.03  -0.03     0.08   0.02   0.03
 102   1     0.04   0.01   0.01    -0.05  -0.04  -0.02     0.08   0.03   0.01
 103   1     0.32   0.01  -0.16     0.42  -0.02  -0.11     0.28  -0.05  -0.06
 104   1    -0.19   0.29  -0.13    -0.25   0.32  -0.11    -0.11   0.14  -0.07
 105   1    -0.13  -0.22   0.14    -0.16  -0.33   0.25    -0.07  -0.24   0.14
 106   1    -0.05   0.08  -0.04    -0.03   0.05  -0.01     0.04  -0.02  -0.05
 107   1    -0.05   0.03  -0.06    -0.03   0.01  -0.02     0.04  -0.03  -0.05
 108   1    -0.02   0.05  -0.01    -0.01   0.02   0.01     0.03  -0.03  -0.04
 109   1    -0.02   0.03  -0.01     0.00   0.00  -0.01     0.00  -0.02  -0.02
 110   1    -0.01   0.01   0.00    -0.02   0.00   0.00    -0.01   0.00  -0.01
 111   1     0.00   0.00  -0.01     0.01  -0.02  -0.03     0.00  -0.02  -0.03
 112   1     0.03   0.01   0.00     0.04   0.01  -0.01     0.03   0.01  -0.02
 113   1     0.00   0.02   0.01     0.00   0.01   0.01     0.00   0.01   0.00
 114   1     0.04   0.06   0.17     0.00  -0.02  -0.03    -0.01   0.00  -0.02
 115   1     0.03   0.02   0.05     0.01   0.00  -0.01    -0.06  -0.03  -0.02
 116   1    -0.01   0.15   0.10     0.00  -0.08   0.00    -0.03   0.08  -0.05
 117   1    -0.12   0.16   0.01     0.04  -0.08   0.05    -0.07   0.07  -0.12
 118   1    -0.03   0.26   0.11     0.00  -0.12   0.01    -0.03   0.12  -0.05
 119   1     0.03   0.02   0.02    -0.01   0.00  -0.02    -0.01  -0.03   0.03
 120   1     0.02   0.01   0.05    -0.01   0.01  -0.05    -0.02  -0.04   0.04
 121   1     0.04  -0.01   0.04    -0.04   0.00  -0.03     0.02   0.00   0.03
 122   1    -0.02   0.03  -0.02     0.01  -0.02   0.01     0.02   0.05   0.00
 123   1    -0.01   0.05   0.00     0.02  -0.01  -0.01     0.00   0.02   0.00
 124   1     0.00   0.02   0.01     0.02  -0.02   0.00    -0.03   0.05   0.02
 125   1    -0.03   0.00   0.00    -0.02   0.00   0.00    -0.01   0.01  -0.01
 126   1    -0.02  -0.01   0.00    -0.01  -0.01   0.02     0.00   0.01   0.01
 127   1    -0.02   0.00   0.00     0.00   0.01   0.00     0.01   0.02  -0.01
                    28                     29                     30
                     A                      A                      A
 Frequencies --   114.9185               118.0769               119.0601
 Red. masses --     3.5631                 2.3805                 2.9534
 Frc consts  --     0.0277                 0.0196                 0.0247
 IR Inten    --     0.4613                 0.0897                 0.2131
 Atom AN      X      Y      Z        X      Y      Z        X      Y      Z
   1   6    -0.04   0.02   0.02    -0.01   0.03  -0.02     0.01  -0.02   0.01
   2   6    -0.06   0.03  -0.03    -0.04   0.06  -0.02     0.03  -0.04   0.01
   3   6    -0.02   0.01  -0.04    -0.02   0.04  -0.01     0.02  -0.03   0.01
   4   6    -0.03   0.02   0.05     0.03  -0.03  -0.02    -0.02   0.01   0.01
   5   6    -0.05   0.00   0.09     0.00   0.00   0.05     0.01   0.00  -0.05
   6   6     0.00   0.02   0.00    -0.03   0.01   0.02     0.03  -0.01  -0.03
   7   8     0.02   0.07  -0.02    -0.04   0.00  -0.03     0.03   0.00   0.01
   8   6     0.01   0.04   0.00    -0.01  -0.03  -0.04     0.01   0.01   0.02
   9   6     0.02  -0.01   0.06     0.01  -0.02   0.00     0.00   0.01   0.01
  10   6     0.03  -0.02  -0.02     0.01   0.00   0.02    -0.01   0.00  -0.01
  11   6     0.01  -0.02   0.04     0.00  -0.01   0.02     0.00   0.01   0.00
  12   6     0.01  -0.01   0.05     0.00   0.00   0.04     0.01   0.01   0.02
  13   6     0.01   0.00   0.05     0.00  -0.01   0.02     0.01   0.01   0.03
  14   6     0.02   0.00   0.04     0.00  -0.02  -0.01     0.00   0.00   0.01
  15   6     0.03  -0.01   0.05     0.01  -0.02  -0.01     0.00   0.01   0.01
  16   6     0.00  -0.04  -0.06    -0.01  -0.03   0.03     0.00   0.01  -0.03
  17   6     0.06  -0.02   0.01     0.01  -0.01   0.02    -0.01   0.01   0.01
  18   6     0.02  -0.02  -0.03     0.03   0.00   0.00    -0.03   0.00   0.00
  19   6    -0.01  -0.01  -0.02     0.05   0.00  -0.01    -0.04   0.00   0.01
  20   6    -0.03  -0.01   0.00     0.04   0.01  -0.01    -0.03   0.00   0.01
  21   6    -0.02  -0.01   0.00     0.02   0.01   0.01    -0.01   0.00  -0.01
  22   6     0.01  -0.01  -0.01     0.00   0.00   0.03     0.00   0.00  -0.02
  23   6     0.02  -0.02  -0.03     0.03  -0.01   0.00    -0.03   0.01   0.01
  24   6     0.00  -0.01   0.01    -0.01   0.00   0.04     0.01   0.00  -0.02
  25   6     0.09  -0.08  -0.10    -0.01  -0.03   0.03     0.03  -0.01  -0.04
  26   6    -0.08  -0.01  -0.11    -0.03  -0.04   0.04    -0.02   0.02  -0.05
  27   6    -0.01   0.01  -0.07    -0.02  -0.05   0.02     0.00   0.01   0.01
  28   6     0.16  -0.05  -0.04     0.04   0.03   0.00    -0.02   0.00   0.01
  29   6    -0.01   0.01   0.01    -0.02   0.00   0.04     0.03   0.00  -0.02
  30   6     0.01  -0.02   0.02     0.00   0.02   0.04     0.01  -0.01  -0.03
  31   6     0.02  -0.02  -0.02     0.00  -0.08   0.01    -0.01   0.06   0.00
  32   6     0.02  -0.01  -0.03     0.00   0.01   0.01     0.00  -0.02   0.00
  33   6    -0.12   0.07   0.02    -0.02   0.05  -0.03     0.01  -0.03   0.02
  34   6    -0.03   0.00  -0.07    -0.03   0.04  -0.04     0.02  -0.02   0.03
  35   8     0.00   0.00   0.00     0.01  -0.01   0.01     0.01  -0.02   0.01
  36  12     0.03   0.03   0.04    -0.01   0.00  -0.03     0.01   0.00   0.02
  37   8    -0.02  -0.03   0.01     0.05   0.08  -0.06     0.08   0.12  -0.09
  38   6     0.00   0.00   0.00     0.01  -0.02   0.00     0.01  -0.03   0.00
  39   7     0.03  -0.02  -0.02     0.01   0.00   0.01    -0.01  -0.01  -0.01
  40   7     0.02  -0.02   0.06     0.00  -0.02  -0.01     0.00   0.01   0.01
  41   8     0.00   0.01   0.00     0.01  -0.02   0.00     0.02  -0.03   0.00
  42   8     0.00   0.00   0.00     0.00   0.00   0.01     0.00   0.00   0.02
  43   6     0.01   0.00   0.00    -0.01   0.00   0.01    -0.01   0.00   0.01
  44   6     0.00  -0.02   0.00     0.01   0.03   0.00     0.02   0.04  -0.01
  45   6     0.00   0.00   0.00     0.01  -0.02   0.00     0.01  -0.02   0.00
  46   8     0.02   0.01   0.00    -0.03  -0.04   0.01    -0.05  -0.05   0.02
  47   6     0.00   0.00  -0.01     0.01  -0.01   0.02     0.01  -0.01   0.03
  48   8    -0.01   0.08   0.09    -0.01   0.00  -0.03    -0.02   0.01   0.04
  49   6    -0.01  -0.02  -0.02     0.03   0.04   0.00     0.05   0.06  -0.01
  50   8     0.00  -0.01  -0.05     0.02   0.00   0.06     0.04   0.00   0.07
  51   8     0.00  -0.02  -0.02     0.00  -0.01  -0.04    -0.02  -0.04  -0.06
  52   6    -0.01   0.02   0.01     0.00   0.00  -0.04    -0.02  -0.02  -0.03
  53   6    -0.02   0.03   0.03    -0.01   0.00  -0.03    -0.03   0.00   0.01
  54   6    -0.01  -0.02  -0.01     0.00   0.03  -0.02    -0.02   0.03  -0.03
  55   8    -0.01   0.04   0.03    -0.01   0.00  -0.04    -0.01   0.00   0.00
  56   6    -0.09  -0.02   0.05    -0.03   0.02  -0.04    -0.12   0.03   0.01
  57   6     0.00  -0.03  -0.01    -0.04   0.06   0.01    -0.11   0.10   0.02
  58   6     0.00   0.01   0.00     0.02  -0.06  -0.01     0.04  -0.11  -0.02
  59   6    -0.01   0.01   0.00     0.04  -0.02   0.01     0.06  -0.03   0.02
  60   1    -0.10   0.05  -0.05    -0.05   0.10  -0.03     0.03  -0.06   0.02
  61   1    -0.06   0.06   0.04     0.01  -0.03  -0.05     0.00   0.02   0.05
  62   1    -0.01   0.00   0.06     0.08  -0.03  -0.02    -0.07   0.00   0.02
  63   1    -0.05  -0.10   0.13     0.03  -0.02   0.09    -0.02   0.03  -0.09
  64   1    -0.12   0.05   0.15    -0.04   0.02   0.07     0.05  -0.02  -0.07
  65   1     0.01  -0.04  -0.04    -0.02   0.00   0.03     0.02   0.00  -0.02
  66   1     0.01   0.07   0.00    -0.06   0.04   0.03     0.04  -0.03  -0.03
  67   1     0.01   0.07  -0.01    -0.02  -0.05  -0.06     0.01   0.03   0.03
  68   1     0.02  -0.01  -0.03    -0.01  -0.03  -0.04     0.01   0.00   0.01
  69   1     0.00  -0.02   0.04    -0.01   0.00   0.07     0.01   0.01   0.02
  70   1     0.01   0.00   0.04     0.00   0.00   0.03     0.01   0.01   0.04
  71   1     0.02   0.00   0.02     0.00  -0.02  -0.02     0.00   0.00   0.01
  72   1    -0.02  -0.03  -0.08     0.00  -0.04   0.02     0.00   0.01  -0.03
  73   1     0.06  -0.02   0.07     0.00   0.00   0.05    -0.01   0.00   0.00
  74   1    -0.02  -0.02  -0.01     0.06   0.00  -0.03    -0.06   0.00   0.03
  75   1    -0.05  -0.01   0.01     0.06   0.01  -0.02    -0.05  -0.01   0.02
  76   1    -0.03   0.00   0.01     0.01   0.01   0.02     0.00   0.00  -0.01
  77   1     0.02  -0.01  -0.03     0.06  -0.01  -0.01    -0.06   0.01   0.02
  78   1     0.01  -0.01   0.01     0.00   0.01   0.03     0.01   0.00  -0.01
  79   1     0.13   0.00  -0.18    -0.02  -0.05   0.03     0.05   0.03  -0.07
  80   1     0.04  -0.09  -0.05     0.02  -0.03   0.02     0.00  -0.01  -0.02
  81   1     0.16  -0.16  -0.10    -0.02   0.00   0.04     0.06  -0.04  -0.05
  82   1    -0.09  -0.02  -0.20    -0.04  -0.06   0.05    -0.02   0.02  -0.08
  83   1    -0.06  -0.02  -0.09    -0.05  -0.02   0.04     0.00   0.01  -0.04
  84   1    -0.15   0.04  -0.07    -0.02  -0.03   0.03    -0.05   0.03  -0.03
  85   1     0.00   0.00  -0.12    -0.05  -0.05   0.03    -0.02   0.00   0.00
  86   1    -0.01   0.00  -0.12    -0.01  -0.08   0.01     0.01   0.00   0.03
  87   1    -0.07   0.06  -0.05    -0.03  -0.05   0.02     0.02   0.03   0.00
  88   1     0.22  -0.06  -0.09     0.04   0.04   0.03    -0.03  -0.01   0.01
  89   1     0.19  -0.09   0.02     0.06   0.06   0.00    -0.02   0.00   0.01
  90   1     0.14  -0.01  -0.09     0.04   0.01  -0.04    -0.01  -0.02   0.02
  91   1    -0.01   0.01   0.03    -0.01   0.01   0.04     0.03   0.00  -0.02
  92   1    -0.01   0.01   0.01    -0.03   0.01   0.04     0.04   0.00  -0.03
  93   1    -0.01   0.02   0.00    -0.03  -0.01   0.02     0.03   0.00  -0.01
  94   1     0.00  -0.02   0.03    -0.02   0.00  -0.01     0.02   0.00   0.01
  95   1     0.01  -0.02   0.02     0.01   0.08   0.04    -0.01  -0.06  -0.04
  96   1     0.01  -0.02   0.02     0.00  -0.01   0.08     0.00   0.02  -0.07
  97   1     0.01  -0.02  -0.02    -0.01  -0.09   0.01     0.01   0.08   0.00
  98   1     0.03  -0.02  -0.01     0.04  -0.11   0.00    -0.04   0.09   0.00
  99   1     0.02  -0.02  -0.02    -0.03  -0.08   0.02     0.03   0.06  -0.01
 100   1     0.02  -0.02  -0.03    -0.02   0.03   0.02     0.01  -0.03  -0.01
 101   1     0.01  -0.01  -0.03     0.00   0.01   0.02     0.00  -0.01  -0.02
 102   1     0.02   0.00  -0.02     0.00   0.03  -0.02     0.00  -0.03   0.02
 103   1    -0.27   0.07   0.03    -0.19   0.06   0.00     0.15  -0.04  -0.01
 104   1    -0.07  -0.02   0.03     0.07  -0.06   0.01    -0.06   0.06  -0.01
 105   1    -0.07   0.21  -0.02     0.04   0.19  -0.12    -0.03  -0.14   0.09
 106   1     0.03  -0.09  -0.08    -0.18   0.39  -0.06     0.14  -0.31   0.05
 107   1    -0.03   0.06   0.01    -0.06  -0.22  -0.37     0.04   0.19   0.30
 108   1    -0.09   0.03  -0.15     0.15  -0.11   0.29    -0.13   0.10  -0.23
 109   1     0.02  -0.03  -0.01    -0.03   0.06   0.02    -0.05   0.10   0.04
 110   1     0.00   0.01   0.01     0.01  -0.02  -0.01     0.01  -0.03  -0.02
 111   1     0.00   0.00   0.00    -0.01  -0.01  -0.01    -0.02  -0.01  -0.02
 112   1    -0.02   0.00  -0.01     0.05  -0.02   0.03     0.08  -0.03   0.05
 113   1     0.00  -0.01  -0.02    -0.02   0.01   0.06    -0.03   0.02   0.09
 114   1     0.02   0.03  -0.01     0.00   0.00  -0.02    -0.01   0.00   0.03
 115   1    -0.01  -0.02  -0.01    -0.02   0.02  -0.02    -0.04   0.01  -0.03
 116   1    -0.09  -0.07   0.00    -0.02   0.01  -0.04    -0.12   0.00  -0.02
 117   1    -0.14  -0.03   0.08    -0.06   0.02  -0.05    -0.18   0.02  -0.02
 118   1    -0.09   0.02   0.08    -0.03   0.05  -0.03    -0.12   0.08   0.06
 119   1     0.01  -0.02  -0.01    -0.07   0.04   0.02    -0.15   0.04   0.06
 120   1     0.00  -0.04  -0.02    -0.04   0.09   0.01    -0.09   0.15   0.00
 121   1     0.00  -0.02  -0.01    -0.05   0.08   0.01    -0.13   0.14   0.03
 122   1     0.03   0.03   0.00    -0.04  -0.11   0.02    -0.06  -0.19   0.04
 123   1     0.00   0.00   0.00     0.03  -0.03  -0.01     0.05  -0.07  -0.02
 124   1    -0.02   0.03   0.02     0.09  -0.11  -0.04     0.14  -0.18  -0.07
 125   1    -0.01   0.01   0.00     0.05  -0.02   0.01     0.07  -0.03   0.03
 126   1    -0.01   0.00  -0.01     0.04  -0.01   0.02     0.06  -0.02   0.04
 127   1    -0.01   0.01   0.00     0.04  -0.03   0.00     0.07  -0.05   0.00
                    31                     32                     33
                     A                      A                      A
 Frequencies --   121.7222               121.9968               125.9251
 Red. masses --     1.6565                 1.9699                 3.0266
 Frc consts  --     0.0145                 0.0173                 0.0283
 IR Inten    --     0.6883                 0.6738                 1.9963
 Atom AN      X      Y      Z        X      Y      Z        X      Y      Z
   1   6    -0.01   0.01  -0.02    -0.02   0.02  -0.03     0.03  -0.01   0.01
   2   6    -0.02   0.02  -0.02    -0.03   0.04  -0.03     0.03  -0.01   0.02
   3   6    -0.01   0.01  -0.01    -0.01   0.01  -0.02     0.02   0.01   0.01
   4   6     0.01   0.01   0.01     0.02   0.01   0.01     0.03  -0.05  -0.01
   5   6     0.03   0.03  -0.03     0.05   0.05  -0.05     0.08  -0.01  -0.11
   6   6     0.01   0.02   0.00     0.01   0.03   0.00     0.06  -0.01  -0.07
   7   8     0.00   0.00   0.01    -0.01   0.00   0.01     0.05  -0.03  -0.05
   8   6     0.00   0.00   0.01    -0.01   0.00   0.01     0.02  -0.05  -0.02
   9   6     0.00  -0.01  -0.01     0.01  -0.02  -0.01     0.01   0.02   0.02
  10   6     0.01  -0.02   0.00     0.01  -0.02   0.01    -0.01   0.01   0.02
  11   6     0.00  -0.01   0.01     0.00  -0.01   0.02     0.01   0.03   0.04
  12   6     0.00   0.00   0.02     0.00   0.00   0.04     0.01   0.04   0.10
  13   6     0.00   0.00   0.00     0.00   0.00   0.02     0.01   0.03   0.09
  14   6     0.00  -0.01  -0.01     0.01  -0.01  -0.01     0.01   0.02   0.06
  15   6     0.00  -0.01  -0.01     0.01  -0.01  -0.01     0.00   0.02   0.04
  16   6     0.00  -0.01   0.02     0.00  -0.02   0.03    -0.01  -0.01  -0.02
  17   6     0.00  -0.01   0.00     0.01  -0.01   0.01    -0.02   0.01   0.02
  18   6    -0.01  -0.02   0.01    -0.01  -0.02   0.02    -0.03   0.01   0.04
  19   6    -0.02  -0.01   0.01    -0.03  -0.02   0.02    -0.02   0.00   0.03
  20   6    -0.02  -0.01   0.01    -0.03  -0.01   0.02     0.01   0.00   0.01
  21   6    -0.01   0.00   0.01    -0.01   0.00   0.02     0.02   0.00   0.00
  22   6     0.01  -0.01   0.01     0.01  -0.01   0.01     0.00   0.00   0.01
  23   6    -0.02  -0.01   0.02    -0.03  -0.02   0.03    -0.06  -0.01   0.05
  24   6     0.02   0.00   0.02     0.03   0.00   0.03    -0.02  -0.01   0.00
  25   6     0.00   0.00   0.02     0.00  -0.01   0.03     0.06  -0.04  -0.06
  26   6    -0.01  -0.02   0.03    -0.02  -0.03   0.04    -0.11   0.00  -0.04
  27   6    -0.02  -0.03   0.00     0.00  -0.03   0.02    -0.02   0.01   0.02
  28   6     0.03   0.02  -0.01     0.02   0.03   0.00    -0.04  -0.03   0.03
  29   6     0.05   0.02   0.03     0.07   0.03   0.04    -0.06  -0.01   0.00
  30   6     0.02   0.00   0.01     0.03   0.00   0.02    -0.02  -0.03   0.02
  31   6     0.00   0.03   0.02     0.00   0.04   0.04    -0.06   0.00   0.06
  32   6    -0.01  -0.03   0.00    -0.02  -0.05   0.00    -0.08  -0.01   0.02
  33   6    -0.03   0.03  -0.03    -0.03   0.04  -0.04     0.06  -0.03   0.01
  34   6    -0.01   0.02  -0.01    -0.02   0.03  -0.01     0.01   0.02   0.00
  35   8    -0.03   0.00   0.03     0.02   0.00  -0.02     0.00   0.00   0.00
  36  12     0.00  -0.01  -0.02     0.00  -0.01  -0.03     0.01   0.00  -0.01
  37   8    -0.01  -0.01   0.00    -0.02  -0.01   0.02    -0.02  -0.04   0.02
  38   6    -0.03   0.00   0.04     0.02   0.00  -0.03    -0.01   0.01   0.00
  39   7     0.01  -0.02   0.00     0.02  -0.02   0.00     0.01   0.01   0.01
  40   7     0.00  -0.01  -0.01     0.01  -0.02  -0.02     0.01   0.01  -0.01
  41   8    -0.04   0.00   0.05     0.03   0.00  -0.04    -0.01   0.01   0.01
  42   8    -0.03  -0.03   0.00     0.02   0.02   0.00     0.00  -0.01  -0.01
  43   6     0.00   0.00   0.00     0.00   0.00   0.00     0.01  -0.01  -0.01
  44   6     0.00   0.00   0.00    -0.01   0.00   0.01     0.00  -0.02   0.00
  45   6    -0.01  -0.01   0.00     0.01   0.01   0.00     0.00   0.00   0.00
  46   8     0.01   0.03   0.00    -0.01  -0.02   0.00     0.02   0.01  -0.01
  47   6     0.05  -0.03  -0.07    -0.04   0.02   0.05     0.00   0.00  -0.02
  48   8     0.00  -0.01  -0.03     0.00  -0.02  -0.04     0.01   0.02  -0.01
  49   6    -0.01  -0.01   0.00    -0.01  -0.01   0.01    -0.01  -0.02  -0.01
  50   8    -0.01  -0.01   0.01    -0.01  -0.02   0.01     0.00  -0.02  -0.02
  51   8     0.00   0.01  -0.01     0.00   0.01  -0.03     0.01   0.00  -0.03
  52   6     0.00   0.00  -0.02     0.00   0.00  -0.04     0.01   0.01  -0.02
  53   6     0.00   0.00  -0.02     0.00   0.00  -0.03     0.00   0.04   0.00
  54   6     0.00  -0.01   0.00    -0.01   0.00  -0.01     0.01   0.00  -0.03
  55   8     0.00   0.00  -0.02     0.00   0.00  -0.04     0.01   0.01  -0.02
  56   6     0.01   0.02  -0.03     0.00   0.04  -0.04    -0.04   0.12  -0.01
  57   6     0.01  -0.01   0.02     0.01  -0.01   0.01     0.04  -0.03  -0.10
  58   6     0.00   0.02   0.00    -0.01   0.02   0.01     0.00   0.02   0.00
  59   6     0.05   0.05  -0.03    -0.05  -0.03   0.02    -0.01   0.01  -0.01
  60   1    -0.03   0.04  -0.03    -0.04   0.06  -0.04     0.04  -0.01   0.02
  61   1     0.03   0.00   0.03     0.05   0.00   0.05     0.08  -0.04   0.06
  62   1    -0.02   0.00   0.01    -0.02  -0.01   0.02    -0.04  -0.08   0.00
  63   1     0.02   0.07  -0.06     0.03   0.12  -0.10     0.04   0.06  -0.17
  64   1     0.07   0.01  -0.05     0.12   0.01  -0.09     0.17  -0.04  -0.14
  65   1     0.00   0.04   0.01     0.00   0.07   0.03     0.05   0.01  -0.06
  66   1     0.00   0.01   0.00     0.00   0.01   0.00     0.06  -0.04  -0.07
  67   1    -0.01  -0.01   0.01    -0.01  -0.02   0.01     0.02  -0.06   0.00
  68   1    -0.01   0.01   0.01    -0.02   0.01   0.01     0.00  -0.06  -0.04
  69   1     0.00   0.00   0.03     0.00   0.01   0.07     0.01   0.05   0.12
  70   1     0.00   0.00   0.01     0.00   0.00   0.03     0.01   0.03   0.11
  71   1     0.00  -0.01  -0.02     0.01  -0.01  -0.01     0.00   0.02   0.07
  72   1     0.00  -0.01   0.01     0.00  -0.03   0.01    -0.01  -0.02  -0.05
  73   1     0.00   0.00   0.02     0.01   0.00   0.03    -0.03   0.02   0.00
  74   1    -0.03  -0.01   0.01    -0.04  -0.02   0.02    -0.03   0.00   0.05
  75   1    -0.03   0.00   0.01    -0.04   0.00   0.02     0.02   0.00   0.01
  76   1    -0.01   0.00   0.01    -0.02   0.00   0.02     0.03  -0.01  -0.01
  77   1    -0.04  -0.01   0.02    -0.07  -0.02   0.04    -0.07  -0.01   0.06
  78   1     0.02  -0.01   0.04     0.03  -0.02   0.06    -0.02   0.01  -0.01
  79   1    -0.01  -0.02   0.03    -0.01  -0.03   0.03     0.08   0.00  -0.12
  80   1     0.01   0.00   0.01     0.02  -0.01   0.02     0.04  -0.05  -0.03
  81   1    -0.01   0.01   0.03    -0.01   0.00   0.03     0.10  -0.08  -0.05
  82   1    -0.01  -0.03   0.04    -0.02  -0.05   0.05    -0.13  -0.02  -0.13
  83   1    -0.02  -0.01   0.03    -0.04  -0.01   0.04    -0.09   0.01   0.00
  84   1     0.01  -0.02   0.02    -0.01  -0.03   0.03    -0.19   0.02  -0.01
  85   1    -0.04  -0.03   0.00     0.01  -0.02   0.04    -0.03   0.00   0.01
  86   1     0.00  -0.05   0.00    -0.01  -0.03  -0.01    -0.01   0.00   0.03
  87   1    -0.02  -0.02   0.00    -0.02  -0.05   0.02    -0.01   0.03   0.02
  88   1     0.02   0.02   0.01     0.02   0.04   0.03    -0.07  -0.04   0.02
  89   1     0.04   0.04  -0.01     0.03   0.05  -0.01    -0.04  -0.03   0.03
  90   1     0.03   0.01  -0.04     0.02   0.02  -0.02    -0.03  -0.06   0.06
  91   1     0.04   0.02   0.04     0.06   0.03   0.06    -0.07  -0.02   0.00
  92   1     0.06   0.02   0.01     0.09   0.03   0.01    -0.06  -0.03   0.02
  93   1     0.06   0.04   0.05     0.08   0.05   0.07    -0.06  -0.01  -0.02
  94   1     0.04   0.01   0.05     0.06   0.02   0.07    -0.06  -0.05  -0.02
  95   1     0.00  -0.04   0.01     0.00  -0.05   0.01     0.01   0.02   0.03
  96   1     0.01   0.03  -0.02     0.02   0.04  -0.03     0.00  -0.07   0.07
  97   1     0.00   0.04   0.03     0.00   0.05   0.05    -0.05   0.02   0.06
  98   1    -0.01   0.05   0.03    -0.02   0.07   0.05    -0.07  -0.01   0.04
  99   1     0.03   0.03   0.02     0.05   0.04   0.03    -0.05  -0.01   0.07
 100   1     0.00  -0.04   0.00    -0.01  -0.07   0.00    -0.12  -0.01   0.04
 101   1    -0.01  -0.02  -0.01    -0.01  -0.04  -0.02    -0.05  -0.02   0.02
 102   1    -0.01  -0.04   0.01    -0.02  -0.06   0.01    -0.10  -0.03  -0.01
 103   1    -0.09   0.03  -0.02    -0.10   0.04  -0.04     0.11  -0.03   0.01
 104   1     0.00  -0.01  -0.01     0.00   0.00  -0.03     0.04   0.00   0.00
 105   1     0.00   0.09  -0.05    -0.01   0.10  -0.07     0.04  -0.08   0.02
 106   1     0.06  -0.14   0.00     0.08  -0.18   0.00    -0.10   0.26  -0.01
 107   1     0.00   0.13   0.14    -0.01   0.18   0.19    -0.03  -0.14  -0.21
 108   1    -0.09   0.08  -0.15    -0.12   0.12  -0.21     0.14  -0.06   0.21
 109   1     0.00  -0.01  -0.01     0.00  -0.01   0.00     0.02  -0.03  -0.01
 110   1    -0.02  -0.05  -0.04     0.01   0.04   0.03     0.00   0.00   0.00
 111   1    -0.13  -0.22  -0.48     0.11   0.17   0.39    -0.02  -0.02  -0.06
 112   1     0.52   0.03  -0.07    -0.44  -0.02   0.04     0.05   0.01  -0.02
 113   1    -0.20   0.07   0.26     0.17  -0.07  -0.24    -0.03   0.00   0.02
 114   1    -0.01   0.00  -0.01    -0.01   0.00  -0.01     0.02   0.03   0.05
 115   1    -0.01  -0.01   0.00    -0.02   0.00  -0.01     0.02   0.05  -0.03
 116   1     0.01   0.03  -0.01     0.00   0.05  -0.03    -0.01   0.10   0.00
 117   1     0.02   0.02  -0.04     0.00   0.04  -0.07    -0.12   0.11  -0.06
 118   1     0.01   0.01  -0.03     0.00   0.05  -0.04    -0.03   0.20   0.02
 119   1     0.02  -0.01   0.02     0.01  -0.01   0.01     0.08   0.01  -0.13
 120   1     0.01  -0.03   0.03     0.00  -0.03   0.03     0.04  -0.04  -0.13
 121   1     0.03   0.00   0.02     0.03  -0.01   0.01     0.01  -0.07  -0.11
 122   1     0.01   0.02  -0.01     0.01   0.03   0.00     0.03   0.05  -0.01
 123   1     0.01   0.02   0.00    -0.01   0.01   0.01     0.00   0.01   0.00
 124   1     0.00   0.02   0.02    -0.03   0.03   0.01    -0.03   0.04   0.02
 125   1     0.09   0.04  -0.08    -0.07  -0.02   0.05    -0.01   0.01  -0.02
 126   1     0.06   0.10   0.01    -0.05  -0.07  -0.01    -0.01   0.02  -0.02
 127   1     0.07   0.06  -0.03    -0.06  -0.04   0.02    -0.02   0.02   0.00
                    34                     35                     36
                     A                      A                      A
 Frequencies --   134.5032               136.1002               144.2078
 Red. masses --     3.4822                 2.1462                 3.5082
 Frc consts  --     0.0371                 0.0234                 0.0430
 IR Inten    --     0.3043                 2.1970                 0.8282
 Atom AN      X      Y      Z        X      Y      Z        X      Y      Z
   1   6     0.00   0.00   0.02     0.00   0.00   0.00     0.04  -0.03   0.00
   2   6     0.00   0.00   0.00     0.00   0.00   0.00     0.03  -0.02  -0.01
   3   6     0.02   0.01  -0.03     0.00   0.00   0.01     0.02   0.02  -0.04
   4   6    -0.02   0.03   0.03     0.00  -0.01  -0.01    -0.01   0.01  -0.02
   5   6     0.01  -0.01  -0.05     0.00   0.00   0.01     0.00   0.02  -0.04
   6   6     0.11  -0.01  -0.09    -0.02   0.00   0.01    -0.02   0.00   0.02
   7   8     0.15   0.07  -0.07    -0.03  -0.02   0.01    -0.04  -0.03   0.06
   8   6     0.07   0.06  -0.01    -0.01  -0.01   0.00    -0.05  -0.01   0.06
   9   6     0.00   0.00   0.01     0.00   0.00   0.00     0.00   0.02  -0.02
  10   6     0.03   0.00   0.00    -0.01   0.00   0.00     0.04  -0.01  -0.02
  11   6    -0.01  -0.02  -0.05     0.00   0.01   0.01     0.00   0.02  -0.01
  12   6    -0.01  -0.03  -0.10     0.00   0.01   0.02     0.00   0.02   0.00
  13   6    -0.01  -0.02  -0.08     0.00   0.01   0.02     0.00   0.02   0.00
  14   6     0.00  -0.01  -0.04     0.00   0.00   0.00     0.00   0.01  -0.01
  15   6     0.00   0.00   0.00     0.00   0.00   0.00     0.00   0.01  -0.02
  16   6     0.00  -0.02  -0.01     0.00   0.01   0.00    -0.01   0.00   0.00
  17   6    -0.01   0.00   0.00     0.00   0.00   0.00    -0.04   0.01  -0.01
  18   6    -0.02  -0.01   0.03     0.00   0.00  -0.01     0.09  -0.01  -0.06
  19   6    -0.05  -0.01   0.05     0.01   0.00  -0.01     0.10   0.00  -0.06
  20   6    -0.02   0.00   0.03     0.01   0.00  -0.01     0.00  -0.01   0.00
  21   6     0.02   0.00   0.00     0.00   0.00   0.00    -0.08  -0.02   0.07
  22   6     0.03   0.00   0.00    -0.01   0.00   0.00    -0.04  -0.01   0.04
  23   6    -0.05  -0.02   0.04     0.01   0.00  -0.01     0.03  -0.01  -0.02
  24   6     0.00   0.00   0.02     0.00   0.00  -0.01    -0.02  -0.01   0.03
  25   6    -0.06   0.01   0.02     0.01   0.00  -0.01    -0.03  -0.02   0.00
  26   6     0.05  -0.03   0.02    -0.02   0.01  -0.01    -0.02   0.01  -0.02
  27   6     0.00   0.00   0.00    -0.01  -0.01   0.00    -0.05  -0.03   0.02
  28   6    -0.03  -0.02   0.00     0.01   0.00  -0.01    -0.08  -0.01   0.01
  29   6    -0.04   0.02   0.02     0.00  -0.01  -0.01     0.01  -0.05   0.02
  30   6     0.00  -0.06   0.04     0.00   0.01  -0.01    -0.02   0.06   0.01
  31   6    -0.05  -0.02   0.05     0.01   0.00  -0.01     0.06  -0.02   0.11
  32   6    -0.07  -0.02   0.03     0.01   0.00  -0.01    -0.07   0.00  -0.10
  33   6    -0.01  -0.01   0.03     0.00   0.00  -0.01     0.07  -0.08   0.02
  34   6    -0.01   0.02  -0.07     0.00   0.00   0.02    -0.03   0.08  -0.10
  35   8    -0.03   0.01   0.03    -0.09   0.03   0.11     0.00   0.00   0.00
  36  12     0.05   0.04   0.00    -0.01  -0.01   0.00     0.05   0.01   0.00
  37   8     0.00   0.01  -0.02     0.00   0.00  -0.03     0.00  -0.01   0.00
  38   6    -0.01   0.00   0.01    -0.05   0.00   0.05     0.00   0.00   0.00
  39   7     0.05  -0.01  -0.01    -0.01   0.00   0.00     0.05  -0.01  -0.02
  40   7     0.01   0.00   0.03     0.00   0.00  -0.01     0.01   0.02  -0.01
  41   8     0.01  -0.01  -0.02     0.03  -0.03  -0.05     0.00   0.00   0.00
  42   8    -0.02  -0.01   0.01    -0.06  -0.04   0.02     0.00   0.00   0.00
  43   6    -0.02   0.00   0.01    -0.03  -0.01   0.02     0.00   0.00   0.00
  44   6     0.00   0.00   0.00     0.00  -0.01  -0.01     0.00   0.00   0.00
  45   6    -0.01   0.00   0.00    -0.03   0.00   0.01     0.00   0.00   0.00
  46   8    -0.01   0.01   0.01    -0.01   0.02   0.03     0.00   0.00   0.00
  47   6     0.02  -0.01  -0.03     0.07  -0.04  -0.10     0.00   0.00   0.00
  48   8    -0.01   0.02   0.00     0.00   0.00   0.01     0.02   0.10   0.08
  49   6    -0.01  -0.01   0.00     0.00   0.00  -0.01     0.00   0.00   0.01
  50   8    -0.01  -0.01   0.01    -0.01  -0.01   0.00    -0.01  -0.01   0.02
  51   8     0.00   0.00  -0.03     0.00   0.00   0.01     0.01   0.03  -0.02
  52   6    -0.02   0.04  -0.01     0.01  -0.01   0.01     0.01   0.01  -0.03
  53   6    -0.02   0.00  -0.03     0.01   0.00   0.01     0.00   0.02   0.00
  54   6    -0.02  -0.02   0.02     0.01   0.00  -0.01     0.01   0.00   0.00
  55   8    -0.03   0.09   0.04     0.01  -0.02   0.00     0.02  -0.02  -0.06
  56   6    -0.01  -0.07  -0.02     0.01   0.01   0.01    -0.09  -0.11   0.03
  57   6    -0.01   0.00   0.15     0.01   0.00  -0.03     0.04  -0.01   0.03
  58   6     0.02   0.00   0.01     0.05  -0.01   0.01     0.00   0.01   0.00
  59   6     0.05   0.02   0.00     0.11   0.10  -0.03     0.00   0.00   0.00
  60   1    -0.02   0.00  -0.01     0.01   0.00   0.01     0.03  -0.03  -0.02
  61   1    -0.02   0.09   0.10     0.00  -0.02  -0.03     0.01  -0.04  -0.04
  62   1    -0.10  -0.01   0.05     0.02   0.01  -0.01    -0.01   0.07  -0.04
  63   1    -0.04  -0.06  -0.09     0.01   0.00   0.02     0.00   0.07  -0.05
  64   1     0.02   0.01  -0.03    -0.01   0.00   0.01     0.03  -0.01  -0.07
  65   1     0.12  -0.06  -0.13    -0.03   0.01   0.01    -0.05   0.04   0.04
  66   1     0.14  -0.01  -0.11    -0.02   0.00   0.01    -0.01  -0.03   0.01
  67   1     0.09   0.12   0.03    -0.02  -0.03   0.00    -0.05  -0.04   0.09
  68   1     0.07   0.00  -0.06    -0.02   0.00   0.01    -0.09   0.04   0.08
  69   1    -0.02  -0.05  -0.14     0.00   0.01   0.04     0.00   0.02   0.01
  70   1    -0.01  -0.02  -0.10     0.00   0.01   0.02     0.00   0.02   0.00
  71   1     0.00   0.00  -0.03     0.00   0.00   0.00     0.00   0.01  -0.01
  72   1     0.01  -0.02   0.01     0.00   0.00   0.00     0.01   0.00   0.01
  73   1    -0.01   0.00  -0.02     0.00   0.01   0.01    -0.06   0.04  -0.03
  74   1    -0.09  -0.01   0.07     0.02   0.00  -0.02     0.15   0.00  -0.09
  75   1    -0.04   0.00   0.04     0.01   0.00  -0.01    -0.01  -0.01   0.01
  76   1     0.03   0.01   0.00     0.00   0.00   0.00    -0.15  -0.02   0.12
  77   1    -0.05  -0.02   0.05     0.01   0.00  -0.01    -0.02  -0.01   0.00
  78   1    -0.01   0.01   0.02     0.00   0.00  -0.01     0.00  -0.02   0.02
  79   1    -0.08  -0.03   0.07     0.02   0.01  -0.02    -0.06  -0.07   0.01
  80   1    -0.04   0.02   0.00     0.01   0.00   0.00     0.01  -0.03   0.00
  81   1    -0.10   0.05   0.02     0.02  -0.01  -0.01    -0.07   0.01   0.00
  82   1     0.05  -0.03   0.08    -0.02   0.01  -0.02    -0.03   0.00  -0.02
  83   1     0.03  -0.03   0.01    -0.01   0.01   0.00    -0.03   0.02  -0.03
  84   1     0.09  -0.06   0.00    -0.03   0.01   0.00    -0.02   0.03  -0.02
  85   1    -0.05  -0.02  -0.04    -0.05  -0.02  -0.02    -0.11  -0.03   0.02
  86   1     0.02  -0.03   0.04     0.01  -0.04   0.03    -0.02  -0.08   0.06
  87   1     0.03   0.05  -0.02     0.01   0.02  -0.01    -0.01   0.00   0.01
  88   1    -0.03  -0.03  -0.01     0.00   0.01   0.00    -0.15  -0.01   0.03
  89   1    -0.04  -0.04   0.01     0.02   0.02  -0.01    -0.06   0.05  -0.01
  90   1    -0.03  -0.02   0.03     0.01  -0.01  -0.02    -0.05  -0.07   0.03
  91   1    -0.08   0.02   0.05     0.01  -0.01  -0.01     0.07  -0.04  -0.01
  92   1    -0.02   0.00   0.03     0.00   0.00  -0.01    -0.02  -0.02   0.03
  93   1    -0.04   0.06   0.00     0.00  -0.02   0.00    -0.01  -0.12   0.03
  94   1    -0.06  -0.08   0.01     0.01   0.02  -0.01     0.02   0.06  -0.05
  95   1     0.03  -0.02   0.04    -0.01   0.01  -0.01    -0.03   0.11   0.01
  96   1     0.03  -0.11   0.07    -0.01   0.02  -0.01    -0.03   0.07   0.03
  97   1    -0.04   0.02   0.06     0.01   0.00  -0.01    -0.04  -0.04   0.16
  98   1    -0.06  -0.03   0.02     0.01   0.00  -0.01     0.12  -0.02   0.19
  99   1    -0.05  -0.04   0.08     0.01   0.01  -0.02     0.12  -0.01   0.09
 100   1    -0.10   0.00   0.05     0.02   0.00  -0.01    -0.18   0.00  -0.04
 101   1    -0.04  -0.02   0.03     0.00   0.01  -0.01    -0.03   0.00  -0.11
 102   1    -0.08  -0.03  -0.02     0.01   0.01   0.00    -0.09   0.02  -0.21
 103   1    -0.04   0.00   0.04     0.01   0.00  -0.01     0.03  -0.07   0.08
 104   1     0.00  -0.03   0.03     0.00   0.01  -0.01     0.12  -0.15   0.04
 105   1     0.00   0.02   0.02     0.00  -0.01   0.00     0.09  -0.07  -0.04
 106   1    -0.07   0.21  -0.10     0.01  -0.04   0.02     0.02   0.05  -0.12
 107   1    -0.06  -0.11  -0.24     0.01   0.02   0.05    -0.10   0.12  -0.03
 108   1     0.08  -0.04   0.08    -0.01   0.01  -0.01    -0.06   0.14  -0.18
 109   1    -0.01   0.01  -0.01    -0.01   0.00  -0.03     0.00   0.00   0.00
 110   1    -0.01  -0.02  -0.03    -0.04  -0.07  -0.07     0.00   0.00   0.00
 111   1     0.09  -0.03   0.10     0.28  -0.14   0.26    -0.01   0.00  -0.01
 112   1    -0.12   0.03  -0.07    -0.30   0.12  -0.25     0.00   0.00   0.00
 113   1     0.11  -0.05  -0.16     0.34  -0.16  -0.48    -0.01   0.00   0.00
 114   1    -0.04   0.01  -0.08     0.01   0.00   0.02     0.03   0.03  -0.09
 115   1    -0.07  -0.09   0.01     0.02   0.01   0.00    -0.01   0.00   0.00
 116   1    -0.04  -0.07  -0.04     0.01   0.02   0.02    -0.11  -0.18  -0.06
 117   1     0.04  -0.07   0.03     0.00   0.02   0.00    -0.11  -0.13   0.13
 118   1    -0.02  -0.13  -0.03     0.01   0.02   0.01    -0.10  -0.14   0.07
 119   1    -0.06  -0.05   0.18     0.02   0.00  -0.02     0.04   0.00   0.03
 120   1    -0.04  -0.02   0.22     0.01   0.00  -0.05     0.03  -0.03   0.06
 121   1     0.07   0.07   0.16    -0.01  -0.01  -0.03     0.08   0.01   0.04
 122   1     0.01  -0.01   0.01     0.03  -0.02   0.02     0.01   0.02   0.00
 123   1     0.03   0.01   0.00     0.07   0.03  -0.01     0.00   0.01   0.00
 124   1     0.03  -0.01   0.02     0.08  -0.03   0.05    -0.01   0.02   0.01
 125   1     0.06   0.02  -0.03     0.17   0.07  -0.12     0.00   0.00   0.00
 126   1     0.05   0.05   0.03     0.12   0.20   0.05     0.00   0.00   0.00
 127   1     0.06   0.02  -0.02     0.14   0.11  -0.06     0.00   0.00   0.00
                    37                     38                     39
                     A                      A                      A
 Frequencies --   144.5502               150.0770               154.7771
 Red. masses --     3.0307                 2.7676                 3.1758
 Frc consts  --     0.0373                 0.0367                 0.0448
 IR Inten    --     2.6165                 0.3333                 0.8361
 Atom AN      X      Y      Z        X      Y      Z        X      Y      Z
   1   6     0.00   0.04  -0.01     0.04   0.04  -0.03     0.02  -0.03  -0.03
   2   6     0.01   0.02   0.01     0.05   0.04  -0.01     0.00   0.01  -0.03
   3   6     0.03  -0.01   0.02     0.03   0.02   0.02    -0.03   0.03  -0.03
   4   6    -0.07  -0.01   0.04     0.04   0.04  -0.01    -0.01   0.04   0.02
   5   6    -0.02   0.00  -0.08    -0.01   0.02   0.10    -0.01   0.03   0.02
   6   6    -0.04  -0.05   0.07     0.05   0.08  -0.08    -0.02   0.02   0.06
   7   8    -0.03  -0.02   0.03     0.06   0.07  -0.03    -0.02   0.04  -0.01
   8   6     0.00   0.00   0.01     0.01   0.04   0.01     0.03   0.05  -0.04
   9   6     0.02  -0.02  -0.01     0.03   0.01  -0.04    -0.01   0.01  -0.03
  10   6     0.00   0.03   0.00    -0.02   0.00   0.01    -0.01  -0.03   0.00
  11   6     0.00  -0.01   0.02     0.01   0.01  -0.01     0.00   0.02   0.00
  12   6     0.00   0.00   0.04     0.01   0.03   0.03     0.00   0.03   0.03
  13   6     0.00  -0.01   0.00     0.01   0.02   0.02     0.00   0.02   0.02
  14   6     0.01  -0.03  -0.05     0.02   0.01  -0.01     0.00   0.01   0.00
  15   6     0.02  -0.03  -0.05     0.02   0.01  -0.03    -0.01   0.01  -0.03
  16   6    -0.01  -0.04   0.03    -0.01  -0.03   0.01     0.00   0.02  -0.01
  17   6     0.00  -0.02  -0.02    -0.04   0.00  -0.01    -0.03   0.01  -0.01
  18   6    -0.02   0.03   0.02    -0.02   0.00   0.00    -0.06  -0.03   0.04
  19   6    -0.02   0.02   0.02    -0.01   0.00  -0.01    -0.07  -0.03   0.04
  20   6     0.03   0.01  -0.02    -0.01   0.00  -0.01     0.02  -0.02  -0.02
  21   6     0.07   0.01  -0.05    -0.02   0.00   0.01     0.08  -0.01  -0.07
  22   6     0.04   0.02  -0.04    -0.02   0.00   0.01     0.05  -0.02  -0.03
  23   6    -0.01   0.02   0.01    -0.01  -0.02  -0.02    -0.01  -0.02   0.01
  24   6     0.00   0.00  -0.05    -0.02  -0.01  -0.03     0.04  -0.01   0.02
  25   6    -0.02  -0.06   0.03    -0.04  -0.02   0.02     0.00   0.01  -0.01
  26   6    -0.05  -0.03   0.02    -0.07  -0.06   0.04     0.00   0.04  -0.02
  27   6     0.01  -0.07   0.02    -0.09  -0.08   0.02    -0.02  -0.02   0.02
  28   6    -0.02   0.03  -0.01    -0.04   0.00  -0.01    -0.04   0.03  -0.01
  29   6    -0.04   0.00  -0.05    -0.02  -0.06  -0.04     0.00   0.07   0.04
  30   6     0.00  -0.06  -0.02    -0.02   0.01  -0.04     0.04  -0.07   0.06
  31   6    -0.02   0.02  -0.04    -0.02  -0.02  -0.04    -0.02   0.02  -0.10
  32   6     0.02  -0.01   0.01    -0.01  -0.03  -0.02     0.10  -0.03   0.09
  33   6    -0.04   0.11  -0.04     0.05   0.08  -0.07     0.09  -0.11   0.00
  34   6     0.09  -0.08   0.08     0.04   0.05   0.06    -0.10   0.13  -0.08
  35   8     0.00   0.00   0.00     0.01   0.00  -0.01     0.00   0.00   0.00
  36  12     0.00   0.03   0.00     0.03  -0.05   0.01     0.00  -0.04   0.00
  37   8     0.00  -0.01   0.01    -0.01  -0.01   0.00     0.00   0.00   0.01
  38   6     0.00   0.00   0.00     0.01   0.00  -0.01     0.00   0.00   0.00
  39   7    -0.02   0.04   0.00     0.00   0.00   0.01     0.00  -0.04   0.00
  40   7     0.02  -0.02   0.01     0.04   0.00  -0.03    -0.01   0.01  -0.04
  41   8     0.00   0.00   0.00     0.00   0.01   0.00     0.00   0.00   0.00
  42   8     0.00   0.00   0.00     0.00   0.00   0.00     0.00   0.00   0.00
  43   6     0.00   0.00   0.00     0.00   0.00   0.00     0.00   0.00   0.00
  44   6     0.00   0.00   0.00     0.00   0.00   0.00     0.00   0.00   0.00
  45   6     0.00   0.00   0.00     0.00   0.00   0.00     0.00   0.00   0.00
  46   8     0.00   0.00   0.00     0.00   0.00   0.00     0.00   0.00   0.00
  47   6     0.00   0.00   0.00    -0.01   0.00   0.01     0.00   0.00   0.00
  48   8     0.02   0.12   0.06     0.00  -0.04   0.04     0.00   0.03   0.06
  49   6     0.00   0.00   0.01    -0.01  -0.01   0.00     0.00   0.00   0.01
  50   8    -0.01  -0.01   0.03    -0.01  -0.01   0.00     0.00   0.00   0.01
  51   8     0.02   0.04  -0.01    -0.01  -0.01   0.02     0.00   0.00   0.02
  52   6     0.02   0.02  -0.03     0.00  -0.02   0.03     0.01  -0.03   0.01
  53   6     0.01   0.03  -0.02     0.00  -0.03   0.04     0.00  -0.01   0.03
  54   6     0.01   0.01   0.00     0.00  -0.01   0.00     0.01   0.00   0.00
  55   8     0.02  -0.01  -0.06     0.03  -0.02   0.03     0.03  -0.05  -0.01
  56   6    -0.05  -0.11   0.02    -0.01  -0.02   0.04    -0.03  -0.07   0.05
  57   6     0.05   0.00   0.03    -0.01  -0.01  -0.02     0.00   0.00  -0.03
  58   6     0.00   0.02   0.00     0.00   0.00   0.00    -0.01   0.00   0.00
  59   6     0.00   0.00   0.00     0.00  -0.01   0.00    -0.01   0.00   0.00
  60   1     0.01   0.03   0.01     0.06   0.06  -0.01     0.00   0.02  -0.03
  61   1    -0.03   0.04   0.13     0.00   0.02  -0.08    -0.02   0.07   0.04
  62   1    -0.17  -0.06   0.06     0.12   0.08  -0.02    -0.02  -0.01   0.03
  63   1    -0.06   0.14  -0.17     0.02  -0.15   0.20    -0.01   0.07   0.01
  64   1     0.10  -0.11  -0.18    -0.13   0.15   0.22     0.00   0.00  -0.01
  65   1     0.03  -0.01   0.17    -0.01   0.02  -0.21     0.03   0.02   0.12
  66   1    -0.11  -0.15   0.10     0.15   0.19  -0.12    -0.09  -0.01   0.09
  67   1     0.00   0.05  -0.03     0.01   0.02   0.04     0.03   0.07  -0.09
  68   1     0.05  -0.03   0.01    -0.04   0.05  -0.01     0.09   0.01  -0.03
  69   1     0.00   0.01   0.08     0.01   0.04   0.06     0.01   0.03   0.05
  70   1     0.00   0.00   0.01     0.01   0.03   0.04     0.00   0.02   0.04
  71   1     0.02  -0.03  -0.08     0.02   0.01  -0.02    -0.01   0.01   0.00
  72   1     0.01  -0.05   0.03     0.02  -0.07  -0.01     0.00   0.03   0.01
  73   1     0.00  -0.01  -0.01    -0.06   0.06   0.01    -0.03   0.02  -0.02
  74   1    -0.05   0.02   0.05     0.00   0.00  -0.02    -0.12  -0.03   0.06
  75   1     0.05   0.01  -0.02    -0.01   0.00  -0.01     0.04  -0.01  -0.04
  76   1     0.11   0.01  -0.08    -0.02   0.00   0.01     0.15   0.00  -0.11
  77   1     0.00   0.01   0.02     0.00  -0.03   0.00     0.01   0.00  -0.01
  78   1    -0.01   0.03  -0.06    -0.02   0.01  -0.04     0.03  -0.02   0.04
  79   1    -0.05  -0.11   0.03    -0.06  -0.06   0.05    -0.01   0.00  -0.02
  80   1     0.04  -0.07   0.02    -0.02  -0.02   0.01     0.00   0.00   0.00
  81   1    -0.05  -0.01   0.04    -0.08   0.02   0.02    -0.01   0.00  -0.01
  82   1    -0.06  -0.08   0.03    -0.09  -0.13   0.08     0.00   0.04  -0.04
  83   1    -0.09  -0.01   0.01    -0.13  -0.01   0.05     0.01   0.03  -0.03
  84   1    -0.03  -0.01   0.02    -0.03  -0.06   0.03    -0.01   0.05  -0.02
  85   1     0.02  -0.04   0.09    -0.29  -0.12  -0.02    -0.05  -0.02   0.03
  86   1     0.00  -0.06  -0.01    -0.01  -0.24   0.11    -0.01  -0.04   0.03
  87   1     0.00  -0.14   0.03    -0.02   0.05  -0.02     0.00  -0.03   0.01
  88   1    -0.07   0.05   0.06    -0.15   0.00   0.04    -0.10   0.03   0.03
  89   1    -0.01   0.10  -0.05     0.02   0.10  -0.04    -0.02   0.08  -0.03
  90   1     0.00  -0.01  -0.02     0.01  -0.11  -0.03    -0.02  -0.03  -0.01
  91   1    -0.08   0.00  -0.05     0.01  -0.05  -0.07    -0.04   0.07   0.11
  92   1    -0.04  -0.02  -0.03    -0.05  -0.05  -0.01     0.01   0.08   0.02
  93   1    -0.05   0.03  -0.08    -0.04  -0.11  -0.04     0.00   0.13   0.01
  94   1    -0.06  -0.08  -0.01    -0.03   0.00  -0.07     0.00  -0.07   0.08
  95   1     0.03  -0.07  -0.02    -0.03   0.03  -0.04     0.08  -0.08   0.06
  96   1     0.03  -0.10  -0.01    -0.02   0.00  -0.03     0.05  -0.09   0.08
  97   1    -0.01  -0.02  -0.05     0.01  -0.01  -0.06     0.07   0.04  -0.14
  98   1    -0.02   0.04  -0.01    -0.04  -0.02  -0.07    -0.09   0.04  -0.16
  99   1    -0.03   0.06  -0.07    -0.04  -0.03  -0.03    -0.05   0.02  -0.09
 100   1     0.03   0.01   0.00     0.01  -0.08  -0.05     0.24  -0.07   0.01
 101   1     0.04  -0.01   0.01    -0.07   0.00  -0.06     0.01  -0.02   0.07
 102   1     0.01  -0.04   0.01     0.01   0.01   0.03     0.14  -0.02   0.25
 103   1     0.08   0.09  -0.13     0.11   0.07  -0.12     0.01  -0.09   0.09
 104   1    -0.12   0.24  -0.08     0.02   0.16  -0.07     0.18  -0.23   0.04
 105   1    -0.08   0.04   0.07     0.03   0.05  -0.02     0.12  -0.08  -0.12
 106   1     0.04  -0.06   0.10     0.05  -0.03   0.09    -0.11   0.20  -0.10
 107   1     0.16  -0.10   0.01     0.06   0.10   0.14    -0.19   0.09  -0.09
 108   1     0.10  -0.13   0.15     0.03   0.09   0.00    -0.05   0.16  -0.07
 109   1     0.00   0.00   0.00     0.00  -0.01   0.00     0.00   0.00   0.00
 110   1     0.00   0.00   0.00     0.00   0.01   0.00     0.00   0.00   0.00
 111   1     0.00   0.00   0.00    -0.02   0.02  -0.01     0.00  -0.01   0.00
 112   1     0.00   0.00   0.00     0.00  -0.01   0.02     0.00   0.00  -0.01
 113   1     0.00   0.00   0.00    -0.03   0.01   0.03     0.00   0.00  -0.01
 114   1     0.04   0.04  -0.10    -0.01  -0.03   0.05     0.02  -0.01   0.00
 115   1    -0.01   0.00   0.00     0.01   0.00   0.00     0.02   0.02   0.00
 116   1    -0.06  -0.19  -0.07    -0.04   0.02   0.04    -0.04  -0.10   0.01
 117   1    -0.09  -0.13   0.12     0.03  -0.01   0.03    -0.04  -0.07   0.08
 118   1    -0.06  -0.12   0.04    -0.02  -0.05   0.06    -0.04  -0.07   0.06
 119   1     0.06   0.00   0.03     0.01  -0.01   0.01     0.01   0.01  -0.02
 120   1     0.04  -0.04   0.06     0.00  -0.01  -0.06     0.01   0.01  -0.06
 121   1     0.09   0.01   0.04    -0.05   0.01  -0.01    -0.04   0.00  -0.03
 122   1     0.00   0.03  -0.01     0.01   0.01   0.00    -0.01   0.01  -0.01
 123   1    -0.01   0.02   0.01     0.00   0.00   0.00    -0.01   0.00   0.00
 124   1    -0.01   0.02   0.01    -0.01   0.01   0.01    -0.01   0.01   0.00
 125   1     0.00   0.00   0.00    -0.01   0.00   0.01     0.00   0.00  -0.01
 126   1     0.00   0.00   0.00     0.00  -0.02   0.01    -0.01   0.01  -0.01
 127   1    -0.01   0.00   0.00     0.00  -0.01   0.00    -0.01   0.01   0.00
                    40                     41                     42
                     A                      A                      A
 Frequencies --   159.0277               162.9085               164.5612
 Red. masses --     3.0013                 3.8835                 2.9874
 Frc consts  --     0.0447                 0.0607                 0.0477
 IR Inten    --     0.1063                 0.8560                 1.5019
 Atom AN      X      Y      Z        X      Y      Z        X      Y      Z
   1   6    -0.03  -0.04  -0.01     0.00   0.01  -0.02     0.01   0.00  -0.03
   2   6    -0.01  -0.08   0.01     0.01  -0.01  -0.01     0.03  -0.04  -0.04
   3   6    -0.01  -0.06   0.00     0.02  -0.02  -0.01     0.05  -0.04  -0.05
   4   6     0.07   0.03  -0.06     0.01   0.02   0.00    -0.02   0.01   0.04
   5   6     0.03   0.02   0.04     0.01   0.04   0.01     0.02   0.06  -0.03
   6   6     0.05   0.06  -0.06    -0.01   0.04   0.01    -0.05   0.03   0.08
   7   8     0.03   0.02   0.00    -0.02   0.03  -0.01    -0.05   0.03  -0.02
   8   6     0.01   0.02   0.01    -0.01   0.02  -0.01     0.00   0.02  -0.04
   9   6    -0.03  -0.02  -0.01     0.00   0.00  -0.01     0.02   0.01  -0.01
  10   6    -0.02  -0.01  -0.02     0.01   0.00  -0.02     0.05   0.00  -0.06
  11   6    -0.01   0.00   0.04     0.00  -0.01  -0.04     0.01   0.01  -0.02
  12   6    -0.01   0.00   0.06     0.00  -0.01  -0.03     0.01   0.02   0.00
  13   6    -0.01  -0.02  -0.02     0.00   0.02   0.04     0.01   0.02   0.01
  14   6    -0.02  -0.05  -0.10     0.00   0.04   0.10     0.02   0.02   0.01
  15   6    -0.02  -0.04  -0.08     0.00   0.02   0.06     0.02   0.01   0.00
  16   6     0.00   0.04   0.02     0.00  -0.01   0.00     0.00  -0.01  -0.01
  17   6     0.01  -0.01  -0.04    -0.01   0.01   0.03    -0.01   0.01  -0.01
  18   6    -0.02   0.00   0.00     0.00   0.00  -0.01     0.03   0.01  -0.03
  19   6    -0.02  -0.01   0.00    -0.01   0.00   0.01    -0.02   0.00   0.01
  20   6    -0.03  -0.01   0.01    -0.02   0.00   0.01    -0.06   0.00   0.03
  21   6    -0.04  -0.01   0.00    -0.01   0.00   0.00    -0.03   0.00   0.00
  22   6    -0.03  -0.01  -0.01     0.01   0.00  -0.01     0.03   0.01  -0.04
  23   6    -0.02   0.04   0.01    -0.01   0.02   0.00     0.01   0.05   0.00
  24   6    -0.01   0.01   0.02     0.00   0.00  -0.01     0.02   0.01  -0.01
  25   6     0.07   0.01  -0.02    -0.07   0.02   0.03    -0.02   0.00   0.00
  26   6     0.00   0.07  -0.03     0.06  -0.02   0.03    -0.02  -0.02   0.01
  27   6     0.03  -0.05   0.01    -0.04   0.05  -0.02    -0.05  -0.02  -0.01
  28   6     0.02   0.11  -0.05     0.02  -0.07   0.02    -0.01  -0.02  -0.01
  29   6     0.02   0.05   0.03     0.00   0.02   0.00     0.00   0.06   0.01
  30   6     0.00   0.04   0.02     0.00  -0.01   0.00     0.02  -0.02   0.02
  31   6    -0.02   0.03   0.05     0.00   0.02   0.03     0.03   0.04   0.09
  32   6    -0.02   0.10   0.07    -0.01   0.04   0.01    -0.03   0.09   0.01
  33   6    -0.05  -0.04   0.00    -0.02   0.04  -0.03    -0.03   0.02  -0.03
  34   6     0.01  -0.11   0.00     0.04  -0.05  -0.01     0.06  -0.08  -0.08
  35   8     0.00   0.00   0.00    -0.06   0.02   0.09     0.02  -0.01  -0.03
  36  12     0.02  -0.05   0.00     0.02  -0.02   0.00     0.04  -0.03   0.00
  37   8    -0.01   0.00   0.02     0.04   0.01   0.11    -0.01   0.00  -0.03
  38   6     0.00   0.00   0.00    -0.03   0.01   0.05     0.01   0.00  -0.02
  39   7    -0.03  -0.02  -0.02     0.01   0.00  -0.02     0.05  -0.01  -0.06
  40   7    -0.03  -0.02  -0.01     0.01   0.00  -0.01     0.02   0.00  -0.02
  41   8     0.00   0.00   0.00    -0.01   0.00   0.03     0.00   0.00  -0.01
  42   8     0.00   0.00   0.00     0.09  -0.02  -0.05    -0.03   0.01   0.02
  43   6     0.00   0.00   0.00     0.07  -0.04  -0.05    -0.02   0.01   0.02
  44   6    -0.01   0.00   0.01     0.01   0.01   0.02     0.00   0.00  -0.01
  45   6     0.00   0.00   0.00     0.00   0.00   0.01     0.00   0.00   0.00
  46   8    -0.01   0.00  -0.01     0.04  -0.08  -0.08    -0.01   0.02   0.03
  47   6     0.00   0.00   0.00     0.05  -0.03  -0.06    -0.02   0.01   0.02
  48   8     0.03   0.00   0.04     0.01  -0.02   0.02    -0.02  -0.05   0.01
  49   6    -0.01   0.00   0.02     0.06   0.03   0.06    -0.02  -0.01  -0.02
  50   8    -0.01  -0.01   0.04     0.09   0.03   0.03    -0.02   0.00  -0.03
  51   8     0.01   0.02  -0.01     0.01  -0.06  -0.05    -0.03  -0.03   0.07
  52   6     0.03  -0.02  -0.02     0.02  -0.06  -0.04    -0.02  -0.03   0.07
  53   6     0.01  -0.01   0.01     0.00  -0.04  -0.02    -0.01  -0.03   0.06
  54   6     0.01   0.01   0.00     0.00   0.02   0.01    -0.01  -0.02   0.01
  55   8     0.05  -0.04  -0.05     0.02  -0.05  -0.03    -0.01  -0.04   0.07
  56   6    -0.04  -0.02   0.02    -0.09  -0.03  -0.01     0.05   0.01   0.05
  57   6     0.03   0.00   0.05    -0.05   0.05  -0.03    -0.06  -0.01  -0.06
  58   6    -0.03   0.02   0.00    -0.13   0.02  -0.04     0.04  -0.02   0.01
  59   6    -0.01   0.00   0.00    -0.13   0.05  -0.06     0.04  -0.01   0.02
  60   1     0.00  -0.10   0.01     0.01  -0.01  -0.02     0.02  -0.05  -0.04
  61   1     0.05  -0.03  -0.15     0.01   0.02   0.00     0.01   0.05   0.12
  62   1     0.16   0.10  -0.08     0.01   0.01   0.00    -0.07  -0.07   0.06
  63   1     0.07  -0.09   0.12     0.01   0.05   0.01     0.00   0.19  -0.09
  64   1    -0.07   0.10   0.12     0.01   0.04   0.01     0.12  -0.02  -0.10
  65   1    -0.02   0.04  -0.14    -0.01   0.04   0.01     0.02   0.06   0.17
  66   1     0.12   0.13  -0.09    -0.02   0.05   0.01    -0.15  -0.03   0.12
  67   1     0.01  -0.03   0.04    -0.01   0.01  -0.02    -0.01   0.03  -0.09
  68   1    -0.04   0.06   0.02     0.00   0.01  -0.01     0.04  -0.02  -0.04
  69   1     0.00   0.02   0.11     0.00  -0.02  -0.07     0.01   0.02   0.00
  70   1    -0.01  -0.02  -0.01     0.00   0.02   0.05     0.01   0.02   0.02
  71   1    -0.02  -0.07  -0.14     0.00   0.06   0.15     0.02   0.02   0.02
  72   1    -0.03   0.07   0.01     0.02  -0.01   0.01     0.02  -0.03  -0.02
  73   1     0.02  -0.04  -0.01    -0.01   0.02   0.03    -0.03   0.04   0.00
  74   1    -0.02  -0.01   0.00    -0.03   0.00   0.01    -0.06   0.00   0.03
  75   1    -0.03  -0.01   0.01    -0.03   0.00   0.02    -0.10  -0.01   0.06
  76   1    -0.04  -0.02   0.00    -0.02   0.00   0.00    -0.06   0.00   0.02
  77   1    -0.01   0.07  -0.04    -0.01   0.03  -0.01    -0.01   0.07  -0.03
  78   1     0.01  -0.02   0.04     0.00   0.00   0.00     0.02   0.00   0.00
  79   1     0.10   0.06  -0.09    -0.10  -0.04   0.09    -0.02   0.00   0.02
  80   1     0.05   0.00   0.01    -0.03   0.03   0.00    -0.04   0.00   0.00
  81   1     0.13  -0.05  -0.01    -0.12   0.09   0.03    -0.03   0.00  -0.01
  82   1     0.01   0.12  -0.11     0.06  -0.04   0.13    -0.03  -0.06   0.04
  83   1     0.07   0.03  -0.03     0.00  -0.01  -0.01    -0.05   0.00   0.01
  84   1    -0.07   0.09   0.00     0.15  -0.04  -0.01     0.01  -0.03   0.00
  85   1     0.06  -0.02   0.07    -0.01   0.04  -0.06    -0.13  -0.04  -0.03
  86   1     0.02  -0.03  -0.01    -0.05   0.06  -0.06    -0.01  -0.10   0.03
  87   1     0.05  -0.11   0.00    -0.08   0.07   0.00    -0.02   0.04  -0.02
  88   1     0.04   0.15   0.04     0.04  -0.09  -0.05    -0.08  -0.03   0.00
  89   1     0.02   0.17  -0.09     0.01  -0.12   0.07     0.03   0.02  -0.01
  90   1     0.01   0.12  -0.10     0.01  -0.05   0.04     0.02  -0.09  -0.01
  91   1     0.02   0.05   0.05    -0.03   0.02   0.01    -0.10   0.05   0.04
  92   1     0.03   0.06   0.00     0.01   0.01  -0.01     0.05   0.01  -0.02
  93   1     0.03   0.06   0.04     0.01   0.05   0.00     0.02   0.17   0.01
  94   1     0.06   0.06   0.07     0.00   0.00   0.02     0.01  -0.02   0.06
  95   1    -0.02  -0.02   0.01     0.01  -0.03   0.00     0.04  -0.06   0.02
  96   1    -0.03   0.10  -0.03     0.00   0.00  -0.01     0.03  -0.02   0.01
  97   1     0.00   0.12   0.07    -0.01   0.04   0.04    -0.03   0.07   0.13
  98   1    -0.04   0.00  -0.03     0.00   0.01   0.02     0.06   0.03   0.11
  99   1    -0.01  -0.03   0.13     0.01   0.00   0.04     0.07   0.03   0.10
 100   1    -0.05   0.21   0.11    -0.05   0.10   0.04    -0.14   0.25   0.10
 101   1     0.04   0.04   0.16     0.04   0.01   0.05     0.13   0.01   0.11
 102   1    -0.04   0.07  -0.01    -0.03   0.02  -0.05    -0.09   0.02  -0.17
 103   1     0.02  -0.04  -0.03    -0.01   0.03  -0.06     0.01   0.01  -0.06
 104   1    -0.10   0.02  -0.03    -0.05   0.07  -0.04    -0.07   0.06  -0.06
 105   1    -0.07  -0.08   0.05    -0.03   0.04   0.01    -0.04   0.00   0.03
 106   1    -0.05   0.02  -0.01     0.01   0.00  -0.01     0.02   0.05  -0.09
 107   1     0.02  -0.20  -0.14     0.05  -0.08  -0.07     0.06  -0.17  -0.21
 108   1     0.07  -0.18   0.13     0.06  -0.08   0.05     0.11  -0.15   0.05
 109   1    -0.01   0.00   0.00     0.00   0.02   0.07     0.00   0.00  -0.02
 110   1     0.00   0.00   0.00     0.03  -0.01   0.10    -0.01   0.00  -0.03
 111   1     0.00   0.00   0.00     0.10  -0.15  -0.01    -0.03   0.05   0.00
 112   1     0.00   0.00   0.00     0.02   0.08  -0.14    -0.01  -0.03   0.04
 113   1     0.00   0.01   0.00     0.11  -0.06  -0.15    -0.04   0.02   0.04
 114   1     0.02  -0.01   0.01     0.03  -0.04  -0.01    -0.01  -0.03   0.08
 115   1    -0.02  -0.01   0.00    -0.02   0.06   0.01     0.04  -0.01   0.01
 116   1    -0.07  -0.02  -0.02    -0.08  -0.08  -0.05     0.06   0.05   0.09
 117   1    -0.04  -0.02   0.01    -0.17  -0.04  -0.02     0.09   0.02   0.02
 118   1    -0.06  -0.03   0.06    -0.09   0.04   0.04     0.06   0.00   0.02
 119   1     0.02   0.00   0.05    -0.10   0.05  -0.07    -0.03  -0.02  -0.01
 120   1     0.02  -0.02   0.09    -0.05   0.11   0.00    -0.03   0.02  -0.16
 121   1     0.08   0.02   0.05    -0.04   0.00  -0.04    -0.18   0.00  -0.05
 122   1    -0.02   0.03  -0.02    -0.14   0.04  -0.10     0.04  -0.02   0.04
 123   1    -0.04   0.02   0.01    -0.22   0.00   0.04     0.07  -0.01  -0.02
 124   1    -0.04   0.03   0.00    -0.16   0.04  -0.11     0.05  -0.02   0.03
 125   1    -0.02   0.00   0.00    -0.11   0.04  -0.10     0.04  -0.01   0.03
 126   1    -0.01  -0.01  -0.01    -0.16   0.06  -0.19     0.05  -0.01   0.06
 127   1    -0.02   0.00   0.00    -0.24   0.10   0.03     0.08  -0.03  -0.01
                    43                     44                     45
                     A                      A                      A
 Frequencies --   166.2681               173.0797               178.0645
 Red. masses --     3.2423                 3.3539                 4.0821
 Frc consts  --     0.0528                 0.0592                 0.0763
 IR Inten    --     3.7825                 2.3056                 1.6876
 Atom AN      X      Y      Z        X      Y      Z        X      Y      Z
   1   6    -0.01   0.00  -0.04    -0.01  -0.01  -0.02     0.00   0.00  -0.07
   2   6    -0.01   0.00  -0.03    -0.01  -0.01  -0.01    -0.02   0.03  -0.05
   3   6    -0.01  -0.02   0.00    -0.02  -0.01   0.01    -0.03   0.00  -0.01
   4   6     0.05   0.02  -0.09    -0.17  -0.01   0.21    -0.03   0.02   0.02
   5   6     0.01  -0.01   0.01    -0.08   0.03  -0.01    -0.01  -0.05  -0.03
   6   6     0.02   0.00  -0.02     0.00   0.06  -0.11     0.08  -0.07  -0.02
   7   8     0.01  -0.04   0.04     0.01   0.05   0.04     0.11   0.00   0.03
   8   6     0.01   0.01   0.02    -0.11   0.00   0.12     0.04   0.03   0.06
   9   6     0.00   0.00  -0.01    -0.01  -0.01  -0.02     0.00  -0.02  -0.05
  10   6    -0.04  -0.02   0.00    -0.01  -0.01   0.00    -0.04  -0.03   0.00
  11   6    -0.01  -0.01  -0.04    -0.01   0.00  -0.01     0.01  -0.01  -0.01
  12   6     0.00   0.00  -0.01     0.00   0.00   0.01     0.02   0.01   0.05
  13   6     0.00   0.03   0.09    -0.01   0.01   0.03     0.01   0.00   0.06
  14   6    -0.01   0.05   0.15    -0.01   0.01   0.03     0.01  -0.02   0.01
  15   6     0.00   0.03   0.09    -0.01   0.00   0.01     0.00  -0.03  -0.04
  16   6     0.00   0.00  -0.01     0.00   0.01  -0.01     0.00  -0.02  -0.01
  17   6     0.01   0.02   0.06     0.00   0.00   0.01     0.01  -0.02  -0.01
  18   6    -0.04  -0.01   0.01     0.03  -0.01  -0.02     0.01  -0.02  -0.02
  19   6    -0.03  -0.01   0.00     0.08  -0.01  -0.05     0.04  -0.02  -0.04
  20   6    -0.01  -0.01  -0.01     0.13   0.00  -0.09     0.02  -0.03  -0.03
  21   6    -0.01  -0.01  -0.02     0.09  -0.01  -0.07    -0.03  -0.03  -0.01
  22   6    -0.02  -0.01  -0.01     0.01  -0.01  -0.01    -0.05  -0.03   0.01
  23   6    -0.02   0.02   0.01     0.01   0.01  -0.01     0.01   0.01  -0.01
  24   6     0.00   0.00   0.01     0.02  -0.01   0.00    -0.01  -0.01   0.04
  25   6    -0.08   0.03   0.03     0.00   0.03   0.00    -0.02  -0.03   0.00
  26   6     0.07  -0.01   0.01     0.03   0.01   0.00     0.00  -0.02  -0.01
  27   6    -0.02   0.08  -0.02     0.00   0.02   0.00     0.03  -0.03   0.02
  28   6     0.04  -0.08   0.04     0.01   0.00   0.00     0.00   0.05  -0.01
  29   6     0.02   0.04   0.02     0.02   0.02   0.01     0.06   0.02   0.05
  30   6     0.01   0.02   0.02     0.02   0.00   0.01     0.01   0.07   0.02
  31   6    -0.02   0.03  -0.01     0.01  -0.02   0.02     0.02   0.01   0.04
  32   6     0.02   0.03   0.06    -0.02   0.04   0.00    -0.01   0.03   0.01
  33   6    -0.02   0.02  -0.05     0.01  -0.02  -0.02     0.05  -0.03  -0.08
  34   6     0.02  -0.04   0.03    -0.01  -0.01   0.02     0.01  -0.03   0.04
  35   8     0.03  -0.01  -0.04     0.01   0.00  -0.01    -0.01   0.00   0.04
  36  12    -0.01  -0.02  -0.02     0.02  -0.05   0.00    -0.10   0.04  -0.04
  37   8    -0.01  -0.02  -0.06    -0.01  -0.01  -0.01     0.02   0.00   0.00
  38   6     0.01   0.00  -0.02     0.00   0.00  -0.01     0.00   0.00   0.03
  39   7    -0.03  -0.01  -0.01    -0.03  -0.01   0.01    -0.05  -0.01  -0.02
  40   7     0.00  -0.02  -0.04    -0.01  -0.01  -0.02    -0.01  -0.01  -0.08
  41   8     0.01   0.00  -0.01     0.00   0.00  -0.01     0.00   0.00   0.02
  42   8    -0.04   0.01   0.02    -0.02   0.00   0.01     0.05   0.00  -0.01
  43   6    -0.02   0.01   0.02    -0.01   0.00   0.01     0.04  -0.01  -0.01
  44   6     0.01  -0.01  -0.02     0.00   0.00   0.00     0.02   0.00   0.00
  45   6     0.00   0.00  -0.01     0.00   0.00   0.00     0.01   0.00   0.01
  46   8     0.00   0.04   0.04    -0.01   0.01   0.01     0.02  -0.03  -0.02
  47   6    -0.02   0.01   0.02    -0.01   0.01   0.01     0.02  -0.02  -0.01
  48   8     0.01   0.05   0.03     0.02  -0.07  -0.01    -0.07   0.14   0.01
  49   6    -0.02  -0.02  -0.03    -0.01  -0.01   0.00     0.02   0.00  -0.01
  50   8    -0.04  -0.02  -0.02    -0.01  -0.01   0.01     0.03   0.01  -0.02
  51   8     0.01   0.05  -0.02     0.01   0.01  -0.02    -0.03  -0.03   0.05
  52   6     0.00   0.02  -0.04     0.01  -0.01  -0.02    -0.05   0.05   0.08
  53   6    -0.01   0.02  -0.03     0.00  -0.02   0.00    -0.02   0.07   0.02
  54   6     0.01   0.00  -0.02     0.00   0.00  -0.01    -0.01   0.00   0.00
  55   8     0.01  -0.01  -0.07     0.04  -0.01  -0.03    -0.10   0.06   0.10
  56   6    -0.06  -0.08   0.00    -0.03   0.05  -0.01     0.08  -0.05   0.04
  57   6     0.06  -0.04  -0.02     0.02  -0.01   0.01    -0.07   0.01  -0.09
  58   6     0.09  -0.03   0.02     0.01   0.00   0.01     0.00  -0.02  -0.02
  59   6     0.06  -0.02   0.02     0.01   0.00   0.00    -0.04   0.01  -0.01
  60   1     0.00   0.01  -0.02     0.00   0.00   0.00     0.00   0.05  -0.04
  61   1     0.03  -0.05  -0.20    -0.10   0.06   0.36    -0.03   0.05   0.04
  62   1     0.14   0.13  -0.12    -0.34  -0.10   0.24    -0.08   0.05   0.02
  63   1     0.05  -0.07   0.07    -0.19   0.01  -0.12    -0.05  -0.08  -0.06
  64   1    -0.08   0.02   0.04     0.06   0.06   0.03    -0.02  -0.05  -0.03
  65   1    -0.03   0.01  -0.06    -0.10   0.04  -0.23     0.09  -0.09  -0.04
  66   1     0.07   0.02  -0.04     0.14   0.12  -0.17     0.11  -0.10  -0.04
  67   1     0.00  -0.04   0.04    -0.09   0.05   0.17     0.06   0.07   0.11
  68   1    -0.02   0.07   0.06    -0.14  -0.06   0.06     0.03   0.02   0.05
  69   1    -0.01  -0.02  -0.05     0.00   0.00   0.02     0.02   0.02   0.10
  70   1    -0.01   0.04   0.11    -0.01   0.01   0.05     0.02   0.01   0.10
  71   1    -0.01   0.08   0.22    -0.01   0.01   0.05     0.00  -0.02   0.02
  72   1     0.01   0.00   0.02    -0.01   0.02   0.00     0.01  -0.02   0.00
  73   1     0.01   0.01   0.05     0.00   0.00   0.01     0.01  -0.03  -0.01
  74   1    -0.02  -0.01   0.00     0.09  -0.01  -0.06     0.07  -0.02  -0.05
  75   1     0.01  -0.01  -0.02     0.19   0.00  -0.13     0.05  -0.03  -0.04
  76   1     0.01  -0.01  -0.03     0.14  -0.01  -0.10    -0.03  -0.04  -0.01
  77   1    -0.01   0.03  -0.02     0.02   0.02  -0.02    -0.01   0.03  -0.03
  78   1     0.01  -0.03   0.04     0.02  -0.02   0.01     0.01  -0.06   0.07
  79   1    -0.10  -0.02   0.10     0.01   0.05   0.01    -0.02  -0.02   0.02
  80   1    -0.05   0.04   0.00    -0.03   0.03   0.00    -0.03  -0.03   0.01
  81   1    -0.13   0.09   0.02     0.00   0.01  -0.01    -0.03  -0.03  -0.01
  82   1     0.08  -0.03   0.14     0.04   0.02   0.03    -0.01  -0.06   0.04
  83   1     0.01   0.00  -0.05     0.03   0.01  -0.01    -0.06   0.00  -0.05
  84   1     0.20  -0.02  -0.04     0.05   0.00  -0.01     0.06   0.00  -0.03
  85   1    -0.03   0.05  -0.11     0.00   0.01  -0.02     0.12   0.00   0.10
  86   1    -0.01   0.07   0.01     0.00   0.01   0.01     0.00   0.03  -0.05
  87   1    -0.03   0.18  -0.02     0.01   0.04  -0.01     0.00  -0.14   0.04
  88   1     0.11  -0.11  -0.07     0.04   0.00  -0.01    -0.05   0.07   0.06
  89   1     0.03  -0.18   0.11     0.01  -0.01   0.01     0.02   0.12  -0.05
  90   1     0.02  -0.02   0.06     0.00   0.03  -0.01     0.02   0.00  -0.03
  91   1     0.05   0.04   0.05     0.07   0.03   0.03     0.14   0.04   0.07
  92   1     0.02   0.06   0.00     0.00   0.06   0.00     0.04   0.09   0.01
  93   1     0.03   0.03   0.03     0.01  -0.01   0.00     0.06  -0.03   0.07
  94   1     0.06   0.05   0.08     0.04   0.01   0.03     0.14   0.13   0.14
  95   1    -0.01  -0.06   0.01     0.02  -0.03   0.00    -0.05  -0.07   0.00
  96   1    -0.02   0.08  -0.04     0.01   0.02  -0.01    -0.06   0.21  -0.09
  97   1     0.02   0.09  -0.01     0.00   0.02   0.04     0.01   0.06   0.06
  98   1    -0.06   0.02  -0.07     0.02  -0.04   0.00     0.01  -0.01   0.01
  99   1    -0.03  -0.01   0.04     0.01  -0.04   0.06     0.04  -0.03   0.08
 100   1     0.05   0.07   0.05    -0.05   0.06   0.02    -0.04   0.09   0.04
 101   1     0.02   0.01   0.10    -0.02   0.03   0.02     0.03   0.01   0.05
 102   1     0.02   0.02   0.08    -0.02   0.06  -0.04    -0.02   0.02  -0.05
 103   1    -0.03   0.02  -0.07     0.01  -0.02  -0.01     0.01  -0.02  -0.04
 104   1    -0.02   0.04  -0.05     0.02  -0.03  -0.01     0.10  -0.07  -0.05
 105   1    -0.02   0.03  -0.04     0.01  -0.02  -0.04     0.07  -0.02  -0.15
 106   1    -0.02  -0.01   0.05    -0.05   0.05   0.02    -0.03  -0.02   0.07
 107   1     0.05  -0.07  -0.03    -0.01  -0.06  -0.05     0.06  -0.05   0.00
 108   1     0.05  -0.08   0.09     0.03  -0.04   0.08     0.04  -0.06   0.10
 109   1     0.01  -0.02  -0.04     0.00  -0.01  -0.01     0.02   0.00   0.01
 110   1    -0.01   0.01  -0.05    -0.01   0.00  -0.02     0.03  -0.01   0.05
 111   1    -0.05   0.06   0.00    -0.01   0.02   0.00     0.03  -0.06   0.00
 112   1    -0.01  -0.03   0.06     0.00  -0.01   0.02     0.01   0.02  -0.04
 113   1    -0.05   0.02   0.06    -0.01   0.01   0.01     0.03  -0.03  -0.04
 114   1    -0.02   0.02  -0.08    -0.01  -0.02   0.05     0.00   0.07  -0.05
 115   1     0.01   0.00  -0.02    -0.01  -0.01  -0.01     0.04   0.02   0.01
 116   1    -0.11  -0.10  -0.07    -0.03   0.06   0.00     0.12  -0.09   0.05
 117   1    -0.03  -0.09   0.06    -0.05   0.05  -0.06     0.09  -0.06   0.14
 118   1    -0.09  -0.15   0.03    -0.03   0.08   0.02     0.10  -0.07  -0.05
 119   1     0.10  -0.01  -0.03     0.02  -0.01   0.01    -0.02   0.00  -0.03
 120   1     0.06  -0.09  -0.02     0.01  -0.03   0.03    -0.02   0.05  -0.23
 121   1     0.08  -0.04  -0.02     0.04   0.00   0.01    -0.23   0.01  -0.09
 122   1     0.09  -0.03   0.06     0.01   0.01   0.01     0.00  -0.02  -0.01
 123   1     0.14  -0.02  -0.03     0.02   0.01   0.00    -0.02  -0.04  -0.01
 124   1     0.10  -0.04   0.06     0.01   0.00   0.02    -0.01  -0.01  -0.05
 125   1     0.06  -0.01   0.03     0.01   0.00   0.00    -0.02   0.00  -0.01
 126   1     0.08  -0.01   0.08     0.02  -0.01   0.02    -0.06   0.01  -0.07
 127   1     0.11  -0.03  -0.02     0.03  -0.01  -0.01    -0.09   0.01   0.03
                    46                     47                     48
                     A                      A                      A
 Frequencies --   189.0489               198.8834               203.5133
 Red. masses --     3.2271                 2.9045                 2.0094
 Frc consts  --     0.0680                 0.0677                 0.0490
 IR Inten    --     2.7965                 0.5509                 1.5584
 Atom AN      X      Y      Z        X      Y      Z        X      Y      Z
   1   6     0.02   0.01   0.01     0.02  -0.03   0.00     0.00   0.01   0.00
   2   6     0.02   0.00  -0.03     0.05  -0.07   0.02    -0.01   0.03  -0.03
   3   6     0.02   0.00  -0.04     0.02  -0.03   0.01    -0.02   0.01  -0.01
   4   6     0.02  -0.02  -0.06     0.00  -0.03   0.00    -0.01  -0.01   0.01
   5   6    -0.01   0.00   0.01     0.00  -0.01   0.00     0.00  -0.01  -0.01
   6   6    -0.03   0.03  -0.07    -0.04  -0.02   0.06    -0.01  -0.03   0.04
   7   8    -0.08  -0.11   0.13    -0.04   0.00  -0.04     0.01   0.02  -0.05
   8   6    -0.10  -0.06   0.12    -0.01  -0.03  -0.05     0.03   0.00  -0.05
   9   6     0.05   0.04   0.04     0.01   0.00   0.00     0.03   0.03   0.02
  10   6     0.00  -0.02  -0.02    -0.03  -0.02   0.00    -0.05  -0.02   0.00
  11   6     0.04   0.02   0.01     0.00   0.00   0.00     0.02   0.02   0.01
  12   6     0.03   0.02  -0.05     0.00   0.00   0.00     0.02   0.01  -0.04
  13   6     0.03   0.01  -0.09     0.00   0.01   0.01     0.02   0.01  -0.05
  14   6     0.05   0.02  -0.06     0.01   0.01   0.00     0.03   0.03  -0.02
  15   6     0.05   0.03   0.01     0.01   0.01   0.00     0.03   0.03   0.01
  16   6     0.02  -0.02   0.01     0.00   0.00  -0.01     0.01  -0.01   0.01
  17   6     0.00   0.02   0.00     0.00   0.01  -0.01     0.00   0.02   0.00
  18   6    -0.05  -0.02   0.01    -0.02  -0.02  -0.01    -0.02  -0.02  -0.01
  19   6    -0.03  -0.02   0.00     0.01  -0.02  -0.03     0.03  -0.03  -0.02
  20   6     0.03  -0.02  -0.04     0.03  -0.01  -0.04     0.03  -0.04  -0.03
  21   6     0.04  -0.02  -0.06    -0.01  -0.01  -0.01    -0.02  -0.04  -0.01
  22   6     0.02  -0.02  -0.04    -0.04  -0.01   0.01    -0.06  -0.04   0.00
  23   6    -0.03   0.00   0.00     0.00   0.01  -0.01    -0.01   0.00  -0.01
  24   6     0.03  -0.01   0.00    -0.02  -0.01   0.02    -0.03  -0.02   0.01
  25   6     0.02  -0.05   0.00     0.01   0.01  -0.01     0.01  -0.03   0.01
  26   6    -0.06  -0.03   0.01     0.01   0.00   0.00    -0.03  -0.01   0.02
  27   6    -0.02  -0.01   0.00    -0.01   0.00   0.00    -0.01   0.01   0.00
  28   6    -0.03  -0.03   0.02    -0.03   0.00   0.00    -0.02  -0.04   0.01
  29   6     0.02   0.05   0.01     0.00   0.00   0.02     0.00   0.00   0.02
  30   6     0.04  -0.05   0.03    -0.02   0.05  -0.01    -0.01   0.08   0.01
  31   6    -0.03   0.03  -0.03     0.00   0.03   0.00     0.00   0.01   0.00
  32   6     0.01   0.01   0.05     0.02   0.03   0.03     0.01   0.01   0.01
  33   6    -0.04   0.00   0.04    -0.03   0.04  -0.02    -0.01  -0.02   0.03
  34   6     0.02   0.00  -0.04    -0.03   0.04   0.00     0.01   0.00   0.05
  35   8    -0.01   0.00   0.02    -0.01  -0.01   0.06     0.01   0.01  -0.04
  36  12     0.02   0.05   0.01     0.03  -0.06   0.01    -0.01   0.01   0.02
  37   8     0.01   0.01   0.01    -0.01  -0.01  -0.04     0.01   0.00   0.04
  38   6     0.00   0.00   0.01     0.01   0.00   0.04     0.00   0.00  -0.02
  39   7     0.02  -0.01  -0.04     0.00  -0.03   0.01    -0.05  -0.01  -0.01
  40   7     0.05   0.03   0.03     0.02  -0.02   0.00     0.02   0.02   0.01
  41   8     0.00   0.00   0.01     0.01   0.01   0.03     0.00   0.00  -0.02
  42   8     0.02   0.00  -0.01     0.07   0.01  -0.01    -0.05  -0.02   0.01
  43   6     0.01   0.00  -0.01     0.04   0.00  -0.01    -0.03  -0.01   0.01
  44   6     0.00   0.01   0.00     0.02   0.00  -0.01    -0.02   0.00   0.01
  45   6     0.00   0.00   0.01     0.03  -0.01   0.02    -0.02   0.01  -0.01
  46   8     0.00  -0.01  -0.01     0.02  -0.03  -0.03    -0.01   0.02   0.02
  47   6     0.01  -0.01   0.00     0.01  -0.03  -0.01    -0.02   0.02   0.00
  48   8    -0.01   0.02  -0.02     0.00  -0.08   0.01     0.02  -0.01   0.00
  49   6     0.01   0.00   0.00    -0.02   0.00  -0.04     0.02   0.00   0.02
  50   8     0.01   0.00   0.00    -0.03  -0.01  -0.01     0.03   0.01   0.01
  51   8    -0.01  -0.01   0.00    -0.01   0.06  -0.04     0.02  -0.03  -0.03
  52   6    -0.02   0.03   0.02    -0.02   0.11   0.01     0.03  -0.03  -0.01
  53   6    -0.01   0.03  -0.01    -0.06   0.01   0.01     0.02  -0.02   0.00
  54   6    -0.01  -0.01   0.01    -0.01   0.01  -0.03     0.01   0.00   0.01
  55   8    -0.05   0.05   0.04     0.00   0.16   0.05     0.03   0.01   0.02
  56   6     0.03   0.03  -0.01    -0.05   0.01   0.01    -0.02   0.01  -0.01
  57   6    -0.03   0.01   0.02     0.05   0.00   0.04     0.01   0.00   0.03
  58   6    -0.02   0.00  -0.01     0.03  -0.01  -0.02    -0.02   0.01   0.01
  59   6    -0.02   0.00   0.00    -0.03  -0.01   0.01     0.01   0.02  -0.01
  60   1     0.00  -0.01  -0.04     0.05  -0.06   0.02    -0.01   0.03  -0.02
  61   1     0.02  -0.16  -0.19     0.00  -0.01   0.03    -0.01   0.04   0.05
  62   1     0.11   0.14  -0.11    -0.01  -0.08   0.02    -0.03  -0.06   0.03
  63   1     0.03  -0.08   0.08     0.00   0.06  -0.02    -0.01   0.04  -0.04
  64   1    -0.08   0.06   0.08     0.03  -0.05  -0.04     0.03  -0.05  -0.05
  65   1    -0.20   0.07  -0.20     0.03  -0.02   0.14     0.07  -0.04   0.10
  66   1     0.15   0.10  -0.15    -0.14  -0.06   0.10    -0.09  -0.06   0.07
  67   1    -0.11  -0.15   0.17    -0.01  -0.03  -0.08     0.03   0.03  -0.08
  68   1    -0.19   0.06   0.17     0.01  -0.04  -0.06     0.06  -0.04  -0.07
  69   1     0.02   0.01  -0.07     0.00   0.00   0.01     0.01   0.00  -0.06
  70   1     0.03   0.00  -0.13     0.00   0.02   0.02     0.02   0.01  -0.09
  71   1     0.05   0.02  -0.09     0.01   0.01   0.00     0.03   0.03  -0.03
  72   1     0.04  -0.05   0.00     0.00   0.00  -0.01     0.03  -0.02   0.01
  73   1    -0.02   0.07  -0.03    -0.01   0.02  -0.02    -0.01   0.05  -0.02
  74   1    -0.05  -0.02   0.01     0.03  -0.02  -0.04     0.06  -0.02  -0.03
  75   1     0.05  -0.02  -0.06     0.06   0.00  -0.06     0.07  -0.04  -0.05
  76   1     0.08  -0.01  -0.09     0.00  -0.01  -0.02    -0.02  -0.06  -0.02
  77   1    -0.03   0.02  -0.02    -0.01   0.03  -0.03    -0.01   0.01  -0.02
  78   1     0.03  -0.03   0.02    -0.01  -0.03   0.02     0.00  -0.07   0.02
  79   1     0.01  -0.08  -0.01     0.05   0.09  -0.01    -0.02  -0.08   0.00
  80   1     0.04  -0.07   0.02    -0.08   0.02   0.02     0.06  -0.04   0.01
  81   1     0.01  -0.05  -0.01     0.05  -0.06  -0.03    -0.01   0.00   0.01
  82   1    -0.08  -0.06  -0.05     0.00  -0.02   0.03    -0.03   0.00  -0.05
  83   1    -0.05  -0.02   0.06    -0.02   0.01  -0.02     0.02  -0.02   0.06
  84   1    -0.12  -0.04   0.04     0.05   0.00  -0.02    -0.10  -0.03   0.04
  85   1    -0.19  -0.05  -0.07     0.05   0.02   0.04    -0.08  -0.01  -0.04
  86   1     0.04  -0.14   0.11    -0.04   0.04  -0.07     0.01  -0.04   0.04
  87   1     0.05   0.13  -0.03    -0.05  -0.07   0.02     0.01   0.07  -0.02
  88   1    -0.11  -0.04   0.01    -0.18   0.01   0.07    -0.14  -0.05   0.02
  89   1    -0.02   0.01   0.00     0.04   0.13  -0.05     0.03   0.04   0.00
  90   1     0.00  -0.09   0.05     0.04  -0.14  -0.01     0.03  -0.15   0.03
  91   1     0.02   0.06   0.07     0.09   0.01   0.02    -0.04  -0.01   0.03
  92   1     0.01   0.07  -0.01    -0.06   0.06   0.02     0.04  -0.03  -0.01
  93   1     0.01   0.07   0.00    -0.03  -0.09   0.01     0.03   0.05   0.05
  94   1     0.04  -0.03   0.10     0.05   0.08   0.03     0.25   0.20   0.30
  95   1     0.05  -0.11   0.02    -0.07   0.00  -0.01    -0.13  -0.26  -0.04
  96   1     0.03  -0.02   0.01    -0.05   0.12  -0.06    -0.13   0.38  -0.26
  97   1     0.03   0.10  -0.03     0.02   0.07   0.00     0.01   0.05   0.00
  98   1    -0.08   0.02  -0.10    -0.02   0.03  -0.03    -0.02   0.01  -0.03
  99   1    -0.04  -0.02   0.03     0.02   0.01   0.02     0.00   0.00   0.02
 100   1     0.06   0.03   0.03     0.07   0.03   0.01     0.02   0.02   0.01
 101   1    -0.01   0.00   0.07    -0.01   0.02   0.05     0.01   0.00   0.03
 102   1     0.02   0.01   0.10     0.04   0.04   0.07     0.01   0.00   0.02
 103   1    -0.04   0.00   0.05     0.02   0.03  -0.10    -0.03  -0.01   0.06
 104   1    -0.06  -0.02   0.02    -0.09   0.13  -0.05     0.01  -0.06   0.03
 105   1    -0.04   0.01   0.07    -0.05   0.03   0.07     0.00   0.00   0.00
 106   1     0.00   0.05  -0.04    -0.03   0.08  -0.02    -0.03   0.02   0.07
 107   1     0.02  -0.04  -0.10    -0.09   0.02   0.00     0.05  -0.02   0.01
 108   1     0.05  -0.03   0.01     0.01   0.07  -0.01     0.04  -0.02   0.10
 109   1     0.00   0.01   0.01     0.04  -0.02   0.00    -0.03   0.01   0.00
 110   1     0.01   0.00   0.02     0.05  -0.01   0.07    -0.03   0.01  -0.04
 111   1     0.01  -0.02   0.00     0.02  -0.07  -0.01    -0.03   0.05   0.00
 112   1     0.01   0.01  -0.01     0.01   0.01  -0.04    -0.02  -0.01   0.02
 113   1     0.02  -0.01  -0.01     0.03  -0.06  -0.03    -0.03   0.03   0.02
 114   1    -0.01   0.03  -0.01    -0.15   0.01   0.02     0.04  -0.02   0.01
 115   1    -0.01  -0.01   0.00    -0.03  -0.02  -0.04    -0.01   0.00   0.00
 116   1     0.04   0.04   0.01    -0.27   0.25  -0.03     0.04  -0.07   0.00
 117   1     0.06   0.03  -0.01     0.26   0.07  -0.03    -0.14  -0.01  -0.02
 118   1     0.04   0.01  -0.04    -0.16  -0.28   0.10     0.01   0.12   0.00
 119   1    -0.05   0.00   0.01     0.07  -0.01   0.07    -0.04   0.01  -0.04
 120   1    -0.03   0.03   0.03     0.03  -0.06   0.07    -0.01   0.02   0.13
 121   1    -0.01   0.00   0.02     0.09   0.05   0.05     0.11  -0.04   0.02
 122   1    -0.01   0.01  -0.01     0.12   0.03   0.04    -0.11  -0.03  -0.04
 123   1    -0.03  -0.02   0.00     0.03  -0.12  -0.04    -0.02   0.12   0.03
 124   1    -0.03   0.01  -0.03    -0.06   0.05  -0.05     0.06  -0.05   0.05
 125   1    -0.03   0.00   0.00     0.01  -0.01   0.04    -0.03   0.02  -0.05
 126   1    -0.03  -0.01  -0.02    -0.06   0.01  -0.08     0.03  -0.01   0.05
 127   1    -0.04   0.00   0.01    -0.11  -0.04   0.06     0.07   0.06  -0.04
                    49                     50                     51
                     A                      A                      A
 Frequencies --   207.0900               207.9456               209.2969
 Red. masses --     1.5714                 1.3106                 2.1629
 Frc consts  --     0.0397                 0.0334                 0.0558
 IR Inten    --     3.1555                 0.3183                 2.2806
 Atom AN      X      Y      Z        X      Y      Z        X      Y      Z
   1   6     0.00  -0.02   0.01     0.01   0.00  -0.01    -0.03   0.04  -0.02
   2   6     0.02  -0.04   0.02     0.02  -0.01   0.00    -0.08   0.12  -0.04
   3   6     0.01  -0.02   0.01     0.01   0.00   0.00    -0.04   0.06  -0.01
   4   6     0.00   0.00   0.00    -0.01   0.00   0.00     0.01   0.00  -0.01
   5   6     0.00   0.00   0.00     0.00   0.00  -0.01     0.00   0.01   0.01
   6   6     0.00   0.00  -0.01    -0.01  -0.01   0.01     0.00   0.02  -0.02
   7   8     0.00   0.00   0.01     0.00   0.00   0.00    -0.01  -0.01   0.01
   8   6    -0.01   0.00   0.01     0.00   0.00  -0.01    -0.01  -0.01   0.00
   9   6     0.00  -0.01   0.00     0.00   0.00   0.00     0.00   0.00   0.00
  10   6     0.00   0.00   0.00     0.00   0.00   0.00     0.02   0.02  -0.01
  11   6     0.00  -0.01  -0.01     0.00   0.01   0.01     0.00   0.00   0.00
  12   6    -0.01   0.00   0.00     0.00   0.00   0.01     0.00   0.00  -0.01
  13   6     0.00   0.01   0.02     0.00  -0.01  -0.02     0.00   0.00   0.00
  14   6     0.00   0.01   0.01     0.00  -0.01  -0.02     0.00   0.00   0.00
  15   6     0.00   0.00  -0.01     0.00   0.00   0.00     0.00   0.00   0.00
  16   6     0.00   0.00  -0.01     0.00   0.00   0.01     0.00   0.00  -0.01
  17   6     0.00   0.00  -0.02     0.00   0.00   0.01     0.00   0.00   0.00
  18   6     0.00   0.00   0.00     0.00   0.00   0.00     0.02   0.02   0.00
  19   6     0.00   0.00   0.00     0.00   0.00  -0.01    -0.01   0.01   0.03
  20   6     0.01   0.01  -0.01     0.00   0.00  -0.01    -0.04   0.00   0.04
  21   6     0.00   0.01   0.00     0.00   0.00   0.00     0.00   0.00   0.01
  22   6     0.00   0.01   0.01    -0.01   0.00   0.00     0.03   0.01  -0.02
  23   6     0.00   0.00   0.00     0.00   0.00   0.00     0.01   0.00  -0.01
  24   6     0.00   0.00   0.01     0.00   0.00   0.00     0.03   0.00  -0.03
  25   6     0.00   0.01   0.00     0.01  -0.01   0.00     0.00   0.00  -0.01
  26   6     0.02   0.00   0.00    -0.02   0.00   0.00     0.00   0.00   0.00
  27   6     0.01   0.00  -0.01    -0.01  -0.01   0.01     0.01   0.01   0.00
  28   6    -0.01   0.00  -0.01     0.01   0.02   0.01    -0.01  -0.01   0.00
  29   6     0.00   0.00   0.01     0.00   0.00   0.00     0.00   0.01  -0.03
  30   6    -0.01   0.00   0.00     0.00   0.01   0.00     0.04  -0.04   0.01
  31   6     0.00   0.00   0.00     0.00   0.01   0.00     0.00  -0.03  -0.01
  32   6     0.00   0.00   0.01     0.00   0.01   0.01    -0.02  -0.01  -0.05
  33   6    -0.03   0.02   0.00     0.01   0.01  -0.02     0.06  -0.08   0.02
  34   6    -0.02   0.01  -0.02     0.00   0.01   0.00     0.04  -0.05   0.05
  35   8     0.05  -0.02  -0.02     0.03  -0.02   0.01     0.02  -0.02   0.03
  36  12     0.00   0.01   0.00     0.00  -0.01  -0.01     0.00  -0.02   0.02
  37   8     0.01  -0.01   0.03     0.00  -0.01   0.01     0.00  -0.01  -0.02
  38   6     0.05   0.02   0.00     0.04   0.01   0.02     0.04   0.01   0.03
  39   7     0.01  -0.01   0.00     0.00  -0.01   0.00    -0.02   0.04   0.00
  40   7     0.00  -0.01   0.01     0.00   0.00  -0.01    -0.02   0.02  -0.01
  41   8     0.04   0.03   0.00     0.04   0.02   0.01     0.03   0.02   0.02
  42   8    -0.04  -0.06   0.01    -0.01  -0.04   0.00     0.02  -0.02   0.00
  43   6    -0.02  -0.03   0.01     0.00  -0.02   0.00     0.01  -0.01   0.00
  44   6    -0.01  -0.02   0.01     0.00  -0.01   0.00     0.01  -0.01  -0.01
  45   6     0.00   0.02   0.00     0.01   0.01   0.01     0.03   0.01   0.01
  46   8     0.01   0.02   0.00     0.01   0.00  -0.01     0.02   0.00  -0.02
  47   6    -0.07  -0.02  -0.02    -0.05  -0.03  -0.02    -0.04  -0.04  -0.02
  48   8     0.00   0.01  -0.01    -0.01   0.00   0.00     0.00  -0.05   0.01
  49   6     0.01   0.01   0.02     0.00   0.01   0.01    -0.01   0.00  -0.01
  50   8     0.01   0.01   0.01     0.00   0.01   0.00    -0.03   0.01   0.00
  51   8     0.00  -0.01  -0.01     0.00   0.01   0.01    -0.01   0.04   0.01
  52   6     0.00   0.00   0.00    -0.01   0.01   0.01    -0.01   0.03   0.00
  53   6     0.00   0.00  -0.01    -0.01   0.00   0.00    -0.03  -0.01   0.01
  54   6     0.00   0.01   0.01     0.00   0.01   0.00     0.00   0.01   0.00
  55   8    -0.01   0.01   0.01    -0.01   0.02   0.01     0.01   0.03   0.00
  56   6     0.00   0.00  -0.01    -0.01   0.00   0.00    -0.06   0.00   0.01
  57   6    -0.02   0.01  -0.01     0.00   0.01   0.00     0.02   0.00   0.01
  58   6     0.03  -0.01   0.03     0.02  -0.01   0.01     0.04  -0.01   0.01
  59   6    -0.03   0.06  -0.04    -0.04   0.04  -0.03    -0.04   0.02  -0.01
  60   1     0.01  -0.04   0.02     0.02  -0.01   0.00    -0.07   0.12  -0.04
  61   1     0.00  -0.01  -0.01    -0.01   0.01   0.01     0.01  -0.02  -0.03
  62   1     0.01   0.01  -0.01    -0.01  -0.01   0.00     0.03   0.01  -0.02
  63   1     0.00  -0.01   0.01    -0.01   0.01  -0.01     0.01  -0.02   0.03
  64   1    -0.01   0.01   0.01     0.01  -0.01  -0.02    -0.01   0.03   0.03
  65   1    -0.01   0.00  -0.02     0.01  -0.01   0.03    -0.04   0.02  -0.05
  66   1     0.01   0.01  -0.01    -0.02  -0.02   0.02     0.03   0.04  -0.03
  67   1    -0.01  -0.01   0.02     0.00   0.01  -0.01    -0.01  -0.02   0.01
  68   1    -0.02   0.01   0.01     0.01   0.00  -0.01    -0.02   0.01   0.01
  69   1    -0.01   0.00   0.00     0.01   0.01   0.01     0.00  -0.01  -0.02
  70   1    -0.01   0.02   0.04     0.01  -0.02  -0.03     0.00   0.00   0.00
  71   1     0.00   0.01   0.02     0.00  -0.02  -0.03     0.00   0.00   0.01
  72   1     0.00   0.00  -0.01     0.00   0.00   0.01     0.00   0.00   0.00
  73   1     0.00   0.00  -0.02     0.00   0.00   0.02     0.00  -0.01  -0.01
  74   1     0.00   0.00  -0.01     0.00   0.00  -0.01    -0.03   0.01   0.05
  75   1     0.01   0.01  -0.01     0.01   0.00  -0.01    -0.07  -0.01   0.08
  76   1     0.01   0.01   0.00     0.00   0.00   0.00     0.00  -0.01   0.01
  77   1     0.00   0.00   0.00     0.00   0.00  -0.01     0.02  -0.01   0.01
  78   1    -0.01   0.01   0.01     0.00  -0.01   0.00     0.03   0.01  -0.04
  79   1     0.00   0.02   0.01     0.01   0.00  -0.01     0.02   0.03  -0.01
  80   1    -0.01   0.02  -0.01     0.01  -0.01   0.01    -0.04  -0.01   0.01
  81   1     0.00   0.01   0.00     0.01  -0.01   0.00     0.02  -0.04  -0.02
  82   1     0.02  -0.03   0.06    -0.02   0.01  -0.04     0.01   0.03  -0.06
  83   1    -0.03   0.01  -0.05     0.01   0.00   0.03     0.06  -0.02   0.04
  84   1     0.10   0.01  -0.03    -0.06   0.00   0.02    -0.06  -0.03   0.02
  85   1     0.12   0.03   0.05    -0.14  -0.05  -0.05     0.09   0.03   0.04
  86   1    -0.03   0.08  -0.10     0.04  -0.11   0.11    -0.02   0.07  -0.05
  87   1    -0.04  -0.10   0.02     0.05   0.10  -0.02    -0.02  -0.06   0.02
  88   1    -0.30   0.02   0.13     0.44   0.01  -0.18    -0.13   0.00   0.06
  89   1     0.15   0.28  -0.10    -0.23  -0.37   0.12     0.06   0.11  -0.03
  90   1     0.13  -0.29  -0.07    -0.20   0.46   0.09     0.05  -0.13  -0.02
  91   1     0.08   0.01   0.00     0.03   0.01   0.01    -0.24  -0.03  -0.03
  92   1    -0.05   0.06   0.02    -0.02   0.02   0.01     0.15  -0.16  -0.07
  93   1    -0.02  -0.08  -0.01    -0.01  -0.03   0.00     0.07   0.24   0.01
  94   1    -0.07  -0.04  -0.11     0.01   0.01   0.01     0.06  -0.01   0.14
  95   1     0.02   0.11   0.01    -0.01  -0.01   0.00     0.05  -0.17  -0.01
  96   1     0.02  -0.09   0.08    -0.01   0.02  -0.01     0.03   0.03  -0.06
  97   1     0.01   0.03   0.00     0.00   0.02   0.00    -0.05  -0.13  -0.02
  98   1    -0.01   0.00  -0.02     0.00   0.01   0.00     0.06  -0.01   0.08
  99   1     0.00  -0.01   0.02     0.01   0.00   0.01    -0.01   0.03  -0.09
 100   1     0.03  -0.02  -0.01     0.01   0.01   0.00    -0.12   0.07   0.02
 101   1    -0.03   0.01   0.00     0.00   0.00   0.01     0.11  -0.05  -0.01
 102   1     0.02   0.02   0.05     0.00   0.01   0.01    -0.07  -0.07  -0.19
 103   1    -0.02   0.01  -0.04     0.05   0.00  -0.04    -0.02  -0.05   0.15
 104   1    -0.06   0.06  -0.01     0.00   0.04  -0.02     0.17  -0.22   0.07
 105   1    -0.04   0.03   0.05     0.00  -0.01   0.00     0.10  -0.06  -0.14
 106   1     0.00   0.02  -0.04     0.00   0.02   0.00     0.02  -0.10   0.09
 107   1    -0.06   0.01  -0.01    -0.01   0.01   0.00     0.16  -0.04   0.02
 108   1    -0.02   0.03  -0.05     0.01   0.02   0.00     0.01  -0.11   0.09
 109   1    -0.03   0.00  -0.02    -0.01   0.00  -0.02     0.00  -0.01  -0.02
 110   1    -0.01   0.06  -0.03     0.01   0.05   0.00     0.03   0.04   0.03
 111   1    -0.11   0.06  -0.06    -0.07   0.02  -0.05    -0.05  -0.02  -0.04
 112   1    -0.10  -0.02  -0.03    -0.07  -0.01  -0.03    -0.05   0.00  -0.04
 113   1    -0.11  -0.09   0.00    -0.08  -0.09  -0.01    -0.05  -0.09  -0.02
 114   1     0.01   0.00  -0.01    -0.02   0.00   0.00    -0.07  -0.01   0.02
 115   1     0.00   0.02   0.01     0.00   0.01   0.00     0.00   0.01   0.00
 116   1     0.03  -0.03  -0.01    -0.04   0.03  -0.01    -0.18   0.12  -0.02
 117   1    -0.04   0.00  -0.01     0.03   0.01   0.00     0.09   0.03  -0.02
 118   1     0.01   0.04  -0.02    -0.03  -0.04   0.02    -0.12  -0.14   0.09
 119   1    -0.01   0.01   0.00    -0.01   0.01   0.01     0.04   0.01   0.02
 120   1    -0.01   0.03  -0.04     0.00   0.01   0.00     0.02  -0.02   0.01
 121   1    -0.05   0.01  -0.01    -0.01   0.01   0.00     0.03   0.02   0.01
 122   1    -0.21  -0.14  -0.09    -0.12  -0.09  -0.05    -0.03  -0.06  -0.02
 123   1     0.06   0.30   0.05     0.04   0.17   0.03     0.06   0.08   0.00
 124   1     0.27  -0.19   0.14     0.17  -0.12   0.08     0.12  -0.07   0.05
 125   1    -0.16   0.06  -0.14    -0.13   0.04  -0.09    -0.09   0.02  -0.04
 126   1     0.00  -0.03   0.02    -0.02  -0.04   0.00    -0.04  -0.03  -0.03
 127   1     0.05   0.20  -0.05     0.00   0.14  -0.02    -0.04   0.08   0.01
                    52                     53                     54
                     A                      A                      A
 Frequencies --   215.4946               218.0973               219.8943
 Red. masses --     1.2908                 2.6031                 1.3530
 Frc consts  --     0.0353                 0.0730                 0.0385
 IR Inten    --     1.2098                 0.8753                 0.7966
 Atom AN      X      Y      Z        X      Y      Z        X      Y      Z
   1   6    -0.01   0.02  -0.02     0.00   0.00   0.01    -0.01   0.01   0.00
   2   6    -0.03   0.05  -0.03     0.01  -0.02   0.01    -0.02   0.02  -0.01
   3   6    -0.01   0.01  -0.01     0.01  -0.01   0.00    -0.01   0.00   0.00
   4   6     0.00   0.00   0.00    -0.01   0.02   0.03     0.00   0.00  -0.01
   5   6     0.00   0.00   0.00     0.00   0.01   0.00     0.00   0.00   0.00
   6   6     0.00  -0.01   0.01     0.02   0.01  -0.01     0.00   0.00   0.00
   7   8     0.00   0.01  -0.01     0.03   0.03  -0.01     0.00   0.00  -0.01
   8   6     0.01   0.00  -0.02     0.02   0.03  -0.01     0.00   0.00  -0.01
   9   6     0.01   0.01   0.00     0.01   0.01   0.02     0.00   0.00   0.00
  10   6    -0.01  -0.01   0.00     0.00   0.00   0.00     0.00   0.00   0.00
  11   6     0.01   0.01   0.01     0.00   0.01   0.02     0.01   0.00  -0.01
  12   6     0.01   0.00  -0.02     0.00  -0.01  -0.04     0.01   0.01   0.00
  13   6     0.01   0.00  -0.03     0.00   0.00  -0.05     0.01   0.01   0.01
  14   6     0.01   0.01   0.00     0.01   0.01   0.00     0.00   0.00  -0.01
  15   6     0.01   0.01   0.01     0.01   0.01   0.02     0.00   0.00   0.00
  16   6     0.00   0.00   0.01     0.00   0.00   0.03     0.00   0.00  -0.01
  17   6     0.00   0.01   0.01     0.01   0.01   0.01     0.00   0.00   0.00
  18   6    -0.01  -0.02  -0.02     0.00   0.00   0.01     0.00   0.00   0.00
  19   6    -0.02  -0.01  -0.02     0.01   0.00   0.00     0.00   0.00   0.00
  20   6    -0.02   0.01  -0.02     0.02   0.00   0.00     0.00   0.00   0.00
  21   6    -0.01   0.01  -0.01     0.00   0.00   0.00     0.00   0.00   0.00
  22   6    -0.01   0.00   0.01    -0.01   0.00   0.01    -0.01   0.00   0.00
  23   6     0.00   0.01  -0.01     0.00   0.00   0.01     0.00   0.00   0.00
  24   6     0.00   0.00   0.02    -0.01   0.00   0.01     0.00   0.00   0.01
  25   6     0.01  -0.02   0.01     0.01  -0.03   0.02     0.00   0.00  -0.01
  26   6    -0.02   0.00   0.01    -0.01   0.01   0.02     0.00  -0.01   0.00
  27   6     0.00   0.01   0.00    -0.01   0.02  -0.01     0.00   0.00   0.00
  28   6     0.00  -0.02   0.01     0.00  -0.03   0.01     0.00   0.01   0.00
  29   6     0.04   0.00   0.02    -0.01  -0.01   0.01     0.01   0.00   0.01
  30   6    -0.02  -0.03  -0.01    -0.02   0.03  -0.01    -0.01  -0.01   0.00
  31   6     0.01   0.02   0.01     0.00   0.00   0.01     0.00   0.00   0.00
  32   6     0.01   0.02   0.01     0.00  -0.01   0.01     0.00   0.00   0.00
  33   6     0.02  -0.03   0.00    -0.04   0.02   0.01     0.00  -0.02   0.02
  34   6     0.02  -0.03   0.03     0.00   0.00  -0.02     0.00  -0.02   0.01
  35   8    -0.01   0.01   0.00     0.02  -0.03   0.06     0.04  -0.02   0.00
  36  12    -0.01  -0.01   0.00    -0.01   0.01  -0.02     0.00   0.01   0.01
  37   8     0.01   0.00   0.00    -0.01   0.00  -0.07     0.00  -0.01   0.00
  38   6    -0.01   0.00  -0.01     0.04   0.00   0.05     0.04   0.00   0.01
  39   7    -0.01  -0.01   0.00     0.01   0.00   0.00    -0.01   0.00   0.00
  40   7     0.00   0.01  -0.01     0.01   0.00   0.02     0.00   0.01   0.01
  41   8    -0.01   0.00   0.00     0.03   0.02   0.04     0.04   0.01   0.01
  42   8     0.00   0.01   0.00     0.05   0.00   0.00    -0.04  -0.04   0.01
  43   6     0.00   0.00   0.00     0.02   0.00  -0.01    -0.01  -0.02   0.01
  44   6     0.00   0.00   0.00     0.01   0.00  -0.03     0.00  -0.01   0.00
  45   6     0.00   0.00   0.00     0.04   0.00   0.02     0.00   0.01   0.00
  46   8     0.00   0.00   0.00     0.01  -0.01  -0.03     0.00  -0.01   0.02
  47   6     0.01   0.01   0.00    -0.02  -0.05  -0.02    -0.05  -0.03  -0.02
  48   8     0.00  -0.01   0.00    -0.03   0.00  -0.03     0.02   0.00   0.00
  49   6     0.00   0.00   0.01    -0.04   0.01  -0.02     0.00   0.01   0.00
  50   8     0.01   0.01   0.00    -0.09   0.04   0.00    -0.01   0.00   0.02
  51   8     0.00   0.00   0.00    -0.03   0.07   0.10     0.01  -0.01  -0.02
  52   6     0.00   0.00   0.00    -0.02  -0.03  -0.01     0.02  -0.01  -0.01
  53   6     0.00  -0.01   0.00    -0.02  -0.01  -0.03     0.02   0.00   0.00
  54   6     0.00   0.00   0.01     0.00   0.02   0.04     0.00   0.01  -0.02
  55   8     0.00   0.00   0.01    -0.04  -0.12  -0.08     0.03   0.01   0.00
  56   6    -0.02   0.00   0.00    -0.01  -0.01  -0.03     0.01   0.00   0.00
  57   6     0.02  -0.01   0.01     0.00   0.00  -0.02    -0.03   0.05   0.01
  58   6     0.00   0.00   0.00     0.06  -0.02  -0.01     0.00   0.01   0.00
  59   6     0.00  -0.01   0.00    -0.04   0.00   0.01    -0.01   0.05  -0.03
  60   1    -0.03   0.05  -0.03     0.01  -0.03   0.01    -0.02   0.01  -0.01
  61   1     0.00   0.01   0.01    -0.01   0.05   0.06     0.00   0.00  -0.01
  62   1    -0.01  -0.01   0.01    -0.04  -0.01   0.04     0.00  -0.01   0.00
  63   1     0.00   0.01  -0.01    -0.02   0.00  -0.02     0.00   0.00   0.00
  64   1     0.01  -0.01  -0.01     0.01   0.01   0.00     0.00  -0.01  -0.01
  65   1     0.02  -0.01   0.03     0.03   0.00  -0.01     0.00   0.00   0.01
  66   1    -0.03  -0.02   0.02     0.02   0.01  -0.01    -0.01  -0.01   0.01
  67   1     0.01   0.01  -0.02     0.03   0.05  -0.01     0.00  -0.01  -0.01
  68   1     0.02   0.00  -0.02     0.04   0.00  -0.02     0.00  -0.01  -0.01
  69   1     0.01   0.00  -0.03    -0.01  -0.02  -0.08     0.00   0.01   0.01
  70   1     0.01  -0.01  -0.05     0.00  -0.01  -0.09     0.01   0.01   0.02
  71   1     0.01   0.01   0.00     0.01   0.02   0.00     0.00   0.00  -0.01
  72   1     0.01   0.00   0.01     0.00   0.01   0.03     0.01  -0.01  -0.01
  73   1     0.00   0.01   0.00     0.00   0.02   0.00     0.00   0.00  -0.01
  74   1    -0.03  -0.01  -0.03     0.02   0.00   0.00     0.00   0.00   0.00
  75   1    -0.02   0.02  -0.03     0.03   0.00  -0.01     0.00   0.00  -0.01
  76   1     0.00   0.03  -0.01     0.00   0.00   0.00     0.00   0.00   0.00
  77   1    -0.01   0.02  -0.04     0.00  -0.01   0.02     0.00   0.00   0.00
  78   1    -0.01  -0.01   0.04    -0.01   0.00   0.01     0.00  -0.01   0.01
  79   1     0.00  -0.04  -0.01    -0.02  -0.08  -0.01     0.00   0.00   0.00
  80   1     0.03  -0.03   0.02     0.07  -0.05   0.02     0.00   0.01  -0.01
  81   1     0.00  -0.01   0.00    -0.01   0.00   0.03    -0.01   0.01  -0.01
  82   1     0.00   0.08  -0.13     0.02   0.21  -0.29    -0.01  -0.08   0.11
  83   1     0.11  -0.04   0.09     0.28  -0.10   0.19    -0.10   0.03  -0.06
  84   1    -0.17  -0.04   0.06    -0.34  -0.07   0.14     0.12   0.01  -0.05
  85   1    -0.01   0.01  -0.01    -0.02   0.01  -0.04    -0.03  -0.01  -0.01
  86   1     0.00   0.00   0.01     0.00   0.01   0.01     0.01  -0.03   0.03
  87   1     0.00   0.03   0.00     0.00   0.06  -0.01     0.02   0.02  -0.01
  88   1    -0.04  -0.02   0.01    -0.14  -0.04   0.05     0.01   0.01  -0.01
  89   1     0.02   0.00   0.01     0.07   0.07  -0.01    -0.01   0.00   0.00
  90   1     0.01  -0.05   0.01     0.07  -0.16   0.01    -0.01   0.02   0.00
  91   1     0.44   0.08   0.04     0.04   0.00   0.00     0.11   0.02   0.01
  92   1    -0.22   0.30   0.08    -0.04   0.03   0.02    -0.06   0.08   0.02
  93   1    -0.09  -0.37  -0.06    -0.03  -0.06  -0.01    -0.03  -0.10  -0.01
  94   1    -0.16  -0.11  -0.22     0.05   0.06   0.05    -0.02  -0.02  -0.03
  95   1     0.04   0.20   0.02    -0.07  -0.05  -0.02     0.00   0.03   0.00
  96   1     0.05  -0.23   0.16    -0.04   0.11  -0.09     0.00  -0.03   0.02
  97   1     0.01   0.05   0.02     0.02   0.05   0.02     0.00   0.01   0.00
  98   1     0.00   0.01  -0.01    -0.03  -0.01  -0.04     0.00   0.00  -0.01
  99   1     0.02  -0.01   0.03     0.00  -0.03   0.05     0.00   0.00   0.00
 100   1    -0.05   0.15   0.07     0.07  -0.11  -0.05    -0.01   0.03   0.01
 101   1     0.12  -0.03   0.09    -0.11   0.03  -0.05     0.03  -0.01   0.02
 102   1    -0.04  -0.03  -0.10     0.05   0.04   0.12    -0.01  -0.01  -0.02
 103   1    -0.01  -0.02   0.05    -0.04   0.02  -0.01    -0.01  -0.01   0.05
 104   1     0.06  -0.09   0.02    -0.06   0.04   0.00     0.01  -0.05   0.02
 105   1     0.04  -0.02  -0.06    -0.04   0.04   0.05     0.00  -0.02   0.00
 106   1     0.02  -0.08   0.06     0.00   0.02  -0.03     0.00  -0.03   0.02
 107   1     0.08   0.00   0.05    -0.02   0.00  -0.02     0.03  -0.01   0.01
 108   1     0.00  -0.04   0.03     0.00   0.01  -0.02    -0.01  -0.02   0.01
 109   1     0.00   0.01   0.00     0.02  -0.01  -0.03     0.00  -0.01   0.00
 110   1     0.00  -0.01   0.00     0.05   0.03   0.06    -0.01   0.04  -0.02
 111   1     0.01   0.00   0.01    -0.03  -0.06  -0.04    -0.08   0.03  -0.04
 112   1     0.01   0.00   0.01    -0.04   0.01  -0.06    -0.07  -0.02  -0.02
 113   1     0.01   0.02   0.00    -0.03  -0.12  -0.03    -0.08  -0.08   0.00
 114   1    -0.01  -0.01   0.01     0.00  -0.01  -0.03     0.02   0.00   0.00
 115   1     0.00   0.00   0.01     0.05   0.01   0.04     0.00   0.00  -0.02
 116   1    -0.05   0.03  -0.01     0.10  -0.13   0.00     0.03  -0.02   0.01
 117   1     0.01   0.01  -0.01    -0.18  -0.04  -0.01    -0.03   0.00   0.00
 118   1    -0.04  -0.02   0.03     0.04   0.15  -0.08     0.02   0.05  -0.01
 119   1    -0.01   0.01  -0.05     0.05   0.02   0.00    -0.02   0.00   0.10
 120   1     0.00  -0.01   0.08     0.02  -0.01  -0.09    -0.01   0.05  -0.06
 121   1     0.10  -0.05   0.00    -0.07  -0.01  -0.02    -0.11   0.11   0.03
 122   1    -0.05  -0.03  -0.02     0.17   0.02   0.08     0.39   0.22   0.20
 123   1     0.00   0.05   0.01     0.09  -0.15  -0.06    -0.01  -0.45  -0.07
 124   1     0.04  -0.04   0.01    -0.03   0.04  -0.04    -0.39   0.29  -0.10
 125   1     0.02  -0.01   0.01    -0.06   0.00   0.02    -0.15   0.05  -0.12
 126   1     0.00   0.01   0.00    -0.05  -0.04  -0.05     0.02  -0.05   0.06
 127   1     0.00  -0.02   0.00    -0.08   0.01   0.04     0.08   0.18  -0.06
                    55                     56                     57
                     A                      A                      A
 Frequencies --   223.1346               225.8965               227.0041
 Red. masses --     1.4166                 1.3301                 1.2197
 Frc consts  --     0.0416                 0.0400                 0.0370
 IR Inten    --     1.5956                 0.5563                 0.8005
 Atom AN      X      Y      Z        X      Y      Z        X      Y      Z
   1   6     0.01   0.00  -0.02     0.02  -0.01   0.01    -0.01   0.00  -0.02
   2   6     0.02  -0.01   0.00     0.03  -0.03   0.03    -0.02   0.01  -0.02
   3   6     0.01   0.00   0.00     0.00  -0.01   0.03    -0.01  -0.01  -0.01
   4   6     0.00   0.00   0.00     0.00   0.00  -0.01    -0.01   0.00   0.00
   5   6     0.00   0.00   0.00     0.00   0.00   0.00     0.00   0.00  -0.01
   6   6     0.00   0.00   0.00     0.01   0.00  -0.01     0.00  -0.01   0.01
   7   8    -0.01  -0.01   0.01     0.01   0.00   0.00     0.00   0.00  -0.01
   8   6    -0.01  -0.01   0.01     0.01   0.01   0.00     0.00   0.00  -0.01
   9   6    -0.01  -0.01  -0.01     0.00   0.00   0.00     0.01   0.01   0.00
  10   6     0.00   0.00   0.00    -0.02  -0.01   0.01    -0.01  -0.01   0.00
  11   6    -0.02  -0.01   0.01     0.00   0.00   0.01     0.01   0.01   0.00
  12   6    -0.02  -0.02   0.00     0.00   0.00   0.00     0.01   0.01  -0.01
  13   6    -0.02  -0.01   0.00     0.00   0.00  -0.01     0.01   0.01  -0.01
  14   6    -0.01   0.00   0.02     0.00   0.01  -0.01     0.01   0.01  -0.01
  15   6    -0.01  -0.01   0.01     0.01   0.00   0.00     0.01   0.01   0.00
  16   6    -0.02   0.01   0.02     0.00   0.00   0.01     0.01   0.00   0.00
  17   6     0.00  -0.01   0.01     0.00   0.00   0.00     0.00   0.01   0.00
  18   6     0.00   0.00   0.00     0.00  -0.01  -0.02     0.00  -0.01  -0.01
  19   6     0.00   0.00   0.00    -0.01  -0.02  -0.01     0.02   0.00  -0.03
  20   6     0.00   0.00   0.00    -0.01  -0.01  -0.01     0.00   0.00  -0.01
  21   6     0.00   0.00   0.00     0.00  -0.01  -0.01    -0.03   0.00   0.01
  22   6     0.00   0.00   0.00     0.00  -0.01   0.00    -0.02   0.00   0.00
  23   6     0.00   0.00   0.00     0.01   0.00  -0.03    -0.01   0.01   0.00
  24   6     0.00   0.00  -0.01     0.01  -0.01   0.00     0.00   0.01   0.00
  25   6    -0.02   0.00   0.02     0.01   0.00   0.00     0.01  -0.01   0.00
  26   6     0.01   0.02   0.00     0.00   0.00   0.01     0.00  -0.01   0.01
  27   6     0.01   0.00   0.00     0.00   0.00   0.00     0.00   0.00   0.00
  28   6     0.01  -0.02   0.01     0.00   0.00   0.00    -0.01   0.00   0.00
  29   6     0.00   0.00  -0.01     0.02   0.00   0.00     0.03   0.00   0.00
  30   6     0.01   0.00   0.01     0.02  -0.01   0.02     0.01   0.02   0.01
  31   6     0.00   0.00   0.00     0.00  -0.01  -0.03     0.00   0.02   0.02
  32   6     0.00   0.00   0.00     0.01   0.02   0.00     0.00   0.01   0.01
  33   6     0.02   0.03  -0.05     0.00   0.03  -0.01     0.00  -0.02   0.00
  34   6     0.00   0.02   0.00    -0.04   0.06   0.02     0.01  -0.04   0.02
  35   8     0.01   0.00  -0.03     0.00   0.00   0.00     0.00   0.00   0.00
  36  12     0.01  -0.03  -0.02    -0.04   0.00   0.01    -0.01  -0.01   0.01
  37   8     0.01   0.00   0.03     0.01   0.00  -0.01     0.00   0.00   0.00
  38   6     0.00   0.00  -0.01     0.00   0.00   0.00     0.00   0.00   0.00
  39   7     0.01   0.00   0.00    -0.02  -0.02   0.02    -0.02  -0.01  -0.01
  40   7     0.00  -0.02  -0.03     0.01  -0.01   0.00     0.00   0.01  -0.01
  41   8     0.00  -0.01  -0.02     0.00   0.00   0.00     0.00   0.00   0.00
  42   8    -0.03  -0.02   0.00     0.00   0.00   0.00     0.00   0.00   0.00
  43   6    -0.01  -0.01   0.01     0.00   0.00   0.00     0.00   0.00   0.00
  44   6     0.00   0.00   0.01     0.00   0.00   0.00     0.00   0.00   0.00
  45   6    -0.02   0.00  -0.01     0.00   0.00   0.00     0.00   0.00   0.00
  46   8     0.00   0.00   0.02     0.00   0.00   0.00     0.00   0.00   0.00
  47   6    -0.01   0.01   0.00     0.00   0.00   0.00     0.00   0.00   0.00
  48   8     0.00   0.02   0.02    -0.01  -0.01  -0.02     0.00  -0.02   0.00
  49   6     0.02   0.00   0.01     0.00   0.01   0.00     0.00   0.01   0.00
  50   8     0.04  -0.01   0.00    -0.01   0.02   0.00    -0.01   0.01   0.00
  51   8     0.01  -0.03  -0.03     0.00   0.02   0.02     0.00   0.01   0.01
  52   6     0.00   0.02   0.01     0.00   0.00   0.00     0.00   0.00   0.01
  53   6     0.00   0.02   0.01    -0.01  -0.01  -0.02    -0.01  -0.02   0.00
  54   6     0.00  -0.01  -0.01     0.01   0.01   0.01     0.00   0.01   0.01
  55   8     0.00   0.04   0.03    -0.01   0.02   0.02     0.00   0.03   0.03
  56   6     0.01   0.00   0.01    -0.03  -0.01  -0.02    -0.03  -0.01   0.00
  57   6    -0.02   0.01   0.01     0.03  -0.01   0.00     0.02  -0.01   0.00
  58   6    -0.02   0.00   0.00     0.01  -0.01   0.00     0.01   0.00   0.00
  59   6     0.01   0.02  -0.02     0.00   0.00   0.00     0.00   0.00   0.00
  60   1     0.03   0.00   0.00     0.03  -0.02   0.03    -0.01   0.01  -0.02
  61   1     0.00  -0.02  -0.02    -0.01   0.00  -0.01     0.00   0.01   0.01
  62   1     0.01   0.01  -0.01     0.00   0.01  -0.01    -0.01  -0.01   0.01
  63   1     0.00   0.00   0.01     0.00  -0.02   0.00    -0.01   0.01  -0.02
  64   1    -0.01   0.00   0.00    -0.01   0.00   0.00     0.01  -0.02  -0.02
  65   1    -0.01   0.00   0.00     0.00  -0.01  -0.02     0.02  -0.01   0.03
  66   1     0.00   0.00   0.00     0.02   0.00  -0.01    -0.02  -0.02   0.02
  67   1    -0.01  -0.02   0.02     0.01   0.01   0.00     0.00   0.01  -0.01
  68   1    -0.02   0.01   0.02     0.01   0.00   0.00     0.01  -0.01  -0.01
  69   1    -0.01  -0.02  -0.01     0.00   0.00   0.00     0.01   0.01  -0.01
  70   1    -0.02  -0.01   0.00     0.00   0.00  -0.02     0.01   0.00  -0.02
  71   1    -0.01   0.00   0.04     0.01   0.01  -0.01     0.01   0.01  -0.01
  72   1    -0.03   0.03   0.03     0.00   0.00   0.01     0.02  -0.01   0.00
  73   1     0.00  -0.02   0.01     0.00   0.01   0.00     0.00   0.02  -0.01
  74   1     0.01   0.00   0.00    -0.01  -0.02  -0.01     0.04   0.00  -0.05
  75   1     0.00   0.00   0.00    -0.02  -0.01  -0.01     0.00   0.00  -0.02
  76   1    -0.01   0.00   0.00     0.01  -0.01  -0.01    -0.04   0.00   0.02
  77   1     0.00   0.00   0.00     0.01   0.01  -0.04    -0.02   0.01  -0.01
  78   1     0.01   0.01  -0.01     0.01  -0.01   0.00     0.00   0.00   0.00
  79   1    -0.05  -0.04   0.02     0.01  -0.01   0.00     0.01  -0.01  -0.01
  80   1     0.02  -0.01   0.02     0.02  -0.01   0.00     0.01  -0.02   0.01
  81   1    -0.05   0.03   0.02     0.01   0.00   0.01     0.01  -0.02   0.00
  82   1     0.06   0.31  -0.40     0.00  -0.01   0.02    -0.01  -0.06   0.06
  83   1     0.41  -0.13   0.23    -0.02   0.01  -0.01    -0.06   0.02  -0.02
  84   1    -0.43  -0.09   0.16     0.02   0.01   0.00     0.05   0.00  -0.01
  85   1     0.07   0.02   0.03    -0.05  -0.01  -0.02    -0.05  -0.01  -0.02
  86   1    -0.02   0.06  -0.05     0.02  -0.03   0.03     0.02  -0.03   0.04
  87   1    -0.03  -0.05   0.02     0.02   0.04  -0.01     0.02   0.05  -0.01
  88   1    -0.01  -0.02   0.01    -0.02   0.01   0.01    -0.01   0.00   0.00
  89   1     0.03   0.00   0.01     0.00   0.02  -0.01    -0.01   0.00   0.00
  90   1     0.02  -0.04   0.00     0.00  -0.01   0.00    -0.01   0.01   0.01
  91   1    -0.15  -0.03  -0.02    -0.15  -0.03   0.00    -0.21  -0.05  -0.02
  92   1     0.10  -0.11  -0.04     0.13  -0.12  -0.04     0.22  -0.19  -0.07
  93   1     0.05   0.14   0.03     0.08   0.16   0.05     0.14   0.24   0.10
  94   1    -0.02  -0.01  -0.04    -0.03  -0.04  -0.07    -0.13  -0.07  -0.26
  95   1     0.04   0.06   0.01     0.07   0.10   0.03     0.11   0.34   0.05
  96   1     0.01  -0.04   0.06     0.03  -0.08   0.11     0.05  -0.19   0.26
  97   1     0.00   0.00   0.00    -0.04  -0.11  -0.04     0.06   0.17   0.05
  98   1     0.00   0.01   0.00     0.05   0.02   0.07    -0.05  -0.02  -0.11
  99   1     0.00   0.01   0.00     0.00   0.06  -0.12     0.02  -0.07   0.15
 100   1     0.02  -0.03  -0.02    -0.20   0.35   0.17     0.13  -0.19  -0.11
 101   1    -0.04   0.02  -0.02     0.35  -0.12   0.19    -0.24   0.10  -0.10
 102   1     0.01   0.03   0.03    -0.14  -0.15  -0.35     0.09   0.13   0.23
 103   1     0.02   0.02  -0.09     0.02   0.02  -0.06    -0.01  -0.02   0.03
 104   1     0.03   0.06  -0.05    -0.03   0.09  -0.02     0.01  -0.05   0.00
 105   1     0.02   0.04  -0.05    -0.02   0.03   0.03     0.00  -0.03  -0.02
 106   1     0.00   0.03   0.00    -0.04   0.06   0.01     0.00  -0.04   0.03
 107   1    -0.01   0.01   0.00    -0.10   0.07   0.06     0.05  -0.04   0.00
 108   1     0.02   0.02   0.00    -0.03   0.11  -0.02     0.01  -0.06   0.04
 109   1    -0.01   0.00   0.01     0.00   0.00   0.00     0.00   0.00   0.00
 110   1    -0.02   0.00  -0.03     0.00   0.00   0.00     0.00   0.00   0.00
 111   1    -0.02   0.03   0.00     0.00   0.00   0.00     0.00   0.00   0.00
 112   1    -0.02  -0.01   0.02     0.00   0.00   0.00     0.00   0.00   0.00
 113   1    -0.02   0.01   0.01     0.00  -0.01   0.00     0.00   0.00   0.00
 114   1     0.00   0.02   0.00     0.00  -0.01  -0.02    -0.01  -0.02   0.00
 115   1    -0.02   0.00  -0.01     0.01   0.02   0.01     0.01   0.01   0.01
 116   1    -0.03   0.04   0.00     0.11  -0.18   0.00     0.04  -0.11   0.00
 117   1     0.08   0.01   0.02    -0.26  -0.05   0.01    -0.18  -0.03   0.01
 118   1    -0.01  -0.07   0.02     0.04   0.20  -0.06     0.00   0.12  -0.01
 119   1    -0.07   0.00  -0.02     0.02   0.02  -0.07     0.01   0.01  -0.04
 120   1    -0.03   0.04   0.05     0.01  -0.01   0.06     0.01  -0.01   0.05
 121   1     0.02   0.00   0.00     0.10  -0.06  -0.01     0.07  -0.03   0.00
 122   1     0.09   0.06   0.06     0.05   0.01   0.03     0.02   0.00   0.01
 123   1    -0.03  -0.13  -0.01     0.01  -0.06  -0.02     0.01  -0.02  -0.01
 124   1    -0.13   0.08  -0.03    -0.03   0.02  -0.02     0.00   0.00  -0.01
 125   1    -0.03   0.02  -0.07    -0.01   0.00  -0.01    -0.01   0.00   0.00
 126   1     0.03   0.00   0.04     0.00  -0.01   0.00     0.00  -0.01   0.00
 127   1     0.06   0.07  -0.04     0.00   0.01   0.00     0.00   0.00   0.00
                    58                     59                     60
                     A                      A                      A
 Frequencies --   230.4922               233.0519               238.9582
 Red. masses --     1.5957                 1.7773                 1.4749
 Frc consts  --     0.0499                 0.0569                 0.0496
 IR Inten    --     3.0827                 1.3238                 1.5710
 Atom AN      X      Y      Z        X      Y      Z        X      Y      Z
   1   6     0.00  -0.01   0.01     0.00  -0.01  -0.01     0.01   0.02   0.01
   2   6     0.00  -0.01   0.01     0.01  -0.01   0.00     0.02  -0.01   0.01
   3   6    -0.01  -0.01   0.01     0.01   0.00   0.00     0.02   0.00   0.00
   4   6    -0.01   0.00   0.02    -0.01   0.01   0.01     0.01   0.00   0.01
   5   6     0.00  -0.01   0.00     0.00   0.00   0.00     0.01   0.01   0.01
   6   6     0.01  -0.01   0.00     0.01   0.00  -0.01     0.01   0.01  -0.01
   7   8     0.02   0.01  -0.02     0.01   0.00   0.01     0.01   0.01   0.00
   8   6     0.02   0.01  -0.01     0.01   0.01   0.01     0.00   0.00   0.01
   9   6     0.01   0.01   0.01     0.00  -0.01   0.00     0.00   0.03   0.00
  10   6    -0.02  -0.01   0.01     0.01   0.01   0.00     0.00  -0.01  -0.01
  11   6     0.01   0.00   0.01    -0.01   0.00   0.02     0.03   0.03  -0.01
  12   6     0.00   0.01  -0.01    -0.02   0.00   0.01     0.06   0.00  -0.01
  13   6     0.01   0.02  -0.02    -0.01   0.00  -0.02     0.04  -0.05  -0.01
  14   6     0.02   0.02   0.00     0.00   0.01  -0.01     0.00  -0.05   0.00
  15   6     0.02   0.02   0.01     0.00   0.00   0.00    -0.02  -0.02   0.01
  16   6     0.01   0.00   0.00     0.00   0.00   0.02     0.01   0.01  -0.01
  17   6     0.01   0.02   0.01     0.01   0.00   0.00    -0.03  -0.02   0.01
  18   6    -0.01  -0.01  -0.01     0.01   0.01   0.00    -0.01  -0.02  -0.02
  19   6     0.01  -0.01  -0.02     0.00   0.01   0.01    -0.01  -0.01  -0.02
  20   6     0.01  -0.01  -0.02    -0.01   0.01   0.02    -0.01  -0.01  -0.02
  21   6    -0.01  -0.01   0.00     0.00   0.01   0.00    -0.01   0.00  -0.01
  22   6    -0.02  -0.01   0.01     0.02   0.01  -0.01     0.00  -0.01   0.00
  23   6     0.00   0.00  -0.01     0.01   0.00   0.00    -0.01   0.00  -0.02
  24   6    -0.01  -0.01   0.01     0.01   0.01  -0.01     0.00  -0.01   0.00
  25   6     0.01  -0.01   0.00     0.04  -0.01   0.00    -0.03   0.00   0.01
  26   6    -0.01   0.00   0.00    -0.01   0.01   0.00    -0.07  -0.01   0.01
  27   6     0.00   0.01   0.00     0.01   0.00   0.00    -0.02   0.02  -0.01
  28   6     0.00  -0.02   0.01     0.00   0.00   0.00     0.00  -0.02   0.00
  29   6     0.02  -0.01   0.01    -0.01   0.01  -0.01     0.00  -0.01   0.00
  30   6     0.00   0.02   0.02     0.00  -0.01  -0.01     0.01   0.00   0.01
  31   6     0.00   0.01  -0.01     0.01  -0.01   0.02     0.00   0.01   0.00
  32   6     0.00   0.01   0.00     0.00   0.00  -0.01     0.00   0.01   0.00
  33   6    -0.03   0.00   0.02     0.00   0.01  -0.02     0.01   0.02   0.01
  34   6    -0.02   0.01   0.02     0.00   0.00  -0.02     0.01   0.03   0.00
  35   8     0.00   0.00   0.01     0.00   0.00  -0.03     0.01  -0.01   0.00
  36  12    -0.03   0.02   0.00    -0.02  -0.01  -0.02    -0.01   0.02   0.02
  37   8    -0.01   0.01   0.00     0.05   0.03   0.02     0.00   0.01  -0.01
  38   6     0.01   0.00   0.01    -0.01  -0.01  -0.02     0.01   0.00   0.00
  39   7    -0.03  -0.01   0.01     0.01   0.01   0.00     0.01  -0.02   0.00
  40   7     0.01   0.00   0.02     0.00  -0.01  -0.01    -0.02   0.06  -0.01
  41   8     0.01   0.00   0.01     0.00  -0.01  -0.02     0.01  -0.01   0.00
  42   8     0.00   0.00   0.00    -0.03  -0.02   0.00    -0.01  -0.01   0.01
  43   6     0.00   0.00   0.00     0.01  -0.01   0.00    -0.01   0.00   0.01
  44   6    -0.01   0.01   0.00     0.02   0.01   0.00     0.00   0.00   0.00
  45   6     0.00   0.00   0.00    -0.02   0.00  -0.01     0.00   0.00   0.00
  46   8    -0.01   0.00  -0.01     0.01  -0.01   0.03    -0.01   0.01   0.01
  47   6    -0.01  -0.01  -0.01     0.00   0.01   0.01    -0.01  -0.01   0.00
  48   8     0.01   0.05   0.01    -0.04  -0.01  -0.02     0.00  -0.01   0.00
  49   6     0.00  -0.01  -0.01     0.03   0.02   0.05     0.00   0.01   0.00
  50   8     0.01  -0.03   0.01     0.07   0.04  -0.01    -0.01   0.01   0.00
  51   8    -0.01  -0.01  -0.02    -0.01   0.01   0.06    -0.01   0.00   0.01
  52   6     0.00  -0.01  -0.02    -0.03   0.00   0.01     0.00  -0.02   0.00
  53   6     0.01   0.03   0.01    -0.04   0.01  -0.01     0.00  -0.01   0.01
  54   6    -0.01  -0.01  -0.02     0.00   0.00   0.06    -0.01   0.00   0.01
  55   8     0.01  -0.08  -0.08    -0.07  -0.03  -0.01     0.00  -0.03  -0.02
  56   6     0.07   0.02   0.01    -0.05   0.00  -0.01     0.00   0.01   0.00
  57   6    -0.04   0.01   0.01     0.05  -0.05  -0.03     0.00   0.00   0.00
  58   6    -0.02   0.01  -0.01     0.01  -0.03   0.00     0.01  -0.01   0.01
  59   6    -0.01   0.00   0.01     0.00   0.03  -0.03     0.01   0.02  -0.02
  60   1     0.00  -0.01   0.01     0.01  -0.01   0.00     0.02  -0.02   0.01
  61   1    -0.01   0.03   0.05    -0.01   0.02   0.02     0.01   0.00   0.01
  62   1    -0.04  -0.04   0.03    -0.02   0.00   0.01     0.01   0.00   0.01
  63   1    -0.01   0.00  -0.02    -0.01   0.00  -0.01     0.01  -0.01   0.02
  64   1     0.02  -0.02  -0.01     0.00   0.00   0.00     0.00   0.02   0.02
  65   1     0.03  -0.02   0.01     0.00   0.00  -0.02     0.00   0.01  -0.02
  66   1     0.00  -0.01   0.01     0.02   0.01  -0.01     0.01   0.02  -0.01
  67   1     0.02   0.02  -0.02     0.01   0.02   0.00     0.00   0.00   0.01
  68   1     0.03  -0.01  -0.02     0.01   0.01   0.01    -0.01   0.00   0.01
  69   1    -0.01   0.01  -0.02    -0.03   0.00   0.00     0.09   0.01  -0.01
  70   1     0.00   0.02  -0.02    -0.02  -0.01  -0.07     0.07  -0.08  -0.03
  71   1     0.02   0.02  -0.01     0.00   0.01  -0.01    -0.01  -0.08   0.00
  72   1     0.01  -0.01   0.00    -0.01   0.01   0.01     0.05  -0.03  -0.02
  73   1     0.00   0.03   0.00     0.01   0.00   0.00    -0.02  -0.04   0.03
  74   1     0.02  -0.01  -0.02    -0.01   0.01   0.02    -0.01  -0.02  -0.03
  75   1     0.02  -0.01  -0.03    -0.02   0.00   0.03    -0.01   0.00  -0.03
  76   1    -0.01  -0.01   0.00     0.00   0.01   0.01    -0.01   0.00  -0.01
  77   1    -0.01   0.01  -0.02     0.01  -0.01   0.01    -0.01   0.01  -0.03
  78   1     0.00  -0.01   0.01     0.00   0.01  -0.01     0.01  -0.01   0.00
  79   1     0.02   0.00  -0.01     0.09   0.08  -0.04    -0.09  -0.11   0.04
  80   1     0.00  -0.02   0.01    -0.03  -0.01   0.03     0.06  -0.01  -0.02
  81   1     0.02  -0.03   0.00     0.11  -0.09  -0.01    -0.10   0.09   0.01
  82   1    -0.01  -0.02   0.01    -0.02  -0.07   0.11    -0.10  -0.10   0.03
  83   1    -0.02   0.01  -0.01    -0.12   0.05  -0.08    -0.15   0.05   0.01
  84   1     0.01   0.01   0.00     0.12   0.06  -0.04    -0.04   0.01   0.00
  85   1    -0.11  -0.02  -0.07    -0.07  -0.02  -0.05     0.35   0.12   0.17
  86   1     0.04  -0.07   0.09     0.04  -0.05   0.08    -0.17   0.29  -0.33
  87   1     0.06   0.12  -0.03     0.06   0.08  -0.02    -0.24  -0.31   0.09
  88   1    -0.06  -0.03   0.01    -0.05   0.01   0.03     0.10  -0.02  -0.05
  89   1     0.03   0.01   0.01     0.02   0.05  -0.01    -0.03  -0.09   0.03
  90   1     0.03  -0.07   0.02     0.02  -0.04   0.00    -0.04   0.07  -0.01
  91   1    -0.14  -0.04  -0.01     0.01   0.01   0.00    -0.04  -0.02   0.00
  92   1     0.16  -0.14  -0.05    -0.03   0.03   0.01     0.04  -0.04  -0.01
  93   1     0.10   0.15   0.08    -0.03  -0.01  -0.03     0.02   0.04   0.01
  94   1    -0.06  -0.03  -0.14     0.03   0.01   0.06     0.01   0.00   0.01
  95   1     0.07   0.20   0.04    -0.02  -0.09  -0.02     0.01   0.00   0.01
  96   1     0.02  -0.09   0.16     0.00   0.04  -0.07     0.00   0.00   0.01
  97   1     0.00   0.01  -0.01     0.00  -0.02   0.02     0.06   0.16   0.02
  98   1    -0.01   0.01  -0.02     0.02  -0.01   0.02    -0.06  -0.02  -0.13
  99   1     0.00   0.00  -0.01     0.01  -0.01   0.01     0.01  -0.08   0.12
 100   1    -0.05   0.11   0.05     0.03  -0.08  -0.04    -0.01   0.05   0.02
 101   1     0.10  -0.04   0.06    -0.08   0.03  -0.06     0.03  -0.01   0.03
 102   1    -0.04  -0.04  -0.10     0.03   0.04   0.05    -0.01   0.00  -0.03
 103   1    -0.03   0.00   0.01     0.01   0.00  -0.03     0.01   0.02   0.01
 104   1    -0.05   0.00   0.01     0.00   0.03  -0.02     0.02   0.01   0.01
 105   1    -0.03   0.01   0.04     0.00   0.00   0.00     0.01   0.01   0.01
 106   1    -0.02   0.00   0.03     0.00   0.02  -0.02     0.00   0.05   0.00
 107   1    -0.03   0.02   0.04    -0.02  -0.01  -0.03    -0.02   0.02  -0.01
 108   1    -0.02   0.03   0.01     0.00   0.00  -0.01     0.02   0.04   0.01
 109   1    -0.01   0.01   0.00     0.00   0.03   0.02    -0.01   0.01   0.00
 110   1     0.00   0.01   0.01    -0.02  -0.01  -0.02     0.00  -0.01  -0.01
 111   1    -0.01  -0.01  -0.01    -0.01   0.03   0.01    -0.02   0.01  -0.01
 112   1    -0.01   0.00  -0.01     0.00  -0.02   0.03    -0.01  -0.01   0.00
 113   1    -0.01  -0.02  -0.01    -0.01   0.03   0.01    -0.02  -0.02   0.01
 114   1     0.01   0.03   0.00    -0.06   0.00  -0.01     0.01  -0.01   0.01
 115   1    -0.02  -0.03  -0.02     0.01   0.05   0.06    -0.01   0.01   0.01
 116   1    -0.19   0.33  -0.02    -0.21   0.16  -0.05    -0.06   0.08   0.00
 117   1     0.50   0.09  -0.05     0.17   0.03  -0.04     0.09   0.03  -0.02
 118   1    -0.05  -0.38   0.07    -0.13  -0.21   0.07    -0.03  -0.07   0.03
 119   1    -0.04  -0.02   0.05    -0.10   0.08  -0.35    -0.08   0.03  -0.10
 120   1    -0.02   0.02  -0.03    -0.03   0.03   0.27    -0.03   0.04   0.13
 121   1    -0.08   0.05   0.02     0.34  -0.30  -0.09     0.12  -0.07  -0.01
 122   1    -0.06   0.00  -0.04     0.12   0.02   0.09     0.05   0.01   0.05
 123   1    -0.03   0.06   0.01     0.01  -0.20  -0.03     0.03  -0.06  -0.01
 124   1     0.01  -0.01   0.00    -0.10   0.05  -0.08    -0.02   0.01   0.00
 125   1    -0.07   0.00  -0.01    -0.07   0.03  -0.10     0.14   0.01   0.01
 126   1     0.00  -0.05   0.04     0.03  -0.01   0.05    -0.02   0.13  -0.10
 127   1     0.03   0.03  -0.01     0.07   0.11  -0.06    -0.08  -0.05   0.03
                    61                     62                     63
                     A                      A                      A
 Frequencies --   241.0443               245.6739               247.3902
 Red. masses --     2.1923                 1.7295                 1.6820
 Frc consts  --     0.0750                 0.0615                 0.0607
 IR Inten    --     2.2074                 4.1288                 1.7052
 Atom AN      X      Y      Z        X      Y      Z        X      Y      Z
   1   6     0.01   0.00  -0.02     0.01   0.01   0.03     0.00  -0.01   0.01
   2   6     0.01   0.01  -0.01     0.01   0.00   0.03     0.02  -0.04   0.02
   3   6     0.01   0.01   0.00    -0.01   0.01   0.03    -0.02  -0.01   0.01
   4   6     0.00   0.00   0.00     0.00   0.00   0.00     0.00   0.00   0.00
   5   6     0.00   0.00   0.00     0.00  -0.01  -0.01     0.00   0.00   0.00
   6   6     0.00   0.00   0.01     0.00  -0.01   0.00     0.01   0.00  -0.01
   7   8     0.00   0.00   0.01     0.00  -0.01   0.01     0.01   0.00  -0.01
   8   6    -0.01   0.00   0.01     0.01   0.00   0.00     0.01   0.00   0.00
   9   6    -0.01  -0.01   0.01     0.00  -0.01   0.00     0.01   0.01  -0.01
  10   6     0.00   0.00   0.00     0.01  -0.01  -0.01    -0.02   0.00  -0.01
  11   6    -0.03   0.00   0.04    -0.01  -0.01  -0.01     0.02   0.01  -0.02
  12   6    -0.04   0.00   0.01    -0.01   0.00   0.01     0.04   0.01   0.00
  13   6    -0.03  -0.01  -0.04    -0.01   0.01   0.03     0.03   0.00   0.02
  14   6    -0.02   0.00  -0.01     0.00   0.00   0.01     0.01  -0.01   0.01
  15   6    -0.01   0.00   0.03     0.00  -0.01  -0.01     0.00   0.00  -0.01
  16   6    -0.02   0.02   0.03    -0.01   0.00  -0.01     0.02   0.00  -0.02
  17   6     0.00   0.00   0.03     0.01  -0.01  -0.01     0.00   0.00  -0.01
  18   6     0.00   0.00  -0.01     0.02  -0.02  -0.05     0.01   0.02  -0.01
  19   6     0.00   0.00   0.00    -0.03  -0.01  -0.04     0.02   0.00   0.01
  20   6    -0.01   0.00   0.00    -0.08   0.00   0.00    -0.03  -0.04   0.03
  21   6     0.00   0.00   0.00    -0.03   0.01  -0.01    -0.03  -0.05   0.00
  22   6     0.00   0.00   0.00     0.04   0.00  -0.03     0.00  -0.03  -0.03
  23   6     0.00   0.00  -0.01     0.02   0.00  -0.04     0.01   0.03  -0.01
  24   6     0.00   0.00   0.00     0.04  -0.01  -0.03     0.03  -0.03   0.00
  25   6     0.03   0.02   0.01    -0.02   0.01   0.00    -0.03  -0.01   0.00
  26   6    -0.03   0.05  -0.01     0.02  -0.01  -0.01    -0.01  -0.02   0.00
  27   6     0.00   0.02   0.02     0.02  -0.02   0.01     0.00   0.00  -0.01
  28   6     0.02  -0.06   0.03     0.01   0.02  -0.01     0.00   0.02  -0.01
  29   6     0.00   0.00   0.00    -0.01   0.00  -0.03     0.05   0.03   0.02
  30   6     0.00  -0.01   0.00     0.04  -0.08   0.01     0.05  -0.06   0.04
  31   6     0.00   0.01   0.00     0.04   0.00   0.04     0.01   0.03  -0.02
  32   6     0.00   0.01  -0.01     0.00   0.02  -0.05    -0.05   0.06  -0.05
  33   6     0.04   0.01  -0.04     0.01   0.03   0.02    -0.03   0.01   0.01
  34   6     0.02   0.01   0.01    -0.03   0.05   0.04    -0.03   0.02   0.02
  35   8     0.01  -0.01   0.07    -0.01   0.01   0.01     0.00   0.00   0.02
  36  12     0.02  -0.04  -0.02    -0.05   0.03   0.03    -0.04   0.02   0.02
  37   8    -0.02   0.05  -0.06     0.00   0.01  -0.01     0.00   0.01  -0.01
  38   6     0.04   0.01   0.04     0.00   0.00   0.00     0.01   0.00   0.01
  39   7     0.01   0.00   0.00    -0.01  -0.01   0.03    -0.05   0.02  -0.01
  40   7     0.00  -0.02  -0.02     0.00   0.00   0.02     0.00   0.02   0.00
  41   8     0.03   0.02   0.05     0.00   0.01   0.01     0.01   0.01   0.01
  42   8     0.00   0.01   0.01     0.00   0.00   0.00     0.00   0.00   0.00
  43   6    -0.03   0.03  -0.01     0.00   0.00   0.00    -0.01   0.01   0.00
  44   6    -0.02   0.04  -0.02     0.00   0.01   0.00     0.00   0.01  -0.01
  45   6     0.02   0.01   0.01     0.00   0.00   0.00     0.01   0.00   0.00
  46   8    -0.05   0.00  -0.04    -0.01   0.00  -0.01    -0.01   0.00  -0.01
  47   6    -0.03  -0.04  -0.03     0.00   0.00  -0.01    -0.01  -0.01  -0.01
  48   8     0.01   0.04   0.02     0.01  -0.01  -0.01     0.01  -0.02   0.00
  49   6    -0.03  -0.01  -0.04     0.00   0.00  -0.01     0.00   0.00  -0.01
  50   8    -0.01  -0.04  -0.03     0.00  -0.01   0.00     0.00   0.00   0.00
  51   8    -0.01  -0.03  -0.05     0.01   0.00  -0.01     0.00   0.00  -0.01
  52   6     0.01   0.00   0.01     0.01   0.00  -0.01     0.01  -0.01   0.00
  53   6     0.02   0.02   0.03     0.00  -0.01  -0.01     0.01  -0.01   0.00
  54   6    -0.03  -0.03  -0.03     0.01   0.00  -0.01     0.00   0.00  -0.01
  55   8     0.03   0.00   0.00     0.01   0.00  -0.01     0.02   0.00   0.00
  56   6     0.09   0.00   0.03    -0.01   0.00  -0.01    -0.01   0.01   0.00
  57   6    -0.01  -0.03   0.03     0.03  -0.01   0.00     0.02  -0.01   0.00
  58   6    -0.05   0.03  -0.04    -0.02   0.01  -0.01    -0.01   0.01  -0.01
  59   6    -0.01  -0.03   0.04     0.00  -0.02   0.02     0.00  -0.01   0.01
  60   1     0.01   0.02  -0.01     0.01   0.01   0.03     0.03  -0.05   0.02
  61   1     0.00   0.00  -0.01     0.00   0.00   0.01     0.00   0.00   0.00
  62   1     0.01   0.01  -0.01    -0.01  -0.01   0.00     0.00   0.00   0.00
  63   1     0.00   0.01   0.00     0.00   0.00  -0.01     0.00  -0.02   0.00
  64   1     0.00   0.00   0.00     0.01  -0.01  -0.01     0.00   0.00   0.01
  65   1     0.00   0.00   0.01    -0.01   0.00   0.00     0.00  -0.01  -0.02
  66   1     0.00   0.00   0.01     0.00   0.00   0.00     0.01   0.00  -0.01
  67   1    -0.01   0.00   0.01     0.01   0.01  -0.02     0.01   0.00   0.00
  68   1    -0.01   0.01   0.01     0.03   0.00   0.01     0.01   0.00  -0.01
  69   1    -0.04  -0.01   0.01    -0.01   0.00   0.02     0.05   0.01   0.00
  70   1    -0.04  -0.02  -0.09    -0.01   0.02   0.06     0.04  -0.01   0.04
  71   1    -0.01   0.01  -0.02     0.00   0.01   0.02     0.01  -0.02   0.02
  72   1    -0.04   0.04   0.02    -0.01   0.00  -0.01     0.04  -0.02  -0.02
  73   1     0.01  -0.01   0.03     0.01  -0.01  -0.01     0.00   0.00  -0.01
  74   1    -0.01   0.00   0.00    -0.04  -0.01  -0.04     0.05   0.00   0.03
  75   1    -0.02   0.00   0.00    -0.14   0.01   0.03    -0.04  -0.06   0.07
  76   1    -0.01   0.00   0.00    -0.04   0.03   0.01    -0.04  -0.06   0.01
  77   1     0.00   0.01  -0.01     0.00   0.02  -0.07     0.01   0.02   0.00
  78   1     0.00   0.00  -0.01     0.03   0.00  -0.03     0.03  -0.06   0.02
  79   1     0.07   0.09  -0.04    -0.03  -0.01   0.02    -0.07  -0.09   0.04
  80   1    -0.02   0.03   0.02    -0.01   0.02  -0.02     0.04  -0.01  -0.02
  81   1     0.09  -0.04   0.02    -0.04   0.04   0.00    -0.09   0.07   0.00
  82   1    -0.05  -0.04   0.09     0.04   0.05  -0.05    -0.01  -0.01  -0.04
  83   1    -0.15   0.08  -0.11     0.09  -0.04   0.02     0.03  -0.02   0.05
  84   1     0.10   0.13  -0.05    -0.03  -0.03   0.01    -0.06  -0.05   0.02
  85   1     0.06   0.03   0.03    -0.08  -0.04  -0.03     0.01   0.01   0.00
  86   1    -0.02   0.06  -0.02     0.06  -0.09   0.10    -0.01   0.01  -0.02
  87   1    -0.03  -0.02   0.03     0.09   0.06  -0.03    -0.01  -0.01  -0.01
  88   1    -0.03  -0.08   0.00    -0.01   0.02   0.02     0.02   0.03   0.00
  89   1     0.07  -0.04   0.05     0.02   0.05  -0.03    -0.01   0.02  -0.02
  90   1     0.05  -0.12   0.02     0.01   0.00  -0.02    -0.01   0.04  -0.02
  91   1     0.03   0.00   0.00     0.02   0.01  -0.01     0.16   0.06   0.06
  92   1    -0.03   0.02   0.01    -0.05   0.04   0.00    -0.01   0.13  -0.01
  93   1    -0.02  -0.03  -0.02    -0.04  -0.03  -0.07     0.02  -0.04   0.00
  94   1     0.01  -0.01   0.03     0.05  -0.05   0.16     0.01  -0.07   0.06
  95   1     0.00  -0.04   0.00     0.04  -0.24  -0.01     0.10  -0.06   0.04
  96   1     0.01   0.00  -0.02     0.04  -0.02  -0.09     0.04  -0.08   0.08
  97   1     0.00   0.02   0.01     0.16   0.42   0.13    -0.14  -0.33  -0.07
  98   1     0.00   0.01   0.00    -0.08  -0.13  -0.31     0.14   0.15   0.32
  99   1     0.01   0.00   0.01     0.07  -0.27   0.40     0.03   0.27  -0.34
 100   1     0.01  -0.02  -0.02     0.00  -0.01  -0.05     0.02  -0.16  -0.13
 101   1    -0.04   0.02  -0.02    -0.04   0.03  -0.05    -0.28   0.14  -0.16
 102   1     0.01   0.03   0.02     0.01   0.05  -0.04     0.04   0.20   0.11
 103   1     0.05   0.01  -0.05     0.01   0.02  -0.01    -0.02   0.01  -0.02
 104   1     0.06   0.03  -0.03     0.01   0.05   0.02    -0.06   0.04  -0.01
 105   1     0.05   0.00  -0.06     0.01   0.03   0.02    -0.04   0.02   0.05
 106   1     0.00   0.02   0.02    -0.07   0.14   0.05    -0.08   0.11   0.02
 107   1     0.02   0.00   0.00    -0.06   0.01  -0.01    -0.06  -0.04  -0.05
 108   1     0.03   0.00   0.03     0.04   0.05   0.10     0.04   0.01   0.09
 109   1    -0.02   0.04  -0.01     0.00   0.01   0.00     0.00   0.01   0.00
 110   1     0.02   0.05   0.01     0.00   0.01   0.00     0.00   0.01   0.00
 111   1    -0.04  -0.04  -0.05     0.00  -0.01   0.00    -0.01  -0.01  -0.01
 112   1    -0.05   0.03  -0.07     0.00   0.01  -0.01    -0.01   0.01  -0.02
 113   1    -0.04  -0.11  -0.04     0.00  -0.01  -0.01    -0.01  -0.02  -0.01
 114   1     0.04   0.02   0.01     0.00  -0.01   0.00     0.01  -0.01   0.01
 115   1    -0.05  -0.04  -0.04     0.00   0.00  -0.01     0.00   0.00  -0.01
 116   1     0.23  -0.13   0.09    -0.02   0.02  -0.01    -0.03   0.03   0.00
 117   1    -0.05  -0.03   0.08     0.01   0.01  -0.02     0.01   0.01  -0.02
 118   1     0.16   0.13  -0.08    -0.01  -0.01   0.00    -0.02  -0.01   0.02
 119   1    -0.22   0.02  -0.22     0.08  -0.01   0.05     0.01   0.00  -0.03
 120   1    -0.11   0.06   0.37     0.04  -0.05  -0.06     0.01  -0.02   0.05
 121   1     0.33  -0.16  -0.01    -0.02   0.03   0.01     0.07  -0.03   0.00
 122   1    -0.08   0.01  -0.07    -0.03   0.01  -0.03    -0.02   0.01  -0.02
 123   1    -0.07   0.06   0.00    -0.03   0.02   0.00    -0.02   0.01   0.00
 124   1    -0.02   0.01  -0.05    -0.01   0.00  -0.01    -0.01   0.01  -0.02
 125   1    -0.19  -0.01   0.03    -0.13   0.00  -0.01    -0.06   0.00   0.01
 126   1     0.04  -0.19   0.13     0.03  -0.13   0.10     0.02  -0.06   0.05
 127   1     0.11   0.06  -0.01     0.10   0.06  -0.03     0.05   0.02  -0.01
                    64                     65                     66
                     A                      A                      A
 Frequencies --   248.6469               254.8341               262.3760
 Red. masses --     2.0397                 1.4845                 3.0190
 Frc consts  --     0.0743                 0.0568                 0.1224
 IR Inten    --     0.9782                 1.7270                14.4091
 Atom AN      X      Y      Z        X      Y      Z        X      Y      Z
   1   6    -0.02   0.01   0.00     0.00   0.01   0.00    -0.01  -0.02  -0.04
   2   6    -0.01  -0.01  -0.01     0.01   0.00   0.00     0.00  -0.05   0.00
   3   6     0.00  -0.01  -0.01     0.01   0.00   0.00    -0.04  -0.03   0.03
   4   6     0.00   0.00   0.00     0.00   0.00   0.00     0.00   0.01   0.00
   5   6     0.00   0.00   0.00     0.00   0.00   0.00     0.00   0.00  -0.01
   6   6     0.00   0.00   0.00     0.00   0.00   0.00     0.01   0.01  -0.02
   7   8     0.00   0.00   0.00     0.00   0.00   0.00     0.01   0.00   0.01
   8   6     0.00   0.00   0.00     0.00   0.00   0.00     0.00   0.00   0.01
   9   6     0.00   0.01  -0.02    -0.01   0.01   0.01     0.00   0.02  -0.01
  10   6     0.01   0.00   0.01     0.00   0.00   0.00     0.01   0.01   0.00
  11   6     0.03   0.01  -0.05    -0.01   0.01   0.02     0.05   0.02   0.01
  12   6     0.06   0.01   0.02    -0.01  -0.01  -0.02     0.05   0.00  -0.03
  13   6     0.05   0.00   0.07    -0.01  -0.03  -0.06     0.05  -0.02  -0.06
  14   6     0.01  -0.02   0.03    -0.01  -0.03  -0.03     0.01  -0.01  -0.01
  15   6    -0.01  -0.01  -0.03    -0.01  -0.01   0.02    -0.01   0.03   0.02
  16   6     0.02  -0.01  -0.05    -0.01   0.02   0.02     0.05  -0.02   0.03
  17   6     0.00  -0.01  -0.03     0.00  -0.01   0.03    -0.03   0.04   0.02
  18   6    -0.01   0.00   0.03    -0.01   0.00  -0.01     0.03   0.00   0.01
  19   6     0.00   0.01   0.02     0.00  -0.01  -0.01    -0.02   0.02   0.03
  20   6     0.04   0.02  -0.01     0.00  -0.01  -0.01    -0.03   0.03   0.03
  21   6     0.03   0.02   0.00     0.00  -0.01   0.00     0.02   0.03  -0.01
  22   6    -0.01   0.02   0.02    -0.01  -0.01   0.00     0.03   0.04  -0.02
  23   6    -0.01  -0.02   0.03    -0.01   0.01  -0.01     0.04  -0.02   0.02
  24   6    -0.03   0.02   0.01     0.00  -0.01   0.00     0.00   0.04  -0.03
  25   6    -0.07   0.01  -0.01     0.01   0.02   0.01     0.07  -0.10   0.01
  26   6     0.00  -0.04   0.00    -0.06   0.04   0.00    -0.01  -0.04   0.05
  27   6     0.02  -0.01  -0.01     0.01   0.01   0.02    -0.06   0.11  -0.05
  28   6     0.00   0.06  -0.04     0.03  -0.06   0.02    -0.03   0.03   0.02
  29   6    -0.03  -0.01   0.00     0.01  -0.01   0.01    -0.06   0.06  -0.03
  30   6    -0.04   0.06  -0.03     0.00   0.00   0.01    -0.01   0.01  -0.05
  31   6    -0.02  -0.03   0.01    -0.01   0.02  -0.01     0.05  -0.07   0.09
  32   6     0.03  -0.04   0.04    -0.01   0.01   0.00     0.05  -0.04   0.01
  33   6    -0.03  -0.02   0.02     0.02   0.01  -0.01    -0.03  -0.01  -0.05
  34   6     0.00  -0.04  -0.05     0.01   0.01   0.00    -0.06  -0.01   0.00
  35   8    -0.01   0.01   0.04    -0.03   0.02   0.00     0.02  -0.01   0.00
  36  12     0.01   0.03   0.02     0.01  -0.01  -0.02    -0.07  -0.06  -0.02
  37   8     0.01   0.04  -0.03     0.01  -0.01   0.02     0.02   0.04  -0.01
  38   6     0.01   0.01   0.01    -0.02   0.00  -0.02     0.02   0.00   0.01
  39   7     0.02   0.00   0.00     0.01  -0.01   0.00    -0.03   0.00   0.02
  40   7    -0.02   0.04  -0.01    -0.01   0.01  -0.01    -0.02   0.02  -0.05
  41   8     0.00   0.02   0.02    -0.03   0.01  -0.01     0.03  -0.01   0.01
  42   8     0.00   0.01   0.00     0.01   0.01  -0.01    -0.03   0.00   0.02
  43   6    -0.01   0.02  -0.01     0.02   0.00   0.00    -0.02   0.02   0.01
  44   6     0.00   0.03  -0.01     0.01  -0.01   0.00     0.00   0.04   0.00
  45   6     0.01   0.00   0.00     0.00  -0.01  -0.01    -0.01   0.01   0.01
  46   8    -0.03  -0.01  -0.02     0.01  -0.01   0.01    -0.04   0.00   0.01
  47   6     0.00  -0.01  -0.02     0.03   0.02   0.00    -0.03  -0.01  -0.01
  48   8    -0.01  -0.02   0.00    -0.01  -0.01  -0.01     0.00   0.01   0.01
  49   6     0.00   0.00  -0.01     0.01   0.00   0.01     0.02  -0.01  -0.02
  50   8     0.02  -0.01  -0.02     0.02   0.00   0.01     0.06  -0.05   0.00
  51   8     0.00  -0.01   0.01     0.01   0.02   0.03     0.01   0.01  -0.01
  52   6     0.00  -0.01   0.01     0.00   0.01   0.00     0.01   0.02   0.01
  53   6     0.00  -0.01   0.01    -0.01   0.00  -0.01     0.00   0.01   0.02
  54   6     0.00  -0.02   0.01     0.02   0.00   0.02     0.01  -0.02  -0.02
  55   8     0.00   0.00   0.02    -0.02   0.00   0.00     0.01   0.01   0.00
  56   6    -0.02   0.00   0.01    -0.04   0.00  -0.01    -0.01  -0.01   0.02
  57   6     0.05  -0.05  -0.02     0.01   0.00   0.00     0.05  -0.03   0.02
  58   6    -0.03   0.01  -0.03     0.00   0.00   0.00    -0.07   0.04  -0.03
  59   6     0.01  -0.05   0.04     0.02  -0.04   0.02     0.01   0.02   0.00
  60   1    -0.02  -0.03   0.00     0.01   0.00   0.00     0.02  -0.03   0.02
  61   1     0.00  -0.01   0.00     0.00   0.00   0.00     0.00   0.00   0.00
  62   1     0.00   0.00   0.00     0.00   0.00   0.00    -0.01   0.01   0.00
  63   1     0.00   0.00   0.00     0.00   0.00   0.01     0.00  -0.01  -0.01
  64   1     0.00   0.00   0.00     0.00   0.01   0.01     0.00   0.01   0.00
  65   1    -0.01   0.00   0.00     0.00   0.00   0.00    -0.01   0.01  -0.04
  66   1     0.00   0.00   0.00     0.00   0.00   0.00     0.04   0.01  -0.03
  67   1     0.00  -0.01   0.00     0.00   0.00   0.01     0.00   0.01   0.01
  68   1    -0.01   0.00   0.00     0.00   0.00   0.00     0.01   0.01   0.01
  69   1     0.08   0.02   0.03     0.00  -0.01  -0.03     0.05   0.00  -0.04
  70   1     0.06  -0.01   0.12     0.00  -0.05  -0.08     0.06  -0.04  -0.08
  71   1     0.00  -0.05   0.05    -0.01  -0.03  -0.04     0.01  -0.03   0.00
  72   1     0.05  -0.04  -0.04    -0.01   0.02   0.01     0.07  -0.04   0.03
  73   1     0.01  -0.02  -0.02     0.00  -0.02   0.03    -0.03   0.04   0.02
  74   1    -0.01   0.01   0.02     0.01  -0.01  -0.01    -0.05   0.01   0.02
  75   1     0.07   0.03  -0.03     0.01  -0.01  -0.01    -0.06   0.03   0.06
  76   1     0.04   0.01  -0.01    -0.01  -0.01   0.00     0.03   0.03  -0.02
  77   1     0.00  -0.02   0.04    -0.01   0.01  -0.01     0.04  -0.03   0.03
  78   1    -0.03   0.03   0.00     0.00  -0.01   0.01    -0.01   0.06  -0.04
  79   1    -0.15  -0.13   0.08     0.00   0.01   0.00     0.09  -0.06  -0.05
  80   1     0.02   0.01  -0.06     0.04   0.02   0.00     0.04  -0.14   0.09
  81   1    -0.19   0.14  -0.01     0.01   0.04   0.03     0.10  -0.18  -0.03
  82   1     0.01   0.01  -0.09    -0.08  -0.04   0.04    -0.02  -0.09   0.07
  83   1     0.09  -0.05   0.09    -0.15   0.07  -0.05    -0.05   0.00   0.08
  84   1    -0.11  -0.11   0.03     0.01   0.10  -0.02     0.00  -0.05   0.05
  85   1    -0.02  -0.02  -0.01     0.13   0.04   0.07     0.03   0.10  -0.10
  86   1     0.03  -0.03   0.04    -0.04   0.10  -0.07    -0.09   0.17  -0.11
  87   1     0.06   0.00  -0.03    -0.06  -0.10   0.05    -0.14   0.13  -0.01
  88   1     0.03   0.08   0.01     0.01  -0.07  -0.02    -0.05   0.02   0.02
  89   1    -0.01   0.07  -0.06     0.06  -0.07   0.05    -0.03   0.03   0.02
  90   1    -0.01   0.08  -0.06     0.04  -0.08   0.01    -0.02   0.01   0.03
  91   1    -0.08  -0.02  -0.02     0.00  -0.01   0.00    -0.07   0.06   0.00
  92   1     0.00  -0.05   0.01     0.02  -0.02   0.00    -0.09   0.07   0.00
  93   1    -0.02   0.03   0.01     0.02   0.00   0.02    -0.08   0.07  -0.10
  94   1    -0.02   0.06  -0.08     0.00   0.00   0.00    -0.02   0.01  -0.04
  95   1    -0.07   0.10  -0.02     0.01   0.01   0.01    -0.03  -0.01  -0.05
  96   1    -0.04   0.06  -0.02     0.00  -0.01   0.02     0.01   0.01  -0.08
  97   1     0.00  -0.02   0.00    -0.01  -0.03  -0.02    -0.04  -0.10   0.13
  98   1    -0.02  -0.03  -0.01     0.00   0.04   0.03     0.13  -0.10   0.14
  99   1    -0.04  -0.03   0.01     0.00   0.05  -0.05     0.06  -0.07   0.08
 100   1     0.00   0.05   0.07     0.00   0.01   0.00     0.07  -0.06  -0.01
 101   1     0.14  -0.08   0.08    -0.03   0.02   0.00     0.04  -0.03  -0.01
 102   1    -0.02  -0.12  -0.02     0.00   0.03   0.01     0.06  -0.04   0.05
 103   1    -0.04  -0.02   0.06     0.02   0.01  -0.02    -0.02  -0.02  -0.07
 104   1    -0.03  -0.06   0.02     0.03   0.02  -0.01    -0.03   0.01  -0.05
 105   1    -0.03  -0.02   0.02     0.02   0.01  -0.03    -0.03  -0.01  -0.03
 106   1     0.06  -0.11  -0.08     0.00   0.02   0.01    -0.04  -0.02  -0.02
 107   1     0.00   0.00   0.00     0.01   0.01   0.00    -0.09   0.00   0.03
 108   1    -0.07  -0.03  -0.12     0.03   0.01   0.01    -0.07   0.01  -0.03
 109   1     0.00   0.04   0.00     0.01  -0.01   0.01    -0.01   0.05   0.02
 110   1     0.00   0.03  -0.01     0.00  -0.01  -0.01    -0.02   0.01  -0.01
 111   1     0.00  -0.03  -0.02     0.04  -0.02   0.02    -0.04   0.02  -0.02
 112   1    -0.01   0.03  -0.04     0.04   0.02   0.00    -0.04  -0.01  -0.01
 113   1     0.00  -0.03  -0.03     0.05   0.05  -0.01    -0.04  -0.05   0.00
 114   1     0.00  -0.01   0.02    -0.02   0.00  -0.02    -0.01   0.01   0.01
 115   1     0.01   0.00   0.01     0.03  -0.01   0.02     0.02  -0.05  -0.03
 116   1    -0.04   0.03   0.00    -0.07   0.01  -0.04     0.01  -0.04   0.01
 117   1     0.01   0.01  -0.01    -0.03   0.00  -0.02    -0.04  -0.02   0.05
 118   1    -0.03  -0.02   0.03    -0.06  -0.02   0.02     0.00   0.01   0.02
 119   1     0.01   0.01  -0.14     0.19  -0.05   0.22     0.25  -0.08   0.25
 120   1     0.01  -0.05   0.10     0.09  -0.09  -0.28     0.12  -0.18  -0.23
 121   1     0.17  -0.14  -0.04    -0.26   0.14   0.03    -0.17   0.14   0.06
 122   1    -0.05   0.01  -0.05    -0.02   0.00  -0.02    -0.09   0.04  -0.07
 123   1    -0.06   0.01  -0.01    -0.01   0.01   0.01    -0.12   0.04   0.03
 124   1    -0.03   0.01  -0.07     0.00  -0.01  -0.01    -0.07   0.04  -0.06
 125   1    -0.33  -0.01  -0.04    -0.35   0.00  -0.10     0.07   0.01   0.02
 126   1     0.10  -0.32   0.27     0.13  -0.33   0.29    -0.01   0.07  -0.02
 127   1     0.27   0.16  -0.09     0.32   0.20  -0.12    -0.03  -0.02   0.02
                    67                     68                     69
                     A                      A                      A
 Frequencies --   264.6863               266.6503               274.8896
 Red. masses --     2.5896                 1.9898                 2.6189
 Frc consts  --     0.1069                 0.0834                 0.1166
 IR Inten    --     4.7541                 5.2643                 2.3785
 Atom AN      X      Y      Z        X      Y      Z        X      Y      Z
   1   6     0.01   0.02   0.03     0.00   0.00   0.00     0.02  -0.03  -0.01
   2   6     0.00   0.04  -0.01     0.00   0.00   0.00     0.02  -0.03  -0.01
   3   6     0.03   0.02  -0.02     0.00   0.00   0.00    -0.02   0.01  -0.02
   4   6     0.01   0.00   0.00    -0.01   0.00   0.00     0.01   0.00   0.00
   5   6     0.00   0.00   0.01     0.00   0.00  -0.01     0.01   0.00   0.00
   6   6     0.00   0.00   0.01     0.00   0.00   0.00     0.00   0.01  -0.01
   7   8     0.00   0.01   0.00     0.00  -0.01   0.00     0.00   0.00   0.00
   8   6     0.00   0.00   0.00     0.00   0.00   0.00     0.00   0.00   0.01
   9   6     0.00  -0.01   0.01     0.01   0.00   0.01     0.03   0.00   0.00
  10   6     0.00   0.00   0.00     0.00   0.00   0.00    -0.03   0.02  -0.02
  11   6    -0.03  -0.03   0.00    -0.01   0.01   0.00    -0.02  -0.01   0.01
  12   6    -0.05   0.00   0.00     0.00   0.00   0.01    -0.05   0.03  -0.01
  13   6    -0.04   0.04   0.03     0.00  -0.02  -0.01    -0.03   0.06  -0.01
  14   6    -0.01   0.04   0.01     0.01  -0.02  -0.02     0.01   0.06  -0.02
  15   6     0.01   0.01  -0.02     0.01  -0.02   0.01     0.04   0.02  -0.02
  16   6    -0.02  -0.02   0.00    -0.02   0.04  -0.02    -0.01   0.00   0.01
  17   6    -0.02   0.00  -0.02     0.05  -0.03   0.02     0.01   0.00  -0.01
  18   6    -0.02   0.00  -0.01     0.00   0.00   0.00     0.02   0.04   0.04
  19   6     0.01  -0.01  -0.02     0.00   0.00   0.00     0.03   0.01   0.07
  20   6     0.02  -0.02  -0.02     0.00   0.00   0.00     0.03  -0.05   0.06
  21   6    -0.01  -0.02   0.01     0.00   0.00   0.00     0.00  -0.07  -0.01
  22   6    -0.02  -0.02   0.01     0.00   0.00   0.00    -0.03  -0.02  -0.04
  23   6    -0.03   0.02  -0.01     0.00   0.00   0.00     0.03  -0.01   0.03
  24   6     0.00  -0.02   0.02     0.00   0.00   0.00    -0.02   0.00  -0.03
  25   6     0.02  -0.02  -0.01    -0.06   0.10   0.01     0.01   0.02   0.00
  26   6     0.08  -0.03   0.01    -0.08   0.07  -0.05     0.02   0.02  -0.01
  27   6    -0.05  -0.04  -0.01     0.08  -0.05   0.06    -0.03  -0.10   0.04
  28   6    -0.04   0.01  -0.01     0.07  -0.07   0.01    -0.01  -0.07   0.00
  29   6     0.04  -0.05   0.02    -0.01   0.01   0.00    -0.01   0.14   0.00
  30   6     0.01  -0.01   0.03    -0.01   0.01  -0.01    -0.01   0.04  -0.02
  31   6    -0.03   0.05  -0.06     0.00  -0.01   0.01     0.00  -0.08   0.03
  32   6    -0.04   0.03  -0.01     0.01  -0.01   0.01     0.03  -0.08  -0.04
  33   6     0.01   0.01   0.04     0.01   0.00  -0.01    -0.01   0.01  -0.03
  34   6     0.05   0.01   0.00     0.00  -0.01  -0.01    -0.01   0.00  -0.02
  35   8     0.03  -0.01   0.01     0.03  -0.01   0.00    -0.01   0.01   0.01
  36  12     0.04   0.03   0.01    -0.02   0.01   0.00    -0.04   0.05   0.03
  37   8     0.03   0.08  -0.02     0.01   0.04  -0.01     0.00  -0.01  -0.01
  38   6     0.03   0.00   0.02     0.02   0.00   0.02     0.00   0.01   0.00
  39   7     0.03   0.00  -0.01     0.00   0.00   0.00    -0.07   0.07  -0.05
  40   7     0.02  -0.02   0.04     0.00   0.00   0.00     0.04  -0.03   0.00
  41   8     0.04  -0.02   0.02     0.04  -0.02   0.01     0.00   0.01   0.01
  42   8    -0.04   0.00   0.02    -0.03  -0.01   0.01     0.00   0.00   0.00
  43   6    -0.03   0.03   0.01    -0.02   0.01   0.00    -0.01   0.00   0.00
  44   6     0.00   0.07  -0.01     0.00   0.03   0.00    -0.01  -0.01  -0.01
  45   6    -0.01   0.01   0.01    -0.02   0.01   0.02     0.01   0.00  -0.01
  46   8    -0.05  -0.01   0.01    -0.03   0.00   0.01     0.00   0.01  -0.01
  47   6    -0.04  -0.02  -0.01    -0.03  -0.02  -0.01     0.00   0.00  -0.01
  48   8    -0.02  -0.01  -0.02    -0.01  -0.02  -0.01     0.01  -0.02  -0.01
  49   6     0.02   0.00  -0.01     0.01   0.00  -0.01     0.00   0.00   0.00
  50   8     0.09  -0.04  -0.02     0.04  -0.02  -0.01    -0.02   0.02   0.00
  51   8     0.00   0.00   0.04     0.00   0.00   0.02     0.01  -0.01   0.00
  52   6    -0.02   0.00   0.00     0.00   0.00   0.01     0.02  -0.03   0.01
  53   6    -0.02   0.00  -0.01     0.00  -0.01   0.00     0.02  -0.03   0.00
  54   6     0.00  -0.04   0.01     0.01  -0.01   0.00     0.01   0.01   0.01
  55   8    -0.04  -0.02  -0.01    -0.01   0.01   0.02     0.03   0.00   0.03
  56   6    -0.01  -0.01  -0.01    -0.03   0.00  -0.01    -0.03   0.00   0.00
  57   6     0.08  -0.09  -0.02     0.05  -0.04   0.00     0.00   0.01   0.00
  58   6    -0.07   0.03  -0.05    -0.05   0.02  -0.02     0.01   0.00   0.00
  59   6     0.01   0.02   0.01    -0.02   0.04   0.00     0.01  -0.02   0.01
  60   1    -0.02   0.03  -0.02     0.00   0.00   0.00     0.04  -0.04  -0.01
  61   1     0.00   0.00   0.00     0.00   0.00   0.00     0.01  -0.01  -0.01
  62   1     0.01   0.00   0.00    -0.01   0.00   0.00     0.01   0.00   0.00
  63   1     0.01   0.00   0.02    -0.01   0.00  -0.01     0.01  -0.01   0.01
  64   1     0.00   0.01   0.01     0.00  -0.01  -0.01     0.00   0.01   0.01
  65   1     0.01   0.00   0.02     0.00   0.00   0.00     0.00   0.00  -0.02
  66   1    -0.02   0.00   0.01     0.00   0.00   0.00     0.01   0.01  -0.02
  67   1     0.00  -0.01   0.01     0.00   0.00   0.00     0.00  -0.01   0.01
  68   1    -0.01   0.00   0.00     0.01   0.00   0.00    -0.01   0.00   0.00
  69   1    -0.08  -0.01   0.00     0.02   0.00   0.01    -0.08   0.02  -0.01
  70   1    -0.06   0.07   0.06     0.00  -0.02  -0.02    -0.06   0.09  -0.02
  71   1     0.00   0.07   0.02     0.01  -0.02  -0.04     0.03   0.10  -0.03
  72   1    -0.04   0.00   0.02    -0.02   0.04  -0.03    -0.03   0.02   0.01
  73   1    -0.03   0.03  -0.02     0.05  -0.04   0.01    -0.01   0.05  -0.02
  74   1     0.03   0.00  -0.02    -0.01   0.00   0.00     0.05   0.02   0.11
  75   1     0.04  -0.01  -0.04     0.00   0.00   0.00     0.04  -0.09   0.10
  76   1    -0.02  -0.02   0.01     0.01   0.00  -0.01     0.01  -0.12  -0.03
  77   1    -0.03   0.02  -0.02     0.00   0.00   0.00     0.05  -0.04   0.08
  78   1     0.01  -0.04   0.03     0.00   0.00   0.00     0.00  -0.04   0.01
  79   1     0.13   0.17  -0.06    -0.17  -0.08   0.09     0.03   0.06  -0.01
  80   1    -0.16  -0.02   0.06     0.10   0.13  -0.11    -0.03   0.03   0.00
  81   1     0.14  -0.22  -0.06    -0.17   0.31   0.08     0.04  -0.02   0.01
  82   1     0.11   0.06   0.01    -0.10   0.01  -0.06     0.03   0.06  -0.02
  83   1     0.15  -0.07   0.02    -0.13   0.08  -0.09     0.05  -0.01  -0.02
  84   1     0.06  -0.07   0.01    -0.07   0.14  -0.04     0.01   0.02  -0.01
  85   1     0.10   0.02   0.11    -0.07  -0.08   0.01     0.10  -0.02   0.23
  86   1    -0.10   0.05  -0.19     0.14  -0.15   0.22    -0.08  -0.03  -0.17
  87   1    -0.17  -0.21   0.05     0.22   0.06  -0.01    -0.15  -0.33   0.09
  88   1     0.04   0.01  -0.04     0.00  -0.08   0.00     0.06  -0.10  -0.10
  89   1    -0.11  -0.07  -0.01     0.13  -0.02   0.03    -0.07  -0.20   0.05
  90   1    -0.09   0.11   0.03     0.11  -0.15  -0.01    -0.04   0.01   0.07
  91   1     0.04  -0.05  -0.01    -0.01   0.01   0.01     0.06   0.16   0.12
  92   1     0.06  -0.06   0.00    -0.01   0.01   0.00    -0.05   0.24  -0.05
  93   1     0.06  -0.05   0.07    -0.01   0.02   0.00    -0.03   0.12  -0.03
  94   1     0.02  -0.01   0.03     0.00   0.01  -0.03    -0.03   0.02  -0.14
  95   1     0.02  -0.01   0.03    -0.01   0.03  -0.01     0.04   0.18   0.00
  96   1    -0.01   0.00   0.04    -0.01   0.01   0.00    -0.01  -0.02   0.09
  97   1     0.03   0.08  -0.09    -0.02  -0.05   0.02     0.04   0.04   0.04
  98   1    -0.09   0.07  -0.11     0.03   0.00   0.05     0.00  -0.17  -0.13
  99   1    -0.04   0.04  -0.05     0.01   0.02  -0.02    -0.07  -0.17   0.16
 100   1    -0.06   0.05   0.01     0.02  -0.01   0.00    -0.02  -0.08  -0.02
 101   1    -0.03   0.02   0.01     0.00   0.00   0.01     0.12  -0.07  -0.08
 102   1    -0.04   0.03  -0.04     0.01   0.00   0.03    -0.01  -0.15  -0.08
 103   1     0.01   0.01   0.05     0.00   0.00  -0.01     0.01   0.00  -0.08
 104   1     0.00   0.00   0.04     0.02   0.00   0.00    -0.04   0.06  -0.04
 105   1     0.01   0.01   0.04     0.01   0.00  -0.02    -0.02   0.02   0.02
 106   1     0.03   0.01   0.01     0.01  -0.02  -0.02     0.01  -0.05  -0.02
 107   1     0.07   0.00  -0.02     0.00   0.00  -0.01     0.00   0.03   0.02
 108   1     0.06  -0.01   0.02    -0.01  -0.01  -0.02    -0.04   0.01  -0.06
 109   1    -0.02   0.08   0.02    -0.01   0.04   0.01    -0.01  -0.01  -0.01
 110   1    -0.02   0.02  -0.02    -0.02   0.02   0.01     0.01   0.01  -0.01
 111   1    -0.06   0.02  -0.03    -0.05   0.03  -0.03     0.00  -0.01  -0.01
 112   1    -0.06  -0.01  -0.02    -0.05  -0.02  -0.01     0.00   0.02  -0.02
 113   1    -0.06  -0.07   0.00    -0.05  -0.06   0.01     0.00   0.00  -0.01
 114   1    -0.03   0.00  -0.01     0.00  -0.01   0.00     0.03  -0.03   0.02
 115   1     0.02  -0.04   0.02     0.02  -0.02   0.00     0.01   0.01   0.01
 116   1     0.01  -0.02  -0.01    -0.06   0.03  -0.02    -0.09   0.05  -0.03
 117   1    -0.03  -0.01   0.00    -0.01   0.01  -0.02     0.01   0.02  -0.04
 118   1     0.00   0.01  -0.03    -0.05  -0.02   0.03    -0.06  -0.03   0.06
 119   1     0.28  -0.07   0.12     0.18  -0.04   0.11    -0.01   0.01  -0.02
 120   1     0.13  -0.24  -0.24     0.09  -0.14  -0.14     0.00   0.02   0.02
 121   1    -0.10  -0.02  -0.01    -0.07   0.03   0.02     0.02  -0.01   0.00
 122   1    -0.09   0.02  -0.07    -0.06   0.02  -0.05     0.02   0.01   0.01
 123   1    -0.13   0.00   0.01    -0.08   0.02   0.01     0.02  -0.01  -0.01
 124   1    -0.08   0.03  -0.12    -0.05   0.03  -0.06     0.00   0.01   0.01
 125   1     0.08   0.01   0.02     0.25   0.01   0.08    -0.02  -0.01   0.03
 126   1     0.00   0.09  -0.02    -0.09   0.25  -0.18     0.02  -0.06   0.04
 127   1    -0.03  -0.02   0.02    -0.22  -0.13   0.09     0.04  -0.03  -0.01
                    70                     71                     72
                     A                      A                      A
 Frequencies --   276.3439               283.8954               292.4403
 Red. masses --     2.2279                 3.0300                 2.7143
 Frc consts  --     0.1002                 0.1439                 0.1368
 IR Inten    --     6.3527                 1.7329                27.7274
 Atom AN      X      Y      Z        X      Y      Z        X      Y      Z
   1   6     0.01   0.01   0.01     0.00   0.01  -0.02     0.01   0.04   0.00
   2   6    -0.01   0.04  -0.02     0.01   0.00   0.00     0.03   0.00   0.00
   3   6     0.01  -0.01   0.00     0.02  -0.01  -0.01     0.05   0.00  -0.02
   4   6     0.00   0.00   0.00     0.00   0.00   0.00     0.00   0.00   0.00
   5   6     0.01   0.00   0.00     0.00  -0.01   0.00     0.00  -0.01  -0.01
   6   6     0.01   0.01  -0.03     0.00  -0.01   0.00    -0.01   0.00  -0.01
   7   8     0.01   0.00   0.00     0.00  -0.01   0.01     0.00  -0.01   0.00
   8   6     0.00   0.00   0.01     0.00   0.00   0.01     0.01   0.00   0.00
   9   6     0.02   0.00   0.00    -0.02  -0.02  -0.01    -0.02   0.00  -0.02
  10   6     0.01  -0.05   0.00     0.02  -0.01   0.00     0.02  -0.01  -0.02
  11   6    -0.01  -0.01   0.00    -0.02  -0.02   0.02    -0.01   0.00   0.00
  12   6    -0.04   0.02   0.00    -0.03  -0.02  -0.01     0.00  -0.01   0.00
  13   6    -0.03   0.05   0.01    -0.03  -0.02  -0.02    -0.01  -0.04   0.00
  14   6     0.01   0.05  -0.01    -0.03  -0.01   0.01    -0.03  -0.04   0.01
  15   6     0.03   0.01  -0.02    -0.03  -0.01   0.01    -0.04  -0.02   0.01
  16   6    -0.01   0.00  -0.01     0.00  -0.01   0.03    -0.02   0.00   0.02
  17   6     0.01   0.00  -0.01    -0.01   0.00   0.00    -0.01  -0.02   0.02
  18   6    -0.01  -0.07  -0.04    -0.01  -0.01  -0.01     0.00  -0.01   0.00
  19   6    -0.06  -0.03  -0.07    -0.01   0.00  -0.02     0.00  -0.02   0.01
  20   6    -0.05   0.04  -0.07     0.01   0.02  -0.02     0.02  -0.02  -0.01
  21   6     0.00   0.05  -0.04     0.00   0.02   0.00     0.00  -0.02  -0.01
  22   6     0.01   0.02   0.00     0.01   0.00   0.02    -0.01  -0.02  -0.01
  23   6     0.01  -0.04  -0.01    -0.02   0.00   0.00    -0.01   0.00   0.00
  24   6     0.00   0.02  -0.01     0.00   0.00   0.02    -0.02  -0.01   0.01
  25   6    -0.01   0.01  -0.01     0.07  -0.04   0.01    -0.02  -0.03   0.01
  26   6     0.03   0.00  -0.01     0.03   0.00   0.03    -0.01  -0.01   0.04
  27   6    -0.01  -0.08   0.03     0.00   0.03  -0.01     0.04   0.04   0.01
  28   6    -0.01  -0.04   0.00     0.00   0.02   0.00     0.04  -0.01   0.00
  29   6    -0.05  -0.01  -0.02     0.00  -0.05   0.01     0.00   0.02   0.01
  30   6    -0.02   0.02  -0.04    -0.01   0.00   0.01    -0.01   0.03   0.00
  31   6     0.05  -0.01   0.11    -0.01   0.02  -0.01    -0.01   0.02  -0.01
  32   6     0.06   0.02   0.10    -0.01   0.01   0.02    -0.01   0.00   0.01
  33   6     0.00  -0.01   0.03     0.06   0.03  -0.06     0.09   0.06  -0.06
  34   6     0.01   0.01   0.03     0.01  -0.01  -0.05     0.04  -0.02  -0.09
  35   8    -0.01   0.00   0.00     0.00   0.06   0.06     0.00  -0.04  -0.03
  36  12    -0.04   0.04   0.03    -0.04   0.07   0.00    -0.09   0.11   0.07
  37   8     0.00   0.00   0.00     0.01  -0.04  -0.02    -0.02   0.01   0.00
  38   6     0.00   0.00   0.00     0.04   0.05   0.01    -0.02  -0.03   0.00
  39   7     0.03  -0.07   0.03     0.04  -0.02   0.00     0.04  -0.01  -0.03
  40   7     0.03  -0.01   0.02    -0.02   0.00  -0.03    -0.04   0.05  -0.03
  41   8    -0.01   0.00   0.00     0.02   0.05   0.05    -0.01  -0.02  -0.02
  42   8     0.01   0.00   0.00    -0.06  -0.04  -0.01     0.03   0.03   0.01
  43   6     0.00   0.00   0.00    -0.04  -0.03  -0.02     0.02   0.01   0.01
  44   6     0.00   0.00   0.00    -0.02  -0.04  -0.04     0.00   0.01   0.02
  45   6     0.00   0.00   0.00     0.01   0.02  -0.03     0.00  -0.01   0.02
  46   8     0.00   0.00   0.00    -0.01   0.02  -0.03     0.00  -0.01   0.01
  47   6     0.01   0.00   0.00    -0.05   0.03  -0.06     0.03  -0.02   0.03
  48   8     0.00   0.00  -0.01     0.04   0.02  -0.01    -0.01  -0.07   0.00
  49   6     0.00   0.00   0.00     0.01   0.01   0.02    -0.01   0.00  -0.02
  50   8    -0.01   0.00   0.00    -0.05   0.06   0.01    -0.02  -0.02   0.00
  51   8     0.00   0.00  -0.01     0.05  -0.07   0.02    -0.01   0.02  -0.02
  52   6     0.00  -0.01  -0.01     0.05  -0.07   0.01     0.02  -0.01   0.00
  53   6     0.00   0.00   0.00     0.07  -0.04  -0.03     0.00  -0.03   0.04
  54   6     0.00   0.01   0.00     0.04   0.00   0.04     0.00   0.01  -0.04
  55   8     0.01  -0.01  -0.01     0.02   0.01   0.09     0.07  -0.02  -0.01
  56   6     0.01   0.00  -0.01    -0.09   0.01  -0.03     0.00  -0.02   0.04
  57   6     0.01   0.00   0.00    -0.01   0.02   0.00     0.02   0.01   0.02
  58   6     0.01  -0.01   0.01     0.00   0.02  -0.03     0.00   0.00   0.02
  59   6     0.00   0.00   0.00     0.03  -0.11   0.08    -0.03   0.06  -0.03
  60   1    -0.03   0.06  -0.03     0.00   0.01   0.00     0.02  -0.02   0.00
  61   1     0.01   0.00   0.00     0.00  -0.01   0.00    -0.01   0.00   0.00
  62   1     0.00   0.00   0.00     0.00   0.00   0.00    -0.01  -0.01   0.00
  63   1     0.00  -0.01   0.00     0.00  -0.01  -0.01     0.00  -0.01  -0.01
  64   1     0.01   0.02   0.01     0.00  -0.01  -0.01     0.00  -0.01  -0.01
  65   1    -0.01   0.01  -0.05    -0.01  -0.01  -0.01    -0.02   0.00  -0.02
  66   1     0.03   0.02  -0.04     0.01   0.00  -0.01     0.01   0.01  -0.01
  67   1     0.01   0.00   0.00     0.00  -0.01   0.01     0.01   0.01  -0.02
  68   1     0.00   0.00   0.00    -0.01   0.00   0.01     0.03  -0.01   0.00
  69   1    -0.06   0.01   0.00    -0.04  -0.02  -0.02     0.02   0.00   0.01
  70   1    -0.04   0.08   0.02    -0.03  -0.02  -0.04     0.00  -0.06   0.00
  71   1     0.02   0.07  -0.01    -0.03   0.00   0.03    -0.04  -0.05   0.01
  72   1    -0.03   0.01   0.00    -0.02   0.01   0.03    -0.01   0.00   0.03
  73   1     0.00   0.03  -0.02     0.00  -0.02   0.01     0.01  -0.06   0.03
  74   1    -0.10  -0.04  -0.10    -0.02  -0.01  -0.03     0.00  -0.01   0.02
  75   1    -0.08   0.07  -0.09     0.01   0.03  -0.04     0.03  -0.03  -0.01
  76   1     0.01   0.09  -0.04     0.00   0.03   0.01     0.00  -0.03  -0.01
  77   1    -0.02   0.00  -0.07    -0.02   0.01  -0.01    -0.01   0.00   0.00
  78   1    -0.01   0.05  -0.03    -0.01   0.01   0.01    -0.01  -0.02   0.02
  79   1     0.03   0.07  -0.01     0.03  -0.10  -0.07     0.19   0.32  -0.03
  80   1    -0.06   0.02   0.00     0.16  -0.06   0.00    -0.36  -0.03   0.16
  81   1     0.03  -0.04  -0.02     0.08  -0.01   0.05     0.15  -0.38  -0.13
  82   1     0.04   0.05  -0.02     0.03   0.00   0.07    -0.01   0.00   0.02
  83   1     0.06  -0.03  -0.01     0.01  -0.01   0.00     0.02  -0.01   0.07
  84   1     0.02  -0.01  -0.01     0.07   0.00   0.01    -0.04  -0.04   0.05
  85   1     0.07  -0.02   0.16    -0.03   0.01  -0.07    -0.04   0.00  -0.08
  86   1    -0.04  -0.04  -0.10     0.01   0.02   0.05     0.07   0.01   0.15
  87   1    -0.08  -0.24   0.06     0.03   0.11  -0.03     0.13   0.16  -0.03
  88   1     0.05  -0.06  -0.07    -0.02   0.03   0.03     0.00   0.00   0.03
  89   1    -0.05  -0.13   0.02     0.02   0.06  -0.01     0.10   0.05   0.01
  90   1    -0.03   0.02   0.04     0.01   0.00  -0.03     0.06  -0.07  -0.05
  91   1    -0.13  -0.02  -0.04    -0.02  -0.06  -0.04     0.00   0.02   0.03
  92   1    -0.02  -0.07   0.00     0.02  -0.08   0.02    -0.01   0.03   0.00
  93   1    -0.04   0.05  -0.05     0.01  -0.05   0.02     0.00   0.02   0.02
  94   1    -0.01   0.02  -0.04     0.01   0.01   0.04     0.01   0.03  -0.05
  95   1    -0.05   0.01  -0.04    -0.02  -0.04   0.00    -0.02   0.07   0.00
  96   1     0.00   0.02  -0.07    -0.01   0.02  -0.02    -0.03   0.04   0.01
  97   1    -0.17  -0.27   0.14    -0.01  -0.01  -0.02    -0.01  -0.01  -0.03
  98   1     0.21   0.08   0.45    -0.02   0.06   0.03    -0.02   0.04   0.01
  99   1     0.17   0.16  -0.13     0.01   0.05  -0.05    -0.01   0.04  -0.04
 100   1     0.18   0.01   0.03     0.01   0.02   0.01     0.00   0.00   0.01
 101   1    -0.07   0.01   0.13    -0.03   0.01   0.04    -0.02   0.00   0.01
 102   1     0.11   0.08   0.23     0.00   0.03   0.03    -0.01   0.01   0.02
 103   1     0.00   0.00   0.05     0.07   0.02  -0.10     0.10   0.05  -0.09
 104   1     0.00  -0.03   0.02     0.10   0.07  -0.03     0.15   0.10  -0.01
 105   1     0.00  -0.01   0.02     0.07   0.02  -0.11     0.10   0.05  -0.12
 106   1    -0.01   0.03   0.04     0.04  -0.01  -0.07     0.09  -0.03  -0.14
 107   1     0.01   0.00   0.01    -0.01  -0.02  -0.05     0.01  -0.02  -0.08
 108   1     0.04   0.01   0.05    -0.01  -0.02  -0.06    -0.02  -0.03  -0.13
 109   1     0.00   0.00   0.00    -0.03  -0.03  -0.08     0.01   0.00   0.03
 110   1     0.00  -0.01   0.00    -0.01   0.07  -0.07     0.01  -0.03   0.05
 111   1     0.01  -0.01   0.01    -0.07   0.02  -0.10     0.03  -0.02   0.05
 112   1     0.01   0.00   0.00    -0.07   0.11  -0.12     0.04  -0.06   0.06
 113   1     0.01   0.01   0.00    -0.07  -0.07  -0.07     0.03   0.03   0.04
 114   1     0.00  -0.01   0.00     0.13  -0.04   0.00    -0.03  -0.03   0.07
 115   1    -0.01   0.01   0.00     0.05   0.02   0.04    -0.01  -0.01  -0.04
 116   1     0.01   0.01   0.00    -0.29   0.18  -0.13     0.03  -0.04   0.05
 117   1     0.02   0.00  -0.01     0.05   0.05  -0.13    -0.04  -0.02   0.05
 118   1     0.01   0.00  -0.01    -0.20  -0.13   0.18     0.01   0.02   0.03
 119   1    -0.01   0.01  -0.02    -0.01   0.02   0.01     0.04   0.00   0.06
 120   1     0.00   0.01   0.02     0.01   0.06  -0.05     0.02  -0.03   0.03
 121   1     0.03   0.00   0.00    -0.07   0.01  -0.01     0.04   0.07   0.03
 122   1     0.02   0.00   0.02     0.05   0.06  -0.05    -0.03  -0.01   0.00
 123   1     0.02  -0.01   0.00     0.00   0.01  -0.04    -0.01   0.03   0.02
 124   1     0.01   0.00   0.01    -0.05   0.06   0.01     0.01  -0.01   0.02
 125   1    -0.03   0.00  -0.02     0.17  -0.08   0.30    -0.06   0.04  -0.13
 126   1     0.01  -0.03   0.02     0.01  -0.05   0.00    -0.02   0.05  -0.02
 127   1     0.03   0.02  -0.01    -0.05  -0.36   0.06    -0.02   0.16  -0.01
                    73                     74                     75
                     A                      A                      A
 Frequencies --   293.4891               301.5678               317.2637
 Red. masses --     3.2881                 2.2746                 2.9681
 Frc consts  --     0.1669                 0.1219                 0.1760
 IR Inten    --     9.0617                 0.8696                12.6833
 Atom AN      X      Y      Z        X      Y      Z        X      Y      Z
   1   6     0.02   0.04   0.06     0.01  -0.01   0.00    -0.02  -0.01  -0.03
   2   6     0.03   0.04   0.00     0.00   0.01   0.00     0.01  -0.05   0.01
   3   6     0.04   0.05  -0.02     0.00   0.01  -0.01    -0.04  -0.01   0.01
   4   6     0.00   0.00   0.00     0.00   0.00   0.00     0.00   0.00  -0.01
   5   6     0.00   0.01   0.00     0.00   0.00   0.00     0.00   0.00   0.00
   6   6    -0.01   0.00   0.00     0.00   0.00   0.00     0.00  -0.01   0.01
   7   8    -0.01   0.00  -0.01     0.00   0.00   0.00     0.01   0.02  -0.02
   8   6    -0.01   0.00  -0.01     0.00  -0.01   0.00    -0.02  -0.01   0.01
   9   6    -0.03  -0.01   0.02    -0.01  -0.03   0.00    -0.01   0.03  -0.02
  10   6    -0.05  -0.03  -0.03     0.00   0.00   0.00    -0.03   0.02   0.01
  11   6    -0.03  -0.02   0.01    -0.02  -0.03   0.02     0.01   0.03  -0.02
  12   6    -0.01  -0.05   0.01    -0.04  -0.02   0.00     0.02   0.02  -0.03
  13   6    -0.02  -0.08   0.03    -0.03   0.00   0.00     0.01   0.00   0.00
  14   6    -0.04  -0.07   0.03    -0.02   0.01   0.01    -0.01   0.00   0.02
  15   6    -0.06  -0.04   0.01    -0.01   0.00   0.00    -0.01   0.00   0.00
  16   6    -0.02   0.00   0.00     0.00  -0.02   0.01     0.00   0.02   0.01
  17   6    -0.03  -0.02   0.00    -0.01   0.01   0.00     0.00  -0.01  -0.01
  18   6    -0.01  -0.03  -0.02     0.00  -0.01   0.00    -0.01   0.02   0.00
  19   6    -0.01  -0.05  -0.01     0.00   0.00  -0.01     0.02   0.04  -0.04
  20   6    -0.02  -0.08  -0.02     0.00   0.00  -0.01    -0.01   0.04  -0.02
  21   6    -0.03  -0.08  -0.05    -0.01   0.00  -0.01    -0.05   0.03   0.00
  22   6    -0.05  -0.05  -0.06     0.00   0.00   0.00    -0.01   0.01   0.00
  23   6     0.01  -0.03  -0.01     0.00   0.00   0.00    -0.01   0.00   0.01
  24   6    -0.02  -0.02  -0.05     0.00   0.00   0.00     0.01   0.01  -0.01
  25   6    -0.01   0.01   0.00     0.08  -0.01   0.00    -0.04  -0.02   0.01
  26   6     0.00   0.00   0.00     0.04   0.00  -0.01    -0.02   0.00   0.04
  27   6     0.01   0.07  -0.04    -0.03   0.03  -0.03     0.04  -0.04   0.04
  28   6    -0.01   0.08  -0.01    -0.03   0.04   0.00     0.03  -0.03  -0.02
  29   6    -0.03   0.15  -0.01     0.00   0.00   0.00     0.03  -0.04  -0.02
  30   6     0.00   0.05  -0.04     0.00   0.00   0.00     0.02  -0.06   0.04
  31   6     0.03  -0.05   0.08     0.00   0.00   0.01    -0.01  -0.03   0.04
  32   6     0.05  -0.03   0.02     0.01   0.00   0.01     0.05  -0.03   0.03
  33   6     0.04   0.04   0.06     0.04   0.01  -0.03    -0.05  -0.02  -0.02
  34   6     0.08   0.09   0.09     0.01   0.00   0.00    -0.04   0.03   0.05
  35   8     0.00   0.02   0.01     0.01  -0.07  -0.03     0.02  -0.03  -0.01
  36  12     0.11   0.01   0.00     0.02   0.03   0.01     0.10   0.03  -0.03
  37   8     0.01   0.00   0.00    -0.03   0.02  -0.04     0.00  -0.04  -0.05
  38   6     0.01   0.01   0.00    -0.02  -0.05   0.01    -0.01  -0.02   0.01
  39   7    -0.02   0.01  -0.05     0.00   0.00  -0.01    -0.06   0.04  -0.01
  40   7    -0.01   0.01   0.04     0.01  -0.04   0.00    -0.03   0.05  -0.04
  41   8     0.01   0.01   0.01     0.00  -0.05  -0.03     0.02  -0.05   0.00
  42   8    -0.02  -0.01   0.00     0.05   0.07   0.02     0.00   0.04   0.01
  43   6     0.00  -0.01  -0.01     0.01   0.05   0.02     0.04   0.01   0.02
  44   6     0.00   0.00  -0.01     0.00   0.04   0.01     0.05  -0.01  -0.04
  45   6     0.00   0.01  -0.01     0.00  -0.01   0.05    -0.03   0.01   0.04
  46   8     0.00   0.00   0.00    -0.02   0.00   0.02     0.03  -0.03   0.10
  47   6    -0.02   0.01  -0.02     0.04  -0.06   0.06    -0.01  -0.02   0.01
  48   8     0.01   0.01   0.00     0.03   0.03   0.00     0.02   0.02  -0.02
  49   6     0.01   0.00   0.01    -0.04   0.00  -0.02    -0.01  -0.01  -0.01
  50   8     0.01   0.01   0.00    -0.06   0.02  -0.02    -0.07   0.03  -0.01
  51   8     0.00  -0.01   0.02     0.00  -0.03   0.02     0.02  -0.02   0.04
  52   6    -0.01   0.01  -0.01     0.02  -0.05   0.01     0.02  -0.02   0.00
  53   6    -0.01   0.01  -0.02     0.05  -0.03  -0.02     0.03   0.00  -0.03
  54   6     0.00  -0.01   0.03     0.00  -0.01   0.01     0.03  -0.01   0.03
  55   8    -0.04  -0.01  -0.01     0.01   0.00   0.06    -0.01   0.00   0.03
  56   6     0.01   0.00  -0.02    -0.02   0.03  -0.03    -0.04  -0.01  -0.03
  57   6    -0.02  -0.01  -0.01     0.00  -0.02   0.00    -0.04   0.02  -0.01
  58   6     0.00   0.00  -0.01    -0.02   0.01  -0.01    -0.07   0.05  -0.09
  59   6     0.01  -0.02   0.02    -0.03   0.10  -0.04     0.01   0.05   0.03
  60   1     0.01   0.00   0.00    -0.01   0.02  -0.01     0.05  -0.06   0.03
  61   1     0.01  -0.01   0.00     0.00  -0.01   0.00     0.01  -0.02  -0.02
  62   1     0.01  -0.01   0.00     0.00   0.00   0.00     0.01   0.01  -0.01
  63   1     0.01   0.02  -0.01     0.00   0.00   0.00     0.01   0.01   0.00
  64   1     0.01   0.00  -0.01     0.00   0.00   0.00     0.00  -0.01  -0.01
  65   1     0.00   0.01   0.01     0.00   0.00   0.00     0.03  -0.01   0.03
  66   1    -0.02   0.00   0.01     0.00   0.00   0.00    -0.03  -0.02   0.02
  67   1    -0.01  -0.01   0.00    -0.01  -0.01   0.01    -0.02  -0.03   0.04
  68   1    -0.01   0.00  -0.01    -0.01   0.00   0.00    -0.06   0.00  -0.01
  69   1     0.03  -0.05   0.01    -0.06  -0.03  -0.01     0.04   0.02  -0.04
  70   1     0.00  -0.09   0.03    -0.04   0.01  -0.01     0.03  -0.01   0.00
  71   1    -0.05  -0.09   0.04    -0.01   0.02   0.02    -0.01   0.00   0.04
  72   1    -0.03   0.01   0.00    -0.03   0.00   0.00     0.03   0.01   0.02
  73   1     0.00  -0.08   0.02    -0.01   0.01   0.00     0.01  -0.02  -0.01
  74   1     0.00  -0.05   0.00     0.00   0.00  -0.01     0.05   0.03  -0.07
  75   1    -0.01  -0.10   0.00     0.00   0.00  -0.01     0.00   0.04  -0.03
  76   1    -0.01  -0.10  -0.07    -0.01   0.00   0.00    -0.07   0.04   0.02
  77   1     0.00  -0.01  -0.03    -0.01   0.00  -0.01    -0.01   0.00   0.01
  78   1     0.01  -0.08  -0.01     0.00   0.00   0.00     0.01   0.01  -0.01
  79   1     0.02   0.07  -0.01    -0.13  -0.36  -0.04     0.13   0.25  -0.01
  80   1    -0.07   0.02   0.01     0.46  -0.02  -0.14    -0.31  -0.04   0.14
  81   1     0.02  -0.04  -0.01    -0.05   0.32   0.17     0.08  -0.30  -0.13
  82   1     0.00   0.00   0.02     0.04   0.01   0.03    -0.03  -0.01   0.03
  83   1    -0.01  -0.01  -0.01     0.01  -0.01  -0.07    -0.01   0.02   0.09
  84   1     0.02   0.00  -0.01     0.10   0.03  -0.03    -0.05  -0.04   0.04
  85   1    -0.04   0.02  -0.19    -0.02   0.02  -0.06     0.02  -0.03   0.09
  86   1     0.03   0.06   0.09    -0.03   0.03  -0.05     0.04  -0.05   0.07
  87   1     0.07   0.23  -0.07    -0.06   0.05  -0.02     0.09  -0.09   0.01
  88   1    -0.03   0.12   0.10    -0.03   0.05   0.03     0.04  -0.04  -0.05
  89   1     0.03   0.18  -0.06    -0.05   0.05  -0.02     0.07  -0.04   0.01
  90   1     0.01   0.05  -0.08    -0.04   0.05   0.01     0.04  -0.04  -0.05
  91   1    -0.02   0.17   0.15     0.00   0.00   0.00     0.04  -0.04  -0.06
  92   1    -0.05   0.24  -0.08     0.00   0.00   0.00     0.05  -0.05  -0.02
  93   1    -0.04   0.21  -0.06     0.00   0.01   0.00     0.04  -0.06   0.02
  94   1    -0.01   0.03  -0.19     0.00   0.00   0.00    -0.02  -0.05   0.12
  95   1     0.04   0.22  -0.02     0.00   0.01   0.00     0.07  -0.13   0.03
  96   1    -0.02  -0.01   0.08     0.00   0.00   0.00     0.03  -0.06   0.02
  97   1    -0.07  -0.09   0.12    -0.01  -0.01   0.01    -0.05  -0.05   0.06
  98   1     0.11  -0.05   0.16     0.01   0.00   0.03     0.03  -0.06   0.06
  99   1     0.07  -0.03   0.04     0.01   0.00   0.00    -0.02  -0.03   0.04
 100   1     0.10  -0.02   0.00     0.02   0.00   0.01     0.09   0.01   0.02
 101   1     0.05  -0.04   0.03     0.01  -0.01   0.02     0.10  -0.05   0.05
 102   1     0.06  -0.05   0.07     0.01  -0.01   0.02     0.03  -0.09   0.06
 103   1     0.04   0.04   0.07     0.04   0.01  -0.06    -0.05  -0.02  -0.02
 104   1     0.05   0.03   0.06     0.06   0.04  -0.01    -0.07  -0.02  -0.04
 105   1     0.05   0.04   0.05     0.04   0.01  -0.05    -0.05  -0.02   0.00
 106   1    -0.01   0.09   0.16     0.00   0.00   0.01    -0.09   0.05   0.08
 107   1     0.12   0.10   0.09     0.02   0.00   0.00    -0.06   0.02   0.05
 108   1     0.16   0.12   0.12     0.01   0.00   0.00     0.01   0.05   0.07
 109   1     0.00   0.00  -0.01     0.03   0.02   0.03     0.08  -0.04  -0.03
 110   1    -0.01   0.02  -0.02     0.02  -0.05   0.08    -0.02  -0.01   0.05
 111   1    -0.02   0.01  -0.03     0.05  -0.05   0.09    -0.02   0.01   0.01
 112   1    -0.02   0.03  -0.03     0.06  -0.12   0.11    -0.01  -0.04   0.02
 113   1    -0.02  -0.02  -0.02     0.05   0.01   0.07    -0.02  -0.02   0.02
 114   1    -0.01   0.01  -0.03     0.10  -0.02  -0.01     0.05   0.00  -0.02
 115   1     0.00   0.00   0.03     0.01  -0.02   0.01     0.04  -0.01   0.03
 116   1     0.01   0.00  -0.02    -0.12   0.12  -0.05    -0.10   0.01  -0.08
 117   1     0.01   0.00  -0.02     0.04   0.05  -0.11    -0.03  -0.01  -0.03
 118   1     0.01   0.00  -0.04    -0.07  -0.02   0.07    -0.07  -0.04   0.05
 119   1     0.00   0.00  -0.01     0.02  -0.02   0.00    -0.12   0.01  -0.07
 120   1     0.00   0.00  -0.05     0.00  -0.03  -0.02    -0.04   0.12   0.02
 121   1    -0.06  -0.03  -0.02    -0.02  -0.03   0.00    -0.03  -0.04  -0.02
 122   1     0.01   0.00  -0.01    -0.07  -0.01  -0.03    -0.15   0.04  -0.25
 123   1     0.00  -0.01  -0.01    -0.04   0.05   0.02    -0.16   0.15   0.02
 124   1    -0.01   0.00  -0.02     0.02  -0.02  -0.02    -0.03   0.03  -0.11
 125   1     0.04  -0.02   0.07    -0.12   0.08  -0.22     0.02   0.03  -0.02
 126   1     0.00   0.00   0.00    -0.01   0.07   0.02     0.02   0.08   0.08
 127   1    -0.02  -0.08   0.01     0.03   0.29  -0.01     0.05   0.07   0.01
                    76                     77                     78
                     A                      A                      A
 Frequencies --   319.3535               323.4843               327.7410
 Red. masses --     4.0779                 3.6496                 4.3563
 Frc consts  --     0.2450                 0.2250                 0.2757
 IR Inten    --    10.7241                14.9450                11.9815
 Atom AN      X      Y      Z        X      Y      Z        X      Y      Z
   1   6    -0.01  -0.06  -0.04     0.02  -0.04   0.00    -0.06  -0.02  -0.06
   2   6    -0.01  -0.04   0.00    -0.01   0.02  -0.01    -0.05  -0.02   0.01
   3   6    -0.07  -0.01   0.00    -0.02   0.01  -0.01    -0.07  -0.07   0.06
   4   6     0.01  -0.01  -0.01     0.00   0.00   0.00     0.01  -0.01  -0.01
   5   6     0.00   0.00   0.00     0.00   0.00   0.00     0.01   0.00   0.00
   6   6    -0.01   0.00   0.01     0.00   0.01  -0.01    -0.02   0.01  -0.01
   7   8     0.00   0.02  -0.03    -0.01   0.00   0.00    -0.03  -0.02   0.01
   8   6    -0.02  -0.01   0.00     0.02   0.00  -0.01     0.02   0.00  -0.03
   9   6     0.01  -0.01  -0.01     0.02  -0.04   0.01    -0.01   0.01  -0.02
  10   6    -0.03   0.03   0.00     0.00   0.01  -0.01     0.01  -0.03   0.02
  11   6     0.00   0.00   0.00    -0.01  -0.04   0.02     0.01   0.02  -0.01
  12   6     0.01  -0.01   0.01    -0.01  -0.02   0.07     0.00   0.02  -0.05
  13   6     0.01  -0.02  -0.01     0.01  -0.02  -0.01     0.00   0.02  -0.01
  14   6     0.01  -0.02  -0.01     0.03  -0.03  -0.05    -0.01   0.03   0.04
  15   6     0.00   0.00   0.00     0.03   0.00   0.01    -0.01   0.01  -0.01
  16   6     0.00   0.00   0.01    -0.01  -0.02  -0.01     0.02   0.01   0.02
  17   6     0.00   0.01   0.01     0.00   0.02   0.03     0.00   0.00  -0.01
  18   6    -0.02   0.02   0.00     0.00   0.01   0.00     0.01  -0.03  -0.01
  19   6     0.04   0.05  -0.07     0.00   0.01  -0.01    -0.10  -0.06   0.09
  20   6    -0.02   0.05  -0.04     0.00   0.01  -0.01    -0.01  -0.04   0.04
  21   6    -0.08   0.04   0.01    -0.02   0.01   0.00     0.13  -0.02  -0.04
  22   6    -0.02   0.02  -0.01    -0.01   0.00   0.00     0.02  -0.01   0.01
  23   6    -0.02  -0.01   0.02    -0.01   0.00   0.01     0.06   0.01  -0.04
  24   6     0.01   0.00  -0.01     0.00   0.00   0.00    -0.02  -0.01   0.03
  25   6    -0.01   0.02   0.01    -0.01   0.06   0.00     0.04  -0.04   0.00
  26   6    -0.02   0.01  -0.01     0.00   0.01  -0.06     0.00   0.00   0.03
  27   6    -0.02   0.04  -0.02    -0.07   0.07  -0.06     0.03  -0.04   0.03
  28   6    -0.01   0.01   0.02    -0.05   0.04   0.05     0.02  -0.02  -0.02
  29   6     0.06  -0.05  -0.02     0.02  -0.02   0.00    -0.05   0.01   0.04
  30   6     0.03  -0.08   0.06     0.00  -0.01   0.02    -0.04   0.08  -0.05
  31   6    -0.03  -0.05   0.06    -0.01  -0.01   0.01     0.07   0.03  -0.03
  32   6     0.08  -0.05   0.06     0.02  -0.01   0.02    -0.07   0.08  -0.10
  33   6     0.04   0.00  -0.12     0.06   0.01  -0.06     0.04  -0.02  -0.12
  34   6    -0.07  -0.03   0.01    -0.01  -0.04  -0.04    -0.11  -0.03   0.08
  35   8    -0.02   0.01   0.01     0.01   0.03  -0.01     0.00   0.01   0.00
  36  12     0.12   0.12   0.07    -0.01   0.06   0.08     0.16   0.10   0.09
  37   8     0.00   0.05   0.04     0.02  -0.06   0.00     0.01   0.00   0.01
  38   6     0.01   0.01  -0.01     0.00   0.01   0.00     0.00   0.00   0.00
  39   7    -0.09   0.07  -0.02    -0.02   0.02  -0.01     0.00  -0.08   0.09
  40   7     0.02  -0.04  -0.03     0.07  -0.10   0.03    -0.04   0.02  -0.06
  41   8    -0.02   0.04   0.00     0.02  -0.03   0.02     0.01  -0.01   0.01
  42   8     0.01  -0.02   0.00    -0.03  -0.03  -0.01    -0.01  -0.01  -0.01
  43   6    -0.05   0.01  -0.02     0.07  -0.04   0.01     0.01   0.00   0.00
  44   6    -0.05   0.03   0.04     0.07  -0.04  -0.03     0.01   0.00  -0.01
  45   6     0.03  -0.01  -0.03    -0.03   0.00   0.00    -0.01   0.00   0.00
  46   8    -0.05   0.04  -0.12     0.09  -0.06   0.14     0.01  -0.01   0.02
  47   6     0.01   0.01   0.00    -0.04   0.03  -0.03    -0.01   0.01  -0.01
  48   8    -0.01  -0.03   0.01    -0.03  -0.07   0.00     0.01  -0.01   0.01
  49   6     0.00   0.01   0.03     0.02  -0.02  -0.02     0.00  -0.01   0.01
  50   8     0.06  -0.01   0.00     0.01  -0.04   0.01     0.02  -0.01  -0.01
  51   8    -0.02  -0.01   0.00    -0.02   0.10   0.04    -0.01   0.02   0.02
  52   6    -0.02   0.00  -0.01    -0.03   0.06   0.00    -0.03   0.03  -0.01
  53   6    -0.02  -0.01   0.01    -0.06   0.01   0.02    -0.03   0.02  -0.01
  54   6    -0.03  -0.01   0.02     0.01   0.02  -0.03    -0.02  -0.01   0.02
  55   8     0.00  -0.02  -0.02    -0.01  -0.01  -0.06    -0.03   0.00  -0.03
  56   6     0.03   0.01   0.01     0.02   0.00   0.03     0.03   0.01  -0.02
  57   6     0.02  -0.06   0.00    -0.04   0.06   0.00    -0.03  -0.02  -0.01
  58   6     0.08  -0.06   0.10    -0.07   0.05  -0.09     0.00  -0.01  -0.02
  59   6    -0.02  -0.03  -0.03     0.04  -0.02   0.03     0.00  -0.01   0.00
  60   1     0.04  -0.03   0.02    -0.02   0.04  -0.02     0.00   0.02   0.03
  61   1     0.01  -0.02  -0.01     0.00   0.01   0.02     0.00   0.01   0.00
  62   1     0.01  -0.01  -0.01    -0.01  -0.02   0.01     0.01  -0.03   0.00
  63   1     0.01   0.01   0.00     0.00   0.00   0.00     0.01   0.00   0.01
  64   1     0.01  -0.01  -0.01     0.00   0.01   0.01     0.01   0.01   0.01
  65   1     0.03  -0.01   0.03    -0.02   0.01  -0.02    -0.05   0.02  -0.03
  66   1    -0.03  -0.01   0.02     0.01   0.02  -0.02     0.01   0.03  -0.02
  67   1    -0.02  -0.03   0.02     0.02   0.02  -0.04     0.02   0.02  -0.08
  68   1    -0.05  -0.01  -0.02     0.05  -0.01  -0.01     0.08  -0.01  -0.01
  69   1     0.01   0.00   0.03    -0.01  -0.01   0.12     0.00   0.01  -0.07
  70   1     0.01  -0.02  -0.02    -0.01   0.00  -0.03     0.00   0.02   0.00
  71   1     0.01  -0.02  -0.02     0.04  -0.03  -0.10    -0.02   0.04   0.07
  72   1     0.00   0.00   0.00    -0.03  -0.01  -0.02     0.02   0.00   0.01
  73   1     0.00   0.01   0.01    -0.01   0.04   0.02     0.00   0.00  -0.01
  74   1     0.08   0.05  -0.12     0.01   0.01  -0.02    -0.18  -0.06   0.15
  75   1     0.00   0.05  -0.05     0.00   0.01  -0.01    -0.05  -0.03   0.05
  76   1    -0.12   0.05   0.04    -0.03   0.01   0.01     0.22  -0.02  -0.11
  77   1    -0.02  -0.01   0.02    -0.01   0.00   0.01     0.05   0.01  -0.05
  78   1     0.02   0.00  -0.02     0.00   0.00   0.00    -0.02  -0.01   0.03
  79   1     0.00   0.04   0.03    -0.09  -0.09   0.07     0.00  -0.11  -0.05
  80   1    -0.03   0.03   0.01     0.12   0.10  -0.12     0.13  -0.07   0.02
  81   1     0.00   0.01   0.01    -0.08   0.24   0.10     0.03  -0.01   0.01
  82   1    -0.02   0.01  -0.03     0.01   0.03  -0.09    -0.01  -0.02   0.05
  83   1    -0.02   0.01  -0.02     0.01  -0.02  -0.10    -0.02   0.02   0.04
  84   1    -0.03   0.04   0.00     0.00   0.06  -0.05     0.01  -0.01   0.03
  85   1    -0.03   0.02  -0.07    -0.01   0.06  -0.13     0.01  -0.02   0.08
  86   1    -0.01   0.03  -0.01    -0.09   0.10  -0.15     0.03  -0.05   0.05
  87   1    -0.02   0.09  -0.01    -0.18   0.12  -0.01     0.07  -0.08   0.01
  88   1    -0.02   0.01   0.03    -0.06   0.04   0.07     0.02  -0.03  -0.05
  89   1    -0.02   0.02   0.01    -0.10   0.04   0.01     0.03  -0.04   0.00
  90   1    -0.01   0.00   0.03    -0.06   0.05   0.10     0.02  -0.03  -0.03
  91   1     0.08  -0.06  -0.09     0.03  -0.02  -0.02    -0.09   0.01   0.06
  92   1     0.07  -0.07  -0.03     0.03  -0.03   0.00    -0.06   0.00   0.06
  93   1     0.07  -0.10   0.04     0.03  -0.04   0.03    -0.06   0.04   0.00
  94   1    -0.02  -0.07   0.18     0.00  -0.01   0.04     0.02   0.07  -0.17
  95   1     0.10  -0.18   0.04     0.02  -0.03   0.02    -0.13   0.18  -0.04
  96   1     0.04  -0.08   0.05     0.00  -0.01   0.02    -0.05   0.08  -0.06
  97   1    -0.09  -0.09   0.08    -0.03  -0.03   0.02     0.09   0.08  -0.02
  98   1     0.04  -0.08   0.10     0.01  -0.01   0.03     0.04   0.05  -0.05
  99   1    -0.04  -0.03   0.05    -0.01   0.00   0.01     0.11   0.01  -0.01
 100   1     0.15   0.01   0.03     0.04   0.00   0.01    -0.16  -0.01  -0.07
 101   1     0.14  -0.07   0.08     0.03  -0.01   0.02    -0.18   0.11  -0.12
 102   1     0.05  -0.15   0.12     0.01  -0.03   0.04    -0.03   0.21  -0.16
 103   1     0.05  -0.02  -0.20     0.06   0.00  -0.12     0.05  -0.03  -0.14
 104   1     0.07   0.08  -0.08     0.09   0.07  -0.02     0.11   0.01  -0.06
 105   1     0.04   0.00  -0.14     0.06   0.02  -0.08     0.05  -0.05  -0.21
 106   1    -0.08  -0.02   0.01     0.02  -0.07  -0.06    -0.12   0.00   0.07
 107   1    -0.06  -0.03   0.00     0.01  -0.04  -0.04    -0.14  -0.05   0.07
 108   1    -0.07  -0.03   0.02    -0.06  -0.07  -0.04    -0.07  -0.01   0.08
 109   1    -0.09   0.06   0.03     0.10  -0.06  -0.02     0.02   0.00   0.00
 110   1     0.03   0.01  -0.03    -0.04   0.00  -0.02    -0.01   0.00  -0.01
 111   1     0.02  -0.02   0.01    -0.05   0.06  -0.05    -0.02   0.01  -0.02
 112   1     0.02   0.02  -0.01    -0.05   0.05  -0.05    -0.02   0.02  -0.02
 113   1     0.02   0.02  -0.01    -0.05  -0.01  -0.03    -0.02  -0.01  -0.01
 114   1    -0.03  -0.01   0.02    -0.13   0.00   0.02    -0.05   0.02  -0.03
 115   1    -0.05  -0.01   0.02     0.04  -0.01  -0.03    -0.01  -0.01   0.02
 116   1     0.07   0.00   0.05     0.10  -0.06   0.07     0.08  -0.01   0.03
 117   1     0.02   0.01   0.00    -0.04  -0.02   0.07     0.02   0.01  -0.01
 118   1     0.05   0.03  -0.05     0.06   0.05  -0.06     0.06   0.03  -0.08
 119   1     0.13  -0.03   0.05    -0.17   0.03  -0.06    -0.03  -0.01  -0.02
 120   1     0.04  -0.15  -0.09    -0.06   0.16   0.11    -0.02   0.01  -0.03
 121   1    -0.04  -0.04   0.01     0.04   0.04   0.00    -0.06  -0.04  -0.01
 122   1     0.16  -0.06   0.29    -0.14   0.04  -0.27    -0.01  -0.01  -0.02
 123   1     0.18  -0.17  -0.03    -0.18   0.14   0.03    -0.01  -0.01  -0.01
 124   1     0.05  -0.04   0.10    -0.04   0.03  -0.12     0.01  -0.01  -0.04
 125   1    -0.04  -0.02  -0.01     0.07  -0.01   0.07     0.02  -0.01   0.02
 126   1    -0.04  -0.06  -0.10     0.06   0.00   0.10     0.00   0.01   0.00
 127   1    -0.07  -0.03   0.00     0.09  -0.08  -0.02     0.00  -0.03   0.00
                    79                     80                     81
                     A                      A                      A
 Frequencies --   330.7895               333.2541               337.5351
 Red. masses --     3.0432                 3.3433                 2.9444
 Frc consts  --     0.1962                 0.2188                 0.1976
 IR Inten    --     0.3854                 0.4045                 2.6216
 Atom AN      X      Y      Z        X      Y      Z        X      Y      Z
   1   6    -0.03   0.03   0.01     0.03  -0.01   0.01    -0.01   0.05   0.04
   2   6    -0.01   0.01   0.03     0.02   0.00  -0.01     0.03  -0.02   0.03
   3   6     0.00  -0.02   0.03     0.01   0.03  -0.03     0.02   0.03  -0.02
   4   6    -0.01   0.00   0.01     0.00   0.00   0.00     0.00   0.00  -0.01
   5   6     0.00   0.00   0.00     0.00   0.00   0.00     0.00   0.00   0.00
   6   6     0.00  -0.01   0.01     0.00   0.00  -0.01     0.00   0.00   0.00
   7   8     0.01   0.02  -0.01     0.00   0.00   0.00     0.00   0.00   0.00
   8   6    -0.01   0.00   0.01     0.01   0.00   0.00     0.00   0.00  -0.01
   9   6    -0.02   0.01  -0.01     0.01  -0.01   0.01    -0.04   0.02  -0.01
  10   6     0.01  -0.01   0.00    -0.01   0.01  -0.01    -0.03   0.02  -0.02
  11   6     0.00   0.01  -0.01     0.00  -0.01   0.01    -0.01   0.02  -0.01
  12   6    -0.02   0.00  -0.09     0.00  -0.09  -0.19    -0.03   0.05   0.03
  13   6    -0.02   0.03   0.01     0.01  -0.02   0.03    -0.05   0.03   0.00
  14   6    -0.03   0.05   0.08     0.01   0.05   0.22    -0.06   0.01  -0.04
  15   6    -0.02   0.00  -0.01     0.01  -0.02   0.00    -0.05   0.00  -0.01
  16   6     0.02   0.01   0.03     0.01   0.03   0.08     0.00  -0.01  -0.02
  17   6     0.00  -0.01  -0.03     0.00  -0.04  -0.07    -0.01   0.00   0.01
  18   6     0.00  -0.01   0.00    -0.01   0.02   0.00    -0.02   0.02  -0.01
  19   6     0.14  -0.01  -0.08    -0.07   0.02   0.03    -0.08   0.02   0.02
  20   6     0.01  -0.02   0.00    -0.01   0.02  -0.02    -0.01   0.01  -0.03
  21   6    -0.11  -0.03   0.09     0.04   0.02  -0.05     0.03   0.00  -0.08
  22   6     0.02   0.00  -0.01    -0.02   0.00   0.00    -0.04  -0.01  -0.02
  23   6    -0.06  -0.01   0.03     0.02   0.01  -0.01     0.02   0.01  -0.02
  24   6     0.04   0.01  -0.06    -0.03  -0.01   0.03    -0.04  -0.02   0.02
  25   6     0.09  -0.06   0.00     0.06   0.01   0.06     0.07  -0.08  -0.05
  26   6     0.00   0.00   0.03    -0.11   0.09   0.01     0.09  -0.06   0.04
  27   6     0.04  -0.07   0.04     0.01  -0.08  -0.04     0.04  -0.01   0.06
  28   6     0.02  -0.01  -0.04    -0.04   0.09  -0.06     0.05  -0.06  -0.01
  29   6    -0.05   0.11  -0.05     0.05  -0.07   0.02     0.07  -0.07   0.02
  30   6     0.05  -0.04  -0.05    -0.02   0.00   0.05    -0.02   0.00   0.07
  31   6    -0.06   0.03  -0.05     0.02  -0.03   0.04     0.02  -0.05   0.06
  32   6     0.00  -0.03   0.08     0.02  -0.01  -0.02     0.05  -0.01  -0.02
  33   6     0.04   0.02  -0.01     0.00   0.01   0.02     0.02   0.05   0.03
  34   6    -0.02  -0.03  -0.03     0.03   0.00  -0.03     0.03   0.01  -0.04
  35   8     0.00   0.02   0.00     0.00   0.00   0.00     0.00   0.01   0.00
  36  12     0.00  -0.01   0.03    -0.04  -0.01   0.00     0.00  -0.03  -0.01
  37   8     0.00  -0.01   0.01     0.00   0.00   0.00     0.00   0.00   0.01
  38   6     0.00   0.01   0.00     0.00   0.00   0.00     0.00   0.01   0.00
  39   7     0.03  -0.03   0.04    -0.03   0.04  -0.04    -0.04   0.07  -0.06
  40   7    -0.05   0.05  -0.01     0.03  -0.03   0.02    -0.08   0.09  -0.01
  41   8     0.00  -0.01   0.01     0.00   0.00   0.00     0.00   0.00   0.00
  42   8    -0.01  -0.02  -0.01     0.00   0.00   0.00    -0.01  -0.02  -0.01
  43   6     0.02  -0.01   0.00     0.00   0.00   0.00     0.01  -0.01   0.00
  44   6     0.01   0.00   0.00     0.00   0.00   0.00     0.01   0.00   0.01
  45   6    -0.01   0.00  -0.01     0.00   0.00   0.00     0.00   0.00  -0.01
  46   8     0.02  -0.01   0.02     0.00   0.00   0.00     0.01  -0.01   0.00
  47   6    -0.01   0.02  -0.02     0.00   0.00   0.00    -0.01   0.01  -0.01
  48   8    -0.01  -0.01   0.01    -0.01  -0.02   0.00    -0.01  -0.02   0.01
  49   6     0.00  -0.01  -0.01     0.00  -0.01  -0.01     0.00  -0.01  -0.02
  50   8     0.03  -0.04   0.00     0.02  -0.03   0.00     0.04  -0.05   0.00
  51   8    -0.02   0.05   0.00    -0.01   0.02  -0.02    -0.02   0.06   0.02
  52   6    -0.02   0.04   0.00     0.00   0.02   0.00    -0.02   0.04   0.01
  53   6    -0.03   0.02   0.01    -0.01   0.00   0.01    -0.02   0.01   0.02
  54   6    -0.01   0.00  -0.01    -0.01   0.00  -0.01    -0.01   0.00  -0.02
  55   8     0.00   0.00  -0.04     0.02   0.00  -0.02     0.01   0.00  -0.02
  56   6     0.02   0.01   0.01     0.01   0.00   0.02     0.00   0.01   0.02
  57   6    -0.02   0.01   0.00    -0.01   0.01   0.01    -0.01   0.01   0.00
  58   6     0.00   0.00  -0.01     0.00   0.00   0.00     0.00   0.00   0.01
  59   6     0.00  -0.01   0.00     0.00   0.00   0.00     0.00  -0.01   0.00
  60   1    -0.01   0.00   0.03     0.01  -0.01  -0.01     0.04  -0.09   0.05
  61   1     0.00  -0.01   0.01     0.00   0.00   0.00     0.00   0.00  -0.01
  62   1    -0.01   0.00   0.01     0.00   0.00   0.00     0.01   0.00  -0.01
  63   1    -0.01   0.00   0.00     0.00   0.00   0.00     0.00   0.00   0.00
  64   1     0.00  -0.01   0.00     0.00   0.01   0.00     0.00   0.00   0.00
  65   1     0.03  -0.02   0.02    -0.01   0.01  -0.01     0.00   0.00   0.00
  66   1    -0.02  -0.02   0.02     0.01   0.01  -0.01     0.00   0.00   0.00
  67   1    -0.01  -0.01   0.03     0.01   0.01  -0.01     0.00   0.00   0.00
  68   1    -0.04  -0.01  -0.01     0.02   0.00   0.00     0.00   0.00   0.00
  69   1    -0.03  -0.02  -0.15     0.00  -0.13  -0.36    -0.04   0.06   0.06
  70   1    -0.02   0.03   0.03     0.00  -0.01   0.03    -0.03   0.02   0.02
  71   1    -0.03   0.08   0.15     0.00   0.10   0.37    -0.06   0.01  -0.07
  72   1     0.02   0.00   0.01     0.01   0.03   0.08    -0.01  -0.01  -0.04
  73   1     0.00  -0.02  -0.03     0.01  -0.04  -0.07    -0.01  -0.02   0.02
  74   1     0.25  -0.01  -0.14    -0.11   0.02   0.05    -0.12   0.02   0.05
  75   1     0.01  -0.01   0.00     0.01   0.01  -0.01     0.01  -0.01  -0.03
  76   1    -0.23  -0.03   0.17     0.08   0.02  -0.09     0.08   0.01  -0.12
  77   1    -0.06  -0.01   0.03     0.02   0.01  -0.01     0.02   0.01  -0.02
  78   1     0.05   0.01  -0.06    -0.03  -0.01   0.03    -0.03  -0.04   0.03
  79   1    -0.04  -0.27  -0.09     0.06   0.02   0.01    -0.10  -0.34  -0.13
  80   1     0.33  -0.10  -0.02     0.08   0.01   0.06     0.36  -0.13  -0.08
  81   1     0.02   0.10   0.08     0.10   0.00   0.09    -0.03   0.13   0.03
  82   1     0.00  -0.03   0.07    -0.16  -0.03  -0.05     0.12   0.00   0.13
  83   1    -0.03   0.02   0.03    -0.20   0.12  -0.05     0.12  -0.06   0.07
  84   1     0.04   0.00   0.02    -0.11   0.22   0.03     0.14  -0.16   0.00
  85   1     0.00  -0.05   0.10    -0.01  -0.07   0.01     0.02   0.00   0.10
  86   1     0.05  -0.08   0.07     0.03  -0.11  -0.04     0.04  -0.01   0.14
  87   1     0.10  -0.12   0.01     0.03  -0.12  -0.04     0.12  -0.04   0.03
  88   1     0.03  -0.01  -0.05     0.02   0.14   0.05     0.04  -0.09  -0.07
  89   1     0.03  -0.01  -0.03    -0.11   0.13  -0.15     0.12  -0.07   0.06
  90   1     0.01   0.00  -0.06    -0.07   0.16  -0.07     0.07  -0.10  -0.06
  91   1    -0.06   0.12   0.07     0.07  -0.07  -0.05     0.10  -0.07  -0.06
  92   1    -0.10   0.16  -0.03     0.08  -0.09  -0.01     0.11  -0.09  -0.03
  93   1    -0.09   0.15  -0.15     0.08  -0.10   0.10     0.11  -0.11   0.13
  94   1     0.00  -0.05  -0.03     0.00   0.01   0.07     0.00   0.01   0.11
  95   1     0.05  -0.05  -0.05     0.01  -0.01   0.05     0.04  -0.02   0.07
  96   1     0.08  -0.07  -0.06    -0.04   0.02   0.06    -0.06   0.02   0.11
  97   1     0.00   0.00  -0.09    -0.04  -0.03   0.07    -0.07  -0.05   0.11
  98   1    -0.12   0.08  -0.05     0.07  -0.07   0.05     0.10  -0.10   0.09
  99   1    -0.08   0.07  -0.08     0.02  -0.04   0.06     0.02  -0.07   0.09
 100   1     0.03   0.04   0.07     0.03  -0.03  -0.03     0.08  -0.03  -0.04
 101   1     0.03  -0.05   0.12     0.03   0.01  -0.05     0.06   0.00  -0.05
 102   1    -0.02  -0.07   0.09     0.02  -0.02  -0.01     0.04  -0.04   0.01
 103   1     0.06   0.02  -0.01    -0.01   0.01   0.00     0.04   0.04   0.02
 104   1     0.09   0.03   0.03    -0.01   0.01   0.00     0.03   0.06   0.04
 105   1     0.05   0.00  -0.07     0.00   0.02   0.04     0.02   0.03   0.02
 106   1     0.02  -0.02  -0.07     0.04  -0.02  -0.03     0.05   0.01  -0.06
 107   1    -0.05  -0.04  -0.03     0.05   0.01  -0.03     0.03   0.01  -0.04
 108   1    -0.06  -0.04  -0.05     0.01  -0.01  -0.03     0.01   0.01  -0.05
 109   1     0.02  -0.01   0.00     0.00   0.00   0.00     0.00   0.00   0.01
 110   1    -0.01   0.00  -0.01     0.00   0.00   0.00     0.00   0.00  -0.01
 111   1    -0.02   0.02  -0.02     0.00   0.01  -0.01    -0.01   0.02  -0.02
 112   1    -0.02   0.03  -0.02     0.00   0.01  -0.01    -0.01   0.02  -0.02
 113   1    -0.02   0.00  -0.01     0.00   0.00   0.00    -0.01   0.00  -0.01
 114   1    -0.07   0.02   0.00    -0.04   0.00   0.02    -0.05   0.01   0.01
 115   1    -0.01  -0.01  -0.01    -0.01  -0.01  -0.01     0.01  -0.01  -0.02
 116   1     0.07  -0.02   0.05     0.04  -0.03   0.03     0.03  -0.01   0.04
 117   1     0.00   0.00   0.03    -0.01  -0.01   0.04    -0.02   0.00   0.03
 118   1     0.05   0.04  -0.05     0.02   0.01  -0.01     0.02   0.03  -0.01
 119   1    -0.05   0.00  -0.01    -0.01  -0.01   0.03    -0.06   0.00  -0.02
 120   1    -0.02   0.03   0.02    -0.01   0.01   0.00    -0.03   0.04   0.05
 121   1     0.00   0.01   0.00    -0.02   0.03   0.01     0.03   0.01   0.00
 122   1    -0.02  -0.01  -0.02    -0.01   0.00  -0.01     0.00  -0.01   0.01
 123   1    -0.02   0.01   0.00    -0.01   0.00   0.00     0.00   0.00   0.01
 124   1     0.00  -0.01  -0.02     0.00   0.00   0.00     0.00  -0.01   0.00
 125   1     0.02  -0.01   0.02     0.00   0.00   0.00     0.02  -0.01   0.02
 126   1     0.00   0.00   0.00     0.00  -0.01   0.00     0.00   0.00  -0.01
 127   1     0.00  -0.04   0.00     0.01  -0.01   0.00    -0.01  -0.03   0.00
                    82                     83                     84
                     A                      A                      A
 Frequencies --   350.3895               353.2281               355.1855
 Red. masses --     5.6517                 3.1590                 2.6873
 Frc consts  --     0.4088                 0.2322                 0.1997
 IR Inten    --    10.0805                14.2902                11.4608
 Atom AN      X      Y      Z        X      Y      Z        X      Y      Z
   1   6     0.00  -0.02  -0.03     0.00   0.02   0.05     0.01  -0.02  -0.05
   2   6     0.01  -0.01  -0.03    -0.02   0.01   0.05     0.03  -0.02  -0.05
   3   6     0.01  -0.01  -0.01    -0.03   0.01   0.03     0.02   0.00  -0.03
   4   6     0.00   0.00   0.00    -0.02   0.01   0.04    -0.02   0.01   0.04
   5   6     0.00   0.00   0.00     0.00   0.01   0.01     0.00   0.00   0.01
   6   6     0.00   0.00   0.00    -0.01   0.04  -0.06    -0.02   0.04  -0.07
   7   8     0.00   0.00   0.00    -0.07  -0.09   0.07    -0.08  -0.11   0.08
   8   6    -0.01   0.00   0.01     0.12   0.04  -0.09     0.13   0.05  -0.09
   9   6     0.00  -0.01  -0.01     0.00   0.01   0.01    -0.01   0.00  -0.02
  10   6     0.01   0.00   0.00    -0.02   0.01   0.00     0.02   0.00  -0.01
  11   6    -0.01  -0.01   0.00     0.01   0.01  -0.01    -0.01   0.00   0.00
  12   6    -0.01  -0.01   0.00     0.02   0.01  -0.01    -0.02   0.00   0.00
  13   6    -0.01  -0.01   0.00     0.02   0.01   0.00    -0.02  -0.01   0.00
  14   6    -0.01   0.00   0.01     0.01   0.01  -0.01    -0.02  -0.01   0.01
  15   6    -0.01  -0.01   0.00     0.01   0.01  -0.01    -0.01  -0.01   0.00
  16   6    -0.01   0.00   0.01     0.01   0.01  -0.01    -0.01   0.00   0.01
  17   6     0.00  -0.01   0.00     0.00   0.01  -0.01    -0.01  -0.01   0.00
  18   6     0.01   0.00   0.01    -0.01   0.00  -0.01     0.01   0.01   0.01
  19   6     0.01   0.00   0.00     0.01   0.00  -0.02     0.04   0.01  -0.01
  20   6     0.01   0.01   0.01    -0.02  -0.01  -0.01     0.01   0.02   0.01
  21   6     0.00   0.01   0.01    -0.03  -0.02   0.00    -0.03   0.01   0.03
  22   6     0.01   0.01   0.01    -0.02  -0.02  -0.01     0.01   0.01   0.00
  23   6     0.00   0.00   0.01    -0.01   0.00   0.00    -0.01   0.00   0.02
  24   6     0.01   0.01   0.00    -0.01  -0.02   0.00     0.00   0.01   0.01
  25   6     0.01   0.00   0.00    -0.02   0.00   0.00     0.01  -0.01   0.00
  26   6     0.00   0.00   0.00    -0.01   0.00   0.01     0.01   0.00   0.00
  27   6     0.00   0.00   0.00     0.00  -0.01   0.01     0.00   0.00   0.00
  28   6     0.00   0.00   0.00     0.00   0.00   0.00     0.01   0.00   0.00
  29   6    -0.01   0.00   0.00     0.02  -0.01   0.00     0.00  -0.01   0.01
  30   6     0.00   0.00  -0.01     0.00   0.00   0.02    -0.01   0.00   0.00
  31   6     0.00   0.01  -0.01    -0.01  -0.01   0.02    -0.02   0.00  -0.01
  32   6    -0.01   0.00   0.00     0.02  -0.01   0.01     0.00  -0.02   0.02
  33   6    -0.05  -0.04   0.00     0.09   0.06   0.00    -0.09  -0.05   0.00
  34   6     0.02   0.04   0.05    -0.04  -0.07  -0.07     0.04   0.07   0.07
  35   8    -0.03  -0.11   0.01    -0.01  -0.04   0.00     0.00   0.02   0.00
  36  12     0.01   0.05  -0.02     0.02  -0.08   0.03     0.00   0.04  -0.01
  37   8     0.03   0.01  -0.07     0.02   0.01  -0.03    -0.01   0.00   0.02
  38   6     0.04   0.04   0.01     0.01   0.01   0.01    -0.01  -0.01   0.00
  39   7     0.02  -0.01   0.00    -0.04   0.03   0.01     0.02   0.00  -0.03
  40   7     0.00  -0.01  -0.03    -0.01   0.01   0.05     0.00   0.00  -0.05
  41   8    -0.08   0.32  -0.16    -0.02   0.09  -0.05     0.01  -0.06   0.03
  42   8    -0.07  -0.17   0.05    -0.02  -0.04   0.01     0.02   0.03  -0.01
  43   6    -0.04  -0.08   0.02     0.00  -0.02   0.01    -0.01   0.02   0.00
  44   6    -0.02  -0.03   0.00     0.01   0.00  -0.02    -0.01   0.00   0.02
  45   6     0.05   0.03   0.05     0.01   0.01   0.02    -0.01  -0.01  -0.01
  46   8     0.00   0.00  -0.03     0.01  -0.01   0.02    -0.02   0.01  -0.02
  47   6     0.15  -0.09   0.14     0.04  -0.03   0.04    -0.03   0.02  -0.03
  48   8    -0.01  -0.03  -0.04     0.03   0.04   0.03     0.02  -0.02  -0.01
  49   6     0.03  -0.03  -0.08     0.00   0.03   0.03     0.00  -0.02  -0.02
  50   8     0.06  -0.11  -0.01    -0.05   0.08   0.01     0.04  -0.06  -0.01
  51   8     0.00   0.07   0.09     0.02  -0.07  -0.05     0.00   0.04   0.04
  52   6     0.01   0.02   0.04    -0.02   0.00  -0.03     0.01   0.02   0.02
  53   6     0.00   0.00   0.00    -0.01   0.02  -0.03     0.02   0.00   0.01
  54   6     0.04  -0.01  -0.04     0.00   0.00   0.03     0.01  -0.01  -0.01
  55   8     0.01  -0.01   0.01    -0.08   0.02  -0.01     0.03   0.01   0.02
  56   6    -0.05  -0.01   0.01     0.04   0.00  -0.03    -0.03  -0.01   0.01
  57   6    -0.03   0.05   0.00     0.03  -0.03  -0.01    -0.03   0.02   0.00
  58   6    -0.06   0.06  -0.01    -0.01   0.01  -0.04     0.01  -0.01   0.03
  59   6    -0.01   0.01   0.05     0.00   0.01   0.02     0.00   0.00  -0.01
  60   1     0.01   0.00  -0.03    -0.02   0.00   0.06     0.03  -0.02  -0.05
  61   1     0.00  -0.01  -0.01    -0.04   0.15   0.15    -0.04   0.16   0.15
  62   1     0.01   0.01  -0.01    -0.09  -0.13   0.08    -0.10  -0.13   0.08
  63   1     0.00   0.00   0.00    -0.02  -0.02   0.00    -0.02  -0.02   0.00
  64   1     0.00   0.00   0.00     0.02   0.04   0.05     0.02   0.04   0.04
  65   1     0.01  -0.01   0.01    -0.18   0.08  -0.19    -0.21   0.08  -0.21
  66   1    -0.01  -0.01   0.01     0.13   0.13  -0.13     0.15   0.14  -0.15
  67   1    -0.01  -0.01   0.02     0.11   0.18  -0.30     0.12   0.19  -0.32
  68   1    -0.02   0.00   0.00     0.41  -0.01   0.00     0.45  -0.01   0.01
  69   1    -0.01  -0.01   0.00     0.02   0.01  -0.01    -0.01   0.00   0.01
  70   1    -0.02  -0.01   0.00     0.02   0.02   0.01    -0.02  -0.02  -0.01
  71   1    -0.01   0.01   0.03     0.01   0.00  -0.01    -0.02   0.00   0.01
  72   1    -0.01   0.00   0.00     0.02   0.00  -0.01    -0.02   0.01   0.00
  73   1     0.00  -0.01   0.00     0.00   0.02  -0.01     0.00  -0.02   0.01
  74   1     0.01   0.00   0.00     0.03   0.00  -0.03     0.06   0.01  -0.03
  75   1     0.01   0.01   0.00    -0.02  -0.02   0.00     0.01   0.02   0.01
  76   1     0.00   0.01   0.02    -0.06  -0.02   0.02    -0.08   0.00   0.07
  77   1     0.00   0.00   0.01    -0.02   0.00  -0.01    -0.01  -0.01   0.03
  78   1     0.00   0.02   0.00    -0.01  -0.03   0.01     0.00   0.02   0.01
  79   1    -0.01  -0.03  -0.01     0.01   0.05   0.02     0.00  -0.03  -0.03
  80   1     0.05   0.00  -0.02    -0.08   0.00   0.03     0.05  -0.01  -0.01
  81   1     0.01   0.03   0.02    -0.01  -0.05  -0.04     0.01   0.02   0.02
  82   1     0.01   0.01   0.00    -0.01  -0.01   0.00     0.01   0.01   0.02
  83   1     0.00   0.00  -0.01     0.00   0.01   0.03     0.01   0.00  -0.01
  84   1     0.01   0.01  -0.01    -0.02  -0.01   0.01     0.02   0.00   0.00
  85   1     0.01   0.00  -0.01     0.02   0.00   0.04     0.02   0.00   0.00
  86   1     0.00   0.00   0.00    -0.01   0.00  -0.02     0.00   0.02   0.01
  87   1     0.00   0.01   0.00    -0.01  -0.05   0.01     0.01   0.01   0.00
  88   1     0.00   0.01   0.01     0.00  -0.01  -0.02     0.01   0.00   0.00
  89   1     0.00   0.01  -0.01    -0.01  -0.02   0.00     0.02   0.00   0.00
  90   1     0.00   0.00  -0.01     0.00   0.00   0.01     0.01   0.00  -0.02
  91   1    -0.02   0.00   0.00     0.05   0.00   0.00     0.02  -0.01  -0.02
  92   1    -0.01   0.00   0.02     0.02   0.02  -0.02    -0.01  -0.01   0.02
  93   1    -0.02   0.01  -0.01     0.02  -0.03   0.02    -0.01  -0.04   0.00
  94   1     0.00   0.00  -0.02     0.01   0.00   0.02    -0.01   0.00  -0.01
  95   1    -0.02   0.00  -0.01     0.02   0.00   0.02    -0.02   0.00   0.00
  96   1     0.01   0.00  -0.02    -0.02   0.01   0.04     0.00   0.00  -0.01
  97   1     0.02   0.01  -0.02    -0.04  -0.02   0.03     0.01  -0.01  -0.03
  98   1    -0.02   0.02  -0.02     0.01  -0.02   0.03    -0.04   0.01  -0.02
  99   1     0.00   0.01  -0.01    -0.01  -0.01   0.01    -0.04   0.01  -0.02
 100   1    -0.02   0.00   0.01     0.05   0.00   0.00     0.00   0.00   0.03
 101   1    -0.01   0.00   0.00     0.02  -0.01   0.02     0.03  -0.02   0.03
 102   1    -0.01   0.01  -0.01     0.02  -0.03   0.05    -0.01  -0.04   0.01
 103   1    -0.06  -0.03   0.02     0.11   0.05  -0.05    -0.10  -0.04   0.05
 104   1    -0.09  -0.07  -0.04     0.16   0.12   0.06    -0.15  -0.11  -0.06
 105   1    -0.06  -0.02   0.04     0.11   0.04  -0.08    -0.10  -0.03   0.07
 106   1    -0.05   0.06   0.10     0.06  -0.10  -0.15    -0.06   0.09   0.14
 107   1     0.01   0.04   0.05    -0.04  -0.08  -0.08     0.05   0.07   0.07
 108   1     0.09   0.08   0.07    -0.15  -0.13  -0.10     0.15   0.12   0.10
 109   1    -0.05   0.00  -0.03     0.00   0.00  -0.03    -0.01   0.00   0.02
 110   1     0.02   0.12  -0.01     0.00   0.04   0.00     0.00  -0.02   0.00
 111   1     0.21  -0.17   0.22     0.06  -0.05   0.07    -0.04   0.03  -0.04
 112   1     0.22  -0.18   0.21     0.06  -0.06   0.07    -0.04   0.04  -0.04
 113   1     0.20   0.10   0.12     0.06   0.02   0.04    -0.04  -0.01  -0.02
 114   1    -0.01   0.00   0.01     0.00   0.02  -0.05     0.01   0.00   0.00
 115   1     0.11  -0.06  -0.04    -0.04   0.03   0.02     0.04  -0.03  -0.01
 116   1    -0.08  -0.02  -0.04     0.06   0.00   0.00    -0.05  -0.02  -0.03
 117   1    -0.07  -0.01   0.02     0.05   0.00  -0.03    -0.05  -0.01   0.02
 118   1    -0.07  -0.01   0.08     0.05  -0.01  -0.09    -0.04  -0.01   0.06
 119   1    -0.17   0.00  -0.05     0.11   0.01   0.01    -0.10  -0.01  -0.02
 120   1    -0.05   0.17   0.11     0.04  -0.08  -0.07    -0.04   0.08   0.04
 121   1     0.06   0.04   0.00    -0.02  -0.04  -0.01    -0.01   0.01   0.00
 122   1    -0.02   0.12  -0.13    -0.01   0.03  -0.07     0.01  -0.02   0.06
 123   1    -0.11   0.08   0.04    -0.04   0.02  -0.01     0.03  -0.01   0.01
 124   1    -0.13   0.11   0.03    -0.03   0.02  -0.04     0.02  -0.01   0.04
 125   1     0.04   0.02   0.13     0.02   0.01   0.04    -0.01   0.00  -0.03
 126   1    -0.03   0.02  -0.04     0.00   0.02   0.01     0.00  -0.01  -0.01
 127   1    -0.09  -0.05   0.09    -0.01  -0.01   0.03     0.01   0.02  -0.02
                    85                     86                     87
                     A                      A                      A
 Frequencies --   363.1253               394.9550               398.6317
 Red. masses --     3.9463                 4.9473                 4.9118
 Frc consts  --     0.3066                 0.4547                 0.4599
 IR Inten    --     4.3845                21.5891                48.0978
 Atom AN      X      Y      Z        X      Y      Z        X      Y      Z
   1   6     0.00  -0.02  -0.06     0.01   0.00  -0.02    -0.02   0.00   0.04
   2   6     0.04  -0.02  -0.07     0.02   0.00  -0.03    -0.02   0.00   0.05
   3   6     0.04  -0.01  -0.05     0.02   0.00  -0.02    -0.03   0.00   0.03
   4   6     0.00   0.00   0.00     0.00  -0.01   0.00     0.00   0.01   0.00
   5   6     0.00   0.00   0.00     0.00   0.00   0.00     0.00   0.00   0.00
   6   6     0.00   0.00   0.00     0.00   0.00   0.01     0.00   0.01  -0.01
   7   8     0.00   0.00   0.00     0.01   0.01  -0.01    -0.01  -0.02   0.02
   8   6     0.00   0.00   0.00    -0.01  -0.01   0.00     0.02   0.01  -0.01
   9   6    -0.01  -0.01  -0.03     0.00   0.00  -0.02     0.00   0.00   0.03
  10   6     0.02   0.00  -0.01     0.00   0.00  -0.01     0.00   0.00   0.01
  11   6    -0.02   0.00   0.00    -0.01   0.00   0.00     0.01   0.00   0.00
  12   6    -0.03   0.00  -0.01     0.00   0.00   0.01     0.01   0.00  -0.01
  13   6    -0.03  -0.02  -0.01    -0.01  -0.01  -0.01     0.01   0.02   0.01
  14   6    -0.03  -0.01   0.01    -0.01  -0.01  -0.01     0.01   0.02   0.01
  15   6    -0.03  -0.02   0.00    -0.01  -0.01   0.00     0.01   0.01   0.01
  16   6    -0.01   0.00   0.01    -0.01   0.01   0.00     0.01  -0.01   0.00
  17   6    -0.01  -0.01   0.01     0.00  -0.01   0.01     0.01   0.01  -0.01
  18   6     0.01   0.01   0.01     0.00   0.01   0.01     0.00  -0.01  -0.01
  19   6     0.01   0.02   0.01     0.01   0.01   0.01    -0.01  -0.01  -0.02
  20   6     0.02   0.02   0.01     0.01   0.01   0.01    -0.02  -0.02  -0.01
  21   6     0.00   0.02   0.01     0.00   0.01   0.00     0.00  -0.01  -0.01
  22   6     0.01   0.02   0.00     0.00   0.01   0.00     0.00  -0.02   0.00
  23   6     0.00   0.01   0.02     0.00   0.01   0.01     0.00  -0.01  -0.01
  24   6     0.00   0.02   0.01     0.00   0.01   0.00     0.00  -0.02   0.00
  25   6     0.05  -0.02  -0.01    -0.01   0.00   0.00     0.00   0.01   0.01
  26   6     0.02   0.00   0.00     0.00   0.00   0.01     0.00   0.00  -0.01
  27   6     0.01   0.01   0.01     0.01   0.01   0.01     0.00  -0.01  -0.01
  28   6     0.02  -0.01   0.00     0.01   0.00   0.00    -0.01   0.01   0.00
  29   6     0.01  -0.01   0.00     0.00  -0.01   0.00     0.00   0.01   0.01
  30   6     0.00   0.00   0.00     0.00   0.00   0.01     0.01   0.00  -0.01
  31   6    -0.01   0.00  -0.01     0.00   0.00   0.00     0.01   0.00   0.00
  32   6     0.00  -0.01   0.00     0.00   0.00   0.00     0.00   0.00   0.01
  33   6    -0.10  -0.06  -0.01    -0.03  -0.02   0.00     0.03   0.03   0.01
  34   6     0.06   0.08   0.07     0.03   0.02  -0.01    -0.04  -0.03   0.01
  35   8     0.00   0.00   0.00    -0.03  -0.02   0.08    -0.03   0.02   0.06
  36  12     0.00   0.04   0.04    -0.06  -0.03   0.08     0.07   0.04  -0.13
  37   8     0.03   0.01   0.00    -0.03   0.03   0.04    -0.01   0.02  -0.02
  38   6     0.01   0.01   0.00     0.08  -0.01  -0.05     0.06  -0.02  -0.06
  39   7     0.03  -0.01  -0.04     0.01  -0.01  -0.02    -0.02   0.02   0.02
  40   7     0.00   0.01  -0.06     0.01   0.00  -0.02    -0.01   0.00   0.03
  41   8    -0.01   0.05  -0.02    -0.02   0.09   0.02    -0.02   0.02   0.05
  42   8    -0.01  -0.05  -0.01    -0.05   0.02  -0.01     0.00   0.04   0.00
  43   6     0.04  -0.03   0.01    -0.01   0.07   0.02    -0.02   0.02   0.05
  44   6     0.04   0.00  -0.02     0.04   0.08  -0.02    -0.03  -0.02   0.05
  45   6     0.00   0.00   0.00     0.10  -0.03  -0.14     0.11  -0.05  -0.15
  46   8     0.06  -0.03   0.08     0.00   0.01   0.21     0.02   0.03   0.18
  47   6     0.01   0.00   0.01     0.03  -0.05   0.02     0.01   0.00  -0.01
  48   8    -0.10  -0.03   0.04     0.13   0.01   0.06    -0.12   0.02  -0.07
  49   6     0.00   0.07   0.05    -0.06  -0.04   0.09     0.02   0.03  -0.09
  50   8    -0.09   0.15   0.03     0.01   0.01  -0.03    -0.01  -0.04   0.02
  51   8    -0.03  -0.10  -0.15     0.00   0.06   0.02    -0.03  -0.04   0.00
  52   6    -0.04  -0.02  -0.02     0.01   0.04  -0.04     0.00  -0.07   0.06
  53   6    -0.08  -0.01   0.08     0.04   0.00  -0.05    -0.01  -0.02   0.04
  54   6    -0.05   0.05  -0.02    -0.09  -0.06   0.12     0.04   0.06  -0.12
  55   8    -0.01  -0.03  -0.03     0.06   0.07  -0.03     0.01  -0.06   0.07
  56   6     0.07   0.01   0.08     0.01   0.01  -0.07    -0.02  -0.01   0.05
  57   6     0.11  -0.04   0.02    -0.13  -0.11  -0.02     0.11   0.08   0.02
  58   6     0.00   0.00  -0.05     0.01  -0.03  -0.06    -0.05   0.03   0.08
  59   6     0.01  -0.01   0.01    -0.03  -0.10  -0.19    -0.03  -0.11  -0.21
  60   1     0.04  -0.03  -0.07     0.02   0.00  -0.04    -0.02   0.00   0.05
  61   1     0.00   0.00   0.00     0.00  -0.02  -0.01     0.00   0.02   0.02
  62   1     0.00   0.00   0.00     0.01   0.00  -0.01    -0.01  -0.01   0.01
  63   1     0.00   0.00   0.00     0.00   0.00   0.00     0.00   0.00   0.00
  64   1     0.00   0.00   0.00     0.00  -0.01   0.00     0.00   0.01   0.00
  65   1     0.00   0.00   0.00     0.02  -0.01   0.02    -0.03   0.01  -0.03
  66   1     0.00   0.00   0.00    -0.02  -0.01   0.01     0.03   0.02  -0.02
  67   1     0.00   0.00   0.00    -0.01  -0.02   0.02     0.02   0.03  -0.04
  68   1     0.00   0.00   0.00    -0.04   0.00  -0.01     0.07   0.00   0.01
  69   1    -0.03   0.00   0.00     0.01   0.01   0.02     0.00  -0.01  -0.03
  70   1    -0.03  -0.02  -0.01     0.00  -0.02  -0.03     0.01   0.03   0.03
  71   1    -0.03   0.00   0.01     0.00  -0.02  -0.02     0.01   0.02   0.02
  72   1    -0.02   0.01   0.00    -0.01   0.01   0.00     0.01  -0.01   0.00
  73   1     0.00  -0.03   0.02     0.00  -0.02   0.01     0.00   0.02  -0.02
  74   1     0.01   0.02   0.01     0.00   0.01   0.01     0.00  -0.01  -0.01
  75   1     0.03   0.02   0.01     0.02   0.01   0.01    -0.03  -0.02  -0.01
  76   1    -0.01   0.01   0.02     0.00   0.00   0.00     0.00   0.00   0.00
  77   1     0.01   0.00   0.03     0.01   0.00   0.02    -0.01   0.00  -0.02
  78   1     0.00   0.03   0.00     0.00   0.02   0.00     0.01  -0.02   0.01
  79   1    -0.04  -0.17  -0.06     0.01   0.04  -0.01     0.00   0.00   0.03
  80   1     0.22  -0.04  -0.05    -0.04  -0.01   0.02     0.00   0.02  -0.01
  81   1     0.01   0.10   0.07     0.01  -0.04  -0.02    -0.01   0.02   0.01
  82   1     0.02   0.01   0.03     0.00   0.01   0.02    -0.01  -0.01  -0.02
  83   1     0.01  -0.01  -0.01     0.00   0.00   0.01     0.00  -0.01  -0.01
  84   1     0.04   0.00  -0.01     0.01  -0.01   0.00    -0.01   0.01   0.00
  85   1     0.01   0.00  -0.01    -0.01   0.00  -0.02    -0.02  -0.01   0.00
  86   1     0.01   0.02   0.05     0.01   0.00   0.04     0.01  -0.03  -0.01
  87   1     0.03   0.03   0.00     0.04   0.04  -0.01     0.00   0.00  -0.01
  88   1     0.02  -0.01   0.00     0.01   0.00   0.00    -0.01   0.01   0.00
  89   1     0.04   0.00   0.01     0.02   0.00   0.01    -0.02   0.00  -0.02
  90   1     0.02  -0.02  -0.03     0.01  -0.01  -0.01    -0.01   0.01   0.01
  91   1     0.01  -0.01  -0.03     0.01  -0.01  -0.02    -0.02   0.01   0.03
  92   1     0.01  -0.02   0.01     0.00  -0.01   0.00     0.00   0.01   0.00
  93   1     0.01  -0.03   0.01     0.00  -0.02   0.00     0.00   0.03   0.00
  94   1    -0.02   0.00   0.02    -0.01   0.00   0.02     0.02   0.00  -0.03
  95   1     0.00  -0.01   0.00     0.00  -0.02   0.00     0.00   0.02  -0.01
  96   1     0.00  -0.01   0.00     0.00  -0.01   0.00     0.00   0.01  -0.01
  97   1     0.01  -0.01  -0.02     0.00  -0.01  -0.01     0.00   0.01   0.01
  98   1    -0.01  -0.01  -0.02     0.00  -0.01  -0.01     0.00   0.01   0.01
  99   1    -0.03   0.00   0.00    -0.02   0.00   0.00     0.03   0.00   0.00
 100   1    -0.01  -0.01   0.01    -0.01  -0.01   0.00     0.01   0.01   0.00
 101   1     0.03  -0.01  -0.01     0.01   0.00  -0.01    -0.02   0.00   0.02
 102   1    -0.01  -0.03  -0.01     0.00  -0.01  -0.01     0.00   0.02   0.01
 103   1    -0.11  -0.05   0.05    -0.03  -0.01   0.02     0.04   0.02  -0.02
 104   1    -0.17  -0.13  -0.07    -0.06  -0.05  -0.03     0.07   0.06   0.04
 105   1    -0.11  -0.05   0.07    -0.03  -0.01   0.03     0.04   0.02  -0.03
 106   1    -0.06   0.11   0.15     0.01   0.02   0.01    -0.02  -0.03  -0.02
 107   1     0.07   0.09   0.07     0.04   0.02   0.00    -0.05  -0.03   0.00
 108   1     0.18   0.14   0.10     0.05   0.03   0.00    -0.07  -0.04   0.00
 109   1     0.03   0.01  -0.02     0.06   0.06  -0.01    -0.04  -0.01   0.08
 110   1     0.00   0.02  -0.01     0.06   0.03  -0.22     0.09  -0.02  -0.20
 111   1     0.02  -0.01   0.02     0.06  -0.13   0.04     0.02  -0.07  -0.01
 112   1     0.02  -0.01   0.01     0.05   0.00  -0.01     0.01   0.06  -0.06
 113   1     0.02   0.01   0.01     0.06  -0.04   0.00     0.02  -0.02  -0.04
 114   1    -0.08  -0.02   0.10     0.02   0.01  -0.08     0.06  -0.02   0.07
 115   1    -0.14   0.09  -0.02    -0.12  -0.03   0.11     0.09   0.02  -0.11
 116   1     0.16   0.01   0.20     0.02   0.02  -0.05    -0.07   0.01   0.01
 117   1     0.11   0.01   0.09     0.00   0.01  -0.10    -0.01  -0.01   0.05
 118   1     0.12   0.01  -0.07     0.02   0.04  -0.07    -0.05  -0.04   0.11
 119   1     0.35   0.03   0.12    -0.11  -0.07  -0.06     0.12   0.05   0.07
 120   1     0.12  -0.30  -0.07    -0.08  -0.02  -0.14     0.07  -0.04   0.14
 121   1     0.09   0.04   0.04    -0.28  -0.23  -0.04     0.27   0.20   0.04
 122   1    -0.02   0.00  -0.08    -0.07  -0.12   0.02    -0.04   0.06   0.00
 123   1    -0.04   0.01  -0.01     0.00  -0.07  -0.05    -0.06   0.09   0.09
 124   1     0.00   0.00  -0.08     0.09  -0.09  -0.19    -0.06   0.04   0.14
 125   1     0.03  -0.01   0.04    -0.07  -0.09  -0.14    -0.10  -0.10  -0.20
 126   1     0.01   0.00   0.01    -0.07  -0.18  -0.37    -0.07  -0.20  -0.40
 127   1     0.00  -0.04   0.00    -0.16  -0.09  -0.09    -0.16  -0.05  -0.10
                    88                     89                     90
                     A                      A                      A
 Frequencies --   413.1987               421.0112               437.4345
 Red. masses --     5.6910                 6.1674                 3.2547
 Frc consts  --     0.5725                 0.6441                 0.3669
 IR Inten    --     6.6833                 2.0404                 1.9239
 Atom AN      X      Y      Z        X      Y      Z        X      Y      Z
   1   6     0.02  -0.01  -0.05    -0.01   0.01   0.00     0.05  -0.05   0.03
   2   6     0.02   0.00  -0.07     0.00   0.00   0.01     0.03  -0.01  -0.01
   3   6     0.02  -0.01  -0.04     0.01   0.00   0.00    -0.05   0.08  -0.05
   4   6     0.00   0.00   0.00     0.00   0.00   0.00     0.00   0.00   0.00
   5   6     0.00   0.00   0.00     0.00   0.00   0.00     0.00   0.00   0.00
   6   6     0.00   0.00   0.01     0.00   0.00   0.00     0.00   0.00   0.00
   7   8     0.02   0.02  -0.03     0.01   0.01  -0.01     0.00   0.01  -0.01
   8   6    -0.02   0.00   0.01    -0.01   0.00   0.00    -0.01   0.00   0.00
   9   6     0.00   0.00  -0.05     0.00  -0.01  -0.02    -0.01   0.01  -0.02
  10   6     0.00   0.00  -0.02     0.00   0.00   0.00     0.02  -0.02   0.01
  11   6    -0.02   0.01  -0.02     0.01  -0.01  -0.01    -0.01   0.01  -0.02
  12   6    -0.01   0.00  -0.01    -0.01   0.01   0.00     0.01  -0.01  -0.01
  13   6    -0.01  -0.02   0.01    -0.01   0.01   0.00     0.01  -0.01   0.01
  14   6    -0.01  -0.02   0.01    -0.01   0.01  -0.01     0.00  -0.02   0.00
  15   6    -0.02  -0.01  -0.02     0.00  -0.01  -0.01    -0.02   0.01  -0.02
  16   6    -0.02   0.04   0.00     0.01  -0.02   0.01     0.00   0.05  -0.01
  17   6    -0.02  -0.01   0.01     0.01   0.00   0.01    -0.06   0.02   0.00
  18   6     0.00   0.02   0.02     0.00   0.00   0.00     0.03  -0.03   0.00
  19   6     0.01   0.02   0.03     0.00   0.00   0.00     0.00   0.01  -0.04
  20   6     0.03   0.02   0.02     0.00   0.00   0.00    -0.04   0.02  -0.02
  21   6     0.00   0.01   0.01     0.00   0.00   0.00     0.00   0.02  -0.02
  22   6    -0.01   0.02   0.00     0.00   0.00   0.00     0.06  -0.04   0.01
  23   6     0.01   0.03   0.02     0.00   0.00   0.00     0.01  -0.08   0.01
  24   6    -0.02   0.02  -0.01     0.00   0.00   0.00     0.13  -0.04   0.11
  25   6    -0.01  -0.02  -0.02     0.03   0.00   0.01     0.00  -0.02  -0.03
  26   6    -0.01   0.02   0.04     0.00  -0.01  -0.02     0.00   0.02   0.04
  27   6     0.01   0.01   0.03     0.00   0.00   0.00     0.00   0.03   0.05
  28   6     0.01  -0.01  -0.01     0.00  -0.01   0.02     0.01  -0.02  -0.05
  29   6     0.01   0.00  -0.02     0.00   0.00   0.00    -0.07  -0.05   0.14
  30   6    -0.01  -0.01   0.02     0.00   0.00   0.00     0.06   0.00  -0.12
  31   6    -0.01  -0.01   0.00     0.00   0.00   0.00     0.05   0.02  -0.03
  32   6     0.01   0.00  -0.02     0.00   0.00   0.00    -0.06  -0.01   0.06
  33   6    -0.03  -0.04  -0.02    -0.01   0.00   0.01     0.00   0.01   0.01
  34   6     0.04   0.02   0.00     0.00   0.00   0.00     0.02   0.00  -0.01
  35   8    -0.01   0.01   0.01     0.00  -0.10   0.06     0.00   0.00   0.00
  36  12    -0.03  -0.08   0.21    -0.01   0.02  -0.01    -0.01  -0.01   0.01
  37   8     0.03  -0.02  -0.07     0.04  -0.14   0.04     0.00   0.01  -0.01
  38   6     0.00  -0.01  -0.02     0.04  -0.02   0.01     0.00   0.00   0.00
  39   7     0.03  -0.04  -0.02     0.00   0.00   0.00    -0.13   0.14  -0.09
  40   7     0.03  -0.02  -0.02    -0.02   0.02  -0.01     0.05  -0.06   0.03
  41   8     0.00  -0.03   0.02     0.02  -0.01   0.04     0.00   0.00   0.00
  42   8     0.03   0.05   0.01    -0.03   0.23  -0.03     0.00   0.00   0.00
  43   6    -0.04  -0.02   0.02    -0.15   0.07  -0.03     0.00   0.00   0.00
  44   6    -0.06  -0.09   0.04    -0.06  -0.11  -0.11     0.00   0.00   0.01
  45   6     0.04  -0.01  -0.03     0.00   0.06  -0.05     0.00   0.00   0.00
  46   8     0.00   0.04   0.01    -0.13   0.12  -0.01     0.00   0.00   0.00
  47   6     0.00   0.01  -0.01     0.04  -0.14   0.07     0.00   0.01   0.00
  48   8     0.08   0.05   0.10     0.02  -0.14  -0.06     0.02  -0.02   0.01
  49   6     0.06   0.03  -0.11     0.09  -0.02   0.07     0.00   0.00   0.00
  50   8     0.01  -0.05   0.02     0.05   0.04   0.04    -0.01   0.00   0.00
  51   8     0.03  -0.03   0.05     0.12  -0.09  -0.05     0.00  -0.01   0.00
  52   6    -0.05  -0.03  -0.02     0.01   0.12  -0.01     0.00   0.01   0.00
  53   6    -0.02  -0.03  -0.09    -0.04   0.12   0.07     0.00   0.01   0.00
  54   6     0.10   0.05  -0.09     0.11  -0.01   0.05     0.00   0.00   0.00
  55   8    -0.25  -0.02   0.01    -0.12  -0.01  -0.10    -0.03   0.00  -0.01
  56   6     0.03   0.02  -0.15    -0.02  -0.03   0.15     0.00   0.00   0.01
  57   6     0.10   0.11   0.00    -0.01   0.06  -0.01     0.00   0.00   0.00
  58   6    -0.05   0.05   0.09     0.03   0.00  -0.09    -0.01   0.00   0.01
  59   6    -0.01  -0.02  -0.05    -0.01   0.01  -0.02     0.00   0.00   0.00
  60   1     0.02   0.01  -0.07     0.00  -0.01   0.01     0.04  -0.05   0.01
  61   1     0.01  -0.02  -0.01     0.00  -0.01  -0.01     0.00  -0.01  -0.01
  62   1     0.01   0.00   0.00     0.01   0.01  -0.01     0.01   0.01   0.00
  63   1     0.00   0.00   0.00     0.00   0.00   0.00     0.00   0.00   0.00
  64   1     0.00   0.00   0.00    -0.01   0.00   0.00     0.00   0.00   0.00
  65   1     0.04  -0.01   0.04     0.02   0.00   0.02     0.01  -0.01   0.01
  66   1    -0.03  -0.02   0.03    -0.01  -0.01   0.01    -0.01  -0.01   0.01
  67   1    -0.02  -0.03   0.05     0.00   0.00   0.02    -0.01  -0.01   0.02
  68   1    -0.08   0.00  -0.02    -0.02   0.00  -0.01    -0.02   0.00   0.00
  69   1     0.02   0.00   0.00    -0.02   0.01   0.02     0.03   0.00   0.01
  70   1    -0.01  -0.02   0.04    -0.01   0.02   0.01     0.01  -0.01   0.03
  71   1    -0.02  -0.01   0.06    -0.01   0.02   0.00    -0.01  -0.03   0.02
  72   1    -0.02   0.04   0.01     0.01  -0.02   0.00     0.00   0.04  -0.01
  73   1    -0.02  -0.02   0.02     0.01   0.00   0.01    -0.05   0.02   0.00
  74   1     0.01   0.01   0.02     0.00   0.00   0.00    -0.03   0.00  -0.06
  75   1     0.04   0.02   0.01     0.00   0.00   0.00    -0.09   0.02   0.00
  76   1     0.00  -0.01   0.00     0.00   0.00   0.00    -0.01   0.07   0.00
  77   1     0.01   0.02   0.03     0.00   0.00   0.00     0.00  -0.07   0.01
  78   1    -0.01   0.03  -0.02     0.00   0.00   0.00     0.12  -0.04   0.11
  79   1     0.01   0.02  -0.06    -0.01  -0.08   0.02    -0.03  -0.06  -0.08
  80   1    -0.02  -0.05   0.04     0.11   0.02  -0.03     0.04  -0.06   0.03
  81   1     0.02  -0.08  -0.05     0.01   0.09   0.07    -0.01  -0.03  -0.06
  82   1     0.00   0.02   0.06     0.00  -0.01  -0.05     0.00   0.01   0.08
  83   1    -0.01   0.04   0.06     0.00  -0.02  -0.04    -0.01   0.05   0.08
  84   1     0.01  -0.01   0.03    -0.01   0.03  -0.01     0.01  -0.03   0.03
  85   1     0.02   0.01   0.02     0.00  -0.01  -0.02     0.01   0.04   0.08
  86   1     0.00   0.04   0.06     0.00   0.00  -0.01    -0.01   0.07   0.12
  87   1     0.04   0.01   0.01    -0.01   0.02   0.00     0.07  -0.01   0.02
  88   1     0.02  -0.02  -0.02     0.00  -0.01   0.01     0.03  -0.03  -0.09
  89   1     0.05  -0.01   0.02     0.00  -0.01   0.01     0.08  -0.03   0.02
  90   1     0.02  -0.02  -0.04     0.01  -0.01   0.03     0.02  -0.03  -0.11
  91   1     0.05   0.00  -0.06     0.00   0.00   0.00    -0.22  -0.07   0.17
  92   1     0.02   0.00  -0.03     0.00   0.00   0.00    -0.13  -0.12   0.30
  93   1     0.02  -0.04   0.01     0.00   0.00   0.00    -0.15   0.04  -0.06
  94   1    -0.04  -0.01   0.07     0.00   0.00   0.00     0.10  -0.02  -0.29
  95   1     0.03  -0.04   0.02     0.00   0.00   0.00    -0.20   0.10  -0.10
  96   1    -0.01  -0.01   0.03     0.00   0.00   0.00     0.15  -0.03  -0.25
  97   1    -0.02  -0.02   0.00     0.00   0.00   0.00     0.13   0.05  -0.06
  98   1     0.01  -0.03  -0.01     0.00   0.00   0.00    -0.05   0.11  -0.03
  99   1    -0.05  -0.01   0.01     0.00   0.00   0.00     0.12   0.03  -0.06
 100   1     0.01  -0.02  -0.02     0.00   0.00   0.00    -0.09   0.02   0.08
 101   1     0.04   0.01  -0.05     0.00   0.00   0.00    -0.12  -0.04   0.12
 102   1     0.00  -0.03  -0.02     0.00   0.00   0.00    -0.03   0.07   0.01
 103   1    -0.04  -0.03   0.01     0.00   0.00   0.02    -0.03   0.00  -0.07
 104   1    -0.06  -0.07  -0.05    -0.01  -0.01   0.01    -0.05   0.06  -0.01
 105   1    -0.04  -0.03   0.00    -0.01   0.00   0.01    -0.01   0.07   0.09
 106   1     0.01   0.02   0.03     0.00   0.01   0.00     0.02  -0.05   0.01
 107   1     0.06   0.03   0.00    -0.01   0.00   0.00     0.12   0.01  -0.03
 108   1     0.08   0.04   0.01     0.01   0.01   0.00    -0.02  -0.05   0.02
 109   1    -0.09  -0.07   0.05    -0.05  -0.11  -0.19    -0.01   0.00   0.01
 110   1     0.04  -0.02  -0.02    -0.01   0.09  -0.07     0.00  -0.01   0.00
 111   1     0.00  -0.01  -0.01     0.05  -0.17   0.09     0.00   0.01   0.00
 112   1     0.00   0.02  -0.02     0.06  -0.14   0.07     0.00   0.01   0.00
 113   1     0.00   0.00  -0.01     0.06  -0.09   0.06     0.00   0.00   0.00
 114   1     0.00  -0.02  -0.14    -0.20   0.11   0.11    -0.02   0.01   0.00
 115   1     0.19  -0.01  -0.08     0.07   0.03   0.05     0.00  -0.01   0.00
 116   1     0.08   0.10  -0.02     0.01  -0.19   0.03     0.01  -0.01   0.00
 117   1     0.07   0.04  -0.26    -0.07  -0.07   0.40     0.00   0.00   0.02
 118   1     0.07   0.06  -0.23    -0.01  -0.08   0.10     0.00   0.00   0.00
 119   1     0.03   0.07   0.01    -0.10   0.02  -0.03     0.00   0.00  -0.01
 120   1     0.07   0.11   0.11     0.02   0.21  -0.05     0.00   0.00   0.00
 121   1     0.21   0.19   0.01    -0.09   0.01  -0.02     0.00  -0.01   0.00
 122   1     0.02   0.15  -0.05     0.08   0.05  -0.11     0.00   0.01   0.00
 123   1    -0.05   0.14   0.10     0.08   0.03  -0.13    -0.01   0.01   0.02
 124   1    -0.13   0.11   0.27     0.00   0.03   0.03    -0.01   0.01   0.03
 125   1    -0.04  -0.02  -0.07    -0.04   0.02   0.02     0.00   0.00  -0.01
 126   1    -0.02  -0.05  -0.11    -0.01  -0.03  -0.04     0.00   0.00  -0.01
 127   1    -0.05   0.02  -0.02    -0.02  -0.01  -0.02    -0.01   0.00   0.00
                    91                     92                     93
                     A                      A                      A
 Frequencies --   441.1844               445.8901               449.1517
 Red. masses --     4.4714                 3.4791                 3.2984
 Frc consts  --     0.5128                 0.4075                 0.3920
 IR Inten    --    10.1243                 7.2750                 4.6134
 Atom AN      X      Y      Z        X      Y      Z        X      Y      Z
   1   6    -0.02   0.04  -0.01    -0.04   0.05  -0.03     0.00   0.04   0.00
   2   6     0.02  -0.02   0.01     0.03  -0.05   0.00     0.03  -0.01   0.01
   3   6     0.01  -0.01   0.01     0.00  -0.01  -0.01     0.02   0.02  -0.01
   4   6     0.00   0.00   0.00     0.00   0.00   0.00     0.00   0.00   0.00
   5   6     0.00   0.00   0.00     0.00   0.00   0.00     0.00   0.00   0.00
   6   6     0.00   0.00   0.00     0.00   0.00   0.00     0.00   0.00   0.00
   7   8     0.01   0.01  -0.01     0.00   0.00   0.00    -0.01  -0.01   0.00
   8   6     0.00   0.00   0.00    -0.01   0.00   0.00     0.01   0.00  -0.01
   9   6     0.01  -0.02  -0.02     0.03   0.02   0.09     0.00  -0.05  -0.11
  10   6     0.00   0.00   0.01     0.05   0.01  -0.03    -0.10  -0.02   0.08
  11   6     0.02  -0.03   0.00     0.01   0.01   0.07     0.02  -0.04  -0.06
  12   6    -0.02   0.02   0.00    -0.03   0.02   0.02    -0.01   0.01  -0.02
  13   6    -0.02   0.02  -0.01    -0.04   0.00  -0.03    -0.01   0.03   0.02
  14   6    -0.01   0.02  -0.01    -0.01   0.02   0.02    -0.02   0.01  -0.03
  15   6     0.02  -0.03  -0.01     0.03  -0.03   0.07     0.00  -0.03  -0.06
  16   6     0.02  -0.07   0.03    -0.02  -0.05  -0.01     0.03  -0.08   0.06
  17   6     0.07  -0.02   0.02     0.14  -0.07   0.01     0.02   0.00   0.03
  18   6     0.00   0.00   0.00     0.03   0.01  -0.02    -0.04  -0.03   0.08
  19   6     0.00   0.00   0.00     0.01   0.01  -0.02    -0.02   0.01   0.01
  20   6     0.00   0.00  -0.01    -0.03   0.00   0.00     0.02   0.04  -0.02
  21   6     0.00   0.00   0.00     0.01   0.00  -0.02    -0.03   0.03   0.01
  22   6     0.00  -0.01   0.00     0.05  -0.02  -0.02    -0.06   0.00   0.05
  23   6     0.00  -0.01   0.00    -0.02   0.02   0.00     0.07  -0.12   0.02
  24   6     0.01  -0.01   0.01     0.06  -0.02   0.07     0.00   0.01  -0.04
  25   6     0.03   0.03   0.06    -0.02   0.03   0.01     0.05   0.02   0.11
  26   6     0.00  -0.03  -0.06     0.02  -0.04  -0.04    -0.02  -0.01  -0.07
  27   6     0.00  -0.03  -0.05     0.02  -0.10  -0.13    -0.01   0.02  -0.01
  28   6     0.00   0.01   0.07    -0.03   0.04   0.10     0.01  -0.02   0.05
  29   6    -0.01  -0.01   0.01    -0.03  -0.04   0.09     0.00   0.03  -0.05
  30   6     0.01   0.00  -0.01     0.02   0.01  -0.05     0.02  -0.03   0.01
  31   6     0.01   0.00   0.00    -0.04   0.01   0.00     0.15   0.00  -0.03
  32   6     0.00   0.00   0.00     0.01  -0.01   0.01    -0.09   0.00   0.04
  33   6    -0.01   0.00   0.01     0.01   0.00  -0.03    -0.03   0.00   0.05
  34   6     0.00   0.01  -0.01     0.00   0.02   0.02     0.02  -0.01  -0.06
  35   8    -0.01   0.06  -0.03     0.00  -0.02   0.01     0.00  -0.01   0.00
  36  12    -0.01   0.01   0.00     0.00  -0.04   0.03     0.03   0.00   0.02
  37   8     0.04   0.10  -0.14    -0.01  -0.03   0.04    -0.02  -0.02   0.04
  38   6    -0.02   0.00  -0.02     0.01   0.00   0.01     0.00   0.00   0.00
  39   7    -0.01   0.02  -0.01    -0.04   0.06  -0.04    -0.05   0.03  -0.03
  40   7    -0.07   0.09  -0.04    -0.08   0.15  -0.05    -0.06   0.05  -0.04
  41   8    -0.02  -0.02  -0.01     0.01   0.00   0.00     0.00   0.01   0.00
  42   8     0.05  -0.08   0.04    -0.01   0.02  -0.01    -0.01   0.01  -0.01
  43   6     0.03  -0.05   0.05    -0.01   0.01  -0.01     0.00   0.01  -0.01
  44   6    -0.03  -0.02   0.10     0.01   0.00  -0.03     0.01   0.01  -0.02
  45   6     0.04  -0.05   0.01    -0.01   0.01   0.00    -0.01   0.01   0.00
  46   8     0.05  -0.01   0.00    -0.01   0.00   0.00    -0.01   0.00   0.00
  47   6    -0.02   0.08  -0.04     0.01  -0.02   0.01     0.00  -0.01   0.01
  48   8     0.14  -0.10  -0.03    -0.02   0.04   0.04    -0.01   0.03   0.03
  49   6     0.00   0.01  -0.03     0.00   0.00   0.00     0.00   0.00   0.00
  50   8    -0.08   0.05  -0.02     0.03  -0.02   0.01     0.01  -0.02   0.00
  51   8     0.06  -0.05  -0.01    -0.02   0.02   0.01    -0.02   0.01   0.01
  52   6     0.01   0.08  -0.01    -0.01  -0.03  -0.01    -0.01  -0.03   0.00
  53   6     0.05   0.10   0.03    -0.02  -0.04  -0.02    -0.01  -0.03  -0.01
  54   6     0.01  -0.08   0.06     0.00   0.03  -0.03     0.00   0.02  -0.02
  55   8    -0.08   0.01  -0.06     0.00  -0.01   0.02     0.00   0.00   0.03
  56   6    -0.02  -0.02   0.09     0.01   0.01  -0.06     0.01   0.00  -0.04
  57   6    -0.06  -0.08  -0.01     0.03   0.04   0.01     0.02   0.02   0.00
  58   6    -0.07   0.05   0.14     0.02  -0.01  -0.04     0.02  -0.01  -0.03
  59   6     0.00  -0.02  -0.04     0.00   0.00   0.01     0.00   0.00   0.01
  60   1     0.03  -0.05   0.02     0.06  -0.09   0.02     0.04  -0.06   0.02
  61   1     0.00  -0.01  -0.01     0.00  -0.01   0.00     0.00   0.02   0.01
  62   1     0.01   0.01   0.00     0.00   0.00   0.00     0.00  -0.02   0.01
  63   1     0.00   0.00   0.00     0.00   0.00   0.00     0.00   0.00   0.01
  64   1     0.00   0.00   0.00     0.00   0.00   0.00     0.00   0.00   0.00
  65   1     0.01   0.00   0.01     0.00   0.00   0.00    -0.01   0.00   0.00
  66   1    -0.01  -0.01   0.01     0.00   0.00   0.00     0.00   0.00   0.00
  67   1     0.00   0.00   0.01    -0.01  -0.01   0.01     0.01   0.01  -0.02
  68   1    -0.02   0.00  -0.01    -0.02   0.00   0.00     0.03   0.00  -0.01
  69   1    -0.04   0.02   0.02    -0.04   0.00  -0.05    -0.04   0.03   0.06
  70   1    -0.02   0.03   0.00    -0.04  -0.02  -0.12    -0.01   0.06   0.12
  71   1     0.00   0.05   0.00     0.01   0.04  -0.05    -0.02   0.04   0.03
  72   1     0.02  -0.07   0.02    -0.03  -0.04  -0.02     0.05  -0.09   0.07
  73   1     0.06  -0.03   0.02     0.14  -0.10   0.01     0.02   0.00   0.05
  74   1     0.00   0.00  -0.01    -0.02   0.01   0.00     0.02   0.00  -0.07
  75   1     0.00   0.00  -0.01    -0.08  -0.01   0.04     0.12   0.05  -0.09
  76   1     0.00   0.01  -0.01    -0.02   0.01   0.01     0.03   0.05  -0.03
  77   1     0.00  -0.01   0.00    -0.03   0.02   0.00     0.09  -0.12   0.03
  78   1     0.02  -0.01   0.01     0.06  -0.03   0.08     0.01   0.01  -0.06
  79   1     0.04   0.04   0.10     0.01   0.07   0.07     0.10   0.10   0.15
  80   1     0.01   0.08  -0.03    -0.08   0.07  -0.05    -0.01   0.09   0.01
  81   1     0.05   0.07   0.12    -0.01   0.03   0.03     0.11   0.02   0.18
  82   1    -0.01  -0.02  -0.13     0.04   0.01  -0.04    -0.04  -0.03  -0.20
  83   1     0.00  -0.07  -0.13     0.05  -0.09  -0.09    -0.03  -0.06  -0.16
  84   1    -0.03   0.08  -0.03     0.04  -0.02  -0.05    -0.09   0.16  -0.01
  85   1    -0.01  -0.05  -0.10    -0.02  -0.13  -0.20    -0.01   0.00  -0.07
  86   1     0.01  -0.06  -0.12     0.04  -0.18  -0.28    -0.02   0.03  -0.03
  87   1    -0.09   0.03  -0.01    -0.15  -0.01  -0.05    -0.05   0.08   0.01
  88   1    -0.03   0.02   0.11    -0.06   0.09   0.26    -0.01  -0.03   0.02
  89   1    -0.08   0.02   0.00    -0.19   0.10  -0.08     0.00  -0.03   0.05
  90   1    -0.01   0.02   0.14    -0.04   0.09   0.25     0.02  -0.03   0.08
  91   1    -0.02  -0.01   0.02    -0.10  -0.05   0.09     0.00   0.04  -0.02
  92   1    -0.02  -0.01   0.03    -0.06  -0.08   0.18     0.01   0.05  -0.08
  93   1    -0.02   0.00  -0.01    -0.07  -0.01   0.00     0.01   0.06  -0.06
  94   1     0.01  -0.01  -0.03     0.06   0.00  -0.16    -0.03  -0.04   0.07
  95   1    -0.02   0.01  -0.01    -0.12   0.08  -0.04     0.08  -0.08   0.00
  96   1     0.02  -0.01  -0.03     0.06   0.00  -0.12     0.03  -0.05   0.02
  97   1     0.01   0.00   0.00    -0.04  -0.01  -0.01     0.23   0.06  -0.05
  98   1     0.00   0.01   0.00    -0.03  -0.01  -0.01     0.02   0.11  -0.02
  99   1     0.01   0.00   0.00    -0.06   0.01   0.00     0.28   0.00  -0.06
 100   1    -0.01   0.00   0.01     0.05   0.00  -0.01    -0.22   0.02   0.12
 101   1    -0.01   0.00   0.01     0.04  -0.01   0.00    -0.20  -0.02   0.12
 102   1     0.00   0.01   0.00     0.01  -0.05   0.04    -0.05   0.19  -0.11
 103   1     0.00   0.01   0.05     0.04   0.01   0.00    -0.03   0.01   0.10
 104   1     0.00  -0.03   0.01     0.04  -0.01  -0.01    -0.06  -0.05   0.02
 105   1    -0.01  -0.02   0.00     0.01  -0.04  -0.08    -0.03   0.00   0.07
 106   1     0.01   0.02  -0.02    -0.03   0.04   0.03     0.07  -0.02  -0.09
 107   1    -0.03   0.00   0.00    -0.03   0.01   0.03     0.02  -0.01  -0.06
 108   1     0.01   0.02  -0.02     0.03   0.05   0.02    -0.03  -0.03  -0.08
 109   1    -0.09   0.03   0.16     0.02  -0.01  -0.04     0.03   0.00  -0.03
 110   1     0.05  -0.08   0.03    -0.01   0.02  -0.01    -0.01   0.01  -0.01
 111   1    -0.03   0.09  -0.06     0.01  -0.02   0.01     0.00  -0.01   0.01
 112   1    -0.03   0.09  -0.05     0.01  -0.02   0.01     0.00  -0.01   0.01
 113   1    -0.03   0.05  -0.04     0.01  -0.01   0.01     0.00  -0.01   0.01
 114   1    -0.06   0.10   0.05     0.02  -0.04  -0.04     0.02  -0.03  -0.02
 115   1    -0.01  -0.11   0.05     0.01   0.03  -0.02     0.01   0.03  -0.02
 116   1    -0.04  -0.15  -0.07     0.03   0.07   0.02     0.02   0.05   0.01
 117   1    -0.08  -0.05   0.28     0.04   0.02  -0.14     0.02   0.02  -0.10
 118   1    -0.04  -0.05   0.13     0.03   0.03  -0.09     0.02   0.02  -0.05
 119   1    -0.09  -0.07  -0.06     0.05   0.03   0.03     0.02   0.02   0.00
 120   1    -0.03   0.01  -0.08     0.02  -0.01   0.03     0.01  -0.01   0.04
 121   1    -0.15  -0.18  -0.03     0.06   0.08   0.02     0.07   0.05   0.00
 122   1    -0.02   0.13   0.01     0.01  -0.03   0.00     0.00  -0.04   0.01
 123   1    -0.11   0.11   0.19     0.03  -0.03  -0.05     0.02  -0.03  -0.04
 124   1    -0.14   0.10   0.24     0.04  -0.03  -0.06     0.04  -0.03  -0.07
 125   1    -0.03  -0.03  -0.10     0.01   0.01   0.03     0.01   0.00   0.02
 126   1    -0.02  -0.03  -0.09     0.01   0.01   0.03     0.00   0.01   0.02
 127   1    -0.04   0.05   0.01     0.02  -0.02  -0.01     0.01  -0.01   0.00
                    94                     95                     96
                     A                      A                      A
 Frequencies --   449.6764               459.3211               461.2977
 Red. masses --     3.1689                 2.9874                 3.3778
 Frc consts  --     0.3775                 0.3713                 0.4235
 IR Inten    --     1.1659                 2.9736                 4.7373
 Atom AN      X      Y      Z        X      Y      Z        X      Y      Z
   1   6     0.01  -0.01  -0.02     0.01   0.01   0.01    -0.01  -0.01   0.03
   2   6     0.01  -0.01  -0.03     0.01   0.02   0.01    -0.02  -0.01   0.03
   3   6     0.00   0.00  -0.02     0.02   0.01   0.02    -0.03   0.01   0.01
   4   6     0.00   0.00   0.00     0.00   0.00   0.00     0.00   0.00   0.00
   5   6     0.00   0.00   0.00     0.00   0.00   0.00     0.00   0.00   0.00
   6   6     0.00   0.00   0.00     0.00   0.00   0.00     0.00   0.00   0.00
   7   8     0.00   0.00   0.00     0.00   0.00   0.00     0.00   0.01   0.00
   8   6     0.01   0.00  -0.01     0.01   0.00  -0.01    -0.01  -0.01   0.02
   9   6     0.01   0.06   0.14     0.00  -0.04  -0.12    -0.01  -0.03  -0.08
  10   6    -0.07  -0.02   0.05    -0.07   0.00   0.05     0.15   0.02  -0.10
  11   6    -0.03   0.06   0.09    -0.03   0.00  -0.09     0.00  -0.01  -0.07
  12   6    -0.01   0.00   0.03    -0.01   0.00  -0.03     0.00   0.00  -0.03
  13   6    -0.02  -0.05  -0.04    -0.01   0.01   0.04     0.00   0.03   0.03
  14   6     0.01  -0.01   0.04    -0.01  -0.02  -0.03     0.00   0.00  -0.03
  15   6     0.01   0.01   0.10     0.01  -0.05  -0.07     0.01  -0.03  -0.06
  16   6    -0.05   0.08  -0.07     0.00   0.14  -0.02     0.02   0.07   0.00
  17   6     0.04  -0.05  -0.03     0.11  -0.03   0.05     0.07  -0.01   0.03
  18   6    -0.02  -0.03   0.06    -0.06   0.01   0.02     0.12  -0.01  -0.07
  19   6    -0.01   0.01   0.02    -0.02   0.00   0.00     0.04  -0.01  -0.03
  20   6     0.03   0.04   0.00     0.02   0.00  -0.02    -0.06  -0.03   0.03
  21   6    -0.02   0.03   0.01    -0.02   0.00   0.02     0.05  -0.02  -0.04
  22   6    -0.05   0.02   0.03    -0.03  -0.02   0.04     0.08   0.02  -0.08
  23   6     0.06  -0.10   0.03     0.00   0.07  -0.02    -0.03  -0.12   0.02
  24   6    -0.03   0.03  -0.05     0.05  -0.01   0.01    -0.12   0.01  -0.02
  25   6    -0.06  -0.02  -0.12     0.00  -0.05  -0.07     0.01  -0.02  -0.02
  26   6     0.04   0.00   0.07    -0.03   0.09   0.12    -0.02   0.05   0.06
  27   6     0.03  -0.07  -0.05     0.00  -0.02  -0.08    -0.01  -0.01  -0.04
  28   6    -0.02   0.04   0.00     0.01  -0.01   0.14     0.01  -0.01   0.08
  29   6     0.02   0.03  -0.08    -0.02   0.00   0.02     0.04   0.00  -0.04
  30   6     0.00  -0.02   0.03     0.04  -0.03  -0.04    -0.10   0.06   0.08
  31   6     0.13   0.00  -0.03    -0.03  -0.01   0.03     0.02   0.03  -0.04
  32   6    -0.08   0.00   0.04     0.04   0.03  -0.06    -0.06  -0.06   0.12
  33   6     0.02   0.00  -0.04    -0.02   0.00   0.05     0.00   0.01   0.02
  34   6     0.01   0.00  -0.02     0.01  -0.02  -0.04    -0.02   0.01   0.05
  35   8     0.00   0.00   0.00     0.00   0.00   0.00     0.00   0.00   0.00
  36  12     0.00   0.00  -0.01     0.01   0.02  -0.01     0.00  -0.01   0.00
  37   8     0.01   0.01  -0.02    -0.01   0.00   0.01     0.00   0.00   0.00
  38   6     0.00   0.00   0.00     0.00   0.00   0.00     0.00   0.00   0.00
  39   7    -0.02  -0.01  -0.02     0.01  -0.03   0.03    -0.01   0.07  -0.01
  40   7     0.04   0.01   0.01     0.01  -0.04   0.00    -0.02  -0.03   0.01
  41   8     0.00   0.00   0.00     0.00   0.00   0.00     0.00   0.00   0.00
  42   8     0.01   0.00   0.00     0.00  -0.01   0.00     0.00   0.00   0.00
  43   6     0.00  -0.01   0.00     0.01   0.01   0.00     0.00   0.00   0.00
  44   6    -0.01  -0.01   0.01     0.01   0.02   0.00     0.00   0.01   0.00
  45   6     0.00   0.00   0.00     0.00   0.00   0.00     0.00   0.00   0.00
  46   8     0.00   0.00   0.00     0.00   0.00   0.00     0.00   0.00   0.00
  47   6     0.00   0.00   0.00     0.00   0.00   0.00     0.00   0.00   0.00
  48   8     0.00  -0.02  -0.02     0.00  -0.01  -0.01     0.01   0.00   0.01
  49   6     0.01   0.00   0.00    -0.01   0.00   0.00     0.00   0.00   0.00
  50   8     0.00   0.01   0.00     0.00   0.00   0.00     0.00   0.00   0.00
  51   8     0.01  -0.01  -0.01     0.00   0.00   0.00     0.00   0.00   0.00
  52   6     0.00   0.02   0.00     0.00   0.00   0.01     0.00   0.00   0.00
  53   6     0.00   0.02   0.01     0.01   0.00   0.01     0.00   0.00   0.00
  54   6     0.00  -0.01   0.01     0.00   0.00  -0.01     0.00   0.00   0.00
  55   8     0.00  -0.01  -0.02     0.00   0.00   0.01    -0.01   0.00   0.01
  56   6     0.00   0.00   0.02     0.00   0.00   0.02     0.00   0.00   0.00
  57   6    -0.01  -0.01   0.00     0.00   0.00   0.00     0.00   0.00   0.00
  58   6    -0.01   0.01   0.01     0.00   0.00  -0.01     0.00   0.00   0.00
  59   6     0.00   0.00   0.00     0.00   0.00   0.00     0.00   0.00   0.00
  60   1     0.01   0.00  -0.03     0.00   0.03   0.01    -0.02  -0.01   0.03
  61   1     0.00   0.01   0.01     0.00   0.01   0.01     0.00  -0.02  -0.02
  62   1     0.00  -0.01   0.00     0.00  -0.01   0.00     0.01   0.02  -0.01
  63   1     0.00   0.00   0.01     0.00   0.00   0.00     0.00   0.01   0.00
  64   1     0.00   0.00   0.00     0.00   0.00   0.00     0.00   0.00   0.00
  65   1     0.00   0.00   0.00     0.00   0.00  -0.01     0.00   0.00   0.01
  66   1     0.00   0.00   0.00     0.00   0.00   0.00    -0.01  -0.01   0.01
  67   1     0.01   0.01  -0.01     0.01   0.01  -0.01    -0.01  -0.01   0.03
  68   1     0.02   0.00   0.00     0.02   0.00   0.00    -0.03   0.00   0.01
  69   1     0.02  -0.02  -0.07     0.00   0.03   0.06     0.00   0.02   0.04
  70   1    -0.01  -0.09  -0.17    -0.02   0.04   0.16     0.00   0.05   0.13
  71   1     0.02  -0.03  -0.05     0.00   0.02   0.04    -0.01   0.02   0.02
  72   1    -0.08   0.09  -0.09    -0.01   0.15   0.00     0.02   0.07   0.01
  73   1     0.05  -0.06  -0.04     0.12  -0.05   0.07     0.07  -0.01   0.05
  74   1     0.01   0.00  -0.04     0.04   0.00  -0.02    -0.07  -0.01   0.06
  75   1     0.10   0.05  -0.05     0.09   0.00  -0.07    -0.22  -0.04   0.15
  76   1     0.02   0.03  -0.02     0.02   0.01  -0.01    -0.04  -0.03   0.02
  77   1     0.08  -0.11   0.04     0.01   0.07  -0.03    -0.05  -0.12   0.03
  78   1    -0.03   0.04  -0.07     0.06  -0.03   0.01    -0.14   0.03  -0.02
  79   1    -0.12  -0.10  -0.17    -0.07  -0.13  -0.20    -0.02  -0.06  -0.07
  80   1     0.00  -0.09  -0.03     0.10  -0.16   0.09     0.05  -0.08   0.06
  81   1    -0.12  -0.01  -0.19    -0.04  -0.08  -0.16    -0.02  -0.05  -0.07
  82   1     0.07   0.05   0.23    -0.05   0.02   0.18    -0.05  -0.01   0.06
  83   1     0.05   0.04   0.16    -0.07   0.20   0.25    -0.05   0.11   0.12
  84   1     0.12  -0.19   0.00    -0.03  -0.05   0.09    -0.04   0.01   0.06
  85   1     0.01  -0.07  -0.04    -0.03  -0.07  -0.20    -0.02  -0.03  -0.10
  86   1     0.04  -0.10  -0.10     0.01  -0.08  -0.20     0.01  -0.05  -0.11
  87   1    -0.01  -0.08  -0.04    -0.16   0.10  -0.01    -0.10   0.06   0.00
  88   1    -0.02   0.08   0.11    -0.06  -0.01   0.17    -0.04  -0.02   0.08
  89   1    -0.09   0.09  -0.09    -0.10  -0.01   0.04    -0.05  -0.02   0.04
  90   1    -0.04   0.07   0.03     0.02  -0.01   0.29     0.02  -0.02   0.18
  91   1     0.05   0.04  -0.07    -0.07   0.00   0.06     0.16   0.01  -0.10
  92   1     0.04   0.05  -0.12    -0.04  -0.01   0.06     0.09   0.04  -0.15
  93   1     0.04   0.02  -0.03    -0.04   0.05  -0.06     0.10  -0.09   0.12
  94   1    -0.06  -0.02   0.12     0.02  -0.04  -0.06    -0.03   0.09   0.11
  95   1     0.10  -0.09   0.02    -0.01  -0.02  -0.04     0.01   0.07   0.08
  96   1    -0.01  -0.03   0.07     0.09  -0.05  -0.07    -0.20   0.13   0.17
  97   1     0.21   0.05  -0.06    -0.10  -0.03   0.06     0.14   0.06  -0.10
  98   1     0.00   0.10  -0.03     0.07  -0.09   0.04    -0.14   0.15  -0.05
  99   1     0.23   0.01  -0.06    -0.07  -0.03   0.05     0.11   0.05  -0.09
 100   1    -0.20   0.01   0.11     0.05  -0.01  -0.07    -0.03   0.03   0.12
 101   1    -0.17  -0.03   0.11     0.09   0.06  -0.12    -0.14  -0.11   0.24
 102   1    -0.05   0.15  -0.09     0.02  -0.03  -0.05    -0.03   0.03   0.13
 103   1     0.03  -0.01  -0.07    -0.03   0.00   0.08     0.00   0.00  -0.01
 104   1     0.04   0.03  -0.03    -0.06  -0.04   0.01     0.00   0.02   0.03
 105   1     0.02   0.00  -0.05    -0.03   0.01   0.08     0.00   0.01   0.02
 106   1     0.01  -0.02  -0.02     0.06  -0.03  -0.07    -0.07   0.04   0.07
 107   1     0.02   0.00  -0.02     0.01  -0.01  -0.03    -0.01   0.00   0.03
 108   1     0.00  -0.01  -0.03    -0.05  -0.04  -0.06     0.02   0.02   0.08
 109   1    -0.02   0.00   0.01     0.02   0.01   0.00     0.01   0.00   0.00
 110   1     0.01  -0.01   0.00     0.00   0.00   0.00     0.00   0.00   0.00
 111   1     0.00   0.00   0.00     0.00   0.00   0.00     0.00   0.00   0.00
 112   1     0.00   0.01   0.00     0.00   0.00   0.00     0.00   0.00   0.00
 113   1     0.00   0.00   0.00     0.00   0.00   0.00     0.00   0.00   0.00
 114   1    -0.02   0.02   0.02     0.01   0.00   0.01     0.00   0.00   0.00
 115   1    -0.01  -0.01   0.01     0.01   0.01   0.00     0.01   0.00   0.00
 116   1    -0.01  -0.03   0.00    -0.01  -0.01   0.00     0.00   0.00   0.00
 117   1    -0.01  -0.01   0.06    -0.01   0.00   0.03     0.00   0.00  -0.01
 118   1    -0.01  -0.01   0.03    -0.01   0.00   0.03     0.00   0.00   0.00
 119   1     0.00  -0.01   0.01    -0.01   0.00  -0.01    -0.01   0.00  -0.01
 120   1     0.00   0.00  -0.03     0.00   0.00   0.02     0.00   0.01   0.01
 121   1    -0.04  -0.01   0.00     0.02   0.00  -0.01     0.01  -0.01  -0.01
 122   1     0.00   0.02  -0.01    -0.01  -0.02   0.01     0.00  -0.01   0.00
 123   1    -0.01   0.02   0.02     0.00  -0.02  -0.01     0.00  -0.01   0.00
 124   1    -0.02   0.02   0.04     0.02  -0.01  -0.03     0.01   0.00  -0.01
 125   1     0.00   0.00  -0.01     0.00   0.00   0.00     0.00   0.00   0.00
 126   1     0.00   0.00  -0.01     0.00   0.00   0.00     0.00   0.00   0.00
 127   1     0.00   0.00   0.00     0.00   0.00   0.00     0.00   0.00   0.00
                    97                     98                     99
                     A                      A                      A
 Frequencies --   469.5685               511.1764               521.2429
 Red. masses --     4.7530                 3.3370                 5.7454
 Frc consts  --     0.6175                 0.5137                 0.9197
 IR Inten    --    14.0215                 0.4156                12.1292
 Atom AN      X      Y      Z        X      Y      Z        X      Y      Z
   1   6     0.00   0.00   0.00     0.11   0.07  -0.10     0.00  -0.01  -0.01
   2   6     0.00   0.00   0.01     0.11   0.07   0.01     0.00   0.01   0.03
   3   6     0.00   0.01   0.01     0.01   0.03   0.13     0.01   0.02   0.03
   4   6     0.00   0.00   0.00     0.00   0.00   0.00     0.00   0.00   0.00
   5   6     0.00   0.00   0.00     0.00   0.00   0.00     0.00   0.00   0.00
   6   6     0.00   0.00   0.00     0.00   0.00   0.00     0.00   0.00   0.00
   7   8    -0.01  -0.01   0.01     0.00   0.00   0.00     0.00   0.00   0.00
   8   6     0.00   0.00   0.00     0.00   0.00   0.00     0.00   0.00   0.00
   9   6     0.00  -0.01  -0.03     0.06   0.02  -0.07     0.00  -0.01   0.00
  10   6     0.00   0.00   0.01    -0.02   0.03   0.06     0.01   0.02   0.02
  11   6     0.00   0.00  -0.02    -0.04   0.02   0.03     0.00   0.00   0.01
  12   6     0.00   0.00   0.00    -0.04   0.00   0.04     0.00  -0.01   0.01
  13   6     0.00   0.00   0.00    -0.05  -0.07  -0.05     0.01   0.00  -0.01
  14   6     0.00   0.00  -0.01     0.02  -0.03   0.06     0.01   0.01   0.01
  15   6     0.00  -0.01  -0.01     0.02  -0.02   0.02     0.00   0.01   0.01
  16   6     0.00   0.01   0.00    -0.08  -0.02   0.01     0.00   0.00   0.00
  17   6     0.01   0.00   0.01    -0.04  -0.04   0.01     0.00   0.01  -0.01
  18   6     0.00   0.00   0.00     0.02   0.00  -0.06    -0.01   0.00  -0.01
  19   6     0.00   0.00   0.00     0.03  -0.02  -0.05    -0.02   0.00  -0.01
  20   6    -0.01   0.00   0.00    -0.08  -0.05   0.02     0.00  -0.02  -0.02
  21   6     0.00   0.00   0.00     0.07  -0.02  -0.01     0.00  -0.01   0.01
  22   6     0.00   0.00   0.00     0.03  -0.01   0.00     0.00  -0.01   0.02
  23   6     0.00   0.00   0.00    -0.04  -0.02  -0.05    -0.01  -0.01  -0.02
  24   6     0.01  -0.01   0.00    -0.03  -0.02  -0.01    -0.01  -0.02  -0.01
  25   6     0.00   0.00   0.00     0.00   0.00  -0.02    -0.01   0.00   0.00
  26   6     0.00   0.01   0.00     0.02  -0.01   0.00     0.00   0.00   0.00
  27   6     0.00   0.00  -0.01     0.00   0.01   0.01     0.00   0.00   0.00
  28   6     0.00   0.00   0.02     0.00   0.01  -0.02     0.00   0.00  -0.01
  29   6     0.00   0.00   0.01     0.01   0.01  -0.01     0.00   0.01  -0.01
  30   6     0.01   0.00   0.00    -0.02   0.01   0.02     0.00   0.00   0.00
  31   6     0.00   0.00   0.00    -0.02   0.01   0.00     0.00   0.00   0.00
  32   6     0.00   0.00   0.00     0.00   0.00   0.01     0.00   0.00   0.00
  33   6    -0.01   0.00   0.02    -0.07  -0.02   0.06    -0.02  -0.02  -0.01
  34   6     0.00   0.00  -0.01    -0.04  -0.06  -0.07     0.01   0.00  -0.01
  35   8    -0.01  -0.02   0.00     0.00   0.00   0.00     0.00  -0.06   0.02
  36  12     0.00  -0.01   0.00     0.02   0.01   0.01    -0.01   0.05  -0.08
  37   8     0.12   0.00  -0.16     0.00   0.00   0.00     0.00   0.06  -0.01
  38   6     0.00  -0.01   0.00     0.00   0.00   0.00     0.01   0.02   0.01
  39   7    -0.01   0.01   0.00    -0.06   0.05   0.10     0.02   0.03   0.03
  40   7     0.00   0.00  -0.01     0.10   0.04  -0.11    -0.01  -0.02  -0.02
  41   8     0.01  -0.04   0.02     0.00   0.00   0.00     0.03  -0.01   0.03
  42   8     0.04   0.09  -0.02     0.00  -0.01   0.01     0.00   0.08  -0.15
  43   6    -0.07  -0.10   0.00     0.00   0.01   0.00     0.01  -0.12  -0.08
  44   6    -0.11  -0.20  -0.01     0.01   0.01   0.00    -0.10  -0.09  -0.04
  45   6     0.01   0.03  -0.01     0.00  -0.01   0.00    -0.08   0.10  -0.05
  46   8     0.03   0.06   0.01    -0.01   0.00   0.00     0.13  -0.01   0.07
  47   6     0.00  -0.03   0.01     0.00   0.01   0.00     0.02  -0.09   0.04
  48   8    -0.16   0.06   0.05    -0.01   0.00   0.00     0.24  -0.04   0.04
  49   6     0.06   0.02   0.05     0.00   0.00   0.00    -0.03   0.07   0.01
  50   8     0.07   0.05   0.02    -0.01   0.00   0.00     0.09  -0.02   0.02
  51   8    -0.02   0.06   0.00     0.01  -0.01   0.00    -0.17   0.06  -0.02
  52   6     0.00   0.00  -0.03     0.00   0.00   0.00    -0.06  -0.04   0.03
  53   6    -0.10  -0.08  -0.01    -0.01   0.00   0.00     0.13   0.01   0.01
  54   6    -0.04  -0.04   0.11     0.01   0.00   0.00    -0.18   0.08  -0.07
  55   8     0.20   0.06  -0.01     0.00   0.00   0.00    -0.11  -0.03   0.05
  56   6     0.02   0.01  -0.07     0.00   0.00   0.00     0.01   0.00   0.03
  57   6    -0.07  -0.09   0.00     0.00   0.01   0.00     0.00  -0.04   0.01
  58   6    -0.06   0.06   0.08     0.00   0.00   0.00    -0.01   0.00   0.04
  59   6     0.00   0.01   0.01     0.00   0.00   0.00     0.01   0.02   0.05
  60   1     0.01   0.00   0.01     0.19   0.14   0.04     0.01   0.03   0.04
  61   1     0.00   0.00   0.00     0.00  -0.01   0.00     0.00   0.00   0.00
  62   1     0.00  -0.01   0.00     0.00   0.00   0.00     0.00   0.00   0.00
  63   1     0.00   0.00   0.00     0.00   0.00   0.00     0.00   0.00   0.00
  64   1     0.00   0.00   0.00     0.00   0.00   0.00     0.00   0.00   0.00
  65   1    -0.02   0.00  -0.01     0.00   0.00   0.00     0.01   0.00   0.00
  66   1     0.01   0.00  -0.01     0.00   0.00   0.00     0.00   0.00   0.00
  67   1     0.00   0.00  -0.02     0.00   0.00   0.00     0.00   0.00   0.01
  68   1     0.02   0.00   0.00     0.00  -0.01   0.00     0.00   0.00   0.00
  69   1     0.00   0.01   0.02     0.02   0.01   0.05     0.00  -0.01   0.00
  70   1     0.00   0.00   0.00    -0.06  -0.09  -0.13     0.01   0.00  -0.03
  71   1     0.00   0.00  -0.01     0.04   0.03   0.08     0.01  -0.01   0.00
  72   1     0.00   0.01   0.01    -0.10   0.00   0.01     0.00   0.01   0.00
  73   1     0.01  -0.01   0.01    -0.04  -0.04   0.00     0.00   0.02  -0.01
  74   1     0.00   0.00   0.00     0.06  -0.01  -0.02    -0.01   0.00   0.01
  75   1    -0.01   0.00   0.00    -0.18  -0.04   0.08     0.01  -0.01  -0.04
  76   1     0.00   0.00   0.00     0.10   0.01  -0.02     0.01   0.01   0.02
  77   1     0.00   0.00   0.00    -0.05  -0.01  -0.06    -0.01   0.00  -0.03
  78   1     0.01  -0.01   0.00    -0.04  -0.01  -0.01    -0.01  -0.02  -0.01
  79   1     0.00  -0.01   0.00    -0.01   0.01  -0.08     0.00   0.02   0.00
  80   1     0.00  -0.01   0.01     0.04   0.01  -0.05    -0.02   0.00   0.00
  81   1     0.00  -0.01   0.00     0.05   0.01   0.05    -0.01  -0.01  -0.01
  82   1    -0.01   0.00   0.00     0.05   0.08   0.05     0.00   0.00   0.01
  83   1    -0.01   0.01   0.01     0.05  -0.06  -0.05     0.00   0.01   0.01
  84   1    -0.01   0.01   0.01     0.07  -0.02  -0.03     0.00   0.00   0.00
  85   1     0.00   0.00  -0.03     0.05   0.00  -0.03    -0.01   0.00   0.02
  86   1     0.00   0.00  -0.02    -0.02   0.07   0.06     0.00  -0.01   0.00
  87   1    -0.02   0.02   0.00     0.04   0.02  -0.01     0.00  -0.02   0.00
  88   1    -0.01   0.00   0.02     0.05   0.03   0.02    -0.01   0.00  -0.01
  89   1    -0.01   0.00   0.01     0.03   0.04  -0.02     0.00   0.00  -0.01
  90   1     0.00   0.00   0.03    -0.01   0.03  -0.10     0.00   0.00   0.00
  91   1    -0.01   0.00   0.01     0.03   0.02   0.02     0.00   0.01   0.02
  92   1     0.00   0.00   0.01     0.02   0.04  -0.06     0.00   0.03  -0.04
  93   1     0.00   0.01   0.00     0.02   0.01   0.02     0.00   0.02  -0.01
  94   1     0.01   0.00  -0.01     0.02   0.02   0.02     0.02   0.01   0.00
  95   1     0.00   0.01   0.00     0.01   0.03   0.02     0.02   0.00   0.00
  96   1     0.01   0.00  -0.01    -0.06   0.05   0.05    -0.02   0.01   0.02
[truncated: 1,931,982 more chars]
