# Supplementary material
Source: publisher figshare collection journal article supplement (https://acs.figshare.com/ndownloader/files/5127205)
Supplement: Supplementary file 1 [file 5127205 › supporting_ja043819b/RRSS_fm-5-product-thf.mol]

  MacMolPlt                       

127131  0  0  0  0  0  0  0  0  0 v2000
   -2.1039    1.3406    2.8492 C   0  0  0  0  0  0  0  0  0  0  0  0
   -3.3062    0.6455    3.0546 C   0  0  0  0  0  0  0  0  0  0  0  0
   -3.9694   -0.2268    2.1675 C   0  0  0  0  0  0  0  0  0  0  0  0
   -1.7735   -3.4158   -2.5572 C   0  0  0  0  0  0  0  0  0  0  0  0
   -0.3677   -3.5504   -1.9157 C   0  0  0  0  0  0  0  0  0  0  0  0
   -0.1050   -2.1554   -1.3120 C   0  0  0  0  0  0  0  0  0  0  0  0
   -1.4035   -1.5381   -1.2027 O   0  0  0  0  0  0  0  0  0  0  0  0
   -2.1013   -1.9269   -2.4083 C   0  0  0  0  0  0  0  0  0  0  0  0
   -0.2850    2.2287    1.5809 C   0  0  0  0  0  0  0  0  0  0  0  0
   -4.1781   -1.5881    0.2081 C   0  0  0  0  0  0  0  0  0  0  0  0
   -0.5192    3.5926    1.1822 C   0  0  0  0  0  0  0  0  0  0  0  0
    0.6043    4.4059    0.8791 C   0  0  0  0  0  0  0  0  0  0  0  0
    1.9198    3.9233    1.0303 C   0  0  0  0  0  0  0  0  0  0  0  0
    2.1395    2.5998    1.4834 C   0  0  0  0  0  0  0  0  0  0  0  0
    1.0479    1.7312    1.7550 C   0  0  0  0  0  0  0  0  0  0  0  0
   -1.9443    4.2192    1.1871 C   0  0  0  0  0  0  0  0  0  0  0  0
    1.3138    0.2938    2.2735 C   0  0  0  0  0  0  0  0  0  0  0  0
   -3.8884   -2.9558    0.5303 C   0  0  0  0  0  0  0  0  0  0  0  0
   -4.3899   -3.9719   -0.3283 C   0  0  0  0  0  0  0  0  0  0  0  0
   -5.1686   -3.6517   -1.4587 C   0  0  0  0  0  0  0  0  0  0  0  0
   -5.4905   -2.3052   -1.7366 C   0  0  0  0  0  0  0  0  0  0  0  0
   -5.0131   -1.2497   -0.9143 C   0  0  0  0  0  0  0  0  0  0  0  0
   -3.0940   -3.3629    1.8035 C   0  0  0  0  0  0  0  0  0  0  0  0
   -5.4329    0.2186   -1.1917 C   0  0  0  0  0  0  0  0  0  0  0  0
   -2.4870    4.5231   -0.2443 C   0  0  0  0  0  0  0  0  0  0  0  0
   -1.9742    5.5149    2.0691 C   0  0  0  0  0  0  0  0  0  0  0  0
    2.1869   -0.5325    1.2793 C   0  0  0  0  0  0  0  0  0  0  0  0
    1.9848    0.3139    3.6881 C   0  0  0  0  0  0  0  0  0  0  0  0
   -5.4449    0.5668   -2.7103 C   0  0  0  0  0  0  0  0  0  0  0  0
   -6.8272    0.5230   -0.5461 C   0  0  0  0  0  0  0  0  0  0  0  0
   -1.6988   -3.9757    1.4617 C   0  0  0  0  0  0  0  0  0  0  0  0
   -3.9188   -4.3593    2.6881 C   0  0  0  0  0  0  0  0  0  0  0  0
   -1.5882    2.1537    4.0317 C   0  0  0  0  0  0  0  0  0  0  0  0
   -5.2427   -0.8589    2.7250 C   0  0  0  0  0  0  0  0  0  0  0  0
    7.2100   -2.5868    2.1494 O   0  0  0  0  0  0  0  0  0  0  0  0
   -1.9290    0.3691   -0.0971 Mg  0  0  0  0  0  0  0  0  0  0  0  0
    4.1990    0.7925   -1.9638 O   0  0  0  0  0  0  0  0  0  0  0  0
    6.2533   -2.1452    1.3112 C   0  0  0  0  0  0  0  0  0  0  0  0
   -3.5337   -0.5246    0.9492 N   0  0  0  0  0  0  0  0  0  0  0  0
   -1.4152    1.3310    1.7076 N   0  0  0  0  0  0  0  0  0  0  0  0
    5.3504   -2.8214    0.8784 O   0  0  0  0  0  0  0  0  0  0  0  0
    5.6076   -0.2591   -0.0568 O   0  0  0  0  0  0  0  0  0  0  0  0
    5.9549   -0.7164   -1.2767 C   0  0  0  0  0  0  0  0  0  0  0  0
    4.9202   -0.3945   -2.3512 C   0  0  0  0  0  0  0  0  0  0  0  0
    6.4676   -0.6562    1.0214 C   0  0  0  0  0  0  0  0  0  0  0  0
    6.9597   -1.3544   -1.5017 O   0  0  0  0  0  0  0  0  0  0  0  0
    7.1157   -3.9751    2.5171 C   0  0  0  0  0  0  0  0  0  0  0  0
   -2.4008    1.4156   -1.6481 O   0  0  0  0  0  0  0  0  0  0  0  0
    2.9110    0.8778   -2.3767 C   0  0  0  0  0  0  0  0  0  0  0  0
    2.3599    0.0422   -3.0568 O   0  0  0  0  0  0  0  0  0  0  0  0
    0.9695    2.3139   -2.4223 O   0  0  0  0  0  0  0  0  0  0  0  0
   -0.0524    1.6516   -1.8642 C   0  0  0  0  0  0  0  0  0  0  0  0
   -1.4351    2.0082   -2.4135 C   0  0  0  0  0  0  0  0  0  0  0  0
    2.2755    2.1541   -1.8396 C   0  0  0  0  0  0  0  0  0  0  0  0
    0.1006    0.8572   -0.9416 O   0  0  0  0  0  0  0  0  0  0  0  0
   -1.5106    1.6558   -3.9168 C   0  0  0  0  0  0  0  0  0  0  0  0
    3.0523    3.4260   -2.1651 C   0  0  0  0  0  0  0  0  0  0  0  0
    5.5605   -0.2188   -3.7236 C   0  0  0  0  0  0  0  0  0  0  0  0
    6.1151    0.2160    2.2242 C   0  0  0  0  0  0  0  0  0  0  0  0
   -3.7736    0.7758    4.0246 H   0  0  0  0  0  0  0  0  0  0  0  0
   -2.5304   -3.9710   -2.0001 H   0  0  0  0  0  0  0  0  0  0  0  0
   -1.7978   -3.7397   -3.6028 H   0  0  0  0  0  0  0  0  0  0  0  0
    0.4046   -3.8095   -2.6467 H   0  0  0  0  0  0  0  0  0  0  0  0
   -0.3672   -4.3194   -1.1390 H   0  0  0  0  0  0  0  0  0  0  0  0
    0.5276   -1.5430   -1.9644 H   0  0  0  0  0  0  0  0  0  0  0  0
    0.3359   -2.1739   -0.3148 H   0  0  0  0  0  0  0  0  0  0  0  0
   -3.1593   -1.7347   -2.2628 H   0  0  0  0  0  0  0  0  0  0  0  0
   -1.7173   -1.3288   -3.2439 H   0  0  0  0  0  0  0  0  0  0  0  0
    0.4442    5.4495    0.5775 H   0  0  0  0  0  0  0  0  0  0  0  0
    2.7756    4.5908    0.8556 H   0  0  0  0  0  0  0  0  0  0  0  0
    3.1659    2.2531    1.6631 H   0  0  0  0  0  0  0  0  0  0  0  0
   -2.6342    3.4839    1.6438 H   0  0  0  0  0  0  0  0  0  0  0  0
    0.3290   -0.2084    2.3691 H   0  0  0  0  0  0  0  0  0  0  0  0
   -4.1964   -5.0253   -0.0863 H   0  0  0  0  0  0  0  0  0  0  0  0
   -5.5552   -4.4529   -2.1035 H   0  0  0  0  0  0  0  0  0  0  0  0
   -6.1332   -2.0698   -2.5950 H   0  0  0  0  0  0  0  0  0  0  0  0
   -2.9083   -2.4498    2.3996 H   0  0  0  0  0  0  0  0  0  0  0  0
   -4.6867    0.8778   -0.7071 H   0  0  0  0  0  0  0  0  0  0  0  0
   -3.4253    5.0963   -0.1747 H   0  0  0  0  0  0  0  0  0  0  0  0
   -2.7019    3.5740   -0.7655 H   0  0  0  0  0  0  0  0  0  0  0  0
   -1.7618    5.1126   -0.8274 H   0  0  0  0  0  0  0  0  0  0  0  0
   -3.0134    5.8605    2.1789 H   0  0  0  0  0  0  0  0  0  0  0  0
   -1.3902    6.3232    1.6037 H   0  0  0  0  0  0  0  0  0  0  0  0
   -1.5639    5.3236    3.0727 H   0  0  0  0  0  0  0  0  0  0  0  0
    2.2939   -1.5697    1.6348 H   0  0  0  0  0  0  0  0  0  0  0  0
    3.1940   -0.0958    1.1751 H   0  0  0  0  0  0  0  0  0  0  0  0
    1.7242   -0.5404    0.2790 H   0  0  0  0  0  0  0  0  0  0  0  0
    2.1058   -0.7155    4.0590 H   0  0  0  0  0  0  0  0  0  0  0  0
    1.3731    0.8745    4.4120 H   0  0  0  0  0  0  0  0  0  0  0  0
    2.9805    0.7871    3.6403 H   0  0  0  0  0  0  0  0  0  0  0  0
   -5.6326    1.6441   -2.8338 H   0  0  0  0  0  0  0  0  0  0  0  0
   -6.2285    0.0136   -3.2513 H   0  0  0  0  0  0  0  0  0  0  0  0
   -4.4657    0.3355   -3.1602 H   0  0  0  0  0  0  0  0  0  0  0  0
   -7.1059    1.5690   -0.7457 H   0  0  0  0  0  0  0  0  0  0  0  0
   -6.7964    0.3765    0.5453 H   0  0  0  0  0  0  0  0  0  0  0  0
   -7.6057   -0.1337   -0.9659 H   0  0  0  0  0  0  0  0  0  0  0  0
   -1.1890   -4.2980    2.3837 H   0  0  0  0  0  0  0  0  0  0  0  0
   -1.0694   -3.2164    0.9662 H   0  0  0  0  0  0  0  0  0  0  0  0
   -1.8001   -4.8461    0.7937 H   0  0  0  0  0  0  0  0  0  0  0  0
   -3.3967   -4.5277    3.6424 H   0  0  0  0  0  0  0  0  0  0  0  0
   -4.0341   -5.3300    2.1827 H   0  0  0  0  0  0  0  0  0  0  0  0
   -4.9214   -3.9601    2.9042 H   0  0  0  0  0  0  0  0  0  0  0  0
   -1.5848    3.2269    3.8135 H   0  0  0  0  0  0  0  0  0  0  0  0
   -2.2122    1.9932    4.9172 H   0  0  0  0  0  0  0  0  0  0  0  0
   -0.5610    1.8673    4.2836 H   0  0  0  0  0  0  0  0  0  0  0  0
   -5.9217   -1.1990    1.9390 H   0  0  0  0  0  0  0  0  0  0  0  0
   -5.0040   -1.7212    3.3595 H   0  0  0  0  0  0  0  0  0  0  0  0
   -5.7739   -0.1337    3.3528 H   0  0  0  0  0  0  0  0  0  0  0  0
    4.2107   -1.2300   -2.3739 H   0  0  0  0  0  0  0  0  0  0  0  0
    7.5109   -0.5161    0.7257 H   0  0  0  0  0  0  0  0  0  0  0  0
    6.1672   -4.1733    3.0230 H   0  0  0  0  0  0  0  0  0  0  0  0
    7.1869   -4.6076    1.6288 H   0  0  0  0  0  0  0  0  0  0  0  0
    7.9555   -4.1570    3.1877 H   0  0  0  0  0  0  0  0  0  0  0  0
   -1.4691    3.1157   -2.3575 H   0  0  0  0  0  0  0  0  0  0  0  0
    2.1793    2.0704   -0.7508 H   0  0  0  0  0  0  0  0  0  0  0  0
   -0.7736    2.2168   -4.5025 H   0  0  0  0  0  0  0  0  0  0  0  0
   -1.3438    0.5860   -4.0784 H   0  0  0  0  0  0  0  0  0  0  0  0
   -2.5149    1.9026   -4.2741 H   0  0  0  0  0  0  0  0  0  0  0  0
    2.5874    4.2490   -1.6164 H   0  0  0  0  0  0  0  0  0  0  0  0
    4.0912    3.3285   -1.8410 H   0  0  0  0  0  0  0  0  0  0  0  0
    3.0286    3.6418   -3.2376 H   0  0  0  0  0  0  0  0  0  0  0  0
    6.1601   -1.0990   -3.9666 H   0  0  0  0  0  0  0  0  0  0  0  0
    4.7794   -0.0951   -4.4776 H   0  0  0  0  0  0  0  0  0  0  0  0
    6.2137    0.6596   -3.7337 H   0  0  0  0  0  0  0  0  0  0  0  0
    6.2925    1.2682    1.9827 H   0  0  0  0  0  0  0  0  0  0  0  0
    5.0621    0.0928    2.4940 H   0  0  0  0  0  0  0  0  0  0  0  0
    6.7385   -0.0602    3.0789 H   0  0  0  0  0  0  0  0  0  0  0  0
  1  2  1  0  0  0  0
  1 33  1  0  0  0  0
  1 40  1  0  0  0  0
  2  3  1  0  0  0  0
  2 60  1  0  0  0  0
  3 34  1  0  0  0  0
  3 39  1  0  0  0  0
  4  5  1  0  0  0  0
  4  8  1  0  0  0  0
  4 61  1  0  0  0  0
  4 62  1  0  0  0  0
  5  6  1  0  0  0  0
  5 63  1  0  0  0  0
  5 64  1  0  0  0  0
  6  7  1  0  0  0  0
  6 65  1  0  0  0  0
  6 66  1  0  0  0  0
  7  8  1  0  0  0  0
  7 36  1  0  0  0  0
  8 67  1  0  0  0  0
  8 68  1  0  0  0  0
  9 11  1  0  0  0  0
  9 15  1  0  0  0  0
  9 40  1  0  0  0  0
 10 18  1  0  0  0  0
 10 22  1  0  0  0  0
 10 39  1  0  0  0  0
 11 12  1  0  0  0  0
 11 16  1  0  0  0  0
 12 13  1  0  0  0  0
 12 69  1  0  0  0  0
 13 14  1  0  0  0  0
 13 70  1  0  0  0  0
 14 15  1  0  0  0  0
 14 71  1  0  0  0  0
 15 17  1  0  0  0  0
 16 25  1  0  0  0  0
 16 26  1  0  0  0  0
 16 72  1  0  0  0  0
 17 27  1  0  0  0  0
 17 28  1  0  0  0  0
 17 73  1  0  0  0  0
 18 19  1  0  0  0  0
 18 23  1  0  0  0  0
 19 20  1  0  0  0  0
 19 74  1  0  0  0  0
 20 21  1  0  0  0  0
 20 75  1  0  0  0  0
 21 22  1  0  0  0  0
 21 76  1  0  0  0  0
 22 24  1  0  0  0  0
 23 31  1  0  0  0  0
 23 32  1  0  0  0  0
 23 77  1  0  0  0  0
 24 29  1  0  0  0  0
 24 30  1  0  0  0  0
 24 78  1  0  0  0  0
 25 79  1  0  0  0  0
 25 80  1  0  0  0  0
 25 81  1  0  0  0  0
 26 82  1  0  0  0  0
 26 83  1  0  0  0  0
 26 84  1  0  0  0  0
 27 85  1  0  0  0  0
 27 86  1  0  0  0  0
 27 87  1  0  0  0  0
 28 88  1  0  0  0  0
 28 89  1  0  0  0  0
 28 90  1  0  0  0  0
 29 91  1  0  0  0  0
 29 92  1  0  0  0  0
 29 93  1  0  0  0  0
 30 94  1  0  0  0  0
 30 95  1  0  0  0  0
 30 96  1  0  0  0  0
 31 97  1  0  0  0  0
 31 98  1  0  0  0  0
 31 99  1  0  0  0  0
 32100  1  0  0  0  0
 32101  1  0  0  0  0
 32102  1  0  0  0  0
 33103  1  0  0  0  0
 33104  1  0  0  0  0
 33105  1  0  0  0  0
 34106  1  0  0  0  0
 34107  1  0  0  0  0
 34108  1  0  0  0  0
 35 38  1  0  0  0  0
 35 47  1  0  0  0  0
 36 39  1  0  0  0  0
 36 40  1  0  0  0  0
 36 48  2  0  0  0  0
 36 55  1  0  0  0  0
 37 44  1  0  0  0  0
 37 49  1  0  0  0  0
 38 41  2  0  0  0  0
 38 45  1  0  0  0  0
 42 43  1  0  0  0  0
 42 45  1  0  0  0  0
 43 44  1  0  0  0  0
 43 46  2  0  0  0  0
 44 58  1  0  0  0  0
 44109  1  0  0  0  0
 45 59  1  0  0  0  0
 45110  1  0  0  0  0
 47111  1  0  0  0  0
 47112  1  0  0  0  0
 47113  1  0  0  0  0
 48 53  1  0  0  0  0
 49 50  2  0  0  0  0
 49 54  1  0  0  0  0
 51 52  1  0  0  0  0
 51 54  1  0  0  0  0
 52 53  1  0  0  0  0
 52 55  2  0  0  0  0
 53 56  1  0  0  0  0
 53114  1  0  0  0  0
 54 57  1  0  0  0  0
 54115  1  0  0  0  0
 56116  1  0  0  0  0
 56117  1  0  0  0  0
 56118  1  0  0  0  0
 57119  1  0  0  0  0
 57120  1  0  0  0  0
 57121  1  0  0  0  0
 58122  1  0  0  0  0
 58123  1  0  0  0  0
 58124  1  0  0  0  0
 59125  1  0  0  0  0
 59126  1  0  0  0  0
 59127  1  0  0  0  0
M  END
