# Supplementary material
Source: publisher figshare collection journal article supplement (https://acs.figshare.com/ndownloader/files/5127205)
Supplement: Supplementary file 1 [file 5127205 › supporting_ja043819b/RRSS_fm-5-react-solv.log]

 Entering Gaussian System, Link 0=g03
 Input=RRSS_fm-5-react-solv.gjf
 Output=RRSS_fm-5-react-solv.log
 Initial command:
 /usr/local/g03/l1.exe /home/rzepa/Gau-18707.inp -scrdir=/home/rzepa/
 Entering Link 1 = /usr/local/g03/l1.exe PID=     18708.
  
 Copyright (c) 1988,1990,1992,1993,1995,1998,2003, Gaussian, Inc.
                  All Rights Reserved.
  
 This is the Gaussian(R) 03 program.  It is based on the
 the Gaussian(R) 98 system (copyright 1998, Gaussian, Inc.),
 the Gaussian(R) 94 system (copyright 1995, Gaussian, Inc.),
 the Gaussian 92(TM) system (copyright 1992, Gaussian, Inc.),
 the Gaussian 90(TM) system (copyright 1990, Gaussian, Inc.),
 the Gaussian 88(TM) system (copyright 1988, Gaussian, Inc.),
 the Gaussian 86(TM) system (copyright 1986, Carnegie Mellon
 University), and the Gaussian 82(TM) system (copyright 1983,
 Carnegie Mellon University). Gaussian is a federally registered
 trademark of Gaussian, Inc.
  
 This software contains proprietary and confidential information,
 including trade secrets, belonging to Gaussian, Inc.
  
 This software is provided under written license and may be
 used, copied, transmitted, or stored only in accord with that
 written license.
  
 The following legend is applicable only to US Government
 contracts under DFARS:
  
                    RESTRICTED RIGHTS LEGEND
  
 Use, duplication or disclosure by the US Government is subject
 to restrictions as set forth in subparagraph (c)(1)(ii) of the
 Rights in Technical Data and Computer Software clause at DFARS
 252.227-7013.
  
 Gaussian, Inc.
 Carnegie Office Park, Building 6, Pittsburgh, PA 15106 USA
  
 The following legend is applicable only to US Government
 contracts under FAR:
  
                    RESTRICTED RIGHTS LEGEND
  
 Use, reproduction and disclosure by the US Government is subject
 to restrictions as set forth in subparagraph (c) of the
 Commercial Computer Software - Restricted Rights clause at FAR
 52.227-19.
  
 Gaussian, Inc.
 Carnegie Office Park, Building 6, Pittsburgh, PA 15106 USA
  
  
 ---------------------------------------------------------------
 Warning -- This program may not be used in any manner that
 competes with the business of Gaussian, Inc. or will provide
 assistance to any competitor of Gaussian, Inc.  The licensee
 of this program is prohibited from giving any competitor of
 Gaussian, Inc. access to this program.  By using this program,
 the user acknowledges that Gaussian, Inc. is engaged in the
 business of creating and licensing software in the field of
 computational chemistry and represents and warrants to the
 licensee that it is not a competitor of Gaussian, Inc. and that
 it will not use this program in any manner prohibited above.
 ---------------------------------------------------------------
  

 Cite this work as:
 Gaussian 03, Revision B.04,
 M. J. Frisch, G. W. Trucks, H. B. Schlegel, G. E. Scuseria, 
 M. A. Robb, J. R. Cheeseman, J. A. Montgomery, Jr., T. Vreven, 
 K. N. Kudin, J. C. Burant, J. M. Millam, S. S. Iyengar, J. Tomasi, 
 V. Barone, B. Mennucci, M. Cossi, G. Scalmani, N. Rega, 
 G. A. Petersson, H. Nakatsuji, M. Hada, M. Ehara, K. Toyota, 
 R. Fukuda, J. Hasegawa, M. Ishida, T. Nakajima, Y. Honda, O. Kitao, 
 H. Nakai, M. Klene, X. Li, J. E. Knox, H. P. Hratchian, J. B. Cross, 
 C. Adamo, J. Jaramillo, R. Gomperts, R. E. Stratmann, O. Yazyev, 
 A. J. Austin, R. Cammi, C. Pomelli, J. W. Ochterski, P. Y. Ayala, 
 K. Morokuma, G. A. Voth, P. Salvador, J. J. Dannenberg, 
 V. G. Zakrzewski, S. Dapprich, A. D. Daniels, M. C. Strain, 
 O. Farkas, D. K. Malick, A. D. Rabuck, K. Raghavachari, 
 J. B. Foresman, J. V. Ortiz, Q. Cui, A. G. Baboul, S. Clifford, 
 J. Cioslowski, B. B. Stefanov, G. Liu, A. Liashenko, P. Piskorz, 
 I. Komaromi, R. L. Martin, D. J. Fox, T. Keith, M. A. Al-Laham, 
 C. Y. Peng, A. Nanayakkara, M. Challacombe, P. M. W. Gill, 
 B. Johnson, W. Chen, M. W. Wong, C. Gonzalez, and J. A. Pople, 
 Gaussian, Inc., Pittsburgh PA, 2003.
 
 *********************************************
 Gaussian 03:  x86-Linux-G03RevB.04 2-Jun-2003
                  22-Nov-2004 
 *********************************************
 %mem=500MB
 %nproc=2
 Will use up to    2 processors via shared memory.
 %chk=RRSS_fm-5-react.chk
 %rwf=re1.rwf,1800MB,re2.rwf,1800MB,re3.rwf,1800MB,re4.rwf,1800MB,re5.rwf,1800MB
 ------------------------------------
 # b3lyp/Gen scrf(IEFPCM,solvent=thf)
 ------------------------------------
 1/38=1/1;
 2/17=6,18=5,40=1/2;
 3/5=7,11=2,16=1,25=1,30=1,70=2201,72=20,74=-5/1,2,3;
 4//1;
 5/5=2,32=1,38=5,53=20/2;
 6/7=2,8=2,9=2,10=2,28=1/1;
 99/5=1,9=1/99;
 ----------------
 from RRSS_fm.gjf
 ----------------
 Symbolic Z-matrix:
 Charge =  0 Multiplicity = 1
 O                    0     4.77812   0.90382  -1.88547 
 Mg                   0    -0.49041  -0.68707   0.45332 
 O                    0    -0.06119   0.07829   2.16799 
 C                    0     4.19491   1.39774  -0.77355 
 N                    0    -0.06936  -2.671     0.002 
 N                    0    -2.52735  -1.13547   0.14085 
 O                    0     3.71641   2.5077   -0.69521 
 C                    0    -0.92119  -3.68212  -0.13661 
 C                    0    -2.31795  -3.54382  -0.04863 
 C                    0    -3.06219  -2.35152   0.05583 
 O                    0     3.37974   0.70692   1.41075 
 C                    0     2.08625   0.4022    1.221 
 C                    0     1.18813   0.55384   2.45236 
 C                    0     4.29461   0.37391   0.35059 
 O                    0     1.66172  -0.02711   0.15419 
 C                    0     4.77851   1.77095  -3.02977 
 O                    0     0.6913    2.8006   -0.52646 
 C                    0    -0.56604   2.38328  -0.45275 
 O                    0    -0.82023   1.20223  -0.62439 
 O                    0    -1.19151   4.53516   0.5687 
 C                    0     0.03713   5.04879   0.36169 
 C                    0     1.06146   4.19661  -0.37764 
 C                    0    -1.65865   3.40532  -0.20484 
 O                    0     0.33504   6.1397    0.78287 
 C                    0     1.44238   4.78047  -1.73631 
 C                    0    -2.30633   3.86268  -1.51659 
 C                    0     1.19766   2.0117    2.96194 
 C                    0     5.6915    0.37246   0.96972 
 C                    0     1.35573  -2.92038  -0.00536 
 C                    0    -3.40667   0.0036   -0.01099 
 C                    0     2.00597  -3.29335   1.22487 
 C                    0     3.42122  -3.28981   1.25701 
 C                    0     4.18009  -2.99139   0.10262 
 C                    0     3.52672  -2.69719  -1.11649 
 C                    0     2.10937  -2.64685  -1.18914 
 C                    0     1.20157  -3.77288   2.46684 
 C                    0     1.40871  -2.3347   -2.5364 
 C                    0    -3.87056   0.36631  -1.32259 
 C                    0    -4.68357   1.52339  -1.45889 
 C                    0    -5.00476   2.3239   -0.34093 
 C                    0    -4.52872   1.97022   0.94158 
 C                    0    -3.73786   0.80131   1.13576 
 C                    0    -3.50406  -0.45934  -2.58749 
 C                    0    -3.32773   0.37466   2.57015 
 C                    0     1.24114  -2.75145   3.64612 
 C                    0     1.69978  -5.18147   2.93954 
 C                    0     1.75464  -0.90551  -3.06152 
 C                    0     1.75671  -3.41718  -3.61309 
 C                    0    -2.77729   1.56687   3.41017 
 C                    0    -4.52975  -0.30693   3.30833 
 C                    0    -2.45058   0.29394  -3.46288 
 C                    0    -4.76417  -0.81623  -3.4459 
 C                    0    -0.38791  -5.07822  -0.43153 
 C                    0    -4.57818  -2.52376   0.01248 
 H                    0    -2.89433  -4.45839  -0.12996 
 H                    0     1.70581  -0.04518   3.23039 
 H                    0     4.05667  -0.61966  -0.03961 
 H                    0     5.20774   2.7443   -2.77944 
 H                    0     3.75755   1.90791  -3.39708 
 H                    0     5.38559   1.26538  -3.78155 
 H                    0     1.95308   4.15859   0.25018 
 H                    0    -2.43931   2.93643   0.40017 
 H                    0     1.78651   5.80883  -1.59525 
 H                    0     0.59486   4.78571  -2.42917 
 H                    0     2.25378   4.18348  -2.15787 
 H                    0    -2.92007   4.74361  -1.30413 
 H                    0    -2.96645   3.06309  -1.85445 
 H                    0    -1.57625   4.12039  -2.29039 
 H                    0     2.21084   2.36499   3.18488 
 H                    0     0.5937    2.06234   3.87246 
 H                    0     0.74153   2.68018   2.22459 
 H                    0     5.74193  -0.39962   1.74299 
 H                    0     5.91875   1.34204   1.42394 
 H                    0     6.44112   0.15263   0.2038 
 H                    0     3.93928  -3.56896   2.18411 
 H                    0     5.27739  -3.03964   0.1376 
 H                    0     4.12403  -2.52395  -2.02161 
 H                    0     0.14153  -3.87435   2.16517 
 H                    0     0.31485  -2.37425  -2.35853 
 H                    0    -5.09366   1.78342  -2.44338 
 H                    0    -5.6461    3.20789  -0.46419 
 H                    0    -4.81749   2.57532   1.81092 
 H                    0    -3.038    -1.40655  -2.25615 
 H                    0    -2.51636  -0.37309   2.48221 
 H                    0     0.76776  -3.19002   4.53901 
 H                    0     0.67421  -1.84656   3.36555 
 H                    0     2.27735  -2.47752   3.89961 
 H                    0     1.03675  -5.56009   3.73233 
 H                    0     2.72177  -5.12425   3.34359 
 H                    0     1.69486  -5.90314   2.10795 
 H                    0     1.23179  -0.71853  -4.013 
 H                    0     2.83783  -0.79825  -3.22755 
 H                    0     1.44071  -0.1423   -2.3268 
 H                    0     1.18941  -3.22234  -4.53609 
 H                    0     1.49712  -4.4243   -3.2517 
 H                    0     2.83031  -3.39971  -3.8557 
 H                    0    -2.39661   1.1897    4.37149 
 H                    0    -3.55639   2.31789   3.61435 
 H                    0    -1.94242   2.05458   2.88009 
 H                    0    -4.21739  -0.6054    4.32064 
 H                    0    -4.86305  -1.20864   2.77065 
 H                    0    -5.3821    0.38544   3.39396 
 H                    0    -2.19694  -0.30842  -4.34962 
 H                    0    -1.52818   0.46888  -2.87982 
 H                    0    -2.84146   1.26693  -3.80027 
 H                    0    -4.47588  -1.50542  -4.25424 
 H                    0    -5.20073   0.08464  -3.90297 
 H                    0    -5.53761  -1.30361  -2.83306 
 H                    0     0.27277  -5.43991   0.36364 
 H                    0    -1.20738  -5.79612  -0.54324 
 H                    0     0.19105  -5.07686  -1.36354 
 H                    0    -5.08978  -1.81896   0.67466 
 H                    0    -4.96689  -2.36876  -1.00096 
 H                    0    -4.85276  -3.5406    0.31455 
 
 Stoichiometry    C42H60MgN2O9
 Framework group  C1[X(C42H60MgN2O9)]
 Deg. of freedom   336
 Full point group                 C1      NOp   1
 Largest Abelian subgroup         C1      NOp   1
 Largest concise Abelian subgroup C1      NOp   1
                         Standard orientation:                         
 ---------------------------------------------------------------------
 Center     Atomic     Atomic              Coordinates (Angstroms)
 Number     Number      Type              X           Y           Z
 ---------------------------------------------------------------------
    1          8             0       -4.040058    2.876285    1.614688
    2         12             0        0.182469   -0.868058   -0.362280
    3          8             0        0.068809   -0.188446   -2.160978
    4          6             0       -3.320342    2.982585    0.478395
    5          7             0       -0.969939   -2.474106    0.277664
    6          7             0        1.889575   -2.030235    0.065475
    7          8             0       -2.450165    3.806460    0.301893
    8          6             0       -0.574769   -3.713824    0.549927
    9          6             0        0.765864   -4.135312    0.496547
   10          6             0        1.912709   -3.341328    0.294752
   11          8             0       -2.854189    1.796970   -1.592819
   12          6             0       -1.777956    1.039724   -1.327735
   13          6             0       -0.901361    0.697961   -2.536306
   14          6             0       -3.817853    1.960343   -0.536173
   15          8             0       -1.543897    0.599111   -0.208053
   16          6             0       -3.695322    3.795765    2.662095
   17          8             0        0.451002    2.889888    0.208626
   18          6             0        1.448144    2.014672    0.222264
   19          8             0        1.226774    0.853313    0.524281
   20          8             0        2.849327    3.633548   -0.994732
   21          6             0        1.917026    4.600492   -0.884867
   22          6             0        0.648838    4.295398   -0.097036
   23          6             0        2.849090    2.502678   -0.092367
   24          8             0        2.061127    5.668884   -1.427084
   25          6             0        0.534842    5.125471    1.179665
   26          6             0        3.634132    2.815102    1.186485
   27          6             0       -0.350058    1.981703   -3.194488
   28          6             0       -5.111479    2.430097   -1.199864
   29          6             0       -2.380351   -2.152256    0.261470
   30          6             0        3.142475   -1.309136    0.128646
   31          6             0       -3.134415   -2.377476   -0.945204
   32          6             0       -4.438187   -1.832009   -1.026581
   33          6             0       -5.012827   -1.140013    0.063593
   34          6             0       -4.286461   -0.989369    1.267492
   35          6             0       -2.959559   -1.481863    1.383616
   36          6             0       -2.588629   -3.262524   -2.102050
   37          6             0       -2.181587   -1.319034    2.714671
   38          6             0        3.721425   -1.012579    1.410802
   39          6             0        4.920024   -0.251102    1.454364
   40          6             0        5.516784    0.236471    0.271159
   41          6             0        4.930376   -0.043953   -0.983439
   42          6             0        3.747133   -0.831132   -1.082536
   43          6             0        3.074376   -1.489669    2.741100
   44          6             0        3.191990   -1.220398   -2.478243
   45          6             0       -2.239492   -2.440136   -3.381644
   46          6             0       -3.597114   -4.412532   -2.442971
   47          6             0       -1.942997    0.181072    3.076298
   48          6             0       -2.912542   -2.059108    3.885196
   49          6             0        3.139000   -0.007519   -3.456048
   50          6             0        4.030338   -2.388914   -3.099565
   51          6             0        2.401865   -0.297769    3.496519
   52          6             0        4.105164   -2.208879    3.675087
   53          6             0       -1.604411   -4.755090    0.969509
   54          6             0        3.244153   -4.078971    0.408278
   55          1             0        0.943963   -5.186606    0.692302
   56          1             0       -1.616965    0.263866   -3.265432
   57          1             0       -3.979825    1.000872   -0.036935
   58          1             0       -3.716383    4.825731    2.297346
   59          1             0       -2.697932    3.567635    3.048376
   60          1             0       -4.444528    3.648698    3.440787
   61          1             0       -0.193153    4.535865   -0.748044
   62          1             0        3.382380    1.706045   -0.618008
   63          1             0        0.614441    6.184944    0.920778
   64          1             0        1.324021    4.879070    1.897204
   65          1             0       -0.440872    4.937400    1.632527
   66          1             0        4.539239    3.362353    0.905134
   67          1             0        3.936064    1.864855    1.628201
   68          1             0        3.067143    3.417180    1.903578
   69          1             0       -1.149317    2.671740   -3.487876
   70          1             0        0.218868    1.695846   -4.083854
   71          1             0        0.335342    2.498728   -2.515135
   72          1             0       -5.463223    1.657788   -1.890097
   73          1             0       -4.949464    3.356481   -1.759873
   74          1             0       -5.881401    2.601331   -0.441717
   75          1             0       -5.031562   -1.989169   -1.937095
   76          1             0       -6.043518   -0.764910   -0.004211
   77          1             0       -4.762654   -0.501560    2.128491
   78          1             0       -1.648044   -3.731333   -1.754909
   79          1             0       -1.189813   -1.796480    2.579902
   80          1             0        5.406926   -0.063569    2.420170
   81          1             0        6.451300    0.812517    0.324151
   82          1             0        5.423655    0.304213   -1.900353
   83          1             0        2.275280   -2.213934    2.493919
   84          1             0        2.155189   -1.583007   -2.341336
   85          1             0       -1.980169   -3.121913   -4.207234
   86          1             0       -1.364203   -1.799080   -3.177036
   87          1             0       -3.090956   -1.817261   -3.697973
   88          1             0       -3.138902   -5.101596   -3.168719
   89          1             0       -4.520592   -4.010117   -2.885960
   90          1             0       -3.865043   -4.984869   -1.541294
   91          1             0       -1.380679    0.254593    4.020779
   92          1             0       -2.898820    0.715142    3.192643
   93          1             0       -1.364198    0.679084    2.277652
   94          1             0       -2.306437   -1.998629    4.802089
   95          1             0       -3.066017   -3.121355    3.639517
   96          1             0       -3.893647   -1.602641    4.087319
   97          1             0        2.634077   -0.311189   -4.385642
   98          1             0        4.146356    0.357847   -3.709953
   99          1             0        2.562403    0.819091   -3.008718
  100          1             0        3.618446   -2.652398   -4.085648
  101          1             0        3.993057   -3.284906   -2.459968
  102          1             0        5.083508   -2.092596   -3.227000
  103          1             0        1.942177   -0.655078    4.431668
  104          1             0        1.614297    0.154565    2.866829
  105          1             0        3.141660    0.479761    3.744443
  106          1             0        3.579267   -2.640927    4.540111
  107          1             0        4.860151   -1.501977    4.051039
  108          1             0        4.624564   -3.020529    3.143328
  109          1             0       -2.360142   -4.918481    0.193752
  110          1             0       -1.125810   -5.716632    1.183476
  111          1             0       -2.129997   -4.428889    1.875706
  112          1             0        3.983192   -3.702781   -0.305357
  113          1             0        3.670924   -3.976259    1.413012
  114          1             0        3.101238   -5.149427    0.223081
 ---------------------------------------------------------------------
 Rotational constants (GHZ):      0.0633029      0.0544819      0.0417979
 General basis read from cards:  (5D, 7F)
 There are   642 symmetry adapted basis functions of A   symmetry.
 Integral buffers will be    262144 words long.
 Raffenetti 2 integral format.
 Two-electron integral symmetry is turned on.
   642 basis functions,  1430 primitive gaussians,   674 cartesian basis functions
   205 alpha electrons      205 beta electrons
       nuclear repulsion energy      9054.4489039688 Hartrees.
 NAtoms=  114 NActive=  114 NUniq=  114 SFac= 1.00D+00 NAtFMM=   60 Big=T
 ------------------------------------------------------------------------------
 United Atom Topological Model (UA0  parameters set).
  Nord Group  Hybr  Charge Alpha Radius          Bonded to
    1   O     *     0.00   1.00  1.750   C4   [s]  C16  [s]
    2  Mg     *     0.00   1.00  1.511   O3   [d]  N5   [s]  N6   [s]  O15  [s]
                                         O19  [s]
    3   O     *     0.00   1.00  1.750  Mg2   [d]  C13  [s]
    4   C     *     0.00   1.00  1.925   O1   [s]  O7   [d]  C14  [s]
    5   N     *     0.00   1.00  1.830  Mg2   [s]  C8   [d]  C29  [s]
    6   N     *     0.00   1.00  1.830  Mg2   [s]  C10  [d]  C30  [s]
    7   O     *     0.00   1.00  1.750   C4   [d]
    8   C     *     0.00   1.00  1.925   N5   [d]  C9   [s]  C53  [s]
    9   CH    *     0.00   1.00  2.125   C8   [s]  C10  [s]
   10   C     *     0.00   1.00  1.925   N6   [d]  C9   [s]  C54  [s]
   11   O     *     0.00   1.00  1.750   C12  [s]  C14  [s]
   12   C     *     0.00   1.00  1.925   O11  [s]  C13  [s]  O15  [d]
   13   CH    *     0.00   1.00  2.125   O3   [s]  C12  [s]  C27  [s]
   14   CH    *     0.00   1.00  2.125   C4   [s]  O11  [s]  C28  [s]
   15   O     *     0.00   1.00  1.750  Mg2   [s]  C12  [d]
   16   CH3   *     0.00   1.00  2.525   O1   [s]
   17   O     *     0.00   1.00  1.750   C18  [s]  C22  [s]
   18   C     *     0.00   1.00  1.925   O17  [s]  O19  [d]  C23  [s]
   19   O     *     0.00   1.00  1.750  Mg2   [s]  C18  [d]
   20   O     *     0.00   1.00  1.750   C21  [s]  C23  [s]
   21   C     *     0.00   1.00  1.925   O20  [s]  C22  [s]  O24  [d]
   22   CH    *     0.00   1.00  2.125   O17  [s]  C21  [s]  C25  [s]
   23   CH    *     0.00   1.00  2.125   C18  [s]  O20  [s]  C26  [s]
   24   O     *     0.00   1.00  1.750   C21  [d]
   25   CH3   *     0.00   1.00  2.525   C22  [s]
   26   CH3   *     0.00   1.00  2.525   C23  [s]
   27   CH3   *     0.00   1.00  2.525   C13  [s]
   28   CH3   *     0.00   1.00  2.525   C14  [s]
   29   C     *     0.00   1.00  1.925   N5   [s]  C31  [s]  C35  [s]
   30   C     *     0.00   1.00  1.925   N6   [s]  C38  [s]  C42  [s]
   31   C     *     0.00   1.00  1.925   C29  [s]  C32  [s]  C36  [s]
   32   CH    *     0.00   1.00  2.125   C31  [s]  C33  [s]
   33   CH    *     0.00   1.00  2.125   C32  [s]  C34  [s]
   34   CH    *     0.00   1.00  2.125   C33  [s]  C35  [s]
   35   C     *     0.00   1.00  1.925   C29  [s]  C34  [s]  C37  [s]
   36   CH    *     0.00   1.00  2.125   C31  [s]  C45  [s]  C46  [s]
   37   CH    *     0.00   1.00  2.125   C35  [s]  C47  [s]  C48  [s]
   38   C     *     0.00   1.00  1.925   C30  [s]  C39  [s]  C43  [s]
   39   CH    *     0.00   1.00  2.125   C38  [s]  C40  [s]
   40   CH    *     0.00   1.00  2.125   C39  [s]  C41  [s]
   41   CH    *     0.00   1.00  2.125   C40  [s]  C42  [s]
   42   C     *     0.00   1.00  1.925   C30  [s]  C41  [s]  C44  [s]
   43   CH    *     0.00   1.00  2.125   C38  [s]  C51  [s]  C52  [s]
   44   CH    *     0.00   1.00  2.125   C42  [s]  C49  [s]  C50  [s]
   45   CH3   *     0.00   1.00  2.525   C36  [s]
   46   CH3   *     0.00   1.00  2.525   C36  [s]
   47   CH3   *     0.00   1.00  2.525   C37  [s]
   48   CH3   *     0.00   1.00  2.525   C37  [s]
   49   CH3   *     0.00   1.00  2.525   C44  [s]
   50   CH3   *     0.00   1.00  2.525   C44  [s]
   51   CH3   *     0.00   1.00  2.525   C43  [s]
   52   CH3   *     0.00   1.00  2.525   C43  [s]
   53   CH3   *     0.00   1.00  2.525   C8   [s]
   54   CH3   *     0.00   1.00  2.525   C10  [s]
 ------------------------------------------------------------------------------
 Polarizable Continuum Model (PCM)
 =================================
 Model                : PCM.
 Atomic radii         : UA0 (Simple United Atom Topological Model).
 Polarization charges : Total charges.
 Charge compensation  : None.
 Solution method      : Matrix inversion.
 Cavity               : GePol (RMin=0.200 OFac=0.890).
                        Default sphere list used, NSphG=   54.
                        Tesserae with average area of 0.200 Ang**2.
 Solvent              : THF, Eps=   7.580000.
 ------------------------------------------------------------------------------
 DisRep: Neglecting contributions from atom    2
 One-electron integrals computed using PRISM.
 NBasis=   642 RedAO= T  NBF=   642
 NBsUse=   642 1.00D-06 NBFU=   642
 Harris functional with IExCor=  402 diagonalized for initial guess.
 ExpMin= 3.48D-02 ExpMax= 4.39D+04 ExpMxC= 1.51D+03 IAcc=3 IRadAn=         5 AccDes= 0.00D+00
 HarFok:  IExCor= 402 AccDes= 0.00D+00 IRadAn=         5 IDoV=1
 ScaDFX=  1.000000  1.000000  1.000000  1.000000
 Initial guess orbital symmetries:
       Occupied  (A) (A) (A) (A) (A) (A) (A) (A) (A) (A) (A) (A)
                 (A) (A) (A) (A) (A) (A) (A) (A) (A) (A) (A) (A)
                 (A) (A) (A) (A) (A) (A) (A) (A) (A) (A) (A) (A)
                 (A) (A) (A) (A) (A) (A) (A) (A) (A) (A) (A) (A)
                 (A) (A) (A) (A) (A) (A) (A) (A) (A) (A) (A) (A)
                 (A) (A) (A) (A) (A) (A) (A) (A) (A) (A) (A) (A)
                 (A) (A) (A) (A) (A) (A) (A) (A) (A) (A) (A) (A)
                 (A) (A) (A) (A) (A) (A) (A) (A) (A) (A) (A) (A)
                 (A) (A) (A) (A) (A) (A) (A) (A) (A) (A) (A) (A)
                 (A) (A) (A) (A) (A) (A) (A) (A) (A) (A) (A) (A)
                 (A) (A) (A) (A) (A) (A) (A) (A) (A) (A) (A) (A)
                 (A) (A) (A) (A) (A) (A) (A) (A) (A) (A) (A) (A)
                 (A) (A) (A) (A) (A) (A) (A) (A) (A) (A) (A) (A)
                 (A) (A) (A) (A) (A) (A) (A) (A) (A) (A) (A) (A)
                 (A) (A) (A) (A) (A) (A) (A) (A) (A) (A) (A) (A)
                 (A) (A) (A) (A) (A) (A) (A) (A) (A) (A) (A) (A)
                 (A) (A) (A) (A) (A) (A) (A) (A) (A) (A) (A) (A)
                 (A)
       Virtual   (A) (A) (A) (A) (A) (A) (A) (A) (A) (A) (A) (A)
                 (A) (A) (A) (A) (A) (A) (A) (A) (A) (A) (A) (A)
                 (A) (A) (A) (A) (A) (A) (A) (A) (A) (A) (A) (A)
                 (A) (A) (A) (A) (A) (A) (A) (A) (A) (A) (A) (A)
                 (A) (A) (A) (A) (A) (A) (A) (A) (A) (A) (A) (A)
                 (A) (A) (A) (A) (A) (A) (A) (A) (A) (A) (A) (A)
                 (A) (A) (A) (A) (A) (A) (A) (A) (A) (A) (A) (A)
                 (A) (A) (A) (A) (A) (A) (A) (A) (A) (A) (A) (A)
                 (A) (A) (A) (A) (A) (A) (A) (A) (A) (A) (A) (A)
                 (A) (A) (A) (A) (A) (A) (A) (A) (A) (A) (A) (A)
                 (A) (A) (A) (A) (A) (A) (A) (A) (A) (A) (A) (A)
                 (A) (A) (A) (A) (A) (A) (A) (A) (A) (A) (A) (A)
                 (A) (A) (A) (A) (A) (A) (A) (A) (A) (A) (A) (A)
                 (A) (A) (A) (A) (A) (A) (A) (A) (A) (A) (A) (A)
                 (A) (A) (A) (A) (A) (A) (A) (A) (A) (A) (A) (A)
                 (A) (A) (A) (A) (A) (A) (A) (A) (A) (A) (A) (A)
                 (A) (A) (A) (A) (A) (A) (A) (A) (A) (A) (A) (A)
                 (A) (A) (A) (A) (A) (A) (A) (A) (A) (A) (A) (A)
                 (A) (A) (A) (A) (A) (A) (A) (A) (A) (A) (A) (A)
                 (A) (A) (A) (A) (A) (A) (A) (A) (A) (A) (A) (A)
                 (A) (A) (A) (A) (A) (A) (A) (A) (A) (A) (A) (A)
                 (A) (A) (A) (A) (A) (A) (A) (A) (A) (A) (A) (A)
                 (A) (A) (A) (A) (A) (A) (A) (A) (A) (A) (A) (A)
                 (A) (A) (A) (A) (A) (A) (A) (A) (A) (A) (A) (A)
                 (A) (A) (A) (A) (A) (A) (A) (A) (A) (A) (A) (A)
                 (A) (A) (A) (A) (A) (A) (A) (A) (A) (A) (A) (A)
                 (A) (A) (A) (A) (A) (A) (A) (A) (A) (A) (A) (A)
                 (A) (A) (A) (A) (A) (A) (A) (A) (A) (A) (A) (A)
                 (A) (A) (A) (A) (A) (A) (A) (A) (A) (A) (A) (A)
                 (A) (A) (A) (A) (A) (A) (A) (A) (A) (A) (A) (A)
                 (A) (A) (A) (A) (A) (A) (A) (A) (A) (A) (A) (A)
                 (A) (A) (A) (A) (A) (A) (A) (A) (A) (A) (A) (A)
                 (A) (A) (A) (A) (A) (A) (A) (A) (A) (A) (A) (A)
                 (A) (A) (A) (A) (A) (A) (A) (A) (A) (A) (A) (A)
                 (A) (A) (A) (A) (A) (A) (A) (A) (A) (A) (A) (A)
                 (A) (A) (A) (A) (A) (A) (A) (A) (A) (A) (A) (A)
                 (A) (A) (A) (A) (A)
 The electronic state of the initial guess is 1-A.
 Requested convergence on RMS density matrix=1.00D-04 within 128 cycles.
 Requested convergence on MAX density matrix=1.00D-02.
 Requested convergence on             energy=1.00D-02.
 No special actions if energy rises.
 Error on total polarization charges =  0.00752
 SCF Done:  E(RB+HF-LYP) =  -2612.21898541     A.U. after    8 cycles
             Convg  =    0.1951D-04             -V/T =  2.0106
             S**2   =   0.0000
 --------------------------------------------------------------------
 Variational PCM results
 =======================
 <psi(f)|   H    |psi(f)>                     (a.u.) =   -2612.205910
 <psi(f)|H+V(f)/2|psi(f)>                     (a.u.) =   -2612.218985
 Total free energy in solution:
  with all non electrostatic terms            (a.u.) =   -2612.155852
 --------------------------------------------------------------------
 (Polarized solute)-Solvent               (kcal/mol) =      -8.20
 --------------------------------------------------------------------
 Cavitation energy                        (kcal/mol) =      75.26
 Dispersion energy                        (kcal/mol) =     -36.85
 Repulsion energy                         (kcal/mol) =       1.21
 Total non electrostatic                  (kcal/mol) =      39.62
 --------------------------------------------------------------------
 Partition over spheres:
 Sphere  on Atom  Surface  Charge   GEl     GCav    GDR
    1      O1       0.00   0.000    0.00    0.32    0.00
    2     Mg2       0.00   0.000    0.00    0.24    0.00
    3      O3       0.00   0.000    0.00    0.48    0.00
    4      C4       0.00   0.000    0.00    0.12    0.00
    5      N5       0.00   0.000    0.00    0.33    0.00
    6      N6       0.00   0.000    0.00    0.31    0.00
    7      O7       2.41   0.023   -0.25    1.05   -0.29
    8      C8       0.00   0.000    0.00    0.13    0.00
    9      C9       3.90   0.003   -0.17    1.43   -0.36
   10      C10      0.00   0.000    0.00    0.12    0.00
   11      O11      0.00   0.000    0.00    0.46    0.00
   12      C12      0.00   0.000    0.00    0.14    0.00
   13      C13      0.00   0.000    0.00    0.31    0.00
   14      C14      0.00   0.000    0.00    0.05    0.00
   15      O15      0.00   0.000    0.00    0.19    0.00
   16      C16     33.65  -0.066   -0.47    4.75   -2.38
   17      O17      0.00   0.000    0.00    0.34    0.00
   18      C18      0.00   0.000    0.00    0.19    0.00
   19      O19      0.00   0.000    0.00    0.40    0.00
   20      O20      3.19   0.021   -0.30    0.95   -0.38
   21      C21      0.00   0.000    0.00    0.36    0.00
   22      C22      0.74  -0.009   -0.03    0.48   -0.09
   23      C23      0.00   0.000    0.00    0.26    0.00
   24      O24     13.94   0.119   -2.28    2.22   -1.65
   25      C25     25.22  -0.041   -0.13    4.04   -1.95
   26      C26     22.22  -0.029   -0.12    3.01   -1.66
   27      C27     21.63   0.007   -0.06    3.67   -1.73
   28      C28     34.45  -0.038   -0.14    4.61   -2.58
   29      C29      0.00   0.000    0.00    0.05    0.00
   30      C30      0.00   0.000    0.00    0.02    0.00
   31      C31      0.00   0.000    0.00    0.04    0.00
   32      C32      4.29  -0.015   -0.16    1.30   -0.50
   33      C33      9.28  -0.021   -0.28    1.43   -1.14
   34      C34      4.53  -0.007   -0.09    1.15   -0.49
   35      C35      0.00   0.000    0.00    0.04    0.00
   36      C36      0.00   0.000    0.00    0.17    0.00
   37      C37      0.00   0.000    0.00    0.25    0.00
   38      C38      0.00   0.000    0.00    0.01    0.00
   39      C39      6.40  -0.015   -0.20    1.05   -0.52
   40      C40     13.84  -0.028   -0.35    1.56   -1.39
   41      C41      7.23  -0.021   -0.22    1.16   -0.65
   42      C42      0.00   0.000    0.00    0.06    0.00
   43      C43      0.00   0.000    0.00    0.19    0.00
   44      C44      0.00   0.000    0.00    0.23    0.00
   45      C45     19.08   0.001   -0.05    3.65   -1.68
   46      C46     30.60  -0.011   -0.04    3.97   -2.38
   47      C47      6.90  -0.002   -0.01    2.63   -0.57
   48      C48     31.85  -0.011   -0.07    4.07   -2.28
   49      C49     18.94  -0.003   -0.04    3.24   -1.58
   50      C50     29.41  -0.007   -0.03    3.94   -2.11
   51      C51     15.09  -0.007   -0.05    3.15   -1.17
   52      C52     31.92  -0.014   -0.09    3.93   -2.36
   53      C53     23.94   0.002   -0.03    3.60   -1.90
   54      C54     22.19   0.000   -0.02    3.43   -1.84
 Added spheres:   223.33   0.162   -2.52    0.00    0.00
 --------------------------------------------------------------------

 **********************************************************************

            Population analysis using the SCF density.

 **********************************************************************

 Orbital symmetries:
       Occupied  (A) (A) (A) (A) (A) (A) (A) (A) (A) (A) (A) (A)
                 (A) (A) (A) (A) (A) (A) (A) (A) (A) (A) (A) (A)
                 (A) (A) (A) (A) (A) (A) (A) (A) (A) (A) (A) (A)
                 (A) (A) (A) (A) (A) (A) (A) (A) (A) (A) (A) (A)
                 (A) (A) (A) (A) (A) (A) (A) (A) (A) (A) (A) (A)
                 (A) (A) (A) (A) (A) (A) (A) (A) (A) (A) (A) (A)
                 (A) (A) (A) (A) (A) (A) (A) (A) (A) (A) (A) (A)
                 (A) (A) (A) (A) (A) (A) (A) (A) (A) (A) (A) (A)
                 (A) (A) (A) (A) (A) (A) (A) (A) (A) (A) (A) (A)
                 (A) (A) (A) (A) (A) (A) (A) (A) (A) (A) (A) (A)
                 (A) (A) (A) (A) (A) (A) (A) (A) (A) (A) (A) (A)
                 (A) (A) (A) (A) (A) (A) (A) (A) (A) (A) (A) (A)
                 (A) (A) (A) (A) (A) (A) (A) (A) (A) (A) (A) (A)
                 (A) (A) (A) (A) (A) (A) (A) (A) (A) (A) (A) (A)
                 (A) (A) (A) (A) (A) (A) (A) (A) (A) (A) (A) (A)
                 (A) (A) (A) (A) (A) (A) (A) (A) (A) (A) (A) (A)
                 (A) (A) (A) (A) (A) (A) (A) (A) (A) (A) (A) (A)
                 (A)
       Virtual   (A) (A) (A) (A) (A) (A) (A) (A) (A) (A) (A) (A)
                 (A) (A) (A) (A) (A) (A) (A) (A) (A) (A) (A) (A)
                 (A) (A) (A) (A) (A) (A) (A) (A) (A) (A) (A) (A)
                 (A) (A) (A) (A) (A) (A) (A) (A) (A) (A) (A) (A)
                 (A) (A) (A) (A) (A) (A) (A) (A) (A) (A) (A) (A)
                 (A) (A) (A) (A) (A) (A) (A) (A) (A) (A) (A) (A)
                 (A) (A) (A) (A) (A) (A) (A) (A) (A) (A) (A) (A)
                 (A) (A) (A) (A) (A) (A) (A) (A) (A) (A) (A) (A)
                 (A) (A) (A) (A) (A) (A) (A) (A) (A) (A) (A) (A)
                 (A) (A) (A) (A) (A) (A) (A) (A) (A) (A) (A) (A)
                 (A) (A) (A) (A) (A) (A) (A) (A) (A) (A) (A) (A)
                 (A) (A) (A) (A) (A) (A) (A) (A) (A) (A) (A) (A)
                 (A) (A) (A) (A) (A) (A) (A) (A) (A) (A) (A) (A)
                 (A) (A) (A) (A) (A) (A) (A) (A) (A) (A) (A) (A)
                 (A) (A) (A) (A) (A) (A) (A) (A) (A) (A) (A) (A)
                 (A) (A) (A) (A) (A) (A) (A) (A) (A) (A) (A) (A)
                 (A) (A) (A) (A) (A) (A) (A) (A) (A) (A) (A) (A)
                 (A) (A) (A) (A) (A) (A) (A) (A) (A) (A) (A) (A)
                 (A) (A) (A) (A) (A) (A) (A) (A) (A) (A) (A) (A)
                 (A) (A) (A) (A) (A) (A) (A) (A) (A) (A) (A) (A)
                 (A) (A) (A) (A) (A) (A) (A) (A) (A) (A) (A) (A)
                 (A) (A) (A) (A) (A) (A) (A) (A) (A) (A) (A) (A)
                 (A) (A) (A) (A) (A) (A) (A) (A) (A) (A) (A) (A)
                 (A) (A) (A) (A) (A) (A) (A) (A) (A) (A) (A) (A)
                 (A) (A) (A) (A) (A) (A) (A) (A) (A) (A) (A) (A)
                 (A) (A) (A) (A) (A) (A) (A) (A) (A) (A) (A) (A)
                 (A) (A) (A) (A) (A) (A) (A) (A) (A) (A) (A) (A)
                 (A) (A) (A) (A) (A) (A) (A) (A) (A) (A) (A) (A)
                 (A) (A) (A) (A) (A) (A) (A) (A) (A) (A) (A) (A)
                 (A) (A) (A) (A) (A) (A) (A) (A) (A) (A) (A) (A)
                 (A) (A) (A) (A) (A) (A) (A) (A) (A) (A) (A) (A)
                 (A) (A) (A) (A) (A) (A) (A) (A) (A) (A) (A) (A)
                 (A) (A) (A) (A) (A) (A) (A) (A) (A) (A) (A) (A)
                 (A) (A) (A) (A) (A) (A) (A) (A) (A) (A) (A) (A)
                 (A) (A) (A) (A) (A) (A) (A) (A) (A) (A) (A) (A)
                 (A) (A) (A) (A) (A) (A) (A) (A) (A) (A) (A) (A)
                 (A) (A) (A) (A) (A)
 The electronic state is 1-A.
 Alpha  occ. eigenvalues --  -46.70260 -19.21434 -19.20673 -19.19162 -19.18645
 Alpha  occ. eigenvalues --  -19.15439 -19.15115 -19.14316 -19.13707 -19.03684
 Alpha  occ. eigenvalues --  -14.27668 -14.27612 -10.34205 -10.33511 -10.31524
 Alpha  occ. eigenvalues --  -10.29868 -10.27095 -10.26399 -10.24401 -10.23312
 Alpha  occ. eigenvalues --  -10.20589 -10.19976 -10.19924 -10.18859 -10.18158
 Alpha  occ. eigenvalues --  -10.17908 -10.15634 -10.15481 -10.15132 -10.12199
 Alpha  occ. eigenvalues --  -10.05733 -10.05510 -10.03113 -10.03038 -10.02976
 Alpha  occ. eigenvalues --  -10.02768 -10.02706 -10.02581 -10.02395 -10.02354
 Alpha  occ. eigenvalues --  -10.02187 -10.02157 -10.02096 -10.01980 -10.01842
 Alpha  occ. eigenvalues --  -10.01296 -10.00784 -10.00604 -10.00561 -10.00488
 Alpha  occ. eigenvalues --  -10.00262 -10.00096  -9.99572  -9.99505  -3.00645
 Alpha  occ. eigenvalues --   -1.75399  -1.75299  -1.75026  -1.13910  -1.11150
 Alpha  occ. eigenvalues --   -1.11056  -1.09812  -1.04275  -1.04004  -1.02174
 Alpha  occ. eigenvalues --   -1.01357  -0.91570  -0.89003  -0.87723  -0.81351
 Alpha  occ. eigenvalues --   -0.80975  -0.80636  -0.79659  -0.79062  -0.76618
 Alpha  occ. eigenvalues --   -0.76496  -0.74559  -0.74082  -0.73804  -0.73010
 Alpha  occ. eigenvalues --   -0.71745  -0.71539  -0.68688  -0.68450  -0.68297
 Alpha  occ. eigenvalues --   -0.68135  -0.67789  -0.67077  -0.66015  -0.65703
 Alpha  occ. eigenvalues --   -0.65636  -0.64792  -0.64515  -0.64275  -0.64037
 Alpha  occ. eigenvalues --   -0.61883  -0.59080  -0.58877  -0.58503  -0.58275
 Alpha  occ. eigenvalues --   -0.57235  -0.56741  -0.55001  -0.54697  -0.54520
 Alpha  occ. eigenvalues --   -0.53337  -0.52452  -0.52351  -0.50826  -0.50279
 Alpha  occ. eigenvalues --   -0.50008  -0.49940  -0.49533  -0.48979  -0.48588
 Alpha  occ. eigenvalues --   -0.48011  -0.47183  -0.46759  -0.46464  -0.46321
 Alpha  occ. eigenvalues --   -0.45618  -0.45036  -0.44691  -0.44517  -0.44348
 Alpha  occ. eigenvalues --   -0.44206  -0.43675  -0.43489  -0.43460  -0.42229
 Alpha  occ. eigenvalues --   -0.41658  -0.41444  -0.41271  -0.41048  -0.40949
 Alpha  occ. eigenvalues --   -0.40916  -0.40661  -0.40485  -0.40059  -0.39939
 Alpha  occ. eigenvalues --   -0.39841  -0.39778  -0.39392  -0.39325  -0.39161
 Alpha  occ. eigenvalues --   -0.38725  -0.38520  -0.38431  -0.38258  -0.38218
 Alpha  occ. eigenvalues --   -0.37793  -0.37713  -0.37101  -0.36868  -0.36571
 Alpha  occ. eigenvalues --   -0.36516  -0.36450  -0.36249  -0.35967  -0.35927
 Alpha  occ. eigenvalues --   -0.35560  -0.35346  -0.35209  -0.35011  -0.34915
 Alpha  occ. eigenvalues --   -0.34806  -0.34693  -0.34291  -0.34270  -0.34060
 Alpha  occ. eigenvalues --   -0.33946  -0.33685  -0.32893  -0.32276  -0.31915
 Alpha  occ. eigenvalues --   -0.31420  -0.30905  -0.30828  -0.30584  -0.30516
 Alpha  occ. eigenvalues --   -0.30222  -0.30120  -0.29834  -0.29762  -0.29441
 Alpha  occ. eigenvalues --   -0.29189  -0.28742  -0.28642  -0.28304  -0.28216
 Alpha  occ. eigenvalues --   -0.28005  -0.27716  -0.27320  -0.27288  -0.27162
 Alpha  occ. eigenvalues --   -0.26881  -0.25023  -0.24515  -0.21449  -0.19717
 Alpha  occ. eigenvalues --   -0.19314  -0.18785  -0.18569  -0.17879  -0.15427
 Alpha virt. eigenvalues --   -0.02303  -0.01174   0.00595   0.01018   0.01466
 Alpha virt. eigenvalues --    0.06144   0.06444   0.06789   0.06865   0.07260
 Alpha virt. eigenvalues --    0.08929   0.09078   0.09711   0.09756   0.11036
 Alpha virt. eigenvalues --    0.11165   0.11840   0.12559   0.13273   0.13501
 Alpha virt. eigenvalues --    0.13998   0.14759   0.15132   0.15569   0.15766
 Alpha virt. eigenvalues --    0.15905   0.16225   0.16640   0.16898   0.17201
 Alpha virt. eigenvalues --    0.17475   0.18579   0.18870   0.19350   0.19454
 Alpha virt. eigenvalues --    0.20203   0.20409   0.20563   0.21057   0.21247
 Alpha virt. eigenvalues --    0.21796   0.21866   0.22128   0.22799   0.22846
 Alpha virt. eigenvalues --    0.23349   0.23816   0.24827   0.25043   0.25822
 Alpha virt. eigenvalues --    0.25989   0.26639   0.27361   0.27888   0.28759
 Alpha virt. eigenvalues --    0.28880   0.29611   0.30024   0.30158   0.30853
 Alpha virt. eigenvalues --    0.31846   0.32253   0.32676   0.33341   0.33631
 Alpha virt. eigenvalues --    0.33816   0.34456   0.34917   0.35172   0.35264
 Alpha virt. eigenvalues --    0.35405   0.35735   0.36491   0.37252   0.38176
 Alpha virt. eigenvalues --    0.38454   0.38640   0.38746   0.39392   0.39861
 Alpha virt. eigenvalues --    0.39889   0.40056   0.40432   0.40772   0.41014
 Alpha virt. eigenvalues --    0.41263   0.41729   0.42077   0.42488   0.42675
 Alpha virt. eigenvalues --    0.42805   0.43271   0.44025   0.44660   0.45172
 Alpha virt. eigenvalues --    0.45364   0.45612   0.45867   0.46137   0.46370
 Alpha virt. eigenvalues --    0.46467   0.46572   0.47142   0.47301   0.47624
 Alpha virt. eigenvalues --    0.47785   0.48439   0.48561   0.48733   0.49095
 Alpha virt. eigenvalues --    0.49154   0.49430   0.49466   0.49647   0.49694
 Alpha virt. eigenvalues --    0.50066   0.50268   0.50632   0.50883   0.51033
 Alpha virt. eigenvalues --    0.51556   0.51729   0.52074   0.52388   0.52657
 Alpha virt. eigenvalues --    0.52741   0.53300   0.53741   0.54530   0.54620
 Alpha virt. eigenvalues --    0.55557   0.55667   0.55793   0.56072   0.56348
 Alpha virt. eigenvalues --    0.56446   0.56600   0.56990   0.57093   0.57286
 Alpha virt. eigenvalues --    0.57360   0.57921   0.57992   0.58275   0.58599
 Alpha virt. eigenvalues --    0.58924   0.59086   0.59451   0.59855   0.60068
 Alpha virt. eigenvalues --    0.60471   0.60829   0.61522   0.62049   0.62450
 Alpha virt. eigenvalues --    0.63097   0.63399   0.63794   0.64283   0.65000
 Alpha virt. eigenvalues --    0.65465   0.66097   0.66552   0.67313   0.68043
 Alpha virt. eigenvalues --    0.68769   0.69173   0.69874   0.70220   0.70925
 Alpha virt. eigenvalues --    0.71529   0.71729   0.71932   0.72369   0.72626
 Alpha virt. eigenvalues --    0.73051   0.73577   0.74380   0.74416   0.75006
 Alpha virt. eigenvalues --    0.75293   0.75530   0.76125   0.76534   0.77186
 Alpha virt. eigenvalues --    0.78495   0.79657   0.79929   0.80817   0.81020
 Alpha virt. eigenvalues --    0.82184   0.83113   0.83358   0.83884   0.84382
 Alpha virt. eigenvalues --    0.84673   0.85107   0.86377   0.86582   0.87181
 Alpha virt. eigenvalues --    0.87983   0.88392   0.88869   0.89428   0.89600
 Alpha virt. eigenvalues --    0.90606   0.90730   0.90913   0.91682   0.92099
 Alpha virt. eigenvalues --    0.92679   0.93682   0.94121   0.95062   0.95566
 Alpha virt. eigenvalues --    0.96047   0.96657   0.97582   0.98069   0.98939
 Alpha virt. eigenvalues --    0.99888   1.01297   1.01891   1.02659   1.03174
 Alpha virt. eigenvalues --    1.03647   1.04347   1.05043   1.05995   1.07122
 Alpha virt. eigenvalues --    1.07847   1.08583   1.08994   1.09390   1.11187
 Alpha virt. eigenvalues --    1.11758   1.12541   1.13179   1.14580   1.14691
 Alpha virt. eigenvalues --    1.16281   1.16600   1.17627   1.18890   1.20145
 Alpha virt. eigenvalues --    1.20799   1.22441   1.23392   1.24235   1.24898
 Alpha virt. eigenvalues --    1.25762   1.26863   1.27697   1.28065   1.30676
 Alpha virt. eigenvalues --    1.32016   1.32377   1.32741   1.34427   1.36588
 Alpha virt. eigenvalues --    1.37470   1.37865   1.39757   1.40032   1.40261
 Alpha virt. eigenvalues --    1.42105   1.43308   1.43757   1.44291   1.44718
 Alpha virt. eigenvalues --    1.46172   1.47223   1.48087   1.49327   1.50106
 Alpha virt. eigenvalues --    1.50849   1.51027   1.51438   1.54342   1.55125
 Alpha virt. eigenvalues --    1.55576   1.56385   1.59668   1.60393   1.62175
 Alpha virt. eigenvalues --    1.62618   1.65038   1.65855   1.66196   1.66647
 Alpha virt. eigenvalues --    1.67870   1.69147   1.70002   1.71127   1.71644
 Alpha virt. eigenvalues --    1.72131   1.72548   1.74012   1.74619   1.75302
 Alpha virt. eigenvalues --    1.76311   1.77450   1.78370   1.78845   1.79370
 Alpha virt. eigenvalues --    1.80758   1.81820   1.82004   1.82885   1.83452
 Alpha virt. eigenvalues --    1.84966   1.85509   1.85827   1.86479   1.87194
 Alpha virt. eigenvalues --    1.87502   1.87983   1.88111   1.88350   1.88877
 Alpha virt. eigenvalues --    1.89435   1.90406   1.91321   1.91685   1.92241
 Alpha virt. eigenvalues --    1.93361   1.94151   1.94763   1.95522   1.95871
 Alpha virt. eigenvalues --    1.96992   1.97549   1.97934   1.98861   1.99454
 Alpha virt. eigenvalues --    2.00185   2.00640   2.01430   2.02026   2.03104
 Alpha virt. eigenvalues --    2.03526   2.05019   2.05732   2.06622   2.07244
 Alpha virt. eigenvalues --    2.08130   2.08355   2.10090   2.10659   2.11504
 Alpha virt. eigenvalues --    2.11986   2.12735   2.14655   2.14976   2.15393
 Alpha virt. eigenvalues --    2.15910   2.16392   2.17033   2.17952   2.18183
 Alpha virt. eigenvalues --    2.18590   2.19076   2.19573   2.21869   2.22514
 Alpha virt. eigenvalues --    2.23482   2.25289   2.27653   2.28283   2.28551
 Alpha virt. eigenvalues --    2.28770   2.29215   2.29929   2.30187   2.31795
 Alpha virt. eigenvalues --    2.32491   2.32948   2.33739   2.34098   2.35703
 Alpha virt. eigenvalues --    2.35752   2.36735   2.38576   2.40924   2.41595
 Alpha virt. eigenvalues --    2.42201   2.44711   2.45280   2.46790   2.47692
 Alpha virt. eigenvalues --    2.48212   2.48668   2.54231   2.57059   2.57930
 Alpha virt. eigenvalues --    2.59572   2.59949   2.60369   2.62350   2.64288
 Alpha virt. eigenvalues --    2.64501   2.66645   2.66926   2.67926   2.69574
 Alpha virt. eigenvalues --    2.69686   2.72542   2.72954   2.75812   2.76010
 Alpha virt. eigenvalues --    2.76212   2.77223   2.81720   2.83414   2.86971
 Alpha virt. eigenvalues --    2.87323   2.89068   2.89634   2.96529   2.98001
 Alpha virt. eigenvalues --    3.00765   3.02391   3.03140   3.04310   3.09086
 Alpha virt. eigenvalues --    3.13900   3.15044   3.17592   3.20907   3.22445
 Alpha virt. eigenvalues --    3.25236   3.26541   3.76023   6.04855   6.14883
 Alpha virt. eigenvalues --    6.30145 103.46996
          Condensed to atoms (all electrons):
 Mulliken atomic charges:
              1
     1  O   -0.447270
     2  Mg   0.824702
     3  O   -0.664187
     4  C    0.598537
     5  N   -0.542196
     6  N   -0.514123
     7  O   -0.456912
     8  C    0.332824
     9  C   -0.256982
    10  C    0.333617
    11  O   -0.459820
    12  C    0.612623
    13  C    0.132713
    14  C    0.055061
    15  O   -0.456312
    16  C   -0.226646
    17  O   -0.415433
    18  C    0.641907
    19  O   -0.442625
    20  O   -0.439602
    21  C    0.556377
    22  C    0.030379
    23  C    0.034680
    24  O   -0.444174
    25  C   -0.480564
    26  C   -0.484033
    27  C   -0.463551
    28  C   -0.474032
    29  C    0.018945
    30  C    0.023086
    31  C    0.002369
    32  C   -0.080790
    33  C   -0.071885
    34  C   -0.071917
    35  C   -0.000299
    36  C   -0.054787
    37  C   -0.058762
    38  C    0.008398
    39  C   -0.079435
    40  C   -0.071214
    41  C   -0.077561
    42  C    0.003486
    43  C   -0.052620
    44  C   -0.059205
    45  C   -0.226250
    46  C   -0.218772
    47  C   -0.223036
    48  C   -0.218336
    49  C   -0.215596
    50  C   -0.218011
    51  C   -0.216880
    52  C   -0.218646
    53  C   -0.448321
    54  C   -0.451705
    55  H    0.080771
    56  H    0.102433
    57  H    0.130449
    58  H    0.175011
    59  H    0.174076
    60  H    0.176045
    61  H    0.227514
    62  H    0.137163
    63  H    0.184556
    64  H    0.167544
    65  H    0.196890
    66  H    0.179474
    67  H    0.141207
    68  H    0.157486
    69  H    0.137760
    70  H    0.155158
    71  H    0.132708
    72  H    0.170595
    73  H    0.168085
    74  H    0.169206
    75  H    0.089554
    76  H    0.094063
    77  H    0.091398
    78  H    0.095252
    79  H    0.098235
    80  H    0.094364
    81  H    0.097409
    82  H    0.096438
    83  H    0.100338
    84  H    0.113858
    85  H    0.072345
    86  H    0.116460
    87  H    0.070682
    88  H    0.076810
    89  H    0.074072
    90  H    0.072251
    91  H    0.072956
    92  H    0.072956
    93  H    0.104022
    94  H    0.076111
    95  H    0.073342
    96  H    0.073372
    97  H    0.077124
    98  H    0.067097
    99  H    0.092200
   100  H    0.077191
   101  H    0.076313
   102  H    0.071798
   103  H    0.075829
   104  H    0.100806
   105  H    0.073203
   106  H    0.077728
   107  H    0.074666
   108  H    0.073934
   109  H    0.128876
   110  H    0.124585
   111  H    0.129203
   112  H    0.126730
   113  H    0.129490
   114  H    0.125598
 Sum of Mulliken charges=   0.00000
 Atomic charges with hydrogens summed into heavy atoms:
              1
     1  O   -0.447270
     2  Mg   0.824702
     3  O   -0.664187
     4  C    0.598537
     5  N   -0.542196
     6  N   -0.514123
     7  O   -0.456912
     8  C    0.332824
     9  C   -0.176211
    10  C    0.333617
    11  O   -0.459820
    12  C    0.612623
    13  C    0.235146
    14  C    0.185510
    15  O   -0.456312
    16  C    0.298486
    17  O   -0.415433
    18  C    0.641907
    19  O   -0.442625
    20  O   -0.439602
    21  C    0.556377
    22  C    0.257893
    23  C    0.171843
    24  O   -0.444174
    25  C    0.068426
    26  C   -0.005866
    27  C   -0.037926
    28  C    0.033854
    29  C    0.018945
    30  C    0.023086
    31  C    0.002369
    32  C    0.008764
    33  C    0.022178
    34  C    0.019481
    35  C   -0.000299
    36  C    0.040465
    37  C    0.039473
    38  C    0.008398
    39  C    0.014929
    40  C    0.026195
    41  C    0.018877
    42  C    0.003486
    43  C    0.047718
    44  C    0.054652
    45  C    0.033237
    46  C    0.004361
    47  C    0.026897
    48  C    0.004489
    49  C    0.020825
    50  C    0.007291
    51  C    0.032958
    52  C    0.007682
    53  C   -0.065657
    54  C   -0.069888
    55  H    0.000000
    56  H    0.000000
    57  H    0.000000
    58  H    0.000000
    59  H    0.000000
    60  H    0.000000
    61  H    0.000000
    62  H    0.000000
    63  H    0.000000
    64  H    0.000000
    65  H    0.000000
    66  H    0.000000
    67  H    0.000000
    68  H    0.000000
    69  H    0.000000
    70  H    0.000000
    71  H    0.000000
    72  H    0.000000
    73  H    0.000000
    74  H    0.000000
    75  H    0.000000
    76  H    0.000000
    77  H    0.000000
    78  H    0.000000
    79  H    0.000000
    80  H    0.000000
    81  H    0.000000
    82  H    0.000000
    83  H    0.000000
    84  H    0.000000
    85  H    0.000000
    86  H    0.000000
    87  H    0.000000
    88  H    0.000000
    89  H    0.000000
    90  H    0.000000
    91  H    0.000000
    92  H    0.000000
    93  H    0.000000
    94  H    0.000000
    95  H    0.000000
    96  H    0.000000
    97  H    0.000000
    98  H    0.000000
    99  H    0.000000
   100  H    0.000000
   101  H    0.000000
   102  H    0.000000
   103  H    0.000000
   104  H    0.000000
   105  H    0.000000
   106  H    0.000000
   107  H    0.000000
   108  H    0.000000
   109  H    0.000000
   110  H    0.000000
   111  H    0.000000
   112  H    0.000000
   113  H    0.000000
   114  H    0.000000
 Sum of Mulliken charges=   0.00000
 Electronic spatial extent (au):  <R**2>= 29943.4658
 Charge=     0.0000 electrons
 Dipole moment (field-independent basis, Debye):
    X=    -2.3858    Y=    -0.8248    Z=     6.9328  Tot=     7.3780
 Quadrupole moment (field-independent basis, Debye-Ang):
   XX=  -269.5017   YY=  -329.2203   ZZ=  -307.4542
   XY=   -11.0122   XZ=     4.9394   YZ=    21.8813
 Traceless Quadrupole moment (field-independent basis, Debye-Ang):
   XX=    32.5570   YY=   -27.1616   ZZ=    -5.3955
   XY=   -11.0122   XZ=     4.9394   YZ=    21.8813
 Octapole moment (field-independent basis, Debye-Ang**2):
  XXX=   -39.7022  YYY=   -85.6353  ZZZ=    52.8676  XYY=  -113.5361
  XXY=    11.6365  XXZ=    32.3160  XZZ=   -28.3678  YZZ=    11.0707
  YYZ=   117.1889  XYZ=     4.0086
 Hexadecapole moment (field-independent basis, Debye-Ang**3):
 XXXX=-16147.8614 YYYY=-14869.3920 ZZZZ= -7145.4444 XXXY=  -166.0611
 XXXZ=    21.8331 YYYX=  -556.8132 YYYZ=   638.3026 ZZZX=   -85.6094
 ZZZY=   135.6254 XXYY= -5239.2426 XXZZ= -3877.0829 YYZZ= -3553.8922
 XXYZ=   217.8318 YYXZ=   123.3424 ZZXY=  -122.6233
 N-N= 9.054448903969D+03 E-N=-2.420580553210D+04  KE= 2.584723724006D+03
 1\1\GINC-KETIDE\SP\RB3LYP\Gen\C42H60Mg1N2O9\RZEPA\23-Nov-2004\0\\# B3L
 YP/GEN SCRF(IEFPCM,SOLVENT=THF)\\from RRSS_fm.gjf\\0,1\O,0,4.778118431
 6,0.903816866,-1.885471215\Mg,0,-0.4904076474,-0.6870701438,0.45332218
 75\O,0,-0.0611946043,0.0782929394,2.167994174\C,0,4.1949123973,1.39773
 77816,-0.773551078\N,0,-0.0693594275,-2.671004699,0.0020034178\N,0,-2.
 5273507359,-1.1354708467,0.1408486581\O,0,3.7164082159,2.5077049355,-0
 .6952055351\C,0,-0.9211913724,-3.6821204424,-0.1366070552\C,0,-2.31794
 88808,-3.543819839,-0.0486332258\C,0,-3.0621932956,-2.351522879,0.0558
 28763\O,0,3.379736886,0.7069199497,1.4107490248\C,0,2.0862488775,0.402
 2045228,1.2209954901\C,0,1.1881289312,0.5538407026,2.4523575938\C,0,4.
 2946142079,0.3739120084,0.3505852405\O,0,1.6617246726,-0.0271058951,0.
 154185609\C,0,4.7785131958,1.7709501429,-3.0297742103\O,0,0.6912952395
 ,2.8005952343,-0.5264556196\C,0,-0.5660433006,2.3832835781,-0.45274643
 27\O,0,-0.8202337829,1.2022253875,-0.6243877477\O,0,-1.191514397,4.535
 1628128,0.5687020764\C,0,0.0371286551,5.0487925739,0.3616851744\C,0,1.
 0614567551,4.1966118826,-0.3776399162\C,0,-1.658647414,3.4053153978,-0
 .204836695\O,0,0.3350412276,6.1397007244,0.782867928\C,0,1.4423831622,
 4.7804676215,-1.7363109613\C,0,-2.3063270389,3.8626773263,-1.516587931
 2\C,0,1.1976568534,2.0117040288,2.9619429408\C,0,5.6915004705,0.372458
 7567,0.96972051\C,0,1.355726882,-2.9203805533,-0.0053646294\C,0,-3.406
 6698088,0.0035976355,-0.0109870601\C,0,2.0059685779,-3.2933477877,1.22
 48713143\C,0,3.4212181084,-3.2898053128,1.257011353\C,0,4.1800878784,-
 2.9913945402,0.1026207111\C,0,3.5267231563,-2.6971853473,-1.1164895855
 \C,0,2.1093696936,-2.6468482681,-1.1891391442\C,0,1.2015713233,-3.7728
 788108,2.4668375806\C,0,1.4087138207,-2.3346991889,-2.536397839\C,0,-3
 .8705634319,0.3663062374,-1.3225883114\C,0,-4.6835670145,1.5233855087,
 -1.4588898517\C,0,-5.0047577151,2.323900511,-0.3409291064\C,0,-4.52872
 24908,1.9702248282,0.9415805685\C,0,-3.7378636493,0.80130641,1.1357619
 451\C,0,-3.5040626416,-0.459337734,-2.587486274\C,0,-3.3277329616,0.37
 46596505,2.5701521976\C,0,1.241140334,-2.7514524134,3.6461187417\C,0,1
 .6997764973,-5.181470533,2.9395391482\C,0,1.7546438719,-0.9055057003,-
 3.0615223388\C,0,1.7567088257,-3.4171798146,-3.6130917408\C,0,-2.77728
 50379,1.5668710213,3.4101675321\C,0,-4.529746786,-0.3069253487,3.30832
 68603\C,0,-2.4505833002,0.2939434851,-3.4628750467\C,0,-4.7641715257,-
 0.8162280889,-3.4459002237\C,0,-0.3879116968,-5.0782151326,-0.43153187
 1\C,0,-4.578176166,-2.5237612397,0.0124758227\H,0,-2.8943295689,-4.458
 3853705,-0.1299634489\H,0,1.7058117376,-0.0451786218,3.2303884966\H,0,
 4.0566696257,-0.6196603524,-0.0396139288\H,0,5.2077376167,2.7443013607
 ,-2.7794356842\H,0,3.7575484608,1.9079065513,-3.3970831806\H,0,5.38558
 63595,1.2653839344,-3.7815485835\H,0,1.953076447,4.1585878466,0.250176
 4175\H,0,-2.4393112007,2.9364336598,0.4001715459\H,0,1.7865056189,5.80
 88270984,-1.5952502482\H,0,0.5948628732,4.7857070543,-2.4291746464\H,0
 ,2.2537833133,4.1834803824,-2.1578658256\H,0,-2.9200700736,4.743607965
 8,-1.3041257226\H,0,-2.9664453873,3.0630915112,-1.8544523059\H,0,-1.57
 62514223,4.1203935363,-2.2903892231\H,0,2.2108355587,2.3649897352,3.18
 48754738\H,0,0.5937032384,2.0623375959,3.8724598097\H,0,0.7415255021,2
 .6801784499,2.22458676\H,0,5.7419348068,-0.3996246008,1.742991979\H,0,
 5.9187532489,1.3420417802,1.4239366665\H,0,6.4411244754,0.1526299138,0
 .2038049491\H,0,3.9392804197,-3.5689600758,2.1841105476\H,0,5.27739042
 25,-3.0396434482,0.1376032136\H,0,4.1240329583,-2.5239539595,-2.021613
 4775\H,0,0.1415315255,-3.8743542095,2.1651660831\H,0,0.3148527389,-2.3
 742520935,-2.3585345367\H,0,-5.0936643246,1.7834159737,-2.4433835347\H
 ,0,-5.6461042111,3.2078919216,-0.464186487\H,0,-4.8174908338,2.5753209
 333,1.810918025\H,0,-3.0379976082,-1.406551531,-2.2561514395\H,0,-2.51
 63603805,-0.3730862018,2.4822053388\H,0,0.7677646989,-3.190015048,4.53
 90050572\H,0,0.6742148888,-1.846562902,3.3655510969\H,0,2.2773504025,-
 2.4775249155,3.8996140967\H,0,1.0367518714,-5.5600889382,3.7323347971\
 H,0,2.7217650494,-5.1242533211,3.3435870598\H,0,1.6948563125,-5.903141
 9561,2.107948299\H,0,1.2317878361,-0.7185260245,-4.0130005505\H,0,2.83
 78315399,-0.7982471165,-3.2275482\H,0,1.4407066658,-0.1422962068,-2.32
 68011225\H,0,1.1894079732,-3.2223370734,-4.53608673\H,0,1.4971228983,-
 4.4243019949,-3.2517032446\H,0,2.8303088204,-3.3997096821,-3.855703999
 2\H,0,-2.3966109067,1.1897026114,4.371489073\H,0,-3.556390527,2.317890
 1744,3.6143524528\H,0,-1.942417864,2.0545829906,2.8800873153\H,0,-4.21
 73947836,-0.6054024999,4.3206438918\H,0,-4.8630461399,-1.2086428676,2.
 770652868\H,0,-5.3821031205,0.3854381113,3.3939565186\H,0,-2.196944750
 4,-0.3084205261,-4.3496169713\H,0,-1.5281840676,0.4688822852,-2.879818
 8466\H,0,-2.8414586573,1.2669264943,-3.8002712892\H,0,-4.4758757469,-1
 .5054152361,-4.2542353748\H,0,-5.2007266459,0.0846376238,-3.9029734408
 \H,0,-5.5376062858,-1.303609347,-2.8330574425\H,0,0.272769791,-5.43991
 06162,0.3636413385\H,0,-1.2073817015,-5.7961247923,-0.5432429778\H,0,0
 .1910544657,-5.0768572201,-1.363539253\H,0,-5.0897789991,-1.81896354,0
 .6746646557\H,0,-4.9668888522,-2.3687588098,-1.0009592188\H,0,-4.85275
 99829,-3.5405953084,0.3145530122\\Version=x86-Linux-G03RevB.04\State=1
 -A\HF=-2612.2189854\RMSD=1.951e-05\Dipole=0.6457559,-0.9437492,-2.6680
 104\PG=C01 [X(C42H60Mg1N2O9)]\\@


 Democracy is the recurrent suspicion that more than half of the people
 are right more than half of the time.
 -- E. B. White
 Job cpu time:  0 days  9 hours 40 minutes 59.3 seconds.
 File lengths (MBytes):  RWF=   1078 Int=      0 D2E=      0 Chk=     24 Scr=      1
 Normal termination of Gaussian 03 at Tue Nov 23 02:07:42 2004.
