# Supplementary material
Source: publisher figshare collection journal article supplement (https://acs.figshare.com/ndownloader/files/5127205)
Supplement: Supplementary file 1 [file 5127205 › supporting_ja043819b/RRSS_fm-5-react.log]

 Entering Gaussian System, Link 0=g03
 Input=RRSS_fm-5-react.gjf
 Output=RRSS_fm-5-react.log
 Initial command:
 /usr/local/g03/l1.exe /home/rzepa/Gau-6385.inp -scrdir=/home/rzepa/
 Entering Link 1 = /usr/local/g03/l1.exe PID=      6386.
  
 Copyright (c) 1988,1990,1992,1993,1995,1998,2003, Gaussian, Inc.
                  All Rights Reserved.
  
 This is the Gaussian(R) 03 program.  It is based on the
 the Gaussian(R) 98 system (copyright 1998, Gaussian, Inc.),
 the Gaussian(R) 94 system (copyright 1995, Gaussian, Inc.),
 the Gaussian 92(TM) system (copyright 1992, Gaussian, Inc.),
 the Gaussian 90(TM) system (copyright 1990, Gaussian, Inc.),
 the Gaussian 88(TM) system (copyright 1988, Gaussian, Inc.),
 the Gaussian 86(TM) system (copyright 1986, Carnegie Mellon
 University), and the Gaussian 82(TM) system (copyright 1983,
 Carnegie Mellon University). Gaussian is a federally registered
 trademark of Gaussian, Inc.
  
 This software contains proprietary and confidential information,
 including trade secrets, belonging to Gaussian, Inc.
  
 This software is provided under written license and may be
 used, copied, transmitted, or stored only in accord with that
 written license.
  
 The following legend is applicable only to US Government
 contracts under DFARS:
  
                    RESTRICTED RIGHTS LEGEND
  
 Use, duplication or disclosure by the US Government is subject
 to restrictions as set forth in subparagraph (c)(1)(ii) of the
 Rights in Technical Data and Computer Software clause at DFARS
 252.227-7013.
  
 Gaussian, Inc.
 Carnegie Office Park, Building 6, Pittsburgh, PA 15106 USA
  
 The following legend is applicable only to US Government
 contracts under FAR:
  
                    RESTRICTED RIGHTS LEGEND
  
 Use, reproduction and disclosure by the US Government is subject
 to restrictions as set forth in subparagraph (c) of the
 Commercial Computer Software - Restricted Rights clause at FAR
 52.227-19.
  
 Gaussian, Inc.
 Carnegie Office Park, Building 6, Pittsburgh, PA 15106 USA
  
  
 ---------------------------------------------------------------
 Warning -- This program may not be used in any manner that
 competes with the business of Gaussian, Inc. or will provide
 assistance to any competitor of Gaussian, Inc.  The licensee
 of this program is prohibited from giving any competitor of
 Gaussian, Inc. access to this program.  By using this program,
 the user acknowledges that Gaussian, Inc. is engaged in the
 business of creating and licensing software in the field of
 computational chemistry and represents and warrants to the
 licensee that it is not a competitor of Gaussian, Inc. and that
 it will not use this program in any manner prohibited above.
 ---------------------------------------------------------------
  

 Cite this work as:
 Gaussian 03, Revision B.04,
 M. J. Frisch, G. W. Trucks, H. B. Schlegel, G. E. Scuseria, 
 M. A. Robb, J. R. Cheeseman, J. A. Montgomery, Jr., T. Vreven, 
 K. N. Kudin, J. C. Burant, J. M. Millam, S. S. Iyengar, J. Tomasi, 
 V. Barone, B. Mennucci, M. Cossi, G. Scalmani, N. Rega, 
 G. A. Petersson, H. Nakatsuji, M. Hada, M. Ehara, K. Toyota, 
 R. Fukuda, J. Hasegawa, M. Ishida, T. Nakajima, Y. Honda, O. Kitao, 
 H. Nakai, M. Klene, X. Li, J. E. Knox, H. P. Hratchian, J. B. Cross, 
 C. Adamo, J. Jaramillo, R. Gomperts, R. E. Stratmann, O. Yazyev, 
 A. J. Austin, R. Cammi, C. Pomelli, J. W. Ochterski, P. Y. Ayala, 
 K. Morokuma, G. A. Voth, P. Salvador, J. J. Dannenberg, 
 V. G. Zakrzewski, S. Dapprich, A. D. Daniels, M. C. Strain, 
 O. Farkas, D. K. Malick, A. D. Rabuck, K. Raghavachari, 
 J. B. Foresman, J. V. Ortiz, Q. Cui, A. G. Baboul, S. Clifford, 
 J. Cioslowski, B. B. Stefanov, G. Liu, A. Liashenko, P. Piskorz, 
 I. Komaromi, R. L. Martin, D. J. Fox, T. Keith, M. A. Al-Laham, 
 C. Y. Peng, A. Nanayakkara, M. Challacombe, P. M. W. Gill, 
 B. Johnson, W. Chen, M. W. Wong, C. Gonzalez, and J. A. Pople, 
 Gaussian, Inc., Pittsburgh PA, 2003.
 
 *********************************************
 Gaussian 03:  x86-Linux-G03RevB.04 2-Jun-2003
                  10-Aug-2004 
 *********************************************
 %mem=500MB
 %nproc=2
 Will use up to    2 processors via shared memory.
 %chk=RRSS_fm-5-react.chk
 %rwf=re1.rwf,1800MB,re2.rwf,1800MB,re3.rwf,1800MB,re4.rwf,1800MB,re5.rwf,1800MB
 -------------------------------------------
 # b3lyp/Gen freq geom=checkpoint guess=read
 -------------------------------------------
 1/10=4,29=2,30=1,38=1/1,3;
 2/40=1/2;
 3/5=7,11=2,16=1,25=1,30=1,74=-5/1,2,3;
 4/5=1/1;
 5/5=2,38=6/2;
 8/6=4,10=90,11=11,27=1179648000/1;
 11/6=1,8=1,9=11,15=111,16=1/1,2,10;
 10/6=1/2;
 6/7=2,8=2,9=2,10=2,18=1,28=1/1;
 7/8=1,10=1,25=1/1,2,3,16;
 1/10=4,30=1/3;
 99//99;
 ----------------
 from RRSS_fm.gjf
 ----------------
 Redundant internal coordinates taken from checkpoint file:
 RRSS_fm-5-react.chk
 Charge =  0 Multiplicity = 1
 O,0,4.7781184316,0.903816866,-1.885471215
 Mg,0,-0.4904076474,-0.6870701438,0.4533221875
 O,0,-0.0611946043,0.0782929394,2.167994174
 C,0,4.1949123973,1.3977377816,-0.773551078
 N,0,-0.0693594275,-2.671004699,0.0020034178
 N,0,-2.5273507359,-1.1354708467,0.1408486581
 O,0,3.7164082159,2.5077049355,-0.6952055351
 C,0,-0.9211913724,-3.6821204424,-0.1366070552
 C,0,-2.3179488808,-3.543819839,-0.0486332258
 C,0,-3.0621932956,-2.351522879,0.055828763
 O,0,3.379736886,0.7069199497,1.4107490248
 C,0,2.0862488775,0.4022045228,1.2209954901
 C,0,1.1881289312,0.5538407026,2.4523575938
 C,0,4.2946142079,0.3739120084,0.3505852405
 O,0,1.6617246726,-0.0271058951,0.154185609
 C,0,4.7785131958,1.7709501429,-3.0297742103
 O,0,0.6912952395,2.8005952343,-0.5264556196
 C,0,-0.5660433006,2.3832835781,-0.4527464327
 O,0,-0.8202337829,1.2022253875,-0.6243877477
 O,0,-1.191514397,4.5351628128,0.5687020764
 C,0,0.0371286551,5.0487925739,0.3616851744
 C,0,1.0614567551,4.1966118826,-0.3776399162
 C,0,-1.658647414,3.4053153978,-0.204836695
 O,0,0.3350412276,6.1397007244,0.782867928
 C,0,1.4423831622,4.7804676215,-1.7363109613
 C,0,-2.3063270389,3.8626773263,-1.5165879312
 C,0,1.1976568534,2.0117040288,2.9619429408
 C,0,5.6915004705,0.3724587567,0.96972051
 C,0,1.355726882,-2.9203805533,-0.0053646294
 C,0,-3.4066698088,0.0035976355,-0.0109870601
 C,0,2.0059685779,-3.2933477877,1.2248713143
 C,0,3.4212181084,-3.2898053128,1.257011353
 C,0,4.1800878784,-2.9913945402,0.1026207111
 C,0,3.5267231563,-2.6971853473,-1.1164895855
 C,0,2.1093696936,-2.6468482681,-1.1891391442
 C,0,1.2015713233,-3.7728788108,2.4668375806
 C,0,1.4087138207,-2.3346991889,-2.536397839
 C,0,-3.8705634319,0.3663062374,-1.3225883114
 C,0,-4.6835670145,1.5233855087,-1.4588898517
 C,0,-5.0047577151,2.323900511,-0.3409291064
 C,0,-4.5287224908,1.9702248282,0.9415805685
 C,0,-3.7378636493,0.80130641,1.1357619451
 C,0,-3.5040626416,-0.459337734,-2.587486274
 C,0,-3.3277329616,0.3746596505,2.5701521976
 C,0,1.241140334,-2.7514524134,3.6461187417
 C,0,1.6997764973,-5.181470533,2.9395391482
 C,0,1.7546438719,-0.9055057003,-3.0615223388
 C,0,1.7567088257,-3.4171798146,-3.6130917408
 C,0,-2.7772850379,1.5668710213,3.4101675321
 C,0,-4.529746786,-0.3069253487,3.3083268603
 C,0,-2.4505833002,0.2939434851,-3.4628750467
 C,0,-4.7641715257,-0.8162280889,-3.4459002237
 C,0,-0.3879116968,-5.0782151326,-0.431531871
 C,0,-4.578176166,-2.5237612397,0.0124758227
 H,0,-2.8943295689,-4.4583853705,-0.1299634489
 H,0,1.7058117376,-0.0451786218,3.2303884966
 H,0,4.0566696257,-0.6196603524,-0.0396139288
 H,0,5.2077376167,2.7443013607,-2.7794356842
 H,0,3.7575484608,1.9079065513,-3.3970831806
 H,0,5.3855863595,1.2653839344,-3.7815485835
 H,0,1.953076447,4.1585878466,0.2501764175
 H,0,-2.4393112007,2.9364336598,0.4001715459
 H,0,1.7865056189,5.8088270984,-1.5952502482
 H,0,0.5948628732,4.7857070543,-2.4291746464
 H,0,2.2537833133,4.1834803824,-2.1578658256
 H,0,-2.9200700736,4.7436079658,-1.3041257226
 H,0,-2.9664453873,3.0630915112,-1.8544523059
 H,0,-1.5762514223,4.1203935363,-2.2903892231
 H,0,2.2108355587,2.3649897352,3.1848754738
 H,0,0.5937032384,2.0623375959,3.8724598097
 H,0,0.7415255021,2.6801784499,2.22458676
 H,0,5.7419348068,-0.3996246008,1.742991979
 H,0,5.9187532489,1.3420417802,1.4239366665
 H,0,6.4411244754,0.1526299138,0.2038049491
 H,0,3.9392804197,-3.5689600758,2.1841105476
 H,0,5.2773904225,-3.0396434482,0.1376032136
 H,0,4.1240329583,-2.5239539595,-2.0216134775
 H,0,0.1415315255,-3.8743542095,2.1651660831
 H,0,0.3148527389,-2.3742520935,-2.3585345367
 H,0,-5.0936643246,1.7834159737,-2.4433835347
 H,0,-5.6461042111,3.2078919216,-0.464186487
 H,0,-4.8174908338,2.5753209333,1.810918025
 H,0,-3.0379976082,-1.406551531,-2.2561514395
 H,0,-2.5163603805,-0.3730862018,2.4822053388
 H,0,0.7677646989,-3.190015048,4.5390050572
 H,0,0.6742148888,-1.846562902,3.3655510969
 H,0,2.2773504025,-2.4775249155,3.8996140967
 H,0,1.0367518714,-5.5600889382,3.7323347971
 H,0,2.7217650494,-5.1242533211,3.3435870598
 H,0,1.6948563125,-5.9031419561,2.107948299
 H,0,1.2317878361,-0.7185260245,-4.0130005505
 H,0,2.8378315399,-0.7982471165,-3.2275482
 H,0,1.4407066658,-0.1422962068,-2.3268011225
 H,0,1.1894079732,-3.2223370734,-4.53608673
 H,0,1.4971228983,-4.4243019949,-3.2517032446
 H,0,2.8303088204,-3.3997096821,-3.8557039992
 H,0,-2.3966109067,1.1897026114,4.371489073
 H,0,-3.556390527,2.3178901744,3.6143524528
 H,0,-1.942417864,2.0545829906,2.8800873153
 H,0,-4.2173947836,-0.6054024999,4.3206438918
 H,0,-4.8630461399,-1.2086428676,2.770652868
 H,0,-5.3821031205,0.3854381113,3.3939565186
 H,0,-2.1969447504,-0.3084205261,-4.3496169713
 H,0,-1.5281840676,0.4688822852,-2.8798188466
 H,0,-2.8414586573,1.2669264943,-3.8002712892
 H,0,-4.4758757469,-1.5054152361,-4.2542353748
 H,0,-5.2007266459,0.0846376238,-3.9029734408
 H,0,-5.5376062858,-1.303609347,-2.8330574425
 H,0,0.272769791,-5.4399106162,0.3636413385
 H,0,-1.2073817015,-5.7961247923,-0.5432429778
 H,0,0.1910544657,-5.0768572201,-1.363539253
 H,0,-5.0897789991,-1.81896354,0.6746646557
 H,0,-4.9668888522,-2.3687588098,-1.0009592188
 H,0,-4.8527599829,-3.5405953084,0.3145530122
 Recover connectivity data from disk.

 GradGradGradGradGradGradGradGradGradGradGradGradGradGradGradGradGradGrad
 Berny optimization.
 Initialization pass.
                           ----------------------------
                           !    Initial Parameters    !
                           ! (Angstroms and Degrees)  !
 --------------------------                            --------------------------
 ! Name  Definition              Value          Derivative Info.                !
 --------------------------------------------------------------------------------
 ! R1    R(1,4)                  1.3492         calculate D2E/DX2 analytically  !
 ! R2    R(1,16)                 1.4357         calculate D2E/DX2 analytically  !
 ! R3    R(2,3)                  1.9262         calculate D2E/DX2 analytically  !
 ! R4    R(2,5)                  2.0777         calculate D2E/DX2 analytically  !
 ! R5    R(2,6)                  2.109          calculate D2E/DX2 analytically  !
 ! R6    R(2,15)                 2.2708         calculate D2E/DX2 analytically  !
 ! R7    R(2,19)                 2.1999         calculate D2E/DX2 analytically  !
 ! R8    R(3,13)                 1.3667         calculate D2E/DX2 analytically  !
 ! R9    R(4,7)                  1.2113         calculate D2E/DX2 analytically  !
 ! R10   R(4,14)                 1.5238         calculate D2E/DX2 analytically  !
 ! R11   R(5,8)                  1.3294         calculate D2E/DX2 analytically  !
 ! R12   R(5,29)                 1.4468         calculate D2E/DX2 analytically  !
 ! R13   R(6,10)                 1.3312         calculate D2E/DX2 analytically  !
 ! R14   R(6,30)                 1.447          calculate D2E/DX2 analytically  !
 ! R15   R(8,9)                  1.4063         calculate D2E/DX2 analytically  !
 ! R16   R(8,53)                 1.5233         calculate D2E/DX2 analytically  !
 ! R17   R(9,10)                 1.4094         calculate D2E/DX2 analytically  !
 ! R18   R(9,55)                 1.0841         calculate D2E/DX2 analytically  !
 ! R19   R(10,54)                1.5264         calculate D2E/DX2 analytically  !
 ! R20   R(11,12)                1.3424         calculate D2E/DX2 analytically  !
 ! R21   R(11,14)                1.4394         calculate D2E/DX2 analytically  !
 ! R22   R(12,13)                1.5316         calculate D2E/DX2 analytically  !
 ! R23   R(12,15)                1.2258         calculate D2E/DX2 analytically  !
 ! R24   R(13,27)                1.5444         calculate D2E/DX2 analytically  !
 ! R25   R(13,56)                1.11           calculate D2E/DX2 analytically  !
 ! R26   R(14,28)                1.5279         calculate D2E/DX2 analytically  !
 ! R27   R(14,57)                1.0936         calculate D2E/DX2 analytically  !
 ! R28   R(16,58)                1.0928         calculate D2E/DX2 analytically  !
 ! R29   R(16,59)                1.0936         calculate D2E/DX2 analytically  !
 ! R30   R(16,60)                1.0906         calculate D2E/DX2 analytically  !
 ! R31   R(17,18)                1.3268         calculate D2E/DX2 analytically  !
 ! R32   R(17,22)                1.4519         calculate D2E/DX2 analytically  !
 ! R33   R(18,19)                1.2202         calculate D2E/DX2 analytically  !
 ! R34   R(18,23)                1.5165         calculate D2E/DX2 analytically  !
 ! R35   R(20,21)                1.3477         calculate D2E/DX2 analytically  !
 ! R36   R(20,23)                1.4468         calculate D2E/DX2 analytically  !
 ! R37   R(21,22)                1.5238         calculate D2E/DX2 analytically  !
 ! R38   R(21,24)                1.2067         calculate D2E/DX2 analytically  !
 ! R39   R(22,25)                1.5271         calculate D2E/DX2 analytically  !
 ! R40   R(22,61)                1.0911         calculate D2E/DX2 analytically  !
 ! R41   R(23,26)                1.5328         calculate D2E/DX2 analytically  !
 ! R42   R(23,62)                1.0933         calculate D2E/DX2 analytically  !
 ! R43   R(25,63)                1.0935         calculate D2E/DX2 analytically  !
 ! R44   R(25,64)                1.0947         calculate D2E/DX2 analytically  !
 ! R45   R(25,65)                1.092          calculate D2E/DX2 analytically  !
 ! R46   R(26,66)                1.0945         calculate D2E/DX2 analytically  !
 ! R47   R(26,67)                1.0905         calculate D2E/DX2 analytically  !
 ! R48   R(26,68)                1.0946         calculate D2E/DX2 analytically  !
 ! R49   R(27,69)                1.0959         calculate D2E/DX2 analytically  !
 ! R50   R(27,70)                1.0938         calculate D2E/DX2 analytically  !
 ! R51   R(27,71)                1.0948         calculate D2E/DX2 analytically  !
 ! R52   R(28,72)                1.0939         calculate D2E/DX2 analytically  !
 ! R53   R(28,73)                1.0946         calculate D2E/DX2 analytically  !
 ! R54   R(28,74)                1.094          calculate D2E/DX2 analytically  !
 ! R55   R(29,31)                1.4406         calculate D2E/DX2 analytically  !
 ! R56   R(29,35)                1.4297         calculate D2E/DX2 analytically  !
 ! R57   R(30,38)                1.4377         calculate D2E/DX2 analytically  !
 ! R58   R(30,42)                1.4356         calculate D2E/DX2 analytically  !
 ! R59   R(31,32)                1.4156         calculate D2E/DX2 analytically  !
 ! R60   R(31,36)                1.5555         calculate D2E/DX2 analytically  !
 ! R61   R(32,33)                1.4133         calculate D2E/DX2 analytically  !
 ! R62   R(32,75)                1.0981         calculate D2E/DX2 analytically  !
 ! R63   R(33,34)                1.4141         calculate D2E/DX2 analytically  !
 ! R64   R(33,76)                1.0989         calculate D2E/DX2 analytically  !
 ! R65   R(34,35)                1.4201         calculate D2E/DX2 analytically  !
 ! R66   R(34,77)                1.0982         calculate D2E/DX2 analytically  !
 ! R67   R(35,37)                1.5503         calculate D2E/DX2 analytically  !
 ! R68   R(36,45)                1.5606         calculate D2E/DX2 analytically  !
 ! R69   R(36,46)                1.5671         calculate D2E/DX2 analytically  !
 ! R70   R(36,78)                1.1068         calculate D2E/DX2 analytically  !
 ! R71   R(37,47)                1.5614         calculate D2E/DX2 analytically  !
 ! R72   R(37,48)                1.5659         calculate D2E/DX2 analytically  !
 ! R73   R(37,79)                1.1089         calculate D2E/DX2 analytically  !
 ! R74   R(38,39)                1.4207         calculate D2E/DX2 analytically  !
 ! R75   R(38,43)                1.5543         calculate D2E/DX2 analytically  !
 ! R76   R(39,40)                1.412          calculate D2E/DX2 analytically  !
 ! R77   R(39,80)                1.0977         calculate D2E/DX2 analytically  !
 ! R78   R(40,41)                1.413          calculate D2E/DX2 analytically  !
 ! R79   R(40,81)                1.0991         calculate D2E/DX2 analytically  !
 ! R80   R(41,42)                1.4246         calculate D2E/DX2 analytically  !
 ! R81   R(41,82)                1.0979         calculate D2E/DX2 analytically  !
 ! R82   R(42,44)                1.5517         calculate D2E/DX2 analytically  !
 ! R83   R(43,51)                1.5632         calculate D2E/DX2 analytically  !
 ! R84   R(43,52)                1.5659         calculate D2E/DX2 analytically  !
 ! R85   R(43,83)                1.1064         calculate D2E/DX2 analytically  !
 ! R86   R(44,49)                1.5588         calculate D2E/DX2 analytically  !
 ! R87   R(44,50)                1.5666         calculate D2E/DX2 analytically  !
 ! R88   R(44,84)                1.1069         calculate D2E/DX2 analytically  !
 ! R89   R(45,85)                1.1017         calculate D2E/DX2 analytically  !
 ! R90   R(45,86)                1.1041         calculate D2E/DX2 analytically  !
 ! R91   R(45,87)                1.1014         calculate D2E/DX2 analytically  !
 ! R92   R(46,88)                1.1007         calculate D2E/DX2 analytically  !
 ! R93   R(46,89)                1.1004         calculate D2E/DX2 analytically  !
 ! R94   R(46,90)                1.1011         calculate D2E/DX2 analytically  !
 ! R95   R(47,91)                1.1017         calculate D2E/DX2 analytically  !
 ! R96   R(47,92)                1.1011         calculate D2E/DX2 analytically  !
 ! R97   R(47,93)                1.1049         calculate D2E/DX2 analytically  !
 ! R98   R(48,94)                1.1008         calculate D2E/DX2 analytically  !
 ! R99   R(48,95)                1.101          calculate D2E/DX2 analytically  !
 ! R100  R(48,96)                1.1008         calculate D2E/DX2 analytically  !
 ! R101  R(49,97)                1.1006         calculate D2E/DX2 analytically  !
 ! R102  R(49,98)                1.1012         calculate D2E/DX2 analytically  !
 ! R103  R(49,99)                1.1027         calculate D2E/DX2 analytically  !
 ! R104  R(50,100)               1.1007         calculate D2E/DX2 analytically  !
 ! R105  R(50,101)               1.1015         calculate D2E/DX2 analytically  !
 ! R106  R(50,102)               1.1015         calculate D2E/DX2 analytically  !
 ! R107  R(51,103)               1.1016         calculate D2E/DX2 analytically  !
 ! R108  R(51,104)               1.1052         calculate D2E/DX2 analytically  !
 ! R109  R(51,105)               1.1015         calculate D2E/DX2 analytically  !
 ! R110  R(52,106)               1.1007         calculate D2E/DX2 analytically  !
 ! R111  R(52,107)               1.1005         calculate D2E/DX2 analytically  !
 ! R112  R(52,108)               1.1006         calculate D2E/DX2 analytically  !
 ! R113  R(53,109)               1.0953         calculate D2E/DX2 analytically  !
 ! R114  R(53,110)               1.0952         calculate D2E/DX2 analytically  !
 ! R115  R(53,111)               1.0972         calculate D2E/DX2 analytically  !
 ! R116  R(54,112)               1.0941         calculate D2E/DX2 analytically  !
 ! R117  R(54,113)               1.0964         calculate D2E/DX2 analytically  !
 ! R118  R(54,114)               1.0957         calculate D2E/DX2 analytically  !
 ! A1    A(4,1,16)             115.8393         calculate D2E/DX2 analytically  !
 ! A2    A(3,2,5)              121.845          calculate D2E/DX2 analytically  !
 ! A3    A(3,2,6)              115.569          calculate D2E/DX2 analytically  !
 ! A4    A(3,2,15)              77.9128         calculate D2E/DX2 analytically  !
 ! A5    A(3,2,19)              97.369          calculate D2E/DX2 analytically  !
 ! A6    A(5,2,6)               87.7377         calculate D2E/DX2 analytically  !
 ! A7    A(5,2,15)              93.2583         calculate D2E/DX2 analytically  !
 ! A8    A(5,2,19)             138.0733         calculate D2E/DX2 analytically  !
 ! A9    A(6,2,15)             163.2603         calculate D2E/DX2 analytically  !
 ! A10   A(6,2,19)              88.006          calculate D2E/DX2 analytically  !
 ! A11   A(15,2,19)             80.094          calculate D2E/DX2 analytically  !
 ! A12   A(2,3,13)             121.8153         calculate D2E/DX2 analytically  !
 ! A13   A(1,4,7)              124.023          calculate D2E/DX2 analytically  !
 ! A14   A(1,4,14)             109.4951         calculate D2E/DX2 analytically  !
 ! A15   A(7,4,14)             126.4309         calculate D2E/DX2 analytically  !
 ! A16   A(2,5,8)              128.2478         calculate D2E/DX2 analytically  !
 ! A17   A(2,5,29)             111.4264         calculate D2E/DX2 analytically  !
 ! A18   A(8,5,29)             119.9703         calculate D2E/DX2 analytically  !
 ! A19   A(2,6,10)             126.2805         calculate D2E/DX2 analytically  !
 ! A20   A(2,6,30)             115.7924         calculate D2E/DX2 analytically  !
 ! A21   A(10,6,30)            117.9214         calculate D2E/DX2 analytically  !
 ! A22   A(5,8,9)              123.7174         calculate D2E/DX2 analytically  !
 ! A23   A(5,8,53)             119.5347         calculate D2E/DX2 analytically  !
 ! A24   A(9,8,53)             116.7395         calculate D2E/DX2 analytically  !
 ! A25   A(8,9,10)             127.7554         calculate D2E/DX2 analytically  !
 ! A26   A(8,9,55)             116.1289         calculate D2E/DX2 analytically  !
 ! A27   A(10,9,55)            116.007          calculate D2E/DX2 analytically  !
 ! A28   A(6,10,9)             124.4278         calculate D2E/DX2 analytically  !
 ! A29   A(6,10,54)            120.2614         calculate D2E/DX2 analytically  !
 ! A30   A(9,10,54)            115.2714         calculate D2E/DX2 analytically  !
 ! A31   A(12,11,14)           117.1179         calculate D2E/DX2 analytically  !
 ! A32   A(11,12,13)           115.3985         calculate D2E/DX2 analytically  !
 ! A33   A(11,12,15)           122.4274         calculate D2E/DX2 analytically  !
 ! A34   A(13,12,15)           122.0915         calculate D2E/DX2 analytically  !
 ! A35   A(3,13,12)            109.5302         calculate D2E/DX2 analytically  !
 ! A36   A(3,13,27)            113.7507         calculate D2E/DX2 analytically  !
 ! A37   A(3,13,56)            112.6057         calculate D2E/DX2 analytically  !
 ! A38   A(12,13,27)           110.8004         calculate D2E/DX2 analytically  !
 ! A39   A(12,13,56)           103.6863         calculate D2E/DX2 analytically  !
 ! A40   A(27,13,56)           105.9776         calculate D2E/DX2 analytically  !
 ! A41   A(4,14,11)            110.2633         calculate D2E/DX2 analytically  !
 ! A42   A(4,14,28)            111.0631         calculate D2E/DX2 analytically  !
 ! A43   A(4,14,57)            109.4494         calculate D2E/DX2 analytically  !
 ! A44   A(11,14,28)           106.4305         calculate D2E/DX2 analytically  !
 ! A45   A(11,14,57)           109.5533         calculate D2E/DX2 analytically  !
 ! A46   A(28,14,57)           110.0364         calculate D2E/DX2 analytically  !
 ! A47   A(2,15,12)            108.3825         calculate D2E/DX2 analytically  !
 ! A48   A(1,16,58)            110.8216         calculate D2E/DX2 analytically  !
 ! A49   A(1,16,59)            110.0636         calculate D2E/DX2 analytically  !
 ! A50   A(1,16,60)            105.6397         calculate D2E/DX2 analytically  !
 ! A51   A(58,16,59)           109.3937         calculate D2E/DX2 analytically  !
 ! A52   A(58,16,60)           110.6203         calculate D2E/DX2 analytically  !
 ! A53   A(59,16,60)           110.2554         calculate D2E/DX2 analytically  !
 ! A54   A(18,17,22)           122.5688         calculate D2E/DX2 analytically  !
 ! A55   A(17,18,19)           119.6043         calculate D2E/DX2 analytically  !
 ! A56   A(17,18,23)           118.676          calculate D2E/DX2 analytically  !
 ! A57   A(19,18,23)           121.6825         calculate D2E/DX2 analytically  !
 ! A58   A(2,19,18)            136.9776         calculate D2E/DX2 analytically  !
 ! A59   A(21,20,23)           120.655          calculate D2E/DX2 analytically  !
 ! A60   A(20,21,22)           118.3088         calculate D2E/DX2 analytically  !
 ! A61   A(20,21,24)           121.0638         calculate D2E/DX2 analytically  !
 ! A62   A(22,21,24)           120.5935         calculate D2E/DX2 analytically  !
 ! A63   A(17,22,21)           114.5861         calculate D2E/DX2 analytically  !
 ! A64   A(17,22,25)           109.8781         calculate D2E/DX2 analytically  !
 ! A65   A(17,22,61)           103.5208         calculate D2E/DX2 analytically  !
 ! A66   A(21,22,25)           112.6769         calculate D2E/DX2 analytically  !
 ! A67   A(21,22,61)           106.8352         calculate D2E/DX2 analytically  !
 ! A68   A(25,22,61)           108.7483         calculate D2E/DX2 analytically  !
 ! A69   A(18,23,20)           112.401          calculate D2E/DX2 analytically  !
 ! A70   A(18,23,26)           111.4467         calculate D2E/DX2 analytically  !
 ! A71   A(18,23,62)           108.414          calculate D2E/DX2 analytically  !
 ! A72   A(20,23,26)           111.1605         calculate D2E/DX2 analytically  !
 ! A73   A(20,23,62)           105.6404         calculate D2E/DX2 analytically  !
 ! A74   A(26,23,62)           107.4474         calculate D2E/DX2 analytically  !
 ! A75   A(22,25,63)           108.861          calculate D2E/DX2 analytically  !
 ! A76   A(22,25,64)           111.8285         calculate D2E/DX2 analytically  !
 ! A77   A(22,25,65)           108.6505         calculate D2E/DX2 analytically  !
 ! A78   A(63,25,64)           108.7096         calculate D2E/DX2 analytically  !
 ! A79   A(63,25,65)           109.2733         calculate D2E/DX2 analytically  !
 ! A80   A(64,25,65)           109.484          calculate D2E/DX2 analytically  !
 ! A81   A(23,26,66)           108.1193         calculate D2E/DX2 analytically  !
 ! A82   A(23,26,67)           107.5864         calculate D2E/DX2 analytically  !
 ! A83   A(23,26,68)           113.1664         calculate D2E/DX2 analytically  !
 ! A84   A(66,26,67)           108.1108         calculate D2E/DX2 analytically  !
 ! A85   A(66,26,68)           108.7681         calculate D2E/DX2 analytically  !
 ! A86   A(67,26,68)           110.937          calculate D2E/DX2 analytically  !
 ! A87   A(13,27,69)           112.1559         calculate D2E/DX2 analytically  !
 ! A88   A(13,27,70)           108.3587         calculate D2E/DX2 analytically  !
 ! A89   A(13,27,71)           110.5839         calculate D2E/DX2 analytically  !
 ! A90   A(69,27,70)           109.0396         calculate D2E/DX2 analytically  !
 ! A91   A(69,27,71)           108.9867         calculate D2E/DX2 analytically  !
 ! A92   A(70,27,71)           107.5981         calculate D2E/DX2 analytically  !
 ! A93   A(14,28,72)           109.224          calculate D2E/DX2 analytically  !
 ! A94   A(14,28,73)           110.9236         calculate D2E/DX2 analytically  !
 ! A95   A(14,28,74)           110.0558         calculate D2E/DX2 analytically  !
 ! A96   A(72,28,73)           108.8024         calculate D2E/DX2 analytically  !
 ! A97   A(72,28,74)           108.7523         calculate D2E/DX2 analytically  !
 ! A98   A(73,28,74)           109.0416         calculate D2E/DX2 analytically  !
 ! A99   A(5,29,31)            119.0043         calculate D2E/DX2 analytically  !
 ! A100  A(5,29,35)            119.3712         calculate D2E/DX2 analytically  !
 ! A101  A(31,29,35)           121.2426         calculate D2E/DX2 analytically  !
 ! A102  A(6,30,38)            119.367          calculate D2E/DX2 analytically  !
 ! A103  A(6,30,42)            119.5896         calculate D2E/DX2 analytically  !
 ! A104  A(38,30,42)           120.9364         calculate D2E/DX2 analytically  !
 ! A105  A(29,31,32)           118.0332         calculate D2E/DX2 analytically  !
 ! A106  A(29,31,36)           121.8867         calculate D2E/DX2 analytically  !
 ! A107  A(32,31,36)           119.9768         calculate D2E/DX2 analytically  !
 ! A108  A(31,32,33)           121.2501         calculate D2E/DX2 analytically  !
 ! A109  A(31,32,75)           119.353          calculate D2E/DX2 analytically  !
 ! A110  A(33,32,75)           119.337          calculate D2E/DX2 analytically  !
 ! A111  A(32,33,34)           120.0            calculate D2E/DX2 analytically  !
 ! A112  A(32,33,76)           120.0576         calculate D2E/DX2 analytically  !
 ! A113  A(34,33,76)           119.8635         calculate D2E/DX2 analytically  !
 ! A114  A(33,34,35)           120.8384         calculate D2E/DX2 analytically  !
 ! A115  A(33,34,77)           119.4761         calculate D2E/DX2 analytically  !
 ! A116  A(35,34,77)           119.6757         calculate D2E/DX2 analytically  !
 ! A117  A(29,35,34)           118.4872         calculate D2E/DX2 analytically  !
 ! A118  A(29,35,37)           121.3201         calculate D2E/DX2 analytically  !
 ! A119  A(34,35,37)           120.1764         calculate D2E/DX2 analytically  !
 ! A120  A(31,36,45)           112.8587         calculate D2E/DX2 analytically  !
 ! A121  A(31,36,46)           110.7042         calculate D2E/DX2 analytically  !
 ! A122  A(31,36,78)           107.8143         calculate D2E/DX2 analytically  !
 ! A123  A(45,36,46)           110.6282         calculate D2E/DX2 analytically  !
 ! A124  A(45,36,78)           106.873          calculate D2E/DX2 analytically  !
 ! A125  A(46,36,78)           107.7156         calculate D2E/DX2 analytically  !
 ! A126  A(35,37,47)           112.1129         calculate D2E/DX2 analytically  !
 ! A127  A(35,37,48)           110.9713         calculate D2E/DX2 analytically  !
 ! A128  A(35,37,79)           107.4118         calculate D2E/DX2 analytically  !
 ! A129  A(47,37,48)           110.6255         calculate D2E/DX2 analytically  !
 ! A130  A(47,37,79)           107.7658         calculate D2E/DX2 analytically  !
 ! A131  A(48,37,79)           107.7482         calculate D2E/DX2 analytically  !
 ! A132  A(30,38,39)           118.531          calculate D2E/DX2 analytically  !
 ! A133  A(30,38,43)           122.1615         calculate D2E/DX2 analytically  !
 ! A134  A(39,38,43)           119.3064         calculate D2E/DX2 analytically  !
 ! A135  A(38,39,40)           121.0603         calculate D2E/DX2 analytically  !
 ! A136  A(38,39,80)           119.5217         calculate D2E/DX2 analytically  !
 ! A137  A(40,39,80)           119.3928         calculate D2E/DX2 analytically  !
 ! A138  A(39,40,41)           120.0062         calculate D2E/DX2 analytically  !
 ! A139  A(39,40,81)           119.9951         calculate D2E/DX2 analytically  !
 ! A140  A(41,40,81)           119.9805         calculate D2E/DX2 analytically  !
 ! A141  A(40,41,42)           121.0725         calculate D2E/DX2 analytically  !
 ! A142  A(40,41,82)           119.4827         calculate D2E/DX2 analytically  !
 ! A143  A(42,41,82)           119.3618         calculate D2E/DX2 analytically  !
 ! A144  A(30,42,41)           118.3663         calculate D2E/DX2 analytically  !
 ! A145  A(30,42,44)           121.6439         calculate D2E/DX2 analytically  !
 ! A146  A(41,42,44)           119.8902         calculate D2E/DX2 analytically  !
 ! A147  A(38,43,51)           111.0177         calculate D2E/DX2 analytically  !
 ! A148  A(38,43,52)           112.1741         calculate D2E/DX2 analytically  !
 ! A149  A(38,43,83)           108.0815         calculate D2E/DX2 analytically  !
 ! A150  A(51,43,52)           110.1915         calculate D2E/DX2 analytically  !
 ! A151  A(51,43,83)           107.239          calculate D2E/DX2 analytically  !
 ! A152  A(52,43,83)           107.9395         calculate D2E/DX2 analytically  !
 ! A153  A(42,44,49)           112.4069         calculate D2E/DX2 analytically  !
 ! A154  A(42,44,50)           110.6341         calculate D2E/DX2 analytically  !
 ! A155  A(42,44,84)           107.8211         calculate D2E/DX2 analytically  !
 ! A156  A(49,44,50)           110.4728         calculate D2E/DX2 analytically  !
 ! A157  A(49,44,84)           107.4957         calculate D2E/DX2 analytically  !
 ! A158  A(50,44,84)           107.8158         calculate D2E/DX2 analytically  !
 ! A159  A(36,45,85)           109.9376         calculate D2E/DX2 analytically  !
 ! A160  A(36,45,86)           109.3525         calculate D2E/DX2 analytically  !
 ! A161  A(36,45,87)           111.1344         calculate D2E/DX2 analytically  !
 ! A162  A(85,45,86)           108.1555         calculate D2E/DX2 analytically  !
 ! A163  A(85,45,87)           108.4655         calculate D2E/DX2 analytically  !
 ! A164  A(86,45,87)           109.74           calculate D2E/DX2 analytically  !
 ! A165  A(36,46,88)           109.5699         calculate D2E/DX2 analytically  !
 ! A166  A(36,46,89)           111.0552         calculate D2E/DX2 analytically  !
 ! A167  A(36,46,90)           111.0936         calculate D2E/DX2 analytically  !
 ! A168  A(88,46,89)           108.2313         calculate D2E/DX2 analytically  !
 ! A169  A(88,46,90)           108.4118         calculate D2E/DX2 analytically  !
 ! A170  A(89,46,90)           108.3928         calculate D2E/DX2 analytically  !
 ! A171  A(37,47,91)           109.9177         calculate D2E/DX2 analytically  !
 ! A172  A(37,47,92)           110.9667         calculate D2E/DX2 analytically  !
 ! A173  A(37,47,93)           110.2223         calculate D2E/DX2 analytically  !
 ! A174  A(91,47,92)           108.6711         calculate D2E/DX2 analytically  !
 ! A175  A(91,47,93)           108.7972         calculate D2E/DX2 analytically  !
 ! A176  A(92,47,93)           108.2093         calculate D2E/DX2 analytically  !
 ! A177  A(37,48,94)           109.8549         calculate D2E/DX2 analytically  !
 ! A178  A(37,48,95)           110.7465         calculate D2E/DX2 analytically  !
 ! A179  A(37,48,96)           110.9347         calculate D2E/DX2 analytically  !
 ! A180  A(94,48,95)           108.3981         calculate D2E/DX2 analytically  !
 ! A181  A(94,48,96)           108.3618         calculate D2E/DX2 analytically  !
 ! A182  A(95,48,96)           108.4691         calculate D2E/DX2 analytically  !
 ! A183  A(44,49,97)           109.3125         calculate D2E/DX2 analytically  !
 ! A184  A(44,49,98)           111.8188         calculate D2E/DX2 analytically  !
 ! A185  A(44,49,99)           110.2785         calculate D2E/DX2 analytically  !
 ! A186  A(97,49,98)           108.4492         calculate D2E/DX2 analytically  !
 ! A187  A(97,49,99)           108.0347         calculate D2E/DX2 analytically  !
 ! A188  A(98,49,99)           108.8538         calculate D2E/DX2 analytically  !
 ! A189  A(44,50,100)          109.4883         calculate D2E/DX2 analytically  !
 ! A190  A(44,50,101)          110.9974         calculate D2E/DX2 analytically  !
 ! A191  A(44,50,102)          110.9097         calculate D2E/DX2 analytically  !
 ! A192  A(100,50,101)         108.2298         calculate D2E/DX2 analytically  !
 ! A193  A(100,50,102)         108.5762         calculate D2E/DX2 analytically  !
 ! A194  A(101,50,102)         108.5647         calculate D2E/DX2 analytically  !
 ! A195  A(43,51,103)          110.0264         calculate D2E/DX2 analytically  !
 ! A196  A(43,51,104)          110.0791         calculate D2E/DX2 analytically  !
 ! A197  A(43,51,105)          110.9802         calculate D2E/DX2 analytically  !
 ! A198  A(103,51,104)         108.6065         calculate D2E/DX2 analytically  !
 ! A199  A(103,51,105)         108.5513         calculate D2E/DX2 analytically  !
 ! A200  A(104,51,105)         108.5389         calculate D2E/DX2 analytically  !
 ! A201  A(43,52,106)          109.5431         calculate D2E/DX2 analytically  !
 ! A202  A(43,52,107)          111.1208         calculate D2E/DX2 analytically  !
 ! A203  A(43,52,108)          111.1728         calculate D2E/DX2 analytically  !
 ! A204  A(106,52,107)         108.1467         calculate D2E/DX2 analytically  !
 ! A205  A(106,52,108)         108.4042         calculate D2E/DX2 analytically  !
 ! A206  A(107,52,108)         108.3612         calculate D2E/DX2 analytically  !
 ! A207  A(8,53,109)           111.9173         calculate D2E/DX2 analytically  !
 ! A208  A(8,53,110)           111.0129         calculate D2E/DX2 analytically  !
 ! A209  A(8,53,111)           110.3684         calculate D2E/DX2 analytically  !
 ! A210  A(109,53,110)         107.9951         calculate D2E/DX2 analytically  !
 ! A211  A(109,53,111)         107.386          calculate D2E/DX2 analytically  !
 ! A212  A(110,53,111)         107.9992         calculate D2E/DX2 analytically  !
 ! A213  A(10,54,112)          111.9969         calculate D2E/DX2 analytically  !
 ! A214  A(10,54,113)          111.2486         calculate D2E/DX2 analytically  !
 ! A215  A(10,54,114)          110.2296         calculate D2E/DX2 analytically  !
 ! A216  A(112,54,113)         107.613          calculate D2E/DX2 analytically  !
 ! A217  A(112,54,114)         108.2871         calculate D2E/DX2 analytically  !
 ! A218  A(113,54,114)         107.2876         calculate D2E/DX2 analytically  !
 ! D1    D(16,1,4,7)            -1.5743         calculate D2E/DX2 analytically  !
 ! D2    D(16,1,4,14)         -179.1219         calculate D2E/DX2 analytically  !
 ! D3    D(4,1,16,58)           53.5346         calculate D2E/DX2 analytically  !
 ! D4    D(4,1,16,59)          -67.6037         calculate D2E/DX2 analytically  !
 ! D5    D(4,1,16,60)          173.3845         calculate D2E/DX2 analytically  !
 ! D6    D(5,2,3,13)            83.1612         calculate D2E/DX2 analytically  !
 ! D7    D(6,2,3,13)          -172.6178         calculate D2E/DX2 analytically  !
 ! D8    D(15,2,3,13)           -3.1358         calculate D2E/DX2 analytically  !
 ! D9    D(19,2,3,13)          -81.3008         calculate D2E/DX2 analytically  !
 ! D10   D(3,2,5,8)            108.4565         calculate D2E/DX2 analytically  !
 ! D11   D(3,2,5,29)           -64.5979         calculate D2E/DX2 analytically  !
 ! D12   D(6,2,5,8)            -10.486          calculate D2E/DX2 analytically  !
 ! D13   D(6,2,5,29)           176.4595         calculate D2E/DX2 analytically  !
 ! D14   D(15,2,5,8)          -173.7563         calculate D2E/DX2 analytically  !
 ! D15   D(15,2,5,29)           13.1893         calculate D2E/DX2 analytically  !
 ! D16   D(19,2,5,8)           -94.9713         calculate D2E/DX2 analytically  !
 ! D17   D(19,2,5,29)           91.9742         calculate D2E/DX2 analytically  !
 ! D18   D(3,2,6,10)          -110.4419         calculate D2E/DX2 analytically  !
 ! D19   D(3,2,6,30)            70.4516         calculate D2E/DX2 analytically  !
 ! D20   D(5,2,6,10)            14.0618         calculate D2E/DX2 analytically  !
 ! D21   D(5,2,6,30)          -165.0446         calculate D2E/DX2 analytically  !
 ! D22   D(15,2,6,10)          107.8543         calculate D2E/DX2 analytically  !
 ! D23   D(15,2,6,30)          -71.2521         calculate D2E/DX2 analytically  !
 ! D24   D(19,2,6,10)          152.3419         calculate D2E/DX2 analytically  !
 ! D25   D(19,2,6,30)          -26.7645         calculate D2E/DX2 analytically  !
 ! D26   D(3,2,15,12)            4.5334         calculate D2E/DX2 analytically  !
 ! D27   D(5,2,15,12)         -117.3551         calculate D2E/DX2 analytically  !
 ! D28   D(6,2,15,12)          149.6639         calculate D2E/DX2 analytically  !
 ! D29   D(19,2,15,12)         104.3532         calculate D2E/DX2 analytically  !
 ! D30   D(3,2,19,18)           16.1338         calculate D2E/DX2 analytically  !
 ! D31   D(5,2,19,18)         -143.9551         calculate D2E/DX2 analytically  !
 ! D32   D(6,2,19,18)          131.6619         calculate D2E/DX2 analytically  !
 ! D33   D(15,2,19,18)         -60.1611         calculate D2E/DX2 analytically  !
 ! D34   D(2,3,13,12)            1.4709         calculate D2E/DX2 analytically  !
 ! D35   D(2,3,13,27)          126.0636         calculate D2E/DX2 analytically  !
 ! D36   D(2,3,13,56)         -113.3408         calculate D2E/DX2 analytically  !
 ! D37   D(1,4,14,11)         -164.1801         calculate D2E/DX2 analytically  !
 ! D38   D(1,4,14,28)           78.0914         calculate D2E/DX2 analytically  !
 ! D39   D(1,4,14,57)          -43.6014         calculate D2E/DX2 analytically  !
 ! D40   D(7,4,14,11)           18.3463         calculate D2E/DX2 analytically  !
 ! D41   D(7,4,14,28)          -99.3822         calculate D2E/DX2 analytically  !
 ! D42   D(7,4,14,57)          138.925          calculate D2E/DX2 analytically  !
 ! D43   D(2,5,8,9)              2.9007         calculate D2E/DX2 analytically  !
 ! D44   D(2,5,8,53)          -178.1874         calculate D2E/DX2 analytically  !
 ! D45   D(29,5,8,9)           175.4343         calculate D2E/DX2 analytically  !
 ! D46   D(29,5,8,53)           -5.6537         calculate D2E/DX2 analytically  !
 ! D47   D(2,5,29,31)           88.3143         calculate D2E/DX2 analytically  !
 ! D48   D(2,5,29,35)          -84.6825         calculate D2E/DX2 analytically  !
 ! D49   D(8,5,29,31)          -85.3919         calculate D2E/DX2 analytically  !
 ! D50   D(8,5,29,35)          101.6113         calculate D2E/DX2 analytically  !
 ! D51   D(2,6,10,9)           -10.5321         calculate D2E/DX2 analytically  !
 ! D52   D(2,6,10,54)          171.8631         calculate D2E/DX2 analytically  !
 ! D53   D(30,6,10,9)          168.5574         calculate D2E/DX2 analytically  !
 ! D54   D(30,6,10,54)          -9.0474         calculate D2E/DX2 analytically  !
 ! D55   D(2,6,30,38)          103.2451         calculate D2E/DX2 analytically  !
 ! D56   D(2,6,30,42)          -73.0298         calculate D2E/DX2 analytically  !
 ! D57   D(10,6,30,38)         -75.9396         calculate D2E/DX2 analytically  !
 ! D58   D(10,6,30,42)         107.7854         calculate D2E/DX2 analytically  !
 ! D59   D(5,8,9,10)             7.0369         calculate D2E/DX2 analytically  !
 ! D60   D(5,8,9,55)          -176.9346         calculate D2E/DX2 analytically  !
 ! D61   D(53,8,9,10)         -171.9031         calculate D2E/DX2 analytically  !
 ! D62   D(53,8,9,55)            4.1254         calculate D2E/DX2 analytically  !
 ! D63   D(5,8,53,109)          60.6969         calculate D2E/DX2 analytically  !
 ! D64   D(5,8,53,110)        -178.5541         calculate D2E/DX2 analytically  !
 ! D65   D(5,8,53,111)         -58.8377         calculate D2E/DX2 analytically  !
 ! D66   D(9,8,53,109)        -120.3165         calculate D2E/DX2 analytically  !
 ! D67   D(9,8,53,110)           0.4326         calculate D2E/DX2 analytically  !
 ! D68   D(9,8,53,111)         120.1489         calculate D2E/DX2 analytically  !
 ! D69   D(8,9,10,6)            -2.7781         calculate D2E/DX2 analytically  !
 ! D70   D(8,9,10,54)          174.9343         calculate D2E/DX2 analytically  !
 ! D71   D(55,9,10,6)         -178.8107         calculate D2E/DX2 analytically  !
 ! D72   D(55,9,10,54)          -1.0984         calculate D2E/DX2 analytically  !
 ! D73   D(6,10,54,112)        -38.3551         calculate D2E/DX2 analytically  !
 ! D74   D(6,10,54,113)         82.1243         calculate D2E/DX2 analytically  !
 ! D75   D(6,10,54,114)       -158.9875         calculate D2E/DX2 analytically  !
 ! D76   D(9,10,54,112)        143.8295         calculate D2E/DX2 analytically  !
 ! D77   D(9,10,54,113)        -95.6911         calculate D2E/DX2 analytically  !
 ! D78   D(9,10,54,114)         23.1971         calculate D2E/DX2 analytically  !
 ! D79   D(14,11,12,13)        170.1752         calculate D2E/DX2 analytically  !
 ! D80   D(14,11,12,15)         -6.5828         calculate D2E/DX2 analytically  !
 ! D81   D(12,11,14,4)          78.0648         calculate D2E/DX2 analytically  !
 ! D82   D(12,11,14,28)       -161.3854         calculate D2E/DX2 analytically  !
 ! D83   D(12,11,14,57)        -42.4515         calculate D2E/DX2 analytically  !
 ! D84   D(11,12,13,3)        -173.47           calculate D2E/DX2 analytically  !
 ! D85   D(11,12,13,27)         60.2391         calculate D2E/DX2 analytically  !
 ! D86   D(11,12,13,56)        -53.0621         calculate D2E/DX2 analytically  !
 ! D87   D(15,12,13,3)           3.3            calculate D2E/DX2 analytically  !
 ! D88   D(15,12,13,27)       -122.9909         calculate D2E/DX2 analytically  !
 ! D89   D(15,12,13,56)        123.7079         calculate D2E/DX2 analytically  !
 ! D90   D(11,12,15,2)         171.1465         calculate D2E/DX2 analytically  !
 ! D91   D(13,12,15,2)          -5.3964         calculate D2E/DX2 analytically  !
 ! D92   D(3,13,27,69)         179.8081         calculate D2E/DX2 analytically  !
 ! D93   D(3,13,27,70)          59.3939         calculate D2E/DX2 analytically  !
 ! D94   D(3,13,27,71)         -58.3102         calculate D2E/DX2 analytically  !
 ! D95   D(12,13,27,69)        -56.2843         calculate D2E/DX2 analytically  !
 ! D96   D(12,13,27,70)       -176.6986         calculate D2E/DX2 analytically  !
 ! D97   D(12,13,27,71)         65.5973         calculate D2E/DX2 analytically  !
 ! D98   D(56,13,27,69)         55.5571         calculate D2E/DX2 analytically  !
 ! D99   D(56,13,27,70)        -64.8571         calculate D2E/DX2 analytically  !
 ! D100  D(56,13,27,71)        177.4388         calculate D2E/DX2 analytically  !
 ! D101  D(4,14,28,72)        -177.6804         calculate D2E/DX2 analytically  !
 ! D102  D(4,14,28,73)          62.4016         calculate D2E/DX2 analytically  !
 ! D103  D(4,14,28,74)         -58.3566         calculate D2E/DX2 analytically  !
 ! D104  D(11,14,28,72)         62.2861         calculate D2E/DX2 analytically  !
 ! D105  D(11,14,28,73)        -57.6319         calculate D2E/DX2 analytically  !
 ! D106  D(11,14,28,74)       -178.3901         calculate D2E/DX2 analytically  !
 ! D107  D(57,14,28,72)        -56.3312         calculate D2E/DX2 analytically  !
 ! D108  D(57,14,28,73)       -176.2492         calculate D2E/DX2 analytically  !
 ! D109  D(57,14,28,74)         62.9926         calculate D2E/DX2 analytically  !
 ! D110  D(22,17,18,19)        177.8876         calculate D2E/DX2 analytically  !
 ! D111  D(22,17,18,23)          0.0676         calculate D2E/DX2 analytically  !
 ! D112  D(18,17,22,21)         21.6997         calculate D2E/DX2 analytically  !
 ! D113  D(18,17,22,25)       -106.344          calculate D2E/DX2 analytically  !
 ! D114  D(18,17,22,61)        137.6503         calculate D2E/DX2 analytically  !
 ! D115  D(17,18,19,2)          69.689          calculate D2E/DX2 analytically  !
 ! D116  D(23,18,19,2)        -112.5586         calculate D2E/DX2 analytically  !
 ! D117  D(17,18,23,20)        -29.6754         calculate D2E/DX2 analytically  !
 ! D118  D(17,18,23,26)         95.8747         calculate D2E/DX2 analytically  !
 ! D119  D(17,18,23,62)       -146.0712         calculate D2E/DX2 analytically  !
 ! D120  D(19,18,23,20)        152.552          calculate D2E/DX2 analytically  !
 ! D121  D(19,18,23,26)        -81.8979         calculate D2E/DX2 analytically  !
 ! D122  D(19,18,23,62)         36.1562         calculate D2E/DX2 analytically  !
 ! D123  D(23,20,21,22)        -17.8555         calculate D2E/DX2 analytically  !
 ! D124  D(23,20,21,24)        164.2497         calculate D2E/DX2 analytically  !
 ! D125  D(21,20,23,18)         38.8501         calculate D2E/DX2 analytically  !
 ! D126  D(21,20,23,26)        -86.8558         calculate D2E/DX2 analytically  !
 ! D127  D(21,20,23,62)        156.8973         calculate D2E/DX2 analytically  !
 ! D128  D(20,21,22,17)        -12.8796         calculate D2E/DX2 analytically  !
 ! D129  D(20,21,22,25)        113.7348         calculate D2E/DX2 analytically  !
 ! D130  D(20,21,22,61)       -126.9003         calculate D2E/DX2 analytically  !
 ! D131  D(24,21,22,17)        165.0255         calculate D2E/DX2 analytically  !
 ! D132  D(24,21,22,25)        -68.3602         calculate D2E/DX2 analytically  !
 ! D133  D(24,21,22,61)         51.0047         calculate D2E/DX2 analytically  !
 ! D134  D(17,22,25,63)       -175.9698         calculate D2E/DX2 analytically  !
 ! D135  D(17,22,25,64)         63.8986         calculate D2E/DX2 analytically  !
 ! D136  D(17,22,25,65)        -57.0596         calculate D2E/DX2 analytically  !
 ! D137  D(21,22,25,63)         54.9387         calculate D2E/DX2 analytically  !
 ! D138  D(21,22,25,64)        -65.1929         calculate D2E/DX2 analytically  !
 ! D139  D(21,22,25,65)        173.8489         calculate D2E/DX2 analytically  !
 ! D140  D(61,22,25,63)        -63.3097         calculate D2E/DX2 analytically  !
 ! D141  D(61,22,25,64)        176.5587         calculate D2E/DX2 analytically  !
 ! D142  D(61,22,25,65)         55.6005         calculate D2E/DX2 analytically  !
 ! D143  D(18,23,26,66)       -167.7591         calculate D2E/DX2 analytically  !
 ! D144  D(18,23,26,67)         75.7006         calculate D2E/DX2 analytically  !
 ! D145  D(18,23,26,68)        -47.2126         calculate D2E/DX2 analytically  !
 ! D146  D(20,23,26,66)        -41.524          calculate D2E/DX2 analytically  !
 ! D147  D(20,23,26,67)       -158.0643         calculate D2E/DX2 analytically  !
 ! D148  D(20,23,26,68)         79.0225         calculate D2E/DX2 analytically  !
 ! D149  D(62,23,26,66)         73.607          calculate D2E/DX2 analytically  !
 ! D150  D(62,23,26,67)        -42.9333         calculate D2E/DX2 analytically  !
 ! D151  D(62,23,26,68)       -165.8465         calculate D2E/DX2 analytically  !
 ! D152  D(5,29,31,32)        -168.4467         calculate D2E/DX2 analytically  !
 ! D153  D(5,29,31,36)          15.2506         calculate D2E/DX2 analytically  !
 ! D154  D(35,29,31,32)          4.4143         calculate D2E/DX2 analytically  !
 ! D155  D(35,29,31,36)       -171.8883         calculate D2E/DX2 analytically  !
 ! D156  D(5,29,35,34)         170.3126         calculate D2E/DX2 analytically  !
 ! D157  D(5,29,35,37)         -11.1527         calculate D2E/DX2 analytically  !
 ! D158  D(31,29,35,34)         -2.5227         calculate D2E/DX2 analytically  !
 ! D159  D(31,29,35,37)        176.012          calculate D2E/DX2 analytically  !
 ! D160  D(6,30,38,39)        -177.1714         calculate D2E/DX2 analytically  !
 ! D161  D(6,30,38,43)           2.4444         calculate D2E/DX2 analytically  !
 ! D162  D(42,30,38,39)         -0.9479         calculate D2E/DX2 analytically  !
 ! D163  D(42,30,38,43)        178.6678         calculate D2E/DX2 analytically  !
 ! D164  D(6,30,42,41)         175.6542         calculate D2E/DX2 analytically  !
 ! D165  D(6,30,42,44)          -7.9801         calculate D2E/DX2 analytically  !
 ! D166  D(38,30,42,41)         -0.561          calculate D2E/DX2 analytically  !
 ! D167  D(38,30,42,44)        175.8048         calculate D2E/DX2 analytically  !
 ! D168  D(29,31,32,33)         -2.9272         calculate D2E/DX2 analytically  !
 ! D169  D(29,31,32,75)        179.9059         calculate D2E/DX2 analytically  !
 ! D170  D(36,31,32,33)        173.4486         calculate D2E/DX2 analytically  !
 ! D171  D(36,31,32,75)         -3.7182         calculate D2E/DX2 analytically  !
 ! D172  D(29,31,36,45)       -111.1332         calculate D2E/DX2 analytically  !
 ! D173  D(29,31,36,46)        124.2521         calculate D2E/DX2 analytically  !
 ! D174  D(29,31,36,78)          6.6624         calculate D2E/DX2 analytically  !
 ! D175  D(32,31,36,45)         72.6345         calculate D2E/DX2 analytically  !
 ! D176  D(32,31,36,46)        -51.9803         calculate D2E/DX2 analytically  !
 ! D177  D(32,31,36,78)       -169.5699         calculate D2E/DX2 analytically  !
 ! D178  D(31,32,33,34)         -0.405          calculate D2E/DX2 analytically  !
 ! D179  D(31,32,33,76)       -177.1696         calculate D2E/DX2 analytically  !
 ! D180  D(75,32,33,34)        176.7623         calculate D2E/DX2 analytically  !
 ! D181  D(75,32,33,76)         -0.0023         calculate D2E/DX2 analytically  !
 ! D182  D(32,33,34,35)          2.4006         calculate D2E/DX2 analytically  !
 ! D183  D(32,33,34,77)       -176.4637         calculate D2E/DX2 analytically  !
 ! D184  D(76,33,34,35)        179.1715         calculate D2E/DX2 analytically  !
 ! D185  D(76,33,34,77)          0.3073         calculate D2E/DX2 analytically  !
 ! D186  D(33,34,35,29)         -0.9281         calculate D2E/DX2 analytically  !
 ! D187  D(33,34,35,37)       -179.4801         calculate D2E/DX2 analytically  !
 ! D188  D(77,34,35,29)        177.9339         calculate D2E/DX2 analytically  !
 ! D189  D(77,34,35,37)         -0.6181         calculate D2E/DX2 analytically  !
 ! D190  D(29,35,37,47)        118.2564         calculate D2E/DX2 analytically  !
 ! D191  D(29,35,37,48)       -117.4844         calculate D2E/DX2 analytically  !
 ! D192  D(29,35,37,79)          0.0536         calculate D2E/DX2 analytically  !
 ! D193  D(34,35,37,47)        -63.2333         calculate D2E/DX2 analytically  !
 ! D194  D(34,35,37,48)         61.0258         calculate D2E/DX2 analytically  !
 ! D195  D(34,35,37,79)        178.5639         calculate D2E/DX2 analytically  !
 ! D196  D(31,36,45,85)       -172.907          calculate D2E/DX2 analytically  !
 ! D197  D(31,36,45,86)         68.4914         calculate D2E/DX2 analytically  !
 ! D198  D(31,36,45,87)        -52.8115         calculate D2E/DX2 analytically  !
 ! D199  D(46,36,45,85)        -48.2507         calculate D2E/DX2 analytically  !
 ! D200  D(46,36,45,86)       -166.8522         calculate D2E/DX2 analytically  !
 ! D201  D(46,36,45,87)         71.8448         calculate D2E/DX2 analytically  !
 ! D202  D(78,36,45,85)         68.7462         calculate D2E/DX2 analytically  !
 ! D203  D(78,36,45,86)        -49.8553         calculate D2E/DX2 analytically  !
 ! D204  D(78,36,45,87)       -171.1583         calculate D2E/DX2 analytically  !
 ! D205  D(31,36,46,88)       -172.7075         calculate D2E/DX2 analytically  !
 ! D206  D(31,36,46,89)         67.7781         calculate D2E/DX2 analytically  !
 ! D207  D(31,36,46,90)        -52.9447         calculate D2E/DX2 analytically  !
 ! D208  D(45,36,46,88)         61.4186         calculate D2E/DX2 analytically  !
 ! D209  D(45,36,46,89)        -58.0958         calculate D2E/DX2 analytically  !
 ! D210  D(45,36,46,90)       -178.8186         calculate D2E/DX2 analytically  !
 ! D211  D(78,36,46,88)        -55.0575         calculate D2E/DX2 analytically  !
 ! D212  D(78,36,46,89)       -174.5719         calculate D2E/DX2 analytically  !
 ! D213  D(78,36,46,90)         64.7054         calculate D2E/DX2 analytically  !
 ! D214  D(35,37,47,91)       -179.4706         calculate D2E/DX2 analytically  !
 ! D215  D(35,37,47,92)         60.2979         calculate D2E/DX2 analytically  !
 ! D216  D(35,37,47,93)        -59.5558         calculate D2E/DX2 analytically  !
 ! D217  D(48,37,47,91)         56.0781         calculate D2E/DX2 analytically  !
 ! D218  D(48,37,47,92)        -64.1534         calculate D2E/DX2 analytically  !
 ! D219  D(48,37,47,93)        175.9929         calculate D2E/DX2 analytically  !
 ! D220  D(79,37,47,91)        -61.478          calculate D2E/DX2 analytically  !
 ! D221  D(79,37,47,92)        178.2905         calculate D2E/DX2 analytically  !
 ! D222  D(79,37,47,93)         58.4368         calculate D2E/DX2 analytically  !
 ! D223  D(35,37,48,94)        175.6042         calculate D2E/DX2 analytically  !
 ! D224  D(35,37,48,95)         55.8937         calculate D2E/DX2 analytically  !
 ! D225  D(35,37,48,96)        -64.6112         calculate D2E/DX2 analytically  !
 ! D226  D(47,37,48,94)        -59.2955         calculate D2E/DX2 analytically  !
 ! D227  D(47,37,48,95)       -179.006          calculate D2E/DX2 analytically  !
 ! D228  D(47,37,48,96)         60.4891         calculate D2E/DX2 analytically  !
 ! D229  D(79,37,48,94)         58.2714         calculate D2E/DX2 analytically  !
 ! D230  D(79,37,48,95)        -61.4391         calculate D2E/DX2 analytically  !
 ! D231  D(79,37,48,96)        178.056          calculate D2E/DX2 analytically  !
 ! D232  D(30,38,39,40)          1.611          calculate D2E/DX2 analytically  !
 ! D233  D(30,38,39,80)       -176.5506         calculate D2E/DX2 analytically  !
 ! D234  D(43,38,39,40)       -178.016          calculate D2E/DX2 analytically  !
 ! D235  D(43,38,39,80)          3.8224         calculate D2E/DX2 analytically  !
 ! D236  D(30,38,43,51)       -106.4732         calculate D2E/DX2 analytically  !
 ! D237  D(30,38,43,52)        129.7552         calculate D2E/DX2 analytically  !
 ! D238  D(30,38,43,83)         10.8764         calculate D2E/DX2 analytically  !
 ! D239  D(39,38,43,51)         73.1397         calculate D2E/DX2 analytically  !
 ! D240  D(39,38,43,52)        -50.6319         calculate D2E/DX2 analytically  !
 ! D241  D(39,38,43,83)       -169.5107         calculate D2E/DX2 analytically  !
 ! D242  D(38,39,40,41)         -0.743          calculate D2E/DX2 analytically  !
 ! D243  D(38,39,40,81)       -179.1934         calculate D2E/DX2 analytically  !
 ! D244  D(80,39,40,41)        177.421          calculate D2E/DX2 analytically  !
 ! D245  D(80,39,40,81)         -1.0294         calculate D2E/DX2 analytically  !
 ! D246  D(39,40,41,42)         -0.8394         calculate D2E/DX2 analytically  !
 ! D247  D(39,40,41,82)       -177.5046         calculate D2E/DX2 analytically  !
 ! D248  D(81,40,41,42)        177.6112         calculate D2E/DX2 analytically  !
 ! D249  D(81,40,41,82)          0.946          calculate D2E/DX2 analytically  !
 ! D250  D(40,41,42,30)          1.4667         calculate D2E/DX2 analytically  !
 ! D251  D(40,41,42,44)       -174.9648         calculate D2E/DX2 analytically  !
 ! D252  D(82,41,42,30)        178.1359         calculate D2E/DX2 analytically  !
 ! D253  D(82,41,42,44)          1.7044         calculate D2E/DX2 analytically  !
 ! D254  D(30,42,44,49)        136.8233         calculate D2E/DX2 analytically  !
 ! D255  D(30,42,44,50)        -99.1542         calculate D2E/DX2 analytically  !
 ! D256  D(30,42,44,84)         18.521          calculate D2E/DX2 analytically  !
 ! D257  D(41,42,44,49)        -46.8654         calculate D2E/DX2 analytically  !
 ! D258  D(41,42,44,50)         77.1572         calculate D2E/DX2 analytically  !
 ! D259  D(41,42,44,84)       -165.1676         calculate D2E/DX2 analytically  !
 ! D260  D(38,43,51,103)       179.553          calculate D2E/DX2 analytically  !
 ! D261  D(38,43,51,104)        59.8955         calculate D2E/DX2 analytically  !
 ! D262  D(38,43,51,105)       -60.2853         calculate D2E/DX2 analytically  !
 ! D263  D(52,43,51,103)       -55.5505         calculate D2E/DX2 analytically  !
 ! D264  D(52,43,51,104)      -175.2079         calculate D2E/DX2 analytically  !
 ! D265  D(52,43,51,105)        64.6113         calculate D2E/DX2 analytically  !
 ! D266  D(83,43,51,103)        61.6905         calculate D2E/DX2 analytically  !
 ! D267  D(83,43,51,104)       -57.967          calculate D2E/DX2 analytically  !
 ! D268  D(83,43,51,105)      -178.1478         calculate D2E/DX2 analytically  !
 ! D269  D(38,43,52,106)      -172.7656         calculate D2E/DX2 analytically  !
 ! D270  D(38,43,52,107)        67.8012         calculate D2E/DX2 analytically  !
 ! D271  D(38,43,52,108)       -52.9797         calculate D2E/DX2 analytically  !
 ! D272  D(51,43,52,106)        63.0023         calculate D2E/DX2 analytically  !
 ! D273  D(51,43,52,107)       -56.4309         calculate D2E/DX2 analytically  !
 ! D274  D(51,43,52,108)      -177.2119         calculate D2E/DX2 analytically  !
 ! D275  D(83,43,52,106)       -53.8032         calculate D2E/DX2 analytically  !
 ! D276  D(83,43,52,107)      -173.2364         calculate D2E/DX2 analytically  !
 ! D277  D(83,43,52,108)        65.9826         calculate D2E/DX2 analytically  !
 ! D278  D(42,44,49,97)       -173.5862         calculate D2E/DX2 analytically  !
 ! D279  D(42,44,49,98)         66.314          calculate D2E/DX2 analytically  !
 ! D280  D(42,44,49,99)        -54.9523         calculate D2E/DX2 analytically  !
 ! D281  D(50,44,49,97)         62.3019         calculate D2E/DX2 analytically  !
 ! D282  D(50,44,49,98)        -57.7979         calculate D2E/DX2 analytically  !
 ! D283  D(50,44,49,99)       -179.0642         calculate D2E/DX2 analytically  !
 ! D284  D(84,44,49,97)        -55.0923         calculate D2E/DX2 analytically  !
 ! D285  D(84,44,49,98)       -175.1922         calculate D2E/DX2 analytically  !
 ! D286  D(84,44,49,99)         63.5416         calculate D2E/DX2 analytically  !
 ! D287  D(42,44,50,100)       179.7608         calculate D2E/DX2 analytically  !
 ! D288  D(42,44,50,101)        60.3368         calculate D2E/DX2 analytically  !
 ! D289  D(42,44,50,102)       -60.4404         calculate D2E/DX2 analytically  !
 ! D290  D(49,44,50,100)       -55.1145         calculate D2E/DX2 analytically  !
 ! D291  D(49,44,50,101)      -174.5386         calculate D2E/DX2 analytically  !
 ! D292  D(49,44,50,102)        64.6843         calculate D2E/DX2 analytically  !
 ! D293  D(84,44,50,100)        62.0823         calculate D2E/DX2 analytically  !
 ! D294  D(84,44,50,101)       -57.3418         calculate D2E/DX2 analytically  !
 ! D295  D(84,44,50,102)      -178.1189         calculate D2E/DX2 analytically  !
 --------------------------------------------------------------------------------
 Trust Radius=3.00D-01 FncErr=1.00D-07 GrdErr=1.00D-07
 Number of steps in this run=   2 maximum allowed number of steps=   2.
 GradGradGradGradGradGradGradGradGradGradGradGradGradGradGradGradGradGrad

 Stoichiometry    C42H60MgN2O9
 Framework group  C1[X(C42H60MgN2O9)]
 Deg. of freedom   336
 Full point group                 C1      NOp   1
 Largest Abelian subgroup         C1      NOp   1
 Largest concise Abelian subgroup C1      NOp   1
                         Standard orientation:                         
 ---------------------------------------------------------------------
 Center     Atomic     Atomic              Coordinates (Angstroms)
 Number     Number      Type              X           Y           Z
 ---------------------------------------------------------------------
    1          8             0       -4.040058    2.876285    1.614688
    2         12             0        0.182469   -0.868058   -0.362280
    3          8             0        0.068809   -0.188446   -2.160978
    4          6             0       -3.320342    2.982585    0.478395
    5          7             0       -0.969939   -2.474106    0.277664
    6          7             0        1.889575   -2.030235    0.065475
    7          8             0       -2.450165    3.806460    0.301893
    8          6             0       -0.574769   -3.713824    0.549927
    9          6             0        0.765864   -4.135312    0.496547
   10          6             0        1.912709   -3.341328    0.294752
   11          8             0       -2.854189    1.796970   -1.592819
   12          6             0       -1.777956    1.039724   -1.327735
   13          6             0       -0.901361    0.697961   -2.536306
   14          6             0       -3.817853    1.960343   -0.536173
   15          8             0       -1.543897    0.599111   -0.208053
   16          6             0       -3.695322    3.795765    2.662095
   17          8             0        0.451002    2.889888    0.208626
   18          6             0        1.448144    2.014672    0.222264
   19          8             0        1.226774    0.853313    0.524281
   20          8             0        2.849327    3.633548   -0.994732
   21          6             0        1.917026    4.600492   -0.884867
   22          6             0        0.648838    4.295398   -0.097036
   23          6             0        2.849090    2.502678   -0.092367
   24          8             0        2.061127    5.668884   -1.427084
   25          6             0        0.534842    5.125471    1.179665
   26          6             0        3.634132    2.815102    1.186485
   27          6             0       -0.350058    1.981703   -3.194488
   28          6             0       -5.111479    2.430097   -1.199864
   29          6             0       -2.380351   -2.152256    0.261470
   30          6             0        3.142475   -1.309136    0.128646
   31          6             0       -3.134415   -2.377476   -0.945204
   32          6             0       -4.438187   -1.832009   -1.026581
   33          6             0       -5.012827   -1.140013    0.063593
   34          6             0       -4.286461   -0.989369    1.267492
   35          6             0       -2.959559   -1.481863    1.383616
   36          6             0       -2.588629   -3.262524   -2.102050
   37          6             0       -2.181587   -1.319034    2.714671
   38          6             0        3.721425   -1.012579    1.410802
   39          6             0        4.920024   -0.251102    1.454364
   40          6             0        5.516784    0.236471    0.271159
   41          6             0        4.930376   -0.043953   -0.983439
   42          6             0        3.747133   -0.831132   -1.082536
   43          6             0        3.074376   -1.489669    2.741100
   44          6             0        3.191990   -1.220398   -2.478243
   45          6             0       -2.239492   -2.440136   -3.381644
   46          6             0       -3.597114   -4.412532   -2.442971
   47          6             0       -1.942997    0.181072    3.076298
   48          6             0       -2.912542   -2.059108    3.885196
   49          6             0        3.139000   -0.007519   -3.456048
   50          6             0        4.030338   -2.388914   -3.099565
   51          6             0        2.401865   -0.297769    3.496519
   52          6             0        4.105164   -2.208879    3.675087
   53          6             0       -1.604411   -4.755090    0.969509
   54          6             0        3.244153   -4.078971    0.408278
   55          1             0        0.943963   -5.186606    0.692302
   56          1             0       -1.616965    0.263866   -3.265432
   57          1             0       -3.979825    1.000872   -0.036935
   58          1             0       -3.716383    4.825731    2.297346
   59          1             0       -2.697932    3.567635    3.048376
   60          1             0       -4.444528    3.648698    3.440787
   61          1             0       -0.193153    4.535865   -0.748044
   62          1             0        3.382380    1.706045   -0.618008
   63          1             0        0.614441    6.184944    0.920778
   64          1             0        1.324021    4.879070    1.897204
   65          1             0       -0.440872    4.937400    1.632527
   66          1             0        4.539239    3.362353    0.905134
   67          1             0        3.936064    1.864855    1.628201
   68          1             0        3.067143    3.417180    1.903578
   69          1             0       -1.149317    2.671740   -3.487876
   70          1             0        0.218868    1.695846   -4.083854
   71          1             0        0.335342    2.498728   -2.515135
   72          1             0       -5.463223    1.657788   -1.890097
   73          1             0       -4.949464    3.356481   -1.759873
   74          1             0       -5.881401    2.601331   -0.441717
   75          1             0       -5.031562   -1.989169   -1.937095
   76          1             0       -6.043518   -0.764910   -0.004211
   77          1             0       -4.762654   -0.501560    2.128491
   78          1             0       -1.648044   -3.731333   -1.754909
   79          1             0       -1.189813   -1.796480    2.579902
   80          1             0        5.406926   -0.063569    2.420170
   81          1             0        6.451300    0.812517    0.324151
   82          1             0        5.423655    0.304213   -1.900353
   83          1             0        2.275280   -2.213934    2.493919
   84          1             0        2.155189   -1.583007   -2.341336
   85          1             0       -1.980169   -3.121913   -4.207234
   86          1             0       -1.364203   -1.799080   -3.177036
   87          1             0       -3.090956   -1.817261   -3.697973
   88          1             0       -3.138902   -5.101596   -3.168719
   89          1             0       -4.520592   -4.010117   -2.885960
   90          1             0       -3.865043   -4.984869   -1.541294
   91          1             0       -1.380679    0.254593    4.020779
   92          1             0       -2.898820    0.715142    3.192643
   93          1             0       -1.364198    0.679084    2.277652
   94          1             0       -2.306437   -1.998629    4.802089
   95          1             0       -3.066017   -3.121355    3.639517
   96          1             0       -3.893647   -1.602641    4.087319
   97          1             0        2.634077   -0.311189   -4.385642
   98          1             0        4.146356    0.357847   -3.709953
   99          1             0        2.562403    0.819091   -3.008718
  100          1             0        3.618446   -2.652398   -4.085648
  101          1             0        3.993057   -3.284906   -2.459968
  102          1             0        5.083508   -2.092596   -3.227000
  103          1             0        1.942177   -0.655078    4.431668
  104          1             0        1.614297    0.154565    2.866829
  105          1             0        3.141660    0.479761    3.744443
  106          1             0        3.579267   -2.640927    4.540111
  107          1             0        4.860151   -1.501977    4.051039
  108          1             0        4.624564   -3.020529    3.143328
  109          1             0       -2.360142   -4.918481    0.193752
  110          1             0       -1.125810   -5.716632    1.183476
  111          1             0       -2.129997   -4.428889    1.875706
  112          1             0        3.983192   -3.702781   -0.305357
  113          1             0        3.670924   -3.976259    1.413012
  114          1             0        3.101238   -5.149427    0.223081
 ---------------------------------------------------------------------
 Rotational constants (GHZ):      0.0633029      0.0544819      0.0417979
 General basis read from cards:  (5D, 7F)
 There are   642 symmetry adapted basis functions of A   symmetry.
 Integral buffers will be    262144 words long.
 Raffenetti 2 integral format.
 Two-electron integral symmetry is turned on.
   642 basis functions,  1430 primitive gaussians,   674 cartesian basis functions
   205 alpha electrons      205 beta electrons
       nuclear repulsion energy      9054.4489039554 Hartrees.
 NAtoms=  114 NActive=  114 NUniq=  114 SFac= 1.00D+00 NAtFMM=   60 Big=T
 One-electron integrals computed using PRISM.
 NBasis=   642 RedAO= T  NBF=   642
 NBsUse=   642 1.00D-06 NBFU=   642
 Initial guess read from the checkpoint file:
 RRSS_fm-5-react.chk
 Initial guess orbital symmetries:
       Occupied  (A) (A) (A) (A) (A) (A) (A) (A) (A) (A) (A) (A)
                 (A) (A) (A) (A) (A) (A) (A) (A) (A) (A) (A) (A)
                 (A) (A) (A) (A) (A) (A) (A) (A) (A) (A) (A) (A)
                 (A) (A) (A) (A) (A) (A) (A) (A) (A) (A) (A) (A)
                 (A) (A) (A) (A) (A) (A) (A) (A) (A) (A) (A) (A)
                 (A) (A) (A) (A) (A) (A) (A) (A) (A) (A) (A) (A)
                 (A) (A) (A) (A) (A) (A) (A) (A) (A) (A) (A) (A)
                 (A) (A) (A) (A) (A) (A) (A) (A) (A) (A) (A) (A)
                 (A) (A) (A) (A) (A) (A) (A) (A) (A) (A) (A) (A)
                 (A) (A) (A) (A) (A) (A) (A) (A) (A) (A) (A) (A)
                 (A) (A) (A) (A) (A) (A) (A) (A) (A) (A) (A) (A)
                 (A) (A) (A) (A) (A) (A) (A) (A) (A) (A) (A) (A)
                 (A) (A) (A) (A) (A) (A) (A) (A) (A) (A) (A) (A)
                 (A) (A) (A) (A) (A) (A) (A) (A) (A) (A) (A) (A)
                 (A) (A) (A) (A) (A) (A) (A) (A) (A) (A) (A) (A)
                 (A) (A) (A) (A) (A) (A) (A) (A) (A) (A) (A) (A)
                 (A) (A) (A) (A) (A) (A) (A) (A) (A) (A) (A) (A)
                 (A)
       Virtual   (A) (A) (A) (A) (A) (A) (A) (A) (A) (A) (A) (A)
                 (A) (A) (A) (A) (A) (A) (A) (A) (A) (A) (A) (A)
                 (A) (A) (A) (A) (A) (A) (A) (A) (A) (A) (A) (A)
                 (A) (A) (A) (A) (A) (A) (A) (A) (A) (A) (A) (A)
                 (A) (A) (A) (A) (A) (A) (A) (A) (A) (A) (A) (A)
                 (A) (A) (A) (A) (A) (A) (A) (A) (A) (A) (A) (A)
                 (A) (A) (A) (A) (A) (A) (A) (A) (A) (A) (A) (A)
                 (A) (A) (A) (A) (A) (A) (A) (A) (A) (A) (A) (A)
                 (A) (A) (A) (A) (A) (A) (A) (A) (A) (A) (A) (A)
                 (A) (A) (A) (A) (A) (A) (A) (A) (A) (A) (A) (A)
                 (A) (A) (A) (A) (A) (A) (A) (A) (A) (A) (A) (A)
                 (A) (A) (A) (A) (A) (A) (A) (A) (A) (A) (A) (A)
                 (A) (A) (A) (A) (A) (A) (A) (A) (A) (A) (A) (A)
                 (A) (A) (A) (A) (A) (A) (A) (A) (A) (A) (A) (A)
                 (A) (A) (A) (A) (A) (A) (A) (A) (A) (A) (A) (A)
                 (A) (A) (A) (A) (A) (A) (A) (A) (A) (A) (A) (A)
                 (A) (A) (A) (A) (A) (A) (A) (A) (A) (A) (A) (A)
                 (A) (A) (A) (A) (A) (A) (A) (A) (A) (A) (A) (A)
                 (A) (A) (A) (A) (A) (A) (A) (A) (A) (A) (A) (A)
                 (A) (A) (A) (A) (A) (A) (A) (A) (A) (A) (A) (A)
                 (A) (A) (A) (A) (A) (A) (A) (A) (A) (A) (A) (A)
                 (A) (A) (A) (A) (A) (A) (A) (A) (A) (A) (A) (A)
                 (A) (A) (A) (A) (A) (A) (A) (A) (A) (A) (A) (A)
                 (A) (A) (A) (A) (A) (A) (A) (A) (A) (A) (A) (A)
                 (A) (A) (A) (A) (A) (A) (A) (A) (A) (A) (A) (A)
                 (A) (A) (A) (A) (A) (A) (A) (A) (A) (A) (A) (A)
                 (A) (A) (A) (A) (A) (A) (A) (A) (A) (A) (A) (A)
                 (A) (A) (A) (A) (A) (A) (A) (A) (A) (A) (A) (A)
                 (A) (A) (A) (A) (A) (A) (A) (A) (A) (A) (A) (A)
                 (A) (A) (A) (A) (A) (A) (A) (A) (A) (A) (A) (A)
                 (A) (A) (A) (A) (A) (A) (A) (A) (A) (A) (A) (A)
                 (A) (A) (A) (A) (A) (A) (A) (A) (A) (A) (A) (A)
                 (A) (A) (A) (A) (A) (A) (A) (A) (A) (A) (A) (A)
                 (A) (A) (A) (A) (A) (A) (A) (A) (A) (A) (A) (A)
                 (A) (A) (A) (A) (A) (A) (A) (A) (A) (A) (A) (A)
                 (A) (A) (A) (A) (A) (A) (A) (A) (A) (A) (A) (A)
                 (A) (A) (A) (A) (A)
 Requested convergence on RMS density matrix=1.00D-08 within 128 cycles.
 Requested convergence on MAX density matrix=1.00D-06.
 Requested convergence on             energy=1.00D-06.
 No special actions if energy rises.
 SCF Done:  E(RB+HF-LYP) =  -2612.20734829     A.U. after    1 cycles
             Convg  =    0.3071D-08             -V/T =  2.0106
             S**2   =   0.0000
 Range of M.O.s used for correlation:     1   642
 NBasis=   642 NAE=   205 NBE=   205 NFC=     0 NFV=     0
 NROrb=    642 NOA=   205 NOB=   205 NVA=   437 NVB=   437
 PrsmSu:  requested number of processors reduced to:   1 ShMem   1 Linda.
 PrsmSu:  requested number of processors reduced to:   1 ShMem   1 Linda.
 Symmetrizing basis deriv contribution to polar:
 IMax=3 JMax=2 DiffMx= 0.00D+00
 G2DrvN: will do   29 centers at a time, making    4 passes doing MaxLOS=2.
 Calling FoFCou, ICntrl=  3107 FMM=T I1Cent=   0.
 Number of processors reduced from  2 to  1 for far-field.
 Calling FoFCou, ICntrl=  3107 FMM=T I1Cent=   0.
 Number of processors reduced from  2 to  1 for far-field.
 Calling FoFCou, ICntrl=  3107 FMM=T I1Cent=   0.
 Number of processors reduced from  2 to  1 for far-field.
 Calling FoFCou, ICntrl=  3107 FMM=T I1Cent=   0.
 Number of processors reduced from  2 to  1 for far-field.
 FoFDir/FoFCou used for L=0 through L=2.
          Differentiating once with respect to electric field.
                with respect to dipole field.
          Differentiating once with respect to nuclear coordinates.
 FoFCou: FMM=T IPFlag=           0 FMFlag=      100000 FMFlg1=        8193
 NFxFlg=           0 DoJE=F BraDBF=F KetDBF=F FulRan=T.
 Symmetry not used in FoFCou.
 FMM levels:  10  Number of levels for PrismC:   9
 Number of processors reduced from  2 to  1 for far-field.
 PrismC:  NFx=      2048 NFxT=         4 NFxU=         4.
 PrismC:  NFx=      2048 NFxT=         4 NFxU=         4.
 Number of processors reduced from  2 to  1 for far-field.
 PrismC:  NFx=      2048 NFxT=         4 NFxU=         4.
 PrismC:  NFx=      2048 NFxT=         4 NFxU=         4.
 Number of processors reduced from  2 to  1 for far-field.
 PrismC:  NFx=      2048 NFxT=         4 NFxU=         4.
 PrismC:  NFx=      2048 NFxT=         4 NFxU=         4.
 Number of processors reduced from  2 to  1 for far-field.
 PrismC:  NFx=      2048 NFxT=         4 NFxU=         4.
 PrismC:  NFx=      2048 NFxT=         4 NFxU=         4.
          There are 345 degrees of freedom in the 1st order CPHF.
   345 vectors were produced by pass  0.
 AX will form  87 AO Fock derivatives at one time.
 Number of processors reduced from  2 to  1 for far-field.
 PrismC:  NFx=      2048 NFxT=         4 NFxU=         4.
 PrismC:  NFx=      2048 NFxT=         4 NFxU=         4.
 Number of processors reduced from  2 to  1 for far-field.
 PrismC:  NFx=      2048 NFxT=         4 NFxU=         4.
 PrismC:  NFx=      2048 NFxT=         4 NFxU=         4.
 Number of processors reduced from  2 to  1 for far-field.
 PrismC:  NFx=      2048 NFxT=         4 NFxU=         4.
 PrismC:  NFx=      2048 NFxT=         4 NFxU=         4.
 Number of processors reduced from  2 to  1 for far-field.
 PrismC:  NFx=      2048 NFxT=         4 NFxU=         4.
 PrismC:  NFx=      2048 NFxT=         4 NFxU=         4.
   344 vectors were produced by pass  1.
 Number of processors reduced from  2 to  1 for far-field.
 PrismC:  NFx=      2048 NFxT=         4 NFxU=         4.
 PrismC:  NFx=      2048 NFxT=         4 NFxU=         4.
 Number of processors reduced from  2 to  1 for far-field.
 PrismC:  NFx=      2048 NFxT=         4 NFxU=         4.
 PrismC:  NFx=      2048 NFxT=         4 NFxU=         4.
 Number of processors reduced from  2 to  1 for far-field.
 PrismC:  NFx=      2048 NFxT=         4 NFxU=         4.
 PrismC:  NFx=      2048 NFxT=         4 NFxU=         4.
 Number of processors reduced from  2 to  1 for far-field.
 PrismC:  NFx=      2048 NFxT=         4 NFxU=         4.
 PrismC:  NFx=      2048 NFxT=         4 NFxU=         4.
   342 vectors were produced by pass  2.
 Number of processors reduced from  2 to  1 for far-field.
 PrismC:  NFx=      2048 NFxT=         4 NFxU=         4.
 PrismC:  NFx=      2048 NFxT=         4 NFxU=         4.
 Number of processors reduced from  2 to  1 for far-field.
 PrismC:  NFx=      2048 NFxT=         4 NFxU=         4.
 PrismC:  NFx=      2048 NFxT=         4 NFxU=         4.
 Number of processors reduced from  2 to  1 for far-field.
 PrismC:  NFx=      2048 NFxT=         4 NFxU=         4.
 PrismC:  NFx=      2048 NFxT=         4 NFxU=         4.
 Number of processors reduced from  2 to  1 for far-field.
 PrismC:  NFx=      2048 NFxT=         4 NFxU=         4.
 PrismC:  NFx=      2048 NFxT=         4 NFxU=         4.
   342 vectors were produced by pass  3.
 Number of processors reduced from  2 to  1 for far-field.
 PrismC:  NFx=      2048 NFxT=         4 NFxU=         4.
 PrismC:  NFx=      2048 NFxT=         4 NFxU=         4.
 Number of processors reduced from  2 to  1 for far-field.
 PrismC:  NFx=      2048 NFxT=         4 NFxU=         4.
 PrismC:  NFx=      2048 NFxT=         4 NFxU=         4.
 Number of processors reduced from  2 to  1 for far-field.
 PrismC:  NFx=      2048 NFxT=         4 NFxU=         4.
 PrismC:  NFx=      2048 NFxT=         4 NFxU=         4.
 Number of processors reduced from  2 to  1 for far-field.
 PrismC:  NFx=      2048 NFxT=         4 NFxU=         4.
 PrismC:  NFx=      2048 NFxT=         4 NFxU=         4.
   342 vectors were produced by pass  4.
 Number of processors reduced from  2 to  1 for far-field.
 PrismC:  NFx=      2048 NFxT=         4 NFxU=         4.
 PrismC:  NFx=      2048 NFxT=         4 NFxU=         4.
 Number of processors reduced from  2 to  1 for far-field.
 PrismC:  NFx=      2048 NFxT=         4 NFxU=         3.
 PrismC:  NFx=      2048 NFxT=         4 NFxU=         4.
 Number of processors reduced from  2 to  1 for far-field.
 PrismC:  NFx=      2048 NFxT=         4 NFxU=         3.
 PrismC:  NFx=      2048 NFxT=         4 NFxU=         3.
 Number of processors reduced from  2 to  1 for far-field.
 PrismC:  NFx=      2048 NFxT=         4 NFxU=         3.
 PrismC:  NFx=      2048 NFxT=         4 NFxU=         3.
   207 vectors were produced by pass  5.
 Number of processors reduced from  2 to  1 for far-field.
 PrismC:  NFx=      2048 NFxT=         4 NFxU=         4.
 PrismC:  NFx=      2048 NFxT=         4 NFxU=         4.
 Number of processors reduced from  2 to  1 for far-field.
 PrismC:  NFx=      2048 NFxT=         4 NFxU=         3.
 PrismC:  NFx=      2048 NFxT=         4 NFxU=         2.
 Number of processors reduced from  2 to  1 for far-field.
 PrismC:  NFx=      2048 NFxT=         4 NFxU=         3.
 PrismC:  NFx=      2048 NFxT=         4 NFxU=         3.
    57 vectors were produced by pass  6.
 Number of processors reduced from  2 to  1 for far-field.
 PrismC:  NFx=      2048 NFxT=         4 NFxU=         3.
 PrismC:  NFx=      2048 NFxT=         4 NFxU=         4.
     3 vectors were produced by pass  7.
 Number of processors reduced from  2 to  1 for far-field.
 PrismC:  NFx=      2048 NFxT=         4 NFxU=         3.
 PrismC:  NFx=      2048 NFxT=         4 NFxU=         2.
 Inv2:  IOpt= 1 Iter= 1 AM= 9.69D-15 Conv= 1.00D-12.
 Inverted reduced A of dimension 1982 with in-core refinement.
 Number of processors reduced from  2 to  1 for far-field.
 PrismC:  NFx=      2048 NFxT=         4 NFxU=         4.
 PrismC:  NFx=      2048 NFxT=         4 NFxU=         4.
 Number of processors reduced from  2 to  1 for far-field.
 PrismC:  NFx=      2048 NFxT=         4 NFxU=         4.
 PrismC:  NFx=      2048 NFxT=         4 NFxU=         4.
 Number of processors reduced from  2 to  1 for far-field.
 PrismC:  NFx=      2048 NFxT=         4 NFxU=         4.
 PrismC:  NFx=      2048 NFxT=         4 NFxU=         4.
 Number of processors reduced from  2 to  1 for far-field.
 PrismC:  NFx=      2048 NFxT=         4 NFxU=         4.
 PrismC:  NFx=      2048 NFxT=         4 NFxU=         4.
 Isotropic polarizability for W=    0.000000      411.05 Bohr**3.
 End of Minotr Frequency-dependent properties file   721 does not exist.

 **********************************************************************

            Population analysis using the SCF density.

 **********************************************************************

 Orbital symmetries:
       Occupied  (A) (A) (A) (A) (A) (A) (A) (A) (A) (A) (A) (A)
                 (A) (A) (A) (A) (A) (A) (A) (A) (A) (A) (A) (A)
                 (A) (A) (A) (A) (A) (A) (A) (A) (A) (A) (A) (A)
                 (A) (A) (A) (A) (A) (A) (A) (A) (A) (A) (A) (A)
                 (A) (A) (A) (A) (A) (A) (A) (A) (A) (A) (A) (A)
                 (A) (A) (A) (A) (A) (A) (A) (A) (A) (A) (A) (A)
                 (A) (A) (A) (A) (A) (A) (A) (A) (A) (A) (A) (A)
                 (A) (A) (A) (A) (A) (A) (A) (A) (A) (A) (A) (A)
                 (A) (A) (A) (A) (A) (A) (A) (A) (A) (A) (A) (A)
                 (A) (A) (A) (A) (A) (A) (A) (A) (A) (A) (A) (A)
                 (A) (A) (A) (A) (A) (A) (A) (A) (A) (A) (A) (A)
                 (A) (A) (A) (A) (A) (A) (A) (A) (A) (A) (A) (A)
                 (A) (A) (A) (A) (A) (A) (A) (A) (A) (A) (A) (A)
                 (A) (A) (A) (A) (A) (A) (A) (A) (A) (A) (A) (A)
                 (A) (A) (A) (A) (A) (A) (A) (A) (A) (A) (A) (A)
                 (A) (A) (A) (A) (A) (A) (A) (A) (A) (A) (A) (A)
                 (A) (A) (A) (A) (A) (A) (A) (A) (A) (A) (A) (A)
                 (A)
       Virtual   (A) (A) (A) (A) (A) (A) (A) (A) (A) (A) (A) (A)
                 (A) (A) (A) (A) (A) (A) (A) (A) (A) (A) (A) (A)
                 (A) (A) (A) (A) (A) (A) (A) (A) (A) (A) (A) (A)
                 (A) (A) (A) (A) (A) (A) (A) (A) (A) (A) (A) (A)
                 (A) (A) (A) (A) (A) (A) (A) (A) (A) (A) (A) (A)
                 (A) (A) (A) (A) (A) (A) (A) (A) (A) (A) (A) (A)
                 (A) (A) (A) (A) (A) (A) (A) (A) (A) (A) (A) (A)
                 (A) (A) (A) (A) (A) (A) (A) (A) (A) (A) (A) (A)
                 (A) (A) (A) (A) (A) (A) (A) (A) (A) (A) (A) (A)
                 (A) (A) (A) (A) (A) (A) (A) (A) (A) (A) (A) (A)
                 (A) (A) (A) (A) (A) (A) (A) (A) (A) (A) (A) (A)
                 (A) (A) (A) (A) (A) (A) (A) (A) (A) (A) (A) (A)
                 (A) (A) (A) (A) (A) (A) (A) (A) (A) (A) (A) (A)
                 (A) (A) (A) (A) (A) (A) (A) (A) (A) (A) (A) (A)
                 (A) (A) (A) (A) (A) (A) (A) (A) (A) (A) (A) (A)
                 (A) (A) (A) (A) (A) (A) (A) (A) (A) (A) (A) (A)
                 (A) (A) (A) (A) (A) (A) (A) (A) (A) (A) (A) (A)
                 (A) (A) (A) (A) (A) (A) (A) (A) (A) (A) (A) (A)
                 (A) (A) (A) (A) (A) (A) (A) (A) (A) (A) (A) (A)
                 (A) (A) (A) (A) (A) (A) (A) (A) (A) (A) (A) (A)
                 (A) (A) (A) (A) (A) (A) (A) (A) (A) (A) (A) (A)
                 (A) (A) (A) (A) (A) (A) (A) (A) (A) (A) (A) (A)
                 (A) (A) (A) (A) (A) (A) (A) (A) (A) (A) (A) (A)
                 (A) (A) (A) (A) (A) (A) (A) (A) (A) (A) (A) (A)
                 (A) (A) (A) (A) (A) (A) (A) (A) (A) (A) (A) (A)
                 (A) (A) (A) (A) (A) (A) (A) (A) (A) (A) (A) (A)
                 (A) (A) (A) (A) (A) (A) (A) (A) (A) (A) (A) (A)
                 (A) (A) (A) (A) (A) (A) (A) (A) (A) (A) (A) (A)
                 (A) (A) (A) (A) (A) (A) (A) (A) (A) (A) (A) (A)
                 (A) (A) (A) (A) (A) (A) (A) (A) (A) (A) (A) (A)
                 (A) (A) (A) (A) (A) (A) (A) (A) (A) (A) (A) (A)
                 (A) (A) (A) (A) (A) (A) (A) (A) (A) (A) (A) (A)
                 (A) (A) (A) (A) (A) (A) (A) (A) (A) (A) (A) (A)
                 (A) (A) (A) (A) (A) (A) (A) (A) (A) (A) (A) (A)
                 (A) (A) (A) (A) (A) (A) (A) (A) (A) (A) (A) (A)
                 (A) (A) (A) (A) (A) (A) (A) (A) (A) (A) (A) (A)
                 (A) (A) (A) (A) (A)
 The electronic state is 1-A.
 Alpha  occ. eigenvalues --  -46.69985 -19.21022 -19.19661 -19.19533 -19.18371
 Alpha  occ. eigenvalues --  -19.15278 -19.14136 -19.13582 -19.13360 -19.03243
 Alpha  occ. eigenvalues --  -14.27646 -14.27552 -10.33942 -10.32174 -10.31552
 Alpha  occ. eigenvalues --  -10.29484 -10.26643 -10.25996 -10.24421 -10.24061
 Alpha  occ. eigenvalues --  -10.19999 -10.19765 -10.19759 -10.18826 -10.18227
 Alpha  occ. eigenvalues --  -10.18153 -10.15491 -10.15340 -10.14307 -10.11941
 Alpha  occ. eigenvalues --  -10.05905 -10.05632 -10.03353 -10.03214 -10.03137
 Alpha  occ. eigenvalues --  -10.02994 -10.02791 -10.02742 -10.02555 -10.02526
 Alpha  occ. eigenvalues --  -10.02489 -10.02488 -10.02370 -10.02179 -10.01884
 Alpha  occ. eigenvalues --  -10.01610 -10.01191 -10.00964 -10.00877 -10.00533
 Alpha  occ. eigenvalues --  -10.00390 -10.00027  -9.99141  -9.99128  -3.00380
 Alpha  occ. eigenvalues --   -1.75131  -1.75036  -1.74759  -1.13359  -1.11186
 Alpha  occ. eigenvalues --   -1.10122  -1.09680  -1.04006  -1.02621  -1.02161
 Alpha  occ. eigenvalues --   -1.01112  -0.91053  -0.88923  -0.87678  -0.81472
 Alpha  occ. eigenvalues --   -0.80854  -0.80524  -0.79733  -0.78740  -0.76747
 Alpha  occ. eigenvalues --   -0.76616  -0.74601  -0.74173  -0.73752  -0.73383
 Alpha  occ. eigenvalues --   -0.71686  -0.71060  -0.68667  -0.68488  -0.68339
 Alpha  occ. eigenvalues --   -0.68251  -0.67849  -0.66802  -0.65920  -0.65654
 Alpha  occ. eigenvalues --   -0.65129  -0.64952  -0.64831  -0.64094  -0.63679
 Alpha  occ. eigenvalues --   -0.61821  -0.59285  -0.59048  -0.58341  -0.57872
 Alpha  occ. eigenvalues --   -0.57115  -0.56840  -0.55061  -0.54811  -0.54567
 Alpha  occ. eigenvalues --   -0.52885  -0.52521  -0.52390  -0.50512  -0.50085
 Alpha  occ. eigenvalues --   -0.50068  -0.49731  -0.49537  -0.48859  -0.48778
 Alpha  occ. eigenvalues --   -0.47808  -0.47062  -0.46755  -0.46283  -0.45854
 Alpha  occ. eigenvalues --   -0.45030  -0.44731  -0.44601  -0.44349  -0.44277
 Alpha  occ. eigenvalues --   -0.43809  -0.43733  -0.43548  -0.43525  -0.42062
 Alpha  occ. eigenvalues --   -0.41557  -0.41405  -0.41097  -0.41048  -0.40946
 Alpha  occ. eigenvalues --   -0.40811  -0.40552  -0.40315  -0.40241  -0.39994
 Alpha  occ. eigenvalues --   -0.39956  -0.39671  -0.39490  -0.39405  -0.39206
 Alpha  occ. eigenvalues --   -0.38729  -0.38548  -0.38318  -0.38238  -0.38140
 Alpha  occ. eigenvalues --   -0.37648  -0.37428  -0.37195  -0.36878  -0.36555
 Alpha  occ. eigenvalues --   -0.36500  -0.36278  -0.35957  -0.35806  -0.35743
 Alpha  occ. eigenvalues --   -0.35552  -0.35471  -0.35114  -0.35006  -0.34848
 Alpha  occ. eigenvalues --   -0.34762  -0.34566  -0.34369  -0.34306  -0.34228
 Alpha  occ. eigenvalues --   -0.33798  -0.33276  -0.32618  -0.32196  -0.31660
 Alpha  occ. eigenvalues --   -0.31074  -0.30894  -0.30852  -0.30645  -0.30595
 Alpha  occ. eigenvalues --   -0.30231  -0.30182  -0.29812  -0.29646  -0.29494
 Alpha  occ. eigenvalues --   -0.28784  -0.28500  -0.28319  -0.28266  -0.28007
 Alpha  occ. eigenvalues --   -0.27579  -0.27357  -0.27268  -0.27142  -0.27033
 Alpha  occ. eigenvalues --   -0.26893  -0.24996  -0.24481  -0.20951  -0.19531
 Alpha  occ. eigenvalues --   -0.19189  -0.18946  -0.18671  -0.17965  -0.15245
 Alpha virt. eigenvalues --   -0.01965  -0.00063   0.00577   0.01178   0.01824
 Alpha virt. eigenvalues --    0.06011   0.06294   0.06688   0.06867   0.07138
 Alpha virt. eigenvalues --    0.08991   0.09156   0.09477   0.10188   0.10764
 Alpha virt. eigenvalues --    0.11406   0.11834   0.12896   0.13653   0.13794
 Alpha virt. eigenvalues --    0.13974   0.14395   0.14934   0.15145   0.15602
 Alpha virt. eigenvalues --    0.15850   0.16238   0.16654   0.16852   0.17352
 Alpha virt. eigenvalues --    0.17704   0.18842   0.19083   0.19555   0.19904
 Alpha virt. eigenvalues --    0.20146   0.20568   0.20835   0.21190   0.21480
 Alpha virt. eigenvalues --    0.21878   0.21960   0.22207   0.22953   0.23017
 Alpha virt. eigenvalues --    0.23465   0.23869   0.25084   0.25271   0.25943
 Alpha virt. eigenvalues --    0.26129   0.26710   0.27472   0.28262   0.29019
 Alpha virt. eigenvalues --    0.29086   0.29991   0.30120   0.30307   0.31054
 Alpha virt. eigenvalues --    0.31971   0.32464   0.32699   0.33489   0.33618
 Alpha virt. eigenvalues --    0.33963   0.34548   0.34990   0.35084   0.35226
 Alpha virt. eigenvalues --    0.35691   0.35853   0.36604   0.37360   0.38245
 Alpha virt. eigenvalues --    0.38366   0.38423   0.38670   0.39192   0.39794
 Alpha virt. eigenvalues --    0.39926   0.40183   0.40365   0.40801   0.40911
 Alpha virt. eigenvalues --    0.41213   0.41889   0.41945   0.42297   0.42606
 Alpha virt. eigenvalues --    0.42772   0.43282   0.44115   0.44766   0.45009
 Alpha virt. eigenvalues --    0.45174   0.45400   0.45815   0.46058   0.46402
 Alpha virt. eigenvalues --    0.46607   0.46717   0.47124   0.47427   0.47661
 Alpha virt. eigenvalues --    0.47713   0.48311   0.48379   0.48744   0.49060
 Alpha virt. eigenvalues --    0.49258   0.49340   0.49467   0.49536   0.49775
 Alpha virt. eigenvalues --    0.50010   0.50448   0.50766   0.50975   0.51098
 Alpha virt. eigenvalues --    0.51556   0.51762   0.51902   0.52532   0.52743
 Alpha virt. eigenvalues --    0.52950   0.53371   0.53877   0.54636   0.54721
 Alpha virt. eigenvalues --    0.55435   0.55573   0.55867   0.56099   0.56255
 Alpha virt. eigenvalues --    0.56465   0.56583   0.56989   0.57021   0.57160
 Alpha virt. eigenvalues --    0.57342   0.57801   0.58186   0.58552   0.58611
 Alpha virt. eigenvalues --    0.58869   0.59155   0.59526   0.60027   0.60261
 Alpha virt. eigenvalues --    0.60740   0.61103   0.61676   0.62299   0.62703
 Alpha virt. eigenvalues --    0.63334   0.63617   0.64268   0.64763   0.65439
 Alpha virt. eigenvalues --    0.65585   0.66238   0.66963   0.67626   0.68184
 Alpha virt. eigenvalues --    0.69370   0.69738   0.70265   0.70531   0.70899
 Alpha virt. eigenvalues --    0.71547   0.71848   0.72095   0.72592   0.72871
 Alpha virt. eigenvalues --    0.73109   0.73663   0.74439   0.74639   0.75056
 Alpha virt. eigenvalues --    0.75416   0.75541   0.76357   0.76725   0.77371
 Alpha virt. eigenvalues --    0.78651   0.79727   0.80305   0.80949   0.81188
 Alpha virt. eigenvalues --    0.82574   0.83198   0.83610   0.83697   0.84403
 Alpha virt. eigenvalues --    0.84863   0.85523   0.86311   0.87041   0.87224
 Alpha virt. eigenvalues --    0.88073   0.88378   0.89027   0.89522   0.89775
 Alpha virt. eigenvalues --    0.90540   0.90933   0.91243   0.92016   0.92266
 Alpha virt. eigenvalues --    0.93108   0.93954   0.94594   0.95422   0.96026
 Alpha virt. eigenvalues --    0.96164   0.96780   0.97555   0.98238   0.99046
 Alpha virt. eigenvalues --    1.00227   1.01587   1.02123   1.02927   1.03305
 Alpha virt. eigenvalues --    1.04098   1.05097   1.05533   1.06326   1.07771
 Alpha virt. eigenvalues --    1.08424   1.08936   1.09657   1.10022   1.11366
 Alpha virt. eigenvalues --    1.11972   1.12733   1.13373   1.14898   1.14945
 Alpha virt. eigenvalues --    1.16700   1.16797   1.17966   1.19202   1.20302
 Alpha virt. eigenvalues --    1.21128   1.22714   1.23671   1.24566   1.24863
 Alpha virt. eigenvalues --    1.26121   1.27328   1.28050   1.28439   1.30952
 Alpha virt. eigenvalues --    1.32361   1.32776   1.33080   1.34925   1.36848
 Alpha virt. eigenvalues --    1.37687   1.38192   1.39899   1.40340   1.40381
 Alpha virt. eigenvalues --    1.42418   1.43585   1.44107   1.44530   1.45073
 Alpha virt. eigenvalues --    1.46636   1.47649   1.48580   1.49827   1.50166
 Alpha virt. eigenvalues --    1.51022   1.51350   1.51527   1.54508   1.55389
 Alpha virt. eigenvalues --    1.55892   1.56765   1.59941   1.60662   1.62373
 Alpha virt. eigenvalues --    1.62880   1.65322   1.66184   1.66439   1.66975
 Alpha virt. eigenvalues --    1.68401   1.69592   1.70308   1.71510   1.72031
 Alpha virt. eigenvalues --    1.72544   1.72892   1.74489   1.74695   1.75652
 Alpha virt. eigenvalues --    1.76937   1.77933   1.78536   1.79261   1.79630
 Alpha virt. eigenvalues --    1.81082   1.82082   1.82555   1.83423   1.83862
 Alpha virt. eigenvalues --    1.85405   1.85819   1.86263   1.86677   1.87502
 Alpha virt. eigenvalues --    1.88069   1.88342   1.88590   1.88859   1.89338
 Alpha virt. eigenvalues --    1.89688   1.90869   1.91573   1.91995   1.92533
 Alpha virt. eigenvalues --    1.93602   1.94801   1.95059   1.95833   1.96109
 Alpha virt. eigenvalues --    1.97324   1.97928   1.98197   1.99308   1.99580
 Alpha virt. eigenvalues --    2.00316   2.00852   2.01635   2.02117   2.02821
 Alpha virt. eigenvalues --    2.03701   2.05337   2.06025   2.06967   2.07525
 Alpha virt. eigenvalues --    2.08442   2.09020   2.10493   2.10625   2.11678
 Alpha virt. eigenvalues --    2.12043   2.12967   2.14904   2.15182   2.15649
 Alpha virt. eigenvalues --    2.16141   2.16506   2.17019   2.18218   2.18372
 Alpha virt. eigenvalues --    2.18772   2.19355   2.19783   2.22064   2.22695
 Alpha virt. eigenvalues --    2.23904   2.25673   2.27513   2.28377   2.28740
 Alpha virt. eigenvalues --    2.29074   2.29206   2.30140   2.30452   2.31641
 Alpha virt. eigenvalues --    2.32735   2.33205   2.33762   2.34163   2.35890
 Alpha virt. eigenvalues --    2.35968   2.37228   2.38903   2.41303   2.41979
 Alpha virt. eigenvalues --    2.42197   2.45130   2.45710   2.47157   2.48113
 Alpha virt. eigenvalues --    2.48384   2.48750   2.54507   2.57534   2.58385
 Alpha virt. eigenvalues --    2.59915   2.60183   2.60406   2.63188   2.64728
 Alpha virt. eigenvalues --    2.65057   2.66917   2.67474   2.68157   2.69714
 Alpha virt. eigenvalues --    2.70228   2.73159   2.73359   2.75988   2.76239
 Alpha virt. eigenvalues --    2.76724   2.77390   2.81699   2.84061   2.87189
 Alpha virt. eigenvalues --    2.87615   2.89325   2.90268   2.96839   2.99723
 Alpha virt. eigenvalues --    3.01125   3.02791   3.03475   3.04605   3.09143
 Alpha virt. eigenvalues --    3.14245   3.15132   3.17857   3.21691   3.22715
 Alpha virt. eigenvalues --    3.25828   3.26744   3.76286   6.05124   6.15140
 Alpha virt. eigenvalues --    6.30407 103.47270
          Condensed to atoms (all electrons):
 Mulliken atomic charges:
              1
     1  O   -0.449034
     2  Mg   0.839520
     3  O   -0.665649
     4  C    0.593679
     5  N   -0.544333
     6  N   -0.520212
     7  O   -0.442699
     8  C    0.333563
     9  C   -0.234057
    10  C    0.334218
    11  O   -0.455681
    12  C    0.611973
    13  C    0.131941
    14  C    0.058430
    15  O   -0.459076
    16  C   -0.218913
    17  O   -0.415308
    18  C    0.640490
    19  O   -0.446680
    20  O   -0.432572
    21  C    0.550553
    22  C    0.033216
    23  C    0.039179
    24  O   -0.409050
    25  C   -0.475889
    26  C   -0.479701
    27  C   -0.463374
    28  C   -0.469473
    29  C    0.020556
    30  C    0.023246
    31  C    0.003670
    32  C   -0.078755
    33  C   -0.070216
    34  C   -0.070658
    35  C    0.000189
    36  C   -0.055743
    37  C   -0.059022
    38  C    0.008751
    39  C   -0.077569
    40  C   -0.068923
    41  C   -0.074727
    42  C    0.005404
    43  C   -0.053105
    44  C   -0.059705
    45  C   -0.224983
    46  C   -0.217243
    47  C   -0.222805
    48  C   -0.217001
    49  C   -0.214888
    50  C   -0.216898
    51  C   -0.216173
    52  C   -0.217147
    53  C   -0.447441
    54  C   -0.450969
    55  H    0.073868
    56  H    0.107173
    57  H    0.128342
    58  H    0.170823
    59  H    0.172463
    60  H    0.164516
    61  H    0.222870
    62  H    0.136885
    63  H    0.183470
    64  H    0.154913
    65  H    0.191654
    66  H    0.174162
    67  H    0.136873
    68  H    0.148012
    69  H    0.139919
    70  H    0.160050
    71  H    0.133455
    72  H    0.166919
    73  H    0.168565
    74  H    0.161238
    75  H    0.082894
    76  H    0.085162
    77  H    0.085372
    78  H    0.098035
    79  H    0.099704
    80  H    0.085401
    81  H    0.087446
    82  H    0.089976
    83  H    0.102438
    84  H    0.116066
    85  H    0.073149
    86  H    0.119089
    87  H    0.068799
    88  H    0.076856
    89  H    0.070990
    90  H    0.071124
    91  H    0.071533
    92  H    0.070960
    93  H    0.105294
    94  H    0.075134
    95  H    0.073773
    96  H    0.070631
    97  H    0.080121
    98  H    0.063879
    99  H    0.094255
   100  H    0.078836
   101  H    0.076685
   102  H    0.068663
   103  H    0.074598
   104  H    0.101913
   105  H    0.070816
   106  H    0.077107
   107  H    0.071107
   108  H    0.074223
   109  H    0.128101
   110  H    0.123736
   111  H    0.127641
   112  H    0.126097
   113  H    0.127947
   114  H    0.125374
 Sum of Mulliken charges=   0.00000
 Atomic charges with hydrogens summed into heavy atoms:
              1
     1  O   -0.449034
     2  Mg   0.839520
     3  O   -0.665649
     4  C    0.593679
     5  N   -0.544333
     6  N   -0.520212
     7  O   -0.442699
     8  C    0.333563
     9  C   -0.160190
    10  C    0.334218
    11  O   -0.455681
    12  C    0.611973
    13  C    0.239114
    14  C    0.186773
    15  O   -0.459076
    16  C    0.288889
    17  O   -0.415308
    18  C    0.640490
    19  O   -0.446680
    20  O   -0.432572
    21  C    0.550553
    22  C    0.256086
    23  C    0.176064
    24  O   -0.409050
    25  C    0.054148
    26  C   -0.020654
    27  C   -0.029951
    28  C    0.027248
    29  C    0.020556
    30  C    0.023246
    31  C    0.003670
    32  C    0.004139
    33  C    0.014946
    34  C    0.014714
    35  C    0.000189
    36  C    0.042291
    37  C    0.040682
    38  C    0.008751
    39  C    0.007832
    40  C    0.018523
    41  C    0.015250
    42  C    0.005404
    43  C    0.049333
    44  C    0.056361
    45  C    0.036054
    46  C    0.001728
    47  C    0.024982
    48  C    0.002537
    49  C    0.023366
    50  C    0.007285
    51  C    0.031154
    52  C    0.005290
    53  C   -0.067963
    54  C   -0.071551
    55  H    0.000000
    56  H    0.000000
    57  H    0.000000
    58  H    0.000000
    59  H    0.000000
    60  H    0.000000
    61  H    0.000000
    62  H    0.000000
    63  H    0.000000
    64  H    0.000000
    65  H    0.000000
    66  H    0.000000
    67  H    0.000000
    68  H    0.000000
    69  H    0.000000
    70  H    0.000000
    71  H    0.000000
    72  H    0.000000
    73  H    0.000000
    74  H    0.000000
    75  H    0.000000
    76  H    0.000000
    77  H    0.000000
    78  H    0.000000
    79  H    0.000000
    80  H    0.000000
    81  H    0.000000
    82  H    0.000000
    83  H    0.000000
    84  H    0.000000
    85  H    0.000000
    86  H    0.000000
    87  H    0.000000
    88  H    0.000000
    89  H    0.000000
    90  H    0.000000
    91  H    0.000000
    92  H    0.000000
    93  H    0.000000
    94  H    0.000000
    95  H    0.000000
    96  H    0.000000
    97  H    0.000000
    98  H    0.000000
    99  H    0.000000
   100  H    0.000000
   101  H    0.000000
   102  H    0.000000
   103  H    0.000000
   104  H    0.000000
   105  H    0.000000
   106  H    0.000000
   107  H    0.000000
   108  H    0.000000
   109  H    0.000000
   110  H    0.000000
   111  H    0.000000
   112  H    0.000000
   113  H    0.000000
   114  H    0.000000
 Sum of Mulliken charges=   0.00000
 APT atomic charges:
              1
     1  O   -0.801221
     2  Mg   1.303979
     3  O   -0.914136
     4  C    1.004317
     5  N   -0.953032
     6  N   -0.944675
     7  O   -0.679393
     8  C    0.945618
     9  C   -0.907266
    10  C    0.941613
    11  O   -0.809215
    12  C    0.939157
    13  C    0.486478
    14  C    0.334037
    15  O   -0.713859
    16  C    0.466455
    17  O   -0.795119
    18  C    1.101866
    19  O   -0.872571
    20  O   -0.779591
    21  C    1.067563
    22  C    0.410853
    23  C    0.337955
    24  O   -0.733988
    25  C    0.018809
    26  C   -0.024347
    27  C    0.059031
    28  C    0.047758
    29  C    0.326779
    30  C    0.326807
    31  C   -0.060342
    32  C   -0.098832
    33  C   -0.117827
    34  C   -0.140314
    35  C   -0.046019
    36  C    0.175180
    37  C    0.183474
    38  C   -0.031064
    39  C   -0.177139
    40  C   -0.080474
    41  C   -0.182663
    42  C   -0.021040
    43  C    0.167957
    44  C    0.161663
    45  C   -0.031497
    46  C   -0.051355
    47  C   -0.005553
    48  C   -0.052068
    49  C   -0.010722
    50  C   -0.042847
    51  C   -0.006934
    52  C   -0.047956
    53  C   -0.207634
    54  C   -0.214679
    55  H   -0.021311
    56  H   -0.085906
    57  H    0.069101
    58  H   -0.010808
    59  H   -0.017062
    60  H   -0.007611
    61  H    0.034836
    62  H    0.090670
    63  H    0.019352
    64  H   -0.007508
    65  H    0.032186
    66  H    0.012009
    67  H    0.099541
    68  H   -0.014740
    69  H   -0.025945
    70  H   -0.015944
    71  H   -0.047962
    72  H    0.007988
    73  H    0.002631
    74  H    0.004099
    75  H    0.062874
    76  H    0.074893
    77  H    0.070906
    78  H   -0.035700
    79  H   -0.049433
    80  H    0.076863
    81  H    0.075757
    82  H    0.079566
    83  H   -0.034840
    84  H   -0.026877
    85  H   -0.005236
    86  H    0.029511
    87  H    0.007472
    88  H    0.004170
    89  H    0.007680
    90  H    0.002423
    91  H   -0.006525
    92  H   -0.002122
    93  H   -0.007988
    94  H    0.002238
    95  H    0.005083
    96  H    0.007474
    97  H    0.007896
    98  H   -0.005931
    99  H   -0.016083
   100  H    0.004259
   101  H    0.002165
   102  H    0.000775
   103  H    0.001119
   104  H   -0.016764
   105  H    0.000254
   106  H    0.005086
   107  H    0.008401
   108  H    0.007893
   109  H    0.049899
   110  H    0.048025
   111  H    0.048579
   112  H    0.046740
   113  H    0.052259
   114  H    0.047648
 Sum of APT charges=   0.00000
 APT Atomic charges with hydrogens summed into heavy atoms:
              1
     1  O   -0.801221
     2  Mg   1.303979
     3  O   -0.914136
     4  C    1.004317
     5  N   -0.953032
     6  N   -0.944675
     7  O   -0.679393
     8  C    0.945618
     9  C   -0.928578
    10  C    0.941613
    11  O   -0.809215
    12  C    0.939157
    13  C    0.400572
    14  C    0.403138
    15  O   -0.713859
    16  C    0.430974
    17  O   -0.795119
    18  C    1.101866
    19  O   -0.872571
    20  O   -0.779591
    21  C    1.067563
    22  C    0.445689
    23  C    0.428625
    24  O   -0.733988
    25  C    0.062838
    26  C    0.072462
    27  C   -0.030820
    28  C    0.062477
    29  C    0.326779
    30  C    0.326807
    31  C   -0.060342
    32  C   -0.035958
    33  C   -0.042933
    34  C   -0.069408
    35  C   -0.046019
    36  C    0.139480
    37  C    0.134041
    38  C   -0.031064
    39  C   -0.100277
    40  C   -0.004717
    41  C   -0.103097
    42  C   -0.021040
    43  C    0.133117
    44  C    0.134786
    45  C    0.000249
    46  C   -0.037082
    47  C   -0.022188
    48  C   -0.037273
    49  C   -0.024840
    50  C   -0.035648
    51  C   -0.022325
    52  C   -0.026577
    53  C   -0.061130
    54  C   -0.068032
    55  H    0.000000
    56  H    0.000000
    57  H    0.000000
    58  H    0.000000
    59  H    0.000000
    60  H    0.000000
    61  H    0.000000
    62  H    0.000000
    63  H    0.000000
    64  H    0.000000
    65  H    0.000000
    66  H    0.000000
    67  H    0.000000
    68  H    0.000000
    69  H    0.000000
    70  H    0.000000
    71  H    0.000000
    72  H    0.000000
    73  H    0.000000
    74  H    0.000000
    75  H    0.000000
    76  H    0.000000
    77  H    0.000000
    78  H    0.000000
    79  H    0.000000
    80  H    0.000000
    81  H    0.000000
    82  H    0.000000
    83  H    0.000000
    84  H    0.000000
    85  H    0.000000
    86  H    0.000000
    87  H    0.000000
    88  H    0.000000
    89  H    0.000000
    90  H    0.000000
    91  H    0.000000
    92  H    0.000000
    93  H    0.000000
    94  H    0.000000
    95  H    0.000000
    96  H    0.000000
    97  H    0.000000
    98  H    0.000000
    99  H    0.000000
   100  H    0.000000
   101  H    0.000000
   102  H    0.000000
   103  H    0.000000
   104  H    0.000000
   105  H    0.000000
   106  H    0.000000
   107  H    0.000000
   108  H    0.000000
   109  H    0.000000
   110  H    0.000000
   111  H    0.000000
   112  H    0.000000
   113  H    0.000000
   114  H    0.000000
 Sum of APT charges=   0.00000
 Electronic spatial extent (au):  <R**2>= 29945.9041
 Charge=     0.0000 electrons
 Dipole moment (field-independent basis, Debye):
    X=    -2.0697    Y=    -0.7412    Z=     5.6733  Tot=     6.0844
 Quadrupole moment (field-independent basis, Debye-Ang):
   XX=  -276.8791   YY=  -324.8758   ZZ=  -307.7009
   XY=   -10.0693   XZ=     4.1056   YZ=    18.8465
 Traceless Quadrupole moment (field-independent basis, Debye-Ang):
   XX=    26.2728   YY=   -21.7239   ZZ=    -4.5490
   XY=   -10.0693   XZ=     4.1056   YZ=    18.8465
 Octapole moment (field-independent basis, Debye-Ang**2):
  XXX=   -36.3471  YYY=   -70.4576  ZZZ=    40.1646  XYY=  -100.9262
  XXY=    11.1438  XXZ=    22.6739  XZZ=   -26.4445  YZZ=    10.4802
  YYZ=    99.9097  XYZ=     2.9482
 Hexadecapole moment (field-independent basis, Debye-Ang**3):
 XXXX=-16423.0036 YYYY=-14718.4781 ZZZZ= -7147.7314 XXXY=  -157.9075
 XXXZ=     9.5415 YYYX=  -501.7878 YYYZ=   559.3602 ZZZX=   -86.0471
 ZZZY=   117.2581 XXYY= -5246.3840 XXZZ= -3914.5745 YYZZ= -3550.6584
 XXYZ=   190.4282 YYXZ=   106.4035 ZZXY=  -113.5184
 N-N= 9.054448903955D+03 E-N=-2.420546439943D+04  KE= 2.584731916647D+03
  Exact polarizability: 461.942   1.013 409.202   0.127   0.527 362.017
 Approx polarizability: 656.720   8.707 569.122   0.771  -9.067 565.279
 Full mass-weighted force constant matrix:
 Low frequencies ---   -1.9865   -0.0008   -0.0004    0.0008    2.4781    7.3115
 Low frequencies ---   13.6341   19.8474   22.4758
 Diagonal vibrational polarizability:
      114.1100497     121.2728402      86.7830355
 Harmonic frequencies (cm**-1), IR intensities (KM/Mole), Raman scattering
 activities (A**4/AMU), depolarization ratios for plane and unpolarized
 incident light, reduced masses (AMU), force constants (mDyne/A),
 and normal coordinates:
                     1                      2                      3
                     A                      A                      A
 Frequencies --    13.5515                19.8036                22.3661
 Red. masses --     4.8509                 3.9571                 4.6880
 Frc consts  --     0.0005                 0.0009                 0.0014
 IR Inten    --     0.0464                 0.0758                 0.4210
 Atom AN      X      Y      Z        X      Y      Z        X      Y      Z
   1   8     0.04   0.05   0.10    -0.05   0.17  -0.05    -0.06   0.00  -0.06
   2  12     0.00   0.00   0.02     0.01   0.00   0.00     0.01   0.00   0.02
   3   8    -0.02   0.01   0.02     0.00   0.00  -0.01     0.03   0.01   0.03
   4   6     0.02   0.03   0.09    -0.03   0.06  -0.04    -0.02   0.00  -0.04
   5   7    -0.01  -0.01   0.00     0.00   0.00   0.00     0.00   0.01   0.03
   6   7    -0.01   0.00   0.03     0.01  -0.01  -0.02     0.01  -0.01   0.02
   7   8     0.02   0.03   0.07    -0.02   0.04  -0.10    -0.01   0.00   0.00
   8   6    -0.01   0.00   0.01     0.00   0.00  -0.01     0.00   0.01   0.05
   9   6     0.00   0.00   0.04     0.00   0.00  -0.02    -0.01   0.01   0.06
  10   6     0.00   0.01   0.05     0.00  -0.01  -0.02     0.00  -0.01   0.04
  11   8     0.00   0.02   0.10    -0.02  -0.05   0.03     0.02   0.02  -0.04
  12   6     0.00   0.01   0.07     0.00  -0.02   0.02     0.02   0.01  -0.01
  13   6    -0.03   0.01   0.04    -0.01  -0.01   0.01     0.04   0.02   0.01
  14   6     0.02   0.01   0.12     0.00  -0.05   0.05     0.00   0.02  -0.06
  15   8     0.02   0.00   0.06     0.03  -0.01   0.02    -0.01   0.01  -0.01
  16   6     0.04   0.08   0.08    -0.09   0.27  -0.13    -0.08  -0.02  -0.04
  17   8     0.02   0.02  -0.02     0.01  -0.01   0.02    -0.01  -0.01   0.11
  18   6     0.02   0.01  -0.02     0.02  -0.01   0.01    -0.02  -0.01   0.06
  19   8     0.02   0.02  -0.01     0.02  -0.01   0.00    -0.01  -0.02   0.05
  20   8     0.01  -0.01  -0.06     0.02   0.01   0.03    -0.07   0.00   0.02
  21   6     0.01   0.00  -0.07     0.02   0.01   0.04    -0.05   0.00   0.08
  22   6     0.02   0.01  -0.04     0.01   0.00   0.03    -0.03  -0.01   0.11
  23   6     0.02   0.01  -0.05     0.02   0.00   0.02    -0.03  -0.01   0.01
  24   8     0.00  -0.01  -0.09     0.02   0.01   0.06    -0.07   0.01   0.10
  25   6     0.04   0.03  -0.05     0.00  -0.01   0.04     0.00  -0.02   0.12
  26   6     0.03   0.02  -0.06     0.01  -0.02   0.03     0.01  -0.01  -0.02
  27   6    -0.05   0.00   0.02    -0.02   0.01   0.02     0.06   0.02   0.03
  28   6    -0.01  -0.05   0.15    -0.06  -0.21   0.07     0.02   0.04  -0.09
  29   6    -0.01  -0.01  -0.04     0.00   0.00   0.00     0.00   0.01   0.01
  30   6     0.00   0.00   0.01     0.01  -0.01  -0.01     0.01  -0.01  -0.03
  31   6     0.04   0.00  -0.07     0.00  -0.01   0.01     0.03   0.01  -0.01
  32   6     0.04   0.00  -0.11    -0.01  -0.02   0.01     0.03   0.01  -0.04
  33   6    -0.01  -0.02  -0.12    -0.01  -0.02   0.01     0.01   0.01  -0.05
  34   6    -0.05  -0.04  -0.09     0.00  -0.01   0.01    -0.01   0.02  -0.04
  35   6    -0.05  -0.04  -0.05     0.00   0.00   0.00    -0.02   0.02  -0.01
  36   6     0.08   0.00  -0.06     0.00  -0.01   0.00     0.05   0.00   0.01
  37   6    -0.11  -0.07  -0.02     0.01   0.01   0.00    -0.04   0.03   0.00
  38   6     0.01   0.02   0.00     0.01  -0.02  -0.01     0.05   0.00  -0.05
  39   6     0.01   0.02  -0.02     0.01  -0.02  -0.01     0.05   0.01  -0.09
  40   6     0.00   0.00  -0.03     0.01  -0.01   0.00     0.00   0.01  -0.12
  41   6    -0.01  -0.02  -0.02     0.01   0.00   0.00    -0.04  -0.01  -0.10
  42   6    -0.01  -0.02   0.00     0.01   0.00  -0.01    -0.03  -0.02  -0.05
  43   6     0.02   0.04   0.02     0.01  -0.03  -0.01     0.10   0.00  -0.02
  44   6    -0.03  -0.03   0.01     0.00   0.02  -0.01    -0.06  -0.06  -0.03
  45   6     0.08   0.00  -0.06    -0.01   0.00   0.00     0.07   0.00   0.01
  46   6     0.10  -0.02  -0.06     0.00  -0.01   0.01     0.07   0.00  -0.01
  47   6    -0.10  -0.07   0.02    -0.02   0.02   0.00    -0.03   0.03  -0.01
  48   6    -0.16  -0.07  -0.06     0.03   0.00   0.00    -0.08   0.05   0.00
  49   6    -0.03  -0.05   0.00     0.00   0.03   0.00    -0.04  -0.10  -0.08
  50   6    -0.04  -0.05   0.02     0.01   0.02  -0.03    -0.11  -0.11   0.00
  51   6     0.01   0.05   0.00     0.01  -0.04   0.00     0.12   0.00   0.00
  52   6     0.02   0.07   0.03     0.02  -0.04  -0.02     0.14   0.02  -0.05
  53   6    -0.01  -0.01  -0.01     0.01   0.00  -0.01    -0.01   0.03   0.06
  54   6     0.00   0.01   0.06     0.00  -0.01  -0.03    -0.01  -0.02   0.04
  55   1     0.00   0.01   0.06     0.00  -0.01  -0.02    -0.01   0.01   0.08
  56   1    -0.05   0.00   0.07    -0.01   0.00   0.01     0.06   0.02  -0.01
  57   1     0.06   0.01   0.13     0.09  -0.02   0.13    -0.03   0.01  -0.07
  58   1     0.01   0.07   0.06    -0.10   0.24  -0.23    -0.06  -0.01  -0.03
  59   1     0.05   0.11   0.06    -0.09   0.33  -0.09    -0.09  -0.03  -0.01
  60   1     0.05   0.08   0.09    -0.10   0.34  -0.13    -0.10  -0.01  -0.06
  61   1     0.01   0.01  -0.03     0.02   0.00   0.03    -0.05  -0.01   0.14
  62   1     0.01   0.00  -0.04     0.02   0.00   0.01    -0.04   0.00  -0.02
  63   1     0.04   0.02  -0.07     0.01  -0.01   0.05    -0.01  -0.02   0.12
  64   1     0.05   0.03  -0.06     0.00  -0.02   0.04     0.02  -0.02   0.10
  65   1     0.05   0.04  -0.04     0.00  -0.01   0.03     0.01  -0.02   0.14
  66   1     0.03   0.01  -0.08     0.01  -0.01   0.03     0.00  -0.01  -0.05
  67   1     0.03   0.03  -0.05     0.01  -0.02   0.02     0.03  -0.01  -0.03
  68   1     0.04   0.04  -0.06     0.01  -0.02   0.03     0.04  -0.02   0.01
  69   1    -0.06   0.00   0.04    -0.03   0.00   0.03     0.07   0.02   0.02
  70   1    -0.08   0.00   0.00    -0.02   0.02   0.02     0.09   0.03   0.05
  71   1    -0.03   0.01  -0.01    -0.02   0.00   0.03     0.05   0.01   0.06
  72   1    -0.01  -0.08   0.19    -0.05  -0.32   0.18     0.04   0.06  -0.12
  73   1    -0.05  -0.06   0.10    -0.16  -0.27  -0.05     0.05   0.05  -0.07
  74   1     0.01  -0.03   0.17    -0.04  -0.17   0.09     0.00   0.03  -0.11
  75   1     0.07   0.01  -0.14    -0.01  -0.02   0.01     0.05   0.00  -0.05
  76   1     0.00  -0.02  -0.15    -0.01  -0.03   0.01     0.01   0.01  -0.07
  77   1    -0.09  -0.07  -0.10     0.00  -0.02   0.01    -0.03   0.03  -0.05
  78   1     0.08   0.03  -0.04     0.00   0.00   0.00     0.05   0.01   0.03
  79   1    -0.11  -0.08   0.02     0.02   0.03  -0.01    -0.05   0.01   0.03
  80   1     0.02   0.03  -0.02     0.01  -0.03  -0.01     0.08   0.02  -0.11
  81   1     0.01  -0.01  -0.05     0.01  -0.01   0.00     0.00   0.02  -0.15
  82   1    -0.01  -0.04  -0.03     0.01   0.01   0.00    -0.07  -0.01  -0.11
  83   1     0.02   0.03   0.03     0.01  -0.03  -0.02     0.10  -0.01   0.01
  84   1    -0.03  -0.03   0.03     0.01   0.01  -0.01    -0.07  -0.02   0.00
  85   1     0.11   0.00  -0.05    -0.01   0.00   0.00     0.10   0.00   0.02
  86   1     0.06   0.02  -0.05    -0.01   0.00   0.00     0.06   0.01   0.03
  87   1     0.07  -0.03  -0.08    -0.01  -0.01   0.01     0.07  -0.01  -0.01
  88   1     0.13  -0.01  -0.05     0.00  -0.01   0.01     0.08   0.00   0.00
  89   1     0.10  -0.04  -0.08     0.00  -0.01   0.01     0.07  -0.01  -0.02
  90   1     0.10  -0.02  -0.06     0.00  -0.01   0.01     0.05   0.00  -0.01
  91   1    -0.15  -0.10   0.05    -0.01   0.02   0.00    -0.05   0.04   0.00
  92   1    -0.09  -0.06  -0.03    -0.02   0.00   0.00    -0.03   0.04  -0.04
  93   1    -0.05  -0.07   0.05    -0.02   0.03   0.00    -0.01   0.01  -0.01
  94   1    -0.20  -0.10  -0.03     0.03   0.01   0.00    -0.09   0.06   0.01
  95   1    -0.18  -0.06  -0.08     0.05   0.00   0.00    -0.09   0.05   0.01
  96   1    -0.16  -0.05  -0.08     0.02  -0.02   0.00    -0.07   0.07  -0.02
  97   1    -0.04  -0.06   0.00     0.00   0.03   0.00    -0.08  -0.11  -0.05
  98   1    -0.04  -0.05  -0.02     0.00   0.03   0.00    -0.03  -0.15  -0.12
  99   1    -0.03  -0.04  -0.01     0.00   0.02   0.01     0.01  -0.05  -0.09
 100   1    -0.05  -0.06   0.03     0.00   0.03  -0.03    -0.12  -0.13   0.02
 101   1    -0.03  -0.04   0.03     0.01   0.02  -0.03    -0.13  -0.08   0.04
 102   1    -0.04  -0.05   0.01     0.00   0.03  -0.03    -0.10  -0.15  -0.01
 103   1     0.02   0.07   0.01     0.02  -0.05  -0.01     0.16   0.00   0.02
 104   1     0.00   0.03  -0.01     0.01  -0.03   0.00     0.08  -0.02   0.03
 105   1     0.01   0.06  -0.02     0.01  -0.04   0.00     0.12   0.01  -0.04
 106   1     0.03   0.08   0.04     0.02  -0.05  -0.02     0.18   0.02  -0.03
 107   1     0.02   0.08   0.01     0.02  -0.04  -0.02     0.15   0.03  -0.08
 108   1     0.03   0.06   0.04     0.02  -0.04  -0.03     0.14   0.02  -0.07
 109   1     0.01  -0.01  -0.03     0.00   0.00   0.00     0.00   0.02   0.05
 110   1    -0.01   0.00   0.00     0.01   0.00  -0.01    -0.02   0.03   0.07
 111   1    -0.04  -0.01  -0.03     0.01   0.00   0.00    -0.02   0.04   0.04
 112   1     0.00   0.00   0.05     0.00  -0.01  -0.04     0.00  -0.02   0.05
 113   1     0.00   0.03   0.05     0.01  -0.02  -0.04    -0.01  -0.03   0.04
 114   1     0.00   0.01   0.08     0.00  -0.01  -0.04    -0.01  -0.02   0.03
                     4                      5                      6
                     A                      A                      A
 Frequencies --    34.5006                37.3889                38.6372
 Red. masses --     5.8336                 4.7699                 5.1134
 Frc consts  --     0.0041                 0.0039                 0.0045
 IR Inten    --     0.0451                 0.4142                 0.4592
 Atom AN      X      Y      Z        X      Y      Z        X      Y      Z
   1   8     0.09  -0.03   0.02     0.14   0.01   0.01     0.15   0.03   0.00
   2  12    -0.02   0.00  -0.03     0.00  -0.02  -0.03    -0.01   0.01   0.03
   3   8    -0.06  -0.06  -0.04     0.00  -0.03  -0.03    -0.01   0.00   0.03
   4   6     0.04  -0.03  -0.02     0.06   0.00  -0.04     0.06   0.03  -0.06
   5   7    -0.01   0.01   0.03    -0.01  -0.02  -0.05     0.00   0.00   0.03
   6   7    -0.01   0.01  -0.01    -0.01  -0.01   0.02     0.00   0.01  -0.01
   7   8     0.03  -0.03  -0.06     0.03   0.02  -0.11     0.03   0.04  -0.14
   8   6     0.00   0.01   0.05    -0.01  -0.02  -0.04     0.01   0.00   0.02
   9   6     0.00   0.02   0.04     0.00  -0.01  -0.01     0.01   0.01  -0.01
  10   6    -0.01   0.02   0.01     0.00  -0.01   0.03     0.01   0.01  -0.03
  11   8    -0.04  -0.05  -0.03    -0.01  -0.05  -0.02    -0.04  -0.03  -0.04
  12   6    -0.04  -0.03  -0.03     0.01  -0.03  -0.02    -0.03  -0.02  -0.02
  13   6    -0.06  -0.05  -0.04     0.01  -0.01  -0.02    -0.01  -0.02   0.00
  14   6    -0.01  -0.02   0.00     0.03  -0.03   0.01    -0.01   0.02  -0.02
  15   8    -0.01  -0.01  -0.02     0.02  -0.02  -0.02    -0.03   0.02  -0.01
  16   6     0.16  -0.05   0.01     0.19   0.03  -0.03     0.24   0.04  -0.04
  17   8     0.03   0.03  -0.08    -0.01   0.03   0.10    -0.04  -0.01   0.11
  18   6     0.03   0.03  -0.04    -0.02   0.02   0.01    -0.05  -0.02   0.07
  19   8     0.01   0.02  -0.10    -0.01   0.01  -0.03    -0.05  -0.01   0.09
  20   8     0.10   0.08   0.10    -0.07   0.03  -0.03    -0.08  -0.06  -0.02
  21   6     0.11   0.08   0.11    -0.06   0.04   0.05    -0.08  -0.06  -0.03
  22   6     0.06   0.04   0.01    -0.03   0.03   0.10    -0.04  -0.02   0.04
  23   6     0.05   0.04   0.05    -0.03   0.03  -0.03    -0.06  -0.04   0.01
  24   8     0.16   0.12   0.20    -0.07   0.06   0.08    -0.10  -0.08  -0.09
  25   6    -0.03  -0.03   0.05     0.01   0.03   0.10     0.03   0.03   0.01
  26   6    -0.02  -0.03   0.10     0.00   0.04  -0.05    -0.01  -0.01  -0.03
  27   6    -0.05  -0.06  -0.05     0.04   0.01   0.03    -0.02  -0.01   0.01
  28   6    -0.02   0.01   0.03     0.00  -0.05   0.04    -0.01   0.06   0.00
  29   6    -0.01  -0.01   0.01    -0.01  -0.01  -0.03     0.00   0.00   0.02
  30   6    -0.01   0.01  -0.03    -0.01   0.00   0.02     0.00   0.01   0.00
  31   6     0.00  -0.04   0.00    -0.03   0.01  -0.02     0.02  -0.01   0.00
  32   6     0.00  -0.05  -0.02    -0.03   0.02   0.02     0.03  -0.01  -0.02
  33   6    -0.02  -0.04  -0.05     0.00   0.00   0.04     0.01   0.00  -0.04
  34   6    -0.04  -0.01  -0.04     0.02  -0.02   0.02    -0.01   0.01  -0.03
  35   6    -0.04   0.00  -0.01     0.02  -0.03  -0.01    -0.02   0.00   0.00
  36   6     0.02  -0.06   0.03    -0.06   0.02  -0.04     0.04  -0.02   0.02
  37   6    -0.06   0.02   0.00     0.05  -0.05  -0.02    -0.04   0.00   0.02
  38   6     0.00   0.01  -0.03    -0.02   0.04   0.01     0.00  -0.02   0.01
  39   6     0.00   0.00  -0.03    -0.03   0.05   0.00     0.00  -0.02   0.02
  40   6    -0.01   0.01  -0.04    -0.03   0.02  -0.01     0.01   0.00   0.04
  41   6    -0.02   0.01  -0.03    -0.02  -0.01   0.00     0.01   0.03   0.03
  42   6    -0.02   0.01  -0.03    -0.01  -0.02   0.01     0.00   0.04   0.01
  43   6     0.00   0.01  -0.03    -0.03   0.07   0.02     0.01  -0.06   0.00
  44   6    -0.03   0.02  -0.02     0.01  -0.08   0.02     0.00   0.09   0.00
  45   6    -0.02  -0.10  -0.01    -0.07   0.03  -0.03     0.05  -0.04   0.01
  46   6     0.05  -0.11   0.09    -0.08   0.03  -0.04     0.05  -0.03   0.03
  47   6    -0.04   0.02  -0.03     0.06  -0.05   0.00    -0.01   0.00   0.00
  48   6    -0.10   0.07   0.01     0.07  -0.07  -0.02    -0.09   0.03   0.01
  49   6    -0.05   0.03  -0.01     0.02  -0.12  -0.03    -0.01   0.13   0.05
  50   6    -0.03   0.03  -0.04     0.02  -0.10   0.07     0.00   0.12  -0.05
  51   6    -0.04   0.01  -0.06    -0.04   0.09  -0.01     0.04  -0.07   0.05
  52   6     0.01   0.05   0.00    -0.04   0.10   0.04     0.01  -0.10  -0.04
  53   6     0.00   0.02   0.09    -0.01  -0.03  -0.07     0.02   0.00   0.03
  54   6     0.00   0.02  -0.01     0.00   0.01   0.09     0.01   0.01  -0.08
  55   1     0.00   0.02   0.06     0.00  -0.01   0.00     0.02   0.00  -0.02
  56   1    -0.06  -0.05  -0.03     0.02   0.02  -0.05     0.01  -0.04  -0.01
  57   1    -0.02  -0.01   0.00     0.04  -0.01   0.04    -0.03   0.04   0.00
  58   1     0.15  -0.04   0.02     0.14   0.02  -0.04     0.19   0.04  -0.04
  59   1     0.17  -0.07  -0.04     0.23   0.06  -0.09     0.27   0.05  -0.13
  60   1     0.19  -0.04   0.04     0.25   0.03   0.03     0.31   0.04   0.03
  61   1     0.10   0.09  -0.03    -0.05   0.03   0.13    -0.07  -0.04   0.08
  62   1     0.07   0.06   0.04    -0.03   0.04  -0.05    -0.08  -0.05   0.01
  63   1     0.00  -0.01   0.12     0.00   0.03   0.10     0.03   0.02  -0.03
  64   1    -0.08  -0.08   0.09     0.03   0.03   0.08     0.06   0.06  -0.01
  65   1    -0.06  -0.05  -0.03     0.02   0.03   0.13     0.05   0.07   0.07
  66   1     0.00  -0.02   0.18    -0.01   0.04  -0.08    -0.02  -0.01  -0.07
  67   1    -0.04  -0.05   0.08     0.01   0.05  -0.05     0.01   0.00  -0.02
  68   1    -0.05  -0.06   0.10     0.01   0.05  -0.05     0.01   0.00  -0.02
  69   1    -0.05  -0.06  -0.06     0.05   0.02   0.03    -0.02  -0.03  -0.02
  70   1    -0.05  -0.06  -0.04     0.05   0.03   0.03     0.01  -0.01   0.02
  71   1    -0.06  -0.05  -0.04     0.02  -0.02   0.06    -0.05   0.00   0.02
  72   1    -0.06   0.02   0.04    -0.03  -0.07   0.09    -0.06   0.07   0.02
  73   1    -0.01   0.01   0.03    -0.02  -0.07   0.00     0.02   0.05  -0.01
  74   1     0.00   0.03   0.05     0.03  -0.02   0.07     0.02   0.10   0.02
  75   1     0.01  -0.07  -0.03    -0.05   0.03   0.02     0.04  -0.01  -0.03
  76   1    -0.02  -0.05  -0.07     0.00   0.01   0.06     0.01   0.01  -0.06
  77   1    -0.06  -0.01  -0.05     0.04  -0.02   0.04    -0.03   0.01  -0.04
  78   1     0.04  -0.02   0.04    -0.06   0.01  -0.06     0.04  -0.02   0.04
  79   1    -0.07   0.00   0.04     0.04  -0.05  -0.05    -0.05  -0.03   0.05
  80   1     0.01  -0.01  -0.04    -0.03   0.07   0.00     0.00  -0.04   0.03
  81   1    -0.01   0.00  -0.04    -0.03   0.03  -0.02     0.01   0.00   0.05
  82   1    -0.03   0.01  -0.04    -0.02  -0.03  -0.01     0.01   0.05   0.04
  83   1     0.02  -0.01  -0.02    -0.03   0.06   0.03     0.00  -0.04  -0.02
  84   1    -0.03   0.01  -0.02     0.01  -0.07   0.02     0.00   0.08  -0.01
  85   1    -0.01  -0.12   0.02    -0.11   0.04  -0.05     0.07  -0.06   0.03
  86   1    -0.04  -0.06  -0.04    -0.06   0.01  -0.04     0.04  -0.03   0.01
  87   1    -0.05  -0.14  -0.02    -0.07   0.06   0.00     0.05  -0.06  -0.01
  88   1     0.07  -0.12   0.10    -0.10   0.04  -0.05     0.06  -0.04   0.04
  89   1     0.04  -0.15   0.08    -0.08   0.05  -0.02     0.05  -0.04   0.02
  90   1     0.08  -0.08   0.11    -0.07   0.02  -0.04     0.04  -0.02   0.04
  91   1    -0.06   0.04  -0.02     0.08  -0.07  -0.02    -0.04  -0.01   0.02
  92   1    -0.03   0.05  -0.07     0.06  -0.05   0.02     0.00   0.02  -0.03
  93   1    -0.01  -0.01  -0.03     0.04  -0.04  -0.01     0.03  -0.03   0.01
  94   1    -0.12   0.07   0.02     0.09  -0.08  -0.03    -0.11   0.02   0.02
  95   1    -0.13   0.06   0.03     0.07  -0.06  -0.03    -0.12   0.04   0.02
  96   1    -0.09   0.10  -0.02     0.07  -0.07   0.01    -0.08   0.07  -0.01
  97   1    -0.06   0.04  -0.01     0.03  -0.16  -0.03    -0.02   0.16   0.04
  98   1    -0.06   0.04  -0.02     0.02  -0.12  -0.03    -0.02   0.14   0.05
  99   1    -0.05   0.03   0.00     0.01  -0.10  -0.07    -0.01   0.11   0.08
 100   1    -0.04   0.04  -0.04     0.04  -0.13   0.07     0.00   0.15  -0.05
 101   1    -0.02   0.03  -0.05     0.01  -0.08   0.10     0.01   0.09  -0.08
 102   1    -0.04   0.04  -0.05     0.02  -0.10   0.08     0.00   0.13  -0.05
 103   1    -0.05   0.01  -0.06    -0.04   0.11  -0.01     0.04  -0.10   0.04
 104   1    -0.05  -0.02  -0.08    -0.04   0.07  -0.03     0.03  -0.04   0.07
 105   1    -0.07   0.03  -0.06    -0.04   0.10  -0.03     0.05  -0.09   0.06
 106   1     0.01   0.05   0.00    -0.04   0.12   0.05     0.02  -0.12  -0.05
 107   1    -0.02   0.08   0.00    -0.04   0.11   0.03     0.02  -0.12  -0.02
 108   1     0.03   0.06   0.02    -0.03   0.08   0.07     0.00  -0.09  -0.07
 109   1     0.00   0.00   0.10     0.00  -0.02  -0.08     0.00   0.00   0.05
 110   1     0.01   0.03   0.10    -0.01  -0.03  -0.07     0.02   0.00   0.02
 111   1     0.02   0.04   0.09    -0.03  -0.04  -0.07     0.04   0.00   0.05
 112   1    -0.03   0.00  -0.04     0.02   0.00   0.11    -0.01   0.02  -0.09
 113   1     0.03   0.05  -0.02    -0.04   0.02   0.10     0.03  -0.02  -0.08
 114   1    -0.01   0.01   0.03     0.01   0.00   0.09     0.00   0.01  -0.09
                     7                      8                      9
                     A                      A                      A
 Frequencies --    47.5659                50.2472                55.2615
 Red. masses --     4.4333                 4.7080                 4.2319
 Frc consts  --     0.0059                 0.0070                 0.0076
 IR Inten    --     0.1516                 0.3340                 0.6143
 Atom AN      X      Y      Z        X      Y      Z        X      Y      Z
   1   8    -0.03   0.03   0.02     0.02   0.08   0.00    -0.07   0.04  -0.06
   2  12     0.01  -0.02  -0.03    -0.01  -0.04   0.00    -0.03  -0.01   0.02
   3   8    -0.02  -0.04  -0.04    -0.03  -0.07   0.00    -0.05  -0.04   0.02
   4   6     0.02   0.02   0.05     0.03   0.10   0.01    -0.02   0.01  -0.03
   5   7     0.01   0.00   0.02     0.02  -0.05   0.01     0.00  -0.03   0.01
   6   7     0.00  -0.03  -0.04     0.00  -0.03   0.00     0.00   0.03   0.02
   7   8     0.04   0.01   0.09     0.01   0.12   0.01     0.01  -0.02   0.00
   8   6     0.00   0.00   0.03     0.03  -0.05   0.00     0.02  -0.03  -0.01
   9   6     0.00  -0.01   0.01     0.03  -0.04   0.00     0.03   0.00   0.00
  10   6     0.00  -0.02  -0.03     0.02  -0.03   0.00     0.02   0.02   0.01
  11   8     0.05   0.05   0.03     0.07   0.09   0.02    -0.02   0.01  -0.03
  12   6     0.03   0.01   0.01     0.02   0.01   0.01    -0.03   0.00   0.00
  13   6     0.00  -0.01  -0.01    -0.01  -0.04   0.00    -0.03  -0.02   0.01
  14   6     0.04   0.03   0.03     0.05   0.10   0.00    -0.04   0.04  -0.05
  15   8     0.03  -0.02   0.00    -0.01  -0.01   0.01    -0.05   0.01   0.01
  16   6    -0.07   0.02   0.04    -0.03   0.12  -0.01    -0.08   0.04  -0.05
  17   8     0.00  -0.02   0.05    -0.06  -0.04  -0.09     0.03   0.03   0.06
  18   6     0.01  -0.01  -0.04    -0.03  -0.01  -0.02     0.00   0.00   0.00
  19   8     0.03  -0.02  -0.08    -0.02  -0.02  -0.03    -0.03   0.00  -0.01
  20   8    -0.08   0.03  -0.08     0.00   0.03   0.07    -0.01  -0.05  -0.07
  21   6    -0.08   0.03   0.02    -0.04   0.00   0.01     0.05   0.00   0.02
  22   6    -0.03  -0.01   0.09    -0.06  -0.03  -0.05     0.07   0.03   0.05
  23   6    -0.01   0.02  -0.09    -0.03   0.02   0.05     0.01  -0.04  -0.06
  24   8    -0.11   0.04   0.05    -0.04   0.00   0.00     0.08   0.01   0.06
  25   6     0.04  -0.04   0.12    -0.11  -0.05  -0.03     0.11   0.03   0.06
  26   6     0.04   0.02  -0.12    -0.09   0.01   0.10     0.06  -0.04  -0.10
  27   6     0.01  -0.03  -0.02     0.01  -0.08  -0.05    -0.01  -0.03   0.01
  28   6     0.04   0.03   0.02     0.08   0.13  -0.04     0.00   0.11  -0.09
  29   6     0.01   0.01   0.01     0.03  -0.03   0.01     0.00  -0.04   0.01
  30   6     0.00  -0.03  -0.02    -0.01  -0.01   0.00     0.00   0.03   0.02
  31   6     0.02  -0.01   0.01     0.03   0.01  -0.01     0.01  -0.01   0.00
  32   6     0.02  -0.01  -0.02     0.06   0.08  -0.02     0.02   0.01   0.00
  33   6     0.01   0.02  -0.04     0.08   0.09  -0.02     0.02   0.01   0.01
  34   6     0.00   0.03  -0.03     0.06   0.03   0.00     0.02  -0.02   0.02
  35   6     0.00   0.03  -0.01     0.04  -0.03   0.01     0.01  -0.05   0.02
  36   6     0.03  -0.03   0.03     0.00  -0.01   0.00    -0.01  -0.01   0.00
  37   6    -0.01   0.06  -0.01     0.03  -0.09   0.02     0.00  -0.09   0.03
  38   6    -0.03  -0.02  -0.01    -0.01   0.00   0.00     0.01   0.02   0.01
  39   6    -0.03  -0.02   0.02    -0.03   0.04  -0.01     0.04  -0.03   0.00
  40   6     0.00  -0.03   0.04    -0.05   0.06  -0.01     0.06  -0.06   0.00
  41   6     0.03  -0.03   0.02    -0.05   0.04  -0.01     0.04  -0.04   0.00
  42   6     0.04  -0.03  -0.01    -0.03   0.01   0.00     0.00   0.01   0.01
  43   6    -0.08  -0.01  -0.03     0.02  -0.02   0.00    -0.01   0.07   0.02
  44   6     0.08  -0.03  -0.02    -0.02  -0.02   0.00    -0.04   0.05   0.01
  45   6    -0.02  -0.06  -0.01    -0.03  -0.04  -0.03    -0.06  -0.02  -0.02
  46   6     0.06  -0.07   0.08    -0.02  -0.01   0.05     0.00  -0.03   0.04
  47   6    -0.02   0.07  -0.03     0.10  -0.10   0.04     0.00  -0.10   0.07
  48   6    -0.03   0.08   0.00    -0.03  -0.06   0.00    -0.01  -0.13   0.00
  49   6     0.01  -0.01   0.01    -0.04  -0.03  -0.01    -0.04   0.09   0.06
  50   6     0.17   0.05  -0.05     0.01   0.00   0.01    -0.08   0.06  -0.05
  51   6    -0.09   0.00  -0.06    -0.03  -0.05   0.00     0.01   0.10  -0.02
  52   6    -0.11  -0.01   0.01     0.05   0.02  -0.01    -0.04   0.07   0.05
  53   6     0.00   0.02   0.07     0.03  -0.06  -0.01     0.04  -0.06  -0.03
  54   6     0.00  -0.03  -0.04     0.03  -0.01   0.00     0.03   0.05   0.00
  55   1    -0.01  -0.01   0.02     0.04  -0.04  -0.01     0.05   0.00  -0.02
  56   1    -0.03   0.01   0.00    -0.05  -0.04   0.03    -0.03  -0.01   0.00
  57   1     0.05   0.02   0.02     0.02   0.10  -0.01    -0.09   0.04  -0.07
  58   1    -0.03   0.02   0.04    -0.08   0.11  -0.03    -0.05   0.04  -0.06
  59   1    -0.09   0.00   0.09    -0.03   0.18   0.01    -0.10   0.02  -0.02
  60   1    -0.11   0.03   0.00    -0.04   0.10  -0.02    -0.11   0.06  -0.08
  61   1    -0.07   0.01   0.14    -0.04  -0.02  -0.07     0.06   0.05   0.07
  62   1    -0.02   0.03  -0.11     0.01   0.04   0.07    -0.03  -0.06  -0.07
  63   1     0.01  -0.04   0.14    -0.11  -0.05   0.00     0.14   0.03   0.06
  64   1     0.08  -0.06   0.07    -0.13  -0.07  -0.01     0.12   0.01   0.04
  65   1     0.07  -0.06   0.17    -0.12  -0.07  -0.07     0.12   0.05   0.08
  66   1     0.02   0.02  -0.15    -0.09   0.03   0.15     0.06  -0.06  -0.15
  67   1     0.06   0.02  -0.13    -0.10   0.00   0.09     0.07  -0.03  -0.09
  68   1     0.06   0.01  -0.10    -0.14  -0.02   0.08     0.10  -0.01  -0.09
  69   1     0.02  -0.01  -0.01     0.03  -0.06  -0.05     0.01  -0.02  -0.01
  70   1    -0.01  -0.04  -0.03    -0.02  -0.13  -0.05     0.01  -0.04   0.03
  71   1     0.04  -0.04  -0.03     0.05  -0.09  -0.08    -0.01  -0.03   0.02
  72   1     0.06   0.03   0.01     0.09   0.15  -0.06     0.00   0.16  -0.13
  73   1     0.04   0.03   0.04     0.11   0.14  -0.02     0.06   0.13  -0.04
  74   1     0.04   0.01   0.02     0.06   0.13  -0.06    -0.02   0.12  -0.11
  75   1     0.03  -0.02  -0.02     0.06   0.11  -0.03     0.02   0.03   0.00
  76   1     0.02   0.02  -0.06     0.09   0.14  -0.03     0.03   0.03   0.01
  77   1    -0.01   0.05  -0.05     0.07   0.04   0.00     0.02  -0.03   0.02
  78   1     0.05   0.01   0.02     0.01  -0.01  -0.01     0.01   0.01  -0.02
  79   1    -0.01   0.06   0.01     0.00  -0.14   0.03     0.00  -0.09   0.02
  80   1    -0.06  -0.02   0.03    -0.03   0.05  -0.01     0.05  -0.04   0.00
  81   1     0.00  -0.03   0.06    -0.07   0.10  -0.02     0.08  -0.10  -0.01
  82   1     0.06  -0.03   0.03    -0.06   0.06  -0.01     0.04  -0.06   0.00
  83   1    -0.07  -0.01  -0.05     0.05  -0.06   0.00    -0.03   0.08   0.02
  84   1     0.10  -0.10  -0.04    -0.01  -0.04   0.00    -0.04   0.07   0.03
  85   1     0.00  -0.08   0.01    -0.05  -0.07  -0.02    -0.08  -0.03  -0.02
  86   1    -0.04  -0.02  -0.04    -0.02  -0.04  -0.07    -0.06  -0.01  -0.06
  87   1    -0.04  -0.10  -0.02    -0.04  -0.05  -0.03    -0.08  -0.04   0.00
  88   1     0.06  -0.08   0.09    -0.05  -0.03   0.05    -0.02  -0.03   0.03
  89   1     0.03  -0.11   0.09    -0.03  -0.01   0.08    -0.02  -0.05   0.07
  90   1     0.09  -0.05   0.10     0.01   0.01   0.07     0.04  -0.03   0.06
  91   1    -0.03   0.08  -0.02     0.10  -0.14   0.04     0.01  -0.13   0.07
  92   1    -0.02   0.07  -0.05     0.13  -0.05   0.04     0.00  -0.11   0.09
  93   1    -0.01   0.05  -0.03     0.13  -0.12   0.05    -0.01  -0.08   0.08
  94   1    -0.04   0.10   0.01    -0.04  -0.11   0.01    -0.02  -0.15   0.01
  95   1    -0.03   0.08   0.02    -0.08  -0.05  -0.02     0.00  -0.12  -0.03
  96   1    -0.03   0.09  -0.02    -0.01  -0.01  -0.01    -0.01  -0.14   0.00
  97   1     0.07  -0.02  -0.02    -0.05  -0.04   0.00    -0.07   0.13   0.06
  98   1    -0.01   0.08   0.06    -0.05  -0.02  -0.03    -0.04   0.08   0.04
  99   1    -0.07  -0.07   0.02    -0.05  -0.03  -0.01    -0.02   0.08   0.10
 100   1     0.19   0.03  -0.05     0.02  -0.02   0.01    -0.11   0.10  -0.04
 101   1     0.24   0.03  -0.06     0.03   0.00   0.01    -0.07   0.04  -0.07
 102   1     0.15   0.13  -0.04     0.01   0.02   0.01    -0.07   0.05  -0.07
 103   1    -0.12   0.01  -0.07    -0.02  -0.07   0.00    -0.01   0.13  -0.02
 104   1    -0.08  -0.01  -0.08    -0.05  -0.08   0.00     0.02   0.10  -0.04
 105   1    -0.10   0.00  -0.05    -0.06  -0.02   0.00     0.02   0.09  -0.03
 106   1    -0.14   0.00   0.00     0.07   0.00  -0.01    -0.07   0.10   0.05
 107   1    -0.12  -0.02   0.03     0.02   0.05  -0.01    -0.03   0.06   0.04
 108   1    -0.10  -0.02   0.03     0.08   0.04  -0.01    -0.06   0.04   0.08
 109   1    -0.02   0.01   0.08     0.03  -0.05  -0.01     0.05  -0.06  -0.04
 110   1     0.00   0.02   0.08     0.03  -0.06  -0.03     0.06  -0.05  -0.04
 111   1     0.02   0.04   0.07     0.03  -0.07   0.00     0.03  -0.08  -0.03
 112   1    -0.03  -0.05  -0.08     0.03   0.00   0.00     0.01   0.03  -0.04
 113   1     0.03   0.01  -0.06     0.03  -0.01   0.00     0.06   0.10  -0.02
 114   1    -0.01  -0.03   0.00     0.04  -0.01   0.00     0.05   0.04   0.05
                    10                     11                     12
                     A                      A                      A
 Frequencies --    57.7918                61.7139                65.3279
 Red. masses --     3.2512                 2.8582                 3.5341
 Frc consts  --     0.0064                 0.0064                 0.0089
 IR Inten    --     0.0992                 0.2624                 0.1690
 Atom AN      X      Y      Z        X      Y      Z        X      Y      Z
   1   8     0.01   0.04   0.02     0.00   0.01  -0.01     0.01   0.02   0.02
   2  12     0.00  -0.01  -0.01     0.00   0.01   0.03    -0.01   0.00   0.00
   3   8    -0.03  -0.01   0.00    -0.01   0.00   0.04     0.01   0.06   0.02
   4   6     0.01   0.03   0.02    -0.01   0.01  -0.02    -0.01   0.03   0.01
   5   7     0.01  -0.02  -0.03    -0.01   0.01   0.01     0.02  -0.02   0.01
   6   7     0.00   0.00   0.02     0.00   0.00   0.01    -0.01  -0.01  -0.02
   7   8     0.02   0.02   0.03    -0.01   0.01  -0.03    -0.02   0.03  -0.01
   8   6     0.01  -0.02  -0.02    -0.01   0.00   0.00     0.02  -0.02   0.01
   9   6     0.01  -0.01   0.00    -0.01   0.00   0.00     0.02  -0.02   0.00
  10   6     0.01   0.00   0.02    -0.01   0.00  -0.01     0.01   0.00  -0.01
  11   8     0.00   0.04   0.02    -0.03  -0.01  -0.01    -0.03   0.02   0.01
  12   6    -0.01   0.01   0.01    -0.02   0.00   0.02    -0.03   0.01   0.00
  13   6    -0.03  -0.01   0.00    -0.01  -0.01   0.03    -0.03   0.02   0.01
  14   6     0.00   0.04   0.02    -0.03   0.02  -0.02    -0.02   0.03   0.01
  15   8    -0.01   0.01   0.01    -0.02   0.03   0.03    -0.04  -0.01   0.00
  16   6     0.03   0.02   0.03     0.03   0.00  -0.01     0.01   0.04   0.01
  17   8    -0.01  -0.02   0.00     0.00   0.01   0.01    -0.03  -0.02  -0.03
  18   6    -0.01  -0.02   0.01     0.00   0.00   0.02    -0.04  -0.03  -0.01
  19   8    -0.01  -0.02   0.00    -0.01   0.01   0.03    -0.05  -0.02   0.02
  20   8    -0.01  -0.02   0.02     0.01  -0.02   0.01    -0.02  -0.05  -0.02
  21   6    -0.01  -0.02   0.01     0.02   0.00   0.01     0.02  -0.02   0.03
  22   6    -0.01  -0.02   0.01     0.01   0.00  -0.01    -0.01  -0.02   0.00
  23   6    -0.01  -0.02   0.02     0.00  -0.01   0.02    -0.03  -0.05  -0.02
  24   8    -0.02  -0.03  -0.01     0.04   0.00   0.02     0.06   0.00   0.09
  25   6     0.01  -0.03   0.02    -0.01   0.02  -0.02    -0.03  -0.04   0.01
  26   6    -0.01  -0.02   0.02    -0.01   0.00   0.02    -0.03  -0.04  -0.02
  27   6    -0.04  -0.02  -0.03    -0.02  -0.01   0.02    -0.08   0.02  -0.03
  28   6     0.01   0.07   0.02    -0.01   0.06  -0.03    -0.02   0.04   0.02
  29   6     0.01  -0.01  -0.03    -0.01   0.00   0.01     0.02  -0.02   0.01
  30   6     0.00   0.00   0.02     0.00  -0.01  -0.01    -0.01   0.00  -0.02
  31   6     0.00  -0.05  -0.02    -0.01   0.00   0.01     0.02  -0.03   0.01
  32   6     0.00  -0.05  -0.02    -0.01   0.00   0.00     0.03  -0.03   0.01
  33   6     0.01  -0.02  -0.03    -0.01   0.00   0.00     0.03  -0.01   0.01
  34   6     0.03   0.03  -0.05    -0.02   0.00   0.00     0.03   0.00   0.00
  35   6     0.03   0.04  -0.05    -0.01   0.01   0.00     0.03  -0.01   0.01
  36   6     0.00  -0.06  -0.01     0.00   0.00   0.01     0.04  -0.04   0.02
  37   6     0.06   0.11  -0.08    -0.02   0.02   0.00     0.04   0.00   0.00
  38   6     0.01   0.00   0.01     0.01   0.02  -0.01    -0.03   0.01  -0.01
  39   6     0.01  -0.01   0.01     0.00   0.03  -0.02    -0.02  -0.01  -0.01
  40   6     0.00  -0.01   0.00    -0.01   0.02  -0.03     0.00  -0.03  -0.01
  41   6    -0.01   0.00   0.01     0.00  -0.01  -0.03     0.01  -0.03  -0.01
  42   6    -0.02   0.01   0.01     0.01  -0.03  -0.02     0.00  -0.02  -0.01
  43   6     0.01   0.00   0.02     0.02   0.01  -0.01    -0.06   0.05  -0.01
  44   6    -0.05   0.03   0.02     0.06  -0.09  -0.02     0.00  -0.02  -0.01
  45   6     0.00  -0.06  -0.01     0.03   0.00   0.02     0.25  -0.01   0.10
  46   6     0.01  -0.06   0.00    -0.01   0.02  -0.01    -0.03   0.07  -0.13
  47   6    -0.13   0.13  -0.04    -0.14   0.02   0.07     0.09   0.01  -0.04
  48   6     0.21  -0.03  -0.08     0.06  -0.10  -0.02     0.02   0.06   0.03
  49   6     0.01   0.03   0.02    -0.10  -0.09   0.00     0.00  -0.02  -0.02
  50   6    -0.12  -0.02   0.02     0.23   0.04  -0.03     0.00  -0.02  -0.01
  51   6    -0.02  -0.01   0.00     0.03   0.00   0.01    -0.02   0.08  -0.03
  52   6     0.02   0.03   0.03     0.04   0.01  -0.03    -0.10   0.02   0.01
  53   6     0.01  -0.02  -0.04    -0.01  -0.01  -0.02     0.02  -0.02   0.03
  54   6     0.01   0.01   0.04    -0.01  -0.01  -0.03     0.02   0.01  -0.01
  55   1     0.02  -0.01   0.01    -0.01   0.00  -0.01     0.03  -0.01   0.00
  56   1    -0.04  -0.02   0.02    -0.01  -0.01   0.03    -0.01  -0.02   0.02
  57   1     0.00   0.04   0.01    -0.06   0.02  -0.02    -0.02   0.02   0.01
  58   1     0.06   0.03   0.04     0.03   0.00   0.00     0.00   0.03   0.00
  59   1     0.02  -0.01   0.03     0.03  -0.01  -0.03     0.02   0.05   0.00
  60   1     0.02   0.04   0.02     0.04   0.00   0.00     0.03   0.03   0.02
  61   1    -0.01  -0.01   0.03     0.02   0.00  -0.03     0.01   0.00  -0.02
  62   1    -0.01  -0.01   0.02     0.00  -0.01   0.02    -0.04  -0.05  -0.01
  63   1     0.01  -0.03   0.03     0.00   0.02  -0.03     0.00  -0.04   0.03
  64   1     0.01  -0.04   0.01    -0.03   0.03   0.00    -0.06  -0.07   0.03
  65   1     0.01  -0.03   0.03    -0.02   0.03  -0.04    -0.05  -0.03  -0.03
  66   1    -0.02  -0.01   0.02     0.00  -0.01   0.02    -0.02  -0.05  -0.03
  67   1    -0.01  -0.02   0.01    -0.02   0.00   0.03    -0.03  -0.04  -0.01
  68   1    -0.02  -0.03   0.02    -0.01   0.02   0.00    -0.02  -0.03  -0.03
  69   1    -0.04  -0.03  -0.03    -0.02  -0.01   0.01    -0.11  -0.01  -0.04
  70   1    -0.05  -0.04  -0.03    -0.02  -0.01   0.02    -0.07   0.03  -0.03
  71   1    -0.03  -0.01  -0.05    -0.02   0.00   0.02    -0.09   0.07  -0.05
  72   1     0.00   0.08   0.01    -0.02   0.08  -0.05    -0.03   0.05   0.02
  73   1     0.02   0.07   0.03     0.02   0.06  -0.02    -0.02   0.05   0.03
  74   1     0.01   0.07   0.02    -0.02   0.07  -0.04    -0.02   0.04   0.03
  75   1    -0.01  -0.08  -0.01    -0.01  -0.01   0.00     0.02  -0.03   0.01
  76   1     0.00  -0.03  -0.03    -0.01  -0.01   0.00     0.03  -0.01   0.00
  77   1     0.03   0.05  -0.06    -0.02   0.00   0.00     0.03   0.00   0.00
  78   1     0.00  -0.05  -0.01    -0.01  -0.01   0.02    -0.04  -0.14   0.09
  79   1     0.12   0.25  -0.13     0.02   0.11  -0.03     0.02  -0.03   0.01
  80   1     0.02  -0.01   0.00     0.00   0.04  -0.03    -0.02   0.00   0.00
  81   1     0.01  -0.01   0.00    -0.02   0.04  -0.04     0.01  -0.04   0.00
  82   1    -0.02   0.01   0.01     0.00  -0.03  -0.03     0.02  -0.04  -0.01
  83   1     0.03  -0.02   0.02     0.02   0.01   0.00    -0.09   0.08  -0.02
  84   1    -0.06   0.09   0.03     0.11  -0.24  -0.01     0.00  -0.02  -0.01
  85   1     0.02  -0.06   0.00     0.03   0.01   0.02     0.32   0.00   0.11
  86   1    -0.02  -0.04  -0.01     0.03  -0.01   0.04     0.25  -0.06   0.23
  87   1    -0.01  -0.08  -0.03     0.04   0.02   0.01     0.31   0.03   0.00
  88   1     0.01  -0.07   0.00    -0.01   0.01  -0.01    -0.02   0.06  -0.11
  89   1     0.00  -0.07  -0.01     0.00   0.03  -0.03     0.05   0.17  -0.20
  90   1     0.01  -0.06   0.00    -0.04   0.01  -0.02    -0.17   0.05  -0.18
  91   1    -0.11   0.17  -0.05    -0.13   0.03   0.06     0.09   0.01  -0.04
  92   1    -0.20   0.00   0.02    -0.19  -0.06   0.11     0.10   0.04  -0.05
  93   1    -0.23   0.24  -0.04    -0.20   0.11   0.08     0.10  -0.03  -0.05
  94   1     0.22   0.06  -0.09     0.05  -0.07  -0.02     0.03   0.06   0.02
  95   1     0.38  -0.05  -0.09     0.17  -0.11  -0.06    -0.01   0.06   0.05
  96   1     0.14  -0.19  -0.05     0.01  -0.21  -0.01     0.04   0.10   0.02
  97   1    -0.03   0.05   0.03    -0.04  -0.15  -0.02     0.02  -0.03  -0.02
  98   1     0.02  -0.03  -0.01    -0.15   0.06   0.03     0.00  -0.01   0.00
  99   1     0.06   0.07   0.02    -0.24  -0.18   0.00    -0.01  -0.03  -0.03
 100   1    -0.14   0.00   0.02     0.26  -0.03  -0.03     0.00  -0.02  -0.01
 101   1    -0.18  -0.01   0.03     0.38   0.03  -0.03     0.00  -0.02  -0.01
 102   1    -0.10  -0.09   0.02     0.18   0.20  -0.04     0.00  -0.02  -0.01
 103   1    -0.01  -0.01   0.00     0.04   0.00   0.01    -0.05   0.11  -0.03
 104   1    -0.03  -0.04  -0.01     0.01   0.00   0.02     0.00   0.11  -0.04
 105   1    -0.04   0.01  -0.01     0.02   0.01   0.00     0.01   0.05  -0.02
 106   1     0.03   0.02   0.03     0.06   0.01  -0.02    -0.13   0.06   0.01
 107   1     0.00   0.05   0.03     0.04   0.01  -0.04    -0.08  -0.01   0.01
 108   1     0.05   0.04   0.04     0.03   0.02  -0.04    -0.13  -0.01   0.03
 109   1     0.04  -0.04  -0.06     0.01  -0.01  -0.03    -0.01   0.00   0.05
 110   1     0.01  -0.01  -0.01    -0.01   0.00  -0.01     0.02  -0.02   0.00
 111   1    -0.03  -0.01  -0.06    -0.03  -0.01  -0.03     0.06  -0.02   0.05
 112   1     0.02   0.01   0.05    -0.04  -0.04  -0.08     0.02   0.02   0.00
 113   1    -0.01   0.01   0.05     0.04   0.04  -0.06     0.01   0.02   0.00
 114   1     0.02   0.01   0.04    -0.02  -0.01   0.02     0.03   0.01  -0.01
                    13                     14                     15
                     A                      A                      A
 Frequencies --    67.0697                69.4725                72.1836
 Red. masses --     3.9894                 4.4456                 3.8933
 Frc consts  --     0.0106                 0.0126                 0.0120
 IR Inten    --     0.1183                 0.6259                 0.7217
 Atom AN      X      Y      Z        X      Y      Z        X      Y      Z
   1   8     0.02  -0.01  -0.02     0.01  -0.03   0.00     0.03  -0.03   0.01
   2  12     0.01  -0.01   0.04     0.02   0.01   0.01     0.01   0.02  -0.01
   3   8     0.04  -0.02   0.03    -0.01  -0.01   0.01     0.00   0.05   0.00
   4   6     0.02  -0.01  -0.02    -0.02   0.00  -0.02    -0.04   0.03  -0.02
   5   7     0.00  -0.01   0.05    -0.01   0.02  -0.02     0.03   0.03   0.03
   6   7    -0.01  -0.03  -0.02     0.02   0.01   0.07     0.02   0.00  -0.03
   7   8     0.01   0.00  -0.03    -0.04   0.02  -0.03    -0.10   0.08  -0.06
   8   6    -0.01  -0.02   0.02    -0.02   0.02   0.00     0.02   0.03   0.03
   9   6    -0.01  -0.03  -0.01    -0.02   0.02   0.04     0.01   0.01   0.01
  10   6    -0.01  -0.03  -0.03    -0.01   0.00   0.06     0.01   0.00  -0.01
  11   8     0.04  -0.02   0.00    -0.02  -0.02  -0.01    -0.03   0.01  -0.01
  12   6     0.04  -0.01   0.02    -0.01   0.00   0.00    -0.02   0.03   0.00
  13   6     0.05  -0.02   0.02    -0.04  -0.04   0.00    -0.01   0.04   0.00
  14   6     0.02  -0.01  -0.02    -0.02  -0.01  -0.01    -0.03   0.01  -0.01
  15   8     0.03   0.00   0.02     0.01   0.03   0.01    -0.01   0.04   0.01
  16   6     0.01  -0.01  -0.02     0.02  -0.03   0.00     0.04  -0.03   0.01
  17   8     0.02   0.05  -0.02    -0.01  -0.06  -0.10    -0.03  -0.06  -0.07
  18   6     0.03   0.06  -0.04     0.03  -0.02  -0.07    -0.01  -0.04  -0.03
  19   8     0.05   0.05  -0.05     0.07  -0.02  -0.05     0.01  -0.04   0.00
  20   8     0.00   0.09  -0.04    -0.03   0.04  -0.06    -0.02  -0.02  -0.02
  21   6    -0.01   0.08  -0.02    -0.04   0.03   0.01    -0.01  -0.02   0.02
  22   6     0.00   0.05  -0.01    -0.04  -0.04  -0.01    -0.04  -0.05  -0.04
  23   6     0.02   0.08  -0.05     0.01   0.02  -0.09    -0.02  -0.03  -0.03
  24   8    -0.02   0.09   0.00    -0.05   0.07   0.08     0.01   0.01   0.08
  25   6    -0.01   0.05  -0.01    -0.06  -0.13   0.04    -0.10  -0.08  -0.02
  26   6     0.03   0.07  -0.06     0.05   0.00  -0.11    -0.01  -0.04  -0.03
  27   6     0.06  -0.02   0.02    -0.08  -0.06  -0.08    -0.02   0.04  -0.01
  28   6     0.04   0.00  -0.05    -0.02  -0.02  -0.01    -0.04  -0.02  -0.01
  29   6     0.00  -0.01   0.04    -0.01   0.03  -0.02     0.03   0.04   0.02
  30   6    -0.02  -0.03  -0.01     0.04  -0.02   0.06     0.02  -0.01  -0.02
  31   6     0.01  -0.01   0.04    -0.02   0.04  -0.02     0.05   0.07   0.00
  32   6     0.02   0.00   0.02    -0.01   0.05  -0.01     0.05   0.06   0.00
  33   6     0.01   0.00   0.02    -0.01   0.04   0.00     0.03   0.03   0.01
  34   6    -0.01   0.00   0.03    -0.01   0.02   0.00     0.01   0.00   0.02
  35   6    -0.01  -0.01   0.04    -0.01   0.02  -0.01     0.01   0.01   0.03
  36   6     0.03  -0.01   0.05    -0.04   0.02  -0.02     0.07   0.08   0.00
  37   6    -0.02  -0.01   0.05     0.00   0.00  -0.01    -0.01  -0.01   0.04
  38   6    -0.03  -0.04  -0.01     0.07  -0.04   0.05     0.00  -0.01  -0.01
  39   6    -0.05  -0.01   0.01     0.07  -0.04   0.03     0.01  -0.03   0.01
  40   6    -0.05   0.01   0.02     0.06  -0.04   0.02     0.04  -0.04   0.02
  41   6    -0.04   0.02   0.01     0.03  -0.02   0.03     0.04  -0.03   0.01
  42   6    -0.03   0.00  -0.01     0.02  -0.01   0.05     0.03  -0.01  -0.01
  43   6    -0.04  -0.08  -0.02     0.10  -0.05   0.06    -0.04   0.01  -0.02
  44   6    -0.04   0.03  -0.01    -0.01   0.02   0.05     0.03   0.00  -0.01
  45   6     0.15   0.00   0.09     0.04   0.01  -0.01    -0.07   0.06  -0.05
  46   6    -0.01   0.05  -0.04    -0.10   0.09  -0.06     0.14  -0.01   0.09
  47   6    -0.12  -0.01   0.11     0.02   0.00  -0.01    -0.09  -0.01   0.10
  48   6     0.02  -0.12   0.01    -0.01   0.01  -0.02     0.03  -0.09   0.01
  49   6     0.03   0.03  -0.02    -0.07   0.06   0.10     0.12  -0.02  -0.03
  50   6    -0.11  -0.02  -0.01     0.01   0.07  -0.01    -0.04  -0.07   0.02
  51   6    -0.12  -0.11  -0.04     0.06  -0.06   0.04     0.02   0.04  -0.01
  52   6    -0.02  -0.03  -0.01     0.14   0.00   0.06    -0.09  -0.05  -0.01
  53   6    -0.01  -0.01   0.02    -0.03   0.03  -0.03     0.01   0.04   0.03
  54   6    -0.01  -0.04  -0.05    -0.01  -0.01   0.06     0.01  -0.01   0.00
  55   1    -0.02  -0.03  -0.03    -0.03   0.02   0.04     0.00   0.01   0.01
  56   1     0.05  -0.02   0.02    -0.05  -0.08   0.04    -0.01   0.04   0.00
  57   1     0.01  -0.01  -0.02    -0.01   0.00   0.00    -0.02   0.01   0.00
  58   1     0.00  -0.01  -0.02     0.00  -0.03   0.01    -0.04  -0.02   0.03
  59   1     0.02   0.00  -0.03     0.03  -0.02  -0.01     0.08   0.02  -0.05
  60   1     0.02  -0.01  -0.02     0.03  -0.05   0.01     0.10  -0.08   0.05
  61   1    -0.01   0.04  -0.01    -0.04  -0.02   0.00    -0.02  -0.05  -0.06
  62   1     0.02   0.08  -0.06     0.01   0.03  -0.12    -0.01  -0.03  -0.04
  63   1    -0.02   0.05  -0.01    -0.07  -0.11   0.11    -0.09  -0.08   0.00
  64   1     0.00   0.05  -0.02    -0.06  -0.17   0.03    -0.14  -0.10   0.01
  65   1     0.00   0.03  -0.01    -0.06  -0.17   0.02    -0.13  -0.10  -0.08
  66   1     0.04   0.06  -0.07     0.03   0.02  -0.12    -0.02  -0.03  -0.03
  67   1     0.03   0.06  -0.07     0.08  -0.01  -0.14     0.00  -0.04  -0.04
  68   1     0.05   0.07  -0.06     0.06  -0.03  -0.07    -0.02  -0.05  -0.03
  69   1     0.06  -0.02   0.01    -0.10  -0.09  -0.09    -0.03   0.04   0.01
  70   1     0.06  -0.03   0.02    -0.10  -0.10  -0.08    -0.04   0.04  -0.01
  71   1     0.05  -0.02   0.02    -0.07  -0.01  -0.13    -0.01   0.04  -0.02
  72   1     0.05   0.00  -0.06    -0.02  -0.04   0.01    -0.03  -0.03   0.01
  73   1     0.06   0.00  -0.05    -0.03  -0.03  -0.02    -0.05  -0.02  -0.02
  74   1     0.03   0.01  -0.07    -0.02  -0.01  -0.01    -0.04  -0.02  -0.01
  75   1     0.02   0.00   0.02    -0.02   0.06  -0.01     0.06   0.08  -0.02
  76   1     0.01   0.00   0.01    -0.01   0.04   0.01     0.02   0.02   0.00
  77   1    -0.01   0.00   0.02     0.00   0.01   0.00    -0.01  -0.02   0.02
  78   1    -0.02  -0.07   0.09    -0.08  -0.04   0.00     0.12   0.16  -0.03
  79   1     0.01   0.06   0.03    -0.01  -0.01  -0.02     0.02   0.05   0.02
  80   1    -0.06  -0.01   0.01     0.09  -0.05   0.02     0.00  -0.04   0.01
  81   1    -0.06   0.02   0.03     0.07  -0.05   0.01     0.04  -0.06   0.03
  82   1    -0.04   0.03   0.01     0.02  -0.03   0.03     0.06  -0.03   0.01
  83   1     0.01  -0.11  -0.04     0.12  -0.08   0.08    -0.07   0.06  -0.03
  84   1    -0.06   0.09  -0.02     0.01  -0.01   0.07     0.01   0.06  -0.02
  85   1     0.18   0.00   0.09     0.02  -0.01   0.00    -0.11   0.05  -0.05
  86   1     0.15  -0.04   0.16     0.08  -0.05   0.02    -0.07   0.10  -0.13
  87   1     0.19   0.03   0.04     0.09   0.06  -0.02    -0.11   0.03   0.01
  88   1     0.00   0.04  -0.02    -0.12   0.06  -0.04     0.15   0.01   0.08
  89   1     0.03   0.10  -0.09    -0.06   0.15  -0.09     0.08  -0.09   0.14
  90   1    -0.10   0.04  -0.07    -0.17   0.10  -0.07     0.23   0.00   0.12
  91   1    -0.12  -0.01   0.11     0.02  -0.02  -0.01    -0.08  -0.01   0.09
  92   1    -0.16  -0.08   0.14     0.03   0.01   0.00    -0.11  -0.06   0.13
  93   1    -0.17   0.06   0.12     0.03  -0.01   0.00    -0.12   0.05   0.11
  94   1     0.00  -0.10   0.02    -0.01  -0.01  -0.02     0.01  -0.09   0.01
  95   1     0.11  -0.12  -0.03    -0.04   0.01  -0.02     0.09  -0.09  -0.03
  96   1    -0.02  -0.20   0.01     0.00   0.03  -0.01    -0.01  -0.16   0.01
  97   1     0.00   0.06  -0.01    -0.08   0.08   0.10     0.12  -0.01  -0.04
  98   1     0.05  -0.04  -0.03    -0.08   0.10   0.10     0.14  -0.07  -0.02
  99   1     0.09   0.07  -0.01    -0.08   0.02   0.14     0.14   0.02  -0.06
 100   1    -0.12   0.01  -0.01    -0.01   0.08   0.00    -0.03  -0.06   0.02
 101   1    -0.18  -0.03  -0.01     0.07   0.06  -0.03    -0.11  -0.06   0.04
 102   1    -0.09  -0.10   0.01     0.00   0.12  -0.04    -0.01  -0.15   0.04
 103   1    -0.12  -0.14  -0.04     0.08  -0.06   0.05    -0.01   0.06  -0.02
 104   1    -0.13  -0.16  -0.05     0.04  -0.10   0.04     0.06   0.09  -0.02
 105   1    -0.16  -0.07  -0.02     0.04  -0.03   0.02     0.06   0.00   0.00
 106   1    -0.02  -0.06  -0.02     0.16  -0.01   0.06    -0.12  -0.02  -0.01
 107   1    -0.06   0.00   0.01     0.11   0.03   0.05    -0.05  -0.09   0.00
 108   1     0.03   0.00  -0.01     0.16   0.02   0.06    -0.13  -0.08   0.00
 109   1    -0.02   0.00   0.03    -0.02   0.03  -0.04     0.01   0.04   0.03
 110   1    -0.01  -0.02   0.00    -0.04   0.02  -0.02     0.00   0.04   0.04
 111   1     0.01  -0.02   0.03    -0.05   0.02  -0.03     0.01   0.05   0.03
 112   1    -0.01  -0.02  -0.03    -0.04  -0.07   0.00     0.04   0.02   0.05
 113   1    -0.02  -0.07  -0.04     0.03   0.04   0.03    -0.04  -0.06   0.02
 114   1    -0.01  -0.03  -0.08    -0.04  -0.02   0.13     0.00   0.00  -0.06
                    16                     17                     18
                     A                      A                      A
 Frequencies --    74.2696                77.5722                82.1020
 Red. masses --     3.4390                 4.0017                 3.8884
 Frc consts  --     0.0112                 0.0142                 0.0154
 IR Inten    --     0.8257                 1.2088                 0.3387
 Atom AN      X      Y      Z        X      Y      Z        X      Y      Z
   1   8     0.01  -0.01   0.02     0.00   0.02  -0.02     0.06  -0.08   0.03
   2  12    -0.01   0.00   0.03     0.00   0.00   0.00     0.00  -0.03   0.02
   3   8     0.01  -0.02   0.02     0.02  -0.03  -0.02     0.03  -0.06   0.01
   4   6     0.01   0.02   0.02     0.04  -0.02   0.00    -0.01   0.03   0.00
   5   7    -0.01  -0.02  -0.01    -0.02   0.02   0.01    -0.01  -0.02   0.01
   6   7    -0.01   0.01   0.01     0.00   0.02  -0.01    -0.02  -0.01   0.02
   7   8    -0.02   0.04   0.02     0.08  -0.06   0.02    -0.11   0.13  -0.03
   8   6    -0.01  -0.02  -0.03    -0.01   0.02   0.01    -0.01  -0.02   0.02
   9   6     0.00  -0.01  -0.04    -0.01   0.03   0.00    -0.01  -0.02   0.03
  10   6    -0.01   0.00  -0.02     0.00   0.02  -0.01    -0.01  -0.02   0.02
  11   8     0.04   0.02   0.02     0.03  -0.02   0.00     0.09   0.03   0.02
  12   6     0.02   0.00   0.01     0.03  -0.02  -0.01     0.08   0.00   0.01
  13   6     0.01  -0.03   0.01     0.02  -0.03  -0.02     0.08   0.00   0.01
  14   6     0.03   0.01   0.01     0.04  -0.02   0.00     0.07  -0.02   0.01
  15   8     0.02  -0.01   0.01     0.04  -0.01  -0.01     0.05  -0.03   0.00
  16   6    -0.02   0.00   0.02     0.01   0.01  -0.02    -0.01  -0.06   0.03
  17   8    -0.01   0.05  -0.02     0.00  -0.06  -0.04    -0.01  -0.01   0.02
  18   6    -0.02   0.04   0.00     0.04  -0.02   0.01    -0.02  -0.02   0.02
  19   8    -0.02   0.05   0.05     0.07  -0.03  -0.01    -0.02  -0.01   0.03
  20   8    -0.03   0.01  -0.06     0.04   0.05   0.10    -0.01  -0.04  -0.01
  21   6     0.02   0.05   0.01    -0.05  -0.02   0.00     0.01  -0.02   0.01
  22   6     0.00   0.05  -0.02    -0.03  -0.05   0.02    -0.01  -0.01  -0.02
  23   6    -0.02   0.02  -0.04     0.04   0.03   0.07    -0.02  -0.03   0.00
  24   8     0.06   0.08   0.09    -0.12  -0.05  -0.08     0.04  -0.02   0.03
  25   6    -0.05   0.05  -0.03     0.01  -0.10   0.05    -0.05   0.03  -0.05
  26   6     0.01   0.05  -0.07     0.00   0.00   0.10    -0.01  -0.02   0.00
  27   6     0.00  -0.05  -0.03     0.01  -0.04  -0.04     0.15  -0.02   0.05
  28   6     0.03   0.00   0.00     0.04  -0.01   0.00     0.04  -0.14  -0.01
  29   6    -0.01  -0.02  -0.01    -0.02   0.01   0.01    -0.01  -0.01   0.00
  30   6    -0.01   0.01   0.02     0.01   0.02  -0.02    -0.02  -0.01   0.00
  31   6    -0.02  -0.04   0.00    -0.03   0.01   0.01     0.00   0.00   0.00
  32   6    -0.02  -0.04  -0.01    -0.02   0.02   0.01     0.00   0.01  -0.01
  33   6    -0.01  -0.01  -0.02    -0.02   0.02   0.00     0.01   0.02  -0.01
  34   6     0.00   0.01  -0.03    -0.03   0.01   0.01     0.01   0.03  -0.01
  35   6    -0.01   0.00  -0.02    -0.03   0.01   0.01     0.00   0.02  -0.01
  36   6    -0.03  -0.06   0.01    -0.04  -0.01   0.02     0.00   0.01  -0.01
  37   6    -0.01   0.01  -0.02    -0.05  -0.01   0.02     0.01   0.03  -0.01
  38   6    -0.01   0.01   0.02     0.00   0.03  -0.02    -0.01   0.01  -0.01
  39   6    -0.01   0.02   0.02     0.02   0.01  -0.02     0.00  -0.01  -0.03
  40   6    -0.01   0.02   0.02     0.03  -0.01  -0.03     0.00  -0.03  -0.03
  41   6    -0.01   0.01   0.02     0.02   0.00  -0.02    -0.02  -0.03  -0.03
  42   6     0.00   0.01   0.02     0.01   0.01  -0.02    -0.03  -0.02  -0.01
  43   6     0.00   0.01   0.02    -0.03   0.10  -0.01    -0.02   0.05   0.00
  44   6     0.00  -0.01   0.02     0.00   0.03  -0.02    -0.06   0.03  -0.01
  45   6    -0.03  -0.08   0.00     0.04  -0.03   0.04    -0.01   0.03   0.00
  46   6    -0.04  -0.06   0.02    -0.09   0.04  -0.01     0.00   0.01  -0.02
  47   6     0.00   0.01  -0.02    -0.09  -0.02   0.07    -0.01   0.04  -0.02
  48   6    -0.01   0.01  -0.02    -0.04  -0.07  -0.01     0.03   0.03  -0.01
  49   6     0.03  -0.02   0.00     0.02   0.04  -0.01    -0.13   0.08   0.06
  50   6     0.00  -0.03   0.05    -0.02   0.02  -0.04    -0.03   0.10  -0.11
  51   6     0.19   0.06   0.12     0.12   0.18  -0.01    -0.01   0.08  -0.03
  52   6    -0.04  -0.17  -0.08    -0.11  -0.01  -0.02    -0.04   0.06   0.03
  53   6     0.00  -0.03  -0.04     0.00   0.02   0.02    -0.02  -0.02   0.00
  54   6    -0.01  -0.01  -0.04    -0.01   0.01  -0.01    -0.01   0.00  -0.01
  55   1     0.00  -0.01  -0.07    -0.01   0.03   0.00    -0.01  -0.02   0.03
  56   1     0.00  -0.05   0.03     0.01  -0.04   0.00     0.07   0.05  -0.01
  57   1     0.03   0.01   0.01     0.03  -0.01   0.00     0.13  -0.02   0.03
  58   1    -0.07   0.00   0.02     0.09   0.01  -0.03    -0.17  -0.05   0.06
  59   1    -0.01   0.04   0.01    -0.02  -0.04   0.03     0.05   0.06  -0.03
  60   1    -0.01  -0.03   0.02    -0.03   0.06  -0.05     0.06  -0.19   0.07
  61   1     0.02   0.04  -0.05    -0.05  -0.04   0.05     0.01  -0.04  -0.05
  62   1    -0.04   0.01  -0.04     0.07   0.05   0.05    -0.02  -0.04   0.01
  63   1    -0.03   0.05  -0.03    -0.03  -0.09   0.09    -0.04   0.02  -0.08
  64   1    -0.07   0.05   0.00     0.04  -0.11   0.02    -0.08   0.04  -0.01
  65   1    -0.06   0.06  -0.06     0.03  -0.14   0.08    -0.07   0.05  -0.08
  66   1     0.01   0.03  -0.10    -0.02   0.05   0.14    -0.01  -0.03  -0.01
  67   1     0.01   0.06  -0.04     0.03  -0.01   0.05    -0.02  -0.02   0.01
  68   1     0.04   0.07  -0.07    -0.03  -0.06   0.12    -0.01  -0.01  -0.01
  69   1     0.00  -0.06  -0.04     0.01  -0.05  -0.05     0.19   0.04   0.07
  70   1    -0.01  -0.08  -0.03     0.00  -0.06  -0.04     0.14  -0.02   0.04
  71   1     0.01  -0.03  -0.05     0.01  -0.03  -0.05     0.18  -0.08   0.06
  72   1     0.04   0.00  -0.01     0.04  -0.02   0.00     0.09  -0.20   0.03
  73   1     0.03   0.00   0.00     0.04  -0.02  -0.01    -0.03  -0.16  -0.06
  74   1     0.02   0.00  -0.01     0.04  -0.01   0.00     0.03  -0.16  -0.02
  75   1    -0.03  -0.05   0.00    -0.02   0.02   0.00     0.00   0.02  -0.01
  76   1    -0.01   0.00  -0.02    -0.02   0.03   0.00     0.01   0.03  -0.02
  77   1     0.00   0.03  -0.03    -0.03   0.01   0.01     0.01   0.04  -0.02
  78   1    -0.04  -0.07   0.01    -0.08  -0.07   0.05     0.00   0.01  -0.01
  79   1    -0.01   0.01  -0.02    -0.03   0.02   0.01     0.01   0.05  -0.02
  80   1    -0.02   0.02   0.02     0.02   0.01  -0.02     0.00   0.00  -0.03
  81   1    -0.01   0.02   0.02     0.04  -0.02  -0.03     0.00  -0.04  -0.05
  82   1    -0.01   0.01   0.02     0.02  -0.01  -0.02    -0.03  -0.03  -0.03
  83   1    -0.11   0.13   0.01    -0.12   0.20  -0.01    -0.03   0.05   0.02
  84   1     0.00   0.01   0.01     0.00   0.05  -0.02    -0.04  -0.02   0.00
  85   1    -0.01  -0.09   0.01     0.05  -0.04   0.05    -0.01   0.04  -0.01
  86   1    -0.03  -0.07   0.00     0.06  -0.06   0.07    -0.01   0.03   0.01
  87   1    -0.03  -0.09  -0.02     0.08   0.00   0.00    -0.02   0.03   0.01
  88   1    -0.05  -0.07   0.03    -0.10   0.01   0.01     0.00   0.02  -0.03
  89   1    -0.04  -0.06   0.02    -0.05   0.09  -0.04     0.00   0.01  -0.01
  90   1    -0.05  -0.04   0.03    -0.15   0.06  -0.02     0.01   0.00  -0.02
  91   1    -0.01   0.01  -0.02    -0.09  -0.03   0.07    -0.01   0.05  -0.02
  92   1     0.00   0.01  -0.03    -0.11  -0.05   0.09    -0.02   0.02  -0.01
  93   1     0.01   0.00  -0.02    -0.11   0.02   0.08    -0.03   0.05  -0.02
  94   1    -0.01   0.01  -0.02    -0.05  -0.08   0.00     0.03   0.05  -0.01
  95   1    -0.01   0.01  -0.02     0.00  -0.07  -0.05     0.05   0.02   0.00
  96   1    -0.01   0.01  -0.03    -0.06  -0.11  -0.01     0.02   0.01  -0.01
  97   1     0.03  -0.03   0.00     0.00   0.07   0.00    -0.18   0.13   0.07
  98   1     0.04  -0.04   0.00     0.02   0.02  -0.02    -0.15   0.11   0.02
  99   1     0.04  -0.01  -0.02     0.04   0.05   0.01    -0.11   0.05   0.14
 100   1     0.01  -0.03   0.04    -0.03   0.04  -0.04    -0.07   0.12  -0.10
 101   1    -0.03  -0.02   0.05    -0.03   0.02  -0.05     0.04   0.06  -0.15
 102   1     0.00  -0.05   0.06    -0.02   0.01  -0.05    -0.05   0.15  -0.15
 103   1     0.17   0.06   0.11     0.08   0.24  -0.01    -0.01   0.11  -0.02
 104   1     0.24   0.21   0.18     0.17   0.28   0.00     0.00   0.07  -0.04
 105   1     0.31  -0.06   0.15     0.21   0.09   0.00     0.00   0.08  -0.05
 106   1    -0.05  -0.14  -0.07    -0.15   0.08   0.00    -0.05   0.11   0.04
 107   1     0.08  -0.29  -0.10    -0.01  -0.10  -0.05    -0.03   0.06   0.00
 108   1    -0.18  -0.22  -0.15    -0.22  -0.09  -0.01    -0.06   0.03   0.06
 109   1     0.00  -0.02  -0.03    -0.02   0.02   0.03     0.02  -0.05  -0.03
 110   1     0.01  -0.03  -0.05     0.00   0.01   0.00    -0.02  -0.01   0.04
 111   1     0.01  -0.04  -0.03     0.02   0.01   0.03    -0.06  -0.01  -0.03
 112   1     0.03   0.07   0.04    -0.01   0.01  -0.02    -0.07  -0.07  -0.12
 113   1    -0.07  -0.12   0.00    -0.01   0.01  -0.02     0.08   0.10  -0.06
 114   1     0.00   0.01  -0.16    -0.01   0.01  -0.01    -0.02  -0.02   0.11
                    19                     20                     21
                     A                      A                      A
 Frequencies --    85.4816                88.3432                93.3154
 Red. masses --     4.5569                 4.6967                 4.4525
 Frc consts  --     0.0196                 0.0216                 0.0228
 IR Inten    --     0.4817                 3.6905                 0.3443
 Atom AN      X      Y      Z        X      Y      Z        X      Y      Z
   1   8    -0.02   0.00  -0.01    -0.02   0.09  -0.03     0.05   0.00   0.03
   2  12     0.01   0.00   0.03     0.00  -0.01   0.01    -0.01   0.00   0.04
   3   8    -0.05  -0.02   0.04     0.02  -0.01   0.01     0.03   0.04   0.05
   4   6    -0.04  -0.01  -0.02     0.08  -0.05   0.02    -0.01   0.04   0.00
   5   7     0.03  -0.02   0.01    -0.01   0.00   0.02    -0.03  -0.01   0.00
   6   7    -0.02  -0.05   0.03     0.00  -0.01   0.01     0.01   0.02   0.00
   7   8    -0.03  -0.01  -0.04     0.22  -0.19   0.05    -0.08   0.10  -0.05
   8   6     0.00  -0.04  -0.01    -0.01  -0.01   0.01     0.00  -0.01  -0.05
   9   6    -0.01  -0.05   0.00    -0.01  -0.01   0.01     0.01   0.01  -0.07
  10   6    -0.01  -0.05   0.01     0.00  -0.01   0.01     0.01   0.02  -0.04
  11   8    -0.06  -0.03  -0.01     0.01  -0.03   0.00     0.01   0.03   0.02
  12   6    -0.04   0.00   0.02     0.02  -0.03   0.00     0.01   0.03   0.04
  13   6    -0.04   0.00   0.03     0.05   0.02   0.01     0.04   0.05   0.05
  14   6    -0.06   0.00  -0.02     0.02  -0.02   0.01    -0.01   0.04  -0.01
  15   8    -0.03   0.05   0.04    -0.01  -0.06  -0.01    -0.02   0.00   0.03
  16   6     0.02  -0.01  -0.02     0.05   0.08  -0.04     0.01   0.06  -0.01
  17   8     0.04   0.02   0.00    -0.04  -0.04  -0.07     0.01  -0.04  -0.06
  18   6     0.06   0.04  -0.02    -0.03  -0.03  -0.03     0.04  -0.01  -0.03
  19   8     0.08   0.02  -0.06    -0.02  -0.02   0.01     0.06  -0.01  -0.02
  20   8     0.06   0.12   0.06    -0.05  -0.04  -0.06     0.02   0.05   0.02
  21   6    -0.02   0.05  -0.02    -0.01  -0.01   0.01    -0.02   0.01  -0.01
  22   6     0.00   0.02   0.00    -0.05  -0.04  -0.07    -0.02  -0.03  -0.02
  23   6     0.05   0.08   0.02    -0.04  -0.02  -0.05     0.03   0.02  -0.01
  24   8    -0.09   0.03  -0.08     0.03   0.03   0.10    -0.06   0.01  -0.02
  25   6     0.01   0.02   0.01    -0.15  -0.04  -0.08    -0.03  -0.07   0.01
  26   6     0.04   0.03   0.04    -0.04   0.01  -0.05     0.04  -0.01   0.00
  27   6    -0.02   0.00   0.05     0.08   0.04   0.08     0.07   0.07   0.09
  28   6    -0.04   0.05  -0.03     0.04   0.06   0.02     0.04   0.13  -0.05
  29   6     0.04   0.00   0.00    -0.01  -0.01   0.02    -0.04  -0.04   0.02
  30   6    -0.02  -0.05   0.02    -0.01   0.00   0.01     0.02   0.01   0.00
  31   6     0.06   0.01  -0.02     0.00   0.01   0.01    -0.07  -0.11   0.04
  32   6     0.05   0.00  -0.02    -0.01  -0.02   0.01    -0.09  -0.16   0.06
  33   6     0.04  -0.02   0.00    -0.02  -0.04   0.02    -0.08  -0.12   0.04
  34   6     0.04  -0.02   0.00    -0.02  -0.03   0.02    -0.05  -0.05   0.01
  35   6     0.04   0.00   0.00    -0.01  -0.02   0.02    -0.04  -0.03   0.01
  36   6     0.09   0.04  -0.03     0.03   0.06  -0.02    -0.04  -0.06   0.02
  37   6     0.06   0.02  -0.02    -0.01   0.02   0.01    -0.05   0.00   0.01
  38   6    -0.02  -0.03   0.02    -0.01   0.01   0.01     0.03   0.00   0.00
  39   6    -0.02  -0.04   0.01    -0.02   0.02   0.00     0.05  -0.02   0.00
  40   6    -0.03  -0.05   0.00    -0.02   0.02   0.00     0.05  -0.04   0.00
  41   6    -0.04  -0.05   0.00    -0.02   0.01   0.00     0.05  -0.03   0.00
  42   6    -0.04  -0.05   0.02    -0.02   0.00   0.01     0.04  -0.01   0.00
  43   6    -0.04   0.00   0.02     0.00   0.01   0.01     0.02   0.01   0.00
  44   6    -0.07  -0.05   0.03    -0.03   0.02   0.01     0.03  -0.01   0.00
  45   6     0.02   0.06  -0.04    -0.04   0.12  -0.01    -0.07   0.03   0.06
  46   6     0.14  -0.01  -0.02     0.09   0.02  -0.04     0.01  -0.08  -0.05
  47   6     0.10   0.02  -0.05    -0.03   0.03  -0.02    -0.01   0.01  -0.04
  48   6     0.07   0.06   0.02     0.02   0.03   0.03    -0.08   0.06   0.03
  49   6    -0.16  -0.03   0.06    -0.05   0.04   0.03     0.06  -0.01  -0.01
  50   6    -0.04   0.00  -0.03    -0.02   0.04  -0.03     0.01  -0.03   0.01
  51   6     0.06   0.06   0.03     0.02   0.02   0.02    -0.02   0.01  -0.04
  52   6    -0.10  -0.09   0.01     0.00   0.00   0.00     0.03   0.06   0.03
  53   6    -0.02  -0.03  -0.04    -0.01  -0.02  -0.02     0.02  -0.05  -0.09
  54   6    -0.01  -0.05  -0.02     0.00  -0.01   0.00     0.01   0.01  -0.04
  55   1    -0.02  -0.06  -0.02    -0.01  -0.01   0.01     0.01   0.00  -0.10
  56   1    -0.03   0.01   0.02     0.06   0.06  -0.03     0.05   0.08   0.02
  57   1    -0.09   0.01  -0.02    -0.02  -0.02  -0.01    -0.07   0.04  -0.02
  58   1     0.03   0.00  -0.01     0.29   0.06  -0.09    -0.14   0.05  -0.04
  59   1     0.02  -0.03  -0.04    -0.03  -0.10   0.07     0.06   0.19  -0.07
  60   1     0.03   0.01   0.00    -0.06   0.26  -0.11     0.07  -0.01   0.04
  61   1    -0.02   0.01   0.02    -0.02  -0.07  -0.12    -0.02  -0.02  -0.01
  62   1     0.07   0.10  -0.01    -0.03  -0.03  -0.03     0.04   0.04  -0.03
  63   1    -0.03   0.02   0.01    -0.16  -0.04  -0.07    -0.05  -0.06   0.04
  64   1     0.04   0.04  -0.02    -0.20  -0.03  -0.03    -0.03  -0.09   0.00
  65   1     0.03  -0.02   0.04    -0.18  -0.06  -0.14    -0.03  -0.10   0.00
  66   1     0.03   0.07   0.08    -0.04   0.00  -0.07     0.02   0.02   0.01
  67   1     0.05   0.01  -0.01    -0.04   0.02  -0.02     0.05  -0.02  -0.04
  68   1     0.01  -0.02   0.07    -0.04   0.03  -0.08     0.03  -0.04   0.02
  69   1    -0.01   0.01   0.05     0.10   0.07   0.10     0.08   0.09   0.11
  70   1    -0.01   0.00   0.06     0.08   0.07   0.07     0.07   0.09   0.09
  71   1    -0.02  -0.01   0.07     0.09  -0.01   0.10     0.07   0.03   0.11
  72   1    -0.06   0.07  -0.05     0.00   0.10   0.00     0.04   0.18  -0.11
  73   1    -0.01   0.05  -0.02     0.08   0.07   0.05     0.11   0.15   0.01
  74   1    -0.05   0.06  -0.04     0.05   0.07   0.03     0.01   0.12  -0.08
  75   1     0.06   0.01  -0.02     0.00  -0.01   0.01    -0.11  -0.21   0.08
  76   1     0.04  -0.04   0.00    -0.03  -0.05   0.02    -0.09  -0.15   0.05
  77   1     0.03  -0.03   0.00    -0.02  -0.04   0.02    -0.04  -0.03   0.01
  78   1     0.12   0.09  -0.05     0.06   0.11  -0.05    -0.02  -0.04  -0.01
  79   1     0.05   0.00  -0.02     0.00   0.03   0.01    -0.06  -0.03   0.03
  80   1    -0.01  -0.03   0.00    -0.02   0.03   0.00     0.05  -0.03   0.00
  81   1    -0.03  -0.05  -0.01    -0.02   0.03   0.00     0.07  -0.05  -0.01
  82   1    -0.05  -0.05   0.00    -0.02   0.01   0.00     0.06  -0.04   0.00
  83   1    -0.11   0.07   0.02    -0.01   0.02   0.02     0.05  -0.01   0.00
  84   1    -0.04  -0.10   0.06    -0.02   0.00   0.01     0.02   0.02   0.00
  85   1     0.01   0.07  -0.05    -0.08   0.16  -0.05    -0.03   0.09   0.03
  86   1     0.01   0.07  -0.06    -0.04   0.12  -0.02    -0.10   0.06   0.11
  87   1     0.00   0.04  -0.01    -0.06   0.13   0.06    -0.09   0.01   0.09
  88   1     0.17   0.02  -0.03     0.12   0.07  -0.07     0.04  -0.02  -0.08
  89   1     0.11  -0.05   0.00     0.06  -0.02  -0.01    -0.01  -0.10  -0.03
  90   1     0.18  -0.03  -0.02     0.14  -0.03  -0.06     0.03  -0.14  -0.08
  91   1     0.11   0.03  -0.06    -0.03   0.06  -0.03    -0.04   0.03  -0.03
  92   1     0.11   0.04  -0.05    -0.04   0.02  -0.04     0.00   0.04  -0.09
  93   1     0.09   0.00  -0.07    -0.03   0.02  -0.03     0.02  -0.03  -0.04
  94   1     0.09   0.07   0.00     0.02   0.07   0.03    -0.08   0.07   0.03
  95   1     0.05   0.05   0.05     0.04   0.02   0.06    -0.11   0.06   0.06
  96   1     0.09   0.08   0.03     0.01   0.02   0.03    -0.06   0.10   0.01
  97   1    -0.18  -0.04   0.07    -0.07   0.06   0.04     0.07  -0.01  -0.01
  98   1    -0.19   0.02   0.03    -0.06   0.05   0.02     0.07  -0.02   0.00
  99   1    -0.18  -0.07   0.10    -0.04   0.03   0.06     0.07   0.00  -0.01
 100   1    -0.08  -0.01  -0.01    -0.03   0.06  -0.03     0.02  -0.01   0.00
 101   1     0.04  -0.01  -0.04     0.01   0.03  -0.04    -0.01  -0.03   0.00
 102   1    -0.06   0.05  -0.08    -0.03   0.06  -0.04     0.02  -0.05   0.02
 103   1     0.02   0.09   0.02     0.03   0.02   0.03    -0.01   0.02  -0.03
 104   1     0.11   0.14   0.03     0.02   0.03   0.03    -0.03  -0.03  -0.05
 105   1     0.13  -0.02   0.05     0.03   0.01   0.02    -0.04   0.04  -0.05
 106   1    -0.13  -0.02   0.03     0.01   0.00   0.01     0.02   0.06   0.03
 107   1    -0.02  -0.16  -0.02     0.02  -0.01  -0.01     0.00   0.08   0.03
 108   1    -0.20  -0.15   0.01    -0.01  -0.01  -0.01     0.05   0.06   0.05
 109   1     0.01  -0.03  -0.08     0.04  -0.05  -0.07     0.06  -0.08  -0.12
 110   1    -0.04  -0.03  -0.02    -0.01   0.00   0.03     0.05  -0.03  -0.07
 111   1    -0.07  -0.02  -0.07    -0.08   0.00  -0.06    -0.03  -0.07  -0.11
 112   1    -0.03  -0.05  -0.04    -0.02  -0.02  -0.02     0.01   0.01  -0.04
 113   1     0.02  -0.04  -0.03     0.02   0.02  -0.01     0.01   0.02  -0.04
 114   1    -0.01  -0.05   0.00    -0.01  -0.01   0.03     0.01   0.01  -0.03
                    22                     23                     24
                     A                      A                      A
 Frequencies --    98.2830               101.7660               109.6213
 Red. masses --     4.2175                 3.6996                 4.2658
 Frc consts  --     0.0240                 0.0226                 0.0302
 IR Inten    --     0.4709                 1.0158                 1.6628
 Atom AN      X      Y      Z        X      Y      Z        X      Y      Z
   1   8     0.03   0.00   0.01     0.01  -0.02  -0.01     0.00   0.01  -0.01
   2  12    -0.01  -0.02  -0.09    -0.02   0.00   0.01     0.03   0.04   0.03
   3   8     0.01   0.05  -0.07     0.01   0.00   0.00     0.10   0.13   0.06
   4   6     0.01   0.02   0.00     0.00   0.01  -0.01     0.00  -0.01  -0.01
   5   7    -0.01  -0.02  -0.05     0.00   0.00   0.03     0.00   0.01  -0.06
   6   7    -0.01  -0.01  -0.01    -0.02   0.01   0.01    -0.01  -0.02   0.00
   7   8    -0.02   0.05  -0.01    -0.02   0.03  -0.02     0.01  -0.02  -0.02
   8   6    -0.01   0.02   0.10     0.00  -0.01   0.00    -0.01   0.02  -0.01
   9   6    -0.01   0.02   0.16     0.00  -0.01  -0.02    -0.02  -0.01   0.00
  10   6    -0.02   0.00   0.09    -0.01   0.01  -0.01    -0.02  -0.02   0.00
  11   8     0.02   0.05  -0.01     0.02   0.01  -0.01     0.00  -0.01   0.00
  12   6     0.01   0.02  -0.04     0.02   0.00  -0.01     0.03   0.04   0.02
  13   6     0.02   0.07  -0.04     0.02   0.00  -0.01     0.04   0.06   0.03
  14   6     0.02   0.02   0.00     0.02  -0.01  -0.01    -0.01   0.00  -0.01
  15   8    -0.02  -0.05  -0.06     0.00  -0.02  -0.02     0.04   0.07   0.03
  16   6    -0.02   0.04  -0.01     0.00  -0.02   0.00     0.02   0.00  -0.01
  17   8    -0.02   0.03  -0.03    -0.03  -0.03  -0.17     0.05  -0.07   0.00
  18   6    -0.02   0.02  -0.03    -0.02  -0.01  -0.03     0.08  -0.03   0.05
  19   8    -0.03   0.02  -0.06    -0.03   0.00   0.02     0.11  -0.03   0.10
  20   8     0.01   0.03   0.01    -0.01  -0.05  -0.05     0.00  -0.05  -0.05
  21   6     0.00   0.03  -0.01     0.03  -0.02  -0.02     0.02  -0.04   0.01
  22   6     0.00   0.03   0.00     0.05   0.00   0.03     0.01  -0.07  -0.01
  23   6    -0.02   0.01  -0.01    -0.01  -0.01   0.00     0.06   0.00   0.01
  24   8    -0.01   0.02  -0.03     0.04  -0.02  -0.03     0.01  -0.02   0.04
  25   6     0.04   0.01   0.01     0.21  -0.17   0.16    -0.04  -0.08  -0.01
  26   6    -0.02  -0.03   0.00    -0.01   0.02  -0.01     0.08   0.10  -0.03
  27   6     0.04   0.10   0.03     0.02  -0.01  -0.04    -0.04   0.08  -0.01
  28   6     0.02   0.05   0.00     0.01  -0.05  -0.01     0.00   0.00  -0.02
  29   6    -0.02  -0.03  -0.03     0.00  -0.01   0.03     0.01   0.01  -0.04
  30   6    -0.01  -0.01   0.00    -0.03   0.03   0.01    -0.02  -0.01   0.00
  31   6    -0.03  -0.04  -0.01     0.01   0.00   0.02    -0.01  -0.02  -0.02
  32   6    -0.05  -0.07   0.02     0.00  -0.01   0.02    -0.02  -0.03  -0.01
  33   6    -0.03  -0.07   0.02    -0.01  -0.02   0.02     0.00  -0.01  -0.01
  34   6    -0.01  -0.06   0.01    -0.01  -0.01   0.02     0.02   0.01  -0.02
  35   6     0.00  -0.05  -0.01    -0.01  -0.01   0.02     0.02   0.01  -0.04
  36   6    -0.01  -0.02  -0.02     0.03   0.04   0.00    -0.03  -0.06   0.00
  37   6     0.03  -0.06  -0.03    -0.01   0.01   0.02     0.03  -0.03  -0.04
  38   6     0.00  -0.04   0.00    -0.04   0.04   0.01    -0.05   0.03   0.00
  39   6     0.00  -0.04   0.00    -0.06   0.07   0.01    -0.08   0.07   0.00
  40   6     0.00  -0.02   0.01    -0.07   0.09   0.01    -0.08   0.06   0.00
  41   6    -0.02   0.01   0.01    -0.06   0.07   0.01    -0.05   0.02  -0.01
  42   6    -0.02   0.01   0.00    -0.05   0.04   0.01    -0.03  -0.01  -0.01
  43   6     0.01  -0.04   0.00    -0.01   0.01   0.01    -0.05   0.02   0.00
  44   6     0.00   0.02   0.00    -0.03   0.01   0.01    -0.04  -0.01   0.00
  45   6    -0.01   0.02   0.01    -0.01   0.07   0.01    -0.04  -0.10  -0.02
  46   6     0.01  -0.03  -0.06     0.08   0.01  -0.02    -0.02  -0.08   0.06
  47   6     0.01  -0.07  -0.01    -0.02   0.02   0.00     0.08  -0.05   0.01
  48   6     0.07  -0.10  -0.02     0.01   0.02   0.03     0.01  -0.05  -0.06
  49   6    -0.03   0.03   0.01    -0.05  -0.01  -0.01    -0.08   0.00   0.01
  50   6     0.04   0.05  -0.01     0.01   0.02   0.04    -0.03   0.02  -0.03
  51   6     0.08  -0.02   0.03     0.00  -0.01   0.06    -0.07   0.00   0.01
  52   6     0.00  -0.09  -0.03     0.01  -0.02  -0.04    -0.03   0.03  -0.01
  53   6    -0.02   0.07   0.22     0.00  -0.03  -0.04    -0.02   0.06   0.07
  54   6    -0.02   0.00   0.11     0.00   0.02  -0.01    -0.02  -0.02  -0.01
  55   1    -0.01   0.03   0.25     0.01  -0.01  -0.04    -0.03  -0.01   0.02
  56   1     0.03   0.11  -0.07     0.01   0.00   0.00     0.07  -0.01   0.05
  57   1     0.01   0.01  -0.02     0.04  -0.01   0.00    -0.01   0.00  -0.01
  58   1    -0.11   0.04  -0.03    -0.01  -0.02   0.00     0.05   0.00  -0.01
  59   1     0.01   0.13  -0.03     0.01   0.00  -0.01     0.01  -0.03  -0.01
  60   1     0.01   0.00   0.01     0.01  -0.03   0.00     0.01   0.02  -0.02
  61   1     0.00   0.06   0.01     0.03   0.16   0.12     0.02  -0.10  -0.02
  62   1    -0.02   0.02  -0.02    -0.01  -0.03   0.03     0.08  -0.01   0.04
  63   1     0.04   0.01   0.03     0.28  -0.14   0.31    -0.05  -0.07   0.00
  64   1     0.05  -0.01  -0.01     0.23  -0.34   0.07    -0.06  -0.07   0.02
  65   1     0.04   0.02   0.03     0.22  -0.15   0.19    -0.05  -0.09  -0.04
  66   1    -0.02  -0.01   0.02     0.01  -0.03  -0.03     0.10   0.04  -0.09
  67   1    -0.01  -0.04  -0.03    -0.05   0.03   0.03     0.04   0.14   0.07
  68   1    -0.03  -0.06   0.02     0.02   0.07  -0.04     0.11   0.20  -0.09
  69   1     0.04   0.12   0.06     0.02  -0.02  -0.04    -0.09   0.02  -0.02
  70   1     0.04   0.14   0.01     0.00  -0.04  -0.04    -0.03   0.09  -0.01
  71   1     0.03   0.06   0.06     0.03   0.00  -0.06    -0.07   0.14  -0.03
  72   1     0.03   0.08  -0.04     0.02  -0.07   0.00     0.00   0.01  -0.03
  73   1     0.04   0.08   0.04    -0.02  -0.05  -0.02     0.01   0.00  -0.02
  74   1     0.02   0.03   0.00     0.00  -0.06  -0.01    -0.01   0.01  -0.03
  75   1    -0.06  -0.08   0.03     0.01  -0.01   0.01    -0.04  -0.06   0.01
  76   1    -0.03  -0.08   0.04    -0.01  -0.03   0.02     0.00  -0.02   0.00
  77   1     0.00  -0.06   0.02    -0.01  -0.01   0.02     0.02   0.01  -0.02
  78   1    -0.01  -0.01  -0.01     0.05   0.07  -0.02    -0.02  -0.04   0.01
  79   1     0.03  -0.04  -0.06     0.00   0.02   0.02     0.02  -0.06  -0.05
  80   1     0.01  -0.06   0.00    -0.06   0.08   0.01    -0.09   0.10   0.00
  81   1     0.00  -0.02   0.01    -0.09   0.11   0.01    -0.09   0.09   0.00
  82   1    -0.02   0.02   0.01    -0.07   0.08   0.01    -0.05   0.02  -0.01
  83   1    -0.02   0.00   0.01    -0.02   0.01   0.01    -0.03   0.00  -0.01
  84   1     0.01  -0.01  -0.02    -0.02  -0.02   0.01    -0.03  -0.03   0.01
  85   1     0.05   0.05   0.00    -0.04   0.10  -0.02     0.01  -0.12   0.01
  86   1    -0.04   0.06   0.05     0.00   0.06   0.00    -0.07  -0.05  -0.04
  87   1    -0.02   0.00   0.00    -0.02   0.09   0.06    -0.06  -0.15  -0.07
  88   1     0.03   0.01  -0.09     0.10   0.04  -0.03    -0.03  -0.10   0.08
  89   1     0.00  -0.03  -0.05     0.06  -0.02   0.00    -0.04  -0.11   0.07
  90   1     0.03  -0.07  -0.08     0.10  -0.03  -0.03     0.01  -0.05   0.09
  91   1     0.05  -0.07  -0.03    -0.02   0.04   0.00     0.08  -0.10   0.01
  92   1     0.01  -0.08   0.03    -0.03   0.01   0.00     0.09  -0.03   0.03
  93   1    -0.02  -0.05  -0.02    -0.03   0.01  -0.01     0.09  -0.05   0.02
  94   1     0.10  -0.11  -0.04     0.01   0.04   0.03     0.03  -0.12  -0.06
  95   1     0.08  -0.10  -0.04     0.03   0.01   0.05    -0.04  -0.03  -0.10
  96   1     0.07  -0.12   0.02     0.00   0.00   0.03     0.04  -0.01  -0.02
  97   1    -0.01   0.03   0.00    -0.05  -0.04   0.00    -0.10   0.01   0.02
  98   1    -0.04   0.06   0.03    -0.06   0.00  -0.02    -0.09   0.01  -0.01
  99   1    -0.05   0.01   0.02    -0.06  -0.01  -0.03    -0.08  -0.01   0.03
 100   1     0.04   0.04  -0.01     0.02  -0.01   0.04    -0.05   0.02  -0.03
 101   1     0.07   0.05  -0.01     0.02   0.02   0.05     0.00   0.01  -0.04
 102   1     0.02   0.09  -0.02     0.00   0.04   0.05    -0.04   0.04  -0.06
 103   1     0.06  -0.01   0.03     0.02  -0.04   0.06    -0.04  -0.02   0.02
 104   1     0.10   0.03   0.04    -0.01   0.00   0.09    -0.09  -0.02   0.03
 105   1     0.12  -0.06   0.04     0.01  -0.02   0.07    -0.08   0.01   0.01
 106   1     0.00  -0.09  -0.03     0.03  -0.05  -0.04    -0.02   0.02  -0.01
 107   1     0.03  -0.12  -0.02     0.01  -0.03  -0.03    -0.04   0.04  -0.01
 108   1    -0.03  -0.10  -0.05     0.00   0.00  -0.07    -0.02   0.04  -0.01
 109   1    -0.06   0.05   0.26     0.05  -0.06  -0.09    -0.19   0.20   0.21
 110   1    -0.03   0.07   0.25     0.01  -0.01   0.00    -0.06   0.00  -0.11
 111   1     0.03   0.14   0.22    -0.06  -0.03  -0.08     0.19   0.02   0.21
 112   1    -0.03  -0.04   0.07     0.02   0.07   0.04    -0.04  -0.05  -0.05
 113   1     0.00   0.03   0.09    -0.04  -0.04   0.01     0.01   0.02  -0.03
 114   1    -0.03  -0.01   0.15     0.02   0.03  -0.08    -0.02  -0.03   0.04
                    25                     26                     27
                     A                      A                      A
 Frequencies --   114.7126               117.9952               118.9298
 Red. masses --     3.0382                 1.4012                 3.4631
 Frc consts  --     0.0236                 0.0115                 0.0289
 IR Inten    --     0.8964                 2.4378                 2.7039
 Atom AN      X      Y      Z        X      Y      Z        X      Y      Z
   1   8    -0.03   0.04  -0.03    -0.01   0.02  -0.01    -0.06   0.05  -0.02
   2  12    -0.02   0.02   0.00     0.00   0.01   0.01    -0.03  -0.03  -0.02
   3   8     0.04   0.07   0.01     0.04   0.05   0.02    -0.09  -0.05  -0.01
   4   6     0.00   0.02  -0.01     0.00   0.01  -0.01    -0.05   0.04  -0.02
   5   7     0.00   0.00   0.00     0.00   0.00   0.00     0.00  -0.04   0.01
   6   7    -0.02   0.02   0.03     0.00   0.00  -0.01     0.01   0.00  -0.01
   7   8     0.05  -0.02   0.01     0.02  -0.01   0.00    -0.02   0.01  -0.01
   8   6     0.00  -0.01  -0.04     0.00   0.00   0.02     0.02  -0.03   0.02
   9   6     0.00  -0.01  -0.07     0.00   0.01   0.05     0.02  -0.01   0.03
  10   6     0.00   0.01  -0.03     0.00   0.00   0.02     0.02   0.00   0.01
  11   8     0.02   0.04  -0.02     0.01   0.01   0.00    -0.05   0.02   0.00
  12   6     0.01   0.03  -0.02     0.01   0.01   0.00    -0.05   0.02   0.01
  13   6     0.05   0.07  -0.01     0.02   0.02   0.01    -0.02   0.05   0.02
  14   6     0.02   0.01  -0.01     0.00   0.00   0.00    -0.05   0.02   0.00
  15   8    -0.02  -0.01  -0.03     0.00   0.01   0.00    -0.06   0.01   0.01
  16   6     0.05  -0.04   0.02     0.02  -0.01   0.00     0.07  -0.06   0.04
  17   8    -0.06   0.03  -0.08    -0.01   0.01  -0.02     0.04  -0.04  -0.01
  18   6    -0.06   0.03  -0.03    -0.01   0.01   0.01     0.04  -0.03  -0.04
  19   8    -0.07   0.04   0.01    -0.01   0.02   0.03     0.05  -0.05  -0.09
  20   8    -0.01   0.05   0.04     0.00   0.02   0.01     0.02  -0.02  -0.03
  21   6    -0.02   0.04  -0.01    -0.01   0.01   0.00     0.02  -0.02  -0.01
  22   6    -0.03   0.04  -0.02    -0.01   0.01  -0.01     0.02  -0.04  -0.01
  23   6    -0.05   0.01  -0.01    -0.01   0.01   0.00     0.04   0.00  -0.02
  24   8    -0.02   0.03  -0.03    -0.01   0.01  -0.01     0.01  -0.01   0.00
  25   6     0.02  -0.01   0.02     0.00   0.00   0.00     0.00  -0.04  -0.01
  26   6    -0.03  -0.08   0.00     0.00  -0.01   0.00     0.01   0.04  -0.01
  27   6     0.05   0.08   0.03    -0.02   0.02  -0.02     0.12   0.08   0.19
  28   6    -0.03  -0.09   0.01    -0.01  -0.03   0.00    -0.08  -0.04   0.00
  29   6     0.00   0.00   0.01     0.00   0.00   0.00     0.00  -0.03   0.00
  30   6    -0.01   0.01   0.03     0.00   0.00  -0.01     0.00   0.01  -0.01
  31   6     0.00  -0.01   0.01     0.00  -0.01   0.00     0.00  -0.01   0.00
  32   6     0.01   0.01   0.00     0.00  -0.01   0.00     0.02   0.04  -0.03
  33   6     0.02   0.04  -0.02     0.01   0.01   0.00     0.03   0.07  -0.04
  34   6     0.02   0.04  -0.02     0.01   0.02  -0.01     0.02   0.05  -0.03
  35   6     0.01   0.02   0.00     0.01   0.01   0.00     0.01   0.01  -0.02
  36   6     0.00  -0.04   0.03    -0.01  -0.02   0.01    -0.03  -0.04   0.01
  37   6     0.00  -0.01   0.00     0.01  -0.01   0.00     0.00   0.01  -0.01
  38   6     0.02  -0.02   0.02     0.00  -0.01  -0.01    -0.01   0.02   0.00
  39   6     0.05  -0.06   0.00     0.00  -0.03  -0.01    -0.02   0.04   0.01
  40   6     0.05  -0.08  -0.01     0.01  -0.02  -0.01    -0.02   0.06   0.01
  41   6     0.02  -0.06   0.00     0.00  -0.01  -0.01    -0.01   0.04   0.01
  42   6    -0.01  -0.02   0.02     0.00   0.00  -0.01     0.00   0.03   0.00
  43   6     0.02  -0.01   0.03    -0.01  -0.01  -0.01     0.00   0.00   0.00
  44   6    -0.02  -0.04   0.03     0.00   0.00  -0.01     0.02   0.02   0.00
  45   6     0.01  -0.06   0.02    -0.01  -0.03   0.01     0.02  -0.05   0.02
  46   6     0.00  -0.05   0.06    -0.01  -0.02   0.03    -0.09   0.01   0.00
  47   6     0.01  -0.01   0.03     0.03  -0.02   0.02    -0.01   0.01   0.00
  48   6    -0.01  -0.03  -0.02    -0.01  -0.01  -0.01    -0.02   0.01  -0.02
  49   6    -0.06  -0.04   0.03     0.00   0.00  -0.01     0.04   0.02  -0.01
  50   6     0.00  -0.02   0.02     0.01   0.01  -0.01     0.02   0.01   0.02
  51   6     0.00   0.00   0.00    -0.01  -0.01  -0.02     0.03   0.00   0.02
  52   6     0.02   0.02   0.04    -0.02  -0.01   0.00     0.01  -0.03  -0.04
  53   6     0.02  -0.01  -0.01    -0.02  -0.01  -0.05     0.03  -0.05   0.02
  54   6     0.00   0.02  -0.05     0.00   0.00   0.02     0.02   0.01   0.03
  55   1     0.01  -0.01  -0.11     0.00   0.01   0.07     0.04   0.00   0.04
  56   1     0.07   0.07  -0.03     0.03  -0.01   0.02     0.00   0.16  -0.06
  57   1     0.07   0.00   0.01     0.02   0.00   0.00    -0.02   0.03   0.02
  58   1     0.24  -0.03   0.05     0.09  -0.01   0.02     0.26  -0.04   0.10
  59   1     0.00  -0.22   0.07     0.00  -0.08   0.03     0.02  -0.26   0.06
  60   1    -0.01   0.05  -0.03    -0.01   0.02  -0.01     0.02   0.03   0.01
  61   1    -0.03   0.09   0.00    -0.01   0.02   0.00     0.02  -0.05  -0.01
  62   1    -0.07   0.01  -0.05    -0.02   0.00  -0.01     0.07   0.01   0.00
  63   1     0.02   0.00   0.07     0.00   0.00   0.02    -0.01  -0.04   0.00
  64   1     0.03  -0.06  -0.01     0.00  -0.01   0.00     0.00  -0.04   0.00
  65   1     0.02  -0.02   0.04     0.00   0.00   0.01     0.00  -0.06  -0.02
  66   1    -0.05  -0.04   0.02     0.00  -0.02  -0.01     0.02   0.03  -0.01
  67   1    -0.01  -0.11  -0.08     0.01  -0.02  -0.02    -0.01   0.05   0.03
  68   1    -0.03  -0.14   0.05     0.02  -0.02   0.01    -0.01   0.06  -0.04
  69   1     0.05   0.08   0.03    -0.04  -0.01  -0.03     0.19   0.19   0.24
  70   1     0.06   0.11   0.03    -0.02   0.02  -0.02     0.13   0.14   0.18
  71   1     0.04   0.07   0.05    -0.04   0.06  -0.03     0.14  -0.07   0.28
  72   1    -0.01  -0.15   0.06     0.00  -0.04   0.01    -0.07  -0.09   0.04
  73   1    -0.10  -0.11  -0.03    -0.02  -0.03  -0.02    -0.11  -0.07  -0.06
  74   1    -0.01  -0.10   0.03     0.00  -0.03   0.00    -0.06  -0.02   0.00
  75   1     0.01   0.00   0.00     0.00  -0.02   0.01     0.03   0.05  -0.03
  76   1     0.03   0.06  -0.03     0.01   0.01   0.00     0.05   0.10  -0.05
  77   1     0.02   0.06  -0.02     0.02   0.03  -0.01     0.03   0.07  -0.04
  78   1     0.00  -0.04   0.04     0.00  -0.02   0.01    -0.06  -0.09   0.02
  79   1     0.00  -0.01   0.00     0.00  -0.02   0.00     0.00   0.01   0.00
  80   1     0.07  -0.08   0.00     0.01  -0.03  -0.01    -0.04   0.05   0.01
  81   1     0.07  -0.11  -0.02     0.01  -0.03   0.00    -0.03   0.08   0.02
  82   1     0.02  -0.07   0.00     0.00  -0.01  -0.01    -0.01   0.05   0.01
  83   1     0.03  -0.02   0.03    -0.01  -0.01  -0.01    -0.01   0.02  -0.01
  84   1    -0.01  -0.06   0.05     0.00   0.00  -0.02     0.01   0.04  -0.01
  85   1     0.07  -0.07   0.05     0.01  -0.04   0.01     0.11  -0.06   0.05
  86   1    -0.04  -0.01   0.04    -0.01  -0.02   0.00    -0.03   0.00   0.06
  87   1    -0.01  -0.11  -0.03    -0.01  -0.04  -0.01     0.01  -0.10  -0.06
  88   1     0.00  -0.06   0.07    -0.01  -0.04   0.05    -0.12  -0.02   0.00
  89   1    -0.01  -0.06   0.07     0.00  -0.03   0.01    -0.06   0.06   0.00
  90   1     0.02  -0.04   0.07    -0.02   0.00   0.04    -0.12   0.02   0.00
  91   1     0.02  -0.03   0.03     0.03  -0.04   0.01    -0.01   0.01   0.00
  92   1     0.01  -0.01   0.05     0.04   0.00   0.02    -0.01   0.01   0.00
  93   1     0.01   0.00   0.03     0.04  -0.02   0.02    -0.01   0.02   0.00
  94   1    -0.01  -0.05  -0.01    -0.01  -0.03  -0.01    -0.04   0.01  -0.01
  95   1    -0.01  -0.02  -0.05    -0.01  -0.01  -0.02    -0.01   0.01  -0.02
  96   1    -0.01  -0.02  -0.02    -0.01  -0.01  -0.02    -0.03   0.01  -0.04
  97   1    -0.06  -0.06   0.03     0.01   0.00  -0.02     0.05   0.02  -0.02
  98   1    -0.08  -0.01   0.02     0.00   0.01   0.00     0.05   0.00  -0.01
  99   1    -0.09  -0.06   0.03    -0.01   0.00  -0.02     0.05   0.03  -0.02
 100   1    -0.01  -0.03   0.02     0.01   0.00  -0.01     0.03   0.00   0.02
 101   1     0.04  -0.02   0.02     0.02   0.01  -0.01    -0.01   0.01   0.03
 102   1    -0.01   0.01  -0.01     0.01   0.01  -0.01     0.02  -0.01   0.05
 103   1    -0.01   0.00   0.00    -0.02  -0.01  -0.02     0.03  -0.01   0.02
 104   1     0.00  -0.02  -0.01    -0.01  -0.01  -0.02     0.03   0.02   0.04
 105   1    -0.01   0.01   0.00    -0.01  -0.01  -0.01     0.04  -0.02   0.03
 106   1     0.02   0.03   0.05    -0.03  -0.01  -0.01     0.02  -0.04  -0.04
 107   1     0.01   0.03   0.04    -0.03  -0.01   0.01     0.02  -0.04  -0.03
 108   1     0.03   0.01   0.06    -0.01  -0.01   0.00     0.00  -0.02  -0.06
 109   1    -0.19   0.20   0.15     0.33  -0.36  -0.32     0.10  -0.13  -0.03
 110   1    -0.01  -0.09  -0.31     0.04   0.12   0.41     0.06  -0.01   0.11
 111   1     0.28  -0.14   0.19    -0.44   0.17  -0.37    -0.05  -0.01  -0.04
 112   1    -0.01   0.03  -0.06    -0.02  -0.02   0.00     0.05   0.05   0.08
 113   1     0.01   0.02  -0.06     0.02   0.03   0.01    -0.02  -0.03   0.05
 114   1     0.01   0.02  -0.06    -0.01   0.00   0.06     0.04   0.02  -0.02
                    28                     29                     30
                     A                      A                      A
 Frequencies --   125.9372               130.6291               138.1338
 Red. masses --     4.7932                 2.4300                 3.5893
 Frc consts  --     0.0448                 0.0244                 0.0404
 IR Inten    --     0.2290                 0.6312                 1.1960
 Atom AN      X      Y      Z        X      Y      Z        X      Y      Z
   1   8     0.01  -0.03   0.02    -0.06   0.09  -0.04     0.02  -0.03   0.01
   2  12     0.02  -0.02   0.10    -0.01   0.00   0.04    -0.06   0.05   0.05
   3   8     0.07   0.00   0.12    -0.02  -0.04   0.04    -0.08  -0.09   0.00
   4   6    -0.01  -0.04   0.01    -0.03   0.07  -0.02     0.02  -0.03   0.01
   5   7    -0.01  -0.03  -0.02    -0.01  -0.02  -0.01    -0.02   0.01  -0.02
   6   7     0.01  -0.02  -0.02     0.00   0.00  -0.01    -0.05   0.09   0.03
   7   8    -0.02  -0.04  -0.02    -0.01   0.04  -0.01     0.03  -0.04   0.02
   8   6     0.00  -0.02   0.04     0.00   0.00   0.03     0.00   0.04   0.04
   9   6     0.01  -0.01   0.07     0.00   0.01   0.04     0.01   0.06   0.02
  10   6     0.01  -0.02   0.02     0.00   0.00   0.01    -0.02   0.08  -0.03
  11   8    -0.02  -0.11   0.04     0.03   0.04   0.01    -0.03   0.00  -0.02
  12   6    -0.01  -0.08   0.09     0.02   0.03   0.03     0.00   0.03  -0.02
  13   6     0.03  -0.04   0.11    -0.01  -0.04   0.03    -0.01  -0.02  -0.01
  14   6    -0.03  -0.04   0.01     0.00   0.04  -0.01     0.00  -0.01   0.00
  15   8    -0.03  -0.06   0.10     0.01   0.04   0.04     0.02   0.09   0.00
  16   6     0.00   0.03  -0.03     0.08  -0.07   0.06    -0.04   0.03  -0.03
  17   8    -0.06   0.03  -0.12     0.00   0.01   0.01    -0.01  -0.02  -0.03
  18   6    -0.05   0.04   0.00     0.00   0.01   0.02     0.01   0.00   0.02
  19   8    -0.05   0.06   0.09     0.00   0.01   0.04     0.01   0.01   0.05
  20   8    -0.01   0.03   0.02     0.00   0.01   0.01     0.00   0.00   0.01
  21   6    -0.01   0.04  -0.02     0.00   0.01   0.00    -0.01   0.00   0.00
  22   6    -0.01   0.05  -0.02     0.00   0.01   0.00    -0.02  -0.02  -0.01
  23   6    -0.04   0.02   0.00     0.00   0.01   0.01     0.01   0.00   0.01
  24   8     0.01   0.03  -0.03     0.00   0.00   0.00    -0.02   0.00   0.00
  25   6     0.06  -0.05   0.05    -0.01   0.01   0.00    -0.03  -0.04   0.01
  26   6    -0.01  -0.03  -0.01     0.01   0.01   0.00     0.04  -0.01  -0.01
  27   6    -0.02  -0.01   0.14    -0.01  -0.10  -0.07     0.12  -0.07   0.01
  28   6     0.02   0.05  -0.04    -0.01  -0.06  -0.05    -0.02   0.00   0.06
  29   6     0.00  -0.02  -0.04    -0.01  -0.02  -0.01    -0.01   0.01  -0.02
  30   6     0.01  -0.01  -0.03     0.00   0.00  -0.02    -0.03   0.07   0.01
  31   6     0.01   0.05  -0.06    -0.02  -0.03   0.00    -0.01   0.00  -0.02
  32   6     0.03   0.10  -0.07    -0.03  -0.05   0.01    -0.01   0.00  -0.02
  33   6     0.02   0.05  -0.05    -0.02  -0.04   0.01    -0.01   0.00  -0.01
  34   6     0.00  -0.02  -0.03    -0.01  -0.02   0.00     0.00   0.01  -0.02
  35   6     0.00  -0.02  -0.03    -0.01  -0.02  -0.01     0.00   0.01  -0.02
  36   6    -0.04   0.01  -0.06    -0.01   0.02  -0.03     0.00   0.00  -0.02
  37   6     0.01   0.02  -0.05     0.01  -0.02  -0.01     0.03  -0.02  -0.04
  38   6     0.01  -0.02  -0.03     0.00   0.00  -0.01    -0.03   0.05   0.01
  39   6     0.01  -0.03  -0.02     0.00  -0.01  -0.01     0.01   0.00   0.01
  40   6     0.02  -0.01  -0.01     0.01  -0.01  -0.01     0.03  -0.05   0.00
  41   6     0.01   0.01  -0.02     0.01   0.00  -0.01     0.04  -0.05   0.00
  42   6     0.01   0.00  -0.03     0.01   0.00  -0.01     0.00   0.00   0.01
  43   6    -0.01   0.00  -0.03    -0.01   0.00  -0.02    -0.02   0.01   0.00
  44   6     0.04   0.02  -0.05     0.02   0.01  -0.02     0.00  -0.03   0.01
  45   6    -0.06  -0.03  -0.09    -0.04   0.08   0.00     0.03   0.00  -0.01
  46   6    -0.09   0.04   0.01     0.03   0.00  -0.08     0.01   0.00  -0.03
  47   6    -0.01   0.03  -0.09     0.03  -0.02  -0.02     0.06  -0.03  -0.01
  48   6     0.05   0.04  -0.01     0.01   0.00   0.00     0.06  -0.04  -0.03
  49   6     0.10   0.03  -0.04     0.05   0.01  -0.02     0.00  -0.06  -0.01
  50   6     0.03   0.01  -0.03     0.01   0.00  -0.01    -0.01  -0.05   0.03
  51   6    -0.02   0.01  -0.06    -0.01   0.00  -0.02    -0.06  -0.05   0.05
  52   6    -0.03   0.01   0.00    -0.01   0.00  -0.01     0.00   0.00  -0.03
  53   6     0.01   0.00   0.09     0.01   0.00   0.07     0.03   0.04   0.10
  54   6     0.01  -0.02   0.00     0.00   0.01   0.00     0.00   0.10  -0.16
  55   1     0.01   0.00   0.10     0.01   0.01   0.06     0.04   0.06   0.03
  56   1     0.07  -0.06   0.09    -0.05  -0.06   0.07    -0.02   0.04  -0.03
  57   1    -0.10  -0.02   0.02     0.03   0.04   0.02     0.01  -0.02  -0.01
  58   1    -0.10   0.02  -0.06     0.50  -0.05   0.10    -0.22   0.02  -0.04
  59   1     0.03   0.12  -0.07    -0.06  -0.44   0.20     0.03   0.20  -0.09
  60   1     0.05   0.00   0.02    -0.09   0.16  -0.07     0.04  -0.07   0.03
  61   1    -0.01   0.13   0.01     0.00   0.00   0.00    -0.01  -0.01  -0.01
  62   1    -0.07   0.01  -0.02    -0.01   0.00   0.01    -0.01   0.00  -0.01
  63   1     0.10  -0.03   0.13    -0.02   0.01  -0.01    -0.03  -0.04   0.03
  64   1     0.06  -0.14   0.01     0.00   0.02   0.00    -0.04  -0.06   0.01
  65   1     0.06  -0.04   0.05     0.00   0.01   0.01    -0.03  -0.05  -0.01
  66   1    -0.01  -0.03  -0.01     0.01   0.00  -0.01     0.05  -0.03  -0.04
  67   1    -0.01  -0.05  -0.04     0.02   0.00   0.00     0.03  -0.02  -0.01
  68   1     0.02  -0.04   0.03     0.02   0.01   0.01     0.07   0.01  -0.01
  69   1    -0.04  -0.04   0.14     0.00  -0.10  -0.10     0.20   0.02   0.00
  70   1     0.01   0.03   0.14    -0.04  -0.17  -0.07     0.11  -0.11   0.02
  71   1    -0.05   0.01   0.16     0.02  -0.06  -0.13     0.16  -0.14   0.03
  72   1    -0.01   0.07  -0.05     0.03  -0.11  -0.01    -0.04   0.02   0.05
  73   1     0.12   0.03  -0.04    -0.04  -0.08  -0.11    -0.05   0.02   0.08
  74   1     0.00   0.11  -0.07    -0.03  -0.04  -0.07     0.00  -0.03   0.09
  75   1     0.05   0.15  -0.09    -0.04  -0.06   0.02    -0.02   0.00  -0.01
  76   1     0.02   0.06  -0.05    -0.02  -0.05   0.02    -0.01   0.00  -0.01
  77   1    -0.01  -0.04  -0.02     0.00  -0.01   0.00     0.00   0.01  -0.01
  78   1    -0.04  -0.01  -0.07     0.01   0.03  -0.05     0.00   0.00   0.00
  79   1     0.02   0.03  -0.05     0.00  -0.03  -0.02     0.02  -0.02  -0.07
  80   1     0.01  -0.03  -0.02     0.00  -0.01  -0.01     0.02  -0.02   0.01
  81   1     0.02  -0.02  -0.01     0.01  -0.01   0.00     0.06  -0.09   0.00
  82   1     0.01   0.02  -0.01     0.02   0.00   0.00     0.07  -0.10   0.00
  83   1    -0.01   0.00  -0.03     0.00   0.00  -0.02     0.00  -0.01  -0.02
  84   1     0.02   0.05  -0.07     0.01   0.02  -0.03     0.00  -0.02   0.03
  85   1    -0.12  -0.07  -0.09    -0.10   0.12  -0.06     0.07   0.00   0.00
  86   1    -0.02  -0.06  -0.15    -0.01   0.04   0.00     0.01   0.01   0.01
  87   1    -0.04  -0.01  -0.07    -0.04   0.12   0.07     0.03  -0.02  -0.04
  88   1    -0.15   0.00   0.01     0.04   0.06  -0.13     0.02   0.00  -0.03
  89   1    -0.09   0.07   0.04     0.00  -0.01  -0.04     0.02   0.00  -0.04
  90   1    -0.08   0.08   0.04     0.06  -0.06  -0.11     0.00   0.00  -0.04
  91   1    -0.01   0.06  -0.09     0.04  -0.02  -0.03     0.09  -0.06  -0.03
  92   1    -0.01   0.02  -0.11     0.03  -0.01  -0.01     0.08  -0.01   0.03
  93   1    -0.01   0.02  -0.10     0.02  -0.02  -0.03     0.05  -0.02  -0.02
  94   1     0.07   0.08  -0.02     0.02  -0.01  -0.01     0.10  -0.08  -0.05
  95   1     0.07   0.03   0.03    -0.02   0.00   0.00     0.04  -0.03  -0.06
  96   1     0.05   0.03   0.00     0.02   0.02   0.01     0.08  -0.03   0.02
  97   1     0.12   0.05  -0.06     0.06   0.02  -0.03     0.01  -0.08  -0.01
  98   1     0.12   0.01  -0.01     0.06  -0.01  -0.01     0.00  -0.06  -0.02
  99   1     0.11   0.04  -0.06     0.06   0.02  -0.03     0.00  -0.05  -0.03
 100   1     0.05   0.03  -0.05     0.03   0.01  -0.02     0.00  -0.04   0.02
 101   1    -0.02   0.00  -0.05    -0.01  -0.01  -0.02    -0.03  -0.05   0.02
 102   1     0.04  -0.02   0.01     0.02  -0.02   0.01     0.00  -0.06   0.04
 103   1    -0.04   0.03  -0.06    -0.01  -0.01  -0.02    -0.03  -0.10   0.04
 104   1     0.00   0.01  -0.08    -0.01   0.00  -0.02    -0.08  -0.05   0.08
 105   1    -0.02   0.01  -0.06    -0.01   0.00  -0.02    -0.08  -0.03   0.07
 106   1    -0.05   0.03  -0.01    -0.02  -0.01  -0.02     0.01  -0.09  -0.07
 107   1    -0.04   0.01   0.00    -0.02   0.00   0.00    -0.04   0.01   0.03
 108   1    -0.03   0.00   0.02     0.00   0.01  -0.01     0.05   0.06  -0.08
 109   1    -0.09   0.07   0.16    -0.07   0.06   0.13     0.11  -0.11   0.05
 110   1    -0.01  -0.03  -0.01     0.00  -0.02  -0.02     0.06   0.10   0.28
 111   1     0.12  -0.02   0.16     0.10  -0.02   0.13    -0.08   0.14   0.00
 112   1    -0.03  -0.07  -0.07    -0.02  -0.02  -0.04    -0.08   0.11  -0.24
 113   1     0.07   0.04  -0.03     0.04   0.04  -0.02     0.11   0.13  -0.20
 114   1    -0.01  -0.03   0.07     0.00   0.00   0.04     0.00   0.10  -0.13
                    31                     32                     33
                     A                      A                      A
 Frequencies --   142.0459               142.6570               148.0700
 Red. masses --     2.2846                 3.7063                 1.4318
 Frc consts  --     0.0272                 0.0444                 0.0185
 IR Inten    --     0.2706                 5.2682                 0.2492
 Atom AN      X      Y      Z        X      Y      Z        X      Y      Z
   1   8     0.01  -0.01   0.00     0.00  -0.01   0.01     0.06  -0.05   0.03
   2  12    -0.02   0.01   0.02     0.05   0.02   0.03     0.01   0.01  -0.01
   3   8    -0.01  -0.02   0.01    -0.06  -0.08   0.01     0.00  -0.01  -0.02
   4   6     0.01  -0.01   0.00     0.00  -0.02   0.01     0.02  -0.01   0.00
   5   7     0.00   0.00   0.01     0.00   0.06  -0.01     0.00   0.02  -0.01
   6   7    -0.01   0.02  -0.03     0.02  -0.04  -0.02     0.00   0.01   0.00
   7   8     0.01  -0.02   0.00     0.00  -0.02   0.00    -0.05   0.05  -0.04
   8   6     0.01   0.00  -0.01    -0.05   0.04  -0.04     0.00   0.02   0.00
   9   6     0.02   0.02   0.02    -0.07   0.00  -0.01     0.00   0.01  -0.02
  10   6     0.01   0.03   0.04    -0.03  -0.04   0.01     0.00   0.01  -0.01
  11   8     0.00   0.00   0.00    -0.04  -0.03  -0.01     0.00  -0.03   0.00
  12   6     0.01   0.01   0.00     0.00   0.03   0.02     0.00  -0.02   0.00
  13   6     0.00  -0.01   0.01    -0.01  -0.02   0.02     0.00  -0.01  -0.01
  14   6     0.00  -0.01   0.00    -0.02  -0.01   0.01     0.01  -0.01   0.01
  15   8     0.02   0.03   0.01     0.03   0.11   0.04     0.02  -0.01   0.00
  16   6    -0.01   0.01  -0.01    -0.02   0.01  -0.01    -0.05   0.01   0.00
  17   8     0.01  -0.01   0.00    -0.04   0.02  -0.04     0.00   0.00   0.00
  18   6     0.01   0.00   0.02    -0.05   0.00  -0.02     0.00   0.00   0.00
  19   8     0.02   0.00   0.04    -0.06   0.01  -0.02     0.00   0.00   0.00
  20   8     0.01   0.01   0.02    -0.02  -0.03  -0.02     0.00  -0.01   0.00
  21   6     0.00   0.00   0.00     0.00   0.00  -0.01     0.00   0.00   0.00
  22   6    -0.01  -0.01  -0.01     0.00   0.02   0.00     0.00   0.00   0.00
  23   6     0.01  -0.01  -0.01    -0.04  -0.01   0.00     0.00  -0.01   0.00
  24   8    -0.01   0.00   0.00     0.03   0.00   0.00     0.00   0.00   0.00
  25   6    -0.03  -0.01  -0.02     0.04  -0.01   0.02     0.00   0.00   0.00
  26   6     0.07  -0.05  -0.03    -0.08  -0.01   0.02     0.01  -0.01   0.00
  27   6     0.03  -0.02   0.00     0.09  -0.05   0.05     0.01   0.01   0.03
  28   6     0.00  -0.01   0.01    -0.02   0.02   0.03     0.02   0.04   0.02
  29   6     0.00   0.00   0.00     0.00   0.07  -0.02     0.00   0.01  -0.01
  30   6    -0.02   0.04  -0.02     0.03  -0.05  -0.02     0.00   0.01   0.01
  31   6     0.00  -0.01   0.00    -0.01   0.00   0.00     0.01   0.02  -0.01
  32   6     0.00  -0.01   0.00    -0.04  -0.07   0.03     0.00   0.01  -0.01
  33   6     0.00   0.00   0.00    -0.03  -0.04   0.02    -0.01  -0.01   0.00
  34   6     0.01   0.01   0.00     0.00   0.05  -0.01    -0.01  -0.03   0.01
  35   6     0.00   0.01   0.00     0.02   0.08  -0.02    -0.01  -0.01   0.00
  36   6     0.00   0.00   0.00     0.03  -0.02   0.03     0.00   0.00   0.00
  37   6     0.00   0.01   0.00     0.03   0.01  -0.02     0.00  -0.01   0.00
  38   6     0.01  -0.02  -0.02     0.02  -0.03  -0.02     0.00   0.00   0.00
  39   6     0.04  -0.07  -0.02     0.00   0.01  -0.01     0.01   0.00   0.00
  40   6     0.02  -0.03  -0.02    -0.02   0.04   0.00     0.01   0.00   0.00
  41   6    -0.03   0.06  -0.02    -0.01   0.03   0.00     0.00   0.01   0.00
  42   6    -0.05   0.08  -0.02     0.01  -0.01  -0.01     0.00   0.01   0.00
  43   6    -0.02  -0.03  -0.04     0.02   0.00  -0.01     0.00   0.00   0.00
  44   6    -0.03   0.04  -0.02     0.03   0.03  -0.02    -0.01   0.00   0.01
  45   6     0.00   0.00   0.01     0.07  -0.04   0.03     0.02  -0.03  -0.02
  46   6     0.00   0.00   0.00     0.07  -0.05   0.01    -0.01   0.01   0.02
  47   6     0.01   0.01   0.01     0.11  -0.03   0.08     0.00   0.00  -0.01
  48   6     0.00   0.01  -0.01     0.00  -0.05  -0.08     0.01   0.00   0.01
  49   6    -0.07   0.00  -0.06     0.08   0.05   0.00    -0.03  -0.01   0.00
  50   6     0.05   0.05   0.06     0.02   0.02  -0.03    -0.01   0.00   0.02
  51   6    -0.03  -0.03  -0.05     0.03   0.04  -0.05    -0.01   0.00   0.00
  52   6    -0.06  -0.04  -0.01     0.01   0.03   0.02    -0.01   0.00   0.01
  53   6     0.02  -0.02  -0.05    -0.10   0.07  -0.08     0.00   0.03   0.01
  54   6     0.01   0.05   0.15    -0.06  -0.08   0.06    -0.01   0.00  -0.02
  55   1     0.03   0.02   0.04    -0.10  -0.01  -0.01    -0.01   0.01  -0.02
  56   1     0.00   0.00   0.01    -0.03   0.03   0.01     0.01   0.01  -0.02
  57   1     0.01  -0.01   0.00    -0.03  -0.01   0.01    -0.01  -0.01   0.01
  58   1    -0.08   0.01  -0.01     0.00   0.00  -0.04     0.42  -0.04  -0.17
  59   1     0.02   0.07  -0.05    -0.03   0.02   0.03    -0.26  -0.25   0.41
  60   1     0.03  -0.04   0.02    -0.04   0.04  -0.03    -0.38   0.38  -0.25
  61   1     0.00  -0.03  -0.02     0.00   0.06   0.01     0.00   0.00   0.00
  62   1    -0.02  -0.01  -0.04    -0.04  -0.02   0.01    -0.01  -0.01   0.00
  63   1    -0.04  -0.01  -0.02     0.07   0.00   0.05    -0.01   0.00   0.00
  64   1    -0.03   0.00  -0.01     0.04  -0.05   0.01     0.00   0.01  -0.01
  65   1    -0.03  -0.02  -0.03     0.04   0.01   0.03     0.00  -0.01   0.00
  66   1     0.08  -0.09  -0.06    -0.09   0.02   0.05     0.01  -0.02  -0.01
  67   1     0.04  -0.06  -0.04    -0.05  -0.01   0.00     0.00  -0.01   0.00
  68   1     0.12  -0.02  -0.01    -0.11  -0.05   0.02     0.01   0.00   0.00
  69   1     0.04  -0.01  -0.01     0.15   0.02   0.06     0.01   0.02   0.05
  70   1     0.02  -0.04   0.00     0.07  -0.08   0.05     0.01   0.04   0.03
  71   1     0.04  -0.04  -0.01     0.13  -0.12   0.06     0.00  -0.01   0.05
  72   1     0.00   0.00   0.00    -0.05   0.04   0.02     0.00   0.06   0.00
  73   1     0.00   0.00   0.01    -0.02   0.03   0.04     0.06   0.04   0.04
  74   1     0.00  -0.01   0.01    -0.01   0.02   0.05     0.03   0.04   0.02
  75   1     0.00  -0.01   0.01    -0.07  -0.14   0.06     0.01   0.02  -0.01
  76   1     0.00   0.00   0.00    -0.04  -0.08   0.03    -0.01  -0.02   0.01
  77   1     0.01   0.02  -0.01     0.01   0.06  -0.01    -0.02  -0.05   0.02
  78   1     0.00   0.00   0.00     0.02   0.01   0.06     0.00   0.00   0.01
  79   1     0.00   0.00   0.00     0.01  -0.03  -0.06     0.00   0.00  -0.01
  80   1     0.07  -0.13  -0.03    -0.01   0.02  -0.01     0.02  -0.01   0.00
  81   1     0.04  -0.07  -0.02    -0.04   0.07   0.00     0.01  -0.01   0.00
  82   1    -0.05   0.08  -0.02    -0.03   0.06   0.00     0.00   0.01   0.00
  83   1    -0.02  -0.02  -0.06     0.01   0.00   0.01     0.00   0.00   0.00
  84   1    -0.01   0.00  -0.02     0.02   0.04  -0.05    -0.01  -0.01   0.02
  85   1     0.00   0.01   0.00     0.15  -0.05   0.07     0.03  -0.05   0.01
  86   1     0.00   0.00   0.01     0.02   0.01   0.07     0.02  -0.02  -0.02
  87   1     0.00   0.00   0.01     0.06  -0.09  -0.04     0.02  -0.04  -0.04
  88   1     0.01   0.00  -0.01     0.13  -0.06   0.06    -0.01  -0.02   0.05
  89   1     0.00   0.00   0.00     0.09  -0.09  -0.06     0.01   0.01  -0.01
  90   1     0.00  -0.01  -0.01     0.03  -0.03   0.01    -0.03   0.04   0.03
  91   1     0.00   0.00   0.01     0.13  -0.13   0.08     0.01   0.00  -0.02
  92   1     0.01   0.01   0.00     0.15   0.01   0.13     0.00  -0.01  -0.01
  93   1     0.02   0.01   0.01     0.13  -0.01   0.11    -0.01  -0.01  -0.02
  94   1    -0.01   0.00   0.00     0.03  -0.19  -0.08     0.03   0.01   0.00
  95   1    -0.01   0.01  -0.01    -0.09  -0.01  -0.18     0.02   0.00   0.02
  96   1     0.00   0.01  -0.01     0.05   0.02  -0.01     0.02   0.00   0.02
  97   1    -0.01  -0.07  -0.07     0.07   0.09  -0.01    -0.04  -0.03   0.01
  98   1    -0.08   0.06  -0.04     0.09   0.01   0.00    -0.04   0.00  -0.01
  99   1    -0.14  -0.02  -0.11     0.12   0.07   0.01    -0.04  -0.02   0.00
 100   1     0.06  -0.05   0.08     0.04   0.05  -0.04    -0.02  -0.02   0.03
 101   1     0.11   0.10   0.14    -0.01   0.01  -0.04     0.01   0.01   0.03
 102   1     0.03   0.11   0.04     0.03   0.00   0.01    -0.01   0.01   0.00
 103   1    -0.06  -0.03  -0.06     0.02   0.08  -0.04    -0.02   0.00  -0.01
 104   1    -0.01  -0.02  -0.07     0.05   0.03  -0.07    -0.01  -0.01  -0.01
 105   1    -0.03  -0.03  -0.03     0.05   0.03  -0.07    -0.02   0.00   0.00
 106   1    -0.10  -0.07  -0.05     0.01   0.09   0.05    -0.01   0.00   0.00
 107   1    -0.09  -0.04   0.05     0.04   0.03  -0.03    -0.01   0.00   0.01
 108   1    -0.02  -0.02  -0.01    -0.02  -0.02   0.05     0.00   0.00   0.01
 109   1    -0.05   0.08   0.00    -0.14   0.17  -0.06     0.03  -0.02  -0.02
 110   1     0.01  -0.06  -0.19    -0.15   0.03  -0.16     0.00   0.04   0.06
 111   1     0.10  -0.11   0.04    -0.05   0.04  -0.04    -0.04   0.06  -0.03
 112   1     0.18   0.24   0.44    -0.04  -0.14   0.05     0.03   0.07   0.06
 113   1    -0.26  -0.22   0.29    -0.07  -0.05   0.06    -0.06  -0.10   0.01
 114   1     0.07   0.09  -0.16    -0.10  -0.09   0.11     0.00   0.02  -0.14
                    34                     35                     36
                     A                      A                      A
 Frequencies --   150.8868               154.6306               161.8363
 Red. masses --     2.1331                 2.4601                 3.1198
 Frc consts  --     0.0286                 0.0347                 0.0481
 IR Inten    --     1.6041                 0.1539                 2.2012
 Atom AN      X      Y      Z        X      Y      Z        X      Y      Z
   1   8    -0.02   0.02  -0.01    -0.05   0.06  -0.01     0.05  -0.06   0.01
   2  12     0.05   0.00   0.00    -0.02   0.00   0.00    -0.05  -0.03   0.01
   3   8     0.00   0.00   0.01     0.01  -0.01  -0.01     0.02   0.03   0.01
   4   6    -0.01   0.00   0.00    -0.02   0.03   0.00     0.02  -0.03   0.00
   5   7     0.03   0.01  -0.03    -0.04   0.01   0.00    -0.03  -0.06   0.02
   6   7     0.05  -0.01   0.01    -0.03   0.01   0.01    -0.04  -0.02   0.01
   7   8     0.01  -0.01   0.01     0.00   0.01   0.01     0.00   0.00  -0.01
   8   6     0.03   0.02   0.01    -0.05   0.01   0.00    -0.02  -0.05   0.03
   9   6     0.03   0.00  -0.03    -0.05   0.01  -0.04    -0.02  -0.04   0.00
  10   6     0.04  -0.02  -0.04    -0.05   0.00  -0.04    -0.03  -0.02  -0.02
  11   8     0.00  -0.01   0.01     0.03   0.02   0.03    -0.02  -0.03  -0.02
  12   6     0.01   0.00   0.02     0.00  -0.02   0.01    -0.03  -0.04  -0.02
  13   6     0.00   0.00   0.02     0.00  -0.01   0.01    -0.01  -0.01  -0.01
  14   6     0.00   0.00   0.00     0.00   0.01   0.00     0.00  -0.01   0.00
  15   8     0.02   0.03   0.03    -0.02  -0.07   0.00    -0.04  -0.06  -0.02
  16   6     0.02  -0.01   0.00     0.05  -0.02   0.02    -0.05   0.00  -0.02
  17   8    -0.01   0.01   0.00     0.01  -0.01   0.01     0.01   0.00   0.01
  18   6    -0.02   0.00  -0.02     0.01  -0.01   0.00     0.02   0.00   0.01
  19   8    -0.02  -0.01  -0.03     0.01  -0.01  -0.01     0.02   0.00   0.01
  20   8    -0.01  -0.02  -0.01     0.01   0.00   0.01     0.02   0.02   0.02
  21   6     0.00  -0.01   0.00     0.00  -0.01   0.00     0.00   0.01   0.00
  22   6     0.00   0.01   0.00     0.00  -0.01   0.00     0.00   0.00   0.00
  23   6    -0.02  -0.01  -0.01     0.01   0.00   0.00     0.02   0.01   0.00
  24   8     0.01   0.00   0.00    -0.01   0.00   0.00    -0.01   0.00   0.00
  25   6     0.02   0.01   0.00    -0.01   0.00  -0.01    -0.01   0.00  -0.01
  26   6    -0.05  -0.01   0.01     0.03  -0.01  -0.01     0.06  -0.01  -0.02
  27   6    -0.01  -0.01   0.01    -0.01   0.00   0.01    -0.06   0.01  -0.01
  28   6     0.00   0.00  -0.02     0.02  -0.02  -0.06    -0.01   0.00   0.04
  29   6     0.02   0.01  -0.02    -0.04   0.01   0.00    -0.02  -0.03   0.02
  30   6     0.04  -0.01   0.02    -0.02   0.01   0.01    -0.03  -0.01   0.01
  31   6     0.00  -0.02   0.00    -0.01   0.04  -0.02    -0.03  -0.05   0.03
  32   6    -0.01  -0.04   0.01    -0.01   0.04  -0.03    -0.01   0.00   0.00
  33   6     0.00  -0.02   0.00    -0.03  -0.01   0.00     0.04   0.10  -0.04
  34   6     0.02   0.01  -0.01    -0.05  -0.06   0.02     0.05   0.14  -0.05
  35   6     0.02   0.02  -0.02    -0.05  -0.04   0.02     0.02   0.07  -0.02
  36   6    -0.03   0.00  -0.02     0.03   0.02   0.01     0.00  -0.01   0.01
  37   6     0.00   0.01  -0.01     0.01  -0.04  -0.01     0.02   0.03  -0.02
  38   6     0.04  -0.01   0.01     0.00   0.00   0.00    -0.02  -0.01   0.00
  39   6     0.03   0.01   0.01     0.01  -0.01   0.00    -0.01  -0.02  -0.01
  40   6     0.01   0.03   0.01     0.00   0.00   0.00    -0.02  -0.01   0.00
  41   6     0.00   0.03   0.01    -0.02   0.01   0.01    -0.04   0.01   0.01
  42   6     0.02   0.01   0.02    -0.02   0.02   0.01    -0.04   0.01   0.01
  43   6     0.01   0.00   0.00     0.02   0.02   0.02     0.02   0.02   0.03
  44   6    -0.02  -0.01   0.04     0.00   0.02   0.00     0.01   0.03  -0.01
  45   6    -0.04   0.03  -0.01     0.07  -0.05  -0.02    -0.04   0.09   0.06
  46   6    -0.05   0.02  -0.04     0.05  -0.01   0.05     0.06  -0.04  -0.06
  47   6    -0.01   0.01   0.02     0.04  -0.03  -0.06     0.04   0.01   0.06
  48   6    -0.05   0.00  -0.04     0.10  -0.02   0.06    -0.02  -0.02  -0.07
  49   6    -0.09  -0.03   0.02     0.03   0.02   0.00     0.07   0.03  -0.01
  50   6    -0.03  -0.01   0.03     0.03   0.03   0.04     0.05   0.03   0.03
  51   6    -0.02   0.01  -0.04     0.02   0.04  -0.01     0.04   0.05   0.00
  52   6    -0.03   0.00   0.05     0.05   0.06   0.02     0.06   0.07   0.02
  53   6     0.04   0.05   0.10    -0.06   0.03   0.01    -0.01  -0.05   0.07
  54   6     0.02  -0.06  -0.09    -0.07  -0.04  -0.07    -0.03  -0.03  -0.07
  55   1     0.01   0.00  -0.02    -0.06   0.00  -0.06     0.00  -0.04  -0.01
  56   1    -0.01   0.00   0.03     0.00  -0.01   0.01     0.02  -0.04  -0.01
  57   1    -0.01   0.00   0.00     0.00   0.02   0.01     0.01  -0.01   0.00
  58   1    -0.07   0.01   0.04    -0.06   0.02   0.12     0.00  -0.02  -0.09
  59   1     0.06   0.04  -0.09     0.11   0.00  -0.13    -0.09   0.02   0.10
  60   1     0.09  -0.08   0.05     0.16  -0.13   0.11    -0.13   0.07  -0.08
  61   1     0.00   0.01   0.01     0.00  -0.02  -0.01     0.00  -0.02  -0.01
  62   1    -0.01  -0.01   0.00     0.01   0.00  -0.01     0.00   0.01  -0.02
  63   1     0.03   0.01   0.00    -0.01   0.00  -0.02    -0.03   0.00  -0.02
  64   1     0.02   0.00   0.00    -0.02   0.01   0.00    -0.01   0.02  -0.01
  65   1     0.02   0.02   0.01    -0.01   0.00  -0.01    -0.01  -0.01  -0.01
  66   1    -0.07   0.03   0.04     0.04  -0.03  -0.02     0.09  -0.08  -0.05
  67   1    -0.02  -0.01  -0.01     0.01  -0.01   0.00     0.01  -0.01   0.01
  68   1    -0.08  -0.05   0.02     0.04   0.01  -0.01     0.11   0.05  -0.03
  69   1    -0.01  -0.01   0.02    -0.01   0.00   0.03    -0.10  -0.04  -0.04
  70   1    -0.02  -0.01   0.00    -0.02   0.01   0.01    -0.02   0.03   0.01
  71   1     0.00   0.00   0.00    -0.01  -0.01   0.01    -0.11   0.07   0.00
  72   1     0.01  -0.01  -0.02     0.05  -0.05  -0.04    -0.05   0.00   0.06
  73   1     0.01  -0.01  -0.03     0.04  -0.04  -0.09    -0.02  -0.01   0.02
  74   1    -0.01   0.01  -0.03    -0.01   0.01  -0.09     0.02   0.02   0.07
  75   1    -0.02  -0.06   0.03     0.01   0.07  -0.04    -0.01  -0.02   0.01
  76   1    -0.01  -0.03   0.01    -0.03  -0.01   0.00     0.06   0.15  -0.06
  77   1     0.03   0.02  -0.01    -0.08  -0.10   0.04     0.08   0.23  -0.08
  78   1    -0.03  -0.02  -0.04     0.02   0.04   0.05     0.02   0.02  -0.01
  79   1     0.00   0.01   0.02     0.00  -0.04  -0.06     0.01   0.02  -0.03
  80   1     0.03   0.01   0.01     0.02  -0.03  -0.01     0.00  -0.03  -0.01
  81   1     0.00   0.05   0.01     0.01  -0.01  -0.01    -0.01  -0.02   0.00
  82   1    -0.01   0.06   0.01    -0.03   0.02   0.00    -0.05   0.01   0.01
  83   1     0.02   0.00  -0.02     0.03   0.00   0.05     0.02   0.00   0.07
  84   1    -0.01  -0.03   0.08     0.00   0.02  -0.03     0.00   0.03  -0.06
  85   1    -0.08   0.05  -0.04     0.13  -0.10   0.04    -0.09   0.16  -0.01
  86   1    -0.02   0.00  -0.01     0.04  -0.02  -0.02    -0.02   0.05   0.08
  87   1    -0.04   0.06   0.04     0.07  -0.09  -0.11    -0.04   0.13   0.15
  88   1    -0.07   0.03  -0.07     0.08  -0.06   0.11     0.08   0.08  -0.16
  89   1    -0.05   0.04  -0.01     0.06  -0.05  -0.01     0.01  -0.06   0.03
  90   1    -0.04   0.00  -0.05     0.02   0.04   0.07     0.16  -0.16  -0.11
  91   1    -0.06  -0.01   0.05     0.13  -0.02  -0.11     0.05  -0.05   0.06
  92   1    -0.01   0.01  -0.02     0.05  -0.03   0.03     0.05   0.02   0.10
  93   1     0.03   0.01   0.05    -0.04  -0.04  -0.12     0.04   0.04   0.08
  94   1    -0.08  -0.04  -0.02     0.17   0.02   0.01    -0.03  -0.09  -0.06
  95   1    -0.07   0.01  -0.07     0.10  -0.03   0.10    -0.03   0.00  -0.14
  96   1    -0.05   0.02  -0.06     0.11  -0.03   0.12    -0.01  -0.02  -0.07
  97   1    -0.12  -0.05   0.05     0.06   0.02  -0.02     0.12   0.04  -0.04
  98   1    -0.10  -0.01  -0.03     0.04   0.02   0.03     0.09   0.03   0.05
  99   1    -0.08  -0.03   0.04     0.02   0.02  -0.02     0.05   0.03  -0.04
 100   1    -0.09  -0.06   0.06     0.08   0.02   0.02     0.14   0.06  -0.01
 101   1     0.02   0.01   0.06     0.01   0.03   0.04    -0.03   0.01   0.00
 102   1    -0.04   0.00  -0.04     0.04   0.03   0.09     0.06   0.02   0.14
 103   1    -0.07   0.03  -0.06     0.05   0.07   0.01     0.09   0.09   0.04
 104   1     0.02   0.01  -0.09    -0.01   0.00  -0.01     0.00   0.00   0.01
 105   1    -0.02   0.01  -0.01     0.01   0.06  -0.07     0.04   0.07  -0.08
 106   1    -0.06   0.08   0.07     0.08   0.10   0.06     0.10   0.12   0.08
 107   1     0.01  -0.02   0.01     0.06   0.08  -0.03     0.08   0.09  -0.05
 108   1    -0.08  -0.06   0.09     0.03   0.04   0.04     0.03   0.04   0.05
 109   1     0.10  -0.09   0.06    -0.01  -0.04  -0.02    -0.01  -0.09   0.07
 110   1     0.05   0.10   0.28    -0.05   0.05   0.10     0.00  -0.04   0.10
 111   1    -0.04   0.17   0.00    -0.12   0.08  -0.04    -0.01  -0.03   0.05
 112   1     0.14   0.16   0.16     0.04   0.15   0.15     0.01   0.08   0.04
 113   1    -0.15  -0.40   0.02    -0.22  -0.33   0.03    -0.09  -0.19  -0.02
 114   1     0.03   0.00  -0.47    -0.06   0.01  -0.38    -0.02   0.00  -0.25
                    37                     38                     39
                     A                      A                      A
 Frequencies --   165.5798               166.8620               177.8557
 Red. masses --     3.5704                 2.0326                 4.0608
 Frc consts  --     0.0577                 0.0333                 0.0757
 IR Inten    --     0.3265                 0.1742                 1.7085
 Atom AN      X      Y      Z        X      Y      Z        X      Y      Z
   1   8     0.03  -0.03   0.00    -0.01   0.02   0.00    -0.04   0.05  -0.01
   2  12     0.00   0.00   0.02     0.01   0.01  -0.01     0.05  -0.02  -0.09
   3   8    -0.02   0.03   0.04     0.00  -0.02  -0.03    -0.08  -0.08  -0.10
   4   6     0.02  -0.01   0.00    -0.01   0.01   0.00    -0.02   0.03   0.00
   5   7     0.01  -0.04   0.01     0.00   0.02  -0.01     0.04   0.02  -0.02
   6   7     0.01  -0.05   0.00     0.00   0.02   0.01     0.02  -0.04  -0.03
   7   8     0.02  -0.01   0.00    -0.01   0.01   0.00    -0.01   0.02   0.01
   8   6     0.01  -0.04   0.02     0.00   0.02  -0.01     0.01   0.01  -0.02
   9   6     0.00  -0.05   0.00     0.00   0.01  -0.01     0.00  -0.02  -0.05
  10   6     0.00  -0.06  -0.01     0.00   0.01  -0.01     0.01  -0.04  -0.02
  11   8    -0.05   0.08  -0.07     0.02  -0.02   0.02    -0.02  -0.01   0.01
  12   6    -0.01   0.11  -0.06     0.01  -0.03   0.01    -0.03  -0.05  -0.04
  13   6     0.02   0.05  -0.03    -0.01  -0.01   0.00    -0.05  -0.02  -0.06
  14   6     0.00   0.01  -0.02     0.00   0.00   0.00    -0.02   0.02   0.01
  15   8    -0.03   0.14  -0.04     0.01  -0.04   0.01    -0.01  -0.07  -0.05
  16   6    -0.03   0.01  -0.02     0.01  -0.01   0.01     0.02  -0.01   0.03
  17   8     0.00   0.00  -0.01     0.00  -0.01   0.01    -0.04   0.02  -0.08
  18   6     0.00   0.01   0.02     0.00  -0.01   0.00    -0.01   0.06   0.12
  19   8     0.01   0.01   0.04     0.00  -0.01  -0.01    -0.02   0.08   0.20
  20   8     0.00   0.00   0.00     0.01  -0.01   0.00     0.00   0.02   0.05
  21   6     0.00   0.01   0.00     0.00  -0.01   0.00    -0.01   0.02   0.00
  22   6     0.00   0.00  -0.01     0.00  -0.01   0.00    -0.03   0.03  -0.03
  23   6     0.00   0.01   0.01     0.00  -0.02  -0.01     0.00   0.03   0.07
  24   8     0.01   0.01   0.00     0.00  -0.01   0.00     0.00   0.00  -0.03
  25   6     0.00   0.00   0.00    -0.01   0.00  -0.01    -0.04  -0.04   0.01
  26   6     0.04   0.02  -0.01     0.03  -0.04  -0.02     0.18   0.03  -0.05
  27   6     0.10  -0.02  -0.09    -0.03   0.01   0.03     0.02   0.00   0.04
  28   6    -0.08   0.00   0.12     0.02   0.00  -0.04    -0.01   0.03   0.00
  29   6     0.01  -0.04   0.01     0.00   0.01   0.00     0.04   0.02   0.00
  30   6     0.01  -0.05   0.00     0.00   0.01   0.01     0.02  -0.03   0.00
  31   6     0.02   0.00  -0.01     0.00   0.00   0.00     0.02   0.00   0.01
  32   6     0.03   0.02  -0.02    -0.01  -0.01   0.01     0.01  -0.03   0.03
  33   6     0.01  -0.03   0.00    -0.01   0.00   0.00     0.01  -0.03   0.03
  34   6    -0.01  -0.08   0.02     0.00   0.01   0.00     0.03  -0.01   0.01
  35   6    -0.01  -0.08   0.02     0.00   0.02   0.00     0.03   0.01   0.00
  36   6    -0.01  -0.01  -0.02     0.00   0.00   0.00     0.01   0.00   0.00
  37   6    -0.02  -0.03   0.02     0.00   0.01   0.00     0.00   0.01   0.02
  38   6     0.03  -0.07   0.00     0.04  -0.05   0.01     0.00  -0.01   0.00
  39   6     0.01  -0.04   0.00     0.04  -0.05   0.00    -0.01   0.00   0.00
  40   6    -0.04   0.03   0.00    -0.02   0.04   0.01     0.00  -0.01   0.01
  41   6    -0.06   0.06   0.01    -0.07   0.11   0.01     0.01  -0.02   0.00
  42   6    -0.03   0.01   0.01    -0.05   0.07   0.01     0.02  -0.03   0.00
  43   6     0.03  -0.02   0.02     0.02  -0.03   0.01    -0.01   0.01   0.01
  44   6     0.00   0.02   0.00    -0.03   0.02   0.02     0.01  -0.02   0.00
  45   6    -0.02  -0.03  -0.03     0.01   0.00   0.00     0.01   0.00   0.00
  46   6    -0.06   0.02   0.01     0.01   0.00   0.00    -0.02   0.02  -0.01
  47   6    -0.07   0.00  -0.06     0.01   0.00   0.02    -0.03   0.01   0.03
  48   6     0.01   0.02   0.07    -0.01   0.00  -0.02    -0.05   0.00  -0.01
  49   6     0.04   0.01  -0.02    -0.03  -0.04  -0.06    -0.01   0.00   0.02
  50   6     0.04   0.02   0.03     0.01   0.00   0.11    -0.02  -0.01  -0.04
  51   6     0.05   0.05  -0.08     0.02   0.01  -0.05    -0.01   0.01   0.01
  52   6     0.00   0.03   0.08    -0.04  -0.03   0.07     0.00   0.04   0.02
  53   6     0.00  -0.03   0.03     0.00   0.02   0.00    -0.01   0.05   0.01
  54   6     0.00  -0.08  -0.05     0.01   0.03  -0.07     0.01  -0.05   0.03
  55   1    -0.01  -0.05   0.00     0.00   0.01  -0.02    -0.02  -0.03  -0.04
  56   1     0.03   0.04  -0.03    -0.02   0.00   0.00    -0.05   0.05  -0.09
  57   1     0.05  -0.01  -0.04    -0.01   0.01   0.01    -0.02   0.02   0.02
  58   1    -0.02   0.00  -0.06     0.01   0.00   0.03    -0.01   0.01   0.09
  59   1    -0.05   0.04   0.04     0.02  -0.02  -0.02     0.04  -0.03  -0.04
  60   1    -0.07   0.04  -0.05     0.03  -0.02   0.02     0.06  -0.06   0.06
  61   1     0.00   0.01  -0.01     0.00  -0.02  -0.01    -0.01   0.06  -0.03
  62   1    -0.01   0.00   0.01    -0.02  -0.02  -0.02    -0.07  -0.01   0.04
  63   1     0.00   0.00   0.00    -0.01   0.00  -0.02     0.03  -0.02   0.09
  64   1     0.00   0.00   0.00    -0.01   0.01  -0.01    -0.09  -0.13   0.04
  65   1     0.00   0.00  -0.01    -0.01   0.00  -0.02    -0.07  -0.01  -0.05
  66   1     0.04  -0.01  -0.04     0.06  -0.10  -0.04     0.30  -0.25  -0.23
  67   1     0.03   0.02   0.01    -0.01  -0.05  -0.01    -0.01   0.04   0.09
  68   1     0.07   0.05  -0.01     0.07   0.00  -0.03     0.40   0.32  -0.11
  69   1     0.15   0.01  -0.16    -0.04   0.01   0.06     0.06   0.08   0.11
  70   1     0.12  -0.10  -0.05    -0.04   0.04   0.01     0.00   0.05   0.01
  71   1     0.11  -0.01  -0.10    -0.02  -0.01   0.03     0.05  -0.10   0.09
  72   1    -0.08   0.05   0.07     0.03  -0.01  -0.03    -0.03   0.03   0.02
  73   1    -0.19   0.07   0.20     0.06  -0.02  -0.06     0.02   0.02  -0.02
  74   1    -0.03  -0.13   0.20     0.01   0.04  -0.07     0.00   0.07   0.00
  75   1     0.05   0.06  -0.03    -0.01  -0.02   0.01     0.00  -0.05   0.04
  76   1     0.01  -0.02   0.00    -0.01  -0.01   0.01     0.00  -0.05   0.04
  77   1    -0.02  -0.12   0.03     0.00   0.01   0.00     0.03  -0.02   0.02
  78   1    -0.02  -0.03  -0.03     0.00   0.01   0.01     0.00  -0.02  -0.01
  79   1     0.00  -0.01   0.04     0.00   0.00  -0.01     0.01   0.01   0.05
  80   1     0.02  -0.05  -0.01     0.07  -0.09  -0.01    -0.03   0.02   0.01
  81   1    -0.06   0.07   0.00    -0.03   0.06   0.00     0.00  -0.01   0.01
  82   1    -0.10   0.12   0.01    -0.11   0.17   0.01     0.02  -0.02   0.01
  83   1     0.02  -0.03   0.05     0.01  -0.02   0.00     0.00   0.00   0.02
  84   1     0.00   0.02  -0.04    -0.03   0.01   0.01     0.01  -0.02   0.01
  85   1    -0.01  -0.03  -0.02     0.01   0.00   0.01     0.00   0.00   0.00
  86   1    -0.03  -0.01  -0.04     0.01   0.00   0.00     0.01   0.00   0.00
  87   1    -0.03  -0.04  -0.04     0.01   0.00   0.00     0.01   0.00   0.01
  88   1    -0.10   0.00   0.01     0.02   0.00   0.01    -0.02   0.01   0.01
  89   1    -0.05   0.05   0.03     0.01  -0.01  -0.01     0.00   0.04  -0.03
  90   1    -0.06   0.04   0.03     0.00   0.00   0.00    -0.04   0.03  -0.01
  91   1    -0.08   0.08  -0.06     0.01  -0.02   0.02    -0.08   0.02   0.06
  92   1    -0.09  -0.03  -0.11     0.02   0.01   0.03    -0.04   0.01  -0.02
  93   1    -0.08  -0.03  -0.09     0.02   0.01   0.02     0.02   0.01   0.06
  94   1    -0.01   0.13   0.07     0.00  -0.03  -0.02    -0.09  -0.01   0.01
  95   1     0.08  -0.01   0.16    -0.03   0.00  -0.04    -0.05   0.01  -0.03
  96   1    -0.02  -0.03   0.02     0.00   0.01   0.00    -0.06   0.01  -0.05
  97   1     0.03   0.02  -0.01    -0.01  -0.11  -0.04    -0.05   0.03   0.04
  98   1     0.05  -0.03  -0.03    -0.03  -0.05  -0.07    -0.01  -0.01  -0.01
  99   1     0.07   0.04  -0.03    -0.04  -0.01  -0.12     0.02   0.01   0.05
 100   1     0.11   0.04   0.00     0.08  -0.01   0.08    -0.06  -0.01  -0.03
 101   1    -0.02   0.01   0.01    -0.05   0.02   0.12     0.01  -0.02  -0.05
 102   1     0.05   0.01   0.12     0.02   0.00   0.18    -0.02  -0.01  -0.09
 103   1     0.02   0.13  -0.06    -0.05   0.04  -0.07     0.04   0.02   0.04
 104   1     0.07   0.03  -0.12     0.08   0.03  -0.10    -0.04  -0.02   0.04
 105   1     0.07   0.04  -0.12     0.04  -0.02  -0.02    -0.02   0.03  -0.03
 106   1     0.00   0.22   0.17    -0.08   0.09   0.10     0.01   0.04   0.03
 107   1     0.08   0.02  -0.06     0.02  -0.06   0.01    -0.01   0.06   0.01
 108   1    -0.10  -0.10   0.19    -0.11  -0.13   0.15     0.02   0.04   0.04
 109   1     0.01  -0.05   0.02     0.00   0.01  -0.01     0.01   0.01   0.00
 110   1     0.00  -0.03   0.05     0.00   0.02   0.01    -0.02   0.05   0.08
 111   1    -0.01  -0.01   0.01    -0.01   0.03  -0.01    -0.02   0.10  -0.02
 112   1    -0.03  -0.09  -0.08    -0.16  -0.20  -0.38     0.03  -0.06   0.05
 113   1     0.04  -0.06  -0.07     0.27   0.37  -0.21    -0.03  -0.05   0.04
 114   1    -0.02  -0.08  -0.03    -0.03  -0.03   0.32     0.00  -0.05   0.03
                    40                     41                     42
                     A                      A                      A
 Frequencies --   181.2023               190.0166               205.5118
 Red. masses --     2.7110                 2.9974                 2.0687
 Frc consts  --     0.0524                 0.0638                 0.0515
 IR Inten    --     3.3595                 0.6370                 0.2835
 Atom AN      X      Y      Z        X      Y      Z        X      Y      Z
   1   8     0.01   0.00  -0.01    -0.02   0.00   0.02     0.00   0.03  -0.05
   2  12    -0.01   0.00   0.01    -0.02  -0.01  -0.06     0.03   0.03   0.03
   3   8    -0.01  -0.01   0.00    -0.03  -0.01  -0.07     0.02   0.00   0.02
   4   6     0.01   0.01   0.00    -0.03  -0.03   0.01     0.04   0.06  -0.02
   5   7    -0.02   0.01   0.01     0.02  -0.03  -0.02     0.04   0.02   0.00
   6   7     0.01   0.02   0.00    -0.06  -0.01  -0.01    -0.02  -0.01   0.01
   7   8     0.01   0.02   0.01    -0.02  -0.04  -0.01     0.04   0.07   0.01
   8   6    -0.01   0.01   0.00     0.01  -0.04  -0.01     0.01   0.01   0.00
   9   6     0.00   0.02   0.01     0.00  -0.04  -0.03     0.00  -0.01   0.02
  10   6     0.00   0.02   0.01    -0.02  -0.01  -0.02     0.00  -0.01   0.01
  11   8    -0.01   0.01  -0.01     0.01  -0.04   0.04    -0.02  -0.02  -0.04
  12   6    -0.03  -0.04  -0.03     0.05   0.04   0.05    -0.03  -0.04  -0.03
  13   6    -0.01  -0.01  -0.02    -0.02   0.03   0.00     0.01  -0.03  -0.01
  14   6     0.00   0.01   0.00    -0.02  -0.03   0.01     0.03   0.04   0.00
  15   8    -0.06  -0.08  -0.04     0.13   0.10   0.06    -0.04  -0.03  -0.03
  16   6    -0.01  -0.01   0.01     0.03   0.02  -0.01    -0.06  -0.06   0.03
  17   8     0.00   0.00  -0.03    -0.01   0.00  -0.02     0.01  -0.01   0.00
  18   6     0.02   0.01   0.05     0.00   0.00   0.02     0.01  -0.01  -0.02
  19   8     0.02   0.02   0.05     0.00   0.01   0.03     0.01  -0.01  -0.01
  20   8    -0.06  -0.05  -0.07    -0.03  -0.03  -0.04     0.00   0.00  -0.01
  21   6     0.00  -0.01  -0.01     0.00   0.00  -0.01     0.00   0.00   0.00
  22   6     0.01   0.00   0.00     0.00   0.00   0.00     0.00  -0.01   0.00
  23   6     0.02   0.05   0.07    -0.01   0.02   0.02     0.01   0.00  -0.01
  24   8     0.03   0.00   0.01     0.02   0.00   0.01     0.00   0.00   0.01
  25   6     0.01  -0.01   0.01     0.01   0.00   0.00     0.00   0.00  -0.01
  26   6    -0.02   0.23   0.06    -0.04   0.08   0.04    -0.02  -0.01   0.01
  27   6     0.00   0.00   0.01    -0.03   0.04   0.00     0.00  -0.01   0.04
  28   6    -0.01   0.00   0.02     0.04   0.01  -0.07    -0.01   0.02   0.06
  29   6    -0.02   0.00   0.01     0.03  -0.01   0.00     0.04   0.02  -0.01
  30   6     0.03   0.00   0.00    -0.07   0.00   0.00    -0.03   0.00   0.00
  31   6    -0.02  -0.01   0.01     0.03   0.00   0.00     0.04   0.00  -0.01
  32   6    -0.01   0.01  -0.01     0.02  -0.01   0.01     0.01  -0.05   0.02
  33   6    -0.01   0.03  -0.02     0.02  -0.02   0.02     0.01  -0.07   0.03
  34   6    -0.01   0.03  -0.01     0.03  -0.02   0.01     0.02  -0.04   0.01
  35   6    -0.02   0.00   0.00     0.04   0.00   0.00     0.04   0.00  -0.01
  36   6     0.00   0.00   0.01     0.01   0.00  -0.01     0.01   0.00  -0.02
  37   6     0.00  -0.01  -0.01     0.01   0.01   0.02     0.01   0.01   0.01
  38   6     0.05  -0.04  -0.01    -0.05  -0.02   0.00    -0.03   0.01   0.00
  39   6     0.06  -0.05   0.00    -0.01  -0.08  -0.01    -0.01  -0.03  -0.01
  40   6     0.05  -0.03   0.00     0.00  -0.10  -0.01     0.00  -0.04  -0.01
  41   6     0.03   0.00  -0.01    -0.04  -0.05   0.00    -0.03  -0.01  -0.01
  42   6     0.02   0.00  -0.01    -0.07   0.01   0.00    -0.05   0.01   0.00
  43   6     0.02  -0.04  -0.02    -0.01   0.00   0.03    -0.02   0.02   0.01
  44   6     0.00  -0.01   0.01    -0.03   0.02  -0.02    -0.02   0.01  -0.01
  45   6     0.01   0.01   0.02     0.00  -0.01  -0.01    -0.01  -0.01  -0.04
  46   6     0.03  -0.02  -0.01    -0.02   0.02   0.00    -0.03   0.03   0.00
  47   6     0.02  -0.01  -0.01    -0.02   0.02   0.02    -0.01   0.01   0.02
  48   6     0.02  -0.01   0.00    -0.03   0.02   0.00    -0.03   0.00  -0.02
  49   6    -0.03  -0.02  -0.01     0.03   0.02  -0.02     0.01   0.01  -0.02
  50   6    -0.01  -0.01   0.00     0.03   0.03   0.04     0.02   0.02   0.03
  51   6     0.00  -0.02  -0.08     0.03   0.02   0.03     0.00   0.02   0.03
  52   6    -0.04  -0.03   0.04     0.05   0.04   0.01     0.00   0.01  -0.02
  53   6     0.00  -0.01  -0.01     0.00  -0.02   0.03    -0.02   0.04  -0.01
  54   6    -0.01   0.01   0.01     0.00   0.03  -0.01     0.01   0.00  -0.02
  55   1     0.00   0.02   0.01     0.02  -0.04  -0.03    -0.01  -0.02   0.01
  56   1     0.01  -0.01  -0.04    -0.07   0.07   0.03     0.05  -0.05  -0.04
  57   1     0.02   0.01   0.01    -0.05  -0.03   0.00     0.04   0.06   0.04
  58   1    -0.03   0.00   0.02     0.06   0.01  -0.04    -0.11  -0.02   0.14
  59   1    -0.01   0.00   0.01     0.04   0.00  -0.03    -0.05  -0.04   0.03
  60   1    -0.02  -0.03   0.00     0.05   0.07   0.01    -0.06  -0.17   0.01
  61   1     0.00   0.01   0.01     0.00   0.02   0.00     0.00  -0.02   0.00
  62   1     0.07   0.04   0.14     0.02   0.02   0.06     0.02   0.01  -0.01
  63   1     0.02  -0.01   0.03     0.01   0.00   0.01    -0.03   0.00  -0.02
  64   1     0.00  -0.03   0.01     0.02  -0.01  -0.01     0.02   0.03  -0.02
  65   1     0.00  -0.01   0.00     0.02  -0.01   0.01     0.02  -0.02   0.01
  66   1    -0.24   0.58   0.06    -0.19   0.35   0.07    -0.08   0.12   0.04
  67   1     0.32   0.27  -0.06     0.20   0.10  -0.09     0.08  -0.01  -0.07
  68   1    -0.19  -0.06   0.17    -0.16  -0.15   0.14    -0.08  -0.13   0.06
  69   1     0.00  -0.01   0.00    -0.02   0.10   0.13     0.00  -0.06  -0.05
  70   1     0.03   0.01   0.03    -0.14   0.06  -0.08     0.12   0.01   0.10
  71   1    -0.02  -0.01   0.04     0.08  -0.04  -0.05    -0.10   0.04   0.10
  72   1    -0.04  -0.02   0.06     0.10   0.04  -0.14    -0.20  -0.11   0.29
  73   1    -0.03  -0.02  -0.01     0.10   0.03  -0.02     0.02  -0.13  -0.18
  74   1     0.01   0.03   0.05    -0.03  -0.02  -0.14     0.12   0.29   0.12
  75   1    -0.01   0.02  -0.01     0.02   0.00   0.01     0.00  -0.07   0.03
  76   1     0.00   0.06  -0.03     0.02  -0.04   0.03    -0.01  -0.11   0.05
  77   1    -0.01   0.04  -0.02     0.03  -0.02   0.01     0.02  -0.06   0.02
  78   1     0.00   0.01   0.02     0.00  -0.02  -0.02     0.01  -0.01  -0.04
  79   1    -0.01  -0.01  -0.03     0.02   0.02   0.05     0.02   0.01   0.04
  80   1     0.08  -0.08  -0.01     0.02  -0.12  -0.02     0.01  -0.05  -0.01
  81   1     0.05  -0.04  -0.01     0.04  -0.16  -0.01     0.02  -0.07  -0.02
  82   1     0.02   0.01  -0.01    -0.03  -0.06   0.00    -0.03  -0.02  -0.01
  83   1     0.02  -0.03  -0.04    -0.01  -0.01   0.08    -0.02   0.02   0.02
  84   1     0.01  -0.01   0.03    -0.03   0.01  -0.08    -0.02   0.01  -0.04
  85   1     0.01   0.02   0.02     0.03  -0.02   0.00    -0.12  -0.02  -0.06
  86   1     0.00   0.01   0.04    -0.02   0.02  -0.02     0.04  -0.07  -0.09
  87   1     0.01   0.02   0.02    -0.01  -0.04  -0.03     0.01   0.05   0.02
  88   1     0.04   0.01  -0.02    -0.04   0.00   0.00    -0.02  -0.05   0.09
  89   1     0.01  -0.03   0.01    -0.01   0.04   0.00     0.02   0.04  -0.09
  90   1     0.05  -0.05  -0.02    -0.03   0.03   0.00    -0.12   0.11   0.03
  91   1     0.08  -0.02  -0.04    -0.13   0.03   0.08    -0.12   0.02   0.08
  92   1     0.03  -0.01   0.06    -0.04   0.02  -0.10    -0.02   0.02  -0.10
  93   1    -0.03   0.00  -0.04     0.06   0.00   0.07     0.08   0.00   0.07
  94   1     0.04  -0.02  -0.01    -0.07   0.04   0.02    -0.05  -0.02   0.00
  95   1     0.02  -0.01   0.00    -0.02   0.02   0.01    -0.03   0.01  -0.04
  96   1     0.03  -0.02   0.03    -0.04   0.02  -0.05    -0.03   0.01  -0.04
  97   1    -0.05  -0.04   0.01     0.13   0.00  -0.08     0.05   0.00  -0.04
  98   1    -0.04  -0.02  -0.04     0.04   0.06   0.08     0.01   0.02   0.02
  99   1    -0.02  -0.02  -0.01    -0.05  -0.01  -0.08    -0.02   0.01  -0.04
 100   1    -0.06  -0.05   0.03     0.17   0.08  -0.03     0.16   0.10  -0.05
 101   1     0.05   0.01   0.03    -0.07   0.00   0.00    -0.11  -0.02  -0.03
 102   1    -0.02   0.01  -0.07     0.06   0.02   0.21     0.05  -0.01   0.21
 103   1    -0.06   0.01  -0.10     0.15   0.06   0.11     0.09   0.03   0.08
 104   1     0.04  -0.02  -0.13    -0.06  -0.04   0.09    -0.07  -0.03   0.08
 105   1    -0.01  -0.02  -0.05     0.03   0.06  -0.10     0.00   0.05  -0.06
 106   1    -0.09   0.04   0.05     0.08   0.00   0.01     0.01  -0.14  -0.10
 107   1    -0.01  -0.05   0.02     0.00   0.08   0.02    -0.09   0.05   0.10
 108   1    -0.07  -0.09   0.10     0.09   0.08  -0.01     0.12   0.13  -0.09
 109   1     0.00   0.01  -0.01     0.02  -0.07   0.03    -0.03   0.07  -0.01
 110   1     0.01  -0.01  -0.04     0.01   0.00   0.09    -0.05   0.02  -0.02
 111   1     0.01  -0.03   0.00    -0.01   0.03   0.01    -0.01   0.05  -0.01
 112   1     0.00   0.00   0.00     0.00   0.05   0.00    -0.01   0.02  -0.02
 113   1     0.00   0.01   0.01    -0.01   0.05   0.00     0.02  -0.02  -0.02
 114   1    -0.02   0.01   0.01     0.04   0.03   0.00     0.01   0.00  -0.04
                    43                     44                     45
                     A                      A                      A
 Frequencies --   208.2929               210.3867               218.1572
 Red. masses --     1.9259                 1.5168                 1.3932
 Frc consts  --     0.0492                 0.0396                 0.0391
 IR Inten    --     1.1935                 2.4219                 1.9438
 Atom AN      X      Y      Z        X      Y      Z        X      Y      Z
   1   8     0.01   0.00  -0.04     0.00   0.00  -0.01    -0.01   0.00   0.00
   2  12     0.00  -0.01  -0.02    -0.02   0.01  -0.01     0.02   0.00  -0.01
   3   8    -0.01   0.00  -0.02    -0.01   0.00  -0.03    -0.01   0.00  -0.02
   4   6     0.04   0.03  -0.02     0.01   0.01   0.00    -0.01   0.00   0.00
   5   7    -0.03  -0.01  -0.01     0.01   0.00   0.02     0.00   0.01   0.02
   6   7     0.01   0.00  -0.02    -0.02   0.02   0.03     0.01   0.00   0.03
   7   8     0.05   0.03   0.00     0.01   0.01   0.00    -0.01   0.00   0.00
   8   6    -0.01  -0.01  -0.02     0.00   0.00   0.04     0.00   0.01   0.04
   9   6    -0.01  -0.01  -0.06     0.01   0.02   0.11     0.00   0.02   0.10
  10   6     0.00   0.00  -0.03     0.00   0.03   0.05     0.00   0.00   0.04
  11   8    -0.02  -0.06  -0.01     0.00  -0.02   0.00     0.00  -0.01   0.01
  12   6     0.02   0.01   0.01     0.01   0.00   0.00     0.01   0.00   0.00
  13   6    -0.01   0.00   0.00    -0.01   0.00  -0.01    -0.01   0.01  -0.01
  14   6     0.02   0.02   0.00     0.01   0.00   0.00     0.00  -0.01   0.00
  15   8     0.08   0.10   0.03     0.04   0.02   0.00     0.03   0.01   0.00
  16   6    -0.06  -0.05   0.02    -0.01  -0.01   0.01     0.00   0.00   0.00
  17   8    -0.01   0.00  -0.01     0.00   0.00   0.00    -0.01   0.00   0.00
  18   6    -0.01   0.00   0.00     0.00   0.00   0.00    -0.01   0.00   0.00
  19   8     0.00   0.00   0.02     0.00   0.00   0.00    -0.01   0.00   0.00
  20   8     0.00   0.00   0.00     0.00  -0.01   0.00     0.00  -0.01   0.00
  21   6     0.00   0.00   0.00     0.00   0.00   0.00     0.00   0.00   0.00
  22   6     0.00   0.00   0.00     0.00   0.00   0.00     0.00   0.00   0.00
  23   6    -0.01   0.00   0.00     0.00   0.00   0.00     0.00   0.00   0.01
  24   8     0.00   0.00   0.00     0.00  -0.01  -0.01     0.00   0.00   0.00
  25   6     0.00   0.00   0.00    -0.01   0.00   0.01    -0.01   0.00   0.00
  26   6    -0.01  -0.01   0.00     0.00   0.01   0.00     0.01   0.00   0.00
  27   6    -0.03   0.02   0.02    -0.03   0.03   0.01    -0.01   0.02   0.00
  28   6     0.01   0.02   0.01     0.02   0.00  -0.01     0.00   0.01   0.00
  29   6    -0.03  -0.02   0.01     0.01   0.00   0.00     0.00   0.00   0.00
  30   6     0.01   0.00   0.00    -0.01   0.01   0.00     0.01   0.00   0.01
  31   6    -0.03  -0.02   0.01     0.01   0.00   0.00     0.00  -0.02   0.00
  32   6    -0.01   0.03  -0.02     0.00  -0.01   0.01     0.01  -0.01   0.00
  33   6     0.00   0.05  -0.02     0.00  -0.02   0.01     0.01   0.01  -0.01
  34   6    -0.02   0.01   0.00     0.00  -0.01   0.00     0.00   0.01  -0.01
  35   6    -0.03  -0.03   0.01     0.01   0.00   0.00     0.00  -0.01   0.00
  36   6    -0.01  -0.01   0.01     0.00   0.00   0.00    -0.01  -0.02   0.00
  37   6    -0.02  -0.03   0.01     0.01   0.00   0.00     0.00  -0.01   0.01
  38   6     0.01   0.00   0.00     0.00  -0.01   0.00     0.02   0.01   0.00
  39   6     0.00   0.00   0.01    -0.01   0.01  -0.01     0.02   0.00   0.00
  40   6     0.00   0.01   0.01    -0.01   0.00  -0.01     0.01   0.01  -0.01
  41   6     0.01   0.01   0.01     0.00  -0.03  -0.01     0.00   0.01   0.00
  42   6     0.02   0.00   0.00     0.00  -0.02   0.00     0.00   0.00   0.00
  43   6     0.01   0.00   0.00     0.01  -0.02   0.01     0.00   0.01  -0.01
  44   6     0.01   0.00   0.01     0.01  -0.01  -0.01     0.00  -0.01   0.01
  45   6     0.01   0.01   0.03     0.00  -0.01  -0.01    -0.01  -0.01   0.01
  46   6     0.02  -0.03  -0.02    -0.01   0.01   0.00    -0.01  -0.01  -0.02
  47   6     0.00  -0.02  -0.03     0.00   0.00   0.00     0.02  -0.01   0.00
  48   6     0.02   0.00   0.05     0.00   0.00  -0.01    -0.01   0.00   0.01
  49   6    -0.01   0.00   0.00     0.02   0.00   0.01    -0.01   0.00   0.01
  50   6    -0.01  -0.01  -0.01     0.01   0.00  -0.03     0.01   0.00   0.01
  51   6     0.01   0.00   0.00    -0.02  -0.03   0.00     0.00   0.01  -0.02
  52   6     0.00   0.00   0.01     0.01  -0.01   0.02    -0.02  -0.01   0.00
  53   6     0.02  -0.01   0.04     0.00  -0.03  -0.06    -0.03   0.00  -0.06
  54   6     0.00   0.00   0.04     0.01   0.03  -0.04    -0.01  -0.03  -0.06
  55   1     0.00   0.00  -0.06     0.03   0.02   0.11    -0.01   0.01   0.08
  56   1    -0.02   0.01   0.00    -0.01   0.02  -0.01    -0.01   0.01  -0.01
  57   1     0.01   0.04   0.05     0.00   0.01   0.02    -0.01  -0.01   0.00
  58   1    -0.11  -0.03   0.08    -0.03  -0.01   0.03     0.01   0.00   0.00
  59   1    -0.05  -0.02   0.03    -0.01  -0.01   0.01     0.01   0.00  -0.01
  60   1    -0.06  -0.14  -0.01    -0.01  -0.04   0.00     0.01   0.01   0.00
  61   1     0.00   0.01   0.00     0.00   0.01   0.00     0.00   0.01   0.00
  62   1    -0.02   0.00  -0.01     0.00   0.00   0.01    -0.01   0.00   0.01
  63   1     0.02   0.00   0.01     0.02   0.00   0.02     0.02   0.00   0.01
  64   1    -0.01  -0.02   0.00    -0.04  -0.03   0.02    -0.03  -0.03   0.02
  65   1    -0.01   0.01  -0.01    -0.03   0.02  -0.02    -0.02   0.02  -0.02
  66   1     0.01  -0.05   0.00     0.03  -0.05  -0.01     0.01  -0.02  -0.01
  67   1    -0.04  -0.02   0.01    -0.06   0.01   0.04     0.00   0.00   0.01
  68   1     0.00   0.01  -0.01     0.02   0.07  -0.03     0.02   0.02  -0.01
  69   1    -0.05   0.02   0.05    -0.04   0.03   0.04    -0.02   0.03   0.03
  70   1    -0.04   0.06   0.01    -0.03   0.06   0.00    -0.03   0.03  -0.02
  71   1    -0.03   0.01   0.03    -0.02   0.02   0.02     0.00   0.00   0.00
  72   1    -0.23  -0.16   0.33    -0.05  -0.05   0.09     0.02   0.02  -0.03
  73   1     0.12  -0.21  -0.33     0.07  -0.07  -0.13     0.01   0.02   0.02
  74   1     0.14   0.43   0.05     0.05   0.15  -0.01    -0.01  -0.02  -0.01
  75   1     0.00   0.05  -0.03     0.00  -0.02   0.01     0.01  -0.01   0.00
  76   1     0.01   0.09  -0.04    -0.01  -0.04   0.01     0.02   0.03  -0.02
  77   1    -0.02   0.01  -0.01     0.00  -0.01   0.00     0.00   0.02  -0.01
  78   1    -0.01   0.00   0.02     0.00   0.00  -0.01    -0.01  -0.02  -0.01
  79   1    -0.02  -0.03  -0.01     0.01   0.00   0.01    -0.01  -0.02   0.01
  80   1    -0.01   0.01   0.01    -0.01   0.04  -0.01     0.03   0.00  -0.01
  81   1     0.00   0.02   0.02    -0.02   0.01  -0.01     0.01   0.01  -0.02
  82   1     0.01   0.02   0.01     0.01  -0.05  -0.01    -0.02   0.02  -0.01
  83   1     0.00   0.00   0.00     0.02  -0.03   0.01     0.00   0.02  -0.03
  84   1     0.01   0.00   0.02     0.00  -0.01  -0.03     0.00  -0.01   0.01
  85   1     0.06   0.03   0.04    -0.01  -0.01  -0.01     0.02   0.00   0.01
  86   1    -0.02   0.03   0.07     0.00  -0.01  -0.02    -0.02   0.01   0.02
  87   1     0.00  -0.01   0.01    -0.01  -0.01  -0.01    -0.02  -0.02   0.00
  88   1     0.00   0.07  -0.12     0.00  -0.03   0.05    -0.05   0.06  -0.10
  89   1    -0.04  -0.04   0.10     0.02   0.02  -0.06    -0.05   0.01   0.08
  90   1     0.14  -0.14  -0.05    -0.07   0.05   0.01     0.07  -0.09  -0.04
  91   1     0.11  -0.01  -0.10    -0.04   0.00   0.03     0.19  -0.03  -0.10
  92   1     0.00  -0.04   0.09     0.00   0.01  -0.04     0.03  -0.04   0.19
  93   1    -0.11  -0.01  -0.10     0.04   0.00   0.03    -0.13   0.02  -0.09
  94   1     0.01   0.12   0.05     0.00  -0.02  -0.01    -0.16   0.27   0.09
  95   1     0.11  -0.03   0.13    -0.02   0.01  -0.02     0.26  -0.07   0.15
  96   1    -0.01  -0.05   0.01     0.01   0.01   0.01    -0.14  -0.18  -0.20
  97   1     0.00  -0.01   0.00     0.03   0.02   0.00    -0.13   0.03   0.06
  98   1    -0.01   0.01   0.01     0.03   0.00   0.02    -0.01  -0.08  -0.10
  99   1    -0.03  -0.01   0.00     0.03   0.00   0.01     0.10   0.04   0.06
 100   1    -0.09  -0.07   0.04     0.04   0.06  -0.07     0.14   0.12  -0.07
 101   1     0.07   0.02   0.04    -0.04  -0.04  -0.08    -0.14  -0.06  -0.08
 102   1    -0.03   0.02  -0.11     0.02  -0.02   0.02     0.05  -0.05   0.19
 103   1     0.00   0.00  -0.01    -0.12  -0.06  -0.06     0.00   0.02  -0.01
 104   1     0.02   0.01  -0.01     0.05   0.02  -0.06    -0.01   0.00  -0.02
 105   1     0.01  -0.01   0.00    -0.03  -0.06   0.10    -0.01   0.02  -0.03
 106   1     0.00   0.00   0.00     0.06   0.38   0.24    -0.08  -0.24  -0.15
 107   1    -0.01   0.01   0.01     0.26  -0.09  -0.33    -0.17   0.03   0.22
 108   1     0.01   0.00   0.01    -0.31  -0.30   0.15     0.15   0.15  -0.08
 109   1     0.03  -0.09   0.04    -0.02   0.08  -0.06    -0.04   0.10  -0.06
 110   1     0.05   0.02   0.11    -0.02  -0.07  -0.18    -0.05  -0.04  -0.16
 111   1     0.00   0.03   0.01     0.02  -0.14  -0.01    -0.01  -0.09  -0.02
 112   1     0.01  -0.05   0.02     0.00   0.13   0.01    -0.03   0.02  -0.06
 113   1    -0.02   0.07   0.04     0.00  -0.12  -0.03     0.03  -0.13  -0.07
 114   1     0.00  -0.01   0.12     0.01   0.05  -0.20    -0.03  -0.01  -0.16
                    46                     47                     48
                     A                      A                      A
 Frequencies --   219.2779               220.6880               222.8793
 Red. masses --     1.3598                 1.1489                 1.1720
 Frc consts  --     0.0385                 0.0330                 0.0343
 IR Inten    --     2.5790                 0.3987                 1.3179
 Atom AN      X      Y      Z        X      Y      Z        X      Y      Z
   1   8     0.00   0.01   0.00     0.00   0.00  -0.01     0.00   0.00   0.00
   2  12     0.01   0.03   0.02     0.00   0.00   0.00     0.01   0.03   0.01
   3   8     0.00  -0.01   0.01     0.00   0.00   0.00    -0.01  -0.01  -0.01
   4   6    -0.01   0.00   0.00     0.01   0.00   0.00     0.00   0.00   0.00
   5   7     0.01   0.02  -0.03     0.01   0.00   0.01     0.01   0.02   0.00
   6   7    -0.01   0.00  -0.01     0.00   0.00   0.00     0.00   0.00   0.01
   7   8    -0.01   0.00   0.00     0.01   0.00   0.00     0.00   0.00   0.00
   8   6     0.00   0.02  -0.04     0.00   0.00   0.02     0.00   0.02   0.00
   9   6    -0.01   0.00  -0.07     0.00   0.00   0.04    -0.01   0.01   0.03
  10   6     0.00   0.00  -0.02    -0.01   0.00   0.01    -0.01   0.00   0.01
  11   8     0.00   0.00   0.00     0.01   0.01   0.00     0.00   0.00   0.00
  12   6    -0.01  -0.02   0.00     0.00   0.00   0.00     0.00  -0.01   0.00
  13   6     0.00  -0.02   0.00     0.00   0.00   0.00     0.00  -0.01   0.00
  14   6     0.00   0.00   0.00     0.01   0.00   0.00     0.00   0.00   0.00
  15   8    -0.02  -0.03  -0.01     0.00   0.00   0.00    -0.01  -0.01   0.00
  16   6     0.01   0.00   0.00     0.00   0.00   0.00     0.00   0.00   0.00
  17   8     0.01  -0.01   0.01     0.00   0.00   0.00     0.00   0.00   0.00
  18   6     0.01   0.00  -0.01     0.00   0.00   0.00     0.00   0.00   0.00
  19   8     0.01   0.00   0.00     0.00   0.00   0.00     0.00   0.00   0.00
  20   8     0.00   0.00   0.00     0.00   0.00   0.00     0.00   0.00   0.00
  21   6     0.00   0.00   0.00     0.00   0.00   0.00     0.00   0.00   0.00
  22   6     0.00  -0.01   0.00     0.00   0.00   0.00     0.00   0.00   0.00
  23   6     0.00   0.00  -0.01     0.00   0.00   0.00     0.00   0.00   0.00
  24   8     0.00   0.00   0.01     0.00   0.00   0.00     0.00   0.00   0.00
  25   6     0.01   0.00   0.00     0.00   0.00   0.00     0.00   0.00   0.00
  26   6    -0.01  -0.01   0.00     0.00   0.00   0.00     0.00  -0.01   0.00
  27   6     0.02  -0.02   0.01    -0.01   0.01   0.01     0.00   0.00   0.01
  28   6     0.00   0.00   0.01     0.00  -0.01   0.00     0.00   0.00   0.00
  29   6     0.01   0.01  -0.01     0.01   0.00   0.00     0.01   0.00   0.00
  30   6    -0.02   0.01   0.00     0.00   0.00   0.00     0.00   0.00   0.00
  31   6     0.01  -0.01   0.00     0.01   0.00   0.00     0.01  -0.01   0.00
  32   6     0.01  -0.01   0.00     0.00  -0.02   0.01     0.02   0.01   0.00
  33   6     0.02   0.00   0.00     0.00  -0.01   0.00     0.02   0.01   0.00
  34   6     0.02   0.00   0.00     0.01   0.00   0.00     0.01  -0.02   0.01
  35   6     0.02  -0.01   0.00     0.01   0.00   0.00     0.01  -0.01   0.01
  36   6     0.00  -0.01   0.00     0.00   0.00  -0.01     0.00  -0.03   0.00
  37   6     0.00  -0.01   0.01     0.00   0.00   0.00     0.01  -0.01   0.01
  38   6    -0.02   0.00   0.00    -0.01  -0.01   0.00    -0.01   0.00   0.00
  39   6    -0.02   0.00  -0.01    -0.01  -0.01   0.01     0.00   0.00   0.00
  40   6    -0.01  -0.02  -0.01     0.00   0.00   0.02     0.00   0.00   0.00
  41   6     0.00  -0.02  -0.01     0.00   0.01   0.02     0.00   0.00   0.00
  42   6    -0.01   0.00   0.00     0.00   0.02   0.00    -0.01   0.01   0.00
  43   6     0.00   0.00   0.01     0.00   0.00   0.01     0.00   0.00   0.00
  44   6    -0.01   0.00  -0.01     0.00   0.02   0.00     0.00   0.01   0.00
  45   6     0.00   0.00   0.00    -0.01   0.00  -0.01     0.01  -0.02   0.01
  46   6     0.00  -0.01  -0.01     0.00   0.01  -0.01    -0.02  -0.01  -0.01
  47   6     0.02  -0.01   0.00     0.02   0.00   0.01    -0.02   0.00  -0.01
  48   6    -0.03   0.01   0.00    -0.01   0.00  -0.01     0.01   0.00   0.01
  49   6     0.00   0.01   0.00     0.02   0.00  -0.03     0.01   0.00  -0.01
  50   6     0.01   0.01   0.00    -0.03  -0.01  -0.01    -0.01   0.00   0.00
  51   6    -0.01  -0.02   0.03     0.01   0.01   0.00     0.00   0.00   0.01
  52   6     0.01   0.01   0.00     0.01   0.01   0.00     0.00   0.00   0.00
  53   6     0.00   0.05   0.03    -0.02   0.00  -0.02    -0.03   0.03  -0.03
  54   6     0.00   0.03   0.05    -0.01  -0.01  -0.04    -0.01  -0.01  -0.02
  55   1    -0.01   0.00  -0.06     0.00   0.00   0.04    -0.02   0.01   0.02
  56   1     0.01  -0.02   0.00     0.00   0.00   0.00     0.00   0.00  -0.01
  57   1     0.00   0.00   0.00     0.01   0.00   0.00     0.01   0.00   0.00
  58   1     0.01   0.00   0.00    -0.01   0.00   0.00     0.00   0.00   0.01
  59   1     0.01   0.00   0.00     0.00   0.00   0.00     0.00  -0.01   0.00
  60   1     0.01   0.01   0.01    -0.01  -0.01   0.00     0.00  -0.01   0.00
  61   1     0.00  -0.01   0.00     0.00   0.00   0.00     0.00   0.00   0.00
  62   1     0.01   0.00  -0.01     0.00   0.00   0.00     0.00   0.00   0.00
  63   1    -0.04   0.00  -0.02     0.01   0.00   0.00    -0.01   0.00   0.00
  64   1     0.04   0.04  -0.03    -0.01  -0.01   0.00     0.01   0.01  -0.01
  65   1     0.03  -0.03   0.03    -0.01   0.01  -0.01     0.01  -0.01   0.01
  66   1    -0.03   0.03   0.03     0.00   0.00   0.00    -0.01   0.01   0.01
  67   1     0.02  -0.02  -0.03     0.00   0.00   0.00     0.01  -0.01  -0.01
  68   1    -0.04  -0.06   0.02     0.00   0.01   0.00    -0.01  -0.02   0.01
  69   1     0.02  -0.03  -0.03    -0.01   0.01   0.03     0.00   0.00   0.01
  70   1     0.04  -0.03   0.03    -0.02   0.02   0.00     0.00   0.01   0.00
  71   1    -0.01  -0.01   0.02     0.00   0.00   0.01     0.00  -0.01   0.01
  72   1     0.04   0.03  -0.05     0.03   0.01  -0.02     0.03   0.01  -0.03
  73   1    -0.03   0.04   0.07    -0.02   0.01   0.03    -0.01   0.02   0.03
  74   1    -0.02  -0.08   0.00    -0.01  -0.05   0.00    -0.01  -0.04   0.00
  75   1     0.00  -0.01   0.01     0.00  -0.03   0.01     0.02   0.03  -0.01
  76   1     0.02   0.01   0.00     0.00  -0.02   0.01     0.03   0.02  -0.01
  77   1     0.02   0.01   0.00     0.01   0.01  -0.01     0.00  -0.03   0.01
  78   1     0.00  -0.01  -0.01     0.00   0.00  -0.01    -0.01  -0.04  -0.01
  79   1     0.00  -0.02   0.03     0.00  -0.01   0.01     0.01   0.00   0.02
  80   1    -0.01   0.01  -0.01    -0.02  -0.02   0.02     0.00   0.00   0.00
  81   1     0.00  -0.02  -0.01     0.00  -0.01   0.03     0.00  -0.01   0.00
  82   1     0.00  -0.04  -0.01     0.01   0.02   0.03     0.00   0.00   0.00
  83   1     0.00  -0.01   0.01    -0.01   0.00   0.02     0.00   0.00   0.01
  84   1    -0.01   0.00  -0.02     0.00   0.03   0.00     0.00   0.01  -0.01
  85   1    -0.02   0.00  -0.01    -0.04  -0.01  -0.02     0.08  -0.01   0.02
  86   1     0.01  -0.02   0.00     0.00  -0.01  -0.03    -0.02   0.02   0.05
  87   1     0.00   0.01   0.01    -0.01   0.01   0.01     0.00  -0.06  -0.04
  88   1    -0.04   0.05  -0.08     0.04  -0.06   0.09    -0.21   0.26  -0.39
  89   1    -0.04   0.00   0.07     0.05   0.00  -0.12    -0.21   0.04   0.44
  90   1     0.07  -0.06  -0.03    -0.11   0.08   0.01     0.35  -0.32  -0.09
  91   1     0.14  -0.02  -0.07     0.07  -0.01  -0.03    -0.19   0.03   0.09
  92   1     0.02  -0.03   0.14     0.02  -0.01   0.07    -0.03   0.03  -0.20
  93   1    -0.10   0.01  -0.06    -0.04   0.01  -0.02     0.13  -0.04   0.07
  94   1    -0.23   0.35   0.11    -0.11   0.16   0.05     0.06  -0.07  -0.01
  95   1     0.32  -0.08   0.17     0.15  -0.04   0.07    -0.07   0.01  -0.02
  96   1    -0.20  -0.23  -0.29    -0.10  -0.11  -0.14     0.05   0.05   0.07
  97   1     0.02   0.01  -0.01     0.28  -0.09  -0.14     0.11  -0.03  -0.05
  98   1     0.00   0.02   0.02     0.02   0.16   0.20     0.01   0.06   0.08
  99   1    -0.01   0.00   0.00    -0.21  -0.10  -0.15    -0.08  -0.03  -0.06
 100   1     0.07   0.05  -0.04    -0.30  -0.26   0.17    -0.07  -0.06   0.04
 101   1    -0.05  -0.02  -0.04     0.28   0.12   0.19     0.06   0.03   0.05
 102   1     0.02  -0.01   0.08    -0.11   0.11  -0.39    -0.03   0.03  -0.09
 103   1    -0.06  -0.06  -0.01     0.09   0.05   0.05     0.02   0.00   0.02
 104   1     0.02   0.02   0.01    -0.04  -0.04   0.03    -0.02  -0.01   0.02
 105   1    -0.01  -0.04   0.09     0.01   0.05  -0.09    -0.01   0.01  -0.02
 106   1     0.06   0.24   0.14     0.02  -0.02  -0.01     0.01   0.02   0.01
 107   1     0.17  -0.04  -0.23    -0.01   0.02   0.02     0.01   0.00  -0.02
 108   1    -0.18  -0.17   0.07     0.03   0.03  -0.01    -0.01  -0.01   0.00
 109   1     0.00   0.00   0.04    -0.03   0.05  -0.02    -0.02   0.07  -0.05
 110   1    -0.01   0.07   0.10    -0.03  -0.02  -0.07    -0.06   0.02  -0.05
 111   1     0.00   0.13   0.00     0.00  -0.04   0.00    -0.04   0.02  -0.04
 112   1     0.02   0.00   0.07    -0.03  -0.01  -0.07    -0.02   0.00  -0.03
 113   1    -0.04   0.08   0.07     0.04  -0.02  -0.06     0.01  -0.02  -0.02
 114   1     0.02   0.01   0.10    -0.02  -0.01  -0.04    -0.02   0.00  -0.03
                    49                     50                     51
                     A                      A                      A
 Frequencies --   227.5584               228.0205               230.7306
 Red. masses --     1.3471                 1.4538                 1.5204
 Frc consts  --     0.0411                 0.0445                 0.0477
 IR Inten    --     1.5265                 4.3720                 2.4556
 Atom AN      X      Y      Z        X      Y      Z        X      Y      Z
   1   8    -0.02   0.03  -0.03     0.02   0.00  -0.03     0.00  -0.02   0.05
   2  12     0.02   0.00  -0.01     0.00   0.00   0.01     0.00   0.01   0.01
   3   8     0.01  -0.01  -0.01     0.00  -0.01   0.01     0.01   0.02   0.01
   4   6     0.01   0.02  -0.01     0.03   0.01  -0.02    -0.03  -0.03   0.03
   5   7     0.01   0.01   0.03     0.00   0.00   0.00     0.02   0.01   0.02
   6   7     0.00  -0.01   0.00     0.00   0.00   0.00     0.00  -0.01  -0.01
   7   8     0.00   0.03  -0.01     0.04   0.01  -0.01    -0.03  -0.04   0.02
   8   6     0.01   0.00   0.01     0.00   0.00  -0.01     0.01   0.01   0.00
   9   6     0.01   0.00   0.01     0.00   0.00  -0.03     0.01   0.00  -0.01
  10   6     0.01  -0.01   0.00     0.00   0.00  -0.01     0.01   0.00   0.00
  11   8    -0.01  -0.03  -0.01     0.02   0.01  -0.01     0.00   0.02   0.01
  12   6     0.00  -0.02  -0.01     0.00   0.00   0.01     0.00   0.02   0.00
  13   6     0.00  -0.01  -0.01    -0.01  -0.01   0.02     0.02   0.02   0.00
  14   6     0.01   0.00   0.01     0.03   0.01  -0.01    -0.03  -0.01   0.00
  15   8     0.04   0.01  -0.01     0.00   0.03   0.02    -0.03  -0.04  -0.02
  16   6    -0.01  -0.02   0.01    -0.02  -0.03   0.00     0.03   0.05  -0.01
  17   8     0.00  -0.01  -0.01     0.00   0.02   0.01     0.00   0.01   0.01
  18   6     0.00   0.00   0.00    -0.01   0.01   0.00     0.00   0.00   0.00
  19   8     0.01   0.00   0.03    -0.02   0.00  -0.06    -0.01   0.00  -0.04
  20   8     0.00   0.01   0.00     0.00  -0.02  -0.01     0.00  -0.01   0.00
  21   6    -0.01   0.00  -0.01     0.01   0.00   0.01     0.01   0.00   0.01
  22   6     0.00  -0.01  -0.01     0.01   0.02   0.03     0.01   0.01   0.02
  23   6     0.00   0.00  -0.01     0.00   0.00   0.02     0.00   0.00   0.01
  24   8     0.00   0.01   0.02     0.00  -0.03  -0.04     0.00  -0.01  -0.02
  25   6     0.02   0.00  -0.02    -0.06  -0.01   0.04    -0.02   0.00   0.02
  26   6    -0.01  -0.02   0.00     0.01   0.04   0.00     0.01   0.02   0.00
  27   6    -0.01   0.01   0.02    -0.04   0.01   0.04     0.06  -0.02  -0.05
  28   6     0.00   0.02   0.05     0.01  -0.02   0.01     0.00   0.00  -0.04
  29   6     0.00   0.00   0.01     0.00   0.00   0.00     0.02   0.01   0.00
  30   6     0.00   0.00   0.00     0.00   0.00   0.00    -0.01   0.00   0.00
  31   6     0.02  -0.01   0.00     0.00   0.00   0.00     0.03   0.00   0.00
  32   6     0.02  -0.01  -0.02     0.00   0.00   0.00     0.02  -0.02  -0.01
  33   6    -0.01  -0.01  -0.03     0.00   0.00   0.00     0.00  -0.03  -0.01
  34   6    -0.03  -0.01  -0.02    -0.01  -0.01   0.00    -0.01  -0.01  -0.01
  35   6    -0.02   0.01   0.00    -0.01   0.00   0.00     0.00   0.01   0.00
  36   6     0.00  -0.01   0.00     0.00   0.00   0.00     0.01  -0.01  -0.01
  37   6    -0.02   0.01   0.00     0.00   0.00   0.00    -0.01   0.02   0.00
  38   6    -0.01   0.00   0.00     0.01   0.00   0.00    -0.01  -0.01   0.00
  39   6    -0.01   0.00   0.00     0.01   0.00  -0.01    -0.01  -0.01   0.00
  40   6     0.00  -0.01   0.00     0.01  -0.02  -0.01     0.00  -0.02   0.00
  41   6    -0.01   0.00   0.00     0.01  -0.02  -0.01     0.00  -0.01   0.00
  42   6    -0.01   0.00   0.00    -0.01   0.00   0.00    -0.01   0.00   0.00
  43   6    -0.01   0.00   0.01     0.01   0.00  -0.01     0.00  -0.01   0.00
  44   6    -0.01   0.00   0.00    -0.01   0.00   0.00    -0.01   0.00   0.00
  45   6    -0.01   0.00   0.00     0.00   0.00   0.00    -0.01  -0.01  -0.01
  46   6    -0.02   0.01   0.00     0.00   0.00   0.00    -0.03   0.02   0.01
  47   6     0.00   0.00   0.02     0.00   0.00   0.00     0.01   0.01   0.03
  48   6     0.01   0.02   0.02     0.01   0.00   0.01    -0.01   0.02  -0.01
  49   6     0.00   0.00  -0.01    -0.01   0.01   0.01     0.00   0.00   0.00
  50   6     0.00   0.00   0.00    -0.01   0.00   0.02     0.00   0.00   0.00
  51   6    -0.01   0.00   0.02     0.00   0.00  -0.01     0.01   0.00   0.00
  52   6     0.00   0.01   0.00     0.00  -0.01  -0.01     0.01   0.00   0.00
  53   6     0.01  -0.01  -0.01     0.00   0.01   0.01     0.01   0.01   0.00
  54   6     0.01   0.00   0.00     0.00   0.00   0.02     0.01   0.01   0.01
  55   1     0.00   0.00   0.00     0.00   0.00  -0.03     0.00  -0.01  -0.01
  56   1     0.02  -0.01  -0.02    -0.01  -0.01   0.01     0.01   0.02   0.01
  57   1     0.01   0.00   0.02     0.04   0.01   0.00    -0.04  -0.02  -0.01
  58   1    -0.03   0.00   0.07    -0.04  -0.02   0.03     0.06   0.02  -0.09
  59   1     0.00  -0.04  -0.02    -0.03  -0.02   0.02     0.03   0.04   0.00
  60   1     0.01  -0.08   0.02    -0.04  -0.06  -0.03     0.03   0.13   0.00
  61   1    -0.01  -0.01   0.00     0.03   0.03   0.00     0.02   0.01   0.00
  62   1     0.00   0.00  -0.02     0.00  -0.01   0.03     0.00   0.00   0.02
  63   1    -0.09   0.00  -0.04     0.31  -0.02   0.12     0.13   0.00   0.05
  64   1     0.11   0.09  -0.08    -0.32  -0.29   0.22    -0.13  -0.11   0.10
  65   1     0.08  -0.08   0.07    -0.23   0.24  -0.21    -0.09   0.11  -0.09
  66   1    -0.04   0.03   0.03     0.06  -0.06  -0.04     0.03  -0.02  -0.02
  67   1     0.03  -0.03  -0.04    -0.07   0.05   0.08    -0.02   0.03   0.03
  68   1    -0.04  -0.08   0.03     0.06   0.15  -0.06     0.03   0.06  -0.02
  69   1    -0.02  -0.01   0.01    -0.07  -0.02   0.03     0.09   0.02  -0.05
  70   1     0.03   0.04   0.03    -0.01   0.05   0.05     0.01  -0.08  -0.06
  71   1    -0.04   0.01   0.05    -0.08   0.04   0.06     0.11  -0.04  -0.09
  72   1     0.08   0.13  -0.12     0.12   0.05  -0.12    -0.17  -0.13   0.19
  73   1    -0.06   0.15   0.24    -0.09   0.08   0.16     0.12  -0.18  -0.31
  74   1    -0.04  -0.19   0.06    -0.04  -0.23   0.02     0.06   0.34  -0.05
  75   1     0.04  -0.01  -0.03     0.00   0.00   0.00     0.03  -0.03  -0.01
  76   1     0.00  -0.02  -0.05     0.00   0.00  -0.01    -0.01  -0.05  -0.02
  77   1    -0.04  -0.01  -0.03    -0.01  -0.01   0.00    -0.02  -0.02  -0.01
  78   1     0.00  -0.03  -0.02     0.00   0.00  -0.01     0.00  -0.03  -0.03
  79   1    -0.02   0.01  -0.02     0.00   0.00   0.00    -0.01   0.01  -0.01
  80   1    -0.01   0.00   0.00     0.01   0.01  -0.01    -0.01  -0.01   0.00
  81   1     0.00  -0.01   0.00     0.02  -0.03  -0.02     0.00  -0.02   0.01
  82   1     0.00   0.00   0.00     0.01  -0.04  -0.01     0.00  -0.01   0.01
  83   1    -0.01   0.00   0.01     0.01   0.00  -0.01    -0.01  -0.01   0.02
  84   1    -0.01   0.00  -0.01    -0.01   0.01  -0.01    -0.01   0.00  -0.01
  85   1    -0.09   0.02  -0.03    -0.02   0.00  -0.01    -0.01  -0.01  -0.02
  86   1     0.03  -0.04  -0.02     0.01  -0.02  -0.01    -0.01   0.00  -0.02
  87   1     0.00   0.05   0.06     0.00   0.02   0.01    -0.01  -0.01   0.00
  88   1    -0.06   0.03  -0.05     0.00   0.00  -0.01    -0.11   0.06  -0.08
  89   1    -0.04   0.04   0.05     0.00   0.00  -0.01    -0.07   0.05   0.12
  90   1     0.01  -0.02  -0.01     0.00   0.00  -0.01     0.05  -0.03   0.00
  91   1     0.33  -0.04  -0.17     0.02   0.00  -0.01     0.26  -0.03  -0.12
  92   1     0.01  -0.08   0.41     0.00  -0.01   0.03     0.01  -0.06   0.34
  93   1    -0.31   0.10  -0.14    -0.03   0.01  -0.01    -0.24   0.10  -0.09
  94   1     0.14  -0.18  -0.05     0.03  -0.01   0.00     0.03  -0.08  -0.03
  95   1    -0.22   0.07  -0.06    -0.02   0.01   0.01    -0.11   0.04  -0.05
  96   1     0.12   0.18   0.20     0.02   0.02   0.03     0.04   0.09   0.06
  97   1     0.06  -0.02  -0.03     0.18  -0.03  -0.07     0.09  -0.02  -0.04
  98   1    -0.01   0.04   0.04    -0.02   0.15   0.18    -0.01   0.07   0.08
  99   1    -0.06  -0.02  -0.04    -0.19  -0.08  -0.05    -0.09  -0.04  -0.04
 100   1     0.01   0.01  -0.01     0.09   0.08  -0.05     0.01   0.01  -0.01
 101   1    -0.02   0.00   0.00    -0.14  -0.04  -0.04    -0.02   0.00   0.00
 102   1     0.00   0.00   0.01     0.03  -0.07   0.16     0.00  -0.01   0.03
 103   1     0.03  -0.01   0.04    -0.04   0.00  -0.04     0.08   0.04   0.04
 104   1    -0.03  -0.02   0.04     0.04   0.03  -0.04    -0.05  -0.05   0.03
 105   1    -0.01   0.01   0.00     0.01  -0.02   0.03     0.00   0.04  -0.09
 106   1     0.02   0.06   0.03     0.00  -0.03  -0.02     0.02   0.01   0.01
 107   1     0.04   0.00  -0.06    -0.01  -0.01   0.01     0.02   0.00  -0.02
 108   1    -0.04  -0.03   0.01     0.01   0.00  -0.01    -0.01  -0.01   0.00
 109   1     0.02   0.00  -0.01     0.00  -0.01   0.02     0.01   0.01  -0.01
 110   1     0.01  -0.01  -0.02     0.01   0.02   0.04     0.00   0.01   0.00
 111   1     0.01  -0.02  -0.01     0.00   0.04   0.00     0.00   0.02  -0.01
 112   1     0.01   0.00  -0.01     0.01  -0.01   0.02     0.01   0.01   0.01
 113   1     0.02   0.00   0.00    -0.01   0.03   0.02     0.01   0.01   0.01
 114   1     0.02   0.00   0.00     0.00   0.00   0.04     0.02   0.00   0.01
                    52                     53                     54
                     A                      A                      A
 Frequencies --   232.9606               236.6053               239.6457
 Red. masses --     1.2177                 2.1630                 1.3615
 Frc consts  --     0.0389                 0.0713                 0.0461
 IR Inten    --     0.5462                 3.3540                 1.0679
 Atom AN      X      Y      Z        X      Y      Z        X      Y      Z
   1   8     0.02  -0.02   0.01     0.08  -0.06   0.00    -0.03   0.02   0.00
   2  12     0.02  -0.02  -0.01    -0.02   0.04   0.03     0.02  -0.01  -0.01
   3   8    -0.02   0.00   0.00    -0.07  -0.03   0.00     0.02   0.01   0.00
   4   6     0.00  -0.01   0.00     0.05   0.00  -0.01    -0.02   0.00   0.00
   5   7     0.00   0.00   0.00     0.01   0.02   0.01    -0.01   0.00  -0.01
   6   7     0.02  -0.01   0.01     0.00   0.01  -0.02     0.01   0.00  -0.02
   7   8     0.01  -0.01   0.01     0.07  -0.01   0.02    -0.02   0.01  -0.01
   8   6     0.00   0.00   0.00     0.01   0.02   0.00     0.01   0.01   0.00
   9   6     0.00   0.00   0.00     0.01   0.01  -0.01     0.01   0.02   0.02
  10   6     0.01  -0.01   0.01     0.00   0.01  -0.01     0.02   0.01   0.01
  11   8     0.01   0.03   0.00     0.05   0.08  -0.01    -0.02  -0.04   0.00
  12   6     0.00   0.01   0.00    -0.01   0.02   0.02     0.01  -0.01   0.00
  13   6    -0.01   0.01   0.01    -0.05   0.00   0.02     0.02   0.00  -0.01
  14   6     0.00   0.01  -0.01     0.03   0.03  -0.03    -0.01  -0.01   0.01
  15   8    -0.02   0.00   0.00    -0.05   0.02   0.02     0.02  -0.01  -0.01
  16   6     0.00   0.01  -0.01    -0.02   0.01  -0.03     0.01  -0.01   0.01
  17   8     0.00  -0.01  -0.01    -0.01   0.00  -0.01     0.00   0.00   0.00
  18   6     0.00   0.00   0.01     0.00   0.00   0.01     0.00   0.00   0.00
  19   8     0.00   0.00   0.02    -0.01   0.00   0.00     0.00   0.00   0.00
  20   8     0.00   0.00   0.01    -0.01   0.00   0.01     0.00   0.00   0.00
  21   6    -0.01   0.00   0.00    -0.01   0.00   0.00     0.00   0.00   0.00
  22   6    -0.01  -0.01  -0.01    -0.01   0.00  -0.01     0.00   0.00   0.00
  23   6     0.00   0.00   0.01     0.00   0.00   0.01     0.00   0.00   0.00
  24   8     0.00   0.01   0.02     0.01   0.00   0.01     0.00   0.00   0.00
  25   6     0.03   0.00  -0.02     0.01   0.00  -0.01     0.01   0.00   0.00
  26   6     0.01   0.00   0.00     0.01   0.01   0.00    -0.01  -0.01   0.00
  27   6    -0.01   0.00   0.00    -0.09   0.03   0.06     0.03  -0.02  -0.02
  28   6     0.00  -0.02  -0.02     0.02  -0.08  -0.08    -0.01   0.03   0.03
  29   6    -0.01   0.00   0.00     0.01   0.00   0.00    -0.02   0.00   0.00
  30   6     0.02   0.00   0.00     0.00  -0.01  -0.01     0.01   0.00  -0.01
  31   6    -0.01   0.00   0.00     0.02  -0.01   0.00    -0.03   0.01   0.00
  32   6    -0.01   0.00   0.00     0.01  -0.03   0.00    -0.02   0.02   0.00
  33   6     0.00   0.01   0.00     0.01  -0.02  -0.01    -0.01   0.03   0.00
  34   6     0.00   0.00   0.00     0.00  -0.01  -0.01    -0.01   0.02   0.00
  35   6    -0.01   0.00   0.00     0.00  -0.01   0.01    -0.01   0.00   0.00
  36   6     0.00   0.00   0.00     0.00  -0.01  -0.01    -0.01   0.01   0.02
  37   6     0.00   0.00   0.00     0.00   0.00   0.01     0.00  -0.01  -0.01
  38   6     0.02   0.02   0.00     0.00  -0.03   0.00     0.00  -0.01   0.00
  39   6     0.01   0.03  -0.01    -0.02  -0.01   0.01    -0.01   0.00   0.01
  40   6     0.01   0.01  -0.02    -0.02   0.02   0.03     0.00   0.01   0.02
  41   6     0.01  -0.01  -0.01     0.01   0.01   0.01     0.02   0.00   0.01
  42   6     0.00   0.00   0.00     0.02  -0.02   0.00     0.02   0.00   0.00
  43   6     0.01   0.01  -0.01     0.00  -0.02   0.00    -0.01  -0.01  -0.01
  44   6    -0.01   0.00   0.00     0.01  -0.02   0.00     0.00  -0.01   0.01
  45   6     0.00   0.00   0.01    -0.01  -0.01  -0.02     0.01   0.01   0.03
  46   6     0.01   0.00   0.00    -0.02   0.01  -0.02     0.02  -0.02   0.01
  47   6     0.00   0.00  -0.01     0.00   0.00   0.02     0.00  -0.01  -0.03
  48   6     0.00   0.00   0.00     0.01   0.01   0.03     0.01  -0.02  -0.01
  49   6    -0.01   0.02   0.02    -0.01  -0.01   0.01    -0.04   0.00   0.02
  50   6    -0.02  -0.01   0.02     0.00  -0.02  -0.02    -0.02  -0.02   0.00
  51   6    -0.02  -0.01   0.00     0.02   0.01  -0.04     0.01   0.01  -0.03
  52   6    -0.01   0.00  -0.01     0.00  -0.02   0.00    -0.01  -0.03  -0.02
  53   6     0.00   0.00   0.00     0.00   0.03   0.00     0.03  -0.01  -0.01
  54   6     0.00  -0.03   0.00     0.01   0.02   0.02     0.02   0.01   0.00
  55   1    -0.01   0.00   0.00     0.00   0.01   0.00     0.01   0.02   0.03
  56   1    -0.02   0.02   0.01    -0.07   0.02   0.02     0.03  -0.01  -0.01
  57   1     0.01   0.00  -0.02     0.07   0.02  -0.03    -0.02  -0.01   0.01
  58   1    -0.01   0.00  -0.04    -0.05  -0.01  -0.08     0.02   0.00   0.03
  59   1     0.00   0.03   0.00    -0.03   0.08   0.04     0.01  -0.03  -0.02
  60   1    -0.01   0.02  -0.02    -0.06   0.01  -0.06     0.02  -0.01   0.02
  61   1    -0.02  -0.01   0.00    -0.02   0.00   0.00     0.00   0.00   0.00
  62   1     0.00   0.00   0.00    -0.01   0.00   0.01     0.00   0.00   0.00
  63   1    -0.21   0.01  -0.06    -0.20   0.01  -0.04     0.03   0.00  -0.01
  64   1     0.18   0.17  -0.12     0.13   0.15  -0.10     0.00  -0.01   0.00
  65   1     0.12  -0.16   0.13     0.09  -0.16   0.11     0.00   0.02   0.00
  66   1     0.01  -0.01  -0.01     0.03  -0.04  -0.02     0.00  -0.03   0.01
  67   1     0.00   0.00   0.01    -0.02   0.01   0.03    -0.04  -0.01   0.01
  68   1     0.02   0.02   0.00     0.04   0.05  -0.02    -0.01   0.01  -0.01
  69   1     0.00   0.05   0.09    -0.11   0.04   0.14     0.05  -0.01  -0.03
  70   1    -0.10   0.01  -0.06    -0.12   0.10   0.02     0.03  -0.04  -0.02
  71   1     0.08  -0.05  -0.04    -0.07   0.01   0.07     0.04  -0.02  -0.03
  72   1    -0.02  -0.06   0.04     0.12  -0.15  -0.06    -0.03   0.07   0.01
  73   1     0.00  -0.06  -0.09    -0.04  -0.09  -0.12     0.01   0.05   0.07
  74   1     0.01   0.04  -0.02    -0.03  -0.12  -0.12     0.00   0.02   0.05
  75   1    -0.01   0.00   0.00     0.01  -0.03   0.00    -0.02   0.03   0.00
  76   1     0.00   0.02   0.00     0.01  -0.03  -0.02    -0.01   0.05   0.00
  77   1     0.00   0.01   0.00    -0.01  -0.01  -0.01     0.00   0.02   0.01
  78   1     0.00   0.01   0.01     0.00  -0.02  -0.03    -0.01   0.03   0.04
  79   1     0.00   0.00   0.00     0.00   0.00   0.01    -0.01  -0.01  -0.02
  80   1     0.01   0.04  -0.01    -0.03  -0.01   0.02    -0.03   0.01   0.02
  81   1     0.01   0.01  -0.03    -0.04   0.04   0.04    -0.01   0.02   0.03
  82   1     0.01  -0.02  -0.01     0.01   0.02   0.02     0.03   0.00   0.02
  83   1     0.01   0.01  -0.03    -0.01  -0.02   0.02    -0.01  -0.01   0.00
  84   1    -0.01   0.01   0.00     0.02  -0.02   0.02     0.00  -0.01   0.02
  85   1     0.04   0.00   0.02    -0.02  -0.01  -0.02     0.03   0.02   0.03
  86   1    -0.02   0.03   0.02    -0.02   0.00  -0.03     0.00   0.02   0.05
  87   1    -0.01  -0.02  -0.02    -0.02  -0.02  -0.01     0.01   0.01   0.02
  88   1     0.03  -0.02   0.03    -0.03   0.00  -0.02     0.05  -0.02   0.04
  89   1     0.02  -0.01  -0.04     0.00   0.03  -0.03     0.02  -0.04  -0.02
  90   1    -0.02   0.02   0.00    -0.04   0.01  -0.03     0.01   0.00   0.02
  91   1    -0.01   0.00   0.00     0.06  -0.01  -0.02    -0.08   0.01   0.01
  92   1     0.00   0.00  -0.02     0.00  -0.02   0.10     0.01   0.02  -0.14
  93   1     0.00  -0.01  -0.01    -0.07   0.02  -0.01     0.09  -0.05   0.00
  94   1     0.01   0.00   0.00     0.04  -0.01   0.01    -0.01   0.02   0.00
  95   1     0.00   0.00   0.01    -0.03   0.02   0.03     0.06  -0.03   0.00
  96   1     0.01   0.00   0.01     0.03   0.04   0.06    -0.02  -0.06  -0.04
  97   1     0.32  -0.07  -0.13    -0.13   0.03   0.07     0.10  -0.05  -0.04
  98   1    -0.03   0.28   0.32    -0.01  -0.08  -0.09    -0.06   0.13   0.13
  99   1    -0.35  -0.15  -0.11     0.10   0.03   0.08    -0.19  -0.09  -0.03
 100   1     0.10   0.11  -0.07     0.03   0.05  -0.05     0.08   0.10  -0.07
 101   1    -0.21  -0.07  -0.07    -0.05  -0.05  -0.06    -0.18  -0.07  -0.08
 102   1     0.03  -0.11   0.21     0.02  -0.05   0.03     0.02  -0.10   0.16
 103   1    -0.18  -0.06  -0.10     0.33   0.13   0.16     0.38   0.12   0.20
 104   1     0.11   0.11  -0.07    -0.21  -0.22   0.09    -0.29  -0.28   0.13
 105   1     0.01  -0.09   0.18    -0.03   0.17  -0.38    -0.07   0.21  -0.44
 106   1    -0.02  -0.03  -0.03     0.00   0.02   0.02     0.00   0.06   0.03
 107   1    -0.03   0.00   0.03     0.02  -0.03  -0.03     0.06  -0.06  -0.09
 108   1     0.02   0.03  -0.02    -0.04  -0.05   0.02    -0.10  -0.09   0.00
 109   1     0.00   0.01   0.00     0.00   0.03   0.00     0.02   0.00  -0.01
 110   1     0.00   0.00  -0.01     0.00   0.02   0.00     0.04  -0.01  -0.03
 111   1     0.00   0.00   0.00     0.01   0.03  -0.01     0.03  -0.03   0.00
 112   1     0.00  -0.04  -0.01     0.02   0.02   0.04     0.02   0.01   0.00
 113   1     0.01  -0.03  -0.01    -0.02   0.02   0.03     0.02   0.00   0.00
 114   1    -0.01  -0.03   0.00     0.02   0.02   0.02     0.02   0.01  -0.01
                    55                     56                     57
                     A                      A                      A
 Frequencies --   245.0861               246.9049               250.9491
 Red. masses --     2.2183                 2.2249                 1.2540
 Frc consts  --     0.0785                 0.0799                 0.0465
 IR Inten    --     2.9047                 9.3209                 1.8282
 Atom AN      X      Y      Z        X      Y      Z        X      Y      Z
   1   8     0.00   0.01  -0.03    -0.03   0.03   0.01     0.00  -0.01   0.03
   2  12    -0.04  -0.05  -0.01    -0.06   0.07   0.03     0.01  -0.02  -0.02
   3   8     0.02   0.01   0.02     0.01   0.00  -0.02    -0.01  -0.01   0.00
   4   6     0.02   0.01  -0.02    -0.02   0.00   0.01    -0.01  -0.01   0.02
   5   7    -0.02  -0.04  -0.03     0.01   0.01   0.02     0.00   0.00   0.00
   6   7    -0.01   0.01   0.00    -0.04   0.03   0.01     0.01  -0.01  -0.01
   7   8     0.02   0.02  -0.02    -0.03   0.01   0.01    -0.01  -0.01   0.03
   8   6     0.00  -0.03   0.00     0.00   0.00  -0.01     0.00   0.00   0.00
   9   6     0.01  -0.01   0.00     0.00   0.00  -0.04     0.00   0.00   0.01
  10   6     0.00   0.01   0.00    -0.02   0.03  -0.01     0.00  -0.01   0.00
  11   8     0.00  -0.01   0.00    -0.01  -0.04   0.01     0.00   0.02   0.00
  12   6     0.00   0.00   0.01     0.01  -0.02  -0.02     0.00   0.00  -0.01
  13   6     0.01   0.00   0.02     0.01  -0.01  -0.03    -0.01  -0.01  -0.01
  14   6     0.01   0.00   0.00     0.00  -0.02   0.02     0.00   0.00   0.00
  15   8    -0.01   0.00   0.01     0.05   0.00  -0.02     0.03   0.04  -0.01
  16   6    -0.02  -0.02   0.00     0.02   0.01   0.02     0.02   0.03   0.00
  17   8    -0.01   0.00  -0.01    -0.01   0.00   0.00     0.00   0.01  -0.01
  18   6    -0.01   0.00   0.00     0.00   0.00  -0.01    -0.01   0.00   0.00
  19   8    -0.01   0.00  -0.02     0.00   0.00  -0.02    -0.01   0.00  -0.01
  20   8    -0.01   0.00   0.01    -0.01  -0.01  -0.01     0.00  -0.01   0.00
  21   6     0.00   0.00   0.00     0.00  -0.01   0.00     0.00   0.00   0.00
  22   6    -0.01   0.00   0.00     0.00   0.00   0.00     0.00   0.01   0.00
  23   6     0.00   0.01   0.02     0.00   0.00   0.01     0.00   0.00   0.01
  24   8     0.00   0.00   0.01     0.01   0.00   0.01     0.01  -0.01  -0.01
  25   6     0.00   0.00   0.00     0.01   0.00   0.00    -0.02  -0.01   0.01
  26   6     0.01   0.03   0.00    -0.03   0.02   0.01     0.01   0.01   0.00
  27   6    -0.01  -0.01   0.00     0.02   0.01   0.00     0.00   0.00   0.02
  28   6     0.00   0.01   0.03     0.02   0.02   0.00     0.01  -0.02  -0.04
  29   6    -0.01   0.02  -0.02     0.01   0.00   0.01     0.00   0.00   0.00
  30   6     0.00   0.00   0.00    -0.01  -0.02   0.00     0.00   0.00   0.00
  31   6    -0.03   0.08  -0.03     0.03  -0.02   0.01     0.00   0.00   0.00
  32   6    -0.06   0.01   0.04     0.03  -0.01  -0.02     0.00   0.00   0.00
  33   6    -0.06  -0.06   0.09     0.02  -0.01  -0.03     0.00   0.00   0.00
  34   6     0.00  -0.01   0.05     0.00  -0.01  -0.02     0.00   0.00   0.00
  35   6     0.02   0.04  -0.02     0.00   0.00   0.00     0.00   0.00   0.00
  36   6     0.00   0.07  -0.02     0.01  -0.02   0.00     0.00   0.00   0.00
  37   6     0.02   0.04  -0.02     0.00   0.00   0.00     0.00   0.00   0.00
  38   6     0.01  -0.02   0.00     0.03  -0.07   0.00     0.00   0.02   0.00
  39   6     0.00  -0.01   0.00    -0.01  -0.02   0.01     0.00   0.01   0.00
  40   6    -0.01   0.01   0.01    -0.06   0.05   0.01     0.02  -0.02   0.00
  41   6     0.00  -0.01   0.00    -0.03  -0.01   0.01     0.02  -0.01   0.00
  42   6     0.00  -0.01   0.00     0.00  -0.05   0.00     0.00   0.01   0.00
  43   6     0.01  -0.02   0.00     0.04  -0.05   0.01    -0.01   0.01  -0.01
  44   6     0.00  -0.01   0.00     0.01  -0.05  -0.02     0.00   0.01   0.01
  45   6     0.07  -0.04  -0.08    -0.01   0.01   0.01     0.00   0.00   0.00
  46   6     0.03   0.04   0.03    -0.02   0.01   0.01     0.00   0.00   0.00
  47   6     0.02   0.03   0.04     0.01   0.00   0.00     0.00   0.00   0.00
  48   6    -0.06   0.02  -0.08     0.01  -0.01   0.00     0.00   0.00   0.00
  49   6     0.00   0.00   0.01     0.03   0.00   0.03    -0.01   0.00   0.00
  50   6     0.00  -0.01  -0.01    -0.01  -0.03  -0.09     0.00   0.00   0.04
  51   6     0.02   0.00  -0.03     0.07   0.01  -0.06    -0.01   0.00   0.00
  52   6     0.00  -0.01   0.01     0.00  -0.02   0.09     0.00   0.00  -0.03
  53   6     0.04  -0.07   0.02     0.01   0.01   0.02     0.00  -0.01   0.00
  54   6     0.02   0.03   0.00     0.00   0.07   0.03     0.00  -0.02  -0.01
  55   1     0.03   0.00   0.01     0.01   0.01  -0.04     0.00   0.00   0.01
  56   1     0.01  -0.01   0.02     0.03  -0.01  -0.05     0.02  -0.01  -0.04
  57   1     0.01   0.01   0.01    -0.02  -0.01   0.02     0.00   0.00  -0.01
  58   1    -0.04  -0.01   0.04     0.03   0.01   0.03     0.03   0.01  -0.04
  59   1    -0.02  -0.02   0.00     0.02  -0.02  -0.02     0.02   0.03   0.00
  60   1    -0.02  -0.07  -0.01     0.04   0.01   0.04     0.03   0.07   0.01
  61   1    -0.01   0.00   0.00    -0.01   0.00   0.01     0.00   0.01   0.00
  62   1     0.00   0.00   0.03     0.00  -0.01   0.03     0.00   0.00   0.01
  63   1    -0.13   0.01  -0.02    -0.15   0.00  -0.02    -0.13   0.00   0.02
  64   1     0.08   0.10  -0.06     0.10   0.11  -0.06     0.02   0.05  -0.01
  65   1     0.06  -0.09   0.07     0.07  -0.12   0.08     0.01  -0.10   0.04
  66   1     0.06  -0.06  -0.03     0.07  -0.15   0.00     0.01   0.00  -0.02
  67   1    -0.06   0.04   0.07    -0.18   0.03   0.13     0.01   0.02   0.01
  68   1     0.06   0.13  -0.04     0.03   0.19  -0.09     0.02   0.02  -0.01
  69   1    -0.02  -0.05  -0.07     0.01  -0.06  -0.13    -0.03  -0.23  -0.45
  70   1     0.04  -0.02   0.03     0.16   0.01   0.10     0.46  -0.04   0.33
  71   1    -0.05   0.05   0.00    -0.12   0.08   0.08    -0.42   0.29   0.23
  72   1     0.01   0.03   0.00     0.02   0.04  -0.03     0.03  -0.04  -0.02
  73   1    -0.02   0.03   0.06     0.06   0.03   0.03     0.03  -0.04  -0.07
  74   1     0.01  -0.04   0.04     0.01   0.02  -0.02    -0.01   0.01  -0.07
  75   1    -0.09   0.01   0.06     0.04  -0.02  -0.02     0.00   0.00   0.00
  76   1    -0.09  -0.13   0.15     0.02  -0.02  -0.04     0.00   0.01   0.00
  77   1     0.02  -0.03   0.07    -0.02  -0.01  -0.02     0.00   0.00   0.00
  78   1     0.00   0.10   0.02     0.01  -0.04  -0.02     0.00   0.00   0.01
  79   1     0.02   0.04   0.00     0.00   0.00  -0.01     0.00   0.00   0.00
  80   1     0.00  -0.01   0.00    -0.01  -0.01   0.00     0.00   0.01   0.00
  81   1    -0.01   0.02   0.01    -0.10   0.11   0.01     0.03  -0.04   0.00
  82   1     0.00   0.00   0.01    -0.03   0.01   0.01     0.02  -0.01   0.00
  83   1     0.01  -0.01   0.00     0.02  -0.04   0.03     0.00   0.01  -0.01
  84   1     0.00  -0.01   0.00     0.01  -0.04  -0.03     0.00   0.01   0.02
  85   1     0.32  -0.14   0.08    -0.17   0.04  -0.05    -0.01   0.00   0.00
  86   1    -0.06   0.12  -0.04     0.08  -0.09  -0.03     0.01  -0.01   0.00
  87   1     0.02  -0.23  -0.33     0.03   0.13   0.13     0.01   0.02   0.01
  88   1    -0.06   0.16  -0.13    -0.05   0.00   0.00     0.01   0.00   0.00
  89   1    -0.09   0.02   0.25    -0.02   0.03   0.03     0.00  -0.01   0.00
  90   1     0.24  -0.07   0.02    -0.02   0.01   0.02     0.01  -0.01   0.00
  91   1     0.13  -0.01  -0.03    -0.04   0.00   0.03     0.00   0.00  -0.01
  92   1     0.02   0.00   0.19     0.02   0.02  -0.06     0.00   0.00  -0.01
  93   1    -0.10   0.10   0.00     0.07  -0.02   0.03     0.00  -0.01  -0.01
  94   1    -0.14   0.03  -0.02     0.00   0.01   0.00     0.01   0.00   0.00
  95   1    -0.01   0.02  -0.10     0.04  -0.02   0.00     0.00   0.00   0.01
  96   1    -0.09   0.00  -0.17     0.00  -0.03  -0.01     0.00   0.00   0.01
  97   1     0.01   0.00   0.00     0.16   0.01  -0.04     0.00  -0.01   0.00
  98   1     0.00   0.01   0.02     0.03   0.08   0.17    -0.02   0.03   0.01
  99   1    -0.01  -0.01   0.01    -0.08  -0.07   0.01    -0.04  -0.01  -0.01
 100   1     0.00   0.01  -0.02    -0.01   0.07  -0.12     0.01  -0.02   0.04
 101   1    -0.01  -0.02  -0.03    -0.04  -0.08  -0.16    -0.01   0.02   0.06
 102   1     0.00  -0.01  -0.01     0.00  -0.05  -0.06     0.00   0.00   0.04
 103   1     0.01   0.03  -0.02    -0.04   0.07  -0.09     0.00  -0.01   0.00
 104   1     0.02   0.00  -0.04     0.17   0.07  -0.14    -0.03  -0.01   0.01
 105   1     0.03   0.00  -0.04     0.12  -0.05  -0.02    -0.02   0.01   0.00
 106   1    -0.02  -0.04  -0.01    -0.08  -0.17  -0.03     0.02   0.03   0.00
 107   1    -0.03   0.00   0.05    -0.15   0.04   0.27     0.04  -0.01  -0.07
 108   1     0.04   0.01   0.01     0.18   0.09   0.09    -0.04  -0.02  -0.04
 109   1     0.04  -0.11   0.03     0.01  -0.02   0.02     0.00   0.00  -0.01
 110   1     0.08  -0.04   0.04     0.02   0.02   0.04    -0.01  -0.01  -0.01
 111   1     0.03  -0.07   0.02     0.01   0.03   0.01     0.00  -0.01   0.00
 112   1     0.02   0.06   0.01     0.04   0.14   0.10    -0.01  -0.05  -0.03
 113   1     0.00   0.02   0.00    -0.08   0.03   0.06     0.02   0.00  -0.02
 114   1     0.04   0.03  -0.03     0.04   0.08  -0.05    -0.02  -0.03   0.02
                    58                     59                     60
                     A                      A                      A
 Frequencies --   252.6060               256.4928               260.8845
 Red. masses --     1.9274                 2.3521                 3.1975
 Frc consts  --     0.0725                 0.0912                 0.1282
 IR Inten    --     2.9825                 1.5054                 9.8550
 Atom AN      X      Y      Z        X      Y      Z        X      Y      Z
   1   8     0.02  -0.02   0.02     0.02  -0.01   0.00    -0.01   0.01   0.00
   2  12    -0.01   0.01   0.00     0.00  -0.03  -0.01    -0.09  -0.01   0.00
   3   8    -0.04  -0.02  -0.02    -0.02  -0.01   0.00     0.01   0.01  -0.01
   4   6     0.00   0.00   0.01     0.01   0.00   0.00     0.00   0.00   0.00
   5   7     0.00   0.00  -0.01     0.00   0.01   0.05    -0.01  -0.02   0.06
   6   7     0.01   0.00   0.00     0.01  -0.02  -0.02    -0.01   0.02  -0.01
   7   8     0.01  -0.01   0.02     0.02   0.00   0.01    -0.01   0.00   0.00
   8   6     0.01   0.00   0.00     0.01   0.00   0.02    -0.04  -0.04   0.02
   9   6     0.01   0.00   0.01     0.01   0.00   0.00    -0.04  -0.01  -0.03
  10   6     0.01   0.00   0.00     0.02  -0.01  -0.01    -0.05   0.01  -0.02
  11   8     0.01   0.03   0.00     0.01   0.03  -0.01     0.00  -0.01   0.00
  12   6    -0.01   0.00  -0.02     0.00   0.01   0.00     0.01   0.00  -0.02
  13   6    -0.03  -0.01  -0.02    -0.01   0.00   0.00     0.01   0.01  -0.02
  14   6     0.00   0.01  -0.01     0.00   0.01  -0.01     0.00  -0.01   0.01
  15   8     0.00  -0.01  -0.02    -0.01   0.02   0.00     0.03   0.00  -0.02
  16   6     0.00   0.02   0.00     0.00   0.00   0.00     0.00   0.00   0.00
  17   8     0.01  -0.02   0.02     0.00   0.00   0.00    -0.02  -0.03  -0.01
  18   6     0.02  -0.01   0.00     0.00   0.00   0.00     0.00  -0.01   0.01
  19   8     0.06   0.01   0.11     0.00   0.00   0.01     0.03  -0.01   0.05
  20   8     0.03   0.04  -0.01     0.00   0.01   0.00     0.01   0.03   0.01
  21   6    -0.01   0.00  -0.01     0.00   0.00   0.00    -0.03  -0.01  -0.01
  22   6     0.00  -0.03  -0.02     0.00   0.00  -0.01    -0.02  -0.04  -0.03
  23   6     0.00   0.00  -0.06     0.00   0.00   0.00    -0.01   0.01   0.00
  24   8    -0.04   0.03   0.03     0.00   0.01   0.00    -0.04   0.03   0.07
  25   6     0.05   0.01  -0.04     0.01   0.00  -0.01     0.10   0.03  -0.07
  26   6    -0.04  -0.08  -0.01     0.01  -0.01   0.00    -0.02   0.00   0.01
  27   6    -0.02   0.01   0.02    -0.02   0.01   0.02     0.00   0.02  -0.01
  28   6     0.01  -0.02  -0.04     0.00  -0.02  -0.02     0.01   0.01   0.01
  29   6    -0.01   0.00  -0.01    -0.01   0.02   0.01     0.01   0.00   0.02
  30   6     0.01  -0.01   0.00     0.00  -0.01  -0.01     0.02   0.01   0.00
  31   6    -0.02   0.01   0.00     0.02   0.03   0.02     0.05  -0.02  -0.01
  32   6    -0.02   0.01   0.02     0.01  -0.02  -0.03     0.05  -0.05  -0.02
  33   6    -0.01   0.01   0.03    -0.06  -0.07  -0.04     0.02  -0.07  -0.03
  34   6     0.00   0.01   0.02    -0.07  -0.03  -0.03     0.00  -0.01  -0.02
  35   6     0.00   0.00   0.00    -0.05   0.03  -0.03     0.01   0.03   0.01
  36   6    -0.01   0.02   0.00     0.03   0.03   0.05     0.03  -0.01  -0.03
  37   6     0.00   0.00   0.00    -0.01   0.01  -0.07     0.01   0.03   0.02
  38   6     0.00  -0.02   0.01    -0.02   0.00   0.00     0.03   0.03  -0.03
  39   6    -0.01   0.01   0.01    -0.01  -0.01   0.01     0.02   0.05   0.00
  40   6    -0.04   0.05   0.01     0.00  -0.01   0.01     0.05   0.03   0.01
  41   6    -0.03   0.03   0.00     0.00   0.01   0.01     0.06  -0.01   0.01
  42   6     0.01  -0.02  -0.01     0.00   0.01   0.00     0.05   0.01   0.02
  43   6     0.00  -0.01   0.02    -0.01   0.01   0.01     0.01   0.01  -0.07
  44   6     0.01  -0.02  -0.02     0.00   0.00   0.00     0.01   0.01   0.06
  45   6     0.01  -0.01  -0.01     0.04   0.07   0.08    -0.01  -0.03  -0.07
  46   6     0.02   0.00  -0.01    -0.04   0.06   0.15    -0.03   0.03  -0.02
  47   6    -0.01   0.00   0.00     0.07   0.00  -0.08     0.04   0.01   0.09
  48   6    -0.01   0.00  -0.01     0.01  -0.06  -0.11     0.02   0.02   0.02
  49   6     0.01  -0.01   0.00    -0.01   0.00  -0.01    -0.03   0.03   0.10
  50   6    -0.01  -0.02  -0.06     0.00   0.00   0.00     0.00  -0.02   0.11
  51   6     0.01   0.00   0.02     0.00   0.00   0.03    -0.02   0.02  -0.12
  52   6    -0.02   0.01   0.05     0.01   0.02   0.00     0.02  -0.02  -0.11
  53   6     0.02  -0.01   0.00     0.04  -0.04   0.00    -0.05  -0.04   0.03
  54   6     0.02   0.00   0.00     0.01  -0.02   0.00    -0.08  -0.02   0.02
  55   1     0.01   0.01   0.02     0.00  -0.01  -0.01    -0.02  -0.01  -0.04
  56   1    -0.02   0.01  -0.03    -0.01   0.00   0.00     0.01   0.01  -0.03
  57   1     0.01   0.00  -0.01     0.01   0.01  -0.01     0.00  -0.01   0.01
  58   1     0.02   0.00  -0.04    -0.01   0.00  -0.01     0.01   0.00   0.01
  59   1     0.00   0.02   0.02    -0.01   0.01   0.01     0.00  -0.02   0.00
  60   1    -0.01   0.05  -0.01    -0.01   0.00  -0.01     0.00   0.00   0.01
  61   1     0.00  -0.04  -0.02     0.00   0.00   0.00    -0.04  -0.03  -0.01
  62   1     0.00   0.01  -0.08     0.00   0.00  -0.01     0.00   0.01   0.00
  63   1     0.43  -0.02  -0.03     0.06   0.00  -0.01     0.34   0.00  -0.13
  64   1    -0.13  -0.24   0.07    -0.02  -0.03   0.01     0.04  -0.10  -0.05
  65   1    -0.07   0.32  -0.17    -0.01   0.05  -0.03     0.06   0.27  -0.06
  66   1    -0.14   0.13   0.09    -0.02   0.05   0.00     0.01  -0.04   0.02
  67   1     0.11  -0.10  -0.17     0.06  -0.01  -0.04    -0.06  -0.01   0.03
  68   1    -0.15  -0.30   0.09    -0.01  -0.06   0.03     0.00   0.03  -0.01
  69   1    -0.03  -0.06  -0.11    -0.02   0.03   0.07     0.00   0.02   0.00
  70   1     0.13   0.02   0.11    -0.05   0.04  -0.01     0.01   0.04  -0.01
  71   1    -0.15   0.08   0.09     0.01  -0.02   0.02     0.00   0.02   0.00
  72   1     0.04  -0.05  -0.03     0.02  -0.03  -0.01    -0.01   0.02   0.01
  73   1     0.01  -0.04  -0.06    -0.01  -0.02  -0.03     0.03   0.00   0.00
  74   1    -0.02  -0.02  -0.07    -0.01  -0.02  -0.03     0.02   0.04   0.01
  75   1    -0.03   0.01   0.02     0.04  -0.04  -0.05     0.06  -0.05  -0.03
  76   1    -0.01   0.00   0.04    -0.08  -0.13  -0.05     0.00  -0.11  -0.04
  77   1     0.02   0.01   0.02    -0.10  -0.06  -0.03    -0.03  -0.01  -0.04
  78   1    -0.01   0.03   0.01     0.01   0.00   0.04     0.03  -0.05  -0.07
  79   1     0.00   0.00   0.01    -0.03  -0.01  -0.11     0.01   0.02   0.01
  80   1    -0.01   0.01   0.00    -0.01  -0.01   0.01    -0.01   0.07   0.01
  81   1    -0.07   0.09   0.01     0.00  -0.02   0.02     0.04   0.04   0.01
  82   1    -0.03   0.06   0.01     0.00   0.01   0.01     0.06  -0.03   0.00
  83   1     0.00  -0.01   0.02    -0.01   0.00   0.02     0.02   0.02  -0.09
  84   1     0.01  -0.02  -0.02     0.00   0.00   0.00     0.02   0.01   0.10
  85   1     0.13  -0.03   0.04    -0.23   0.11  -0.04    -0.13  -0.05  -0.08
  86   1    -0.05   0.07   0.02     0.21  -0.14   0.05     0.04  -0.08  -0.15
  87   1    -0.02  -0.09  -0.11     0.14   0.30   0.28     0.00   0.02   0.01
  88   1     0.04   0.01  -0.01    -0.19   0.08   0.05    -0.10   0.04  -0.07
  89   1     0.01  -0.02  -0.02    -0.12   0.10   0.34    -0.04   0.09   0.04
  90   1     0.02  -0.01  -0.01     0.11   0.04   0.18    -0.01   0.01  -0.03
  91   1     0.02   0.01  -0.02     0.04  -0.02  -0.06    -0.05  -0.05   0.15
  92   1    -0.02  -0.01   0.04     0.11   0.08  -0.13     0.06   0.06   0.02
  93   1    -0.05   0.02  -0.02     0.14  -0.07  -0.06     0.15   0.02   0.17
  94   1    -0.01  -0.01   0.00    -0.06   0.00  -0.07     0.00   0.07   0.03
  95   1    -0.03   0.01  -0.02     0.16  -0.08  -0.13     0.09   0.00   0.04
  96   1     0.00   0.02   0.00    -0.06  -0.19  -0.17    -0.01  -0.04  -0.01
  97   1     0.10  -0.02  -0.04    -0.04  -0.01   0.00    -0.05   0.05   0.10
  98   1     0.01   0.06   0.08    -0.01  -0.02  -0.04    -0.05   0.07   0.09
  99   1    -0.07  -0.05  -0.03     0.01   0.01  -0.01    -0.05  -0.01   0.14
 100   1     0.00   0.07  -0.09     0.01   0.01   0.00     0.01  -0.06   0.11
 101   1    -0.06  -0.06  -0.12    -0.01   0.00   0.00    -0.04   0.01   0.15
 102   1     0.00  -0.05  -0.02     0.00   0.00   0.01     0.01  -0.05   0.12
 103   1     0.00  -0.01   0.01    -0.03  -0.02   0.00    -0.03   0.05  -0.11
 104   1     0.02   0.02   0.03     0.02   0.04   0.02    -0.01  -0.03  -0.16
 105   1     0.02  -0.02   0.04     0.01  -0.03   0.07    -0.04   0.05  -0.14
 106   1    -0.05  -0.02   0.02     0.03   0.02   0.01     0.05   0.00  -0.08
 107   1    -0.06   0.03   0.10     0.01   0.03  -0.02     0.07  -0.06  -0.16
 108   1     0.04   0.03   0.07     0.01   0.02   0.00    -0.05  -0.05  -0.14
 109   1     0.02  -0.02   0.00     0.04  -0.05   0.00    -0.05  -0.05   0.03
 110   1     0.04  -0.01   0.00     0.07  -0.03  -0.02    -0.04  -0.03   0.04
 111   1     0.02  -0.02   0.00     0.03  -0.08   0.01    -0.05  -0.02   0.03
 112   1     0.03   0.04   0.03     0.01  -0.04  -0.01    -0.07  -0.12  -0.03
 113   1    -0.01  -0.04   0.01     0.01   0.00   0.00    -0.06   0.06   0.00
 114   1     0.02   0.01  -0.05     0.01  -0.02   0.02    -0.11  -0.03   0.13
                    61                     62                     63
                     A                      A                      A
 Frequencies --   266.2146               271.2109               272.7991
 Red. masses --     2.5408                 2.7076                 2.7608
 Frc consts  --     0.1061                 0.1173                 0.1211
 IR Inten    --     3.3328                 1.1293                 9.5589
 Atom AN      X      Y      Z        X      Y      Z        X      Y      Z
   1   8     0.01  -0.01   0.00     0.00   0.00   0.01     0.00   0.00   0.01
   2  12     0.04  -0.02  -0.01     0.00   0.03   0.02    -0.02   0.07   0.04
   3   8     0.01   0.00   0.02    -0.02  -0.01  -0.01    -0.01  -0.01   0.00
   4   6     0.00   0.00   0.00     0.00   0.00   0.01     0.00   0.00   0.00
   5   7     0.01   0.02  -0.03     0.01  -0.03  -0.06     0.02  -0.01  -0.05
   6   7     0.00   0.00   0.00    -0.02   0.02   0.12    -0.02  -0.02  -0.07
   7   8     0.01   0.00   0.01     0.00   0.00   0.01     0.00   0.00   0.00
   8   6     0.01   0.02  -0.01    -0.01  -0.03  -0.03     0.01   0.00   0.00
   9   6     0.01   0.01   0.01    -0.01  -0.03  -0.03     0.01   0.00   0.06
  10   6     0.01   0.00   0.01    -0.02   0.00   0.03     0.00  -0.01  -0.01
  11   8     0.00   0.01   0.00     0.00   0.01   0.00     0.00  -0.02   0.00
  12   6     0.00   0.00   0.02     0.00   0.00  -0.02     0.00  -0.01  -0.01
  13   6     0.00   0.00   0.02    -0.01  -0.01  -0.02    -0.01  -0.01  -0.01
  14   6     0.00   0.01  -0.01     0.00   0.00   0.00     0.00   0.00   0.01
  15   8    -0.02   0.01   0.02     0.01   0.01  -0.02     0.01  -0.01  -0.01
  16   6     0.00   0.00  -0.01     0.00   0.01   0.00     0.00   0.00   0.01
  17   8    -0.06  -0.05  -0.03     0.00   0.00   0.00     0.00   0.00   0.00
  18   6    -0.02  -0.01   0.01     0.00   0.00   0.00     0.00   0.00   0.00
  19   8     0.01  -0.03  -0.07     0.01   0.00   0.01     0.01   0.01   0.02
  20   8    -0.02   0.00   0.02     0.00   0.00   0.00     0.00   0.00  -0.01
  21   6    -0.05  -0.03  -0.01     0.00   0.00   0.00     0.00   0.00   0.00
  22   6    -0.06  -0.05  -0.05     0.00   0.00   0.00     0.00   0.00   0.00
  23   6    -0.02   0.03   0.06     0.00   0.00   0.00     0.00   0.00  -0.01
  24   8    -0.04   0.03   0.12     0.00   0.00   0.00     0.00   0.00   0.00
  25   6     0.15   0.06  -0.10     0.00   0.00   0.00     0.00   0.00   0.00
  26   6     0.00   0.09   0.04    -0.01  -0.01   0.00    -0.02  -0.01   0.00
  27   6     0.01  -0.02   0.01    -0.02   0.01   0.01     0.00   0.00   0.01
  28   6    -0.01  -0.01   0.00     0.00  -0.01  -0.02     0.01  -0.01  -0.01
  29   6     0.00   0.00  -0.01     0.02  -0.01  -0.02     0.02  -0.01  -0.02
  30   6    -0.02   0.01   0.00     0.00   0.01   0.05    -0.02  -0.02  -0.03
  31   6    -0.01   0.00   0.00     0.00   0.01   0.00    -0.02   0.01   0.01
  32   6    -0.01   0.01   0.00     0.00   0.02   0.03    -0.01   0.03   0.04
  33   6     0.00   0.03   0.00     0.02   0.01   0.05     0.03   0.04   0.06
  34   6     0.01   0.00   0.00     0.05  -0.02   0.03     0.06  -0.01   0.04
  35   6     0.00  -0.01   0.00     0.04  -0.03  -0.01     0.04  -0.04  -0.01
  36   6    -0.01  -0.01   0.01     0.00   0.01   0.02    -0.01   0.00   0.02
  37   6     0.00  -0.02   0.00     0.02  -0.02  -0.02     0.02  -0.03  -0.02
  38   6    -0.01  -0.01   0.01     0.06   0.05   0.01    -0.05  -0.05  -0.03
  39   6     0.00  -0.04   0.00     0.06   0.06  -0.07    -0.07  -0.03   0.04
  40   6     0.02  -0.07  -0.01     0.01   0.03  -0.11    -0.01  -0.02   0.08
  41   6     0.00  -0.04  -0.01    -0.04  -0.03  -0.07     0.03  -0.01   0.06
  42   6    -0.03   0.01  -0.01    -0.05  -0.03   0.02     0.03   0.00   0.01
  43   6     0.00   0.00   0.02     0.03   0.02  -0.02    -0.03  -0.02  -0.04
  44   6    -0.02   0.01  -0.02    -0.02  -0.01   0.01     0.01   0.00   0.03
  45   6     0.00   0.01   0.03     0.03   0.03   0.05     0.02   0.03   0.05
  46   6     0.01  -0.02   0.01     0.01  -0.01   0.06     0.02  -0.03   0.03
  47   6    -0.02  -0.01  -0.03    -0.05   0.00  -0.08    -0.07   0.00  -0.11
  48   6    -0.01   0.00   0.00    -0.05  -0.01  -0.06    -0.06  -0.01  -0.06
  49   6     0.00  -0.01  -0.06     0.09   0.04   0.08    -0.05   0.00   0.05
  50   6     0.01   0.02  -0.01     0.03   0.01   0.04    -0.01  -0.02   0.07
  51   6     0.01  -0.01   0.04    -0.05  -0.02  -0.03     0.04   0.05  -0.11
  52   6     0.00   0.01   0.03    -0.06  -0.08   0.00     0.08   0.05  -0.11
  53   6     0.00   0.04  -0.02    -0.02   0.00   0.02    -0.01   0.02  -0.03
  54   6     0.03   0.02  -0.01    -0.03  -0.01   0.01     0.01   0.01  -0.01
  55   1     0.00   0.01   0.02    -0.01  -0.03  -0.05     0.01   0.00   0.10
  56   1     0.00  -0.01   0.02    -0.01   0.00  -0.03     0.00   0.00  -0.02
  57   1     0.00   0.01  -0.01     0.00   0.00   0.00     0.00   0.00   0.01
  58   1     0.01   0.00  -0.02     0.01   0.00  -0.01    -0.01   0.00   0.02
  59   1    -0.01   0.00   0.01     0.00   0.01   0.01     0.00   0.00   0.01
  60   1    -0.01   0.02  -0.01     0.00   0.02   0.00    -0.01  -0.01   0.01
  61   1    -0.08  -0.04  -0.01     0.00   0.00   0.00     0.00   0.00   0.00
  62   1     0.00   0.02   0.09     0.00   0.00   0.00     0.00   0.00   0.00
  63   1     0.38   0.01  -0.22     0.01   0.00   0.00     0.01   0.00   0.00
  64   1     0.14  -0.04  -0.13     0.00  -0.01   0.00     0.00  -0.01   0.00
  65   1     0.14   0.32  -0.01     0.00   0.01   0.00     0.00   0.00   0.00
  66   1     0.15  -0.21  -0.04     0.00  -0.02   0.01     0.00  -0.02   0.02
  67   1    -0.24   0.10   0.23    -0.03  -0.01   0.01    -0.04  -0.01   0.01
  68   1     0.13   0.38  -0.11    -0.01   0.00  -0.01    -0.02   0.00  -0.01
  69   1     0.01  -0.05  -0.07    -0.02   0.03   0.07     0.00   0.03   0.06
  70   1     0.08  -0.04   0.06    -0.04   0.05  -0.02    -0.04   0.02  -0.02
  71   1    -0.05   0.03   0.03     0.00  -0.02   0.02     0.03  -0.04   0.00
  72   1     0.00  -0.01   0.00     0.02  -0.02  -0.01     0.04   0.00  -0.03
  73   1    -0.02  -0.01  -0.01     0.01  -0.01  -0.03     0.02   0.00   0.00
  74   1    -0.01  -0.02   0.00    -0.01   0.00  -0.03    -0.01  -0.02  -0.03
  75   1    -0.01   0.02   0.01    -0.02   0.03   0.03    -0.03   0.05   0.05
  76   1     0.01   0.05   0.00     0.02   0.02   0.07     0.03   0.07   0.08
  77   1     0.01   0.00   0.01     0.07  -0.03   0.05     0.09  -0.02   0.06
  78   1    -0.01   0.00   0.02     0.00   0.01   0.04    -0.01   0.02   0.04
  79   1     0.00  -0.01   0.00     0.03  -0.01   0.03     0.03  -0.02   0.03
  80   1     0.01  -0.04  -0.01     0.11   0.09  -0.09    -0.12  -0.04   0.07
  81   1     0.04  -0.11  -0.01     0.01   0.04  -0.18    -0.02  -0.02   0.13
  82   1     0.01  -0.05  -0.01    -0.08  -0.07  -0.10     0.06   0.00   0.08
  83   1     0.00  -0.01   0.03     0.04   0.04  -0.10    -0.03  -0.04   0.03
  84   1    -0.02   0.01  -0.04    -0.03   0.00  -0.05     0.02   0.00   0.07
  85   1     0.00   0.03   0.01    -0.07   0.06  -0.01     0.02   0.05   0.03
  86   1     0.01   0.00   0.05     0.10  -0.07   0.06     0.03   0.00   0.10
  87   1     0.01   0.03   0.04     0.08   0.14   0.12     0.04   0.06   0.06
  88   1     0.03  -0.02   0.02     0.01  -0.03   0.07     0.05  -0.04   0.07
  89   1     0.01  -0.04  -0.02     0.00  -0.04   0.07     0.02  -0.06   0.00
  90   1     0.00  -0.01   0.01     0.04   0.01   0.08     0.02   0.00   0.05
  91   1     0.01   0.02  -0.05     0.08   0.08  -0.16     0.07   0.10  -0.20
  92   1    -0.03  -0.03  -0.01    -0.08  -0.08   0.04    -0.10  -0.10   0.02
  93   1    -0.06  -0.01  -0.06    -0.21   0.03  -0.18    -0.25   0.02  -0.22
  94   1     0.01  -0.02   0.00    -0.07  -0.11  -0.04    -0.07  -0.13  -0.04
  95   1    -0.04   0.00   0.00    -0.15   0.02  -0.11    -0.17   0.02  -0.12
  96   1     0.01   0.02   0.02    -0.01   0.07  -0.05    -0.01   0.08  -0.05
  97   1    -0.03  -0.02  -0.03     0.13   0.14   0.03    -0.11   0.02   0.08
  98   1     0.01  -0.06  -0.09     0.12   0.01   0.16    -0.06   0.01  -0.01
  99   1     0.05   0.03  -0.07     0.11   0.05   0.10    -0.02   0.00   0.10
 100   1     0.01   0.00   0.00    -0.02  -0.12   0.10     0.00  -0.05   0.07
 101   1     0.04   0.03   0.01     0.18   0.07   0.12    -0.04   0.00   0.09
 102   1     0.00   0.06  -0.02    -0.01   0.11  -0.07     0.00  -0.05   0.07
 103   1     0.01  -0.02   0.03     0.09  -0.03   0.04    -0.17   0.11  -0.18
 104   1     0.01   0.01   0.05    -0.18  -0.19   0.01     0.21   0.19  -0.23
 105   1     0.02  -0.02   0.06    -0.14   0.11  -0.16     0.12  -0.07   0.02
 106   1    -0.01   0.00   0.03    -0.14  -0.07  -0.05     0.20   0.00  -0.06
 107   1    -0.02   0.02   0.04    -0.02  -0.16   0.05     0.07   0.10  -0.18
 108   1     0.02   0.01   0.04    -0.11  -0.11  -0.01     0.10   0.09  -0.16
 109   1     0.00   0.06  -0.02    -0.03  -0.04   0.03    -0.01   0.05  -0.03
 110   1    -0.02   0.03  -0.02    -0.03   0.01   0.07    -0.03   0.00  -0.05
 111   1     0.00   0.04  -0.02    -0.02   0.05   0.00    -0.01   0.01  -0.02
 112   1     0.02   0.06  -0.01    -0.04  -0.01  -0.01     0.00   0.00  -0.03
 113   1     0.03   0.00  -0.01    -0.01  -0.01   0.00     0.03   0.02  -0.02
 114   1     0.05   0.02  -0.05    -0.03  -0.01   0.01     0.01   0.00   0.00
                    64                     65                     66
                     A                      A                      A
 Frequencies --   281.0444               285.8522               291.4338
 Red. masses --     2.2919                 2.0653                 3.6926
 Frc consts  --     0.1067                 0.0994                 0.1848
 IR Inten    --     1.9747                17.4200                14.7502
 Atom AN      X      Y      Z        X      Y      Z        X      Y      Z
   1   8    -0.01   0.00  -0.01     0.00   0.01   0.00     0.02  -0.02  -0.02
   2  12    -0.02   0.01   0.00     0.02   0.08   0.06     0.09  -0.11  -0.10
   3   8     0.02   0.01   0.00    -0.03  -0.01  -0.02     0.01   0.01   0.02
   4   6     0.00   0.00   0.00     0.00   0.00   0.00     0.01   0.00  -0.02
   5   7     0.00   0.00  -0.01     0.02   0.03   0.07     0.00   0.03  -0.03
   6   7     0.00   0.00   0.01     0.01  -0.04   0.01    -0.04   0.01   0.02
   7   8     0.00   0.00  -0.01     0.00   0.01  -0.01     0.02  -0.01  -0.02
   8   6     0.00   0.00  -0.01     0.04   0.02   0.02     0.02   0.04  -0.01
   9   6     0.00   0.00   0.00     0.03  -0.01  -0.01     0.03   0.01   0.01
  10   6     0.00   0.00   0.00     0.04  -0.04   0.00     0.02   0.02   0.01
  11   8     0.00  -0.02   0.00    -0.01  -0.03   0.01     0.01   0.03   0.01
  12   6     0.01   0.00   0.01     0.00  -0.01  -0.02     0.00   0.02   0.06
  13   6     0.01   0.00   0.01    -0.01   0.01  -0.03    -0.01   0.01   0.06
  14   6     0.00  -0.01   0.00     0.00  -0.01   0.01    -0.01   0.02  -0.01
  15   8     0.01   0.02   0.02     0.02  -0.03  -0.03    -0.06  -0.01   0.06
  16   6     0.00   0.00   0.00    -0.01   0.00   0.02    -0.02  -0.01  -0.01
  17   8    -0.05  -0.01  -0.03    -0.01   0.00   0.00     0.02   0.00   0.01
  18   6    -0.03   0.00   0.02    -0.01   0.01   0.00     0.01   0.00   0.01
  19   8    -0.07  -0.02  -0.11     0.00   0.00  -0.02     0.01   0.01   0.06
  20   8    -0.02  -0.02   0.07    -0.01  -0.01   0.00     0.01   0.01  -0.01
  21   6    -0.02  -0.03   0.02    -0.01  -0.01   0.00     0.01   0.01   0.00
  22   6    -0.04  -0.01  -0.02    -0.01   0.00   0.00     0.01   0.00   0.00
  23   6     0.00  -0.01   0.08     0.00   0.00   0.01     0.00   0.00  -0.02
  24   8     0.01  -0.03   0.03     0.00   0.00   0.01     0.00   0.01  -0.01
  25   6     0.02   0.02  -0.04     0.01   0.01  -0.01    -0.01  -0.01   0.00
  26   6     0.19  -0.01  -0.04     0.01   0.01   0.01    -0.02  -0.02  -0.01
  27   6     0.00   0.00   0.00    -0.02   0.02  -0.03     0.02  -0.05   0.00
  28   6     0.01   0.01   0.01     0.02   0.00  -0.01    -0.04   0.00   0.01
  29   6     0.00   0.00   0.00     0.00   0.01   0.02    -0.01   0.02   0.00
  30   6     0.00   0.00   0.01    -0.01  -0.03   0.01    -0.06   0.00   0.01
  31   6     0.00   0.00   0.00     0.01   0.00   0.02    -0.01   0.00   0.00
  32   6     0.00   0.00   0.00     0.00  -0.01  -0.01    -0.01   0.00  -0.03
  33   6     0.01   0.01   0.00    -0.03   0.00  -0.04    -0.02   0.00  -0.04
  34   6     0.01   0.00   0.00    -0.05   0.01  -0.02    -0.04   0.00  -0.03
  35   6     0.01   0.00   0.00    -0.04   0.02   0.00    -0.03   0.01   0.00
  36   6     0.00   0.00   0.00    -0.01   0.02   0.01    -0.01  -0.01   0.01
  37   6     0.00   0.00   0.00    -0.02   0.01  -0.02    -0.02   0.01   0.01
  38   6    -0.01   0.01   0.00    -0.01   0.00   0.00    -0.03  -0.03  -0.01
  39   6     0.00   0.01   0.01    -0.01   0.00  -0.02    -0.04  -0.02  -0.02
  40   6    -0.04   0.06   0.01    -0.02  -0.03  -0.04    -0.08   0.00  -0.03
  41   6    -0.04   0.05   0.01    -0.04  -0.03  -0.02    -0.07  -0.04  -0.01
  42   6     0.01  -0.02   0.01    -0.04  -0.02   0.01    -0.06  -0.05   0.02
  43   6    -0.01   0.01   0.00    -0.01   0.00  -0.01     0.00  -0.04  -0.02
  44   6     0.02  -0.03   0.01    -0.02  -0.01   0.01    -0.02  -0.05   0.03
  45   6     0.00   0.00   0.01    -0.05   0.03   0.01     0.00   0.01   0.03
  46   6     0.00  -0.01   0.00    -0.02   0.04  -0.01    -0.01  -0.01   0.01
  47   6    -0.01   0.00   0.00     0.03   0.00  -0.02     0.02  -0.01   0.05
  48   6     0.00   0.00   0.00     0.02  -0.03  -0.01     0.03   0.01   0.05
  49   6     0.02  -0.01   0.05     0.03   0.03   0.05     0.06   0.04   0.15
  50   6    -0.01  -0.03  -0.05     0.02   0.01   0.05     0.02  -0.03   0.06
  51   6    -0.01   0.01   0.00    -0.01   0.01  -0.01     0.02   0.03  -0.11
  52   6     0.01   0.00  -0.03     0.00   0.00  -0.03     0.03  -0.02  -0.05
  53   6     0.00   0.01   0.00     0.08  -0.02   0.01     0.00   0.06  -0.03
  54   6     0.01   0.01   0.00     0.04  -0.05   0.01     0.09   0.15  -0.03
  55   1     0.00   0.00   0.00     0.00  -0.02  -0.03     0.02   0.01   0.01
  56   1     0.01   0.00   0.02    -0.02   0.04  -0.03    -0.03   0.00   0.09
  57   1     0.00  -0.01   0.01    -0.01  -0.01   0.02    -0.01   0.02  -0.01
  58   1     0.00   0.00   0.01    -0.01   0.00   0.04    -0.03  -0.01  -0.01
  59   1     0.00  -0.01  -0.01    -0.01  -0.01   0.01    -0.02   0.01   0.01
  60   1     0.00  -0.01   0.00    -0.01  -0.02   0.01    -0.03  -0.03  -0.03
  61   1    -0.04   0.00  -0.02    -0.01   0.00   0.00     0.01  -0.01   0.00
  62   1    -0.06  -0.02   0.02    -0.01   0.00   0.02     0.01   0.01  -0.03
  63   1     0.09   0.01  -0.08     0.01   0.00  -0.02     0.00  -0.01   0.02
  64   1     0.03  -0.01  -0.06     0.02   0.01  -0.01    -0.02  -0.02   0.01
  65   1     0.02   0.10  -0.01     0.01   0.02   0.01    -0.01  -0.02  -0.01
  66   1    -0.06   0.33  -0.18     0.02  -0.01  -0.01    -0.03   0.03   0.03
  67   1     0.59   0.00  -0.29     0.00   0.00   0.01     0.00  -0.02  -0.03
  68   1     0.19  -0.32   0.23     0.02   0.02   0.00    -0.05  -0.06   0.01
  69   1     0.00  -0.02  -0.04    -0.03  -0.01  -0.05     0.05  -0.07  -0.12
  70   1     0.03  -0.01   0.02     0.00   0.02  -0.02     0.08  -0.14   0.07
  71   1    -0.02   0.03   0.00    -0.04   0.05  -0.03    -0.02   0.01   0.00
  72   1     0.00   0.01   0.01     0.05   0.01  -0.04    -0.05  -0.01   0.03
  73   1     0.01   0.01   0.02     0.04   0.01   0.01    -0.07   0.00   0.01
  74   1     0.01   0.01   0.01     0.00  -0.01  -0.03    -0.01  -0.01   0.04
  75   1     0.00   0.01   0.00     0.03  -0.02  -0.03     0.00  -0.01  -0.04
  76   1     0.01   0.01   0.00    -0.03  -0.01  -0.06    -0.02   0.01  -0.06
  77   1     0.01   0.00   0.00    -0.06   0.01  -0.03    -0.06   0.00  -0.04
  78   1     0.00   0.00   0.00     0.00   0.02  -0.02    -0.01  -0.01   0.01
  79   1     0.00   0.00   0.01    -0.03   0.00  -0.05    -0.03   0.00  -0.02
  80   1     0.01  -0.02   0.00     0.00   0.01  -0.03    -0.03  -0.02  -0.03
  81   1    -0.06   0.09   0.01    -0.01  -0.04  -0.05    -0.09   0.03  -0.04
  82   1    -0.05   0.08   0.01    -0.05  -0.04  -0.03    -0.07  -0.06  -0.02
  83   1    -0.01   0.01   0.00    -0.01   0.00   0.00    -0.01  -0.04   0.01
  84   1     0.02  -0.03   0.01    -0.03  -0.01  -0.03    -0.03  -0.06  -0.03
  85   1    -0.02   0.01  -0.01     0.41   0.04   0.15     0.00   0.03   0.01
  86   1     0.02  -0.02   0.01    -0.33   0.37   0.15     0.00   0.01   0.04
  87   1     0.01   0.02   0.03    -0.22  -0.33  -0.24     0.00   0.03   0.04
  88   1     0.01  -0.01   0.01    -0.01   0.01   0.03     0.00   0.00   0.01
  89   1     0.00  -0.01   0.00     0.02   0.06  -0.07    -0.01  -0.01   0.01
  90   1     0.00  -0.01   0.00    -0.09   0.07  -0.01     0.00  -0.01   0.01
  91   1     0.00   0.01  -0.01     0.00  -0.02   0.00    -0.02  -0.06   0.08
  92   1    -0.01  -0.01   0.00     0.06   0.06  -0.07     0.04   0.03   0.02
  93   1    -0.02   0.00  -0.01     0.09  -0.05  -0.01     0.08  -0.01   0.09
  94   1     0.00   0.00   0.00     0.03  -0.01  -0.02     0.06   0.08   0.02
  95   1    -0.01   0.00   0.00     0.08  -0.04  -0.03     0.07   0.00   0.10
  96   1     0.00   0.01   0.00     0.00  -0.09   0.00     0.02  -0.02   0.06
  97   1     0.06   0.02   0.02     0.03   0.10   0.03     0.06   0.19   0.10
  98   1     0.02   0.03   0.09     0.05  -0.01   0.07     0.09   0.01   0.22
  99   1    -0.02  -0.04   0.06     0.07   0.04   0.08     0.11   0.02   0.24
 100   1    -0.03   0.02  -0.05     0.01  -0.09   0.08    -0.03  -0.16   0.11
 101   1    -0.02  -0.06  -0.08     0.10   0.05   0.12     0.15   0.02   0.14
 102   1     0.00  -0.05  -0.05     0.00   0.07   0.00    -0.01   0.05  -0.05
 103   1    -0.03   0.00  -0.02    -0.02   0.01  -0.02    -0.08   0.11  -0.13
 104   1     0.01   0.01  -0.02     0.00   0.02  -0.02     0.10   0.05  -0.20
 105   1    -0.01   0.00   0.02     0.00   0.00   0.00     0.05  -0.01  -0.10
 106   1     0.04   0.00  -0.02     0.02  -0.01  -0.02     0.07  -0.06  -0.05
 107   1     0.03  -0.01  -0.06     0.01   0.00  -0.03     0.02   0.00  -0.05
 108   1    -0.01   0.00  -0.06     0.00   0.01  -0.05     0.05   0.01  -0.08
 109   1     0.00   0.02   0.00     0.08  -0.04   0.01     0.00   0.10  -0.04
 110   1    -0.01   0.01   0.00     0.12   0.00   0.00    -0.04   0.05  -0.04
 111   1     0.00   0.02  -0.01     0.07  -0.05   0.02     0.00   0.07  -0.04
 112   1     0.01   0.03   0.01     0.04  -0.08   0.00     0.05   0.29   0.00
 113   1     0.00   0.00   0.01     0.05  -0.02   0.01     0.08   0.12  -0.03
 114   1     0.02   0.02  -0.01     0.03  -0.05   0.05     0.21   0.15  -0.12
                    67                     68                     69
                     A                      A                      A
 Frequencies --   297.6792               306.4795               318.7059
 Red. masses --     2.4845                 3.2190                 4.1629
 Frc consts  --     0.1297                 0.1781                 0.2491
 IR Inten    --     2.2190                 4.6405                15.3099
 Atom AN      X      Y      Z        X      Y      Z        X      Y      Z
   1   8     0.02   0.01  -0.03     0.11   0.05   0.07     0.01  -0.01   0.05
   2  12    -0.04  -0.05  -0.03    -0.02   0.00  -0.03     0.17  -0.05  -0.01
   3   8    -0.03   0.01   0.01     0.01   0.06   0.01     0.06   0.00   0.02
   4   6     0.02   0.00  -0.03     0.05   0.08   0.02    -0.01   0.03   0.03
   5   7     0.02  -0.01   0.02     0.00  -0.01  -0.02     0.00  -0.02   0.09
   6   7    -0.01   0.03   0.00     0.01  -0.01  -0.01    -0.04   0.06   0.09
   7   8     0.03  -0.02  -0.08     0.10   0.01   0.00     0.00   0.05   0.14
   8   6    -0.03  -0.02   0.00     0.00   0.00   0.00    -0.05  -0.05   0.02
   9   6    -0.03  -0.01  -0.02     0.00   0.00   0.02    -0.05  -0.02  -0.07
  10   6    -0.04   0.03  -0.01     0.01   0.00   0.00    -0.07   0.04   0.01
  11   8     0.01  -0.01   0.04    -0.13  -0.13   0.00    -0.06  -0.04  -0.08
  12   6     0.02   0.02   0.07    -0.05  -0.02  -0.01    -0.04  -0.04  -0.07
  13   6    -0.01   0.05   0.05     0.00   0.03  -0.02     0.02  -0.06  -0.03
  14   6     0.00  -0.01   0.02    -0.07   0.04   0.04    -0.01   0.04  -0.03
  15   8    -0.02  -0.04   0.05    -0.02   0.00  -0.01     0.00   0.06  -0.04
  16   6    -0.04  -0.04   0.02    -0.08   0.02   0.16     0.04   0.05   0.00
  17   8     0.01   0.00   0.00     0.00   0.00   0.00     0.00   0.00   0.00
  18   6     0.00   0.00   0.00     0.00   0.00   0.00     0.00   0.00   0.00
  19   8     0.00   0.00   0.02     0.00   0.00   0.00     0.00   0.00  -0.01
  20   8     0.00   0.00   0.00     0.00   0.00   0.00     0.00   0.00   0.00
  21   6     0.00   0.00   0.00     0.00   0.00   0.00     0.00   0.00   0.00
  22   6     0.00   0.00   0.00     0.00   0.00   0.00     0.00   0.00   0.00
  23   6     0.00   0.00  -0.01     0.00   0.00   0.00     0.00   0.00   0.00
  24   8     0.00   0.00   0.00     0.00   0.00   0.00     0.00   0.00   0.00
  25   6     0.00   0.00   0.00     0.00   0.00   0.00     0.00   0.00   0.00
  26   6    -0.01   0.00   0.00     0.00   0.00   0.00     0.00   0.00   0.00
  27   6     0.02  -0.01  -0.05     0.09  -0.03  -0.06    -0.02  -0.02   0.03
  28   6     0.01   0.01   0.01    -0.01  -0.07  -0.17    -0.03  -0.03  -0.05
  29   6     0.04  -0.01   0.01     0.00   0.00  -0.01     0.01   0.00   0.04
  30   6     0.01   0.02   0.00     0.00   0.00   0.00    -0.02   0.04   0.03
  31   6     0.05  -0.03   0.02    -0.01   0.00  -0.01     0.04  -0.01   0.03
  32   6     0.07  -0.02  -0.01     0.00   0.01  -0.01     0.02  -0.05   0.04
  33   6     0.06  -0.02  -0.02     0.00   0.00   0.00     0.01  -0.01   0.00
  34   6     0.03  -0.04  -0.01    -0.01  -0.01   0.00     0.01   0.04   0.00
  35   6     0.03  -0.02   0.00     0.00   0.00   0.00    -0.01   0.00   0.02
  36   6     0.02  -0.02   0.02    -0.01  -0.01   0.00     0.03   0.02   0.00
  37   6     0.02  -0.01  -0.01     0.00   0.01   0.00    -0.01  -0.02   0.00
  38   6     0.02   0.01   0.00     0.00   0.00   0.00     0.00   0.01   0.02
  39   6     0.02   0.02   0.01     0.00   0.00  -0.01     0.02  -0.02   0.05
  40   6     0.03   0.03   0.02     0.00   0.00  -0.01     0.00   0.00   0.06
  41   6     0.03   0.02   0.01     0.00   0.00  -0.01    -0.01   0.02   0.05
  42   6     0.03   0.02   0.00     0.00   0.00   0.00    -0.01   0.01   0.02
  43   6     0.02   0.00   0.00     0.00   0.00   0.00     0.00   0.00  -0.01
  44   6     0.02   0.01   0.00     0.00   0.00   0.00     0.01   0.00   0.00
  45   6    -0.05   0.07   0.07     0.01  -0.01   0.00    -0.03   0.00  -0.03
  46   6    -0.04   0.03   0.05     0.00  -0.02   0.00    -0.01   0.06  -0.01
  47   6    -0.01   0.01  -0.06     0.00   0.00   0.04     0.00   0.00  -0.08
  48   6    -0.02  -0.02  -0.05     0.00   0.02   0.01    -0.01  -0.05  -0.02
  49   6    -0.02  -0.02  -0.04     0.00   0.00   0.01     0.00  -0.04  -0.05
  50   6    -0.01   0.00  -0.03     0.00   0.00   0.01    -0.02   0.02  -0.08
  51   6     0.00  -0.01   0.01     0.00   0.00   0.01    -0.02   0.03  -0.07
  52   6    -0.01  -0.01   0.02    -0.01   0.00   0.01     0.04  -0.02  -0.07
  53   6    -0.10   0.05   0.00     0.01  -0.01   0.00    -0.05  -0.06   0.05
  54   6    -0.04   0.03   0.00     0.00  -0.02   0.00    -0.05   0.11   0.01
  55   1    -0.01  -0.01  -0.02     0.00   0.00   0.02     0.00  -0.02  -0.12
  56   1    -0.06   0.07   0.08     0.02   0.02  -0.03     0.08  -0.09  -0.07
  57   1    -0.01  -0.01   0.03    -0.10   0.08   0.12    -0.01   0.05   0.00
  58   1    -0.08  -0.02   0.07    -0.17   0.05   0.24     0.06   0.02  -0.07
  59   1    -0.05  -0.02   0.04    -0.10   0.11   0.26     0.04   0.05   0.00
  60   1    -0.06  -0.11  -0.01    -0.15  -0.12   0.07     0.04   0.11   0.01
  61   1     0.01   0.00   0.00     0.00   0.00   0.00     0.00   0.00   0.00
  62   1     0.00   0.00  -0.01     0.00   0.00   0.00    -0.01   0.00   0.00
  63   1    -0.01   0.00   0.00    -0.01   0.00   0.00     0.01   0.00   0.00
  64   1     0.00   0.01   0.00     0.00   0.01   0.00     0.00  -0.01   0.00
  65   1     0.00  -0.01   0.00     0.00   0.00   0.00     0.00   0.00  -0.01
  66   1    -0.01   0.01   0.01     0.00   0.01  -0.01     0.00   0.00   0.00
  67   1     0.00   0.00  -0.01     0.01   0.00   0.00     0.01   0.00   0.00
  68   1    -0.02  -0.01   0.00     0.01   0.00   0.00     0.00  -0.01   0.00
  69   1     0.03  -0.08  -0.23     0.17   0.05  -0.09    -0.04   0.03   0.18
  70   1     0.11  -0.14   0.05     0.06  -0.13  -0.04    -0.10   0.08  -0.06
  71   1    -0.06   0.11  -0.06     0.15  -0.08  -0.08     0.05  -0.10   0.03
  72   1     0.00   0.02   0.00     0.30  -0.09  -0.29     0.06  -0.05  -0.07
  73   1     0.02   0.01   0.02    -0.02  -0.02  -0.09    -0.09  -0.01  -0.05
  74   1     0.01   0.01   0.01    -0.23  -0.23  -0.35    -0.07  -0.10  -0.08
  75   1     0.09  -0.01  -0.03     0.00   0.02  -0.02     0.02  -0.08   0.04
  76   1     0.06  -0.02  -0.04    -0.01  -0.01   0.00     0.01  -0.02  -0.02
  77   1     0.01  -0.05  -0.01    -0.01  -0.03   0.00     0.01   0.08  -0.02
  78   1     0.03  -0.04  -0.03    -0.01  -0.01   0.01     0.04   0.01  -0.04
  79   1     0.03   0.00   0.01     0.00   0.01   0.00    -0.01  -0.02   0.00
  80   1     0.02   0.01   0.02     0.00   0.01  -0.01     0.02  -0.05   0.06
  81   1     0.02   0.03   0.02     0.00   0.00  -0.01     0.01   0.00   0.05
  82   1     0.04   0.02   0.01     0.00   0.00  -0.01     0.00   0.03   0.06
  83   1     0.02   0.01  -0.02     0.00   0.00   0.00     0.00   0.00  -0.01
  84   1     0.02   0.01   0.02     0.00   0.00   0.00     0.01  -0.01   0.00
  85   1     0.31   0.16   0.12    -0.08  -0.01  -0.03     0.17  -0.02   0.05
  86   1    -0.28   0.34   0.22     0.06  -0.07  -0.02    -0.16   0.17  -0.02
  87   1    -0.20  -0.20  -0.05     0.04   0.07   0.05    -0.13  -0.20  -0.15
  88   1    -0.08  -0.04   0.09     0.01  -0.01   0.00    -0.03   0.05  -0.02
  89   1     0.00   0.08   0.00     0.00  -0.03   0.00     0.02   0.10  -0.02
  90   1    -0.12   0.10   0.07     0.01  -0.02   0.00    -0.04   0.05  -0.03
  91   1     0.05   0.05  -0.09    -0.01  -0.03   0.05     0.03   0.07  -0.11
  92   1    -0.02  -0.03  -0.01     0.01   0.01   0.04     0.00   0.01  -0.10
  93   1    -0.08   0.00  -0.11     0.02   0.02   0.06    -0.03  -0.07  -0.14
  94   1    -0.04  -0.08  -0.03     0.01   0.04   0.01    -0.01  -0.10  -0.02
  95   1    -0.05   0.00  -0.10     0.01   0.01   0.03    -0.01  -0.04  -0.07
  96   1    -0.01   0.01  -0.06     0.00   0.02   0.01    -0.01  -0.07   0.00
  97   1    -0.01  -0.07  -0.02     0.01   0.01   0.00     0.01  -0.11  -0.04
  98   1    -0.03   0.01  -0.05     0.00   0.02   0.02     0.00  -0.06  -0.07
  99   1    -0.05  -0.03  -0.06    -0.01  -0.01   0.01     0.00  -0.02  -0.11
 100   1    -0.01   0.06  -0.05     0.00  -0.01   0.01    -0.04   0.12  -0.10
 101   1    -0.06  -0.03  -0.07     0.00   0.00   0.01    -0.03  -0.04  -0.16
 102   1     0.00  -0.04   0.00     0.00   0.00   0.01    -0.01   0.00  -0.07
 103   1     0.03  -0.02   0.02     0.01  -0.02   0.01    -0.08   0.08  -0.08
 104   1    -0.02  -0.03   0.02    -0.01  -0.01   0.02     0.02   0.00  -0.14
 105   1    -0.02   0.01  -0.01    -0.01   0.00   0.01    -0.03   0.04  -0.08
 106   1    -0.04   0.01   0.01    -0.02   0.00   0.01     0.09  -0.04  -0.05
 107   1    -0.01  -0.02   0.03    -0.01   0.00   0.02     0.08  -0.05  -0.11
 108   1    -0.01  -0.02   0.04     0.00   0.00   0.02    -0.02  -0.02  -0.14
 109   1    -0.10   0.10  -0.02     0.01  -0.01   0.00    -0.05  -0.09   0.05
 110   1    -0.18   0.01   0.01     0.02  -0.01  -0.01    -0.03  -0.04   0.07
 111   1    -0.09   0.10  -0.02     0.01  -0.02   0.00    -0.05  -0.04   0.04
 112   1    -0.04   0.04   0.01     0.00  -0.03  -0.01    -0.05   0.18   0.05
 113   1    -0.06   0.03   0.01     0.01  -0.03  -0.01    -0.09   0.11   0.03
 114   1    -0.03   0.03   0.00    -0.02  -0.02   0.00     0.03   0.11  -0.01
                    70                     71                     72
                     A                      A                      A
 Frequencies --   321.8538               329.0074               330.4416
 Red. masses --     3.5274                 3.6429                 3.2623
 Frc consts  --     0.2153                 0.2323                 0.2099
 IR Inten    --    12.2168                 8.1237                 1.2616
 Atom AN      X      Y      Z        X      Y      Z        X      Y      Z
   1   8     0.00   0.00   0.01    -0.03  -0.01   0.02     0.00   0.00   0.00
   2  12    -0.08  -0.08  -0.02    -0.12  -0.08   0.03     0.04  -0.01  -0.01
   3   8     0.04   0.02   0.03     0.05  -0.01   0.04     0.01   0.00   0.00
   4   6     0.00   0.00   0.01     0.00   0.01   0.03     0.00   0.00   0.00
   5   7     0.01   0.06   0.15     0.01  -0.03  -0.08     0.00   0.02   0.07
   6   7     0.02  -0.02  -0.10     0.02  -0.04  -0.03     0.00   0.01  -0.03
   7   8     0.00   0.01   0.02    -0.03   0.07   0.15     0.00   0.01   0.02
   8   6     0.02   0.04   0.05     0.02  -0.02  -0.03    -0.01   0.01   0.03
   9   6     0.01   0.01  -0.02     0.03  -0.03   0.03    -0.01   0.01  -0.01
  10   6     0.03  -0.01  -0.05     0.05  -0.03   0.00    -0.02   0.01  -0.02
  11   8    -0.01  -0.03  -0.01    -0.04  -0.06  -0.08     0.00   0.01  -0.01
  12   6     0.00   0.00   0.00    -0.02  -0.04  -0.08     0.00   0.00  -0.01
  13   6     0.02  -0.01   0.01     0.03  -0.06  -0.03     0.00  -0.01   0.00
  14   6    -0.01   0.00   0.00     0.03   0.01  -0.02     0.01   0.00  -0.01
  15   8     0.01   0.03   0.01     0.01   0.06  -0.04    -0.01   0.02  -0.01
  16   6     0.00   0.01   0.00     0.06   0.03  -0.04     0.01   0.00  -0.01
  17   8     0.00   0.00   0.00     0.01   0.00   0.00     0.00   0.00   0.00
  18   6     0.00  -0.01   0.00     0.00  -0.01   0.00     0.00   0.00   0.00
  19   8    -0.01  -0.01   0.00    -0.01  -0.01   0.00     0.00   0.00   0.00
  20   8     0.00   0.01   0.01     0.01   0.01   0.01     0.00   0.00   0.00
  21   6     0.00   0.01   0.00     0.00   0.01   0.00     0.00   0.00   0.00
  22   6     0.00   0.00   0.00     0.01   0.00   0.00     0.00   0.00   0.00
  23   6     0.00   0.00   0.00     0.00   0.00   0.00     0.00   0.00   0.00
  24   8     0.00   0.00  -0.01     0.00   0.00  -0.01     0.00   0.00   0.00
  25   6     0.00   0.00   0.00    -0.01   0.00   0.00     0.00   0.00   0.00
  26   6     0.01   0.01  -0.01     0.01   0.01  -0.01     0.00   0.00   0.00
  27   6     0.00  -0.01   0.01    -0.04  -0.01   0.03     0.00   0.00   0.01
  28   6    -0.01  -0.01  -0.01     0.02  -0.02  -0.02     0.00   0.00   0.00
  29   6     0.00   0.01   0.05     0.01   0.00  -0.03     0.00   0.00   0.03
  30   6     0.01  -0.01  -0.03     0.01  -0.01  -0.01     0.00   0.00  -0.01
  31   6     0.03  -0.01   0.04    -0.01   0.00  -0.01     0.00  -0.01   0.02
  32   6     0.00  -0.06   0.09     0.00   0.02  -0.05     0.09   0.19  -0.04
  33   6     0.01   0.04   0.04    -0.01  -0.03  -0.04     0.00   0.00   0.05
  34   6     0.02   0.11   0.03    -0.01  -0.06  -0.03    -0.08  -0.19   0.11
  35   6    -0.02   0.01   0.03     0.01   0.00  -0.02     0.00   0.01   0.02
  36   6     0.03   0.01  -0.01    -0.02   0.00   0.01    -0.04  -0.07   0.03
  37   6    -0.02  -0.04   0.01     0.00   0.01  -0.01     0.04   0.08  -0.02
  38   6     0.00  -0.01  -0.02     0.00   0.00  -0.01     0.00  -0.01  -0.01
  39   6    -0.02   0.02  -0.05    -0.02   0.04  -0.01    -0.01   0.00  -0.01
  40   6    -0.01   0.01  -0.05     0.01   0.01  -0.01    -0.01   0.00  -0.01
  41   6     0.01  -0.01  -0.05     0.03  -0.02  -0.01     0.00   0.00  -0.01
  42   6     0.01  -0.01  -0.02     0.02   0.01  -0.01     0.00   0.00  -0.01
  43   6     0.01  -0.01   0.00     0.01  -0.01   0.00     0.00  -0.01   0.00
  44   6     0.00  -0.01   0.00     0.00   0.02   0.00     0.00   0.00   0.00
  45   6    -0.01  -0.08  -0.09    -0.01   0.08   0.08    -0.06  -0.05   0.05
  46   6     0.02   0.04  -0.07    -0.02  -0.01   0.05     0.02  -0.09  -0.13
  47   6    -0.01  -0.01  -0.16     0.00  -0.01   0.08     0.06   0.08   0.02
  48   6    -0.02  -0.09  -0.03     0.02   0.04   0.02    -0.04  -0.01  -0.14
  49   6    -0.01   0.04   0.07    -0.01   0.01  -0.01     0.00   0.01   0.02
  50   6     0.01  -0.03   0.07     0.00   0.00   0.03     0.00  -0.01   0.02
  51   6     0.03  -0.03   0.06     0.02  -0.02   0.01     0.01  -0.01   0.01
  52   6    -0.03   0.02   0.08    -0.02   0.00   0.04    -0.01   0.01   0.02
  53   6    -0.04   0.08  -0.03    -0.09   0.11  -0.03     0.00  -0.02   0.00
  54   6     0.04   0.03  -0.01     0.10   0.03  -0.02    -0.02   0.03   0.00
  55   1    -0.01   0.00  -0.02     0.01  -0.03   0.06     0.00   0.01  -0.03
  56   1     0.03  -0.04   0.01     0.09  -0.09  -0.07     0.01  -0.02  -0.01
  57   1    -0.01   0.01   0.01     0.03   0.02   0.00     0.01   0.00  -0.01
  58   1     0.01   0.00   0.00     0.11   0.01  -0.11     0.01   0.00  -0.02
  59   1     0.00   0.01   0.01     0.06   0.00  -0.08     0.01   0.00  -0.02
  60   1     0.00   0.02   0.01     0.08   0.12   0.00     0.01   0.01  -0.01
  61   1     0.01   0.01   0.00     0.01   0.00   0.00     0.00   0.00   0.00
  62   1     0.00   0.01  -0.01     0.00   0.00  -0.01     0.00   0.00   0.00
  63   1     0.00   0.00   0.00     0.00   0.00   0.00     0.00   0.00   0.00
  64   1    -0.01   0.01   0.01    -0.01   0.00   0.01     0.00   0.00   0.00
  65   1    -0.01   0.00   0.00    -0.01   0.00  -0.01     0.00   0.00   0.00
  66   1    -0.01   0.03  -0.01    -0.01   0.04  -0.02     0.00   0.01   0.00
  67   1     0.03   0.01  -0.02     0.04   0.01  -0.02     0.01   0.00   0.00
  68   1     0.00  -0.01   0.00     0.00  -0.02   0.00     0.00   0.00   0.00
  69   1     0.00   0.00   0.05    -0.08   0.02   0.20    -0.01   0.01   0.03
  70   1    -0.03   0.01  -0.01    -0.13   0.12  -0.07    -0.01   0.02   0.00
  71   1     0.03  -0.03   0.00     0.02  -0.08   0.02     0.00  -0.02   0.01
  72   1     0.01  -0.01  -0.02     0.06  -0.02  -0.03     0.00  -0.01   0.01
  73   1    -0.01   0.00   0.00    -0.01   0.00   0.00    -0.01  -0.01  -0.01
  74   1    -0.02  -0.02  -0.01     0.00  -0.06  -0.03     0.01   0.00   0.00
  75   1    -0.03  -0.12   0.12     0.02   0.03  -0.07     0.15   0.34  -0.11
  76   1     0.02   0.05   0.01    -0.02  -0.04  -0.02     0.00  -0.02   0.04
  77   1     0.05   0.18   0.00    -0.04  -0.10  -0.02    -0.14  -0.35   0.17
  78   1     0.03   0.00  -0.02    -0.01   0.01   0.00    -0.04  -0.07   0.04
  79   1    -0.02  -0.04  -0.01     0.01   0.01   0.00     0.04   0.08  -0.01
  80   1    -0.01   0.03  -0.05    -0.03   0.06  -0.01    -0.01   0.00  -0.01
  81   1    -0.02   0.02  -0.04     0.01   0.01   0.00    -0.01   0.01  -0.01
  82   1     0.01  -0.03  -0.06     0.05  -0.05  -0.02     0.00   0.00  -0.01
  83   1     0.01  -0.01   0.00     0.01  -0.01  -0.01     0.00  -0.01   0.00
  84   1     0.00   0.00   0.01     0.00   0.02   0.01     0.00   0.00   0.00
  85   1    -0.12  -0.18  -0.04     0.26   0.16   0.10    -0.10  -0.02   0.02
  86   1     0.03  -0.10  -0.23    -0.16   0.23   0.24    -0.06  -0.05   0.03
  87   1    -0.01  -0.07  -0.08    -0.09  -0.08  -0.03    -0.08  -0.04   0.11
  88   1     0.02   0.09  -0.12    -0.02  -0.05   0.09     0.16  -0.02  -0.11
  89   1     0.03   0.08  -0.05    -0.02  -0.03   0.04     0.07  -0.09  -0.24
  90   1     0.00  -0.03  -0.11    -0.02   0.04   0.09    -0.09  -0.17  -0.21
  91   1     0.06   0.14  -0.22    -0.03  -0.08   0.10     0.09   0.03   0.01
  92   1    -0.01   0.00  -0.18     0.00  -0.01   0.08     0.08   0.10   0.06
  93   1    -0.08  -0.12  -0.28     0.04   0.05   0.14     0.06   0.08   0.02
  94   1    -0.02  -0.17  -0.03     0.03   0.09   0.01    -0.14  -0.10  -0.06
  95   1    -0.02  -0.07  -0.12     0.02   0.03   0.08     0.01   0.01  -0.27
  96   1    -0.02  -0.11   0.01     0.02   0.05   0.01    -0.07  -0.06  -0.20
  97   1    -0.03   0.11   0.06    -0.03   0.01   0.01    -0.01   0.04   0.02
  98   1    -0.01   0.06   0.08    -0.02   0.01  -0.03    -0.01   0.02   0.03
  99   1     0.00   0.01   0.14    -0.01   0.01   0.00     0.00   0.00   0.05
 100   1     0.02  -0.11   0.09     0.01  -0.03   0.04     0.00  -0.04   0.02
 101   1     0.02   0.02   0.14    -0.01   0.02   0.06     0.00   0.00   0.04
 102   1     0.01  -0.03   0.05     0.00   0.00   0.03     0.00  -0.02   0.01
 103   1     0.08  -0.07   0.07     0.04  -0.02   0.02     0.03  -0.02   0.02
 104   1    -0.01  -0.01   0.12     0.00  -0.01   0.03     0.00   0.00   0.03
 105   1     0.04  -0.04   0.05     0.02  -0.01   0.00     0.02  -0.02   0.01
 106   1    -0.10   0.05   0.05    -0.06   0.01   0.02    -0.02   0.02   0.02
 107   1    -0.07   0.04   0.11    -0.03   0.00   0.06    -0.02   0.02   0.03
 108   1     0.02   0.00   0.15     0.01  -0.01   0.07     0.01   0.00   0.05
 109   1    -0.02   0.17  -0.07    -0.10   0.20  -0.04     0.01  -0.02  -0.01
 110   1    -0.12   0.04  -0.05    -0.23   0.04   0.01     0.01  -0.01  -0.01
 111   1    -0.06   0.08  -0.04    -0.07   0.21  -0.05    -0.02  -0.04   0.00
 112   1     0.05   0.03   0.01     0.07   0.10  -0.01    -0.01   0.02   0.01
 113   1     0.01   0.07   0.00     0.10   0.03  -0.02    -0.04   0.04   0.01
 114   1     0.08   0.02   0.02     0.17   0.02  -0.05    -0.01   0.02   0.01
                    73                     74                     75
                     A                      A                      A
 Frequencies --   336.0513               338.5344               356.1540
 Red. masses --     3.8781                 3.1567                 3.9999
 Frc consts  --     0.2580                 0.2132                 0.2989
 IR Inten    --     9.4890                 0.8664                18.0832
 Atom AN      X      Y      Z        X      Y      Z        X      Y      Z
   1   8     0.00  -0.01   0.00     0.00   0.01   0.00    -0.01  -0.05  -0.04
   2  12     0.14   0.06   0.00     0.01   0.00   0.00    -0.09  -0.01  -0.10
   3   8     0.01   0.00   0.00    -0.01   0.00  -0.01     0.05   0.03  -0.01
   4   6     0.00   0.01   0.00     0.00   0.00   0.00     0.02   0.03  -0.01
   5   7    -0.02  -0.05  -0.04     0.00   0.01   0.02     0.01   0.08  -0.03
   6   7    -0.03   0.04  -0.16    -0.01  -0.01   0.06    -0.02   0.05   0.03
   7   8     0.00   0.02   0.04     0.00  -0.02  -0.03     0.01   0.08   0.15
   8   6    -0.06  -0.04   0.03     0.01   0.00   0.00     0.04   0.10  -0.02
   9   6    -0.05   0.03   0.05     0.01  -0.01  -0.02     0.00   0.11   0.00
  10   6    -0.09   0.06  -0.05     0.01  -0.01   0.02    -0.01   0.06   0.02
  11   8     0.00  -0.01  -0.01     0.01   0.01   0.01    -0.02  -0.07  -0.02
  12   6    -0.01  -0.02   0.00     0.00   0.01   0.01    -0.01  -0.03   0.06
  13   6     0.00  -0.01   0.01     0.00   0.01   0.00     0.00  -0.01   0.05
  14   6     0.00   0.01  -0.01     0.00   0.00   0.01     0.01   0.04  -0.02
  15   8    -0.02   0.00   0.01     0.00   0.00   0.00    -0.05   0.00   0.08
  16   6     0.01   0.00  -0.02    -0.01   0.00   0.02     0.05  -0.01  -0.11
  17   8    -0.01   0.00   0.00     0.00   0.00   0.00     0.01   0.00   0.00
  18   6    -0.01   0.01   0.00    -0.01  -0.01   0.00     0.01  -0.01   0.00
  19   8    -0.01   0.00  -0.03    -0.04   0.00   0.01     0.00   0.00   0.02
  20   8     0.00  -0.01   0.01     0.03   0.02   0.04     0.01   0.00   0.00
  21   6    -0.01  -0.01   0.00     0.00  -0.01   0.01     0.00   0.00   0.00
  22   6    -0.01   0.00   0.00     0.00  -0.01  -0.01     0.01   0.00   0.00
  23   6     0.00  -0.01   0.01     0.00  -0.02  -0.01     0.01   0.00  -0.01
  24   8     0.00  -0.01   0.01    -0.01  -0.01   0.01    -0.01   0.00   0.00
  25   6     0.00   0.00   0.00     0.00  -0.01  -0.01    -0.01   0.00   0.00
  26   6     0.02  -0.01   0.00     0.04  -0.02  -0.03     0.00   0.00   0.00
  27   6     0.00  -0.02   0.01     0.00   0.01  -0.01     0.03  -0.06   0.01
  28   6    -0.01   0.00   0.00     0.00   0.00   0.00    -0.02  -0.01   0.01
  29   6     0.01  -0.02  -0.02     0.00   0.00   0.01     0.02   0.02  -0.01
  30   6     0.00   0.00  -0.07    -0.01   0.00   0.02    -0.02   0.02   0.02
  31   6     0.01  -0.01  -0.01     0.00   0.00   0.00     0.03  -0.02   0.00
  32   6     0.00  -0.04  -0.01     0.00   0.01   0.01     0.03  -0.02   0.00
  33   6     0.02  -0.02  -0.02    -0.01   0.01   0.01     0.05   0.00  -0.01
  34   6     0.04   0.00  -0.03    -0.01   0.01   0.01     0.03  -0.02   0.01
  35   6     0.03  -0.02  -0.01    -0.01   0.01   0.00     0.02  -0.01   0.01
  36   6     0.01   0.01  -0.01     0.00   0.00   0.00     0.02  -0.02   0.00
  37   6     0.01  -0.01   0.00    -0.01   0.00   0.00     0.02  -0.01   0.01
  38   6    -0.02  -0.03  -0.04     0.00   0.00   0.02    -0.01  -0.01   0.01
  39   6    -0.06   0.04  -0.06    -0.13   0.19   0.04    -0.02   0.00   0.01
  40   6    -0.02   0.03  -0.05    -0.02   0.01   0.02    -0.04  -0.01   0.00
  41   6     0.06  -0.03  -0.06     0.10  -0.19   0.00    -0.02  -0.03   0.00
  42   6     0.04   0.00  -0.04    -0.03   0.00   0.00    -0.03  -0.01   0.00
  43   6     0.02  -0.04   0.00     0.05  -0.07   0.01     0.00  -0.01   0.02
  44   6     0.01   0.01  -0.01    -0.05   0.07  -0.02    -0.02  -0.01   0.00
  45   6     0.01   0.05   0.01     0.00  -0.02  -0.01    -0.02   0.02   0.02
  46   6    -0.02   0.02   0.05     0.01   0.00  -0.02    -0.01   0.01   0.00
  47   6    -0.02  -0.01   0.03     0.00   0.00  -0.01    -0.01   0.00  -0.02
  48   6     0.00   0.03   0.03     0.00  -0.01   0.00    -0.01   0.00   0.00
  49   6    -0.04   0.07   0.06    -0.02   0.00  -0.14     0.01  -0.01   0.00
  50   6     0.01  -0.05   0.10     0.00   0.09   0.04     0.00   0.01  -0.01
  51   6     0.07  -0.06   0.06     0.05   0.00  -0.11     0.00   0.01  -0.03
  52   6    -0.04   0.03   0.13     0.01  -0.06   0.07     0.01  -0.01   0.00
  53   6     0.00  -0.12   0.02     0.01   0.01   0.00     0.18  -0.01  -0.03
  54   6    -0.11   0.06  -0.02     0.02   0.00   0.00    -0.13  -0.15   0.02
  55   1     0.02   0.05   0.10    -0.01  -0.02  -0.04    -0.03   0.11   0.00
  56   1     0.00  -0.01   0.00    -0.01   0.01   0.00    -0.02  -0.02   0.08
  57   1     0.00   0.01  -0.01     0.00  -0.01   0.00     0.00   0.06   0.03
  58   1     0.03   0.00  -0.05    -0.02   0.00   0.03     0.09  -0.03  -0.19
  59   1     0.02   0.00  -0.03    -0.01   0.00   0.02     0.05  -0.02  -0.13
  60   1     0.02   0.03  -0.01    -0.02  -0.02   0.01     0.06   0.08  -0.08
  61   1    -0.01   0.00   0.00     0.00  -0.01  -0.01     0.01   0.00   0.00
  62   1    -0.01  -0.01   0.00    -0.01  -0.01  -0.04     0.01   0.00  -0.01
  63   1     0.01   0.00  -0.01     0.01  -0.01   0.00     0.00   0.00   0.00
  64   1     0.01   0.00  -0.01     0.00  -0.02  -0.01    -0.01   0.00   0.01
  65   1     0.00   0.01   0.00     0.00   0.00  -0.01    -0.01   0.00  -0.01
  66   1    -0.01   0.04  -0.02    -0.06   0.13  -0.06    -0.01   0.01   0.01
  67   1     0.08  -0.01  -0.04     0.19  -0.01  -0.12     0.00   0.00  -0.01
  68   1     0.02  -0.05   0.03     0.00  -0.15   0.05    -0.02  -0.02   0.00
  69   1     0.01  -0.01   0.01     0.01   0.00  -0.02     0.07  -0.04  -0.05
  70   1     0.00  -0.03   0.01     0.02   0.00   0.00     0.03  -0.15   0.04
  71   1     0.01  -0.03   0.01     0.00   0.01   0.00     0.05  -0.06  -0.01
  72   1     0.00  -0.01   0.00    -0.01   0.00   0.00     0.01  -0.02   0.00
  73   1    -0.04   0.00   0.00     0.01   0.00   0.00    -0.10   0.01   0.02
  74   1    -0.01  -0.02   0.01     0.00   0.01   0.00    -0.01  -0.08   0.03
  75   1    -0.01  -0.05  -0.01     0.00   0.01   0.01     0.02  -0.03   0.01
  76   1     0.02  -0.02  -0.01    -0.01   0.01   0.00     0.05   0.01  -0.01
  77   1     0.04   0.02  -0.04    -0.01   0.01   0.01     0.02  -0.03   0.00
  78   1     0.02   0.01  -0.02    -0.01   0.00   0.01     0.02  -0.03  -0.02
  79   1     0.02  -0.01   0.02    -0.01   0.00  -0.01     0.02  -0.01   0.03
  80   1    -0.09   0.09  -0.05    -0.22   0.34   0.06    -0.02   0.01   0.00
  81   1    -0.03   0.06  -0.01    -0.03   0.01   0.01    -0.04  -0.01  -0.01
  82   1     0.09  -0.07  -0.06     0.19  -0.34   0.00    -0.01  -0.05   0.00
  83   1     0.01  -0.05   0.01     0.05  -0.07   0.01     0.00  -0.02   0.03
  84   1     0.02   0.01   0.01    -0.06   0.08  -0.03    -0.03  -0.01  -0.02
  85   1     0.12   0.08   0.02    -0.05  -0.04  -0.01     0.05   0.05   0.01
  86   1    -0.05   0.10   0.08     0.03  -0.05  -0.04    -0.07   0.08   0.04
  87   1    -0.02  -0.01  -0.03     0.02   0.01   0.01    -0.06  -0.05   0.01
  88   1    -0.07  -0.03   0.07     0.02   0.01  -0.03    -0.03  -0.01   0.01
  89   1    -0.02   0.02   0.07     0.01  -0.01  -0.02     0.00   0.04   0.00
  90   1     0.00   0.07   0.09     0.00  -0.02  -0.03    -0.03   0.02   0.00
  91   1    -0.03  -0.02   0.04     0.01   0.01  -0.01     0.01   0.03  -0.04
  92   1    -0.04  -0.05   0.03     0.01   0.02  -0.02    -0.03  -0.03  -0.01
  93   1    -0.03   0.02   0.05     0.01  -0.01  -0.02    -0.05   0.00  -0.04
  94   1     0.01   0.05   0.02     0.00  -0.02   0.00    -0.02  -0.02   0.01
  95   1    -0.03   0.02   0.07     0.01  -0.01  -0.02    -0.03   0.01  -0.01
  96   1     0.02   0.07   0.02    -0.01  -0.02   0.00     0.00   0.02  -0.02
  97   1    -0.09   0.14   0.07    -0.03  -0.11  -0.09     0.03   0.00  -0.02
  98   1    -0.06   0.12   0.05    -0.01  -0.07  -0.19     0.03  -0.03   0.03
  99   1    -0.04   0.01   0.17     0.01   0.07  -0.24     0.02   0.01  -0.02
 100   1     0.03  -0.17   0.13     0.05   0.04   0.03     0.01   0.02  -0.02
 101   1    -0.02   0.04   0.22     0.02   0.11   0.07     0.03   0.00  -0.03
 102   1     0.02  -0.08   0.10    -0.01   0.14   0.08    -0.01   0.05  -0.01
 103   1     0.13  -0.09   0.08    -0.01   0.12  -0.10    -0.03   0.05  -0.03
 104   1     0.03   0.00   0.15     0.11  -0.04  -0.21     0.03   0.00  -0.07
 105   1     0.11  -0.09   0.06     0.07  -0.01  -0.16     0.01   0.01  -0.03
 106   1    -0.15   0.08   0.09    -0.05  -0.09   0.02     0.03  -0.04   0.00
 107   1    -0.13   0.09   0.18    -0.03  -0.06   0.14     0.01  -0.01   0.00
 108   1     0.06   0.01   0.26     0.06  -0.05   0.10     0.02   0.00  -0.02
 109   1     0.00  -0.16   0.03     0.01   0.00   0.01     0.18  -0.10  -0.01
 110   1     0.09  -0.09  -0.03     0.01   0.01   0.01     0.32   0.06  -0.07
 111   1    -0.01  -0.21   0.05     0.01   0.02   0.00     0.16  -0.12   0.00
 112   1    -0.09   0.05  -0.01     0.01   0.01   0.00    -0.08  -0.35  -0.04
 113   1    -0.13   0.07  -0.02     0.03  -0.01   0.00    -0.07  -0.18  -0.01
 114   1    -0.11   0.06  -0.02     0.03   0.00  -0.01    -0.37  -0.13   0.09
                    76                     77                     78
                     A                      A                      A
 Frequencies --   375.5802               382.1555               396.1729
 Red. masses --     4.5525                 4.9674                 4.9701
 Frc consts  --     0.3784                 0.4274                 0.4596
 IR Inten    --    16.1954                 7.6948                60.5695
 Atom AN      X      Y      Z        X      Y      Z        X      Y      Z
   1   8     0.00  -0.08  -0.10    -0.01  -0.02  -0.04    -0.07   0.05  -0.02
   2  12     0.02   0.09   0.00     0.02   0.04   0.01     0.05  -0.12   0.04
   3   8    -0.11   0.03  -0.05    -0.06   0.02  -0.01    -0.16   0.01   0.12
   4   6     0.04   0.04  -0.03     0.02   0.01  -0.01     0.05  -0.07   0.04
   5   7     0.00  -0.04   0.03     0.00  -0.02   0.01    -0.01   0.03   0.00
   6   7     0.01  -0.04   0.00     0.00  -0.02  -0.01     0.00   0.03   0.01
   7   8     0.02   0.11   0.16     0.00   0.05   0.06    -0.06   0.03  -0.02
   8   6    -0.01  -0.06   0.01    -0.01  -0.02   0.01     0.00   0.04  -0.01
   9   6     0.01  -0.08   0.00     0.00  -0.03   0.00    -0.01   0.06  -0.01
  10   6     0.01  -0.05   0.00     0.00  -0.02   0.00    -0.01   0.04   0.00
  11   8    -0.04  -0.12   0.04    -0.02  -0.06   0.02    -0.06  -0.06  -0.06
  12   6     0.01   0.01   0.09     0.00   0.01   0.03    -0.04   0.04  -0.06
  13   6    -0.04   0.13   0.03    -0.02   0.06   0.01    -0.03   0.08  -0.01
  14   6     0.01   0.02   0.01     0.03  -0.01   0.02     0.14  -0.16   0.10
  15   8    -0.02  -0.08   0.06    -0.02  -0.02   0.02    -0.13   0.06  -0.05
  16   6     0.05  -0.04  -0.17     0.02  -0.02  -0.07     0.01  -0.01   0.01
  17   8     0.00  -0.01  -0.07    -0.02   0.02   0.19     0.02  -0.01  -0.06
  18   6     0.03   0.01   0.01    -0.08  -0.02  -0.01     0.02  -0.02  -0.01
  19   8     0.08   0.00   0.00    -0.19   0.01   0.02    -0.01  -0.01   0.01
  20   8    -0.08  -0.05  -0.03     0.22   0.11   0.07    -0.01  -0.01   0.00
  21   6    -0.03   0.00   0.01     0.07  -0.03  -0.03     0.00   0.00   0.02
  22   6    -0.02   0.03   0.03     0.04  -0.08  -0.09     0.02   0.01   0.04
  23   6     0.01   0.01   0.02    -0.03  -0.02  -0.06     0.02  -0.01   0.00
  24   8     0.01  -0.01  -0.01    -0.04   0.02   0.03    -0.03   0.00   0.00
  25   6    -0.02   0.07   0.02     0.03  -0.18  -0.06    -0.01   0.06   0.01
  26   6     0.01  -0.06   0.04    -0.05   0.16  -0.11     0.01   0.00   0.00
  27   6     0.06   0.05  -0.08     0.02   0.03  -0.05    -0.01   0.08  -0.05
  28   6     0.01  -0.01   0.00     0.05  -0.01   0.01     0.28  -0.05   0.02
  29   6    -0.01  -0.03   0.02     0.00  -0.01   0.00     0.00   0.02  -0.02
  30   6     0.02  -0.03   0.00     0.00   0.00   0.00    -0.01   0.02   0.00
  31   6    -0.02   0.01   0.01    -0.01   0.00   0.00     0.01   0.00  -0.01
  32   6    -0.02   0.01   0.01    -0.01   0.00   0.01     0.00  -0.01   0.00
  33   6    -0.04   0.01   0.01    -0.01   0.00   0.00     0.02   0.01   0.00
  34   6    -0.03   0.02   0.01    -0.01   0.01   0.00     0.02   0.01   0.00
  35   6    -0.03   0.00   0.00    -0.01   0.00   0.00     0.02   0.00   0.00
  36   6    -0.01   0.01   0.00     0.00   0.00   0.00     0.00  -0.01  -0.01
  37   6    -0.02   0.01  -0.01    -0.01   0.00   0.00     0.01  -0.01   0.01
  38   6     0.02   0.01   0.00     0.01   0.00   0.00    -0.01  -0.01   0.00
  39   6     0.01   0.03   0.00     0.03  -0.03  -0.01    -0.02  -0.01   0.00
  40   6     0.02   0.01   0.00     0.02  -0.01   0.00    -0.03  -0.01   0.00
  41   6     0.02   0.00   0.01    -0.01   0.03   0.00    -0.01  -0.01   0.00
  42   6     0.01   0.00   0.01     0.00   0.01   0.00    -0.01   0.00  -0.01
  43   6     0.01   0.01   0.00     0.00   0.01   0.00    -0.01  -0.01   0.00
  44   6     0.00   0.02   0.01     0.01  -0.01   0.00    -0.01  -0.01  -0.01
  45   6     0.02  -0.04  -0.03     0.01  -0.01  -0.01     0.01   0.00  -0.01
  46   6     0.01  -0.01  -0.01     0.00   0.00   0.00    -0.01  -0.01   0.00
  47   6     0.01   0.01   0.00     0.00   0.00   0.00    -0.01  -0.01   0.00
  48   6     0.00  -0.01  -0.01     0.00   0.00   0.00     0.00   0.00   0.01
  49   6     0.00  -0.01  -0.02     0.00  -0.01   0.01     0.01   0.01   0.00
  50   6     0.00   0.01   0.00     0.00  -0.01  -0.01     0.01  -0.01   0.00
  51   6    -0.01   0.00   0.00    -0.01   0.00   0.01     0.01   0.00  -0.01
  52   6     0.00   0.00  -0.01     0.00   0.00  -0.01     0.00   0.00   0.00
  53   6    -0.09  -0.01   0.02    -0.03  -0.01   0.01     0.05   0.01  -0.01
  54   6     0.08   0.05   0.00     0.02   0.01   0.00    -0.05   0.00   0.00
  55   1     0.01  -0.08  -0.01     0.00  -0.03   0.00    -0.01   0.06  -0.02
  56   1    -0.13   0.19   0.07    -0.06   0.09   0.02    -0.01   0.10  -0.05
  57   1    -0.02   0.07   0.11     0.02   0.01   0.06     0.17  -0.16   0.08
  58   1     0.10  -0.07  -0.25     0.04  -0.03  -0.09     0.04   0.01   0.07
  59   1     0.05  -0.06  -0.20     0.03  -0.04  -0.09     0.02  -0.08  -0.06
  60   1     0.07   0.05  -0.14     0.04   0.01  -0.05     0.05  -0.02   0.04
  61   1    -0.02   0.04   0.05     0.06  -0.11  -0.13     0.03   0.03   0.04
  62   1     0.01   0.00   0.02    -0.03  -0.03  -0.05     0.03   0.00  -0.01
  63   1     0.00   0.05  -0.04     0.00  -0.14   0.11    -0.02   0.04  -0.06
  64   1    -0.02   0.11   0.04     0.03  -0.29  -0.10    -0.02   0.12   0.05
  65   1    -0.02   0.11   0.03     0.04  -0.30  -0.08    -0.02   0.08   0.01
  66   1     0.05  -0.10   0.10    -0.13   0.23  -0.24     0.01   0.00   0.01
  67   1    -0.04  -0.11  -0.02     0.07   0.27   0.05     0.01   0.00   0.01
  68   1     0.03  -0.09   0.08    -0.09   0.23  -0.21    -0.01  -0.01  -0.01
  69   1     0.12   0.05  -0.26     0.05   0.04  -0.11    -0.02   0.07  -0.04
  70   1     0.09  -0.15   0.01     0.03  -0.06  -0.01    -0.04   0.06  -0.07
  71   1     0.05   0.13  -0.13     0.03   0.05  -0.07     0.01   0.11  -0.09
  72   1     0.08  -0.01  -0.03     0.08   0.00  -0.02     0.32   0.01  -0.06
  73   1    -0.03   0.02   0.03     0.07   0.00   0.02     0.54  -0.08   0.05
  74   1    -0.02  -0.08  -0.02     0.02  -0.02  -0.02     0.17   0.07  -0.13
  75   1    -0.02   0.02   0.01    -0.01   0.00   0.01    -0.01  -0.01   0.01
  76   1    -0.04   0.00   0.01    -0.01   0.01   0.00     0.03   0.03   0.00
  77   1    -0.02   0.02   0.01     0.00   0.01   0.00     0.02   0.02   0.00
  78   1    -0.01   0.01   0.02    -0.01   0.00   0.01     0.00  -0.02  -0.01
  79   1    -0.02   0.01  -0.03    -0.01   0.00  -0.01     0.01  -0.01   0.02
  80   1     0.00   0.04   0.01     0.05  -0.06  -0.01    -0.01  -0.01   0.00
  81   1     0.02   0.02   0.00     0.03  -0.03   0.00    -0.03   0.00   0.00
  82   1     0.01   0.00   0.00    -0.03   0.05   0.00     0.00  -0.01   0.00
  83   1     0.01   0.02  -0.02     0.00   0.01  -0.01    -0.01  -0.02   0.02
  84   1     0.00   0.02   0.02     0.01  -0.01   0.01    -0.01  -0.01  -0.02
  85   1    -0.15  -0.08  -0.05    -0.06  -0.03  -0.02    -0.05   0.01  -0.04
  86   1     0.12  -0.14  -0.11     0.05  -0.06  -0.04     0.05  -0.05  -0.01
  87   1     0.09   0.08   0.03     0.04   0.04   0.01     0.04   0.05   0.04
  88   1     0.02   0.01  -0.02     0.01   0.00  -0.01    -0.01  -0.02   0.01
  89   1     0.00  -0.02   0.00     0.00  -0.01   0.00    -0.01  -0.02   0.01
  90   1     0.02  -0.02  -0.01     0.01  -0.01   0.00     0.00   0.00   0.01
  91   1     0.01  -0.01   0.00     0.00   0.00   0.00    -0.02   0.01   0.00
  92   1     0.03   0.03   0.00     0.01   0.01   0.00    -0.02  -0.03  -0.01
  93   1     0.03   0.00   0.00     0.01   0.00   0.00    -0.02   0.00   0.00
  94   1     0.01  -0.01  -0.01     0.00   0.00   0.00     0.00   0.01   0.01
  95   1     0.02  -0.01  -0.02     0.01   0.00   0.00    -0.01   0.00   0.02
  96   1     0.00  -0.03   0.00     0.00  -0.01   0.00     0.00   0.02   0.00
  97   1     0.01  -0.05  -0.01     0.00   0.00   0.01     0.00   0.03   0.00
  98   1    -0.01   0.00  -0.03     0.00   0.00   0.01     0.01  -0.01   0.00
  99   1    -0.02   0.00  -0.05     0.00  -0.01   0.02     0.03   0.01   0.02
 100   1    -0.01   0.02   0.00    -0.01   0.01  -0.01     0.01  -0.02   0.00
 101   1    -0.01   0.01   0.00     0.00  -0.02  -0.02     0.01   0.00   0.01
 102   1     0.00   0.01   0.00     0.00  -0.02  -0.02     0.00   0.00   0.00
 103   1    -0.01  -0.01   0.00     0.00  -0.02   0.01     0.00   0.02   0.00
 104   1    -0.02  -0.01   0.00    -0.02   0.00   0.02     0.02   0.01  -0.01
 105   1    -0.03   0.02   0.01    -0.01   0.00   0.02     0.02  -0.01  -0.02
 106   1    -0.01  -0.01  -0.01     0.00   0.01   0.00     0.01   0.00   0.01
 107   1     0.01  -0.02   0.00     0.00   0.00  -0.01     0.00   0.01   0.00
 108   1    -0.02  -0.01  -0.02    -0.01   0.00  -0.01     0.01   0.01   0.00
 109   1    -0.09   0.03   0.01    -0.03   0.00   0.00     0.05  -0.02   0.00
 110   1    -0.16  -0.04   0.04    -0.05  -0.02   0.01     0.10   0.03  -0.02
 111   1    -0.08   0.04   0.00    -0.03   0.00   0.00     0.04  -0.02   0.00
 112   1     0.05   0.16   0.02     0.01   0.04   0.00    -0.03  -0.04   0.00
 113   1     0.06   0.07   0.00     0.02   0.02   0.00    -0.04  -0.01   0.00
 114   1     0.21   0.04  -0.04     0.06   0.01  -0.01    -0.10   0.00   0.01
                    79                     80                     81
                     A                      A                      A
 Frequencies --   403.3928               414.0234               426.2805
 Red. masses --     5.3563                 6.1821                 5.8942
 Frc consts  --     0.5135                 0.6244                 0.6310
 IR Inten    --     7.6115                 4.8322                14.7411
 Atom AN      X      Y      Z        X      Y      Z        X      Y      Z
   1   8    -0.01   0.01  -0.01    -0.04   0.04   0.01    -0.01   0.00   0.00
   2  12    -0.01  -0.03   0.00    -0.03   0.18  -0.16    -0.02   0.05  -0.06
   3   8    -0.02   0.02   0.03     0.13   0.08  -0.07     0.03   0.05   0.00
   4   6     0.01  -0.01   0.01     0.02  -0.06   0.04     0.01  -0.02   0.01
   5   7     0.00   0.01   0.00     0.02  -0.05  -0.03     0.01  -0.01  -0.02
   6   7     0.00   0.01   0.00    -0.01  -0.05  -0.03     0.00  -0.01  -0.01
   7   8    -0.01   0.01   0.00    -0.04  -0.01  -0.05    -0.01  -0.01  -0.02
   8   6     0.00   0.01   0.00    -0.01  -0.06   0.01     0.00  -0.02   0.00
   9   6     0.00   0.01   0.00     0.00  -0.08   0.02     0.00  -0.02   0.01
  10   6     0.00   0.01   0.00     0.00  -0.06   0.00    -0.01  -0.01   0.00
  11   8    -0.01  -0.01  -0.01     0.01   0.03  -0.06     0.00   0.03  -0.01
  12   6    -0.01   0.00  -0.01    -0.07  -0.02   0.00    -0.04  -0.01  -0.01
  13   6    -0.01   0.01   0.00    -0.05  -0.09   0.03    -0.05  -0.03   0.00
  14   6     0.03  -0.03   0.02     0.09  -0.09   0.04     0.03  -0.02   0.02
  15   8    -0.03   0.00  -0.01    -0.20   0.13   0.09    -0.05   0.02   0.01
  16   6     0.00   0.00   0.00     0.00   0.01   0.04     0.00   0.00   0.00
  17   8    -0.08   0.03   0.23     0.08   0.02   0.01    -0.23  -0.07  -0.04
  18   6    -0.03   0.08   0.08     0.04   0.00   0.02    -0.11   0.03  -0.04
  19   8     0.18   0.01  -0.07    -0.08   0.02   0.01     0.26  -0.03   0.02
  20   8    -0.11   0.01   0.00    -0.04  -0.02  -0.05     0.12   0.05   0.13
  21   6    -0.06   0.05  -0.13    -0.02   0.01  -0.03     0.06  -0.06   0.09
  22   6    -0.14   0.01  -0.14     0.01   0.00  -0.03    -0.02   0.00   0.11
  23   6    -0.08   0.10   0.05     0.05   0.00   0.02    -0.13   0.00  -0.08
  24   8     0.25   0.04  -0.06    -0.05   0.04   0.02     0.12  -0.14  -0.04
  25   6     0.02  -0.18  -0.04     0.01  -0.04  -0.02    -0.02   0.12   0.07
  26   6     0.01  -0.07   0.05     0.02  -0.03   0.06    -0.08   0.08  -0.17
  27   6     0.00   0.00  -0.01     0.02  -0.15   0.09     0.01  -0.06   0.04
  28   6     0.05  -0.01   0.00     0.16  -0.03   0.03     0.05  -0.01   0.01
  29   6     0.00   0.00   0.00     0.00  -0.02   0.03     0.01   0.00   0.01
  30   6     0.01  -0.01   0.00     0.00  -0.03   0.01     0.02  -0.04   0.01
  31   6     0.00   0.00   0.00    -0.01   0.01   0.03     0.00   0.01   0.01
  32   6     0.00   0.00   0.00    -0.01   0.00   0.00     0.00   0.00   0.00
  33   6     0.01   0.00   0.00    -0.03   0.01  -0.02    -0.01   0.00  -0.01
  34   6     0.00   0.00   0.00    -0.03   0.01  -0.02    -0.01   0.00  -0.01
  35   6     0.00   0.00   0.00    -0.03   0.00   0.01     0.00   0.00   0.00
  36   6     0.00   0.00   0.00     0.01   0.02   0.04     0.01   0.01   0.02
  37   6     0.00   0.00   0.00    -0.03   0.02   0.01    -0.01   0.00   0.01
  38   6     0.00   0.00   0.00     0.02   0.02   0.00     0.02  -0.02   0.00
  39   6    -0.02   0.02   0.00     0.03   0.02  -0.01     0.01   0.00  -0.01
  40   6    -0.01   0.00   0.00     0.04   0.02  -0.01     0.01   0.00   0.00
  41   6     0.01  -0.02   0.00     0.01   0.01   0.01     0.00  -0.01   0.00
  42   6     0.00  -0.01   0.00     0.01   0.00   0.02     0.01  -0.01   0.01
  43   6     0.00   0.00   0.00     0.02   0.02   0.01     0.00   0.01   0.00
  44   6    -0.01   0.01   0.00     0.00   0.01   0.03    -0.01   0.01   0.01
  45   6     0.00   0.00   0.00    -0.03  -0.02   0.01    -0.02  -0.01   0.01
  46   6     0.00   0.00   0.00     0.02   0.04  -0.01     0.01   0.02  -0.01
  47   6     0.00   0.00   0.00     0.02   0.02  -0.01     0.01   0.01  -0.01
  48   6     0.00   0.00   0.00     0.00  -0.02   0.00     0.00  -0.01   0.00
  49   6     0.00   0.00  -0.01     0.00  -0.02   0.00     0.00  -0.01  -0.01
  50   6     0.00   0.01   0.01    -0.01   0.03  -0.01    -0.01   0.02   0.01
  51   6     0.00   0.00   0.00    -0.02   0.01   0.00    -0.01   0.01   0.01
  52   6     0.00   0.00   0.00     0.00  -0.02   0.00     0.00   0.00  -0.01
  53   6     0.01   0.01   0.00    -0.06  -0.04   0.01    -0.01  -0.02   0.00
  54   6    -0.01   0.00   0.00     0.05   0.01   0.00     0.01   0.02   0.00
  55   1     0.00   0.01   0.00     0.01  -0.08   0.04     0.00  -0.02   0.02
  56   1     0.00   0.01  -0.01    -0.03  -0.16   0.05    -0.02  -0.06   0.00
  57   1     0.03  -0.03   0.02     0.13  -0.12  -0.01     0.04  -0.03   0.00
  58   1     0.01   0.00   0.01     0.01   0.02   0.07     0.00   0.00   0.00
  59   1     0.01  -0.02  -0.02     0.01  -0.03   0.00     0.00  -0.01  -0.01
  60   1     0.01  -0.01   0.00     0.02  -0.01   0.05     0.01   0.00   0.00
  61   1    -0.22  -0.10  -0.08    -0.01  -0.04  -0.02     0.05   0.13   0.07
  62   1    -0.14   0.07   0.03     0.07   0.02   0.03    -0.21  -0.06  -0.08
  63   1     0.10  -0.11   0.28     0.03  -0.03   0.03    -0.08   0.08  -0.11
  64   1     0.07  -0.48  -0.20     0.00  -0.09  -0.03     0.01   0.30   0.11
  65   1     0.06  -0.24   0.03     0.00  -0.05  -0.03    -0.01   0.16   0.11
  66   1     0.06  -0.14   0.06     0.07  -0.07   0.13    -0.20   0.19  -0.33
  67   1    -0.06  -0.15  -0.09    -0.05  -0.07   0.03     0.09   0.17  -0.09
  68   1     0.12  -0.10   0.16     0.02  -0.04   0.06    -0.09   0.10  -0.19
  69   1     0.01   0.01  -0.01     0.15  -0.01   0.06     0.09   0.02   0.04
  70   1     0.00  -0.01  -0.01     0.06  -0.21   0.14     0.02  -0.09   0.06
  71   1     0.01   0.00  -0.01     0.05  -0.30   0.17     0.03  -0.16   0.09
  72   1     0.06   0.00  -0.01     0.15  -0.01   0.01     0.05  -0.01   0.00
  73   1     0.10  -0.02   0.01     0.29  -0.05   0.03     0.09  -0.02   0.01
  74   1     0.03   0.01  -0.02     0.13   0.04  -0.02     0.04   0.01  -0.01
  75   1     0.00   0.00   0.00     0.01  -0.01  -0.01     0.01  -0.01   0.00
  76   1     0.01   0.01   0.00    -0.03   0.02  -0.03    -0.01   0.00  -0.01
  77   1     0.00   0.00   0.00    -0.02   0.04  -0.03    -0.01   0.00  -0.01
  78   1     0.00   0.00   0.00     0.01   0.04   0.04     0.01   0.01   0.02
  79   1     0.00   0.00   0.00    -0.03   0.02  -0.01    -0.01   0.00   0.00
  80   1    -0.03   0.04   0.00     0.02   0.02   0.00     0.00   0.03   0.00
  81   1    -0.01   0.01   0.00     0.04   0.01  -0.02     0.00   0.01  -0.01
  82   1     0.01  -0.03   0.00    -0.01   0.01  -0.01    -0.02   0.01   0.00
  83   1     0.00   0.00   0.01     0.03   0.03  -0.02     0.00   0.02   0.00
  84   1    -0.01   0.01   0.00     0.01   0.00   0.04    -0.01   0.01   0.02
  85   1     0.00   0.00  -0.01     0.02  -0.06   0.06    -0.01  -0.03   0.03
  86   1     0.00   0.00   0.00    -0.06   0.04  -0.04    -0.03   0.01  -0.02
  87   1     0.00   0.00   0.00    -0.07  -0.10  -0.03    -0.04  -0.04   0.00
  88   1     0.00   0.00   0.00     0.04   0.08  -0.04     0.02   0.04  -0.02
  89   1     0.00   0.00   0.00     0.04   0.07  -0.02     0.02   0.04  -0.01
  90   1     0.00   0.00   0.00    -0.01   0.00  -0.05    -0.01   0.00  -0.03
  91   1     0.00   0.00   0.00     0.04   0.01  -0.03     0.02   0.01  -0.01
  92   1     0.00   0.00   0.00     0.04   0.06   0.00     0.01   0.02  -0.01
  93   1     0.00   0.00   0.00     0.02  -0.02  -0.03     0.01  -0.01  -0.02
  94   1     0.00   0.00   0.00     0.01  -0.04  -0.01     0.00  -0.02   0.00
  95   1     0.00   0.00   0.00     0.03  -0.02  -0.03     0.01  -0.01  -0.01
  96   1     0.00   0.00   0.00    -0.01  -0.06   0.03    -0.01  -0.02   0.02
  97   1     0.00   0.00  -0.01     0.03  -0.07   0.00     0.02  -0.03  -0.01
  98   1     0.00   0.00  -0.01     0.00  -0.02   0.00     0.01  -0.02   0.00
  99   1     0.00   0.01  -0.01    -0.02  -0.01  -0.06     0.00   0.01  -0.04
 100   1     0.01   0.00   0.01    -0.03   0.07  -0.01     0.00   0.03   0.00
 101   1     0.00   0.01   0.01    -0.01   0.00  -0.04     0.01   0.02   0.00
 102   1     0.00   0.01   0.01    -0.01   0.03  -0.01    -0.01   0.04   0.02
 103   1     0.00   0.01   0.00    -0.02  -0.01  -0.01    -0.02  -0.02   0.00
 104   1     0.01   0.00  -0.01    -0.02  -0.03  -0.02    -0.02   0.01   0.01
 105   1     0.00   0.00   0.00    -0.05   0.04   0.02    -0.03   0.01   0.03
 106   1     0.00  -0.01   0.00    -0.01  -0.02  -0.01     0.01  -0.01  -0.01
 107   1     0.00   0.00   0.00     0.03  -0.05   0.02     0.01   0.00  -0.01
 108   1     0.00   0.00   0.00    -0.02  -0.02  -0.02    -0.01   0.01  -0.03
 109   1     0.01   0.00   0.00    -0.05  -0.02   0.01    -0.01  -0.02   0.00
 110   1     0.02   0.01  -0.01    -0.09  -0.06   0.02     0.00  -0.02   0.00
 111   1     0.01   0.00   0.00    -0.05  -0.03   0.01    -0.01  -0.02   0.00
 112   1     0.00  -0.01   0.00     0.02   0.07   0.00     0.00   0.05   0.00
 113   1    -0.01   0.00   0.00     0.05   0.01  -0.01     0.01   0.02   0.00
 114   1    -0.02   0.00   0.00     0.13   0.00  -0.03     0.04   0.02  -0.02
                    82                     83                     84
                     A                      A                      A
 Frequencies --   437.3633               438.1891               444.1772
 Red. masses --     6.5348                 3.5465                 4.0183
 Frc consts  --     0.7365                 0.4012                 0.4671
 IR Inten    --     4.2785                 1.0270                 7.5217
 Atom AN      X      Y      Z        X      Y      Z        X      Y      Z
   1   8     0.00   0.00   0.00     0.00   0.00   0.00     0.00  -0.01  -0.02
   2  12     0.01   0.03   0.01     0.00   0.01   0.01    -0.03  -0.03   0.01
   3   8     0.01   0.00  -0.01    -0.01   0.00   0.00    -0.03   0.04   0.06
   4   6     0.00   0.00   0.00     0.00   0.00   0.00     0.00   0.01  -0.01
   5   7     0.01   0.02   0.06     0.00  -0.03  -0.13     0.06   0.00  -0.03
   6   7     0.01  -0.02  -0.09    -0.02   0.02   0.17     0.00  -0.01  -0.04
   7   8     0.00   0.00   0.00     0.00   0.00   0.00     0.01   0.00   0.00
   8   6    -0.01   0.01   0.05     0.00  -0.03  -0.09    -0.02  -0.03   0.01
   9   6    -0.01   0.00   0.01     0.01  -0.02   0.00    -0.02  -0.03   0.02
  10   6    -0.01  -0.01  -0.05     0.00   0.01   0.10    -0.03  -0.01  -0.02
  11   8     0.00   0.00   0.01     0.00   0.00   0.01     0.00   0.02   0.04
  12   6     0.00  -0.01   0.01     0.00   0.00   0.00    -0.01  -0.01  -0.01
  13   6     0.00  -0.01   0.00     0.00   0.00   0.00    -0.04   0.00   0.00
  14   6     0.00   0.00   0.00     0.00   0.00   0.00    -0.01   0.01   0.02
  15   8     0.00   0.00   0.01     0.00   0.00   0.00     0.05  -0.03  -0.04
  16   6     0.00   0.00   0.00     0.00   0.00  -0.01     0.00  -0.01  -0.03
  17   8     0.17  -0.08  -0.04     0.05  -0.02  -0.01     0.00   0.01   0.00
  18   6     0.05  -0.23  -0.01     0.02  -0.07   0.00     0.00   0.01   0.00
  19   8    -0.08  -0.20   0.06    -0.03  -0.06   0.01    -0.01   0.02  -0.01
  20   8    -0.17   0.11   0.21    -0.05   0.03   0.06     0.01  -0.01  -0.03
  21   6    -0.09   0.18  -0.01    -0.03   0.05   0.00     0.01  -0.01   0.00
  22   6    -0.05   0.04   0.00    -0.01   0.01   0.00     0.01   0.00  -0.01
  23   6    -0.03  -0.08  -0.03    -0.01  -0.02  -0.01     0.01   0.01   0.01
  24   8     0.18   0.09  -0.14     0.05   0.03  -0.04    -0.02   0.00   0.01
  25   6     0.02   0.05   0.01     0.01   0.01   0.00     0.00  -0.01   0.00
  26   6    -0.05   0.07  -0.09    -0.01   0.02  -0.02     0.01  -0.01   0.02
  27   6     0.00  -0.01   0.00     0.00   0.00   0.00     0.00  -0.02   0.01
  28   6    -0.01   0.00   0.00     0.00   0.00   0.00     0.00   0.00   0.00
  29   6     0.01   0.02  -0.02     0.01   0.02   0.02     0.12   0.22  -0.09
  30   6     0.00  -0.01   0.02     0.00   0.00  -0.03     0.01  -0.03   0.00
  31   6     0.00   0.01  -0.02     0.01   0.01   0.04     0.06   0.16  -0.02
  32   6     0.00   0.01   0.01     0.00  -0.01  -0.02     0.01   0.05  -0.02
  33   6     0.00   0.00   0.02    -0.01  -0.01  -0.03    -0.06  -0.06   0.00
  34   6     0.01   0.00   0.01    -0.01   0.00  -0.02     0.01   0.04  -0.05
  35   6     0.01   0.01  -0.02     0.00   0.02   0.03     0.05   0.13  -0.07
  36   6    -0.02  -0.01  -0.02     0.04   0.01   0.08    -0.01  -0.03   0.13
  37   6     0.02  -0.03  -0.03    -0.04   0.04   0.07    -0.02  -0.08  -0.02
  38   6     0.00   0.00   0.02     0.01  -0.02  -0.04     0.01  -0.01   0.00
  39   6     0.01   0.00  -0.02     0.00  -0.03   0.03     0.01   0.00  -0.01
  40   6     0.02  -0.01  -0.02    -0.01   0.01   0.04     0.01   0.01  -0.01
  41   6    -0.01   0.01  -0.01     0.01   0.00   0.03     0.01   0.00   0.00
  42   6    -0.01   0.01   0.03     0.02  -0.02  -0.05     0.01  -0.01   0.01
  43   6     0.02   0.02   0.03    -0.04  -0.02  -0.07     0.01   0.02   0.02
  44   6    -0.04  -0.02   0.07     0.06   0.02  -0.10    -0.01   0.01   0.03
  45   6     0.01   0.02   0.00    -0.05  -0.06   0.03    -0.09  -0.08   0.13
  46   6    -0.01  -0.04   0.00     0.03   0.07  -0.02     0.03   0.01  -0.08
  47   6    -0.02  -0.04   0.00     0.03   0.06  -0.02    -0.05  -0.10  -0.05
  48   6     0.01   0.03  -0.01    -0.02  -0.07   0.04     0.01   0.01   0.07
  49   6     0.04  -0.07   0.03    -0.06   0.10  -0.04     0.01  -0.02   0.00
  50   6    -0.02   0.06  -0.01     0.03  -0.09   0.02    -0.01   0.03   0.00
  51   6    -0.03   0.02  -0.01     0.05  -0.05   0.01    -0.02   0.01   0.01
  52   6     0.02  -0.03   0.00    -0.04   0.07  -0.02     0.01  -0.01   0.00
  53   6     0.00  -0.02   0.00     0.02   0.00   0.00     0.02  -0.08   0.02
  54   6    -0.01   0.02   0.00     0.01  -0.01  -0.01    -0.01   0.03  -0.01
  55   1    -0.01   0.01   0.02     0.00  -0.02  -0.01     0.01  -0.02   0.04
  56   1    -0.01   0.00   0.00    -0.01   0.01   0.00    -0.01  -0.03  -0.02
  57   1    -0.01   0.00   0.00     0.00   0.00   0.01    -0.01   0.02   0.03
  58   1     0.00   0.00   0.00     0.00   0.00  -0.01     0.01  -0.02  -0.04
  59   1     0.00   0.00   0.00     0.00   0.00  -0.01     0.00  -0.01  -0.03
  60   1     0.00   0.00   0.00     0.00   0.00  -0.01     0.00   0.00  -0.03
  61   1    -0.17  -0.11   0.11    -0.05  -0.04   0.03     0.02   0.01  -0.01
  62   1     0.11   0.08  -0.14     0.04   0.02  -0.04     0.00   0.00   0.02
  63   1     0.15   0.03  -0.04     0.05   0.01  -0.01    -0.01   0.00   0.01
  64   1     0.02   0.00   0.00     0.01  -0.01   0.00     0.00  -0.01   0.00
  65   1     0.01   0.20   0.05     0.00   0.05   0.01     0.00  -0.03  -0.01
  66   1    -0.09   0.08  -0.20    -0.02   0.02  -0.06     0.02  -0.02   0.03
  67   1     0.00   0.17   0.08     0.00   0.05   0.03     0.00  -0.02   0.00
  68   1    -0.08   0.18  -0.21    -0.02   0.05  -0.06     0.02  -0.02   0.03
  69   1     0.01   0.00   0.00     0.01   0.01  -0.01     0.04   0.03   0.02
  70   1     0.01  -0.01   0.01     0.01   0.00   0.00     0.01  -0.03   0.02
  71   1     0.00  -0.02   0.01     0.00   0.00   0.00     0.02  -0.07   0.04
  72   1    -0.01   0.00   0.00     0.00   0.00   0.00     0.02   0.00  -0.01
  73   1    -0.01   0.00   0.00     0.00   0.00   0.00     0.01   0.00   0.00
  74   1     0.00   0.00   0.00    -0.01   0.00   0.00    -0.02   0.00  -0.02
  75   1    -0.02   0.00   0.02     0.03  -0.03  -0.03    -0.02  -0.12   0.03
  76   1    -0.01  -0.03   0.03    -0.01  -0.01  -0.04    -0.13  -0.26   0.09
  77   1     0.01  -0.01   0.02    -0.04   0.00  -0.03    -0.03  -0.11   0.01
  78   1    -0.02  -0.01  -0.02     0.04   0.01   0.08    -0.03  -0.03   0.17
  79   1     0.01  -0.03  -0.03    -0.04   0.03   0.06    -0.04  -0.10  -0.02
  80   1     0.03   0.00  -0.02    -0.02  -0.04   0.04     0.00   0.02  -0.01
  81   1     0.03  -0.03  -0.03    -0.03   0.04   0.05     0.00   0.02  -0.01
  82   1    -0.02  -0.01  -0.02     0.03   0.03   0.05    -0.01   0.01  -0.01
  83   1     0.02   0.02   0.02    -0.04  -0.02  -0.06     0.01   0.02   0.01
  84   1    -0.04  -0.02   0.08     0.06   0.02  -0.11    -0.01   0.01   0.03
  85   1     0.04   0.05  -0.01    -0.12  -0.12   0.05    -0.16  -0.07   0.11
  86   1     0.01   0.01   0.06    -0.04  -0.02  -0.11    -0.10  -0.03   0.03
  87   1     0.03   0.04  -0.01    -0.09  -0.10   0.07    -0.15  -0.11   0.21
  88   1     0.00  -0.05   0.02     0.04   0.14  -0.08     0.14   0.18  -0.16
  89   1    -0.03  -0.07   0.00     0.08   0.16  -0.03     0.08   0.07  -0.12
  90   1     0.01  -0.02   0.02    -0.04  -0.02  -0.10    -0.06  -0.18  -0.23
  91   1    -0.05  -0.05   0.02     0.08   0.11  -0.06    -0.06  -0.03  -0.05
  92   1    -0.05  -0.08   0.01     0.08   0.14  -0.03    -0.08  -0.14  -0.07
  93   1    -0.03   0.01   0.04     0.03  -0.05  -0.09    -0.08  -0.09  -0.06
  94   1     0.02   0.08  -0.01    -0.01  -0.13   0.04     0.09   0.13   0.01
  95   1    -0.02   0.02   0.06     0.03  -0.05  -0.07     0.00  -0.02   0.22
  96   1     0.02   0.07  -0.03    -0.04  -0.14   0.09     0.03   0.04   0.10
  97   1     0.10  -0.11   0.01    -0.15   0.16  -0.01     0.03  -0.05   0.00
  98   1     0.07  -0.14   0.08    -0.11   0.21  -0.12     0.02  -0.04   0.01
  99   1     0.05  -0.01  -0.07    -0.07   0.01   0.11     0.01   0.00  -0.04
 100   1    -0.02   0.15  -0.04     0.03  -0.22   0.05    -0.01   0.05   0.00
 101   1     0.05  -0.01  -0.11    -0.07   0.01   0.16     0.01   0.01  -0.02
 102   1    -0.04   0.14  -0.01     0.06  -0.21   0.01    -0.01   0.05   0.01
 103   1    -0.06   0.04  -0.02     0.11  -0.09   0.03    -0.03   0.01   0.00
 104   1    -0.01  -0.02  -0.06     0.01   0.04   0.12    -0.02  -0.01  -0.01
 105   1    -0.06   0.05   0.01     0.11  -0.10   0.01    -0.04   0.03   0.02
 106   1     0.03  -0.06  -0.01    -0.05   0.13   0.00     0.01  -0.03  -0.01
 107   1     0.05  -0.06   0.02    -0.10   0.14  -0.06     0.02  -0.04   0.01
 108   1    -0.01  -0.02  -0.04     0.01   0.05   0.07    -0.01  -0.01  -0.03
 109   1     0.02   0.00  -0.02    -0.03  -0.07   0.06     0.02  -0.12   0.02
 110   1     0.01  -0.02  -0.04     0.03   0.03   0.07     0.08  -0.05   0.00
 111   1    -0.03  -0.08   0.01     0.07   0.09   0.00     0.01  -0.12   0.03
 112   1     0.01   0.03   0.03    -0.05   0.02  -0.05    -0.02   0.07   0.00
 113   1    -0.06   0.06   0.02     0.09  -0.08  -0.04    -0.03   0.05   0.00
 114   1     0.03   0.01   0.02    -0.02   0.00  -0.06     0.03   0.03  -0.01
                    85                     86                     87
                     A                      A                      A
 Frequencies --   445.3107               451.9335               453.5741
 Red. masses --     3.7190                 2.7359                 4.3764
 Frc consts  --     0.4345                 0.3292                 0.5305
 IR Inten    --     5.0149                 0.4388                13.1670
 Atom AN      X      Y      Z        X      Y      Z        X      Y      Z
   1   8     0.00   0.01   0.01     0.00  -0.01  -0.01     0.00  -0.04  -0.05
   2  12    -0.02   0.02  -0.04    -0.01   0.00   0.00     0.01   0.00  -0.03
   3   8     0.04  -0.02  -0.06    -0.01   0.02   0.02    -0.04   0.21   0.13
   4   6     0.00  -0.01   0.01     0.00   0.00   0.00     0.01   0.01  -0.02
   5   7     0.04   0.05   0.19    -0.01   0.00  -0.01     0.00   0.01   0.06
   6   7    -0.02   0.01   0.15     0.02   0.00  -0.04    -0.01   0.01   0.05
   7   8    -0.01   0.00   0.00     0.00   0.00   0.00     0.02   0.00  -0.02
   8   6     0.01   0.00   0.06    -0.01   0.01   0.00     0.01   0.00   0.01
   9   6    -0.01  -0.04  -0.06    -0.01   0.02   0.01     0.01  -0.01  -0.02
  10   6     0.00  -0.01   0.02    -0.01   0.01  -0.01     0.01   0.00   0.01
  11   8     0.00  -0.01  -0.02     0.00   0.01   0.01    -0.01   0.08   0.10
  12   6     0.00   0.00   0.02    -0.01   0.00  -0.01    -0.08  -0.04  -0.05
  13   6     0.02   0.00   0.01    -0.02  -0.01   0.00    -0.18  -0.04  -0.04
  14   6     0.01  -0.01  -0.01     0.00   0.00   0.01     0.00   0.02   0.06
  15   8    -0.06   0.02   0.04     0.02   0.00  -0.01     0.17  -0.03  -0.10
  16   6     0.00   0.01   0.02     0.00   0.00  -0.01     0.00  -0.04  -0.08
  17   8    -0.01   0.00   0.00     0.01   0.00   0.00     0.02   0.01  -0.01
  18   6     0.00   0.00   0.00     0.00  -0.01   0.00     0.00  -0.01  -0.01
  19   8     0.01   0.00   0.01    -0.01   0.00   0.00    -0.03   0.00  -0.02
  20   8     0.00   0.00   0.01     0.00   0.00   0.00    -0.01  -0.01   0.00
  21   6     0.00   0.00   0.00     0.00   0.01   0.00     0.00   0.00   0.00
  22   6     0.00   0.00   0.00     0.00   0.00   0.00     0.00   0.00   0.00
  23   6     0.00   0.00   0.00     0.00   0.00   0.00     0.01   0.00   0.01
  24   8     0.01   0.00   0.00     0.00   0.01   0.00    -0.01   0.01   0.00
  25   6     0.00   0.00   0.00     0.00   0.00   0.00     0.00   0.00   0.00
  26   6     0.00   0.00  -0.01     0.00   0.01   0.00     0.01   0.00   0.01
  27   6     0.00   0.00   0.00     0.00  -0.01   0.01     0.01  -0.13   0.08
  28   6     0.01   0.00   0.00     0.00   0.00   0.00     0.03   0.00   0.00
  29   6     0.03   0.04  -0.04    -0.01  -0.01   0.00     0.00  -0.02   0.00
  30   6     0.02  -0.03  -0.01     0.05  -0.06   0.01    -0.02   0.03   0.00
  31   6     0.01   0.04  -0.04     0.00  -0.01   0.00     0.00  -0.02  -0.02
  32   6     0.00   0.04   0.03     0.00  -0.01   0.00     0.00   0.00   0.00
  33   6    -0.03   0.00   0.05     0.01   0.00   0.00     0.01   0.00   0.01
  34   6     0.00   0.03   0.02     0.00  -0.01   0.00     0.00   0.00   0.01
  35   6     0.00   0.02  -0.06     0.00  -0.01   0.01     0.00   0.00   0.01
  36   6    -0.07  -0.02  -0.06     0.00   0.00  -0.01    -0.05   0.00  -0.09
  37   6     0.03  -0.07  -0.11     0.00   0.01   0.02    -0.01   0.02   0.03
  38   6     0.02  -0.02  -0.02     0.01  -0.05   0.06    -0.01   0.02  -0.01
  39   6     0.01  -0.02   0.03     0.01  -0.03   0.00     0.00   0.00   0.01
  40   6    -0.01   0.01   0.03    -0.04   0.00  -0.02     0.01   0.00   0.01
  41   6     0.00  -0.01   0.02    -0.01  -0.02  -0.03     0.00   0.01   0.01
  42   6     0.02  -0.03  -0.03     0.02  -0.05  -0.04    -0.01   0.01   0.00
  43   6    -0.02   0.00  -0.04     0.03   0.07   0.17    -0.01  -0.02  -0.04
  44   6     0.05   0.03  -0.10     0.04   0.03  -0.11     0.01  -0.01  -0.01
  45   6     0.03   0.05   0.00     0.00   0.01  -0.01     0.04   0.07  -0.04
  46   6    -0.04  -0.09   0.00     0.00   0.00   0.01    -0.04  -0.07   0.02
  47   6    -0.06  -0.12   0.01     0.01   0.02   0.00     0.02   0.03   0.00
  48   6     0.03   0.09  -0.03    -0.01  -0.01   0.00    -0.01  -0.02   0.01
  49   6    -0.05   0.10  -0.05    -0.05   0.10  -0.07     0.00   0.01   0.00
  50   6     0.02  -0.08   0.02     0.02  -0.07   0.03     0.01  -0.02  -0.01
  51   6     0.02  -0.02   0.01    -0.13   0.12   0.03     0.03  -0.03  -0.01
  52   6    -0.03   0.04  -0.03     0.09  -0.12   0.03    -0.02   0.03   0.00
  53   6     0.00  -0.01   0.01     0.00   0.00   0.00     0.00   0.01   0.00
  54   6     0.01   0.01   0.01     0.00   0.03  -0.01     0.00  -0.02   0.00
  55   1    -0.02  -0.06  -0.14     0.00   0.02   0.02     0.00  -0.01  -0.05
  56   1     0.00   0.01   0.03    -0.01  -0.02  -0.01    -0.08  -0.15  -0.07
  57   1     0.01  -0.01  -0.01     0.00   0.00   0.01     0.01   0.02   0.08
  58   1     0.00   0.01   0.02     0.00  -0.01  -0.01     0.01  -0.05  -0.11
  59   1     0.00   0.01   0.02     0.00   0.00  -0.01     0.01  -0.04  -0.09
  60   1     0.00   0.00   0.01     0.00   0.00  -0.01     0.01  -0.02  -0.07
  61   1     0.00   0.00   0.00     0.00   0.00   0.00     0.00   0.00   0.00
  62   1    -0.01   0.00  -0.01     0.01   0.00   0.00     0.02   0.00   0.00
  63   1     0.00   0.00   0.00     0.00   0.00   0.00     0.00   0.00   0.00
  64   1     0.00   0.01   0.00     0.00   0.00   0.00     0.00  -0.01   0.00
  65   1     0.00   0.00   0.00     0.00   0.00   0.00     0.00   0.00   0.00
  66   1    -0.01   0.01  -0.01     0.00   0.01   0.00     0.01  -0.01   0.01
  67   1     0.00   0.01   0.00     0.00   0.01   0.01     0.00  -0.01   0.01
  68   1    -0.01   0.00  -0.01     0.00   0.01  -0.01     0.01   0.00   0.01
  69   1    -0.01  -0.03  -0.01     0.03   0.01   0.01     0.25   0.14   0.06
  70   1     0.00  -0.01   0.00     0.01  -0.02   0.01     0.07  -0.20   0.14
  71   1    -0.01   0.02  -0.01     0.01  -0.05   0.03     0.08  -0.43   0.24
  72   1     0.00   0.00   0.00     0.01   0.00   0.00     0.10  -0.02  -0.01
  73   1     0.01   0.00   0.01     0.00   0.00   0.00     0.08  -0.02  -0.01
  74   1     0.02   0.00   0.01    -0.01   0.00  -0.01    -0.04   0.02  -0.07
  75   1    -0.03   0.00   0.05     0.00   0.00   0.00    -0.01   0.02   0.01
  76   1    -0.05  -0.06   0.07     0.02   0.02  -0.01     0.01   0.00   0.01
  77   1     0.03  -0.02   0.05     0.00   0.00   0.00     0.00   0.01   0.01
  78   1    -0.07  -0.02  -0.05     0.01   0.00  -0.01    -0.04  -0.01  -0.11
  79   1     0.02  -0.08  -0.12     0.00   0.01   0.02    -0.01   0.02   0.04
  80   1    -0.01  -0.01   0.04     0.02   0.03  -0.02     0.00  -0.02   0.01
  81   1    -0.04   0.06   0.03    -0.09   0.07  -0.01     0.02  -0.02   0.01
  82   1     0.01   0.02   0.04    -0.03   0.03  -0.02     0.01  -0.01   0.02
  83   1    -0.02   0.00  -0.04     0.02   0.06   0.20     0.00  -0.02  -0.05
  84   1     0.05   0.03  -0.11     0.03   0.04  -0.13     0.01  -0.01  -0.01
  85   1     0.11   0.11  -0.03     0.01   0.01  -0.01     0.16   0.12  -0.05
  86   1     0.03   0.01   0.14     0.00   0.01   0.00     0.02   0.04   0.11
  87   1     0.08   0.10  -0.04     0.00   0.00  -0.01     0.09   0.10  -0.11
  88   1     0.01  -0.12   0.05    -0.01  -0.01   0.01    -0.03  -0.14   0.08
  89   1    -0.08  -0.20  -0.01     0.00   0.00   0.01    -0.09  -0.18   0.02
  90   1     0.03  -0.05   0.05     0.00   0.02   0.02     0.05   0.02   0.10
  91   1    -0.13  -0.17   0.05     0.02   0.03   0.00     0.03   0.04   0.00
  92   1    -0.12  -0.23   0.02     0.02   0.03   0.00     0.03   0.06   0.00
  93   1    -0.07   0.04   0.10     0.01   0.00  -0.01     0.03  -0.01  -0.01
  94   1     0.05   0.23  -0.06    -0.01  -0.03   0.01     0.00  -0.05   0.01
  95   1    -0.04   0.06   0.17     0.00   0.00  -0.03     0.01  -0.02  -0.03
  96   1     0.07   0.19  -0.09    -0.01  -0.02   0.00    -0.02  -0.05   0.04
  97   1    -0.13   0.13  -0.02    -0.12   0.13  -0.04    -0.01   0.02   0.00
  98   1    -0.11   0.19  -0.12    -0.10   0.20  -0.13    -0.01   0.02   0.00
  99   1    -0.08   0.02   0.06    -0.08   0.03   0.04     0.00  -0.01   0.03
 100   1     0.03  -0.20   0.05     0.05  -0.21   0.05     0.00  -0.02  -0.01
 101   1    -0.07   0.02   0.16    -0.06   0.04   0.17     0.00  -0.01   0.00
 102   1     0.05  -0.18   0.02     0.05  -0.16   0.03     0.01  -0.03  -0.02
 103   1     0.06  -0.06   0.02    -0.26   0.17  -0.01     0.07  -0.04   0.00
 104   1    -0.01   0.03   0.08    -0.07  -0.05  -0.16     0.02   0.01   0.03
 105   1     0.05  -0.05   0.02    -0.26   0.23   0.07     0.07  -0.06  -0.02
 106   1    -0.02   0.07  -0.01     0.15  -0.27  -0.01    -0.04   0.07   0.00
 107   1    -0.05   0.08  -0.05     0.20  -0.27   0.08    -0.05   0.06  -0.01
 108   1     0.00   0.03   0.02    -0.05  -0.06  -0.21     0.01   0.01   0.06
 109   1     0.02  -0.01   0.00     0.00  -0.01   0.00     0.00   0.02   0.00
 110   1     0.01  -0.01   0.00     0.01   0.00  -0.01    -0.02   0.00   0.00
 111   1    -0.02  -0.03   0.01     0.00  -0.01   0.00    -0.01   0.02   0.00
 112   1     0.01   0.03   0.01    -0.01   0.05   0.00     0.01  -0.03   0.00
 113   1     0.00   0.03   0.01    -0.01   0.04  -0.01     0.01  -0.02   0.00
 114   1     0.04   0.01   0.01     0.02   0.03  -0.01    -0.01  -0.02   0.01
                    88                     89                     90
                     A                      A                      A
 Frequencies --   456.6175               460.4335               513.4527
 Red. masses --     2.9232                 3.8401                 3.4507
 Frc consts  --     0.3591                 0.4797                 0.5360
 IR Inten    --     0.5098                 2.3523                 0.1423
 Atom AN      X      Y      Z        X      Y      Z        X      Y      Z
   1   8     0.00   0.01   0.01     0.00   0.01   0.01     0.00   0.00   0.00
   2  12    -0.02   0.00   0.00     0.01   0.02   0.00     0.03   0.00   0.00
   3   8     0.02  -0.04  -0.03     0.01  -0.03  -0.02     0.00   0.00  -0.01
   4   6     0.00   0.00   0.00     0.00   0.00   0.00     0.00   0.00   0.00
   5   7     0.02   0.01  -0.01     0.03  -0.03   0.01     0.07  -0.12   0.04
   6   7     0.00  -0.01   0.00    -0.04  -0.01  -0.04     0.02   0.13   0.01
   7   8     0.00   0.00   0.00     0.00   0.00   0.00     0.00   0.00   0.00
   8   6    -0.01   0.00   0.00     0.02  -0.04   0.01     0.10  -0.10   0.04
   9   6    -0.02  -0.01   0.01     0.03  -0.04   0.00     0.13   0.01  -0.02
  10   6    -0.02  -0.01   0.00     0.03  -0.02  -0.01     0.05   0.12  -0.05
  11   8     0.00  -0.02  -0.02     0.00  -0.01  -0.01     0.00   0.00   0.00
  12   6     0.02   0.01   0.01     0.01   0.00   0.01     0.00   0.00   0.00
  13   6     0.04   0.00   0.02     0.02   0.00   0.01     0.00   0.00   0.00
  14   6     0.00   0.00  -0.01     0.00   0.00  -0.01     0.00   0.00   0.00
  15   8    -0.04   0.00   0.02    -0.03   0.00   0.01    -0.01   0.01   0.01
  16   6     0.00   0.01   0.02     0.00   0.01   0.01     0.00   0.00   0.00
  17   8     0.00   0.00   0.00    -0.01  -0.01   0.00     0.02   0.02   0.00
  18   6     0.00   0.00   0.00     0.00   0.00   0.00     0.02   0.02  -0.02
  19   8     0.00   0.00   0.00     0.04   0.00   0.00     0.00   0.03   0.00
  20   8     0.00   0.00   0.00     0.00   0.00   0.01    -0.01   0.00   0.03
  21   6     0.00   0.00   0.00     0.00   0.00   0.01    -0.03  -0.02   0.01
  22   6     0.00   0.00   0.00    -0.01   0.00   0.01    -0.04   0.00  -0.01
  23   6     0.00   0.00   0.00    -0.01   0.00  -0.01     0.02  -0.02  -0.02
  24   8     0.00   0.00   0.00     0.02  -0.01  -0.01     0.01  -0.03   0.01
  25   6     0.00   0.00   0.00     0.00   0.01   0.01     0.00   0.00   0.00
  26   6     0.00   0.00   0.00    -0.01   0.00  -0.01    -0.01   0.01  -0.01
  27   6    -0.01   0.02  -0.01     0.00   0.01  -0.01     0.00   0.00   0.00
  28   6    -0.01   0.00   0.00     0.00   0.00   0.00     0.00   0.00   0.00
  29   6     0.04   0.09  -0.04     0.03   0.04  -0.02     0.04  -0.09   0.03
  30   6     0.04  -0.06   0.00    -0.14   0.20   0.00     0.02   0.07   0.00
  31   6     0.03   0.05  -0.06     0.01   0.05  -0.02    -0.01   0.05   0.02
  32   6     0.01   0.01  -0.02     0.00   0.02  -0.01    -0.02   0.05  -0.01
  33   6     0.01  -0.03   0.00    -0.03  -0.02   0.01    -0.09  -0.05   0.01
  34   6     0.02   0.02  -0.01     0.00   0.02  -0.02     0.01   0.03  -0.06
  35   6     0.03   0.06   0.02     0.01   0.04  -0.01     0.01   0.00  -0.04
  36   6    -0.08  -0.03  -0.10    -0.05   0.00  -0.02    -0.06   0.04   0.03
  37   6    -0.07   0.05   0.13    -0.04   0.01   0.03    -0.05   0.01  -0.01
  38   6     0.03  -0.04  -0.01    -0.09   0.15   0.01     0.01  -0.07   0.03
  39   6     0.01  -0.01  -0.01    -0.04   0.06   0.01     0.01  -0.08   0.00
  40   6    -0.01   0.02   0.00     0.07  -0.06   0.01    -0.10   0.05  -0.01
  41   6     0.01  -0.02   0.00    -0.02   0.08   0.02     0.03  -0.05  -0.05
  42   6     0.02  -0.04   0.01    -0.07   0.14  -0.01     0.03  -0.03  -0.03
  43   6    -0.02   0.01  -0.01     0.08  -0.02   0.04    -0.06  -0.03   0.03
  44   6    -0.02   0.02   0.02     0.09  -0.05  -0.05    -0.05  -0.01   0.00
  45   6     0.05   0.07  -0.02     0.01   0.01   0.01     0.00  -0.01   0.02
  46   6    -0.06  -0.13   0.00    -0.02  -0.05  -0.01     0.00  -0.01  -0.01
  47   6     0.05   0.10  -0.04     0.01   0.02  -0.02     0.01   0.00   0.00
  48   6    -0.04  -0.12   0.10    -0.01  -0.04   0.04     0.00  -0.01   0.02
  49   6     0.01  -0.01  -0.01    -0.02   0.03   0.04     0.01  -0.01   0.00
  50   6    -0.01   0.04   0.02     0.03  -0.13  -0.07    -0.01   0.03   0.02
  51   6    -0.01   0.00   0.02     0.02   0.00  -0.07    -0.02   0.02   0.02
  52   6    -0.01   0.02  -0.02     0.04  -0.08   0.09     0.00   0.01  -0.01
  53   6     0.02  -0.03   0.01    -0.03  -0.01   0.01    -0.07   0.05  -0.01
  54   6     0.00   0.04   0.00     0.01  -0.09   0.01    -0.06  -0.07   0.01
  55   1    -0.01  -0.01   0.02     0.03  -0.04   0.00     0.23   0.02  -0.04
  56   1     0.02   0.03   0.02     0.01   0.02   0.01    -0.01   0.00   0.00
  57   1    -0.01   0.00  -0.02     0.00   0.00  -0.01     0.00   0.00   0.00
  58   1     0.00   0.01   0.02     0.00   0.01   0.01     0.00   0.00   0.00
  59   1     0.00   0.01   0.02     0.00   0.00   0.01     0.00   0.00   0.00
  60   1     0.00   0.00   0.01     0.00   0.00   0.01     0.00   0.00   0.00
  61   1     0.00   0.00   0.00    -0.01   0.00   0.01    -0.05   0.00   0.00
  62   1     0.00   0.00   0.00    -0.01   0.00  -0.01     0.03  -0.01  -0.02
  63   1     0.00   0.00   0.00     0.00   0.00  -0.01     0.02   0.00   0.02
  64   1     0.00   0.00   0.00     0.00   0.02   0.01     0.02  -0.03  -0.03
  65   1     0.00  -0.01   0.00     0.00   0.02   0.02     0.01   0.01   0.03
  66   1     0.00   0.00   0.00    -0.01   0.00  -0.01    -0.01   0.03   0.00
  67   1     0.00   0.00   0.00    -0.01   0.00  -0.01     0.00   0.03   0.03
  68   1     0.00   0.00   0.00    -0.01   0.00  -0.02    -0.04   0.02  -0.05
  69   1    -0.06  -0.04  -0.01    -0.03  -0.02  -0.01     0.01   0.01  -0.01
  70   1    -0.02   0.03  -0.03    -0.01   0.02  -0.02     0.01   0.00   0.00
  71   1    -0.02   0.08  -0.05    -0.01   0.05  -0.03     0.00  -0.01   0.00
  72   1    -0.02   0.00   0.00    -0.01   0.00   0.00     0.00   0.00   0.00
  73   1    -0.02   0.00   0.01    -0.01   0.00   0.00     0.00   0.00   0.00
  74   1     0.01  -0.01   0.02     0.01   0.00   0.01     0.00   0.00   0.00
  75   1    -0.03  -0.05   0.01    -0.01  -0.02   0.01     0.03   0.05  -0.04
  76   1    -0.02  -0.12   0.04    -0.06  -0.09   0.04    -0.12  -0.11   0.06
  77   1    -0.02  -0.03   0.00    -0.01  -0.01   0.00     0.06   0.06  -0.05
  78   1    -0.09  -0.05  -0.11    -0.05  -0.01  -0.01    -0.06   0.05   0.05
  79   1    -0.06   0.04   0.17    -0.04   0.00   0.04    -0.05   0.01   0.00
  80   1    -0.01   0.03   0.00     0.03  -0.10   0.01     0.05  -0.05  -0.03
  81   1    -0.04   0.08   0.00     0.20  -0.29   0.00    -0.17   0.16   0.02
  82   1    -0.02   0.02  -0.01     0.07  -0.04   0.02     0.07  -0.05  -0.03
  83   1    -0.02   0.02  -0.01     0.10  -0.04   0.04    -0.07  -0.03   0.06
  84   1    -0.02   0.02   0.03     0.09  -0.07  -0.07    -0.05   0.00   0.01
  85   1     0.15   0.17  -0.07     0.04   0.04  -0.01    -0.01  -0.06   0.05
  86   1     0.04   0.02   0.18     0.02  -0.01   0.07     0.02  -0.05   0.02
  87   1     0.12   0.15  -0.07     0.04   0.05  -0.01     0.04   0.02  -0.04
  88   1    -0.01  -0.18   0.06     0.03  -0.04   0.00     0.09   0.04  -0.01
  89   1    -0.12  -0.29  -0.01    -0.04  -0.12  -0.02    -0.01  -0.08  -0.04
  90   1     0.04  -0.06   0.08     0.02  -0.06   0.00     0.02  -0.06  -0.03
  91   1     0.15   0.21  -0.11     0.04   0.04  -0.04     0.02  -0.04  -0.01
  92   1     0.12   0.23  -0.06     0.04   0.07  -0.02     0.04   0.06   0.02
  93   1     0.03  -0.11  -0.18     0.01  -0.05  -0.06     0.03  -0.03   0.00
  94   1     0.00  -0.22   0.09     0.03  -0.05   0.02     0.05   0.00  -0.02
  95   1     0.06  -0.10  -0.06     0.03  -0.04   0.02     0.03  -0.02   0.03
  96   1    -0.07  -0.25   0.22    -0.02  -0.09   0.10     0.00  -0.05   0.08
  97   1     0.03  -0.06  -0.01    -0.10   0.14   0.05     0.04   0.02  -0.02
  98   1     0.02  -0.04   0.00    -0.06   0.12   0.00     0.04  -0.05   0.05
  99   1     0.00   0.01  -0.07    -0.01  -0.06   0.21     0.03   0.02  -0.02
 100   1     0.01   0.04   0.01    -0.07  -0.10  -0.04     0.05   0.01   0.00
 101   1     0.01   0.03   0.01    -0.05  -0.11  -0.05     0.03   0.03   0.02
 102   1    -0.02   0.07   0.04     0.06  -0.26  -0.14    -0.02   0.10   0.06
 103   1     0.02  -0.03   0.02    -0.07   0.10  -0.07    -0.02   0.06   0.03
 104   1    -0.03   0.02   0.05     0.08  -0.08  -0.20     0.00   0.04   0.02
 105   1    -0.01   0.00   0.03    -0.02   0.04  -0.09     0.02  -0.01  -0.01
 106   1     0.01   0.01  -0.02    -0.06  -0.06   0.04     0.09  -0.03   0.02
 107   1    -0.02   0.03  -0.04     0.07  -0.15   0.17    -0.01   0.05  -0.07
 108   1    -0.01   0.03  -0.03     0.01  -0.12   0.12     0.01   0.04  -0.06
 109   1     0.01  -0.07   0.02    -0.02   0.03  -0.01    -0.04   0.25  -0.08
 110   1     0.06  -0.01   0.01    -0.08  -0.03   0.02    -0.32  -0.07   0.03
 111   1     0.01  -0.06   0.02    -0.03   0.02  -0.01    -0.07   0.20  -0.06
 112   1    -0.02   0.08   0.01     0.03  -0.17  -0.02     0.07  -0.32   0.02
 113   1    -0.01   0.04   0.00     0.03  -0.08   0.00    -0.08  -0.11   0.03
 114   1     0.05   0.03  -0.02    -0.07  -0.09   0.05    -0.32  -0.05   0.09
                    91                     92                     93
                     A                      A                      A
 Frequencies --   521.3796               530.4086               531.8673
 Red. masses --     6.3651                 3.8156                 4.9972
 Frc consts  --     1.0194                 0.6325                 0.8329
 IR Inten    --     7.3029                 0.2940                 1.4915
 Atom AN      X      Y      Z        X      Y      Z        X      Y      Z
   1   8     0.00   0.00   0.00     0.00   0.00   0.00     0.00  -0.01  -0.01
   2  12    -0.02  -0.01  -0.02     0.00   0.00  -0.02     0.00   0.00   0.05
   3   8    -0.01   0.00   0.03    -0.02  -0.01   0.04     0.06   0.02  -0.11
   4   6     0.00   0.00   0.00     0.00   0.00   0.00     0.00   0.01   0.00
   5   7    -0.02   0.04  -0.01     0.05   0.01  -0.02    -0.15  -0.01   0.02
   6   7    -0.02  -0.04  -0.01    -0.06  -0.02   0.02     0.16   0.03   0.00
   7   8     0.00   0.00   0.00     0.00   0.00   0.00     0.01   0.00  -0.01
   8   6    -0.03   0.03  -0.02     0.07   0.06   0.22    -0.09   0.04   0.08
   9   6    -0.04  -0.01   0.01     0.01  -0.05   0.01    -0.03   0.14  -0.05
  10   6    -0.01  -0.04   0.02    -0.04  -0.06  -0.22     0.09   0.03  -0.07
  11   8     0.00   0.00  -0.01     0.00  -0.01  -0.01    -0.01   0.02   0.04
  12   6     0.01   0.00   0.00     0.01   0.00   0.00    -0.03   0.00   0.01
  13   6     0.00   0.00   0.01     0.01   0.00   0.01    -0.02  -0.01  -0.03
  14   6     0.00   0.00  -0.01     0.00   0.00  -0.01    -0.01   0.00   0.04
  15   8     0.01  -0.01  -0.01     0.01  -0.01  -0.01    -0.04   0.03   0.02
  16   6     0.00   0.00   0.01     0.00   0.00   0.01     0.00  -0.01  -0.02
  17   8     0.13   0.12  -0.02     0.00   0.00   0.00     0.01   0.01   0.00
  18   6     0.15   0.12  -0.14     0.00   0.00   0.00     0.01   0.01  -0.01
  19   8    -0.01   0.22   0.00     0.00   0.00   0.00     0.00   0.01   0.00
  20   8    -0.04  -0.03   0.16     0.00   0.00   0.00     0.00   0.00   0.01
  21   6    -0.19  -0.16   0.07     0.00   0.00   0.00    -0.01  -0.01   0.00
  22   6    -0.23   0.03  -0.05     0.00   0.00   0.00    -0.01   0.00   0.00
  23   6     0.15  -0.09  -0.13     0.00   0.00   0.00     0.01  -0.01  -0.01
  24   8     0.07  -0.21   0.10     0.00   0.00   0.00     0.00  -0.01   0.01
  25   6     0.00  -0.01   0.01     0.00   0.00   0.00     0.00   0.00   0.00
  26   6    -0.05   0.03  -0.06     0.00   0.00   0.00     0.00   0.00   0.00
  27   6     0.00   0.00   0.00     0.00   0.01   0.00     0.01  -0.01   0.00
  28   6     0.00   0.00   0.00     0.00   0.00   0.00     0.01   0.00   0.00
  29   6    -0.01   0.03  -0.01     0.03  -0.02  -0.03    -0.10  -0.01  -0.01
  30   6    -0.02  -0.02   0.00    -0.02  -0.03   0.03     0.11   0.01   0.02
  31   6     0.01  -0.02   0.00    -0.07   0.03   0.00    -0.02   0.03  -0.07
  32   6     0.01  -0.02   0.01    -0.10  -0.03  -0.05     0.00   0.03  -0.12
  33   6     0.02   0.02   0.00    -0.01   0.03  -0.06     0.04  -0.13   0.01
  34   6    -0.01  -0.01   0.02     0.05  -0.08  -0.07     0.10   0.04  -0.03
  35   6    -0.01   0.00   0.01     0.04  -0.08   0.00     0.07   0.03   0.03
  36   6     0.02  -0.01  -0.01    -0.05   0.06   0.05     0.04  -0.03   0.02
  37   6     0.01   0.00   0.00     0.02   0.02   0.04     0.10  -0.03   0.07
  38   6     0.00   0.01  -0.01     0.06   0.05   0.00     0.03   0.03   0.06
  39   6     0.01   0.00  -0.01     0.08   0.03   0.07    -0.01   0.06   0.11
  40   6     0.02   0.01   0.00     0.02   0.02   0.05    -0.03  -0.11   0.03
  41   6     0.00   0.02   0.01    -0.06  -0.04   0.09    -0.09   0.00   0.01
  42   6     0.00   0.00   0.01    -0.05  -0.05   0.03    -0.07   0.00  -0.05
  43   6     0.02   0.01  -0.01     0.05   0.04  -0.05    -0.04  -0.04  -0.01
  44   6     0.02   0.01   0.01     0.00   0.00  -0.04    -0.09  -0.06  -0.08
  45   6     0.00   0.00  -0.01    -0.01  -0.02   0.02    -0.02  -0.01   0.04
  46   6     0.00   0.00   0.00     0.02   0.03   0.01     0.00   0.01   0.00
  47   6     0.00   0.00   0.00     0.02   0.05   0.02    -0.01   0.01  -0.02
  48   6     0.00   0.00  -0.01    -0.01  -0.02   0.01    -0.01  -0.02   0.03
  49   6     0.00   0.00   0.00    -0.02   0.03  -0.04     0.00   0.02   0.00
  50   6     0.00   0.00   0.00     0.01  -0.02  -0.01     0.02  -0.03  -0.01
  51   6     0.00   0.00   0.00     0.02  -0.02  -0.01     0.02  -0.01  -0.02
  52   6     0.00   0.00   0.00    -0.02   0.02  -0.02    -0.01   0.02  -0.02
  53   6     0.02  -0.01   0.00     0.04   0.03  -0.02    -0.10  -0.06   0.03
  54   6     0.02   0.01   0.00    -0.06   0.03   0.00     0.11  -0.02   0.01
  55   1    -0.07  -0.02   0.01     0.00  -0.04   0.04    -0.03   0.13  -0.08
  56   1     0.01   0.00   0.00     0.01   0.00   0.01    -0.04   0.00  -0.02
  57   1     0.00   0.00  -0.01     0.00   0.00  -0.02    -0.01   0.01   0.05
  58   1     0.00   0.00   0.01     0.00   0.01   0.01     0.00  -0.02  -0.03
  59   1     0.00   0.00   0.01     0.00   0.00   0.01     0.00  -0.01  -0.03
  60   1     0.00   0.00   0.00     0.00   0.00   0.01     0.00  -0.01  -0.02
  61   1    -0.29   0.00   0.01     0.00   0.00   0.00    -0.02   0.00   0.00
  62   1     0.18  -0.07  -0.14     0.00   0.00   0.00     0.01  -0.01   0.00
  63   1     0.11   0.01   0.13     0.00   0.00   0.00     0.01   0.00   0.01
  64   1     0.10  -0.22  -0.17     0.00   0.00   0.00     0.01  -0.01  -0.01
  65   1     0.07   0.05   0.18     0.00   0.00   0.00     0.00   0.00   0.01
  66   1    -0.08   0.13   0.05     0.00   0.00   0.00     0.00   0.00   0.00
  67   1    -0.04   0.12   0.13     0.00   0.00   0.00     0.00   0.00   0.00
  68   1    -0.27   0.06  -0.27     0.00   0.00   0.00    -0.01   0.00  -0.01
  69   1    -0.02  -0.01   0.01    -0.02  -0.01   0.01     0.07   0.05  -0.03
  70   1    -0.01   0.01  -0.01    -0.01   0.02  -0.01     0.04  -0.03   0.03
  71   1     0.00   0.01  -0.01     0.00   0.03  -0.02     0.01  -0.07   0.04
  72   1    -0.01   0.00   0.00    -0.02   0.00   0.00     0.05  -0.01  -0.01
  73   1    -0.01   0.00   0.00    -0.01   0.00   0.00     0.04  -0.01   0.00
  74   1     0.01   0.00   0.01     0.01   0.00   0.01    -0.03   0.01  -0.04
  75   1    -0.01  -0.02   0.02    -0.09  -0.06  -0.05    -0.04   0.07  -0.10
  76   1     0.03   0.04  -0.02     0.02   0.13   0.01     0.00  -0.23   0.12
  77   1    -0.02  -0.02   0.02     0.07  -0.06  -0.08     0.04   0.07  -0.08
  78   1     0.02  -0.02  -0.02    -0.05   0.09   0.09     0.03  -0.02   0.05
  79   1     0.01   0.00  -0.01     0.03   0.04   0.09     0.11  -0.04   0.11
  80   1     0.00  -0.02   0.00     0.05   0.02   0.08     0.02   0.12   0.09
  81   1     0.03   0.00   0.00     0.02   0.04  -0.05     0.02  -0.19  -0.05
  82   1    -0.01   0.01   0.00    -0.08  -0.04   0.08    -0.04   0.05   0.06
  83   1     0.02   0.01  -0.01     0.06   0.06  -0.12    -0.03  -0.04  -0.04
  84   1     0.02   0.01   0.01    -0.01   0.00  -0.09    -0.10  -0.07  -0.12
  85   1     0.00   0.02  -0.02    -0.04  -0.09   0.07    -0.03   0.04   0.00
  86   1    -0.01   0.01   0.00     0.02  -0.05  -0.02    -0.05   0.03   0.03
  87   1    -0.01   0.00   0.01     0.02   0.00  -0.03    -0.07  -0.04   0.11
  88   1    -0.03  -0.02   0.00     0.07   0.09  -0.01    -0.04   0.01  -0.03
  89   1     0.00   0.02   0.01     0.01   0.00  -0.01     0.02   0.08   0.01
  90   1    -0.01   0.02   0.01     0.02  -0.02  -0.02    -0.04  -0.01  -0.02
  91   1    -0.01   0.00   0.00     0.04   0.05   0.01    -0.01   0.17  -0.02
  92   1    -0.01  -0.02   0.00     0.03   0.07   0.03    -0.07  -0.10  -0.07
  93   1    -0.01   0.01   0.00     0.02   0.02   0.00    -0.08   0.00  -0.07
  94   1    -0.01   0.00   0.00    -0.03  -0.07   0.03    -0.10  -0.07   0.09
  95   1    -0.01   0.01   0.00     0.00   0.00  -0.05    -0.06  -0.01   0.00
  96   1     0.00   0.02  -0.02    -0.01  -0.03   0.01    -0.01   0.04  -0.06
[truncated: 1,626,271 more chars]
