# Supplementary material
Source: publisher figshare collection journal article supplement (https://acs.figshare.com/ndownloader/files/5127205)
Supplement: Supplementary file 1 [file 5127205 › supporting_ja043819b/RRSS_fm-5-react.mol]

  MacMolPlt                       

114118  0  0  0  0  0  0  0  0  0 v2000
   -4.0401    2.8763    1.6147 O   0  0  0  0  0  0  0  0  0  0  0  0
    0.1825   -0.8681   -0.3623 Mg  0  0  0  0  0  0  0  0  0  0  0  0
    0.0688   -0.1884   -2.1610 O   0  0  0  0  0  0  0  0  0  0  0  0
   -3.3203    2.9826    0.4784 C   0  0  0  0  0  0  0  0  0  0  0  0
   -0.9699   -2.4741    0.2777 N   0  0  0  0  0  0  0  0  0  0  0  0
    1.8896   -2.0302    0.0655 N   0  0  0  0  0  0  0  0  0  0  0  0
   -2.4502    3.8065    0.3019 O   0  0  0  0  0  0  0  0  0  0  0  0
   -0.5748   -3.7138    0.5499 C   0  0  0  0  0  0  0  0  0  0  0  0
    0.7659   -4.1353    0.4965 C   0  0  0  0  0  0  0  0  0  0  0  0
    1.9127   -3.3413    0.2948 C   0  0  0  0  0  0  0  0  0  0  0  0
   -2.8542    1.7970   -1.5928 O   0  0  0  0  0  0  0  0  0  0  0  0
   -1.7780    1.0397   -1.3277 C   0  0  0  0  0  0  0  0  0  0  0  0
   -0.9014    0.6980   -2.5363 C   0  0  0  0  0  0  0  0  0  0  0  0
   -3.8179    1.9603   -0.5362 C   0  0  0  0  0  0  0  0  0  0  0  0
   -1.5439    0.5991   -0.2081 O   0  0  0  0  0  0  0  0  0  0  0  0
   -3.6953    3.7958    2.6621 C   0  0  0  0  0  0  0  0  0  0  0  0
    0.4510    2.8899    0.2086 O   0  0  0  0  0  0  0  0  0  0  0  0
    1.4481    2.0147    0.2223 C   0  0  0  0  0  0  0  0  0  0  0  0
    1.2268    0.8533    0.5243 O   0  0  0  0  0  0  0  0  0  0  0  0
    2.8493    3.6335   -0.9947 O   0  0  0  0  0  0  0  0  0  0  0  0
    1.9170    4.6005   -0.8849 C   0  0  0  0  0  0  0  0  0  0  0  0
    0.6488    4.2954   -0.0970 C   0  0  0  0  0  0  0  0  0  0  0  0
    2.8491    2.5027   -0.0924 C   0  0  0  0  0  0  0  0  0  0  0  0
    2.0611    5.6689   -1.4271 O   0  0  0  0  0  0  0  0  0  0  0  0
    0.5348    5.1255    1.1797 C   0  0  0  0  0  0  0  0  0  0  0  0
    3.6341    2.8151    1.1865 C   0  0  0  0  0  0  0  0  0  0  0  0
   -0.3501    1.9817   -3.1945 C   0  0  0  0  0  0  0  0  0  0  0  0
   -5.1115    2.4301   -1.1999 C   0  0  0  0  0  0  0  0  0  0  0  0
   -2.3804   -2.1523    0.2615 C   0  0  0  0  0  0  0  0  0  0  0  0
    3.1425   -1.3091    0.1286 C   0  0  0  0  0  0  0  0  0  0  0  0
   -3.1344   -2.3775   -0.9452 C   0  0  0  0  0  0  0  0  0  0  0  0
   -4.4382   -1.8320   -1.0266 C   0  0  0  0  0  0  0  0  0  0  0  0
   -5.0128   -1.1400    0.0636 C   0  0  0  0  0  0  0  0  0  0  0  0
   -4.2865   -0.9894    1.2675 C   0  0  0  0  0  0  0  0  0  0  0  0
   -2.9596   -1.4819    1.3836 C   0  0  0  0  0  0  0  0  0  0  0  0
   -2.5886   -3.2625   -2.1021 C   0  0  0  0  0  0  0  0  0  0  0  0
   -2.1816   -1.3190    2.7147 C   0  0  0  0  0  0  0  0  0  0  0  0
    3.7214   -1.0126    1.4108 C   0  0  0  0  0  0  0  0  0  0  0  0
    4.9200   -0.2511    1.4544 C   0  0  0  0  0  0  0  0  0  0  0  0
    5.5168    0.2365    0.2712 C   0  0  0  0  0  0  0  0  0  0  0  0
    4.9304   -0.0440   -0.9834 C   0  0  0  0  0  0  0  0  0  0  0  0
    3.7471   -0.8311   -1.0825 C   0  0  0  0  0  0  0  0  0  0  0  0
    3.0744   -1.4897    2.7411 C   0  0  0  0  0  0  0  0  0  0  0  0
    3.1920   -1.2204   -2.4782 C   0  0  0  0  0  0  0  0  0  0  0  0
   -2.2395   -2.4401   -3.3816 C   0  0  0  0  0  0  0  0  0  0  0  0
   -3.5971   -4.4125   -2.4430 C   0  0  0  0  0  0  0  0  0  0  0  0
   -1.9430    0.1811    3.0763 C   0  0  0  0  0  0  0  0  0  0  0  0
   -2.9125   -2.0591    3.8852 C   0  0  0  0  0  0  0  0  0  0  0  0
    3.1390   -0.0075   -3.4560 C   0  0  0  0  0  0  0  0  0  0  0  0
    4.0303   -2.3889   -3.0996 C   0  0  0  0  0  0  0  0  0  0  0  0
    2.4019   -0.2978    3.4965 C   0  0  0  0  0  0  0  0  0  0  0  0
    4.1052   -2.2089    3.6751 C   0  0  0  0  0  0  0  0  0  0  0  0
   -1.6044   -4.7551    0.9695 C   0  0  0  0  0  0  0  0  0  0  0  0
    3.2442   -4.0790    0.4083 C   0  0  0  0  0  0  0  0  0  0  0  0
    0.9440   -5.1866    0.6923 H   0  0  0  0  0  0  0  0  0  0  0  0
   -1.6170    0.2639   -3.2654 H   0  0  0  0  0  0  0  0  0  0  0  0
   -3.9798    1.0009   -0.0369 H   0  0  0  0  0  0  0  0  0  0  0  0
   -3.7164    4.8257    2.2973 H   0  0  0  0  0  0  0  0  0  0  0  0
   -2.6979    3.5676    3.0484 H   0  0  0  0  0  0  0  0  0  0  0  0
   -4.4445    3.6487    3.4408 H   0  0  0  0  0  0  0  0  0  0  0  0
   -0.1932    4.5359   -0.7480 H   0  0  0  0  0  0  0  0  0  0  0  0
    3.3824    1.7060   -0.6180 H   0  0  0  0  0  0  0  0  0  0  0  0
    0.6144    6.1849    0.9208 H   0  0  0  0  0  0  0  0  0  0  0  0
    1.3240    4.8791    1.8972 H   0  0  0  0  0  0  0  0  0  0  0  0
   -0.4409    4.9374    1.6325 H   0  0  0  0  0  0  0  0  0  0  0  0
    4.5392    3.3624    0.9051 H   0  0  0  0  0  0  0  0  0  0  0  0
    3.9361    1.8649    1.6282 H   0  0  0  0  0  0  0  0  0  0  0  0
    3.0671    3.4172    1.9036 H   0  0  0  0  0  0  0  0  0  0  0  0
   -1.1493    2.6717   -3.4879 H   0  0  0  0  0  0  0  0  0  0  0  0
    0.2189    1.6958   -4.0839 H   0  0  0  0  0  0  0  0  0  0  0  0
    0.3353    2.4987   -2.5151 H   0  0  0  0  0  0  0  0  0  0  0  0
   -5.4632    1.6578   -1.8901 H   0  0  0  0  0  0  0  0  0  0  0  0
   -4.9495    3.3565   -1.7599 H   0  0  0  0  0  0  0  0  0  0  0  0
   -5.8814    2.6013   -0.4417 H   0  0  0  0  0  0  0  0  0  0  0  0
   -5.0316   -1.9892   -1.9371 H   0  0  0  0  0  0  0  0  0  0  0  0
   -6.0435   -0.7649   -0.0042 H   0  0  0  0  0  0  0  0  0  0  0  0
   -4.7627   -0.5016    2.1285 H   0  0  0  0  0  0  0  0  0  0  0  0
   -1.6480   -3.7313   -1.7549 H   0  0  0  0  0  0  0  0  0  0  0  0
   -1.1898   -1.7965    2.5799 H   0  0  0  0  0  0  0  0  0  0  0  0
    5.4069   -0.0636    2.4202 H   0  0  0  0  0  0  0  0  0  0  0  0
    6.4513    0.8125    0.3242 H   0  0  0  0  0  0  0  0  0  0  0  0
    5.4237    0.3042   -1.9004 H   0  0  0  0  0  0  0  0  0  0  0  0
    2.2753   -2.2139    2.4939 H   0  0  0  0  0  0  0  0  0  0  0  0
    2.1552   -1.5830   -2.3413 H   0  0  0  0  0  0  0  0  0  0  0  0
   -1.9802   -3.1219   -4.2072 H   0  0  0  0  0  0  0  0  0  0  0  0
   -1.3642   -1.7991   -3.1770 H   0  0  0  0  0  0  0  0  0  0  0  0
   -3.0910   -1.8173   -3.6980 H   0  0  0  0  0  0  0  0  0  0  0  0
   -3.1389   -5.1016   -3.1687 H   0  0  0  0  0  0  0  0  0  0  0  0
   -4.5206   -4.0101   -2.8860 H   0  0  0  0  0  0  0  0  0  0  0  0
   -3.8650   -4.9849   -1.5413 H   0  0  0  0  0  0  0  0  0  0  0  0
   -1.3807    0.2546    4.0208 H   0  0  0  0  0  0  0  0  0  0  0  0
   -2.8988    0.7151    3.1926 H   0  0  0  0  0  0  0  0  0  0  0  0
   -1.3642    0.6791    2.2777 H   0  0  0  0  0  0  0  0  0  0  0  0
   -2.3064   -1.9986    4.8021 H   0  0  0  0  0  0  0  0  0  0  0  0
   -3.0660   -3.1214    3.6395 H   0  0  0  0  0  0  0  0  0  0  0  0
   -3.8936   -1.6026    4.0873 H   0  0  0  0  0  0  0  0  0  0  0  0
    2.6341   -0.3112   -4.3856 H   0  0  0  0  0  0  0  0  0  0  0  0
    4.1464    0.3578   -3.7100 H   0  0  0  0  0  0  0  0  0  0  0  0
    2.5624    0.8191   -3.0087 H   0  0  0  0  0  0  0  0  0  0  0  0
    3.6184   -2.6524   -4.0856 H   0  0  0  0  0  0  0  0  0  0  0  0
    3.9931   -3.2849   -2.4600 H   0  0  0  0  0  0  0  0  0  0  0  0
    5.0835   -2.0926   -3.2270 H   0  0  0  0  0  0  0  0  0  0  0  0
    1.9422   -0.6551    4.4317 H   0  0  0  0  0  0  0  0  0  0  0  0
    1.6143    0.1546    2.8668 H   0  0  0  0  0  0  0  0  0  0  0  0
    3.1417    0.4798    3.7444 H   0  0  0  0  0  0  0  0  0  0  0  0
    3.5793   -2.6409    4.5401 H   0  0  0  0  0  0  0  0  0  0  0  0
    4.8602   -1.5020    4.0510 H   0  0  0  0  0  0  0  0  0  0  0  0
    4.6246   -3.0205    3.1433 H   0  0  0  0  0  0  0  0  0  0  0  0
   -2.3601   -4.9185    0.1938 H   0  0  0  0  0  0  0  0  0  0  0  0
   -1.1258   -5.7166    1.1835 H   0  0  0  0  0  0  0  0  0  0  0  0
   -2.1300   -4.4289    1.8757 H   0  0  0  0  0  0  0  0  0  0  0  0
    3.9832   -3.7028   -0.3054 H   0  0  0  0  0  0  0  0  0  0  0  0
    3.6709   -3.9763    1.4130 H   0  0  0  0  0  0  0  0  0  0  0  0
    3.1012   -5.1494    0.2231 H   0  0  0  0  0  0  0  0  0  0  0  0
  1  4  1  0  0  0  0
  1 16  1  0  0  0  0
  2  3  2  0  0  0  0
  2  5  1  0  0  0  0
  2  6  1  0  0  0  0
  2 15  1  0  0  0  0
  2 19  1  0  0  0  0
  3 13  1  0  0  0  0
  4  7  2  0  0  0  0
  4 14  1  0  0  0  0
  5  8  1  0  0  0  0
  5 29  1  0  0  0  0
  6 10  1  0  0  0  0
  6 30  1  0  0  0  0
  8  9  1  0  0  0  0
  8 53  1  0  0  0  0
  9 10  1  0  0  0  0
  9 55  1  0  0  0  0
 10 54  1  0  0  0  0
 11 12  1  0  0  0  0
 11 14  1  0  0  0  0
 12 13  1  0  0  0  0
 12 15  2  0  0  0  0
 13 27  1  0  0  0  0
 13 56  1  0  0  0  0
 14 28  1  0  0  0  0
 14 57  1  0  0  0  0
 16 58  1  0  0  0  0
 16 59  1  0  0  0  0
 16 60  1  0  0  0  0
 17 18  1  0  0  0  0
 17 22  1  0  0  0  0
 18 19  2  0  0  0  0
 18 23  1  0  0  0  0
 20 21  1  0  0  0  0
 20 23  1  0  0  0  0
 21 22  1  0  0  0  0
 21 24  2  0  0  0  0
 22 25  1  0  0  0  0
 22 61  1  0  0  0  0
 23 26  1  0  0  0  0
 23 62  1  0  0  0  0
 25 63  1  0  0  0  0
 25 64  1  0  0  0  0
 25 65  1  0  0  0  0
 26 66  1  0  0  0  0
 26 67  1  0  0  0  0
 26 68  1  0  0  0  0
 27 69  1  0  0  0  0
 27 70  1  0  0  0  0
 27 71  1  0  0  0  0
 28 72  1  0  0  0  0
 28 73  1  0  0  0  0
 28 74  1  0  0  0  0
 29 31  1  0  0  0  0
 29 35  1  0  0  0  0
 30 38  1  0  0  0  0
 30 42  1  0  0  0  0
 31 32  1  0  0  0  0
 31 36  1  0  0  0  0
 32 33  1  0  0  0  0
 32 75  1  0  0  0  0
 33 34  1  0  0  0  0
 33 76  1  0  0  0  0
 34 35  1  0  0  0  0
 34 77  1  0  0  0  0
 35 37  1  0  0  0  0
 36 45  1  0  0  0  0
 36 46  1  0  0  0  0
 36 78  1  0  0  0  0
 37 47  1  0  0  0  0
 37 48  1  0  0  0  0
 37 79  1  0  0  0  0
 38 39  1  0  0  0  0
 38 43  1  0  0  0  0
 39 40  1  0  0  0  0
 39 80  1  0  0  0  0
 40 41  1  0  0  0  0
 40 81  1  0  0  0  0
 41 42  1  0  0  0  0
 41 82  1  0  0  0  0
 42 44  1  0  0  0  0
 43 51  1  0  0  0  0
 43 52  1  0  0  0  0
 43 83  1  0  0  0  0
 44 49  1  0  0  0  0
 44 50  1  0  0  0  0
 44 84  1  0  0  0  0
 45 85  1  0  0  0  0
 45 86  1  0  0  0  0
 45 87  1  0  0  0  0
 46 88  1  0  0  0  0
 46 89  1  0  0  0  0
 46 90  1  0  0  0  0
 47 91  1  0  0  0  0
 47 92  1  0  0  0  0
 47 93  1  0  0  0  0
 48 94  1  0  0  0  0
 48 95  1  0  0  0  0
 48 96  1  0  0  0  0
 49 97  1  0  0  0  0
 49 98  1  0  0  0  0
 49 99  1  0  0  0  0
 50100  1  0  0  0  0
 50101  1  0  0  0  0
 50102  1  0  0  0  0
 51103  1  0  0  0  0
 51104  1  0  0  0  0
 51105  1  0  0  0  0
 52106  1  0  0  0  0
 52107  1  0  0  0  0
 52108  1  0  0  0  0
 53109  1  0  0  0  0
 53110  1  0  0  0  0
 53111  1  0  0  0  0
 54112  1  0  0  0  0
 54113  1  0  0  0  0
 54114  1  0  0  0  0
M  END
