# Supplementary material
Source: publisher figshare collection journal article supplement (https://acs.figshare.com/ndownloader/files/5127205)
Supplement: Supplementary file 1 [file 5127205 › supporting_ja043819b/RRSS_fm-5-thf.log]

 Entering Gaussian System, Link 0=g03
 Input=RRSS_fm-5-thf.gjf
 Output=RRSS_fm-5-thf.log
 Initial command:
 /usr/local/g03/l1.exe /home/rzepa/Gau-22969.inp -scrdir=/home/rzepa/
 Entering Link 1 = /usr/local/g03/l1.exe PID=     22970.
  
 Copyright (c) 1988,1990,1992,1993,1995,1998,2003,2004, Gaussian, Inc.
                  All Rights Reserved.
  
 This is the Gaussian(R) 03 program.  It is based on the
 the Gaussian(R) 98 system (copyright 1998, Gaussian, Inc.),
 the Gaussian(R) 94 system (copyright 1995, Gaussian, Inc.),
 the Gaussian 92(TM) system (copyright 1992, Gaussian, Inc.),
 the Gaussian 90(TM) system (copyright 1990, Gaussian, Inc.),
 the Gaussian 88(TM) system (copyright 1988, Gaussian, Inc.),
 the Gaussian 86(TM) system (copyright 1986, Carnegie Mellon
 University), and the Gaussian 82(TM) system (copyright 1983,
 Carnegie Mellon University). Gaussian is a federally registered
 trademark of Gaussian, Inc.
  
 This software contains proprietary and confidential information,
 including trade secrets, belonging to Gaussian, Inc.
  
 This software is provided under written license and may be
 used, copied, transmitted, or stored only in accord with that
 written license.
  
 The following legend is applicable only to US Government
 contracts under FAR:
  
                    RESTRICTED RIGHTS LEGEND
  
 Use, reproduction and disclosure by the US Government is
 subject to restrictions as set forth in subparagraphs (a)
 and (c) of the Commercial Computer Software - Restricted
 Rights clause in FAR 52.227-19.
  
 Gaussian, Inc.
 340 Quinnipiac St., Bldg. 40, Wallingford CT 06492
  
  
 ---------------------------------------------------------------
 Warning -- This program may not be used in any manner that
 competes with the business of Gaussian, Inc. or will provide
 assistance to any competitor of Gaussian, Inc.  The licensee
 of this program is prohibited from giving any competitor of
 Gaussian, Inc. access to this program.  By using this program,
 the user acknowledges that Gaussian, Inc. is engaged in the
 business of creating and licensing software in the field of
 computational chemistry and represents and warrants to the
 licensee that it is not a competitor of Gaussian, Inc. and that
 it will not use this program in any manner prohibited above.
 ---------------------------------------------------------------
  

 Cite this work as:
 Gaussian 03, Revision C.01,
 M. J. Frisch, G. W. Trucks, H. B. Schlegel, G. E. Scuseria, 
 M. A. Robb, J. R. Cheeseman, J. A. Montgomery, Jr., T. Vreven, 
 K. N. Kudin, J. C. Burant, J. M. Millam, S. S. Iyengar, J. Tomasi, 
 V. Barone, B. Mennucci, M. Cossi, G. Scalmani, N. Rega, 
 G. A. Petersson, H. Nakatsuji, M. Hada, M. Ehara, K. Toyota, 
 R. Fukuda, J. Hasegawa, M. Ishida, T. Nakajima, Y. Honda, O. Kitao, 
 H. Nakai, M. Klene, X. Li, J. E. Knox, H. P. Hratchian, J. B. Cross, 
 C. Adamo, J. Jaramillo, R. Gomperts, R. E. Stratmann, O. Yazyev, 
 A. J. Austin, R. Cammi, C. Pomelli, J. W. Ochterski, P. Y. Ayala, 
 K. Morokuma, G. A. Voth, P. Salvador, J. J. Dannenberg, 
 V. G. Zakrzewski, S. Dapprich, A. D. Daniels, M. C. Strain, 
 O. Farkas, D. K. Malick, A. D. Rabuck, K. Raghavachari, 
 J. B. Foresman, J. V. Ortiz, Q. Cui, A. G. Baboul, S. Clifford, 
 J. Cioslowski, B. B. Stefanov, G. Liu, A. Liashenko, P. Piskorz, 
 I. Komaromi, R. L. Martin, D. J. Fox, T. Keith, M. A. Al-Laham, 
 C. Y. Peng, A. Nanayakkara, M. Challacombe, P. M. W. Gill, 
 B. Johnson, W. Chen, M. W. Wong, C. Gonzalez, and J. A. Pople, 
 Gaussian, Inc., Wallingford CT, 2004.
 
 ******************************************
 Gaussian 03:  AM64L-G03RevC.01  3-Apr-2004
                28-Nov-2004 
 ******************************************
 %mem=3800MB
 %nprocshared=2
 Will use up to    2 processors via shared memory.
 %chk=RRSS_fm-5-rhf.chk
 -------------------------------------------
 # b3lyp/Gen geom=checkpoint guess=read freq
 -------------------------------------------
 1/10=4,29=2,30=1,38=1/1,3;
 2/40=1/2;
 3/5=7,11=2,16=1,25=1,30=1,74=-5/1,2,3;
 4/5=1/1;
 5/5=2,38=6/2;
 8/6=4,10=90,11=11/1;
 11/6=1,8=1,9=11,15=111,16=1/1,2,10;
 10/6=1/2;
 6/7=2,8=2,9=2,10=2,18=1,28=1/1;
 7/8=1,10=1,25=1/1,2,3,16;
 1/10=4,30=1/3;
 99//99;
 ----------------
 from RRSS_fm.gjf
 ----------------
 Redundant internal coordinates taken from checkpoint file:
 RRSS_fm-5-rhf.chk
 Charge =  0 Multiplicity = 1
 O,0,4.6903918596,-3.0159945751,0.5244891186
 Mg,0,-0.4731753725,0.3314214674,-0.3045472125
 O,0,-0.1700146207,0.3400297724,-2.2089275016
 C,0,3.8477684306,-2.7024592668,-0.4843039181
 N,0,0.3492103251,1.8463141867,0.9002683503
 N,0,-2.3803000482,0.9921114197,0.3274570508
 O,0,3.0219922268,-3.4641974964,-0.9346398153
 C,0,-0.2982822134,2.8302641316,1.5238491104
 C,0,-1.6950176692,2.977292478,1.5301421707
 C,0,-2.6637809109,2.1147487136,0.9780839609
 O,0,3.1625200666,-0.9287891863,-1.9807971664
 C,0,1.911701795,-0.6227759434,-1.6119927851
 C,0,1.0044027816,-0.1207386958,-2.7365734336
 C,0,4.0959740933,-1.2697288055,-0.9402058966
 O,0,1.5338171422,-0.6878771881,-0.4457336309
 C,0,4.5343755684,-4.3357906372,1.0695590305
 C,0,-2.2597583781,-3.8159403158,-0.3965230506
 C,0,-1.2316111422,-4.0707484908,0.7371256258
 C,0,-0.280423006,-2.8592391584,0.6487117703
 O,0,-1.0154642773,-1.8529530254,-0.0743170428
 C,0,-1.7114742512,-2.5781159877,-1.114462034
 C,0,0.8318404972,-1.2250392669,-3.804515463
 C,0,5.4914064826,-1.0554860463,-1.5200466136
 C,0,1.7949509345,1.9017758617,0.8314540342
 C,0,-3.4494597555,0.0758341094,-0.0065774493
 C,0,2.4161727991,2.6974181077,-0.1968563582
 C,0,3.8181222905,2.5801547526,-0.3789356433
 C,0,4.6016691042,1.7686657185,0.4665750063
 C,0,3.9897611398,1.044501457,1.5172795963
 C,0,2.5812406431,1.0820034697,1.7041325353
 C,0,1.617339795,3.7401738505,-1.0322287445
 C,0,1.9325503379,0.2741463848,2.8580190208
 C,0,-3.9930746558,-0.7823260058,1.0066375288
 C,0,-4.9073427948,-1.7977390891,0.6134708434
 C,0,-5.2887842774,-1.952187821,-0.7345592584
 C,0,-4.787831517,-1.0684371256,-1.715547223
 C,0,-3.8706140719,-0.037616628,-1.3784798866
 C,0,-3.6612172162,-0.6041502882,2.5148878404
 C,0,-3.3896457447,0.9716368106,-2.4547546258
 C,0,1.4440824296,3.32513327,-2.526639687
 C,0,2.2839951259,5.1554781791,-0.9326980935
 C,0,2.3553438481,-1.2285884869,2.8299211846
 C,0,2.2706895014,0.9024789147,4.2525703942
 C,0,-3.0834466639,0.2941743303,-3.824157237
 C,0,-4.4363541904,2.1231617264,-2.6339384485
 C,0,-2.844656513,-1.8043880251,3.0906600567
 C,0,-4.9657017636,-0.3869135899,3.3555112328
 C,0,0.4912627717,3.8924591564,2.2815481491
 C,0,-4.1097870386,2.543224304,1.2170030127
 H,0,-2.0809849529,3.8470520512,2.0508309201
 H,0,1.5953158217,0.6826773289,-3.222474734
 H,0,3.9541375852,-0.5937114709,-0.0910386578
 H,0,4.6464610848,-5.0919609222,0.2885101073
 H,0,3.5483110348,-4.4417537144,1.5302790728
 H,0,5.3188423875,-4.4379728817,1.8200866246
 H,0,-3.2434630994,-3.5541105679,-0.0022930334
 H,0,-2.3670901043,-4.6693004827,-1.0738150438
 H,0,-0.6818413586,-5.0076319984,0.602793094
 H,0,-1.7292210548,-4.1074800792,1.7095992643
 H,0,0.6322697451,-3.1024588466,0.0933896581
 H,0,-0.0018835352,-2.4337894241,1.6136081617
 H,0,-2.4903678519,-1.9342516373,-1.5102959752
 H,0,-0.9920002438,-2.8376398165,-1.9010470029
 H,0,1.7902134186,-1.5058002275,-4.2559284091
 H,0,0.1668778288,-0.8423891751,-4.5846084446
 H,0,0.3733113163,-2.1209729634,-3.373853597
 H,0,5.6212912742,0.0112054097,-1.7235928294
 H,0,5.6238934924,-1.6174047086,-2.4497681552
 H,0,6.2502927487,-1.3714324003,-0.7993957624
 H,0,4.308919078,3.1760832695,-1.1596575633
 H,0,5.6935912848,1.7367225195,0.3437129349
 H,0,4.6140566207,0.4673103821,2.2120346296
 H,0,0.6013095523,3.8141595777,-0.6000210272
 H,0,0.8326974834,0.3284538096,2.7185589783
 H,0,-5.3490750636,-2.4496928743,1.3785307697
 H,0,-6.0044559874,-2.736744476,-1.0162667919
 H,0,-5.1252823197,-1.1689399566,-2.7554000192
 H,0,-3.0292250803,0.29734807,2.6233153703
 H,0,-2.4472924098,1.4253662968,-2.0916359322
 H,0,1.00031166,4.1568023544,-3.0969445605
 H,0,0.7606831528,2.4606973755,-2.5904114948
 H,0,2.4133594357,3.0687198904,-2.9827340186
 H,0,1.6278369268,5.9044305088,-1.4017077007
 H,0,3.2526958755,5.1726271049,-1.4543576006
 H,0,2.4497508105,5.4459203309,0.1162842235
 H,0,1.780231555,-1.7943140508,3.5804844729
 H,0,3.4264258122,-1.3458413153,3.0569351588
 H,0,2.1664686817,-1.6590699523,1.8330082903
 H,0,1.7805120264,0.3246235156,5.0511706484
 H,0,1.9173045762,1.9430038545,4.3122398485
 H,0,3.3572647441,0.8917709019,4.4306821453
 H,0,-2.636714976,1.0358903071,-4.5034641557
 H,0,-3.9945984593,-0.1048910906,-4.2965647685
 H,0,-2.359903083,-0.5263392135,-3.6889512759
 H,0,-4.0756522679,2.8342125298,-3.3928217461
 H,0,-4.5851760021,2.6717829611,-1.6902792772
 H,0,-5.4081652661,1.7221153642,-2.9629331617
 H,0,-2.673520049,-1.6646944416,4.1700300365
 H,0,-1.8625357083,-1.8612034871,2.5901924824
 H,0,-3.3772752819,-2.7572053507,2.9401871895
 H,0,-4.7009538735,-0.1346673306,4.3937930832
 H,0,-5.5813085964,-1.2991439963,3.3686514962
 H,0,-5.5709593792,0.4329710012,2.9401641915
 H,0,1.0666000325,4.5281917133,1.599802635
 H,0,-0.1794907818,4.5404215321,2.855734115
 H,0,1.2009621804,3.4333207038,2.9778419763
 H,0,-4.8058222908,2.0866373653,0.5089774804
 H,0,-4.4332425216,2.2733643614,2.2299258776
 H,0,-4.1932238502,3.6332468829,1.1319273229
 Recover connectivity data from disk.

 GradGradGradGradGradGradGradGradGradGradGradGradGradGradGradGradGradGrad
 Berny optimization.
 Initialization pass.
                           ----------------------------
                           !    Initial Parameters    !
                           ! (Angstroms and Degrees)  !
 --------------------------                            --------------------------
 ! Name  Definition              Value          Derivative Info.                !
 --------------------------------------------------------------------------------
 ! R1    R(1,4)                  1.3513         calculate D2E/DX2 analytically  !
 ! R2    R(1,16)                 1.4364         calculate D2E/DX2 analytically  !
 ! R3    R(2,3)                  1.9284         calculate D2E/DX2 analytically  !
 ! R4    R(2,5)                  2.103          calculate D2E/DX2 analytically  !
 ! R5    R(2,6)                  2.115          calculate D2E/DX2 analytically  !
 ! R6    R(2,15)                 2.2554         calculate D2E/DX2 analytically  !
 ! R7    R(2,20)                 2.2624         calculate D2E/DX2 analytically  !
 ! R8    R(3,13)                 1.3675         calculate D2E/DX2 analytically  !
 ! R9    R(4,7)                  1.2104         calculate D2E/DX2 analytically  !
 ! R10   R(4,14)                 1.5239         calculate D2E/DX2 analytically  !
 ! R11   R(5,8)                  1.3328         calculate D2E/DX2 analytically  !
 ! R12   R(5,24)                 1.4484         calculate D2E/DX2 analytically  !
 ! R13   R(6,10)                 1.3282         calculate D2E/DX2 analytically  !
 ! R14   R(6,25)                 1.4472         calculate D2E/DX2 analytically  !
 ! R15   R(8,9)                  1.4045         calculate D2E/DX2 analytically  !
 ! R16   R(8,48)                 1.525          calculate D2E/DX2 analytically  !
 ! R17   R(9,10)                 1.4097         calculate D2E/DX2 analytically  !
 ! R18   R(9,50)                 1.0847         calculate D2E/DX2 analytically  !
 ! R19   R(10,49)                1.527          calculate D2E/DX2 analytically  !
 ! R20   R(11,12)                1.3395         calculate D2E/DX2 analytically  !
 ! R21   R(11,14)                1.4389         calculate D2E/DX2 analytically  !
 ! R22   R(12,13)                1.5297         calculate D2E/DX2 analytically  !
 ! R23   R(12,15)                1.2277         calculate D2E/DX2 analytically  !
 ! R24   R(13,22)                1.5459         calculate D2E/DX2 analytically  !
 ! R25   R(13,51)                1.1094         calculate D2E/DX2 analytically  !
 ! R26   R(14,23)                1.5262         calculate D2E/DX2 analytically  !
 ! R27   R(14,52)                1.0946         calculate D2E/DX2 analytically  !
 ! R28   R(16,53)                1.0929         calculate D2E/DX2 analytically  !
 ! R29   R(16,54)                1.0935         calculate D2E/DX2 analytically  !
 ! R30   R(16,55)                1.0905         calculate D2E/DX2 analytically  !
 ! R31   R(17,18)                1.5515         calculate D2E/DX2 analytically  !
 ! R32   R(17,21)                1.5324         calculate D2E/DX2 analytically  !
 ! R33   R(17,56)                1.0916         calculate D2E/DX2 analytically  !
 ! R34   R(17,57)                1.0947         calculate D2E/DX2 analytically  !
 ! R35   R(18,19)                1.5428         calculate D2E/DX2 analytically  !
 ! R36   R(18,58)                1.0946         calculate D2E/DX2 analytically  !
 ! R37   R(18,59)                1.093          calculate D2E/DX2 analytically  !
 ! R38   R(19,20)                1.4407         calculate D2E/DX2 analytically  !
 ! R39   R(19,60)                1.0957         calculate D2E/DX2 analytically  !
 ! R40   R(19,61)                1.0907         calculate D2E/DX2 analytically  !
 ! R41   R(20,21)                1.4464         calculate D2E/DX2 analytically  !
 ! R42   R(21,62)                1.0853         calculate D2E/DX2 analytically  !
 ! R43   R(21,63)                1.0971         calculate D2E/DX2 analytically  !
 ! R44   R(22,64)                1.0959         calculate D2E/DX2 analytically  !
 ! R45   R(22,65)                1.0941         calculate D2E/DX2 analytically  !
 ! R46   R(22,66)                1.0947         calculate D2E/DX2 analytically  !
 ! R47   R(23,67)                1.0937         calculate D2E/DX2 analytically  !
 ! R48   R(23,68)                1.0944         calculate D2E/DX2 analytically  !
 ! R49   R(23,69)                1.0932         calculate D2E/DX2 analytically  !
 ! R50   R(24,26)                1.441          calculate D2E/DX2 analytically  !
 ! R51   R(24,30)                1.4324         calculate D2E/DX2 analytically  !
 ! R52   R(25,33)                1.4348         calculate D2E/DX2 analytically  !
 ! R53   R(25,37)                1.4396         calculate D2E/DX2 analytically  !
 ! R54   R(26,27)                1.4186         calculate D2E/DX2 analytically  !
 ! R55   R(26,31)                1.5567         calculate D2E/DX2 analytically  !
 ! R56   R(27,28)                1.4097         calculate D2E/DX2 analytically  !
 ! R57   R(27,70)                1.098          calculate D2E/DX2 analytically  !
 ! R58   R(28,29)                1.4152         calculate D2E/DX2 analytically  !
 ! R59   R(28,71)                1.0993         calculate D2E/DX2 analytically  !
 ! R60   R(29,30)                1.4214         calculate D2E/DX2 analytically  !
 ! R61   R(29,72)                1.098          calculate D2E/DX2 analytically  !
 ! R62   R(30,32)                1.5508         calculate D2E/DX2 analytically  !
 ! R63   R(31,40)                1.5606         calculate D2E/DX2 analytically  !
 ! R64   R(31,41)                1.5676         calculate D2E/DX2 analytically  !
 ! R65   R(31,73)                1.1066         calculate D2E/DX2 analytically  !
 ! R66   R(32,42)                1.5613         calculate D2E/DX2 analytically  !
 ! R67   R(32,43)                1.5665         calculate D2E/DX2 analytically  !
 ! R68   R(32,74)                1.11           calculate D2E/DX2 analytically  !
 ! R69   R(33,34)                1.4218         calculate D2E/DX2 analytically  !
 ! R70   R(33,38)                1.5546         calculate D2E/DX2 analytically  !
 ! R71   R(34,35)                1.4094         calculate D2E/DX2 analytically  !
 ! R72   R(34,75)                1.0979         calculate D2E/DX2 analytically  !
 ! R73   R(35,36)                1.4122         calculate D2E/DX2 analytically  !
 ! R74   R(35,76)                1.0987         calculate D2E/DX2 analytically  !
 ! R75   R(36,37)                1.4204         calculate D2E/DX2 analytically  !
 ! R76   R(36,77)                1.0978         calculate D2E/DX2 analytically  !
 ! R77   R(37,39)                1.5519         calculate D2E/DX2 analytically  !
 ! R78   R(38,46)                1.5617         calculate D2E/DX2 analytically  !
 ! R79   R(38,47)                1.567          calculate D2E/DX2 analytically  !
 ! R80   R(38,78)                1.1063         calculate D2E/DX2 analytically  !
 ! R81   R(39,44)                1.5582         calculate D2E/DX2 analytically  !
 ! R82   R(39,45)                1.5664         calculate D2E/DX2 analytically  !
 ! R83   R(39,79)                1.1071         calculate D2E/DX2 analytically  !
 ! R84   R(40,80)                1.1018         calculate D2E/DX2 analytically  !
 ! R85   R(40,81)                1.1038         calculate D2E/DX2 analytically  !
 ! R86   R(40,82)                1.1015         calculate D2E/DX2 analytically  !
 ! R87   R(41,83)                1.1007         calculate D2E/DX2 analytically  !
 ! R88   R(41,84)                1.1004         calculate D2E/DX2 analytically  !
 ! R89   R(41,85)                1.101          calculate D2E/DX2 analytically  !
 ! R90   R(42,86)                1.1019         calculate D2E/DX2 analytically  !
 ! R91   R(42,87)                1.1011         calculate D2E/DX2 analytically  !
 ! R92   R(42,88)                1.1022         calculate D2E/DX2 analytically  !
 ! R93   R(43,89)                1.1009         calculate D2E/DX2 analytically  !
 ! R94   R(43,90)                1.1005         calculate D2E/DX2 analytically  !
 ! R95   R(43,91)                1.1011         calculate D2E/DX2 analytically  !
 ! R96   R(44,92)                1.1005         calculate D2E/DX2 analytically  !
 ! R97   R(44,93)                1.1012         calculate D2E/DX2 analytically  !
 ! R98   R(44,94)                1.1023         calculate D2E/DX2 analytically  !
 ! R99   R(45,95)                1.1007         calculate D2E/DX2 analytically  !
 ! R100  R(45,96)                1.1016         calculate D2E/DX2 analytically  !
 ! R101  R(45,97)                1.1016         calculate D2E/DX2 analytically  !
 ! R102  R(46,98)                1.1017         calculate D2E/DX2 analytically  !
 ! R103  R(46,99)                1.1037         calculate D2E/DX2 analytically  !
 ! R104  R(46,100)               1.1019         calculate D2E/DX2 analytically  !
 ! R105  R(47,101)               1.1008         calculate D2E/DX2 analytically  !
 ! R106  R(47,102)               1.1006         calculate D2E/DX2 analytically  !
 ! R107  R(47,103)               1.1005         calculate D2E/DX2 analytically  !
 ! R108  R(48,104)               1.0954         calculate D2E/DX2 analytically  !
 ! R109  R(48,105)               1.0952         calculate D2E/DX2 analytically  !
 ! R110  R(48,106)               1.0951         calculate D2E/DX2 analytically  !
 ! R111  R(49,107)               1.0928         calculate D2E/DX2 analytically  !
 ! R112  R(49,108)               1.097          calculate D2E/DX2 analytically  !
 ! R113  R(49,109)               1.0965         calculate D2E/DX2 analytically  !
 ! A1    A(4,1,16)             115.3879         calculate D2E/DX2 analytically  !
 ! A2    A(3,2,5)              120.0708         calculate D2E/DX2 analytically  !
 ! A3    A(3,2,6)              115.8154         calculate D2E/DX2 analytically  !
 ! A4    A(3,2,15)              78.4808         calculate D2E/DX2 analytically  !
 ! A5    A(3,2,20)              98.1919         calculate D2E/DX2 analytically  !
 ! A6    A(5,2,6)               87.5011         calculate D2E/DX2 analytically  !
 ! A7    A(5,2,15)              90.7696         calculate D2E/DX2 analytically  !
 ! A8    A(5,2,20)             136.9631         calculate D2E/DX2 analytically  !
 ! A9    A(6,2,15)             164.2155         calculate D2E/DX2 analytically  !
 ! A10   A(6,2,20)              93.1565         calculate D2E/DX2 analytically  !
 ! A11   A(15,2,20)             77.4859         calculate D2E/DX2 analytically  !
 ! A12   A(2,3,13)             120.9684         calculate D2E/DX2 analytically  !
 ! A13   A(1,4,7)              123.8607         calculate D2E/DX2 analytically  !
 ! A14   A(1,4,14)             109.8726         calculate D2E/DX2 analytically  !
 ! A15   A(7,4,14)             126.2653         calculate D2E/DX2 analytically  !
 ! A16   A(2,5,8)              127.5803         calculate D2E/DX2 analytically  !
 ! A17   A(2,5,24)             112.9969         calculate D2E/DX2 analytically  !
 ! A18   A(8,5,24)             118.6124         calculate D2E/DX2 analytically  !
 ! A19   A(2,6,10)             127.078          calculate D2E/DX2 analytically  !
 ! A20   A(2,6,25)             113.5428         calculate D2E/DX2 analytically  !
 ! A21   A(10,6,25)            119.378          calculate D2E/DX2 analytically  !
 ! A22   A(5,8,9)              124.2314         calculate D2E/DX2 analytically  !
 ! A23   A(5,8,48)             119.6799         calculate D2E/DX2 analytically  !
 ! A24   A(9,8,48)             116.0867         calculate D2E/DX2 analytically  !
 ! A25   A(8,9,10)             128.1426         calculate D2E/DX2 analytically  !
 ! A26   A(8,9,50)             116.1016         calculate D2E/DX2 analytically  !
 ! A27   A(10,9,50)            115.7265         calculate D2E/DX2 analytically  !
 ! A28   A(6,10,9)             124.2183         calculate D2E/DX2 analytically  !
 ! A29   A(6,10,49)            121.0616         calculate D2E/DX2 analytically  !
 ! A30   A(9,10,49)            114.6965         calculate D2E/DX2 analytically  !
 ! A31   A(12,11,14)           117.439          calculate D2E/DX2 analytically  !
 ! A32   A(11,12,13)           115.2413         calculate D2E/DX2 analytically  !
 ! A33   A(11,12,15)           122.4711         calculate D2E/DX2 analytically  !
 ! A34   A(13,12,15)           122.224          calculate D2E/DX2 analytically  !
 ! A35   A(3,13,12)            109.6522         calculate D2E/DX2 analytically  !
 ! A36   A(3,13,22)            114.2923         calculate D2E/DX2 analytically  !
 ! A37   A(3,13,51)            112.4844         calculate D2E/DX2 analytically  !
 ! A38   A(12,13,22)           109.8551         calculate D2E/DX2 analytically  !
 ! A39   A(12,13,51)           104.1079         calculate D2E/DX2 analytically  !
 ! A40   A(22,13,51)           105.9149         calculate D2E/DX2 analytically  !
 ! A41   A(4,14,11)            109.4796         calculate D2E/DX2 analytically  !
 ! A42   A(4,14,23)            113.2387         calculate D2E/DX2 analytically  !
 ! A43   A(4,14,52)            109.1142         calculate D2E/DX2 analytically  !
 ! A44   A(11,14,23)           106.5663         calculate D2E/DX2 analytically  !
 ! A45   A(11,14,52)           109.307          calculate D2E/DX2 analytically  !
 ! A46   A(23,14,52)           109.0568         calculate D2E/DX2 analytically  !
 ! A47   A(2,15,12)            108.0232         calculate D2E/DX2 analytically  !
 ! A48   A(1,16,53)            110.6952         calculate D2E/DX2 analytically  !
 ! A49   A(1,16,54)            110.2945         calculate D2E/DX2 analytically  !
 ! A50   A(1,16,55)            105.6126         calculate D2E/DX2 analytically  !
 ! A51   A(53,16,54)           109.0585         calculate D2E/DX2 analytically  !
 ! A52   A(53,16,55)           110.6871         calculate D2E/DX2 analytically  !
 ! A53   A(54,16,55)           110.4649         calculate D2E/DX2 analytically  !
 ! A54   A(18,17,21)           103.7618         calculate D2E/DX2 analytically  !
 ! A55   A(18,17,56)           111.8809         calculate D2E/DX2 analytically  !
 ! A56   A(18,17,57)           112.8924         calculate D2E/DX2 analytically  !
 ! A57   A(21,17,56)           107.3298         calculate D2E/DX2 analytically  !
 ! A58   A(21,17,57)           112.0172         calculate D2E/DX2 analytically  !
 ! A59   A(56,17,57)           108.7867         calculate D2E/DX2 analytically  !
 ! A60   A(17,18,19)           103.7519         calculate D2E/DX2 analytically  !
 ! A61   A(17,18,58)           112.5661         calculate D2E/DX2 analytically  !
 ! A62   A(17,18,59)           110.7275         calculate D2E/DX2 analytically  !
 ! A63   A(19,18,58)           110.8203         calculate D2E/DX2 analytically  !
 ! A64   A(19,18,59)           110.9809         calculate D2E/DX2 analytically  !
 ! A65   A(58,18,59)           108.005          calculate D2E/DX2 analytically  !
 ! A66   A(18,19,20)           105.2293         calculate D2E/DX2 analytically  !
 ! A67   A(18,19,60)           111.61           calculate D2E/DX2 analytically  !
 ! A68   A(18,19,61)           114.3968         calculate D2E/DX2 analytically  !
 ! A69   A(20,19,60)           109.0063         calculate D2E/DX2 analytically  !
 ! A70   A(20,19,61)           107.5664         calculate D2E/DX2 analytically  !
 ! A71   A(60,19,61)           108.7977         calculate D2E/DX2 analytically  !
 ! A72   A(2,20,19)            127.0955         calculate D2E/DX2 analytically  !
 ! A73   A(2,20,21)            121.7495         calculate D2E/DX2 analytically  !
 ! A74   A(19,20,21)           104.8456         calculate D2E/DX2 analytically  !
 ! A75   A(17,21,20)           103.9            calculate D2E/DX2 analytically  !
 ! A76   A(17,21,62)           113.1601         calculate D2E/DX2 analytically  !
 ! A77   A(17,21,63)           112.2995         calculate D2E/DX2 analytically  !
 ! A78   A(20,21,62)           108.07           calculate D2E/DX2 analytically  !
 ! A79   A(20,21,63)           108.5782         calculate D2E/DX2 analytically  !
 ! A80   A(62,21,63)           110.4551         calculate D2E/DX2 analytically  !
 ! A81   A(13,22,64)           111.7119         calculate D2E/DX2 analytically  !
 ! A82   A(13,22,65)           108.0928         calculate D2E/DX2 analytically  !
 ! A83   A(13,22,66)           111.0766         calculate D2E/DX2 analytically  !
 ! A84   A(64,22,65)           109.1102         calculate D2E/DX2 analytically  !
 ! A85   A(64,22,66)           108.5816         calculate D2E/DX2 analytically  !
 ! A86   A(65,22,66)           108.1885         calculate D2E/DX2 analytically  !
 ! A87   A(14,23,67)           108.4333         calculate D2E/DX2 analytically  !
 ! A88   A(14,23,68)           111.184          calculate D2E/DX2 analytically  !
 ! A89   A(14,23,69)           110.1016         calculate D2E/DX2 analytically  !
 ! A90   A(67,23,68)           109.1656         calculate D2E/DX2 analytically  !
 ! A91   A(67,23,69)           108.7916         calculate D2E/DX2 analytically  !
 ! A92   A(68,23,69)           109.1228         calculate D2E/DX2 analytically  !
 ! A93   A(5,24,26)            119.0359         calculate D2E/DX2 analytically  !
 ! A94   A(5,24,30)            119.8044         calculate D2E/DX2 analytically  !
 ! A95   A(26,24,30)           120.9382         calculate D2E/DX2 analytically  !
 ! A96   A(6,25,33)            119.7108         calculate D2E/DX2 analytically  !
 ! A97   A(6,25,37)            119.0788         calculate D2E/DX2 analytically  !
 ! A98   A(33,25,37)           120.9982         calculate D2E/DX2 analytically  !
 ! A99   A(24,26,27)           118.1651         calculate D2E/DX2 analytically  !
 ! A100  A(24,26,31)           122.1127         calculate D2E/DX2 analytically  !
 ! A101  A(27,26,31)           119.5798         calculate D2E/DX2 analytically  !
 ! A102  A(26,27,28)           121.3254         calculate D2E/DX2 analytically  !
 ! A103  A(26,27,70)           119.22           calculate D2E/DX2 analytically  !
 ! A104  A(28,27,70)           119.37           calculate D2E/DX2 analytically  !
 ! A105  A(27,28,29)           119.9681         calculate D2E/DX2 analytically  !
 ! A106  A(27,28,71)           120.1183         calculate D2E/DX2 analytically  !
 ! A107  A(29,28,71)           119.8411         calculate D2E/DX2 analytically  !
 ! A108  A(28,29,30)           120.8355         calculate D2E/DX2 analytically  !
 ! A109  A(28,29,72)           119.5331         calculate D2E/DX2 analytically  !
 ! A110  A(30,29,72)           119.6127         calculate D2E/DX2 analytically  !
 ! A111  A(24,30,29)           118.6184         calculate D2E/DX2 analytically  !
 ! A112  A(24,30,32)           121.455          calculate D2E/DX2 analytically  !
 ! A113  A(29,30,32)           119.9072         calculate D2E/DX2 analytically  !
 ! A114  A(26,31,40)           113.1219         calculate D2E/DX2 analytically  !
 ! A115  A(26,31,41)           110.6382         calculate D2E/DX2 analytically  !
 ! A116  A(26,31,73)           107.8392         calculate D2E/DX2 analytically  !
 ! A117  A(40,31,41)           110.3721         calculate D2E/DX2 analytically  !
 ! A118  A(40,31,73)           106.8488         calculate D2E/DX2 analytically  !
 ! A119  A(41,31,73)           107.776          calculate D2E/DX2 analytically  !
 ! A120  A(30,32,42)           112.0074         calculate D2E/DX2 analytically  !
 ! A121  A(30,32,43)           111.2941         calculate D2E/DX2 analytically  !
 ! A122  A(30,32,74)           107.1881         calculate D2E/DX2 analytically  !
 ! A123  A(42,32,43)           110.0977         calculate D2E/DX2 analytically  !
 ! A124  A(42,32,74)           108.249          calculate D2E/DX2 analytically  !
 ! A125  A(43,32,74)           107.825          calculate D2E/DX2 analytically  !
 ! A126  A(25,33,34)           118.393          calculate D2E/DX2 analytically  !
 ! A127  A(25,33,38)           122.3921         calculate D2E/DX2 analytically  !
 ! A128  A(34,33,38)           119.1705         calculate D2E/DX2 analytically  !
 ! A129  A(33,34,35)           121.1153         calculate D2E/DX2 analytically  !
 ! A130  A(33,34,75)           119.3467         calculate D2E/DX2 analytically  !
 ! A131  A(35,34,75)           119.5047         calculate D2E/DX2 analytically  !
 ! A132  A(34,35,36)           119.9872         calculate D2E/DX2 analytically  !
 ! A133  A(34,35,76)           119.9852         calculate D2E/DX2 analytically  !
 ! A134  A(36,35,76)           119.9893         calculate D2E/DX2 analytically  !
 ! A135  A(35,36,37)           121.224          calculate D2E/DX2 analytically  !
 ! A136  A(35,36,77)           119.448          calculate D2E/DX2 analytically  !
 ! A137  A(37,36,77)           119.3207         calculate D2E/DX2 analytically  !
 ! A138  A(25,37,36)           118.1815         calculate D2E/DX2 analytically  !
 ! A139  A(25,37,39)           121.266          calculate D2E/DX2 analytically  !
 ! A140  A(36,37,39)           120.4998         calculate D2E/DX2 analytically  !
 ! A141  A(33,38,46)           112.41           calculate D2E/DX2 analytically  !
 ! A142  A(33,38,47)           111.0171         calculate D2E/DX2 analytically  !
 ! A143  A(33,38,78)           108.0856         calculate D2E/DX2 analytically  !
 ! A144  A(46,38,47)           110.123          calculate D2E/DX2 analytically  !
 ! A145  A(46,38,78)           106.9446         calculate D2E/DX2 analytically  !
 ! A146  A(47,38,78)           108.0604         calculate D2E/DX2 analytically  !
 ! A147  A(37,39,44)           112.8087         calculate D2E/DX2 analytically  !
 ! A148  A(37,39,45)           110.507          calculate D2E/DX2 analytically  !
 ! A149  A(37,39,79)           107.6295         calculate D2E/DX2 analytically  !
 ! A150  A(44,39,45)           110.5113         calculate D2E/DX2 analytically  !
 ! A151  A(44,39,79)           107.4072         calculate D2E/DX2 analytically  !
 ! A152  A(45,39,79)           107.7583         calculate D2E/DX2 analytically  !
 ! A153  A(31,40,80)           109.8549         calculate D2E/DX2 analytically  !
 ! A154  A(31,40,81)           109.4106         calculate D2E/DX2 analytically  !
 ! A155  A(31,40,82)           111.1445         calculate D2E/DX2 analytically  !
 ! A156  A(80,40,81)           108.1728         calculate D2E/DX2 analytically  !
 ! A157  A(80,40,82)           108.4107         calculate D2E/DX2 analytically  !
 ! A158  A(81,40,82)           109.7912         calculate D2E/DX2 analytically  !
 ! A159  A(31,41,83)           109.4976         calculate D2E/DX2 analytically  !
 ! A160  A(31,41,84)           110.999          calculate D2E/DX2 analytically  !
 ! A161  A(31,41,85)           111.2651         calculate D2E/DX2 analytically  !
 ! A162  A(83,41,84)           108.1919         calculate D2E/DX2 analytically  !
 ! A163  A(83,41,85)           108.4353         calculate D2E/DX2 analytically  !
 ! A164  A(84,41,85)           108.3628         calculate D2E/DX2 analytically  !
 ! A165  A(32,42,86)           109.9107         calculate D2E/DX2 analytically  !
 ! A166  A(32,42,87)           111.2339         calculate D2E/DX2 analytically  !
 ! A167  A(32,42,88)           110.2297         calculate D2E/DX2 analytically  !
 ! A168  A(86,42,87)           108.2153         calculate D2E/DX2 analytically  !
 ! A169  A(86,42,88)           109.0344         calculate D2E/DX2 analytically  !
 ! A170  A(87,42,88)           108.1538         calculate D2E/DX2 analytically  !
 ! A171  A(32,43,89)           109.8243         calculate D2E/DX2 analytically  !
 ! A172  A(32,43,90)           110.9895         calculate D2E/DX2 analytically  !
 ! A173  A(32,43,91)           110.6772         calculate D2E/DX2 analytically  !
 ! A174  A(89,43,90)           108.2992         calculate D2E/DX2 analytically  !
 ! A175  A(89,43,91)           108.4773         calculate D2E/DX2 analytically  !
 ! A176  A(90,43,91)           108.499          calculate D2E/DX2 analytically  !
 ! A177  A(39,44,92)           109.221          calculate D2E/DX2 analytically  !
 ! A178  A(39,44,93)           111.8379         calculate D2E/DX2 analytically  !
 ! A179  A(39,44,94)           110.1711         calculate D2E/DX2 analytically  !
 ! A180  A(92,44,93)           108.3796         calculate D2E/DX2 analytically  !
 ! A181  A(92,44,94)           108.116          calculate D2E/DX2 analytically  !
 ! A182  A(93,44,94)           109.0254         calculate D2E/DX2 analytically  !
 ! A183  A(39,45,95)           109.5588         calculate D2E/DX2 analytically  !
 ! A184  A(39,45,96)           111.0006         calculate D2E/DX2 analytically  !
 ! A185  A(39,45,97)           110.8561         calculate D2E/DX2 analytically  !
 ! A186  A(95,45,96)           108.2482         calculate D2E/DX2 analytically  !
 ! A187  A(95,45,97)           108.5639         calculate D2E/DX2 analytically  !
 ! A188  A(96,45,97)           108.5392         calculate D2E/DX2 analytically  !
 ! A189  A(38,46,98)           110.18           calculate D2E/DX2 analytically  !
 ! A190  A(38,46,99)           109.7334         calculate D2E/DX2 analytically  !
 ! A191  A(38,46,100)          111.1915         calculate D2E/DX2 analytically  !
 ! A192  A(98,46,99)           108.2117         calculate D2E/DX2 analytically  !
 ! A193  A(98,46,100)          108.5725         calculate D2E/DX2 analytically  !
 ! A194  A(99,46,100)          108.885          calculate D2E/DX2 analytically  !
 ! A195  A(38,47,101)          109.7271         calculate D2E/DX2 analytically  !
 ! A196  A(38,47,102)          110.9242         calculate D2E/DX2 analytically  !
 ! A197  A(38,47,103)          111.0183         calculate D2E/DX2 analytically  !
 ! A198  A(101,47,102)         108.2518         calculate D2E/DX2 analytically  !
 ! A199  A(101,47,103)         108.5145         calculate D2E/DX2 analytically  !
 ! A200  A(102,47,103)         108.3238         calculate D2E/DX2 analytically  !
 ! A201  A(8,48,104)           111.526          calculate D2E/DX2 analytically  !
 ! A202  A(8,48,105)           110.823          calculate D2E/DX2 analytically  !
 ! A203  A(8,48,106)           111.0629         calculate D2E/DX2 analytically  !
 ! A204  A(104,48,105)         107.734          calculate D2E/DX2 analytically  !
 ! A205  A(104,48,106)         107.3765         calculate D2E/DX2 analytically  !
 ! A206  A(105,48,106)         108.1561         calculate D2E/DX2 analytically  !
 ! A207  A(10,49,107)          112.6152         calculate D2E/DX2 analytically  !
 ! A208  A(10,49,108)          110.7727         calculate D2E/DX2 analytically  !
 ! A209  A(10,49,109)          109.8077         calculate D2E/DX2 analytically  !
 ! A210  A(107,49,108)         107.9177         calculate D2E/DX2 analytically  !
 ! A211  A(107,49,109)         108.4575         calculate D2E/DX2 analytically  !
 ! A212  A(108,49,109)         107.082          calculate D2E/DX2 analytically  !
 ! D1    D(16,1,4,7)            -1.1143         calculate D2E/DX2 analytically  !
 ! D2    D(16,1,4,14)          178.4909         calculate D2E/DX2 analytically  !
 ! D3    D(4,1,16,53)           56.9788         calculate D2E/DX2 analytically  !
 ! D4    D(4,1,16,54)          -63.8092         calculate D2E/DX2 analytically  !
 ! D5    D(4,1,16,55)          176.8244         calculate D2E/DX2 analytically  !
 ! D6    D(5,2,3,13)            79.9178         calculate D2E/DX2 analytically  !
 ! D7    D(6,2,3,13)          -177.1309         calculate D2E/DX2 analytically  !
 ! D8    D(15,2,3,13)           -4.2186         calculate D2E/DX2 analytically  !
 ! D9    D(20,2,3,13)          -79.5782         calculate D2E/DX2 analytically  !
 ! D10   D(3,2,5,8)            109.5549         calculate D2E/DX2 analytically  !
 ! D11   D(3,2,5,24)           -59.8795         calculate D2E/DX2 analytically  !
 ! D12   D(6,2,5,8)             -9.0267         calculate D2E/DX2 analytically  !
 ! D13   D(6,2,5,24)          -178.4612         calculate D2E/DX2 analytically  !
 ! D14   D(15,2,5,8)          -173.3303         calculate D2E/DX2 analytically  !
 ! D15   D(15,2,5,24)           17.2353         calculate D2E/DX2 analytically  !
 ! D16   D(20,2,5,8)          -100.9763         calculate D2E/DX2 analytically  !
 ! D17   D(20,2,5,24)           89.5893         calculate D2E/DX2 analytically  !
 ! D18   D(3,2,6,10)          -110.4569         calculate D2E/DX2 analytically  !
 ! D19   D(3,2,6,25)            69.9513         calculate D2E/DX2 analytically  !
 ! D20   D(5,2,6,10)            11.9574         calculate D2E/DX2 analytically  !
 ! D21   D(5,2,6,25)          -167.6344         calculate D2E/DX2 analytically  !
 ! D22   D(15,2,6,10)           95.9323         calculate D2E/DX2 analytically  !
 ! D23   D(15,2,6,25)          -83.6595         calculate D2E/DX2 analytically  !
 ! D24   D(20,2,6,10)          148.8701         calculate D2E/DX2 analytically  !
 ! D25   D(20,2,6,25)          -30.7217         calculate D2E/DX2 analytically  !
 ! D26   D(3,2,15,12)            6.9205         calculate D2E/DX2 analytically  !
 ! D27   D(5,2,15,12)         -113.6553         calculate D2E/DX2 analytically  !
 ! D28   D(6,2,15,12)          162.8203         calculate D2E/DX2 analytically  !
 ! D29   D(20,2,15,12)         108.1179         calculate D2E/DX2 analytically  !
 ! D30   D(3,2,20,19)          114.9138         calculate D2E/DX2 analytically  !
 ! D31   D(3,2,20,21)          -32.83           calculate D2E/DX2 analytically  !
 ! D32   D(5,2,20,19)          -38.7163         calculate D2E/DX2 analytically  !
 ! D33   D(5,2,20,21)          173.5399         calculate D2E/DX2 analytically  !
 ! D34   D(6,2,20,19)         -128.4343         calculate D2E/DX2 analytically  !
 ! D35   D(6,2,20,21)           83.822          calculate D2E/DX2 analytically  !
 ! D36   D(15,2,20,19)          38.7187         calculate D2E/DX2 analytically  !
 ! D37   D(15,2,20,21)        -109.0251         calculate D2E/DX2 analytically  !
 ! D38   D(2,3,13,12)            1.2983         calculate D2E/DX2 analytically  !
 ! D39   D(2,3,13,22)          125.1378         calculate D2E/DX2 analytically  !
 ! D40   D(2,3,13,51)         -114.0376         calculate D2E/DX2 analytically  !
 ! D41   D(1,4,14,11)         -177.9314         calculate D2E/DX2 analytically  !
 ! D42   D(1,4,14,23)           63.3162         calculate D2E/DX2 analytically  !
 ! D43   D(1,4,14,52)          -58.344          calculate D2E/DX2 analytically  !
 ! D44   D(7,4,14,11)            1.662          calculate D2E/DX2 analytically  !
 ! D45   D(7,4,14,23)         -117.0904         calculate D2E/DX2 analytically  !
 ! D46   D(7,4,14,52)          121.2494         calculate D2E/DX2 analytically  !
 ! D47   D(2,5,8,9)              3.5015         calculate D2E/DX2 analytically  !
 ! D48   D(2,5,8,48)          -175.9638         calculate D2E/DX2 analytically  !
 ! D49   D(24,5,8,9)           172.4163         calculate D2E/DX2 analytically  !
 ! D50   D(24,5,8,48)           -7.049          calculate D2E/DX2 analytically  !
 ! D51   D(2,5,24,26)           87.7123         calculate D2E/DX2 analytically  !
 ! D52   D(2,5,24,30)          -86.9319         calculate D2E/DX2 analytically  !
 ! D53   D(8,5,24,26)          -82.7598         calculate D2E/DX2 analytically  !
 ! D54   D(8,5,24,30)          102.596          calculate D2E/DX2 analytically  !
 ! D55   D(2,6,10,9)            -9.5574         calculate D2E/DX2 analytically  !
 ! D56   D(2,6,10,49)          172.3053         calculate D2E/DX2 analytically  !
 ! D57   D(25,6,10,9)          170.0131         calculate D2E/DX2 analytically  !
 ! D58   D(25,6,10,49)          -8.1242         calculate D2E/DX2 analytically  !
 ! D59   D(2,6,25,33)          102.1706         calculate D2E/DX2 analytically  !
 ! D60   D(2,6,25,37)          -72.5904         calculate D2E/DX2 analytically  !
 ! D61   D(10,6,25,33)         -77.4557         calculate D2E/DX2 analytically  !
 ! D62   D(10,6,25,37)         107.7833         calculate D2E/DX2 analytically  !
 ! D63   D(5,8,9,10)             4.1583         calculate D2E/DX2 analytically  !
 ! D64   D(5,8,9,50)          -177.9099         calculate D2E/DX2 analytically  !
 ! D65   D(48,8,9,10)         -176.3589         calculate D2E/DX2 analytically  !
 ! D66   D(48,8,9,50)            1.5729         calculate D2E/DX2 analytically  !
 ! D67   D(5,8,48,104)          68.2429         calculate D2E/DX2 analytically  !
 ! D68   D(5,8,48,105)        -171.7351         calculate D2E/DX2 analytically  !
 ! D69   D(5,8,48,106)         -51.4885         calculate D2E/DX2 analytically  !
 ! D70   D(9,8,48,104)        -111.2649         calculate D2E/DX2 analytically  !
 ! D71   D(9,8,48,105)           8.757          calculate D2E/DX2 analytically  !
 ! D72   D(9,8,48,106)         129.0037         calculate D2E/DX2 analytically  !
 ! D73   D(8,9,10,6)            -0.8543         calculate D2E/DX2 analytically  !
 ! D74   D(8,9,10,49)          177.3895         calculate D2E/DX2 analytically  !
 ! D75   D(50,9,10,6)         -178.7926         calculate D2E/DX2 analytically  !
 ! D76   D(50,9,10,49)          -0.5488         calculate D2E/DX2 analytically  !
 ! D77   D(6,10,49,107)        -22.0311         calculate D2E/DX2 analytically  !
 ! D78   D(6,10,49,108)         98.9304         calculate D2E/DX2 analytically  !
 ! D79   D(6,10,49,109)       -143.0004         calculate D2E/DX2 analytically  !
 ! D80   D(9,10,49,107)        159.6642         calculate D2E/DX2 analytically  !
 ! D81   D(9,10,49,108)        -79.3743         calculate D2E/DX2 analytically  !
 ! D82   D(9,10,49,109)         38.6949         calculate D2E/DX2 analytically  !
 ! D83   D(14,11,12,13)        173.5728         calculate D2E/DX2 analytically  !
 ! D84   D(14,11,12,15)         -3.5849         calculate D2E/DX2 analytically  !
 ! D85   D(12,11,14,4)          78.0433         calculate D2E/DX2 analytically  !
 ! D86   D(12,11,14,23)       -159.1461         calculate D2E/DX2 analytically  !
 ! D87   D(12,11,14,52)        -41.4255         calculate D2E/DX2 analytically  !
 ! D88   D(11,12,13,3)        -171.19           calculate D2E/DX2 analytically  !
 ! D89   D(11,12,13,22)         62.4112         calculate D2E/DX2 analytically  !
 ! D90   D(11,12,13,51)        -50.6282         calculate D2E/DX2 analytically  !
 ! D91   D(15,12,13,3)           5.9755         calculate D2E/DX2 analytically  !
 ! D92   D(15,12,13,22)       -120.4233         calculate D2E/DX2 analytically  !
 ! D93   D(15,12,13,51)        126.5373         calculate D2E/DX2 analytically  !
 ! D94   D(11,12,15,2)         168.205          calculate D2E/DX2 analytically  !
 ! D95   D(13,12,15,2)          -8.7559         calculate D2E/DX2 analytically  !
 ! D96   D(3,13,22,64)         175.4156         calculate D2E/DX2 analytically  !
 ! D97   D(3,13,22,65)          55.3621         calculate D2E/DX2 analytically  !
 ! D98   D(3,13,22,66)         -63.1823         calculate D2E/DX2 analytically  !
 ! D99   D(12,13,22,64)        -60.8538         calculate D2E/DX2 analytically  !
 ! D100  D(12,13,22,65)        179.0927         calculate D2E/DX2 analytically  !
 ! D101  D(12,13,22,66)         60.5483         calculate D2E/DX2 analytically  !
 ! D102  D(51,13,22,64)         51.013          calculate D2E/DX2 analytically  !
 ! D103  D(51,13,22,65)        -69.0406         calculate D2E/DX2 analytically  !
 ! D104  D(51,13,22,66)        172.415          calculate D2E/DX2 analytically  !
 ! D105  D(4,14,23,67)        -174.1972         calculate D2E/DX2 analytically  !
 ! D106  D(4,14,23,68)          65.7825         calculate D2E/DX2 analytically  !
 ! D107  D(4,14,23,69)         -55.2793         calculate D2E/DX2 analytically  !
 ! D108  D(11,14,23,67)         65.3808         calculate D2E/DX2 analytically  !
 ! D109  D(11,14,23,68)        -54.6395         calculate D2E/DX2 analytically  !
 ! D110  D(11,14,23,69)       -175.7014         calculate D2E/DX2 analytically  !
 ! D111  D(52,14,23,67)        -52.5049         calculate D2E/DX2 analytically  !
 ! D112  D(52,14,23,68)       -172.5252         calculate D2E/DX2 analytically  !
 ! D113  D(52,14,23,69)         66.413          calculate D2E/DX2 analytically  !
 ! D114  D(21,17,18,19)          5.9988         calculate D2E/DX2 analytically  !
 ! D115  D(21,17,18,58)       -113.867          calculate D2E/DX2 analytically  !
 ! D116  D(21,17,18,59)        125.1257         calculate D2E/DX2 analytically  !
 ! D117  D(56,17,18,19)       -109.3954         calculate D2E/DX2 analytically  !
 ! D118  D(56,17,18,58)        130.7388         calculate D2E/DX2 analytically  !
 ! D119  D(56,17,18,59)          9.7314         calculate D2E/DX2 analytically  !
 ! D120  D(57,17,18,19)        127.491          calculate D2E/DX2 analytically  !
 ! D121  D(57,17,18,58)          7.6252         calculate D2E/DX2 analytically  !
 ! D122  D(57,17,18,59)       -113.3822         calculate D2E/DX2 analytically  !
 ! D123  D(18,17,21,20)        -29.6845         calculate D2E/DX2 analytically  !
 ! D124  D(18,17,21,62)       -146.6472         calculate D2E/DX2 analytically  !
 ! D125  D(18,17,21,63)         87.4599         calculate D2E/DX2 analytically  !
 ! D126  D(56,17,21,20)         88.8939         calculate D2E/DX2 analytically  !
 ! D127  D(56,17,21,62)        -28.0688         calculate D2E/DX2 analytically  !
 ! D128  D(56,17,21,63)       -153.9617         calculate D2E/DX2 analytically  !
 ! D129  D(57,17,21,20)       -151.7604         calculate D2E/DX2 analytically  !
 ! D130  D(57,17,21,62)         91.2769         calculate D2E/DX2 analytically  !
 ! D131  D(57,17,21,63)        -34.616          calculate D2E/DX2 analytically  !
 ! D132  D(17,18,19,20)         19.7778         calculate D2E/DX2 analytically  !
 ! D133  D(17,18,19,60)        -98.3141         calculate D2E/DX2 analytically  !
 ! D134  D(17,18,19,61)        137.6137         calculate D2E/DX2 analytically  !
 ! D135  D(58,18,19,20)        140.8247         calculate D2E/DX2 analytically  !
 ! D136  D(58,18,19,60)         22.7328         calculate D2E/DX2 analytically  !
 ! D137  D(58,18,19,61)       -101.3394         calculate D2E/DX2 analytically  !
 ! D138  D(59,18,19,20)        -99.1752         calculate D2E/DX2 analytically  !
 ! D139  D(59,18,19,60)        142.7329         calculate D2E/DX2 analytically  !
 ! D140  D(59,18,19,61)         18.6608         calculate D2E/DX2 analytically  !
 ! D141  D(18,19,20,2)         168.1909         calculate D2E/DX2 analytically  !
 ! D142  D(18,19,20,21)        -39.8117         calculate D2E/DX2 analytically  !
 ! D143  D(60,19,20,2)         -71.9761         calculate D2E/DX2 analytically  !
 ! D144  D(60,19,20,21)         80.0212         calculate D2E/DX2 analytically  !
 ! D145  D(61,19,20,2)          45.8327         calculate D2E/DX2 analytically  !
 ! D146  D(61,19,20,21)       -162.17           calculate D2E/DX2 analytically  !
 ! D147  D(2,20,21,17)        -162.4252         calculate D2E/DX2 analytically  !
 ! D148  D(2,20,21,62)         -41.9655         calculate D2E/DX2 analytically  !
 ! D149  D(2,20,21,63)          77.8678         calculate D2E/DX2 analytically  !
 ! D150  D(19,20,21,17)         43.7043         calculate D2E/DX2 analytically  !
 ! D151  D(19,20,21,62)        164.1639         calculate D2E/DX2 analytically  !
 ! D152  D(19,20,21,63)        -76.0028         calculate D2E/DX2 analytically  !
 ! D153  D(5,24,26,27)        -170.5248         calculate D2E/DX2 analytically  !
 ! D154  D(5,24,26,31)          13.8344         calculate D2E/DX2 analytically  !
 ! D155  D(30,24,26,27)          4.0567         calculate D2E/DX2 analytically  !
 ! D156  D(30,24,26,31)       -171.584          calculate D2E/DX2 analytically  !
 ! D157  D(5,24,30,29)         173.1566         calculate D2E/DX2 analytically  !
 ! D158  D(5,24,30,32)          -8.444          calculate D2E/DX2 analytically  !
 ! D159  D(26,24,30,29)         -1.3837         calculate D2E/DX2 analytically  !
 ! D160  D(26,24,30,32)        177.0157         calculate D2E/DX2 analytically  !
 ! D161  D(6,25,33,34)        -171.3717         calculate D2E/DX2 analytically  !
 ! D162  D(6,25,33,38)          11.0747         calculate D2E/DX2 analytically  !
 ! D163  D(37,25,33,34)          3.2866         calculate D2E/DX2 analytically  !
 ! D164  D(37,25,33,38)       -174.2671         calculate D2E/DX2 analytically  !
 ! D165  D(6,25,37,36)         171.4744         calculate D2E/DX2 analytically  !
 ! D166  D(6,25,37,39)         -11.1547         calculate D2E/DX2 analytically  !
 ! D167  D(33,25,37,36)         -3.217          calculate D2E/DX2 analytically  !
 ! D168  D(33,25,37,39)        174.1539         calculate D2E/DX2 analytically  !
 ! D169  D(24,26,27,28)         -3.5567         calculate D2E/DX2 analytically  !
 ! D170  D(24,26,27,70)        179.8096         calculate D2E/DX2 analytically  !
 ! D171  D(31,26,27,28)        172.1979         calculate D2E/DX2 analytically  !
 ! D172  D(31,26,27,70)         -4.4358         calculate D2E/DX2 analytically  !
 ! D173  D(24,26,31,40)       -111.0582         calculate D2E/DX2 analytically  !
 ! D174  D(24,26,31,41)        124.5187         calculate D2E/DX2 analytically  !
 ! D175  D(24,26,31,73)          6.8784         calculate D2E/DX2 analytically  !
 ! D176  D(27,26,31,40)         73.3609         calculate D2E/DX2 analytically  !
 ! D177  D(27,26,31,41)        -51.0622         calculate D2E/DX2 analytically  !
 ! D178  D(27,26,31,73)       -168.7024         calculate D2E/DX2 analytically  !
 ! D179  D(26,27,28,29)          0.3825         calculate D2E/DX2 analytically  !
 ! D180  D(26,27,28,71)       -176.5168         calculate D2E/DX2 analytically  !
 ! D181  D(70,27,28,29)        177.0113         calculate D2E/DX2 analytically  !
 ! D182  D(70,27,28,71)          0.1119         calculate D2E/DX2 analytically  !
 ! D183  D(27,28,29,30)          2.4305         calculate D2E/DX2 analytically  !
 ! D184  D(27,28,29,72)       -175.991          calculate D2E/DX2 analytically  !
 ! D185  D(71,28,29,30)        179.3384         calculate D2E/DX2 analytically  !
 ! D186  D(71,28,29,72)          0.917          calculate D2E/DX2 analytically  !
 ! D187  D(28,29,30,24)         -1.8984         calculate D2E/DX2 analytically  !
 ! D188  D(28,29,30,32)        179.6766         calculate D2E/DX2 analytically  !
 ! D189  D(72,29,30,24)        176.5217         calculate D2E/DX2 analytically  !
 ! D190  D(72,29,30,32)         -1.9032         calculate D2E/DX2 analytically  !
 ! D191  D(24,30,32,42)        128.5566         calculate D2E/DX2 analytically  !
 ! D192  D(24,30,32,43)       -107.7107         calculate D2E/DX2 analytically  !
 ! D193  D(24,30,32,74)          9.9647         calculate D2E/DX2 analytically  !
 ! D194  D(29,30,32,42)        -53.0642         calculate D2E/DX2 analytically  !
 ! D195  D(29,30,32,43)         70.6684         calculate D2E/DX2 analytically  !
 ! D196  D(29,30,32,74)       -171.6561         calculate D2E/DX2 analytically  !
 ! D197  D(26,31,40,80)       -172.0759         calculate D2E/DX2 analytically  !
 ! D198  D(26,31,40,81)         69.3158         calculate D2E/DX2 analytically  !
 ! D199  D(26,31,40,82)        -52.0965         calculate D2E/DX2 analytically  !
 ! D200  D(41,31,40,80)        -47.508          calculate D2E/DX2 analytically  !
 ! D201  D(41,31,40,81)       -166.1163         calculate D2E/DX2 analytically  !
 ! D202  D(41,31,40,82)         72.4713         calculate D2E/DX2 analytically  !
 ! D203  D(73,31,40,80)         69.4112         calculate D2E/DX2 analytically  !
 ! D204  D(73,31,40,81)        -49.1971         calculate D2E/DX2 analytically  !
 ! D205  D(73,31,40,82)       -170.6095         calculate D2E/DX2 analytically  !
 ! D206  D(26,31,41,83)       -171.6245         calculate D2E/DX2 analytically  !
 ! D207  D(26,31,41,84)         68.9915         calculate D2E/DX2 analytically  !
 ! D208  D(26,31,41,85)        -51.7713         calculate D2E/DX2 analytically  !
 ! D209  D(40,31,41,83)         62.3974         calculate D2E/DX2 analytically  !
 ! D210  D(40,31,41,84)        -56.9867         calculate D2E/DX2 analytically  !
 ! D211  D(40,31,41,85)       -177.7495         calculate D2E/DX2 analytically  !
 ! D212  D(73,31,41,83)        -53.9455         calculate D2E/DX2 analytically  !
 ! D213  D(73,31,41,84)       -173.3295         calculate D2E/DX2 analytically  !
 ! D214  D(73,31,41,85)         65.9077         calculate D2E/DX2 analytically  !
 ! D215  D(30,32,42,86)       -172.8877         calculate D2E/DX2 analytically  !
 ! D216  D(30,32,42,87)         67.2832         calculate D2E/DX2 analytically  !
 ! D217  D(30,32,42,88)        -52.6788         calculate D2E/DX2 analytically  !
 ! D218  D(43,32,42,86)         62.7113         calculate D2E/DX2 analytically  !
 ! D219  D(43,32,42,87)        -57.1178         calculate D2E/DX2 analytically  !
 ! D220  D(43,32,42,88)       -177.0799         calculate D2E/DX2 analytically  !
 ! D221  D(74,32,42,86)        -54.9259         calculate D2E/DX2 analytically  !
 ! D222  D(74,32,42,87)       -174.755          calculate D2E/DX2 analytically  !
 ! D223  D(74,32,42,88)         65.283          calculate D2E/DX2 analytically  !
 ! D224  D(30,32,43,89)        178.7274         calculate D2E/DX2 analytically  !
 ! D225  D(30,32,43,90)         59.0057         calculate D2E/DX2 analytically  !
 ! D226  D(30,32,43,91)        -61.5271         calculate D2E/DX2 analytically  !
 ! D227  D(42,32,43,89)        -56.4612         calculate D2E/DX2 analytically  !
 ! D228  D(42,32,43,90)       -176.1829         calculate D2E/DX2 analytically  !
 ! D229  D(42,32,43,91)         63.2843         calculate D2E/DX2 analytically  !
 ! D230  D(74,32,43,89)         61.4382         calculate D2E/DX2 analytically  !
 ! D231  D(74,32,43,90)        -58.2835         calculate D2E/DX2 analytically  !
 ! D232  D(74,32,43,91)       -178.8164         calculate D2E/DX2 analytically  !
 ! D233  D(25,33,34,35)         -0.8337         calculate D2E/DX2 analytically  !
 ! D234  D(25,33,34,75)       -178.7263         calculate D2E/DX2 analytically  !
 ! D235  D(38,33,34,35)        176.8006         calculate D2E/DX2 analytically  !
 ! D236  D(38,33,34,75)         -1.092          calculate D2E/DX2 analytically  !
 ! D237  D(25,33,38,46)       -114.0158         calculate D2E/DX2 analytically  !
 ! D238  D(25,33,38,47)        122.1287         calculate D2E/DX2 analytically  !
 ! D239  D(25,33,38,78)          3.7793         calculate D2E/DX2 analytically  !
 ! D240  D(34,33,38,46)         68.4489         calculate D2E/DX2 analytically  !
 ! D241  D(34,33,38,47)        -55.4066         calculate D2E/DX2 analytically  !
 ! D242  D(34,33,38,78)       -173.756          calculate D2E/DX2 analytically  !
 ! D243  D(33,34,35,36)         -1.6365         calculate D2E/DX2 analytically  !
 ! D244  D(33,34,35,76)       -179.3841         calculate D2E/DX2 analytically  !
 ! D245  D(75,34,35,36)        176.2528         calculate D2E/DX2 analytically  !
 ! D246  D(75,34,35,76)         -1.4948         calculate D2E/DX2 analytically  !
 ! D247  D(34,35,36,37)          1.7047         calculate D2E/DX2 analytically  !
 ! D248  D(34,35,36,77)       -177.3018         calculate D2E/DX2 analytically  !
 ! D249  D(76,35,36,37)        179.4521         calculate D2E/DX2 analytically  !
 ! D250  D(76,35,36,77)          0.4456         calculate D2E/DX2 analytically  !
 ! D251  D(35,36,37,25)          0.6972         calculate D2E/DX2 analytically  !
 ! D252  D(35,36,37,39)       -176.6946         calculate D2E/DX2 analytically  !
 ! D253  D(77,36,37,25)        179.7049         calculate D2E/DX2 analytically  !
 ! D254  D(77,36,37,39)          2.3131         calculate D2E/DX2 analytically  !
 ! D255  D(25,37,39,44)        141.0891         calculate D2E/DX2 analytically  !
 ! D256  D(25,37,39,45)        -94.6387         calculate D2E/DX2 analytically  !
 ! D257  D(25,37,39,79)         22.7836         calculate D2E/DX2 analytically  !
 ! D258  D(36,37,39,44)        -41.6006         calculate D2E/DX2 analytically  !
 ! D259  D(36,37,39,45)         82.6716         calculate D2E/DX2 analytically  !
 ! D260  D(36,37,39,79)       -159.906          calculate D2E/DX2 analytically  !
 ! D261  D(33,38,46,98)       -177.1784         calculate D2E/DX2 analytically  !
 ! D262  D(33,38,46,99)         63.7711         calculate D2E/DX2 analytically  !
 ! D263  D(33,38,46,100)       -56.7514         calculate D2E/DX2 analytically  !
 ! D264  D(47,38,46,98)        -52.8274         calculate D2E/DX2 analytically  !
 ! D265  D(47,38,46,99)       -171.8779         calculate D2E/DX2 analytically  !
 ! D266  D(47,38,46,100)        67.5996         calculate D2E/DX2 analytically  !
 ! D267  D(78,38,46,98)         64.353          calculate D2E/DX2 analytically  !
 ! D268  D(78,38,46,99)        -54.6975         calculate D2E/DX2 analytically  !
 ! D269  D(78,38,46,100)      -175.22           calculate D2E/DX2 analytically  !
 ! D270  D(33,38,47,101)      -172.7447         calculate D2E/DX2 analytically  !
 ! D271  D(33,38,47,102)        67.6965         calculate D2E/DX2 analytically  !
 ! D272  D(33,38,47,103)       -52.7998         calculate D2E/DX2 analytically  !
 ! D273  D(46,38,47,101)        62.1046         calculate D2E/DX2 analytically  !
 ! D274  D(46,38,47,102)       -57.4541         calculate D2E/DX2 analytically  !
 ! D275  D(46,38,47,103)      -177.9505         calculate D2E/DX2 analytically  !
 ! D276  D(78,38,47,101)       -54.3801         calculate D2E/DX2 analytically  !
 ! D277  D(78,38,47,102)      -173.9388         calculate D2E/DX2 analytically  !
 ! D278  D(78,38,47,103)        65.5648         calculate D2E/DX2 analytically  !
 ! D279  D(37,39,44,92)       -173.3614         calculate D2E/DX2 analytically  !
 ! D280  D(37,39,44,93)         66.6744         calculate D2E/DX2 analytically  !
 ! D281  D(37,39,44,94)        -54.7483         calculate D2E/DX2 analytically  !
 ! D282  D(45,39,44,92)         62.3687         calculate D2E/DX2 analytically  !
 ! D283  D(45,39,44,93)        -57.5955         calculate D2E/DX2 analytically  !
 ! D284  D(45,39,44,94)       -179.0182         calculate D2E/DX2 analytically  !
 ! D285  D(79,39,44,92)        -54.926          calculate D2E/DX2 analytically  !
 ! D286  D(79,39,44,93)       -174.8902         calculate D2E/DX2 analytically  !
 ! D287  D(79,39,44,94)         63.6871         calculate D2E/DX2 analytically  !
 ! D288  D(37,39,45,95)        179.463          calculate D2E/DX2 analytically  !
 ! D289  D(37,39,45,96)         59.969          calculate D2E/DX2 analytically  !
 ! D290  D(37,39,45,97)        -60.7418         calculate D2E/DX2 analytically  !
 ! D291  D(44,39,45,95)        -54.9581         calculate D2E/DX2 analytically  !
 ! D292  D(44,39,45,96)       -174.452          calculate D2E/DX2 analytically  !
 ! D293  D(44,39,45,97)         64.8371         calculate D2E/DX2 analytically  !
 ! D294  D(79,39,45,95)         62.12           calculate D2E/DX2 analytically  !
 ! D295  D(79,39,45,96)        -57.374          calculate D2E/DX2 analytically  !
 ! D296  D(79,39,45,97)       -178.0848         calculate D2E/DX2 analytically  !
 --------------------------------------------------------------------------------
 Trust Radius=3.00D-01 FncErr=1.00D-07 GrdErr=1.00D-07
 Number of steps in this run=   2 maximum allowed number of steps=   2.
 GradGradGradGradGradGradGradGradGradGradGradGradGradGradGradGradGradGrad

 Stoichiometry    C40H60MgN2O6
 Framework group  C1[X(C40H60MgN2O6)]
 Deg. of freedom   321
 Full point group                 C1      NOp   1
 Largest Abelian subgroup         C1      NOp   1
 Largest concise Abelian subgroup C1      NOp   1
                         Standard orientation:                         
 ---------------------------------------------------------------------
 Center     Atomic     Atomic              Coordinates (Angstroms)
 Number     Number      Type              X           Y           Z
 ---------------------------------------------------------------------
    1          8             0        4.690392   -3.015995    0.524489
    2         12             0       -0.473175    0.331421   -0.304547
    3          8             0       -0.170015    0.340030   -2.208928
    4          6             0        3.847768   -2.702459   -0.484304
    5          7             0        0.349210    1.846314    0.900268
    6          7             0       -2.380300    0.992111    0.327457
    7          8             0        3.021992   -3.464197   -0.934640
    8          6             0       -0.298282    2.830264    1.523849
    9          6             0       -1.695018    2.977292    1.530142
   10          6             0       -2.663781    2.114749    0.978084
   11          8             0        3.162520   -0.928789   -1.980797
   12          6             0        1.911702   -0.622776   -1.611993
   13          6             0        1.004403   -0.120739   -2.736573
   14          6             0        4.095974   -1.269729   -0.940206
   15          8             0        1.533817   -0.687877   -0.445734
   16          6             0        4.534376   -4.335791    1.069559
   17          6             0       -2.259758   -3.815940   -0.396523
   18          6             0       -1.231611   -4.070748    0.737126
   19          6             0       -0.280423   -2.859239    0.648712
   20          8             0       -1.015464   -1.852953   -0.074317
   21          6             0       -1.711474   -2.578116   -1.114462
   22          6             0        0.831840   -1.225039   -3.804515
   23          6             0        5.491406   -1.055486   -1.520047
   24          6             0        1.794951    1.901776    0.831454
   25          6             0       -3.449460    0.075834   -0.006577
   26          6             0        2.416173    2.697418   -0.196856
   27          6             0        3.818122    2.580155   -0.378936
   28          6             0        4.601669    1.768666    0.466575
   29          6             0        3.989761    1.044501    1.517280
   30          6             0        2.581241    1.082003    1.704133
   31          6             0        1.617340    3.740174   -1.032229
   32          6             0        1.932550    0.274146    2.858019
   33          6             0       -3.993075   -0.782326    1.006638
   34          6             0       -4.907343   -1.797739    0.613471
   35          6             0       -5.288784   -1.952188   -0.734559
   36          6             0       -4.787832   -1.068437   -1.715547
   37          6             0       -3.870614   -0.037617   -1.378480
   38          6             0       -3.661217   -0.604150    2.514888
   39          6             0       -3.389646    0.971637   -2.454755
   40          6             0        1.444082    3.325133   -2.526640
   41          6             0        2.283995    5.155478   -0.932698
   42          6             0        2.355344   -1.228588    2.829921
   43          6             0        2.270690    0.902479    4.252570
   44          6             0       -3.083447    0.294174   -3.824157
   45          6             0       -4.436354    2.123162   -2.633938
   46          6             0       -2.844657   -1.804388    3.090660
   47          6             0       -4.965702   -0.386914    3.355511
   48          6             0        0.491263    3.892459    2.281548
   49          6             0       -4.109787    2.543224    1.217003
   50          1             0       -2.080985    3.847052    2.050831
   51          1             0        1.595316    0.682677   -3.222475
   52          1             0        3.954138   -0.593711   -0.091039
   53          1             0        4.646461   -5.091961    0.288510
   54          1             0        3.548311   -4.441754    1.530279
   55          1             0        5.318842   -4.437973    1.820087
   56          1             0       -3.243463   -3.554111   -0.002293
   57          1             0       -2.367090   -4.669300   -1.073815
   58          1             0       -0.681841   -5.007632    0.602793
   59          1             0       -1.729221   -4.107480    1.709599
   60          1             0        0.632270   -3.102459    0.093390
   61          1             0       -0.001884   -2.433789    1.613608
   62          1             0       -2.490368   -1.934252   -1.510296
   63          1             0       -0.992000   -2.837640   -1.901047
   64          1             0        1.790213   -1.505800   -4.255928
   65          1             0        0.166878   -0.842389   -4.584608
   66          1             0        0.373311   -2.120973   -3.373854
   67          1             0        5.621291    0.011205   -1.723593
   68          1             0        5.623893   -1.617405   -2.449768
   69          1             0        6.250293   -1.371432   -0.799396
   70          1             0        4.308919    3.176083   -1.159658
   71          1             0        5.693591    1.736723    0.343713
   72          1             0        4.614057    0.467310    2.212035
   73          1             0        0.601310    3.814160   -0.600021
   74          1             0        0.832697    0.328454    2.718559
   75          1             0       -5.349075   -2.449693    1.378531
   76          1             0       -6.004456   -2.736744   -1.016267
   77          1             0       -5.125282   -1.168940   -2.755400
   78          1             0       -3.029225    0.297348    2.623315
   79          1             0       -2.447292    1.425366   -2.091636
   80          1             0        1.000312    4.156802   -3.096945
   81          1             0        0.760683    2.460697   -2.590411
   82          1             0        2.413359    3.068720   -2.982734
   83          1             0        1.627837    5.904431   -1.401708
   84          1             0        3.252696    5.172627   -1.454358
   85          1             0        2.449751    5.445920    0.116284
   86          1             0        1.780232   -1.794314    3.580484
   87          1             0        3.426426   -1.345841    3.056935
   88          1             0        2.166469   -1.659070    1.833008
   89          1             0        1.780512    0.324624    5.051171
   90          1             0        1.917305    1.943004    4.312240
   91          1             0        3.357265    0.891771    4.430682
   92          1             0       -2.636715    1.035890   -4.503464
   93          1             0       -3.994598   -0.104891   -4.296565
   94          1             0       -2.359903   -0.526339   -3.688951
   95          1             0       -4.075652    2.834213   -3.392822
   96          1             0       -4.585176    2.671783   -1.690279
   97          1             0       -5.408165    1.722115   -2.962933
   98          1             0       -2.673520   -1.664694    4.170030
   99          1             0       -1.862536   -1.861203    2.590192
  100          1             0       -3.377275   -2.757205    2.940187
  101          1             0       -4.700954   -0.134667    4.393793
  102          1             0       -5.581309   -1.299144    3.368651
  103          1             0       -5.570959    0.432971    2.940164
  104          1             0        1.066600    4.528192    1.599803
  105          1             0       -0.179491    4.540422    2.855734
  106          1             0        1.200962    3.433321    2.977842
  107          1             0       -4.805822    2.086637    0.508977
  108          1             0       -4.433243    2.273364    2.229926
  109          1             0       -4.193224    3.633247    1.131927
 ---------------------------------------------------------------------
 Rotational constants (GHZ):      0.0842089      0.0559546      0.0498816
 General basis read from cards:  (5D, 7F)
 There are   572 symmetry adapted basis functions of A   symmetry.
 Integral buffers will be    131072 words long.
 Raffenetti 2 integral format.
 Two-electron integral symmetry is turned on.
   572 basis functions,  1290 primitive gaussians,   599 cartesian basis functions
   187 alpha electrons      187 beta electrons
       nuclear repulsion energy      7746.4440491804 Hartrees.
 NAtoms=  109 NActive=  109 NUniq=  109 SFac= 1.00D+00 NAtFMM=   60 Big=T
 One-electron integrals computed using PRISM.
 NBasis=   572 RedAO= T  NBF=   572
 NBsUse=   572 1.00D-06 NBFU=   572
 Initial guess read from the checkpoint file:
 RRSS_fm-5-rhf.chk
 Initial guess orbital symmetries:
       Occupied  (A) (A) (A) (A) (A) (A) (A) (A) (A) (A) (A) (A)
                 (A) (A) (A) (A) (A) (A) (A) (A) (A) (A) (A) (A)
                 (A) (A) (A) (A) (A) (A) (A) (A) (A) (A) (A) (A)
                 (A) (A) (A) (A) (A) (A) (A) (A) (A) (A) (A) (A)
                 (A) (A) (A) (A) (A) (A) (A) (A) (A) (A) (A) (A)
                 (A) (A) (A) (A) (A) (A) (A) (A) (A) (A) (A) (A)
                 (A) (A) (A) (A) (A) (A) (A) (A) (A) (A) (A) (A)
                 (A) (A) (A) (A) (A) (A) (A) (A) (A) (A) (A) (A)
                 (A) (A) (A) (A) (A) (A) (A) (A) (A) (A) (A) (A)
                 (A) (A) (A) (A) (A) (A) (A) (A) (A) (A) (A) (A)
                 (A) (A) (A) (A) (A) (A) (A) (A) (A) (A) (A) (A)
                 (A) (A) (A) (A) (A) (A) (A) (A) (A) (A) (A) (A)
                 (A) (A) (A) (A) (A) (A) (A) (A) (A) (A) (A) (A)
                 (A) (A) (A) (A) (A) (A) (A) (A) (A) (A) (A) (A)
                 (A) (A) (A) (A) (A) (A) (A) (A) (A) (A) (A) (A)
                 (A) (A) (A) (A) (A) (A) (A)
       Virtual   (A) (A) (A) (A) (A) (A) (A) (A) (A) (A) (A) (A)
                 (A) (A) (A) (A) (A) (A) (A) (A) (A) (A) (A) (A)
                 (A) (A) (A) (A) (A) (A) (A) (A) (A) (A) (A) (A)
                 (A) (A) (A) (A) (A) (A) (A) (A) (A) (A) (A) (A)
                 (A) (A) (A) (A) (A) (A) (A) (A) (A) (A) (A) (A)
                 (A) (A) (A) (A) (A) (A) (A) (A) (A) (A) (A) (A)
                 (A) (A) (A) (A) (A) (A) (A) (A) (A) (A) (A) (A)
                 (A) (A) (A) (A) (A) (A) (A) (A) (A) (A) (A) (A)
                 (A) (A) (A) (A) (A) (A) (A) (A) (A) (A) (A) (A)
                 (A) (A) (A) (A) (A) (A) (A) (A) (A) (A) (A) (A)
                 (A) (A) (A) (A) (A) (A) (A) (A) (A) (A) (A) (A)
                 (A) (A) (A) (A) (A) (A) (A) (A) (A) (A) (A) (A)
                 (A) (A) (A) (A) (A) (A) (A) (A) (A) (A) (A) (A)
                 (A) (A) (A) (A) (A) (A) (A) (A) (A) (A) (A) (A)
                 (A) (A) (A) (A) (A) (A) (A) (A) (A) (A) (A) (A)
                 (A) (A) (A) (A) (A) (A) (A) (A) (A) (A) (A) (A)
                 (A) (A) (A) (A) (A) (A) (A) (A) (A) (A) (A) (A)
                 (A) (A) (A) (A) (A) (A) (A) (A) (A) (A) (A) (A)
                 (A) (A) (A) (A) (A) (A) (A) (A) (A) (A) (A) (A)
                 (A) (A) (A) (A) (A) (A) (A) (A) (A) (A) (A) (A)
                 (A) (A) (A) (A) (A) (A) (A) (A) (A) (A) (A) (A)
                 (A) (A) (A) (A) (A) (A) (A) (A) (A) (A) (A) (A)
                 (A) (A) (A) (A) (A) (A) (A) (A) (A) (A) (A) (A)
                 (A) (A) (A) (A) (A) (A) (A) (A) (A) (A) (A) (A)
                 (A) (A) (A) (A) (A) (A) (A) (A) (A) (A) (A) (A)
                 (A) (A) (A) (A) (A) (A) (A) (A) (A) (A) (A) (A)
                 (A) (A) (A) (A) (A) (A) (A) (A) (A) (A) (A) (A)
                 (A) (A) (A) (A) (A) (A) (A) (A) (A) (A) (A) (A)
                 (A) (A) (A) (A) (A) (A) (A) (A) (A) (A) (A) (A)
                 (A) (A) (A) (A) (A) (A) (A) (A) (A) (A) (A) (A)
                 (A) (A) (A) (A) (A) (A) (A) (A) (A) (A) (A) (A)
                 (A) (A) (A) (A) (A) (A) (A) (A) (A) (A) (A) (A)
                 (A)
 Requested convergence on RMS density matrix=1.00D-08 within 128 cycles.
 Requested convergence on MAX density matrix=1.00D-06.
 Requested convergence on             energy=1.00D-06.
 No special actions if energy rises.
 SCF Done:  E(RB+HF-LYP) =  -2310.29907589     A.U. after    7 cycles
             Convg  =    0.8398D-08             -V/T =  2.0112
             S**2   =   0.0000
 Range of M.O.s used for correlation:     1   572
 NBasis=   572 NAE=   187 NBE=   187 NFC=     0 NFV=     0
 NROrb=    572 NOA=   187 NOB=   187 NVA=   385 NVB=   385
 Symmetrizing basis deriv contribution to polar:
 IMax=3 JMax=2 DiffMx= 0.00D+00
 G2DrvN: will do  110 centers at a time, making    1 passes doing MaxLOS=2.
 Calling FoFCou, ICntrl=  3107 FMM=T I1Cent=   0.
 FoFDir/FoFCou used for L=0 through L=2.
 DoAtom=TTTTTTTTTTTTTTTTTTTTTTTTTTTTTTTTTTTTTTTTTTTTTTTTTT
 DoAtom=TTTTTTTTTTTTTTTTTTTTTTTTTTTTTTTTTTTTTTTTTTTTTTTTTT
 DoAtom=TTTTTTTTT
          Differentiating once with respect to electric field.
                with respect to dipole field.
          Differentiating once with respect to nuclear coordinates.
 FoFCou: FMM=T IPFlag=           0 FMFlag=      100000 FMFlg1=        8193
 NFxFlg=           0 DoJE=F BraDBF=F KetDBF=F FulRan=T.
 Symmetry not used in FoFCou.
 FMM levels:  10  Number of levels for PrismC:   9
 PrismC:  NFx=      2048 NFxT=         4 NFxU=         4.
 PrismC:  NFx=      2048 NFxT=         4 NFxU=         4.
          There are 330 degrees of freedom in the 1st order CPHF.
   327 vectors were produced by pass  0.
 AX will form 327 AO Fock derivatives at one time.
 PrismC:  NFx=      2048 NFxT=         4 NFxU=         4.
 PrismC:  NFx=      2048 NFxT=         4 NFxU=         4.
   327 vectors were produced by pass  1.
 PrismC:  NFx=      2048 NFxT=         4 NFxU=         4.
 PrismC:  NFx=      2048 NFxT=         4 NFxU=         4.
   327 vectors were produced by pass  2.
 PrismC:  NFx=      2048 NFxT=         4 NFxU=         4.
 PrismC:  NFx=      2048 NFxT=         4 NFxU=         4.
   327 vectors were produced by pass  3.
 PrismC:  NFx=      2048 NFxT=         4 NFxU=         4.
 PrismC:  NFx=      2048 NFxT=         4 NFxU=         4.
   327 vectors were produced by pass  4.
 PrismC:  NFx=      2048 NFxT=         4 NFxU=         4.
 PrismC:  NFx=      2048 NFxT=         4 NFxU=         4.
   177 vectors were produced by pass  5.
 PrismC:  NFx=      2048 NFxT=         4 NFxU=         4.
 PrismC:  NFx=      2048 NFxT=         4 NFxU=         4.
    18 vectors were produced by pass  6.
 PrismC:  NFx=      2048 NFxT=         4 NFxU=         3.
 PrismC:  NFx=      2048 NFxT=         4 NFxU=         3.
     3 vectors were produced by pass  7.
 PrismC:  NFx=      2048 NFxT=         4 NFxU=         0.
 PrismC:  NFx=      2048 NFxT=         4 NFxU=         0.
 Inv2:  IOpt= 1 Iter= 1 AM= 8.90D-15 Conv= 1.00D-12.
 Inverted reduced A of dimension 1833 with in-core refinement.
 PrismC:  NFx=      2048 NFxT=         4 NFxU=         4.
 PrismC:  NFx=      2048 NFxT=         4 NFxU=         4.
 Isotropic polarizability for W=    0.000000      382.08 Bohr**3.
 End of Minotr Frequency-dependent properties file   721 does not exist.

 **********************************************************************

            Population analysis using the SCF density.

 **********************************************************************

 Orbital symmetries:
       Occupied  (A) (A) (A) (A) (A) (A) (A) (A) (A) (A) (A) (A)
                 (A) (A) (A) (A) (A) (A) (A) (A) (A) (A) (A) (A)
                 (A) (A) (A) (A) (A) (A) (A) (A) (A) (A) (A) (A)
                 (A) (A) (A) (A) (A) (A) (A) (A) (A) (A) (A) (A)
                 (A) (A) (A) (A) (A) (A) (A) (A) (A) (A) (A) (A)
                 (A) (A) (A) (A) (A) (A) (A) (A) (A) (A) (A) (A)
                 (A) (A) (A) (A) (A) (A) (A) (A) (A) (A) (A) (A)
                 (A) (A) (A) (A) (A) (A) (A) (A) (A) (A) (A) (A)
                 (A) (A) (A) (A) (A) (A) (A) (A) (A) (A) (A) (A)
                 (A) (A) (A) (A) (A) (A) (A) (A) (A) (A) (A) (A)
                 (A) (A) (A) (A) (A) (A) (A) (A) (A) (A) (A) (A)
                 (A) (A) (A) (A) (A) (A) (A) (A) (A) (A) (A) (A)
                 (A) (A) (A) (A) (A) (A) (A) (A) (A) (A) (A) (A)
                 (A) (A) (A) (A) (A) (A) (A) (A) (A) (A) (A) (A)
                 (A) (A) (A) (A) (A) (A) (A) (A) (A) (A) (A) (A)
                 (A) (A) (A) (A) (A) (A) (A)
       Virtual   (A) (A) (A) (A) (A) (A) (A) (A) (A) (A) (A) (A)
                 (A) (A) (A) (A) (A) (A) (A) (A) (A) (A) (A) (A)
                 (A) (A) (A) (A) (A) (A) (A) (A) (A) (A) (A) (A)
                 (A) (A) (A) (A) (A) (A) (A) (A) (A) (A) (A) (A)
                 (A) (A) (A) (A) (A) (A) (A) (A) (A) (A) (A) (A)
                 (A) (A) (A) (A) (A) (A) (A) (A) (A) (A) (A) (A)
                 (A) (A) (A) (A) (A) (A) (A) (A) (A) (A) (A) (A)
                 (A) (A) (A) (A) (A) (A) (A) (A) (A) (A) (A) (A)
                 (A) (A) (A) (A) (A) (A) (A) (A) (A) (A) (A) (A)
                 (A) (A) (A) (A) (A) (A) (A) (A) (A) (A) (A) (A)
                 (A) (A) (A) (A) (A) (A) (A) (A) (A) (A) (A) (A)
                 (A) (A) (A) (A) (A) (A) (A) (A) (A) (A) (A) (A)
                 (A) (A) (A) (A) (A) (A) (A) (A) (A) (A) (A) (A)
                 (A) (A) (A) (A) (A) (A) (A) (A) (A) (A) (A) (A)
                 (A) (A) (A) (A) (A) (A) (A) (A) (A) (A) (A) (A)
                 (A) (A) (A) (A) (A) (A) (A) (A) (A) (A) (A) (A)
                 (A) (A) (A) (A) (A) (A) (A) (A) (A) (A) (A) (A)
                 (A) (A) (A) (A) (A) (A) (A) (A) (A) (A) (A) (A)
                 (A) (A) (A) (A) (A) (A) (A) (A) (A) (A) (A) (A)
                 (A) (A) (A) (A) (A) (A) (A) (A) (A) (A) (A) (A)
                 (A) (A) (A) (A) (A) (A) (A) (A) (A) (A) (A) (A)
                 (A) (A) (A) (A) (A) (A) (A) (A) (A) (A) (A) (A)
                 (A) (A) (A) (A) (A) (A) (A) (A) (A) (A) (A) (A)
                 (A) (A) (A) (A) (A) (A) (A) (A) (A) (A) (A) (A)
                 (A) (A) (A) (A) (A) (A) (A) (A) (A) (A) (A) (A)
                 (A) (A) (A) (A) (A) (A) (A) (A) (A) (A) (A) (A)
                 (A) (A) (A) (A) (A) (A) (A) (A) (A) (A) (A) (A)
                 (A) (A) (A) (A) (A) (A) (A) (A) (A) (A) (A) (A)
                 (A) (A) (A) (A) (A) (A) (A) (A) (A) (A) (A) (A)
                 (A) (A) (A) (A) (A) (A) (A) (A) (A) (A) (A) (A)
                 (A) (A) (A) (A) (A) (A) (A) (A) (A) (A) (A) (A)
                 (A) (A) (A) (A) (A) (A) (A) (A) (A) (A) (A) (A)
                 (A)
 The electronic state is 1-A.
 Alpha  occ. eigenvalues --  -46.69760 -19.19125 -19.18089 -19.14663 -19.13570
 Alpha  occ. eigenvalues --  -19.13127 -19.02826 -14.27622 -14.27323 -10.31060
 Alpha  occ. eigenvalues --  -10.29309 -10.24132 -10.23667 -10.20936 -10.19840
 Alpha  occ. eigenvalues --  -10.19616 -10.19539 -10.19486 -10.17644 -10.16647
 Alpha  occ. eigenvalues --  -10.15837 -10.15228 -10.15209 -10.13710 -10.11651
 Alpha  occ. eigenvalues --  -10.05585 -10.05433 -10.03244 -10.03191 -10.02792
 Alpha  occ. eigenvalues --  -10.02728 -10.02689 -10.02588 -10.02394 -10.02335
 Alpha  occ. eigenvalues --  -10.02255 -10.01954 -10.01798 -10.01623 -10.01568
 Alpha  occ. eigenvalues --  -10.01552 -10.01070 -10.01007 -10.00971 -10.00772
 Alpha  occ. eigenvalues --  -10.00431  -9.99741  -9.98899  -9.98769  -3.00117
 Alpha  occ. eigenvalues --   -1.74857  -1.74778  -1.74498  -1.10827  -1.09417
 Alpha  occ. eigenvalues --   -1.02782  -1.01693  -1.00833  -0.90592  -0.88644
 Alpha  occ. eigenvalues --   -0.87404  -0.81150  -0.80563  -0.79395  -0.76646
 Alpha  occ. eigenvalues --   -0.76491  -0.76326  -0.74391  -0.74024  -0.73589
 Alpha  occ. eigenvalues --   -0.72895  -0.72026  -0.71523  -0.70601  -0.68379
 Alpha  occ. eigenvalues --   -0.68249  -0.68063  -0.67632  -0.65629  -0.65421
 Alpha  occ. eigenvalues --   -0.65091  -0.65042  -0.63922  -0.63400  -0.61442
 Alpha  occ. eigenvalues --   -0.59060  -0.58937  -0.58660  -0.58090  -0.57562
 Alpha  occ. eigenvalues --   -0.56629  -0.56589  -0.54953  -0.54578  -0.54419
 Alpha  occ. eigenvalues --   -0.52273  -0.52105  -0.50053  -0.49771  -0.49606
 Alpha  occ. eigenvalues --   -0.49098  -0.48690  -0.48221  -0.47931  -0.47034
 Alpha  occ. eigenvalues --   -0.46673  -0.45841  -0.44799  -0.44576  -0.44425
 Alpha  occ. eigenvalues --   -0.44160  -0.43834  -0.43557  -0.43394  -0.42947
 Alpha  occ. eigenvalues --   -0.41358  -0.40958  -0.40840  -0.40656  -0.40522
 Alpha  occ. eigenvalues --   -0.40316  -0.40123  -0.39915  -0.39823  -0.39720
 Alpha  occ. eigenvalues --   -0.39409  -0.39229  -0.39101  -0.38880  -0.38497
 Alpha  occ. eigenvalues --   -0.38371  -0.38070  -0.37958  -0.37828  -0.37257
 Alpha  occ. eigenvalues --   -0.37132  -0.36437  -0.36171  -0.35967  -0.35794
 Alpha  occ. eigenvalues --   -0.35768  -0.35723  -0.35331  -0.35032  -0.34938
 Alpha  occ. eigenvalues --   -0.34751  -0.34552  -0.34404  -0.34313  -0.34162
 Alpha  occ. eigenvalues --   -0.33986  -0.33776  -0.33508  -0.33351  -0.32800
 Alpha  occ. eigenvalues --   -0.32403  -0.32059  -0.31658  -0.31250  -0.30755
 Alpha  occ. eigenvalues --   -0.30653  -0.30474  -0.30411  -0.30154  -0.30051
 Alpha  occ. eigenvalues --   -0.29733  -0.29582  -0.29211  -0.28425  -0.28105
 Alpha  occ. eigenvalues --   -0.27979  -0.27772  -0.27608  -0.27104  -0.26968
 Alpha  occ. eigenvalues --   -0.26887  -0.26791  -0.25479  -0.24670  -0.24316
 Alpha  occ. eigenvalues --   -0.20526  -0.19000  -0.18792  -0.18719  -0.18322
 Alpha  occ. eigenvalues --   -0.17804  -0.14913
 Alpha virt. eigenvalues --    0.00998   0.01465   0.02034   0.06331   0.06725
 Alpha virt. eigenvalues --    0.07063   0.07124   0.07721   0.08776   0.10371
 Alpha virt. eigenvalues --    0.10564   0.11226   0.12020   0.12800   0.13534
 Alpha virt. eigenvalues --    0.13721   0.14289   0.14396   0.15009   0.15476
 Alpha virt. eigenvalues --    0.15909   0.16175   0.16423   0.16957   0.17496
 Alpha virt. eigenvalues --    0.17574   0.18122   0.18650   0.19384   0.19927
 Alpha virt. eigenvalues --    0.20213   0.20656   0.20884   0.21389   0.21835
 Alpha virt. eigenvalues --    0.22123   0.22961   0.23360   0.23757   0.24354
 Alpha virt. eigenvalues --    0.24968   0.25681   0.25935   0.26501   0.26722
 Alpha virt. eigenvalues --    0.26896   0.28362   0.28663   0.29260   0.29864
 Alpha virt. eigenvalues --    0.30038   0.30144   0.30967   0.31147   0.31731
 Alpha virt. eigenvalues --    0.32217   0.32785   0.33055   0.33300   0.33880
 Alpha virt. eigenvalues --    0.34405   0.34467   0.34760   0.35178   0.35567
 Alpha virt. eigenvalues --    0.35913   0.36570   0.36724   0.37754   0.38360
 Alpha virt. eigenvalues --    0.38515   0.38695   0.39008   0.39431   0.39679
 Alpha virt. eigenvalues --    0.40326   0.40437   0.40777   0.40961   0.41234
 Alpha virt. eigenvalues --    0.41763   0.42048   0.42728   0.42805   0.43336
 Alpha virt. eigenvalues --    0.43719   0.44295   0.44974   0.45325   0.45791
 Alpha virt. eigenvalues --    0.45890   0.46127   0.46633   0.46831   0.47060
 Alpha virt. eigenvalues --    0.47160   0.47624   0.47786   0.48247   0.48344
 Alpha virt. eigenvalues --    0.48567   0.48739   0.49303   0.49505   0.49641
 Alpha virt. eigenvalues --    0.49677   0.50274   0.50553   0.50803   0.50986
 Alpha virt. eigenvalues --    0.51170   0.51402   0.51452   0.51846   0.52203
 Alpha virt. eigenvalues --    0.53490   0.53747   0.54314   0.54684   0.54905
 Alpha virt. eigenvalues --    0.55250   0.55838   0.56001   0.56391   0.56650
 Alpha virt. eigenvalues --    0.56802   0.57022   0.57200   0.57588   0.57961
 Alpha virt. eigenvalues --    0.58174   0.58351   0.58794   0.59042   0.59101
 Alpha virt. eigenvalues --    0.59621   0.60126   0.60489   0.60988   0.61552
 Alpha virt. eigenvalues --    0.61928   0.62827   0.62872   0.63404   0.63963
 Alpha virt. eigenvalues --    0.64811   0.64944   0.65219   0.65879   0.66805
 Alpha virt. eigenvalues --    0.67217   0.67821   0.68164   0.69128   0.69421
 Alpha virt. eigenvalues --    0.70087   0.70907   0.71229   0.71867   0.72111
 Alpha virt. eigenvalues --    0.72818   0.73275   0.73511   0.74345   0.74791
 Alpha virt. eigenvalues --    0.75531   0.75767   0.76166   0.76813   0.77119
 Alpha virt. eigenvalues --    0.77348   0.78420   0.78689   0.80052   0.80327
 Alpha virt. eigenvalues --    0.81222   0.82365   0.83982   0.84161   0.84431
 Alpha virt. eigenvalues --    0.85121   0.85275   0.85928   0.87000   0.87667
 Alpha virt. eigenvalues --    0.88451   0.88940   0.89189   0.90051   0.91082
 Alpha virt. eigenvalues --    0.91128   0.91878   0.92703   0.92939   0.93577
 Alpha virt. eigenvalues --    0.94276   0.94769   0.95364   0.95559   0.96385
 Alpha virt. eigenvalues --    0.97246   0.98240   0.99125   0.99957   1.00036
 Alpha virt. eigenvalues --    1.01623   1.02052   1.04457   1.04886   1.06270
 Alpha virt. eigenvalues --    1.06513   1.07901   1.08879   1.10093   1.11675
 Alpha virt. eigenvalues --    1.12958   1.13873   1.14465   1.15174   1.16763
 Alpha virt. eigenvalues --    1.18003   1.19006   1.21065   1.21994   1.22601
 Alpha virt. eigenvalues --    1.23824   1.25289   1.26200   1.26566   1.28775
 Alpha virt. eigenvalues --    1.31155   1.32353   1.33889   1.35366   1.36289
 Alpha virt. eigenvalues --    1.37504   1.38190   1.40134   1.40950   1.41748
 Alpha virt. eigenvalues --    1.42114   1.42863   1.44266   1.45379   1.47145
 Alpha virt. eigenvalues --    1.47269   1.48405   1.49588   1.50638   1.51177
 Alpha virt. eigenvalues --    1.51316   1.52701   1.54143   1.56314   1.57574
 Alpha virt. eigenvalues --    1.60191   1.63035   1.63856   1.65381   1.65739
 Alpha virt. eigenvalues --    1.67114   1.68628   1.69237   1.70321   1.71944
 Alpha virt. eigenvalues --    1.73408   1.73951   1.74517   1.76682   1.78029
 Alpha virt. eigenvalues --    1.79458   1.79688   1.80772   1.82512   1.83471
 Alpha virt. eigenvalues --    1.83948   1.84225   1.84662   1.86077   1.86704
 Alpha virt. eigenvalues --    1.87906   1.88555   1.89035   1.89241   1.90467
 Alpha virt. eigenvalues --    1.91265   1.91871   1.92322   1.92980   1.93545
 Alpha virt. eigenvalues --    1.95047   1.95857   1.96981   1.98280   1.98922
 Alpha virt. eigenvalues --    1.99577   2.00673   2.00976   2.01910   2.02269
 Alpha virt. eigenvalues --    2.02725   2.03266   2.03418   2.04762   2.05678
 Alpha virt. eigenvalues --    2.07339   2.08890   2.09353   2.09946   2.10783
 Alpha virt. eigenvalues --    2.11563   2.13543   2.14538   2.15087   2.15536
 Alpha virt. eigenvalues --    2.16475   2.16650   2.17229   2.17488   2.18745
 Alpha virt. eigenvalues --    2.19617   2.19878   2.22178   2.23306   2.24222
 Alpha virt. eigenvalues --    2.25328   2.27328   2.27744   2.28943   2.29347
 Alpha virt. eigenvalues --    2.29552   2.30112   2.31425   2.31738   2.33740
 Alpha virt. eigenvalues --    2.34344   2.34825   2.35922   2.36334   2.38917
 Alpha virt. eigenvalues --    2.40776   2.41281   2.42138   2.44920   2.45883
 Alpha virt. eigenvalues --    2.46693   2.48436   2.48713   2.51882   2.55273
 Alpha virt. eigenvalues --    2.57070   2.58204   2.60227   2.62194   2.63185
 Alpha virt. eigenvalues --    2.64525   2.67240   2.67636   2.67973   2.69837
 Alpha virt. eigenvalues --    2.74209   2.74889   2.75940   2.76097   2.77380
 Alpha virt. eigenvalues --    2.79418   2.82375   2.87782   2.88196   2.90335
 Alpha virt. eigenvalues --    2.96000   2.98181   2.99531   3.03478   3.04403
 Alpha virt. eigenvalues --    3.09263   3.15784   3.19346   3.22661   3.27156
 Alpha virt. eigenvalues --    3.77489   6.05881   6.13818   6.29523 103.48201
          Condensed to atoms (all electrons):
 Mulliken atomic charges:
              1
     1  O   -0.451347
     2  Mg   0.870502
     3  O   -0.668160
     4  C    0.581720
     5  N   -0.541743
     6  N   -0.521811
     7  O   -0.432567
     8  C    0.335085
     9  C   -0.234014
    10  C    0.334677
    11  O   -0.451674
    12  C    0.617843
    13  C    0.138452
    14  C    0.049056
    15  O   -0.470234
    16  C   -0.212556
    17  C   -0.284643
    18  C   -0.299775
    19  C   -0.042624
    20  O   -0.509202
    21  C   -0.033225
    22  C   -0.470846
    23  C   -0.464624
    24  C    0.023467
    25  C    0.017528
    26  C    0.005243
    27  C   -0.078677
    28  C   -0.071879
    29  C   -0.072899
    30  C    0.005014
    31  C   -0.056209
    32  C   -0.055995
    33  C    0.007039
    34  C   -0.074233
    35  C   -0.071708
    36  C   -0.075673
    37  C    0.001187
    38  C   -0.050578
    39  C   -0.061178
    40  C   -0.225633
    41  C   -0.217362
    42  C   -0.222535
    43  C   -0.216337
    44  C   -0.216918
    45  C   -0.217462
    46  C   -0.213337
    47  C   -0.217418
    48  C   -0.451357
    49  C   -0.452030
    50  H    0.073418
    51  H    0.105813
    52  H    0.129906
    53  H    0.172890
    54  H    0.168562
    55  H    0.162528
    56  H    0.110616
    57  H    0.133452
    58  H    0.140074
    59  H    0.133791
    60  H    0.187086
    61  H    0.143457
    62  H    0.114146
    63  H    0.156057
    64  H    0.137741
    65  H    0.154019
    66  H    0.157219
    67  H    0.156511
    68  H    0.164542
    69  H    0.163463
    70  H    0.083698
    71  H    0.085651
    72  H    0.085164
    73  H    0.099035
    74  H    0.100741
    75  H    0.083378
    76  H    0.085503
    77  H    0.086611
    78  H    0.100697
    79  H    0.114203
    80  H    0.072420
    81  H    0.121365
    82  H    0.069149
    83  H    0.076853
    84  H    0.071049
    85  H    0.071001
    86  H    0.071758
    87  H    0.071696
    88  H    0.094976
    89  H    0.075839
    90  H    0.076040
    91  H    0.071338
    92  H    0.078103
    93  H    0.061553
    94  H    0.096900
    95  H    0.077251
    96  H    0.077864
    97  H    0.068399
    98  H    0.075596
    99  H    0.093644
   100  H    0.074911
   101  H    0.075696
   102  H    0.071879
   103  H    0.076294
   104  H    0.128581
   105  H    0.123421
   106  H    0.125060
   107  H    0.125540
   108  H    0.129472
   109  H    0.128029
 Sum of Mulliken charges=   0.00000
 Atomic charges with hydrogens summed into heavy atoms:
              1
     1  O   -0.451347
     2  Mg   0.870502
     3  O   -0.668160
     4  C    0.581720
     5  N   -0.541743
     6  N   -0.521811
     7  O   -0.432567
     8  C    0.335085
     9  C   -0.160596
    10  C    0.334677
    11  O   -0.451674
    12  C    0.617843
    13  C    0.244265
    14  C    0.178962
    15  O   -0.470234
    16  C    0.291424
    17  C   -0.040574
    18  C   -0.025909
    19  C    0.287920
    20  O   -0.509202
    21  C    0.236978
    22  C   -0.021867
    23  C    0.019893
    24  C    0.023467
    25  C    0.017528
    26  C    0.005243
    27  C    0.005020
    28  C    0.013772
    29  C    0.012266
    30  C    0.005014
    31  C    0.042826
    32  C    0.044746
    33  C    0.007039
    34  C    0.009145
    35  C    0.013795
    36  C    0.010938
    37  C    0.001187
    38  C    0.050119
    39  C    0.053025
    40  C    0.037301
    41  C    0.001541
    42  C    0.015895
    43  C    0.006880
    44  C    0.019638
    45  C    0.006052
    46  C    0.030813
    47  C    0.006451
    48  C   -0.074296
    49  C   -0.068989
    50  H    0.000000
    51  H    0.000000
    52  H    0.000000
    53  H    0.000000
    54  H    0.000000
    55  H    0.000000
    56  H    0.000000
    57  H    0.000000
    58  H    0.000000
    59  H    0.000000
    60  H    0.000000
    61  H    0.000000
    62  H    0.000000
    63  H    0.000000
    64  H    0.000000
    65  H    0.000000
    66  H    0.000000
    67  H    0.000000
    68  H    0.000000
    69  H    0.000000
    70  H    0.000000
    71  H    0.000000
    72  H    0.000000
    73  H    0.000000
    74  H    0.000000
    75  H    0.000000
    76  H    0.000000
    77  H    0.000000
    78  H    0.000000
    79  H    0.000000
    80  H    0.000000
    81  H    0.000000
    82  H    0.000000
    83  H    0.000000
    84  H    0.000000
    85  H    0.000000
    86  H    0.000000
    87  H    0.000000
    88  H    0.000000
    89  H    0.000000
    90  H    0.000000
    91  H    0.000000
    92  H    0.000000
    93  H    0.000000
    94  H    0.000000
    95  H    0.000000
    96  H    0.000000
    97  H    0.000000
    98  H    0.000000
    99  H    0.000000
   100  H    0.000000
   101  H    0.000000
   102  H    0.000000
   103  H    0.000000
   104  H    0.000000
   105  H    0.000000
   106  H    0.000000
   107  H    0.000000
   108  H    0.000000
   109  H    0.000000
 Sum of Mulliken charges=   0.00000
 APT atomic charges:
              1
     1  O   -0.818573
     2  Mg   1.269427
     3  O   -0.930917
     4  C    1.007195
     5  N   -0.958477
     6  N   -0.916318
     7  O   -0.656025
     8  C    0.948381
     9  C   -0.910541
    10  C    0.938481
    11  O   -0.828993
    12  C    0.989007
    13  C    0.497362
    14  C    0.320756
    15  O   -0.747126
    16  C    0.481118
    17  C    0.026235
    18  C    0.046581
    19  C    0.418760
    20  O   -0.731890
    21  C    0.375208
    22  C    0.038868
    23  C    0.043410
    24  C    0.330012
    25  C    0.311309
    26  C   -0.044751
    27  C   -0.113341
    28  C   -0.102226
    29  C   -0.169898
    30  C   -0.041574
    31  C    0.172053
    32  C    0.185228
    33  C   -0.057741
    34  C   -0.140797
    35  C   -0.081467
    36  C   -0.134348
    37  C   -0.041008
    38  C    0.168667
    39  C    0.173905
    40  C   -0.034602
    41  C   -0.052346
    42  C   -0.036910
    43  C   -0.050311
    44  C   -0.012526
    45  C   -0.044455
    46  C   -0.012869
    47  C   -0.049817
    48  C   -0.207470
    49  C   -0.227237
    50  H   -0.021813
    51  H   -0.085574
    52  H    0.078609
    53  H   -0.015948
    54  H   -0.021660
    55  H   -0.011297
    56  H    0.031272
    57  H   -0.035353
    58  H   -0.035455
    59  H   -0.020822
    60  H   -0.024446
    61  H   -0.006808
    62  H    0.051432
    63  H   -0.050533
    64  H   -0.033861
    65  H   -0.016374
    66  H   -0.021683
    67  H    0.024069
    68  H   -0.001013
    69  H    0.007652
    70  H    0.062678
    71  H    0.071426
    72  H    0.074447
    73  H   -0.037390
    74  H   -0.053373
    75  H    0.070152
    76  H    0.074924
    77  H    0.070674
    78  H   -0.035408
    79  H   -0.032841
    80  H   -0.005317
    81  H    0.036407
    82  H    0.007647
    83  H    0.004620
    84  H    0.007807
    85  H    0.002357
    86  H   -0.001703
    87  H    0.005140
    88  H   -0.005060
    89  H    0.002566
    90  H    0.006664
    91  H    0.006568
    92  H    0.006450
    93  H   -0.009229
    94  H   -0.004867
    95  H    0.003194
    96  H    0.001094
    97  H   -0.000204
    98  H   -0.001341
    99  H   -0.024226
   100  H    0.005065
   101  H    0.003447
   102  H    0.009182
   103  H    0.009491
   104  H    0.051382
   105  H    0.046097
   106  H    0.048757
   107  H    0.045295
   108  H    0.051411
   109  H    0.048220
 Sum of APT charges=   0.00000
 APT Atomic charges with hydrogens summed into heavy atoms:
              1
     1  O   -0.818573
     2  Mg   1.269427
     3  O   -0.930917
     4  C    1.007195
     5  N   -0.958477
     6  N   -0.916318
     7  O   -0.656025
     8  C    0.948381
     9  C   -0.932354
    10  C    0.938481
    11  O   -0.828993
    12  C    0.989007
    13  C    0.411788
    14  C    0.399364
    15  O   -0.747126
    16  C    0.432213
    17  C    0.022154
    18  C   -0.009697
    19  C    0.387505
    20  O   -0.731890
    21  C    0.376107
    22  C   -0.033050
    23  C    0.074118
    24  C    0.330012
    25  C    0.311309
    26  C   -0.044751
    27  C   -0.050663
    28  C   -0.030801
    29  C   -0.095451
    30  C   -0.041574
    31  C    0.134662
    32  C    0.131855
    33  C   -0.057741
    34  C   -0.070645
    35  C   -0.006543
    36  C   -0.063674
    37  C   -0.041008
    38  C    0.133258
    39  C    0.141063
    40  C    0.004135
    41  C   -0.037562
    42  C   -0.038533
    43  C   -0.034514
    44  C   -0.020173
    45  C   -0.040372
    46  C   -0.033371
    47  C   -0.027696
    48  C   -0.061234
    49  C   -0.082311
    50  H    0.000000
    51  H    0.000000
    52  H    0.000000
    53  H    0.000000
    54  H    0.000000
    55  H    0.000000
    56  H    0.000000
    57  H    0.000000
    58  H    0.000000
    59  H    0.000000
    60  H    0.000000
    61  H    0.000000
    62  H    0.000000
    63  H    0.000000
    64  H    0.000000
    65  H    0.000000
    66  H    0.000000
    67  H    0.000000
    68  H    0.000000
    69  H    0.000000
    70  H    0.000000
    71  H    0.000000
    72  H    0.000000
    73  H    0.000000
    74  H    0.000000
    75  H    0.000000
    76  H    0.000000
    77  H    0.000000
    78  H    0.000000
    79  H    0.000000
    80  H    0.000000
    81  H    0.000000
    82  H    0.000000
    83  H    0.000000
    84  H    0.000000
    85  H    0.000000
    86  H    0.000000
    87  H    0.000000
    88  H    0.000000
    89  H    0.000000
    90  H    0.000000
    91  H    0.000000
    92  H    0.000000
    93  H    0.000000
    94  H    0.000000
    95  H    0.000000
    96  H    0.000000
    97  H    0.000000
    98  H    0.000000
    99  H    0.000000
   100  H    0.000000
   101  H    0.000000
   102  H    0.000000
   103  H    0.000000
   104  H    0.000000
   105  H    0.000000
   106  H    0.000000
   107  H    0.000000
   108  H    0.000000
   109  H    0.000000
 Sum of APT charges=   0.00000
 Electronic spatial extent (au):  <R**2>= 25973.6997
 Charge=     0.0000 electrons
 Dipole moment (field-independent basis, Debye):
    X=     1.3840    Y=    -1.4222    Z=     3.8482  Tot=     4.3297
 Quadrupole moment (field-independent basis, Debye-Ang):
   XX=  -252.7232   YY=  -277.1990   ZZ=  -285.8018
   XY=     3.2639   XZ=     5.5129   YZ=    -8.0675
 Traceless Quadrupole moment (field-independent basis, Debye-Ang):
   XX=    19.1848   YY=    -5.2910   ZZ=   -13.8938
   XY=     3.2639   XZ=     5.5129   YZ=    -8.0675
 Octapole moment (field-independent basis, Debye-Ang**2):
  XXX=    58.0220  YYY=   -35.4426  ZZZ=    22.9043  XYY=    48.8168
  XXY=   -52.3478  XXZ=     5.7308  XZZ=    -2.7232  YZZ=   -12.8362
  YYZ=    20.0121  XYZ=   -26.8622
 Hexadecapole moment (field-independent basis, Debye-Ang**3):
 XXXX=-16275.5147 YYYY= -9417.9150 ZZZZ= -6924.4700 XXXY=   -99.4868
 XXXZ=    84.0219 YYYX=  -200.9412 YYYZ=  -167.6512 ZZZX=    58.3861
 ZZZY=   -79.1156 XXYY= -4164.0191 XXZZ= -3856.4948 YYZZ= -2734.0017
 XXYZ=  -102.3982 YYXZ=    75.9113 ZZXY=   -10.6980
 N-N= 7.746444049180D+03 E-N=-2.088109350210D+04  KE= 2.284778608031D+03
  Exact polarizability: 438.410  15.170 364.218   7.614  -4.663 343.619
 Approx polarizability: 611.271  38.515 514.641  15.574 -13.809 530.404
 Full mass-weighted force constant matrix:
 Low frequencies ---   -6.5169   -1.9820   -0.0010   -0.0005    0.0011    6.4931
 Low frequencies ---    7.8528   18.0437   20.7769
 Diagonal vibrational polarizability:
      147.4403690     120.8895784     179.3114873
 Harmonic frequencies (cm**-1), IR intensities (KM/Mole), Raman scattering
 activities (A**4/AMU), depolarization ratios for plane and unpolarized
 incident light, reduced masses (AMU), force constants (mDyne/A),
 and normal coordinates:
                     1                      2                      3
                     A                      A                      A
 Frequencies --     7.0182                17.9411                20.5397
 Red. masses --     3.7634                 4.1580                 4.1928
 Frc consts  --     0.0001                 0.0008                 0.0010
 IR Inten    --     0.2787                 0.3952                 0.0403
 Atom AN      X      Y      Z        X      Y      Z        X      Y      Z
   1   8     0.08  -0.06  -0.07     0.08  -0.04  -0.01    -0.08   0.01   0.11
   2  12    -0.01   0.00  -0.02    -0.01  -0.02   0.02     0.01   0.01  -0.02
   3   8     0.00   0.00  -0.02    -0.01  -0.06   0.02     0.03   0.02  -0.01
   4   6     0.04  -0.01  -0.02     0.04  -0.03   0.03    -0.03  -0.01   0.07
   5   7     0.00   0.01  -0.03     0.01  -0.01   0.00     0.01   0.02  -0.02
   6   7     0.00   0.00  -0.01     0.00   0.00   0.03     0.01  -0.01   0.01
   7   8     0.05   0.00  -0.05     0.04  -0.03   0.04    -0.01  -0.01   0.03
   8   6     0.00   0.02  -0.04     0.01  -0.02   0.02     0.01   0.01  -0.02
   9   6     0.00   0.02  -0.05     0.01  -0.02   0.05     0.00   0.00   0.00
  10   6     0.00   0.02  -0.03     0.00  -0.01   0.04     0.01  -0.01   0.01
  11   8     0.00   0.03   0.05    -0.01  -0.02   0.06     0.01  -0.01   0.04
  12   6    -0.01   0.00   0.02    -0.01  -0.03   0.04     0.01   0.00   0.02
  13   6     0.01  -0.01   0.01    -0.01  -0.05   0.03     0.03   0.01   0.01
  14   6    -0.01   0.03   0.07    -0.01   0.00   0.07    -0.01  -0.01   0.06
  15   8    -0.03  -0.01   0.02    -0.02  -0.03   0.04    -0.01   0.00   0.02
  16   6     0.12  -0.10  -0.15     0.13  -0.07  -0.05    -0.10   0.01   0.12
  17   6    -0.05  -0.01   0.01    -0.03  -0.01   0.00    -0.05   0.00  -0.11
  18   6    -0.03  -0.01  -0.02    -0.03  -0.03  -0.01    -0.02  -0.05  -0.15
  19   6    -0.02  -0.02  -0.05    -0.03  -0.02   0.01     0.00  -0.07  -0.15
  20   8    -0.03  -0.02  -0.04    -0.03  -0.02   0.03    -0.01  -0.03  -0.10
  21   6    -0.06  -0.02  -0.01    -0.03   0.00   0.01    -0.06   0.01  -0.10
  22   6     0.01  -0.04   0.03     0.01  -0.07   0.04     0.04   0.00   0.01
  23   6    -0.01   0.16   0.14    -0.01   0.09   0.11     0.00  -0.04   0.08
  24   6     0.00   0.00  -0.01     0.00   0.00  -0.03     0.01   0.02  -0.02
  25   6    -0.01   0.01   0.01    -0.01   0.01  -0.01     0.00  -0.01   0.02
  26   6     0.03   0.01   0.01    -0.03   0.00  -0.05     0.01   0.01  -0.03
  27   6     0.04   0.02   0.06    -0.02   0.03  -0.06     0.01   0.01  -0.03
  28   6     0.02   0.02   0.08     0.00   0.06  -0.06     0.01   0.02  -0.02
  29   6    -0.01   0.00   0.05     0.03   0.06  -0.04     0.01   0.04   0.00
  30   6    -0.02  -0.01   0.01     0.03   0.03  -0.02     0.01   0.04   0.00
  31   6     0.05   0.00  -0.01    -0.06  -0.02  -0.05     0.01   0.00  -0.04
  32   6    -0.05  -0.02  -0.02     0.06   0.05   0.00     0.01   0.07   0.02
  33   6     0.00   0.02   0.03    -0.03   0.00  -0.03     0.02  -0.02   0.02
  34   6    -0.02   0.02   0.05    -0.03   0.01  -0.07     0.00   0.00   0.03
  35   6    -0.04   0.02   0.06    -0.01   0.04  -0.08    -0.05   0.03   0.04
  36   6    -0.05   0.00   0.04     0.01   0.06  -0.05    -0.06   0.04   0.04
  37   6    -0.03   0.00   0.02     0.01   0.05  -0.01    -0.03   0.02   0.03
  38   6     0.03   0.02   0.02    -0.06  -0.04  -0.02     0.08  -0.06   0.01
  39   6    -0.04  -0.03   0.00     0.03   0.08   0.02    -0.04   0.02   0.03
  40   6     0.07  -0.02  -0.01    -0.07  -0.04  -0.04     0.01   0.00  -0.04
  41   6     0.05   0.00  -0.02    -0.08  -0.01  -0.07     0.00   0.01  -0.03
  42   6    -0.02  -0.02  -0.01     0.04   0.04  -0.01    -0.05   0.05   0.01
  43   6    -0.11  -0.02  -0.01     0.13   0.04  -0.01     0.08   0.06   0.01
  44   6    -0.02  -0.06   0.02     0.01   0.12  -0.01    -0.01   0.01   0.04
  45   6    -0.04  -0.04  -0.04     0.05   0.10   0.07    -0.05   0.00   0.00
  46   6     0.05   0.03   0.00    -0.09  -0.06  -0.03     0.11  -0.06  -0.05
  47   6     0.05   0.02   0.05    -0.07  -0.03  -0.05     0.11  -0.09   0.07
  48   6     0.00   0.02  -0.04     0.02  -0.01   0.00     0.00   0.02  -0.02
  49   6     0.00   0.02  -0.03     0.01  -0.01   0.06     0.01  -0.04   0.03
  50   1     0.01   0.03  -0.06     0.02  -0.03   0.06     0.00   0.00   0.00
  51   1     0.01  -0.03  -0.01    -0.01  -0.05   0.03     0.04   0.00   0.01
  52   1    -0.09  -0.03   0.11    -0.06  -0.03   0.08    -0.01   0.00   0.05
  53   1     0.15  -0.04  -0.20     0.14  -0.04  -0.08    -0.06   0.00   0.13
  54   1     0.13  -0.16  -0.16     0.13  -0.11  -0.04    -0.13   0.02   0.07
  55   1     0.13  -0.12  -0.16     0.14  -0.07  -0.07    -0.14   0.02   0.16
  56   1    -0.04   0.00   0.03    -0.03  -0.01   0.00    -0.04   0.00  -0.07
  57   1    -0.08  -0.01   0.01    -0.04   0.00  -0.01    -0.09   0.02  -0.13
  58   1    -0.04  -0.02  -0.03    -0.02  -0.02  -0.03    -0.04  -0.06  -0.19
  59   1     0.00   0.00   0.00    -0.03  -0.05  -0.01     0.01  -0.07  -0.14
  60   1    -0.03  -0.03  -0.07    -0.03  -0.01   0.02    -0.03  -0.07  -0.19
  61   1     0.01  -0.02  -0.06    -0.04  -0.04   0.02     0.04  -0.10  -0.15
  62   1    -0.07  -0.01   0.00    -0.02   0.00   0.02    -0.06   0.03  -0.05
  63   1    -0.08  -0.03  -0.03    -0.03   0.01   0.01    -0.09   0.02  -0.13
  64   1     0.02  -0.06   0.05     0.02  -0.06   0.05     0.04   0.00   0.02
  65   1     0.02  -0.06   0.02     0.01  -0.09   0.04     0.05   0.00   0.00
  66   1     0.01  -0.03   0.05     0.03  -0.07   0.05     0.03   0.01   0.00
  67   1    -0.07   0.19   0.27    -0.06   0.11   0.18     0.02  -0.04   0.07
  68   1     0.06   0.27   0.09     0.03   0.15   0.08     0.01  -0.05   0.08
  69   1    -0.01   0.14   0.14    -0.01   0.08   0.10    -0.01  -0.04   0.09
  70   1     0.06   0.03   0.08    -0.05   0.03  -0.08     0.01   0.00  -0.04
  71   1     0.02   0.04   0.12     0.00   0.09  -0.06     0.01   0.02  -0.02
  72   1    -0.03   0.00   0.06     0.05   0.09  -0.04     0.01   0.05   0.01
  73   1     0.04   0.01  -0.03    -0.05  -0.04  -0.03     0.00   0.00  -0.04
  74   1    -0.04  -0.04  -0.06     0.06   0.06   0.05     0.01   0.11   0.05
  75   1    -0.01   0.03   0.06    -0.05   0.00  -0.09     0.01  -0.01   0.03
  76   1    -0.06   0.02   0.08    -0.01   0.05  -0.11    -0.07   0.05   0.04
  77   1    -0.07   0.00   0.05     0.03   0.08  -0.06    -0.09   0.07   0.05
  78   1     0.03   0.03   0.00    -0.04  -0.05   0.00     0.07  -0.05   0.01
  79   1    -0.04  -0.01  -0.01     0.04   0.05   0.03    -0.05   0.04   0.04
  80   1     0.09  -0.02  -0.03    -0.09  -0.06  -0.04     0.02   0.00  -0.04
  81   1     0.06  -0.01  -0.01    -0.05  -0.06  -0.02     0.01   0.00  -0.04
  82   1     0.08  -0.03   0.01    -0.07  -0.03  -0.05     0.02   0.00  -0.03
  83   1     0.05   0.00  -0.03    -0.10  -0.03  -0.07     0.00   0.00  -0.04
  84   1     0.05   0.00  -0.01    -0.09   0.00  -0.09     0.01   0.01  -0.03
  85   1     0.04   0.01  -0.02    -0.07   0.00  -0.08     0.00   0.01  -0.03
  86   1    -0.04  -0.03  -0.03     0.08   0.05   0.03    -0.04   0.08   0.04
  87   1    -0.03   0.00   0.03     0.05   0.03  -0.08    -0.04   0.01  -0.04
  88   1     0.02  -0.02  -0.02    -0.04   0.03   0.00    -0.11   0.06   0.02
  89   1    -0.13  -0.04  -0.03     0.14   0.06   0.01     0.07   0.09   0.02
  90   1    -0.14  -0.03  -0.01     0.16   0.05   0.00     0.13   0.08   0.01
  91   1    -0.12   0.00   0.03     0.14   0.01  -0.05     0.08   0.01  -0.02
  92   1    -0.03  -0.07   0.00     0.03   0.14   0.02    -0.03   0.02   0.03
  93   1    -0.01  -0.09   0.03     0.01   0.16  -0.02     0.00  -0.03   0.04
  94   1     0.00  -0.04   0.04     0.00   0.10  -0.03     0.02   0.04   0.05
  95   1    -0.04  -0.06  -0.06     0.06   0.12   0.09    -0.05   0.00   0.00
  96   1    -0.06  -0.02  -0.06     0.07   0.07   0.09    -0.07   0.01   0.00
  97   1    -0.04  -0.06  -0.04     0.04   0.14   0.06    -0.04  -0.02  -0.01
  98   1     0.08   0.04   0.00    -0.10  -0.08  -0.02     0.16  -0.09  -0.06
  99   1     0.04   0.03  -0.02    -0.08  -0.07  -0.01     0.09  -0.05  -0.10
 100   1     0.05   0.03   0.02    -0.10  -0.05  -0.06     0.11  -0.06  -0.05
 101   1     0.08   0.03   0.04    -0.08  -0.06  -0.03     0.15  -0.11   0.07
 102   1     0.06   0.02   0.07    -0.09  -0.02  -0.08     0.12  -0.10   0.08
 103   1     0.04   0.02   0.06    -0.04  -0.01  -0.04     0.08  -0.09   0.11
 104   1    -0.01   0.02  -0.05     0.03  -0.03  -0.01     0.02   0.00  -0.02
 105   1     0.00   0.01  -0.04     0.03   0.00  -0.01     0.00   0.03  -0.04
 106   1     0.01   0.02  -0.05     0.02  -0.01   0.00    -0.01   0.02   0.00
 107   1     0.01   0.06  -0.07    -0.01  -0.03   0.09     0.02   0.04  -0.04
 108   1    -0.02  -0.04  -0.05     0.03   0.03   0.07    -0.02  -0.15  -0.01
 109   1     0.01   0.02   0.03     0.01  -0.01   0.02     0.01  -0.03   0.15
                     4                      5                      6
                     A                      A                      A
 Frequencies --    29.9136                35.7152                44.3192
 Red. masses --     4.4808                 3.5619                 3.3971
 Frc consts  --     0.0024                 0.0027                 0.0039
 IR Inten    --     0.4793                 0.0869                 1.0113
 Atom AN      X      Y      Z        X      Y      Z        X      Y      Z
   1   8     0.08   0.17   0.05     0.05   0.04   0.01    -0.10   0.03   0.05
   2  12    -0.01  -0.02  -0.01     0.00  -0.01   0.00     0.00  -0.02  -0.03
   3   8    -0.04  -0.07  -0.02     0.01   0.01   0.00     0.00   0.00  -0.03
   4   6     0.07   0.08   0.03     0.03   0.02   0.02    -0.03   0.04   0.00
   5   7     0.01  -0.02  -0.02     0.01  -0.05   0.04     0.02  -0.03  -0.02
   6   7     0.00   0.00   0.00     0.00   0.01  -0.03     0.01  -0.02  -0.01
   7   8     0.09   0.02   0.08     0.03   0.00   0.04     0.00   0.04  -0.07
   8   6     0.02  -0.01  -0.02     0.01  -0.05   0.04     0.02  -0.03  -0.01
   9   6     0.02   0.00   0.00     0.01  -0.02   0.01     0.02  -0.03   0.00
  10   6     0.01   0.00   0.01     0.01   0.01  -0.03     0.01  -0.03   0.00
  11   8    -0.02  -0.01  -0.04     0.01  -0.01   0.00     0.02   0.06   0.01
  12   6    -0.02  -0.03  -0.03     0.01  -0.01   0.00     0.00   0.02  -0.02
  13   6    -0.04  -0.07  -0.03     0.01   0.00   0.00     0.00   0.00  -0.03
  14   6     0.02   0.06  -0.05     0.02   0.01  -0.01    -0.02   0.05   0.04
  15   8     0.00  -0.01  -0.02     0.01  -0.02   0.00    -0.02   0.00  -0.02
  16   6     0.12   0.21   0.15     0.06   0.05   0.04    -0.14   0.03   0.04
  17   6    -0.04   0.00   0.00    -0.07   0.02   0.00    -0.02  -0.01   0.01
  18   6    -0.02  -0.02  -0.03    -0.06   0.01  -0.01    -0.04   0.00   0.03
  19   6    -0.01  -0.02  -0.03    -0.04  -0.01  -0.02    -0.03  -0.01   0.01
  20   8    -0.02  -0.01   0.00    -0.02   0.00  -0.02    -0.01  -0.02  -0.02
  21   6    -0.05   0.01   0.00    -0.04   0.01  -0.01     0.00  -0.04  -0.01
  22   6    -0.04  -0.09   0.00     0.00   0.01   0.00     0.01  -0.02  -0.01
  23   6     0.00   0.05  -0.10     0.01   0.02  -0.02     0.00   0.08   0.10
  24   6     0.01  -0.03  -0.01     0.01  -0.03   0.02     0.02  -0.01  -0.02
  25   6    -0.01   0.01   0.00    -0.02   0.02  -0.02     0.00  -0.02   0.00
  26   6     0.03  -0.02   0.01    -0.03   0.00   0.02     0.02   0.02   0.00
  27   6     0.03  -0.02   0.05    -0.03   0.02  -0.01     0.02   0.06   0.02
  28   6     0.02  -0.02   0.06     0.00   0.03  -0.03     0.03   0.07   0.02
  29   6    -0.01  -0.03   0.04     0.04   0.01  -0.02     0.03   0.03  -0.01
  30   6    -0.01  -0.04   0.00     0.04  -0.02   0.00     0.03  -0.01  -0.02
  31   6     0.04  -0.03  -0.01    -0.06  -0.01   0.05     0.00   0.01   0.00
  32   6    -0.04  -0.06  -0.03     0.08  -0.03   0.02     0.04  -0.04  -0.04
  33   6    -0.01   0.01   0.00    -0.03   0.05   0.00    -0.01   0.00   0.01
  34   6    -0.03   0.02  -0.01    -0.05   0.06   0.02    -0.02   0.00   0.03
  35   6    -0.04   0.04  -0.01    -0.06   0.04   0.03    -0.02  -0.01   0.03
  36   6    -0.04   0.05   0.00    -0.05   0.02   0.01     0.00  -0.04   0.01
  37   6    -0.02   0.03   0.00    -0.03   0.00  -0.02     0.01  -0.05   0.00
  38   6     0.00  -0.02   0.00    -0.01   0.06  -0.01    -0.01   0.02   0.01
  39   6    -0.02   0.04   0.02    -0.01  -0.03  -0.04     0.05  -0.07  -0.01
  40   6     0.04  -0.07   0.00    -0.06   0.02   0.04     0.02   0.01   0.00
  41   6     0.05  -0.04  -0.04    -0.09   0.01   0.07    -0.03   0.02   0.01
  42   6    -0.02  -0.06  -0.03     0.05  -0.04  -0.04     0.04  -0.03  -0.08
  43   6    -0.10  -0.08  -0.01     0.17  -0.08   0.01     0.04  -0.07  -0.03
  44   6    -0.06   0.06   0.00     0.06  -0.10   0.00    -0.11  -0.07  -0.05
  45   6     0.01   0.07   0.06    -0.05  -0.08  -0.15     0.17   0.05   0.08
  46   6    -0.01  -0.03  -0.02     0.01   0.06  -0.01    -0.04   0.01   0.03
  47   6     0.02   0.00   0.01     0.01   0.06   0.01    -0.01   0.06   0.00
  48   6     0.03  -0.02  -0.02     0.01  -0.08   0.09     0.02  -0.05   0.01
  49   6     0.01   0.00   0.03     0.01   0.04  -0.08     0.02  -0.01   0.01
  50   1     0.03   0.00   0.00     0.02  -0.02   0.01     0.02  -0.04   0.01
  51   1    -0.06  -0.07  -0.05     0.01   0.00   0.01     0.00   0.00  -0.04
  52   1     0.03   0.09  -0.08     0.02   0.02  -0.01    -0.05   0.03   0.05
  53   1     0.12   0.15   0.20     0.05   0.03   0.05    -0.10   0.03   0.04
  54   1     0.13   0.22   0.17     0.07   0.06   0.06    -0.17   0.04  -0.02
  55   1     0.14   0.28   0.14     0.08   0.07   0.03    -0.19   0.02   0.08
  56   1    -0.03   0.01   0.03    -0.06   0.05   0.00    -0.03   0.00  -0.01
  57   1    -0.07   0.02  -0.01    -0.09   0.02   0.01    -0.03  -0.03   0.03
  58   1    -0.02  -0.02  -0.07    -0.09  -0.01   0.00    -0.05  -0.01   0.05
  59   1     0.01  -0.04  -0.02    -0.06   0.03   0.00    -0.05   0.02   0.02
  60   1    -0.02  -0.02  -0.05    -0.04  -0.04  -0.03    -0.02  -0.03   0.03
  61   1     0.00  -0.04  -0.03    -0.02  -0.01  -0.03    -0.04   0.01   0.00
  62   1    -0.05   0.02   0.02    -0.03   0.02  -0.01     0.00  -0.04  -0.03
  63   1    -0.06   0.01  -0.02    -0.05  -0.02  -0.02     0.00  -0.06   0.00
  64   1    -0.05  -0.08  -0.02     0.00   0.00   0.00     0.01  -0.02   0.00
  65   1    -0.08  -0.13   0.01     0.01   0.02   0.00     0.01  -0.03  -0.01
  66   1     0.00  -0.10   0.03    -0.01   0.01   0.00     0.02  -0.01   0.01
  67   1    -0.02   0.05  -0.17     0.00   0.01  -0.03     0.01   0.09   0.17
  68   1    -0.02   0.01  -0.08     0.01   0.00  -0.01     0.04   0.13   0.08
  69   1     0.02   0.11  -0.11     0.02   0.03  -0.02    -0.02   0.05   0.12
  70   1     0.05  -0.01   0.06    -0.05   0.04  -0.01     0.02   0.08   0.03
  71   1     0.02  -0.02   0.08     0.00   0.05  -0.05     0.03   0.10   0.03
  72   1    -0.02  -0.04   0.04     0.06   0.02  -0.04     0.04   0.04   0.00
  73   1     0.04  -0.02  -0.01    -0.06  -0.04   0.06     0.00  -0.01   0.00
  74   1    -0.04  -0.08  -0.07     0.07  -0.01   0.07     0.04  -0.04  -0.04
  75   1    -0.03   0.02  -0.01    -0.05   0.08   0.03    -0.03   0.02   0.03
  76   1    -0.05   0.05  -0.01    -0.08   0.05   0.05    -0.03  -0.01   0.04
  77   1    -0.05   0.06   0.00    -0.06   0.01   0.01     0.01  -0.06   0.01
  78   1     0.02  -0.03   0.00    -0.01   0.06  -0.02     0.00   0.01   0.00
  79   1     0.00   0.01   0.01    -0.04   0.01  -0.03     0.12  -0.18  -0.07
  80   1     0.05  -0.08  -0.02    -0.09   0.02   0.06     0.01   0.01   0.00
  81   1     0.03  -0.06   0.02    -0.04   0.00   0.03     0.03   0.00  -0.01
  82   1     0.04  -0.09   0.01    -0.06   0.06   0.03     0.02   0.03   0.00
  83   1     0.05  -0.04  -0.05    -0.11   0.00   0.09    -0.04   0.01   0.01
  84   1     0.05  -0.05  -0.04    -0.09   0.04   0.06    -0.03   0.05   0.01
  85   1     0.05  -0.01  -0.05    -0.09  -0.01   0.07    -0.03   0.02   0.01
  86   1    -0.04  -0.07  -0.06     0.09  -0.05  -0.02     0.06  -0.05  -0.07
  87   1    -0.03  -0.04   0.01     0.06  -0.07  -0.12     0.05  -0.03  -0.11
  88   1     0.02  -0.05  -0.04    -0.03  -0.01  -0.04     0.02  -0.02  -0.08
  89   1    -0.11  -0.10  -0.03     0.18  -0.07   0.02     0.04  -0.08  -0.04
  90   1    -0.13  -0.09   0.00     0.21  -0.06   0.05     0.04  -0.07   0.00
  91   1    -0.11  -0.05   0.03     0.18  -0.12  -0.04     0.04  -0.07  -0.03
  92   1    -0.06   0.07   0.00     0.05  -0.12  -0.02    -0.03  -0.11  -0.04
  93   1    -0.08   0.10   0.00     0.09  -0.16   0.00    -0.18   0.06  -0.02
  94   1    -0.08   0.04  -0.03     0.09  -0.06   0.07    -0.21  -0.18  -0.11
  95   1     0.01   0.08   0.06    -0.03  -0.10  -0.17     0.19   0.01   0.06
  96   1     0.04   0.06   0.07    -0.12  -0.04  -0.19     0.31   0.06   0.10
  97   1    -0.01   0.11   0.08    -0.01  -0.13  -0.18     0.09   0.17   0.16
  98   1     0.01  -0.05  -0.03     0.03   0.07  -0.02    -0.04   0.02   0.03
  99   1    -0.02  -0.05  -0.04     0.00   0.06  -0.03    -0.04  -0.01   0.04
 100   1    -0.03  -0.02  -0.03     0.01   0.06   0.00    -0.05   0.02   0.04
 101   1     0.03  -0.02   0.01     0.02   0.07   0.01    -0.01   0.07   0.00
 102   1     0.00   0.00   0.00     0.02   0.05   0.04    -0.03   0.07   0.01
 103   1     0.02   0.01   0.03    -0.01   0.04   0.01     0.01   0.07  -0.01
 104   1     0.02  -0.02  -0.03     0.06  -0.09   0.12     0.03  -0.04   0.02
 105   1     0.04  -0.02  -0.01     0.01  -0.07   0.07     0.02  -0.05   0.01
 106   1     0.04  -0.02  -0.03    -0.03  -0.11   0.11     0.01  -0.06   0.01
 107   1     0.00   0.00   0.05     0.04   0.14  -0.18    -0.01  -0.10   0.10
 108   1     0.04   0.02   0.04    -0.08  -0.06  -0.14     0.07   0.11   0.06
 109   1     0.01   0.00   0.02     0.05   0.05   0.03     0.01  -0.02  -0.11
                     7                      8                      9
                     A                      A                      A
 Frequencies --    48.5747                49.6687                54.5267
 Red. masses --     4.1228                 3.4276                 2.7860
 Frc consts  --     0.0057                 0.0050                 0.0049
 IR Inten    --     0.1709                 0.1409                 0.8674
 Atom AN      X      Y      Z        X      Y      Z        X      Y      Z
   1   8     0.12  -0.05  -0.01     0.02   0.02  -0.05     0.01  -0.02  -0.01
   2  12     0.00   0.02  -0.01     0.01  -0.01   0.02     0.01   0.01   0.01
   3   8     0.03   0.04  -0.01     0.00  -0.01   0.02     0.02   0.04   0.02
   4   6     0.02  -0.06   0.07     0.03   0.02  -0.05    -0.01  -0.02   0.01
   5   7    -0.02   0.02  -0.01    -0.01   0.00   0.02    -0.01   0.02   0.01
   6   7    -0.01   0.00   0.00     0.00  -0.01   0.00     0.01  -0.01   0.02
   7   8    -0.04  -0.05   0.18     0.05   0.01  -0.07    -0.02  -0.01   0.02
   8   6    -0.02   0.02   0.00    -0.02   0.01   0.00    -0.01   0.01   0.01
   9   6    -0.02   0.01   0.00    -0.02   0.00  -0.01    -0.01   0.00   0.02
  10   6    -0.02   0.00   0.00    -0.01  -0.01  -0.02     0.00  -0.01   0.02
  11   8    -0.02  -0.11   0.01     0.01   0.03  -0.03     0.00  -0.02   0.00
  12   6    -0.01  -0.03   0.01     0.01   0.01  -0.01     0.01   0.00   0.01
  13   6     0.03   0.04   0.00    -0.01  -0.01   0.00     0.01   0.01   0.01
  14   6    -0.01  -0.07   0.02     0.03   0.02  -0.05     0.01  -0.02  -0.01
  15   8    -0.01   0.01   0.01     0.03   0.00   0.00     0.01   0.01   0.01
  16   6     0.16  -0.03   0.03     0.04   0.01  -0.08    -0.01  -0.02   0.01
  17   6     0.01   0.03  -0.13    -0.04   0.02  -0.01    -0.04   0.01   0.12
  18   6    -0.06   0.03  -0.06    -0.03  -0.01  -0.02     0.05  -0.01   0.03
  19   6    -0.04   0.01  -0.02    -0.01  -0.03  -0.02     0.04   0.00  -0.03
  20   8     0.01   0.02  -0.04     0.01  -0.01  -0.01     0.01  -0.01  -0.01
  21   6     0.05   0.04  -0.08    -0.01   0.01  -0.01    -0.05  -0.03   0.05
  22   6     0.04   0.11  -0.07    -0.02  -0.02   0.02    -0.03  -0.01   0.04
  23   6    -0.02  -0.05   0.00     0.02  -0.01  -0.10     0.01  -0.05  -0.03
  24   6    -0.02   0.02  -0.01    -0.01   0.00   0.03    -0.01   0.02  -0.01
  25   6     0.00  -0.01   0.01    -0.01  -0.01   0.00     0.00   0.01   0.01
  26   6    -0.02   0.02  -0.01    -0.01  -0.04   0.01    -0.02   0.03   0.00
  27   6    -0.02   0.01  -0.02    -0.01  -0.06   0.00    -0.02   0.03  -0.01
  28   6    -0.02  -0.01  -0.04    -0.02  -0.06   0.02    -0.01   0.02  -0.03
  29   6    -0.02  -0.02  -0.04    -0.02  -0.01   0.05    -0.01   0.01  -0.03
  30   6    -0.02   0.00  -0.03    -0.02   0.03   0.06    -0.01   0.00  -0.03
  31   6    -0.02   0.04   0.01     0.01  -0.03   0.00    -0.03   0.02   0.00
  32   6    -0.02  -0.01  -0.04    -0.02   0.10   0.11    -0.01  -0.04  -0.05
  33   6     0.00   0.00   0.03    -0.02   0.01   0.00    -0.03   0.01   0.00
  34   6     0.01  -0.01   0.04    -0.05   0.02   0.01    -0.06   0.04  -0.01
  35   6     0.00  -0.03   0.04    -0.05   0.03   0.01    -0.06   0.06  -0.02
  36   6     0.00  -0.04   0.03    -0.03   0.00   0.01    -0.02   0.05  -0.01
  37   6     0.00  -0.04   0.01     0.00  -0.02   0.00     0.01   0.02   0.00
  38   6     0.01   0.02   0.02    -0.01   0.00   0.00    -0.01  -0.03   0.00
  39   6     0.02  -0.06   0.00     0.06  -0.06  -0.02     0.08  -0.01   0.00
  40   6    -0.02   0.06   0.00     0.01  -0.03   0.00     0.00   0.03  -0.01
  41   6    -0.01   0.03   0.03     0.03  -0.04   0.01    -0.05   0.03   0.01
  42   6    -0.02  -0.01  -0.04    -0.11   0.07   0.12     0.07  -0.01  -0.03
  43   6    -0.04  -0.02  -0.03     0.09   0.11   0.08    -0.11  -0.01  -0.04
  44   6    -0.10  -0.06  -0.02    -0.05  -0.09  -0.03     0.07  -0.05   0.01
  45   6     0.11   0.03   0.08     0.17   0.05   0.02     0.15   0.04  -0.04
  46   6     0.00   0.03   0.04     0.00   0.00  -0.02     0.05  -0.02  -0.06
  47   6     0.01   0.04   0.02     0.00  -0.01   0.02     0.00  -0.11   0.04
  48   6    -0.03   0.02   0.00    -0.03   0.01   0.01    -0.01   0.03  -0.01
  49   6    -0.02  -0.01   0.01    -0.02  -0.02  -0.03    -0.01  -0.03   0.00
  50   1    -0.03   0.00   0.00    -0.03   0.00  -0.03    -0.02   0.00   0.01
  51   1     0.07   0.05   0.07    -0.02  -0.01  -0.02     0.02  -0.01  -0.01
  52   1    -0.02  -0.04   0.00     0.06   0.02  -0.05     0.03  -0.01  -0.01
  53   1     0.07  -0.05   0.04     0.10   0.03  -0.09    -0.04  -0.02   0.01
  54   1     0.21  -0.01   0.14     0.03  -0.04  -0.11     0.00   0.01   0.03
  55   1     0.25  -0.02  -0.05     0.03   0.02  -0.06     0.01  -0.03  -0.01
  56   1    -0.01   0.02  -0.19    -0.03   0.04   0.00     0.00   0.06   0.19
  57   1     0.06   0.03  -0.14    -0.07   0.03  -0.01    -0.13   0.00   0.14
  58   1    -0.07   0.02  -0.01    -0.05  -0.02  -0.04     0.04   0.00  -0.04
  59   1    -0.12   0.06  -0.09    -0.02  -0.02  -0.02     0.13  -0.03   0.07
  60   1    -0.02   0.00   0.02    -0.01  -0.04  -0.02     0.02  -0.01  -0.06
  61   1    -0.07   0.01   0.00     0.00  -0.04  -0.02     0.08   0.01  -0.04
  62   1     0.07   0.05  -0.10     0.00   0.03   0.00    -0.06  -0.02   0.06
  63   1     0.09   0.05  -0.06    -0.02  -0.01  -0.01    -0.10  -0.07   0.02
  64   1     0.05   0.10  -0.05    -0.02  -0.01  -0.01    -0.04  -0.05   0.03
  65   1     0.08   0.18  -0.07    -0.05  -0.04   0.04    -0.03  -0.01   0.04
  66   1    -0.01   0.10  -0.14     0.02  -0.03   0.04    -0.05   0.01   0.07
  67   1    -0.04  -0.06  -0.03     0.03  -0.02  -0.13     0.02  -0.06  -0.05
  68   1    -0.01  -0.08   0.02    -0.01  -0.04  -0.08    -0.01  -0.07  -0.02
  69   1    -0.01  -0.02   0.01     0.04   0.00  -0.11     0.01  -0.05  -0.03
  70   1    -0.02   0.01  -0.02    -0.01  -0.09  -0.02    -0.02   0.04  -0.01
  71   1    -0.03  -0.02  -0.05    -0.02  -0.08   0.01    -0.02   0.02  -0.03
  72   1    -0.02  -0.03  -0.05    -0.03   0.00   0.06     0.00   0.00  -0.05
  73   1    -0.02   0.03   0.01     0.01  -0.02   0.00    -0.03   0.01  -0.01
  74   1    -0.02  -0.02  -0.04    -0.02   0.16   0.16    -0.01  -0.10  -0.10
  75   1     0.01   0.00   0.05    -0.06   0.04   0.02    -0.08   0.05  -0.02
  76   1     0.00  -0.03   0.06    -0.07   0.04   0.02    -0.08   0.09  -0.02
  77   1     0.00  -0.06   0.03    -0.02   0.00   0.01    -0.01   0.06  -0.01
  78   1     0.01   0.02   0.01    -0.01   0.00   0.00    -0.04  -0.01   0.02
  79   1     0.08  -0.14  -0.04     0.11  -0.15  -0.05     0.09  -0.06   0.00
  80   1    -0.02   0.07   0.02     0.02  -0.02   0.00    -0.01   0.02  -0.01
  81   1    -0.01   0.06  -0.01    -0.01  -0.01   0.00     0.02   0.01  -0.02
  82   1    -0.02   0.08   0.00     0.01  -0.04   0.01     0.01   0.05   0.00
  83   1     0.00   0.04   0.04     0.04  -0.03   0.00    -0.05   0.03   0.01
  84   1    -0.01   0.04   0.04     0.03  -0.05   0.02    -0.04   0.05   0.02
  85   1    -0.01   0.02   0.04     0.02  -0.04   0.01    -0.06   0.03   0.01
  86   1    -0.01  -0.02  -0.04    -0.13   0.11   0.14     0.07  -0.04  -0.05
  87   1    -0.02  -0.01  -0.04    -0.11   0.01   0.09     0.07   0.05   0.02
  88   1    -0.02  -0.01  -0.04    -0.16   0.07   0.12     0.14  -0.03  -0.03
  89   1    -0.04  -0.03  -0.04     0.08   0.17   0.12    -0.10  -0.05  -0.06
  90   1    -0.05  -0.02  -0.03     0.19   0.14   0.07    -0.20  -0.04  -0.05
  91   1    -0.04  -0.01  -0.03     0.10   0.02   0.04    -0.12   0.08   0.00
  92   1    -0.05  -0.09  -0.02     0.04  -0.14  -0.03     0.14  -0.09   0.02
  93   1    -0.15   0.04   0.00    -0.11   0.03  -0.02     0.05   0.01  -0.01
  94   1    -0.18  -0.14  -0.07    -0.16  -0.19  -0.05     0.00  -0.11   0.04
  95   1     0.13   0.01   0.06     0.21   0.00  -0.01     0.20   0.00  -0.05
  96   1     0.23   0.04   0.09     0.28   0.08   0.02     0.17   0.08  -0.06
  97   1     0.05   0.12   0.14     0.11   0.15   0.07     0.13   0.09  -0.04
  98   1     0.01   0.04   0.04     0.02  -0.01  -0.02     0.07  -0.04  -0.06
  99   1     0.00   0.02   0.04    -0.01   0.00  -0.04     0.04   0.04  -0.09
 100   1     0.00   0.03   0.05     0.00   0.00  -0.01     0.08  -0.03  -0.08
 101   1     0.01   0.05   0.02     0.02  -0.01   0.02     0.02  -0.13   0.04
 102   1     0.00   0.04   0.03     0.01  -0.01   0.03     0.05  -0.14   0.03
 103   1     0.01   0.04   0.01    -0.01  -0.01   0.03    -0.05  -0.13   0.08
 104   1    -0.03   0.03   0.00     0.02  -0.03   0.02    -0.09   0.07  -0.03
 105   1    -0.03   0.01   0.01    -0.04   0.05  -0.05    -0.01  -0.02   0.04
 106   1    -0.02   0.02  -0.01    -0.09   0.01   0.06     0.05   0.05  -0.07
 107   1    -0.04  -0.09   0.08    -0.01   0.01  -0.05     0.04   0.14  -0.15
 108   1     0.03   0.08   0.05    -0.04  -0.05  -0.04    -0.10  -0.25  -0.08
 109   1    -0.04  -0.02  -0.08    -0.02  -0.01   0.01     0.01  -0.01   0.24
                    10                     11                     12
                     A                      A                      A
 Frequencies --    59.9970                61.9594                67.9697
 Red. masses --     3.9638                 4.5743                 4.2696
 Frc consts  --     0.0084                 0.0103                 0.0116
 IR Inten    --     0.3750                 1.4781                 1.9022
 Atom AN      X      Y      Z        X      Y      Z        X      Y      Z
   1   8     0.01   0.04   0.01    -0.04   0.01   0.06    -0.06   0.04   0.10
   2  12     0.00   0.00   0.00     0.01  -0.02   0.03    -0.02   0.01   0.00
   3   8     0.03   0.11   0.01     0.04  -0.06   0.04    -0.01   0.06   0.01
   4   6     0.01   0.00  -0.01     0.08  -0.02  -0.05     0.04  -0.06  -0.02
   5   7     0.03   0.02  -0.04    -0.02   0.00   0.00    -0.02   0.00   0.02
   6   7     0.00  -0.05   0.05    -0.01  -0.01   0.04     0.00   0.04  -0.01
   7   8     0.05  -0.03  -0.01     0.17  -0.05  -0.16     0.19  -0.16  -0.13
   8   6     0.02   0.01  -0.03    -0.01   0.01  -0.01    -0.01   0.01   0.02
   9   6     0.02  -0.02   0.01    -0.01   0.01   0.01    -0.01   0.02   0.01
  10   6     0.01  -0.04   0.04    -0.01   0.00   0.02    -0.01   0.04   0.00
  11   8    -0.02  -0.01  -0.01     0.08   0.02   0.00    -0.06  -0.07   0.00
  12   6    -0.02   0.00  -0.01     0.07  -0.02   0.02    -0.05  -0.04   0.00
  13   6     0.00   0.07   0.00     0.06   0.00   0.04    -0.02   0.02   0.00
  14   6    -0.02   0.01  -0.01     0.08  -0.01  -0.01    -0.05  -0.04   0.01
  15   8    -0.03  -0.03  -0.02     0.08  -0.07   0.02    -0.05  -0.05   0.00
  16   6     0.04   0.05   0.03    -0.04  -0.01   0.01     0.05   0.02   0.07
  17   6    -0.06  -0.02   0.03     0.00   0.08  -0.12     0.01  -0.06   0.04
  18   6    -0.07  -0.01   0.04    -0.08   0.03  -0.05     0.02   0.00   0.05
  19   6    -0.06  -0.01   0.03    -0.04   0.00   0.03     0.02  -0.01  -0.03
  20   8    -0.02  -0.03  -0.03     0.01   0.05   0.04    -0.01  -0.03  -0.02
  21   6    -0.02  -0.06  -0.01     0.05   0.11  -0.03    -0.02  -0.05   0.01
  22   6    -0.05   0.11  -0.03     0.11   0.03  -0.01    -0.07   0.07  -0.03
  23   6    -0.02   0.04  -0.01     0.08  -0.04  -0.03    -0.06   0.06   0.04
  24   6     0.03   0.01  -0.04    -0.02   0.00  -0.02    -0.02  -0.01   0.00
  25   6    -0.01  -0.04   0.04    -0.02   0.00   0.04     0.01   0.03  -0.02
  26   6     0.05   0.01  -0.03    -0.03   0.00  -0.02    -0.03  -0.02  -0.01
  27   6     0.05  -0.01  -0.02    -0.03   0.01  -0.02    -0.03  -0.03  -0.02
  28   6     0.03  -0.02  -0.02    -0.02   0.01  -0.02    -0.03  -0.04  -0.03
  29   6     0.02  -0.01  -0.02    -0.02   0.00  -0.02    -0.02  -0.03  -0.03
  30   6     0.02   0.01  -0.03    -0.02  -0.01  -0.03    -0.02  -0.02  -0.01
  31   6     0.08   0.03  -0.03    -0.04   0.00  -0.02    -0.03  -0.01   0.01
  32   6     0.00   0.04  -0.02    -0.03  -0.03  -0.05    -0.01  -0.01   0.01
  33   6    -0.05  -0.03   0.02    -0.04   0.01   0.04     0.03   0.02  -0.01
  34   6    -0.06  -0.02   0.00    -0.05   0.02   0.03     0.06   0.00  -0.01
  35   6    -0.03  -0.01  -0.01    -0.05   0.03   0.03     0.08  -0.02  -0.01
  36   6     0.00  -0.01   0.01    -0.03   0.02   0.04     0.06  -0.01  -0.02
  37   6     0.01  -0.03   0.03    -0.02   0.01   0.04     0.03   0.01  -0.02
  38   6    -0.09  -0.05   0.03    -0.05   0.00   0.04     0.03   0.05  -0.01
  39   6     0.03  -0.02   0.04     0.00   0.00   0.04     0.01   0.02  -0.02
  40   6     0.14   0.08  -0.05    -0.10  -0.03   0.00    -0.02   0.03   0.00
  41   6     0.09   0.03   0.04    -0.03  -0.01  -0.07    -0.03  -0.01   0.05
  42   6    -0.05   0.02  -0.01     0.03  -0.02  -0.02    -0.01  -0.01   0.03
  43   6     0.04   0.04  -0.03    -0.12  -0.01  -0.04     0.00   0.01   0.00
  44   6     0.12  -0.03   0.07     0.05  -0.02   0.06    -0.02   0.04  -0.03
  45   6    -0.01  -0.07  -0.03     0.00  -0.01  -0.01     0.02   0.04   0.02
  46   6    -0.14  -0.07   0.05    -0.07  -0.01   0.04     0.12   0.12  -0.01
  47   6    -0.11  -0.03  -0.01    -0.05   0.03   0.03     0.01  -0.04  -0.01
  48   6     0.02   0.02  -0.05     0.00   0.03  -0.04     0.00   0.00   0.02
  49   6     0.01  -0.04   0.04    -0.01   0.00   0.02    -0.01   0.03  -0.01
  50   1     0.02  -0.02   0.00    -0.01   0.01   0.00     0.00   0.02   0.02
  51   1     0.05   0.05   0.02     0.04   0.03   0.07     0.01   0.01   0.03
  52   1    -0.03   0.00  -0.01     0.10  -0.02   0.00    -0.10  -0.06   0.02
  53   1     0.10   0.04   0.05     0.15   0.01   0.02     0.37   0.03   0.10
  54   1     0.03   0.01   0.00    -0.11  -0.09  -0.16    -0.04  -0.16  -0.17
  55   1     0.02   0.09   0.06    -0.16   0.03   0.15    -0.11   0.16   0.25
  56   1    -0.05   0.02   0.02    -0.03   0.06  -0.18     0.01  -0.07   0.03
  57   1    -0.08  -0.04   0.06     0.06   0.11  -0.16     0.04  -0.07   0.06
  58   1    -0.07  -0.01   0.06    -0.11   0.02  -0.02     0.01  -0.01   0.10
  59   1    -0.07   0.00   0.04    -0.15   0.04  -0.08     0.02   0.06   0.05
  60   1    -0.04  -0.04   0.07    -0.03   0.00   0.05    -0.01  -0.03  -0.06
  61   1    -0.09   0.02   0.02    -0.06  -0.04   0.06     0.07   0.01  -0.05
  62   1    -0.01  -0.06  -0.04     0.08   0.14  -0.03    -0.04  -0.07   0.01
  63   1    -0.02  -0.11   0.01     0.09   0.15   0.00    -0.04  -0.06   0.00
  64   1    -0.06   0.04  -0.01     0.13   0.10  -0.02    -0.08   0.02  -0.02
  65   1     0.01   0.19  -0.05     0.10   0.03   0.01    -0.02   0.13  -0.04
  66   1    -0.15   0.15  -0.07     0.16  -0.01  -0.05    -0.14   0.09  -0.07
  67   1    -0.05   0.04   0.00     0.11  -0.04  -0.03    -0.12   0.08   0.09
  68   1    -0.02   0.05  -0.02     0.07  -0.05  -0.02    -0.01   0.11   0.01
  69   1    -0.02   0.04  -0.02     0.08  -0.05  -0.03    -0.05   0.07   0.04
  70   1     0.06  -0.01  -0.02    -0.03   0.01  -0.02    -0.04  -0.03  -0.03
  71   1     0.04  -0.03  -0.01    -0.02   0.02  -0.02    -0.03  -0.04  -0.04
  72   1     0.00  -0.01  -0.01    -0.01   0.00  -0.03    -0.02  -0.04  -0.03
  73   1     0.07   0.02  -0.06    -0.03   0.02   0.02    -0.03  -0.02   0.01
  74   1     0.00   0.07   0.00    -0.03  -0.08  -0.09    -0.01   0.00   0.02
  75   1    -0.09  -0.01  -0.01    -0.05   0.02   0.03     0.08  -0.01  -0.01
  76   1    -0.04   0.01  -0.03    -0.06   0.04   0.03     0.10  -0.04  -0.01
  77   1     0.02   0.01   0.00    -0.03   0.03   0.03     0.06  -0.03  -0.02
  78   1    -0.07  -0.06   0.06    -0.03  -0.01   0.04    -0.04   0.10  -0.02
  79   1    -0.01   0.02   0.08    -0.01   0.01   0.06     0.03   0.01  -0.03
  80   1     0.18   0.11  -0.04    -0.12  -0.04   0.00    -0.01   0.04   0.02
  81   1     0.12   0.10  -0.10    -0.10  -0.03   0.04    -0.01   0.03  -0.02
  82   1     0.15   0.07  -0.02    -0.12  -0.04  -0.03    -0.01   0.04   0.00
  83   1     0.11   0.05   0.04    -0.04  -0.01  -0.06    -0.03   0.00   0.06
  84   1     0.11   0.03   0.08    -0.05  -0.03  -0.11    -0.03   0.01   0.06
  85   1     0.05  -0.01   0.06     0.02   0.01  -0.08    -0.04  -0.03   0.06
  86   1    -0.05   0.05   0.00     0.03  -0.03  -0.03    -0.02   0.00   0.03
  87   1    -0.05  -0.01  -0.03     0.03   0.03   0.02    -0.02  -0.01   0.04
  88   1    -0.08   0.02  -0.01     0.08  -0.04  -0.02     0.00  -0.02   0.03
  89   1     0.03   0.07  -0.02    -0.12  -0.04  -0.05     0.01   0.02   0.01
  90   1     0.09   0.06  -0.04    -0.19  -0.03  -0.05     0.00   0.01  -0.01
  91   1     0.05   0.00  -0.04    -0.13   0.06   0.00     0.00   0.02  -0.01
  92   1     0.12  -0.02   0.07     0.05  -0.02   0.05    -0.02   0.05  -0.03
  93   1     0.16  -0.08   0.03     0.06  -0.04   0.04    -0.03   0.07  -0.03
  94   1     0.15   0.00   0.11     0.06  -0.01   0.09    -0.03   0.03  -0.06
  95   1     0.00  -0.06  -0.01     0.02  -0.02   0.00     0.01   0.04   0.02
  96   1    -0.10  -0.08  -0.04    -0.04  -0.01  -0.01     0.06   0.04   0.03
  97   1     0.03  -0.12  -0.09     0.02  -0.02  -0.04     0.01   0.06   0.05
  98   1    -0.18  -0.09   0.06    -0.07  -0.01   0.04     0.12   0.15  -0.01
  99   1    -0.12  -0.08   0.09    -0.07  -0.03   0.05     0.12   0.19  -0.02
 100   1    -0.15  -0.06   0.02    -0.09   0.00   0.04     0.19   0.08   0.01
 101   1    -0.14  -0.03   0.00    -0.05   0.02   0.03     0.00  -0.02  -0.01
 102   1    -0.13  -0.01  -0.03    -0.06   0.03   0.03     0.08  -0.08  -0.01
 103   1    -0.09  -0.01  -0.03    -0.03   0.03   0.03    -0.04  -0.08  -0.01
 104   1     0.00   0.02  -0.06    -0.06   0.05  -0.06    -0.02   0.01   0.01
 105   1     0.01   0.02  -0.05     0.01   0.00   0.00     0.01  -0.01   0.04
 106   1     0.03   0.04  -0.05     0.05   0.05  -0.08     0.02  -0.01   0.00
 107   1     0.02  -0.01   0.02     0.00   0.03  -0.01     0.00   0.03  -0.01
 108   1     0.00  -0.07   0.03    -0.02  -0.03   0.00    -0.02   0.02  -0.01
 109   1     0.02  -0.04   0.08     0.00   0.00   0.05    -0.01   0.03   0.00
                    13                     14                     15
                     A                      A                      A
 Frequencies --    72.8629                75.8417                83.0324
 Red. masses --     2.9220                 3.3346                 3.3532
 Frc consts  --     0.0091                 0.0113                 0.0136
 IR Inten    --     0.3319                 0.9197                 0.3209
 Atom AN      X      Y      Z        X      Y      Z        X      Y      Z
   1   8    -0.01   0.02  -0.03     0.02  -0.01  -0.01    -0.01   0.01   0.02
   2  12    -0.01  -0.01   0.03    -0.01   0.01  -0.06    -0.01   0.01  -0.02
   3   8    -0.05  -0.04   0.02     0.05   0.01  -0.05    -0.03  -0.01  -0.03
   4   6    -0.03   0.03   0.00     0.02   0.01   0.01    -0.01  -0.01   0.01
   5   7     0.01   0.01   0.00    -0.01  -0.02  -0.01     0.01  -0.02  -0.01
   6   7     0.01   0.01   0.04    -0.02  -0.01   0.00    -0.02  -0.01  -0.01
   7   8    -0.06   0.05   0.03    -0.01   0.03   0.02     0.00  -0.03   0.01
   8   6     0.02   0.02   0.00     0.00  -0.04   0.01     0.01  -0.02   0.00
   9   6     0.02   0.02   0.01     0.00  -0.04   0.04     0.01  -0.02   0.00
  10   6     0.01   0.02   0.02    -0.01  -0.03   0.03     0.00  -0.01   0.00
  11   8    -0.03   0.03   0.00     0.05   0.02   0.00    -0.02  -0.03  -0.01
  12   6    -0.04   0.00   0.00     0.05   0.01  -0.01    -0.02   0.00  -0.03
  13   6    -0.05   0.00   0.01     0.05  -0.01  -0.03    -0.01   0.02  -0.03
  14   6    -0.03   0.03   0.00     0.04   0.01   0.00    -0.05   0.00   0.02
  15   8    -0.03   0.00   0.01     0.03   0.01  -0.02    -0.03   0.02  -0.03
  16   6    -0.02   0.03  -0.01     0.00  -0.01  -0.01     0.00   0.01   0.03
  17   6     0.01  -0.03  -0.10    -0.01   0.04   0.02     0.08   0.08   0.02
  18   6    -0.09  -0.01  -0.01    -0.03   0.12   0.06     0.11   0.05  -0.02
  19   6    -0.05  -0.05   0.02    -0.01   0.09  -0.02     0.05   0.11   0.06
  20   8    -0.01  -0.02   0.02     0.00   0.06  -0.08     0.01   0.10   0.08
  21   6     0.04   0.00  -0.03    -0.01   0.01  -0.04     0.05   0.11   0.05
  22   6    -0.02   0.01  -0.01     0.05  -0.05   0.01     0.02   0.08  -0.09
  23   6    -0.03   0.05   0.00     0.05  -0.02   0.01    -0.03   0.08   0.09
  24   6     0.01   0.00   0.00     0.00  -0.02  -0.01     0.02  -0.03  -0.01
  25   6     0.02   0.01   0.02    -0.02  -0.01   0.01    -0.04   0.00  -0.01
  26   6     0.01   0.00   0.00     0.00  -0.04  -0.02     0.02  -0.04  -0.01
  27   6     0.01   0.00   0.01     0.00  -0.04  -0.02     0.02  -0.05  -0.01
  28   6     0.01   0.00   0.02     0.00  -0.01   0.00     0.02  -0.04   0.00
  29   6     0.00   0.00   0.01     0.00   0.00   0.02     0.02  -0.03   0.00
  30   6     0.00   0.00   0.00     0.00   0.00   0.01     0.02  -0.02   0.00
  31   6     0.01   0.00   0.00     0.00  -0.05  -0.04     0.03  -0.02   0.00
  32   6    -0.01  -0.01  -0.01     0.00   0.00   0.01     0.02   0.00   0.02
  33   6     0.01   0.01   0.01    -0.04   0.01   0.01    -0.04   0.00  -0.01
  34   6     0.04  -0.01   0.00    -0.02  -0.01   0.01    -0.04   0.00  -0.01
  35   6     0.07  -0.02  -0.01    -0.01  -0.02   0.00    -0.06   0.01   0.00
  36   6     0.07  -0.01   0.00    -0.01  -0.02   0.00    -0.06   0.01   0.00
  37   6     0.05   0.00   0.01    -0.02  -0.01   0.01    -0.05   0.00   0.00
  38   6    -0.03   0.02   0.02    -0.08   0.04   0.02    -0.02  -0.04  -0.01
  39   6     0.07  -0.01   0.01    -0.04   0.01   0.02    -0.03  -0.03  -0.02
  40   6    -0.08  -0.05   0.02     0.09  -0.02  -0.06    -0.04  -0.02   0.01
  41   6     0.07  -0.02  -0.10    -0.04  -0.03   0.03     0.09  -0.04  -0.04
  42   6    -0.04  -0.01  -0.04     0.00   0.00   0.01     0.02  -0.01   0.03
  43   6     0.01  -0.04   0.00     0.01   0.00   0.01     0.04   0.01   0.01
  44   6     0.10  -0.03   0.02    -0.05   0.04   0.00    -0.06  -0.07  -0.01
  45   6     0.07  -0.01  -0.04    -0.05   0.00   0.05     0.00   0.00  -0.05
  46   6     0.08   0.10   0.02     0.08   0.15   0.03    -0.01  -0.06  -0.05
  47   6    -0.06  -0.11   0.01    -0.12  -0.13   0.00    -0.01  -0.08   0.02
  48   6     0.03   0.01  -0.01     0.01  -0.04   0.01     0.01  -0.03   0.01
  49   6     0.01   0.01   0.01    -0.01  -0.04   0.06     0.00  -0.01   0.02
  50   1     0.02   0.03   0.00     0.01  -0.05   0.06     0.02  -0.02   0.01
  51   1    -0.07   0.02   0.02     0.06  -0.03  -0.06    -0.01   0.05   0.02
  52   1    -0.04   0.03   0.00     0.05   0.01   0.00    -0.11  -0.02   0.03
  53   1    -0.10   0.02  -0.02    -0.05  -0.01  -0.01     0.03   0.00   0.05
  54   1     0.00   0.07   0.05     0.01   0.02   0.02    -0.01   0.00   0.02
  55   1     0.02   0.00  -0.06     0.02  -0.04  -0.03    -0.01   0.04   0.05
  56   1    -0.03  -0.07  -0.18    -0.02   0.05  -0.01     0.09   0.06   0.05
  57   1     0.10  -0.02  -0.13     0.02   0.00   0.07     0.07   0.10  -0.01
  58   1    -0.11  -0.04   0.09    -0.05   0.09   0.15     0.16   0.09  -0.10
  59   1    -0.17   0.06  -0.05    -0.05   0.21   0.06     0.13  -0.05  -0.01
  60   1    -0.05  -0.07   0.03    -0.02   0.04  -0.01     0.07   0.18   0.06
  61   1    -0.04  -0.07   0.03     0.00   0.15  -0.05     0.01   0.08   0.08
  62   1     0.05   0.01  -0.04    -0.01  -0.01  -0.06     0.04   0.10   0.05
  63   1     0.07   0.04  -0.01    -0.02  -0.03  -0.03     0.08   0.15   0.06
  64   1    -0.02   0.05  -0.02     0.05  -0.07   0.02     0.04   0.10  -0.07
  65   1    -0.04   0.01   0.00     0.05  -0.09   0.00     0.05   0.12  -0.09
  66   1     0.00  -0.01  -0.03     0.06  -0.04   0.05     0.01   0.06  -0.15
  67   1    -0.04   0.06   0.02     0.07  -0.03  -0.01    -0.08   0.10   0.16
  68   1    -0.03   0.07  -0.01     0.05  -0.04   0.02     0.03   0.14   0.07
  69   1    -0.03   0.05   0.00     0.04  -0.02   0.02    -0.05   0.08   0.11
  70   1     0.02   0.00   0.01     0.00  -0.05  -0.02     0.02  -0.05  -0.02
  71   1     0.01   0.01   0.03     0.00  -0.01   0.01     0.02  -0.04   0.00
  72   1    -0.01   0.00   0.01     0.00   0.02   0.03     0.01  -0.02   0.01
  73   1     0.04   0.06   0.04    -0.02  -0.09  -0.08     0.05   0.03   0.04
  74   1    -0.01   0.02   0.00     0.00   0.01   0.02     0.02   0.00   0.03
  75   1     0.04  -0.02  -0.01    -0.03   0.00   0.00    -0.03   0.00  -0.01
  76   1     0.09  -0.03  -0.02     0.00  -0.03   0.00    -0.06   0.01   0.00
  77   1     0.09  -0.02  -0.01    -0.01  -0.02   0.00    -0.06   0.01   0.00
  78   1    -0.11   0.08   0.04    -0.20   0.12   0.03    -0.02  -0.04   0.01
  79   1     0.06   0.00   0.02    -0.04   0.01   0.01    -0.02  -0.05  -0.04
  80   1    -0.09  -0.06   0.01     0.11  -0.01  -0.06    -0.03  -0.01   0.02
  81   1    -0.11  -0.03   0.09     0.10  -0.02  -0.11    -0.08   0.00   0.04
  82   1    -0.12  -0.10  -0.02     0.11   0.00  -0.01    -0.07  -0.06  -0.02
  83   1     0.06  -0.02  -0.09    -0.04  -0.04   0.00     0.10  -0.02  -0.01
  84   1     0.04  -0.07  -0.16    -0.01   0.00   0.08     0.07  -0.08  -0.08
  85   1     0.14   0.01  -0.12    -0.11  -0.05   0.04     0.15  -0.05  -0.04
  86   1    -0.05  -0.01  -0.04     0.00   0.00   0.01     0.02   0.00   0.03
  87   1    -0.04  -0.04  -0.05     0.00   0.00   0.01     0.02   0.00   0.03
  88   1    -0.06   0.01  -0.04     0.00   0.01   0.01     0.03  -0.01   0.03
  89   1    -0.01  -0.04  -0.01     0.02   0.00   0.02     0.05   0.02   0.02
  90   1     0.04  -0.03   0.01     0.02   0.00   0.02     0.05   0.01   0.00
  91   1     0.01  -0.07   0.00     0.02   0.00   0.01     0.05   0.00  -0.01
  92   1     0.13  -0.05   0.03    -0.08   0.06   0.00    -0.02  -0.10  -0.02
  93   1     0.10  -0.01   0.00    -0.05   0.03   0.01    -0.08  -0.02  -0.01
  94   1     0.08  -0.04   0.06    -0.03   0.06  -0.03    -0.11  -0.11   0.00
  95   1     0.09  -0.03  -0.05    -0.07   0.02   0.06     0.02  -0.04  -0.08
  96   1     0.05   0.01  -0.06    -0.04  -0.01   0.07     0.04   0.04  -0.06
  97   1     0.08  -0.02  -0.05    -0.05   0.00   0.07    -0.02   0.02  -0.02
  98   1     0.07   0.11   0.02     0.03   0.17   0.03     0.00  -0.10  -0.05
  99   1     0.09   0.19   0.02     0.10   0.30   0.05    -0.02  -0.04  -0.07
 100   1     0.17   0.05   0.02     0.22   0.08   0.01    -0.01  -0.06  -0.08
 101   1    -0.09  -0.09   0.01    -0.17  -0.10   0.00     0.01  -0.10   0.02
 102   1     0.03  -0.17   0.00     0.00  -0.22  -0.01     0.01  -0.09   0.01
 103   1    -0.13  -0.17   0.01    -0.22  -0.22  -0.02    -0.03  -0.08   0.05
 104   1     0.06  -0.01  -0.01     0.00  -0.05   0.01     0.04  -0.04   0.01
 105   1     0.03   0.04  -0.03     0.01  -0.04   0.02     0.01  -0.02  -0.01
 106   1     0.00   0.01   0.02     0.01  -0.05   0.00    -0.01  -0.04   0.02
 107   1     0.05   0.17  -0.14    -0.01   0.02   0.02     0.03   0.17  -0.13
 108   1    -0.08  -0.20  -0.08    -0.02  -0.12   0.04    -0.08  -0.24  -0.07
 109   1     0.03   0.03   0.23     0.00  -0.03   0.15     0.03   0.01   0.27
                    16                     17                     18
                     A                      A                      A
 Frequencies --    88.2163                90.6771                92.5247
 Red. masses --     3.7912                 2.9085                 3.0344
 Frc consts  --     0.0174                 0.0141                 0.0153
 IR Inten    --     0.2670                 0.5499                 0.2688
 Atom AN      X      Y      Z        X      Y      Z        X      Y      Z
   1   8    -0.01  -0.02   0.02    -0.01   0.01  -0.01    -0.01   0.00   0.00
   2  12     0.02   0.00   0.02     0.00  -0.03   0.04    -0.01   0.02  -0.01
   3   8    -0.02  -0.08   0.02    -0.04  -0.03   0.04    -0.01  -0.02  -0.01
   4   6     0.01  -0.04   0.00    -0.02   0.00  -0.01    -0.01   0.00  -0.01
   5   7     0.01   0.05  -0.04     0.03  -0.03   0.02    -0.03   0.02   0.00
   6   7    -0.01  -0.02  -0.02     0.00  -0.01  -0.01     0.00   0.03   0.02
   7   8     0.04  -0.05  -0.03    -0.02   0.00   0.00     0.00  -0.01  -0.01
   8   6    -0.02   0.03  -0.04     0.02  -0.01  -0.01    -0.01   0.01   0.02
   9   6    -0.02   0.02  -0.06     0.02  -0.01  -0.02    -0.01   0.02   0.03
  10   6    -0.01   0.00  -0.04     0.01   0.00  -0.02    -0.01   0.03   0.03
  11   8     0.00  -0.04   0.00    -0.03   0.00   0.00    -0.01  -0.02  -0.01
  12   6     0.01  -0.03   0.01    -0.03  -0.02   0.01    -0.01  -0.01  -0.01
  13   6    -0.01  -0.05   0.01    -0.04  -0.02   0.02    -0.02  -0.05  -0.02
  14   6     0.01  -0.04  -0.01    -0.02   0.00  -0.01    -0.02   0.00   0.00
  15   8     0.02  -0.01   0.01    -0.02  -0.03   0.02    -0.01   0.01  -0.01
  16   6     0.02  -0.04  -0.01    -0.02   0.01   0.00    -0.01   0.00   0.00
  17   6    -0.01   0.02   0.02     0.01   0.01  -0.11     0.06   0.03  -0.06
  18   6    -0.04  -0.02   0.04    -0.06  -0.02  -0.04     0.04   0.01  -0.05
  19   6    -0.01  -0.04   0.07    -0.03  -0.05   0.02     0.00   0.04   0.03
  20   8     0.01   0.00   0.10     0.00   0.00   0.06    -0.01   0.05   0.05
  21   6     0.02   0.04   0.07     0.03   0.06  -0.01     0.05   0.07   0.00
  22   6     0.01  -0.07   0.02    -0.05  -0.01   0.01    -0.04  -0.09   0.02
  23   6     0.01  -0.08  -0.04    -0.03   0.02  -0.02    -0.01   0.03   0.02
  24   6     0.02   0.06   0.00     0.03  -0.02   0.01    -0.03   0.00  -0.01
  25   6    -0.02  -0.01  -0.01    -0.01   0.00  -0.01     0.01   0.02   0.02
  26   6     0.04   0.10   0.04     0.02  -0.01   0.01    -0.03  -0.02  -0.02
  27   6     0.04   0.11   0.06     0.02   0.02   0.01    -0.03  -0.02  -0.02
  28   6     0.02   0.05   0.02     0.03   0.02  -0.01    -0.03   0.00   0.00
  29   6     0.01   0.02  -0.01     0.04   0.00  -0.01    -0.03   0.00   0.00
  30   6     0.00   0.03  -0.02     0.04  -0.01   0.00    -0.03   0.01   0.00
  31   6     0.05   0.11   0.04     0.01  -0.02   0.00    -0.02  -0.04  -0.06
  32   6     0.00   0.02  -0.04     0.06  -0.01   0.01    -0.04   0.00  -0.01
  33   6    -0.01  -0.02  -0.02    -0.01   0.00  -0.01     0.02   0.01   0.02
  34   6    -0.02  -0.01  -0.01     0.00  -0.01  -0.01     0.04   0.00   0.01
  35   6    -0.03  -0.01  -0.01     0.00  -0.01  -0.01     0.04   0.00   0.01
  36   6    -0.04   0.00  -0.01    -0.02   0.00  -0.01     0.03   0.00   0.01
  37   6    -0.03   0.00  -0.01    -0.02   0.00  -0.01     0.02   0.01   0.02
  38   6    -0.02  -0.02  -0.01    -0.01   0.00  -0.01     0.03  -0.01   0.02
  39   6    -0.05   0.01  -0.01    -0.03  -0.01  -0.02     0.04   0.00   0.01
  40   6     0.07   0.08   0.05     0.13   0.03  -0.02     0.17   0.00  -0.09
  41   6     0.06   0.11   0.03    -0.06   0.01   0.10    -0.14   0.00   0.06
  42   6    -0.09   0.00  -0.12     0.17   0.02   0.11    -0.11  -0.02  -0.08
  43   6     0.10  -0.06  -0.02    -0.04   0.10  -0.01     0.02  -0.07   0.00
  44   6    -0.09   0.02  -0.03    -0.06  -0.01  -0.02     0.08  -0.03   0.04
  45   6    -0.05   0.02   0.02    -0.02   0.00  -0.01     0.05  -0.01  -0.04
  46   6     0.05   0.02  -0.03     0.02   0.02  -0.01    -0.02  -0.05   0.01
  47   6    -0.03  -0.10  -0.01    -0.02  -0.03  -0.01     0.04   0.03   0.03
  48   6    -0.04   0.02   0.00     0.01   0.03  -0.05     0.01  -0.01   0.03
  49   6    -0.02  -0.02  -0.04     0.01   0.02  -0.03    -0.01   0.02   0.03
  50   1    -0.03   0.01  -0.07     0.02   0.00  -0.03     0.00   0.02   0.04
  51   1    -0.03  -0.04   0.00    -0.05  -0.02   0.02    -0.03  -0.07  -0.06
  52   1     0.04  -0.02  -0.02    -0.02   0.00  -0.01    -0.04   0.00   0.00
  53   1     0.13  -0.02  -0.01    -0.05   0.01   0.00     0.02   0.00   0.01
  54   1    -0.02  -0.10  -0.10     0.00   0.04   0.03    -0.02  -0.01  -0.03
  55   1    -0.04   0.00   0.06     0.01   0.01  -0.02    -0.03   0.01   0.02
  56   1    -0.02   0.01   0.00    -0.02  -0.04  -0.16     0.04  -0.02  -0.08
  57   1     0.01   0.04  -0.01     0.09   0.04  -0.16     0.10   0.05  -0.10
  58   1    -0.05  -0.03   0.04    -0.08  -0.04   0.00     0.07   0.03  -0.07
  59   1    -0.06  -0.02   0.02    -0.13   0.00  -0.07     0.01  -0.05  -0.06
  60   1    -0.01  -0.04   0.06    -0.03  -0.05   0.01     0.03   0.09   0.05
  61   1     0.00  -0.08   0.09    -0.01  -0.10   0.04    -0.04   0.01   0.06
  62   1     0.03   0.06   0.07     0.05   0.08   0.01     0.04   0.06   0.00
  63   1     0.03   0.06   0.07     0.06   0.11   0.00     0.08   0.12   0.02
  64   1     0.01  -0.03   0.00    -0.05   0.02  -0.02    -0.05  -0.07   0.00
  65   1    -0.02  -0.10   0.03    -0.08  -0.01   0.04    -0.08  -0.13   0.03
  66   1     0.06  -0.08   0.04    -0.01  -0.03   0.01     0.00  -0.09   0.06
  67   1     0.03  -0.08  -0.08    -0.04   0.02   0.00    -0.03   0.03   0.03
  68   1    -0.02  -0.10  -0.03    -0.04   0.04  -0.03     0.01   0.04   0.01
  69   1     0.02  -0.07  -0.05    -0.02   0.01  -0.03    -0.02   0.03   0.02
  70   1     0.06   0.14   0.09     0.01   0.03   0.01    -0.02  -0.02  -0.02
  71   1     0.02   0.04   0.03     0.03   0.03  -0.01    -0.03   0.00   0.01
  72   1    -0.01  -0.01  -0.03     0.05   0.01  -0.02    -0.04   0.00   0.00
  73   1     0.05   0.12   0.03    -0.02  -0.08  -0.06    -0.07  -0.14  -0.15
  74   1     0.00   0.09   0.01     0.06  -0.09  -0.03    -0.04   0.05   0.02
  75   1    -0.01  -0.02  -0.01     0.01  -0.02  -0.01     0.05  -0.01   0.01
  76   1    -0.03  -0.01  -0.01     0.00  -0.02  -0.01     0.05  -0.01   0.01
  77   1    -0.04   0.01  -0.01    -0.02  -0.01   0.00     0.05   0.00   0.01
  78   1    -0.06   0.02  -0.01    -0.03   0.02  -0.01     0.06  -0.03   0.02
  79   1    -0.04   0.00  -0.03    -0.01  -0.02  -0.03     0.03   0.01   0.03
  80   1     0.03   0.05   0.03     0.17   0.04  -0.03     0.22   0.00  -0.12
  81   1     0.10   0.05   0.06     0.14   0.03  -0.09     0.19  -0.01  -0.19
  82   1     0.07   0.10   0.05     0.17   0.04   0.04     0.22   0.03   0.02
  83   1     0.07   0.10   0.00    -0.07   0.00   0.09    -0.13  -0.03   0.00
  84   1     0.07   0.10   0.05    -0.03   0.08   0.16    -0.07   0.08   0.19
  85   1     0.04   0.13   0.03    -0.14  -0.02   0.12    -0.29  -0.01   0.09
  86   1    -0.11  -0.01  -0.14     0.22   0.04   0.16    -0.14  -0.03  -0.11
  87   1    -0.10  -0.08  -0.14     0.18   0.11   0.09    -0.11  -0.07  -0.08
  88   1    -0.13   0.06  -0.14     0.17  -0.07   0.15    -0.12   0.04  -0.10
  89   1     0.07  -0.04  -0.03     0.00   0.09   0.01     0.00  -0.06  -0.01
  90   1     0.20  -0.02   0.02    -0.15   0.07  -0.07     0.09  -0.05   0.05
  91   1     0.10  -0.17  -0.06    -0.04   0.22   0.02     0.03  -0.14  -0.02
  92   1    -0.10   0.03  -0.03    -0.04  -0.03  -0.03     0.12  -0.05   0.04
  93   1    -0.11   0.04  -0.01    -0.07   0.01  -0.01     0.09  -0.03   0.01
  94   1    -0.10   0.01  -0.06    -0.08  -0.04  -0.03     0.06  -0.04   0.08
  95   1    -0.07   0.01   0.01    -0.03  -0.01  -0.03     0.08  -0.02  -0.04
  96   1    -0.01   0.02   0.03     0.01   0.02  -0.02     0.02   0.01  -0.06
  97   1    -0.07   0.02   0.07    -0.03   0.01   0.02     0.06  -0.01  -0.07
  98   1     0.04   0.02  -0.02     0.03   0.03  -0.01    -0.01  -0.06   0.01
  99   1     0.05   0.08  -0.03     0.02   0.04  -0.02    -0.02  -0.08   0.01
 100   1     0.09   0.00  -0.03     0.04   0.01   0.00    -0.05  -0.02   0.00
 101   1    -0.04  -0.09  -0.01    -0.02  -0.03  -0.01     0.05   0.01   0.03
 102   1     0.03  -0.13  -0.01     0.01  -0.05  -0.01     0.01   0.05   0.02
 103   1    -0.08  -0.13   0.00    -0.04  -0.05  -0.01     0.06   0.05   0.03
 104   1     0.08  -0.04   0.05    -0.16   0.13  -0.10     0.05  -0.05   0.03
 105   1    -0.07   0.08  -0.09     0.01  -0.07   0.07     0.02   0.03   0.00
 106   1    -0.15  -0.01   0.10     0.16   0.08  -0.17    -0.03  -0.03   0.05
 107   1     0.00   0.05  -0.11     0.03   0.09  -0.10     0.00   0.08  -0.03
 108   1    -0.05  -0.13  -0.08    -0.03  -0.06  -0.07    -0.04  -0.07   0.00
 109   1    -0.02  -0.02   0.08     0.04   0.02   0.05    -0.01   0.02   0.12
                    19                     20                     21
                     A                      A                      A
 Frequencies --   100.3731               109.1956               114.4347
 Red. masses --     3.9838                 3.5659                 3.5156
 Frc consts  --     0.0236                 0.0251                 0.0271
 IR Inten    --     0.1021                 1.5529                 0.5800
 Atom AN      X      Y      Z        X      Y      Z        X      Y      Z
   1   8     0.04   0.00  -0.02    -0.01   0.01   0.03     0.01   0.01   0.00
   2  12     0.00  -0.05   0.04    -0.04   0.02   0.05    -0.03   0.01   0.01
   3   8     0.04   0.04   0.06     0.01   0.08   0.06    -0.02  -0.04   0.02
   4   6     0.02   0.04   0.00     0.00   0.01   0.02     0.02   0.02   0.00
   5   7    -0.02  -0.03   0.00     0.00   0.00   0.03     0.00   0.03  -0.03
   6   7    -0.01   0.00  -0.01    -0.04   0.02   0.02    -0.03   0.04  -0.02
   7   8    -0.02   0.07   0.02     0.02   0.01   0.00     0.01   0.02   0.00
   8   6    -0.01   0.01  -0.05     0.00   0.04  -0.03     0.01  -0.02   0.06
   9   6    -0.01   0.04  -0.08     0.00   0.06  -0.07     0.01  -0.05   0.13
  10   6    -0.01   0.02  -0.06    -0.02   0.05  -0.03    -0.01  -0.01   0.07
  11   8     0.05   0.08   0.03    -0.01   0.05   0.06     0.01   0.05   0.04
  12   6     0.04   0.02   0.03    -0.01   0.04   0.08     0.01   0.03   0.05
  13   6     0.05   0.08   0.05     0.00   0.04   0.07     0.00  -0.01   0.04
  14   6     0.05   0.04   0.02     0.02   0.01   0.02     0.02   0.02   0.02
  15   8     0.01  -0.08   0.02     0.00   0.02   0.07     0.00   0.00   0.04
  16   6    -0.04   0.03   0.01     0.03  -0.01  -0.02    -0.01   0.01   0.01
  17   6    -0.01  -0.03   0.04     0.05  -0.03  -0.03     0.01  -0.03  -0.02
  18   6    -0.02  -0.06   0.05     0.11  -0.01  -0.08     0.03  -0.06  -0.05
  19   6    -0.01  -0.07   0.08     0.04   0.05  -0.09     0.01  -0.03  -0.02
  20   8    -0.01  -0.04   0.11    -0.04   0.02  -0.05    -0.03  -0.02   0.04
  21   6     0.00  -0.01   0.08    -0.04   0.00  -0.04    -0.03   0.01   0.02
  22   6     0.06   0.15  -0.02    -0.04   0.00   0.12     0.04  -0.07   0.09
  23   6     0.05   0.04   0.03     0.00  -0.06  -0.05     0.02   0.01   0.00
  24   6    -0.03  -0.04  -0.02     0.01   0.00   0.02     0.00   0.01  -0.05
  25   6    -0.01   0.00  -0.01    -0.04   0.01   0.02    -0.02   0.04  -0.02
  26   6    -0.03  -0.07  -0.06     0.00  -0.02   0.00     0.01  -0.01  -0.06
  27   6    -0.04  -0.09  -0.07     0.00  -0.03  -0.02     0.00  -0.07  -0.09
  28   6    -0.03  -0.05  -0.04     0.01  -0.01  -0.01    -0.01  -0.07  -0.08
  29   6    -0.02  -0.02  -0.02     0.02   0.01   0.00    -0.01  -0.02  -0.05
  30   6    -0.02  -0.03  -0.02     0.02   0.00   0.01    -0.01   0.00  -0.04
  31   6    -0.02  -0.05  -0.04     0.02  -0.02  -0.02     0.04   0.05   0.00
  32   6    -0.02  -0.03  -0.01     0.05  -0.05  -0.01    -0.03   0.02  -0.04
  33   6     0.01  -0.01  -0.01    -0.02  -0.01   0.01    -0.02   0.04  -0.02
  34   6     0.00   0.00  -0.01     0.02  -0.05   0.00     0.01   0.01  -0.01
  35   6    -0.01   0.01  -0.01     0.04  -0.06   0.00     0.02  -0.02   0.00
  36   6    -0.02   0.02   0.00     0.01  -0.04   0.01     0.02  -0.03  -0.02
  37   6    -0.02   0.02   0.00    -0.03   0.00   0.02    -0.01   0.00  -0.03
  38   6     0.03  -0.01  -0.01    -0.06   0.00   0.01    -0.01   0.04  -0.02
  39   6    -0.02   0.04   0.01    -0.02  -0.02   0.01    -0.01  -0.03  -0.06
  40   6     0.03   0.04  -0.07     0.03  -0.03  -0.02    -0.02   0.13  -0.01
  41   6    -0.03  -0.05   0.05     0.04  -0.03  -0.04     0.13   0.01   0.06
  42   6    -0.06  -0.04  -0.05     0.08  -0.04  -0.06    -0.04   0.02  -0.02
  43   6     0.03  -0.06  -0.01     0.06  -0.09   0.01    -0.04   0.03  -0.04
  44   6    -0.04   0.06  -0.01    -0.06  -0.03   0.00    -0.04  -0.06  -0.05
  45   6    -0.01   0.05   0.04     0.01   0.01   0.01    -0.02  -0.03  -0.06
  46   6     0.06   0.01  -0.03    -0.07   0.00   0.03     0.00   0.04  -0.04
  47   6     0.05  -0.03   0.01    -0.09  -0.01  -0.03    -0.01   0.03  -0.01
  48   6     0.00   0.01  -0.07     0.00   0.04  -0.04     0.02  -0.04   0.07
  49   6    -0.01   0.02  -0.08    -0.02   0.07  -0.05     0.00   0.00   0.11
  50   1    -0.01   0.06  -0.11     0.01   0.09  -0.11     0.01  -0.09   0.20
  51   1     0.05   0.11   0.10     0.01   0.01   0.04    -0.03  -0.01   0.01
  52   1     0.05   0.02   0.03     0.08   0.02   0.02     0.04   0.00   0.03
  53   1    -0.30   0.01   0.00     0.21   0.01  -0.02    -0.09   0.01   0.00
  54   1     0.04   0.17   0.21    -0.03  -0.12  -0.16     0.02   0.06   0.07
  55   1     0.09  -0.07  -0.13    -0.07   0.04   0.08     0.03  -0.02  -0.04
  56   1    -0.02  -0.04   0.04     0.06  -0.08   0.02     0.01  -0.06   0.01
  57   1     0.00  -0.01   0.02     0.05  -0.03  -0.04     0.01  -0.01  -0.05
  58   1    -0.04  -0.07   0.04     0.16   0.03  -0.14     0.05  -0.04  -0.09
  59   1    -0.03  -0.07   0.04     0.16  -0.06  -0.06     0.05  -0.10  -0.04
  60   1    -0.02  -0.06   0.06     0.04   0.11  -0.12     0.00   0.01  -0.05
  61   1     0.00  -0.10   0.09     0.04   0.05  -0.09     0.02  -0.07  -0.01
  62   1     0.00   0.00   0.09    -0.09  -0.03   0.00    -0.04   0.01   0.05
  63   1     0.00   0.01   0.08    -0.06   0.04  -0.07    -0.03   0.05   0.01
  64   1     0.07   0.14   0.00    -0.05   0.00   0.09     0.05  -0.02   0.07
  65   1     0.11   0.21  -0.03    -0.08  -0.04   0.14    -0.02  -0.16   0.10
  66   1     0.01   0.14  -0.09     0.00   0.00   0.17     0.14  -0.09   0.15
  67   1     0.06   0.05   0.06     0.04  -0.07  -0.10     0.02   0.01   0.01
  68   1     0.06   0.06   0.02    -0.08  -0.10  -0.04     0.00   0.02  -0.01
  69   1     0.04   0.03   0.03     0.02  -0.07  -0.08     0.03   0.00  -0.02
  70   1    -0.04  -0.12  -0.10    -0.01  -0.05  -0.04     0.00  -0.10  -0.11
  71   1    -0.03  -0.05  -0.04     0.01  -0.01  -0.02    -0.01  -0.10  -0.10
  72   1    -0.02   0.00   0.00     0.02   0.01   0.01    -0.02  -0.02  -0.05
  73   1    -0.04  -0.08  -0.07     0.02   0.00  -0.03     0.06   0.09   0.03
  74   1    -0.02   0.01   0.01     0.04  -0.06   0.01    -0.02   0.03  -0.05
  75   1     0.01  -0.01  -0.01     0.05  -0.07   0.00     0.02   0.02   0.00
  76   1    -0.01   0.01  -0.01     0.08  -0.09  -0.01     0.04  -0.04   0.00
  77   1    -0.03   0.02   0.00     0.02  -0.05   0.00     0.03  -0.06  -0.02
  78   1     0.02   0.01  -0.03    -0.07   0.00   0.03    -0.02   0.04  -0.01
  79   1    -0.01   0.02   0.01    -0.01  -0.04  -0.01    -0.01  -0.03  -0.08
  80   1     0.09   0.09  -0.05     0.07  -0.02  -0.04    -0.06   0.15   0.05
  81   1    -0.01   0.07  -0.14    -0.01   0.00  -0.02     0.00   0.12  -0.03
  82   1     0.04   0.02  -0.05     0.02  -0.08   0.00    -0.04   0.16  -0.07
  83   1    -0.01  -0.03   0.08     0.05  -0.03  -0.04     0.17   0.08   0.11
  84   1    -0.01  -0.03   0.08     0.04  -0.06  -0.04     0.12  -0.02   0.05
  85   1    -0.05  -0.11   0.07     0.05  -0.02  -0.04     0.17  -0.06   0.07
  86   1    -0.08  -0.04  -0.06     0.11  -0.08  -0.07    -0.07   0.03  -0.03
  87   1    -0.07  -0.07  -0.06     0.09  -0.02  -0.09    -0.05   0.01   0.01
  88   1    -0.08  -0.01  -0.06     0.07  -0.01  -0.07    -0.02   0.02  -0.03
  89   1     0.01  -0.05  -0.01     0.09  -0.12   0.00    -0.04   0.03  -0.04
  90   1     0.07  -0.04   0.00     0.04  -0.10   0.05    -0.04   0.03  -0.05
  91   1     0.03  -0.11  -0.03     0.07  -0.07  -0.01    -0.04   0.03  -0.04
  92   1    -0.05   0.07   0.00    -0.02  -0.06   0.01    -0.03  -0.09  -0.07
  93   1    -0.05   0.07   0.00    -0.09   0.02   0.00    -0.05  -0.06  -0.03
  94   1    -0.04   0.06  -0.03    -0.11  -0.08   0.00    -0.06  -0.08  -0.04
  95   1    -0.02   0.05   0.04     0.00  -0.02  -0.02    -0.02  -0.04  -0.06
  96   1     0.02   0.05   0.05     0.06   0.04   0.00    -0.01  -0.03  -0.06
  97   1    -0.02   0.07   0.06    -0.02   0.03   0.06    -0.02  -0.04  -0.05
  98   1     0.09   0.02  -0.03    -0.08   0.00   0.03     0.04   0.05  -0.04
  99   1     0.05   0.02  -0.05    -0.06  -0.01   0.03    -0.02   0.03  -0.07
 100   1     0.07   0.00   0.00    -0.06   0.00   0.02    -0.01   0.04  -0.01
 101   1     0.06  -0.03   0.01    -0.12  -0.02  -0.01    -0.01   0.02  -0.01
 102   1     0.06  -0.03   0.02    -0.09  -0.01  -0.06    -0.01   0.02  -0.02
 103   1     0.03  -0.03   0.03    -0.07   0.00  -0.04    -0.02   0.03   0.00
 104   1     0.07  -0.05  -0.06     0.12  -0.05  -0.03    -0.15   0.09   0.05
 105   1     0.00   0.07  -0.13    -0.01   0.14  -0.16     0.04  -0.16   0.24
 106   1    -0.07   0.01   0.00    -0.11   0.04   0.06     0.17  -0.04  -0.08
 107   1     0.00   0.05  -0.10     0.00   0.15  -0.11    -0.03  -0.04   0.17
 108   1    -0.04  -0.01  -0.09    -0.06  -0.01  -0.08     0.05   0.07   0.15
 109   1    -0.01   0.03  -0.04     0.01   0.08   0.04     0.00   0.00   0.05
                    22                     23                     24
                     A                      A                      A
 Frequencies --   114.9693               118.1727               121.5866
 Red. masses --     1.9671                 2.6095                 2.2962
 Frc consts  --     0.0153                 0.0215                 0.0200
 IR Inten    --     2.6041                 0.5242                 0.6313
 Atom AN      X      Y      Z        X      Y      Z        X      Y      Z
   1   8    -0.03   0.03   0.03     0.00  -0.01  -0.01     0.00   0.01  -0.01
   2  12     0.00   0.00   0.00     0.04   0.03   0.05     0.03   0.00   0.00
   3   8     0.00   0.02   0.00     0.02   0.09   0.05    -0.01  -0.01  -0.01
   4   6    -0.03   0.03   0.04     0.01  -0.02  -0.02    -0.01   0.02   0.01
   5   7     0.01  -0.01  -0.01     0.01   0.03   0.04    -0.01   0.01   0.02
   6   7     0.00   0.01  -0.02     0.00  -0.02  -0.01     0.02  -0.03   0.01
   7   8    -0.04   0.04   0.04     0.02  -0.03  -0.03    -0.04   0.03   0.04
   8   6     0.01  -0.03   0.03    -0.02   0.01   0.03    -0.02   0.02  -0.02
   9   6     0.01  -0.04   0.05    -0.02  -0.03   0.04    -0.02   0.02  -0.05
  10   6     0.01  -0.02   0.03    -0.01  -0.04   0.02     0.00  -0.01  -0.04
  11   8     0.00   0.03   0.02    -0.02  -0.02   0.00     0.00   0.01   0.00
  12   6    -0.01   0.02   0.01     0.00   0.01   0.02     0.00   0.03  -0.01
  13   6     0.00   0.04   0.01    -0.02   0.02   0.03    -0.01  -0.02  -0.01
  14   6     0.00   0.02   0.01    -0.01  -0.01   0.00    -0.01   0.02   0.01
  15   8    -0.02   0.00   0.01     0.02   0.04   0.02     0.01   0.06   0.00
  16   6     0.06  -0.02  -0.07    -0.03   0.01   0.03     0.00   0.01  -0.01
  17   6    -0.01   0.00   0.01    -0.02   0.08  -0.01    -0.02   0.05  -0.01
  18   6    -0.04  -0.01   0.03    -0.03   0.01  -0.01    -0.06   0.05   0.03
  19   6    -0.02  -0.03   0.04     0.03  -0.04   0.01    -0.01   0.01   0.02
  20   8     0.00  -0.01   0.04     0.09   0.01   0.01     0.04   0.02  -0.02
  21   6     0.01   0.00   0.03     0.06   0.05   0.00     0.03   0.02  -0.01
  22   6     0.02   0.07  -0.03    -0.10   0.01   0.06    -0.02  -0.09   0.05
  23   6    -0.01  -0.07  -0.03    -0.02   0.04   0.01     0.00   0.05   0.05
  24   6     0.01   0.00  -0.01     0.01   0.03   0.03    -0.01   0.00   0.01
  25   6     0.00   0.01  -0.02     0.01  -0.02  -0.03     0.02  -0.03   0.01
  26   6     0.01  -0.01  -0.02     0.00   0.00   0.00    -0.01  -0.03  -0.01
  27   6     0.01   0.00   0.00     0.00  -0.02  -0.01    -0.02  -0.07  -0.06
  28   6     0.01   0.03   0.02     0.00  -0.01   0.00    -0.02  -0.08  -0.07
  29   6     0.01   0.04   0.03     0.01   0.00   0.01    -0.01  -0.05  -0.04
  30   6     0.01   0.02   0.01     0.01   0.02   0.02     0.00  -0.02  -0.01
  31   6     0.00  -0.03  -0.04     0.01  -0.03  -0.04     0.00   0.01   0.03
  32   6    -0.01   0.01   0.00     0.01  -0.01   0.00     0.01  -0.02  -0.01
  33   6     0.00   0.01  -0.02    -0.02   0.00  -0.02     0.02  -0.03   0.00
  34   6     0.00   0.01  -0.01    -0.04   0.02  -0.01    -0.01  -0.01   0.00
  35   6    -0.01   0.01  -0.01    -0.04   0.02  -0.01    -0.02   0.01   0.00
  36   6     0.00   0.00  -0.01    -0.01  -0.01  -0.02    -0.01   0.01   0.00
  37   6     0.00   0.00  -0.02     0.01  -0.03  -0.03     0.01  -0.01   0.01
  38   6     0.02   0.00  -0.02     0.00   0.01  -0.02     0.02  -0.03   0.00
  39   6    -0.01  -0.01  -0.03     0.00  -0.02  -0.03     0.02   0.01   0.02
  40   6     0.03  -0.04  -0.04     0.03  -0.08  -0.03    -0.04   0.06   0.02
  41   6    -0.02  -0.02  -0.04     0.01  -0.02  -0.09     0.05  -0.01   0.07
  42   6     0.00   0.01  -0.02     0.02  -0.01  -0.05     0.03  -0.02   0.00
  43   6    -0.04  -0.02   0.01     0.01  -0.06   0.02     0.01  -0.01  -0.01
  44   6    -0.02  -0.01  -0.03    -0.01  -0.01  -0.03     0.04   0.03   0.02
  45   6    -0.01  -0.01  -0.02    -0.03  -0.04  -0.01     0.01   0.00   0.02
  46   6     0.02   0.00  -0.03     0.04   0.03  -0.05     0.02  -0.02   0.01
  47   6     0.04   0.00   0.00     0.00  -0.02  -0.01     0.02  -0.02   0.00
  48   6     0.02  -0.03   0.02    -0.04   0.04   0.02    -0.04   0.03  -0.02
  49   6     0.01  -0.02   0.04    -0.01  -0.04   0.02    -0.01  -0.02  -0.06
  50   1     0.01  -0.05   0.08    -0.05  -0.05   0.05    -0.03   0.03  -0.08
  51   1     0.01   0.04   0.04     0.01  -0.01  -0.01    -0.03  -0.04  -0.06
  52   1     0.04   0.05   0.00    -0.03  -0.03   0.01    -0.04   0.01   0.01
  53   1     0.54   0.03  -0.06    -0.21  -0.01   0.03     0.40   0.00   0.05
  54   1    -0.09  -0.28  -0.46     0.03   0.10   0.18    -0.15  -0.13  -0.37
  55   1    -0.20   0.13   0.22     0.08  -0.05  -0.08    -0.25   0.16   0.27
  56   1    -0.02   0.00  -0.01    -0.01   0.14  -0.01    -0.02   0.07  -0.04
  57   1     0.00   0.00   0.00    -0.08   0.09  -0.01    -0.01   0.04   0.00
  58   1    -0.05  -0.02   0.04    -0.08  -0.02  -0.03    -0.09   0.02   0.08
  59   1    -0.06   0.00   0.02    -0.03   0.02  -0.01    -0.09   0.10   0.02
  60   1    -0.02  -0.04   0.04     0.02  -0.08   0.01    -0.01  -0.04   0.03
  61   1    -0.01  -0.04   0.04     0.05  -0.06   0.01    -0.01   0.02   0.01
  62   1     0.02   0.01   0.02     0.10   0.09  -0.01     0.05   0.04  -0.03
  63   1     0.02   0.00   0.04     0.05   0.00   0.01     0.03  -0.01   0.00
  64   1     0.02   0.06   0.00    -0.13  -0.03   0.02    -0.03  -0.07   0.02
  65   1     0.05   0.11  -0.04    -0.12   0.03   0.08    -0.08  -0.16   0.07
  66   1    -0.02   0.07  -0.07    -0.11   0.04   0.09     0.05  -0.09   0.12
  67   1     0.04  -0.09  -0.11    -0.04   0.05   0.06    -0.02   0.06   0.08
  68   1    -0.05  -0.14   0.00     0.00   0.08  -0.01     0.04   0.08   0.04
  69   1     0.00  -0.06  -0.03    -0.01   0.03   0.01    -0.02   0.06   0.07
  70   1     0.01  -0.01  -0.01     0.00  -0.03  -0.02    -0.03  -0.09  -0.09
  71   1     0.01   0.04   0.03     0.00  -0.01  -0.01    -0.02  -0.10  -0.10
  72   1     0.01   0.06   0.05     0.01   0.00   0.00     0.00  -0.05  -0.05
  73   1     0.00  -0.04  -0.05     0.01  -0.01  -0.05     0.01   0.03   0.05
  74   1     0.00   0.00  -0.02     0.01  -0.01   0.00     0.01  -0.04  -0.01
  75   1     0.00   0.02   0.00    -0.07   0.04  -0.01    -0.02  -0.01  -0.01
  76   1    -0.01   0.01   0.00    -0.06   0.03  -0.01    -0.04   0.03   0.00
  77   1     0.00  -0.01  -0.01    -0.01  -0.01  -0.02    -0.02   0.03   0.00
  78   1     0.03   0.00  -0.02    -0.03   0.02  -0.03     0.02  -0.03  -0.01
  79   1     0.00   0.00  -0.04    -0.01  -0.01  -0.03     0.01   0.01   0.04
  80   1     0.07  -0.03  -0.06     0.08  -0.08  -0.07    -0.08   0.07   0.07
  81   1    -0.01  -0.01  -0.05     0.00  -0.05  -0.01    -0.01   0.04   0.01
  82   1     0.03  -0.08  -0.01     0.04  -0.13   0.01    -0.05   0.11  -0.02
  83   1    -0.02  -0.04  -0.06     0.02  -0.05  -0.14     0.07   0.03   0.11
  84   1    -0.01  -0.01  -0.03     0.02  -0.05  -0.07     0.04  -0.03   0.05
  85   1    -0.04  -0.01  -0.04    -0.02   0.02  -0.10     0.08  -0.06   0.08
  86   1     0.00   0.00  -0.03     0.02  -0.04  -0.07     0.04  -0.02   0.00
  87   1     0.00   0.01  -0.02     0.02  -0.02  -0.05     0.03   0.00   0.00
  88   1     0.01   0.02  -0.03     0.02   0.02  -0.07     0.03  -0.03   0.00
  89   1    -0.04  -0.04  -0.01     0.02  -0.08   0.00     0.02  -0.02  -0.01
  90   1    -0.05  -0.02   0.03     0.00  -0.06   0.05    -0.01  -0.02  -0.02
  91   1    -0.04  -0.01   0.03     0.01  -0.05   0.01     0.01   0.01  -0.02
  92   1    -0.03  -0.01  -0.04    -0.03  -0.01  -0.04     0.04   0.04   0.03
  93   1    -0.03  -0.02  -0.02     0.00  -0.03  -0.02     0.06   0.01   0.01
  94   1    -0.02  -0.01  -0.04     0.01   0.00  -0.04     0.06   0.04   0.02
  95   1    -0.02  -0.01  -0.02    -0.04  -0.01   0.02     0.02   0.02   0.04
  96   1    -0.01  -0.01  -0.02    -0.06  -0.08   0.01    -0.02  -0.01   0.03
  97   1    -0.01  -0.01  -0.02    -0.02  -0.06  -0.03     0.02   0.00  -0.01
  98   1     0.04  -0.01  -0.04     0.07   0.04  -0.05     0.00  -0.02   0.02
  99   1     0.02  -0.01  -0.05     0.03   0.05  -0.08     0.03  -0.01   0.04
 100   1     0.02   0.00  -0.03     0.06   0.02  -0.03     0.03  -0.03   0.00
 101   1     0.06   0.00   0.00     0.02  -0.04   0.00     0.02  -0.02   0.00
 102   1     0.04   0.00   0.01     0.01  -0.02  -0.02     0.02  -0.02   0.00
 103   1     0.03   0.00   0.01     0.00  -0.01   0.02     0.03  -0.02   0.00
 104   1    -0.02   0.00   0.01    -0.06   0.04   0.00     0.00   0.01   0.00
 105   1     0.03  -0.06   0.06    -0.06   0.04   0.01    -0.05   0.06  -0.06
 106   1     0.06  -0.03  -0.02    -0.03   0.07   0.02    -0.08   0.04   0.03
 107   1     0.00  -0.02   0.05    -0.07  -0.31   0.25    -0.01  -0.11   0.00
 108   1     0.02  -0.01   0.05     0.12   0.29   0.15     0.02   0.08  -0.02
 109   1     0.01  -0.02   0.03    -0.07  -0.07  -0.33    -0.04  -0.03  -0.17
                    25                     26                     27
                     A                      A                      A
 Frequencies --   124.4402               128.6067               132.6882
 Red. masses --     2.0717                 2.5606                 1.4247
 Frc consts  --     0.0189                 0.0250                 0.0148
 IR Inten    --     0.5289                 0.1278                 0.3519
 Atom AN      X      Y      Z        X      Y      Z        X      Y      Z
   1   8     0.00   0.00  -0.01     0.01  -0.01  -0.01     0.03  -0.01  -0.02
   2  12    -0.01  -0.03   0.00     0.04   0.01   0.00     0.00   0.00   0.01
   3   8    -0.03  -0.07   0.00     0.00  -0.01  -0.01     0.02   0.02   0.01
   4   6    -0.01   0.01   0.01     0.00  -0.01   0.00     0.01   0.00  -0.01
   5   7     0.00  -0.02  -0.02     0.01   0.01   0.01     0.00  -0.01   0.02
   6   7    -0.02  -0.01   0.01     0.02   0.00   0.01     0.00   0.00   0.00
   7   8    -0.03   0.01   0.02    -0.02   0.00   0.02    -0.02   0.01   0.02
   8   6     0.00  -0.01  -0.03     0.01   0.01   0.02     0.00   0.00   0.00
   9   6     0.00   0.00  -0.03     0.01   0.01   0.01     0.00   0.00   0.01
  10   6    -0.01   0.00   0.00     0.02   0.01   0.00     0.00   0.00   0.00
  11   8    -0.01  -0.01  -0.01     0.00  -0.02  -0.02     0.02   0.00  -0.01
  12   6    -0.01  -0.01  -0.01     0.01   0.01  -0.02     0.01  -0.01  -0.01
  13   6    -0.01  -0.01  -0.01     0.00   0.00  -0.02     0.01   0.00   0.00
  14   6    -0.01   0.00   0.00    -0.01  -0.01   0.00     0.01   0.00  -0.01
  15   8     0.00  -0.01  -0.01     0.03   0.06  -0.01     0.01  -0.03  -0.01
  16   6     0.00   0.00  -0.01    -0.02   0.00   0.01    -0.02   0.01   0.01
  17   6     0.02   0.00   0.00     0.00   0.02   0.01     0.00   0.00   0.01
  18   6     0.10  -0.06  -0.08     0.04  -0.09  -0.05     0.02   0.01  -0.01
  19   6     0.06  -0.02  -0.04     0.08  -0.10  -0.01    -0.01   0.03   0.00
  20   8     0.01  -0.01   0.02     0.12  -0.07  -0.02    -0.02   0.02   0.00
  21   6     0.00   0.01   0.02     0.08  -0.04  -0.01    -0.02   0.01   0.00
  22   6     0.04   0.03  -0.06     0.00   0.00  -0.02    -0.02   0.00   0.00
  23   6    -0.01   0.00   0.00     0.00   0.03   0.04     0.02   0.02   0.01
  24   6     0.00  -0.01  -0.01     0.00   0.01   0.01     0.00  -0.01   0.01
  25   6    -0.02   0.00   0.01     0.01   0.01   0.01     0.00   0.00   0.00
  26   6     0.00   0.00   0.00     0.00   0.00  -0.01     0.00   0.01   0.02
  27   6     0.00   0.02   0.02    -0.01  -0.02  -0.02     0.00   0.02   0.04
  28   6     0.00   0.01   0.02    -0.01  -0.02  -0.02     0.00   0.00   0.02
  29   6     0.00   0.00   0.00     0.00  -0.01   0.00     0.00  -0.03  -0.01
  30   6     0.00  -0.01  -0.01     0.00   0.01   0.01     0.00  -0.03  -0.01
  31   6     0.00   0.00   0.01    -0.01  -0.01  -0.01    -0.01   0.00   0.01
  32   6     0.00   0.00   0.00    -0.01   0.01   0.00     0.00  -0.01   0.00
  33   6    -0.05   0.02   0.02    -0.04   0.05   0.02     0.01   0.00   0.00
  34   6    -0.05   0.02   0.01    -0.04   0.05   0.02     0.01  -0.01   0.00
  35   6    -0.03   0.02   0.01     0.01   0.01   0.02     0.01  -0.01   0.00
  36   6    -0.01   0.00   0.01     0.04  -0.02   0.01     0.00   0.00   0.00
  37   6     0.00  -0.01   0.01     0.03  -0.01   0.01    -0.01   0.00   0.00
  38   6    -0.06   0.04   0.01    -0.06   0.05   0.02     0.00   0.00   0.00
  39   6     0.02  -0.01   0.03    -0.02   0.01   0.00     0.00   0.00   0.00
  40   6     0.02   0.02   0.00     0.00  -0.01  -0.01    -0.01  -0.03   0.02
  41   6    -0.01   0.01   0.03    -0.03   0.00   0.00    -0.02   0.00  -0.01
  42   6    -0.01   0.00   0.01    -0.03   0.00  -0.01    -0.07  -0.03  -0.01
  43   6     0.01   0.01  -0.01    -0.03  -0.01   0.01     0.07  -0.01  -0.02
  44   6     0.08   0.00   0.04    -0.06   0.04  -0.02    -0.01  -0.01   0.00
  45   6     0.02  -0.01   0.01    -0.05  -0.02   0.06     0.00   0.00   0.00
  46   6     0.03   0.09  -0.01    -0.08   0.03   0.01     0.01   0.00   0.01
  47   6    -0.06  -0.02   0.03    -0.07   0.05   0.01     0.00   0.00  -0.01
  48   6     0.01  -0.01  -0.04     0.01   0.01   0.02    -0.01   0.06  -0.06
  49   6     0.00   0.03   0.01     0.01   0.00  -0.04     0.00   0.00   0.00
  50   1     0.01   0.01  -0.03     0.01   0.01   0.01     0.00   0.00   0.00
  51   1    -0.03   0.03   0.03    -0.01   0.00  -0.03     0.02  -0.01   0.00
  52   1    -0.01   0.01  -0.01    -0.04  -0.01  -0.01     0.00  -0.01   0.00
  53   1     0.13   0.00   0.01     0.10  -0.02   0.05     0.10  -0.03   0.06
  54   1    -0.05  -0.05  -0.12    -0.07  -0.01  -0.10    -0.08   0.01  -0.11
  55   1    -0.08   0.04   0.08    -0.10   0.05   0.10    -0.12   0.05   0.12
  56   1     0.05   0.00   0.08     0.04   0.12   0.07     0.01  -0.01   0.02
  57   1    -0.04   0.03  -0.02    -0.13   0.03   0.02     0.01   0.00   0.01
  58   1     0.12  -0.03  -0.19     0.01  -0.09  -0.15     0.04   0.02  -0.02
  59   1     0.17  -0.16  -0.05     0.09  -0.15  -0.03     0.03  -0.02   0.00
  60   1     0.06   0.03  -0.08     0.09  -0.12   0.01     0.00   0.05   0.00
  61   1     0.07  -0.06  -0.03     0.05  -0.12   0.00    -0.02   0.03   0.00
  62   1    -0.02   0.02   0.05     0.12   0.00  -0.02    -0.03  -0.01   0.01
  63   1    -0.02   0.04   0.00     0.06  -0.11  -0.01    -0.02   0.02   0.00
  64   1     0.06   0.07  -0.04     0.00   0.00  -0.02    -0.03  -0.01  -0.01
  65   1     0.06   0.05  -0.06    -0.01   0.00  -0.02    -0.02   0.01   0.01
  66   1     0.05   0.00  -0.11     0.00   0.00  -0.02    -0.03   0.01   0.01
  67   1    -0.01   0.00   0.00    -0.02   0.04   0.06     0.01   0.02   0.03
  68   1     0.00   0.00   0.01     0.05   0.05   0.03     0.03   0.03   0.00
  69   1    -0.01   0.01   0.01    -0.01   0.04   0.05     0.01   0.01   0.01
  70   1     0.01   0.03   0.03    -0.01  -0.03  -0.03     0.01   0.05   0.05
  71   1     0.00   0.02   0.02    -0.01  -0.02  -0.02     0.00   0.01   0.02
  72   1     0.00   0.00   0.00     0.00  -0.01  -0.01    -0.01  -0.05  -0.02
  73   1     0.00  -0.01   0.00    -0.02  -0.03  -0.01    -0.01   0.00   0.01
  74   1     0.00   0.00   0.01    -0.01   0.02  -0.01    -0.01   0.04   0.03
  75   1    -0.07   0.04   0.01    -0.07   0.08   0.03     0.02  -0.01   0.00
  76   1    -0.03   0.02   0.01     0.01   0.00   0.02     0.01  -0.01   0.00
  77   1     0.00   0.00   0.00     0.07  -0.04   0.00    -0.01   0.00   0.00
  78   1    -0.11   0.08   0.01    -0.05   0.04   0.04     0.00   0.00   0.00
  79   1     0.01   0.00   0.06    -0.01   0.02  -0.02     0.00   0.00   0.00
  80   1     0.03   0.02   0.00     0.00  -0.01  -0.01    -0.01  -0.04   0.01
  81   1     0.02   0.02  -0.01     0.00  -0.01  -0.01    -0.01  -0.03   0.04
  82   1     0.02   0.02   0.01     0.00   0.00   0.00    -0.01  -0.03   0.02
  83   1    -0.02   0.01   0.04    -0.04  -0.01  -0.01    -0.03  -0.01  -0.01
  84   1    -0.01   0.03   0.04    -0.03   0.01   0.01    -0.03   0.01  -0.04
  85   1    -0.02   0.00   0.03    -0.05   0.00   0.00     0.01   0.02  -0.02
  86   1    -0.01   0.01   0.01    -0.06   0.00  -0.03    -0.09  -0.01   0.00
  87   1    -0.01  -0.01   0.02    -0.04  -0.01   0.01    -0.07  -0.07  -0.02
  88   1    -0.01  -0.01   0.02    -0.02   0.02  -0.02    -0.09  -0.01  -0.01
  89   1     0.01   0.03   0.00    -0.04  -0.01   0.00     0.07   0.02   0.01
  90   1     0.03   0.02  -0.02    -0.02   0.00   0.01     0.11   0.01  -0.02
  91   1     0.01   0.00  -0.01    -0.03  -0.02   0.02     0.07  -0.05  -0.05
  92   1     0.07   0.01   0.05    -0.10   0.06  -0.02     0.00  -0.01   0.00
  93   1     0.10  -0.02   0.02    -0.07   0.04   0.01    -0.01   0.00   0.00
  94   1     0.10   0.03   0.06    -0.04   0.05  -0.07    -0.01  -0.01   0.00
  95   1     0.06   0.03   0.07    -0.13  -0.03   0.00     0.01   0.00   0.00
  96   1    -0.05  -0.06   0.03     0.01   0.01   0.05     0.00   0.01   0.00
  97   1     0.05  -0.01  -0.07    -0.07  -0.05   0.15     0.00   0.01   0.00
  98   1     0.10   0.12  -0.02    -0.03   0.04   0.00     0.00   0.01   0.01
  99   1     0.00   0.12  -0.08    -0.10  -0.01  -0.03     0.01   0.01   0.01
 100   1     0.07   0.06   0.04    -0.11   0.05   0.04     0.01   0.00   0.00
 101   1    -0.06  -0.07   0.04    -0.08   0.07   0.01    -0.01   0.00  -0.01
 102   1    -0.05  -0.03  -0.02    -0.05   0.04   0.03     0.00   0.00  -0.01
 103   1    -0.06   0.00   0.06    -0.09   0.02  -0.01     0.00  -0.01  -0.01
 104   1     0.07  -0.06  -0.03    -0.06   0.06   0.01    -0.44   0.35  -0.16
 105   1     0.01   0.04  -0.10     0.01  -0.04   0.09     0.02  -0.23   0.29
 106   1    -0.05  -0.02   0.02     0.07   0.01  -0.04     0.38   0.13  -0.41
 107   1    -0.07  -0.24   0.26     0.09   0.27  -0.29     0.00  -0.01   0.01
 108   1     0.14   0.39   0.15    -0.14  -0.32  -0.18     0.01   0.02   0.01
 109   1    -0.04   0.00  -0.38     0.07   0.04   0.31     0.00   0.00  -0.02
                    28                     29                     30
                     A                      A                      A
 Frequencies --   138.5133               141.9769               147.3792
 Red. masses --     2.2434                 3.0684                 3.1160
 Frc consts  --     0.0254                 0.0364                 0.0399
 IR Inten    --     2.4990                 0.9867                 2.9535
 Atom AN      X      Y      Z        X      Y      Z        X      Y      Z
   1   8    -0.10   0.07   0.10    -0.03   0.01   0.02    -0.05   0.05   0.06
   2  12    -0.01   0.00  -0.01     0.04  -0.01   0.01     0.03  -0.01   0.00
   3   8    -0.04  -0.04  -0.03     0.01   0.02   0.00     0.08   0.12   0.01
   4   6    -0.05   0.03   0.04    -0.02   0.00   0.01    -0.03   0.03   0.04
   5   7     0.00  -0.01   0.00     0.02   0.01  -0.01     0.02  -0.03  -0.01
   6   7     0.00  -0.01   0.01     0.04  -0.05   0.02     0.02   0.00  -0.01
   7   8     0.03  -0.01  -0.04     0.00  -0.01   0.00    -0.01   0.02   0.02
   8   6     0.00   0.00  -0.01     0.00  -0.03   0.05     0.04   0.00  -0.03
   9   6     0.00   0.01  -0.02     0.00  -0.05   0.03     0.04   0.01  -0.02
  10   6     0.00   0.00  -0.02     0.02  -0.03  -0.03     0.03   0.00   0.00
  11   8    -0.02   0.03   0.02     0.00  -0.01  -0.01     0.04   0.02  -0.03
  12   6    -0.02   0.04   0.01     0.00   0.00  -0.02     0.03  -0.01  -0.05
  13   6    -0.02   0.00  -0.01     0.00   0.01  -0.02     0.01   0.01  -0.03
  14   6    -0.03   0.02   0.03    -0.01   0.00   0.01     0.00   0.02   0.01
  15   8    -0.03   0.06   0.00     0.01   0.01  -0.02     0.01  -0.08  -0.06
  16   6     0.10  -0.02  -0.07     0.03  -0.01  -0.02     0.07  -0.01  -0.05
  17   6     0.00   0.03   0.01     0.03  -0.03  -0.02    -0.01   0.04  -0.02
  18   6     0.00   0.02   0.01     0.04  -0.02  -0.01     0.01  -0.03  -0.06
  19   6     0.01   0.00   0.01     0.04  -0.03  -0.04    -0.01   0.00   0.03
  20   8     0.04   0.00  -0.02     0.00   0.00   0.03    -0.01   0.02   0.05
  21   6     0.04  -0.01  -0.02    -0.03   0.03   0.03     0.01   0.05   0.02
  22   6     0.05  -0.01  -0.01    -0.04   0.01  -0.01    -0.15  -0.05   0.06
  23   6    -0.03  -0.07   0.01     0.00  -0.01   0.03     0.04  -0.05   0.07
  24   6     0.00  -0.01   0.00     0.01   0.02  -0.01     0.01  -0.03  -0.02
  25   6     0.00  -0.01   0.01     0.02  -0.03   0.01     0.01   0.00   0.00
  26   6     0.00  -0.02   0.00     0.01   0.00  -0.03     0.00   0.00   0.00
  27   6    -0.01  -0.03  -0.01     0.01  -0.02  -0.03     0.01   0.02   0.02
  28   6     0.00  -0.01   0.00     0.01   0.00  -0.01     0.00   0.00   0.00
  29   6     0.00   0.00   0.01     0.01   0.03   0.01     0.01  -0.04  -0.02
  30   6     0.00   0.00   0.01     0.01   0.04   0.01     0.01  -0.05  -0.03
  31   6     0.00  -0.01   0.01     0.01   0.00  -0.03    -0.03   0.00   0.03
  32   6     0.01  -0.01   0.00    -0.02   0.03  -0.01    -0.03   0.00  -0.02
  33   6    -0.02   0.00   0.01     0.06  -0.07   0.00     0.00   0.01   0.00
  34   6    -0.03   0.02   0.01     0.06  -0.06   0.00     0.01   0.01   0.00
  35   6    -0.01   0.01   0.00    -0.04   0.02   0.02     0.02  -0.01   0.00
  36   6     0.01  -0.01   0.00    -0.11   0.08   0.04     0.02  -0.01   0.00
  37   6     0.01  -0.01   0.00    -0.05   0.04   0.03     0.01  -0.01   0.00
  38   6     0.00   0.00   0.01     0.00  -0.02   0.01    -0.01   0.01   0.00
  39   6     0.02   0.00   0.01    -0.02   0.03   0.03    -0.01  -0.01  -0.01
  40   6     0.00   0.02   0.00     0.00   0.00  -0.03    -0.09   0.02   0.04
  41   6     0.01  -0.02   0.03     0.01   0.00  -0.03    -0.06   0.01   0.02
  42   6     0.00  -0.02  -0.03    -0.03   0.03  -0.03    -0.08  -0.02   0.05
  43   6     0.03  -0.03   0.01    -0.06   0.00   0.01    -0.04   0.04  -0.04
  44   6     0.03   0.03   0.01    -0.01  -0.02   0.06    -0.03  -0.01  -0.02
  45   6     0.00  -0.01   0.02     0.02   0.06  -0.03    -0.02  -0.02   0.00
  46   6     0.00  -0.01  -0.01     0.00   0.04   0.13     0.00   0.01  -0.01
  47   6     0.01   0.00   0.03    -0.07   0.00  -0.10    -0.03  -0.03  -0.01
  48   6    -0.01   0.03  -0.04    -0.01  -0.06   0.11     0.06  -0.01  -0.05
  49   6     0.00   0.00  -0.03     0.02   0.01  -0.15     0.04   0.00   0.04
  50   1     0.00   0.01  -0.04    -0.01  -0.06   0.04     0.05   0.01  -0.03
  51   1    -0.04   0.02  -0.01     0.00   0.00  -0.03     0.04  -0.06  -0.11
  52   1     0.00   0.05   0.01    -0.02   0.01   0.00    -0.01   0.04  -0.01
  53   1    -0.14   0.11  -0.23    -0.02   0.02  -0.05     0.03   0.07  -0.14
  54   1     0.25  -0.12   0.24     0.06  -0.04   0.05     0.12  -0.11   0.04
  55   1     0.34  -0.13  -0.34     0.08  -0.03  -0.08     0.15  -0.05  -0.14
  56   1     0.01   0.07   0.01     0.01  -0.11  -0.01     0.01   0.05   0.01
  57   1    -0.03   0.01   0.03     0.10  -0.01  -0.06    -0.05   0.07  -0.05
  58   1    -0.02   0.01   0.02     0.03  -0.03   0.01     0.04   0.00  -0.16
  59   1     0.00   0.02   0.01     0.03   0.02  -0.01     0.03  -0.14  -0.05
  60   1     0.02  -0.02   0.03     0.01  -0.02  -0.10     0.01   0.05   0.05
  61   1     0.00   0.01   0.01     0.10  -0.06  -0.04    -0.06  -0.04   0.06
  62   1     0.06   0.00  -0.04    -0.07   0.04   0.10     0.02   0.06   0.02
  63   1     0.05  -0.04   0.00    -0.07   0.10  -0.02     0.02   0.05   0.03
  64   1     0.07   0.02   0.01    -0.05   0.00  -0.04    -0.22  -0.14  -0.03
  65   1     0.05  -0.05  -0.02    -0.06   0.01   0.01    -0.22  -0.06   0.10
  66   1     0.08  -0.03  -0.01    -0.03   0.01   0.00    -0.16   0.00   0.16
  67   1     0.01  -0.09  -0.08     0.00  -0.02   0.00     0.07  -0.06   0.01
  68   1    -0.06  -0.15   0.05     0.02  -0.03   0.04     0.08  -0.11   0.12
  69   1    -0.04  -0.04   0.02    -0.02   0.01   0.05    -0.01  -0.02   0.14
  70   1    -0.01  -0.04  -0.03     0.01  -0.04  -0.05     0.01   0.05   0.04
  71   1     0.00  -0.02  -0.01     0.01  -0.01  -0.02     0.01   0.02   0.01
  72   1     0.00   0.01   0.01     0.01   0.04   0.02     0.01  -0.04  -0.03
  73   1     0.00  -0.01   0.01     0.01   0.00  -0.02    -0.02  -0.02   0.07
  74   1     0.01   0.00   0.02    -0.01   0.04  -0.04    -0.02   0.02  -0.04
  75   1    -0.05   0.03   0.00     0.10  -0.10  -0.01     0.01   0.01   0.00
  76   1    -0.02   0.02   0.00    -0.06   0.04   0.02     0.02  -0.02   0.00
  77   1     0.02  -0.01  -0.01    -0.18   0.15   0.05     0.02  -0.02   0.00
  78   1     0.00   0.00   0.00    -0.03   0.01   0.00    -0.03   0.02   0.02
  79   1     0.01   0.01   0.03    -0.02   0.01   0.04     0.00   0.00  -0.03
  80   1     0.00   0.03   0.01    -0.01   0.00  -0.02    -0.19   0.00   0.09
  81   1    -0.01   0.02  -0.02    -0.01   0.00  -0.02    -0.03  -0.03   0.06
  82   1    -0.01   0.01  -0.01    -0.01   0.00  -0.03    -0.10   0.10  -0.03
  83   1     0.01   0.00   0.06     0.02  -0.01  -0.04    -0.11   0.01   0.08
  84   1     0.00  -0.01   0.02     0.02  -0.01  -0.01    -0.09   0.05  -0.04
  85   1     0.03  -0.05   0.04    -0.01   0.00  -0.02     0.01   0.00   0.02
  86   1     0.01  -0.03  -0.03    -0.07   0.02  -0.07    -0.11   0.03   0.06
  87   1     0.00  -0.03  -0.05    -0.04   0.01   0.01    -0.09  -0.05   0.08
  88   1    -0.02   0.00  -0.03     0.01   0.06  -0.05    -0.07  -0.05   0.07
  89   1     0.05  -0.05   0.01    -0.08  -0.02  -0.02    -0.11   0.12  -0.03
  90   1     0.03  -0.04   0.03    -0.06   0.00   0.03     0.04   0.07  -0.10
  91   1     0.04  -0.03  -0.02    -0.06  -0.01   0.05    -0.04  -0.03   0.01
  92   1     0.02   0.04   0.02     0.04  -0.06   0.05    -0.02  -0.02  -0.02
  93   1     0.04   0.01   0.00    -0.02   0.01   0.04    -0.04   0.00  -0.01
  94   1     0.05   0.04   0.00    -0.05  -0.05   0.10    -0.04  -0.03  -0.03
  95   1     0.00   0.01   0.04     0.07   0.01  -0.06    -0.05  -0.02  -0.01
  96   1    -0.01  -0.02   0.03     0.03   0.11  -0.06    -0.01  -0.02   0.00
  97   1     0.01  -0.01   0.01     0.01   0.09  -0.03    -0.03  -0.04   0.03
  98   1     0.02  -0.01  -0.02    -0.09   0.10   0.14     0.00   0.01   0.00
  99   1    -0.01  -0.01  -0.03     0.05   0.05   0.22     0.00   0.03  -0.01
 100   1     0.00   0.00  -0.01     0.06   0.01   0.13     0.02   0.01  -0.01
 101   1     0.03  -0.02   0.03    -0.16   0.09  -0.10    -0.05  -0.04  -0.01
 102   1     0.00   0.00   0.03    -0.04  -0.02  -0.08    -0.01  -0.04  -0.03
 103   1     0.01   0.01   0.05    -0.06  -0.06  -0.22    -0.04  -0.03  -0.01
 104   1    -0.26   0.20  -0.10    -0.13   0.06   0.12     0.21  -0.14  -0.04
 105   1     0.00  -0.14   0.17    -0.02  -0.18   0.24     0.07   0.11  -0.19
 106   1     0.22   0.07  -0.25     0.09  -0.08  -0.01    -0.07  -0.02   0.08
 107   1     0.00  -0.01  -0.03     0.05  -0.04  -0.15     0.02  -0.01   0.07
 108   1    -0.01   0.01  -0.03    -0.05   0.11  -0.14     0.07   0.01   0.05
 109   1     0.00   0.00  -0.04     0.04   0.00  -0.26     0.04   0.00   0.03
                    31                     32                     33
                     A                      A                      A
 Frequencies --   152.6116               155.2242               159.9198
 Red. masses --     3.2819                 3.0825                 2.9481
 Frc consts  --     0.0450                 0.0438                 0.0444
 IR Inten    --     0.6182                 0.4487                 0.7796
 Atom AN      X      Y      Z        X      Y      Z        X      Y      Z
   1   8    -0.02   0.01   0.01    -0.01   0.02   0.02    -0.01   0.01   0.01
   2  12     0.03   0.04  -0.02     0.01   0.03  -0.03    -0.01  -0.07   0.05
   3   8    -0.01  -0.04  -0.04     0.05   0.04  -0.03    -0.02  -0.01   0.06
   4   6    -0.01   0.00   0.00    -0.01   0.01   0.01    -0.01   0.01   0.01
   5   7     0.00   0.02   0.05    -0.04   0.02   0.01    -0.01  -0.03  -0.02
   6   7     0.02   0.04  -0.02    -0.02   0.00  -0.02     0.00  -0.04  -0.02
   7   8     0.00   0.00  -0.01     0.00   0.01   0.00    -0.02   0.01   0.01
   8   6     0.00   0.07  -0.02    -0.07   0.00   0.02    -0.01  -0.03  -0.02
   9   6     0.00   0.04   0.00    -0.07  -0.01   0.01    -0.02  -0.06   0.02
  10   6     0.01   0.00   0.05    -0.05  -0.02   0.00    -0.01  -0.06   0.02
  11   8     0.01  -0.01  -0.01     0.04   0.00  -0.03    -0.02   0.02   0.02
  12   6     0.01   0.03  -0.03     0.02  -0.02  -0.05    -0.02  -0.02   0.04
  13   6     0.01   0.00  -0.03     0.03  -0.01  -0.05    -0.03   0.00   0.05
  14   6    -0.01   0.00   0.00     0.01   0.01   0.00    -0.01   0.01   0.01
  15   8     0.01   0.08  -0.02     0.00  -0.04  -0.06     0.00  -0.06   0.04
  16   6     0.02   0.00  -0.01     0.02   0.00  -0.02     0.00   0.00  -0.01
  17   6    -0.02  -0.03   0.01    -0.02  -0.03  -0.03     0.08   0.00  -0.02
  18   6    -0.01  -0.05   0.00     0.01  -0.08  -0.07     0.05   0.06   0.03
  19   6     0.02  -0.07  -0.03    -0.05  -0.02   0.03     0.08   0.02  -0.05
  20   8     0.00  -0.04   0.03    -0.08   0.00   0.08     0.07   0.01  -0.05
  21   6    -0.05   0.00   0.04    -0.04   0.01   0.03     0.05   0.00  -0.03
  22   6     0.07   0.01  -0.05    -0.04  -0.03  -0.03    -0.04   0.02   0.04
  23   6     0.00   0.00   0.03     0.03  -0.02   0.05    -0.02   0.01  -0.01
  24   6     0.00   0.01   0.05    -0.03   0.02   0.02    -0.01  -0.02  -0.03
  25   6     0.03   0.02  -0.01    -0.01  -0.01  -0.01     0.00  -0.03  -0.03
  26   6    -0.01  -0.01   0.03    -0.02   0.01   0.02     0.00   0.01   0.00
  27   6    -0.02  -0.03   0.00    -0.02  -0.01   0.00     0.01   0.03   0.02
  28   6    -0.01  -0.04  -0.01    -0.02  -0.01   0.00     0.00   0.01   0.01
  29   6    -0.01  -0.03   0.00    -0.03   0.00   0.00    -0.01  -0.02  -0.02
  30   6     0.00  -0.01   0.02    -0.03   0.01   0.00    -0.01  -0.03  -0.03
  31   6    -0.02  -0.02   0.02     0.03   0.02  -0.01     0.01   0.01   0.00
  32   6     0.02  -0.03   0.02     0.03  -0.02   0.02    -0.01  -0.01  -0.02
  33   6     0.06  -0.01  -0.02    -0.01   0.01   0.01     0.00  -0.02  -0.02
  34   6     0.06  -0.01  -0.01    -0.01   0.00   0.01    -0.03   0.00  -0.01
  35   6    -0.01   0.03   0.01     0.01  -0.02   0.01    -0.06   0.03   0.00
  36   6    -0.05   0.06   0.01     0.02  -0.03  -0.01    -0.05   0.02  -0.01
  37   6    -0.02   0.04   0.00     0.00  -0.02  -0.01    -0.02   0.00  -0.02
  38   6     0.01   0.00  -0.01     0.00   0.04   0.00     0.02   0.04  -0.03
  39   6    -0.02   0.00  -0.04     0.02   0.01   0.03     0.00   0.01   0.00
  40   6     0.01  -0.02   0.02     0.05  -0.02   0.00     0.01   0.01   0.00
  41   6    -0.04  -0.01   0.03     0.10  -0.01  -0.05     0.02   0.01   0.00
  42   6     0.03  -0.03   0.00     0.13   0.00   0.00    -0.04  -0.02   0.01
  43   6     0.03  -0.04   0.02     0.05   0.00   0.00     0.03   0.02  -0.04
  44   6    -0.04  -0.07  -0.01     0.06   0.06   0.01     0.04   0.05   0.00
  45   6     0.00   0.01  -0.08     0.02   0.01   0.05     0.02   0.03   0.00
  46   6    -0.02   0.02   0.07     0.01   0.06   0.02     0.01   0.06   0.04
  47   6    -0.05   0.01  -0.10     0.02   0.07   0.03     0.05   0.14  -0.02
  48   6    -0.01   0.13  -0.11    -0.10   0.00   0.05    -0.02  -0.01  -0.06
  49   6     0.00  -0.09   0.18    -0.07  -0.07   0.00    -0.02  -0.11   0.06
  50   1    -0.02   0.04  -0.01    -0.08  -0.03   0.02    -0.02  -0.07   0.03
  51   1    -0.01   0.03  -0.02     0.04  -0.04  -0.08    -0.03   0.00   0.06
  52   1    -0.02   0.00  -0.01    -0.01   0.02  -0.02     0.00   0.01   0.01
  53   1     0.01   0.02  -0.03     0.02   0.02  -0.05     0.01   0.01  -0.03
  54   1     0.03  -0.02   0.02     0.03  -0.03   0.00     0.01  -0.02  -0.01
  55   1     0.04   0.00  -0.03     0.04  -0.01  -0.04     0.01  -0.01  -0.02
  56   1    -0.02  -0.07   0.02    -0.01  -0.05   0.01     0.05  -0.04  -0.06
  57   1     0.00  -0.02  -0.01    -0.03   0.01  -0.07     0.15  -0.02   0.00
  58   1    -0.04  -0.07   0.02     0.07  -0.03  -0.17     0.02   0.03   0.14
  59   1     0.00  -0.01   0.01     0.03  -0.20  -0.06     0.02   0.18   0.02
  60   1    -0.02  -0.09  -0.08    -0.03   0.07   0.04     0.05  -0.02  -0.09
  61   1     0.08  -0.10  -0.03    -0.09  -0.06   0.07     0.14   0.05  -0.08
  62   1    -0.06   0.02   0.09    -0.05   0.00   0.04     0.04   0.00  -0.02
  63   1    -0.08   0.03   0.00    -0.02   0.06   0.04     0.04   0.01  -0.05
  64   1     0.09   0.05  -0.03    -0.06  -0.08  -0.03    -0.05   0.05  -0.01
  65   1     0.08   0.00  -0.06    -0.03  -0.01  -0.03    -0.08   0.03   0.07
  66   1     0.09  -0.01  -0.07    -0.08   0.01   0.00    -0.01   0.00   0.03
  67   1     0.00   0.00   0.01     0.04  -0.03  -0.01    -0.01   0.01   0.00
  68   1     0.03  -0.02   0.04     0.08  -0.07   0.09    -0.03   0.02  -0.02
  69   1    -0.01   0.02   0.05     0.00   0.02   0.10    -0.01  -0.01  -0.03
  70   1    -0.03  -0.04  -0.01    -0.03  -0.02  -0.01     0.01   0.05   0.05
  71   1    -0.02  -0.05  -0.04    -0.02  -0.02  -0.01     0.00   0.02   0.03
  72   1     0.00  -0.05  -0.02    -0.03   0.00  -0.01    -0.02  -0.03  -0.02
  73   1    -0.03  -0.03   0.01     0.03   0.08  -0.03     0.01   0.02  -0.01
  74   1     0.02  -0.04   0.04     0.03  -0.08   0.05    -0.01   0.01  -0.01
  75   1     0.09  -0.03  -0.01    -0.02   0.01   0.02    -0.04   0.01   0.00
  76   1    -0.02   0.05   0.01     0.02  -0.03   0.01    -0.09   0.05   0.00
  77   1    -0.09   0.10   0.03     0.03  -0.05  -0.01    -0.08   0.04  -0.01
  78   1     0.00   0.00   0.01     0.01   0.04  -0.03     0.05   0.02  -0.09
  79   1    -0.01   0.01  -0.06     0.01   0.00   0.06     0.00   0.00   0.03
  80   1     0.02  -0.02   0.01     0.08  -0.03  -0.04     0.02   0.02  -0.01
  81   1     0.00  -0.01   0.01     0.04  -0.01   0.01     0.00   0.02   0.00
  82   1     0.01  -0.02   0.04     0.06  -0.06   0.03     0.01   0.00   0.00
  83   1    -0.05  -0.02   0.03     0.17   0.01  -0.11     0.01   0.02   0.01
  84   1    -0.04   0.01   0.04     0.13  -0.09  -0.01     0.01   0.01  -0.02
  85   1    -0.05   0.00   0.03     0.08   0.03  -0.05     0.03   0.01   0.00
  86   1     0.05  -0.04   0.00     0.23  -0.03   0.06    -0.08   0.00   0.00
  87   1     0.04  -0.02  -0.02     0.15   0.07  -0.10    -0.05  -0.04   0.05
  88   1     0.02  -0.02   0.00     0.06  -0.03   0.02    -0.01  -0.03   0.01
  89   1     0.06  -0.05   0.03     0.17  -0.07   0.03     0.00   0.07  -0.02
  90   1     0.02  -0.04   0.03    -0.06  -0.04   0.04     0.09   0.04  -0.08
  91   1     0.04  -0.02   0.00     0.07   0.12  -0.07     0.03  -0.03  -0.05
  92   1    -0.02  -0.12  -0.05     0.03   0.11   0.04     0.01   0.07   0.01
  93   1    -0.05  -0.07   0.01     0.09   0.03  -0.01     0.06   0.01  -0.01
  94   1    -0.06  -0.09   0.03     0.11   0.10   0.00     0.08   0.08  -0.01
  95   1     0.01  -0.02  -0.10     0.05   0.05   0.10     0.07   0.06   0.05
  96   1    -0.01   0.03  -0.10    -0.01  -0.04   0.07    -0.03  -0.02   0.01
  97   1     0.00   0.00  -0.08     0.04   0.03  -0.01     0.03   0.05  -0.08
  98   1    -0.12   0.03   0.09     0.08   0.12   0.00     0.03   0.14   0.02
  99   1     0.02   0.02   0.16    -0.02   0.01  -0.03     0.00   0.01   0.02
 100   1     0.00   0.01   0.04    -0.01   0.06   0.11    -0.02   0.06   0.12
 101   1    -0.14   0.13  -0.11     0.05   0.17   0.00     0.07   0.36  -0.08
 102   1     0.00  -0.03  -0.05     0.06   0.05   0.13     0.09   0.11   0.18
 103   1    -0.08  -0.07  -0.22    -0.03   0.01  -0.02    -0.02   0.02  -0.16
 104   1     0.07   0.01  -0.15    -0.13   0.05   0.06     0.07  -0.10  -0.06
 105   1    -0.01   0.24  -0.24    -0.12  -0.04   0.07    -0.03   0.07  -0.16
 106   1    -0.08   0.19   0.01    -0.08   0.01   0.03    -0.10   0.00   0.04
 107   1    -0.03  -0.10   0.22    -0.04   0.02  -0.09     0.01   0.04  -0.06
 108   1     0.10  -0.13   0.19    -0.11  -0.22  -0.05    -0.06  -0.34  -0.01
 109   1    -0.06  -0.09   0.22    -0.08  -0.06   0.16    -0.02  -0.10   0.30
                    34                     35                     36
                     A                      A                      A
 Frequencies --   164.8964               167.6088               172.7094
 Red. masses --     2.5558                 3.0273                 4.0269
 Frc consts  --     0.0409                 0.0501                 0.0708
 IR Inten    --     0.3148                 0.8628                 3.0274
 Atom AN      X      Y      Z        X      Y      Z        X      Y      Z
   1   8    -0.01   0.01   0.01     0.03  -0.04  -0.02     0.03  -0.03  -0.03
   2  12    -0.03   0.02  -0.02    -0.01  -0.01  -0.01    -0.01   0.05  -0.08
   3   8     0.03   0.03  -0.01     0.02   0.02   0.00     0.03   0.13  -0.08
   4   6    -0.01   0.01   0.01     0.02  -0.02  -0.01     0.02  -0.04  -0.03
   5   7    -0.02   0.00   0.00     0.00  -0.03  -0.01     0.02  -0.02  -0.02
   6   7    -0.05   0.04   0.01    -0.02   0.00  -0.01     0.00  -0.02  -0.02
   7   8    -0.01   0.01   0.01     0.01  -0.02   0.00     0.02  -0.05  -0.02
   8   6    -0.02   0.00   0.01     0.01   0.00  -0.04     0.02  -0.02  -0.03
   9   6    -0.01   0.02   0.02     0.01   0.01  -0.03     0.02  -0.01  -0.04
  10   6    -0.03   0.04   0.02     0.00   0.00   0.00     0.01  -0.02  -0.03
  11   8     0.04   0.00  -0.03     0.01  -0.04  -0.03    -0.04   0.03   0.05
  12   6     0.03   0.00  -0.04     0.00  -0.04  -0.03    -0.02   0.10   0.04
  13   6     0.02   0.00  -0.03    -0.01  -0.02  -0.03     0.04   0.06  -0.01
  14   6     0.01   0.00   0.00     0.01  -0.02  -0.01    -0.01  -0.02   0.01
  15   8     0.03   0.00  -0.04     0.01  -0.03  -0.03    -0.06   0.13   0.02
  16   6     0.02   0.00  -0.01    -0.03  -0.01   0.02     0.00   0.01   0.05
  17   6     0.08  -0.09  -0.04     0.05  -0.03  -0.03     0.11  -0.13  -0.09
  18   6    -0.03   0.02   0.10     0.00   0.01   0.02     0.03  -0.08   0.00
  19   6     0.07  -0.08  -0.04     0.03  -0.02  -0.02    -0.04  -0.02   0.11
  20   8     0.08  -0.05   0.00     0.02  -0.01   0.01    -0.03  -0.04   0.07
  21   6     0.04  -0.02   0.01     0.01   0.01   0.01     0.07  -0.05   0.01
  22   6    -0.03  -0.01  -0.01    -0.09  -0.03  -0.01     0.06  -0.06   0.10
  23   6     0.04  -0.02   0.06     0.01  -0.01   0.00    -0.05  -0.01  -0.08
  24   6    -0.02   0.00   0.00     0.00  -0.01   0.00     0.02  -0.02   0.00
  25   6    -0.06   0.04   0.02    -0.02   0.01   0.00    -0.01  -0.02  -0.01
  26   6    -0.01   0.02   0.02    -0.01  -0.05  -0.04     0.02  -0.01   0.01
  27   6    -0.01   0.02   0.03    -0.01  -0.03  -0.03     0.02   0.01   0.02
  28   6    -0.02  -0.01   0.00     0.01   0.07   0.06     0.02   0.00   0.01
  29   6    -0.03  -0.04  -0.03     0.02   0.15   0.12     0.02  -0.02   0.00
  30   6    -0.02  -0.03  -0.03     0.01   0.09   0.08     0.02  -0.02  -0.01
  31   6     0.01   0.02   0.00    -0.01  -0.02   0.00    -0.01  -0.02   0.01
  32   6     0.00  -0.02   0.00     0.01   0.05   0.05     0.00  -0.01   0.00
  33   6    -0.05   0.02   0.01    -0.02   0.01   0.00    -0.03   0.00   0.00
  34   6    -0.01   0.00   0.00    -0.02   0.00   0.00    -0.05   0.03   0.01
  35   6     0.00  -0.01   0.00    -0.01   0.00   0.00    -0.09   0.05   0.01
  36   6    -0.02   0.02   0.01    -0.01   0.00   0.00    -0.07   0.04   0.01
  37   6    -0.05   0.03   0.02    -0.02   0.00   0.00    -0.03   0.00   0.00
  38   6    -0.03  -0.01   0.01    -0.01   0.01   0.00    -0.01   0.02   0.00
  39   6    -0.03   0.02   0.01     0.00   0.00   0.00     0.00   0.01   0.02
  40   6     0.03  -0.02   0.01    -0.08   0.10  -0.02    -0.04  -0.02   0.02
  41   6     0.03   0.01  -0.04     0.05  -0.05   0.08    -0.05  -0.01  -0.01
  42   6     0.02  -0.01   0.03     0.03   0.06  -0.08    -0.02  -0.01   0.03
  43   6     0.04   0.02  -0.03    -0.03  -0.07   0.11    -0.01   0.01  -0.01
  44   6    -0.01  -0.02   0.03     0.01   0.00   0.01     0.03   0.03   0.02
  45   6     0.00   0.04  -0.04     0.00   0.01  -0.01     0.02   0.02   0.01
  46   6    -0.03  -0.04  -0.06    -0.01   0.00  -0.02     0.02   0.04   0.00
  47   6     0.00  -0.01   0.05     0.00   0.02   0.02     0.00   0.00   0.02
  48   6     0.00  -0.02   0.03     0.02   0.02  -0.08     0.01  -0.03  -0.01
  49   6    -0.02   0.08   0.01     0.01  -0.01   0.05     0.01  -0.03   0.01
  50   1     0.00   0.02   0.02     0.02   0.02  -0.04     0.02  -0.01  -0.05
  51   1     0.01  -0.01  -0.05     0.00  -0.04  -0.05     0.06   0.01  -0.07
  52   1    -0.02   0.01  -0.01     0.00  -0.01  -0.01     0.03  -0.05   0.03
  53   1     0.03   0.02  -0.03    -0.03  -0.05   0.05     0.01  -0.05   0.11
  54   1     0.03  -0.03   0.00    -0.04   0.03  -0.01    -0.02   0.06   0.03
  55   1     0.03   0.00  -0.02    -0.05  -0.01   0.04    -0.02   0.05   0.08
  56   1     0.00  -0.20  -0.16     0.01  -0.10  -0.08     0.05  -0.22  -0.16
  57   1     0.27  -0.10  -0.06     0.14  -0.03  -0.05     0.25  -0.11  -0.12
  58   1    -0.11  -0.06   0.34    -0.02  -0.02   0.11     0.10  -0.04   0.04
  59   1    -0.13   0.27   0.05    -0.04   0.10   0.00    -0.05  -0.13  -0.04
  60   1    -0.01  -0.18  -0.13     0.00  -0.05  -0.06     0.03   0.05   0.19
  61   1     0.22  -0.07  -0.09     0.09  -0.03  -0.03    -0.15  -0.02   0.15
  62   1     0.01  -0.02   0.07    -0.01   0.01   0.03     0.05  -0.08   0.00
  63   1     0.01   0.03  -0.03     0.00   0.05  -0.01     0.12   0.02   0.03
  64   1    -0.05  -0.01  -0.05    -0.12  -0.07  -0.06     0.08  -0.10   0.16
  65   1    -0.07  -0.02   0.02    -0.12  -0.01   0.02     0.07  -0.16   0.04
  66   1     0.00  -0.01   0.02    -0.10  -0.01   0.02     0.07  -0.01   0.20
  67   1     0.05  -0.02   0.03     0.00  -0.02  -0.03    -0.03   0.01   0.02
  68   1     0.09  -0.05   0.09     0.03  -0.04   0.02    -0.15   0.08  -0.15
  69   1     0.00   0.01   0.11     0.00   0.02   0.02     0.01  -0.11  -0.18
  70   1     0.00   0.04   0.04    -0.02  -0.07  -0.06     0.02   0.03   0.03
  71   1    -0.02  -0.02   0.00     0.01   0.10   0.08     0.02   0.01   0.02
  72   1    -0.03  -0.06  -0.04     0.03   0.23   0.18     0.02  -0.02   0.00
  73   1     0.00   0.04  -0.02     0.00  -0.01   0.03    -0.01  -0.04   0.03
  74   1     0.00  -0.03   0.02     0.01   0.04   0.04     0.00   0.00  -0.02
  75   1     0.01  -0.02  -0.01    -0.01   0.00   0.00    -0.06   0.03   0.01
  76   1     0.02  -0.03  -0.01     0.00  -0.01   0.00    -0.12   0.08   0.02
  77   1    -0.01   0.01   0.00    -0.01  -0.01   0.00    -0.10   0.06   0.02
  78   1    -0.01  -0.02   0.02     0.00   0.00  -0.01    -0.02   0.03  -0.02
  79   1    -0.03   0.01   0.02    -0.01   0.00   0.02    -0.01   0.00   0.04
  80   1     0.05  -0.04  -0.03    -0.16   0.12   0.08    -0.07  -0.03   0.03
  81   1     0.03  -0.02   0.02    -0.04   0.06  -0.05    -0.03  -0.03   0.03
  82   1     0.04  -0.05   0.04    -0.10   0.19  -0.11    -0.05   0.00  -0.01
  83   1     0.05   0.00  -0.09     0.02   0.03   0.25    -0.09  -0.02   0.02
  84   1     0.04  -0.02  -0.01    -0.01  -0.03  -0.03    -0.07   0.02  -0.05
  85   1    -0.01   0.06  -0.04     0.19  -0.18   0.10    -0.01   0.00  -0.02
  86   1     0.02  -0.01   0.04     0.04  -0.02  -0.13    -0.02   0.01   0.05
  87   1     0.02   0.00   0.05     0.03   0.05  -0.10    -0.02  -0.02   0.02
  88   1     0.04  -0.04   0.04     0.03   0.15  -0.12    -0.04  -0.04   0.04
  89   1     0.10   0.03   0.01    -0.01  -0.17   0.05    -0.06   0.06  -0.01
  90   1     0.01   0.01  -0.04    -0.08  -0.09   0.21     0.05   0.03  -0.05
  91   1     0.05   0.07  -0.09    -0.03  -0.04   0.12    -0.01  -0.04   0.02
  92   1     0.07  -0.06   0.04     0.04   0.00   0.02     0.00   0.05   0.02
  93   1    -0.02   0.04   0.00     0.02   0.02  -0.01     0.05  -0.02   0.01
  94   1    -0.08  -0.08   0.07     0.00  -0.01   0.02     0.07   0.06   0.02
  95   1     0.05   0.02  -0.03     0.03   0.03   0.03     0.07   0.06   0.07
  96   1    -0.02   0.05  -0.05    -0.03  -0.02   0.00    -0.04  -0.03   0.03
  97   1     0.01   0.05  -0.07     0.02   0.02  -0.06     0.03   0.05  -0.07
  98   1     0.03  -0.07  -0.06     0.03   0.01  -0.03     0.07   0.07  -0.01
  99   1    -0.06  -0.06  -0.11    -0.03  -0.01  -0.06     0.00   0.04  -0.04
 100   1    -0.07  -0.02  -0.05    -0.03   0.01   0.01     0.02   0.03   0.05
 101   1     0.03  -0.17   0.08     0.02   0.01   0.02     0.02   0.04   0.01
 102   1    -0.08   0.03  -0.06    -0.01   0.03   0.02     0.03  -0.02   0.07
 103   1     0.06   0.09   0.16     0.01   0.03   0.04    -0.04  -0.03   0.02
 104   1     0.01  -0.02   0.03    -0.08   0.07  -0.12    -0.01   0.00  -0.01
 105   1     0.01  -0.02   0.04     0.04  -0.03  -0.01     0.01  -0.05   0.01
 106   1    -0.01  -0.04   0.02     0.11   0.04  -0.16     0.02  -0.03  -0.03
 107   1    -0.04   0.04   0.06    -0.02   0.01   0.06     0.00  -0.03   0.02
 108   1     0.00   0.16   0.04     0.04  -0.04   0.06     0.04  -0.04   0.01
 109   1     0.00   0.08  -0.07     0.00   0.00   0.09     0.01  -0.03   0.01
                    37                     38                     39
                     A                      A                      A
 Frequencies --   175.5519               182.1031               196.1698
 Red. masses --     3.3974                 2.6633                 2.3929
 Frc consts  --     0.0617                 0.0520                 0.0543
 IR Inten    --     1.7544                 2.1858                 0.8095
 Atom AN      X      Y      Z        X      Y      Z        X      Y      Z
   1   8     0.02  -0.02  -0.02     0.01  -0.01   0.00    -0.01   0.00  -0.03
   2  12    -0.04   0.00  -0.04    -0.04   0.00  -0.02    -0.01  -0.04   0.04
   3   8     0.00   0.05  -0.04     0.00   0.01  -0.01    -0.02  -0.03   0.05
   4   6     0.00  -0.03  -0.01     0.01   0.01   0.01    -0.02  -0.03  -0.03
   5   7    -0.01  -0.04  -0.05    -0.05  -0.01  -0.03     0.01  -0.02   0.02
   6   7    -0.05   0.00  -0.02    -0.02   0.04   0.01    -0.03  -0.01   0.01
   7   8     0.00  -0.04   0.00     0.01   0.01   0.00    -0.01  -0.05  -0.01
   8   6     0.00  -0.04  -0.04    -0.02  -0.01  -0.01     0.00  -0.02   0.01
   9   6     0.00  -0.01  -0.04    -0.02   0.03   0.01     0.00  -0.04   0.05
  10   6    -0.02   0.01  -0.01    -0.02   0.04   0.01    -0.01  -0.01   0.02
  11   8    -0.02   0.00   0.01     0.00   0.00   0.01     0.03   0.00  -0.05
  12   6     0.00   0.06   0.01    -0.01  -0.03   0.02     0.04   0.07  -0.04
  13   6     0.01   0.04  -0.01     0.00  -0.02   0.01    -0.02   0.04   0.00
  14   6    -0.01  -0.02   0.00     0.01   0.01   0.00    -0.01  -0.03  -0.02
  15   8    -0.01   0.09   0.01    -0.02  -0.06   0.01     0.08   0.11  -0.02
  16   6     0.01   0.01   0.03    -0.02  -0.01  -0.01     0.05   0.02   0.03
  17   6    -0.12   0.14   0.06    -0.02   0.06   0.02    -0.02  -0.02   0.02
  18   6    -0.07   0.01  -0.02     0.01  -0.05  -0.03     0.00  -0.02  -0.01
  19   6     0.05  -0.09  -0.06    -0.01  -0.01   0.10    -0.06   0.04   0.06
  20   8     0.08   0.02   0.06     0.10  -0.04  -0.06    -0.03  -0.01  -0.04
  21   6    -0.05   0.12   0.08     0.13  -0.06  -0.06     0.00  -0.06  -0.04
  22   6     0.04   0.00   0.04    -0.02  -0.02   0.01    -0.01   0.03   0.00
  23   6    -0.02  -0.01  -0.03     0.00   0.00  -0.02     0.03  -0.04   0.08
  24   6    -0.01  -0.04  -0.03    -0.05  -0.03  -0.03     0.01   0.00   0.00
  25   6    -0.05   0.00   0.00     0.00   0.02   0.01    -0.04   0.00   0.00
  26   6     0.00  -0.01  -0.01    -0.03  -0.01  -0.01     0.00   0.00   0.00
  27   6     0.01   0.03   0.03    -0.03   0.02   0.03     0.00   0.01   0.00
  28   6     0.01   0.03   0.04    -0.03   0.04   0.04     0.01   0.02   0.00
  29   6     0.00   0.00   0.01    -0.04   0.02   0.02     0.02   0.01   0.00
  30   6    -0.01  -0.02  -0.02    -0.05  -0.02  -0.01     0.02   0.01   0.01
  31   6     0.00  -0.01  -0.01     0.00   0.01  -0.01     0.00   0.00  -0.01
  32   6     0.00  -0.01   0.00    -0.01  -0.02   0.01     0.01   0.01   0.00
  33   6     0.00  -0.04   0.00     0.05  -0.01   0.00    -0.02  -0.01  -0.01
  34   6     0.05  -0.09  -0.01     0.05  -0.01   0.00     0.01  -0.03  -0.01
  35   6     0.08  -0.11  -0.02    -0.01   0.03   0.01     0.02  -0.04  -0.02
  36   6     0.03  -0.07  -0.01    -0.04   0.06   0.02    -0.02  -0.01  -0.01
  37   6    -0.04  -0.01   0.00    -0.02   0.05   0.01    -0.04   0.02   0.00
  38   6     0.01  -0.01  -0.01     0.03  -0.02   0.01     0.01   0.01  -0.01
  39   6    -0.01   0.00   0.03    -0.02   0.03   0.00    -0.03   0.02   0.01
  40   6    -0.02   0.00  -0.01     0.01   0.03  -0.02     0.01   0.00  -0.01
  41   6     0.00  -0.01   0.00     0.06  -0.01   0.00     0.00   0.00   0.00
  42   6     0.00  -0.01   0.03     0.04  -0.01   0.01     0.00   0.01  -0.01
  43   6     0.02   0.02  -0.02     0.04   0.01  -0.02    -0.02   0.00   0.01
  44   6     0.05   0.02   0.04    -0.03  -0.03   0.02    -0.01   0.01   0.02
  45   6     0.04   0.03   0.00     0.00   0.04  -0.06     0.00   0.04  -0.04
  46   6     0.00   0.00   0.03     0.02   0.00   0.05     0.03   0.03  -0.01
  47   6     0.01   0.04  -0.02    -0.01  -0.03  -0.05     0.03   0.02   0.02
  48   6     0.02  -0.08  -0.01     0.02  -0.04   0.00     0.01   0.01  -0.04
  49   6    -0.01   0.02   0.03    -0.02   0.03   0.03     0.00   0.03  -0.01
  50   1     0.03   0.00  -0.03     0.00   0.03   0.02     0.01  -0.04   0.04
  51   1     0.01   0.03  -0.02     0.02  -0.03   0.01    -0.09   0.07  -0.03
  52   1     0.00  -0.03   0.01     0.02   0.01   0.00    -0.04  -0.04  -0.02
  53   1     0.01  -0.03   0.06    -0.02  -0.01  -0.01     0.07  -0.01   0.07
  54   1     0.00   0.03   0.02    -0.03   0.00  -0.02     0.06   0.01   0.05
  55   1     0.00   0.03   0.04    -0.03  -0.02   0.01     0.06   0.09   0.03
  56   1    -0.07   0.20   0.11     0.05   0.23   0.07     0.00   0.04   0.04
  57   1    -0.22   0.18   0.02    -0.20   0.04   0.07    -0.08  -0.04   0.05
  58   1    -0.18  -0.05  -0.06     0.04  -0.01  -0.18     0.06   0.02  -0.08
  59   1    -0.01   0.05   0.02     0.04  -0.21  -0.02     0.01  -0.13   0.00
  60   1    -0.03  -0.16  -0.17     0.10   0.01   0.28     0.01   0.08   0.18
  61   1     0.20  -0.16  -0.07    -0.21   0.03   0.14    -0.20   0.08   0.09
  62   1    -0.01   0.19   0.13     0.20  -0.03  -0.15     0.01  -0.07  -0.08
  63   1    -0.11   0.09   0.03     0.16  -0.19   0.01     0.02  -0.10  -0.01
  64   1     0.05  -0.01   0.06    -0.02  -0.10   0.07    -0.05   0.27  -0.23
  65   1     0.04  -0.05   0.01     0.04   0.02  -0.03    -0.29  -0.09   0.18
  66   1     0.06   0.01   0.08    -0.11   0.02   0.00     0.30  -0.10   0.07
  67   1    -0.01   0.00   0.03     0.01  -0.01  -0.04     0.06  -0.04   0.10
  68   1    -0.07   0.04  -0.07    -0.02  -0.01  -0.02     0.12  -0.04   0.10
  69   1     0.00  -0.07  -0.07     0.02   0.00  -0.04    -0.03  -0.05   0.15
  70   1     0.02   0.05   0.06    -0.02   0.03   0.04     0.00   0.01   0.00
  71   1     0.01   0.06   0.07    -0.03   0.06   0.08     0.01   0.02   0.00
  72   1    -0.01   0.01   0.02    -0.05   0.04   0.04     0.02   0.02   0.00
  73   1     0.00  -0.01   0.00     0.00   0.05  -0.02     0.00   0.00  -0.01
  74   1     0.00  -0.01   0.01    -0.01  -0.05   0.05     0.01   0.01  -0.02
  75   1     0.08  -0.11  -0.01     0.07  -0.04   0.00     0.02  -0.05  -0.02
  76   1     0.14  -0.16  -0.03    -0.02   0.04   0.01     0.04  -0.06  -0.02
  77   1     0.06  -0.10  -0.02    -0.08   0.09   0.03    -0.01  -0.01  -0.01
  78   1     0.02  -0.02  -0.04     0.01   0.00   0.02     0.00   0.01  -0.04
  79   1    -0.02  -0.02   0.08    -0.02   0.03  -0.01    -0.03   0.00   0.03
  80   1    -0.01   0.02   0.00     0.01   0.04  -0.01     0.07   0.03  -0.02
  81   1    -0.03   0.02  -0.01     0.01   0.03  -0.03    -0.03   0.04  -0.02
  82   1    -0.02  -0.01  -0.02     0.01   0.03  -0.02     0.01  -0.05   0.01
  83   1    -0.02   0.00   0.05     0.08   0.03   0.04    -0.01   0.00   0.02
  84   1    -0.02   0.00  -0.05     0.05  -0.04  -0.03    -0.01   0.00  -0.02
  85   1     0.05  -0.04   0.00     0.10  -0.05   0.00     0.03  -0.01   0.00
  86   1    -0.01   0.01   0.04     0.14   0.00   0.09     0.03   0.01   0.02
  87   1    -0.01  -0.01   0.04     0.07   0.04  -0.09     0.01   0.00  -0.05
  88   1     0.00  -0.03   0.03    -0.05  -0.05   0.05    -0.04   0.00   0.00
  89   1     0.03   0.05   0.00     0.18  -0.04   0.02    -0.13   0.06  -0.02
  90   1     0.03   0.03  -0.04    -0.06  -0.03   0.01     0.08   0.04  -0.04
  91   1     0.02   0.02  -0.04     0.06   0.12  -0.11    -0.03  -0.10   0.08
  92   1     0.15   0.01   0.09     0.04  -0.08   0.01     0.13  -0.03   0.06
  93   1     0.06   0.09  -0.04    -0.04   0.01   0.01    -0.02   0.13  -0.05
  94   1     0.00  -0.03   0.07    -0.08  -0.07   0.07    -0.12  -0.08   0.05
  95   1     0.14   0.08   0.09     0.03   0.01  -0.08     0.09   0.06   0.02
  96   1    -0.06  -0.03   0.02    -0.01   0.08  -0.09    -0.08   0.01  -0.04
  97   1     0.06   0.08  -0.14     0.00   0.05  -0.07     0.03   0.07  -0.15
  98   1     0.05   0.07   0.02    -0.08  -0.01   0.07     0.08   0.07  -0.02
  99   1    -0.02  -0.06   0.00     0.07   0.04   0.14     0.00   0.01  -0.05
 100   1    -0.03   0.01   0.12     0.07  -0.02  -0.01     0.02   0.02   0.05
 101   1     0.01   0.10  -0.03    -0.06   0.01  -0.04     0.07   0.04   0.01
 102   1     0.01   0.04   0.03     0.02  -0.06  -0.04     0.03   0.03   0.05
 103   1     0.01   0.02  -0.07    -0.02  -0.07  -0.10     0.02   0.02   0.03
 104   1    -0.01  -0.04   0.00     0.01  -0.03   0.00     0.04  -0.05  -0.08
 105   1     0.04  -0.11   0.04     0.04  -0.05   0.04     0.01   0.07  -0.11
 106   1     0.05  -0.10  -0.06     0.03  -0.07  -0.04    -0.02   0.05   0.01
 107   1    -0.03   0.09  -0.01    -0.04  -0.02   0.07     0.00   0.05  -0.03
 108   1    -0.01  -0.06   0.01     0.01   0.09   0.05    -0.04   0.04  -0.02
 109   1     0.01   0.03   0.12    -0.04   0.03  -0.04     0.03   0.03  -0.02
                    40                     41                     42
                     A                      A                      A
 Frequencies --   199.7729               205.9405               208.5081
 Red. masses --     1.7930                 1.3449                 1.4244
 Frc consts  --     0.0422                 0.0336                 0.0365
 IR Inten    --     0.4874                 2.1382                 1.5888
 Atom AN      X      Y      Z        X      Y      Z        X      Y      Z
   1   8     0.00   0.00  -0.03     0.00   0.00  -0.01     0.00   0.00  -0.03
   2  12     0.00  -0.03   0.00     0.00  -0.01   0.02    -0.01   0.00   0.01
   3   8    -0.01   0.02   0.00    -0.01  -0.01   0.03    -0.01   0.00   0.01
   4   6    -0.02  -0.03  -0.02    -0.01   0.00  -0.01    -0.02  -0.01  -0.02
   5   7    -0.03  -0.02  -0.01     0.01   0.01  -0.02    -0.02   0.00  -0.01
   6   7     0.04  -0.01   0.02    -0.01   0.01  -0.02     0.00   0.03  -0.01
   7   8    -0.02  -0.04  -0.01    -0.01  -0.01   0.00    -0.02  -0.02  -0.01
   8   6    -0.01  -0.01   0.00     0.01   0.01  -0.03    -0.01   0.01  -0.01
   9   6     0.00  -0.01   0.04     0.02   0.04  -0.07    -0.01   0.05  -0.05
  10   6     0.01  -0.01   0.02     0.01   0.02  -0.03    -0.01   0.03  -0.02
  11   8     0.00   0.02  -0.01     0.01   0.01  -0.01     0.01   0.02  -0.01
  12   6     0.00   0.04  -0.01     0.01   0.01   0.00     0.00   0.01  -0.01
  13   6     0.00   0.04   0.00    -0.01   0.01   0.01     0.00   0.01   0.00
  14   6    -0.02  -0.02  -0.01     0.00   0.00   0.00    -0.01  -0.01  -0.01
  15   8    -0.01   0.01  -0.02     0.02   0.01   0.00     0.00  -0.02  -0.01
  16   6     0.03   0.02   0.03     0.01   0.01   0.01     0.02   0.02   0.02
  17   6     0.01   0.00  -0.01     0.00   0.00   0.00     0.00   0.00   0.00
  18   6     0.00   0.01   0.00     0.00   0.00   0.00     0.00   0.00   0.00
  19   6     0.01   0.00  -0.02    -0.01   0.01   0.00     0.01  -0.01  -0.02
  20   8    -0.02   0.01   0.02    -0.01   0.00  -0.01     0.01   0.00   0.00
  21   6    -0.03   0.03   0.02     0.00  -0.01  -0.01     0.00   0.01   0.00
  22   6     0.03   0.00   0.03    -0.02   0.02   0.01     0.00   0.01   0.01
  23   6    -0.01  -0.03   0.02     0.01  -0.01   0.03     0.01  -0.02   0.03
  24   6    -0.04  -0.02  -0.02     0.01   0.01   0.00    -0.01  -0.01   0.00
  25   6     0.05   0.00   0.01     0.00   0.00  -0.01     0.02   0.01   0.00
  26   6    -0.03  -0.01  -0.01     0.02   0.01   0.00    -0.02  -0.01  -0.01
  27   6    -0.02   0.02   0.04     0.01  -0.01  -0.01    -0.01   0.01   0.00
  28   6    -0.03   0.03   0.05     0.00  -0.03  -0.01    -0.01   0.03   0.01
  29   6    -0.04   0.01   0.02     0.00  -0.01   0.00     0.00   0.02   0.00
  30   6    -0.04  -0.01  -0.01     0.00   0.01   0.01    -0.01   0.00   0.00
  31   6    -0.01   0.00  -0.02     0.00   0.00   0.00     0.00   0.00  -0.01
  32   6    -0.02  -0.01   0.01    -0.01   0.02   0.01     0.01  -0.01   0.00
  33   6     0.02   0.01   0.00     0.01   0.00   0.00     0.02   0.01   0.00
  34   6    -0.01   0.04   0.00     0.00   0.00   0.01     0.00   0.03   0.01
  35   6    -0.01   0.05   0.00    -0.02   0.00   0.02    -0.02   0.03   0.02
  36   6     0.03   0.02   0.00    -0.02  -0.01   0.01     0.00   0.01   0.01
  37   6     0.06   0.00   0.00    -0.01  -0.02  -0.01     0.03  -0.01   0.00
  38   6     0.01   0.00   0.01     0.00  -0.01   0.00     0.01  -0.01   0.01
  39   6     0.03   0.00  -0.01     0.00  -0.02  -0.01     0.02  -0.02  -0.01
  40   6     0.00   0.02  -0.03    -0.01  -0.01   0.01     0.01   0.00  -0.02
  41   6     0.02  -0.01  -0.01    -0.03   0.02  -0.01     0.02  -0.01  -0.01
  42   6     0.00  -0.01   0.01    -0.02   0.01  -0.01     0.04   0.00   0.02
  43   6     0.04   0.01  -0.02     0.00   0.01   0.01    -0.01  -0.01   0.00
  44   6     0.00  -0.01  -0.02     0.00   0.00  -0.02     0.00  -0.01  -0.02
  45   6    -0.03  -0.05   0.03     0.02   0.00   0.01     0.01  -0.02   0.02
  46   6     0.00  -0.01   0.01     0.00  -0.01   0.00    -0.01  -0.03   0.01
  47   6    -0.01  -0.01  -0.01    -0.01  -0.01  -0.02    -0.01  -0.02  -0.02
  48   6     0.03  -0.01  -0.03     0.02  -0.04   0.04    -0.01  -0.03   0.04
  49   6     0.00  -0.01  -0.04     0.02   0.01   0.04    -0.01   0.00   0.03
  50   1     0.00  -0.01   0.04     0.02   0.04  -0.06     0.00   0.05  -0.04
  51   1    -0.02   0.04  -0.02    -0.02   0.02   0.01    -0.02   0.02   0.00
  52   1    -0.02  -0.04   0.01    -0.01  -0.01   0.00    -0.01  -0.02   0.00
  53   1     0.05  -0.02   0.07     0.02   0.00   0.01     0.04  -0.01   0.05
  54   1     0.04   0.02   0.04     0.02   0.00   0.01     0.03   0.02   0.02
  55   1     0.04   0.08   0.04     0.02   0.03   0.00     0.03   0.06   0.02
  56   1    -0.01  -0.04  -0.01     0.00   0.00   0.00     0.00  -0.01   0.00
  57   1     0.04   0.01  -0.02    -0.01  -0.01   0.01     0.01   0.00   0.00
  58   1    -0.01   0.00   0.03     0.01   0.00  -0.01    -0.01  -0.01   0.02
  59   1     0.00   0.04   0.00     0.00  -0.01   0.00     0.00   0.03   0.00
  60   1    -0.02   0.00  -0.07     0.00   0.01   0.02     0.00  -0.02  -0.04
  61   1     0.06  -0.02  -0.03    -0.02   0.01   0.01     0.04  -0.02  -0.02
  62   1    -0.04   0.02   0.04     0.00  -0.01  -0.01     0.00   0.01   0.01
  63   1    -0.03   0.06   0.00     0.00  -0.02   0.00    -0.01   0.01   0.00
  64   1     0.01   0.14  -0.10    -0.03   0.08  -0.06    -0.02   0.10  -0.08
  65   1    -0.14  -0.11   0.12    -0.08   0.00   0.06    -0.11  -0.04   0.08
  66   1     0.23  -0.07   0.10     0.06  -0.02   0.02     0.13  -0.04   0.04
  67   1     0.03  -0.02   0.08     0.01  -0.01   0.02     0.03  -0.02   0.06
  68   1    -0.02   0.02  -0.01     0.04  -0.01   0.03     0.01   0.00   0.01
  69   1    -0.02  -0.10   0.00    -0.01   0.00   0.05    -0.02  -0.06   0.03
  70   1    -0.01   0.04   0.06     0.02  -0.01  -0.01    -0.02   0.01   0.00
  71   1    -0.02   0.06   0.08     0.00  -0.05  -0.02    -0.01   0.05   0.02
  72   1    -0.05   0.01   0.03     0.00  -0.02  -0.01     0.00   0.03   0.01
  73   1    -0.01   0.02  -0.03     0.00  -0.01   0.01    -0.01   0.02  -0.02
  74   1    -0.02  -0.02   0.05    -0.01   0.02   0.01     0.01  -0.02  -0.01
  75   1    -0.03   0.06   0.00     0.01   0.00   0.02     0.00   0.04   0.02
  76   1    -0.04   0.08   0.00    -0.03   0.00   0.03    -0.04   0.05   0.04
  77   1     0.04   0.03   0.00    -0.03  -0.02   0.01    -0.01   0.00   0.02
  78   1     0.01   0.00   0.03     0.00   0.00   0.00     0.01  -0.01   0.03
  79   1     0.03   0.02  -0.05     0.01  -0.03   0.00     0.03  -0.02  -0.03
  80   1     0.05   0.05  -0.03    -0.01  -0.02   0.00     0.06   0.02  -0.03
  81   1    -0.03   0.06  -0.05    -0.01  -0.01   0.02    -0.02   0.03  -0.03
  82   1     0.00  -0.01  -0.01    -0.01  -0.01   0.00     0.01  -0.04   0.00
  83   1     0.01   0.02   0.06    -0.01  -0.02  -0.08     0.04   0.00   0.00
  84   1    -0.01  -0.01  -0.07     0.01   0.02   0.06     0.02  -0.03  -0.01
  85   1     0.10  -0.05  -0.01    -0.11   0.06  -0.01     0.03  -0.03   0.00
  86   1     0.01  -0.01   0.01    -0.09   0.00  -0.07     0.11   0.01   0.08
  87   1     0.00   0.01   0.00    -0.04  -0.01   0.07     0.06   0.03  -0.07
  88   1     0.00  -0.01   0.01     0.05   0.05  -0.04    -0.03  -0.04   0.05
  89   1     0.32  -0.14   0.04     0.32  -0.23   0.04    -0.33   0.22  -0.03
  90   1    -0.21  -0.08   0.08    -0.34  -0.12   0.16     0.34   0.12  -0.14
  91   1     0.07   0.28  -0.19     0.03   0.35  -0.16    -0.04  -0.36   0.17
  92   1    -0.02   0.00  -0.03    -0.18   0.06  -0.07    -0.23   0.06  -0.10
  93   1    -0.01  -0.01   0.00     0.02  -0.16   0.07     0.03  -0.22   0.09
  94   1     0.00  -0.01  -0.04     0.14   0.12  -0.05     0.19   0.15  -0.07
  95   1    -0.22  -0.17  -0.18     0.16   0.14   0.21     0.03   0.03   0.08
  96   1     0.19   0.11  -0.03    -0.16  -0.17   0.08    -0.02  -0.08   0.05
  97   1    -0.10  -0.13   0.33     0.09   0.05  -0.25     0.03  -0.01  -0.02
  98   1    -0.06  -0.04   0.02    -0.06  -0.04   0.01    -0.14  -0.11   0.04
  99   1     0.02   0.02   0.06     0.02   0.02   0.04     0.05   0.04   0.12
 100   1     0.02  -0.01  -0.05     0.02  -0.01  -0.06     0.03  -0.03  -0.12
 101   1    -0.02  -0.01  -0.01    -0.02   0.03  -0.02    -0.05   0.02  -0.03
 102   1     0.00  -0.01  -0.02     0.02  -0.03   0.02     0.02  -0.05   0.00
 103   1     0.00  -0.01  -0.02    -0.03  -0.05  -0.05    -0.04  -0.06  -0.06
 104   1     0.05  -0.06  -0.05     0.00   0.02   0.08    -0.05   0.04   0.08
 105   1     0.05   0.03  -0.06     0.02  -0.09   0.10     0.00  -0.10   0.13
 106   1     0.01  -0.01  -0.01     0.03  -0.09  -0.01     0.03  -0.08  -0.02
 107   1     0.03  -0.05  -0.04    -0.01   0.03   0.06    -0.03  -0.01   0.05
 108   1    -0.03   0.02  -0.04     0.07  -0.04   0.05     0.03  -0.02   0.04
 109   1     0.00  -0.02  -0.09     0.00   0.01   0.09    -0.04   0.00   0.05
                    43                     44                     45
                     A                      A                      A
 Frequencies --   211.7978               216.3006               221.3219
 Red. masses --     1.4565                 2.9489                 1.2521
 Frc consts  --     0.0385                 0.0813                 0.0361
 IR Inten    --     1.4690                 1.2244                 1.7834
 Atom AN      X      Y      Z        X      Y      Z        X      Y      Z
   1   8     0.00   0.00  -0.01     0.02  -0.02   0.09    -0.01   0.00   0.01
   2  12    -0.01   0.00   0.00    -0.02   0.01   0.02     0.03   0.03   0.00
   3   8    -0.01   0.00   0.01    -0.01  -0.02   0.04     0.01   0.00   0.00
   4   6     0.00   0.00  -0.01     0.07   0.03   0.06     0.00   0.00   0.01
   5   7     0.01   0.01  -0.02    -0.01  -0.01  -0.02     0.00   0.03   0.01
   6   7    -0.01   0.01  -0.01    -0.01   0.01   0.00     0.01   0.00  -0.01
   7   8     0.00   0.00   0.00     0.07   0.04   0.03     0.00   0.01   0.01
   8   6     0.00   0.01  -0.04     0.00  -0.01  -0.02    -0.01   0.02   0.01
   9   6     0.01   0.05  -0.10     0.00   0.03  -0.04    -0.01   0.01  -0.01
  10   6     0.00   0.02  -0.03    -0.01   0.02  -0.01     0.00   0.00  -0.01
  11   8     0.00   0.02   0.00     0.00  -0.11  -0.02     0.00   0.00   0.00
  12   6     0.00   0.00   0.00     0.03   0.02   0.00     0.00  -0.02   0.00
  13   6     0.00   0.01   0.01    -0.02  -0.01   0.01     0.01   0.00   0.00
  14   6     0.00   0.00   0.00     0.04   0.02   0.00     0.00   0.00   0.00
  15   8    -0.01  -0.03   0.00     0.09   0.19   0.03    -0.02  -0.05   0.00
  16   6     0.01   0.01   0.01    -0.08  -0.08  -0.06     0.00  -0.01  -0.01
  17   6     0.00   0.00   0.00     0.00  -0.03  -0.01     0.00  -0.01   0.00
  18   6     0.00   0.00   0.00    -0.01  -0.01   0.00     0.00   0.00   0.00
  19   6     0.00   0.00   0.00    -0.02   0.00   0.00     0.00   0.00  -0.01
  20   8     0.00   0.00  -0.01    -0.04   0.00   0.01     0.00   0.00   0.00
  21   6     0.01  -0.01  -0.01    -0.03   0.00   0.01     0.00  -0.01   0.00
  22   6     0.00   0.01   0.00    -0.08   0.04  -0.03     0.02   0.00  -0.01
  23   6     0.00  -0.01   0.01     0.02   0.06  -0.04    -0.01   0.02  -0.02
  24   6     0.01   0.01   0.00    -0.01  -0.02  -0.02     0.00   0.01   0.00
  25   6     0.00   0.00   0.00     0.00   0.00   0.00     0.01   0.00   0.00
  26   6     0.01   0.01   0.00    -0.01  -0.02  -0.02     0.01  -0.01  -0.01
  27   6     0.01  -0.01  -0.02     0.00   0.02   0.02     0.01   0.01   0.01
  28   6     0.01  -0.02  -0.02     0.00   0.02   0.03     0.01   0.01   0.01
  29   6     0.01   0.00   0.00    -0.01  -0.01   0.00     0.00  -0.01  -0.01
  30   6     0.01   0.01   0.01    -0.02  -0.03  -0.03     0.00  -0.01  -0.01
  31   6     0.00   0.00   0.01     0.00  -0.02  -0.02     0.00  -0.02  -0.01
  32   6     0.01   0.01   0.01    -0.01  -0.02  -0.02     0.00  -0.01  -0.01
  33   6    -0.01  -0.01  -0.01     0.00  -0.01  -0.01     0.01   0.01   0.01
  34   6    -0.02   0.00  -0.02    -0.02   0.01  -0.01     0.00   0.02   0.01
  35   6    -0.01   0.01  -0.02    -0.03   0.02   0.00     0.01   0.01   0.01
  36   6     0.01   0.01  -0.01     0.00   0.00  -0.01     0.01  -0.01   0.00
  37   6     0.00   0.00   0.01     0.01  -0.01   0.00     0.01   0.00   0.00
  38   6     0.00   0.00  -0.01     0.01  -0.01  -0.01     0.00   0.01   0.01
  39   6     0.00   0.01   0.02     0.02  -0.01   0.00     0.00   0.00   0.00
  40   6    -0.01  -0.02   0.01     0.01   0.01  -0.03     0.01  -0.01  -0.02
  41   6    -0.02   0.01   0.00     0.01  -0.02   0.01    -0.01  -0.02   0.00
  42   6     0.01   0.01   0.00     0.00  -0.02   0.02     0.00  -0.01   0.00
  43   6    -0.01  -0.01   0.02     0.02   0.02  -0.05     0.01   0.01  -0.02
  44   6     0.03   0.00   0.03     0.03   0.00   0.00    -0.02   0.01  -0.01
  45   6    -0.04  -0.03   0.02     0.00  -0.03   0.04    -0.01  -0.01  -0.01
  46   6     0.01   0.01   0.00     0.01  -0.01  -0.01    -0.01  -0.01   0.00
  47   6     0.01   0.01   0.00     0.01   0.00  -0.01    -0.01  -0.01   0.01
  48   6    -0.01  -0.04   0.05     0.02  -0.05   0.03    -0.03   0.01   0.05
  49   6     0.00  -0.02   0.06    -0.01   0.02   0.02     0.00  -0.03  -0.01
  50   1     0.01   0.05  -0.09     0.01   0.03  -0.03    -0.02   0.01  -0.01
  51   1    -0.01   0.01   0.01    -0.03   0.00   0.01     0.01   0.00   0.01
  52   1     0.00  -0.01   0.01     0.02   0.07  -0.04     0.00   0.00   0.00
  53   1     0.01   0.00   0.02    -0.13   0.01  -0.14    -0.01   0.01  -0.02
  54   1     0.01   0.01   0.01    -0.10  -0.06  -0.08     0.00  -0.02  -0.01
  55   1     0.01   0.02   0.01    -0.10  -0.22  -0.06     0.00  -0.02  -0.01
  56   1     0.00   0.01   0.00    -0.02  -0.08  -0.02     0.00   0.00   0.01
  57   1    -0.01   0.00   0.01     0.05  -0.03  -0.03     0.00  -0.01   0.01
  58   1     0.00   0.00   0.00     0.01   0.00   0.01     0.00   0.00   0.01
  59   1     0.00   0.00   0.00    -0.02  -0.01  -0.01     0.01   0.01   0.00
  60   1     0.00   0.00   0.01    -0.02   0.02   0.00     0.00   0.00  -0.01
  61   1     0.00   0.00   0.00    -0.03   0.00   0.01     0.01   0.00  -0.01
  62   1     0.01  -0.01  -0.01    -0.05  -0.01   0.03     0.00  -0.01   0.00
  63   1     0.01  -0.01   0.00    -0.04   0.03   0.00     0.00   0.00   0.00
  64   1    -0.02   0.09  -0.08    -0.11   0.04  -0.09     0.00   0.14  -0.12
  65   1    -0.09  -0.01   0.06    -0.11   0.09   0.02    -0.12  -0.05   0.09
  66   1     0.09  -0.03   0.01    -0.08   0.03  -0.05     0.18  -0.07   0.02
  67   1     0.01  -0.01   0.02    -0.09   0.03  -0.23     0.00   0.03   0.05
  68   1     0.01  -0.01   0.01     0.10  -0.10   0.07    -0.06   0.09  -0.07
  69   1     0.00  -0.02   0.02     0.05   0.27   0.03     0.01  -0.05  -0.08
  70   1     0.01  -0.03  -0.03     0.00   0.04   0.04     0.01   0.02   0.02
  71   1     0.01  -0.04  -0.03     0.00   0.05   0.05     0.01   0.02   0.03
  72   1     0.01   0.00  -0.01    -0.02  -0.01   0.00     0.00  -0.02  -0.01
  73   1     0.01   0.00   0.01     0.00  -0.02  -0.02     0.00  -0.04  -0.01
  74   1     0.01   0.01  -0.01    -0.01  -0.03  -0.01     0.00   0.00  -0.01
  75   1    -0.03   0.01  -0.02    -0.03   0.01  -0.01    -0.01   0.03   0.01
  76   1    -0.02   0.02  -0.03    -0.05   0.03   0.00     0.00   0.00   0.02
  77   1     0.02   0.02  -0.02     0.00   0.00  -0.01     0.02  -0.01   0.00
  78   1     0.00   0.00  -0.03     0.01  -0.01  -0.02     0.00   0.01   0.03
  79   1    -0.01   0.03   0.03     0.01  -0.01   0.00    -0.01   0.01   0.01
  80   1    -0.02  -0.03   0.01     0.04   0.03  -0.02     0.06   0.02  -0.02
  81   1     0.00  -0.02   0.03    -0.02   0.03  -0.05    -0.02   0.02  -0.04
  82   1    -0.01  -0.02   0.01     0.01  -0.01  -0.01     0.02  -0.04   0.00
  83   1     0.03  -0.03  -0.14    -0.08   0.02   0.21    -0.20   0.04   0.36
  84   1     0.05  -0.01   0.13    -0.09   0.03  -0.17    -0.19   0.10  -0.33
  85   1    -0.17   0.09   0.00     0.21  -0.13   0.01     0.34  -0.19   0.00
  86   1    -0.01   0.00  -0.02     0.03   0.01   0.07    -0.01   0.00   0.00
  87   1     0.00   0.01   0.02     0.01  -0.01  -0.02    -0.01  -0.01   0.01
  88   1     0.02   0.02  -0.01    -0.04  -0.07   0.05     0.00  -0.01   0.00
  89   1    -0.04  -0.01   0.00     0.04   0.05  -0.02     0.03   0.01  -0.01
  90   1     0.00   0.00   0.03     0.02   0.03  -0.08    -0.01   0.00  -0.02
  91   1    -0.02  -0.03   0.04     0.02   0.03  -0.07     0.01   0.03  -0.03
  92   1     0.38  -0.10   0.15    -0.02   0.02  -0.01     0.19  -0.04   0.07
  93   1    -0.02   0.32  -0.16     0.04  -0.05   0.01    -0.06   0.23  -0.10
  94   1    -0.26  -0.24   0.09     0.07   0.03  -0.01    -0.20  -0.15   0.00
  95   1    -0.18  -0.14  -0.16    -0.11  -0.10  -0.08     0.09   0.11   0.14
  96   1     0.12   0.11  -0.04     0.14   0.05   0.01    -0.20  -0.14   0.04
  97   1    -0.09  -0.09   0.25    -0.05  -0.06   0.22     0.06   0.00  -0.23
  98   1     0.02   0.02   0.00    -0.07  -0.05   0.01    -0.05  -0.04   0.01
  99   1     0.00   0.00  -0.01     0.04   0.04   0.06     0.01   0.02   0.03
 100   1     0.01   0.00   0.02     0.05  -0.02  -0.08     0.00   0.00  -0.05
 101   1     0.02   0.16  -0.04     0.01   0.19  -0.06    -0.01  -0.05   0.02
 102   1     0.07  -0.03   0.13     0.10  -0.06   0.15    -0.02   0.00  -0.03
 103   1    -0.06  -0.08  -0.09    -0.08  -0.13  -0.13     0.00   0.01   0.03
 104   1    -0.06   0.06   0.11     0.01  -0.02   0.05    -0.02   0.03   0.07
 105   1    -0.02  -0.13   0.15     0.03  -0.08   0.07    -0.05   0.00   0.05
 106   1     0.03  -0.10  -0.02     0.02  -0.10  -0.01    -0.04   0.00   0.05
 107   1    -0.04  -0.05   0.12    -0.03   0.00   0.05     0.00  -0.03   0.00
 108   1     0.09  -0.02   0.09     0.03   0.02   0.04     0.00  -0.04  -0.01
 109   1    -0.04  -0.02   0.06    -0.02   0.01   0.02    -0.03  -0.03   0.00
                    46                     47                     48
                     A                      A                      A
 Frequencies --   223.0142               223.5849               229.2989
 Red. masses --     1.4013                 1.2270                 1.5255
 Frc consts  --     0.0411                 0.0361                 0.0473
 IR Inten    --     1.4083                 0.9394                 3.5401
 Atom AN      X      Y      Z        X      Y      Z        X      Y      Z
   1   8    -0.01   0.01  -0.04     0.01   0.00  -0.01    -0.01   0.00   0.03
   2  12    -0.02   0.03   0.01    -0.01   0.01  -0.01    -0.02   0.04  -0.02
   3   8    -0.01  -0.02   0.01     0.00   0.00  -0.01     0.03   0.02  -0.02
   4   6    -0.03  -0.01  -0.03     0.00   0.00   0.00     0.01   0.01   0.02
   5   7     0.01   0.02   0.00     0.00  -0.01   0.01     0.01   0.01   0.01
   6   7    -0.03   0.01   0.01     0.00   0.00   0.02    -0.03   0.00   0.01
   7   8    -0.03  -0.01  -0.03     0.00   0.00   0.00     0.00   0.01   0.03
   8   6     0.00   0.01   0.01     0.01   0.00   0.02     0.00   0.00   0.01
   9   6     0.00   0.01   0.00     0.01  -0.02   0.05     0.00  -0.01   0.03
  10   6    -0.02   0.01   0.00     0.00   0.00   0.02    -0.01   0.01   0.02
  11   8     0.02   0.04  -0.01     0.00   0.01   0.00    -0.01  -0.03   0.00
  12   6     0.00   0.00   0.00     0.00   0.00   0.00    -0.01  -0.03  -0.01
  13   6    -0.01  -0.02   0.01     0.00   0.00  -0.01     0.02   0.01  -0.01
  14   6    -0.01  -0.01  -0.01     0.00   0.00   0.00     0.00   0.00   0.00
  15   8     0.02  -0.01   0.00    -0.01  -0.01  -0.01    -0.03  -0.08  -0.02
  16   6     0.04   0.04   0.02     0.00   0.00   0.00    -0.02  -0.02  -0.02
  17   6     0.00   0.00   0.00     0.01   0.00  -0.01    -0.01   0.01   0.01
  18   6     0.00   0.00   0.00     0.00   0.00   0.00    -0.01  -0.01   0.01
  19   6     0.00   0.00   0.00     0.01  -0.01  -0.01     0.00  -0.01   0.01
  20   8     0.00   0.00  -0.01     0.00   0.00   0.01     0.02  -0.01   0.00
  21   6     0.01  -0.01  -0.01     0.00   0.01   0.01     0.02  -0.01   0.00
  22   6     0.00  -0.01   0.00     0.01  -0.01   0.00     0.04   0.00   0.00
  23   6     0.02  -0.04   0.05     0.00  -0.01   0.01    -0.02   0.04  -0.04
  24   6     0.02   0.01   0.01     0.00   0.00   0.00     0.02   0.01   0.01
  25   6    -0.02   0.00   0.00     0.00   0.00   0.00    -0.03   0.00   0.00
  26   6     0.02   0.00   0.00    -0.01   0.00   0.00     0.02   0.00   0.00
  27   6     0.02   0.00   0.00    -0.01   0.00   0.00     0.02  -0.01  -0.01
  28   6     0.02  -0.01  -0.01    -0.01   0.00   0.00     0.01  -0.01  -0.01
  29   6     0.02  -0.01  -0.01     0.00   0.00   0.00     0.02  -0.01   0.00
  30   6     0.02   0.01   0.00     0.00   0.00   0.00     0.02   0.01   0.01
  31   6     0.01  -0.02   0.00     0.00   0.01   0.00     0.01   0.00   0.01
  32   6     0.01   0.01  -0.01     0.00   0.00   0.00     0.01   0.01   0.00
  33   6    -0.01  -0.02  -0.01    -0.01   0.00   0.00    -0.02  -0.02  -0.01
  34   6    -0.01  -0.02  -0.01    -0.03   0.02   0.01     0.00  -0.03  -0.01
  35   6    -0.01  -0.01  -0.01    -0.01   0.00   0.01     0.00  -0.02  -0.01
  36   6    -0.01   0.00  -0.01     0.02  -0.02   0.00    -0.01  -0.01   0.00
  37   6    -0.01   0.00   0.00     0.01  -0.01   0.00    -0.02   0.00   0.00
  38   6     0.00  -0.01  -0.01     0.01  -0.01   0.00     0.00  -0.01  -0.01
  39   6     0.00   0.00   0.01     0.00  -0.01   0.00    -0.01   0.00   0.01
  40   6     0.02  -0.02   0.00     0.00   0.01   0.00     0.00  -0.01   0.01
  41   6    -0.02   0.00   0.01     0.01   0.01   0.00    -0.02   0.01   0.00
  42   6    -0.01   0.01  -0.01     0.00   0.00   0.00     0.00   0.01  -0.01
  43   6    -0.01   0.01   0.00     0.00   0.00   0.00    -0.01   0.00   0.02
  44   6     0.02  -0.01   0.02    -0.01   0.01  -0.01     0.02  -0.01   0.02
  45   6     0.01   0.01   0.01    -0.01  -0.02   0.01     0.02   0.02   0.01
  46   6     0.01   0.00  -0.01     0.00  -0.03  -0.02     0.00  -0.01  -0.01
  47   6     0.01   0.01   0.00     0.01   0.00   0.00     0.01   0.00   0.00
  48   6    -0.02   0.01   0.03     0.02   0.02  -0.03     0.00   0.03  -0.01
  49   6    -0.01   0.03   0.01     0.01   0.05  -0.04     0.00   0.05  -0.01
  50   1     0.00   0.01   0.00     0.01  -0.01   0.05     0.00  -0.01   0.02
  51   1    -0.01  -0.01   0.01     0.01  -0.01  -0.01     0.03   0.01  -0.01
  52   1    -0.01  -0.02   0.01     0.00   0.00   0.00     0.00   0.01  -0.01
  53   1     0.06   0.00   0.06     0.00  -0.01   0.01    -0.03   0.01  -0.06
  54   1     0.05   0.03   0.04     0.00   0.01   0.00    -0.02  -0.03  -0.03
  55   1     0.05   0.10   0.02    -0.01   0.01   0.01    -0.02  -0.06  -0.03
  56   1     0.00   0.01  -0.01     0.00  -0.02  -0.01     0.00   0.04   0.02
  57   1     0.00   0.00   0.00     0.02   0.00  -0.01    -0.04   0.01   0.02
  58   1     0.00   0.00   0.00    -0.01  -0.01   0.01    -0.01  -0.01  -0.01
  59   1    -0.01   0.00   0.00     0.00   0.02   0.00     0.00  -0.01   0.01
  60   1     0.00   0.00   0.01     0.00  -0.01  -0.03     0.01  -0.02   0.02
  61   1    -0.01   0.00   0.00     0.03  -0.02  -0.01     0.00  -0.01   0.01
  62   1     0.02  -0.01  -0.02     0.00   0.01   0.01     0.03   0.00  -0.01
  63   1     0.02  -0.02   0.00     0.00   0.02   0.00     0.02  -0.03   0.00
  64   1     0.03  -0.20   0.20     0.02  -0.05   0.04     0.00   0.28  -0.26
  65   1     0.22   0.08  -0.15     0.05   0.00  -0.04    -0.26  -0.14   0.19
  66   1    -0.25   0.10  -0.05    -0.04   0.01  -0.01     0.39  -0.16   0.06
  67   1     0.08  -0.04   0.09     0.00  -0.02  -0.04    -0.05   0.05  -0.01
  68   1     0.04  -0.03   0.04     0.02  -0.05   0.03    -0.05   0.08  -0.07
  69   1    -0.02  -0.09   0.08     0.00   0.03   0.03     0.02   0.04  -0.08
  70   1     0.02   0.01   0.00    -0.01   0.00   0.00     0.01  -0.01  -0.01
  71   1     0.02  -0.01  -0.01    -0.01   0.00  -0.01     0.01  -0.03  -0.02
  72   1     0.01  -0.02  -0.02     0.00   0.00   0.00     0.01  -0.01  -0.01
  73   1     0.01  -0.04   0.01     0.00   0.02   0.00     0.01  -0.02   0.02
  74   1     0.01   0.02  -0.02     0.00   0.00   0.01     0.01   0.02  -0.01
  75   1     0.00  -0.03  -0.01    -0.04   0.04   0.01     0.01  -0.04  -0.01
  76   1    -0.01  -0.01  -0.02    -0.02   0.01   0.01     0.01  -0.03  -0.02
  77   1    -0.01   0.00  -0.01     0.04  -0.04  -0.01    -0.02  -0.01   0.00
  78   1     0.00  -0.01  -0.03     0.01  -0.01   0.00     0.00  -0.01  -0.03
  79   1     0.00  -0.01   0.01     0.00  -0.01   0.01     0.00  -0.01   0.01
  80   1     0.04  -0.01  -0.01    -0.01   0.00   0.01    -0.02  -0.02   0.01
  81   1     0.00   0.00  -0.01     0.01   0.00   0.01     0.01  -0.02   0.02
  82   1     0.02  -0.04   0.02     0.00   0.02   0.00     0.00   0.00   0.00
  83   1    -0.20   0.04   0.32     0.05   0.00  -0.08    -0.04   0.00   0.02
  84   1    -0.18   0.11  -0.29     0.05  -0.03   0.06    -0.03   0.03  -0.02
  85   1     0.29  -0.15   0.00    -0.06   0.04   0.00     0.00   0.01   0.00
  86   1    -0.06   0.00  -0.05     0.00   0.00   0.00    -0.03   0.00  -0.04
  87   1    -0.02  -0.01   0.05     0.00   0.00   0.00    -0.01  -0.01   0.03
  88   1     0.04   0.03  -0.03     0.00   0.00   0.00     0.03   0.03  -0.02
  89   1     0.02  -0.02  -0.01    -0.01   0.00   0.00     0.00  -0.03   0.00
  90   1    -0.05  -0.01   0.01     0.01   0.00   0.00    -0.03  -0.01   0.03
  91   1     0.00   0.05  -0.01     0.00  -0.01   0.01    -0.01   0.02   0.02
  92   1    -0.08   0.01  -0.02     0.11  -0.02   0.05    -0.19   0.04  -0.06
  93   1     0.05  -0.13   0.06    -0.04   0.15  -0.07     0.07  -0.24   0.11
  94   1     0.11   0.07   0.03    -0.12  -0.09  -0.02     0.20   0.15   0.02
  95   1    -0.07  -0.09  -0.11     0.07   0.08   0.14    -0.04  -0.07  -0.11
  96   1     0.16   0.11  -0.02    -0.15  -0.14   0.06     0.16   0.12  -0.03
  97   1    -0.05   0.00   0.19     0.05  -0.01  -0.16    -0.04   0.03   0.16
  98   1     0.03   0.02  -0.02    -0.22  -0.18   0.03     0.08   0.04  -0.03
  99   1    -0.01  -0.02  -0.03     0.10   0.12   0.16    -0.03  -0.05  -0.07
 100   1     0.00   0.00   0.02     0.10  -0.05  -0.27    -0.03   0.00   0.07
 101   1     0.02   0.19  -0.05     0.02   0.39  -0.10     0.02   0.20  -0.05
 102   1     0.09  -0.04   0.16     0.20  -0.13   0.34     0.10  -0.06   0.17
 103   1    -0.07  -0.11  -0.11    -0.18  -0.26  -0.23    -0.09  -0.13  -0.12
 104   1    -0.01   0.02   0.04     0.04  -0.03  -0.07     0.00   0.00  -0.03
 105   1    -0.03   0.01   0.02     0.03   0.07  -0.07    -0.01   0.05  -0.04
 106   1    -0.03   0.01   0.04     0.02   0.05   0.00    -0.01   0.05   0.02
 107   1    -0.02   0.02   0.03     0.02   0.04  -0.05    -0.01   0.04   0.00
 108   1     0.00   0.05   0.02    -0.04   0.11  -0.04    -0.02   0.08   0.00
 109   1     0.00   0.03  -0.01     0.04   0.05  -0.10     0.02   0.05  -0.04
                    49                     50                     51
                     A                      A                      A
 Frequencies --   230.1127               237.3965               240.7739
 Red. masses --     1.2445                 1.2808                 3.2097
 Frc consts  --     0.0388                 0.0425                 0.1096
 IR Inten    --     0.7702                 1.0125                 3.0330
 Atom AN      X      Y      Z        X      Y      Z        X      Y      Z
   1   8    -0.04   0.02   0.04     0.00   0.00   0.00    -0.09   0.05   0.01
   2  12     0.01  -0.01   0.01     0.00  -0.02   0.00     0.03  -0.07   0.03
   3   8     0.02  -0.01   0.01     0.00   0.01   0.00     0.07   0.06   0.03
   4   6    -0.01   0.00   0.01     0.00   0.00   0.00    -0.06  -0.01  -0.03
   5   7     0.00   0.00   0.00     0.01  -0.01   0.00    -0.01  -0.03   0.00
   6   7     0.00   0.00   0.00    -0.01   0.00  -0.04     0.01  -0.01   0.00
   7   8    -0.02   0.00   0.03     0.00   0.00   0.00    -0.08  -0.02   0.00
   8   6     0.00   0.00   0.00    -0.01  -0.02  -0.01     0.01  -0.01  -0.02
   9   6     0.00   0.00   0.00    -0.01  -0.03   0.00     0.01   0.02  -0.04
  10   6     0.00   0.00   0.00    -0.02  -0.02  -0.01     0.02   0.00  -0.01
  11   8     0.02  -0.02  -0.02     0.00   0.00   0.00    -0.04  -0.11  -0.08
  12   6     0.02   0.00  -0.01     0.00   0.00   0.00     0.02  -0.02   0.00
  13   6     0.01  -0.01   0.00     0.00   0.01   0.00     0.06   0.03   0.04
  14   6     0.02  -0.01  -0.02     0.00   0.00   0.00    -0.05  -0.03  -0.07
  15   8     0.05   0.02   0.00     0.00   0.00   0.00     0.08  -0.04   0.02
  16   6     0.02  -0.01  -0.01     0.00   0.00   0.00     0.02   0.03  -0.03
  17   6     0.00  -0.01   0.00     0.00   0.00   0.00     0.00  -0.01   0.00
  18   6     0.00   0.00   0.00     0.00  -0.01  -0.01     0.00   0.00   0.00
  19   6    -0.01   0.00   0.00     0.00  -0.01   0.01    -0.01   0.01   0.01
  20   8    -0.01   0.00   0.00     0.01  -0.01   0.00    -0.01   0.00  -0.01
  21   6    -0.01   0.00   0.00     0.01   0.00   0.00    -0.02   0.00   0.00
  22   6    -0.01   0.00  -0.01     0.00   0.00   0.01     0.15  -0.04   0.09
  23   6     0.01   0.03  -0.04    -0.01   0.01   0.00    -0.06   0.12  -0.03
  24   6     0.00   0.00   0.00     0.01   0.00   0.00    -0.02   0.00   0.01
  25   6    -0.01   0.01   0.00    -0.02   0.01  -0.01     0.00   0.01   0.00
  26   6     0.00  -0.01  -0.01     0.02   0.00   0.01    -0.04   0.03   0.01
  27   6     0.00   0.00   0.00     0.01   0.00  -0.01    -0.04   0.03   0.00
  28   6     0.00   0.01   0.01     0.02  -0.01  -0.02    -0.04   0.00  -0.03
  29   6     0.00   0.01   0.00     0.02   0.00  -0.01    -0.02   0.01  -0.01
  30   6     0.00   0.00   0.00     0.02   0.01   0.00    -0.01   0.02   0.02
  31   6     0.00   0.00   0.00     0.01   0.00   0.01    -0.01   0.04  -0.01
  32   6     0.00   0.00   0.00     0.01   0.01   0.00     0.00   0.01   0.03
  33   6    -0.01   0.01   0.00    -0.01   0.03   0.01    -0.01   0.01   0.00
  34   6     0.00   0.00   0.00     0.01   0.01   0.02     0.00   0.00   0.00
  35   6     0.01  -0.01   0.00     0.02  -0.02   0.03     0.02  -0.01  -0.01
  36   6     0.00   0.00   0.00    -0.01  -0.02   0.01     0.01   0.00   0.00
  37   6    -0.01   0.00   0.00    -0.03   0.00  -0.01    -0.01   0.01   0.00
  38   6     0.00   0.00   0.00     0.00   0.03   0.01    -0.01   0.01   0.00
  39   6     0.00   0.00   0.00    -0.02   0.01   0.01    -0.01   0.01   0.00
  40   6    -0.01   0.01  -0.01     0.00  -0.02   0.02     0.03   0.02  -0.01
  41   6     0.01  -0.01   0.01    -0.01   0.01   0.00     0.02   0.03  -0.05
  42   6     0.00   0.00   0.00    -0.01   0.01  -0.01     0.01   0.01   0.02
  43   6     0.00   0.00   0.00    -0.01   0.00   0.01    -0.02  -0.04   0.06
  44   6     0.00   0.00   0.01     0.03   0.02   0.02    -0.02  -0.01   0.01
  45   6     0.00   0.01   0.00     0.01   0.04  -0.01    -0.01   0.01  -0.02
  46   6     0.00   0.00  -0.01     0.00   0.01  -0.03    -0.01   0.00  -0.02
  47   6     0.00   0.00   0.01     0.00   0.03   0.01     0.00   0.00   0.02
  48   6     0.00   0.00   0.00    -0.03   0.00  -0.01     0.04  -0.04   0.00
  49   6     0.00   0.00   0.01    -0.02  -0.03   0.01     0.02  -0.01   0.03
  50   1     0.00   0.00   0.00    -0.01  -0.03   0.01     0.02   0.02  -0.04
  51   1     0.01  -0.01  -0.01     0.01   0.00   0.00     0.08   0.01   0.03
  52   1     0.01  -0.03  -0.01     0.00   0.00   0.00    -0.10  -0.02  -0.09
  53   1     0.03   0.03  -0.05     0.00   0.00   0.00     0.05   0.06  -0.06
  54   1     0.04  -0.08   0.01     0.00   0.00   0.00     0.05  -0.07   0.01
  55   1     0.05  -0.02  -0.04     0.00   0.00   0.00     0.06   0.06  -0.07
  56   1     0.00  -0.02  -0.01     0.00   0.01   0.01     0.00  -0.03  -0.01
  57   1     0.01  -0.01  -0.01    -0.02   0.01   0.00     0.02  -0.01  -0.01
  58   1     0.01   0.00   0.00     0.00  -0.01  -0.02     0.02   0.01   0.00
  59   1     0.00   0.00   0.00     0.01  -0.02  -0.01     0.00  -0.01   0.00
  60   1     0.00   0.01   0.01     0.01  -0.01   0.01     0.00   0.02   0.03
  61   1    -0.01   0.00   0.00    -0.01  -0.01   0.01    -0.04   0.02   0.02
  62   1    -0.01  -0.01   0.00     0.01   0.00   0.00    -0.03   0.00   0.01
  63   1    -0.01   0.00   0.00     0.00   0.00   0.00    -0.02   0.01  -0.01
  64   1    -0.01  -0.07   0.03     0.00   0.02  -0.01     0.21  -0.13   0.28
  65   1     0.05   0.04  -0.04    -0.02  -0.01   0.02     0.29  -0.10  -0.06
  66   1    -0.10   0.03  -0.03     0.03  -0.01   0.01     0.04   0.02   0.11
  67   1     0.15   0.11   0.47    -0.03   0.00  -0.05    -0.27   0.12  -0.19
  68   1    -0.20   0.46  -0.32     0.01  -0.03   0.02     0.12   0.00   0.06
  69   1     0.03  -0.44  -0.27     0.00   0.05   0.01    -0.04   0.40   0.07
  70   1     0.00   0.00   0.00     0.01  -0.01  -0.01    -0.04   0.04   0.01
  71   1     0.00   0.04   0.03     0.01  -0.02  -0.03    -0.04  -0.01  -0.05
  72   1     0.00   0.01   0.01     0.02  -0.01  -0.01     0.00   0.00  -0.03
  73   1     0.00   0.00   0.00     0.01  -0.01   0.02    -0.02   0.06  -0.03
  74   1     0.00   0.00   0.00     0.01   0.02  -0.02     0.00   0.00   0.04
  75   1     0.00   0.00   0.00     0.03   0.01   0.03     0.00   0.00  -0.01
  76   1     0.01  -0.01   0.00     0.04  -0.05   0.04     0.04  -0.03  -0.01
  77   1     0.00  -0.01   0.00    -0.02  -0.04   0.01     0.01   0.00   0.00
  78   1     0.00   0.00   0.00     0.00   0.03   0.03    -0.01   0.00   0.00
  79   1     0.00   0.00   0.00    -0.02   0.00   0.03    -0.01   0.01   0.00
  80   1    -0.04   0.00   0.01     0.00  -0.02   0.01     0.09   0.03  -0.05
  81   1     0.01  -0.01  -0.01     0.00  -0.02   0.03     0.01   0.04  -0.03
  82   1    -0.01   0.04  -0.02     0.00  -0.02   0.02     0.05  -0.02   0.04
  83   1     0.06  -0.01  -0.06    -0.03   0.00   0.03    -0.02   0.05   0.03
  84   1     0.05  -0.04   0.08    -0.02   0.02  -0.02    -0.04   0.02  -0.16
  85   1    -0.06   0.02   0.01     0.02   0.00   0.00     0.14   0.01  -0.06
  86   1     0.01   0.00   0.01    -0.06   0.00  -0.06     0.05   0.01   0.05
  87   1     0.00   0.00  -0.02    -0.02  -0.01   0.05     0.02   0.03  -0.03
  88   1    -0.02   0.00   0.00     0.05   0.04  -0.04    -0.03   0.00   0.03
  89   1     0.01  -0.01   0.00     0.00  -0.02   0.00    -0.04  -0.07   0.03
  90   1    -0.01   0.00   0.00    -0.04  -0.01   0.02     0.00  -0.04   0.11
  91   1     0.00   0.01   0.00    -0.01   0.03   0.01    -0.02  -0.07   0.09
  92   1     0.00   0.00   0.00     0.03   0.03   0.03     0.01  -0.03   0.00
  93   1     0.00  -0.01   0.01     0.06  -0.01  -0.01    -0.03   0.01   0.01
  94   1     0.00   0.00   0.01     0.06   0.04   0.04    -0.04  -0.03   0.02
  95   1    -0.01  -0.01  -0.03    -0.04  -0.06  -0.13     0.00   0.00  -0.02
  96   1     0.02   0.03  -0.01     0.14   0.15  -0.06    -0.01   0.02  -0.02
  97   1    -0.01   0.01   0.02    -0.04   0.05   0.13    -0.01   0.02  -0.02
  98   1    -0.05  -0.05   0.00    -0.40  -0.27   0.07     0.02  -0.01  -0.03
  99   1     0.02   0.03   0.03     0.18   0.30   0.30    -0.02   0.00  -0.05
 100   1     0.02  -0.01  -0.08     0.20  -0.04  -0.47    -0.02   0.01  -0.02
 101   1     0.01   0.06  -0.01     0.01  -0.13   0.05     0.02   0.08  -0.01
 102   1     0.03  -0.02   0.06    -0.08   0.08  -0.12     0.04  -0.03   0.09
 103   1    -0.03  -0.04  -0.02     0.08   0.14   0.11    -0.05  -0.05  -0.02
 104   1    -0.01   0.00   0.01    -0.03  -0.01  -0.02     0.02  -0.01   0.01
 105   1    -0.01  -0.01   0.01    -0.05   0.00  -0.04     0.06  -0.07   0.05
 106   1     0.00   0.00   0.00    -0.04   0.01   0.00     0.06  -0.08  -0.05
 107   1    -0.01  -0.01   0.02    -0.02  -0.03   0.01     0.00  -0.03   0.06
 108   1     0.01   0.01   0.01    -0.01  -0.04   0.01     0.06   0.00   0.04
 109   1    -0.01   0.00   0.00    -0.03  -0.03   0.02     0.01  -0.01   0.01
                    52                     53                     54
                     A                      A                      A
 Frequencies --   245.2438               246.7578               254.4480
 Red. masses --     2.4308                 2.8528                 1.5185
 Frc consts  --     0.0861                 0.1023                 0.0579
 IR Inten    --     1.6455                 4.0609                 0.2439
 Atom AN      X      Y      Z        X      Y      Z        X      Y      Z
   1   8     0.00   0.00   0.02    -0.05   0.03  -0.02    -0.01   0.00   0.00
   2  12    -0.06  -0.01  -0.02     0.00   0.10   0.02     0.00   0.01   0.00
   3   8     0.00   0.00  -0.01     0.02  -0.01   0.03     0.01   0.00   0.00
   4   6     0.01   0.00   0.01    -0.04  -0.01  -0.03     0.00   0.00   0.00
   5   7    -0.01  -0.03   0.02     0.01   0.05   0.00     0.00  -0.03   0.05
   6   7    -0.03   0.03  -0.01    -0.03   0.03  -0.02    -0.01   0.02  -0.01
   7   8     0.01   0.01   0.01    -0.05  -0.01  -0.01     0.00   0.00   0.00
   8   6     0.01  -0.02   0.01     0.00   0.03   0.03    -0.01  -0.01   0.01
   9   6     0.01  -0.01   0.04    -0.01  -0.01   0.04    -0.01   0.01  -0.01
  10   6    -0.01   0.03   0.01    -0.02   0.02   0.01    -0.02   0.01  -0.01
  11   8     0.01   0.00   0.00    -0.01  -0.05  -0.05     0.00  -0.02  -0.01
  12   6     0.01   0.00  -0.01     0.01  -0.03   0.01     0.00   0.00  -0.01
  13   6     0.00   0.00  -0.01     0.02  -0.01   0.03     0.00   0.00   0.00
  14   6     0.01   0.00   0.00    -0.02  -0.02  -0.04     0.00   0.00  -0.01
  15   8     0.00   0.00  -0.01     0.06  -0.03   0.02     0.00   0.00  -0.01
  16   6    -0.01  -0.01  -0.01     0.02   0.03  -0.01     0.00   0.00   0.00
  17   6     0.00   0.01   0.00     0.00  -0.01   0.00    -0.01   0.00   0.00
  18   6     0.00  -0.01   0.00     0.00  -0.01   0.00    -0.01  -0.01   0.00
  19   6     0.00  -0.01   0.00     0.00  -0.01   0.00    -0.01   0.00   0.01
  20   8     0.00   0.00   0.01     0.00  -0.01   0.00    -0.01   0.00   0.00
  21   6     0.01   0.00   0.00     0.00  -0.01   0.00     0.00  -0.01  -0.01
  22   6    -0.01   0.00  -0.01     0.06  -0.01   0.03     0.02  -0.01   0.00
  23   6     0.01   0.01   0.00    -0.01   0.03   0.01     0.00   0.00   0.00
  24   6    -0.01   0.00   0.02     0.02   0.00  -0.02     0.00  -0.02   0.02
  25   6    -0.01  -0.01  -0.01    -0.02  -0.01  -0.02     0.00   0.01   0.00
  26   6    -0.03   0.04   0.03     0.04  -0.05  -0.04    -0.04  -0.02   0.00
  27   6    -0.05   0.02  -0.02     0.06  -0.02   0.03    -0.03   0.04  -0.01
  28   6    -0.03  -0.03  -0.07     0.05   0.04   0.10     0.01   0.09  -0.01
  29   6     0.00   0.00  -0.04     0.01   0.01   0.05     0.05   0.04  -0.02
  30   6     0.01   0.02   0.02     0.00  -0.02  -0.02     0.05  -0.01  -0.01
  31   6    -0.01   0.05   0.02     0.01  -0.06  -0.03    -0.02  -0.02   0.00
  32   6     0.01   0.02   0.03    -0.01  -0.02  -0.03     0.03  -0.01  -0.02
  33   6     0.03  -0.04  -0.03     0.01  -0.02  -0.02     0.01   0.01   0.00
  34   6    -0.01  -0.02  -0.01     0.00  -0.02   0.00     0.01   0.01   0.01
  35   6    -0.09   0.03   0.01    -0.06   0.00   0.01     0.00   0.01   0.01
  36   6    -0.05   0.00   0.00    -0.05  -0.01   0.00     0.01   0.01   0.00
  37   6     0.01  -0.05  -0.01    -0.01  -0.04  -0.01     0.01   0.00   0.00
  38   6     0.04  -0.02  -0.04     0.02  -0.01  -0.03     0.01   0.00   0.01
  39   6     0.03  -0.06   0.01     0.01  -0.04   0.02     0.00   0.00  -0.01
  40   6     0.06  -0.01   0.03    -0.07   0.03  -0.04     0.00  -0.01  -0.01
  41   6     0.02   0.05  -0.03    -0.02  -0.06   0.04     0.06  -0.06   0.03
  42   6     0.00   0.02   0.01     0.00  -0.02  -0.01    -0.04  -0.03   0.02
  43   6    -0.02  -0.03   0.07     0.02   0.03  -0.07     0.01   0.02  -0.03
  44   6     0.05   0.00  -0.01     0.04   0.00   0.01     0.00   0.00  -0.01
  45   6     0.00  -0.08   0.11     0.00  -0.05   0.09     0.00   0.00   0.00
  46   6     0.05   0.01   0.02     0.03   0.01  -0.01    -0.01  -0.01   0.02
  47   6     0.01   0.02  -0.11     0.00   0.02  -0.08     0.00  -0.02   0.00
  48   6     0.06  -0.01  -0.05    -0.03   0.05   0.02    -0.03   0.01   0.01
  49   6     0.01   0.09   0.02    -0.01   0.06   0.00    -0.02   0.00   0.01
  50   1     0.03   0.00   0.03    -0.01  -0.02   0.05    -0.01   0.02  -0.02
  51   1     0.00   0.00  -0.01     0.02   0.00   0.05     0.00   0.00   0.00
  52   1     0.01   0.00   0.00    -0.04  -0.01  -0.05    -0.01   0.00  -0.01
  53   1    -0.01   0.01  -0.02     0.04   0.03  -0.01     0.00   0.00   0.00
  54   1    -0.01  -0.02  -0.01     0.04  -0.02   0.01     0.00   0.00   0.00
  55   1     0.00  -0.03  -0.01     0.04   0.07  -0.03     0.00   0.00   0.00
  56   1     0.00   0.02   0.00     0.00  -0.01   0.00     0.00   0.01   0.00
  57   1    -0.01   0.01   0.00     0.00  -0.02   0.01    -0.01   0.00   0.00
  58   1    -0.01  -0.01  -0.01     0.00  -0.01   0.01     0.00   0.00  -0.02
  59   1     0.00  -0.01   0.00     0.00  -0.01   0.00    -0.01  -0.02  -0.01
  60   1     0.00   0.00   0.00     0.00  -0.01   0.00    -0.01   0.00   0.01
  61   1     0.01  -0.01   0.01     0.00  -0.01   0.00    -0.01   0.00   0.01
  62   1     0.02   0.01  -0.01     0.00  -0.01   0.00     0.01  -0.01  -0.02
  63   1     0.02   0.00   0.01     0.00  -0.02   0.00     0.01  -0.01   0.01
  64   1    -0.02  -0.01  -0.02     0.08   0.00   0.07     0.02  -0.01   0.02
  65   1    -0.02   0.00   0.00     0.09  -0.02  -0.01     0.03  -0.02  -0.01
  66   1    -0.01   0.00   0.00     0.05  -0.01   0.01     0.01  -0.01   0.01
  67   1     0.05   0.03   0.11    -0.08   0.02  -0.07    -0.02   0.00  -0.03
  68   1    -0.03   0.11  -0.07     0.09  -0.04   0.06     0.01  -0.02   0.01
  69   1     0.02  -0.10  -0.06    -0.03   0.15   0.08     0.00   0.03   0.01
  70   1    -0.06   0.02  -0.03     0.08  -0.02   0.04    -0.07   0.05  -0.02
  71   1    -0.04  -0.06  -0.13     0.06   0.08   0.17     0.01   0.14  -0.02
  72   1     0.02  -0.01  -0.06    -0.02   0.01   0.08     0.07   0.05  -0.03
  73   1    -0.02   0.07  -0.01     0.03  -0.09   0.01    -0.02   0.02  -0.02
  74   1     0.01   0.02   0.02    -0.01  -0.03  -0.02     0.04   0.02  -0.06
  75   1     0.00  -0.02   0.00     0.01  -0.02   0.01     0.00   0.01   0.01
  76   1    -0.15   0.08   0.03    -0.10   0.03   0.03    -0.01   0.02   0.01
  77   1    -0.07   0.02   0.00    -0.06   0.00   0.00     0.00   0.00   0.00
  78   1     0.03  -0.01  -0.05     0.02   0.00  -0.04     0.00   0.00   0.02
  79   1     0.02  -0.06   0.04     0.00  -0.05   0.05     0.00   0.01  -0.01
  80   1     0.15  -0.02  -0.05    -0.23   0.02   0.08     0.10   0.02  -0.04
  81   1     0.01   0.02   0.03     0.01  -0.04  -0.04    -0.06   0.04  -0.02
  82   1     0.07  -0.10   0.12    -0.09   0.18  -0.17     0.00  -0.11   0.04
  83   1    -0.05   0.06   0.08     0.07  -0.08  -0.12     0.16  -0.01  -0.03
  84   1    -0.06   0.05  -0.18     0.09  -0.07   0.24     0.11  -0.13   0.12
  85   1     0.18   0.02  -0.05    -0.23  -0.02   0.06    -0.01  -0.06   0.04
  86   1    -0.06   0.00  -0.06     0.07   0.00   0.06    -0.43  -0.06  -0.30
  87   1    -0.02   0.00   0.09     0.02  -0.01  -0.11    -0.15  -0.12   0.52
  88   1     0.07   0.06  -0.02    -0.09  -0.06   0.02     0.40   0.07  -0.10
  89   1    -0.06  -0.06   0.02     0.07   0.06  -0.02     0.00   0.03  -0.03
  90   1    -0.01  -0.03   0.11     0.01   0.03  -0.11     0.00   0.02  -0.06
  91   1    -0.03  -0.06   0.11     0.03   0.07  -0.12     0.00   0.03  -0.02
  92   1     0.15   0.01   0.06     0.14   0.00   0.07     0.02   0.00   0.00
  93   1     0.05   0.10  -0.09     0.05   0.09  -0.07    -0.01   0.02  -0.01
  94   1    -0.02  -0.06  -0.02    -0.02  -0.05   0.02    -0.01  -0.01  -0.01
  95   1    -0.05   0.00   0.16    -0.03   0.00   0.11     0.00   0.00   0.00
  96   1    -0.01  -0.17   0.16     0.02  -0.10   0.12    -0.01  -0.01   0.00
  97   1     0.00  -0.09   0.10    -0.01  -0.04   0.10     0.00  -0.01  -0.01
  98   1     0.01   0.05   0.02    -0.03   0.00   0.00     0.03   0.02   0.01
  99   1     0.07   0.03   0.05     0.06   0.06   0.04    -0.02  -0.05  -0.01
 100   1     0.09  -0.01   0.03     0.08  -0.01  -0.06    -0.04   0.00   0.07
 101   1    -0.05  -0.21  -0.04    -0.04  -0.14  -0.03    -0.01   0.00   0.00
 102   1    -0.13   0.11  -0.33    -0.10   0.08  -0.23     0.02  -0.03   0.01
 103   1     0.17   0.18  -0.02     0.12   0.13  -0.02    -0.02  -0.04  -0.01
 104   1     0.05  -0.05  -0.09    -0.01   0.03   0.02    -0.02   0.00   0.01
 105   1     0.09   0.03  -0.05    -0.06   0.07  -0.03    -0.04   0.01  -0.01
 106   1     0.07   0.00  -0.05    -0.06   0.08   0.07    -0.04   0.02   0.03
 107   1     0.01   0.22  -0.07     0.00   0.15  -0.06    -0.02  -0.01   0.02
 108   1    -0.05  -0.01  -0.03    -0.06  -0.02  -0.03     0.00   0.00   0.01
 109   1     0.09   0.11   0.15     0.04   0.07   0.10    -0.03   0.00   0.00
                    55                     56                     57
                     A                      A                      A
 Frequencies --   262.5789               263.1802               271.9265
 Red. masses --     3.0550                 2.2040                 2.6445
 Frc consts  --     0.1241                 0.0899                 0.1152
 IR Inten    --     8.8502                 3.2872                 3.2625
 Atom AN      X      Y      Z        X      Y      Z        X      Y      Z
   1   8    -0.03   0.02   0.01     0.01   0.00  -0.01    -0.01   0.00   0.00
   2  12    -0.10   0.00  -0.02     0.02   0.03   0.00     0.00  -0.03   0.00
   3   8     0.01   0.01   0.02    -0.01  -0.02   0.00     0.00   0.00   0.01
   4   6    -0.01   0.00  -0.01     0.00   0.00   0.00    -0.01   0.00   0.00
   5   7     0.00   0.01  -0.08     0.00   0.03  -0.01     0.00  -0.01  -0.03
   6   7    -0.03   0.02   0.03     0.01  -0.01   0.00     0.00   0.07  -0.11
   7   8    -0.02   0.00   0.01     0.00   0.01  -0.01    -0.01   0.00   0.00
   8   6    -0.03  -0.03  -0.04     0.01   0.02   0.00    -0.02  -0.03  -0.01
   9   6    -0.03  -0.03   0.03     0.01   0.00   0.00    -0.02  -0.04   0.04
  10   6    -0.06   0.01   0.03     0.02  -0.01   0.00    -0.02   0.01  -0.02
  11   8     0.01  -0.03  -0.03     0.00   0.01   0.01     0.00   0.00   0.00
  12   6     0.02   0.00   0.01    -0.01  -0.01   0.01     0.00   0.00   0.01
  13   6     0.01   0.01   0.02    -0.01  -0.01   0.00     0.00   0.00   0.02
  14   6     0.01  -0.01  -0.03     0.00   0.01   0.01     0.00   0.00   0.00
  15   8     0.05   0.00   0.01     0.00   0.01   0.01     0.02   0.01   0.02
  16   6     0.00   0.00  -0.01     0.00   0.00   0.00     0.01   0.00   0.00
  17   6     0.00   0.00  -0.01    -0.01   0.00   0.00     0.00   0.00   0.00
  18   6     0.00  -0.01  -0.01    -0.01  -0.01   0.00    -0.01   0.01   0.01
  19   6     0.01  -0.02  -0.01    -0.01   0.00   0.01    -0.01   0.01   0.01
  20   8    -0.01   0.00   0.02    -0.01   0.00   0.00     0.00   0.00  -0.01
  21   6     0.00   0.00   0.00     0.00  -0.01  -0.01     0.00   0.00  -0.01
  22   6     0.01   0.01   0.02    -0.02   0.01  -0.02    -0.02   0.02   0.01
  23   6     0.01   0.03   0.00     0.01  -0.02   0.01     0.00   0.01   0.00
  24   6     0.02   0.01  -0.02     0.00   0.01  -0.01     0.00   0.00  -0.01
  25   6     0.01   0.00   0.01     0.00  -0.01   0.00     0.02   0.04  -0.04
  26   6     0.07   0.00   0.00     0.00   0.01  -0.03     0.02   0.00   0.00
  27   6     0.07  -0.03   0.02     0.01   0.01   0.02     0.02  -0.02   0.01
  28   6     0.04  -0.07   0.02    -0.02  -0.01   0.03     0.01  -0.04   0.00
  29   6     0.00  -0.03   0.02    -0.03  -0.04   0.01    -0.01  -0.02   0.01
  30   6     0.00   0.02   0.01    -0.02  -0.02   0.01    -0.01   0.01   0.00
  31   6     0.04  -0.01   0.01     0.01   0.03  -0.06     0.02   0.00   0.01
  32   6     0.01   0.02   0.01     0.01  -0.05   0.05     0.00   0.01   0.00
  33   6     0.02  -0.02   0.02    -0.01   0.00  -0.01     0.07   0.09   0.02
  34   6    -0.02   0.03  -0.01     0.00  -0.01   0.00     0.07   0.06   0.10
  35   6    -0.01   0.06  -0.02     0.00  -0.02   0.00     0.01   0.00   0.14
  36   6     0.05   0.02  -0.03    -0.01  -0.01   0.00    -0.04  -0.04   0.07
  37   6     0.06   0.01  -0.02    -0.02   0.00   0.00    -0.03  -0.02  -0.01
  38   6     0.02  -0.04   0.05    -0.01   0.01  -0.01     0.03   0.04   0.02
  39   6     0.03   0.01  -0.06    -0.01   0.00   0.01    -0.01  -0.01   0.00
  40   6    -0.02   0.00   0.02    -0.01   0.13  -0.10     0.00  -0.01   0.02
  41   6    -0.06   0.04  -0.01    -0.03   0.05  -0.11    -0.02   0.02   0.00
  42   6     0.06   0.03  -0.02     0.03  -0.05   0.13     0.03   0.02  -0.03
  43   6     0.02  -0.01   0.02     0.04  -0.09   0.07     0.01   0.01   0.00
  44   6    -0.03   0.05  -0.10     0.01  -0.01   0.02     0.07   0.05  -0.01
  45   6     0.00  -0.02  -0.07     0.00   0.01   0.01     0.01   0.02   0.02
  46   6    -0.01  -0.01   0.18     0.00   0.01  -0.04    -0.05  -0.06  -0.08
  47   6     0.03  -0.04   0.08     0.00   0.02  -0.01    -0.06  -0.08  -0.08
  48   6    -0.03  -0.03  -0.04     0.02   0.01   0.01     0.00  -0.02  -0.05
  49   6    -0.07   0.01  -0.02     0.01  -0.02  -0.01    -0.03  -0.03  -0.03
  50   1     0.00  -0.02   0.04    -0.01  -0.01   0.01    -0.01  -0.06   0.08
  51   1     0.02   0.00   0.02    -0.01  -0.01   0.01     0.00   0.00   0.02
  52   1    -0.01  -0.01  -0.03     0.01   0.00   0.01     0.00  -0.01   0.00
  53   1     0.01   0.02  -0.03     0.00   0.00   0.01     0.01   0.00   0.00
  54   1     0.01  -0.03   0.00     0.00   0.01   0.00     0.01  -0.01   0.01
  55   1     0.02   0.00  -0.02     0.00   0.01   0.01     0.01   0.01   0.00
  56   1     0.00   0.00   0.00     0.00   0.01   0.00    -0.01  -0.01  -0.01
  57   1    -0.01   0.01  -0.02    -0.02   0.00   0.00     0.01  -0.01   0.00
  58   1    -0.01  -0.02  -0.02     0.00   0.00  -0.01    -0.01   0.01   0.02
  59   1     0.01  -0.01  -0.01    -0.01  -0.02   0.00    -0.02   0.01   0.00
  60   1    -0.01  -0.01  -0.04    -0.01   0.00   0.02     0.00   0.00   0.02
  61   1     0.03  -0.03  -0.01    -0.02   0.01   0.01    -0.02   0.02   0.01
  62   1     0.01   0.01   0.00     0.01  -0.01  -0.02    -0.01   0.00   0.00
  63   1     0.01   0.01   0.01     0.01  -0.01   0.00    -0.01   0.00  -0.01
  64   1     0.00   0.00   0.03    -0.03   0.03  -0.05    -0.02   0.01  -0.01
  65   1     0.02   0.02   0.02    -0.04   0.02   0.01    -0.02   0.03   0.02
  66   1    -0.01   0.02   0.02     0.00  -0.01  -0.03    -0.02   0.02   0.00
  67   1    -0.02   0.04   0.03     0.03  -0.02   0.01    -0.02   0.01  -0.01
  68   1     0.06   0.05   0.00    -0.01  -0.02   0.01     0.01   0.00   0.01
  69   1     0.01   0.04   0.02     0.00  -0.04   0.01     0.00   0.03   0.01
  70   1     0.10  -0.04   0.03     0.04   0.01   0.04     0.04  -0.02   0.01
  71   1     0.04  -0.12   0.02    -0.01  -0.02   0.04     0.01  -0.06   0.00
  72   1    -0.03  -0.06   0.03    -0.03  -0.06   0.00    -0.02  -0.02   0.02
  73   1     0.05  -0.06   0.04     0.00   0.02  -0.06     0.02  -0.02   0.02
  74   1     0.01   0.00   0.02     0.00  -0.06   0.07     0.00   0.00   0.01
  75   1    -0.06   0.03  -0.03     0.01  -0.01   0.00     0.12   0.09   0.15
  76   1    -0.05   0.10  -0.03     0.02  -0.03   0.00     0.00  -0.02   0.21
  77   1     0.07   0.01  -0.03    -0.02  -0.01   0.00    -0.08  -0.09   0.09
  78   1     0.01  -0.03   0.05    -0.01   0.01  -0.02     0.02   0.03   0.12
  79   1     0.04   0.03  -0.09    -0.01  -0.01   0.02    -0.03  -0.02   0.06
  80   1    -0.18  -0.05   0.08    -0.21   0.12   0.04    -0.05  -0.03   0.03
  81   1     0.08  -0.09   0.06     0.14   0.02  -0.16     0.03  -0.03   0.04
  82   1    -0.03   0.14  -0.07     0.00   0.37  -0.20     0.00   0.03  -0.01
  83   1    -0.14  -0.02   0.01    -0.07   0.01  -0.11    -0.05   0.00   0.01
  84   1    -0.08   0.11  -0.04    -0.05   0.07  -0.14    -0.03   0.05  -0.02
  85   1    -0.05   0.05  -0.02    -0.01   0.10  -0.12    -0.01   0.03  -0.01
  86   1    -0.09  -0.05  -0.20    -0.19  -0.06  -0.05     0.00  -0.02  -0.08
  87   1     0.01   0.05   0.21    -0.04  -0.04   0.47     0.02   0.03   0.03
  88   1     0.29   0.11  -0.10     0.34  -0.06   0.07     0.09   0.06  -0.06
  89   1    -0.04   0.02   0.01     0.00  -0.09   0.04    -0.02   0.02   0.00
  90   1     0.10   0.02   0.02     0.12  -0.07   0.11     0.04   0.02   0.00
  91   1     0.02  -0.09   0.05     0.04  -0.19   0.07     0.01  -0.03   0.01
  92   1    -0.05   0.08  -0.08     0.00  -0.01   0.02     0.18   0.07   0.09
  93   1    -0.07   0.11  -0.08     0.02  -0.03   0.02     0.09   0.13  -0.12
  94   1    -0.05   0.02  -0.19     0.02   0.01   0.04     0.01   0.01   0.01
  95   1     0.00  -0.01  -0.07     0.01   0.00   0.00     0.00  -0.02  -0.03
  96   1    -0.05  -0.02  -0.08     0.02   0.03   0.00     0.09   0.05   0.01
  97   1     0.03  -0.06  -0.10    -0.01   0.03   0.02    -0.02   0.05   0.08
  98   1    -0.09   0.09   0.18    -0.01  -0.03  -0.03     0.21  -0.03  -0.12
  99   1     0.04  -0.06   0.26     0.01   0.05  -0.03    -0.18  -0.26  -0.30
 100   1     0.00  -0.02   0.23     0.03   0.00  -0.08    -0.26   0.03   0.08
 101   1     0.07  -0.09   0.09     0.00   0.01  -0.01    -0.19   0.03  -0.08
 102   1     0.02  -0.04   0.06    -0.01   0.02  -0.01     0.08  -0.18  -0.07
 103   1     0.03  -0.02   0.14     0.01   0.02  -0.01    -0.15  -0.21  -0.19
 104   1    -0.03  -0.03  -0.05     0.00   0.02   0.01    -0.01  -0.05  -0.08
 105   1    -0.02  -0.03  -0.04     0.03  -0.01   0.04     0.01   0.01  -0.07
 106   1    -0.02  -0.03  -0.05     0.03   0.00  -0.02     0.00   0.00  -0.04
 107   1    -0.04  -0.03  -0.03     0.02  -0.02  -0.01    -0.02  -0.08  -0.01
 108   1    -0.10   0.06  -0.02     0.01  -0.02  -0.01    -0.03   0.01  -0.02
 109   1    -0.07   0.01  -0.08     0.01  -0.02  -0.01    -0.07  -0.04  -0.09
                    58                     59                     60
                     A                      A                      A
 Frequencies --   276.1010               291.4733               292.8587
 Red. masses --     2.4578                 4.0723                 2.8479
 Frc consts  --     0.1104                 0.2038                 0.1439
 IR Inten    --     7.2230                21.7720                 6.9208
 Atom AN      X      Y      Z        X      Y      Z        X      Y      Z
   1   8     0.00   0.01  -0.01    -0.03   0.02  -0.02     0.00   0.00   0.00
   2  12     0.00   0.08  -0.01    -0.05   0.22  -0.07     0.08   0.01   0.02
   3   8    -0.01  -0.02   0.01    -0.01  -0.04   0.03     0.00  -0.01   0.00
   4   6     0.00   0.00  -0.01    -0.02   0.01  -0.03     0.00   0.00   0.00
   5   7     0.02  -0.03   0.05    -0.01   0.01  -0.07    -0.02   0.05  -0.01
   6   7    -0.02   0.01  -0.06     0.04  -0.04   0.01     0.01  -0.03  -0.03
   7   8    -0.01   0.01  -0.01    -0.04   0.03  -0.03     0.00   0.00   0.00
   8   6     0.02  -0.01   0.02     0.02  -0.01  -0.03     0.04   0.06   0.02
   9   6     0.01  -0.02  -0.01     0.01  -0.01   0.00     0.05   0.02   0.00
  10   6     0.00   0.00  -0.02     0.03  -0.04   0.00     0.07  -0.01  -0.02
  11   8     0.00   0.00   0.00     0.00  -0.04   0.00     0.00   0.01   0.01
  12   6     0.00  -0.02   0.02     0.00  -0.06   0.07     0.00   0.00  -0.01
  13   6    -0.01  -0.02   0.02     0.00  -0.05   0.07     0.00   0.00  -0.01
  14   6     0.00   0.00   0.00     0.01  -0.01  -0.02     0.00   0.00   0.01
  15   8     0.01  -0.01   0.02     0.08  -0.02   0.09    -0.01  -0.01  -0.01
  16   6     0.00   0.01   0.00     0.02   0.03   0.00     0.00   0.00   0.00
  17   6     0.01  -0.01   0.00    -0.01  -0.01   0.00     0.00  -0.01   0.00
  18   6     0.01   0.00   0.00    -0.01  -0.01   0.00     0.00   0.00  -0.01
  19   6     0.01  -0.01  -0.02    -0.01  -0.01  -0.01    -0.01   0.01   0.00
  20   8     0.01   0.00   0.00    -0.01   0.00   0.02    -0.01   0.00  -0.01
  21   6     0.00   0.00   0.01     0.01   0.00   0.01     0.00  -0.01  -0.01
  22   6    -0.01   0.01  -0.01    -0.04   0.04   0.01     0.00  -0.01   0.00
  23   6     0.01  -0.01   0.01     0.03   0.00   0.03    -0.01   0.00   0.00
  24   6     0.02  -0.01   0.02    -0.02  -0.02  -0.03    -0.04   0.01  -0.01
  25   6    -0.02  -0.01  -0.02     0.03  -0.03   0.01    -0.04  -0.02  -0.02
  26   6    -0.03   0.01   0.00    -0.02   0.01   0.01    -0.03   0.00   0.00
  27   6    -0.03   0.04  -0.03    -0.03   0.02  -0.01    -0.04  -0.02   0.03
  28   6     0.00   0.06  -0.04    -0.03   0.00  -0.03    -0.07  -0.03   0.05
  29   6     0.05   0.02  -0.04    -0.03   0.02  -0.01    -0.09  -0.02   0.04
  30   6     0.05  -0.02   0.00    -0.03   0.01   0.00    -0.08   0.01   0.00
  31   6    -0.01   0.02  -0.02    -0.02   0.02   0.03    -0.02   0.01   0.01
  32   6     0.01  -0.02   0.01    -0.01   0.01   0.01    -0.04   0.00   0.00
  33   6     0.01   0.00   0.01    -0.01   0.00   0.00    -0.03  -0.03  -0.01
  34   6    -0.01   0.01   0.03     0.00   0.00   0.00    -0.03  -0.04   0.01
  35   6    -0.02  -0.01   0.03     0.03  -0.01  -0.01    -0.05  -0.06   0.02
  36   6    -0.02  -0.05   0.00     0.02   0.01   0.01    -0.06  -0.07   0.00
  37   6    -0.03  -0.03  -0.04     0.01   0.01   0.02    -0.06  -0.05  -0.03
  38   6     0.01  -0.02   0.04    -0.02   0.02  -0.01    -0.01  -0.02   0.00
  39   6    -0.01  -0.01  -0.04    -0.01   0.02   0.02    -0.03  -0.03  -0.03
  40   6     0.01   0.04  -0.03     0.00  -0.06   0.05    -0.01  -0.01   0.01
  41   6     0.03   0.00  -0.03     0.01   0.00   0.06    -0.01   0.00   0.03
  42   6    -0.09  -0.05   0.08     0.02   0.02   0.00     0.08   0.04  -0.07
  43   6    -0.04  -0.05   0.04     0.01  -0.02   0.02     0.04   0.05  -0.04
  44   6     0.04   0.09  -0.08    -0.03  -0.03   0.05     0.05   0.10  -0.08
  45   6     0.02   0.02  -0.06    -0.01   0.02   0.00     0.03   0.02  -0.06
  46   6    -0.03  -0.02   0.11     0.00   0.01  -0.06    -0.01   0.00   0.06
  47   6     0.01  -0.06   0.06    -0.01   0.03   0.00     0.01  -0.02   0.04
  48   6     0.01   0.01  -0.01     0.14  -0.07  -0.08     0.09   0.03   0.03
  49   6     0.01   0.00   0.00    -0.01  -0.14  -0.09     0.10   0.04   0.03
  50   1     0.01  -0.02  -0.01     0.00  -0.02   0.01     0.01   0.00   0.01
  51   1     0.00  -0.01   0.03     0.03  -0.03   0.13    -0.01   0.00  -0.01
  52   1     0.00   0.00   0.00     0.00  -0.01  -0.02     0.00   0.00   0.01
  53   1     0.01   0.00   0.01     0.04   0.03   0.00     0.00   0.00   0.01
  54   1     0.00   0.01   0.00     0.04   0.00   0.02     0.00   0.00   0.00
  55   1     0.00   0.02   0.00     0.04   0.07  -0.01     0.00   0.00   0.00
  56   1     0.00  -0.02   0.00    -0.01   0.00   0.00     0.00   0.00   0.00
  57   1     0.02   0.00   0.00    -0.01   0.00   0.00     0.00  -0.01   0.00
  58   1     0.00  -0.01   0.02    -0.01  -0.01   0.00     0.01   0.00  -0.01
  59   1     0.01   0.02   0.01    -0.01  -0.01   0.00     0.01  -0.02   0.00
  60   1     0.00  -0.02  -0.03    -0.02  -0.02  -0.03     0.00   0.01   0.01
  61   1     0.03  -0.01  -0.02     0.02  -0.02  -0.01    -0.02   0.01   0.00
  62   1    -0.01   0.00   0.02     0.01  -0.01  -0.01     0.00  -0.01  -0.01
  63   1    -0.01   0.01  -0.01     0.02  -0.01   0.02     0.00  -0.01  -0.01
  64   1    -0.01   0.03  -0.03    -0.07   0.10  -0.10     0.00  -0.02   0.01
  65   1    -0.02   0.02   0.01    -0.11   0.10   0.10     0.01  -0.01  -0.01
  66   1     0.00  -0.01  -0.03     0.01  -0.01  -0.04    -0.01   0.00   0.00
  67   1     0.03  -0.01   0.02     0.05   0.01   0.07     0.00   0.00   0.01
  68   1     0.02  -0.01   0.01     0.08   0.04   0.01    -0.03   0.01  -0.01
  69   1    -0.01  -0.02   0.02     0.00  -0.03   0.05     0.00  -0.02  -0.02
  70   1    -0.05   0.05  -0.04    -0.03   0.02  -0.01    -0.01  -0.04   0.04
  71   1     0.00   0.09  -0.06    -0.04   0.00  -0.03    -0.07  -0.05   0.07
  72   1     0.09   0.03  -0.06    -0.02   0.03  -0.01    -0.11  -0.02   0.05
  73   1    -0.02   0.04  -0.03    -0.02   0.04   0.03    -0.02   0.02   0.00
  74   1     0.02   0.02  -0.02    -0.01   0.00   0.02    -0.05  -0.05   0.05
  75   1    -0.01   0.02   0.04    -0.02   0.01   0.00    -0.02  -0.03   0.03
  76   1    -0.03  -0.01   0.06     0.04  -0.02  -0.02    -0.04  -0.07   0.04
  77   1    -0.02  -0.08   0.00     0.01   0.02   0.01    -0.06  -0.09   0.00
  78   1     0.00  -0.02   0.05    -0.02   0.02  -0.01    -0.01  -0.02  -0.02
  79   1    -0.02  -0.02   0.00    -0.01   0.03   0.01    -0.04  -0.06   0.03
  80   1     0.04   0.06  -0.03     0.23  -0.02  -0.07     0.17   0.04  -0.06
  81   1     0.00   0.05  -0.07    -0.17   0.07   0.08    -0.15   0.09   0.00
  82   1     0.02   0.04  -0.01    -0.02  -0.32   0.16    -0.03  -0.20   0.08
  83   1     0.06   0.01  -0.06     0.05   0.03   0.06     0.01   0.02   0.04
  84   1     0.04  -0.05  -0.02     0.03  -0.02   0.09     0.00  -0.01   0.03
  85   1     0.03   0.02  -0.04    -0.01  -0.03   0.07    -0.01  -0.02   0.03
  86   1     0.09   0.10   0.32    -0.02  -0.01  -0.05    -0.01  -0.10  -0.23
  87   1    -0.03  -0.09  -0.21     0.01   0.04   0.08     0.04   0.11   0.12
  88   1    -0.40  -0.18   0.20     0.10   0.03  -0.02     0.30   0.13  -0.15
  89   1     0.03  -0.17   0.00    -0.01  -0.01   0.01     0.00   0.17   0.01
  90   1    -0.18  -0.10   0.11     0.05   0.00   0.05     0.17   0.10  -0.11
  91   1    -0.04   0.07   0.04     0.01  -0.07   0.02     0.05  -0.07  -0.07
  92   1     0.07   0.17   0.01    -0.04  -0.06   0.00     0.06   0.19   0.03
  93   1     0.06   0.15  -0.16    -0.03  -0.06   0.09     0.08   0.13  -0.17
  94   1     0.04   0.08  -0.14    -0.02  -0.02   0.08     0.06   0.10  -0.14
  95   1     0.01  -0.07  -0.15     0.03   0.03   0.03     0.03  -0.08  -0.15
  96   1     0.11   0.11  -0.10    -0.05   0.01   0.00     0.13   0.12  -0.10
  97   1    -0.02   0.03   0.03     0.01   0.03  -0.05    -0.02   0.06   0.04
  98   1    -0.06   0.04   0.10     0.00  -0.05  -0.05    -0.06   0.04   0.06
  99   1    -0.01  -0.08   0.14     0.00   0.07  -0.07     0.02   0.01   0.11
 100   1    -0.05  -0.01   0.15     0.03   0.01  -0.12     0.02  -0.01   0.06
 101   1     0.03  -0.06   0.06    -0.01   0.02   0.00     0.05  -0.03   0.03
 102   1     0.04  -0.08   0.07    -0.03   0.05  -0.01     0.01  -0.02   0.06
 103   1    -0.03  -0.07   0.09     0.00   0.05   0.00     0.00  -0.01   0.07
 104   1     0.01  -0.01  -0.02     0.13  -0.11  -0.11     0.09   0.02   0.02
 105   1     0.01   0.02  -0.03     0.24  -0.03   0.00     0.12   0.03   0.06
 106   1     0.01   0.02   0.01     0.16  -0.15  -0.15     0.10  -0.01   0.00
 107   1    -0.01  -0.02   0.03     0.08  -0.23  -0.11     0.06   0.09   0.05
 108   1     0.03   0.03   0.02    -0.05  -0.12  -0.09     0.13   0.05   0.04
 109   1     0.01   0.00  -0.03    -0.09  -0.15  -0.14     0.15   0.05   0.05
                    61                     62                     63
                     A                      A                      A
 Frequencies --   301.1936               315.8760               319.3181
 Red. masses --     1.9560                 2.6463                 3.7929
 Frc consts  --     0.1045                 0.1556                 0.2279
 IR Inten    --     7.7466                11.4605                 5.0967
 Atom AN      X      Y      Z        X      Y      Z        X      Y      Z
   1   8    -0.03  -0.01  -0.03    -0.07  -0.08   0.03     0.05   0.04  -0.03
   2  12     0.04  -0.01   0.00     0.07  -0.01  -0.01     0.16   0.04   0.04
   3   8     0.07   0.01  -0.01     0.01  -0.05  -0.01    -0.01   0.01   0.01
   4   6    -0.03   0.00  -0.02    -0.03  -0.06  -0.01     0.01   0.04   0.01
   5   7    -0.02  -0.03   0.03     0.00   0.02  -0.06     0.00  -0.04  -0.01
   6   7     0.00   0.01  -0.01    -0.02   0.03  -0.03    -0.03   0.08  -0.10
   7   8    -0.05   0.04  -0.07    -0.07   0.00  -0.03     0.05   0.01   0.00
   8   6    -0.01  -0.01   0.01    -0.01  -0.01  -0.02    -0.03  -0.06  -0.01
   9   6     0.00   0.01  -0.01    -0.01  -0.03   0.03    -0.03  -0.03   0.02
  10   6     0.00   0.01  -0.01    -0.03   0.01   0.00    -0.06   0.02  -0.03
  11   8    -0.01   0.00   0.06     0.06   0.10   0.05    -0.05  -0.05   0.00
  12   6    -0.01  -0.04   0.05     0.03   0.02   0.00    -0.03  -0.02   0.00
  13   6     0.04  -0.07   0.01     0.01  -0.01  -0.02    -0.02   0.00   0.01
  14   6     0.00   0.01   0.03     0.05  -0.02   0.03    -0.04   0.02   0.01
  15   8     0.00   0.05   0.06     0.01   0.00  -0.01    -0.02  -0.01   0.01
  16   6     0.05   0.02   0.04     0.08  -0.07   0.11    -0.05   0.05  -0.06
  17   6     0.00   0.00   0.00     0.00   0.00   0.00     0.00  -0.01   0.00
  18   6     0.00   0.00   0.00     0.00   0.00   0.00     0.00  -0.01   0.00
  19   6     0.00   0.00   0.01     0.00   0.00   0.00    -0.01   0.00   0.02
  20   8     0.00   0.00   0.00     0.01   0.00  -0.01     0.03  -0.01  -0.03
  21   6    -0.01   0.00   0.00    -0.01   0.00   0.00    -0.03   0.01   0.00
  22   6    -0.02   0.01  -0.07    -0.07   0.00  -0.03     0.03  -0.01   0.01
  23   6    -0.02   0.01  -0.02    -0.02   0.10  -0.09    -0.02  -0.07   0.06
  24   6    -0.02  -0.01   0.02     0.01   0.01  -0.02     0.00  -0.01  -0.01
  25   6    -0.01   0.00   0.00    -0.01   0.02  -0.01    -0.02   0.04  -0.04
  26   6    -0.03   0.00   0.02     0.02   0.01  -0.02     0.01   0.00   0.00
  27   6    -0.04  -0.01  -0.01     0.02   0.00  -0.02     0.01   0.00   0.02
  28   6    -0.02   0.01  -0.01     0.01   0.00   0.00     0.00  -0.03   0.00
  29   6    -0.01   0.02   0.00     0.00   0.01   0.00     0.00  -0.02   0.00
  30   6     0.00   0.00   0.00    -0.01   0.00  -0.01     0.00   0.00   0.00
  31   6     0.00   0.00   0.01     0.01   0.01   0.00     0.00   0.01   0.00
  32   6     0.00   0.00  -0.01     0.00  -0.01   0.00     0.00   0.01   0.01
  33   6    -0.01   0.00   0.00     0.00   0.01  -0.01     0.00   0.03  -0.02
  34   6     0.00  -0.01  -0.01     0.02  -0.01  -0.03     0.09  -0.03  -0.08
  35   6     0.00   0.00  -0.01     0.01   0.01  -0.03     0.02   0.02  -0.07
  36   6    -0.01   0.00  -0.01    -0.01   0.02  -0.02    -0.06   0.08  -0.05
  37   6     0.00   0.00   0.00     0.00   0.01  -0.01    -0.01   0.02  -0.03
  38   6     0.00   0.00   0.00    -0.01   0.00   0.00    -0.03   0.02   0.01
  39   6     0.00   0.00   0.00     0.01   0.00   0.00     0.02  -0.01  -0.01
  40   6     0.05  -0.03   0.03    -0.03   0.00   0.00    -0.01   0.02   0.00
  41   6     0.03  -0.01  -0.01    -0.01   0.02   0.03    -0.01   0.02  -0.01
  42   6     0.00   0.01  -0.04     0.00  -0.02   0.05     0.01   0.02  -0.02
  43   6     0.00   0.04  -0.03     0.01  -0.05   0.01     0.00   0.01   0.01
  44   6     0.00  -0.01   0.00     0.01  -0.03   0.01     0.03  -0.08   0.03
  45   6     0.00  -0.01   0.01    -0.01  -0.01   0.04    -0.02  -0.04   0.12
  46   6     0.00   0.00   0.02    -0.02   0.00   0.03    -0.07   0.02   0.06
  47   6     0.01   0.00   0.02     0.01  -0.01   0.04     0.03  -0.04   0.13
  48   6     0.02  -0.02  -0.01    -0.03   0.00  -0.02     0.02  -0.07  -0.07
  49   6     0.00   0.02   0.01    -0.02   0.05   0.01    -0.07   0.03   0.00
  50   1     0.00   0.01  -0.01     0.00  -0.04   0.06     0.01  -0.04   0.06
  51   1     0.11  -0.10   0.03    -0.01   0.00  -0.03     0.00   0.00   0.03
  52   1     0.02  -0.01   0.05     0.08  -0.06   0.06    -0.06   0.05  -0.01
  53   1     0.09  -0.02   0.09     0.14  -0.10   0.15    -0.08   0.06  -0.08
  54   1     0.07  -0.01   0.07     0.12  -0.15   0.16    -0.07   0.11  -0.10
  55   1     0.07   0.12   0.03     0.13   0.07   0.08    -0.08  -0.03  -0.04
  56   1     0.00  -0.01   0.00     0.00  -0.01   0.00     0.00  -0.03   0.01
  57   1     0.00   0.00   0.00     0.01   0.00   0.00     0.01  -0.01   0.00
  58   1     0.01   0.00   0.00     0.00   0.00   0.00     0.02   0.00  -0.01
  59   1     0.00  -0.01   0.00     0.00  -0.01   0.00     0.00  -0.03   0.00
  60   1     0.00   0.00   0.01     0.01   0.00   0.02     0.03   0.00   0.07
  61   1    -0.01   0.00   0.01    -0.02   0.00   0.01    -0.06   0.02   0.02
  62   1    -0.02   0.00   0.02    -0.01   0.00   0.01    -0.05   0.01   0.05
  63   1    -0.02   0.01  -0.01    -0.02   0.00  -0.01    -0.08   0.02  -0.05
  64   1    -0.06   0.11  -0.21    -0.11  -0.05  -0.08     0.05   0.02   0.04
  65   1    -0.12   0.09   0.05    -0.08   0.06   0.01     0.04  -0.04  -0.01
  66   1     0.06  -0.06  -0.14    -0.11   0.03  -0.02     0.05  -0.02   0.01
  67   1    -0.06   0.00  -0.06    -0.24   0.10  -0.24     0.13  -0.07   0.13
  68   1    -0.05  -0.02   0.00     0.00   0.01  -0.04    -0.06  -0.03   0.03
  69   1     0.01   0.05  -0.04     0.11   0.34  -0.12    -0.08  -0.22   0.06
  70   1    -0.06  -0.01  -0.02     0.03  -0.01  -0.02     0.02   0.01   0.03
  71   1    -0.02   0.01  -0.03     0.01   0.00   0.01     0.00  -0.04   0.00
  72   1     0.00   0.03   0.01    -0.01   0.03   0.01    -0.01  -0.04   0.00
  73   1    -0.02   0.01  -0.02     0.02   0.00   0.02     0.01   0.00   0.01
  74   1     0.00   0.00  -0.01     0.00  -0.01   0.00     0.00   0.01   0.01
  75   1     0.00  -0.01  -0.02     0.04  -0.02  -0.03     0.13  -0.09  -0.10
  76   1     0.00   0.00  -0.02     0.01   0.01  -0.02     0.04   0.00  -0.06
  77   1     0.00   0.01  -0.01    -0.02   0.04  -0.02    -0.10   0.13  -0.04
  78   1     0.00   0.00  -0.01    -0.01   0.00   0.00    -0.03   0.02   0.02
  79   1     0.00   0.00   0.00     0.01   0.00   0.00     0.02  -0.02  -0.01
  80   1    -0.37  -0.21   0.09     0.24   0.09  -0.07     0.10   0.07  -0.02
  81   1     0.42  -0.32   0.06    -0.26   0.17   0.01    -0.11   0.09  -0.02
  82   1     0.13   0.41  -0.06    -0.08  -0.30   0.07    -0.03  -0.09   0.02
  83   1     0.02   0.01   0.04    -0.01   0.01   0.01    -0.02   0.00  -0.03
  84   1     0.00  -0.04  -0.08     0.00   0.04   0.06    -0.01   0.02   0.00
  85   1     0.11  -0.03  -0.02    -0.06   0.01   0.04    -0.02   0.04  -0.01
  86   1    -0.02  -0.02  -0.07    -0.01   0.02   0.08     0.00  -0.01  -0.05
  87   1    -0.01   0.00  -0.03     0.00   0.00   0.07     0.01   0.02  -0.01
  88   1     0.01   0.04  -0.06     0.01  -0.07   0.08     0.03   0.05  -0.04
  89   1     0.00   0.07  -0.01     0.02  -0.08   0.00    -0.01   0.02   0.00
  90   1     0.00   0.04  -0.07     0.01  -0.05   0.06     0.01   0.02   0.00
  91   1     0.00   0.04  -0.03     0.01  -0.06   0.00     0.00   0.00   0.01
  92   1    -0.01  -0.01  -0.01     0.01  -0.05  -0.01     0.06  -0.14  -0.01
  93   1     0.00  -0.01   0.00     0.01  -0.04   0.02     0.04  -0.10   0.03
  94   1     0.00   0.00   0.00     0.01  -0.03   0.04     0.01  -0.08   0.11
  95   1    -0.01   0.00   0.01    -0.03   0.02   0.07    -0.09   0.08   0.19
  96   1     0.00  -0.01   0.01    -0.01  -0.06   0.06    -0.01  -0.17   0.19
  97   1     0.00  -0.01   0.01     0.00  -0.02   0.04    -0.02  -0.05   0.11
  98   1    -0.02   0.01   0.02    -0.04   0.02   0.03    -0.13   0.04   0.07
  99   1     0.01   0.00   0.03    -0.01  -0.01   0.05    -0.04  -0.03   0.12
 100   1     0.00   0.00   0.02    -0.02   0.01   0.03    -0.09   0.03   0.06
 101   1     0.03   0.00   0.01     0.04  -0.01   0.03     0.14  -0.04   0.10
 102   1     0.01   0.00   0.03     0.03  -0.03   0.06     0.09  -0.08   0.19
 103   1     0.00   0.00   0.03    -0.02  -0.02   0.06    -0.07  -0.07   0.22
 104   1     0.02  -0.04  -0.02    -0.03   0.00  -0.02     0.01  -0.12  -0.12
 105   1     0.04  -0.01   0.00    -0.04   0.00  -0.03     0.08  -0.03  -0.06
 106   1     0.02  -0.03  -0.02    -0.03   0.01  -0.01     0.04  -0.08  -0.10
 107   1    -0.01   0.03   0.02    -0.03   0.08   0.00    -0.08   0.05   0.00
 108   1     0.02   0.01   0.02    -0.03   0.05   0.00    -0.05   0.02   0.00
 109   1     0.01   0.02   0.02     0.02   0.05   0.02    -0.05   0.03   0.02
                    64                     65                     66
                     A                      A                      A
 Frequencies --   324.4743               328.1110               331.0738
 Red. masses --     3.6509                 4.2463                 3.1256
 Frc consts  --     0.2265                 0.2693                 0.2019
 IR Inten    --    13.7357                13.5038                 0.2936
 Atom AN      X      Y      Z        X      Y      Z        X      Y      Z
   1   8    -0.02  -0.04   0.05     0.02   0.00  -0.01     0.01  -0.01   0.01
   2  12    -0.01   0.09   0.02     0.18   0.05   0.07     0.05   0.02   0.04
   3   8    -0.06  -0.05   0.02     0.01   0.00   0.01    -0.01   0.00   0.01
   4   6     0.01  -0.05   0.01     0.00   0.01   0.01     0.01  -0.01   0.01
   5   7     0.01  -0.09   0.13    -0.01  -0.02  -0.05    -0.01   0.04  -0.05
   6   7     0.00   0.02  -0.04    -0.05   0.02   0.06    -0.01  -0.01   0.08
   7   8    -0.01  -0.07   0.07     0.01   0.00  -0.01     0.01  -0.03   0.03
   8   6     0.00  -0.04   0.04    -0.05  -0.04  -0.05    -0.02   0.02  -0.03
   9   6     0.01   0.02  -0.04    -0.05  -0.01   0.00    -0.02   0.03   0.01
  10   6     0.00   0.01  -0.04    -0.09   0.02   0.03    -0.04   0.01   0.04
  11   8     0.05   0.11  -0.02    -0.01   0.01   0.01     0.01   0.05   0.00
  12   6     0.03   0.06  -0.04    -0.01   0.00  -0.02     0.00   0.03  -0.02
  13   6    -0.04   0.04  -0.01     0.00   0.00  -0.02    -0.01   0.01  -0.01
  14   6     0.03  -0.02  -0.02    -0.02   0.01   0.02     0.00   0.00   0.00
  15   8     0.00  -0.04  -0.06    -0.02   0.01  -0.02    -0.02   0.00  -0.03
  16   6     0.01  -0.06   0.03    -0.01   0.00   0.00    -0.01  -0.02   0.00
  17   6     0.00   0.00   0.00     0.01  -0.02   0.00    -0.01   0.00   0.00
  18   6     0.00   0.00   0.00     0.01   0.00   0.01     0.00   0.00   0.00
  19   6     0.00   0.00  -0.03     0.00   0.01  -0.04    -0.01   0.00   0.01
  20   8    -0.03   0.00   0.01    -0.06   0.00   0.02     0.01   0.00  -0.01
  21   6     0.03  -0.02  -0.01     0.04  -0.03  -0.02    -0.01   0.00   0.00
  22   6    -0.01   0.01   0.03     0.02  -0.02  -0.01     0.01   0.00  -0.01
  23   6     0.01   0.07  -0.05    -0.03  -0.02   0.00     0.00   0.01  -0.01
  24   6     0.00  -0.03   0.05     0.00  -0.01  -0.02    -0.01   0.01  -0.02
  25   6     0.00   0.00  -0.01    -0.02   0.00   0.02     0.00  -0.01   0.02
  26   6    -0.03  -0.01   0.04     0.01   0.00  -0.01     0.01   0.00  -0.01
  27   6    -0.02   0.01   0.08     0.02   0.02   0.00     0.03   0.13   0.06
  28   6    -0.01  -0.04   0.02     0.01   0.00  -0.01     0.01   0.02  -0.04
  29   6     0.02  -0.08   0.00     0.00  -0.01  -0.02    -0.01  -0.09  -0.13
  30   6     0.03  -0.01   0.03     0.00   0.00  -0.01     0.00   0.01  -0.02
  31   6    -0.01  -0.02  -0.01     0.01   0.00   0.00    -0.01  -0.06  -0.03
  32   6     0.01   0.03   0.02     0.00   0.01   0.00     0.01   0.05   0.02
  33   6     0.00   0.01  -0.01     0.00  -0.02   0.00    -0.01  -0.02   0.01
  34   6    -0.01   0.02  -0.01    -0.16   0.10   0.05     0.07  -0.09   0.01
  35   6     0.00   0.00  -0.02    -0.03   0.01   0.03    -0.01  -0.01   0.02
  36   6     0.01  -0.01  -0.02     0.14  -0.12  -0.01    -0.07   0.05   0.05
  37   6    -0.01   0.00   0.00     0.00   0.00   0.02     0.02  -0.01   0.01
  38   6     0.00   0.00   0.00     0.07  -0.06  -0.02    -0.03   0.02   0.00
  39   6    -0.01   0.01   0.01    -0.04   0.04   0.03     0.04  -0.03  -0.02
  40   6     0.03   0.09  -0.05    -0.01  -0.02   0.01    -0.01  -0.06  -0.03
  41   6     0.00  -0.02  -0.08     0.00   0.00   0.02     0.04  -0.10   0.08
  42   6     0.01   0.04  -0.14     0.00   0.01   0.01     0.01   0.06   0.01
  43   6    -0.03   0.10  -0.01     0.00  -0.02   0.02    -0.02  -0.04   0.08
  44   6     0.00  -0.03   0.04    -0.04   0.01   0.06     0.00   0.07  -0.09
  45   6    -0.01   0.02   0.02     0.00   0.07  -0.07     0.02  -0.06  -0.03
  46   6    -0.01   0.00   0.02     0.08  -0.03   0.04     0.00   0.01  -0.07
  47   6     0.01  -0.01   0.01     0.01   0.00  -0.15    -0.02   0.04   0.02
  48   6     0.07  -0.04  -0.01     0.01  -0.10  -0.07     0.04  -0.03  -0.02
  49   6    -0.02  -0.07  -0.02    -0.09   0.07   0.04    -0.05   0.00   0.00
  50   1     0.01   0.03  -0.06     0.01   0.01   0.01    -0.01   0.04   0.01
  51   1    -0.11   0.08  -0.04    -0.01   0.00  -0.02    -0.03   0.01  -0.03
  52   1     0.04  -0.05   0.01    -0.02   0.02   0.02     0.01  -0.01   0.01
  53   1     0.01  -0.04   0.01    -0.02   0.00   0.00    -0.02  -0.01  -0.01
  54   1     0.02  -0.10   0.04    -0.01   0.03  -0.01    -0.01  -0.01   0.00
  55   1     0.02  -0.06   0.01    -0.01   0.00   0.00    -0.01  -0.03   0.00
  56   1     0.01   0.04   0.01     0.01   0.02  -0.01     0.00   0.00   0.01
  57   1    -0.03  -0.01   0.02    -0.01  -0.03   0.02    -0.01   0.00   0.00
  58   1    -0.01  -0.01   0.01     0.01   0.00   0.03     0.00   0.00  -0.01
  59   1     0.01   0.02   0.01     0.01   0.03   0.01     0.00  -0.01   0.00
  60   1    -0.02   0.00  -0.07    -0.04   0.02  -0.10     0.01   0.00   0.04
  61   1     0.05  -0.01  -0.04     0.07   0.00  -0.05    -0.03   0.01   0.02
  62   1     0.05  -0.03  -0.07     0.06  -0.06  -0.09    -0.02   0.01   0.02
  63   1     0.08  -0.05   0.04     0.11  -0.06   0.05    -0.04   0.00  -0.02
  64   1     0.01  -0.05   0.10     0.03  -0.01   0.02     0.03   0.00   0.03
  65   1     0.06  -0.02  -0.04     0.03  -0.04  -0.03     0.04  -0.01  -0.03
  66   1    -0.07   0.05   0.05     0.02  -0.02  -0.01     0.00   0.01  -0.01
  67   1    -0.13   0.07  -0.12     0.00  -0.02   0.00    -0.04   0.01  -0.05
  68   1     0.06   0.03  -0.02    -0.07  -0.02   0.00     0.00  -0.02   0.00
  69   1     0.06   0.21  -0.05    -0.02  -0.04  -0.02     0.01   0.05  -0.01
  70   1    -0.02   0.05   0.11     0.02   0.03   0.01     0.03   0.22   0.13
  71   1    -0.01  -0.03  -0.02     0.01  -0.01  -0.01     0.01   0.02  -0.03
  72   1     0.02  -0.12  -0.03     0.00  -0.01  -0.02    -0.02  -0.17  -0.19
  73   1    -0.03   0.00  -0.04     0.01  -0.01   0.01    -0.01  -0.06  -0.04
  74   1     0.01   0.04   0.00     0.00   0.01   0.00     0.01   0.05   0.02
  75   1    -0.02   0.03  -0.01    -0.26   0.19   0.07     0.13  -0.14   0.00
  76   1     0.01   0.00  -0.01    -0.05   0.03   0.02    -0.02   0.00   0.02
  77   1     0.02  -0.01  -0.02     0.25  -0.22  -0.03    -0.13   0.11   0.06
  78   1     0.00   0.00   0.00     0.07  -0.05  -0.03    -0.04   0.02  -0.01
  79   1    -0.01   0.01   0.01    -0.04   0.04   0.04     0.04  -0.04  -0.02
  80   1    -0.11   0.09   0.06     0.00  -0.02   0.00    -0.23  -0.14   0.02
  81   1     0.14   0.00  -0.14    -0.02  -0.01   0.03     0.14  -0.18   0.02
  82   1     0.06   0.29  -0.09    -0.02  -0.04   0.01     0.00   0.13  -0.10
  83   1     0.00  -0.04  -0.12     0.00   0.00   0.02     0.12  -0.02   0.10
  84   1    -0.01  -0.07  -0.11     0.01   0.01   0.03     0.08  -0.11   0.15
  85   1     0.04   0.05  -0.11    -0.01  -0.01   0.02     0.00  -0.20   0.11
  86   1     0.03  -0.07  -0.19     0.01   0.02   0.02     0.03   0.05   0.01
  87   1     0.02   0.01  -0.20     0.00   0.01   0.01     0.02   0.07   0.00
  88   1    -0.04   0.19  -0.19     0.00   0.00   0.02     0.01   0.06   0.01
  89   1    -0.05   0.17   0.02    -0.01  -0.04   0.00    -0.05  -0.12   0.01
  90   1    -0.04   0.10  -0.10    -0.01  -0.02   0.05    -0.02  -0.05   0.18
  91   1    -0.03   0.14   0.03    -0.01  -0.02   0.03    -0.02  -0.07   0.12
  92   1     0.01  -0.06   0.01    -0.07  -0.01   0.02    -0.01   0.15  -0.02
  93   1     0.01  -0.05   0.04    -0.04  -0.03   0.09    -0.02   0.14  -0.11
  94   1     0.00  -0.02   0.09    -0.02   0.03   0.08     0.00   0.04  -0.21
  95   1     0.00   0.03   0.03     0.07  -0.02  -0.12     0.00  -0.07  -0.05
  96   1    -0.01   0.00   0.03    -0.01   0.17  -0.13     0.01  -0.03  -0.05
  97   1    -0.01   0.03   0.01    -0.01   0.09  -0.08     0.03  -0.09  -0.02
  98   1    -0.03   0.02   0.02     0.08   0.04   0.03     0.04  -0.06  -0.07
  99   1     0.00  -0.01   0.04     0.08  -0.05   0.04    -0.02   0.07  -0.12
 100   1    -0.02   0.00   0.03     0.09  -0.05   0.10     0.02   0.01  -0.12
 101   1     0.02  -0.03   0.01    -0.12  -0.02  -0.11     0.00   0.06   0.01
 102   1     0.01  -0.01   0.01    -0.05   0.04  -0.24    -0.04   0.05   0.05
 103   1     0.00  -0.01   0.03     0.12   0.04  -0.23    -0.02   0.04   0.01
 104   1     0.05  -0.09  -0.06     0.01  -0.11  -0.09     0.04  -0.03  -0.02
 105   1     0.12   0.00   0.00     0.08  -0.07  -0.02     0.09  -0.02   0.03
 106   1     0.09  -0.05  -0.04     0.03  -0.15  -0.12     0.04  -0.10  -0.07
 107   1     0.00  -0.12   0.00    -0.11   0.11   0.02    -0.02  -0.01  -0.02
 108   1     0.02  -0.08  -0.01    -0.10   0.06   0.03    -0.09   0.01  -0.01
 109   1    -0.10  -0.07  -0.03    -0.05   0.07   0.06    -0.06   0.00  -0.01
                    67                     68                     69
                     A                      A                      A
 Frequencies --   332.0368               338.1818               347.0985
 Red. masses --     3.3670                 2.8080                 2.3534
 Frc consts  --     0.2187                 0.1892                 0.1671
 IR Inten    --     2.9578                 1.7200                 7.8715
 Atom AN      X      Y      Z        X      Y      Z        X      Y      Z
   1   8     0.01  -0.01   0.01    -0.01  -0.01  -0.01     0.00   0.01   0.01
   2  12     0.04   0.05   0.05     0.02   0.02  -0.03     0.00   0.02  -0.02
   3   8    -0.02  -0.01   0.02     0.02   0.00  -0.02    -0.03  -0.01  -0.01
   4   6     0.00  -0.02   0.01     0.00   0.02  -0.01     0.00  -0.01   0.00
   5   7    -0.01  -0.01   0.00     0.01  -0.09   0.06     0.00   0.00   0.00
   6   7    -0.02   0.00   0.07    -0.01  -0.03   0.09     0.00  -0.01   0.01
   7   8     0.01  -0.05   0.04    -0.02   0.08  -0.06     0.01  -0.04   0.03
   8   6    -0.02   0.00  -0.01    -0.02  -0.06  -0.01     0.00   0.00   0.00
   9   6    -0.02   0.03  -0.01    -0.01   0.00  -0.05     0.00   0.00   0.00
  10   6    -0.05   0.01   0.03    -0.04   0.00   0.02     0.00   0.00   0.00
  11   8     0.02   0.04  -0.03    -0.02  -0.06   0.03     0.01   0.04   0.00
  12   6     0.01   0.03  -0.04    -0.01  -0.05   0.03     0.00   0.00   0.01
  13   6    -0.02   0.03  -0.02     0.02  -0.04   0.01    -0.01   0.01   0.01
  14   6    -0.01   0.00   0.00     0.01   0.01   0.02     0.00  -0.01  -0.01
  15   8     0.00  -0.03  -0.05     0.00   0.01   0.04     0.02  -0.03   0.01
  16   6    -0.01  -0.02   0.00     0.03   0.01   0.03    -0.01   0.00  -0.01
  17   6     0.00   0.00   0.01     0.00   0.00   0.00     0.02  -0.04  -0.02
  18   6     0.00   0.00   0.00     0.00   0.00   0.00     0.00  -0.01  -0.01
  19   6    -0.01   0.00   0.00    -0.01   0.00   0.02    -0.02   0.01   0.11
  20   8     0.00   0.00  -0.01     0.02   0.00  -0.01     0.16  -0.01  -0.10
  21   6     0.00   0.00   0.00    -0.02   0.01   0.01    -0.16   0.08   0.04
  22   6     0.02   0.00   0.01    -0.02  -0.01  -0.02    -0.01   0.02   0.00
  23   6    -0.02   0.02  -0.02     0.01  -0.01   0.01     0.00   0.01   0.00
  24   6     0.00  -0.01   0.00     0.02  -0.02   0.03     0.00   0.00   0.00
  25   6     0.00  -0.01   0.02     0.01  -0.02   0.04     0.00   0.00   0.01
  26   6     0.01   0.00   0.01     0.00  -0.01   0.02     0.00   0.00   0.00
  27   6    -0.02  -0.14  -0.11     0.01  -0.02   0.05    -0.01   0.00   0.00
  28   6     0.01   0.02   0.01     0.02  -0.05   0.02     0.00   0.00   0.00
  29   6     0.03   0.15   0.12     0.03  -0.05   0.02     0.00   0.00   0.00
  30   6     0.01  -0.01   0.00     0.03  -0.01   0.02     0.00   0.00   0.00
  31   6     0.03   0.05   0.05    -0.01   0.01  -0.01     0.00   0.00   0.00
  32   6     0.00  -0.06  -0.04     0.01   0.01   0.01     0.00   0.00   0.00
  33   6     0.00  -0.02   0.01     0.00  -0.02   0.02     0.00   0.00   0.00
  34   6     0.05  -0.07   0.01     0.03  -0.05   0.03    -0.05   0.04   0.01
  35   6    -0.01  -0.01   0.02     0.01   0.01   0.03     0.00   0.00   0.00
  36   6    -0.05   0.04   0.04    -0.01   0.04   0.05     0.05  -0.04  -0.01
  37   6     0.02  -0.01   0.01     0.04   0.01   0.03     0.00   0.00   0.00
  38   6    -0.03   0.01   0.00    -0.01   0.01   0.01     0.02  -0.01  -0.01
  39   6     0.03  -0.02  -0.02     0.04  -0.01  -0.01     0.00   0.00   0.00
  40   6     0.06  -0.02   0.08    -0.03   0.11  -0.04     0.01   0.00   0.00
  41   6    -0.03   0.09  -0.04    -0.03   0.03  -0.07     0.00   0.00   0.00
  42   6    -0.03  -0.08   0.05     0.00   0.01  -0.07     0.00   0.00  -0.01
  43   6     0.02   0.01  -0.08    -0.01   0.06  -0.01     0.00   0.01   0.00
  44   6     0.00   0.05  -0.07    -0.02   0.06  -0.06    -0.01   0.00   0.01
  45   6     0.02  -0.04  -0.03     0.02  -0.04  -0.05     0.00   0.00   0.00
  46   6     0.00   0.01  -0.06     0.03   0.00  -0.07     0.02  -0.01   0.01
  47   6    -0.02   0.04   0.01    -0.03   0.04  -0.02     0.01   0.00  -0.03
  48   6     0.06  -0.06  -0.03    -0.06  -0.04  -0.02     0.00   0.00   0.00
  49   6    -0.07  -0.02  -0.01    -0.02   0.05   0.04     0.00   0.00   0.00
  50   1     0.00   0.05  -0.02     0.03   0.04  -0.09     0.00   0.00  -0.01
  51   1    -0.06   0.04  -0.05     0.05  -0.04   0.03    -0.02   0.01   0.02
  52   1    -0.01  -0.01   0.00     0.01   0.02   0.01     0.01  -0.02   0.00
  53   1    -0.02  -0.01  -0.01     0.05  -0.01   0.05    -0.02   0.01  -0.03
  54   1    -0.02  -0.01  -0.01     0.04   0.00   0.04    -0.02   0.00  -0.02
  55   1    -0.02  -0.04   0.00     0.04   0.06   0.02    -0.02  -0.02  -0.01
  56   1     0.00   0.00   0.01    -0.01  -0.02   0.00    -0.04  -0.25  -0.03
  57   1    -0.01   0.00   0.01     0.02   0.00  -0.01     0.18   0.00  -0.10
  58   1     0.00   0.00   0.00     0.00   0.00   0.00     0.04   0.02  -0.03
  59   1     0.00   0.00   0.00    -0.01  -0.01   0.00    -0.04  -0.09  -0.03
  60   1     0.00   0.00   0.01     0.01   0.00   0.05     0.13  -0.01   0.36
  61   1    -0.01   0.01   0.00    -0.03   0.01   0.02    -0.27   0.07   0.16
  62   1     0.00   0.00   0.00    -0.03   0.02   0.04    -0.27   0.13   0.34
  63   1    -0.01  -0.01  -0.01    -0.05   0.02  -0.02    -0.41   0.19  -0.23
  64   1     0.05  -0.03   0.08    -0.04   0.00  -0.07    -0.01   0.01   0.01
  65   1     0.07  -0.05  -0.05    -0.05   0.02   0.03     0.00   0.03   0.00
  66   1     0.00   0.02   0.03     0.01  -0.03  -0.03    -0.02   0.02   0.00
  67   1    -0.05   0.02  -0.02     0.04  -0.01   0.02    -0.02   0.01  -0.01
  68   1    -0.03   0.02  -0.02    -0.01   0.00   0.00     0.02   0.00   0.00
  69   1     0.00   0.04  -0.03     0.00  -0.05   0.00     0.00   0.03   0.01
  70   1    -0.05  -0.24  -0.21     0.02  -0.01   0.06    -0.01   0.00   0.00
  71   1     0.01   0.03   0.01     0.01  -0.05   0.00     0.00   0.00  -0.01
  72   1     0.04   0.27   0.21     0.02  -0.07   0.01     0.00   0.00   0.00
  73   1     0.03   0.04   0.05     0.00   0.02   0.01     0.00   0.00   0.00
  74   1     0.00  -0.06  -0.04     0.02   0.01   0.00     0.00   0.00   0.00
  75   1     0.09  -0.10   0.01     0.06  -0.07   0.02    -0.09   0.07   0.01
  76   1    -0.02   0.00   0.01     0.00   0.03   0.01     0.00   0.00   0.00
  77   1    -0.10   0.08   0.05    -0.04   0.07   0.05     0.11  -0.09  -0.02
  78   1    -0.03   0.01  -0.01    -0.02   0.01   0.01     0.02  -0.01  -0.01
  79   1     0.03  -0.03  -0.02     0.05   0.00  -0.03     0.00   0.01   0.00
  80   1    -0.07  -0.12   0.04     0.29   0.29  -0.04    -0.03  -0.02   0.01
  81   1     0.17  -0.11   0.14    -0.29   0.31  -0.16     0.04  -0.03   0.00
  82   1     0.09   0.08   0.09    -0.08  -0.17   0.02     0.02   0.04   0.00
  83   1    -0.12   0.02  -0.03    -0.04  -0.02  -0.12     0.00   0.00   0.00
  84   1    -0.07   0.12  -0.13    -0.03   0.02  -0.07     0.00  -0.01  -0.01
  85   1     0.04   0.16  -0.07    -0.04   0.11  -0.09     0.01   0.00  -0.01
  86   1    -0.07  -0.01   0.07     0.01  -0.04  -0.10    -0.02  -0.01  -0.03
  87   1    -0.04  -0.09   0.09     0.00  -0.03  -0.11     0.00   0.00   0.03
  88   1    -0.01  -0.14   0.07    -0.03   0.09  -0.10     0.03   0.02  -0.02
  89   1     0.05   0.06  -0.03    -0.02   0.10   0.02     0.00   0.01   0.00
  90   1     0.01   0.01  -0.14    -0.03   0.05  -0.07     0.00   0.01  -0.01
  91   1     0.02   0.03  -0.12    -0.02   0.09   0.02     0.00   0.01   0.00
  92   1    -0.01   0.11  -0.01    -0.06   0.11  -0.03    -0.02   0.00   0.00
  93   1    -0.02   0.11  -0.08    -0.06   0.11  -0.04    -0.01  -0.01   0.02
  94   1    -0.01   0.03  -0.16    -0.03   0.04  -0.18     0.00   0.01   0.01
  95   1     0.00  -0.05  -0.05     0.01  -0.07  -0.09     0.01   0.00  -0.01
  96   1     0.00  -0.02  -0.04    -0.02   0.00  -0.08     0.00   0.01  -0.01
  97   1     0.03  -0.07  -0.02     0.04  -0.09  -0.06     0.00   0.00  -0.01
  98   1     0.04  -0.05  -0.06     0.09  -0.07  -0.07     0.02   0.01   0.01
  99   1    -0.02   0.06  -0.10    -0.01   0.06  -0.14     0.03   0.00   0.02
 100   1     0.02   0.00  -0.10     0.05  -0.01  -0.11     0.03  -0.01   0.02
 101   1    -0.01   0.05   0.01    -0.06   0.07  -0.02    -0.02  -0.01  -0.03
 102   1    -0.04   0.05   0.03    -0.05   0.06  -0.01    -0.01   0.01  -0.06
 103   1    -0.01   0.04   0.00     0.00   0.04  -0.07     0.03   0.01  -0.05
 104   1     0.06  -0.07  -0.04    -0.07  -0.02  -0.01     0.00   0.00   0.00
 105   1     0.13  -0.04   0.04    -0.09  -0.05  -0.03    -0.01   0.00   0.00
 106   1     0.07  -0.12  -0.09    -0.06  -0.01   0.00     0.00   0.00   0.00
 107   1    -0.03  -0.06  -0.02    -0.05   0.09   0.04     0.00   0.00   0.00
 108   1    -0.09  -0.02  -0.01    -0.02   0.05   0.04     0.00   0.00   0.00
 109   1    -0.11  -0.02  -0.02     0.03   0.05   0.06     0.01   0.00   0.00
                    70                     71                     72
                     A                      A                      A
 Frequencies --   355.6953               374.8378               399.0845
 Red. masses --     3.5618                 4.5981                 5.8586
 Frc consts  --     0.2655                 0.3806                 0.5498
 IR Inten    --    16.4889                12.7959                62.8023
 Atom AN      X      Y      Z        X      Y      Z        X      Y      Z
   1   8     0.00  -0.04   0.00     0.00  -0.11   0.06     0.05  -0.03  -0.03
   2  12    -0.05  -0.07   0.06     0.00   0.06   0.04    -0.14   0.12   0.17
   3   8     0.05   0.03   0.01    -0.14   0.01   0.02     0.17  -0.01   0.18
   4   6     0.01   0.02   0.01     0.06   0.03   0.03    -0.04   0.04   0.06
   5   7    -0.01   0.06   0.06     0.00  -0.02  -0.04     0.02  -0.04  -0.02
   6   7    -0.03   0.06   0.00     0.01  -0.03  -0.01     0.01  -0.06  -0.01
   7   8    -0.01   0.11  -0.08    -0.02   0.22  -0.12     0.04   0.01  -0.04
   8   6     0.01   0.09   0.05     0.00  -0.03  -0.03     0.02  -0.05  -0.04
   9   6    -0.03   0.10   0.04     0.01  -0.05  -0.02     0.03  -0.07  -0.05
  10   6    -0.04   0.07   0.02     0.02  -0.04  -0.02     0.04  -0.05  -0.02
  11   8    -0.01  -0.07   0.01    -0.03  -0.14  -0.07     0.05   0.04   0.00
  12   6    -0.01  -0.02  -0.04    -0.02   0.03  -0.06     0.03   0.00  -0.10
  13   6     0.01  -0.01  -0.04    -0.09   0.12   0.01     0.04  -0.06  -0.07
  14   6     0.01   0.02   0.03     0.06   0.02  -0.03    -0.12   0.07   0.13
  15   8    -0.06   0.03  -0.05    -0.07  -0.04  -0.08     0.02   0.03  -0.12
  16   6     0.04  -0.02   0.06     0.09  -0.11   0.14     0.00   0.00   0.02
  17   6     0.00   0.00   0.00     0.00   0.00   0.00     0.00  -0.01   0.00
  18   6     0.00   0.00   0.00     0.00   0.00   0.00     0.00   0.00   0.00
  19   6     0.00   0.00   0.02     0.00   0.00   0.01    -0.01   0.00   0.01
  20   8     0.04   0.00  -0.03     0.02   0.00  -0.02     0.03  -0.01  -0.03
  21   6    -0.03   0.01   0.00    -0.02   0.01   0.00    -0.02   0.01   0.00
  22   6     0.03  -0.04  -0.04     0.04   0.03   0.10     0.05  -0.08  -0.10
  23   6     0.00  -0.01   0.00     0.09  -0.01   0.01    -0.20  -0.03  -0.02
  24   6     0.01   0.02   0.02    -0.01  -0.02  -0.02     0.01  -0.03  -0.05
  25   6    -0.03   0.02   0.00     0.01  -0.01  -0.01     0.01  -0.02  -0.02
  26   6     0.03  -0.01   0.00    -0.01   0.00   0.00    -0.01   0.01  -0.02
  27   6     0.04  -0.01   0.01    -0.02   0.01  -0.02    -0.01   0.01   0.00
  28   6     0.05   0.00   0.01    -0.03   0.01  -0.01    -0.03  -0.02   0.00
  29   6     0.04  -0.02  -0.01    -0.02   0.02  -0.01    -0.03  -0.02   0.00
  30   6     0.03   0.00  -0.01    -0.02   0.00  -0.01    -0.02  -0.01  -0.01
  31   6     0.02  -0.01  -0.01     0.00   0.00   0.01     0.00   0.02  -0.01
  32   6     0.02   0.00  -0.01    -0.01   0.00   0.01    -0.02   0.01   0.01
  33   6    -0.01  -0.01  -0.02     0.01   0.01   0.00     0.02   0.02   0.01
  34   6    -0.03   0.00  -0.01     0.01   0.02   0.01     0.02   0.03   0.02
  35   6    -0.04  -0.02  -0.01     0.02   0.01   0.00     0.04   0.02   0.01
  36   6    -0.01  -0.04  -0.01     0.01   0.01   0.00     0.01   0.02   0.00
  37   6    -0.03  -0.02  -0.01     0.01   0.01  -0.01     0.01   0.02  -0.02
  38   6     0.00  -0.01  -0.02     0.01   0.01   0.01     0.02   0.03   0.01
  39   6    -0.02  -0.02   0.00     0.00   0.01  -0.01     0.01   0.02  -0.02
  40   6    -0.03   0.03  -0.02     0.04  -0.05   0.03    -0.01  -0.01  -0.01
  41   6    -0.02   0.00   0.00     0.01  -0.01   0.00     0.01   0.02   0.01
  42   6    -0.01   0.00   0.00     0.01   0.01   0.01     0.01   0.02   0.00
  43   6    -0.01   0.01   0.00     0.00  -0.01   0.01     0.00  -0.01   0.02
  44   6     0.01   0.00   0.00     0.01  -0.01   0.01     0.00  -0.02  -0.01
  45   6     0.00   0.01   0.01     0.00   0.01   0.01    -0.02   0.01   0.01
  46   6     0.00   0.00   0.02    -0.01   0.00   0.00    -0.01   0.00   0.00
  47   6     0.02   0.00  -0.01     0.00  -0.01   0.00     0.00  -0.01   0.00
  48   6     0.18   0.01   0.03    -0.06  -0.01  -0.01    -0.07  -0.02  -0.02
  49   6    -0.12  -0.14  -0.07     0.06   0.04   0.02     0.08   0.00   0.00
  50   1    -0.04   0.10   0.04     0.01  -0.05  -0.01     0.03  -0.07  -0.05
  51   1     0.02  -0.03  -0.06    -0.16   0.15   0.00     0.00  -0.06  -0.14
  52   1     0.00   0.05   0.01     0.01   0.09  -0.09    -0.14   0.09   0.10
  53   1     0.07  -0.06   0.10     0.15  -0.15   0.20    -0.02  -0.05   0.06
  54   1     0.05  -0.03   0.08     0.11  -0.15   0.19    -0.02   0.06   0.00
  55   1     0.05   0.05   0.06     0.12   0.01   0.13    -0.02   0.00   0.04
  56   1    -0.01  -0.04   0.00     0.00  -0.03   0.00    -0.01  -0.03   0.00
  57   1     0.03   0.00  -0.01     0.02   0.00  -0.01     0.01  -0.01   0.00
  58   1     0.01   0.00   0.00     0.00   0.00   0.00     0.00   0.00   0.00
  59   1     0.00  -0.01   0.00     0.00  -0.01   0.00    -0.01  -0.01   0.00
  60   1     0.03   0.00   0.07     0.02   0.00   0.04     0.02   0.00   0.06
  61   1    -0.05   0.02   0.03    -0.04   0.01   0.02    -0.05   0.02   0.02
  62   1    -0.05   0.02   0.06    -0.03   0.01   0.03    -0.04   0.02   0.05
  63   1    -0.08   0.04  -0.05    -0.05   0.02  -0.03    -0.07   0.02  -0.04
  64   1     0.05  -0.03  -0.01     0.12   0.03   0.25     0.10  -0.05  -0.02
  65   1     0.04  -0.08  -0.07     0.11  -0.12  -0.03     0.12  -0.11  -0.17
  66   1     0.05  -0.05  -0.03     0.06   0.06   0.17     0.05  -0.10  -0.14
  67   1     0.03  -0.02   0.00     0.20  -0.01   0.08    -0.19  -0.05  -0.10
  68   1    -0.06  -0.02  -0.01     0.11   0.03   0.00    -0.46  -0.07  -0.03
  69   1     0.01  -0.05  -0.03     0.02  -0.11   0.04    -0.06  -0.06  -0.18
  70   1     0.04  -0.01   0.01    -0.02   0.01  -0.01     0.01   0.02   0.03
  71   1     0.05   0.01   0.02    -0.03   0.01  -0.01    -0.03  -0.04   0.00
  72   1     0.02  -0.04  -0.01    -0.02   0.03   0.00    -0.03  -0.01   0.00
  73   1     0.03  -0.03   0.01    -0.01   0.00  -0.01     0.00   0.03  -0.01
  74   1     0.02   0.01  -0.03    -0.02  -0.01   0.02    -0.03   0.00   0.03
  75   1    -0.03   0.01   0.00     0.01   0.02   0.00     0.01   0.02   0.01
  76   1    -0.04  -0.02   0.00     0.02   0.00   0.01     0.05   0.01   0.02
  77   1     0.02  -0.06  -0.02     0.00   0.00   0.00     0.00   0.00   0.00
  78   1     0.01  -0.01  -0.04     0.00   0.01   0.02     0.02   0.02   0.04
  79   1    -0.02  -0.03   0.02     0.00   0.01  -0.01     0.01   0.02  -0.04
  80   1     0.11   0.12  -0.01    -0.17  -0.15   0.03     0.06   0.00  -0.05
  81   1    -0.16   0.13  -0.05     0.20  -0.18   0.07    -0.06   0.03   0.03
  82   1    -0.07  -0.11  -0.02     0.07   0.16  -0.01    -0.02  -0.10   0.02
  83   1    -0.03  -0.02  -0.02     0.01   0.00   0.02     0.01   0.04   0.03
  84   1     0.00   0.03   0.02     0.00  -0.01  -0.01     0.01   0.03   0.02
  85   1    -0.05   0.02   0.00     0.03  -0.02   0.00     0.00   0.00   0.02
  86   1    -0.01   0.02   0.02     0.01   0.00   0.00     0.02  -0.01  -0.01
  87   1    -0.01  -0.03  -0.01     0.01   0.03   0.03     0.01   0.06   0.02
  88   1    -0.04  -0.01   0.01     0.03   0.01   0.00     0.04   0.03   0.00
  89   1    -0.02   0.00  -0.01     0.01  -0.02   0.01     0.01  -0.02   0.01
  90   1    -0.02   0.00  -0.01     0.02  -0.01   0.03     0.02  -0.01   0.05
  91   1    -0.01   0.02   0.02     0.00  -0.03   0.00     0.01  -0.03   0.00
  92   1     0.02   0.01   0.02     0.02  -0.03  -0.01     0.03  -0.06  -0.03
  93   1     0.03  -0.01  -0.03     0.01  -0.02   0.01     0.00  -0.01   0.00
  94   1     0.02   0.01   0.01     0.00  -0.01   0.03    -0.02  -0.03   0.03
  95   1     0.02   0.01   0.02    -0.01   0.02   0.01    -0.04   0.04   0.03
  96   1     0.02   0.00   0.02     0.00  -0.01   0.02    -0.01  -0.02   0.03
  97   1    -0.01   0.04   0.01     0.00   0.00   0.01    -0.01   0.00   0.02
  98   1    -0.03   0.04   0.02    -0.01  -0.01   0.00    -0.01  -0.02   0.00
  99   1     0.02   0.00   0.05    -0.01  -0.01   0.00    -0.02  -0.03   0.00
 100   1     0.01  -0.01   0.04    -0.02   0.01  -0.01    -0.05   0.02  -0.02
 101   1     0.03  -0.03  -0.01     0.00  -0.01   0.01    -0.02  -0.02   0.00
 102   1     0.00   0.01  -0.02     0.02  -0.02   0.00     0.03  -0.04  -0.02
 103   1     0.03   0.02   0.02    -0.02  -0.02   0.01    -0.02  -0.03   0.00
 104   1     0.19  -0.05  -0.02    -0.06   0.01   0.00    -0.07   0.01   0.01
 105   1     0.33   0.07   0.12    -0.11  -0.04  -0.04    -0.15  -0.06  -0.06
 106   1     0.20  -0.11  -0.07    -0.07   0.02   0.02    -0.08   0.02   0.03
 107   1     0.02  -0.32  -0.08     0.00   0.10   0.03     0.03   0.05   0.02
 108   1    -0.14  -0.14  -0.07     0.07   0.04   0.02     0.09   0.01   0.01
 109   1    -0.34  -0.16  -0.14     0.13   0.04   0.04     0.14   0.01   0.02
                    73                     74                     75
                     A                      A                      A
 Frequencies --   418.3943               436.9219               443.8182
 Red. masses --     4.8254                 3.2046                 3.4232
 Frc consts  --     0.4977                 0.3604                 0.3973
 IR Inten    --     3.8784                 0.9382                 4.1389
 Atom AN      X      Y      Z        X      Y      Z        X      Y      Z
   1   8     0.07  -0.05  -0.02     0.00   0.00   0.00     0.01  -0.01   0.00
   2  12     0.03  -0.04  -0.14     0.01   0.00  -0.01     0.01   0.00  -0.04
   3   8    -0.05  -0.10  -0.02     0.00   0.00  -0.01    -0.04   0.02  -0.05
   4   6    -0.04   0.06   0.09     0.00   0.00   0.00     0.00   0.01   0.01
   5   7    -0.01   0.03  -0.02    -0.01   0.05  -0.09    -0.01  -0.11   0.17
   6   7     0.00   0.03  -0.02     0.02  -0.09   0.17     0.00  -0.05   0.10
   7   8     0.05   0.06  -0.07     0.00   0.00   0.00     0.01   0.01   0.00
   8   6    -0.01   0.03   0.01    -0.01   0.04  -0.07    -0.01  -0.04   0.06
   9   6    -0.01   0.03   0.03    -0.01   0.02  -0.01     0.00   0.04  -0.05
  10   6     0.00   0.02   0.01    -0.01  -0.04   0.09     0.00   0.00   0.00
  11   8     0.03  -0.03  -0.05     0.00   0.00   0.00     0.00   0.01  -0.02
  12   6     0.09   0.04  -0.04     0.00   0.00   0.00     0.00   0.00   0.01
  13   6     0.04   0.09   0.03     0.00   0.00   0.00    -0.02   0.00   0.01
  14   6    -0.14   0.07   0.13     0.00   0.00   0.00    -0.02   0.01   0.01
  15   8     0.21  -0.09   0.00     0.01   0.00   0.01     0.06  -0.02   0.03
  16   6     0.01  -0.02   0.03     0.00   0.00   0.00     0.00  -0.01   0.01
  17   6     0.00   0.00   0.00     0.00   0.00   0.00     0.00   0.00   0.00
  18   6     0.00   0.00   0.00     0.00   0.00   0.00     0.00   0.00   0.00
  19   6     0.00   0.00   0.00     0.00   0.00   0.00     0.00   0.00   0.00
  20   8    -0.01   0.01   0.01     0.00   0.00   0.00    -0.01   0.00   0.01
  21   6     0.01   0.00   0.00     0.01   0.00   0.00     0.01   0.00   0.00
  22   6    -0.04   0.08   0.12     0.00   0.00   0.00     0.00   0.01   0.00
  23   6    -0.24  -0.04   0.01    -0.01   0.00   0.00    -0.02   0.00   0.00
  24   6     0.00   0.01   0.03     0.00  -0.01   0.02    -0.01   0.01  -0.03
  25   6     0.00   0.00   0.01    -0.01   0.02  -0.02    -0.03   0.02   0.00
  26   6     0.00   0.00   0.02     0.00  -0.01   0.03     0.00   0.00  -0.03
  27   6     0.00   0.01   0.01    -0.01   0.02   0.00     0.02  -0.04   0.02
  28   6     0.01   0.00  -0.02     0.00   0.01  -0.02     0.02  -0.02   0.04
  29   6     0.01   0.00  -0.02     0.01   0.01  -0.01     0.00  -0.02   0.01
  30   6     0.01   0.00   0.01     0.01  -0.01   0.03     0.00   0.02  -0.06
  31   6    -0.01  -0.03   0.02    -0.03  -0.03   0.04     0.04   0.04  -0.05
  32   6     0.02  -0.01   0.01     0.05  -0.04   0.05    -0.08   0.09  -0.11
  33   6    -0.01  -0.02   0.00    -0.01   0.03  -0.02    -0.02   0.01   0.01
  34   6    -0.01  -0.01  -0.01    -0.01   0.02   0.04    -0.01   0.01   0.02
  35   6    -0.02  -0.01  -0.01     0.02  -0.02   0.04     0.02  -0.01   0.02
  36   6     0.00  -0.01   0.00    -0.01   0.00   0.02     0.00   0.01   0.02
  37   6     0.00  -0.01   0.02    -0.03   0.04  -0.05    -0.02   0.04  -0.02
  38   6    -0.01  -0.02   0.00     0.03   0.04  -0.04     0.01  -0.01   0.00
  39   6     0.00  -0.01   0.03    -0.08   0.01  -0.15    -0.04   0.00  -0.10
  40   6     0.02   0.01   0.01     0.02   0.04   0.02    -0.02  -0.05  -0.03
  41   6    -0.01  -0.04  -0.02    -0.01  -0.05  -0.03     0.01   0.06   0.03
  42   6    -0.01  -0.02  -0.01    -0.01  -0.07  -0.03     0.01   0.14   0.05
  43   6     0.00   0.02   0.00    -0.01   0.06   0.04     0.02  -0.11  -0.08
  44   6    -0.01   0.02   0.01     0.10  -0.08  -0.11     0.07  -0.05  -0.08
  45   6     0.01  -0.01  -0.01    -0.06   0.09   0.07    -0.03   0.05   0.04
  46   6     0.02   0.00   0.00    -0.04   0.02   0.01     0.01  -0.01   0.01
  47   6    -0.01   0.01   0.01     0.05  -0.04  -0.03     0.00   0.00  -0.01
  48   6     0.02   0.02   0.01    -0.01  -0.01   0.00     0.00   0.00   0.00
  49   6    -0.02   0.00   0.00    -0.01   0.01   0.00    -0.01  -0.01   0.00
  50   1    -0.01   0.02   0.04     0.00   0.04  -0.03     0.00   0.08  -0.11
  51   1    -0.03   0.14   0.04     0.01   0.00   0.00     0.00   0.00   0.02
  52   1    -0.21   0.14   0.06     0.00   0.00   0.00    -0.02   0.02   0.00
  53   1    -0.01  -0.07   0.08     0.00   0.00   0.00     0.00  -0.02   0.02
  54   1    -0.01   0.05   0.02     0.00   0.00   0.00     0.00  -0.01   0.01
  55   1    -0.02  -0.01   0.06     0.00   0.00   0.00     0.00  -0.01   0.01
  56   1     0.00   0.00  -0.01     0.01   0.01   0.00     0.00   0.01   0.00
  57   1     0.00   0.00  -0.01     0.00   0.00   0.00    -0.01   0.00   0.00
  58   1     0.00   0.00   0.00     0.00   0.00   0.00     0.00   0.00   0.00
  59   1     0.00   0.00   0.00     0.00   0.00   0.00     0.00   0.00   0.00
  60   1    -0.01   0.00  -0.02     0.00   0.00  -0.01    -0.01   0.00  -0.01
  61   1     0.02  -0.01  -0.01     0.01   0.00   0.00     0.01   0.00   0.00
  62   1     0.02  -0.01  -0.02     0.01   0.00  -0.01     0.01  -0.01  -0.01
  63   1     0.03  -0.01   0.02     0.01   0.00   0.01     0.02  -0.01   0.01
  64   1    -0.11  -0.07   0.06    -0.01   0.00  -0.01     0.00   0.02   0.00
  65   1    -0.07   0.09   0.15    -0.01   0.00   0.01    -0.01   0.01   0.01
  66   1    -0.12   0.19   0.24     0.00   0.00   0.00     0.01   0.00  -0.01
  67   1    -0.19  -0.06  -0.05    -0.01   0.00   0.00    -0.01  -0.01   0.00
  68   1    -0.50  -0.07  -0.01    -0.01   0.00   0.00    -0.04  -0.01   0.00
  69   1    -0.12  -0.11  -0.15     0.00   0.00   0.00    -0.02  -0.01   0.00
  70   1    -0.01   0.02   0.00    -0.03   0.02  -0.02     0.04  -0.03   0.04
  71   1     0.01  -0.03  -0.05     0.00   0.00  -0.04     0.03   0.00   0.06
  72   1     0.01  -0.03  -0.04     0.03   0.01  -0.03    -0.04  -0.03   0.05
  73   1    -0.01  -0.03   0.01    -0.03  -0.02   0.03     0.04   0.03  -0.04
  74   1     0.02  -0.01   0.00     0.05  -0.04   0.05    -0.07   0.10  -0.13
  75   1    -0.01  -0.02  -0.01     0.01   0.02   0.05     0.00  -0.01   0.02
  76   1    -0.03   0.00  -0.02     0.06  -0.05   0.04     0.06  -0.03   0.01
  77   1     0.01   0.01   0.00    -0.02  -0.05   0.03     0.00  -0.02   0.02
  78   1    -0.01  -0.02  -0.01     0.04   0.03  -0.02     0.01  -0.01   0.01
  79   1     0.00  -0.01   0.03    -0.07   0.01  -0.16    -0.04   0.01  -0.11
  80   1    -0.04   0.01   0.05     0.05   0.08   0.05    -0.07  -0.10  -0.06
  81   1     0.07  -0.02  -0.04     0.01   0.05  -0.07    -0.02  -0.06   0.09
  82   1     0.04   0.10  -0.01     0.04   0.06   0.05    -0.05  -0.08  -0.07
  83   1     0.00  -0.05  -0.04     0.00  -0.06  -0.07    -0.01   0.08   0.08
  84   1    -0.01  -0.06  -0.03    -0.02  -0.10  -0.05     0.02   0.15   0.06
  85   1     0.01  -0.01  -0.03     0.02   0.02  -0.05    -0.03  -0.01   0.06
  86   1    -0.02  -0.02  -0.02    -0.04  -0.10  -0.07     0.06   0.21   0.14
  87   1    -0.01  -0.05  -0.02    -0.01  -0.17  -0.07     0.02   0.31   0.12
  88   1    -0.02   0.01  -0.02    -0.06   0.03  -0.07     0.10  -0.06   0.12
  89   1    -0.01   0.03   0.01    -0.04   0.13   0.07     0.06  -0.24  -0.14
  90   1    -0.02   0.01  -0.03    -0.06   0.05  -0.09     0.10  -0.09   0.17
  91   1    -0.01   0.04   0.02    -0.02   0.13   0.10     0.03  -0.22  -0.18
  92   1    -0.04   0.04   0.02     0.23  -0.14  -0.08     0.14  -0.08  -0.06
  93   1    -0.02   0.02   0.03     0.20  -0.15  -0.25     0.13  -0.10  -0.17
  94   1     0.00   0.02  -0.03     0.09  -0.05   0.11     0.07  -0.03   0.05
  95   1     0.03  -0.04  -0.03    -0.09   0.23   0.18    -0.07   0.14   0.12
  96   1    -0.01   0.02  -0.04     0.10  -0.10   0.20     0.06  -0.07   0.13
  97   1     0.02  -0.02  -0.02    -0.13   0.23   0.11    -0.08   0.13   0.07
  98   1     0.03   0.00   0.00    -0.10   0.05   0.02     0.01   0.00   0.01
  99   1     0.01   0.03  -0.01    -0.01  -0.06   0.08     0.01  -0.01   0.02
 100   1     0.04  -0.02   0.00    -0.09   0.05   0.02     0.01  -0.01   0.02
 101   1     0.00   0.03   0.00     0.05  -0.08  -0.02    -0.02   0.01  -0.01
 102   1    -0.04   0.03   0.02     0.10  -0.07  -0.06     0.00   0.00  -0.02
 103   1     0.01   0.02  -0.01    -0.01  -0.05   0.03     0.01   0.00  -0.03
 104   1     0.02   0.01   0.00     0.02   0.04   0.07    -0.02  -0.02  -0.04
 105   1     0.04   0.03   0.02     0.00  -0.06   0.05     0.01   0.02  -0.01
 106   1     0.02   0.02   0.01    -0.03  -0.09  -0.03     0.02   0.04   0.01
 107   1     0.00  -0.02  -0.01     0.02   0.03  -0.04    -0.01  -0.03   0.02
 108   1    -0.03   0.00  -0.01    -0.10   0.05  -0.02     0.01  -0.02   0.01
 109   1    -0.04   0.00  -0.01     0.04   0.02  -0.04    -0.04  -0.01   0.01
                    76                     77                     78
                     A                      A                      A
 Frequencies --   447.1356               449.0929               453.6420
 Red. masses --     3.7576                 3.2331                 4.6355
 Frc consts  --     0.4426                 0.3842                 0.5621
 IR Inten    --     5.7214                 3.9022                 9.3695
 Atom AN      X      Y      Z        X      Y      Z        X      Y      Z
   1   8     0.01  -0.03   0.01     0.00  -0.01   0.01     0.02  -0.06   0.03
   2  12    -0.03  -0.01   0.00     0.00  -0.01   0.01     0.01  -0.01   0.03
   3   8    -0.04   0.09  -0.04    -0.01   0.04  -0.01    -0.09   0.22  -0.06
   4   6     0.00   0.01   0.02     0.00   0.00   0.00     0.01   0.01   0.03
   5   7     0.03   0.01   0.02     0.03   0.02  -0.02    -0.02   0.02  -0.05
   6   7     0.02  -0.02   0.02    -0.03   0.01  -0.06    -0.01   0.02  -0.02
   7   8     0.01   0.01   0.00     0.00   0.00   0.00     0.03   0.00   0.01
   8   6    -0.02  -0.02  -0.01     0.01  -0.02  -0.01     0.01   0.02  -0.01
   9   6    -0.02  -0.01  -0.02     0.01  -0.04   0.00     0.01   0.00   0.02
  10   6    -0.03  -0.01   0.00     0.01  -0.01  -0.03     0.01   0.01   0.00
  11   8    -0.01   0.05  -0.04    -0.01   0.02  -0.01    -0.02   0.12  -0.07
  12   6    -0.02  -0.02   0.00    -0.01  -0.01   0.00    -0.06  -0.06   0.01
  13   6    -0.06  -0.03   0.00    -0.03  -0.01   0.00    -0.16  -0.09   0.00
  14   6    -0.02   0.03  -0.01     0.00   0.01  -0.01    -0.03   0.05  -0.03
  15   8     0.08  -0.03   0.04     0.02  -0.01   0.01     0.20  -0.02   0.10
  16   6     0.01  -0.04   0.03     0.00  -0.02   0.01     0.01  -0.08   0.06
  17   6     0.00   0.00   0.00     0.00   0.00   0.00     0.00   0.00   0.00
  18   6     0.00   0.00   0.00     0.00   0.00   0.01     0.00  -0.01   0.00
  19   6     0.00   0.00   0.00     0.00   0.00   0.00     0.00   0.00   0.00
  20   8     0.00   0.00   0.01    -0.01   0.00   0.00    -0.02   0.00   0.01
  21   6    -0.01   0.00   0.01     0.01  -0.01  -0.01     0.00  -0.01   0.00
  22   6     0.02  -0.03  -0.05     0.01  -0.01  -0.02     0.05  -0.08  -0.12
  23   6    -0.01   0.00   0.01     0.00   0.00   0.00    -0.02   0.00   0.01
  24   6     0.04   0.15   0.11     0.03   0.08   0.06    -0.02  -0.08  -0.06
  25   6     0.09  -0.07  -0.03    -0.10   0.07   0.03    -0.03   0.03   0.01
  26   6     0.01   0.11   0.05     0.00   0.08   0.03     0.00  -0.07  -0.02
  27   6     0.00   0.02   0.03    -0.01   0.02   0.01     0.00  -0.01  -0.02
  28   6    -0.03  -0.06  -0.01    -0.04  -0.03  -0.02     0.02   0.03   0.00
  29   6     0.00   0.01   0.05    -0.01   0.01   0.03     0.00  -0.01  -0.03
  30   6     0.01   0.08   0.08     0.00   0.04   0.06    -0.01  -0.05  -0.04
  31   6     0.00   0.02  -0.11    -0.01   0.02  -0.07    -0.02  -0.03   0.09
  32   6     0.01  -0.06  -0.01     0.02  -0.06   0.02     0.00   0.03   0.01
  33   6     0.05  -0.04  -0.04    -0.06   0.04   0.07    -0.01   0.01   0.00
  34   6     0.02  -0.02   0.00    -0.01   0.03   0.00     0.00   0.00  -0.01
  35   6    -0.03   0.00   0.02     0.06   0.02  -0.02     0.00   0.00  -0.01
  36   6     0.01  -0.03   0.01     0.00   0.05  -0.02    -0.01   0.00  -0.01
  37   6     0.05  -0.05  -0.01    -0.05   0.07   0.01    -0.02   0.00   0.01
  38   6     0.00   0.07  -0.07    -0.01  -0.11   0.13     0.00  -0.01   0.00
  39   6    -0.01   0.02   0.04     0.01  -0.01  -0.06     0.02  -0.01   0.02
  40   6    -0.06  -0.05  -0.12    -0.04  -0.03  -0.07     0.04   0.06   0.09
  41   6     0.02   0.00   0.06     0.02   0.00   0.04    -0.02  -0.03  -0.05
  42   6    -0.01  -0.08   0.01    -0.01  -0.08   0.00     0.00   0.04  -0.02
  43   6     0.01   0.02  -0.06     0.00   0.04  -0.01     0.00   0.00   0.03
  44   6    -0.02   0.01   0.05     0.04  -0.02  -0.07    -0.01   0.01   0.01
  45   6     0.00   0.02  -0.03    -0.01  -0.02   0.03     0.01  -0.03   0.00
  46   6    -0.09   0.06  -0.03     0.14  -0.10   0.03     0.01  -0.01   0.01
  47   6     0.05  -0.04   0.01    -0.09   0.07   0.00     0.00   0.00  -0.01
  48   6     0.03  -0.06  -0.03     0.01  -0.02  -0.01    -0.02   0.04   0.02
  49   6    -0.01   0.05   0.03     0.02  -0.04  -0.02     0.00  -0.02  -0.01
  50   1     0.00   0.01  -0.03     0.01  -0.05   0.01     0.00  -0.01   0.04
  51   1    -0.02  -0.06   0.00    -0.01  -0.02   0.00    -0.05  -0.16   0.00
  52   1    -0.03   0.04  -0.02    -0.01   0.01  -0.01    -0.03   0.07  -0.04
  53   1     0.01  -0.05   0.04     0.01  -0.02   0.01     0.02  -0.10   0.08
  54   1     0.01  -0.03   0.03     0.00  -0.02   0.01     0.02  -0.07   0.07
  55   1     0.01  -0.02   0.03     0.00  -0.01   0.01     0.02  -0.05   0.06
  56   1     0.00  -0.01   0.00     0.01   0.02   0.00     0.00   0.01   0.00
  57   1     0.00   0.00   0.00    -0.01  -0.01   0.01    -0.01  -0.01   0.01
  58   1     0.00   0.00  -0.01     0.00   0.00   0.01     0.00   0.00   0.00
  59   1     0.00   0.00   0.00     0.00   0.00   0.00     0.00  -0.01   0.00
  60   1     0.00   0.00  -0.01     0.00   0.00   0.00    -0.01   0.00  -0.02
  61   1     0.01  -0.01   0.00     0.00   0.00   0.00     0.02  -0.01  -0.01
  62   1    -0.01   0.00   0.01     0.01  -0.01  -0.02     0.01  -0.02  -0.02
  63   1     0.00   0.01   0.01     0.02  -0.01   0.00     0.03  -0.01   0.01
  64   1     0.08   0.08   0.01     0.03   0.03   0.01     0.19   0.20   0.02
  65   1     0.05  -0.05  -0.08     0.02  -0.02  -0.03     0.12  -0.13  -0.21
  66   1     0.08  -0.10  -0.13     0.03  -0.04  -0.05     0.19  -0.26  -0.34
  67   1     0.03   0.00   0.02     0.02   0.00   0.01     0.06  -0.01   0.01
  68   1    -0.02   0.01   0.00     0.01   0.01   0.00     0.00  -0.03   0.03
  69   1    -0.03  -0.03   0.01    -0.01  -0.01   0.01    -0.07  -0.04   0.05
  70   1     0.01  -0.09  -0.04     0.00  -0.04  -0.03    -0.01   0.05   0.02
  71   1    -0.04  -0.19  -0.12    -0.05  -0.12  -0.08     0.02   0.10   0.06
  72   1    -0.01  -0.08  -0.03     0.00  -0.04  -0.02     0.01   0.03   0.00
  73   1    -0.01   0.02  -0.13    -0.02   0.02  -0.09    -0.01  -0.03   0.11
  74   1     0.01  -0.07  -0.03     0.01  -0.07   0.03     0.00   0.04   0.02
  75   1    -0.02   0.04   0.03     0.03  -0.05  -0.05     0.01  -0.01  -0.02
  76   1    -0.11   0.06   0.04     0.15  -0.06  -0.05     0.02  -0.02  -0.01
  77   1    -0.05   0.01   0.02     0.05   0.01  -0.03     0.01   0.00  -0.01
  78   1    -0.01   0.08  -0.08     0.00  -0.11   0.15     0.01  -0.01   0.00
  79   1    -0.02   0.03   0.04     0.02  -0.02  -0.07     0.02  -0.02   0.03
  80   1    -0.11  -0.07  -0.11    -0.07  -0.05  -0.08     0.14   0.12   0.10
  81   1    -0.08  -0.04  -0.02    -0.03  -0.04  -0.01     0.01   0.09  -0.04
  82   1    -0.10  -0.07  -0.19    -0.05  -0.04  -0.11     0.07   0.05   0.16
  83   1     0.07   0.12   0.18     0.05   0.08   0.11    -0.03  -0.11  -0.15
  84   1     0.05   0.06   0.12     0.03   0.03   0.07    -0.04  -0.11  -0.10
  85   1    -0.01  -0.19   0.13     0.00  -0.13   0.08     0.02   0.13  -0.10
  86   1    -0.02  -0.02   0.05    -0.02  -0.08  -0.01     0.01   0.00  -0.04
  87   1    -0.01  -0.11   0.00    -0.01  -0.13  -0.03     0.00   0.05  -0.02
  88   1    -0.04  -0.11   0.04    -0.04  -0.05  -0.01     0.02   0.07  -0.03
  89   1     0.03   0.09   0.01     0.00   0.12   0.05    -0.02  -0.04   0.00
  90   1     0.01   0.02  -0.15    -0.01   0.04  -0.13    -0.01  -0.01   0.07
  91   1     0.01   0.04  -0.08     0.00   0.08  -0.01    -0.01  -0.01   0.05
  92   1    -0.02  -0.01   0.03     0.05  -0.01  -0.05    -0.04   0.04   0.02
  93   1    -0.04   0.01   0.08     0.06  -0.04  -0.10    -0.02   0.02   0.03
  94   1    -0.04   0.00   0.06     0.05  -0.01  -0.05     0.00   0.01  -0.04
  95   1     0.04  -0.03  -0.05    -0.07   0.06   0.08     0.01  -0.04  -0.02
  96   1    -0.02   0.08  -0.06     0.03  -0.11   0.09    -0.01  -0.01  -0.02
  97   1     0.01   0.02  -0.04    -0.02  -0.02   0.06     0.03  -0.05  -0.01
  98   1    -0.15   0.05  -0.02     0.27  -0.11   0.02     0.01   0.00   0.01
  99   1    -0.07  -0.03   0.03     0.09   0.06  -0.09     0.01   0.00   0.01
 100   1    -0.17   0.11  -0.06     0.26  -0.17   0.06     0.02  -0.02   0.02
 101   1     0.13  -0.12   0.01    -0.22   0.21   0.00    -0.01   0.01  -0.01
 102   1     0.13  -0.10   0.00    -0.22   0.16   0.03    -0.01   0.01  -0.01
 103   1    -0.06  -0.05   0.15     0.08   0.09  -0.22     0.01   0.00  -0.02
 104   1     0.03  -0.09  -0.06     0.01  -0.03  -0.02    -0.01   0.06   0.05
 105   1     0.09  -0.03   0.00     0.02  -0.02  -0.01    -0.05   0.01   0.01
 106   1     0.04  -0.10  -0.07     0.01  -0.02  -0.02    -0.03   0.05   0.04
 107   1    -0.06   0.11   0.04     0.02  -0.06  -0.01     0.03  -0.05  -0.02
 108   1     0.00   0.05   0.03     0.03  -0.04  -0.02     0.00  -0.02  -0.01
 109   1     0.05   0.06   0.06    -0.01  -0.04  -0.03    -0.03  -0.02  -0.03
                    79                     80                     81
                     A                      A                      A
 Frequencies --   459.6132               461.4022               510.7197
 Red. masses --     2.9385                 3.3551                 3.3327
 Frc consts  --     0.3657                 0.4208                 0.5122
 IR Inten    --     1.2532                 4.5064                 0.4025
 Atom AN      X      Y      Z        X      Y      Z        X      Y      Z
   1   8     0.00   0.00   0.00     0.00   0.00   0.00     0.00   0.00   0.00
   2  12     0.02   0.00  -0.01     0.00  -0.01   0.00     0.03   0.01   0.01
   3   8    -0.02   0.00  -0.02     0.00   0.01   0.00     0.00   0.00   0.00
   4   6     0.00   0.00   0.00     0.00   0.00   0.00     0.00   0.00   0.00
   5   7    -0.01  -0.04   0.04    -0.03   0.00   0.02     0.11  -0.08  -0.06
   6   7    -0.01  -0.01   0.04     0.03   0.05  -0.05    -0.02   0.12   0.03
   7   8     0.00   0.00   0.00     0.00   0.00   0.00     0.00   0.00   0.00
   8   6     0.01   0.00   0.02    -0.01   0.01   0.02     0.14  -0.05  -0.08
   9   6     0.02   0.02   0.00    -0.02   0.02   0.02     0.13   0.01   0.02
  10   6     0.01   0.01   0.01    -0.02   0.03  -0.01     0.01   0.09   0.10
  11   8     0.00   0.00   0.00     0.00   0.01   0.00     0.00   0.00   0.00
  12   6     0.00   0.00   0.01     0.00   0.00   0.00     0.00   0.00   0.00
  13   6     0.00   0.00   0.01    -0.01  -0.01   0.00     0.00   0.00   0.00
  14   6    -0.01   0.00   0.00     0.00   0.00   0.00     0.00   0.00   0.00
  15   8     0.02   0.00   0.01     0.01   0.01   0.01     0.00   0.00   0.00
  16   6     0.00   0.00   0.00     0.00   0.00   0.00     0.00   0.00   0.00
  17   6     0.00   0.00   0.00    -0.01   0.00   0.00     0.00   0.00   0.00
  18   6     0.00   0.00   0.00     0.00   0.00   0.00     0.00   0.00   0.00
  19   6     0.00   0.00   0.00     0.00   0.00   0.00     0.00   0.00   0.00
  20   8     0.00   0.00   0.00     0.00   0.01   0.00     0.00   0.00   0.00
  21   6     0.01   0.00   0.00    -0.01   0.01   0.01     0.00   0.00   0.00
  22   6     0.00   0.01   0.01     0.00   0.00  -0.01     0.00   0.00   0.00
  23   6    -0.01   0.00   0.00     0.00   0.00   0.00     0.00   0.00   0.00
  24   6    -0.01  -0.08  -0.07    -0.02  -0.06  -0.05     0.07  -0.05  -0.04
  25   6    -0.06   0.05   0.02     0.14  -0.11  -0.03     0.00   0.07   0.03
  26   6    -0.01  -0.03  -0.08     0.00  -0.04  -0.05    -0.03   0.06   0.00
  27   6     0.00  -0.01  -0.03     0.01  -0.01  -0.02    -0.04   0.04   0.03
  28   6    -0.01   0.03   0.02     0.02   0.03   0.01    -0.08  -0.06  -0.02
  29   6    -0.01  -0.03  -0.02     0.00  -0.02  -0.03     0.00   0.01   0.07
  30   6    -0.01  -0.07  -0.02    -0.01  -0.05  -0.03     0.01  -0.01   0.04
  31   6     0.08   0.09  -0.10     0.05   0.04  -0.03    -0.08   0.03  -0.02
  32   6     0.06  -0.03   0.10     0.04  -0.01   0.05    -0.06  -0.01   0.00
  33   6    -0.04   0.04  -0.01     0.10  -0.10   0.00     0.02  -0.04  -0.03
  34   6    -0.02   0.01   0.00     0.03  -0.04   0.00     0.02  -0.05  -0.02
  35   6     0.01  -0.02  -0.01    -0.06   0.03   0.01    -0.09   0.01   0.01
  36   6    -0.02   0.01   0.01     0.04  -0.06  -0.01     0.04  -0.05   0.02
  37   6    -0.04   0.02   0.02     0.08  -0.07  -0.04     0.02  -0.02   0.02
  38   6     0.04   0.03  -0.05    -0.10  -0.06   0.07    -0.04  -0.03  -0.04
  39   6     0.03  -0.02   0.03    -0.09   0.04  -0.06    -0.04  -0.02  -0.01
  40   6    -0.04  -0.09  -0.05    -0.01  -0.03   0.00     0.00  -0.01  -0.02
  41   6     0.02   0.16   0.05     0.01   0.08   0.01     0.01  -0.01   0.01
  42   6     0.00  -0.07  -0.05     0.00  -0.03  -0.03     0.01   0.02   0.00
  43   6    -0.02   0.07   0.10    -0.01   0.04   0.07     0.01  -0.01  -0.02
  44   6    -0.01   0.02   0.00     0.04  -0.04  -0.01     0.01   0.00  -0.01
  45   6     0.02  -0.05   0.00    -0.05   0.12  -0.01    -0.01   0.02   0.00
  46   6    -0.03   0.02   0.01     0.05  -0.02  -0.04    -0.01   0.02  -0.01
  47   6     0.05  -0.03  -0.04    -0.10   0.07   0.10     0.00   0.01   0.01
  48   6    -0.02   0.03   0.03     0.00   0.01   0.01    -0.07   0.05   0.03
  49   6     0.00  -0.03  -0.01    -0.02   0.05   0.02    -0.06  -0.07  -0.04
  50   1     0.01   0.03  -0.02    -0.02   0.02   0.03     0.23   0.04   0.05
  51   1     0.00   0.00   0.01    -0.01  -0.01   0.00     0.00   0.00   0.00
  52   1     0.00   0.01   0.00     0.00   0.00   0.00     0.00  -0.01   0.00
  53   1     0.00   0.00   0.00     0.00  -0.01   0.00     0.00   0.00   0.00
  54   1     0.00   0.00   0.00     0.00   0.00   0.00     0.00   0.00   0.00
  55   1     0.00   0.00   0.00     0.00   0.00   0.00     0.00   0.00   0.00
  56   1     0.01   0.01   0.00    -0.01  -0.02   0.00     0.00   0.00   0.00
  57   1    -0.01   0.00   0.00     0.01   0.00  -0.01     0.00   0.00   0.00
  58   1     0.00   0.00   0.00     0.00   0.01  -0.01     0.00   0.00   0.00
  59   1     0.00   0.00   0.00     0.00   0.00   0.00     0.00   0.00   0.00
  60   1     0.00   0.00  -0.01     0.00   0.00   0.01     0.00   0.00   0.00
  61   1     0.01   0.00   0.00    -0.01   0.00   0.00     0.00   0.00   0.00
  62   1     0.01  -0.01  -0.01    -0.01   0.01   0.02     0.00   0.00   0.00
  63   1     0.01  -0.01   0.00    -0.02   0.01   0.00     0.00  -0.01   0.00
  64   1     0.00   0.01   0.00     0.02   0.02   0.00     0.00   0.00   0.00
  65   1     0.00   0.01   0.01     0.01  -0.01  -0.01     0.00   0.00   0.00
  66   1     0.00   0.00   0.00     0.02  -0.02  -0.03     0.00   0.00   0.01
  67   1    -0.01   0.00  -0.01     0.00   0.00  -0.01     0.00   0.00   0.01
  68   1    -0.01  -0.01   0.01     0.00  -0.01   0.00     0.00   0.01   0.00
  69   1    -0.01   0.00   0.00    -0.01   0.00   0.01     0.00   0.00   0.00
  70   1     0.02   0.04   0.03     0.01   0.03   0.02     0.01   0.02   0.05
  71   1     0.00   0.11   0.09     0.02   0.10   0.08    -0.09  -0.11  -0.10
  72   1     0.00   0.03   0.02     0.00   0.02   0.00     0.05   0.05   0.07
  73   1     0.08   0.11  -0.09     0.05   0.04  -0.02    -0.09   0.05  -0.04
  74   1     0.05  -0.04   0.13     0.04  -0.01   0.07    -0.06   0.00  -0.01
  75   1     0.03  -0.02   0.00    -0.07   0.05   0.02     0.04  -0.04   0.01
  76   1     0.07  -0.07  -0.02    -0.22   0.16   0.05    -0.17   0.08   0.01
  77   1     0.02  -0.01   0.00    -0.04   0.00   0.01     0.08  -0.05   0.01
  78   1     0.05   0.02  -0.06    -0.11  -0.04   0.07    -0.04  -0.02  -0.06
  79   1     0.03  -0.04   0.04    -0.10   0.07  -0.08    -0.04  -0.01  -0.01
  80   1    -0.14  -0.21  -0.15    -0.04  -0.07  -0.04     0.00  -0.05  -0.08
  81   1    -0.03  -0.11   0.20    -0.01  -0.03   0.10     0.04  -0.04  -0.03
  82   1    -0.09  -0.16  -0.13    -0.04  -0.07  -0.04     0.04   0.02   0.05
  83   1    -0.03   0.16   0.14    -0.04   0.05   0.03     0.09   0.07   0.03
  84   1     0.05   0.33   0.11     0.02   0.16   0.03     0.01  -0.09   0.01
  85   1    -0.06   0.02   0.11    -0.04   0.05   0.03     0.04  -0.07   0.02
  86   1    -0.04  -0.15  -0.13    -0.03  -0.07  -0.07     0.05  -0.02   0.00
  87   1    -0.01  -0.19  -0.09    -0.01  -0.10  -0.05     0.01   0.10   0.00
  88   1    -0.06   0.10  -0.11    -0.04   0.07  -0.06     0.05   0.00   0.00
  89   1    -0.07   0.12   0.11    -0.05   0.05   0.05     0.05   0.01   0.02
  90   1    -0.08   0.05  -0.02    -0.05   0.03   0.01     0.04   0.00  -0.01
  91   1    -0.03   0.14   0.21    -0.02   0.08   0.14     0.02  -0.04  -0.10
  92   1    -0.06   0.06   0.02     0.14  -0.11  -0.02     0.03   0.01   0.02
  93   1    -0.04   0.04   0.03     0.10  -0.10  -0.10     0.04  -0.01  -0.06
  94   1     0.00   0.02  -0.08     0.02  -0.03   0.18     0.02   0.01   0.02
  95   1     0.00  -0.06  -0.02     0.02   0.14   0.04     0.04   0.01   0.01
  96   1    -0.01  -0.03  -0.01     0.04   0.09   0.03     0.02   0.02   0.00
  97   1     0.04  -0.10   0.00    -0.11   0.26  -0.01    -0.03   0.08  -0.01
  98   1    -0.10   0.06   0.02     0.17  -0.08  -0.05    -0.02   0.05  -0.01
  99   1     0.00  -0.06   0.09    -0.02   0.14  -0.17    -0.01   0.04   0.00
 100   1    -0.08   0.04   0.02     0.15  -0.08  -0.05     0.03  -0.01   0.01
 101   1     0.04  -0.07  -0.03    -0.03   0.12   0.07     0.08   0.00   0.00
 102   1     0.11  -0.07  -0.08    -0.21   0.14   0.19    -0.03   0.03   0.06
 103   1     0.00  -0.05  -0.01    -0.01   0.12   0.07     0.00   0.03   0.06
 104   1    -0.02   0.05   0.04     0.00  -0.01  -0.01    -0.07   0.20   0.17
 105   1    -0.06   0.01   0.00     0.02   0.03   0.00    -0.31  -0.11  -0.07
 106   1    -0.03   0.06   0.05     0.01   0.02   0.01    -0.12   0.17   0.17
 107   1     0.03  -0.08  -0.01    -0.04   0.09   0.01     0.16  -0.26  -0.13
 108   1     0.00  -0.03  -0.01    -0.01   0.02   0.02    -0.18  -0.08  -0.08
 109   1    -0.06  -0.04  -0.04     0.01   0.05   0.07    -0.27  -0.09  -0.13
                    82                     83                     84
                     A                      A                      A
 Frequencies --   529.1829               532.7770               544.9956
 Red. masses --     4.7588                 3.9212                 7.2913
 Frc consts  --     0.7852                 0.6558                 1.2760
 IR Inten    --     1.1299                 0.0647                31.4415
 Atom AN      X      Y      Z        X      Y      Z        X      Y      Z
   1   8     0.00  -0.01   0.01     0.00   0.00   0.00     0.01  -0.08   0.04
   2  12     0.00   0.02  -0.04     0.00   0.00  -0.01     0.05  -0.04  -0.21
   3   8     0.04   0.00   0.11     0.01   0.00   0.03     0.19  -0.06   0.30
   4   6     0.00   0.00   0.00     0.00   0.00   0.00     0.02   0.04   0.02
   5   7    -0.12  -0.05  -0.06    -0.03  -0.01   0.01     0.03   0.02   0.01
   6   7     0.16   0.08   0.05     0.03   0.00  -0.01    -0.05  -0.01  -0.04
   7   8     0.01   0.00   0.01     0.00   0.00   0.00     0.05   0.00   0.04
   8   6    -0.08  -0.08   0.06    -0.01   0.14  -0.19     0.02   0.02  -0.01
   9   6    -0.03   0.12   0.09    -0.02   0.02   0.01     0.00  -0.03  -0.02
  10   6     0.09   0.13  -0.03     0.00  -0.11   0.20    -0.02  -0.03   0.01
  11   8    -0.01   0.02  -0.02     0.00   0.01  -0.01    -0.13   0.15  -0.16
  12   6    -0.02  -0.01  -0.01     0.00   0.00   0.00    -0.10   0.00   0.00
  13   6    -0.02  -0.02   0.02    -0.01   0.00   0.01     0.02  -0.08   0.09
  14   6    -0.01   0.01  -0.02     0.00   0.00  -0.01    -0.09   0.11  -0.19
  15   8    -0.03   0.02  -0.02    -0.01   0.00   0.00    -0.12   0.06   0.00
  16   6     0.00  -0.02   0.01     0.00  -0.01   0.00     0.01  -0.13   0.08
  17   6     0.00   0.00   0.00     0.00   0.00   0.00     0.00   0.01   0.00
  18   6     0.00   0.00   0.00     0.00   0.00   0.00     0.00   0.00   0.00
  19   6     0.00   0.00   0.00     0.00   0.00   0.00     0.00   0.00   0.00
  20   8     0.00   0.00   0.00     0.00   0.00   0.00     0.00   0.00   0.00
  21   6     0.00   0.00   0.00     0.00   0.00   0.00     0.00   0.01   0.00
  22   6     0.01  -0.01   0.00     0.00   0.00   0.00     0.03   0.00   0.02
  23   6     0.01   0.00   0.00     0.00   0.00   0.00     0.00   0.00   0.01
  24   6    -0.08  -0.02  -0.02    -0.02  -0.04   0.01     0.02   0.02   0.03
  25   6     0.11   0.05   0.03     0.06  -0.02  -0.04    -0.05   0.01   0.01
  26   6     0.02   0.00   0.05    -0.08  -0.01   0.03    -0.02  -0.01  -0.01
  27   6     0.04   0.03   0.07    -0.07  -0.06   0.08    -0.03  -0.04  -0.02
  28   6     0.06  -0.08  -0.07     0.02  -0.04   0.03    -0.01   0.04   0.04
  29   6     0.02   0.08   0.02     0.10  -0.05   0.05     0.01  -0.04   0.00
  30   6     0.01   0.08   0.00     0.08  -0.02  -0.02     0.01  -0.02   0.00
  31   6     0.05  -0.03   0.00    -0.02   0.04  -0.03    -0.02   0.02   0.00
  32   6     0.07   0.00  -0.03     0.06   0.04  -0.05    -0.01   0.01   0.00
  33   6    -0.02   0.02  -0.05     0.05   0.08   0.00    -0.03  -0.03   0.01
  34   6    -0.07   0.05  -0.05     0.04   0.11  -0.07    -0.01  -0.07   0.05
  35   6     0.00  -0.12  -0.05     0.03  -0.02  -0.07    -0.01   0.03   0.04
  36   6    -0.06   0.01   0.05    -0.08  -0.02  -0.10     0.05   0.01   0.04
  37   6    -0.05   0.01   0.08    -0.06  -0.06  -0.02     0.04   0.03  -0.01
  38   6    -0.04  -0.07  -0.06     0.02   0.01   0.06     0.00   0.00  -0.02
  39   6    -0.08  -0.09   0.01    -0.05  -0.06   0.05     0.05   0.05  -0.02
  40   6    -0.01   0.01  -0.01    -0.01  -0.01  -0.04     0.00   0.00   0.00
  41   6     0.00  -0.01   0.00     0.00   0.04   0.01     0.00   0.01   0.00
  42   6    -0.01  -0.03   0.01     0.00   0.05   0.00     0.00   0.01   0.00
  43   6     0.00  -0.01  -0.02     0.00  -0.02  -0.02     0.00   0.00   0.00
  44   6     0.01   0.01  -0.03    -0.02   0.02   0.04     0.00  -0.01  -0.01
  45   6     0.02  -0.02   0.00     0.02  -0.03   0.00    -0.01   0.02   0.00
  46   6     0.01   0.00   0.01     0.03  -0.03   0.02    -0.01   0.01  -0.01
  47   6     0.01   0.00   0.00    -0.02   0.02   0.02     0.01  -0.01  -0.01
  48   6    -0.11  -0.07  -0.06     0.00   0.00   0.01     0.04   0.03   0.02
  49   6     0.11  -0.02  -0.01     0.00   0.03   0.01    -0.04   0.01   0.00
  50   1     0.00   0.11   0.11    -0.02   0.03  -0.01    -0.01  -0.03  -0.03
  51   1    -0.04  -0.01   0.01    -0.01   0.00   0.00     0.00  -0.07   0.09
  52   1    -0.01   0.02  -0.03     0.00   0.00  -0.01    -0.10   0.16  -0.23
  53   1     0.00  -0.02   0.01     0.00  -0.01   0.00     0.03  -0.15   0.11
  54   1     0.00  -0.02   0.01     0.00  -0.01   0.00     0.03  -0.13   0.10
  55   1     0.00  -0.01   0.01     0.00   0.00   0.00     0.03  -0.07   0.07
  56   1     0.01   0.01   0.00     0.00   0.00   0.00     0.00   0.01   0.00
  57   1     0.00   0.00   0.00     0.00   0.00   0.00     0.00   0.01   0.00
  58   1     0.00   0.00   0.01     0.00   0.00   0.00     0.00   0.00   0.00
  59   1     0.00   0.01   0.00     0.00   0.00   0.00     0.00   0.00   0.00
  60   1     0.00   0.00   0.00     0.00   0.00   0.00     0.00   0.00   0.00
  61   1     0.00   0.00   0.00     0.00   0.00   0.00     0.00   0.00   0.00
  62   1     0.00   0.00   0.00     0.00   0.00   0.00     0.00   0.00   0.01
  63   1     0.00   0.01   0.00     0.00   0.00   0.00     0.00   0.01   0.00
  64   1     0.05   0.05   0.04     0.01   0.01   0.01     0.06   0.08   0.06
  65   1     0.04  -0.02  -0.04     0.01   0.00  -0.01     0.08   0.08   0.01
  66   1     0.03  -0.04  -0.06     0.01  -0.01  -0.01     0.02  -0.06  -0.10
  67   1     0.04   0.00   0.01     0.01   0.00   0.00     0.24  -0.02   0.06
  68   1     0.03   0.01   0.00     0.01   0.00   0.00     0.19  -0.03   0.05
  69   1    -0.02  -0.02   0.02    -0.01   0.00   0.01    -0.25  -0.13   0.22
  70   1     0.01   0.07   0.07    -0.08  -0.06   0.08    -0.02  -0.06  -0.03
  71   1     0.05  -0.19  -0.14     0.02   0.04  -0.05     0.00   0.09   0.06
  72   1    -0.03   0.06   0.04     0.08  -0.04   0.08     0.02  -0.07  -0.03
  73   1     0.05  -0.04   0.00    -0.04   0.09  -0.07    -0.02   0.03  -0.01
  74   1     0.07  -0.01  -0.04     0.06   0.08  -0.10    -0.01   0.01  -0.01
  75   1    -0.07   0.10   0.00     0.02   0.13  -0.07     0.01  -0.09   0.03
  76   1     0.09  -0.20  -0.07     0.05  -0.08   0.04    -0.03   0.07  -0.01
  77   1    -0.02   0.09   0.03    -0.11   0.03  -0.10     0.05  -0.03   0.04
  78   1    -0.04  -0.07  -0.07     0.02   0.00   0.13     0.00   0.01  -0.05
  79   1    -0.08  -0.11   0.02    -0.06  -0.09   0.10     0.04   0.07  -0.04
  80   1    -0.01   0.05   0.05    -0.04  -0.05  -0.07     0.01  -0.01  -0.03
  81   1    -0.05   0.04  -0.01     0.01  -0.03   0.01     0.00   0.00   0.01
  82   1    -0.05  -0.01  -0.08    -0.01  -0.01  -0.03     0.00  -0.01   0.02
  83   1    -0.04  -0.04   0.00     0.01   0.07   0.04     0.01   0.03   0.01
  84   1     0.00   0.04   0.00     0.01   0.05   0.01     0.00   0.00   0.00
  85   1    -0.03  -0.01   0.00     0.00  -0.01   0.02     0.01   0.00   0.00
  86   1    -0.07   0.07   0.04    -0.03   0.11   0.03     0.01   0.00   0.00
  87   1    -0.02  -0.13   0.02    -0.01   0.01   0.01     0.00   0.03   0.00
  88   1    -0.06  -0.07   0.04    -0.02   0.00   0.02     0.01   0.01   0.00
  89   1    -0.04  -0.02  -0.05    -0.03  -0.08  -0.09     0.01  -0.01   0.00
  90   1    -0.04  -0.02  -0.04    -0.03  -0.03   0.04     0.01   0.00   0.01
  91   1    -0.01   0.03   0.05    -0.01  -0.01   0.03     0.00  -0.01  -0.01
  92   1     0.02   0.13   0.10    -0.04   0.08   0.10     0.00  -0.07  -0.08
  93   1     0.08   0.01  -0.16     0.00   0.02   0.00    -0.03  -0.01   0.04
  94   1     0.07   0.05  -0.07     0.01   0.04  -0.01    -0.03  -0.04   0.01
  95   1     0.11  -0.06   0.01     0.10  -0.09  -0.02    -0.07   0.06   0.01
  96   1     0.07  -0.01   0.00     0.03   0.03  -0.04    -0.03  -0.02   0.02
  97   1    -0.03   0.09  -0.01     0.01   0.02  -0.02     0.01  -0.04   0.01
  98   1    -0.03   0.11   0.01     0.08  -0.06   0.02    -0.03   0.02  -0.01
  99   1     0.03   0.04   0.05     0.01  -0.01  -0.02    -0.01   0.00   0.01
 100   1     0.09  -0.06   0.09     0.02  -0.02   0.01    -0.02   0.02  -0.01
 101   1     0.10   0.02  -0.03    -0.08   0.05   0.03     0.02  -0.02  -0.01
 102   1    -0.05   0.04   0.08    -0.03   0.02   0.01     0.02  -0.01  -0.02
 103   1     0.03   0.03   0.03     0.00   0.01  -0.03     0.00  -0.01   0.00
 104   1    -0.16  -0.13  -0.16     0.12   0.16   0.26     0.05   0.04   0.04
 105   1    -0.12  -0.01  -0.13    -0.01  -0.14   0.15     0.04   0.02   0.04
 106   1    -0.06   0.06  -0.02    -0.12  -0.27  -0.06     0.03   0.00   0.01
 107   1     0.11  -0.10   0.04     0.09   0.10  -0.14    -0.04   0.03  -0.02
 108   1     0.22  -0.09   0.01    -0.30   0.17  -0.05    -0.08   0.03  -0.01
 109   1    -0.04  -0.03   0.04     0.19   0.03  -0.12     0.00   0.01  -0.02
                    85                     86                     87
                     A                      A                      A
 Frequencies --   550.8687               559.7019               567.9839
 Red. masses --     4.5184                 4.6332                 4.5892
 Frc consts  --     0.8078                 0.8551                 0.8723
 IR Inten    --     0.3659                 1.0987                37.3877
 Atom AN      X      Y      Z        X      Y      Z        X      Y      Z
   1   8     0.00   0.01   0.00     0.00   0.01   0.00    -0.01   0.05  -0.03
   2  12     0.02   0.01   0.02    -0.02   0.00   0.02     0.03  -0.02  -0.16
   3   8    -0.02   0.01  -0.01    -0.02   0.01  -0.02    -0.07   0.10   0.23
   4   6     0.00  -0.01   0.00     0.00   0.00   0.00    -0.01  -0.03  -0.01
   5   7    -0.12   0.03  -0.06     0.06   0.08  -0.08     0.02  -0.01   0.03
   6   7    -0.06  -0.02  -0.08     0.05   0.07  -0.09    -0.01   0.00  -0.02
   7   8    -0.01   0.00   0.00    -0.01   0.00  -0.01    -0.03  -0.02  -0.02
   8   6    -0.04   0.08  -0.01     0.00   0.00  -0.04     0.02   0.01   0.00
   9   6    -0.03   0.00   0.04    -0.01  -0.04   0.05     0.00  -0.01  -0.02
  10   6     0.04  -0.04  -0.04    -0.01   0.04  -0.04    -0.03  -0.03   0.02
  11   8     0.02  -0.02   0.02     0.02  -0.02   0.02     0.10  -0.08   0.10
  12   6     0.01   0.00  -0.01     0.01   0.00   0.00     0.05  -0.06  -0.06
  13   6    -0.02   0.01  -0.01    -0.01   0.01  -0.01    -0.20  -0.02   0.03
  14   6     0.01  -0.01   0.03     0.01  -0.01   0.02     0.08  -0.07   0.15
  15   8     0.01   0.00  -0.01     0.01  -0.01   0.00     0.00   0.02  -0.08
  16   6     0.00   0.02  -0.01     0.00   0.01  -0.01    -0.01   0.08  -0.05
  17   6     0.00   0.00   0.00     0.00   0.00   0.00     0.00   0.00   0.00
  18   6     0.00   0.00   0.00     0.00   0.00   0.00     0.00   0.00   0.00
  19   6     0.00   0.00   0.00     0.00   0.00   0.00     0.00   0.00   0.00
  20   8     0.00   0.00   0.00     0.00   0.00   0.00     0.00   0.00   0.00
  21   6     0.00   0.00   0.00     0.00   0.00  -0.01     0.00   0.00   0.00
  22   6     0.00   0.00   0.00     0.00   0.00   0.00     0.01  -0.02  -0.02
  23   6     0.00   0.00   0.00     0.00   0.00   0.00     0.02   0.00  -0.01
  24   6    -0.10  -0.10  -0.06     0.06   0.05   0.07     0.01  -0.01   0.00
  25   6    -0.13   0.04   0.01     0.11  -0.04   0.01     0.02  -0.03   0.00
  26   6    -0.07  -0.01   0.05    -0.08   0.01  -0.01     0.02   0.00   0.00
  27   6    -0.05  -0.02   0.16    -0.10  -0.13  -0.01     0.02   0.03  -0.01
  28   6     0.05  -0.14  -0.03    -0.01   0.08   0.13    -0.01  -0.01  -0.03
  29   6     0.10   0.03   0.09     0.08  -0.16   0.01    -0.02   0.02   0.00
  30   6     0.08   0.05  -0.04     0.08  -0.07  -0.02    -0.02   0.00   0.01
  31   6    -0.01   0.02  -0.03    -0.10   0.07  -0.02     0.02  -0.01   0.00
  32   6     0.15   0.05  -0.07     0.03   0.04  -0.02    -0.03  -0.01   0.01
  33   6    -0.04  -0.06   0.00    -0.07  -0.04  -0.04    -0.02   0.00   0.01
  34   6     0.02  -0.14   0.07    -0.15  -0.01   0.07    -0.03   0.00   0.02
  35   6    -0.07   0.08   0.08     0.08  -0.13   0.03     0.03  -0.02   0.00
  36   6     0.10  -0.02   0.06    -0.03   0.09   0.16    -0.01   0.03   0.02
  37   6     0.06   0.05  -0.03     0.04   0.07   0.05     0.01   0.01   0.00
  38   6    -0.02  -0.01  -0.04    -0.05  -0.08  -0.10     0.00   0.00   0.00
  39   6     0.09   0.10  -0.03     0.04   0.03  -0.03     0.02   0.01  -0.01
  40   6    -0.01  -0.01  -0.03     0.00  -0.01  -0.01     0.00   0.00   0.00
  41   6     0.00   0.02   0.01     0.01   0.03   0.00     0.00  -0.01   0.00
  42   6    -0.01   0.00   0.01     0.00   0.05  -0.01     0.00   0.00   0.00
  43   6     0.00  -0.01  -0.03     0.00  -0.01   0.01     0.00   0.00   0.00
  44   6     0.01  -0.01   0.00     0.02   0.00  -0.04     0.00   0.00  -0.01
  45   6    -0.02   0.03   0.00     0.00   0.00   0.00     0.00   0.00   0.00
  46   6    -0.02   0.02  -0.01    -0.01   0.01   0.00     0.00   0.00   0.00
  47   6     0.01  -0.01  -0.01     0.02  -0.01  -0.02     0.01   0.00  -0.01
  48   6     0.01   0.03   0.02    -0.01  -0.03  -0.03     0.04   0.04   0.03
  49   6     0.09  -0.02  -0.02    -0.03   0.02   0.01    -0.06   0.02   0.01
  50   1    -0.11  -0.06   0.08     0.01  -0.05   0.09     0.00   0.00  -0.04
  51   1    -0.02   0.01  -0.01    -0.01   0.01  -0.02    -0.29   0.01  -0.02
  52   1     0.01  -0.03   0.04     0.01  -0.02   0.03     0.08  -0.10   0.18
  53   1     0.00   0.02  -0.02     0.00   0.02  -0.01    -0.02   0.10  -0.07
  54   1     0.00   0.02  -0.01     0.00   0.02  -0.01    -0.02   0.09  -0.07
  55   1     0.00   0.01  -0.01     0.00   0.01  -0.01    -0.02   0.05  -0.05
  56   1     0.00   0.00   0.00     0.01   0.00   0.00     0.00   0.01   0.00
  57   1     0.00   0.00   0.00     0.00   0.00   0.00     0.00   0.00   0.00
  58   1     0.00   0.00   0.00     0.00   0.00   0.01     0.00   0.00   0.00
  59   1     0.00   0.00   0.00     0.00   0.00   0.00     0.00   0.00   0.00
  60   1     0.00   0.00   0.00     0.00   0.00   0.00     0.00   0.00   0.00
  61   1     0.00   0.00   0.00     0.00   0.00   0.00     0.00   0.00   0.00
  62   1     0.00   0.00   0.00     0.00   0.00   0.00     0.00   0.00   0.01
  63   1     0.00  -0.01   0.00     0.00   0.01  -0.01     0.00   0.01   0.00
  64   1     0.01   0.02   0.02     0.00   0.00   0.00     0.22   0.26   0.26
  65   1     0.01  -0.02  -0.02     0.00  -0.01  -0.01     0.16  -0.17  -0.23
  66   1     0.01  -0.01  -0.01     0.00   0.00   0.00     0.15  -0.18  -0.19
  67   1    -0.03   0.00   0.00    -0.04   0.00  -0.02    -0.15   0.01  -0.06
  68   1    -0.02   0.01  -0.01    -0.02  -0.01   0.00    -0.13   0.02  -0.04
  69   1     0.04   0.01  -0.03     0.03   0.02  -0.02     0.22   0.10  -0.17
  70   1    -0.06   0.04   0.20    -0.08  -0.21  -0.05     0.02   0.05   0.00
  71   1     0.03  -0.16  -0.19    -0.01   0.27   0.13    -0.01  -0.03  -0.02
  72   1     0.04   0.07   0.18     0.09  -0.19  -0.02     0.00   0.05   0.00
  73   1    -0.03   0.05  -0.06    -0.11   0.10  -0.04     0.02  -0.02   0.00
  74   1     0.15   0.06  -0.11     0.03   0.07  -0.05    -0.03  -0.02   0.01
  75   1     0.08  -0.19   0.06    -0.19   0.06   0.11    -0.04   0.01   0.01
  76   1    -0.14   0.17   0.01     0.21  -0.19  -0.11     0.06  -0.03  -0.02
  77   1     0.14  -0.13   0.06    -0.09   0.15   0.17    -0.05   0.04   0.02
  78   1    -0.02   0.00  -0.08    -0.05  -0.08  -0.14     0.01   0.00  -0.01
  79   1     0.09   0.12  -0.06     0.05   0.04  -0.07     0.01   0.02  -0.01
  80   1    -0.03  -0.02  -0.04     0.00  -0.09  -0.12    -0.02   0.00   0.02
  81   1    -0.01  -0.01  -0.01     0.06  -0.06   0.01     0.00   0.00   0.01
  82   1    -0.02  -0.01  -0.05     0.05   0.01   0.10    -0.01   0.01  -0.03
  83   1     0.00   0.04   0.03     0.08   0.11   0.03    -0.01  -0.01   0.00
  84   1     0.00   0.04   0.01     0.00  -0.06   0.00     0.00   0.01   0.01
  85   1    -0.01  -0.02   0.02     0.05  -0.01   0.01    -0.01  -0.01   0.00
  86   1    -0.11   0.17   0.06     0.01   0.05   0.00     0.02  -0.04  -0.01
  87   1    -0.03  -0.15   0.03     0.00   0.05  -0.01     0.01   0.03   0.00
  88   1    -0.09  -0.06   0.05     0.00   0.05  -0.01     0.02   0.00  -0.01
  89   1    -0.09  -0.10  -0.14    -0.01  -0.06  -0.04     0.02   0.02   0.03
  90   1    -0.08  -0.04   0.00    -0.01  -0.01   0.06     0.02   0.01  -0.01
  91   1    -0.03   0.03   0.13     0.00  -0.01   0.03     0.01  -0.01  -0.04
  92   1     0.01  -0.12  -0.12     0.03  -0.02  -0.05     0.00  -0.02  -0.03
  93   1    -0.06  -0.01   0.11     0.01   0.01  -0.02    -0.01   0.00   0.01
  94   1    -0.05  -0.05   0.04     0.00  -0.02  -0.03    -0.01  -0.01   0.00
  95   1    -0.13   0.09   0.00    -0.06   0.05   0.02    -0.02   0.01   0.00
  96   1    -0.06  -0.02   0.02    -0.01  -0.05   0.03     0.00  -0.01   0.01
  97   1     0.02  -0.09   0.02     0.01  -0.04   0.02     0.01  -0.02   0.01
  98   1    -0.04   0.04  -0.01    -0.07   0.14   0.00    -0.01   0.00   0.00
  99   1    -0.01   0.01   0.01     0.03   0.04   0.07     0.00  -0.01   0.01
 100   1    -0.01   0.01  -0.01     0.08  -0.06   0.09     0.00   0.00   0.00
 101   1     0.05  -0.02  -0.01     0.14  -0.01  -0.05     0.00  -0.01   0.00
 102   1     0.01  -0.01   0.00    -0.04   0.03   0.06     0.01   0.00  -0.02
 103   1    -0.01   0.00   0.02     0.04   0.03   0.03     0.01   0.00  -0.01
 104   1     0.04   0.03   0.04     0.00  -0.03  -0.02     0.04   0.05   0.05
 105   1     0.05   0.03   0.05     0.00  -0.02  -0.02     0.03   0.02   0.03
 106   1     0.00  -0.04  -0.01    -0.02  -0.05  -0.03     0.03   0.03   0.03
 107   1     0.06   0.00   0.00    -0.05   0.03   0.03    -0.05   0.04  -0.01
 108   1     0.11  -0.02  -0.01     0.02   0.00   0.02    -0.11   0.05   0.00
 109   1     0.11  -0.02  -0.01    -0.03   0.02   0.03     0.00   0.02  -0.01
                    88                     89                     90
                     A                      A                      A
 Frequencies --   569.8349               574.7310               613.6382
 Red. masses --     4.1229                 3.8547                 3.1336
 Frc consts  --     0.7888                 0.7502                 0.6952
 IR Inten    --     0.5368                 1.3697                 0.9046
 Atom AN      X      Y      Z        X      Y      Z        X      Y      Z
   1   8     0.00   0.01  -0.01     0.00  -0.01   0.00     0.00   0.00   0.00
   2  12     0.00   0.00  -0.02    -0.01   0.01   0.03     0.00   0.00   0.01
   3   8    -0.02   0.02   0.03     0.00  -0.01  -0.04     0.00   0.00  -0.01
   4   6     0.00  -0.01   0.00     0.00   0.00   0.00     0.00   0.00   0.00
   5   7    -0.02  -0.01   0.02    -0.02  -0.09   0.13    -0.01   0.01  -0.01
   6   7     0.03   0.03   0.01     0.01   0.07  -0.13    -0.02   0.04  -0.10
   7   8    -0.01   0.00  -0.01     0.00   0.00   0.00     0.00   0.00   0.00
   8   6    -0.07   0.00  -0.07    -0.01   0.09  -0.14     0.00   0.04  -0.05
   9   6    -0.02   0.05   0.04     0.00   0.01   0.00     0.00  -0.04   0.04
  10   6     0.08   0.00   0.06     0.01  -0.09   0.14     0.00   0.00  -0.02
  11   8     0.02  -0.02   0.03    -0.01   0.01  -0.01     0.00   0.00   0.00
  12   6     0.01  -0.01  -0.01    -0.01   0.01   0.01     0.00   0.00   0.00
  13   6    -0.03   0.00   0.00     0.03   0.00  -0.01     0.00   0.00  -0.01
  14   6     0.02  -0.02   0.04    -0.01   0.01  -0.02     0.00   0.00   0.00
  15   8     0.00   0.00  -0.01     0.00   0.00   0.01     0.00   0.00   0.00
  16   6     0.00   0.02  -0.01     0.00  -0.01   0.01     0.00   0.00   0.00
  17   6     0.00   0.00   0.00     0.00   0.00   0.00     0.00   0.00   0.00
  18   6     0.00   0.00   0.00     0.00   0.00   0.00     0.00   0.00   0.00
  19   6     0.00   0.00   0.00     0.00   0.00   0.00     0.00   0.00   0.00
  20   8     0.00   0.00   0.00     0.00   0.00   0.00     0.00   0.00   0.00
  21   6     0.00   0.00   0.00     0.00   0.00   0.00     0.00   0.00   0.00
  22   6     0.00  -0.01  -0.01     0.00   0.00   0.00     0.00   0.00   0.00
  23   6     0.00   0.00   0.00     0.00   0.00   0.00     0.00   0.00   0.00
  24   6     0.00   0.13   0.14    -0.03  -0.01   0.01    -0.01  -0.04   0.05
  25   6    -0.11   0.14   0.03     0.03   0.00  -0.03     0.00  -0.06   0.13
  26   6     0.01  -0.02   0.02     0.07  -0.02   0.02    -0.01  -0.04   0.05
  27   6    -0.02  -0.09  -0.08     0.06   0.08  -0.04    -0.03   0.01   0.01
  28   6     0.03   0.14   0.09     0.01   0.01  -0.08     0.00   0.02  -0.04
  29   6    -0.01  -0.09  -0.10    -0.06   0.09  -0.05     0.03   0.01  -0.01
  30   6    -0.01  -0.01   0.00    -0.06   0.02   0.03     0.02  -0.02   0.03
  31   6     0.05  -0.02   0.00     0.12  -0.06   0.01     0.08  -0.03  -0.01
  32   6    -0.02   0.00   0.00    -0.08  -0.03   0.03    -0.06  -0.01   0.01
  33   6     0.01   0.00  -0.03    -0.05  -0.01  -0.05    -0.01  -0.10   0.10
  34   6     0.10  -0.07  -0.03    -0.07  -0.03   0.06    -0.07  -0.07  -0.02
  35   6    -0.13   0.08   0.02     0.03  -0.07   0.05     0.02   0.04  -0.08
  36   6     0.09  -0.08  -0.01    -0.01   0.04   0.11     0.08   0.08   0.02
  37   6    -0.01   0.01   0.02     0.04   0.04  -0.01     0.01   0.02   0.13
  38   6    -0.03  -0.02  -0.02    -0.06  -0.08  -0.08     0.08   0.12   0.06
  39   6    -0.02  -0.02   0.01     0.08   0.07  -0.02    -0.11  -0.10  -0.01
  40   6     0.00   0.00   0.01     0.00   0.01   0.00    -0.01   0.00  -0.02
  41   6     0.00   0.01   0.00     0.00  -0.01   0.00     0.01   0.02   0.00
  42   6     0.00   0.02   0.00     0.00  -0.02   0.00     0.00   0.02   0.00
  43   6     0.00   0.00   0.01     0.00   0.00  -0.01     0.00  -0.01  -0.02
  44   6     0.00   0.00   0.01     0.00   0.00   0.00     0.02  -0.02  -0.06
  45   6     0.00   0.00   0.00     0.00   0.00   0.00    -0.01   0.01   0.00
  46   6    -0.01   0.01  -0.01     0.00   0.00   0.01    -0.03   0.04  -0.03
  47   6    -0.01   0.00   0.01     0.01   0.00  -0.01     0.04  -0.01  -0.03
  48   6    -0.08  -0.11  -0.08    -0.01  -0.01  -0.01     0.00   0.01   0.00
  49   6     0.14  -0.05  -0.03     0.02   0.00   0.00     0.02   0.00  -0.01
  50   1    -0.01   0.04   0.04    -0.01   0.02  -0.01    -0.02  -0.05   0.04
  51   1    -0.05   0.01  -0.01     0.04   0.00   0.00     0.00   0.00  -0.01
  52   1     0.02  -0.02   0.04    -0.01   0.02  -0.02     0.00   0.00   0.00
  53   1     0.00   0.02  -0.02     0.00  -0.01   0.01     0.00   0.00   0.00
  54   1     0.00   0.02  -0.02     0.00  -0.01   0.01     0.00   0.00   0.00
  55   1     0.00   0.01  -0.01     0.00   0.00   0.00     0.00   0.00   0.00
  56   1     0.00   0.01   0.00     0.00   0.00   0.00     0.00   0.00   0.00
  57   1    -0.01   0.00   0.00     0.00   0.00   0.00     0.00   0.00   0.00
  58   1     0.00   0.00   0.00     0.00   0.00   0.00     0.00   0.00   0.00
  59   1     0.00   0.00   0.00     0.00   0.00   0.00     0.00   0.00   0.00
  60   1     0.00   0.00   0.00     0.00   0.00   0.00     0.00   0.00   0.00
  61   1     0.00   0.00   0.00     0.00   0.00   0.00     0.00   0.00   0.00
  62   1     0.00   0.00   0.00     0.00   0.00   0.00     0.00   0.00   0.00
  63   1     0.00  -0.01   0.00     0.00   0.00   0.00     0.00   0.00   0.00
  64   1     0.03   0.04   0.04    -0.03  -0.04  -0.04    -0.01  -0.01  -0.01
  65   1     0.03  -0.04  -0.04    -0.02   0.02   0.03    -0.01   0.00   0.00
  66   1     0.03  -0.03  -0.03    -0.02   0.02   0.03     0.00   0.00   0.00
  67   1    -0.04   0.00  -0.02     0.02   0.00   0.01     0.00   0.00   0.00
  68   1    -0.03  -0.01  -0.01     0.02   0.00   0.00     0.00   0.00   0.00
  69   1     0.05   0.03  -0.04    -0.02  -0.01   0.02     0.00   0.00   0.00
  70   1    -0.07  -0.18  -0.19     0.01   0.12  -0.04    -0.10   0.04  -0.01
  71   1     0.04   0.25   0.17     0.01  -0.09  -0.04     0.00   0.03  -0.07
  72   1    -0.02  -0.20  -0.18    -0.04   0.10  -0.06     0.07   0.03  -0.04
  73   1     0.05  -0.01   0.00     0.12  -0.07   0.02     0.07   0.00  -0.03
  74   1    -0.02   0.01   0.00    -0.08  -0.04   0.04    -0.05   0.01  -0.02
  75   1     0.21  -0.13  -0.02    -0.05   0.01   0.11    -0.19  -0.10  -0.12
  76   1    -0.23   0.16   0.05     0.08  -0.08  -0.03     0.00   0.09  -0.18
  77   1     0.23  -0.17  -0.04    -0.06   0.03   0.12     0.16   0.18  -0.01
  78   1    -0.03  -0.02  -0.02    -0.06  -0.08  -0.09     0.07   0.13  -0.03
  79   1    -0.02  -0.02   0.01     0.08   0.07  -0.03    -0.10  -0.06  -0.09
  80   1    -0.01   0.02   0.04    -0.01   0.08   0.12    -0.03   0.04   0.06
  81   1    -0.02   0.02   0.02    -0.06   0.06   0.01    -0.05   0.03   0.01
  82   1    -0.03  -0.01  -0.04    -0.07  -0.02  -0.12    -0.06  -0.02  -0.12
  83   1    -0.05  -0.03   0.00    -0.10  -0.11  -0.02    -0.08  -0.05   0.00
  84   1     0.00   0.07  -0.01     0.00   0.12   0.00     0.01   0.14   0.01
  85   1    -0.02   0.03  -0.01    -0.06   0.03  -0.01    -0.04   0.04   0.00
  86   1     0.02   0.00  -0.01     0.04  -0.08  -0.01     0.05  -0.04  -0.01
  87   1     0.00   0.04  -0.01     0.01   0.06   0.00     0.01   0.11  -0.01
  88   1     0.01   0.03  -0.01     0.04  -0.01  -0.01     0.04   0.02  -0.01
  89   1     0.01   0.00   0.01     0.05   0.06   0.06     0.05   0.02   0.03
  90   1     0.01   0.00   0.02     0.04   0.02  -0.03     0.04   0.01  -0.01
  91   1     0.00  -0.01  -0.01     0.01  -0.02  -0.10     0.01  -0.03  -0.10
  92   1    -0.01   0.03   0.03     0.00  -0.07  -0.08     0.05   0.13   0.12
  93   1     0.01   0.00  -0.02    -0.05   0.02   0.09     0.13  -0.04  -0.27
  94   1     0.01   0.02   0.00    -0.04  -0.03   0.01     0.10   0.05  -0.08
  95   1     0.03  -0.02   0.00    -0.10   0.05   0.00     0.13  -0.03   0.03
  96   1     0.01   0.01   0.00    -0.04  -0.03   0.01     0.08   0.01   0.01
  97   1    -0.01   0.03  -0.01     0.04  -0.10   0.02    -0.08   0.20  -0.03
  98   1    -0.01   0.04  -0.01    -0.05   0.14   0.00    -0.01  -0.15  -0.01
  99   1     0.00   0.03   0.00     0.03   0.04   0.06    -0.06  -0.06  -0.06
 100   1     0.03  -0.01   0.02     0.10  -0.08   0.10    -0.20   0.16  -0.17
 101   1     0.06   0.01   0.00     0.13   0.01  -0.04    -0.14  -0.06   0.03
 102   1    -0.03   0.02   0.06    -0.07   0.05   0.09     0.17  -0.10  -0.19
 103   1    -0.01   0.02   0.04     0.04   0.04   0.03    -0.03  -0.07  -0.05
 104   1    -0.06  -0.09  -0.04     0.09   0.12   0.21     0.04   0.05   0.07
 105   1    -0.04  -0.12  -0.02    -0.02  -0.13   0.11     0.00  -0.03   0.03
 106   1    -0.10  -0.20  -0.12    -0.11  -0.24  -0.05    -0.03  -0.07  -0.02
 107   1     0.21  -0.09  -0.06     0.12   0.05  -0.13     0.01   0.01  -0.01
 108   1     0.07  -0.02  -0.04    -0.23   0.12  -0.06     0.01   0.00  -0.01
 109   1     0.12  -0.06  -0.08     0.18   0.01  -0.12     0.03   0.00  -0.01
                    91                     92                     93
                     A                      A                      A
 Frequencies --   620.3158               642.7716               646.4205
 Red. masses --     3.1632                 3.6324                 3.1181
 Frc consts  --     0.7171                 0.8842                 0.7677
 IR Inten    --     0.1973                 4.3515                 0.7315
 Atom AN      X      Y      Z        X      Y      Z        X      Y      Z
   1   8     0.00   0.00   0.00     0.01   0.01   0.02     0.03   0.03   0.05
   2  12     0.00   0.00   0.00     0.01   0.00   0.01     0.00   0.00   0.00
   3   8     0.00   0.00   0.00     0.01   0.00   0.01     0.02  -0.01   0.02
   4   6     0.00   0.00   0.00     0.03  -0.02  -0.01     0.06  -0.04  -0.03
   5   7     0.01  -0.06   0.11    -0.02   0.00  -0.09     0.00   0.02  -0.03
   6   7    -0.01   0.04  -0.07    -0.05   0.06  -0.04     0.00   0.00  -0.02
   7   8     0.00   0.00   0.00    -0.01   0.03  -0.01    -0.02   0.06  -0.02
   8   6     0.00   0.01  -0.02     0.04  -0.10   0.09     0.01  -0.04   0.06
   9   6     0.00   0.01  -0.03     0.07   0.09  -0.09     0.01   0.01  -0.07
  10   6     0.00  -0.04   0.06     0.03  -0.01   0.14    -0.01  -0.05   0.06
  11   8     0.00   0.00   0.00    -0.02   0.00   0.01    -0.02   0.01   0.01
  12   6     0.00   0.00   0.00     0.00   0.04   0.01     0.01   0.08   0.03
  13   6     0.00   0.00   0.00     0.00   0.02  -0.03     0.00   0.03  -0.04
  14   6     0.00   0.00   0.00     0.00  -0.04  -0.01    -0.01  -0.09  -0.03
  15   8     0.00   0.00   0.00     0.01  -0.02   0.02     0.02  -0.03   0.03
  16   6     0.00   0.00   0.00     0.00   0.01   0.00     0.00   0.01   0.00
  17   6     0.00   0.00   0.00    -0.05  -0.03   0.00     0.15   0.10   0.02
  18   6     0.00   0.00   0.00    -0.01   0.02  -0.03     0.04  -0.07   0.10
  19   6     0.00   0.00   0.00     0.01   0.02  -0.01    -0.05  -0.07   0.02
  20   8     0.00   0.00   0.00     0.03   0.03   0.00    -0.08  -0.07  -0.02
  21   6     0.00   0.00   0.00     0.00  -0.02   0.05    -0.01   0.08  -0.14
  22   6     0.00   0.00   0.00     0.00  -0.02  -0.03    -0.01  -0.03  -0.04
  23   6     0.00   0.00   0.00    -0.02  -0.01   0.01    -0.04  -0.02   0.01
  24   6    -0.01   0.10  -0.10    -0.04   0.04   0.05     0.00   0.00   0.01
  25   6     0.00  -0.01   0.05     0.00  -0.06   0.00     0.01   0.01   0.00
  26   6     0.04   0.07  -0.10    -0.03  -0.08  -0.02    -0.02  -0.05  -0.03
  27   6     0.09  -0.02  -0.02    -0.05  -0.03   0.02    -0.02   0.01   0.02
  28   6     0.00  -0.04   0.08    -0.02   0.04   0.03    -0.02   0.00   0.00
  29   6    -0.11  -0.01   0.00    -0.03  -0.03  -0.05     0.00  -0.01  -0.01
  30   6    -0.06   0.08  -0.09     0.00   0.12   0.05     0.01   0.05   0.04
  31   6    -0.14   0.04   0.02     0.07  -0.03   0.01     0.02   0.00   0.00
  32   6     0.15   0.02  -0.03     0.07   0.01  -0.04     0.02   0.00  -0.01
  33   6     0.00  -0.04   0.03    -0.11   0.04   0.05     0.07  -0.04  -0.02
  34   6    -0.03  -0.03  -0.01    -0.04  -0.04   0.00     0.00   0.02   0.00
  35   6     0.00   0.01  -0.03     0.01  -0.06  -0.02     0.00   0.02   0.01
  36   6     0.04   0.03   0.02    -0.07   0.01  -0.02     0.03  -0.01   0.00
  37   6     0.00   0.01   0.06     0.11  -0.11  -0.06    -0.06   0.06   0.02
  38   6     0.02   0.03   0.01     0.06   0.05   0.06    -0.02  -0.01  -0.02
  39   6    -0.05  -0.04   0.00     0.03   0.06  -0.01     0.00  -0.02   0.00
  40   6     0.01   0.01   0.04     0.01   0.00   0.02     0.00   0.00   0.01
  41   6    -0.02  -0.05   0.00     0.01   0.02   0.00     0.00   0.01   0.00
  42   6     0.01  -0.06   0.01     0.00  -0.01   0.01     0.00  -0.01   0.00
  43   6     0.00   0.01   0.04     0.00  -0.01  -0.03     0.00  -0.01  -0.02
  44   6     0.01  -0.01  -0.02     0.00   0.00   0.01     0.00   0.00  -0.01
  45   6     0.00   0.00   0.00    -0.02   0.05  -0.01     0.01  -0.02   0.01
  46   6    -0.01   0.02  -0.01     0.02  -0.02   0.02    -0.01   0.01  -0.01
  47   6     0.02   0.00  -0.01     0.02   0.00  -0.02    -0.01   0.00   0.01
  48   6    -0.01  -0.01  -0.01    -0.02  -0.01   0.01     0.01   0.01   0.01
  49   6     0.01  -0.01   0.00     0.02  -0.02   0.00    -0.02   0.00   0.01
  50   1     0.00   0.01  -0.04     0.11   0.10  -0.07     0.01   0.01  -0.07
  51   1     0.00   0.00   0.00    -0.03   0.02  -0.06    -0.05   0.03  -0.10
  52   1     0.00   0.00   0.00    -0.01  -0.06   0.00    -0.01  -0.14   0.01
  53   1     0.00   0.00   0.00     0.00   0.02  -0.02    -0.01   0.05  -0.05
  54   1     0.00   0.00   0.00    -0.01   0.01  -0.02    -0.01   0.01  -0.03
  55   1     0.00   0.00   0.00    -0.01  -0.03   0.00    -0.02  -0.06   0.00
  56   1     0.00   0.00   0.00    -0.09  -0.12  -0.05     0.27   0.36   0.14
  57   1     0.00   0.00   0.00     0.07  -0.01  -0.05    -0.20   0.03   0.16
  58   1     0.00   0.00   0.00     0.00   0.03  -0.05     0.02  -0.08   0.15
  59   1     0.00   0.00   0.00     0.02   0.00  -0.02    -0.06  -0.04   0.06
  60   1     0.00   0.00   0.00     0.02   0.03   0.00    -0.08  -0.09  -0.01
  61   1     0.00   0.00   0.00     0.00  -0.01   0.01     0.00   0.04  -0.04
  62   1     0.00   0.00   0.00     0.06   0.00  -0.03    -0.19   0.02   0.11
  63   1     0.00   0.00   0.00     0.03  -0.10   0.10    -0.11   0.34  -0.31
  64   1     0.00   0.01   0.00     0.00  -0.03  -0.03    -0.01  -0.05  -0.03
  65   1     0.00   0.00   0.00     0.00  -0.03  -0.04     0.00  -0.03  -0.06
  66   1     0.00   0.00   0.00    -0.01  -0.01  -0.01    -0.03  -0.02  -0.03
  67   1    -0.01   0.00   0.00    -0.04   0.00   0.02    -0.10  -0.01   0.06
  68   1     0.00   0.00   0.00     0.02   0.00   0.00     0.04   0.01   0.01
  69   1     0.00   0.00   0.00    -0.02   0.00   0.02    -0.06   0.01   0.05
  70   1     0.22  -0.08   0.01    -0.08   0.00   0.02    -0.02   0.05   0.05
  71   1     0.01  -0.10   0.18    -0.02   0.05   0.02    -0.02   0.02   0.00
  72   1    -0.23  -0.06   0.07    -0.07  -0.16  -0.12    -0.01  -0.04  -0.03
  73   1    -0.12  -0.03   0.08     0.07  -0.01   0.00     0.02   0.00   0.01
  74   1     0.14  -0.04   0.05     0.07  -0.01  -0.04     0.02  -0.01  -0.02
  75   1    -0.07  -0.04  -0.04    -0.03  -0.10  -0.03    -0.04   0.06   0.02
  76   1     0.00   0.03  -0.08     0.00  -0.05  -0.03     0.01   0.02   0.01
  77   1     0.08   0.08   0.01    -0.23   0.12   0.02     0.10  -0.06  -0.01
  78   1     0.02   0.04  -0.02     0.07   0.05   0.03    -0.03  -0.01  -0.01
  79   1    -0.04  -0.03  -0.04     0.02   0.08  -0.02     0.00  -0.03   0.01
  80   1     0.07  -0.06  -0.09    -0.01   0.02   0.07     0.00  -0.01   0.01
  81   1     0.09  -0.05  -0.02    -0.02   0.02   0.06     0.00   0.00   0.04
  82   1     0.11   0.04   0.25    -0.03  -0.02  -0.05     0.00  -0.01   0.00
  83   1     0.14   0.07  -0.01    -0.09  -0.07  -0.02    -0.03  -0.02  -0.01
  84   1    -0.02  -0.28  -0.02     0.00   0.13  -0.01     0.00   0.05   0.00
  85   1     0.08  -0.07  -0.01    -0.04   0.07  -0.01    -0.01   0.04  -0.01
  86   1    -0.13   0.11   0.03    -0.07   0.11   0.04    -0.02   0.03   0.02
  87   1    -0.02  -0.30   0.02    -0.01  -0.11   0.02     0.00  -0.03   0.01
  88   1    -0.10  -0.07   0.03    -0.05  -0.06   0.04    -0.01  -0.03   0.02
  89   1    -0.12  -0.05  -0.09    -0.03  -0.02  -0.07     0.00   0.00  -0.02
  90   1    -0.09  -0.02   0.02    -0.03  -0.02  -0.05     0.00  -0.01  -0.03
  91   1    -0.03   0.08   0.26    -0.01   0.01   0.03     0.00   0.00  -0.02
  92   1     0.02   0.06   0.05     0.02  -0.09  -0.08    -0.01   0.03   0.02
  93   1     0.06  -0.02  -0.11    -0.03  -0.01   0.08     0.01   0.00  -0.03
  94   1     0.04   0.02  -0.03    -0.05  -0.03   0.07     0.02   0.01  -0.04
  95   1     0.06  -0.01   0.02    -0.03   0.05  -0.02     0.00  -0.01   0.01
  96   1     0.04   0.00   0.01    -0.05   0.06  -0.02     0.02  -0.04   0.01
  97   1    -0.03   0.08  -0.01    -0.01   0.02  -0.02     0.01  -0.03   0.01
  98   1    -0.01  -0.03  -0.01     0.02  -0.09   0.03     0.00   0.02  -0.02
  99   1    -0.02  -0.01  -0.02     0.02  -0.07   0.02    -0.02   0.03  -0.02
 100   1    -0.06   0.05  -0.05    -0.06   0.03  -0.03     0.01   0.00   0.00
 101   1    -0.03  -0.02   0.00    -0.14  -0.01   0.02     0.06   0.00  -0.01
 102   1     0.05  -0.03  -0.06     0.09  -0.05  -0.14    -0.03   0.02   0.05
 103   1    -0.01  -0.02  -0.01     0.01  -0.05  -0.09    -0.01   0.02   0.05
 104   1     0.03   0.02   0.05    -0.13  -0.06  -0.13    -0.04  -0.04  -0.07
 105   1     0.00  -0.04   0.02    -0.09   0.02  -0.11     0.01   0.04  -0.03
 106   1    -0.04  -0.08  -0.02     0.07   0.24   0.08     0.06   0.10   0.03
 107   1     0.06   0.01  -0.06     0.20  -0.08  -0.14     0.01   0.03  -0.04
 108   1    -0.11   0.05  -0.02    -0.22   0.05  -0.06    -0.13   0.06  -0.01
 109   1     0.08  -0.01  -0.06     0.02  -0.03  -0.12     0.06   0.00  -0.04
                    94                     95                     96
                     A                      A                      A
 Frequencies --   647.7352               650.4107               652.3558
 Red. masses --     4.1626                 3.6049                 4.1605
 Frc consts  --     1.0290                 0.8985                 1.0432
 IR Inten    --    12.1804                 9.0801                 1.5266
 Atom AN      X      Y      Z        X      Y      Z        X      Y      Z
   1   8    -0.06  -0.06  -0.11     0.02   0.02   0.03    -0.01  -0.01  -0.02
   2  12     0.00   0.00   0.02     0.01   0.01  -0.02     0.00   0.00   0.00
   3   8    -0.03   0.02  -0.06     0.01   0.00   0.02     0.00   0.00   0.00
   4   6    -0.14   0.08   0.07     0.04  -0.02  -0.02    -0.02   0.01   0.01
   5   7    -0.01   0.00  -0.04     0.00  -0.06   0.05     0.03  -0.05   0.03
   6   7    -0.02   0.03  -0.02     0.00   0.01   0.07    -0.01  -0.03   0.06
   7   8     0.05  -0.12   0.03    -0.01   0.03  -0.01     0.01  -0.02   0.00
   8   6     0.01  -0.04   0.04     0.01   0.07  -0.13     0.06   0.06  -0.13
   9   6     0.02   0.04  -0.03     0.01  -0.02   0.16     0.04  -0.11   0.09
  10   6     0.01   0.00   0.05     0.02   0.13  -0.11    -0.02   0.07  -0.12
  11   8     0.06  -0.02  -0.03    -0.01   0.01   0.00     0.01  -0.01   0.00
  12   6    -0.01  -0.16  -0.05     0.00   0.04   0.01     0.00  -0.02  -0.01
  13   6     0.01  -0.05   0.08     0.00   0.01  -0.01     0.00  -0.01   0.01
  14   6     0.03   0.19   0.07    -0.01  -0.05  -0.02     0.01   0.03   0.01
  15   8    -0.04   0.06  -0.06     0.01  -0.01   0.01    -0.01   0.00  -0.01
  16   6     0.00  -0.02   0.01     0.00   0.00   0.00     0.00   0.00   0.00
  17   6     0.11   0.07   0.02     0.08   0.05   0.01    -0.02  -0.01   0.00
  18   6     0.02  -0.05   0.07     0.02  -0.04   0.06     0.00   0.01  -0.01
  19   6    -0.04  -0.05   0.01    -0.03  -0.04   0.01     0.01   0.01   0.00
  20   8    -0.05  -0.04  -0.02    -0.04  -0.03  -0.01     0.01   0.01   0.00
  21   6    -0.01   0.06  -0.09    -0.01   0.05  -0.07     0.00  -0.01   0.02
  22   6     0.01   0.06   0.09    -0.01  -0.01  -0.02     0.00   0.01   0.01
  23   6     0.10   0.05  -0.03    -0.03  -0.01   0.01     0.02   0.01   0.00
  24   6    -0.01   0.01   0.01     0.00   0.02   0.00    -0.02   0.04   0.02
  25   6     0.00  -0.03   0.00     0.00  -0.05  -0.01     0.00   0.00  -0.02
  26   6    -0.01  -0.01   0.01     0.02   0.06   0.04    -0.06  -0.18  -0.14
  27   6    -0.02  -0.01   0.00     0.02  -0.02  -0.02    -0.06   0.01   0.04
  28   6     0.00   0.01   0.01     0.01   0.01   0.01    -0.07   0.02   0.03
  29   6    -0.01  -0.01  -0.02    -0.02   0.01  -0.01    -0.06  -0.05  -0.04
  30   6     0.00   0.02   0.00    -0.02  -0.03  -0.04     0.01   0.24   0.14
  31   6     0.02  -0.01   0.00    -0.01   0.00   0.00     0.08  -0.02   0.02
  32   6     0.02   0.01  -0.01     0.01   0.00   0.00     0.09   0.00  -0.05
  33   6    -0.02   0.00   0.02    -0.11   0.05   0.05     0.07  -0.04  -0.02
  34   6    -0.02  -0.02   0.00    -0.03  -0.05   0.00     0.00   0.03   0.01
  35   6     0.00  -0.02  -0.01    -0.02  -0.06  -0.02     0.02   0.01   0.01
  36   6    -0.02   0.00  -0.01    -0.07  -0.01  -0.04     0.00  -0.01  -0.01
  37   6     0.03  -0.03  -0.02     0.11  -0.11  -0.07    -0.06   0.04   0.00
  38   6     0.02   0.03   0.03     0.06   0.06   0.07    -0.02  -0.01  -0.01
  39   6     0.02   0.03  -0.01     0.05   0.07  -0.01     0.01   0.00   0.00
  40   6     0.00   0.00   0.00     0.00   0.00  -0.01     0.02   0.01   0.07
  41   6     0.00   0.00   0.00    -0.01  -0.02   0.00     0.01   0.03  -0.01
  42   6     0.00   0.00   0.00     0.00   0.00   0.00     0.01  -0.04   0.01
  43   6     0.00   0.00  -0.01     0.00   0.01   0.02     0.00  -0.02  -0.07
  44   6     0.00   0.00   0.00     0.00   0.00   0.01     0.00   0.00   0.00
  45   6    -0.01   0.01   0.00    -0.02   0.05  -0.01     0.01  -0.02   0.01
  46   6     0.01   0.00   0.00     0.03  -0.02   0.02    -0.01   0.01  -0.01
  47   6     0.00   0.00   0.00     0.01   0.00  -0.01    -0.02   0.00   0.02
  48   6    -0.01  -0.01   0.00    -0.03  -0.01  -0.03     0.02   0.03   0.00
  49   6     0.01  -0.01   0.00     0.03   0.00  -0.02    -0.05   0.01  -0.01
  50   1     0.04   0.04  -0.02     0.04  -0.01   0.15     0.07  -0.08   0.07
  51   1     0.12  -0.05   0.20    -0.03   0.01  -0.04     0.01   0.00   0.02
  52   1     0.02   0.30  -0.03    -0.01  -0.08   0.01     0.00   0.05  -0.01
  53   1     0.02  -0.11   0.10    -0.01   0.03  -0.03     0.00  -0.01   0.01
  54   1     0.03  -0.02   0.07    -0.01   0.01  -0.02     0.00   0.00   0.01
  55   1     0.03   0.14  -0.01    -0.01  -0.04   0.00     0.00   0.02   0.00
  56   1     0.18   0.24   0.10     0.14   0.18   0.07    -0.03  -0.04  -0.02
  57   1    -0.13   0.03   0.11    -0.09   0.02   0.08     0.02  -0.01  -0.02
  58   1     0.02  -0.06   0.10     0.02  -0.04   0.07     0.00   0.01  -0.02
  59   1    -0.04  -0.04   0.04    -0.03  -0.04   0.03     0.01   0.01  -0.01
  60   1    -0.06  -0.07  -0.01    -0.05  -0.06  -0.01     0.01   0.01   0.00
  61   1     0.00   0.02  -0.03     0.01   0.02  -0.03     0.00  -0.01   0.01
  62   1    -0.14   0.01   0.08    -0.11   0.01   0.07     0.03  -0.01  -0.02
  63   1    -0.08   0.24  -0.22    -0.07   0.19  -0.17     0.02  -0.05   0.04
  64   1     0.01   0.07   0.08     0.00  -0.02  -0.01     0.00   0.01   0.01
  65   1     0.00   0.08   0.11     0.00  -0.01  -0.03     0.00   0.00   0.01
  66   1     0.03   0.04   0.07    -0.01  -0.01  -0.02     0.01   0.00   0.01
  67   1     0.22   0.02  -0.12    -0.06  -0.01   0.03     0.03   0.00  -0.02
  68   1    -0.09  -0.02  -0.01     0.02   0.00   0.00    -0.02   0.00   0.00
  69   1     0.14  -0.02  -0.11    -0.04   0.01   0.03     0.03   0.00  -0.02
  70   1    -0.03  -0.03  -0.02     0.02  -0.08  -0.07    -0.04   0.15   0.16
  71   1     0.00  -0.01  -0.01     0.02   0.00   0.03    -0.07   0.02   0.03
  72   1    -0.02  -0.07  -0.05    -0.03   0.03   0.02    -0.10  -0.26  -0.19
  73   1     0.02   0.00   0.00    -0.01  -0.01   0.00     0.09   0.01   0.05
  74   1     0.02   0.00  -0.01     0.00   0.00   0.02     0.09  -0.03  -0.07
  75   1    -0.04  -0.02  -0.01     0.00  -0.11  -0.03    -0.05   0.09   0.02
  76   1     0.00  -0.02  -0.01    -0.02  -0.06  -0.01     0.02   0.00   0.03
  77   1    -0.06   0.02   0.00    -0.21   0.06  -0.01     0.03  -0.05  -0.01
  78   1     0.02   0.03   0.01     0.08   0.05   0.04    -0.02  -0.01   0.00
  79   1     0.02   0.03   0.00     0.03   0.09  -0.01     0.01  -0.03   0.02
  80   1     0.00   0.02   0.03     0.00   0.01   0.00     0.01   0.00   0.06
  81   1    -0.02   0.01   0.00     0.00   0.00  -0.03     0.01   0.01   0.12
  82   1    -0.02  -0.01  -0.03     0.00   0.01  -0.01     0.00  -0.02   0.04
  83   1    -0.03  -0.02   0.00     0.02   0.01   0.01    -0.12  -0.10  -0.05
  84   1     0.00   0.04   0.00     0.00  -0.04   0.00     0.00   0.16  -0.02
  85   1    -0.01   0.02   0.00     0.01  -0.04   0.00    -0.05   0.13  -0.03
  86   1    -0.02   0.03   0.01     0.00  -0.01  -0.01    -0.09   0.15   0.08
  87   1     0.00  -0.03   0.01     0.00  -0.01   0.00    -0.02  -0.19   0.04
  88   1    -0.01  -0.01   0.01     0.00   0.02  -0.01    -0.07  -0.14   0.07
  89   1    -0.01  -0.01  -0.02    -0.01  -0.01   0.00    -0.03   0.00  -0.08
  90   1    -0.01  -0.01   0.00    -0.01   0.00   0.03    -0.03  -0.02  -0.12
  91   1     0.00   0.00   0.02     0.00   0.01   0.04    -0.01   0.02  -0.02
  92   1     0.00  -0.04  -0.04     0.01  -0.11  -0.10    -0.01   0.01   0.00
  93   1    -0.02   0.00   0.04    -0.05   0.00   0.12     0.00   0.01   0.00
  94   1    -0.02  -0.01   0.02    -0.06  -0.04   0.08     0.01   0.00  -0.02
  95   1    -0.03   0.02  -0.01    -0.06   0.05  -0.03    -0.02  -0.01   0.00
  96   1    -0.02   0.01   0.00    -0.06   0.06  -0.02     0.01  -0.03   0.01
  97   1     0.00  -0.01   0.00     0.00   0.00  -0.01     0.02  -0.05   0.02
  98   1     0.01  -0.05   0.01     0.04  -0.11   0.03     0.01   0.01  -0.01
  99   1     0.00  -0.03  -0.01     0.02  -0.08   0.01    -0.01   0.03  -0.02
 100   1    -0.03   0.02  -0.03    -0.05   0.03  -0.04     0.01   0.00   0.00
 101   1    -0.06  -0.01   0.01    -0.17   0.00   0.03     0.04   0.00   0.00
 102   1     0.03  -0.02  -0.05     0.08  -0.05  -0.14    -0.04   0.02   0.05
 103   1     0.00  -0.02  -0.03     0.00  -0.05  -0.09    -0.01   0.02   0.04
 104   1    -0.05  -0.03  -0.06     0.07   0.12   0.18     0.10   0.18   0.20
 105   1    -0.03   0.01  -0.05    -0.08  -0.12   0.04    -0.06  -0.10   0.06
 106   1     0.02   0.08   0.03    -0.13  -0.18  -0.03    -0.07  -0.09   0.02
 107   1     0.09  -0.03  -0.05     0.00  -0.10   0.07    -0.12  -0.04   0.09
 108   1    -0.08   0.02  -0.02     0.25  -0.15   0.02     0.17  -0.11   0.03
 109   1     0.01  -0.01  -0.05    -0.20  -0.01   0.09    -0.20   0.01   0.10
                    97                     98                     99
                     A                      A                      A
 Frequencies --   661.9808               668.4996               671.5372
 Red. masses --     3.8369                 3.4773                 3.3985
 Frc consts  --     0.9907                 0.9156                 0.9030
 IR Inten    --     3.5862                 0.8986                 0.9092
 Atom AN      X      Y      Z        X      Y      Z        X      Y      Z
   1   8     0.00   0.00   0.00    -0.01  -0.01  -0.02    -0.03  -0.02  -0.04
   2  12     0.01   0.01   0.00     0.00   0.00   0.00     0.00  -0.01  -0.01
   3   8     0.00   0.00   0.01     0.01  -0.01   0.01     0.02  -0.02   0.04
   4   6     0.00   0.00   0.00    -0.03   0.02   0.01    -0.06   0.04   0.03
   5   7    -0.02  -0.05  -0.04     0.02  -0.01  -0.02    -0.01   0.00   0.01
   6   7    -0.05   0.02   0.03     0.00  -0.04   0.00     0.00   0.01   0.00
   7   8     0.00   0.00   0.00     0.01  -0.02   0.01     0.02  -0.04   0.01
   8   6     0.05  -0.03  -0.01     0.06  -0.01  -0.01    -0.02   0.01   0.00
   9   6     0.07   0.01   0.01     0.04  -0.11  -0.04    -0.02   0.04   0.02
  10   6     0.01   0.04   0.02    -0.04  -0.03  -0.05     0.01   0.01   0.01
  11   8    -0.01   0.00   0.00    -0.03  -0.02   0.02    -0.06  -0.06   0.04
  12   6     0.00   0.01   0.00     0.00   0.05   0.02     0.00   0.11   0.04
  13   6     0.00   0.01  -0.01     0.00   0.03  -0.04    -0.01   0.07  -0.08
  14   6     0.00   0.00   0.00     0.01   0.03   0.01     0.01   0.07   0.02
  15   8     0.00  -0.01   0.01     0.01  -0.02   0.02     0.03  -0.05   0.05
  16   6     0.00   0.00   0.00     0.00   0.00   0.00     0.00   0.00   0.00
  17   6    -0.02  -0.01  -0.01     0.03   0.00   0.02     0.06  -0.04   0.06
  18   6     0.00   0.01  -0.02    -0.02  -0.05   0.03    -0.05  -0.12   0.07
  19   6     0.01   0.01   0.00    -0.05  -0.01  -0.02    -0.15  -0.01  -0.06
  20   8     0.00   0.00   0.01     0.02   0.05  -0.03     0.06   0.16  -0.07
  21   6     0.01  -0.02   0.01     0.01   0.02   0.01     0.06   0.04   0.06
  22   6     0.00  -0.01  -0.01    -0.01  -0.02  -0.03    -0.01  -0.04  -0.07
  23   6     0.00   0.00   0.00     0.03   0.01  -0.01     0.07   0.02  -0.02
  24   6    -0.05   0.03   0.03    -0.04   0.02   0.02     0.02  -0.01  -0.01
  25   6    -0.01  -0.05  -0.03     0.02   0.04   0.02    -0.01  -0.01  -0.01
  26   6     0.02   0.11   0.17     0.00   0.05   0.12     0.00  -0.02  -0.05
  27   6    -0.03  -0.06  -0.01    -0.05  -0.04   0.01     0.02   0.02  -0.01
  28   6     0.00   0.04   0.03    -0.04   0.02   0.02     0.02  -0.01  -0.01
  29   6    -0.06   0.03  -0.04    -0.07   0.03  -0.02     0.03  -0.01   0.01
  30   6    -0.05  -0.07  -0.12    -0.04  -0.04  -0.09     0.02   0.01   0.03
  31   6     0.08  -0.06  -0.01     0.10  -0.06   0.00    -0.05   0.03   0.00
  32   6     0.09   0.04  -0.03     0.10   0.04  -0.04    -0.04  -0.01   0.02
  33   6     0.17  -0.16  -0.01    -0.09   0.12  -0.02     0.04  -0.04   0.01
  34   6    -0.06   0.03   0.03     0.07   0.02  -0.02    -0.03   0.00   0.01
  35   6     0.04  -0.03   0.00     0.01   0.05   0.02     0.00  -0.02   0.00
  36   6    -0.03  -0.02  -0.05     0.04   0.03   0.05    -0.01  -0.01  -0.02
  37   6    -0.15   0.11  -0.02     0.10  -0.06   0.04    -0.04   0.03  -0.01
  38   6     0.01   0.04   0.04    -0.05  -0.07  -0.07     0.01   0.02   0.02
  39   6     0.08   0.05  -0.02    -0.09  -0.07   0.02     0.03   0.02  -0.01
  40   6    -0.01   0.00  -0.03     0.00   0.00  -0.01     0.00   0.00   0.00
  41   6    -0.01  -0.03   0.00     0.00  -0.02   0.00     0.00   0.01   0.00
  42   6     0.00   0.03   0.00     0.00   0.02   0.00     0.00  -0.01   0.00
  43   6     0.00   0.01   0.03     0.01   0.00   0.01     0.00   0.00   0.00
  44   6     0.01   0.00  -0.02    -0.01   0.00   0.02     0.00   0.00  -0.01
  45   6     0.02  -0.04   0.01    -0.01   0.01  -0.01     0.01  -0.01   0.00
  46   6    -0.02   0.02  -0.02     0.00  -0.01   0.01     0.00   0.01   0.00
  47   6    -0.03   0.01   0.03     0.02  -0.01  -0.02    -0.01   0.00   0.01
  48   6     0.00   0.02   0.01     0.05   0.05   0.04    -0.02  -0.02  -0.01
  49   6    -0.01   0.00   0.00    -0.08   0.01   0.01     0.03   0.00   0.00
  50   1     0.11   0.02   0.01     0.04  -0.09  -0.07    -0.02   0.03   0.03
  51   1    -0.01   0.01  -0.02    -0.04   0.03  -0.07    -0.10   0.08  -0.15
  52   1     0.00   0.00   0.00     0.01   0.05  -0.01     0.04   0.12  -0.02
  53   1     0.00   0.00   0.00     0.00  -0.02   0.02     0.01  -0.05   0.04
  54   1     0.00   0.00   0.00     0.01   0.00   0.01     0.01   0.00   0.03
  55   1     0.00   0.00   0.00     0.01   0.03   0.00     0.01   0.06   0.00
  56   1    -0.03  -0.04  -0.02     0.02  -0.02   0.00    -0.01  -0.12  -0.03
  57   1     0.02  -0.01  -0.02     0.04   0.02   0.00     0.17   0.03  -0.05
  58   1    -0.01   0.01  -0.01     0.05   0.00  -0.05     0.15   0.03  -0.18
  59   1     0.01   0.02  -0.01     0.00  -0.15   0.04     0.02  -0.43   0.10
  60   1     0.02   0.02   0.01    -0.11  -0.08  -0.09    -0.32  -0.20  -0.25
  61   1     0.00   0.00   0.01     0.06  -0.01  -0.05     0.18  -0.02  -0.15
  62   1     0.03  -0.01  -0.02    -0.02  -0.02   0.00     0.02  -0.08  -0.05
  63   1     0.03  -0.05   0.04     0.01   0.02   0.00     0.09  -0.03   0.10
  64   1     0.00  -0.01  -0.01    -0.01  -0.04  -0.03    -0.01  -0.08  -0.05
  65   1     0.00  -0.01  -0.01    -0.01  -0.04  -0.04    -0.01  -0.10  -0.10
  66   1     0.00   0.00   0.00    -0.01   0.00   0.00    -0.01  -0.01   0.00
  67   1     0.01   0.00   0.00     0.06   0.01  -0.02     0.13   0.01  -0.03
  68   1     0.01   0.00   0.00     0.02   0.00   0.00     0.05   0.00  -0.01
  69   1     0.00   0.00   0.00     0.02  -0.01   0.00     0.04  -0.01  -0.01
  70   1    -0.12  -0.22  -0.18    -0.12  -0.12  -0.08     0.05   0.04   0.03
  71   1     0.00   0.01   0.03    -0.04   0.00   0.01     0.02  -0.01  -0.01
  72   1    -0.12   0.05   0.03    -0.11   0.04   0.02     0.04  -0.02  -0.01
  73   1     0.07  -0.04  -0.05     0.09  -0.03  -0.04    -0.04   0.01   0.01
  74   1     0.08   0.02   0.03     0.09   0.02   0.01    -0.04  -0.01   0.00
  75   1    -0.27   0.18   0.04     0.20  -0.05  -0.01    -0.08   0.03   0.01
  76   1     0.04  -0.03   0.02     0.01   0.05   0.02    -0.01  -0.01   0.00
  77   1     0.01  -0.13  -0.05     0.02   0.12   0.05    -0.01  -0.04  -0.02
  78   1    -0.02   0.06   0.02    -0.03  -0.09  -0.04     0.01   0.03   0.01
  79   1     0.09  -0.02   0.04    -0.10  -0.03  -0.02     0.03   0.00   0.01
  80   1    -0.04   0.09   0.13    -0.04   0.09   0.14     0.01  -0.04  -0.06
  81   1    -0.08   0.06  -0.05    -0.07   0.06  -0.01     0.04  -0.03   0.01
  82   1    -0.08   0.00  -0.19    -0.08   0.00  -0.18     0.04   0.01   0.07
  83   1    -0.07  -0.08   0.02    -0.10  -0.11   0.01     0.05   0.05   0.00
  84   1     0.00   0.06   0.01     0.00   0.11   0.01     0.00  -0.05   0.00
  85   1    -0.04  -0.05   0.01    -0.05  -0.01   0.00     0.02   0.00   0.00
  86   1    -0.07   0.10  -0.01    -0.08   0.12   0.01     0.04  -0.05   0.00
  87   1    -0.02  -0.08   0.01    -0.02  -0.11   0.01     0.01   0.05  -0.01
  88   1    -0.04   0.04   0.00    -0.05   0.02   0.01     0.02   0.00  -0.01
  89   1    -0.09  -0.09  -0.10    -0.09  -0.09  -0.11     0.04   0.03   0.05
  90   1    -0.06  -0.02   0.08    -0.06  -0.02   0.05     0.02   0.01  -0.01
  91   1    -0.02   0.03   0.19    -0.02   0.03   0.17     0.01  -0.01  -0.06
  92   1    -0.03  -0.05  -0.09     0.02   0.09   0.13    -0.01  -0.03  -0.05
  93   1    -0.05   0.01   0.08     0.06  -0.01  -0.12    -0.02   0.00   0.04
  94   1    -0.01  -0.03  -0.05     0.03   0.04   0.02    -0.01  -0.02  -0.01
  95   1    -0.15   0.05   0.01     0.17  -0.08   0.00    -0.06   0.03   0.00
  96   1    -0.03  -0.10   0.04     0.05   0.07  -0.03    -0.02  -0.03   0.01
  97   1     0.07  -0.20   0.07    -0.06   0.18  -0.06     0.02  -0.07   0.02
  98   1     0.05  -0.12  -0.01    -0.06   0.17   0.00     0.01  -0.05   0.00
  99   1    -0.06   0.02  -0.10     0.05   0.03   0.08    -0.01  -0.01  -0.02
 100   1    -0.08   0.08  -0.11     0.12  -0.09   0.13    -0.03   0.03  -0.05
 101   1    -0.03  -0.02   0.04     0.12   0.02  -0.06    -0.03  -0.01   0.02
 102   1    -0.01  -0.01   0.02    -0.05   0.04   0.07     0.01  -0.01  -0.02
 103   1    -0.06   0.01   0.07     0.05   0.02  -0.01    -0.02   0.00   0.01
 104   1    -0.01   0.08   0.05     0.05   0.09   0.07    -0.01  -0.03  -0.02
 105   1    -0.11  -0.04  -0.05    -0.01   0.01   0.01     0.01   0.00   0.00
 106   1    -0.01   0.10   0.08     0.04   0.08   0.07    -0.01  -0.04  -0.03
 107   1     0.07  -0.08  -0.03    -0.14   0.05   0.05     0.04  -0.01  -0.01
 108   1    -0.02  -0.05  -0.02    -0.02   0.01   0.03     0.01  -0.01  -0.01
 109   1    -0.12  -0.01  -0.01    -0.04   0.02   0.03     0.02  -0.01  -0.01
                   100                    101                    102
                     A                      A                      A
 Frequencies --   672.3555               726.9579               741.5468
 Red. masses --     4.0582                 4.1203                 3.8202
 Frc consts  --     1.0809                 1.2829                 1.2377
 IR Inten    --    37.7302                 0.2954                 1.8705
 Atom AN      X      Y      Z        X      Y      Z        X      Y      Z
   1   8    -0.05  -0.04  -0.07     0.00   0.00   0.00     0.00   0.00   0.00
   2  12     0.00   0.01  -0.02     0.02   0.01   0.01    -0.01   0.02   0.02
   3   8     0.03  -0.03   0.06     0.00   0.00   0.00     0.00   0.00  -0.01
   4   6    -0.09   0.06   0.05     0.00   0.00   0.00     0.00   0.00   0.00
   5   7     0.00   0.00   0.01    -0.13  -0.10  -0.06    -0.09  -0.09  -0.06
   6   7     0.01   0.00   0.00    -0.16  -0.02   0.02     0.15  -0.01  -0.04
   7   8     0.03  -0.07   0.02     0.00   0.00   0.00     0.00   0.00   0.00
   8   6     0.00   0.00   0.00     0.02   0.00  -0.01     0.04  -0.02  -0.01
   9   6    -0.01   0.00   0.01     0.04   0.01   0.02     0.01  -0.06  -0.01
  10   6     0.00   0.00   0.00     0.01   0.02  -0.01    -0.02  -0.04  -0.02
  11   8    -0.09  -0.09   0.06     0.00   0.00   0.00     0.00   0.00   0.00
  12   6     0.01   0.17   0.06     0.00   0.00   0.00     0.00   0.00   0.00
  13   6    -0.01   0.10  -0.12     0.00   0.00   0.00     0.00   0.00   0.00
  14   6     0.02   0.11   0.03     0.00   0.00   0.00     0.00   0.00   0.00
  15   8     0.05  -0.08   0.08     0.00   0.00   0.00     0.00   0.00   0.00
  16   6     0.00  -0.01   0.00     0.00   0.00   0.00     0.00   0.00   0.00
  17   6    -0.05   0.03  -0.05     0.00   0.00   0.00     0.00   0.00   0.00
  18   6     0.05   0.11  -0.06     0.00   0.00   0.00     0.00   0.00   0.00
[truncated: 1,148,302 more chars]
