# Supplementary material
Source: publisher figshare collection journal article supplement (https://acs.figshare.com/ndownloader/files/5127205)
Supplement: Supplementary file 1 [file 5127205 › supporting_ja043819b/RRSS_fm-5-ti1.log]

 Entering Gaussian System, Link 0=g03
 Input=RRSS_fm-5-ti2.gjf
 Output=RRSS_fm-5-ti2.log
 Initial command:
 /usr/local/g03/l1.exe /home/rzepa/Gau-3137.inp -scrdir=/home/rzepa/
 Entering Link 1 = /usr/local/g03/l1.exe PID=      3138.
  
 Copyright (c) 1988,1990,1992,1993,1995,1998,2003, Gaussian, Inc.
                  All Rights Reserved.
  
 This is the Gaussian(R) 03 program.  It is based on the
 the Gaussian(R) 98 system (copyright 1998, Gaussian, Inc.),
 the Gaussian(R) 94 system (copyright 1995, Gaussian, Inc.),
 the Gaussian 92(TM) system (copyright 1992, Gaussian, Inc.),
 the Gaussian 90(TM) system (copyright 1990, Gaussian, Inc.),
 the Gaussian 88(TM) system (copyright 1988, Gaussian, Inc.),
 the Gaussian 86(TM) system (copyright 1986, Carnegie Mellon
 University), and the Gaussian 82(TM) system (copyright 1983,
 Carnegie Mellon University). Gaussian is a federally registered
 trademark of Gaussian, Inc.
  
 This software contains proprietary and confidential information,
 including trade secrets, belonging to Gaussian, Inc.
  
 This software is provided under written license and may be
 used, copied, transmitted, or stored only in accord with that
 written license.
  
 The following legend is applicable only to US Government
 contracts under DFARS:
  
                    RESTRICTED RIGHTS LEGEND
  
 Use, duplication or disclosure by the US Government is subject
 to restrictions as set forth in subparagraph (c)(1)(ii) of the
 Rights in Technical Data and Computer Software clause at DFARS
 252.227-7013.
  
 Gaussian, Inc.
 Carnegie Office Park, Building 6, Pittsburgh, PA 15106 USA
  
 The following legend is applicable only to US Government
 contracts under FAR:
  
                    RESTRICTED RIGHTS LEGEND
  
 Use, reproduction and disclosure by the US Government is subject
 to restrictions as set forth in subparagraph (c) of the
 Commercial Computer Software - Restricted Rights clause at FAR
 52.227-19.
  
 Gaussian, Inc.
 Carnegie Office Park, Building 6, Pittsburgh, PA 15106 USA
  
  
 ---------------------------------------------------------------
 Warning -- This program may not be used in any manner that
 competes with the business of Gaussian, Inc. or will provide
 assistance to any competitor of Gaussian, Inc.  The licensee
 of this program is prohibited from giving any competitor of
 Gaussian, Inc. access to this program.  By using this program,
 the user acknowledges that Gaussian, Inc. is engaged in the
 business of creating and licensing software in the field of
 computational chemistry and represents and warrants to the
 licensee that it is not a competitor of Gaussian, Inc. and that
 it will not use this program in any manner prohibited above.
 ---------------------------------------------------------------
  

 Cite this work as:
 Gaussian 03, Revision B.04,
 M. J. Frisch, G. W. Trucks, H. B. Schlegel, G. E. Scuseria, 
 M. A. Robb, J. R. Cheeseman, J. A. Montgomery, Jr., T. Vreven, 
 K. N. Kudin, J. C. Burant, J. M. Millam, S. S. Iyengar, J. Tomasi, 
 V. Barone, B. Mennucci, M. Cossi, G. Scalmani, N. Rega, 
 G. A. Petersson, H. Nakatsuji, M. Hada, M. Ehara, K. Toyota, 
 R. Fukuda, J. Hasegawa, M. Ishida, T. Nakajima, Y. Honda, O. Kitao, 
 H. Nakai, M. Klene, X. Li, J. E. Knox, H. P. Hratchian, J. B. Cross, 
 C. Adamo, J. Jaramillo, R. Gomperts, R. E. Stratmann, O. Yazyev, 
 A. J. Austin, R. Cammi, C. Pomelli, J. W. Ochterski, P. Y. Ayala, 
 K. Morokuma, G. A. Voth, P. Salvador, J. J. Dannenberg, 
 V. G. Zakrzewski, S. Dapprich, A. D. Daniels, M. C. Strain, 
 O. Farkas, D. K. Malick, A. D. Rabuck, K. Raghavachari, 
 J. B. Foresman, J. V. Ortiz, Q. Cui, A. G. Baboul, S. Clifford, 
 J. Cioslowski, B. B. Stefanov, G. Liu, A. Liashenko, P. Piskorz, 
 I. Komaromi, R. L. Martin, D. J. Fox, T. Keith, M. A. Al-Laham, 
 C. Y. Peng, A. Nanayakkara, M. Challacombe, P. M. W. Gill, 
 B. Johnson, W. Chen, M. W. Wong, C. Gonzalez, and J. A. Pople, 
 Gaussian, Inc., Pittsburgh PA, 2003.
 
 *********************************************
 Gaussian 03:  x86-Linux-G03RevB.04 2-Jun-2003
                  10-Aug-2004 
 *********************************************
 %mem=500MB
 %nproc=2
 Will use up to    2 processors via shared memory.
 %chk=RRSS_fm-5-ti2.chk
 %rwf=ts1.rwf,1800MB,ts2.rwf,1800MB,ts3.rwf,1800MB,ts4.rwf,1800MB,ts5.rwf,1800MB
 -------------------------------------------
 # b3lyp/Gen freq guess=read geom=checkpoint
 -------------------------------------------
 1/10=4,29=2,30=1,38=1/1,3;
 2/40=1/2;
 3/5=7,11=2,16=1,25=1,30=1,74=-5/1,2,3;
 4/5=1/1;
 5/5=2,38=6/2;
 8/6=4,10=90,11=11,27=1179648000/1;
 11/6=1,8=1,9=11,15=111,16=1/1,2,10;
 10/6=1/2;
 6/7=2,8=2,9=2,10=2,18=1,28=1/1;
 7/8=1,10=1,25=1/1,2,3,16;
 1/10=4,30=1/3;
 99//99;
 ----------------
 from RRSS_fm.gjf
 ----------------
 Redundant internal coordinates taken from checkpoint file:
 RRSS_fm-5-ti2.chk
 Charge =  0 Multiplicity = 1
 O,0,5.710689978,0.9755391236,-1.0399491705
 Mg,0,-0.6386139498,-0.6292346106,-0.0827416277
 O,0,-0.4382132543,1.3072822002,1.1250704354
 C,0,4.6796261432,1.4529022934,-0.3118533265
 N,0,-0.1111816783,-2.6410892893,-0.1723585047
 N,0,-2.612571784,-1.2373344626,0.1342587139
 O,0,4.2501752006,2.5794927779,-0.4037507856
 C,0,-0.9277665055,-3.6952240038,-0.2458578562
 C,0,-2.3212836841,-3.6224504862,-0.100844929
 C,0,-3.1109697415,-2.4649795068,0.0754545758
 O,0,3.0772303938,0.9393442702,1.3877118365
 C,0,1.8228681223,0.6340630853,1.0751836076
 C,0,0.7421124068,1.3117272306,1.909705255
 C,0,4.1470581089,0.3565605999,0.6072804787
 O,0,1.5133906335,-0.1989403512,0.2348934374
 C,0,6.288620294,1.9062718914,-1.9721501047
 O,0,0.8426129243,2.4838852514,-0.5627496625
 C,0,-0.4655396055,1.9958020174,-0.3396061436
 O,0,-0.7867232815,1.0249700805,-1.1394970858
 O,0,-1.0046325459,4.264468125,0.5204137067
 C,0,0.1886102153,4.7763761037,0.1735905274
 C,0,1.1499742112,3.8835617445,-0.6049073746
 C,0,-1.5224840843,3.1044925514,-0.1921933648
 O,0,0.5098626975,5.8924261812,0.5175433067
 C,0,1.3574936322,4.3637774716,-2.0454101358
 C,0,-2.1600422089,3.5184336215,-1.5207935031
 C,0,1.1245239921,2.6289377703,2.5825050064
 C,0,5.1826231574,-0.1955758045,1.5829548307
 C,0,1.3193627054,-2.8670456819,-0.1855906626
 C,0,-3.4990181314,-0.0917812714,0.140574074
 C,0,1.9813397574,-3.2056777132,1.0444036415
 C,0,3.3963886657,-3.2288506069,1.0593918162
 C,0,4.1413628491,-2.9243108633,-0.1036842626
 C,0,3.4768658504,-2.6085321158,-1.3096870488
 C,0,2.0589053203,-2.5890819731,-1.3765496159
 C,0,1.1594193859,-3.5341903582,2.3225451323
 C,0,1.3437326302,-2.2708198474,-2.7140590479
 C,0,-4.1132970735,0.342964452,-1.0823273039
 C,0,-4.8726070573,1.5426589846,-1.0609609416
 C,0,-5.0039298244,2.3013378114,0.1212943641
 C,0,-4.4022739116,1.8594056021,1.3202501828
 C,0,-3.648190164,0.6551799522,1.3575519349
 C,0,-3.9776747944,-0.4505593047,-2.410952233
 C,0,-3.0571822768,0.1262165831,2.6910467798
 C,0,0.7579495306,-2.2314835479,3.0883067104
 C,0,1.891156936,-4.5262950439,3.2834431191
 C,0,1.6331886258,-0.8133917395,-3.194771189
 C,0,1.7288608768,-3.3093342063,-3.8202749164
 C,0,-2.6054802094,1.2642029321,3.6572723981
 C,0,-4.0669117718,-0.8289558435,3.4136511461
 C,0,-3.1174762457,0.3280186611,-3.4573672713
 C,0,-5.3791054431,-0.8061165551,-3.013201164
 C,0,-0.3411009906,-5.0738920535,-0.528874702
 C,0,-4.6146858226,-2.7076471033,0.1491697255
 H,0,-2.8609779407,-4.5611609369,-0.1600043315
 H,0,0.5289871714,0.5932034915,2.7155340462
 H,0,3.7728958281,-0.4693680047,-0.00723873
 H,0,6.6760164495,2.7833365408,-1.4474125167
 H,0,5.5413457629,2.2285990018,-2.7018756106
 H,0,7.0967216592,1.363677323,-2.4632506746
 H,0,2.114149491,3.9776875924,-0.097804778
 H,0,-2.315880204,2.7366754011,0.4560783651
 H,0,1.6822298859,5.4089208069,-2.034808671
 H,0,0.446655276,4.2823854167,-2.6434803174
 H,0,2.1366223381,3.7527379327,-2.5096544192
 H,0,-2.5741640709,4.5270940378,-1.4157791712
 H,0,-2.9811236711,2.8309409237,-1.7196113326
 H,0,-1.4631812596,3.4995884432,-2.3616527048
 H,0,1.8700155666,2.4382729426,3.3615023608
 H,0,0.2340186013,3.0575647243,3.0491562911
 H,0,1.5479498492,3.3595638425,1.8959637732
 H,0,4.7650475332,-1.0906406461,2.0506329392
 H,0,5.4405927139,0.5436593503,2.3472197546
 H,0,6.0879075893,-0.4811561955,1.0415718353
 H,0,3.9278672006,-3.5263489836,1.9727765856
 H,0,5.2392003716,-2.9727602012,-0.0798044719
 H,0,4.0658591705,-2.4096202952,-2.2153428683
 H,0,0.2158681736,-4.016825506,2.0055609357
 H,0,0.2518086179,-2.3608505437,-2.5374168267
 H,0,-5.3815935974,1.8749344608,-1.974980958
 H,0,-5.595643495,3.2274450152,0.1160523724
 H,0,-4.5440479533,2.4405605647,2.2402099902
 H,0,-3.4498340762,-1.3992261746,-2.1913419367
 H,0,-2.1639382209,-0.4813633349,2.4322478753
 H,0,0.212934053,-2.4803406343,4.0140581582
 H,0,0.0867778121,-1.6247986253,2.4521598426
 H,0,1.6493916044,-1.6371259674,3.3524950081
 H,0,1.1991315605,-4.8422226532,4.0788363673
 H,0,2.7640056794,-4.0542638223,3.7588850739
 H,0,2.227364285,-5.4217420879,2.7389886392
 H,0,1.0999842172,-0.6187605918,-4.1399642786
 H,0,2.7103565851,-0.6604914883,-3.3629478104
 H,0,1.2853992664,-0.0781505979,-2.4464887927
 H,0,1.1547283577,-3.1061878723,-4.7371643112
 H,0,1.5032287896,-4.3346778402,-3.4879274919
 H,0,2.801087481,-3.2481934015,-4.0613527435
 H,0,-2.0429775973,0.8306455861,4.4984512852
 H,0,-3.4697614422,1.8072781768,4.0697440439
 H,0,-1.9603037501,1.9847535211,3.1295785271
 H,0,-3.6324145095,-1.1789702276,4.3627286906
 H,0,-4.2894323617,-1.7094115612,2.7903802078
 H,0,-5.0107065182,-0.3046223145,3.6318220644
 H,0,-2.9835247236,-0.2865528841,-4.3621008549
 H,0,-2.1282167666,0.5669304201,-3.0300416556
 H,0,-3.6081554008,1.2702777252,-3.7468483012
 H,0,-5.2504617097,-1.45723939,-3.8913226652
 H,0,-5.9090102206,0.1034784855,-3.3340393229
 H,0,-6.0075496597,-1.3316979766,-2.2780886046
 H,0,0.3735985697,-5.3880744373,0.2394861939
 H,0,-1.1308002939,-5.8305013399,-0.5860123285
 H,0,0.1925044366,-5.0686551602,-1.4880145072
 H,0,-5.1419971411,-1.9147989411,0.6861603961
 H,0,-5.0422298399,-2.7681598364,-0.8596375283
 H,0,-4.8199690812,-3.6633853105,0.6452905587
 Recover connectivity data from disk.

 GradGradGradGradGradGradGradGradGradGradGradGradGradGradGradGradGradGrad
 Berny optimization.
 Initialization pass.
                           ----------------------------
                           !    Initial Parameters    !
                           ! (Angstroms and Degrees)  !
 --------------------------                            --------------------------
 ! Name  Definition              Value          Derivative Info.                !
 --------------------------------------------------------------------------------
 ! R1    R(1,4)                  1.3495         calculate D2E/DX2 analytically  !
 ! R2    R(1,16)                 1.4385         calculate D2E/DX2 analytically  !
 ! R3    R(2,5)                  2.0818         calculate D2E/DX2 analytically  !
 ! R4    R(2,6)                  2.0769         calculate D2E/DX2 analytically  !
 ! R5    R(2,15)                 2.2175         calculate D2E/DX2 analytically  !
 ! R6    R(2,19)                 1.9685         calculate D2E/DX2 analytically  !
 ! R7    R(3,13)                 1.4173         calculate D2E/DX2 analytically  !
 ! R8    R(3,18)                 1.6187         calculate D2E/DX2 analytically  !
 ! R9    R(4,7)                  1.2092         calculate D2E/DX2 analytically  !
 ! R10   R(4,14)                 1.5266         calculate D2E/DX2 analytically  !
 ! R11   R(5,8)                  1.3354         calculate D2E/DX2 analytically  !
 ! R12   R(5,29)                 1.4483         calculate D2E/DX2 analytically  !
 ! R13   R(6,10)                 1.3263         calculate D2E/DX2 analytically  !
 ! R14   R(6,30)                 1.4485         calculate D2E/DX2 analytically  !
 ! R15   R(8,9)                  1.4029         calculate D2E/DX2 analytically  !
 ! R16   R(8,53)                 1.5248         calculate D2E/DX2 analytically  !
 ! R17   R(9,10)                 1.4122         calculate D2E/DX2 analytically  !
 ! R18   R(9,55)                 1.0844         calculate D2E/DX2 analytically  !
 ! R19   R(10,54)                1.525          calculate D2E/DX2 analytically  !
 ! R20   R(11,12)                1.3283         calculate D2E/DX2 analytically  !
 ! R21   R(11,14)                1.4468         calculate D2E/DX2 analytically  !
 ! R22   R(12,13)                1.5244         calculate D2E/DX2 analytically  !
 ! R23   R(12,15)                1.223          calculate D2E/DX2 analytically  !
 ! R24   R(13,27)                1.5277         calculate D2E/DX2 analytically  !
 ! R25   R(13,56)                1.1005         calculate D2E/DX2 analytically  !
 ! R26   R(14,28)                1.5262         calculate D2E/DX2 analytically  !
 ! R27   R(14,57)                1.0953         calculate D2E/DX2 analytically  !
 ! R28   R(16,58)                1.093          calculate D2E/DX2 analytically  !
 ! R29   R(16,59)                1.0931         calculate D2E/DX2 analytically  !
 ! R30   R(16,60)                1.0902         calculate D2E/DX2 analytically  !
 ! R31   R(17,18)                1.414          calculate D2E/DX2 analytically  !
 ! R32   R(17,22)                1.4336         calculate D2E/DX2 analytically  !
 ! R33   R(18,19)                1.2983         calculate D2E/DX2 analytically  !
 ! R34   R(18,23)                1.5388         calculate D2E/DX2 analytically  !
 ! R35   R(20,21)                1.3439         calculate D2E/DX2 analytically  !
 ! R36   R(20,23)                1.4565         calculate D2E/DX2 analytically  !
 ! R37   R(21,22)                1.5256         calculate D2E/DX2 analytically  !
 ! R38   R(21,24)                1.2112         calculate D2E/DX2 analytically  !
 ! R39   R(22,25)                1.5326         calculate D2E/DX2 analytically  !
 ! R40   R(22,61)                1.0935         calculate D2E/DX2 analytically  !
 ! R41   R(23,26)                1.5307         calculate D2E/DX2 analytically  !
 ! R42   R(23,62)                1.0886         calculate D2E/DX2 analytically  !
 ! R43   R(25,63)                1.0945         calculate D2E/DX2 analytically  !
 ! R44   R(25,64)                1.0927         calculate D2E/DX2 analytically  !
 ! R45   R(25,65)                1.0936         calculate D2E/DX2 analytically  !
 ! R46   R(26,66)                1.0954         calculate D2E/DX2 analytically  !
 ! R47   R(26,67)                1.0892         calculate D2E/DX2 analytically  !
 ! R48   R(26,68)                1.0923         calculate D2E/DX2 analytically  !
 ! R49   R(27,69)                1.095          calculate D2E/DX2 analytically  !
 ! R50   R(27,70)                1.0929         calculate D2E/DX2 analytically  !
 ! R51   R(27,71)                1.0883         calculate D2E/DX2 analytically  !
 ! R52   R(28,72)                1.0928         calculate D2E/DX2 analytically  !
 ! R53   R(28,73)                1.0941         calculate D2E/DX2 analytically  !
 ! R54   R(28,74)                1.0928         calculate D2E/DX2 analytically  !
 ! R55   R(29,31)                1.4373         calculate D2E/DX2 analytically  !
 ! R56   R(29,35)                1.4292         calculate D2E/DX2 analytically  !
 ! R57   R(30,38)                1.4359         calculate D2E/DX2 analytically  !
 ! R58   R(30,42)                1.4357         calculate D2E/DX2 analytically  !
 ! R59   R(31,32)                1.4153         calculate D2E/DX2 analytically  !
 ! R60   R(31,36)                1.5547         calculate D2E/DX2 analytically  !
 ! R61   R(32,33)                1.4144         calculate D2E/DX2 analytically  !
 ! R62   R(32,75)                1.0978         calculate D2E/DX2 analytically  !
 ! R63   R(33,34)                1.4127         calculate D2E/DX2 analytically  !
 ! R64   R(33,76)                1.0992         calculate D2E/DX2 analytically  !
 ! R65   R(34,35)                1.4197         calculate D2E/DX2 analytically  !
 ! R66   R(34,77)                1.0985         calculate D2E/DX2 analytically  !
 ! R67   R(35,37)                1.5497         calculate D2E/DX2 analytically  !
 ! R68   R(36,45)                1.5635         calculate D2E/DX2 analytically  !
 ! R69   R(36,46)                1.563          calculate D2E/DX2 analytically  !
 ! R70   R(36,78)                1.1062         calculate D2E/DX2 analytically  !
 ! R71   R(37,47)                1.5617         calculate D2E/DX2 analytically  !
 ! R72   R(37,48)                1.5654         calculate D2E/DX2 analytically  !
 ! R73   R(37,79)                1.1098         calculate D2E/DX2 analytically  !
 ! R74   R(38,39)                1.42           calculate D2E/DX2 analytically  !
 ! R75   R(38,43)                1.5535         calculate D2E/DX2 analytically  !
 ! R76   R(39,40)                1.4109         calculate D2E/DX2 analytically  !
 ! R77   R(39,80)                1.0977         calculate D2E/DX2 analytically  !
 ! R78   R(40,41)                1.4124         calculate D2E/DX2 analytically  !
 ! R79   R(40,81)                1.099          calculate D2E/DX2 analytically  !
 ! R80   R(41,42)                1.4213         calculate D2E/DX2 analytically  !
 ! R81   R(41,82)                1.0973         calculate D2E/DX2 analytically  !
 ! R82   R(42,44)                1.5515         calculate D2E/DX2 analytically  !
 ! R83   R(43,51)                1.5624         calculate D2E/DX2 analytically  !
 ! R84   R(43,52)                1.5662         calculate D2E/DX2 analytically  !
 ! R85   R(43,83)                1.1076         calculate D2E/DX2 analytically  !
 ! R86   R(44,49)                1.5597         calculate D2E/DX2 analytically  !
 ! R87   R(44,50)                1.5665         calculate D2E/DX2 analytically  !
 ! R88   R(44,84)                1.1109         calculate D2E/DX2 analytically  !
 ! R89   R(45,85)                1.1027         calculate D2E/DX2 analytically  !
 ! R90   R(45,86)                1.106          calculate D2E/DX2 analytically  !
 ! R91   R(45,87)                1.1035         calculate D2E/DX2 analytically  !
 ! R92   R(46,88)                1.1006         calculate D2E/DX2 analytically  !
 ! R93   R(46,89)                1.1003         calculate D2E/DX2 analytically  !
 ! R94   R(46,90)                1.1006         calculate D2E/DX2 analytically  !
 ! R95   R(47,91)                1.1025         calculate D2E/DX2 analytically  !
 ! R96   R(47,92)                1.1009         calculate D2E/DX2 analytically  !
 ! R97   R(47,93)                1.1052         calculate D2E/DX2 analytically  !
 ! R98   R(48,94)                1.1007         calculate D2E/DX2 analytically  !
 ! R99   R(48,95)                1.1012         calculate D2E/DX2 analytically  !
 ! R100  R(48,96)                1.1007         calculate D2E/DX2 analytically  !
 ! R101  R(49,97)                1.1009         calculate D2E/DX2 analytically  !
 ! R102  R(49,98)                1.1009         calculate D2E/DX2 analytically  !
 ! R103  R(49,99)                1.1018         calculate D2E/DX2 analytically  !
 ! R104  R(50,100)               1.1009         calculate D2E/DX2 analytically  !
 ! R105  R(50,101)               1.1014         calculate D2E/DX2 analytically  !
 ! R106  R(50,102)               1.1015         calculate D2E/DX2 analytically  !
 ! R107  R(51,103)               1.1019         calculate D2E/DX2 analytically  !
 ! R108  R(51,104)               1.1038         calculate D2E/DX2 analytically  !
 ! R109  R(51,105)               1.1011         calculate D2E/DX2 analytically  !
 ! R110  R(52,106)               1.1007         calculate D2E/DX2 analytically  !
 ! R111  R(52,107)               1.1005         calculate D2E/DX2 analytically  !
 ! R112  R(52,108)               1.1007         calculate D2E/DX2 analytically  !
 ! R113  R(53,109)               1.0954         calculate D2E/DX2 analytically  !
 ! R114  R(53,110)               1.0951         calculate D2E/DX2 analytically  !
 ! R115  R(53,111)               1.0976         calculate D2E/DX2 analytically  !
 ! R116  R(54,112)               1.0932         calculate D2E/DX2 analytically  !
 ! R117  R(54,113)               1.0973         calculate D2E/DX2 analytically  !
 ! R118  R(54,114)               1.0962         calculate D2E/DX2 analytically  !
 ! A1    A(4,1,16)             115.3236         calculate D2E/DX2 analytically  !
 ! A2    A(5,2,6)               87.8416         calculate D2E/DX2 analytically  !
 ! A3    A(5,2,15)              87.0089         calculate D2E/DX2 analytically  !
 ! A4    A(5,2,19)             143.9068         calculate D2E/DX2 analytically  !
 ! A5    A(6,2,15)             164.6311         calculate D2E/DX2 analytically  !
 ! A6    A(6,2,19)             103.3339         calculate D2E/DX2 analytically  !
 ! A7    A(15,2,19)             89.2466         calculate D2E/DX2 analytically  !
 ! A8    A(13,3,18)            120.9077         calculate D2E/DX2 analytically  !
 ! A9    A(1,4,7)              124.0515         calculate D2E/DX2 analytically  !
 ! A10   A(1,4,14)             109.7159         calculate D2E/DX2 analytically  !
 ! A11   A(7,4,14)             126.227          calculate D2E/DX2 analytically  !
 ! A12   A(2,5,8)              127.6104         calculate D2E/DX2 analytically  !
 ! A13   A(2,5,29)             113.6663         calculate D2E/DX2 analytically  !
 ! A14   A(8,5,29)             118.7055         calculate D2E/DX2 analytically  !
 ! A15   A(2,6,10)             128.5768         calculate D2E/DX2 analytically  !
 ! A16   A(2,6,30)             110.521          calculate D2E/DX2 analytically  !
 ! A17   A(10,6,30)            120.1504         calculate D2E/DX2 analytically  !
 ! A18   A(5,8,9)              124.1065         calculate D2E/DX2 analytically  !
 ! A19   A(5,8,53)             119.2523         calculate D2E/DX2 analytically  !
 ! A20   A(9,8,53)             116.6318         calculate D2E/DX2 analytically  !
 ! A21   A(8,9,10)             127.6502         calculate D2E/DX2 analytically  !
 ! A22   A(8,9,55)             116.3468         calculate D2E/DX2 analytically  !
 ! A23   A(10,9,55)            115.9762         calculate D2E/DX2 analytically  !
 ! A24   A(6,10,9)             123.6459         calculate D2E/DX2 analytically  !
 ! A25   A(6,10,54)            121.0451         calculate D2E/DX2 analytically  !
 ! A26   A(9,10,54)            115.2771         calculate D2E/DX2 analytically  !
 ! A27   A(12,11,14)           118.6071         calculate D2E/DX2 analytically  !
 ! A28   A(11,12,13)           116.0117         calculate D2E/DX2 analytically  !
 ! A29   A(11,12,15)           123.8601         calculate D2E/DX2 analytically  !
 ! A30   A(13,12,15)           119.9684         calculate D2E/DX2 analytically  !
 ! A31   A(3,13,12)            106.6165         calculate D2E/DX2 analytically  !
 ! A32   A(3,13,27)            117.0625         calculate D2E/DX2 analytically  !
 ! A33   A(3,13,56)            104.0073         calculate D2E/DX2 analytically  !
 ! A34   A(12,13,27)           116.5464         calculate D2E/DX2 analytically  !
 ! A35   A(12,13,56)           104.3547         calculate D2E/DX2 analytically  !
 ! A36   A(27,13,56)           106.7949         calculate D2E/DX2 analytically  !
 ! A37   A(4,14,11)            107.0652         calculate D2E/DX2 analytically  !
 ! A38   A(4,14,28)            114.0803         calculate D2E/DX2 analytically  !
 ! A39   A(4,14,57)            108.8389         calculate D2E/DX2 analytically  !
 ! A40   A(11,14,28)           107.615          calculate D2E/DX2 analytically  !
 ! A41   A(11,14,57)           110.7181         calculate D2E/DX2 analytically  !
 ! A42   A(28,14,57)           108.521          calculate D2E/DX2 analytically  !
 ! A43   A(2,15,12)            118.4348         calculate D2E/DX2 analytically  !
 ! A44   A(1,16,58)            110.5161         calculate D2E/DX2 analytically  !
 ! A45   A(1,16,59)            110.4113         calculate D2E/DX2 analytically  !
 ! A46   A(1,16,60)            105.5269         calculate D2E/DX2 analytically  !
 ! A47   A(58,16,59)           109.0373         calculate D2E/DX2 analytically  !
 ! A48   A(58,16,60)           110.665          calculate D2E/DX2 analytically  !
 ! A49   A(59,16,60)           110.6567         calculate D2E/DX2 analytically  !
 ! A50   A(18,17,22)           122.6836         calculate D2E/DX2 analytically  !
 ! A51   A(3,18,17)            105.9032         calculate D2E/DX2 analytically  !
 ! A52   A(3,18,19)            104.0992         calculate D2E/DX2 analytically  !
 ! A53   A(3,18,23)            103.378          calculate D2E/DX2 analytically  !
 ! A54   A(17,18,19)           112.9406         calculate D2E/DX2 analytically  !
 ! A55   A(17,18,23)           113.6948         calculate D2E/DX2 analytically  !
 ! A56   A(19,18,23)           115.3318         calculate D2E/DX2 analytically  !
 ! A57   A(2,19,18)            106.2021         calculate D2E/DX2 analytically  !
 ! A58   A(21,20,23)           119.522          calculate D2E/DX2 analytically  !
 ! A59   A(20,21,22)           117.9226         calculate D2E/DX2 analytically  !
 ! A60   A(20,21,24)           120.8757         calculate D2E/DX2 analytically  !
 ! A61   A(22,21,24)           121.1321         calculate D2E/DX2 analytically  !
 ! A62   A(17,22,21)           114.9139         calculate D2E/DX2 analytically  !
 ! A63   A(17,22,25)           111.2593         calculate D2E/DX2 analytically  !
 ! A64   A(17,22,61)           105.0373         calculate D2E/DX2 analytically  !
 ! A65   A(21,22,25)           112.4326         calculate D2E/DX2 analytically  !
 ! A66   A(21,22,61)           105.5825         calculate D2E/DX2 analytically  !
 ! A67   A(25,22,61)           106.8301         calculate D2E/DX2 analytically  !
 ! A68   A(18,23,20)           112.1135         calculate D2E/DX2 analytically  !
 ! A69   A(18,23,26)           113.4388         calculate D2E/DX2 analytically  !
 ! A70   A(18,23,62)           108.3127         calculate D2E/DX2 analytically  !
 ! A71   A(20,23,26)           110.939          calculate D2E/DX2 analytically  !
 ! A72   A(20,23,62)           103.7012         calculate D2E/DX2 analytically  !
 ! A73   A(26,23,62)           107.7399         calculate D2E/DX2 analytically  !
 ! A74   A(22,25,63)           109.2864         calculate D2E/DX2 analytically  !
 ! A75   A(22,25,64)           112.2256         calculate D2E/DX2 analytically  !
 ! A76   A(22,25,65)           108.6876         calculate D2E/DX2 analytically  !
 ! A77   A(63,25,64)           108.8905         calculate D2E/DX2 analytically  !
 ! A78   A(63,25,65)           109.0434         calculate D2E/DX2 analytically  !
 ! A79   A(64,25,65)           108.6577         calculate D2E/DX2 analytically  !
 ! A80   A(23,26,66)           108.8606         calculate D2E/DX2 analytically  !
 ! A81   A(23,26,67)           107.5617         calculate D2E/DX2 analytically  !
 ! A82   A(23,26,68)           113.4405         calculate D2E/DX2 analytically  !
 ! A83   A(66,26,67)           108.2832         calculate D2E/DX2 analytically  !
 ! A84   A(66,26,68)           109.3227         calculate D2E/DX2 analytically  !
 ! A85   A(67,26,68)           109.2408         calculate D2E/DX2 analytically  !
 ! A86   A(13,27,69)           109.4875         calculate D2E/DX2 analytically  !
 ! A87   A(13,27,70)           108.7975         calculate D2E/DX2 analytically  !
 ! A88   A(13,27,71)           113.4784         calculate D2E/DX2 analytically  !
 ! A89   A(69,27,70)           108.6184         calculate D2E/DX2 analytically  !
 ! A90   A(69,27,71)           107.5058         calculate D2E/DX2 analytically  !
 ! A91   A(70,27,71)           108.8485         calculate D2E/DX2 analytically  !
 ! A92   A(14,28,72)           108.0972         calculate D2E/DX2 analytically  !
 ! A93   A(14,28,73)           111.2298         calculate D2E/DX2 analytically  !
 ! A94   A(14,28,74)           109.8732         calculate D2E/DX2 analytically  !
 ! A95   A(72,28,73)           110.1536         calculate D2E/DX2 analytically  !
 ! A96   A(72,28,74)           108.3319         calculate D2E/DX2 analytically  !
 ! A97   A(73,28,74)           109.1049         calculate D2E/DX2 analytically  !
 ! A98   A(5,29,31)            118.9376         calculate D2E/DX2 analytically  !
 ! A99   A(5,29,35)            119.2335         calculate D2E/DX2 analytically  !
 ! A100  A(31,29,35)           121.3743         calculate D2E/DX2 analytically  !
 ! A101  A(6,30,38)            119.8372         calculate D2E/DX2 analytically  !
 ! A102  A(6,30,42)            118.6036         calculate D2E/DX2 analytically  !
 ! A103  A(38,30,42)           121.3282         calculate D2E/DX2 analytically  !
 ! A104  A(29,31,32)           118.2558         calculate D2E/DX2 analytically  !
 ! A105  A(29,31,36)           120.6531         calculate D2E/DX2 analytically  !
 ! A106  A(32,31,36)           121.091          calculate D2E/DX2 analytically  !
 ! A107  A(31,32,33)           120.956          calculate D2E/DX2 analytically  !
 ! A108  A(31,32,75)           119.8195         calculate D2E/DX2 analytically  !
 ! A109  A(33,32,75)           119.1775         calculate D2E/DX2 analytically  !
 ! A110  A(32,33,34)           120.1577         calculate D2E/DX2 analytically  !
 ! A111  A(32,33,76)           119.9154         calculate D2E/DX2 analytically  !
 ! A112  A(34,33,76)           119.8814         calculate D2E/DX2 analytically  !
 ! A113  A(33,34,35)           120.869          calculate D2E/DX2 analytically  !
 ! A114  A(33,34,77)           119.4783         calculate D2E/DX2 analytically  !
 ! A115  A(35,34,77)           119.6187         calculate D2E/DX2 analytically  !
 ! A116  A(29,35,34)           118.3544         calculate D2E/DX2 analytically  !
 ! A117  A(29,35,37)           121.3551         calculate D2E/DX2 analytically  !
 ! A118  A(34,35,37)           120.2905         calculate D2E/DX2 analytically  !
 ! A119  A(31,36,45)           111.2436         calculate D2E/DX2 analytically  !
 ! A120  A(31,36,46)           113.0809         calculate D2E/DX2 analytically  !
 ! A121  A(31,36,78)           107.9113         calculate D2E/DX2 analytically  !
 ! A122  A(45,36,46)           110.3631         calculate D2E/DX2 analytically  !
 ! A123  A(45,36,78)           106.5494         calculate D2E/DX2 analytically  !
 ! A124  A(46,36,78)           107.3703         calculate D2E/DX2 analytically  !
 ! A125  A(35,37,47)           111.8251         calculate D2E/DX2 analytically  !
 ! A126  A(35,37,48)           111.1068         calculate D2E/DX2 analytically  !
 ! A127  A(35,37,79)           107.459          calculate D2E/DX2 analytically  !
 ! A128  A(47,37,48)           110.8542         calculate D2E/DX2 analytically  !
 ! A129  A(47,37,79)           107.8824         calculate D2E/DX2 analytically  !
 ! A130  A(48,37,79)           107.501          calculate D2E/DX2 analytically  !
 ! A131  A(30,38,39)           118.1479         calculate D2E/DX2 analytically  !
 ! A132  A(30,38,43)           122.4377         calculate D2E/DX2 analytically  !
 ! A133  A(39,38,43)           119.4143         calculate D2E/DX2 analytically  !
 ! A134  A(38,39,40)           121.1115         calculate D2E/DX2 analytically  !
 ! A135  A(38,39,80)           119.418          calculate D2E/DX2 analytically  !
 ! A136  A(40,39,80)           119.4601         calculate D2E/DX2 analytically  !
 ! A137  A(39,40,41)           120.2273         calculate D2E/DX2 analytically  !
 ! A138  A(39,40,81)           119.9506         calculate D2E/DX2 analytically  !
 ! A139  A(41,40,81)           119.8068         calculate D2E/DX2 analytically  !
 ! A140  A(40,41,42)           120.89           calculate D2E/DX2 analytically  !
 ! A141  A(40,41,82)           119.4013         calculate D2E/DX2 analytically  !
 ! A142  A(42,41,82)           119.6861         calculate D2E/DX2 analytically  !
 ! A143  A(30,42,41)           118.2736         calculate D2E/DX2 analytically  !
 ! A144  A(30,42,44)           120.7686         calculate D2E/DX2 analytically  !
 ! A145  A(41,42,44)           120.8971         calculate D2E/DX2 analytically  !
 ! A146  A(38,43,51)           111.4892         calculate D2E/DX2 analytically  !
 ! A147  A(38,43,52)           111.5124         calculate D2E/DX2 analytically  !
 ! A148  A(38,43,83)           108.0309         calculate D2E/DX2 analytically  !
 ! A149  A(51,43,52)           110.3785         calculate D2E/DX2 analytically  !
 ! A150  A(51,43,83)           107.2912         calculate D2E/DX2 analytically  !
 ! A151  A(52,43,83)           107.9515         calculate D2E/DX2 analytically  !
 ! A152  A(42,44,49)           113.2038         calculate D2E/DX2 analytically  !
 ! A153  A(42,44,50)           111.0264         calculate D2E/DX2 analytically  !
 ! A154  A(42,44,84)           107.0096         calculate D2E/DX2 analytically  !
 ! A155  A(49,44,50)           110.2298         calculate D2E/DX2 analytically  !
 ! A156  A(49,44,84)           108.0901         calculate D2E/DX2 analytically  !
 ! A157  A(50,44,84)           106.9935         calculate D2E/DX2 analytically  !
 ! A158  A(36,45,85)           110.4901         calculate D2E/DX2 analytically  !
 ! A159  A(36,45,86)           109.3389         calculate D2E/DX2 analytically  !
 ! A160  A(36,45,87)           111.0134         calculate D2E/DX2 analytically  !
 ! A161  A(85,45,86)           107.8625         calculate D2E/DX2 analytically  !
 ! A162  A(85,45,87)           108.6526         calculate D2E/DX2 analytically  !
 ! A163  A(86,45,87)           109.4196         calculate D2E/DX2 analytically  !
 ! A164  A(36,46,88)           109.3976         calculate D2E/DX2 analytically  !
 ! A165  A(36,46,89)           111.3898         calculate D2E/DX2 analytically  !
 ! A166  A(36,46,90)           110.8128         calculate D2E/DX2 analytically  !
 ! A167  A(88,46,89)           108.0381         calculate D2E/DX2 analytically  !
 ! A168  A(88,46,90)           108.4234         calculate D2E/DX2 analytically  !
 ! A169  A(89,46,90)           108.6906         calculate D2E/DX2 analytically  !
 ! A170  A(37,47,91)           109.8153         calculate D2E/DX2 analytically  !
 ! A171  A(37,47,92)           110.9766         calculate D2E/DX2 analytically  !
 ! A172  A(37,47,93)           110.7384         calculate D2E/DX2 analytically  !
 ! A173  A(91,47,92)           108.5248         calculate D2E/DX2 analytically  !
 ! A174  A(91,47,93)           108.1081         calculate D2E/DX2 analytically  !
 ! A175  A(92,47,93)           108.5988         calculate D2E/DX2 analytically  !
 ! A176  A(37,48,94)           109.7476         calculate D2E/DX2 analytically  !
 ! A177  A(37,48,95)           110.7334         calculate D2E/DX2 analytically  !
 ! A178  A(37,48,96)           110.9518         calculate D2E/DX2 analytically  !
 ! A179  A(94,48,95)           108.4432         calculate D2E/DX2 analytically  !
 ! A180  A(94,48,96)           108.3856         calculate D2E/DX2 analytically  !
 ! A181  A(95,48,96)           108.5066         calculate D2E/DX2 analytically  !
 ! A182  A(44,49,97)           109.5108         calculate D2E/DX2 analytically  !
 ! A183  A(44,49,98)           111.3864         calculate D2E/DX2 analytically  !
 ! A184  A(44,49,99)           110.4903         calculate D2E/DX2 analytically  !
 ! A185  A(97,49,98)           108.0061         calculate D2E/DX2 analytically  !
 ! A186  A(97,49,99)           108.924          calculate D2E/DX2 analytically  !
 ! A187  A(98,49,99)           108.454          calculate D2E/DX2 analytically  !
 ! A188  A(44,50,100)          109.7012         calculate D2E/DX2 analytically  !
 ! A189  A(44,50,101)          110.8913         calculate D2E/DX2 analytically  !
 ! A190  A(44,50,102)          110.6953         calculate D2E/DX2 analytically  !
 ! A191  A(100,50,101)         108.2648         calculate D2E/DX2 analytically  !
 ! A192  A(100,50,102)         108.5876         calculate D2E/DX2 analytically  !
 ! A193  A(101,50,102)         108.6323         calculate D2E/DX2 analytically  !
 ! A194  A(43,51,103)          109.81           calculate D2E/DX2 analytically  !
 ! A195  A(43,51,104)          109.9994         calculate D2E/DX2 analytically  !
 ! A196  A(43,51,105)          110.9264         calculate D2E/DX2 analytically  !
 ! A197  A(103,51,104)         109.2473         calculate D2E/DX2 analytically  !
 ! A198  A(103,51,105)         108.3966         calculate D2E/DX2 analytically  !
 ! A199  A(104,51,105)         108.4182         calculate D2E/DX2 analytically  !
 ! A200  A(43,52,106)          109.6617         calculate D2E/DX2 analytically  !
 ! A201  A(43,52,107)          110.8126         calculate D2E/DX2 analytically  !
 ! A202  A(43,52,108)          111.2513         calculate D2E/DX2 analytically  !
 ! A203  A(106,52,107)         108.2171         calculate D2E/DX2 analytically  !
 ! A204  A(106,52,108)         108.4852         calculate D2E/DX2 analytically  !
 ! A205  A(107,52,108)         108.3276         calculate D2E/DX2 analytically  !
 ! A206  A(8,53,109)           112.3444         calculate D2E/DX2 analytically  !
 ! A207  A(8,53,110)           110.9105         calculate D2E/DX2 analytically  !
 ! A208  A(8,53,111)           110.1777         calculate D2E/DX2 analytically  !
 ! A209  A(109,53,110)         107.9942         calculate D2E/DX2 analytically  !
 ! A210  A(109,53,111)         107.2856         calculate D2E/DX2 analytically  !
 ! A211  A(110,53,111)         107.9549         calculate D2E/DX2 analytically  !
 ! A212  A(10,54,112)          112.5806         calculate D2E/DX2 analytically  !
 ! A213  A(10,54,113)          110.3974         calculate D2E/DX2 analytically  !
 ! A214  A(10,54,114)          110.1983         calculate D2E/DX2 analytically  !
 ! A215  A(112,54,113)         107.6768         calculate D2E/DX2 analytically  !
 ! A216  A(112,54,114)         108.6437         calculate D2E/DX2 analytically  !
 ! A217  A(113,54,114)         107.1587         calculate D2E/DX2 analytically  !
 ! D1    D(16,1,4,7)            -0.4272         calculate D2E/DX2 analytically  !
 ! D2    D(16,1,4,14)          178.7568         calculate D2E/DX2 analytically  !
 ! D3    D(4,1,16,58)           60.102          calculate D2E/DX2 analytically  !
 ! D4    D(4,1,16,59)          -60.6187         calculate D2E/DX2 analytically  !
 ! D5    D(4,1,16,60)          179.7745         calculate D2E/DX2 analytically  !
 ! D6    D(6,2,5,8)              8.1838         calculate D2E/DX2 analytically  !
 ! D7    D(6,2,5,29)          -173.3892         calculate D2E/DX2 analytically  !
 ! D8    D(15,2,5,8)           173.698          calculate D2E/DX2 analytically  !
 ! D9    D(15,2,5,29)           -7.875          calculate D2E/DX2 analytically  !
 ! D10   D(19,2,5,8)          -101.6972         calculate D2E/DX2 analytically  !
 ! D11   D(19,2,5,29)           76.7298         calculate D2E/DX2 analytically  !
 ! D12   D(5,2,6,10)            -5.3859         calculate D2E/DX2 analytically  !
 ! D13   D(5,2,6,30)          -175.305          calculate D2E/DX2 analytically  !
 ! D14   D(15,2,6,10)          -75.8655         calculate D2E/DX2 analytically  !
 ! D15   D(15,2,6,30)          114.2154         calculate D2E/DX2 analytically  !
 ! D16   D(19,2,6,10)          139.91           calculate D2E/DX2 analytically  !
 ! D17   D(19,2,6,30)          -30.0091         calculate D2E/DX2 analytically  !
 ! D18   D(5,2,15,12)         -137.6061         calculate D2E/DX2 analytically  !
 ! D19   D(6,2,15,12)          -67.0206         calculate D2E/DX2 analytically  !
 ! D20   D(19,2,15,12)          78.3059         calculate D2E/DX2 analytically  !
 ! D21   D(5,2,19,18)         -144.5876         calculate D2E/DX2 analytically  !
 ! D22   D(6,2,19,18)          110.3775         calculate D2E/DX2 analytically  !
 ! D23   D(15,2,19,18)         -60.7084         calculate D2E/DX2 analytically  !
 ! D24   D(18,3,13,12)         -57.5458         calculate D2E/DX2 analytically  !
 ! D25   D(18,3,13,27)          75.0024         calculate D2E/DX2 analytically  !
 ! D26   D(18,3,13,56)        -167.4899         calculate D2E/DX2 analytically  !
 ! D27   D(13,3,18,17)           1.3544         calculate D2E/DX2 analytically  !
 ! D28   D(13,3,18,19)         120.6582         calculate D2E/DX2 analytically  !
 ! D29   D(13,3,18,23)        -118.4654         calculate D2E/DX2 analytically  !
 ! D30   D(1,4,14,11)          178.2152         calculate D2E/DX2 analytically  !
 ! D31   D(1,4,14,28)           59.2733         calculate D2E/DX2 analytically  !
 ! D32   D(1,4,14,57)          -62.0659         calculate D2E/DX2 analytically  !
 ! D33   D(7,4,14,11)           -2.6229         calculate D2E/DX2 analytically  !
 ! D34   D(7,4,14,28)         -121.5649         calculate D2E/DX2 analytically  !
 ! D35   D(7,4,14,57)          117.0959         calculate D2E/DX2 analytically  !
 ! D36   D(2,5,8,9)             -8.6584         calculate D2E/DX2 analytically  !
 ! D37   D(2,5,8,53)           170.1879         calculate D2E/DX2 analytically  !
 ! D38   D(29,5,8,9)           172.9842         calculate D2E/DX2 analytically  !
 ! D39   D(29,5,8,53)           -8.1695         calculate D2E/DX2 analytically  !
 ! D40   D(2,5,29,31)           98.1275         calculate D2E/DX2 analytically  !
 ! D41   D(2,5,29,35)          -74.2446         calculate D2E/DX2 analytically  !
 ! D42   D(8,5,29,31)          -83.2931         calculate D2E/DX2 analytically  !
 ! D43   D(8,5,29,35)          104.3348         calculate D2E/DX2 analytically  !
 ! D44   D(2,6,10,9)             2.8154         calculate D2E/DX2 analytically  !
 ! D45   D(2,6,10,54)         -175.0318         calculate D2E/DX2 analytically  !
 ! D46   D(30,6,10,9)          171.8872         calculate D2E/DX2 analytically  !
 ! D47   D(30,6,10,54)          -5.96           calculate D2E/DX2 analytically  !
 ! D48   D(2,6,30,38)           93.8505         calculate D2E/DX2 analytically  !
 ! D49   D(2,6,30,42)          -80.7026         calculate D2E/DX2 analytically  !
 ! D50   D(10,6,30,38)         -77.0442         calculate D2E/DX2 analytically  !
 ! D51   D(10,6,30,42)         108.4027         calculate D2E/DX2 analytically  !
 ! D52   D(5,8,9,10)             3.3927         calculate D2E/DX2 analytically  !
 ! D53   D(5,8,9,55)          -178.5832         calculate D2E/DX2 analytically  !
 ! D54   D(53,8,9,10)         -175.4812         calculate D2E/DX2 analytically  !
 ! D55   D(53,8,9,55)            2.5428         calculate D2E/DX2 analytically  !
 ! D56   D(5,8,53,109)          60.5353         calculate D2E/DX2 analytically  !
 ! D57   D(5,8,53,110)        -178.4944         calculate D2E/DX2 analytically  !
 ! D58   D(5,8,53,111)         -59.0231         calculate D2E/DX2 analytically  !
 ! D59   D(9,8,53,109)        -120.5334         calculate D2E/DX2 analytically  !
 ! D60   D(9,8,53,110)           0.4369         calculate D2E/DX2 analytically  !
 ! D61   D(9,8,53,111)         119.9082         calculate D2E/DX2 analytically  !
 ! D62   D(8,9,10,6)            -0.2551         calculate D2E/DX2 analytically  !
 ! D63   D(8,9,10,54)          177.7053         calculate D2E/DX2 analytically  !
 ! D64   D(55,9,10,6)         -178.2854         calculate D2E/DX2 analytically  !
 ! D65   D(55,9,10,54)          -0.3251         calculate D2E/DX2 analytically  !
 ! D66   D(6,10,54,112)        -26.1879         calculate D2E/DX2 analytically  !
 ! D67   D(6,10,54,113)         94.1762         calculate D2E/DX2 analytically  !
 ! D68   D(6,10,54,114)       -147.6479         calculate D2E/DX2 analytically  !
 ! D69   D(9,10,54,112)        155.7939         calculate D2E/DX2 analytically  !
 ! D70   D(9,10,54,113)        -83.842          calculate D2E/DX2 analytically  !
 ! D71   D(9,10,54,114)         34.334          calculate D2E/DX2 analytically  !
 ! D72   D(14,11,12,13)       -178.3138         calculate D2E/DX2 analytically  !
 ! D73   D(14,11,12,15)          6.296          calculate D2E/DX2 analytically  !
 ! D74   D(12,11,14,4)         104.6556         calculate D2E/DX2 analytically  !
 ! D75   D(12,11,14,28)       -132.3011         calculate D2E/DX2 analytically  !
 ! D76   D(12,11,14,57)        -13.8498         calculate D2E/DX2 analytically  !
 ! D77   D(11,12,13,3)         156.8797         calculate D2E/DX2 analytically  !
 ! D78   D(11,12,13,27)         24.0489         calculate D2E/DX2 analytically  !
 ! D79   D(11,12,13,56)        -93.4197         calculate D2E/DX2 analytically  !
 ! D80   D(15,12,13,3)         -27.5386         calculate D2E/DX2 analytically  !
 ! D81   D(15,12,13,27)       -160.3694         calculate D2E/DX2 analytically  !
 ! D82   D(15,12,13,56)         82.162          calculate D2E/DX2 analytically  !
 ! D83   D(11,12,15,2)         177.4235         calculate D2E/DX2 analytically  !
 ! D84   D(13,12,15,2)           2.2062         calculate D2E/DX2 analytically  !
 ! D85   D(3,13,27,69)         164.385          calculate D2E/DX2 analytically  !
 ! D86   D(3,13,27,70)          45.8173         calculate D2E/DX2 analytically  !
 ! D87   D(3,13,27,71)         -75.5097         calculate D2E/DX2 analytically  !
 ! D88   D(12,13,27,69)        -67.7203         calculate D2E/DX2 analytically  !
 ! D89   D(12,13,27,70)        173.712          calculate D2E/DX2 analytically  !
 ! D90   D(12,13,27,71)         52.385          calculate D2E/DX2 analytically  !
 ! D91   D(56,13,27,69)         48.4013         calculate D2E/DX2 analytically  !
 ! D92   D(56,13,27,70)        -70.1664         calculate D2E/DX2 analytically  !
 ! D93   D(56,13,27,71)        168.5066         calculate D2E/DX2 analytically  !
 ! D94   D(4,14,28,72)        -169.206          calculate D2E/DX2 analytically  !
 ! D95   D(4,14,28,73)          69.7424         calculate D2E/DX2 analytically  !
 ! D96   D(4,14,28,74)         -51.1737         calculate D2E/DX2 analytically  !
 ! D97   D(11,14,28,72)         72.1645         calculate D2E/DX2 analytically  !
 ! D98   D(11,14,28,73)        -48.8871         calculate D2E/DX2 analytically  !
 ! D99   D(11,14,28,74)       -169.8032         calculate D2E/DX2 analytically  !
 ! D100  D(57,14,28,72)        -47.6909         calculate D2E/DX2 analytically  !
 ! D101  D(57,14,28,73)       -168.7426         calculate D2E/DX2 analytically  !
 ! D102  D(57,14,28,74)         70.3414         calculate D2E/DX2 analytically  !
 ! D103  D(22,17,18,3)        -111.017          calculate D2E/DX2 analytically  !
 ! D104  D(22,17,18,19)        135.6769         calculate D2E/DX2 analytically  !
 ! D105  D(22,17,18,23)          1.7988         calculate D2E/DX2 analytically  !
 ! D106  D(18,17,22,21)         25.4964         calculate D2E/DX2 analytically  !
 ! D107  D(18,17,22,25)       -103.7152         calculate D2E/DX2 analytically  !
 ! D108  D(18,17,22,61)        141.0573         calculate D2E/DX2 analytically  !
 ! D109  D(3,18,19,2)          -11.5661         calculate D2E/DX2 analytically  !
 ! D110  D(17,18,19,2)         102.8334         calculate D2E/DX2 analytically  !
 ! D111  D(23,18,19,2)        -124.0756         calculate D2E/DX2 analytically  !
 ! D112  D(3,18,23,20)          77.3716         calculate D2E/DX2 analytically  !
 ! D113  D(3,18,23,26)        -156.0013         calculate D2E/DX2 analytically  !
 ! D114  D(3,18,23,62)         -36.4435         calculate D2E/DX2 analytically  !
 ! D115  D(17,18,23,20)        -36.9563         calculate D2E/DX2 analytically  !
 ! D116  D(17,18,23,26)         89.6707         calculate D2E/DX2 analytically  !
 ! D117  D(17,18,23,62)       -150.7714         calculate D2E/DX2 analytically  !
 ! D118  D(19,18,23,20)       -169.6977         calculate D2E/DX2 analytically  !
 ! D119  D(19,18,23,26)        -43.0707         calculate D2E/DX2 analytically  !
 ! D120  D(19,18,23,62)         76.4872         calculate D2E/DX2 analytically  !
 ! D121  D(23,20,21,22)        -20.0135         calculate D2E/DX2 analytically  !
 ! D122  D(23,20,21,24)        162.9869         calculate D2E/DX2 analytically  !
 ! D123  D(21,20,23,18)         47.4051         calculate D2E/DX2 analytically  !
 ! D124  D(21,20,23,26)        -80.5607         calculate D2E/DX2 analytically  !
 ! D125  D(21,20,23,62)        164.0299         calculate D2E/DX2 analytically  !
 ! D126  D(20,21,22,17)        -16.818          calculate D2E/DX2 analytically  !
 ! D127  D(20,21,22,25)        111.811          calculate D2E/DX2 analytically  !
 ! D128  D(20,21,22,61)       -132.0647         calculate D2E/DX2 analytically  !
 ! D129  D(24,21,22,17)        160.1735         calculate D2E/DX2 analytically  !
 ! D130  D(24,21,22,25)        -71.1974         calculate D2E/DX2 analytically  !
 ! D131  D(24,21,22,61)         44.9269         calculate D2E/DX2 analytically  !
 ! D132  D(17,22,25,63)       -174.6811         calculate D2E/DX2 analytically  !
 ! D133  D(17,22,25,64)         64.4199         calculate D2E/DX2 analytically  !
 ! D134  D(17,22,25,65)        -55.781          calculate D2E/DX2 analytically  !
 ! D135  D(21,22,25,63)         54.8044         calculate D2E/DX2 analytically  !
 ! D136  D(21,22,25,64)        -66.0946         calculate D2E/DX2 analytically  !
 ! D137  D(21,22,25,65)        173.7045         calculate D2E/DX2 analytically  !
 ! D138  D(61,22,25,63)        -60.568          calculate D2E/DX2 analytically  !
 ! D139  D(61,22,25,64)        178.533          calculate D2E/DX2 analytically  !
 ! D140  D(61,22,25,65)         58.3321         calculate D2E/DX2 analytically  !
 ! D141  D(18,23,26,66)       -157.7666         calculate D2E/DX2 analytically  !
 ! D142  D(18,23,26,67)         85.1149         calculate D2E/DX2 analytically  !
 ! D143  D(18,23,26,68)        -35.8132         calculate D2E/DX2 analytically  !
 ! D144  D(20,23,26,66)        -30.5232         calculate D2E/DX2 analytically  !
 ! D145  D(20,23,26,67)       -147.6418         calculate D2E/DX2 analytically  !
 ! D146  D(20,23,26,68)         91.4302         calculate D2E/DX2 analytically  !
 ! D147  D(62,23,26,66)         82.349          calculate D2E/DX2 analytically  !
 ! D148  D(62,23,26,67)        -34.7695         calculate D2E/DX2 analytically  !
 ! D149  D(62,23,26,68)       -155.6976         calculate D2E/DX2 analytically  !
 ! D150  D(5,29,31,32)        -170.786          calculate D2E/DX2 analytically  !
 ! D151  D(5,29,31,36)           9.0925         calculate D2E/DX2 analytically  !
 ! D152  D(35,29,31,32)          1.4166         calculate D2E/DX2 analytically  !
 ! D153  D(35,29,31,36)       -178.7049         calculate D2E/DX2 analytically  !
 ! D154  D(5,29,35,34)         170.0068         calculate D2E/DX2 analytically  !
 ! D155  D(5,29,35,37)          -9.9079         calculate D2E/DX2 analytically  !
 ! D156  D(31,29,35,34)         -2.1732         calculate D2E/DX2 analytically  !
 ! D157  D(31,29,35,37)        177.912          calculate D2E/DX2 analytically  !
 ! D158  D(6,30,38,39)        -174.0906         calculate D2E/DX2 analytically  !
 ! D159  D(6,30,38,43)           6.0669         calculate D2E/DX2 analytically  !
 ! D160  D(42,30,38,39)          0.3105         calculate D2E/DX2 analytically  !
 ! D161  D(42,30,38,43)       -179.5319         calculate D2E/DX2 analytically  !
 ! D162  D(6,30,42,41)         173.2514         calculate D2E/DX2 analytically  !
 ! D163  D(6,30,42,44)          -9.5561         calculate D2E/DX2 analytically  !
 ! D164  D(38,30,42,41)         -1.217          calculate D2E/DX2 analytically  !
 ! D165  D(38,30,42,44)        175.9755         calculate D2E/DX2 analytically  !
 ! D166  D(29,31,32,33)          0.1318         calculate D2E/DX2 analytically  !
 ! D167  D(29,31,32,75)       -177.356          calculate D2E/DX2 analytically  !
 ! D168  D(36,31,32,33)       -179.7461         calculate D2E/DX2 analytically  !
 ! D169  D(36,31,32,75)          2.766          calculate D2E/DX2 analytically  !
 ! D170  D(29,31,36,45)        -84.2618         calculate D2E/DX2 analytically  !
 ! D171  D(29,31,36,46)        150.8843         calculate D2E/DX2 analytically  !
 ! D172  D(29,31,36,78)         32.2781         calculate D2E/DX2 analytically  !
 ! D173  D(32,31,36,45)         95.6132         calculate D2E/DX2 analytically  !
 ! D174  D(32,31,36,46)        -29.2407         calculate D2E/DX2 analytically  !
 ! D175  D(32,31,36,78)       -147.8469         calculate D2E/DX2 analytically  !
 ! D176  D(31,32,33,34)         -0.8791         calculate D2E/DX2 analytically  !
 ! D177  D(31,32,33,76)       -178.4234         calculate D2E/DX2 analytically  !
 ! D178  D(75,32,33,34)        176.6246         calculate D2E/DX2 analytically  !
 ! D179  D(75,32,33,76)         -0.9197         calculate D2E/DX2 analytically  !
 ! D180  D(32,33,34,35)          0.0884         calculate D2E/DX2 analytically  !
 ! D181  D(32,33,34,77)       -177.7839         calculate D2E/DX2 analytically  !
 ! D182  D(76,33,34,35)        177.6335         calculate D2E/DX2 analytically  !
 ! D183  D(76,33,34,77)         -0.2388         calculate D2E/DX2 analytically  !
 ! D184  D(33,34,35,29)          1.4068         calculate D2E/DX2 analytically  !
 ! D185  D(33,34,35,37)       -178.6775         calculate D2E/DX2 analytically  !
 ! D186  D(77,34,35,29)        179.2761         calculate D2E/DX2 analytically  !
 ! D187  D(77,34,35,37)         -0.8082         calculate D2E/DX2 analytically  !
 ! D188  D(29,35,37,47)        115.434          calculate D2E/DX2 analytically  !
 ! D189  D(29,35,37,48)       -120.119          calculate D2E/DX2 analytically  !
 ! D190  D(29,35,37,79)         -2.7758         calculate D2E/DX2 analytically  !
 ! D191  D(34,35,37,47)        -64.4791         calculate D2E/DX2 analytically  !
 ! D192  D(34,35,37,48)         59.9678         calculate D2E/DX2 analytically  !
 ! D193  D(34,35,37,79)        177.311          calculate D2E/DX2 analytically  !
 ! D194  D(31,36,45,85)       -177.6081         calculate D2E/DX2 analytically  !
 ! D195  D(31,36,45,86)         63.8252         calculate D2E/DX2 analytically  !
 ! D196  D(31,36,45,87)        -56.9908         calculate D2E/DX2 analytically  !
 ! D197  D(46,36,45,85)        -51.2422         calculate D2E/DX2 analytically  !
 ! D198  D(46,36,45,86)       -169.8089         calculate D2E/DX2 analytically  !
 ! D199  D(46,36,45,87)         69.3751         calculate D2E/DX2 analytically  !
 ! D200  D(78,36,45,85)         65.0213         calculate D2E/DX2 analytically  !
 ! D201  D(78,36,45,86)        -53.5453         calculate D2E/DX2 analytically  !
 ! D202  D(78,36,45,87)       -174.3613         calculate D2E/DX2 analytically  !
 ! D203  D(31,36,46,88)       -170.9695         calculate D2E/DX2 analytically  !
 ! D204  D(31,36,46,89)         69.6581         calculate D2E/DX2 analytically  !
 ! D205  D(31,36,46,90)        -51.4784         calculate D2E/DX2 analytically  !
 ! D206  D(45,36,46,88)         63.7005         calculate D2E/DX2 analytically  !
 ! D207  D(45,36,46,89)        -55.672          calculate D2E/DX2 analytically  !
 ! D208  D(45,36,46,90)       -176.8084         calculate D2E/DX2 analytically  !
 ! D209  D(78,36,46,88)        -52.0499         calculate D2E/DX2 analytically  !
 ! D210  D(78,36,46,89)       -171.4224         calculate D2E/DX2 analytically  !
 ! D211  D(78,36,46,90)         67.4412         calculate D2E/DX2 analytically  !
 ! D212  D(35,37,47,91)       -179.3161         calculate D2E/DX2 analytically  !
 ! D213  D(35,37,47,92)         60.6952         calculate D2E/DX2 analytically  !
 ! D214  D(35,37,47,93)        -59.9958         calculate D2E/DX2 analytically  !
 ! D215  D(48,37,47,91)         56.0961         calculate D2E/DX2 analytically  !
 ! D216  D(48,37,47,92)        -63.8926         calculate D2E/DX2 analytically  !
 ! D217  D(48,37,47,93)        175.4164         calculate D2E/DX2 analytically  !
 ! D218  D(79,37,47,91)        -61.359          calculate D2E/DX2 analytically  !
 ! D219  D(79,37,47,92)        178.6523         calculate D2E/DX2 analytically  !
 ! D220  D(79,37,47,93)         57.9613         calculate D2E/DX2 analytically  !
 ! D221  D(35,37,48,94)        175.9487         calculate D2E/DX2 analytically  !
 ! D222  D(35,37,48,95)         56.2592         calculate D2E/DX2 analytically  !
 ! D223  D(35,37,48,96)        -64.2956         calculate D2E/DX2 analytically  !
 ! D224  D(47,37,48,94)        -59.057          calculate D2E/DX2 analytically  !
 ! D225  D(47,37,48,95)       -178.7465         calculate D2E/DX2 analytically  !
 ! D226  D(47,37,48,96)         60.6986         calculate D2E/DX2 analytically  !
 ! D227  D(79,37,48,94)         58.6311         calculate D2E/DX2 analytically  !
 ! D228  D(79,37,48,95)        -61.0584         calculate D2E/DX2 analytically  !
 ! D229  D(79,37,48,96)        178.3868         calculate D2E/DX2 analytically  !
 ! D230  D(30,38,39,40)          1.0439         calculate D2E/DX2 analytically  !
 ! D231  D(30,38,39,80)       -177.776          calculate D2E/DX2 analytically  !
 ! D232  D(43,38,39,40)       -179.1087         calculate D2E/DX2 analytically  !
 ! D233  D(43,38,39,80)          2.0714         calculate D2E/DX2 analytically  !
 ! D234  D(30,38,43,51)       -111.6125         calculate D2E/DX2 analytically  !
 ! D235  D(30,38,43,52)        124.5089         calculate D2E/DX2 analytically  !
 ! D236  D(30,38,43,83)          6.0384         calculate D2E/DX2 analytically  !
 ! D237  D(39,38,43,51)         68.5469         calculate D2E/DX2 analytically  !
 ! D238  D(39,38,43,52)        -55.3316         calculate D2E/DX2 analytically  !
 ! D239  D(39,38,43,83)       -173.8021         calculate D2E/DX2 analytically  !
 ! D240  D(38,39,40,41)         -1.4693         calculate D2E/DX2 analytically  !
 ! D241  D(38,39,40,81)        179.9545         calculate D2E/DX2 analytically  !
 ! D242  D(80,39,40,41)        177.3501         calculate D2E/DX2 analytically  !
 ! D243  D(80,39,40,81)         -1.2261         calculate D2E/DX2 analytically  !
 ! D244  D(39,40,41,42)          0.515          calculate D2E/DX2 analytically  !
 ! D245  D(39,40,41,82)       -177.7477         calculate D2E/DX2 analytically  !
 ! D246  D(81,40,41,42)        179.0933         calculate D2E/DX2 analytically  !
 ! D247  D(81,40,41,82)          0.8305         calculate D2E/DX2 analytically  !
 ! D248  D(40,41,42,30)          0.8028         calculate D2E/DX2 analytically  !
 ! D249  D(40,41,42,44)       -176.386          calculate D2E/DX2 analytically  !
 ! D250  D(82,41,42,30)        179.0606         calculate D2E/DX2 analytically  !
 ! D251  D(82,41,42,44)          1.8718         calculate D2E/DX2 analytically  !
 ! D252  D(30,42,44,49)        148.4601         calculate D2E/DX2 analytically  !
 ! D253  D(30,42,44,50)        -86.9403         calculate D2E/DX2 analytically  !
 ! D254  D(30,42,44,84)         29.4846         calculate D2E/DX2 analytically  !
 ! D255  D(41,42,44,49)        -34.4214         calculate D2E/DX2 analytically  !
 ! D256  D(41,42,44,50)         90.1782         calculate D2E/DX2 analytically  !
 ! D257  D(41,42,44,84)       -153.3969         calculate D2E/DX2 analytically  !
 ! D258  D(38,43,51,103)       176.2811         calculate D2E/DX2 analytically  !
 ! D259  D(38,43,51,104)        56.018          calculate D2E/DX2 analytically  !
 ! D260  D(38,43,51,105)       -63.9253         calculate D2E/DX2 analytically  !
 ! D261  D(52,43,51,103)       -59.2016         calculate D2E/DX2 analytically  !
 ! D262  D(52,43,51,104)      -179.4647         calculate D2E/DX2 analytically  !
 ! D263  D(52,43,51,105)        60.592          calculate D2E/DX2 analytically  !
 ! D264  D(83,43,51,103)        58.1848         calculate D2E/DX2 analytically  !
 ! D265  D(83,43,51,104)       -62.0782         calculate D2E/DX2 analytically  !
 ! D266  D(83,43,51,105)       177.9785         calculate D2E/DX2 analytically  !
 ! D267  D(38,43,52,106)      -173.9826         calculate D2E/DX2 analytically  !
 ! D268  D(38,43,52,107)        66.6135         calculate D2E/DX2 analytically  !
 ! D269  D(38,43,52,108)       -53.9686         calculate D2E/DX2 analytically  !
 ! D270  D(51,43,52,106)        61.5135         calculate D2E/DX2 analytically  !
 ! D271  D(51,43,52,107)       -57.8905         calculate D2E/DX2 analytically  !
 ! D272  D(51,43,52,108)      -178.4726         calculate D2E/DX2 analytically  !
 ! D273  D(83,43,52,106)       -55.4646         calculate D2E/DX2 analytically  !
 ! D274  D(83,43,52,107)      -174.8685         calculate D2E/DX2 analytically  !
 ! D275  D(83,43,52,108)        64.5493         calculate D2E/DX2 analytically  !
 ! D276  D(42,44,49,97)       -170.3237         calculate D2E/DX2 analytically  !
 ! D277  D(42,44,49,98)         70.2723         calculate D2E/DX2 analytically  !
 ! D278  D(42,44,49,99)        -50.3422         calculate D2E/DX2 analytically  !
 ! D279  D(50,44,49,97)         64.6455         calculate D2E/DX2 analytically  !
 ! D280  D(50,44,49,98)        -54.7585         calculate D2E/DX2 analytically  !
 ! D281  D(50,44,49,99)       -175.3729         calculate D2E/DX2 analytically  !
 ! D282  D(84,44,49,97)        -51.9734         calculate D2E/DX2 analytically  !
 ! D283  D(84,44,49,98)       -171.3774         calculate D2E/DX2 analytically  !
 ! D284  D(84,44,49,99)         68.0081         calculate D2E/DX2 analytically  !
 ! D285  D(42,44,50,100)      -179.1577         calculate D2E/DX2 analytically  !
 ! D286  D(42,44,50,101)        61.3048         calculate D2E/DX2 analytically  !
 ! D287  D(42,44,50,102)       -59.3429         calculate D2E/DX2 analytically  !
 ! D288  D(49,44,50,100)       -52.893          calculate D2E/DX2 analytically  !
 ! D289  D(49,44,50,101)      -172.4306         calculate D2E/DX2 analytically  !
 ! D290  D(49,44,50,102)        66.9218         calculate D2E/DX2 analytically  !
 ! D291  D(84,44,50,100)        64.4075         calculate D2E/DX2 analytically  !
 ! D292  D(84,44,50,101)       -55.1301         calculate D2E/DX2 analytically  !
 ! D293  D(84,44,50,102)      -175.7777         calculate D2E/DX2 analytically  !
 --------------------------------------------------------------------------------
 Trust Radius=3.00D-01 FncErr=1.00D-07 GrdErr=1.00D-07
 Number of steps in this run=   2 maximum allowed number of steps=   2.
 GradGradGradGradGradGradGradGradGradGradGradGradGradGradGradGradGradGrad

 Stoichiometry    C42H60MgN2O9
 Framework group  C1[X(C42H60MgN2O9)]
 Deg. of freedom   336
 Full point group                 C1      NOp   1
 Largest Abelian subgroup         C1      NOp   1
 Largest concise Abelian subgroup C1      NOp   1
                         Standard orientation:                         
 ---------------------------------------------------------------------
 Center     Atomic     Atomic              Coordinates (Angstroms)
 Number     Number      Type              X           Y           Z
 ---------------------------------------------------------------------
    1          8             0       -5.611874    1.531664    0.897792
    2         12             0        0.578537   -0.678615    0.124043
    3          8             0        0.566965    1.204436   -1.180968
    4          6             0       -4.533649    1.877834    0.163838
    5          7             0       -0.128377   -2.628374    0.304284
    6          7             0        2.492349   -1.470310   -0.030642
    7          8             0       -4.005911    2.964900    0.206970
    8          6             0        0.589367   -3.745973    0.442955
    9          6             0        1.985396   -3.805036    0.317143
   10          6             0        2.877810   -2.732910    0.096758
   11          8             0       -2.963990    1.138245   -1.482101
   12          6             0       -1.745849    0.738667   -1.134586
   13          6             0       -0.598907    1.274273   -1.983903
   14          6             0       -4.090896    0.693310   -0.691307
   15          8             0       -1.522278   -0.074991   -0.249298
   16          6             0       -6.114822    2.556152    1.773424
   17          8             0       -0.622789    2.574346    0.425729
   18          6             0        0.638798    1.961026    0.248190
   19          8             0        0.862129    1.007178    1.100126
   20          8             0        1.389418    4.126217   -0.713901
   21          6             0        0.242957    4.759262   -0.412161
   22          6             0       -0.803739    3.996168    0.393762
   23          6             0        1.792654    2.962287    0.063394
   24          8             0        0.027242    5.880645   -0.815944
   25          6             0       -0.984203    4.565244    1.805253
   26          6             0        2.449162    3.384506    1.380108
   27          6             0       -0.853613    2.584563   -2.727009
   28          6             0       -5.160323    0.186933   -1.655204
   29          6             0       -1.573486   -2.725060    0.305454
   30          6             0        3.478061   -0.410054   -0.079115
   31          6             0       -2.248709   -3.065201   -0.916900
   32          6             0       -3.659851   -2.962979   -0.953670
   33          6             0       -4.388077   -2.534827    0.180724
   34          6             0       -3.712115   -2.218858    1.380287
   35          6             0       -2.299015   -2.322417    1.469093
   36          6             0       -1.444654   -3.529877   -2.163773
   37          6             0       -1.573905   -2.001835    2.800685
   38          6             0        4.114493    0.029584    1.130638
   39          6             0        4.978627    1.154258    1.062401
   40          6             0        5.191387    1.837415   -0.153575
   41          6             0        4.566601    1.390716   -1.338855
   42          6             0        3.707953    0.258100   -1.328898
   43          6             0        3.892605   -0.680444    2.494436
   44          6             0        3.087537   -0.282930   -2.644068
   45          6             0       -0.918908   -2.308536   -2.986288
   46          6             0       -2.251168   -4.500221   -3.086272
   47          6             0       -1.736986   -0.501965    3.204120
   48          6             0       -2.063656   -2.944599    3.950419
   49          6             0        2.751180    0.840400   -3.672481
   50          6             0        4.015858   -1.359580   -3.302178
   51          6             0        3.093550    0.223610    3.487061
   52          6             0        5.249298   -1.128470    3.136146
   53          6             0       -0.121968   -5.050813    0.784123
   54          6             0        4.354433   -3.111961    0.059503
   55          1             0        2.437916   -4.783882    0.431306
   56          1             0       -0.441700    0.499765   -2.749723
   57          1             0       -3.799622   -0.130498   -0.030785
   58          1             0       -6.415739    3.436549    1.199824
   59          1             0       -5.350245    2.847158    2.498373
   60          1             0       -6.974074    2.113240    2.277539
   61          1             0       -1.749556    4.150009   -0.132936
   62          1             0        2.557382    2.492931   -0.552982
   63          1             0       -1.213664    5.633275    1.737815
   64          1             0       -0.091429    4.433424    2.421303
   65          1             0       -1.820431    4.050308    2.286395
   66          1             0        2.953359    4.345661    1.232166
   67          1             0        3.202825    2.637562    1.625904
   68          1             0        1.743604    3.470382    2.209461
   69          1             0       -1.604018    2.421874   -3.507632
   70          1             0        0.077187    2.908005   -3.199745
   71          1             0       -1.217771    3.383804   -2.084322
   72          1             0       -4.819320   -0.764284   -2.071302
   73          1             0       -5.341907    0.906576   -2.459107
   74          1             0       -6.093878    0.010883   -1.115137
   75          1             0       -4.205135   -3.257802   -1.859756
   76          1             0       -5.485476   -2.486451    0.141465
   77          1             0       -4.291461   -1.922698    2.265351
   78          1             0       -0.552021   -4.077968   -1.808095
   79          1             0       -0.492474   -2.197585    2.646431
   80          1             0        5.504625    1.485710    1.967040
   81          1             0        5.863743    2.706214   -0.184454
   82          1             0        4.770756    1.909627   -2.283958
   83          1             0        3.284351   -1.588223    2.313386
   84          1             0        2.140384   -0.794659   -2.370115
   85          1             0       -0.387607   -2.651478   -3.889669
   86          1             0       -0.203498   -1.732625   -2.370061
   87          1             0       -1.750237   -1.651279   -3.293910
   88          1             0       -1.581011   -4.916376   -3.853776
   89          1             0       -3.072482   -3.976994   -3.598524
   90          1             0       -2.672765   -5.333458   -2.503808
   91          1             0       -1.199591   -0.308012    4.147076
   92          1             0       -2.797979   -0.245420    3.347056
   93          1             0       -1.315845    0.160561    2.426198
   94          1             0       -1.484404   -2.747253    4.865354
   95          1             0       -1.927091   -4.001465    3.672787
   96          1             0       -3.128820   -2.776081    4.170767
   97          1             0        2.161939    0.416651   -4.500246
   98          1             0        3.665502    1.282766   -4.097185
   99          1             0        2.167141    1.641329   -3.191526
  100          1             0        3.562862   -1.717087   -4.239744
  101          1             0        4.151116   -2.223679   -2.632684
  102          1             0        5.005404   -0.933106   -3.530630
  103          1             0        2.894364   -0.330009    4.418734
  104          1             0        2.134813    0.527747    3.032479
  105          1             0        3.663400    1.131860    3.737601
  106          1             0        5.052429   -1.720269    4.043133
  107          1             0        5.854912   -0.254619    3.420249
  108          1             0        5.836608   -1.744463    2.438158
  109          1             0       -0.852919   -5.338574    0.020717
  110          1             0        0.595901   -5.870885    0.891333
  111          1             0       -0.664167   -4.949536    1.733056
  112          1             0        4.957051   -2.397426   -0.507344
  113          1             0        4.762952   -3.159179    1.076868
  114          1             0        4.478903   -4.106063   -0.385446
 ---------------------------------------------------------------------
 Rotational constants (GHZ):      0.0666766      0.0539472      0.0416525
 General basis read from cards:  (5D, 7F)
 There are   642 symmetry adapted basis functions of A   symmetry.
 Integral buffers will be    262144 words long.
 Raffenetti 2 integral format.
 Two-electron integral symmetry is turned on.
   642 basis functions,  1430 primitive gaussians,   674 cartesian basis functions
   205 alpha electrons      205 beta electrons
       nuclear repulsion energy      9143.0015986556 Hartrees.
 NAtoms=  114 NActive=  114 NUniq=  114 SFac= 1.00D+00 NAtFMM=   60 Big=T
 One-electron integrals computed using PRISM.
 NBasis=   642 RedAO= T  NBF=   642
 NBsUse=   642 1.00D-06 NBFU=   642
 Initial guess read from the checkpoint file:
 RRSS_fm-5-ti2.chk
 Initial guess orbital symmetries:
       Occupied  (A) (A) (A) (A) (A) (A) (A) (A) (A) (A) (A) (A)
                 (A) (A) (A) (A) (A) (A) (A) (A) (A) (A) (A) (A)
                 (A) (A) (A) (A) (A) (A) (A) (A) (A) (A) (A) (A)
                 (A) (A) (A) (A) (A) (A) (A) (A) (A) (A) (A) (A)
                 (A) (A) (A) (A) (A) (A) (A) (A) (A) (A) (A) (A)
                 (A) (A) (A) (A) (A) (A) (A) (A) (A) (A) (A) (A)
                 (A) (A) (A) (A) (A) (A) (A) (A) (A) (A) (A) (A)
                 (A) (A) (A) (A) (A) (A) (A) (A) (A) (A) (A) (A)
                 (A) (A) (A) (A) (A) (A) (A) (A) (A) (A) (A) (A)
                 (A) (A) (A) (A) (A) (A) (A) (A) (A) (A) (A) (A)
                 (A) (A) (A) (A) (A) (A) (A) (A) (A) (A) (A) (A)
                 (A) (A) (A) (A) (A) (A) (A) (A) (A) (A) (A) (A)
                 (A) (A) (A) (A) (A) (A) (A) (A) (A) (A) (A) (A)
                 (A) (A) (A) (A) (A) (A) (A) (A) (A) (A) (A) (A)
                 (A) (A) (A) (A) (A) (A) (A) (A) (A) (A) (A) (A)
                 (A) (A) (A) (A) (A) (A) (A) (A) (A) (A) (A) (A)
                 (A) (A) (A) (A) (A) (A) (A) (A) (A) (A) (A) (A)
                 (A)
       Virtual   (A) (A) (A) (A) (A) (A) (A) (A) (A) (A) (A) (A)
                 (A) (A) (A) (A) (A) (A) (A) (A) (A) (A) (A) (A)
                 (A) (A) (A) (A) (A) (A) (A) (A) (A) (A) (A) (A)
                 (A) (A) (A) (A) (A) (A) (A) (A) (A) (A) (A) (A)
                 (A) (A) (A) (A) (A) (A) (A) (A) (A) (A) (A) (A)
                 (A) (A) (A) (A) (A) (A) (A) (A) (A) (A) (A) (A)
                 (A) (A) (A) (A) (A) (A) (A) (A) (A) (A) (A) (A)
                 (A) (A) (A) (A) (A) (A) (A) (A) (A) (A) (A) (A)
                 (A) (A) (A) (A) (A) (A) (A) (A) (A) (A) (A) (A)
                 (A) (A) (A) (A) (A) (A) (A) (A) (A) (A) (A) (A)
                 (A) (A) (A) (A) (A) (A) (A) (A) (A) (A) (A) (A)
                 (A) (A) (A) (A) (A) (A) (A) (A) (A) (A) (A) (A)
                 (A) (A) (A) (A) (A) (A) (A) (A) (A) (A) (A) (A)
                 (A) (A) (A) (A) (A) (A) (A) (A) (A) (A) (A) (A)
                 (A) (A) (A) (A) (A) (A) (A) (A) (A) (A) (A) (A)
                 (A) (A) (A) (A) (A) (A) (A) (A) (A) (A) (A) (A)
                 (A) (A) (A) (A) (A) (A) (A) (A) (A) (A) (A) (A)
                 (A) (A) (A) (A) (A) (A) (A) (A) (A) (A) (A) (A)
                 (A) (A) (A) (A) (A) (A) (A) (A) (A) (A) (A) (A)
                 (A) (A) (A) (A) (A) (A) (A) (A) (A) (A) (A) (A)
                 (A) (A) (A) (A) (A) (A) (A) (A) (A) (A) (A) (A)
                 (A) (A) (A) (A) (A) (A) (A) (A) (A) (A) (A) (A)
                 (A) (A) (A) (A) (A) (A) (A) (A) (A) (A) (A) (A)
                 (A) (A) (A) (A) (A) (A) (A) (A) (A) (A) (A) (A)
                 (A) (A) (A) (A) (A) (A) (A) (A) (A) (A) (A) (A)
                 (A) (A) (A) (A) (A) (A) (A) (A) (A) (A) (A) (A)
                 (A) (A) (A) (A) (A) (A) (A) (A) (A) (A) (A) (A)
                 (A) (A) (A) (A) (A) (A) (A) (A) (A) (A) (A) (A)
                 (A) (A) (A) (A) (A) (A) (A) (A) (A) (A) (A) (A)
                 (A) (A) (A) (A) (A) (A) (A) (A) (A) (A) (A) (A)
                 (A) (A) (A) (A) (A) (A) (A) (A) (A) (A) (A) (A)
                 (A) (A) (A) (A) (A) (A) (A) (A) (A) (A) (A) (A)
                 (A) (A) (A) (A) (A) (A) (A) (A) (A) (A) (A) (A)
                 (A) (A) (A) (A) (A) (A) (A) (A) (A) (A) (A) (A)
                 (A) (A) (A) (A) (A) (A) (A) (A) (A) (A) (A) (A)
                 (A) (A) (A) (A) (A) (A) (A) (A) (A) (A) (A) (A)
                 (A) (A) (A) (A) (A)
 Requested convergence on RMS density matrix=1.00D-08 within 128 cycles.
 Requested convergence on MAX density matrix=1.00D-06.
 Requested convergence on             energy=1.00D-06.
 No special actions if energy rises.
 SCF Done:  E(RB+HF-LYP) =  -2612.18951330     A.U. after    1 cycles
             Convg  =    0.2993D-08             -V/T =  2.0106
             S**2   =   0.0000
 Range of M.O.s used for correlation:     1   642
 NBasis=   642 NAE=   205 NBE=   205 NFC=     0 NFV=     0
 NROrb=    642 NOA=   205 NOB=   205 NVA=   437 NVB=   437
 PrsmSu:  requested number of processors reduced to:   1 ShMem   1 Linda.
 PrsmSu:  requested number of processors reduced to:   1 ShMem   1 Linda.
 Symmetrizing basis deriv contribution to polar:
 IMax=3 JMax=2 DiffMx= 0.00D+00
 G2DrvN: will do   29 centers at a time, making    4 passes doing MaxLOS=2.
 Calling FoFCou, ICntrl=  3107 FMM=T I1Cent=   0.
 Number of processors reduced from  2 to  1 for far-field.
 Calling FoFCou, ICntrl=  3107 FMM=T I1Cent=   0.
 Number of processors reduced from  2 to  1 for far-field.
 Calling FoFCou, ICntrl=  3107 FMM=T I1Cent=   0.
 Number of processors reduced from  2 to  1 for far-field.
 Calling FoFCou, ICntrl=  3107 FMM=T I1Cent=   0.
 Number of processors reduced from  2 to  1 for far-field.
 FoFDir/FoFCou used for L=0 through L=2.
          Differentiating once with respect to electric field.
                with respect to dipole field.
          Differentiating once with respect to nuclear coordinates.
 FoFCou: FMM=T IPFlag=           0 FMFlag=      100000 FMFlg1=        8193
 NFxFlg=           0 DoJE=F BraDBF=F KetDBF=F FulRan=T.
 Symmetry not used in FoFCou.
 FMM levels:  10  Number of levels for PrismC:   9
 Number of processors reduced from  2 to  1 for far-field.
 PrismC:  NFx=      2048 NFxT=         4 NFxU=         4.
 PrismC:  NFx=      2048 NFxT=         4 NFxU=         4.
 Number of processors reduced from  2 to  1 for far-field.
 PrismC:  NFx=      2048 NFxT=         4 NFxU=         4.
 PrismC:  NFx=      2048 NFxT=         4 NFxU=         4.
 Number of processors reduced from  2 to  1 for far-field.
 PrismC:  NFx=      2048 NFxT=         4 NFxU=         4.
 PrismC:  NFx=      2048 NFxT=         4 NFxU=         4.
 Number of processors reduced from  2 to  1 for far-field.
 PrismC:  NFx=      2048 NFxT=         4 NFxU=         4.
 PrismC:  NFx=      2048 NFxT=         4 NFxU=         4.
          There are 345 degrees of freedom in the 1st order CPHF.
   345 vectors were produced by pass  0.
 AX will form  87 AO Fock derivatives at one time.
 Number of processors reduced from  2 to  1 for far-field.
 PrismC:  NFx=      2048 NFxT=         4 NFxU=         4.
 PrismC:  NFx=      2048 NFxT=         4 NFxU=         4.
 Number of processors reduced from  2 to  1 for far-field.
 PrismC:  NFx=      2048 NFxT=         4 NFxU=         4.
 PrismC:  NFx=      2048 NFxT=         4 NFxU=         4.
 Number of processors reduced from  2 to  1 for far-field.
 PrismC:  NFx=      2048 NFxT=         4 NFxU=         4.
 PrismC:  NFx=      2048 NFxT=         4 NFxU=         4.
 Number of processors reduced from  2 to  1 for far-field.
 PrismC:  NFx=      2048 NFxT=         4 NFxU=         4.
 PrismC:  NFx=      2048 NFxT=         4 NFxU=         4.
   345 vectors were produced by pass  1.
 Number of processors reduced from  2 to  1 for far-field.
 PrismC:  NFx=      2048 NFxT=         4 NFxU=         4.
 PrismC:  NFx=      2048 NFxT=         4 NFxU=         4.
 Number of processors reduced from  2 to  1 for far-field.
 PrismC:  NFx=      2048 NFxT=         4 NFxU=         4.
 PrismC:  NFx=      2048 NFxT=         4 NFxU=         4.
 Number of processors reduced from  2 to  1 for far-field.
 PrismC:  NFx=      2048 NFxT=         4 NFxU=         4.
 PrismC:  NFx=      2048 NFxT=         4 NFxU=         4.
 Number of processors reduced from  2 to  1 for far-field.
 PrismC:  NFx=      2048 NFxT=         4 NFxU=         4.
 PrismC:  NFx=      2048 NFxT=         4 NFxU=         4.
   342 vectors were produced by pass  2.
 Number of processors reduced from  2 to  1 for far-field.
 PrismC:  NFx=      2048 NFxT=         4 NFxU=         4.
 PrismC:  NFx=      2048 NFxT=         4 NFxU=         4.
 Number of processors reduced from  2 to  1 for far-field.
 PrismC:  NFx=      2048 NFxT=         4 NFxU=         4.
 PrismC:  NFx=      2048 NFxT=         4 NFxU=         4.
 Number of processors reduced from  2 to  1 for far-field.
 PrismC:  NFx=      2048 NFxT=         4 NFxU=         4.
 PrismC:  NFx=      2048 NFxT=         4 NFxU=         4.
 Number of processors reduced from  2 to  1 for far-field.
 PrismC:  NFx=      2048 NFxT=         4 NFxU=         4.
 PrismC:  NFx=      2048 NFxT=         4 NFxU=         4.
   342 vectors were produced by pass  3.
 Number of processors reduced from  2 to  1 for far-field.
 PrismC:  NFx=      2048 NFxT=         4 NFxU=         4.
 PrismC:  NFx=      2048 NFxT=         4 NFxU=         4.
 Number of processors reduced from  2 to  1 for far-field.
 PrismC:  NFx=      2048 NFxT=         4 NFxU=         4.
 PrismC:  NFx=      2048 NFxT=         4 NFxU=         4.
 Number of processors reduced from  2 to  1 for far-field.
 PrismC:  NFx=      2048 NFxT=         4 NFxU=         4.
 PrismC:  NFx=      2048 NFxT=         4 NFxU=         4.
 Number of processors reduced from  2 to  1 for far-field.
 PrismC:  NFx=      2048 NFxT=         4 NFxU=         4.
 PrismC:  NFx=      2048 NFxT=         4 NFxU=         4.
   342 vectors were produced by pass  4.
 Number of processors reduced from  2 to  1 for far-field.
 PrismC:  NFx=      2048 NFxT=         4 NFxU=         4.
 PrismC:  NFx=      2048 NFxT=         4 NFxU=         4.
 Number of processors reduced from  2 to  1 for far-field.
 PrismC:  NFx=      2048 NFxT=         4 NFxU=         3.
 PrismC:  NFx=      2048 NFxT=         4 NFxU=         3.
 Number of processors reduced from  2 to  1 for far-field.
 PrismC:  NFx=      2048 NFxT=         4 NFxU=         3.
 PrismC:  NFx=      2048 NFxT=         4 NFxU=         3.
 Number of processors reduced from  2 to  1 for far-field.
 PrismC:  NFx=      2048 NFxT=         4 NFxU=         2.
 PrismC:  NFx=      2048 NFxT=         4 NFxU=         2.
   204 vectors were produced by pass  5.
 Number of processors reduced from  2 to  1 for far-field.
 PrismC:  NFx=      2048 NFxT=         4 NFxU=         4.
 PrismC:  NFx=      2048 NFxT=         4 NFxU=         4.
 Number of processors reduced from  2 to  1 for far-field.
 PrismC:  NFx=      2048 NFxT=         4 NFxU=         2.
 PrismC:  NFx=      2048 NFxT=         4 NFxU=         2.
 Number of processors reduced from  2 to  1 for far-field.
 PrismC:  NFx=      2048 NFxT=         4 NFxU=         3.
 PrismC:  NFx=      2048 NFxT=         4 NFxU=         2.
    64 vectors were produced by pass  6.
 Number of processors reduced from  2 to  1 for far-field.
 PrismC:  NFx=      2048 NFxT=         4 NFxU=         3.
 PrismC:  NFx=      2048 NFxT=         4 NFxU=         3.
     3 vectors were produced by pass  7.
 Number of processors reduced from  2 to  1 for far-field.
 PrismC:  NFx=      2048 NFxT=         4 NFxU=         2.
 PrismC:  NFx=      2048 NFxT=         4 NFxU=         2.
 Inv2:  IOpt= 1 Iter= 1 AM= 8.14D-15 Conv= 1.00D-12.
 Inverted reduced A of dimension 1987 with in-core refinement.
 Number of processors reduced from  2 to  1 for far-field.
 PrismC:  NFx=      2048 NFxT=         4 NFxU=         4.
 PrismC:  NFx=      2048 NFxT=         4 NFxU=         4.
 Number of processors reduced from  2 to  1 for far-field.
 PrismC:  NFx=      2048 NFxT=         4 NFxU=         4.
 PrismC:  NFx=      2048 NFxT=         4 NFxU=         4.
 Number of processors reduced from  2 to  1 for far-field.
 PrismC:  NFx=      2048 NFxT=         4 NFxU=         4.
 PrismC:  NFx=      2048 NFxT=         4 NFxU=         4.
 Number of processors reduced from  2 to  1 for far-field.
 PrismC:  NFx=      2048 NFxT=         4 NFxU=         4.
 PrismC:  NFx=      2048 NFxT=         4 NFxU=         4.
 Isotropic polarizability for W=    0.000000      409.90 Bohr**3.
 End of Minotr Frequency-dependent properties file   721 does not exist.

 **********************************************************************

            Population analysis using the SCF density.

 **********************************************************************

 Orbital symmetries:
       Occupied  (A) (A) (A) (A) (A) (A) (A) (A) (A) (A) (A) (A)
                 (A) (A) (A) (A) (A) (A) (A) (A) (A) (A) (A) (A)
                 (A) (A) (A) (A) (A) (A) (A) (A) (A) (A) (A) (A)
                 (A) (A) (A) (A) (A) (A) (A) (A) (A) (A) (A) (A)
                 (A) (A) (A) (A) (A) (A) (A) (A) (A) (A) (A) (A)
                 (A) (A) (A) (A) (A) (A) (A) (A) (A) (A) (A) (A)
                 (A) (A) (A) (A) (A) (A) (A) (A) (A) (A) (A) (A)
                 (A) (A) (A) (A) (A) (A) (A) (A) (A) (A) (A) (A)
                 (A) (A) (A) (A) (A) (A) (A) (A) (A) (A) (A) (A)
                 (A) (A) (A) (A) (A) (A) (A) (A) (A) (A) (A) (A)
                 (A) (A) (A) (A) (A) (A) (A) (A) (A) (A) (A) (A)
                 (A) (A) (A) (A) (A) (A) (A) (A) (A) (A) (A) (A)
                 (A) (A) (A) (A) (A) (A) (A) (A) (A) (A) (A) (A)
                 (A) (A) (A) (A) (A) (A) (A) (A) (A) (A) (A) (A)
                 (A) (A) (A) (A) (A) (A) (A) (A) (A) (A) (A) (A)
                 (A) (A) (A) (A) (A) (A) (A) (A) (A) (A) (A) (A)
                 (A) (A) (A) (A) (A) (A) (A) (A) (A) (A) (A) (A)
                 (A)
       Virtual   (A) (A) (A) (A) (A) (A) (A) (A) (A) (A) (A) (A)
                 (A) (A) (A) (A) (A) (A) (A) (A) (A) (A) (A) (A)
                 (A) (A) (A) (A) (A) (A) (A) (A) (A) (A) (A) (A)
                 (A) (A) (A) (A) (A) (A) (A) (A) (A) (A) (A) (A)
                 (A) (A) (A) (A) (A) (A) (A) (A) (A) (A) (A) (A)
                 (A) (A) (A) (A) (A) (A) (A) (A) (A) (A) (A) (A)
                 (A) (A) (A) (A) (A) (A) (A) (A) (A) (A) (A) (A)
                 (A) (A) (A) (A) (A) (A) (A) (A) (A) (A) (A) (A)
                 (A) (A) (A) (A) (A) (A) (A) (A) (A) (A) (A) (A)
                 (A) (A) (A) (A) (A) (A) (A) (A) (A) (A) (A) (A)
                 (A) (A) (A) (A) (A) (A) (A) (A) (A) (A) (A) (A)
                 (A) (A) (A) (A) (A) (A) (A) (A) (A) (A) (A) (A)
                 (A) (A) (A) (A) (A) (A) (A) (A) (A) (A) (A) (A)
                 (A) (A) (A) (A) (A) (A) (A) (A) (A) (A) (A) (A)
                 (A) (A) (A) (A) (A) (A) (A) (A) (A) (A) (A) (A)
                 (A) (A) (A) (A) (A) (A) (A) (A) (A) (A) (A) (A)
                 (A) (A) (A) (A) (A) (A) (A) (A) (A) (A) (A) (A)
                 (A) (A) (A) (A) (A) (A) (A) (A) (A) (A) (A) (A)
                 (A) (A) (A) (A) (A) (A) (A) (A) (A) (A) (A) (A)
                 (A) (A) (A) (A) (A) (A) (A) (A) (A) (A) (A) (A)
                 (A) (A) (A) (A) (A) (A) (A) (A) (A) (A) (A) (A)
                 (A) (A) (A) (A) (A) (A) (A) (A) (A) (A) (A) (A)
                 (A) (A) (A) (A) (A) (A) (A) (A) (A) (A) (A) (A)
                 (A) (A) (A) (A) (A) (A) (A) (A) (A) (A) (A) (A)
                 (A) (A) (A) (A) (A) (A) (A) (A) (A) (A) (A) (A)
                 (A) (A) (A) (A) (A) (A) (A) (A) (A) (A) (A) (A)
                 (A) (A) (A) (A) (A) (A) (A) (A) (A) (A) (A) (A)
                 (A) (A) (A) (A) (A) (A) (A) (A) (A) (A) (A) (A)
                 (A) (A) (A) (A) (A) (A) (A) (A) (A) (A) (A) (A)
                 (A) (A) (A) (A) (A) (A) (A) (A) (A) (A) (A) (A)
                 (A) (A) (A) (A) (A) (A) (A) (A) (A) (A) (A) (A)
                 (A) (A) (A) (A) (A) (A) (A) (A) (A) (A) (A) (A)
                 (A) (A) (A) (A) (A) (A) (A) (A) (A) (A) (A) (A)
                 (A) (A) (A) (A) (A) (A) (A) (A) (A) (A) (A) (A)
                 (A) (A) (A) (A) (A) (A) (A) (A) (A) (A) (A) (A)
                 (A) (A) (A) (A) (A) (A) (A) (A) (A) (A) (A) (A)
                 (A) (A) (A) (A) (A)
 The electronic state is 1-A.
 Alpha  occ. eigenvalues --  -46.72058 -19.20307 -19.19777 -19.16169 -19.14770
 Alpha  occ. eigenvalues --  -19.14303 -19.13986 -19.13159 -19.10530 -19.06668
 Alpha  occ. eigenvalues --  -14.28495 -14.28331 -10.32350 -10.31890 -10.30809
 Alpha  occ. eigenvalues --  -10.28878 -10.25537 -10.24215 -10.24072 -10.22866
 Alpha  occ. eigenvalues --  -10.21436 -10.20568 -10.20471 -10.18386 -10.16436
 Alpha  occ. eigenvalues --  -10.16124 -10.15936 -10.15906 -10.14375 -10.12677
 Alpha  occ. eigenvalues --  -10.06203 -10.05863 -10.04381 -10.03434 -10.03400
 Alpha  occ. eigenvalues --  -10.03244 -10.03215 -10.03164 -10.03128 -10.02985
 Alpha  occ. eigenvalues --  -10.02805 -10.02695 -10.02485 -10.02419 -10.02262
 Alpha  occ. eigenvalues --  -10.02075 -10.01874 -10.01849 -10.01091 -10.00966
 Alpha  occ. eigenvalues --  -10.00723 -10.00515 -10.00010  -9.99322  -3.02431
 Alpha  occ. eigenvalues --   -1.77274  -1.76994  -1.76805  -1.12371  -1.10886
 Alpha  occ. eigenvalues --   -1.08150  -1.05134  -1.03282  -1.02101  -0.99157
 Alpha  occ. eigenvalues --   -0.98671  -0.94815  -0.89601  -0.88291  -0.81858
 Alpha  occ. eigenvalues --   -0.81058  -0.80818  -0.77609  -0.76786  -0.76439
 Alpha  occ. eigenvalues --   -0.75316  -0.75227  -0.74741  -0.74422  -0.74185
 Alpha  occ. eigenvalues --   -0.73114  -0.72266  -0.69244  -0.68903  -0.68480
 Alpha  occ. eigenvalues --   -0.68250  -0.67631  -0.66276  -0.66143  -0.65295
 Alpha  occ. eigenvalues --   -0.64913  -0.64683  -0.64249  -0.64178  -0.62589
 Alpha  occ. eigenvalues --   -0.61012  -0.59989  -0.59212  -0.59090  -0.58782
 Alpha  occ. eigenvalues --   -0.57258  -0.55901  -0.55800  -0.55077  -0.54179
 Alpha  occ. eigenvalues --   -0.53000  -0.52883  -0.51685  -0.50943  -0.50545
 Alpha  occ. eigenvalues --   -0.50215  -0.49705  -0.48987  -0.48095  -0.47783
 Alpha  occ. eigenvalues --   -0.47546  -0.47356  -0.46352  -0.45593  -0.45311
 Alpha  occ. eigenvalues --   -0.45250  -0.44991  -0.44584  -0.44291  -0.43982
 Alpha  occ. eigenvalues --   -0.43869  -0.43329  -0.42375  -0.42126  -0.41602
 Alpha  occ. eigenvalues --   -0.41420  -0.41195  -0.41130  -0.40987  -0.40885
 Alpha  occ. eigenvalues --   -0.40609  -0.40572  -0.40372  -0.40098  -0.39901
 Alpha  occ. eigenvalues --   -0.39679  -0.39490  -0.39370  -0.39194  -0.39171
 Alpha  occ. eigenvalues --   -0.38968  -0.38866  -0.38434  -0.38015  -0.37572
 Alpha  occ. eigenvalues --   -0.37267  -0.37203  -0.37130  -0.36861  -0.36695
 Alpha  occ. eigenvalues --   -0.36563  -0.36403  -0.36313  -0.35772  -0.35702
 Alpha  occ. eigenvalues --   -0.35599  -0.35350  -0.35244  -0.35161  -0.34960
 Alpha  occ. eigenvalues --   -0.34953  -0.34731  -0.34335  -0.34082  -0.33765
 Alpha  occ. eigenvalues --   -0.33041  -0.32851  -0.32364  -0.31847  -0.31702
 Alpha  occ. eigenvalues --   -0.31393  -0.31291  -0.31057  -0.30876  -0.30768
 Alpha  occ. eigenvalues --   -0.30413  -0.30271  -0.30008  -0.29922  -0.29410
 Alpha  occ. eigenvalues --   -0.29106  -0.28752  -0.28574  -0.28186  -0.28056
 Alpha  occ. eigenvalues --   -0.27881  -0.27681  -0.27431  -0.26977  -0.26879
 Alpha  occ. eigenvalues --   -0.25581  -0.25202  -0.24193  -0.23566  -0.22170
 Alpha  occ. eigenvalues --   -0.19823  -0.19013  -0.18981  -0.18411  -0.15960
 Alpha virt. eigenvalues --   -0.00100   0.00376   0.00499   0.02782   0.05504
 Alpha virt. eigenvalues --    0.06143   0.06679   0.06739   0.07664   0.07950
 Alpha virt. eigenvalues --    0.08834   0.09661   0.10442   0.11098   0.11679
 Alpha virt. eigenvalues --    0.11879   0.12450   0.13202   0.13822   0.14136
 Alpha virt. eigenvalues --    0.14393   0.14752   0.15102   0.15398   0.15912
 Alpha virt. eigenvalues --    0.16235   0.16370   0.16645   0.17508   0.17837
 Alpha virt. eigenvalues --    0.18168   0.18757   0.19071   0.19682   0.20072
 Alpha virt. eigenvalues --    0.20133   0.20842   0.21357   0.21430   0.21723
 Alpha virt. eigenvalues --    0.22217   0.22417   0.23180   0.24021   0.24364
 Alpha virt. eigenvalues --    0.24576   0.24981   0.25002   0.25409   0.25619
 Alpha virt. eigenvalues --    0.26256   0.26629   0.27410   0.27884   0.28370
 Alpha virt. eigenvalues --    0.28919   0.29574   0.30024   0.30394   0.31461
 Alpha virt. eigenvalues --    0.31653   0.32313   0.32652   0.33271   0.33712
 Alpha virt. eigenvalues --    0.34010   0.34337   0.34536   0.34733   0.34990
 Alpha virt. eigenvalues --    0.35206   0.36483   0.36694   0.37231   0.37382
 Alpha virt. eigenvalues --    0.37835   0.38318   0.38533   0.38793   0.39330
 Alpha virt. eigenvalues --    0.39496   0.39959   0.40154   0.40409   0.40651
 Alpha virt. eigenvalues --    0.40780   0.41290   0.41549   0.42382   0.42647
 Alpha virt. eigenvalues --    0.42782   0.43037   0.43758   0.44125   0.44352
 Alpha virt. eigenvalues --    0.44630   0.45315   0.45480   0.45702   0.45948
 Alpha virt. eigenvalues --    0.45976   0.46295   0.46617   0.46843   0.47112
 Alpha virt. eigenvalues --    0.47458   0.47799   0.48036   0.48077   0.48543
 Alpha virt. eigenvalues --    0.48776   0.48829   0.49099   0.49276   0.49445
 Alpha virt. eigenvalues --    0.49588   0.49681   0.49842   0.50294   0.50662
 Alpha virt. eigenvalues --    0.50878   0.51041   0.51394   0.52261   0.52389
 Alpha virt. eigenvalues --    0.53051   0.53313   0.53810   0.54226   0.54391
 Alpha virt. eigenvalues --    0.54976   0.55205   0.55635   0.55747   0.56408
 Alpha virt. eigenvalues --    0.56515   0.56720   0.56905   0.57283   0.57554
 Alpha virt. eigenvalues --    0.57797   0.58258   0.58539   0.58749   0.58927
 Alpha virt. eigenvalues --    0.59453   0.59529   0.60092   0.60479   0.61139
 Alpha virt. eigenvalues --    0.61319   0.61798   0.62168   0.62716   0.63180
 Alpha virt. eigenvalues --    0.63498   0.63870   0.64518   0.64754   0.65619
 Alpha virt. eigenvalues --    0.66407   0.67206   0.67949   0.68061   0.68763
 Alpha virt. eigenvalues --    0.70031   0.70137   0.70637   0.71336   0.71430
 Alpha virt. eigenvalues --    0.71903   0.72081   0.72611   0.73173   0.73934
 Alpha virt. eigenvalues --    0.74403   0.74693   0.75176   0.75279   0.75919
 Alpha virt. eigenvalues --    0.76043   0.76342   0.77527   0.77706   0.78699
 Alpha virt. eigenvalues --    0.79495   0.80422   0.81298   0.81985   0.82723
 Alpha virt. eigenvalues --    0.82961   0.83381   0.84128   0.84424   0.85310
 Alpha virt. eigenvalues --    0.85880   0.86143   0.86876   0.87196   0.88016
 Alpha virt. eigenvalues --    0.88900   0.89635   0.89837   0.90298   0.90771
 Alpha virt. eigenvalues --    0.91536   0.91956   0.92423   0.93165   0.93467
 Alpha virt. eigenvalues --    0.94265   0.94452   0.95238   0.95583   0.96803
 Alpha virt. eigenvalues --    0.97335   0.98449   0.99079   0.99641   1.01176
 Alpha virt. eigenvalues --    1.01652   1.02419   1.02611   1.03461   1.03842
 Alpha virt. eigenvalues --    1.04310   1.05762   1.07380   1.08158   1.08866
 Alpha virt. eigenvalues --    1.09450   1.09870   1.11008   1.12173   1.12796
 Alpha virt. eigenvalues --    1.13431   1.13838   1.14831   1.15471   1.16258
 Alpha virt. eigenvalues --    1.19223   1.20039   1.20342   1.20958   1.22634
 Alpha virt. eigenvalues --    1.23663   1.23773   1.25014   1.25553   1.27833
 Alpha virt. eigenvalues --    1.28326   1.30086   1.30557   1.32144   1.32835
 Alpha virt. eigenvalues --    1.34172   1.35150   1.36941   1.37426   1.37925
 Alpha virt. eigenvalues --    1.38401   1.40084   1.40599   1.42168   1.42441
 Alpha virt. eigenvalues --    1.43141   1.43558   1.45331   1.46392   1.47437
 Alpha virt. eigenvalues --    1.49560   1.50222   1.50828   1.50939   1.51585
 Alpha virt. eigenvalues --    1.53163   1.53206   1.54335   1.54838   1.55886
 Alpha virt. eigenvalues --    1.59067   1.60439   1.62055   1.62928   1.63471
 Alpha virt. eigenvalues --    1.64780   1.65956   1.66514   1.68290   1.69080
 Alpha virt. eigenvalues --    1.70121   1.70629   1.70807   1.72603   1.73210
 Alpha virt. eigenvalues --    1.74470   1.75701   1.76661   1.77374   1.77668
 Alpha virt. eigenvalues --    1.78976   1.79444   1.79793   1.81012   1.81240
 Alpha virt. eigenvalues --    1.81883   1.82893   1.83276   1.84529   1.84975
 Alpha virt. eigenvalues --    1.85650   1.85788   1.86311   1.87608   1.87846
 Alpha virt. eigenvalues --    1.88444   1.89035   1.89412   1.90761   1.91104
 Alpha virt. eigenvalues --    1.91846   1.92697   1.93460   1.94154   1.94763
 Alpha virt. eigenvalues --    1.95013   1.95439   1.96201   1.97311   1.97838
 Alpha virt. eigenvalues --    1.98283   1.99760   1.99892   2.00511   2.00707
 Alpha virt. eigenvalues --    2.01193   2.01834   2.02849   2.03751   2.04304
 Alpha virt. eigenvalues --    2.05941   2.07087   2.08460   2.08901   2.09412
 Alpha virt. eigenvalues --    2.09752   2.10363   2.12039   2.12632   2.13116
 Alpha virt. eigenvalues --    2.13633   2.13979   2.14595   2.15744   2.16175
 Alpha virt. eigenvalues --    2.16722   2.17846   2.17969   2.19766   2.20487
 Alpha virt. eigenvalues --    2.21654   2.22030   2.23209   2.24986   2.25613
 Alpha virt. eigenvalues --    2.27512   2.28059   2.28395   2.28620   2.28942
 Alpha virt. eigenvalues --    2.30221   2.31512   2.32751   2.32972   2.33667
 Alpha virt. eigenvalues --    2.34384   2.35243   2.35630   2.36283   2.37074
 Alpha virt. eigenvalues --    2.37890   2.39042   2.40565   2.42850   2.43191
 Alpha virt. eigenvalues --    2.44552   2.46392   2.47035   2.47490   2.48795
 Alpha virt. eigenvalues --    2.51097   2.54292   2.54966   2.57569   2.59271
 Alpha virt. eigenvalues --    2.59842   2.61792   2.63789   2.65525   2.66003
 Alpha virt. eigenvalues --    2.66450   2.67181   2.68492   2.70384   2.72473
 Alpha virt. eigenvalues --    2.73483   2.75119   2.75397   2.76838   2.77698
 Alpha virt. eigenvalues --    2.78713   2.81207   2.86606   2.87568   2.88475
 Alpha virt. eigenvalues --    2.89591   2.92945   2.96591   2.98622   3.00042
 Alpha virt. eigenvalues --    3.02432   3.03139   3.05275   3.06826   3.08802
 Alpha virt. eigenvalues --    3.10181   3.14871   3.17678   3.20226   3.22347
 Alpha virt. eigenvalues --    3.24864   3.26126   3.84994   5.95541   6.13942
 Alpha virt. eigenvalues --    6.32102 103.58536
          Condensed to atoms (all electrons):
 Mulliken atomic charges:
              1
     1  O   -0.450469
     2  Mg   0.867596
     3  O   -0.574813
     4  C    0.585427
     5  N   -0.538383
     6  N   -0.525612
     7  O   -0.424231
     8  C    0.328824
     9  C   -0.235067
    10  C    0.339116
    11  O   -0.444631
    12  C    0.660410
    13  C    0.061850
    14  C    0.023013
    15  O   -0.453138
    16  C   -0.214203
    17  O   -0.505541
    18  C    0.767670
    19  O   -0.619437
    20  O   -0.446847
    21  C    0.540252
    22  C    0.040215
    23  C    0.066409
    24  O   -0.436211
    25  C   -0.463307
    26  C   -0.474455
    27  C   -0.470445
    28  C   -0.461184
    29  C    0.024599
    30  C    0.016136
    31  C   -0.001339
    32  C   -0.082124
    33  C   -0.069718
    34  C   -0.073922
    35  C   -0.001111
    36  C   -0.053067
    37  C   -0.063959
    38  C    0.007520
    39  C   -0.074805
    40  C   -0.066512
    41  C   -0.074131
    42  C    0.004985
    43  C   -0.055265
    44  C   -0.051553
    45  C   -0.216144
    46  C   -0.218944
    47  C   -0.227283
    48  C   -0.217219
    49  C   -0.220858
    50  C   -0.217602
    51  C   -0.222694
    52  C   -0.217722
    53  C   -0.445946
    54  C   -0.448922
    55  H    0.077669
    56  H    0.167740
    57  H    0.165746
    58  H    0.174603
    59  H    0.175878
    60  H    0.164848
    61  H    0.198404
    62  H    0.117650
    63  H    0.164575
    64  H    0.158409
    65  H    0.166753
    66  H    0.147442
    67  H    0.127921
    68  H    0.159997
    69  H    0.149260
    70  H    0.168757
    71  H    0.181804
    72  H    0.143542
    73  H    0.163019
    74  H    0.167831
    75  H    0.085156
    76  H    0.087287
    77  H    0.085969
    78  H    0.094927
    79  H    0.097353
    80  H    0.086714
    81  H    0.088938
    82  H    0.089387
    83  H    0.095546
    84  H    0.095899
    85  H    0.081273
    86  H    0.089628
    87  H    0.076825
    88  H    0.078137
    89  H    0.072842
    90  H    0.076393
    91  H    0.077585
    92  H    0.067852
    93  H    0.114732
    94  H    0.077794
    95  H    0.073435
    96  H    0.070819
    97  H    0.072034
    98  H    0.071086
    99  H    0.095205
   100  H    0.075813
   101  H    0.083721
   102  H    0.072766
   103  H    0.070958
   104  H    0.118059
   105  H    0.070530
   106  H    0.076104
   107  H    0.072201
   108  H    0.072815
   109  H    0.127070
   110  H    0.124119
   111  H    0.129635
   112  H    0.127089
   113  H    0.132351
   114  H    0.126895
 Sum of Mulliken charges=   0.00000
 Atomic charges with hydrogens summed into heavy atoms:
              1
     1  O   -0.450469
     2  Mg   0.867596
     3  O   -0.574813
     4  C    0.585427
     5  N   -0.538383
     6  N   -0.525612
     7  O   -0.424231
     8  C    0.328824
     9  C   -0.157397
    10  C    0.339116
    11  O   -0.444631
    12  C    0.660410
    13  C    0.229590
    14  C    0.188759
    15  O   -0.453138
    16  C    0.301127
    17  O   -0.505541
    18  C    0.767670
    19  O   -0.619437
    20  O   -0.446847
    21  C    0.540252
    22  C    0.238618
    23  C    0.184060
    24  O   -0.436211
    25  C    0.026429
    26  C   -0.039096
    27  C    0.029376
    28  C    0.013209
    29  C    0.024599
    30  C    0.016136
    31  C   -0.001339
    32  C    0.003032
    33  C    0.017570
    34  C    0.012047
    35  C   -0.001111
    36  C    0.041860
    37  C    0.033394
    38  C    0.007520
    39  C    0.011908
    40  C    0.022426
    41  C    0.015256
    42  C    0.004985
    43  C    0.040281
    44  C    0.044346
    45  C    0.031581
    46  C    0.008428
    47  C    0.032886
    48  C    0.004830
    49  C    0.017467
    50  C    0.014698
    51  C    0.036853
    52  C    0.003399
    53  C   -0.065122
    54  C   -0.062587
    55  H    0.000000
    56  H    0.000000
    57  H    0.000000
    58  H    0.000000
    59  H    0.000000
    60  H    0.000000
    61  H    0.000000
    62  H    0.000000
    63  H    0.000000
    64  H    0.000000
    65  H    0.000000
    66  H    0.000000
    67  H    0.000000
    68  H    0.000000
    69  H    0.000000
    70  H    0.000000
    71  H    0.000000
    72  H    0.000000
    73  H    0.000000
    74  H    0.000000
    75  H    0.000000
    76  H    0.000000
    77  H    0.000000
    78  H    0.000000
    79  H    0.000000
    80  H    0.000000
    81  H    0.000000
    82  H    0.000000
    83  H    0.000000
    84  H    0.000000
    85  H    0.000000
    86  H    0.000000
    87  H    0.000000
    88  H    0.000000
    89  H    0.000000
    90  H    0.000000
    91  H    0.000000
    92  H    0.000000
    93  H    0.000000
    94  H    0.000000
    95  H    0.000000
    96  H    0.000000
    97  H    0.000000
    98  H    0.000000
    99  H    0.000000
   100  H    0.000000
   101  H    0.000000
   102  H    0.000000
   103  H    0.000000
   104  H    0.000000
   105  H    0.000000
   106  H    0.000000
   107  H    0.000000
   108  H    0.000000
   109  H    0.000000
   110  H    0.000000
   111  H    0.000000
   112  H    0.000000
   113  H    0.000000
   114  H    0.000000
 Sum of Mulliken charges=   0.00000
 APT atomic charges:
              1
     1  O   -0.851473
     2  Mg   1.255647
     3  O   -0.898825
     4  C    1.043073
     5  N   -0.953728
     6  N   -0.896654
     7  O   -0.659034
     8  C    0.933997
     9  C   -0.891890
    10  C    0.932346
    11  O   -0.837471
    12  C    1.072015
    13  C    0.400248
    14  C    0.327276
    15  O   -0.748847
    16  C    0.492210
    17  O   -0.853533
    18  C    1.366109
    19  O   -0.983530
    20  O   -0.791870
    21  C    1.039661
    22  C    0.394881
    23  C    0.371004
    24  O   -0.752888
    25  C    0.026393
    26  C   -0.025376
    27  C    0.005569
    28  C    0.023000
    29  C    0.318760
    30  C    0.277817
    31  C   -0.051127
    32  C   -0.140414
    33  C   -0.115015
    34  C   -0.127667
    35  C   -0.040937
    36  C    0.171852
    37  C    0.177362
    38  C   -0.026961
    39  C   -0.162361
    40  C   -0.058497
    41  C   -0.173108
    42  C   -0.021680
    43  C    0.175877
    44  C    0.200745
    45  C   -0.000447
    46  C   -0.048481
    47  C    0.002323
    48  C   -0.049181
    49  C   -0.029324
    50  C   -0.045682
    51  C   -0.023758
    52  C   -0.047688
    53  C   -0.202451
    54  C   -0.231136
    55  H   -0.019061
    56  H   -0.028821
    57  H    0.081053
    58  H   -0.017683
    59  H   -0.017587
    60  H   -0.009336
    61  H    0.003986
    62  H    0.045183
    63  H   -0.001304
    64  H   -0.003710
    65  H    0.000597
    66  H   -0.014597
    67  H    0.066955
    68  H   -0.000143
    69  H   -0.010651
    70  H    0.017571
    71  H    0.014024
    72  H    0.038360
    73  H    0.001075
    74  H    0.019022
    75  H    0.070759
    76  H    0.072524
    77  H    0.068299
    78  H   -0.027814
    79  H   -0.054628
    80  H    0.077063
    81  H    0.076963
    82  H    0.078718
    83  H   -0.047249
    84  H   -0.083321
    85  H    0.000374
    86  H   -0.049176
    87  H   -0.003836
    88  H    0.008938
    89  H    0.008819
    90  H    0.008118
    91  H   -0.006854
    92  H    0.000052
    93  H    0.000473
    94  H    0.004824
    95  H    0.003603
    96  H    0.006966
    97  H    0.003330
    98  H    0.003944
    99  H   -0.001550
   100  H    0.001093
   101  H    0.004170
   102  H    0.006109
   103  H   -0.004400
   104  H    0.023252
   105  H    0.005227
   106  H    0.003287
   107  H    0.009748
   108  H    0.004309
   109  H    0.046626
   110  H    0.047365
   111  H    0.048285
   112  H    0.047696
   113  H    0.056219
   114  H    0.049612
 Sum of APT charges=   0.00000
 APT Atomic charges with hydrogens summed into heavy atoms:
              1
     1  O   -0.851473
     2  Mg   1.255647
     3  O   -0.898825
     4  C    1.043073
     5  N   -0.953728
     6  N   -0.896654
     7  O   -0.659034
     8  C    0.933997
     9  C   -0.910951
    10  C    0.932346
    11  O   -0.837471
    12  C    1.072015
    13  C    0.371428
    14  C    0.408329
    15  O   -0.748847
    16  C    0.447604
    17  O   -0.853533
    18  C    1.366109
    19  O   -0.983530
    20  O   -0.791870
    21  C    1.039661
    22  C    0.398867
    23  C    0.416188
    24  O   -0.752888
    25  C    0.021976
    26  C    0.026839
    27  C    0.026513
    28  C    0.081457
    29  C    0.318760
    30  C    0.277817
    31  C   -0.051127
    32  C   -0.069655
    33  C   -0.042490
    34  C   -0.059368
    35  C   -0.040937
    36  C    0.144038
    37  C    0.122734
    38  C   -0.026961
    39  C   -0.085298
    40  C    0.018466
    41  C   -0.094389
    42  C   -0.021680
    43  C    0.128628
    44  C    0.117424
    45  C   -0.053085
    46  C   -0.022606
    47  C   -0.004006
    48  C   -0.033789
    49  C   -0.023600
    50  C   -0.034309
    51  C    0.000322
    52  C   -0.030344
    53  C   -0.060175
    54  C   -0.077610
    55  H    0.000000
    56  H    0.000000
    57  H    0.000000
    58  H    0.000000
    59  H    0.000000
    60  H    0.000000
    61  H    0.000000
    62  H    0.000000
    63  H    0.000000
    64  H    0.000000
    65  H    0.000000
    66  H    0.000000
    67  H    0.000000
    68  H    0.000000
    69  H    0.000000
    70  H    0.000000
    71  H    0.000000
    72  H    0.000000
    73  H    0.000000
    74  H    0.000000
    75  H    0.000000
    76  H    0.000000
    77  H    0.000000
    78  H    0.000000
    79  H    0.000000
    80  H    0.000000
    81  H    0.000000
    82  H    0.000000
    83  H    0.000000
    84  H    0.000000
    85  H    0.000000
    86  H    0.000000
    87  H    0.000000
    88  H    0.000000
    89  H    0.000000
    90  H    0.000000
    91  H    0.000000
    92  H    0.000000
    93  H    0.000000
    94  H    0.000000
    95  H    0.000000
    96  H    0.000000
    97  H    0.000000
    98  H    0.000000
    99  H    0.000000
   100  H    0.000000
   101  H    0.000000
   102  H    0.000000
   103  H    0.000000
   104  H    0.000000
   105  H    0.000000
   106  H    0.000000
   107  H    0.000000
   108  H    0.000000
   109  H    0.000000
   110  H    0.000000
   111  H    0.000000
   112  H    0.000000
   113  H    0.000000
   114  H    0.000000
 Sum of APT charges=   0.00000
 Electronic spatial extent (au):  <R**2>= 29677.4320
 Charge=     0.0000 electrons
 Dipole moment (field-independent basis, Debye):
    X=    -2.9872    Y=    -6.4901    Z=     0.1136  Tot=     7.1454
 Quadrupole moment (field-independent basis, Debye-Ang):
   XX=  -268.9261   YY=  -344.6395   ZZ=  -298.9792
   XY=     1.3694   XZ=    -4.5486   YZ=    12.7139
 Traceless Quadrupole moment (field-independent basis, Debye-Ang):
   XX=    35.2555   YY=   -40.4579   ZZ=     5.2024
   XY=     1.3694   XZ=    -4.5486   YZ=    12.7139
 Octapole moment (field-independent basis, Debye-Ang**2):
  XXX=  -120.2995  YYY=  -225.8057  ZZZ=    -8.8688  XYY=   -41.9984
  XXY=    56.4396  XXZ=    44.1630  XZZ=   -27.8945  YZZ=     2.1648
  YYZ=    63.0121  XYZ=   -23.4167
 Hexadecapole moment (field-independent basis, Debye-Ang**3):
 XXXX=-16474.9786 YYYY=-14914.8457 ZZZZ= -6692.9209 XXXY=  -198.6252
 XXXZ=  -273.4538 YYYX=   -78.5469 YYYZ=   424.5540 ZZZX=   -79.8517
 ZZZY=     4.8486 XXYY= -5026.0044 XXZZ= -3880.4877 YYZZ= -3362.0667
 XXYZ=   130.1719 YYXZ=   -21.0087 ZZXY=   -24.4841
 N-N= 9.143001598656D+03 E-N=-2.438258333745D+04  KE= 2.584720199962D+03
  Exact polarizability: 463.458  14.945 408.183   1.202   0.811 358.062
 Approx polarizability: 644.287  35.151 580.171   4.462 -10.299 565.750
 Full mass-weighted force constant matrix:
 Low frequencies ---   -7.5576   -0.0009   -0.0002    0.0005    0.1941    2.9944
 Low frequencies ---   14.3439   20.6674   27.7448
 Diagonal vibrational polarizability:
      124.0923272     132.9379920     147.9520106
 Harmonic frequencies (cm**-1), IR intensities (KM/Mole), Raman scattering
 activities (A**4/AMU), depolarization ratios for plane and unpolarized
 incident light, reduced masses (AMU), force constants (mDyne/A),
 and normal coordinates:
                     1                      2                      3
                     A                      A                      A
 Frequencies --    14.2794                20.5401                27.7388
 Red. masses --     5.0754                 4.3761                 5.0751
 Frc consts  --     0.0006                 0.0011                 0.0023
 IR Inten    --     0.3814                 0.5123                 0.1520
 Atom AN      X      Y      Z        X      Y      Z        X      Y      Z
   1   8     0.10  -0.03   0.18     0.00  -0.02   0.01     0.16  -0.05   0.10
   2  12    -0.01   0.01   0.00     0.01   0.01   0.01     0.00  -0.02  -0.03
   3   8    -0.02  -0.02  -0.02     0.01   0.03   0.01     0.03   0.04  -0.04
   4   6     0.04  -0.01   0.10     0.00  -0.01   0.02     0.07   0.01   0.00
   5   7    -0.01   0.01  -0.02    -0.01   0.01   0.03     0.00  -0.02   0.01
   6   7     0.00   0.01   0.03     0.00  -0.01   0.02    -0.01  -0.02  -0.03
   7   8     0.03  -0.01   0.07    -0.01  -0.01   0.03     0.01   0.04  -0.07
   8   6    -0.01   0.01  -0.01    -0.02   0.01   0.06     0.00  -0.02   0.01
   9   6    -0.01   0.01   0.02    -0.02   0.01   0.08     0.00  -0.02   0.00
  10   6    -0.01   0.01   0.04    -0.01  -0.01   0.05     0.00  -0.02  -0.01
  11   8    -0.03  -0.01   0.03     0.01   0.02   0.02     0.04   0.03  -0.05
  12   6    -0.02   0.00   0.02     0.02   0.02   0.01     0.04   0.00  -0.08
  13   6    -0.03  -0.03   0.00     0.01   0.03   0.01     0.04   0.03  -0.06
  14   6    -0.01   0.00   0.06     0.02   0.00   0.02     0.05   0.02  -0.03
  15   8    -0.01   0.02   0.04     0.02   0.00  -0.01     0.04  -0.04  -0.12
  16   6     0.16  -0.04   0.23    -0.01  -0.03   0.02     0.19  -0.07   0.14
  17   8     0.00   0.02  -0.02     0.01   0.00   0.02    -0.04  -0.03  -0.07
  18   6     0.00   0.01  -0.02     0.02   0.01   0.01    -0.02  -0.01  -0.05
  19   8    -0.01   0.02  -0.01     0.02   0.00   0.00    -0.04  -0.02  -0.05
  20   8     0.01  -0.02  -0.08     0.00   0.03   0.04    -0.02   0.04   0.05
  21   6     0.01  -0.01  -0.10     0.00   0.02   0.07    -0.04   0.02   0.06
  22   6     0.01   0.02  -0.07     0.01   0.00   0.06    -0.05  -0.03  -0.01
  23   6     0.00   0.00  -0.05     0.01   0.02   0.01    -0.03   0.02   0.02
  24   8     0.01  -0.02  -0.13     0.00   0.04   0.11    -0.03   0.04   0.11
  25   6     0.02   0.07  -0.08     0.02  -0.04   0.08    -0.11  -0.09   0.01
  26   6     0.01   0.03  -0.06     0.03   0.00   0.01    -0.07  -0.02   0.06
  27   6    -0.04  -0.04  -0.02     0.00   0.04   0.03     0.03   0.04  -0.05
  28   6    -0.06   0.05   0.08     0.03  -0.02   0.02     0.02   0.04  -0.01
  29   6    -0.01   0.00  -0.05    -0.01   0.01  -0.01     0.00   0.00   0.02
  30   6     0.00   0.01   0.03     0.00  -0.01  -0.02    -0.02  -0.01  -0.01
  31   6     0.01   0.01  -0.06     0.03  -0.02  -0.03    -0.01  -0.02   0.03
  32   6     0.01   0.00  -0.08     0.03  -0.05  -0.08     0.00   0.00   0.03
  33   6    -0.01  -0.03  -0.08    -0.01  -0.05  -0.11     0.01   0.04   0.02
  34   6    -0.03  -0.05  -0.06    -0.06  -0.02  -0.09     0.01   0.06   0.01
  35   6    -0.03  -0.03  -0.05    -0.06   0.02  -0.05     0.01   0.04   0.01
  36   6     0.03   0.02  -0.05     0.08  -0.01   0.00    -0.01  -0.04   0.03
  37   6    -0.05  -0.05  -0.03    -0.10   0.06  -0.03     0.02   0.08   0.00
  38   6    -0.01   0.02   0.03     0.03   0.01  -0.04    -0.04  -0.01   0.00
  39   6     0.00   0.01   0.03     0.02   0.01  -0.08    -0.05   0.00   0.02
  40   6     0.02  -0.01   0.02    -0.01   0.00  -0.10    -0.05   0.02   0.03
  41   6     0.03  -0.01   0.02    -0.04  -0.02  -0.08    -0.03   0.02   0.02
  42   6     0.02  -0.01   0.03    -0.03  -0.03  -0.04    -0.01   0.00   0.00
  43   6    -0.03   0.04   0.04     0.06   0.03  -0.03    -0.05  -0.03  -0.01
  44   6     0.02  -0.02   0.03    -0.05  -0.06  -0.02     0.01   0.01  -0.01
  45   6     0.05   0.02  -0.03     0.05  -0.01  -0.01    -0.05  -0.05  -0.01
  46   6     0.04   0.03  -0.07     0.14  -0.06   0.00    -0.01  -0.08   0.07
  47   6    -0.04  -0.05  -0.03    -0.15   0.06  -0.06     0.02   0.09  -0.04
  48   6    -0.08  -0.05  -0.05    -0.12   0.07  -0.03     0.03   0.10   0.02
  49   6     0.02  -0.02   0.02    -0.06  -0.08  -0.04     0.04   0.01  -0.02
  50   6     0.03  -0.01   0.04    -0.07  -0.08   0.00     0.02   0.00   0.01
  51   6    -0.04   0.06   0.02     0.08   0.04  -0.02    -0.08  -0.05  -0.01
  52   6    -0.04   0.04   0.06     0.08   0.05  -0.05    -0.05  -0.01   0.01
  53   6    -0.01   0.00  -0.03    -0.03   0.02   0.07     0.00  -0.01   0.03
  54   6     0.00   0.02   0.06    -0.01  -0.02   0.04     0.00  -0.01  -0.01
  55   1    -0.01   0.01   0.03    -0.02   0.01   0.11     0.00  -0.02   0.00
  56   1    -0.05  -0.04   0.01     0.01   0.05   0.00     0.07   0.04  -0.07
  57   1    -0.01  -0.02   0.03     0.03   0.00   0.02     0.06   0.01  -0.05
  58   1     0.10  -0.04   0.26    -0.02  -0.03   0.02     0.06  -0.10   0.16
  59   1     0.21  -0.03   0.17    -0.01  -0.03   0.02     0.25   0.00   0.05
  60   1     0.20  -0.06   0.29    -0.01  -0.04   0.01     0.28  -0.12   0.25
  61   1     0.01   0.01  -0.06     0.01   0.02   0.07    -0.04  -0.01  -0.04
  62   1     0.00  -0.03  -0.04     0.00   0.03  -0.01    -0.01   0.05   0.03
  63   1     0.03   0.07  -0.12     0.02  -0.04   0.11    -0.11  -0.09   0.05
  64   1     0.03   0.09  -0.09     0.03  -0.05   0.07    -0.13  -0.12   0.04
  65   1     0.02   0.09  -0.06     0.03  -0.05   0.07    -0.13  -0.11  -0.05
  66   1     0.00   0.02  -0.09     0.03   0.00   0.02    -0.07  -0.02   0.10
  67   1     0.01   0.03  -0.05     0.03  -0.01  -0.01    -0.08  -0.03   0.05
  68   1     0.01   0.05  -0.06     0.04  -0.01   0.02    -0.10  -0.05   0.04
  69   1    -0.05  -0.05  -0.01     0.00   0.05   0.03     0.04   0.04  -0.06
  70   1    -0.04  -0.05  -0.04     0.00   0.06   0.04     0.04   0.05  -0.04
  71   1    -0.03  -0.02  -0.04     0.00   0.03   0.05     0.02   0.03  -0.05
  72   1    -0.10   0.05   0.05     0.04  -0.02   0.03     0.00   0.04  -0.04
  73   1    -0.07   0.08   0.11     0.03  -0.03   0.01     0.01   0.06   0.00
  74   1    -0.05   0.06   0.11     0.02  -0.02   0.01     0.04   0.05   0.01
  75   1     0.02   0.01  -0.09     0.07  -0.07  -0.09    -0.01   0.00   0.03
  76   1    -0.01  -0.05  -0.09    -0.01  -0.08  -0.14     0.01   0.06   0.02
  77   1    -0.05  -0.07  -0.07    -0.09  -0.02  -0.11     0.02   0.09   0.00
  78   1     0.02   0.01  -0.04     0.09   0.03   0.03     0.00  -0.02   0.03
  79   1    -0.05  -0.06  -0.02    -0.09   0.08   0.01     0.02   0.07   0.00
  80   1    -0.01   0.02   0.03     0.04   0.03  -0.10    -0.07   0.00   0.03
  81   1     0.03  -0.01   0.02    -0.02   0.00  -0.13    -0.06   0.03   0.05
  82   1     0.04  -0.03   0.02    -0.06  -0.04  -0.09    -0.02   0.03   0.03
  83   1    -0.04   0.04   0.04     0.06   0.02   0.00    -0.03  -0.04  -0.02
  84   1     0.03  -0.02   0.02    -0.05  -0.05   0.01     0.00   0.01  -0.03
  85   1     0.05   0.03  -0.03     0.09   0.00   0.01    -0.04  -0.07   0.00
  86   1     0.05   0.01  -0.02     0.01   0.03   0.00    -0.06  -0.02  -0.03
  87   1     0.06   0.03  -0.03     0.03  -0.04  -0.04    -0.06  -0.08  -0.02
  88   1     0.05   0.03  -0.06     0.17  -0.05   0.02    -0.02  -0.09   0.07
  89   1     0.05   0.04  -0.08     0.13  -0.11  -0.03    -0.03  -0.11   0.07
  90   1     0.03   0.03  -0.09     0.16  -0.07   0.00     0.01  -0.07   0.10
  91   1    -0.06  -0.06  -0.01    -0.18   0.09  -0.05     0.01   0.11  -0.04
  92   1    -0.04  -0.04  -0.05    -0.16   0.04  -0.11     0.01   0.09  -0.05
  93   1    -0.02  -0.05  -0.01    -0.13   0.05  -0.06     0.02   0.07  -0.05
  94   1    -0.09  -0.07  -0.04    -0.15   0.10  -0.01     0.03   0.13   0.01
  95   1    -0.09  -0.05  -0.05    -0.09   0.07   0.00     0.03   0.10   0.05
  96   1    -0.08  -0.04  -0.06    -0.13   0.05  -0.06     0.03   0.10   0.02
  97   1     0.03  -0.03   0.02    -0.08  -0.10  -0.02     0.04   0.01  -0.03
  98   1     0.02  -0.01   0.03    -0.07  -0.10  -0.07     0.05   0.00  -0.01
  99   1     0.01  -0.03   0.01    -0.05  -0.07  -0.05     0.04   0.01  -0.03
 100   1     0.04  -0.02   0.04    -0.09  -0.11   0.02     0.03   0.01  -0.01
 101   1     0.04  -0.01   0.04    -0.06  -0.06   0.02     0.00   0.00   0.01
 102   1     0.03  -0.01   0.04    -0.07  -0.09  -0.03     0.03   0.00   0.03
 103   1    -0.06   0.07   0.02     0.10   0.05  -0.01    -0.09  -0.06  -0.02
 104   1    -0.03   0.06   0.00     0.06   0.02  -0.01    -0.07  -0.06  -0.03
 105   1    -0.04   0.06   0.01     0.07   0.05  -0.05    -0.10  -0.04   0.01
 106   1    -0.06   0.05   0.07     0.11   0.06  -0.04    -0.05  -0.02   0.00
 107   1    -0.04   0.04   0.06     0.08   0.06  -0.08    -0.07   0.00   0.03
 108   1    -0.04   0.03   0.08     0.07   0.04  -0.06    -0.03   0.00   0.02
 109   1     0.00   0.01  -0.05     0.02  -0.01   0.03     0.00  -0.02   0.04
 110   1    -0.01   0.01  -0.02    -0.03   0.03   0.13     0.00  -0.01   0.04
 111   1    -0.03   0.00  -0.04    -0.08   0.05   0.03     0.00   0.00   0.03
 112   1     0.00   0.00   0.04    -0.01  -0.03   0.03     0.00  -0.01   0.00
 113   1    -0.01   0.05   0.07    -0.01  -0.02   0.04    -0.01  -0.02   0.00
 114   1     0.00   0.00   0.10    -0.02  -0.02   0.04     0.00  -0.01  -0.01
                     4                      5                      6
                     A                      A                      A
 Frequencies --    31.1992                36.7052                38.9477
 Red. masses --     3.7172                 4.7281                 4.8155
 Frc consts  --     0.0021                 0.0038                 0.0043
 IR Inten    --     0.4148                 0.0356                 0.3670
 Atom AN      X      Y      Z        X      Y      Z        X      Y      Z
   1   8     0.03  -0.03  -0.03    -0.01   0.16   0.04     0.09   0.12   0.03
   2  12    -0.01   0.00   0.02     0.01  -0.03  -0.02    -0.01   0.00   0.03
   3   8     0.00  -0.01   0.01     0.01   0.01  -0.03    -0.01  -0.04   0.05
   4   6     0.02  -0.02  -0.04     0.00   0.12   0.03     0.04   0.06  -0.07
   5   7     0.00  -0.01   0.01     0.02  -0.03  -0.05     0.00   0.00   0.05
   6   7     0.00   0.00   0.03     0.02  -0.02   0.03    -0.01   0.01  -0.03
   7   8     0.03  -0.02  -0.03    -0.01   0.13  -0.04     0.04   0.06  -0.19
   8   6     0.00  -0.01   0.01     0.02  -0.03  -0.03     0.01   0.00   0.04
   9   6     0.01   0.00   0.03     0.03  -0.02   0.01     0.01   0.01   0.00
  10   6     0.00   0.00   0.04     0.03  -0.01   0.04     0.00   0.01  -0.04
  11   8     0.01  -0.01  -0.07     0.01   0.06   0.08    -0.01  -0.08  -0.04
  12   6     0.00   0.00  -0.03     0.01   0.01   0.01    -0.01  -0.05   0.01
  13   6     0.02   0.00   0.00     0.00   0.01  -0.01     0.00  -0.05   0.02
  14   6    -0.01   0.00  -0.09     0.03   0.07   0.11    -0.02   0.00  -0.01
  15   8    -0.02   0.00  -0.01     0.02  -0.03  -0.03    -0.03  -0.01   0.05
  16   6     0.07  -0.05   0.01    -0.04   0.22  -0.05     0.14   0.19  -0.03
  17   8    -0.01  -0.01  -0.01    -0.02  -0.03  -0.02    -0.02  -0.01   0.03
  18   6    -0.01   0.00   0.00    -0.01  -0.02  -0.03    -0.02  -0.01   0.05
  19   8    -0.01   0.00   0.01     0.00  -0.02  -0.03    -0.03  -0.01   0.06
  20   8    -0.02   0.01   0.01    -0.03   0.01   0.01    -0.01  -0.03   0.02
  21   6    -0.01   0.01   0.03    -0.04  -0.01   0.03    -0.02  -0.03  -0.01
  22   6    -0.02  -0.01   0.02    -0.04  -0.03   0.00    -0.02  -0.01   0.00
  23   6    -0.01   0.00   0.01    -0.02   0.00   0.00    -0.02  -0.02   0.04
  24   8    -0.01   0.01   0.05    -0.05   0.00   0.06    -0.02  -0.04  -0.03
  25   6    -0.02  -0.03   0.02    -0.06  -0.06   0.01    -0.03   0.01  -0.01
  26   6    -0.01   0.00   0.01    -0.04   0.00   0.01    -0.02   0.00   0.04
  27   6     0.03   0.00   0.00    -0.01   0.00  -0.02     0.01  -0.06   0.02
  28   6    -0.03   0.09  -0.12     0.03  -0.02   0.15    -0.05   0.01   0.02
  29   6     0.00   0.00   0.01     0.02  -0.03  -0.04     0.00  -0.01   0.03
  30   6    -0.01   0.00   0.01     0.00  -0.01   0.02    -0.01   0.02  -0.03
  31   6     0.00   0.05   0.00     0.00  -0.03  -0.03     0.03  -0.01   0.01
  32   6     0.00   0.10   0.00     0.00  -0.03  -0.02     0.03  -0.02  -0.02
  33   6     0.01   0.09   0.01     0.02  -0.02  -0.01     0.01  -0.02  -0.03
  34   6     0.02   0.01   0.03     0.03  -0.02  -0.02    -0.02  -0.03  -0.02
  35   6     0.01  -0.04   0.03     0.03  -0.03  -0.03    -0.02  -0.03   0.02
  36   6    -0.01   0.05   0.00    -0.01  -0.02  -0.05     0.06  -0.02   0.03
  37   6     0.02  -0.12   0.04     0.05  -0.05  -0.04    -0.06  -0.04   0.04
  38   6     0.00   0.03  -0.01    -0.01   0.03   0.01     0.00   0.00  -0.02
  39   6    -0.01   0.04  -0.05    -0.02   0.04  -0.01    -0.01   0.01  -0.01
  40   6    -0.03   0.01  -0.06    -0.03   0.02  -0.02    -0.02   0.03   0.00
  41   6    -0.04  -0.01  -0.05    -0.03  -0.01  -0.01    -0.03   0.04   0.00
  42   6    -0.03  -0.02  -0.01    -0.01  -0.02   0.01    -0.02   0.04  -0.02
  43   6     0.03   0.05   0.00     0.00   0.05   0.02     0.02  -0.03  -0.04
  44   6    -0.04  -0.06   0.01     0.01  -0.06   0.02    -0.02   0.06  -0.02
  45   6     0.03   0.04   0.01    -0.04  -0.02  -0.06     0.10  -0.03   0.05
  46   6    -0.04   0.09  -0.02    -0.01  -0.04  -0.03     0.07   0.00   0.01
  47   6     0.17  -0.11   0.05     0.05  -0.06  -0.01    -0.05  -0.04   0.04
  48   6    -0.10  -0.08   0.03     0.06  -0.07  -0.05    -0.10  -0.04   0.02
  49   6    -0.04  -0.08  -0.02     0.00  -0.09  -0.02    -0.05   0.08   0.01
  50   6    -0.05  -0.08   0.03     0.02  -0.08   0.05    -0.01   0.09  -0.06
  51   6     0.03   0.06   0.00    -0.02   0.06   0.00     0.05  -0.06   0.00
  52   6     0.04   0.08  -0.01     0.00   0.09   0.04     0.04  -0.05  -0.08
  53   6     0.00  -0.01   0.00     0.02  -0.04  -0.06     0.03   0.00   0.05
  54   6     0.00   0.01   0.05     0.03   0.00   0.08     0.00   0.01  -0.09
  55   1     0.01   0.00   0.04     0.03  -0.02   0.02     0.02   0.01  -0.01
  56   1     0.03   0.00  -0.01    -0.01   0.00  -0.01     0.02  -0.05   0.03
  57   1    -0.05  -0.03  -0.12     0.05   0.11   0.15    -0.04   0.01   0.01
  58   1     0.07  -0.02   0.04    -0.05   0.17  -0.13     0.09   0.14  -0.09
  59   1     0.08  -0.08   0.01    -0.05   0.30  -0.07     0.19   0.27  -0.11
  60   1     0.07  -0.05   0.01    -0.03   0.25  -0.03     0.19   0.23   0.08
  61   1    -0.01   0.00   0.01    -0.03  -0.03   0.00    -0.02  -0.03   0.00
  62   1    -0.01   0.01   0.00    -0.01   0.02   0.00    -0.02  -0.03   0.05
  63   1    -0.02  -0.03   0.04    -0.07  -0.06   0.03    -0.03   0.01  -0.03
  64   1    -0.03  -0.04   0.03    -0.07  -0.07   0.02    -0.03   0.03   0.00
  65   1    -0.03  -0.04   0.01    -0.07  -0.07  -0.01    -0.03   0.02   0.00
  66   1    -0.02   0.01   0.01    -0.05   0.01   0.03    -0.03   0.00   0.03
  67   1    -0.01   0.01   0.01    -0.04   0.00   0.01    -0.02   0.00   0.04
  68   1    -0.01   0.00   0.01    -0.05  -0.02   0.01    -0.03   0.00   0.03
  69   1     0.05   0.01  -0.02    -0.03   0.00   0.00     0.03  -0.06   0.00
  70   1     0.04   0.01   0.03    -0.02  -0.01  -0.04     0.02  -0.04   0.04
  71   1     0.01  -0.01   0.00     0.01   0.01  -0.02    -0.02  -0.06   0.01
  72   1    -0.05   0.12  -0.20     0.04  -0.05   0.23    -0.09  -0.02   0.04
  73   1    -0.02   0.15  -0.06     0.03  -0.08   0.09    -0.04  -0.01   0.00
  74   1    -0.03   0.07  -0.12     0.03   0.02   0.16    -0.05   0.06   0.04
  75   1     0.00   0.15  -0.02    -0.01  -0.04  -0.01     0.05  -0.01  -0.03
  76   1     0.01   0.13   0.00     0.02  -0.03   0.00     0.01  -0.03  -0.06
  77   1     0.02  -0.01   0.03     0.04  -0.03  -0.01    -0.04  -0.04  -0.03
  78   1    -0.03   0.02  -0.01     0.01  -0.01  -0.06     0.04  -0.04   0.06
  79   1     0.00  -0.23   0.06     0.04  -0.05  -0.05    -0.05  -0.05   0.06
  80   1     0.00   0.06  -0.06    -0.03   0.06  -0.02    -0.01  -0.01  -0.01
  81   1    -0.04   0.02  -0.09    -0.05   0.03  -0.04    -0.03   0.03   0.01
  82   1    -0.06  -0.03  -0.06    -0.03  -0.02  -0.02    -0.04   0.06   0.01
  83   1     0.03   0.05   0.03     0.02   0.04   0.04     0.02  -0.03  -0.05
  84   1    -0.04  -0.05   0.03     0.01  -0.06   0.02    -0.01   0.04  -0.03
  85   1     0.03   0.04   0.01    -0.05  -0.01  -0.06     0.12  -0.03   0.06
  86   1     0.05   0.01   0.02    -0.05   0.00  -0.07     0.10  -0.04   0.07
  87   1     0.06   0.07   0.02    -0.06  -0.03  -0.05     0.12  -0.01   0.04
  88   1    -0.05   0.08  -0.03    -0.02  -0.03  -0.04     0.09  -0.01   0.02
  89   1    -0.02   0.12  -0.02    -0.03  -0.05  -0.01     0.10   0.01  -0.02
  90   1    -0.07   0.09  -0.04     0.01  -0.04  -0.02     0.04   0.00  -0.01
  91   1     0.16  -0.17   0.07     0.06  -0.08  -0.01    -0.08  -0.05   0.06
  92   1     0.19   0.00   0.03     0.05  -0.06   0.01    -0.05  -0.03   0.01
  93   1     0.25  -0.14   0.07     0.04  -0.05   0.00    -0.02  -0.04   0.06
  94   1    -0.08  -0.16   0.04     0.07  -0.09  -0.05    -0.12  -0.05   0.03
  95   1    -0.21  -0.10   0.02     0.06  -0.07  -0.07    -0.10  -0.04   0.01
  96   1    -0.08   0.03   0.02     0.06  -0.08  -0.03    -0.10  -0.03  -0.01
  97   1    -0.06  -0.10   0.00     0.01  -0.12  -0.01    -0.06   0.10   0.01
  98   1    -0.05  -0.10  -0.05     0.00  -0.10  -0.02    -0.06   0.10   0.00
  99   1    -0.03  -0.07  -0.04    -0.01  -0.09  -0.04    -0.05   0.07   0.03
 100   1    -0.05  -0.10   0.04     0.03  -0.11   0.06    -0.02   0.11  -0.06
 101   1    -0.05  -0.06   0.05     0.02  -0.06   0.08     0.01   0.08  -0.08
 102   1    -0.05  -0.09   0.01     0.02  -0.08   0.05    -0.02   0.12  -0.06
 103   1     0.05   0.08   0.01    -0.02   0.07   0.01     0.07  -0.08  -0.01
 104   1     0.02   0.04   0.01    -0.03   0.03  -0.01     0.03  -0.05   0.03
 105   1     0.03   0.08  -0.03    -0.04   0.07  -0.01     0.05  -0.06   0.01
 106   1     0.06   0.09   0.01     0.01   0.10   0.05     0.06  -0.07  -0.09
 107   1     0.04   0.09  -0.03    -0.01   0.11   0.03     0.05  -0.06  -0.07
 108   1     0.04   0.07  -0.01     0.02   0.09   0.06     0.02  -0.04  -0.11
 109   1    -0.01   0.01   0.00     0.03  -0.03  -0.07     0.02  -0.01   0.07
 110   1     0.00  -0.02  -0.03     0.02  -0.03  -0.06     0.04   0.01   0.05
 111   1     0.01  -0.03   0.00     0.01  -0.05  -0.07     0.04   0.00   0.06
 112   1     0.00   0.01   0.05     0.03   0.00   0.08    -0.01   0.04  -0.06
 113   1     0.00   0.03   0.06     0.01   0.04   0.10     0.02  -0.06  -0.10
 114   1     0.01   0.01   0.07     0.06  -0.01   0.12    -0.02   0.04  -0.16
                     7                      8                      9
                     A                      A                      A
 Frequencies --    42.8842                46.1920                48.8687
 Red. masses --     4.0149                 3.9806                 3.1346
 Frc consts  --     0.0044                 0.0050                 0.0044
 IR Inten    --     0.2310                 0.3884                 0.0619
 Atom AN      X      Y      Z        X      Y      Z        X      Y      Z
   1   8     0.07  -0.02   0.00    -0.01   0.03  -0.01    -0.01   0.00   0.01
   2  12     0.00   0.02   0.01    -0.01   0.00  -0.01     0.01   0.00  -0.01
   3   8    -0.01  -0.02   0.03    -0.04  -0.01  -0.04    -0.01  -0.03  -0.01
   4   6     0.03  -0.04  -0.07     0.00  -0.01  -0.01    -0.01  -0.01   0.00
   5   7    -0.01   0.01  -0.05     0.00   0.00   0.02    -0.01   0.01   0.01
   6   7     0.00   0.02   0.04    -0.01   0.02  -0.01     0.01  -0.01  -0.02
   7   8     0.02  -0.03  -0.15     0.02  -0.02  -0.03     0.00  -0.01   0.00
   8   6    -0.02   0.01  -0.05     0.01   0.01   0.02    -0.01   0.01   0.01
   9   6    -0.01   0.01  -0.01     0.01   0.01   0.00    -0.02   0.00   0.01
  10   6    -0.01   0.01   0.03     0.00   0.02  -0.01     0.00  -0.01   0.00
  11   8    -0.02  -0.11  -0.07    -0.04  -0.05  -0.02    -0.02  -0.02   0.00
  12   6    -0.01  -0.04  -0.01    -0.03  -0.02  -0.02    -0.02  -0.01   0.01
  13   6     0.00  -0.02   0.01    -0.05   0.00  -0.02    -0.02  -0.02   0.00
  14   6    -0.02  -0.07  -0.05    -0.03  -0.03   0.00    -0.02  -0.01   0.01
  15   8    -0.01   0.02   0.05    -0.02   0.00  -0.01    -0.01   0.01   0.02
  16   6     0.12   0.02  -0.01     0.02   0.06  -0.02     0.00   0.01   0.00
  17   8     0.00   0.01   0.02     0.00   0.01  -0.07     0.00  -0.02   0.00
  18   6     0.00   0.01   0.03     0.00   0.01  -0.07     0.00  -0.01  -0.01
  19   8     0.00   0.01   0.03     0.01   0.02  -0.06     0.03   0.00  -0.01
  20   8    -0.01   0.00   0.00    -0.03   0.02  -0.06    -0.05   0.00  -0.02
  21   6     0.01   0.01   0.04     0.02   0.05   0.06    -0.04   0.00   0.03
  22   6     0.02   0.01   0.05     0.03   0.02   0.05    -0.02  -0.03   0.03
  23   6     0.00   0.00   0.00     0.00   0.00  -0.10    -0.01   0.01  -0.04
  24   8     0.02   0.02   0.06     0.04   0.09   0.16    -0.05   0.01   0.07
  25   6     0.05   0.00   0.06     0.09  -0.08   0.10    -0.02  -0.06   0.04
  26   6     0.04   0.01  -0.02     0.07  -0.02  -0.13     0.01   0.02  -0.05
  27   6    -0.01  -0.01   0.04    -0.07   0.02   0.02    -0.02  -0.01   0.01
  28   6    -0.04  -0.06  -0.03    -0.05  -0.03   0.03    -0.03  -0.01   0.01
  29   6    -0.01   0.01  -0.03     0.00  -0.01   0.01    -0.01   0.02   0.01
  30   6     0.00   0.01   0.03     0.01   0.01   0.00     0.01  -0.01  -0.01
  31   6    -0.04   0.00  -0.01     0.01  -0.01   0.01    -0.01   0.02   0.01
  32   6    -0.04  -0.03   0.02     0.01  -0.02   0.00    -0.01   0.01   0.01
  33   6    -0.02  -0.04   0.04     0.00  -0.03   0.00    -0.01   0.00   0.01
  34   6     0.00  -0.02   0.02    -0.01  -0.03   0.01    -0.01   0.00   0.01
  35   6     0.01   0.02  -0.02    -0.01  -0.03   0.02    -0.01   0.02   0.01
  36   6    -0.06   0.01  -0.03     0.02  -0.01   0.02     0.00   0.03   0.00
  37   6     0.03   0.07  -0.04    -0.01  -0.05   0.02     0.00   0.04   0.00
  38   6     0.02   0.02   0.02     0.01  -0.02   0.01    -0.01   0.00  -0.01
  39   6     0.03   0.01  -0.01     0.05  -0.05   0.02    -0.02   0.01   0.00
  40   6     0.02  -0.01  -0.02     0.09  -0.05   0.02    -0.01   0.01   0.00
  41   6     0.01  -0.01  -0.01     0.07  -0.02   0.02     0.01  -0.01  -0.01
  42   6    -0.01   0.00   0.02     0.03   0.01   0.01     0.03  -0.03  -0.02
  43   6     0.02   0.04   0.03    -0.04   0.01   0.01    -0.02   0.00  -0.01
  44   6    -0.03  -0.01   0.03     0.01   0.05   0.00     0.11  -0.07  -0.03
  45   6    -0.07   0.02  -0.02    -0.01  -0.01   0.00     0.09   0.03   0.07
  46   6    -0.08   0.03  -0.04     0.04  -0.04   0.03    -0.04   0.13  -0.07
  47   6    -0.13   0.03   0.01     0.09  -0.03  -0.02    -0.02   0.04  -0.02
  48   6     0.20  -0.03  -0.05    -0.10   0.02   0.04     0.01   0.05   0.02
  49   6    -0.02  -0.02   0.02     0.02   0.08   0.03     0.00  -0.10  -0.02
  50   6    -0.06  -0.04   0.04    -0.02   0.04  -0.03     0.25   0.05  -0.02
  51   6     0.03   0.06   0.02    -0.08   0.03  -0.04     0.02   0.02   0.01
  52   6     0.02   0.05   0.03    -0.08   0.01   0.09    -0.02  -0.04  -0.03
  53   6    -0.02   0.01  -0.07     0.02   0.00   0.03    -0.02   0.02   0.02
  54   6    -0.01   0.02   0.05     0.00   0.04  -0.01    -0.01  -0.04   0.01
  55   1    -0.02   0.01  -0.02     0.01   0.01   0.00    -0.02  -0.01   0.01
  56   1     0.01   0.00   0.00    -0.05   0.02  -0.04    -0.03  -0.02   0.00
  57   1    -0.03  -0.06  -0.04    -0.03  -0.02   0.01    -0.02  -0.01   0.01
  58   1     0.06  -0.01  -0.02     0.04   0.06  -0.04     0.00   0.01   0.00
  59   1     0.17   0.06  -0.07     0.02   0.05  -0.03     0.00   0.01   0.00
  60   1     0.16   0.03   0.08     0.00   0.09  -0.01     0.00   0.02   0.01
  61   1     0.01   0.03   0.06     0.02   0.08   0.09    -0.03  -0.03   0.04
  62   1    -0.01  -0.01  -0.02    -0.03   0.00  -0.14    -0.02   0.02  -0.05
  63   1     0.06   0.00   0.08     0.12  -0.07   0.18    -0.03  -0.06   0.06
  64   1     0.06  -0.02   0.04     0.11  -0.15   0.06    -0.02  -0.07   0.04
  65   1     0.05   0.00   0.07     0.09  -0.09   0.08    -0.02  -0.07   0.03
  66   1     0.03   0.00  -0.04     0.08  -0.03  -0.14     0.03   0.00  -0.08
  67   1     0.04   0.01  -0.03     0.06  -0.03  -0.16    -0.01   0.00  -0.04
  68   1     0.06   0.02  -0.01     0.10  -0.01  -0.10     0.01   0.05  -0.05
  69   1     0.01   0.00   0.02    -0.07   0.03   0.01    -0.02  -0.01   0.01
  70   1    -0.01   0.03   0.07    -0.08   0.05   0.03    -0.02  -0.01   0.01
  71   1    -0.05  -0.03   0.06    -0.09  -0.01   0.05    -0.02  -0.02   0.01
  72   1    -0.07  -0.07  -0.02    -0.06  -0.04   0.03    -0.03  -0.01   0.02
  73   1    -0.04  -0.07  -0.04    -0.06  -0.04   0.02    -0.03  -0.01   0.01
  74   1    -0.04  -0.02  -0.01    -0.04  -0.02   0.05    -0.02  -0.01   0.02
  75   1    -0.06  -0.05   0.04     0.02  -0.03   0.00    -0.01   0.00   0.01
  76   1    -0.03  -0.07   0.06     0.00  -0.04   0.00    -0.01  -0.02   0.02
  77   1     0.02  -0.02   0.03    -0.01  -0.04   0.01    -0.01   0.00   0.01
  78   1    -0.06   0.00  -0.06     0.03   0.02   0.02    -0.05  -0.04   0.00
  79   1     0.05   0.20  -0.10    -0.02  -0.13   0.05     0.00   0.05   0.00
  80   1     0.04   0.02  -0.02     0.06  -0.07   0.02    -0.04   0.02   0.00
  81   1     0.03  -0.01  -0.04     0.12  -0.08   0.02    -0.02   0.02   0.00
  82   1     0.00  -0.02  -0.01     0.09  -0.02   0.02     0.03  -0.02  -0.01
  83   1     0.02   0.04   0.04    -0.04   0.01   0.01    -0.04   0.02  -0.01
  84   1    -0.04   0.01   0.05     0.00   0.06   0.00     0.16  -0.19  -0.05
  85   1    -0.09   0.04  -0.04    -0.01  -0.01   0.00     0.10   0.04   0.07
  86   1    -0.05   0.00  -0.03    -0.02   0.02  -0.01     0.11  -0.03   0.11
  87   1    -0.07   0.03   0.01    -0.03  -0.03  -0.01     0.14   0.09   0.07
  88   1    -0.10   0.04  -0.06     0.05  -0.04   0.04    -0.04   0.13  -0.07
  89   1    -0.09   0.05  -0.02     0.03  -0.07   0.03     0.01   0.21  -0.06
  90   1    -0.08   0.02  -0.05     0.06  -0.04   0.04    -0.11   0.12  -0.12
  91   1    -0.09   0.07  -0.02     0.07  -0.04  -0.01    -0.02   0.06  -0.02
  92   1    -0.15  -0.10   0.08     0.10   0.05  -0.06    -0.02   0.03  -0.02
  93   1    -0.26   0.10   0.00     0.16  -0.07  -0.02    -0.03   0.04  -0.03
  94   1     0.20   0.03  -0.07    -0.10  -0.01   0.04     0.01   0.07   0.01
  95   1     0.32   0.00  -0.08    -0.18   0.00   0.06     0.02   0.05   0.03
  96   1     0.18  -0.17  -0.01    -0.09   0.11   0.02     0.01   0.04   0.02
  97   1    -0.04  -0.02   0.03     0.02   0.10   0.01     0.06  -0.15  -0.04
  98   1    -0.02  -0.04   0.00     0.03   0.08   0.04    -0.04   0.01   0.00
  99   1     0.00   0.00   0.01     0.03   0.07   0.04    -0.09  -0.17  -0.02
 100   1    -0.08  -0.04   0.05    -0.03   0.08  -0.04     0.30  -0.02  -0.02
 101   1    -0.07  -0.04   0.05    -0.04   0.02  -0.06     0.37   0.07  -0.02
 102   1    -0.05  -0.07   0.02    -0.01   0.02  -0.02     0.20   0.18  -0.03
 103   1     0.03   0.08   0.03    -0.13   0.04  -0.04     0.02   0.02   0.01
 104   1     0.03   0.06   0.02    -0.06   0.03  -0.08     0.02   0.04   0.02
 105   1     0.03   0.06   0.00    -0.08   0.03  -0.02     0.05   0.00   0.00
 106   1     0.02   0.06   0.04    -0.12   0.02   0.08    -0.02  -0.03  -0.03
 107   1     0.02   0.05   0.02    -0.09   0.02   0.11     0.02  -0.05  -0.05
 108   1     0.02   0.04   0.04    -0.04   0.01   0.12    -0.05  -0.06  -0.04
 109   1    -0.02   0.02  -0.07     0.02  -0.01   0.03    -0.03   0.02   0.03
 110   1    -0.02   0.01  -0.08     0.02   0.01   0.03    -0.03   0.01   0.02
 111   1    -0.02  -0.01  -0.07     0.02   0.01   0.02    -0.01   0.02   0.03
 112   1    -0.01  -0.01   0.02    -0.04  -0.04  -0.15     0.03   0.03   0.14
 113   1    -0.01   0.06   0.05     0.05   0.21  -0.02    -0.06  -0.19   0.02
 114   1     0.00   0.00   0.09     0.01  -0.03   0.14    -0.02   0.02  -0.12
                    10                     11                     12
                     A                      A                      A
 Frequencies --    53.3249                56.0720                60.5183
 Red. masses --     3.0637                 3.6173                 4.0882
 Frc consts  --     0.0051                 0.0067                 0.0088
 IR Inten    --     0.6069                 1.9193                 0.9152
 Atom AN      X      Y      Z        X      Y      Z        X      Y      Z
   1   8     0.02  -0.03   0.04    -0.05   0.08  -0.07     0.00  -0.02   0.01
   2  12     0.01  -0.01   0.00    -0.01  -0.02  -0.02    -0.02  -0.01   0.02
   3   8     0.01   0.03  -0.02    -0.01  -0.04  -0.01     0.01   0.02   0.00
   4   6    -0.03   0.00  -0.01     0.05   0.00   0.04    -0.01   0.00   0.00
   5   7     0.01  -0.01   0.01     0.02  -0.02   0.01     0.00  -0.01   0.04
   6   7     0.00  -0.01   0.00     0.00   0.00  -0.01    -0.02   0.00  -0.02
   7   8    -0.10   0.04  -0.07     0.18  -0.06   0.18    -0.05   0.02  -0.02
   8   6     0.00  -0.01   0.01     0.02  -0.01   0.02     0.00  -0.01   0.03
   9   6     0.00  -0.02   0.00     0.02  -0.01   0.01     0.00   0.00   0.00
  10   6     0.00  -0.02   0.00     0.01   0.00   0.00    -0.01   0.00  -0.02
  11   8     0.01   0.01   0.03    -0.01   0.01  -0.02     0.01   0.03   0.01
  12   6     0.02   0.00   0.00    -0.02  -0.01  -0.02     0.01   0.01   0.00
  13   6     0.00   0.01  -0.01    -0.01  -0.03  -0.02     0.01   0.02   0.00
  14   6     0.02  -0.01   0.03    -0.02   0.02  -0.02     0.01   0.01   0.01
  15   8     0.03  -0.02  -0.02    -0.03  -0.02  -0.02     0.01  -0.01  -0.02
  16   6    -0.04  -0.02   0.00     0.03   0.06   0.00    -0.03  -0.03   0.00
  17   8     0.00   0.00  -0.03    -0.02  -0.03  -0.02     0.00   0.05  -0.05
  18   6     0.00   0.00  -0.03    -0.02  -0.03  -0.01    -0.01   0.01  -0.01
  19   8     0.00   0.00  -0.02    -0.02  -0.02  -0.01    -0.06   0.01   0.00
  20   8     0.01   0.02   0.00    -0.02  -0.02   0.00     0.08  -0.01   0.01
  21   6     0.00   0.01  -0.01    -0.02  -0.02   0.01     0.11   0.04   0.02
  22   6    -0.01   0.00  -0.02    -0.02  -0.03   0.00     0.05   0.05  -0.04
  23   6     0.00   0.01  -0.01    -0.02  -0.02  -0.01     0.03  -0.02   0.03
  24   8     0.00   0.01  -0.01    -0.02  -0.02   0.03     0.18   0.07   0.07
  25   6    -0.01  -0.01  -0.02    -0.03  -0.05   0.01    -0.02   0.05  -0.05
  26   6     0.00  -0.01   0.00    -0.02  -0.02  -0.01    -0.02  -0.03   0.05
  27   6    -0.01   0.01  -0.02     0.01  -0.03  -0.02     0.01   0.01  -0.01
  28   6     0.04  -0.07   0.04    -0.05   0.09  -0.02     0.03  -0.01   0.00
  29   6     0.01   0.00   0.01     0.02  -0.01   0.01     0.00  -0.01   0.03
  30   6     0.00  -0.02   0.00    -0.01   0.00  -0.01    -0.03   0.00  -0.03
  31   6     0.01   0.00   0.01     0.02   0.00   0.00     0.01  -0.01   0.02
  32   6     0.01  -0.02   0.02     0.03   0.03  -0.01     0.01  -0.01   0.01
  33   6     0.01  -0.03   0.02     0.02   0.04  -0.02     0.00  -0.01   0.01
  34   6     0.01  -0.01   0.01     0.02   0.03  -0.01    -0.01  -0.02   0.02
  35   6     0.01   0.00   0.01     0.02   0.02   0.00    -0.01  -0.02   0.03
  36   6     0.02   0.03   0.00     0.03  -0.02   0.01     0.02   0.00   0.03
  37   6     0.01   0.02   0.00     0.01   0.06  -0.01    -0.02  -0.04   0.04
  38   6     0.01  -0.03   0.00    -0.01   0.00   0.00    -0.04   0.02  -0.03
  39   6     0.01  -0.03   0.00     0.00   0.00   0.00    -0.04   0.01  -0.04
  40   6     0.01  -0.02   0.00     0.00   0.00   0.00    -0.02  -0.01  -0.04
  41   6     0.00  -0.01   0.01    -0.01   0.00   0.00    -0.01  -0.02  -0.05
  42   6    -0.01  -0.01   0.00    -0.01   0.01   0.00    -0.01  -0.02  -0.04
  43   6     0.00  -0.03   0.00    -0.02   0.01   0.00    -0.06   0.03  -0.02
  44   6    -0.05   0.02   0.01    -0.03   0.02   0.00     0.02  -0.04  -0.05
  45   6     0.16   0.04   0.11     0.12  -0.04   0.05     0.04   0.00   0.04
  46   6    -0.03   0.18  -0.12     0.00   0.04  -0.03     0.02   0.01   0.02
  47   6     0.01   0.02  -0.02    -0.10   0.04   0.01    -0.12  -0.07   0.12
  48   6     0.01   0.04   0.02     0.10   0.00  -0.02     0.06  -0.15  -0.02
  49   6     0.02   0.03   0.00     0.01   0.03   0.00    -0.07  -0.04  -0.02
  50   6    -0.15  -0.06   0.02    -0.08  -0.02   0.00     0.09   0.05  -0.08
  51   6    -0.04  -0.04  -0.02    -0.06   0.00  -0.03    -0.11   0.02  -0.05
  52   6     0.00   0.01   0.03    -0.02   0.04   0.03    -0.07   0.08   0.02
  53   6     0.00  -0.01   0.01     0.03  -0.01   0.03     0.01  -0.01   0.03
  54   6     0.00  -0.01  -0.01     0.02   0.02   0.00    -0.01   0.03  -0.03
  55   1     0.00  -0.02   0.00     0.03   0.00   0.01     0.01   0.00   0.00
  56   1     0.01   0.01   0.00    -0.01  -0.04  -0.01     0.02   0.01   0.00
  57   1     0.05   0.02   0.06    -0.04  -0.01  -0.05     0.02   0.01   0.01
  58   1    -0.17  -0.10  -0.05     0.29   0.20   0.08    -0.08  -0.06  -0.01
  59   1    -0.03   0.11  -0.07    -0.02  -0.20   0.15    -0.03   0.02  -0.02
  60   1     0.04  -0.08   0.08    -0.13   0.16  -0.18     0.00  -0.07   0.03
  61   1     0.00   0.01  -0.02    -0.02  -0.03   0.00     0.08   0.09  -0.10
  62   1     0.00   0.01  -0.01    -0.02  -0.02  -0.01     0.04  -0.03   0.05
  63   1    -0.01  -0.01  -0.01    -0.02  -0.05   0.02     0.03   0.06  -0.05
  64   1    -0.01  -0.01  -0.02    -0.04  -0.07   0.01    -0.06   0.00   0.00
  65   1     0.00  -0.01  -0.02    -0.04  -0.06  -0.01    -0.07   0.08  -0.11
  66   1    -0.01  -0.01   0.02    -0.02  -0.02  -0.01     0.00  -0.04   0.07
  67   1     0.00  -0.01  -0.01    -0.02  -0.02  -0.01    -0.04  -0.04   0.08
  68   1    -0.01  -0.03   0.00    -0.02  -0.03  -0.01    -0.05  -0.02   0.02
  69   1    -0.02   0.00  -0.01     0.01  -0.03  -0.02     0.00   0.01   0.00
  70   1    -0.02   0.01  -0.03     0.01  -0.05  -0.03     0.01   0.00  -0.02
  71   1    -0.01   0.01  -0.02     0.02  -0.02  -0.03     0.03   0.02  -0.01
  72   1     0.07  -0.08   0.09    -0.08   0.11  -0.08     0.04  -0.01   0.00
  73   1     0.03  -0.10   0.02    -0.05   0.14   0.02     0.03  -0.01  -0.01
  74   1     0.04  -0.07   0.04    -0.04   0.09  -0.01     0.03  -0.02  -0.01
  75   1     0.00  -0.03   0.02     0.03   0.04  -0.02     0.01   0.00   0.01
  76   1     0.01  -0.05   0.02     0.02   0.05  -0.03     0.00   0.00   0.00
  77   1     0.01  -0.01   0.01     0.02   0.04  -0.02    -0.01  -0.02   0.02
  78   1    -0.05  -0.09  -0.01    -0.01  -0.08   0.03     0.01  -0.01   0.04
  79   1     0.01   0.01   0.01     0.03   0.14  -0.03    -0.01   0.05   0.02
  80   1     0.02  -0.03   0.00     0.00   0.00   0.00    -0.05   0.02  -0.04
  81   1     0.01  -0.03   0.00     0.00  -0.01   0.00    -0.02  -0.01  -0.05
  82   1    -0.01   0.00   0.01    -0.01   0.01   0.00     0.01  -0.04  -0.05
  83   1     0.02  -0.04  -0.01     0.01  -0.01  -0.01    -0.03   0.01  -0.03
  84   1    -0.09   0.10   0.02    -0.05   0.06   0.00     0.06  -0.11  -0.05
  85   1     0.18   0.06   0.12     0.14  -0.06   0.06     0.05   0.00   0.05
  86   1     0.18  -0.06   0.19     0.13  -0.08   0.08     0.03  -0.01   0.05
  87   1     0.23   0.12   0.11     0.17   0.01   0.03     0.04   0.00   0.03
  88   1    -0.04   0.19  -0.13     0.00   0.02  -0.02     0.03   0.01   0.02
  89   1     0.04   0.30  -0.11     0.04   0.11  -0.04     0.03   0.01   0.01
  90   1    -0.13   0.16  -0.21    -0.07   0.06  -0.06     0.01   0.00   0.00
  91   1     0.01   0.04  -0.02    -0.09   0.07   0.00    -0.11  -0.08   0.12
  92   1     0.01   0.03  -0.03    -0.12  -0.05   0.05    -0.14  -0.16   0.17
  93   1     0.02   0.01  -0.03    -0.17   0.08   0.01    -0.20   0.00   0.14
  94   1     0.01   0.05   0.02     0.09   0.04  -0.02     0.04  -0.15   0.00
  95   1     0.00   0.03   0.04     0.20   0.01  -0.03     0.15  -0.12  -0.07
  96   1     0.01   0.05   0.02     0.09  -0.10  -0.01     0.05  -0.25  -0.01
  97   1     0.00   0.06   0.00    -0.01   0.05   0.00    -0.06  -0.05  -0.02
  98   1     0.06  -0.04  -0.01     0.02   0.00  -0.01    -0.10   0.02  -0.03
  99   1     0.08   0.08  -0.01     0.04   0.06  -0.01    -0.10  -0.08   0.01
 100   1    -0.17  -0.01   0.01    -0.09   0.01  -0.01     0.11   0.03  -0.08
 101   1    -0.23  -0.07   0.01    -0.13  -0.03  -0.01     0.16   0.04  -0.10
 102   1    -0.10  -0.15   0.03    -0.06  -0.07   0.00     0.06   0.13  -0.08
 103   1    -0.05  -0.04  -0.02    -0.06   0.00  -0.03    -0.12   0.02  -0.05
 104   1    -0.03  -0.05  -0.04    -0.05  -0.03  -0.05    -0.11  -0.01  -0.08
 105   1    -0.06  -0.03  -0.01    -0.08   0.01  -0.02    -0.14   0.04  -0.05
 106   1    -0.01   0.00   0.02    -0.03   0.04   0.03    -0.08   0.08   0.02
 107   1    -0.03   0.02   0.04    -0.05   0.06   0.05    -0.10   0.10   0.04
 108   1     0.03   0.02   0.04     0.02   0.06   0.05    -0.02   0.09   0.05
 109   1    -0.02   0.00   0.03     0.01  -0.01   0.05     0.01  -0.02   0.03
 110   1     0.00  -0.02  -0.01     0.03  -0.01   0.02     0.02  -0.01   0.02
 111   1     0.02  -0.01   0.02     0.05  -0.01   0.05     0.02  -0.02   0.03
 112   1    -0.02  -0.05  -0.09    -0.02  -0.03  -0.10    -0.05  -0.03  -0.14
 113   1     0.04   0.10  -0.01     0.05   0.15  -0.01     0.04   0.17  -0.04
 114   1     0.00  -0.05   0.09     0.03  -0.03   0.11     0.00  -0.03   0.09
                    13                     14                     15
                     A                      A                      A
 Frequencies --    62.8331                68.5105                71.4428
 Red. masses --     4.6200                 2.8236                 4.7033
 Frc consts  --     0.0107                 0.0078                 0.0141
 IR Inten    --     0.4535                 0.9872                 0.3752
 Atom AN      X      Y      Z        X      Y      Z        X      Y      Z
   1   8     0.01   0.03  -0.06    -0.01   0.00   0.00    -0.03   0.00   0.02
   2  12     0.00   0.01   0.03     0.00   0.02   0.00    -0.02   0.00  -0.01
   3   8     0.03   0.06   0.00     0.01  -0.01  -0.03    -0.03  -0.08   0.02
   4   6     0.09  -0.06   0.02     0.00   0.00   0.01    -0.04   0.01   0.01
   5   7    -0.02   0.01  -0.01    -0.01   0.02   0.01     0.00  -0.01  -0.05
   6   7    -0.02   0.00  -0.01     0.00   0.01  -0.01     0.01   0.03   0.03
   7   8     0.20  -0.12   0.08     0.00   0.00   0.01    -0.05   0.01   0.01
   8   6    -0.02   0.00  -0.02    -0.01   0.02   0.01     0.01   0.00  -0.03
   9   6    -0.02   0.00  -0.03    -0.01   0.02   0.00     0.01   0.02  -0.01
  10   6    -0.02   0.00  -0.02     0.00   0.01   0.00     0.01   0.03   0.01
  11   8     0.03  -0.09  -0.01     0.00   0.00   0.01    -0.04   0.00   0.01
  12   6     0.05  -0.03  -0.01     0.00   0.00   0.01    -0.05  -0.02   0.02
  13   6     0.03   0.02   0.00     0.00  -0.02  -0.02    -0.03  -0.07   0.01
  14   6     0.06  -0.09   0.03     0.00   0.00   0.01    -0.05   0.01   0.01
  15   8     0.08  -0.01   0.00     0.01   0.02   0.02    -0.06   0.00   0.04
  16   6     0.07   0.06  -0.06    -0.01  -0.01   0.00    -0.04  -0.01   0.03
  17   8     0.01   0.05  -0.01     0.00   0.01  -0.06    -0.01   0.01  -0.02
  18   6     0.01   0.04   0.00     0.00   0.02  -0.04    -0.03  -0.03   0.03
  19   8     0.00   0.03   0.00     0.01   0.04  -0.02    -0.06  -0.02   0.04
  20   8     0.04   0.04   0.03    -0.02   0.03  -0.05     0.05  -0.07  -0.01
  21   6     0.04   0.05   0.00     0.00   0.04   0.01     0.11   0.00   0.04
  22   6     0.01   0.05  -0.04    -0.02   0.01  -0.04     0.02   0.01  -0.06
  23   6     0.01   0.04   0.04    -0.01   0.03  -0.05     0.00  -0.07   0.02
  24   8     0.06   0.05   0.01     0.02   0.08   0.09     0.21   0.06   0.14
  25   6    -0.06   0.06  -0.05    -0.08  -0.03  -0.03    -0.11   0.02  -0.08
  26   6    -0.04   0.04   0.06     0.01   0.04  -0.07    -0.02  -0.05   0.02
  27   6    -0.02   0.02   0.00     0.01  -0.03  -0.04     0.02  -0.09  -0.03
  28   6     0.04  -0.14   0.08     0.00   0.00   0.01    -0.05   0.02   0.00
  29   6    -0.02  -0.01   0.00     0.00   0.02   0.01     0.00  -0.02  -0.04
  30   6    -0.02   0.00  -0.01     0.00   0.01   0.00     0.01   0.03   0.02
  31   6    -0.03  -0.03   0.00     0.00   0.01   0.01    -0.02  -0.03  -0.03
  32   6    -0.03  -0.09   0.03     0.00   0.01   0.00    -0.02  -0.02  -0.01
  33   6    -0.03  -0.11   0.04    -0.01   0.00   0.00     0.00   0.00  -0.01
  34   6    -0.02  -0.07   0.02    -0.01  -0.01   0.01     0.01   0.01  -0.02
  35   6    -0.02  -0.03   0.01    -0.01   0.00   0.01     0.01   0.00  -0.04
  36   6    -0.03   0.01  -0.01     0.01   0.00   0.01    -0.04  -0.07  -0.02
  37   6    -0.01  -0.03   0.00    -0.02  -0.03   0.02     0.02   0.03  -0.05
  38   6    -0.04   0.02   0.00     0.00   0.00   0.01     0.02   0.03   0.01
  39   6    -0.06   0.03   0.00     0.00   0.00   0.02     0.02   0.03   0.00
  40   6    -0.07   0.03   0.00     0.00   0.01   0.03     0.01   0.03   0.00
  41   6    -0.05   0.02   0.00     0.01   0.02   0.02     0.00   0.03   0.01
  42   6    -0.03   0.00  -0.01     0.01   0.02   0.01     0.00   0.03   0.02
  43   6    -0.03   0.00  -0.01     0.01  -0.03  -0.01     0.07   0.02   0.01
  44   6    -0.02  -0.01  -0.01     0.01   0.02   0.01     0.00   0.02   0.02
  45   6    -0.04   0.05   0.02     0.00   0.00   0.00     0.04  -0.10  -0.02
  46   6    -0.03   0.05  -0.05     0.01  -0.01   0.03    -0.09  -0.02  -0.03
  47   6     0.07   0.00  -0.06    -0.07  -0.06   0.09     0.10   0.06  -0.12
  48   6    -0.08   0.05   0.04     0.02  -0.11  -0.02    -0.03   0.12   0.00
  49   6    -0.01  -0.02  -0.02     0.13   0.01  -0.05    -0.01   0.02   0.02
  50   6    -0.01  -0.01   0.01    -0.06  -0.08   0.08     0.00   0.03   0.02
  51   6    -0.03  -0.01   0.01     0.08  -0.02   0.04     0.08   0.00   0.04
  52   6    -0.03   0.00  -0.03     0.01  -0.11  -0.07     0.09   0.04  -0.03
  53   6    -0.03   0.00  -0.04    -0.01   0.02   0.02     0.03   0.00  -0.01
  54   6    -0.02  -0.01  -0.02    -0.01  -0.02  -0.01     0.01   0.03   0.02
  55   1    -0.03   0.00  -0.03    -0.01   0.02   0.01     0.02   0.03   0.00
  56   1     0.06   0.03  -0.01    -0.01  -0.04   0.00    -0.05  -0.10   0.03
  57   1     0.09  -0.06   0.05     0.00   0.00   0.01    -0.05   0.00   0.00
  58   1     0.29   0.14  -0.05    -0.01   0.00   0.00    -0.05  -0.01   0.04
  59   1     0.03  -0.11   0.05    -0.02  -0.01   0.01    -0.03   0.00   0.02
  60   1    -0.06   0.17  -0.19    -0.02  -0.01  -0.01    -0.02  -0.02   0.04
  61   1     0.03   0.04  -0.08     0.00   0.01  -0.07     0.08   0.03  -0.15
  62   1     0.04   0.05   0.06    -0.01   0.03  -0.06     0.01  -0.10   0.04
  63   1    -0.05   0.06  -0.07    -0.06  -0.02  -0.01    -0.04   0.03  -0.10
  64   1    -0.09   0.06  -0.01    -0.12  -0.06   0.01    -0.19  -0.05   0.03
  65   1    -0.09   0.07  -0.09    -0.12  -0.03  -0.09    -0.20   0.07  -0.18
  66   1    -0.01   0.03   0.08     0.06   0.00  -0.10     0.04  -0.09   0.00
  67   1    -0.06   0.02   0.10    -0.04   0.01  -0.03    -0.08  -0.08   0.09
  68   1    -0.07   0.06   0.03     0.00   0.12  -0.08    -0.06   0.04  -0.01
  69   1    -0.02   0.00   0.01    -0.01  -0.04  -0.03     0.00  -0.08  -0.01
  70   1    -0.03   0.05   0.00     0.00  -0.06  -0.06     0.02  -0.15  -0.06
  71   1    -0.04   0.00   0.01     0.03  -0.01  -0.06     0.07  -0.05  -0.04
  72   1     0.04  -0.16   0.13     0.01   0.00   0.01    -0.06   0.02   0.00
  73   1     0.02  -0.18   0.05     0.00   0.00   0.01    -0.04   0.03   0.00
  74   1     0.06  -0.11   0.12     0.01  -0.01   0.01    -0.05   0.03   0.00
  75   1    -0.04  -0.12   0.04     0.00   0.01   0.00    -0.03  -0.03   0.00
  76   1    -0.03  -0.15   0.05    -0.01   0.00   0.00     0.00   0.01   0.00
  77   1    -0.02  -0.08   0.03    -0.02  -0.02   0.01     0.02   0.02  -0.02
  78   1    -0.03   0.01  -0.04     0.01   0.01   0.02    -0.07  -0.13  -0.02
  79   1    -0.02  -0.10   0.02    -0.01   0.01   0.01     0.01  -0.03  -0.03
  80   1    -0.07   0.04   0.01    -0.01   0.00   0.03     0.02   0.04   0.00
  81   1    -0.08   0.05   0.01     0.00   0.02   0.04     0.00   0.04  -0.01
  82   1    -0.05   0.02   0.00     0.01   0.03   0.03    -0.01   0.02   0.00
  83   1    -0.03   0.00  -0.01    -0.04   0.00  -0.01     0.08   0.01   0.02
  84   1    -0.02  -0.01  -0.01    -0.04   0.11  -0.01     0.00   0.02   0.02
  85   1    -0.05   0.08   0.01     0.00  -0.01   0.00     0.04  -0.13  -0.01
  86   1    -0.04   0.03   0.04     0.01   0.00  -0.01     0.06  -0.14  -0.01
  87   1    -0.05   0.05   0.05     0.00  -0.01  -0.01     0.08  -0.06  -0.03
  88   1    -0.03   0.08  -0.06     0.02  -0.02   0.03    -0.10  -0.06  -0.03
  89   1    -0.03   0.06  -0.03     0.01  -0.02   0.02    -0.05   0.03  -0.04
  90   1    -0.03   0.02  -0.08     0.01  -0.01   0.04    -0.14   0.00  -0.04
  91   1     0.06   0.00  -0.05    -0.06  -0.08   0.09     0.08   0.07  -0.11
  92   1     0.09   0.07  -0.09    -0.08  -0.10   0.11     0.11   0.12  -0.16
  93   1     0.13  -0.05  -0.07    -0.10  -0.01   0.11     0.16   0.01  -0.13
  94   1    -0.06   0.04   0.03     0.01  -0.12  -0.01    -0.01   0.13  -0.01
  95   1    -0.16   0.03   0.07     0.06  -0.09  -0.07    -0.10   0.10   0.05
  96   1    -0.07   0.14   0.04     0.01  -0.16  -0.02    -0.02   0.20   0.00
  97   1    -0.01  -0.03  -0.02     0.15   0.02  -0.06    -0.02   0.02   0.03
  98   1    -0.01  -0.03  -0.02     0.18  -0.06  -0.02    -0.02   0.02   0.01
  99   1    -0.01  -0.02  -0.03     0.15   0.06  -0.10    -0.01   0.02   0.03
 100   1     0.00  -0.03   0.01    -0.05  -0.08   0.08     0.00   0.02   0.02
 101   1    -0.01  -0.01   0.02    -0.15  -0.06   0.12     0.01   0.03   0.02
 102   1    -0.01  -0.01   0.01    -0.01  -0.17   0.10    -0.01   0.04   0.01
 103   1    -0.02  -0.02   0.00     0.08  -0.03   0.03     0.12   0.00   0.04
 104   1    -0.03   0.00   0.02     0.07   0.03   0.07     0.05  -0.03   0.07
 105   1    -0.02  -0.01   0.02     0.12  -0.04   0.04     0.06   0.02   0.02
 106   1    -0.02   0.00  -0.02     0.02  -0.11  -0.07     0.13   0.02  -0.03
 107   1    -0.02  -0.01  -0.03     0.07  -0.15  -0.09     0.08   0.04  -0.04
 108   1    -0.04  -0.01  -0.04    -0.05  -0.13  -0.10     0.08   0.06  -0.05
 109   1    -0.02   0.00  -0.05    -0.01   0.02   0.03     0.00   0.00   0.02
 110   1    -0.03   0.00  -0.04    -0.01   0.02   0.02     0.03   0.00  -0.03
 111   1    -0.04  -0.01  -0.04     0.00   0.03   0.02     0.06   0.00   0.01
 112   1     0.00   0.03   0.05     0.06   0.11   0.23     0.02   0.06   0.05
 113   1    -0.05  -0.09  -0.01    -0.09  -0.32   0.01     0.00  -0.01   0.02
 114   1    -0.02   0.02  -0.09    -0.02   0.09  -0.27     0.02   0.05  -0.02
                    16                     17                     18
                     A                      A                      A
 Frequencies --    75.2127                79.5260                84.3863
 Red. masses --     3.5502                 3.4770                 3.8605
 Frc consts  --     0.0118                 0.0130                 0.0162
 IR Inten    --     0.3414                 0.2988                 1.0543
 Atom AN      X      Y      Z        X      Y      Z        X      Y      Z
   1   8     0.02  -0.01   0.00    -0.03   0.02   0.01     0.00   0.01  -0.01
   2  12    -0.02  -0.01   0.02    -0.02  -0.01  -0.04    -0.03  -0.01  -0.06
   3   8     0.04  -0.03   0.03    -0.05   0.02  -0.01    -0.01   0.04  -0.04
   4   6     0.01   0.01   0.01    -0.03   0.00  -0.01     0.00   0.00   0.00
   5   7    -0.02  -0.01  -0.01     0.04  -0.01   0.01    -0.03  -0.01  -0.02
   6   7    -0.02   0.03  -0.03    -0.01  -0.01  -0.03     0.00   0.04   0.00
   7   8    -0.01   0.02   0.01    -0.02  -0.01  -0.03     0.02   0.00   0.02
   8   6     0.00   0.00  -0.03     0.04  -0.02   0.00    -0.01   0.02   0.04
   9   6     0.00   0.02  -0.05     0.03  -0.01  -0.01     0.00   0.04   0.07
  10   6    -0.01   0.03  -0.04     0.02   0.00  -0.02    -0.01   0.04   0.05
  11   8     0.04   0.02   0.03    -0.06  -0.02  -0.03    -0.01   0.03  -0.02
  12   6     0.04   0.00   0.02    -0.06   0.00  -0.02    -0.01   0.01  -0.07
  13   6     0.05  -0.03   0.02    -0.06   0.04   0.00    -0.01   0.05  -0.05
  14   6     0.04   0.01   0.01    -0.06  -0.01  -0.02     0.01   0.01   0.00
  15   8     0.02  -0.01   0.02    -0.05   0.00  -0.03     0.00  -0.04  -0.12
  16   6    -0.01  -0.02   0.00     0.01   0.03   0.01     0.01  -0.01   0.01
  17   8     0.02  -0.03   0.03    -0.01   0.03   0.05    -0.03   0.01  -0.04
  18   6     0.03  -0.02   0.04    -0.03  -0.01   0.02    -0.03  -0.01  -0.03
  19   8     0.03  -0.02   0.04    -0.05  -0.03   0.00    -0.07  -0.03  -0.04
  20   8     0.00  -0.03   0.01     0.03  -0.04   0.02     0.03   0.00   0.04
  21   6     0.00  -0.03   0.02     0.05   0.00   0.00     0.02   0.00  -0.01
  22   6     0.01  -0.03   0.03     0.03   0.04   0.03     0.03   0.02   0.03
  23   6     0.02  -0.01   0.03    -0.01  -0.04   0.03    -0.01  -0.02   0.03
  24   8    -0.02  -0.04   0.01     0.07  -0.01  -0.02     0.01  -0.03  -0.07
  25   6     0.03  -0.04   0.04     0.07   0.07   0.02     0.15  -0.01   0.06
  26   6     0.02   0.02   0.02    -0.03  -0.04   0.05    -0.02  -0.08   0.06
  27   6     0.08  -0.03   0.00    -0.08   0.07   0.05    -0.03   0.07   0.00
  28   6     0.06   0.00   0.00    -0.08   0.01  -0.01     0.00  -0.03   0.03
  29   6    -0.02  -0.02   0.00     0.04  -0.01   0.01    -0.03  -0.02  -0.01
  30   6    -0.02   0.03  -0.02    -0.03   0.00  -0.01     0.00   0.04   0.00
  31   6    -0.02  -0.03   0.00     0.05   0.00   0.00    -0.05  -0.04   0.00
  32   6    -0.02  -0.02   0.00     0.05   0.00   0.00    -0.05  -0.05   0.02
  33   6    -0.02   0.00   0.00     0.05  -0.01   0.00    -0.04  -0.03   0.02
  34   6    -0.02   0.01  -0.01     0.04  -0.01   0.00    -0.03  -0.01   0.01
  35   6    -0.02   0.00  -0.01     0.04   0.00   0.01    -0.03  -0.02   0.00
  36   6    -0.03  -0.06   0.01     0.07   0.03   0.01    -0.06  -0.06   0.01
  37   6    -0.02   0.00  -0.01     0.05   0.02   0.00    -0.02  -0.04   0.00
  38   6    -0.05   0.06  -0.02    -0.05   0.01   0.00     0.03   0.02   0.00
  39   6    -0.02   0.03  -0.02    -0.05   0.01   0.00     0.05   0.01   0.00
  40   6     0.03   0.00  -0.03    -0.04   0.01   0.00     0.03   0.03   0.00
  41   6     0.03   0.00  -0.03    -0.02   0.00  -0.01     0.01   0.04   0.01
  42   6     0.01   0.01  -0.03    -0.02   0.00  -0.01     0.01   0.05   0.01
  43   6    -0.12   0.11   0.00    -0.07   0.00  -0.01     0.06   0.01  -0.01
  44   6     0.00   0.03  -0.03     0.00  -0.03  -0.01     0.03   0.04   0.00
  45   6     0.04  -0.08   0.02     0.03   0.05   0.01     0.03  -0.08   0.03
  46   6    -0.06  -0.02  -0.01     0.11   0.00   0.01    -0.11   0.01  -0.03
  47   6     0.00   0.00  -0.02     0.05   0.03  -0.03    -0.03  -0.05   0.02
  48   6    -0.04   0.01   0.00     0.07   0.05   0.03    -0.02  -0.06  -0.02
  49   6     0.05   0.03  -0.04     0.07  -0.07  -0.06     0.06   0.03  -0.02
  50   6    -0.04  -0.02  -0.02    -0.02  -0.10   0.07     0.05   0.04   0.04
  51   6     0.02   0.24   0.01    -0.02   0.03   0.01     0.07   0.00   0.01
  52   6    -0.17  -0.05  -0.01    -0.09  -0.07  -0.03     0.08   0.01  -0.04
  53   6     0.03  -0.01  -0.01     0.04  -0.01   0.00     0.02   0.02   0.09
  54   6    -0.01   0.04  -0.05     0.02   0.00   0.00    -0.01   0.03   0.07
  55   1     0.01   0.02  -0.06     0.04  -0.01  -0.01     0.01   0.05   0.11
  56   1     0.04  -0.04   0.03    -0.06   0.07  -0.03     0.00   0.07  -0.07
  57   1     0.04   0.02   0.02    -0.06  -0.02  -0.03     0.04   0.02   0.00
  58   1    -0.04  -0.04   0.00     0.01   0.03   0.02     0.05   0.02   0.03
  59   1    -0.01   0.01  -0.01     0.03   0.02  -0.01     0.01  -0.05   0.03
  60   1     0.01  -0.05   0.01     0.01   0.04   0.04    -0.01   0.01  -0.02
  61   1     0.01  -0.04   0.05     0.03   0.06   0.04     0.00   0.08   0.09
  62   1     0.02  -0.01   0.03    -0.01  -0.05   0.05    -0.01  -0.02   0.03
  63   1     0.02  -0.04   0.04     0.09   0.08   0.00     0.15  -0.01   0.10
  64   1     0.04  -0.03   0.02     0.09   0.08   0.01     0.20  -0.02  -0.02
  65   1     0.04  -0.04   0.05     0.08   0.10   0.06     0.19  -0.02   0.12
  66   1    -0.02   0.04   0.01    -0.06  -0.02   0.08    -0.14  -0.01   0.15
  67   1     0.06   0.05   0.00    -0.01  -0.02   0.04     0.07  -0.03  -0.04
  68   1     0.03  -0.01   0.03    -0.04  -0.08   0.05    -0.01  -0.27   0.09
  69   1     0.08  -0.03   0.00    -0.08   0.09   0.05    -0.03   0.09  -0.01
  70   1     0.09  -0.05   0.01    -0.08   0.10   0.07    -0.04   0.10   0.01
  71   1     0.08  -0.02  -0.01    -0.09   0.04   0.08    -0.04   0.04   0.03
  72   1     0.07   0.00   0.02    -0.09   0.02  -0.04     0.01  -0.04   0.05
  73   1     0.07  -0.01  -0.02    -0.10   0.03   0.01    -0.02  -0.06   0.01
  74   1     0.05   0.01  -0.02    -0.07   0.01   0.01     0.01  -0.03   0.04
  75   1    -0.02  -0.03   0.01     0.06   0.02  -0.01    -0.06  -0.06   0.03
  76   1    -0.02   0.01  -0.01     0.05  -0.01   0.00    -0.04  -0.02   0.03
  77   1    -0.01   0.02  -0.01     0.04  -0.01   0.00    -0.02  -0.01   0.01
  78   1    -0.06  -0.11   0.01     0.09   0.06   0.01    -0.10  -0.13   0.01
  79   1    -0.02  -0.02   0.00     0.05   0.02  -0.01    -0.02  -0.03  -0.01
  80   1    -0.03   0.03  -0.01    -0.06   0.01   0.01     0.06  -0.01  -0.01
  81   1     0.06  -0.02  -0.03    -0.04   0.01   0.01     0.04   0.02   0.01
  82   1     0.06  -0.02  -0.03    -0.01   0.00   0.00     0.01   0.05   0.01
  83   1    -0.24   0.18   0.03    -0.12   0.04  -0.02     0.06   0.01   0.00
  84   1    -0.02   0.07  -0.03    -0.02   0.01  -0.01     0.02   0.05  -0.02
  85   1     0.04  -0.10   0.03     0.04   0.07   0.01     0.05  -0.10   0.05
  86   1     0.05  -0.11   0.04     0.01   0.07   0.01     0.03  -0.11   0.06
  87   1     0.07  -0.05   0.01     0.01   0.02   0.01     0.07  -0.05   0.00
  88   1    -0.07  -0.04   0.00     0.13   0.03   0.00    -0.13  -0.02  -0.03
  89   1    -0.03   0.03  -0.02     0.08  -0.04   0.01    -0.07   0.08  -0.03
  90   1    -0.11   0.00  -0.02     0.15  -0.02   0.01    -0.18   0.03  -0.06
  91   1     0.00   0.00  -0.01     0.05   0.05  -0.04    -0.03  -0.06   0.03
  92   1     0.00   0.02  -0.03     0.05   0.03  -0.04    -0.03  -0.05   0.02
  93   1     0.02  -0.01  -0.01     0.05   0.02  -0.05    -0.02  -0.03   0.04
  94   1    -0.04   0.01   0.00     0.07   0.08   0.02    -0.02  -0.09  -0.02
  95   1    -0.06   0.01   0.00     0.07   0.04   0.05    -0.03  -0.06  -0.05
  96   1    -0.04   0.03  -0.01     0.07   0.05   0.03    -0.02  -0.07  -0.02
  97   1     0.04   0.05  -0.04     0.10  -0.09  -0.08     0.08   0.03  -0.03
  98   1     0.07   0.00  -0.03     0.09  -0.09  -0.03     0.07   0.04   0.01
  99   1     0.08   0.06  -0.05     0.05  -0.04  -0.12     0.04   0.04  -0.04
 100   1    -0.05   0.00  -0.02    -0.01  -0.13   0.07     0.08   0.01   0.04
 101   1    -0.08  -0.02  -0.02    -0.07  -0.07   0.12     0.05   0.06   0.07
 102   1    -0.02  -0.06  -0.01     0.00  -0.15   0.07     0.05   0.05   0.05
 103   1    -0.01   0.28   0.03    -0.03   0.03   0.01     0.10   0.01   0.02
 104   1     0.05   0.34   0.03    -0.01   0.07   0.03     0.06  -0.01   0.03
 105   1     0.15   0.17  -0.03     0.02   0.00   0.02     0.07   0.01  -0.01
 106   1    -0.23   0.01   0.01    -0.11  -0.06  -0.03     0.10   0.00  -0.04
 107   1    -0.04  -0.12  -0.06    -0.03  -0.11  -0.05     0.08   0.01  -0.04
 108   1    -0.26  -0.15   0.00    -0.14  -0.11  -0.04     0.07   0.02  -0.06
 109   1    -0.01  -0.01   0.03     0.04  -0.02  -0.01     0.01  -0.02   0.11
 110   1     0.04  -0.01  -0.06     0.04  -0.01   0.00     0.03   0.03   0.12
 111   1     0.08  -0.03   0.02     0.03  -0.01   0.00     0.02   0.04   0.09
 112   1     0.00   0.08   0.02     0.08   0.14   0.24     0.04   0.09   0.20
 113   1    -0.04  -0.03  -0.04    -0.07  -0.28   0.02    -0.06  -0.13   0.09
 114   1     0.00   0.07  -0.11     0.04   0.11  -0.25    -0.01   0.08  -0.06
                    19                     20                     21
                     A                      A                      A
 Frequencies --    88.0684                92.6525                97.1814
 Red. masses --     3.4081                 3.7566                 3.6262
 Frc consts  --     0.0156                 0.0190                 0.0202
 IR Inten    --     1.1117                 0.6068                 1.3403
 Atom AN      X      Y      Z        X      Y      Z        X      Y      Z
   1   8     0.00  -0.01   0.01    -0.01   0.01   0.00     0.00   0.00   0.00
   2  12     0.02   0.02  -0.04    -0.01  -0.03  -0.02    -0.03  -0.01   0.09
   3   8     0.00  -0.04   0.01    -0.01  -0.03  -0.02     0.01  -0.02   0.03
   4   6    -0.01  -0.01   0.00     0.00   0.01   0.01     0.00   0.01   0.01
   5   7    -0.01   0.03  -0.01    -0.01   0.00   0.05     0.00  -0.02   0.05
   6   7     0.01   0.02  -0.07     0.01   0.02   0.01    -0.01   0.03   0.03
   7   8    -0.01  -0.01  -0.02     0.00   0.00   0.01     0.00   0.01   0.02
   8   6    -0.01   0.04   0.01     0.00   0.00   0.00     0.01  -0.03  -0.09
   9   6    -0.01   0.03   0.01     0.00   0.01  -0.01     0.01   0.00  -0.14
  10   6     0.00   0.02  -0.01     0.01   0.02   0.00     0.00   0.02  -0.06
  11   8    -0.01  -0.03   0.00    -0.01   0.01  -0.01     0.02   0.01   0.02
  12   6    -0.01   0.00   0.03    -0.01  -0.01  -0.03     0.01  -0.01   0.02
  13   6     0.00  -0.03   0.02     0.00  -0.01  -0.03     0.02  -0.03   0.01
  14   6    -0.01  -0.02   0.00     0.00   0.01   0.00     0.01   0.02   0.00
  15   8    -0.01   0.03   0.06    -0.01  -0.04  -0.06     0.00  -0.02   0.02
  16   6     0.00   0.00   0.00     0.00   0.01   0.00    -0.02  -0.01   0.00
  17   8     0.03  -0.03   0.08    -0.03  -0.05  -0.04    -0.03   0.02  -0.11
  18   6     0.02  -0.01   0.06    -0.03  -0.05  -0.02    -0.02   0.00  -0.03
  19   8     0.03  -0.03   0.03    -0.05  -0.05  -0.01    -0.05   0.03   0.02
  20   8     0.01  -0.03   0.03     0.02  -0.05   0.03    -0.01   0.00  -0.03
  21   6     0.00  -0.03   0.02     0.01  -0.05   0.00     0.00   0.02  -0.02
  22   6     0.00  -0.03   0.03    -0.02  -0.05  -0.05     0.02   0.02   0.02
  23   6     0.01  -0.02   0.03    -0.01  -0.06   0.02    -0.01   0.00  -0.02
  24   8    -0.01  -0.04   0.01     0.03  -0.04   0.00     0.00   0.01  -0.03
  25   6    -0.02   0.00   0.01    -0.08  -0.06  -0.05     0.14  -0.05   0.06
  26   6     0.01   0.00   0.03    -0.04  -0.08   0.04    -0.01  -0.01  -0.02
  27   6     0.02  -0.03   0.01     0.02  -0.01  -0.03     0.03  -0.04   0.00
  28   6    -0.02  -0.02   0.01    -0.01  -0.01   0.02     0.01   0.04  -0.02
  29   6    -0.02   0.02   0.00    -0.01  -0.01   0.04     0.00  -0.03   0.04
  30   6     0.02   0.01  -0.05     0.03   0.01   0.00    -0.02   0.03   0.02
  31   6    -0.02   0.02   0.00     0.00   0.02   0.03     0.00  -0.03   0.03
  32   6    -0.02   0.00   0.01     0.00   0.00   0.02     0.00  -0.01   0.01
  33   6    -0.02  -0.01   0.01    -0.01  -0.03   0.03    -0.01   0.01   0.00
  34   6    -0.02  -0.01   0.01    -0.02  -0.04   0.03    -0.02   0.01   0.00
  35   6    -0.02   0.00   0.00    -0.02  -0.02   0.04    -0.02   0.00   0.02
  36   6    -0.03   0.02   0.00     0.01   0.13   0.00     0.00  -0.02   0.03
  37   6    -0.03  -0.01   0.01    -0.04   0.02   0.04    -0.04   0.02   0.03
  38   6     0.00   0.01  -0.04     0.04   0.01   0.00    -0.01   0.03   0.01
  39   6    -0.01   0.02  -0.02     0.07  -0.01  -0.01    -0.02   0.04   0.01
  40   6     0.00   0.03  -0.01     0.08  -0.02  -0.02    -0.03   0.04   0.00
  41   6     0.03   0.03  -0.03     0.07  -0.02  -0.01    -0.02   0.02   0.00
  42   6     0.04   0.02  -0.05     0.04   0.00   0.00    -0.01   0.01   0.01
  43   6     0.00  -0.01  -0.05     0.03   0.04   0.01     0.03   0.00   0.00
  44   6     0.07   0.02  -0.06     0.03   0.02   0.00     0.02  -0.03   0.02
  45   6    -0.04   0.02  -0.02    -0.13   0.20   0.02     0.00  -0.01   0.04
  46   6    -0.03   0.01   0.01     0.08   0.07   0.00     0.00  -0.01   0.02
  47   6    -0.01   0.00   0.01    -0.08   0.02   0.00    -0.06   0.03   0.00
  48   6    -0.06   0.00   0.01    -0.04   0.04   0.06    -0.06   0.04   0.04
  49   6     0.21   0.01  -0.12     0.04   0.04   0.01     0.04  -0.06  -0.03
  50   6     0.03  -0.08   0.02     0.00   0.01  -0.02     0.04  -0.05   0.07
  51   6    -0.13  -0.09  -0.08     0.09   0.10   0.01    -0.04  -0.08   0.01
  52   6     0.01   0.12   0.01     0.02   0.00   0.00     0.06   0.08  -0.01
  53   6    -0.01   0.05   0.04     0.01  -0.02  -0.06     0.04  -0.07  -0.18
  54   6     0.01   0.02   0.03     0.01   0.02   0.00     0.00   0.04  -0.08
  55   1    -0.01   0.04   0.05     0.01   0.01  -0.03     0.02  -0.01  -0.23
  56   1    -0.03  -0.04   0.02     0.00  -0.01  -0.03     0.03  -0.04   0.03
  57   1    -0.02  -0.01   0.01     0.01   0.01   0.01    -0.01   0.01   0.00
  58   1    -0.02  -0.01  -0.01     0.03   0.02   0.01    -0.03  -0.01   0.00
  59   1     0.01   0.03  -0.02    -0.01  -0.02   0.03    -0.02   0.01   0.00
  60   1     0.02   0.00   0.03    -0.02   0.02  -0.02    -0.01  -0.02   0.00
  61   1     0.01  -0.06   0.01     0.00  -0.04  -0.08    -0.01   0.09   0.09
  62   1     0.01  -0.02   0.03     0.00  -0.06   0.03    -0.02   0.00  -0.02
  63   1    -0.04   0.00  -0.02    -0.06  -0.06  -0.05     0.15  -0.04   0.14
  64   1    -0.03   0.03   0.03    -0.10  -0.08  -0.02     0.18  -0.10  -0.01
  65   1    -0.02   0.01   0.01    -0.10  -0.06  -0.09     0.17  -0.06   0.10
  66   1     0.05  -0.03   0.00    -0.09  -0.05   0.09    -0.07   0.03   0.01
  67   1    -0.02  -0.02   0.06     0.00  -0.05   0.01     0.04   0.03  -0.07
  68   1     0.00   0.05   0.02    -0.05  -0.16   0.04     0.01  -0.09   0.01
  69   1     0.00  -0.02   0.03     0.02   0.00  -0.03     0.06  -0.05  -0.03
  70   1     0.02  -0.06  -0.01     0.02  -0.03  -0.03     0.04  -0.03   0.02
  71   1     0.06  -0.01   0.01     0.03   0.00  -0.04     0.00  -0.04  -0.02
  72   1    -0.02  -0.02   0.01     0.00  -0.01   0.02     0.01   0.04  -0.03
  73   1    -0.01  -0.02   0.00    -0.02  -0.01   0.02     0.03   0.05  -0.01
  74   1    -0.02  -0.01   0.01     0.00  -0.01   0.03     0.01   0.04  -0.03
  75   1    -0.02   0.00   0.01     0.01   0.02   0.01     0.01   0.00   0.01
  76   1    -0.02  -0.02   0.02    -0.01  -0.05   0.02     0.00   0.02  -0.01
  77   1    -0.02  -0.02   0.01    -0.03  -0.05   0.03    -0.02   0.02  -0.01
  78   1    -0.02   0.03  -0.01     0.07   0.20  -0.04     0.01  -0.02   0.01
  79   1    -0.03  -0.02   0.02    -0.04   0.03   0.06    -0.04   0.02   0.05
  80   1    -0.03   0.02  -0.01     0.07  -0.02  -0.02    -0.01   0.04   0.00
  81   1    -0.01   0.05   0.00     0.10  -0.04  -0.03    -0.04   0.04   0.00
  82   1     0.04   0.04  -0.02     0.07  -0.03  -0.01    -0.02   0.01   0.00
  83   1     0.09  -0.06  -0.07    -0.01   0.07   0.04     0.10  -0.04  -0.02
  84   1     0.02   0.10  -0.10     0.02   0.04   0.00     0.01  -0.02   0.01
  85   1    -0.07   0.01  -0.03    -0.17   0.28  -0.03     0.00   0.00   0.03
  86   1    -0.03   0.01  -0.03    -0.14   0.22   0.00     0.00  -0.02   0.05
  87   1    -0.05   0.02   0.00    -0.20   0.16   0.11     0.00   0.00   0.05
  88   1    -0.03   0.00   0.01     0.10   0.16  -0.03     0.00  -0.01   0.02
  89   1    -0.04   0.00   0.01     0.01   0.01   0.04     0.00  -0.01   0.02
  90   1    -0.02   0.01   0.02     0.18   0.02  -0.02     0.00  -0.01   0.01
  91   1    -0.02  -0.01   0.01    -0.11   0.06   0.01    -0.09   0.05   0.01
  92   1    -0.01   0.01  -0.01    -0.09   0.00  -0.03    -0.07   0.02  -0.03
  93   1     0.01  -0.01   0.01    -0.08   0.01   0.00    -0.05   0.02   0.00
  94   1    -0.06  -0.01   0.01    -0.06   0.07   0.07    -0.09   0.07   0.05
  95   1    -0.08   0.00   0.01    -0.01   0.03   0.09    -0.04   0.04   0.06
  96   1    -0.05   0.03   0.00    -0.05   0.02   0.04    -0.07   0.03   0.00
  97   1     0.25   0.01  -0.15     0.03   0.06   0.01     0.07  -0.09  -0.03
  98   1     0.26  -0.05  -0.06     0.05   0.03   0.01     0.05  -0.07  -0.02
  99   1     0.21   0.05  -0.19     0.06   0.05   0.02     0.03  -0.05  -0.07
 100   1     0.07  -0.04  -0.01     0.00   0.04  -0.02     0.08  -0.05   0.05
 101   1    -0.11  -0.08   0.04    -0.01   0.00  -0.03     0.00  -0.04   0.08
 102   1     0.09  -0.18   0.10     0.01   0.00  -0.01     0.05  -0.06   0.11
 103   1    -0.12  -0.12  -0.09     0.10   0.14   0.03    -0.02  -0.11   0.00
 104   1    -0.13  -0.16  -0.12     0.08   0.11   0.02    -0.05  -0.13   0.00
 105   1    -0.22  -0.04  -0.04     0.13   0.09  -0.04    -0.11  -0.05   0.04
 106   1     0.03   0.08  -0.02     0.01   0.02   0.01     0.11   0.06  -0.01
 107   1    -0.10   0.18   0.07     0.06  -0.02  -0.02     0.01   0.12   0.01
 108   1     0.12   0.21   0.03    -0.01  -0.04   0.00     0.10   0.13  -0.02
 109   1     0.01   0.02   0.04     0.07  -0.02  -0.12    -0.04   0.02  -0.12
 110   1    -0.01   0.05   0.08     0.02  -0.01  -0.04     0.05  -0.09  -0.35
 111   1    -0.02   0.07   0.03    -0.05  -0.05  -0.10     0.15  -0.18  -0.10
 112   1    -0.01  -0.06  -0.08    -0.01  -0.02  -0.05     0.01   0.10   0.01
 113   1     0.02   0.18   0.03     0.02   0.09   0.00    -0.02  -0.07  -0.08
 114   1     0.01  -0.04   0.17     0.00  -0.01   0.07     0.02   0.09  -0.19
                    22                     23                     24
                     A                      A                      A
 Frequencies --   106.8159               114.5665               115.8503
 Red. masses --     3.6079                 2.5827                 1.7961
 Frc consts  --     0.0243                 0.0200                 0.0142
 IR Inten    --     0.3589                 0.7421                 2.9663
 Atom AN      X      Y      Z        X      Y      Z        X      Y      Z
   1   8     0.02  -0.01   0.00    -0.01   0.02  -0.03    -0.01   0.01  -0.01
   2  12     0.00  -0.02  -0.01    -0.01  -0.02  -0.04     0.00   0.02   0.03
   3   8     0.03  -0.07   0.01    -0.01   0.01  -0.02     0.00  -0.02   0.03
   4   6     0.02   0.01   0.01    -0.03   0.04  -0.04    -0.03   0.03  -0.03
   5   7     0.00  -0.01  -0.01    -0.01  -0.02   0.02     0.00   0.02  -0.01
   6   7    -0.01  -0.01  -0.02     0.00  -0.01   0.00    -0.01   0.01   0.00
   7   8     0.00   0.01   0.02    -0.05   0.05  -0.05    -0.05   0.04  -0.05
   8   6     0.00   0.00   0.06     0.01  -0.02  -0.02     0.00   0.02   0.01
   9   6     0.01   0.01   0.11     0.01  -0.01  -0.04     0.00   0.01   0.03
  10   6     0.00   0.01   0.06     0.01   0.00  -0.01    -0.01   0.01   0.00
  11   8     0.03   0.02   0.02     0.00   0.05  -0.01     0.00   0.01   0.01
  12   6     0.03  -0.01   0.01     0.00   0.02  -0.03     0.00   0.01   0.02
  13   6     0.04  -0.05   0.00     0.00   0.05  -0.01     0.01  -0.03   0.01
  14   6     0.03   0.01   0.01     0.00   0.03  -0.02     0.00   0.02   0.00
  15   8     0.01  -0.02   0.01    -0.01  -0.02  -0.06    -0.02   0.02   0.04
  16   6    -0.02  -0.01  -0.02     0.05  -0.03   0.07     0.04  -0.03   0.06
  17   8     0.02  -0.04  -0.05     0.05  -0.02   0.10    -0.03   0.01  -0.06
  18   6     0.03  -0.04  -0.01     0.04  -0.02   0.02    -0.02   0.01   0.00
  19   8     0.02  -0.02   0.01     0.07  -0.04  -0.03    -0.04   0.03   0.03
  20   8     0.00  -0.07  -0.08    -0.01  -0.05  -0.07     0.00   0.02   0.03
  21   6     0.04  -0.04  -0.02     0.02  -0.03   0.00    -0.01   0.01   0.00
  22   6     0.05  -0.03   0.01     0.02  -0.03   0.02    -0.01   0.01   0.00
  23   6     0.02  -0.04  -0.04     0.03  -0.01  -0.04    -0.02   0.01   0.02
  24   8     0.05  -0.03   0.01     0.02  -0.02   0.03    -0.01   0.01  -0.02
  25   6     0.11  -0.08   0.04    -0.03   0.04  -0.02     0.03  -0.03   0.02
  26   6     0.02   0.03  -0.06     0.04   0.06  -0.07    -0.01  -0.02   0.02
  27   6     0.07  -0.05  -0.01     0.00   0.07   0.03     0.04  -0.05  -0.03
  28   6     0.04   0.02   0.00     0.02  -0.02  -0.02     0.02  -0.04   0.01
  29   6     0.00  -0.01  -0.01    -0.01  -0.03   0.02     0.00   0.02  -0.02
  30   6    -0.04   0.02  -0.01     0.00   0.00   0.01     0.00   0.00  -0.01
  31   6     0.00   0.01  -0.01    -0.01  -0.04   0.03     0.01   0.01  -0.01
  32   6     0.00   0.01  -0.01    -0.01  -0.04   0.02     0.00  -0.02   0.00
  33   6     0.00  -0.01   0.00    -0.01  -0.03   0.02     0.01  -0.02   0.00
  34   6     0.00  -0.03   0.01    -0.01  -0.01   0.01     0.01  -0.01   0.00
  35   6     0.01  -0.02   0.00    -0.01  -0.02   0.02     0.01   0.01  -0.01
  36   6     0.00   0.06  -0.03    -0.01  -0.02   0.02     0.01   0.01  -0.01
  37   6     0.02   0.00  -0.01    -0.02  -0.01   0.02     0.02   0.00  -0.02
  38   6    -0.06   0.02   0.00    -0.01   0.01   0.01     0.00  -0.01  -0.01
  39   6    -0.08   0.05   0.01    -0.03   0.03   0.02     0.02  -0.02  -0.01
  40   6    -0.10   0.07   0.02    -0.03   0.03   0.02     0.02  -0.02  -0.01
  41   6    -0.09   0.07   0.01    -0.02   0.02   0.01     0.01  -0.01  -0.01
  42   6    -0.06   0.05   0.00    -0.01   0.01   0.01     0.00  -0.01  -0.01
  43   6    -0.04  -0.01  -0.02     0.01   0.01   0.01    -0.01  -0.01  -0.01
  44   6    -0.05   0.05  -0.01    -0.01   0.01   0.01     0.00  -0.01  -0.01
  45   6    -0.08   0.10  -0.02     0.00   0.00   0.05     0.00   0.02  -0.01
  46   6     0.02   0.04  -0.03    -0.01   0.00   0.00     0.02   0.00  -0.01
  47   6     0.01   0.00  -0.04    -0.04  -0.01   0.01     0.05   0.00  -0.01
  48   6     0.04   0.01   0.01    -0.04  -0.01   0.02     0.03   0.00  -0.01
  49   6    -0.06   0.05   0.00    -0.01   0.01   0.01     0.00  -0.01  -0.01
  50   6    -0.03   0.07   0.00    -0.01   0.01   0.01     0.00  -0.01  -0.01
  51   6    -0.06  -0.05   0.00     0.01  -0.01   0.02    -0.02  -0.01  -0.01
  52   6    -0.03   0.01  -0.03     0.03   0.03   0.00    -0.02  -0.02   0.00
  53   6     0.00   0.01   0.06     0.02  -0.04  -0.04    -0.01   0.03   0.03
  54   6     0.00   0.00   0.08     0.01   0.00   0.01    -0.01   0.00  -0.01
  55   1     0.02   0.02   0.16     0.01  -0.01  -0.05    -0.01   0.01   0.04
  56   1     0.02  -0.06   0.00    -0.01   0.07  -0.04     0.01  -0.06   0.04
  57   1     0.03   0.01   0.01     0.01   0.05   0.00     0.01   0.04   0.03
  58   1    -0.12  -0.06  -0.04     0.42   0.18   0.19     0.49   0.20   0.17
  59   1    -0.02   0.08  -0.06    -0.03  -0.39   0.30    -0.09  -0.43   0.36
  60   1     0.03  -0.06   0.03    -0.18   0.09  -0.22    -0.24   0.13  -0.28
  61   1     0.04   0.00   0.05     0.03  -0.07  -0.01    -0.02   0.04   0.02
  62   1     0.02  -0.05  -0.02     0.02  -0.03  -0.03    -0.02   0.01   0.01
  63   1     0.14  -0.07   0.09    -0.02   0.04  -0.08     0.03  -0.02   0.06
  64   1     0.13  -0.12   0.01    -0.05   0.07   0.02     0.04  -0.05  -0.01
  65   1     0.11  -0.07   0.05    -0.05   0.07  -0.02     0.03  -0.04   0.02
  66   1     0.03   0.01  -0.11     0.15  -0.01  -0.18    -0.05   0.00   0.06
  67   1     0.01   0.03  -0.02    -0.04   0.01   0.03     0.03   0.00  -0.03
  68   1     0.02   0.08  -0.06     0.03   0.25  -0.10     0.01  -0.10   0.04
  69   1     0.08  -0.04  -0.03     0.01   0.10   0.01     0.04  -0.05  -0.03
  70   1     0.08  -0.07   0.00     0.00   0.11   0.06     0.05  -0.09  -0.03
  71   1     0.07  -0.04  -0.02    -0.03   0.05   0.05     0.06  -0.02  -0.05
  72   1     0.05   0.02   0.00     0.04  -0.03   0.03     0.04  -0.06   0.07
  73   1     0.05   0.02   0.00     0.03  -0.06  -0.06     0.03  -0.09  -0.03
  74   1     0.04   0.01  -0.01     0.01   0.00  -0.04     0.01  -0.03   0.00
  75   1     0.00   0.02  -0.01    -0.01  -0.06   0.03     0.00  -0.03   0.00
  76   1     0.00  -0.02   0.01    -0.01  -0.02   0.01     0.01  -0.04   0.01
  77   1     0.01  -0.04   0.01    -0.01   0.00   0.01     0.01  -0.02   0.00
  78   1     0.03   0.09  -0.05    -0.01  -0.03   0.01     0.02   0.02  -0.01
  79   1     0.02   0.00  -0.02    -0.02   0.00   0.03     0.02  -0.01  -0.03
  80   1    -0.09   0.05   0.02    -0.04   0.04   0.02     0.03  -0.03  -0.01
  81   1    -0.13   0.09   0.04    -0.05   0.04   0.02     0.03  -0.03  -0.01
  82   1    -0.11   0.09   0.02    -0.02   0.02   0.01     0.02  -0.02  -0.01
  83   1    -0.02  -0.02  -0.03     0.02   0.00   0.02    -0.01  -0.01  -0.02
  84   1    -0.05   0.04  -0.01    -0.01   0.01   0.01     0.00  -0.01   0.00
  85   1    -0.11   0.14  -0.06     0.01   0.02   0.05    -0.01   0.02  -0.02
  86   1    -0.06   0.09  -0.04    -0.02   0.00   0.07     0.00   0.02  -0.02
  87   1    -0.11   0.08   0.04    -0.01  -0.01   0.05    -0.01   0.01  -0.01
  88   1     0.02   0.09  -0.06    -0.01   0.02  -0.01     0.03   0.01  -0.01
  89   1    -0.01   0.02  -0.01     0.00   0.02   0.01     0.02  -0.01  -0.01
  90   1     0.07   0.01  -0.04    -0.01  -0.01  -0.02     0.04  -0.01  -0.01
  91   1     0.02   0.02  -0.05    -0.05   0.00   0.01     0.06  -0.01  -0.01
  92   1     0.01  -0.01  -0.02    -0.04  -0.02   0.00     0.05   0.01   0.01
  93   1    -0.01  -0.01  -0.06    -0.04  -0.01   0.01     0.05   0.00  -0.01
  94   1     0.05   0.04   0.00    -0.05   0.00   0.03     0.05  -0.01  -0.02
  95   1     0.05   0.01   0.03    -0.02  -0.01   0.03     0.01   0.00  -0.02
  96   1     0.04   0.01   0.02    -0.04  -0.01   0.00     0.04   0.01   0.01
  97   1    -0.08   0.06   0.01    -0.01   0.01   0.01    -0.01  -0.02  -0.01
  98   1    -0.07   0.05  -0.01    -0.01   0.01   0.01     0.00  -0.01  -0.01
  99   1    -0.06   0.06   0.01    -0.01   0.01   0.01     0.00  -0.01  -0.01
 100   1    -0.05   0.02   0.02     0.00   0.01   0.01     0.00  -0.01   0.00
 101   1     0.02   0.10   0.03    -0.01   0.01   0.01     0.01  -0.01  -0.01
 102   1    -0.06   0.10  -0.04    -0.01   0.01   0.02     0.00  -0.01  -0.01
 103   1    -0.06  -0.08  -0.01     0.02  -0.01   0.02    -0.03  -0.02  -0.02
 104   1    -0.06  -0.05   0.01     0.00  -0.02   0.03    -0.01  -0.01  -0.02
 105   1    -0.08  -0.05   0.03    -0.01   0.00   0.02    -0.02  -0.02   0.00
 106   1    -0.01  -0.01  -0.04     0.05   0.02   0.00    -0.03  -0.02   0.00
 107   1    -0.04   0.02  -0.02     0.01   0.04  -0.01    -0.02  -0.02   0.01
 108   1    -0.02   0.04  -0.05     0.03   0.05  -0.01    -0.01  -0.02   0.01
 109   1     0.13  -0.07  -0.04    -0.02   0.00  -0.01     0.04  -0.01  -0.01
 110   1     0.01   0.04   0.24     0.03  -0.04  -0.11    -0.01   0.04   0.10
 111   1    -0.16   0.06  -0.03     0.07  -0.07  -0.01    -0.07   0.06  -0.01
 112   1     0.05   0.11   0.27     0.01   0.00   0.02    -0.01   0.01   0.00
 113   1    -0.07  -0.24   0.09     0.00   0.01   0.02     0.00  -0.02  -0.02
 114   1     0.01   0.09  -0.13     0.02   0.00   0.02    -0.02   0.01  -0.04
                    25                     26                     27
                     A                      A                      A
 Frequencies --   123.3720               125.9825               130.8163
 Red. masses --     3.7841                 1.6512                 2.7060
 Frc consts  --     0.0339                 0.0154                 0.0273
 IR Inten    --     3.0103                 0.1093                 4.3929
 Atom AN      X      Y      Z        X      Y      Z        X      Y      Z
   1   8    -0.01   0.03  -0.02     0.00   0.00   0.00    -0.05   0.04  -0.08
   2  12    -0.04   0.00   0.06    -0.01   0.01  -0.02    -0.02   0.04  -0.03
   3   8     0.01   0.02   0.03     0.00   0.00  -0.01    -0.01  -0.05   0.02
   4   6     0.00   0.04  -0.01     0.00   0.00   0.00    -0.01   0.03  -0.02
   5   7    -0.01  -0.03   0.00     0.00   0.01   0.00    -0.01   0.04  -0.01
   6   7    -0.03   0.03   0.01     0.00   0.03   0.00    -0.03   0.02   0.01
   7   8     0.01   0.03   0.02     0.01  -0.01   0.00     0.04   0.00   0.06
   8   6     0.02  -0.01   0.04     0.01   0.02  -0.01    -0.02   0.03  -0.02
   9   6     0.02   0.02   0.05     0.01   0.02  -0.01    -0.03   0.01  -0.04
  10   6    -0.01   0.03   0.01     0.01   0.03   0.00    -0.03   0.02  -0.02
  11   8     0.02   0.06   0.01     0.00   0.00  -0.01    -0.01   0.06  -0.04
  12   6     0.00   0.03   0.01     0.00   0.00  -0.01    -0.02   0.03  -0.05
  13   6     0.02   0.03   0.03     0.00   0.00  -0.01     0.02   0.00  -0.02
  14   6    -0.02   0.06  -0.04     0.01  -0.01   0.00     0.01   0.03  -0.02
  15   8    -0.02  -0.01  -0.01     0.00   0.01   0.00    -0.04   0.02  -0.06
  16   6     0.01   0.01   0.01     0.01   0.00   0.00     0.04  -0.03   0.06
  17   8     0.00   0.03   0.02     0.01  -0.02   0.03    -0.02   0.00   0.01
  18   6     0.01   0.03   0.01     0.01  -0.01   0.01    -0.03   0.00   0.05
  19   8     0.01   0.03   0.02     0.01  -0.01   0.00    -0.04   0.01   0.05
  20   8    -0.01   0.05   0.02     0.01   0.00   0.03    -0.03  -0.04  -0.02
  21   6    -0.03   0.03   0.00     0.00  -0.01   0.01    -0.01  -0.02   0.00
  22   6    -0.03   0.02  -0.01    -0.01  -0.02  -0.01    -0.01   0.00   0.02
  23   6     0.00   0.04  -0.01     0.01  -0.01   0.00    -0.02  -0.02   0.00
  24   8    -0.04   0.03  -0.01    -0.01  -0.02   0.00     0.00  -0.01   0.00
  25   6    -0.06   0.04  -0.02    -0.04  -0.01  -0.02     0.00   0.00   0.02
  26   6     0.04   0.03  -0.02     0.03  -0.03   0.00     0.03   0.01  -0.04
  27   6     0.03   0.02   0.02     0.01   0.00  -0.01     0.10   0.01  -0.03
  28   6     0.00   0.15  -0.11     0.01  -0.03   0.02     0.03  -0.10   0.03
  29   6    -0.01  -0.08   0.00     0.00   0.01   0.00    -0.01   0.03  -0.01
  30   6    -0.02   0.02   0.00     0.00   0.03   0.00    -0.02   0.01   0.01
  31   6    -0.02  -0.08   0.00     0.00   0.01   0.00     0.00  -0.02   0.01
  32   6    -0.02  -0.09   0.01     0.00   0.01   0.00    -0.01  -0.08   0.02
  33   6    -0.02  -0.12   0.03     0.00   0.01   0.00     0.00  -0.05   0.02
  34   6    -0.01  -0.15   0.03     0.00   0.02   0.00     0.00   0.02   0.00
  35   6    -0.01  -0.12   0.01     0.00   0.02   0.00     0.00   0.04  -0.01
  36   6    -0.02  -0.03  -0.02     0.00   0.00   0.00     0.03   0.00   0.02
  37   6     0.01  -0.05  -0.01    -0.01   0.01   0.01     0.02   0.00  -0.01
  38   6     0.00  -0.01  -0.01     0.02   0.01   0.00    -0.01   0.00   0.01
  39   6     0.04  -0.04  -0.02     0.06  -0.02  -0.02     0.00   0.00   0.01
  40   6     0.07  -0.05  -0.02     0.07  -0.04  -0.03     0.00  -0.01   0.00
  41   6     0.05  -0.04  -0.02     0.04  -0.02  -0.02     0.00  -0.02   0.00
  42   6     0.01   0.00  -0.01     0.00   0.01   0.00     0.00  -0.01   0.01
  43   6     0.00  -0.02  -0.02     0.00   0.00  -0.01     0.00  -0.01   0.01
  44   6     0.01  -0.01  -0.01    -0.03   0.00   0.02     0.00  -0.02   0.01
  45   6    -0.05   0.01   0.03     0.00   0.00   0.00     0.02   0.02   0.04
  46   6    -0.01   0.00  -0.06    -0.01   0.00   0.01     0.08  -0.01  -0.01
  47   6    -0.01  -0.03  -0.11     0.00   0.00   0.02     0.08   0.00   0.04
  48   6     0.07   0.02   0.07    -0.03   0.00  -0.01     0.02  -0.02  -0.03
  49   6     0.02  -0.02  -0.02    -0.08  -0.01   0.02    -0.01  -0.03   0.01
  50   6     0.02  -0.01   0.00    -0.03   0.01   0.01     0.01  -0.02   0.01
  51   6    -0.02  -0.04  -0.01    -0.09  -0.03  -0.04     0.01  -0.02   0.03
  52   6     0.00  -0.01  -0.01    -0.02   0.04   0.04     0.01   0.00  -0.01
  53   6     0.05  -0.02   0.05     0.02   0.01  -0.02    -0.03   0.04   0.01
  54   6     0.00   0.05  -0.02     0.00   0.00   0.01    -0.03   0.02  -0.04
  55   1     0.04   0.03   0.07     0.02   0.03  -0.02    -0.03   0.01  -0.05
  56   1     0.02   0.02   0.03     0.00   0.00  -0.01     0.01  -0.01  -0.02
  57   1    -0.06   0.01  -0.08     0.02   0.00   0.01     0.06   0.08   0.02
  58   1    -0.14  -0.03   0.02    -0.02  -0.01   0.00    -0.30  -0.10   0.13
  59   1     0.07   0.11  -0.09     0.02   0.02  -0.02     0.22   0.13  -0.19
  60   1     0.11  -0.05   0.13     0.02  -0.01   0.02     0.28  -0.17   0.33
  61   1    -0.02   0.00  -0.03     0.00  -0.04  -0.03    -0.01   0.01   0.02
  62   1    -0.01   0.04  -0.03     0.00  -0.01  -0.01    -0.04  -0.05  -0.01
  63   1    -0.07   0.04  -0.04    -0.05  -0.01  -0.03     0.03   0.01   0.02
  64   1    -0.07   0.06  -0.01    -0.05   0.00   0.00     0.00  -0.03   0.02
  65   1    -0.06   0.04  -0.03    -0.05  -0.01  -0.03    -0.01   0.02   0.02
  66   1     0.11  -0.01  -0.06     0.07  -0.05  -0.01     0.09  -0.03  -0.11
  67   1     0.00  -0.01  -0.01     0.01  -0.06   0.00    -0.02  -0.02   0.00
  68   1     0.05   0.10  -0.02     0.04   0.01   0.00     0.05   0.12  -0.03
  69   1     0.06   0.02  -0.01    -0.01   0.01   0.00     0.13   0.04  -0.06
  70   1     0.05   0.02   0.05     0.00  -0.02  -0.03     0.13  -0.03   0.02
  71   1     0.01   0.02   0.00     0.03   0.01  -0.01     0.10   0.02  -0.04
  72   1    -0.04   0.15  -0.14     0.01  -0.03   0.03     0.06  -0.14   0.15
  73   1     0.07   0.19  -0.09    -0.01  -0.05   0.01     0.01  -0.19  -0.05
  74   1    -0.04   0.18  -0.16     0.01  -0.03   0.03     0.03  -0.06   0.04
  75   1    -0.02  -0.07   0.01     0.00   0.00   0.01    -0.01  -0.14   0.04
  76   1    -0.02  -0.13   0.03     0.00   0.01   0.00     0.00  -0.09   0.03
  77   1    -0.01  -0.18   0.04     0.00   0.03   0.00     0.00   0.02  -0.01
  78   1    -0.01  -0.04  -0.04     0.00   0.00   0.01     0.04   0.02   0.03
  79   1     0.01  -0.04  -0.03    -0.01   0.00   0.01     0.02  -0.02  -0.03
  80   1     0.06  -0.05  -0.02     0.08  -0.03  -0.03     0.00   0.00   0.00
  81   1     0.11  -0.08  -0.03     0.11  -0.07  -0.04     0.01  -0.02   0.00
  82   1     0.08  -0.06  -0.02     0.05  -0.03  -0.02     0.01  -0.03   0.00
  83   1     0.02  -0.03  -0.03     0.04  -0.02  -0.03     0.00  -0.01   0.01
  84   1     0.01  -0.01  -0.01    -0.01  -0.01   0.05     0.01  -0.03   0.02
  85   1    -0.04   0.06   0.01     0.00  -0.01   0.00     0.05   0.04   0.05
  86   1    -0.06   0.00   0.05     0.01   0.00   0.00    -0.01   0.03   0.06
  87   1    -0.06   0.01   0.06     0.01   0.00   0.00     0.01   0.01   0.03
  88   1    -0.01   0.04  -0.08    -0.01   0.00   0.01     0.10   0.03  -0.01
  89   1    -0.02   0.01  -0.02     0.00   0.01   0.01     0.06  -0.04   0.00
  90   1     0.00  -0.04  -0.09    -0.01   0.01   0.01     0.11  -0.04  -0.02
  91   1     0.04   0.06  -0.16    -0.02  -0.01   0.03     0.09  -0.06   0.04
  92   1    -0.01  -0.05  -0.07    -0.01   0.01   0.01     0.09   0.03   0.06
  93   1    -0.08  -0.06  -0.18     0.01   0.01   0.03     0.09   0.01   0.06
  94   1     0.09   0.11   0.04    -0.03  -0.02   0.00     0.06  -0.08  -0.04
  95   1     0.10   0.00   0.15    -0.03   0.00  -0.02    -0.03  -0.02  -0.08
  96   1     0.07   0.00   0.09    -0.03   0.00  -0.02     0.04   0.01   0.01
  97   1     0.03  -0.03  -0.02    -0.09  -0.03   0.04    -0.02  -0.04   0.02
  98   1     0.02  -0.01  -0.01    -0.10   0.01  -0.01    -0.02  -0.03   0.00
  99   1     0.00  -0.02  -0.03    -0.08  -0.02   0.03    -0.01  -0.03   0.01
 100   1     0.03  -0.02   0.00    -0.09  -0.08   0.08     0.02   0.00   0.00
 101   1     0.02  -0.01   0.01     0.08   0.06   0.06    -0.01  -0.03   0.00
 102   1     0.02  -0.01   0.01    -0.07   0.05  -0.10     0.01  -0.02   0.04
 103   1    -0.03  -0.06  -0.03    -0.12  -0.05  -0.06     0.03  -0.03   0.03
 104   1    -0.02  -0.05  -0.02    -0.07  -0.06  -0.09    -0.01  -0.03   0.05
 105   1    -0.04  -0.04   0.01    -0.13  -0.02   0.00     0.00  -0.02   0.03
 106   1    -0.01  -0.04  -0.03    -0.04   0.07   0.06     0.02  -0.03  -0.02
 107   1    -0.02  -0.01   0.02    -0.03   0.06   0.03     0.00   0.00   0.01
 108   1     0.02   0.01  -0.01     0.00   0.02   0.08     0.02   0.03  -0.02
 109   1     0.17  -0.12  -0.02    -0.03   0.04   0.02    -0.08   0.06   0.04
 110   1     0.08   0.02   0.20     0.02   0.00  -0.09    -0.04   0.03  -0.03
 111   1    -0.08   0.01  -0.02     0.09  -0.02   0.02     0.01   0.05   0.03
 112   1    -0.01   0.10   0.04     0.11   0.23   0.41    -0.06  -0.03  -0.14
 113   1     0.00  -0.05  -0.03    -0.13  -0.47   0.04     0.02   0.14  -0.05
 114   1     0.00   0.09  -0.12     0.01   0.19  -0.42    -0.03  -0.02   0.07
                    28                     29                     30
                     A                      A                      A
 Frequencies --   137.2766               140.0132               142.5733
 Red. masses --     1.6027                 3.2777                 2.5000
 Frc consts  --     0.0178                 0.0379                 0.0299
 IR Inten    --     0.3793                 0.5114                 2.0093
 Atom AN      X      Y      Z        X      Y      Z        X      Y      Z
   1   8     0.00   0.00  -0.01     0.05  -0.03   0.05    -0.08   0.05  -0.07
   2  12    -0.01  -0.01   0.04    -0.01   0.00   0.01     0.05  -0.02  -0.01
   3   8    -0.01   0.00   0.02    -0.01  -0.01   0.02     0.00   0.01  -0.03
   4   6     0.00   0.00   0.00     0.03  -0.02   0.03    -0.05   0.03  -0.04
   5   7     0.01  -0.02   0.02     0.01   0.00  -0.02     0.01   0.01  -0.01
   6   7    -0.01   0.00  -0.01     0.00   0.02   0.05     0.05  -0.03   0.01
   7   8     0.01  -0.01   0.00     0.00   0.00   0.00    -0.01   0.00   0.01
   8   6     0.01  -0.02   0.01     0.03   0.02   0.05     0.01   0.00   0.01
   9   6     0.02   0.00   0.04     0.02   0.01  -0.01     0.01  -0.02  -0.02
  10   6     0.00   0.01   0.02     0.01   0.01  -0.06     0.03  -0.04  -0.04
  11   8     0.00  -0.01   0.00     0.01  -0.01   0.00    -0.01   0.01   0.01
  12   6     0.00  -0.01   0.00     0.01  -0.02  -0.03    -0.01   0.02   0.04
  13   6     0.00   0.01   0.01     0.01   0.02   0.00    -0.02   0.00   0.01
  14   6     0.01  -0.01   0.01     0.03  -0.01   0.02    -0.04   0.02  -0.02
  15   8     0.00  -0.02  -0.01     0.01  -0.05  -0.06    -0.01   0.04   0.05
  16   6     0.01   0.00   0.00    -0.04   0.00  -0.05     0.06  -0.01   0.08
  17   8    -0.01   0.01   0.01    -0.02   0.00   0.01     0.03  -0.01  -0.02
  18   6    -0.02   0.00   0.01    -0.02  -0.01   0.02     0.03  -0.01  -0.05
  19   8    -0.02   0.01   0.02    -0.04  -0.01   0.03     0.05  -0.01  -0.05
  20   8    -0.02  -0.01  -0.01    -0.03  -0.05  -0.05     0.03   0.02   0.01
  21   6    -0.01   0.00   0.00     0.00  -0.02  -0.01     0.01   0.00   0.00
  22   6    -0.01   0.01   0.00    -0.01   0.00   0.01     0.02  -0.01  -0.01
  23   6    -0.01   0.00   0.00    -0.02  -0.02  -0.01     0.02   0.01   0.00
  24   8     0.00   0.01   0.00     0.02  -0.01   0.01     0.00   0.00   0.00
  25   6    -0.02   0.03  -0.01     0.00   0.01   0.01     0.02  -0.03   0.00
  26   6     0.01   0.01  -0.02    -0.01   0.03  -0.03    -0.06  -0.01   0.05
  27   6    -0.01   0.01   0.03     0.00   0.05   0.05    -0.04  -0.02  -0.02
  28   6     0.01  -0.03   0.02     0.00  -0.01   0.04     0.00  -0.01  -0.05
  29   6     0.01  -0.01   0.01     0.01  -0.01  -0.02     0.01   0.00   0.00
  30   6    -0.01   0.00  -0.01     0.01   0.01   0.03     0.05  -0.02   0.01
  31   6     0.01  -0.03   0.01     0.00   0.02  -0.02     0.00  -0.02   0.01
  32   6     0.01   0.00   0.01     0.00   0.04  -0.02     0.00  -0.03   0.01
  33   6     0.01   0.05  -0.01     0.00   0.04  -0.02     0.00  -0.03   0.01
  34   6     0.01   0.08  -0.02     0.01   0.02  -0.02     0.00  -0.01   0.00
  35   6     0.01   0.04  -0.01     0.01   0.00  -0.02     0.00   0.00   0.00
  36   6     0.00  -0.02   0.00    -0.02   0.02  -0.03    -0.01  -0.01   0.00
  37   6     0.00   0.02   0.00     0.00   0.00  -0.01    -0.01   0.00   0.01
  38   6     0.00  -0.01  -0.01    -0.01   0.03   0.04     0.02   0.01   0.02
  39   6     0.01  -0.02  -0.01    -0.01   0.04   0.03    -0.02   0.04   0.02
  40   6     0.02  -0.02  -0.01     0.02   0.00   0.01    -0.04   0.04   0.02
  41   6     0.01  -0.01  -0.01     0.05  -0.04   0.01    -0.01   0.01   0.01
  42   6     0.00   0.00  -0.01     0.04  -0.03   0.02     0.03  -0.01   0.01
  43   6     0.00  -0.01  -0.01     0.00   0.02   0.03     0.01   0.02   0.02
  44   6     0.01   0.01  -0.02     0.02  -0.05   0.04     0.01  -0.01   0.02
  45   6     0.00  -0.01   0.02    -0.05   0.02  -0.05    -0.02  -0.01   0.00
  46   6    -0.02   0.00  -0.01    -0.05   0.03  -0.03    -0.03   0.01  -0.01
  47   6     0.01   0.01   0.04    -0.02   0.00  -0.01    -0.02   0.00   0.01
  48   6    -0.03   0.00  -0.03    -0.01  -0.01  -0.02    -0.04  -0.01   0.00
  49   6     0.02   0.01  -0.02     0.00  -0.06   0.04    -0.01   0.00   0.04
  50   6     0.01   0.00  -0.01    -0.01  -0.06   0.00    -0.03  -0.02  -0.01
  51   6     0.00  -0.01  -0.01    -0.02  -0.02   0.05    -0.01   0.04  -0.01
  52   6     0.00  -0.01  -0.02     0.02   0.04   0.01     0.01   0.05   0.05
  53   6     0.01  -0.05  -0.08     0.04   0.04   0.17     0.00   0.02   0.03
  54   6     0.01   0.02   0.03     0.01   0.02  -0.24     0.02  -0.07  -0.11
  55   1     0.03   0.01   0.05     0.03   0.02  -0.02    -0.01  -0.03  -0.03
  56   1     0.02   0.02   0.00     0.03   0.05  -0.03    -0.04  -0.02   0.02
  57   1     0.02   0.00   0.02     0.04  -0.02   0.01    -0.05   0.03   0.00
  58   1    -0.02  -0.01   0.01     0.07   0.00  -0.11    -0.10   0.01   0.18
  59   1     0.02   0.01  -0.02    -0.13   0.00   0.05     0.20  -0.01  -0.07
  60   1     0.02  -0.01   0.02    -0.12   0.04  -0.16     0.18  -0.06   0.24
  61   1    -0.01   0.01   0.00    -0.01   0.01   0.01     0.02  -0.01   0.00
  62   1    -0.02  -0.01  -0.01    -0.02  -0.04   0.01     0.05   0.04   0.02
  63   1     0.00   0.03  -0.02     0.03   0.02   0.00    -0.02  -0.04   0.01
  64   1    -0.02   0.02   0.00    -0.02  -0.02   0.02     0.03   0.00  -0.01
  65   1    -0.03   0.04  -0.01    -0.03   0.04   0.00     0.05  -0.06   0.01
  66   1     0.03   0.00  -0.05     0.01   0.01  -0.08    -0.16   0.06   0.14
  67   1    -0.01   0.00  -0.01    -0.03   0.03   0.01     0.02   0.05   0.00
  68   1     0.02   0.06  -0.02    -0.01   0.10  -0.03    -0.08  -0.18   0.04
  69   1     0.03   0.01   0.00     0.08   0.05  -0.03    -0.09  -0.02   0.04
  70   1     0.00   0.05   0.07     0.02   0.13   0.15    -0.06  -0.06  -0.09
  71   1    -0.06  -0.01   0.03    -0.11  -0.02   0.07     0.03   0.02  -0.02
  72   1     0.02  -0.04   0.03     0.01   0.01   0.00     0.00  -0.03   0.01
  73   1     0.00  -0.05   0.00    -0.04   0.01   0.07     0.05  -0.04  -0.09
  74   1     0.01  -0.03   0.02     0.03  -0.04   0.08    -0.03   0.04  -0.09
  75   1     0.00  -0.02   0.01     0.00   0.06  -0.02     0.00  -0.05   0.02
  76   1     0.01   0.07  -0.02     0.01   0.06  -0.02     0.00  -0.04   0.02
  77   1     0.02   0.13  -0.03     0.02   0.03  -0.02     0.01  -0.01   0.00
  78   1    -0.01  -0.03  -0.02    -0.02   0.01  -0.05    -0.01  -0.02  -0.02
  79   1     0.00   0.01   0.01     0.00   0.01   0.00    -0.01   0.00   0.03
  80   1     0.02  -0.03  -0.01    -0.03   0.06   0.03    -0.05   0.07   0.02
  81   1     0.04  -0.03  -0.01     0.02   0.00   0.00    -0.07   0.07   0.02
  82   1     0.02  -0.01  -0.01     0.08  -0.07  -0.01    -0.02   0.02   0.02
  83   1     0.00  -0.01  -0.02     0.03   0.00   0.02     0.02   0.01   0.03
  84   1     0.00   0.01  -0.02     0.02  -0.04   0.06     0.01   0.00   0.04
  85   1     0.00   0.00   0.01    -0.08   0.03  -0.06    -0.03   0.00  -0.01
  86   1     0.00  -0.02   0.03    -0.04   0.03  -0.06     0.00  -0.02   0.00
  87   1     0.00   0.00   0.03    -0.06   0.02  -0.02    -0.02   0.00   0.02
  88   1    -0.03   0.01  -0.02    -0.07   0.02  -0.04    -0.04   0.00  -0.02
  89   1    -0.02   0.03   0.00    -0.05   0.04  -0.01    -0.03   0.03   0.00
  90   1    -0.03   0.00  -0.02    -0.05   0.03  -0.02    -0.04   0.01  -0.01
  91   1    -0.01  -0.02   0.06    -0.05   0.00   0.00    -0.04  -0.01   0.02
  92   1     0.01   0.03   0.02    -0.02  -0.01  -0.04    -0.03  -0.01  -0.01
  93   1     0.04   0.03   0.07     0.00   0.00   0.00    -0.01   0.00   0.02
  94   1    -0.05  -0.03  -0.02    -0.03  -0.01  -0.02    -0.05  -0.01   0.01
  95   1    -0.02   0.00  -0.06    -0.01   0.00  -0.03    -0.03  -0.01  -0.01
  96   1    -0.03  -0.01  -0.06    -0.02  -0.01  -0.04    -0.04  -0.01  -0.02
  97   1     0.04   0.01  -0.03    -0.03  -0.06   0.06    -0.03   0.02   0.05
  98   1     0.03   0.01   0.00    -0.02  -0.06   0.01    -0.01  -0.01   0.01
  99   1     0.01   0.01  -0.03     0.01  -0.06   0.05     0.02   0.01   0.06
 100   1     0.02   0.00  -0.01    -0.02   0.00  -0.01    -0.06   0.00  -0.01
 101   1     0.00   0.01   0.00    -0.05  -0.10  -0.03    -0.02  -0.03  -0.03
 102   1     0.01   0.00   0.00     0.01  -0.09   0.03    -0.03  -0.03  -0.04
 103   1     0.00  -0.02  -0.01     0.00  -0.04   0.04    -0.03   0.05   0.00
 104   1     0.00  -0.01  -0.01    -0.02  -0.03   0.06     0.00   0.03  -0.03
 105   1     0.00  -0.01  -0.01    -0.04  -0.01   0.06    -0.01   0.04  -0.01
 106   1    -0.01  -0.03  -0.03     0.04   0.05   0.02     0.00   0.13   0.10
 107   1    -0.01  -0.02   0.01     0.02   0.05  -0.01     0.04   0.05  -0.04
 108   1     0.00   0.00  -0.02     0.00   0.03   0.01    -0.03  -0.04   0.09
 109   1     0.41  -0.25  -0.39     0.10  -0.07   0.16     0.22  -0.14  -0.13
 110   1     0.06   0.06   0.36     0.06   0.07   0.32     0.02   0.07   0.33
 111   1    -0.44   0.02  -0.35    -0.02   0.15   0.12    -0.26   0.12  -0.13
 112   1     0.01   0.03   0.04    -0.06   0.05  -0.26     0.02  -0.03  -0.05
 113   1     0.00   0.02   0.03     0.12  -0.03  -0.28     0.04  -0.20  -0.12
 114   1     0.02   0.03   0.02    -0.04   0.04  -0.31    -0.02  -0.03  -0.23
                    31                     32                     33
                     A                      A                      A
 Frequencies --   148.4571               150.6102               152.0439
 Red. masses --     2.4802                 2.7153                 4.2050
 Frc consts  --     0.0322                 0.0363                 0.0573
 IR Inten    --     2.4825                 0.6667                 6.9664
 Atom AN      X      Y      Z        X      Y      Z        X      Y      Z
   1   8     0.07  -0.04   0.08    -0.01   0.00   0.00     0.02  -0.01   0.01
   2  12    -0.01   0.02  -0.06    -0.02   0.02  -0.05     0.09   0.04  -0.08
   3   8     0.00  -0.01  -0.04     0.00   0.00  -0.05    -0.02  -0.03   0.03
   4   6     0.03  -0.02   0.03    -0.01   0.00   0.00     0.02   0.02   0.01
   5   7    -0.03   0.04   0.00     0.03   0.00   0.00     0.04   0.04  -0.01
   6   7    -0.02   0.01   0.01    -0.02   0.04   0.00     0.08  -0.04  -0.04
   7   8     0.00   0.00  -0.01     0.00  -0.01  -0.01     0.00   0.03   0.02
   8   6    -0.04   0.03  -0.03     0.05   0.02   0.00     0.03   0.03  -0.03
   9   6    -0.05   0.01  -0.05     0.05   0.03  -0.01     0.03  -0.01  -0.03
  10   6    -0.03   0.00  -0.03     0.02   0.05  -0.01     0.06  -0.04  -0.01
  11   8    -0.01   0.00  -0.03    -0.01   0.00  -0.01     0.00   0.03  -0.02
  12   6    -0.01   0.01  -0.03    -0.01   0.02   0.00     0.00  -0.02  -0.05
  13   6     0.00   0.00  -0.04    -0.01  -0.02  -0.03     0.02  -0.03  -0.03
  14   6     0.00   0.00  -0.01    -0.01  -0.01   0.00     0.01   0.03  -0.01
  15   8    -0.01   0.02  -0.02     0.00   0.04   0.02    -0.01  -0.04  -0.07
  16   6    -0.06   0.01  -0.07     0.01   0.00   0.01    -0.03  -0.01  -0.02
  17   8     0.02  -0.01   0.02     0.04  -0.01   0.01    -0.06   0.05   0.03
  18   6     0.02   0.00   0.01     0.03   0.01   0.00    -0.07   0.03   0.08
  19   8     0.03  -0.01  -0.02     0.05  -0.01  -0.03    -0.10   0.02   0.06
  20   8     0.02   0.01   0.03     0.05   0.05   0.06    -0.06  -0.03  -0.03
  21   6     0.01  -0.01   0.01     0.01   0.00   0.01    -0.02   0.02   0.00
  22   6     0.01  -0.01   0.01     0.02  -0.01   0.00    -0.03   0.06   0.03
  23   6     0.02   0.00   0.01     0.03   0.01   0.00    -0.06   0.00   0.02
  24   8    -0.01  -0.02  -0.01    -0.02  -0.01  -0.01     0.02   0.04   0.03
  25   6     0.01  -0.02   0.01     0.01  -0.03   0.00     0.04   0.09   0.02
  26   6     0.03  -0.03   0.01     0.06  -0.05   0.01    -0.01   0.05  -0.02
  27   6     0.03  -0.01  -0.06     0.00  -0.04  -0.08     0.08  -0.03  -0.04
  28   6    -0.05   0.08   0.01    -0.01  -0.02   0.02     0.00   0.03   0.01
  29   6    -0.02   0.03   0.01     0.02  -0.01   0.01     0.04   0.02   0.01
  30   6    -0.01   0.00   0.02    -0.03   0.04   0.02     0.07  -0.04  -0.02
  31   6    -0.01   0.00   0.01     0.02   0.01   0.00     0.03   0.03   0.01
  32   6    -0.01  -0.04   0.02     0.02   0.02   0.01     0.03  -0.01   0.03
  33   6    -0.02  -0.06   0.02     0.02   0.01   0.01     0.02  -0.06   0.04
  34   6    -0.02  -0.04   0.02     0.02  -0.01   0.01     0.02  -0.10   0.04
  35   6    -0.02   0.00   0.02     0.02  -0.01   0.01     0.03  -0.04   0.03
  36   6     0.03  -0.01   0.04    -0.01   0.01  -0.01    -0.01   0.00  -0.01
  37   6     0.01  -0.01   0.00    -0.02   0.00   0.02    -0.03  -0.02   0.05
  38   6    -0.01   0.01   0.02    -0.02   0.02   0.02     0.07  -0.05  -0.02
  39   6    -0.01   0.01   0.01     0.00   0.00   0.01     0.04  -0.02  -0.01
  40   6    -0.01   0.01   0.01    -0.01   0.00   0.01    -0.02   0.03   0.01
  41   6    -0.01   0.00   0.01    -0.03   0.02   0.01    -0.04   0.05   0.01
  42   6    -0.01   0.00   0.02    -0.03   0.03   0.01     0.02   0.00  -0.01
  43   6     0.01   0.02   0.02    -0.03  -0.02   0.00     0.01  -0.03  -0.02
  44   6     0.00   0.00   0.02    -0.03  -0.03   0.03    -0.01  -0.01   0.01
  45   6     0.07  -0.02   0.04    -0.02   0.00  -0.03     0.01  -0.04  -0.06
  46   6     0.06  -0.03   0.02    -0.05   0.02   0.00    -0.09   0.02   0.03
  47   6     0.05  -0.01   0.01    -0.06   0.00   0.01    -0.09  -0.01  -0.01
  48   6     0.04  -0.01   0.02    -0.06   0.01   0.01    -0.08   0.02   0.06
  49   6    -0.01   0.00   0.02    -0.09  -0.09  -0.01    -0.05  -0.03   0.00
  50   6     0.00   0.00   0.01     0.01  -0.02   0.06    -0.02  -0.02   0.00
  51   6     0.00   0.02   0.02     0.01  -0.05   0.05    -0.01   0.02  -0.08
  52   6     0.02   0.05   0.02    -0.04  -0.10  -0.03    -0.04  -0.07   0.07
  53   6    -0.07   0.03  -0.06     0.08   0.01   0.01     0.00   0.04  -0.05
  54   6    -0.04  -0.02  -0.05     0.04   0.12  -0.01     0.05  -0.07   0.05
  55   1    -0.06   0.00  -0.07     0.07   0.04  -0.01    -0.01  -0.03  -0.03
  56   1    -0.02  -0.02  -0.03    -0.04  -0.04  -0.01     0.04  -0.04  -0.01
  57   1     0.00  -0.03  -0.05     0.01   0.00   0.00     0.03   0.02  -0.02
  58   1     0.07  -0.01  -0.17     0.00   0.01   0.01    -0.02  -0.02  -0.03
  59   1    -0.19   0.03   0.06     0.02   0.00   0.00    -0.07   0.00   0.02
  60   1    -0.17   0.06  -0.21     0.01   0.01   0.01    -0.04  -0.03  -0.05
  61   1     0.01  -0.02   0.01     0.02  -0.03   0.00    -0.04   0.06   0.05
  62   1     0.01   0.00   0.00     0.02   0.02  -0.02    -0.08  -0.03   0.02
  63   1     0.00  -0.02   0.01    -0.02  -0.03   0.01     0.06   0.10   0.00
  64   1     0.01  -0.01   0.01     0.01  -0.01   0.00     0.06   0.10  -0.01
  65   1     0.01  -0.03   0.01     0.02  -0.05   0.00     0.04   0.13   0.07
  66   1     0.09  -0.06   0.00     0.17  -0.11   0.00    -0.07   0.08  -0.06
  67   1    -0.02  -0.07   0.03    -0.03  -0.13   0.03     0.05   0.10  -0.05
  68   1     0.02   0.03   0.00     0.05   0.05  -0.01     0.03   0.02   0.02
  69   1    -0.03   0.01   0.00    -0.12  -0.03   0.03     0.12  -0.02  -0.08
  70   1     0.02  -0.08  -0.12    -0.03  -0.16  -0.22     0.11  -0.05   0.01
  71   1     0.12   0.03  -0.06     0.16   0.04  -0.08     0.06  -0.03  -0.05
  72   1    -0.10   0.09  -0.07     0.00  -0.02   0.01    -0.01   0.04   0.00
  73   1    -0.07   0.13   0.06    -0.04  -0.03   0.02    -0.03   0.04   0.02
  74   1    -0.03   0.07   0.04     0.00  -0.04   0.03     0.01   0.02   0.03
  75   1    -0.01  -0.05   0.02     0.02   0.03   0.00     0.03   0.01   0.02
  76   1    -0.02  -0.08   0.03     0.02   0.01   0.01     0.02  -0.09   0.05
  77   1    -0.03  -0.07   0.03     0.02  -0.01   0.01     0.03  -0.15   0.06
  78   1     0.01   0.00   0.07    -0.01  -0.01  -0.04    -0.02  -0.03  -0.03
  79   1     0.00  -0.02  -0.03    -0.01   0.01   0.06    -0.01   0.00   0.11
  80   1    -0.01   0.02   0.01     0.02  -0.01   0.00     0.05  -0.02  -0.01
  81   1    -0.01   0.01   0.00     0.00  -0.01   0.00    -0.06   0.06   0.02
  82   1    -0.01   0.00   0.01    -0.02   0.02   0.00    -0.09   0.09   0.02
  83   1     0.02   0.01   0.03    -0.06   0.01  -0.04    -0.01  -0.01  -0.03
  84   1     0.00   0.00   0.01     0.00  -0.06   0.06     0.01  -0.02   0.04
  85   1     0.11  -0.04   0.07    -0.07   0.00  -0.06    -0.05  -0.08  -0.07
  86   1     0.04  -0.02   0.07     0.02  -0.02  -0.06     0.06  -0.05  -0.10
  87   1     0.09  -0.03  -0.01    -0.02   0.02   0.02     0.02  -0.01  -0.04
  88   1     0.09  -0.02   0.04    -0.08   0.00   0.00    -0.13  -0.05   0.04
  89   1     0.07  -0.05   0.00    -0.04   0.05   0.01    -0.06   0.06   0.02
  90   1     0.06  -0.03   0.02    -0.07   0.04   0.01    -0.14   0.07   0.06
  91   1     0.10  -0.02  -0.02    -0.12   0.02   0.04    -0.21   0.03   0.05
  92   1     0.06   0.00   0.07    -0.07  -0.01  -0.06    -0.12  -0.02  -0.14
  93   1     0.01  -0.01  -0.01    -0.02   0.00   0.02    -0.01  -0.02   0.02
  94   1     0.09  -0.02  -0.01    -0.10   0.03   0.04    -0.14   0.06   0.08
  95   1     0.02  -0.01   0.01    -0.03   0.00   0.03    -0.04   0.01   0.11
  96   1     0.06   0.00   0.06    -0.07  -0.01  -0.04    -0.09   0.01  -0.01
  97   1    -0.02   0.00   0.02    -0.08  -0.15   0.01    -0.07  -0.05   0.03
  98   1    -0.01  -0.01   0.01    -0.11  -0.07  -0.04    -0.07  -0.03  -0.03
  99   1     0.00   0.00   0.02    -0.11  -0.10  -0.03    -0.04  -0.03   0.01
 100   1     0.01   0.02   0.01     0.03  -0.04   0.06    -0.07  -0.08   0.06
 101   1    -0.01   0.00   0.00     0.01  -0.01   0.07     0.05   0.02   0.04
 102   1     0.00   0.01   0.03     0.00  -0.01   0.08    -0.05   0.00  -0.09
 103   1     0.03   0.03   0.03     0.01  -0.09   0.03    -0.10   0.04  -0.09
 104   1    -0.01  -0.01   0.03     0.01  -0.01   0.09     0.04   0.06  -0.15
 105   1    -0.02   0.04  -0.01     0.03  -0.08   0.09     0.02  -0.01  -0.06
 106   1     0.04   0.08   0.04    -0.06  -0.21  -0.11    -0.13   0.01   0.11
 107   1     0.02   0.07  -0.02    -0.05  -0.13   0.09     0.00  -0.09   0.04
 108   1     0.01   0.03   0.03    -0.02  -0.01  -0.09    -0.05  -0.16   0.15
 109   1     0.20  -0.12  -0.26     0.17  -0.07  -0.05     0.08   0.01  -0.11
 110   1    -0.05   0.09   0.27     0.11   0.05   0.12    -0.01   0.05   0.05
 111   1    -0.39   0.12  -0.25    -0.02   0.03  -0.05    -0.09   0.07  -0.11
 112   1    -0.03  -0.01  -0.03    -0.03   0.03  -0.21     0.09  -0.10   0.05
 113   1    -0.04  -0.06  -0.05     0.11   0.38  -0.02     0.02  -0.06   0.06
 114   1    -0.06  -0.01  -0.08     0.08   0.03   0.21     0.05  -0.09   0.08
                    34                     35                     36
                     A                      A                      A
 Frequencies --   157.9050               162.1090               166.5337
 Red. masses --     2.9482                 2.7838                 2.6572
 Frc consts  --     0.0433                 0.0431                 0.0434
 IR Inten    --     0.4343                 0.6638                 0.2169
 Atom AN      X      Y      Z        X      Y      Z        X      Y      Z
   1   8    -0.04   0.03  -0.05     0.01  -0.01   0.02     0.00   0.00   0.01
   2  12    -0.02   0.00   0.00     0.02   0.02  -0.02     0.02   0.02   0.01
   3   8     0.00   0.00   0.00     0.00  -0.01   0.00     0.01  -0.03   0.02
   4   6    -0.02   0.01  -0.02     0.00   0.00   0.01     0.00   0.00   0.00
   5   7    -0.01   0.01   0.02     0.01   0.03  -0.01     0.00   0.04  -0.01
   6   7    -0.02   0.01   0.01     0.02   0.01  -0.01     0.01   0.02  -0.01
   7   8     0.00   0.00   0.00     0.00   0.00   0.00     0.00   0.00   0.00
   8   6    -0.02   0.00   0.01     0.01   0.03  -0.02    -0.01   0.04  -0.02
   9   6    -0.02   0.00   0.01     0.01   0.02   0.00    -0.01   0.03  -0.03
  10   6    -0.03   0.01   0.01     0.02   0.02   0.02     0.01   0.02  -0.02
  11   8     0.00   0.00   0.01    -0.01   0.01  -0.01     0.00   0.00   0.01
  12   6     0.00   0.00  -0.01    -0.01   0.02   0.00     0.00   0.01   0.03
  13   6     0.00   0.01  -0.01     0.00   0.01   0.00     0.00   0.04   0.04
  14   6     0.01  -0.01   0.02    -0.01   0.01  -0.01    -0.01   0.00   0.00
  15   8     0.01  -0.02  -0.03    -0.01   0.03   0.01     0.00   0.02   0.03
  16   6     0.04  -0.01   0.04    -0.01   0.00  -0.01     0.00   0.01   0.00
  17   8     0.00   0.00   0.00     0.00  -0.01  -0.02     0.00  -0.03  -0.09
  18   6     0.00   0.00   0.00     0.01  -0.01  -0.02     0.02  -0.03  -0.04
  19   8     0.00   0.00   0.00     0.02   0.00  -0.01     0.02   0.01   0.01
  20   8     0.00   0.00   0.00    -0.02  -0.02  -0.04     0.03  -0.02  -0.02
  21   6     0.00  -0.01   0.00     0.00   0.00  -0.01     0.02  -0.03  -0.03
  22   6     0.00   0.00   0.00     0.01  -0.01   0.00     0.01  -0.04  -0.05
  23   6     0.00  -0.01   0.00    -0.01   0.01   0.00     0.02  -0.02  -0.01
  24   8     0.00  -0.01  -0.01     0.00   0.00   0.01     0.02  -0.03  -0.05
  25   6     0.00  -0.01   0.01     0.02  -0.02   0.01    -0.06  -0.11  -0.04
  26   6     0.01   0.00   0.00    -0.09   0.04   0.04    -0.01  -0.02   0.00
  27   6     0.00   0.02   0.01     0.01   0.02   0.01     0.00   0.12   0.17
  28   6     0.04  -0.10   0.04    -0.02   0.03  -0.01    -0.01   0.02  -0.01
  29   6    -0.01   0.01   0.01     0.01   0.02   0.00     0.00   0.03  -0.01
  30   6    -0.02   0.01   0.00     0.02   0.01  -0.01     0.02   0.02   0.00
  31   6     0.01   0.11  -0.03     0.00  -0.01   0.01     0.00   0.02   0.00
  32   6     0.02   0.16  -0.05     0.00  -0.04   0.02    -0.01  -0.01   0.01
  33   6     0.00   0.04  -0.01     0.00  -0.04   0.02    -0.01  -0.04   0.01
  34   6    -0.01  -0.10   0.04     0.01  -0.02   0.01    -0.01  -0.03   0.01
  35   6    -0.01  -0.08   0.04     0.01   0.01   0.00    -0.01   0.01   0.00
  36   6     0.02   0.04  -0.01     0.00  -0.01   0.01     0.00   0.00   0.01
  37   6     0.00  -0.05   0.02     0.00   0.01   0.01     0.00   0.00   0.00
  38   6    -0.03   0.02   0.01    -0.06   0.06   0.02     0.04   0.00  -0.01
  39   6    -0.02   0.01   0.00    -0.07   0.07   0.03     0.04   0.00  -0.01
  40   6     0.01  -0.02   0.00     0.04  -0.01   0.00    -0.01   0.03   0.00
  41   6     0.03  -0.03  -0.01     0.13  -0.08  -0.03    -0.03   0.05   0.00
  42   6     0.01  -0.02   0.00     0.10  -0.05  -0.02    -0.01   0.04   0.00
  43   6    -0.01   0.02   0.01    -0.04   0.01  -0.01     0.00  -0.02  -0.02
  44   6     0.01   0.00  -0.01     0.03  -0.03  -0.01    -0.02   0.00   0.02
  45   6     0.10  -0.06  -0.11     0.01  -0.01   0.01     0.04  -0.03  -0.01
  46   6    -0.03   0.00   0.08    -0.01   0.00   0.01    -0.01  -0.01   0.02
  47   6    -0.04  -0.02  -0.08    -0.01   0.00   0.02     0.01   0.00   0.01
  48   6     0.06   0.03   0.11    -0.03   0.00  -0.01     0.00   0.00   0.00
  49   6     0.02   0.02   0.01    -0.02   0.01   0.06    -0.04  -0.05  -0.02
  50   6     0.00   0.00  -0.03    -0.07  -0.05  -0.12     0.00  -0.01   0.06
  51   6     0.00  -0.01   0.04    -0.02  -0.08   0.09    -0.01  -0.01  -0.03
  52   6     0.02   0.04  -0.03     0.00  -0.02  -0.10    -0.03  -0.06   0.03
  53   6    -0.04  -0.01  -0.06     0.00   0.02  -0.04    -0.01   0.05  -0.02
  54   6    -0.03   0.01  -0.01     0.02   0.02   0.09     0.01   0.02   0.01
  55   1    -0.02   0.00   0.00     0.00   0.02   0.02    -0.02   0.02  -0.03
  56   1     0.01   0.02  -0.01    -0.01   0.01   0.00    -0.01   0.11  -0.02
  57   1     0.04   0.03   0.05    -0.01   0.00  -0.02    -0.02  -0.01  -0.01
  58   1    -0.02   0.01   0.10     0.00   0.00  -0.03     0.00   0.00   0.00
  59   1     0.11  -0.03  -0.03    -0.04   0.01   0.01     0.00   0.01   0.00
  60   1     0.09  -0.03   0.11    -0.03   0.01  -0.03     0.00   0.01   0.00
  61   1     0.00   0.00   0.00     0.00   0.00   0.02     0.02  -0.02  -0.07
  62   1     0.00  -0.01   0.00     0.03   0.02   0.03     0.03  -0.01   0.00
  63   1     0.01  -0.01   0.01    -0.01  -0.03   0.02     0.00  -0.10   0.02
  64   1    -0.01  -0.03   0.01     0.02   0.00   0.00    -0.12  -0.21   0.02
  65   1    -0.01   0.00  -0.01     0.03  -0.05   0.02    -0.13  -0.10  -0.14
  66   1     0.07  -0.04  -0.03    -0.24   0.14   0.11    -0.03   0.00   0.02
  67   1    -0.04  -0.04   0.03     0.02   0.14   0.00     0.01   0.00   0.00
  68   1     0.00   0.07  -0.02    -0.12  -0.14   0.03    -0.02  -0.05   0.00
  69   1     0.02   0.02  -0.01     0.04   0.02  -0.02     0.22   0.13  -0.04
  70   1     0.01   0.04   0.03     0.02   0.04   0.05     0.07   0.33   0.45
  71   1    -0.02   0.01   0.02    -0.02   0.00   0.01    -0.28  -0.03   0.19
  72   1     0.11  -0.07   0.05    -0.04   0.03  -0.02    -0.02   0.01  -0.01
  73   1    -0.04  -0.12   0.04    -0.01   0.04  -0.01     0.02   0.02  -0.02
  74   1     0.06  -0.17   0.06    -0.02   0.05  -0.01    -0.02   0.04  -0.02
  75   1     0.02   0.24  -0.08     0.00  -0.07   0.03     0.00  -0.02   0.01
  76   1     0.01   0.05  -0.02     0.00  -0.07   0.03    -0.01  -0.06   0.02
  77   1    -0.03  -0.19   0.06     0.01  -0.02   0.01    -0.01  -0.06   0.02
  78   1    -0.01   0.03   0.04     0.00  -0.02   0.00    -0.01  -0.01   0.02
  79   1     0.00  -0.02   0.01     0.00   0.01   0.02     0.00   0.00   0.00
  80   1    -0.04   0.02   0.01    -0.13   0.11   0.05     0.06  -0.02  -0.01
  81   1     0.03  -0.03  -0.01     0.05  -0.03   0.00    -0.01   0.03   0.01
  82   1     0.06  -0.06  -0.01     0.21  -0.14  -0.04    -0.06   0.08   0.01
  83   1     0.00   0.01   0.02    -0.04   0.01  -0.04    -0.01   0.00  -0.04
  84   1     0.00   0.01  -0.02     0.04  -0.01   0.05     0.00  -0.01   0.04
  85   1     0.10  -0.19  -0.06     0.01  -0.02   0.01     0.07  -0.07   0.02
  86   1     0.12  -0.04  -0.16     0.01  -0.02   0.01     0.02  -0.02  -0.01
  87   1     0.14  -0.05  -0.20     0.01  -0.01   0.01     0.05  -0.04  -0.07
  88   1    -0.04  -0.13   0.14    -0.02  -0.01   0.01    -0.01  -0.05   0.04
  89   1     0.02   0.00   0.00    -0.01   0.01   0.01     0.01   0.00   0.00
  90   1    -0.10   0.09   0.16    -0.02   0.00   0.00    -0.03   0.02   0.04
  91   1     0.03   0.08  -0.14    -0.05  -0.01   0.05     0.01  -0.01   0.01
  92   1    -0.04  -0.07   0.00    -0.01   0.01  -0.03     0.01   0.00   0.01
  93   1    -0.14  -0.06  -0.16     0.04   0.01   0.05     0.01   0.00   0.01
  94   1     0.06   0.15   0.08    -0.04  -0.02   0.00     0.02  -0.02   0.00
  95   1     0.12   0.01   0.21    -0.04   0.00  -0.02    -0.02   0.00  -0.01
  96   1     0.05  -0.02   0.11    -0.03   0.01  -0.02     0.01   0.01   0.02
  97   1     0.02   0.05   0.00    -0.09   0.05   0.08    -0.02  -0.09  -0.01
  98   1     0.03   0.02   0.02    -0.05   0.01   0.01    -0.06  -0.03  -0.03
  99   1     0.04   0.02   0.03     0.02   0.00   0.13    -0.07  -0.05  -0.05
 100   1    -0.01   0.03  -0.04    -0.24  -0.10  -0.01     0.02  -0.05   0.07
 101   1    -0.01  -0.01  -0.05     0.07  -0.02  -0.10     0.01   0.02   0.09
 102   1     0.00  -0.01  -0.02    -0.11  -0.05  -0.32     0.00   0.00   0.05
 103   1     0.05  -0.01   0.05     0.03  -0.16   0.05    -0.07  -0.03  -0.06
 104   1    -0.03  -0.04   0.07    -0.04  -0.07   0.15     0.03   0.04  -0.07
 105   1    -0.02   0.01   0.02    -0.03  -0.09   0.14     0.02  -0.04   0.02
 106   1     0.06   0.01  -0.04     0.05  -0.19  -0.20    -0.08  -0.06   0.01
 107   1     0.00   0.05  -0.03    -0.06  -0.02   0.04    -0.02  -0.08   0.06
 108   1     0.02   0.08  -0.07     0.03   0.15  -0.22    -0.02  -0.06   0.04
 109   1     0.08  -0.04  -0.15     0.00   0.04  -0.05     0.04   0.01  -0.05
 110   1    -0.03   0.01   0.05     0.00   0.02  -0.06    -0.01   0.06   0.06
 111   1    -0.17  -0.01  -0.13     0.00   0.01  -0.04    -0.07   0.08  -0.05
 112   1    -0.03   0.03   0.02     0.04   0.01   0.10     0.00  -0.04  -0.07
 113   1    -0.03  -0.04  -0.01    -0.02   0.04   0.11     0.01   0.13   0.01
 114   1    -0.03   0.02  -0.05     0.05   0.01   0.12     0.01  -0.03   0.11
                    37                     38                     39
                     A                      A                      A
 Frequencies --   168.6127               181.7465               193.0608
 Red. masses --     1.9520                 3.3058                 2.5879
 Frc consts  --     0.0327                 0.0643                 0.0568
 IR Inten    --     1.9267                 0.7248                 0.1740
 Atom AN      X      Y      Z        X      Y      Z        X      Y      Z
   1   8    -0.01   0.00   0.00     0.02  -0.02   0.02     0.03  -0.01   0.02
   2  12     0.03   0.01   0.00    -0.03  -0.01   0.05    -0.03   0.00  -0.01
   3   8     0.00  -0.01   0.01    -0.01  -0.05   0.03     0.00   0.06  -0.02
   4   6    -0.01   0.00   0.00     0.01   0.00   0.01     0.02  -0.01   0.00
   5   7     0.02   0.00   0.00     0.03  -0.03   0.02     0.03   0.00  -0.01
   6   7     0.02  -0.03   0.00    -0.01  -0.03   0.02    -0.04  -0.02   0.00
   7   8    -0.01   0.00   0.00     0.00   0.00   0.01     0.02  -0.02   0.00
   8   6     0.01  -0.01   0.00     0.02  -0.04   0.03     0.01  -0.01   0.00
   9   6     0.01  -0.02   0.01     0.03  -0.03   0.05     0.01  -0.03   0.00
  10   6     0.02  -0.03   0.01     0.01  -0.02   0.03    -0.01  -0.01   0.00
  11   8    -0.01  -0.01  -0.01    -0.07   0.02  -0.11     0.02   0.04   0.02
  12   6    -0.01  -0.01   0.00    -0.05   0.09  -0.04     0.02   0.07   0.04
  13   6     0.00   0.00   0.01     0.01   0.05   0.00    -0.01   0.05   0.01
  14   6    -0.02   0.00   0.00    -0.02   0.01  -0.02     0.02   0.00  -0.01
  15   8    -0.01  -0.01  -0.01    -0.08   0.13   0.01     0.02   0.11   0.08
  16   6    -0.01   0.00   0.01    -0.03  -0.01  -0.02     0.02   0.02  -0.02
  17   8    -0.02   0.02  -0.06     0.04  -0.01  -0.01    -0.03   0.00   0.00
  18   6    -0.01   0.02   0.00     0.04  -0.01  -0.03    -0.03  -0.01   0.00
  19   8    -0.04   0.02   0.02     0.07   0.01  -0.01    -0.05  -0.02   0.00
  20   8     0.04   0.06   0.08     0.01   0.04   0.00    -0.03  -0.07  -0.04
  21   6     0.00   0.02   0.00     0.00   0.01  -0.01     0.00  -0.03   0.00
  22   6     0.00   0.02  -0.01     0.01  -0.01  -0.02    -0.01   0.00   0.02
  23   6     0.01   0.00   0.01     0.02   0.02  -0.02    -0.02  -0.03   0.01
  24   8    -0.02  -0.01  -0.07    -0.02   0.01   0.00     0.02  -0.03  -0.01
  25   6    -0.01  -0.04   0.02    -0.01   0.00  -0.02    -0.02  -0.04   0.03
  26   6     0.09  -0.07  -0.03    -0.03   0.00   0.01    -0.02   0.02  -0.01
  27   6     0.01   0.02   0.03     0.19   0.08  -0.01    -0.04   0.04  -0.02
  28   6    -0.03   0.01   0.00    -0.11  -0.06   0.12     0.06   0.00  -0.06
  29   6     0.02   0.00   0.00     0.03  -0.02   0.00     0.04   0.02  -0.01
  30   6     0.01  -0.02  -0.01    -0.02  -0.02   0.00    -0.05  -0.01   0.01
  31   6     0.01  -0.01   0.00     0.02  -0.01   0.00     0.03   0.02   0.00
  32   6     0.01  -0.02   0.01     0.02  -0.01   0.00     0.03  -0.03   0.02
  33   6     0.01  -0.01   0.01     0.02  -0.01   0.00     0.03  -0.07   0.04
  34   6     0.02   0.00   0.00     0.03  -0.01   0.00     0.04  -0.04   0.02
  35   6     0.02   0.01   0.00     0.02  -0.01   0.00     0.05   0.01   0.00
  36   6     0.00  -0.01  -0.01     0.00  -0.01  -0.02     0.01   0.01  -0.02
  37   6     0.00   0.01   0.01     0.00   0.00   0.01     0.02   0.02   0.02
  38   6    -0.02   0.01   0.00    -0.01  -0.03   0.00    -0.03  -0.02   0.00
  39   6    -0.05   0.03   0.01    -0.01  -0.02  -0.01     0.00  -0.05  -0.01
  40   6    -0.04   0.02   0.01    -0.03  -0.01   0.00     0.02  -0.06  -0.01
  41   6     0.01  -0.02   0.00    -0.03  -0.01   0.00    -0.02  -0.04   0.00
  42   6     0.02  -0.03  -0.01    -0.03  -0.02   0.00    -0.05  -0.01   0.01
  43   6    -0.01   0.02   0.01     0.01  -0.01   0.01     0.00   0.00   0.02
  44   6     0.02   0.00  -0.02    -0.01   0.00  -0.02    -0.02   0.01  -0.01
  45   6    -0.02   0.00  -0.01    -0.02  -0.01  -0.02     0.01  -0.02  -0.06
  46   6    -0.02   0.01  -0.01    -0.04   0.01  -0.01    -0.03   0.01   0.01
  47   6    -0.02   0.01   0.01    -0.03   0.00  -0.01    -0.03   0.02   0.03
  48   6    -0.03   0.00  -0.01    -0.02   0.00   0.00    -0.03   0.01  -0.01
  49   6     0.03   0.04   0.02     0.04   0.03  -0.01     0.02   0.02  -0.01
  50   6    -0.02   0.00  -0.06     0.01   0.02  -0.02     0.03   0.03   0.02
  51   6     0.01   0.02   0.03     0.01   0.01  -0.01     0.02   0.02   0.01
  52   6     0.00   0.03  -0.01     0.01   0.02   0.01     0.02   0.04  -0.01
  53   6     0.00   0.00   0.00     0.02  -0.05  -0.01    -0.02   0.01   0.01
  54   6     0.02  -0.04   0.01     0.01  -0.01  -0.02     0.00   0.02   0.00
  55   1     0.00  -0.03   0.02     0.03  -0.02   0.06     0.01  -0.02   0.00
  56   1     0.00   0.01   0.00    -0.02   0.04   0.00    -0.04   0.04   0.01
  57   1    -0.02   0.00  -0.01     0.05   0.03  -0.03     0.02  -0.01  -0.02
  58   1    -0.01   0.00   0.01    -0.02  -0.03  -0.05     0.04   0.01  -0.06
  59   1     0.00   0.00   0.00    -0.07   0.02   0.01     0.01   0.04  -0.02
  60   1     0.00   0.00   0.01    -0.05  -0.02  -0.05     0.01   0.05  -0.03
  61   1     0.00   0.05   0.00     0.01  -0.03  -0.02     0.00   0.02   0.01
  62   1    -0.02  -0.01  -0.02     0.04   0.05  -0.02    -0.03  -0.05   0.02
  63   1     0.08  -0.02   0.08    -0.11  -0.03  -0.04     0.15   0.00   0.07
  64   1    -0.05  -0.16   0.05     0.02   0.09  -0.04    -0.08  -0.21   0.08
  65   1    -0.07   0.00  -0.05     0.05  -0.08   0.00    -0.13   0.07  -0.06
  66   1     0.50  -0.30  -0.17    -0.17   0.09   0.11    -0.02   0.01  -0.05
  67   1    -0.22  -0.32   0.15     0.08   0.09  -0.06    -0.02   0.03   0.01
  68   1     0.08   0.39  -0.08    -0.04  -0.19   0.03    -0.01   0.05  -0.01
  69   1     0.06   0.03  -0.01     0.28   0.15  -0.11    -0.16   0.03   0.09
  70   1     0.03   0.05   0.09     0.28   0.01   0.12    -0.09  -0.03  -0.16
  71   1    -0.04  -0.01   0.04     0.17   0.10  -0.04     0.09   0.09  -0.01
  72   1    -0.04   0.01   0.00    -0.10  -0.02   0.04     0.08   0.00  -0.03
  73   1    -0.02   0.02   0.00    -0.31  -0.06   0.16     0.13   0.00  -0.08
  74   1    -0.03   0.03   0.01    -0.01  -0.15   0.27     0.03   0.02  -0.12
  75   1     0.01  -0.03   0.02     0.02   0.00   0.00     0.02  -0.05   0.03
  76   1     0.01  -0.02   0.01     0.02  -0.01   0.01     0.03  -0.11   0.06
  77   1     0.02   0.01   0.00     0.03   0.00   0.00     0.05  -0.06   0.03
  78   1     0.00  -0.02  -0.03     0.00  -0.02  -0.04     0.01  -0.01  -0.03
  79   1     0.00   0.01   0.03     0.01   0.00   0.03     0.02   0.03   0.06
  80   1    -0.09   0.06   0.02    -0.01  -0.02  -0.01     0.02  -0.06  -0.02
  81   1    -0.06   0.04   0.01    -0.03  -0.01  -0.01     0.05  -0.09  -0.02
  82   1     0.02  -0.02   0.00    -0.04  -0.01   0.00    -0.01  -0.05   0.00
  83   1    -0.01   0.02   0.03     0.01  -0.02   0.03     0.01  -0.02   0.05
  84   1     0.01   0.01  -0.02    -0.02   0.00  -0.05    -0.03   0.00  -0.06
  85   1    -0.04   0.01  -0.02    -0.04  -0.01  -0.04    -0.03  -0.05  -0.07
  86   1    -0.01  -0.01  -0.01     0.00  -0.02  -0.04     0.05  -0.02  -0.09
  87   1    -0.02   0.00   0.02    -0.02  -0.01   0.00     0.02   0.00  -0.04
  88   1    -0.04   0.01  -0.02    -0.06  -0.01  -0.02    -0.05  -0.03   0.01
  89   1    -0.02   0.02   0.00    -0.03   0.03   0.00    -0.01   0.03   0.00
  90   1    -0.03   0.01  -0.01    -0.06   0.02   0.00    -0.06   0.04   0.03
  91   1    -0.08  -0.01   0.05    -0.08   0.01   0.02    -0.31  -0.05   0.20
  92   1    -0.02   0.01  -0.06    -0.04  -0.01  -0.06    -0.06   0.06  -0.29
  93   1     0.05   0.01   0.05     0.01   0.00   0.01     0.25   0.02   0.18
  94   1    -0.05  -0.01   0.00    -0.06   0.02   0.02    -0.03  -0.03   0.01
  95   1    -0.02   0.00  -0.02     0.02   0.00   0.02    -0.05   0.01  -0.03
  96   1    -0.03   0.00  -0.04    -0.03  -0.03  -0.05    -0.02   0.03  -0.02
  97   1     0.01   0.07   0.01     0.02   0.07  -0.01     0.04   0.04  -0.03
  98   1     0.03   0.03   0.02     0.05   0.00   0.01     0.03   0.02   0.03
  99   1     0.05   0.03   0.05     0.06   0.05   0.00     0.01   0.02  -0.02
 100   1    -0.06   0.01  -0.05     0.07   0.09  -0.08     0.15   0.13  -0.08
 101   1     0.00  -0.01  -0.07    -0.05  -0.02  -0.06    -0.11  -0.04  -0.04
 102   1    -0.03  -0.01  -0.10     0.04   0.01   0.08     0.08   0.01   0.20
 103   1     0.07   0.04   0.05     0.00   0.04   0.00     0.10   0.07   0.06
 104   1    -0.03  -0.01   0.07     0.01   0.01  -0.02    -0.03  -0.06   0.05
 105   1    -0.01   0.05  -0.02     0.01   0.02  -0.03    -0.01   0.06  -0.08
 106   1     0.03   0.05   0.01     0.02   0.09   0.06     0.06   0.04   0.01
 107   1     0.01   0.04  -0.05     0.03   0.03  -0.06     0.01   0.06  -0.03
 108   1    -0.02   0.01  -0.02    -0.01  -0.04   0.05     0.02   0.04  -0.01
 109   1    -0.04   0.03   0.02    -0.01   0.00   0.01    -0.02   0.02   0.01
 110   1    -0.01  -0.02  -0.04     0.02  -0.06  -0.08    -0.03   0.00   0.02
 111   1     0.04  -0.01   0.02     0.07  -0.09   0.02    -0.02   0.03   0.00
 112   1     0.03  -0.02   0.06     0.00   0.03   0.02    -0.01   0.06   0.05
 113   1     0.00  -0.10   0.02     0.03  -0.08  -0.03    -0.02  -0.04   0.01
 114   1     0.01  -0.02  -0.03     0.01   0.02  -0.09     0.02   0.05  -0.06
                    40                     41                     42
                     A                      A                      A
 Frequencies --   196.8941               203.4208               209.0215
 Red. masses --     2.1090                 2.5594                 1.8542
 Frc consts  --     0.0482                 0.0624                 0.0477
 IR Inten    --     1.3370                 2.4025                 3.0651
 Atom AN      X      Y      Z        X      Y      Z        X      Y      Z
   1   8     0.02  -0.01   0.01    -0.01   0.01  -0.01    -0.01  -0.02   0.06
   2  12     0.00  -0.02   0.07     0.01   0.01   0.05    -0.02  -0.02   0.02
   3   8    -0.01   0.07   0.00     0.00   0.01   0.00    -0.01  -0.01   0.01
   4   6     0.01  -0.01   0.00    -0.01   0.01   0.00    -0.02  -0.05   0.02
   5   7    -0.02   0.00   0.02     0.00   0.03   0.04    -0.01   0.00   0.00
   6   7     0.03   0.02   0.01     0.00   0.02   0.06     0.01   0.01   0.00
   7   8     0.01  -0.01   0.00    -0.01   0.02   0.00    -0.01  -0.06   0.01
   8   6     0.00   0.01   0.02    -0.01   0.03   0.06     0.00   0.00   0.00
   9   6     0.01   0.03   0.06     0.00   0.04   0.18     0.00   0.01   0.01
  10   6     0.02   0.02   0.02     0.00   0.02   0.08     0.00   0.01   0.00
  11   8    -0.01   0.02  -0.02     0.00  -0.01   0.00     0.00   0.05   0.04
  12   6    -0.01   0.06   0.00     0.00  -0.04  -0.03    -0.01   0.04   0.02
  13   6    -0.01   0.06   0.00     0.00  -0.01  -0.01    -0.01   0.02   0.01
  14   6     0.00   0.00  -0.01    -0.01   0.01   0.00     0.00  -0.03   0.00
  15   8     0.00   0.08   0.02     0.00  -0.08  -0.07    -0.01   0.02   0.00
  16   6     0.01   0.00  -0.02    -0.01  -0.01   0.01     0.04   0.08  -0.02
  17   8    -0.03   0.00   0.01     0.02  -0.02   0.03    -0.01  -0.01   0.00
  18   6    -0.02  -0.01  -0.01     0.02   0.00  -0.01    -0.02  -0.02  -0.02
  19   8    -0.03  -0.01   0.00     0.03   0.00   0.00    -0.02  -0.01  -0.01
  20   8    -0.01  -0.06  -0.03     0.02   0.00   0.01    -0.02   0.00   0.00
  21   6     0.01  -0.03   0.01     0.01  -0.01   0.00    -0.02   0.00   0.00
  22   6     0.00   0.00   0.03     0.01  -0.02   0.00    -0.02  -0.01  -0.02
  23   6    -0.01  -0.02   0.01     0.02   0.00   0.00    -0.02  -0.03  -0.03
  24   8     0.02  -0.04  -0.03     0.00  -0.01   0.01     0.00   0.01   0.04
  25   6    -0.01  -0.04   0.04     0.00   0.00  -0.01     0.02   0.04  -0.03
  26   6    -0.01   0.02  -0.01     0.01  -0.01   0.01     0.01  -0.08  -0.03
  27   6    -0.01   0.02  -0.06    -0.04  -0.02  -0.01     0.05   0.03   0.00
  28   6    -0.01  -0.02   0.01    -0.03   0.04  -0.01     0.07  -0.04  -0.07
  29   6    -0.02   0.00   0.00     0.01   0.04  -0.01    -0.01   0.00   0.00
  30   6     0.05   0.01  -0.01     0.01   0.01   0.00     0.02   0.01   0.00
  31   6    -0.02   0.00   0.00     0.02   0.03  -0.01    -0.01   0.01   0.00
  32   6    -0.02   0.00  -0.01     0.01  -0.04   0.01    -0.01   0.01   0.00
  33   6    -0.02   0.01  -0.01     0.00  -0.07   0.02    -0.01   0.00   0.00
  34   6    -0.03   0.00  -0.01     0.00  -0.02   0.01    -0.01  -0.01   0.01
  35   6    -0.03  -0.01   0.00     0.00   0.04  -0.01    -0.01   0.00   0.00
  36   6    -0.01  -0.01   0.01     0.01   0.02  -0.02     0.00   0.01   0.00
  37   6    -0.01  -0.01  -0.01     0.01   0.03   0.00     0.00   0.00   0.00
  38   6     0.05   0.00  -0.01     0.01   0.02   0.00     0.01   0.00   0.00
  39   6     0.01   0.04   0.00     0.00   0.03  -0.01    -0.01   0.02   0.01
  40   6    -0.02   0.06   0.01    -0.01   0.02  -0.02    -0.02   0.03   0.01
  41   6     0.02   0.03   0.00    -0.01   0.00  -0.01     0.00   0.02   0.01
  42   6     0.05   0.00  -0.01     0.00   0.00   0.00     0.02   0.00   0.00
  43   6     0.02  -0.01  -0.02    -0.01   0.01  -0.01     0.01   0.00   0.00
  44   6     0.03  -0.01   0.00     0.00  -0.01   0.00     0.02   0.00   0.00
  45   6     0.00  -0.01   0.01     0.02  -0.02  -0.06     0.01   0.00   0.00
  46   6     0.00  -0.01   0.00    -0.03   0.02   0.01     0.01   0.00   0.01
  47   6     0.02  -0.01  -0.01     0.02   0.02   0.04     0.00   0.00   0.00
  48   6     0.01   0.00   0.01     0.01   0.00  -0.03     0.02   0.00   0.00
  49   6     0.00  -0.02   0.00     0.00   0.00   0.00     0.01  -0.01   0.00
  50   6    -0.02  -0.03  -0.03     0.01   0.00  -0.01    -0.01  -0.01  -0.02
  51   6    -0.01  -0.01  -0.04    -0.03  -0.02   0.00     0.00   0.00   0.00
  52   6    -0.02  -0.05   0.03    -0.03  -0.03   0.00     0.00  -0.01   0.01
  53   6     0.02  -0.02  -0.03    -0.04   0.00  -0.11     0.00   0.00  -0.01
  54   6     0.01  -0.01  -0.02    -0.01   0.00  -0.10     0.00   0.00  -0.01
  55   1     0.01   0.03   0.06     0.00   0.04   0.17     0.00   0.01   0.01
  56   1    -0.01   0.03   0.02     0.03  -0.01  -0.01    -0.04   0.01   0.01
  57   1     0.03   0.00  -0.02    -0.03   0.00   0.00     0.01  -0.04  -0.02
  58   1     0.02  -0.01  -0.04    -0.03   0.00   0.03     0.11   0.05  -0.09
  59   1     0.00   0.02  -0.01    -0.01  -0.02   0.01     0.06   0.09  -0.04
  60   1     0.00   0.01  -0.02    -0.01  -0.03   0.01     0.01   0.17   0.01
  61   1     0.01   0.03   0.02     0.01  -0.03   0.00    -0.03  -0.03   0.00
  62   1    -0.01  -0.04   0.03     0.02   0.00   0.00    -0.03  -0.02  -0.05
  63   1     0.24   0.02   0.09    -0.06  -0.01  -0.03    -0.33  -0.04  -0.09
  64   1    -0.10  -0.29   0.13     0.02   0.07  -0.02     0.16   0.40  -0.16
  65   1    -0.18   0.13  -0.07     0.04  -0.04   0.02     0.26  -0.19   0.14
  66   1     0.09  -0.05  -0.08     0.00  -0.01   0.02     0.09  -0.12  -0.03
  67   1    -0.10  -0.03   0.09     0.01  -0.01   0.00    -0.06  -0.14  -0.02
  68   1    -0.03   0.18  -0.03     0.00  -0.03   0.00     0.01  -0.02  -0.04
  69   1    -0.17   0.03   0.09    -0.06  -0.04   0.01     0.06   0.06  -0.01
  70   1    -0.06  -0.12  -0.26    -0.06  -0.01  -0.04     0.08  -0.02   0.01
  71   1     0.20   0.13  -0.07    -0.04  -0.03   0.00     0.08   0.05  -0.01
  72   1     0.02   0.00  -0.02    -0.08   0.00   0.03     0.13  -0.02  -0.08
  73   1    -0.07  -0.02   0.03     0.04   0.03  -0.03     0.09  -0.03  -0.07
  74   1     0.02  -0.07   0.04    -0.05   0.13  -0.02     0.04  -0.09  -0.14
  75   1    -0.01   0.00  -0.01     0.01  -0.06   0.02    -0.01   0.02   0.00
  76   1    -0.02   0.01  -0.02     0.00  -0.13   0.03    -0.01   0.00   0.01
  77   1    -0.03   0.00  -0.01     0.00  -0.04   0.01    -0.01  -0.01   0.01
  78   1    -0.01  -0.01   0.01     0.00   0.01  -0.02    -0.01   0.01   0.02
  79   1    -0.02  -0.02  -0.03     0.01   0.03  -0.01     0.00   0.01  -0.01
  80   1    -0.01   0.05   0.01     0.01   0.04  -0.02    -0.02   0.03   0.01
  81   1    -0.06   0.09   0.02    -0.02   0.03  -0.03    -0.04   0.05   0.02
  82   1     0.00   0.05   0.00    -0.01   0.00  -0.02     0.00   0.03   0.01
  83   1     0.01   0.00  -0.05    -0.01   0.01  -0.04     0.00   0.00  -0.01
  84   1     0.03   0.00   0.04     0.00  -0.01  -0.01     0.02   0.01   0.02
  85   1     0.05  -0.01   0.04     0.01  -0.06  -0.05     0.05  -0.01   0.02
  86   1    -0.04   0.01   0.04     0.04  -0.01  -0.09    -0.02   0.02   0.01
  87   1     0.00  -0.03  -0.03     0.03  -0.01  -0.08     0.01  -0.02  -0.04
  88   1     0.00  -0.01   0.01    -0.04  -0.04   0.03     0.01  -0.01   0.01
  89   1     0.00  -0.01  -0.01     0.00   0.03  -0.01     0.01  -0.01   0.00
  90   1    -0.01  -0.01   0.00    -0.07   0.06   0.04     0.00   0.00   0.01
  91   1     0.21   0.03  -0.13    -0.15  -0.05   0.14    -0.15  -0.03   0.08
  92   1     0.04  -0.04   0.20     0.00   0.07  -0.15    -0.01   0.04  -0.17
  93   1    -0.16  -0.01  -0.11     0.20   0.04   0.14     0.15   0.00   0.07
  94   1     0.02   0.02   0.00     0.09  -0.12  -0.06     0.09  -0.06  -0.03
  95   1     0.02   0.00   0.02    -0.10   0.00  -0.12    -0.05   0.00  -0.04
  96   1     0.01   0.00   0.02     0.04   0.07   0.06     0.04   0.05   0.07
  97   1    -0.02  -0.03   0.02    -0.02   0.00   0.01     0.01  -0.02   0.00
  98   1    -0.01  -0.02  -0.02     0.00  -0.02  -0.02     0.01   0.00   0.00
  99   1     0.00  -0.02   0.01     0.03   0.01   0.00     0.00  -0.01  -0.01
 100   1    -0.13  -0.11   0.06     0.12   0.16  -0.12    -0.13  -0.13   0.08
 101   1     0.10   0.03   0.01    -0.16  -0.10  -0.10     0.13   0.06   0.04
 102   1    -0.06  -0.01  -0.19     0.08  -0.06   0.19    -0.07   0.02  -0.20
 103   1    -0.12  -0.05  -0.09    -0.12  -0.09  -0.06    -0.03  -0.02  -0.02
 104   1     0.05   0.07  -0.11     0.02   0.06  -0.05     0.02   0.02  -0.02
 105   1     0.03  -0.06   0.05     0.00  -0.07   0.11     0.01  -0.02   0.03
 106   1    -0.07   0.03   0.07    -0.05   0.01   0.02    -0.01   0.04   0.04
 107   1     0.04  -0.07  -0.03     0.02  -0.05  -0.03     0.03  -0.02  -0.04
 108   1    -0.05  -0.15   0.08    -0.06  -0.08   0.02    -0.03  -0.06   0.03
 109   1     0.01   0.02  -0.03    -0.12   0.18  -0.10     0.00   0.00  -0.01
 110   1     0.03  -0.02  -0.10    -0.08  -0.05  -0.32     0.00   0.00  -0.01
 111   1     0.04  -0.08  -0.02     0.04  -0.15  -0.05     0.00  -0.01  -0.01
 112   1    -0.01  -0.04  -0.08    -0.08   0.01  -0.16    -0.01  -0.02  -0.04
 113   1     0.06   0.03  -0.04     0.13  -0.03  -0.15     0.01   0.04  -0.02
 114   1    -0.02  -0.03   0.02    -0.08   0.01  -0.14    -0.02  -0.01   0.02
                    43                     44                     45
                     A                      A                      A
 Frequencies --   210.5564               211.1870               215.8421
 Red. masses --     1.2908                 2.9800                 1.5491
 Frc consts  --     0.0337                 0.0783                 0.0425
 IR Inten    --     1.0705                 5.0907                 4.4188
 Atom AN      X      Y      Z        X      Y      Z        X      Y      Z
   1   8     0.01  -0.01   0.02     0.08   0.01  -0.09    -0.01   0.00   0.01
   2  12     0.01   0.00  -0.02     0.00  -0.03   0.05     0.03  -0.02   0.08
   3   8    -0.01  -0.01  -0.01     0.00   0.02  -0.02     0.00   0.03   0.02
   4   6     0.00  -0.01   0.01     0.09   0.10  -0.03    -0.01  -0.01   0.00
   5   7     0.01   0.01   0.01     0.00   0.00   0.00     0.00   0.00   0.00
   6   7     0.01  -0.01   0.01     0.01   0.00   0.00     0.03  -0.02   0.00
   7   8     0.00  -0.01   0.01     0.07   0.10   0.00    -0.01  -0.01   0.00
   8   6     0.01   0.01   0.01     0.00   0.00   0.00    -0.01   0.00  -0.01
   9   6     0.01   0.00   0.03     0.00   0.00  -0.01    -0.01  -0.02  -0.04
  10   6     0.01  -0.01   0.01     0.00   0.00  -0.01     0.01  -0.03  -0.02
  11   8     0.01   0.02   0.01     0.03  -0.03  -0.06    -0.01   0.01  -0.01
  12   6     0.00   0.01   0.01     0.02   0.00   0.00    -0.01   0.01  -0.01
  13   6    -0.01   0.00   0.00     0.00  -0.01  -0.02     0.00   0.02   0.01
  14   6     0.00   0.00   0.00     0.06   0.07  -0.01    -0.01  -0.01   0.00
  15   8     0.00   0.02   0.02     0.01   0.10   0.09     0.00  -0.02  -0.04
  16   6     0.01   0.01  -0.01    -0.06  -0.14  -0.01     0.01   0.02   0.00
  17   8    -0.01   0.00   0.00    -0.02  -0.01   0.02     0.00  -0.01   0.01
  18   6    -0.01  -0.01   0.00    -0.03  -0.02  -0.02     0.00  -0.01  -0.02
  19   8    -0.02  -0.01   0.00    -0.03  -0.03  -0.02     0.01   0.00   0.00
  20   8    -0.01  -0.01   0.00    -0.02  -0.02   0.00     0.00  -0.01   0.00
  21   6    -0.01   0.00   0.00    -0.02  -0.02   0.00     0.00  -0.01   0.00
  22   6    -0.01   0.00  -0.01    -0.02  -0.01   0.00     0.00  -0.01   0.00
  23   6    -0.01  -0.02  -0.01    -0.03  -0.04  -0.02     0.00  -0.01  -0.01
  24   8     0.00   0.00   0.01     0.00   0.00   0.04     0.00  -0.01   0.01
  25   6     0.01   0.02  -0.01     0.01   0.05  -0.02     0.00   0.01  -0.01
  26   6     0.00  -0.04  -0.01    -0.01  -0.10  -0.02     0.01  -0.02  -0.01
  27   6     0.00   0.01   0.01    -0.09   0.00   0.01     0.03   0.01  -0.03
  28   6     0.03   0.00  -0.03     0.00   0.03   0.08    -0.03   0.00   0.00
  29   6     0.01   0.01   0.00    -0.01   0.01   0.00     0.00   0.01   0.00
  30   6    -0.01   0.00   0.00     0.01   0.01   0.00     0.02   0.00   0.00
  31   6     0.02   0.00   0.00     0.00   0.01  -0.01     0.00   0.01   0.00
  32   6     0.02  -0.03   0.00    -0.01   0.00   0.00     0.00   0.00   0.00
  33   6     0.01  -0.03   0.00    -0.01  -0.02   0.01     0.00  -0.02   0.00
  34   6     0.00   0.00  -0.01    -0.01  -0.02   0.01     0.00  -0.01   0.00
  35   6     0.00   0.02   0.00    -0.01   0.00   0.00     0.00   0.01   0.00
  36   6     0.00   0.00  -0.01     0.00   0.01   0.00     0.00   0.01  -0.01
  37   6    -0.01   0.01   0.01     0.00   0.00   0.00     0.00   0.01   0.00
  38   6    -0.01   0.00   0.00     0.00   0.01   0.00     0.00   0.02  -0.01
  39   6     0.00   0.00   0.00     0.00   0.01   0.00     0.02   0.01  -0.01
  40   6     0.00  -0.01  -0.01     0.00   0.02   0.01     0.02   0.01  -0.01
  41   6    -0.01  -0.01   0.00     0.00   0.02   0.01    -0.01   0.02   0.00
  42   6    -0.01  -0.01   0.00     0.01   0.01   0.00     0.00   0.02   0.01
  43   6    -0.01   0.01   0.00     0.00   0.01   0.00    -0.02   0.03  -0.01
  44   6    -0.01   0.00   0.00     0.01   0.01   0.00    -0.01   0.02   0.01
  45   6    -0.01  -0.01  -0.03     0.01   0.00  -0.01     0.00   0.00  -0.02
  46   6    -0.02   0.01   0.00     0.00   0.00   0.01    -0.01   0.01   0.00
  47   6     0.02   0.00   0.03     0.00   0.00   0.00     0.00   0.00   0.01
  48   6    -0.05   0.01   0.00     0.01   0.00   0.01     0.00   0.00  -0.01
  49   6    -0.01   0.01   0.01     0.00   0.00  -0.01    -0.01   0.00   0.00
  50   6     0.01   0.01   0.01    -0.01   0.00   0.00     0.01   0.01   0.04
  51   6     0.00   0.00   0.01     0.00   0.01   0.00    -0.01   0.03  -0.01
  52   6    -0.01   0.00  -0.01    -0.01   0.00   0.00    -0.02   0.00  -0.02
  53   6     0.00   0.01  -0.02     0.00   0.00   0.01    -0.02   0.01   0.03
  54   6     0.01   0.00  -0.01     0.00   0.00   0.00     0.00  -0.06   0.00
  55   1     0.01   0.00   0.02     0.00   0.00  -0.01    -0.02  -0.02  -0.04
  56   1    -0.02   0.00  -0.01     0.01   0.00  -0.03     0.02   0.01   0.02
  57   1     0.00   0.00  -0.01     0.06   0.10   0.03    -0.01  -0.01  -0.01
  58   1     0.02   0.00  -0.03    -0.15  -0.12   0.07     0.01   0.01   0.00
  59   1     0.00   0.03   0.00    -0.13  -0.13   0.06     0.02   0.01  -0.01
  60   1    -0.01   0.03  -0.01    -0.03  -0.29  -0.09     0.00   0.03   0.01
  61   1    -0.02  -0.01   0.00    -0.03  -0.02   0.01     0.00  -0.01   0.00
  62   1    -0.02  -0.02  -0.02    -0.04  -0.04  -0.04    -0.01  -0.01  -0.02
  63   1    -0.12  -0.01  -0.03    -0.25  -0.01  -0.08     0.04   0.01  -0.02
  64   1     0.06   0.14  -0.06     0.11   0.33  -0.11    -0.01  -0.02   0.00
  65   1     0.09  -0.06   0.05     0.19  -0.12   0.12    -0.02   0.04  -0.01
  66   1     0.03  -0.06   0.00     0.12  -0.17  -0.03     0.02  -0.02  -0.01
  67   1    -0.03  -0.06  -0.01    -0.11  -0.19   0.01     0.01  -0.03  -0.02
  68   1     0.00  -0.02  -0.01    -0.02   0.01  -0.04     0.01  -0.02  -0.01
  69   1     0.02   0.02  -0.02    -0.05  -0.05  -0.02    -0.03   0.01   0.03
  70   1     0.01   0.03   0.04    -0.11   0.11   0.07     0.01  -0.06  -0.09
  71   1    -0.03  -0.01   0.01    -0.20  -0.07   0.04     0.11   0.05  -0.04
  72   1     0.02  -0.03   0.03    -0.06  -0.03   0.17    -0.02   0.03  -0.04
  73   1     0.10  -0.03  -0.07     0.01  -0.04   0.01    -0.07   0.03   0.04
  74   1    -0.01   0.06  -0.08     0.01   0.13   0.13     0.00  -0.04   0.03
  75   1     0.02  -0.06   0.01    -0.01  -0.01   0.00     0.01   0.00   0.00
  76   1     0.01  -0.05  -0.01    -0.01  -0.04   0.01     0.00  -0.04   0.00
  77   1     0.00   0.01  -0.02    -0.01  -0.04   0.01    -0.01  -0.02   0.00
  78   1     0.01  -0.01  -0.03     0.00   0.01   0.01     0.00   0.00  -0.01
  79   1    -0.01  -0.01   0.02     0.00   0.00  -0.01     0.00   0.01  -0.01
  80   1     0.00   0.00  -0.01    -0.01   0.01   0.01     0.03  -0.01  -0.01
  81   1     0.01  -0.02  -0.01    -0.01   0.02   0.01     0.03   0.00  -0.01
  82   1    -0.01  -0.01  -0.01     0.00   0.02   0.01    -0.02   0.03   0.00
  83   1    -0.01   0.01   0.00    -0.01   0.01   0.00    -0.03   0.04  -0.03
  84   1    -0.01  -0.01  -0.01     0.00   0.01   0.01    -0.01   0.02   0.02
  85   1    -0.06  -0.01  -0.05     0.00  -0.01  -0.01     0.03  -0.02   0.00
  86   1     0.04  -0.02  -0.06     0.02  -0.01  -0.02    -0.02   0.02  -0.02
  87   1    -0.01   0.01   0.02     0.02   0.01  -0.01     0.00  -0.02  -0.06
  88   1    -0.04  -0.02   0.01     0.01  -0.02   0.02    -0.01  -0.01   0.01
  89   1     0.00   0.04  -0.01     0.01  -0.01  -0.01     0.00   0.01  -0.01
  90   1    -0.06   0.04   0.01     0.00   0.01   0.02    -0.02   0.02   0.01
  91   1     0.42   0.07  -0.21    -0.07  -0.02   0.04     0.00  -0.01   0.02
  92   1     0.06  -0.09   0.50    -0.01   0.02  -0.08     0.00   0.01   0.01
  93   1    -0.38   0.02  -0.16     0.07   0.00   0.03     0.01   0.01   0.02
  94   1    -0.15   0.10   0.05     0.07  -0.04  -0.02     0.06  -0.06  -0.03
  95   1     0.06   0.01   0.06    -0.05   0.00  -0.02    -0.07   0.00  -0.05
  96   1    -0.08  -0.06  -0.11     0.03   0.05   0.06     0.02   0.05   0.05
  97   1    -0.02   0.02   0.01     0.04  -0.02  -0.03    -0.01  -0.01   0.01
  98   1    -0.01   0.00   0.00     0.01   0.02   0.02    -0.01   0.00  -0.01
  99   1     0.01   0.01   0.02    -0.03  -0.02  -0.03    -0.01   0.01  -0.01
 100   1     0.10   0.12  -0.08    -0.09  -0.11   0.08     0.03  -0.01   0.04
 101   1    -0.13  -0.07  -0.06     0.11   0.06   0.06     0.00   0.02   0.06
 102   1     0.06  -0.03   0.17    -0.05   0.03  -0.14     0.01   0.01   0.06
 103   1     0.04   0.01   0.03     0.04   0.03   0.02     0.10   0.08   0.04
 104   1    -0.03  -0.03   0.03    -0.02  -0.02   0.02    -0.06  -0.05   0.04
 105   1    -0.02   0.02  -0.02    -0.01   0.03  -0.04    -0.05   0.09  -0.11
 106   1     0.00  -0.05  -0.04    -0.01  -0.06  -0.04    -0.03  -0.43  -0.31
 107   1    -0.02   0.00   0.04    -0.03  -0.01   0.05    -0.23  -0.01   0.44
 108   1     0.01   0.05  -0.04     0.02   0.05  -0.03     0.19   0.42  -0.22
 109   1    -0.02   0.04  -0.02     0.01  -0.02   0.01    -0.02  -0.01   0.03
 110   1    -0.01  -0.01  -0.06     0.01   0.00   0.03    -0.03   0.01   0.07
 111   1     0.02  -0.02  -0.01    -0.01   0.01   0.00    -0.03   0.06   0.02
 112   1     0.00   0.01   0.00     0.00  -0.02  -0.02     0.03  -0.07   0.02
 113   1     0.03  -0.04  -0.02     0.00   0.03   0.00    -0.02  -0.06   0.01
 114   1     0.01   0.01  -0.05     0.00  -0.01   0.03    -0.01  -0.06   0.00
                    46                     47                     48
                     A                      A                      A
 Frequencies --   218.8590               222.4831               225.2682
 Red. masses --     1.5671                 1.7485                 1.1871
 Frc consts  --     0.0442                 0.0510                 0.0355
 IR Inten    --     1.4001                 2.1754                 0.3740
 Atom AN      X      Y      Z        X      Y      Z        X      Y      Z
   1   8    -0.01   0.00   0.00    -0.01   0.00  -0.01     0.00   0.00   0.00
   2  12    -0.03   0.00   0.04     0.00  -0.02   0.09     0.00   0.00   0.04
   3   8     0.00   0.01   0.01     0.00   0.04   0.02     0.00   0.02   0.01
   4   6    -0.01   0.00   0.00    -0.01   0.00   0.00     0.00   0.00   0.00
   5   7     0.02   0.01   0.02     0.01   0.01  -0.01     0.00   0.01  -0.02
   6   7    -0.03   0.00  -0.01     0.00   0.00  -0.02     0.00   0.00   0.01
   7   8    -0.01   0.00   0.00    -0.01   0.00   0.00     0.00   0.00   0.00
   8   6     0.00   0.00   0.01     0.00   0.00  -0.04    -0.01   0.01  -0.01
   9   6     0.00  -0.01  -0.01     0.00  -0.01  -0.11    -0.01   0.00  -0.01
  10   6    -0.02   0.00  -0.02     0.00   0.00  -0.04    -0.01   0.00   0.00
  11   8     0.00   0.00   0.00    -0.01   0.00  -0.01     0.00   0.00   0.00
  12   6     0.00  -0.02  -0.02     0.00   0.00  -0.01     0.00   0.00  -0.01
  13   6     0.00   0.00   0.00     0.01   0.02   0.01     0.00   0.01   0.01
  14   6    -0.01   0.00   0.00    -0.01   0.00   0.00     0.00   0.00   0.00
  15   8     0.00  -0.04  -0.04     0.00  -0.03  -0.04     0.00  -0.02  -0.02
  16   6     0.00   0.00   0.01     0.00   0.00   0.00     0.00   0.00   0.00
  17   8     0.01  -0.01   0.01     0.00  -0.01   0.00     0.00  -0.01   0.00
  18   6     0.01   0.00   0.00     0.00  -0.01  -0.02     0.00   0.00   0.00
  19   8     0.02   0.01   0.00     0.00   0.00   0.00     0.00   0.00   0.01
  20   8     0.01   0.00   0.00     0.00  -0.01  -0.01     0.00  -0.01   0.00
  21   6     0.01  -0.01   0.00     0.00  -0.01   0.00     0.01  -0.01   0.00
  22   6     0.01  -0.01   0.00     0.00  -0.01   0.00     0.00  -0.01   0.00
  23   6     0.01   0.01   0.00     0.00  -0.01   0.00     0.01  -0.01   0.00
  24   8     0.00  -0.01   0.00     0.01  -0.01   0.01     0.01  -0.01   0.00
  25   6     0.00  -0.01   0.00     0.00   0.00   0.00    -0.01  -0.02   0.00
  26   6     0.01   0.01   0.00     0.00  -0.01  -0.01     0.01   0.00   0.00
  27   6    -0.01  -0.01  -0.01     0.00   0.00  -0.02    -0.01   0.00  -0.01
  28   6    -0.01   0.02  -0.01    -0.03   0.01   0.01    -0.01   0.01   0.01
  29   6     0.02   0.02   0.00     0.01   0.01   0.00     0.01   0.01  -0.01
  30   6    -0.03   0.00   0.00     0.00   0.00   0.00     0.00   0.00   0.00
  31   6     0.04   0.01  -0.01     0.01   0.02  -0.01     0.00   0.00   0.00
  32   6     0.03  -0.03   0.00     0.01  -0.01   0.00     0.00  -0.01   0.01
  33   6     0.02  -0.05   0.00     0.00  -0.03   0.00     0.01   0.00   0.02
  34   6     0.01  -0.01   0.00     0.00  -0.02   0.00     0.02   0.01   0.01
  35   6     0.01   0.03   0.00     0.00   0.02   0.00     0.02   0.00   0.00
  36   6     0.02   0.02  -0.02     0.01   0.01  -0.01     0.00   0.00   0.00
  37   6     0.00   0.02   0.01     0.00   0.02   0.00     0.02  -0.01   0.01
  38   6    -0.02  -0.03   0.00    -0.01   0.01   0.00     0.00   0.01   0.00
  39   6    -0.01  -0.04   0.01    -0.01   0.02  -0.01     0.00   0.01   0.00
  40   6    -0.01  -0.02   0.03     0.01  -0.01  -0.02     0.01   0.00  -0.01
  41   6    -0.02   0.00   0.02     0.02  -0.02  -0.02     0.00   0.00   0.00
  42   6    -0.02   0.01   0.00     0.00   0.00   0.00     0.00   0.01   0.00
  43   6     0.00  -0.01   0.02     0.00   0.00  -0.01     0.00   0.00   0.00
  44   6     0.00   0.01  -0.01    -0.01   0.00   0.00     0.00   0.01   0.00
  45   6     0.00  -0.01  -0.07     0.00   0.00  -0.03     0.01   0.00   0.00
  46   6    -0.03   0.02   0.00    -0.01   0.01   0.01     0.01   0.00  -0.01
  47   6     0.01   0.02   0.05     0.00   0.01   0.03     0.02   0.00  -0.01
  48   6    -0.02   0.01  -0.01    -0.01   0.01  -0.01    -0.02  -0.01  -0.01
  49   6     0.04  -0.01  -0.04    -0.01   0.01   0.01     0.00   0.00  -0.01
  50   6    -0.01   0.00  -0.01     0.01   0.01   0.01     0.00   0.00   0.01
  51   6     0.02   0.01   0.01    -0.01  -0.03   0.02     0.00  -0.01   0.00
  52   6     0.02   0.03   0.01     0.01   0.00  -0.02     0.00   0.00  -0.01
  53   6    -0.01   0.01   0.01     0.01   0.03   0.06    -0.03   0.03   0.01
  54   6    -0.01   0.03  -0.01     0.01   0.01   0.09    -0.01  -0.01   0.00
  55   1     0.00  -0.01  -0.02    -0.01  -0.01  -0.11    -0.02   0.00   0.00
  56   1     0.02   0.00   0.00     0.04   0.01   0.02     0.02   0.01   0.01
  57   1    -0.02  -0.01   0.00    -0.01  -0.01  -0.01     0.00   0.00   0.00
  58   1     0.00   0.00   0.01     0.00   0.00   0.02     0.00   0.00   0.01
  59   1     0.00   0.00   0.00     0.01  -0.01   0.00     0.00  -0.01   0.00
  60   1     0.00   0.00   0.01     0.00   0.00   0.01     0.00  -0.01   0.00
  61   1     0.01  -0.01  -0.01     0.00  -0.01   0.00     0.00  -0.01   0.00
  62   1     0.01   0.01   0.00     0.01  -0.01   0.00     0.01  -0.01   0.01
  63   1     0.04   0.00   0.00    -0.11  -0.03  -0.01    -0.12  -0.04   0.00
  64   1    -0.02  -0.05   0.01     0.04   0.10  -0.04     0.03   0.08  -0.03
  65   1    -0.03   0.02  -0.02     0.08  -0.08   0.04     0.07  -0.11   0.03
  66   1    -0.05   0.04   0.02     0.06  -0.04  -0.03     0.02   0.00  -0.02
  67   1     0.05   0.04  -0.02    -0.04  -0.04   0.03     0.00   0.00   0.01
  68   1     0.01  -0.05   0.01    -0.01   0.06  -0.02     0.01   0.03   0.00
  69   1    -0.02  -0.02   0.01    -0.06  -0.01   0.04    -0.07   0.00   0.05
  70   1    -0.02  -0.01  -0.03    -0.02  -0.05  -0.10    -0.04  -0.03  -0.08
  71   1     0.00   0.00  -0.01     0.07   0.04  -0.03     0.05   0.03   0.00
  72   1    -0.05  -0.01   0.03    -0.03   0.03  -0.03    -0.02   0.01   0.00
  73   1     0.04   0.00  -0.03    -0.07   0.04   0.05    -0.02   0.01   0.01
  74   1    -0.04   0.08  -0.02    -0.01  -0.02   0.04    -0.01   0.00   0.02
  75   1     0.04  -0.05   0.01     0.02   0.00  -0.01    -0.02  -0.02   0.02
  76   1     0.02  -0.10   0.00     0.00  -0.06   0.00     0.01   0.00   0.03
  77   1     0.00  -0.02  -0.01    -0.01  -0.03   0.00     0.03   0.02   0.01
  78   1     0.02   0.01  -0.04     0.01   0.01  -0.01     0.00   0.00   0.00
  79   1     0.00   0.02   0.01     0.00   0.02   0.00     0.02  -0.01   0.03
  80   1     0.00  -0.06   0.02    -0.02   0.03  -0.01     0.01   0.01   0.00
  81   1     0.00  -0.02   0.04     0.02  -0.01  -0.03     0.01   0.00  -0.01
  82   1    -0.01   0.02   0.03     0.03  -0.04  -0.03     0.00   0.00   0.00
  83   1     0.01  -0.03   0.05     0.00   0.00  -0.02     0.00   0.01  -0.01
  84   1    -0.01   0.02  -0.02    -0.01   0.00   0.00     0.00   0.01   0.00
  85   1    -0.11  -0.03  -0.12     0.00  -0.02  -0.03     0.08  -0.01   0.04
  86   1     0.09  -0.04  -0.14     0.01   0.01  -0.05    -0.05   0.04   0.03
  87   1     0.01   0.04   0.01     0.00  -0.01  -0.05     0.01  -0.04  -0.07
  88   1    -0.04  -0.05   0.03    -0.01  -0.03   0.02     0.01   0.04  -0.04
  89   1     0.01   0.06  -0.03     0.01   0.02  -0.02    -0.02  -0.02   0.02
  90   1    -0.09   0.07   0.03    -0.04   0.04   0.02     0.05  -0.03  -0.02
  91   1     0.13   0.01  -0.01     0.07   0.00  -0.01    -0.05  -0.01   0.03
  92   1     0.03  -0.01   0.19     0.00  -0.02   0.12     0.02   0.03  -0.11
  93   1    -0.10   0.04   0.01    -0.08   0.03   0.01     0.11  -0.02   0.02
  94   1    -0.01  -0.03  -0.01     0.11  -0.12  -0.05    -0.39   0.33   0.15
  95   1    -0.05   0.01  -0.04    -0.17   0.01  -0.08     0.45   0.00   0.18
  96   1    -0.01   0.04   0.00     0.03   0.13   0.11    -0.15  -0.37  -0.38
  97   1     0.14  -0.03  -0.10    -0.06   0.03   0.04     0.02   0.00  -0.01
  98   1     0.06   0.04   0.05    -0.02  -0.01  -0.02     0.01   0.00   0.00
  99   1    -0.05  -0.03  -0.10     0.03   0.03   0.04     0.00   0.00  -0.02
 100   1    -0.23  -0.31   0.21     0.13   0.15  -0.10    -0.01  -0.03   0.03
 101   1     0.35   0.19   0.16    -0.16  -0.08  -0.06     0.03   0.03   0.03
 102   1    -0.16   0.12  -0.42     0.08  -0.04   0.21    -0.01   0.02  -0.03
 103   1     0.10   0.06   0.06    -0.18  -0.14  -0.08    -0.06  -0.04  -0.03
 104   1    -0.02  -0.06   0.05     0.08   0.13  -0.05     0.02   0.04  -0.02
 105   1     0.00   0.05  -0.09     0.06  -0.13   0.21     0.02  -0.04   0.06
 106   1     0.04   0.11   0.07     0.02   0.25   0.14     0.00   0.02   0.01
 107   1     0.04   0.04  -0.08     0.13   0.00  -0.30     0.01   0.00  -0.03
 108   1    -0.01  -0.04   0.05    -0.13  -0.24   0.08    -0.01  -0.02   0.00
 109   1    -0.02   0.01   0.02     0.03  -0.06   0.07    -0.04   0.03   0.02
 110   1    -0.02   0.00   0.01     0.01   0.05   0.17    -0.05   0.01   0.01
 111   1    -0.01   0.02   0.02    -0.02   0.13   0.03    -0.03   0.05   0.01
 112   1    -0.03   0.02  -0.04     0.06   0.00   0.13    -0.01  -0.02  -0.01
 113   1    -0.01   0.08  -0.01    -0.09   0.05   0.13    -0.01   0.01   0.01
 114   1     0.00   0.02   0.03     0.06   0.00   0.14    -0.02  -0.02   0.03
                    49                     50                     51
                     A                      A                      A
 Frequencies --   228.6459               237.9094               239.3195
 Red. masses --     1.5726                 1.2843                 1.2826
 Frc consts  --     0.0484                 0.0428                 0.0433
 IR Inten    --     5.9987                 1.2989                 0.5344
 Atom AN      X      Y      Z        X      Y      Z        X      Y      Z
   1   8     0.02  -0.01   0.02     0.02  -0.01   0.03    -0.01   0.00  -0.01
   2  12     0.00  -0.02   0.03    -0.02   0.00   0.02     0.01   0.00   0.03
   3   8    -0.02  -0.02   0.00    -0.01   0.00   0.01     0.00   0.00   0.00
   4   6     0.01   0.00   0.01     0.00   0.00   0.01     0.00   0.00   0.00
   5   7     0.00   0.00   0.00    -0.01  -0.01   0.00     0.00   0.01  -0.02
   6   7     0.01   0.00   0.01     0.00   0.01  -0.01     0.00   0.01  -0.02
   7   8     0.01   0.00   0.02     0.01   0.00   0.02    -0.01   0.00   0.00
   8   6     0.00   0.00  -0.01     0.00   0.00  -0.01     0.01   0.02  -0.01
   9   6    -0.01   0.00  -0.02     0.00   0.00  -0.02     0.02   0.02   0.01
  10   6     0.00   0.00  -0.01     0.00   0.01  -0.01     0.01   0.02   0.00
  11   8     0.00   0.02   0.00    -0.02  -0.01  -0.02     0.00   0.00   0.01
  12   6    -0.01   0.00   0.00    -0.02   0.00  -0.01     0.01  -0.01   0.00
  13   6    -0.01  -0.02  -0.01    -0.01   0.00   0.00     0.00  -0.01   0.00
  14   6     0.00   0.01  -0.01    -0.02   0.01  -0.01     0.00   0.00   0.01
  15   8    -0.02   0.00   0.01    -0.02  -0.02  -0.02     0.01  -0.01  -0.01
  16   6     0.00   0.01  -0.01    -0.02   0.00   0.00     0.00   0.00   0.00
  17   8     0.00  -0.01   0.04     0.01   0.00   0.00     0.00  -0.01   0.01
  18   6    -0.01  -0.01  -0.03     0.01   0.00  -0.01     0.00  -0.01  -0.02
  19   8     0.03  -0.01  -0.03     0.02   0.01   0.00     0.02   0.00  -0.01
  20   8     0.00   0.04   0.02     0.01   0.00  -0.01     0.00   0.00  -0.01
  21   6    -0.02   0.00   0.01     0.01   0.01   0.00    -0.01  -0.01   0.00
  22   6    -0.01   0.00   0.00     0.01   0.01   0.01     0.00  -0.01   0.00
  23   6    -0.01  -0.01  -0.04     0.01   0.01   0.00    -0.01   0.00  -0.01
  24   8    -0.04   0.01   0.03     0.00   0.00  -0.02    -0.01   0.00   0.02
  25   6     0.02   0.08  -0.03     0.00  -0.02   0.02     0.02   0.02  -0.01
  26   6     0.01  -0.11  -0.02    -0.03   0.03   0.01    -0.03  -0.03   0.01
  27   6     0.02  -0.01   0.00     0.01   0.00   0.00     0.01  -0.01  -0.01
  28   6     0.04  -0.02  -0.03    -0.01  -0.03  -0.02     0.00   0.01   0.00
  29   6     0.00   0.01   0.00    -0.01   0.00   0.00     0.00   0.01  -0.01
  30   6     0.00   0.01   0.00     0.01   0.00   0.00    -0.01   0.00  -0.01
  31   6     0.00   0.01   0.00    -0.01   0.02   0.00    -0.02   0.02  -0.01
  32   6     0.00   0.00   0.00    -0.01   0.02   0.00    -0.02   0.01   0.02
  33   6     0.00   0.00   0.01    -0.01   0.02   0.00    -0.01  -0.01   0.03
  34   6     0.00   0.00   0.00    -0.01   0.01   0.00     0.01  -0.01   0.02
  35   6     0.00   0.00   0.00    -0.01   0.00   0.00     0.01   0.01   0.00
  36   6     0.00   0.01   0.00     0.00   0.02   0.00    -0.02   0.01   0.00
  37   6     0.00   0.00   0.00     0.00  -0.01   0.00     0.00   0.01   0.00
  38   6    -0.01   0.02   0.00     0.02  -0.02  -0.01    -0.01  -0.02   0.00
  39   6    -0.01   0.02   0.00     0.00   0.00   0.00    -0.02  -0.02   0.01
  40   6     0.00   0.02  -0.01    -0.01   0.01   0.01    -0.01  -0.01   0.02
  41   6     0.00   0.01  -0.01     0.01   0.00   0.00     0.00   0.00   0.01
  42   6     0.00   0.00   0.00     0.02  -0.01   0.00     0.00   0.00  -0.01
  43   6    -0.01   0.02   0.00     0.01  -0.02  -0.01     0.00  -0.02   0.00
  44   6     0.00   0.00   0.00     0.01  -0.01   0.00     0.00  -0.01  -0.01
  45   6     0.01   0.00  -0.01     0.01   0.00  -0.01     0.01  -0.01  -0.01
  46   6     0.00   0.00   0.00     0.00   0.00   0.01     0.01   0.00  -0.01
  47   6     0.01   0.00   0.00     0.00  -0.01  -0.01    -0.01   0.00   0.01
  48   6     0.00   0.00   0.00     0.01   0.00   0.01    -0.02   0.00  -0.01
  49   6     0.00   0.01   0.00    -0.01   0.00   0.01    -0.01  -0.01  -0.01
  50   6     0.00   0.00   0.00     0.00  -0.01  -0.02     0.00  -0.01  -0.01
  51   6    -0.01  -0.01   0.03     0.01   0.01  -0.03     0.01   0.00  -0.01
  52   6     0.00   0.01  -0.02     0.00  -0.02   0.02     0.00  -0.01   0.01
  53   6    -0.01   0.00   0.01     0.02  -0.01   0.01     0.02   0.02  -0.01
  54   6     0.00  -0.01   0.01     0.00   0.02   0.02     0.02   0.04   0.00
  55   1    -0.01   0.00  -0.02     0.01   0.01  -0.02     0.01   0.02   0.03
  56   1    -0.01  -0.02   0.00     0.00   0.00   0.00     0.01  -0.01   0.01
  57   1     0.01   0.02   0.00    -0.02   0.02   0.01     0.00  -0.01   0.00
  58   1     0.01  -0.01  -0.04    -0.01  -0.02  -0.03     0.00   0.01   0.01
  59   1    -0.02   0.03   0.00    -0.05   0.03   0.02     0.01  -0.01   0.00
  60   1    -0.01   0.01  -0.02    -0.03   0.00  -0.03     0.01   0.00   0.01
  61   1    -0.01  -0.01   0.00     0.01   0.01   0.01     0.00  -0.01   0.01
  62   1    -0.03   0.01  -0.08     0.02   0.02   0.02     0.00   0.01  -0.01
  63   1     0.45   0.17  -0.08    -0.07  -0.03   0.03     0.10   0.04  -0.03
  64   1    -0.10  -0.26   0.07     0.00   0.03   0.01     0.01  -0.03   0.01
  65   1    -0.23   0.42  -0.11     0.03  -0.07   0.01    -0.02   0.10   0.00
  66   1    -0.06  -0.06   0.07     0.02   0.00   0.00     0.02  -0.05   0.02
  67   1     0.06  -0.09  -0.13    -0.07   0.01   0.07    -0.08  -0.06   0.03
  68   1     0.02  -0.26   0.01    -0.05   0.10  -0.02    -0.06   0.00  -0.02
  69   1     0.12  -0.02  -0.10    -0.02   0.02   0.03     0.05  -0.03  -0.05
  70   1     0.06   0.04   0.12     0.00  -0.04  -0.04     0.02   0.01   0.04
  71   1    -0.10  -0.05  -0.02     0.07   0.02   0.00    -0.05  -0.02  -0.03
  72   1     0.02  -0.09   0.10    -0.19  -0.27   0.39     0.03   0.06  -0.08
  73   1     0.15  -0.09  -0.12     0.37  -0.26  -0.31    -0.07   0.06   0.06
  74   1    -0.02   0.09  -0.09    -0.17   0.44  -0.14     0.03  -0.08   0.02
  75   1    -0.01  -0.01   0.01    -0.01   0.00   0.00    -0.04   0.02   0.02
  76   1     0.00  -0.01   0.01    -0.01   0.01   0.00    -0.01  -0.02   0.05
  77   1     0.00   0.00   0.00    -0.01   0.02   0.00     0.02  -0.02   0.03
  78   1     0.00   0.01   0.00     0.00   0.02   0.01    -0.02   0.01   0.01
  79   1     0.00   0.00   0.01     0.00  -0.01  -0.01     0.00   0.01   0.01
  80   1    -0.01   0.03   0.00    -0.01   0.00   0.01    -0.02  -0.02   0.02
  81   1    -0.01   0.02  -0.01    -0.03   0.02   0.02    -0.02  -0.01   0.03
  82   1     0.00   0.00  -0.01     0.01   0.00   0.00     0.02   0.00   0.01
  83   1    -0.01   0.02  -0.02     0.01  -0.01   0.00     0.00  -0.03   0.02
  84   1     0.00   0.01   0.00     0.01  -0.01   0.01     0.00  -0.01   0.00
  85   1     0.00  -0.01  -0.01     0.03  -0.02   0.01     0.32  -0.04   0.18
  86   1     0.01   0.00  -0.02    -0.01   0.02  -0.01    -0.24   0.17   0.12
  87   1     0.01   0.00  -0.02     0.01  -0.01  -0.05     0.00  -0.17  -0.31
  88   1     0.01  -0.01   0.01     0.01  -0.02   0.03    -0.01   0.14  -0.11
  89   1     0.01   0.00   0.00     0.02   0.00  -0.01    -0.10  -0.05   0.11
  90   1     0.00   0.01   0.01    -0.01   0.02   0.03     0.16  -0.10  -0.05
  91   1    -0.03  -0.01   0.02    -0.03   0.00   0.01     0.02   0.01  -0.01
  92   1     0.00   0.01  -0.04     0.00   0.01  -0.05    -0.01  -0.02   0.05
  93   1     0.04   0.00   0.02     0.03  -0.01   0.00    -0.06   0.02  -0.01
  94   1    -0.07   0.07   0.03     0.01   0.01   0.00    -0.02  -0.03  -0.01
  95   1     0.10   0.00   0.04     0.03  -0.01   0.02    -0.05   0.00  -0.03
  96   1    -0.03  -0.08  -0.07     0.01  -0.02   0.01    -0.02   0.03  -0.02
  97   1    -0.01   0.01   0.01    -0.04   0.01   0.03    -0.01  -0.02   0.00
  98   1     0.00   0.00   0.00    -0.02  -0.02  -0.02    -0.02   0.00  -0.01
  99   1     0.01   0.01   0.01     0.02   0.00   0.04    -0.02  -0.02   0.00
 100   1     0.00   0.00   0.00     0.03   0.05  -0.05     0.02   0.03  -0.04
 101   1     0.00   0.00   0.00    -0.06  -0.05  -0.05    -0.05  -0.03  -0.04
 102   1     0.00   0.00   0.00     0.03  -0.04   0.05     0.01  -0.03   0.03
 103   1    -0.12  -0.10  -0.05     0.10   0.08   0.03     0.29   0.14   0.13
 104   1     0.05   0.10  -0.02    -0.03  -0.09  -0.01    -0.13  -0.26   0.11
 105   1     0.04  -0.08   0.16    -0.04   0.07  -0.15    -0.12   0.16  -0.29
 106   1     0.01   0.05   0.01    -0.02  -0.04   0.00     0.00   0.09   0.07
 107   1     0.03   0.00  -0.07    -0.01  -0.02   0.05     0.04  -0.01  -0.09
 108   1    -0.04  -0.03  -0.01     0.02   0.00   0.02    -0.05  -0.10   0.05
 109   1    -0.01  -0.01   0.02     0.03  -0.04   0.01     0.02   0.02  -0.01
 110   1    -0.01   0.00   0.03     0.04   0.01   0.04     0.02   0.02  -0.01
 111   1    -0.01   0.03   0.01     0.01   0.00   0.01     0.01   0.02  -0.01
 112   1     0.00  -0.03   0.00     0.02   0.04   0.06     0.01   0.06   0.02
 113   1    -0.01   0.02   0.02    -0.03  -0.01   0.03     0.02   0.03   0.01
 114   1     0.00  -0.03   0.04     0.02   0.03   0.00     0.04   0.05  -0.02
                    52                     53                     54
                     A                      A                      A
 Frequencies --   240.6518               246.2932               247.7943
 Red. masses --     1.3108                 2.1847                 1.4643
 Frc consts  --     0.0447                 0.0781                 0.0530
 IR Inten    --     0.8644                 2.0232                 0.5573
 Atom AN      X      Y      Z        X      Y      Z        X      Y      Z
   1   8     0.01   0.00   0.00    -0.01   0.00   0.00     0.02   0.00  -0.01
   2  12     0.02   0.01  -0.02     0.06  -0.01  -0.01     0.01   0.02   0.01
   3   8     0.00  -0.01   0.00     0.00   0.00   0.01    -0.01  -0.04   0.02
   4   6     0.01   0.01   0.00    -0.01   0.00   0.00     0.02   0.01  -0.01
   5   7     0.01  -0.01  -0.02     0.00  -0.01   0.02     0.00   0.02   0.00
   6   7     0.01  -0.02   0.02     0.03  -0.02  -0.04     0.00   0.00  -0.01
   7   8     0.01   0.00   0.00     0.00  -0.01   0.00     0.02   0.01  -0.01
   8   6     0.01  -0.01   0.00     0.00  -0.01   0.03     0.00   0.02   0.00
   9   6     0.01  -0.02   0.02     0.00   0.00   0.05     0.00   0.01   0.00
  10   6     0.01  -0.02   0.01     0.02  -0.03   0.00     0.01   0.01   0.00
  11   8     0.00  -0.01  -0.01    -0.01  -0.02   0.00     0.01   0.01   0.00
  12   6     0.00   0.00   0.00     0.00   0.00   0.01     0.00  -0.01   0.01
  13   6     0.00   0.01   0.01     0.01   0.01   0.01    -0.01   0.01   0.03
  14   6     0.00   0.00   0.00    -0.01  -0.01   0.00     0.01   0.01   0.00
  15   8     0.00   0.00   0.00     0.02   0.01   0.01    -0.02  -0.03  -0.01
  16   6    -0.01  -0.01   0.00     0.00   0.00   0.00     0.00  -0.02  -0.01
  17   8    -0.01   0.00  -0.01    -0.01   0.00  -0.01     0.00   0.00  -0.01
  18   6    -0.01   0.01   0.02    -0.01  -0.01  -0.01     0.00   0.00   0.01
  19   8    -0.02   0.01   0.02    -0.01   0.00  -0.01    -0.01   0.02   0.03
  20   8     0.00   0.00   0.01    -0.01   0.00  -0.01     0.00   0.01   0.00
  21   6     0.00   0.00   0.00     0.00   0.01   0.00    -0.01   0.00  -0.01
  22   6    -0.01   0.00  -0.01     0.00   0.01   0.00    -0.01  -0.01  -0.03
  23   6     0.00   0.00   0.00    -0.01   0.00   0.00     0.00  -0.01  -0.03
  24   8     0.01   0.00  -0.01     0.00   0.01   0.00    -0.01   0.00   0.00
  25   6    -0.02  -0.02  -0.01     0.01   0.01   0.00    -0.02   0.00  -0.03
  26   6     0.05   0.00  -0.02    -0.03   0.00   0.00     0.05  -0.05  -0.04
  27   6     0.00   0.02   0.02     0.05   0.02   0.01    -0.01   0.04   0.09
  28   6    -0.01   0.00   0.00    -0.03   0.00   0.01     0.01   0.00   0.01
  29   6     0.01   0.00  -0.01     0.00   0.00   0.00     0.00   0.00   0.00
  30   6    -0.01   0.00   0.01     0.00   0.01  -0.02     0.01   0.00   0.00
  31   6    -0.01   0.00  -0.01     0.00  -0.01   0.01     0.00  -0.01   0.01
  32   6    -0.01   0.02   0.01     0.00   0.00  -0.01     0.00   0.00  -0.01
  33   6     0.01   0.02   0.02    -0.01   0.01  -0.01     0.00   0.01  -0.02
  34   6     0.02   0.01   0.02    -0.01   0.01  -0.01    -0.01   0.00  -0.01
  35   6     0.02  -0.01   0.00    -0.01  -0.01   0.00    -0.01  -0.01   0.00
  36   6    -0.01   0.00  -0.01     0.00  -0.01   0.01     0.00  -0.01   0.01
  37   6     0.00   0.00   0.01     0.00  -0.01  -0.01     0.00  -0.01  -0.01
  38   6    -0.02   0.01   0.01    -0.04   0.03  -0.01    -0.01  -0.01   0.00
  39   6     0.00   0.00  -0.01     0.00   0.00   0.01    -0.02   0.00   0.01
  40   6     0.01  -0.02  -0.02     0.10  -0.04   0.01    -0.03   0.02   0.02
  41   6    -0.02   0.00   0.00     0.07   0.01   0.00    -0.01   0.01   0.01
  42   6    -0.03   0.00   0.00    -0.01   0.06   0.01     0.02  -0.01  -0.01
  43   6    -0.01   0.02   0.01    -0.05   0.02  -0.02    -0.01  -0.01   0.01
  44   6    -0.01   0.01  -0.01    -0.03   0.05   0.03     0.01  -0.01  -0.01
  45   6     0.01  -0.01  -0.01    -0.01   0.01   0.02    -0.01   0.01   0.02
  46   6     0.00   0.00  -0.02    -0.01   0.00   0.01    -0.01   0.00   0.01
  47   6    -0.03  -0.01   0.00     0.00  -0.01  -0.03     0.01   0.00  -0.02
  48   6    -0.02   0.01   0.01     0.01  -0.01   0.00     0.01  -0.01   0.00
  49   6     0.02   0.01  -0.02    -0.06  -0.01  -0.02    -0.01  -0.01   0.01
  50   6     0.00   0.02   0.00     0.01   0.03   0.14    -0.01  -0.02  -0.03
  51   6    -0.01  -0.01   0.05    -0.04  -0.01   0.01     0.00  -0.01   0.01
  52   6     0.00   0.02  -0.01    -0.01   0.04  -0.11     0.00   0.00   0.00
  53   6     0.00  -0.01   0.00    -0.01  -0.02  -0.02     0.00   0.02  -0.01
  54   6     0.01  -0.02  -0.02     0.01  -0.08  -0.03     0.01   0.01   0.01
  55   1     0.00  -0.02   0.02    -0.01  -0.01   0.05     0.00   0.01   0.00
  56   1    -0.02   0.02  -0.01     0.00   0.01   0.01    -0.03   0.05  -0.01
  57   1    -0.01   0.01   0.01    -0.02  -0.01   0.01     0.01   0.01   0.00
  58   1    -0.01  -0.01   0.00     0.00   0.00   0.01    -0.01  -0.02   0.00
  59   1    -0.02   0.00   0.01     0.00   0.00   0.00    -0.02  -0.02   0.00
  60   1    -0.01  -0.02  -0.01     0.00   0.00   0.01     0.00  -0.04  -0.02
  61   1    -0.01   0.00  -0.02     0.00   0.01   0.01    -0.01  -0.02  -0.03
  62   1    -0.02  -0.01  -0.02     0.00   0.00   0.00    -0.03  -0.01  -0.06
  63   1    -0.06  -0.02   0.01     0.01   0.01   0.00     0.02   0.01  -0.04
  64   1    -0.01   0.00  -0.02     0.01   0.01   0.00    -0.03  -0.03  -0.03
  65   1     0.00  -0.06  -0.01     0.01   0.02   0.01    -0.04   0.03  -0.04
  66   1    -0.06   0.06  -0.01     0.03  -0.03  -0.01    -0.11   0.04   0.03
  67   1     0.14   0.07  -0.11    -0.08  -0.04   0.05     0.18   0.03  -0.18
  68   1     0.10  -0.11   0.03    -0.05   0.06  -0.02     0.11  -0.26   0.03
  69   1    -0.12   0.06   0.13     0.00   0.06   0.05    -0.32   0.16   0.36
  70   1    -0.04  -0.06  -0.11     0.05  -0.05  -0.04    -0.11  -0.15  -0.26
  71   1     0.15   0.06   0.05     0.14   0.06   0.01     0.37   0.13   0.18
  72   1    -0.07  -0.08   0.13    -0.10  -0.06   0.10     0.04   0.02  -0.03
  73   1     0.11  -0.07  -0.09     0.07  -0.04  -0.05    -0.04   0.01   0.03
  74   1    -0.05   0.15  -0.03    -0.06   0.14  -0.01     0.03  -0.06   0.02
  75   1    -0.02   0.02   0.02     0.01   0.00  -0.01     0.01   0.00  -0.01
  76   1     0.01   0.03   0.03    -0.01   0.02  -0.02     0.00   0.02  -0.03
  77   1     0.03   0.01   0.02    -0.01   0.01  -0.01    -0.01   0.01  -0.01
  78   1    -0.01   0.00   0.00     0.00  -0.01   0.01     0.00  -0.01   0.00
  79   1     0.01   0.00   0.03    -0.01  -0.01  -0.02     0.00  -0.01  -0.02
  80   1     0.02  -0.01  -0.02    -0.03  -0.01   0.03    -0.02   0.00   0.02
  81   1     0.03  -0.03  -0.03     0.17  -0.10   0.01    -0.05   0.03   0.03
  82   1    -0.03  -0.01  -0.01     0.10  -0.01   0.00    -0.01   0.02   0.01
  83   1    -0.01   0.02   0.01    -0.04   0.01  -0.02    -0.01  -0.01   0.01
  84   1    -0.02   0.01  -0.03    -0.02   0.05   0.06     0.02  -0.01   0.00
  85   1     0.28  -0.04   0.16    -0.05   0.02  -0.01    -0.08   0.03  -0.02
  86   1    -0.23   0.15   0.11     0.02  -0.02   0.02     0.04  -0.04   0.00
  87   1    -0.01  -0.16  -0.28    -0.01   0.03   0.07    -0.01   0.04   0.10
  88   1    -0.03   0.17  -0.14     0.00  -0.06   0.06     0.01  -0.09   0.07
  89   1    -0.12  -0.05   0.12     0.04   0.02  -0.04     0.06   0.03  -0.07
  90   1     0.17  -0.11  -0.07    -0.07   0.04   0.03    -0.10   0.06   0.03
  91   1     0.03   0.03  -0.04    -0.02   0.00  -0.02    -0.01   0.00  -0.01
  92   1    -0.03  -0.06   0.07     0.00   0.01  -0.06     0.01   0.01  -0.04
  93   1    -0.12   0.00  -0.04     0.03  -0.02  -0.03     0.03  -0.01  -0.02
  94   1     0.06  -0.08  -0.02     0.02   0.00  -0.01     0.01   0.00   0.00
  95   1    -0.16   0.00  -0.02     0.03  -0.01   0.00     0.03  -0.01   0.00
  96   1     0.01   0.12   0.09     0.01  -0.03   0.01     0.01  -0.02   0.00
  97   1     0.08   0.01  -0.05     0.01  -0.08  -0.03    -0.01  -0.01   0.01
  98   1     0.04   0.03   0.04    -0.07   0.05   0.01    -0.02   0.01   0.00
  99   1    -0.02   0.00  -0.05    -0.14  -0.04  -0.07    -0.01  -0.02   0.02
 100   1    -0.03  -0.06   0.05     0.03  -0.10   0.17     0.01   0.06  -0.07
 101   1     0.09   0.06   0.05     0.04   0.11   0.23    -0.08  -0.06  -0.08
 102   1    -0.03   0.06  -0.08    -0.01   0.04   0.10     0.02  -0.05   0.03
 103   1    -0.17  -0.11  -0.05     0.14   0.02   0.07     0.16   0.06   0.08
 104   1     0.08   0.17  -0.01    -0.13  -0.16   0.11    -0.08  -0.15   0.08
 105   1     0.08  -0.11   0.23    -0.13   0.08  -0.11    -0.08   0.09  -0.15
 106   1     0.02   0.00  -0.03     0.08   0.24   0.04     0.00   0.04   0.04
 107   1    -0.01   0.03   0.00     0.12   0.04  -0.39     0.02   0.00  -0.05
 108   1     0.01   0.06  -0.04    -0.17  -0.16  -0.07    -0.03  -0.05   0.02
 109   1     0.00   0.00  -0.01    -0.02   0.03  -0.03     0.00   0.02  -0.01
 110   1    -0.01  -0.01  -0.01    -0.01  -0.03  -0.07     0.00   0.02  -0.01
 111   1     0.00  -0.01   0.00     0.00  -0.06  -0.01     0.00   0.02  -0.01
 112   1     0.00  -0.03  -0.05    -0.01  -0.18  -0.18     0.02   0.03   0.04
 113   1     0.04  -0.01  -0.03     0.07   0.06  -0.05    -0.01  -0.01   0.02
 114   1     0.00  -0.03  -0.01    -0.05  -0.15   0.11     0.02   0.02   0.00
                    55                     56                     57
                     A                      A                      A
 Frequencies --   252.4117               256.6555               259.1650
 Red. masses --     2.6952                 2.0346                 2.0479
 Frc consts  --     0.1012                 0.0790                 0.0810
 IR Inten    --     0.1269                 5.5474                 1.8738
 Atom AN      X      Y      Z        X      Y      Z        X      Y      Z
   1   8    -0.07   0.02  -0.04     0.00  -0.01   0.02    -0.02   0.00   0.00
   2  12     0.00  -0.03  -0.05     0.05   0.02   0.04    -0.03  -0.01   0.00
   3   8     0.04   0.02  -0.02    -0.01   0.05   0.00     0.01   0.06  -0.01
   4   6    -0.02  -0.02   0.00    -0.01   0.00   0.00    -0.01  -0.01   0.00
   5   7    -0.01  -0.03  -0.01     0.01   0.03  -0.02    -0.01  -0.02   0.02
   6   7    -0.01   0.00   0.00     0.02  -0.02   0.01     0.00   0.01  -0.03
   7   8    -0.03  -0.01  -0.04    -0.01  -0.01   0.02    -0.01  -0.01   0.00
   8   6     0.01  -0.02   0.00     0.02   0.03  -0.01    -0.01  -0.02   0.01
   9   6     0.01   0.00   0.00     0.03   0.00   0.00    -0.01   0.00   0.00
  10   6     0.00   0.01   0.00     0.04  -0.01   0.01    -0.02   0.00  -0.01
  11   8     0.02  -0.10   0.04    -0.01   0.02  -0.02     0.00  -0.01   0.00
  12   6     0.05   0.00   0.03    -0.01   0.01  -0.02     0.01   0.02   0.00
  13   6     0.04   0.03   0.00    -0.01   0.01  -0.01     0.01   0.02  -0.01
  14   6    -0.01  -0.05   0.04    -0.01   0.01  -0.01     0.00  -0.01   0.01
  15   8     0.12   0.01   0.03    -0.01   0.02  -0.02     0.03   0.03   0.01
  16   6     0.00  -0.01   0.03     0.00   0.02   0.00     0.00   0.01   0.01
  17   8    -0.03  -0.01  -0.02     0.00   0.00   0.02    -0.01   0.00   0.01
  18   6    -0.01  -0.01   0.00    -0.01   0.01   0.02    -0.01   0.01   0.04
  19   8    -0.04  -0.02  -0.01     0.00   0.01   0.02    -0.05  -0.01   0.02
  20   8    -0.03  -0.01   0.00     0.01  -0.02   0.01     0.01  -0.01   0.04
  21   6    -0.03  -0.01  -0.01     0.01  -0.02   0.00     0.00  -0.01   0.00
  22   6    -0.02  -0.01  -0.02     0.00  -0.01   0.00    -0.02  -0.01  -0.02
  23   6    -0.02  -0.01   0.00     0.01  -0.01   0.01     0.02  -0.01   0.02
  24   8    -0.02   0.01   0.03     0.02  -0.02   0.00     0.02  -0.01   0.00
  25   6     0.04   0.05  -0.03    -0.02  -0.04   0.00    -0.03  -0.03  -0.02
  26   6     0.00  -0.01  -0.01     0.06   0.00  -0.01     0.16   0.02  -0.04
  27   6     0.12   0.05   0.02    -0.05  -0.03  -0.07    -0.02  -0.01  -0.06
  28   6    -0.07   0.08   0.04     0.00  -0.02  -0.01    -0.02   0.01   0.01
  29   6    -0.02   0.01   0.00     0.00   0.01  -0.01    -0.01  -0.01   0.01
  30   6    -0.01   0.00   0.01    -0.01  -0.01   0.00     0.02   0.00  -0.01
  31   6    -0.03   0.05   0.00    -0.02   0.01   0.01     0.01   0.00  -0.01
  32   6    -0.03   0.01   0.00    -0.02   0.02   0.00     0.00  -0.01  -0.01
  33   6    -0.04  -0.05   0.02    -0.02   0.01   0.00     0.00  -0.02  -0.01
  34   6    -0.03  -0.02   0.01    -0.01  -0.01   0.00    -0.01   0.00  -0.01
  35   6    -0.02   0.03  -0.01    -0.01  -0.01  -0.02    -0.01   0.01   0.01
  36   6    -0.01   0.04   0.02    -0.01   0.01   0.04     0.00   0.00  -0.02
  37   6    -0.01   0.03  -0.02     0.00  -0.02  -0.03     0.00   0.01   0.01
  38   6     0.00  -0.01   0.01    -0.02   0.00   0.01    -0.01   0.00  -0.01
  39   6     0.01  -0.01   0.00    -0.01  -0.02   0.00    -0.02   0.02   0.03
  40   6    -0.02  -0.01  -0.01    -0.01  -0.03  -0.01    -0.02   0.04   0.04
  41   6    -0.02  -0.01   0.00    -0.04  -0.01   0.00     0.02   0.03   0.02
  42   6    -0.01  -0.01   0.00    -0.03  -0.01  -0.01     0.05   0.01   0.00
  43   6     0.01   0.00   0.02    -0.02   0.00   0.03    -0.01   0.00  -0.02
  44   6     0.00  -0.01  -0.01    -0.02   0.00  -0.03     0.03  -0.01   0.03
  45   6     0.01   0.02   0.00    -0.02   0.04   0.09     0.00  -0.01  -0.04
  46   6     0.01   0.01   0.05     0.00  -0.01   0.06     0.00   0.01  -0.02
  47   6     0.03   0.02   0.00    -0.01  -0.01  -0.09     0.02   0.01   0.04
  48   6    -0.01  -0.01  -0.06    -0.01  -0.04  -0.05     0.01   0.02   0.02
  49   6     0.02   0.00  -0.01     0.02   0.00  -0.03    -0.03  -0.01   0.05
  50   6     0.00   0.00  -0.03    -0.01   0.01  -0.03     0.00  -0.03   0.01
  51   6     0.02   0.00   0.02     0.00  -0.02   0.07    -0.02   0.01  -0.04
  52   6     0.01   0.00   0.04    -0.01   0.01   0.02     0.01   0.01  -0.06
  53   6     0.05  -0.04   0.01     0.03   0.03  -0.01     0.02  -0.04   0.01
  54   6     0.01   0.04  -0.01     0.05   0.01   0.00    -0.02  -0.02   0.01
  55   1     0.02   0.01   0.00     0.01  -0.01   0.01     0.01   0.00   0.01
  56   1     0.01   0.04  -0.01     0.03  -0.01   0.02     0.02   0.00   0.01
  57   1    -0.06  -0.07   0.04     0.01   0.01  -0.02    -0.01  -0.01   0.00
  58   1    -0.02   0.02   0.09     0.02   0.01  -0.03     0.00   0.01   0.01
  59   1     0.05  -0.06   0.00     0.00   0.03   0.00     0.01   0.00   0.00
  60   1     0.02  -0.02   0.06     0.00   0.03   0.00     0.00   0.01   0.02
  61   1    -0.03   0.00   0.00     0.00  -0.01  -0.02    -0.01  -0.02  -0.04
  62   1    -0.02   0.00   0.00    -0.02  -0.03   0.00    -0.04  -0.04  -0.03
  63   1     0.12   0.06  -0.08    -0.07  -0.04   0.03    -0.07  -0.04   0.02
  64   1     0.04   0.00  -0.04    -0.01  -0.01  -0.01    -0.01  -0.03  -0.04
  65   1     0.00   0.14   0.01     0.01  -0.09   0.00    -0.01  -0.08  -0.02
  66   1     0.04  -0.03  -0.04    -0.04   0.05   0.00    -0.10   0.15  -0.05
  67   1    -0.03  -0.03   0.00     0.15   0.06  -0.10     0.37   0.17  -0.25
  68   1     0.01   0.04  -0.01     0.11  -0.11   0.04     0.28  -0.23   0.09
  69   1     0.07   0.14   0.05     0.11  -0.14  -0.20     0.13  -0.09  -0.19
  70   1     0.14  -0.05  -0.02    -0.01   0.10   0.08     0.03   0.09   0.10
  71   1     0.24   0.10   0.03    -0.27  -0.07  -0.13    -0.21  -0.04  -0.12
  72   1    -0.23   0.02   0.05     0.01  -0.03   0.03    -0.07  -0.01   0.03
  73   1     0.05   0.10   0.03     0.02  -0.05  -0.04     0.02   0.01  -0.01
  74   1    -0.11   0.25   0.04     0.00   0.00  -0.02    -0.04   0.08   0.01
  75   1    -0.02   0.02  -0.01    -0.01   0.01   0.00     0.01  -0.01  -0.01
  76   1    -0.04  -0.10   0.04    -0.02   0.02   0.01     0.00  -0.03  -0.01
  77   1    -0.02  -0.04   0.02     0.00  -0.02   0.01    -0.02   0.00  -0.01
  78   1    -0.01   0.06   0.06    -0.01   0.02   0.06     0.00   0.00  -0.02
  79   1    -0.01   0.02  -0.04     0.00  -0.02  -0.03    -0.01   0.01   0.00
  80   1     0.02  -0.01  -0.01     0.02  -0.02  -0.02    -0.04   0.01   0.04
  81   1    -0.02   0.00  -0.01     0.00  -0.04  -0.02    -0.04   0.07   0.07
  82   1    -0.03   0.00   0.00    -0.05   0.00   0.00     0.02   0.04   0.03
  83   1     0.01   0.00   0.02    -0.01   0.00   0.04    -0.01  -0.01  -0.02
  84   1     0.00  -0.02  -0.02    -0.03  -0.01  -0.06     0.05  -0.01   0.07
  85   1     0.11  -0.01   0.07     0.07   0.08   0.13     0.04  -0.04  -0.01
  86   1    -0.06   0.08   0.04    -0.11   0.07   0.16    -0.03   0.03  -0.05
  87   1     0.02  -0.03  -0.11    -0.04  -0.01   0.03     0.00  -0.04  -0.09
  88   1     0.08  -0.22   0.23     0.07  -0.28   0.27    -0.01   0.04  -0.04
  89   1     0.17   0.04  -0.18     0.20   0.05  -0.21    -0.02   0.01   0.01
  90   1    -0.21   0.17   0.12    -0.28   0.18   0.13     0.02  -0.01  -0.03
  91   1     0.04  -0.01   0.01     0.00   0.04  -0.10     0.00  -0.03   0.06
  92   1     0.04   0.06   0.01    -0.01  -0.01  -0.09     0.02   0.03   0.02
  93   1     0.06   0.02   0.02    -0.02  -0.04  -0.12     0.05   0.02   0.07
  94   1    -0.09   0.02  -0.02     0.00  -0.07  -0.05     0.00   0.06   0.02
  95   1     0.09   0.01  -0.06    -0.02  -0.03  -0.09     0.05   0.01   0.05
  96   1    -0.04  -0.09  -0.13     0.00  -0.03  -0.04     0.00  -0.01   0.01
  97   1    -0.06   0.02   0.03     0.14  -0.02  -0.11    -0.21   0.02   0.16
  98   1     0.02  -0.08  -0.07     0.03   0.08   0.08    -0.05  -0.11  -0.12
  99   1     0.10   0.05   0.01    -0.09  -0.05  -0.08     0.13   0.05   0.12
 100   1    -0.02   0.00  -0.02     0.00   0.02  -0.04     0.00   0.01   0.00
 101   1     0.04   0.00  -0.04     0.01   0.00  -0.04    -0.05  -0.05  -0.01
 102   1    -0.01   0.02  -0.06    -0.01   0.03  -0.03     0.02  -0.07   0.04
 103   1    -0.06  -0.04  -0.02     0.07  -0.03   0.07     0.07   0.07   0.01
 104   1     0.06   0.08  -0.01    -0.03  -0.04   0.12    -0.07  -0.10  -0.02
 105   1     0.07  -0.05   0.10    -0.01   0.00   0.04    -0.08   0.08  -0.15
 106   1    -0.01  -0.05   0.00     0.00   0.04   0.04     0.05   0.06  -0.02
 107   1    -0.03   0.00   0.10     0.00   0.02  -0.01     0.04   0.01  -0.14
 108   1     0.05   0.05   0.03    -0.02   0.00   0.03    -0.04  -0.03  -0.07
 109   1     0.07  -0.08   0.01     0.03   0.03  -0.02     0.02  -0.05   0.01
 110   1     0.08  -0.01   0.03     0.02   0.03  -0.01     0.03  -0.03   0.00
 111   1     0.04  -0.05   0.01     0.02   0.03  -0.02     0.02  -0.06   0.01
 112   1     0.00   0.08   0.03     0.04   0.03   0.01     0.00  -0.05  -0.01
 113   1     0.01   0.00  -0.01     0.05  -0.01   0.00    -0.03   0.01   0.02
 114   1     0.04   0.07  -0.05     0.06   0.02  -0.03    -0.03  -0.04   0.05
                    58                     59                     60
                     A                      A                      A
 Frequencies --   260.3529               267.0370               268.2425
 Red. masses --     1.6000                 1.3968                 1.8715
 Frc consts  --     0.0639                 0.0587                 0.0793
 IR Inten    --     1.4389                 0.6833                 0.5601
 Atom AN      X      Y      Z        X      Y      Z        X      Y      Z
   1   8    -0.03   0.00  -0.01     0.00   0.00   0.00    -0.02   0.00   0.00
   2  12     0.02   0.02   0.02    -0.01  -0.02   0.00     0.02   0.02   0.00
   3   8     0.01   0.05   0.00     0.00   0.00   0.01     0.01   0.02  -0.01
   4   6    -0.02  -0.01   0.00     0.00   0.00   0.00    -0.01  -0.01   0.00
   5   7     0.01   0.03  -0.02     0.00  -0.02  -0.01    -0.01   0.03   0.03
   6   7     0.00   0.01   0.02     0.00   0.00  -0.03     0.00   0.01  -0.01
   7   8    -0.02  -0.01  -0.01     0.00   0.00   0.00    -0.01  -0.01  -0.01
   8   6     0.00   0.03  -0.01     0.00  -0.01   0.00    -0.01   0.03   0.00
   9   6     0.00   0.01   0.00     0.01   0.00   0.01    -0.01   0.01  -0.01
  10   6     0.00   0.01   0.01     0.00   0.00  -0.01     0.00   0.01   0.00
  11   8     0.00  -0.03   0.01     0.00   0.00   0.00     0.00  -0.02   0.00
  12   6     0.02   0.01   0.00     0.00   0.00   0.00     0.01   0.01   0.00
  13   6     0.01   0.03  -0.01     0.00   0.00   0.01     0.01   0.02  -0.01
  14   6    -0.01  -0.02   0.01     0.00   0.00   0.00     0.00  -0.01   0.01
  15   8     0.06   0.01  -0.01     0.00   0.00   0.00     0.04   0.02   0.00
  16   6     0.00   0.01   0.01     0.00   0.00   0.00     0.00   0.00   0.01
  17   8    -0.02  -0.02   0.01     0.00   0.00   0.00    -0.01  -0.01   0.00
  18   6    -0.01   0.00  -0.01     0.00   0.00   0.00    -0.01   0.00   0.00
  19   8    -0.01   0.00   0.00    -0.01  -0.01   0.00     0.00   0.00   0.00
  20   8    -0.01  -0.03  -0.01     0.00   0.01   0.01     0.00  -0.01   0.00
  21   6    -0.01  -0.03   0.00     0.00   0.00   0.00    -0.01  -0.02   0.00
  22   6    -0.01  -0.02  -0.01     0.00   0.00   0.00    -0.01  -0.02  -0.01
  23   6    -0.01  -0.02   0.00     0.00   0.00   0.00    -0.01  -0.01   0.00
  24   8     0.00  -0.01   0.03     0.00   0.00   0.00     0.00  -0.01   0.02
  25   6     0.01   0.01  -0.02     0.00   0.00   0.00     0.02   0.01  -0.02
  26   6     0.02  -0.03  -0.01     0.02   0.01  -0.01     0.00  -0.01   0.00
  27   6     0.03   0.03  -0.03     0.01   0.00   0.00     0.02   0.01  -0.03
  28   6    -0.03   0.02   0.02     0.00   0.00   0.00    -0.02   0.01   0.01
  29   6     0.01   0.01  -0.01    -0.01   0.01  -0.01     0.00  -0.01   0.02
  30   6    -0.01   0.00   0.01     0.01  -0.01  -0.01     0.01   0.00   0.00
  31   6     0.00  -0.01   0.00    -0.02   0.04   0.00     0.03  -0.05   0.00
  32   6     0.00   0.02   0.01    -0.02   0.02   0.01     0.03  -0.03  -0.04
  33   6     0.01   0.04   0.00    -0.02  -0.03   0.03     0.02   0.04  -0.07
  34   6     0.02   0.01   0.01    -0.01  -0.02   0.02    -0.02   0.03  -0.04
  35   6     0.01  -0.02   0.00     0.00   0.01  -0.01    -0.02  -0.01   0.02
  36   6     0.00  -0.03   0.01     0.00   0.03   0.01     0.01  -0.05  -0.03
  37   6     0.01  -0.03   0.00     0.00   0.02  -0.02    -0.02  -0.02   0.04
  38   6     0.00   0.00   0.01    -0.01  -0.02  -0.01     0.00   0.00   0.00
  39   6     0.01   0.00  -0.01    -0.02  -0.01   0.03     0.00   0.00   0.01
  40   6    -0.01   0.00  -0.01    -0.01   0.01   0.04    -0.01   0.00   0.01
  41   6    -0.02   0.00  -0.01     0.02   0.00   0.02     0.00   0.00   0.00
  42   6    -0.01  -0.01   0.00     0.02   0.00   0.00     0.00   0.00  -0.01
  43   6     0.00   0.00   0.01     0.00  -0.01  -0.01     0.01   0.00   0.01
  44   6     0.00  -0.01  -0.01     0.01   0.00   0.00     0.00   0.00  -0.02
  45   6     0.02  -0.01   0.04     0.04   0.00   0.00    -0.05  -0.02  -0.02
  46   6     0.00  -0.03   0.01     0.00   0.00   0.04    -0.01   0.01  -0.08
  47   6    -0.03  -0.02  -0.05     0.01   0.02  -0.02     0.01  -0.02   0.07
  48   6    -0.01  -0.01   0.00    -0.02  -0.02  -0.06     0.06   0.03   0.12
  49   6     0.02   0.00  -0.02    -0.03   0.00   0.02    -0.02  -0.01  -0.01
  50   6     0.00   0.01  -0.03    -0.03  -0.03   0.00    -0.02  -0.01  -0.03
  51   6     0.00  -0.02   0.03     0.01   0.03  -0.04     0.01   0.00   0.02
  52   6    -0.01  -0.01   0.02     0.02   0.02  -0.03     0.00   0.00   0.03
  53   6    -0.03   0.05  -0.02     0.03  -0.02   0.00    -0.02   0.03  -0.01
  54   6     0.01   0.02   0.00     0.01   0.00   0.00     0.00   0.01   0.01
  55   1    -0.01   0.01   0.00     0.01   0.01   0.02    -0.02   0.01  -0.02
  56   1     0.03   0.03   0.00     0.01   0.00   0.01     0.01   0.01   0.00
  57   1    -0.02  -0.03   0.01     0.00   0.00   0.00    -0.01  -0.02   0.01
  58   1     0.00   0.02   0.02     0.00   0.00   0.00     0.00   0.01   0.01
  59   1     0.02  -0.01   0.00     0.00   0.00   0.00     0.02  -0.01   0.00
  60   1     0.01   0.02   0.03     0.00   0.00   0.00     0.00   0.01   0.02
  61   1    -0.02  -0.02  -0.01     0.00   0.00  -0.01    -0.01  -0.02   0.00
  62   1    -0.02  -0.03  -0.01     0.00   0.00   0.00    -0.01  -0.01   0.00
  63   1     0.03   0.01  -0.04     0.00   0.00   0.00     0.05   0.01  -0.03
  64   1     0.02   0.00  -0.04     0.00   0.00  -0.01     0.03   0.00  -0.03
  65   1     0.01   0.03   0.01     0.00   0.00   0.00     0.02   0.04   0.01
  66   1     0.00  -0.02  -0.01    -0.01   0.02  -0.01     0.01  -0.02   0.00
  67   1     0.03  -0.02  -0.04     0.04   0.03  -0.02    -0.01  -0.03   0.00
  68   1     0.04  -0.05   0.01     0.03  -0.01   0.01     0.00   0.00   0.00
  69   1     0.06   0.01  -0.06     0.01   0.00   0.00     0.06   0.00  -0.06
  70   1     0.05   0.03   0.01     0.01  -0.01  -0.01     0.04   0.02   0.01
  71   1    -0.01   0.03  -0.05     0.01   0.00  -0.01    -0.01   0.02  -0.05
  72   1    -0.13  -0.04   0.09     0.00   0.01  -0.01    -0.08  -0.02   0.05
  73   1     0.07  -0.01  -0.03    -0.01   0.01   0.01     0.03   0.00  -0.01
  74   1    -0.07   0.17   0.00     0.00  -0.01   0.01    -0.04   0.09   0.01
  75   1    -0.01   0.02   0.01    -0.03   0.03   0.02     0.05  -0.04  -0.04
  76   1     0.01   0.07   0.00    -0.02  -0.06   0.05     0.02   0.08  -0.11
  77   1     0.03   0.01   0.01     0.01  -0.04   0.04    -0.05   0.05  -0.07
  78   1     0.00  -0.04   0.00    -0.01   0.03   0.04     0.02  -0.05  -0.07
  79   1     0.01  -0.02   0.01     0.00   0.01  -0.02    -0.02  -0.02   0.01
  80   1     0.02   0.00  -0.02    -0.04  -0.01   0.04     0.00   0.00   0.01
  81   1    -0.01   0.00  -0.02    -0.02   0.01   0.06    -0.01   0.01   0.01
  82   1    -0.03   0.00  -0.01     0.05   0.01   0.03     0.01   0.01   0.01
  83   1     0.00   0.00   0.01     0.00  -0.02   0.01     0.01   0.00   0.01
  84   1    -0.01  -0.01  -0.03     0.01   0.00   0.02    -0.01   0.00  -0.02
  85   1    -0.26   0.03  -0.14    -0.07  -0.02  -0.05     0.04   0.00   0.02
  86   1     0.27  -0.22  -0.05     0.15  -0.08  -0.05    -0.15   0.07   0.01
  87   1     0.06   0.18   0.33     0.08   0.10   0.08    -0.09  -0.11  -0.09
  88   1    -0.08   0.24  -0.20    -0.03   0.11  -0.05     0.00  -0.03  -0.04
  89   1    -0.22  -0.11   0.27    -0.11  -0.07   0.16     0.06   0.07  -0.12
  90   1     0.30  -0.21  -0.04     0.16  -0.08   0.05    -0.11   0.03  -0.12
  91   1    -0.03   0.04  -0.06     0.03   0.02  -0.04    -0.05  -0.08   0.11
  92   1    -0.04  -0.05  -0.05     0.01   0.02   0.00     0.01   0.02   0.00
  93   1    -0.06  -0.04  -0.08    -0.01   0.01  -0.04     0.10  -0.01   0.12
  94   1     0.03  -0.05  -0.01    -0.05  -0.05  -0.04     0.09   0.14   0.07
  95   1    -0.06  -0.02  -0.01    -0.01   0.00  -0.10     0.09   0.01   0.20
  96   1     0.01   0.03   0.03    -0.03  -0.03  -0.09     0.06   0.01   0.15
  97   1    -0.03   0.01   0.01     0.34  -0.10  -0.19     0.33  -0.09  -0.21
  98   1     0.03  -0.06  -0.06    -0.06   0.34   0.34    -0.02   0.29   0.28
  99   1     0.07   0.04  -0.02    -0.42  -0.25  -0.04    -0.37  -0.21  -0.09
 100   1    -0.01   0.01  -0.03     0.00   0.05  -0.05     0.00   0.07  -0.08
 101   1     0.02   0.00  -0.04    -0.14  -0.08  -0.04    -0.11  -0.06  -0.08
 102   1    -0.01   0.02  -0.04     0.02  -0.10   0.08     0.01  -0.06   0.04
 103   1     0.08  -0.01   0.06    -0.10   0.03  -0.06     0.01  -0.01   0.02
 104   1    -0.04  -0.08   0.08     0.06   0.11  -0.10     0.01   0.01   0.03
 105   1    -0.04   0.02  -0.02     0.06  -0.02   0.01     0.02  -0.01   0.03
 106   1    -0.03   0.01   0.03     0.05  -0.01  -0.04    -0.02  -0.01   0.02
 107   1     0.00  -0.02   0.01    -0.01   0.04  -0.01    -0.01   0.00   0.05
 108   1    -0.02  -0.04   0.04     0.04   0.06  -0.05     0.02   0.01   0.04
 109   1    -0.04   0.06  -0.02     0.04  -0.04   0.00    -0.03   0.05   0.00
 110   1    -0.06   0.03  -0.01     0.05  -0.01   0.00    -0.03   0.02  -0.02
 111   1    -0.03   0.07  -0.02     0.02  -0.04   0.00    -0.01   0.03   0.00
 112   1     0.00   0.03   0.01     0.01   0.01   0.02     0.01   0.02   0.04
 113   1     0.01   0.00   0.00     0.00  -0.01   0.01    -0.02  -0.02   0.02
 114   1     0.01   0.03  -0.02     0.01   0.01  -0.01     0.00   0.02  -0.01
                    61                     62                     63
                     A                      A                      A
 Frequencies --   274.0587               277.2842               279.4246
 Red. masses --     2.5132                 2.2843                 3.6772
 Frc consts  --     0.1112                 0.1035                 0.1692
 IR Inten    --     3.6483                 1.3633                 1.8123
 Atom AN      X      Y      Z        X      Y      Z        X      Y      Z
   1   8    -0.01   0.00   0.00    -0.01   0.00   0.00     0.02  -0.01   0.02
   2  12    -0.04   0.02   0.01    -0.03  -0.02  -0.01     0.00  -0.02  -0.02
   3   8     0.01   0.02   0.01     0.00  -0.01  -0.02     0.02   0.01   0.01
   4   6     0.00   0.00   0.00     0.00   0.00   0.00     0.00   0.01   0.00
   5   7     0.03   0.01  -0.08     0.00  -0.04  -0.06    -0.01  -0.02   0.00
   6   7    -0.04   0.01  -0.01     0.01   0.02   0.11     0.02   0.00   0.02
   7   8     0.00   0.00   0.00     0.00   0.00   0.00     0.01   0.00   0.02
   8   6    -0.01   0.00  -0.02    -0.01  -0.04  -0.03     0.00  -0.01   0.00
   9   6    -0.01   0.00   0.03    -0.01  -0.02  -0.02     0.00   0.00  -0.01
  10   6    -0.03   0.01   0.01    -0.01   0.00   0.03     0.01  -0.01   0.00
  11   8     0.00  -0.01   0.00     0.00  -0.01   0.01    -0.02   0.04  -0.03
  12   6     0.01   0.00   0.01     0.01   0.00   0.00    -0.02   0.03   0.01
  13   6     0.00   0.01   0.01     0.00  -0.01  -0.01     0.00   0.02   0.03
  14   6     0.00  -0.01   0.01     0.00  -0.01   0.01    -0.01   0.02  -0.04
  15   8     0.01   0.00   0.00     0.01   0.00   0.01    -0.07   0.01   0.00
  16   6     0.00   0.00   0.00     0.00   0.00   0.00     0.00   0.01  -0.01
  17   8    -0.01  -0.03  -0.02     0.01   0.02   0.01    -0.05  -0.09  -0.10
  18   6     0.00  -0.01  -0.01     0.00   0.00   0.01     0.01  -0.01   0.04
  19   8     0.01   0.00   0.00    -0.01  -0.01  -0.01     0.00  -0.01   0.03
  20   8     0.01   0.00   0.01     0.00   0.00   0.00     0.03   0.03   0.06
  21   6    -0.01  -0.03  -0.01     0.01   0.02   0.01    -0.04  -0.06  -0.04
  22   6    -0.01  -0.04  -0.03     0.01   0.02   0.02    -0.04  -0.10  -0.13
  23   6     0.00   0.00   0.01     0.00   0.00  -0.01     0.01   0.04   0.10
  24   8    -0.02  -0.01   0.05     0.01   0.00  -0.03    -0.04   0.00   0.14
  25   6     0.05   0.01  -0.04    -0.03  -0.01   0.03     0.17   0.02  -0.16
  26   6     0.00   0.00   0.01     0.01   0.00  -0.01     0.05   0.15   0.05
  27   6     0.00   0.01   0.00     0.02   0.00   0.00    -0.08   0.00   0.02
  28   6    -0.01   0.01   0.01     0.00   0.01   0.00    -0.01  -0.04  -0.01
  29   6     0.04   0.00  -0.03     0.00  -0.01  -0.02    -0.01   0.00   0.00
  30   6    -0.01  -0.01  -0.01     0.02   0.02   0.04     0.01   0.01   0.01
  31   6     0.00  -0.03   0.00    -0.02   0.01  -0.01    -0.01   0.02  -0.01
  32   6     0.01   0.00   0.04    -0.03   0.01   0.02    -0.02   0.00   0.00
  33   6     0.06   0.06   0.05     0.01   0.00   0.05    -0.02  -0.02   0.01
  34   6     0.10   0.03   0.03     0.04   0.00   0.03    -0.01   0.00   0.00
  35   6     0.09  -0.03   0.00     0.04   0.00   0.00    -0.01   0.01   0.00
  36   6     0.00  -0.03   0.00    -0.01   0.01  -0.01     0.00   0.02   0.00
  37   6     0.04  -0.03   0.02     0.02   0.01   0.01    -0.01   0.01   0.00
  38   6     0.00  -0.03  -0.02     0.05   0.08   0.00     0.02   0.03   0.00
  39   6    -0.02  -0.01   0.03     0.04   0.09  -0.05     0.02   0.02  -0.03
  40   6    -0.01   0.01   0.05     0.00   0.05  -0.09     0.02   0.00  -0.04
  41   6     0.03  -0.01   0.03    -0.02  -0.01  -0.05     0.00  -0.01  -0.03
  42   6     0.03   0.00   0.01    -0.02  -0.02   0.01    -0.01   0.00   0.00
  43   6     0.00  -0.02  -0.03     0.01   0.03  -0.02     0.00   0.01   0.00
  44   6     0.02  -0.01   0.03    -0.01  -0.01   0.01    -0.01   0.01  -0.01
  45   6    -0.02   0.01   0.04     0.01   0.00  -0.02     0.02   0.00  -0.02
  46   6     0.04  -0.03  -0.04     0.06  -0.02  -0.03     0.01   0.00   0.01
  47   6    -0.07  -0.03  -0.05    -0.03   0.00   0.03     0.01   0.01   0.02
  48   6    -0.05   0.00   0.01    -0.03   0.02   0.00     0.00   0.01   0.00
  49   6    -0.01   0.00   0.06     0.05   0.04   0.05     0.01   0.01  -0.02
  50   6     0.00  -0.02   0.03     0.00   0.01   0.00     0.00   0.01   0.00
  51   6    -0.01   0.05  -0.11    -0.05  -0.05   0.00    -0.01  -0.03   0.04
  52   6     0.03   0.01  -0.07    -0.04  -0.08   0.00    -0.02  -0.02   0.03
  53   6    -0.09   0.05  -0.02    -0.01  -0.03   0.02     0.03  -0.03   0.01
  54   6    -0.03   0.04  -0.01    -0.02  -0.04   0.01     0.00  -0.04   0.00
  55   1     0.00   0.00   0.06     0.00  -0.01  -0.03     0.00  -0.01  -0.01
  56   1     0.01   0.01   0.01    -0.01  -0.01  -0.02    -0.01   0.02   0.03
  57   1     0.00  -0.01   0.01     0.00  -0.01   0.01     0.01   0.03  -0.04
  58   1     0.00   0.00   0.01     0.00   0.00   0.01     0.01  -0.01  -0.04
  59   1     0.00  -0.01   0.00     0.01  -0.01   0.00    -0.02   0.03   0.00
  60   1     0.00   0.00   0.00     0.00   0.00   0.01    -0.01   0.01  -0.02
  61   1    -0.02  -0.04  -0.01     0.01   0.02   0.01    -0.07  -0.10  -0.07
  62   1     0.01   0.00   0.02     0.00   0.00  -0.02     0.02   0.03   0.12
  63   1     0.11   0.02  -0.08    -0.07  -0.01   0.05     0.33   0.05  -0.24
  64   1     0.06  -0.01  -0.07    -0.04   0.01   0.05     0.22  -0.06  -0.26
  65   1     0.04   0.08   0.01    -0.03  -0.04  -0.01     0.15   0.19   0.00
  66   1     0.05  -0.03  -0.01    -0.04   0.04   0.00     0.10   0.10  -0.10
  67   1    -0.04  -0.02   0.04     0.06   0.04  -0.05     0.01   0.14   0.14
  68   1    -0.01   0.06   0.00     0.03  -0.06   0.00     0.08   0.33   0.06
  69   1    -0.01  -0.01   0.01     0.03   0.03  -0.01    -0.13  -0.06   0.08
  70   1    -0.01   0.00  -0.02     0.03   0.00   0.02    -0.13   0.03  -0.06
  71   1     0.00   0.02  -0.01     0.02   0.00   0.01    -0.08   0.01   0.01
  72   1    -0.04  -0.02   0.03    -0.01   0.01   0.00     0.01  -0.04   0.02
  73   1     0.02  -0.01  -0.01     0.01   0.02   0.01    -0.06  -0.07  -0.03
  74   1    -0.02   0.06   0.01     0.00   0.02   0.00     0.01  -0.06   0.02
  75   1    -0.02  -0.01   0.05    -0.05   0.02   0.03    -0.02   0.00   0.00
  76   1     0.06   0.11   0.07     0.01   0.01   0.09    -0.02  -0.03   0.01
  77   1     0.13   0.05   0.04     0.06   0.01   0.05    -0.01   0.00   0.00
  78   1     0.01  -0.02   0.00    -0.01   0.03   0.02    -0.01   0.02   0.01
  79   1     0.06  -0.01   0.09     0.03   0.02   0.05    -0.01   0.01  -0.01
  80   1    -0.05  -0.02   0.05     0.06   0.12  -0.08     0.04   0.03  -0.04
  81   1    -0.03   0.03   0.07    -0.01   0.05  -0.15     0.04  -0.02  -0.07
  82   1     0.05  -0.01   0.03    -0.05  -0.05  -0.07    -0.01  -0.02  -0.04
  83   1     0.01  -0.02  -0.01     0.01   0.05  -0.10     0.00   0.02  -0.03
  84   1     0.03  -0.01   0.05    -0.02   0.00  -0.03    -0.02   0.01  -0.02
  85   1     0.02   0.06   0.05    -0.04  -0.02  -0.05    -0.01  -0.03  -0.03
  86   1    -0.07   0.02   0.08     0.07  -0.04  -0.05     0.05  -0.02  -0.05
  87   1    -0.05  -0.02   0.04     0.03   0.04   0.02     0.03   0.02  -0.01
  88   1     0.13  -0.23   0.16     0.13  -0.10   0.07     0.01   0.02  -0.01
  89   1     0.22   0.04  -0.27     0.13  -0.02  -0.16    -0.01  -0.02   0.02
  90   1    -0.21   0.11  -0.02    -0.05   0.04  -0.03     0.04  -0.01   0.01
  91   1    -0.04   0.09  -0.09    -0.01   0.01   0.01     0.01  -0.02   0.02
  92   1    -0.09  -0.14   0.00    -0.03  -0.05   0.06     0.01   0.02   0.02
  93   1    -0.20  -0.03  -0.11    -0.08   0.03   0.02     0.02   0.01   0.03
  94   1    -0.01  -0.10   0.00    -0.04  -0.01   0.01    -0.01   0.02   0.00
  95   1    -0.20  -0.01  -0.01    -0.08   0.01   0.00     0.02   0.01   0.00
  96   1    -0.02   0.14   0.03    -0.03   0.07  -0.02     0.00  -0.01  -0.01
  97   1    -0.02   0.02   0.06     0.28   0.05  -0.11     0.03   0.00  -0.03
  98   1    -0.02   0.03   0.06     0.07   0.21   0.28     0.02   0.00   0.00
  99   1    -0.01  -0.02   0.10    -0.15  -0.09   0.02     0.00   0.01  -0.04
 100   1    -0.01  -0.04   0.04    -0.01  -0.02   0.02     0.01   0.00   0.00
 101   1     0.00  -0.01   0.05     0.04   0.02   0.01     0.01   0.02   0.01
 102   1     0.01  -0.04   0.01    -0.01   0.03  -0.03    -0.01   0.03   0.00
 103   1    -0.17   0.08  -0.13     0.19  -0.02   0.07     0.11  -0.04   0.06
 104   1     0.07   0.14  -0.22    -0.17  -0.30   0.09    -0.07  -0.12   0.10
 105   1     0.05  -0.01  -0.06    -0.22   0.10  -0.15    -0.07   0.02  -0.02
 106   1     0.08  -0.02  -0.08    -0.12  -0.02   0.03    -0.07   0.00   0.04
 107   1     0.01   0.03  -0.06     0.07  -0.15  -0.03     0.01  -0.04   0.03
 108   1     0.03   0.06  -0.11    -0.11  -0.19   0.04    -0.03  -0.06   0.06
 109   1    -0.11   0.10  -0.02    -0.01  -0.07   0.04     0.04  -0.05   0.01
 110   1    -0.14   0.00  -0.02     0.00  -0.02   0.07     0.05  -0.01   0.02
 111   1    -0.08   0.09  -0.02    -0.01   0.01   0.02     0.03  -0.04   0.01
 112   1    -0.05   0.05  -0.02    -0.02  -0.08  -0.04     0.02  -0.07  -0.02
 113   1    -0.01   0.04  -0.02     0.00   0.01   0.00     0.01  -0.03   0.00
 114   1    -0.02   0.04  -0.02    -0.06  -0.06   0.05    -0.02  -0.06   0.02
                    64                     65                     66
                     A                      A                      A
 Frequencies --   284.2832               293.4507               315.9784
 Red. masses --     2.7909                 3.1536                 3.4025
 Frc consts  --     0.1329                 0.1600                 0.2002
 IR Inten    --     4.2028                 2.3377                 5.0162
 Atom AN      X      Y      Z        X      Y      Z        X      Y      Z
   1   8    -0.01   0.00   0.00     0.00   0.00   0.00    -0.03  -0.02   0.00
   2  12    -0.01   0.04  -0.02     0.06   0.01   0.01     0.04   0.06   0.02
   3   8     0.00  -0.02  -0.03     0.00   0.01   0.02     0.01  -0.04  -0.04
   4   6     0.00   0.00   0.00     0.00   0.00   0.00    -0.02  -0.01   0.01
   5   7     0.03   0.03   0.10    -0.02   0.03  -0.06    -0.02   0.02   0.09
   6   7    -0.02   0.01   0.07     0.01  -0.04   0.04    -0.01   0.00   0.00
   7   8     0.00   0.00   0.00     0.00   0.00   0.01    -0.06   0.01   0.05
   8   6     0.00   0.00   0.02     0.04   0.06  -0.03     0.00   0.02   0.03
   9   6    -0.01  -0.02  -0.05     0.05   0.02   0.02    -0.01   0.02  -0.03
  10   6    -0.02   0.00   0.00     0.08  -0.02   0.02    -0.01   0.00  -0.02
  11   8     0.00  -0.01   0.01     0.00   0.01  -0.01     0.01  -0.01  -0.03
  12   6     0.01   0.00  -0.01    -0.01   0.00   0.00     0.02  -0.01  -0.05
  13   6     0.00  -0.01  -0.02     0.00   0.01   0.01     0.02  -0.02  -0.06
  14   6     0.00  -0.01   0.01     0.00   0.01  -0.01     0.02   0.01  -0.01
  15   8     0.02   0.02   0.01    -0.01  -0.01  -0.01     0.05   0.05   0.00
  16   6     0.00   0.00   0.00     0.00   0.00   0.00     0.04   0.03  -0.02
  17   8     0.00  -0.01   0.00     0.00  -0.01   0.00     0.00  -0.01   0.00
  18   6     0.00   0.01   0.02     0.00   0.00  -0.01     0.00   0.02   0.03
  19   8     0.00   0.01   0.01     0.01   0.00   0.00     0.02   0.05   0.04
  20   8     0.00  -0.01   0.00     0.00   0.00   0.00     0.00  -0.02  -0.01
  21   6     0.00  -0.02   0.00     0.00  -0.01   0.00     0.00  -0.02   0.00
  22   6     0.00  -0.02  -0.01     0.00  -0.01   0.00     0.00  -0.01   0.00
  23   6     0.00   0.00   0.01     0.00   0.00   0.00    -0.01  -0.01   0.00
  24   8     0.00  -0.01   0.02     0.00   0.00   0.00     0.00  -0.01   0.01
  25   6     0.02   0.00  -0.01     0.00   0.00  -0.01     0.00   0.00   0.00
  26   6    -0.01  -0.01   0.01     0.00  -0.01   0.00    -0.02  -0.03   0.01
  27   6     0.00   0.01   0.00    -0.01   0.00   0.00    -0.04   0.01   0.01
  28   6     0.01   0.01   0.00     0.00  -0.01   0.00     0.00   0.03   0.01
  29   6     0.03   0.01   0.04    -0.05   0.01  -0.02    -0.02   0.00   0.04
  30   6    -0.01  -0.01   0.03    -0.04  -0.04   0.02     0.00  -0.01   0.00
  31   6     0.08  -0.01   0.03    -0.07   0.02  -0.02    -0.02   0.01   0.02
  32   6     0.08  -0.02  -0.03    -0.07   0.03  -0.03    -0.04  -0.10   0.11
  33   6     0.03  -0.02  -0.07    -0.07   0.00  -0.02    -0.03   0.03   0.08
  34   6    -0.02  -0.02  -0.05    -0.06  -0.02  -0.01    -0.02   0.16   0.03
  35   6    -0.02   0.00  -0.01    -0.05   0.01   0.00    -0.03   0.00   0.03
  36   6     0.03  -0.01   0.03    -0.04   0.00   0.00     0.00   0.05  -0.01
  37   6    -0.01  -0.01  -0.03    -0.03   0.01   0.01    -0.01  -0.05   0.01
  38   6     0.02   0.02  -0.01    -0.03  -0.03  -0.01    -0.01  -0.01   0.00
  39   6     0.00   0.03  -0.03    -0.03  -0.04  -0.01     0.00  -0.02  -0.01
  40   6    -0.02   0.01  -0.05    -0.04  -0.06  -0.02    -0.01  -0.02   0.00
  41   6    -0.02  -0.04  -0.02    -0.06  -0.07   0.00    -0.02  -0.01   0.00
  42   6    -0.02  -0.04   0.03    -0.06  -0.06   0.03    -0.01  -0.01   0.00
  43   6     0.01   0.00  -0.04    -0.02  -0.02  -0.02    -0.01   0.00   0.00
  44   6     0.00  -0.03   0.03    -0.02  -0.04   0.03     0.00  -0.01   0.00
  45   6    -0.03   0.03   0.05     0.02  -0.02   0.00     0.03  -0.04  -0.15
  46   6    -0.12   0.05   0.10     0.05  -0.03  -0.05     0.07   0.04  -0.07
  47   6     0.03   0.01  -0.09     0.02   0.00   0.10    -0.02  -0.03  -0.13
  48   6     0.02  -0.05  -0.06     0.03   0.05   0.07     0.01  -0.07   0.01
  49   6     0.05   0.06   0.11     0.07   0.06   0.12     0.01   0.01   0.03
  50   6     0.02  -0.01   0.04     0.03  -0.01   0.05     0.01  -0.01   0.01
  51   6    -0.04   0.01  -0.09    -0.03   0.04  -0.09     0.00   0.01   0.00
  52   6     0.00  -0.04  -0.06     0.02   0.00  -0.10     0.00   0.01  -0.01
  53   6    -0.02   0.01   0.01     0.08   0.05  -0.02     0.09  -0.04   0.01
  54   6    -0.02   0.02   0.02     0.11   0.07  -0.02    -0.02  -0.03   0.02
  55   1    -0.01  -0.02  -0.10     0.01   0.00   0.02    -0.02   0.02  -0.05
  56   1    -0.02   0.00  -0.04     0.02   0.00   0.01     0.01   0.01  -0.09
  57   1     0.00  -0.01   0.01     0.00   0.01  -0.01     0.02   0.00  -0.02
  58   1     0.00   0.00   0.01     0.00   0.00  -0.01     0.07   0.03  -0.04
  59   1     0.00   0.00   0.00     0.00   0.01   0.00     0.07   0.02  -0.05
  60   1     0.00   0.00   0.01     0.00   0.01   0.00     0.03   0.09   0.02
  61   1    -0.01  -0.02   0.00     0.00   0.00   0.00    -0.01  -0.01   0.00
  62   1     0.00  -0.01   0.01     0.00  -0.01   0.00    -0.01  -0.02   0.01
  63   1     0.04   0.01  -0.03     0.00   0.00  -0.01     0.01   0.00  -0.02
  64   1     0.02   0.00  -0.02     0.01   0.00  -0.01     0.00   0.00   0.00
  65   1     0.01   0.03   0.00     0.01   0.00   0.00     0.00   0.02   0.01
  66   1     0.01  -0.02   0.01     0.01  -0.01   0.00     0.01  -0.04   0.04
  67   1    -0.02  -0.02   0.02    -0.01  -0.01   0.00    -0.05  -0.05   0.02
  68   1    -0.01   0.01   0.00     0.00   0.00   0.00    -0.04  -0.03   0.00
  69   1    -0.01   0.02   0.00    -0.02   0.00   0.02    -0.09   0.04   0.06
  70   1    -0.01   0.02   0.00    -0.02  -0.01  -0.02    -0.08   0.07  -0.03
  71   1     0.00   0.00   0.01     0.01   0.01   0.00    -0.02  -0.04   0.08
  72   1    -0.01   0.01   0.00     0.01  -0.01   0.00    -0.01   0.05  -0.04
  73   1     0.03   0.01   0.00    -0.02  -0.01   0.00    -0.05   0.05   0.04
  74   1    -0.01   0.03  -0.01     0.01  -0.02   0.00     0.02  -0.01   0.03
  75   1     0.12  -0.02  -0.05    -0.07   0.03  -0.04    -0.06  -0.20   0.15
  76   1     0.03  -0.03  -0.12    -0.07   0.00  -0.01    -0.03   0.03   0.07
  77   1    -0.05  -0.03  -0.06    -0.07  -0.04   0.00     0.01   0.28   0.01
  78   1     0.05  -0.03  -0.05    -0.05   0.01   0.04     0.01   0.06   0.01
  79   1    -0.02  -0.02  -0.06    -0.04   0.00  -0.03    -0.02  -0.06   0.00
  80   1     0.01   0.05  -0.04    -0.02  -0.03  -0.02     0.01  -0.02  -0.01
  81   1    -0.04   0.02  -0.08    -0.04  -0.06  -0.04    -0.01  -0.02   0.00
  82   1    -0.03  -0.07  -0.04    -0.07  -0.08  -0.01    -0.03   0.00   0.00
  83   1     0.01   0.01  -0.06    -0.02  -0.02   0.00    -0.01  -0.01   0.01
  84   1    -0.02  -0.03   0.00    -0.04  -0.05  -0.04    -0.01  -0.01  -0.01
  85   1     0.16   0.08   0.14    -0.10  -0.03  -0.06    -0.06  -0.20  -0.15
  86   1    -0.21   0.16   0.13     0.13  -0.12  -0.03     0.12  -0.01  -0.29
  87   1    -0.09  -0.11  -0.09     0.06   0.09   0.11     0.05  -0.03  -0.19
  88   1    -0.27   0.09  -0.05     0.11   0.02  -0.02     0.14   0.06  -0.01
  89   1    -0.21   0.08   0.29     0.03  -0.08  -0.08     0.12   0.05  -0.13
  90   1    -0.01   0.02   0.14     0.08  -0.07  -0.07     0.02   0.03  -0.12
  91   1     0.03   0.04  -0.10    -0.01  -0.12   0.14    -0.04   0.11  -0.15
  92   1     0.03   0.05  -0.11     0.03   0.05   0.08    -0.03  -0.01  -0.19
  93   1     0.05  -0.05  -0.12     0.10   0.04   0.18    -0.02  -0.13  -0.22
  94   1     0.03  -0.08  -0.05     0.03   0.16   0.04     0.05  -0.11   0.00
  95   1     0.05  -0.03  -0.11     0.10   0.03   0.15     0.00  -0.06  -0.03
  96   1     0.02  -0.10  -0.04     0.02   0.00   0.07     0.02  -0.08   0.05
  97   1     0.11   0.14   0.03     0.04   0.20   0.07     0.00   0.04   0.02
  98   1     0.08   0.11   0.22     0.11   0.02   0.17     0.01   0.01   0.03
  99   1     0.02   0.00   0.16     0.14   0.06   0.19     0.02   0.01   0.05
 100   1     0.00  -0.09   0.08     0.01  -0.13   0.11     0.01  -0.02   0.01
 101   1     0.10   0.04   0.08     0.17   0.07   0.12     0.02   0.00   0.01
 102   1    -0.01   0.04  -0.03    -0.03   0.08  -0.04     0.00   0.00   0.00
 103   1    -0.04   0.05  -0.07    -0.14   0.08  -0.09    -0.03   0.01  -0.01
 104   1    -0.03  -0.05  -0.14     0.02   0.08  -0.18     0.01   0.04  -0.01
 105   1    -0.08   0.04  -0.12     0.00   0.02  -0.08     0.02  -0.01   0.01
 106   1     0.00  -0.04  -0.05     0.10  -0.01  -0.09     0.02   0.01  -0.01
 107   1     0.04  -0.07  -0.07     0.02   0.01  -0.14    -0.01   0.02  -0.02
 108   1    -0.04  -0.06  -0.07    -0.02   0.02  -0.15     0.00   0.02  -0.02
 109   1    -0.01   0.02   0.01     0.09   0.02  -0.02     0.12  -0.09   0.00
 110   1    -0.03   0.00   0.02     0.10   0.07  -0.01     0.17   0.02  -0.01
 111   1    -0.02   0.02   0.01     0.07   0.04  -0.02     0.09  -0.11   0.01
 112   1    -0.02   0.02   0.01     0.04   0.12  -0.03     0.02  -0.06   0.02
 113   1    -0.03   0.06   0.02     0.15   0.08  -0.04    -0.05  -0.02   0.03
 114   1     0.01   0.01   0.05     0.16   0.08  -0.04    -0.04  -0.04   0.04
                    67                     68                     69
                     A                      A                      A
 Frequencies --   319.4499               324.5708               326.9593
 Red. masses --     4.4460                 3.8901                 3.1637
 Frc consts  --     0.2673                 0.2415                 0.1993
 IR Inten    --    14.0630                17.9106                 3.6647
 Atom AN      X      Y      Z        X      Y      Z        X      Y      Z
   1   8     0.05   0.04  -0.01     0.01   0.04   0.01     0.02   0.07   0.05
   2  12     0.02  -0.02  -0.08    -0.01   0.16  -0.01     0.02   0.00   0.00
   3   8    -0.03   0.13   0.13    -0.03   0.03   0.04    -0.01   0.01  -0.02
   4   6     0.04   0.02  -0.03     0.01   0.01   0.00     0.00   0.04   0.01
   5   7    -0.01   0.01   0.04     0.00   0.01   0.00     0.00   0.00   0.01
   6   7    -0.01   0.00  -0.06    -0.03   0.02  -0.03     0.01   0.01   0.11
   7   8     0.14  -0.03  -0.11     0.05  -0.01  -0.05     0.09   0.00  -0.04
   8   6    -0.01   0.01   0.03    -0.01   0.01   0.01     0.00   0.00  -0.01
   9   6     0.00   0.01   0.01    -0.02   0.03   0.01    -0.01   0.00  -0.04
  10   6    -0.01   0.01  -0.02    -0.05   0.02  -0.01     0.00   0.00   0.03
  11   8    -0.02   0.02   0.08    -0.01  -0.01   0.02    -0.03  -0.06   0.01
  12   6    -0.04   0.04   0.13    -0.01   0.02  -0.01    -0.01  -0.01   0.00
  13   6    -0.05   0.08   0.15    -0.02   0.05   0.00    -0.02   0.01  -0.01
  14   6    -0.04  -0.02   0.01    -0.01  -0.02   0.02    -0.05  -0.01   0.01
  15   8    -0.06  -0.10   0.00     0.04   0.00  -0.04     0.02  -0.01   0.00
  16   6    -0.07  -0.07   0.03    -0.05  -0.02   0.04    -0.11  -0.01   0.08
  17   8    -0.02   0.00   0.00    -0.02  -0.02   0.02    -0.01  -0.01   0.00
  18   6     0.00  -0.02  -0.05     0.00   0.04   0.02    -0.01   0.00   0.00
  19   8     0.02  -0.03  -0.03     0.08   0.10   0.07     0.01   0.00  -0.02
  20   8    -0.01   0.00  -0.02     0.00  -0.03  -0.05     0.01   0.00   0.00
  21   6     0.00   0.01  -0.01     0.00  -0.04  -0.02     0.00  -0.01   0.00
  22   6    -0.01   0.00  -0.02    -0.01  -0.03  -0.02     0.00  -0.01   0.00
  23   6     0.00   0.00  -0.01    -0.01   0.00  -0.02    -0.01   0.00   0.01
  24   8     0.01   0.02  -0.01     0.01  -0.02   0.03     0.01  -0.01   0.01
  25   6     0.00  -0.03  -0.01     0.02  -0.04  -0.02     0.01  -0.01   0.00
  26   6     0.02  -0.02  -0.02    -0.04  -0.09   0.02    -0.02   0.03   0.01
  27   6     0.06  -0.02  -0.05    -0.02   0.02  -0.05     0.04   0.02  -0.01
  28   6    -0.02  -0.01  -0.01     0.02  -0.01  -0.02     0.03  -0.04  -0.08
  29   6    -0.01  -0.01   0.03     0.01  -0.01  -0.01     0.00   0.00   0.01
  30   6     0.00  -0.01  -0.01     0.00  -0.01  -0.02     0.00   0.02   0.04
  31   6     0.00   0.00   0.02     0.00  -0.01  -0.01     0.00   0.00   0.01
  32   6    -0.01  -0.08   0.06     0.01   0.10  -0.03     0.00  -0.01   0.01
  33   6    -0.01   0.02   0.02     0.02   0.00   0.01     0.00   0.00   0.01
  34   6    -0.01   0.11   0.00     0.02  -0.11   0.04     0.00   0.02   0.00
  35   6    -0.02   0.00   0.02     0.02   0.00   0.00     0.00   0.00   0.00
  36   6     0.02   0.04   0.00    -0.02  -0.04  -0.01     0.00   0.00   0.00
  37   6    -0.01  -0.03   0.01     0.02   0.05  -0.01     0.00   0.00   0.00
  38   6     0.00   0.00  -0.01     0.00  -0.02  -0.01     0.01   0.02   0.03
  39   6    -0.02   0.01  -0.04    -0.02  -0.01  -0.02     0.12  -0.07   0.04
  40   6    -0.03   0.01  -0.05    -0.02   0.00  -0.02     0.04  -0.01   0.06
  41   6    -0.01  -0.02  -0.04     0.00  -0.01  -0.02    -0.08   0.07   0.08
  42   6     0.00  -0.01  -0.01     0.00  -0.01  -0.01    -0.01   0.01   0.03
  43   6     0.01   0.00   0.00     0.00   0.00   0.00    -0.04   0.03   0.01
  44   6     0.00  -0.01   0.01     0.00   0.00   0.00     0.02  -0.02   0.00
  45   6     0.02  -0.02  -0.09    -0.03  -0.01   0.04     0.00  -0.01  -0.02
  46   6     0.02   0.04   0.00     0.01  -0.03  -0.06     0.01   0.01  -0.01
  47   6    -0.01  -0.02  -0.08     0.01   0.03   0.05     0.00   0.00  -0.01
  48   6     0.01  -0.04   0.01    -0.02   0.02  -0.05     0.00  -0.01   0.00
  49   6     0.02   0.04   0.07     0.00   0.02   0.03     0.02  -0.07  -0.05
  50   6     0.02  -0.02   0.05     0.01  -0.01   0.04    -0.03   0.00  -0.13
  51   6     0.03  -0.02   0.03     0.02   0.00   0.02    -0.08   0.03  -0.02
  52   6    -0.01  -0.01   0.05    -0.01   0.02   0.03     0.01   0.01  -0.13
  53   6    -0.02   0.01  -0.01     0.16  -0.09   0.00     0.02   0.00   0.01
  54   6     0.00   0.05  -0.02    -0.09  -0.13   0.01    -0.01  -0.02   0.02
  55   1     0.00   0.01   0.01    -0.01   0.04   0.02    -0.01  -0.01  -0.07
  56   1    -0.02   0.00   0.24     0.00   0.04   0.01    -0.03   0.01  -0.01
  57   1    -0.06  -0.03   0.01    -0.02  -0.02   0.02    -0.08  -0.01   0.02
  58   1    -0.14  -0.06   0.08    -0.09  -0.01   0.07    -0.17  -0.01   0.12
  59   1    -0.14  -0.05   0.09    -0.08  -0.01   0.07    -0.19   0.01   0.15
  60   1    -0.06  -0.19  -0.05    -0.04  -0.08   0.00    -0.10  -0.13   0.01
  61   1     0.00   0.01  -0.02    -0.01  -0.03  -0.02     0.00   0.00   0.00
  62   1    -0.01   0.01  -0.02    -0.02  -0.04   0.00     0.00   0.00   0.03
  63   1    -0.01  -0.03   0.04     0.02  -0.04   0.00     0.01  -0.01   0.00
  64   1     0.01  -0.04  -0.03     0.04  -0.05  -0.05     0.02   0.00  -0.01
  65   1     0.02  -0.06  -0.01     0.04  -0.05  -0.01     0.02  -0.01   0.01
  66   1     0.02  -0.02  -0.01     0.03  -0.12   0.11     0.02   0.00  -0.02
  67   1     0.02  -0.03  -0.05    -0.11  -0.16   0.01    -0.05   0.01   0.06
  68   1     0.03  -0.04  -0.01    -0.08  -0.11  -0.01    -0.03   0.10   0.00
  69   1     0.18  -0.12  -0.14     0.00  -0.03  -0.06     0.07   0.06  -0.05
  70   1     0.14  -0.14   0.03    -0.01   0.01  -0.05     0.08  -0.02   0.03
  71   1     0.00   0.10  -0.23    -0.04   0.05  -0.10     0.06   0.04  -0.03
  72   1     0.02   0.02  -0.06     0.04  -0.01  -0.01     0.17   0.03  -0.13
  73   1    -0.06   0.02   0.03     0.08   0.00  -0.03     0.01   0.00  -0.04
  74   1     0.00  -0.09  -0.01    -0.01   0.00  -0.07     0.02  -0.19  -0.15
  75   1    -0.02  -0.15   0.08     0.01   0.18  -0.06     0.00  -0.02   0.01
  76   1    -0.01   0.02   0.01     0.02   0.01   0.02     0.00   0.01   0.00
  77   1     0.00   0.20  -0.03     0.02  -0.19   0.07     0.00   0.03   0.00
  78   1     0.02   0.04   0.00    -0.02  -0.05   0.00     0.00   0.01   0.00
  79   1    -0.01  -0.03   0.00     0.02   0.05   0.01     0.00   0.00   0.00
  80   1    -0.03   0.04  -0.05    -0.03   0.01  -0.02     0.19  -0.14   0.02
  81   1    -0.04   0.01  -0.05    -0.04   0.01  -0.01     0.05  -0.03   0.04
  82   1     0.00  -0.03  -0.05     0.00  -0.02  -0.02    -0.15   0.14   0.11
  83   1     0.01   0.00   0.00     0.00  -0.01   0.01    -0.04   0.03   0.00
  84   1     0.00  -0.02  -0.01     0.00   0.00   0.00     0.02  -0.03   0.00
  85   1     0.00  -0.11  -0.07    -0.05   0.04   0.01    -0.01  -0.02  -0.02
  86   1     0.06   0.02  -0.16    -0.03  -0.04   0.06     0.01   0.00  -0.04
  87   1     0.04  -0.02  -0.13    -0.04   0.00   0.09     0.00  -0.01  -0.02
  88   1     0.02   0.04   0.00     0.05  -0.02  -0.03     0.01   0.01   0.00
  89   1     0.03   0.05  -0.01     0.04  -0.02  -0.08     0.01   0.01  -0.01
  90   1     0.01   0.04  -0.01    -0.01  -0.05  -0.09     0.00   0.01  -0.01
  91   1     0.00   0.07  -0.10     0.02  -0.01   0.05     0.00   0.01  -0.02
  92   1    -0.01  -0.01  -0.08     0.01   0.02   0.08     0.00   0.01  -0.02
  93   1    -0.03  -0.08  -0.13     0.00   0.08   0.08     0.00  -0.01  -0.02
  94   1     0.04  -0.06   0.00    -0.06  -0.02  -0.02     0.00  -0.02   0.00
  95   1     0.00  -0.04  -0.01    -0.03   0.03  -0.08     0.00  -0.01  -0.01
  96   1     0.01  -0.05   0.04    -0.03   0.03  -0.09     0.00  -0.02   0.00
  97   1     0.02   0.11   0.03    -0.01   0.06   0.02     0.04  -0.12  -0.03
  98   1     0.02   0.07   0.12     0.00   0.04   0.04     0.03  -0.10  -0.06
  99   1     0.02   0.01   0.13     0.01   0.01   0.07     0.02  -0.03  -0.12
 100   1     0.03  -0.09   0.08     0.03  -0.05   0.04    -0.09   0.15  -0.16
 101   1     0.05   0.03   0.11     0.01   0.02   0.07    -0.04  -0.10  -0.25
 102   1     0.01  -0.01   0.03     0.01  -0.01   0.04    -0.02  -0.01  -0.12
 103   1     0.07  -0.04   0.03     0.01  -0.02   0.01    -0.11   0.04  -0.02
 104   1     0.01  -0.03   0.08     0.02   0.03   0.03    -0.07  -0.01  -0.06
 105   1     0.03  -0.02   0.02     0.04  -0.02   0.03    -0.12   0.05  -0.01
 106   1    -0.06   0.00   0.05    -0.02   0.00   0.02     0.14   0.02  -0.11
 107   1    -0.03   0.00   0.09    -0.04   0.03   0.06     0.08   0.00  -0.23
 108   1     0.03  -0.01   0.09     0.03   0.04   0.04    -0.11   0.00  -0.23
 109   1    -0.02   0.05  -0.02     0.19  -0.19   0.01     0.02  -0.04   0.02
 110   1    -0.04  -0.01  -0.04     0.29   0.03  -0.03     0.03   0.02   0.04
 111   1    -0.03  -0.02  -0.01     0.16  -0.20   0.02     0.02   0.01   0.01
 112   1    -0.02   0.08   0.00     0.01  -0.25  -0.04     0.00  -0.04   0.01
 113   1     0.00   0.04  -0.02    -0.10  -0.12   0.02     0.00  -0.02   0.02
 114   1     0.04   0.06  -0.03    -0.22  -0.18   0.08    -0.03  -0.03   0.03
                    70                     71                     72
                     A                      A                      A
 Frequencies --   329.7794               333.6702               338.8249
 Red. masses --     3.5858                 5.1619                 3.5030
 Frc consts  --     0.2298                 0.3386                 0.2369
 IR Inten    --     8.6351                16.2473                 4.4360
 Atom AN      X      Y      Z        X      Y      Z        X      Y      Z
   1   8     0.00  -0.09  -0.09     0.01  -0.01   0.02     0.01   0.00  -0.01
   2  12    -0.01   0.03  -0.05     0.27   0.01  -0.03     0.07   0.04  -0.03
   3   8     0.00   0.03   0.08     0.00   0.03   0.03    -0.01   0.02   0.03
   4   6     0.02  -0.06  -0.03    -0.01   0.02   0.00     0.01  -0.01  -0.01
   5   7     0.00   0.00  -0.02     0.00  -0.09   0.06     0.00  -0.02  -0.03
   6   7     0.00   0.02   0.05    -0.05   0.03  -0.02    -0.01   0.01   0.14
   7   8    -0.05  -0.03  -0.01    -0.03   0.03   0.06     0.02  -0.01  -0.02
   8   6     0.00   0.00  -0.01    -0.07  -0.13   0.04    -0.01  -0.03  -0.02
   9   6    -0.01   0.01  -0.01    -0.05  -0.06  -0.02    -0.01  -0.02  -0.03
  10   6    -0.02   0.01   0.02    -0.11   0.01  -0.01    -0.02  -0.01   0.05
  11   8     0.03   0.12   0.05    -0.01   0.01  -0.06     0.00   0.03   0.02
  12   6     0.00   0.05   0.06     0.00   0.00  -0.01    -0.01   0.02   0.02
  13   6     0.00   0.02   0.09     0.01   0.01   0.01    -0.01   0.02   0.02
  14   6     0.06   0.01   0.00    -0.01   0.03  -0.05     0.00   0.00   0.00
  15   8    -0.07  -0.04  -0.01     0.00   0.02   0.00     0.00  -0.01  -0.01
  16   6     0.13  -0.02  -0.11     0.01   0.02  -0.01     0.00  -0.01  -0.01
  17   8     0.00   0.00  -0.01    -0.02   0.00   0.00    -0.01   0.00   0.02
  18   6     0.02  -0.01  -0.02    -0.01   0.01   0.00    -0.01   0.01   0.01
  19   8     0.04   0.01   0.01     0.03   0.03   0.02     0.01   0.03   0.02
  20   8    -0.02  -0.01  -0.04    -0.01  -0.01  -0.01     0.01   0.00   0.00
  21   6     0.00   0.01  -0.01     0.00  -0.01  -0.01     0.00  -0.01   0.00
  22   6     0.00   0.01   0.00    -0.01   0.00  -0.01    -0.01  -0.01  -0.01
  23   6     0.00   0.01  -0.02    -0.01   0.00   0.00     0.00  -0.01  -0.02
  24   8     0.00   0.01   0.00     0.02   0.00   0.00     0.00  -0.01   0.01
  25   6     0.00  -0.01   0.00     0.01  -0.02  -0.01     0.00  -0.02  -0.01
  26   6    -0.03  -0.05   0.01    -0.01  -0.03   0.00     0.01  -0.05  -0.01
  27   6    -0.04  -0.04   0.00    -0.01   0.00   0.00    -0.01   0.00  -0.02
  28   6    -0.06   0.06   0.12    -0.02  -0.04  -0.02    -0.01   0.01   0.01
  29   6     0.00  -0.01   0.00     0.00  -0.02   0.02     0.00   0.00  -0.01
  30   6     0.00   0.01   0.02    -0.01   0.02   0.00    -0.03   0.01   0.05
  31   6     0.01   0.00   0.00     0.00  -0.01   0.00    -0.01   0.01  -0.01
  32   6     0.01  -0.01  -0.01     0.01   0.08  -0.01    -0.01  -0.04   0.00
  33   6     0.01  -0.01  -0.01     0.00  -0.01   0.03    -0.01  -0.01  -0.01
  34   6     0.01   0.00  -0.01     0.00  -0.07   0.04     0.00   0.04  -0.03
  35   6     0.01   0.00   0.00     0.00   0.00   0.01     0.00   0.00  -0.01
  36   6     0.01   0.01   0.00    -0.01  -0.03  -0.01     0.00   0.03   0.00
  37   6     0.00   0.00   0.00     0.01   0.04   0.00    -0.01  -0.02   0.00
  38   6     0.01   0.01   0.02     0.01   0.02   0.00     0.01   0.02   0.03
  39   6     0.10  -0.06   0.01     0.04  -0.01  -0.01    -0.12   0.11   0.08
  40   6     0.02   0.00   0.03     0.01   0.03   0.00     0.00  -0.01   0.04
  41   6    -0.08   0.06   0.05    -0.01   0.04   0.01     0.12  -0.12   0.01
  42   6     0.00   0.00   0.02     0.02   0.01   0.00    -0.04   0.00   0.02
  43   6    -0.03   0.03   0.01     0.00   0.01  -0.01     0.06  -0.04   0.00
  44   6     0.03  -0.03   0.01     0.03  -0.01   0.01    -0.07   0.06  -0.01
  45   6     0.01   0.01   0.00    -0.03  -0.03  -0.01     0.02   0.02  -0.01
  46   6    -0.02   0.01   0.03     0.03  -0.02  -0.07    -0.01   0.01   0.04
  47   6     0.00   0.00   0.01     0.02   0.04   0.02    -0.01  -0.02   0.00
  48   6     0.00   0.01   0.01    -0.01  -0.01  -0.05     0.01   0.01   0.03
  49   6     0.03  -0.04   0.00     0.00   0.00   0.04    -0.01  -0.05  -0.17
  50   6    -0.01  -0.02  -0.08     0.00  -0.03  -0.01    -0.03   0.10  -0.01
  51   6    -0.06   0.02   0.01     0.00  -0.01   0.00    -0.01   0.03  -0.13
  52   6     0.00   0.02  -0.09     0.00   0.00  -0.01     0.05  -0.07   0.01
  53   6     0.04  -0.02   0.01    -0.12  -0.13   0.05     0.03  -0.05   0.02
  54   6    -0.03  -0.04   0.01    -0.08   0.23  -0.01    -0.02   0.01   0.01
  55   1     0.00   0.01  -0.02     0.03  -0.03  -0.04     0.00  -0.02  -0.06
  56   1     0.01  -0.02   0.13     0.04   0.01   0.02    -0.01   0.01   0.04
  57   1     0.10   0.00  -0.03     0.00   0.04  -0.04     0.00   0.00  -0.01
  58   1     0.19  -0.02  -0.14     0.04   0.01  -0.05     0.00  -0.01   0.00
  59   1     0.21  -0.06  -0.18     0.01   0.04  -0.02     0.00  -0.01  -0.01
  60   1     0.12   0.08  -0.04     0.00   0.05  -0.01     0.00  -0.02  -0.01
  61   1     0.00   0.01   0.00    -0.01   0.00  -0.01     0.00  -0.01  -0.02
  62   1     0.01   0.02  -0.01    -0.02  -0.01   0.00    -0.02  -0.02  -0.03
  63   1     0.00   0.00   0.02     0.01  -0.01   0.01     0.00  -0.02   0.01
  64   1     0.00  -0.02   0.01     0.01  -0.03  -0.02     0.01  -0.03  -0.02
  65   1     0.00  -0.01   0.00     0.01  -0.02   0.00     0.01  -0.03  -0.01
  66   1     0.05  -0.08   0.05     0.02  -0.04   0.02    -0.01  -0.03   0.03
  67   1    -0.10  -0.11   0.03    -0.03  -0.05  -0.01     0.03  -0.04  -0.06
  68   1    -0.07  -0.01  -0.02     0.00  -0.03   0.00     0.02  -0.11   0.00
  69   1    -0.01  -0.15   0.00    -0.04  -0.03   0.03     0.02  -0.04  -0.03
  70   1    -0.05  -0.03  -0.02    -0.03   0.00  -0.03     0.00  -0.01   0.00
  71   1    -0.09  -0.01  -0.07    -0.01   0.00   0.00    -0.03   0.02  -0.05
  72   1    -0.26  -0.04   0.18     0.02  -0.04   0.03    -0.03   0.01   0.00
  73   1    -0.03   0.01   0.07    -0.06  -0.09  -0.05    -0.02   0.01   0.02
  74   1    -0.04   0.27   0.23     0.00  -0.05   0.01     0.00   0.01   0.03
  75   1     0.01  -0.01  -0.01     0.01   0.14  -0.03    -0.01  -0.07   0.01
  76   1     0.01  -0.01  -0.01     0.00  -0.02   0.03    -0.01  -0.02   0.00
  77   1     0.01   0.02  -0.02     0.00  -0.13   0.06     0.00   0.08  -0.03
  78   1     0.01   0.01   0.00    -0.01  -0.03   0.00     0.00   0.03   0.01
  79   1     0.00   0.00   0.00     0.01   0.04   0.00    -0.01  -0.02  -0.01
  80   1     0.17  -0.11  -0.01     0.07  -0.03  -0.02    -0.22   0.19   0.11
  81   1     0.02  -0.01   0.02     0.00   0.03   0.00     0.00  -0.01   0.02
  82   1    -0.15   0.13   0.07    -0.04   0.06   0.01     0.24  -0.22  -0.02
  83   1    -0.03   0.03   0.00     0.00   0.02  -0.02     0.06  -0.04  -0.01
  84   1     0.03  -0.04   0.01     0.03  -0.02   0.02    -0.07   0.06  -0.04
  85   1     0.03   0.02   0.02    -0.06  -0.02  -0.03     0.02   0.00   0.00
  86   1    -0.01   0.02   0.02    -0.01  -0.03  -0.02     0.03   0.01  -0.01
  87   1     0.01   0.01  -0.01    -0.04  -0.02   0.03     0.04   0.03  -0.02
  88   1    -0.04  -0.01   0.02     0.07   0.01  -0.04    -0.03  -0.01   0.03
  89   1    -0.03   0.00   0.05     0.05   0.00  -0.10    -0.03  -0.01   0.05
  90   1     0.00   0.02   0.06     0.00  -0.04  -0.12     0.02   0.02   0.08
  91   1     0.00  -0.01   0.01     0.03   0.02   0.01    -0.02  -0.03   0.01
  92   1     0.00  -0.01   0.02     0.02   0.05   0.03    -0.01  -0.02   0.00
  93   1    -0.01   0.01   0.01     0.02   0.04   0.02     0.00  -0.01   0.01
  94   1     0.00   0.02   0.00    -0.04  -0.06  -0.03     0.02   0.04   0.01
  95   1    -0.01   0.01   0.02    -0.01   0.01  -0.11     0.00   0.00   0.07
  96   1     0.00   0.02   0.01    -0.02  -0.02  -0.08     0.01   0.02   0.04
  97   1     0.03  -0.04   0.00    -0.01   0.01   0.04     0.02  -0.18  -0.13
  98   1     0.03  -0.05   0.00    -0.01   0.02   0.03     0.02  -0.14  -0.20
  99   1     0.03  -0.02  -0.01     0.00  -0.02   0.07    -0.02   0.05  -0.34
 100   1    -0.06   0.08  -0.09    -0.03  -0.02   0.00     0.01   0.12  -0.04
 101   1    -0.02  -0.08  -0.16     0.00  -0.04  -0.02     0.00   0.08  -0.04
 102   1    -0.01  -0.03  -0.09     0.01  -0.06  -0.03    -0.05   0.16   0.02
 103   1    -0.06   0.00   0.00     0.02  -0.02   0.00    -0.12   0.13  -0.10
 104   1    -0.06  -0.01   0.00    -0.02  -0.02   0.01     0.05   0.00  -0.27
 105   1    -0.08   0.03   0.03    -0.02   0.00   0.00    -0.02   0.05  -0.17
 106   1     0.08   0.02  -0.07    -0.01   0.02   0.00     0.02  -0.10  -0.02
 107   1     0.04   0.01  -0.15     0.01  -0.01  -0.02     0.07  -0.09   0.05
 108   1    -0.08   0.01  -0.15    -0.02  -0.02   0.00     0.05  -0.05   0.00
 109   1     0.05  -0.06   0.01    -0.13  -0.10   0.04     0.03  -0.11   0.04
 110   1     0.08   0.01   0.01    -0.15  -0.16   0.05     0.06  -0.01   0.06
 111   1     0.04  -0.04   0.01    -0.13  -0.11   0.04     0.03  -0.03   0.03
 112   1    -0.01  -0.08  -0.01    -0.20   0.41   0.10    -0.05   0.03   0.00
 113   1    -0.02  -0.04   0.01    -0.10   0.21   0.00     0.02   0.01  -0.01
 114   1    -0.08  -0.05   0.03     0.14   0.30  -0.11    -0.02   0.02  -0.01
                    73                     74                     75
                     A                      A                      A
 Frequencies --   341.7007               361.2756               373.0856
 Red. masses --     3.4174                 6.1000                 4.8093
 Frc consts  --     0.2351                 0.4691                 0.3944
 IR Inten    --     1.6318                32.2811                31.5603
 Atom AN      X      Y      Z        X      Y      Z        X      Y      Z
   1   8     0.00  -0.02  -0.03     0.03  -0.02   0.06     0.00   0.00  -0.01
   2  12    -0.04  -0.03  -0.01    -0.03  -0.04  -0.09     0.16  -0.05   0.05
   3   8     0.00  -0.01  -0.02     0.09   0.18   0.12     0.02  -0.03  -0.10
   4   6     0.02  -0.02  -0.01    -0.04   0.08   0.00     0.01  -0.02  -0.01
   5   7     0.00   0.05   0.15    -0.01   0.06   0.00    -0.02   0.05  -0.03
   6   7     0.02  -0.02   0.05    -0.02   0.04   0.02    -0.04   0.07  -0.01
   7   8     0.02  -0.02  -0.04    -0.12   0.12   0.21     0.05  -0.04  -0.07
   8   6     0.02   0.05   0.03     0.00   0.07   0.00    -0.04   0.07  -0.01
   9   6     0.01   0.00  -0.05    -0.02   0.07   0.00    -0.06   0.10   0.01
  10   6     0.05  -0.01   0.00    -0.02   0.05   0.01    -0.09   0.07   0.00
  11   8     0.00   0.05   0.04     0.03  -0.17  -0.15    -0.01   0.08   0.05
  12   6    -0.01   0.02   0.03     0.03  -0.07   0.03    -0.02   0.01   0.03
  13   6    -0.02   0.00   0.01     0.08   0.03   0.12    -0.03  -0.04  -0.03
  14   6     0.02  -0.01   0.02    -0.05   0.06  -0.10     0.00   0.00   0.00
  15   8    -0.03  -0.01   0.01    -0.01  -0.06   0.05    -0.05  -0.01   0.01
  16   6     0.02  -0.02  -0.03     0.03   0.06  -0.01    -0.01  -0.02   0.00
  17   8     0.00   0.00   0.00     0.00   0.02  -0.06     0.01   0.00  -0.10
  18   6     0.00  -0.01  -0.01     0.04  -0.04  -0.09     0.00  -0.04  -0.08
  19   8    -0.03  -0.03  -0.03    -0.01  -0.07  -0.06    -0.10  -0.05  -0.07
  20   8     0.01   0.01   0.02    -0.05  -0.04  -0.03     0.05   0.00   0.06
  21   6     0.00   0.00   0.01    -0.02   0.00   0.01     0.03  -0.04   0.08
  22   6     0.00   0.00   0.00    -0.01   0.01   0.03     0.05   0.00   0.09
  23   6     0.01   0.00   0.01     0.02  -0.01  -0.01     0.04  -0.03   0.00
  24   8     0.00   0.00   0.00     0.00   0.00  -0.01    -0.06  -0.08   0.02
  25   6     0.00   0.01   0.00    -0.03   0.05   0.02    -0.05   0.12   0.05
  26   6     0.01   0.03  -0.01     0.04  -0.04  -0.02     0.04   0.09  -0.03
  27   6     0.01   0.00   0.00     0.04  -0.05   0.04     0.02  -0.01   0.02
  28   6     0.00   0.01   0.04    -0.03  -0.09  -0.07    -0.02   0.00   0.02
  29   6     0.00   0.00   0.06     0.00   0.01   0.02     0.00   0.03  -0.02
  30   6     0.00   0.00   0.02    -0.03   0.02   0.02    -0.04   0.03   0.00
  31   6     0.02  -0.03   0.04     0.03  -0.02   0.01     0.02  -0.01  -0.01
  32   6     0.03   0.12   0.02     0.04   0.01   0.00     0.03   0.00  -0.01
  33   6     0.00   0.04   0.04     0.03   0.01   0.00     0.05   0.02  -0.01
  34   6    -0.04  -0.10   0.09     0.01  -0.03   0.02     0.04  -0.01   0.00
  35   6    -0.03   0.01   0.04     0.01  -0.01   0.02     0.03   0.00   0.00
  36   6    -0.02  -0.08   0.01     0.02  -0.02   0.01     0.02  -0.02  -0.01
  37   6    -0.01   0.06   0.00     0.01   0.02   0.01     0.03  -0.01   0.01
  38   6     0.00   0.01   0.01    -0.01   0.00   0.02    -0.02  -0.02   0.01
  39   6    -0.03   0.03   0.03    -0.03   0.01   0.01    -0.03  -0.03   0.00
  40   6     0.00  -0.01   0.01    -0.03  -0.01   0.00    -0.04  -0.03   0.00
  41   6     0.02  -0.04   0.01     0.00  -0.04   0.00    -0.02  -0.02  -0.01
  42   6    -0.02   0.00   0.01    -0.03  -0.01   0.01    -0.03  -0.01  -0.01
  43   6     0.01  -0.01   0.00     0.01  -0.01   0.02     0.00  -0.03   0.01
  44   6    -0.02   0.01   0.00    -0.02  -0.01   0.00    -0.01  -0.03  -0.01
  45   6    -0.07  -0.09  -0.03    -0.02  -0.01   0.00     0.00   0.01   0.02
  46   6     0.06  -0.01  -0.16     0.00   0.01  -0.01    -0.01   0.00   0.01
  47   6     0.04   0.08  -0.04     0.01   0.02  -0.01    -0.01  -0.01   0.00
  48   6    -0.01  -0.06  -0.10    -0.01  -0.02  -0.02    -0.01   0.01   0.00
  49   6     0.00  -0.02  -0.05     0.02  -0.01  -0.01     0.01   0.01   0.03
  50   6    -0.01   0.03  -0.02     0.00   0.02  -0.02     0.01  -0.02   0.00
  51   6    -0.01   0.01  -0.04    -0.01   0.01  -0.02     0.02   0.00  -0.01
  52   6     0.02  -0.02  -0.01     0.02  -0.02   0.00     0.01   0.00   0.02
  53   6    -0.03   0.07  -0.02     0.09   0.04  -0.02     0.13  -0.01  -0.01
  54   6     0.05  -0.01   0.01    -0.06  -0.08   0.01    -0.14  -0.03   0.01
  55   1    -0.02  -0.02  -0.10    -0.03   0.07  -0.02    -0.04   0.11   0.01
  56   1    -0.06  -0.02   0.01     0.23   0.01   0.17    -0.10  -0.05  -0.03
  57   1     0.03  -0.01   0.01    -0.10   0.09  -0.04     0.02  -0.01  -0.01
  58   1     0.03  -0.02  -0.02     0.07   0.03  -0.09    -0.02  -0.02   0.01
  59   1     0.04  -0.03  -0.04     0.02   0.10  -0.02    -0.02  -0.02   0.01
  60   1     0.03  -0.02  -0.02     0.00   0.12   0.00    -0.01  -0.04  -0.01
  61   1     0.00   0.00   0.00    -0.01   0.03   0.03     0.07   0.05   0.07
  62   1     0.01   0.00   0.00     0.03   0.03  -0.03     0.06  -0.02   0.01
  63   1     0.00   0.01   0.00    -0.03   0.04  -0.04    -0.09   0.10  -0.16
  64   1    -0.01   0.01   0.01    -0.04   0.08   0.05    -0.10   0.27   0.15
  65   1    -0.01   0.01   0.00    -0.04   0.07   0.02    -0.08   0.18   0.06
  66   1    -0.02   0.04  -0.04     0.04  -0.04   0.02    -0.09   0.14  -0.13
  67   1     0.04   0.05  -0.01     0.04  -0.06  -0.06     0.13   0.21   0.02
  68   1     0.03   0.02   0.00     0.05  -0.08   0.00     0.04   0.09  -0.02
  69   1     0.04   0.01  -0.03     0.02  -0.13   0.09     0.05   0.08  -0.02
  70   1     0.03  -0.01   0.04     0.02  -0.09  -0.02     0.05  -0.01   0.09
  71   1     0.00   0.00  -0.01     0.06   0.00  -0.01     0.03  -0.04   0.06
  72   1    -0.08  -0.04   0.09     0.13  -0.05  -0.04    -0.07  -0.02   0.04
  73   1     0.07  -0.01   0.00    -0.19  -0.16  -0.09    -0.01  -0.01   0.01
  74   1    -0.02   0.13   0.04     0.03  -0.25  -0.02    -0.02   0.05   0.04
  75   1     0.04   0.22  -0.02     0.04   0.03  -0.01     0.02  -0.01   0.00
  76   1     0.00   0.05   0.00     0.04   0.02  -0.02     0.05   0.03  -0.01
  77   1    -0.04  -0.19   0.12     0.00  -0.06   0.02     0.03  -0.02   0.00
  78   1    -0.01  -0.08  -0.01     0.03  -0.03  -0.02     0.02  -0.02  -0.02
  79   1    -0.01   0.06  -0.01     0.01   0.02   0.02     0.03   0.00   0.03
  80   1    -0.05   0.04   0.03    -0.03   0.02   0.01     0.00  -0.03  -0.01
  81   1     0.01  -0.02   0.00    -0.03  -0.01  -0.01    -0.04  -0.03   0.00
  82   1     0.05  -0.06   0.00     0.02  -0.06  -0.01     0.00  -0.03  -0.01
  83   1     0.01  -0.01   0.00     0.01  -0.02   0.02     0.00  -0.04   0.03
  84   1    -0.03   0.01  -0.02    -0.03  -0.02  -0.02    -0.02  -0.03  -0.03
  85   1    -0.13  -0.10  -0.06     0.00   0.00   0.01     0.00   0.05   0.00
  86   1    -0.05  -0.04  -0.10    -0.05   0.03  -0.01    -0.02   0.01   0.04
  87   1    -0.12  -0.12   0.01    -0.05  -0.06  -0.02    -0.02   0.00   0.04
  88   1     0.17   0.09  -0.12    -0.01   0.02  -0.03    -0.04  -0.02  -0.01
  89   1     0.14   0.07  -0.22     0.01   0.05   0.00    -0.01   0.01   0.02
  90   1    -0.02  -0.08  -0.33    -0.03   0.01  -0.04    -0.02   0.01   0.02
  91   1     0.08   0.11  -0.07     0.03   0.05  -0.03    -0.02   0.01   0.00
  92   1     0.05   0.14  -0.03     0.01   0.02   0.01    -0.02  -0.05   0.00
  93   1     0.05   0.02  -0.09    -0.01   0.01  -0.03    -0.04   0.00  -0.01
  94   1    -0.05  -0.18  -0.05    -0.02  -0.06  -0.01    -0.02   0.00   0.01
  95   1     0.02  -0.02  -0.25    -0.01   0.00  -0.07    -0.03   0.00   0.01
  96   1    -0.03  -0.13  -0.11    -0.01  -0.02  -0.03    -0.01   0.04  -0.02
  97   1     0.02  -0.05  -0.04     0.05  -0.01  -0.03    -0.01   0.07   0.01
  98   1     0.02  -0.05  -0.05     0.04  -0.03   0.03     0.02   0.01   0.05
  99   1     0.00   0.02  -0.11     0.02   0.01  -0.04     0.03   0.00   0.08
 100   1     0.00   0.05  -0.03     0.00   0.03  -0.03     0.02  -0.03   0.00
 101   1     0.00   0.02  -0.04     0.03   0.00  -0.04     0.03  -0.01   0.01
 102   1    -0.02   0.06   0.00    -0.02   0.05  -0.01     0.00   0.00   0.00
 103   1    -0.04   0.04  -0.02    -0.04   0.05  -0.01     0.00   0.03   0.01
 104   1     0.01   0.00  -0.08     0.01  -0.01  -0.07     0.03   0.02  -0.02
 105   1    -0.02   0.02  -0.05    -0.02   0.02  -0.04     0.04  -0.01  -0.03
 106   1     0.02  -0.03  -0.01     0.03  -0.04  -0.01     0.02   0.00   0.02
 107   1     0.03  -0.03  -0.01     0.02  -0.02   0.01    -0.02   0.02   0.02
 108   1     0.00  -0.02  -0.02     0.01   0.00  -0.02     0.03   0.02   0.02
 109   1    -0.02   0.12  -0.04     0.11  -0.01  -0.02     0.15  -0.12   0.01
 110   1    -0.07   0.04  -0.02     0.16   0.10  -0.05     0.26   0.10  -0.04
 111   1    -0.05   0.08  -0.03     0.09  -0.03  -0.02     0.14  -0.11   0.01
 112   1     0.06  -0.01   0.02     0.01  -0.18  -0.04    -0.07  -0.12  -0.01
 113   1     0.04  -0.01   0.02    -0.05  -0.08   0.00    -0.16  -0.04   0.02
 114   1     0.06  -0.01   0.02    -0.19  -0.12   0.06    -0.25  -0.06   0.05
                    76                     77                     78
                     A                      A                      A
 Frequencies --   379.7575               395.5553               403.4683
 Red. masses --     4.6394                 5.3450                 8.6621
 Frc consts  --     0.3942                 0.4927                 0.8308
 IR Inten    --     9.9837                 6.5613                 8.5378
 Atom AN      X      Y      Z        X      Y      Z        X      Y      Z
   1   8     0.02  -0.03  -0.05    -0.05   0.05   0.07     0.00   0.00  -0.02
   2  12     0.06  -0.07   0.03     0.04  -0.10   0.01     0.00  -0.02   0.02
   3   8    -0.09   0.01  -0.04     0.14  -0.04  -0.01    -0.06  -0.06  -0.01
   4   6     0.03   0.02   0.00    -0.05  -0.05   0.00     0.02   0.00   0.01
   5   7    -0.02   0.04  -0.02    -0.02   0.03  -0.01    -0.01   0.01  -0.01
   6   7    -0.02   0.04  -0.01    -0.01   0.03   0.00     0.00   0.01   0.02
   7   8    -0.04   0.05   0.05     0.06  -0.10  -0.09     0.00   0.01  -0.01
   8   6    -0.02   0.05  -0.01    -0.01   0.04  -0.01     0.00   0.01  -0.01
   9   6    -0.03   0.07   0.00    -0.02   0.05   0.00    -0.01   0.01   0.00
  10   6    -0.04   0.05   0.00    -0.02   0.04   0.00    -0.01   0.01   0.00
  11   8    -0.01  -0.05   0.02     0.03   0.12  -0.02    -0.02  -0.01   0.01
  12   6    -0.02  -0.05   0.01     0.05   0.04  -0.04    -0.02  -0.01  -0.01
  13   6    -0.07  -0.02  -0.02     0.13  -0.03   0.00    -0.05  -0.01  -0.03
  14   6     0.02   0.01   0.04    -0.01   0.00  -0.07     0.02  -0.01   0.04
  15   8    -0.01  -0.02   0.04     0.01   0.05  -0.03    -0.01   0.00  -0.01
  16   6     0.06  -0.02  -0.06    -0.10   0.03   0.09     0.02  -0.01  -0.02
  17   8    -0.04  -0.02   0.23     0.12   0.04   0.06    -0.15  -0.04  -0.16
  18   6    -0.10   0.00   0.03     0.07  -0.03   0.07     0.01  -0.01  -0.02
  19   8    -0.01  -0.06  -0.07    -0.03  -0.08   0.04     0.37   0.01  -0.12
  20   8     0.04   0.09   0.05    -0.16  -0.03  -0.03    -0.20  -0.13   0.18
  21   6     0.00   0.05  -0.08    -0.10   0.11  -0.07    -0.13   0.01   0.04
  22   6    -0.04   0.00  -0.11    -0.05   0.04  -0.07    -0.21   0.04   0.05
  23   6    -0.09   0.02   0.01    -0.01   0.02   0.03    -0.09   0.01   0.12
  24   8     0.08   0.09  -0.04     0.05   0.15  -0.05     0.30   0.03  -0.13
  25   6     0.08  -0.17  -0.07     0.03  -0.07  -0.03    -0.03   0.10   0.07
  26   6    -0.04   0.06  -0.03     0.01  -0.07   0.05     0.11   0.03   0.05
  27   6     0.07   0.03   0.01    -0.06  -0.05   0.05     0.01   0.02  -0.01
  28   6     0.05   0.03   0.01    -0.08  -0.03   0.01     0.04   0.02   0.01
  29   6     0.00   0.02  -0.01     0.00   0.02   0.00     0.00   0.00   0.00
  30   6    -0.02   0.02   0.00    -0.02   0.02   0.00     0.00   0.00   0.00
  31   6     0.02  -0.01   0.00     0.02   0.00   0.00     0.00   0.00   0.00
  32   6     0.02  -0.01   0.00     0.02   0.01  -0.01     0.00   0.00   0.00
  33   6     0.03   0.01   0.00     0.03   0.01   0.00     0.01   0.00   0.00
  34   6     0.02   0.00   0.00     0.01  -0.01   0.01     0.01   0.00   0.00
  35   6     0.02   0.00   0.00     0.01   0.01   0.01     0.01   0.00   0.00
  36   6     0.02  -0.01   0.00     0.01  -0.01   0.00     0.00   0.00   0.00
  37   6     0.02   0.00   0.01     0.01   0.00   0.01     0.00   0.00   0.00
  38   6    -0.01  -0.01   0.01    -0.01  -0.01   0.01     0.00   0.00   0.00
  39   6    -0.01  -0.02   0.00    -0.01  -0.01   0.01    -0.02   0.01   0.01
  40   6    -0.01  -0.02   0.00    -0.02  -0.01   0.00    -0.01   0.00   0.00
  41   6    -0.01  -0.02  -0.01     0.00  -0.02   0.00     0.02  -0.02   0.00
  42   6    -0.02   0.00   0.00    -0.02   0.00   0.00     0.00  -0.01   0.00
  43   6     0.00  -0.02   0.01     0.00  -0.01   0.01     0.00  -0.01  -0.01
  44   6    -0.01  -0.02   0.00    -0.01  -0.01   0.00    -0.01   0.00   0.00
  45   6     0.00   0.00   0.01    -0.01   0.00   0.01     0.00   0.00   0.00
  46   6    -0.01   0.00   0.01     0.00   0.00   0.00     0.00   0.00   0.00
  47   6    -0.01   0.00   0.00     0.00   0.00  -0.01     0.00   0.00   0.01
  48   6     0.00   0.00   0.00     0.00  -0.01   0.00     0.00   0.00   0.00
  49   6     0.01   0.00   0.01     0.00   0.00   0.01     0.00   0.00  -0.01
  50   6     0.01  -0.01  -0.01     0.00   0.00   0.00     0.00   0.01   0.01
  51   6     0.01   0.00  -0.01     0.00   0.01  -0.02     0.00   0.00  -0.01
  52   6     0.01   0.00   0.01     0.01   0.00   0.00     0.00   0.00   0.00
  53   6     0.06   0.02  -0.01     0.04   0.02  -0.01     0.01   0.01   0.00
  54   6    -0.07  -0.03   0.01    -0.05  -0.02   0.00    -0.01   0.00   0.00
  55   1    -0.03   0.07   0.01    -0.02   0.05   0.00    -0.01   0.01   0.00
  56   1    -0.10  -0.01  -0.04     0.13  -0.02  -0.01    -0.06   0.00  -0.05
  57   1     0.00   0.01   0.06     0.04  -0.01  -0.11     0.02  -0.01   0.04
  58   1     0.09  -0.02  -0.07    -0.13   0.03   0.11     0.02  -0.01  -0.01
  59   1     0.09  -0.02  -0.08    -0.13   0.04   0.13     0.03  -0.02  -0.02
  60   1     0.06   0.02  -0.03    -0.10  -0.02   0.06     0.02  -0.01  -0.01
  61   1    -0.05  -0.06  -0.11    -0.10  -0.11  -0.02    -0.26   0.03   0.13
  62   1    -0.11  -0.02   0.00     0.02   0.12  -0.01    -0.09   0.03   0.09
  63   1     0.10  -0.15   0.22     0.13  -0.04   0.13     0.06   0.12   0.00
  64   1     0.14  -0.35  -0.21     0.06  -0.24  -0.12     0.04   0.10  -0.04
  65   1     0.14  -0.28  -0.08     0.03  -0.07  -0.04    -0.02   0.24   0.24
  66   1    -0.04   0.04  -0.12     0.13  -0.12   0.13     0.08   0.02  -0.10
  67   1    -0.04   0.07  -0.01    -0.07  -0.18  -0.02     0.16   0.04  -0.06
  68   1     0.00   0.13  -0.01     0.02  -0.07   0.06     0.26   0.08   0.18
  69   1     0.10   0.19  -0.05    -0.15  -0.16   0.15     0.01   0.08  -0.02
  70   1     0.15  -0.08   0.10    -0.19   0.12  -0.08     0.03  -0.02   0.01
  71   1     0.15   0.05   0.03    -0.13  -0.13   0.11     0.05   0.02   0.01
  72   1     0.09   0.05  -0.01    -0.18  -0.08   0.05     0.05   0.03  -0.01
  73   1     0.09   0.05   0.02    -0.15  -0.09  -0.03     0.09   0.05   0.02
  74   1     0.03   0.00  -0.05    -0.04   0.06   0.12     0.01   0.02  -0.04
  75   1     0.01  -0.01   0.00     0.02   0.01   0.00     0.00   0.00   0.00
  76   1     0.03   0.02  -0.01     0.03   0.01  -0.01     0.01   0.01   0.00
  77   1     0.01  -0.01   0.00     0.00  -0.03   0.00     0.00   0.00   0.00
  78   1     0.02  -0.01  -0.01     0.01  -0.02  -0.01     0.00   0.00   0.00
  79   1     0.02   0.00   0.02     0.01   0.00   0.02     0.01   0.00   0.01
  80   1     0.00  -0.02   0.00    -0.01   0.00   0.00    -0.03   0.02   0.01
  81   1     0.00  -0.03   0.00    -0.01  -0.02   0.00    -0.01   0.00   0.00
  82   1     0.01  -0.02   0.00     0.02  -0.03   0.00     0.03  -0.03   0.00
  83   1     0.00  -0.02   0.02     0.00  -0.02   0.01     0.00  -0.01   0.00
  84   1    -0.01  -0.02  -0.02    -0.01  -0.01  -0.01    -0.01   0.01  -0.01
  85   1     0.00   0.02   0.00    -0.01   0.02   0.00     0.00   0.01   0.00
  86   1    -0.01   0.01   0.01    -0.02   0.01   0.01     0.00   0.00   0.00
  87   1    -0.02  -0.01   0.02    -0.03  -0.02   0.02     0.00   0.00   0.01
  88   1    -0.03  -0.01   0.00    -0.01   0.00  -0.01    -0.01  -0.01   0.00
  89   1    -0.01   0.02   0.02     0.00   0.02   0.01     0.00   0.00   0.00
  90   1    -0.01   0.01   0.01    -0.01   0.00  -0.01     0.00   0.00   0.01
  91   1    -0.01   0.02   0.00     0.00   0.03  -0.01    -0.02   0.00   0.01
  92   1    -0.01  -0.02  -0.01     0.00   0.00  -0.01    -0.01  -0.01  -0.01
  93   1    -0.02   0.00  -0.01    -0.01  -0.01  -0.02     0.00   0.00   0.01
  94   1    -0.01  -0.01   0.01    -0.01  -0.02   0.01     0.00   0.00   0.00
  95   1    -0.02   0.00   0.00    -0.01  -0.01  -0.01     0.00   0.00   0.00
  96   1    -0.01   0.02  -0.01     0.00   0.00   0.00     0.00   0.01   0.00
  97   1     0.00   0.04   0.01     0.00   0.02   0.00     0.00   0.00  -0.01
  98   1     0.02  -0.01   0.02     0.01   0.00   0.02     0.00   0.00  -0.01
  99   1     0.03   0.00   0.04     0.01   0.00   0.02     0.00   0.01  -0.01
 100   1     0.01  -0.01  -0.01     0.00   0.00   0.00     0.01  -0.01   0.01
 101   1     0.02  -0.01  -0.01     0.01   0.00  -0.01     0.00   0.01   0.01
 102   1     0.00   0.00  -0.01     0.00   0.01   0.00     0.00   0.01   0.01
 103   1    -0.01   0.02   0.00    -0.02   0.03  -0.01     0.01   0.01   0.00
 104   1     0.02   0.01  -0.02     0.02   0.02  -0.04     0.00   0.00   0.00
 105   1     0.02  -0.01  -0.02     0.01   0.00  -0.02     0.01   0.00  -0.02
 106   1     0.01   0.00   0.01     0.02  -0.01   0.00     0.00   0.01   0.00
 107   1    -0.01   0.01   0.01     0.00   0.00   0.01    -0.01   0.01   0.00
 108   1     0.02   0.01   0.01     0.01   0.00   0.00     0.01   0.01   0.01
 109   1     0.07  -0.03   0.00     0.05   0.00  -0.01     0.01  -0.01   0.00
 110   1     0.12   0.07  -0.03     0.08   0.06  -0.02     0.02   0.02   0.00
 111   1     0.07  -0.03   0.00     0.04   0.00  -0.01     0.01   0.00   0.00
 112   1    -0.02  -0.09  -0.01    -0.01  -0.06  -0.01    -0.01   0.00   0.00
 113   1    -0.08  -0.03   0.01    -0.05  -0.02   0.00    -0.01   0.00   0.00
 114   1    -0.14  -0.05   0.04    -0.10  -0.03   0.02    -0.02   0.00   0.00
                    79                     80                     81
                     A                      A                      A
 Frequencies --   421.1722               430.7125               437.0412
 Red. masses --     5.2555                 3.4578                 5.3521
 Frc consts  --     0.5493                 0.3779                 0.6023
 IR Inten    --    28.5042                 4.2023                 6.9819
 Atom AN      X      Y      Z        X      Y      Z        X      Y      Z
   1   8    -0.07   0.03   0.00    -0.01   0.00   0.00     0.05  -0.02  -0.05
   2  12     0.02  -0.11  -0.05    -0.01   0.01  -0.01     0.04  -0.06   0.01
   3   8    -0.11  -0.08   0.26     0.00   0.01   0.02    -0.07  -0.15  -0.01
   4   6     0.02  -0.05   0.07     0.00  -0.01   0.00     0.04   0.05   0.00
   5   7    -0.02   0.00  -0.05     0.03   0.03   0.20    -0.01   0.02   0.07
   6   7     0.00   0.01  -0.04     0.00  -0.01  -0.10     0.00   0.02   0.05
   7   8    -0.02  -0.03  -0.05     0.00  -0.01  -0.01    -0.03   0.08   0.06
   8   6    -0.01   0.01  -0.01     0.02   0.01   0.11     0.00   0.02   0.02
   9   6    -0.01   0.03   0.02     0.00   0.00  -0.02    -0.01   0.02  -0.03
  10   6    -0.01   0.02   0.00     0.00  -0.01  -0.08     0.00   0.02   0.01
  11   8    -0.03  -0.05  -0.11     0.01   0.01  -0.01    -0.07  -0.12   0.03
  12   6    -0.01   0.03  -0.12     0.00   0.00  -0.01    -0.04   0.05   0.06
  13   6     0.05   0.05   0.01     0.02  -0.01   0.00    -0.11   0.13   0.03
  14   6     0.10  -0.06   0.10     0.01   0.00   0.00    -0.03  -0.02   0.07
  15   8     0.02   0.13  -0.05    -0.01   0.01   0.00     0.04  -0.03  -0.04
  16   6    -0.04   0.02   0.05    -0.01   0.00   0.01     0.06  -0.04  -0.07
  17   8    -0.04  -0.02  -0.05    -0.01  -0.01   0.01     0.18   0.05  -0.09
  18   6    -0.02  -0.09  -0.02    -0.01  -0.01  -0.02     0.11  -0.05   0.07
  19   8     0.06  -0.04   0.06     0.00  -0.02  -0.02    -0.05  -0.05   0.12
  20   8     0.07   0.08   0.03     0.01   0.01   0.01    -0.11  -0.05  -0.02
  21   6     0.05   0.03   0.02     0.00   0.00   0.00    -0.06   0.06  -0.01
  22   6     0.06   0.00   0.01     0.00   0.00   0.00     0.03   0.02  -0.02
  23   6    -0.02  -0.02  -0.04    -0.01   0.00  -0.01     0.07  -0.01   0.03
  24   8    -0.03   0.01  -0.01     0.01   0.00  -0.01    -0.06   0.07   0.00
  25   6    -0.01   0.02   0.00     0.00   0.00   0.00     0.00   0.01  -0.02
  26   6    -0.04   0.03  -0.07    -0.01   0.01  -0.02     0.04  -0.02   0.08
  27   6    -0.08   0.00  -0.05     0.00  -0.02   0.02    -0.05   0.11  -0.15
  28   6     0.14   0.09   0.04     0.00   0.01   0.00     0.04   0.01  -0.02
  29   6    -0.01   0.02   0.01     0.02   0.06  -0.04     0.00   0.01  -0.01
  30   6    -0.02   0.02   0.01    -0.01   0.01   0.02    -0.03   0.03   0.00
  31   6     0.01  -0.01   0.01     0.01   0.07  -0.07     0.01   0.01  -0.02
  32   6     0.02   0.00  -0.01    -0.01   0.02   0.02     0.00   0.00   0.01
  33   6     0.02   0.00  -0.01     0.00  -0.04   0.05     0.01   0.00   0.02
  34   6     0.00  -0.01   0.00     0.02   0.05   0.01     0.01   0.02   0.01
  35   6     0.00   0.01   0.02     0.01   0.04  -0.05     0.01   0.01  -0.01
  36   6     0.02  -0.02   0.03    -0.09   0.00  -0.13    -0.02   0.00  -0.05
  37   6    -0.01   0.00   0.03     0.03  -0.04  -0.05     0.02  -0.01  -0.02
  38   6    -0.01   0.01   0.02     0.00   0.02   0.02    -0.01   0.00   0.00
  39   6    -0.01   0.00   0.00    -0.01   0.02  -0.01     0.00  -0.01   0.02
  40   6     0.00  -0.01  -0.01     0.01   0.00  -0.02    -0.01  -0.01   0.02
  41   6    -0.01   0.00  -0.01    -0.01   0.00  -0.01     0.00   0.00   0.01
  42   6    -0.02   0.01   0.01    -0.02   0.01   0.04    -0.02   0.00  -0.02
  43   6     0.01   0.00   0.02     0.03   0.02   0.03    -0.01  -0.02  -0.02
  44   6    -0.01  -0.02   0.03    -0.03  -0.02   0.07     0.01   0.00  -0.04
  45   6    -0.02  -0.02   0.00     0.04   0.07   0.04     0.03   0.03   0.01
  46   6     0.01   0.03   0.00    -0.05  -0.15  -0.07    -0.02  -0.05  -0.02
  47   6     0.00   0.02  -0.01    -0.02  -0.08   0.00    -0.01  -0.02   0.00
  48   6     0.00  -0.03   0.01     0.01   0.05   0.01     0.00   0.02   0.00
  49   6     0.03  -0.03   0.01     0.05  -0.06   0.03    -0.02   0.03  -0.01
  50   6    -0.01   0.01  -0.02    -0.03   0.05  -0.03     0.02  -0.04   0.00
  51   6    -0.02   0.01  -0.01    -0.03   0.02   0.00     0.02   0.00  -0.02
  52   6     0.02  -0.02   0.00     0.04  -0.03   0.01    -0.01   0.01   0.00
  53   6     0.01   0.01  -0.01     0.00  -0.01   0.01     0.01   0.02   0.00
  54   6    -0.02   0.00   0.00     0.00   0.00   0.01    -0.01  -0.01   0.00
  55   1    -0.01   0.04   0.03     0.01   0.00  -0.04    -0.01   0.01  -0.06
  56   1     0.24   0.08   0.02     0.05  -0.01   0.01    -0.25   0.13   0.00
  57   1     0.17  -0.07   0.05     0.01   0.00  -0.01    -0.09  -0.01   0.11
  58   1    -0.05   0.05   0.10    -0.01   0.01   0.01     0.07  -0.04  -0.07
  59   1    -0.01  -0.01   0.04    -0.01   0.00   0.01     0.07  -0.03  -0.08
  60   1    -0.02   0.01   0.07    -0.01   0.00   0.01     0.06  -0.02  -0.06
  61   1     0.08   0.06  -0.01     0.00   0.00   0.00     0.00  -0.08   0.01
  62   1    -0.02  -0.02  -0.05    -0.01   0.00  -0.01     0.12   0.11   0.01
  63   1    -0.05   0.01  -0.04     0.00   0.00   0.00     0.05   0.02  -0.03
  64   1    -0.04   0.07   0.06     0.00   0.00   0.00    -0.02  -0.02   0.01
  65   1    -0.02   0.00  -0.03     0.00   0.00   0.00    -0.03   0.04  -0.04
  66   1    -0.10   0.05  -0.11    -0.02   0.01  -0.03     0.09  -0.04   0.13
  67   1     0.01   0.09  -0.02     0.01   0.02  -0.01    -0.01  -0.06   0.08
  68   1    -0.05   0.02  -0.08     0.00   0.01  -0.01     0.01  -0.02   0.05
  69   1    -0.15  -0.21   0.06    -0.01  -0.02   0.03     0.05  -0.05  -0.21
  70   1    -0.19   0.09  -0.20    -0.01   0.00   0.01     0.00   0.00  -0.12
  71   1    -0.14   0.01  -0.09     0.00  -0.03   0.04    -0.10   0.25  -0.35
  72   1     0.09   0.10  -0.03     0.00   0.01  -0.01     0.15   0.06  -0.06
  73   1     0.33   0.20   0.09     0.00   0.02   0.01     0.12   0.06   0.00
  74   1     0.05   0.15  -0.10     0.01   0.01   0.01    -0.02  -0.08  -0.16
  75   1     0.02   0.00  -0.01    -0.03  -0.04   0.05    -0.01   0.00   0.02
  76   1     0.02   0.02  -0.03    -0.01  -0.13   0.08     0.01  -0.02   0.02
  77   1    -0.01  -0.02  -0.01     0.04   0.02   0.03     0.01   0.01   0.02
  78   1     0.02  -0.02   0.02    -0.09  -0.01  -0.11    -0.02  -0.01  -0.05
  79   1    -0.01   0.01   0.04     0.03  -0.05  -0.05     0.02  -0.01  -0.01
  80   1     0.01   0.01  -0.01     0.00   0.03  -0.02     0.01  -0.03   0.01
  81   1     0.02  -0.02  -0.02     0.04  -0.02  -0.04     0.00  -0.02   0.01
  82   1     0.00  -0.02  -0.01    -0.01  -0.02  -0.02     0.02   0.00   0.01
  83   1     0.01   0.00   0.02     0.03   0.02   0.02     0.00  -0.02  -0.01
  84   1    -0.01  -0.03   0.02    -0.03  -0.03   0.07     0.01   0.00  -0.05
  85   1    -0.04  -0.03  -0.01     0.15   0.21   0.05     0.04   0.07   0.00
  86   1    -0.02   0.02  -0.04     0.00  -0.10   0.26     0.02  -0.03   0.07
  87   1    -0.05  -0.06   0.01     0.13   0.20   0.07     0.06   0.08   0.03
  88   1     0.00   0.05  -0.02    -0.01  -0.22   0.01    -0.02  -0.09   0.00
  89   1     0.02   0.07   0.03    -0.10  -0.31  -0.15    -0.04  -0.10  -0.04
  90   1    -0.01   0.01  -0.04     0.02  -0.10   0.06     0.00  -0.03   0.03
  91   1     0.02   0.06  -0.03    -0.05  -0.10   0.02    -0.02  -0.03   0.01
  92   1     0.01   0.04  -0.02    -0.04  -0.15   0.00    -0.01  -0.06   0.00
  93   1     0.01  -0.02  -0.05    -0.05  -0.01   0.04    -0.02   0.00   0.02
  94   1     0.00  -0.06   0.02     0.01   0.14  -0.01    -0.01   0.04  -0.01
  95   1     0.01  -0.02  -0.03    -0.02   0.01   0.13    -0.01   0.01   0.03
  96   1     0.00  -0.05   0.03     0.01   0.11  -0.01     0.00   0.04  -0.02
  97   1     0.05  -0.02   0.00     0.11  -0.08   0.00    -0.06   0.06   0.01
  98   1     0.06  -0.07   0.04     0.11  -0.13   0.08    -0.04   0.05  -0.04
  99   1     0.05   0.01  -0.03     0.05  -0.01  -0.07     0.00   0.00   0.06
 100   1    -0.02   0.05  -0.03    -0.05   0.15  -0.05     0.02  -0.08   0.01
 101   1     0.03  -0.01  -0.06     0.04  -0.02  -0.13    -0.01  -0.01   0.04
 102   1    -0.02   0.05  -0.02    -0.06   0.13  -0.02     0.03  -0.07  -0.01
 103   1    -0.03   0.03   0.00    -0.07   0.03   0.00     0.02   0.01  -0.01
 104   1    -0.01  -0.02  -0.05    -0.01  -0.03  -0.07     0.02   0.02  -0.01
 105   1    -0.04   0.02  -0.02    -0.08   0.04   0.00     0.05  -0.02  -0.03
 106   1     0.03  -0.03   0.00     0.04  -0.06  -0.01    -0.02   0.03   0.01
 107   1     0.04  -0.03   0.01     0.08  -0.06   0.01    -0.03   0.03   0.00
 108   1     0.00  -0.02  -0.01    -0.01  -0.03  -0.03     0.02   0.01   0.03
 109   1     0.02   0.00  -0.01     0.03   0.07  -0.05     0.01   0.02   0.00
 110   1     0.03   0.02  -0.01    -0.01  -0.03  -0.06     0.01   0.02   0.00
 111   1     0.02  -0.01  -0.01    -0.04  -0.11  -0.01     0.00   0.01   0.00
 112   1    -0.02  -0.02  -0.02     0.05  -0.01   0.05     0.01  -0.03   0.00
 113   1    -0.02  -0.01  -0.01    -0.10   0.02   0.05    -0.01  -0.01   0.01
 114   1    -0.05  -0.01   0.00     0.04  -0.01   0.05    -0.03  -0.02   0.02
                    82                     83                     84
                     A                      A                      A
 Frequencies --   439.2263               443.5224               448.7667
 Red. masses --     3.5036                 5.4241                 3.0742
 Frc consts  --     0.3982                 0.6287                 0.3648
 IR Inten    --     9.6884                29.9709                 3.6919
 Atom AN      X      Y      Z        X      Y      Z        X      Y      Z
   1   8    -0.03   0.01   0.01     0.06  -0.02   0.02     0.01   0.00   0.00
   2  12    -0.01  -0.01  -0.03    -0.03  -0.05  -0.02    -0.02  -0.01   0.01
   3   8     0.01   0.04   0.05    -0.05  -0.12   0.07    -0.01  -0.03   0.00
   4   6     0.00  -0.02   0.02    -0.04   0.06  -0.07     0.00   0.01  -0.01
   5   7     0.02   0.02   0.09     0.01   0.00   0.01    -0.01   0.01  -0.01
   6   7     0.00   0.01   0.20    -0.01   0.01   0.04     0.02   0.01  -0.06
   7   8     0.00  -0.02  -0.02     0.03   0.02   0.05     0.00   0.01   0.01
   8   6     0.00   0.00   0.00     0.01   0.00  -0.01    -0.01   0.01   0.01
   9   6    -0.01  -0.02  -0.05     0.01   0.01  -0.01    -0.02   0.02   0.01
  10   6     0.00   0.00   0.06     0.01   0.01   0.01    -0.02   0.01  -0.02
  11   8     0.01   0.00  -0.04     0.05   0.08   0.11     0.00   0.00   0.02
  12   6     0.00  -0.01  -0.03     0.07   0.05   0.06     0.01   0.01   0.01
  13   6     0.03  -0.02   0.01     0.00   0.03   0.01    -0.01   0.01   0.00
  14   6     0.03  -0.01   0.01    -0.11   0.07  -0.14    -0.02   0.01  -0.01
  15   8    -0.04   0.01   0.00     0.27   0.01  -0.03     0.04   0.00  -0.01
  16   6    -0.02   0.01   0.02     0.01  -0.01  -0.03     0.01   0.00  -0.01
  17   8    -0.03  -0.01   0.01    -0.08  -0.04   0.01     0.00   0.00   0.00
  18   6    -0.02  -0.01  -0.02    -0.05  -0.05   0.02     0.00  -0.01   0.01
  19   8     0.00  -0.02  -0.04     0.07   0.01   0.06     0.00   0.00   0.01
  20   8     0.02   0.02   0.00     0.08   0.08   0.08     0.00   0.01   0.01
  21   6     0.01   0.00   0.00     0.04   0.02   0.02     0.00   0.01   0.00
  22   6     0.00   0.00   0.00     0.02   0.00   0.02     0.00   0.00   0.00
  23   6    -0.01   0.00  -0.01    -0.06  -0.04  -0.05     0.00   0.00   0.00
  24   8     0.00   0.00   0.00     0.03   0.00  -0.03     0.00   0.01   0.00
  25   6     0.00   0.00   0.00    -0.01   0.02   0.02     0.00   0.00   0.00
  26   6    -0.01   0.01  -0.02    -0.08   0.03  -0.10    -0.01   0.01  -0.01
  27   6     0.01  -0.03   0.03    -0.05   0.00  -0.04    -0.01   0.01  -0.01
  28   6     0.03   0.02   0.01    -0.18  -0.10  -0.06    -0.02  -0.01  -0.01
  29   6     0.02   0.06  -0.02     0.01   0.03  -0.01     0.00   0.01   0.00
  30   6     0.03  -0.02  -0.02    -0.04   0.03   0.00     0.12  -0.08   0.00
  31   6     0.01   0.05  -0.03     0.01   0.03  -0.01     0.00   0.00   0.00
  32   6     0.01   0.01   0.01     0.01   0.01  -0.01     0.00   0.00   0.00
  33   6     0.00  -0.03   0.02     0.00  -0.02   0.00     0.01   0.01   0.00
  34   6     0.00   0.03   0.00     0.00   0.00   0.00     0.01  -0.01   0.00
  35   6     0.00   0.04  -0.01     0.00   0.03   0.00     0.00   0.00   0.00
  36   6    -0.05  -0.01  -0.07    -0.01  -0.01  -0.01     0.02  -0.01   0.02
  37   6    -0.01  -0.02   0.01    -0.01   0.00   0.03     0.02  -0.01  -0.02
  38   6     0.02  -0.03  -0.02    -0.02   0.02  -0.01     0.07  -0.07   0.05
  39   6     0.03  -0.04   0.02     0.00   0.00   0.01     0.02  -0.03  -0.02
  40   6    -0.03   0.00   0.04     0.01  -0.01   0.01    -0.06  -0.01  -0.03
  41   6     0.01  -0.02   0.02     0.00   0.01   0.01     0.00  -0.04  -0.04
  42   6     0.03  -0.04  -0.06    -0.02   0.02   0.00     0.06  -0.07  -0.03
  43   6    -0.04  -0.01  -0.03    -0.01  -0.02  -0.04     0.03   0.07   0.17
  44   6     0.06   0.05  -0.15     0.02  -0.01  -0.02    -0.01   0.04  -0.06
  45   6     0.01   0.03   0.03     0.00   0.00   0.02    -0.01  -0.01   0.00
  46   6    -0.03  -0.08  -0.05    -0.01  -0.02  -0.02     0.01   0.02   0.01
  47   6     0.00  -0.01  -0.02     0.00   0.01  -0.01     0.00  -0.02   0.00
  48   6     0.00  -0.01   0.03     0.00  -0.02   0.02     0.00   0.02  -0.01
  49   6    -0.10   0.13  -0.08     0.00   0.01   0.01    -0.05   0.06  -0.07
  50   6     0.05  -0.10   0.04     0.01  -0.03  -0.01     0.01   0.01   0.05
  51   6     0.02  -0.01   0.02     0.03  -0.02  -0.02    -0.16   0.07   0.08
  52   6    -0.04   0.04  -0.02    -0.02   0.02   0.01     0.11  -0.08  -0.03
  53   6     0.02  -0.01   0.01     0.00   0.01   0.00     0.01   0.00   0.00
  54   6    -0.01   0.01   0.00     0.00  -0.03   0.00    -0.02   0.05  -0.01
  55   1    -0.01  -0.03  -0.13     0.01   0.01  -0.02    -0.01   0.02   0.03
  56   1     0.10  -0.02   0.03    -0.04   0.02   0.01    -0.03   0.01   0.00
  57   1     0.06  -0.01   0.00    -0.18   0.07  -0.09    -0.03   0.01   0.00
  58   1    -0.02   0.02   0.03     0.02  -0.04  -0.07     0.01  -0.01  -0.02
  59   1    -0.01   0.00   0.02    -0.03   0.03   0.00     0.00   0.00  -0.01
  60   1    -0.01   0.01   0.03     0.00  -0.01  -0.05     0.00   0.00  -0.01
  61   1     0.01   0.02  -0.01     0.03   0.05   0.01     0.00   0.00   0.00
  62   1    -0.02  -0.01  -0.01    -0.09  -0.06  -0.07     0.00   0.00   0.00
  63   1    -0.01   0.00   0.00    -0.03   0.01  -0.02     0.00   0.00   0.00
  64   1     0.00   0.00   0.00    -0.02   0.06   0.05     0.00   0.00   0.00
  65   1     0.00  -0.01   0.00    -0.01   0.01   0.02     0.00   0.00   0.00
  66   1    -0.02   0.01  -0.04    -0.16   0.06  -0.17    -0.02   0.01  -0.02
  67   1     0.00   0.02  -0.01    -0.02   0.11  -0.03     0.00   0.02   0.01
  68   1     0.00   0.01  -0.02    -0.09   0.04  -0.12    -0.01   0.01  -0.01
  69   1    -0.02  -0.03   0.06    -0.05  -0.12  -0.02     0.00  -0.01  -0.02
  70   1    -0.02   0.00   0.01    -0.09   0.06  -0.08    -0.01   0.01  -0.01
  71   1     0.01  -0.05   0.06    -0.12   0.02  -0.09    -0.02   0.02  -0.03
  72   1     0.01   0.02   0.00    -0.16  -0.13   0.02    -0.01  -0.02   0.00
  73   1     0.06   0.05   0.03    -0.42  -0.23  -0.13    -0.05  -0.03  -0.02
  74   1     0.02   0.04   0.00    -0.06  -0.14   0.14    -0.01  -0.02   0.01
  75   1     0.00  -0.03   0.02     0.01  -0.02   0.00     0.00   0.00   0.00
  76   1     0.00  -0.09   0.03     0.00  -0.08   0.02     0.01   0.01   0.00
  77   1     0.00   0.00   0.01    -0.01  -0.03   0.00     0.00  -0.02   0.01
  78   1    -0.05  -0.02  -0.06    -0.02  -0.02  -0.01     0.02  -0.01   0.02
  79   1    -0.01  -0.02   0.01    -0.01   0.00   0.03     0.02  -0.01  -0.02
  80   1     0.01  -0.04   0.04     0.01  -0.03   0.01    -0.02   0.06  -0.03
  81   1    -0.10   0.05   0.06     0.04  -0.03   0.01    -0.17   0.08  -0.01
  82   1     0.00   0.03   0.04     0.02   0.00   0.01    -0.07   0.01  -0.03
  83   1    -0.04  -0.01  -0.02     0.00  -0.02  -0.04     0.02   0.06   0.20
  84   1     0.04   0.06  -0.17     0.02  -0.01  -0.02    -0.03   0.06  -0.06
  85   1     0.07   0.11   0.03     0.00   0.03   0.01    -0.03  -0.02  -0.01
  86   1    -0.02  -0.05   0.14    -0.01  -0.02   0.04    -0.01   0.01  -0.03
  87   1     0.05   0.09   0.04     0.00   0.01   0.04    -0.03  -0.04   0.01
  88   1     0.01  -0.10  -0.01     0.01  -0.02  -0.01     0.00   0.03  -0.01
  89   1    -0.05  -0.16  -0.09    -0.01  -0.04  -0.03     0.02   0.05   0.03
  90   1     0.01  -0.07   0.00     0.00  -0.03  -0.02    -0.01   0.01  -0.01
  91   1     0.00   0.01  -0.02     0.01   0.04  -0.02    -0.02  -0.02   0.01
  92   1     0.00  -0.01  -0.02     0.01   0.04  -0.02    -0.01  -0.05   0.00
  93   1    -0.01  -0.04  -0.04     0.01  -0.03  -0.04    -0.02   0.01   0.02
  94   1     0.02   0.01   0.01     0.01  -0.03   0.02    -0.01   0.03  -0.01
  95   1     0.01  -0.02   0.04     0.02  -0.02   0.00    -0.01   0.01   0.02
  96   1     0.01  -0.02   0.05     0.00  -0.05   0.04     0.00   0.04  -0.03
  97   1    -0.21   0.16  -0.02    -0.03   0.03   0.01    -0.05   0.03  -0.05
  98   1    -0.21   0.26  -0.18    -0.01   0.02  -0.01    -0.08   0.10  -0.09
  99   1    -0.10   0.02   0.10     0.01   0.00   0.04    -0.07   0.03  -0.06
 100   1     0.10  -0.29   0.09     0.00  -0.03   0.00     0.08  -0.10   0.06
 101   1    -0.09   0.05   0.26    -0.01  -0.02   0.00    -0.02   0.08   0.15
 102   1     0.11  -0.24   0.04     0.02  -0.05  -0.02     0.02  -0.01   0.08
 103   1     0.07  -0.04   0.01     0.06  -0.01  -0.01    -0.27   0.08   0.07
 104   1     0.00   0.02   0.09     0.03   0.01   0.01    -0.12  -0.07  -0.10
 105   1     0.06  -0.04   0.02     0.07  -0.03  -0.04    -0.33   0.16   0.15
 106   1    -0.02   0.06   0.00    -0.05   0.05   0.02     0.24  -0.21  -0.08
 107   1    -0.08   0.07  -0.03    -0.06   0.04   0.01     0.27  -0.19  -0.04
 108   1    -0.01   0.04   0.01     0.03   0.01   0.06    -0.11  -0.04  -0.25
 109   1     0.02  -0.05   0.02     0.00   0.02   0.00     0.02  -0.01  -0.01
 110   1     0.04   0.01   0.04    -0.01   0.01   0.01     0.04   0.02  -0.02
 111   1     0.02   0.01   0.01     0.00   0.03   0.00     0.01  -0.04   0.00
 112   1    -0.03   0.03  -0.01     0.02  -0.05  -0.02    -0.04   0.08   0.02
 113   1     0.04   0.01  -0.02     0.02  -0.03   0.00    -0.04   0.06   0.00
 114   1    -0.01   0.02  -0.02    -0.04  -0.03   0.01     0.03   0.06  -0.01
                    85                     86                     87
                     A                      A                      A
 Frequencies --   449.7946               454.4392               458.6975
 Red. masses --     3.1107                 3.2366                 3.4370
 Frc consts  --     0.3708                 0.3938                 0.4261
 IR Inten    --     3.4418                 0.6005                 3.8742
 Atom AN      X      Y      Z        X      Y      Z        X      Y      Z
   1   8     0.01   0.00  -0.01     0.01   0.00  -0.01     0.00   0.00   0.00
   2  12    -0.01   0.01   0.02    -0.02   0.01   0.01    -0.01  -0.01  -0.01
   3   8     0.00   0.00  -0.02     0.00   0.00   0.01     0.00  -0.02   0.01
   4   6     0.01   0.01   0.00     0.00   0.00   0.00     0.00   0.00   0.00
   5   7     0.04   0.00  -0.09     0.05   0.03   0.01    -0.04   0.02   0.02
   6   7    -0.01  -0.01  -0.04     0.00  -0.01   0.02     0.03   0.02   0.06
   7   8     0.00   0.01   0.01     0.00   0.01   0.01     0.00   0.00   0.00
   8   6    -0.01  -0.03  -0.03     0.00  -0.02   0.01    -0.03   0.03   0.00
   9   6     0.00  -0.03   0.03    -0.01  -0.03   0.00    -0.04   0.03  -0.01
  10   6    -0.02  -0.01   0.01    -0.02  -0.02   0.00    -0.02   0.01   0.02
  11   8    -0.01  -0.01   0.01    -0.01  -0.01   0.01     0.00   0.00   0.00
  12   6    -0.01  -0.01   0.01    -0.01   0.00   0.00     0.01   0.01   0.00
  13   6    -0.02   0.00   0.00    -0.01   0.00   0.01     0.00   0.01   0.00
  14   6    -0.01   0.00   0.01    -0.01   0.00   0.01     0.00   0.00  -0.01
  15   8    -0.01  -0.02  -0.01     0.00  -0.01  -0.01     0.01   0.01   0.00
  16   6     0.01  -0.01  -0.01     0.01   0.00  -0.01     0.00   0.00   0.00
  17   8     0.03   0.01   0.00     0.02   0.00   0.00     0.00   0.00   0.00
  18   6     0.01   0.00   0.00     0.01  -0.02  -0.02     0.00  -0.01   0.01
  19   8    -0.02  -0.01   0.00    -0.02  -0.03  -0.01    -0.01  -0.01   0.01
  20   8    -0.02  -0.01   0.00    -0.01   0.00   0.02     0.01   0.01   0.01
  21   6    -0.01   0.00   0.00    -0.01   0.01   0.00     0.00   0.01   0.00
  22   6    -0.01   0.00  -0.01     0.00   0.00   0.00     0.01   0.00   0.00
  23   6     0.01   0.00   0.01     0.01  -0.01   0.00     0.00  -0.01   0.00
  24   8     0.00   0.01   0.00     0.00   0.01  -0.01    -0.01   0.01   0.00
  25   6     0.00   0.00   0.00     0.00   0.00   0.00     0.00   0.00   0.00
  26   6     0.01   0.00   0.02     0.00   0.01   0.00    -0.01   0.01  -0.01
  27   6     0.01   0.00   0.00     0.00  -0.01   0.00    -0.01   0.01  -0.01
  28   6     0.00   0.00   0.00     0.00   0.00  -0.01    -0.01   0.00   0.00
  29   6     0.02   0.13  -0.02     0.04   0.17  -0.04    -0.03  -0.05   0.01
  30   6     0.03  -0.03   0.00     0.03  -0.04  -0.01     0.16  -0.12  -0.03
  31   6     0.01   0.09  -0.03     0.01   0.12   0.02     0.01  -0.06  -0.01
  32   6     0.02   0.01  -0.04     0.01   0.04  -0.01     0.01  -0.02   0.01
  33   6     0.01  -0.05  -0.03    -0.03  -0.05   0.00     0.03   0.03   0.00
  34   6     0.01   0.03  -0.04     0.00   0.02  -0.04     0.01  -0.02   0.03
  35   6     0.02   0.09   0.03     0.01   0.10  -0.07     0.00  -0.04   0.02
  36   6    -0.05  -0.03  -0.03     0.01  -0.06   0.14     0.02   0.01  -0.05
  37   6    -0.10   0.02   0.17     0.03  -0.08  -0.08     0.02   0.02   0.00
  38   6     0.02  -0.01   0.00     0.02  -0.01  -0.02     0.10  -0.09  -0.05
  39   6     0.00   0.00  -0.02     0.01   0.00  -0.01     0.03  -0.04  -0.02
  40   6     0.00   0.01  -0.01     0.00   0.02   0.00    -0.06   0.02   0.00
  41   6     0.01   0.00  -0.01     0.01   0.00   0.01     0.03  -0.06  -0.01
  42   6     0.02  -0.01   0.01     0.03  -0.01   0.01     0.09  -0.09   0.01
  43   6     0.00   0.01   0.01    -0.03   0.00  -0.04    -0.10  -0.02  -0.08
  44   6    -0.02   0.00   0.04    -0.02   0.01   0.03    -0.09   0.02   0.09
  45   6    -0.01   0.00   0.04    -0.11  -0.12   0.05     0.04   0.04  -0.02
  46   6    -0.02  -0.06  -0.05     0.05   0.09   0.00    -0.02  -0.02   0.01
  47   6     0.03   0.12  -0.05    -0.03  -0.13  -0.03     0.00   0.02   0.01
  48   6     0.00  -0.16   0.12     0.01   0.06   0.01    -0.01   0.01  -0.02
  49   6     0.02  -0.03   0.01     0.01  -0.02   0.00     0.04  -0.06  -0.01
  50   6    -0.02   0.04   0.01    -0.01   0.04   0.01    -0.04   0.13   0.05
  51   6    -0.01   0.00   0.01     0.03  -0.02   0.00     0.04  -0.03   0.04
  52   6     0.00   0.00  -0.01    -0.04   0.03  -0.01    -0.11   0.09  -0.07
  53   6     0.03  -0.05   0.01     0.03  -0.05   0.00     0.02   0.02   0.00
  54   6    -0.02   0.02   0.00    -0.02   0.03   0.00    -0.02   0.07   0.00
  55   1     0.02  -0.01   0.07     0.00  -0.03   0.00    -0.05   0.02  -0.02
  56   1    -0.03  -0.01   0.00     0.00   0.00   0.02     0.00   0.01   0.00
  57   1    -0.02   0.00   0.02    -0.02   0.00   0.01     0.00   0.00  -0.01
  58   1     0.01  -0.01  -0.01     0.01   0.00  -0.01     0.00   0.00   0.00
  59   1     0.01  -0.01  -0.01     0.01   0.00  -0.01     0.00   0.00   0.00
  60   1     0.01  -0.01  -0.01     0.01   0.00  -0.01     0.00   0.00   0.00
  61   1    -0.01  -0.02   0.00    -0.01  -0.02   0.00     0.01   0.00   0.00
  62   1     0.02   0.02   0.01     0.02   0.02  -0.01    -0.01  -0.01  -0.01
  63   1     0.01   0.00   0.00     0.01   0.00   0.00     0.00   0.00   0.00
  64   1     0.01  -0.02  -0.01     0.00  -0.01  -0.01     0.00   0.00   0.01
  65   1     0.00   0.00   0.00     0.00   0.01   0.00     0.00   0.00  -0.01
  66   1     0.02   0.00   0.02    -0.01   0.01  -0.02    -0.03   0.02  -0.02
  67   1     0.00  -0.01   0.01     0.01   0.02   0.01     0.00   0.02   0.00
  68   1     0.01   0.00   0.02    -0.01   0.02  -0.01    -0.01   0.01  -0.01
  69   1     0.02   0.02  -0.01     0.00  -0.01   0.00     0.00  -0.02  -0.01
  70   1     0.02  -0.02   0.02     0.00  -0.01   0.00    -0.01   0.01  -0.02
  71   1     0.02   0.01   0.00     0.00   0.00   0.00    -0.02   0.01  -0.02
  72   1     0.02   0.01  -0.01     0.02   0.01  -0.01    -0.01  -0.01   0.00
  73   1     0.01   0.01   0.00     0.00   0.01   0.00    -0.01  -0.01  -0.01
  74   1     0.00  -0.02  -0.02     0.00  -0.02  -0.02     0.00   0.00   0.01
  75   1     0.03  -0.08  -0.02     0.04  -0.08   0.01    -0.02   0.03   0.01
  76   1     0.01  -0.17   0.01    -0.04  -0.21   0.04     0.03   0.11  -0.02
  77   1    -0.03  -0.05  -0.04     0.00  -0.11   0.01     0.00   0.03   0.01
  78   1    -0.06  -0.04  -0.02    -0.01  -0.06   0.18     0.03   0.01  -0.07
  79   1    -0.09   0.02   0.20     0.02  -0.10  -0.10     0.02   0.03   0.00
  80   1    -0.01   0.02  -0.01    -0.02   0.01   0.00    -0.07   0.06   0.01
  81   1    -0.02   0.03   0.00    -0.03   0.04   0.01    -0.22   0.15   0.03
  82   1    -0.02   0.01  -0.01    -0.02   0.01   0.01    -0.08   0.01   0.00
  83   1     0.00   0.02   0.01    -0.03   0.00  -0.05    -0.12  -0.01  -0.08
  84   1    -0.01   0.01   0.05    -0.01   0.01   0.05    -0.09   0.04   0.12
  85   1     0.02   0.07   0.03    -0.20  -0.14   0.01     0.07   0.06  -0.01
  86   1    -0.04  -0.06   0.12    -0.08   0.00  -0.08     0.03   0.01   0.02
  87   1     0.00   0.03   0.07    -0.21  -0.22   0.10     0.06   0.07  -0.03
  88   1     0.03  -0.03  -0.03     0.10   0.25  -0.05    -0.06  -0.09   0.01
  89   1    -0.03  -0.11  -0.08     0.11   0.22   0.04    -0.04  -0.05   0.01
  90   1     0.01  -0.08  -0.06    -0.01  -0.03  -0.22    -0.01   0.02   0.09
  91   1     0.10   0.30  -0.13    -0.08  -0.13   0.00     0.00   0.00   0.02
  92   1     0.07   0.30  -0.08    -0.06  -0.24  -0.04     0.00   0.01   0.02
  93   1     0.08  -0.12  -0.23    -0.07  -0.05   0.02     0.00   0.03   0.03
  94   1     0.08  -0.26   0.10     0.01   0.21  -0.02    -0.03  -0.03   0.00
  95   1     0.10  -0.10  -0.07    -0.02   0.01   0.19    -0.02   0.01  -0.05
  96   1     0.00  -0.33   0.26     0.02   0.14  -0.01    -0.01   0.02  -0.05
  97   1     0.05  -0.06   0.00     0.05  -0.06   0.00     0.14  -0.13  -0.04
  98   1     0.04  -0.05   0.02     0.03  -0.05   0.02     0.12  -0.16   0.06
  99   1     0.00   0.00  -0.05     0.00   0.00  -0.06     0.01   0.04  -0.20
 100   1    -0.02   0.07   0.00    -0.01   0.06   0.00     0.03   0.16   0.01
 101   1     0.01   0.01  -0.03     0.01   0.02  -0.02     0.05   0.10  -0.02
 102   1    -0.03   0.07   0.01    -0.03   0.07   0.02    -0.09   0.28   0.11
 103   1    -0.01  -0.01   0.01     0.08  -0.05   0.00     0.17  -0.09   0.02
 104   1    -0.02  -0.01   0.01     0.00   0.02   0.08    -0.01   0.06   0.22
 105   1    -0.03   0.01   0.03     0.07  -0.04   0.00     0.14  -0.09   0.02
 106   1     0.01  -0.01  -0.01    -0.05   0.06   0.00    -0.04   0.13  -0.03
 107   1     0.02  -0.01  -0.01    -0.08   0.06  -0.02    -0.22   0.19  -0.12
 108   1    -0.02   0.00  -0.02     0.00   0.03   0.02    -0.03   0.13  -0.03
 109   1     0.03  -0.10   0.02     0.05  -0.09   0.00     0.02  -0.02   0.01
 110   1     0.06  -0.01   0.02     0.07  -0.01   0.00     0.06   0.05  -0.01
 111   1     0.03  -0.04   0.01     0.02  -0.09   0.00     0.03  -0.01   0.01
 112   1    -0.05   0.05   0.00    -0.04   0.06   0.02    -0.06   0.13   0.04
 113   1     0.00   0.02  -0.01    -0.03   0.03   0.00    -0.03   0.04   0.00
 114   1     0.01   0.03  -0.02     0.03   0.04  -0.02     0.04   0.10  -0.05
                    88                     89                     90
                     A                      A                      A
 Frequencies --   482.0277               510.6821               518.7044
 Red. masses --     5.8585                 3.4823                 6.8411
 Frc consts  --     0.8020                 0.5351                 1.0845
 IR Inten    --    24.6442                 1.2286                16.1054
 Atom AN      X      Y      Z        X      Y      Z        X      Y      Z
   1   8    -0.01   0.01   0.00    -0.01   0.01   0.00     0.03  -0.02  -0.02
   2  12     0.00   0.20   0.03     0.03  -0.01  -0.01     0.02   0.12   0.02
   3   8     0.05  -0.01   0.02     0.03   0.00  -0.03    -0.19   0.01   0.20
   4   6     0.00  -0.01   0.01     0.00  -0.01   0.00    -0.01   0.02  -0.01
   5   7     0.02   0.01  -0.02     0.09  -0.10   0.02     0.07  -0.02   0.00
   6   7    -0.02  -0.04   0.00    -0.01   0.13   0.02    -0.04   0.02   0.02
   7   8    -0.01   0.00   0.00    -0.01   0.00   0.00     0.03   0.01   0.00
   8   6     0.00  -0.01   0.00     0.13  -0.08   0.02     0.06  -0.03   0.00
   9   6     0.01  -0.05   0.01     0.12   0.05  -0.03     0.06  -0.03   0.00
  10   6     0.00  -0.04   0.01     0.01   0.14  -0.03    -0.01   0.03   0.00
  11   8     0.01  -0.03  -0.04     0.01  -0.01  -0.02    -0.05   0.07   0.08
  12   6     0.01   0.02   0.02     0.00   0.01   0.02    -0.04  -0.05  -0.12
  13   6     0.01   0.04   0.04     0.00   0.02   0.01    -0.04  -0.11  -0.07
  14   6     0.02  -0.01   0.00     0.01   0.00   0.00    -0.06   0.02   0.02
  15   8    -0.02  -0.01  -0.01    -0.04  -0.02   0.01     0.19   0.13  -0.04
  16   6    -0.01   0.01   0.01    -0.01   0.01   0.01     0.03  -0.03  -0.04
  17   8     0.15  -0.02   0.04     0.00  -0.01   0.00     0.07   0.09   0.00
  18   6     0.07  -0.12  -0.12     0.01   0.01   0.02     0.00  -0.06  -0.17
  19   8    -0.12  -0.10   0.00     0.00   0.03   0.03    -0.05  -0.12  -0.17
  20   8    -0.06   0.04   0.25     0.00   0.01   0.03    -0.05  -0.08  -0.03
  21   6    -0.09   0.02   0.06    -0.01  -0.01   0.01    -0.02   0.01  -0.01
  22   6    -0.07  -0.05   0.00    -0.02  -0.01   0.01     0.01   0.04  -0.05
  23   6     0.04  -0.11  -0.11     0.00  -0.01  -0.03     0.06  -0.01   0.10
  24   8     0.12   0.02  -0.07     0.02  -0.01  -0.01    -0.08   0.01   0.03
  25   6     0.03   0.00   0.00     0.00   0.00   0.01     0.01  -0.02  -0.05
  26   6    -0.12   0.06  -0.17    -0.03   0.00  -0.03     0.11   0.04   0.13
  27   6    -0.02   0.00  -0.02     0.00   0.02  -0.01     0.03  -0.09   0.09
  28   6     0.02   0.01   0.01     0.01   0.00   0.00    -0.03  -0.01  -0.02
  29   6     0.01  -0.04   0.01     0.06  -0.08   0.02     0.04  -0.06   0.02
  30   6    -0.01  -0.02   0.00     0.01   0.07   0.00    -0.03   0.01   0.00
  31   6    -0.01  -0.04   0.01    -0.03   0.05   0.02    -0.02  -0.02   0.03
  32   6    -0.02  -0.02   0.01    -0.03   0.04  -0.01    -0.02  -0.01   0.02
  33   6    -0.02   0.03  -0.01    -0.06  -0.07   0.00    -0.05   0.02  -0.01
  34   6    -0.01  -0.02   0.00     0.00   0.04  -0.07    -0.02  -0.02  -0.02
  35   6    -0.01  -0.04   0.01     0.01  -0.01  -0.03    -0.01  -0.05  -0.01
  36   6    -0.01   0.02  -0.01    -0.07   0.03   0.04    -0.03   0.03   0.01
  37   6    -0.02   0.02   0.00    -0.04   0.00   0.00    -0.04   0.01  -0.02
  38   6     0.00   0.01  -0.01     0.03  -0.06   0.02     0.01  -0.02  -0.01
  39   6     0.01   0.01  -0.01     0.02  -0.07  -0.01     0.02  -0.03  -0.02
  40   6     0.03   0.01   0.00    -0.10   0.00   0.00    -0.04   0.04   0.00
  41   6    -0.01   0.02   0.01     0.04  -0.04  -0.06     0.03  -0.01  -0.02
  42   6     0.00   0.01   0.01     0.02  -0.01  -0.04     0.02  -0.01   0.00
  43   6     0.01   0.02   0.00    -0.04  -0.05   0.03    -0.01   0.00   0.00
  44   6     0.02   0.01   0.00    -0.05  -0.02   0.01     0.01   0.01   0.01
  45   6     0.02   0.01  -0.02    -0.01  -0.03   0.01     0.01   0.01  -0.01
  46   6     0.00   0.00   0.01     0.01   0.01   0.00     0.01   0.00   0.00
  47   6     0.01   0.02   0.01     0.01   0.01   0.00     0.01   0.01   0.01
  48   6     0.00   0.00  -0.01     0.00  -0.01   0.02     0.00   0.00  -0.01
  49   6    -0.01   0.00   0.00     0.01  -0.01   0.01     0.00   0.00  -0.01
  50   6     0.00  -0.01   0.00    -0.01   0.03   0.01    -0.01   0.01   0.01
  51   6     0.00   0.00   0.00    -0.01   0.01   0.02     0.00   0.00   0.01
  52   6     0.00  -0.01   0.01    -0.01   0.01  -0.02     0.00   0.00   0.00
  53   6     0.00  -0.02   0.01    -0.08   0.05  -0.01    -0.02   0.02   0.00
  54   6     0.01   0.01   0.00    -0.05  -0.07   0.01    -0.03  -0.03   0.00
  55   1     0.00  -0.05   0.02     0.22   0.09  -0.05     0.09  -0.01  -0.01
  56   1     0.02   0.03   0.06    -0.04   0.02   0.00     0.23  -0.10  -0.01
  57   1     0.03  -0.02  -0.01     0.02   0.00  -0.01    -0.07   0.03   0.04
  58   1    -0.01   0.01   0.02    -0.01   0.01   0.01     0.04  -0.03  -0.05
  59   1    -0.01   0.00   0.01    -0.01   0.00   0.01     0.03  -0.02  -0.04
  60   1    -0.01   0.00   0.01    -0.01   0.00   0.01     0.02  -0.01  -0.03
  61   1    -0.13  -0.19   0.05    -0.02  -0.02   0.01     0.01   0.03  -0.06
  62   1     0.07   0.06  -0.19    -0.01  -0.01  -0.04     0.14   0.07   0.12
  63   1     0.13   0.02  -0.04     0.01   0.00  -0.01     0.01  -0.02   0.06
  64   1     0.07  -0.05  -0.08     0.01   0.00   0.00     0.02  -0.10  -0.08
  65   1     0.02   0.10   0.10     0.00   0.02   0.03     0.03  -0.08  -0.08
  66   1    -0.28   0.12  -0.30    -0.05   0.01  -0.02     0.14   0.02   0.04
  67   1    -0.04   0.22   0.08    -0.03   0.01   0.00     0.12   0.04   0.10
  68   1    -0.26   0.12  -0.29    -0.06  -0.01  -0.06     0.18   0.10   0.18
  69   1     0.00  -0.11  -0.01     0.01  -0.01  -0.02    -0.05   0.07   0.12
  70   1    -0.04   0.02  -0.05     0.00   0.01  -0.01     0.01  -0.06   0.08
  71   1    -0.07   0.04  -0.09    -0.02   0.03  -0.04     0.11  -0.19   0.25
  72   1     0.00   0.01   0.00     0.00   0.00   0.00     0.03   0.00   0.00
  73   1     0.03   0.02   0.01     0.01   0.01   0.01    -0.03  -0.02  -0.03
  74   1     0.01   0.02   0.00     0.01   0.01   0.01    -0.04  -0.05  -0.05
  75   1    -0.01   0.01   0.00     0.02   0.05  -0.05     0.00   0.01   0.00
  76   1    -0.02   0.10  -0.02    -0.07  -0.13   0.04    -0.05   0.08  -0.02
  77   1     0.00   0.02   0.00     0.04   0.09  -0.06     0.01   0.02  -0.01
  78   1     0.00   0.03  -0.01    -0.08   0.03   0.07    -0.03   0.04   0.00
  79   1    -0.02   0.02  -0.01    -0.04   0.00   0.00    -0.04   0.02  -0.02
  80   1     0.02  -0.02   0.00     0.04  -0.02  -0.03     0.04  -0.04  -0.03
  81   1     0.05   0.00  -0.01    -0.20   0.07   0.05    -0.09   0.08   0.03
  82   1    -0.01   0.01   0.01     0.07  -0.02  -0.04     0.04  -0.03  -0.02
  83   1     0.01   0.02  -0.01    -0.05  -0.05   0.06    -0.01   0.00   0.01
  84   1     0.03   0.00   0.00    -0.05  -0.01   0.02     0.01   0.01   0.02
  85   1     0.02  -0.02  -0.01    -0.03  -0.10   0.03     0.02  -0.05   0.01
  86   1     0.03   0.00  -0.02     0.02  -0.04  -0.01     0.03  -0.02  -0.01
  87   1     0.04   0.03  -0.05     0.03   0.01  -0.02     0.05   0.04  -0.06
  88   1     0.00  -0.02   0.02     0.09   0.07   0.03     0.04   0.01   0.03
  89   1    -0.01  -0.02   0.00     0.01  -0.03  -0.05     0.00  -0.04  -0.03
  90   1     0.01   0.01   0.03     0.03  -0.03  -0.05     0.02   0.00   0.01
  91   1     0.02  -0.01   0.01     0.03  -0.02  -0.01     0.03  -0.05   0.01
  92   1     0.02   0.05   0.03     0.02   0.06   0.02     0.02   0.06   0.04
  93   1     0.02   0.02   0.02     0.03  -0.01   0.00     0.04   0.02   0.03
  94   1     0.00  -0.02  -0.01     0.04   0.01  -0.01     0.03   0.01  -0.03
  95   1     0.01   0.01  -0.04     0.03  -0.01   0.01     0.02   0.01  -0.02
  96   1     0.00  -0.02   0.00     0.01  -0.04   0.06     0.00  -0.02   0.02
  97   1    -0.01  -0.01   0.01     0.03   0.03  -0.02     0.01  -0.03   0.00
  98   1    -0.03   0.03  -0.02     0.05  -0.05   0.06     0.00  -0.01  -0.01
  99   1    -0.02   0.00   0.00     0.03   0.02  -0.01     0.00   0.01  -0.03
 100   1    -0.02  -0.01   0.01     0.05   0.02  -0.01     0.00   0.02   0.00
 101   1    -0.02  -0.01   0.00     0.03   0.03   0.00    -0.01   0.01   0.01
 102   1     0.01  -0.04  -0.02    -0.03   0.10   0.05     0.00   0.01   0.01
 103   1     0.00  -0.02  -0.01    -0.03   0.05   0.04     0.01   0.00   0.01
 104   1    -0.01  -0.02   0.00     0.00   0.04   0.02    -0.01   0.00   0.02
 105   1    -0.03   0.01   0.02     0.03  -0.01  -0.02     0.00   0.00   0.01
 106   1    -0.02  -0.01   0.00     0.09   0.00   0.00     0.01   0.00   0.00
 107   1     0.02  -0.03   0.02    -0.05   0.06  -0.06    -0.01   0.01  -0.01
 108   1     0.00  -0.02   0.01     0.00   0.06  -0.05    -0.01   0.01  -0.01
 109   1     0.00  -0.04   0.01    -0.11   0.24  -0.04    -0.03   0.09  -0.02
 110   1     0.01  -0.01   0.00    -0.29  -0.14   0.04    -0.10  -0.05   0.01
 111   1     0.01  -0.03   0.01    -0.12   0.21  -0.04    -0.03   0.08  -0.02
 112   1    -0.02   0.04   0.00     0.15  -0.27  -0.02     0.03  -0.09  -0.01
 113   1     0.03   0.01  -0.01    -0.10  -0.12   0.03    -0.04  -0.04   0.01
 114   1     0.06   0.02  -0.02    -0.28  -0.13   0.09    -0.10  -0.04   0.03
                    91                     92                     93
                     A                      A                      A
 Frequencies --   531.5965               533.0252               549.0154
 Red. masses --     3.8048                 4.8857                 5.2487
 Frc consts  --     0.6335                 0.8178                 0.9321
 IR Inten    --     0.1108                 4.9214                29.9799
 Atom AN      X      Y      Z        X      Y      Z        X      Y      Z
   1   8     0.00   0.00   0.00     0.01  -0.01  -0.01     0.01  -0.01  -0.01
   2  12    -0.01   0.00   0.00    -0.03   0.03  -0.01     0.01  -0.11  -0.04
   3   8     0.00   0.00   0.00    -0.03   0.03   0.04    -0.02   0.04   0.03
   4   6     0.00   0.00   0.00     0.00   0.01   0.00     0.00   0.01   0.00
   5   7     0.00   0.01  -0.02    -0.12  -0.06   0.03    -0.08   0.01   0.05
   6   7     0.01   0.00   0.01     0.16   0.10  -0.03    -0.06  -0.06   0.06
   7   8     0.00   0.00   0.00     0.01   0.01   0.00     0.01   0.01   0.00
   8   6     0.03   0.05   0.22    -0.10  -0.04  -0.03    -0.03   0.07   0.06
   9   6     0.00   0.00   0.01    -0.06   0.14  -0.03    -0.03   0.00  -0.02
  10   6    -0.03  -0.03  -0.23     0.08   0.09   0.03     0.02  -0.06  -0.01
  11   8     0.00   0.00   0.00    -0.02   0.02   0.02    -0.04   0.01   0.02
  12   6     0.00   0.00   0.00    -0.02  -0.01  -0.04    -0.02  -0.01  -0.04
  13   6     0.00   0.00   0.00     0.00  -0.03  -0.02     0.00  -0.03  -0.02
  14   6     0.00   0.00   0.00    -0.02   0.00   0.02    -0.03   0.00   0.03
  15   8     0.00   0.00   0.00     0.03   0.03  -0.01     0.02   0.04  -0.01
  16   6     0.00   0.00   0.00     0.01  -0.01  -0.01     0.01  -0.01  -0.02
  17   8     0.00   0.00   0.00     0.05   0.05   0.01     0.05   0.10   0.02
  18   6     0.00   0.00   0.00     0.03   0.02  -0.05     0.06   0.09  -0.03
  19   8     0.00  -0.01   0.00    -0.03   0.04  -0.01    -0.02   0.16   0.04
  20   8     0.00   0.00   0.00    -0.02  -0.02   0.04     0.00  -0.03   0.06
  21   6     0.00   0.01   0.00    -0.03  -0.04   0.02    -0.06  -0.11   0.03
  22   6     0.01   0.00   0.00    -0.05   0.00  -0.02    -0.12   0.01  -0.03
  23   6     0.00   0.00   0.01     0.05  -0.01  -0.02     0.11   0.00  -0.08
  24   8    -0.01   0.00   0.00     0.02  -0.04   0.01     0.04  -0.10   0.04
  25   6     0.00   0.00   0.00     0.01  -0.01  -0.01     0.01  -0.01  -0.01
  26   6     0.01   0.00   0.00     0.00   0.00  -0.01    -0.04   0.01  -0.03
  27   6     0.00   0.00   0.00     0.01  -0.03   0.03     0.01  -0.03   0.03
  28   6     0.00   0.00   0.00     0.00   0.00  -0.01     0.00   0.00  -0.01
  29   6     0.00  -0.03  -0.03    -0.07  -0.01   0.00    -0.06  -0.04   0.00
  30   6     0.05  -0.03   0.03     0.15   0.04  -0.02    -0.14   0.03   0.02
  31   6    -0.08   0.02  -0.01     0.01   0.01  -0.05    -0.05   0.02  -0.04
  32   6    -0.09  -0.05  -0.08     0.02   0.04  -0.06    -0.04   0.00  -0.10
  33   6     0.00   0.00  -0.06     0.07  -0.08   0.02     0.05  -0.06  -0.03
  34   6     0.08  -0.04  -0.08     0.03   0.05   0.01     0.07   0.02  -0.05
  35   6     0.08  -0.05   0.01     0.02   0.06   0.03     0.06   0.00   0.04
  36   6    -0.05   0.03   0.05     0.05  -0.04   0.00    -0.01   0.00   0.03
  37   6     0.04   0.02   0.05     0.07  -0.01   0.04     0.11   0.00   0.06
  38   6     0.05   0.06   0.01     0.01   0.01   0.06    -0.03  -0.03  -0.02
  39   6     0.05   0.07   0.09    -0.06   0.04   0.10     0.04  -0.09  -0.11
  40   6     0.03  -0.03   0.05     0.02  -0.14   0.01    -0.07   0.10  -0.02
  41   6    -0.05  -0.07   0.09    -0.08   0.01  -0.01     0.08   0.00  -0.05
  42   6    -0.06  -0.06   0.01    -0.07   0.02  -0.06     0.06   0.01   0.04
  43   6     0.01   0.04  -0.05    -0.04  -0.07   0.02     0.00   0.00   0.01
  44   6    -0.04  -0.03  -0.06    -0.10  -0.09  -0.05     0.08   0.07   0.05
  45   6    -0.02  -0.03   0.01    -0.02  -0.01   0.01    -0.02  -0.02   0.01
  46   6     0.01   0.04   0.03     0.00   0.01   0.00     0.00   0.02   0.01
  47   6     0.01   0.05   0.02    -0.01  -0.01  -0.01     0.00   0.01   0.00
  48   6     0.00  -0.02   0.01    -0.01  -0.01   0.01     0.00  -0.01   0.01
  49   6    -0.02   0.03  -0.03     0.01   0.01   0.02     0.00  -0.01   0.00
  50   6     0.02  -0.03  -0.01     0.02  -0.03  -0.02    -0.02   0.03   0.01
  51   6     0.02  -0.02  -0.02     0.01   0.00  -0.01    -0.01   0.00   0.01
  52   6    -0.03   0.02  -0.01     0.00   0.01  -0.01     0.00  -0.01   0.00
  53   6     0.00   0.01  -0.01    -0.10  -0.11   0.04     0.03   0.04  -0.01
  54   6    -0.03   0.02   0.01     0.11   0.00  -0.01     0.06  -0.02   0.00
  55   1     0.00   0.01   0.03    -0.03   0.14  -0.04    -0.10  -0.04  -0.06
  56   1     0.00   0.00   0.00     0.07  -0.03   0.00     0.06  -0.03   0.00
  57   1     0.00   0.00  -0.01    -0.03   0.00   0.02    -0.03   0.00   0.03
  58   1     0.00   0.00   0.00     0.01  -0.01  -0.02     0.02  -0.01  -0.02
  59   1     0.00   0.00   0.00     0.01  -0.01  -0.02     0.01  -0.01  -0.02
  60   1     0.00   0.00   0.00     0.01  -0.01  -0.01     0.01  -0.01  -0.01
  61   1     0.01   0.00   0.00    -0.06  -0.02  -0.01    -0.13  -0.01  -0.03
  62   1     0.00  -0.01   0.01     0.07   0.02  -0.03     0.11   0.02  -0.09
  63   1     0.00   0.00   0.00     0.04   0.00   0.04     0.07   0.00   0.11
  64   1     0.00   0.00   0.00     0.04  -0.06  -0.07     0.09  -0.12  -0.15
  65   1     0.00   0.00  -0.01     0.03  -0.01   0.02     0.06  -0.02   0.08
  66   1     0.01   0.00   0.00    -0.02   0.02   0.01    -0.06   0.04   0.06
  67   1     0.01   0.00   0.00    -0.01   0.02   0.05    -0.06   0.03   0.11
  68   1     0.01   0.00   0.01    -0.06   0.00  -0.05    -0.19  -0.03  -0.16
  69   1     0.00   0.00   0.00    -0.01   0.02   0.04    -0.01   0.03   0.03
  70   1     0.00   0.00   0.00     0.01  -0.02   0.04     0.01  -0.01   0.04
  71   1     0.00   0.00   0.00     0.03  -0.07   0.08     0.03  -0.07   0.08
  72   1     0.00   0.00   0.00     0.02   0.01   0.00     0.03   0.01  -0.01
  73   1    -0.01   0.00   0.00     0.01   0.00   0.00     0.03   0.01   0.00
  74   1     0.00   0.00   0.01    -0.02  -0.02  -0.03    -0.03  -0.03  -0.05
  75   1    -0.08  -0.07  -0.08    -0.02   0.06  -0.04    -0.06   0.01  -0.10
  76   1     0.00   0.07   0.04     0.06  -0.19   0.06     0.04  -0.09   0.06
  77   1     0.08   0.00  -0.10    -0.02   0.04  -0.02     0.02   0.05  -0.09
  78   1    -0.06   0.05   0.10     0.05  -0.04   0.01    -0.02   0.01   0.06
  79   1     0.05   0.04   0.11     0.07  -0.02   0.04     0.11   0.01   0.09
  80   1     0.03   0.09   0.11    -0.08   0.14   0.08     0.11  -0.16  -0.12
  81   1     0.03  -0.03  -0.07     0.11  -0.21  -0.04    -0.15   0.17   0.07
  82   1    -0.07  -0.04   0.10    -0.05   0.10   0.04     0.10  -0.09  -0.09
  83   1     0.01   0.06  -0.11    -0.03  -0.07   0.01     0.00   0.00   0.04
  84   1    -0.06  -0.04  -0.12    -0.10  -0.11  -0.09     0.08   0.08   0.08
  85   1    -0.04  -0.11   0.03    -0.02   0.06  -0.02    -0.03  -0.03   0.01
  86   1     0.02  -0.02  -0.04    -0.04   0.02   0.01    -0.01   0.00  -0.01
  87   1     0.01  -0.01  -0.02    -0.07  -0.05   0.06    -0.02  -0.03   0.02
  88   1     0.05   0.09   0.04    -0.06  -0.01  -0.03     0.00   0.04   0.00
  89   1     0.01   0.02   0.01     0.00   0.07   0.05     0.00   0.03   0.02
  90   1     0.02   0.00  -0.01    -0.03   0.02   0.00     0.00   0.00  -0.01
  91   1     0.01   0.10   0.01    -0.05   0.09  -0.01    -0.05   0.13   0.00
  92   1     0.00   0.04   0.01    -0.04  -0.11  -0.06    -0.03  -0.10  -0.04
  93   1     0.00   0.03  -0.01    -0.06  -0.02  -0.05    -0.06   0.01  -0.03
  94   1    -0.03  -0.10   0.05    -0.05  -0.04   0.05    -0.08  -0.09   0.07
  95   1    -0.02  -0.01  -0.05    -0.04  -0.01   0.01    -0.06  -0.01  -0.03
  96   1    -0.01  -0.02  -0.01    -0.01   0.04  -0.05    -0.01   0.06  -0.09
  97   1    -0.05   0.09  -0.05     0.00   0.18  -0.07     0.01  -0.15   0.06
  98   1    -0.01   0.03  -0.02     0.08  -0.04   0.12    -0.05   0.03  -0.08
  99   1     0.01   0.03   0.01     0.09   0.03   0.09    -0.06  -0.02  -0.06
[truncated: 1,574,064 more chars]
