# Supplementary material
Source: publisher figshare collection journal article supplement (https://acs.figshare.com/ndownloader/files/5127205)
Supplement: Supplementary file 1 [file 5127205 › supporting_ja043819b/RRSS_fm-5-ti1.mol]

  MacMolPlt                       

114119  0  0  0  0  0  0  0  0  0 v2000
   -5.6119    1.5317    0.8978 O   0  0  0  0  0  0  0  0  0  0  0  0
    0.5785   -0.6786    0.1240 Mg  0  0  0  0  0  0  0  0  0  0  0  0
    0.5670    1.2044   -1.1810 O   0  0  0  0  0  0  0  0  0  0  0  0
   -4.5336    1.8778    0.1638 C   0  0  0  0  0  0  0  0  0  0  0  0
   -0.1284   -2.6284    0.3043 N   0  0  0  0  0  0  0  0  0  0  0  0
    2.4923   -1.4703   -0.0306 N   0  0  0  0  0  0  0  0  0  0  0  0
   -4.0059    2.9649    0.2070 O   0  0  0  0  0  0  0  0  0  0  0  0
    0.5894   -3.7460    0.4430 C   0  0  0  0  0  0  0  0  0  0  0  0
    1.9854   -3.8050    0.3171 C   0  0  0  0  0  0  0  0  0  0  0  0
    2.8778   -2.7329    0.0968 C   0  0  0  0  0  0  0  0  0  0  0  0
   -2.9640    1.1382   -1.4821 O   0  0  0  0  0  0  0  0  0  0  0  0
   -1.7458    0.7387   -1.1346 C   0  0  0  0  0  0  0  0  0  0  0  0
   -0.5989    1.2743   -1.9839 C   0  0  0  0  0  0  0  0  0  0  0  0
   -4.0909    0.6933   -0.6913 C   0  0  0  0  0  0  0  0  0  0  0  0
   -1.5223   -0.0750   -0.2493 O   0  0  0  0  0  0  0  0  0  0  0  0
   -6.1148    2.5562    1.7734 C   0  0  0  0  0  0  0  0  0  0  0  0
   -0.6228    2.5743    0.4257 O   0  0  0  0  0  0  0  0  0  0  0  0
    0.6388    1.9610    0.2482 C   0  0  0  0  0  0  0  0  0  0  0  0
    0.8621    1.0072    1.1001 O   0  0  0  0  0  0  0  0  0  0  0  0
    1.3894    4.1262   -0.7139 O   0  0  0  0  0  0  0  0  0  0  0  0
    0.2430    4.7593   -0.4122 C   0  0  0  0  0  0  0  0  0  0  0  0
   -0.8037    3.9962    0.3938 C   0  0  0  0  0  0  0  0  0  0  0  0
    1.7927    2.9623    0.0634 C   0  0  0  0  0  0  0  0  0  0  0  0
    0.0272    5.8806   -0.8159 O   0  0  0  0  0  0  0  0  0  0  0  0
   -0.9842    4.5652    1.8053 C   0  0  0  0  0  0  0  0  0  0  0  0
    2.4492    3.3845    1.3801 C   0  0  0  0  0  0  0  0  0  0  0  0
   -0.8536    2.5846   -2.7270 C   0  0  0  0  0  0  0  0  0  0  0  0
   -5.1603    0.1869   -1.6552 C   0  0  0  0  0  0  0  0  0  0  0  0
   -1.5735   -2.7251    0.3055 C   0  0  0  0  0  0  0  0  0  0  0  0
    3.4781   -0.4101   -0.0791 C   0  0  0  0  0  0  0  0  0  0  0  0
   -2.2487   -3.0652   -0.9169 C   0  0  0  0  0  0  0  0  0  0  0  0
   -3.6599   -2.9630   -0.9537 C   0  0  0  0  0  0  0  0  0  0  0  0
   -4.3881   -2.5348    0.1807 C   0  0  0  0  0  0  0  0  0  0  0  0
   -3.7121   -2.2189    1.3803 C   0  0  0  0  0  0  0  0  0  0  0  0
   -2.2990   -2.3224    1.4691 C   0  0  0  0  0  0  0  0  0  0  0  0
   -1.4447   -3.5299   -2.1638 C   0  0  0  0  0  0  0  0  0  0  0  0
   -1.5739   -2.0018    2.8007 C   0  0  0  0  0  0  0  0  0  0  0  0
    4.1145    0.0296    1.1306 C   0  0  0  0  0  0  0  0  0  0  0  0
    4.9786    1.1543    1.0624 C   0  0  0  0  0  0  0  0  0  0  0  0
    5.1914    1.8374   -0.1536 C   0  0  0  0  0  0  0  0  0  0  0  0
    4.5666    1.3907   -1.3389 C   0  0  0  0  0  0  0  0  0  0  0  0
    3.7080    0.2581   -1.3289 C   0  0  0  0  0  0  0  0  0  0  0  0
    3.8926   -0.6804    2.4944 C   0  0  0  0  0  0  0  0  0  0  0  0
    3.0875   -0.2829   -2.6441 C   0  0  0  0  0  0  0  0  0  0  0  0
   -0.9189   -2.3085   -2.9863 C   0  0  0  0  0  0  0  0  0  0  0  0
   -2.2512   -4.5002   -3.0863 C   0  0  0  0  0  0  0  0  0  0  0  0
   -1.7370   -0.5020    3.2041 C   0  0  0  0  0  0  0  0  0  0  0  0
   -2.0637   -2.9446    3.9504 C   0  0  0  0  0  0  0  0  0  0  0  0
    2.7512    0.8404   -3.6725 C   0  0  0  0  0  0  0  0  0  0  0  0
    4.0159   -1.3596   -3.3022 C   0  0  0  0  0  0  0  0  0  0  0  0
    3.0935    0.2236    3.4871 C   0  0  0  0  0  0  0  0  0  0  0  0
    5.2493   -1.1285    3.1361 C   0  0  0  0  0  0  0  0  0  0  0  0
   -0.1220   -5.0508    0.7841 C   0  0  0  0  0  0  0  0  0  0  0  0
    4.3544   -3.1120    0.0595 C   0  0  0  0  0  0  0  0  0  0  0  0
    2.4379   -4.7839    0.4313 H   0  0  0  0  0  0  0  0  0  0  0  0
   -0.4417    0.4998   -2.7497 H   0  0  0  0  0  0  0  0  0  0  0  0
   -3.7996   -0.1305   -0.0308 H   0  0  0  0  0  0  0  0  0  0  0  0
   -6.4157    3.4365    1.1998 H   0  0  0  0  0  0  0  0  0  0  0  0
   -5.3502    2.8472    2.4984 H   0  0  0  0  0  0  0  0  0  0  0  0
   -6.9741    2.1132    2.2775 H   0  0  0  0  0  0  0  0  0  0  0  0
   -1.7496    4.1500   -0.1329 H   0  0  0  0  0  0  0  0  0  0  0  0
    2.5574    2.4929   -0.5530 H   0  0  0  0  0  0  0  0  0  0  0  0
   -1.2137    5.6333    1.7378 H   0  0  0  0  0  0  0  0  0  0  0  0
   -0.0914    4.4334    2.4213 H   0  0  0  0  0  0  0  0  0  0  0  0
   -1.8204    4.0503    2.2864 H   0  0  0  0  0  0  0  0  0  0  0  0
    2.9534    4.3457    1.2322 H   0  0  0  0  0  0  0  0  0  0  0  0
    3.2028    2.6376    1.6259 H   0  0  0  0  0  0  0  0  0  0  0  0
    1.7436    3.4704    2.2095 H   0  0  0  0  0  0  0  0  0  0  0  0
   -1.6040    2.4219   -3.5076 H   0  0  0  0  0  0  0  0  0  0  0  0
    0.0772    2.9080   -3.1997 H   0  0  0  0  0  0  0  0  0  0  0  0
   -1.2178    3.3838   -2.0843 H   0  0  0  0  0  0  0  0  0  0  0  0
   -4.8193   -0.7643   -2.0713 H   0  0  0  0  0  0  0  0  0  0  0  0
   -5.3419    0.9066   -2.4591 H   0  0  0  0  0  0  0  0  0  0  0  0
   -6.0939    0.0109   -1.1151 H   0  0  0  0  0  0  0  0  0  0  0  0
   -4.2051   -3.2578   -1.8598 H   0  0  0  0  0  0  0  0  0  0  0  0
   -5.4855   -2.4865    0.1415 H   0  0  0  0  0  0  0  0  0  0  0  0
   -4.2915   -1.9227    2.2654 H   0  0  0  0  0  0  0  0  0  0  0  0
   -0.5520   -4.0780   -1.8081 H   0  0  0  0  0  0  0  0  0  0  0  0
   -0.4925   -2.1976    2.6464 H   0  0  0  0  0  0  0  0  0  0  0  0
    5.5046    1.4857    1.9670 H   0  0  0  0  0  0  0  0  0  0  0  0
    5.8637    2.7062   -0.1845 H   0  0  0  0  0  0  0  0  0  0  0  0
    4.7708    1.9096   -2.2840 H   0  0  0  0  0  0  0  0  0  0  0  0
    3.2844   -1.5882    2.3134 H   0  0  0  0  0  0  0  0  0  0  0  0
    2.1404   -0.7947   -2.3701 H   0  0  0  0  0  0  0  0  0  0  0  0
   -0.3876   -2.6515   -3.8897 H   0  0  0  0  0  0  0  0  0  0  0  0
   -0.2035   -1.7326   -2.3701 H   0  0  0  0  0  0  0  0  0  0  0  0
   -1.7502   -1.6513   -3.2939 H   0  0  0  0  0  0  0  0  0  0  0  0
   -1.5810   -4.9164   -3.8538 H   0  0  0  0  0  0  0  0  0  0  0  0
   -3.0725   -3.9770   -3.5985 H   0  0  0  0  0  0  0  0  0  0  0  0
   -2.6728   -5.3335   -2.5038 H   0  0  0  0  0  0  0  0  0  0  0  0
   -1.1996   -0.3080    4.1471 H   0  0  0  0  0  0  0  0  0  0  0  0
   -2.7980   -0.2454    3.3471 H   0  0  0  0  0  0  0  0  0  0  0  0
   -1.3158    0.1606    2.4262 H   0  0  0  0  0  0  0  0  0  0  0  0
   -1.4844   -2.7473    4.8654 H   0  0  0  0  0  0  0  0  0  0  0  0
   -1.9271   -4.0015    3.6728 H   0  0  0  0  0  0  0  0  0  0  0  0
   -3.1288   -2.7761    4.1708 H   0  0  0  0  0  0  0  0  0  0  0  0
    2.1619    0.4167   -4.5002 H   0  0  0  0  0  0  0  0  0  0  0  0
    3.6655    1.2828   -4.0972 H   0  0  0  0  0  0  0  0  0  0  0  0
    2.1671    1.6413   -3.1915 H   0  0  0  0  0  0  0  0  0  0  0  0
    3.5629   -1.7171   -4.2397 H   0  0  0  0  0  0  0  0  0  0  0  0
    4.1511   -2.2237   -2.6327 H   0  0  0  0  0  0  0  0  0  0  0  0
    5.0054   -0.9331   -3.5306 H   0  0  0  0  0  0  0  0  0  0  0  0
    2.8944   -0.3300    4.4187 H   0  0  0  0  0  0  0  0  0  0  0  0
    2.1348    0.5277    3.0325 H   0  0  0  0  0  0  0  0  0  0  0  0
    3.6634    1.1319    3.7376 H   0  0  0  0  0  0  0  0  0  0  0  0
    5.0524   -1.7203    4.0431 H   0  0  0  0  0  0  0  0  0  0  0  0
    5.8549   -0.2546    3.4202 H   0  0  0  0  0  0  0  0  0  0  0  0
    5.8366   -1.7445    2.4382 H   0  0  0  0  0  0  0  0  0  0  0  0
   -0.8529   -5.3386    0.0207 H   0  0  0  0  0  0  0  0  0  0  0  0
    0.5959   -5.8709    0.8913 H   0  0  0  0  0  0  0  0  0  0  0  0
   -0.6642   -4.9495    1.7331 H   0  0  0  0  0  0  0  0  0  0  0  0
    4.9571   -2.3974   -0.5073 H   0  0  0  0  0  0  0  0  0  0  0  0
    4.7630   -3.1592    1.0769 H   0  0  0  0  0  0  0  0  0  0  0  0
    4.4789   -4.1061   -0.3854 H   0  0  0  0  0  0  0  0  0  0  0  0
  1  4  1  0  0  0  0
  1 16  1  0  0  0  0
  2  3  1  0  0  0  0
  2  5  1  0  0  0  0
  2  6  1  0  0  0  0
  2 15  1  0  0  0  0
  2 19  2  0  0  0  0
  3 13  1  0  0  0  0
  3 18  1  0  0  0  0
  4  7  2  0  0  0  0
  4 14  1  0  0  0  0
  5  8  1  0  0  0  0
  5 29  1  0  0  0  0
  6 10  1  0  0  0  0
  6 30  1  0  0  0  0
  8  9  1  0  0  0  0
  8 53  1  0  0  0  0
  9 10  1  0  0  0  0
  9 55  1  0  0  0  0
 10 54  1  0  0  0  0
 11 12  1  0  0  0  0
 11 14  1  0  0  0  0
 12 13  1  0  0  0  0
 12 15  2  0  0  0  0
 13 27  1  0  0  0  0
 13 56  1  0  0  0  0
 14 28  1  0  0  0  0
 14 57  1  0  0  0  0
 16 58  1  0  0  0  0
 16 59  1  0  0  0  0
 16 60  1  0  0  0  0
 17 18  1  0  0  0  0
 17 22  1  0  0  0  0
 18 19  2  0  0  0  0
 18 23  1  0  0  0  0
 20 21  1  0  0  0  0
 20 23  1  0  0  0  0
 21 22  1  0  0  0  0
 21 24  2  0  0  0  0
 22 25  1  0  0  0  0
 22 61  1  0  0  0  0
 23 26  1  0  0  0  0
 23 62  1  0  0  0  0
 25 63  1  0  0  0  0
 25 64  1  0  0  0  0
 25 65  1  0  0  0  0
 26 66  1  0  0  0  0
 26 67  1  0  0  0  0
 26 68  1  0  0  0  0
 27 69  1  0  0  0  0
 27 70  1  0  0  0  0
 27 71  1  0  0  0  0
 28 72  1  0  0  0  0
 28 73  1  0  0  0  0
 28 74  1  0  0  0  0
 29 31  1  0  0  0  0
 29 35  1  0  0  0  0
 30 38  1  0  0  0  0
 30 42  1  0  0  0  0
 31 32  1  0  0  0  0
 31 36  1  0  0  0  0
 32 33  1  0  0  0  0
 32 75  1  0  0  0  0
 33 34  1  0  0  0  0
 33 76  1  0  0  0  0
 34 35  1  0  0  0  0
 34 77  1  0  0  0  0
 35 37  1  0  0  0  0
 36 45  1  0  0  0  0
 36 46  1  0  0  0  0
 36 78  1  0  0  0  0
 37 47  1  0  0  0  0
 37 48  1  0  0  0  0
 37 79  1  0  0  0  0
 38 39  1  0  0  0  0
 38 43  1  0  0  0  0
 39 40  1  0  0  0  0
 39 80  1  0  0  0  0
 40 41  1  0  0  0  0
 40 81  1  0  0  0  0
 41 42  1  0  0  0  0
 41 82  1  0  0  0  0
 42 44  1  0  0  0  0
 43 51  1  0  0  0  0
 43 52  1  0  0  0  0
 43 83  1  0  0  0  0
 44 49  1  0  0  0  0
 44 50  1  0  0  0  0
 44 84  1  0  0  0  0
 45 85  1  0  0  0  0
 45 86  1  0  0  0  0
 45 87  1  0  0  0  0
 46 88  1  0  0  0  0
 46 89  1  0  0  0  0
 46 90  1  0  0  0  0
 47 91  1  0  0  0  0
 47 92  1  0  0  0  0
 47 93  1  0  0  0  0
 48 94  1  0  0  0  0
 48 95  1  0  0  0  0
 48 96  1  0  0  0  0
 49 97  1  0  0  0  0
 49 98  1  0  0  0  0
 49 99  1  0  0  0  0
 50100  1  0  0  0  0
 50101  1  0  0  0  0
 50102  1  0  0  0  0
 51103  1  0  0  0  0
 51104  1  0  0  0  0
 51105  1  0  0  0  0
 52106  1  0  0  0  0
 52107  1  0  0  0  0
 52108  1  0  0  0  0
 53109  1  0  0  0  0
 53110  1  0  0  0  0
 53111  1  0  0  0  0
 54112  1  0  0  0  0
 54113  1  0  0  0  0
 54114  1  0  0  0  0
M  END
