# Supplementary material
Source: publisher figshare collection journal article supplement (https://acs.figshare.com/ndownloader/files/5127205)
Supplement: Supplementary file 1 [file 5127205 › supporting_ja043819b/RRSS_fm-5-ti2.log]

 Entering Gaussian System, Link 0=g03
 Input=RRSS_fm-5-ti.gjf
 Output=RRSS_fm-5-ti.log
 Initial command:
 /usr/local/g03/l1.exe /home/rzepa/Gau-14480.inp -scrdir=/home/rzepa/
 Entering Link 1 = /usr/local/g03/l1.exe PID=     14481.
  
 Copyright (c) 1988,1990,1992,1993,1995,1998,2003,2004, Gaussian, Inc.
                  All Rights Reserved.
  
 This is the Gaussian(R) 03 program.  It is based on the
 the Gaussian(R) 98 system (copyright 1998, Gaussian, Inc.),
 the Gaussian(R) 94 system (copyright 1995, Gaussian, Inc.),
 the Gaussian 92(TM) system (copyright 1992, Gaussian, Inc.),
 the Gaussian 90(TM) system (copyright 1990, Gaussian, Inc.),
 the Gaussian 88(TM) system (copyright 1988, Gaussian, Inc.),
 the Gaussian 86(TM) system (copyright 1986, Carnegie Mellon
 University), and the Gaussian 82(TM) system (copyright 1983,
 Carnegie Mellon University). Gaussian is a federally registered
 trademark of Gaussian, Inc.
  
 This software contains proprietary and confidential information,
 including trade secrets, belonging to Gaussian, Inc.
  
 This software is provided under written license and may be
 used, copied, transmitted, or stored only in accord with that
 written license.
  
 The following legend is applicable only to US Government
 contracts under FAR:
  
                    RESTRICTED RIGHTS LEGEND
  
 Use, reproduction and disclosure by the US Government is
 subject to restrictions as set forth in subparagraphs (a)
 and (c) of the Commercial Computer Software - Restricted
 Rights clause in FAR 52.227-19.
  
 Gaussian, Inc.
 340 Quinnipiac St., Bldg. 40, Wallingford CT 06492
  
  
 ---------------------------------------------------------------
 Warning -- This program may not be used in any manner that
 competes with the business of Gaussian, Inc. or will provide
 assistance to any competitor of Gaussian, Inc.  The licensee
 of this program is prohibited from giving any competitor of
 Gaussian, Inc. access to this program.  By using this program,
 the user acknowledges that Gaussian, Inc. is engaged in the
 business of creating and licensing software in the field of
 computational chemistry and represents and warrants to the
 licensee that it is not a competitor of Gaussian, Inc. and that
 it will not use this program in any manner prohibited above.
 ---------------------------------------------------------------
  

 Cite this work as:
 Gaussian 03, Revision C.01,
 M. J. Frisch, G. W. Trucks, H. B. Schlegel, G. E. Scuseria, 
 M. A. Robb, J. R. Cheeseman, J. A. Montgomery, Jr., T. Vreven, 
 K. N. Kudin, J. C. Burant, J. M. Millam, S. S. Iyengar, J. Tomasi, 
 V. Barone, B. Mennucci, M. Cossi, G. Scalmani, N. Rega, 
 G. A. Petersson, H. Nakatsuji, M. Hada, M. Ehara, K. Toyota, 
 R. Fukuda, J. Hasegawa, M. Ishida, T. Nakajima, Y. Honda, O. Kitao, 
 H. Nakai, M. Klene, X. Li, J. E. Knox, H. P. Hratchian, J. B. Cross, 
 C. Adamo, J. Jaramillo, R. Gomperts, R. E. Stratmann, O. Yazyev, 
 A. J. Austin, R. Cammi, C. Pomelli, J. W. Ochterski, P. Y. Ayala, 
 K. Morokuma, G. A. Voth, P. Salvador, J. J. Dannenberg, 
 V. G. Zakrzewski, S. Dapprich, A. D. Daniels, M. C. Strain, 
 O. Farkas, D. K. Malick, A. D. Rabuck, K. Raghavachari, 
 J. B. Foresman, J. V. Ortiz, Q. Cui, A. G. Baboul, S. Clifford, 
 J. Cioslowski, B. B. Stefanov, G. Liu, A. Liashenko, P. Piskorz, 
 I. Komaromi, R. L. Martin, D. J. Fox, T. Keith, M. A. Al-Laham, 
 C. Y. Peng, A. Nanayakkara, M. Challacombe, P. M. W. Gill, 
 B. Johnson, W. Chen, M. W. Wong, C. Gonzalez, and J. A. Pople, 
 Gaussian, Inc., Wallingford CT, 2004.
 
 ******************************************
 Gaussian 03:  AM64L-G03RevC.01  3-Apr-2004
                 2-Oct-2004 
 ******************************************
 %mem=3GB
 %nprocshared=2
 Will use up to    2 processors via shared memory.
 %chk=RRSS_fm-5-ti.chk
 -------------------------------------------
 # b3lyp/gen geom=checkpoint guess=read freq
 -------------------------------------------
 1/10=4,29=2,30=1,38=1/1,3;
 2/40=1/2;
 3/5=7,11=2,16=1,25=1,30=1,74=-5/1,2,3;
 4/5=1/1;
 5/5=2,38=6/2;
 8/6=4,10=90,11=11/1;
 11/6=1,8=1,9=11,15=111,16=1/1,2,10;
 10/6=1/2;
 6/7=2,8=2,9=2,10=2,18=1,28=1/1;
 7/8=1,10=1,25=1/1,2,3,16;
 1/10=4,30=1/3;
 99//99;
 --------------------
 from SSSS_fm-oco.gjf
 --------------------
 Redundant internal coordinates taken from checkpoint file:
 RRSS_fm-5-ti.chk
 Charge =  0 Multiplicity = 1
 O,0,-4.3762507106,-2.7236014311,-1.1915212803
 Mg,0,0.1382315855,0.2231023095,-0.1671663394
 O,0,-0.5138110005,0.1029372164,3.1195452813
 C,0,-4.1147998044,-2.4460824924,0.0984904113
 N,0,-0.2993381452,1.406753445,-1.7590916104
 N,0,0.8217586811,-1.2784150723,-1.3795208965
 O,0,-3.8224196285,-3.2623726661,0.940335371
 C,0,-0.4408175499,0.9898116564,-3.003070668
 C,0,-0.2215274506,-0.3586843101,-3.3834889941
 C,0,0.4237849139,-1.3757648052,-2.6552026283
 O,0,-3.6906701416,-0.5480783984,1.5697568145
 C,0,-2.3642040667,-0.3664459849,1.5554679482
 C,0,-1.8787170774,0.3014776082,2.8561128429
 C,0,-4.3332178231,-0.9542880537,0.3449402472
 O,0,-1.6911066464,-0.6433768873,0.5706341583
 C,0,-4.3083223143,-4.1140259213,-1.5608478725
 O,0,1.3976491502,-0.0852634041,1.8387099238
 C,0,0.4465827379,0.9065072687,2.3392906441
 O,0,-0.0847257994,1.4970598782,1.3076706228
 O,0,2.5753094649,1.97066033,3.0695564151
 C,0,3.2968925268,0.8310779396,2.9357205896
 C,0,2.4526561299,-0.4342864353,2.7532826094
 C,0,1.1595399195,1.8412031012,3.3642546081
 O,0,4.5045027594,0.867508392,2.9223179908
 C,0,3.2579725095,-1.6060983516,2.2362067187
 C,0,0.5771205491,3.2447443511,3.3427846899
 C,0,-2.6516069234,-0.1879210239,4.0849153238
 C,0,-5.8206174313,-0.6538816215,0.5182158376
 C,0,-0.4205526543,2.780806525,-1.3102256228
 C,0,1.7523905702,-2.2784738488,-0.8763627052
 C,0,0.7839399397,3.4526472542,-0.9098015818
 C,0,0.6757004992,4.6842400593,-0.2199835221
 C,0,-0.5847095974,5.2463241408,0.0693237455
 C,0,-1.7569717423,4.5966738445,-0.3547150699
 C,0,-1.7046280708,3.3577489545,-1.0402791768
 C,0,2.1746824037,2.8618118613,-1.2596351551
 C,0,-3.0290469497,2.6852891868,-1.4847433556
 C,0,1.2895637444,-3.3577967908,-0.0557543132
 C,0,2.2395400376,-4.2806278344,0.4589698091
 C,0,3.6121177765,-4.1511182692,0.1724534729
 C,0,4.0596459837,-3.088286368,-0.6356064242
 C,0,3.152487459,-2.1395925963,-1.1722507955
 C,0,-0.2098167976,-3.5708467871,0.2680894314
 C,0,3.7093229295,-0.9836563035,-2.0458771693
 C,0,3.304275802,3.328030365,-0.2907108127
 C,0,2.553757221,3.1886897161,-2.7427995062
 C,0,-4.0042660554,2.494943905,-0.278826137
 C,0,-3.7371055032,3.5160366072,-2.6087954539
 C,0,4.6547431818,-0.0675589324,-1.2038374722
 C,0,4.4609669114,-1.5162225291,-3.3118916332
 C,0,-0.4730136788,-3.459748282,1.802597582
 C,0,-0.7222895657,-4.9452845202,-0.2779251201
 C,0,-0.8410342483,1.9415341056,-4.1227196716
 C,0,0.7156099799,-2.6605965936,-3.4228483076
 H,0,-0.4605556427,-0.5966832986,-4.4149594618
 H,0,-2.0836117464,1.3685720192,2.6793367908
 H,0,-3.9065051543,-0.3879375458,-0.4848398677
 H,0,-3.3046298164,-4.503599277,-1.3836315708
 H,0,-4.5528214926,-4.14385969,-2.6226282573
 H,0,-5.0306514225,-4.6964847704,-0.9822789114
 H,0,1.9958315213,-0.7008794116,3.7185949061
 H,0,1.0717232358,1.4016560446,4.3641659412
 H,0,4.0553764653,-1.8284927165,2.9518463229
 H,0,3.7159878645,-1.3951258923,1.2713817447
 H,0,2.6334906091,-2.4882615084,2.1016473158
 H,0,1.1442343359,3.8912511582,4.0204204232
 H,0,-0.463619123,3.2158469135,3.6843464252
 H,0,0.5874718477,3.6573524183,2.3296545279
 H,0,-3.7233089491,-0.004988789,3.9833344301
 H,0,-2.2777859167,0.3435584433,4.9641618416
 H,0,-2.4902907621,-1.25962451,4.2360951451
 H,0,-5.9629689024,0.4161659268,0.6868151394
 H,0,-6.2244312434,-1.2062317027,1.3721472538
 H,0,-6.3642406303,-0.9466236462,-0.3845418019
 H,0,1.5845954176,5.221352226,0.0764622668
 H,0,-0.6482710549,6.2045040521,0.6029073752
 H,0,-2.7325275893,5.0580206795,-0.1539981158
 H,0,2.0984130076,1.7538797735,-1.1858532529
 H,0,-2.7868840722,1.6825303229,-1.8920439575
 H,0,1.8917123977,-5.121774119,1.072880509
 H,0,4.3299061768,-4.8814106793,0.5707167626
 H,0,5.1294289904,-2.9962996502,-0.8642362164
 H,0,-0.7815961156,-2.7700575739,-0.2394751648
 H,0,2.8532097696,-0.3692475413,-2.3898070428
 H,0,4.2328489436,2.7851478384,-0.5175575794
 H,0,3.0308593286,3.1293949395,0.759136267
 H,0,3.5051275341,4.4043071155,-0.4018501612
 H,0,3.5360350283,2.7544833412,-2.9836883011
 H,0,2.6033378832,4.2781887347,-2.8979393954
 H,0,1.8079452752,2.7704133958,-3.4389902218
 H,0,-4.9152696643,1.9678530715,-0.6115309912
 H,0,-4.307615229,3.4636148626,0.1464850668
 H,0,-3.519659576,1.9103092161,0.5234470713
 H,0,-4.6416140304,2.9911735232,-2.9530530003
 H,0,-3.0697400695,3.6636725583,-3.470772804
 H,0,-4.0323846789,4.5051589092,-2.2262752959
 H,0,5.0112811829,0.7757602922,-1.8160061373
 H,0,4.1215262449,0.3386587587,-0.3250338051
 H,0,5.5298432932,-0.6290458376,-0.8418733136
 H,0,4.795696913,-0.667778359,-3.9281277751
 H,0,3.8039754858,-2.1507610942,-3.9257040527
 H,0,5.3451225703,-2.1054794876,-3.0247005243
 H,0,-1.5528780798,-3.5439632475,2.0046194508
 H,0,-0.1146847594,-2.4855311208,2.1832760174
 H,0,0.0494146987,-4.2573044243,2.3536346383
 H,0,-1.7758109659,-5.086961987,0.0195420201
 H,0,-0.1423387568,-5.7839405345,0.1388344156
 H,0,-0.6478266053,-4.9861050212,-1.3769406916
 H,0,-0.7381091683,2.9885382929,-3.8232925787
 H,0,-0.2232776249,1.7688063361,-5.0120298091
 H,0,-1.8850609041,1.7686216893,-4.4148027382
 H,0,1.7837792305,-2.7604791652,-3.6449072082
 H,0,0.4182237517,-3.5424416107,-2.8446483817
 H,0,0.1748578549,-2.6746579729,-4.3751344957
 Recover connectivity data from disk.

 GradGradGradGradGradGradGradGradGradGradGradGradGradGradGradGradGradGrad
 Berny optimization.
 Initialization pass.
                           ----------------------------
                           !    Initial Parameters    !
                           ! (Angstroms and Degrees)  !
 --------------------------                            --------------------------
 ! Name  Definition              Value          Derivative Info.                !
 --------------------------------------------------------------------------------
 ! R1    R(1,4)                  1.3452         calculate D2E/DX2 analytically  !
 ! R2    R(1,16)                 1.4402         calculate D2E/DX2 analytically  !
 ! R3    R(2,5)                  2.0314         calculate D2E/DX2 analytically  !
 ! R4    R(2,6)                  2.0473         calculate D2E/DX2 analytically  !
 ! R5    R(2,15)                 2.1544         calculate D2E/DX2 analytically  !
 ! R6    R(2,19)                 1.9616         calculate D2E/DX2 analytically  !
 ! R7    R(3,13)                 1.4042         calculate D2E/DX2 analytically  !
 ! R8    R(3,18)                 1.4754         calculate D2E/DX2 analytically  !
 ! R9    R(4,7)                  1.2085         calculate D2E/DX2 analytically  !
 ! R10   R(4,14)                 1.5277         calculate D2E/DX2 analytically  !
 ! R11   R(5,8)                  1.3196         calculate D2E/DX2 analytically  !
 ! R12   R(5,29)                 1.4506         calculate D2E/DX2 analytically  !
 ! R13   R(6,10)                 1.3399         calculate D2E/DX2 analytically  !
 ! R14   R(6,30)                 1.4558         calculate D2E/DX2 analytically  !
 ! R15   R(8,9)                  1.4182         calculate D2E/DX2 analytically  !
 ! R16   R(8,53)                 1.523          calculate D2E/DX2 analytically  !
 ! R17   R(9,10)                 1.4076         calculate D2E/DX2 analytically  !
 ! R18   R(9,55)                 1.0852         calculate D2E/DX2 analytically  !
 ! R19   R(10,54)                1.5249         calculate D2E/DX2 analytically  !
 ! R20   R(11,12)                1.3389         calculate D2E/DX2 analytically  !
 ! R21   R(11,14)                1.4415         calculate D2E/DX2 analytically  !
 ! R22   R(12,13)                1.5406         calculate D2E/DX2 analytically  !
 ! R23   R(12,15)                1.2246         calculate D2E/DX2 analytically  !
 ! R24   R(13,27)                1.5319         calculate D2E/DX2 analytically  !
 ! R25   R(13,56)                1.1009         calculate D2E/DX2 analytically  !
 ! R26   R(14,28)                1.5273         calculate D2E/DX2 analytically  !
 ! R27   R(14,57)                1.0915         calculate D2E/DX2 analytically  !
 ! R28   R(16,58)                1.0911         calculate D2E/DX2 analytically  !
 ! R29   R(16,59)                1.09           calculate D2E/DX2 analytically  !
 ! R30   R(16,60)                1.0935         calculate D2E/DX2 analytically  !
 ! R31   R(17,18)                1.4624         calculate D2E/DX2 analytically  !
 ! R32   R(17,22)                1.4392         calculate D2E/DX2 analytically  !
 ! R33   R(18,19)                1.302          calculate D2E/DX2 analytically  !
 ! R34   R(18,23)                1.5597         calculate D2E/DX2 analytically  !
 ! R35   R(20,21)                1.3554         calculate D2E/DX2 analytically  !
 ! R36   R(20,23)                1.4519         calculate D2E/DX2 analytically  !
 ! R37   R(21,22)                1.532          calculate D2E/DX2 analytically  !
 ! R38   R(21,24)                1.2082         calculate D2E/DX2 analytically  !
 ! R39   R(22,25)                1.513          calculate D2E/DX2 analytically  !
 ! R40   R(22,61)                1.1007         calculate D2E/DX2 analytically  !
 ! R41   R(23,26)                1.5197         calculate D2E/DX2 analytically  !
 ! R42   R(23,62)                1.0958         calculate D2E/DX2 analytically  !
 ! R43   R(25,63)                1.0943         calculate D2E/DX2 analytically  !
 ! R44   R(25,64)                1.0887         calculate D2E/DX2 analytically  !
 ! R45   R(25,65)                1.0892         calculate D2E/DX2 analytically  !
 ! R46   R(26,66)                1.0949         calculate D2E/DX2 analytically  !
 ! R47   R(26,67)                1.0957         calculate D2E/DX2 analytically  !
 ! R48   R(26,68)                1.094          calculate D2E/DX2 analytically  !
 ! R49   R(27,69)                1.0919         calculate D2E/DX2 analytically  !
 ! R50   R(27,70)                1.0933         calculate D2E/DX2 analytically  !
 ! R51   R(27,71)                1.0943         calculate D2E/DX2 analytically  !
 ! R52   R(28,72)                1.0926         calculate D2E/DX2 analytically  !
 ! R53   R(28,73)                1.0942         calculate D2E/DX2 analytically  !
 ! R54   R(28,74)                1.0937         calculate D2E/DX2 analytically  !
 ! R55   R(29,31)                1.4361         calculate D2E/DX2 analytically  !
 ! R56   R(29,35)                1.4334         calculate D2E/DX2 analytically  !
 ! R57   R(30,38)                1.4327         calculate D2E/DX2 analytically  !
 ! R58   R(30,42)                1.4377         calculate D2E/DX2 analytically  !
 ! R59   R(31,32)                1.4158         calculate D2E/DX2 analytically  !
 ! R60   R(31,36)                1.551          calculate D2E/DX2 analytically  !
 ! R61   R(32,33)                1.4101         calculate D2E/DX2 analytically  !
 ! R62   R(32,75)                1.0966         calculate D2E/DX2 analytically  !
 ! R63   R(33,34)                1.4057         calculate D2E/DX2 analytically  !
 ! R64   R(33,76)                1.0986         calculate D2E/DX2 analytically  !
 ! R65   R(34,35)                1.4169         calculate D2E/DX2 analytically  !
 ! R66   R(34,77)                1.0977         calculate D2E/DX2 analytically  !
 ! R67   R(35,37)                1.5504         calculate D2E/DX2 analytically  !
 ! R68   R(36,45)                1.5595         calculate D2E/DX2 analytically  !
 ! R69   R(36,46)                1.5654         calculate D2E/DX2 analytically  !
 ! R70   R(36,78)                1.113          calculate D2E/DX2 analytically  !
 ! R71   R(37,47)                1.5625         calculate D2E/DX2 analytically  !
 ! R72   R(37,48)                1.5668         calculate D2E/DX2 analytically  !
 ! R73   R(37,79)                1.1091         calculate D2E/DX2 analytically  !
 ! R74   R(38,39)                1.4209         calculate D2E/DX2 analytically  !
 ! R75   R(38,43)                1.5487         calculate D2E/DX2 analytically  !
 ! R76   R(39,40)                1.4081         calculate D2E/DX2 analytically  !
 ! R77   R(39,80)                1.0979         calculate D2E/DX2 analytically  !
 ! R78   R(40,41)                1.4081         calculate D2E/DX2 analytically  !
 ! R79   R(40,81)                1.0987         calculate D2E/DX2 analytically  !
 ! R80   R(41,42)                1.4181         calculate D2E/DX2 analytically  !
 ! R81   R(41,82)                1.0978         calculate D2E/DX2 analytically  !
 ! R82   R(42,44)                1.5522         calculate D2E/DX2 analytically  !
 ! R83   R(43,51)                1.5609         calculate D2E/DX2 analytically  !
 ! R84   R(43,52)                1.5652         calculate D2E/DX2 analytically  !
 ! R85   R(43,83)                1.1072         calculate D2E/DX2 analytically  !
 ! R86   R(44,49)                1.5627         calculate D2E/DX2 analytically  !
 ! R87   R(44,50)                1.5657         calculate D2E/DX2 analytically  !
 ! R88   R(44,84)                1.1085         calculate D2E/DX2 analytically  !
 ! R89   R(45,85)                1.0993         calculate D2E/DX2 analytically  !
 ! R90   R(45,86)                1.1029         calculate D2E/DX2 analytically  !
 ! R91   R(45,87)                1.1005         calculate D2E/DX2 analytically  !
 ! R92   R(46,88)                1.1007         calculate D2E/DX2 analytically  !
 ! R93   R(46,89)                1.1016         calculate D2E/DX2 analytically  !
 ! R94   R(46,90)                1.1027         calculate D2E/DX2 analytically  !
 ! R95   R(47,91)                1.1038         calculate D2E/DX2 analytically  !
 ! R96   R(47,92)                1.1006         calculate D2E/DX2 analytically  !
 ! R97   R(47,93)                1.1047         calculate D2E/DX2 analytically  !
 ! R98   R(48,94)                1.101          calculate D2E/DX2 analytically  !
 ! R99   R(48,95)                1.1001         calculate D2E/DX2 analytically  !
 ! R100  R(48,96)                1.1009         calculate D2E/DX2 analytically  !
 ! R101  R(49,97)                1.1014         calculate D2E/DX2 analytically  !
 ! R102  R(49,98)                1.1053         calculate D2E/DX2 analytically  !
 ! R103  R(49,99)                1.1009         calculate D2E/DX2 analytically  !
 ! R104  R(50,100)               1.1007         calculate D2E/DX2 analytically  !
 ! R105  R(50,101)               1.1005         calculate D2E/DX2 analytically  !
 ! R106  R(50,102)               1.1007         calculate D2E/DX2 analytically  !
 ! R107  R(51,103)               1.1018         calculate D2E/DX2 analytically  !
 ! R108  R(51,104)               1.1056         calculate D2E/DX2 analytically  !
 ! R109  R(51,105)               1.1012         calculate D2E/DX2 analytically  !
 ! R110  R(52,106)               1.1038         calculate D2E/DX2 analytically  !
 ! R111  R(52,107)               1.1015         calculate D2E/DX2 analytically  !
 ! R112  R(52,108)               1.1023         calculate D2E/DX2 analytically  !
 ! R113  R(53,109)               1.0938         calculate D2E/DX2 analytically  !
 ! R114  R(53,110)               1.0965         calculate D2E/DX2 analytically  !
 ! R115  R(53,111)               1.0978         calculate D2E/DX2 analytically  !
 ! R116  R(54,112)               1.0956         calculate D2E/DX2 analytically  !
 ! R117  R(54,113)               1.0956         calculate D2E/DX2 analytically  !
 ! R118  R(54,114)               1.0952         calculate D2E/DX2 analytically  !
 ! A1    A(4,1,16)             115.8439         calculate D2E/DX2 analytically  !
 ! A2    A(5,2,6)               92.0171         calculate D2E/DX2 analytically  !
 ! A3    A(5,2,15)             108.6513         calculate D2E/DX2 analytically  !
 ! A4    A(5,2,19)             100.7366         calculate D2E/DX2 analytically  !
 ! A5    A(6,2,15)             101.0293         calculate D2E/DX2 analytically  !
 ! A6    A(6,2,19)             163.6339         calculate D2E/DX2 analytically  !
 ! A7    A(15,2,19)             84.6759         calculate D2E/DX2 analytically  !
 ! A8    A(13,3,18)            117.1611         calculate D2E/DX2 analytically  !
 ! A9    A(1,4,7)              125.1485         calculate D2E/DX2 analytically  !
 ! A10   A(1,4,14)             109.17           calculate D2E/DX2 analytically  !
 ! A11   A(7,4,14)             125.576          calculate D2E/DX2 analytically  !
 ! A12   A(2,5,8)              125.2912         calculate D2E/DX2 analytically  !
 ! A13   A(2,5,29)             109.1132         calculate D2E/DX2 analytically  !
 ! A14   A(8,5,29)             125.594          calculate D2E/DX2 analytically  !
 ! A15   A(2,6,10)             121.1928         calculate D2E/DX2 analytically  !
 ! A16   A(2,6,30)             120.835          calculate D2E/DX2 analytically  !
 ! A17   A(10,6,30)            117.9715         calculate D2E/DX2 analytically  !
 ! A18   A(5,8,9)              122.4612         calculate D2E/DX2 analytically  !
 ! A19   A(5,8,53)             121.5847         calculate D2E/DX2 analytically  !
 ! A20   A(9,8,53)             115.9522         calculate D2E/DX2 analytically  !
 ! A21   A(8,9,10)             128.2553         calculate D2E/DX2 analytically  !
 ! A22   A(8,9,55)             115.4315         calculate D2E/DX2 analytically  !
 ! A23   A(10,9,55)            115.7399         calculate D2E/DX2 analytically  !
 ! A24   A(6,10,9)             125.1903         calculate D2E/DX2 analytically  !
 ! A25   A(6,10,54)            118.9259         calculate D2E/DX2 analytically  !
 ! A26   A(9,10,54)            115.8551         calculate D2E/DX2 analytically  !
 ! A27   A(12,11,14)           118.0829         calculate D2E/DX2 analytically  !
 ! A28   A(11,12,13)           111.2229         calculate D2E/DX2 analytically  !
 ! A29   A(11,12,15)           121.496          calculate D2E/DX2 analytically  !
 ! A30   A(13,12,15)           127.1408         calculate D2E/DX2 analytically  !
 ! A31   A(3,13,12)            113.7902         calculate D2E/DX2 analytically  !
 ! A32   A(3,13,27)            107.1425         calculate D2E/DX2 analytically  !
 ! A33   A(3,13,56)            110.3704         calculate D2E/DX2 analytically  !
 ! A34   A(12,13,27)           112.3148         calculate D2E/DX2 analytically  !
 ! A35   A(12,13,56)           103.0631         calculate D2E/DX2 analytically  !
 ! A36   A(27,13,56)           110.1552         calculate D2E/DX2 analytically  !
 ! A37   A(4,14,11)            110.3958         calculate D2E/DX2 analytically  !
 ! A38   A(4,14,28)            110.4633         calculate D2E/DX2 analytically  !
 ! A39   A(4,14,57)            109.1561         calculate D2E/DX2 analytically  !
 ! A40   A(11,14,28)           106.3958         calculate D2E/DX2 analytically  !
 ! A41   A(11,14,57)           108.9932         calculate D2E/DX2 analytically  !
 ! A42   A(28,14,57)           111.4027         calculate D2E/DX2 analytically  !
 ! A43   A(2,15,12)            130.6292         calculate D2E/DX2 analytically  !
 ! A44   A(1,16,58)            110.2686         calculate D2E/DX2 analytically  !
 ! A45   A(1,16,59)            105.4053         calculate D2E/DX2 analytically  !
 ! A46   A(1,16,60)            110.328          calculate D2E/DX2 analytically  !
 ! A47   A(58,16,59)           110.78           calculate D2E/DX2 analytically  !
 ! A48   A(58,16,60)           109.3609         calculate D2E/DX2 analytically  !
 ! A49   A(59,16,60)           110.6497         calculate D2E/DX2 analytically  !
 ! A50   A(18,17,22)           115.0665         calculate D2E/DX2 analytically  !
 ! A51   A(3,18,17)            103.5905         calculate D2E/DX2 analytically  !
 ! A52   A(3,18,19)            113.604          calculate D2E/DX2 analytically  !
 ! A53   A(3,18,23)            106.0466         calculate D2E/DX2 analytically  !
 ! A54   A(17,18,19)           107.5634         calculate D2E/DX2 analytically  !
 ! A55   A(17,18,23)           109.5169         calculate D2E/DX2 analytically  !
 ! A56   A(19,18,23)           115.8112         calculate D2E/DX2 analytically  !
 ! A57   A(2,19,18)            104.7595         calculate D2E/DX2 analytically  !
 ! A58   A(21,20,23)           117.6577         calculate D2E/DX2 analytically  !
 ! A59   A(20,21,22)           114.3806         calculate D2E/DX2 analytically  !
 ! A60   A(20,21,24)           120.5192         calculate D2E/DX2 analytically  !
 ! A61   A(22,21,24)           125.0541         calculate D2E/DX2 analytically  !
 ! A62   A(17,22,21)           106.2198         calculate D2E/DX2 analytically  !
 ! A63   A(17,22,25)           111.1515         calculate D2E/DX2 analytically  !
 ! A64   A(17,22,61)           108.1678         calculate D2E/DX2 analytically  !
 ! A65   A(21,22,25)           112.773          calculate D2E/DX2 analytically  !
 ! A66   A(21,22,61)           108.9235         calculate D2E/DX2 analytically  !
 ! A67   A(25,22,61)           109.4535         calculate D2E/DX2 analytically  !
 ! A68   A(18,23,20)           111.4566         calculate D2E/DX2 analytically  !
 ! A69   A(18,23,26)           111.6543         calculate D2E/DX2 analytically  !
 ! A70   A(18,23,62)           108.8233         calculate D2E/DX2 analytically  !
 ! A71   A(20,23,26)           106.7673         calculate D2E/DX2 analytically  !
 ! A72   A(20,23,62)           107.4053         calculate D2E/DX2 analytically  !
 ! A73   A(26,23,62)           110.6486         calculate D2E/DX2 analytically  !
 ! A74   A(22,25,63)           108.7701         calculate D2E/DX2 analytically  !
 ! A75   A(22,25,64)           112.1315         calculate D2E/DX2 analytically  !
 ! A76   A(22,25,65)           111.3675         calculate D2E/DX2 analytically  !
 ! A77   A(63,25,64)           108.204          calculate D2E/DX2 analytically  !
 ! A78   A(63,25,65)           109.5113         calculate D2E/DX2 analytically  !
 ! A79   A(64,25,65)           106.7795         calculate D2E/DX2 analytically  !
 ! A80   A(23,26,66)           109.7602         calculate D2E/DX2 analytically  !
 ! A81   A(23,26,67)           109.5872         calculate D2E/DX2 analytically  !
 ! A82   A(23,26,68)           110.9641         calculate D2E/DX2 analytically  !
 ! A83   A(66,26,67)           108.3375         calculate D2E/DX2 analytically  !
 ! A84   A(66,26,68)           110.2162         calculate D2E/DX2 analytically  !
 ! A85   A(67,26,68)           107.9156         calculate D2E/DX2 analytically  !
 ! A86   A(13,27,69)           111.5325         calculate D2E/DX2 analytically  !
 ! A87   A(13,27,70)           108.4983         calculate D2E/DX2 analytically  !
 ! A88   A(13,27,71)           110.4457         calculate D2E/DX2 analytically  !
 ! A89   A(69,27,70)           109.2057         calculate D2E/DX2 analytically  !
 ! A90   A(69,27,71)           108.7606         calculate D2E/DX2 analytically  !
 ! A91   A(70,27,71)           108.336          calculate D2E/DX2 analytically  !
 ! A92   A(14,28,72)           109.6963         calculate D2E/DX2 analytically  !
 ! A93   A(14,28,73)           110.4047         calculate D2E/DX2 analytically  !
 ! A94   A(14,28,74)           109.7412         calculate D2E/DX2 analytically  !
 ! A95   A(72,28,73)           109.0183         calculate D2E/DX2 analytically  !
 ! A96   A(72,28,74)           108.9509         calculate D2E/DX2 analytically  !
 ! A97   A(73,28,74)           109.0022         calculate D2E/DX2 analytically  !
 ! A98   A(5,29,31)            117.3433         calculate D2E/DX2 analytically  !
 ! A99   A(5,29,35)            120.9576         calculate D2E/DX2 analytically  !
 ! A100  A(31,29,35)           120.6993         calculate D2E/DX2 analytically  !
 ! A101  A(6,30,38)            120.5955         calculate D2E/DX2 analytically  !
 ! A102  A(6,30,42)            119.0146         calculate D2E/DX2 analytically  !
 ! A103  A(38,30,42)           120.3475         calculate D2E/DX2 analytically  !
 ! A104  A(29,31,32)           118.5995         calculate D2E/DX2 analytically  !
 ! A105  A(29,31,36)           120.7266         calculate D2E/DX2 analytically  !
 ! A106  A(32,31,36)           120.6527         calculate D2E/DX2 analytically  !
 ! A107  A(31,32,33)           121.0026         calculate D2E/DX2 analytically  !
 ! A108  A(31,32,75)           119.6333         calculate D2E/DX2 analytically  !
 ! A109  A(33,32,75)           119.3518         calculate D2E/DX2 analytically  !
 ! A110  A(32,33,34)           119.9539         calculate D2E/DX2 analytically  !
 ! A111  A(32,33,76)           119.9374         calculate D2E/DX2 analytically  !
 ! A112  A(34,33,76)           120.0895         calculate D2E/DX2 analytically  !
 ! A113  A(33,34,35)           121.281          calculate D2E/DX2 analytically  !
 ! A114  A(33,34,77)           119.4563         calculate D2E/DX2 analytically  !
 ! A115  A(35,34,77)           119.2625         calculate D2E/DX2 analytically  !
 ! A116  A(29,35,34)           118.4346         calculate D2E/DX2 analytically  !
 ! A117  A(29,35,37)           122.4581         calculate D2E/DX2 analytically  !
 ! A118  A(34,35,37)           119.1032         calculate D2E/DX2 analytically  !
 ! A119  A(31,36,45)           113.2944         calculate D2E/DX2 analytically  !
 ! A120  A(31,36,46)           110.5672         calculate D2E/DX2 analytically  !
 ! A121  A(31,36,78)           107.6261         calculate D2E/DX2 analytically  !
 ! A122  A(45,36,46)           110.5387         calculate D2E/DX2 analytically  !
 ! A123  A(45,36,78)           107.8203         calculate D2E/DX2 analytically  !
 ! A124  A(46,36,78)           106.6949         calculate D2E/DX2 analytically  !
 ! A125  A(35,37,47)           111.3913         calculate D2E/DX2 analytically  !
 ! A126  A(35,37,48)           111.206          calculate D2E/DX2 analytically  !
 ! A127  A(35,37,79)           108.1139         calculate D2E/DX2 analytically  !
 ! A128  A(47,37,48)           109.6463         calculate D2E/DX2 analytically  !
 ! A129  A(47,37,79)           108.0327         calculate D2E/DX2 analytically  !
 ! A130  A(48,37,79)           108.336          calculate D2E/DX2 analytically  !
 ! A131  A(30,38,39)           118.7369         calculate D2E/DX2 analytically  !
 ! A132  A(30,38,43)           122.4241         calculate D2E/DX2 analytically  !
 ! A133  A(39,38,43)           118.8284         calculate D2E/DX2 analytically  !
 ! A134  A(38,39,40)           121.2145         calculate D2E/DX2 analytically  !
 ! A135  A(38,39,80)           119.2305         calculate D2E/DX2 analytically  !
 ! A136  A(40,39,80)           119.5412         calculate D2E/DX2 analytically  !
 ! A137  A(39,40,41)           119.7339         calculate D2E/DX2 analytically  !
 ! A138  A(39,40,81)           120.127          calculate D2E/DX2 analytically  !
 ! A139  A(41,40,81)           120.137          calculate D2E/DX2 analytically  !
 ! A140  A(40,41,42)           121.2517         calculate D2E/DX2 analytically  !
 ! A141  A(40,41,82)           119.5023         calculate D2E/DX2 analytically  !
 ! A142  A(42,41,82)           119.2429         calculate D2E/DX2 analytically  !
 ! A143  A(30,42,41)           118.7151         calculate D2E/DX2 analytically  !
 ! A144  A(30,42,44)           122.4862         calculate D2E/DX2 analytically  !
 ! A145  A(41,42,44)           118.7964         calculate D2E/DX2 analytically  !
 ! A146  A(38,43,51)           111.0412         calculate D2E/DX2 analytically  !
 ! A147  A(38,43,52)           111.3984         calculate D2E/DX2 analytically  !
 ! A148  A(38,43,83)           107.736          calculate D2E/DX2 analytically  !
 ! A149  A(51,43,52)           110.5024         calculate D2E/DX2 analytically  !
 ! A150  A(51,43,83)           108.1876         calculate D2E/DX2 analytically  !
 ! A151  A(52,43,83)           107.8252         calculate D2E/DX2 analytically  !
 ! A152  A(42,44,49)           110.5065         calculate D2E/DX2 analytically  !
 ! A153  A(42,44,50)           111.9626         calculate D2E/DX2 analytically  !
 ! A154  A(42,44,84)           108.0794         calculate D2E/DX2 analytically  !
 ! A155  A(49,44,50)           110.1612         calculate D2E/DX2 analytically  !
 ! A156  A(49,44,84)           108.0293         calculate D2E/DX2 analytically  !
 ! A157  A(50,44,84)           107.9645         calculate D2E/DX2 analytically  !
 ! A158  A(36,45,85)           109.6327         calculate D2E/DX2 analytically  !
 ! A159  A(36,45,86)           110.9774         calculate D2E/DX2 analytically  !
 ! A160  A(36,45,87)           111.2121         calculate D2E/DX2 analytically  !
 ! A161  A(85,45,86)           108.4753         calculate D2E/DX2 analytically  !
 ! A162  A(85,45,87)           107.9374         calculate D2E/DX2 analytically  !
 ! A163  A(86,45,87)           108.513          calculate D2E/DX2 analytically  !
 ! A164  A(36,46,88)           109.9446         calculate D2E/DX2 analytically  !
 ! A165  A(36,46,89)           110.54           calculate D2E/DX2 analytically  !
 ! A166  A(36,46,90)           110.8066         calculate D2E/DX2 analytically  !
 ! A167  A(88,46,89)           108.613          calculate D2E/DX2 analytically  !
 ! A168  A(88,46,90)           108.4092         calculate D2E/DX2 analytically  !
 ! A169  A(89,46,90)           108.4628         calculate D2E/DX2 analytically  !
 ! A170  A(37,47,91)           109.9164         calculate D2E/DX2 analytically  !
 ! A171  A(37,47,92)           111.2882         calculate D2E/DX2 analytically  !
 ! A172  A(37,47,93)           110.5594         calculate D2E/DX2 analytically  !
 ! A173  A(91,47,92)           108.0161         calculate D2E/DX2 analytically  !
 ! A174  A(91,47,93)           109.1619         calculate D2E/DX2 analytically  !
 ! A175  A(92,47,93)           107.8227         calculate D2E/DX2 analytically  !
 ! A176  A(37,48,94)           110.0489         calculate D2E/DX2 analytically  !
 ! A177  A(37,48,95)           111.0471         calculate D2E/DX2 analytically  !
 ! A178  A(37,48,96)           110.385          calculate D2E/DX2 analytically  !
 ! A179  A(94,48,95)           108.504          calculate D2E/DX2 analytically  !
 ! A180  A(94,48,96)           108.4593         calculate D2E/DX2 analytically  !
 ! A181  A(95,48,96)           108.3249         calculate D2E/DX2 analytically  !
 ! A182  A(44,49,97)           110.1949         calculate D2E/DX2 analytically  !
 ! A183  A(44,49,98)           110.6105         calculate D2E/DX2 analytically  !
 ! A184  A(44,49,99)           111.0424         calculate D2E/DX2 analytically  !
 ! A185  A(97,49,98)           108.4628         calculate D2E/DX2 analytically  !
 ! A186  A(97,49,99)           108.4171         calculate D2E/DX2 analytically  !
 ! A187  A(98,49,99)           108.0288         calculate D2E/DX2 analytically  !
 ! A188  A(44,50,100)          109.6629         calculate D2E/DX2 analytically  !
 ! A189  A(44,50,101)          111.1332         calculate D2E/DX2 analytically  !
 ! A190  A(44,50,102)          110.9015         calculate D2E/DX2 analytically  !
 ! A191  A(100,50,101)         108.284          calculate D2E/DX2 analytically  !
 ! A192  A(100,50,102)         108.3279         calculate D2E/DX2 analytically  !
 ! A193  A(101,50,102)         108.4465         calculate D2E/DX2 analytically  !
 ! A194  A(43,51,103)          109.8815         calculate D2E/DX2 analytically  !
 ! A195  A(43,51,104)          110.2771         calculate D2E/DX2 analytically  !
 ! A196  A(43,51,105)          111.1243         calculate D2E/DX2 analytically  !
 ! A197  A(103,51,104)         108.7751         calculate D2E/DX2 analytically  !
 ! A198  A(103,51,105)         108.5331         calculate D2E/DX2 analytically  !
 ! A199  A(104,51,105)         108.1874         calculate D2E/DX2 analytically  !
 ! A200  A(43,52,106)          109.341          calculate D2E/DX2 analytically  !
 ! A201  A(43,52,107)          111.3581         calculate D2E/DX2 analytically  !
 ! A202  A(43,52,108)          110.9904         calculate D2E/DX2 analytically  !
 ! A203  A(106,52,107)         107.6268         calculate D2E/DX2 analytically  !
 ! A204  A(106,52,108)         109.1719         calculate D2E/DX2 analytically  !
 ! A205  A(107,52,108)         108.2678         calculate D2E/DX2 analytically  !
 ! A206  A(8,53,109)           111.8498         calculate D2E/DX2 analytically  !
 ! A207  A(8,53,110)           110.4724         calculate D2E/DX2 analytically  !
 ! A208  A(8,53,111)           110.3084         calculate D2E/DX2 analytically  !
 ! A209  A(109,53,110)         108.6499         calculate D2E/DX2 analytically  !
 ! A210  A(109,53,111)         108.2449         calculate D2E/DX2 analytically  !
 ! A211  A(110,53,111)         107.1687         calculate D2E/DX2 analytically  !
 ! A212  A(10,54,112)          111.435          calculate D2E/DX2 analytically  !
 ! A213  A(10,54,113)          111.1346         calculate D2E/DX2 analytically  !
 ! A214  A(10,54,114)          110.7353         calculate D2E/DX2 analytically  !
 ! A215  A(112,54,113)         107.3511         calculate D2E/DX2 analytically  !
 ! A216  A(112,54,114)         107.6974         calculate D2E/DX2 analytically  !
 ! A217  A(113,54,114)         108.3317         calculate D2E/DX2 analytically  !
 ! D1    D(16,1,4,7)             0.7385         calculate D2E/DX2 analytically  !
 ! D2    D(16,1,4,14)         -175.6955         calculate D2E/DX2 analytically  !
 ! D3    D(4,1,16,58)          -60.7988         calculate D2E/DX2 analytically  !
 ! D4    D(4,1,16,59)          179.594          calculate D2E/DX2 analytically  !
 ! D5    D(4,1,16,60)           60.1106         calculate D2E/DX2 analytically  !
 ! D6    D(6,2,5,8)             18.2933         calculate D2E/DX2 analytically  !
 ! D7    D(6,2,5,29)          -161.2774         calculate D2E/DX2 analytically  !
 ! D8    D(15,2,5,8)           -84.0593         calculate D2E/DX2 analytically  !
 ! D9    D(15,2,5,29)           96.3699         calculate D2E/DX2 analytically  !
 ! D10   D(19,2,5,8)          -172.0147         calculate D2E/DX2 analytically  !
 ! D11   D(19,2,5,29)            8.4145         calculate D2E/DX2 analytically  !
 ! D12   D(5,2,6,10)           -23.1632         calculate D2E/DX2 analytically  !
 ! D13   D(5,2,6,30)           157.1479         calculate D2E/DX2 analytically  !
 ! D14   D(15,2,6,10)           86.2812         calculate D2E/DX2 analytically  !
 ! D15   D(15,2,6,30)          -93.4077         calculate D2E/DX2 analytically  !
 ! D16   D(19,2,6,10)         -164.5595         calculate D2E/DX2 analytically  !
 ! D17   D(19,2,6,30)           15.7516         calculate D2E/DX2 analytically  !
 ! D18   D(5,2,15,12)         -103.8234         calculate D2E/DX2 analytically  !
 ! D19   D(6,2,15,12)          160.228          calculate D2E/DX2 analytically  !
 ! D20   D(19,2,15,12)          -4.2671         calculate D2E/DX2 analytically  !
 ! D21   D(5,2,19,18)         -166.9688         calculate D2E/DX2 analytically  !
 ! D22   D(6,2,19,18)          -26.363          calculate D2E/DX2 analytically  !
 ! D23   D(15,2,19,18)          85.0175         calculate D2E/DX2 analytically  !
 ! D24   D(18,3,13,12)          76.5503         calculate D2E/DX2 analytically  !
 ! D25   D(18,3,13,27)        -158.6837         calculate D2E/DX2 analytically  !
 ! D26   D(18,3,13,56)         -38.7386         calculate D2E/DX2 analytically  !
 ! D27   D(13,3,18,17)        -130.0556         calculate D2E/DX2 analytically  !
 ! D28   D(13,3,18,19)         -13.6683         calculate D2E/DX2 analytically  !
 ! D29   D(13,3,18,23)         114.6559         calculate D2E/DX2 analytically  !
 ! D30   D(1,4,14,11)         -162.6697         calculate D2E/DX2 analytically  !
 ! D31   D(1,4,14,28)           79.9317         calculate D2E/DX2 analytically  !
 ! D32   D(1,4,14,57)          -42.8852         calculate D2E/DX2 analytically  !
 ! D33   D(7,4,14,11)           20.9153         calculate D2E/DX2 analytically  !
 ! D34   D(7,4,14,28)          -96.4833         calculate D2E/DX2 analytically  !
 ! D35   D(7,4,14,57)          140.6997         calculate D2E/DX2 analytically  !
 ! D36   D(2,5,8,9)             -3.7501         calculate D2E/DX2 analytically  !
 ! D37   D(2,5,8,53)           176.7797         calculate D2E/DX2 analytically  !
 ! D38   D(29,5,8,9)           175.7511         calculate D2E/DX2 analytically  !
 ! D39   D(29,5,8,53)           -3.7191         calculate D2E/DX2 analytically  !
 ! D40   D(2,5,29,31)           70.7311         calculate D2E/DX2 analytically  !
 ! D41   D(2,5,29,35)          -97.9074         calculate D2E/DX2 analytically  !
 ! D42   D(8,5,29,31)         -108.838          calculate D2E/DX2 analytically  !
 ! D43   D(8,5,29,35)           82.5235         calculate D2E/DX2 analytically  !
 ! D44   D(2,6,10,9)            15.0593         calculate D2E/DX2 analytically  !
 ! D45   D(2,6,10,54)         -166.9737         calculate D2E/DX2 analytically  !
 ! D46   D(30,6,10,9)         -165.2432         calculate D2E/DX2 analytically  !
 ! D47   D(30,6,10,54)          12.7238         calculate D2E/DX2 analytically  !
 ! D48   D(2,6,30,38)           77.8628         calculate D2E/DX2 analytically  !
 ! D49   D(2,6,30,42)          -99.7787         calculate D2E/DX2 analytically  !
 ! D50   D(10,6,30,38)        -101.8359         calculate D2E/DX2 analytically  !
 ! D51   D(10,6,30,42)          80.5227         calculate D2E/DX2 analytically  !
 ! D52   D(5,8,9,10)           -14.6844         calculate D2E/DX2 analytically  !
 ! D53   D(5,8,9,55)           174.4491         calculate D2E/DX2 analytically  !
 ! D54   D(53,8,9,10)          164.8137         calculate D2E/DX2 analytically  !
 ! D55   D(53,8,9,55)           -6.0528         calculate D2E/DX2 analytically  !
 ! D56   D(5,8,53,109)          14.4942         calculate D2E/DX2 analytically  !
 ! D57   D(5,8,53,110)         135.6563         calculate D2E/DX2 analytically  !
 ! D58   D(5,8,53,111)        -106.0407         calculate D2E/DX2 analytically  !
 ! D59   D(9,8,53,109)        -165.0087         calculate D2E/DX2 analytically  !
 ! D60   D(9,8,53,110)         -43.8465         calculate D2E/DX2 analytically  !
 ! D61   D(9,8,53,111)          74.4565         calculate D2E/DX2 analytically  !
 ! D62   D(8,9,10,6)             8.0816         calculate D2E/DX2 analytically  !
 ! D63   D(8,9,10,54)         -169.9412         calculate D2E/DX2 analytically  !
 ! D64   D(55,9,10,6)          178.9243         calculate D2E/DX2 analytically  !
 ! D65   D(55,9,10,54)           0.9015         calculate D2E/DX2 analytically  !
 ! D66   D(6,10,54,112)        -70.8877         calculate D2E/DX2 analytically  !
 ! D67   D(6,10,54,113)         48.7988         calculate D2E/DX2 analytically  !
 ! D68   D(6,10,54,114)        169.2561         calculate D2E/DX2 analytically  !
 ! D69   D(9,10,54,112)        107.2661         calculate D2E/DX2 analytically  !
 ! D70   D(9,10,54,113)       -133.0473         calculate D2E/DX2 analytically  !
 ! D71   D(9,10,54,114)        -12.5901         calculate D2E/DX2 analytically  !
 ! D72   D(14,11,12,13)        169.8386         calculate D2E/DX2 analytically  !
 ! D73   D(14,11,12,15)         -6.147          calculate D2E/DX2 analytically  !
 ! D74   D(12,11,14,4)          77.7861         calculate D2E/DX2 analytically  !
 ! D75   D(12,11,14,28)       -162.3328         calculate D2E/DX2 analytically  !
 ! D76   D(12,11,14,57)        -42.0966         calculate D2E/DX2 analytically  !
 ! D77   D(11,12,13,3)         158.897          calculate D2E/DX2 analytically  !
 ! D78   D(11,12,13,27)         36.95           calculate D2E/DX2 analytically  !
 ! D79   D(11,12,13,56)        -81.5777         calculate D2E/DX2 analytically  !
 ! D80   D(15,12,13,3)         -25.3975         calculate D2E/DX2 analytically  !
 ! D81   D(15,12,13,27)       -147.3445         calculate D2E/DX2 analytically  !
 ! D82   D(15,12,13,56)         94.1278         calculate D2E/DX2 analytically  !
 ! D83   D(11,12,15,2)         149.7871         calculate D2E/DX2 analytically  !
 ! D84   D(13,12,15,2)         -25.5171         calculate D2E/DX2 analytically  !
 ! D85   D(3,13,27,69)         176.2288         calculate D2E/DX2 analytically  !
 ! D86   D(3,13,27,70)          55.9031         calculate D2E/DX2 analytically  !
 ! D87   D(3,13,27,71)         -62.7012         calculate D2E/DX2 analytically  !
 ! D88   D(12,13,27,69)        -58.1153         calculate D2E/DX2 analytically  !
 ! D89   D(12,13,27,70)       -178.4411         calculate D2E/DX2 analytically  !
 ! D90   D(12,13,27,71)         62.9546         calculate D2E/DX2 analytically  !
 ! D91   D(56,13,27,69)         56.1462         calculate D2E/DX2 analytically  !
 ! D92   D(56,13,27,70)        -64.1795         calculate D2E/DX2 analytically  !
 ! D93   D(56,13,27,71)        177.2162         calculate D2E/DX2 analytically  !
 ! D94   D(4,14,28,72)        -179.6187         calculate D2E/DX2 analytically  !
 ! D95   D(4,14,28,73)          60.2186         calculate D2E/DX2 analytically  !
 ! D96   D(4,14,28,74)         -59.9527         calculate D2E/DX2 analytically  !
 ! D97   D(11,14,28,72)         60.544          calculate D2E/DX2 analytically  !
 ! D98   D(11,14,28,73)        -59.6187         calculate D2E/DX2 analytically  !
 ! D99   D(11,14,28,74)       -179.79           calculate D2E/DX2 analytically  !
 ! D100  D(57,14,28,72)        -58.1222         calculate D2E/DX2 analytically  !
 ! D101  D(57,14,28,73)       -178.2849         calculate D2E/DX2 analytically  !
 ! D102  D(57,14,28,74)         61.5437         calculate D2E/DX2 analytically  !
 ! D103  D(22,17,18,3)         -84.0982         calculate D2E/DX2 analytically  !
 ! D104  D(22,17,18,19)        155.3307         calculate D2E/DX2 analytically  !
 ! D105  D(22,17,18,23)         28.695          calculate D2E/DX2 analytically  !
 ! D106  D(18,17,22,21)        -65.4878         calculate D2E/DX2 analytically  !
 ! D107  D(18,17,22,25)        171.5013         calculate D2E/DX2 analytically  !
 ! D108  D(18,17,22,61)         51.3157         calculate D2E/DX2 analytically  !
 ! D109  D(3,18,19,2)          -91.0261         calculate D2E/DX2 analytically  !
 ! D110  D(17,18,19,2)          23.0081         calculate D2E/DX2 analytically  !
 ! D111  D(23,18,19,2)         145.8512         calculate D2E/DX2 analytically  !
 ! D112  D(3,18,23,20)         140.4348         calculate D2E/DX2 analytically  !
 ! D113  D(3,18,23,26)        -100.2542         calculate D2E/DX2 analytically  !
 ! D114  D(3,18,23,62)          22.1703         calculate D2E/DX2 analytically  !
 ! D115  D(17,18,23,20)         29.2509         calculate D2E/DX2 analytically  !
 ! D116  D(17,18,23,26)        148.5619         calculate D2E/DX2 analytically  !
 ! D117  D(17,18,23,62)        -89.0136         calculate D2E/DX2 analytically  !
 ! D118  D(19,18,23,20)        -92.5568         calculate D2E/DX2 analytically  !
 ! D119  D(19,18,23,26)         26.7542         calculate D2E/DX2 analytically  !
 ! D120  D(19,18,23,62)        149.1787         calculate D2E/DX2 analytically  !
 ! D121  D(23,20,21,22)         15.2271         calculate D2E/DX2 analytically  !
 ! D122  D(23,20,21,24)       -167.1193         calculate D2E/DX2 analytically  !
 ! D123  D(21,20,23,18)        -53.08           calculate D2E/DX2 analytically  !
 ! D124  D(21,20,23,26)       -175.2551         calculate D2E/DX2 analytically  !
 ! D125  D(21,20,23,62)         66.0322         calculate D2E/DX2 analytically  !
 ! D126  D(20,21,22,17)         42.3163         calculate D2E/DX2 analytically  !
 ! D127  D(20,21,22,25)        164.3006         calculate D2E/DX2 analytically  !
 ! D128  D(20,21,22,61)        -73.9799         calculate D2E/DX2 analytically  !
 ! D129  D(24,21,22,17)       -135.2144         calculate D2E/DX2 analytically  !
 ! D130  D(24,21,22,25)        -13.2301         calculate D2E/DX2 analytically  !
 ! D131  D(24,21,22,61)        108.4894         calculate D2E/DX2 analytically  !
 ! D132  D(17,22,25,63)        179.1885         calculate D2E/DX2 analytically  !
 ! D133  D(17,22,25,64)         59.5579         calculate D2E/DX2 analytically  !
 ! D134  D(17,22,25,65)        -60.0309         calculate D2E/DX2 analytically  !
 ! D135  D(21,22,25,63)         60.0288         calculate D2E/DX2 analytically  !
 ! D136  D(21,22,25,64)        -59.6019         calculate D2E/DX2 analytically  !
 ! D137  D(21,22,25,65)       -179.1906         calculate D2E/DX2 analytically  !
 ! D138  D(61,22,25,63)        -61.3906         calculate D2E/DX2 analytically  !
 ! D139  D(61,22,25,64)        178.9788         calculate D2E/DX2 analytically  !
 ! D140  D(61,22,25,65)         59.39           calculate D2E/DX2 analytically  !
 ! D141  D(18,23,26,66)       -176.0523         calculate D2E/DX2 analytically  !
 ! D142  D(18,23,26,67)         65.0883         calculate D2E/DX2 analytically  !
 ! D143  D(18,23,26,68)        -53.9892         calculate D2E/DX2 analytically  !
 ! D144  D(20,23,26,66)        -54.0016         calculate D2E/DX2 analytically  !
 ! D145  D(20,23,26,67)       -172.8609         calculate D2E/DX2 analytically  !
 ! D146  D(20,23,26,68)         68.0616         calculate D2E/DX2 analytically  !
 ! D147  D(62,23,26,66)         62.5754         calculate D2E/DX2 analytically  !
 ! D148  D(62,23,26,67)        -56.284          calculate D2E/DX2 analytically  !
 ! D149  D(62,23,26,68)       -175.3615         calculate D2E/DX2 analytically  !
 ! D150  D(5,29,31,32)        -167.4678         calculate D2E/DX2 analytically  !
 ! D151  D(5,29,31,36)          14.1983         calculate D2E/DX2 analytically  !
 ! D152  D(35,29,31,32)          1.2017         calculate D2E/DX2 analytically  !
 ! D153  D(35,29,31,36)       -177.1323         calculate D2E/DX2 analytically  !
 ! D154  D(5,29,35,34)         167.4632         calculate D2E/DX2 analytically  !
 ! D155  D(5,29,35,37)         -13.2794         calculate D2E/DX2 analytically  !
 ! D156  D(31,29,35,34)         -0.7947         calculate D2E/DX2 analytically  !
 ! D157  D(31,29,35,37)        178.4627         calculate D2E/DX2 analytically  !
 ! D158  D(6,30,38,39)        -177.4555         calculate D2E/DX2 analytically  !
 ! D159  D(6,30,38,43)           3.7463         calculate D2E/DX2 analytically  !
 ! D160  D(42,30,38,39)          0.1544         calculate D2E/DX2 analytically  !
 ! D161  D(42,30,38,43)       -178.6437         calculate D2E/DX2 analytically  !
 ! D162  D(6,30,42,41)         177.577          calculate D2E/DX2 analytically  !
 ! D163  D(6,30,42,44)          -1.857          calculate D2E/DX2 analytically  !
 ! D164  D(38,30,42,41)         -0.0704         calculate D2E/DX2 analytically  !
 ! D165  D(38,30,42,44)       -179.5045         calculate D2E/DX2 analytically  !
 ! D166  D(29,31,32,33)         -0.099          calculate D2E/DX2 analytically  !
 ! D167  D(29,31,32,75)       -178.8132         calculate D2E/DX2 analytically  !
 ! D168  D(36,31,32,33)        178.2362         calculate D2E/DX2 analytically  !
 ! D169  D(36,31,32,75)         -0.478          calculate D2E/DX2 analytically  !
 ! D170  D(29,31,36,45)       -155.5085         calculate D2E/DX2 analytically  !
 ! D171  D(29,31,36,46)         79.7739         calculate D2E/DX2 analytically  !
 ! D172  D(29,31,36,78)        -36.4041         calculate D2E/DX2 analytically  !
 ! D173  D(32,31,36,45)         26.1919         calculate D2E/DX2 analytically  !
 ! D174  D(32,31,36,46)        -98.5258         calculate D2E/DX2 analytically  !
 ! D175  D(32,31,36,78)        145.2962         calculate D2E/DX2 analytically  !
 ! D176  D(31,32,33,34)         -1.4051         calculate D2E/DX2 analytically  !
 ! D177  D(31,32,33,76)       -179.8148         calculate D2E/DX2 analytically  !
 ! D178  D(75,32,33,34)        177.3127         calculate D2E/DX2 analytically  !
 ! D179  D(75,32,33,76)         -1.097          calculate D2E/DX2 analytically  !
 ! D180  D(32,33,34,35)          1.8355         calculate D2E/DX2 analytically  !
 ! D181  D(32,33,34,77)       -178.0007         calculate D2E/DX2 analytically  !
 ! D182  D(76,33,34,35)       -179.7572         calculate D2E/DX2 analytically  !
 ! D183  D(76,33,34,77)          0.4065         calculate D2E/DX2 analytically  !
 ! D184  D(33,34,35,29)         -0.7332         calculate D2E/DX2 analytically  !
 ! D185  D(33,34,35,37)        179.9839         calculate D2E/DX2 analytically  !
 ! D186  D(77,34,35,29)        179.1033         calculate D2E/DX2 analytically  !
 ! D187  D(77,34,35,37)         -0.1795         calculate D2E/DX2 analytically  !
 ! D188  D(29,35,37,47)        125.8094         calculate D2E/DX2 analytically  !
 ! D189  D(29,35,37,48)       -111.5545         calculate D2E/DX2 analytically  !
 ! D190  D(29,35,37,79)          7.2586         calculate D2E/DX2 analytically  !
 ! D191  D(34,35,37,47)        -54.938          calculate D2E/DX2 analytically  !
 ! D192  D(34,35,37,48)         67.6981         calculate D2E/DX2 analytically  !
 ! D193  D(34,35,37,79)       -173.4888         calculate D2E/DX2 analytically  !
 ! D194  D(31,36,45,85)        173.323          calculate D2E/DX2 analytically  !
 ! D195  D(31,36,45,86)         53.5139         calculate D2E/DX2 analytically  !
 ! D196  D(31,36,45,87)        -67.3888         calculate D2E/DX2 analytically  !
 ! D197  D(46,36,45,85)        -61.9439         calculate D2E/DX2 analytically  !
 ! D198  D(46,36,45,86)        178.247          calculate D2E/DX2 analytically  !
 ! D199  D(46,36,45,87)         57.3443         calculate D2E/DX2 analytically  !
 ! D200  D(78,36,45,85)         54.3305         calculate D2E/DX2 analytically  !
 ! D201  D(78,36,45,86)        -65.4786         calculate D2E/DX2 analytically  !
 ! D202  D(78,36,45,87)        173.6187         calculate D2E/DX2 analytically  !
 ! D203  D(31,36,46,88)       -179.3078         calculate D2E/DX2 analytically  !
 ! D204  D(31,36,46,89)         60.7879         calculate D2E/DX2 analytically  !
 ! D205  D(31,36,46,90)        -59.4876         calculate D2E/DX2 analytically  !
 ! D206  D(45,36,46,88)         54.4197         calculate D2E/DX2 analytically  !
 ! D207  D(45,36,46,89)        -65.4846         calculate D2E/DX2 analytically  !
 ! D208  D(45,36,46,90)        174.2398         calculate D2E/DX2 analytically  !
 ! D209  D(78,36,46,88)        -62.5522         calculate D2E/DX2 analytically  !
 ! D210  D(78,36,46,89)        177.5435         calculate D2E/DX2 analytically  !
 ! D211  D(78,36,46,90)         57.268          calculate D2E/DX2 analytically  !
 ! D212  D(35,37,47,91)       -177.0578         calculate D2E/DX2 analytically  !
 ! D213  D(35,37,47,92)         63.3236         calculate D2E/DX2 analytically  !
 ! D214  D(35,37,47,93)        -56.4765         calculate D2E/DX2 analytically  !
 ! D215  D(48,37,47,91)         59.4144         calculate D2E/DX2 analytically  !
 ! D216  D(48,37,47,92)        -60.2042         calculate D2E/DX2 analytically  !
 ! D217  D(48,37,47,93)        179.9958         calculate D2E/DX2 analytically  !
 ! D218  D(79,37,47,91)        -58.4584         calculate D2E/DX2 analytically  !
 ! D219  D(79,37,47,92)       -178.077          calculate D2E/DX2 analytically  !
 ! D220  D(79,37,47,93)         62.123          calculate D2E/DX2 analytically  !
 ! D221  D(35,37,48,94)        176.544          calculate D2E/DX2 analytically  !
 ! D222  D(35,37,48,95)         56.3835         calculate D2E/DX2 analytically  !
 ! D223  D(35,37,48,96)        -63.7741         calculate D2E/DX2 analytically  !
 ! D224  D(47,37,48,94)        -59.8195         calculate D2E/DX2 analytically  !
 ! D225  D(47,37,48,95)       -179.98           calculate D2E/DX2 analytically  !
 ! D226  D(47,37,48,96)         59.8624         calculate D2E/DX2 analytically  !
 ! D227  D(79,37,48,94)         57.8642         calculate D2E/DX2 analytically  !
 ! D228  D(79,37,48,95)        -62.2963         calculate D2E/DX2 analytically  !
 ! D229  D(79,37,48,96)        177.5461         calculate D2E/DX2 analytically  !
 ! D230  D(30,38,39,40)         -0.1985         calculate D2E/DX2 analytically  !
 ! D231  D(30,38,39,80)       -178.8406         calculate D2E/DX2 analytically  !
 ! D232  D(43,38,39,40)        178.6435         calculate D2E/DX2 analytically  !
 ! D233  D(43,38,39,80)          0.0014         calculate D2E/DX2 analytically  !
 ! D234  D(30,38,43,51)       -118.1309         calculate D2E/DX2 analytically  !
 ! D235  D(30,38,43,52)        118.2411         calculate D2E/DX2 analytically  !
 ! D236  D(30,38,43,83)          0.1733         calculate D2E/DX2 analytically  !
 ! D237  D(39,38,43,51)         63.072          calculate D2E/DX2 analytically  !
 ! D238  D(39,38,43,52)        -60.556          calculate D2E/DX2 analytically  !
 ! D239  D(39,38,43,83)       -178.6238         calculate D2E/DX2 analytically  !
 ! D240  D(38,39,40,41)          0.1566         calculate D2E/DX2 analytically  !
 ! D241  D(38,39,40,81)       -179.3191         calculate D2E/DX2 analytically  !
 ! D242  D(80,39,40,41)        178.7946         calculate D2E/DX2 analytically  !
 ! D243  D(80,39,40,81)         -0.6812         calculate D2E/DX2 analytically  !
 ! D244  D(39,40,41,42)         -0.0686         calculate D2E/DX2 analytically  !
 ! D245  D(39,40,41,82)       -179.4346         calculate D2E/DX2 analytically  !
 ! D246  D(81,40,41,42)        179.4071         calculate D2E/DX2 analytically  !
 ! D247  D(81,40,41,82)          0.0411         calculate D2E/DX2 analytically  !
 ! D248  D(40,41,42,30)          0.0265         calculate D2E/DX2 analytically  !
 ! D249  D(40,41,42,44)        179.4817         calculate D2E/DX2 analytically  !
 ! D250  D(82,41,42,30)        179.394          calculate D2E/DX2 analytically  !
 ! D251  D(82,41,42,44)         -1.1507         calculate D2E/DX2 analytically  !
 ! D252  D(30,42,44,49)        116.0309         calculate D2E/DX2 analytically  !
 ! D253  D(30,42,44,50)       -120.7663         calculate D2E/DX2 analytically  !
 ! D254  D(30,42,44,84)         -1.984          calculate D2E/DX2 analytically  !
 ! D255  D(41,42,44,49)        -63.4027         calculate D2E/DX2 analytically  !
 ! D256  D(41,42,44,50)         59.8001         calculate D2E/DX2 analytically  !
 ! D257  D(41,42,44,84)        178.5824         calculate D2E/DX2 analytically  !
 ! D258  D(38,43,51,103)       176.0674         calculate D2E/DX2 analytically  !
 ! D259  D(38,43,51,104)        56.1685         calculate D2E/DX2 analytically  !
 ! D260  D(38,43,51,105)       -63.7958         calculate D2E/DX2 analytically  !
 ! D261  D(52,43,51,103)       -59.7937         calculate D2E/DX2 analytically  !
 ! D262  D(52,43,51,104)      -179.6927         calculate D2E/DX2 analytically  !
 ! D263  D(52,43,51,105)        60.343          calculate D2E/DX2 analytically  !
 ! D264  D(83,43,51,103)        58.0366         calculate D2E/DX2 analytically  !
 ! D265  D(83,43,51,104)       -61.8623         calculate D2E/DX2 analytically  !
 ! D266  D(83,43,51,105)       178.1734         calculate D2E/DX2 analytically  !
 ! D267  D(38,43,52,106)       176.8647         calculate D2E/DX2 analytically  !
 ! D268  D(38,43,52,107)        58.0583         calculate D2E/DX2 analytically  !
 ! D269  D(38,43,52,108)       -62.6411         calculate D2E/DX2 analytically  !
 ! D270  D(51,43,52,106)        52.9312         calculate D2E/DX2 analytically  !
 ! D271  D(51,43,52,107)       -65.8752         calculate D2E/DX2 analytically  !
 ! D272  D(51,43,52,108)       173.4254         calculate D2E/DX2 analytically  !
 ! D273  D(83,43,52,106)       -65.1212         calculate D2E/DX2 analytically  !
 ! D274  D(83,43,52,107)       176.0723         calculate D2E/DX2 analytically  !
 ! D275  D(83,43,52,108)        55.373          calculate D2E/DX2 analytically  !
 ! D276  D(42,44,49,97)       -177.4903         calculate D2E/DX2 analytically  !
 ! D277  D(42,44,49,98)        -57.5669         calculate D2E/DX2 analytically  !
 ! D278  D(42,44,49,99)         62.365          calculate D2E/DX2 analytically  !
 ! D279  D(50,44,49,97)         58.2675         calculate D2E/DX2 analytically  !
 ! D280  D(50,44,49,98)        178.1909         calculate D2E/DX2 analytically  !
 ! D281  D(50,44,49,99)        -61.8772         calculate D2E/DX2 analytically  !
 ! D282  D(84,44,49,97)        -59.4447         calculate D2E/DX2 analytically  !
 ! D283  D(84,44,49,98)         60.4787         calculate D2E/DX2 analytically  !
 ! D284  D(84,44,49,99)       -179.5894         calculate D2E/DX2 analytically  !
 ! D285  D(42,44,50,100)       177.2141         calculate D2E/DX2 analytically  !
 ! D286  D(42,44,50,101)        57.5251         calculate D2E/DX2 analytically  !
 ! D287  D(42,44,50,102)       -63.1882         calculate D2E/DX2 analytically  !
 ! D288  D(49,44,50,100)       -59.3883         calculate D2E/DX2 analytically  !
 ! D289  D(49,44,50,101)      -179.0773         calculate D2E/DX2 analytically  !
 ! D290  D(49,44,50,102)        60.2094         calculate D2E/DX2 analytically  !
 ! D291  D(84,44,50,100)        58.3639         calculate D2E/DX2 analytically  !
 ! D292  D(84,44,50,101)       -61.325          calculate D2E/DX2 analytically  !
 ! D293  D(84,44,50,102)       177.9616         calculate D2E/DX2 analytically  !
 --------------------------------------------------------------------------------
 Trust Radius=3.00D-01 FncErr=1.00D-07 GrdErr=1.00D-07
 Number of steps in this run=   2 maximum allowed number of steps=   2.
 GradGradGradGradGradGradGradGradGradGradGradGradGradGradGradGradGradGrad

 Stoichiometry    C42H60MgN2O9
 Framework group  C1[X(C42H60MgN2O9)]
 Deg. of freedom   336
 Full point group                 C1      NOp   1
 Largest Abelian subgroup         C1      NOp   1
 Largest concise Abelian subgroup C1      NOp   1
                         Standard orientation:                         
 ---------------------------------------------------------------------
 Center     Atomic     Atomic              Coordinates (Angstroms)
 Number     Number      Type              X           Y           Z
 ---------------------------------------------------------------------
    1          8             0       -4.376251   -2.723601   -1.191521
    2         12             0        0.138232    0.223102   -0.167166
    3          8             0       -0.513811    0.102937    3.119545
    4          6             0       -4.114800   -2.446082    0.098490
    5          7             0       -0.299338    1.406753   -1.759092
    6          7             0        0.821759   -1.278415   -1.379521
    7          8             0       -3.822420   -3.262373    0.940335
    8          6             0       -0.440818    0.989812   -3.003071
    9          6             0       -0.221527   -0.358684   -3.383489
   10          6             0        0.423785   -1.375765   -2.655203
   11          8             0       -3.690670   -0.548078    1.569757
   12          6             0       -2.364204   -0.366446    1.555468
   13          6             0       -1.878717    0.301478    2.856113
   14          6             0       -4.333218   -0.954288    0.344940
   15          8             0       -1.691107   -0.643377    0.570634
   16          6             0       -4.308322   -4.114026   -1.560848
   17          8             0        1.397649   -0.085263    1.838710
   18          6             0        0.446583    0.906507    2.339291
   19          8             0       -0.084726    1.497060    1.307671
   20          8             0        2.575309    1.970660    3.069556
   21          6             0        3.296893    0.831078    2.935721
   22          6             0        2.452656   -0.434286    2.753283
   23          6             0        1.159540    1.841203    3.364255
   24          8             0        4.504503    0.867508    2.922318
   25          6             0        3.257973   -1.606098    2.236207
   26          6             0        0.577121    3.244744    3.342785
   27          6             0       -2.651607   -0.187921    4.084915
   28          6             0       -5.820617   -0.653882    0.518216
   29          6             0       -0.420553    2.780807   -1.310226
   30          6             0        1.752391   -2.278474   -0.876363
   31          6             0        0.783940    3.452647   -0.909802
   32          6             0        0.675700    4.684240   -0.219984
   33          6             0       -0.584710    5.246324    0.069324
   34          6             0       -1.756972    4.596674   -0.354715
   35          6             0       -1.704628    3.357749   -1.040279
   36          6             0        2.174682    2.861812   -1.259635
   37          6             0       -3.029047    2.685289   -1.484743
   38          6             0        1.289564   -3.357797   -0.055754
   39          6             0        2.239540   -4.280628    0.458970
   40          6             0        3.612118   -4.151118    0.172453
   41          6             0        4.059646   -3.088286   -0.635606
   42          6             0        3.152487   -2.139593   -1.172251
   43          6             0       -0.209817   -3.570847    0.268089
   44          6             0        3.709323   -0.983656   -2.045877
   45          6             0        3.304276    3.328030   -0.290711
   46          6             0        2.553757    3.188690   -2.742800
   47          6             0       -4.004266    2.494944   -0.278826
   48          6             0       -3.737106    3.516037   -2.608795
   49          6             0        4.654743   -0.067559   -1.203837
   50          6             0        4.460967   -1.516223   -3.311892
   51          6             0       -0.473014   -3.459748    1.802598
   52          6             0       -0.722290   -4.945285   -0.277925
   53          6             0       -0.841034    1.941534   -4.122720
   54          6             0        0.715610   -2.660597   -3.422848
   55          1             0       -0.460556   -0.596683   -4.414959
   56          1             0       -2.083612    1.368572    2.679337
   57          1             0       -3.906505   -0.387938   -0.484840
   58          1             0       -3.304630   -4.503599   -1.383632
   59          1             0       -4.552821   -4.143860   -2.622628
   60          1             0       -5.030651   -4.696485   -0.982279
   61          1             0        1.995832   -0.700879    3.718595
   62          1             0        1.071723    1.401656    4.364166
   63          1             0        4.055376   -1.828493    2.951846
   64          1             0        3.715988   -1.395126    1.271382
   65          1             0        2.633491   -2.488262    2.101647
   66          1             0        1.144234    3.891251    4.020420
   67          1             0       -0.463619    3.215847    3.684346
   68          1             0        0.587472    3.657352    2.329655
   69          1             0       -3.723309   -0.004989    3.983334
   70          1             0       -2.277786    0.343558    4.964162
   71          1             0       -2.490291   -1.259625    4.236095
   72          1             0       -5.962969    0.416166    0.686815
   73          1             0       -6.224431   -1.206232    1.372147
   74          1             0       -6.364241   -0.946624   -0.384542
   75          1             0        1.584595    5.221352    0.076462
   76          1             0       -0.648271    6.204504    0.602907
   77          1             0       -2.732528    5.058021   -0.153998
   78          1             0        2.098413    1.753880   -1.185853
   79          1             0       -2.786884    1.682530   -1.892044
   80          1             0        1.891712   -5.121774    1.072881
   81          1             0        4.329906   -4.881411    0.570717
   82          1             0        5.129429   -2.996300   -0.864236
   83          1             0       -0.781596   -2.770058   -0.239475
   84          1             0        2.853210   -0.369248   -2.389807
   85          1             0        4.232849    2.785148   -0.517558
   86          1             0        3.030859    3.129395    0.759136
   87          1             0        3.505128    4.404307   -0.401850
   88          1             0        3.536035    2.754483   -2.983688
   89          1             0        2.603338    4.278189   -2.897939
   90          1             0        1.807945    2.770413   -3.438990
   91          1             0       -4.915270    1.967853   -0.611531
   92          1             0       -4.307615    3.463615    0.146485
   93          1             0       -3.519660    1.910309    0.523447
   94          1             0       -4.641614    2.991174   -2.953053
   95          1             0       -3.069740    3.663673   -3.470773
   96          1             0       -4.032385    4.505159   -2.226275
   97          1             0        5.011281    0.775760   -1.816006
   98          1             0        4.121526    0.338659   -0.325034
   99          1             0        5.529843   -0.629046   -0.841873
  100          1             0        4.795697   -0.667778   -3.928128
  101          1             0        3.803975   -2.150761   -3.925704
  102          1             0        5.345123   -2.105479   -3.024701
  103          1             0       -1.552878   -3.543963    2.004619
  104          1             0       -0.114685   -2.485531    2.183276
  105          1             0        0.049415   -4.257304    2.353635
  106          1             0       -1.775811   -5.086962    0.019542
  107          1             0       -0.142339   -5.783941    0.138834
  108          1             0       -0.647827   -4.986105   -1.376941
  109          1             0       -0.738109    2.988538   -3.823293
  110          1             0       -0.223278    1.768806   -5.012030
  111          1             0       -1.885061    1.768622   -4.414803
  112          1             0        1.783779   -2.760479   -3.644907
  113          1             0        0.418224   -3.542442   -2.844648
  114          1             0        0.174858   -2.674658   -4.375134
 ---------------------------------------------------------------------
 Rotational constants (GHZ):      0.0609518      0.0566981      0.0472350
 General basis read from cards:  (5D, 7F)
 There are   642 symmetry adapted basis functions of A   symmetry.
 Integral buffers will be    131072 words long.
 Raffenetti 2 integral format.
 Two-electron integral symmetry is turned on.
   642 basis functions,  1430 primitive gaussians,   674 cartesian basis functions
   205 alpha electrons      205 beta electrons
       nuclear repulsion energy      9173.0590293883 Hartrees.
 NAtoms=  114 NActive=  114 NUniq=  114 SFac= 1.00D+00 NAtFMM=   60 Big=T
 One-electron integrals computed using PRISM.
 NBasis=   642 RedAO= T  NBF=   642
 NBsUse=   642 1.00D-06 NBFU=   642
 Initial guess read from the checkpoint file:
 RRSS_fm-5-ti.chk
 Initial guess orbital symmetries:
       Occupied  (A) (A) (A) (A) (A) (A) (A) (A) (A) (A) (A) (A)
                 (A) (A) (A) (A) (A) (A) (A) (A) (A) (A) (A) (A)
                 (A) (A) (A) (A) (A) (A) (A) (A) (A) (A) (A) (A)
                 (A) (A) (A) (A) (A) (A) (A) (A) (A) (A) (A) (A)
                 (A) (A) (A) (A) (A) (A) (A) (A) (A) (A) (A) (A)
                 (A) (A) (A) (A) (A) (A) (A) (A) (A) (A) (A) (A)
                 (A) (A) (A) (A) (A) (A) (A) (A) (A) (A) (A) (A)
                 (A) (A) (A) (A) (A) (A) (A) (A) (A) (A) (A) (A)
                 (A) (A) (A) (A) (A) (A) (A) (A) (A) (A) (A) (A)
                 (A) (A) (A) (A) (A) (A) (A) (A) (A) (A) (A) (A)
                 (A) (A) (A) (A) (A) (A) (A) (A) (A) (A) (A) (A)
                 (A) (A) (A) (A) (A) (A) (A) (A) (A) (A) (A) (A)
                 (A) (A) (A) (A) (A) (A) (A) (A) (A) (A) (A) (A)
                 (A) (A) (A) (A) (A) (A) (A) (A) (A) (A) (A) (A)
                 (A) (A) (A) (A) (A) (A) (A) (A) (A) (A) (A) (A)
                 (A) (A) (A) (A) (A) (A) (A) (A) (A) (A) (A) (A)
                 (A) (A) (A) (A) (A) (A) (A) (A) (A) (A) (A) (A)
                 (A)
       Virtual   (A) (A) (A) (A) (A) (A) (A) (A) (A) (A) (A) (A)
                 (A) (A) (A) (A) (A) (A) (A) (A) (A) (A) (A) (A)
                 (A) (A) (A) (A) (A) (A) (A) (A) (A) (A) (A) (A)
                 (A) (A) (A) (A) (A) (A) (A) (A) (A) (A) (A) (A)
                 (A) (A) (A) (A) (A) (A) (A) (A) (A) (A) (A) (A)
                 (A) (A) (A) (A) (A) (A) (A) (A) (A) (A) (A) (A)
                 (A) (A) (A) (A) (A) (A) (A) (A) (A) (A) (A) (A)
                 (A) (A) (A) (A) (A) (A) (A) (A) (A) (A) (A) (A)
                 (A) (A) (A) (A) (A) (A) (A) (A) (A) (A) (A) (A)
                 (A) (A) (A) (A) (A) (A) (A) (A) (A) (A) (A) (A)
                 (A) (A) (A) (A) (A) (A) (A) (A) (A) (A) (A) (A)
                 (A) (A) (A) (A) (A) (A) (A) (A) (A) (A) (A) (A)
                 (A) (A) (A) (A) (A) (A) (A) (A) (A) (A) (A) (A)
                 (A) (A) (A) (A) (A) (A) (A) (A) (A) (A) (A) (A)
                 (A) (A) (A) (A) (A) (A) (A) (A) (A) (A) (A) (A)
                 (A) (A) (A) (A) (A) (A) (A) (A) (A) (A) (A) (A)
                 (A) (A) (A) (A) (A) (A) (A) (A) (A) (A) (A) (A)
                 (A) (A) (A) (A) (A) (A) (A) (A) (A) (A) (A) (A)
                 (A) (A) (A) (A) (A) (A) (A) (A) (A) (A) (A) (A)
                 (A) (A) (A) (A) (A) (A) (A) (A) (A) (A) (A) (A)
                 (A) (A) (A) (A) (A) (A) (A) (A) (A) (A) (A) (A)
                 (A) (A) (A) (A) (A) (A) (A) (A) (A) (A) (A) (A)
                 (A) (A) (A) (A) (A) (A) (A) (A) (A) (A) (A) (A)
                 (A) (A) (A) (A) (A) (A) (A) (A) (A) (A) (A) (A)
                 (A) (A) (A) (A) (A) (A) (A) (A) (A) (A) (A) (A)
                 (A) (A) (A) (A) (A) (A) (A) (A) (A) (A) (A) (A)
                 (A) (A) (A) (A) (A) (A) (A) (A) (A) (A) (A) (A)
                 (A) (A) (A) (A) (A) (A) (A) (A) (A) (A) (A) (A)
                 (A) (A) (A) (A) (A) (A) (A) (A) (A) (A) (A) (A)
                 (A) (A) (A) (A) (A) (A) (A) (A) (A) (A) (A) (A)
                 (A) (A) (A) (A) (A) (A) (A) (A) (A) (A) (A) (A)
                 (A) (A) (A) (A) (A) (A) (A) (A) (A) (A) (A) (A)
                 (A) (A) (A) (A) (A) (A) (A) (A) (A) (A) (A) (A)
                 (A) (A) (A) (A) (A) (A) (A) (A) (A) (A) (A) (A)
                 (A) (A) (A) (A) (A) (A) (A) (A) (A) (A) (A) (A)
                 (A) (A) (A) (A) (A) (A) (A) (A) (A) (A) (A) (A)
                 (A) (A) (A) (A) (A)
 Requested convergence on RMS density matrix=1.00D-08 within 128 cycles.
 Requested convergence on MAX density matrix=1.00D-06.
 Requested convergence on             energy=1.00D-06.
 No special actions if energy rises.
 SCF Done:  E(RB+HF-LYP) =  -2612.19238842     A.U. after    1 cycles
             Convg  =    0.6693D-08             -V/T =  2.0106
             S**2   =   0.0000
 Range of M.O.s used for correlation:     1   642
 NBasis=   642 NAE=   205 NBE=   205 NFC=     0 NFV=     0
 NROrb=    642 NOA=   205 NOB=   205 NVA=   437 NVB=   437
 Symmetrizing basis deriv contribution to polar:
 IMax=3 JMax=2 DiffMx= 0.00D+00
 G2DrvN: will do  115 centers at a time, making    1 passes doing MaxLOS=2.
 Calling FoFCou, ICntrl=  3107 FMM=T I1Cent=   0.
 FoFDir/FoFCou used for L=0 through L=2.
 DoAtom=TTTTTTTTTTTTTTTTTTTTTTTTTTTTTTTTTTTTTTTTTTTTTTTTTT
 DoAtom=TTTTTTTTTTTTTTTTTTTTTTTTTTTTTTTTTTTTTTTTTTTTTTTTTT
 DoAtom=TTTTTTTTTTTTTT
          Differentiating once with respect to electric field.
                with respect to dipole field.
          Differentiating once with respect to nuclear coordinates.
 FoFCou: FMM=T IPFlag=           0 FMFlag=      100000 FMFlg1=        8193
 NFxFlg=           0 DoJE=F BraDBF=F KetDBF=F FulRan=T.
 Symmetry not used in FoFCou.
 FMM levels:  10  Number of levels for PrismC:   9
 PrismC:  NFx=      2048 NFxT=         4 NFxU=         4.
 PrismC:  NFx=      2048 NFxT=         4 NFxU=         4.
          There are 345 degrees of freedom in the 1st order CPHF.
   342 vectors were produced by pass  0.
 AX will form 342 AO Fock derivatives at one time.
 PrismC:  NFx=      2048 NFxT=         4 NFxU=         4.
 PrismC:  NFx=      2048 NFxT=         4 NFxU=         4.
   342 vectors were produced by pass  1.
 PrismC:  NFx=      2048 NFxT=         4 NFxU=         4.
 PrismC:  NFx=      2048 NFxT=         4 NFxU=         4.
   342 vectors were produced by pass  2.
 PrismC:  NFx=      2048 NFxT=         4 NFxU=         4.
 PrismC:  NFx=      2048 NFxT=         4 NFxU=         4.
   342 vectors were produced by pass  3.
 PrismC:  NFx=      2048 NFxT=         4 NFxU=         4.
 PrismC:  NFx=      2048 NFxT=         4 NFxU=         4.
   342 vectors were produced by pass  4.
 PrismC:  NFx=      2048 NFxT=         4 NFxU=         4.
 PrismC:  NFx=      2048 NFxT=         4 NFxU=         4.
   206 vectors were produced by pass  5.
 PrismC:  NFx=      2048 NFxT=         4 NFxU=         3.
 PrismC:  NFx=      2048 NFxT=         4 NFxU=         4.
    36 vectors were produced by pass  6.
 PrismC:  NFx=      2048 NFxT=         4 NFxU=         2.
 PrismC:  NFx=      2048 NFxT=         4 NFxU=         2.
     3 vectors were produced by pass  7.
 PrismC:  NFx=      2048 NFxT=         4 NFxU=         1.
 PrismC:  NFx=      2048 NFxT=         4 NFxU=         1.
 Inv2:  IOpt= 1 Iter= 1 AM= 7.38D-15 Conv= 1.00D-12.
 Inverted reduced A of dimension 1955 with in-core refinement.
 PrismC:  NFx=      2048 NFxT=         4 NFxU=         4.
 PrismC:  NFx=      2048 NFxT=         4 NFxU=         4.
 Isotropic polarizability for W=    0.000000      404.44 Bohr**3.
 End of Minotr Frequency-dependent properties file   721 does not exist.

 **********************************************************************

            Population analysis using the SCF density.

 **********************************************************************

 Orbital symmetries:
       Occupied  (A) (A) (A) (A) (A) (A) (A) (A) (A) (A) (A) (A)
                 (A) (A) (A) (A) (A) (A) (A) (A) (A) (A) (A) (A)
                 (A) (A) (A) (A) (A) (A) (A) (A) (A) (A) (A) (A)
                 (A) (A) (A) (A) (A) (A) (A) (A) (A) (A) (A) (A)
                 (A) (A) (A) (A) (A) (A) (A) (A) (A) (A) (A) (A)
                 (A) (A) (A) (A) (A) (A) (A) (A) (A) (A) (A) (A)
                 (A) (A) (A) (A) (A) (A) (A) (A) (A) (A) (A) (A)
                 (A) (A) (A) (A) (A) (A) (A) (A) (A) (A) (A) (A)
                 (A) (A) (A) (A) (A) (A) (A) (A) (A) (A) (A) (A)
                 (A) (A) (A) (A) (A) (A) (A) (A) (A) (A) (A) (A)
                 (A) (A) (A) (A) (A) (A) (A) (A) (A) (A) (A) (A)
                 (A) (A) (A) (A) (A) (A) (A) (A) (A) (A) (A) (A)
                 (A) (A) (A) (A) (A) (A) (A) (A) (A) (A) (A) (A)
                 (A) (A) (A) (A) (A) (A) (A) (A) (A) (A) (A) (A)
                 (A) (A) (A) (A) (A) (A) (A) (A) (A) (A) (A) (A)
                 (A) (A) (A) (A) (A) (A) (A) (A) (A) (A) (A) (A)
                 (A) (A) (A) (A) (A) (A) (A) (A) (A) (A) (A) (A)
                 (A)
       Virtual   (A) (A) (A) (A) (A) (A) (A) (A) (A) (A) (A) (A)
                 (A) (A) (A) (A) (A) (A) (A) (A) (A) (A) (A) (A)
                 (A) (A) (A) (A) (A) (A) (A) (A) (A) (A) (A) (A)
                 (A) (A) (A) (A) (A) (A) (A) (A) (A) (A) (A) (A)
                 (A) (A) (A) (A) (A) (A) (A) (A) (A) (A) (A) (A)
                 (A) (A) (A) (A) (A) (A) (A) (A) (A) (A) (A) (A)
                 (A) (A) (A) (A) (A) (A) (A) (A) (A) (A) (A) (A)
                 (A) (A) (A) (A) (A) (A) (A) (A) (A) (A) (A) (A)
                 (A) (A) (A) (A) (A) (A) (A) (A) (A) (A) (A) (A)
                 (A) (A) (A) (A) (A) (A) (A) (A) (A) (A) (A) (A)
                 (A) (A) (A) (A) (A) (A) (A) (A) (A) (A) (A) (A)
                 (A) (A) (A) (A) (A) (A) (A) (A) (A) (A) (A) (A)
                 (A) (A) (A) (A) (A) (A) (A) (A) (A) (A) (A) (A)
                 (A) (A) (A) (A) (A) (A) (A) (A) (A) (A) (A) (A)
                 (A) (A) (A) (A) (A) (A) (A) (A) (A) (A) (A) (A)
                 (A) (A) (A) (A) (A) (A) (A) (A) (A) (A) (A) (A)
                 (A) (A) (A) (A) (A) (A) (A) (A) (A) (A) (A) (A)
                 (A) (A) (A) (A) (A) (A) (A) (A) (A) (A) (A) (A)
                 (A) (A) (A) (A) (A) (A) (A) (A) (A) (A) (A) (A)
                 (A) (A) (A) (A) (A) (A) (A) (A) (A) (A) (A) (A)
                 (A) (A) (A) (A) (A) (A) (A) (A) (A) (A) (A) (A)
                 (A) (A) (A) (A) (A) (A) (A) (A) (A) (A) (A) (A)
                 (A) (A) (A) (A) (A) (A) (A) (A) (A) (A) (A) (A)
                 (A) (A) (A) (A) (A) (A) (A) (A) (A) (A) (A) (A)
                 (A) (A) (A) (A) (A) (A) (A) (A) (A) (A) (A) (A)
                 (A) (A) (A) (A) (A) (A) (A) (A) (A) (A) (A) (A)
                 (A) (A) (A) (A) (A) (A) (A) (A) (A) (A) (A) (A)
                 (A) (A) (A) (A) (A) (A) (A) (A) (A) (A) (A) (A)
                 (A) (A) (A) (A) (A) (A) (A) (A) (A) (A) (A) (A)
                 (A) (A) (A) (A) (A) (A) (A) (A) (A) (A) (A) (A)
                 (A) (A) (A) (A) (A) (A) (A) (A) (A) (A) (A) (A)
                 (A) (A) (A) (A) (A) (A) (A) (A) (A) (A) (A) (A)
                 (A) (A) (A) (A) (A) (A) (A) (A) (A) (A) (A) (A)
                 (A) (A) (A) (A) (A) (A) (A) (A) (A) (A) (A) (A)
                 (A) (A) (A) (A) (A) (A) (A) (A) (A) (A) (A) (A)
                 (A) (A) (A) (A) (A) (A) (A) (A) (A) (A) (A) (A)
                 (A) (A) (A) (A) (A)
 The electronic state is 1-A.
 Alpha  occ. eigenvalues --  -46.71563 -19.21188 -19.20195 -19.16505 -19.16244
 Alpha  occ. eigenvalues --  -19.14727 -19.14572 -19.13332 -19.10965 -19.06648
 Alpha  occ. eigenvalues --  -14.28402 -14.27903 -10.33586 -10.32408 -10.30307
 Alpha  occ. eigenvalues --  -10.28709 -10.26920 -10.24783 -10.24130 -10.22930
 Alpha  occ. eigenvalues --  -10.22352 -10.20685 -10.20332 -10.19585 -10.17173
 Alpha  occ. eigenvalues --  -10.16104 -10.15725 -10.15107 -10.13994 -10.12618
 Alpha  occ. eigenvalues --  -10.05618 -10.05420 -10.03975 -10.02950 -10.02801
 Alpha  occ. eigenvalues --  -10.02726 -10.02590 -10.02529 -10.02427 -10.02234
 Alpha  occ. eigenvalues --  -10.02103 -10.01784 -10.01570 -10.01494 -10.01357
 Alpha  occ. eigenvalues --  -10.01192 -10.01182 -10.00894 -10.00884 -10.00797
 Alpha  occ. eigenvalues --  -10.00429 -10.00368  -9.99672  -9.99381  -3.02068
 Alpha  occ. eigenvalues --   -1.76882  -1.76676  -1.76431  -1.13346  -1.11344
 Alpha  occ. eigenvalues --   -1.08528  -1.05879  -1.04102  -1.02737  -0.99920
 Alpha  occ. eigenvalues --   -0.99320  -0.94686  -0.89231  -0.87795  -0.82012
 Alpha  occ. eigenvalues --   -0.81147  -0.80537  -0.77354  -0.77009  -0.76725
 Alpha  occ. eigenvalues --   -0.75238  -0.74667  -0.74433  -0.74215  -0.74122
 Alpha  occ. eigenvalues --   -0.73766  -0.72021  -0.68578  -0.68198  -0.68170
 Alpha  occ. eigenvalues --   -0.68070  -0.67804  -0.65965  -0.65814  -0.65269
 Alpha  occ. eigenvalues --   -0.64703  -0.64602  -0.64097  -0.63533  -0.63434
 Alpha  occ. eigenvalues --   -0.60736  -0.59136  -0.58976  -0.58391  -0.58346
 Alpha  occ. eigenvalues --   -0.56902  -0.56143  -0.55306  -0.54891  -0.54257
 Alpha  occ. eigenvalues --   -0.53261  -0.52930  -0.52440  -0.51839  -0.50241
 Alpha  occ. eigenvalues --   -0.50118  -0.49962  -0.49781  -0.49646  -0.49325
 Alpha  occ. eigenvalues --   -0.48648  -0.47750  -0.47019  -0.45763  -0.45447
 Alpha  occ. eigenvalues --   -0.44826  -0.44678  -0.44292  -0.44155  -0.43798
 Alpha  occ. eigenvalues --   -0.43687  -0.43054  -0.42710  -0.41857  -0.41666
 Alpha  occ. eigenvalues --   -0.41231  -0.41122  -0.40837  -0.40767  -0.40708
 Alpha  occ. eigenvalues --   -0.40461  -0.40153  -0.40002  -0.39755  -0.39554
 Alpha  occ. eigenvalues --   -0.39526  -0.39441  -0.39309  -0.39219  -0.39031
 Alpha  occ. eigenvalues --   -0.38719  -0.38531  -0.38391  -0.37825  -0.37796
 Alpha  occ. eigenvalues --   -0.37479  -0.37296  -0.37154  -0.36818  -0.36546
 Alpha  occ. eigenvalues --   -0.36480  -0.36411  -0.36272  -0.36132  -0.35939
 Alpha  occ. eigenvalues --   -0.35403  -0.35287  -0.35137  -0.35078  -0.34930
 Alpha  occ. eigenvalues --   -0.34417  -0.34297  -0.34188  -0.33631  -0.33450
 Alpha  occ. eigenvalues --   -0.33321  -0.33133  -0.32726  -0.32094  -0.31730
 Alpha  occ. eigenvalues --   -0.31446  -0.31261  -0.31183  -0.30977  -0.30891
 Alpha  occ. eigenvalues --   -0.30536  -0.30261  -0.29935  -0.29773  -0.29457
 Alpha  occ. eigenvalues --   -0.28968  -0.28708  -0.28418  -0.28169  -0.28021
 Alpha  occ. eigenvalues --   -0.27953  -0.27609  -0.27176  -0.27006  -0.26008
 Alpha  occ. eigenvalues --   -0.25766  -0.24840  -0.24383  -0.23229  -0.23047
 Alpha  occ. eigenvalues --   -0.18678  -0.18512  -0.18321  -0.17788  -0.15692
 Alpha virt. eigenvalues --   -0.01761  -0.00218   0.00737   0.02533   0.06374
 Alpha virt. eigenvalues --    0.06910   0.07375   0.07462   0.07849   0.08465
 Alpha virt. eigenvalues --    0.09332   0.09909   0.10425   0.10653   0.11487
 Alpha virt. eigenvalues --    0.12329   0.12788   0.13089   0.13280   0.13922
 Alpha virt. eigenvalues --    0.14517   0.14812   0.15322   0.15580   0.15709
 Alpha virt. eigenvalues --    0.15852   0.16379   0.16703   0.17159   0.17538
 Alpha virt. eigenvalues --    0.17764   0.18253   0.19153   0.19455   0.19789
 Alpha virt. eigenvalues --    0.20485   0.21015   0.21113   0.21521   0.21747
 Alpha virt. eigenvalues --    0.22217   0.22602   0.23099   0.23611   0.23974
 Alpha virt. eigenvalues --    0.24330   0.24806   0.25146   0.25342   0.25809
 Alpha virt. eigenvalues --    0.25946   0.26149   0.27279   0.27626   0.28175
 Alpha virt. eigenvalues --    0.28491   0.29017   0.29441   0.30031   0.30864
 Alpha virt. eigenvalues --    0.31141   0.31638   0.32424   0.32608   0.33111
 Alpha virt. eigenvalues --    0.33515   0.34279   0.34712   0.34875   0.35303
 Alpha virt. eigenvalues --    0.35567   0.36209   0.36773   0.37615   0.37800
 Alpha virt. eigenvalues --    0.37957   0.38220   0.38503   0.38642   0.39023
 Alpha virt. eigenvalues --    0.39180   0.39546   0.40209   0.40403   0.40670
 Alpha virt. eigenvalues --    0.41007   0.41100   0.41363   0.42073   0.42356
 Alpha virt. eigenvalues --    0.42740   0.43077   0.43596   0.43900   0.44148
 Alpha virt. eigenvalues --    0.44692   0.44960   0.45135   0.45539   0.45633
 Alpha virt. eigenvalues --    0.46112   0.46296   0.46593   0.47076   0.47103
 Alpha virt. eigenvalues --    0.47487   0.47640   0.47983   0.48190   0.48213
 Alpha virt. eigenvalues --    0.48616   0.48989   0.49588   0.49915   0.49966
 Alpha virt. eigenvalues --    0.50105   0.50528   0.51069   0.51401   0.51684
 Alpha virt. eigenvalues --    0.51786   0.52351   0.52671   0.52863   0.53218
 Alpha virt. eigenvalues --    0.53857   0.54098   0.54320   0.54657   0.55351
 Alpha virt. eigenvalues --    0.55485   0.55908   0.55972   0.56534   0.56580
 Alpha virt. eigenvalues --    0.56881   0.57244   0.57381   0.57519   0.57905
 Alpha virt. eigenvalues --    0.58105   0.58514   0.58607   0.58962   0.59307
 Alpha virt. eigenvalues --    0.59737   0.59873   0.60430   0.60742   0.61009
 Alpha virt. eigenvalues --    0.61616   0.62368   0.63141   0.63292   0.63641
 Alpha virt. eigenvalues --    0.64841   0.65057   0.65658   0.65976   0.66086
 Alpha virt. eigenvalues --    0.67052   0.67244   0.68206   0.68463   0.68929
 Alpha virt. eigenvalues --    0.69844   0.70608   0.70894   0.71229   0.71869
 Alpha virt. eigenvalues --    0.72259   0.72983   0.73299   0.73570   0.73759
 Alpha virt. eigenvalues --    0.74301   0.75061   0.75395   0.76110   0.76801
 Alpha virt. eigenvalues --    0.77212   0.77406   0.77792   0.78216   0.78726
 Alpha virt. eigenvalues --    0.79304   0.79812   0.80008   0.80816   0.81629
 Alpha virt. eigenvalues --    0.82508   0.82927   0.83832   0.84330   0.84781
 Alpha virt. eigenvalues --    0.86065   0.86674   0.87210   0.87752   0.88404
 Alpha virt. eigenvalues --    0.88508   0.89394   0.89510   0.90100   0.90394
 Alpha virt. eigenvalues --    0.91088   0.91692   0.92135   0.93152   0.93258
 Alpha virt. eigenvalues --    0.94052   0.94895   0.95076   0.95316   0.95973
 Alpha virt. eigenvalues --    0.96735   0.97598   0.97824   0.98214   0.99405
 Alpha virt. eigenvalues --    1.00040   1.00687   1.00814   1.01772   1.02684
 Alpha virt. eigenvalues --    1.03745   1.04309   1.05248   1.07186   1.07594
 Alpha virt. eigenvalues --    1.08463   1.09674   1.10158   1.11148   1.11730
 Alpha virt. eigenvalues --    1.12051   1.12393   1.13452   1.13791   1.14858
 Alpha virt. eigenvalues --    1.16600   1.18173   1.19706   1.20598   1.21749
 Alpha virt. eigenvalues --    1.22424   1.22798   1.23932   1.24443   1.27014
 Alpha virt. eigenvalues --    1.27735   1.29626   1.30226   1.30701   1.32382
 Alpha virt. eigenvalues --    1.34431   1.35300   1.36539   1.37627   1.38004
 Alpha virt. eigenvalues --    1.38168   1.39061   1.40302   1.42047   1.42241
 Alpha virt. eigenvalues --    1.43309   1.44361   1.46388   1.47108   1.48603
 Alpha virt. eigenvalues --    1.49134   1.49323   1.49649   1.50478   1.50799
 Alpha virt. eigenvalues --    1.52257   1.52794   1.54997   1.55859   1.57099
 Alpha virt. eigenvalues --    1.57481   1.60896   1.61818   1.62483   1.62981
 Alpha virt. eigenvalues --    1.64599   1.65967   1.67571   1.68103   1.69090
 Alpha virt. eigenvalues --    1.69585   1.70968   1.71554   1.71845   1.72818
 Alpha virt. eigenvalues --    1.73558   1.74161   1.74339   1.76461   1.77238
 Alpha virt. eigenvalues --    1.77775   1.78047   1.79122   1.79510   1.81222
 Alpha virt. eigenvalues --    1.82178   1.82537   1.83434   1.84453   1.84722
 Alpha virt. eigenvalues --    1.85848   1.86164   1.87046   1.87666   1.88241
 Alpha virt. eigenvalues --    1.88756   1.89436   1.90246   1.90711   1.91519
 Alpha virt. eigenvalues --    1.91751   1.92541   1.93338   1.94414   1.94895
 Alpha virt. eigenvalues --    1.95729   1.96458   1.97124   1.97649   1.98314
 Alpha virt. eigenvalues --    1.98677   1.98888   1.99929   2.00440   2.01324
 Alpha virt. eigenvalues --    2.01421   2.01817   2.02695   2.03367   2.04093
 Alpha virt. eigenvalues --    2.05523   2.06505   2.08036   2.08355   2.09404
 Alpha virt. eigenvalues --    2.10159   2.10546   2.11709   2.12622   2.13605
 Alpha virt. eigenvalues --    2.14649   2.14871   2.15971   2.16654   2.17325
 Alpha virt. eigenvalues --    2.17793   2.18492   2.18706   2.19340   2.20592
 Alpha virt. eigenvalues --    2.21205   2.21955   2.22750   2.23529   2.23929
 Alpha virt. eigenvalues --    2.25101   2.26249   2.27876   2.28085   2.28393
 Alpha virt. eigenvalues --    2.29913   2.30536   2.30627   2.31960   2.32472
 Alpha virt. eigenvalues --    2.33321   2.33462   2.34585   2.34974   2.36710
 Alpha virt. eigenvalues --    2.37590   2.38087   2.39685   2.40725   2.40963
 Alpha virt. eigenvalues --    2.43626   2.45849   2.47578   2.47761   2.49659
 Alpha virt. eigenvalues --    2.49889   2.51170   2.54151   2.57630   2.58161
 Alpha virt. eigenvalues --    2.59088   2.60693   2.61350   2.65221   2.65439
 Alpha virt. eigenvalues --    2.66916   2.67753   2.68482   2.69377   2.72178
 Alpha virt. eigenvalues --    2.73380   2.73909   2.75751   2.77077   2.80154
 Alpha virt. eigenvalues --    2.80878   2.82678   2.83847   2.85919   2.87806
 Alpha virt. eigenvalues --    2.88417   2.94478   2.95507   2.96920   3.01090
 Alpha virt. eigenvalues --    3.01672   3.02669   3.06499   3.07877   3.10745
 Alpha virt. eigenvalues --    3.13790   3.14284   3.15498   3.16026   3.20357
 Alpha virt. eigenvalues --    3.24356   3.25045   3.80474   6.04747   6.13558
 Alpha virt. eigenvalues --    6.31227 103.54190
          Condensed to atoms (all electrons):
 Mulliken atomic charges:
              1
     1  O   -0.447927
     2  Mg   0.849124
     3  O   -0.520907
     4  C    0.591915
     5  N   -0.547309
     6  N   -0.554311
     7  O   -0.435413
     8  C    0.339979
     9  C   -0.244136
    10  C    0.344763
    11  O   -0.440563
    12  C    0.633763
    13  C    0.068438
    14  C    0.045584
    15  O   -0.462772
    16  C   -0.216185
    17  O   -0.549787
    18  C    0.794913
    19  O   -0.642704
    20  O   -0.450907
    21  C    0.568023
    22  C    0.049404
    23  C    0.058873
    24  O   -0.420707
    25  C   -0.468715
    26  C   -0.463730
    27  C   -0.458132
    28  C   -0.472213
    29  C    0.014782
    30  C    0.016857
    31  C   -0.000751
    32  C   -0.077973
    33  C   -0.072338
    34  C   -0.078504
    35  C    0.001854
    36  C   -0.057636
    37  C   -0.051865
    38  C   -0.000175
    39  C   -0.074896
    40  C   -0.069566
    41  C   -0.075617
    42  C    0.003869
    43  C   -0.060474
    44  C   -0.054612
    45  C   -0.223907
    46  C   -0.217682
    47  C   -0.214527
    48  C   -0.217786
    49  C   -0.214536
    50  C   -0.215893
    51  C   -0.226037
    52  C   -0.217465
    53  C   -0.447247
    54  C   -0.448629
    55  H    0.076953
    56  H    0.196684
    57  H    0.203002
    58  H    0.166516
    59  H    0.168468
    60  H    0.168782
    61  H    0.159841
    62  H    0.145228
    63  H    0.147602
    64  H    0.138970
    65  H    0.125471
    66  H    0.145946
    67  H    0.140383
    68  H    0.182856
    69  H    0.158247
    70  H    0.159867
    71  H    0.170598
    72  H    0.164250
    73  H    0.175535
    74  H    0.171519
    75  H    0.086983
    76  H    0.082907
    77  H    0.076668
    78  H    0.091038
    79  H    0.092958
    80  H    0.082903
    81  H    0.085685
    82  H    0.083459
    83  H    0.102238
    84  H    0.103566
    85  H    0.078430
    86  H    0.100383
    87  H    0.068907
    88  H    0.074846
    89  H    0.072390
    90  H    0.083637
    91  H    0.074303
    92  H    0.078736
    93  H    0.087893
    94  H    0.073748
    95  H    0.079585
    96  H    0.074056
    97  H    0.074705
    98  H    0.096161
    99  H    0.077263
   100  H    0.076685
   101  H    0.073049
   102  H    0.072323
   103  H    0.088434
   104  H    0.101844
   105  H    0.069542
   106  H    0.086831
   107  H    0.074914
   108  H    0.072893
   109  H    0.127760
   110  H    0.129466
   111  H    0.131120
   112  H    0.128390
   113  H    0.126094
   114  H    0.122877
 Sum of Mulliken charges=   0.00000
 Atomic charges with hydrogens summed into heavy atoms:
              1
     1  O   -0.447927
     2  Mg   0.849124
     3  O   -0.520907
     4  C    0.591915
     5  N   -0.547309
     6  N   -0.554311
     7  O   -0.435413
     8  C    0.339979
     9  C   -0.167183
    10  C    0.344763
    11  O   -0.440563
    12  C    0.633763
    13  C    0.265122
    14  C    0.248586
    15  O   -0.462772
    16  C    0.287581
    17  O   -0.549787
    18  C    0.794913
    19  O   -0.642704
    20  O   -0.450907
    21  C    0.568023
    22  C    0.209245
    23  C    0.204101
    24  O   -0.420707
    25  C   -0.056671
    26  C    0.005455
    27  C    0.030580
    28  C    0.039091
    29  C    0.014782
    30  C    0.016857
    31  C   -0.000751
    32  C    0.009010
    33  C    0.010569
    34  C   -0.001836
    35  C    0.001854
    36  C    0.033402
    37  C    0.041093
    38  C   -0.000175
    39  C    0.008007
    40  C    0.016119
    41  C    0.007843
    42  C    0.003869
    43  C    0.041764
    44  C    0.048954
    45  C    0.023814
    46  C    0.013191
    47  C    0.026406
    48  C    0.009603
    49  C    0.033593
    50  C    0.006164
    51  C    0.033783
    52  C    0.017173
    53  C   -0.058901
    54  C   -0.071268
    55  H    0.000000
    56  H    0.000000
    57  H    0.000000
    58  H    0.000000
    59  H    0.000000
    60  H    0.000000
    61  H    0.000000
    62  H    0.000000
    63  H    0.000000
    64  H    0.000000
    65  H    0.000000
    66  H    0.000000
    67  H    0.000000
    68  H    0.000000
    69  H    0.000000
    70  H    0.000000
    71  H    0.000000
    72  H    0.000000
    73  H    0.000000
    74  H    0.000000
    75  H    0.000000
    76  H    0.000000
    77  H    0.000000
    78  H    0.000000
    79  H    0.000000
    80  H    0.000000
    81  H    0.000000
    82  H    0.000000
    83  H    0.000000
    84  H    0.000000
    85  H    0.000000
    86  H    0.000000
    87  H    0.000000
    88  H    0.000000
    89  H    0.000000
    90  H    0.000000
    91  H    0.000000
    92  H    0.000000
    93  H    0.000000
    94  H    0.000000
    95  H    0.000000
    96  H    0.000000
    97  H    0.000000
    98  H    0.000000
    99  H    0.000000
   100  H    0.000000
   101  H    0.000000
   102  H    0.000000
   103  H    0.000000
   104  H    0.000000
   105  H    0.000000
   106  H    0.000000
   107  H    0.000000
   108  H    0.000000
   109  H    0.000000
   110  H    0.000000
   111  H    0.000000
   112  H    0.000000
   113  H    0.000000
   114  H    0.000000
 Sum of Mulliken charges=   0.00000
 APT atomic charges:
              1
     1  O   -0.782445
     2  Mg   1.273547
     3  O   -0.887759
     4  C    0.956486
     5  N   -0.889074
     6  N   -0.929958
     7  O   -0.631459
     8  C    0.924408
     9  C   -0.858906
    10  C    0.866447
    11  O   -0.897690
    12  C    1.111218
    13  C    0.457706
    14  C    0.422700
    15  O   -0.817076
    16  C    0.472054
    17  O   -0.883313
    18  C    1.319604
    19  O   -0.917127
    20  O   -0.806445
    21  C    1.010343
    22  C    0.408570
    23  C    0.390791
    24  O   -0.720512
    25  C    0.000805
    26  C    0.044647
    27  C    0.044881
    28  C    0.021990
    29  C    0.286650
    30  C    0.293370
    31  C   -0.042273
    32  C   -0.148315
    33  C   -0.051137
    34  C   -0.109069
    35  C   -0.043460
    36  C    0.203188
    37  C    0.185378
    38  C   -0.023130
    39  C   -0.157256
    40  C   -0.049756
    41  C   -0.138626
    42  C   -0.055475
    43  C    0.168948
    44  C    0.176055
    45  C   -0.040134
    46  C   -0.041998
    47  C   -0.015321
    48  C   -0.053992
    49  C   -0.030305
    50  C   -0.046213
    51  C   -0.012190
    52  C   -0.047371
    53  C   -0.236288
    54  C   -0.197206
    55  H   -0.017366
    56  H   -0.016697
    57  H   -0.000319
    58  H    0.002302
    59  H   -0.004408
    60  H   -0.023318
    61  H   -0.039767
    62  H   -0.060793
    63  H   -0.012498
    64  H    0.053328
    65  H    0.053470
    66  H   -0.022371
    67  H   -0.013584
    68  H    0.055523
    69  H   -0.002305
    70  H   -0.007092
    71  H    0.006481
    72  H    0.023351
    73  H    0.010095
    74  H    0.011397
    75  H    0.079367
    76  H    0.069558
    77  H    0.058114
    78  H   -0.098665
    79  H   -0.043139
    80  H    0.068564
    81  H    0.073357
    82  H    0.065425
    83  H   -0.037176
    84  H   -0.052014
    85  H    0.014643
    86  H    0.014850
    87  H    0.003811
    88  H    0.002543
    89  H    0.006269
    90  H   -0.000371
    91  H   -0.026156
    92  H    0.012629
    93  H   -0.032474
    94  H    0.000167
    95  H    0.011708
    96  H    0.011162
    97  H    0.004774
    98  H   -0.020428
    99  H    0.016986
   100  H    0.004989
   101  H    0.004623
   102  H    0.010592
   103  H    0.012076
   104  H   -0.011803
   105  H    0.003599
   106  H   -0.014708
   107  H    0.004490
   108  H    0.009027
   109  H    0.051379
   110  H    0.051465
   111  H    0.051039
   112  H    0.054547
   113  H    0.044628
   114  H    0.046618
 Sum of APT charges=   0.00000
 APT Atomic charges with hydrogens summed into heavy atoms:
              1
     1  O   -0.782445
     2  Mg   1.273547
     3  O   -0.887759
     4  C    0.956486
     5  N   -0.889074
     6  N   -0.929958
     7  O   -0.631459
     8  C    0.924408
     9  C   -0.876272
    10  C    0.866447
    11  O   -0.897690
    12  C    1.111218
    13  C    0.441009
    14  C    0.422381
    15  O   -0.817076
    16  C    0.446630
    17  O   -0.883313
    18  C    1.319604
    19  O   -0.917127
    20  O   -0.806445
    21  C    1.010343
    22  C    0.368803
    23  C    0.329998
    24  O   -0.720512
    25  C    0.095105
    26  C    0.064216
    27  C    0.041964
    28  C    0.066834
    29  C    0.286650
    30  C    0.293370
    31  C   -0.042273
    32  C   -0.068947
    33  C    0.018420
    34  C   -0.050955
    35  C   -0.043460
    36  C    0.104523
    37  C    0.142239
    38  C   -0.023130
    39  C   -0.088692
    40  C    0.023602
    41  C   -0.073202
    42  C   -0.055475
    43  C    0.131772
    44  C    0.124041
    45  C   -0.006830
    46  C   -0.033558
    47  C   -0.061322
    48  C   -0.030955
    49  C   -0.028973
    50  C   -0.026010
    51  C   -0.008316
    52  C   -0.048562
    53  C   -0.082405
    54  C   -0.051413
    55  H    0.000000
    56  H    0.000000
    57  H    0.000000
    58  H    0.000000
    59  H    0.000000
    60  H    0.000000
    61  H    0.000000
    62  H    0.000000
    63  H    0.000000
    64  H    0.000000
    65  H    0.000000
    66  H    0.000000
    67  H    0.000000
    68  H    0.000000
    69  H    0.000000
    70  H    0.000000
    71  H    0.000000
    72  H    0.000000
    73  H    0.000000
    74  H    0.000000
    75  H    0.000000
    76  H    0.000000
    77  H    0.000000
    78  H    0.000000
    79  H    0.000000
    80  H    0.000000
    81  H    0.000000
    82  H    0.000000
    83  H    0.000000
    84  H    0.000000
    85  H    0.000000
    86  H    0.000000
    87  H    0.000000
    88  H    0.000000
    89  H    0.000000
    90  H    0.000000
    91  H    0.000000
    92  H    0.000000
    93  H    0.000000
    94  H    0.000000
    95  H    0.000000
    96  H    0.000000
    97  H    0.000000
    98  H    0.000000
    99  H    0.000000
   100  H    0.000000
   101  H    0.000000
   102  H    0.000000
   103  H    0.000000
   104  H    0.000000
   105  H    0.000000
   106  H    0.000000
   107  H    0.000000
   108  H    0.000000
   109  H    0.000000
   110  H    0.000000
   111  H    0.000000
   112  H    0.000000
   113  H    0.000000
   114  H    0.000000
 Sum of APT charges=   0.00000
 Electronic spatial extent (au):  <R**2>= 28527.6700
 Charge=     0.0000 electrons
 Dipole moment (field-independent basis, Debye):
    X=    -6.2243    Y=    -1.6290    Z=    -3.9847  Tot=     7.5679
 Quadrupole moment (field-independent basis, Debye-Ang):
   XX=  -303.5237   YY=  -292.7609   ZZ=  -313.4114
   XY=   -11.0787   XZ=   -11.3683   YZ=     0.7907
 Traceless Quadrupole moment (field-independent basis, Debye-Ang):
   XX=    -0.2917   YY=    10.4711   ZZ=   -10.1794
   XY=   -11.0787   XZ=   -11.3683   YZ=     0.7907
 Octapole moment (field-independent basis, Debye-Ang**2):
  XXX=  -207.6565  YYY=   -25.3167  ZZZ=    22.8242  XYY=   -21.0622
  XXY=   -58.8432  XXZ=  -104.8820  XZZ=   -43.2883  YZZ=    -7.6619
  YYZ=   -29.5513  XYZ=   -54.0911
 Hexadecapole moment (field-independent basis, Debye-Ang**3):
 XXXX=-14385.5148 YYYY=-12611.1088 ZZZZ= -8673.2323 XXXY=   -59.8426
 XXXZ=  -347.0999 YYYX=    86.8345 YYYZ=    97.8179 ZZZX=   -31.6353
 ZZZY=    24.0990 XXYY= -4398.5373 XXZZ= -4080.9890 YYZZ= -3673.0070
 XXYZ=     2.9200 YYXZ=   128.4355 ZZXY=   -32.6598
 N-N= 9.173059029388D+03 E-N=-2.444301982817D+04  KE= 2.584842961782D+03
  Exact polarizability: 427.046 -27.677 427.306  13.982  10.466 358.956
 Approx polarizability: 621.163 -47.233 619.188  16.439  -0.618 528.960
 Full mass-weighted force constant matrix:
 Low frequencies ---   -5.1242   -0.0009   -0.0005    0.0002    1.7634    4.4787
 Low frequencies ---   12.5070   20.0804   29.4802
 Diagonal vibrational polarizability:
      263.9733075     137.3770206     128.9810665
 Harmonic frequencies (cm**-1), IR intensities (KM/Mole), Raman scattering
 activities (A**4/AMU), depolarization ratios for plane and unpolarized
 incident light, reduced masses (AMU), force constants (mDyne/A),
 and normal coordinates:
                     1                      2                      3
                     A                      A                      A
 Frequencies --    12.0716                19.9953                29.4512
 Red. masses --     4.6134                 4.8259                 4.1966
 Frc consts  --     0.0004                 0.0011                 0.0021
 IR Inten    --     1.0523                 0.6662                 0.1521
 Atom AN      X      Y      Z        X      Y      Z        X      Y      Z
   1   8    -0.09  -0.07   0.08    -0.13  -0.14   0.10     0.08  -0.09  -0.03
   2  12    -0.01   0.01  -0.03     0.01   0.00   0.00     0.02   0.02   0.02
   3   8    -0.01   0.01  -0.02    -0.01  -0.01  -0.01    -0.07   0.06   0.01
   4   6    -0.04  -0.03   0.07    -0.05  -0.06   0.07     0.05  -0.06  -0.03
   5   7     0.00   0.01  -0.03     0.05   0.02   0.00     0.01   0.01   0.01
   6   7     0.02   0.01  -0.02     0.00   0.01  -0.01    -0.02   0.00   0.02
   7   8    -0.01  -0.01   0.08    -0.02  -0.01   0.10     0.04  -0.03   0.00
   8   6     0.02   0.01  -0.03     0.04   0.03   0.00    -0.03   0.00   0.02
   9   6     0.04   0.02  -0.04     0.02   0.03  -0.01    -0.05  -0.01   0.03
  10   6     0.04   0.02  -0.03     0.00   0.02  -0.01    -0.05  -0.01   0.03
  11   8     0.00   0.01   0.01    -0.01  -0.01  -0.03    -0.01  -0.02  -0.06
  12   6    -0.01   0.04  -0.02    -0.01  -0.03  -0.01    -0.01   0.02  -0.03
  13   6     0.01   0.09  -0.05    -0.02  -0.06   0.01    -0.05   0.08  -0.05
  14   6    -0.02  -0.02   0.02    -0.01  -0.04  -0.02     0.03  -0.05  -0.07
  15   8    -0.02   0.04  -0.03     0.00  -0.03  -0.01     0.01   0.02  -0.01
  16   6    -0.11  -0.08   0.13    -0.17  -0.17   0.19     0.09  -0.10   0.01
  17   8     0.02  -0.07   0.04    -0.03   0.04  -0.04    -0.05  -0.04   0.04
  18   6     0.05  -0.03   0.00    -0.05   0.02  -0.01    -0.02   0.00   0.02
  19   8     0.10  -0.01  -0.02    -0.08   0.01   0.00     0.03   0.02   0.01
  20   8     0.05  -0.06   0.03    -0.05   0.03  -0.02    -0.01  -0.01  -0.01
  21   6     0.04  -0.07   0.04    -0.04   0.04  -0.02    -0.01  -0.01  -0.04
  22   6     0.02  -0.06   0.04    -0.03   0.03  -0.04    -0.01  -0.01   0.01
  23   6     0.05  -0.05   0.02    -0.05   0.02  -0.02     0.00  -0.02   0.03
  24   8     0.04  -0.09   0.04    -0.04   0.05  -0.02    -0.01   0.00  -0.10
  25   6     0.01  -0.07   0.04    -0.02   0.04  -0.04    -0.02  -0.01   0.00
  26   6     0.06  -0.04   0.03    -0.06   0.02  -0.02    -0.01  -0.02   0.08
  27   6    -0.05   0.23  -0.03     0.01  -0.15  -0.01    -0.12   0.20  -0.05
  28   6    -0.02   0.00   0.03     0.00   0.02  -0.06     0.02  -0.06  -0.12
  29   6    -0.02   0.00  -0.02     0.05   0.02   0.01     0.02   0.01   0.02
  30   6     0.01   0.01  -0.02     0.00   0.01  -0.02    -0.01   0.00   0.00
  31   6    -0.03   0.02  -0.01     0.05   0.01   0.03     0.03  -0.01   0.02
  32   6    -0.05   0.01   0.00     0.05   0.01   0.03     0.04  -0.02   0.04
  33   6    -0.06  -0.01   0.00     0.05   0.02   0.01     0.05  -0.01   0.06
  34   6    -0.05  -0.02  -0.01     0.05   0.03  -0.01     0.04   0.01   0.05
  35   6    -0.03  -0.02  -0.02     0.05   0.03  -0.01     0.03   0.02   0.03
  36   6    -0.02   0.04  -0.01     0.05   0.00   0.05     0.02  -0.02   0.01
  37   6    -0.02  -0.03  -0.04     0.06   0.04  -0.03     0.02   0.04   0.02
  38   6     0.00   0.00  -0.03     0.01   0.00  -0.02     0.01   0.00   0.01
  39   6     0.00  -0.01  -0.04     0.01   0.01  -0.02     0.02   0.00  -0.01
  40   6     0.00  -0.01  -0.03     0.01   0.01  -0.02     0.02   0.01  -0.03
  41   6     0.01   0.01   0.00     0.01   0.01  -0.02     0.00   0.01  -0.03
  42   6     0.02   0.02   0.00     0.00   0.01  -0.02    -0.01   0.01  -0.02
  43   6     0.00   0.01  -0.04     0.01   0.00  -0.01     0.02   0.00   0.04
  44   6     0.02   0.03   0.03     0.00   0.01  -0.02    -0.03   0.01  -0.03
  45   6    -0.04   0.03   0.01     0.05   0.01   0.05     0.03  -0.02  -0.01
  46   6    -0.01   0.08   0.00     0.07  -0.02   0.05     0.00  -0.03   0.00
  47   6    -0.04  -0.03  -0.06     0.06   0.01  -0.04     0.02   0.02   0.01
  48   6     0.00  -0.03  -0.05     0.06   0.06  -0.01     0.02   0.08   0.04
  49   6    -0.01   0.03   0.07     0.02   0.00  -0.04     0.02  -0.01  -0.06
  50   6     0.06   0.06   0.04    -0.02   0.01  -0.04    -0.10   0.02  -0.07
  51   6     0.00   0.00  -0.04     0.02  -0.01  -0.01     0.04   0.04   0.04
  52   6     0.00   0.02  -0.05     0.01   0.00  -0.02     0.02  -0.02   0.09
  53   6     0.03   0.02  -0.03     0.06   0.04   0.00    -0.04   0.00   0.02
  54   6     0.06   0.03  -0.03    -0.01   0.02  -0.01    -0.09  -0.02   0.04
  55   1     0.06   0.02  -0.04     0.02   0.04  -0.01    -0.08  -0.01   0.04
  56   1     0.09   0.09  -0.13    -0.07  -0.06   0.06     0.00   0.08  -0.14
  57   1    -0.03  -0.05   0.00     0.03  -0.10  -0.04     0.05  -0.07  -0.07
  58   1    -0.11  -0.08   0.09    -0.16  -0.17   0.16     0.09  -0.09   0.02
  59   1    -0.16  -0.12   0.14    -0.23  -0.24   0.21     0.10  -0.13   0.01
  60   1    -0.09  -0.06   0.18    -0.14  -0.12   0.27     0.09  -0.09   0.02
  61   1     0.02  -0.06   0.05    -0.04   0.02  -0.05     0.02   0.00   0.03
  62   1     0.03  -0.06   0.01    -0.05   0.03  -0.02     0.03  -0.05   0.02
  63   1     0.00  -0.09   0.04    -0.02   0.05  -0.04    -0.01  -0.01  -0.02
  64   1     0.01  -0.07   0.04    -0.02   0.05  -0.04    -0.04  -0.02  -0.01
  65   1    -0.01  -0.06   0.03    -0.01   0.03  -0.04    -0.02  -0.02   0.02
  66   1     0.07  -0.05   0.03    -0.07   0.02  -0.01     0.00  -0.04   0.08
  67   1     0.06  -0.04   0.04    -0.06   0.01  -0.03     0.00  -0.04   0.10
  68   1     0.06  -0.04   0.03    -0.05   0.02  -0.02    -0.02   0.00   0.09
  69   1    -0.03   0.31  -0.06     0.00  -0.19   0.01    -0.11   0.24  -0.11
  70   1    -0.02   0.27  -0.06     0.00  -0.17   0.01    -0.14   0.25  -0.07
  71   1    -0.13   0.23   0.05     0.05  -0.15  -0.06    -0.17   0.21   0.04
  72   1    -0.01   0.00   0.00     0.04   0.04  -0.12     0.01  -0.06  -0.15
  73   1    -0.01   0.03   0.06    -0.04   0.09  -0.04     0.00  -0.04  -0.12
  74   1    -0.03  -0.03   0.05     0.01   0.00  -0.05     0.06  -0.09  -0.13
  75   1    -0.06   0.02   0.01     0.05   0.00   0.05     0.05  -0.03   0.05
  76   1    -0.08  -0.02   0.01     0.05   0.02   0.02     0.06  -0.02   0.07
  77   1    -0.06  -0.04  -0.01     0.05   0.03  -0.02     0.04   0.01   0.06
  78   1    -0.01   0.04  -0.03     0.05   0.00   0.06     0.01  -0.01   0.02
  79   1     0.00  -0.02  -0.04     0.06   0.05  -0.05     0.01   0.05  -0.01
  80   1    -0.01  -0.01  -0.05     0.02   0.01  -0.01     0.03   0.00  -0.01
  81   1    -0.01  -0.02  -0.03     0.02   0.02  -0.02     0.03   0.01  -0.04
  82   1     0.01   0.01   0.01     0.01   0.02  -0.02    -0.01   0.02  -0.05
  83   1     0.00   0.02  -0.04     0.01   0.00  -0.01     0.00  -0.02   0.03
  84   1     0.03   0.03   0.01     0.00   0.02  -0.01    -0.04   0.03   0.02
  85   1    -0.03   0.05   0.01     0.04  -0.01   0.07     0.03  -0.02  -0.02
  86   1    -0.04   0.00   0.01     0.03   0.03   0.05     0.05  -0.01   0.00
  87   1    -0.05   0.04   0.05     0.06   0.00   0.03     0.04  -0.02  -0.02
  88   1     0.00   0.10   0.00     0.07  -0.03   0.07     0.00  -0.03  -0.01
  89   1    -0.02   0.09   0.03     0.07  -0.03   0.03     0.01  -0.03  -0.01
  90   1     0.00   0.09  -0.01     0.08  -0.03   0.05    -0.01  -0.03   0.01
  91   1    -0.02  -0.05  -0.08     0.06   0.02  -0.05     0.01   0.03   0.00
  92   1    -0.06  -0.04  -0.07     0.06  -0.01  -0.01     0.03   0.01   0.04
  93   1    -0.05  -0.03  -0.05     0.06  -0.02  -0.06     0.02  -0.01  -0.01
  94   1     0.01  -0.03  -0.07     0.06   0.07  -0.03     0.02   0.10   0.03
  95   1     0.01  -0.02  -0.04     0.06   0.08  -0.01     0.02   0.09   0.04
  96   1    -0.02  -0.03  -0.06     0.06   0.06   0.01     0.03   0.07   0.07
  97   1     0.00   0.04   0.09     0.01   0.00  -0.04    -0.01   0.00  -0.06
  98   1    -0.04   0.02   0.05     0.04   0.00  -0.02     0.07  -0.03  -0.02
  99   1    -0.02   0.04   0.09     0.02   0.00  -0.06     0.04  -0.03  -0.12
 100   1     0.07   0.07   0.06    -0.02   0.01  -0.03    -0.10   0.02  -0.06
 101   1     0.09   0.06   0.02    -0.03   0.02  -0.03    -0.15   0.05  -0.06
 102   1     0.07   0.07   0.06    -0.02   0.00  -0.05    -0.11  -0.02  -0.12
 103   1     0.00   0.00  -0.04     0.02  -0.02  -0.01     0.05   0.03   0.06
 104   1     0.00   0.00  -0.04     0.01  -0.01  -0.01     0.04   0.05   0.01
 105   1     0.00   0.00  -0.04     0.02  -0.01  -0.02     0.06   0.06   0.05
 106   1     0.00   0.01  -0.04     0.02  -0.01  -0.02     0.02  -0.02   0.11
 107   1     0.00   0.01  -0.07     0.02   0.00  -0.03     0.03  -0.01   0.10
 108   1    -0.01   0.03  -0.05     0.01   0.01  -0.02    -0.01  -0.06   0.09
 109   1     0.01   0.02  -0.02     0.07   0.04   0.01    -0.01   0.00   0.01
 110   1     0.06   0.04  -0.02     0.07   0.04   0.01    -0.07  -0.03   0.01
 111   1     0.04   0.00  -0.06     0.06   0.06  -0.01    -0.05   0.02   0.05
 112   1     0.07   0.04  -0.02    -0.01   0.00  -0.02    -0.10  -0.06   0.03
 113   1     0.07   0.02  -0.04    -0.02   0.02  -0.02    -0.12  -0.01   0.05
 114   1     0.07   0.03  -0.04    -0.01   0.03  -0.01    -0.10  -0.02   0.04
                     4                      5                      6
                     A                      A                      A
 Frequencies --    34.7283                36.1634                40.5850
 Red. masses --     4.2422                 4.2727                 6.2853
 Frc consts  --     0.0030                 0.0033                 0.0061
 IR Inten    --     0.2640                 0.5657                 1.4672
 Atom AN      X      Y      Z        X      Y      Z        X      Y      Z
   1   8    -0.03  -0.02  -0.02    -0.02   0.01   0.00    -0.01  -0.07  -0.01
   2  12     0.00   0.00   0.00    -0.01   0.01  -0.02     0.00   0.03  -0.02
   3   8    -0.02   0.02   0.00     0.02  -0.07  -0.05     0.01  -0.01  -0.04
   4   6    -0.02  -0.04  -0.01     0.00   0.02  -0.01     0.01  -0.07  -0.02
   5   7     0.03   0.01   0.00    -0.01   0.00  -0.03    -0.01   0.02  -0.02
   6   7     0.02   0.01   0.00    -0.01   0.00  -0.01    -0.01   0.02  -0.01
   7   8    -0.03  -0.06  -0.02     0.02   0.03   0.00     0.01  -0.07  -0.02
   8   6     0.04   0.02  -0.01     0.00   0.00  -0.03    -0.04   0.00  -0.01
   9   6     0.05   0.02  -0.02    -0.01  -0.01  -0.02    -0.04   0.00   0.00
  10   6     0.04   0.02  -0.01    -0.02  -0.01  -0.01    -0.03   0.01  -0.01
  11   8    -0.01  -0.06   0.01     0.00   0.03  -0.02     0.02  -0.08  -0.01
  12   6    -0.01  -0.02  -0.01     0.00   0.02  -0.03     0.01  -0.02  -0.03
  13   6    -0.02   0.01  -0.01     0.03  -0.02  -0.02     0.01  -0.01  -0.03
  14   6    -0.01  -0.05   0.01    -0.01   0.02  -0.01     0.01  -0.07  -0.01
  15   8    -0.01   0.01  -0.01    -0.02   0.04  -0.05     0.01   0.01  -0.04
  16   6    -0.05  -0.02  -0.03     0.00   0.00   0.01    -0.03  -0.07  -0.01
  17   8    -0.02   0.00   0.00     0.07   0.01   0.01     0.04   0.06  -0.01
  18   6    -0.02   0.01   0.00     0.04  -0.03   0.00     0.01   0.03  -0.02
  19   8    -0.01   0.00  -0.01     0.05  -0.01   0.00     0.01   0.03  -0.02
  20   8    -0.02   0.04  -0.05    -0.02   0.01   0.10     0.00  -0.02   0.10
  21   6    -0.01   0.05  -0.07     0.02   0.04   0.08    -0.02  -0.04   0.18
  22   6     0.01   0.03  -0.02     0.06   0.02   0.02    -0.04  -0.01   0.05
  23   6    -0.01   0.01  -0.01    -0.02  -0.04   0.05    -0.03   0.03   0.01
  24   8    -0.01   0.07  -0.13     0.02   0.07   0.12    -0.02  -0.08   0.36
  25   6     0.01   0.03  -0.01     0.11   0.06  -0.03    -0.02   0.01   0.03
  26   6    -0.04   0.00   0.02    -0.06  -0.06   0.09     0.02   0.05  -0.06
  27   6    -0.03   0.03  -0.01     0.03  -0.04  -0.03     0.01   0.00  -0.03
  28   6    -0.01  -0.04   0.02    -0.01   0.02   0.00     0.02  -0.06  -0.01
  29   6     0.02   0.00   0.01    -0.01  -0.01  -0.01     0.01   0.02  -0.03
  30   6     0.00  -0.01   0.01    -0.01   0.00   0.00    -0.01   0.02  -0.01
  31   6     0.03   0.01  -0.02    -0.02  -0.02   0.01     0.03   0.02  -0.08
  32   6     0.03  -0.01   0.02    -0.02  -0.04   0.05     0.06   0.03  -0.10
  33   6     0.04  -0.04   0.09    -0.03  -0.06   0.07     0.08   0.05  -0.07
  34   6     0.03  -0.05   0.11    -0.02  -0.05   0.04     0.06   0.05  -0.01
  35   6     0.02  -0.02   0.07    -0.02  -0.02  -0.01     0.03   0.03   0.01
  36   6     0.03   0.06  -0.11    -0.01   0.01  -0.01     0.02   0.00  -0.11
  37   6     0.02  -0.03   0.08    -0.01   0.00  -0.05     0.01   0.03   0.08
  38   6    -0.03   0.01   0.02     0.00   0.03   0.03    -0.01   0.02  -0.01
  39   6    -0.05   0.01   0.05     0.00   0.04   0.04    -0.02   0.02   0.00
  40   6    -0.04  -0.02   0.06     0.00   0.02   0.01    -0.01   0.02   0.01
  41   6    -0.02  -0.05   0.04    -0.01  -0.01  -0.03    -0.01   0.02   0.01
  42   6     0.00  -0.04   0.01    -0.01  -0.02  -0.04    -0.01   0.02   0.00
  43   6    -0.03   0.03   0.00     0.00   0.04   0.06    -0.01   0.02  -0.01
  44   6     0.03  -0.07   0.00    -0.02  -0.05  -0.09     0.00   0.01   0.00
  45   6     0.04  -0.01  -0.10    -0.03  -0.08   0.05     0.03  -0.04  -0.11
  46   6    -0.02   0.20  -0.09     0.02   0.14   0.02     0.00   0.04  -0.11
  47   6     0.03  -0.03   0.08    -0.05  -0.01  -0.09     0.08   0.01   0.14
  48   6     0.02  -0.03   0.08     0.04   0.02  -0.07    -0.06   0.02   0.12
  49   6    -0.03  -0.02   0.01     0.00  -0.03  -0.14     0.02  -0.01  -0.01
  50   6     0.11  -0.11   0.06    -0.05  -0.10  -0.08    -0.02   0.00  -0.01
  51   6    -0.05   0.02   0.00     0.02   0.07   0.06    -0.01   0.02  -0.01
  52   6    -0.04   0.05  -0.01    -0.01   0.04   0.09    -0.01   0.01  -0.01
  53   6     0.03   0.02   0.00     0.03   0.00  -0.04    -0.09  -0.01   0.00
  54   6     0.06   0.03  -0.02    -0.04  -0.03   0.01    -0.03   0.00   0.00
  55   1     0.07   0.03  -0.02    -0.01  -0.02  -0.02    -0.06  -0.01   0.00
  56   1    -0.02   0.00  -0.04     0.06  -0.01   0.01     0.01  -0.01  -0.05
  57   1    -0.02  -0.04   0.01    -0.02   0.02  -0.02     0.02  -0.07  -0.01
  58   1    -0.05  -0.03  -0.05     0.01   0.02   0.02    -0.03  -0.08  -0.03
  59   1    -0.06   0.00  -0.03     0.00  -0.01   0.01    -0.05  -0.07  -0.01
  60   1    -0.05  -0.02  -0.04     0.01   0.00   0.02    -0.02  -0.07   0.00
  61   1     0.03   0.05   0.00     0.06  -0.04   0.00    -0.11  -0.05   0.00
  62   1     0.02   0.00  -0.01    -0.03  -0.08   0.04    -0.10   0.06   0.01
  63   1     0.02   0.05  -0.02     0.13   0.07  -0.04    -0.05  -0.03   0.06
  64   1    -0.01   0.01  -0.02     0.09   0.11  -0.03     0.02   0.05   0.06
  65   1     0.01   0.02   0.02     0.14   0.04  -0.05    -0.02   0.01  -0.03
  66   1    -0.04   0.00   0.02    -0.09  -0.06   0.12     0.00   0.05  -0.05
  67   1    -0.03  -0.03   0.04    -0.07  -0.10   0.08     0.00   0.09  -0.11
  68   1    -0.06   0.01   0.02    -0.06  -0.03   0.10     0.08   0.03  -0.07
  69   1    -0.03   0.03  -0.02     0.03   0.00  -0.01     0.01   0.00  -0.03
  70   1    -0.03   0.06  -0.02     0.05  -0.07  -0.02     0.01   0.02  -0.03
  71   1    -0.03   0.04   0.02     0.00  -0.04  -0.06     0.02   0.01  -0.01
  72   1    -0.01  -0.05   0.03    -0.01   0.02  -0.01     0.02  -0.06  -0.01
  73   1    -0.01  -0.05   0.02     0.00   0.02   0.01     0.02  -0.06  -0.01
  74   1    -0.02  -0.03   0.02    -0.02   0.01   0.00     0.01  -0.06  -0.01
  75   1     0.04   0.00   0.00    -0.03  -0.05   0.07     0.08   0.03  -0.14
  76   1     0.04  -0.06   0.13    -0.03  -0.08   0.10     0.10   0.06  -0.09
  77   1     0.03  -0.07   0.16    -0.02  -0.05   0.04     0.07   0.06   0.01
  78   1     0.04   0.05  -0.20    -0.02   0.00  -0.11     0.00   0.00  -0.14
  79   1     0.03  -0.03   0.08     0.00   0.00  -0.06    -0.01   0.03   0.07
  80   1    -0.07   0.02   0.05     0.01   0.05   0.07    -0.02   0.02   0.00
  81   1    -0.06  -0.03   0.08     0.00   0.02   0.02    -0.02   0.02   0.01
  82   1    -0.01  -0.07   0.05    -0.02  -0.02  -0.05    -0.01   0.02   0.02
  83   1    -0.02   0.04   0.00     0.00   0.04   0.05    -0.01   0.02  -0.02
  84   1     0.04  -0.09  -0.07    -0.02  -0.06  -0.10     0.00   0.02   0.01
  85   1     0.05   0.03  -0.17    -0.03  -0.07   0.02     0.03  -0.04  -0.15
  86   1     0.07  -0.10  -0.11    -0.06  -0.18   0.03     0.05  -0.08  -0.12
  87   1     0.03   0.01  -0.01    -0.03  -0.07   0.16     0.04  -0.04  -0.07
  88   1    -0.03   0.22  -0.16     0.01   0.15   0.00    -0.02   0.02  -0.14
  89   1    -0.03   0.21   0.01     0.03   0.15   0.13     0.02   0.04  -0.08
  90   1    -0.04   0.26  -0.11     0.02   0.21  -0.02    -0.03   0.07  -0.11
  91   1     0.03  -0.04   0.08    -0.04  -0.01  -0.12     0.06   0.02   0.20
  92   1     0.02  -0.03   0.08    -0.07  -0.01  -0.10     0.12   0.01   0.18
  93   1     0.03  -0.03   0.08    -0.08  -0.01  -0.07     0.13   0.00   0.10
  94   1     0.02  -0.03   0.09     0.04   0.03  -0.10    -0.08   0.01   0.17
  95   1     0.02  -0.03   0.08     0.06   0.01  -0.04    -0.11   0.03   0.09
  96   1     0.02  -0.03   0.09     0.04   0.02  -0.06    -0.05   0.02   0.14
  97   1     0.01  -0.05  -0.01    -0.02  -0.04  -0.17     0.02  -0.01  -0.01
  98   1    -0.09   0.02  -0.05     0.02  -0.01  -0.13     0.04   0.00   0.00
  99   1    -0.05   0.00   0.10     0.01  -0.02  -0.15     0.02  -0.02  -0.02
 100   1     0.10  -0.13   0.02    -0.06  -0.13  -0.12    -0.01   0.00  -0.01
 101   1     0.16  -0.17   0.07    -0.06  -0.13  -0.05    -0.05   0.02  -0.01
 102   1     0.12  -0.06   0.13    -0.04  -0.09  -0.08    -0.04  -0.02  -0.02
 103   1    -0.05   0.04  -0.01     0.02   0.08   0.07    -0.01   0.02  -0.01
 104   1    -0.04   0.02   0.02     0.03   0.08   0.04    -0.01   0.02  -0.02
 105   1    -0.07   0.01   0.00     0.02   0.08   0.07    -0.02   0.03  -0.01
 106   1    -0.05   0.05  -0.02    -0.01   0.05   0.10    -0.01   0.01   0.00
 107   1    -0.05   0.03  -0.02    -0.02   0.04   0.10    -0.01   0.02   0.00
 108   1    -0.04   0.06  -0.02    -0.02   0.01   0.09    -0.02   0.01  -0.01
 109   1     0.01   0.02   0.01     0.01   0.00  -0.03    -0.04  -0.01  -0.03
 110   1     0.04   0.05   0.00     0.06   0.01  -0.02    -0.16  -0.05  -0.04
 111   1     0.03   0.00  -0.01     0.04  -0.01  -0.08    -0.12   0.02   0.08
 112   1     0.07   0.06  -0.03    -0.05  -0.04   0.00    -0.03   0.00   0.00
 113   1     0.09   0.02  -0.02    -0.05  -0.01   0.03    -0.04   0.01   0.00
 114   1     0.06   0.02  -0.02    -0.06  -0.04   0.02    -0.03   0.00   0.00
                     7                      8                      9
                     A                      A                      A
 Frequencies --    41.1883                50.1394                54.2456
 Red. masses --     4.1494                 3.9110                 4.0831
 Frc consts  --     0.0041                 0.0058                 0.0071
 IR Inten    --     0.0101                 0.0972                 0.1225
 Atom AN      X      Y      Z        X      Y      Z        X      Y      Z
   1   8     0.07  -0.01   0.00     0.02   0.03   0.03    -0.05   0.06   0.01
   2  12     0.00   0.00   0.01    -0.01  -0.02   0.01    -0.04  -0.03  -0.01
   3   8     0.01   0.03   0.01    -0.02   0.00   0.02    -0.02  -0.01  -0.01
   4   6     0.03  -0.04   0.01     0.01   0.07   0.02    -0.06   0.01   0.02
   5   7     0.06   0.03   0.00     0.00  -0.02   0.00     0.03  -0.02  -0.02
   6   7    -0.05  -0.02   0.01    -0.01  -0.02   0.01    -0.01  -0.01  -0.02
   7   8     0.00  -0.06   0.00     0.01   0.10   0.05    -0.05  -0.02  -0.01
   8   6     0.07   0.04   0.00     0.01  -0.03   0.00     0.04   0.00  -0.02
   9   6     0.02   0.03   0.00    -0.01  -0.03   0.01     0.02  -0.01  -0.03
  10   6    -0.04   0.00   0.00    -0.01  -0.03   0.02     0.00  -0.01  -0.02
  11   8     0.01  -0.05   0.04    -0.03   0.10  -0.03    -0.04  -0.03   0.06
  12   6     0.01  -0.02   0.03    -0.02   0.03   0.00    -0.05  -0.01   0.02
  13   6     0.00   0.00   0.02    -0.02  -0.01   0.02    -0.02   0.03  -0.01
  14   6     0.02  -0.05   0.03    -0.01   0.07  -0.03    -0.08  -0.01   0.08
  15   8     0.01   0.00   0.02    -0.01  -0.02   0.02    -0.07  -0.01   0.01
  16   6     0.08   0.00  -0.04     0.05   0.02   0.07    -0.01   0.08  -0.06
  17   8    -0.02   0.02  -0.03    -0.03  -0.01   0.00     0.00  -0.01   0.02
  18   6    -0.01   0.03  -0.01    -0.03  -0.01   0.00    -0.01  -0.01  -0.01
  19   8    -0.03   0.02   0.00    -0.03  -0.01   0.00    -0.01  -0.03  -0.02
  20   8     0.02  -0.01  -0.02    -0.01  -0.02  -0.02    -0.04   0.03   0.00
  21   6     0.00  -0.03  -0.01    -0.03  -0.03   0.01    -0.02   0.05   0.02
  22   6    -0.03  -0.01  -0.02    -0.04  -0.02   0.01     0.01   0.03   0.02
  23   6     0.02   0.03  -0.03    -0.01   0.00  -0.01    -0.04   0.01  -0.01
  24   8     0.00  -0.06   0.01    -0.03  -0.05   0.02    -0.02   0.07   0.03
  25   6    -0.05  -0.03  -0.02    -0.05  -0.04   0.02     0.03   0.04   0.02
  26   6     0.06   0.05  -0.05     0.00   0.00  -0.02    -0.07   0.00  -0.03
  27   6     0.02   0.00   0.03    -0.01  -0.08   0.00    -0.04   0.14   0.02
  28   6     0.01  -0.07   0.04    -0.01   0.07  -0.06    -0.08  -0.03   0.14
  29   6     0.04   0.03   0.00     0.01  -0.02  -0.01     0.04  -0.02  -0.01
  30   6    -0.05  -0.02   0.00     0.01  -0.01   0.01     0.01   0.01  -0.01
  31   6     0.02   0.06   0.00     0.01  -0.01  -0.04     0.04  -0.03   0.00
  32   6    -0.02   0.07  -0.03     0.02  -0.02  -0.01     0.05  -0.03   0.00
  33   6    -0.04   0.05  -0.06     0.02  -0.05   0.05     0.05  -0.03   0.01
  34   6    -0.02   0.02  -0.06     0.02  -0.05   0.06     0.05  -0.03   0.02
  35   6     0.02   0.00  -0.03     0.01  -0.03   0.03     0.04  -0.03   0.01
  36   6     0.03   0.09   0.03     0.01   0.04  -0.12     0.04  -0.04   0.01
  37   6     0.04  -0.05  -0.02     0.01  -0.02   0.02     0.04  -0.05   0.03
  38   6    -0.04  -0.02   0.00     0.03  -0.03  -0.01     0.03   0.00  -0.01
  39   6    -0.03  -0.03  -0.01     0.05  -0.02  -0.03     0.05   0.03   0.00
  40   6    -0.04  -0.02  -0.03     0.05   0.01  -0.03     0.04   0.06   0.01
  41   6    -0.05  -0.02  -0.03     0.02   0.04   0.00     0.03   0.06   0.00
  42   6    -0.06  -0.02  -0.02     0.00   0.03   0.02     0.01   0.04  -0.01
  43   6    -0.04  -0.02   0.03     0.03  -0.06  -0.01     0.03  -0.03  -0.04
  44   6    -0.07  -0.01  -0.01    -0.02   0.06   0.04    -0.01   0.05  -0.01
  45   6    -0.01   0.05   0.10     0.03  -0.03  -0.10     0.04  -0.05   0.02
  46   6     0.09   0.18   0.06    -0.03   0.20  -0.10     0.06  -0.06   0.01
  47   6     0.05  -0.06  -0.02    -0.04   0.04  -0.01     0.05  -0.03   0.04
  48   6     0.02  -0.10  -0.04     0.06  -0.03  -0.02     0.03  -0.07   0.02
  49   6    -0.08   0.00  -0.02     0.01   0.03   0.05     0.06   0.01  -0.06
  50   6    -0.08   0.01  -0.02    -0.06   0.11   0.00    -0.10   0.06  -0.07
  51   6    -0.01   0.00   0.04     0.04  -0.06  -0.01    -0.01  -0.06  -0.04
  52   6    -0.05  -0.03   0.07     0.06  -0.08   0.00     0.07  -0.04  -0.07
  53   6     0.14   0.06  -0.01     0.03  -0.03  -0.01     0.09   0.02  -0.02
  54   6    -0.08  -0.01   0.01    -0.02  -0.04   0.03    -0.01  -0.02  -0.01
  55   1     0.02   0.04  -0.01    -0.01  -0.04   0.01     0.02   0.00  -0.03
  56   1    -0.02   0.00   0.01    -0.04   0.00   0.07     0.03   0.03  -0.07
  57   1     0.00  -0.03   0.04     0.00   0.06  -0.03    -0.12   0.03   0.08
  58   1     0.07  -0.01  -0.02     0.05   0.04   0.09     0.00   0.09  -0.04
  59   1     0.10   0.02  -0.04     0.06  -0.02   0.07     0.03   0.12  -0.07
  60   1     0.06  -0.02  -0.07     0.05   0.02   0.08    -0.01   0.03  -0.11
  61   1    -0.05  -0.01  -0.03    -0.05  -0.01   0.01     0.02   0.02   0.03
  62   1     0.00   0.05  -0.02    -0.02   0.01  -0.01    -0.05   0.02  -0.01
  63   1    -0.06  -0.04  -0.02    -0.06  -0.04   0.03     0.04   0.06   0.01
  64   1    -0.04  -0.03  -0.02    -0.04  -0.05   0.03     0.02   0.06   0.01
  65   1    -0.07  -0.01  -0.03    -0.06  -0.03   0.02     0.05   0.03   0.02
  66   1     0.07   0.04  -0.07     0.01   0.00  -0.03    -0.10   0.01  -0.02
  67   1     0.06   0.08  -0.05     0.00   0.02  -0.01    -0.08  -0.02  -0.05
  68   1     0.07   0.03  -0.06     0.00   0.00  -0.02    -0.06   0.00  -0.03
  69   1     0.02  -0.02   0.03    -0.01  -0.10   0.02    -0.03   0.19   0.02
  70   1     0.01   0.02   0.02    -0.02  -0.12   0.03    -0.01   0.18  -0.01
  71   1     0.04   0.01   0.04     0.01  -0.08  -0.05    -0.09   0.15   0.09
  72   1     0.00  -0.07   0.06    -0.02   0.07  -0.08    -0.09  -0.04   0.17
  73   1     0.02  -0.08   0.04    -0.03   0.08  -0.05    -0.03  -0.05   0.15
  74   1     0.01  -0.07   0.04     0.00   0.05  -0.06    -0.11  -0.02   0.16
  75   1    -0.04   0.10  -0.02     0.02  -0.02  -0.03     0.05  -0.04   0.00
  76   1    -0.07   0.06  -0.08     0.03  -0.06   0.08     0.05  -0.03   0.01
  77   1    -0.03   0.00  -0.09     0.02  -0.06   0.09     0.05  -0.03   0.03
  78   1     0.04   0.09  -0.03     0.03   0.03  -0.23     0.03  -0.04   0.02
  79   1     0.08  -0.05   0.00     0.00  -0.03   0.05     0.05  -0.05   0.05
  80   1    -0.02  -0.03  -0.01     0.07  -0.04  -0.04     0.06   0.03   0.00
  81   1    -0.03  -0.02  -0.04     0.06   0.02  -0.04     0.06   0.08   0.02
  82   1    -0.05  -0.01  -0.04     0.02   0.06   0.00     0.02   0.08   0.00
  83   1    -0.04  -0.03   0.03     0.02  -0.07  -0.01     0.02  -0.04  -0.04
  84   1    -0.08  -0.02  -0.01    -0.03   0.07   0.09    -0.02   0.08   0.05
  85   1     0.00   0.06   0.12     0.03   0.01  -0.18     0.03  -0.06   0.04
  86   1    -0.05   0.00   0.08     0.05  -0.15  -0.11     0.02  -0.03   0.02
  87   1    -0.01   0.06   0.16     0.00  -0.02   0.01     0.05  -0.05   0.01
  88   1     0.10   0.19   0.07    -0.03   0.23  -0.17     0.06  -0.07   0.03
  89   1     0.09   0.19   0.13    -0.04   0.22   0.02     0.08  -0.06   0.00
  90   1     0.12   0.22   0.01    -0.05   0.27  -0.12     0.07  -0.06   0.01
  91   1     0.07  -0.10   0.00    -0.03   0.05  -0.03     0.06  -0.06   0.07
  92   1     0.02  -0.06  -0.04    -0.04   0.06  -0.05     0.04  -0.03   0.02
  93   1     0.07  -0.02   0.00    -0.08   0.06   0.03     0.07   0.00   0.06
  94   1     0.03  -0.14  -0.03     0.06  -0.01  -0.03     0.03  -0.09   0.04
  95   1     0.01  -0.11  -0.05     0.09  -0.06  -0.01     0.02  -0.09   0.01
  96   1    -0.01  -0.10  -0.07     0.07  -0.01  -0.05     0.03  -0.07   0.00
  97   1    -0.09   0.01  -0.02    -0.01   0.05   0.06     0.02   0.02  -0.05
  98   1    -0.09  -0.01  -0.01     0.04   0.00   0.08     0.14  -0.02   0.00
  99   1    -0.08   0.01  -0.02     0.02   0.01   0.00     0.09  -0.01  -0.15
 100   1    -0.09   0.01  -0.02    -0.06   0.13   0.03    -0.08   0.06  -0.05
 101   1    -0.08   0.00  -0.02    -0.10   0.16  -0.02    -0.17   0.12  -0.07
 102   1    -0.07   0.02  -0.03    -0.07   0.07  -0.06    -0.12  -0.01  -0.14
 103   1     0.00   0.01   0.06     0.04  -0.08   0.00    -0.01  -0.08  -0.07
 104   1     0.00   0.01   0.01     0.01  -0.04  -0.01    -0.04  -0.05  -0.03
 105   1     0.00   0.01   0.04     0.06  -0.04   0.00     0.00  -0.05  -0.04
 106   1    -0.04  -0.03   0.09     0.06  -0.09   0.00     0.06  -0.05  -0.12
 107   1    -0.03  -0.02   0.06     0.07  -0.06   0.02     0.06  -0.03  -0.05
 108   1    -0.07  -0.05   0.06     0.07  -0.09   0.01     0.11  -0.03  -0.07
 109   1     0.07   0.05   0.03    -0.01  -0.03   0.00     0.05   0.01   0.01
 110   1     0.24   0.10   0.05     0.08  -0.01   0.01     0.15   0.05   0.01
 111   1     0.18   0.02  -0.12     0.05  -0.06  -0.07     0.11   0.00  -0.10
 112   1    -0.08  -0.05   0.01    -0.02  -0.06   0.05    -0.01  -0.05   0.01
 113   1    -0.11   0.00   0.01    -0.04  -0.03   0.03    -0.05  -0.01  -0.02
 114   1    -0.08   0.00   0.01     0.00  -0.04   0.02     0.01  -0.01  -0.03
                    10                     11                     12
                     A                      A                      A
 Frequencies --    58.3011                59.9280                63.7195
 Red. masses --     3.9975                 4.6324                 3.5295
 Frc consts  --     0.0080                 0.0098                 0.0084
 IR Inten    --     0.5934                 1.7402                 0.0308
 Atom AN      X      Y      Z        X      Y      Z        X      Y      Z
   1   8    -0.01  -0.01  -0.02     0.15  -0.01   0.02     0.00   0.00  -0.02
   2  12    -0.01   0.04  -0.02    -0.01  -0.02  -0.01     0.03   0.02   0.01
   3   8     0.04  -0.02  -0.01     0.01   0.06   0.01     0.03   0.02   0.02
   4   6    -0.01  -0.04  -0.01     0.03  -0.01   0.05    -0.01  -0.03  -0.01
   5   7     0.04   0.01  -0.05    -0.02  -0.01   0.00    -0.02   0.00   0.01
   6   7    -0.04   0.01   0.00    -0.02  -0.01  -0.03     0.00   0.00   0.01
   7   8    -0.03  -0.07  -0.03    -0.09  -0.02   0.08    -0.07  -0.05  -0.02
   8   6     0.01   0.00  -0.04    -0.01   0.01  -0.01    -0.04  -0.02   0.01
   9   6    -0.02  -0.01  -0.02     0.01   0.02  -0.03    -0.04  -0.02   0.03
  10   6    -0.04  -0.01   0.01     0.00   0.01  -0.04    -0.03  -0.02   0.03
  11   8     0.03  -0.07   0.03     0.01   0.02   0.02     0.05  -0.05   0.00
  12   6     0.02  -0.02   0.00     0.01   0.00   0.03     0.04  -0.03   0.01
  13   6     0.03  -0.04   0.00     0.01   0.04   0.01     0.03   0.00   0.01
  14   6     0.01  -0.05   0.03     0.03  -0.01   0.02     0.05  -0.02  -0.01
  15   8     0.01   0.03  -0.03     0.02  -0.04   0.04     0.06  -0.02   0.02
  16   6    -0.03   0.00  -0.05     0.12  -0.02   0.03    -0.08  -0.01  -0.03
  17   8     0.04   0.01   0.00     0.00   0.05  -0.02     0.02   0.01   0.02
  18   6     0.03  -0.01   0.00    -0.01   0.04  -0.03     0.03   0.01   0.02
  19   8     0.03   0.00   0.00    -0.03   0.01  -0.04     0.03   0.01   0.02
  20   8     0.02   0.01   0.00     0.01   0.03  -0.04     0.02   0.03   0.01
  21   6     0.03   0.01   0.00    -0.01   0.01   0.03     0.03   0.03  -0.02
  22   6     0.03   0.01   0.01    -0.03   0.03   0.00     0.03   0.03   0.02
  23   6     0.02  -0.01   0.00     0.00   0.08  -0.06     0.03   0.01   0.02
  24   8     0.03   0.02  -0.01    -0.01  -0.02   0.12     0.03   0.05  -0.07
  25   6     0.02   0.00   0.03    -0.03   0.02   0.00     0.02   0.01   0.03
  26   6     0.01  -0.01   0.02     0.03   0.09  -0.13     0.02   0.01   0.03
  27   6     0.05  -0.06   0.01     0.02   0.07   0.02     0.02   0.02   0.01
  28   6     0.02  -0.03   0.05     0.02  -0.01   0.00     0.06   0.03  -0.03
  29   6     0.03   0.01  -0.03    -0.01  -0.01   0.02    -0.02   0.00  -0.01
  30   6    -0.04   0.02   0.02    -0.02  -0.02  -0.03     0.00   0.00   0.02
  31   6     0.03   0.00   0.00    -0.01  -0.03   0.05    -0.02   0.00  -0.01
  32   6     0.01  -0.04   0.06    -0.01  -0.06   0.10    -0.01   0.01  -0.03
  33   6     0.01  -0.07   0.10     0.00  -0.07   0.13    -0.01   0.02  -0.05
  34   6     0.01  -0.05   0.06    -0.01  -0.05   0.10    -0.01   0.03  -0.05
  35   6     0.03  -0.01  -0.02    -0.01  -0.01   0.03    -0.01   0.02  -0.03
  36   6     0.03   0.02  -0.03    -0.02  -0.03   0.03    -0.02   0.00  -0.01
  37   6     0.04   0.02  -0.09    -0.01   0.04  -0.04    -0.02   0.03  -0.04
  38   6    -0.04   0.01   0.01    -0.02  -0.01  -0.02    -0.01  -0.01   0.00
  39   6    -0.04   0.01   0.01    -0.02   0.01   0.01    -0.01   0.00   0.02
  40   6    -0.04   0.02   0.01    -0.02   0.01   0.03    -0.01   0.02   0.06
  41   6    -0.04   0.03   0.03    -0.01   0.00   0.01     0.00   0.02   0.06
  42   6    -0.04   0.04   0.04    -0.01  -0.02  -0.02     0.00   0.01   0.05
  43   6    -0.04   0.01   0.02    -0.02  -0.04  -0.05    -0.02  -0.05  -0.06
  44   6    -0.05   0.07   0.09    -0.01  -0.05  -0.05     0.01   0.01   0.05
  45   6     0.06   0.10  -0.11     0.00  -0.03   0.01    -0.04  -0.11   0.07
  46   6    -0.04  -0.07  -0.06    -0.03  -0.02   0.02     0.03   0.15   0.03
  47   6     0.00  -0.06  -0.12    -0.06  -0.01  -0.09    -0.01   0.00  -0.03
  48   6     0.07   0.09  -0.05     0.05   0.13  -0.02    -0.03   0.06  -0.01
  49   6    -0.02   0.03   0.11    -0.05   0.00  -0.05     0.09  -0.04   0.01
  50   6    -0.08   0.13   0.04     0.05  -0.09   0.00    -0.08   0.00   0.00
  51   6    -0.04   0.03   0.02    -0.06  -0.07  -0.06    -0.08  -0.10  -0.07
  52   6    -0.05   0.00   0.04     0.03  -0.05  -0.09     0.03  -0.04  -0.13
  53   6     0.00  -0.01  -0.04    -0.01   0.03   0.00    -0.06  -0.03   0.01
  54   6    -0.06  -0.03   0.03     0.03   0.03  -0.06    -0.05  -0.03   0.04
  55   1    -0.03  -0.03  -0.01     0.02   0.03  -0.03    -0.06  -0.04   0.03
  56   1     0.02  -0.04   0.01     0.00   0.03  -0.02     0.02  -0.01  -0.02
  57   1     0.00  -0.04   0.03     0.03  -0.02   0.02     0.08  -0.03   0.00
  58   1    -0.04  -0.02  -0.04     0.11  -0.04   0.07    -0.11  -0.07  -0.01
  59   1    -0.01   0.04  -0.06     0.16  -0.01   0.03    -0.06   0.01  -0.03
  60   1    -0.05   0.00  -0.09     0.09   0.01   0.01    -0.13   0.04  -0.05
  61   1     0.02   0.02   0.01    -0.05   0.02  -0.01     0.04   0.05   0.03
  62   1     0.03  -0.02   0.00    -0.02   0.13  -0.04     0.04   0.01   0.02
  63   1     0.01   0.00   0.03    -0.04   0.01   0.01     0.02   0.02   0.03
  64   1     0.03  -0.01   0.03    -0.02   0.03   0.01     0.02  -0.01   0.03
  65   1     0.01   0.00   0.03    -0.03   0.03  -0.01     0.01   0.02   0.05
  66   1     0.01  -0.01   0.02     0.05   0.11  -0.16     0.02   0.01   0.03
  67   1     0.01  -0.03   0.03     0.03   0.13  -0.13     0.02   0.00   0.04
  68   1    -0.01   0.00   0.03     0.03   0.05  -0.15     0.01   0.01   0.03
  69   1     0.05  -0.07   0.02     0.01   0.06   0.02     0.02   0.00  -0.01
  70   1     0.06  -0.06   0.01     0.01   0.11   0.01     0.00   0.04   0.00
  71   1     0.07  -0.06  -0.01     0.03   0.08   0.06     0.03   0.02   0.04
  72   1     0.03  -0.03   0.06     0.02  -0.01  -0.03     0.09   0.04  -0.02
  73   1     0.02  -0.03   0.06     0.02   0.01   0.01     0.03   0.04  -0.04
  74   1     0.00  -0.02   0.06     0.03  -0.03   0.00     0.06   0.06  -0.04
  75   1     0.01  -0.04   0.09     0.00  -0.07   0.11    -0.01   0.01  -0.03
  76   1     0.00  -0.10   0.15     0.00  -0.10   0.18    -0.01   0.03  -0.06
  77   1     0.01  -0.07   0.07     0.00  -0.05   0.11    -0.01   0.04  -0.07
  78   1     0.06   0.02   0.05    -0.01  -0.03   0.02    -0.04   0.00  -0.13
  79   1     0.04   0.04  -0.14    -0.02   0.06  -0.09    -0.03   0.04  -0.06
  80   1    -0.04   0.00   0.00    -0.02   0.01   0.02    -0.02   0.00   0.01
  81   1    -0.04   0.01   0.00    -0.01   0.03   0.06    -0.01   0.02   0.07
  82   1    -0.04   0.04   0.04    -0.01   0.00   0.02     0.00   0.02   0.08
  83   1    -0.04   0.01   0.01    -0.03  -0.05  -0.06    -0.01  -0.04  -0.05
  84   1    -0.05   0.10   0.13     0.00  -0.07  -0.11     0.01   0.05   0.10
  85   1     0.06   0.12  -0.12     0.00  -0.03   0.00    -0.04  -0.10   0.05
  86   1     0.12   0.16  -0.08     0.01  -0.03   0.02    -0.09  -0.21   0.04
  87   1     0.02   0.10  -0.18    -0.01  -0.03   0.01    -0.02  -0.10   0.19
  88   1    -0.04  -0.05  -0.07    -0.03  -0.02   0.01     0.03   0.14   0.01
  89   1    -0.09  -0.08  -0.14    -0.04  -0.02   0.03     0.07   0.16   0.15
  90   1    -0.05  -0.14  -0.01    -0.04  -0.03   0.03     0.04   0.24  -0.03
  91   1     0.02  -0.07  -0.18    -0.05   0.01  -0.15    -0.02   0.03  -0.04
  92   1    -0.03  -0.09  -0.08    -0.07  -0.03  -0.05     0.02  -0.01   0.01
  93   1     0.00  -0.10  -0.14    -0.10  -0.05  -0.10     0.00  -0.03  -0.06
  94   1     0.07   0.12  -0.11     0.04   0.18  -0.08    -0.03   0.07  -0.02
  95   1     0.09   0.14  -0.03     0.08   0.17   0.02    -0.03   0.09  -0.01
  96   1     0.06   0.07   0.00     0.06   0.11   0.04    -0.03   0.05   0.02
  97   1    -0.01   0.04   0.13    -0.05  -0.01  -0.07     0.08  -0.04   0.01
  98   1    -0.01   0.01   0.13    -0.09   0.02  -0.08     0.16  -0.05   0.05
  99   1    -0.03   0.00   0.08    -0.05   0.03  -0.01     0.10  -0.08  -0.06
 100   1    -0.06   0.16   0.10     0.03  -0.11  -0.04    -0.04   0.00   0.01
 101   1    -0.12   0.20   0.01     0.10  -0.15   0.02    -0.15   0.07   0.00
 102   1    -0.10   0.08  -0.01     0.07  -0.03   0.06    -0.12  -0.08  -0.06
 103   1    -0.04   0.04   0.02    -0.06  -0.09  -0.08    -0.09  -0.12  -0.11
 104   1    -0.03   0.03   0.00    -0.08  -0.07  -0.03    -0.10  -0.11  -0.02
 105   1    -0.04   0.03   0.02    -0.06  -0.07  -0.06    -0.09  -0.12  -0.07
 106   1    -0.05   0.02   0.03     0.04  -0.11  -0.07     0.02  -0.07  -0.18
 107   1    -0.06   0.01   0.05     0.08  -0.04  -0.12     0.03  -0.04  -0.12
 108   1    -0.04  -0.02   0.04     0.01  -0.01  -0.09     0.08  -0.01  -0.12
 109   1     0.02  -0.01  -0.06     0.02   0.02   0.01     0.00  -0.03  -0.02
 110   1    -0.01  -0.03  -0.05    -0.04   0.01  -0.01    -0.12  -0.08  -0.02
 111   1    -0.01  -0.01  -0.03    -0.02   0.06   0.03    -0.09   0.01   0.08
 112   1    -0.05  -0.07   0.06     0.03   0.06  -0.07    -0.05  -0.07   0.06
 113   1    -0.10  -0.01   0.04     0.06   0.01  -0.07    -0.09  -0.01   0.04
 114   1    -0.04  -0.03   0.02     0.02   0.03  -0.06    -0.04  -0.02   0.03
                    13                     14                     15
                     A                      A                      A
 Frequencies --    65.1798                69.3048                73.3777
 Red. masses --     4.0212                 4.5363                 3.5693
 Frc consts  --     0.0101                 0.0128                 0.0113
 IR Inten    --     0.6342                 0.5036                 0.1481
 Atom AN      X      Y      Z        X      Y      Z        X      Y      Z
   1   8    -0.09   0.01   0.00     0.15  -0.02   0.04    -0.11   0.03   0.01
   2  12     0.01   0.01   0.00    -0.06   0.01  -0.03    -0.01  -0.01   0.02
   3   8     0.00   0.06   0.01    -0.01  -0.06  -0.01    -0.02   0.00   0.02
   4   6     0.01  -0.01  -0.01    -0.01  -0.02   0.07     0.00   0.00  -0.01
   5   7    -0.02  -0.02  -0.01    -0.03   0.00  -0.03     0.02   0.00   0.01
   6   7     0.05   0.03   0.00     0.01   0.03  -0.02     0.00  -0.02   0.03
   7   8     0.11  -0.02  -0.06    -0.11  -0.02   0.11     0.11  -0.01  -0.06
   8   6    -0.01  -0.01  -0.01    -0.01   0.01  -0.04    -0.02  -0.02   0.03
   9   6     0.02  -0.01  -0.01     0.03   0.02  -0.04    -0.03  -0.03   0.04
  10   6     0.04   0.01   0.00     0.03   0.03  -0.03    -0.01  -0.02   0.03
  11   8     0.01  -0.04   0.03    -0.04   0.00   0.04    -0.02  -0.03   0.05
  12   6     0.00   0.00   0.01    -0.04   0.00   0.02    -0.02  -0.02   0.03
  13   6    -0.01   0.02   0.01    -0.01  -0.03   0.02    -0.02   0.00   0.02
  14   6    -0.01  -0.02   0.03    -0.05  -0.03   0.06    -0.03  -0.01   0.05
  15   8     0.00   0.02   0.00    -0.06   0.01   0.00    -0.02  -0.02   0.03
  16   6    -0.05   0.02  -0.04     0.18  -0.01   0.03    -0.03   0.05  -0.05
  17   8    -0.04   0.04  -0.05    -0.01  -0.04   0.00    -0.03  -0.01   0.01
  18   6    -0.03   0.05  -0.02    -0.01  -0.05   0.00    -0.02  -0.01   0.02
  19   8    -0.05   0.04  -0.01    -0.01  -0.03   0.00    -0.02  -0.01   0.02
  20   8     0.01   0.00  -0.05    -0.02  -0.03   0.01    -0.02  -0.01   0.00
  21   6    -0.02  -0.03  -0.02    -0.01  -0.01  -0.03    -0.02  -0.02   0.00
  22   6    -0.06   0.00  -0.03     0.00  -0.02   0.00    -0.02  -0.02   0.00
  23   6     0.01   0.06  -0.05    -0.02  -0.05   0.01    -0.01  -0.01   0.01
  24   8    -0.02  -0.07   0.01    -0.01   0.01  -0.08    -0.02  -0.02   0.01
  25   6    -0.09  -0.03  -0.01     0.00  -0.02   0.01    -0.01  -0.01  -0.01
  26   6     0.06   0.08  -0.08    -0.04  -0.06   0.04    -0.01  -0.01   0.01
  27   6     0.01   0.00   0.01     0.01  -0.06   0.03    -0.02   0.04   0.03
  28   6    -0.01  -0.04   0.06    -0.05  -0.06   0.08    -0.03  -0.03   0.08
  29   6    -0.02  -0.02   0.00    -0.01   0.01  -0.04     0.02   0.01  -0.01
  30   6     0.04   0.02   0.00     0.00   0.03  -0.01     0.01  -0.02   0.01
  31   6    -0.02  -0.04   0.02     0.01  -0.02  -0.04     0.02   0.01  -0.01
  32   6    -0.01  -0.05   0.05     0.04   0.00  -0.06     0.02   0.01  -0.01
  33   6    -0.01  -0.06   0.07     0.05   0.03  -0.07     0.02   0.03  -0.03
  34   6    -0.01  -0.04   0.05     0.04   0.06  -0.07     0.02   0.04  -0.06
  35   6    -0.02  -0.02   0.01     0.01   0.05  -0.05     0.03   0.03  -0.05
  36   6    -0.02  -0.05   0.01     0.00  -0.04  -0.04     0.02   0.03  -0.02
  37   6    -0.02   0.00  -0.02    -0.01   0.07  -0.04     0.02   0.07  -0.09
  38   6     0.02   0.02  -0.01    -0.01   0.03  -0.01     0.04  -0.02   0.02
  39   6     0.00  -0.01  -0.04    -0.02   0.01  -0.02     0.05  -0.02   0.00
  40   6     0.01  -0.03  -0.04    -0.02  -0.01  -0.02     0.05   0.00  -0.02
  41   6     0.03  -0.02  -0.01    -0.01   0.00  -0.01     0.03   0.00  -0.03
  42   6     0.05   0.01   0.00     0.01   0.01   0.00     0.01  -0.01  -0.02
  43   6     0.02   0.07   0.02    -0.01   0.05   0.00     0.04  -0.04   0.03
  44   6     0.07   0.01   0.03     0.03   0.03   0.03    -0.02  -0.02  -0.05
  45   6    -0.03  -0.12   0.06    -0.02  -0.13   0.02     0.02   0.02  -0.02
  46   6     0.01   0.03   0.04     0.05   0.04  -0.01     0.01   0.08  -0.02
  47   6    -0.04  -0.03  -0.04     0.04   0.01  -0.02     0.03  -0.03  -0.10
  48   6     0.00   0.03  -0.01    -0.03   0.12   0.01     0.02   0.17  -0.02
  49   6     0.17  -0.08   0.02     0.04  -0.02   0.07    -0.12   0.07  -0.04
  50   6    -0.02   0.03  -0.03     0.04   0.06   0.03     0.08  -0.03   0.01
  51   6     0.07   0.11   0.03     0.00   0.09   0.00     0.06  -0.08   0.04
  52   6    -0.05   0.09   0.06    -0.02   0.03   0.05     0.04  -0.02   0.00
  53   6    -0.02  -0.02  -0.01    -0.02   0.01  -0.03    -0.07  -0.04   0.03
  54   6     0.03  -0.01   0.03     0.07   0.03  -0.03     0.02   0.00   0.01
  55   1     0.02  -0.02   0.00     0.05   0.01  -0.04    -0.04  -0.03   0.04
  56   1    -0.04   0.01   0.00    -0.01  -0.03   0.06    -0.01   0.00  -0.01
  57   1    -0.03   0.00   0.03    -0.08  -0.02   0.05    -0.05   0.02   0.05
  58   1    -0.03   0.05  -0.10     0.18   0.00   0.08     0.00   0.11  -0.10
  59   1    -0.11   0.04  -0.03     0.24  -0.01   0.02    -0.06   0.08  -0.04
  60   1    -0.01  -0.02  -0.02     0.16  -0.03  -0.01     0.03  -0.02  -0.05
  61   1    -0.09   0.02  -0.04     0.01  -0.02   0.01    -0.01  -0.02   0.00
  62   1    -0.01   0.08  -0.04    -0.01  -0.07   0.01    -0.01  -0.01   0.01
  63   1    -0.11  -0.05   0.01     0.01  -0.02   0.01    -0.01   0.00  -0.02
  64   1    -0.05  -0.05   0.00     0.00  -0.03   0.00    -0.02   0.00  -0.01
  65   1    -0.11  -0.01  -0.02     0.01  -0.02   0.01    -0.01  -0.01  -0.01
  66   1     0.09   0.08  -0.11    -0.06  -0.06   0.06    -0.01  -0.01   0.01
  67   1     0.06   0.12  -0.06    -0.05  -0.08   0.03    -0.01  -0.01   0.01
  68   1     0.05   0.05  -0.09    -0.03  -0.04   0.05    -0.01  -0.01   0.01
  69   1     0.00  -0.03   0.02     0.01  -0.04   0.06    -0.02   0.05   0.03
  70   1     0.00   0.02   0.01     0.03  -0.09   0.03    -0.02   0.06   0.02
  71   1     0.04   0.01   0.02     0.00  -0.07  -0.01    -0.03   0.04   0.07
  72   1    -0.02  -0.04   0.08    -0.08  -0.06   0.05    -0.03  -0.03   0.09
  73   1     0.01  -0.05   0.06    -0.02  -0.05   0.10    -0.01  -0.03   0.08
  74   1    -0.02  -0.03   0.07    -0.06  -0.10   0.10    -0.05  -0.02   0.09
  75   1    -0.01  -0.06   0.05     0.05  -0.02  -0.06     0.02   0.01  -0.01
  76   1    -0.01  -0.07   0.09     0.07   0.04  -0.09     0.02   0.03  -0.04
  77   1    -0.01  -0.04   0.07     0.05   0.08  -0.08     0.02   0.05  -0.08
  78   1    -0.04  -0.05  -0.05    -0.04  -0.04  -0.11     0.03   0.03  -0.05
  79   1    -0.02   0.01  -0.04    -0.02   0.09  -0.10     0.01   0.10  -0.17
  80   1    -0.01  -0.01  -0.05    -0.03   0.02  -0.02     0.07  -0.02   0.00
  81   1    -0.01  -0.06  -0.06    -0.03  -0.02  -0.03     0.06   0.01  -0.03
  82   1     0.03  -0.04  -0.01    -0.01  -0.02  -0.01     0.02   0.01  -0.04
  83   1     0.04   0.09   0.03    -0.01   0.04  -0.01     0.03  -0.02   0.06
  84   1     0.09   0.08   0.10     0.05   0.05   0.04    -0.04  -0.08  -0.12
  85   1    -0.04  -0.12   0.04    -0.02  -0.14   0.02     0.03   0.04  -0.03
  86   1    -0.06  -0.18   0.04    -0.05  -0.20   0.00     0.03  -0.01  -0.02
  87   1    -0.01  -0.12   0.13     0.01  -0.13   0.10     0.01   0.02   0.01
  88   1     0.00   0.02   0.03     0.04   0.02  -0.01     0.01   0.09  -0.04
  89   1     0.04   0.04   0.10     0.10   0.05   0.06     0.00   0.08   0.02
  90   1     0.01   0.09   0.00     0.05   0.11  -0.05     0.01   0.09  -0.02
  91   1    -0.03  -0.03  -0.06     0.03   0.02   0.00     0.03  -0.01  -0.12
  92   1    -0.05  -0.04  -0.03     0.05  -0.01   0.04     0.03  -0.06  -0.02
  93   1    -0.05  -0.04  -0.04     0.07  -0.02  -0.06     0.05  -0.08  -0.15
  94   1     0.00   0.05  -0.03    -0.05   0.15   0.02     0.02   0.20  -0.07
  95   1     0.02   0.05   0.01    -0.06   0.15   0.00     0.02   0.24  -0.01
  96   1     0.01   0.03   0.01    -0.01   0.11   0.06     0.03   0.14   0.06
  97   1     0.18  -0.07   0.04     0.07  -0.01   0.10    -0.13   0.06  -0.05
  98   1     0.24  -0.09   0.07     0.04  -0.03   0.08    -0.19   0.07  -0.08
  99   1     0.16  -0.14  -0.05     0.03  -0.05   0.06    -0.11   0.13   0.03
 100   1     0.04   0.04   0.02     0.07   0.07   0.07     0.00  -0.04  -0.04
 101   1    -0.10   0.14  -0.06     0.03   0.10  -0.01     0.16  -0.15   0.04
 102   1    -0.07  -0.08  -0.10     0.02   0.02   0.02     0.13   0.09   0.08
 103   1     0.08   0.14   0.06     0.01   0.10   0.02     0.07  -0.10   0.05
 104   1     0.10   0.11   0.00     0.02   0.10  -0.02     0.05  -0.08   0.06
 105   1     0.07   0.11   0.03     0.00   0.10   0.02     0.08  -0.08   0.01
 106   1    -0.05   0.15   0.08     0.00   0.02   0.12     0.03  -0.01  -0.03
 107   1    -0.08   0.07   0.07     0.02   0.05   0.03     0.03  -0.03  -0.01
 108   1    -0.06   0.06   0.06    -0.08   0.02   0.05     0.06   0.00   0.00
 109   1     0.00  -0.02  -0.02     0.06   0.01  -0.05     0.06  -0.04  -0.03
 110   1    -0.04  -0.03  -0.03    -0.10  -0.04  -0.07    -0.20  -0.14  -0.04
 111   1    -0.03  -0.01   0.01    -0.06   0.08   0.06    -0.13   0.04   0.17
 112   1     0.03  -0.04   0.06     0.07   0.05  -0.01     0.02   0.07  -0.05
 113   1    -0.02   0.01   0.03     0.07   0.03  -0.04     0.11  -0.03   0.02
 114   1     0.05  -0.01   0.01     0.08   0.03  -0.04    -0.03  -0.03   0.04
                    16                     17                     18
                     A                      A                      A
 Frequencies --    79.9820                84.0930                88.6907
 Red. masses --     4.4891                 3.8027                 4.2669
 Frc consts  --     0.0169                 0.0158                 0.0198
 IR Inten    --     1.0153                 0.6775                 1.3727
 Atom AN      X      Y      Z        X      Y      Z        X      Y      Z
   1   8    -0.05  -0.02   0.01     0.00  -0.03   0.04     0.02   0.00   0.03
   2  12    -0.03  -0.03  -0.04    -0.02   0.03   0.01     0.05   0.02   0.00
   3   8     0.03  -0.02  -0.06    -0.01   0.00   0.03     0.01  -0.02  -0.09
   4   6     0.06   0.02  -0.02     0.10   0.00   0.02     0.00   0.03   0.02
   5   7    -0.03  -0.02  -0.02    -0.02   0.01  -0.01     0.06   0.02   0.01
   6   7    -0.06  -0.04  -0.02    -0.01   0.03   0.00     0.04  -0.01   0.02
   7   8     0.19   0.05  -0.04     0.25   0.03  -0.01     0.02   0.05   0.04
   8   6    -0.02  -0.01  -0.02     0.02   0.03  -0.02    -0.02  -0.02   0.03
   9   6    -0.02  -0.01  -0.03     0.02   0.03  -0.02    -0.03  -0.02   0.05
  10   6    -0.03  -0.02  -0.03     0.00   0.03  -0.01    -0.01  -0.02   0.03
  11   8     0.01   0.03  -0.03    -0.01   0.02   0.02    -0.02   0.06  -0.03
  12   6     0.01   0.01  -0.03    -0.01   0.02   0.03    -0.02   0.06  -0.06
  13   6     0.03   0.01  -0.04    -0.01   0.00   0.04     0.01   0.02  -0.06
  14   6     0.01   0.01  -0.03     0.01  -0.01   0.02    -0.07   0.02   0.01
  15   8     0.00   0.00  -0.04     0.00   0.03   0.03    -0.04   0.06  -0.08
  16   6     0.01  -0.02   0.03     0.08  -0.02   0.04     0.09   0.00   0.04
  17   8     0.05   0.01  -0.02    -0.02   0.00   0.03     0.02   0.07  -0.09
  18   6     0.03   0.00  -0.04    -0.01   0.00   0.03    -0.01   0.03  -0.05
  19   8     0.03  -0.01  -0.05    -0.01   0.02   0.03    -0.01   0.06  -0.03
  20   8     0.01   0.04  -0.02    -0.01   0.00   0.04    -0.02   0.01   0.03
  21   6     0.03   0.05  -0.02    -0.01   0.00   0.01    -0.01   0.02  -0.01
  22   6     0.04   0.04  -0.01    -0.01   0.00   0.02    -0.01   0.02  -0.08
  23   6     0.00   0.02  -0.04    -0.01  -0.01   0.04    -0.02  -0.01   0.00
  24   8     0.02   0.07  -0.02    -0.01   0.01  -0.01    -0.01   0.03   0.02
  25   6     0.05   0.03   0.01    -0.02   0.00   0.01     0.01   0.04  -0.09
  26   6    -0.02   0.02  -0.07    -0.02  -0.02   0.08    -0.03  -0.01   0.05
  27   6     0.03   0.03  -0.03     0.00  -0.03   0.03     0.02   0.02  -0.06
  28   6     0.00  -0.03  -0.02     0.00  -0.09   0.02    -0.07  -0.05   0.09
  29   6    -0.01  -0.02   0.00    -0.01   0.01  -0.01     0.03   0.02   0.00
  30   6    -0.06  -0.03  -0.01    -0.02   0.02   0.01     0.02  -0.03   0.00
  31   6     0.01  -0.04   0.00     0.00   0.00  -0.03     0.01   0.04   0.03
  32   6     0.03  -0.04   0.01     0.00   0.00  -0.02    -0.02   0.03   0.04
  33   6     0.04  -0.02   0.02     0.01   0.01  -0.02    -0.03   0.00   0.03
  34   6     0.03  -0.01   0.03     0.00   0.01  -0.01    -0.01  -0.01   0.01
  35   6     0.00  -0.01   0.02    -0.01   0.01  -0.01     0.02   0.00  -0.01
  36   6     0.00  -0.06   0.03    -0.01  -0.01  -0.04     0.03   0.06   0.04
  37   6    -0.01   0.01   0.05     0.00   0.01  -0.02     0.02  -0.02   0.00
  38   6    -0.04  -0.02   0.00    -0.04   0.02   0.00     0.00  -0.05  -0.03
  39   6    -0.03  -0.01   0.01    -0.06   0.01   0.00    -0.02  -0.07  -0.04
  40   6    -0.03   0.00   0.00    -0.05  -0.01   0.02    -0.01  -0.08  -0.02
  41   6    -0.05   0.01   0.00    -0.04  -0.01   0.02     0.01  -0.07   0.01
  42   6    -0.06   0.00   0.01    -0.02   0.00   0.02     0.02  -0.04   0.02
  43   6    -0.04  -0.04   0.02    -0.04   0.01  -0.03    -0.01  -0.05  -0.06
  44   6    -0.07   0.04   0.06     0.01  -0.02   0.00     0.05  -0.03   0.05
  45   6    -0.03  -0.14   0.11     0.01   0.00  -0.07     0.02   0.10   0.03
  46   6     0.08   0.00   0.07    -0.03  -0.05  -0.05     0.01   0.04   0.03
  47   6     0.01   0.03   0.07    -0.02   0.02  -0.03     0.05  -0.07   0.01
  48   6    -0.02   0.01   0.06     0.02  -0.01  -0.05    -0.02  -0.02   0.03
  49   6    -0.15   0.05   0.14     0.07  -0.06  -0.02     0.08  -0.07   0.06
  50   6     0.02   0.11   0.08    -0.05  -0.06  -0.01     0.02  -0.02   0.03
  51   6    -0.01  -0.04   0.03    -0.05  -0.12  -0.02    -0.03  -0.02  -0.06
  52   6    -0.03  -0.04   0.02    -0.04   0.05  -0.15     0.01  -0.07  -0.04
  53   6    -0.01   0.00  -0.01     0.08   0.04  -0.03    -0.12  -0.05   0.03
  54   6     0.01   0.00  -0.05     0.00   0.02   0.00    -0.06  -0.04   0.04
  55   1     0.00   0.00  -0.04     0.04   0.03  -0.03    -0.08  -0.04   0.06
  56   1     0.05   0.01  -0.04    -0.02   0.01   0.06     0.04   0.03  -0.03
  57   1    -0.01   0.02  -0.03    -0.02   0.01   0.03    -0.13   0.03  -0.02
  58   1     0.05   0.05  -0.07     0.16   0.09  -0.16     0.12   0.07   0.00
  59   1    -0.10  -0.06   0.05    -0.13  -0.05   0.09     0.05  -0.02   0.05
  60   1     0.11  -0.06   0.11     0.27  -0.10   0.19     0.15  -0.04   0.08
  61   1     0.04   0.04  -0.01    -0.01   0.00   0.02    -0.04  -0.01  -0.10
  62   1    -0.01   0.04  -0.04     0.00  -0.03   0.04    -0.04  -0.05  -0.02
  63   1     0.05   0.04   0.00    -0.02  -0.01   0.01     0.00   0.03  -0.08
  64   1     0.04   0.03   0.00    -0.02   0.00   0.01     0.02   0.06  -0.08
  65   1     0.05   0.03   0.01    -0.02   0.01   0.01     0.02   0.03  -0.11
  66   1    -0.04   0.03  -0.07    -0.02  -0.03   0.09    -0.04  -0.03   0.08
  67   1    -0.02   0.01  -0.09    -0.02  -0.03   0.08    -0.03  -0.03   0.05
  68   1    -0.01   0.00  -0.08    -0.03   0.00   0.09    -0.03   0.03   0.07
  69   1     0.03   0.05  -0.03     0.00  -0.03   0.04     0.02   0.06  -0.02
  70   1     0.04   0.03  -0.04     0.00  -0.04   0.04     0.06  -0.02  -0.05
  71   1     0.01   0.03  -0.03     0.00  -0.03   0.01    -0.03   0.01  -0.09
  72   1    -0.03  -0.03  -0.02    -0.05  -0.09   0.02    -0.11  -0.05   0.08
  73   1     0.02  -0.04  -0.02     0.03  -0.10   0.03     0.01  -0.05   0.13
  74   1     0.01  -0.04  -0.02     0.01  -0.12   0.03    -0.11  -0.09   0.13
  75   1     0.04  -0.06   0.01     0.01   0.00  -0.03    -0.03   0.04   0.06
  76   1     0.05  -0.03   0.02     0.01   0.01  -0.02    -0.06  -0.01   0.04
  77   1     0.03   0.00   0.05     0.00   0.02  -0.01    -0.02  -0.03   0.00
  78   1    -0.03  -0.06  -0.03    -0.02  -0.01  -0.01     0.05   0.06   0.06
  79   1    -0.03   0.00   0.05     0.00   0.00   0.00     0.04  -0.01  -0.02
  80   1    -0.02   0.00   0.02    -0.07   0.01  -0.01    -0.03  -0.08  -0.06
  81   1    -0.02   0.01   0.00    -0.06  -0.01   0.02    -0.02  -0.10  -0.03
  82   1    -0.05   0.03   0.01    -0.03  -0.02   0.03     0.01  -0.08   0.02
  83   1    -0.05  -0.04   0.03    -0.04   0.05   0.03     0.00  -0.06  -0.08
  84   1    -0.07   0.01   0.03     0.02   0.01   0.02     0.06   0.00   0.08
  85   1    -0.03  -0.15   0.13     0.00  -0.01  -0.07     0.03   0.10   0.04
  86   1    -0.09  -0.20   0.09     0.03   0.01  -0.06     0.02   0.13   0.03
  87   1    -0.01  -0.14   0.18     0.01  -0.01  -0.09     0.01   0.10  -0.01
  88   1     0.07  -0.02   0.08    -0.04  -0.06  -0.05     0.02   0.06   0.04
  89   1     0.13   0.01   0.13    -0.03  -0.05  -0.08    -0.01   0.04   0.01
  90   1     0.09   0.07   0.01    -0.04  -0.06  -0.03     0.02   0.00   0.05
  91   1     0.00   0.04   0.09    -0.01   0.00  -0.04     0.06  -0.10   0.02
  92   1     0.03   0.03   0.07    -0.04   0.03  -0.06     0.01  -0.08   0.01
  93   1     0.02   0.03   0.06    -0.03   0.05  -0.01     0.08  -0.05   0.00
  94   1    -0.04   0.03   0.08     0.01  -0.01  -0.04     0.00  -0.04   0.02
  95   1    -0.04   0.00   0.05     0.03  -0.04  -0.04    -0.03   0.04   0.03
  96   1     0.00   0.02   0.06     0.02   0.00  -0.07    -0.05  -0.04   0.06
  97   1    -0.13   0.07   0.18     0.08  -0.07  -0.04     0.12  -0.09   0.07
  98   1    -0.22   0.02   0.11     0.11  -0.04  -0.01     0.09  -0.04   0.05
  99   1    -0.15   0.07   0.18     0.06  -0.09  -0.05     0.05  -0.11   0.08
 100   1     0.00   0.15   0.12    -0.01  -0.07  -0.02     0.05  -0.02   0.06
 101   1     0.08   0.10   0.03    -0.09  -0.02  -0.01    -0.02   0.03   0.02
 102   1     0.04   0.15   0.11    -0.08  -0.11  -0.03    -0.01  -0.08   0.01
 103   1     0.00  -0.05   0.05    -0.04  -0.14  -0.03    -0.03  -0.03  -0.08
 104   1    -0.01  -0.04   0.02    -0.05  -0.14   0.05    -0.05  -0.01  -0.08
 105   1     0.01  -0.04   0.02    -0.04  -0.16  -0.08    -0.03  -0.01  -0.04
 106   1    -0.03  -0.05   0.04    -0.01  -0.01  -0.09     0.02  -0.08  -0.03
 107   1    -0.02  -0.04   0.01     0.02   0.02  -0.29     0.02  -0.05  -0.02
 108   1    -0.05  -0.03   0.02    -0.12   0.18  -0.16     0.02  -0.09  -0.03
 109   1     0.03   0.00  -0.02    -0.01   0.04   0.01    -0.01  -0.04  -0.04
 110   1    -0.05  -0.02  -0.03     0.18   0.10   0.03    -0.26  -0.14  -0.05
 111   1    -0.03   0.04   0.02     0.12  -0.01  -0.14    -0.17   0.00   0.19
 112   1     0.01   0.04  -0.05     0.00   0.02   0.00    -0.06  -0.08   0.05
 113   1     0.04  -0.02  -0.06     0.00   0.03   0.00    -0.09  -0.02   0.05
 114   1     0.01   0.00  -0.05     0.01   0.03   0.00    -0.05  -0.02   0.04
                    19                     20                     21
                     A                      A                      A
 Frequencies --    89.6843                96.5561               102.5297
 Red. masses --     4.1546                 4.0735                 2.9303
 Frc consts  --     0.0197                 0.0224                 0.0181
 IR Inten    --     1.8266                 0.1927                 0.1864
 Atom AN      X      Y      Z        X      Y      Z        X      Y      Z
   1   8     0.05   0.01  -0.01     0.02   0.00   0.01     0.04   0.02   0.00
   2  12     0.02   0.04   0.05     0.03   0.07  -0.01     0.00  -0.03  -0.01
   3   8     0.00   0.03   0.02    -0.01   0.04   0.02    -0.01   0.00   0.03
   4   6     0.00  -0.02   0.01     0.01   0.01   0.01     0.02   0.03   0.00
   5   7    -0.01  -0.03   0.00     0.04  -0.01  -0.06     0.05  -0.01  -0.01
   6   7     0.00   0.01   0.02    -0.01   0.04  -0.02     0.00  -0.01  -0.02
   7   8    -0.08  -0.04   0.02     0.00   0.02   0.02    -0.01   0.04   0.02
   8   6    -0.01  -0.04   0.00    -0.04  -0.03  -0.04     0.00  -0.01  -0.01
   9   6    -0.02  -0.04   0.01    -0.06  -0.04  -0.02     0.00  -0.01  -0.02
  10   6     0.00  -0.01   0.02    -0.03  -0.01  -0.01     0.01  -0.01  -0.03
  11   8     0.02  -0.03   0.03     0.01   0.02  -0.01    -0.01   0.04   0.00
  12   6     0.01   0.00   0.04     0.00   0.05  -0.01     0.00   0.00   0.02
  13   6     0.00   0.03   0.03    -0.02   0.01   0.01    -0.01   0.00   0.02
  14   6     0.04  -0.01   0.01     0.00   0.01   0.00     0.02   0.03  -0.02
  15   8     0.03   0.01   0.06     0.00   0.08  -0.02     0.01  -0.04   0.04
  16   6    -0.03   0.01  -0.02     0.01   0.00   0.02     0.00   0.01   0.02
  17   8    -0.02   0.08  -0.04    -0.03   0.01   0.01    -0.01  -0.05   0.05
  18   6    -0.02   0.06   0.02    -0.01   0.03   0.02    -0.01  -0.03   0.01
  19   8    -0.04   0.08   0.05     0.00   0.05   0.02     0.00  -0.06  -0.01
  20   8    -0.02   0.03   0.06     0.02  -0.03   0.02    -0.02   0.01  -0.03
  21   6    -0.02   0.03   0.02    -0.01  -0.04  -0.01     0.00   0.02   0.01
  22   6    -0.01   0.04  -0.07    -0.05  -0.02   0.02     0.02   0.00   0.04
  23   6    -0.02   0.01   0.06     0.02   0.00   0.03    -0.01   0.00  -0.02
  24   8    -0.02   0.03   0.06    -0.01  -0.08  -0.07     0.00   0.03   0.03
  25   6     0.01   0.07  -0.14    -0.09  -0.05   0.05     0.04   0.01   0.03
  26   6    -0.02   0.00   0.15     0.05   0.01   0.07    -0.03   0.00  -0.07
  27   6    -0.01   0.07   0.04     0.00  -0.09  -0.01    -0.02   0.02   0.02
  28   6     0.04   0.03  -0.04     0.00  -0.01   0.02     0.02   0.04  -0.07
  29   6     0.00  -0.03  -0.02     0.03  -0.02  -0.05     0.03  -0.02  -0.01
  30   6     0.00   0.00   0.00     0.00   0.05  -0.01    -0.01   0.00  -0.01
  31   6     0.01  -0.04  -0.03     0.03  -0.03  -0.01     0.02   0.00   0.01
  32   6     0.02  -0.04  -0.02     0.02  -0.05   0.02    -0.01   0.00   0.02
  33   6     0.03  -0.04  -0.01     0.01  -0.07   0.03    -0.02  -0.02   0.00
  34   6     0.02  -0.03  -0.01     0.02  -0.06   0.01    -0.01  -0.03  -0.02
  35   6     0.01  -0.03  -0.01     0.03  -0.04  -0.03     0.02  -0.03  -0.02
  36   6     0.00  -0.05  -0.03     0.04  -0.03   0.02     0.03   0.03   0.02
  37   6     0.01  -0.03   0.00     0.04  -0.07   0.00     0.03  -0.05  -0.02
  38   6     0.00  -0.01  -0.02     0.00   0.06   0.00    -0.01   0.02   0.01
  39   6     0.00  -0.05  -0.08     0.00   0.07   0.02    -0.02   0.01   0.00
  40   6    -0.01  -0.07  -0.13     0.00   0.10   0.05    -0.02  -0.01  -0.02
  41   6    -0.01  -0.05  -0.11     0.00   0.09   0.04    -0.01  -0.02  -0.03
  42   6    -0.01  -0.02  -0.05     0.00   0.06   0.00    -0.01  -0.01  -0.02
  43   6     0.00   0.01   0.00    -0.01   0.05  -0.04    -0.01   0.06   0.04
  44   6    -0.01   0.02   0.00    -0.02   0.02  -0.05     0.00   0.01   0.00
  45   6     0.00  -0.09  -0.01     0.01  -0.05   0.06     0.02   0.07   0.01
  46   6     0.02  -0.04  -0.02     0.08  -0.02   0.03     0.02   0.04   0.01
  47   6    -0.02   0.02  -0.01     0.07  -0.08   0.02     0.07  -0.12   0.00
  48   6     0.03  -0.08  -0.05    -0.01  -0.10   0.01    -0.03  -0.02   0.03
  49   6    -0.07   0.02   0.07    -0.08   0.11  -0.08     0.04  -0.04   0.01
  50   6     0.06   0.09   0.01     0.05  -0.04   0.01    -0.05   0.04  -0.04
  51   6     0.04  -0.05   0.01    -0.05   0.04  -0.05     0.04  -0.05   0.06
  52   6    -0.06   0.06  -0.06     0.02   0.04  -0.06    -0.09   0.13  -0.06
  53   6     0.02  -0.04  -0.01    -0.10  -0.06  -0.04    -0.10  -0.02   0.02
  54   6     0.04  -0.01   0.03    -0.02  -0.02   0.02     0.03   0.00  -0.04
  55   1    -0.01  -0.05   0.01    -0.09  -0.07  -0.01    -0.01   0.00  -0.02
  56   1     0.00   0.02   0.00    -0.05   0.01   0.07    -0.01   0.00   0.01
  57   1     0.08  -0.02   0.02    -0.02   0.01  -0.01     0.05   0.02  -0.01
  58   1    -0.06  -0.06   0.01     0.02   0.01  -0.01     0.01   0.01  -0.04
  59   1     0.00   0.03  -0.02    -0.02  -0.01   0.03    -0.06   0.00   0.03
  60   1    -0.09   0.05  -0.04     0.03   0.01   0.05     0.03   0.03   0.07
  61   1     0.00  -0.03  -0.09    -0.07   0.02   0.02     0.04   0.00   0.05
  62   1    -0.01  -0.05   0.04     0.02  -0.02   0.02     0.00   0.04  -0.01
  63   1     0.02   0.06  -0.16    -0.11  -0.08   0.07     0.05   0.03   0.02
  64   1    -0.01   0.13  -0.13    -0.06  -0.08   0.06     0.01   0.02   0.02
  65   1     0.03   0.06  -0.17    -0.12  -0.03   0.05     0.05   0.00   0.04
  66   1    -0.01  -0.03   0.17     0.08  -0.01   0.06    -0.05   0.02  -0.08
  67   1    -0.02  -0.02   0.17     0.06   0.03   0.10    -0.04  -0.01  -0.08
  68   1    -0.05   0.05   0.17     0.03   0.02   0.07    -0.03  -0.03  -0.08
  69   1    -0.01   0.06   0.03     0.00  -0.11   0.00    -0.02   0.02   0.00
  70   1    -0.02   0.11   0.02    -0.01  -0.13   0.02    -0.04   0.03   0.02
  71   1    -0.01   0.08   0.09     0.03  -0.09  -0.08    -0.03   0.02   0.03
  72   1     0.07   0.04  -0.03    -0.02  -0.01   0.03     0.02   0.04  -0.06
  73   1     0.00   0.04  -0.05     0.02  -0.02   0.02    -0.02   0.04  -0.09
  74   1     0.06   0.06  -0.06    -0.01  -0.01   0.03     0.05   0.06  -0.09
  75   1     0.02  -0.05  -0.02     0.01  -0.06   0.05    -0.02   0.01   0.03
  76   1     0.03  -0.04  -0.01     0.01  -0.08   0.06    -0.04  -0.02   0.00
  77   1     0.02  -0.02   0.00     0.02  -0.08   0.03    -0.02  -0.05  -0.04
  78   1    -0.01  -0.05  -0.05     0.03  -0.03   0.00     0.06   0.03   0.02
  79   1     0.01  -0.05   0.04     0.05  -0.07   0.00     0.04  -0.03  -0.06
  80   1     0.00  -0.06  -0.10     0.00   0.07   0.02    -0.02   0.02   0.01
  81   1    -0.01  -0.10  -0.17     0.01   0.11   0.08    -0.03  -0.03  -0.03
  82   1    -0.02  -0.07  -0.13     0.01   0.10   0.06    -0.02  -0.03  -0.03
  83   1     0.01   0.06   0.06     0.00   0.04  -0.05     0.01   0.12   0.13
  84   1    -0.02   0.00  -0.02    -0.03  -0.03  -0.12     0.00   0.04   0.04
  85   1     0.00  -0.08  -0.02     0.02  -0.04   0.08     0.03   0.08   0.02
  86   1    -0.01  -0.12  -0.02    -0.02  -0.07   0.05     0.03   0.08   0.01
  87   1     0.00  -0.09   0.03     0.01  -0.05   0.09     0.01   0.07  -0.01
  88   1     0.01  -0.05  -0.02     0.08  -0.04   0.05     0.04   0.08   0.02
  89   1     0.05  -0.03   0.00     0.11  -0.02   0.04    -0.02   0.05   0.01
  90   1     0.01   0.00  -0.03     0.09   0.00   0.01     0.03   0.01   0.02
  91   1    -0.01   0.02  -0.02     0.08  -0.11   0.05     0.07  -0.12   0.01
  92   1    -0.01   0.03  -0.05     0.04  -0.08   0.01     0.07  -0.14   0.05
  93   1    -0.04   0.04   0.01     0.10  -0.05   0.02     0.11  -0.14  -0.04
  94   1     0.04  -0.09  -0.04     0.01  -0.14   0.02     0.00  -0.06   0.02
  95   1     0.04  -0.11  -0.04    -0.03  -0.07   0.00    -0.05   0.07   0.03
  96   1     0.02  -0.06  -0.09    -0.05  -0.11   0.01    -0.08  -0.06   0.10
  97   1    -0.03   0.03   0.09    -0.13   0.12  -0.11     0.04  -0.03   0.02
  98   1    -0.14   0.02   0.03    -0.11   0.10  -0.09     0.07  -0.05   0.03
  99   1    -0.10   0.03   0.13    -0.05   0.18  -0.06     0.03  -0.07  -0.03
 100   1     0.03   0.12   0.04    -0.01  -0.07  -0.07    -0.02   0.06   0.00
 101   1     0.12   0.06  -0.02     0.11  -0.15   0.06    -0.09   0.10  -0.06
 102   1     0.09   0.13   0.03     0.09   0.06   0.08    -0.07  -0.02  -0.09
 103   1     0.04  -0.04   0.03    -0.06   0.03  -0.08     0.04  -0.03   0.08
 104   1     0.06  -0.07   0.05    -0.07   0.04  -0.04     0.08  -0.09   0.12
 105   1     0.04  -0.09  -0.03    -0.06   0.04  -0.04     0.03  -0.11  -0.01
 106   1    -0.04   0.06   0.00     0.02   0.02  -0.07    -0.06   0.12   0.05
 107   1    -0.05   0.02  -0.15     0.03   0.05  -0.07    -0.06   0.07  -0.23
 108   1    -0.12   0.13  -0.06     0.02   0.06  -0.06    -0.22   0.27  -0.07
 109   1    -0.03  -0.04   0.00    -0.01  -0.05  -0.09     0.09  -0.02  -0.04
 110   1     0.07  -0.02   0.02    -0.19  -0.12  -0.09    -0.29  -0.13  -0.09
 111   1     0.04  -0.07  -0.07    -0.13  -0.01   0.07    -0.17   0.10   0.24
 112   1     0.04   0.07  -0.03    -0.02   0.03  -0.03     0.03   0.04  -0.06
 113   1     0.13  -0.02   0.05     0.06  -0.02   0.06     0.07  -0.01  -0.04
 114   1    -0.01  -0.05   0.06    -0.06  -0.07   0.05     0.01  -0.01  -0.03
                    22                     23                     24
                     A                      A                      A
 Frequencies --   109.0775               114.3642               124.6377
 Red. masses --     3.6727                 3.0820                 1.9415
 Frc consts  --     0.0257                 0.0237                 0.0178
 IR Inten    --     0.0390                 0.2309                 0.5137
 Atom AN      X      Y      Z        X      Y      Z        X      Y      Z
   1   8    -0.02   0.02   0.02    -0.01   0.02   0.00    -0.01  -0.01   0.00
   2  12     0.01  -0.02   0.01     0.00   0.03   0.01     0.01  -0.01   0.01
   3   8    -0.02   0.03   0.09     0.00   0.02  -0.01     0.00   0.01   0.01
   4   6     0.04   0.02   0.00     0.00   0.02  -0.01     0.00  -0.02   0.00
   5   7     0.01  -0.02   0.00     0.00  -0.01  -0.02     0.01   0.00   0.02
   6   7     0.00   0.00  -0.05    -0.03  -0.02   0.02    -0.01  -0.01   0.00
   7   8     0.09   0.02  -0.01     0.01   0.02  -0.01     0.01  -0.02  -0.01
   8   6    -0.01   0.00  -0.01     0.08   0.02  -0.04     0.00   0.00   0.01
   9   6    -0.02   0.01  -0.03     0.15   0.04  -0.06     0.03   0.02  -0.01
  10   6    -0.01   0.00  -0.04     0.09   0.02  -0.02     0.03   0.01  -0.01
  11   8     0.02   0.00   0.03     0.01   0.02  -0.01     0.00  -0.02   0.00
  12   6     0.02  -0.01   0.06     0.01   0.02   0.00     0.00   0.00   0.00
  13   6    -0.01   0.01   0.06     0.00   0.01   0.00     0.00   0.00   0.00
  14   6     0.04   0.02   0.01     0.01   0.02  -0.01    -0.01  -0.02   0.01
  15   8     0.03  -0.03   0.07     0.01   0.02   0.01     0.00   0.01  -0.01
  16   6    -0.02   0.02   0.02    -0.03   0.01   0.01     0.00  -0.01  -0.01
  17   8    -0.02  -0.03   0.08    -0.01   0.04  -0.03     0.00   0.00   0.01
  18   6    -0.01  -0.01   0.05     0.00   0.04   0.00     0.00   0.00   0.01
  19   8    -0.01  -0.03   0.03    -0.01   0.05   0.01     0.00   0.00   0.01
  20   8    -0.02   0.03   0.00     0.01  -0.01   0.04     0.00   0.00   0.01
  21   6    -0.01   0.04   0.03     0.00  -0.01   0.00     0.00   0.00   0.00
  22   6     0.02   0.01   0.04    -0.02   0.00  -0.03     0.00   0.00   0.01
  23   6    -0.02   0.01   0.03     0.01   0.00   0.03     0.00   0.00   0.01
  24   8    -0.01   0.06   0.04     0.00  -0.03  -0.01     0.00   0.01  -0.01
  25   6     0.02   0.03   0.00    -0.04   0.00  -0.03     0.00   0.00   0.01
  26   6    -0.04   0.00   0.03     0.02   0.00   0.09     0.00   0.01   0.00
  27   6    -0.03   0.01   0.05     0.01   0.00   0.00     0.00  -0.01   0.00
  28   6     0.04   0.03  -0.03     0.01   0.03  -0.03    -0.01  -0.03   0.03
  29   6     0.01  -0.02   0.00    -0.02  -0.01  -0.02     0.01   0.00   0.02
  30   6    -0.01  -0.01  -0.06    -0.03  -0.02   0.03    -0.01  -0.01   0.00
  31   6     0.01  -0.02   0.00    -0.02   0.00  -0.03     0.01   0.01  -0.01
  32   6     0.00  -0.01   0.00    -0.02  -0.01  -0.03     0.01   0.02  -0.03
  33   6    -0.01  -0.01  -0.02    -0.02  -0.02   0.00     0.02   0.02  -0.01
  34   6     0.00  -0.01  -0.04    -0.02  -0.03   0.01     0.01   0.00   0.03
  35   6     0.01  -0.02  -0.02    -0.02  -0.02  -0.01     0.01  -0.01   0.04
  36   6     0.01   0.00  -0.01    -0.02  -0.01  -0.02     0.01   0.01   0.00
  37   6     0.02  -0.03  -0.03    -0.02  -0.01  -0.01     0.01  -0.01   0.03
  38   6    -0.03  -0.03  -0.09    -0.01  -0.02   0.03    -0.01   0.00   0.00
  39   6    -0.04  -0.03  -0.07     0.01  -0.01   0.03    -0.01   0.00   0.01
  40   6    -0.03  -0.02  -0.03     0.00   0.00   0.01    -0.01   0.00   0.00
  41   6    -0.01  -0.01  -0.01    -0.02   0.00   0.00    -0.01   0.00  -0.01
  42   6     0.00  -0.01  -0.03    -0.03  -0.01   0.01    -0.01  -0.01  -0.01
  43   6    -0.03  -0.02  -0.12    -0.01  -0.06   0.03    -0.01   0.00   0.00
  44   6     0.02   0.00   0.00    -0.05  -0.01   0.00    -0.02   0.00  -0.01
  45   6     0.02   0.00  -0.02    -0.03  -0.01  -0.02     0.00   0.01   0.01
  46   6     0.00   0.01  -0.01     0.00  -0.03  -0.02     0.03   0.00   0.00
  47   6     0.03  -0.07  -0.02     0.03  -0.11   0.02    -0.09   0.11  -0.02
  48   6    -0.01  -0.02   0.00    -0.08   0.06   0.08     0.10  -0.07  -0.08
  49   6     0.01  -0.02   0.02    -0.01  -0.02  -0.03    -0.01  -0.01  -0.01
  50   6     0.05   0.00   0.01    -0.09   0.01  -0.04    -0.04   0.02  -0.03
  51   6    -0.06   0.19  -0.14    -0.02  -0.04   0.03    -0.03   0.02  -0.01
  52   6     0.01  -0.12   0.08     0.05  -0.09   0.06     0.00  -0.02   0.01
  53   6    -0.02   0.02   0.01     0.04   0.03  -0.01    -0.09   0.00   0.05
  54   6    -0.04   0.00  -0.04     0.14   0.03  -0.03     0.07   0.03  -0.04
  55   1    -0.03   0.02  -0.03     0.23   0.05  -0.08     0.04   0.03  -0.01
  56   1    -0.03   0.00   0.05    -0.01   0.01   0.01    -0.01   0.00   0.01
  57   1     0.07   0.02   0.03     0.03   0.02  -0.01    -0.02  -0.01   0.01
  58   1    -0.02   0.02   0.00    -0.06  -0.02   0.10     0.00  -0.01  -0.01
  59   1    -0.05   0.01   0.02     0.06   0.01  -0.01     0.00   0.00  -0.01
  60   1    -0.01   0.02   0.04    -0.10   0.04  -0.05     0.00  -0.02  -0.01
  61   1     0.06   0.00   0.06    -0.04   0.00  -0.04     0.01   0.00   0.01
  62   1     0.01   0.02   0.03     0.01  -0.04   0.01     0.00   0.01   0.01
  63   1     0.05   0.03  -0.02    -0.04  -0.01  -0.02     0.01   0.00   0.01
  64   1     0.00   0.06  -0.01    -0.02   0.00  -0.02     0.00   0.00   0.01
  65   1     0.03   0.03   0.00    -0.04   0.01  -0.04     0.00   0.00   0.01
  66   1    -0.06   0.01   0.02     0.04  -0.03   0.10     0.00   0.01   0.00
  67   1    -0.04  -0.02   0.03     0.03   0.00   0.12     0.00   0.01  -0.01
  68   1    -0.06   0.00   0.02     0.00   0.03   0.10     0.01   0.00  -0.01
  69   1    -0.03  -0.02   0.03     0.01  -0.01   0.01     0.00  -0.02   0.00
  70   1    -0.06   0.03   0.05     0.01   0.00   0.00    -0.01  -0.02   0.00
  71   1    -0.01   0.01   0.07     0.02   0.00   0.00     0.00  -0.01  -0.01
  72   1     0.05   0.02  -0.01     0.02   0.03  -0.01    -0.01  -0.03   0.02
  73   1     0.01   0.02  -0.05     0.00   0.02  -0.04     0.02  -0.02   0.05
  74   1     0.07   0.05  -0.05     0.02   0.05  -0.04    -0.02  -0.05   0.05
  75   1     0.00  -0.01   0.00    -0.02   0.00  -0.03     0.02   0.04  -0.06
  76   1    -0.01  -0.01  -0.03    -0.03  -0.03   0.00     0.02   0.02  -0.03
  77   1     0.00  -0.01  -0.05    -0.03  -0.04   0.02     0.01  -0.01   0.04
  78   1     0.02   0.00  -0.02    -0.02  -0.01  -0.01     0.01   0.01   0.00
  79   1     0.02  -0.02  -0.05    -0.02   0.02  -0.09     0.01  -0.05   0.12
  80   1    -0.05  -0.03  -0.08     0.02   0.00   0.04     0.00   0.01   0.02
  81   1    -0.04  -0.02  -0.01     0.01   0.01   0.01    -0.01   0.00   0.00
  82   1    -0.01  -0.01   0.01    -0.02   0.00  -0.02    -0.01  -0.01  -0.02
  83   1    -0.03  -0.10  -0.25    -0.03  -0.08   0.01    -0.01  -0.01  -0.02
  84   1     0.03   0.00  -0.02    -0.05   0.01   0.03    -0.03   0.01   0.01
  85   1     0.02   0.01  -0.03    -0.03  -0.01   0.00     0.00   0.00   0.03
  86   1     0.03  -0.01  -0.01    -0.04   0.00  -0.02    -0.01   0.03   0.01
  87   1     0.00   0.00  -0.01    -0.02  -0.01  -0.02     0.02   0.01   0.00
  88   1     0.00   0.03  -0.02     0.01  -0.02   0.01     0.04   0.01   0.02
  89   1    -0.02   0.01   0.00    -0.02  -0.04  -0.04     0.02   0.00  -0.01
  90   1     0.00   0.01  -0.01     0.02  -0.06  -0.03     0.05  -0.02  -0.01
  91   1     0.03  -0.06  -0.02     0.02  -0.09   0.02    -0.07   0.11  -0.05
  92   1     0.03  -0.08   0.01     0.05  -0.15   0.11    -0.10   0.16  -0.13
  93   1     0.05  -0.08  -0.04     0.07  -0.17  -0.05    -0.17   0.17   0.06
  94   1     0.00  -0.03  -0.01    -0.08   0.07   0.07     0.16  -0.12  -0.17
  95   1    -0.02   0.03   0.00    -0.11   0.14   0.07     0.19  -0.06  -0.01
  96   1    -0.04  -0.04   0.03    -0.09   0.02   0.17     0.02  -0.08  -0.14
  97   1     0.04  -0.02   0.03    -0.04  -0.02  -0.03    -0.02   0.00  -0.01
  98   1    -0.01  -0.01   0.00     0.03  -0.03   0.00     0.01  -0.03   0.00
  99   1    -0.01  -0.03   0.05     0.00  -0.03  -0.08     0.00  -0.02  -0.04
 100   1     0.08   0.00   0.03    -0.09   0.02  -0.02    -0.04   0.03  -0.01
 101   1     0.05   0.02  -0.02    -0.12   0.03  -0.04    -0.05   0.04  -0.04
 102   1     0.03  -0.03   0.02    -0.10  -0.02  -0.07    -0.04   0.01  -0.05
 103   1    -0.06   0.23  -0.14    -0.02  -0.07   0.02    -0.03   0.01  -0.01
 104   1    -0.06   0.24  -0.27    -0.06  -0.02   0.02    -0.03   0.02  -0.02
 105   1    -0.07   0.26  -0.03     0.00  -0.02   0.05    -0.03   0.02   0.01
 106   1    -0.02  -0.05   0.00     0.03  -0.09  -0.01     0.00  -0.01  -0.01
 107   1    -0.04  -0.05   0.30     0.04  -0.06   0.13    -0.01  -0.01   0.04
 108   1     0.12  -0.32   0.09     0.12  -0.13   0.06     0.02  -0.03   0.01
 109   1     0.02   0.02   0.02     0.26   0.03  -0.06     0.25   0.00  -0.07
 110   1    -0.05   0.01  -0.01    -0.16  -0.10  -0.12    -0.40  -0.22  -0.12
 111   1    -0.03   0.05   0.05    -0.05   0.21   0.20    -0.22   0.24   0.38
 112   1    -0.03  -0.06   0.01     0.15   0.00   0.08     0.07   0.06  -0.03
 113   1    -0.12   0.01  -0.07     0.05   0.03  -0.08     0.08   0.01  -0.06
 114   1     0.01   0.04  -0.07     0.23   0.07  -0.08     0.08   0.04  -0.05
                    25                     26                     27
                     A                      A                      A
 Frequencies --   131.2451               136.1348               136.6421
 Red. masses --     2.7891                 1.7360                 2.4057
 Frc consts  --     0.0283                 0.0190                 0.0265
 IR Inten    --     0.5873                 0.3262                 0.5523
 Atom AN      X      Y      Z        X      Y      Z        X      Y      Z
   1   8     0.06   0.01  -0.02     0.05   0.02   0.00    -0.01  -0.01   0.00
   2  12     0.03   0.01   0.00    -0.02   0.00  -0.02     0.01  -0.01   0.01
   3   8    -0.03   0.07   0.05     0.01  -0.04  -0.03     0.00   0.02   0.00
   4   6     0.03   0.01  -0.01     0.06   0.01   0.00     0.00   0.00   0.00
   5   7     0.00   0.00   0.00     0.00   0.01  -0.01     0.02   0.00   0.01
   6   7     0.01  -0.01   0.01    -0.01   0.01  -0.02    -0.03  -0.02   0.00
   7   8    -0.01   0.01   0.00     0.07   0.01   0.00     0.01   0.00  -0.01
   8   6     0.01   0.00   0.00    -0.01   0.01  -0.01    -0.04  -0.01   0.02
   9   6     0.01   0.00   0.00    -0.02   0.01  -0.01    -0.03   0.00   0.01
  10   6     0.00   0.00   0.01    -0.01   0.01  -0.01     0.02   0.01  -0.02
  11   8     0.01   0.05  -0.05    -0.01   0.01   0.02     0.00   0.00  -0.01
  12   6     0.01   0.06  -0.05     0.00  -0.01   0.03     0.00   0.01  -0.01
  13   6    -0.03   0.03  -0.01     0.01  -0.01   0.01     0.00   0.01  -0.01
  14   6    -0.02   0.00  -0.01     0.02   0.00   0.01    -0.01   0.00   0.00
  15   8     0.01   0.05  -0.04     0.00  -0.02   0.03     0.00   0.02  -0.02
  16   6    -0.09   0.00   0.01    -0.08   0.01   0.02     0.00  -0.01   0.00
  17   8    -0.01  -0.03   0.10     0.00   0.01  -0.05     0.00   0.01   0.00
  18   6     0.00   0.01   0.04    -0.01  -0.02  -0.03     0.00   0.01   0.00
  19   8     0.05  -0.01   0.01    -0.03  -0.01  -0.01     0.00   0.01   0.00
  20   8     0.00   0.03   0.01    -0.02  -0.01  -0.01     0.01   0.00  -0.01
  21   6     0.01   0.03   0.02    -0.02  -0.02  -0.01     0.00   0.00   0.00
  22   6     0.01   0.02   0.08    -0.02  -0.01  -0.03     0.00   0.00   0.00
  23   6     0.00   0.04   0.02    -0.01  -0.03  -0.01     0.01   0.01   0.00
  24   8     0.01   0.05   0.00    -0.02  -0.02   0.00     0.00  -0.01   0.01
  25   6     0.01   0.01   0.07    -0.01  -0.01  -0.02     0.00   0.00   0.00
  26   6     0.01   0.04  -0.03    -0.03  -0.04   0.02     0.02   0.01   0.01
  27   6    -0.05  -0.09  -0.07     0.02   0.05   0.04     0.00  -0.01  -0.01
  28   6    -0.03  -0.11   0.10     0.01  -0.04  -0.02     0.00  -0.01   0.02
  29   6    -0.01   0.00   0.00     0.01   0.01  -0.01     0.02   0.00   0.02
  30   6     0.00  -0.02  -0.01    -0.01   0.01  -0.01    -0.02  -0.01   0.00
  31   6     0.00   0.00  -0.01     0.01   0.00   0.00     0.01  -0.03   0.08
  32   6     0.00   0.01  -0.02     0.00   0.00   0.02     0.01  -0.04   0.10
  33   6     0.00   0.00   0.00     0.00   0.00   0.01     0.01   0.00   0.01
  34   6     0.00   0.00   0.01     0.01   0.01   0.00     0.02   0.05  -0.08
  35   6    -0.01   0.00   0.01     0.01   0.01  -0.01     0.02   0.03  -0.06
  36   6    -0.01  -0.01  -0.01     0.01   0.01   0.00     0.00  -0.02   0.03
  37   6    -0.01   0.01   0.00     0.01   0.00   0.00     0.02   0.01  -0.04
  38   6     0.01  -0.02  -0.01    -0.01   0.01  -0.01    -0.01   0.01   0.03
  39   6     0.01  -0.04  -0.04    -0.01   0.02   0.01     0.00   0.02   0.04
  40   6     0.00  -0.05  -0.06     0.00   0.03   0.03    -0.01   0.01   0.02
  41   6     0.00  -0.05  -0.06     0.00   0.03   0.04    -0.02  -0.01  -0.02
  42   6     0.00  -0.03  -0.03     0.00   0.02   0.02    -0.02  -0.02  -0.02
  43   6     0.01  -0.02   0.00     0.00   0.00   0.01    -0.01  -0.01   0.02
  44   6    -0.01  -0.02  -0.02     0.02   0.01   0.01    -0.02   0.00  -0.01
  45   6    -0.01  -0.02   0.00     0.01   0.01   0.00     0.05  -0.03  -0.02
  46   6     0.00  -0.02  -0.01     0.01   0.01   0.00    -0.10   0.04   0.01
  47   6    -0.01  -0.02  -0.01     0.00   0.03   0.00     0.06   0.03   0.00
  48   6    -0.01   0.03   0.02     0.00  -0.02  -0.02    -0.03  -0.06  -0.05
  49   6    -0.03  -0.02   0.01     0.03   0.00   0.00     0.00  -0.04   0.01
  50   6     0.01   0.01  -0.02     0.01  -0.03   0.02    -0.04   0.04  -0.04
  51   6     0.03  -0.04   0.01     0.02  -0.01   0.01    -0.04   0.00   0.01
  52   6    -0.01   0.00  -0.02     0.00   0.00   0.01     0.03  -0.03   0.02
  53   6     0.03   0.00  -0.01    -0.02   0.00  -0.01    -0.08  -0.03   0.02
  54   6    -0.02  -0.01   0.01    -0.02   0.00  -0.01     0.13   0.07  -0.08
  55   1     0.02   0.00   0.00    -0.02   0.00  -0.01    -0.02   0.01   0.01
  56   1    -0.08   0.03   0.04     0.04   0.00   0.00    -0.01   0.01   0.00
  57   1    -0.11   0.03  -0.04     0.02   0.02   0.02    -0.02   0.00   0.00
  58   1    -0.22  -0.20   0.33    -0.25  -0.22   0.46    -0.01  -0.01   0.06
  59   1     0.23   0.03  -0.06     0.38   0.07  -0.09     0.07   0.00  -0.02
  60   1    -0.39   0.14  -0.20    -0.47   0.16  -0.31    -0.04   0.00  -0.05
  61   1     0.05   0.03   0.10    -0.04  -0.02  -0.05     0.00   0.01   0.00
  62   1     0.00   0.07   0.03    -0.01  -0.05  -0.02     0.01   0.00   0.00
  63   1     0.02   0.01   0.06    -0.03  -0.01  -0.01     0.00   0.00   0.00
  64   1    -0.01  -0.01   0.06     0.00  -0.01  -0.01    -0.01  -0.01   0.00
  65   1     0.00   0.01   0.09    -0.01  -0.01  -0.04    -0.01   0.00   0.01
  66   1     0.01   0.06  -0.04    -0.05  -0.04   0.03     0.03   0.00   0.01
  67   1     0.01   0.06  -0.03    -0.03  -0.06   0.01     0.02   0.01   0.03
  68   1     0.01   0.01  -0.04    -0.03  -0.01   0.02     0.01   0.01   0.01
  69   1    -0.05  -0.11  -0.07     0.02   0.07   0.04     0.00  -0.01  -0.01
  70   1    -0.07  -0.17  -0.01     0.04   0.06   0.02    -0.01  -0.02  -0.01
  71   1    -0.03  -0.11  -0.17     0.00   0.05   0.07     0.00  -0.01  -0.03
  72   1    -0.10  -0.12   0.10    -0.02  -0.05  -0.01    -0.01  -0.01   0.01
  73   1     0.09  -0.13   0.15     0.01  -0.06  -0.03     0.01  -0.01   0.03
  74   1    -0.08  -0.17   0.16     0.04  -0.05  -0.03    -0.02  -0.02   0.03
  75   1     0.00   0.01  -0.03     0.00  -0.01   0.03     0.01  -0.07   0.16
  76   1     0.00   0.00  -0.01     0.00   0.00   0.02     0.00   0.00   0.01
  77   1     0.00  -0.01   0.02     0.01   0.01  -0.01     0.02   0.08  -0.15
  78   1    -0.02  -0.01  -0.01     0.01   0.01   0.01     0.02  -0.02   0.00
  79   1    -0.01   0.02  -0.02     0.01   0.00   0.02     0.03   0.00   0.00
  80   1     0.01  -0.04  -0.04    -0.01   0.02   0.01     0.00   0.04   0.07
  81   1     0.00  -0.06  -0.09     0.00   0.03   0.05     0.00   0.02   0.02
  82   1     0.00  -0.05  -0.08     0.00   0.04   0.06    -0.02  -0.02  -0.04
  83   1     0.01   0.00   0.02    -0.01   0.00   0.02    -0.02  -0.03   0.00
  84   1    -0.01  -0.02  -0.01     0.02   0.01   0.00    -0.02   0.02   0.03
  85   1    -0.01  -0.03   0.01     0.01   0.01   0.00     0.05   0.01  -0.11
  86   1    -0.02  -0.01   0.00     0.01   0.01   0.00     0.13  -0.09  -0.01
  87   1     0.00  -0.02   0.00     0.01   0.01   0.00     0.02  -0.02   0.01
  88   1     0.00  -0.03   0.00     0.01   0.01   0.00    -0.12   0.04  -0.08
  89   1     0.02  -0.02  -0.01     0.00   0.01   0.00    -0.09   0.05   0.06
  90   1     0.00  -0.01  -0.01     0.01   0.00   0.00    -0.16   0.08   0.05
  91   1     0.00  -0.04   0.00     0.01   0.01   0.02     0.06  -0.01   0.05
  92   1    -0.03  -0.03   0.00     0.00   0.04  -0.02     0.05   0.03  -0.03
  93   1     0.00  -0.01  -0.01     0.01   0.05   0.02     0.10   0.06   0.00
  94   1    -0.02   0.05   0.02     0.01  -0.04  -0.02    -0.04  -0.09   0.02
  95   1    -0.01   0.03   0.01     0.01  -0.03  -0.02    -0.07  -0.10  -0.09
  96   1     0.01   0.03   0.03    -0.01  -0.02  -0.04    -0.02  -0.04  -0.10
  97   1    -0.02  -0.01   0.03     0.04  -0.01  -0.01     0.01  -0.03   0.03
  98   1    -0.05  -0.04   0.01     0.03   0.02   0.00     0.03  -0.06   0.03
  99   1    -0.03  -0.02   0.02     0.02  -0.01   0.01     0.00  -0.07  -0.03
 100   1     0.00   0.03   0.00     0.04  -0.04   0.02    -0.03   0.06   0.00
 101   1     0.02   0.02  -0.04     0.01  -0.02   0.03    -0.05   0.08  -0.06
 102   1     0.02   0.02  -0.03     0.00  -0.04   0.04    -0.05   0.01  -0.07
 103   1     0.03  -0.06   0.02     0.02  -0.01   0.03    -0.04  -0.01  -0.01
 104   1     0.02  -0.04   0.02     0.03  -0.01   0.01    -0.07   0.01   0.01
 105   1     0.05  -0.04  -0.01     0.03  -0.01   0.00    -0.04   0.02   0.03
 106   1     0.00  -0.01   0.01     0.01  -0.02   0.05     0.02  -0.04  -0.02
 107   1     0.00  -0.02  -0.05     0.02   0.00  -0.02     0.03  -0.01   0.06
 108   1    -0.04   0.02  -0.02    -0.04   0.01   0.01     0.08  -0.04   0.03
 109   1    -0.01   0.00   0.01     0.01   0.01  -0.02    -0.37  -0.02   0.09
 110   1     0.06   0.03   0.01    -0.05  -0.02  -0.03     0.12   0.17   0.12
 111   1     0.04  -0.02  -0.05    -0.04   0.02   0.02     0.02  -0.26  -0.18
 112   1    -0.02  -0.02   0.00    -0.02  -0.01   0.00     0.12   0.25  -0.19
 113   1    -0.02   0.00   0.01    -0.05   0.01  -0.02     0.32   0.00  -0.08
 114   1    -0.02   0.00   0.01    -0.01   0.01  -0.02     0.04   0.02  -0.03
                    28                     29                     30
                     A                      A                      A
 Frequencies --   142.6241               143.3759               147.3092
 Red. masses --     4.1028                 4.8841                 2.2433
 Frc consts  --     0.0492                 0.0592                 0.0287
 IR Inten    --     0.8848                 1.9417                 0.2465
 Atom AN      X      Y      Z        X      Y      Z        X      Y      Z
   1   8    -0.07  -0.01   0.03     0.02   0.01   0.00    -0.01  -0.01   0.00
   2  12    -0.05   0.08  -0.07     0.06  -0.07   0.03    -0.05  -0.01   0.02
   3   8     0.01  -0.01   0.00     0.04  -0.05  -0.07     0.00  -0.02  -0.02
   4   6    -0.04  -0.02   0.02     0.00   0.01   0.00     0.00   0.00   0.00
   5   7     0.00   0.06  -0.09     0.01  -0.04   0.06     0.00  -0.01   0.02
   6   7     0.00   0.02   0.01    -0.01  -0.04  -0.05    -0.01   0.00   0.02
   7   8     0.01  -0.03   0.00    -0.02   0.02   0.01     0.03   0.00  -0.01
   8   6    -0.01   0.02  -0.07    -0.01   0.00   0.05    -0.03  -0.02   0.02
   9   6     0.01   0.01  -0.02    -0.03   0.01   0.00    -0.06  -0.03   0.04
  10   6     0.00   0.02   0.01    -0.02  -0.01  -0.05    -0.02  -0.01   0.03
  11   8     0.00  -0.06   0.05     0.03   0.02  -0.02    -0.04   0.00   0.02
  12   6     0.00  -0.01   0.03     0.03  -0.02  -0.02    -0.04   0.02   0.02
  13   6     0.01  -0.01   0.02     0.04  -0.01  -0.04     0.00   0.00   0.01
  14   6     0.02  -0.01   0.02     0.01   0.01   0.00    -0.01   0.00  -0.01
  15   8    -0.01   0.04   0.00     0.04  -0.06   0.00    -0.05   0.04   0.00
  16   6     0.07   0.01  -0.03     0.00   0.01   0.01     0.01  -0.01   0.00
  17   8     0.02   0.01   0.04     0.05   0.10  -0.04     0.01   0.01   0.00
  18   6     0.01   0.00   0.00     0.01   0.04  -0.02     0.01   0.00   0.00
  19   8     0.02   0.00  -0.01     0.01   0.03  -0.01     0.01   0.01   0.01
  20   8    -0.02   0.01   0.10    -0.02  -0.01   0.25     0.01  -0.01   0.05
  21   6    -0.01   0.02   0.03    -0.03   0.01   0.05     0.01  -0.01   0.01
  22   6    -0.02   0.02   0.08    -0.05   0.02   0.05     0.01   0.00   0.00
  23   6    -0.03   0.03   0.02    -0.06   0.02   0.06     0.00   0.01   0.01
  24   8    -0.02   0.04  -0.07    -0.04   0.03  -0.16     0.01   0.00  -0.03
  25   6    -0.05  -0.03   0.13    -0.10  -0.05   0.13     0.02   0.00  -0.01
  26   6    -0.03   0.03  -0.06    -0.03   0.04  -0.01     0.04   0.02  -0.05
  27   6     0.03   0.01   0.04     0.04   0.05  -0.02     0.02   0.00   0.03
  28   6     0.03   0.11  -0.06     0.01   0.01   0.04    -0.01   0.00  -0.08
  29   6     0.00   0.06  -0.07     0.00  -0.04   0.05     0.01  -0.01   0.01
  30   6    -0.01   0.00   0.00     0.00  -0.04  -0.06     0.00   0.01   0.01
  31   6     0.00   0.03  -0.01     0.00  -0.02   0.02     0.00   0.02  -0.04
  32   6     0.00  -0.01   0.06     0.00   0.01  -0.03     0.00   0.04  -0.08
  33   6    -0.01  -0.02   0.08     0.00   0.01  -0.05     0.00   0.01  -0.02
  34   6     0.00   0.01   0.02     0.00  -0.01  -0.01    -0.01  -0.04   0.06
  35   6     0.00   0.04  -0.04     0.00  -0.03   0.03     0.00  -0.03   0.05
  36   6     0.00   0.03   0.01     0.00  -0.01  -0.01     0.01   0.02  -0.01
  37   6     0.00   0.02   0.01     0.01  -0.03  -0.01     0.01  -0.02   0.01
  38   6     0.00  -0.02  -0.02     0.00  -0.04  -0.06     0.00   0.02   0.02
  39   6     0.00  -0.05  -0.07     0.00  -0.02  -0.04    -0.01   0.02   0.02
  40   6     0.00  -0.06  -0.09     0.01   0.02   0.02    -0.01  -0.01  -0.01
  41   6    -0.01  -0.04  -0.06     0.01   0.04   0.04    -0.01  -0.03  -0.03
  42   6    -0.01  -0.02  -0.02     0.00   0.00   0.00     0.00  -0.01  -0.01
  43   6     0.02  -0.06   0.02     0.00   0.00  -0.01    -0.01   0.02  -0.01
  44   6     0.02  -0.03  -0.01     0.00   0.00  -0.01     0.00   0.00  -0.01
  45   6    -0.01   0.04   0.02     0.02  -0.02  -0.04    -0.02   0.04   0.02
  46   6     0.03  -0.01   0.01    -0.05   0.00  -0.02     0.07  -0.01   0.00
  47   6     0.03   0.07   0.04    -0.02  -0.07  -0.04    -0.03  -0.07  -0.02
  48   6    -0.04  -0.06  -0.02     0.03   0.02   0.00     0.05   0.05   0.04
  49   6     0.03  -0.05   0.00    -0.01   0.01  -0.02     0.03  -0.03   0.00
  50   6     0.04  -0.06   0.01     0.00  -0.01   0.00    -0.01   0.02  -0.02
  51   6     0.07  -0.08   0.03     0.09   0.02   0.00    -0.07   0.04  -0.03
  52   6     0.04  -0.07   0.03    -0.09   0.02   0.02     0.04   0.00  -0.02
  53   6    -0.06  -0.03  -0.10     0.01   0.05   0.08     0.01  -0.03   0.01
  54   6     0.00   0.01   0.02    -0.02   0.03  -0.10     0.06   0.03   0.00
  55   1     0.01  -0.03  -0.01    -0.05   0.06  -0.01    -0.07  -0.04   0.04
  56   1     0.01  -0.01   0.02     0.08  -0.01  -0.06     0.01   0.00   0.03
  57   1     0.10  -0.04   0.04    -0.02   0.01  -0.01     0.03  -0.01   0.01
  58   1     0.08   0.07   0.08     0.01   0.01  -0.04    -0.03  -0.04   0.15
  59   1     0.21   0.04  -0.06    -0.05   0.00   0.02     0.17   0.01  -0.04
  60   1     0.04  -0.07  -0.15     0.03   0.01   0.05    -0.10   0.01  -0.12
  61   1    -0.05   0.06   0.08    -0.16   0.07   0.01     0.02  -0.01   0.00
  62   1    -0.09   0.06   0.03    -0.20   0.02   0.05    -0.04   0.03   0.02
  63   1    -0.09  -0.07   0.17    -0.19  -0.13   0.21     0.02   0.01  -0.02
  64   1     0.00  -0.07   0.14     0.02  -0.08   0.18     0.01   0.01  -0.02
  65   1    -0.09   0.00   0.11    -0.17   0.01   0.07     0.02   0.00  -0.01
  66   1    -0.06   0.05  -0.05    -0.07   0.04   0.03     0.04   0.03  -0.05
  67   1    -0.05   0.04  -0.10    -0.06   0.07  -0.11     0.03   0.07  -0.07
  68   1     0.01   0.00  -0.07     0.07   0.03  -0.02     0.08   0.00  -0.06
  69   1     0.03  -0.01   0.05     0.05   0.08  -0.01     0.01  -0.01   0.04
  70   1     0.04   0.03   0.02     0.07   0.06  -0.04     0.03   0.00   0.02
  71   1     0.05   0.01   0.06     0.01   0.05   0.02     0.02   0.00   0.02
  72   1     0.12   0.12  -0.06     0.02   0.01   0.04    -0.02   0.00  -0.08
  73   1    -0.07   0.14  -0.10     0.04   0.02   0.06    -0.07   0.00  -0.10
  74   1     0.07   0.17  -0.10    -0.02   0.01   0.06     0.04   0.01  -0.11
  75   1    -0.01  -0.04   0.11     0.00   0.03  -0.07    -0.01   0.08  -0.13
  76   1    -0.01  -0.05   0.14     0.00   0.03  -0.09    -0.01   0.01  -0.03
  77   1     0.00   0.00   0.05     0.00  -0.01  -0.03    -0.01  -0.07   0.10
  78   1     0.00   0.03   0.03     0.00  -0.01  -0.02     0.00   0.02   0.01
  79   1     0.00   0.00   0.05     0.02  -0.01  -0.04     0.01   0.00  -0.03
  80   1     0.00  -0.07  -0.10     0.00  -0.03  -0.05    -0.01   0.02   0.03
  81   1    -0.01  -0.09  -0.13     0.02   0.04   0.05    -0.01  -0.02  -0.03
  82   1    -0.01  -0.05  -0.08     0.02   0.08   0.09    -0.01  -0.05  -0.06
  83   1    -0.02  -0.07   0.04     0.01   0.02   0.01     0.00   0.00  -0.05
  84   1     0.04  -0.01  -0.03    -0.01  -0.01  -0.01     0.01   0.02   0.02
  85   1    -0.01   0.02   0.05     0.02   0.00  -0.08    -0.02   0.01   0.08
  86   1    -0.02   0.07   0.02     0.05  -0.05  -0.03    -0.07   0.08   0.02
  87   1     0.01   0.03  -0.01     0.00  -0.02  -0.01     0.01   0.03  -0.01
  88   1     0.02  -0.02   0.03    -0.05   0.01  -0.06     0.07  -0.04   0.04
  89   1     0.04  -0.01  -0.01    -0.06   0.00  -0.01     0.10  -0.02  -0.02
  90   1     0.03  -0.01   0.01    -0.07   0.00   0.00     0.08  -0.01  -0.02
  91   1     0.03   0.05   0.08    -0.01  -0.04  -0.08    -0.02  -0.05  -0.08
  92   1     0.04   0.08   0.01    -0.02  -0.08  -0.01    -0.03  -0.09   0.01
  93   1     0.05   0.10   0.05    -0.04  -0.10  -0.05    -0.05  -0.11  -0.04
  94   1    -0.04  -0.09   0.04     0.06   0.02  -0.05     0.04   0.08  -0.01
  95   1    -0.07  -0.11  -0.05     0.06   0.07   0.03     0.07   0.07   0.06
  96   1    -0.04  -0.04  -0.08     0.00  -0.01   0.04     0.06   0.03   0.08
  97   1     0.06  -0.06   0.01    -0.05   0.03  -0.01     0.04  -0.03   0.01
  98   1     0.02  -0.04  -0.01     0.01  -0.02   0.01     0.04  -0.03   0.01
  99   1     0.01  -0.07   0.02     0.02   0.03  -0.05     0.02  -0.05  -0.01
 100   1     0.05  -0.07  -0.01     0.00  -0.01  -0.01    -0.03   0.03  -0.02
 101   1     0.04  -0.06   0.01     0.00  -0.01   0.00    -0.01   0.02  -0.02
 102   1     0.03  -0.06   0.03    -0.01  -0.01   0.00     0.00   0.03  -0.04
 103   1     0.08  -0.13   0.07     0.10   0.07   0.06    -0.08   0.03  -0.07
 104   1     0.03  -0.06   0.02     0.15   0.01  -0.02    -0.09   0.05  -0.03
 105   1     0.13  -0.05   0.00     0.08   0.00  -0.02    -0.08   0.05   0.01
 106   1     0.05  -0.10   0.06    -0.07   0.06   0.13     0.03  -0.02  -0.06
 107   1     0.07  -0.06   0.02    -0.08   0.00  -0.06     0.04   0.02   0.01
 108   1     0.01  -0.08   0.03    -0.21   0.04   0.01     0.08  -0.01  -0.01
 109   1    -0.05  -0.02  -0.15    -0.05   0.04   0.14    -0.11  -0.03   0.04
 110   1    -0.09  -0.07  -0.12     0.07   0.13   0.11     0.12   0.04   0.07
 111   1    -0.07  -0.05  -0.05     0.04   0.02   0.01     0.06  -0.11  -0.12
 112   1     0.00   0.02   0.00    -0.02   0.07  -0.14     0.03   0.28  -0.30
 113   1     0.03   0.01   0.04     0.03   0.00  -0.12     0.44  -0.04   0.09
 114   1    -0.02  -0.01   0.03    -0.05   0.05  -0.08    -0.19  -0.12   0.14
                    31                     32                     33
                     A                      A                      A
 Frequencies --   150.7883               153.1903               157.0782
 Red. masses --     2.6416                 2.6151                 2.0669
 Frc consts  --     0.0354                 0.0362                 0.0300
 IR Inten    --     3.2595                 0.9755                 1.7386
 Atom AN      X      Y      Z        X      Y      Z        X      Y      Z
   1   8     0.12   0.03  -0.03    -0.03  -0.02   0.00    -0.07  -0.03   0.03
   2  12    -0.04   0.00  -0.01    -0.04  -0.01   0.04     0.03  -0.01   0.01
   3   8     0.01  -0.05  -0.02     0.00  -0.03  -0.02    -0.01   0.02   0.01
   4   6     0.07   0.01  -0.01    -0.02  -0.01   0.00    -0.03  -0.02   0.02
   5   7     0.00   0.00  -0.02    -0.01  -0.01   0.04     0.01  -0.03   0.01
   6   7     0.01   0.00   0.04     0.01   0.03   0.04     0.01  -0.02   0.00
   7   8     0.00   0.00   0.00     0.02   0.00   0.00     0.03  -0.01   0.01
   8   6     0.01  -0.03  -0.01     0.03   0.01   0.03     0.00  -0.04   0.01
   9   6     0.05  -0.04   0.01     0.04   0.02   0.02     0.03  -0.03   0.00
  10   6     0.05  -0.02   0.03     0.01   0.02   0.04     0.04  -0.02  -0.01
  11   8    -0.01   0.02   0.02    -0.05   0.00   0.01     0.00  -0.02   0.00
  12   6    -0.01   0.01   0.02    -0.05   0.02   0.00     0.00   0.00  -0.01
  13   6     0.01   0.00   0.02    -0.01   0.00   0.01    -0.01   0.00   0.00
  14   6     0.02   0.00   0.00    -0.03  -0.01  -0.01    -0.01  -0.01   0.01
  15   8    -0.02   0.01   0.01    -0.06   0.05  -0.02     0.00   0.02  -0.01
  16   6    -0.12   0.00   0.02     0.04  -0.01  -0.01     0.09  -0.01  -0.02
  17   8     0.02   0.01  -0.01     0.02   0.01   0.01     0.00  -0.01   0.01
  18   6     0.00  -0.02  -0.01     0.01   0.00   0.01     0.00   0.01   0.00
  19   8    -0.01  -0.01   0.00     0.01   0.00   0.02     0.01   0.00   0.00
  20   8    -0.01  -0.01   0.06     0.03  -0.02   0.07     0.00   0.01  -0.03
  21   6    -0.01   0.00   0.01     0.03   0.00   0.01     0.01   0.01   0.00
  22   6     0.00   0.00   0.00     0.03   0.00   0.00     0.01   0.01   0.00
  23   6    -0.02   0.00   0.00     0.01   0.02   0.01     0.01   0.00   0.00
  24   8    -0.01   0.01  -0.04     0.03   0.01  -0.04     0.01   0.01   0.02
  25   6     0.00  -0.01   0.01     0.04   0.02  -0.04     0.01   0.01  -0.01
  26   6    -0.02   0.00  -0.06     0.07   0.05  -0.10     0.00   0.00   0.02
  27   6     0.02   0.03   0.03     0.00   0.00   0.01     0.00  -0.01  -0.01
  28   6     0.00  -0.09  -0.02    -0.03   0.00  -0.08     0.00   0.05   0.00
  29   6     0.00   0.00  -0.02     0.00  -0.01   0.04     0.00  -0.02   0.00
  30   6     0.01   0.00   0.04     0.01   0.02   0.03     0.00  -0.01   0.01
  31   6     0.00  -0.01   0.01     0.00  -0.03   0.06     0.00  -0.01   0.00
  32   6     0.00  -0.02   0.03     0.01  -0.03   0.05     0.00   0.00  -0.02
  33   6     0.00  -0.01   0.02     0.01   0.00  -0.01     0.00   0.00  -0.02
  34   6     0.01   0.01  -0.01     0.00   0.03  -0.05     0.00  -0.01   0.00
  35   6     0.01   0.01  -0.02     0.00   0.01  -0.02     0.00  -0.02   0.01
  36   6     0.01   0.02   0.02    -0.02  -0.04   0.00     0.01   0.01   0.01
  37   6    -0.01   0.03   0.01     0.02  -0.02  -0.02    -0.01   0.01   0.01
  38   6     0.00  -0.02   0.00     0.00   0.02   0.01    -0.01  -0.04  -0.04
  39   6     0.00  -0.04  -0.04     0.00   0.00  -0.01    -0.02  -0.04  -0.05
  40   6     0.00  -0.03  -0.04    -0.01  -0.01  -0.03    -0.01  -0.01   0.00
  41   6     0.01  -0.01   0.00     0.00  -0.01  -0.02     0.01   0.02   0.05
  42   6     0.01   0.01   0.03     0.01   0.01   0.01     0.01   0.02   0.04
  43   6    -0.01   0.00  -0.03     0.00   0.02  -0.02    -0.02   0.00  -0.04
  44   6    -0.03   0.00   0.00     0.00   0.01   0.00    -0.03   0.01   0.01
  45   6     0.00   0.05   0.01     0.03  -0.07  -0.04    -0.01   0.04   0.02
  46   6     0.00   0.02   0.02    -0.09   0.00  -0.01     0.02   0.02   0.02
  47   6     0.01   0.07   0.03     0.03  -0.04  -0.01    -0.02   0.04   0.02
  48   6    -0.01   0.03   0.01    -0.01  -0.05  -0.02     0.01   0.05   0.02
  49   6    -0.03   0.05  -0.06    -0.03   0.04  -0.01    -0.02   0.06  -0.05
  50   6    -0.06   0.00  -0.02     0.01   0.00   0.01    -0.06  -0.01   0.00
  51   6    -0.04   0.05  -0.04    -0.04   0.01  -0.02     0.01   0.03  -0.03
  52   6    -0.03   0.01  -0.01     0.01   0.03  -0.04    -0.09   0.03  -0.02
  53   6    -0.01  -0.08  -0.04     0.03   0.04   0.05    -0.03  -0.06   0.00
  54   6     0.09  -0.03   0.06    -0.04  -0.02   0.08     0.08  -0.02   0.00
  55   1     0.06  -0.05   0.01     0.05   0.02   0.02     0.04  -0.02  -0.01
  56   1     0.04   0.00   0.02     0.01   0.00   0.02    -0.02   0.00   0.00
  57   1     0.00   0.04   0.01     0.00  -0.02   0.00     0.01  -0.04   0.00
  58   1    -0.10  -0.08  -0.26     0.00  -0.02   0.16     0.05   0.03   0.23
  59   1    -0.44  -0.03   0.10     0.22   0.01  -0.05     0.37   0.04  -0.09
  60   1     0.01   0.10   0.28    -0.07  -0.02  -0.15    -0.05  -0.07  -0.25
  61   1    -0.02   0.00   0.00     0.04  -0.02   0.00     0.02   0.00   0.01
  62   1    -0.07   0.02   0.01    -0.05   0.07   0.03     0.03   0.00   0.00
  63   1    -0.02  -0.02   0.02     0.06   0.02  -0.06     0.01   0.00  -0.01
  64   1     0.02   0.00   0.02     0.02   0.04  -0.04     0.01   0.02   0.00
  65   1     0.00   0.00  -0.01     0.06   0.01  -0.04     0.01   0.01  -0.02
  66   1    -0.04   0.02  -0.06     0.08   0.06  -0.12     0.01   0.00   0.01
  67   1    -0.03   0.02  -0.11     0.05   0.12  -0.14     0.01  -0.01   0.03
  68   1     0.03  -0.02  -0.07     0.12  -0.02  -0.13    -0.01   0.01   0.02
  69   1     0.02   0.05   0.05     0.00   0.01   0.03    -0.01  -0.02  -0.01
  70   1     0.05   0.03   0.02     0.02  -0.02   0.01    -0.01  -0.02   0.00
  71   1    -0.01   0.02   0.04    -0.01  -0.01   0.00     0.01  -0.01  -0.02
  72   1    -0.06  -0.10   0.00    -0.04   0.00  -0.09     0.04   0.06  -0.03
  73   1     0.02  -0.13  -0.03    -0.08   0.01  -0.10    -0.03   0.09   0.01
  74   1     0.04  -0.10  -0.03     0.02   0.00  -0.11    -0.01   0.05   0.00
  75   1     0.00  -0.03   0.05     0.01  -0.04   0.07     0.00   0.01  -0.03
  76   1     0.00  -0.01   0.03     0.01   0.01  -0.03     0.00   0.01  -0.03
  77   1     0.01   0.01  -0.02     0.01   0.06  -0.09     0.00  -0.02   0.00
  78   1     0.03   0.02   0.02    -0.02  -0.04  -0.02     0.03   0.01   0.02
  79   1    -0.04   0.02   0.01     0.05  -0.01  -0.01    -0.05   0.00   0.00
  80   1     0.00  -0.07  -0.07    -0.01  -0.01  -0.02    -0.02  -0.07  -0.08
  81   1     0.00  -0.05  -0.07    -0.01  -0.03  -0.05    -0.01  -0.01   0.00
  82   1     0.01  -0.01  -0.01     0.00  -0.02  -0.03     0.01   0.04   0.09
  83   1     0.02   0.01  -0.06     0.01   0.03  -0.02     0.01   0.03  -0.03
  84   1    -0.05  -0.02   0.01    -0.01  -0.01  -0.02    -0.05  -0.01   0.02
  85   1     0.01   0.06   0.03     0.03  -0.03  -0.13     0.00   0.05   0.05
  86   1     0.00   0.07   0.02     0.10  -0.14  -0.04    -0.02   0.06   0.02
  87   1    -0.01   0.05  -0.01     0.00  -0.06   0.01    -0.01   0.04   0.00
  88   1     0.01   0.05   0.02    -0.10   0.03  -0.07     0.03   0.03   0.02
  89   1    -0.03   0.03   0.02    -0.13   0.01   0.02     0.01   0.02   0.02
  90   1     0.01   0.00   0.02    -0.12   0.01   0.02     0.03   0.01   0.01
  91   1     0.00   0.05   0.07     0.04  -0.06  -0.01    -0.04   0.08   0.01
  92   1     0.02   0.08   0.00     0.03  -0.05   0.00     0.02   0.04   0.02
  93   1     0.03   0.09   0.04     0.06  -0.04  -0.03    -0.04   0.01   0.01
  94   1    -0.07   0.08   0.08     0.04  -0.12  -0.07    -0.05   0.12   0.07
  95   1    -0.05  -0.05  -0.03     0.00   0.03   0.00    -0.01  -0.03  -0.01
  96   1     0.08   0.07  -0.02    -0.11  -0.08  -0.01     0.11   0.08   0.02
  97   1    -0.09   0.05  -0.09    -0.03   0.03  -0.02    -0.09   0.06  -0.09
  98   1     0.00   0.04  -0.04    -0.05   0.05  -0.03     0.01   0.05  -0.03
  99   1     0.01   0.09  -0.09    -0.03   0.06   0.02     0.02   0.10  -0.09
 100   1    -0.15  -0.01  -0.07    -0.02   0.00  -0.01    -0.12  -0.02  -0.05
 101   1    -0.04  -0.08   0.05     0.03  -0.03   0.03    -0.06  -0.06   0.05
 102   1     0.00   0.08  -0.03     0.03   0.04   0.02    -0.03   0.04  -0.01
 103   1    -0.04   0.07  -0.06    -0.04   0.01  -0.05     0.01   0.09  -0.02
 104   1    -0.03   0.05  -0.06    -0.05   0.01  -0.01     0.06   0.02  -0.05
 105   1    -0.06   0.05  -0.01    -0.05   0.01  -0.02    -0.02   0.01  -0.03
 106   1    -0.07   0.09  -0.10     0.01   0.00  -0.03    -0.05   0.01   0.13
 107   1    -0.12  -0.01   0.08     0.02   0.03  -0.06    -0.03   0.01  -0.15
 108   1     0.06  -0.05   0.00     0.00   0.05  -0.04    -0.25   0.08  -0.04
 109   1    -0.09  -0.07  -0.05     0.23   0.03   0.01    -0.21  -0.05   0.04
 110   1     0.03  -0.05  -0.01    -0.12  -0.08  -0.03     0.09   0.06   0.06
 111   1     0.01  -0.16  -0.07    -0.04   0.19   0.20     0.03  -0.21  -0.12
 112   1     0.11  -0.06   0.17    -0.01  -0.19   0.27     0.11  -0.11   0.22
 113   1     0.00  -0.02   0.03    -0.28   0.03   0.03    -0.12  -0.01  -0.09
 114   1     0.19  -0.01   0.00     0.13   0.06  -0.02     0.27   0.06  -0.11
                    34                     35                     36
                     A                      A                      A
 Frequencies --   161.1623               164.0944               167.4244
 Red. masses --     1.6938                 2.4055                 4.0569
 Frc consts  --     0.0259                 0.0382                 0.0670
 IR Inten    --     0.1720                 1.0524                 2.4578
 Atom AN      X      Y      Z        X      Y      Z        X      Y      Z
   1   8     0.00   0.00  -0.01     0.03   0.01  -0.02     0.02   0.00   0.01
   2  12    -0.03   0.00   0.00    -0.04   0.00   0.00     0.01  -0.06   0.00
   3   8     0.00   0.01   0.00    -0.01   0.02   0.00     0.01   0.03  -0.06
   4   6    -0.01   0.00  -0.01     0.00   0.00  -0.01     0.01  -0.03   0.02
   5   7    -0.01   0.00   0.01     0.00   0.02   0.01     0.00  -0.04   0.03
   6   7    -0.01   0.00   0.02    -0.03   0.00  -0.01     0.01  -0.06  -0.03
   7   8    -0.01   0.00   0.00    -0.03  -0.02  -0.01     0.00  -0.05   0.01
   8   6     0.01   0.00   0.00    -0.05   0.02   0.01     0.02  -0.02   0.02
   9   6    -0.01   0.00   0.01    -0.04   0.03   0.00     0.00  -0.02  -0.01
  10   6    -0.01   0.00   0.02    -0.01   0.03  -0.02    -0.01  -0.04  -0.03
  11   8    -0.01   0.00  -0.01    -0.04   0.01   0.02    -0.06  -0.03   0.07
  12   6    -0.01   0.01  -0.01    -0.05   0.04   0.01    -0.07   0.09   0.03
  13   6     0.00   0.00  -0.01    -0.02   0.02   0.02    -0.01   0.05   0.03
  14   6    -0.01   0.00  -0.01    -0.01  -0.01   0.00     0.01  -0.03   0.03
  15   8    -0.01   0.00  -0.01    -0.05   0.06   0.00    -0.09   0.18  -0.01
  16   6     0.00   0.00   0.00    -0.05   0.01  -0.01    -0.03   0.01  -0.03
  17   8     0.01   0.00   0.01     0.00  -0.01   0.02     0.01   0.01  -0.01
  18   6     0.01   0.01   0.00     0.01   0.01   0.00     0.01   0.04  -0.04
  19   8     0.01   0.00   0.00     0.02   0.01   0.00     0.05   0.04  -0.05
  20   8     0.01   0.01  -0.04     0.02   0.01  -0.02     0.00   0.04  -0.10
  21   6     0.02   0.01  -0.01     0.02   0.01   0.00     0.00   0.02  -0.01
  22   6     0.01   0.01   0.00     0.02   0.01   0.00    -0.02   0.03   0.03
  23   6     0.02   0.00  -0.01     0.02   0.00   0.00     0.02   0.00  -0.02
  24   8     0.02   0.01   0.02     0.02   0.01   0.01     0.00   0.01   0.04
  25   6     0.01   0.01   0.00     0.03   0.02  -0.03    -0.05  -0.04   0.13
  26   6     0.01   0.00   0.02     0.04   0.01   0.01    -0.03  -0.02   0.11
  27   6     0.00  -0.01  -0.01     0.01  -0.03   0.02     0.10  -0.03   0.07
  28   6    -0.01  -0.01  -0.01    -0.02  -0.04  -0.06    -0.01  -0.02  -0.12
  29   6    -0.01   0.00   0.00     0.01   0.02   0.01     0.00  -0.03   0.02
  30   6     0.00   0.00   0.01    -0.02   0.00  -0.01     0.02  -0.05  -0.04
  31   6     0.00  -0.01   0.01     0.01   0.02  -0.02    -0.01  -0.03   0.03
  32   6     0.00  -0.02   0.03     0.01   0.03  -0.03    -0.01  -0.02   0.02
  33   6     0.00   0.00   0.01     0.01   0.01   0.00    -0.01   0.00  -0.02
  34   6     0.00   0.01  -0.02     0.00  -0.01   0.03     0.00   0.00  -0.04
  35   6     0.00   0.01  -0.02     0.01   0.00   0.03     0.00  -0.02  -0.01
  36   6    -0.01  -0.01   0.00     0.00   0.00  -0.01     0.00   0.00   0.02
  37   6     0.00   0.00  -0.01     0.03  -0.02  -0.01    -0.02   0.01   0.01
  38   6     0.00  -0.04  -0.04    -0.01  -0.03  -0.03     0.03  -0.03  -0.01
  39   6     0.00  -0.05  -0.07     0.00  -0.02  -0.04     0.04   0.00   0.03
  40   6     0.00  -0.01  -0.01     0.01   0.01   0.00     0.04   0.00   0.03
  41   6     0.01   0.04   0.06     0.00   0.05   0.04     0.03  -0.02  -0.02
  42   6     0.00   0.04   0.05    -0.01   0.03   0.03     0.02  -0.05  -0.05
  43   6     0.00  -0.03  -0.02     0.01  -0.05   0.02     0.03   0.01  -0.02
  44   6     0.00   0.02   0.03     0.01   0.01   0.02     0.00  -0.03  -0.03
  45   6     0.00  -0.02  -0.01     0.00  -0.04   0.01     0.00   0.03   0.00
  46   6    -0.02   0.00   0.00     0.03  -0.02  -0.01    -0.03   0.02   0.01
  47   6     0.02   0.00   0.01     0.00  -0.07  -0.04    -0.01   0.05   0.02
  48   6    -0.02  -0.02  -0.01     0.04  -0.03  -0.02    -0.01   0.03   0.02
  49   6     0.04   0.04  -0.03     0.04   0.00  -0.01    -0.03  -0.03   0.02
  50   6    -0.04  -0.05   0.04     0.01  -0.06   0.04     0.03   0.04  -0.04
  51   6     0.05   0.00  -0.01     0.09  -0.06   0.04     0.02   0.01  -0.02
  52   6    -0.06  -0.02   0.02    -0.02  -0.05   0.04    -0.01   0.03  -0.04
  53   6     0.06   0.02   0.00    -0.09   0.01   0.02     0.06   0.01   0.03
  54   6     0.01   0.02   0.00     0.03   0.06  -0.05    -0.06  -0.04  -0.05
  55   1     0.01  -0.01   0.01    -0.04   0.04   0.00    -0.01   0.00  -0.01
  56   1    -0.01   0.00   0.00    -0.03   0.02   0.05    -0.03   0.06   0.10
  57   1    -0.01   0.00  -0.01     0.00   0.00   0.01     0.07  -0.04   0.06
  58   1     0.00   0.00  -0.02    -0.03  -0.01  -0.16    -0.03  -0.02  -0.09
  59   1    -0.02  -0.01   0.00    -0.21   0.00   0.02    -0.08   0.05  -0.02
  60   1     0.00   0.00   0.01     0.03   0.03   0.11    -0.02   0.01  -0.02
  61   1     0.03   0.01   0.01     0.05  -0.01   0.01    -0.06   0.09   0.03
  62   1     0.05   0.00  -0.01     0.03   0.00   0.00     0.08  -0.06  -0.04
  63   1     0.00   0.00   0.00     0.04   0.01  -0.04    -0.09  -0.04   0.17
  64   1     0.02   0.01   0.01     0.01   0.04  -0.03    -0.01  -0.13   0.12
  65   1     0.01   0.01  -0.02     0.03   0.01  -0.04    -0.10  -0.02   0.16
  66   1     0.02   0.00   0.01     0.05   0.00   0.01    -0.02  -0.04   0.12
  67   1     0.02  -0.01   0.05     0.04   0.02   0.03    -0.01  -0.09   0.18
  68   1    -0.02   0.01   0.02     0.03   0.01   0.02    -0.11   0.05   0.14
  69   1     0.00  -0.02  -0.01     0.01  -0.06   0.05     0.08  -0.10   0.15
  70   1     0.00  -0.02   0.00     0.02  -0.04   0.03     0.13  -0.04   0.06
  71   1     0.01  -0.01  -0.02     0.05  -0.03  -0.01     0.18  -0.03   0.02
  72   1    -0.02  -0.01  -0.01    -0.05  -0.04  -0.06    -0.01  -0.02  -0.13
  73   1    -0.01  -0.01  -0.01    -0.06  -0.05  -0.09    -0.12  -0.02  -0.17
  74   1    -0.01  -0.02  -0.01     0.03  -0.03  -0.09     0.10  -0.01  -0.18
  75   1     0.00  -0.03   0.05     0.01   0.05  -0.06    -0.01  -0.03   0.03
  76   1     0.00  -0.01   0.01     0.01   0.02  -0.01    -0.01   0.01  -0.04
  77   1     0.00   0.03  -0.03     0.00  -0.02   0.06     0.00   0.02  -0.07
  78   1    -0.01  -0.01  -0.01    -0.03   0.00  -0.01     0.03   0.00   0.02
  79   1     0.01   0.00   0.00     0.06  -0.01  -0.01    -0.05   0.00   0.01
  80   1    -0.01  -0.09  -0.12     0.01  -0.05  -0.07     0.04   0.02   0.06
  81   1     0.01  -0.01  -0.02     0.01   0.02   0.00     0.04   0.03   0.06
  82   1     0.01   0.08   0.09     0.00   0.08   0.08     0.03  -0.02  -0.02
  83   1     0.00  -0.02  -0.01    -0.02  -0.05   0.05     0.05   0.03  -0.02
  84   1     0.00   0.02   0.03     0.03   0.02  -0.01    -0.01  -0.03  -0.02
  85   1     0.00  -0.01  -0.04     0.00  -0.04   0.00     0.01   0.04  -0.01
  86   1     0.02  -0.04  -0.01    -0.01  -0.05   0.00     0.02   0.04   0.00
  87   1    -0.01  -0.02   0.00     0.02  -0.04   0.03    -0.01   0.03  -0.02
  88   1    -0.01   0.03  -0.01    -0.02  -0.13  -0.02     0.01   0.12   0.01
  89   1    -0.06   0.00   0.00     0.15  -0.03   0.00    -0.14   0.03   0.01
  90   1    -0.01  -0.02   0.00    -0.02   0.06  -0.01     0.00  -0.05   0.02
  91   1     0.02  -0.01   0.03     0.03  -0.10  -0.08    -0.03   0.08   0.04
  92   1     0.02   0.00   0.01    -0.05  -0.09  -0.04     0.03   0.06   0.02
  93   1     0.04   0.01   0.00    -0.01  -0.06  -0.04    -0.02   0.04   0.02
  94   1     0.00  -0.05  -0.01     0.09  -0.08  -0.08    -0.05   0.08   0.05
  95   1    -0.02   0.01   0.00     0.07   0.04   0.02    -0.03  -0.01   0.00
  96   1    -0.06  -0.03  -0.01    -0.04  -0.06   0.00     0.05   0.05   0.02
  97   1     0.02   0.01  -0.07     0.06  -0.02  -0.03    -0.06   0.01   0.07
  98   1     0.09   0.07  -0.02     0.06   0.04  -0.01    -0.06  -0.10   0.04
  99   1     0.05   0.04  -0.06     0.03  -0.01   0.00    -0.02  -0.02   0.00
 100   1    -0.17  -0.09  -0.09     0.06  -0.09   0.03     0.10   0.08   0.05
 101   1    -0.01  -0.19   0.16     0.00  -0.04   0.05     0.01   0.14  -0.13
 102   1     0.04   0.08   0.05    -0.02  -0.09   0.08    -0.02  -0.04  -0.06
 103   1     0.06   0.02   0.03     0.10  -0.10   0.10     0.01   0.02  -0.03
 104   1     0.08   0.01  -0.05     0.08  -0.05   0.02     0.02   0.02  -0.02
 105   1     0.06   0.01  -0.02     0.15  -0.05   0.00     0.01   0.02  -0.01
 106   1    -0.04   0.00   0.10    -0.02  -0.02   0.04    -0.01   0.06  -0.05
 107   1    -0.04  -0.03  -0.03    -0.03  -0.05   0.06    -0.03   0.01  -0.04
 108   1    -0.15  -0.02   0.01    -0.02  -0.07   0.04     0.00   0.04  -0.04
 109   1     0.24   0.02  -0.04    -0.29   0.02   0.07     0.18   0.00   0.03
 110   1    -0.06  -0.11  -0.05     0.04   0.16   0.08    -0.01  -0.06   0.00
 111   1     0.00   0.18   0.11    -0.03  -0.15  -0.10     0.02   0.12   0.09
 112   1    -0.03   0.27  -0.36     0.07  -0.07   0.22    -0.06  -0.07  -0.07
 113   1     0.42  -0.03   0.13    -0.23   0.05  -0.18    -0.07  -0.04  -0.05
 114   1    -0.30  -0.14   0.18     0.26   0.19  -0.18    -0.07  -0.02  -0.04
                    37                     38                     39
                     A                      A                      A
 Frequencies --   171.8187               181.5471               195.8260
 Red. masses --     3.1092                 3.9266                 1.4270
 Frc consts  --     0.0541                 0.0763                 0.0322
 IR Inten    --     0.6795                 6.5704                 0.1166
 Atom AN      X      Y      Z        X      Y      Z        X      Y      Z
   1   8    -0.01   0.00   0.00     0.03   0.02   0.03     0.02   0.00   0.00
   2  12    -0.01  -0.02  -0.01     0.15   0.04  -0.02    -0.03   0.01   0.01
   3   8    -0.03   0.05   0.04    -0.01  -0.04   0.02     0.01  -0.03   0.01
   4   6    -0.01  -0.01   0.00     0.03  -0.02   0.04     0.01   0.00   0.00
   5   7     0.00  -0.03  -0.03     0.03   0.02  -0.01    -0.01  -0.01   0.01
   6   7    -0.03  -0.04  -0.05     0.02  -0.02  -0.01    -0.02   0.01   0.02
   7   8    -0.02  -0.02   0.00     0.02  -0.04   0.02     0.01   0.00   0.00
   8   6     0.01  -0.03  -0.04     0.03   0.03  -0.01    -0.01  -0.01   0.01
   9   6    -0.01  -0.03  -0.05     0.06   0.03  -0.01    -0.03  -0.02   0.02
  10   6    -0.02  -0.04  -0.06     0.02   0.01  -0.01    -0.01   0.00   0.02
  11   8    -0.02   0.00   0.00     0.04  -0.05   0.06     0.03  -0.02   0.00
  12   6    -0.02   0.02   0.01     0.02   0.08   0.01     0.02   0.01  -0.02
  13   6    -0.03   0.02   0.02     0.00   0.02   0.03     0.02  -0.01  -0.01
  14   6    -0.01  -0.01   0.00     0.06  -0.01   0.05     0.02   0.00   0.00
  15   8    -0.01   0.02   0.02     0.00   0.21  -0.04     0.00   0.05  -0.04
  16   6    -0.01   0.00  -0.02    -0.02   0.04  -0.01     0.00   0.00   0.01
  17   8    -0.03   0.00   0.03    -0.04  -0.06  -0.01     0.00   0.00  -0.01
  18   6    -0.01   0.02   0.03    -0.03  -0.05   0.00     0.00  -0.01   0.01
  19   8     0.01   0.00   0.01    -0.01  -0.03   0.00    -0.02  -0.01   0.02
  20   8     0.03  -0.03   0.14    -0.05  -0.03   0.02    -0.01   0.00  -0.03
  21   6     0.01  -0.02   0.02    -0.05  -0.03  -0.01     0.00   0.00  -0.01
  22   6     0.02  -0.02  -0.02    -0.02  -0.05  -0.03     0.00   0.00   0.00
  23   6     0.00   0.01   0.05    -0.05  -0.02  -0.02     0.00   0.00  -0.01
  24   8     0.01  -0.02  -0.05    -0.05  -0.01  -0.01     0.00   0.00   0.01
  25   6     0.05   0.06  -0.15     0.04   0.01  -0.09    -0.01  -0.01   0.01
  26   6     0.09   0.05  -0.03    -0.08  -0.03  -0.14    -0.02  -0.01  -0.02
  27   6    -0.04  -0.04   0.00    -0.04   0.00   0.01    -0.03   0.01  -0.03
  28   6    -0.02  -0.03  -0.01     0.07   0.06  -0.01     0.03   0.03   0.02
  29   6     0.00  -0.03  -0.02    -0.01   0.01   0.01     0.00  -0.01   0.01
  30   6    -0.01  -0.02  -0.04     0.01  -0.03   0.00    -0.01   0.01   0.01
  31   6     0.00  -0.03   0.00    -0.01   0.02   0.00     0.00  -0.01   0.01
  32   6    -0.01  -0.05   0.02    -0.01   0.03  -0.01     0.00   0.00   0.00
  33   6    -0.01  -0.03   0.00    -0.01   0.02  -0.01     0.00   0.00  -0.01
  34   6     0.00  -0.02  -0.03    -0.01   0.00   0.02     0.00   0.00  -0.01
  35   6     0.00  -0.02  -0.03    -0.01   0.00   0.02     0.00  -0.01   0.01
  36   6     0.02   0.02   0.01    -0.03  -0.01  -0.01     0.00  -0.01   0.00
  37   6    -0.03   0.02   0.00     0.00  -0.01   0.01     0.00   0.00   0.00
  38   6     0.00  -0.01  -0.02     0.01  -0.03   0.00    -0.01   0.00  -0.01
  39   6     0.01   0.03   0.03     0.01  -0.01   0.02     0.00  -0.01  -0.03
  40   6     0.01   0.05   0.07     0.02   0.01   0.05     0.00   0.01  -0.01
  41   6     0.00   0.04   0.04     0.02   0.01   0.05    -0.01   0.03   0.00
  42   6    -0.01   0.00  -0.01     0.01  -0.01   0.02    -0.01   0.02   0.00
  43   6     0.00  -0.02   0.01     0.00  -0.02   0.00    -0.01  -0.01  -0.01
  44   6     0.02   0.00   0.01    -0.02   0.00   0.03     0.00   0.00  -0.02
  45   6     0.00   0.09   0.01    -0.01  -0.07  -0.01     0.00   0.00   0.00
  46   6     0.01   0.04   0.02    -0.03  -0.03  -0.01    -0.01   0.01   0.00
  47   6     0.00   0.09   0.04    -0.02  -0.02  -0.01     0.00  -0.01   0.00
  48   6    -0.03   0.04   0.02     0.00   0.00   0.01     0.01   0.00   0.01
  49   6     0.04  -0.03   0.03    -0.02   0.02   0.01    -0.02   0.02  -0.03
  50   6     0.03  -0.01   0.02    -0.05   0.02   0.01     0.03  -0.03   0.01
  51   6     0.05  -0.03   0.02     0.01  -0.02   0.01     0.01  -0.01   0.00
  52   6    -0.01  -0.01   0.01    -0.01  -0.01   0.00    -0.01  -0.01   0.01
  53   6     0.03  -0.01  -0.03    -0.02   0.01   0.01     0.03  -0.01   0.00
  54   6    -0.03  -0.03  -0.07    -0.04   0.00  -0.02     0.05   0.01   0.03
  55   1    -0.01  -0.01  -0.05     0.05   0.03  -0.01    -0.01  -0.02   0.02
  56   1    -0.06   0.02   0.04     0.03   0.03   0.08     0.04  -0.01  -0.01
  57   1    -0.01  -0.01   0.00     0.10  -0.03   0.06     0.02   0.00   0.01
  58   1     0.00   0.01  -0.06    -0.02   0.01  -0.06    -0.01  -0.01   0.00
  59   1    -0.05   0.01  -0.01    -0.05   0.08   0.00    -0.01  -0.01   0.01
  60   1     0.02  -0.01   0.01    -0.01   0.03  -0.01     0.00   0.01   0.02
  61   1     0.07  -0.09  -0.02     0.01  -0.09  -0.04    -0.01   0.01   0.00
  62   1    -0.08   0.04   0.05    -0.09   0.03   0.01     0.01   0.01   0.00
  63   1     0.10   0.05  -0.21     0.07   0.04  -0.12    -0.02  -0.01   0.01
  64   1    -0.01   0.17  -0.15     0.00   0.08  -0.09     0.00  -0.01   0.01
  65   1     0.09   0.04  -0.18     0.09  -0.02  -0.10    -0.02   0.00   0.00
  66   1     0.13   0.04  -0.05    -0.16   0.01  -0.12    -0.03   0.01  -0.02
  67   1     0.08   0.14  -0.04    -0.11  -0.04  -0.24    -0.02  -0.01  -0.02
  68   1     0.13   0.00  -0.05     0.00  -0.08  -0.16    -0.02  -0.02  -0.02
  69   1    -0.04  -0.07  -0.01    -0.01   0.19   0.06    -0.01   0.15  -0.01
  70   1    -0.06  -0.05   0.02     0.07  -0.15   0.05     0.05  -0.09   0.00
  71   1     0.00  -0.04  -0.03    -0.21  -0.04  -0.11    -0.18  -0.02  -0.09
  72   1    -0.03  -0.03  -0.02     0.13   0.07   0.00     0.06   0.04   0.04
  73   1    -0.01  -0.02   0.00     0.00   0.08  -0.03     0.03   0.03   0.02
  74   1    -0.01  -0.05   0.00     0.09   0.11  -0.03     0.01   0.06   0.03
  75   1    -0.01  -0.06   0.04    -0.01   0.04  -0.03     0.00   0.00  -0.01
  76   1    -0.01  -0.04   0.01    -0.01   0.02  -0.02     0.01   0.01  -0.02
  77   1     0.00  -0.01  -0.05    -0.01  -0.01   0.03     0.00   0.01  -0.01
  78   1     0.08   0.01   0.02    -0.06  -0.01  -0.02     0.01  -0.01   0.00
  79   1    -0.09   0.00   0.01     0.00   0.00   0.00     0.00   0.00   0.00
  80   1     0.01   0.04   0.05     0.01  -0.01   0.03     0.00  -0.03  -0.05
  81   1     0.02   0.09   0.11     0.02   0.02   0.07     0.00   0.01  -0.02
  82   1     0.01   0.07   0.08     0.02   0.03   0.07    -0.01   0.04   0.02
  83   1    -0.01  -0.01   0.03     0.01  -0.01   0.01    -0.01  -0.01   0.00
  84   1     0.04   0.03   0.00    -0.04  -0.01   0.05     0.01   0.00  -0.06
  85   1     0.01   0.09   0.05    -0.02  -0.06  -0.04     0.00   0.00   0.00
  86   1    -0.01   0.14   0.02     0.00  -0.11  -0.01     0.00   0.01   0.00
  87   1    -0.02   0.09  -0.05     0.00  -0.06   0.04     0.00   0.00  -0.01
  88   1     0.08   0.19   0.05    -0.09  -0.13  -0.05     0.02   0.07   0.01
  89   1    -0.15   0.05   0.00     0.08  -0.03   0.01    -0.08   0.01   0.00
  90   1     0.09  -0.09   0.01    -0.10   0.07   0.00     0.02  -0.04   0.00
  91   1    -0.03   0.11   0.09    -0.02  -0.01  -0.04     0.00   0.00  -0.01
  92   1     0.04   0.12   0.02    -0.02  -0.02   0.00     0.01  -0.01   0.02
  93   1     0.00   0.11   0.05    -0.04  -0.04  -0.01     0.00  -0.03  -0.01
  94   1    -0.12   0.14   0.13     0.02  -0.01  -0.02     0.02   0.00  -0.02
  95   1    -0.09  -0.09  -0.05     0.02   0.03   0.02     0.02   0.02   0.02
  96   1     0.13   0.10  -0.01    -0.02  -0.01   0.02    -0.01  -0.01   0.02
  97   1     0.09  -0.05   0.03    -0.05   0.02   0.00    -0.07   0.05  -0.02
  98   1     0.03   0.01   0.01    -0.01   0.01   0.02    -0.02  -0.01  -0.01
  99   1     0.00  -0.06   0.06     0.00   0.03   0.00     0.01   0.05  -0.05
 100   1     0.20  -0.01   0.11    -0.19   0.02  -0.06     0.49  -0.04   0.25
 101   1    -0.02   0.14  -0.08    -0.01  -0.09   0.09    -0.11   0.37  -0.25
 102   1    -0.07  -0.16   0.03     0.04   0.14  -0.02    -0.27  -0.45   0.05
 103   1     0.05  -0.03   0.05     0.01  -0.02   0.01     0.01  -0.01   0.01
 104   1     0.06  -0.03   0.01     0.01  -0.01   0.00     0.00   0.00  -0.01
 105   1     0.07  -0.03   0.00     0.02  -0.01   0.01     0.02   0.00   0.00
 106   1     0.00  -0.02   0.06    -0.02   0.00   0.00    -0.01  -0.02   0.03
 107   1     0.01  -0.01  -0.02    -0.02  -0.02   0.01     0.00  -0.01  -0.01
 108   1    -0.06   0.00   0.01    -0.01  -0.02   0.01    -0.04  -0.01   0.00
 109   1     0.12  -0.01  -0.05    -0.11   0.02   0.02     0.08  -0.01  -0.01
 110   1    -0.01  -0.06  -0.06     0.01   0.08   0.01     0.02  -0.05   0.00
 111   1     0.01   0.07   0.01     0.00  -0.07  -0.02     0.02   0.04   0.01
 112   1    -0.04  -0.01  -0.12    -0.08   0.06  -0.22     0.05   0.06   0.03
 113   1     0.02  -0.04  -0.05     0.12  -0.01   0.06     0.09  -0.01   0.03
 114   1    -0.07  -0.04  -0.04    -0.22  -0.06   0.08     0.05  -0.02   0.03
                    40                     41                     42
                     A                      A                      A
 Frequencies --   196.8833               205.4659               210.5171
 Red. masses --     1.9744                 2.9026                 2.2689
 Frc consts  --     0.0451                 0.0722                 0.0592
 IR Inten    --     0.2695                 4.2091                 1.9000
 Atom AN      X      Y      Z        X      Y      Z        X      Y      Z
   1   8    -0.01   0.00   0.00    -0.03  -0.01  -0.01    -0.04   0.01   0.09
   2  12     0.02   0.01  -0.02     0.14   0.05   0.02     0.02   0.00   0.00
   3   8    -0.01   0.02   0.00     0.00  -0.03  -0.02     0.00   0.00  -0.02
   4   6    -0.01   0.00   0.00    -0.02   0.00  -0.01     0.01  -0.05   0.10
   5   7     0.01   0.05  -0.01     0.05  -0.03  -0.01    -0.01   0.00   0.01
   6   7     0.03  -0.02   0.01     0.00   0.05  -0.01     0.00   0.00   0.00
   7   8     0.00   0.01   0.00    -0.02   0.01  -0.01     0.01  -0.07   0.07
   8   6     0.03   0.02   0.00     0.04   0.01  -0.02    -0.01   0.00   0.01
   9   6     0.06   0.02   0.01     0.08   0.03  -0.06    -0.02   0.00   0.01
  10   6     0.03   0.00   0.02     0.03   0.03  -0.01    -0.01   0.00   0.01
  11   8    -0.03   0.02  -0.01    -0.05   0.03  -0.01    -0.01   0.10  -0.02
  12   6    -0.02  -0.02   0.02    -0.03  -0.01   0.02     0.00   0.04   0.00
  13   6    -0.01   0.00   0.01    -0.01  -0.01   0.02     0.00   0.04  -0.01
  14   6    -0.02   0.00  -0.01    -0.04   0.00  -0.02     0.01  -0.04   0.02
  15   8     0.00  -0.06   0.04     0.00  -0.03   0.05     0.03  -0.08   0.05
  16   6     0.01   0.00   0.00     0.00  -0.01   0.00    -0.02   0.08  -0.12
  17   8     0.00  -0.01   0.01     0.02   0.00   0.00     0.01   0.00  -0.01
  18   6     0.00   0.00   0.00     0.00  -0.01   0.01     0.01   0.00  -0.01
  19   8     0.01   0.00  -0.01     0.01   0.00   0.01     0.01   0.00  -0.02
  20   8     0.01  -0.01   0.02     0.00   0.00  -0.03     0.00   0.00   0.01
  21   6     0.01   0.00   0.00     0.01   0.00   0.00     0.00   0.00   0.00
  22   6     0.01   0.00   0.00     0.01   0.00   0.00     0.00   0.00   0.00
  23   6     0.00   0.00   0.00     0.00   0.00  -0.01     0.00   0.00   0.00
  24   8     0.01   0.00  -0.01     0.01   0.02   0.01     0.00   0.00   0.00
  25   6     0.01   0.01  -0.02     0.02  -0.02   0.04     0.00   0.00   0.01
  26   6     0.02   0.01   0.01     0.00  -0.01  -0.03     0.00  -0.01   0.00
  27   6     0.03   0.00   0.03     0.05   0.03   0.06    -0.03  -0.03  -0.05
  28   6    -0.03  -0.03  -0.03    -0.06  -0.07  -0.04     0.00  -0.05  -0.07
  29   6     0.00   0.05  -0.02     0.01  -0.05   0.02     0.00   0.01  -0.01
  30   6     0.02  -0.04   0.00    -0.02   0.05   0.02     0.00   0.01   0.01
  31   6    -0.01   0.05  -0.02     0.01  -0.04   0.02     0.00   0.01  -0.01
  32   6     0.00   0.04   0.02     0.00  -0.02  -0.02     0.00   0.00   0.01
  33   6    -0.01   0.02   0.05     0.00  -0.01  -0.06     0.00  -0.01   0.02
  34   6    -0.01   0.02   0.03     0.00  -0.03  -0.03     0.00   0.00   0.01
  35   6    -0.01   0.05  -0.01     0.00  -0.06   0.01     0.00   0.01  -0.01
  36   6    -0.02   0.01  -0.01     0.01  -0.02   0.02     0.00   0.00  -0.01
  37   6     0.01   0.02  -0.01    -0.01  -0.02   0.01     0.00   0.01  -0.01
  38   6     0.02  -0.05  -0.01    -0.03   0.04   0.00     0.00   0.01   0.01
  39   6     0.02  -0.03   0.02    -0.04   0.01  -0.05    -0.01   0.00  -0.01
  40   6     0.03   0.01   0.07    -0.04   0.00  -0.07    -0.01  -0.01  -0.01
  41   6     0.03  -0.01   0.04    -0.03   0.03  -0.02     0.00   0.00   0.00
  42   6     0.02  -0.04  -0.01    -0.02   0.05   0.01     0.00   0.01   0.01
  43   6     0.01  -0.01  -0.03    -0.03   0.00   0.02     0.00   0.01   0.01
  44   6    -0.02  -0.03  -0.01     0.00   0.03   0.00     0.00   0.00   0.00
  45   6    -0.01  -0.04  -0.01     0.02  -0.01   0.01     0.00   0.00   0.00
  46   6     0.00  -0.04  -0.02    -0.03   0.01   0.01     0.02   0.00  -0.01
  47   6     0.02  -0.01  -0.01    -0.04   0.02   0.00     0.01   0.00   0.00
  48   6    -0.02  -0.02  -0.02     0.03   0.03   0.02    -0.03  -0.01  -0.01
  49   6    -0.07   0.01  -0.01     0.01   0.04  -0.02     0.00   0.01  -0.01
  50   6    -0.02   0.03  -0.03     0.01  -0.04   0.03     0.00  -0.01   0.01
  51   6     0.01   0.03  -0.04    -0.01  -0.04   0.03    -0.01   0.00   0.01
  52   6    -0.05   0.01  -0.02     0.03  -0.03   0.03     0.00   0.01   0.00
  53   6    -0.02  -0.03  -0.02    -0.06   0.02   0.02     0.01   0.01   0.00
  54   6    -0.02  -0.01   0.01    -0.03  -0.02   0.04     0.01   0.01   0.00
  55   1     0.05   0.01   0.02     0.09   0.02  -0.06    -0.02   0.00   0.01
  56   1    -0.03  -0.01   0.00     0.01  -0.01   0.01     0.01   0.04   0.04
  57   1    -0.03   0.01  -0.01    -0.06   0.01  -0.02     0.02  -0.12  -0.03
  58   1     0.01   0.01   0.02     0.01   0.02   0.00     0.00   0.07  -0.19
  59   1     0.02   0.00  -0.01     0.01  -0.02  -0.01    -0.03   0.24  -0.12
  60   1     0.00  -0.01  -0.02     0.02  -0.02  -0.01     0.00  -0.03  -0.20
  61   1     0.02  -0.01   0.00     0.00   0.02   0.00    -0.01   0.00  -0.01
  62   1    -0.01  -0.01   0.00     0.02   0.01   0.00    -0.01  -0.01  -0.01
  63   1     0.03   0.01  -0.03     0.00  -0.01   0.06    -0.01  -0.01   0.02
  64   1     0.00   0.02  -0.02     0.04  -0.04   0.04     0.02  -0.01   0.01
  65   1     0.02   0.00  -0.02     0.01  -0.01   0.03     0.00   0.00   0.00
  66   1     0.03   0.00   0.01    -0.01   0.00  -0.03    -0.01  -0.01   0.01
  67   1     0.02   0.02   0.01     0.00   0.00  -0.04    -0.01  -0.01  -0.01
  68   1     0.02   0.01   0.01     0.01  -0.02  -0.03     0.00   0.00   0.00
  69   1     0.00  -0.15   0.00     0.02  -0.15   0.03     0.01   0.25   0.05
  70   1    -0.06   0.11   0.00    -0.04   0.18   0.01     0.15  -0.28   0.03
  71   1     0.17   0.03   0.12     0.21   0.07   0.19    -0.28  -0.09  -0.26
  72   1    -0.07  -0.04  -0.03    -0.13  -0.07  -0.07    -0.06  -0.01  -0.35
  73   1    -0.03  -0.05  -0.03    -0.05  -0.08  -0.04     0.01   0.15   0.07
  74   1    -0.01  -0.05  -0.03    -0.03  -0.13  -0.05     0.03  -0.32   0.00
  75   1     0.00   0.03   0.03     0.00   0.00  -0.04     0.00  -0.01   0.01
  76   1    -0.01  -0.01   0.09    -0.01   0.02  -0.11     0.00  -0.02   0.04
  77   1    -0.01   0.01   0.06     0.00  -0.03  -0.05     0.00   0.00   0.01
  78   1    -0.07   0.02  -0.01     0.04  -0.02   0.00     0.00   0.00  -0.01
  79   1     0.04   0.02   0.00    -0.05  -0.03   0.00     0.00   0.01   0.00
  80   1     0.02  -0.02   0.03    -0.04  -0.01  -0.08    -0.01  -0.01  -0.02
  81   1     0.04   0.04   0.11    -0.05  -0.03  -0.11    -0.01  -0.02  -0.03
  82   1     0.03   0.01   0.07    -0.03   0.02  -0.03     0.00   0.00   0.00
  83   1     0.05   0.01  -0.04    -0.07  -0.02   0.03     0.00   0.01   0.00
  84   1    -0.04  -0.06   0.00     0.02   0.04  -0.04     0.00   0.00   0.00
  85   1    -0.02  -0.05  -0.02     0.03   0.03  -0.02    -0.01   0.00   0.01
  86   1    -0.02  -0.06  -0.01     0.04  -0.04   0.01    -0.01   0.01  -0.01
  87   1     0.01  -0.04   0.03    -0.02   0.00   0.03     0.00   0.00  -0.01
  88   1    -0.10  -0.26  -0.05     0.00   0.07  -0.01     0.01  -0.03   0.00
  89   1     0.26  -0.04   0.01    -0.10   0.02   0.02     0.05  -0.01  -0.01
  90   1    -0.11   0.16  -0.01    -0.01  -0.03   0.03     0.02   0.01  -0.02
  91   1     0.04  -0.06   0.00    -0.05   0.04  -0.01     0.01   0.00   0.01
  92   1    -0.03  -0.01  -0.02    -0.01   0.03  -0.02     0.01   0.00   0.01
  93   1     0.05   0.03   0.00    -0.07   0.01   0.01     0.02   0.00  -0.01
  94   1     0.02  -0.08  -0.04    -0.09   0.16   0.12    -0.02  -0.03   0.01
  95   1    -0.01   0.02  -0.01    -0.02  -0.12  -0.04    -0.04  -0.01  -0.01
  96   1    -0.09  -0.04  -0.03     0.22   0.10   0.00    -0.04  -0.01  -0.01
  97   1    -0.18   0.08   0.02     0.02   0.02  -0.04    -0.02   0.02  -0.02
  98   1    -0.08  -0.08   0.03     0.02   0.06  -0.03     0.01   0.01   0.00
  99   1     0.00   0.08  -0.06     0.01   0.04  -0.01     0.01   0.02  -0.02
 100   1     0.24   0.06   0.16     0.21  -0.07   0.10     0.05  -0.01   0.03
 101   1    -0.11   0.30  -0.21    -0.05   0.10  -0.05    -0.02   0.03  -0.02
 102   1    -0.18  -0.24  -0.05    -0.11  -0.21   0.08    -0.03  -0.05   0.01
 103   1     0.00   0.12  -0.04     0.00  -0.12   0.04    -0.01  -0.03   0.00
 104   1     0.08   0.02  -0.05    -0.08  -0.02   0.04    -0.03   0.00   0.01
 105   1    -0.05   0.01  -0.02     0.05  -0.01   0.01     0.01   0.01   0.00
 106   1    -0.03   0.02   0.07     0.02  -0.04  -0.02    -0.06   0.10  -0.16
 107   1    -0.03  -0.01  -0.09     0.02   0.00   0.09    -0.13   0.00   0.16
 108   1    -0.15   0.03  -0.02     0.09  -0.07   0.04     0.18  -0.06   0.02
 109   1    -0.07  -0.01  -0.05    -0.18   0.02   0.07     0.04   0.00   0.00
 110   1    -0.03  -0.02  -0.03    -0.03   0.13   0.02     0.01  -0.01   0.00
 111   1    -0.02  -0.08   0.00    -0.03  -0.09   0.00     0.01   0.03   0.00
 112   1    -0.04   0.02  -0.12    -0.06   0.03  -0.14     0.02   0.02   0.01
 113   1     0.09  -0.01   0.07     0.13   0.01   0.16     0.02   0.00  -0.01
 114   1    -0.14  -0.05   0.08    -0.19  -0.12   0.14     0.02   0.01   0.00
                    43                     44                     45
                     A                      A                      A
 Frequencies --   213.3958               215.9878               218.6661
 Red. masses --     1.6546                 2.4354                 1.5894
 Frc consts  --     0.0444                 0.0669                 0.0448
 IR Inten    --     1.7141                 9.1378                 7.4033
 Atom AN      X      Y      Z        X      Y      Z        X      Y      Z
   1   8    -0.01   0.00   0.01    -0.01  -0.01  -0.02     0.01   0.00   0.01
   2  12     0.03   0.01  -0.02     0.10   0.01   0.04    -0.06  -0.04   0.00
   3   8    -0.01   0.06  -0.01     0.01  -0.04  -0.01    -0.01   0.06   0.00
   4   6     0.00  -0.01   0.01    -0.01   0.01  -0.02     0.01  -0.01   0.01
   5   7    -0.03   0.00   0.00    -0.01   0.00   0.04     0.02  -0.01   0.01
   6   7    -0.01   0.00   0.01    -0.01   0.00   0.01    -0.02   0.00   0.00
   7   8     0.00  -0.01   0.01    -0.02   0.01  -0.02     0.01  -0.01   0.01
   8   6    -0.03  -0.01   0.01    -0.04  -0.01   0.05     0.02  -0.01   0.01
   9   6    -0.06  -0.02   0.03    -0.11  -0.02   0.06     0.00  -0.01   0.00
  10   6    -0.02  -0.01   0.01    -0.04   0.00   0.02     0.00  -0.01   0.00
  11   8     0.01   0.02  -0.01    -0.01  -0.01   0.00     0.03   0.00   0.00
  12   6     0.01   0.02   0.00    -0.01   0.00   0.01     0.02   0.01  -0.01
  13   6    -0.01   0.03  -0.01     0.00  -0.01   0.01     0.00   0.03  -0.02
  14   6     0.01   0.00   0.00    -0.01   0.01  -0.01     0.02  -0.01   0.00
  15   8     0.03   0.01   0.01     0.00   0.03   0.01     0.01   0.01  -0.02
  16   6     0.00   0.01  -0.01     0.01  -0.02   0.02     0.00   0.01  -0.01
  17   8    -0.02  -0.04   0.00     0.01  -0.01   0.00    -0.02  -0.02   0.00
  18   6     0.01   0.00  -0.02    -0.01  -0.02   0.01     0.01   0.01  -0.02
  19   8     0.05   0.01  -0.04     0.00   0.00   0.02     0.03   0.01  -0.04
  20   8    -0.01  -0.01   0.03    -0.01  -0.01  -0.02    -0.01   0.00   0.03
  21   6    -0.02  -0.02   0.00     0.00   0.00   0.00    -0.02  -0.01   0.00
  22   6    -0.01  -0.02   0.00     0.01  -0.01   0.00    -0.01  -0.01   0.00
  23   6    -0.02  -0.01  -0.01    -0.01   0.00   0.00    -0.01   0.00  -0.01
  24   8    -0.02  -0.02  -0.01     0.00   0.00   0.00    -0.02  -0.02  -0.01
  25   6     0.02   0.01  -0.03     0.02  -0.01   0.02     0.00   0.01  -0.02
  26   6    -0.06  -0.03  -0.03    -0.01  -0.01  -0.05    -0.04  -0.02   0.00
  27   6     0.06  -0.01   0.02     0.02   0.02   0.03     0.03  -0.02  -0.02
  28   6     0.01   0.00   0.01    -0.02  -0.02   0.00     0.03   0.03   0.02
  29   6    -0.01   0.01   0.00     0.00   0.01  -0.02     0.01  -0.01   0.01
  30   6     0.00   0.01   0.01     0.00   0.00   0.00    -0.01   0.02   0.01
  31   6     0.00  -0.01   0.00     0.00   0.02  -0.05     0.00   0.01   0.02
  32   6     0.01   0.00   0.00    -0.01  -0.02   0.01    -0.02   0.01   0.01
  33   6     0.02   0.01   0.01    -0.02  -0.06   0.07    -0.03   0.01  -0.02
  34   6     0.01   0.02   0.01    -0.02  -0.02   0.01    -0.01  -0.01  -0.02
  35   6     0.00   0.02   0.01    -0.01   0.02  -0.06     0.01  -0.02   0.00
  36   6    -0.01  -0.01   0.00     0.01   0.02  -0.05     0.00   0.01   0.02
  37   6     0.01   0.01   0.01    -0.02   0.02  -0.05     0.00  -0.01   0.00
  38   6     0.00   0.00   0.01     0.00   0.00   0.00     0.00   0.02   0.01
  39   6     0.00  -0.01  -0.01     0.00   0.00   0.00     0.00   0.00  -0.02
  40   6    -0.01  -0.01  -0.01     0.00   0.00   0.00    -0.01  -0.01  -0.04
  41   6     0.00   0.00   0.00     0.00   0.00   0.00    -0.01   0.01  -0.01
  42   6     0.00   0.01   0.01     0.00   0.00   0.00    -0.01   0.03   0.01
  43   6     0.00   0.00   0.01     0.00   0.00   0.00     0.00   0.01   0.01
  44   6     0.00   0.01   0.01     0.00   0.00   0.00     0.01   0.02   0.01
  45   6    -0.01  -0.01   0.01    -0.01   0.01  -0.03     0.03   0.01  -0.01
  46   6    -0.02   0.01   0.00     0.10  -0.02  -0.04    -0.01  -0.01   0.01
  47   6     0.01  -0.02   0.00     0.02   0.02  -0.02     0.00   0.01   0.01
  48   6     0.00  -0.01   0.00    -0.09  -0.01  -0.03     0.02   0.01   0.01
  49   6     0.00   0.02  -0.01     0.01   0.00  -0.01     0.02   0.02  -0.01
  50   6    -0.01  -0.01   0.01     0.00   0.00   0.00     0.01  -0.02   0.02
  51   6    -0.02   0.00   0.01     0.00   0.00   0.00    -0.02   0.00   0.01
  52   6     0.01   0.00   0.00     0.00   0.00   0.01     0.02   0.01   0.00
  53   6     0.04  -0.01  -0.02     0.08   0.04   0.05     0.01   0.00   0.02
  54   6     0.04   0.02   0.00     0.05   0.06  -0.03     0.00  -0.02   0.01
  55   1    -0.05  -0.02   0.03    -0.11   0.00   0.05     0.00   0.00   0.00
  56   1    -0.05   0.03   0.00     0.02  -0.01   0.01    -0.04   0.02  -0.01
  57   1     0.00  -0.01  -0.01    -0.02   0.02   0.00     0.02  -0.02   0.00
  58   1     0.01   0.01  -0.01     0.01   0.00   0.04     0.00  -0.01  -0.02
  59   1     0.01   0.02  -0.02     0.03  -0.05   0.02     0.00   0.03  -0.01
  60   1     0.00  -0.01  -0.03     0.01  -0.01   0.02    -0.01   0.00  -0.02
  61   1     0.00  -0.05   0.00     0.00   0.00   0.00    -0.01  -0.03   0.00
  62   1    -0.04  -0.02  -0.02     0.00   0.02   0.01    -0.03  -0.02  -0.02
  63   1     0.03   0.02  -0.04     0.01   0.00   0.03     0.01   0.01  -0.03
  64   1     0.01   0.04  -0.03     0.02  -0.02   0.02    -0.01   0.04  -0.02
  65   1     0.05  -0.01  -0.04     0.02  -0.02   0.02     0.02   0.00  -0.03
  66   1    -0.16  -0.02   0.04    -0.01   0.02  -0.07    -0.11  -0.02   0.06
  67   1    -0.09  -0.09  -0.13    -0.01   0.00  -0.04    -0.06  -0.07  -0.06
  68   1     0.00  -0.01  -0.02    -0.02  -0.04  -0.06     0.00   0.01   0.02
  69   1     0.01  -0.35  -0.05     0.01  -0.03   0.02     0.00  -0.19  -0.06
  70   1    -0.13   0.22  -0.03    -0.01   0.08   0.01    -0.08   0.09  -0.03
  71   1     0.39   0.06   0.17     0.06   0.03   0.09     0.20   0.02   0.04
  72   1     0.00   0.01  -0.04    -0.03  -0.03   0.06     0.06   0.04  -0.02
  73   1     0.03   0.04   0.05    -0.02  -0.08  -0.04     0.04   0.08   0.06
  74   1    -0.01  -0.05   0.04    -0.01   0.03  -0.02     0.00   0.01   0.05
  75   1     0.02  -0.02   0.00    -0.02  -0.02   0.04    -0.03   0.02   0.02
  76   1     0.03   0.01   0.01    -0.02  -0.10   0.15    -0.04   0.01  -0.03
  77   1     0.01   0.03   0.02    -0.01  -0.03   0.03    -0.02  -0.02  -0.04
  78   1     0.00  -0.01  -0.01    -0.01   0.02  -0.05    -0.01   0.01   0.03
  79   1     0.03   0.01   0.01    -0.03   0.01  -0.04    -0.02  -0.02   0.00
  80   1    -0.01  -0.01  -0.01     0.00   0.00   0.00     0.00  -0.01  -0.03
  81   1    -0.01  -0.02  -0.03     0.00  -0.01  -0.01    -0.01  -0.02  -0.07
  82   1     0.00   0.00   0.00     0.00   0.00   0.00    -0.01   0.01  -0.02
  83   1     0.00   0.00   0.01     0.00   0.00   0.00     0.00   0.01   0.01
  84   1     0.00   0.00   0.00     0.00   0.00   0.00     0.01   0.02  -0.01
  85   1    -0.02  -0.04   0.04    -0.01   0.00   0.00     0.05   0.08  -0.11
  86   1    -0.04   0.03   0.01    -0.04   0.02  -0.03     0.10  -0.08  -0.01
  87   1     0.02  -0.02  -0.02     0.00   0.00  -0.03    -0.05   0.03   0.05
  88   1     0.09   0.24   0.06     0.05  -0.16   0.00    -0.20  -0.38  -0.11
  89   1    -0.29   0.02  -0.05     0.26  -0.03  -0.03     0.41  -0.02   0.11
  90   1     0.11  -0.21  -0.01     0.07   0.09  -0.08    -0.23   0.35   0.04
  91   1     0.00   0.00  -0.01     0.05  -0.08   0.04    -0.01   0.02   0.01
  92   1     0.02  -0.03   0.04    -0.06   0.02  -0.08     0.01   0.01   0.00
  93   1     0.01  -0.05  -0.02     0.08   0.11   0.01    -0.01   0.00   0.01
  94   1     0.14  -0.14  -0.16    -0.25   0.10   0.23    -0.09   0.13   0.13
  95   1     0.09   0.19   0.10    -0.23  -0.27  -0.19    -0.03  -0.14  -0.06
  96   1    -0.22  -0.10   0.05     0.17   0.10  -0.12     0.20   0.08  -0.03
  97   1    -0.02   0.02  -0.02     0.00   0.00  -0.01     0.05  -0.01  -0.03
  98   1     0.02   0.01   0.00     0.02   0.00   0.00     0.02   0.06  -0.03
  99   1     0.02   0.03  -0.03     0.01   0.00  -0.02     0.00   0.01   0.02
 100   1     0.05  -0.01   0.03     0.00   0.00   0.00     0.07  -0.04   0.03
 101   1    -0.02   0.03  -0.01     0.00   0.00   0.00    -0.02   0.01   0.01
 102   1    -0.04  -0.05   0.02     0.00   0.00   0.00    -0.03  -0.07   0.05
 103   1    -0.02  -0.01   0.00    -0.01   0.01   0.00    -0.02  -0.04   0.00
 104   1    -0.03   0.00   0.01     0.00   0.00   0.00    -0.05   0.00   0.02
 105   1    -0.01   0.00   0.01    -0.01   0.00   0.01     0.00   0.01   0.01
 106   1    -0.01   0.02  -0.04     0.01  -0.02   0.02    -0.01   0.03  -0.08
 107   1    -0.02   0.00   0.04     0.02   0.00  -0.01    -0.03   0.01   0.05
 108   1     0.05  -0.01   0.01    -0.01   0.00   0.00     0.10   0.00   0.00
 109   1     0.09  -0.01  -0.02     0.27   0.03   0.04     0.07   0.00   0.00
 110   1     0.07  -0.05   0.01     0.02  -0.08   0.04    -0.05  -0.04  -0.01
 111   1     0.05   0.04  -0.05     0.04   0.23   0.08    -0.02   0.05   0.08
 112   1     0.06   0.03   0.08     0.09   0.08   0.13     0.00  -0.01   0.00
 113   1     0.01   0.00  -0.04    -0.03   0.02  -0.14     0.01  -0.01   0.02
 114   1     0.11   0.03  -0.04     0.20   0.13  -0.11    -0.01  -0.03   0.01
                    46                     47                     48
                     A                      A                      A
 Frequencies --   227.1342               232.5509               236.7122
 Red. masses --     1.3063                 2.4741                 1.4763
 Frc consts  --     0.0397                 0.0788                 0.0487
 IR Inten    --     4.5080                 5.7990                 0.2221
 Atom AN      X      Y      Z        X      Y      Z        X      Y      Z
   1   8     0.00   0.00  -0.01     0.03   0.00   0.00    -0.01   0.00  -0.01
   2  12     0.04   0.01   0.01    -0.03  -0.07   0.03     0.03  -0.02  -0.01
   3   8     0.00  -0.02   0.00     0.00   0.02   0.00    -0.01   0.06  -0.02
   4   6    -0.01   0.00  -0.01     0.01   0.00   0.00    -0.01   0.01  -0.02
   5   7    -0.01  -0.02  -0.01    -0.01  -0.03   0.04     0.00   0.00   0.00
   6   7    -0.01  -0.01  -0.01     0.02   0.00   0.00     0.00  -0.01  -0.01
   7   8    -0.01   0.00  -0.01     0.02   0.00   0.00    -0.01   0.01  -0.02
   8   6     0.00  -0.02  -0.01     0.01   0.02   0.02     0.00   0.00   0.00
   9   6    -0.02  -0.03  -0.01     0.08   0.05  -0.02     0.00  -0.01   0.00
  10   6    -0.01  -0.02  -0.01     0.03   0.02  -0.01     0.00  -0.01  -0.01
  11   8    -0.01   0.00   0.00     0.01  -0.03   0.01    -0.01  -0.02   0.02
  12   6    -0.01   0.00   0.01     0.00   0.00  -0.01    -0.01  -0.01   0.02
  13   6     0.00  -0.01   0.01     0.00   0.00  -0.02    -0.02   0.03   0.00
  14   6    -0.01   0.00   0.00     0.00   0.00   0.01    -0.01   0.00   0.01
  15   8     0.00   0.01   0.01    -0.02   0.01  -0.03     0.01  -0.05   0.05
  16   6     0.00  -0.01   0.01     0.00  -0.01   0.01     0.02  -0.02   0.03
  17   8     0.01   0.01   0.00     0.00   0.00   0.00    -0.01  -0.01   0.00
  18   6    -0.01   0.00   0.01     0.00   0.01  -0.01     0.01   0.02  -0.03
  19   8    -0.01   0.00   0.01     0.00   0.00  -0.01     0.05   0.02  -0.05
  20   8     0.00   0.00  -0.01     0.00   0.00   0.01     0.00   0.00   0.02
  21   6     0.00   0.00   0.00    -0.01   0.00   0.00    -0.01   0.00   0.00
  22   6     0.00   0.00   0.00     0.00   0.00   0.00     0.00  -0.01   0.00
  23   6     0.00   0.00   0.00     0.00   0.00   0.00     0.00   0.00  -0.01
  24   8     0.00   0.01   0.00    -0.01   0.00   0.00    -0.01  -0.01  -0.01
  25   6     0.00   0.00   0.01     0.00   0.00   0.00     0.01   0.01   0.00
  26   6     0.01   0.01   0.00     0.00   0.01   0.01    -0.01   0.00   0.01
  27   6     0.00   0.01   0.02     0.00  -0.01  -0.02     0.01  -0.03  -0.01
  28   6    -0.01  -0.02   0.00     0.02   0.04   0.02    -0.01  -0.02   0.00
  29   6    -0.01  -0.02  -0.01    -0.01  -0.02   0.00     0.00   0.01   0.00
  30   6    -0.01   0.01  -0.01     0.01   0.00   0.01     0.00   0.01   0.01
  31   6     0.00  -0.02   0.00     0.01  -0.03  -0.05     0.00   0.00   0.00
  32   6    -0.01  -0.02   0.02     0.02  -0.05   0.00     0.00   0.01   0.00
  33   6     0.00  -0.01   0.00     0.03  -0.07   0.04     0.00   0.01   0.01
  34   6     0.00   0.00  -0.02     0.01  -0.01  -0.01     0.00   0.01   0.00
  35   6    -0.01  -0.01  -0.01    -0.01   0.01  -0.04     0.00   0.01   0.00
  36   6     0.01   0.01   0.01     0.03   0.00  -0.05    -0.01   0.00   0.00
  37   6    -0.02   0.01   0.01    -0.03   0.02  -0.04     0.00   0.01   0.00
  38   6    -0.01   0.01   0.00     0.01   0.01   0.02     0.00   0.01   0.02
  39   6    -0.01   0.01   0.00     0.00  -0.02  -0.01    -0.01  -0.01  -0.01
  40   6    -0.01   0.01  -0.01     0.00  -0.04  -0.03    -0.01  -0.02  -0.03
  41   6    -0.01   0.01  -0.01     0.01  -0.01   0.01     0.00   0.00   0.00
  42   6    -0.01   0.01  -0.01     0.01   0.00   0.03     0.00   0.01   0.02
  43   6    -0.01   0.00   0.00     0.01   0.02   0.02     0.00   0.01   0.01
  44   6     0.00   0.01   0.00     0.00   0.01   0.03     0.00   0.01   0.01
  45   6     0.01   0.05  -0.01     0.00   0.04  -0.02    -0.01   0.00   0.00
  46   6     0.02   0.01   0.01     0.12   0.01  -0.03    -0.02   0.00   0.00
  47   6    -0.01   0.04   0.03    -0.02   0.04  -0.03     0.00   0.00   0.00
  48   6    -0.02   0.02   0.01    -0.12  -0.02  -0.03     0.01   0.01   0.00
  49   6     0.02  -0.01   0.00    -0.01   0.05  -0.01     0.01   0.03  -0.01
  50   6     0.01   0.00   0.00    -0.02  -0.02   0.03     0.00  -0.01   0.02
  51   6     0.00   0.00   0.00    -0.02  -0.01   0.02    -0.03   0.00   0.01
  52   6     0.00  -0.01   0.01     0.02   0.03  -0.01     0.02   0.01   0.00
  53   6     0.04  -0.01  -0.02    -0.07   0.07   0.10     0.01  -0.01  -0.01
  54   6     0.02  -0.02  -0.01    -0.06   0.00   0.00     0.00  -0.01  -0.01
  55   1    -0.01  -0.02  -0.01     0.07   0.06  -0.02    -0.01   0.00   0.00
  56   1     0.01  -0.01   0.01    -0.01   0.00  -0.02    -0.05   0.03   0.01
  57   1    -0.02   0.01   0.00     0.01   0.00   0.01     0.00   0.04   0.03
  58   1     0.00   0.00   0.02    -0.01  -0.03   0.03     0.02   0.01   0.06
  59   1     0.00  -0.03   0.01     0.02  -0.01   0.01     0.04  -0.05   0.02
  60   1     0.00   0.00   0.02    -0.02   0.01   0.00     0.01  -0.01   0.03
  61   1     0.00   0.01   0.00     0.00  -0.01   0.00     0.00  -0.01   0.00
  62   1     0.01   0.01   0.01    -0.01   0.00   0.00    -0.02  -0.02  -0.02
  63   1    -0.01  -0.01   0.02     0.02   0.02  -0.01     0.01   0.01   0.00
  64   1     0.01  -0.01   0.02    -0.01   0.01  -0.01     0.01   0.02   0.00
  65   1    -0.01   0.00   0.01     0.02  -0.01   0.01     0.03   0.00  -0.01
  66   1     0.04   0.01  -0.03     0.03   0.01  -0.01    -0.05  -0.01   0.05
  67   1     0.02   0.03   0.03     0.01   0.02   0.05    -0.02  -0.03  -0.03
  68   1    -0.01  -0.01  -0.01    -0.03   0.00   0.01     0.02   0.03   0.02
  69   1     0.00   0.05   0.03    -0.01  -0.07  -0.04     0.03   0.22   0.13
  70   1     0.03  -0.01   0.02    -0.05   0.04  -0.03     0.21  -0.26   0.04
  71   1    -0.05   0.00   0.01     0.06   0.01   0.01    -0.21  -0.09  -0.21
  72   1    -0.03  -0.01  -0.03     0.06   0.05   0.03     0.02  -0.08   0.43
  73   1     0.00   0.00   0.02     0.00   0.05   0.02    -0.13  -0.35  -0.27
  74   1    -0.02  -0.05   0.01    -0.01   0.07   0.03     0.07   0.38  -0.18
  75   1    -0.01  -0.03   0.03     0.02  -0.06   0.01     0.00   0.00   0.00
  76   1     0.00  -0.01  -0.01     0.04  -0.10   0.10     0.01   0.01   0.01
  77   1     0.00   0.01  -0.04     0.03   0.01   0.00     0.00   0.01   0.01
  78   1     0.03   0.01   0.01     0.05   0.00  -0.05    -0.01   0.00   0.00
  79   1    -0.04   0.01   0.01    -0.04   0.02  -0.03     0.01   0.01   0.00
  80   1     0.00   0.01   0.00    -0.01  -0.03  -0.03    -0.01  -0.01  -0.02
  81   1    -0.01   0.01  -0.02    -0.01  -0.07  -0.06    -0.02  -0.04  -0.06
  82   1    -0.01   0.01  -0.01     0.01  -0.01   0.02     0.00  -0.01  -0.01
  83   1    -0.02   0.00   0.00     0.02   0.03   0.02     0.00   0.01   0.01
  84   1     0.01   0.02  -0.01    -0.01  -0.01   0.02     0.00   0.01   0.01
  85   1     0.02   0.08  -0.03    -0.01  -0.01   0.08     0.00   0.00   0.00
  86   1     0.04   0.04   0.00    -0.07   0.14  -0.01     0.00  -0.01   0.00
  87   1    -0.03   0.05  -0.02     0.04   0.02  -0.10    -0.01   0.00   0.01
  88   1    -0.11  -0.25  -0.07     0.17   0.07   0.06    -0.02  -0.01  -0.01
  89   1     0.32   0.00   0.09     0.07   0.01  -0.04    -0.01   0.00   0.00
  90   1    -0.13   0.27   0.01     0.20  -0.05  -0.08    -0.02   0.00   0.01
  91   1    -0.08   0.15   0.02    -0.04   0.07  -0.01     0.05  -0.09   0.03
  92   1     0.10   0.05   0.09     0.02   0.05  -0.02    -0.08   0.00  -0.06
  93   1    -0.05  -0.05  -0.02    -0.03   0.03  -0.03     0.04   0.09   0.04
  94   1     0.21  -0.19  -0.29    -0.01  -0.17  -0.10     0.03  -0.01  -0.03
  95   1     0.13   0.38   0.19    -0.11   0.15   0.00     0.03   0.04   0.02
  96   1    -0.40  -0.15   0.14    -0.31  -0.10   0.01    -0.02  -0.01   0.01
  97   1     0.06  -0.03  -0.01    -0.10   0.08  -0.02    -0.03   0.04  -0.03
  98   1     0.01   0.03  -0.02     0.01   0.00   0.03     0.03   0.02   0.01
  99   1    -0.01  -0.03   0.03     0.05   0.10  -0.07     0.04   0.05  -0.05
 100   1     0.00  -0.01  -0.01     0.05  -0.04   0.05     0.04  -0.02   0.02
 101   1     0.02  -0.02   0.01    -0.07   0.04   0.01    -0.02   0.01   0.01
 102   1     0.02   0.01   0.01    -0.08  -0.10   0.03    -0.03  -0.05   0.03
 103   1     0.00  -0.02   0.01    -0.02  -0.04   0.00    -0.03   0.00  -0.01
 104   1    -0.01   0.00   0.01    -0.05   0.00   0.04    -0.03   0.00   0.03
 105   1     0.01   0.00   0.00     0.00   0.00   0.01    -0.04  -0.01   0.01
 106   1     0.01  -0.02   0.03    -0.03   0.10  -0.17     0.01   0.01  -0.03
 107   1     0.03   0.00  -0.01    -0.09   0.02   0.12     0.01   0.01   0.03
 108   1    -0.02   0.00   0.01     0.20  -0.02   0.00     0.06   0.01   0.01
 109   1     0.05  -0.02  -0.01    -0.26   0.05   0.21     0.02  -0.01  -0.01
 110   1     0.07  -0.02   0.00     0.01   0.27   0.11     0.01  -0.02   0.00
 111   1     0.05   0.01  -0.05    -0.02  -0.08   0.01     0.01   0.00   0.00
 112   1     0.03  -0.01   0.02    -0.09  -0.02  -0.14     0.00  -0.01  -0.02
 113   1     0.01  -0.02  -0.02     0.00   0.02   0.07     0.01  -0.01  -0.01
 114   1     0.05  -0.02  -0.02    -0.18  -0.03   0.07     0.00  -0.01  -0.01
                    49                     50                     51
                     A                      A                      A
 Frequencies --   240.4569               247.0038               249.0142
 Red. masses --     1.6436                 1.5785                 1.5786
 Frc consts  --     0.0560                 0.0567                 0.0577
 IR Inten    --     3.4655                 0.5680                 0.7795
 Atom AN      X      Y      Z        X      Y      Z        X      Y      Z
   1   8    -0.03   0.00  -0.03     0.01   0.02   0.06     0.00  -0.02  -0.03
   2  12    -0.03  -0.02   0.02     0.01   0.01   0.01     0.01  -0.01   0.00
   3   8     0.00   0.03  -0.01     0.00   0.00   0.00     0.00   0.00   0.00
   4   6    -0.01   0.00  -0.03     0.02  -0.01   0.06    -0.01   0.01  -0.03
   5   7    -0.01  -0.01   0.02     0.00  -0.01   0.01     0.01   0.01   0.00
   6   7     0.00   0.02   0.02    -0.01   0.01   0.02    -0.03  -0.04   0.00
   7   8    -0.03  -0.02  -0.04     0.01  -0.01   0.06    -0.01   0.01  -0.03
   8   6     0.01   0.00   0.01     0.01   0.00   0.01     0.01   0.00   0.00
   9   6     0.04   0.01   0.00     0.02   0.00   0.00     0.02   0.00   0.00
  10   6     0.02   0.01   0.02     0.01   0.00   0.02     0.00  -0.02  -0.01
  11   8     0.01   0.02  -0.01     0.01   0.01   0.00     0.00  -0.01   0.00
  12   6     0.00   0.04   0.02     0.01  -0.01  -0.03    -0.01   0.00   0.02
  13   6     0.00   0.04   0.02     0.01  -0.01  -0.04     0.00   0.00   0.02
  14   6     0.01   0.00  -0.01     0.01  -0.01   0.02    -0.01   0.01  -0.01
  15   8     0.03   0.01   0.05    -0.02  -0.02  -0.05     0.01   0.01   0.03
  16   6    -0.01  -0.01   0.00    -0.02   0.05  -0.03     0.02  -0.04   0.02
  17   8    -0.01  -0.02   0.00     0.00   0.00   0.00     0.00   0.00   0.00
  18   6     0.02   0.01  -0.02     0.00  -0.01   0.01     0.00   0.00   0.00
  19   8     0.04   0.02  -0.02    -0.01   0.00   0.01     0.00   0.00   0.00
  20   8     0.00   0.00   0.01     0.00   0.00  -0.01     0.00   0.00  -0.01
  21   6    -0.01  -0.01   0.00     0.00   0.00   0.00     0.00   0.00   0.00
  22   6    -0.01  -0.01   0.00     0.00   0.00   0.00     0.00   0.00   0.01
  23   6     0.00   0.00  -0.01     0.00   0.00   0.00     0.00   0.00   0.00
  24   8    -0.01  -0.02  -0.01     0.00   0.00   0.00     0.00   0.00   0.00
  25   6     0.00   0.00   0.00     0.00   0.00   0.01     0.01   0.00   0.01
  26   6    -0.05  -0.03  -0.02    -0.01  -0.01  -0.01     0.01   0.01   0.00
  27   6     0.04  -0.01   0.02    -0.02  -0.01  -0.05     0.01   0.01   0.03
  28   6     0.01  -0.02   0.01     0.00  -0.02  -0.03     0.00   0.01   0.02
  29   6     0.00  -0.01   0.01     0.00  -0.01   0.00     0.00   0.01  -0.01
  30   6    -0.01   0.02   0.01    -0.01   0.01   0.00    -0.01  -0.01   0.01
  31   6     0.01  -0.01  -0.01     0.00  -0.01   0.00     0.00   0.02  -0.01
  32   6     0.01  -0.01   0.00     0.00  -0.01   0.00     0.00   0.02   0.00
  33   6     0.01  -0.02   0.01     0.01  -0.01   0.00    -0.01   0.01   0.01
  34   6     0.00   0.00   0.00     0.00   0.00   0.00     0.00   0.00   0.01
  35   6     0.00   0.00  -0.01     0.00   0.00   0.00     0.00   0.01   0.00
  36   6     0.01   0.00  -0.01     0.01   0.00   0.00    -0.01   0.00   0.00
  37   6    -0.01   0.00  -0.01    -0.01   0.01   0.00     0.01   0.01   0.00
  38   6    -0.01   0.00   0.00     0.00  -0.01  -0.01     0.03  -0.02   0.01
  39   6     0.01   0.02   0.01     0.02   0.02   0.00     0.05  -0.02  -0.02
  40   6     0.00   0.03   0.00     0.02   0.05   0.01     0.04   0.01  -0.04
  41   6    -0.01   0.01  -0.03    -0.01   0.03  -0.02     0.01   0.04  -0.01
  42   6    -0.01   0.01  -0.02    -0.02   0.01  -0.02    -0.02   0.02   0.01
  43   6    -0.01  -0.02  -0.01     0.00  -0.01  -0.02     0.03   0.02   0.00
  44   6     0.00   0.00  -0.02    -0.01   0.00  -0.02    -0.03   0.01   0.01
  45   6     0.01   0.01  -0.01     0.01   0.01   0.00    -0.01  -0.02   0.01
  46   6     0.03   0.00   0.00     0.02   0.00   0.00    -0.01  -0.01   0.00
  47   6    -0.01   0.00  -0.01    -0.02   0.01  -0.01     0.01   0.00   0.00
  48   6    -0.03  -0.01  -0.01    -0.02   0.00   0.00     0.00   0.00   0.00
  49   6     0.01  -0.02   0.01    -0.01  -0.05   0.03    -0.03  -0.03   0.05
  50   6     0.01   0.00  -0.01    -0.01  -0.01  -0.02    -0.07  -0.07   0.02
  51   6    -0.01   0.02  -0.02     0.01   0.01  -0.02     0.00   0.04  -0.01
  52   6     0.01  -0.05   0.02    -0.02  -0.01   0.00     0.01   0.05  -0.04
  53   6    -0.03   0.02   0.04     0.00   0.00   0.02     0.00  -0.02  -0.01
  54   6     0.00  -0.01   0.06     0.02  -0.01   0.04     0.00   0.00  -0.04
  55   1     0.05   0.01   0.00     0.03   0.00   0.00     0.02   0.01   0.00
  56   1    -0.01   0.05   0.05     0.01  -0.01  -0.05     0.00   0.00   0.02
  57   1     0.00   0.00  -0.02     0.01  -0.03   0.01    -0.01   0.02  -0.01
  58   1     0.00   0.01  -0.03    -0.02   0.03  -0.09     0.02  -0.02   0.07
  59   1    -0.06  -0.05   0.01    -0.05   0.13  -0.03     0.07  -0.07   0.01
  60   1     0.03  -0.02   0.05    -0.01   0.02  -0.06     0.00  -0.02   0.01
  61   1    -0.01  -0.01   0.00     0.00   0.00   0.00    -0.01   0.00   0.00
  62   1    -0.01  -0.01  -0.01     0.01   0.00   0.00     0.00   0.00   0.00
  63   1     0.00   0.00  -0.01    -0.03  -0.03   0.03    -0.04  -0.04   0.05
  64   1     0.00   0.01   0.00     0.03   0.01   0.02     0.07   0.04   0.04
  65   1     0.01  -0.01  -0.01    -0.01   0.01  -0.03     0.00   0.02  -0.06
  66   1    -0.16  -0.01   0.05    -0.02   0.00  -0.01     0.02   0.00  -0.01
  67   1    -0.08  -0.10  -0.12    -0.01  -0.01  -0.02     0.01   0.01   0.02
  68   1     0.01   0.00  -0.01     0.00  -0.01  -0.01    -0.01   0.00   0.00
  69   1     0.05   0.13   0.13    -0.04  -0.17  -0.15     0.02   0.09   0.08
  70   1     0.17  -0.14   0.05    -0.16   0.12  -0.07     0.09  -0.06   0.04
  71   1    -0.07  -0.04  -0.11     0.12   0.03   0.04    -0.07  -0.01  -0.01
  72   1    -0.01   0.00  -0.12     0.02  -0.07   0.28    -0.01   0.03  -0.11
  73   1     0.08   0.08   0.11    -0.12  -0.27  -0.25     0.06   0.12   0.11
  74   1    -0.03  -0.15   0.08     0.10   0.27  -0.19    -0.05  -0.11   0.09
  75   1     0.01  -0.02   0.00     0.01  -0.01   0.00    -0.01   0.02   0.00
  76   1     0.01  -0.02   0.02     0.01  -0.01   0.00    -0.01   0.00   0.02
  77   1     0.01   0.01   0.00     0.01   0.01  -0.01    -0.01  -0.01   0.02
  78   1     0.02   0.00  -0.01     0.02   0.00   0.00    -0.03   0.01   0.00
  79   1    -0.01   0.00  -0.01    -0.01   0.01   0.00     0.01   0.01   0.00
  80   1     0.02   0.03   0.02     0.03   0.02   0.01     0.07  -0.03  -0.03
  81   1     0.01   0.04   0.01     0.03   0.07   0.02     0.06   0.01  -0.07
  82   1    -0.01   0.00  -0.04    -0.01   0.04  -0.03     0.00   0.07  -0.02
  83   1    -0.02  -0.04  -0.03     0.00  -0.01  -0.02     0.07   0.04  -0.01
  84   1     0.01   0.02  -0.03     0.01   0.03  -0.03    -0.01   0.03   0.00
  85   1     0.00   0.00   0.01     0.01   0.02  -0.01     0.00   0.02  -0.04
  86   1     0.00   0.04   0.00     0.02   0.00   0.00     0.00  -0.10   0.00
  87   1     0.02   0.01  -0.03    -0.01   0.01   0.00    -0.04  -0.01   0.08
  88   1     0.04   0.02   0.02     0.03   0.01   0.01     0.03   0.04   0.02
  89   1     0.02   0.00   0.00     0.02   0.00   0.00    -0.08  -0.02  -0.04
  90   1     0.05  -0.01  -0.02     0.03   0.00  -0.01     0.03  -0.09   0.00
  91   1    -0.01   0.00  -0.01     0.03  -0.07   0.01     0.01   0.01   0.00
  92   1    -0.01   0.00  -0.01    -0.09   0.01  -0.07     0.03   0.00   0.02
  93   1    -0.01   0.00  -0.01     0.01   0.09   0.04     0.02  -0.01  -0.01
  94   1    -0.03  -0.03   0.01     0.01  -0.03  -0.03     0.00   0.00   0.00
  95   1    -0.05   0.00  -0.02    -0.01   0.05   0.02     0.00  -0.01  -0.01
  96   1    -0.04  -0.01  -0.01    -0.07  -0.02   0.02     0.00   0.00  -0.01
  97   1     0.12  -0.08  -0.01     0.28  -0.20  -0.01     0.32  -0.23  -0.03
  98   1    -0.04   0.06  -0.06    -0.13   0.18  -0.14    -0.17   0.27  -0.17
  99   1    -0.07  -0.07   0.11    -0.20  -0.16   0.30    -0.25  -0.15   0.39
 100   1     0.00   0.01  -0.02    -0.01  -0.02  -0.03     0.01  -0.11   0.00
 101   1     0.03  -0.01  -0.01    -0.02  -0.01  -0.01    -0.13  -0.02   0.04
 102   1     0.02   0.02  -0.01    -0.01  -0.01  -0.02    -0.12  -0.15   0.03
 103   1    -0.01   0.08  -0.02     0.01   0.03  -0.01    -0.01   0.11  -0.04
 104   1     0.04   0.01  -0.04     0.03   0.01  -0.04     0.06   0.01   0.00
 105   1    -0.05   0.01   0.01     0.01   0.01  -0.01    -0.08   0.00   0.01
 106   1     0.13  -0.25   0.38     0.00  -0.03   0.07    -0.05   0.14  -0.20
 107   1     0.29  -0.01  -0.31     0.02  -0.01  -0.07    -0.12   0.02   0.08
 108   1    -0.39   0.10  -0.02    -0.10   0.01  -0.01     0.18   0.02  -0.03
 109   1    -0.08   0.01   0.07    -0.03   0.00   0.03    -0.02  -0.01  -0.02
 110   1    -0.01   0.08   0.04     0.01   0.03   0.02     0.00  -0.02  -0.01
 111   1    -0.01  -0.03   0.02     0.00  -0.02   0.00     0.00  -0.04   0.00
 112   1     0.00  -0.02   0.04     0.02   0.00   0.04     0.00   0.00  -0.04
 113   1     0.02   0.01   0.10     0.03   0.00   0.06     0.00  -0.02  -0.05
 114   1    -0.02  -0.04   0.07     0.02  -0.04   0.04     0.00   0.02  -0.03
                    52                     53                     54
                     A                      A                      A
 Frequencies --   255.5623               258.6848               259.6407
 Red. masses --     2.5315                 2.3726                 2.0743
 Frc consts  --     0.0974                 0.0935                 0.0824
 IR Inten    --     1.3062                 2.7032                 0.7879
 Atom AN      X      Y      Z        X      Y      Z        X      Y      Z
   1   8     0.09   0.05   0.01     0.00  -0.01   0.00    -0.04   0.01   0.02
   2  12     0.08  -0.02  -0.01     0.01  -0.04   0.02    -0.01  -0.03  -0.01
   3   8    -0.03   0.02  -0.04     0.00  -0.01   0.00     0.01  -0.03   0.03
   4   6     0.02   0.00   0.03     0.00   0.00  -0.01     0.00  -0.01   0.02
   5   7     0.03   0.01   0.01     0.01   0.00   0.03     0.00   0.00   0.00
   6   7     0.00   0.00  -0.01    -0.04  -0.03   0.00    -0.03  -0.05  -0.03
   7   8     0.06  -0.01   0.00     0.01   0.01   0.00    -0.02  -0.02   0.02
   8   6     0.01   0.00   0.02     0.04  -0.02   0.03     0.01  -0.01   0.00
   9   6    -0.01  -0.01   0.01     0.06  -0.01  -0.01     0.01  -0.01  -0.02
  10   6     0.00  -0.01   0.00     0.01  -0.04  -0.01    -0.01  -0.03  -0.04
  11   8    -0.03  -0.08   0.06     0.00   0.00   0.00     0.02   0.04  -0.02
  12   6    -0.03  -0.07  -0.01     0.00   0.01   0.00     0.02   0.03  -0.01
  13   6    -0.03  -0.02  -0.05     0.00   0.00   0.00     0.02  -0.01   0.02
  14   6    -0.03  -0.02   0.05     0.00   0.00  -0.01     0.03   0.00  -0.01
  15   8    -0.07  -0.08  -0.03     0.00   0.03  -0.01     0.02   0.05  -0.01
  16   6    -0.05   0.04   0.02     0.01  -0.01   0.00    -0.01   0.03  -0.03
  17   8    -0.01  -0.02   0.01     0.00   0.00   0.00     0.01   0.02  -0.02
  18   6    -0.02   0.01  -0.02     0.00   0.00   0.00    -0.01  -0.01   0.01
  19   8     0.03   0.00  -0.05     0.00   0.00   0.00    -0.05  -0.03   0.02
  20   8    -0.02  -0.01   0.01     0.00   0.00  -0.01    -0.01   0.00   0.00
  21   6    -0.02   0.00   0.01     0.00   0.00   0.00     0.00   0.00   0.00
  22   6     0.00  -0.01   0.02     0.00   0.00   0.00     0.00   0.00  -0.01
  23   6    -0.02   0.00   0.00     0.00   0.00   0.00    -0.01   0.00   0.01
  24   8    -0.02   0.01  -0.01     0.00   0.00   0.00     0.00   0.01   0.00
  25   6     0.04   0.02   0.02     0.00   0.00   0.01     0.00   0.00   0.01
  26   6     0.06   0.04   0.04     0.01   0.01   0.00     0.02   0.01   0.02
  27   6    -0.02  -0.02  -0.05     0.00   0.00   0.01    -0.02   0.01   0.00
  28   6    -0.02   0.09  -0.01     0.01   0.01   0.01     0.02  -0.05  -0.02
  29   6     0.00   0.02  -0.01     0.00   0.02   0.00     0.00   0.01   0.00
  30   6    -0.01   0.01   0.01    -0.02   0.00  -0.01     0.00  -0.01   0.01
  31   6    -0.01   0.04  -0.01    -0.01   0.03  -0.02    -0.01   0.01  -0.01
  32   6    -0.02   0.03   0.00     0.00   0.03   0.00     0.00   0.01  -0.01
  33   6    -0.02   0.00   0.03     0.00   0.01   0.04     0.01   0.01   0.01
  34   6    -0.01   0.00   0.01     0.00   0.02   0.03     0.01   0.01   0.02
  35   6     0.00   0.01  -0.01     0.01   0.04  -0.01     0.01   0.02   0.00
  36   6    -0.02   0.01  -0.01    -0.04   0.01  -0.01    -0.02   0.00   0.00
  37   6     0.01   0.00  -0.01     0.02   0.03  -0.01     0.01   0.01   0.00
  38   6    -0.01   0.02   0.02    -0.02  -0.01   0.00     0.02   0.01   0.04
  39   6    -0.01   0.01   0.00     0.01   0.02  -0.01     0.03  -0.01   0.00
  40   6    -0.01  -0.01  -0.04     0.01   0.06  -0.03     0.01  -0.05  -0.07
  41   6    -0.01   0.00  -0.03    -0.01   0.06  -0.04     0.00  -0.01  -0.03
  42   6    -0.01   0.02   0.01    -0.02   0.05  -0.04     0.00   0.02   0.03
  43   6    -0.01   0.00   0.01    -0.04  -0.02   0.02     0.02   0.02   0.03
  44   6     0.00   0.02   0.01     0.04   0.04  -0.04    -0.01   0.02   0.04
  45   6    -0.03  -0.03   0.01    -0.05  -0.02   0.01    -0.03  -0.01   0.01
  46   6    -0.01  -0.02  -0.02    -0.03   0.00  -0.02    -0.03   0.00  -0.01
  47   6     0.03   0.02   0.01     0.05   0.00   0.00     0.02   0.00   0.00
  48   6     0.01  -0.01  -0.02     0.00   0.00  -0.02     0.01   0.01   0.00
  49   6     0.02   0.02  -0.01     0.09   0.00  -0.04     0.01   0.04   0.01
  50   6     0.00  -0.01   0.02     0.11   0.05  -0.01    -0.03  -0.06   0.07
  51   6    -0.03   0.02   0.01    -0.10  -0.07   0.01    -0.04   0.06   0.02
  52   6     0.03  -0.02   0.01    -0.11  -0.02   0.06     0.09   0.01  -0.02
  53   6     0.01  -0.02   0.01     0.00  -0.05   0.02     0.00  -0.02  -0.01
  54   6     0.01  -0.01   0.00     0.00  -0.06   0.01    -0.03  -0.02  -0.08
  55   1    -0.02   0.00   0.01     0.06   0.01  -0.02     0.01   0.02  -0.02
  56   1    -0.06  -0.03  -0.08     0.01   0.00   0.01     0.04   0.00   0.02
  57   1     0.01  -0.02   0.07     0.00   0.00  -0.01     0.02  -0.01  -0.02
  58   1    -0.07  -0.05  -0.04     0.01  -0.01   0.03     0.01   0.05  -0.07
  59   1    -0.14   0.04   0.04     0.04  -0.02  -0.01    -0.05   0.06  -0.02
  60   1    -0.06   0.11   0.09     0.00  -0.02  -0.02     0.02  -0.02  -0.02
  61   1     0.00  -0.02   0.01     0.00   0.00   0.00    -0.01   0.01  -0.02
  62   1    -0.03  -0.01  -0.01     0.00   0.00   0.00     0.00   0.00   0.01
  63   1     0.06   0.07   0.01    -0.03  -0.03   0.03    -0.01   0.00   0.03
  64   1     0.01   0.03   0.01     0.03   0.01   0.03     0.02  -0.02   0.01
  65   1     0.08  -0.02   0.04    -0.01   0.01  -0.03     0.00   0.00   0.01
  66   1     0.21   0.01  -0.06     0.04   0.01  -0.03     0.10   0.01  -0.05
  67   1     0.11   0.13   0.19     0.02   0.02   0.05     0.05   0.05   0.10
  68   1    -0.04   0.02   0.03    -0.03  -0.01   0.00    -0.04  -0.01   0.01
  69   1    -0.02  -0.02  -0.03     0.00  -0.01   0.00    -0.03  -0.08  -0.09
  70   1     0.00  -0.03  -0.05    -0.01   0.02   0.00    -0.13   0.10  -0.01
  71   1    -0.02  -0.03  -0.06     0.02   0.01   0.02     0.05   0.04   0.08
  72   1     0.05   0.13  -0.21     0.01   0.02  -0.03    -0.03  -0.06   0.01
  73   1    -0.06   0.27   0.09     0.03   0.05   0.04     0.03  -0.10  -0.04
  74   1    -0.03  -0.04   0.04    -0.02  -0.02   0.04     0.05  -0.05  -0.04
  75   1    -0.02   0.03   0.01     0.01   0.02  -0.02     0.01   0.01  -0.02
  76   1    -0.03  -0.01   0.05     0.01   0.00   0.07     0.01   0.01   0.02
  77   1    -0.02  -0.02   0.02     0.00   0.00   0.05     0.00   0.00   0.03
  78   1    -0.05   0.01  -0.01    -0.07   0.01  -0.02    -0.03   0.00   0.00
  79   1     0.00   0.00   0.00     0.04   0.03  -0.01     0.03   0.02   0.00
  80   1     0.00   0.01   0.00     0.05   0.01   0.00     0.03  -0.01   0.00
  81   1    -0.02  -0.03  -0.07     0.03   0.08  -0.03     0.01  -0.08  -0.14
  82   1    -0.01  -0.01  -0.04    -0.01   0.07  -0.04     0.00  -0.01  -0.05
  83   1    -0.03  -0.02   0.00    -0.02  -0.01   0.02     0.03   0.00   0.00
  84   1     0.01   0.02   0.00     0.07   0.07  -0.07     0.00   0.02   0.03
  85   1    -0.02   0.00  -0.03    -0.11  -0.20   0.19    -0.06  -0.09   0.10
  86   1    -0.03  -0.11   0.00    -0.18   0.19   0.02    -0.10   0.10   0.01
  87   1    -0.04  -0.02   0.09     0.13  -0.07  -0.14     0.05  -0.03  -0.07
  88   1     0.01   0.03   0.02    -0.04  -0.01  -0.02    -0.04  -0.01  -0.02
  89   1    -0.08  -0.03  -0.07    -0.03   0.00  -0.02    -0.01   0.00   0.00
  90   1     0.02  -0.10  -0.01    -0.04   0.00  -0.01    -0.05   0.02   0.00
  91   1    -0.07   0.20   0.00     0.11  -0.13   0.04     0.12  -0.20   0.05
  92   1     0.21   0.01   0.15    -0.07   0.00  -0.07    -0.15   0.00  -0.13
  93   1    -0.01  -0.16  -0.09     0.12   0.12   0.04     0.11   0.18   0.09
  94   1     0.00   0.00   0.00     0.01  -0.03  -0.01     0.03  -0.01  -0.02
  95   1     0.01  -0.04  -0.03     0.00   0.00  -0.02     0.02   0.04   0.01
  96   1     0.04   0.01  -0.04    -0.02   0.00  -0.03    -0.02   0.00   0.01
  97   1     0.06  -0.02  -0.04     0.12  -0.02  -0.05    -0.10   0.09   0.01
  98   1     0.02   0.08  -0.04     0.13   0.03  -0.03     0.06  -0.03   0.07
  99   1    -0.01   0.01   0.03     0.07  -0.05  -0.07     0.08   0.08  -0.09
 100   1     0.03  -0.02   0.01     0.08   0.06  -0.01     0.03  -0.11   0.04
 101   1    -0.01   0.01   0.01     0.18  -0.01  -0.03    -0.07  -0.04   0.09
 102   1    -0.02  -0.03   0.03     0.14   0.12   0.04    -0.07  -0.11   0.10
 103   1    -0.03  -0.01  -0.01    -0.13   0.09  -0.07    -0.06   0.11  -0.04
 104   1    -0.07   0.03  -0.01     0.03  -0.16   0.12    -0.02   0.05   0.01
 105   1    -0.02   0.04   0.03    -0.28  -0.21  -0.01    -0.11   0.05   0.07
 106   1     0.11  -0.18   0.24    -0.15   0.12  -0.01     0.18  -0.20   0.20
 107   1     0.23   0.01  -0.21    -0.24  -0.04   0.19     0.33   0.04  -0.28
 108   1    -0.23   0.09  -0.01    -0.02  -0.13   0.07    -0.16   0.18  -0.04
 109   1     0.02  -0.01  -0.01    -0.04  -0.04   0.00     0.00  -0.02  -0.02
 110   1     0.01  -0.03   0.01    -0.01  -0.04   0.01     0.00  -0.03  -0.01
 111   1     0.01  -0.01   0.01     0.00  -0.09   0.04     0.00  -0.03   0.00
 112   1     0.02   0.00   0.01    -0.01  -0.07  -0.01    -0.03  -0.04  -0.08
 113   1     0.01  -0.01  -0.01     0.01  -0.04   0.04    -0.05  -0.03  -0.11
 114   1     0.03  -0.01  -0.01    -0.02  -0.08   0.02    -0.03   0.03  -0.08
                    55                     56                     57
                     A                      A                      A
 Frequencies --   262.3384               267.2836               271.7456
 Red. masses --     1.2847                 1.4462                 1.7946
 Frc consts  --     0.0521                 0.0609                 0.0781
 IR Inten    --     0.7306                 4.1052                 1.9790
 Atom AN      X      Y      Z        X      Y      Z        X      Y      Z
   1   8     0.01   0.00  -0.01     0.01   0.01   0.01    -0.01   0.00   0.00
   2  12     0.02   0.00   0.01     0.00   0.04  -0.02    -0.01  -0.01   0.03
   3   8     0.00   0.01  -0.01     0.00   0.02   0.00     0.01   0.02   0.04
   4   6     0.00   0.00   0.00     0.00   0.00   0.01     0.00   0.00   0.00
   5   7    -0.03  -0.01   0.01    -0.02   0.00  -0.02     0.05   0.00   0.01
   6   7     0.01   0.01   0.00    -0.01  -0.01   0.02    -0.02  -0.01   0.00
   7   8     0.01   0.00  -0.01     0.01   0.00   0.01    -0.01   0.00   0.00
   8   6    -0.01  -0.01   0.00    -0.02   0.02  -0.02     0.02   0.00   0.02
   9   6     0.01   0.00  -0.01    -0.02   0.02   0.00     0.01   0.00   0.00
  10   6     0.01   0.00   0.00    -0.02   0.02   0.01     0.00  -0.01   0.00
  11   8    -0.01  -0.01   0.01    -0.01  -0.01   0.01     0.00   0.00   0.00
  12   6    -0.01  -0.01   0.00     0.00  -0.01   0.00     0.00   0.00   0.00
  13   6    -0.01   0.00  -0.01    -0.01   0.00  -0.01     0.00   0.00   0.01
  14   6    -0.01   0.00   0.00    -0.01   0.00   0.01    -0.01   0.00   0.00
  15   8    -0.01  -0.01   0.00    -0.01  -0.01   0.00    -0.01   0.00  -0.01
  16   6     0.00   0.00   0.01     0.00   0.01   0.00     0.00   0.00   0.00
  17   8     0.00   0.00   0.00     0.00   0.00   0.00     0.01   0.03  -0.01
  18   6     0.00   0.00   0.00     0.00   0.00   0.00     0.02   0.00   0.01
  19   8     0.01   0.01   0.00     0.00   0.01   0.00    -0.02   0.00   0.02
  20   8     0.00   0.00   0.00     0.01   0.00   0.00     0.05   0.01   0.02
  21   6     0.00   0.00   0.00     0.00   0.00   0.00     0.05   0.01  -0.01
  22   6     0.00   0.00   0.00     0.00   0.00   0.00     0.03   0.02  -0.02
  23   6     0.00   0.00   0.00     0.00   0.00   0.00     0.03   0.00   0.00
  24   8     0.00   0.00   0.00     0.00   0.00   0.00     0.05   0.00   0.01
  25   6     0.00   0.00   0.00     0.01   0.00   0.00    -0.05  -0.03  -0.02
  26   6     0.00   0.00   0.00     0.00  -0.01  -0.01    -0.06  -0.04  -0.03
  27   6     0.00   0.00   0.00    -0.01  -0.01  -0.01    -0.04   0.00  -0.02
  28   6    -0.01   0.02   0.00    -0.01  -0.01  -0.01    -0.02  -0.03  -0.01
  29   6    -0.01  -0.01   0.01     0.00  -0.01   0.00     0.01   0.01  -0.02
  30   6     0.00   0.01   0.00     0.00  -0.01   0.01    -0.01   0.00   0.00
  31   6    -0.01  -0.02   0.01     0.01  -0.03   0.01    -0.01   0.04  -0.02
  32   6     0.02  -0.02   0.00     0.02  -0.03   0.01    -0.03   0.02   0.00
  33   6     0.03   0.00   0.00     0.02  -0.01  -0.03    -0.05  -0.02   0.04
  34   6     0.02   0.02   0.00     0.01   0.00  -0.02    -0.02  -0.03   0.00
  35   6     0.00   0.01   0.01    -0.01  -0.02   0.01     0.01  -0.01  -0.03
  36   6    -0.02  -0.01   0.00     0.02  -0.01   0.01    -0.03   0.02  -0.02
  37   6     0.02   0.00   0.00    -0.01  -0.02   0.01     0.01   0.00  -0.02
  38   6    -0.01   0.01  -0.01     0.03  -0.03   0.02     0.00   0.00   0.00
  39   6    -0.02   0.01  -0.01     0.05  -0.02   0.01     0.00   0.00   0.00
  40   6    -0.01   0.00   0.01     0.05  -0.01  -0.02     0.00   0.01  -0.01
  41   6    -0.01   0.00   0.01     0.02   0.01  -0.02    -0.01   0.01  -0.01
  42   6    -0.01   0.00   0.00     0.00   0.00   0.01    -0.01   0.01   0.00
  43   6     0.00   0.01  -0.01     0.02  -0.01   0.01     0.00   0.01   0.00
  44   6    -0.01  -0.01   0.00     0.00   0.00   0.01     0.00   0.00   0.00
  45   6    -0.04   0.02   0.00     0.02   0.01  -0.01    -0.04  -0.03   0.01
  46   6    -0.04   0.04   0.00     0.01   0.02   0.01    -0.01  -0.02  -0.03
  47   6     0.02  -0.03   0.00    -0.04  -0.02  -0.01     0.07   0.05   0.03
  48   6     0.03  -0.01  -0.01     0.00  -0.02   0.00     0.04   0.01  -0.03
  49   6    -0.03  -0.02   0.02     0.00  -0.01   0.01     0.01  -0.01   0.01
  50   6    -0.03  -0.02   0.00     0.00  -0.02   0.02     0.01  -0.01   0.01
  51   6     0.05   0.02  -0.01    -0.05   0.00   0.00     0.00   0.01   0.00
  52   6     0.02   0.01  -0.02    -0.01   0.00   0.01     0.01   0.01  -0.01
  53   6     0.00   0.00   0.00    -0.01   0.04  -0.02    -0.01  -0.01   0.02
  54   6     0.01   0.00   0.01    -0.01   0.04  -0.01    -0.01  -0.01  -0.01
  55   1     0.02   0.00  -0.01    -0.01   0.00   0.00     0.00   0.01   0.00
  56   1    -0.01   0.00  -0.01    -0.02   0.00  -0.01    -0.01  -0.01   0.00
  57   1     0.00   0.00   0.01    -0.01   0.00   0.01    -0.02   0.01   0.00
  58   1    -0.01  -0.01   0.01    -0.01   0.00   0.00     0.00   0.01   0.00
  59   1     0.00  -0.01   0.01    -0.01   0.02   0.01     0.01   0.00   0.00
  60   1    -0.01   0.01   0.01    -0.01   0.02   0.01     0.00   0.00   0.00
  61   1     0.00   0.00   0.00     0.00   0.00   0.00     0.03   0.05  -0.02
  62   1     0.00   0.00   0.00     0.00   0.00   0.00     0.04   0.00   0.00
  63   1     0.01   0.01  -0.01    -0.05  -0.05   0.04    -0.09  -0.11   0.00
  64   1    -0.02  -0.01  -0.01     0.07   0.03   0.04    -0.01  -0.07   0.00
  65   1     0.00  -0.01   0.02    -0.01   0.02  -0.07    -0.12   0.03  -0.03
  66   1    -0.01   0.00   0.01    -0.04  -0.01   0.03    -0.29  -0.03   0.15
  67   1     0.00   0.00  -0.01    -0.02  -0.02  -0.05    -0.14  -0.18  -0.30
  68   1     0.01   0.00   0.00     0.03   0.01   0.00     0.13   0.02   0.00
  69   1     0.00   0.01   0.01    -0.01  -0.01  -0.02    -0.03  -0.02  -0.07
  70   1     0.02  -0.02   0.00    -0.01  -0.01  -0.01    -0.08   0.01   0.00
  71   1    -0.01  -0.01  -0.02    -0.01  -0.01  -0.02    -0.03   0.00   0.00
  72   1     0.01   0.02  -0.02    -0.02  -0.01   0.02    -0.04  -0.05   0.08
  73   1    -0.01   0.04   0.02    -0.04  -0.03  -0.04    -0.04  -0.12  -0.07
  74   1    -0.01   0.00   0.01     0.01   0.02  -0.03     0.02   0.04  -0.05
  75   1     0.03  -0.04  -0.01     0.02  -0.04   0.02    -0.04   0.04   0.01
  76   1     0.05   0.01  -0.01     0.02   0.01  -0.05    -0.07  -0.04   0.07
  77   1     0.03   0.03   0.00     0.02   0.02  -0.04    -0.03  -0.05   0.00
  78   1    -0.01  -0.02  -0.02     0.04  -0.02   0.00    -0.07   0.02  -0.02
  79   1     0.03   0.00   0.00    -0.02  -0.02   0.01    -0.02  -0.02  -0.01
  80   1    -0.03   0.01  -0.01     0.07  -0.02   0.01     0.01   0.00   0.00
  81   1    -0.02   0.00   0.02     0.06   0.00  -0.04     0.01   0.01  -0.01
  82   1    -0.01   0.00   0.02     0.01   0.02  -0.03    -0.01   0.02  -0.01
  83   1    -0.01   0.01  -0.01     0.06   0.00   0.00     0.00   0.01   0.00
  84   1    -0.02  -0.01   0.00     0.00   0.00   0.01     0.00   0.01  -0.01
  85   1    -0.14  -0.31   0.34    -0.01  -0.09   0.09    -0.06  -0.07   0.04
  86   1    -0.24   0.47   0.03    -0.02   0.17   0.01    -0.10  -0.04   0.00
  87   1     0.26  -0.07  -0.36     0.11  -0.02  -0.15     0.00  -0.04   0.04
  88   1    -0.10  -0.06  -0.07    -0.02  -0.01  -0.02     0.01   0.00   0.00
  89   1     0.08   0.04   0.09     0.05   0.03   0.06    -0.05  -0.03  -0.08
  90   1    -0.11   0.18   0.00    -0.02   0.09   0.00     0.01  -0.08  -0.02
  91   1     0.02  -0.01  -0.01    -0.13   0.19  -0.08    -0.11   0.35   0.06
  92   1     0.03  -0.04   0.03     0.14  -0.03   0.14     0.40   0.05   0.25
  93   1     0.03  -0.05  -0.02    -0.14  -0.22  -0.10     0.01  -0.23  -0.13
  94   1     0.00   0.01   0.02    -0.04   0.02   0.04     0.05   0.01  -0.06
  95   1     0.02  -0.08  -0.03    -0.02  -0.08  -0.02     0.07   0.01  -0.01
  96   1     0.08   0.02  -0.05     0.06   0.01  -0.02     0.03   0.01  -0.04
  97   1     0.03  -0.04   0.03    -0.06   0.03   0.04    -0.04   0.03   0.03
  98   1    -0.07   0.01  -0.01     0.03  -0.07   0.06     0.03  -0.06   0.05
  99   1    -0.07  -0.03   0.08     0.04   0.01  -0.06     0.03   0.00  -0.06
 100   1    -0.03  -0.02  -0.01     0.01  -0.04   0.01     0.00  -0.02   0.00
 101   1    -0.04  -0.01   0.01    -0.01  -0.02   0.03     0.01  -0.03   0.02
 102   1    -0.03  -0.02  -0.01    -0.01  -0.03   0.04     0.01   0.00   0.03
 103   1     0.07  -0.14   0.05    -0.11   0.41  -0.11     0.01  -0.08   0.02
 104   1    -0.07   0.08  -0.06     0.30  -0.17   0.10    -0.08   0.05  -0.02
 105   1     0.20   0.12  -0.01    -0.43  -0.25   0.00     0.08   0.07   0.01
 106   1     0.02   0.00  -0.06     0.00   0.02   0.04     0.01   0.00  -0.02
 107   1     0.02   0.01  -0.01    -0.01  -0.01  -0.01     0.02   0.01  -0.03
 108   1     0.06   0.01  -0.02    -0.04   0.01   0.01     0.01   0.03  -0.01
 109   1     0.03   0.00  -0.01     0.01   0.03  -0.01    -0.04  -0.01   0.03
 110   1    -0.01  -0.02  -0.01    -0.01   0.03  -0.02     0.00   0.02   0.02
 111   1    -0.01   0.02   0.01    -0.01   0.06  -0.02     0.00  -0.04   0.03
 112   1     0.01   0.00   0.00    -0.01   0.04   0.01    -0.01  -0.01  -0.01
 113   1     0.02   0.00   0.03    -0.03   0.03  -0.04    -0.01  -0.01  -0.03
 114   1     0.00  -0.02   0.02     0.00   0.07  -0.02     0.00   0.01  -0.02
                    58                     59                     60
                     A                      A                      A
 Frequencies --   274.0488               274.8143               281.7951
 Red. masses --     1.3652                 1.2877                 1.8318
 Frc consts  --     0.0604                 0.0573                 0.0857
 IR Inten    --     0.8517                 1.6404                 1.7026
 Atom AN      X      Y      Z        X      Y      Z        X      Y      Z
   1   8    -0.02  -0.01   0.01     0.02   0.01   0.00     0.01   0.00   0.00
   2  12    -0.02  -0.01   0.00     0.02   0.01   0.00    -0.01   0.00   0.01
   3   8     0.01  -0.03  -0.03     0.00   0.02   0.01     0.00   0.01  -0.01
   4   6     0.00  -0.01   0.00     0.00   0.00   0.00     0.00   0.00   0.00
   5   7     0.01   0.00   0.00     0.00   0.00   0.00     0.00  -0.02  -0.01
   6   7     0.00   0.00   0.01    -0.02  -0.01   0.00     0.04   0.04   0.00
   7   8    -0.01   0.00   0.01     0.01   0.00   0.00     0.00   0.00   0.00
   8   6     0.00   0.01   0.00     0.00   0.00   0.00    -0.02   0.01  -0.01
   9   6     0.00   0.01   0.00     0.01   0.00  -0.01    -0.03   0.01  -0.01
  10   6     0.00   0.01   0.01    -0.01  -0.01   0.00     0.00   0.03   0.01
  11   8     0.02   0.04  -0.03    -0.01  -0.03   0.02     0.00  -0.01   0.01
  12   6     0.01   0.03   0.00    -0.01  -0.02   0.00     0.00  -0.01   0.00
  13   6     0.01   0.01   0.00    -0.01  -0.01  -0.01     0.00   0.00  -0.01
  14   6     0.02   0.00  -0.02    -0.01   0.00   0.01     0.00   0.00   0.01
  15   8     0.03   0.02   0.01    -0.02  -0.02  -0.01    -0.01  -0.01  -0.01
  16   6     0.00   0.00  -0.02     0.00   0.00   0.01     0.00   0.00   0.00
  17   8    -0.01  -0.02   0.00     0.00   0.01  -0.01     0.00   0.00   0.00
  18   6    -0.01  -0.01   0.00     0.00   0.01   0.00     0.00   0.00   0.00
  19   8     0.00   0.00   0.00     0.00   0.01   0.00     0.01   0.01   0.00
  20   8    -0.03  -0.01   0.00     0.02   0.00   0.02     0.00   0.00   0.00
  21   6    -0.03  -0.01   0.00     0.03   0.01  -0.01     0.00   0.00   0.00
  22   6    -0.02  -0.02   0.01     0.01   0.02  -0.02     0.00   0.00   0.00
  23   6    -0.03   0.00   0.00     0.01   0.00   0.00     0.00   0.00   0.00
  24   8    -0.03   0.00   0.00     0.03   0.01   0.02     0.00   0.00   0.00
  25   6     0.01   0.00   0.01    -0.05  -0.03   0.00     0.00   0.00   0.00
  26   6     0.02   0.02   0.01    -0.02  -0.02  -0.01    -0.01   0.00  -0.01
  27   6     0.04   0.01   0.02    -0.02   0.00  -0.01     0.00   0.00  -0.01
  28   6     0.02  -0.03   0.02    -0.01   0.02  -0.01     0.00   0.01  -0.01
  29   6     0.01   0.00  -0.01     0.00   0.00   0.00     0.01  -0.03  -0.02
  30   6     0.00   0.00   0.00    -0.01   0.00   0.00     0.01   0.01   0.00
  31   6     0.00   0.01  -0.01     0.00  -0.01   0.01    -0.02  -0.01  -0.02
  32   6    -0.01   0.00   0.01     0.01   0.00   0.00    -0.04  -0.02  -0.01
  33   6    -0.02  -0.01   0.01     0.01   0.01  -0.01    -0.04  -0.04  -0.01
  34   6    -0.01  -0.01  -0.01     0.01   0.00   0.01    -0.02  -0.05  -0.03
  35   6     0.00  -0.01  -0.01     0.00   0.00   0.00     0.02  -0.04  -0.03
  36   6    -0.01   0.00  -0.01     0.01   0.00   0.01    -0.02   0.00  -0.02
  37   6     0.01  -0.01   0.00    -0.01   0.01   0.00     0.03  -0.02  -0.01
  38   6     0.00   0.00   0.00     0.01  -0.01   0.00     0.00   0.01  -0.01
  39   6     0.01   0.00   0.00     0.02   0.00   0.00    -0.02   0.00   0.00
  40   6     0.00   0.00   0.00     0.01   0.01  -0.01    -0.02  -0.02   0.02
  41   6     0.00   0.00   0.00     0.00   0.01  -0.01     0.00  -0.03   0.02
  42   6     0.00   0.00   0.00    -0.01   0.01   0.00     0.02  -0.02   0.01
  43   6     0.00  -0.01  -0.01     0.01   0.00   0.00     0.01   0.00  -0.01
  44   6     0.00   0.00   0.00     0.00   0.01   0.00     0.00  -0.02   0.01
  45   6    -0.02  -0.01   0.00     0.02   0.00   0.00    -0.07   0.01   0.02
  46   6     0.00  -0.01  -0.01     0.00   0.00   0.01    -0.03  -0.01  -0.02
  47   6     0.03   0.02   0.02    -0.03  -0.01  -0.01     0.11   0.05   0.05
  48   6     0.03   0.00  -0.01    -0.03   0.00   0.01     0.09   0.05   0.00
  49   6     0.00   0.00   0.00     0.01  -0.01   0.01    -0.02   0.01   0.00
  50   6     0.00   0.00   0.00     0.00  -0.02   0.02    -0.03   0.00  -0.02
  51   6     0.01   0.00  -0.01     0.00   0.01   0.00     0.03  -0.02   0.00
  52   6    -0.01   0.00   0.00     0.00   0.01  -0.01     0.03  -0.02   0.01
  53   6    -0.01   0.01   0.01     0.01  -0.01  -0.01    -0.01   0.06   0.03
  54   6     0.00   0.01   0.01     0.00  -0.01  -0.01     0.01   0.03   0.03
  55   1     0.00   0.00   0.00     0.01   0.00  -0.01    -0.03  -0.01   0.00
  56   1     0.03   0.02   0.02    -0.02  -0.01  -0.02    -0.01   0.00  -0.01
  57   1     0.00   0.00  -0.03     0.00   0.00   0.02     0.01   0.00   0.01
  58   1     0.01   0.01  -0.03    -0.01  -0.01   0.02    -0.01  -0.01   0.00
  59   1     0.01   0.02  -0.03    -0.01  -0.01   0.01    -0.01   0.00   0.01
  60   1     0.01  -0.03  -0.04    -0.01   0.02   0.02     0.00   0.01   0.01
  61   1    -0.02  -0.02   0.01     0.03   0.06   0.00     0.00   0.00   0.00
  62   1    -0.03   0.00   0.01     0.01   0.00   0.00     0.00   0.00   0.00
  63   1     0.27   0.30  -0.19     0.24   0.25  -0.23     0.00   0.00   0.00
  64   1    -0.33  -0.13  -0.18    -0.42  -0.26  -0.23     0.00   0.00   0.00
  65   1     0.12  -0.13   0.38    -0.01  -0.13   0.45     0.00   0.00   0.00
  66   1     0.19   0.03  -0.13    -0.17  -0.03   0.13    -0.03   0.00   0.00
  67   1     0.09   0.11   0.20    -0.08  -0.08  -0.21    -0.01  -0.02  -0.02
  68   1    -0.12  -0.04  -0.02     0.14   0.04   0.01     0.00  -0.01  -0.01
  69   1     0.04   0.01   0.05    -0.01   0.01  -0.02     0.00   0.00  -0.01
  70   1     0.07   0.01   0.01    -0.01  -0.01  -0.01     0.00   0.00  -0.01
  71   1     0.05   0.01   0.01    -0.03  -0.01  -0.01     0.00   0.00  -0.01
  72   1     0.02  -0.05   0.17    -0.01   0.04  -0.11     0.00   0.03  -0.08
  73   1     0.02  -0.15  -0.06    -0.01   0.10   0.04     0.00   0.08   0.04
  74   1     0.02   0.10  -0.03    -0.02  -0.06   0.02    -0.01  -0.05   0.02
  75   1    -0.02   0.00   0.02     0.01   0.00  -0.01    -0.05  -0.01  -0.01
  76   1    -0.03  -0.02   0.01     0.01   0.01  -0.01    -0.06  -0.05   0.01
  77   1    -0.01  -0.01  -0.02     0.01   0.00   0.02    -0.04  -0.07  -0.04
  78   1    -0.02   0.01  -0.01     0.01   0.00   0.01    -0.02   0.00  -0.02
  79   1    -0.01  -0.02   0.00     0.00   0.01   0.00    -0.01  -0.03  -0.01
  80   1     0.01  -0.01  -0.01     0.02  -0.01  -0.01    -0.04   0.01   0.00
  81   1     0.01   0.01   0.00     0.02   0.01  -0.02    -0.03  -0.03   0.04
  82   1     0.00   0.01   0.00     0.00   0.03  -0.02     0.01  -0.04   0.03
  83   1     0.01   0.00  -0.01     0.02   0.01   0.00    -0.01  -0.01   0.00
  84   1     0.00   0.00   0.00     0.01   0.02  -0.01    -0.01  -0.03   0.02
  85   1    -0.02  -0.04   0.03     0.02   0.01  -0.02    -0.04   0.04   0.06
  86   1    -0.04   0.01   0.00     0.04  -0.01   0.00    -0.11   0.00   0.00
  87   1     0.01  -0.02  -0.01     0.00   0.01   0.00    -0.09   0.02   0.04
  88   1     0.00   0.00   0.00     0.00   0.00   0.00    -0.04  -0.04  -0.03
  89   1    -0.01  -0.01  -0.02     0.00   0.01   0.02     0.00  -0.01  -0.02
  90   1     0.01  -0.02  -0.01    -0.01   0.01   0.01    -0.05   0.01  -0.01
  91   1    -0.09   0.23   0.02     0.06  -0.16  -0.01     0.19  -0.20   0.21
  92   1     0.25   0.02   0.17    -0.18   0.00  -0.13    -0.06   0.08  -0.15
  93   1    -0.02  -0.18  -0.09     0.01   0.14   0.07     0.26   0.32   0.16
  94   1     0.03   0.02  -0.03    -0.02  -0.02   0.01     0.13   0.07  -0.14
  95   1     0.05  -0.02  -0.01    -0.04   0.03   0.01     0.17   0.15   0.08
  96   1     0.05   0.01  -0.02    -0.05  -0.01   0.03     0.04   0.01   0.06
  97   1     0.02  -0.02   0.00     0.00   0.00   0.02     0.01  -0.02  -0.01
  98   1    -0.01   0.01  -0.01     0.02  -0.03   0.03    -0.06   0.04  -0.04
  99   1    -0.02  -0.02   0.03     0.01  -0.02  -0.01    -0.04   0.02   0.07
 100   1     0.00  -0.01   0.00     0.01  -0.04   0.00    -0.03   0.01  -0.01
 101   1     0.00   0.00   0.00     0.00  -0.03   0.03    -0.05   0.03  -0.02
 102   1     0.00  -0.01   0.00    -0.01  -0.02   0.04    -0.03  -0.01  -0.05
 103   1     0.00   0.05  -0.01    -0.01   0.06  -0.01     0.01   0.29  -0.01
 104   1     0.05  -0.02   0.00     0.04  -0.01   0.00     0.33  -0.15   0.07
 105   1    -0.03  -0.03  -0.01    -0.05  -0.02   0.00    -0.22  -0.22  -0.05
 106   1    -0.02   0.02  -0.01    -0.01   0.02  -0.02     0.02  -0.02  -0.01
 107   1    -0.03  -0.01   0.01    -0.02   0.00   0.00     0.03   0.00   0.05
 108   1     0.00  -0.02   0.00     0.01   0.01  -0.01     0.06  -0.05   0.02
 109   1    -0.02   0.01   0.02     0.01  -0.01  -0.01    -0.02   0.04   0.09
 110   1    -0.01   0.03   0.01     0.00  -0.02  -0.01     0.01   0.11   0.03
 111   1    -0.01   0.00   0.01     0.00  -0.01  -0.01     0.00   0.07  -0.01
 112   1     0.00   0.01   0.01     0.00   0.00  -0.01     0.01   0.03   0.02
 113   1     0.00   0.01   0.01     0.00  -0.01  -0.02     0.02   0.03   0.04
 114   1     0.00   0.01   0.01     0.01   0.00  -0.01     0.00   0.01   0.03
                    61                     62                     63
                     A                      A                      A
 Frequencies --   283.3289               292.8876               294.8334
 Red. masses --     2.0353                 2.2948                 2.2397
 Frc consts  --     0.0963                 0.1160                 0.1147
 IR Inten    --     1.9240                 1.0758                 5.2060
 Atom AN      X      Y      Z        X      Y      Z        X      Y      Z
   1   8    -0.02   0.01   0.00    -0.02   0.02   0.00     0.02  -0.02  -0.01
   2  12     0.01  -0.03  -0.02    -0.02   0.00  -0.03     0.00  -0.04   0.01
   3   8     0.01   0.00   0.03     0.02   0.02   0.03    -0.01  -0.02  -0.02
   4   6     0.00   0.01   0.00     0.00   0.02   0.00     0.00  -0.02   0.00
   5   7    -0.07  -0.01   0.01     0.13   0.03  -0.03     0.07   0.01   0.01
   6   7     0.07   0.01  -0.04     0.03   0.00   0.00     0.01   0.02  -0.03
   7   8    -0.01   0.00   0.00    -0.01   0.02   0.00     0.01  -0.03  -0.01
   8   6    -0.03   0.00   0.00     0.02   0.02  -0.01     0.04  -0.02   0.02
   9   6     0.00   0.00   0.00    -0.06  -0.01   0.03    -0.01  -0.03   0.00
  10   6     0.03   0.00  -0.02    -0.01   0.00   0.01     0.01  -0.03  -0.02
  11   8     0.00   0.00   0.00     0.01  -0.02   0.01    -0.01   0.03  -0.01
  12   6     0.01   0.00   0.00     0.02  -0.03  -0.01    -0.01   0.04   0.01
  13   6     0.01  -0.01   0.01     0.02  -0.02  -0.01    -0.02   0.02   0.02
  14   6     0.01   0.00   0.00     0.01   0.01   0.00     0.00  -0.01   0.00
  15   8     0.00   0.03  -0.01    -0.01  -0.01  -0.04     0.01   0.02   0.03
  16   6     0.00   0.01   0.01     0.01   0.02   0.02    -0.01  -0.02  -0.02
  17   8     0.01   0.02   0.00    -0.01   0.00   0.03     0.01   0.00  -0.02
  18   6     0.00   0.00   0.00     0.01   0.00   0.01    -0.01   0.00  -0.01
  19   8    -0.02  -0.02   0.00     0.00  -0.02   0.00    -0.01   0.00  -0.01
  20   8     0.02   0.01   0.02     0.01   0.01   0.00     0.00  -0.01   0.01
  21   6     0.02   0.01   0.00    -0.01   0.00   0.01     0.02   0.01  -0.01
  22   6     0.00   0.02   0.00    -0.01   0.00   0.02     0.02   0.01  -0.02
  23   6     0.01   0.00   0.00     0.00   0.01   0.00     0.00  -0.02   0.00
  24   8     0.02   0.01   0.01    -0.01  -0.02  -0.01     0.02   0.03   0.02
  25   6    -0.05  -0.02  -0.01    -0.03   0.01  -0.03    -0.01  -0.02   0.01
  26   6    -0.01  -0.01   0.01    -0.02   0.01   0.02     0.02  -0.01   0.00
  27   6    -0.02   0.00   0.00     0.03   0.01   0.01    -0.03  -0.01   0.00
  28   6     0.00  -0.03  -0.02     0.00  -0.04  -0.03     0.01   0.03   0.03
  29   6    -0.03   0.00   0.01     0.05   0.01  -0.02     0.02   0.03   0.00
  30   6     0.04   0.00  -0.01     0.02  -0.01   0.01    -0.01   0.03  -0.02
  31   6    -0.01  -0.02   0.00     0.02   0.04   0.02     0.01   0.05   0.01
  32   6     0.02  -0.02   0.00    -0.02   0.03   0.02     0.01   0.06   0.00
  33   6     0.04   0.01   0.01    -0.06  -0.01  -0.02    -0.01   0.02   0.02
  34   6     0.02   0.04   0.02    -0.03  -0.06  -0.04     0.00   0.00   0.03
  35   6    -0.01   0.04   0.02     0.01  -0.06  -0.03     0.00   0.01   0.00
  36   6    -0.01  -0.01   0.00     0.01   0.01   0.01     0.01   0.02   0.02
  37   6     0.01   0.02   0.01    -0.03  -0.03   0.00    -0.02   0.01   0.00
  38   6    -0.01   0.02   0.00     0.01  -0.01   0.02    -0.04   0.05  -0.04
  39   6    -0.04  -0.01   0.00     0.00  -0.03   0.00    -0.08   0.03  -0.01
  40   6    -0.04  -0.06   0.01     0.01  -0.03   0.00    -0.08   0.00   0.02
  41   6     0.02  -0.05   0.04     0.02  -0.02   0.03    -0.04  -0.01   0.02
  42   6     0.06  -0.01   0.03     0.03  -0.01   0.02     0.00   0.01   0.00
  43   6    -0.02   0.00   0.02     0.00   0.00   0.02    -0.01   0.02  -0.02
  44   6     0.03   0.01   0.01     0.01   0.00   0.00     0.00   0.00   0.00
  45   6    -0.03   0.04   0.01     0.08  -0.09  -0.02     0.06  -0.05  -0.01
  46   6     0.01   0.01   0.00    -0.01   0.00   0.00    -0.01   0.00   0.01
  47   6     0.01  -0.04  -0.01    -0.06   0.05   0.00    -0.05   0.01  -0.03
  48   6     0.02  -0.03  -0.03    -0.04   0.03   0.05    -0.08  -0.01   0.01
  49   6     0.01   0.09  -0.06     0.01   0.05  -0.04    -0.02   0.01   0.00
  50   6    -0.01   0.06  -0.04     0.01   0.04  -0.02    -0.01   0.01  -0.01
  51   6    -0.04  -0.05   0.03    -0.05  -0.01   0.01     0.10   0.00   0.00
  52   6     0.01  -0.02   0.05    -0.02   0.00   0.02     0.09  -0.02  -0.01
  53   6     0.01  -0.02  -0.02     0.01   0.03   0.01     0.03  -0.05   0.00
  54   6    -0.02   0.00  -0.05     0.00   0.03  -0.02     0.03  -0.04   0.01
  55   1    -0.01   0.00   0.00    -0.10  -0.02   0.04    -0.04  -0.01   0.01
  56   1     0.01  -0.01   0.01     0.01  -0.02  -0.04    -0.01   0.03   0.05
  57   1     0.00   0.01   0.00     0.01   0.02   0.01    -0.01  -0.02  -0.02
  58   1     0.01   0.03   0.01     0.01   0.04   0.03    -0.01  -0.03  -0.04
  59   1     0.00   0.00   0.01     0.02   0.00   0.01    -0.03   0.00  -0.01
  60   1     0.01   0.00   0.01     0.01   0.01   0.02    -0.01  -0.01  -0.01
  61   1     0.01   0.04   0.00     0.00  -0.01   0.03     0.02   0.03  -0.01
  62   1     0.01   0.00   0.00     0.01   0.01   0.00    -0.01  -0.02  -0.01
  63   1     0.01   0.01  -0.06     0.00  -0.01  -0.07    -0.04  -0.05   0.03
  64   1    -0.13  -0.08  -0.06    -0.07   0.04  -0.04     0.02  -0.06   0.01
  65   1    -0.07  -0.02   0.10    -0.04   0.02  -0.02    -0.05   0.00   0.00
  66   1    -0.06  -0.01   0.06    -0.01   0.02   0.01     0.04  -0.02   0.00
  67   1    -0.03  -0.04  -0.05    -0.01  -0.01   0.04     0.02   0.02   0.00
  68   1     0.03   0.02   0.02    -0.04   0.01   0.02     0.03  -0.01   0.00
  69   1    -0.02  -0.01  -0.03     0.04   0.08   0.06    -0.04  -0.07  -0.04
  70   1    -0.05   0.02   0.00     0.11  -0.01  -0.01    -0.10   0.01   0.01
  71   1    -0.02   0.01   0.02    -0.02   0.00   0.00     0.02   0.00   0.01
  72   1    -0.04  -0.03  -0.02    -0.06  -0.04  -0.09     0.07   0.03   0.11
  73   1     0.00  -0.04  -0.03     0.01  -0.02  -0.01     0.00   0.00   0.01
  74   1     0.02  -0.05  -0.03     0.04  -0.12  -0.03    -0.03   0.12   0.02
  75   1     0.04  -0.04  -0.01    -0.04   0.06   0.04     0.00   0.07  -0.01
  76   1     0.08   0.02   0.01    -0.11  -0.01  -0.04    -0.03   0.02   0.02
  77   1     0.03   0.07   0.02    -0.04  -0.09  -0.05     0.00  -0.02   0.05
  78   1     0.02  -0.01   0.00    -0.05   0.01  -0.01    -0.04   0.02   0.02
  79   1     0.05   0.02   0.01    -0.09  -0.04  -0.01    -0.02   0.01  -0.01
  80   1    -0.07  -0.01  -0.01     0.00  -0.03  -0.02    -0.12   0.04  -0.02
  81   1    -0.07  -0.09   0.00     0.00  -0.05  -0.01    -0.10  -0.02   0.03
  82   1     0.03  -0.08   0.07     0.03  -0.02   0.04    -0.03  -0.04   0.04
  83   1    -0.04  -0.01   0.03     0.00   0.00   0.01    -0.07   0.00   0.01
  84   1     0.00  -0.03   0.03    -0.01  -0.02   0.01    -0.01  -0.01   0.00
  85   1     0.01   0.12  -0.02    -0.05  -0.37   0.12     0.00  -0.17   0.01
  86   1    -0.01  -0.02   0.00    -0.01   0.17   0.00     0.05   0.02   0.00
  87   1    -0.12   0.06   0.04     0.35  -0.16  -0.22     0.18  -0.08  -0.06
  88   1     0.00  -0.02   0.00     0.00   0.04   0.00     0.00   0.03   0.01
  89   1     0.04   0.01   0.03    -0.06   0.00  -0.02    -0.06  -0.01  -0.02
  90   1     0.00   0.04  -0.01     0.00  -0.04   0.01     0.00  -0.05   0.02
  91   1    -0.03   0.06  -0.05    -0.04   0.02   0.01    -0.07   0.08  -0.08
  92   1     0.09  -0.07   0.12    -0.08   0.09  -0.11    -0.01   0.01   0.01
  93   1    -0.02  -0.18  -0.09    -0.09   0.13   0.07    -0.12  -0.06  -0.04
  94   1    -0.02  -0.01   0.04    -0.02   0.02  -0.01    -0.07  -0.05   0.06
  95   1     0.00  -0.13  -0.06    -0.04   0.14   0.07    -0.13   0.01  -0.02
  96   1     0.07   0.02  -0.10    -0.09  -0.02   0.14    -0.11  -0.02   0.02
  97   1     0.25  -0.13  -0.24     0.13  -0.08  -0.14     0.00   0.00  -0.01
  98   1    -0.10   0.42  -0.28    -0.05   0.22  -0.16    -0.04   0.02  -0.02
  99   1    -0.14   0.07   0.27    -0.08   0.03   0.14    -0.03   0.01   0.03
 100   1     0.01   0.10   0.02     0.02   0.07   0.03    -0.02   0.01  -0.01
 101   1    -0.05   0.14  -0.08     0.00   0.08  -0.05    -0.02   0.01  -0.01
 102   1    -0.03   0.00  -0.11     0.00   0.01  -0.05    -0.01   0.01  -0.02
 103   1    -0.05   0.00  -0.01    -0.05  -0.13  -0.02     0.08   0.37   0.06
 104   1     0.00  -0.08   0.09    -0.17   0.03   0.02     0.48  -0.16   0.06
 105   1    -0.10  -0.10   0.00     0.03   0.05   0.04    -0.16  -0.24  -0.10
 106   1     0.03  -0.06   0.10    -0.01   0.00   0.06     0.08  -0.09  -0.08
 107   1     0.06   0.01   0.03     0.00   0.00  -0.01     0.13   0.04   0.05
 108   1    -0.04  -0.03   0.05    -0.06   0.01   0.02     0.17  -0.04   0.00
 109   1     0.04  -0.01  -0.05     0.01   0.02   0.02     0.03  -0.04  -0.04
 110   1     0.00  -0.07  -0.02     0.01   0.04   0.00     0.01  -0.09   0.00
 111   1     0.00   0.01  -0.01     0.01   0.04   0.00     0.02  -0.06   0.02
 112   1    -0.03  -0.02  -0.09     0.01   0.04   0.01     0.03  -0.03   0.02
 113   1    -0.02   0.00  -0.04    -0.01   0.01  -0.06     0.05  -0.03   0.03
 114   1    -0.06   0.02  -0.02     0.03   0.06  -0.03     0.03  -0.07   0.01
                    64                     65                     66
                     A                      A                      A
 Frequencies --   296.9260               297.3957               309.9058
 Red. masses --     2.9620                 2.4670                 2.5756
 Frc consts  --     0.1539                 0.1286                 0.1457
 IR Inten    --     2.7584                 5.8903                 1.7933
 Atom AN      X      Y      Z        X      Y      Z        X      Y      Z
   1   8     0.04  -0.04  -0.01    -0.02   0.02   0.00    -0.06   0.06   0.00
   2  12    -0.01   0.01  -0.02    -0.01   0.00   0.02     0.00  -0.03  -0.03
   3   8    -0.04  -0.02  -0.03     0.01   0.03   0.04    -0.01   0.04   0.01
   4   6     0.01  -0.04   0.00     0.00   0.02   0.00     0.00   0.05  -0.01
   5   7     0.02   0.01  -0.02     0.01   0.00   0.00    -0.01   0.01   0.01
   6   7     0.02   0.00   0.01     0.00   0.00  -0.01     0.01   0.01   0.00
   7   8     0.04  -0.05  -0.02    -0.02   0.02   0.01    -0.05   0.02  -0.03
   8   6    -0.01   0.02  -0.02     0.01  -0.01   0.00    -0.01   0.00   0.01
   9   6    -0.03   0.01   0.01     0.00   0.00  -0.01     0.00   0.00   0.00
  10   6    -0.01   0.02   0.02     0.00  -0.01  -0.01     0.00   0.00   0.01
  11   8    -0.03   0.06  -0.02     0.01  -0.03   0.01     0.03  -0.08   0.06
  12   6    -0.04   0.07   0.04     0.01  -0.02   0.00     0.02   0.00   0.04
  13   6    -0.06   0.05   0.04     0.01  -0.02   0.00    -0.02   0.02   0.01
  14   6    -0.02  -0.02  -0.01     0.01   0.01   0.00     0.05   0.02   0.03
  15   8     0.03   0.01   0.11    -0.01   0.02  -0.03     0.03   0.03   0.04
  16   6    -0.01  -0.04  -0.04     0.01   0.02   0.02     0.04   0.05   0.10
  17   8     0.02   0.01  -0.09     0.00   0.01  -0.07     0.02   0.00  -0.07
  18   6    -0.02  -0.01  -0.04    -0.01   0.02  -0.01     0.01   0.00  -0.05
  19   8    -0.04   0.02  -0.02    -0.07   0.02   0.02     0.01  -0.01  -0.05
  20   8     0.00  -0.03   0.03     0.02   0.00  -0.01     0.01  -0.01   0.07
  21   6     0.03   0.01  -0.03    -0.04  -0.03   0.01     0.02   0.01  -0.02
  22   6     0.03   0.02  -0.07    -0.04  -0.01   0.00     0.02   0.01  -0.06
  23   6     0.00  -0.05  -0.02     0.02   0.01  -0.01    -0.01  -0.03  -0.02
  24   8     0.04   0.04   0.03    -0.04  -0.12  -0.04     0.02   0.03   0.02
  25   6     0.07  -0.03   0.09     0.20   0.09   0.14     0.02  -0.04   0.03
  26   6     0.06  -0.02  -0.01     0.02   0.01   0.03    -0.02  -0.03  -0.02
  27   6    -0.11  -0.03  -0.01    -0.02   0.01  -0.01    -0.10  -0.03  -0.05
  28   6     0.02   0.10   0.08     0.00  -0.05  -0.03     0.03  -0.09  -0.05
  29   6     0.01  -0.01  -0.01     0.00   0.00   0.00    -0.01   0.01   0.01
  30   6     0.02  -0.01   0.02     0.00   0.00  -0.01     0.00   0.01   0.00
  31   6     0.00  -0.01   0.00     0.00   0.01   0.00     0.00   0.01   0.00
  32   6    -0.01  -0.01   0.00     0.00   0.01  -0.01    -0.02  -0.01   0.04
  33   6    -0.02  -0.02  -0.02     0.00   0.00   0.01    -0.02   0.01   0.00
  34   6    -0.01  -0.03  -0.02     0.00  -0.01   0.01    -0.02   0.03  -0.04
  35   6     0.00  -0.03  -0.01     0.00   0.00   0.00    -0.01   0.01   0.01
  36   6     0.00  -0.01   0.00     0.00   0.00   0.00     0.00   0.01  -0.01
  37   6     0.00  -0.02   0.00     0.00   0.01  -0.01     0.00  -0.01   0.02
  38   6     0.02  -0.02   0.02    -0.01   0.00  -0.01     0.00   0.01  -0.01
  39   6     0.04  -0.02   0.01    -0.02   0.01   0.00     0.00   0.01  -0.01
  40   6     0.04  -0.02   0.00    -0.02  -0.01   0.00     0.00   0.02   0.00
  41   6     0.03  -0.01   0.00    -0.01  -0.02   0.00     0.00   0.02   0.00
  42   6     0.02  -0.01   0.01     0.00   0.00   0.00    -0.01   0.01  -0.01
  43   6     0.00  -0.02   0.01    -0.01   0.00  -0.02     0.00   0.00  -0.01
  44   6     0.01   0.00   0.00     0.00   0.00   0.00    -0.01   0.00  -0.01
  45   6     0.01  -0.01   0.00     0.00   0.00   0.00     0.02  -0.01  -0.02
  46   6    -0.01   0.00   0.00    -0.01   0.00   0.00     0.04   0.00  -0.01
  47   6     0.00   0.02   0.01     0.00   0.01  -0.01    -0.02  -0.02   0.01
  48   6     0.02   0.01   0.02    -0.02   0.00  -0.01     0.03   0.00   0.01
  49   6     0.01   0.03  -0.02     0.00   0.01  -0.01    -0.01  -0.02   0.02
  50   6     0.01   0.02  -0.01     0.00   0.01  -0.01     0.00  -0.01  -0.01
  51   6    -0.06  -0.01   0.00     0.04  -0.01  -0.01     0.01  -0.01  -0.01
  52   6    -0.06  -0.01   0.02    -0.01  -0.01   0.00    -0.01   0.00   0.00
  53   6    -0.01   0.04  -0.01     0.00  -0.01   0.00    -0.01   0.01   0.02
  54   6    -0.02   0.04  -0.01     0.00  -0.01  -0.01     0.03  -0.02   0.05
  55   1    -0.03  -0.01   0.01     0.00   0.00  -0.01     0.00   0.00   0.01
  56   1    -0.04   0.06   0.11    -0.01  -0.02  -0.02    -0.04   0.01   0.02
  57   1    -0.02  -0.05  -0.03     0.01   0.03   0.02     0.07   0.06   0.07
  58   1    -0.03  -0.09  -0.06     0.02   0.04   0.04     0.05   0.13   0.17
  59   1    -0.04  -0.01  -0.03     0.03   0.00   0.02     0.09  -0.05   0.09
  60   1    -0.03  -0.03  -0.04     0.02   0.01   0.02     0.05   0.04   0.11
  61   1    -0.01   0.06  -0.07    -0.12  -0.03  -0.04     0.00   0.04  -0.07
  62   1    -0.03  -0.07  -0.03     0.02  -0.01  -0.02    -0.05  -0.05  -0.04
  63   1     0.01   0.06   0.19     0.21   0.37   0.21    -0.01   0.01   0.07
  64   1     0.14  -0.13   0.10     0.21   0.11   0.14     0.04  -0.13   0.02
  65   1     0.09  -0.05   0.14     0.41  -0.07   0.18     0.00  -0.04   0.09
  66   1     0.04  -0.08   0.07    -0.17  -0.07   0.26     0.20   0.04  -0.27
  67   1     0.03   0.02  -0.11    -0.07  -0.06  -0.26     0.09   0.01   0.33
  68   1     0.18   0.01   0.01     0.26   0.14   0.08    -0.32  -0.14  -0.06
  69   1    -0.12  -0.17  -0.13    -0.01   0.03  -0.03    -0.10  -0.12  -0.19
  70   1    -0.28   0.02   0.04    -0.02   0.01  -0.01    -0.26  -0.01   0.00
  71   1     0.01  -0.01   0.01    -0.05   0.00   0.01    -0.05  -0.02  -0.04
  72   1     0.16   0.10   0.20    -0.07  -0.05  -0.08    -0.11  -0.09  -0.18
  73   1     0.00   0.07   0.06     0.01  -0.04  -0.02     0.06  -0.04   0.00
  74   1    -0.08   0.25   0.09     0.04  -0.12  -0.03     0.10  -0.26  -0.03
  75   1    -0.02   0.00   0.01     0.00   0.02  -0.02    -0.02  -0.03   0.08
  76   1    -0.04  -0.02  -0.02     0.00   0.00   0.01    -0.02   0.01   0.00
  77   1    -0.02  -0.04  -0.03     0.00  -0.01   0.03    -0.02   0.04  -0.07
  78   1     0.00  -0.01  -0.01    -0.01   0.00   0.00    -0.01   0.01  -0.01
  79   1    -0.03  -0.03   0.00     0.00   0.01  -0.01     0.01  -0.01   0.02
  80   1     0.04  -0.03   0.01    -0.03   0.01   0.00     0.00   0.00  -0.02
  81   1     0.04  -0.02  -0.01    -0.03  -0.02  -0.01     0.00   0.03   0.01
  82   1     0.03  -0.01  -0.01    -0.01  -0.03  -0.01     0.00   0.02   0.00
  83   1     0.03  -0.01  -0.01    -0.02  -0.01  -0.01    -0.01   0.01   0.00
  84   1     0.00  -0.02   0.01     0.00  -0.01   0.00     0.00   0.01  -0.02
  85   1    -0.01  -0.07   0.04     0.00  -0.02   0.01     0.00  -0.03  -0.03
  86   1    -0.02   0.05   0.00     0.00   0.01   0.00     0.03   0.00  -0.02
  87   1     0.06  -0.03  -0.06     0.02  -0.01   0.00     0.04  -0.02  -0.03
  88   1    -0.01   0.00  -0.01    -0.01   0.00   0.00     0.06   0.01   0.04
  89   1    -0.01   0.00   0.01    -0.01   0.00   0.00     0.03  -0.01  -0.03
  90   1    -0.01   0.01   0.00    -0.01   0.00   0.01     0.07  -0.03  -0.03
  91   1     0.01  -0.02   0.04    -0.02   0.03  -0.01    -0.01  -0.02  -0.01
  92   1    -0.02   0.03  -0.04     0.02   0.00   0.01    -0.03  -0.02   0.01
  93   1     0.01   0.07   0.04    -0.01  -0.02  -0.02    -0.03  -0.02   0.01
  94   1     0.02   0.03  -0.02    -0.01  -0.02   0.01     0.02   0.03  -0.01
  95   1     0.03   0.05   0.04    -0.03   0.00  -0.01     0.05  -0.01   0.02
  96   1     0.01   0.00   0.06    -0.03   0.00  -0.01     0.06   0.01   0.01
  97   1     0.09  -0.06  -0.08     0.01   0.00  -0.02    -0.02   0.01   0.05
  98   1    -0.03   0.14  -0.10    -0.01   0.02  -0.02    -0.02  -0.07   0.03
  99   1    -0.05   0.01   0.09    -0.01   0.01   0.01    -0.01  -0.03   0.00
 100   1     0.02   0.04   0.02     0.00   0.02   0.00    -0.01  -0.02  -0.02
 101   1     0.00   0.05  -0.04     0.01   0.01  -0.01     0.00  -0.03   0.00
 102   1     0.00   0.00  -0.03     0.00   0.01  -0.01     0.00   0.00   0.00
 103   1    -0.06  -0.19  -0.05     0.04   0.04   0.02     0.01  -0.02   0.01
 104   1    -0.25   0.07  -0.02     0.10  -0.03  -0.01     0.01  -0.01   0.00
 105   1     0.06   0.10   0.04     0.02  -0.04  -0.04     0.03  -0.01  -0.02
 106   1    -0.04   0.02   0.10    -0.02   0.01  -0.04    -0.03   0.04  -0.04
 107   1    -0.05  -0.03  -0.03    -0.03  -0.01   0.04    -0.06   0.00   0.05
 108   1    -0.14   0.01   0.02     0.03  -0.04   0.00     0.03  -0.03   0.00
 109   1    -0.01   0.03   0.01     0.00  -0.01  -0.02    -0.01   0.01   0.04
 110   1     0.00   0.06  -0.01     0.00  -0.02  -0.01     0.00   0.03   0.02
 111   1    -0.01   0.05  -0.02     0.00  -0.02   0.00     0.00   0.01   0.01
 112   1    -0.01   0.04   0.00     0.00  -0.01  -0.02     0.03   0.00   0.06
 113   1    -0.03   0.03  -0.03     0.00  -0.01  -0.01     0.04   0.00   0.09
 114   1    -0.01   0.06  -0.01    -0.01  -0.01  -0.01     0.03  -0.07   0.05
                    67                     68                     69
                     A                      A                      A
 Frequencies --   314.1743               320.7391               324.1681
 Red. masses --     3.0219                 2.3253                 3.4694
 Frc consts  --     0.1757                 0.1409                 0.2148
 IR Inten    --     0.0877                 0.9167                 3.3475
 Atom AN      X      Y      Z        X      Y      Z        X      Y      Z
   1   8     0.03  -0.02  -0.01    -0.03   0.02   0.01     0.00   0.02   0.00
   2  12     0.01  -0.01   0.04    -0.01   0.00   0.00    -0.03   0.08   0.04
   3   8     0.01   0.01   0.01    -0.02  -0.08  -0.08     0.00  -0.07  -0.07
   4   6     0.00  -0.02   0.00     0.01   0.03   0.00     0.00   0.01   0.00
   5   7    -0.04   0.01   0.03    -0.02   0.00   0.01     0.02   0.00   0.00
   6   7    -0.01   0.00   0.00    -0.01  -0.01   0.00    -0.11  -0.08   0.05
   7   8     0.02  -0.02   0.00    -0.02   0.04   0.03     0.00   0.01   0.00
   8   6     0.01   0.00   0.02     0.00   0.00   0.01     0.03   0.00   0.00
   9   6     0.05   0.02   0.01     0.02   0.00   0.00     0.05   0.02   0.00
  10   6     0.01   0.01   0.00     0.00  -0.01   0.00    -0.04  -0.02   0.03
  11   8    -0.02   0.03  -0.02     0.02  -0.05   0.01    -0.01  -0.03   0.02
  12   6    -0.01   0.01  -0.01     0.01  -0.02   0.02    -0.01  -0.01   0.03
  13   6     0.01   0.01  -0.01    -0.01  -0.03   0.00    -0.01  -0.01   0.00
  14   6    -0.03  -0.01  -0.01     0.04   0.01   0.00    -0.01   0.00   0.01
  15   8    -0.02  -0.01  -0.01     0.05   0.02   0.03     0.04  -0.02   0.07
  16   6    -0.01  -0.02  -0.03     0.01   0.03   0.01     0.00   0.01   0.02
  17   8     0.01   0.02   0.00    -0.02  -0.03   0.03     0.03   0.03   0.01
  18   6     0.01   0.01   0.02    -0.01   0.00  -0.01     0.04   0.01   0.01
  19   8    -0.02   0.00   0.03     0.07   0.04  -0.03     0.11   0.10   0.02
  20   8     0.03   0.01   0.00    -0.07  -0.02  -0.07     0.01   0.01  -0.05
  21   6     0.01  -0.01   0.01    -0.03   0.00   0.00    -0.01  -0.01   0.01
  22   6     0.00   0.00   0.01    -0.01  -0.02   0.02    -0.01  -0.01   0.03
  23   6     0.02   0.01   0.01    -0.03  -0.01   0.00     0.01   0.02   0.01
  24   8     0.01  -0.05  -0.01    -0.04   0.08   0.01    -0.01  -0.06  -0.02
  25   6     0.02   0.02   0.01    -0.03  -0.01  -0.03     0.01   0.02   0.00
  26   6    -0.05  -0.01  -0.02     0.12   0.05   0.03    -0.08  -0.02  -0.06
  27   6     0.03   0.01   0.01    -0.04  -0.01  -0.01    -0.09  -0.03  -0.05
  28   6    -0.02   0.05   0.01     0.03  -0.04  -0.01    -0.01   0.00   0.00
  29   6    -0.03   0.02   0.02    -0.01   0.00   0.01     0.01  -0.01  -0.01
  30   6    -0.01   0.00   0.00     0.00   0.00   0.00    -0.03  -0.04   0.02
  31   6    -0.02   0.02   0.00    -0.01   0.01   0.00     0.01  -0.02   0.00
  32   6    -0.06  -0.05   0.15    -0.02  -0.02   0.05     0.02  -0.01  -0.03
  33   6    -0.07   0.02   0.00    -0.03   0.00   0.01     0.02  -0.02  -0.01
  34   6    -0.06   0.09  -0.13    -0.02   0.02  -0.03     0.02  -0.02   0.01
  35   6    -0.02   0.01   0.02    -0.01   0.00   0.00     0.00  -0.01  -0.01
  36   6    -0.01   0.02  -0.06     0.00   0.01  -0.02     0.00  -0.01   0.01
  37   6     0.00  -0.03   0.07     0.00  -0.01   0.01     0.00   0.00  -0.01
  38   6    -0.01   0.01   0.00     0.00   0.00   0.00     0.00  -0.04   0.02
  39   6    -0.02   0.01   0.00    -0.01  -0.01  -0.01    -0.02  -0.06   0.04
  40   6    -0.02   0.00   0.00    -0.01   0.00   0.00    -0.03  -0.05   0.03
  41   6    -0.01   0.00   0.00     0.00   0.01   0.01    -0.05  -0.03   0.03
  42   6    -0.01   0.01   0.00     0.00   0.00   0.00    -0.02  -0.01   0.01
  43   6    -0.01   0.00   0.00     0.00   0.01   0.01     0.01  -0.01   0.01
  44   6     0.00   0.01   0.00     0.00   0.00   0.00     0.01   0.00   0.00
  45   6     0.03  -0.04  -0.08     0.01  -0.02  -0.03    -0.02   0.01   0.02
  46   6     0.15  -0.01  -0.04     0.05   0.00  -0.01    -0.03   0.00   0.00
  47   6    -0.04  -0.05   0.04     0.00  -0.01   0.01     0.00   0.01  -0.01
  48   6     0.11   0.02   0.05     0.03   0.01   0.00    -0.01   0.00   0.00
  49   6     0.01   0.01  -0.01     0.00   0.00  -0.01     0.07   0.03  -0.10
  50   6     0.01   0.01   0.01     0.01   0.01   0.00     0.08   0.09   0.00
  51   6     0.02   0.00   0.00     0.00   0.01   0.01     0.06   0.07   0.01
  52   6     0.02   0.00   0.00     0.01   0.01   0.00     0.05   0.01  -0.07
  53   6     0.00  -0.09  -0.06    -0.01  -0.01   0.01    -0.01  -0.01   0.01
  54   6    -0.04   0.02  -0.05     0.00  -0.01   0.00    -0.05   0.02  -0.06
  55   1     0.06   0.04   0.01     0.02   0.01   0.00     0.08   0.03  -0.01
  56   1     0.01   0.01   0.00     0.01  -0.02   0.00     0.02   0.00   0.02
  57   1    -0.03  -0.03  -0.02     0.04   0.03   0.01     0.00   0.01   0.02
  58   1    -0.02  -0.05  -0.05     0.02   0.06   0.02     0.00   0.02   0.03
  59   1    -0.03   0.00  -0.02     0.02   0.02   0.01     0.01   0.00   0.02
  60   1    -0.02  -0.01  -0.03     0.02   0.01   0.01     0.00   0.02   0.03
  61   1    -0.01   0.00   0.00     0.01  -0.03   0.03    -0.03  -0.03   0.02
  62   1     0.03   0.03   0.01    -0.03  -0.01   0.00     0.05   0.05   0.03
  63   1     0.03   0.05   0.01    -0.04  -0.08  -0.04     0.04   0.04  -0.03
  64   1     0.01   0.03   0.01    -0.02   0.02  -0.02    -0.03   0.06  -0.01
  65   1     0.05   0.00   0.02    -0.05   0.01  -0.07     0.03   0.00   0.00
  66   1    -0.06   0.05  -0.08    -0.06  -0.14   0.37    -0.02   0.11  -0.23
  67   1    -0.03  -0.07   0.04    -0.03   0.14  -0.42    -0.02  -0.06   0.12
  68   1    -0.14  -0.06  -0.04     0.58   0.22   0.11    -0.27  -0.13  -0.11
  69   1     0.03   0.03   0.04    -0.04  -0.05  -0.06    -0.09  -0.11  -0.19
  70   1     0.06   0.00   0.00    -0.09   0.02  -0.01    -0.24   0.01  -0.01
  71   1     0.02   0.00  -0.01    -0.02   0.00   0.03    -0.03  -0.02  -0.02
  72   1     0.04   0.05   0.03    -0.03  -0.05  -0.05    -0.02   0.00  -0.03
  73   1    -0.04   0.06   0.01     0.07  -0.04   0.02    -0.01   0.01   0.01
  74   1    -0.05   0.10   0.01     0.04  -0.11   0.01     0.00  -0.03   0.00
  75   1    -0.07  -0.10   0.28    -0.03  -0.02   0.07     0.02  -0.01  -0.03
  76   1    -0.07   0.02   0.00    -0.03   0.00   0.01     0.02  -0.01  -0.02
  77   1    -0.06   0.14  -0.26    -0.03   0.03  -0.07     0.02  -0.02   0.02
  78   1    -0.04   0.02  -0.07    -0.02   0.01  -0.02     0.02  -0.01   0.01
  79   1     0.01  -0.03   0.06     0.00  -0.01   0.01    -0.01   0.00  -0.01
  80   1    -0.02   0.01   0.00    -0.01  -0.01  -0.01    -0.03  -0.05   0.04
  81   1    -0.02   0.00   0.00     0.00   0.00   0.00    -0.02  -0.04   0.02
  82   1    -0.01  -0.01   0.00     0.00   0.01   0.02    -0.04  -0.04   0.04
  83   1    -0.02   0.00   0.00     0.00   0.01   0.01     0.03   0.00   0.00
  84   1     0.00   0.01   0.00     0.00   0.00   0.00     0.00  -0.01   0.00
  85   1    -0.02  -0.13  -0.06    -0.01  -0.05  -0.03     0.00   0.03   0.04
  86   1     0.03   0.03  -0.06     0.02   0.01  -0.02    -0.04   0.01   0.02
  87   1     0.12  -0.06  -0.13     0.05  -0.02  -0.05    -0.04   0.02   0.02
  88   1     0.21   0.02   0.14     0.07   0.01   0.06    -0.04   0.00  -0.04
  89   1     0.13  -0.02  -0.09     0.05  -0.01  -0.02    -0.03   0.01   0.03
  90   1     0.28  -0.09  -0.13     0.10  -0.03  -0.04    -0.06   0.03   0.02
  91   1     0.01  -0.12   0.01     0.00  -0.02   0.02     0.00   0.01   0.00
  92   1    -0.12  -0.06   0.00    -0.01  -0.01   0.01     0.00   0.02  -0.02
  93   1    -0.04   0.00   0.08     0.01   0.00   0.01     0.00   0.02   0.00
  94   1     0.10   0.10  -0.04     0.03   0.03  -0.03    -0.01  -0.01   0.00
  95   1     0.19   0.00   0.11     0.06   0.00   0.02    -0.02   0.02   0.00
  96   1     0.16   0.03   0.06     0.05   0.01   0.00    -0.02  -0.01   0.01
  97   1     0.01   0.00  -0.02     0.00   0.00  -0.01     0.13  -0.09  -0.23
  98   1     0.02   0.02  -0.01     0.01   0.00   0.00     0.12   0.20  -0.14
  99   1     0.01   0.01  -0.01     0.00  -0.01  -0.01     0.03   0.01  -0.04
 100   1     0.01   0.01   0.01     0.00   0.01   0.00     0.07   0.16   0.09
 101   1     0.01   0.01   0.00     0.02   0.01  -0.01     0.15   0.11  -0.09
 102   1     0.01   0.01   0.01     0.01   0.02   0.00     0.09   0.12   0.02
 103   1     0.02   0.05   0.02     0.00   0.00   0.01     0.06   0.13   0.06
 104   1     0.06  -0.01   0.00    -0.01   0.01   0.00     0.11   0.08  -0.08
 105   1    -0.01  -0.02  -0.01     0.00   0.01   0.01     0.05   0.09   0.04
 106   1     0.02  -0.03  -0.01     0.01  -0.01  -0.01     0.04  -0.03  -0.15
 107   1     0.04   0.01  -0.01     0.02   0.01  -0.01     0.04   0.00  -0.09
 108   1     0.02   0.00  -0.01     0.02   0.02   0.00     0.12   0.09  -0.07
 109   1    -0.04  -0.06  -0.16    -0.02  -0.01   0.01    -0.05   0.00   0.00
 110   1     0.01  -0.16  -0.03     0.00   0.00   0.01    -0.02   0.02  -0.01
 111   1     0.00  -0.16  -0.05     0.00  -0.03   0.00    -0.01  -0.06   0.03
 112   1    -0.05  -0.01  -0.09    -0.01  -0.01  -0.01    -0.05   0.02  -0.06
 113   1    -0.06   0.01  -0.08     0.00  -0.01   0.00    -0.07  -0.02  -0.13
 114   1    -0.07   0.08  -0.04    -0.01  -0.01   0.00    -0.04   0.10  -0.06
                    70                     71                     72
                     A                      A                      A
 Frequencies --   329.0903               333.7869               334.7383
 Red. masses --     3.5013                 3.9582                 4.0437
 Frc consts  --     0.2234                 0.2598                 0.2670
 IR Inten    --    11.4851                10.4292                 8.6987
 Atom AN      X      Y      Z        X      Y      Z        X      Y      Z
   1   8    -0.01   0.02   0.00    -0.01  -0.02   0.01     0.02  -0.06   0.00
   2  12    -0.01  -0.06   0.10    -0.01  -0.03   0.09    -0.01   0.01  -0.05
   3   8     0.01  -0.08  -0.06    -0.03   0.09   0.01     0.00  -0.04  -0.01
   4   6     0.00   0.00   0.00     0.00   0.03   0.00     0.00   0.01  -0.01
   5   7     0.00  -0.01   0.01     0.01   0.00   0.01     0.02   0.00   0.00
   6   7     0.10   0.08  -0.02    -0.02   0.01   0.05     0.04   0.01  -0.04
   7   8     0.00  -0.02  -0.02    -0.01   0.13   0.10     0.01   0.14   0.11
   8   6     0.00   0.01   0.01     0.02   0.03   0.00    -0.01  -0.02   0.00
   9   6     0.00   0.03   0.02     0.03   0.04   0.03    -0.03  -0.03  -0.01
  10   6     0.04   0.07   0.00     0.00   0.05   0.04     0.01  -0.03  -0.03
  11   8     0.00  -0.01   0.02     0.03  -0.09  -0.01    -0.01  -0.07  -0.01
  12   6    -0.01   0.01   0.02     0.01  -0.05  -0.02    -0.01  -0.05   0.04
  13   6     0.01   0.00   0.00    -0.03   0.01  -0.03    -0.02  -0.07   0.05
  14   6     0.01   0.00   0.02     0.02   0.01  -0.04    -0.02   0.01  -0.05
  15   8     0.01   0.00   0.04     0.01   0.01  -0.04     0.03   0.05   0.04
  16   6     0.01   0.01   0.03    -0.02   0.00  -0.07    -0.03  -0.03  -0.12
  17   8     0.02   0.03   0.02    -0.05  -0.08  -0.04     0.02   0.04   0.01
  18   6     0.03   0.02   0.01    -0.03   0.00   0.00     0.03   0.02  -0.02
  19   8     0.09   0.06   0.02    -0.01   0.04   0.01     0.07   0.03  -0.03
  20   8     0.01   0.02  -0.05    -0.03  -0.04   0.05     0.04   0.03  -0.01
  21   6    -0.01  -0.01   0.01     0.01   0.01  -0.05     0.01   0.00   0.01
  22   6    -0.01  -0.01   0.04     0.04  -0.02  -0.10    -0.01   0.02   0.03
  23   6     0.01   0.03   0.01    -0.02  -0.05   0.01     0.02   0.02  -0.01
  24   8    -0.01  -0.06  -0.02     0.01   0.12   0.06     0.01  -0.07  -0.02
  25   6     0.00   0.03  -0.02     0.03  -0.10   0.04    -0.03   0.04  -0.01
  26   6    -0.05   0.01  -0.02     0.03  -0.03  -0.03    -0.04   0.00  -0.01
  27   6    -0.06  -0.02  -0.05     0.08   0.01   0.03    -0.09  -0.01   0.04
  28   6     0.00  -0.01   0.00     0.01  -0.03   0.00    -0.02   0.00   0.02
  29   6     0.01  -0.01   0.00     0.00  -0.01   0.00     0.01   0.01   0.00
  30   6     0.03   0.03  -0.02    -0.01   0.00   0.01     0.02   0.01  -0.01
  31   6     0.01  -0.01   0.01     0.01  -0.02   0.00     0.00   0.02   0.00
  32   6     0.00   0.02  -0.05     0.01  -0.01  -0.03     0.00   0.00   0.03
  33   6    -0.01  -0.02  -0.01     0.01  -0.03  -0.01     0.00   0.02   0.01
  34   6    -0.01  -0.05   0.04     0.01  -0.04   0.01     0.00   0.03  -0.02
  35   6     0.00  -0.02  -0.01     0.00  -0.02  -0.01     0.00   0.01   0.01
  36   6     0.01  -0.01   0.03     0.01  -0.02   0.01    -0.01   0.01  -0.01
  37   6    -0.01   0.01  -0.03    -0.01   0.00  -0.02     0.00   0.00   0.02
  38   6     0.00   0.04  -0.02     0.00  -0.01   0.00     0.01   0.01  -0.01
  39   6     0.02   0.04  -0.03     0.00   0.03   0.07     0.03   0.11   0.13
  40   6     0.02   0.03  -0.02    -0.01   0.00   0.02     0.01   0.00  -0.01
  41   6     0.04   0.02  -0.02    -0.02  -0.04  -0.05     0.00  -0.10  -0.14
  42   6     0.03   0.00  -0.01    -0.01   0.01   0.00     0.02   0.00   0.01
  43   6    -0.01   0.01  -0.01     0.00  -0.02  -0.03     0.00  -0.03  -0.06
  44   6     0.01   0.00   0.00     0.00   0.02   0.02     0.01   0.04   0.06
  45   6     0.05  -0.01   0.00     0.00   0.01   0.01    -0.01  -0.01   0.00
  46   6    -0.02   0.01   0.03    -0.02   0.01   0.01     0.00  -0.01  -0.01
  47   6     0.02   0.03   0.00     0.01   0.02   0.00    -0.02  -0.01  -0.01
  48   6    -0.04   0.01  -0.01    -0.02   0.01   0.00     0.01  -0.01   0.01
  49   6    -0.05  -0.01   0.08     0.03   0.04  -0.03     0.01   0.08   0.02
  50   6    -0.06  -0.07   0.00     0.01   0.01   0.02    -0.06  -0.06   0.07
  51   6    -0.06  -0.06  -0.01     0.05   0.01  -0.02     0.05  -0.03  -0.05
  52   6    -0.04  -0.01   0.07    -0.02  -0.02  -0.02    -0.08  -0.04   0.02
  53   6     0.02  -0.12  -0.11     0.00  -0.09  -0.09     0.00   0.05   0.06
  54   6    -0.05   0.09  -0.06    -0.07   0.11  -0.05     0.05  -0.06   0.02
  55   1    -0.02   0.01   0.03     0.06   0.03   0.03    -0.06  -0.03  -0.01
  56   1     0.05   0.01   0.02    -0.09  -0.01  -0.08    -0.03  -0.07   0.02
  57   1     0.01   0.00   0.02     0.02   0.05  -0.01    -0.02   0.05  -0.02
  58   1     0.01   0.03   0.05    -0.01  -0.01  -0.12    -0.04  -0.08  -0.20
  59   1     0.01  -0.02   0.03    -0.03   0.08  -0.07    -0.06   0.09  -0.12
  60   1     0.01   0.02   0.05    -0.01  -0.04  -0.11    -0.04  -0.07  -0.17
  61   1    -0.03  -0.03   0.02     0.07   0.04  -0.07    -0.03   0.01   0.02
  62   1     0.04   0.05   0.03    -0.06  -0.05   0.01     0.03   0.02  -0.01
  63   1     0.04   0.03  -0.07    -0.10  -0.12   0.17    -0.01   0.01  -0.05
  64   1    -0.06   0.08  -0.03     0.17  -0.21   0.08    -0.05   0.07  -0.02
  65   1     0.02   0.01  -0.02    -0.03  -0.05   0.02    -0.03   0.05  -0.03
  66   1    -0.06   0.07  -0.07     0.11  -0.02  -0.11    -0.04   0.05  -0.05
  67   1    -0.04  -0.04   0.02     0.05   0.05   0.03    -0.02  -0.06   0.06
  68   1    -0.11  -0.04  -0.04     0.00  -0.09  -0.06    -0.13  -0.02  -0.01
  69   1    -0.07  -0.10  -0.17     0.08   0.09   0.20    -0.07   0.03  -0.03
  70   1    -0.20   0.01  -0.01     0.25  -0.04  -0.01    -0.12   0.01   0.05
  71   1    -0.01  -0.01  -0.02     0.03   0.00  -0.02    -0.14  -0.01   0.09
  72   1     0.00  -0.01  -0.02    -0.04  -0.04  -0.04    -0.03   0.00   0.02
  73   1     0.00   0.00   0.00     0.08  -0.03   0.03     0.04   0.00   0.05
  74   1     0.02  -0.02  -0.01     0.00  -0.10   0.02    -0.07  -0.02   0.05
  75   1     0.00   0.05  -0.09     0.01   0.01  -0.06     0.00  -0.01   0.06
  76   1    -0.02  -0.02  -0.01     0.01  -0.03  -0.01     0.00   0.02   0.01
  77   1    -0.01  -0.07   0.08     0.01  -0.04   0.04     0.00   0.03  -0.03
  78   1     0.01  -0.01   0.03     0.02  -0.02   0.01    -0.02   0.01  -0.01
  79   1    -0.03   0.00  -0.03    -0.02  -0.01  -0.02     0.01   0.00   0.02
  80   1     0.02   0.04  -0.03     0.00   0.07   0.12     0.04   0.19   0.24
  81   1     0.01   0.03   0.00    -0.01   0.01   0.03     0.00  -0.01  -0.01
  82   1     0.04   0.02  -0.02    -0.03  -0.08  -0.10    -0.02  -0.18  -0.25
  83   1    -0.03   0.00   0.00     0.00  -0.02  -0.03    -0.01  -0.03  -0.05
  84   1     0.00   0.00   0.01     0.00   0.02   0.01     0.00   0.03   0.06
  85   1     0.03  -0.03  -0.02     0.01   0.03   0.01    -0.02  -0.04   0.02
  86   1     0.08   0.02   0.01     0.01   0.01   0.01    -0.03   0.00   0.00
  87   1     0.06  -0.01  -0.03    -0.02   0.01   0.00     0.02  -0.02   0.00
  88   1    -0.02   0.02  -0.01    -0.02   0.01  -0.02     0.00  -0.01   0.00
  89   1    -0.03   0.01   0.05    -0.02   0.01   0.04     0.00  -0.01  -0.03
  90   1    -0.04   0.02   0.04    -0.04   0.03   0.02     0.01  -0.02  -0.01
  91   1     0.00   0.03   0.04     0.00   0.01   0.03    -0.01  -0.01  -0.04
  92   1     0.04   0.04  -0.01     0.01   0.03  -0.02    -0.04  -0.02  -0.01
  93   1     0.04   0.04   0.00     0.02   0.04   0.01    -0.05  -0.02   0.00
  94   1    -0.02  -0.02  -0.02    -0.01   0.00  -0.02     0.00   0.00   0.02
  95   1    -0.04   0.05  -0.01    -0.02   0.04   0.00     0.00  -0.02   0.00
  96   1    -0.08  -0.01   0.01    -0.05  -0.01   0.02     0.02   0.00   0.00
  97   1    -0.10   0.08   0.17     0.05  -0.01  -0.09    -0.02   0.07  -0.03
  98   1    -0.11  -0.14   0.10     0.05   0.12  -0.05     0.02   0.11   0.01
  99   1    -0.02   0.02   0.05     0.02   0.04   0.00     0.04   0.12   0.02
 100   1    -0.06  -0.12  -0.08     0.03   0.01   0.03    -0.01  -0.13   0.00
 101   1    -0.13  -0.07   0.07     0.01   0.02   0.01    -0.14  -0.04   0.13
 102   1    -0.07  -0.10  -0.03    -0.01   0.00   0.04    -0.11  -0.12   0.07
 103   1    -0.06  -0.13  -0.06     0.06   0.03   0.04     0.06  -0.05  -0.01
 104   1    -0.13  -0.06   0.07     0.08   0.02  -0.07     0.05  -0.03  -0.06
 105   1    -0.04  -0.07  -0.04     0.07   0.02  -0.02     0.08  -0.03  -0.08
 106   1    -0.03   0.03   0.14    -0.03   0.00  -0.02    -0.07   0.04   0.08
 107   1    -0.04   0.01   0.09    -0.04  -0.03  -0.02    -0.11  -0.05   0.04
 108   1    -0.11  -0.08   0.07    -0.03  -0.02  -0.02    -0.14  -0.11   0.02
 109   1     0.05  -0.07  -0.30    -0.01  -0.04  -0.25     0.02   0.02   0.15
 110   1     0.01  -0.29  -0.09    -0.01  -0.21  -0.08     0.01   0.12   0.05
 111   1     0.01  -0.14  -0.08     0.00  -0.14  -0.05     0.00   0.09   0.04
 112   1    -0.07   0.03  -0.11    -0.08   0.07  -0.08     0.05  -0.05   0.04
 113   1    -0.10   0.08  -0.10    -0.10   0.07  -0.13     0.07  -0.04   0.06
 114   1    -0.09   0.19  -0.04    -0.09   0.22  -0.04     0.06  -0.12   0.01
                    73                     74                     75
                     A                      A                      A
 Frequencies --   337.5059               342.1902               351.5998
 Red. masses --     3.6944                 3.1231                 5.4135
 Frc consts  --     0.2479                 0.2155                 0.3943
 IR Inten    --    10.1474                 4.8789                 7.8444
 Atom AN      X      Y      Z        X      Y      Z        X      Y      Z
   1   8     0.02  -0.06   0.01     0.00   0.00   0.00     0.01   0.03   0.01
   2  12     0.00   0.00   0.00    -0.01  -0.04   0.03    -0.12   0.22   0.02
   3   8    -0.01   0.01   0.00     0.00  -0.01  -0.01    -0.02   0.02  -0.03
   4   6     0.00   0.01   0.00     0.00   0.00   0.00     0.00   0.00   0.01
   5   7    -0.02  -0.01   0.00     0.15   0.03  -0.02     0.02  -0.02   0.04
   6   7     0.01   0.01  -0.02     0.02   0.02   0.01     0.06   0.01  -0.10
   7   8     0.02   0.15   0.12     0.00   0.01   0.01     0.01  -0.03  -0.02
   8   6    -0.01  -0.01   0.00     0.05   0.02   0.00     0.03  -0.10   0.06
   9   6     0.00  -0.01  -0.01    -0.03   0.00   0.03     0.00  -0.08  -0.02
  10   6     0.01  -0.01  -0.02    -0.01   0.02   0.02     0.05  -0.11  -0.08
  11   8    -0.01  -0.08  -0.02     0.00  -0.01   0.00     0.01  -0.01   0.00
  12   6    -0.01  -0.05   0.02     0.00   0.00   0.01     0.00  -0.01  -0.02
  13   6    -0.03  -0.05   0.02     0.00   0.00   0.00    -0.01   0.03  -0.05
  14   6    -0.02   0.01  -0.05     0.01   0.00   0.00    -0.01  -0.01   0.02
  15   8     0.02   0.03   0.02     0.00   0.00   0.01     0.02  -0.05   0.00
  16   6    -0.04  -0.03  -0.14     0.00   0.00   0.00     0.00   0.03   0.04
  17   8     0.00   0.01  -0.02     0.00   0.00   0.00    -0.06  -0.06  -0.02
  18   6     0.01   0.02  -0.02     0.00   0.00   0.00    -0.01  -0.01   0.06
  19   8     0.03   0.03  -0.01     0.01   0.00  -0.01     0.03   0.14   0.11
  20   8     0.02   0.01   0.02     0.00   0.00  -0.01    -0.03  -0.03  -0.01
  21   6     0.01   0.00  -0.01     0.00   0.00   0.00    -0.01   0.00  -0.04
  22   6     0.00   0.01  -0.02     0.00   0.00   0.00     0.01  -0.02  -0.07
  23   6     0.01   0.00  -0.01     0.00   0.00   0.00     0.00  -0.03   0.05
  24   8     0.02  -0.03   0.00     0.00   0.00   0.00    -0.01   0.06   0.04
  25   6     0.03   0.01   0.02     0.00   0.00   0.00     0.05  -0.05   0.04
  26   6    -0.03  -0.01  -0.02     0.01   0.01   0.00    -0.01  -0.04  -0.08
  27   6    -0.04   0.00   0.05    -0.01   0.00   0.00     0.07   0.00  -0.02
  28   6    -0.01   0.00   0.02     0.01  -0.01   0.00    -0.02   0.00  -0.01
  29   6    -0.01   0.00   0.00     0.05   0.01  -0.03     0.01   0.01   0.00
  30   6     0.00   0.00  -0.01     0.01   0.01   0.00     0.04   0.02  -0.04
  31   6     0.00   0.00   0.00     0.02   0.02  -0.03     0.00   0.02   0.00
  32   6    -0.01   0.01  -0.01     0.07  -0.06   0.09     0.00   0.01   0.03
  33   6    -0.01   0.01   0.00     0.08  -0.01   0.00     0.00   0.02   0.02
  34   6    -0.01   0.00   0.02     0.08   0.04  -0.10     0.00   0.02  -0.01
  35   6     0.00   0.01   0.00     0.04  -0.01  -0.01     0.00   0.01   0.00
  36   6     0.00   0.00   0.01    -0.02   0.02  -0.07     0.00   0.02  -0.01
  37   6     0.00   0.01   0.00     0.01  -0.03   0.05     0.01   0.00   0.01
  38   6     0.00   0.01   0.00     0.00   0.01  -0.01     0.01   0.04  -0.02
  39   6    -0.02  -0.10  -0.16    -0.01  -0.01  -0.03     0.00   0.03  -0.02
  40   6     0.00   0.00  -0.01     0.00   0.01   0.00     0.01  -0.01  -0.01
  41   6     0.03   0.11   0.15     0.01   0.02   0.02     0.05  -0.01   0.01
  42   6     0.00  -0.01  -0.01     0.00   0.00  -0.01     0.05  -0.01   0.00
  43   6     0.00   0.03   0.07     0.00   0.01   0.01     0.00   0.03  -0.01
  44   6     0.00  -0.05  -0.06     0.00  -0.01  -0.01     0.03  -0.01   0.00
  45   6     0.03   0.00  -0.01    -0.19   0.05   0.09    -0.01  -0.01   0.01
  46   6     0.01   0.00   0.02    -0.06  -0.03  -0.10     0.00  -0.01  -0.01
  47   6     0.01   0.00   0.00    -0.11  -0.02  -0.04    -0.01   0.00  -0.01
  48   6     0.00   0.00  -0.01    -0.02  -0.02   0.09     0.00   0.00   0.01
  49   6    -0.05  -0.09   0.03    -0.01  -0.03   0.02    -0.03   0.02   0.05
  50   6     0.03   0.02  -0.08     0.00  -0.01  -0.02    -0.04  -0.04  -0.02
  51   6    -0.09   0.01   0.06    -0.02  -0.01   0.01    -0.05  -0.05  -0.01
  52   6     0.09   0.03   0.02     0.01   0.00   0.01    -0.02   0.00   0.06
  53   6     0.00   0.01   0.01     0.01  -0.01  -0.01     0.03  -0.03   0.15
  54   6     0.01  -0.02   0.01     0.00   0.04   0.00     0.00  -0.12  -0.15
  55   1     0.00   0.00  -0.01    -0.07  -0.01   0.04    -0.04  -0.01  -0.02
  56   1    -0.06  -0.06  -0.01     0.00   0.00   0.00    -0.02   0.03  -0.06
  57   1    -0.02   0.05  -0.03     0.01   0.01   0.00    -0.01  -0.02   0.01
  58   1    -0.04  -0.09  -0.24     0.00   0.00  -0.01     0.00   0.03   0.05
  59   1    -0.10   0.11  -0.13     0.00   0.01   0.00     0.00   0.00   0.04
  60   1    -0.04  -0.07  -0.18     0.00   0.00  -0.01     0.00   0.05   0.06
  61   1    -0.01   0.02  -0.02     0.00   0.00   0.00     0.05   0.00  -0.04
  62   1     0.01   0.00  -0.01     0.00   0.00   0.00     0.02   0.02   0.07
  63   1     0.05   0.08   0.02     0.01   0.00  -0.01    -0.01  -0.01   0.13
  64   1     0.01   0.00   0.00     0.00   0.01   0.00     0.13  -0.13   0.06
  65   1     0.06  -0.02   0.05     0.01   0.00   0.00     0.06  -0.06   0.04
  66   1     0.00   0.04  -0.09    -0.02  -0.01   0.03     0.03   0.04  -0.19
  67   1     0.00  -0.04   0.08    -0.01   0.00  -0.04     0.01   0.01  -0.03
  68   1    -0.14  -0.06  -0.03     0.04   0.02   0.01    -0.05  -0.17  -0.13
  69   1    -0.03   0.06   0.05    -0.01  -0.01  -0.01     0.06  -0.01   0.08
  70   1     0.00  -0.01   0.03    -0.02   0.00   0.00     0.14  -0.02  -0.04
  71   1    -0.10  -0.01   0.06    -0.01   0.00   0.00     0.10   0.00  -0.07
  72   1    -0.02   0.00   0.01     0.00  -0.01   0.00    -0.01   0.00  -0.03
  73   1     0.05   0.00   0.05     0.02  -0.01   0.00    -0.05   0.01  -0.03
  74   1    -0.07  -0.02   0.05     0.01  -0.01   0.00     0.01   0.00  -0.03
  75   1    -0.01   0.02  -0.02     0.07  -0.11   0.18     0.00   0.00   0.05
  76   1    -0.01   0.01   0.00     0.07  -0.02   0.02     0.00   0.01   0.03
  77   1    -0.01  -0.01   0.03     0.09   0.09  -0.16     0.00   0.03  -0.03
  78   1     0.00   0.00   0.02    -0.01   0.02  -0.06    -0.02   0.02  -0.01
  79   1     0.00   0.01   0.00     0.01  -0.03   0.04     0.01   0.01   0.01
  80   1    -0.04  -0.18  -0.29    -0.01  -0.02  -0.06    -0.01   0.03  -0.03
  81   1     0.00  -0.01  -0.02     0.00   0.01   0.01    -0.02  -0.03   0.00
  82   1     0.05   0.19   0.27     0.01   0.03   0.04     0.05  -0.01   0.03
  83   1    -0.01   0.02   0.06    -0.01   0.00   0.01    -0.01   0.02   0.00
  84   1     0.00  -0.04  -0.05     0.01   0.00  -0.01     0.02  -0.02   0.02
  85   1     0.02   0.00  -0.04    -0.09   0.17   0.22    -0.01  -0.02   0.01
  86   1     0.06   0.00   0.00    -0.38  -0.08   0.02    -0.03  -0.03   0.00
  87   1     0.03   0.00  -0.01    -0.29   0.08   0.24     0.01  -0.01   0.04
  88   1     0.01   0.01   0.02    -0.10  -0.08  -0.15     0.00  -0.01  -0.01
  89   1     0.00   0.00   0.02    -0.03  -0.04  -0.16     0.00  -0.01  -0.04
  90   1     0.01   0.00   0.01    -0.13  -0.03  -0.03     0.00  -0.03   0.00
  91   1     0.01  -0.01   0.02    -0.08   0.01  -0.18    -0.01   0.00  -0.03
  92   1     0.01   0.00   0.01    -0.15  -0.01  -0.09    -0.02  -0.01   0.00
  93   1     0.03   0.00   0.00    -0.26  -0.04   0.03    -0.04  -0.02   0.00
  94   1     0.00   0.00  -0.01    -0.03  -0.01   0.11     0.00  -0.01   0.02
  95   1     0.01  -0.01  -0.01    -0.06   0.02   0.06    -0.01  -0.01   0.00
  96   1     0.00   0.00  -0.03    -0.01  -0.03   0.14     0.00   0.00   0.00
  97   1    -0.04  -0.03   0.12    -0.02   0.01   0.06    -0.05   0.05   0.09
  98   1    -0.09  -0.18   0.04    -0.03  -0.07   0.03    -0.11  -0.03   0.03
  99   1    -0.05  -0.11   0.01    -0.01  -0.03   0.01    -0.02   0.06   0.09
 100   1    -0.03   0.07  -0.04    -0.02  -0.01  -0.03    -0.06  -0.07  -0.07
 101   1     0.07   0.00  -0.10    -0.01  -0.01  -0.01    -0.11  -0.03   0.04
 102   1     0.07   0.07  -0.10     0.00   0.00  -0.03    -0.05  -0.07  -0.08
 103   1    -0.10  -0.01  -0.03    -0.02  -0.02  -0.01    -0.05  -0.12  -0.06
 104   1    -0.14   0.01   0.11    -0.03  -0.01   0.03    -0.11  -0.07   0.08
 105   1    -0.12   0.00   0.09    -0.02  -0.01   0.00    -0.03  -0.07  -0.04
 106   1     0.12  -0.11   0.06     0.01  -0.01   0.03     0.00   0.02   0.13
 107   1     0.20   0.06  -0.07     0.02   0.01   0.01     0.00   0.03   0.09
 108   1     0.04   0.11   0.02     0.00   0.00   0.01    -0.08  -0.06   0.06
 109   1     0.00   0.00   0.03     0.00   0.00  -0.05     0.03  -0.06   0.27
 110   1     0.00   0.02   0.01    -0.01  -0.03  -0.02     0.04   0.08   0.13
 111   1     0.00   0.02   0.00     0.01  -0.04   0.02     0.04   0.00   0.13
 112   1     0.00  -0.03   0.00     0.00   0.05   0.02    -0.01  -0.17  -0.19
 113   1     0.01  -0.01   0.03    -0.01   0.02  -0.03    -0.04  -0.13  -0.18
 114   1     0.00  -0.05   0.01     0.02   0.07  -0.01    -0.03  -0.04  -0.13
                    76                     77                     78
                     A                      A                      A
 Frequencies --   384.0219               395.2466               403.1035
 Red. masses --     5.1510                 5.7126                 6.2373
 Frc consts  --     0.4476                 0.5258                 0.5971
 IR Inten    --    19.5117                11.6540                10.4329
 Atom AN      X      Y      Z        X      Y      Z        X      Y      Z
   1   8     0.01   0.02   0.01    -0.05  -0.04  -0.02     0.03  -0.05  -0.03
   2  12     0.01  -0.13   0.17     0.02   0.02   0.07    -0.02   0.01  -0.02
   3   8     0.01  -0.02   0.01    -0.06   0.00  -0.11     0.10   0.13   0.15
   4   6    -0.01  -0.01   0.01     0.04   0.04  -0.05    -0.04   0.00  -0.01
   5   7    -0.01  -0.01  -0.11     0.00  -0.01  -0.03     0.00   0.00   0.01
   6   7    -0.04  -0.01  -0.07    -0.01   0.00  -0.02     0.00   0.00   0.00
   7   8     0.01  -0.03  -0.01    -0.04   0.12   0.05     0.02   0.03   0.00
   8   6    -0.07   0.04  -0.14    -0.01   0.00  -0.03     0.00   0.00   0.01
   9   6    -0.08  -0.01  -0.14    -0.02  -0.01  -0.04     0.01   0.00   0.01
  10   6    -0.06   0.01  -0.09    -0.01  -0.01  -0.03     0.01   0.00   0.00
  11   8     0.01   0.00  -0.02    -0.03  -0.09   0.11     0.00   0.00   0.04
  12   6     0.01  -0.02  -0.02    -0.07   0.12   0.02     0.03   0.02   0.03
  13   6     0.02  -0.02  -0.01    -0.04   0.22  -0.09     0.09   0.04   0.04
  14   6    -0.03  -0.01   0.01     0.13   0.02  -0.01    -0.09   0.01   0.04
  15   8     0.02   0.00  -0.02    -0.11  -0.08   0.06     0.02   0.01   0.02
  16   6     0.00   0.02   0.02     0.00  -0.04  -0.06    -0.01  -0.06  -0.05
  17   8    -0.04  -0.03  -0.01     0.08   0.11   0.07     0.21   0.14  -0.06
  18   6     0.01   0.03   0.07    -0.07  -0.02   0.05     0.06   0.06   0.03
  19   8     0.07   0.12   0.10    -0.18  -0.06   0.06     0.03  -0.04   0.00
  20   8    -0.02   0.00  -0.02    -0.01  -0.07  -0.06    -0.13  -0.12  -0.10
  21   6    -0.02   0.00  -0.04     0.05  -0.05   0.07    -0.07  -0.12   0.09
  22   6     0.01  -0.03  -0.07     0.03  -0.02   0.11     0.05  -0.21   0.02
  23   6     0.01   0.02   0.07    -0.01  -0.03   0.01    -0.06   0.06   0.00
  24   8    -0.02   0.02   0.02     0.05   0.00  -0.04    -0.08   0.13  -0.04
  25   6     0.04  -0.06   0.01     0.01   0.01  -0.01     0.08  -0.21  -0.06
  26   6    -0.04   0.02  -0.04    -0.01  -0.04  -0.02    -0.07   0.10   0.04
  27   6     0.02   0.00  -0.01     0.09  -0.01  -0.13    -0.02   0.00  -0.06
  28   6    -0.04   0.01  -0.01     0.15  -0.04   0.04    -0.12   0.02  -0.03
  29   6     0.01   0.02  -0.06     0.00   0.01  -0.02     0.00   0.00   0.00
  30   6    -0.01  -0.03  -0.05     0.00  -0.01  -0.02     0.00   0.01   0.01
  31   6    -0.01   0.05  -0.01     0.00   0.02   0.00     0.00   0.00   0.00
  32   6    -0.02   0.04   0.03    -0.01   0.01   0.01     0.00   0.00   0.00
  33   6    -0.01   0.06   0.03     0.00   0.02   0.01     0.00  -0.01   0.00
  34   6     0.00   0.05   0.01     0.00   0.02   0.01     0.00   0.00   0.00
  35   6     0.02   0.04   0.01     0.00   0.01   0.00     0.00   0.00   0.00
  36   6    -0.01   0.04   0.02     0.00   0.01   0.00     0.01   0.00   0.00
  37   6     0.02   0.02   0.03     0.01   0.01   0.01     0.00   0.00   0.00
  38   6     0.03  -0.02   0.00     0.01   0.00   0.00     0.00   0.01   0.00
  39   6     0.04  -0.02   0.02     0.01   0.00   0.00     0.00   0.01   0.01
  40   6     0.04  -0.05   0.01     0.01  -0.02   0.00     0.00   0.01   0.02
  41   6     0.02  -0.03   0.02     0.01  -0.02   0.00     0.00   0.00   0.00
  42   6     0.01  -0.03   0.02     0.01  -0.01   0.00     0.00   0.01   0.00
  43   6     0.03  -0.01   0.02     0.01   0.00   0.00     0.00   0.00   0.00
  44   6     0.01  -0.02   0.03     0.01  -0.01   0.01     0.00   0.00   0.00
  45   6     0.03  -0.02   0.00     0.01  -0.01   0.00     0.00   0.00   0.00
  46   6     0.00  -0.01   0.01     0.00   0.00   0.00     0.00   0.00  -0.01
  47   6    -0.02  -0.02  -0.01    -0.01  -0.01   0.00     0.00   0.00   0.00
  48   6     0.01  -0.02   0.02     0.00   0.00   0.00     0.00   0.00   0.00
  49   6     0.01   0.02  -0.02     0.00   0.01   0.00     0.00   0.00   0.00
  50   6    -0.01   0.01   0.01    -0.01   0.00   0.00     0.00   0.00  -0.01
  51   6    -0.02   0.00   0.01    -0.01   0.00   0.00     0.00  -0.01   0.00
  52   6     0.00   0.02   0.00     0.00   0.01   0.01     0.00   0.00   0.00
  53   6    -0.06   0.15  -0.12    -0.01   0.03  -0.02     0.00  -0.01   0.01
  54   6     0.08  -0.09   0.11     0.02  -0.03   0.01    -0.01   0.00  -0.01
  55   1    -0.07  -0.05  -0.14    -0.02  -0.01  -0.04     0.00   0.00   0.01
  56   1     0.03  -0.02  -0.03     0.03   0.24   0.01     0.07   0.03   0.02
  57   1    -0.04  -0.03  -0.01     0.19   0.11   0.09    -0.10   0.03   0.05
  58   1     0.00   0.01   0.03     0.02   0.00  -0.06    -0.02  -0.10  -0.08
  59   1     0.00   0.00   0.02     0.01  -0.02  -0.06    -0.03  -0.03  -0.05
  60   1     0.00   0.03   0.03     0.01  -0.09  -0.08    -0.03  -0.04  -0.05
  61   1     0.03  -0.02  -0.05     0.00  -0.07   0.08    -0.09  -0.33  -0.08
  62   1     0.04   0.08   0.09     0.02  -0.02   0.01    -0.09   0.08   0.01
  63   1    -0.02  -0.02   0.08     0.07  -0.03  -0.10     0.14  -0.18  -0.11
  64   1     0.10  -0.13   0.03    -0.06   0.11  -0.03     0.01  -0.19  -0.09
  65   1     0.04  -0.07   0.03     0.02   0.01  -0.05     0.11  -0.23  -0.02
  66   1    -0.07   0.09  -0.07    -0.04  -0.01  -0.03    -0.09   0.07   0.09
  67   1    -0.04   0.01  -0.06    -0.02  -0.06  -0.03    -0.07   0.07   0.02
  68   1    -0.03  -0.06  -0.07    -0.02  -0.07  -0.03    -0.05   0.15   0.06
  69   1     0.02   0.02   0.01     0.05  -0.20  -0.03     0.00   0.00  -0.20
  70   1     0.04   0.01  -0.02     0.06  -0.10  -0.07    -0.15  -0.04   0.02
  71   1     0.01   0.00   0.01     0.31   0.00  -0.33    -0.05  -0.01  -0.09
  72   1    -0.03   0.01  -0.02     0.10  -0.04   0.02    -0.15   0.03  -0.09
  73   1    -0.07   0.01  -0.03     0.28  -0.04   0.10    -0.22   0.05  -0.07
  74   1    -0.01   0.02  -0.03     0.08  -0.11   0.10    -0.03   0.00  -0.09
  75   1    -0.01   0.01   0.06     0.00   0.00   0.01     0.00   0.00   0.00
  76   1    -0.01   0.05   0.04     0.00   0.02   0.01     0.00   0.00   0.00
  77   1    -0.01   0.02   0.01     0.00   0.01   0.01     0.00   0.00  -0.01
  78   1    -0.06   0.04   0.02    -0.01   0.01   0.00     0.01   0.00   0.00
  79   1     0.05   0.02   0.04     0.02   0.01   0.01     0.00   0.00   0.00
  80   1     0.02  -0.01   0.04     0.00   0.01   0.01     0.00   0.01   0.00
  81   1     0.04  -0.06   0.01     0.01  -0.02   0.01     0.00   0.02   0.03
  82   1     0.02  -0.01   0.03     0.01  -0.01   0.01     0.00   0.00   0.00
  83   1     0.06   0.00   0.00     0.02   0.00   0.00    -0.01   0.00   0.00
  84   1    -0.01  -0.04   0.04     0.00  -0.01   0.02     0.00   0.00   0.00
  85   1    -0.01  -0.06  -0.05     0.00  -0.03  -0.01     0.00  -0.01   0.02
  86   1     0.06  -0.03   0.00     0.01   0.00   0.00    -0.02   0.01   0.00
  87   1     0.08  -0.03   0.01     0.03  -0.01   0.00     0.01   0.00  -0.01
  88   1     0.00  -0.01   0.04     0.00  -0.01   0.01     0.00   0.00  -0.01
  89   1    -0.01  -0.01  -0.03     0.00   0.00  -0.01     0.00   0.00  -0.01
  90   1     0.01  -0.04   0.02     0.00  -0.01   0.00    -0.01   0.00   0.00
  91   1    -0.01   0.00  -0.08    -0.01   0.01  -0.02     0.00   0.00   0.00
  92   1    -0.05  -0.03   0.02     0.00  -0.01   0.02     0.00   0.01  -0.01
  93   1    -0.07  -0.06  -0.01    -0.02  -0.03  -0.01     0.00   0.01   0.00
  94   1     0.01  -0.03   0.05     0.00  -0.01   0.01     0.00   0.00   0.00
  95   1     0.00  -0.05   0.00     0.00  -0.01   0.00     0.00   0.01   0.00
  96   1     0.02   0.00  -0.02     0.01   0.00  -0.01     0.00   0.00   0.01
  97   1     0.00  -0.02  -0.07    -0.01   0.01  -0.01     0.00   0.00   0.01
  98   1     0.01   0.08  -0.04     0.00   0.02  -0.01    -0.01   0.00   0.00
  99   1     0.01   0.05   0.02     0.01   0.03   0.01     0.00   0.00   0.01
 100   1    -0.02   0.03   0.03    -0.01   0.00   0.00     0.00  -0.01  -0.01
 101   1    -0.02   0.03   0.00    -0.02   0.01   0.01    -0.01   0.00   0.00
 102   1     0.00   0.00  -0.02    -0.01  -0.01  -0.01     0.00   0.00  -0.01
 103   1    -0.03  -0.03  -0.04    -0.01  -0.01  -0.02     0.00  -0.01   0.00
 104   1    -0.07   0.02   0.01    -0.03   0.00   0.01     0.00  -0.01   0.00
 105   1    -0.03   0.03   0.05    -0.01   0.00   0.01     0.01  -0.01  -0.01
 106   1     0.00   0.04   0.00     0.01   0.01   0.02     0.00  -0.01   0.01
 107   1    -0.02  -0.01  -0.02     0.00   0.00   0.00     0.01   0.00   0.00
 108   1    -0.01   0.03   0.00    -0.01   0.00   0.01    -0.01  -0.01   0.00
 109   1    -0.03   0.12  -0.03     0.00   0.02   0.02     0.00  -0.01   0.01
 110   1    -0.05   0.21  -0.13    -0.01   0.06  -0.02     0.00  -0.01   0.01
 111   1    -0.06   0.21  -0.15    -0.01   0.05  -0.03     0.00  -0.01   0.02
 112   1     0.10  -0.02   0.19     0.02  -0.02   0.02    -0.01   0.00  -0.02
 113   1     0.15  -0.01   0.26     0.03  -0.02   0.03    -0.01   0.00  -0.02
 114   1     0.13  -0.33   0.08     0.03  -0.08   0.00    -0.01   0.02  -0.01
                    79                     80                     81
                     A                      A                      A
 Frequencies --   413.1990               423.2412               432.5756
 Red. masses --     6.3048                 4.9159                 3.2051
 Frc consts  --     0.6342                 0.5188                 0.3534
 IR Inten    --    26.6802                10.9905                 2.5657
 Atom AN      X      Y      Z        X      Y      Z        X      Y      Z
   1   8     0.07   0.07   0.02    -0.02   0.08   0.05     0.00   0.00   0.00
   2  12    -0.03  -0.04   0.01    -0.01  -0.01   0.01    -0.01  -0.01   0.01
   3   8    -0.07   0.00  -0.06    -0.12   0.07  -0.04     0.00   0.00   0.00
   4   6    -0.08  -0.01   0.05     0.04  -0.01   0.04     0.00   0.00   0.00
   5   7     0.00   0.00   0.00    -0.01   0.00   0.00     0.20   0.05  -0.05
   6   7     0.01   0.00   0.00     0.00   0.00   0.00    -0.04  -0.03   0.02
   7   8     0.06   0.00   0.01    -0.01  -0.08   0.00     0.00   0.00   0.00
   8   6     0.00   0.01   0.00     0.00   0.00   0.00     0.09   0.03  -0.02
   9   6     0.00   0.01   0.00     0.00   0.00   0.00    -0.03  -0.01   0.02
  10   6     0.00   0.01   0.00     0.00   0.00   0.00    -0.06  -0.02   0.02
  11   8     0.08  -0.16  -0.08    -0.01   0.03  -0.12     0.00   0.00   0.00
  12   6     0.07   0.03  -0.06    -0.03  -0.10  -0.04     0.00   0.00   0.00
  13   6    -0.06   0.07  -0.06    -0.16  -0.13   0.01     0.00   0.00   0.00
  14   6    -0.18  -0.06   0.04     0.07  -0.02  -0.09     0.00   0.00   0.00
  15   8     0.31   0.11   0.09    -0.02   0.03  -0.08     0.00   0.00   0.01
  16   6    -0.01   0.07   0.06     0.01   0.10   0.08     0.00   0.00   0.00
  17   8     0.03   0.07   0.05     0.10   0.14   0.04     0.00   0.00   0.00
  18   6    -0.07  -0.02  -0.01    -0.06   0.08  -0.02     0.00   0.00   0.00
  19   8    -0.15  -0.05   0.01    -0.01   0.06  -0.05     0.00   0.00   0.00
  20   8     0.01  -0.05  -0.03    -0.02  -0.11  -0.06     0.00   0.00   0.00
  21   6     0.05  -0.01   0.05     0.08  -0.08   0.06     0.00   0.00   0.00
  22   6     0.00   0.03   0.10     0.07  -0.06   0.07     0.00   0.00   0.00
  23   6     0.00  -0.08  -0.02    -0.04  -0.01  -0.02     0.00   0.01   0.00
  24   8     0.06   0.00  -0.02     0.08   0.02  -0.03     0.00   0.00   0.00
  25   6    -0.03   0.07   0.01     0.06  -0.05  -0.01     0.01  -0.01   0.00
  26   6     0.03  -0.09  -0.03    -0.05  -0.01  -0.02    -0.01   0.01   0.00
  27   6     0.08   0.01  -0.02    -0.05   0.00   0.18     0.00   0.00   0.00
  28   6    -0.23   0.03  -0.07     0.11  -0.02   0.03     0.00   0.00   0.00
  29   6     0.00   0.00   0.00     0.00   0.01  -0.02    -0.03  -0.01   0.02
  30   6     0.00  -0.01   0.00     0.00   0.01   0.00     0.01   0.01  -0.01
  31   6     0.00   0.00   0.00     0.00   0.00  -0.01    -0.06  -0.04   0.05
  32   6     0.00   0.00   0.00     0.00   0.00  -0.01     0.03  -0.02   0.01
  33   6     0.00   0.00   0.00     0.00  -0.01   0.00     0.04   0.03  -0.04
  34   6     0.00   0.00   0.00     0.00   0.00   0.00     0.02   0.00   0.05
  35   6     0.00   0.00   0.00     0.00   0.01  -0.01    -0.04  -0.01   0.03
  36   6     0.00   0.00   0.00     0.00   0.00   0.01    -0.13  -0.11   0.00
  37   6     0.00   0.00   0.00     0.00   0.00   0.01    -0.07   0.05   0.00
  38   6     0.00   0.00   0.00     0.00   0.00   0.00     0.01   0.02  -0.01
  39   6     0.00   0.00   0.00     0.00   0.00   0.00    -0.01   0.00   0.00
  40   6     0.00   0.00  -0.01     0.00   0.00   0.00    -0.01  -0.01   0.00
  41   6     0.00   0.00   0.00     0.00   0.00   0.00     0.00  -0.01   0.01
  42   6     0.00   0.00   0.00     0.00   0.00   0.00     0.02   0.00   0.00
  43   6     0.00   0.00   0.00     0.00   0.00   0.00     0.01   0.03  -0.02
  44   6     0.00   0.00   0.00     0.00   0.00   0.00     0.03   0.00   0.00
  45   6     0.00   0.00   0.00     0.01   0.00   0.00    -0.11   0.01  -0.15
  46   6     0.00   0.00   0.00    -0.01   0.00   0.01     0.07   0.02   0.10
  47   6     0.00   0.01   0.00    -0.01  -0.01   0.01     0.01  -0.04   0.06
  48   6     0.00   0.00   0.00     0.01   0.00   0.00     0.00   0.02  -0.08
  49   6     0.00   0.00   0.00     0.00   0.00   0.00     0.00   0.02   0.02
  50   6     0.00   0.00   0.01     0.00   0.00   0.00     0.00  -0.01  -0.03
  51   6     0.00   0.00   0.00     0.00  -0.01   0.00     0.00  -0.03  -0.03
  52   6     0.00   0.00   0.00     0.00   0.00   0.00     0.01   0.02   0.03
  53   6     0.00   0.00  -0.01     0.00   0.00   0.01    -0.01   0.01   0.00
  54   6     0.00   0.00   0.01     0.00   0.00   0.00     0.01   0.00   0.00
  55   1     0.00   0.00   0.00     0.00   0.00   0.00    -0.07  -0.02   0.03
  56   1    -0.05   0.08  -0.04    -0.30  -0.16  -0.05     0.00   0.00   0.00
  57   1    -0.22  -0.09  -0.02     0.06  -0.09  -0.14     0.00   0.00   0.00
  58   1    -0.03   0.02   0.06     0.02   0.13   0.11     0.00   0.00   0.00
  59   1    -0.03   0.04   0.07     0.03   0.06   0.08    -0.01   0.00   0.00
  60   1    -0.03   0.14   0.10     0.03   0.09   0.09     0.00   0.00   0.00
  61   1    -0.02   0.02   0.08     0.02  -0.10   0.03     0.01  -0.01   0.00
  62   1     0.01  -0.10  -0.03    -0.04  -0.02  -0.03     0.00   0.01   0.00
  63   1     0.02   0.04  -0.06     0.09  -0.06  -0.04     0.00  -0.01   0.00
  64   1    -0.08   0.17   0.00     0.03   0.00  -0.01     0.01  -0.01   0.00
  65   1    -0.01   0.07  -0.04     0.08  -0.07  -0.02     0.00  -0.01   0.00
  66   1     0.04  -0.08  -0.05    -0.08   0.03  -0.04    -0.01   0.01   0.00
  67   1     0.03  -0.07  -0.03    -0.04  -0.07   0.01     0.00   0.00   0.01
  68   1     0.03  -0.12  -0.04    -0.11  -0.03  -0.02    -0.02   0.01   0.00
  69   1     0.06  -0.03   0.15    -0.05   0.12   0.35     0.00   0.00   0.00
  70   1     0.19  -0.02  -0.04     0.17   0.08   0.04     0.00   0.00   0.00
  71   1     0.16   0.02  -0.09    -0.15   0.00   0.30     0.00   0.00   0.00
  72   1    -0.21   0.04  -0.14     0.18  -0.02   0.13     0.00   0.00  -0.01
  73   1    -0.41   0.07  -0.13     0.23  -0.05   0.07     0.00   0.01   0.00
  74   1    -0.09   0.03  -0.16    -0.03   0.06   0.10     0.00   0.00   0.00
  75   1     0.00   0.01   0.00     0.00  -0.01   0.01     0.05  -0.03  -0.03
  76   1     0.00   0.00   0.00     0.00  -0.01   0.02     0.06   0.07  -0.11
  77   1     0.00   0.00   0.00     0.00   0.00   0.01     0.04   0.03   0.06
  78   1     0.00   0.00   0.00     0.00   0.00   0.01    -0.12  -0.11  -0.01
  79   1     0.00   0.00   0.00     0.00   0.00   0.01    -0.06   0.05  -0.01
  80   1     0.01   0.00   0.00     0.00   0.00   0.00    -0.02   0.01   0.00
  81   1     0.00   0.00  -0.01     0.00   0.00   0.00    -0.02  -0.02   0.00
  82   1     0.00   0.00   0.00     0.00   0.00   0.00     0.00  -0.02   0.02
  83   1     0.00   0.00   0.00     0.00   0.00   0.00     0.01   0.03  -0.02
  84   1     0.00   0.00   0.00     0.00   0.00   0.00     0.03   0.00   0.00
  85   1     0.00   0.00   0.00     0.01  -0.01   0.00    -0.07   0.11  -0.24
  86   1    -0.01   0.00   0.00     0.02   0.01   0.01     0.08   0.09  -0.09
  87   1     0.00   0.00   0.00     0.02   0.00  -0.01    -0.25   0.02  -0.29
  88   1     0.00   0.00   0.00    -0.01   0.01  -0.01     0.13   0.09   0.26
  89   1     0.00   0.00  -0.01    -0.01   0.00   0.01     0.09   0.04   0.27
  90   1     0.00   0.00   0.00    -0.02   0.00   0.02     0.23   0.11  -0.13
  91   1     0.01   0.00   0.00     0.00  -0.01   0.00     0.02  -0.11   0.13
  92   1    -0.01   0.01  -0.01    -0.01  -0.01   0.01    -0.03  -0.08   0.12
  93   1     0.00   0.02   0.01    -0.01  -0.01   0.00     0.14  -0.02  -0.01
  94   1     0.00   0.00   0.00     0.01   0.01  -0.01     0.02   0.01  -0.13
  95   1    -0.01   0.00   0.00     0.02   0.00   0.01     0.07  -0.06  -0.04
  96   1    -0.01   0.00   0.00     0.01   0.00   0.00    -0.01   0.05  -0.18
  97   1     0.00   0.00  -0.01     0.00   0.00   0.01    -0.02   0.04   0.05
  98   1     0.01   0.00   0.00    -0.01   0.00   0.00    -0.04  -0.02   0.02
  99   1     0.00   0.00  -0.01     0.00   0.00   0.00     0.01   0.05   0.04
 100   1     0.00   0.00   0.01     0.00   0.00  -0.01    -0.02  -0.02  -0.05
 101   1     0.00   0.00   0.00     0.00   0.00   0.00    -0.04  -0.01   0.00
 102   1     0.00   0.00   0.01     0.00   0.00  -0.01     0.00  -0.03  -0.07
 103   1     0.00   0.00   0.00     0.00  -0.01   0.00     0.00  -0.06  -0.05
 104   1    -0.01   0.01   0.00     0.01  -0.01   0.01    -0.02  -0.04   0.03
 105   1     0.00   0.01   0.01     0.00  -0.01  -0.01     0.01  -0.05  -0.07
 106   1     0.00   0.00  -0.01     0.00   0.01   0.00     0.02   0.02   0.08
 107   1     0.00   0.00  -0.01    -0.01   0.00   0.01     0.03   0.04   0.06
 108   1     0.00   0.01   0.00     0.00  -0.01   0.00    -0.03  -0.04   0.03
 109   1     0.00   0.01  -0.02     0.00   0.00   0.01    -0.06   0.01   0.01
 110   1     0.00  -0.01  -0.01     0.00   0.01   0.00    -0.04   0.06  -0.03
 111   1     0.00   0.00  -0.01     0.00   0.00   0.00    -0.01  -0.06   0.05
 112   1     0.00   0.00   0.02     0.00  -0.01  -0.01     0.03   0.08   0.06
 113   1     0.00   0.01   0.02     0.00   0.00  -0.01     0.04  -0.04  -0.05
 114   1     0.00  -0.01   0.01    -0.01   0.00   0.00     0.07   0.01  -0.03
                    82                     83                     84
                     A                      A                      A
 Frequencies --   440.0173               443.6642               444.9604
 Red. masses --     4.3430                 3.4241                 3.5085
 Frc consts  --     0.4954                 0.3971                 0.4093
 IR Inten    --     7.2241                 4.1604                 6.0044
 Atom AN      X      Y      Z        X      Y      Z        X      Y      Z
   1   8     0.00   0.02   0.01     0.00   0.00   0.00     0.00   0.01   0.00
   2  12    -0.01   0.01  -0.02    -0.02   0.01  -0.01     0.00   0.03  -0.03
   3   8    -0.02  -0.09  -0.10    -0.01   0.00   0.00    -0.01   0.00  -0.01
   4   6    -0.01   0.00   0.01     0.00   0.00   0.00     0.00   0.00   0.00
   5   7     0.00   0.00   0.00     0.07   0.00   0.00    -0.04  -0.03   0.02
   6   7     0.01   0.01   0.00     0.17   0.11  -0.08    -0.08  -0.05   0.01
   7   8     0.01   0.01   0.01     0.00   0.00   0.00     0.00   0.00   0.00
   8   6     0.00  -0.01   0.01    -0.02  -0.01   0.01    -0.01   0.02  -0.02
   9   6     0.00  -0.01   0.01    -0.06  -0.02   0.00     0.01   0.03  -0.02
  10   6     0.01  -0.01   0.00     0.07   0.03  -0.05    -0.05   0.00   0.00
  11   8     0.01  -0.04  -0.01     0.00   0.00   0.00     0.00  -0.01  -0.01
  12   6    -0.01   0.02  -0.01    -0.01   0.00   0.00     0.00  -0.01   0.00
  13   6    -0.02   0.02  -0.02    -0.01   0.00   0.00    -0.01  -0.01   0.00
  14   6    -0.01  -0.01  -0.01     0.01   0.00   0.00     0.00   0.00  -0.01
  15   8     0.05   0.02   0.04    -0.01  -0.01   0.00     0.01   0.00   0.00
  16   6     0.00   0.02   0.01     0.01   0.00   0.01     0.00   0.01   0.00
  17   8    -0.04  -0.09   0.08     0.00   0.01   0.00     0.00   0.00   0.00
  18   6    -0.05   0.03   0.02     0.00   0.01   0.01    -0.01   0.00   0.00
  19   8    -0.08  -0.05  -0.01     0.01   0.02   0.02     0.00  -0.01   0.00
  20   8     0.05   0.03   0.05     0.00  -0.01  -0.01     0.00   0.00   0.00
  21   6     0.05  -0.02  -0.08     0.00  -0.01   0.00     0.01   0.00  -0.01
  22   6     0.11  -0.04  -0.09     0.00  -0.01   0.00     0.01   0.00  -0.01
  23   6    -0.05   0.19  -0.03     0.00   0.00   0.01    -0.01   0.02  -0.01
  24   8     0.06  -0.10   0.01     0.00   0.00   0.00     0.01  -0.01   0.00
  25   6     0.09  -0.15  -0.02     0.01  -0.01   0.01     0.01  -0.01   0.00
  26   6    -0.14   0.25   0.09    -0.01   0.00  -0.01    -0.02   0.03   0.01
  27   6     0.01   0.00  -0.02     0.00   0.00   0.01     0.00   0.00   0.01
  28   6    -0.01   0.00   0.00     0.01   0.00   0.00     0.00  -0.01   0.00
  29   6     0.00   0.01  -0.02     0.01  -0.03   0.08     0.02  -0.08   0.19
  30   6     0.00   0.02   0.03    -0.02  -0.04  -0.02     0.00  -0.02  -0.04
  31   6     0.00   0.00  -0.01    -0.02  -0.01   0.06     0.01  -0.03   0.12
  32   6     0.00   0.00  -0.01     0.00   0.01   0.03    -0.04   0.02   0.05
  33   6     0.00  -0.01   0.00     0.00   0.04  -0.01    -0.04   0.06  -0.02
  34   6     0.00   0.00  -0.01     0.01  -0.01   0.03    -0.02  -0.02   0.05
  35   6    -0.01   0.00  -0.01     0.01  -0.02   0.05     0.04  -0.05   0.12
  36   6     0.01   0.00   0.01    -0.06  -0.03  -0.02    -0.01   0.01  -0.07
  37   6    -0.01   0.00   0.01     0.03   0.01  -0.02     0.12  -0.02  -0.07
  38   6    -0.01   0.01   0.01    -0.04  -0.04  -0.01     0.02   0.00  -0.02
  39   6     0.00   0.00   0.00     0.03   0.01  -0.02    -0.01  -0.01   0.00
  40   6     0.00   0.01   0.00     0.04   0.04  -0.01    -0.01  -0.02   0.02
  41   6     0.00   0.01   0.00     0.02   0.02  -0.04    -0.01  -0.02   0.01
  42   6     0.00   0.01   0.01    -0.04  -0.03  -0.01     0.01  -0.01  -0.02
  43   6    -0.01  -0.01   0.00    -0.05  -0.10   0.09     0.02   0.04  -0.02
  44   6    -0.01   0.00  -0.01    -0.11   0.00   0.03     0.05   0.00   0.00
  45   6     0.01   0.00   0.01    -0.07   0.00  -0.06    -0.07  -0.01  -0.02
  46   6    -0.01   0.00   0.00     0.04   0.00   0.01     0.06  -0.01  -0.08
  47   6    -0.01  -0.01   0.01     0.03   0.03  -0.03     0.09   0.10  -0.12
  48   6     0.01   0.00   0.00    -0.03   0.00   0.00    -0.07  -0.02   0.06
  49   6     0.00  -0.01  -0.01     0.00  -0.05  -0.07     0.01   0.04   0.03
  50   6     0.01   0.00   0.00     0.00   0.04   0.10    -0.01  -0.02  -0.03
  51   6     0.01   0.01   0.00    -0.02   0.08   0.11    -0.01  -0.03  -0.03
  52   6    -0.01  -0.01  -0.01    -0.03  -0.06  -0.10     0.02   0.03   0.04
  53   6     0.00   0.00   0.02     0.02  -0.02  -0.01    -0.01  -0.01  -0.07
  54   6    -0.01   0.00  -0.02     0.01  -0.01   0.00     0.01   0.00   0.04
  55   1     0.00  -0.01   0.01    -0.12  -0.02   0.01     0.05   0.03  -0.03
  56   1     0.02   0.03   0.01    -0.01   0.00   0.00    -0.02  -0.01  -0.01
  57   1    -0.01  -0.02  -0.01     0.01   0.00   0.00     0.00   0.00  -0.01
  58   1     0.00   0.02   0.02     0.00   0.01   0.02     0.00   0.01   0.00
  59   1     0.00   0.01   0.01     0.02   0.00   0.00     0.00   0.01   0.00
  60   1     0.00   0.03   0.02     0.00   0.00   0.00     0.00   0.01   0.01
  61   1     0.25  -0.02  -0.01     0.00   0.00  -0.01     0.02   0.00   0.00
  62   1    -0.09   0.24  -0.02     0.01   0.01   0.02    -0.01   0.02   0.00
  63   1     0.02  -0.17   0.05     0.01   0.01   0.01     0.00  -0.01   0.01
  64   1     0.16  -0.29  -0.02     0.01  -0.02   0.00     0.02  -0.03   0.00
  65   1     0.01  -0.10   0.03     0.02  -0.02   0.02     0.00  -0.01   0.01
  66   1    -0.22   0.19   0.21    -0.01   0.02  -0.02    -0.01   0.02   0.01
  67   1    -0.14   0.08   0.11     0.00   0.00   0.00    -0.01   0.01   0.03
  68   1    -0.20   0.42   0.16    -0.01  -0.02  -0.02    -0.04   0.04   0.02
  69   1     0.01  -0.03   0.02     0.00   0.00   0.02     0.00   0.00   0.02
  70   1     0.02   0.00  -0.02     0.01   0.00   0.00     0.01   0.00   0.00
  71   1     0.05   0.01  -0.03     0.01   0.00   0.00     0.00   0.00   0.01
  72   1     0.00   0.00   0.00     0.01   0.00   0.01     0.01  -0.01   0.02
  73   1    -0.01   0.01   0.00     0.01  -0.01   0.00     0.01  -0.02   0.00
  74   1    -0.01   0.00   0.00     0.00   0.00   0.00     0.00   0.01   0.00
  75   1     0.00  -0.01   0.00     0.00   0.04  -0.02    -0.05   0.11  -0.06
  76   1     0.00  -0.01   0.01    -0.01   0.08  -0.09    -0.05   0.16  -0.19
  77   1     0.00   0.00   0.00     0.00   0.01  -0.02    -0.04   0.01  -0.09
  78   1     0.01   0.00   0.01    -0.06  -0.02  -0.04    -0.01   0.01  -0.10
  79   1    -0.01   0.00   0.01     0.03   0.01  -0.03     0.13  -0.01  -0.08
  80   1     0.00  -0.01  -0.01     0.07   0.01   0.01    -0.02   0.01   0.02
  81   1     0.00   0.00  -0.01     0.04   0.07   0.03    -0.01  -0.01   0.04
  82   1     0.00   0.00  -0.01     0.01   0.06  -0.04     0.00  -0.01   0.04
  83   1    -0.01  -0.01   0.00    -0.06  -0.10   0.10     0.03   0.05  -0.02
  84   1    -0.01   0.00  -0.01    -0.10   0.00   0.03     0.05   0.00   0.01
  85   1     0.01   0.00   0.01    -0.05   0.04  -0.07    -0.05   0.00   0.06
  86   1     0.01   0.00   0.01    -0.04   0.02  -0.05    -0.16   0.00  -0.05
  87   1     0.01   0.00   0.01    -0.12   0.01  -0.09    -0.06  -0.01   0.00
  88   1    -0.01   0.00  -0.02     0.07   0.01   0.11     0.07  -0.05   0.03
  89   1    -0.01   0.00   0.00     0.07   0.00   0.04     0.10  -0.02  -0.13
  90   1    -0.02   0.00   0.02     0.12   0.02  -0.09     0.11  -0.04  -0.12
  91   1     0.00  -0.02   0.01     0.02   0.04  -0.02     0.05   0.17  -0.11
  92   1    -0.02  -0.01   0.02     0.05   0.04  -0.05     0.18   0.17  -0.23
  93   1     0.00  -0.01   0.01     0.03   0.04  -0.02    -0.01   0.12  -0.04
  94   1     0.01   0.01  -0.02    -0.03  -0.04   0.06    -0.09  -0.10   0.23
  95   1     0.03  -0.01   0.01    -0.09   0.02  -0.04    -0.26   0.09  -0.08
  96   1     0.01   0.01  -0.01    -0.05  -0.02   0.02    -0.10  -0.08   0.17
  97   1     0.01  -0.01   0.00     0.04  -0.13  -0.15    -0.02   0.06   0.04
  98   1     0.00  -0.01   0.00     0.15   0.06  -0.03    -0.05   0.02   0.01
  99   1    -0.01  -0.03  -0.01    -0.02  -0.14  -0.14     0.03   0.09   0.07
 100   1     0.01   0.01   0.01     0.05   0.06   0.16    -0.03  -0.04  -0.07
 101   1     0.02   0.00  -0.02     0.11   0.01   0.01    -0.07  -0.01   0.02
 102   1     0.01   0.01   0.01    -0.01   0.08   0.22    -0.01  -0.04  -0.09
 103   1     0.01   0.02   0.02    -0.02   0.19   0.15    -0.01  -0.08  -0.07
 104   1     0.02   0.01  -0.02     0.05   0.13  -0.08    -0.05  -0.04   0.05
 105   1     0.01   0.01   0.01    -0.05   0.15   0.25     0.00  -0.05  -0.07
 106   1    -0.01  -0.01  -0.02    -0.07  -0.09  -0.26     0.04   0.03   0.09
 107   1    -0.02  -0.02  -0.02    -0.09  -0.14  -0.18     0.05   0.07   0.07
 108   1     0.00   0.00  -0.01     0.11   0.13  -0.10    -0.02  -0.03   0.04
 109   1     0.01  -0.01   0.04     0.05  -0.02  -0.03    -0.01   0.01  -0.14
 110   1     0.01   0.01   0.02     0.03  -0.07   0.01    -0.01  -0.08  -0.06
 111   1     0.00   0.01   0.01     0.02   0.02  -0.03    -0.01  -0.04  -0.05
 112   1    -0.01  -0.01  -0.03     0.00  -0.07  -0.02     0.03   0.04   0.08
 113   1    -0.02  -0.01  -0.03    -0.01   0.04   0.06     0.04   0.00   0.06
 114   1    -0.02   0.03  -0.01    -0.02  -0.04   0.02     0.05  -0.06   0.02
                    85                     86                     87
                     A                      A                      A
 Frequencies --   453.9747               456.1433               458.5435
 Red. masses --     3.1857                 2.7391                 3.1948
 Frc consts  --     0.3868                 0.3358                 0.3958
 IR Inten    --     1.8826                 1.8547                 4.4104
 Atom AN      X      Y      Z        X      Y      Z        X      Y      Z
   1   8     0.00   0.00   0.00     0.00   0.00   0.00     0.00   0.00   0.00
   2  12     0.01  -0.01   0.01     0.01  -0.01   0.01     0.00  -0.01  -0.01
   3   8     0.00   0.00   0.00     0.00   0.00   0.00    -0.01   0.00   0.00
   4   6     0.00   0.00   0.00     0.00   0.00   0.00     0.00   0.00   0.00
   5   7    -0.01  -0.01  -0.02    -0.04   0.00  -0.01     0.05  -0.02  -0.02
   6   7     0.00   0.04  -0.01    -0.02   0.00   0.02    -0.02   0.02  -0.01
   7   8     0.00   0.00   0.00     0.00   0.00   0.00     0.00   0.00   0.00
   8   6    -0.01  -0.02  -0.02    -0.01  -0.02  -0.01     0.00   0.00  -0.03
   9   6     0.00  -0.02  -0.02     0.01  -0.02   0.00    -0.02  -0.01  -0.03
  10   6     0.01  -0.02  -0.02     0.01  -0.01   0.00    -0.01  -0.01  -0.02
  11   8     0.00   0.00   0.00     0.00   0.00   0.00     0.00   0.00   0.00
  12   6     0.00   0.00   0.00     0.00   0.00   0.00     0.00   0.00   0.00
  13   6     0.00   0.00   0.00     0.00   0.00   0.00     0.00   0.00   0.00
  14   6     0.00   0.00   0.00     0.00   0.00   0.00     0.00   0.00   0.00
  15   8     0.00   0.00   0.00     0.00   0.00   0.00     0.00   0.00   0.00
  16   6     0.00   0.00   0.00     0.00   0.00   0.00     0.00   0.00   0.00
  17   8     0.00   0.00   0.00     0.00   0.00   0.00     0.00   0.01   0.00
  18   6     0.00   0.00   0.00     0.00   0.00   0.00     0.00   0.00   0.01
  19   8     0.00  -0.01  -0.01     0.00   0.00   0.00     0.01   0.00   0.00
  20   8     0.00   0.00   0.00     0.00   0.00   0.00     0.00   0.00  -0.01
  21   6     0.00   0.00   0.00     0.00   0.00   0.00     0.00   0.00   0.00
  22   6     0.00   0.00   0.00     0.00   0.00   0.00     0.00   0.00   0.00
  23   6     0.00   0.00   0.00     0.00  -0.01   0.00     0.00  -0.01   0.01
  24   8     0.00   0.00   0.00     0.00   0.00   0.00     0.00   0.00   0.00
  25   6    -0.01   0.01  -0.01    -0.01   0.01  -0.01    -0.01   0.01  -0.01
  26   6     0.00  -0.01   0.00     0.00  -0.01   0.00     0.00  -0.01  -0.01
  27   6     0.00   0.00   0.00     0.00   0.00   0.00     0.00   0.00   0.00
  28   6     0.00   0.00   0.00     0.00   0.00   0.00     0.00   0.00   0.00
  29   6     0.00   0.00  -0.01     0.01   0.02  -0.07     0.00  -0.05   0.11
  30   6     0.01   0.11   0.14     0.01   0.05   0.08     0.01   0.09   0.12
  31   6    -0.02   0.01   0.00    -0.02   0.02  -0.03     0.02  -0.02   0.07
  32   6    -0.01   0.01   0.00    -0.01   0.01  -0.02     0.00   0.00   0.04
  33   6    -0.01   0.02   0.01     0.00   0.01   0.02     0.00   0.03  -0.03
  34   6     0.01   0.01   0.01     0.01   0.01  -0.01    -0.01   0.00   0.03
  35   6     0.02   0.01   0.00     0.04   0.02  -0.04    -0.03  -0.03   0.08
  36   6    -0.04  -0.01   0.01    -0.07  -0.05   0.03     0.07   0.07  -0.05
  37   6     0.06  -0.02   0.00     0.09  -0.05   0.00    -0.09   0.07  -0.01
  38   6     0.05   0.08   0.09    -0.02   0.02   0.06     0.01   0.04   0.09
  39   6     0.03   0.02   0.04    -0.01   0.01   0.03     0.02   0.02   0.04
  40   6     0.02  -0.05  -0.04    -0.02   0.00  -0.02     0.00  -0.04  -0.04
  41   6     0.01   0.02   0.05     0.00   0.02   0.01     0.01   0.02   0.04
  42   6    -0.02   0.04   0.12     0.03   0.05   0.03     0.02   0.06   0.08
  43   6     0.05   0.04  -0.10    -0.04  -0.10   0.04    -0.01  -0.09   0.01
  44   6    -0.13  -0.06  -0.01     0.11   0.00  -0.04     0.05  -0.03  -0.04
  45   6    -0.03   0.00  -0.04    -0.03   0.00  -0.06     0.03   0.00   0.07
  46   6     0.01   0.00   0.03     0.00   0.01   0.08     0.02  -0.02  -0.11
  47   6     0.02   0.03  -0.05     0.01   0.04  -0.07     0.00  -0.04   0.07
  48   6     0.00  -0.02   0.05     0.02  -0.03   0.10    -0.04   0.03  -0.12
  49   6    -0.05  -0.14  -0.08     0.00   0.04   0.07    -0.02  -0.01   0.03
  50   6     0.03   0.06   0.06     0.02  -0.03  -0.12     0.03  -0.01  -0.09
  51   6     0.05  -0.05  -0.12     0.01   0.05   0.05     0.03   0.03   0.01
  52   6    -0.02   0.01   0.05    -0.06  -0.07  -0.08    -0.07  -0.07  -0.06
  53   6     0.00   0.01   0.00     0.00   0.02   0.01    -0.01   0.01  -0.03
  54   6    -0.03  -0.01  -0.07    -0.02   0.00  -0.04    -0.01  -0.01  -0.04
  55   1    -0.02  -0.02  -0.02     0.01  -0.02   0.00    -0.04  -0.01  -0.03
  56   1     0.00   0.00   0.00     0.01   0.00   0.00     0.00   0.00   0.00
  57   1     0.00   0.00   0.00     0.00   0.01   0.00     0.01   0.00   0.00
  58   1     0.00   0.00  -0.01     0.00   0.00   0.01     0.00   0.00   0.01
  59   1     0.00   0.00   0.00     0.01  -0.01   0.00     0.01   0.00   0.00
  60   1     0.00   0.00   0.00     0.00   0.00   0.00     0.00   0.00   0.00
  61   1     0.00   0.00   0.00     0.00   0.00   0.00    -0.01   0.00   0.00
  62   1     0.00  -0.01   0.00     0.00  -0.01   0.00     0.01   0.00   0.01
  63   1    -0.01  -0.01  -0.02    -0.01   0.00  -0.01    -0.01   0.00  -0.01
  64   1    -0.02   0.02  -0.01    -0.01   0.02   0.00    -0.01   0.01  -0.01
  65   1    -0.02   0.01  -0.02    -0.01   0.01  -0.02    -0.01   0.01  -0.02
  66   1     0.01  -0.01   0.00     0.01  -0.01   0.00     0.01   0.00  -0.02
  67   1     0.00   0.00   0.00     0.00   0.00   0.00     0.00   0.00  -0.01
  68   1     0.00  -0.01   0.00     0.01  -0.01   0.00     0.01  -0.02  -0.01
  69   1     0.00   0.00   0.00     0.00   0.00  -0.01     0.00   0.00   0.01
  70   1     0.00   0.00   0.00     0.00   0.00   0.00     0.01   0.00   0.00
  71   1     0.00   0.00   0.00     0.00   0.00   0.00     0.01   0.00   0.00
  72   1     0.00   0.00   0.00    -0.01   0.00   0.00     0.00   0.00  -0.01
  73   1    -0.01  -0.01   0.00    -0.01  -0.01  -0.01     0.01   0.01   0.00
  74   1     0.00   0.00   0.00     0.00   0.00  -0.01     0.00   0.00   0.00
  75   1    -0.01   0.00   0.00     0.00  -0.02   0.02    -0.01   0.04  -0.02
  76   1    -0.01   0.02   0.01    -0.01  -0.03   0.08     0.00   0.10  -0.14
  77   1     0.00  -0.01   0.00     0.00  -0.03   0.03     0.00   0.05  -0.04
  78   1    -0.05  -0.01   0.01    -0.09  -0.04   0.04     0.10   0.07  -0.06
  79   1     0.07  -0.01   0.00     0.11  -0.05   0.02    -0.11   0.07  -0.02
  80   1     0.00  -0.04  -0.07     0.00  -0.03  -0.02     0.00  -0.04  -0.04
  81   1     0.00  -0.16  -0.19    -0.02  -0.05  -0.10    -0.01  -0.13  -0.18
  82   1    -0.02  -0.02  -0.06     0.00  -0.03  -0.03    -0.01  -0.03  -0.05
  83   1     0.07   0.04  -0.12    -0.05  -0.10   0.04    -0.01  -0.09   0.00
  84   1    -0.15  -0.09  -0.01     0.12   0.01  -0.06     0.06  -0.04  -0.05
  85   1    -0.03   0.02  -0.07    -0.03   0.03  -0.14     0.02  -0.05   0.16
  86   1     0.03   0.01  -0.02     0.09   0.04  -0.03    -0.12  -0.06   0.02
  87   1    -0.05   0.01  -0.06    -0.09   0.00  -0.14     0.11  -0.01   0.17
  88   1     0.02   0.02   0.08     0.03   0.06   0.12    -0.02  -0.08  -0.12
  89   1     0.01   0.01   0.06    -0.01   0.03   0.17     0.04  -0.04  -0.25
  90   1     0.05   0.02  -0.02     0.06   0.06  -0.01    -0.04  -0.09  -0.01
  91   1     0.01   0.08  -0.09    -0.01   0.13  -0.15     0.02  -0.14   0.15
  92   1     0.04   0.06  -0.09     0.06   0.09  -0.15    -0.06  -0.10   0.16
  93   1    -0.07   0.02   0.00    -0.14   0.03   0.01     0.17  -0.03  -0.03
  94   1    -0.01  -0.03   0.10    -0.01  -0.02   0.16     0.00  -0.01  -0.15
  95   1    -0.07   0.03   0.00    -0.08   0.06   0.04     0.04  -0.07  -0.08
  96   1     0.00  -0.04   0.10     0.04  -0.07   0.21    -0.07   0.07  -0.26
  97   1     0.01  -0.18  -0.10    -0.05   0.14   0.18    -0.04   0.05   0.11
  98   1     0.07  -0.09  -0.03    -0.15  -0.09   0.04    -0.12  -0.10   0.01
  99   1    -0.09  -0.26  -0.17     0.03   0.13   0.13    -0.01   0.03   0.07
 100   1     0.06   0.16   0.21    -0.04  -0.04  -0.17    -0.02   0.03  -0.07
 101   1     0.21   0.06  -0.13    -0.09  -0.01  -0.04     0.00   0.02  -0.09
 102   1     0.05   0.13   0.16     0.04  -0.07  -0.25     0.06  -0.01  -0.18
 103   1     0.06  -0.09  -0.10     0.02   0.15   0.12     0.04   0.12   0.07
 104   1     0.05  -0.08  -0.03     0.10   0.08  -0.11     0.10   0.06  -0.12
 105   1     0.08  -0.09  -0.22     0.00   0.10   0.14     0.02   0.07   0.07
 106   1     0.01   0.10   0.20    -0.09  -0.04  -0.16    -0.09   0.01  -0.08
 107   1    -0.02   0.04   0.11    -0.13  -0.16  -0.13    -0.15  -0.15  -0.09
 108   1    -0.15  -0.14   0.05     0.01   0.04  -0.08    -0.05  -0.01  -0.06
 109   1     0.01   0.00   0.04     0.00   0.00   0.06     0.01   0.01  -0.03
 110   1     0.00   0.04   0.00     0.00   0.06   0.01    -0.01   0.00  -0.03
 111   1     0.00   0.04  -0.01     0.00   0.04   0.00    -0.01   0.03  -0.03
 112   1    -0.03  -0.04  -0.09    -0.02  -0.03  -0.07    -0.01  -0.01  -0.04
 113   1    -0.05  -0.03  -0.09    -0.03  -0.02  -0.07    -0.01  -0.02  -0.05
 114   1    -0.05   0.04  -0.05    -0.03   0.05  -0.03    -0.01   0.00  -0.04
                    88                     89                     90
                     A                      A                      A
 Frequencies --   498.1229               510.9965               522.3767
 Red. masses --     5.9966                 3.4473                 6.1893
 Frc consts  --     0.8767                 0.5304                 0.9951
 IR Inten    --    27.5406                 0.5493                 2.2205
 Atom AN      X      Y      Z        X      Y      Z        X      Y      Z
   1   8     0.00  -0.02   0.00     0.00   0.01   0.00     0.00  -0.06  -0.03
   2  12    -0.02   0.12   0.21     0.01  -0.04   0.02     0.01  -0.06  -0.04
   3   8     0.09   0.05  -0.05    -0.01   0.00   0.01     0.03  -0.01  -0.08
   4   6     0.00   0.00   0.00     0.00   0.00   0.00     0.00   0.02  -0.02
   5   7     0.03  -0.09  -0.02     0.00  -0.06  -0.12    -0.02   0.10  -0.02
   6   7    -0.03   0.08   0.00     0.08  -0.02   0.12     0.05  -0.09   0.02
   7   8     0.00  -0.01  -0.01     0.00   0.00   0.00    -0.02   0.00  -0.04
   8   6     0.01  -0.07  -0.04    -0.02  -0.08  -0.12    -0.03   0.06   0.01
   9   6    -0.01  -0.04  -0.10     0.04  -0.12   0.04     0.01   0.01   0.10
  10   6    -0.03   0.01  -0.01     0.06  -0.05   0.13     0.06  -0.04   0.02
  11   8     0.01   0.06   0.02     0.00  -0.01  -0.01     0.06   0.12   0.12
  12   6     0.03  -0.05   0.04    -0.01   0.00   0.00     0.09  -0.02   0.03
  13   6     0.06  -0.09   0.03    -0.01   0.01   0.00     0.07  -0.08   0.01
  14   6    -0.01   0.03   0.03     0.00  -0.01  -0.01     0.00   0.08   0.13
  15   8     0.00   0.05   0.00     0.00   0.00   0.00     0.01   0.00  -0.04
  16   6     0.00  -0.03  -0.02     0.00   0.01   0.01     0.00  -0.10  -0.06
  17   8    -0.02  -0.14   0.02     0.01   0.01  -0.01    -0.13  -0.03   0.11
  18   6     0.01   0.01  -0.18     0.01  -0.01   0.01    -0.08   0.12  -0.03
  19   8    -0.12  -0.02  -0.15     0.02  -0.02   0.01    -0.11   0.22   0.01
  20   8     0.04  -0.02   0.06     0.00   0.01   0.00     0.01  -0.13  -0.01
  21   6     0.04  -0.01   0.09    -0.01   0.01  -0.01     0.09  -0.06   0.02
  22   6    -0.01  -0.04   0.13     0.00   0.01  -0.01    -0.01  -0.03   0.06
  23   6     0.00   0.00  -0.22     0.00   0.00   0.02    -0.01  -0.02  -0.03
  24   8     0.03   0.06  -0.02    -0.01  -0.01   0.00     0.10   0.07   0.00
  25   6    -0.03   0.02  -0.01     0.00   0.00   0.00     0.02   0.01   0.02
  26   6     0.00   0.00   0.03     0.00   0.00   0.00    -0.03  -0.03  -0.03
  27   6    -0.05   0.00   0.00     0.00   0.00   0.00    -0.02   0.00  -0.01
  28   6    -0.02   0.00   0.00     0.00   0.00   0.00    -0.04   0.01  -0.01
  29   6     0.00  -0.06   0.00     0.00  -0.04  -0.05    -0.01   0.08  -0.03
  30   6    -0.03   0.03  -0.02     0.05  -0.02   0.07     0.04  -0.05   0.01
  31   6    -0.03   0.02   0.00    -0.03  -0.01   0.02     0.04  -0.04   0.03
  32   6    -0.02   0.02   0.01    -0.05  -0.02   0.05     0.00  -0.05   0.04
  33   6     0.00   0.05   0.04    -0.02   0.09  -0.02    -0.01   0.00  -0.10
  34   6     0.03   0.03   0.00     0.00   0.02   0.06    -0.06  -0.03   0.06
  35   6     0.03   0.00   0.02     0.03   0.01   0.05    -0.03   0.00   0.02
  36   6    -0.03   0.05   0.01     0.00   0.06   0.00     0.05  -0.06  -0.02
  37   6     0.01   0.05   0.02     0.03   0.06   0.02     0.00  -0.03  -0.02
  38   6     0.02  -0.01  -0.03    -0.04  -0.04  -0.02    -0.03   0.00   0.03
  39   6     0.03  -0.01  -0.03    -0.05  -0.04  -0.04    -0.03   0.01   0.03
  40   6     0.04  -0.01   0.04    -0.04   0.09   0.04    -0.05   0.02  -0.05
  41   6     0.01  -0.04  -0.01    -0.01   0.00  -0.07     0.00   0.04   0.00
  42   6    -0.01  -0.04  -0.01     0.01   0.01  -0.06     0.01   0.03  -0.01
  43   6     0.03  -0.02   0.02    -0.05   0.04  -0.01    -0.05   0.02  -0.02
  44   6     0.02  -0.03   0.03    -0.02   0.06  -0.03    -0.02   0.04  -0.03
  45   6     0.01  -0.01   0.00     0.02  -0.01   0.01     0.00   0.01   0.01
  46   6     0.00   0.00   0.00     0.01  -0.01  -0.02     0.01   0.00  -0.04
  47   6     0.00  -0.01   0.00     0.01   0.00  -0.02     0.02   0.01  -0.01
  48   6    -0.01   0.00  -0.01    -0.01  -0.01  -0.01     0.00   0.00   0.00
  49   6     0.01   0.02   0.00     0.01   0.01   0.01     0.00  -0.01   0.00
  50   6    -0.01   0.00   0.01    -0.01  -0.01   0.02     0.00   0.00   0.00
  51   6    -0.02   0.01   0.02     0.00  -0.01   0.00     0.01   0.00  -0.01
  52   6     0.00   0.00   0.00     0.03   0.02   0.01     0.00   0.00   0.00
  53   6     0.00  -0.02   0.01    -0.02   0.09   0.00    -0.02   0.06  -0.04
  54   6    -0.02   0.02  -0.03    -0.04   0.03  -0.08     0.02  -0.07  -0.02
  55   1     0.04  -0.04  -0.11     0.05  -0.25   0.06    -0.06  -0.02   0.12
  56   1     0.00  -0.10   0.00     0.00   0.01   0.00     0.03  -0.08  -0.01
  57   1    -0.02   0.03   0.02     0.00  -0.01  -0.02    -0.02   0.13   0.16
  58   1     0.00  -0.04  -0.03     0.00   0.01   0.01     0.00  -0.11  -0.08
  59   1     0.00  -0.01  -0.02     0.00   0.01   0.01    -0.01  -0.05  -0.06
  60   1     0.00  -0.03  -0.02     0.00   0.01   0.01    -0.01  -0.11  -0.08
  61   1    -0.04  -0.05   0.11    -0.01   0.01  -0.02     0.07   0.00   0.10
  62   1    -0.14  -0.10  -0.28     0.02   0.01   0.02    -0.05  -0.06  -0.06
  63   1     0.05  -0.07  -0.12    -0.01   0.01   0.01     0.03   0.05   0.02
  64   1    -0.12   0.17  -0.02     0.01  -0.02   0.00     0.04   0.10   0.04
  65   1    -0.02   0.02  -0.09     0.00   0.00   0.01     0.10  -0.03  -0.04
  66   1     0.08  -0.16   0.12     0.01   0.01  -0.01    -0.07   0.02  -0.04
  67   1     0.05  -0.08   0.16     0.00   0.02  -0.01    -0.02  -0.12   0.00
  68   1    -0.12   0.24   0.12     0.02  -0.02  -0.01    -0.10  -0.05  -0.03
  69   1    -0.02   0.08  -0.18     0.00  -0.01   0.02     0.00   0.05  -0.13
  70   1    -0.15   0.03   0.02     0.02  -0.01   0.00    -0.08   0.05  -0.01
  71   1    -0.18  -0.01   0.10     0.02   0.00  -0.01    -0.10   0.00   0.09
  72   1    -0.06   0.00  -0.02     0.02   0.00   0.01    -0.17   0.00  -0.10
  73   1    -0.05   0.00  -0.02     0.01   0.00   0.01    -0.17   0.00  -0.08
  74   1     0.02  -0.01  -0.03    -0.01   0.01   0.01     0.16  -0.08  -0.10
  75   1     0.00   0.00  -0.02    -0.02  -0.05   0.04    -0.03  -0.03   0.08
  76   1     0.00   0.06   0.03     0.01   0.14  -0.11     0.01   0.05  -0.19
  77   1     0.01   0.01  -0.05    -0.02  -0.02   0.03    -0.04  -0.03   0.12
  78   1    -0.05   0.05   0.01     0.00   0.05  -0.01     0.08  -0.06  -0.04
  79   1     0.02   0.05   0.02     0.05   0.06   0.02     0.01  -0.03  -0.03
  80   1     0.00   0.00  -0.02     0.00  -0.07  -0.05     0.01   0.00   0.04
  81   1     0.04   0.02   0.10    -0.02   0.17   0.14    -0.05   0.00  -0.09
  82   1     0.00  -0.01  -0.02    -0.01  -0.05  -0.06     0.01   0.01   0.04
  83   1     0.03  -0.02   0.02    -0.05   0.04   0.00    -0.05   0.02  -0.02
  84   1     0.01  -0.04   0.04    -0.01   0.08  -0.03    -0.02   0.05  -0.04
  85   1    -0.03  -0.05  -0.05    -0.02  -0.06  -0.01     0.05   0.06   0.09
  86   1     0.03  -0.03   0.00     0.00  -0.03   0.00    -0.06   0.03   0.00
  87   1     0.07  -0.02   0.03     0.09  -0.02   0.05    -0.06   0.02  -0.01
  88   1     0.00  -0.03   0.05     0.00  -0.05   0.02     0.00   0.02  -0.09
  89   1     0.02  -0.01  -0.05     0.04  -0.02  -0.10    -0.01   0.01   0.01
  90   1     0.02  -0.04   0.01     0.01  -0.04   0.00    -0.01   0.02  -0.03
  91   1     0.02  -0.03  -0.04     0.04  -0.01  -0.06    -0.01   0.03   0.04
  92   1    -0.05  -0.04   0.04    -0.02  -0.03   0.03     0.07   0.04  -0.04
  93   1     0.00  -0.03  -0.02     0.01  -0.02  -0.03     0.02   0.03   0.00
  94   1     0.01  -0.05   0.01     0.01  -0.07   0.05    -0.02   0.03   0.00
  95   1    -0.01  -0.03  -0.02    -0.05  -0.04  -0.04    -0.01   0.03   0.00
  96   1    -0.04   0.01  -0.07    -0.05   0.01  -0.07     0.02  -0.01   0.04
  97   1    -0.03   0.00  -0.05     0.05   0.02   0.04     0.04   0.01   0.06
  98   1     0.00   0.05  -0.02     0.03  -0.01   0.03     0.01  -0.04   0.03
  99   1     0.03   0.07   0.02    -0.02  -0.05  -0.02    -0.03  -0.07  -0.02
 100   1    -0.03   0.02   0.03     0.04  -0.07  -0.04     0.04  -0.04  -0.03
 101   1    -0.02   0.02   0.01    -0.01  -0.04   0.05     0.02  -0.03   0.01
 102   1     0.01   0.00  -0.04    -0.04  -0.02   0.10    -0.02   0.00   0.06
 103   1    -0.03   0.01  -0.03     0.01  -0.02   0.05     0.03  -0.01   0.06
 104   1    -0.04   0.02   0.00     0.01  -0.02   0.04     0.05  -0.02   0.00
 105   1    -0.04   0.03   0.07     0.03  -0.03  -0.06     0.05  -0.02  -0.07
 106   1    -0.01   0.03  -0.01     0.03  -0.07   0.00     0.01  -0.05   0.00
 107   1    -0.03  -0.03  -0.03     0.09   0.08   0.04     0.05   0.04   0.03
 108   1     0.00   0.04   0.00     0.05   0.00   0.02     0.02  -0.03   0.00
 109   1     0.01  -0.04   0.08     0.02   0.01   0.27     0.00   0.06  -0.03
 110   1     0.00   0.04  -0.01    -0.04   0.30  -0.05     0.00   0.04  -0.02
 111   1     0.00   0.01   0.01    -0.04   0.21  -0.02    -0.02   0.09  -0.06
 112   1    -0.02   0.02  -0.03    -0.06  -0.02  -0.18     0.01  -0.11  -0.05
 113   1    -0.02   0.00  -0.06    -0.09  -0.09  -0.28     0.00  -0.05  -0.01
 114   1    -0.01   0.05  -0.03    -0.10   0.31  -0.05    -0.01  -0.04   0.00
                    91                     92                     93
                     A                      A                      A
 Frequencies --   532.3859               535.3503               549.2887
 Red. masses --     3.7952                 4.9589                 4.7446
 Frc consts  --     0.6338                 0.8374                 0.8434
 IR Inten    --     0.7568                 8.6538                 5.8777
 Atom AN      X      Y      Z        X      Y      Z        X      Y      Z
   1   8     0.00   0.01   0.00     0.00   0.04   0.02     0.00  -0.03  -0.01
   2  12     0.00  -0.01   0.02    -0.01   0.04   0.12     0.00   0.00   0.04
   3   8     0.00   0.00   0.00     0.03   0.02   0.02    -0.04   0.00   0.01
   4   6     0.00   0.00   0.00     0.00  -0.02   0.01     0.00   0.01  -0.01
   5   7    -0.04   0.03  -0.01     0.00   0.15   0.00     0.03   0.04   0.00
   6   7     0.01   0.02  -0.01     0.02  -0.05  -0.01    -0.05   0.10  -0.04
   7   8     0.00   0.00   0.00     0.01  -0.01   0.02    -0.01   0.01  -0.02
   8   6     0.22   0.05  -0.03    -0.09   0.06   0.05    -0.01  -0.03   0.05
   9   6     0.00   0.00   0.01    -0.01   0.02   0.08    -0.02   0.00  -0.05
  10   6    -0.20  -0.09   0.06     0.12  -0.02  -0.05     0.03   0.04  -0.08
  11   8    -0.01  -0.01  -0.01    -0.06  -0.07  -0.08     0.06   0.04   0.05
  12   6    -0.01   0.00   0.00    -0.07  -0.01   0.01     0.05   0.02  -0.03
  13   6     0.00   0.00   0.00     0.00   0.01   0.00    -0.03   0.01   0.01
  14   6     0.00  -0.01  -0.01    -0.01  -0.05  -0.10     0.00   0.03   0.08
  15   8     0.00   0.00   0.00    -0.01   0.02   0.05     0.01  -0.02  -0.05
  16   6     0.00   0.01   0.01     0.00   0.07   0.04     0.00  -0.04  -0.02
  17   8     0.01   0.00  -0.01     0.05  -0.07  -0.07     0.03   0.07   0.03
  18   6     0.01  -0.01   0.00     0.06  -0.04  -0.03    -0.02  -0.02   0.01
  19   8     0.00  -0.01   0.00    -0.02  -0.07   0.00     0.06  -0.06  -0.06
  20   8     0.00   0.01   0.00     0.04   0.08   0.03    -0.07  -0.03  -0.01
  21   6    -0.01   0.00   0.00    -0.04   0.02   0.06     0.01   0.02  -0.08
  22   6     0.00   0.00   0.00    -0.03  -0.05   0.03     0.06   0.08  -0.04
  23   6     0.01   0.00   0.00     0.06   0.02  -0.06    -0.09  -0.03   0.03
  24   8    -0.01   0.00   0.00    -0.05   0.04  -0.01     0.02  -0.09   0.01
  25   6     0.00   0.00   0.00    -0.02  -0.02  -0.02     0.00   0.03   0.01
  26   6     0.00   0.00   0.00     0.02   0.01   0.01     0.00   0.01   0.00
  27   6     0.00   0.00   0.00     0.01   0.00  -0.02    -0.02  -0.01   0.04
  28   6     0.00   0.00   0.00     0.02  -0.01   0.01    -0.02   0.00  -0.01
  29   6    -0.03   0.04  -0.04     0.00   0.14  -0.08     0.00   0.08  -0.11
  30   6     0.02   0.02  -0.03     0.01  -0.03   0.00    -0.05   0.11   0.06
  31   6     0.01  -0.08  -0.02     0.06  -0.04   0.04     0.03  -0.05   0.01
  32   6    -0.07  -0.09  -0.02     0.01  -0.06   0.07    -0.05  -0.08   0.05
  33   6    -0.05   0.00  -0.05    -0.02   0.01  -0.15    -0.04   0.04  -0.11
  34   6    -0.10   0.04   0.06    -0.07  -0.06   0.09    -0.08  -0.01   0.10
  35   6    -0.02   0.07   0.03    -0.04   0.00   0.01    -0.01   0.05   0.02
  36   6     0.07  -0.05  -0.01     0.06  -0.09  -0.03     0.05  -0.07  -0.02
  37   6     0.05   0.02   0.01    -0.01  -0.05  -0.03     0.03   0.02   0.01
  38   6    -0.04   0.06  -0.04     0.00  -0.01   0.03     0.06  -0.03  -0.02
  39   6     0.02   0.11  -0.06    -0.01  -0.01   0.04     0.02  -0.11  -0.05
  40   6     0.04   0.02  -0.03    -0.03   0.00  -0.03     0.03   0.01   0.14
  41   6     0.12  -0.02  -0.01    -0.02   0.03   0.01    -0.11  -0.07  -0.05
  42   6     0.06  -0.05   0.04    -0.01   0.02  -0.01    -0.07  -0.01  -0.02
  43   6    -0.06  -0.01   0.02    -0.01   0.01  -0.01     0.11  -0.03   0.02
  44   6    -0.02  -0.06   0.04    -0.01   0.03  -0.02     0.03  -0.02   0.02
  45   6     0.04   0.01   0.04    -0.02   0.01   0.01     0.01   0.00   0.01
  46   6     0.00   0.00  -0.04     0.01   0.00  -0.04     0.01   0.00  -0.03
  47   6     0.03   0.02  -0.03     0.02   0.02  -0.01     0.01   0.01  -0.01
  48   6     0.01  -0.01   0.03     0.00   0.00   0.00     0.00   0.00   0.01
  49   6    -0.02  -0.03  -0.02     0.00   0.00   0.00     0.01   0.03   0.01
  50   6    -0.01   0.01   0.03     0.00   0.00  -0.01     0.00   0.00  -0.01
  51   6    -0.01   0.01   0.04     0.01   0.00  -0.01    -0.01   0.00   0.00
  52   6    -0.02  -0.03  -0.02     0.00   0.00   0.00     0.01   0.02   0.01
  53   6     0.00   0.00   0.02    -0.01   0.05  -0.03     0.03  -0.06   0.07
  54   6     0.00   0.00   0.00     0.04  -0.12  -0.04     0.00  -0.01  -0.02
  55   1    -0.04   0.01   0.02    -0.07   0.04   0.09    -0.04   0.06  -0.06
  56   1     0.00   0.00   0.00     0.02   0.01  -0.01    -0.05   0.01   0.03
  57   1     0.00  -0.01  -0.01     0.01  -0.09  -0.12    -0.02   0.06   0.09
  58   1     0.00   0.01   0.01     0.00   0.07   0.05     0.00  -0.05  -0.03
  59   1     0.00   0.00   0.01     0.01   0.04   0.04    -0.01  -0.02  -0.02
  60   1     0.00   0.01   0.01     0.01   0.07   0.05     0.00  -0.05  -0.03
  61   1    -0.01  -0.01   0.00    -0.11  -0.09  -0.02     0.12   0.13   0.00
  62   1     0.00   0.00   0.00     0.04   0.01  -0.06    -0.08  -0.04   0.03
  63   1     0.00   0.00  -0.01     0.02  -0.07  -0.08    -0.04   0.02   0.05
  64   1    -0.01   0.00  -0.01    -0.07   0.03  -0.03     0.04  -0.06   0.01
  65   1    -0.01   0.00   0.00    -0.03  -0.01  -0.04    -0.06   0.07   0.06
  66   1     0.00  -0.01   0.01     0.03  -0.04   0.05     0.06  -0.04   0.00
  67   1     0.00   0.00   0.00     0.03  -0.04   0.05    -0.01   0.13  -0.03
  68   1     0.01   0.01   0.01    -0.02   0.08   0.04     0.08  -0.02  -0.01
  69   1     0.00   0.00   0.00     0.01   0.01  -0.04    -0.02  -0.02   0.09
  70   1     0.00   0.00   0.00    -0.01  -0.03   0.01     0.02   0.01   0.01
  71   1     0.00   0.00   0.00     0.00   0.00  -0.05     0.01   0.00   0.05
  72   1     0.01   0.00   0.01     0.12   0.00   0.08    -0.09   0.00  -0.06
  73   1     0.01   0.00   0.01     0.13   0.00   0.06    -0.10   0.00  -0.05
  74   1    -0.01   0.01   0.01    -0.13   0.06   0.08     0.10  -0.04  -0.06
  75   1    -0.09  -0.08   0.01    -0.03  -0.04   0.16    -0.07  -0.09   0.14
  76   1     0.06   0.02  -0.07     0.01   0.08  -0.28     0.03   0.10  -0.19
  77   1    -0.10   0.03   0.10    -0.05  -0.07   0.21    -0.09  -0.06   0.20
  78   1     0.13  -0.06  -0.03     0.09  -0.09  -0.05     0.09  -0.07  -0.04
  79   1     0.10   0.03   0.02    -0.01  -0.04  -0.03     0.05   0.03   0.01
  80   1     0.02   0.12  -0.05     0.00  -0.02   0.04    -0.06  -0.13  -0.12
  81   1    -0.05  -0.05   0.02    -0.01  -0.01  -0.07     0.10   0.12   0.22
  82   1     0.12  -0.01  -0.02    -0.02   0.02   0.04    -0.12  -0.08  -0.14
  83   1    -0.11  -0.04   0.04     0.01   0.01  -0.02     0.14  -0.02   0.02
  84   1    -0.06  -0.10   0.07     0.00   0.04  -0.03     0.05   0.01   0.01
  85   1     0.07   0.03   0.11     0.06   0.09   0.12     0.06   0.05   0.09
  86   1    -0.02   0.03   0.02    -0.09   0.05   0.00    -0.05   0.03   0.00
  87   1     0.00   0.01   0.02    -0.12   0.02  -0.03    -0.06   0.01  -0.02
  88   1    -0.01   0.03  -0.13     0.01   0.04  -0.12     0.00   0.03  -0.10
  89   1    -0.03   0.01   0.00    -0.02   0.02   0.04    -0.02   0.01   0.02
  90   1    -0.05   0.02   0.01    -0.01   0.04  -0.04    -0.02   0.03  -0.02
  91   1     0.02   0.05  -0.06    -0.02   0.04   0.06     0.02   0.02  -0.04
  92   1     0.03   0.02  -0.03     0.07   0.05  -0.05     0.01   0.00   0.00
  93   1    -0.02   0.00  -0.01     0.03   0.04   0.01    -0.01  -0.01  -0.02
  94   1     0.01  -0.03   0.07    -0.02   0.05  -0.02     0.01  -0.03   0.04
  95   1    -0.03   0.00   0.00     0.00   0.03   0.00    -0.02  -0.01  -0.01
  96   1     0.01  -0.02   0.04     0.03  -0.01   0.06    -0.01   0.00   0.00
  97   1    -0.03  -0.07  -0.08     0.02   0.02   0.04    -0.03   0.02  -0.03
  98   1     0.01   0.02  -0.03     0.00  -0.02   0.01     0.00   0.05  -0.01
  99   1    -0.01  -0.01  -0.01    -0.01  -0.03  -0.01     0.04   0.09   0.03
 100   1    -0.02   0.05   0.09     0.02  -0.03  -0.03    -0.03   0.02   0.00
 101   1     0.01   0.03  -0.02     0.01  -0.02   0.01    -0.03   0.02   0.01
 102   1     0.00   0.01   0.01     0.00   0.00   0.02     0.01   0.00  -0.06
 103   1    -0.01   0.05   0.09     0.01  -0.01   0.01    -0.04  -0.02  -0.15
 104   1     0.03   0.02   0.00     0.02  -0.01  -0.01    -0.09   0.02   0.01
 105   1    -0.01   0.02   0.05     0.02  -0.01  -0.03    -0.07   0.02   0.10
 106   1    -0.03  -0.07  -0.08     0.00  -0.01   0.01     0.01   0.13   0.05
 107   1    -0.02  -0.03  -0.02     0.01   0.02   0.01    -0.06  -0.05  -0.04
 108   1     0.03   0.00  -0.02     0.00  -0.01   0.00    -0.04   0.05   0.01
 109   1    -0.20   0.02   0.01     0.06   0.05  -0.07     0.05  -0.06   0.06
 110   1    -0.17   0.15  -0.12     0.06  -0.04   0.03     0.04  -0.08   0.08
 111   1    -0.03  -0.25   0.26     0.00   0.13  -0.13     0.03  -0.04   0.05
 112   1     0.07   0.30   0.16     0.01  -0.27  -0.12    -0.01  -0.08  -0.04
 113   1     0.13  -0.16  -0.18    -0.02  -0.03   0.07    -0.03   0.05   0.05
 114   1     0.18   0.02  -0.10    -0.05  -0.15   0.01    -0.03  -0.05   0.00
                    94                     95                     96
                     A                      A                      A
 Frequencies --   556.2885               559.1085               566.7045
 Red. masses --     5.3060                 4.7696                 4.1696
 Frc consts  --     0.9674                 0.8785                 0.7890
 IR Inten    --    13.4891                14.0222                 7.0119
 Atom AN      X      Y      Z        X      Y      Z        X      Y      Z
   1   8     0.00  -0.02  -0.01     0.00  -0.01  -0.01     0.00  -0.01   0.00
   2  12    -0.01   0.04   0.09    -0.03   0.07   0.09    -0.01   0.04   0.06
   3   8    -0.03   0.01   0.01    -0.03   0.01   0.01    -0.01   0.01   0.00
   4   6     0.00   0.01   0.00     0.00   0.01   0.00     0.00   0.00   0.00
   5   7    -0.10   0.03   0.01     0.05  -0.03  -0.02     0.07   0.05   0.00
   6   7    -0.07  -0.08   0.05     0.09  -0.03  -0.01     0.01  -0.04   0.01
   7   8     0.00   0.00  -0.01     0.00   0.00  -0.01     0.00   0.00   0.00
   8   6    -0.07   0.03   0.01     0.01  -0.02  -0.02    -0.03   0.08  -0.01
   9   6     0.05   0.02   0.03    -0.01  -0.01   0.01    -0.02   0.01   0.07
  10   6     0.01  -0.05   0.02     0.02   0.03   0.03     0.05  -0.06  -0.01
  11   8     0.05   0.03   0.04     0.04   0.02   0.03     0.02   0.01   0.01
  12   6     0.04   0.01  -0.02     0.03   0.02  -0.02     0.01   0.00  -0.01
  13   6    -0.03   0.00   0.00    -0.03   0.01   0.01    -0.01   0.00   0.00
  14   6     0.00   0.03   0.06     0.00   0.02   0.05     0.00   0.01   0.02
  15   8     0.01  -0.01  -0.04     0.01  -0.02  -0.04     0.00   0.00  -0.01
  16   6     0.00  -0.03  -0.02     0.00  -0.03  -0.01     0.00  -0.01  -0.01
  17   8     0.05   0.05   0.01     0.05   0.04   0.00     0.02   0.01   0.00
  18   6    -0.01  -0.04   0.00     0.00  -0.04  -0.01     0.00  -0.02  -0.01
  19   8     0.06  -0.08  -0.06     0.06  -0.08  -0.06     0.02  -0.03  -0.03
  20   8    -0.06  -0.01   0.00    -0.06  -0.01   0.00    -0.02   0.00   0.00
  21   6     0.00   0.03  -0.07     0.00   0.02  -0.06     0.00   0.01  -0.02
  22   6     0.06   0.08  -0.03     0.06   0.07  -0.03     0.03   0.03   0.00
  23   6    -0.10  -0.03   0.00    -0.09  -0.03  -0.01    -0.04  -0.01  -0.02
  24   8     0.01  -0.10   0.01     0.01  -0.09   0.00     0.00  -0.04   0.00
  25   6    -0.01   0.03   0.01    -0.01   0.02   0.00     0.00   0.01   0.00
  26   6     0.00   0.01   0.01     0.00   0.02   0.01     0.00   0.00   0.00
  27   6    -0.02   0.00   0.03    -0.02  -0.01   0.04    -0.01   0.00   0.01
  28   6    -0.01   0.01   0.00    -0.01   0.00   0.00     0.00   0.00   0.00
  29   6     0.02   0.04  -0.01     0.00  -0.03  -0.02     0.00  -0.05   0.18
  30   6     0.03   0.00   0.00     0.01  -0.17  -0.16     0.03   0.04   0.09
  31   6     0.00   0.09   0.03    -0.01  -0.04  -0.02     0.04  -0.05   0.01
  32   6     0.12   0.06   0.10    -0.06  -0.04  -0.03    -0.03   0.04  -0.16
  33   6     0.08   0.01  -0.06    -0.04   0.01   0.02    -0.05  -0.12   0.15
  34   6     0.11  -0.10  -0.01    -0.04   0.04   0.01    -0.07   0.10  -0.10
  35   6    -0.02  -0.11  -0.01     0.02   0.04   0.01    -0.01   0.06  -0.03
  36   6    -0.06   0.07   0.01     0.02  -0.02   0.00     0.05  -0.10  -0.01
  37   6    -0.07  -0.10  -0.06     0.03   0.06   0.03     0.01   0.02   0.03
  38   6    -0.07   0.06  -0.03     0.00  -0.02   0.04    -0.01  -0.01   0.01
  39   6     0.01   0.12  -0.09    -0.01   0.04   0.18    -0.02  -0.04  -0.06
  40   6     0.04   0.05  -0.04    -0.07  -0.11  -0.18     0.00   0.06   0.06
  41   6     0.16  -0.01  -0.02    -0.02   0.12   0.13     0.01  -0.03  -0.06
  42   6     0.07  -0.06   0.03     0.00   0.05  -0.02     0.01   0.00  -0.01
  43   6    -0.12   0.03   0.00    -0.01   0.00  -0.02    -0.03   0.01   0.00
  44   6     0.00  -0.08   0.05    -0.02   0.07  -0.06    -0.01   0.02  -0.01
  45   6    -0.03   0.00  -0.02     0.02   0.00   0.01     0.00   0.00   0.01
  46   6     0.00   0.00   0.02     0.00   0.00  -0.01     0.00   0.00  -0.01
  47   6     0.00  -0.01   0.02     0.00   0.00  -0.01    -0.02   0.00   0.01
  48   6    -0.02   0.01  -0.03     0.01  -0.01   0.01     0.02  -0.01   0.02
  49   6    -0.01  -0.02  -0.01    -0.01  -0.01   0.00     0.00   0.00   0.00
[truncated: 1,568,242 more chars]
