# Supplementary material
Source: publisher figshare collection journal article supplement (https://acs.figshare.com/ndownloader/files/5127205)
Supplement: Supplementary file 1 [file 5127205 › supporting_ja043819b/RRSS_fm-5-ti2.mol]

  MacMolPlt                       

114119  0  0  0  0  0  0  0  0  0 v2000
   -4.3703   -2.7162   -1.1960 O   0  0  0  0  0  0  0  0  0  0  0  0
    0.1471    0.2222   -0.1598 Mg  0  0  0  0  0  0  0  0  0  0  0  0
   -0.5248    0.1240    3.1217 O   0  0  0  0  0  0  0  0  0  0  0  0
   -4.1190   -2.4356    0.0953 C   0  0  0  0  0  0  0  0  0  0  0  0
   -0.2851    1.4053   -1.7573 N   0  0  0  0  0  0  0  0  0  0  0  0
    0.8164   -1.2860   -1.3737 N   0  0  0  0  0  0  0  0  0  0  0  0
   -3.8368   -3.2502    0.9422 O   0  0  0  0  0  0  0  0  0  0  0  0
   -0.4321    0.9864   -3.0000 C   0  0  0  0  0  0  0  0  0  0  0  0
   -0.2227   -0.3643   -3.3784 C   0  0  0  0  0  0  0  0  0  0  0  0
    0.4173   -1.3837   -2.6487 C   0  0  0  0  0  0  0  0  0  0  0  0
   -3.6955   -0.5335    1.5615 O   0  0  0  0  0  0  0  0  0  0  0  0
   -2.3688   -0.3521    1.5516 C   0  0  0  0  0  0  0  0  0  0  0  0
   -1.8887    0.3219    2.8510 C   0  0  0  0  0  0  0  0  0  0  0  0
   -4.3335   -0.9422    0.3351 C   0  0  0  0  0  0  0  0  0  0  0  0
   -1.6918   -0.6327    0.5706 O   0  0  0  0  0  0  0  0  0  0  0  0
   -4.3047   -4.1079   -1.5607 C   0  0  0  0  0  0  0  0  0  0  0  0
    1.3850   -0.0824    1.8392 O   0  0  0  0  0  0  0  0  0  0  0  0
    0.4386    0.9193    2.3390 C   0  0  0  0  0  0  0  0  0  0  0  0
   -0.0884    1.5104    1.3061 O   0  0  0  0  0  0  0  0  0  0  0  0
    2.5769    1.9652    3.0680 O   0  0  0  0  0  0  0  0  0  0  0  0
    3.2890    0.8189    2.9406 C   0  0  0  0  0  0  0  0  0  0  0  0
    2.4349   -0.4397    2.7572 C   0  0  0  0  0  0  0  0  0  0  0  0
    1.1597    1.8500    3.3614 C   0  0  0  0  0  0  0  0  0  0  0  0
    4.4968    0.8458    2.9240 O   0  0  0  0  0  0  0  0  0  0  0  0
    3.2326   -1.6195    2.2466 C   0  0  0  0  0  0  0  0  0  0  0  0
    0.5904    3.2589    3.3339 C   0  0  0  0  0  0  0  0  0  0  0  0
   -2.6668   -0.1601    4.0793 C   0  0  0  0  0  0  0  0  0  0  0  0
   -5.8207   -0.6360    0.5001 C   0  0  0  0  0  0  0  0  0  0  0  0
   -0.4003    2.7815   -1.3132 C   0  0  0  0  0  0  0  0  0  0  0  0
    1.7416   -2.2902   -0.8690 C   0  0  0  0  0  0  0  0  0  0  0  0
    0.8067    3.4497   -0.9142 C   0  0  0  0  0  0  0  0  0  0  0  0
    0.7032    4.6838   -0.2280 C   0  0  0  0  0  0  0  0  0  0  0  0
   -0.5550    5.2524    0.0581 C   0  0  0  0  0  0  0  0  0  0  0  0
   -1.7297    4.6071   -0.3661 C   0  0  0  0  0  0  0  0  0  0  0  0
   -1.6822    3.3658   -1.0477 C   0  0  0  0  0  0  0  0  0  0  0  0
    2.1952    2.8517   -1.2608 C   0  0  0  0  0  0  0  0  0  0  0  0
   -3.0096    2.6997   -1.4931 C   0  0  0  0  0  0  0  0  0  0  0  0
    1.2720   -3.3655   -0.0467 C   0  0  0  0  0  0  0  0  0  0  0  0
    2.2167   -4.2903    0.4739 C   0  0  0  0  0  0  0  0  0  0  0  0
    3.5907   -4.1669    0.1911 C   0  0  0  0  0  0  0  0  0  0  0  0
    4.0446   -3.1097   -0.6204 C   0  0  0  0  0  0  0  0  0  0  0  0
    3.1428   -2.1592   -1.1632 C   0  0  0  0  0  0  0  0  0  0  0  0
   -0.2295   -3.5721    0.2715 C   0  0  0  0  0  0  0  0  0  0  0  0
    3.7068   -1.0108   -2.0422 C   0  0  0  0  0  0  0  0  0  0  0  0
    3.3272    3.3234   -0.2974 C   0  0  0  0  0  0  0  0  0  0  0  0
    2.5738    3.1648   -2.7471 C   0  0  0  0  0  0  0  0  0  0  0  0
   -3.9879    2.5174   -0.2885 C   0  0  0  0  0  0  0  0  0  0  0  0
   -3.7115    3.5326   -2.6194 C   0  0  0  0  0  0  0  0  0  0  0  0
    4.6586   -0.0969   -1.2051 C   0  0  0  0  0  0  0  0  0  0  0  0
    4.4550   -1.5543   -3.3056 C   0  0  0  0  0  0  0  0  0  0  0  0
   -0.5008   -3.4450    1.8033 C   0  0  0  0  0  0  0  0  0  0  0  0
   -0.7421   -4.9509   -0.2634 C   0  0  0  0  0  0  0  0  0  0  0  0
   -0.8285    1.9379   -4.1214 C   0  0  0  0  0  0  0  0  0  0  0  0
    0.7019   -2.6716   -3.4140 C   0  0  0  0  0  0  0  0  0  0  0  0
   -0.4651   -0.6027   -4.4090 H   0  0  0  0  0  0  0  0  0  0  0  0
   -2.0916    1.3882    2.6673 H   0  0  0  0  0  0  0  0  0  0  0  0
   -3.9010   -0.3803   -0.4947 H   0  0  0  0  0  0  0  0  0  0  0  0
   -3.3054   -4.5022   -1.3699 H   0  0  0  0  0  0  0  0  0  0  0  0
   -4.5364   -4.1396   -2.6252 H   0  0  0  0  0  0  0  0  0  0  0  0
   -5.0373   -4.6850   -0.9896 H   0  0  0  0  0  0  0  0  0  0  0  0
    1.9720   -0.7005    3.7211 H   0  0  0  0  0  0  0  0  0  0  0  0
    1.0665    1.4150    4.3628 H   0  0  0  0  0  0  0  0  0  0  0  0
    4.0246   -1.8459    2.9671 H   0  0  0  0  0  0  0  0  0  0  0  0
    3.6974   -1.4153    1.2837 H   0  0  0  0  0  0  0  0  0  0  0  0
    2.6020   -2.4974    2.1121 H   0  0  0  0  0  0  0  0  0  0  0  0
    1.1625    3.9024    4.0102 H   0  0  0  0  0  0  0  0  0  0  0  0
   -0.4511    3.2409    3.6740 H   0  0  0  0  0  0  0  0  0  0  0  0
    0.6066    3.6677    2.3193 H   0  0  0  0  0  0  0  0  0  0  0  0
   -3.7379    0.0228    3.9722 H   0  0  0  0  0  0  0  0  0  0  0  0
   -2.2964    0.3762    4.9571 H   0  0  0  0  0  0  0  0  0  0  0  0
   -2.5068   -1.2310    4.2374 H   0  0  0  0  0  0  0  0  0  0  0  0
   -5.9601    0.4352    0.6638 H   0  0  0  0  0  0  0  0  0  0  0  0
   -6.2305   -1.1835    1.3543 H   0  0  0  0  0  0  0  0  0  0  0  0
   -6.3611   -0.9304   -0.4041 H   0  0  0  0  0  0  0  0  0  0  0  0
    1.6141    5.2179    0.0679 H   0  0  0  0  0  0  0  0  0  0  0  0
   -0.6149    6.2126    0.5884 H   0  0  0  0  0  0  0  0  0  0  0  0
   -2.7033    5.0740   -0.1686 H   0  0  0  0  0  0  0  0  0  0  0  0
    2.1158    1.7447   -1.1774 H   0  0  0  0  0  0  0  0  0  0  0  0
   -2.7725    1.6950   -1.8983 H   0  0  0  0  0  0  0  0  0  0  0  0
    1.8639   -5.1282    1.0895 H   0  0  0  0  0  0  0  0  0  0  0  0
    4.3044   -4.8986    0.5941 H   0  0  0  0  0  0  0  0  0  0  0  0
    5.1153   -3.0235   -0.8472 H   0  0  0  0  0  0  0  0  0  0  0  0
   -0.7967   -2.7754   -0.2472 H   0  0  0  0  0  0  0  0  0  0  0  0
    2.8545   -0.3925   -2.3888 H   0  0  0  0  0  0  0  0  0  0  0  0
    4.2538    2.7751   -0.5197 H   0  0  0  0  0  0  0  0  0  0  0  0
    3.0541    3.1361    0.7546 H   0  0  0  0  0  0  0  0  0  0  0  0
    3.5316    4.3978   -0.4194 H   0  0  0  0  0  0  0  0  0  0  0  0
    3.5547    2.7259   -2.9851 H   0  0  0  0  0  0  0  0  0  0  0  0
    2.6262    4.2529   -2.9114 H   0  0  0  0  0  0  0  0  0  0  0  0
    1.8263    2.7428   -3.4392 H   0  0  0  0  0  0  0  0  0  0  0  0
   -4.9014    1.9947   -0.6215 H   0  0  0  0  0  0  0  0  0  0  0  0
   -4.2865    3.4888    0.1339 H   0  0  0  0  0  0  0  0  0  0  0  0
   -3.5081    1.9319    0.5160 H   0  0  0  0  0  0  0  0  0  0  0  0
   -4.6178    3.0116   -2.9650 H   0  0  0  0  0  0  0  0  0  0  0  0
   -3.0419    3.6764   -3.4802 H   0  0  0  0  0  0  0  0  0  0  0  0
   -4.0031    4.5235   -2.2385 H   0  0  0  0  0  0  0  0  0  0  0  0
    5.0213    0.7403   -1.8220 H   0  0  0  0  0  0  0  0  0  0  0  0
    4.1283    0.3185   -0.3287 H   0  0  0  0  0  0  0  0  0  0  0  0
    5.5296   -0.6626   -0.8397 H   0  0  0  0  0  0  0  0  0  0  0  0
    4.7906   -0.7113   -3.9286 H   0  0  0  0  0  0  0  0  0  0  0  0
    3.7958   -2.1921   -3.9136 H   0  0  0  0  0  0  0  0  0  0  0  0
    5.3382   -2.1434   -3.0152 H   0  0  0  0  0  0  0  0  0  0  0  0
   -1.5818   -3.5270    2.0003 H   0  0  0  0  0  0  0  0  0  0  0  0
   -0.1443   -2.4669    2.1755 H   0  0  0  0  0  0  0  0  0  0  0  0
    0.0185   -4.2368    2.3656 H   0  0  0  0  0  0  0  0  0  0  0  0
   -1.7982   -5.0865    0.0278 H   0  0  0  0  0  0  0  0  0  0  0  0
   -0.1676   -5.7869    0.1661 H   0  0  0  0  0  0  0  0  0  0  0  0
   -0.6596   -5.0035   -1.3614 H   0  0  0  0  0  0  0  0  0  0  0  0
   -0.7147    2.9851   -3.8267 H   0  0  0  0  0  0  0  0  0  0  0  0
   -0.2159    1.7561   -5.0125 H   0  0  0  0  0  0  0  0  0  0  0  0
   -1.8751    1.7733   -4.4087 H   0  0  0  0  0  0  0  0  0  0  0  0
    1.7698   -2.7764   -3.6361 H   0  0  0  0  0  0  0  0  0  0  0  0
    0.4007   -3.5517   -2.8355 H   0  0  0  0  0  0  0  0  0  0  0  0
    0.1617   -2.6835   -4.3666 H   0  0  0  0  0  0  0  0  0  0  0  0
  1  4  1  0  0  0  0
  1 16  1  0  0  0  0
  2  5  1  0  0  0  0
  2  6  1  0  0  0  0
  2 15  1  0  0  0  0
  2 17  1  0  0  0  0
  2 19  2  0  0  0  0
  3 13  1  0  0  0  0
  3 18  1  0  0  0  0
  4  7  2  0  0  0  0
  4 14  1  0  0  0  0
  5  8  1  0  0  0  0
  5 29  1  0  0  0  0
  6 10  1  0  0  0  0
  6 30  1  0  0  0  0
  8  9  1  0  0  0  0
  8 53  1  0  0  0  0
  9 10  1  0  0  0  0
  9 55  1  0  0  0  0
 10 54  1  0  0  0  0
 11 12  1  0  0  0  0
 11 14  1  0  0  0  0
 12 13  1  0  0  0  0
 12 15  2  0  0  0  0
 13 27  1  0  0  0  0
 13 56  1  0  0  0  0
 14 28  1  0  0  0  0
 14 57  1  0  0  0  0
 16 58  1  0  0  0  0
 16 59  1  0  0  0  0
 16 60  1  0  0  0  0
 17 18  1  0  0  0  0
 17 22  1  0  0  0  0
 18 19  2  0  0  0  0
 18 23  1  0  0  0  0
 20 21  1  0  0  0  0
 20 23  1  0  0  0  0
 21 22  1  0  0  0  0
 21 24  2  0  0  0  0
 22 25  1  0  0  0  0
 22 61  1  0  0  0  0
 23 26  1  0  0  0  0
 23 62  1  0  0  0  0
 25 63  1  0  0  0  0
 25 64  1  0  0  0  0
 25 65  1  0  0  0  0
 26 66  1  0  0  0  0
 26 67  1  0  0  0  0
 26 68  1  0  0  0  0
 27 69  1  0  0  0  0
 27 70  1  0  0  0  0
 27 71  1  0  0  0  0
 28 72  1  0  0  0  0
 28 73  1  0  0  0  0
 28 74  1  0  0  0  0
 29 31  1  0  0  0  0
 29 35  1  0  0  0  0
 30 38  1  0  0  0  0
 30 42  1  0  0  0  0
 31 32  1  0  0  0  0
 31 36  1  0  0  0  0
 32 33  1  0  0  0  0
 32 75  1  0  0  0  0
 33 34  1  0  0  0  0
 33 76  1  0  0  0  0
 34 35  1  0  0  0  0
 34 77  1  0  0  0  0
 35 37  1  0  0  0  0
 36 45  1  0  0  0  0
 36 46  1  0  0  0  0
 36 78  1  0  0  0  0
 37 47  1  0  0  0  0
 37 48  1  0  0  0  0
 37 79  1  0  0  0  0
 38 39  1  0  0  0  0
 38 43  1  0  0  0  0
 39 40  1  0  0  0  0
 39 80  1  0  0  0  0
 40 41  1  0  0  0  0
 40 81  1  0  0  0  0
 41 42  1  0  0  0  0
 41 82  1  0  0  0  0
 42 44  1  0  0  0  0
 43 51  1  0  0  0  0
 43 52  1  0  0  0  0
 43 83  1  0  0  0  0
 44 49  1  0  0  0  0
 44 50  1  0  0  0  0
 44 84  1  0  0  0  0
 45 85  1  0  0  0  0
 45 86  1  0  0  0  0
 45 87  1  0  0  0  0
 46 88  1  0  0  0  0
 46 89  1  0  0  0  0
 46 90  1  0  0  0  0
 47 91  1  0  0  0  0
 47 92  1  0  0  0  0
 47 93  1  0  0  0  0
 48 94  1  0  0  0  0
 48 95  1  0  0  0  0
 48 96  1  0  0  0  0
 49 97  1  0  0  0  0
 49 98  1  0  0  0  0
 49 99  1  0  0  0  0
 50100  1  0  0  0  0
 50101  1  0  0  0  0
 50102  1  0  0  0  0
 51103  1  0  0  0  0
 51104  1  0  0  0  0
 51105  1  0  0  0  0
 52106  1  0  0  0  0
 52107  1  0  0  0  0
 52108  1  0  0  0  0
 53109  1  0  0  0  0
 53110  1  0  0  0  0
 53111  1  0  0  0  0
 54112  1  0  0  0  0
 54113  1  0  0  0  0
 54114  1  0  0  0  0
M  END
