# Supplementary material
Source: publisher figshare collection journal article supplement (https://acs.figshare.com/ndownloader/files/5127205)
Supplement: Supplementary file 1 [file 5127205 › supporting_ja043819b/RRSS_fm-5-ts1-101.xyz]

114
O	-5.566474	1.623822	0.946886	-0.01	0.01	-0.01
Mg	0.564669	-0.657405	0.102731	-0.01	0.07	-0.18
O	0.551562	1.123962	-1.189841	-0.04	-0.21	-0.16
C	-4.493213	1.927786	0.187843	0.0	-0.01	-0.01
N	-0.1765	-2.600353	0.290744	0.0	0.04	-0.03
N	2.471837	-1.486194	-0.011219	0.0	0.02	-0.01
O	-3.921319	2.993106	0.220301	0.03	-0.03	0.01
C	0.524155	-3.727356	0.446904	-0.01	0.04	-0.01
C	1.919675	-3.809524	0.338513	-0.01	0.03	0.0
C	2.83325	-2.754134	0.123558	0.0	0.02	0.0
O	-2.987673	1.123181	-1.490822	-0.05	-0.05	-0.04
C	-1.772542	0.739593	-1.107641	-0.04	-0.04	-0.04
C	-0.613404	1.212766	-1.979345	-0.03	-0.14	-0.1
C	-4.118373	0.729741	-0.680459	-0.04	-0.01	-0.01
O	-1.56336	-0.012073	-0.166431	-0.05	0.07	0.05
C	-6.00522	2.66438	1.837713	0.02	0.02	0.0
O	-0.554612	2.598701	0.503478	0.07	0.01	0.24
C	0.674134	1.968645	0.322975	0.02	0.09	0.32
O	0.89144	1.003709	1.141123	0.01	-0.01	0.1
O	1.455037	4.050363	-0.779576	0.0	-0.06	0.03
C	0.322074	4.715648	-0.501331	0.01	-0.04	0.02
C	-0.729608	4.017234	0.354599	0.01	0.0	0.05
C	1.846067	2.916431	0.04369	0.02	-0.02	0.07
O	0.118153	5.817394	-0.960751	0.0	-0.06	-0.01
C	-0.902709	4.68451	1.722354	-0.04	0.1	-0.01
C	2.5395	3.391807	1.323926	0.13	0.06	-0.02
C	-0.836841	2.520311	-2.740926	0.0	-0.09	-0.04
C	-5.225576	0.277182	-1.627901	-0.06	0.0	0.01
C	-1.622777	-2.684819	0.28702	0.0	0.03	-0.02
C	3.474835	-0.442986	-0.060972	0.0	0.02	0.0
C	-2.29624	-3.021583	-0.937635	0.0	0.01	-0.01
C	-3.706957	-2.912964	-0.978308	-0.01	0.0	-0.01
C	-4.437466	-2.492101	0.157292	-0.01	-0.01	-0.01
C	-3.763878	-2.186885	1.361293	0.0	0.0	-0.01
C	-2.350864	-2.289505	1.451832	0.0	0.01	-0.01
C	-1.491424	-3.5058	-2.177138	-0.01	-0.01	-0.01
C	-1.629027	-1.975748	2.78685	0.0	0.01	-0.01
C	4.111644	-0.004286	1.148468	0.0	0.02	0.0
C	4.999076	1.10188	1.075404	0.0	0.01	0.0
C	5.232023	1.770252	-0.144779	0.0	0.02	0.01
C	4.605957	1.324969	-1.329891	0.0	0.02	0.01
C	3.726891	0.207995	-1.31557	0.01	0.02	0.0
C	3.875792	-0.703413	2.515104	0.01	0.01	0.0
C	3.113733	-0.340994	-2.630292	0.02	0.01	-0.01
C	-0.935867	-2.301432	-3.004325	0.0	-0.03	-0.03
C	-2.308675	-4.467213	-3.099543	-0.01	-0.02	0.01
C	-1.807143	-0.482539	3.207293	-0.02	0.0	0.0
C	-2.109942	-2.935294	3.926489	0.01	0.0	-0.02
C	2.783677	0.775232	-3.667912	0.04	0.0	-0.02
C	4.048486	-1.422533	-3.271034	0.03	0.0	0.01
C	3.135408	0.235524	3.520723	0.03	0.01	0.02
C	5.220879	-1.214467	3.133848	0.01	-0.01	-0.02
C	-0.209033	-5.019712	0.79077	-0.01	0.05	0.01
C	4.30056	-3.170128	0.095072	-0.01	0.02	0.01
H	2.355132	-4.795154	0.462604	-0.01	0.03	0.01
H	-0.510291	0.423932	-2.74121	-0.22	-0.12	-0.16
H	-3.85283	-0.109004	-0.028133	-0.04	-0.02	-0.01
H	-6.277823	3.560992	1.275201	0.04	0.03	0.01
H	-5.213754	2.915991	2.548486	0.02	-0.01	0.01
H	-6.87305	2.257298	2.357106	0.01	0.03	0.0
H	-1.675257	4.132413	-0.181121	0.01	-0.12	0.02
H	2.583306	2.393862	-0.561795	-0.05	-0.11	0.06
H	-1.124954	5.746458	1.580226	-0.06	0.09	-0.1
H	-0.007138	4.590126	2.341948	-0.04	0.17	0.01
H	-1.739956	4.210208	2.241737	-0.04	0.13	0.02
H	3.097451	4.307749	1.101743	0.25	-0.05	-0.17
H	3.251648	2.622798	1.619425	0.03	0.01	0.07
H	1.846694	3.585319	2.146731	0.18	0.3	-0.03
H	-1.608416	2.374934	-3.504	-0.08	0.02	0.02
H	0.096055	2.802144	-3.235538	-0.01	-0.16	-0.11
H	-1.158351	3.343716	-2.10565	0.14	-0.08	0.02
H	-4.930678	-0.682183	-2.060609	-0.08	0.0	0.0
H	-5.392816	1.010943	-2.422118	-0.06	0.0	0.01
H	-6.155413	0.133687	-1.071879	-0.05	0.01	0.02
H	-4.250516	-3.200743	-1.887611	-0.01	-0.01	0.0
H	-5.534694	-2.442391	0.115891	-0.01	-0.02	0.0
H	-4.345118	-1.8976	2.247362	0.0	-0.01	0.0
H	-0.611886	-4.067974	-1.810907	-0.01	-0.01	0.0
H	-0.545704	-2.158406	2.630528	0.0	0.03	-0.02
H	5.526993	1.429532	1.980373	0.01	0.01	0.0
H	5.92143	2.62542	-0.179194	0.0	0.02	0.01
H	4.8248	1.831383	-2.278551	0.0	0.03	0.01
H	3.223492	-1.581972	2.342249	-0.01	0.02	0.0
H	2.164964	-0.849816	-2.358311	0.02	0.02	-0.02
H	-0.412958	-2.660759	-3.906259	0.0	-0.05	-0.02
H	-0.205967	-1.74127	-2.390761	0.01	-0.02	-0.04
H	-1.751243	-1.625846	-3.315268	0.01	-0.03	-0.04
H	-1.640347	-4.899744	-3.859535	-0.01	-0.03	0.01
H	-3.116568	-3.932319	-3.621004	-0.01	-0.02	0.0
H	-2.749398	-5.289267	-2.515383	-0.02	-0.01	0.02
H	-1.265821	-0.292467	4.14856	-0.01	0.01	-0.01
H	-2.86995	-0.239719	3.359594	-0.02	-0.02	0.02
H	-1.399636	0.191173	2.432257	-0.05	0.01	0.0
H	-1.533768	-2.741086	4.844034	0.02	-0.01	-0.02
H	-1.962378	-3.987967	3.638891	0.02	0.0	-0.03
H	-3.177077	-2.77993	4.147165	0.01	-0.02	-0.01
H	2.206517	0.344307	-4.500443	0.05	-0.01	-0.02
H	3.69997	1.22208	-4.083595	0.04	0.01	0.0
H	2.18794	1.573409	-3.19647	0.02	-0.01	-0.03
H	3.597407	-1.799221	-4.201987	0.04	-0.01	0.01
H	4.190339	-2.27379	-2.58634	0.02	0.01	0.02
H	5.035156	-0.993636	-3.507274	0.03	0.0	0.02
H	2.934758	-0.306037	4.458993	0.06	0.01	0.03
H	2.178649	0.573686	3.086656	0.01	0.0	0.06
H	3.74563	1.121773	3.754756	0.03	0.01	0.0
H	5.012932	-1.792112	4.04747	0.01	-0.02	-0.02
H	5.874097	-0.369953	3.401286	0.01	-0.01	-0.01
H	5.763072	-1.861556	2.427638	0.0	0.0	-0.03
H	-0.941728	-5.299857	0.026366	-0.02	0.04	0.02
H	0.496002	-5.850016	0.904049	-0.01	0.05	0.02
H	-0.752486	-4.906534	1.737464	-0.01	0.06	0.01
H	4.947218	-2.410142	-0.350207	0.01	0.02	0.04
H	4.660497	-3.365466	1.113207	-0.02	-0.01	0.01
H	4.414193	-4.102849	-0.470391	-0.01	0.03	-0.01
114
O	-5.568637118960625	1.6259851189606247	0.9447228810393754	-0.01	0.01	-0.01
Mg	0.5625058810393754	-0.6422631672756276	0.06379485870875663	-0.01	0.07	-0.18
O	0.5429095241575015	1.0785365018268827	-1.224450903369994	-0.04	-0.21	-0.16
C	-4.493213	1.9256228810393754	0.18567988103937538	0.0	-0.01	-0.01
N	-0.1765	-2.5917005241575017	0.2842546431181261	0.0	0.04	-0.03
N	2.471837	-1.4818677620787508	-0.013382118960624632	0.0	0.02	-0.01
O	-3.914829643118126	2.986616643118126	0.22246411896062462	0.03	-0.03	0.01
C	0.5219918810393754	-3.7187035241575015	0.44474088103937537	-0.01	0.04	-0.01
C	1.9175118810393754	-3.803034643118126	0.338513	-0.01	0.03	0.0
C	2.83325	-2.749807762078751	0.123558	0.0	0.02	0.0
O	-2.9984885948031232	1.1123654051968768	-1.4994744758424987	-0.05	-0.05	-0.04
C	-1.7811944758424987	0.7309405241575014	-1.1162934758424987	-0.04	-0.04	-0.04
C	-0.6198933568818739	1.1824823345512552	-2.0009761896062463	-0.03	-0.14	-0.1
C	-4.1270254758424985	0.7275778810393754	-0.6826221189606246	-0.04	-0.01	-0.01
O	-1.5741755948031233	0.0030688327243724237	-0.15561540519687683	-0.05	0.07	0.05
C	-6.00089376207875	2.668706237921249	1.837713	0.02	0.02	0.0
O	-0.5394701672756276	2.600864118960625	0.5553928550549911	0.07	0.01	0.24
C	0.6784602379212493	1.9881130706456216	0.39219480673998824	0.02	0.09	0.32
O	0.8936031189606246	1.0015458810393754	1.1627541896062463	0.01	-0.01	0.1
O	1.455037	4.037384286236252	-0.7730866431181261	0.0	-0.06	0.03
C	0.3242371189606247	4.706995524157501	-0.4970047620787507	0.01	-0.04	0.02
C	-0.7274448810393754	4.017234	0.36541459480312316	0.01	0.0	0.05
C	1.850393237921249	2.912104762078751	0.058831832724372424	0.02	-0.02	0.07
O	0.118153	5.804415286236252	-0.9629141189606246	0.0	-0.06	-0.01
C	-0.9113614758424985	4.706141189606247	1.7201908810393753	-0.04	0.1	-0.01
C	2.56762054648812	3.4047857137637476	1.3195997620787507	0.13	0.06	-0.02
C	-0.836841	2.5008429293543784	-2.7495784758424984	0.0	-0.09	-0.04
C	-5.238554713763748	0.277182	-1.6257378810393754	-0.06	0.0	0.01
C	-1.622777	-2.678329643118126	0.28269376207875074	0.0	0.03	-0.02
C	3.474835	-0.43865976207875074	-0.060972	0.0	0.02	0.0
C	-2.29624	-3.0194198810393753	-0.9397981189606246	0.0	0.01	-0.01
C	-3.709120118960625	-2.912964	-0.9804711189606246	-0.01	0.0	-0.01
C	-4.4396291189606245	-2.4942641189606247	0.15512888103937536	-0.01	-0.01	-0.01
C	-3.763878	-2.186885	1.3591298810393755	0.0	0.0	-0.01
C	-2.350864	-2.2873418810393753	1.4496688810393754	0.0	0.01	-0.01
C	-1.4935871189606247	-3.5079631189606246	-2.1793011189606246	-0.01	-0.01	-0.01
C	-1.629027	-1.9735848810393755	2.784686881039375	0.0	0.01	-0.01
C	4.111644	4.0237921249263765E-5	1.148468	0.0	0.02	0.0
C	4.999076	1.1040431189606246	1.075404	0.0	0.01	0.0
C	5.232023	1.7745782379212491	-0.14261588103937536	0.0	0.02	0.01
C	4.605957	1.3292952379212493	-1.3277278810393753	0.0	0.02	0.01
C	3.729054118960625	0.21232123792124927	-1.31557	0.01	0.02	0.0
C	3.877955118960625	-0.7012498810393754	2.515104	0.01	0.01	0.0
C	3.118059237921249	-0.33883088103937536	-2.6324551189606247	0.02	0.01	-0.01
C	-0.935867	-2.307921356881874	-3.010814356881874	0.0	-0.03	-0.03
C	-2.310838118960625	-4.47153923792125	-3.0973798810393753	-0.01	-0.02	0.01
C	-1.8114692379212491	-0.482539	3.207293	-0.02	0.0	0.0
C	-2.1077788810393754	-2.935294	3.922162762078751	0.01	0.0	-0.02
C	2.7923294758424984	0.775232	-3.672238237921249	0.04	0.0	-0.02
C	4.054975356881873	-1.422533	-3.2688708810393754	0.03	0.0	0.01
C	3.141897356881874	0.23768711896062464	3.525049237921249	0.03	0.01	0.02
C	5.223042118960625	-1.2166301189606246	3.1295217620787508	0.01	-0.01	-0.02
C	-0.21119611896062462	-5.008896405196877	0.7929331189606246	-0.01	0.05	0.01
C	4.298396881039375	-3.165801762078751	0.09723511896062463	-0.01	0.02	0.01
H	2.352968881039375	-4.788664643118127	0.46476711896062467	-0.01	0.03	0.01
H	-0.5578796171337419	0.3979745724725044	-2.775819903369994	-0.22	-0.12	-0.16
H	-3.8614824758424984	-0.11333023792124927	-0.03029611896062463	-0.04	-0.02	-0.01
H	-6.269170524157501	3.567481356881874	1.2773641189606246	0.04	0.03	0.01
H	-5.20942776207875	2.913827881039375	2.550649118960625	0.02	-0.01	0.01
H	-6.870886881039375	2.263787356881874	2.357106	0.01	0.03	0.0
H	-1.6730938810393754	4.1064555724725045	-0.17679476207875075	0.01	-0.12	0.02
H	2.5724904051968767	2.370067691433129	-0.5488162862362522	-0.05	-0.11	0.06
H	-1.1379327137637478	5.765926070645621	1.5585948103937537	-0.06	0.09	-0.1
H	-0.015790475842498528	4.626899022330618	2.3441111189606247	-0.04	0.17	0.01
H	-1.7486084758424987	4.23832854648812	2.2460632379212493	-0.04	0.13	0.02
H	3.1515289740156156	4.296933405196877	1.064969977669381	0.25	-0.05	-0.17
H	3.258137356881874	2.624961118960625	1.6345668327243723	0.03	0.01	0.07
H	1.8856301412912435	3.650212568818739	2.140241643118126	0.18	0.3	-0.03
H	-1.625720951684997	2.3792602379212493	-3.499673762078751	-0.08	0.02	0.02
H	0.09389188103937537	2.767534096630006	-3.259332308566871	-0.01	-0.16	-0.11
H	-1.128067334551255	3.326411048315003	-2.1013237620787506	0.14	-0.08	0.02
H	-4.947982951684997	-0.682183	-2.060609	-0.08	0.0	0.0
H	-5.405794713763748	1.010943	-2.4199548810393754	-0.06	0.0	0.01
H	-6.1662285948031235	0.13585011896062463	-1.0675527620787508	-0.05	0.01	0.02
H	-4.252679118960625	-3.202906118960625	-1.887611	-0.01	-0.01	0.0
H	-5.536857118960625	-2.4467172379212494	0.115891	-0.01	-0.02	0.0
H	-4.345118	-1.8997631189606246	2.247362	0.0	-0.01	0.0
H	-0.6140491189606246	-4.070137118960625	-1.810907	-0.01	-0.01	0.0
H	-0.545704	-2.151916643118126	2.626201762078751	0.0	0.03	-0.02
H	5.529156118960625	1.4316951189606246	1.980373	0.01	0.01	0.0
H	5.92143	2.6297462379212493	-0.17703088103937537	0.0	0.02	0.01
H	4.8248	1.8378723568818738	-2.2763878810393754	0.0	0.03	0.01
H	3.221328881039375	-1.5776457620787507	2.342249	-0.01	0.02	0.0
H	2.169290237921249	-0.8454897620787507	-2.3626372379212492	0.02	0.02	-0.02
H	-0.412958	-2.6715745948031233	-3.910585237921249	0.0	-0.05	-0.02
H	-0.20380388103937538	-1.7455962379212493	-2.3994134758424983	0.01	-0.02	-0.04
H	-1.7490798810393755	-1.6323353568818737	-3.3239204758424985	0.01	-0.03	-0.04
H	-1.6425101189606246	-4.906233356881874	-3.8573718810393753	-0.01	-0.03	0.01
H	-3.118731118960625	-3.9366452379212493	-3.621004	-0.01	-0.02	0.0
H	-2.753724237921249	-5.2914301189606245	-2.5110567620787507	-0.02	-0.01	0.02
H	-1.2679841189606247	-0.2903038810393753	4.146396881039375	-0.01	0.01	-0.01
H	-2.874276237921249	-0.24404523792124924	3.363920237921249	-0.02	-0.02	0.02
H	-1.4104515948031233	0.19333611896062464	2.432257	-0.05	0.01	0.0
H	-1.5294417620787508	-2.743249118960625	4.83970776207875	0.02	-0.01	-0.02
H	-1.9580517620787508	-3.987967	3.632401643118126	0.02	0.0	-0.03
H	-3.1749138810393753	-2.784256237921249	4.145001881039375	0.01	-0.02	-0.01
H	2.217332594803123	0.3421438810393753	-4.504769237921249	0.05	-0.01	-0.02
H	3.7086224758424984	1.2242431189606247	-4.083595	0.04	0.01	0.0
H	2.1922662379212494	1.5712458810393755	-3.202959356881874	0.02	-0.01	-0.03
H	3.6060594758424984	-1.8013841189606246	-4.199823881039375	0.04	-0.01	0.01
H	4.1946652379212495	-2.271626881039375	-2.5820137620787507	0.02	0.01	0.02
H	5.041645356881873	-0.993636	-3.5029477620787506	0.03	0.0	0.02
H	2.9477367137637476	-0.30387388103937535	4.465482356881874	0.06	0.01	0.03
H	2.180812118960625	0.573686	3.0996347137637477	0.01	0.0	0.06
H	3.752119356881874	1.1239361189606245	3.754756	0.03	0.01	0.0
H	5.015095118960625	-1.7964382379212491	4.04314376207875	0.01	-0.02	-0.02
H	5.876260118960625	-0.37211611896062463	3.399122881039375	0.01	-0.01	-0.01
H	5.763072	-1.861556	2.421148643118126	0.0	0.0	-0.03
H	-0.9460542379212493	-5.291204524157502	0.030692237921249265	-0.02	0.04	0.02
H	0.49383888103937534	-5.839200405196877	0.9083752379212493	-0.01	0.05	0.02
H	-0.7546491189606246	-4.893555286236252	1.7396271189606245	-0.01	0.06	0.01
H	4.949381118960625	-2.405815762078751	-0.3415545241575015	0.01	0.02	0.04
H	4.656170762078751	-3.367629118960625	1.1153701189606247	-0.02	-0.01	0.01
H	4.412029881039375	-4.096359643118126	-0.47255411896062466	-0.01	0.03	-0.01
114
O	-5.570588496766048	1.6279364967660475	0.9427715032339526	-0.01	0.01	-0.01
Mg	0.5605545032339526	-0.6286035226376688	0.02867005821114839	-0.01	0.07	-0.18
O	0.5351040129358108	1.0375575679130065	-1.255672948256757	-0.04	-0.21	-0.16
C	-4.493213	1.9236715032339526	0.1837285032339527	0.0	-0.01	-0.01
N	-0.1765	-2.5838950129358107	0.2784005097018581	0.0	0.04	-0.03
N	2.471837	-1.4779650064679053	-0.015333496766047311	0.0	0.02	-0.01
O	-3.908975509701858	2.980762509701858	0.2244154967660473	0.03	-0.03	0.01
C	0.5200405032339527	-3.7108980129358105	0.4427895032339527	-0.01	0.04	-0.01
C	1.9155605032339527	-3.797180509701858	0.338513	-0.01	0.03	0.0
C	2.83325	-2.7459050064679054	0.123558	0.0	0.02	0.0
O	-3.0082454838302364	1.1026085161697634	-1.5072799870641893	-0.05	-0.05	-0.04
C	-1.7889999870641893	0.7231350129358107	-1.1240989870641893	-0.04	-0.04	-0.04
C	-0.6257474902981419	1.1551630452753376	-2.020489967660473	-0.03	-0.14	-0.1
C	-4.1348309870641895	0.7256265032339526	-0.6845734967660474	-0.04	-0.01	-0.01
O	-1.5839324838302367	0.016728477362331184	-0.14585851616976342	-0.05	0.07	0.05
C	-5.996991006467905	2.6726089935320947	1.837713	0.02	0.02	0.0
O	-0.5258105226376688	2.6028154967660475	0.6022259223851355	0.07	0.01	0.24
C	0.6823629935320946	2.0056754708944258	0.45463889651351397	0.02	0.09	0.32
O	0.8955544967660474	0.9995945032339526	1.1822679676604733	0.01	-0.01	0.1
O	1.455037	4.025676019403716	-0.7672325097018581	0.0	-0.06	0.03
C	0.32618849676604733	4.69919001293581	-0.49310200646790536	0.01	-0.04	0.02
C	-0.7254935032339527	4.017234	0.3751714838302366	0.01	0.0	0.05
C	1.8542959935320946	2.9082020064679055	0.07249147736233119	0.02	-0.02	0.07
O	0.118153	5.792707019403716	-0.9648654967660474	0.0	-0.06	-0.01
C	-0.9191669870641892	4.725654967660473	1.7182395032339526	-0.04	0.1	-0.01
C	2.592988457958615	3.4164939805962837	1.3156970064679052	0.13	0.06	-0.02
C	-0.836841	2.483280529105574	-2.7573839870641894	0.0	-0.09	-0.04
C	-5.250262980596284	0.277182	-1.6237865032339527	-0.06	0.0	0.01
C	-1.622777	-2.672475509701858	0.2787910064679054	0.0	0.03	-0.02
C	3.474835	-0.4347570064679054	-0.060972	0.0	0.02	0.0
C	-2.29624	-3.0174685032339528	-0.9417494967660474	0.0	0.01	-0.01
C	-3.7110714967660474	-2.912964	-0.9824224967660473	-0.01	0.0	-0.01
C	-4.441580496766047	-2.4962154967660473	0.15317750323395268	-0.01	-0.01	-0.01
C	-3.763878	-2.186885	1.3571785032339527	0.0	0.0	-0.01
C	-2.350864	-2.2853905032339528	1.4477175032339527	0.0	0.01	-0.01
C	-1.4955384967660474	-3.509914496766047	-2.181252496766047	-0.01	-0.01	-0.01
C	-1.629027	-1.9716335032339527	2.7827355032339525	0.0	0.01	-0.01
C	4.111644	0.003942993532094624	1.148468	0.0	0.02	0.0
C	4.999076	1.1059944967660473	1.075404	0.0	0.01	0.0
C	5.232023	1.7784809935320947	-0.1406645032339527	0.0	0.02	0.01
C	4.605957	1.3331979935320948	-1.3257765032339526	0.0	0.02	0.01
C	3.7310054967660475	0.21622399353209465	-1.31557	0.01	0.02	0.0
C	3.8799064967660475	-0.6992985032339526	2.515104	0.01	0.01	0.0
C	3.1219619935320946	-0.3368795032339527	-2.634406496766047	0.02	0.01	-0.01
C	-0.935867	-2.3137754902981422	-3.016668490298142	0.0	-0.03	-0.03
C	-2.3127894967660474	-4.475441993532095	-3.095428503233953	-0.01	-0.02	0.01
C	-1.8153719935320947	-0.482539	3.207293	-0.02	0.0	0.0
C	-2.105827503233953	-2.935294	3.9182600064679054	0.01	0.0	-0.02
C	2.8001349870641894	0.775232	-3.6761409935320946	0.04	0.0	-0.02
C	4.060829490298142	-1.422533	-3.266919503233953	0.03	0.0	0.01
C	3.147751490298142	0.23963849676604732	3.5289519935320945	0.03	0.01	0.02
C	5.224993496766047	-1.2185814967660473	3.1256190064679052	0.01	-0.01	-0.02
C	-0.2131474967660473	-4.999139516169763	0.7948844967660473	-0.01	0.05	0.01
C	4.296445503233953	-3.1618990064679053	0.09918649676604732	-0.01	0.02	0.01
H	2.3510175032339524	-4.782810509701858	0.4667184967660473	-0.01	0.03	0.01
H	-0.6008099288530409	0.3745580388074322	-2.807041948256757	-0.22	-0.12	-0.16
H	-3.8692879870641894	-0.11723299353209463	-0.03224749676604731	-0.04	-0.02	-0.01
H	-6.26136501293581	3.5733354902981422	1.2793154967660474	0.04	0.03	0.01
H	-5.205525006467905	2.9118765032339526	2.5526004967660474	0.02	-0.01	0.01
H	-6.868935503233953	2.269641490298142	2.357106	0.01	0.03	0.0
H	-1.6711425032339526	4.083039038807432	-0.17289200646790537	0.01	-0.12	0.02
H	2.5627335161697635	2.3486025355734794	-0.5371080194037162	-0.05	-0.11	0.06
H	-1.149640980596284	5.783488470894426	1.5390810323395268	-0.06	0.09	-0.1
H	-0.02359598706418925	4.660072445022804	2.3460624967660473	-0.04	0.17	0.01
H	-1.7564139870641893	4.2636964579586145	2.249965993532095	-0.04	0.13	0.02
H	3.2003134191511826	4.2871765161697635	1.0317965549771957	0.25	-0.05	-0.17
H	3.263991490298142	2.6269124967660473	1.6482264773623312	0.03	0.01	0.07
H	1.9207549417888516	3.7087539029814196	2.134387509701858	0.18	0.3	-0.03
H	-1.6413319741283785	2.383162993532095	-3.4957710064679053	-0.08	0.02	0.02
H	0.09194050323395268	2.7363120517432433	-3.2807974644265205	-0.01	-0.16	-0.11
H	-1.1007480452753375	3.3108000258716217	-2.097421006467905	0.14	-0.08	0.02
H	-4.963593974128379	-0.682183	-2.060609	-0.08	0.0	0.0
H	-5.417502980596284	1.010943	-2.418003503233953	-0.06	0.0	0.01
H	-6.175985483830237	0.1378014967660473	-1.0636500064679053	-0.05	0.01	0.02
H	-4.2546304967660475	-3.2048574967660475	-1.887611	-0.01	-0.01	0.0
H	-5.538808496766047	-2.450619993532095	0.115891	-0.01	-0.02	0.0
H	-4.345118	-1.9017144967660473	2.247362	0.0	-0.01	0.0
H	-0.6160004967660474	-4.072088496766048	-1.810907	-0.01	-0.01	0.0
H	-0.545704	-2.1460625097018577	2.6222990064679053	0.0	0.03	-0.02
H	5.531107496766047	1.4336464967660474	1.980373	0.01	0.01	0.0
H	5.92143	2.633648993532095	-0.1750795032339527	0.0	0.02	0.01
H	4.8248	1.8437264902981418	-2.274436503233953	0.0	0.03	0.01
H	3.2193775032339524	-1.5737430064679052	2.342249	-0.01	0.02	0.0
H	2.1731929935320946	-0.8415870064679054	-2.3665399935320948	0.02	0.02	-0.02
H	-0.412958	-2.6813314838302365	-3.9144879935320946	0.0	-0.05	-0.02
H	-0.2018525032339527	-1.7494989935320948	-2.4072189870641894	0.01	-0.02	-0.04
H	-1.7471285032339527	-1.6381894902981418	-3.3317259870641895	0.01	-0.03	-0.04
H	-1.6444614967660474	-4.912087490298142	-3.855420503233953	-0.01	-0.03	0.01
H	-3.1206824967660474	-3.940547993532095	-3.621004	-0.01	-0.02	0.0
H	-2.7576269935320945	-5.293381496766047	-2.507154006467905	-0.02	-0.01	0.02
H	-1.2699354967660474	-0.2883525032339527	4.144445503233952	-0.01	0.01	-0.01
H	-2.8781789935320945	-0.24794799353209462	3.3678229935320947	-0.02	-0.02	0.02
H	-1.4202084838302367	0.1952874967660473	2.432257	-0.05	0.01	0.0
H	-1.5255390064679053	-2.7452004967660475	4.835805006467905	0.02	-0.01	-0.02
H	-1.9541490064679052	-3.987967	3.626547509701858	0.02	0.0	-0.03
H	-3.172962503233953	-2.7881589935320945	4.143050503233953	0.01	-0.02	-0.01
H	2.227089483830236	0.34019250323395267	-4.5086719935320945	0.05	-0.01	-0.02
H	3.7164279870641894	1.2261944967660474	-4.083595	0.04	0.01	0.0
H	2.196168993532095	1.5692945032339527	-3.2088134902981422	0.02	-0.01	-0.03
H	3.6138649870641895	-1.8033354967660473	-4.197872503233953	0.04	-0.01	0.01
H	4.1985679935320945	-2.2696755032339526	-2.578111006467905	0.02	0.01	0.02
H	5.047499490298142	-0.993636	-3.499045006467905	0.03	0.0	0.02
H	2.9594449805962837	-0.3019225032339527	4.4713364902981425	0.06	0.01	0.03
H	2.1827634967660474	0.573686	3.111342980596284	0.01	0.0	0.06
H	3.757973490298142	1.1258874967660473	3.754756	0.03	0.01	0.0
H	5.0170464967660475	-1.8003409935320946	4.039241006467905	0.01	-0.02	-0.02
H	5.878211496766047	-0.3740674967660473	3.3971715032339524	0.01	-0.01	-0.01
H	5.763072	-1.861556	2.415294509701858	0.0	0.0	-0.03
H	-0.9499569935320946	-5.283399012935811	0.03459499353209462	-0.02	0.04	0.02
H	0.4918875032339527	-5.829443516169763	0.9122779935320946	-0.01	0.05	0.02
H	-0.7566004967660473	-4.881847019403716	1.7415784967660473	-0.01	0.06	0.01
H	4.951332496766048	-2.4019130064679053	-0.3337490129358107	0.01	0.02	0.04
H	4.652268006467906	-3.3695804967660474	1.1173214967660474	-0.02	-0.01	0.01
H	4.410078503233953	-4.090505509701858	-0.4745054967660473	-0.01	0.03	-0.01
114
O	-5.572137118960625	1.6294851189606248	0.9412228810393753	-0.01	0.01	-0.01
Mg	0.5590058810393753	-0.6177631672756276	7.948587087566461E-4	-0.01	0.07	-0.18
O	0.5289095241575015	1.0050365018268828	-1.280450903369994	-0.04	-0.21	-0.16
C	-4.493213	1.9221228810393753	0.18217988103937538	0.0	-0.01	-0.01
N	-0.1765	-2.5777005241575015	0.2737546431181261	0.0	0.04	-0.03
N	2.471837	-1.4748677620787507	-0.01688211896062463	0.0	0.02	-0.01
O	-3.904329643118126	2.976116643118126	0.22596411896062463	0.03	-0.03	0.01
C	0.5184918810393754	-3.7047035241575013	0.44124088103937537	-0.01	0.04	-0.01
C	1.9140118810393754	-3.792534643118126	0.338513	-0.01	0.03	0.0
C	2.83325	-2.7428077620787508	0.123558	0.0	0.02	0.0
O	-3.0159885948031233	1.094865405196877	-1.5134744758424987	-0.05	-0.05	-0.04
C	-1.7951944758424987	0.7169405241575014	-1.1302934758424987	-0.04	-0.04	-0.04
C	-0.6303933568818738	1.1334823345512552	-2.035976189606246	-0.03	-0.14	-0.1
C	-4.141025475842499	0.7240778810393753	-0.6861221189606247	-0.04	-0.01	-0.01
O	-1.5916755948031232	0.027568832724372425	-0.13811540519687684	-0.05	0.07	0.05
C	-5.99389376207875	2.6757062379212493	1.837713	0.02	0.02	0.0
O	-0.5149701672756276	2.604364118960625	0.6393928550549911	0.07	0.01	0.24
C	0.6854602379212493	2.0196130706456215	0.5041948067399882	0.02	0.09	0.32
O	0.8971031189606247	0.9980458810393753	1.1977541896062465	0.01	-0.01	0.1
O	1.455037	4.016384286236252	-0.7625866431181262	0.0	-0.06	0.03
C	0.3277371189606247	4.692995524157501	-0.4900047620787507	0.01	-0.04	0.02
C	-0.7239448810393754	4.017234	0.3829145948031232	0.01	0.0	0.05
C	1.8573932379212492	2.905104762078751	0.08333183272437242	0.02	-0.02	0.07
O	0.118153	5.783415286236252	-0.9664141189606247	0.0	-0.06	-0.01
C	-0.9253614758424985	4.741141189606247	1.7166908810393753	-0.04	0.1	-0.01
C	2.61312054648812	3.425785713763748	1.3125997620787506	0.13	0.06	-0.02
C	-0.836841	2.4693429293543785	-2.7635784758424986	0.0	-0.09	-0.04
C	-5.259554713763748	0.277182	-1.6222378810393754	-0.06	0.0	0.01
C	-1.622777	-2.667829643118126	0.27569376207875074	0.0	0.03	-0.02
C	3.474835	-0.43165976207875073	-0.060972	0.0	0.02	0.0
C	-2.29624	-3.0159198810393755	-0.9432981189606247	0.0	0.01	-0.01
C	-3.7126201189606247	-2.912964	-0.9839711189606246	-0.01	0.0	-0.01
C	-4.443129118960624	-2.4977641189606246	0.15162888103937536	-0.01	-0.01	-0.01
C	-3.763878	-2.186885	1.3556298810393754	0.0	0.0	-0.01
C	-2.350864	-2.2838418810393755	1.4461688810393754	0.0	0.01	-0.01
C	-1.4970871189606247	-3.5114631189606245	-2.1828011189606245	-0.01	-0.01	-0.01
C	-1.629027	-1.9700848810393754	2.781186881039375	0.0	0.01	-0.01
C	4.111644	0.007040237921249262	1.148468	0.0	0.02	0.0
C	4.999076	1.1075431189606246	1.075404	0.0	0.01	0.0
C	5.232023	1.7815782379212493	-0.13911588103937536	0.0	0.02	0.01
C	4.605957	1.3362952379212494	-1.3242278810393753	0.0	0.02	0.01
C	3.732554118960625	0.21932123792124927	-1.31557	0.01	0.02	0.0
C	3.881455118960625	-0.6977498810393753	2.515104	0.01	0.01	0.0
C	3.125059237921249	-0.33533088103937536	-2.6359551189606245	0.02	0.01	-0.01
C	-0.935867	-2.318421356881874	-3.021314356881874	0.0	-0.03	-0.03
C	-2.3143381189606247	-4.478539237921249	-3.0938798810393755	-0.01	-0.02	0.01
C	-1.8184692379212493	-0.482539	3.207293	-0.02	0.0	0.0
C	-2.1042788810393755	-2.935294	3.915162762078751	0.01	0.0	-0.02
C	2.8063294758424986	0.775232	-3.679238237921249	0.04	0.0	-0.02
C	4.065475356881874	-1.422533	-3.2653708810393756	0.03	0.0	0.01
C	3.152397356881874	0.24118711896062464	3.532049237921249	0.03	0.01	0.02
C	5.226542118960625	-1.2201301189606246	3.1225217620787507	0.01	-0.01	-0.02
C	-0.21469611896062463	-4.991396405196877	0.7964331189606246	-0.01	0.05	0.01
C	4.294896881039375	-3.1588017620787507	0.10073511896062463	-0.01	0.02	0.01
H	2.349468881039375	-4.778164643118126	0.4682671189606247	-0.01	0.03	0.01
H	-0.634879617133742	0.3559745724725044	-2.8318199033699942	-0.22	-0.12	-0.16
H	-3.8754824758424986	-0.12033023792124926	-0.03379611896062463	-0.04	-0.02	-0.01
H	-6.255170524157501	3.577981356881874	1.2808641189606247	0.04	0.03	0.01
H	-5.2024277620787505	2.9103278810393753	2.5541491189606247	0.02	-0.01	0.01
H	-6.8673868810393754	2.274287356881874	2.357106	0.01	0.03	0.0
H	-1.6695938810393753	4.064455572472504	-0.16979476207875074	0.01	-0.12	0.02
H	2.5549904051968766	2.331567691433129	-0.5278162862362522	-0.05	-0.11	0.06
H	-1.1589327137637477	5.7974260706456215	1.5235948103937536	-0.06	0.09	-0.1
H	-0.029790475842498526	4.686399022330619	2.3476111189606246	-0.04	0.17	0.01
H	-1.7626084758424987	4.28382854648812	2.2530632379212494	-0.04	0.13	0.02
H	3.239028974015616	4.279433405196877	1.0054699776693812	0.25	-0.05	-0.17
H	3.268637356881874	2.6284611189606246	1.6590668327243723	0.03	0.01	0.07
H	1.9486301412912435	3.755212568818739	2.129741643118126	0.18	0.3	-0.03
H	-1.653720951684997	2.3862602379212494	-3.4926737620787507	-0.08	0.02	0.02
H	0.09039188103937537	2.711534096630006	-3.297832308566871	-0.01	-0.16	-0.11
H	-1.0790673345512551	3.298411048315003	-2.0943237620787505	0.14	-0.08	0.02
H	-4.975982951684998	-0.682183	-2.060609	-0.08	0.0	0.0
H	-5.426794713763748	1.010943	-2.4164548810393756	-0.06	0.0	0.01
H	-6.1837285948031235	0.13935011896062463	-1.0605527620787507	-0.05	0.01	0.02
H	-4.256179118960625	-3.2064061189606248	-1.887611	-0.01	-0.01	0.0
H	-5.540357118960625	-2.4537172379212495	0.115891	-0.01	-0.02	0.0
H	-4.345118	-1.9032631189606246	2.247362	0.0	-0.01	0.0
H	-0.6175491189606247	-4.073637118960625	-1.810907	-0.01	-0.01	0.0
H	-0.545704	-2.141416643118126	2.6192017620787507	0.0	0.03	-0.02
H	5.532656118960625	1.4351951189606247	1.980373	0.01	0.01	0.0
H	5.92143	2.6367462379212494	-0.17353088103937536	0.0	0.02	0.01
H	4.8248	1.848372356881874	-2.2728878810393756	0.0	0.03	0.01
H	3.217828881039375	-1.5706457620787506	2.342249	-0.01	0.02	0.0
H	2.176290237921249	-0.8384897620787507	-2.3696372379212494	0.02	0.02	-0.02
H	-0.412958	-2.6890745948031234	-3.9175852379212492	0.0	-0.05	-0.02
H	-0.20030388103937538	-1.7525962379212494	-2.4134134758424985	0.01	-0.02	-0.04
H	-1.7455798810393754	-1.6428353568818739	-3.3379204758424987	0.01	-0.03	-0.04
H	-1.6460101189606247	-4.916733356881874	-3.8538718810393755	-0.01	-0.03	0.01
H	-3.1222311189606247	-3.9436452379212494	-3.621004	-0.01	-0.02	0.0
H	-2.760724237921249	-5.294930118960624	-2.5040567620787506	-0.02	-0.01	0.02
H	-1.2714841189606247	-0.2868038810393753	4.142896881039375	-0.01	0.01	-0.01
H	-2.881276237921249	-0.2510452379212493	3.3709202379212493	-0.02	-0.02	0.02
H	-1.4279515948031232	0.19683611896062464	2.432257	-0.05	0.01	0.0
H	-1.5224417620787507	-2.746749118960625	4.83270776207875	0.02	-0.01	-0.02
H	-1.9510517620787506	-3.987967	3.621901643118126	0.02	0.0	-0.03
H	-3.1714138810393755	-2.791256237921249	4.1415018810393756	0.01	-0.02	-0.01
H	2.234832594803123	0.3386438810393753	-4.511769237921249	0.05	-0.01	-0.02
H	3.7226224758424986	1.2277431189606247	-4.083595	0.04	0.01	0.0
H	2.1992662379212495	1.5677458810393754	-3.213459356881874	0.02	-0.01	-0.03
H	3.6200594758424987	-1.8048841189606246	-4.196323881039375	0.04	-0.01	0.01
H	4.201665237921249	-2.2681268810393753	-2.5750137620787505	0.02	0.01	0.02
H	5.052145356881874	-0.993636	-3.4959477620787505	0.03	0.0	0.02
H	2.968736713763748	-0.30037388103937535	4.475982356881874	0.06	0.01	0.03
H	2.1843121189606247	0.573686	3.120634713763748	0.01	0.0	0.06
H	3.7626193568818738	1.1274361189606246	3.754756	0.03	0.01	0.0
H	5.018595118960625	-1.8034382379212492	4.03614376207875	0.01	-0.02	-0.02
H	5.879760118960625	-0.37561611896062463	3.395622881039375	0.01	-0.01	-0.01
H	5.763072	-1.861556	2.410648643118126	0.0	0.0	-0.03
H	-0.9530542379212493	-5.277204524157502	0.03769223792124926	-0.02	0.04	0.02
H	0.49033888103937534	-5.821700405196877	0.9153752379212493	-0.01	0.05	0.02
H	-0.7581491189606246	-4.872555286236252	1.7431271189606246	-0.01	0.06	0.01
H	4.952881118960625	-2.3988157620787507	-0.32755452415750147	0.01	0.02	0.04
H	4.649170762078751	-3.3711291189606247	1.1188701189606247	-0.02	-0.01	0.01
H	4.408529881039375	-4.085859643118126	-0.47605411896062466	-0.01	0.03	-0.01
114
O	-5.573131395614066	1.6304793956140662	0.9402286043859339	-0.01	0.01	-0.01
Mg	0.5580116043859339	-0.6108032307015375	-0.017102121053189326	-0.01	0.07	-0.18
O	0.5249324175437357	0.9841566921046123	-1.296359329825057	-0.04	-0.21	-0.16
C	-4.493213	1.921128604385934	0.18118560438593392	0.0	-0.01	-0.01
N	-0.1765	-2.573723417543736	0.2707718131578018	0.0	0.04	-0.03
N	2.471837	-1.4728792087718678	-0.017876395614066072	0.0	0.02	-0.01
O	-3.9013468131578017	2.973133813157802	0.22695839561406608	0.03	-0.03	0.01
C	0.517497604385934	-3.7007264175437355	0.44024660438593394	-0.01	0.04	-0.01
C	1.913017604385934	-3.789551813157802	0.338513	-0.01	0.03	0.0
C	2.83325	-2.740819208771868	0.123558	0.0	0.02	0.0
O	-3.0209599780703305	1.0898940219296696	-1.5174515824562644	-0.05	-0.05	-0.04
C	-1.7991715824562644	0.7129634175437356	-1.1342705824562644	-0.04	-0.04	-0.04
C	-0.6333761868421982	1.119562461403075	-2.0459189561406608	-0.03	-0.14	-0.1
C	-4.145002582456264	0.7230836043859339	-0.6871163956140661	-0.04	-0.01	-0.01
O	-1.5966469780703305	0.03452876929846252	-0.13314402192966962	-0.05	0.07	0.05
C	-5.991905208771867	2.677694791228132	1.837713	0.02	0.02	0.0
O	-0.5080102307015375	2.6053583956140662	0.6632554947375857	0.07	0.01	0.24
C	0.6874487912281322	2.0285615605265948	0.5360116596501143	0.02	0.09	0.32
O	0.8980973956140661	0.9970516043859339	1.2076969561406607	0.01	-0.01	0.1
O	1.455037	4.010418626315603	-0.7596038131578018	0.0	-0.06	0.03
C	0.3287313956140661	4.6890184175437355	-0.4880162087718678	0.01	-0.04	0.02
C	-0.722950604385934	4.017234	0.3878859780703304	0.01	0.0	0.05
C	1.859381791228132	2.903116208771868	0.09029176929846253	0.02	-0.02	0.07
O	0.118153	5.777449626315604	-0.9674083956140661	0.0	-0.06	-0.01
C	-0.9293385824562643	4.751083956140661	1.7156966043859339	-0.04	0.1	-0.01
C	2.626046142982859	3.4317513736843965	1.3106112087718678	0.13	0.06	-0.02
C	-0.836841	2.460394439473405	-2.7675555824562643	0.0	-0.09	-0.04
C	-5.265520373684397	0.277182	-1.621243604385934	-0.06	0.0	0.01
C	-1.622777	-2.664846813157802	0.2737052087718678	0.0	0.03	-0.02
C	3.474835	-0.4296712087718678	-0.060972	0.0	0.02	0.0
C	-2.29624	-3.014925604385934	-0.9442923956140661	0.0	0.01	-0.01
C	-3.713614395614066	-2.912964	-0.984965395614066	-0.01	0.0	-0.01
C	-4.444123395614065	-2.498758395614066	0.1506346043859339	-0.01	-0.01	-0.01
C	-3.763878	-2.186885	1.354635604385934	0.0	0.0	-0.01
C	-2.350864	-2.282847604385934	1.445174604385934	0.0	0.01	-0.01
C	-1.4980813956140662	-3.512457395614066	-2.183795395614066	-0.01	-0.01	-0.01
C	-1.629027	-1.969090604385934	2.7801926043859337	0.0	0.01	-0.01
C	4.111644	0.009028791228132148	1.148468	0.0	0.02	0.0
C	4.999076	1.108537395614066	1.075404	0.0	0.01	0.0
C	5.232023	1.783566791228132	-0.1381216043859339	0.0	0.02	0.01
C	4.605957	1.3382837912281322	-1.3232336043859338	0.0	0.02	0.01
C	3.7335483956140663	0.22130979122813216	-1.31557	0.01	0.02	0.0
C	3.882449395614066	-0.6967556043859339	2.515104	0.01	0.01	0.0
C	3.127047791228132	-0.33433660438593393	-2.636949395614066	0.02	0.01	-0.01
C	-0.935867	-2.3214041868421984	-3.0242971868421984	0.0	-0.03	-0.03
C	-2.315332395614066	-4.480527791228132	-3.092885604385934	-0.01	-0.02	0.01
C	-1.8204577912281321	-0.482539	3.207293	-0.02	0.0	0.0
C	-2.103284604385934	-2.935294	3.913174208771868	0.01	0.0	-0.02
C	2.8103065824562643	0.775232	-3.681226791228132	0.04	0.0	-0.02
C	4.068458186842197	-1.422533	-3.264376604385934	0.03	0.0	0.01
C	3.1553801868421982	0.2421813956140661	3.534037791228132	0.03	0.01	0.02
C	5.227536395614066	-1.221124395614066	3.120533208771868	0.01	-0.01	-0.02
C	-0.21569039561406608	-4.98642502192967	0.7974273956140661	-0.01	0.05	0.01
C	4.293902604385934	-3.156813208771868	0.10172939561406608	-0.01	0.02	0.01
H	2.3484746043859337	-4.775181813157802	0.4692613956140661	-0.01	0.03	0.01
H	-0.6567537035094537	0.3440432526312071	-2.8477283298250575	-0.22	-0.12	-0.16
H	-3.8794595824562643	-0.12231879122813215	-0.03479039561406607	-0.04	-0.02	-0.01
H	-6.251193417543735	3.5809641868421984	1.2818583956140661	0.04	0.03	0.01
H	-5.200439208771868	2.909333604385934	2.555143395614066	0.02	-0.01	0.01
H	-6.8663926043859345	2.2772701868421983	2.357106	0.01	0.03	0.0
H	-1.668599604385934	4.052524252631207	-0.16780620877186786	0.01	-0.12	0.02
H	2.5500190219296694	2.320630648245273	-0.5218506263156036	-0.05	-0.11	0.06
H	-1.1648983736843965	5.806374560526594	1.5136520438593393	-0.06	0.09	-0.1
H	-0.033767582456264295	4.703301725439123	2.348605395614066	-0.04	0.17	0.01
H	-1.7665855824562644	4.296754142982858	2.2550517912281323	-0.04	0.13	0.02
H	3.2638858903516517	4.27446202192967	0.9885672745608767	0.25	-0.05	-0.17
H	3.271620186842198	2.629455395614066	1.6660267692984625	0.03	0.01	0.07
H	1.9665271210531894	3.7850408684219823	2.1267588131578017	0.18	0.3	-0.03
H	-1.6616751649125288	2.3882487912281323	-3.490685208771868	-0.08	0.02	0.02
H	0.08939760438593393	2.695625670174943	-3.308769351754727	-0.01	-0.16	-0.11
H	-1.065147461403075	3.2904568350874714	-2.0923352087718676	0.14	-0.08	0.02
H	-4.983937164912529	-0.682183	-2.060609	-0.08	0.0	0.0
H	-5.432760373684396	1.010943	-2.415460604385934	-0.06	0.0	0.01
H	-6.18869997807033	0.1403443956140661	-1.0585642087718679	-0.05	0.01	0.02
H	-4.257173395614066	-3.207400395614066	-1.887611	-0.01	-0.01	0.0
H	-5.541351395614066	-2.4557057912281324	0.115891	-0.01	-0.02	0.0
H	-4.345118	-1.904257395614066	2.247362	0.0	-0.01	0.0
H	-0.6185433956140661	-4.074631395614066	-1.810907	-0.01	-0.01	0.0
H	-0.545704	-2.1384338131578016	2.617213208771868	0.0	0.03	-0.02
H	5.533650395614066	1.4361893956140661	1.980373	0.01	0.01	0.0
H	5.92143	2.6387347912281323	-0.1725366043859339	0.0	0.02	0.01
H	4.8248	1.8513551868421982	-2.271893604385934	0.0	0.03	0.01
H	3.2168346043859337	-1.5686572087718678	2.342249	-0.01	0.02	0.0
H	2.178278791228132	-0.8365012087718678	-2.371625791228132	0.02	0.02	-0.02
H	-0.412958	-2.6940459780703305	-3.919573791228132	0.0	-0.05	-0.02
H	-0.19930960438593393	-1.7545847912281323	-2.4173905824562643	0.01	-0.02	-0.04
H	-1.744585604385934	-1.6458181868421982	-3.3418975824562644	0.01	-0.03	-0.04
H	-1.647004395614066	-4.919716186842198	-3.852877604385934	-0.01	-0.03	0.01
H	-3.123225395614066	-3.9456337912281323	-3.621004	-0.01	-0.02	0.0
H	-2.762712791228132	-5.295924395614065	-2.5020682087718678	-0.02	-0.01	0.02
H	-1.2724783956140662	-0.2858096043859339	4.141902604385934	-0.01	0.01	-0.01
H	-2.883264791228132	-0.25303379122813213	3.372908791228132	-0.02	-0.02	0.02
H	-1.4329229780703305	0.1978303956140661	2.432257	-0.05	0.01	0.0
H	-1.5204532087718678	-2.747743395614066	4.830719208771868	0.02	-0.01	-0.02
H	-1.9490632087718678	-3.987967	3.618918813157802	0.02	0.0	-0.03
H	-3.170419604385934	-2.793244791228132	4.140507604385935	0.01	-0.02	-0.01
H	2.2398039780703303	0.3376496043859339	-4.513757791228132	0.05	-0.01	-0.02
H	3.7265995824562643	1.2287373956140661	-4.083595	0.04	0.01	0.0
H	2.2012547912281324	1.566751604385934	-3.2164421868421984	0.02	-0.01	-0.03
H	3.6240365824562644	-1.805878395614066	-4.195329604385934	0.04	-0.01	0.01
H	4.203653791228132	-2.267132604385934	-2.5730252087718677	0.02	0.01	0.02
H	5.055128186842198	-0.993636	-3.4939592087718676	0.03	0.0	0.02
H	2.9747023736843965	-0.2993796043859339	4.478965186842198	0.06	0.01	0.03
H	2.185306395614066	0.573686	3.1266003736843966	0.01	0.0	0.06
H	3.765602186842198	1.128430395614066	3.754756	0.03	0.01	0.0
H	5.019589395614066	-1.805426791228132	4.0341552087718675	0.01	-0.02	-0.02
H	5.8807543956140655	-0.37661039561406606	3.3946286043859337	0.01	-0.01	-0.01
H	5.763072	-1.861556	2.4076658131578017	0.0	0.0	-0.03
H	-0.9550427912281322	-5.273227417543736	0.039680791228132145	-0.02	0.04	0.02
H	0.4893446043859339	-5.81672902192967	0.9173637912281322	-0.01	0.05	0.02
H	-0.7591433956140661	-4.866589626315603	1.744121395614066	-0.01	0.06	0.01
H	4.953875395614066	-2.396827208771868	-0.3235774175437357	0.01	0.02	0.04
H	4.647182208771868	-3.372123395614066	1.1198643956140661	-0.02	-0.01	0.01
H	4.407535604385934	-4.082876813157802	-0.4770483956140661	-0.01	0.03	-0.01
114
O	-5.573474	1.630822	0.939886	-0.01	0.01	-0.01
Mg	0.557669	-0.608405	-0.023268999999999998	-0.01	0.07	-0.18
O	0.523562	0.9769619999999999	-1.301841	-0.04	-0.21	-0.16
C	-4.493213	1.920786	0.180843	0.0	-0.01	-0.01
N	-0.1765	-2.572353	0.269744	0.0	0.04	-0.03
N	2.471837	-1.472194	-0.018219	0.0	0.02	-0.01
O	-3.900319	2.972106	0.227301	0.03	-0.03	0.01
C	0.517155	-3.699356	0.439904	-0.01	0.04	-0.01
C	1.9126750000000001	-3.7885240000000002	0.338513	-0.01	0.03	0.0
C	2.83325	-2.7401340000000003	0.123558	0.0	0.02	0.0
O	-3.022673	1.088181	-1.5188220000000001	-0.05	-0.05	-0.04
C	-1.800542	0.7115929999999999	-1.1356410000000001	-0.04	-0.04	-0.04
C	-0.634404	1.114766	-2.0493449999999998	-0.03	-0.14	-0.1
C	-4.146373	0.722741	-0.687459	-0.04	-0.01	-0.01
O	-1.59836	0.036927	-0.131431	-0.05	0.07	0.05
C	-5.991219999999999	2.6783799999999998	1.837713	0.02	0.02	0.0
O	-0.505612	2.6057010000000003	0.671478	0.07	0.01	0.24
C	0.688134	2.031645	0.546975	0.02	0.09	0.32
O	0.89844	0.996709	1.2111230000000002	0.01	-0.01	0.1
O	1.455037	4.008363	-0.758576	0.0	-0.06	0.03
C	0.32907400000000003	4.687648	-0.48733099999999996	0.01	-0.04	0.02
C	-0.722608	4.017234	0.389599	0.01	0.0	0.05
C	1.860067	2.9024310000000004	0.09269	0.02	-0.02	0.07
O	0.118153	5.775394	-0.967751	0.0	-0.06	-0.01
C	-0.930709	4.754510000000001	1.715354	-0.04	0.1	-0.01
C	2.6305	3.433807	1.309926	0.13	0.06	-0.02
C	-0.836841	2.457311	-2.768926	0.0	-0.09	-0.04
C	-5.267576	0.277182	-1.6209010000000001	-0.06	0.0	0.01
C	-1.622777	-2.663819	0.27302	0.0	0.03	-0.02
C	3.474835	-0.428986	-0.060972	0.0	0.02	0.0
C	-2.29624	-3.014583	-0.944635	0.0	0.01	-0.01
C	-3.713957	-2.912964	-0.985308	-0.01	0.0	-0.01
C	-4.444465999999999	-2.499101	0.15029199999999998	-0.01	-0.01	-0.01
C	-3.763878	-2.186885	1.3542930000000002	0.0	0.0	-0.01
C	-2.350864	-2.282505	1.4448320000000001	0.0	0.01	-0.01
C	-1.498424	-3.5128	-2.184138	-0.01	-0.01	-0.01
C	-1.629027	-1.9687480000000002	2.7798499999999997	0.0	0.01	-0.01
C	4.111644	0.009713999999999999	1.148468	0.0	0.02	0.0
C	4.999076	1.1088799999999999	1.075404	0.0	0.01	0.0
C	5.232023	1.784252	-0.13777899999999998	0.0	0.02	0.01
C	4.605957	1.338969	-1.322891	0.0	0.02	0.01
C	3.7338910000000003	0.221995	-1.31557	0.01	0.02	0.0
C	3.8827920000000002	-0.696413	2.515104	0.01	0.01	0.0
C	3.1277329999999997	-0.333994	-2.637292	0.02	0.01	-0.01
C	-0.935867	-2.322432	-3.025325	0.0	-0.03	-0.03
C	-2.315675	-4.481213	-3.092543	-0.01	-0.02	0.01
C	-1.821143	-0.482539	3.207293	-0.02	0.0	0.0
C	-2.102942	-2.935294	3.9124890000000003	0.01	0.0	-0.02
C	2.811677	0.775232	-3.6819119999999996	0.04	0.0	-0.02
C	4.0694859999999995	-1.422533	-3.264034	0.03	0.0	0.01
C	3.156408	0.24252400000000002	3.5347229999999996	0.03	0.01	0.02
C	5.227879	-1.2214669999999999	3.119848	0.01	-0.01	-0.02
C	-0.216033	-4.984712	0.79777	-0.01	0.05	0.01
C	4.29356	-3.1561280000000003	0.102072	-0.01	0.02	0.01
H	2.3481319999999997	-4.774154	0.469604	-0.01	0.03	0.01
H	-0.6642910000000001	0.339932	-2.8532100000000002	-0.22	-0.12	-0.16
H	-3.88083	-0.123004	-0.035133	-0.04	-0.02	-0.01
H	-6.249823	3.581992	1.282201	0.04	0.03	0.01
H	-5.1997539999999995	2.908991	2.555486	0.02	-0.01	0.01
H	-6.86605	2.278298	2.357106	0.01	0.03	0.0
H	-1.668257	4.048413	-0.16712100000000002	0.01	-0.12	0.02
H	2.5483059999999997	2.316862	-0.519795	-0.05	-0.11	0.06
H	-1.166954	5.809457999999999	1.5102259999999998	-0.06	0.09	-0.1
H	-0.035137999999999996	4.7091259999999995	2.348948	-0.04	0.17	0.01
H	-1.767956	4.301208	2.255737	-0.04	0.13	0.02
H	3.2724509999999998	4.272749	0.9827429999999999	0.25	-0.05	-0.17
H	3.272648	2.629798	1.6684249999999998	0.03	0.01	0.07
H	1.9726940000000002	3.795319	2.125731	0.18	0.3	-0.03
H	-1.6644160000000001	2.388934	-3.49	-0.08	0.02	0.02
H	0.089055	2.690144	-3.312538	-0.01	-0.16	-0.11
H	-1.0603509999999998	3.287716	-2.09165	0.14	-0.08	0.02
H	-4.986678	-0.682183	-2.060609	-0.08	0.0	0.0
H	-5.434816	1.010943	-2.415118	-0.06	0.0	0.01
H	-6.190413	0.140687	-1.057879	-0.05	0.01	0.02
H	-4.257516	-3.2077430000000002	-1.887611	-0.01	-0.01	0.0
H	-5.541694	-2.456391	0.115891	-0.01	-0.02	0.0
H	-4.345118	-1.9045999999999998	2.247362	0.0	-0.01	0.0
H	-0.618886	-4.074974	-1.810907	-0.01	-0.01	0.0
H	-0.545704	-2.137406	2.616528	0.0	0.03	-0.02
H	5.533993	1.436532	1.980373	0.01	0.01	0.0
H	5.92143	2.63942	-0.17219399999999999	0.0	0.02	0.01
H	4.8248	1.852383	-2.271551	0.0	0.03	0.01
H	3.2164919999999997	-1.567972	2.342249	-0.01	0.02	0.0
H	2.1789639999999997	-0.835816	-2.372311	0.02	0.02	-0.02
H	-0.412958	-2.6957590000000002	-3.9202589999999997	0.0	-0.05	-0.02
H	-0.198967	-1.75527	-2.418761	0.01	-0.02	-0.04
H	-1.7442430000000002	-1.6468459999999998	-3.343268	0.01	-0.03	-0.04
H	-1.647347	-4.920744	-3.852535	-0.01	-0.03	0.01
H	-3.123568	-3.946319	-3.621004	-0.01	-0.02	0.0
H	-2.7633979999999996	-5.296266999999999	-2.501383	-0.02	-0.01	0.02
H	-1.272821	-0.28546699999999997	4.14156	-0.01	0.01	-0.01
H	-2.8839499999999996	-0.253719	3.3735939999999998	-0.02	-0.02	0.02
H	-1.434636	0.19817300000000002	2.432257	-0.05	0.01	0.0
H	-1.519768	-2.7480860000000003	4.8300339999999995	0.02	-0.01	-0.02
H	-1.948378	-3.987967	3.617891	0.02	0.0	-0.03
H	-3.170077	-2.7939299999999996	4.1401650000000005	0.01	-0.02	-0.01
H	2.241517	0.33730699999999997	-4.514443	0.05	-0.01	-0.02
H	3.72797	1.22908	-4.083595	0.04	0.01	0.0
H	2.20194	1.5664090000000002	-3.21747	0.02	-0.01	-0.03
H	3.625407	-1.8062209999999999	-4.194987	0.04	-0.01	0.01
H	4.204339	-2.26679	-2.57234	0.02	0.01	0.02
H	5.056156	-0.993636	-3.493274	0.03	0.0	0.02
H	2.976758	-0.299037	4.479993	0.06	0.01	0.03
H	2.185649	0.573686	3.128656	0.01	0.0	0.06
H	3.7666299999999997	1.1287729999999998	3.754756	0.03	0.01	0.0
H	5.019932	-1.806112	4.0334699999999994	0.01	-0.02	-0.02
H	5.881097	-0.376953	3.3942859999999997	0.01	-0.01	-0.01
H	5.763072	-1.861556	2.406638	0.0	0.0	-0.03
H	-0.955728	-5.271857000000001	0.040366	-0.02	0.04	0.02
H	0.489002	-5.815016	0.918049	-0.01	0.05	0.02
H	-0.759486	-4.864534	1.7444639999999998	-0.01	0.06	0.01
H	4.954218	-2.396142	-0.322207	0.01	0.02	0.04
H	4.646497	-3.372466	1.120207	-0.02	-0.01	0.01
H	4.407193	-4.081849	-0.477391	-0.01	0.03	-0.01
114
O	-5.573131395614066	1.6304793956140662	0.9402286043859339	-0.01	0.01	-0.01
Mg	0.5580116043859339	-0.6108032307015375	-0.01710212105318934	-0.01	0.07	-0.18
O	0.5249324175437357	0.9841566921046123	-1.296359329825057	-0.04	-0.21	-0.16
C	-4.493213	1.921128604385934	0.18118560438593392	0.0	-0.01	-0.01
N	-0.1765	-2.573723417543736	0.2707718131578018	0.0	0.04	-0.03
N	2.471837	-1.4728792087718678	-0.017876395614066076	0.0	0.02	-0.01
O	-3.9013468131578017	2.973133813157802	0.22695839561406608	0.03	-0.03	0.01
C	0.517497604385934	-3.7007264175437355	0.44024660438593394	-0.01	0.04	-0.01
C	1.913017604385934	-3.789551813157802	0.338513	-0.01	0.03	0.0
C	2.83325	-2.740819208771868	0.123558	0.0	0.02	0.0
O	-3.0209599780703305	1.0898940219296696	-1.5174515824562644	-0.05	-0.05	-0.04
C	-1.7991715824562644	0.7129634175437356	-1.1342705824562644	-0.04	-0.04	-0.04
C	-0.6333761868421982	1.119562461403075	-2.0459189561406608	-0.03	-0.14	-0.1
C	-4.145002582456264	0.7230836043859339	-0.6871163956140661	-0.04	-0.01	-0.01
O	-1.5966469780703305	0.034528769298462526	-0.13314402192966962	-0.05	0.07	0.05
C	-5.991905208771867	2.677694791228132	1.837713	0.02	0.02	0.0
O	-0.5080102307015375	2.6053583956140662	0.6632554947375857	0.07	0.01	0.24
C	0.6874487912281322	2.0285615605265948	0.5360116596501144	0.02	0.09	0.32
O	0.8980973956140661	0.9970516043859339	1.2076969561406607	0.01	-0.01	0.1
O	1.455037	4.010418626315603	-0.7596038131578018	0.0	-0.06	0.03
C	0.3287313956140661	4.6890184175437355	-0.4880162087718678	0.01	-0.04	0.02
C	-0.722950604385934	4.017234	0.3878859780703304	0.01	0.0	0.05
C	1.859381791228132	2.903116208771868	0.09029176929846253	0.02	-0.02	0.07
O	0.118153	5.777449626315604	-0.9674083956140661	0.0	-0.06	-0.01
C	-0.9293385824562643	4.751083956140661	1.7156966043859339	-0.04	0.1	-0.01
C	2.626046142982859	3.4317513736843965	1.3106112087718678	0.13	0.06	-0.02
C	-0.836841	2.460394439473405	-2.7675555824562643	0.0	-0.09	-0.04
C	-5.265520373684397	0.277182	-1.621243604385934	-0.06	0.0	0.01
C	-1.622777	-2.664846813157802	0.2737052087718678	0.0	0.03	-0.02
C	3.474835	-0.4296712087718678	-0.060972	0.0	0.02	0.0
C	-2.29624	-3.014925604385934	-0.9442923956140661	0.0	0.01	-0.01
C	-3.713614395614066	-2.912964	-0.984965395614066	-0.01	0.0	-0.01
C	-4.444123395614065	-2.498758395614066	0.1506346043859339	-0.01	-0.01	-0.01
C	-3.763878	-2.186885	1.354635604385934	0.0	0.0	-0.01
C	-2.350864	-2.282847604385934	1.445174604385934	0.0	0.01	-0.01
C	-1.4980813956140662	-3.512457395614066	-2.183795395614066	-0.01	-0.01	-0.01
C	-1.629027	-1.969090604385934	2.7801926043859337	0.0	0.01	-0.01
C	4.111644	0.00902879122813215	1.148468	0.0	0.02	0.0
C	4.999076	1.108537395614066	1.075404	0.0	0.01	0.0
C	5.232023	1.783566791228132	-0.1381216043859339	0.0	0.02	0.01
C	4.605957	1.3382837912281322	-1.3232336043859338	0.0	0.02	0.01
C	3.7335483956140663	0.22130979122813216	-1.31557	0.01	0.02	0.0
C	3.882449395614066	-0.6967556043859339	2.515104	0.01	0.01	0.0
C	3.127047791228132	-0.33433660438593393	-2.636949395614066	0.02	0.01	-0.01
C	-0.935867	-2.3214041868421984	-3.0242971868421984	0.0	-0.03	-0.03
C	-2.315332395614066	-4.480527791228132	-3.092885604385934	-0.01	-0.02	0.01
C	-1.8204577912281321	-0.482539	3.207293	-0.02	0.0	0.0
C	-2.103284604385934	-2.935294	3.913174208771868	0.01	0.0	-0.02
C	2.8103065824562643	0.775232	-3.681226791228132	0.04	0.0	-0.02
C	4.068458186842197	-1.422533	-3.264376604385934	0.03	0.0	0.01
C	3.1553801868421982	0.2421813956140661	3.534037791228132	0.03	0.01	0.02
C	5.227536395614066	-1.221124395614066	3.120533208771868	0.01	-0.01	-0.02
C	-0.21569039561406608	-4.98642502192967	0.7974273956140661	-0.01	0.05	0.01
C	4.293902604385934	-3.156813208771868	0.10172939561406608	-0.01	0.02	0.01
H	2.3484746043859337	-4.775181813157802	0.4692613956140661	-0.01	0.03	0.01
H	-0.6567537035094537	0.34404325263120705	-2.8477283298250575	-0.22	-0.12	-0.16
H	-3.8794595824562643	-0.12231879122813215	-0.03479039561406607	-0.04	-0.02	-0.01
H	-6.251193417543735	3.5809641868421984	1.2818583956140661	0.04	0.03	0.01
H	-5.200439208771868	2.909333604385934	2.555143395614066	0.02	-0.01	0.01
H	-6.8663926043859345	2.2772701868421983	2.357106	0.01	0.03	0.0
H	-1.668599604385934	4.052524252631207	-0.16780620877186786	0.01	-0.12	0.02
H	2.5500190219296694	2.320630648245273	-0.5218506263156036	-0.05	-0.11	0.06
H	-1.1648983736843965	5.806374560526594	1.5136520438593393	-0.06	0.09	-0.1
H	-0.0337675824562643	4.703301725439123	2.348605395614066	-0.04	0.17	0.01
H	-1.7665855824562644	4.296754142982858	2.2550517912281323	-0.04	0.13	0.02
H	3.2638858903516517	4.27446202192967	0.9885672745608767	0.25	-0.05	-0.17
H	3.271620186842198	2.629455395614066	1.6660267692984625	0.03	0.01	0.07
H	1.9665271210531894	3.7850408684219823	2.1267588131578017	0.18	0.3	-0.03
H	-1.6616751649125288	2.3882487912281323	-3.490685208771868	-0.08	0.02	0.02
H	0.08939760438593393	2.695625670174943	-3.308769351754727	-0.01	-0.16	-0.11
H	-1.065147461403075	3.2904568350874714	-2.0923352087718676	0.14	-0.08	0.02
H	-4.983937164912529	-0.682183	-2.060609	-0.08	0.0	0.0
H	-5.432760373684396	1.010943	-2.415460604385934	-0.06	0.0	0.01
H	-6.18869997807033	0.1403443956140661	-1.0585642087718679	-0.05	0.01	0.02
H	-4.257173395614066	-3.207400395614066	-1.887611	-0.01	-0.01	0.0
H	-5.541351395614066	-2.4557057912281324	0.115891	-0.01	-0.02	0.0
H	-4.345118	-1.904257395614066	2.247362	0.0	-0.01	0.0
H	-0.6185433956140661	-4.074631395614066	-1.810907	-0.01	-0.01	0.0
H	-0.545704	-2.1384338131578016	2.617213208771868	0.0	0.03	-0.02
H	5.533650395614066	1.4361893956140661	1.980373	0.01	0.01	0.0
H	5.92143	2.6387347912281323	-0.1725366043859339	0.0	0.02	0.01
H	4.8248	1.8513551868421982	-2.271893604385934	0.0	0.03	0.01
H	3.2168346043859337	-1.5686572087718678	2.342249	-0.01	0.02	0.0
H	2.178278791228132	-0.8365012087718678	-2.371625791228132	0.02	0.02	-0.02
H	-0.412958	-2.6940459780703305	-3.919573791228132	0.0	-0.05	-0.02
H	-0.19930960438593393	-1.7545847912281323	-2.4173905824562643	0.01	-0.02	-0.04
H	-1.744585604385934	-1.6458181868421982	-3.3418975824562644	0.01	-0.03	-0.04
H	-1.647004395614066	-4.919716186842198	-3.852877604385934	-0.01	-0.03	0.01
H	-3.123225395614066	-3.9456337912281323	-3.621004	-0.01	-0.02	0.0
H	-2.762712791228132	-5.295924395614065	-2.5020682087718678	-0.02	-0.01	0.02
H	-1.2724783956140662	-0.2858096043859339	4.141902604385934	-0.01	0.01	-0.01
H	-2.883264791228132	-0.25303379122813213	3.372908791228132	-0.02	-0.02	0.02
H	-1.4329229780703305	0.1978303956140661	2.432257	-0.05	0.01	0.0
H	-1.5204532087718678	-2.747743395614066	4.830719208771868	0.02	-0.01	-0.02
H	-1.9490632087718678	-3.987967	3.618918813157802	0.02	0.0	-0.03
H	-3.170419604385934	-2.793244791228132	4.140507604385935	0.01	-0.02	-0.01
H	2.2398039780703303	0.3376496043859339	-4.513757791228132	0.05	-0.01	-0.02
H	3.7265995824562643	1.2287373956140661	-4.083595	0.04	0.01	0.0
H	2.2012547912281324	1.566751604385934	-3.2164421868421984	0.02	-0.01	-0.03
H	3.6240365824562644	-1.805878395614066	-4.195329604385934	0.04	-0.01	0.01
H	4.203653791228132	-2.267132604385934	-2.5730252087718677	0.02	0.01	0.02
H	5.055128186842198	-0.993636	-3.4939592087718676	0.03	0.0	0.02
H	2.9747023736843965	-0.2993796043859339	4.478965186842198	0.06	0.01	0.03
H	2.185306395614066	0.573686	3.1266003736843966	0.01	0.0	0.06
H	3.765602186842198	1.128430395614066	3.754756	0.03	0.01	0.0
H	5.019589395614066	-1.805426791228132	4.0341552087718675	0.01	-0.02	-0.02
H	5.8807543956140655	-0.37661039561406606	3.3946286043859337	0.01	-0.01	-0.01
H	5.763072	-1.861556	2.4076658131578017	0.0	0.0	-0.03
H	-0.9550427912281322	-5.273227417543736	0.03968079122813215	-0.02	0.04	0.02
H	0.4893446043859339	-5.81672902192967	0.9173637912281322	-0.01	0.05	0.02
H	-0.7591433956140661	-4.866589626315603	1.744121395614066	-0.01	0.06	0.01
H	4.953875395614066	-2.396827208771868	-0.3235774175437357	0.01	0.02	0.04
H	4.647182208771868	-3.372123395614066	1.1198643956140661	-0.02	-0.01	0.01
H	4.407535604385934	-4.082876813157802	-0.4770483956140661	-0.01	0.03	-0.01
114
O	-5.572137118960625	1.6294851189606248	0.9412228810393753	-0.01	0.01	-0.01
Mg	0.5590058810393753	-0.6177631672756276	7.948587087566461E-4	-0.01	0.07	-0.18
O	0.5289095241575015	1.0050365018268828	-1.280450903369994	-0.04	-0.21	-0.16
C	-4.493213	1.9221228810393753	0.18217988103937538	0.0	-0.01	-0.01
N	-0.1765	-2.5777005241575015	0.2737546431181261	0.0	0.04	-0.03
N	2.471837	-1.4748677620787507	-0.01688211896062463	0.0	0.02	-0.01
O	-3.904329643118126	2.976116643118126	0.22596411896062463	0.03	-0.03	0.01
C	0.5184918810393754	-3.7047035241575013	0.44124088103937537	-0.01	0.04	-0.01
C	1.9140118810393754	-3.792534643118126	0.338513	-0.01	0.03	0.0
C	2.83325	-2.7428077620787508	0.123558	0.0	0.02	0.0
O	-3.0159885948031233	1.094865405196877	-1.5134744758424987	-0.05	-0.05	-0.04
C	-1.7951944758424987	0.7169405241575014	-1.1302934758424987	-0.04	-0.04	-0.04
C	-0.6303933568818738	1.1334823345512552	-2.035976189606246	-0.03	-0.14	-0.1
C	-4.141025475842499	0.7240778810393753	-0.6861221189606247	-0.04	-0.01	-0.01
O	-1.5916755948031232	0.027568832724372425	-0.13811540519687684	-0.05	0.07	0.05
C	-5.99389376207875	2.6757062379212493	1.837713	0.02	0.02	0.0
O	-0.5149701672756276	2.604364118960625	0.6393928550549911	0.07	0.01	0.24
C	0.6854602379212493	2.0196130706456215	0.5041948067399882	0.02	0.09	0.32
O	0.8971031189606247	0.9980458810393753	1.1977541896062465	0.01	-0.01	0.1
O	1.455037	4.016384286236252	-0.7625866431181262	0.0	-0.06	0.03
C	0.3277371189606247	4.692995524157501	-0.4900047620787507	0.01	-0.04	0.02
C	-0.7239448810393754	4.017234	0.3829145948031232	0.01	0.0	0.05
C	1.8573932379212492	2.905104762078751	0.08333183272437242	0.02	-0.02	0.07
O	0.118153	5.783415286236252	-0.9664141189606247	0.0	-0.06	-0.01
C	-0.9253614758424985	4.741141189606247	1.7166908810393753	-0.04	0.1	-0.01
C	2.61312054648812	3.425785713763748	1.3125997620787506	0.13	0.06	-0.02
C	-0.836841	2.4693429293543785	-2.7635784758424986	0.0	-0.09	-0.04
C	-5.259554713763748	0.277182	-1.6222378810393754	-0.06	0.0	0.01
C	-1.622777	-2.667829643118126	0.27569376207875074	0.0	0.03	-0.02
C	3.474835	-0.43165976207875073	-0.060972	0.0	0.02	0.0
C	-2.29624	-3.0159198810393755	-0.9432981189606247	0.0	0.01	-0.01
C	-3.7126201189606247	-2.912964	-0.9839711189606246	-0.01	0.0	-0.01
C	-4.443129118960624	-2.4977641189606246	0.15162888103937536	-0.01	-0.01	-0.01
C	-3.763878	-2.186885	1.3556298810393754	0.0	0.0	-0.01
C	-2.350864	-2.2838418810393755	1.4461688810393754	0.0	0.01	-0.01
C	-1.4970871189606247	-3.5114631189606245	-2.1828011189606245	-0.01	-0.01	-0.01
C	-1.629027	-1.9700848810393754	2.781186881039375	0.0	0.01	-0.01
C	4.111644	0.007040237921249262	1.148468	0.0	0.02	0.0
C	4.999076	1.1075431189606246	1.075404	0.0	0.01	0.0
C	5.232023	1.7815782379212493	-0.13911588103937536	0.0	0.02	0.01
C	4.605957	1.3362952379212494	-1.3242278810393753	0.0	0.02	0.01
C	3.732554118960625	0.21932123792124927	-1.31557	0.01	0.02	0.0
C	3.881455118960625	-0.6977498810393753	2.515104	0.01	0.01	0.0
C	3.125059237921249	-0.33533088103937536	-2.6359551189606245	0.02	0.01	-0.01
C	-0.935867	-2.318421356881874	-3.021314356881874	0.0	-0.03	-0.03
C	-2.3143381189606247	-4.478539237921249	-3.0938798810393755	-0.01	-0.02	0.01
C	-1.8184692379212493	-0.482539	3.207293	-0.02	0.0	0.0
C	-2.1042788810393755	-2.935294	3.915162762078751	0.01	0.0	-0.02
C	2.8063294758424986	0.775232	-3.679238237921249	0.04	0.0	-0.02
C	4.065475356881874	-1.422533	-3.2653708810393756	0.03	0.0	0.01
C	3.152397356881874	0.24118711896062464	3.532049237921249	0.03	0.01	0.02
C	5.226542118960625	-1.2201301189606246	3.1225217620787507	0.01	-0.01	-0.02
C	-0.21469611896062463	-4.991396405196877	0.7964331189606246	-0.01	0.05	0.01
C	4.294896881039375	-3.1588017620787507	0.10073511896062463	-0.01	0.02	0.01
H	2.349468881039375	-4.778164643118126	0.4682671189606247	-0.01	0.03	0.01
H	-0.634879617133742	0.3559745724725044	-2.8318199033699942	-0.22	-0.12	-0.16
H	-3.8754824758424986	-0.12033023792124926	-0.03379611896062463	-0.04	-0.02	-0.01
H	-6.255170524157501	3.577981356881874	1.2808641189606247	0.04	0.03	0.01
H	-5.2024277620787505	2.9103278810393753	2.5541491189606247	0.02	-0.01	0.01
H	-6.8673868810393754	2.274287356881874	2.357106	0.01	0.03	0.0
H	-1.6695938810393753	4.064455572472504	-0.16979476207875074	0.01	-0.12	0.02
H	2.5549904051968766	2.331567691433129	-0.5278162862362522	-0.05	-0.11	0.06
H	-1.1589327137637477	5.7974260706456215	1.5235948103937536	-0.06	0.09	-0.1
H	-0.029790475842498526	4.686399022330619	2.3476111189606246	-0.04	0.17	0.01
H	-1.7626084758424987	4.28382854648812	2.2530632379212494	-0.04	0.13	0.02
H	3.239028974015616	4.279433405196877	1.0054699776693812	0.25	-0.05	-0.17
H	3.268637356881874	2.6284611189606246	1.6590668327243723	0.03	0.01	0.07
H	1.9486301412912435	3.755212568818739	2.129741643118126	0.18	0.3	-0.03
H	-1.653720951684997	2.3862602379212494	-3.4926737620787507	-0.08	0.02	0.02
H	0.09039188103937537	2.711534096630006	-3.297832308566871	-0.01	-0.16	-0.11
H	-1.0790673345512551	3.298411048315003	-2.0943237620787505	0.14	-0.08	0.02
H	-4.975982951684998	-0.682183	-2.060609	-0.08	0.0	0.0
H	-5.426794713763748	1.010943	-2.4164548810393756	-0.06	0.0	0.01
H	-6.1837285948031235	0.13935011896062463	-1.0605527620787507	-0.05	0.01	0.02
H	-4.256179118960625	-3.2064061189606248	-1.887611	-0.01	-0.01	0.0
H	-5.540357118960625	-2.4537172379212495	0.115891	-0.01	-0.02	0.0
H	-4.345118	-1.9032631189606246	2.247362	0.0	-0.01	0.0
H	-0.6175491189606247	-4.073637118960625	-1.810907	-0.01	-0.01	0.0
H	-0.545704	-2.141416643118126	2.6192017620787507	0.0	0.03	-0.02
H	5.532656118960625	1.4351951189606247	1.980373	0.01	0.01	0.0
H	5.92143	2.6367462379212494	-0.17353088103937536	0.0	0.02	0.01
H	4.8248	1.848372356881874	-2.2728878810393756	0.0	0.03	0.01
H	3.217828881039375	-1.5706457620787506	2.342249	-0.01	0.02	0.0
H	2.176290237921249	-0.8384897620787507	-2.3696372379212494	0.02	0.02	-0.02
H	-0.412958	-2.6890745948031234	-3.9175852379212492	0.0	-0.05	-0.02
H	-0.20030388103937538	-1.7525962379212494	-2.4134134758424985	0.01	-0.02	-0.04
H	-1.7455798810393754	-1.6428353568818739	-3.3379204758424987	0.01	-0.03	-0.04
H	-1.6460101189606247	-4.916733356881874	-3.8538718810393755	-0.01	-0.03	0.01
H	-3.1222311189606247	-3.9436452379212494	-3.621004	-0.01	-0.02	0.0
H	-2.760724237921249	-5.294930118960624	-2.5040567620787506	-0.02	-0.01	0.02
H	-1.2714841189606247	-0.2868038810393753	4.142896881039375	-0.01	0.01	-0.01
H	-2.881276237921249	-0.2510452379212493	3.3709202379212493	-0.02	-0.02	0.02
H	-1.4279515948031232	0.19683611896062464	2.432257	-0.05	0.01	0.0
H	-1.5224417620787507	-2.746749118960625	4.83270776207875	0.02	-0.01	-0.02
H	-1.9510517620787506	-3.987967	3.621901643118126	0.02	0.0	-0.03
H	-3.1714138810393755	-2.791256237921249	4.1415018810393756	0.01	-0.02	-0.01
H	2.234832594803123	0.3386438810393753	-4.511769237921249	0.05	-0.01	-0.02
H	3.7226224758424986	1.2277431189606247	-4.083595	0.04	0.01	0.0
H	2.1992662379212495	1.5677458810393754	-3.213459356881874	0.02	-0.01	-0.03
H	3.6200594758424987	-1.8048841189606246	-4.196323881039375	0.04	-0.01	0.01
H	4.201665237921249	-2.2681268810393753	-2.5750137620787505	0.02	0.01	0.02
H	5.052145356881874	-0.993636	-3.4959477620787505	0.03	0.0	0.02
H	2.968736713763748	-0.30037388103937535	4.475982356881874	0.06	0.01	0.03
H	2.1843121189606247	0.573686	3.120634713763748	0.01	0.0	0.06
H	3.7626193568818738	1.1274361189606246	3.754756	0.03	0.01	0.0
H	5.018595118960625	-1.8034382379212492	4.03614376207875	0.01	-0.02	-0.02
H	5.879760118960625	-0.37561611896062463	3.395622881039375	0.01	-0.01	-0.01
H	5.763072	-1.861556	2.410648643118126	0.0	0.0	-0.03
H	-0.9530542379212493	-5.277204524157502	0.03769223792124926	-0.02	0.04	0.02
H	0.49033888103937534	-5.821700405196877	0.9153752379212493	-0.01	0.05	0.02
H	-0.7581491189606246	-4.872555286236252	1.7431271189606246	-0.01	0.06	0.01
H	4.952881118960625	-2.3988157620787507	-0.32755452415750147	0.01	0.02	0.04
H	4.649170762078751	-3.3711291189606247	1.1188701189606247	-0.02	-0.01	0.01
H	4.408529881039375	-4.085859643118126	-0.47605411896062466	-0.01	0.03	-0.01
114
O	-5.570588496766048	1.6279364967660475	0.9427715032339526	-0.01	0.01	-0.01
Mg	0.5605545032339526	-0.6286035226376688	0.028670058211148375	-0.01	0.07	-0.18
O	0.5351040129358108	1.0375575679130065	-1.255672948256757	-0.04	-0.21	-0.16
C	-4.493213	1.9236715032339526	0.1837285032339527	0.0	-0.01	-0.01
N	-0.1765	-2.5838950129358107	0.2784005097018581	0.0	0.04	-0.03
N	2.471837	-1.4779650064679053	-0.015333496766047313	0.0	0.02	-0.01
O	-3.908975509701858	2.980762509701858	0.2244154967660473	0.03	-0.03	0.01
C	0.5200405032339527	-3.7108980129358105	0.4427895032339527	-0.01	0.04	-0.01
C	1.9155605032339527	-3.797180509701858	0.338513	-0.01	0.03	0.0
C	2.83325	-2.7459050064679054	0.123558	0.0	0.02	0.0
O	-3.0082454838302364	1.1026085161697634	-1.5072799870641893	-0.05	-0.05	-0.04
C	-1.7889999870641893	0.7231350129358107	-1.1240989870641893	-0.04	-0.04	-0.04
C	-0.6257474902981419	1.1551630452753376	-2.020489967660473	-0.03	-0.14	-0.1
C	-4.1348309870641895	0.7256265032339526	-0.6845734967660474	-0.04	-0.01	-0.01
O	-1.5839324838302367	0.01672847736233119	-0.14585851616976342	-0.05	0.07	0.05
C	-5.996991006467905	2.6726089935320947	1.837713	0.02	0.02	0.0
O	-0.5258105226376688	2.6028154967660475	0.6022259223851355	0.07	0.01	0.24
C	0.6823629935320946	2.0056754708944258	0.454638896513514	0.02	0.09	0.32
O	0.8955544967660474	0.9995945032339526	1.1822679676604733	0.01	-0.01	0.1
O	1.455037	4.025676019403716	-0.7672325097018581	0.0	-0.06	0.03
C	0.32618849676604733	4.69919001293581	-0.49310200646790536	0.01	-0.04	0.02
C	-0.7254935032339527	4.017234	0.3751714838302366	0.01	0.0	0.05
C	1.8542959935320946	2.9082020064679055	0.07249147736233119	0.02	-0.02	0.07
O	0.118153	5.792707019403716	-0.9648654967660474	0.0	-0.06	-0.01
C	-0.9191669870641892	4.725654967660473	1.7182395032339526	-0.04	0.1	-0.01
C	2.592988457958615	3.4164939805962837	1.3156970064679052	0.13	0.06	-0.02
C	-0.836841	2.483280529105574	-2.7573839870641894	0.0	-0.09	-0.04
C	-5.250262980596284	0.277182	-1.6237865032339527	-0.06	0.0	0.01
C	-1.622777	-2.672475509701858	0.2787910064679054	0.0	0.03	-0.02
C	3.474835	-0.4347570064679054	-0.060972	0.0	0.02	0.0
C	-2.29624	-3.0174685032339528	-0.9417494967660474	0.0	0.01	-0.01
C	-3.7110714967660474	-2.912964	-0.9824224967660473	-0.01	0.0	-0.01
C	-4.441580496766047	-2.4962154967660473	0.15317750323395268	-0.01	-0.01	-0.01
C	-3.763878	-2.186885	1.3571785032339527	0.0	0.0	-0.01
C	-2.350864	-2.2853905032339528	1.4477175032339527	0.0	0.01	-0.01
C	-1.4955384967660474	-3.509914496766047	-2.181252496766047	-0.01	-0.01	-0.01
C	-1.629027	-1.9716335032339527	2.7827355032339525	0.0	0.01	-0.01
C	4.111644	0.003942993532094626	1.148468	0.0	0.02	0.0
C	4.999076	1.1059944967660473	1.075404	0.0	0.01	0.0
C	5.232023	1.7784809935320947	-0.1406645032339527	0.0	0.02	0.01
C	4.605957	1.3331979935320948	-1.3257765032339526	0.0	0.02	0.01
C	3.7310054967660475	0.21622399353209465	-1.31557	0.01	0.02	0.0
C	3.8799064967660475	-0.6992985032339526	2.515104	0.01	0.01	0.0
C	3.1219619935320946	-0.3368795032339527	-2.634406496766047	0.02	0.01	-0.01
C	-0.935867	-2.3137754902981422	-3.016668490298142	0.0	-0.03	-0.03
C	-2.3127894967660474	-4.475441993532095	-3.095428503233953	-0.01	-0.02	0.01
C	-1.8153719935320947	-0.482539	3.207293	-0.02	0.0	0.0
C	-2.105827503233953	-2.935294	3.9182600064679054	0.01	0.0	-0.02
C	2.8001349870641894	0.775232	-3.6761409935320946	0.04	0.0	-0.02
C	4.060829490298142	-1.422533	-3.266919503233953	0.03	0.0	0.01
C	3.147751490298142	0.23963849676604732	3.5289519935320945	0.03	0.01	0.02
C	5.224993496766047	-1.2185814967660473	3.1256190064679052	0.01	-0.01	-0.02
C	-0.2131474967660473	-4.999139516169763	0.7948844967660473	-0.01	0.05	0.01
C	4.296445503233953	-3.1618990064679053	0.09918649676604732	-0.01	0.02	0.01
H	2.3510175032339524	-4.782810509701858	0.4667184967660473	-0.01	0.03	0.01
H	-0.600809928853041	0.3745580388074322	-2.807041948256757	-0.22	-0.12	-0.16
H	-3.8692879870641894	-0.11723299353209463	-0.03224749676604731	-0.04	-0.02	-0.01
H	-6.26136501293581	3.5733354902981422	1.2793154967660474	0.04	0.03	0.01
H	-5.205525006467905	2.9118765032339526	2.5526004967660474	0.02	-0.01	0.01
H	-6.868935503233953	2.269641490298142	2.357106	0.01	0.03	0.0
H	-1.6711425032339526	4.083039038807432	-0.17289200646790537	0.01	-0.12	0.02
H	2.5627335161697635	2.3486025355734794	-0.5371080194037162	-0.05	-0.11	0.06
H	-1.149640980596284	5.783488470894426	1.5390810323395268	-0.06	0.09	-0.1
H	-0.02359598706418925	4.660072445022804	2.3460624967660473	-0.04	0.17	0.01
H	-1.7564139870641893	4.2636964579586145	2.249965993532095	-0.04	0.13	0.02
H	3.2003134191511826	4.2871765161697635	1.0317965549771957	0.25	-0.05	-0.17
H	3.263991490298142	2.6269124967660473	1.6482264773623312	0.03	0.01	0.07
H	1.9207549417888516	3.7087539029814196	2.134387509701858	0.18	0.3	-0.03
H	-1.6413319741283785	2.383162993532095	-3.4957710064679053	-0.08	0.02	0.02
H	0.09194050323395268	2.7363120517432433	-3.2807974644265205	-0.01	-0.16	-0.11
H	-1.1007480452753375	3.3108000258716217	-2.097421006467905	0.14	-0.08	0.02
H	-4.963593974128379	-0.682183	-2.060609	-0.08	0.0	0.0
H	-5.417502980596284	1.010943	-2.418003503233953	-0.06	0.0	0.01
H	-6.175985483830237	0.1378014967660473	-1.0636500064679053	-0.05	0.01	0.02
H	-4.2546304967660475	-3.2048574967660475	-1.887611	-0.01	-0.01	0.0
H	-5.538808496766047	-2.450619993532095	0.115891	-0.01	-0.02	0.0
H	-4.345118	-1.9017144967660473	2.247362	0.0	-0.01	0.0
H	-0.6160004967660474	-4.072088496766048	-1.810907	-0.01	-0.01	0.0
H	-0.545704	-2.1460625097018577	2.6222990064679053	0.0	0.03	-0.02
H	5.531107496766047	1.4336464967660474	1.980373	0.01	0.01	0.0
H	5.92143	2.633648993532095	-0.1750795032339527	0.0	0.02	0.01
H	4.8248	1.8437264902981418	-2.274436503233953	0.0	0.03	0.01
H	3.2193775032339524	-1.5737430064679052	2.342249	-0.01	0.02	0.0
H	2.1731929935320946	-0.8415870064679054	-2.3665399935320948	0.02	0.02	-0.02
H	-0.412958	-2.6813314838302365	-3.9144879935320946	0.0	-0.05	-0.02
H	-0.2018525032339527	-1.7494989935320948	-2.4072189870641894	0.01	-0.02	-0.04
H	-1.7471285032339527	-1.6381894902981418	-3.3317259870641895	0.01	-0.03	-0.04
H	-1.6444614967660474	-4.912087490298142	-3.855420503233953	-0.01	-0.03	0.01
H	-3.1206824967660474	-3.940547993532095	-3.621004	-0.01	-0.02	0.0
H	-2.7576269935320945	-5.293381496766047	-2.507154006467905	-0.02	-0.01	0.02
H	-1.2699354967660474	-0.2883525032339527	4.144445503233952	-0.01	0.01	-0.01
H	-2.8781789935320945	-0.24794799353209462	3.3678229935320947	-0.02	-0.02	0.02
H	-1.4202084838302367	0.1952874967660473	2.432257	-0.05	0.01	0.0
H	-1.5255390064679053	-2.7452004967660475	4.835805006467905	0.02	-0.01	-0.02
H	-1.9541490064679052	-3.987967	3.626547509701858	0.02	0.0	-0.03
H	-3.172962503233953	-2.7881589935320945	4.143050503233953	0.01	-0.02	-0.01
H	2.227089483830236	0.34019250323395267	-4.5086719935320945	0.05	-0.01	-0.02
H	3.7164279870641894	1.2261944967660474	-4.083595	0.04	0.01	0.0
H	2.196168993532095	1.5692945032339527	-3.2088134902981422	0.02	-0.01	-0.03
H	3.6138649870641895	-1.8033354967660473	-4.197872503233953	0.04	-0.01	0.01
H	4.1985679935320945	-2.2696755032339526	-2.578111006467905	0.02	0.01	0.02
H	5.047499490298142	-0.993636	-3.499045006467905	0.03	0.0	0.02
H	2.9594449805962837	-0.3019225032339527	4.4713364902981425	0.06	0.01	0.03
H	2.1827634967660474	0.573686	3.111342980596284	0.01	0.0	0.06
H	3.757973490298142	1.1258874967660473	3.754756	0.03	0.01	0.0
H	5.0170464967660475	-1.8003409935320946	4.039241006467905	0.01	-0.02	-0.02
H	5.878211496766047	-0.3740674967660473	3.3971715032339524	0.01	-0.01	-0.01
H	5.763072	-1.861556	2.415294509701858	0.0	0.0	-0.03
H	-0.9499569935320946	-5.283399012935811	0.03459499353209462	-0.02	0.04	0.02
H	0.4918875032339527	-5.829443516169763	0.9122779935320946	-0.01	0.05	0.02
H	-0.7566004967660473	-4.881847019403716	1.7415784967660473	-0.01	0.06	0.01
H	4.951332496766048	-2.4019130064679053	-0.3337490129358107	0.01	0.02	0.04
H	4.652268006467906	-3.3695804967660474	1.1173214967660474	-0.02	-0.01	0.01
H	4.410078503233953	-4.090505509701858	-0.4745054967660473	-0.01	0.03	-0.01
114
O	-5.568637118960625	1.6259851189606247	0.9447228810393754	-0.01	0.01	-0.01
Mg	0.5625058810393754	-0.6422631672756276	0.06379485870875662	-0.01	0.07	-0.18
O	0.5429095241575015	1.0785365018268827	-1.224450903369994	-0.04	-0.21	-0.16
C	-4.493213	1.9256228810393754	0.18567988103937538	0.0	-0.01	-0.01
N	-0.1765	-2.5917005241575017	0.2842546431181261	0.0	0.04	-0.03
N	2.471837	-1.4818677620787508	-0.013382118960624632	0.0	0.02	-0.01
O	-3.914829643118126	2.986616643118126	0.22246411896062462	0.03	-0.03	0.01
C	0.5219918810393754	-3.7187035241575015	0.44474088103937537	-0.01	0.04	-0.01
C	1.9175118810393754	-3.803034643118126	0.338513	-0.01	0.03	0.0
C	2.83325	-2.749807762078751	0.123558	0.0	0.02	0.0
O	-2.9984885948031232	1.1123654051968768	-1.4994744758424987	-0.05	-0.05	-0.04
C	-1.7811944758424987	0.7309405241575014	-1.1162934758424987	-0.04	-0.04	-0.04
C	-0.6198933568818739	1.1824823345512552	-2.0009761896062463	-0.03	-0.14	-0.1
C	-4.1270254758424985	0.7275778810393754	-0.6826221189606246	-0.04	-0.01	-0.01
O	-1.5741755948031233	0.003068832724372427	-0.15561540519687683	-0.05	0.07	0.05
C	-6.00089376207875	2.668706237921249	1.837713	0.02	0.02	0.0
O	-0.5394701672756276	2.600864118960625	0.5553928550549911	0.07	0.01	0.24
C	0.6784602379212493	1.9881130706456216	0.39219480673998824	0.02	0.09	0.32
O	0.8936031189606246	1.0015458810393754	1.1627541896062463	0.01	-0.01	0.1
O	1.455037	4.037384286236252	-0.7730866431181261	0.0	-0.06	0.03
C	0.3242371189606247	4.706995524157501	-0.4970047620787507	0.01	-0.04	0.02
C	-0.7274448810393754	4.017234	0.36541459480312316	0.01	0.0	0.05
C	1.850393237921249	2.912104762078751	0.058831832724372424	0.02	-0.02	0.07
O	0.118153	5.804415286236252	-0.9629141189606246	0.0	-0.06	-0.01
C	-0.9113614758424985	4.706141189606247	1.7201908810393753	-0.04	0.1	-0.01
C	2.56762054648812	3.4047857137637476	1.3195997620787507	0.13	0.06	-0.02
C	-0.836841	2.5008429293543784	-2.7495784758424984	0.0	-0.09	-0.04
C	-5.238554713763748	0.277182	-1.6257378810393754	-0.06	0.0	0.01
C	-1.622777	-2.678329643118126	0.28269376207875074	0.0	0.03	-0.02
C	3.474835	-0.43865976207875074	-0.060972	0.0	0.02	0.0
C	-2.29624	-3.0194198810393753	-0.9397981189606246	0.0	0.01	-0.01
C	-3.709120118960625	-2.912964	-0.9804711189606246	-0.01	0.0	-0.01
C	-4.4396291189606245	-2.4942641189606247	0.15512888103937536	-0.01	-0.01	-0.01
C	-3.763878	-2.186885	1.3591298810393755	0.0	0.0	-0.01
C	-2.350864	-2.2873418810393753	1.4496688810393754	0.0	0.01	-0.01
C	-1.4935871189606247	-3.5079631189606246	-2.1793011189606246	-0.01	-0.01	-0.01
C	-1.629027	-1.9735848810393755	2.784686881039375	0.0	0.01	-0.01
C	4.111644	4.023792124926463E-5	1.148468	0.0	0.02	0.0
C	4.999076	1.1040431189606246	1.075404	0.0	0.01	0.0
C	5.232023	1.7745782379212491	-0.14261588103937536	0.0	0.02	0.01
C	4.605957	1.3292952379212493	-1.3277278810393753	0.0	0.02	0.01
C	3.729054118960625	0.21232123792124927	-1.31557	0.01	0.02	0.0
C	3.877955118960625	-0.7012498810393754	2.515104	0.01	0.01	0.0
C	3.118059237921249	-0.33883088103937536	-2.6324551189606247	0.02	0.01	-0.01
C	-0.935867	-2.307921356881874	-3.010814356881874	0.0	-0.03	-0.03
C	-2.310838118960625	-4.47153923792125	-3.0973798810393753	-0.01	-0.02	0.01
C	-1.8114692379212491	-0.482539	3.207293	-0.02	0.0	0.0
C	-2.1077788810393754	-2.935294	3.922162762078751	0.01	0.0	-0.02
C	2.7923294758424984	0.775232	-3.672238237921249	0.04	0.0	-0.02
C	4.054975356881873	-1.422533	-3.2688708810393754	0.03	0.0	0.01
C	3.141897356881874	0.23768711896062464	3.525049237921249	0.03	0.01	0.02
C	5.223042118960625	-1.2166301189606246	3.1295217620787508	0.01	-0.01	-0.02
C	-0.21119611896062462	-5.008896405196877	0.7929331189606246	-0.01	0.05	0.01
C	4.298396881039375	-3.165801762078751	0.09723511896062463	-0.01	0.02	0.01
H	2.352968881039375	-4.788664643118127	0.46476711896062467	-0.01	0.03	0.01
H	-0.557879617133742	0.3979745724725044	-2.775819903369994	-0.22	-0.12	-0.16
H	-3.8614824758424984	-0.11333023792124927	-0.030296118960624632	-0.04	-0.02	-0.01
H	-6.269170524157501	3.567481356881874	1.2773641189606246	0.04	0.03	0.01
H	-5.20942776207875	2.913827881039375	2.550649118960625	0.02	-0.01	0.01
H	-6.870886881039375	2.263787356881874	2.357106	0.01	0.03	0.0
H	-1.6730938810393754	4.1064555724725045	-0.17679476207875075	0.01	-0.12	0.02
H	2.5724904051968767	2.370067691433129	-0.5488162862362522	-0.05	-0.11	0.06
H	-1.1379327137637478	5.765926070645621	1.5585948103937537	-0.06	0.09	-0.1
H	-0.015790475842498528	4.626899022330618	2.3441111189606247	-0.04	0.17	0.01
H	-1.7486084758424987	4.23832854648812	2.2460632379212493	-0.04	0.13	0.02
H	3.1515289740156156	4.296933405196877	1.064969977669381	0.25	-0.05	-0.17
H	3.258137356881874	2.624961118960625	1.6345668327243723	0.03	0.01	0.07
H	1.8856301412912435	3.650212568818739	2.140241643118126	0.18	0.3	-0.03
H	-1.625720951684997	2.3792602379212493	-3.499673762078751	-0.08	0.02	0.02
H	0.09389188103937537	2.767534096630006	-3.259332308566871	-0.01	-0.16	-0.11
H	-1.128067334551255	3.326411048315003	-2.1013237620787506	0.14	-0.08	0.02
H	-4.947982951684997	-0.682183	-2.060609	-0.08	0.0	0.0
H	-5.405794713763748	1.010943	-2.4199548810393754	-0.06	0.0	0.01
H	-6.1662285948031235	0.13585011896062463	-1.0675527620787508	-0.05	0.01	0.02
H	-4.252679118960625	-3.202906118960625	-1.887611	-0.01	-0.01	0.0
H	-5.536857118960625	-2.4467172379212494	0.115891	-0.01	-0.02	0.0
H	-4.345118	-1.8997631189606246	2.247362	0.0	-0.01	0.0
H	-0.6140491189606246	-4.070137118960625	-1.810907	-0.01	-0.01	0.0
H	-0.545704	-2.151916643118126	2.626201762078751	0.0	0.03	-0.02
H	5.529156118960625	1.4316951189606246	1.980373	0.01	0.01	0.0
H	5.92143	2.6297462379212493	-0.17703088103937537	0.0	0.02	0.01
H	4.8248	1.8378723568818738	-2.2763878810393754	0.0	0.03	0.01
H	3.221328881039375	-1.5776457620787507	2.342249	-0.01	0.02	0.0
H	2.169290237921249	-0.8454897620787507	-2.3626372379212492	0.02	0.02	-0.02
H	-0.412958	-2.6715745948031233	-3.910585237921249	0.0	-0.05	-0.02
H	-0.20380388103937538	-1.7455962379212493	-2.3994134758424983	0.01	-0.02	-0.04
H	-1.7490798810393755	-1.6323353568818737	-3.3239204758424985	0.01	-0.03	-0.04
H	-1.6425101189606246	-4.906233356881874	-3.8573718810393753	-0.01	-0.03	0.01
H	-3.118731118960625	-3.9366452379212493	-3.621004	-0.01	-0.02	0.0
H	-2.753724237921249	-5.2914301189606245	-2.5110567620787507	-0.02	-0.01	0.02
H	-1.2679841189606247	-0.2903038810393753	4.146396881039375	-0.01	0.01	-0.01
H	-2.874276237921249	-0.24404523792124924	3.363920237921249	-0.02	-0.02	0.02
H	-1.4104515948031233	0.19333611896062464	2.432257	-0.05	0.01	0.0
H	-1.5294417620787508	-2.743249118960625	4.83970776207875	0.02	-0.01	-0.02
H	-1.9580517620787508	-3.987967	3.632401643118126	0.02	0.0	-0.03
H	-3.1749138810393753	-2.784256237921249	4.145001881039375	0.01	-0.02	-0.01
H	2.217332594803123	0.3421438810393753	-4.504769237921249	0.05	-0.01	-0.02
H	3.7086224758424984	1.2242431189606247	-4.083595	0.04	0.01	0.0
H	2.1922662379212494	1.5712458810393755	-3.202959356881874	0.02	-0.01	-0.03
H	3.6060594758424984	-1.8013841189606246	-4.199823881039375	0.04	-0.01	0.01
H	4.1946652379212495	-2.271626881039375	-2.5820137620787507	0.02	0.01	0.02
H	5.041645356881873	-0.993636	-3.5029477620787506	0.03	0.0	0.02
H	2.9477367137637476	-0.30387388103937535	4.465482356881874	0.06	0.01	0.03
H	2.180812118960625	0.573686	3.0996347137637477	0.01	0.0	0.06
H	3.752119356881874	1.1239361189606245	3.754756	0.03	0.01	0.0
H	5.015095118960625	-1.7964382379212491	4.04314376207875	0.01	-0.02	-0.02
H	5.876260118960625	-0.37211611896062463	3.399122881039375	0.01	-0.01	-0.01
H	5.763072	-1.861556	2.421148643118126	0.0	0.0	-0.03
H	-0.9460542379212493	-5.291204524157502	0.030692237921249265	-0.02	0.04	0.02
H	0.49383888103937534	-5.839200405196877	0.9083752379212493	-0.01	0.05	0.02
H	-0.7546491189606246	-4.893555286236252	1.7396271189606245	-0.01	0.06	0.01
H	4.949381118960625	-2.405815762078751	-0.3415545241575015	0.01	0.02	0.04
H	4.656170762078751	-3.367629118960625	1.1153701189606247	-0.02	-0.01	0.01
H	4.412029881039375	-4.096359643118126	-0.47255411896062466	-0.01	0.03	-0.01
114
O	-5.566474	1.623822	0.946886	-0.01	0.01	-0.01
Mg	0.564669	-0.657405	0.10273099999999999	-0.01	0.07	-0.18
O	0.551562	1.123962	-1.189841	-0.04	-0.21	-0.16
C	-4.493213	1.927786	0.187843	0.0	-0.01	-0.01
N	-0.1765	-2.600353	0.290744	0.0	0.04	-0.03
N	2.471837	-1.486194	-0.011219	0.0	0.02	-0.01
O	-3.921319	2.993106	0.220301	0.03	-0.03	0.01
C	0.524155	-3.727356	0.446904	-0.01	0.04	-0.01
C	1.919675	-3.809524	0.338513	-0.01	0.03	0.0
C	2.83325	-2.754134	0.123558	0.0	0.02	0.0
O	-2.987673	1.123181	-1.490822	-0.05	-0.05	-0.04
C	-1.772542	0.739593	-1.107641	-0.04	-0.04	-0.04
C	-0.613404	1.212766	-1.979345	-0.03	-0.14	-0.1
C	-4.118373	0.729741	-0.680459	-0.04	-0.01	-0.01
O	-1.56336	-0.012072999999999995	-0.166431	-0.05	0.07	0.05
C	-6.00522	2.66438	1.837713	0.02	0.02	0.0
O	-0.554612	2.598701	0.503478	0.07	0.01	0.24
C	0.674134	1.968645	0.322975	0.02	0.09	0.32
O	0.89144	1.003709	1.141123	0.01	-0.01	0.1
O	1.455037	4.050363	-0.779576	0.0	-0.06	0.03
C	0.322074	4.715648	-0.501331	0.01	-0.04	0.02
C	-0.729608	4.017234	0.354599	0.01	0.0	0.05
C	1.846067	2.916431	0.04369000000000001	0.02	-0.02	0.07
O	0.118153	5.817394	-0.960751	0.0	-0.06	-0.01
C	-0.902709	4.68451	1.722354	-0.04	0.1	-0.01
C	2.5395	3.391807	1.323926	0.13	0.06	-0.02
C	-0.836841	2.520311	-2.740926	0.0	-0.09	-0.04
C	-5.225576	0.277182	-1.627901	-0.06	0.0	0.01
C	-1.622777	-2.684819	0.28702	0.0	0.03	-0.02
C	3.474835	-0.442986	-0.060972	0.0	0.02	0.0
C	-2.29624	-3.021583	-0.937635	0.0	0.01	-0.01
C	-3.706957	-2.912964	-0.978308	-0.01	0.0	-0.01
C	-4.437466	-2.492101	0.157292	-0.01	-0.01	-0.01
C	-3.763878	-2.186885	1.361293	0.0	0.0	-0.01
C	-2.350864	-2.289505	1.451832	0.0	0.01	-0.01
C	-1.491424	-3.5058	-2.177138	-0.01	-0.01	-0.01
C	-1.629027	-1.975748	2.78685	0.0	0.01	-0.01
C	4.111644	-0.004285999999999998	1.148468	0.0	0.02	0.0
C	4.999076	1.10188	1.075404	0.0	0.01	0.0
C	5.232023	1.770252	-0.144779	0.0	0.02	0.01
C	4.605957	1.324969	-1.329891	0.0	0.02	0.01
C	3.726891	0.207995	-1.31557	0.01	0.02	0.0
C	3.875792	-0.703413	2.515104	0.01	0.01	0.0
C	3.113733	-0.340994	-2.630292	0.02	0.01	-0.01
C	-0.935867	-2.301432	-3.004325	0.0	-0.03	-0.03
C	-2.308675	-4.467213	-3.099543	-0.01	-0.02	0.01
C	-1.807143	-0.482539	3.207293	-0.02	0.0	0.0
C	-2.109942	-2.935294	3.926489	0.01	0.0	-0.02
C	2.783677	0.775232	-3.667912	0.04	0.0	-0.02
C	4.048486	-1.422533	-3.271034	0.03	0.0	0.01
C	3.135408	0.235524	3.520723	0.03	0.01	0.02
C	5.220879	-1.214467	3.133848	0.01	-0.01	-0.02
C	-0.209033	-5.019712	0.79077	-0.01	0.05	0.01
C	4.30056	-3.170128	0.095072	-0.01	0.02	0.01
H	2.355132	-4.795154	0.462604	-0.01	0.03	0.01
H	-0.510291	0.423932	-2.74121	-0.22	-0.12	-0.16
H	-3.85283	-0.109004	-0.028133	-0.04	-0.02	-0.01
H	-6.277823	3.560992	1.275201	0.04	0.03	0.01
H	-5.213754	2.915991	2.548486	0.02	-0.01	0.01
H	-6.87305	2.257298	2.357106	0.01	0.03	0.0
H	-1.675257	4.132413	-0.181121	0.01	-0.12	0.02
H	2.583306	2.393862	-0.561795	-0.05	-0.11	0.06
H	-1.124954	5.746458	1.580226	-0.06	0.09	-0.1
H	-0.007138000000000004	4.590126	2.341948	-0.04	0.17	0.01
H	-1.739956	4.210208	2.241737	-0.04	0.13	0.02
H	3.097451	4.307749	1.101743	0.25	-0.05	-0.17
H	3.251648	2.622798	1.619425	0.03	0.01	0.07
H	1.846694	3.585319	2.146731	0.18	0.3	-0.03
H	-1.608416	2.374934	-3.504	-0.08	0.02	0.02
H	0.096055	2.802144	-3.235538	-0.01	-0.16	-0.11
H	-1.158351	3.343716	-2.10565	0.14	-0.08	0.02
H	-4.930678	-0.682183	-2.060609	-0.08	0.0	0.0
H	-5.392816	1.010943	-2.422118	-0.06	0.0	0.01
H	-6.155413	0.133687	-1.071879	-0.05	0.01	0.02
H	-4.250516	-3.200743	-1.887611	-0.01	-0.01	0.0
H	-5.534694	-2.442391	0.115891	-0.01	-0.02	0.0
H	-4.345118	-1.8976	2.247362	0.0	-0.01	0.0
H	-0.611886	-4.067974	-1.810907	-0.01	-0.01	0.0
H	-0.545704	-2.158406	2.630528	0.0	0.03	-0.02
H	5.526993	1.429532	1.980373	0.01	0.01	0.0
H	5.92143	2.62542	-0.179194	0.0	0.02	0.01
H	4.8248	1.831383	-2.278551	0.0	0.03	0.01
H	3.223492	-1.581972	2.342249	-0.01	0.02	0.0
H	2.164964	-0.849816	-2.358311	0.02	0.02	-0.02
H	-0.412958	-2.660759	-3.906259	0.0	-0.05	-0.02
H	-0.205967	-1.74127	-2.390761	0.01	-0.02	-0.04
H	-1.751243	-1.625846	-3.315268	0.01	-0.03	-0.04
H	-1.640347	-4.899744	-3.859535	-0.01	-0.03	0.01
H	-3.116568	-3.932319	-3.621004	-0.01	-0.02	0.0
H	-2.749398	-5.289267	-2.515383	-0.02	-0.01	0.02
H	-1.265821	-0.292467	4.14856	-0.01	0.01	-0.01
H	-2.86995	-0.239719	3.359594	-0.02	-0.02	0.02
H	-1.399636	0.191173	2.432257	-0.05	0.01	0.0
H	-1.533768	-2.741086	4.844034	0.02	-0.01	-0.02
H	-1.962378	-3.987967	3.638891	0.02	0.0	-0.03
H	-3.177077	-2.77993	4.147165	0.01	-0.02	-0.01
H	2.206517	0.344307	-4.500443	0.05	-0.01	-0.02
H	3.69997	1.22208	-4.083595	0.04	0.01	0.0
H	2.18794	1.573409	-3.19647	0.02	-0.01	-0.03
H	3.597407	-1.799221	-4.201987	0.04	-0.01	0.01
H	4.190339	-2.27379	-2.58634	0.02	0.01	0.02
H	5.035156	-0.993636	-3.507274	0.03	0.0	0.02
H	2.934758	-0.306037	4.458993	0.06	0.01	0.03
H	2.178649	0.573686	3.086656	0.01	0.0	0.06
H	3.74563	1.121773	3.754756	0.03	0.01	0.0
H	5.012932	-1.792112	4.04747	0.01	-0.02	-0.02
H	5.874097	-0.369953	3.401286	0.01	-0.01	-0.01
H	5.763072	-1.861556	2.427638	0.0	0.0	-0.03
H	-0.941728	-5.299857	0.026366	-0.02	0.04	0.02
H	0.496002	-5.850016	0.904049	-0.01	0.05	0.02
H	-0.752486	-4.906534	1.737464	-0.01	0.06	0.01
H	4.947218	-2.410142	-0.350207	0.01	0.02	0.04
H	4.660497	-3.365466	1.113207	-0.02	-0.01	0.01
H	4.414193	-4.102849	-0.470391	-0.01	0.03	-0.01
114
O	-5.5643108810393755	1.6216588810393755	0.9490491189606246	-0.01	0.01	-0.01
Mg	0.5668321189606246	-0.6725468327243724	0.1416671412912433	-0.01	0.07	-0.18
O	0.5602144758424985	1.1693874981731172	-1.155231096630006	-0.04	-0.21	-0.16
C	-4.493213	1.9299491189606246	0.19000611896062464	0.0	-0.01	-0.01
N	-0.1765	-2.6090054758424985	0.2972333568818739	0.0	0.04	-0.03
N	2.471837	-1.4905202379212492	-0.009055881039375371	0.0	0.02	-0.01
O	-3.927808356881874	2.999595356881874	0.21813788103937537	0.03	-0.03	0.01
C	0.5263181189606246	-3.7360084758424983	0.4490671189606247	-0.01	0.04	-0.01
C	1.9218381189606246	-3.816013356881874	0.338513	-0.01	0.03	0.0
C	2.83325	-2.7584602379212493	0.123558	0.0	0.02	0.0
O	-2.976857405196877	1.1339965948031232	-1.4821695241575015	-0.05	-0.05	-0.04
C	-1.7638895241575014	0.7482454758424985	-1.0989885241575015	-0.04	-0.04	-0.04
C	-0.606914643118126	1.2430496654487448	-1.9577138103937537	-0.03	-0.14	-0.1
C	-4.109720524157502	0.7319041189606246	-0.6782958810393754	-0.04	-0.01	-0.01
O	-1.5525444051968769	-0.027214832724372397	-0.17724659480312313	-0.05	0.07	0.05
C	-6.009546237921249	2.6600537620787508	1.837713	0.02	0.02	0.0
O	-0.5697538327243724	2.5965378810393753	0.45156314494500893	0.07	0.01	0.24
C	0.6698077620787507	1.9491769293543784	0.2537551932600119	0.02	0.09	0.32
O	0.8892768810393754	1.0058721189606246	1.119491810393754	0.01	-0.01	0.1
O	1.455037	4.063341713763748	-0.786065356881874	0.0	-0.06	0.03
C	0.31991088103937537	4.724300475842498	-0.5056572379212493	0.01	-0.04	0.02
C	-0.7317711189606246	4.017234	0.34378340519687683	0.01	0.0	0.05
C	1.8417407620787507	2.9207572379212494	0.028548167275627603	0.02	-0.02	0.07
O	0.118153	5.830372713763748	-0.9585878810393754	0.0	-0.06	-0.01
C	-0.8940565241575015	4.662878810393754	1.7245171189606245	-0.04	0.1	-0.01
C	2.51137945351188	3.3788282862362524	1.3282522379212491	0.13	0.06	-0.02
C	-0.836841	2.5397790706456216	-2.7322735241575016	0.0	-0.09	-0.04
C	-5.212597286236252	0.277182	-1.6300641189606246	-0.06	0.0	0.01
C	-1.622777	-2.691308356881874	0.29134623792124925	0.0	0.03	-0.02
C	3.474835	-0.44731223792124924	-0.060972	0.0	0.02	0.0
C	-2.29624	-3.023746118960625	-0.9354718810393754	0.0	0.01	-0.01
C	-3.7047938810393752	-2.912964	-0.9761448810393754	-0.01	0.0	-0.01
C	-4.435302881039375	-2.489937881039375	0.15945511896062461	-0.01	-0.01	-0.01
C	-3.763878	-2.186885	1.3634561189606247	0.0	0.0	-0.01
C	-2.350864	-2.291668118960625	1.4539951189606246	0.0	0.01	-0.01
C	-1.4892608810393755	-3.503636881039375	-2.174974881039375	-0.01	-0.01	-0.01
C	-1.629027	-1.9779111189606247	2.7890131189606246	0.0	0.01	-0.01
C	4.111644	-0.008612237921249256	1.148468	0.0	0.02	0.0
C	4.999076	1.0997168810393754	1.075404	0.0	0.01	0.0
C	5.232023	1.7659257620787507	-0.14694211896062462	0.0	0.02	0.01
C	4.605957	1.3206427620787509	-1.3320541189606245	0.0	0.02	0.01
C	3.7247278810393754	0.20366876207875076	-1.31557	0.01	0.02	0.0
C	3.8736288810393753	-0.7055761189606246	2.515104	0.01	0.01	0.0
C	3.1094067620787507	-0.3431571189606247	-2.628128881039375	0.02	0.01	-0.01
C	-0.935867	-2.294942643118126	-2.997835643118126	0.0	-0.03	-0.03
C	-2.306511881039375	-4.4628867620787505	-3.101706118960625	-0.01	-0.02	0.01
C	-1.8028167620787507	-0.482539	3.207293	-0.02	0.0	0.0
C	-2.112105118960625	-2.935294	3.9308152379212493	0.01	0.0	-0.02
C	2.7750245241575016	0.775232	-3.6635857620787506	0.04	0.0	-0.02
C	4.041996643118126	-1.422533	-3.273197118960625	0.03	0.0	0.01
C	3.128918643118126	0.23336088103937538	3.5163967620787506	0.03	0.01	0.02
C	5.218715881039375	-1.2123038810393754	3.138174237921249	0.01	-0.01	-0.02
C	-0.20686988103937537	-5.030527594803123	0.7886068810393754	-0.01	0.05	0.01
C	4.302723118960625	-3.1744542379212493	0.09290888103937538	-0.01	0.02	0.01
H	2.3572951189606246	-4.801643356881874	0.46044088103937536	-0.01	0.03	0.01
H	-0.4627023828662582	0.4498894275274955	-2.706600096630006	-0.22	-0.12	-0.16
H	-3.8441775241575016	-0.10467776207875075	-0.02596988103937537	-0.04	-0.02	-0.01
H	-6.286475475842498	3.554502643118126	1.2730378810393754	0.04	0.03	0.01
H	-5.218080237921249	2.918154118960625	2.546322881039375	0.02	-0.01	0.01
H	-6.875213118960625	2.250808643118126	2.357106	0.01	0.03	0.0
H	-1.6774201189606246	4.158370427527495	-0.18544723792124926	0.01	-0.12	0.02
H	2.594121594803123	2.4176563085668707	-0.5747737137637479	-0.05	-0.11	0.06
H	-1.1119752862362522	5.726989929354378	1.6018571896062461	-0.06	0.09	-0.1
H	0.0015144758424985132	4.553352977669381	2.339784881039375	-0.04	0.17	0.01
H	-1.7313035241575014	4.18208745351188	2.237410762078751	-0.04	0.13	0.02
H	3.0433730259843843	4.3185645948031235	1.1385160223306185	0.25	-0.05	-0.17
H	3.245158643118126	2.620634881039375	1.6042831672756275	0.03	0.01	0.07
H	1.8077578587087568	3.5204254311812613	2.153220356881874	0.18	0.3	-0.03
H	-1.591111048315003	2.370607762078751	-3.508326237921249	-0.08	0.02	0.02
H	0.09821811896062463	2.8367539033699942	-3.211743691433129	-0.01	-0.16	-0.11
H	-1.1886346654487447	3.3610209516849974	-2.109976237921249	0.14	-0.08	0.02
H	-4.9133730483150035	-0.682183	-2.060609	-0.08	0.0	0.0
H	-5.379837286236252	1.010943	-2.424281118960625	-0.06	0.0	0.01
H	-6.144597405196877	0.13152388103937537	-1.0762052379212492	-0.05	0.01	0.02
H	-4.248352881039375	-3.1985798810393753	-1.887611	-0.01	-0.01	0.0
H	-5.532530881039375	-2.438064762078751	0.115891	-0.01	-0.02	0.0
H	-4.345118	-1.8954368810393754	2.247362	0.0	-0.01	0.0
H	-0.6097228810393754	-4.065810881039376	-1.810907	-0.01	-0.01	0.0
H	-0.545704	-2.164895356881874	2.634854237921249	0.0	0.03	-0.02
H	5.524829881039375	1.4273688810393754	1.980373	0.01	0.01	0.0
H	5.92143	2.621093762078751	-0.18135711896062462	0.0	0.02	0.01
H	4.8248	1.8248936431181262	-2.280714118960625	0.0	0.03	0.01
H	3.2256551189606246	-1.5862982379212491	2.342249	-0.01	0.02	0.0
H	2.1606377620787507	-0.8541422379212493	-2.353984762078751	0.02	0.02	-0.02
H	-0.412958	-2.649943405196877	-3.9019327620787507	0.0	-0.05	-0.02
H	-0.20813011896062464	-1.736943762078751	-2.3821085241575015	0.01	-0.02	-0.04
H	-1.7534061189606247	-1.619356643118126	-3.3066155241575017	0.01	-0.03	-0.04
H	-1.6381838810393754	-4.8932546431181265	-3.861698118960625	-0.01	-0.03	0.01
H	-3.114404881039375	-3.927992762078751	-3.621004	-0.01	-0.02	0.0
H	-2.7450717620787506	-5.287103881039375	-2.519709237921249	-0.02	-0.01	0.02
H	-1.2636578810393755	-0.29463011896062463	4.150723118960625	-0.01	0.01	-0.01
H	-2.8656237620787506	-0.23539276207875073	3.3552677620787508	-0.02	-0.02	0.02
H	-1.3888204051968769	0.18900988103937538	2.432257	-0.05	0.01	0.0
H	-1.5380942379212492	-2.7389228810393753	4.848360237921249	0.02	-0.01	-0.02
H	-1.9667042379212492	-3.987967	3.645380356881874	0.02	0.0	-0.03
H	-3.179240118960625	-2.7756037620787506	4.149328118960625	0.01	-0.02	-0.01
H	2.1957014051968766	0.34647011896062463	-4.49611676207875	0.05	-0.01	-0.02
H	3.6913175241575016	1.2199168810393755	-4.083595	0.04	0.01	0.0
H	2.183613762078751	1.5755721189606247	-3.189980643118126	0.02	-0.01	-0.03
H	3.5887545241575016	-1.7970578810393754	-4.204150118960625	0.04	-0.01	0.01
H	4.18601276207875	-2.275953118960625	-2.590666237921249	0.02	0.01	0.02
H	5.028666643118126	-0.993636	-3.511600237921249	0.03	0.0	0.02
H	2.9217792862362524	-0.30820011896062466	4.452503643118127	0.06	0.01	0.03
H	2.1764858810393752	0.573686	3.0736772862362525	0.01	0.0	0.06
H	3.7391406431181258	1.1196098810393753	3.754756	0.03	0.01	0.0
H	5.010768881039375	-1.7877857620787507	4.051796237921249	0.01	-0.02	-0.02
H	5.871933881039375	-0.3677898810393753	3.4034491189606246	0.01	-0.01	-0.01
H	5.763072	-1.861556	2.434127356881874	0.0	0.0	-0.03
H	-0.9374017620787507	-5.308509475842499	0.022039762078750743	-0.02	0.04	0.02
H	0.49816511896062465	-5.860831594803123	0.8997227620787507	-0.01	0.05	0.02
H	-0.7503228810393754	-4.919512713763748	1.7353008810393753	-0.01	0.06	0.01
H	4.9450548810393755	-2.414468237921249	-0.3588594758424985	0.01	0.02	0.04
H	4.66482323792125	-3.3633028810393752	1.1110438810393755	-0.02	-0.01	0.01
H	4.416356118960625	-4.1093383568818735	-0.46822788103937535	-0.01	0.03	-0.01
114
O	-5.562359503233953	1.6197075032339527	0.9510004967660474	-0.01	0.01	-0.01
Mg	0.5687834967660473	-0.6862064773623312	0.1767919417888516	-0.01	0.07	-0.18
O	0.5680199870641892	1.2103664320869933	-1.124009051743243	-0.04	-0.21	-0.16
C	-4.493213	1.9319004967660474	0.19195749676604731	0.0	-0.01	-0.01
N	-0.1765	-2.6168109870641896	0.3030874902981419	0.0	0.04	-0.03
N	2.471837	-1.4944229935320947	-0.007104503233952689	0.0	0.02	-0.01
O	-3.933662490298142	3.005449490298142	0.2161865032339527	0.03	-0.03	0.01
C	0.5282694967660474	-3.7438139870641893	0.4510184967660473	-0.01	0.04	-0.01
C	1.9237894967660474	-3.821867490298142	0.338513	-0.01	0.03	0.0
C	2.83325	-2.762362993532095	0.123558	0.0	0.02	0.0
O	-2.9671005161697637	1.1437534838302366	-1.4743640129358109	-0.05	-0.05	-0.04
C	-1.7560840129358108	0.7560509870641892	-1.0911830129358109	-0.04	-0.04	-0.04
C	-0.601060509701858	1.2703689547246624	-1.9382000323395268	-0.03	-0.14	-0.1
C	-4.101915012935811	0.7338554967660473	-0.6763445032339527	-0.04	-0.01	-0.01
O	-1.5427875161697635	-0.04087447736233118	-0.18700348383023654	-0.05	0.07	0.05
C	-6.013448993532094	2.6561510064679053	1.837713	0.02	0.02	0.0
O	-0.5834134773623312	2.594586503233953	0.4047300776148645	0.07	0.01	0.24
C	0.6659050064679054	1.9316145291055742	0.19131110348648606	0.02	0.09	0.32
O	0.8873255032339527	1.0078234967660473	1.099978032339527	0.01	-0.01	0.1
O	1.455037	4.075049980596284	-0.791919490298142	0.0	-0.06	0.03
C	0.3179595032339527	4.732105987064189	-0.5095599935320946	0.01	-0.04	0.02
C	-0.7337224967660474	4.017234	0.3340265161697634	0.01	0.0	0.05
C	1.8378380064679052	2.924659993532095	0.014888522637668822	0.02	-0.02	0.07
O	0.118153	5.842080980596284	-0.9566365032339527	0.0	-0.06	-0.01
C	-0.8862510129358108	4.643365032339528	1.7264684967660473	-0.04	0.1	-0.01
C	2.4860115420413846	3.3671200194037163	1.3321549935320947	0.13	0.06	-0.02
C	-0.836841	2.5573414708944258	-2.7244680129358105	0.0	-0.09	-0.04
C	-5.200889019403716	0.277182	-1.6320154967660474	-0.06	0.0	0.01
C	-1.622777	-2.697162490298142	0.2952489935320946	0.0	0.03	-0.02
C	3.474835	-0.4512149935320946	-0.060972	0.0	0.02	0.0
C	-2.29624	-3.0256974967660475	-0.9335205032339526	0.0	0.01	-0.01
C	-3.7028425032339527	-2.912964	-0.9741935032339526	-0.01	0.0	-0.01
C	-4.433351503233952	-2.4879865032339525	0.1614064967660473	-0.01	-0.01	-0.01
C	-3.763878	-2.186885	1.3654074967660474	0.0	0.0	-0.01
C	-2.350864	-2.2936194967660475	1.4559464967660474	0.0	0.01	-0.01
C	-1.4873095032339527	-3.5016855032339524	-2.1730235032339524	-0.01	-0.01	-0.01
C	-1.629027	-1.9798624967660474	2.790964496766047	0.0	0.01	-0.01
C	4.111644	-0.012514993532094622	1.148468	0.0	0.02	0.0
C	4.999076	1.0977655032339526	1.075404	0.0	0.01	0.0
C	5.232023	1.7620230064679052	-0.1488934967660473	0.0	0.02	0.01
C	4.605957	1.3167400064679053	-1.3340054967660473	0.0	0.02	0.01
C	3.722776503233953	0.19976600646790538	-1.31557	0.01	0.02	0.0
C	3.8716775032339528	-0.7075274967660473	2.515104	0.01	0.01	0.0
C	3.105504006467905	-0.3451084967660473	-2.6261775032339525	0.02	0.01	-0.01
C	-0.935867	-2.289088509701858	-2.991981509701858	0.0	-0.03	-0.03
C	-2.3045605032339527	-4.458984006467905	-3.1036574967660475	-0.01	-0.02	0.01
C	-1.7989140064679052	-0.482539	3.207293	-0.02	0.0	0.0
C	-2.1140564967660476	-2.935294	3.934717993532095	0.01	0.0	-0.02
C	2.7672190129358105	0.775232	-3.659683006467905	0.04	0.0	-0.02
C	4.0361425097018575	-1.422533	-3.2751484967660476	0.03	0.0	0.01
C	3.123064509701858	0.2314095032339527	3.512494006467905	0.03	0.01	0.02
C	5.216764503233953	-1.2103525032339526	3.1420769935320947	0.01	-0.01	-0.02
C	-0.2049185032339527	-5.040284483830237	0.7866555032339526	-0.01	0.05	0.01
C	4.304674496766047	-3.1783569935320948	0.09095750323395269	-0.01	0.02	0.01
H	2.359246496766047	-4.807497490298142	0.4584895032339527	-0.01	0.03	0.01
H	-0.4197720711469592	0.4733059611925677	-2.6753780517432433	-0.22	-0.12	-0.16
H	-3.8363720129358105	-0.10077500646790538	-0.024018503233952687	-0.04	-0.02	-0.01
H	-6.294280987064189	3.548648509701858	1.2710865032339527	0.04	0.03	0.01
H	-5.2219829935320945	2.9201054967660474	2.5443715032339527	0.02	-0.01	0.01
H	-6.8771644967660475	2.244954509701858	2.357106	0.01	0.03	0.0
H	-1.6793714967660474	4.181786961192567	-0.18934999353209464	0.01	-0.12	0.02
H	2.6038784838302362	2.4391214644265204	-0.5864819805962839	-0.05	-0.11	0.06
H	-1.100267019403716	5.709427529105573	1.621370967660473	-0.06	0.09	-0.1
H	0.009319987064189244	4.5201795549771955	2.3378335032339526	-0.04	0.17	0.01
H	-1.7234980129358108	4.156719542041385	2.2335080064679054	-0.04	0.13	0.02
H	2.9945885808488173	4.328321483830237	1.1716894450228041	0.25	-0.05	-0.17
H	3.239304509701858	2.6186835032339526	1.5906235226376688	0.03	0.01	0.07
H	1.7726330582111485	3.4618840970185807	2.159074490298142	0.18	0.3	-0.03
H	-1.5755000258716216	2.3667050064679054	-3.5122289935320947	-0.08	0.02	0.02
H	0.1001694967660473	2.867975948256757	-3.1902785355734795	-0.01	-0.16	-0.11
H	-1.2159539547246623	3.3766319741283786	-2.1138789935320945	0.14	-0.08	0.02
H	-4.8977620258716215	-0.682183	-2.060609	-0.08	0.0	0.0
H	-5.368129019403716	1.010943	-2.4262324967660476	-0.06	0.0	0.01
H	-6.1348405161697634	0.1295725032339527	-1.0801079935320947	-0.05	0.01	0.02
H	-4.246401503233953	-3.1966285032339528	-1.887611	-0.01	-0.01	0.0
H	-5.530579503233953	-2.4341620064679055	0.115891	-0.01	-0.02	0.0
H	-4.345118	-1.8934855032339526	2.247362	0.0	-0.01	0.0
H	-0.6077715032339527	-4.063859503233953	-1.810907	-0.01	-0.01	0.0
H	-0.545704	-2.170749490298142	2.6387569935320947	0.0	0.03	-0.02
H	5.522878503233953	1.4254175032339527	1.980373	0.01	0.01	0.0
H	5.92143	2.6171910064679054	-0.1833084967660473	0.0	0.02	0.01
H	4.8248	1.8190395097018581	-2.2826654967660476	0.0	0.03	0.01
H	3.227606496766047	-1.5902009935320947	2.342249	-0.01	0.02	0.0
H	2.156735006467905	-0.8580449935320946	-2.3500820064679053	0.02	0.02	-0.02
H	-0.412958	-2.6401865161697637	-3.898030006467905	0.0	-0.05	-0.02
H	-0.21008149676604732	-1.7330410064679054	-2.3743030129358105	0.01	-0.02	-0.04
H	-1.7553574967660475	-1.613502509701858	-3.2988100129358107	0.01	-0.03	-0.04
H	-1.6362325032339526	-4.887400509701858	-3.8636494967660475	-0.01	-0.03	0.01
H	-3.1124535032339526	-3.9240900064679054	-3.621004	-0.01	-0.02	0.0
H	-2.741169006467905	-5.285152503233952	-2.5236119935320946	-0.02	-0.01	0.02
H	-1.2617065032339527	-0.2965814967660473	4.152674496766047	-0.01	0.01	-0.01
H	-2.861721006467905	-0.23149000646790535	3.3513650064679052	-0.02	-0.02	0.02
H	-1.3790635161697635	0.1870585032339527	2.432257	-0.05	0.01	0.0
H	-1.5419969935320947	-2.7369715032339528	4.8522629935320944	0.02	-0.01	-0.02
H	-1.9706069935320947	-3.987967	3.651234490298142	0.02	0.0	-0.03
H	-3.1811914967660475	-2.771701006467905	4.151279496766048	0.01	-0.02	-0.01
H	2.1859445161697635	0.3484214967660473	-4.492214006467905	0.05	-0.01	-0.02
H	3.6835120129358105	1.2179655032339527	-4.083595	0.04	0.01	0.0
H	2.1797110064679055	1.5775234967660474	-3.184126509701858	0.02	-0.01	-0.03
H	3.5809490129358106	-1.7951065032339526	-4.206101496766047	0.04	-0.01	0.01
H	4.182110006467905	-2.2779044967660473	-2.5945689935320946	0.02	0.01	0.02
H	5.022812509701858	-0.993636	-3.5155029935320945	0.03	0.0	0.02
H	2.9100710194037163	-0.3101514967660473	4.446649509701858	0.06	0.01	0.03
H	2.1745345032339527	0.573686	3.0619690194037164	0.01	0.0	0.06
H	3.7332865097018577	1.1176585032339525	3.754756	0.03	0.01	0.0
H	5.008817503233953	-1.7838830064679052	4.055698993532094	0.01	-0.02	-0.02
H	5.8699825032339525	-0.36583850323395267	3.405400496766047	0.01	-0.01	-0.01
H	5.763072	-1.861556	2.439981490298142	0.0	0.0	-0.03
H	-0.9334990064679054	-5.31631498706419	0.01813700646790538	-0.02	0.04	0.02
H	0.5001164967660473	-5.870588483830237	0.8958200064679054	-0.01	0.05	0.02
H	-0.7483715032339526	-4.931220980596284	1.7333495032339525	-0.01	0.06	0.01
H	4.943103503233953	-2.4183709935320947	-0.36666498706418926	0.01	0.02	0.04
H	4.668725993532095	-3.3613515032339527	1.1090925032339527	-0.02	-0.01	0.01
H	4.418307496766047	-4.115192490298142	-0.4662765032339527	-0.01	0.03	-0.01
114
O	-5.560810881039376	1.6181588810393754	0.9525491189606247	-0.01	0.01	-0.01
Mg	0.5703321189606246	-0.6970468327243724	0.20466714129124336	-0.01	0.07	-0.18
O	0.5742144758424985	1.242887498173117	-1.0992310966300058	-0.04	-0.21	-0.16
C	-4.493213	1.9334491189606247	0.19350611896062464	0.0	-0.01	-0.01
N	-0.1765	-2.6230054758424988	0.3077333568818739	0.0	0.04	-0.03
N	2.471837	-1.4975202379212493	-0.005555881039375369	0.0	0.02	-0.01
O	-3.938308356881874	3.010095356881874	0.21463788103937537	0.03	-0.03	0.01
C	0.5298181189606247	-3.7500084758424985	0.4525671189606247	-0.01	0.04	-0.01
C	1.9253381189606247	-3.826513356881874	0.338513	-0.01	0.03	0.0
C	2.83325	-2.7654602379212494	0.123558	0.0	0.02	0.0
O	-2.9593574051968767	1.151496594803123	-1.4681695241575015	-0.05	-0.05	-0.04
C	-1.7498895241575014	0.7622454758424985	-1.0849885241575015	-0.04	-0.04	-0.04
C	-0.5964146431181261	1.2920496654487448	-1.9227138103937536	-0.03	-0.14	-0.1
C	-4.095720524157501	0.7354041189606246	-0.6747958810393754	-0.04	-0.01	-0.01
O	-1.535044405196877	-0.051714832724372425	-0.19474659480312315	-0.05	0.07	0.05
C	-6.016546237921249	2.6530537620787507	1.837713	0.02	0.02	0.0
O	-0.5942538327243724	2.5930378810393755	0.36756314494500886	0.07	0.01	0.24
C	0.6628077620787507	1.9176769293543783	0.14175519326001182	0.02	0.09	0.32
O	0.8857768810393754	1.0093721189606246	1.0844918103937538	0.01	-0.01	0.1
O	1.455037	4.084341713763748	-0.7965653568818739	0.0	-0.06	0.03
C	0.31641088103937537	4.7383004758424985	-0.5126572379212493	0.01	-0.04	0.02
C	-0.7352711189606247	4.017234	0.3262834051968768	0.01	0.0	0.05
C	1.8347407620787506	2.9277572379212495	0.004048167275627575	0.02	-0.02	0.07
O	0.118153	5.851372713763748	-0.9550878810393754	0.0	-0.06	-0.01
C	-0.8800565241575015	4.627878810393754	1.7280171189606246	-0.04	0.1	-0.01
C	2.4658794535118798	3.357828286236252	1.3352522379212493	0.13	0.06	-0.02
C	-0.836841	2.5712790706456214	-2.7182735241575013	0.0	-0.09	-0.04
C	-5.191597286236252	0.277182	-1.6335641189606247	-0.06	0.0	0.01
C	-1.622777	-2.701808356881874	0.29834623792124926	0.0	0.03	-0.02
C	3.474835	-0.45431223792124925	-0.060972	0.0	0.02	0.0
C	-2.29624	-3.027246118960625	-0.9319718810393753	0.0	0.01	-0.01
C	-3.7012938810393754	-2.912964	-0.9726448810393753	-0.01	0.0	-0.01
C	-4.431802881039375	-2.4864378810393752	0.16295511896062462	-0.01	-0.01	-0.01
C	-3.763878	-2.186885	1.3669561189606247	0.0	0.0	-0.01
C	-2.350864	-2.295168118960625	1.4574951189606247	0.0	0.01	-0.01
C	-1.4857608810393754	-3.500136881039375	-2.171474881039375	-0.01	-0.01	-0.01
C	-1.629027	-1.9814111189606247	2.7925131189606245	0.0	0.01	-0.01
C	4.111644	-0.015612237921249262	1.148468	0.0	0.02	0.0
C	4.999076	1.0962168810393753	1.075404	0.0	0.01	0.0
C	5.232023	1.7589257620787506	-0.15044211896062462	0.0	0.02	0.01
C	4.605957	1.3136427620787507	-1.3355541189606246	0.0	0.02	0.01
C	3.7212278810393755	0.19666876207875075	-1.31557	0.01	0.02	0.0
C	3.8701288810393755	-0.7090761189606246	2.515104	0.01	0.01	0.0
C	3.1024067620787505	-0.3466571189606247	-2.624628881039375	0.02	0.01	-0.01
C	-0.935867	-2.284442643118126	-2.987335643118126	0.0	-0.03	-0.03
C	-2.3030118810393754	-4.455886762078751	-3.105206118960625	-0.01	-0.02	0.01
C	-1.7958167620787506	-0.482539	3.207293	-0.02	0.0	0.0
C	-2.115605118960625	-2.935294	3.9378152379212494	0.01	0.0	-0.02
C	2.7610245241575013	0.775232	-3.6565857620787505	0.04	0.0	-0.02
C	4.031496643118126	-1.422533	-3.276697118960625	0.03	0.0	0.01
C	3.118418643118126	0.22986088103937538	3.5093967620787505	0.03	0.01	0.02
C	5.215215881039375	-1.2088038810393753	3.1451742379212493	0.01	-0.01	-0.02
C	-0.20336988103937537	-5.0480275948031235	0.7851068810393753	-0.01	0.05	0.01
C	4.306223118960625	-3.1814542379212494	0.08940888103937537	-0.01	0.02	0.01
H	2.3607951189606244	-4.812143356881874	0.45694088103937536	-0.01	0.03	0.01
H	-0.38570238286625813	0.49188942752749554	-2.650600096630006	-0.22	-0.12	-0.16
H	-3.8301775241575013	-0.09767776207875074	-0.022469881039375368	-0.04	-0.02	-0.01
H	-6.300475475842498	3.544002643118126	1.2695378810393754	0.04	0.03	0.01
H	-5.225080237921249	2.9216541189606247	2.5428228810393754	0.02	-0.01	0.01
H	-6.878713118960625	2.240308643118126	2.357106	0.01	0.03	0.0
H	-1.6809201189606247	4.200370427527496	-0.19244723792124926	0.01	-0.12	0.02
H	2.611621594803123	2.4561563085668707	-0.5957737137637479	-0.05	-0.11	0.06
H	-1.0909752862362523	5.695489929354378	1.6368571896062463	-0.06	0.09	-0.1
H	0.015514475842498524	4.4938529776693805	2.3362848810393753	-0.04	0.17	0.01
H	-1.7173035241575014	4.136587453511879	2.2304107620787508	-0.04	0.13	0.02
H	2.955873025984384	4.336064594803124	1.1980160223306187	0.25	-0.05	-0.17
H	3.234658643118126	2.6171348810393753	1.5797831672756275	0.03	0.01	0.07
H	1.7447578587087567	3.4154254311812613	2.163720356881874	0.18	0.3	-0.03
H	-1.563111048315003	2.363607762078751	-3.5153262379212493	-0.08	0.02	0.02
H	0.10171811896062463	2.8927539033699943	-3.1732436914331292	-0.01	-0.16	-0.11
H	-1.2376346654487447	3.3890209516849974	-2.116976237921249	0.14	-0.08	0.02
H	-4.885373048315003	-0.682183	-2.060609	-0.08	0.0	0.0
H	-5.358837286236252	1.010943	-2.427781118960625	-0.06	0.0	0.01
H	-6.127097405196877	0.12802388103937537	-1.0832052379212493	-0.05	0.01	0.02
H	-4.2448528810393755	-3.1950798810393755	-1.887611	-0.01	-0.01	0.0
H	-5.529030881039375	-2.431064762078751	0.115891	-0.01	-0.02	0.0
H	-4.345118	-1.8919368810393753	2.247362	0.0	-0.01	0.0
H	-0.6062228810393754	-4.062310881039376	-1.810907	-0.01	-0.01	0.0
H	-0.545704	-2.175395356881874	2.6418542379212493	0.0	0.03	-0.02
H	5.521329881039375	1.4238688810393754	1.980373	0.01	0.01	0.0
H	5.92143	2.6140937620787508	-0.18485711896062462	0.0	0.02	0.01
H	4.8248	1.814393643118126	-2.284214118960625	0.0	0.03	0.01
H	3.2291551189606245	-1.5932982379212492	2.342249	-0.01	0.02	0.0
H	2.1536377620787506	-0.8611422379212493	-2.3469847620787507	0.02	0.02	-0.02
H	-0.412958	-2.632443405196877	-3.8949327620787506	0.0	-0.05	-0.02
H	-0.21163011896062464	-1.7299437620787508	-2.3681085241575013	0.01	-0.02	-0.04
H	-1.7569061189606248	-1.608856643118126	-3.2926155241575015	0.01	-0.03	-0.04
H	-1.6346838810393753	-4.882754643118126	-3.865198118960625	-0.01	-0.03	0.01
H	-3.1109048810393753	-3.920992762078751	-3.621004	-0.01	-0.02	0.0
H	-2.7380717620787505	-5.283603881039375	-2.5267092379212492	-0.02	-0.01	0.02
H	-1.2601578810393754	-0.29813011896062463	4.1542231189606245	-0.01	0.01	-0.01
H	-2.8586237620787505	-0.22839276207875073	3.3482677620787507	-0.02	-0.02	0.02
H	-1.371320405196877	0.18550988103937538	2.432257	-0.05	0.01	0.0
H	-1.5450942379212493	-2.7354228810393755	4.855360237921249	0.02	-0.01	-0.02
H	-1.9737042379212493	-3.987967	3.655880356881874	0.02	0.0	-0.03
H	-3.182740118960625	-2.7686037620787505	4.152828118960625	0.01	-0.02	-0.01
H	2.1782014051968766	0.34997011896062463	-4.48911676207875	0.05	-0.01	-0.02
H	3.6773175241575013	1.2164168810393754	-4.083595	0.04	0.01	0.0
H	2.176613762078751	1.5790721189606247	-3.179480643118126	0.02	-0.01	-0.03
H	3.5747545241575014	-1.7935578810393753	-4.207650118960625	0.04	-0.01	0.01
H	4.1790127620787505	-2.2794531189606246	-2.597666237921249	0.02	0.01	0.02
H	5.018166643118126	-0.993636	-3.518600237921249	0.03	0.0	0.02
H	2.900779286236252	-0.31170011896062466	4.4420036431181265	0.06	0.01	0.03
H	2.1729858810393754	0.573686	3.052677286236252	0.01	0.0	0.06
H	3.728640643118126	1.1161098810393753	3.754756	0.03	0.01	0.0
H	5.0072688810393755	-1.7807857620787506	4.058796237921249	0.01	-0.02	-0.02
H	5.868433881039375	-0.3642898810393753	3.4069491189606245	0.01	-0.01	-0.01
H	5.763072	-1.861556	2.444627356881874	0.0	0.0	-0.03
H	-0.9304017620787507	-5.322509475842499	0.015039762078750738	-0.02	0.04	0.02
H	0.5016651189606246	-5.878331594803123	0.8927227620787507	-0.01	0.05	0.02
H	-0.7468228810393753	-4.940512713763748	1.7318008810393752	-0.01	0.06	0.01
H	4.941554881039376	-2.4214682379212493	-0.3728594758424985	0.01	0.02	0.04
H	4.67182323792125	-3.3598028810393754	1.1075438810393754	-0.02	-0.01	0.01
H	4.419856118960625	-4.119838356881874	-0.46472788103937535	-0.01	0.03	-0.01
114
O	-5.559816604385935	1.617164604385934	0.9535433956140661	-0.01	0.01	-0.01
Mg	0.5713263956140661	-0.7040067692984625	0.22256412105318935	-0.01	0.07	-0.18
O	0.5781915824562643	1.2637673078953875	-1.0833226701749428	-0.04	-0.21	-0.16
C	-4.493213	1.934443395614066	0.1945003956140661	0.0	-0.01	-0.01
N	-0.1765	-2.6269825824562645	0.3107161868421982	0.0	0.04	-0.03
N	2.471837	-1.4995087912281322	-0.004561604385933926	0.0	0.02	-0.01
O	-3.9412911868421983	3.0130781868421983	0.2136436043859339	0.03	-0.03	0.01
C	0.5308123956140661	-3.7539855824562642	0.4535613956140661	-0.01	0.04	-0.01
C	1.926332395614066	-3.8294961868421984	0.338513	-0.01	0.03	0.0
C	2.83325	-2.7674487912281323	0.123558	0.0	0.02	0.0
O	-2.9543860219296696	1.1564679780703304	-1.4641924175437357	-0.05	-0.05	-0.04
C	-1.7459124175437357	0.7662225824562643	-1.0810114175437358	-0.04	-0.04	-0.04
C	-0.5934318131578017	1.305969538596925	-1.9127710438593393	-0.03	-0.14	-0.1
C	-4.091743417543736	0.7363983956140661	-0.673801604385934	-0.04	-0.01	-0.01
O	-1.5300730219296697	-0.05867476929846252	-0.19971797807033037	-0.05	0.07	0.05
C	-6.018534791228132	2.651065208771868	1.837713	0.02	0.02	0.0
O	-0.6012137692984625	2.592043604385934	0.34370050526241425	0.07	0.01	0.24
C	0.6608192087718678	1.9087284394734052	0.10993834034988564	0.02	0.09	0.32
O	0.8847826043859339	1.010366395614066	1.0745490438593395	0.01	-0.01	0.1
O	1.455037	4.0903073736843965	-0.7995481868421983	0.0	-0.06	0.03
C	0.31541660438593394	4.742277582456264	-0.5146457912281321	0.01	-0.04	0.02
C	-0.7362653956140661	4.017234	0.3213120219296696	0.01	0.0	0.05
C	1.8327522087718677	2.9297457912281324	-0.00291176929846252	0.02	-0.02	0.07
O	0.118153	5.857338373684397	-0.9540936043859339	0.0	-0.06	-0.01
C	-0.8760794175437356	4.6179360438593395	1.729011395614066	-0.04	0.1	-0.01
C	2.4529538570171407	3.3518626263156035	1.337240791228132	0.13	0.06	-0.02
C	-0.836841	2.5802275605265947	-2.7142964175437356	0.0	-0.09	-0.04
C	-5.185631626315604	0.277182	-1.6345583956140661	-0.06	0.0	0.01
C	-1.622777	-2.7047911868421983	0.30033479122813217	0.0	0.03	-0.02
C	3.474835	-0.45630079122813216	-0.060972	0.0	0.02	0.0
C	-2.29624	-3.028240395614066	-0.9309776043859339	0.0	0.01	-0.01
C	-3.700299604385934	-2.912964	-0.9716506043859339	-0.01	0.0	-0.01
C	-4.430808604385934	-2.485443604385934	0.16394939561406607	-0.01	-0.01	-0.01
C	-3.763878	-2.186885	1.3679503956140662	0.0	0.0	-0.01
C	-2.350864	-2.296162395614066	1.458489395614066	0.0	0.01	-0.01
C	-1.484766604385934	-3.4991426043859337	-2.1704806043859337	-0.01	-0.01	-0.01
C	-1.629027	-1.9824053956140661	2.793507395614066	0.0	0.01	-0.01
C	4.111644	-0.01760079122813215	1.148468	0.0	0.02	0.0
C	4.999076	1.0952226043859339	1.075404	0.0	0.01	0.0
C	5.232023	1.7569372087718678	-0.15143639561406608	0.0	0.02	0.01
C	4.605957	1.311654208771868	-1.336548395614066	0.0	0.02	0.01
C	3.720233604385934	0.19468020877186787	-1.31557	0.01	0.02	0.0
C	3.869134604385934	-0.710070395614066	2.515104	0.01	0.01	0.0
C	3.1004182087718677	-0.3476513956140661	-2.6236346043859338	0.02	0.01	-0.01
C	-0.935867	-2.281459813157802	-2.984352813157802	0.0	-0.03	-0.03
C	-2.302017604385934	-4.453898208771868	-3.1062003956140662	-0.01	-0.02	0.01
C	-1.7938282087718678	-0.482539	3.207293	-0.02	0.0	0.0
C	-2.1165993956140663	-2.935294	3.9398037912281323	0.01	0.0	-0.02
C	2.7570474175437356	0.775232	-3.6545972087718677	0.04	0.0	-0.02
C	4.028513813157802	-1.422533	-3.2776913956140663	0.03	0.0	0.01
C	3.1154358131578017	0.22886660438593392	3.5074082087718677	0.03	0.01	0.02
C	5.214221604385934	-1.2078096043859339	3.147162791228132	0.01	-0.01	-0.02
C	-0.2023756043859339	-5.05299897807033	0.7841126043859339	-0.01	0.05	0.01
C	4.307217395614066	-3.1834427912281322	0.08841460438593393	-0.01	0.02	0.01
H	2.361789395614066	-4.815126186842198	0.45594660438593393	-0.01	0.03	0.01
H	-0.36382829649054643	0.5038207473687929	-2.6346916701749428	-0.22	-0.12	-0.16
H	-3.8262004175437356	-0.09568920877186786	-0.021475604385933926	-0.04	-0.02	-0.01
H	-6.304452582456264	3.541019813157802	1.268543604385934	0.04	0.03	0.01
H	-5.227068791228132	2.922648395614066	2.541828604385934	0.02	-0.01	0.01
H	-6.879707395614066	2.2373258131578018	2.357106	0.01	0.03	0.0
H	-1.681914395614066	4.212301747368793	-0.19443579122813215	0.01	-0.12	0.02
H	2.6165929780703303	2.467093351754727	-0.6017393736843965	-0.05	-0.11	0.06
H	-1.0850096263156035	5.686541439473405	1.6467999561406605	-0.06	0.09	-0.1
H	0.019491582456264298	4.476950274560877	2.335290604385934	-0.04	0.17	0.01
H	-1.7133264175437357	4.123661857017141	2.228422208771868	-0.04	0.13	0.02
H	2.9310161096483482	4.34103597807033	1.2149187254391232	0.25	-0.05	-0.17
H	3.2316758131578016	2.616140604385934	1.5728232307015373	0.03	0.01	0.07
H	1.7268608789468107	3.385597131578018	2.166703186842198	0.18	0.3	-0.03
H	-1.5551568350874714	2.361619208771868	-3.517314791228132	-0.08	0.02	0.02
H	0.10271239561406607	2.9086623298250576	-3.162306648245273	-0.01	-0.16	-0.11
H	-1.251554538596925	3.396975164912529	-2.118964791228132	0.14	-0.08	0.02
H	-4.877418835087472	-0.682183	-2.060609	-0.08	0.0	0.0
H	-5.352871626315603	1.010943	-2.4287753956140663	-0.06	0.0	0.01
H	-6.12212602192967	0.12702960438593391	-1.0851937912281322	-0.05	0.01	0.02
H	-4.2438586043859345	-3.194085604385934	-1.887611	-0.01	-0.01	0.0
H	-5.528036604385934	-2.429076208771868	0.115891	-0.01	-0.02	0.0
H	-4.345118	-1.8909426043859339	2.247362	0.0	-0.01	0.0
H	-0.605228604385934	-4.061316604385935	-1.810907	-0.01	-0.01	0.0
H	-0.545704	-2.178378186842198	2.643842791228132	0.0	0.03	-0.02
H	5.520335604385934	1.422874604385934	1.980373	0.01	0.01	0.0
H	5.92143	2.612105208771868	-0.18585139561406608	0.0	0.02	0.01
H	4.8248	1.8114108131578017	-2.2852083956140663	0.0	0.03	0.01
H	3.230149395614066	-1.595286791228132	2.342249	-0.01	0.02	0.0
H	2.1516492087718677	-0.8631307912281322	-2.344996208771868	0.02	0.02	-0.02
H	-0.412958	-2.6274720219296697	-3.8929442087718678	0.0	-0.05	-0.02
H	-0.2126243956140661	-1.727955208771868	-2.3641314175437356	0.01	-0.02	-0.04
H	-1.7579003956140662	-1.6058738131578016	-3.2886384175437358	0.01	-0.03	-0.04
H	-1.633689604385934	-4.879771813157802	-3.8661923956140662	-0.01	-0.03	0.01
H	-3.109910604385934	-3.919004208771868	-3.621004	-0.01	-0.02	0.0
H	-2.7360832087718676	-5.282609604385934	-2.528697791228132	-0.02	-0.01	0.02
H	-1.259163604385934	-0.29912439561406606	4.1552173956140654	-0.01	0.01	-0.01
H	-2.8566352087718676	-0.22640420877186784	3.346279208771868	-0.02	-0.02	0.02
H	-1.3663490219296697	0.18451560438593392	2.432257	-0.05	0.01	0.0
H	-1.5470827912281322	-2.734428604385934	4.857348791228132	0.02	-0.01	-0.02
H	-1.9756927912281321	-3.987967	3.6588631868421984	0.02	0.0	-0.03
H	-3.1837343956140662	-2.7666152087718676	4.153822395614066	0.01	-0.02	-0.01
H	2.1732300219296694	0.35096439561406606	-4.487128208771868	0.05	-0.01	-0.02
H	3.6733404175437356	1.215422604385934	-4.083595	0.04	0.01	0.0
H	2.174625208771868	1.5800663956140661	-3.176497813157802	0.02	-0.01	-0.03
H	3.5707774175437357	-1.7925636043859339	-4.208644395614066	0.04	-0.01	0.01
H	4.177024208771868	-2.280447395614066	-2.599654791228132	0.02	0.01	0.02
H	5.015183813157802	-0.993636	-3.520588791228132	0.03	0.0	0.02
H	2.8948136263156035	-0.3126943956140661	4.439020813157803	0.06	0.01	0.03
H	2.171991604385934	0.573686	3.0467116263156035	0.01	0.0	0.06
H	3.7256578131578015	1.1151156043859338	3.754756	0.03	0.01	0.0
H	5.0062746043859345	-1.7787972087718678	4.060784791228132	0.01	-0.02	-0.02
H	5.867439604385934	-0.3632956043859339	3.407943395614066	0.01	-0.01	-0.01
H	5.763072	-1.861556	2.447610186842198	0.0	0.0	-0.03
H	-0.9284132087718678	-5.326486582456265	0.013051208771867853	-0.02	0.04	0.02
H	0.502659395614066	-5.88330297807033	0.8907342087718678	-0.01	0.05	0.02
H	-0.7458286043859339	-4.946478373684396	1.7308066043859338	-0.01	0.06	0.01
H	4.940560604385935	-2.423456791228132	-0.3768365824562643	0.01	0.02	0.04
H	4.6738117912281325	-3.358808604385934	1.106549604385934	-0.02	-0.01	0.01
H	4.420850395614066	-4.122821186842198	-0.4637336043859339	-0.01	0.03	-0.01
114
O	-5.559474000000001	1.6168220000000002	0.953886	-0.01	0.01	-0.01
Mg	0.571669	-0.7064050000000001	0.22873100000000002	-0.01	0.07	-0.18
O	0.579562	1.270962	-1.0778409999999998	-0.04	-0.21	-0.16
C	-4.493213	1.934786	0.19484300000000002	0.0	-0.01	-0.01
N	-0.1765	-2.628353	0.311744	0.0	0.04	-0.03
N	2.471837	-1.500194	-0.0042190000000000005	0.0	0.02	-0.01
O	-3.942319	3.014106	0.213301	0.03	-0.03	0.01
C	0.531155	-3.755356	0.45390400000000003	-0.01	0.04	-0.01
C	1.926675	-3.830524	0.338513	-0.01	0.03	0.0
C	2.83325	-2.768134	0.123558	0.0	0.02	0.0
O	-2.952673	1.158181	-1.462822	-0.05	-0.05	-0.04
C	-1.744542	0.767593	-1.079641	-0.04	-0.04	-0.04
C	-0.5924039999999999	1.310766	-1.9093449999999998	-0.03	-0.14	-0.1
C	-4.0903730000000005	0.736741	-0.673459	-0.04	-0.01	-0.01
O	-1.5283600000000002	-0.061073	-0.201431	-0.05	0.07	0.05
C	-6.01922	2.65038	1.837713	0.02	0.02	0.0
O	-0.603612	2.591701	0.335478	0.07	0.01	0.24
C	0.660134	1.905645	0.09897500000000004	0.02	0.09	0.32
O	0.88444	1.0107089999999999	1.071123	0.01	-0.01	0.1
O	1.455037	4.092363	-0.8005760000000001	0.0	-0.06	0.03
C	0.315074	4.743647999999999	-0.515331	0.01	-0.04	0.02
C	-0.736608	4.017234	0.319599	0.01	0.0	0.05
C	1.832067	2.930431	-0.005310000000000002	0.02	-0.02	0.07
O	0.118153	5.859394	-0.953751	0.0	-0.06	-0.01
C	-0.874709	4.61451	1.7293539999999998	-0.04	0.1	-0.01
C	2.4484999999999997	3.349807	1.337926	0.13	0.06	-0.02
C	-0.836841	2.583311	-2.712926	0.0	-0.09	-0.04
C	-5.183576	0.277182	-1.634901	-0.06	0.0	0.01
C	-1.622777	-2.705819	0.30102	0.0	0.03	-0.02
C	3.474835	-0.456986	-0.060972	0.0	0.02	0.0
C	-2.29624	-3.0285830000000002	-0.930635	0.0	0.01	-0.01
C	-3.699957	-2.912964	-0.971308	-0.01	0.0	-0.01
C	-4.430466	-2.485101	0.164292	-0.01	-0.01	-0.01
C	-3.763878	-2.186885	1.368293	0.0	0.0	-0.01
C	-2.350864	-2.2965050000000002	1.458832	0.0	0.01	-0.01
C	-1.4844240000000002	-3.4987999999999997	-2.1701379999999997	-0.01	-0.01	-0.01
C	-1.629027	-1.982748	2.79385	0.0	0.01	-0.01
C	4.111644	-0.018285999999999997	1.148468	0.0	0.02	0.0
C	4.999076	1.09488	1.075404	0.0	0.01	0.0
C	5.232023	1.756252	-0.151779	0.0	0.02	0.01
C	4.605957	1.310969	-1.3368909999999998	0.0	0.02	0.01
C	3.719891	0.19399500000000003	-1.31557	0.01	0.02	0.0
C	3.868792	-0.710413	2.515104	0.01	0.01	0.0
C	3.099733	-0.347994	-2.6232919999999997	0.02	0.01	-0.01
C	-0.935867	-2.2804320000000002	-2.9833250000000002	0.0	-0.03	-0.03
C	-2.301675	-4.453213	-3.1065430000000003	-0.01	-0.02	0.01
C	-1.793143	-0.482539	3.207293	-0.02	0.0	0.0
C	-2.1169420000000003	-2.935294	3.940489	0.01	0.0	-0.02
C	2.755677	0.775232	-3.653912	0.04	0.0	-0.02
C	4.027486	-1.422533	-3.2780340000000003	0.03	0.0	0.01
C	3.114408	0.228524	3.506723	0.03	0.01	0.02
C	5.213879	-1.207467	3.1478479999999998	0.01	-0.01	-0.02
C	-0.202033	-5.054712	0.78377	-0.01	0.05	0.01
C	4.30756	-3.184128	0.08807200000000001	-0.01	0.02	0.01
H	2.362132	-4.816154	0.455604	-0.01	0.03	0.01
H	-0.356291	0.5079319999999999	-2.62921	-0.22	-0.12	-0.16
H	-3.82483	-0.095004	-0.021133	-0.04	-0.02	-0.01
H	-6.305822999999999	3.5399920000000002	1.2682010000000001	0.04	0.03	0.01
H	-5.227754	2.922991	2.541486	0.02	-0.01	0.01
H	-6.88005	2.236298	2.357106	0.01	0.03	0.0
H	-1.682257	4.216412999999999	-0.195121	0.01	-0.12	0.02
H	2.618306	2.470862	-0.6037950000000001	-0.05	-0.11	0.06
H	-1.082954	5.683458	1.650226	-0.06	0.09	-0.1
H	0.020862	4.471126	2.334948	-0.04	0.17	0.01
H	-1.711956	4.1192079999999995	2.2277370000000003	-0.04	0.13	0.02
H	2.922451	4.342749	1.220743	0.25	-0.05	-0.17
H	3.230648	2.615798	1.570425	0.03	0.01	0.07
H	1.720694	3.375319	2.167731	0.18	0.3	-0.03
H	-1.552416	2.3609340000000003	-3.518	-0.08	0.02	0.02
H	0.10305500000000001	2.9141440000000003	-3.158538	-0.01	-0.16	-0.11
H	-1.256351	3.399716	-2.1196499999999996	0.14	-0.08	0.02
H	-4.874678	-0.682183	-2.060609	-0.08	0.0	0.0
H	-5.350816	1.010943	-2.4291180000000003	-0.06	0.0	0.01
H	-6.120413	0.126687	-1.085879	-0.05	0.01	0.02
H	-4.2435160000000005	-3.193743	-1.887611	-0.01	-0.01	0.0
H	-5.527694	-2.4283910000000004	0.115891	-0.01	-0.02	0.0
H	-4.345118	-1.8906	2.247362	0.0	-0.01	0.0
H	-0.604886	-4.060974000000001	-1.810907	-0.01	-0.01	0.0
H	-0.545704	-2.1794059999999997	2.6445279999999998	0.0	0.03	-0.02
H	5.519993	1.4225320000000001	1.980373	0.01	0.01	0.0
H	5.92143	2.6114200000000003	-0.186194	0.0	0.02	0.01
H	4.8248	1.810383	-2.2855510000000003	0.0	0.03	0.01
H	3.230492	-1.595972	2.342249	-0.01	0.02	0.0
H	2.150964	-0.863816	-2.3443110000000003	0.02	0.02	-0.02
H	-0.412958	-2.625759	-3.892259	0.0	-0.05	-0.02
H	-0.21296700000000002	-1.72727	-2.362761	0.01	-0.02	-0.04
H	-1.758243	-1.604846	-3.287268	0.01	-0.03	-0.04
H	-1.633347	-4.878744	-3.8665350000000003	-0.01	-0.03	0.01
H	-3.109568	-3.9183190000000003	-3.621004	-0.01	-0.02	0.0
H	-2.735398	-5.282267	-2.5293829999999997	-0.02	-0.01	0.02
H	-1.2588210000000002	-0.299467	4.1555599999999995	-0.01	0.01	-0.01
H	-2.85595	-0.225719	3.345594	-0.02	-0.02	0.02
H	-1.3646360000000002	0.184173	2.432257	-0.05	0.01	0.0
H	-1.547768	-2.734086	4.858034	0.02	-0.01	-0.02
H	-1.976378	-3.987967	3.659891	0.02	0.0	-0.03
H	-3.1840770000000003	-2.76593	4.154165	0.01	-0.02	-0.01
H	2.1715169999999997	0.351307	-4.4864429999999995	0.05	-0.01	-0.02
H	3.67197	1.2150800000000002	-4.083595	0.04	0.01	0.0
H	2.1739400000000004	1.580409	-3.1754700000000002	0.02	-0.01	-0.03
H	3.569407	-1.792221	-4.208987	0.04	-0.01	0.01
H	4.176339	-2.28079	-2.6003399999999997	0.02	0.01	0.02
H	5.014156	-0.993636	-3.5212739999999996	0.03	0.0	0.02
H	2.892758	-0.313037	4.4379930000000005	0.06	0.01	0.03
H	2.171649	0.573686	3.0446560000000003	0.01	0.0	0.06
H	3.72463	1.114773	3.754756	0.03	0.01	0.0
H	5.0059320000000005	-1.778112	4.06147	0.01	-0.02	-0.02
H	5.867097	-0.36295299999999997	3.408286	0.01	-0.01	-0.01
H	5.763072	-1.861556	2.448638	0.0	0.0	-0.03
H	-0.927728	-5.327857	0.012366000000000002	-0.02	0.04	0.02
H	0.503002	-5.885016	0.890049	-0.01	0.05	0.02
H	-0.745486	-4.9485339999999995	1.730464	-0.01	0.06	0.01
H	4.940218000000001	-2.424142	-0.37820699999999996	0.01	0.02	0.04
H	4.674497000000001	-3.358466	1.1062070000000002	-0.02	-0.01	0.01
H	4.421193	-4.123849	-0.463391	-0.01	0.03	-0.01
114
O	-5.559816604385935	1.617164604385934	0.9535433956140661	-0.01	0.01	-0.01
Mg	0.5713263956140661	-0.7040067692984625	0.22256412105318935	-0.01	0.07	-0.18
O	0.5781915824562643	1.2637673078953875	-1.0833226701749428	-0.04	-0.21	-0.16
C	-4.493213	1.934443395614066	0.1945003956140661	0.0	-0.01	-0.01
N	-0.1765	-2.6269825824562645	0.3107161868421982	0.0	0.04	-0.03
N	2.471837	-1.4995087912281322	-0.004561604385933925	0.0	0.02	-0.01
O	-3.9412911868421983	3.0130781868421983	0.2136436043859339	0.03	-0.03	0.01
C	0.5308123956140661	-3.7539855824562642	0.4535613956140661	-0.01	0.04	-0.01
C	1.926332395614066	-3.8294961868421984	0.338513	-0.01	0.03	0.0
C	2.83325	-2.7674487912281323	0.123558	0.0	0.02	0.0
O	-2.9543860219296696	1.1564679780703304	-1.4641924175437357	-0.05	-0.05	-0.04
C	-1.7459124175437357	0.7662225824562643	-1.0810114175437358	-0.04	-0.04	-0.04
C	-0.5934318131578017	1.305969538596925	-1.912771043859339	-0.03	-0.14	-0.1
C	-4.091743417543736	0.7363983956140661	-0.673801604385934	-0.04	-0.01	-0.01
O	-1.5300730219296697	-0.05867476929846253	-0.19971797807033037	-0.05	0.07	0.05
C	-6.018534791228132	2.651065208771868	1.837713	0.02	0.02	0.0
O	-0.6012137692984625	2.592043604385934	0.3437005052624142	0.07	0.01	0.24
C	0.6608192087718678	1.9087284394734052	0.10993834034988562	0.02	0.09	0.32
O	0.8847826043859339	1.010366395614066	1.0745490438593395	0.01	-0.01	0.1
O	1.455037	4.0903073736843965	-0.7995481868421983	0.0	-0.06	0.03
C	0.31541660438593394	4.742277582456264	-0.5146457912281321	0.01	-0.04	0.02
C	-0.7362653956140661	4.017234	0.3213120219296696	0.01	0.0	0.05
C	1.8327522087718677	2.9297457912281324	-0.002911769298462527	0.02	-0.02	0.07
O	0.118153	5.857338373684397	-0.9540936043859339	0.0	-0.06	-0.01
C	-0.8760794175437356	4.6179360438593395	1.729011395614066	-0.04	0.1	-0.01
C	2.4529538570171407	3.3518626263156035	1.337240791228132	0.13	0.06	-0.02
C	-0.836841	2.5802275605265947	-2.7142964175437356	0.0	-0.09	-0.04
C	-5.185631626315604	0.277182	-1.6345583956140661	-0.06	0.0	0.01
C	-1.622777	-2.7047911868421983	0.30033479122813217	0.0	0.03	-0.02
C	3.474835	-0.45630079122813216	-0.060972	0.0	0.02	0.0
C	-2.29624	-3.028240395614066	-0.9309776043859339	0.0	0.01	-0.01
C	-3.700299604385934	-2.912964	-0.9716506043859339	-0.01	0.0	-0.01
C	-4.430808604385934	-2.485443604385934	0.16394939561406607	-0.01	-0.01	-0.01
C	-3.763878	-2.186885	1.3679503956140662	0.0	0.0	-0.01
C	-2.350864	-2.296162395614066	1.458489395614066	0.0	0.01	-0.01
C	-1.484766604385934	-3.4991426043859337	-2.1704806043859337	-0.01	-0.01	-0.01
C	-1.629027	-1.9824053956140661	2.793507395614066	0.0	0.01	-0.01
C	4.111644	-0.01760079122813215	1.148468	0.0	0.02	0.0
C	4.999076	1.0952226043859339	1.075404	0.0	0.01	0.0
C	5.232023	1.7569372087718678	-0.15143639561406608	0.0	0.02	0.01
C	4.605957	1.311654208771868	-1.336548395614066	0.0	0.02	0.01
C	3.720233604385934	0.19468020877186787	-1.31557	0.01	0.02	0.0
C	3.869134604385934	-0.710070395614066	2.515104	0.01	0.01	0.0
C	3.1004182087718677	-0.3476513956140661	-2.6236346043859338	0.02	0.01	-0.01
C	-0.935867	-2.281459813157802	-2.984352813157802	0.0	-0.03	-0.03
C	-2.302017604385934	-4.453898208771868	-3.1062003956140662	-0.01	-0.02	0.01
C	-1.7938282087718678	-0.482539	3.207293	-0.02	0.0	0.0
C	-2.1165993956140663	-2.935294	3.9398037912281323	0.01	0.0	-0.02
C	2.7570474175437356	0.775232	-3.6545972087718677	0.04	0.0	-0.02
C	4.028513813157802	-1.422533	-3.2776913956140663	0.03	0.0	0.01
C	3.1154358131578017	0.22886660438593392	3.5074082087718677	0.03	0.01	0.02
C	5.214221604385934	-1.2078096043859339	3.147162791228132	0.01	-0.01	-0.02
C	-0.2023756043859339	-5.05299897807033	0.7841126043859339	-0.01	0.05	0.01
C	4.307217395614066	-3.1834427912281322	0.08841460438593393	-0.01	0.02	0.01
H	2.361789395614066	-4.815126186842198	0.45594660438593393	-0.01	0.03	0.01
H	-0.3638282964905464	0.5038207473687929	-2.6346916701749428	-0.22	-0.12	-0.16
H	-3.8262004175437356	-0.09568920877186786	-0.021475604385933923	-0.04	-0.02	-0.01
H	-6.304452582456264	3.541019813157802	1.268543604385934	0.04	0.03	0.01
H	-5.227068791228132	2.922648395614066	2.541828604385934	0.02	-0.01	0.01
H	-6.879707395614066	2.2373258131578018	2.357106	0.01	0.03	0.0
H	-1.681914395614066	4.212301747368793	-0.19443579122813215	0.01	-0.12	0.02
H	2.6165929780703303	2.467093351754727	-0.6017393736843965	-0.05	-0.11	0.06
H	-1.0850096263156035	5.686541439473405	1.6467999561406605	-0.06	0.09	-0.1
H	0.019491582456264298	4.476950274560877	2.335290604385934	-0.04	0.17	0.01
H	-1.7133264175437357	4.123661857017141	2.228422208771868	-0.04	0.13	0.02
H	2.9310161096483482	4.34103597807033	1.2149187254391232	0.25	-0.05	-0.17
H	3.2316758131578016	2.616140604385934	1.5728232307015373	0.03	0.01	0.07
H	1.7268608789468107	3.385597131578018	2.166703186842198	0.18	0.3	-0.03
H	-1.5551568350874714	2.361619208771868	-3.517314791228132	-0.08	0.02	0.02
H	0.10271239561406607	2.9086623298250576	-3.162306648245273	-0.01	-0.16	-0.11
H	-1.251554538596925	3.396975164912529	-2.118964791228132	0.14	-0.08	0.02
H	-4.877418835087472	-0.682183	-2.060609	-0.08	0.0	0.0
H	-5.352871626315603	1.010943	-2.4287753956140663	-0.06	0.0	0.01
H	-6.12212602192967	0.12702960438593391	-1.0851937912281322	-0.05	0.01	0.02
H	-4.2438586043859345	-3.194085604385934	-1.887611	-0.01	-0.01	0.0
H	-5.528036604385934	-2.429076208771868	0.115891	-0.01	-0.02	0.0
H	-4.345118	-1.8909426043859339	2.247362	0.0	-0.01	0.0
H	-0.605228604385934	-4.061316604385935	-1.810907	-0.01	-0.01	0.0
H	-0.545704	-2.178378186842198	2.643842791228132	0.0	0.03	-0.02
H	5.520335604385934	1.422874604385934	1.980373	0.01	0.01	0.0
H	5.92143	2.612105208771868	-0.18585139561406608	0.0	0.02	0.01
H	4.8248	1.8114108131578017	-2.2852083956140663	0.0	0.03	0.01
H	3.230149395614066	-1.595286791228132	2.342249	-0.01	0.02	0.0
H	2.1516492087718677	-0.8631307912281322	-2.344996208771868	0.02	0.02	-0.02
H	-0.412958	-2.6274720219296697	-3.8929442087718678	0.0	-0.05	-0.02
H	-0.2126243956140661	-1.727955208771868	-2.3641314175437356	0.01	-0.02	-0.04
H	-1.7579003956140662	-1.6058738131578016	-3.2886384175437358	0.01	-0.03	-0.04
H	-1.633689604385934	-4.879771813157802	-3.8661923956140662	-0.01	-0.03	0.01
H	-3.109910604385934	-3.919004208771868	-3.621004	-0.01	-0.02	0.0
H	-2.7360832087718676	-5.282609604385934	-2.528697791228132	-0.02	-0.01	0.02
H	-1.259163604385934	-0.29912439561406606	4.1552173956140654	-0.01	0.01	-0.01
H	-2.8566352087718676	-0.22640420877186784	3.346279208771868	-0.02	-0.02	0.02
H	-1.3663490219296697	0.18451560438593392	2.432257	-0.05	0.01	0.0
H	-1.5470827912281322	-2.734428604385934	4.857348791228132	0.02	-0.01	-0.02
H	-1.9756927912281321	-3.987967	3.6588631868421984	0.02	0.0	-0.03
H	-3.1837343956140662	-2.7666152087718676	4.153822395614066	0.01	-0.02	-0.01
H	2.1732300219296694	0.35096439561406606	-4.487128208771868	0.05	-0.01	-0.02
H	3.6733404175437356	1.215422604385934	-4.083595	0.04	0.01	0.0
H	2.174625208771868	1.5800663956140661	-3.176497813157802	0.02	-0.01	-0.03
H	3.5707774175437357	-1.7925636043859339	-4.208644395614066	0.04	-0.01	0.01
H	4.177024208771868	-2.280447395614066	-2.599654791228132	0.02	0.01	0.02
H	5.015183813157802	-0.993636	-3.520588791228132	0.03	0.0	0.02
H	2.8948136263156035	-0.3126943956140661	4.439020813157803	0.06	0.01	0.03
H	2.171991604385934	0.573686	3.0467116263156035	0.01	0.0	0.06
H	3.7256578131578015	1.1151156043859338	3.754756	0.03	0.01	0.0
H	5.0062746043859345	-1.7787972087718678	4.060784791228132	0.01	-0.02	-0.02
H	5.867439604385934	-0.3632956043859339	3.407943395614066	0.01	-0.01	-0.01
H	5.763072	-1.861556	2.447610186842198	0.0	0.0	-0.03
H	-0.9284132087718678	-5.326486582456265	0.01305120877186785	-0.02	0.04	0.02
H	0.502659395614066	-5.88330297807033	0.8907342087718678	-0.01	0.05	0.02
H	-0.7458286043859339	-4.946478373684396	1.7308066043859338	-0.01	0.06	0.01
H	4.940560604385935	-2.423456791228132	-0.3768365824562643	0.01	0.02	0.04
H	4.6738117912281325	-3.358808604385934	1.106549604385934	-0.02	-0.01	0.01
H	4.420850395614066	-4.122821186842198	-0.4637336043859339	-0.01	0.03	-0.01
114
O	-5.560810881039376	1.6181588810393754	0.9525491189606247	-0.01	0.01	-0.01
Mg	0.5703321189606246	-0.6970468327243724	0.2046671412912434	-0.01	0.07	-0.18
O	0.5742144758424985	1.2428874981731173	-1.0992310966300058	-0.04	-0.21	-0.16
C	-4.493213	1.9334491189606247	0.19350611896062464	0.0	-0.01	-0.01
N	-0.1765	-2.6230054758424988	0.3077333568818739	0.0	0.04	-0.03
N	2.471837	-1.4975202379212493	-0.005555881039375367	0.0	0.02	-0.01
O	-3.938308356881874	3.010095356881874	0.21463788103937537	0.03	-0.03	0.01
C	0.5298181189606247	-3.7500084758424985	0.4525671189606247	-0.01	0.04	-0.01
C	1.9253381189606247	-3.826513356881874	0.338513	-0.01	0.03	0.0
C	2.83325	-2.7654602379212494	0.123558	0.0	0.02	0.0
O	-2.9593574051968767	1.151496594803123	-1.4681695241575015	-0.05	-0.05	-0.04
C	-1.7498895241575014	0.7622454758424985	-1.0849885241575015	-0.04	-0.04	-0.04
C	-0.5964146431181261	1.2920496654487448	-1.9227138103937536	-0.03	-0.14	-0.1
C	-4.095720524157501	0.7354041189606246	-0.6747958810393754	-0.04	-0.01	-0.01
O	-1.535044405196877	-0.05171483272437243	-0.19474659480312317	-0.05	0.07	0.05
C	-6.016546237921249	2.6530537620787507	1.837713	0.02	0.02	0.0
O	-0.5942538327243724	2.5930378810393755	0.3675631449450088	0.07	0.01	0.24
C	0.6628077620787507	1.9176769293543783	0.14175519326001176	0.02	0.09	0.32
O	0.8857768810393754	1.0093721189606246	1.0844918103937538	0.01	-0.01	0.1
O	1.455037	4.084341713763748	-0.7965653568818739	0.0	-0.06	0.03
C	0.31641088103937537	4.7383004758424985	-0.5126572379212493	0.01	-0.04	0.02
C	-0.7352711189606247	4.017234	0.3262834051968768	0.01	0.0	0.05
C	1.8347407620787506	2.9277572379212495	0.004048167275627568	0.02	-0.02	0.07
O	0.118153	5.851372713763748	-0.9550878810393754	0.0	-0.06	-0.01
C	-0.8800565241575015	4.627878810393754	1.7280171189606246	-0.04	0.1	-0.01
C	2.4658794535118798	3.357828286236252	1.3352522379212493	0.13	0.06	-0.02
C	-0.836841	2.5712790706456214	-2.7182735241575013	0.0	-0.09	-0.04
C	-5.191597286236252	0.277182	-1.6335641189606247	-0.06	0.0	0.01
C	-1.622777	-2.701808356881874	0.29834623792124926	0.0	0.03	-0.02
C	3.474835	-0.45431223792124925	-0.060972	0.0	0.02	0.0
C	-2.29624	-3.027246118960625	-0.9319718810393753	0.0	0.01	-0.01
C	-3.7012938810393754	-2.912964	-0.9726448810393753	-0.01	0.0	-0.01
C	-4.431802881039375	-2.4864378810393752	0.16295511896062462	-0.01	-0.01	-0.01
C	-3.763878	-2.186885	1.3669561189606247	0.0	0.0	-0.01
C	-2.350864	-2.295168118960625	1.4574951189606247	0.0	0.01	-0.01
C	-1.4857608810393754	-3.500136881039375	-2.171474881039375	-0.01	-0.01	-0.01
C	-1.629027	-1.9814111189606247	2.7925131189606245	0.0	0.01	-0.01
C	4.111644	-0.015612237921249265	1.148468	0.0	0.02	0.0
C	4.999076	1.0962168810393753	1.075404	0.0	0.01	0.0
C	5.232023	1.7589257620787506	-0.15044211896062462	0.0	0.02	0.01
C	4.605957	1.3136427620787507	-1.3355541189606246	0.0	0.02	0.01
C	3.7212278810393755	0.19666876207875075	-1.31557	0.01	0.02	0.0
C	3.8701288810393755	-0.7090761189606246	2.515104	0.01	0.01	0.0
C	3.1024067620787505	-0.3466571189606247	-2.624628881039375	0.02	0.01	-0.01
[truncated: 300 more rows]
