# Supplementary material
Source: publisher figshare collection journal article supplement (https://acs.figshare.com/ndownloader/files/5127205)
Supplement: Supplementary file 1 [file 5127205 › supporting_ja043819b/RRSS_fm-5-ts1-freq-101.log]

 Entering Gaussian System, Link 0=/homes/rzepa/g98/g98
 Input=RRSS_fm-5-ts1.gjf
 Output=RRSS_fm-5-ts1.log
 Initial command:
 /homes/rzepa/g98/l1.exe /scratch/Gau-1999.inp -scrdir=/scratch/
 Entering Link 1 = /homes/rzepa/g98/l1.exe PID=      2000.
  
 Copyright (c) 1988,1990,1992,1993,1995,1998 Gaussian, Inc.
                  All Rights Reserved.
  
 This is part of the Gaussian(R) 98 program.  It is based on
 the Gaussian 94(TM) system (copyright 1995 Gaussian, Inc.),
 the Gaussian 92(TM) system (copyright 1992 Gaussian, Inc.),
 the Gaussian 90(TM) system (copyright 1990 Gaussian, Inc.),
 the Gaussian 88(TM) system (copyright 1988 Gaussian, Inc.),
 the Gaussian 86(TM) system (copyright 1986 Carnegie Mellon
 University), and the Gaussian 82(TM) system (copyright 1983
 Carnegie Mellon University). Gaussian is a federally registered
 trademark of Gaussian, Inc.
  
 This software contains proprietary and confidential information,
 including trade secrets, belonging to Gaussian, Inc.
  
 This software is provided under written license and may be
 used, copied, transmitted, or stored only in accord with that
 written license.
  
 The following legend is applicable only to US Government
 contracts under DFARS:
  
                    RESTRICTED RIGHTS LEGEND
  
 Use, duplication or disclosure by the US Government is subject
 to restrictions as set forth in subparagraph (c)(1)(ii) of the
 Rights in Technical Data and Computer Software clause at DFARS
 252.227-7013.
  
 Gaussian, Inc.
 Carnegie Office Park, Building 6, Pittsburgh, PA 15106 USA
  
 The following legend is applicable only to US Government
 contracts under FAR:
  
                    RESTRICTED RIGHTS LEGEND
  
 Use, reproduction and disclosure by the US Government is subject
 to restrictions as set forth in subparagraph (c) of the
 Commercial Computer Software - Restricted Rights clause at FAR
 52.227-19.
  
 Gaussian, Inc.
 Carnegie Office Park, Building 6, Pittsburgh, PA 15106 USA
  
  
 ---------------------------------------------------------------
 Warning -- This program may not be used in any manner that
 competes with the business of Gaussian, Inc. or will provide
 assistance to any competitor of Gaussian, Inc.  The licensee
 of this program is prohibited from giving any competitor of
 Gaussian, Inc. access to this program.  By using this program,
 the user acknowledges that Gaussian, Inc. is engaged in the
 business of creating and licensing software in the field of
 computational chemistry and represents and warrants to the
 licensee that it is not a competitor of Gaussian, Inc. and that
 it will not use this program in any manner prohibited above.
 ---------------------------------------------------------------
  

 Cite this work as:
 Gaussian 98, Revision A.11.3,
 M. J. Frisch, G. W. Trucks, H. B. Schlegel, G. E. Scuseria, 
 M. A. Robb, J. R. Cheeseman, V. G. Zakrzewski, J. A. Montgomery, Jr., 
 R. E. Stratmann, J. C. Burant, S. Dapprich, J. M. Millam, 
 A. D. Daniels, K. N. Kudin, M. C. Strain, O. Farkas, J. Tomasi, 
 V. Barone, M. Cossi, R. Cammi, B. Mennucci, C. Pomelli, C. Adamo, 
 S. Clifford, J. Ochterski, G. A. Petersson, P. Y. Ayala, Q. Cui, 
 K. Morokuma, N. Rega, P. Salvador, J. J. Dannenberg, D. K. Malick, 
 A. D. Rabuck, K. Raghavachari, J. B. Foresman, J. Cioslowski, 
 J. V. Ortiz, A. G. Baboul, B. B. Stefanov, G. Liu, A. Liashenko, 
 P. Piskorz, I. Komaromi, R. Gomperts, R. L. Martin, D. J. Fox, 
 T. Keith, M. A. Al-Laham, C. Y. Peng, A. Nanayakkara, M. Challacombe, 
 P. M. W. Gill, B. Johnson, W. Chen, M. W. Wong, J. L. Andres, 
 C. Gonzalez, M. Head-Gordon, E. S. Replogle, and J. A. Pople, 
 Gaussian, Inc., Pittsburgh PA, 2002.

 ***********************************************
 Gaussian 98:  x86-Linux-G98RevA.11.3 5-Feb-2002
                    9-Mar-2004 
 ***********************************************
 %mem=500MB
 %nproc=2
 Will use up to    2 processors via shared memory.
 %chk=RRSS_fm-5-ts1.chk
 %rwf=/scratch/51.rwf,1800MB,/scratch/52.rwf,1800MB,/scratch/53.rwf,1800MB,/scrat
 ch/54.rwf,1800MB,/scratch/55.rwf,1800MB,/scratch/56.rwf,1800MB,/scratch/57.rwf,1
 800MB,/scratch/58.rwf,1800MB,/scratch/59.rwf,1800MB
 -------------------------------------------
 # b3lyp/Gen geom=checkpoint guess=read freq
 -------------------------------------------
 1/10=4,29=2,30=1,38=1/1,3;
 2/40=1/2;
 3/5=7,11=2,25=1,30=1/1,2,3;
 4/5=1/1;
 5/5=2,42=-5/2;
 8/6=4,11=11/1;
 11/6=1,8=1,9=11,15=111,16=11/1,2,10;
 10/6=1/2;
 6/7=2,8=2,9=2,10=2,18=1,28=1/1;
 7/8=1,10=1,25=1/1,2,3,16;
 1/10=4,30=1/3;
 99//99;
 ----------------
 from RRSS_fm.gjf
 ----------------
 Redundant internal coordinates taken from checkpoint file:
 RRSS_fm-5-ts1.chk
 Charge =  0 Multiplicity = 1
 O,0,5.6884894765,0.9756033061,-1.0992305091
 Mg,0,-0.6319125093,-0.598934195,-0.0595864445
 O,0,-0.4106325115,1.2384093327,1.1317935935
 C,0,4.6660526441,1.4313744864,-0.3460214085
 N,0,-0.1010249877,-2.6163822911,-0.1478354058
 N,0,-2.6129536614,-1.2150956104,0.1220335451
 O,0,4.2080540964,2.5476297585,-0.4310692727
 C,0,-0.9181150361,-3.6701991823,-0.233122363
 C,0,-2.3125146128,-3.5991107746,-0.1043809146
 C,0,-3.1070558897,-2.4433957212,0.0620447722
 O,0,3.1138229827,0.8815419229,1.3918577645
 C,0,1.8588696845,0.6077792026,1.0444996943
 C,0,0.7706448305,1.246695946,1.9017702069
 C,0,4.1831504375,0.3281050131,0.5917254105
 O,0,1.5561823945,-0.1674728018,0.1489551655
 C,0,6.218106045,1.9145494377,-2.0514484993
 O,0,0.8141974161,2.4948973996,-0.6533778665
 C,0,-0.4703345229,2.0082946572,-0.4241106441
 O,0,-0.8012529697,1.0287754746,-1.1848512376
 O,0,-1.0105111256,4.217147587,0.5699484233
 C,0,0.1807732945,4.7435266066,0.2422353357
 C,0,1.1388978711,3.8931080329,-0.5855441715
 C,0,-1.5319128788,3.0878206668,-0.1845257658
 O,0,0.5064981721,5.8409146046,0.6373783375
 C,0,1.3571781089,4.4635645705,-1.9901467118
 C,0,-2.1938335644,3.5636210341,-1.4811796211
 C,0,1.1424622729,2.5627162026,2.5869305165
 C,0,5.2531759167,-0.1865574358,1.5501209078
 C,0,1.3283738958,-2.852216412,-0.1559649868
 C,0,-3.5005297938,-0.0709970541,0.1252221618
 C,0,1.9839547214,-3.1912809847,1.0777252311
 C,0,3.3987915084,-3.2296467002,1.0961653817
 C,0,4.1496118808,-2.9499705155,-0.0693412646
 C,0,3.4909683181,-2.6411023585,-1.2806569535
 C,0,2.0736158811,-2.5992337741,-1.3491894696
 C,0,1.1544159386,-3.5204328244,2.3513369735
 C,0,1.3656326697,-2.2838895934,-2.6912336687
 C,0,-4.1087569951,0.3662544548,-1.0993588728
 C,0,-4.8744403859,1.5619706466,-1.0777151982
 C,0,-5.0152990408,2.3161072213,0.1060367907
 C,0,-4.4188606977,1.8721335644,1.3068184864
 C,0,-3.6616139634,0.6697413579,1.3445189955
 C,0,-3.9707402434,-0.4266422888,-2.4276535454
 C,0,-3.0866113982,0.1311530203,2.6806106838
 C,0,0.7419690307,-2.2213623425,3.1166391257
 C,0,1.8825510783,-4.5112252458,3.3163205583
 C,0,1.691439135,-0.8426262542,-3.1959901827
 C,0,1.7240468388,-3.348891361,-3.7812314544
 C,0,-2.6240026835,1.2608995264,3.6507751985
 C,0,-4.1180305286,-0.8098179983,3.391094359
 C,0,-3.1537658336,0.3734582612,-3.4922818913
 C,0,-5.3722819276,-0.8260340947,-3.0016279207
 C,0,-0.329909612,-5.0492068289,-0.5130239185
 C,0,-4.6090744386,-2.7005553092,0.1303755387
 H,0,-2.8505813271,-4.5387148101,-0.1685368499
 H,0,0.5988436741,0.5154246255,2.7074107731
 H,0,3.8202957391,-0.5120710356,-0.0099189911
 H,0,6.5924792949,2.8065896653,-1.5427692067
 H,0,5.4451322868,2.2092476412,-2.7660033059
 H,0,7.0296205387,1.3909494292,-2.5573145431
 H,0,2.1004784701,3.9369415612,-0.067900304
 H,0,-2.3091650862,2.6792088603,0.4574457413
 H,0,1.6915097777,5.5023573693,-1.9097839322
 H,0,0.4461232987,4.4305774339,-2.5932584046
 H,0,2.1312626289,3.8764337676,-2.4919196109
 H,0,-2.6491855047,4.5438433586,-1.3038574708
 H,0,-2.9873664059,2.8589633983,-1.7253377429
 H,0,-1.4988641394,3.6384146238,-2.3213331997
 H,0,1.9076492239,2.3784257794,3.3480291219
 H,0,0.2527421128,2.9674528198,3.0757583017
 H,0,1.5372215479,3.3121807541,1.9032577984
 H,0,4.867197899,-1.0847759806,2.0388009722
 H,0,5.5097588124,0.5673827576,2.3003840459
 H,0,6.1532433506,-0.4569246374,0.9923322054
 H,0,3.9248884644,-3.5234473911,2.0137749135
 H,0,5.2465811379,-3.0138099135,-0.0433170648
 H,0,4.0839103365,-2.462889342,-2.188017137
 H,0,0.2148144766,-4.0059188053,2.0269848975
 H,0,0.2720079955,-2.3428409015,-2.5126272245
 H,0,-5.3807455005,1.8939529633,-1.9933929507
 H,0,-5.6109441808,3.2396639703,0.1007732764
 H,0,-4.5672772861,2.4492903942,2.2283209463
 H,0,-3.4108704878,-1.3583193448,-2.2137298473
 H,0,-2.2009808747,-0.4886158349,2.4264837832
 H,0,0.1999884677,-2.4744048034,4.0430634356
 H,0,0.0641067828,-1.6215012077,2.4812911818
 H,0,1.6286605836,-1.6194975079,3.380224913
 H,0,1.1858828382,-4.8293302691,4.1067612049
 H,0,2.7507317807,-4.0369000628,3.7979881894
 H,0,2.2249109304,-5.4054498756,2.7737287136
 H,0,1.1568146139,-0.6478093832,-4.1401098154
 H,0,2.7710145393,-0.7215584503,-3.3736904401
 H,0,1.3699019001,-0.0888810109,-2.454968055
 H,0,1.1556053202,-3.1450186077,-4.7014995269
 H,0,1.4723360671,-4.3631055101,-3.433928693
 H,0,2.7976167695,-3.3188171571,-4.022387092
 H,0,-2.0807619772,0.8172734755,4.4993050214
 H,0,-3.4813402439,1.823480165,4.0514438756
 H,0,-1.9563735116,1.9653165534,3.1289373093
 H,0,-3.6928055352,-1.1810045518,4.3363170903
 H,0,-4.3597535636,-1.6771819731,2.7564158952
 H,0,-5.050309653,-0.267357766,3.6144114861
 H,0,-3.026932212,-0.2361228645,-4.4012506675
 H,0,-2.1596016171,0.6320462221,-3.0886421935
 H,0,-3.6720430587,1.3050376783,-3.7681939945
 H,0,-5.2415357158,-1.4708819585,-3.8840667137
 H,0,-5.9382460965,0.0668217012,-3.3080807951
 H,0,-5.9668525003,-1.37336846,-2.2544053226
 H,0,0.3825664101,-5.3631574736,0.2573332946
 H,0,-1.1196352974,-5.805628,-0.5719311674
 H,0,0.2060264817,-5.0451655644,-1.4706966243
 H,0,-5.1650830498,-1.853803365,0.5401126797
 H,0,-5.0049006173,-2.9116814022,-0.8711519604
 H,0,-4.8097396369,-3.5842119006,0.7480435411
 Recover connectivity data from disk.

 GradGradGradGradGradGradGradGradGradGradGradGradGradGradGradGradGradGrad
 Berny optimization.
 Initialization pass.
                         ----------------------------
                         !    Initial Parameters    !
                         ! (Angstroms and Degrees)  !
 ------------------------                            -------------------------
 ! Name  Definition              Value          Derivative Info.             !
 -----------------------------------------------------------------------------
 ! R1    R(1,4)                  1.3492         calculate D2E/DX2 analyticall!
 ! R2    R(1,16)                 1.4383         calculate D2E/DX2 analyticall!
 ! R3    R(2,3)                  2.201          calculate D2E/DX2 analyticall!
 ! R4    R(2,5)                  2.088          calculate D2E/DX2 analyticall!
 ! R5    R(2,6)                  2.0826         calculate D2E/DX2 analyticall!
 ! R6    R(2,15)                 2.24           calculate D2E/DX2 analyticall!
 ! R7    R(2,19)                 1.986          calculate D2E/DX2 analyticall!
 ! R8    R(3,13)                 1.4101         calculate D2E/DX2 analyticall!
 ! R9    R(3,18)                 1.737          calculate D2E/DX2 analyticall!
 ! R10   R(4,7)                  1.2096         calculate D2E/DX2 analyticall!
 ! R11   R(4,14)                 1.5264         calculate D2E/DX2 analyticall!
 ! R12   R(5,8)                  1.3362         calculate D2E/DX2 analyticall!
 ! R13   R(5,29)                 1.4487         calculate D2E/DX2 analyticall!
 ! R14   R(6,10)                 1.3253         calculate D2E/DX2 analyticall!
 ! R15   R(6,30)                 1.448          calculate D2E/DX2 analyticall!
 ! R16   R(8,9)                  1.4021         calculate D2E/DX2 analyticall!
 ! R17   R(8,53)                 1.5251         calculate D2E/DX2 analyticall!
 ! R18   R(9,10)                 1.4123         calculate D2E/DX2 analyticall!
 ! R19   R(9,55)                 1.0847         calculate D2E/DX2 analyticall!
 ! R20   R(10,54)                1.5254         calculate D2E/DX2 analyticall!
 ! R21   R(11,12)                1.3306         calculate D2E/DX2 analyticall!
 ! R22   R(11,14)                1.4457         calculate D2E/DX2 analyticall!
 ! R23   R(12,13)                1.5256         calculate D2E/DX2 analyticall!
 ! R24   R(12,15)                1.2226         calculate D2E/DX2 analyticall!
 ! R25   R(13,27)                1.5296         calculate D2E/DX2 analyticall!
 ! R26   R(13,56)                1.1015         calculate D2E/DX2 analyticall!
 ! R27   R(14,28)                1.5259         calculate D2E/DX2 analyticall!
 ! R28   R(14,57)                1.0952         calculate D2E/DX2 analyticall!
 ! R29   R(16,58)                1.093          calculate D2E/DX2 analyticall!
 ! R30   R(16,59)                1.0931         calculate D2E/DX2 analyticall!
 ! R31   R(16,60)                1.0902         calculate D2E/DX2 analyticall!
 ! R32   R(17,18)                1.3926         calculate D2E/DX2 analyticall!
 ! R33   R(17,22)                1.437          calculate D2E/DX2 analyticall!
 ! R34   R(18,19)                1.2836         calculate D2E/DX2 analyticall!
 ! R35   R(18,23)                1.5329         calculate D2E/DX2 analyticall!
 ! R36   R(20,21)                1.343          calculate D2E/DX2 analyticall!
 ! R37   R(20,23)                1.4548         calculate D2E/DX2 analyticall!
 ! R38   R(21,22)                1.5253         calculate D2E/DX2 analyticall!
 ! R39   R(21,24)                1.211          calculate D2E/DX2 analyticall!
 ! R40   R(22,25)                1.5317         calculate D2E/DX2 analyticall!
 ! R41   R(22,61)                1.0929         calculate D2E/DX2 analyticall!
 ! R42   R(23,26)                1.5316         calculate D2E/DX2 analyticall!
 ! R43   R(23,62)                1.0878         calculate D2E/DX2 analyticall!
 ! R44   R(25,63)                1.0942         calculate D2E/DX2 analyticall!
 ! R45   R(25,64)                1.0931         calculate D2E/DX2 analyticall!
 ! R46   R(25,65)                1.0935         calculate D2E/DX2 analyticall!
 ! R47   R(26,66)                1.0953         calculate D2E/DX2 analyticall!
 ! R48   R(26,67)                1.089          calculate D2E/DX2 analyticall!
 ! R49   R(26,68)                1.0929         calculate D2E/DX2 analyticall!
 ! R50   R(27,69)                1.0949         calculate D2E/DX2 analyticall!
 ! R51   R(27,70)                1.0929         calculate D2E/DX2 analyticall!
 ! R52   R(27,71)                1.0885         calculate D2E/DX2 analyticall!
 ! R53   R(28,72)                1.093          calculate D2E/DX2 analyticall!
 ! R54   R(28,73)                1.0941         calculate D2E/DX2 analyticall!
 ! R55   R(28,74)                1.0929         calculate D2E/DX2 analyticall!
 ! R56   R(29,31)                1.4376         calculate D2E/DX2 analyticall!
 ! R57   R(29,35)                1.4294         calculate D2E/DX2 analyticall!
 ! R58   R(30,38)                1.4355         calculate D2E/DX2 analyticall!
 ! R59   R(30,42)                1.4357         calculate D2E/DX2 analyticall!
 ! R60   R(31,32)                1.4155         calculate D2E/DX2 analyticall!
 ! R61   R(31,36)                1.5552         calculate D2E/DX2 analyticall!
 ! R62   R(32,33)                1.4143         calculate D2E/DX2 analyticall!
 ! R63   R(32,75)                1.0978         calculate D2E/DX2 analyticall!
 ! R64   R(33,34)                1.413          calculate D2E/DX2 analyticall!
 ! R65   R(33,76)                1.0991         calculate D2E/DX2 analyticall!
 ! R66   R(34,35)                1.4196         calculate D2E/DX2 analyticall!
 ! R67   R(34,77)                1.0985         calculate D2E/DX2 analyticall!
 ! R68   R(35,37)                1.5498         calculate D2E/DX2 analyticall!
 ! R69   R(36,45)                1.5631         calculate D2E/DX2 analyticall!
 ! R70   R(36,46)                1.563          calculate D2E/DX2 analyticall!
 ! R71   R(36,78)                1.1062         calculate D2E/DX2 analyticall!
 ! R72   R(37,47)                1.5615         calculate D2E/DX2 analyticall!
 ! R73   R(37,48)                1.5655         calculate D2E/DX2 analyticall!
 ! R74   R(37,79)                1.1097         calculate D2E/DX2 analyticall!
 ! R75   R(38,39)                1.42           calculate D2E/DX2 analyticall!
 ! R76   R(38,43)                1.5531         calculate D2E/DX2 analyticall!
 ! R77   R(39,40)                1.4106         calculate D2E/DX2 analyticall!
 ! R78   R(39,80)                1.0977         calculate D2E/DX2 analyticall!
 ! R79   R(40,41)                1.4123         calculate D2E/DX2 analyticall!
 ! R80   R(40,81)                1.099          calculate D2E/DX2 analyticall!
 ! R81   R(41,42)                1.4215         calculate D2E/DX2 analyticall!
 ! R82   R(41,82)                1.0974         calculate D2E/DX2 analyticall!
 ! R83   R(42,44)                1.5511         calculate D2E/DX2 analyticall!
 ! R84   R(43,51)                1.5624         calculate D2E/DX2 analyticall!
 ! R85   R(43,52)                1.5663         calculate D2E/DX2 analyticall!
 ! R86   R(43,83)                1.1078         calculate D2E/DX2 analyticall!
 ! R87   R(44,49)                1.5593         calculate D2E/DX2 analyticall!
 ! R88   R(44,50)                1.5665         calculate D2E/DX2 analyticall!
 ! R89   R(44,84)                1.1104         calculate D2E/DX2 analyticall!
 ! R90   R(45,85)                1.1027         calculate D2E/DX2 analyticall!
 ! R91   R(45,86)                1.1059         calculate D2E/DX2 analyticall!
 ! R92   R(45,87)                1.1036         calculate D2E/DX2 analyticall!
 ! R93   R(46,88)                1.1006         calculate D2E/DX2 analyticall!
 ! R94   R(46,89)                1.1003         calculate D2E/DX2 analyticall!
 ! R95   R(46,90)                1.1006         calculate D2E/DX2 analyticall!
 ! R96   R(47,91)                1.1023         calculate D2E/DX2 analyticall!
 ! R97   R(47,92)                1.1008         calculate D2E/DX2 analyticall!
 ! R98   R(47,93)                1.1048         calculate D2E/DX2 analyticall!
 ! R99   R(48,94)                1.1007         calculate D2E/DX2 analyticall!
 ! R100  R(48,95)                1.1012         calculate D2E/DX2 analyticall!
 ! R101  R(48,96)                1.1007         calculate D2E/DX2 analyticall!
 ! R102  R(49,97)                1.1009         calculate D2E/DX2 analyticall!
 ! R103  R(49,98)                1.1009         calculate D2E/DX2 analyticall!
 ! R104  R(49,99)                1.1019         calculate D2E/DX2 analyticall!
 ! R105  R(50,100)               1.1009         calculate D2E/DX2 analyticall!
 ! R106  R(50,101)               1.1016         calculate D2E/DX2 analyticall!
 ! R107  R(50,102)               1.1015         calculate D2E/DX2 analyticall!
 ! R108  R(51,103)               1.1018         calculate D2E/DX2 analyticall!
 ! R109  R(51,104)               1.1037         calculate D2E/DX2 analyticall!
 ! R110  R(51,105)               1.1012         calculate D2E/DX2 analyticall!
 ! R111  R(52,106)               1.1007         calculate D2E/DX2 analyticall!
 ! R112  R(52,107)               1.1006         calculate D2E/DX2 analyticall!
 ! R113  R(52,108)               1.1007         calculate D2E/DX2 analyticall!
 ! R114  R(53,109)               1.0953         calculate D2E/DX2 analyticall!
 ! R115  R(53,110)               1.0951         calculate D2E/DX2 analyticall!
 ! R116  R(53,111)               1.0974         calculate D2E/DX2 analyticall!
 ! R117  R(54,112)               1.0927         calculate D2E/DX2 analyticall!
 ! R118  R(54,113)               1.0974         calculate D2E/DX2 analyticall!
 ! R119  R(54,114)               1.0966         calculate D2E/DX2 analyticall!
 ! A1    A(4,1,16)             115.3463         calculate D2E/DX2 analyticall!
 ! A2    A(3,2,5)              143.5047         calculate D2E/DX2 analyticall!
 ! A3    A(3,2,6)              107.1825         calculate D2E/DX2 analyticall!
 ! A4    A(3,2,15)              71.9766         calculate D2E/DX2 analyticall!
 ! A5    A(3,2,19)              68.3515         calculate D2E/DX2 analyticall!
 ! A6    A(5,2,6)               87.6891         calculate D2E/DX2 analyticall!
 ! A7    A(5,2,15)              86.6564         calculate D2E/DX2 analyticall!
 ! A8    A(5,2,19)             142.1499         calculate D2E/DX2 analyticall!
 ! A9    A(6,2,15)             167.9833         calculate D2E/DX2 analyticall!
 ! A10   A(6,2,19)             102.1685         calculate D2E/DX2 analyticall!
 ! A11   A(15,2,19)             88.7494         calculate D2E/DX2 analyticall!
 ! A12   A(2,3,13)             112.6256         calculate D2E/DX2 analyticall!
 ! A13   A(2,3,18)              83.2048         calculate D2E/DX2 analyticall!
 ! A14   A(13,3,18)            121.0183         calculate D2E/DX2 analyticall!
 ! A15   A(1,4,7)              124.0164         calculate D2E/DX2 analyticall!
 ! A16   A(1,4,14)             109.7887         calculate D2E/DX2 analyticall!
 ! A17   A(7,4,14)             126.1897         calculate D2E/DX2 analyticall!
 ! A18   A(2,5,8)              127.5344         calculate D2E/DX2 analyticall!
 ! A19   A(2,5,29)             114.1033         calculate D2E/DX2 analyticall!
 ! A20   A(8,5,29)             118.3329         calculate D2E/DX2 analyticall!
 ! A21   A(2,6,10)             128.6748         calculate D2E/DX2 analyticall!
 ! A22   A(2,6,30)             110.4566         calculate D2E/DX2 analyticall!
 ! A23   A(10,6,30)            120.2552         calculate D2E/DX2 analyticall!
 ! A24   A(5,8,9)              124.2138         calculate D2E/DX2 analyticall!
 ! A25   A(5,8,53)             119.2735         calculate D2E/DX2 analyticall!
 ! A26   A(9,8,53)             116.503          calculate D2E/DX2 analyticall!
 ! A27   A(8,9,10)             127.7183         calculate D2E/DX2 analyticall!
 ! A28   A(8,9,55)             116.3583         calculate D2E/DX2 analyticall!
 ! A29   A(10,9,55)            115.8975         calculate D2E/DX2 analyticall!
 ! A30   A(6,10,9)             123.6418         calculate D2E/DX2 analyticall!
 ! A31   A(6,10,54)            121.4208         calculate D2E/DX2 analyticall!
 ! A32   A(9,10,54)            114.9152         calculate D2E/DX2 analyticall!
 ! A33   A(12,11,14)           118.3186         calculate D2E/DX2 analyticall!
 ! A34   A(11,12,13)           116.0979         calculate D2E/DX2 analyticall!
 ! A35   A(11,12,15)           123.7247         calculate D2E/DX2 analyticall!
 ! A36   A(13,12,15)           120.0394         calculate D2E/DX2 analyticall!
 ! A37   A(3,13,12)            106.7544         calculate D2E/DX2 analyticall!
 ! A38   A(3,13,27)            116.9553         calculate D2E/DX2 analyticall!
 ! A39   A(3,13,56)            105.356          calculate D2E/DX2 analyticall!
 ! A40   A(12,13,27)           116.0177         calculate D2E/DX2 analyticall!
 ! A41   A(12,13,56)           104.1355         calculate D2E/DX2 analyticall!
 ! A42   A(27,13,56)           106.3487         calculate D2E/DX2 analyticall!
 ! A43   A(4,14,11)            107.2979         calculate D2E/DX2 analyticall!
 ! A44   A(4,14,28)            114.0677         calculate D2E/DX2 analyticall!
 ! A45   A(4,14,57)            108.7724         calculate D2E/DX2 analyticall!
 ! A46   A(11,14,28)           107.4689         calculate D2E/DX2 analyticall!
 ! A47   A(11,14,57)           110.6496         calculate D2E/DX2 analyticall!
 ! A48   A(28,14,57)           108.5791         calculate D2E/DX2 analyticall!
 ! A49   A(2,15,12)            115.6071         calculate D2E/DX2 analyticall!
 ! A50   A(1,16,58)            110.5356         calculate D2E/DX2 analyticall!
 ! A51   A(1,16,59)            110.3876         calculate D2E/DX2 analyticall!
 ! A52   A(1,16,60)            105.5299         calculate D2E/DX2 analyticall!
 ! A53   A(58,16,59)           109.0504         calculate D2E/DX2 analyticall!
 ! A54   A(58,16,60)           110.668          calculate D2E/DX2 analyticall!
 ! A55   A(59,16,60)           110.6412         calculate D2E/DX2 analyticall!
 ! A56   A(18,17,22)           122.7264         calculate D2E/DX2 analyticall!
 ! A57   A(3,18,17)            105.7022         calculate D2E/DX2 analyticall!
 ! A58   A(3,18,19)            101.6249         calculate D2E/DX2 analyticall!
 ! A59   A(3,18,23)            101.2998         calculate D2E/DX2 analyticall!
 ! A60   A(17,18,19)           114.0077         calculate D2E/DX2 analyticall!
 ! A61   A(17,18,23)           114.7365         calculate D2E/DX2 analyticall!
 ! A62   A(19,18,23)           116.8397         calculate D2E/DX2 analyticall!
 ! A63   A(2,19,18)            105.5239         calculate D2E/DX2 analyticall!
 ! A64   A(21,20,23)           119.7106         calculate D2E/DX2 analyticall!
 ! A65   A(20,21,22)           118.1064         calculate D2E/DX2 analyticall!
 ! A66   A(20,21,24)           120.9403         calculate D2E/DX2 analyticall!
 ! A67   A(22,21,24)           120.8889         calculate D2E/DX2 analyticall!
 ! A68   A(17,22,21)           115.2253         calculate D2E/DX2 analyticall!
 ! A69   A(17,22,25)           110.5667         calculate D2E/DX2 analyticall!
 ! A70   A(17,22,61)           105.0806         calculate D2E/DX2 analyticall!
 ! A71   A(21,22,25)           112.3062         calculate D2E/DX2 analyticall!
 ! A72   A(21,22,61)           105.8588         calculate D2E/DX2 analyticall!
 ! A73   A(25,22,61)           107.0985         calculate D2E/DX2 analyticall!
 ! A74   A(18,23,20)           112.3051         calculate D2E/DX2 analyticall!
 ! A75   A(18,23,26)           112.6904         calculate D2E/DX2 analyticall!
 ! A76   A(18,23,62)           108.817          calculate D2E/DX2 analyticall!
 ! A77   A(20,23,26)           110.658          calculate D2E/DX2 analyticall!
 ! A78   A(20,23,62)           103.9825         calculate D2E/DX2 analyticall!
 ! A79   A(26,23,62)           107.9105         calculate D2E/DX2 analyticall!
 ! A80   A(22,25,63)           109.2548         calculate D2E/DX2 analyticall!
 ! A81   A(22,25,64)           112.0837         calculate D2E/DX2 analyticall!
 ! A82   A(22,25,65)           108.7668         calculate D2E/DX2 analyticall!
 ! A83   A(63,25,64)           108.8947         calculate D2E/DX2 analyticall!
 ! A84   A(63,25,65)           109.0954         calculate D2E/DX2 analyticall!
 ! A85   A(64,25,65)           108.7009         calculate D2E/DX2 analyticall!
 ! A86   A(23,26,66)           108.7012         calculate D2E/DX2 analyticall!
 ! A87   A(23,26,67)           107.6812         calculate D2E/DX2 analyticall!
 ! A88   A(23,26,68)           113.4065         calculate D2E/DX2 analyticall!
 ! A89   A(66,26,67)           108.2077         calculate D2E/DX2 analyticall!
 ! A90   A(66,26,68)           109.1218         calculate D2E/DX2 analyticall!
 ! A91   A(67,26,68)           109.5909         calculate D2E/DX2 analyticall!
 ! A92   A(13,27,69)           109.6609         calculate D2E/DX2 analyticall!
 ! A93   A(13,27,70)           108.7292         calculate D2E/DX2 analyticall!
 ! A94   A(13,27,71)           113.5277         calculate D2E/DX2 analyticall!
 ! A95   A(69,27,70)           108.6856         calculate D2E/DX2 analyticall!
 ! A96   A(69,27,71)           107.3997         calculate D2E/DX2 analyticall!
 ! A97   A(70,27,71)           108.7342         calculate D2E/DX2 analyticall!
 ! A98   A(14,28,72)           108.0815         calculate D2E/DX2 analyticall!
 ! A99   A(14,28,73)           111.2671         calculate D2E/DX2 analyticall!
 ! A100  A(14,28,74)           109.9017         calculate D2E/DX2 analyticall!
 ! A101  A(72,28,73)           110.03           calculate D2E/DX2 analyticall!
 ! A102  A(72,28,74)           108.4053         calculate D2E/DX2 analyticall!
 ! A103  A(73,28,74)           109.1059         calculate D2E/DX2 analyticall!
 ! A104  A(5,29,31)            118.9147         calculate D2E/DX2 analyticall!
 ! A105  A(5,29,35)            119.359          calculate D2E/DX2 analyticall!
 ! A106  A(31,29,35)           121.3558         calculate D2E/DX2 analyticall!
 ! A107  A(6,30,38)            119.9004         calculate D2E/DX2 analyticall!
 ! A108  A(6,30,42)            118.5735         calculate D2E/DX2 analyticall!
 ! A109  A(38,30,42)           121.3169         calculate D2E/DX2 analyticall!
 ! A110  A(29,31,32)           118.2543         calculate D2E/DX2 analyticall!
 ! A111  A(29,31,36)           120.6277         calculate D2E/DX2 analyticall!
 ! A112  A(32,31,36)           121.1151         calculate D2E/DX2 analyticall!
 ! A113  A(31,32,33)           120.9659         calculate D2E/DX2 analyticall!
 ! A114  A(31,32,75)           119.8128         calculate D2E/DX2 analyticall!
 ! A115  A(33,32,75)           119.1655         calculate D2E/DX2 analyticall!
 ! A116  A(32,33,34)           120.1472         calculate D2E/DX2 analyticall!
 ! A117  A(32,33,76)           119.922          calculate D2E/DX2 analyticall!
 ! A118  A(34,33,76)           119.882          calculate D2E/DX2 analyticall!
 ! A119  A(33,34,35)           120.8789         calculate D2E/DX2 analyticall!
 ! A120  A(33,34,77)           119.4707         calculate D2E/DX2 analyticall!
 ! A121  A(35,34,77)           119.6211         calculate D2E/DX2 analyticall!
 ! A122  A(29,35,34)           118.3603         calculate D2E/DX2 analyticall!
 ! A123  A(29,35,37)           121.3808         calculate D2E/DX2 analyticall!
 ! A124  A(34,35,37)           120.2589         calculate D2E/DX2 analyticall!
 ! A125  A(31,36,45)           111.457          calculate D2E/DX2 analyticall!
 ! A126  A(31,36,46)           113.0343         calculate D2E/DX2 analyticall!
 ! A127  A(31,36,78)           107.8078         calculate D2E/DX2 analyticall!
 ! A128  A(45,36,46)           110.3321         calculate D2E/DX2 analyticall!
 ! A129  A(45,36,78)           106.5088         calculate D2E/DX2 analyticall!
 ! A130  A(46,36,78)           107.3678         calculate D2E/DX2 analyticall!
 ! A131  A(35,37,47)           111.8653         calculate D2E/DX2 analyticall!
 ! A132  A(35,37,48)           111.0956         calculate D2E/DX2 analyticall!
 ! A133  A(35,37,79)           107.4596         calculate D2E/DX2 analyticall!
 ! A134  A(47,37,48)           110.7986         calculate D2E/DX2 analyticall!
 ! A135  A(47,37,79)           107.8605         calculate D2E/DX2 analyticall!
 ! A136  A(48,37,79)           107.5512         calculate D2E/DX2 analyticall!
 ! A137  A(30,38,39)           118.1601         calculate D2E/DX2 analyticall!
 ! A138  A(30,38,43)           122.4407         calculate D2E/DX2 analyticall!
 ! A139  A(39,38,43)           119.3955         calculate D2E/DX2 analyticall!
 ! A140  A(38,39,40)           121.1178         calculate D2E/DX2 analyticall!
 ! A141  A(38,39,80)           119.3823         calculate D2E/DX2 analyticall!
 ! A142  A(40,39,80)           119.4893         calculate D2E/DX2 analyticall!
 ! A143  A(39,40,41)           120.2147         calculate D2E/DX2 analyticall!
 ! A144  A(39,40,81)           119.9588         calculate D2E/DX2 analyticall!
 ! A145  A(41,40,81)           119.8102         calculate D2E/DX2 analyticall!
 ! A146  A(40,41,42)           120.8919         calculate D2E/DX2 analyticall!
 ! A147  A(40,41,82)           119.4381         calculate D2E/DX2 analyticall!
 ! A148  A(42,41,82)           119.6464         calculate D2E/DX2 analyticall!
 ! A149  A(30,42,41)           118.2721         calculate D2E/DX2 analyticall!
 ! A150  A(30,42,44)           120.7171         calculate D2E/DX2 analyticall!
 ! A151  A(41,42,44)           120.9339         calculate D2E/DX2 analyticall!
 ! A152  A(38,43,51)           111.5806         calculate D2E/DX2 analyticall!
 ! A153  A(38,43,52)           111.3506         calculate D2E/DX2 analyticall!
 ! A154  A(38,43,83)           108.0059         calculate D2E/DX2 analyticall!
 ! A155  A(51,43,52)           110.4125         calculate D2E/DX2 analyticall!
 ! A156  A(51,43,83)           107.3375         calculate D2E/DX2 analyticall!
 ! A157  A(52,43,83)           107.9712         calculate D2E/DX2 analyticall!
 ! A158  A(42,44,49)           113.2244         calculate D2E/DX2 analyticall!
 ! A159  A(42,44,50)           110.8038         calculate D2E/DX2 analyticall!
 ! A160  A(42,44,84)           106.9978         calculate D2E/DX2 analyticall!
 ! A161  A(49,44,50)           110.3859         calculate D2E/DX2 analyticall!
 ! A162  A(49,44,84)           108.068          calculate D2E/DX2 analyticall!
 ! A163  A(50,44,84)           107.0771         calculate D2E/DX2 analyticall!
 ! A164  A(36,45,85)           110.5053         calculate D2E/DX2 analyticall!
 ! A165  A(36,45,86)           109.3444         calculate D2E/DX2 analyticall!
 ! A166  A(36,45,87)           110.988          calculate D2E/DX2 analyticall!
 ! A167  A(85,45,86)           107.8101         calculate D2E/DX2 analyticall!
 ! A168  A(85,45,87)           108.6251         calculate D2E/DX2 analyticall!
 ! A169  A(86,45,87)           109.5044         calculate D2E/DX2 analyticall!
 ! A170  A(36,46,88)           109.3739         calculate D2E/DX2 analyticall!
 ! A171  A(36,46,89)           111.3809         calculate D2E/DX2 analyticall!
 ! A172  A(36,46,90)           110.8293         calculate D2E/DX2 analyticall!
 ! A173  A(88,46,89)           108.0378         calculate D2E/DX2 analyticall!
 ! A174  A(88,46,90)           108.4298         calculate D2E/DX2 analyticall!
 ! A175  A(89,46,90)           108.7006         calculate D2E/DX2 analyticall!
 ! A176  A(37,47,91)           109.8034         calculate D2E/DX2 analyticall!
 ! A177  A(37,47,92)           110.9981         calculate D2E/DX2 analyticall!
 ! A178  A(37,47,93)           110.6204         calculate D2E/DX2 analyticall!
 ! A179  A(91,47,92)           108.5391         calculate D2E/DX2 analyticall!
 ! A180  A(91,47,93)           108.2239         calculate D2E/DX2 analyticall!
 ! A181  A(92,47,93)           108.5822         calculate D2E/DX2 analyticall!
 ! A182  A(37,48,94)           109.7478         calculate D2E/DX2 analyticall!
 ! A183  A(37,48,95)           110.7713         calculate D2E/DX2 analyticall!
 ! A184  A(37,48,96)           110.9314         calculate D2E/DX2 analyticall!
 ! A185  A(94,48,95)           108.435          calculate D2E/DX2 analyticall!
 ! A186  A(94,48,96)           108.3882         calculate D2E/DX2 analyticall!
 ! A187  A(95,48,96)           108.4938         calculate D2E/DX2 analyticall!
 ! A188  A(44,49,97)           109.511          calculate D2E/DX2 analyticall!
 ! A189  A(44,49,98)           111.4458         calculate D2E/DX2 analyticall!
 ! A190  A(44,49,99)           110.3804         calculate D2E/DX2 analyticall!
 ! A191  A(97,49,98)           108.0403         calculate D2E/DX2 analyticall!
 ! A192  A(97,49,99)           108.8836         calculate D2E/DX2 analyticall!
 ! A193  A(98,49,99)           108.5118         calculate D2E/DX2 analyticall!
 ! A194  A(44,50,100)          109.7313         calculate D2E/DX2 analyticall!
 ! A195  A(44,50,101)          110.8616         calculate D2E/DX2 analyticall!
 ! A196  A(44,50,102)          110.6952         calculate D2E/DX2 analyticall!
 ! A197  A(100,50,101)         108.2967         calculate D2E/DX2 analyticall!
 ! A198  A(100,50,102)         108.5955         calculate D2E/DX2 analyticall!
 ! A199  A(101,50,102)         108.593          calculate D2E/DX2 analyticall!
 ! A200  A(43,51,103)          109.818          calculate D2E/DX2 analyticall!
 ! A201  A(43,51,104)          109.9857         calculate D2E/DX2 analyticall!
 ! A202  A(43,51,105)          110.9689         calculate D2E/DX2 analyticall!
 ! A203  A(103,51,104)         109.1263         calculate D2E/DX2 analyticall!
 ! A204  A(103,51,105)         108.3928         calculate D2E/DX2 analyticall!
 ! A205  A(104,51,105)         108.5043         calculate D2E/DX2 analyticall!
 ! A206  A(43,52,106)          109.6866         calculate D2E/DX2 analyticall!
 ! A207  A(43,52,107)          110.812          calculate D2E/DX2 analyticall!
 ! A208  A(43,52,108)          111.1861         calculate D2E/DX2 analyticall!
 ! A209  A(106,52,107)         108.2462         calculate D2E/DX2 analyticall!
 ! A210  A(106,52,108)         108.4873         calculate D2E/DX2 analyticall!
 ! A211  A(107,52,108)         108.3396         calculate D2E/DX2 analyticall!
 ! A212  A(8,53,109)           112.3943         calculate D2E/DX2 analyticall!
 ! A213  A(8,53,110)           110.8725         calculate D2E/DX2 analyticall!
 ! A214  A(8,53,111)           110.1922         calculate D2E/DX2 analyticall!
 ! A215  A(109,53,110)         107.9952         calculate D2E/DX2 analyticall!
 ! A216  A(109,53,111)         107.2866         calculate D2E/DX2 analyticall!
 ! A217  A(110,53,111)         107.9246         calculate D2E/DX2 analyticall!
 ! A218  A(10,54,112)          112.7799         calculate D2E/DX2 analyticall!
 ! A219  A(10,54,113)          110.2864         calculate D2E/DX2 analyticall!
 ! A220  A(10,54,114)          109.9529         calculate D2E/DX2 analyticall!
 ! A221  A(112,54,113)         107.9243         calculate D2E/DX2 analyticall!
 ! A222  A(112,54,114)         108.6692         calculate D2E/DX2 analyticall!
 ! A223  A(113,54,114)         107.0378         calculate D2E/DX2 analyticall!
 ! D1    D(16,1,4,7)            -0.5418         calculate D2E/DX2 analyticall!
 ! D2    D(16,1,4,14)          178.6691         calculate D2E/DX2 analyticall!
 ! D3    D(4,1,16,58)           59.7685         calculate D2E/DX2 analyticall!
 ! D4    D(4,1,16,59)          -60.9659         calculate D2E/DX2 analyticall!
 ! D5    D(4,1,16,60)          179.4567         calculate D2E/DX2 analyticall!
 ! D6    D(5,2,3,13)            25.979          calculate D2E/DX2 analyticall!
 ! D7    D(5,2,3,18)           146.8138         calculate D2E/DX2 analyticall!
 ! D8    D(6,2,3,13)           136.2824         calculate D2E/DX2 analyticall!
 ! D9    D(6,2,3,18)          -102.8829         calculate D2E/DX2 analyticall!
 ! D10   D(15,2,3,13)          -31.139          calculate D2E/DX2 analyticall!
 ! D11   D(15,2,3,18)           89.6958         calculate D2E/DX2 analyticall!
 ! D12   D(19,2,3,13)         -127.1343         calculate D2E/DX2 analyticall!
 ! D13   D(19,2,3,18)           -6.2996         calculate D2E/DX2 analyticall!
 ! D14   D(3,2,5,8)            124.1319         calculate D2E/DX2 analyticall!
 ! D15   D(3,2,5,29)           -57.8911         calculate D2E/DX2 analyticall!
 ! D16   D(6,2,5,8)              7.8646         calculate D2E/DX2 analyticall!
 ! D17   D(6,2,5,29)          -174.1583         calculate D2E/DX2 analyticall!
 ! D18   D(15,2,5,8)           177.2566         calculate D2E/DX2 analyticall!
 ! D19   D(15,2,5,29)           -4.7663         calculate D2E/DX2 analyticall!
 ! D20   D(19,2,5,8)           -99.1056         calculate D2E/DX2 analyticall!
 ! D21   D(19,2,5,29)           78.8715         calculate D2E/DX2 analyticall!
 ! D22   D(3,2,6,10)          -150.7981         calculate D2E/DX2 analyticall!
 ! D23   D(3,2,6,30)            38.3077         calculate D2E/DX2 analyticall!
 ! D24   D(5,2,6,10)            -4.7335         calculate D2E/DX2 analyticall!
 ! D25   D(5,2,6,30)          -175.6277         calculate D2E/DX2 analyticall!
 ! D26   D(15,2,6,10)          -66.703          calculate D2E/DX2 analyticall!
 ! D27   D(15,2,6,30)          122.4028         calculate D2E/DX2 analyticall!
 ! D28   D(19,2,6,10)          138.3702         calculate D2E/DX2 analyticall!
 ! D29   D(19,2,6,30)          -32.524          calculate D2E/DX2 analyticall!
 ! D30   D(3,2,15,12)           17.6751         calculate D2E/DX2 analyticall!
 ! D31   D(5,2,15,12)         -132.3035         calculate D2E/DX2 analyticall!
 ! D32   D(6,2,15,12)          -70.2381         calculate D2E/DX2 analyticall!
 ! D33   D(19,2,15,12)          85.2834         calculate D2E/DX2 analyticall!
 ! D34   D(3,2,19,18)            8.8021         calculate D2E/DX2 analyticall!
 ! D35   D(5,2,19,18)         -145.1999         calculate D2E/DX2 analyticall!
 ! D36   D(6,2,19,18)          112.6622         calculate D2E/DX2 analyticall!
 ! D37   D(15,2,19,18)         -62.2748         calculate D2E/DX2 analyticall!
 ! D38   D(2,3,13,12)           38.3681         calculate D2E/DX2 analyticall!
 ! D39   D(2,3,13,27)          170.2059         calculate D2E/DX2 analyticall!
 ! D40   D(2,3,13,56)          -71.9456         calculate D2E/DX2 analyticall!
 ! D41   D(18,3,13,12)         -57.4308         calculate D2E/DX2 analyticall!
 ! D42   D(18,3,13,27)          74.407          calculate D2E/DX2 analyticall!
 ! D43   D(18,3,13,56)        -167.7444         calculate D2E/DX2 analyticall!
 ! D44   D(2,3,18,17)         -110.0249         calculate D2E/DX2 analyticall!
 ! D45   D(2,3,18,19)            9.2708         calculate D2E/DX2 analyticall!
 ! D46   D(2,3,18,23)          130.0126         calculate D2E/DX2 analyticall!
 ! D47   D(13,3,18,17)           2.3351         calculate D2E/DX2 analyticall!
 ! D48   D(13,3,18,19)         121.6309         calculate D2E/DX2 analyticall!
 ! D49   D(13,3,18,23)        -117.6274         calculate D2E/DX2 analyticall!
 ! D50   D(1,4,14,11)          178.6639         calculate D2E/DX2 analyticall!
 ! D51   D(1,4,14,28)           59.7536         calculate D2E/DX2 analyticall!
 ! D52   D(1,4,14,57)          -61.6032         calculate D2E/DX2 analyticall!
 ! D53   D(7,4,14,11)           -2.1466         calculate D2E/DX2 analyticall!
 ! D54   D(7,4,14,28)         -121.0569         calculate D2E/DX2 analyticall!
 ! D55   D(7,4,14,57)          117.5864         calculate D2E/DX2 analyticall!
 ! D56   D(2,5,8,9)             -8.6576         calculate D2E/DX2 analyticall!
 ! D57   D(2,5,8,53)           170.1675         calculate D2E/DX2 analyticall!
 ! D58   D(29,5,8,9)           173.4403         calculate D2E/DX2 analyticall!
 ! D59   D(29,5,8,53)           -7.7346         calculate D2E/DX2 analyticall!
 ! D60   D(2,5,29,31)           97.9204         calculate D2E/DX2 analyticall!
 ! D61   D(2,5,29,35)          -75.1882         calculate D2E/DX2 analyticall!
 ! D62   D(8,5,29,31)          -83.902          calculate D2E/DX2 analyticall!
 ! D63   D(8,5,29,35)          102.9894         calculate D2E/DX2 analyticall!
 ! D64   D(2,6,10,9)             2.1122         calculate D2E/DX2 analyticall!
 ! D65   D(2,6,10,54)         -176.0855         calculate D2E/DX2 analyticall!
 ! D66   D(30,6,10,9)          172.2278         calculate D2E/DX2 analyticall!
 ! D67   D(30,6,10,54)          -5.9698         calculate D2E/DX2 analyticall!
 ! D68   D(2,6,30,38)           94.5408         calculate D2E/DX2 analyticall!
 ! D69   D(2,6,30,42)          -80.2732         calculate D2E/DX2 analyticall!
 ! D70   D(10,6,30,38)         -77.2356         calculate D2E/DX2 analyticall!
 ! D71   D(10,6,30,42)         107.9504         calculate D2E/DX2 analyticall!
 ! D72   D(5,8,9,10)             3.5699         calculate D2E/DX2 analyticall!
 ! D73   D(5,8,9,55)          -178.3695         calculate D2E/DX2 analyticall!
 ! D74   D(53,8,9,10)         -175.2849         calculate D2E/DX2 analyticall!
 ! D75   D(53,8,9,55)            2.7757         calculate D2E/DX2 analyticall!
 ! D76   D(5,8,53,109)          60.0291         calculate D2E/DX2 analyticall!
 ! D77   D(5,8,53,110)        -178.9918         calculate D2E/DX2 analyticall!
 ! D78   D(5,8,53,111)         -59.5732         calculate D2E/DX2 analyticall!
 ! D79   D(9,8,53,109)        -121.0565         calculate D2E/DX2 analyticall!
 ! D80   D(9,8,53,110)          -0.0774         calculate D2E/DX2 analyticall!
 ! D81   D(9,8,53,111)         119.3412         calculate D2E/DX2 analyticall!
 ! D82   D(8,9,10,6)            -0.0516         calculate D2E/DX2 analyticall!
 ! D83   D(8,9,10,54)          178.2526         calculate D2E/DX2 analyticall!
 ! D84   D(55,9,10,6)         -178.1198         calculate D2E/DX2 analyticall!
 ! D85   D(55,9,10,54)           0.1843         calculate D2E/DX2 analyticall!
 ! D86   D(6,10,54,112)        -18.2305         calculate D2E/DX2 analyticall!
 ! D87   D(6,10,54,113)        102.5067         calculate D2E/DX2 analyticall!
 ! D88   D(6,10,54,114)       -139.6845         calculate D2E/DX2 analyticall!
 ! D89   D(9,10,54,112)        163.4239         calculate D2E/DX2 analyticall!
 ! D90   D(9,10,54,113)        -75.8388         calculate D2E/DX2 analyticall!
 ! D91   D(9,10,54,114)         41.97           calculate D2E/DX2 analyticall!
 ! D92   D(14,11,12,13)       -178.4766         calculate D2E/DX2 analyticall!
 ! D93   D(14,11,12,15)          5.8046         calculate D2E/DX2 analyticall!
 ! D94   D(12,11,14,4)          99.9803         calculate D2E/DX2 analyticall!
 ! D95   D(12,11,14,28)       -136.9409         calculate D2E/DX2 analyticall!
 ! D96   D(12,11,14,57)        -18.5457         calculate D2E/DX2 analyticall!
 ! D97   D(11,12,13,3)         159.8035         calculate D2E/DX2 analyticall!
 ! D98   D(11,12,13,27)         27.4486         calculate D2E/DX2 analyticall!
 ! D99   D(11,12,13,56)        -89.0344         calculate D2E/DX2 analyticall!
 ! D100  D(15,12,13,3)         -24.3095         calculate D2E/DX2 analyticall!
 ! D101  D(15,12,13,27)       -156.6644         calculate D2E/DX2 analyticall!
 ! D102  D(15,12,13,56)         86.8526         calculate D2E/DX2 analyticall!
 ! D103  D(11,12,15,2)         173.5562         calculate D2E/DX2 analyticall!
 ! D104  D(13,12,15,2)          -2.0022         calculate D2E/DX2 analyticall!
 ! D105  D(3,13,27,69)         165.2037         calculate D2E/DX2 analyticall!
 ! D106  D(3,13,27,70)          46.4942         calculate D2E/DX2 analyticall!
 ! D107  D(3,13,27,71)         -74.6708         calculate D2E/DX2 analyticall!
 ! D108  D(12,13,27,69)        -67.344          calculate D2E/DX2 analyticall!
 ! D109  D(12,13,27,70)        173.9466         calculate D2E/DX2 analyticall!
 ! D110  D(12,13,27,71)         52.7816         calculate D2E/DX2 analyticall!
 ! D111  D(56,13,27,69)         47.8948         calculate D2E/DX2 analyticall!
 ! D112  D(56,13,27,70)        -70.8146         calculate D2E/DX2 analyticall!
 ! D113  D(56,13,27,71)        168.0204         calculate D2E/DX2 analyticall!
 ! D114  D(4,14,28,72)        -169.6543         calculate D2E/DX2 analyticall!
 ! D115  D(4,14,28,73)          69.4341         calculate D2E/DX2 analyticall!
 ! D116  D(4,14,28,74)         -51.5268         calculate D2E/DX2 analyticall!
 ! D117  D(11,14,28,72)         71.5325         calculate D2E/DX2 analyticall!
 ! D118  D(11,14,28,73)        -49.379          calculate D2E/DX2 analyticall!
 ! D119  D(11,14,28,74)       -170.3399         calculate D2E/DX2 analyticall!
 ! D120  D(57,14,28,72)        -48.1906         calculate D2E/DX2 analyticall!
 ! D121  D(57,14,28,73)       -169.1022         calculate D2E/DX2 analyticall!
 ! D122  D(57,14,28,74)         69.9369         calculate D2E/DX2 analyticall!
 ! D123  D(22,17,18,3)        -106.8606         calculate D2E/DX2 analyticall!
 ! D124  D(22,17,18,19)        142.3859         calculate D2E/DX2 analyticall!
 ! D125  D(22,17,18,23)          3.8486         calculate D2E/DX2 analyticall!
 ! D126  D(18,17,22,21)         22.2546         calculate D2E/DX2 analyticall!
 ! D127  D(18,17,22,25)       -106.4197         calculate D2E/DX2 analyticall!
 ! D128  D(18,17,22,61)        138.3451         calculate D2E/DX2 analyticall!
 ! D129  D(3,18,19,2)          -10.6024         calculate D2E/DX2 analyticall!
 ! D130  D(17,18,19,2)         102.6074         calculate D2E/DX2 analyticall!
 ! D131  D(23,18,19,2)        -119.7677         calculate D2E/DX2 analyticall!
 ! D132  D(3,18,23,20)          76.8005         calculate D2E/DX2 analyticall!
 ! D133  D(3,18,23,26)        -157.4082         calculate D2E/DX2 analyticall!
 ! D134  D(3,18,23,62)         -37.7631         calculate D2E/DX2 analyticall!
 ! D135  D(17,18,23,20)        -36.5234         calculate D2E/DX2 analyticall!
 ! D136  D(17,18,23,26)         89.2678         calculate D2E/DX2 analyticall!
 ! D137  D(17,18,23,62)       -151.087          calculate D2E/DX2 analyticall!
 ! D138  D(19,18,23,20)       -173.8455         calculate D2E/DX2 analyticall!
 ! D139  D(19,18,23,26)        -48.0543         calculate D2E/DX2 analyticall!
 ! D140  D(19,18,23,62)         71.5909         calculate D2E/DX2 analyticall!
 ! D141  D(23,20,21,22)        -19.3988         calculate D2E/DX2 analyticall!
 ! D142  D(23,20,21,24)        163.4941         calculate D2E/DX2 analyticall!
 ! D143  D(21,20,23,18)         45.3689         calculate D2E/DX2 analyticall!
 ! D144  D(21,20,23,26)        -81.5204         calculate D2E/DX2 analyticall!
 ! D145  D(21,20,23,62)        162.8482         calculate D2E/DX2 analyticall!
 ! D146  D(20,21,22,17)        -14.9227         calculate D2E/DX2 analyticall!
 ! D147  D(20,21,22,25)        112.8849         calculate D2E/DX2 analyticall!
 ! D148  D(20,21,22,61)       -130.569          calculate D2E/DX2 analyticall!
 ! D149  D(24,21,22,17)        162.186          calculate D2E/DX2 analyticall!
 ! D150  D(24,21,22,25)        -70.0064         calculate D2E/DX2 analyticall!
 ! D151  D(24,21,22,61)         46.5397         calculate D2E/DX2 analyticall!
 ! D152  D(17,22,25,63)       -174.8784         calculate D2E/DX2 analyticall!
 ! D153  D(17,22,25,64)         64.3312         calculate D2E/DX2 analyticall!
 ! D154  D(17,22,25,65)        -55.8874         calculate D2E/DX2 analyticall!
 ! D155  D(21,22,25,63)         54.8853         calculate D2E/DX2 analyticall!
 ! D156  D(21,22,25,64)        -65.9051         calculate D2E/DX2 analyticall!
 ! D157  D(21,22,25,65)        173.8763         calculate D2E/DX2 analyticall!
 ! D158  D(61,22,25,63)        -60.9146         calculate D2E/DX2 analyticall!
 ! D159  D(61,22,25,64)        178.295          calculate D2E/DX2 analyticall!
 ! D160  D(61,22,25,65)         58.0764         calculate D2E/DX2 analyticall!
 ! D161  D(18,23,26,66)       -159.7364         calculate D2E/DX2 analyticall!
 ! D162  D(18,23,26,67)         83.2538         calculate D2E/DX2 analyticall!
 ! D163  D(18,23,26,68)        -38.1774         calculate D2E/DX2 analyticall!
 ! D164  D(20,23,26,66)        -33.0606         calculate D2E/DX2 analyticall!
 ! D165  D(20,23,26,67)       -150.0704         calculate D2E/DX2 analyticall!
 ! D166  D(20,23,26,68)         88.4984         calculate D2E/DX2 analyticall!
 ! D167  D(62,23,26,66)         80.0953         calculate D2E/DX2 analyticall!
 ! D168  D(62,23,26,67)        -36.9145         calculate D2E/DX2 analyticall!
 ! D169  D(62,23,26,68)       -158.3457         calculate D2E/DX2 analyticall!
 ! D170  D(5,29,31,32)        -171.0466         calculate D2E/DX2 analyticall!
 ! D171  D(5,29,31,36)           9.5668         calculate D2E/DX2 analyticall!
 ! D172  D(35,29,31,32)          1.9192         calculate D2E/DX2 analyticall!
 ! D173  D(35,29,31,36)       -177.4675         calculate D2E/DX2 analyticall!
 ! D174  D(5,29,35,34)         170.6211         calculate D2E/DX2 analyticall!
 ! D175  D(5,29,35,37)          -9.3003         calculate D2E/DX2 analyticall!
 ! D176  D(31,29,35,34)         -2.314          calculate D2E/DX2 analyticall!
 ! D177  D(31,29,35,37)        177.7646         calculate D2E/DX2 analyticall!
 ! D178  D(6,30,38,39)        -174.3662         calculate D2E/DX2 analyticall!
 ! D179  D(6,30,38,43)           6.3435         calculate D2E/DX2 analyticall!
 ! D180  D(42,30,38,39)          0.3024         calculate D2E/DX2 analyticall!
 ! D181  D(42,30,38,43)       -178.988          calculate D2E/DX2 analyticall!
 ! D182  D(6,30,42,41)         173.3698         calculate D2E/DX2 analyticall!
 ! D183  D(6,30,42,44)          -9.7911         calculate D2E/DX2 analyticall!
 ! D184  D(38,30,42,41)         -1.3676         calculate D2E/DX2 analyticall!
 ! D185  D(38,30,42,44)        175.4715         calculate D2E/DX2 analyticall!
 ! D186  D(29,31,32,33)         -0.3736         calculate D2E/DX2 analyticall!
 ! D187  D(29,31,32,75)       -177.6321         calculate D2E/DX2 analyticall!
 ! D188  D(36,31,32,33)        179.0099         calculate D2E/DX2 analyticall!
 ! D189  D(36,31,32,75)          1.7515         calculate D2E/DX2 analyticall!
 ! D190  D(29,31,36,45)        -84.0836         calculate D2E/DX2 analyticall!
 ! D191  D(29,31,36,46)        150.9709         calculate D2E/DX2 analyticall!
 ! D192  D(29,31,36,78)         32.464          calculate D2E/DX2 analyticall!
 ! D193  D(32,31,36,45)         96.5474         calculate D2E/DX2 analyticall!
 ! D194  D(32,31,36,46)        -28.3981         calculate D2E/DX2 analyticall!
 ! D195  D(32,31,36,78)       -146.905          calculate D2E/DX2 analyticall!
 ! D196  D(31,32,33,34)         -0.7283         calculate D2E/DX2 analyticall!
 ! D197  D(31,32,33,76)       -178.1878         calculate D2E/DX2 analyticall!
 ! D198  D(75,32,33,34)        176.5476         calculate D2E/DX2 analyticall!
 ! D199  D(75,32,33,76)         -0.9119         calculate D2E/DX2 analyticall!
 ! D200  D(32,33,34,35)          0.3167         calculate D2E/DX2 analyticall!
 ! D201  D(32,33,34,77)       -177.7078         calculate D2E/DX2 analyticall!
 ! D202  D(76,33,34,35)        177.7772         calculate D2E/DX2 analyticall!
 ! D203  D(76,33,34,77)         -0.2473         calculate D2E/DX2 analyticall!
 ! D204  D(33,34,35,29)          1.1781         calculate D2E/DX2 analyticall!
 ! D205  D(33,34,35,37)       -178.8996         calculate D2E/DX2 analyticall!
 ! D206  D(77,34,35,29)        179.1996         calculate D2E/DX2 analyticall!
 ! D207  D(77,34,35,37)         -0.878          calculate D2E/DX2 analyticall!
 ! D208  D(29,35,37,47)        116.0595         calculate D2E/DX2 analyticall!
 ! D209  D(29,35,37,48)       -119.545          calculate D2E/DX2 analyticall!
 ! D210  D(29,35,37,79)         -2.1471         calculate D2E/DX2 analyticall!
 ! D211  D(34,35,37,47)        -63.8604         calculate D2E/DX2 analyticall!
 ! D212  D(34,35,37,48)         60.5351         calculate D2E/DX2 analyticall!
 ! D213  D(34,35,37,79)        177.933          calculate D2E/DX2 analyticall!
 ! D214  D(31,36,45,85)       -177.091          calculate D2E/DX2 analyticall!
 ! D215  D(31,36,45,86)         64.394          calculate D2E/DX2 analyticall!
 ! D216  D(31,36,45,87)        -56.5151         calculate D2E/DX2 analyticall!
 ! D217  D(46,36,45,85)        -50.6497         calculate D2E/DX2 analyticall!
 ! D218  D(46,36,45,86)       -169.1647         calculate D2E/DX2 analyticall!
 ! D219  D(46,36,45,87)         69.9262         calculate D2E/DX2 analyticall!
 ! D220  D(78,36,45,85)         65.5723         calculate D2E/DX2 analyticall!
 ! D221  D(78,36,45,86)        -52.9427         calculate D2E/DX2 analyticall!
 ! D222  D(78,36,45,87)       -173.8518         calculate D2E/DX2 analyticall!
 ! D223  D(31,36,46,88)       -170.8743         calculate D2E/DX2 analyticall!
 ! D224  D(31,36,46,89)         69.7744         calculate D2E/DX2 analyticall!
 ! D225  D(31,36,46,90)        -51.3802         calculate D2E/DX2 analyticall!
 ! D226  D(45,36,46,88)         63.5725         calculate D2E/DX2 analyticall!
 ! D227  D(45,36,46,89)        -55.7788         calculate D2E/DX2 analyticall!
 ! D228  D(45,36,46,90)       -176.9333         calculate D2E/DX2 analyticall!
 ! D229  D(78,36,46,88)        -52.112          calculate D2E/DX2 analyticall!
 ! D230  D(78,36,46,89)       -171.4633         calculate D2E/DX2 analyticall!
 ! D231  D(78,36,46,90)         67.3822         calculate D2E/DX2 analyticall!
 ! D232  D(35,37,47,91)       -178.9317         calculate D2E/DX2 analyticall!
 ! D233  D(35,37,47,92)         61.056          calculate D2E/DX2 analyticall!
 ! D234  D(35,37,47,93)        -59.5494         calculate D2E/DX2 analyticall!
 ! D235  D(48,37,47,91)         56.5072         calculate D2E/DX2 analyticall!
 ! D236  D(48,37,47,92)        -63.5051         calculate D2E/DX2 analyticall!
 ! D237  D(48,37,47,93)        175.8895         calculate D2E/DX2 analyticall!
 ! D238  D(79,37,47,91)        -60.9643         calculate D2E/DX2 analyticall!
 ! D239  D(79,37,47,92)        179.0234         calculate D2E/DX2 analyticall!
 ! D240  D(79,37,47,93)         58.418          calculate D2E/DX2 analyticall!
 ! D241  D(35,37,48,94)        176.0244         calculate D2E/DX2 analyticall!
 ! D242  D(35,37,48,95)         56.3211         calculate D2E/DX2 analyticall!
 ! D243  D(35,37,48,96)        -64.2295         calculate D2E/DX2 analyticall!
 ! D244  D(47,37,48,94)        -58.9783         calculate D2E/DX2 analyticall!
 ! D245  D(47,37,48,95)       -178.6816         calculate D2E/DX2 analyticall!
 ! D246  D(47,37,48,96)         60.7678         calculate D2E/DX2 analyticall!
 ! D247  D(79,37,48,94)         58.6823         calculate D2E/DX2 analyticall!
 ! D248  D(79,37,48,95)        -61.021          calculate D2E/DX2 analyticall!
 ! D249  D(79,37,48,96)        178.4284         calculate D2E/DX2 analyticall!
 ! D250  D(30,38,39,40)          1.1845         calculate D2E/DX2 analyticall!
 ! D251  D(30,38,39,80)       -177.6289         calculate D2E/DX2 analyticall!
 ! D252  D(43,38,39,40)       -179.503          calculate D2E/DX2 analyticall!
 ! D253  D(43,38,39,80)          1.6837         calculate D2E/DX2 analyticall!
 ! D254  D(30,38,43,51)       -113.9368         calculate D2E/DX2 analyticall!
 ! D255  D(30,38,43,52)        122.1924         calculate D2E/DX2 analyticall!
 ! D256  D(30,38,43,83)          3.8077         calculate D2E/DX2 analyticall!
 ! D257  D(39,38,43,51)         66.7813         calculate D2E/DX2 analyticall!
 ! D258  D(39,38,43,52)        -57.0894         calculate D2E/DX2 analyticall!
 ! D259  D(39,38,43,83)       -175.4742         calculate D2E/DX2 analyticall!
 ! D260  D(38,39,40,41)         -1.5796         calculate D2E/DX2 analyticall!
 ! D261  D(38,39,40,81)        179.8927         calculate D2E/DX2 analyticall!
 ! D262  D(80,39,40,41)        177.2324         calculate D2E/DX2 analyticall!
 ! D263  D(80,39,40,81)         -1.2952         calculate D2E/DX2 analyticall!
 ! D264  D(39,40,41,42)          0.4583         calculate D2E/DX2 analyticall!
 ! D265  D(39,40,41,82)       -177.7657         calculate D2E/DX2 analyticall!
 ! D266  D(81,40,41,42)        178.9881         calculate D2E/DX2 analyticall!
 ! D267  D(81,40,41,82)          0.7641         calculate D2E/DX2 analyticall!
 ! D268  D(40,41,42,30)          0.986          calculate D2E/DX2 analyticall!
 ! D269  D(40,41,42,44)       -175.8458         calculate D2E/DX2 analyticall!
 ! D270  D(82,41,42,30)        179.2064         calculate D2E/DX2 analyticall!
 ! D271  D(82,41,42,44)          2.3745         calculate D2E/DX2 analyticall!
 ! D272  D(30,42,44,49)        147.6547         calculate D2E/DX2 analyticall!
 ! D273  D(30,42,44,50)        -87.6976         calculate D2E/DX2 analyticall!
 ! D274  D(30,42,44,84)         28.7023         calculate D2E/DX2 analyticall!
 ! D275  D(41,42,44,49)        -35.5909         calculate D2E/DX2 analyticall!
 ! D276  D(41,42,44,50)         89.0568         calculate D2E/DX2 analyticall!
 ! D277  D(41,42,44,84)       -154.5433         calculate D2E/DX2 analyticall!
 ! D278  D(38,43,51,103)       176.9458         calculate D2E/DX2 analyticall!
 ! D279  D(38,43,51,104)        56.8358         calculate D2E/DX2 analyticall!
 ! D280  D(38,43,51,105)       -63.2333         calculate D2E/DX2 analyticall!
 ! D281  D(52,43,51,103)       -58.6555         calculate D2E/DX2 analyticall!
 ! D282  D(52,43,51,104)      -178.7655         calculate D2E/DX2 analyticall!
 ! D283  D(52,43,51,105)        61.1654         calculate D2E/DX2 analyticall!
 ! D284  D(83,43,51,103)        58.7999         calculate D2E/DX2 analyticall!
 ! D285  D(83,43,51,104)       -61.3101         calculate D2E/DX2 analyticall!
 ! D286  D(83,43,51,105)       178.6208         calculate D2E/DX2 analyticall!
 ! D287  D(38,43,52,106)      -174.326          calculate D2E/DX2 analyticall!
 ! D288  D(38,43,52,107)        66.2186         calculate D2E/DX2 analyticall!
 ! D289  D(38,43,52,108)       -54.3347         calculate D2E/DX2 analyticall!
 ! D290  D(51,43,52,106)        61.1436         calculate D2E/DX2 analyticall!
 ! D291  D(51,43,52,107)       -58.3118         calculate D2E/DX2 analyticall!
 ! D292  D(51,43,52,108)      -178.8651         calculate D2E/DX2 analyticall!
 ! D293  D(83,43,52,106)       -55.9204         calculate D2E/DX2 analyticall!
 ! D294  D(83,43,52,107)      -175.3758         calculate D2E/DX2 analyticall!
 ! D295  D(83,43,52,108)        64.0709         calculate D2E/DX2 analyticall!
 ! D296  D(42,44,49,97)       -170.8202         calculate D2E/DX2 analyticall!
 ! D297  D(42,44,49,98)         69.6957         calculate D2E/DX2 analyticall!
 ! D298  D(42,44,49,99)        -50.957          calculate D2E/DX2 analyticall!
 ! D299  D(50,44,49,97)         64.3058         calculate D2E/DX2 analyticall!
 ! D300  D(50,44,49,98)        -55.1783         calculate D2E/DX2 analyticall!
 ! D301  D(50,44,49,99)       -175.831          calculate D2E/DX2 analyticall!
 ! D302  D(84,44,49,97)        -52.4868         calculate D2E/DX2 analyticall!
 ! D303  D(84,44,49,98)       -171.971          calculate D2E/DX2 analyticall!
 ! D304  D(84,44,49,99)         67.3763         calculate D2E/DX2 analyticall!
 ! D305  D(42,44,50,100)      -179.9646         calculate D2E/DX2 analyticall!
 ! D306  D(42,44,50,101)        60.4576         calculate D2E/DX2 analyticall!
 ! D307  D(42,44,50,102)       -60.1208         calculate D2E/DX2 analyticall!
 ! D308  D(49,44,50,100)       -53.7213         calculate D2E/DX2 analyticall!
 ! D309  D(49,44,50,101)      -173.2992         calculate D2E/DX2 analyticall!
 ! D310  D(49,44,50,102)        66.1225         calculate D2E/DX2 analyticall!
 ! D311  D(84,44,50,100)        63.6845         calculate D2E/DX2 analyticall!
 ! D312  D(84,44,50,101)       -55.8933         calculate D2E/DX2 analyticall!
 ! D313  D(84,44,50,102)      -176.4716         calculate D2E/DX2 analyticall!
 -----------------------------------------------------------------------------
 Trust Radius=3.00D-01 FncErr=1.00D-07 GrdErr=1.00D-07
 Number of steps in this run= 665 maximum allowed number of steps= 684.
 GradGradGradGradGradGradGradGradGradGradGradGradGradGradGradGradGradGrad

 Stoichiometry    C42H60MgN2O9
 Framework group  C1[X(C42H60MgN2O9)]
 Deg. of freedom  336
 Full point group                 C1      NOp   1
 Largest Abelian subgroup         C1      NOp   1
 Largest concise Abelian subgroup C1      NOp   1
                         Standard orientation:                         
 ---------------------------------------------------------------------
 Center     Atomic     Atomic              Coordinates (Angstroms)
 Number     Number      Type              X           Y           Z
 ---------------------------------------------------------------------
    1          8             0       -5.566474    1.623822    0.946886
    2         12             0        0.564669   -0.657405    0.102731
    3          8             0        0.551562    1.123962   -1.189841
    4          6             0       -4.493213    1.927786    0.187843
    5          7             0       -0.176500   -2.600353    0.290744
    6          7             0        2.471837   -1.486194   -0.011219
    7          8             0       -3.921319    2.993106    0.220301
    8          6             0        0.524155   -3.727356    0.446904
    9          6             0        1.919675   -3.809524    0.338513
   10          6             0        2.833250   -2.754134    0.123558
   11          8             0       -2.987673    1.123181   -1.490822
   12          6             0       -1.772542    0.739593   -1.107641
   13          6             0       -0.613404    1.212766   -1.979345
   14          6             0       -4.118373    0.729741   -0.680459
   15          8             0       -1.563360   -0.012073   -0.166431
   16          6             0       -6.005220    2.664380    1.837713
   17          8             0       -0.554612    2.598701    0.503478
   18          6             0        0.674134    1.968645    0.322975
   19          8             0        0.891440    1.003709    1.141123
   20          8             0        1.455037    4.050363   -0.779576
   21          6             0        0.322074    4.715648   -0.501331
   22          6             0       -0.729608    4.017234    0.354599
   23          6             0        1.846067    2.916431    0.043690
   24          8             0        0.118153    5.817394   -0.960751
   25          6             0       -0.902709    4.684510    1.722354
   26          6             0        2.539500    3.391807    1.323926
   27          6             0       -0.836841    2.520311   -2.740926
   28          6             0       -5.225576    0.277182   -1.627901
   29          6             0       -1.622777   -2.684819    0.287020
   30          6             0        3.474835   -0.442986   -0.060972
   31          6             0       -2.296240   -3.021583   -0.937635
   32          6             0       -3.706957   -2.912964   -0.978308
   33          6             0       -4.437466   -2.492101    0.157292
   34          6             0       -3.763878   -2.186885    1.361293
   35          6             0       -2.350864   -2.289505    1.451832
   36          6             0       -1.491424   -3.505800   -2.177138
   37          6             0       -1.629027   -1.975748    2.786850
   38          6             0        4.111644   -0.004286    1.148468
   39          6             0        4.999076    1.101880    1.075404
   40          6             0        5.232023    1.770252   -0.144779
   41          6             0        4.605957    1.324969   -1.329891
   42          6             0        3.726891    0.207995   -1.315570
   43          6             0        3.875792   -0.703413    2.515104
   44          6             0        3.113733   -0.340994   -2.630292
   45          6             0       -0.935867   -2.301432   -3.004325
   46          6             0       -2.308675   -4.467213   -3.099543
   47          6             0       -1.807143   -0.482539    3.207293
   48          6             0       -2.109942   -2.935294    3.926489
   49          6             0        2.783677    0.775232   -3.667912
   50          6             0        4.048486   -1.422533   -3.271034
   51          6             0        3.135408    0.235524    3.520723
   52          6             0        5.220879   -1.214467    3.133848
   53          6             0       -0.209033   -5.019712    0.790770
   54          6             0        4.300560   -3.170128    0.095072
   55          1             0        2.355132   -4.795154    0.462604
   56          1             0       -0.510291    0.423932   -2.741210
   57          1             0       -3.852830   -0.109004   -0.028133
   58          1             0       -6.277823    3.560992    1.275201
   59          1             0       -5.213754    2.915991    2.548486
   60          1             0       -6.873050    2.257298    2.357106
   61          1             0       -1.675257    4.132413   -0.181121
   62          1             0        2.583306    2.393862   -0.561795
   63          1             0       -1.124954    5.746458    1.580226
   64          1             0       -0.007138    4.590126    2.341948
   65          1             0       -1.739956    4.210208    2.241737
   66          1             0        3.097451    4.307749    1.101743
   67          1             0        3.251648    2.622798    1.619425
   68          1             0        1.846694    3.585319    2.146731
   69          1             0       -1.608416    2.374934   -3.504000
   70          1             0        0.096055    2.802144   -3.235538
   71          1             0       -1.158351    3.343716   -2.105650
   72          1             0       -4.930678   -0.682183   -2.060609
   73          1             0       -5.392816    1.010943   -2.422118
   74          1             0       -6.155413    0.133687   -1.071879
   75          1             0       -4.250516   -3.200743   -1.887611
   76          1             0       -5.534694   -2.442391    0.115891
   77          1             0       -4.345118   -1.897600    2.247362
   78          1             0       -0.611886   -4.067974   -1.810907
   79          1             0       -0.545704   -2.158406    2.630528
   80          1             0        5.526993    1.429532    1.980373
   81          1             0        5.921430    2.625420   -0.179194
   82          1             0        4.824800    1.831383   -2.278551
   83          1             0        3.223492   -1.581972    2.342249
   84          1             0        2.164964   -0.849816   -2.358311
   85          1             0       -0.412958   -2.660759   -3.906259
   86          1             0       -0.205967   -1.741270   -2.390761
   87          1             0       -1.751243   -1.625846   -3.315268
   88          1             0       -1.640347   -4.899744   -3.859535
   89          1             0       -3.116568   -3.932319   -3.621004
   90          1             0       -2.749398   -5.289267   -2.515383
   91          1             0       -1.265821   -0.292467    4.148560
   92          1             0       -2.869950   -0.239719    3.359594
   93          1             0       -1.399636    0.191173    2.432257
   94          1             0       -1.533768   -2.741086    4.844034
   95          1             0       -1.962378   -3.987967    3.638891
   96          1             0       -3.177077   -2.779930    4.147165
   97          1             0        2.206517    0.344307   -4.500443
   98          1             0        3.699970    1.222080   -4.083595
   99          1             0        2.187940    1.573409   -3.196470
  100          1             0        3.597407   -1.799221   -4.201987
  101          1             0        4.190339   -2.273790   -2.586340
  102          1             0        5.035156   -0.993636   -3.507274
  103          1             0        2.934758   -0.306037    4.458993
  104          1             0        2.178649    0.573686    3.086656
  105          1             0        3.745630    1.121773    3.754756
  106          1             0        5.012932   -1.792112    4.047470
  107          1             0        5.874097   -0.369953    3.401286
  108          1             0        5.763072   -1.861556    2.427638
  109          1             0       -0.941728   -5.299857    0.026366
  110          1             0        0.496002   -5.850016    0.904049
  111          1             0       -0.752486   -4.906534    1.737464
  112          1             0        4.947218   -2.410142   -0.350207
  113          1             0        4.660497   -3.365466    1.113207
  114          1             0        4.414193   -4.102849   -0.470391
 ---------------------------------------------------------------------
 Rotational constants (GHZ):      0.0668618      0.0537538      0.0416543
 Isotopes: O-16,Mg-24,O-16,C-12,N-14,N-14,O-16,C-12,C-12,C-12,O-16,C-12,C-12,C-12
 ,O-16,C-12,O-16,C-12,O-16,O-16,C-12,C-12,C-12,O-16,C-12,C-12,C-12,C-12,C-12,C-12
 ,C-12,C-12,C-12,C-12,C-12,C-12,C-12,C-12,C-12,C-12,C-12,C-12,C-12,C-12,C-12,C-12
 ,C-12,C-12,C-12,C-12,C-12,C-12,C-12,C-12,H-1,H-1,H-1,H-1,H-1,H-1,H-1,H-1,H-1,H-1
 ,H-1,H-1,H-1,H-1,H-1,H-1,H-1,H-1,H-1,H-1,H-1,H-1,H-1,H-1,H-1,H-1,H-1,H-1,H-1,H-1
 ,H-1,H-1,H-1,H-1,H-1,H-1,H-1,H-1,H-1,H-1,H-1,H-1,H-1,H-1,H-1,H-1,H-1,H-1,H-1,H-1
 ,H-1,H-1,H-1,H-1,H-1,H-1,H-1,H-1,H-1,H-1
 General basis read from cards:  (5D, 7F)
 There are   642 symmetry adapted basis functions of A   symmetry.
 Crude estimate of integral set expansion from redundant integrals=1.000.
 Integral buffers will be    262144 words long.
 Raffenetti 2 integral format.
 Two-electron integral symmetry is turned on.
   642 basis functions     1430 primitive gaussians
   205 alpha electrons      205 beta electrons
       nuclear repulsion energy      9139.2888395799 Hartrees.
 One-electron integrals computed using PRISM.
 NBasis=   642 RedAO= T  NBF=   642
 NBsUse=   642 1.00D-04 NBFU=   642
 Initial guess read from the checkpoint file:
 RRSS_fm-5-ts1.chk
 Requested convergence on RMS density matrix=1.00D-08 within  64 cycles.
 Requested convergence on MAX density matrix=1.00D-06.
 SCF Done:  E(RB+HF-LYP) =  -2612.18938397     A.U. after    1 cycles
             Convg  =    0.4508D-08             -V/T =  2.0106
             S**2   =   0.0000
 Range of M.O.s used for correlation:     1   642
 NBasis=   642 NAE=   205 NBE=   205 NFC=     0 NFV=     0
 NROrb=    642 NOA=   205 NOB=   205 NVA=   437 NVB=   437
 PrsmSu:  requested number of processors reduced to:   1 ShMem   1 Linda.
 PrsmSu:  requested number of processors reduced to:   1 ShMem   1 Linda.
 G2DrvN: will do   23 atoms at a time, making    5 passes doing MaxLOS=2.
 FoFDir used for L=0 through L=2.
          Differentiating once with respect to electric field.
                with respect to dipole field.
          Differentiating once with respect to nuclear coordinates.
 Integrals replicated using symmetry in FoFDir.
 MinBra= 0 MaxBra= 2 Meth= 1.
 IRaf=       0 NMat=  69 IRICut=      69 DoRegI=T DoRafI=T ISym2E= 2 JSym2E=2.
 Raff turned off since only 53.95% of shell-pairs survive.
          There are 345 degrees of freedom in the 1st order CPHF.
 345 vectors were produced by pass  0.
 AX will form  69 AO Fock derivatives at one time.
 345 vectors were produced by pass  1.
 345 vectors were produced by pass  2.
 344 vectors were produced by pass  3.
 342 vectors were produced by pass  4.
 203 vectors were produced by pass  5.
  40 vectors were produced by pass  6.
   3 vectors were produced by pass  7.
 Inv2:  IOpt= 1 Iter= 1 AM= 7.87D-15 Conv= 1.00D-12.
 Inverted reduced A of dimension1967 with in-core refinement.

 **********************************************************************

            Population analysis using the SCF density.

 **********************************************************************

 Alpha  occ. eigenvalues --  -46.71963 -19.20037 -19.19736 -19.16505 -19.14868
 Alpha  occ. eigenvalues --  -19.14502 -19.14277 -19.11737 -19.10812 -19.07685
 Alpha  occ. eigenvalues --  -14.28441 -14.28220 -10.31866 -10.31832 -10.31170
 Alpha  occ. eigenvalues --  -10.29222 -10.25351 -10.24043 -10.23570 -10.23276
 Alpha  occ. eigenvalues --  -10.21862 -10.20492 -10.20350 -10.18313 -10.16258
 Alpha  occ. eigenvalues --  -10.16145 -10.16030 -10.15907 -10.14790 -10.12543
 Alpha  occ. eigenvalues --  -10.06141 -10.05829 -10.04310 -10.03348 -10.03277
 Alpha  occ. eigenvalues --  -10.03193 -10.03159 -10.03095 -10.03085 -10.02972
 Alpha  occ. eigenvalues --  -10.02795 -10.02648 -10.02374 -10.02354 -10.02246
 Alpha  occ. eigenvalues --  -10.02080 -10.01847 -10.01804 -10.01033 -10.00864
 Alpha  occ. eigenvalues --  -10.00695 -10.00332  -9.99941  -9.99401  -3.02315
 Alpha  occ. eigenvalues --   -1.77132  -1.76890  -1.76708  -1.12121  -1.10779
 Alpha  occ. eigenvalues --   -1.08557  -1.05395  -1.03182  -1.02034  -0.99509
 Alpha  occ. eigenvalues --   -0.98015  -0.95522  -0.89511  -0.88210  -0.81785
 Alpha  occ. eigenvalues --   -0.81032  -0.80627  -0.77532  -0.76748  -0.76720
 Alpha  occ. eigenvalues --   -0.75217  -0.75125  -0.74763  -0.74529  -0.74137
 Alpha  occ. eigenvalues --   -0.73008  -0.72204  -0.69183  -0.68837  -0.68452
 Alpha  occ. eigenvalues --   -0.68222  -0.67368  -0.66189  -0.66057  -0.65292
 Alpha  occ. eigenvalues --   -0.64768  -0.64623  -0.64227  -0.64133  -0.62805
 Alpha  occ. eigenvalues --   -0.61188  -0.59924  -0.59165  -0.59048  -0.58714
 Alpha  occ. eigenvalues --   -0.57195  -0.55790  -0.55694  -0.55017  -0.53865
 Alpha  occ. eigenvalues --   -0.53359  -0.52835  -0.51370  -0.50876  -0.50336
 Alpha  occ. eigenvalues --   -0.50157  -0.49537  -0.48889  -0.48268  -0.47548
 Alpha  occ. eigenvalues --   -0.47396  -0.47280  -0.46606  -0.45615  -0.45405
 Alpha  occ. eigenvalues --   -0.45203  -0.44773  -0.44494  -0.44223  -0.43927
 Alpha  occ. eigenvalues --   -0.43830  -0.43030  -0.42507  -0.42316  -0.41537
 Alpha  occ. eigenvalues --   -0.41427  -0.41326  -0.41063  -0.40985  -0.40832
 Alpha  occ. eigenvalues --   -0.40777  -0.40410  -0.40294  -0.40043  -0.39856
 Alpha  occ. eigenvalues --   -0.39618  -0.39405  -0.39374  -0.39248  -0.39144
 Alpha  occ. eigenvalues --   -0.38980  -0.38721  -0.38411  -0.37958  -0.37854
 Alpha  occ. eigenvalues --   -0.37549  -0.37148  -0.37037  -0.36850  -0.36666
 Alpha  occ. eigenvalues --   -0.36505  -0.36403  -0.36274  -0.35932  -0.35644
 Alpha  occ. eigenvalues --   -0.35580  -0.35448  -0.35196  -0.35175  -0.34942
 Alpha  occ. eigenvalues --   -0.34882  -0.34650  -0.34371  -0.34213  -0.33966
 Alpha  occ. eigenvalues --   -0.33067  -0.32833  -0.32260  -0.31742  -0.31617
 Alpha  occ. eigenvalues --   -0.31567  -0.31217  -0.31026  -0.30757  -0.30628
 Alpha  occ. eigenvalues --   -0.30383  -0.30203  -0.29962  -0.29799  -0.29343
 Alpha  occ. eigenvalues --   -0.29029  -0.28673  -0.28476  -0.27998  -0.27974
 Alpha  occ. eigenvalues --   -0.27778  -0.27475  -0.27393  -0.27309  -0.26781
 Alpha  occ. eigenvalues --   -0.25516  -0.25110  -0.24248  -0.24022  -0.22716
 Alpha  occ. eigenvalues --   -0.19765  -0.19026  -0.18931  -0.18341  -0.15871
 Alpha virt. eigenvalues --    0.00197   0.00422   0.00636   0.02506   0.05601
 Alpha virt. eigenvalues --    0.06239   0.06655   0.06732   0.07409   0.07952
 Alpha virt. eigenvalues --    0.08134   0.08984   0.10133   0.11008   0.11188
 Alpha virt. eigenvalues --    0.11878   0.12502   0.13095   0.13828   0.14228
 Alpha virt. eigenvalues --    0.14449   0.14661   0.15179   0.15397   0.15910
 Alpha virt. eigenvalues --    0.16249   0.16490   0.16811   0.17518   0.17983
 Alpha virt. eigenvalues --    0.18052   0.18750   0.19125   0.19821   0.20000
 Alpha virt. eigenvalues --    0.20186   0.20694   0.21409   0.21519   0.21798
 Alpha virt. eigenvalues --    0.22148   0.22365   0.23031   0.24234   0.24406
 Alpha virt. eigenvalues --    0.24713   0.25008   0.25022   0.25230   0.25615
 Alpha virt. eigenvalues --    0.26099   0.26702   0.27326   0.27941   0.28519
 Alpha virt. eigenvalues --    0.28888   0.29461   0.30046   0.30688   0.31578
 Alpha virt. eigenvalues --    0.31741   0.32507   0.32820   0.33431   0.33812
 Alpha virt. eigenvalues --    0.34073   0.34369   0.34679   0.34898   0.35153
 Alpha virt. eigenvalues --    0.35327   0.36471   0.36771   0.37337   0.37504
 Alpha virt. eigenvalues --    0.37904   0.38380   0.38563   0.38925   0.39489
 Alpha virt. eigenvalues --    0.39598   0.40018   0.40241   0.40461   0.40752
 Alpha virt. eigenvalues --    0.40892   0.41467   0.41552   0.42292   0.42647
 Alpha virt. eigenvalues --    0.42828   0.43190   0.43954   0.44134   0.44467
 Alpha virt. eigenvalues --    0.44705   0.45172   0.45519   0.45744   0.45986
 Alpha virt. eigenvalues --    0.46164   0.46344   0.46598   0.46835   0.47163
 Alpha virt. eigenvalues --    0.47526   0.47685   0.48100   0.48161   0.48600
 Alpha virt. eigenvalues --    0.48852   0.48900   0.49027   0.49242   0.49474
 Alpha virt. eigenvalues --    0.49609   0.49646   0.49961   0.50213   0.50678
 Alpha virt. eigenvalues --    0.50877   0.51221   0.51415   0.52368   0.52572
 Alpha virt. eigenvalues --    0.53139   0.53436   0.53703   0.54247   0.54493
 Alpha virt. eigenvalues --    0.54889   0.55251   0.55746   0.55821   0.56500
 Alpha virt. eigenvalues --    0.56534   0.56726   0.56924   0.57428   0.57655
 Alpha virt. eigenvalues --    0.57870   0.58340   0.58631   0.58798   0.59097
 Alpha virt. eigenvalues --    0.59185   0.59541   0.60014   0.60394   0.61140
 Alpha virt. eigenvalues --    0.61398   0.62104   0.62271   0.62822   0.63167
 Alpha virt. eigenvalues --    0.63573   0.63902   0.64254   0.64818   0.65994
 Alpha virt. eigenvalues --    0.66234   0.66834   0.67601   0.67776   0.68853
 Alpha virt. eigenvalues --    0.69968   0.70307   0.70631   0.71378   0.71612
 Alpha virt. eigenvalues --    0.72092   0.72120   0.72534   0.72929   0.73723
 Alpha virt. eigenvalues --    0.74495   0.74703   0.75458   0.75652   0.75983
 Alpha virt. eigenvalues --    0.76163   0.76453   0.77525   0.77677   0.78643
 Alpha virt. eigenvalues --    0.79597   0.80144   0.81339   0.82187   0.82893
 Alpha virt. eigenvalues --    0.83148   0.83353   0.83932   0.84505   0.85411
 Alpha virt. eigenvalues --    0.85990   0.86491   0.86709   0.87372   0.88241
 Alpha virt. eigenvalues --    0.88977   0.89782   0.89960   0.90505   0.90697
 Alpha virt. eigenvalues --    0.91499   0.92117   0.92308   0.93115   0.93464
 Alpha virt. eigenvalues --    0.94230   0.94642   0.95409   0.95737   0.96726
 Alpha virt. eigenvalues --    0.97151   0.98287   0.98924   0.99607   1.01442
 Alpha virt. eigenvalues --    1.01804   1.02407   1.02548   1.03670   1.04150
 Alpha virt. eigenvalues --    1.04398   1.06043   1.07258   1.08122   1.08905
 Alpha virt. eigenvalues --    1.09343   1.10149   1.11183   1.12113   1.12998
 Alpha virt. eigenvalues --    1.13274   1.13717   1.15172   1.15322   1.16536
 Alpha virt. eigenvalues --    1.19162   1.20303   1.20551   1.21297   1.22920
 Alpha virt. eigenvalues --    1.23259   1.23887   1.24950   1.25798   1.27836
 Alpha virt. eigenvalues --    1.28268   1.29956   1.31404   1.32538   1.32608
 Alpha virt. eigenvalues --    1.34713   1.35501   1.36170   1.37342   1.37785
 Alpha virt. eigenvalues --    1.38146   1.39951   1.40437   1.41517   1.42416
 Alpha virt. eigenvalues --    1.43054   1.43443   1.44677   1.46495   1.48061
 Alpha virt. eigenvalues --    1.48413   1.49530   1.50384   1.50914   1.51687
 Alpha virt. eigenvalues --    1.52278   1.53291   1.54120   1.54950   1.55806
 Alpha virt. eigenvalues --    1.58210   1.59378   1.61088   1.62175   1.62911
 Alpha virt. eigenvalues --    1.64172   1.65743   1.66610   1.67277   1.68601
 Alpha virt. eigenvalues --    1.69579   1.70302   1.70636   1.72610   1.73269
 Alpha virt. eigenvalues --    1.73793   1.75015   1.76195   1.76577   1.77570
 Alpha virt. eigenvalues --    1.78367   1.79204   1.80553   1.80897   1.81269
 Alpha virt. eigenvalues --    1.82106   1.82424   1.82839   1.84571   1.85004
 Alpha virt. eigenvalues --    1.85193   1.85492   1.86798   1.87749   1.88006
 Alpha virt. eigenvalues --    1.88347   1.89012   1.90193   1.90885   1.91251
 Alpha virt. eigenvalues --    1.91976   1.92944   1.93768   1.93917   1.94477
 Alpha virt. eigenvalues --    1.94927   1.95607   1.95989   1.97607   1.97848
 Alpha virt. eigenvalues --    1.98333   1.99121   1.99922   2.00729   2.01167
 Alpha virt. eigenvalues --    2.01885   2.02964   2.03212   2.03680   2.04694
 Alpha virt. eigenvalues --    2.06139   2.07075   2.07694   2.08352   2.08971
 Alpha virt. eigenvalues --    2.09669   2.10103   2.12664   2.13144   2.13184
 Alpha virt. eigenvalues --    2.13839   2.14073   2.14860   2.15346   2.15964
 Alpha virt. eigenvalues --    2.16212   2.17183   2.18141   2.20133   2.21329
 Alpha virt. eigenvalues --    2.21641   2.22483   2.23343   2.25586   2.26478
 Alpha virt. eigenvalues --    2.27439   2.28203   2.28471   2.28566   2.28981
 Alpha virt. eigenvalues --    2.29853   2.31620   2.32875   2.33192   2.33648
 Alpha virt. eigenvalues --    2.34492   2.35168   2.35836   2.36044   2.36676
 Alpha virt. eigenvalues --    2.37316   2.38703   2.39946   2.42412   2.42977
 Alpha virt. eigenvalues --    2.43627   2.46400   2.47363   2.47778   2.48947
 Alpha virt. eigenvalues --    2.50959   2.52987   2.55429   2.57009   2.59596
 Alpha virt. eigenvalues --    2.60042   2.61834   2.64007   2.65906   2.66046
 Alpha virt. eigenvalues --    2.66751   2.67474   2.67611   2.70054   2.72126
 Alpha virt. eigenvalues --    2.73150   2.74818   2.75135   2.76598   2.77037
 Alpha virt. eigenvalues --    2.79066   2.81024   2.86568   2.87715   2.88364
 Alpha virt. eigenvalues --    2.89813   2.93372   2.94666   2.97466   2.98952
 Alpha virt. eigenvalues --    3.02584   3.03094   3.05728   3.07102   3.07609
 Alpha virt. eigenvalues --    3.11172   3.14353   3.17497   3.21039   3.22466
 Alpha virt. eigenvalues --    3.25263   3.26298   3.86859   5.96102   6.13578
 Alpha virt. eigenvalues --    6.33820 103.60360
          Condensed to atoms (all electrons):
 Total atomic charges:
              1
  1  O   -0.450135
  2  Mg   0.867130
  3  O   -0.592922
  4  C    0.586142
  5  N   -0.539446
  6  N   -0.524448
  7  O   -0.426484
  8  C    0.328511
  9  C   -0.235386
 10  C    0.339575
 11  O   -0.446484
 12  C    0.652811
 13  C    0.067281
 14  C    0.025820
 15  O   -0.449849
 16  C   -0.214217
 17  O   -0.485669
 18  C    0.745066
 19  O   -0.599645
 20  O   -0.443872
 21  C    0.544350
 22  C    0.035096
 23  C    0.068248
 24  O   -0.435606
 25  C   -0.464181
 26  C   -0.476207
 27  C   -0.471934
 28  C   -0.461311
 29  C    0.025659
 30  C    0.015322
 31  C   -0.001450
 32  C   -0.082075
 33  C   -0.069515
 34  C   -0.073299
 35  C    0.000145
 36  C   -0.052922
 37  C   -0.063522
 38  C    0.007360
 39  C   -0.075521
 40  C   -0.067559
 41  C   -0.074200
 42  C    0.005284
 43  C   -0.054545
 44  C   -0.051933
 45  C   -0.216540
 46  C   -0.218912
 47  C   -0.226542
 48  C   -0.217152
 49  C   -0.220551
 50  C   -0.217588
 51  C   -0.221851
 52  C   -0.217670
 53  C   -0.446739
 54  C   -0.449885
 55  H    0.077547
 56  H    0.161652
 57  H    0.161352
 58  H    0.174380
 59  H    0.175564
 60  H    0.164840
 61  H    0.203262
 62  H    0.121597
 63  H    0.167640
 64  H    0.158342
 65  H    0.169109
 66  H    0.150828
 67  H    0.132061
 68  H    0.155455
 69  H    0.148578
 70  H    0.167809
 71  H    0.175534
 72  H    0.144692
 73  H    0.163389
 74  H    0.167341
 75  H    0.085062
 76  H    0.087240
 77  H    0.085932
 78  H    0.094841
 79  H    0.097604
 80  H    0.086362
 81  H    0.088526
 82  H    0.089513
 83  H    0.096507
 84  H    0.097521
 85  H    0.081455
 86  H    0.090730
 87  H    0.077617
 88  H    0.078072
 89  H    0.072886
 90  H    0.076260
 91  H    0.076966
 92  H    0.067244
 93  H    0.113958
 94  H    0.077670
 95  H    0.073221
 96  H    0.070702
 97  H    0.072320
 98  H    0.070335
 99  H    0.096563
100  H    0.075816
101  H    0.083256
102  H    0.072489
103  H    0.071317
104  H    0.116306
105  H    0.069957
106  H    0.075935
107  H    0.071856
108  H    0.073694
109  H    0.126856
110  H    0.123955
111  H    0.129369
112  H    0.126579
113  H    0.132315
114  H    0.128185
 Sum of Mulliken charges=   0.00000
 Atomic charges with hydrogens summed into heavy atoms:
              1
  1  O   -0.450135
  2  Mg   0.867130
  3  O   -0.592922
  4  C    0.586142
  5  N   -0.539446
  6  N   -0.524448
  7  O   -0.426484
  8  C    0.328511
  9  C   -0.157839
 10  C    0.339575
 11  O   -0.446484
 12  C    0.652811
 13  C    0.228933
 14  C    0.187172
 15  O   -0.449849
 16  C    0.300567
 17  O   -0.485669
 18  C    0.745066
 19  O   -0.599645
 20  O   -0.443872
 21  C    0.544350
 22  C    0.238358
 23  C    0.189845
 24  O   -0.435606
 25  C    0.030910
 26  C   -0.037863
 27  C    0.019988
 28  C    0.014112
 29  C    0.025659
 30  C    0.015322
 31  C   -0.001450
 32  C    0.002987
 33  C    0.017725
 34  C    0.012633
 35  C    0.000145
 36  C    0.041919
 37  C    0.034082
 38  C    0.007360
 39  C    0.010840
 40  C    0.020968
 41  C    0.015313
 42  C    0.005284
 43  C    0.041961
 44  C    0.045588
 45  C    0.033261
 46  C    0.008307
 47  C    0.031627
 48  C    0.004441
 49  C    0.018666
 50  C    0.013973
 51  C    0.035730
 52  C    0.003816
 53  C   -0.066559
 54  C   -0.062805
 55  H    0.000000
 56  H    0.000000
 57  H    0.000000
 58  H    0.000000
 59  H    0.000000
 60  H    0.000000
 61  H    0.000000
 62  H    0.000000
 63  H    0.000000
 64  H    0.000000
 65  H    0.000000
 66  H    0.000000
 67  H    0.000000
 68  H    0.000000
 69  H    0.000000
 70  H    0.000000
 71  H    0.000000
 72  H    0.000000
 73  H    0.000000
 74  H    0.000000
 75  H    0.000000
 76  H    0.000000
 77  H    0.000000
 78  H    0.000000
 79  H    0.000000
 80  H    0.000000
 81  H    0.000000
 82  H    0.000000
 83  H    0.000000
 84  H    0.000000
 85  H    0.000000
 86  H    0.000000
 87  H    0.000000
 88  H    0.000000
 89  H    0.000000
 90  H    0.000000
 91  H    0.000000
 92  H    0.000000
 93  H    0.000000
 94  H    0.000000
 95  H    0.000000
 96  H    0.000000
 97  H    0.000000
 98  H    0.000000
 99  H    0.000000
100  H    0.000000
101  H    0.000000
102  H    0.000000
103  H    0.000000
104  H    0.000000
105  H    0.000000
106  H    0.000000
107  H    0.000000
108  H    0.000000
109  H    0.000000
110  H    0.000000
111  H    0.000000
112  H    0.000000
113  H    0.000000
114  H    0.000000
 Sum of Mulliken charges=   0.00000
 Electronic spatial extent (au):  <R**2>= 29697.1571
 Charge=     0.0000 electrons
 Dipole moment (Debye):
    X=    -2.9385    Y=    -5.9677    Z=     0.5449  Tot=     6.6742
 Quadrupole moment (Debye-Ang):
   XX=  -269.0871   YY=  -341.0680   ZZ=  -300.2701
   XY=     0.5618   XZ=    -4.2294   YZ=    14.6453
 Octapole moment (Debye-Ang**2):
  XXX=  -112.5644  YYY=  -201.3926  ZZZ=    -5.6940  XYY=   -46.5644
  XXY=    57.1531  XXZ=    43.6254  XZZ=   -28.2115  YZZ=    -1.6703
  YYZ=    71.0326  XYZ=   -23.2916
 Hexadecapole moment (Debye-Ang**3):
 XXXX=-16606.3758 YYYY=-14718.8621 ZZZZ= -6708.1020 XXXY=  -193.4334
 XXXZ=  -264.5247 YYYX=  -113.3492 YYYZ=   465.5724 ZZZX=   -84.0173
 ZZZY=    17.3013 XXYY= -5013.0070 XXZZ= -3893.5062 YYZZ= -3368.7916
 XXYZ=   135.9402 YYXZ=   -20.5202 ZZXY=   -32.0504
 N-N= 9.139288839580D+03 E-N=-2.437524423727D+04  KE= 2.584711475258D+03
  Exact polarizability: 464.368  14.549 407.304   1.854   1.006 359.598
 Approx polarizability: 645.703  34.756 577.044   5.430 -10.291 571.664
 Full mass-weighted force constant matrix:
 Low frequencies --- -101.2395   -7.9664   -2.4610   -0.0210   -0.0089    0.0034
 Low frequencies ---    1.8603   13.6085   19.3449
 ******    1 imaginary frequencies (negative Signs) ****** 
 Harmonic frequencies (cm**-1), IR intensities (KM/Mole),
 Raman scattering activities (A**4/AMU), Raman depolarization ratios,
 reduced masses (AMU), force constants (mDyne/A) and normal coordinates:
                     1                      2                      3
                    ?A                     ?A                     ?A
 Frequencies --  -101.2312                13.5958                19.0904
 Red. masses --     6.9231                 4.8782                 4.3352
 Frc consts  --     0.0418                 0.0005                 0.0009
 IR Inten    --    58.8002                 0.2543                 0.4060
 Raman Activ --     0.0000                 0.0000                 0.0000
 Depolar     --     0.0000                 0.0000                 0.0000
 Atom AN      X      Y      Z        X      Y      Z        X      Y      Z
   1   8    -0.01   0.01  -0.01     0.13  -0.05   0.19     0.02   0.02   0.00
   2  12    -0.01   0.07  -0.18    -0.01   0.00   0.00    -0.01  -0.01  -0.01
   3   8    -0.04  -0.21  -0.16    -0.01   0.00  -0.02    -0.01  -0.02  -0.02
   4   6     0.00  -0.01  -0.01     0.06  -0.01   0.10     0.01   0.01  -0.02
   5   7     0.00   0.04  -0.03    -0.01   0.00  -0.02     0.01  -0.02  -0.03
   6   7     0.00   0.02  -0.01    -0.01   0.01   0.03     0.00   0.01  -0.02
   7   8     0.03  -0.03   0.01     0.04   0.00   0.07     0.01   0.01  -0.04
   8   6    -0.01   0.04  -0.01    -0.01   0.00   0.00     0.02  -0.02  -0.06
   9   6    -0.01   0.03   0.00    -0.01   0.01   0.02     0.02  -0.01  -0.08
  10   6     0.00   0.02   0.00    -0.01   0.01   0.04     0.01   0.00  -0.05
  11   8    -0.05  -0.05  -0.04    -0.02   0.00   0.02    -0.01  -0.01  -0.02
  12   6    -0.04  -0.04  -0.04    -0.01   0.00   0.00    -0.01  -0.01  -0.02
  13   6    -0.03  -0.14  -0.10    -0.02  -0.01  -0.01    -0.01  -0.03  -0.02
  14   6    -0.04  -0.01  -0.01     0.00   0.01   0.05    -0.01   0.01  -0.02
  15   8    -0.05   0.07   0.05    -0.01   0.01   0.01    -0.02  -0.01  -0.02
  16   6     0.02   0.02   0.00     0.19  -0.07   0.25     0.04   0.03   0.00
  17   8     0.07   0.01   0.24    -0.01   0.02  -0.04    -0.02   0.00  -0.03
  18   6     0.02   0.09   0.32    -0.01   0.01  -0.04    -0.02  -0.01  -0.02
  19   8     0.01  -0.01   0.10    -0.01   0.02  -0.03    -0.03   0.00  -0.02
  20   8     0.00  -0.06   0.03     0.00  -0.01  -0.06     0.00  -0.02  -0.03
  21   6     0.01  -0.04   0.02     0.00   0.00  -0.07    -0.01  -0.02  -0.06
  22   6     0.01   0.00   0.05     0.00   0.02  -0.06    -0.02  -0.01  -0.06
  23   6     0.02  -0.02   0.07    -0.01   0.00  -0.05    -0.02  -0.01  -0.02
  24   8     0.00  -0.06  -0.01     0.01  -0.01  -0.09    -0.01  -0.03  -0.08
  25   6    -0.04   0.10  -0.01     0.00   0.04  -0.07    -0.04   0.02  -0.08
  26   6     0.13   0.06  -0.02    -0.01   0.02  -0.05    -0.04   0.00  -0.01
  27   6     0.00  -0.09  -0.04    -0.03  -0.02  -0.03     0.00  -0.04  -0.04
  28   6    -0.06   0.00   0.01    -0.05   0.08   0.07    -0.02   0.03  -0.02
  29   6     0.00   0.03  -0.02    -0.01   0.00  -0.04     0.01  -0.01   0.02
  30   6     0.00   0.02   0.00    -0.01   0.01   0.03     0.00   0.01   0.02
  31   6     0.00   0.01  -0.01     0.01   0.01  -0.05    -0.03   0.02   0.03
  32   6    -0.01   0.00  -0.01     0.01   0.01  -0.07    -0.03   0.05   0.08
  33   6    -0.01  -0.01  -0.01    -0.01  -0.02  -0.08     0.01   0.06   0.10
  34   6     0.00   0.00  -0.01    -0.03  -0.03  -0.06     0.06   0.02   0.09
  35   6     0.00   0.01  -0.01    -0.03  -0.02  -0.04     0.06  -0.02   0.05
  36   6    -0.01  -0.01  -0.01     0.03   0.01  -0.04    -0.08   0.01   0.01
  37   6     0.00   0.01  -0.01    -0.05  -0.04  -0.03     0.10  -0.06   0.03
  38   6     0.00   0.02   0.00    -0.02   0.02   0.03    -0.03  -0.01   0.04
  39   6     0.00   0.01   0.00    -0.01   0.01   0.03    -0.03  -0.01   0.08
  40   6     0.00   0.02   0.01     0.01   0.00   0.02     0.01   0.01   0.10
  41   6     0.00   0.02   0.01     0.02  -0.01   0.02     0.04   0.03   0.08
  42   6     0.01   0.02   0.00     0.01  -0.01   0.02     0.03   0.03   0.04
  43   6     0.01   0.01   0.00    -0.04   0.04   0.04    -0.07  -0.03   0.03
  44   6     0.02   0.01  -0.01     0.02  -0.02   0.02     0.06   0.06   0.01
  45   6     0.00  -0.03  -0.03     0.04   0.01  -0.04    -0.05   0.00   0.01
  46   6    -0.01  -0.02   0.01     0.05   0.00  -0.05    -0.14   0.05   0.01
  47   6    -0.02   0.00   0.00    -0.04  -0.04  -0.03     0.17  -0.05   0.05
  48   6     0.01   0.00  -0.02    -0.08  -0.03  -0.04     0.10  -0.05   0.03
  49   6     0.04   0.00  -0.02     0.02  -0.03   0.01     0.07   0.08   0.04
  50   6     0.03   0.00   0.01     0.03  -0.02   0.04     0.07   0.08   0.00
  51   6     0.03   0.01   0.02    -0.05   0.05   0.01    -0.09  -0.04   0.02
  52   6     0.01  -0.01  -0.02    -0.05   0.04   0.06    -0.09  -0.05   0.06
  53   6    -0.01   0.05   0.01    -0.01   0.00  -0.02     0.03  -0.02  -0.06
  54   6    -0.01   0.02   0.01    -0.01   0.01   0.06     0.01   0.02  -0.04
  55   1    -0.01   0.03   0.01    -0.01   0.01   0.03     0.02  -0.01  -0.10
  56   1    -0.22  -0.12  -0.16    -0.03  -0.02   0.00    -0.01  -0.04  -0.01
  57   1    -0.04  -0.02  -0.01    -0.01  -0.02   0.01    -0.02   0.00  -0.02
  58   1     0.04   0.03   0.01     0.12  -0.07   0.29     0.02   0.02   0.00
  59   1     0.02  -0.01   0.01     0.25  -0.06   0.18     0.05   0.03  -0.02
  60   1     0.01   0.03   0.00     0.25  -0.10   0.32     0.05   0.03   0.03
  61   1     0.01  -0.12   0.02     0.00   0.01  -0.06    -0.01  -0.02  -0.08
  62   1    -0.05  -0.11   0.06     0.00  -0.01  -0.04    -0.01  -0.02   0.00
  63   1    -0.06   0.09  -0.10     0.01   0.04  -0.09    -0.04   0.01  -0.10
  64   1    -0.04   0.17   0.01     0.00   0.04  -0.07    -0.05   0.03  -0.06
  65   1    -0.04   0.13   0.02     0.00   0.05  -0.07    -0.05   0.02  -0.08
  66   1     0.25  -0.05  -0.17    -0.01   0.02  -0.06    -0.03  -0.01  -0.01
  67   1     0.03   0.01   0.07    -0.01   0.02  -0.04    -0.04   0.00   0.01
  68   1     0.18   0.30  -0.03    -0.02   0.03  -0.06    -0.05   0.01  -0.02
  69   1    -0.08   0.02   0.02    -0.04  -0.03  -0.02     0.00  -0.05  -0.04
  70   1    -0.01  -0.16  -0.11    -0.03  -0.03  -0.05     0.00  -0.05  -0.04
  71   1     0.14  -0.08   0.02    -0.02  -0.01  -0.04     0.00  -0.03  -0.06
  72   1    -0.08   0.00   0.00    -0.09   0.09   0.02    -0.04   0.04  -0.04
  73   1    -0.06   0.00   0.01    -0.06   0.11   0.10    -0.03   0.05   0.00
  74   1    -0.05   0.01   0.02    -0.03   0.08   0.10    -0.02   0.03  -0.01
  75   1    -0.01  -0.01   0.00     0.03   0.02  -0.09    -0.06   0.07   0.09
  76   1    -0.01  -0.02   0.00    -0.01  -0.02  -0.09     0.01   0.09   0.14
  77   1     0.00  -0.01   0.00    -0.04  -0.05  -0.07     0.09   0.02   0.11
  78   1    -0.01  -0.01   0.00     0.03   0.01  -0.03    -0.09  -0.03  -0.02
  79   1     0.00   0.03  -0.02    -0.05  -0.05  -0.01     0.09  -0.09   0.00
  80   1     0.01   0.01   0.00    -0.02   0.02   0.03    -0.05  -0.02   0.10
  81   1     0.00   0.02   0.01     0.01  -0.01   0.02     0.01   0.00   0.13
  82   1     0.00   0.03   0.01     0.03  -0.03   0.02     0.06   0.04   0.09
  83   1    -0.01   0.02   0.00    -0.04   0.04   0.04    -0.07  -0.02   0.00
  84   1     0.02   0.02  -0.02     0.02  -0.03   0.02     0.05   0.05  -0.01
  85   1     0.00  -0.05  -0.02     0.05   0.01  -0.03    -0.09  -0.01  -0.01
  86   1     0.01  -0.02  -0.04     0.03   0.01  -0.03    -0.02  -0.03   0.00
  87   1     0.01  -0.03  -0.04     0.04   0.00  -0.05    -0.04   0.03   0.03
  88   1    -0.01  -0.03   0.01     0.06   0.00  -0.04    -0.17   0.04  -0.01
  89   1    -0.01  -0.02   0.00     0.05   0.00  -0.06    -0.13   0.09   0.04
  90   1    -0.02  -0.01   0.02     0.04   0.00  -0.05    -0.15   0.06   0.01
  91   1    -0.01   0.01  -0.01    -0.06  -0.05  -0.01     0.20  -0.08   0.04
  92   1    -0.02  -0.02   0.02    -0.04  -0.02  -0.06     0.18  -0.02   0.08
  93   1    -0.05   0.01   0.00    -0.01  -0.04  -0.02     0.17  -0.06   0.05
  94   1     0.02  -0.01  -0.02    -0.09  -0.05  -0.03     0.13  -0.08   0.02
  95   1     0.02   0.00  -0.03    -0.10  -0.03  -0.04     0.06  -0.05   0.01
  96   1     0.01  -0.02  -0.01    -0.08  -0.02  -0.06     0.11  -0.02   0.06
  97   1     0.05  -0.01  -0.02     0.04  -0.04   0.01     0.09   0.10   0.01
  98   1     0.04   0.01   0.00     0.02  -0.02   0.02     0.08   0.10   0.07
  99   1     0.02  -0.01  -0.03     0.01  -0.03   0.00     0.06   0.07   0.04
 100   1     0.04  -0.01   0.01     0.04  -0.03   0.04     0.09   0.10  -0.02
 101   1     0.02   0.01   0.02     0.04  -0.01   0.05     0.06   0.06  -0.02
 102   1     0.03   0.00   0.02     0.03  -0.02   0.04     0.08   0.09   0.03
 103   1     0.06   0.01   0.03    -0.06   0.07   0.02    -0.12  -0.06   0.01
 104   1     0.01   0.00   0.06    -0.04   0.05  -0.01    -0.07  -0.02   0.00
 105   1     0.03   0.01   0.00    -0.05   0.05   0.01    -0.09  -0.05   0.06
 106   1     0.01  -0.02  -0.02    -0.06   0.05   0.07    -0.12  -0.06   0.04
 107   1     0.01  -0.01  -0.01    -0.05   0.04   0.06    -0.09  -0.06   0.09
 108   1     0.00   0.00  -0.03    -0.04   0.03   0.08    -0.07  -0.04   0.06
 109   1    -0.02   0.04   0.02     0.00   0.00  -0.03    -0.02   0.00  -0.03
 110   1    -0.01   0.05   0.02    -0.01   0.00  -0.01     0.03  -0.03  -0.12
 111   1    -0.01   0.06   0.01    -0.03   0.00  -0.03     0.08  -0.05  -0.02
 112   1     0.01   0.02   0.04     0.00   0.01   0.06     0.01   0.03  -0.03
 113   1    -0.02  -0.01   0.01    -0.02   0.02   0.07     0.01   0.02  -0.04
 114   1    -0.01   0.03  -0.01     0.00   0.00   0.07     0.03   0.02  -0.04
                     4                      5                      6
                    ?A                     ?A                     ?A
 Frequencies --    29.1226                30.1247                37.0692
 Red. masses --     4.6759                 3.8292                 5.1116
 Frc consts  --     0.0023                 0.0020                 0.0041
 IR Inten    --     0.1835                 0.1405                 0.3603
 Raman Activ --     0.0000                 0.0000                 0.0000
 Depolar     --     0.0000                 0.0000                 0.0000
 Atom AN      X      Y      Z        X      Y      Z        X      Y      Z
   1   8    -0.12   0.07   0.01    -0.07   0.05  -0.05     0.10   0.18   0.07
   2  12     0.01   0.00   0.00     0.00   0.00   0.02     0.00  -0.02  -0.01
   3   8    -0.01   0.01  -0.01    -0.01  -0.01   0.02     0.00  -0.02   0.00
   4   6    -0.06   0.04   0.08    -0.03   0.02   0.00     0.05   0.12  -0.03
   5   7     0.00   0.00  -0.03     0.01  -0.01  -0.01     0.01  -0.03  -0.01
   6   7     0.01   0.00   0.00     0.01   0.00   0.04     0.01  -0.01   0.00
   7   8    -0.06   0.04   0.09     0.00   0.01   0.03     0.03   0.14  -0.17
   8   6     0.00   0.00  -0.04     0.01  -0.01  -0.01     0.02  -0.02   0.00
   9   6     0.00   0.00  -0.03     0.01   0.00   0.02     0.02  -0.01   0.00
  10   6     0.01   0.00  -0.01     0.01   0.01   0.05     0.02  -0.01   0.00
  11   8    -0.02   0.04   0.13    -0.01   0.01   0.02     0.01  -0.01   0.01
  12   6    -0.01   0.02   0.07    -0.02   0.01   0.03     0.01  -0.03  -0.01
  13   6    -0.04   0.00   0.03    -0.02  -0.01   0.02     0.01  -0.03  -0.01
  14   6     0.00   0.02   0.15    -0.03   0.02   0.00     0.02   0.05   0.06
  15   8     0.02   0.00   0.06    -0.02   0.01   0.04     0.01  -0.04  -0.02
  16   6    -0.18   0.11  -0.06    -0.08   0.06  -0.06     0.12   0.28  -0.03
  17   8     0.03   0.02  -0.01     0.01   0.01   0.02    -0.04  -0.04   0.00
  18   6     0.02   0.00  -0.03     0.01   0.00   0.01    -0.03  -0.02   0.01
  19   8     0.03   0.01  -0.02     0.01   0.01   0.01    -0.02  -0.03   0.01
  20   8     0.02  -0.01  -0.06     0.00  -0.01  -0.03    -0.04   0.00   0.04
  21   6     0.02  -0.01  -0.07     0.00  -0.01  -0.02    -0.05  -0.01   0.04
  22   6     0.03   0.01  -0.03     0.01   0.00   0.00    -0.06  -0.04   0.02
  23   6     0.02   0.00  -0.05     0.00   0.00  -0.02    -0.04   0.00   0.03
  24   8     0.01  -0.02  -0.09     0.00  -0.01  -0.03    -0.05  -0.01   0.06
  25   6     0.06   0.05  -0.05     0.03   0.02   0.00    -0.09  -0.06   0.02
  26   6     0.03   0.01  -0.05     0.01   0.01  -0.03    -0.06  -0.01   0.05
  27   6    -0.05  -0.02   0.00    -0.01  -0.01   0.02     0.00  -0.03  -0.01
  28   6     0.03  -0.11   0.17    -0.02   0.04  -0.02     0.00  -0.01   0.12
  29   6     0.00  -0.01  -0.03     0.01  -0.01  -0.02     0.01  -0.03  -0.02
  30   6     0.02   0.00   0.01     0.00   0.01   0.02    -0.01   0.00  -0.01
  31   6     0.00  -0.03  -0.03     0.01   0.04  -0.03     0.02  -0.04  -0.01
  32   6     0.00  -0.08  -0.02     0.01   0.07  -0.03     0.02  -0.04  -0.02
  33   6    -0.01  -0.09  -0.02     0.01   0.04  -0.01     0.01  -0.03  -0.03
  34   6    -0.01  -0.04  -0.03     0.01  -0.03   0.00     0.01  -0.02  -0.03
  35   6     0.00  -0.01  -0.04     0.01  -0.06   0.00     0.01  -0.02  -0.02
  36   6     0.01  -0.02  -0.03     0.00   0.05  -0.04     0.02  -0.04  -0.01
  37   6    -0.01   0.03  -0.04     0.02  -0.16   0.03     0.00  -0.03  -0.02
  38   6     0.01  -0.01   0.02     0.02   0.03   0.00    -0.01   0.02  -0.01
  39   6     0.02  -0.02   0.04     0.02   0.03  -0.04    -0.04   0.04  -0.01
  40   6     0.05  -0.02   0.04     0.00   0.00  -0.06    -0.06   0.04  -0.01
  41   6     0.05  -0.01   0.03    -0.01  -0.02  -0.04    -0.05   0.03  -0.01
  42   6     0.04   0.00   0.02    -0.01  -0.03   0.00    -0.02   0.01  -0.01
  43   6    -0.02  -0.01   0.02     0.03   0.07   0.02     0.01   0.01  -0.01
  44   6     0.04   0.02   0.01    -0.02  -0.06   0.02    -0.01  -0.01  -0.01
  45   6    -0.01   0.00  -0.03     0.02   0.05  -0.02     0.01  -0.05  -0.02
  46   6     0.02  -0.03  -0.03    -0.01   0.07  -0.05     0.03  -0.06   0.00
  47   6    -0.09   0.01  -0.02     0.16  -0.16   0.06    -0.01  -0.03   0.00
  48   6     0.06  -0.01  -0.05    -0.09  -0.14  -0.01     0.01  -0.04  -0.03
  49   6     0.04   0.03   0.03    -0.04  -0.09  -0.01    -0.02  -0.03  -0.01
  50   6     0.05   0.03   0.00    -0.02  -0.07   0.04     0.01   0.00   0.01
  51   6    -0.02   0.00   0.01     0.05   0.09   0.01    -0.01  -0.01   0.00
  52   6    -0.04  -0.03   0.04     0.04   0.08   0.01     0.03   0.04  -0.02
  53   6     0.00   0.00  -0.04     0.01  -0.01  -0.04     0.03  -0.03  -0.01
  54   6     0.01   0.00  -0.01     0.01   0.01   0.07     0.02   0.00   0.01
  55   1     0.00   0.00  -0.03     0.01   0.00   0.03     0.03  -0.01   0.01
  56   1    -0.07  -0.02   0.04    -0.03  -0.01   0.03     0.01  -0.03  -0.01
  57   1     0.05   0.06   0.19    -0.04   0.01   0.00     0.03   0.09   0.11
  58   1    -0.14   0.09  -0.11    -0.03   0.07  -0.07     0.04   0.20  -0.13
  59   1    -0.24   0.13  -0.01    -0.11   0.03  -0.02     0.16   0.40  -0.13
  60   1    -0.22   0.13  -0.11    -0.12   0.08  -0.11     0.18   0.31   0.08
  61   1     0.02   0.01  -0.02     0.00   0.00   0.01    -0.05  -0.05   0.00
  62   1     0.02  -0.01  -0.04     0.00  -0.01  -0.02    -0.02   0.01   0.04
  63   1     0.05   0.04  -0.07     0.02   0.02  -0.01    -0.10  -0.06   0.03
  64   1     0.07   0.06  -0.06     0.03   0.03  -0.01    -0.11  -0.06   0.04
  65   1     0.06   0.06  -0.02     0.03   0.02   0.01    -0.10  -0.07  -0.01
  66   1     0.03   0.01  -0.07     0.00   0.02  -0.04    -0.06   0.00   0.06
  67   1     0.03   0.01  -0.05     0.02   0.02  -0.03    -0.06   0.00   0.05
  68   1     0.04   0.01  -0.05     0.02   0.01  -0.02    -0.07  -0.01   0.04
  69   1    -0.08  -0.03   0.04    -0.01  -0.01   0.02     0.00  -0.03  -0.01
  70   1    -0.07  -0.05  -0.05    -0.01  -0.02   0.02     0.00  -0.02   0.00
  71   1    -0.01   0.00  -0.01    -0.01   0.00   0.01    -0.01  -0.03  -0.01
  72   1     0.08  -0.14   0.27    -0.01   0.05  -0.04    -0.02  -0.05   0.20
  73   1     0.02  -0.18   0.10    -0.01   0.06   0.00    -0.01  -0.07   0.07
  74   1     0.03  -0.10   0.16    -0.02   0.03  -0.03     0.00   0.05   0.15
  75   1     0.00  -0.11  -0.01     0.00   0.11  -0.04     0.02  -0.05  -0.02
  76   1    -0.01  -0.13  -0.01     0.01   0.06  -0.01     0.01  -0.03  -0.03
  77   1    -0.01  -0.05  -0.03     0.02  -0.06   0.02     0.01  -0.01  -0.03
  78   1     0.02   0.00  -0.03    -0.01   0.03  -0.04     0.03  -0.03   0.00
  79   1     0.00   0.09  -0.06     0.00  -0.26   0.04     0.01  -0.01  -0.02
  80   1     0.02  -0.03   0.05     0.03   0.05  -0.05    -0.04   0.05  -0.01
  81   1     0.06  -0.03   0.05     0.00   0.00  -0.08    -0.08   0.06  -0.01
  82   1     0.07  -0.01   0.04    -0.02  -0.05  -0.05    -0.06   0.03  -0.01
  83   1    -0.03   0.00   0.01     0.03   0.06   0.05     0.03  -0.01  -0.01
  84   1     0.04   0.01   0.00    -0.01  -0.06   0.04     0.00  -0.03  -0.01
  85   1    -0.01   0.01  -0.03     0.02   0.05  -0.02     0.01  -0.05  -0.02
  86   1    -0.02   0.00  -0.03     0.03   0.03  -0.01     0.00  -0.03  -0.03
  87   1    -0.02  -0.02  -0.02     0.03   0.06  -0.02     0.00  -0.06  -0.03
  88   1     0.03  -0.01  -0.04    -0.02   0.07  -0.05     0.03  -0.06   0.01
  89   1     0.02  -0.04  -0.03     0.00   0.09  -0.04     0.02  -0.08   0.00
  90   1     0.04  -0.04  -0.04    -0.03   0.07  -0.06     0.04  -0.06   0.01
  91   1    -0.08   0.03  -0.03     0.15  -0.23   0.08    -0.02  -0.04   0.00
  92   1    -0.10  -0.05   0.00     0.17  -0.05   0.03    -0.01  -0.04  -0.01
  93   1    -0.14   0.04  -0.02     0.24  -0.18   0.08    -0.01  -0.02   0.01
  94   1     0.06   0.01  -0.05    -0.08  -0.23   0.01     0.01  -0.04  -0.02
  95   1     0.12   0.00  -0.06    -0.20  -0.15  -0.03     0.02  -0.04  -0.04
  96   1     0.05  -0.08  -0.04    -0.08  -0.04  -0.01     0.01  -0.05  -0.03
  97   1     0.06   0.04   0.01    -0.05  -0.11   0.01    -0.02  -0.04  -0.01
  98   1     0.04   0.05   0.04    -0.05  -0.09  -0.03    -0.03  -0.02  -0.02
  99   1     0.03   0.02   0.03    -0.04  -0.08  -0.02    -0.03  -0.03  -0.02
 100   1     0.05   0.04  -0.01    -0.03  -0.10   0.05     0.02  -0.02   0.01
 101   1     0.05   0.02  -0.01     0.00  -0.05   0.06     0.03   0.01   0.02
 102   1     0.05   0.04   0.01    -0.02  -0.07   0.01     0.01   0.01   0.01
 103   1    -0.05   0.00   0.00     0.06   0.12   0.02     0.01  -0.02   0.00
 104   1    -0.01   0.02  -0.01     0.04   0.08   0.01    -0.02  -0.03   0.01
 105   1    -0.01  -0.01   0.02     0.05   0.10  -0.03    -0.02   0.00   0.00
 106   1    -0.06  -0.03   0.04     0.05   0.10   0.03     0.05   0.03  -0.02
 107   1    -0.03  -0.04   0.05     0.04   0.08  -0.02     0.01   0.05  -0.02
 108   1    -0.04  -0.04   0.05     0.03   0.06   0.02     0.03   0.05  -0.02
 109   1     0.01  -0.01  -0.05     0.01   0.01  -0.05     0.04  -0.03  -0.01
 110   1     0.01   0.00  -0.04     0.00  -0.02  -0.06     0.03  -0.02   0.00
 111   1    -0.01  -0.01  -0.05     0.01  -0.04  -0.04     0.02  -0.03  -0.01
 112   1     0.01  -0.01  -0.01     0.02   0.01   0.07     0.02   0.02   0.03
 113   1     0.00   0.01   0.00     0.00   0.02   0.07     0.01  -0.01   0.01
 114   1     0.01  -0.01   0.00     0.03   0.01   0.08     0.03   0.01   0.00
                     7                      8                      9
                    ?A                     ?A                     ?A
 Frequencies --    39.6710                43.3424                48.7626
 Red. masses --     3.9526                 4.3940                 3.7091
 Frc consts  --     0.0037                 0.0049                 0.0052
 IR Inten    --     0.0906                 0.1745                 0.0179
 Raman Activ --     0.0000                 0.0000                 0.0000
 Depolar     --     0.0000                 0.0000                 0.0000
 Atom AN      X      Y      Z        X      Y      Z        X      Y      Z
   1   8     0.00  -0.03   0.01    -0.06   0.01   0.00    -0.01   0.02   0.00
   2  12     0.01  -0.01  -0.04     0.01  -0.02  -0.04     0.00   0.00  -0.03
   3   8     0.02   0.01  -0.03     0.02  -0.01  -0.03    -0.03  -0.01  -0.04
   4   6     0.00   0.00   0.02    -0.02   0.05   0.08     0.00  -0.02  -0.01
   5   7     0.00  -0.01  -0.07     0.02  -0.01   0.03    -0.01   0.01   0.02
   6   7     0.01  -0.02   0.03     0.01  -0.02  -0.04     0.00   0.00  -0.02
   7   8    -0.02   0.00   0.05    -0.01   0.05   0.17     0.02  -0.03  -0.02
   8   6    -0.01  -0.01  -0.05     0.01  -0.01   0.04    -0.01   0.01   0.02
   9   6    -0.01  -0.01   0.00     0.01  -0.02   0.02    -0.01   0.00   0.01
  10   6     0.01  -0.02   0.05     0.01  -0.02  -0.01    -0.01   0.00  -0.01
  11   8     0.02   0.04   0.01     0.03   0.14   0.06    -0.04  -0.05  -0.02
  12   6     0.02   0.02  -0.02     0.02   0.04  -0.01    -0.03  -0.02  -0.01
  13   6     0.02   0.02  -0.02     0.02   0.00  -0.03    -0.04   0.00  -0.02
  14   6     0.03   0.01   0.01     0.02   0.09   0.03    -0.03  -0.03   0.00
  15   8     0.03   0.00  -0.04     0.01  -0.02  -0.06    -0.02   0.00   0.00
  16   6    -0.03  -0.06   0.03    -0.11  -0.04   0.04     0.02   0.03  -0.01
  17   8     0.00  -0.02   0.00    -0.01  -0.04   0.00     0.00  -0.01  -0.02
  18   6     0.01   0.00   0.00     0.00  -0.02   0.01     0.01   0.00  -0.04
  19   8     0.01  -0.01  -0.02     0.00  -0.03  -0.02     0.03   0.00  -0.04
  20   8    -0.02   0.02   0.02    -0.01   0.00   0.03    -0.05   0.01  -0.04
  21   6    -0.02   0.01   0.05    -0.03  -0.03   0.00    -0.01   0.03   0.06
  22   6    -0.02  -0.02   0.02    -0.05  -0.05  -0.04     0.01   0.00   0.06
  23   6     0.00   0.01   0.01    -0.01   0.00   0.03    -0.01   0.01  -0.07
  24   8    -0.02   0.02   0.08    -0.04  -0.03  -0.01     0.00   0.07   0.15
  25   6    -0.05  -0.05   0.03    -0.13  -0.04  -0.05     0.05  -0.07   0.10
  26   6    -0.02   0.01   0.02    -0.05   0.00   0.05     0.04   0.00  -0.10
  27   6     0.02   0.02  -0.02     0.05  -0.02  -0.06    -0.06   0.03   0.03
  28   6     0.04  -0.01   0.01     0.04   0.10   0.00    -0.05  -0.03   0.02
  29   6     0.00   0.01  -0.04     0.02   0.00   0.02    -0.01   0.00   0.02
  30   6     0.00  -0.01   0.02     0.00  -0.02  -0.03     0.01   0.00  -0.02
  31   6    -0.04   0.00  -0.02     0.03   0.01   0.01     0.00   0.00   0.01
  32   6    -0.04   0.00   0.02     0.03   0.05  -0.02     0.00  -0.01   0.01
  33   6    -0.01   0.01   0.04     0.03   0.08  -0.03    -0.01  -0.02   0.01
  34   6     0.03   0.03   0.01     0.01   0.06  -0.02    -0.01  -0.02   0.01
  35   6     0.03   0.03  -0.03     0.01   0.02   0.01    -0.01  -0.01   0.02
  36   6    -0.08   0.01  -0.05     0.04  -0.03   0.03     0.01   0.01   0.02
  37   6     0.07   0.07  -0.06    -0.01   0.00   0.02    -0.01  -0.01   0.02
  38   6    -0.01   0.03   0.02    -0.03  -0.01  -0.02    -0.02   0.00  -0.01
  39   6    -0.03   0.04  -0.01    -0.06   0.02   0.00     0.00  -0.01   0.00
  40   6    -0.03   0.01  -0.02    -0.06   0.03   0.01     0.03  -0.02   0.00
  41   6    -0.02  -0.03  -0.02    -0.03   0.02  -0.01     0.05  -0.03  -0.01
  42   6     0.00  -0.04   0.01     0.00  -0.01  -0.03     0.04  -0.02  -0.02
  43   6    -0.01   0.06   0.03    -0.01  -0.03  -0.03    -0.07   0.03   0.00
  44   6     0.03  -0.10   0.02     0.05  -0.03  -0.04     0.10  -0.05  -0.03
  45   6    -0.10   0.01  -0.06     0.05  -0.05   0.00     0.03   0.01   0.03
  46   6    -0.10   0.01  -0.03     0.05  -0.05   0.05     0.01   0.03   0.00
  47   6    -0.01   0.05  -0.04     0.09   0.02  -0.02     0.05   0.01  -0.02
  48   6     0.19   0.02  -0.05    -0.11   0.06   0.03    -0.07   0.04   0.04
  49   6     0.02  -0.14  -0.03     0.03  -0.04  -0.04     0.00  -0.06  -0.01
  50   6     0.06  -0.11   0.08     0.11   0.01  -0.02     0.23   0.07  -0.05
  51   6     0.00   0.08   0.02    -0.01  -0.06  -0.01    -0.02   0.08  -0.01
  52   6    -0.01   0.07   0.04    -0.01  -0.03  -0.05    -0.10  -0.04   0.01
  53   6    -0.02  -0.01  -0.08     0.01   0.00   0.07    -0.01   0.01   0.04
  54   6     0.01  -0.02   0.11     0.01  -0.03  -0.02    -0.01  -0.01  -0.01
  55   1    -0.01  -0.02   0.01     0.01  -0.01   0.03    -0.01   0.01   0.01
  56   1     0.01   0.02  -0.03    -0.01  -0.02  -0.01    -0.05   0.03  -0.04
  57   1     0.04   0.02   0.01     0.03   0.08   0.01    -0.03  -0.02   0.00
  58   1    -0.03  -0.05   0.04    -0.04   0.01   0.08     0.04   0.04  -0.02
  59   1    -0.04  -0.06   0.04    -0.16  -0.11   0.12     0.02   0.02  -0.02
  60   1    -0.03  -0.08   0.01    -0.16  -0.06  -0.06     0.01   0.06  -0.01
  61   1    -0.01  -0.03   0.01    -0.03  -0.09  -0.07     0.00   0.03   0.09
  62   1     0.01   0.03   0.00     0.01   0.01   0.04    -0.03   0.01  -0.10
  63   1    -0.06  -0.05   0.05    -0.14  -0.04  -0.08     0.06  -0.06   0.16
  64   1    -0.06  -0.06   0.05    -0.15  -0.01  -0.01     0.06  -0.12   0.08
  65   1    -0.06  -0.07   0.00    -0.14  -0.04  -0.09     0.05  -0.09   0.09
  66   1    -0.01   0.01   0.02    -0.02  -0.02   0.05     0.05  -0.01  -0.12
  67   1    -0.02   0.01   0.03    -0.08  -0.01   0.09     0.03  -0.01  -0.11
  68   1    -0.02   0.02   0.01    -0.08   0.04   0.02     0.07   0.02  -0.08
  69   1     0.01   0.03  -0.01     0.02  -0.01  -0.03    -0.06   0.05   0.03
  70   1     0.02   0.01  -0.03     0.05  -0.08  -0.11    -0.06   0.06   0.04
  71   1     0.04   0.03  -0.01     0.11   0.02  -0.09    -0.07   0.00   0.07
  72   1     0.05  -0.01   0.02     0.07   0.12  -0.03    -0.06  -0.03   0.02
  73   1     0.03  -0.02   0.00     0.04   0.12   0.02    -0.06  -0.03   0.02
  74   1     0.04  -0.02   0.00     0.04   0.06  -0.02    -0.04  -0.02   0.04
  75   1    -0.07  -0.01   0.04     0.04   0.06  -0.03     0.00  -0.01   0.01
  76   1    -0.01   0.01   0.07     0.03   0.11  -0.05    -0.01  -0.03   0.01
  77   1     0.06   0.05   0.02     0.00   0.07  -0.03    -0.02  -0.02   0.01
  78   1    -0.06   0.00  -0.08     0.04  -0.02   0.05     0.00   0.00   0.02
  79   1     0.08   0.14  -0.11    -0.02  -0.08   0.05    -0.02  -0.06   0.04
  80   1    -0.03   0.07  -0.02    -0.08   0.03   0.01    -0.01  -0.01   0.01
  81   1    -0.05   0.02  -0.04    -0.08   0.05   0.02     0.04  -0.03   0.01
  82   1    -0.02  -0.05  -0.03    -0.02   0.03   0.00     0.08  -0.04  -0.01
  83   1    -0.01   0.06   0.05    -0.01  -0.03  -0.04    -0.11   0.06   0.00
  84   1     0.04  -0.11   0.02     0.07  -0.07  -0.06     0.16  -0.15  -0.05
  85   1    -0.13   0.02  -0.08     0.06  -0.07   0.02     0.04   0.02   0.04
  86   1    -0.08   0.01  -0.08     0.04  -0.03  -0.01     0.02   0.01   0.04
  87   1    -0.11   0.01  -0.03     0.05  -0.06  -0.02     0.03   0.02   0.02
  88   1    -0.13   0.01  -0.05     0.06  -0.08   0.07     0.02   0.03   0.00
  89   1    -0.12   0.01   0.00     0.05  -0.07   0.03     0.02   0.04   0.00
  90   1    -0.09   0.01  -0.02     0.05  -0.04   0.07     0.00   0.02  -0.02
  91   1     0.04   0.08  -0.07     0.06   0.00   0.00     0.03   0.01  -0.01
  92   1    -0.02  -0.03   0.03     0.10   0.10  -0.07     0.05   0.06  -0.05
  93   1    -0.10   0.09  -0.05     0.17  -0.03  -0.02     0.10  -0.03  -0.02
  94   1     0.21   0.06  -0.07    -0.11   0.03   0.04    -0.07   0.03   0.04
  95   1     0.26   0.04  -0.06    -0.18   0.04   0.05    -0.13   0.03   0.06
  96   1     0.19  -0.06  -0.01    -0.10   0.14   0.00    -0.07   0.10   0.03
  97   1     0.04  -0.19  -0.02     0.06  -0.06  -0.06     0.06  -0.10  -0.03
  98   1     0.02  -0.14  -0.03     0.02   0.00  -0.03    -0.04   0.06   0.03
  99   1     0.00  -0.14  -0.06     0.00  -0.06  -0.05    -0.10  -0.14   0.01
 100   1     0.08  -0.16   0.09     0.15  -0.01  -0.03     0.27   0.02  -0.05
 101   1     0.07  -0.07   0.11     0.14   0.02  -0.01     0.33   0.08  -0.05
 102   1     0.05  -0.09   0.07     0.10   0.06   0.00     0.18   0.19  -0.05
 103   1     0.01   0.11   0.03     0.00  -0.08  -0.02    -0.05   0.10  -0.01
 104   1     0.00   0.07   0.02    -0.02  -0.06   0.01     0.00   0.12  -0.02
 105   1     0.00   0.09  -0.01    -0.02  -0.06   0.00     0.03   0.05  -0.02
 106   1     0.00   0.10   0.05     0.01  -0.05  -0.06    -0.13  -0.02   0.02
 107   1     0.00   0.07   0.01    -0.01  -0.04  -0.05    -0.05  -0.07   0.01
 108   1    -0.02   0.05   0.05    -0.01  -0.02  -0.07    -0.13  -0.08   0.02
 109   1    -0.01   0.01  -0.09     0.01  -0.01   0.08    -0.01   0.01   0.04
 110   1    -0.03  -0.01  -0.08     0.01   0.00   0.09    -0.01   0.01   0.04
 111   1    -0.04  -0.02  -0.08     0.02   0.02   0.07     0.00   0.03   0.04
 112   1     0.03  -0.01   0.16     0.02   0.00   0.05     0.01   0.01   0.05
 113   1    -0.05  -0.05   0.12    -0.01  -0.11  -0.03    -0.03  -0.08  -0.02
 114   1     0.03   0.00   0.09     0.01   0.02  -0.09    -0.01   0.02  -0.07
                    10                     11                     12
                    ?A                     ?A                     ?A
 Frequencies --    50.9050                56.4319                57.7055
 Red. masses --     3.3027                 3.5406                 3.2606
 Frc consts  --     0.0050                 0.0066                 0.0064
 IR Inten    --     0.2844                 1.8685                 0.9235
 Raman Activ --     0.0000                 0.0000                 0.0000
 Depolar     --     0.0000                 0.0000                 0.0000
 Atom AN      X      Y      Z        X      Y      Z        X      Y      Z
   1   8     0.03  -0.03   0.02    -0.05   0.08  -0.07    -0.01   0.03  -0.05
   2  12     0.01   0.00   0.04    -0.01  -0.02   0.00    -0.01   0.00   0.05
   3   8     0.02   0.01   0.04    -0.02  -0.02  -0.01     0.01   0.02   0.05
   4   6     0.00  -0.01  -0.02     0.05  -0.01   0.04     0.04  -0.01   0.00
   5   7    -0.01   0.01   0.02     0.01  -0.02   0.01    -0.01   0.00   0.01
   6   7     0.00  -0.02   0.00     0.00  -0.01   0.00    -0.01   0.01   0.00
   7   8    -0.04   0.02  -0.06     0.19  -0.09   0.16     0.11  -0.05   0.06
   8   6    -0.02   0.00   0.00     0.02  -0.01   0.01    -0.01   0.00  -0.01
   9   6    -0.02  -0.01  -0.01     0.02  -0.01   0.01    -0.01   0.00  -0.02
  10   6    -0.01  -0.02  -0.01     0.01   0.00   0.00    -0.01   0.01  -0.02
  11   8     0.02  -0.02   0.01    -0.02  -0.02  -0.02     0.02  -0.02  -0.01
  12   6     0.02   0.00   0.03    -0.02  -0.02  -0.01     0.01   0.00   0.02
  13   6     0.02   0.00   0.03    -0.02  -0.02  -0.01     0.02   0.01   0.03
  14   6     0.02  -0.02   0.01    -0.02   0.00  -0.01     0.01  -0.01  -0.03
  15   8     0.02   0.01   0.03    -0.02  -0.02  -0.01     0.00   0.01   0.02
  16   6     0.01  -0.02   0.00     0.03   0.08  -0.02     0.04   0.02  -0.02
  17   8     0.00   0.00   0.03    -0.02  -0.02  -0.03     0.00   0.03   0.00
  18   6     0.01   0.00   0.03    -0.02  -0.02  -0.02     0.00   0.00   0.01
  19   8     0.01   0.01   0.03    -0.02  -0.01  -0.01    -0.02   0.01   0.04
  20   8     0.01   0.00   0.02    -0.02  -0.02  -0.01     0.04  -0.01   0.01
  21   6    -0.02  -0.02  -0.04    -0.02  -0.01   0.00     0.04   0.00  -0.02
  22   6    -0.01  -0.01  -0.03    -0.01  -0.02   0.00     0.02   0.02  -0.02
  23   6     0.00   0.01   0.04    -0.02  -0.02  -0.02     0.01   0.00   0.04
  24   8    -0.04  -0.05  -0.10    -0.01   0.00   0.02     0.05  -0.01  -0.04
  25   6    -0.03   0.05  -0.05    -0.01  -0.04   0.01     0.01   0.05  -0.03
  26   6    -0.03   0.03   0.05    -0.02  -0.02  -0.02    -0.02   0.01   0.05
  27   6     0.02  -0.02   0.01    -0.02  -0.02  -0.01     0.02   0.00   0.02
  28   6     0.03  -0.04   0.00    -0.05   0.07  -0.01     0.00   0.04  -0.04
  29   6    -0.01   0.01   0.01     0.01  -0.01   0.01    -0.01  -0.01   0.01
  30   6     0.00  -0.01  -0.01     0.00   0.00   0.00    -0.02   0.01  -0.01
  31   6    -0.01   0.02   0.01     0.02   0.00   0.00    -0.01  -0.01   0.00
  32   6    -0.01   0.00   0.01     0.02   0.01   0.00    -0.01   0.00   0.00
  33   6    -0.01  -0.02   0.02     0.02   0.01   0.00    -0.01   0.01  -0.01
  34   6    -0.01  -0.01   0.01     0.01   0.01   0.00    -0.01  -0.01   0.00
  35   6    -0.01   0.01   0.01     0.01   0.01   0.00    -0.01  -0.01   0.00
  36   6     0.00   0.04   0.00     0.02   0.00   0.01    -0.01  -0.01   0.01
  37   6    -0.02   0.02   0.01     0.01   0.04   0.00    -0.02  -0.02   0.01
  38   6    -0.02   0.00  -0.01     0.00   0.00   0.00    -0.03   0.03  -0.01
  39   6    -0.04   0.02  -0.01     0.00   0.00  -0.01    -0.04   0.03  -0.01
  40   6    -0.05   0.02  -0.01     0.00   0.00  -0.01    -0.03   0.02  -0.02
  41   6    -0.03   0.00  -0.02    -0.01   0.00   0.00    -0.02   0.00  -0.02
  42   6    -0.01  -0.02  -0.01    -0.01   0.00   0.00    -0.01   0.00  -0.01
  43   6     0.01  -0.01  -0.02     0.00   0.00   0.00    -0.02   0.03  -0.01
  44   6     0.03  -0.05  -0.02    -0.02   0.01   0.00     0.03  -0.03  -0.02
  45   6     0.12   0.06   0.10     0.13   0.00   0.08    -0.13  -0.01  -0.07
  46   6    -0.04   0.18  -0.11    -0.01   0.10  -0.07     0.03  -0.13   0.09
  47   6    -0.07   0.01   0.02    -0.10   0.03   0.01    -0.09  -0.04   0.06
  48   6     0.03  -0.01   0.00     0.10  -0.01  -0.01     0.04  -0.09  -0.03
  49   6    -0.05  -0.07  -0.01    -0.01   0.01   0.00    -0.09  -0.03   0.01
  50   6     0.13   0.03  -0.02    -0.04  -0.01  -0.01     0.13   0.08  -0.05
  51   6     0.06   0.00   0.02    -0.06  -0.02  -0.03     0.02   0.05   0.01
  52   6     0.02  -0.05  -0.07     0.00   0.06   0.03    -0.03  -0.01  -0.03
  53   6    -0.03   0.00  -0.01     0.02  -0.02   0.02     0.00  -0.01  -0.03
  54   6    -0.02  -0.04  -0.03     0.01   0.01   0.01    -0.01   0.01  -0.04
  55   1    -0.03  -0.02  -0.02     0.02  -0.01   0.01     0.00   0.00  -0.03
  56   1     0.04  -0.01   0.04    -0.01  -0.02  -0.01     0.05   0.01   0.04
  57   1     0.02  -0.01   0.02    -0.04  -0.03  -0.04    -0.02  -0.03  -0.04
  58   1    -0.07  -0.06  -0.03     0.31   0.20   0.03     0.17   0.08   0.01
  59   1     0.02   0.06  -0.05    -0.03  -0.17   0.13     0.01  -0.10   0.05
  60   1     0.05  -0.05   0.05    -0.13   0.20  -0.20    -0.04   0.08  -0.10
  61   1    -0.01  -0.04  -0.04    -0.02  -0.01   0.00     0.03   0.03  -0.03
  62   1     0.02   0.01   0.06    -0.02  -0.02  -0.02     0.03   0.00   0.06
  63   1    -0.06   0.03  -0.10     0.00  -0.03   0.03     0.02   0.05  -0.05
  64   1    -0.03   0.09  -0.05    -0.01  -0.06   0.01     0.00   0.05  -0.02
  65   1    -0.02   0.05  -0.04    -0.02  -0.04   0.00     0.00   0.06  -0.03
  66   1    -0.04   0.03   0.05    -0.03  -0.02  -0.01    -0.04   0.02   0.07
  67   1    -0.03   0.04   0.07    -0.01  -0.02  -0.02    -0.02   0.02   0.06
  68   1    -0.05   0.03   0.03    -0.02  -0.03  -0.01    -0.04  -0.01   0.04
  69   1     0.03  -0.04   0.00    -0.01  -0.02  -0.01     0.04  -0.01   0.00
  70   1     0.02  -0.01   0.02    -0.02  -0.01   0.00     0.03   0.02   0.05
  71   1    -0.01  -0.01  -0.01    -0.02  -0.02   0.00    -0.01   0.00   0.01
  72   1     0.04  -0.05   0.03    -0.09   0.09  -0.06    -0.02   0.05  -0.07
  73   1     0.04  -0.06  -0.01    -0.05   0.11   0.03     0.01   0.06  -0.02
  74   1     0.02  -0.03   0.00    -0.05   0.08   0.00     0.00   0.04  -0.04
  75   1    -0.01   0.00   0.01     0.02   0.03  -0.01     0.00   0.01  -0.01
  76   1    -0.01  -0.03   0.02     0.02   0.02  -0.01    -0.01   0.01  -0.01
  77   1    -0.02  -0.01   0.01     0.01   0.01   0.00    -0.02  -0.01   0.00
  78   1    -0.06  -0.05  -0.01    -0.03  -0.08   0.01     0.04   0.08   0.01
  79   1    -0.01   0.07   0.00     0.02   0.13  -0.02    -0.01   0.04  -0.01
  80   1    -0.05   0.04  -0.01     0.00   0.00  -0.01    -0.04   0.04  -0.01
  81   1    -0.07   0.04  -0.02     0.00   0.00  -0.01    -0.04   0.03  -0.02
  82   1    -0.03   0.00  -0.02    -0.01   0.00   0.00    -0.01  -0.01  -0.02
  83   1    -0.02   0.01  -0.01     0.03  -0.03  -0.01    -0.05   0.05   0.00
  84   1     0.08  -0.13  -0.02    -0.02   0.02   0.00     0.08  -0.13  -0.01
  85   1     0.15   0.07   0.11     0.16   0.00   0.09    -0.16  -0.02  -0.09
  86   1     0.13  -0.02   0.17     0.13  -0.06   0.13    -0.13   0.05  -0.13
  87   1     0.18   0.12   0.09     0.18   0.05   0.05    -0.18  -0.07  -0.05
  88   1    -0.04   0.19  -0.12    -0.01   0.10  -0.07     0.04  -0.14   0.10
  89   1     0.02   0.29  -0.09     0.04   0.18  -0.06    -0.03  -0.23   0.08
  90   1    -0.12   0.17  -0.19    -0.08   0.10  -0.13     0.11  -0.13   0.16
  91   1    -0.07   0.03   0.02    -0.08   0.06  -0.01    -0.08  -0.04   0.06
  92   1    -0.08  -0.03   0.04    -0.11  -0.06   0.06    -0.10  -0.11   0.09
  93   1    -0.11   0.03   0.02    -0.18   0.06   0.00    -0.15   0.00   0.07
  94   1     0.02   0.01   0.00     0.09   0.04  -0.01     0.02  -0.08  -0.02
  95   1     0.08   0.00  -0.01     0.20   0.01  -0.01     0.10  -0.07  -0.06
  96   1     0.02  -0.06   0.01     0.09  -0.10   0.00     0.03  -0.16  -0.02
  97   1    -0.03  -0.10  -0.01    -0.02   0.02   0.00    -0.07  -0.06   0.02
  98   1    -0.09   0.00  -0.01    -0.01   0.00   0.00    -0.13   0.05   0.01
  99   1    -0.10  -0.12   0.00     0.00   0.02   0.00    -0.14  -0.09   0.05
 100   1     0.15  -0.02  -0.02    -0.04   0.01  -0.01     0.15   0.04  -0.04
 101   1     0.21   0.04  -0.02    -0.05  -0.01  -0.01     0.24   0.09  -0.06
 102   1     0.09   0.12  -0.03    -0.03  -0.02  -0.01     0.07   0.19  -0.07
 103   1     0.08  -0.01   0.02    -0.07  -0.02  -0.03     0.03   0.05   0.02
 104   1     0.05   0.02   0.06    -0.06  -0.05  -0.05     0.02   0.07   0.04
 105   1     0.09  -0.02   0.01    -0.10   0.00  -0.01     0.05   0.03   0.00
 106   1     0.04  -0.05  -0.07     0.00   0.05   0.03    -0.02   0.00  -0.03
 107   1     0.05  -0.07  -0.09    -0.04   0.08   0.05     0.00  -0.02  -0.05
 108   1    -0.03  -0.06  -0.10     0.04   0.07   0.05    -0.06  -0.02  -0.05
 109   1    -0.04   0.02   0.00     0.01  -0.01   0.03     0.01  -0.01  -0.05
 110   1    -0.03  -0.01  -0.03     0.02  -0.02   0.00     0.00  -0.01  -0.03
 111   1    -0.01   0.00   0.00     0.04  -0.02   0.03    -0.01  -0.02  -0.04
 112   1     0.00   0.00   0.07    -0.01  -0.02  -0.08    -0.01   0.04   0.01
 113   1    -0.04  -0.16  -0.05     0.04   0.12   0.02    -0.02  -0.06  -0.05
 114   1    -0.02   0.03  -0.14     0.01  -0.04   0.10    -0.01   0.04  -0.10
                    13                     14                     15
                    ?A                     ?A                     ?A
 Frequencies --    62.4228                63.2378                64.8494
 Red. masses --     3.2404                 4.4842                 3.2480
 Frc consts  --     0.0074                 0.0106                 0.0080
 IR Inten    --     0.0495                 0.3220                 0.1690
 Raman Activ --     0.0000                 0.0000                 0.0000
 Depolar     --     0.0000                 0.0000                 0.0000
 Atom AN      X      Y      Z        X      Y      Z        X      Y      Z
   1   8    -0.01  -0.03   0.03     0.01  -0.01  -0.02     0.00  -0.01   0.02
   2  12    -0.01  -0.01  -0.02    -0.01   0.02  -0.02    -0.02  -0.01   0.00
   3   8    -0.03  -0.02  -0.02     0.04   0.03  -0.03     0.01  -0.03   0.00
   4   6    -0.06   0.02  -0.01     0.05  -0.04   0.02    -0.03   0.03   0.00
   5   7     0.01  -0.01   0.01    -0.02   0.01   0.00     0.01  -0.01   0.03
   6   7     0.00   0.00   0.00    -0.02   0.00  -0.03    -0.01   0.01  -0.03
   7   8    -0.12   0.05  -0.06     0.08  -0.06   0.04    -0.07   0.06  -0.03
   8   6     0.01   0.00   0.02    -0.02   0.01   0.00     0.02  -0.01   0.01
   9   6     0.01   0.00   0.02    -0.02   0.01  -0.01     0.02   0.01  -0.01
  10   6     0.01   0.00   0.01    -0.02   0.01  -0.02     0.00   0.02  -0.03
  11   8    -0.03   0.03   0.00     0.03  -0.04   0.01     0.01   0.05   0.01
  12   6    -0.03   0.01   0.00     0.04  -0.01  -0.01     0.00   0.01   0.00
  13   6    -0.03  -0.01  -0.01     0.03   0.00  -0.02     0.01  -0.02   0.00
  14   6    -0.04   0.03  -0.01     0.06  -0.06   0.05     0.00   0.04  -0.01
  15   8    -0.04   0.01   0.00     0.06  -0.01  -0.01    -0.01   0.00   0.00
  16   6    -0.04  -0.03   0.03     0.01   0.00  -0.03    -0.03  -0.03   0.02
  17   8    -0.01   0.02  -0.02     0.02   0.05  -0.02     0.00  -0.01  -0.02
  18   6    -0.02   0.00   0.00     0.01   0.04   0.01     0.00  -0.01   0.01
  19   8    -0.05  -0.01   0.00    -0.03   0.03   0.00    -0.01  -0.01   0.01
  20   8     0.04  -0.03   0.00     0.08   0.02   0.03     0.01  -0.03  -0.01
  21   6     0.08   0.02   0.02     0.11   0.06   0.04     0.04   0.00   0.03
  22   6     0.03   0.03  -0.02     0.03   0.05  -0.06     0.01  -0.01   0.00
  23   6     0.01  -0.04   0.00     0.03   0.01   0.04     0.01  -0.02   0.00
  24   8     0.13   0.04   0.06     0.17   0.10   0.10     0.07   0.02   0.07
  25   6     0.00   0.02  -0.02    -0.11   0.06  -0.08    -0.01  -0.02   0.00
  26   6     0.01  -0.05   0.01    -0.01   0.02   0.06     0.01  -0.01  -0.01
  27   6    -0.01   0.00  -0.01     0.01   0.00  -0.03     0.04  -0.02  -0.02
  28   6    -0.03   0.03  -0.02     0.06  -0.14   0.09     0.01   0.05  -0.03
  29   6     0.01   0.00   0.01    -0.02  -0.01   0.00     0.01  -0.01   0.02
  30   6     0.00  -0.01  -0.01    -0.03   0.01  -0.03    -0.02   0.02  -0.02
  31   6     0.01   0.01   0.01    -0.02  -0.03   0.01     0.02  -0.01   0.02
  32   6     0.01   0.02   0.00    -0.03  -0.08   0.03     0.02   0.02   0.00
  33   6     0.01   0.02   0.00    -0.03  -0.08   0.03     0.02   0.03  -0.01
  34   6     0.01   0.01   0.00    -0.02  -0.06   0.02     0.01   0.01   0.00
  35   6     0.01   0.00   0.01    -0.02  -0.03   0.01     0.01   0.00   0.01
  36   6     0.01   0.00   0.01    -0.02  -0.01   0.00     0.03  -0.02   0.03
  37   6     0.01   0.00   0.01    -0.01  -0.05   0.01     0.00  -0.01   0.02
  38   6     0.02  -0.01  -0.01    -0.05   0.02  -0.02    -0.04   0.03  -0.02
  39   6     0.01  -0.01  -0.02    -0.07   0.04  -0.01    -0.01   0.00  -0.02
  40   6     0.00   0.00  -0.02    -0.06   0.03  -0.01     0.03  -0.02  -0.02
  41   6     0.00  -0.01  -0.02    -0.04   0.02  -0.02     0.03  -0.01  -0.02
  42   6     0.01  -0.01  -0.01    -0.03   0.01  -0.03     0.00   0.00  -0.03
  43   6     0.05  -0.03  -0.01    -0.06   0.02  -0.02    -0.10   0.07  -0.01
  44   6     0.02  -0.03  -0.01    -0.02   0.00  -0.03    -0.02   0.02  -0.02
  45   6     0.03  -0.01   0.01     0.01   0.00   0.04     0.08  -0.04   0.04
  46   6     0.01   0.01   0.01    -0.04   0.04  -0.04     0.02   0.00   0.01
  47   6    -0.06  -0.02   0.05     0.07  -0.03  -0.01    -0.10  -0.04   0.08
  48   6     0.06  -0.06  -0.01    -0.09   0.00   0.03     0.07  -0.10  -0.02
  49   6    -0.06  -0.03   0.01     0.03  -0.01  -0.05     0.06   0.02  -0.04
  50   6     0.09   0.05  -0.04    -0.05  -0.04   0.00    -0.08  -0.05   0.00
  51   6    -0.11  -0.11  -0.05    -0.09  -0.01  -0.02     0.02   0.16   0.00
  52   6     0.08   0.13   0.04    -0.05   0.04  -0.01    -0.15  -0.07  -0.02
  53   6     0.01   0.00   0.03    -0.01   0.01   0.01     0.04  -0.01   0.03
  54   6     0.01   0.02   0.03    -0.02   0.01  -0.01     0.00   0.02  -0.05
  55   1     0.01   0.00   0.03    -0.01   0.01  -0.01     0.03   0.01  -0.01
  56   1    -0.05  -0.01  -0.01     0.03   0.00  -0.02    -0.01  -0.03   0.01
  57   1    -0.04   0.02  -0.01     0.10  -0.02   0.07    -0.01   0.03  -0.01
  58   1    -0.17  -0.08   0.01     0.09   0.02  -0.04    -0.12  -0.06   0.01
  59   1    -0.02   0.07  -0.04    -0.02  -0.05   0.02    -0.02   0.05  -0.02
  60   1     0.03  -0.10   0.11    -0.04   0.05  -0.09     0.02  -0.08   0.07
  61   1     0.05   0.06  -0.05     0.08   0.05  -0.15     0.03   0.01  -0.02
  62   1     0.00  -0.06   0.01     0.05   0.01   0.06     0.01  -0.03   0.00
  63   1     0.04   0.03  -0.02    -0.06   0.06  -0.10     0.01  -0.02   0.01
  64   1    -0.03  -0.02   0.01    -0.18   0.03   0.02    -0.03  -0.05   0.02
  65   1    -0.04   0.05  -0.06    -0.18   0.08  -0.18    -0.04  -0.01  -0.03
  66   1     0.06  -0.09   0.00     0.10  -0.06   0.04     0.01  -0.01  -0.02
  67   1    -0.05  -0.09   0.04    -0.12  -0.04   0.16     0.01  -0.01   0.00
  68   1     0.00   0.01  -0.02    -0.06   0.15  -0.01     0.01   0.00  -0.01
  69   1    -0.03   0.02   0.01    -0.02   0.00   0.01     0.03  -0.01  -0.01
  70   1    -0.02  -0.03  -0.03     0.00  -0.03  -0.07     0.04  -0.06  -0.03
  71   1     0.02   0.01   0.00     0.06   0.01  -0.02     0.07   0.00  -0.03
  72   1    -0.02   0.04  -0.03     0.08  -0.16   0.15     0.02   0.06  -0.04
  73   1    -0.03   0.04  -0.01     0.03  -0.19   0.05     0.02   0.06  -0.02
  74   1    -0.03   0.02  -0.03     0.07  -0.13   0.11     0.01   0.04  -0.04
  75   1     0.01   0.03   0.00    -0.03  -0.11   0.04     0.03   0.03  -0.01
  76   1     0.01   0.03   0.00    -0.03  -0.11   0.04     0.02   0.04  -0.02
  77   1     0.01   0.01   0.00    -0.02  -0.07   0.03     0.00   0.02   0.00
  78   1     0.01  -0.01   0.02    -0.04  -0.04  -0.01     0.01  -0.05   0.04
  79   1     0.01   0.05   0.00    -0.02  -0.12   0.03     0.01   0.07   0.00
  80   1     0.02   0.00  -0.02    -0.09   0.05  -0.01    -0.02   0.00  -0.01
  81   1    -0.01   0.00  -0.02    -0.07   0.04  -0.01     0.05  -0.04  -0.02
  82   1     0.00  -0.02  -0.02    -0.03   0.02  -0.02     0.04  -0.02  -0.03
  83   1     0.15  -0.10  -0.03    -0.03   0.00  -0.03    -0.20   0.14   0.01
  84   1     0.06  -0.10  -0.01    -0.04   0.04  -0.03    -0.05   0.09  -0.02
  85   1     0.04  -0.02   0.02     0.02   0.02   0.04     0.10  -0.05   0.06
  86   1     0.03  -0.01   0.02     0.01  -0.03   0.07     0.07  -0.05   0.06
  87   1     0.04  -0.01   0.00     0.03   0.02   0.05     0.10  -0.03   0.01
  88   1     0.01   0.00   0.01    -0.04   0.05  -0.05     0.02  -0.01   0.02
  89   1     0.02   0.01   0.00    -0.02   0.08  -0.03     0.04   0.02   0.00
  90   1     0.00   0.01   0.01    -0.06   0.03  -0.08    -0.01   0.01   0.00
  91   1    -0.05  -0.02   0.05     0.06  -0.05   0.00    -0.08  -0.04   0.07
  92   1    -0.07  -0.08   0.08     0.08   0.04  -0.05    -0.11  -0.12   0.12
  93   1    -0.11   0.01   0.06     0.14  -0.07  -0.01    -0.17   0.01   0.09
  94   1     0.05  -0.05  -0.01    -0.07  -0.03   0.02     0.05  -0.09  -0.01
  95   1     0.11  -0.05  -0.04    -0.16  -0.01   0.04     0.16  -0.07  -0.06
  96   1     0.05  -0.12  -0.01    -0.07   0.08   0.02     0.06  -0.19  -0.02
  97   1    -0.04  -0.05   0.01     0.03   0.00  -0.05     0.04   0.05  -0.04
  98   1    -0.09   0.03   0.01     0.05  -0.05  -0.05     0.09  -0.03  -0.04
  99   1    -0.10  -0.07   0.03     0.05   0.02  -0.07     0.10   0.07  -0.06
 100   1     0.11   0.04  -0.05    -0.04  -0.03   0.00    -0.10  -0.03   0.00
 101   1     0.16   0.04  -0.06    -0.09  -0.04   0.01    -0.15  -0.05   0.01
 102   1     0.06   0.12  -0.04    -0.03  -0.08   0.02    -0.05  -0.12   0.00
 103   1    -0.09  -0.13  -0.06    -0.08  -0.02  -0.03     0.00   0.20   0.01
 104   1    -0.12  -0.21  -0.09    -0.09  -0.03  -0.03     0.04   0.25   0.02
 105   1    -0.21  -0.04  -0.02    -0.11   0.00  -0.01     0.12   0.11  -0.04
 106   1     0.11   0.11   0.03    -0.05   0.04  -0.01    -0.20  -0.04  -0.01
 107   1    -0.03   0.21   0.07    -0.07   0.06   0.00    -0.06  -0.14  -0.03
 108   1     0.19   0.20   0.07    -0.03   0.06  -0.01    -0.23  -0.14  -0.01
 109   1     0.01   0.00   0.03    -0.02   0.00   0.02     0.02  -0.01   0.05
 110   1     0.01   0.00   0.03    -0.01   0.01   0.01     0.04  -0.01   0.01
 111   1     0.01   0.00   0.03     0.00   0.01   0.01     0.06  -0.02   0.04
 112   1    -0.03  -0.06  -0.16    -0.02   0.01  -0.02     0.01   0.08   0.06
 113   1     0.07   0.24   0.05    -0.02   0.03  -0.01    -0.02  -0.11  -0.07
 114   1     0.01  -0.09   0.22    -0.01   0.01   0.00     0.01   0.09  -0.16
                    16                     17                     18
                    ?A                     ?A                     ?A
 Frequencies --    71.8106                76.1251                80.8746
 Red. masses --     3.6628                 4.0426                 3.8302
 Frc consts  --     0.0111                 0.0138                 0.0148
 IR Inten    --     1.4420                 1.2599                 0.3457
 Raman Activ --     0.0000                 0.0000                 0.0000
 Depolar     --     0.0000                 0.0000                 0.0000
 Atom AN      X      Y      Z        X      Y      Z        X      Y      Z
   1   8     0.01   0.00   0.01    -0.03   0.01   0.01    -0.03   0.02   0.01
   2  12    -0.02  -0.03  -0.01    -0.02  -0.02   0.04     0.00   0.00  -0.01
   3   8     0.00   0.00   0.02    -0.03  -0.05   0.03    -0.06   0.03   0.00
   4   6     0.00   0.01   0.00    -0.02   0.01   0.01    -0.03  -0.01  -0.01
   5   7     0.01  -0.03  -0.01    -0.01  -0.02  -0.03     0.05  -0.01   0.01
   6   7    -0.02   0.00  -0.01     0.01   0.03   0.05     0.00  -0.03   0.00
   7   8    -0.01   0.02   0.00    -0.01   0.00   0.02    -0.02  -0.02  -0.02
   8   6     0.02  -0.03  -0.02     0.01  -0.01  -0.03     0.03  -0.02  -0.01
   9   6     0.02  -0.01  -0.03     0.01   0.01  -0.01     0.03  -0.04  -0.01
  10   6     0.00   0.00  -0.02     0.01   0.02   0.02     0.02  -0.03  -0.01
  11   8     0.01   0.02   0.01    -0.03  -0.01   0.00    -0.07  -0.03  -0.02
  12   6     0.01   0.00  -0.01    -0.04  -0.02   0.02    -0.06   0.00   0.00
  13   6     0.01   0.02   0.01    -0.02  -0.06   0.02    -0.06   0.04   0.01
  14   6     0.01   0.01   0.00    -0.04   0.01   0.00    -0.06  -0.01  -0.01
  15   8     0.00  -0.03  -0.03    -0.05  -0.01   0.03    -0.05   0.01   0.00
  16   6     0.00  -0.01   0.01    -0.01   0.01   0.02     0.00   0.03   0.01
  17   8     0.01  -0.01   0.07    -0.03   0.00  -0.06    -0.01   0.05   0.03
  18   6     0.00  -0.03   0.06    -0.03  -0.03  -0.02    -0.04   0.01   0.00
  19   8    -0.02  -0.05   0.03    -0.05  -0.01   0.02    -0.05   0.00   0.00
  20   8     0.04  -0.05   0.06     0.02  -0.05  -0.02     0.03  -0.02   0.00
  21   6     0.02  -0.06   0.00     0.06   0.00   0.01     0.04   0.02  -0.01
  22   6     0.03  -0.01   0.04     0.01   0.00  -0.05     0.02   0.05   0.00
  23   6     0.02  -0.04   0.08    -0.01  -0.05  -0.01    -0.01  -0.02   0.02
  24   8     0.01  -0.09  -0.08     0.13   0.04   0.08     0.07   0.02  -0.02
  25   6     0.10   0.03   0.03    -0.07  -0.02  -0.06     0.02   0.09  -0.02
  26   6     0.00  -0.05   0.09    -0.03  -0.04   0.00    -0.04  -0.02   0.03
  27   6     0.01   0.03   0.04     0.01  -0.07  -0.02    -0.08   0.06   0.05
  28   6     0.02   0.00   0.00    -0.05   0.04  -0.01    -0.08   0.01   0.00
  29   6     0.01  -0.03  -0.01    -0.01  -0.02  -0.03     0.05   0.00   0.01
  30   6    -0.02   0.01  -0.01     0.01   0.03   0.04    -0.02  -0.02   0.00
  31   6     0.00  -0.04  -0.01    -0.02  -0.03  -0.02     0.07   0.02   0.00
  32   6     0.00  -0.03   0.00    -0.02  -0.02  -0.01     0.07   0.01  -0.01
  33   6     0.01  -0.01   0.00    -0.01   0.00  -0.02     0.06  -0.01  -0.01
  34   6     0.02   0.01  -0.01     0.00   0.01  -0.02     0.06  -0.01   0.00
  35   6     0.01   0.00  -0.01     0.00   0.00  -0.03     0.06   0.00   0.00
  36   6     0.00  -0.03  -0.01    -0.03  -0.06  -0.02     0.09   0.05   0.00
  37   6     0.02   0.03  -0.03     0.01   0.04  -0.04     0.07   0.03  -0.01
  38   6    -0.03   0.02  -0.01     0.04   0.03   0.03    -0.04  -0.01   0.01
  39   6    -0.01   0.00  -0.03     0.04   0.02   0.01    -0.06   0.00   0.02
  40   6     0.01  -0.02  -0.04     0.03   0.02   0.01    -0.07   0.00   0.02
  41   6     0.00  -0.03  -0.03     0.01   0.01   0.02    -0.05  -0.01   0.01
  42   6    -0.01  -0.01  -0.02     0.00   0.02   0.04    -0.03  -0.02   0.01
  43   6    -0.08   0.08   0.01     0.08   0.03   0.03    -0.04  -0.04   0.00
  44   6    -0.03   0.00  -0.01    -0.01   0.03   0.04    -0.02  -0.05   0.01
  45   6     0.03  -0.03   0.02     0.03  -0.08  -0.01     0.01   0.08  -0.02
  46   6    -0.02   0.00  -0.03    -0.08   0.00  -0.04     0.15  -0.01   0.01
  47   6     0.09   0.06  -0.10     0.05   0.06  -0.10     0.08   0.05  -0.05
  48   6    -0.03   0.11   0.02    -0.02   0.10   0.00     0.09   0.07   0.03
  49   6    -0.11   0.01   0.03    -0.07   0.04   0.07     0.00  -0.09  -0.02
  50   6    -0.01   0.05  -0.08     0.01   0.07   0.01    -0.03  -0.09   0.06
  51   6    -0.09   0.12  -0.04     0.19   0.07   0.08    -0.01  -0.05   0.03
  52   6    -0.10   0.09   0.07     0.09  -0.05  -0.05    -0.04  -0.09  -0.04
  53   6     0.03  -0.03  -0.02     0.02  -0.02  -0.03     0.02  -0.02  -0.03
  54   6     0.01   0.04  -0.01     0.01   0.02  -0.01     0.02  -0.02  -0.01
  55   1     0.03  -0.01  -0.03     0.02   0.02  -0.03     0.03  -0.04  -0.02
  56   1     0.03   0.03   0.00    -0.02  -0.08   0.04    -0.05   0.07  -0.01
  57   1     0.02   0.02   0.01    -0.06   0.00  -0.01    -0.07  -0.02  -0.02
  58   1    -0.03  -0.02   0.00     0.01   0.02   0.03     0.01   0.03   0.00
  59   1     0.01   0.02  -0.01    -0.01  -0.02   0.03     0.02   0.03  -0.01
  60   1     0.02  -0.02   0.03    -0.03   0.02   0.01     0.00   0.05   0.03
  61   1     0.02  -0.01   0.07     0.04   0.03  -0.11     0.03   0.06  -0.01
  62   1     0.02  -0.05   0.09    -0.01  -0.06   0.01    -0.01  -0.03   0.04
  63   1     0.09   0.02   0.01    -0.01   0.00  -0.05     0.04   0.09  -0.05
  64   1     0.13   0.06  -0.01    -0.12  -0.07   0.01     0.02   0.09  -0.01
  65   1     0.13   0.04   0.09    -0.13   0.01  -0.13     0.01   0.12  -0.01
  66   1    -0.08   0.01   0.13    -0.02  -0.05   0.00    -0.02  -0.03   0.04
  67   1     0.07   0.00   0.04    -0.04  -0.04   0.02    -0.06  -0.03   0.06
  68   1     0.00  -0.15   0.12    -0.05  -0.03  -0.02    -0.06   0.00   0.01
  69   1     0.03   0.04   0.02     0.00  -0.08  -0.01    -0.07   0.07   0.03
  70   1     0.02   0.05   0.06     0.01  -0.11  -0.03    -0.09   0.10   0.07
  71   1    -0.01   0.01   0.05     0.03  -0.05  -0.04    -0.11   0.03   0.07
  72   1     0.02  -0.01   0.02    -0.06   0.04  -0.02    -0.10   0.03  -0.04
  73   1     0.02  -0.01   0.00    -0.03   0.05   0.00    -0.10   0.04   0.02
  74   1     0.02   0.00   0.00    -0.05   0.05  -0.02    -0.07   0.00   0.02
  75   1     0.00  -0.03   0.00    -0.03  -0.02  -0.01     0.07   0.03  -0.02
  76   1     0.01   0.00   0.00    -0.01   0.01  -0.01     0.06  -0.02  -0.01
  77   1     0.02   0.03  -0.02     0.01   0.03  -0.02     0.05  -0.02   0.00
  78   1    -0.01  -0.06  -0.02    -0.07  -0.11  -0.02     0.13   0.11   0.00
  79   1     0.02  -0.03  -0.01     0.00   0.00  -0.03     0.07   0.03  -0.02
  80   1     0.00   0.01  -0.03     0.06   0.02   0.00    -0.07   0.01   0.02
  81   1     0.03  -0.04  -0.05     0.04   0.01  -0.01    -0.08   0.02   0.02
  82   1     0.01  -0.04  -0.04     0.00   0.01   0.01    -0.05   0.00   0.01
  83   1    -0.08   0.08   0.02     0.02   0.07   0.06    -0.06  -0.02  -0.02
  84   1     0.00  -0.05   0.00     0.01  -0.01   0.06    -0.03  -0.03   0.02
  85   1     0.04  -0.02   0.02     0.04  -0.10   0.01     0.01   0.11  -0.03
  86   1     0.02  -0.04   0.04     0.04  -0.10   0.02     0.00   0.12  -0.03
  87   1     0.04  -0.01   0.01     0.06  -0.05  -0.03    -0.03   0.04   0.00
  88   1    -0.02   0.01  -0.04    -0.09  -0.03  -0.04     0.17   0.03   0.01
  89   1     0.00   0.03  -0.03    -0.04   0.05  -0.04     0.11  -0.07   0.01
  90   1    -0.03   0.00  -0.06    -0.12   0.01  -0.06     0.21  -0.03   0.02
  91   1     0.08   0.07  -0.09     0.04   0.07  -0.10     0.08   0.07  -0.06
  92   1     0.10   0.11  -0.13     0.05   0.10  -0.13     0.08   0.06  -0.05
  93   1     0.14   0.00  -0.11     0.09   0.02  -0.11     0.08   0.03  -0.07
  94   1    -0.01   0.12   0.01    -0.01   0.12  -0.01     0.10   0.10   0.01
  95   1    -0.08   0.09   0.07    -0.05   0.08   0.04     0.08   0.06   0.06
  96   1    -0.02   0.17   0.02    -0.01   0.14   0.00     0.09   0.08   0.04
  97   1    -0.14   0.02   0.04    -0.09   0.04   0.08     0.02  -0.11  -0.03
  98   1    -0.14   0.05   0.00    -0.09   0.06   0.05     0.01  -0.09  -0.01
  99   1    -0.11  -0.02   0.08    -0.07   0.02   0.10    -0.02  -0.08  -0.06
 100   1    -0.03   0.06  -0.07     0.00   0.06   0.02    -0.03  -0.12   0.08
 101   1     0.05   0.04  -0.11     0.07   0.07   0.00    -0.04  -0.06   0.10
 102   1    -0.04   0.10  -0.10    -0.02   0.11  -0.02    -0.02  -0.11   0.05
 103   1    -0.11   0.16  -0.02     0.23   0.09   0.10    -0.01  -0.07   0.02
 104   1    -0.08   0.12  -0.07     0.17   0.10   0.14    -0.01  -0.02   0.05
 105   1    -0.08   0.12  -0.06     0.24   0.05   0.02     0.01  -0.07   0.05
 106   1    -0.14   0.12   0.08     0.11  -0.04  -0.04    -0.05  -0.10  -0.04
 107   1    -0.11   0.09   0.07     0.15  -0.08  -0.09    -0.01  -0.11  -0.04
 108   1    -0.08   0.07   0.11     0.01  -0.07  -0.09    -0.08  -0.10  -0.05
 109   1     0.02  -0.03  -0.01     0.00  -0.01  -0.02     0.03  -0.01  -0.05
 110   1     0.04  -0.03  -0.03     0.03  -0.02  -0.06     0.01  -0.02  -0.02
 111   1     0.04  -0.04  -0.01     0.05  -0.04  -0.02    -0.01  -0.02  -0.05
 112   1    -0.03  -0.02  -0.17     0.02   0.07   0.10     0.05   0.07   0.18
 113   1     0.07   0.23   0.01    -0.02  -0.11  -0.03    -0.04  -0.25  -0.04
 114   1     0.02  -0.06   0.15     0.01   0.09  -0.12     0.04   0.10  -0.21
                    19                     20                     21
                    ?A                     ?A                     ?A
 Frequencies --    84.4995                92.8883                94.8465
 Red. masses --     3.6136                 3.9642                 3.5452
 Frc consts  --     0.0152                 0.0202                 0.0188
 IR Inten    --     0.8439                 1.0877                 0.7213
 Raman Activ --     0.0000                 0.0000                 0.0000
 Depolar     --     0.0000                 0.0000                 0.0000
 Atom AN      X      Y      Z        X      Y      Z        X      Y      Z
   1   8    -0.01   0.01   0.00    -0.01   0.00   0.01     0.00  -0.01   0.00
   2  12    -0.03  -0.01  -0.06     0.00  -0.01   0.08    -0.01   0.02   0.05
   3   8    -0.02   0.03  -0.03     0.00  -0.05   0.07     0.01   0.00   0.04
   4   6    -0.01   0.00   0.00    -0.01  -0.01   0.00     0.00   0.00   0.00
   5   7    -0.02   0.00  -0.01    -0.01   0.00   0.03     0.00  -0.01  -0.03
   6   7     0.00   0.04  -0.03     0.01   0.03  -0.02    -0.02   0.00   0.00
   7   8     0.01   0.00   0.02    -0.01  -0.01  -0.01    -0.01   0.01   0.00
   8   6     0.00   0.02   0.03     0.01   0.00  -0.07     0.00  -0.01  -0.03
   9   6     0.00   0.05   0.05     0.01   0.01  -0.12     0.00  -0.01  -0.04
  10   6     0.00   0.05   0.03     0.01   0.02  -0.08    -0.01   0.00  -0.03
  11   8    -0.03   0.02  -0.02    -0.01  -0.04   0.02     0.02   0.00   0.01
  12   6    -0.02   0.00  -0.05    -0.01  -0.02   0.06     0.01   0.00   0.04
  13   6    -0.02   0.04  -0.04     0.00  -0.05   0.06     0.01  -0.02   0.03
  14   6    -0.01   0.00   0.00    -0.03  -0.01   0.00     0.00   0.01  -0.01
  15   8    -0.01  -0.04  -0.08    -0.03   0.01   0.09     0.00   0.02   0.06
  16   6     0.01   0.01   0.01     0.00   0.02   0.00    -0.01  -0.01   0.00
  17   8    -0.04   0.01  -0.04    -0.01  -0.03   0.00     0.01   0.04   0.00
  18   6    -0.05  -0.02  -0.01     0.00  -0.04   0.01     0.01   0.03   0.01
  19   8    -0.09  -0.03  -0.02     0.00  -0.01   0.05     0.02   0.05   0.03
  20   8     0.04  -0.02   0.05    -0.01  -0.04   0.00    -0.02   0.02  -0.04
  21   6     0.02  -0.02  -0.01     0.00  -0.03   0.01     0.00   0.04   0.00
  22   6     0.03   0.02   0.02     0.00  -0.03   0.00     0.04   0.05   0.05
  23   6    -0.02  -0.04   0.05     0.00  -0.03   0.01     0.00   0.04  -0.02
  24   8     0.03  -0.04  -0.08     0.01  -0.03   0.02    -0.01   0.03  -0.01
  25   6     0.15   0.00   0.05    -0.02  -0.04   0.00     0.15   0.03   0.08
  26   6    -0.05  -0.09   0.09    -0.02  -0.01   0.01     0.03   0.07  -0.05
  27   6    -0.03   0.06   0.01     0.03  -0.07   0.03     0.01  -0.02   0.03
  28   6    -0.02  -0.02   0.02    -0.03   0.04  -0.03     0.01   0.04  -0.03
  29   6    -0.02  -0.02   0.00    -0.01   0.00   0.03     0.00  -0.02  -0.03
  30   6     0.00   0.04  -0.02     0.02   0.03  -0.02    -0.03   0.01   0.00
  31   6    -0.03  -0.03   0.01     0.00   0.01   0.02    -0.01  -0.04  -0.02
  32   6    -0.03  -0.04   0.02     0.00   0.01   0.01    -0.01  -0.02  -0.02
  33   6    -0.03  -0.03   0.02    -0.01   0.00   0.00     0.00   0.02  -0.02
  34   6    -0.02  -0.02   0.01    -0.02  -0.01   0.01     0.01   0.03  -0.03
  35   6    -0.02  -0.02   0.00    -0.02   0.00   0.02     0.01   0.01  -0.03
  36   6    -0.04  -0.03   0.01     0.00   0.04   0.01    -0.02  -0.13   0.01
  37   6    -0.02  -0.03   0.01    -0.05   0.04   0.03     0.02   0.00  -0.03
  38   6     0.02   0.03  -0.02     0.00   0.04  -0.02    -0.04   0.02   0.01
  39   6     0.03   0.02  -0.01     0.00   0.04  -0.02    -0.07   0.04   0.02
  40   6     0.02   0.04   0.00     0.02   0.03  -0.02    -0.09   0.05   0.02
  41   6     0.02   0.05   0.00     0.05   0.01  -0.02    -0.06   0.04   0.01
  42   6     0.02   0.05  -0.01     0.05   0.01  -0.03    -0.04   0.02   0.00
  43   6     0.04   0.01  -0.02     0.01   0.03  -0.02    -0.02  -0.02  -0.01
  44   6     0.06   0.03  -0.02     0.08  -0.01  -0.03    -0.01  -0.02   0.00
  45   6    -0.02  -0.02   0.03    -0.06   0.06   0.00     0.11  -0.19   0.00
  46   6    -0.06   0.01  -0.02     0.02   0.01   0.02    -0.09  -0.06   0.00
  47   6    -0.03  -0.03   0.01    -0.06   0.05  -0.03     0.04   0.00  -0.02
  48   6    -0.02  -0.04   0.00    -0.09   0.08   0.05     0.01   0.00  -0.04
  49   6     0.14   0.00  -0.08     0.19  -0.03  -0.09     0.01  -0.05  -0.03
  50   6     0.07  -0.02   0.07     0.04  -0.09   0.04     0.01  -0.03   0.05
  51   6     0.06   0.00   0.00    -0.05  -0.01  -0.03    -0.07  -0.09   0.02
  52   6     0.05   0.00  -0.06     0.03   0.10   0.00     0.00   0.02  -0.03
  53   6     0.02   0.02   0.07     0.03  -0.03  -0.14     0.02  -0.01   0.00
  54   6     0.00   0.03   0.06     0.01   0.04  -0.07     0.00   0.01  -0.04
  55   1     0.02   0.06   0.09     0.01   0.01  -0.18     0.01   0.00  -0.05
  56   1    -0.01   0.06  -0.06     0.00  -0.07   0.08     0.02  -0.03   0.05
  57   1     0.01   0.01   0.00    -0.06  -0.03  -0.01    -0.02   0.00  -0.01
  58   1     0.04   0.03   0.03    -0.02   0.00  -0.01    -0.04  -0.02   0.00
  59   1     0.01  -0.03   0.03     0.00   0.03  -0.02     0.00   0.02  -0.02
  60   1    -0.01   0.02  -0.01     0.00   0.02   0.02     0.02  -0.03   0.02
  61   1     0.00   0.09   0.08     0.00  -0.03   0.00     0.01   0.08   0.12
  62   1    -0.01  -0.04   0.06     0.01  -0.03   0.02     0.00   0.04  -0.03
  63   1     0.15   0.01   0.08    -0.01  -0.03   0.01     0.15   0.03   0.12
  64   1     0.19  -0.02  -0.02    -0.03  -0.04   0.01     0.19   0.01   0.02
  65   1     0.18   0.01   0.10    -0.03  -0.03  -0.01     0.18   0.03   0.14
  66   1    -0.18   0.02   0.19    -0.04   0.00   0.02     0.05   0.05  -0.09
  67   1     0.07  -0.03  -0.03     0.00   0.00   0.02     0.01   0.06  -0.03
  68   1    -0.04  -0.30   0.14    -0.03  -0.03   0.01     0.05   0.12  -0.05
  69   1    -0.02   0.08   0.00     0.03  -0.08   0.02     0.03  -0.02   0.02
  70   1    -0.03   0.09   0.02     0.04  -0.10   0.03     0.02  -0.01   0.05
  71   1    -0.04   0.04   0.03     0.03  -0.05   0.00    -0.01  -0.03   0.03
  72   1    -0.02  -0.03   0.04    -0.05   0.05  -0.05     0.00   0.04  -0.04
  73   1    -0.04  -0.04   0.01     0.00   0.07  -0.01     0.04   0.05  -0.03
  74   1    -0.01  -0.02   0.04    -0.04   0.05  -0.04     0.00   0.05  -0.05
  75   1    -0.04  -0.05   0.02     0.01   0.03  -0.01    -0.01  -0.03  -0.01
  76   1    -0.03  -0.03   0.03    -0.01   0.00  -0.01     0.00   0.04  -0.02
  77   1    -0.02  -0.02   0.02    -0.03  -0.01   0.00     0.01   0.05  -0.03
  78   1    -0.05  -0.05   0.00     0.02   0.07  -0.01    -0.08  -0.20   0.03
  79   1    -0.02  -0.02   0.01    -0.05   0.02   0.06     0.01  -0.02  -0.04
  80   1     0.04   0.00  -0.01    -0.01   0.05  -0.01    -0.08   0.05   0.02
  81   1     0.02   0.04   0.01     0.02   0.03  -0.02    -0.11   0.07   0.02
  82   1     0.01   0.06   0.00     0.07  -0.01  -0.03    -0.07   0.04   0.01
  83   1     0.04   0.01  -0.02     0.06   0.00  -0.03     0.02  -0.05  -0.04
  84   1     0.03   0.06  -0.05     0.03   0.06  -0.05    -0.01  -0.01   0.00
  85   1    -0.01  -0.02   0.03    -0.09   0.09  -0.03     0.16  -0.25   0.06
  86   1    -0.02  -0.03   0.04    -0.04   0.06  -0.02     0.09  -0.20   0.04
  87   1    -0.01  -0.01   0.03    -0.08   0.06   0.05     0.17  -0.16  -0.09
  88   1    -0.06   0.01  -0.02     0.02   0.03   0.01    -0.11  -0.13   0.02
  89   1    -0.04   0.04  -0.01    -0.01  -0.02   0.03    -0.03   0.00  -0.03
  90   1    -0.08   0.01  -0.03     0.05   0.00   0.03    -0.17  -0.02  -0.01
  91   1    -0.04  -0.03   0.02    -0.09   0.08  -0.01     0.05  -0.02  -0.02
  92   1    -0.03  -0.03   0.01    -0.06   0.06  -0.07     0.05   0.01  -0.01
  93   1    -0.02  -0.03   0.02    -0.03   0.03  -0.03     0.05   0.00  -0.01
  94   1    -0.02  -0.05   0.00    -0.11   0.12   0.06     0.02  -0.02  -0.04
  95   1    -0.02  -0.04  -0.01    -0.09   0.07   0.10    -0.01   0.00  -0.05
  96   1    -0.02  -0.04   0.00    -0.09   0.10   0.02     0.01   0.01  -0.03
  97   1     0.19  -0.01  -0.10     0.21  -0.03  -0.11     0.03  -0.07  -0.04
  98   1     0.18  -0.02  -0.03     0.23  -0.09  -0.05     0.02  -0.05  -0.02
  99   1     0.12   0.03  -0.14     0.20   0.01  -0.15    -0.01  -0.04  -0.07
 100   1     0.11  -0.05   0.06     0.08  -0.06   0.01     0.04  -0.05   0.05
 101   1     0.01   0.00   0.12    -0.08  -0.10   0.05    -0.01  -0.02   0.08
 102   1     0.09  -0.05   0.11     0.09  -0.17   0.11     0.02  -0.03   0.07
 103   1     0.09  -0.01   0.00    -0.05  -0.02  -0.04    -0.07  -0.14  -0.01
 104   1     0.05  -0.01   0.03    -0.06  -0.05  -0.05    -0.07  -0.10   0.01
 105   1     0.06   0.00  -0.01    -0.10   0.02  -0.01    -0.10  -0.08   0.06
 106   1     0.08  -0.02  -0.06     0.04   0.09   0.00     0.03  -0.01  -0.04
 107   1     0.06  -0.01  -0.06    -0.02   0.13   0.01    -0.03   0.04  -0.02
 108   1     0.04   0.01  -0.08     0.07   0.12   0.01     0.02   0.05  -0.04
 109   1     0.03  -0.02   0.07    -0.01   0.02  -0.12    -0.06   0.01   0.06
 110   1     0.04   0.03   0.09     0.04  -0.04  -0.23     0.02  -0.02  -0.08
 111   1     0.01   0.03   0.06     0.08  -0.10  -0.10     0.11  -0.02   0.05
 112   1     0.04   0.10   0.23     0.00   0.01  -0.13     0.01   0.07   0.07
 113   1    -0.08  -0.15   0.05     0.03   0.11  -0.06    -0.03  -0.10  -0.05
 114   1     0.02   0.13  -0.09     0.02   0.00  -0.01     0.02   0.08  -0.14
                    22                     23                     24
                    ?A                     ?A                     ?A
 Frequencies --   107.0169               107.6483               114.4058
 Red. masses --     3.8942                 4.0246                 1.3668
 Frc consts  --     0.0263                 0.0275                 0.0105
 IR Inten    --     1.0405                 2.7634                 0.7739
 Raman Activ --     0.0000                 0.0000                 0.0000
 Depolar     --     0.0000                 0.0000                 0.0000
 Atom AN      X      Y      Z        X      Y      Z        X      Y      Z
   1   8     0.02   0.00   0.00     0.00  -0.01   0.02    -0.01   0.02  -0.01
   2  12    -0.02  -0.04  -0.02     0.03  -0.01   0.04     0.00   0.00   0.01
   3   8     0.02  -0.06  -0.03     0.01  -0.01   0.07     0.00   0.00   0.02
   4   6     0.02   0.02   0.01     0.00  -0.03   0.01    -0.03   0.03  -0.03
   5   7     0.00  -0.03   0.03     0.00   0.01  -0.05     0.00   0.00   0.00
   6   7    -0.01   0.00   0.00     0.02  -0.01  -0.06     0.00   0.00  -0.01
   7   8     0.00   0.03   0.02     0.01  -0.03  -0.01    -0.06   0.04  -0.06
   8   6     0.01  -0.03   0.02     0.00   0.03   0.10     0.00   0.00   0.01
   9   6     0.01   0.00   0.03     0.00   0.02   0.17     0.00   0.00   0.02
  10   6     0.01   0.00   0.03     0.01   0.00   0.07     0.00   0.00   0.01
  11   8     0.03   0.04   0.01     0.00  -0.06   0.02     0.00   0.02   0.00
  12   6     0.03  -0.01  -0.03     0.00  -0.02   0.08    -0.01   0.01   0.01
  13   6     0.03  -0.02  -0.03    -0.01  -0.03   0.08     0.00   0.01   0.02
  14   6     0.03   0.03   0.00    -0.02  -0.03   0.00    -0.01   0.02  -0.01
  15   8     0.01  -0.05  -0.06    -0.01   0.03   0.12    -0.01   0.01   0.01
  16   6    -0.02  -0.01  -0.01    -0.01   0.02  -0.03     0.05  -0.02   0.07
  17   8     0.03  -0.05  -0.02     0.02  -0.03   0.00     0.01  -0.01   0.02
  18   6     0.03  -0.04   0.00     0.02  -0.04  -0.02     0.01  -0.01   0.00
  19   8     0.03  -0.04  -0.01     0.04  -0.02   0.02     0.02  -0.01   0.01
  20   8    -0.01  -0.10  -0.11     0.01  -0.03  -0.01     0.00  -0.02  -0.02
  21   6     0.04  -0.05  -0.02     0.02  -0.03   0.00     0.00  -0.01   0.00
  22   6     0.06  -0.04   0.02     0.02  -0.03  -0.01     0.00  -0.01   0.00
  23   6     0.02  -0.05  -0.06     0.02  -0.02   0.01     0.01  -0.01  -0.01
  24   8     0.05  -0.03   0.02     0.03  -0.02   0.01     0.00  -0.01   0.00
  25   6     0.11  -0.06   0.04    -0.02  -0.03  -0.01    -0.01   0.00   0.00
  26   6     0.04   0.04  -0.11    -0.03   0.00   0.03     0.01   0.01  -0.01
  27   6     0.05   0.00   0.00    -0.01  -0.06   0.04     0.01   0.01   0.01
  28   6     0.04   0.02  -0.01    -0.03   0.04  -0.03     0.01  -0.03  -0.01
  29   6     0.00  -0.03   0.03     0.00   0.02  -0.05     0.00   0.00   0.00
  30   6    -0.03   0.02   0.01     0.01   0.00  -0.06     0.00   0.00  -0.01
  31   6     0.00  -0.01   0.02    -0.01   0.04  -0.05     0.00  -0.01   0.00
  32   6     0.00  -0.01   0.01    -0.01   0.05  -0.04     0.00  -0.02   0.00
  33   6    -0.01  -0.02   0.02     0.00   0.01  -0.02     0.00  -0.01   0.00
  34   6    -0.01  -0.03   0.02     0.01  -0.02  -0.02     0.00   0.00   0.00
  35   6    -0.01  -0.03   0.03     0.01  -0.01  -0.04     0.00   0.00   0.00
  36   6     0.00   0.06   0.00    -0.03   0.03  -0.06     0.00   0.00   0.00
  37   6    -0.02   0.00   0.02     0.04   0.00  -0.05     0.00   0.00  -0.01
  38   6    -0.05   0.04   0.01    -0.02   0.00  -0.04     0.00   0.00   0.00
  39   6    -0.09   0.07   0.03    -0.04   0.01  -0.02    -0.01   0.00   0.00
  40   6    -0.11   0.09   0.03    -0.03   0.03  -0.01     0.00   0.00   0.00
  41   6    -0.09   0.07   0.03    -0.01   0.03  -0.02     0.00   0.00   0.00
  42   6    -0.06   0.05   0.02     0.01   0.02  -0.04     0.00   0.00   0.00
  43   6    -0.01   0.01   0.01    -0.04   0.00  -0.05     0.00   0.00  -0.01
  44   6    -0.04   0.05   0.01     0.01   0.05  -0.06     0.00   0.00  -0.01
  45   6    -0.09   0.12   0.02    -0.04   0.01  -0.09    -0.01   0.00   0.00
  46   6     0.03   0.05  -0.02    -0.04   0.02  -0.03     0.00   0.00  -0.01
  47   6    -0.05   0.01  -0.02     0.05   0.01  -0.06     0.01   0.00   0.00
  48   6    -0.02   0.02   0.05     0.07   0.02  -0.03     0.01   0.00  -0.01
  49   6    -0.05   0.05   0.01     0.06   0.07  -0.05     0.01   0.01  -0.01
  50   6    -0.02   0.06   0.02     0.00   0.03  -0.05     0.00   0.00   0.00
  51   6    -0.01  -0.03   0.04    -0.05  -0.01  -0.05    -0.01  -0.01   0.00
  52   6     0.02   0.02  -0.04    -0.05  -0.01  -0.03     0.00   0.00   0.00
  53   6     0.02  -0.05  -0.04    -0.03   0.06   0.16     0.00   0.00   0.01
  54   6     0.01   0.01   0.05     0.00  -0.03   0.09     0.00   0.00   0.01
  55   1     0.03   0.00   0.03     0.00   0.03   0.28     0.00   0.00   0.03
  56   1     0.01   0.00  -0.05     0.01  -0.05   0.10     0.00   0.01   0.02
  57   1     0.04   0.02   0.00    -0.07  -0.06  -0.01     0.00   0.04   0.02
  58   1    -0.11  -0.05  -0.03    -0.13  -0.04  -0.08     0.55   0.20   0.18
  59   1    -0.01   0.07  -0.05     0.02   0.15  -0.11    -0.10  -0.47   0.39
  60   1     0.03  -0.06   0.03     0.06   0.00   0.07    -0.26   0.16  -0.30
  61   1     0.04  -0.01   0.05     0.02  -0.04  -0.02     0.01  -0.02   0.00
  62   1     0.02  -0.07  -0.04     0.04  -0.01   0.02     0.01  -0.01   0.00
  63   1     0.15  -0.05   0.07    -0.02  -0.03  -0.02     0.00   0.00  -0.02
  64   1     0.11  -0.11   0.03    -0.03  -0.02   0.01    -0.01   0.01   0.01
  65   1     0.10  -0.04   0.04    -0.02  -0.03  -0.03    -0.01   0.01  -0.01
  66   1     0.17  -0.07  -0.23    -0.06   0.02   0.05     0.03  -0.01  -0.04
  67   1    -0.06   0.00   0.02    -0.01   0.02   0.04    -0.01   0.00   0.01
  68   1     0.05   0.26  -0.16    -0.06  -0.04   0.01     0.00   0.05  -0.03
  69   1     0.07   0.02  -0.03     0.00  -0.08   0.04     0.02   0.00   0.00
  70   1     0.06   0.02   0.04     0.00  -0.07   0.04     0.02   0.01   0.03
  71   1     0.02  -0.02   0.02    -0.01  -0.04   0.01    -0.01   0.01   0.01
  72   1     0.05   0.02  -0.01    -0.05   0.05  -0.07     0.03  -0.05   0.04
  73   1     0.04   0.02  -0.01     0.00   0.08   0.00     0.03  -0.07  -0.05
  74   1     0.04   0.01  -0.01    -0.04   0.04  -0.04     0.00  -0.01  -0.03
  75   1     0.00   0.01   0.01    -0.02   0.07  -0.04    -0.01  -0.03   0.01
  76   1    -0.01  -0.01   0.01     0.00   0.01  -0.01     0.00  -0.02   0.01
  77   1    -0.01  -0.03   0.02     0.02  -0.04   0.00     0.00   0.00   0.00
  78   1     0.04   0.09  -0.04    -0.02   0.03  -0.06     0.00   0.00  -0.01
  79   1    -0.02   0.01   0.04     0.04   0.00  -0.07     0.00  -0.01  -0.01
  80   1    -0.10   0.08   0.03    -0.06   0.01   0.00    -0.01   0.01   0.00
  81   1    -0.14   0.11   0.04    -0.04   0.04   0.01    -0.01   0.01   0.00
  82   1    -0.11   0.09   0.03    -0.01   0.05  -0.01     0.00   0.00   0.00
  83   1     0.00   0.00   0.00    -0.04   0.00  -0.05     0.00   0.00  -0.01
  84   1    -0.04   0.03   0.01     0.00   0.07  -0.07     0.00   0.01  -0.01
  85   1    -0.13   0.18  -0.03    -0.07   0.00  -0.10    -0.01   0.01   0.00
  86   1    -0.06   0.10   0.01    -0.02   0.02  -0.11    -0.01   0.00   0.01
  87   1    -0.12   0.11   0.11    -0.04   0.01  -0.08    -0.01   0.00   0.01
  88   1     0.04   0.11  -0.04    -0.06   0.00  -0.04     0.00   0.01  -0.01
  89   1     0.00   0.03   0.01    -0.05   0.02  -0.03     0.00   0.00  -0.01
  90   1     0.08   0.01  -0.04    -0.04   0.03  -0.02     0.00  -0.01  -0.02
  91   1    -0.06   0.05  -0.02     0.08   0.01  -0.08     0.01  -0.01   0.00
  92   1    -0.06  -0.01  -0.03     0.05   0.01  -0.03     0.01   0.00   0.00
  93   1    -0.07  -0.01  -0.04     0.03   0.00  -0.07     0.01   0.00   0.00
  94   1    -0.04   0.06   0.05     0.10   0.02  -0.05     0.01  -0.01  -0.01
  95   1     0.01   0.02   0.08     0.05   0.01  -0.02     0.00   0.00  -0.01
  96   1    -0.02   0.00   0.03     0.07   0.02   0.00     0.01   0.00   0.00
  97   1    -0.06   0.04   0.02     0.06   0.10  -0.06     0.01   0.01  -0.01
  98   1    -0.05   0.04   0.01     0.08   0.05  -0.03     0.01   0.00   0.00
  99   1    -0.05   0.05   0.02     0.07   0.08  -0.05     0.01   0.01  -0.01
 100   1    -0.02   0.04   0.03    -0.01   0.03  -0.05     0.00   0.00  -0.01
 101   1     0.00   0.08   0.03    -0.02   0.04  -0.04     0.00   0.00   0.00
 102   1    -0.04   0.08   0.01     0.00   0.02  -0.05     0.00   0.00   0.00
 103   1     0.02  -0.06   0.03    -0.08  -0.02  -0.06    -0.01  -0.01  -0.01
 104   1    -0.02  -0.04   0.07    -0.04   0.01  -0.07    -0.01  -0.01   0.00
 105   1    -0.02  -0.02   0.05    -0.05  -0.02  -0.02    -0.01  -0.01   0.00
 106   1     0.06   0.01  -0.04    -0.07  -0.02  -0.04     0.00   0.00  -0.01
 107   1     0.01   0.03  -0.05    -0.06  -0.01  -0.01    -0.01   0.01   0.00
 108   1     0.01   0.04  -0.06    -0.04   0.00  -0.02     0.00   0.01  -0.01
 109   1     0.09  -0.06  -0.10     0.11  -0.05   0.06     0.03  -0.02   0.00
 110   1     0.03  -0.03   0.02    -0.03   0.09   0.39     0.00   0.01   0.05
 111   1    -0.06  -0.06  -0.08    -0.20   0.17   0.05    -0.03   0.01  -0.01
 112   1     0.03   0.08   0.20     0.03  -0.01   0.15     0.00   0.00   0.01
 113   1    -0.05  -0.15   0.04    -0.03  -0.10   0.09     0.00  -0.01   0.01
 114   1     0.04   0.10  -0.09     0.00   0.01   0.03     0.00   0.00   0.00
                    25                     26                     27
                    ?A                     ?A                     ?A
 Frequencies --   117.8372               124.1995               130.4117
 Red. masses --     3.5696                 3.8105                 1.5884
 Frc consts  --     0.0292                 0.0346                 0.0159
 IR Inten    --     6.3958                 1.6317                 2.0786
 Raman Activ --     0.0000                 0.0000                 0.0000
 Depolar     --     0.0000                 0.0000                 0.0000
 Atom AN      X      Y      Z        X      Y      Z        X      Y      Z
   1   8    -0.01   0.02  -0.01     0.00   0.02  -0.01     0.00  -0.01   0.01
   2  12     0.00  -0.03   0.01    -0.05   0.03   0.04     0.00  -0.01   0.00
   3   8    -0.02   0.09   0.03     0.01  -0.03   0.02     0.00   0.01   0.00
   4   6    -0.01   0.01  -0.01     0.00   0.04   0.00     0.00  -0.01   0.00
   5   7    -0.01  -0.04   0.00    -0.01  -0.01   0.00     0.01   0.00   0.00
   6   7     0.01   0.00  -0.01    -0.04   0.04   0.02     0.01   0.02   0.00
   7   8     0.01   0.00   0.00     0.00   0.04   0.02     0.00  -0.01  -0.01
   8   6     0.01  -0.03   0.01     0.01   0.01   0.03     0.02   0.01  -0.01
   9   6     0.01  -0.01   0.01     0.01   0.03   0.05     0.02   0.02   0.00
  10   6     0.01   0.00   0.00    -0.02   0.05   0.02     0.02   0.03   0.01
  11   8    -0.01   0.03  -0.01     0.03   0.06   0.00     0.00  -0.01   0.00
  12   6    -0.01   0.02  -0.01     0.01   0.01   0.00     0.00   0.00   0.00
  13   6    -0.02   0.11   0.03     0.03  -0.04   0.00    -0.01   0.01   0.00
  14   6    -0.03   0.02  -0.04     0.01   0.05  -0.02     0.00  -0.01   0.01
  15   8    -0.01  -0.03  -0.05    -0.02   0.00   0.00     0.01   0.00   0.01
  16   6     0.01   0.02   0.00     0.00   0.00   0.01     0.00   0.00  -0.01
  17   8     0.07   0.01   0.14    -0.04   0.03  -0.04     0.02  -0.01   0.02
  18   6     0.05  -0.01  -0.02    -0.02   0.05   0.04     0.02  -0.01  -0.01
  19   8     0.09  -0.04  -0.04    -0.05   0.06   0.05     0.03  -0.02  -0.02
  20   8     0.00  -0.01  -0.03    -0.01   0.06   0.04     0.02   0.01   0.02
  21   6     0.01  -0.01   0.00    -0.04   0.04   0.00     0.00  -0.01   0.00
  22   6     0.01  -0.02   0.00    -0.04   0.04  -0.01     0.00  -0.02  -0.01
  23   6     0.03   0.01  -0.02    -0.01   0.04   0.01     0.02  -0.01   0.00
  24   8    -0.01  -0.01   0.01    -0.05   0.03  -0.02    -0.01  -0.02   0.00
  25   6    -0.11   0.09  -0.07    -0.01   0.01   0.01    -0.04  -0.01  -0.02
  26   6     0.02   0.05  -0.04     0.06   0.00  -0.02     0.02  -0.03   0.00
  27   6    -0.06   0.14   0.09     0.09  -0.06  -0.05    -0.02   0.01   0.01
  28   6    -0.03   0.10  -0.07     0.02   0.10  -0.06     0.00  -0.02   0.01
  29   6    -0.02  -0.06   0.01    -0.01  -0.05   0.00     0.00   0.00   0.00
  30   6     0.01   0.00  -0.01    -0.03   0.03   0.00     0.00   0.03   0.00
  31   6    -0.03  -0.08   0.01    -0.01  -0.06   0.00     0.00   0.01   0.00
  32   6    -0.02  -0.07   0.02    -0.01  -0.10   0.02     0.00   0.02   0.00
  33   6    -0.02  -0.05   0.01    -0.01  -0.13   0.03     0.00   0.03   0.00
  34   6    -0.02  -0.05   0.01    -0.01  -0.13   0.03     0.00   0.03   0.00
  35   6    -0.01  -0.06   0.00     0.00  -0.09   0.01     0.00   0.01   0.00
  36   6    -0.03  -0.07   0.01     0.00   0.00  -0.02    -0.01   0.00   0.00
  37   6    -0.02  -0.03   0.00     0.02  -0.04  -0.01    -0.02   0.01   0.01
  38   6     0.01   0.00   0.00     0.00  -0.01  -0.01     0.02   0.01   0.00
  39   6     0.00   0.01   0.00     0.06  -0.05  -0.02     0.05  -0.01  -0.01
  40   6     0.01   0.00   0.01     0.08  -0.07  -0.03     0.05  -0.02  -0.02
  41   6     0.03  -0.01   0.00     0.04  -0.04  -0.02     0.03   0.00  -0.01
  42   6     0.03  -0.01   0.00    -0.01   0.00  -0.01     0.00   0.02   0.00
  43   6     0.01   0.01   0.00    -0.01  -0.03  -0.02     0.00   0.00  -0.01
  44   6     0.03   0.01  -0.01    -0.01  -0.02   0.00    -0.02   0.01   0.02
  45   6    -0.02  -0.05   0.04    -0.05   0.05   0.02     0.00  -0.01  -0.01
  46   6    -0.05  -0.02  -0.02     0.03   0.01  -0.05    -0.03   0.01   0.01
  47   6    -0.04  -0.02  -0.04     0.03  -0.02  -0.09    -0.03   0.01   0.01
  48   6     0.00   0.00   0.02     0.07   0.02   0.05    -0.04   0.00  -0.01
  49   6     0.06   0.02  -0.01    -0.03  -0.05  -0.01    -0.06  -0.01   0.01
  50   6     0.01  -0.01   0.00     0.02  -0.01   0.01    -0.02   0.01   0.02
  51   6     0.03   0.01   0.01    -0.05  -0.06  -0.02    -0.08  -0.04  -0.03
  52   6     0.02   0.01  -0.01    -0.02  -0.03   0.00    -0.01   0.02   0.03
  53   6     0.04  -0.04   0.03     0.03   0.00   0.03     0.04  -0.01  -0.02
  54   6     0.01   0.00   0.02    -0.01   0.06  -0.04     0.02   0.01   0.01
  55   1     0.02   0.00   0.02     0.03   0.05   0.07     0.03   0.03   0.00
  56   1     0.02   0.14   0.00     0.02  -0.06   0.03     0.00   0.01   0.00
  57   1    -0.06  -0.01  -0.06    -0.02   0.03  -0.04     0.00  -0.01   0.01
  58   1    -0.15  -0.03  -0.01    -0.07  -0.01   0.03     0.03   0.00  -0.02
  59   1     0.08   0.13  -0.12     0.02   0.04  -0.02    -0.01  -0.01   0.01
  60   1     0.11  -0.03   0.13     0.04  -0.04   0.05    -0.02   0.02  -0.02
  61   1     0.03  -0.10  -0.05    -0.04   0.04   0.00     0.01  -0.04  -0.03
  62   1     0.05   0.02  -0.02    -0.05   0.02  -0.03     0.02   0.00  -0.01
  63   1    -0.15   0.07  -0.18     0.00   0.01   0.04    -0.05  -0.01  -0.04
  64   1    -0.15   0.18   0.00     0.00  -0.02  -0.01    -0.05   0.01   0.00
  65   1    -0.13   0.10  -0.08     0.00   0.00   0.02    -0.04  -0.02  -0.03
  66   1     0.15  -0.05  -0.11     0.10  -0.03  -0.05     0.05  -0.05   0.01
  67   1    -0.10  -0.01   0.09     0.04  -0.03  -0.05     0.00  -0.05   0.01
  68   1    -0.01   0.24  -0.11     0.11   0.04   0.01     0.02  -0.01   0.00
  69   1     0.01   0.12   0.02     0.08  -0.04  -0.04    -0.03   0.01   0.02
  70   1    -0.04   0.24   0.19     0.10  -0.13  -0.07    -0.03   0.02   0.00
  71   1    -0.19   0.07   0.11     0.14  -0.01  -0.08    -0.02   0.01   0.01
  72   1    -0.06   0.10  -0.11     0.00   0.09  -0.06     0.00  -0.01   0.00
  73   1     0.01   0.13  -0.05     0.08   0.11  -0.07    -0.01  -0.01   0.01
  74   1    -0.05   0.11  -0.09     0.00   0.13  -0.10     0.00  -0.03   0.01
  75   1    -0.03  -0.06   0.01    -0.01  -0.10   0.02     0.00   0.03   0.00
  76   1    -0.02  -0.04   0.01    -0.01  -0.15   0.04     0.00   0.04  -0.01
  77   1    -0.01  -0.04   0.01    -0.01  -0.16   0.04     0.00   0.04  -0.01
  78   1    -0.04  -0.09  -0.01     0.02   0.02  -0.04    -0.02  -0.02   0.00
  79   1    -0.01  -0.01   0.00     0.02  -0.04  -0.03    -0.01   0.01   0.03
  80   1    -0.02   0.02   0.01     0.10  -0.08  -0.03     0.06  -0.02  -0.02
  81   1     0.01   0.00   0.01     0.12  -0.11  -0.04     0.08  -0.04  -0.03
  82   1     0.05  -0.02   0.00     0.06  -0.06  -0.03     0.03  -0.01  -0.02
  83   1     0.01   0.00   0.01     0.01  -0.03  -0.04     0.03  -0.02  -0.04
  84   1     0.01   0.03  -0.02     0.01  -0.04   0.01    -0.01   0.00   0.05
  85   1     0.01  -0.03   0.05    -0.07   0.11  -0.01    -0.01  -0.02  -0.01
  86   1    -0.04  -0.05   0.07    -0.05   0.03   0.03     0.00  -0.02  -0.01
  87   1    -0.01  -0.05   0.04    -0.08   0.05   0.09     0.00  -0.01  -0.01
  88   1    -0.06  -0.02  -0.03     0.04   0.07  -0.08    -0.04  -0.01   0.01
  89   1    -0.04   0.01  -0.01     0.01   0.00  -0.02    -0.02   0.02   0.01
  90   1    -0.07  -0.03  -0.05     0.07  -0.04  -0.09    -0.05   0.02   0.02
  91   1    -0.03   0.02  -0.05     0.07   0.04  -0.12    -0.05   0.00   0.03
  92   1    -0.05  -0.03  -0.04     0.03  -0.03  -0.05    -0.03   0.00  -0.01
  93   1    -0.07  -0.03  -0.07    -0.02  -0.05  -0.14    -0.01   0.01   0.03
  94   1    -0.01   0.03   0.02     0.10   0.08   0.02    -0.06   0.00   0.01
  95   1     0.02  -0.01   0.05     0.07   0.01   0.11    -0.03   0.00  -0.01
  96   1    -0.01  -0.02   0.01     0.08   0.02   0.08    -0.04   0.00  -0.03
  97   1     0.08   0.03  -0.03    -0.02  -0.07  -0.01    -0.06  -0.04   0.02
  98   1     0.07   0.02   0.02    -0.04  -0.03  -0.02    -0.08   0.01  -0.01
  99   1     0.05   0.02  -0.02    -0.04  -0.05  -0.02    -0.08  -0.03   0.01
 100   1     0.02   0.01  -0.02     0.02  -0.04   0.02    -0.07  -0.08   0.08
 101   1    -0.03  -0.02  -0.01     0.05   0.01   0.03     0.07   0.06   0.08
 102   1     0.03  -0.04   0.02     0.00   0.01   0.00    -0.05   0.04  -0.07
 103   1     0.04   0.01   0.01    -0.07  -0.09  -0.04    -0.11  -0.06  -0.06
 104   1     0.02   0.01   0.02    -0.04  -0.06  -0.03    -0.06  -0.06  -0.08
 105   1     0.03   0.01   0.00    -0.07  -0.06   0.02    -0.11  -0.03   0.02
 106   1     0.04   0.01  -0.01    -0.04  -0.05  -0.02    -0.03   0.06   0.05
 107   1     0.02   0.02  -0.01    -0.03  -0.03   0.04    -0.01   0.03   0.00
 108   1     0.03   0.02  -0.02     0.00  -0.01  -0.01    -0.01  -0.01   0.06
 109   1     0.03  -0.05   0.04     0.18  -0.11  -0.08    -0.01   0.03   0.01
 110   1     0.05  -0.02   0.02     0.06   0.05   0.21     0.04  -0.01  -0.10
 111   1     0.05  -0.04   0.03    -0.14   0.04  -0.08     0.10  -0.04   0.02
 112   1     0.00  -0.03  -0.04    -0.01   0.13   0.08     0.10   0.20   0.45
 113   1     0.02   0.09   0.03    -0.02  -0.10  -0.07    -0.13  -0.47  -0.03
 114   1     0.01  -0.04   0.09    -0.01   0.15  -0.18     0.06   0.27  -0.40
                    28                     29                     30
                    ?A                     ?A                     ?A
 Frequencies --   134.4266               137.2524               138.3055
 Red. masses --     2.4757                 1.9501                 3.0976
 Frc consts  --     0.0264                 0.0216                 0.0349
 IR Inten    --     2.1334                 0.5014                 0.7605
 Raman Activ --     0.0000                 0.0000                 0.0000
 Depolar     --     0.0000                 0.0000                 0.0000
 Atom AN      X      Y      Z        X      Y      Z        X      Y      Z
   1   8     0.08  -0.06   0.09    -0.03   0.03  -0.04     0.07  -0.05   0.06
   2  12     0.02   0.00  -0.03     0.01   0.00  -0.01    -0.02   0.00   0.02
   3   8     0.01   0.01  -0.04     0.00  -0.01   0.00     0.00   0.00   0.02
   4   6     0.03  -0.03   0.04    -0.02   0.02  -0.02     0.04  -0.03   0.03
   5   7     0.00  -0.01   0.00    -0.01   0.02  -0.03     0.01  -0.01  -0.01
   6   7     0.01  -0.02   0.00     0.01   0.01   0.02    -0.01   0.03   0.03
   7   8    -0.04   0.01  -0.04     0.00   0.00   0.01     0.00   0.00  -0.01
   8   6     0.01  -0.01  -0.01    -0.01   0.03   0.00     0.02   0.01   0.05
   9   6     0.01  -0.01  -0.02    -0.01   0.01  -0.04     0.02   0.02   0.02
  10   6     0.01  -0.02   0.00     0.00   0.00  -0.04     0.00   0.02  -0.03
  11   8     0.01  -0.03   0.02    -0.01   0.02   0.00     0.01  -0.02   0.00
  12   6     0.01  -0.02   0.00    -0.01   0.02   0.01     0.02  -0.03  -0.04
  13   6     0.00  -0.02  -0.02     0.00   0.01   0.00     0.02   0.01   0.00
  14   6     0.00  -0.02   0.01    -0.01   0.01  -0.01     0.04  -0.02   0.03
  15   8     0.03  -0.02   0.01    -0.01   0.02   0.01     0.02  -0.06  -0.06
  16   6    -0.08   0.03  -0.08     0.03  -0.01   0.04    -0.06   0.00  -0.07
  17   8     0.02   0.01  -0.02     0.01  -0.02  -0.01    -0.04   0.01   0.01
  18   6     0.02   0.02  -0.01     0.01  -0.02  -0.02    -0.04   0.00   0.04
  19   8     0.03   0.01  -0.03     0.02  -0.01  -0.01    -0.07   0.00   0.05
  20   8     0.03   0.05   0.03     0.01  -0.02  -0.01    -0.04  -0.06  -0.04
  21   6     0.01   0.03   0.00     0.01  -0.02   0.00    -0.01  -0.02   0.00
  22   6     0.01   0.01   0.00     0.01  -0.02   0.00    -0.02   0.01   0.01
  23   6     0.02   0.03   0.01     0.01  -0.01   0.00    -0.03  -0.03   0.00
  24   8    -0.01   0.02  -0.01     0.01  -0.02   0.00     0.01  -0.01   0.00
  25   6     0.03   0.00   0.00     0.00  -0.04   0.00    -0.02   0.03   0.00
  26   6     0.00   0.00   0.04    -0.02   0.00   0.01     0.01   0.02  -0.05
  27   6    -0.04  -0.03  -0.03     0.02   0.01   0.00     0.00   0.05   0.06
  28   6    -0.03   0.13  -0.02     0.01  -0.02  -0.01     0.01  -0.02   0.06
  29   6     0.00  -0.02   0.01    -0.01   0.02  -0.02     0.01  -0.01  -0.01
  30   6     0.01  -0.01   0.00     0.01   0.00   0.02     0.00   0.02   0.02
  31   6     0.00   0.02   0.00    -0.01   0.02  -0.02     0.00   0.02  -0.02
  32   6     0.00   0.04  -0.01    -0.01  -0.01  -0.01     0.01   0.07  -0.03
  33   6     0.00  -0.02   0.01    -0.01  -0.04   0.01     0.01   0.07  -0.03
  34   6    -0.01  -0.09   0.03    -0.01  -0.05   0.01     0.01   0.04  -0.02
  35   6     0.00  -0.07   0.02    -0.01  -0.02   0.00     0.01   0.01  -0.02
  36   6    -0.01   0.01  -0.01     0.00   0.02  -0.01    -0.02   0.02  -0.03
  37   6    -0.02  -0.02   0.02     0.01  -0.02  -0.01     0.00   0.01  -0.01
  38   6     0.01  -0.01   0.00     0.00   0.02   0.02    -0.01   0.02   0.02
  39   6    -0.01   0.00   0.01    -0.02   0.03   0.02     0.00   0.01   0.01
  40   6    -0.03   0.02   0.01    -0.01   0.02   0.01     0.03  -0.02   0.00
  41   6    -0.03   0.02   0.01     0.01  -0.01   0.01     0.05  -0.04   0.00
  42   6    -0.01   0.00   0.01     0.02  -0.01   0.02     0.03  -0.02   0.01
  43   6     0.00   0.00   0.01     0.00   0.02   0.02     0.00   0.01   0.02
  44   6    -0.01   0.00   0.01     0.00  -0.02   0.03     0.02  -0.04   0.02
  45   6    -0.01  -0.01  -0.03    -0.02   0.03  -0.02    -0.03   0.01  -0.05
  46   6    -0.03   0.01   0.01     0.02   0.00  -0.01    -0.05   0.03  -0.02
  47   6    -0.06  -0.01  -0.06     0.01  -0.01  -0.02    -0.01   0.00  -0.01
  48   6     0.00   0.02   0.06     0.03  -0.01   0.00    -0.01   0.00  -0.03
  49   6    -0.02   0.00   0.01    -0.02  -0.02   0.03     0.01  -0.04   0.02
  50   6    -0.01   0.00   0.00    -0.02  -0.02   0.01     0.00  -0.05   0.00
  51   6     0.01   0.02   0.00    -0.01   0.00   0.02    -0.01  -0.02   0.04
  52   6    -0.01  -0.01   0.01     0.02   0.04   0.01     0.02   0.02  -0.01
  53   6     0.01   0.00   0.02     0.00   0.07   0.14     0.04   0.02   0.12
  54   6     0.01  -0.02   0.01    -0.01  -0.01  -0.10     0.01   0.04  -0.17
  55   1     0.00  -0.02  -0.02    -0.02   0.00  -0.04     0.04   0.02   0.02
  56   1    -0.01  -0.02  -0.02    -0.01   0.00   0.01     0.05   0.05  -0.04
  57   1    -0.04  -0.07  -0.04     0.00   0.02   0.00     0.06  -0.02   0.02
  58   1     0.20   0.04  -0.20    -0.06   0.00   0.09     0.07  -0.02  -0.16
  59   1    -0.27  -0.04   0.16     0.10   0.00  -0.04    -0.18   0.01   0.06
  60   1    -0.28   0.15  -0.33     0.10  -0.04   0.12    -0.16   0.05  -0.20
  61   1     0.01   0.01   0.00     0.01  -0.02   0.00    -0.02   0.02   0.01
  62   1     0.03   0.05   0.01     0.02   0.00   0.01    -0.05  -0.06   0.00
  63   1     0.00   0.00   0.01     0.01  -0.04   0.02     0.03   0.03  -0.01
  64   1     0.04   0.02  -0.01     0.00  -0.05   0.01    -0.03  -0.01   0.02
  65   1     0.05  -0.02   0.02     0.00  -0.05  -0.01    -0.05   0.07  -0.01
  66   1    -0.05   0.04   0.09    -0.03   0.01   0.02     0.11  -0.06  -0.14
  67   1     0.03   0.01  -0.01    -0.01   0.01   0.02    -0.07  -0.02   0.03
  68   1    -0.01  -0.08   0.05    -0.03  -0.02   0.00     0.03   0.18  -0.07
  69   1    -0.10  -0.02   0.03     0.02   0.01   0.00     0.10   0.04  -0.04
  70   1    -0.07  -0.05  -0.10     0.02  -0.01  -0.01     0.03   0.17   0.19
  71   1     0.02  -0.01  -0.01     0.03   0.02  -0.01    -0.16  -0.03   0.08
  72   1    -0.08   0.17  -0.14     0.02  -0.03   0.03     0.02   0.01   0.01
  73   1    -0.02   0.23   0.07     0.02  -0.05  -0.04    -0.05   0.01   0.10
  74   1    -0.03   0.10  -0.01     0.00   0.00  -0.02     0.04  -0.07   0.10
  75   1     0.01   0.09  -0.03    -0.01  -0.02   0.00     0.00   0.09  -0.03
  76   1     0.00  -0.02   0.01    -0.01  -0.07   0.02     0.01   0.10  -0.03
  77   1    -0.01  -0.13   0.04    -0.01  -0.08   0.02     0.02   0.06  -0.02
  78   1    -0.01   0.00  -0.01     0.01   0.04   0.00    -0.02   0.01  -0.04
  79   1    -0.01   0.00   0.03     0.00  -0.01  -0.03     0.00   0.01   0.00
  80   1    -0.01   0.00   0.00    -0.03   0.05   0.02    -0.01   0.02   0.01
  81   1    -0.04   0.03   0.01    -0.02   0.03   0.01     0.05  -0.04  -0.01
  82   1    -0.04   0.03   0.01     0.01  -0.01   0.00     0.08  -0.07  -0.01
  83   1    -0.01   0.01   0.01     0.02   0.00   0.02     0.02   0.00   0.01
  84   1    -0.01   0.00   0.01     0.01  -0.02   0.04     0.02  -0.03   0.03
  85   1    -0.02  -0.03  -0.03    -0.02   0.03  -0.02    -0.07   0.01  -0.07
  86   1     0.01  -0.01  -0.05    -0.02   0.04  -0.03    -0.01   0.01  -0.07
  87   1     0.00   0.00  -0.03    -0.03   0.02  -0.02    -0.04   0.02  -0.02
  88   1    -0.04  -0.02   0.02     0.03   0.02  -0.01    -0.07   0.01  -0.02
  89   1    -0.02   0.01   0.01     0.01  -0.02  -0.01    -0.05   0.04  -0.01
  90   1    -0.04   0.02   0.03     0.04   0.00  -0.01    -0.06   0.04  -0.01
  91   1    -0.06   0.06  -0.07     0.03   0.00  -0.04    -0.03   0.00   0.00
  92   1    -0.07  -0.04  -0.07     0.01  -0.02   0.00    -0.02   0.00  -0.03
  93   1    -0.09  -0.04  -0.09    -0.02  -0.02  -0.04     0.00   0.01   0.00
  94   1    -0.01   0.09   0.06     0.05  -0.01  -0.01    -0.02   0.00  -0.02
  95   1     0.03   0.01   0.12     0.01  -0.01   0.00     0.00   0.00  -0.03
  96   1    -0.01   0.00   0.05     0.03   0.00   0.03    -0.01  -0.01  -0.04
  97   1    -0.02   0.00   0.01    -0.04  -0.02   0.04     0.01  -0.05   0.02
  98   1    -0.02   0.00   0.00    -0.03  -0.03   0.01     0.01  -0.04   0.01
  99   1    -0.02   0.00   0.01     0.00  -0.02   0.04     0.01  -0.04   0.02
 100   1    -0.01   0.00   0.00    -0.03  -0.01   0.01     0.00  -0.01  -0.01
 101   1     0.00   0.00   0.00    -0.02  -0.03   0.00    -0.04  -0.07  -0.02
 102   1    -0.01   0.01   0.00    -0.02  -0.03   0.00     0.01  -0.07   0.03
 103   1     0.01   0.03   0.01    -0.01  -0.01   0.02     0.01  -0.04   0.03
 104   1     0.02   0.02   0.00    -0.02  -0.01   0.02    -0.02  -0.03   0.05
 105   1     0.02   0.01  -0.01    -0.03   0.01   0.03    -0.02  -0.01   0.05
 106   1    -0.01   0.00   0.02     0.03   0.06   0.03     0.04   0.00  -0.01
 107   1     0.00  -0.02   0.00     0.02   0.05  -0.02     0.01   0.02   0.00
 108   1    -0.01  -0.02   0.02     0.00   0.02   0.02     0.01   0.03  -0.02
 109   1    -0.16   0.10   0.15    -0.36   0.22   0.43     0.15  -0.10   0.05
 110   1    -0.01  -0.05  -0.18    -0.05  -0.02  -0.22     0.06   0.06   0.31
 111   1     0.21  -0.05   0.14     0.41   0.04   0.39    -0.09   0.11   0.03
 112   1     0.01  -0.04  -0.03    -0.01   0.01  -0.08    -0.05   0.05  -0.24
 113   1     0.02   0.04   0.02     0.02  -0.07  -0.12     0.11   0.06  -0.21
 114   1     0.01  -0.04   0.06    -0.03   0.02  -0.16    -0.04   0.04  -0.17
                    31                     32                     33
                    ?A                     ?A                     ?A
 Frequencies --   142.5006               146.9508               148.9389
 Red. masses --     1.8332                 2.8099                 2.5212
 Frc consts  --     0.0219                 0.0358                 0.0330
 IR Inten    --     0.1543                 2.4317                 1.8088
 Raman Activ --     0.0000                 0.0000                 0.0000
 Depolar     --     0.0000                 0.0000                 0.0000
 Atom AN      X      Y      Z        X      Y      Z        X      Y      Z
   1   8    -0.03   0.02  -0.02     0.02  -0.02   0.04     0.06  -0.03   0.05
   2  12     0.04   0.00  -0.03    -0.05   0.00   0.01     0.01   0.00   0.00
   3   8     0.00   0.00  -0.04     0.00   0.01  -0.02     0.00  -0.01   0.01
   4   6    -0.02   0.01  -0.01     0.00  -0.02   0.01     0.03  -0.01   0.03
   5   7     0.01   0.00   0.00    -0.03   0.01   0.00    -0.03   0.03  -0.01
   6   7     0.03  -0.02   0.02    -0.05   0.03   0.02     0.00  -0.01   0.00
   7   8    -0.01   0.00   0.00    -0.01  -0.02  -0.02     0.00   0.01   0.00
   8   6     0.02   0.01   0.02    -0.03   0.01   0.00    -0.06   0.01  -0.02
   9   6     0.01  -0.01  -0.01    -0.03   0.02  -0.01    -0.06  -0.01  -0.02
  10   6     0.03  -0.02  -0.04    -0.04   0.03  -0.01    -0.04  -0.03  -0.01
  11   8    -0.01   0.00   0.00    -0.02  -0.02  -0.01     0.00   0.01  -0.02
  12   6    -0.01   0.01   0.01    -0.01   0.02   0.01     0.00   0.00  -0.02
  13   6    -0.02  -0.01  -0.01    -0.02   0.02   0.00     0.01   0.01   0.00
  14   6    -0.02   0.01  -0.01    -0.02  -0.02   0.00     0.01   0.01   0.00
  15   8     0.00   0.02   0.01    -0.01   0.04   0.03     0.00   0.00  -0.02
  16   6     0.01   0.00   0.02    -0.02   0.02  -0.03    -0.05   0.01  -0.05
  17   8     0.03   0.00   0.00     0.04  -0.04  -0.05    -0.01   0.00   0.02
  18   6     0.02   0.00  -0.02     0.05  -0.02  -0.05    -0.01  -0.01   0.02
  19   8     0.04  -0.01  -0.04     0.06  -0.01  -0.04    -0.02  -0.01   0.02
  20   8     0.02   0.02   0.01     0.08   0.06   0.08    -0.03  -0.05  -0.05
  21   6     0.01   0.01   0.00     0.02  -0.02   0.00     0.00  -0.02   0.00
  22   6     0.02   0.00   0.00     0.02  -0.05  -0.02     0.00   0.00   0.01
  23   6     0.01   0.02   0.00     0.06  -0.01   0.00    -0.02  -0.01   0.00
  24   8     0.00   0.01   0.01    -0.04  -0.05  -0.06     0.02   0.00   0.03
  25   6     0.03  -0.01   0.00    -0.01  -0.10   0.01     0.00   0.02   0.00
  26   6    -0.03   0.01   0.04     0.07  -0.10   0.02    -0.04   0.04   0.00
  27   6    -0.02  -0.02  -0.04    -0.02   0.02   0.00     0.03   0.02   0.01
  28   6    -0.02   0.02  -0.02    -0.04   0.02   0.01    -0.02   0.06   0.00
  29   6     0.01   0.00   0.00    -0.02   0.01   0.00    -0.03   0.03   0.00
  30   6     0.03  -0.01   0.02    -0.04   0.03   0.02     0.02  -0.02   0.00
  31   6     0.00  -0.02   0.01    -0.01  -0.01   0.00    -0.02  -0.02   0.01
  32   6     0.00  -0.02   0.02    -0.01  -0.01   0.00    -0.02  -0.07   0.01
  33   6     0.00  -0.02   0.01    -0.01   0.00  -0.01    -0.02  -0.05   0.01
  34   6     0.01  -0.01   0.01    -0.02   0.03  -0.01    -0.03   0.00   0.00
  35   6     0.01   0.00   0.00    -0.02   0.03  -0.01    -0.02   0.03   0.00
  36   6    -0.02  -0.01   0.00     0.02  -0.01   0.02     0.02  -0.01   0.03
  37   6    -0.01   0.00   0.01     0.02   0.01  -0.02     0.02   0.00  -0.02
  38   6     0.01   0.01   0.02    -0.04   0.04   0.02     0.02  -0.01   0.00
  39   6    -0.02   0.03   0.02    -0.03   0.02   0.01     0.01   0.00   0.00
  40   6    -0.03   0.03   0.02    -0.01   0.00   0.00     0.01   0.00   0.00
  41   6    -0.01   0.01   0.02     0.01  -0.01   0.00     0.01  -0.01   0.00
  42   6     0.02  -0.01   0.02    -0.02   0.00   0.01     0.02  -0.01   0.00
  43   6     0.01   0.01   0.02    -0.01   0.03   0.02     0.03   0.02   0.01
  44   6     0.00  -0.02   0.03     0.00   0.00   0.01     0.01   0.02  -0.01
  45   6    -0.02  -0.01   0.00     0.04   0.00   0.04     0.04   0.00   0.06
  46   6    -0.04   0.01  -0.01     0.06  -0.02   0.00     0.09  -0.03   0.00
  47   6    -0.04   0.00   0.01     0.06   0.00   0.02     0.08   0.00   0.02
  48   6    -0.04   0.00   0.00     0.05  -0.01  -0.02     0.05  -0.02  -0.02
  49   6    -0.02  -0.02   0.03     0.01   0.00   0.00     0.04   0.05   0.02
  50   6    -0.02  -0.02   0.00     0.01   0.00   0.02     0.00   0.02  -0.02
  51   6    -0.01   0.02   0.01     0.02   0.00   0.07    -0.02   0.03  -0.03
  52   6     0.01   0.03   0.04     0.02   0.04  -0.04     0.04   0.09   0.03
  53   6     0.01   0.01   0.02    -0.03   0.01  -0.01    -0.09   0.03  -0.03
  54   6     0.02  -0.04  -0.12    -0.04   0.05  -0.04    -0.05  -0.09  -0.02
  55   1     0.00  -0.02  -0.02    -0.02   0.02  -0.02    -0.08  -0.02  -0.03
  56   1    -0.04  -0.02   0.00    -0.03   0.02   0.00     0.02   0.02  -0.01
  57   1    -0.03   0.00  -0.01    -0.02  -0.03  -0.02     0.00  -0.02  -0.03
  58   1    -0.02   0.01   0.06     0.04   0.01  -0.08     0.02  -0.02  -0.13
  59   1     0.05  -0.01  -0.01    -0.06   0.03   0.02    -0.14   0.04   0.04
  60   1     0.04  -0.01   0.06    -0.06   0.06  -0.07    -0.11   0.03  -0.14
  61   1     0.01  -0.01   0.01     0.03  -0.04  -0.02     0.00  -0.01   0.00
  62   1     0.04   0.04   0.01     0.05   0.02  -0.03    -0.01  -0.02   0.02
  63   1    -0.01  -0.01   0.01     0.00  -0.09   0.05     0.00   0.01  -0.02
  64   1     0.04   0.03  -0.01    -0.04  -0.14   0.03     0.00   0.03   0.00
  65   1     0.05  -0.03   0.02    -0.03  -0.12  -0.05     0.00   0.03   0.00
  66   1    -0.14   0.09   0.11     0.38  -0.30  -0.03    -0.19   0.14   0.02
  67   1     0.05   0.06  -0.02    -0.20  -0.28   0.18     0.09   0.13  -0.07
  68   1    -0.05  -0.14   0.05     0.04   0.23  -0.09    -0.04  -0.11   0.03
  69   1    -0.09  -0.01   0.03    -0.06   0.03   0.04     0.07   0.02  -0.04
  70   1    -0.05  -0.07  -0.12    -0.03  -0.01  -0.05     0.05   0.05   0.07
  71   1     0.06   0.01  -0.03     0.04   0.04   0.00    -0.03   0.00   0.01
  72   1    -0.02   0.01  -0.02    -0.06   0.03  -0.03    -0.06   0.07  -0.03
  73   1     0.01   0.02  -0.03    -0.05   0.04   0.03     0.00   0.09   0.02
  74   1    -0.03   0.03  -0.04    -0.03   0.01   0.02    -0.01   0.08   0.01
  75   1     0.00  -0.03   0.02    -0.01  -0.03   0.00    -0.02  -0.10   0.02
  76   1     0.00  -0.02   0.01    -0.01   0.00  -0.01    -0.02  -0.07   0.02
  77   1     0.01  -0.01   0.01    -0.02   0.03  -0.01    -0.03   0.01   0.00
  78   1    -0.02  -0.03  -0.02     0.02   0.01   0.05     0.02   0.01   0.06
  79   1    -0.01   0.00   0.04     0.01  -0.01  -0.06     0.01  -0.02  -0.07
  80   1    -0.03   0.05   0.02    -0.04   0.03   0.01     0.00   0.01   0.00
  81   1    -0.06   0.06   0.02     0.01  -0.01   0.00     0.01   0.00   0.00
  82   1    -0.02   0.01   0.02     0.03  -0.04   0.00     0.01  -0.01   0.00
  83   1     0.02   0.01   0.02    -0.01   0.02   0.03     0.06  -0.01   0.03
  84   1     0.01  -0.01   0.04    -0.01   0.00   0.00     0.00   0.03  -0.02
  85   1    -0.03   0.00  -0.01     0.08   0.00   0.06     0.09   0.02   0.09
  86   1     0.00  -0.02  -0.01     0.00   0.01   0.06    -0.01   0.01   0.10
  87   1    -0.02   0.00   0.02     0.04  -0.02  -0.01     0.04  -0.01   0.02
  88   1    -0.06   0.01  -0.02     0.09  -0.01   0.02     0.12   0.01   0.01
  89   1    -0.03   0.04   0.00     0.06  -0.05  -0.01     0.07  -0.07  -0.01
  90   1    -0.06   0.02  -0.01     0.07  -0.04   0.00     0.11  -0.06  -0.02
  91   1    -0.07   0.00   0.03     0.12  -0.03  -0.01     0.15  -0.04  -0.01
  92   1    -0.04  -0.01  -0.03     0.08   0.02   0.09     0.10   0.02   0.10
  93   1    -0.01   0.00   0.02     0.03   0.01   0.01     0.05   0.00   0.02
  94   1    -0.07   0.00   0.02     0.09  -0.05  -0.04     0.12  -0.07  -0.05
  95   1    -0.02   0.00   0.01     0.02  -0.01  -0.06     0.00  -0.01  -0.07
  96   1    -0.05  -0.01  -0.03     0.06   0.00   0.02     0.07   0.01   0.04
  97   1    -0.04  -0.02   0.05     0.02   0.00   0.00     0.02   0.08   0.01
  98   1    -0.03  -0.02   0.01     0.01   0.00   0.01     0.05   0.03   0.02
  99   1     0.00  -0.01   0.05     0.00   0.00  -0.01     0.06   0.06   0.04
 100   1    -0.04  -0.01   0.00     0.04   0.03  -0.01    -0.02   0.02  -0.02
 101   1    -0.02  -0.03  -0.01    -0.03  -0.01   0.00     0.01   0.02  -0.03
 102   1    -0.02  -0.04  -0.01     0.02   0.00   0.06     0.00   0.02  -0.04
 103   1    -0.02   0.02   0.01     0.08  -0.01   0.07    -0.02   0.05  -0.02
 104   1     0.00   0.01  -0.01    -0.02  -0.02   0.12    -0.02  -0.01  -0.06
 105   1    -0.02   0.02   0.01     0.00   0.02   0.04    -0.05   0.05  -0.05
 106   1     0.01   0.09   0.08     0.06   0.00  -0.05     0.07   0.20   0.11
 107   1     0.03   0.04  -0.02     0.00   0.05  -0.03     0.06   0.12  -0.09
 108   1    -0.02  -0.02   0.07     0.01   0.08  -0.08     0.01   0.00   0.09
 109   1     0.33  -0.21  -0.22     0.10  -0.07  -0.10    -0.05   0.01  -0.06
 110   1     0.04   0.10   0.44    -0.01   0.05   0.15    -0.10   0.02   0.02
 111   1    -0.37   0.14  -0.22    -0.17   0.05  -0.10    -0.14   0.05  -0.06
 112   1     0.01  -0.02  -0.10    -0.06   0.04  -0.10     0.01   0.00   0.21
 113   1     0.06  -0.11  -0.15     0.00   0.10  -0.05    -0.13  -0.37  -0.05
 114   1    -0.02  -0.01  -0.19    -0.05   0.02   0.00    -0.06   0.05  -0.26
                    34                     35                     36
                    ?A                     ?A                     ?A
 Frequencies --   154.4321               157.5997               162.5373
 Red. masses --     2.1788                 2.7774                 3.0715
 Frc consts  --     0.0306                 0.0406                 0.0478
 IR Inten    --     2.1581                 0.4657                 2.0338
 Raman Activ --     0.0000                 0.0000                 0.0000
 Depolar     --     0.0000                 0.0000                 0.0000
 Atom AN      X      Y      Z        X      Y      Z        X      Y      Z
   1   8    -0.03   0.02  -0.03    -0.02   0.01  -0.03     0.00   0.00  -0.01
   2  12     0.03   0.00   0.01    -0.05   0.00   0.00    -0.05  -0.02   0.03
   3   8     0.00   0.00   0.01     0.00   0.01  -0.02     0.00   0.01   0.00
   4   6    -0.02   0.01  -0.01    -0.01   0.00  -0.01     0.00  -0.01  -0.01
   5   7     0.00   0.00   0.01    -0.02   0.00   0.02    -0.02  -0.04   0.01
   6   7     0.02  -0.04   0.00    -0.04   0.03   0.02    -0.04   0.01   0.01
   7   8     0.00   0.01   0.00     0.00   0.00  -0.01     0.00  -0.01  -0.01
   8   6    -0.01  -0.02   0.00    -0.03   0.00   0.00    -0.01  -0.03   0.02
   9   6    -0.02  -0.04   0.01    -0.03   0.01   0.01    -0.01  -0.01   0.00
  10   6     0.00  -0.05   0.00    -0.04   0.03   0.01    -0.03   0.01  -0.02
  11   8     0.00   0.00   0.01     0.00   0.01   0.00     0.01  -0.01   0.01
  12   6     0.00  -0.02   0.00     0.00   0.01  -0.01     0.01  -0.01   0.01
  13   6     0.00   0.00   0.01     0.00   0.01  -0.01     0.00   0.00   0.00
  14   6     0.00   0.00   0.00     0.01  -0.01   0.01     0.01  -0.01   0.01
  15   8     0.00  -0.04  -0.02     0.01  -0.01  -0.02     0.01  -0.02   0.00
  16   6     0.02  -0.01   0.03     0.02  -0.01   0.02     0.01   0.00   0.00
  17   8    -0.04   0.02  -0.03     0.03  -0.01   0.03     0.03  -0.01   0.04
  18   6    -0.04   0.02   0.01     0.03  -0.01  -0.01     0.02  -0.01   0.00
  19   8    -0.06   0.02   0.02     0.04  -0.01  -0.02     0.04  -0.02  -0.02
  20   8     0.01   0.03   0.05    -0.01  -0.02  -0.03     0.01   0.00  -0.01
  21   6    -0.01   0.02   0.00     0.00  -0.01   0.00     0.01  -0.01   0.00
  22   6    -0.02   0.03   0.00     0.01  -0.02   0.01     0.01  -0.02  -0.01
  23   6    -0.01   0.00   0.01     0.01   0.01   0.00     0.02   0.00  -0.01
  24   8    -0.02   0.00  -0.04     0.01   0.00   0.03     0.01   0.00   0.03
  25   6     0.01   0.01   0.02     0.00   0.00  -0.01    -0.02   0.03  -0.04
  26   6     0.06  -0.05  -0.02    -0.04   0.04   0.02     0.03  -0.01  -0.02
  27   6     0.00   0.01   0.02     0.00   0.01  -0.02    -0.02  -0.01  -0.01
  28   6     0.01  -0.02   0.00     0.02  -0.07   0.03     0.02  -0.03   0.01
  29   6     0.00   0.00   0.00    -0.02   0.00   0.01    -0.02  -0.03   0.00
  30   6     0.03  -0.04  -0.01    -0.04   0.02   0.01    -0.04   0.01   0.01
  31   6     0.01   0.04  -0.01     0.00   0.08  -0.02    -0.01   0.01  -0.01
  32   6     0.01   0.06  -0.02     0.01   0.13  -0.04    -0.01   0.05  -0.03
  33   6     0.01   0.01   0.00    -0.01   0.03  -0.01    -0.01   0.06  -0.03
  34   6     0.00  -0.05   0.02    -0.02  -0.09   0.03    -0.02   0.03  -0.02
  35   6     0.00  -0.04   0.02    -0.02  -0.08   0.03    -0.02  -0.01   0.00
  36   6     0.00   0.01  -0.01     0.02   0.03   0.01     0.00   0.01   0.00
  37   6     0.00  -0.02   0.01     0.00  -0.04   0.02     0.01  -0.01  -0.02
  38   6     0.02  -0.03  -0.01    -0.05   0.03   0.01     0.05  -0.06  -0.01
  39   6     0.00  -0.01  -0.01    -0.02   0.01   0.01     0.08  -0.08  -0.03
  40   6    -0.03   0.02   0.00     0.04  -0.03  -0.01    -0.02   0.00   0.00
  41   6    -0.03   0.01   0.01     0.06  -0.05  -0.01    -0.13   0.09   0.03
  42   6     0.00  -0.01   0.00     0.01  -0.02   0.00    -0.11   0.07   0.03
  43   6     0.02   0.02   0.01    -0.01   0.01   0.01     0.04  -0.02   0.00
  44   6     0.01   0.02  -0.02     0.01   0.00   0.00    -0.04   0.03   0.01
  45   6     0.03  -0.03  -0.05     0.09  -0.06  -0.07     0.00   0.02   0.01
  46   6    -0.03   0.00   0.03     0.00  -0.01   0.06     0.03   0.00  -0.01
  47   6    -0.02  -0.01  -0.04    -0.01  -0.02  -0.07     0.02  -0.01  -0.03
  48   6     0.02   0.01   0.05     0.07   0.02   0.10     0.04   0.00   0.01
  49   6     0.05   0.05   0.00     0.01   0.02   0.02     0.01  -0.02  -0.07
  50   6     0.01   0.02  -0.03     0.00   0.00  -0.02     0.07   0.05   0.15
  51   6     0.01   0.07  -0.04    -0.01  -0.04   0.05     0.02   0.06  -0.08
  52   6     0.02   0.06   0.05     0.03   0.04  -0.06     0.01   0.00   0.09
  53   6    -0.04  -0.01  -0.02    -0.03  -0.02  -0.06     0.00  -0.03   0.05
  54   6    -0.01  -0.09  -0.03    -0.04   0.04   0.00    -0.03   0.02  -0.09
  55   1    -0.03  -0.04   0.00    -0.01   0.02   0.00     0.00   0.00  -0.02
  56   1     0.02   0.01   0.00     0.00   0.01  -0.01     0.00  -0.01   0.01
  57   1     0.00   0.02   0.02     0.04   0.02   0.03     0.01   0.00   0.02
  58   1    -0.02   0.01   0.07     0.00   0.01   0.06     0.01   0.00   0.01
  59   1     0.06  -0.02  -0.02     0.06  -0.03  -0.01     0.03  -0.01  -0.01
  60   1     0.05  -0.02   0.07     0.05  -0.02   0.05     0.02   0.00   0.01
  61   1    -0.02   0.06   0.01     0.01  -0.04   0.00     0.01  -0.05  -0.03
  62   1    -0.05  -0.02  -0.01     0.03   0.02   0.01     0.00   0.00  -0.03
  63   1     0.07   0.02   0.04    -0.05  -0.01  -0.03    -0.06   0.01  -0.08
  64   1    -0.01  -0.06   0.03     0.01   0.06  -0.02    -0.01   0.08  -0.04
  65   1    -0.03   0.04   0.00     0.03  -0.02   0.01     0.00   0.01  -0.01
  66   1     0.38  -0.27  -0.14    -0.24   0.18   0.09    -0.09   0.08   0.02
  67   1    -0.20  -0.22   0.14     0.12   0.15  -0.07     0.15   0.05  -0.12
  68   1     0.08   0.33  -0.10    -0.06  -0.19   0.06     0.06  -0.16   0.04
  69   1     0.03   0.00  -0.01    -0.02   0.01   0.00    -0.05  -0.02   0.02
  70   1     0.01   0.04   0.07    -0.01   0.00  -0.03    -0.04  -0.03  -0.05
  71   1    -0.05  -0.02   0.03     0.02   0.02  -0.01     0.02   0.00  -0.01
  72   1     0.04  -0.02   0.02     0.08  -0.05   0.03     0.05  -0.03   0.01
  73   1     0.01  -0.04  -0.01    -0.03  -0.08   0.03     0.01  -0.04   0.01
  74   1     0.01  -0.04   0.00     0.04  -0.12   0.04     0.02  -0.06   0.00
  75   1     0.01   0.09  -0.03     0.01   0.20  -0.07     0.00   0.08  -0.04
  76   1     0.01   0.01   0.00     0.00   0.04  -0.02    -0.01   0.09  -0.04
  77   1     0.00  -0.09   0.03    -0.04  -0.16   0.05    -0.02   0.04  -0.02
  78   1    -0.01   0.00   0.00    -0.01   0.02   0.06     0.01   0.02   0.01
  79   1     0.00  -0.01   0.02     0.00  -0.03  -0.01     0.00  -0.01  -0.04
  80   1    -0.02   0.01   0.00    -0.03   0.01   0.01     0.16  -0.15  -0.05
  81   1    -0.05   0.04   0.01     0.07  -0.06  -0.02    -0.02   0.00   0.00
  82   1    -0.05   0.03   0.01     0.10  -0.09  -0.02    -0.20   0.14   0.04
  83   1     0.03   0.00   0.05     0.01   0.00   0.01     0.04  -0.02   0.03
  84   1     0.00   0.03  -0.04     0.00   0.00  -0.01    -0.04   0.01  -0.04
  85   1     0.03  -0.08  -0.03     0.13  -0.16  -0.01     0.00   0.03   0.01
  86   1     0.04  -0.02  -0.06     0.08  -0.02  -0.08    -0.01   0.02   0.01
  87   1     0.05  -0.03  -0.08     0.13  -0.06  -0.17    -0.01   0.01   0.01
  88   1    -0.04  -0.05   0.04     0.00  -0.10   0.11     0.04   0.01   0.00
  89   1    -0.01   0.01   0.00     0.03  -0.02   0.00     0.02  -0.02  -0.01
  90   1    -0.05   0.04   0.06    -0.04   0.05   0.12     0.05  -0.01  -0.01
  91   1    -0.01   0.04  -0.05     0.09   0.07  -0.15     0.11   0.02  -0.08
  92   1    -0.03  -0.03  -0.03     0.00  -0.06   0.04     0.03  -0.02   0.07
  93   1    -0.05  -0.03  -0.07    -0.13  -0.06  -0.16    -0.05  -0.01  -0.07
  94   1     0.01   0.07   0.04     0.09   0.12   0.07     0.07   0.02  -0.01
  95   1     0.04   0.01   0.09     0.12   0.01   0.18     0.05   0.00   0.02
  96   1     0.01   0.00   0.04     0.07  -0.01   0.12     0.05  -0.01   0.03
  97   1     0.05   0.08  -0.01     0.01   0.04   0.01     0.09  -0.08  -0.09
  98   1     0.07   0.03   0.02     0.02   0.01   0.02     0.03  -0.02  -0.02
  99   1     0.07   0.06   0.01     0.02   0.02   0.03    -0.05  -0.01  -0.16
 100   1     0.01   0.05  -0.04    -0.01   0.02  -0.03     0.25   0.07   0.05
 101   1    -0.02   0.00  -0.04    -0.01  -0.01  -0.04    -0.05   0.04   0.15
 102   1     0.01   0.01   0.00     0.00   0.00  -0.02     0.11   0.07   0.34
 103   1     0.03   0.13   0.00     0.04  -0.07   0.04    -0.03   0.12  -0.06
 104   1     0.00   0.02  -0.05    -0.03  -0.05   0.09     0.05   0.05  -0.15
 105   1     0.00   0.10  -0.11    -0.03  -0.02   0.06     0.03   0.06  -0.12
 106   1     0.02   0.19   0.13     0.09  -0.02  -0.08    -0.04   0.12   0.16
 107   1     0.06   0.07  -0.09     0.00   0.05  -0.03     0.04   0.00   0.01
 108   1    -0.03  -0.06   0.12     0.04   0.10  -0.11    -0.01  -0.11   0.18
 109   1    -0.03   0.01  -0.03     0.07  -0.05  -0.14     0.02  -0.06   0.04
 110   1    -0.05  -0.02  -0.01    -0.02   0.01   0.04     0.02  -0.02   0.08
 111   1    -0.06  -0.01  -0.03    -0.15  -0.02  -0.13    -0.01  -0.01   0.04
 112   1     0.02  -0.04   0.10    -0.04   0.06   0.04    -0.06   0.01  -0.16
 113   1    -0.04  -0.25  -0.04    -0.04  -0.02  -0.01     0.04   0.06  -0.11
 114   1    -0.03  -0.01  -0.16    -0.03   0.07  -0.05    -0.05   0.00  -0.07
                    37                     38                     39
                    ?A                     ?A                     ?A
 Frequencies --   163.3844               178.0970               181.7302
 Red. masses --     2.8962                 3.5741                 2.4097
 Frc consts  --     0.0456                 0.0668                 0.0469
 IR Inten    --     1.1107                 4.2414                 8.5002
 Raman Activ --     0.0000                 0.0000                 0.0000
 Depolar     --     0.0000                 0.0000                 0.0000
 Atom AN      X      Y      Z        X      Y      Z        X      Y      Z
   1   8     0.01   0.00   0.01     0.03  -0.03   0.03     0.02  -0.01   0.01
   2  12     0.04   0.03  -0.03    -0.01  -0.01   0.07     0.01  -0.01   0.02
   3   8     0.01  -0.02   0.02    -0.03   0.01   0.07    -0.01   0.13   0.03
   4   6     0.01   0.01   0.01     0.01  -0.01   0.01     0.01  -0.02   0.00
   5   7     0.00   0.08  -0.02     0.02  -0.01   0.01    -0.01   0.02  -0.01
   6   7     0.03   0.03  -0.02     0.00  -0.02   0.00     0.01   0.02  -0.01
   7   8     0.00   0.01   0.01     0.01  -0.01   0.01     0.01  -0.02  -0.01
   8   6    -0.01   0.07  -0.04     0.02  -0.01   0.01    -0.01   0.03  -0.01
   9   6    -0.01   0.04  -0.06     0.02  -0.02   0.03    -0.01   0.02  -0.03
  10   6     0.01   0.02  -0.03     0.02  -0.02   0.02     0.00   0.01  -0.02
  11   8     0.00   0.02  -0.01    -0.08   0.04  -0.12     0.02   0.02   0.02
  12   6     0.00   0.02   0.00    -0.06   0.10  -0.06     0.01   0.03   0.01
  13   6     0.01   0.03   0.02     0.01   0.05  -0.01    -0.01   0.04   0.01
  14   6     0.00   0.01  -0.01    -0.02   0.00  -0.03     0.01  -0.01  -0.01
  15   8    -0.01   0.03   0.00    -0.09   0.12  -0.04     0.03   0.00  -0.02
  16   6    -0.01   0.00  -0.01    -0.03   0.00  -0.04     0.02   0.02  -0.02
  17   8    -0.02  -0.03  -0.04     0.02   0.00   0.05    -0.03   0.00   0.08
  18   6     0.00  -0.02   0.00     0.01  -0.02  -0.03    -0.04  -0.03  -0.02
  19   8    -0.01  -0.01   0.03     0.04  -0.01   0.00    -0.04  -0.04  -0.01
  20   8     0.00  -0.06  -0.03     0.00   0.01   0.00    -0.04  -0.07  -0.03
  21   6     0.01  -0.04  -0.01     0.00   0.00   0.01    -0.01  -0.04   0.02
  22   6     0.00  -0.03  -0.02     0.01  -0.01   0.02    -0.01   0.00   0.05
  23   6     0.00  -0.03   0.00     0.01   0.00  -0.02    -0.03  -0.05   0.00
  24   8     0.03  -0.04  -0.02    -0.02   0.00   0.01     0.01  -0.03   0.03
  25   6    -0.04  -0.07  -0.01     0.01   0.03   0.00     0.03   0.05   0.03
  26   6     0.00  -0.01  -0.01     0.00  -0.02  -0.01    -0.01  -0.03  -0.03
  27   6     0.05   0.08   0.08     0.21   0.03  -0.11    -0.06  -0.06  -0.14
  28   6     0.00   0.01   0.00    -0.11  -0.07   0.12     0.04   0.00  -0.05
  29   6     0.00   0.06  -0.01     0.02   0.00   0.00    -0.01   0.02   0.00
  30   6     0.03   0.02   0.00     0.00  -0.02   0.00     0.02   0.01   0.00
  31   6     0.00   0.05   0.00     0.02   0.00   0.00    -0.01   0.02   0.00
  32   6     0.00  -0.01   0.01     0.02  -0.01   0.01    -0.01   0.00   0.00
  33   6    -0.01  -0.07   0.03     0.02  -0.03   0.01    -0.01  -0.02   0.01
  34   6    -0.01  -0.09   0.04     0.02  -0.03   0.01    -0.01  -0.02   0.01
  35   6     0.00  -0.01   0.02     0.02  -0.01   0.00    -0.01   0.00   0.00
  36   6     0.01   0.01   0.01     0.00  -0.01  -0.02     0.00   0.01   0.01
  37   6    -0.01  -0.01   0.02     0.00   0.00   0.01     0.00   0.00   0.00
  38   6     0.05  -0.01  -0.01     0.00  -0.02  -0.01     0.02   0.01   0.00
  39   6     0.05   0.00  -0.01    -0.01  -0.01   0.00     0.02   0.01   0.00
  40   6     0.00   0.04   0.00    -0.03   0.01   0.00     0.01   0.02   0.00
  41   6    -0.04   0.07   0.00    -0.03   0.00   0.00     0.02   0.02   0.00
  42   6    -0.01   0.05   0.00    -0.01  -0.01   0.00     0.02   0.02   0.00
  43   6     0.00  -0.02  -0.02     0.00  -0.01   0.00     0.00   0.00  -0.01
  44   6    -0.02   0.00   0.03     0.00   0.00  -0.01     0.01   0.00   0.01
  45   6     0.07  -0.06  -0.04     0.00  -0.02  -0.04     0.02  -0.01  -0.01
  46   6    -0.02  -0.01   0.05    -0.04   0.01   0.00     0.01   0.00   0.02
  47   6    -0.01  -0.01   0.00    -0.03   0.00   0.00     0.01   0.00   0.00
  48   6     0.00   0.00   0.03    -0.02   0.00   0.00     0.01   0.00   0.00
  49   6    -0.07  -0.07  -0.02     0.02   0.01  -0.01    -0.02  -0.02   0.00
  50   6     0.00  -0.01   0.07     0.01   0.01  -0.01     0.00  -0.01   0.02
  51   6    -0.01  -0.01  -0.04     0.00   0.01  -0.02     0.00   0.00  -0.01
  52   6    -0.05  -0.08   0.04     0.00   0.00   0.01    -0.01  -0.02   0.00
  53   6    -0.03   0.09  -0.03     0.01  -0.01  -0.01    -0.01   0.03   0.01
  54   6     0.01   0.01   0.02     0.02  -0.01  -0.01     0.00   0.00   0.01
  55   1    -0.04   0.03  -0.06     0.02  -0.02   0.04    -0.02   0.02  -0.03
  56   1     0.01   0.06  -0.02     0.03   0.01   0.04     0.05  -0.02   0.08
  57   1     0.01   0.01  -0.01     0.07   0.02  -0.05     0.01  -0.02  -0.02
  58   1    -0.01  -0.01  -0.02    -0.01  -0.03  -0.10     0.04   0.01  -0.05
  59   1    -0.03   0.01   0.00    -0.08   0.05   0.00     0.02   0.02  -0.02
  60   1    -0.02  -0.01  -0.02    -0.06   0.02  -0.07     0.01   0.04  -0.02
  61   1     0.01  -0.02  -0.04     0.01  -0.02   0.02    -0.01   0.01   0.06
  62   1     0.00  -0.05   0.01     0.01   0.01  -0.03    -0.04  -0.06   0.00
  63   1     0.02  -0.05   0.01    -0.04   0.02  -0.03     0.08   0.06  -0.01
  64   1    -0.08  -0.14   0.03     0.04   0.09  -0.02     0.03   0.03   0.03
  65   1    -0.10  -0.04  -0.08     0.05   0.01   0.04     0.01   0.12   0.06
  66   1     0.02  -0.02  -0.04     0.03  -0.04  -0.01     0.16  -0.15  -0.11
  67   1     0.00  -0.01   0.01    -0.03  -0.04   0.00    -0.15  -0.11   0.09
  68   1     0.01   0.02  -0.02    -0.01   0.00  -0.03    -0.01   0.19  -0.09
  69   1     0.20   0.08  -0.07     0.19   0.09  -0.10    -0.33  -0.10   0.14
  70   1     0.11   0.20   0.28     0.26  -0.17  -0.13    -0.18  -0.27  -0.49
  71   1    -0.15   0.00   0.09     0.35   0.14  -0.18     0.26   0.10  -0.18
  72   1    -0.01   0.01   0.00    -0.09  -0.01   0.02     0.05   0.00  -0.04
  73   1    -0.01   0.01   0.00    -0.35  -0.05   0.19     0.08   0.01  -0.05
  74   1     0.00   0.02   0.01     0.01  -0.20   0.29     0.02   0.01  -0.08
  75   1     0.00  -0.01   0.01     0.02  -0.01   0.01    -0.01   0.00   0.00
  76   1    -0.01  -0.12   0.05     0.02  -0.05   0.02    -0.01  -0.03   0.01
  77   1    -0.01  -0.15   0.06     0.02  -0.04   0.01    -0.01  -0.04   0.01
  78   1    -0.02  -0.01   0.04    -0.01  -0.02  -0.03     0.00   0.01   0.02
  79   1     0.00  -0.01   0.02     0.01   0.00   0.04     0.00   0.00  -0.01
  80   1     0.07  -0.02  -0.01    -0.02   0.00   0.00     0.01   0.02   0.00
  81   1    -0.02   0.05   0.01    -0.05   0.02   0.00     0.01   0.02   0.01
  82   1    -0.08   0.10   0.01    -0.04   0.01   0.00     0.01   0.02   0.00
  83   1    -0.02   0.01  -0.06     0.00  -0.01   0.01     0.00   0.01  -0.02
  84   1     0.00  -0.01   0.07     0.00   0.00  -0.03     0.01   0.00   0.04
  85   1     0.11  -0.14   0.01    -0.01  -0.04  -0.04     0.04  -0.03   0.01
  86   1     0.05  -0.03  -0.04     0.01  -0.01  -0.05     0.01   0.00   0.00
  87   1     0.11  -0.06  -0.13     0.00  -0.02  -0.04     0.03  -0.01  -0.04
  88   1    -0.03  -0.08   0.08    -0.07  -0.02   0.00     0.02  -0.02   0.03
  89   1     0.01   0.00   0.01    -0.03   0.03   0.00     0.01  -0.01   0.00
  90   1    -0.07   0.04   0.09    -0.07   0.03   0.02     0.00   0.01   0.03
  91   1    -0.03   0.00   0.01    -0.10   0.00   0.03     0.01  -0.01   0.00
  92   1    -0.02  -0.01  -0.02    -0.04  -0.01  -0.08     0.01   0.00   0.01
  93   1     0.00  -0.02   0.00     0.02   0.00   0.02     0.01   0.00   0.01
  94   1     0.01   0.01   0.03    -0.05   0.01   0.02     0.04  -0.02  -0.01
  95   1    -0.02   0.00   0.05     0.01   0.00   0.02    -0.01   0.00  -0.01
  96   1     0.00   0.02   0.05    -0.03  -0.02  -0.03     0.02   0.02   0.03
  97   1    -0.06  -0.13   0.01    -0.01   0.03   0.01    -0.03  -0.05   0.01
  98   1    -0.09  -0.05  -0.05     0.03  -0.02  -0.02    -0.03  -0.02  -0.02
  99   1    -0.10  -0.07  -0.05     0.06   0.04   0.01    -0.02  -0.02  -0.01
 100   1    -0.01  -0.09   0.11     0.04   0.04  -0.04    -0.03  -0.06   0.06
 101   1     0.04   0.03   0.12    -0.01  -0.01  -0.03     0.04   0.02   0.05
 102   1    -0.02   0.00   0.02     0.02   0.01   0.03    -0.02   0.00  -0.03
 103   1    -0.09  -0.02  -0.07    -0.01   0.03  -0.01    -0.02  -0.01  -0.02
 104   1     0.03   0.04  -0.09     0.01   0.02  -0.03     0.01   0.01  -0.02
 105   1     0.02  -0.04   0.01     0.01   0.01  -0.02     0.01  -0.01   0.01
 106   1    -0.13  -0.11   0.00     0.00   0.05   0.04    -0.03  -0.05  -0.02
 107   1    -0.04  -0.11   0.12     0.02   0.00  -0.03    -0.01  -0.03   0.04
 108   1    -0.02  -0.07   0.05    -0.02  -0.04   0.04     0.00   0.00  -0.01
 109   1     0.09   0.00  -0.12    -0.01   0.02   0.00     0.02   0.00  -0.01
 110   1    -0.03   0.11   0.14     0.01  -0.03  -0.05    -0.01   0.04   0.06
 111   1    -0.18   0.15  -0.13     0.04  -0.04   0.01    -0.05   0.07  -0.02
 112   1     0.01  -0.06  -0.09     0.01   0.00   0.00     0.01  -0.02  -0.02
 113   1     0.01   0.17   0.05     0.03  -0.02  -0.01    -0.01   0.05   0.03
 114   1     0.01  -0.07   0.16     0.01   0.00  -0.02     0.00  -0.02   0.06
                    40                     41                     42
                    ?A                     ?A                     ?A
 Frequencies --   191.9084               202.2747               203.9691
 Red. masses --     2.4482                 1.9194                 2.5202
 Frc consts  --     0.0531                 0.0463                 0.0618
 IR Inten    --     0.7020                 3.2705                 1.3433
 Raman Activ --     0.0000                 0.0000                 0.0000
 Depolar     --     0.0000                 0.0000                 0.0000
 Atom AN      X      Y      Z        X      Y      Z        X      Y      Z
   1   8     0.02  -0.01   0.01     0.01  -0.01   0.02     0.00   0.01  -0.01
   2  12    -0.03   0.01  -0.03    -0.01   0.00  -0.03     0.00   0.01   0.02
   3   8     0.01   0.02  -0.03     0.01   0.01  -0.03     0.00   0.02  -0.03
   4   6     0.01  -0.01   0.00     0.00  -0.02   0.00     0.00   0.01   0.00
   5   7     0.04   0.00  -0.01     0.00  -0.03   0.00     0.00   0.02   0.05
   6   7    -0.05  -0.02   0.01     0.00  -0.01  -0.01     0.01   0.02   0.06
   7   8     0.01  -0.01   0.00     0.00  -0.02  -0.01     0.00   0.01   0.00
   8   6     0.01  -0.02   0.00     0.01  -0.02   0.00     0.00   0.02   0.07
   9   6     0.01  -0.03   0.01     0.02  -0.01  -0.01     0.01   0.04   0.21
  10   6    -0.02  -0.01   0.01     0.01   0.00   0.00     0.00   0.02   0.09
  11   8     0.02   0.03   0.02     0.00   0.02   0.00     0.00  -0.01  -0.01
  12   6     0.02   0.06   0.04     0.00   0.07   0.03     0.00  -0.01  -0.02
  13   6    -0.01   0.04   0.01    -0.01   0.04   0.00    -0.01   0.01  -0.02
  14   6     0.01   0.00  -0.01     0.00  -0.01  -0.01    -0.01   0.01   0.00
  15   8     0.02   0.09   0.07     0.00   0.11   0.07     0.01  -0.02  -0.03
  16   6     0.02   0.02  -0.02     0.02   0.02  -0.02    -0.01  -0.01   0.01
  17   8    -0.02  -0.01  -0.02    -0.02   0.01  -0.04     0.01  -0.01   0.00
  18   6    -0.01   0.00   0.01    -0.01   0.01   0.02     0.01   0.01   0.01
  19   8    -0.03  -0.01   0.00    -0.03   0.01   0.01     0.01   0.00   0.00
  20   8    -0.02  -0.04  -0.02    -0.01  -0.03  -0.02     0.01  -0.02  -0.01
  21   6     0.00  -0.02  -0.01     0.01   0.00  -0.01     0.02  -0.02   0.00
  22   6    -0.01   0.00   0.00     0.00   0.01   0.01     0.01  -0.01   0.01
  23   6    -0.01  -0.02   0.00    -0.01   0.01   0.02     0.01   0.00   0.02
  24   8     0.01  -0.02  -0.01     0.01  -0.02  -0.04     0.01  -0.03  -0.02
  25   6    -0.02  -0.03   0.01    -0.02  -0.05   0.03    -0.01  -0.05   0.02
  26   6    -0.01   0.01  -0.01    -0.02   0.06   0.01    -0.01   0.04   0.02
  27   6    -0.03   0.04   0.01     0.01   0.05   0.01    -0.06   0.01  -0.01
  28   6     0.05   0.01  -0.06     0.02  -0.03  -0.01    -0.02   0.03   0.00
  29   6     0.04   0.02  -0.01    -0.01  -0.03   0.01     0.00   0.02   0.00
  30   6    -0.07  -0.01   0.01     0.01  -0.01   0.00     0.02   0.00   0.00
  31   6     0.04   0.01   0.00    -0.01  -0.03   0.01     0.01   0.01   0.00
  32   6     0.03  -0.03   0.02    -0.01   0.01  -0.01     0.00  -0.03   0.01
  33   6     0.04  -0.06   0.04    -0.01   0.04  -0.02     0.00  -0.04   0.01
  34   6     0.05  -0.03   0.02    -0.01   0.02  -0.01    -0.01  -0.01   0.00
  35   6     0.05   0.01   0.00    -0.01  -0.02   0.00    -0.01   0.02   0.00
  36   6     0.01   0.00  -0.02    -0.01  -0.02   0.01     0.00   0.00  -0.01
  37   6     0.02   0.02   0.02    -0.01  -0.02   0.00     0.00   0.02  -0.01
  38   6    -0.05  -0.03   0.01     0.02  -0.02   0.00     0.03   0.01   0.00
  39   6    -0.01  -0.06  -0.01     0.00  -0.01   0.01     0.01   0.02  -0.01
  40   6     0.01  -0.08  -0.01    -0.01   0.00   0.01    -0.02   0.03  -0.01
  41   6    -0.02  -0.05   0.00     0.01   0.00   0.00    -0.01   0.01  -0.01
  42   6    -0.07  -0.01   0.01     0.02  -0.01   0.00     0.01  -0.01  -0.01
  43   6    -0.01   0.00   0.02     0.02  -0.02   0.00     0.01  -0.01  -0.01
  44   6    -0.03   0.01  -0.02     0.01  -0.01   0.00     0.01  -0.01  -0.01
  45   6     0.01  -0.02  -0.05    -0.02   0.00   0.04     0.01  -0.02  -0.03
  46   6    -0.03   0.02   0.00     0.00  -0.01  -0.01    -0.03   0.01   0.01
  47   6    -0.03   0.02   0.03     0.01  -0.02  -0.02     0.02   0.01   0.02
  48   6    -0.03   0.01  -0.01    -0.02   0.01   0.02     0.00   0.00  -0.02
  49   6     0.02   0.03  -0.01     0.00   0.00   0.01     0.01  -0.01   0.00
  50   6     0.03   0.04   0.02    -0.01  -0.01  -0.02     0.00  -0.01  -0.03
  51   6     0.02   0.01   0.03     0.01   0.00  -0.02    -0.02  -0.02  -0.02
  52   6     0.03   0.05  -0.01     0.01  -0.01   0.02    -0.02  -0.04   0.02
  53   6    -0.01   0.00   0.00     0.04  -0.03   0.01    -0.02  -0.03  -0.13
  54   6     0.00   0.03  -0.01     0.01   0.00   0.01     0.00   0.01  -0.11
  55   1     0.02  -0.03   0.01     0.02   0.00  -0.01     0.01   0.04   0.19
  56   1    -0.05   0.04   0.00    -0.07   0.04  -0.01     0.00   0.02  -0.03
  57   1     0.01  -0.01  -0.01     0.02  -0.01  -0.01    -0.01   0.00   0.00
  58   1     0.03   0.01  -0.04     0.04   0.01  -0.05    -0.02  -0.01   0.02
  59   1     0.01   0.03  -0.02     0.02   0.03  -0.02    -0.01  -0.01   0.01
  60   1     0.01   0.04  -0.02     0.01   0.05  -0.01    -0.01  -0.03   0.00
  61   1     0.00   0.01  -0.01     0.01   0.04   0.00     0.02   0.00   0.00
  62   1    -0.02  -0.03   0.01     0.00  -0.01   0.05     0.02  -0.01   0.04
  63   1     0.04  -0.01   0.03     0.22   0.01   0.10     0.15  -0.01   0.06
  64   1    -0.05  -0.10   0.04    -0.12  -0.31   0.14    -0.09  -0.22   0.10
  65   1    -0.07   0.00  -0.04    -0.19   0.08  -0.11    -0.13   0.05  -0.08
  66   1    -0.06   0.04  -0.01    -0.04   0.07  -0.03    -0.03   0.05   0.00
  67   1     0.04   0.04  -0.03     0.00   0.09   0.03     0.01   0.07   0.03
  68   1     0.00  -0.03   0.01    -0.02   0.08   0.01    -0.01   0.04   0.01
  69   1    -0.08   0.05   0.06    -0.08   0.10   0.09    -0.12   0.01   0.06
  70   1    -0.05   0.03  -0.04    -0.02  -0.02  -0.09    -0.10   0.00  -0.09
  71   1     0.02   0.05   0.03     0.13   0.09   0.03     0.00   0.02   0.01
  72   1     0.06  -0.01  -0.02     0.07   0.00  -0.05    -0.06   0.00   0.03
  73   1     0.12   0.00  -0.08    -0.02  -0.02   0.01     0.02   0.01  -0.02
  74   1     0.01   0.04  -0.12     0.03  -0.10  -0.01    -0.03   0.08   0.00
  75   1     0.02  -0.05   0.03     0.00   0.02  -0.02     0.01  -0.05   0.01
  76   1     0.04  -0.10   0.06     0.00   0.08  -0.04    -0.01  -0.08   0.01
  77   1     0.05  -0.05   0.03    -0.01   0.04  -0.02    -0.01  -0.01   0.00
  78   1     0.01  -0.01  -0.04    -0.01  -0.02   0.00     0.00  -0.01  -0.02
  79   1     0.03   0.04   0.07    -0.01  -0.03   0.00     0.00   0.01  -0.01
  80   1     0.01  -0.08  -0.02     0.00  -0.01   0.01     0.02   0.03  -0.01
  81   1     0.05  -0.11  -0.02    -0.02   0.01   0.02    -0.04   0.05  -0.02
  82   1    -0.01  -0.06   0.00     0.00   0.00   0.01    -0.02   0.01  -0.01
  83   1     0.00  -0.02   0.07     0.01  -0.02   0.01     0.01   0.00  -0.04
  84   1    -0.04   0.00  -0.07     0.01   0.00   0.00     0.01  -0.01  -0.01
  85   1    -0.01  -0.05  -0.06     0.00   0.04   0.04     0.01  -0.04  -0.02
  86   1     0.03  -0.01  -0.08    -0.04   0.01   0.06     0.01  -0.01  -0.04
  87   1     0.01  -0.02  -0.06    -0.03  -0.01   0.04     0.02  -0.02  -0.05
  88   1    -0.06  -0.02   0.00     0.00   0.01  -0.02    -0.04  -0.03   0.01
  89   1    -0.02   0.04   0.01    -0.01  -0.01   0.00    -0.01   0.03  -0.01
  90   1    -0.06   0.04   0.02     0.01  -0.03  -0.03    -0.06   0.03   0.02
  91   1    -0.36  -0.06   0.22     0.32   0.08  -0.22     0.05  -0.01   0.01
  92   1    -0.07   0.07  -0.34     0.04  -0.10   0.33     0.03   0.02   0.05
  93   1     0.28   0.02   0.20    -0.32  -0.03  -0.20     0.01   0.02   0.02
  94   1    -0.05  -0.02   0.01    -0.10   0.12   0.05     0.04  -0.05  -0.03
  95   1    -0.04   0.01  -0.02     0.09   0.00   0.10    -0.05   0.00  -0.06
  96   1    -0.03   0.02  -0.03    -0.05  -0.06  -0.07     0.01   0.03   0.02
  97   1     0.06   0.05  -0.05     0.00   0.00   0.00    -0.01   0.00   0.01
  98   1     0.05   0.03   0.04     0.00   0.00   0.01     0.01  -0.03  -0.02
  99   1     0.01   0.03  -0.03     0.00  -0.01   0.01     0.03   0.00   0.01
 100   1     0.16   0.14  -0.09    -0.06  -0.05   0.02     0.07   0.13  -0.12
 101   1    -0.11  -0.04  -0.04     0.05   0.02   0.00    -0.13  -0.10  -0.11
 102   1     0.08   0.02   0.22    -0.03   0.00  -0.10     0.06  -0.05   0.12
 103   1     0.11   0.06   0.07     0.00   0.02  -0.01    -0.13  -0.06  -0.07
 104   1    -0.03  -0.06   0.08     0.02   0.00  -0.03     0.04   0.05  -0.08
 105   1    -0.01   0.06  -0.07     0.02   0.00  -0.03     0.01  -0.06   0.08
 106   1     0.09   0.09   0.02     0.00   0.06   0.07    -0.07   0.00   0.04
 107   1     0.02   0.08  -0.08     0.04  -0.01  -0.04     0.02  -0.07   0.00
 108   1     0.01   0.03  -0.01    -0.02  -0.08   0.06    -0.05  -0.10   0.06
 109   1    -0.02   0.01   0.00     0.05  -0.06   0.01    -0.11   0.18  -0.12
 110   1    -0.03  -0.01   0.00     0.06  -0.01   0.02    -0.04  -0.08  -0.39
 111   1    -0.01   0.01   0.00     0.03  -0.04   0.01     0.08  -0.22  -0.05
 112   1    -0.02   0.08   0.06     0.02   0.01   0.03    -0.07  -0.01  -0.23
 113   1    -0.01  -0.04  -0.02     0.00   0.00   0.02     0.17   0.01  -0.17
 114   1     0.02   0.07  -0.07     0.02   0.01   0.01    -0.11   0.00  -0.12
                    43                     44                     45
                    ?A                     ?A                     ?A
 Frequencies --   209.2486               210.8565               212.2710
 Red. masses --     1.5703                 2.0342                 3.2614
 Frc consts  --     0.0405                 0.0533                 0.0866
 IR Inten    --     2.5356                 1.2541                 2.9983
 Raman Activ --     0.0000                 0.0000                 0.0000
 Depolar     --     0.0000                 0.0000                 0.0000
 Atom AN      X      Y      Z        X      Y      Z        X      Y      Z
   1   8     0.02  -0.01   0.02     0.02   0.02  -0.06     0.07   0.01  -0.10
   2  12     0.01  -0.01  -0.01     0.02   0.01   0.03    -0.02  -0.02   0.00
   3   8    -0.01  -0.02  -0.02     0.00   0.04   0.02     0.00   0.00  -0.04
   4   6     0.01   0.00   0.01     0.04   0.06  -0.02     0.09   0.09  -0.04
   5   7     0.01   0.01   0.01     0.02   0.02  -0.01    -0.02  -0.03   0.00
   6   7     0.01   0.00   0.01    -0.01  -0.02  -0.01     0.00   0.01   0.00
   7   8     0.01   0.00   0.01     0.02   0.07  -0.01     0.07   0.10   0.00
   8   6     0.01   0.01   0.01     0.01   0.01  -0.02     0.00  -0.02   0.01
   9   6     0.01   0.00   0.04     0.00  -0.02  -0.05     0.00   0.01   0.03
  10   6     0.01   0.00   0.02     0.00  -0.02  -0.02     0.00   0.01   0.01
  11   8     0.01   0.02   0.01     0.00  -0.05  -0.04     0.03  -0.04  -0.06
  12   6     0.01   0.02   0.02     0.01  -0.03  -0.02     0.02   0.02   0.02
  13   6    -0.01   0.00  -0.01     0.01  -0.01   0.00    -0.01  -0.01  -0.02
  14   6     0.01   0.01   0.00     0.01   0.03   0.00     0.06   0.06   0.00
  15   8     0.00   0.05   0.04     0.01  -0.01  -0.01     0.01   0.15   0.12
  16   6     0.00   0.01  -0.01    -0.05  -0.09   0.01    -0.06  -0.14  -0.01
  17   8    -0.01   0.00   0.01     0.00   0.00   0.02    -0.01   0.00   0.01
  18   6    -0.02  -0.02  -0.02     0.00   0.00  -0.01    -0.02  -0.01  -0.01
  19   8    -0.02  -0.02  -0.02     0.02   0.00   0.00    -0.03  -0.02  -0.02
  20   8    -0.02   0.00   0.01     0.01  -0.01   0.00    -0.02  -0.01   0.00
  21   6    -0.02   0.00   0.00     0.01  -0.01   0.01    -0.01   0.00   0.00
  22   6    -0.02   0.00  -0.01     0.01   0.00   0.01    -0.01   0.00   0.01
  23   6    -0.02  -0.03  -0.03     0.01   0.00   0.01    -0.02  -0.02  -0.01
  24   8     0.00   0.02   0.04     0.00  -0.01  -0.01    -0.01   0.00   0.01
  25   6     0.02   0.05  -0.03    -0.01  -0.01   0.02     0.00   0.02   0.00
  26   6    -0.01  -0.10  -0.02     0.00   0.01   0.01    -0.03  -0.06   0.00
  27   6     0.00   0.02   0.02    -0.06  -0.03  -0.02    -0.09   0.00   0.02
  28   6     0.05  -0.01  -0.04    -0.06   0.04   0.07     0.00   0.02   0.09
  29   6     0.01   0.01   0.00     0.02   0.02   0.00    -0.02  -0.03   0.00
  30   6     0.00   0.00   0.00    -0.03   0.00   0.00     0.02   0.00   0.00
  31   6     0.01   0.01   0.00     0.02   0.00   0.00    -0.03  -0.01   0.00
  32   6     0.01  -0.03   0.01     0.02  -0.03   0.01    -0.03   0.03  -0.01
  33   6     0.00  -0.03   0.00     0.02  -0.04   0.01    -0.02   0.02   0.00
  34   6     0.00   0.00   0.00     0.02   0.00   0.00    -0.02  -0.01   0.00
  35   6     0.00   0.01   0.00     0.02   0.01   0.00    -0.02  -0.03   0.00
  36   6     0.00   0.00  -0.01     0.01   0.00  -0.01    -0.01  -0.01   0.01
  37   6    -0.01   0.01   0.01     0.00   0.01   0.01     0.00  -0.02  -0.01
  38   6    -0.01   0.01   0.00    -0.03   0.00   0.00     0.02  -0.01   0.00
  39   6    -0.01   0.01   0.00     0.00  -0.02  -0.01     0.00   0.01   0.01
  40   6    -0.01   0.00   0.00     0.02  -0.04  -0.02    -0.01   0.03   0.02
  41   6    -0.01   0.00   0.00    -0.01  -0.02  -0.01     0.01   0.02   0.01
  42   6     0.00   0.00   0.00    -0.04   0.00   0.00     0.03   0.00   0.00
  43   6    -0.01   0.01   0.00    -0.02   0.01   0.00     0.01  -0.01   0.00
  44   6     0.00   0.00   0.00    -0.02   0.01   0.00     0.02   0.00   0.00
  45   6     0.00  -0.01  -0.03     0.00   0.00  -0.03     0.00   0.00   0.04
  46   6    -0.02   0.01   0.00    -0.02   0.01   0.00     0.02  -0.02   0.00
  47   6     0.02   0.00   0.03     0.01   0.00   0.03    -0.01  -0.01  -0.05
  48   6    -0.03   0.01   0.00    -0.05   0.01   0.00     0.05   0.00   0.02
  49   6     0.00   0.00   0.00    -0.01   0.01   0.00     0.01  -0.01   0.00
  50   6     0.00   0.00   0.00     0.02   0.02   0.04    -0.02  -0.02  -0.03
  51   6     0.00   0.00   0.01     0.00   0.01   0.02     0.01   0.00  -0.01
  52   6    -0.01   0.00  -0.01     0.00   0.02  -0.02     0.00  -0.02   0.02
  53   6     0.00   0.00  -0.03    -0.01   0.03   0.03     0.03  -0.04  -0.01
  54   6     0.01   0.00  -0.03     0.01   0.00   0.03     0.00   0.01  -0.02
  55   1     0.01   0.00   0.04    -0.01  -0.02  -0.05     0.02   0.02   0.03
  56   1    -0.04   0.00  -0.02     0.06  -0.01   0.01    -0.02   0.00  -0.03
  57   1     0.01   0.01   0.00     0.00   0.04   0.02     0.06   0.09   0.04
  58   1     0.02   0.00  -0.04    -0.11  -0.06   0.09    -0.16  -0.11   0.08
  59   1    -0.01   0.02   0.00    -0.07  -0.09   0.04    -0.12  -0.13   0.05
  60   1    -0.01   0.02  -0.02    -0.02  -0.19  -0.02    -0.04  -0.29  -0.08
  61   1    -0.03  -0.02   0.00     0.02   0.01   0.00    -0.02   0.00   0.02
  62   1    -0.04  -0.02  -0.05     0.01   0.00   0.02    -0.02  -0.02  -0.02
  63   1    -0.29  -0.03  -0.09     0.18   0.03   0.03    -0.10   0.00  -0.02
  64   1     0.14   0.35  -0.17    -0.08  -0.18   0.09     0.04   0.12  -0.04
  65   1     0.23  -0.14   0.14    -0.13   0.11  -0.07     0.07  -0.04   0.05
  66   1     0.04  -0.12   0.02    -0.01   0.02   0.00     0.03  -0.09   0.01
  67   1    -0.05  -0.14  -0.04     0.00   0.02   0.02    -0.09  -0.10   0.03
  68   1    -0.01  -0.09  -0.02    -0.01   0.02   0.00    -0.05  -0.01  -0.02
  69   1     0.06   0.02  -0.05    -0.06  -0.09  -0.01    -0.07  -0.03   0.01
  70   1     0.03   0.06   0.10    -0.08   0.01  -0.04    -0.10   0.09   0.04
  71   1    -0.07  -0.02   0.02    -0.09  -0.04  -0.02    -0.16  -0.05   0.05
  72   1     0.04  -0.05   0.04    -0.13   0.01   0.10    -0.03  -0.01   0.13
  73   1     0.14  -0.05  -0.10    -0.07   0.02   0.05    -0.04  -0.03   0.06
  74   1     0.00   0.07  -0.09    -0.03   0.12   0.13     0.04   0.05   0.16
  75   1     0.01  -0.05   0.01     0.02  -0.05   0.02    -0.03   0.05  -0.02
  76   1     0.00  -0.05   0.00     0.02  -0.06   0.01    -0.02   0.05  -0.01
  77   1     0.00   0.00  -0.01     0.01  -0.01   0.00    -0.01  -0.02   0.01
  78   1     0.00   0.00  -0.02     0.01   0.00  -0.03    -0.01   0.00   0.03
  79   1    -0.01  -0.01   0.01     0.00   0.00   0.03     0.00  -0.01  -0.03
  80   1    -0.01   0.01   0.00     0.01  -0.03  -0.01    -0.01   0.01   0.02
  81   1    -0.01   0.01  -0.01     0.06  -0.07  -0.03    -0.04   0.05   0.03
  82   1    -0.01   0.00   0.00     0.00  -0.03  -0.01     0.01   0.03   0.01
  83   1    -0.01   0.01   0.00    -0.01   0.00   0.02     0.01  -0.01   0.00
  84   1     0.00   0.00  -0.01    -0.03   0.00  -0.03     0.02   0.01   0.02
  85   1    -0.01  -0.02  -0.03    -0.05  -0.01  -0.06     0.05   0.02   0.07
  86   1     0.01   0.00  -0.04     0.03  -0.02  -0.06    -0.04   0.02   0.08
  87   1     0.00  -0.01  -0.03    -0.01   0.01   0.00     0.00  -0.01   0.00
  88   1    -0.03  -0.01   0.01    -0.03  -0.01  -0.01     0.04   0.01  -0.01
  89   1     0.00   0.03  -0.01    -0.01   0.03   0.00     0.01  -0.04   0.00
  90   1    -0.04   0.03   0.01    -0.03   0.03   0.00     0.05  -0.04  -0.02
  91   1     0.31   0.06  -0.15     0.27   0.05  -0.13    -0.22  -0.04   0.08
  92   1     0.05  -0.07   0.37     0.03  -0.07   0.34    -0.04   0.05  -0.30
  93   1    -0.28   0.02  -0.12    -0.27   0.02  -0.10     0.20  -0.04   0.04
  94   1    -0.10   0.06   0.03    -0.16   0.08   0.05     0.14  -0.03  -0.03
  95   1     0.03   0.01   0.04     0.06   0.01   0.05    -0.03  -0.01   0.01
  96   1    -0.06  -0.03  -0.07    -0.08  -0.06  -0.12     0.07   0.05   0.12
  97   1    -0.01   0.01   0.01     0.00   0.02  -0.01     0.05  -0.03  -0.02
  98   1     0.00   0.00   0.00     0.00   0.01   0.01     0.00   0.02   0.02
  99   1     0.01   0.00   0.01    -0.01   0.02  -0.01    -0.03  -0.03  -0.02
 100   1     0.04   0.07  -0.05     0.15   0.13  -0.07    -0.14  -0.14   0.08
 101   1    -0.07  -0.04  -0.04    -0.13  -0.04  -0.01     0.14   0.06   0.04
 102   1     0.03  -0.02   0.08     0.08   0.00   0.24    -0.08   0.01  -0.22
 103   1     0.03   0.00   0.02     0.07   0.03   0.04    -0.01   0.01  -0.01
 104   1    -0.02  -0.02   0.04    -0.04  -0.05   0.06     0.02   0.01  -0.03
 105   1    -0.02   0.02  -0.01    -0.03   0.04  -0.05     0.02   0.00  -0.01
 106   1     0.00  -0.04  -0.04     0.03  -0.06  -0.07    -0.01   0.05   0.06
 107   1    -0.02   0.00   0.03    -0.04   0.03   0.05     0.04  -0.02  -0.04
 108   1     0.01   0.04  -0.03     0.04   0.11  -0.07    -0.03  -0.09   0.06
 109   1    -0.02   0.05  -0.03    -0.01   0.00   0.04     0.04  -0.04  -0.02
 110   1    -0.01  -0.01  -0.08    -0.02   0.03   0.08     0.05  -0.02  -0.03
 111   1     0.02  -0.04  -0.01    -0.02   0.09   0.02     0.03  -0.07  -0.01
 112   1    -0.01   0.01  -0.04     0.02   0.02   0.09    -0.01   0.00  -0.06
 113   1     0.05  -0.01  -0.04    -0.04  -0.03   0.04     0.03   0.04  -0.02
 114   1    -0.01   0.01  -0.04     0.05   0.02   0.01    -0.02   0.00   0.01
                    46                     47                     48
                    ?A                     ?A                     ?A
 Frequencies --   219.2132               222.5400               224.4802
 Red. masses --     1.4088                 1.1495                 1.1187
 Frc consts  --     0.0399                 0.0335                 0.0332
 IR Inten    --     1.7104                 0.9109                 0.0953
 Raman Activ --     0.0000                 0.0000                 0.0000
 Depolar     --     0.0000                 0.0000                 0.0000
 Atom AN      X      Y      Z        X      Y      Z        X      Y      Z
   1   8     0.00   0.00   0.00     0.00   0.00   0.00     0.00   0.00   0.00
   2  12     0.03  -0.01  -0.02     0.01  -0.01   0.01     0.00   0.01   0.00
   3   8     0.00   0.00   0.00     0.00  -0.01  -0.01     0.00   0.00   0.00
   4   6     0.00   0.00   0.00     0.00   0.00   0.00     0.00   0.00   0.00
   5   7    -0.01  -0.01  -0.01     0.00  -0.01   0.02     0.00   0.01  -0.02
   6   7     0.03  -0.01   0.02     0.01  -0.01   0.01     0.00   0.01   0.01
   7   8     0.00   0.00   0.00     0.00   0.00   0.00     0.00   0.00   0.00
   8   6     0.00   0.00  -0.01     0.00  -0.01   0.02    -0.01   0.01   0.00
   9   6     0.00   0.00   0.00     0.00  -0.01   0.03    -0.01   0.01   0.03
  10   6     0.02  -0.01   0.01     0.00  -0.02   0.00    -0.01   0.00   0.01
  11   8     0.00   0.00   0.00     0.00   0.01   0.00     0.00   0.00   0.00
  12   6     0.00   0.01   0.01     0.00   0.01   0.00     0.00   0.00   0.00
  13   6     0.00   0.00   0.00     0.00   0.00   0.00     0.00   0.00   0.00
  14   6     0.00   0.00   0.00     0.00   0.00   0.00     0.00   0.00   0.00
  15   8     0.00   0.03   0.02     0.00   0.01   0.00     0.00  -0.01  -0.01
  16   6     0.01   0.00   0.00     0.00   0.00   0.00     0.00   0.00   0.00
  17   8    -0.01   0.01   0.00     0.00   0.00   0.01     0.00   0.00   0.00
  18   6    -0.01   0.00   0.00     0.00   0.00   0.00     0.00   0.00   0.00
  19   8    -0.01   0.00   0.00     0.00   0.00   0.00     0.00   0.00   0.01
  20   8    -0.01   0.00   0.00     0.00   0.01   0.00     0.00   0.00   0.00
  21   6     0.00   0.00   0.00     0.00   0.00   0.00     0.00   0.00   0.00
  22   6     0.00   0.01   0.00     0.00   0.00   0.00     0.00   0.00   0.00
  23   6    -0.01   0.00   0.00     0.00   0.00  -0.01     0.00   0.00   0.00
  24   8     0.00   0.00   0.00    -0.01   0.00   0.00     0.00   0.00   0.00
  25   6     0.00   0.01   0.00    -0.01   0.01   0.00     0.00  -0.01   0.00
  26   6    -0.01  -0.01   0.00     0.01  -0.01  -0.01     0.01   0.00   0.00
  27   6     0.02   0.01   0.01     0.01   0.01   0.00    -0.01   0.00   0.00
  28   6     0.00  -0.01   0.01     0.00   0.00  -0.01     0.00   0.00   0.00
  29   6    -0.02  -0.01   0.00     0.00   0.00   0.00     0.00   0.00  -0.01
  30   6     0.03   0.00   0.01     0.00  -0.01   0.00     0.00   0.00   0.00
  31   6    -0.03  -0.01   0.00     0.01   0.00   0.00    -0.01  -0.01   0.00
  32   6    -0.02   0.03   0.00     0.01   0.00   0.00    -0.01   0.00   0.01
  33   6    -0.02   0.04   0.00     0.00  -0.01   0.00     0.01   0.02   0.02
  34   6    -0.01   0.01   0.00     0.00   0.00   0.00     0.02   0.01   0.01
  35   6    -0.01  -0.02   0.00     0.00   0.00   0.00     0.02  -0.01   0.00
  36   6    -0.01  -0.01   0.02     0.00   0.00   0.00     0.00  -0.01   0.00
  37   6     0.00  -0.02  -0.01     0.00   0.00   0.00     0.02  -0.01   0.00
  38   6     0.02   0.03   0.00     0.00   0.00   0.00     0.00   0.00   0.00
  39   6     0.02   0.03  -0.02     0.01  -0.01   0.01     0.01   0.00   0.00
  40   6     0.02   0.01  -0.03     0.01   0.00   0.01     0.00   0.01   0.00
  41   6     0.00   0.00  -0.02    -0.01   0.02   0.01     0.00   0.01   0.00
  42   6     0.00   0.00   0.00     0.00   0.01   0.01     0.00   0.01   0.00
  43   6     0.00   0.02  -0.02    -0.01   0.02   0.00     0.00   0.00   0.00
  44   6    -0.01   0.00   0.01     0.00   0.01   0.01     0.00   0.00   0.00
  45   6    -0.01   0.01   0.05     0.00   0.00  -0.01     0.00   0.00   0.02
  46   6     0.02  -0.02   0.00    -0.01   0.00   0.00     0.02  -0.01  -0.01
  47   6    -0.01  -0.01  -0.04     0.00   0.00   0.00     0.02  -0.01  -0.03
  48   6     0.02  -0.01   0.01     0.01   0.00   0.00    -0.01  -0.01  -0.01
  49   6    -0.03   0.01   0.04     0.01   0.00  -0.01     0.01   0.00  -0.01
  50   6     0.02   0.01   0.03    -0.01   0.00   0.02     0.00   0.00   0.00
  51   6    -0.02   0.00  -0.01     0.00   0.03  -0.01     0.00   0.00   0.00
  52   6    -0.02  -0.02  -0.01     0.00   0.02  -0.01     0.00   0.00   0.00
  53   6     0.00  -0.01   0.00    -0.01  -0.02  -0.01    -0.03   0.01  -0.01
  54   6     0.01  -0.04   0.01     0.00  -0.04  -0.04    -0.02  -0.01  -0.02
  55   1    -0.01  -0.01   0.00     0.00  -0.01   0.02    -0.01   0.01   0.03
  56   1    -0.02   0.00   0.00    -0.01   0.00  -0.01     0.00   0.00   0.00
  57   1     0.01   0.00   0.00     0.00   0.00   0.00     0.00   0.00   0.00
  58   1     0.01   0.00   0.00     0.01   0.00  -0.01     0.00   0.00   0.00
  59   1     0.01   0.00  -0.01     0.00   0.01   0.00     0.00   0.00   0.00
  60   1     0.01   0.01   0.00     0.00   0.01   0.00     0.00   0.00   0.00
  61   1    -0.01   0.01   0.00     0.00   0.00   0.00     0.00  -0.01   0.00
  62   1    -0.01   0.00   0.00    -0.01   0.00  -0.02     0.00   0.00   0.00
  63   1     0.02   0.01   0.00     0.13   0.04   0.00    -0.05  -0.02   0.00
  64   1     0.00   0.00   0.00    -0.05  -0.11   0.04     0.01   0.03  -0.02
  65   1    -0.01   0.02   0.00    -0.09   0.10  -0.05     0.03  -0.04   0.01
  66   1     0.01  -0.02  -0.01    -0.03   0.01   0.01     0.00   0.00   0.00
  67   1    -0.02  -0.02   0.01     0.04   0.00  -0.05     0.01   0.00   0.00
  68   1    -0.01   0.02  -0.01     0.02  -0.07   0.01     0.01   0.00   0.00
  69   1     0.01   0.02   0.01     0.00   0.02   0.01    -0.02  -0.01   0.02
  70   1     0.02   0.00   0.01     0.01   0.00   0.00    -0.02  -0.01  -0.02
  71   1     0.03   0.01   0.01     0.02   0.01   0.01     0.01   0.00   0.00
  72   1     0.04   0.03  -0.05     0.01  -0.01   0.00     0.00   0.00   0.00
  73   1    -0.06   0.02   0.05     0.01  -0.01  -0.01     0.00   0.00   0.00
  74   1     0.03  -0.09   0.03     0.00   0.00  -0.01     0.00   0.00   0.00
  75   1    -0.03   0.04  -0.01     0.01  -0.01   0.00    -0.02  -0.01   0.02
  76   1    -0.02   0.07  -0.01     0.00  -0.01  -0.01     0.01   0.03   0.03
  77   1     0.00   0.01   0.00    -0.01   0.00   0.00     0.03   0.03   0.01
  78   1    -0.01   0.00   0.03     0.00   0.00  -0.01     0.00   0.00   0.01
  79   1     0.00  -0.01  -0.02     0.00   0.00  -0.01     0.02  -0.02   0.03
  80   1     0.02   0.05  -0.03     0.02  -0.03   0.01     0.01   0.00   0.00
  81   1     0.02   0.01  -0.05     0.01   0.00   0.01     0.00   0.01   0.00
  82   1    -0.01  -0.02  -0.03    -0.03   0.03   0.02     0.00   0.01   0.00
  83   1    -0.01   0.03  -0.05    -0.01   0.01   0.01     0.00   0.00   0.00
  84   1     0.00  -0.01   0.01     0.00   0.02   0.01     0.00   0.01   0.00
  85   1     0.05   0.03   0.08    -0.01   0.00  -0.01     0.04   0.00   0.04
  86   1    -0.06   0.02   0.10     0.00   0.00  -0.02    -0.03   0.01   0.04
  87   1    -0.01  -0.01   0.02     0.00   0.00   0.00     0.00  -0.01  -0.01
  88   1     0.04   0.02  -0.01    -0.01  -0.01   0.00     0.02   0.03  -0.03
  89   1     0.00  -0.04   0.01     0.00   0.01   0.00    -0.01  -0.03   0.02
  90   1     0.06  -0.05  -0.02    -0.02   0.01   0.00     0.06  -0.04  -0.02
  91   1    -0.09  -0.01   0.01     0.00   0.00   0.00    -0.08  -0.02   0.03
  92   1    -0.02   0.01  -0.14     0.00   0.00   0.01     0.01   0.04  -0.15
  93   1     0.07  -0.03  -0.01     0.00   0.01   0.01     0.13  -0.03   0.01
  94   1     0.03   0.00   0.00     0.07  -0.05  -0.03    -0.39   0.33   0.15
  95   1     0.02  -0.01   0.02    -0.07   0.00  -0.03     0.48   0.00   0.19
  96   1     0.02  -0.01   0.03     0.03   0.06   0.06    -0.14  -0.38  -0.38
  97   1    -0.14   0.04   0.10     0.07  -0.02  -0.04     0.03  -0.01  -0.02
  98   1    -0.04  -0.06  -0.06     0.02   0.03   0.03     0.01   0.01   0.01
  99   1     0.07   0.05   0.09    -0.03  -0.02  -0.04    -0.01  -0.01  -0.02
 100   1     0.24   0.30  -0.20    -0.11  -0.16   0.14    -0.04  -0.06   0.05
 101   1    -0.33  -0.18  -0.13     0.18   0.11   0.11     0.06   0.04   0.03
 102   1     0.16  -0.09   0.43    -0.08   0.06  -0.19    -0.03   0.02  -0.08
 103   1    -0.05  -0.03  -0.03     0.18   0.12   0.08     0.00   0.00   0.00
 104   1    -0.01   0.01  -0.02    -0.10  -0.13   0.07     0.00   0.00   0.00
 105   1    -0.03  -0.01   0.04    -0.08   0.14  -0.19    -0.01   0.01   0.00
 106   1    -0.06  -0.24  -0.16    -0.02  -0.35  -0.24    -0.01  -0.05  -0.03
 107   1    -0.10  -0.03   0.24    -0.18   0.03   0.38    -0.02   0.00   0.06
 108   1     0.09   0.18  -0.12     0.19   0.36  -0.17     0.02   0.05  -0.02
 109   1     0.01  -0.02   0.00    -0.02   0.01  -0.01    -0.05   0.04   0.00
 110   1     0.01   0.00   0.01    -0.02  -0.03  -0.04    -0.04   0.00  -0.04
 111   1    -0.01   0.00  -0.01     0.00  -0.04   0.00    -0.01   0.00   0.00
 112   1     0.03  -0.03   0.05    -0.01  -0.03  -0.05    -0.02  -0.02  -0.05
 113   1    -0.01  -0.10   0.00     0.03  -0.06  -0.06     0.01   0.00  -0.03
 114   1     0.00  -0.01  -0.04    -0.03  -0.03  -0.07    -0.04  -0.02  -0.01
                    49                     50                     51
                    ?A                     ?A                     ?A
 Frequencies --   227.7093               235.4998               235.9842
 Red. masses --     1.4103                 1.3959                 1.3573
 Frc consts  --     0.0431                 0.0456                 0.0445
 IR Inten    --     4.7730                 0.6951                 1.5363
 Raman Activ --     0.0000                 0.0000                 0.0000
 Depolar     --     0.0000                 0.0000                 0.0000
 Atom AN      X      Y      Z        X      Y      Z        X      Y      Z
   1   8     0.02  -0.01   0.03     0.01  -0.01   0.03     0.03  -0.01   0.01
   2  12    -0.01  -0.01   0.00    -0.02   0.00  -0.01     0.00   0.00   0.02
   3   8    -0.02  -0.02   0.00    -0.01   0.00   0.01    -0.01  -0.02   0.00
   4   6     0.01   0.00   0.01     0.00   0.00   0.01     0.02   0.01   0.00
   5   7     0.00   0.00   0.00    -0.01   0.00   0.00     0.00  -0.01   0.01
   6   7     0.00   0.00   0.00    -0.01   0.01  -0.02     0.01  -0.01   0.02
   7   8     0.01   0.00   0.02     0.01   0.00   0.02     0.02   0.01   0.01
   8   6     0.00   0.00   0.00     0.01   0.00   0.00     0.00  -0.02   0.00
   9   6     0.00   0.00   0.00     0.01   0.01   0.00     0.00  -0.02  -0.03
  10   6     0.00   0.00   0.00     0.00   0.02   0.00     0.00  -0.02  -0.01
  11   8     0.00   0.02   0.00    -0.01  -0.01  -0.01    -0.01   0.00  -0.02
  12   6    -0.01   0.00   0.00    -0.01  -0.01  -0.01    -0.01   0.00  -0.01
  13   6    -0.01  -0.03  -0.01     0.00  -0.01   0.00    -0.01   0.02   0.01
  14   6     0.00   0.01  -0.01    -0.02   0.00  -0.01    -0.01   0.01  -0.01
  15   8    -0.02   0.01   0.01    -0.02  -0.01  -0.01    -0.02  -0.02  -0.02
  16   6     0.00   0.01  -0.01    -0.02   0.00   0.00    -0.02  -0.02  -0.01
  17   8     0.01   0.01   0.05     0.01   0.00   0.00     0.00   0.00  -0.02
  18   6     0.00  -0.01  -0.02     0.01   0.00  -0.01     0.00   0.01   0.02
  19   8     0.02  -0.01  -0.03     0.02   0.00  -0.01    -0.02   0.01   0.02
  20   8     0.00   0.03   0.01     0.00   0.00  -0.01     0.01   0.00   0.01
  21   6    -0.01   0.01   0.01     0.01   0.01   0.00     0.00   0.00   0.00
  22   6     0.00   0.01   0.01     0.02   0.01   0.02    -0.01   0.00  -0.01
  23   6    -0.01  -0.01  -0.04     0.00   0.02   0.01     0.01   0.00   0.00
  24   8    -0.04   0.01   0.01     0.00   0.00  -0.01     0.01   0.00  -0.02
  25   6     0.01   0.06  -0.01     0.02  -0.01   0.03    -0.03  -0.02  -0.01
  26   6     0.01  -0.09  -0.02    -0.07   0.06   0.04     0.05   0.00  -0.03
  27   6     0.01  -0.02  -0.01     0.02  -0.02  -0.02     0.00   0.04   0.06
  28   6     0.04  -0.02  -0.03    -0.01  -0.02  -0.02    -0.01  -0.02   0.00
  29   6     0.00   0.00   0.00    -0.01   0.00   0.00     0.00  -0.01   0.00
  30   6     0.00   0.00   0.00     0.00   0.00  -0.01     0.01   0.00   0.01
  31   6     0.00   0.01   0.00    -0.01   0.02   0.00     0.01   0.01   0.00
  32   6    -0.01   0.01   0.00    -0.01   0.02   0.00     0.00   0.01   0.00
  33   6     0.00   0.00   0.00    -0.01   0.01   0.00     0.00   0.01   0.00
  34   6     0.00   0.00   0.00    -0.01   0.01   0.00     0.00   0.01   0.00
  35   6     0.00   0.00   0.00    -0.01   0.00   0.00     0.00   0.00   0.00
  36   6     0.00   0.01   0.00     0.00   0.01   0.00     0.00   0.01  -0.01
  37   6     0.00   0.00   0.00     0.00  -0.01   0.00     0.00   0.00   0.00
  38   6    -0.01   0.01   0.00     0.02  -0.03  -0.01     0.00   0.02   0.00
  39   6    -0.01   0.02   0.00     0.00  -0.02   0.01     0.00   0.02  -0.01
  40   6    -0.01   0.02   0.00     0.00  -0.01   0.02    -0.01   0.02  -0.02
  41   6     0.00   0.01   0.00     0.01  -0.01   0.01    -0.01   0.01  -0.01
  42   6     0.01   0.00   0.00     0.01  -0.01   0.00     0.00   0.00   0.00
  43   6    -0.01   0.01   0.00     0.02  -0.03  -0.01     0.00   0.02   0.00
  44   6     0.00   0.00   0.00     0.01  -0.01   0.00     0.00   0.00   0.00
  45   6     0.01   0.00   0.00     0.01   0.00   0.00     0.00   0.00  -0.02
  46   6     0.01   0.00   0.00     0.01   0.00   0.01    -0.01   0.01   0.00
  47   6     0.00   0.00   0.00     0.00   0.00  -0.01     0.00   0.00   0.00
  48   6     0.00   0.00   0.00     0.01   0.00   0.00     0.01   0.00   0.01
  49   6     0.00   0.00   0.01    -0.02  -0.01   0.01     0.02   0.01   0.01
  50   6     0.00   0.00  -0.01     0.00  -0.01  -0.01     0.00   0.00  -0.01
  51   6    -0.01  -0.01   0.02     0.02   0.02  -0.05    -0.01  -0.01   0.02
  52   6     0.00   0.00  -0.01     0.00  -0.02   0.03     0.00   0.01  -0.01
  53   6     0.00   0.00   0.00     0.03  -0.01   0.00     0.00  -0.01   0.02
  54   6     0.00   0.00   0.01     0.01   0.03   0.01     0.00  -0.03   0.01
  55   1     0.00   0.00   0.00     0.01   0.02   0.01     0.00  -0.02  -0.04
  56   1    -0.01  -0.03   0.00     0.01  -0.02   0.01    -0.03   0.05  -0.02
  57   1     0.01   0.01   0.00    -0.02   0.01   0.01    -0.01   0.02   0.01
  58   1     0.00  -0.01  -0.04    -0.01  -0.01  -0.03    -0.03  -0.03  -0.02
  59   1    -0.02   0.03   0.00    -0.04   0.03   0.02    -0.05   0.01   0.02
  60   1    -0.01   0.02  -0.02    -0.03   0.01  -0.02    -0.03  -0.03  -0.03
  61   1     0.00   0.00   0.00     0.01   0.01   0.02     0.00   0.00  -0.02
  62   1    -0.02   0.00  -0.07     0.04   0.03   0.05    -0.02  -0.01  -0.02
  63   1     0.44   0.15  -0.05    -0.04  -0.02   0.04    -0.12  -0.04   0.01
  64   1    -0.12  -0.29   0.12     0.03   0.04   0.02    -0.01   0.04  -0.02
  65   1    -0.26   0.39  -0.14     0.05  -0.05   0.03     0.01  -0.10   0.00
  66   1    -0.05  -0.04   0.06     0.04  -0.01   0.01    -0.04   0.05  -0.03
  67   1     0.05  -0.08  -0.11    -0.17   0.01   0.17     0.14   0.05  -0.11
  68   1     0.02  -0.21   0.02    -0.12   0.20  -0.04     0.09  -0.09   0.03
  69   1     0.14  -0.05  -0.14     0.09  -0.04  -0.09    -0.23   0.15   0.27
  70   1     0.07   0.05   0.14     0.05   0.01   0.06    -0.09  -0.11  -0.20
  71   1    -0.14  -0.06  -0.04    -0.06  -0.03  -0.05     0.30   0.11   0.12
  72   1     0.00  -0.11   0.13    -0.16  -0.21   0.31    -0.14  -0.18   0.28
  73   1     0.18  -0.12  -0.15     0.29  -0.21  -0.25     0.23  -0.19  -0.21
  74   1    -0.03   0.13  -0.10    -0.13   0.37  -0.11    -0.10   0.31  -0.07
  75   1    -0.01   0.00   0.00    -0.02   0.00   0.00     0.00  -0.01   0.00
  76   1     0.00   0.00   0.01    -0.01   0.01   0.01     0.00   0.00  -0.01
  77   1     0.00   0.00   0.00     0.00   0.01   0.00     0.00   0.01  -0.01
  78   1     0.00   0.01   0.01     0.00   0.02   0.02     0.00   0.00  -0.01
  79   1     0.00   0.00   0.00     0.00  -0.01  -0.01     0.00   0.00   0.00
  80   1    -0.01   0.03   0.00    -0.01  -0.02   0.01     0.01   0.02  -0.01
  81   1    -0.02   0.02   0.00    -0.01   0.00   0.03    -0.01   0.02  -0.03
  82   1     0.00   0.00   0.00     0.02   0.00   0.01    -0.03   0.00  -0.01
  83   1    -0.01   0.01  -0.01     0.01  -0.03   0.01     0.00   0.02  -0.02
  84   1     0.00   0.00   0.00     0.01  -0.01   0.01     0.00   0.00  -0.01
  85   1     0.01   0.00   0.00     0.02  -0.01   0.01     0.02  -0.02  -0.01
  86   1     0.01   0.00  -0.01     0.00   0.01   0.00    -0.01   0.02  -0.02
  87   1     0.01   0.00  -0.01     0.02   0.00  -0.02     0.00  -0.02  -0.04
  88   1     0.01   0.00   0.01     0.02  -0.01   0.02    -0.01  -0.01   0.01
  89   1     0.01  -0.01   0.00     0.01  -0.01   0.00     0.00   0.01  -0.01
  90   1     0.01   0.00   0.01     0.01   0.01   0.02    -0.02   0.02   0.01
  91   1    -0.03  -0.01   0.01    -0.03   0.00   0.00    -0.01   0.00   0.00
  92   1     0.00   0.01  -0.04     0.00   0.01  -0.05    -0.01   0.00  -0.01
  93   1     0.03  -0.01   0.01     0.03  -0.01   0.00     0.00   0.00   0.00
  94   1    -0.04   0.04   0.02     0.00   0.01   0.00     0.03  -0.01   0.00
  95   1     0.06   0.00   0.03     0.03   0.00   0.01    -0.02   0.00   0.01
  96   1    -0.01  -0.05  -0.04     0.00  -0.02   0.00     0.01   0.02   0.03
  97   1    -0.02   0.01   0.02    -0.05  -0.01   0.03     0.01   0.03   0.00
  98   1     0.00  -0.01  -0.01    -0.03  -0.02  -0.03     0.02   0.00   0.01
  99   1     0.02   0.01   0.02     0.01   0.00   0.03     0.03   0.02   0.01
 100   1     0.00   0.02  -0.02     0.04   0.05  -0.05    -0.01  -0.01   0.01
 101   1    -0.02  -0.02  -0.02    -0.07  -0.05  -0.04     0.02   0.01   0.00
 102   1     0.01  -0.01   0.01     0.03  -0.04   0.07    -0.01   0.01  -0.03
 103   1    -0.10  -0.07  -0.03     0.21   0.14   0.06    -0.18  -0.10  -0.07
 104   1     0.04   0.08  -0.01    -0.08  -0.18   0.02     0.08   0.15  -0.05
 105   1     0.03  -0.07   0.12    -0.08   0.14  -0.27     0.07  -0.11   0.19
 106   1     0.01   0.08   0.04    -0.02  -0.04   0.01    -0.01  -0.05  -0.04
 107   1     0.04   0.00  -0.10    -0.02  -0.02   0.07    -0.02   0.00   0.05
 108   1    -0.06  -0.07   0.02     0.04   0.00   0.04     0.02   0.06  -0.04
 109   1     0.00  -0.01   0.00     0.03  -0.02   0.00     0.01  -0.04   0.03
 110   1     0.00   0.00   0.01     0.04   0.01   0.01     0.00  -0.01   0.05
 111   1     0.00   0.00   0.00     0.02  -0.01   0.00    -0.01   0.01   0.02
 112   1     0.00  -0.01  -0.01     0.01   0.06   0.05     0.01  -0.04   0.02
 113   1     0.00   0.02   0.01    -0.01  -0.01   0.01    -0.03  -0.03   0.02
 114   1     0.00  -0.01   0.03     0.03   0.06  -0.03     0.00  -0.03   0.02
                    52                     53                     54
                    ?A                     ?A                     ?A
 Frequencies --   243.9385               244.6568               248.4805
 Red. masses --     1.5892                 2.2458                 1.5119
 Frc consts  --     0.0557                 0.0792                 0.0550
 IR Inten    --     1.3432                 1.1044                 1.1558
 Raman Activ --     0.0000                 0.0000                 0.0000
 Depolar     --     0.0000                 0.0000                 0.0000
 Atom AN      X      Y      Z        X      Y      Z        X      Y      Z
   1   8     0.00   0.01  -0.02    -0.01   0.00   0.01     0.00   0.00   0.01
   2  12     0.04   0.00  -0.02     0.06  -0.02  -0.04     0.02   0.02   0.01
   3   8     0.01  -0.04   0.02     0.01   0.02   0.00     0.00   0.04   0.01
   4   6     0.01   0.00  -0.01    -0.01  -0.01   0.00    -0.01   0.00   0.00
   5   7     0.00   0.01  -0.02     0.00  -0.02   0.01     0.01   0.01  -0.05
   6   7     0.01   0.00  -0.04     0.03  -0.03  -0.02     0.00  -0.01   0.02
   7   8     0.00   0.00  -0.01    -0.01  -0.01   0.00     0.00   0.00   0.00
   8   6     0.01   0.02   0.00    -0.01  -0.02   0.03     0.01   0.01  -0.02
   9   6     0.01   0.02   0.04     0.00  -0.02   0.05     0.02   0.00   0.02
  10   6     0.02   0.00   0.01     0.01  -0.04   0.00     0.02   0.00   0.01
  11   8     0.01  -0.02   0.01    -0.01  -0.02  -0.01    -0.01   0.00   0.00
  12   6     0.01  -0.02   0.01     0.00   0.01   0.01     0.00   0.00  -0.01
  13   6     0.01   0.00   0.02     0.01   0.01   0.00     0.00   0.01   0.00
  14   6     0.00  -0.01   0.01    -0.02  -0.01   0.00    -0.01   0.00   0.00
  15   8     0.01  -0.04  -0.01     0.01   0.03   0.02     0.00   0.00  -0.01
  16   6     0.00  -0.02   0.00     0.00   0.01   0.01     0.00   0.01   0.00
  17   8    -0.01   0.00   0.00    -0.01   0.01  -0.01    -0.01   0.00   0.00
  18   6     0.00  -0.01  -0.01    -0.01   0.00   0.00     0.00   0.00   0.01
  19   8     0.00   0.00   0.01    -0.01  -0.01  -0.01     0.00   0.00   0.01
  20   8    -0.01   0.01  -0.01    -0.01  -0.01   0.00     0.01  -0.01   0.01
  21   6    -0.01   0.00  -0.01     0.00   0.01   0.00     0.00  -0.01   0.00
  22   6    -0.01   0.00  -0.01     0.00   0.01   0.01     0.00  -0.01  -0.01
  23   6    -0.01  -0.01  -0.03    -0.01   0.01   0.02     0.01  -0.01   0.01
  24   8    -0.02   0.01   0.01     0.01   0.00  -0.01     0.01  -0.01   0.00
  25   6     0.00   0.04  -0.03     0.01   0.00   0.02     0.00  -0.02   0.00
  26   6     0.00  -0.04  -0.02    -0.04   0.05   0.02     0.04   0.00  -0.01
  27   6     0.06   0.04   0.07     0.04  -0.01  -0.04    -0.02  -0.02  -0.05
  28   6    -0.01   0.02   0.02    -0.03   0.00   0.01    -0.01   0.00   0.00
  29   6    -0.01   0.01  -0.01     0.00  -0.01   0.00     0.01   0.00  -0.02
  30   6     0.00   0.00  -0.02    -0.01   0.01  -0.01    -0.01  -0.01   0.01
  31   6    -0.02   0.01   0.00     0.00  -0.01   0.00    -0.03   0.01  -0.01
  32   6    -0.02   0.01   0.01     0.00   0.01   0.00    -0.03   0.03   0.03
  33   6    -0.01   0.01   0.02     0.00   0.02  -0.01     0.00   0.03   0.05
  34   6     0.00   0.00   0.01     0.00   0.01   0.00     0.03   0.00   0.03
  35   6     0.00   0.00  -0.01     0.00  -0.01   0.00     0.03  -0.01   0.00
  36   6    -0.01   0.00   0.01     0.00  -0.01   0.00    -0.02   0.00   0.00
  37   6     0.00   0.00  -0.01     0.00  -0.01   0.00     0.01  -0.01   0.00
  38   6    -0.03  -0.01   0.00    -0.03   0.04  -0.01    -0.01  -0.01   0.01
  39   6    -0.02  -0.02   0.02     0.02   0.00  -0.01     0.00  -0.01   0.00
  40   6     0.01  -0.02   0.03     0.10  -0.05  -0.02    -0.02  -0.01  -0.01
  41   6     0.02   0.01   0.01     0.05  -0.01   0.00    -0.03  -0.01   0.00
  42   6     0.01   0.02   0.00    -0.03   0.06   0.01    -0.03  -0.01   0.00
  43   6    -0.03  -0.01   0.00    -0.03   0.04  -0.01     0.00   0.00   0.02
  44   6     0.00   0.01   0.01    -0.04   0.05   0.03    -0.01  -0.01  -0.02
  45   6     0.01   0.00   0.03    -0.01   0.00   0.02     0.02  -0.01   0.02
  46   6     0.01  -0.01   0.01     0.00   0.00   0.00     0.03  -0.02  -0.02
  47   6    -0.01   0.00  -0.02    -0.01  -0.01  -0.02    -0.05  -0.01  -0.02
  48   6    -0.01  -0.01  -0.02     0.00   0.00   0.01    -0.04   0.00   0.00
  49   6    -0.04  -0.02  -0.01    -0.03   0.01  -0.02     0.03   0.00  -0.02
  50   6    -0.01  -0.01   0.03     0.01   0.04   0.13     0.00   0.01  -0.03
  51   6    -0.01   0.00   0.01    -0.03   0.00   0.03     0.01  -0.01   0.04
  52   6     0.00   0.01  -0.04     0.00   0.04  -0.09     0.00   0.01   0.02
  53   6     0.01   0.02  -0.03    -0.02  -0.03  -0.02     0.00   0.02  -0.01
  54   6     0.02   0.01  -0.01     0.00  -0.08  -0.04     0.03   0.02  -0.01
  55   1     0.01   0.02   0.06    -0.01  -0.02   0.05     0.01   0.00   0.03
  56   1    -0.01   0.03  -0.01     0.01  -0.01   0.02     0.03  -0.01   0.02
  57   1    -0.01  -0.01   0.01    -0.02  -0.01   0.00     0.00   0.00   0.00
  58   1    -0.01  -0.01   0.02     0.00   0.01   0.00     0.00   0.00  -0.01
  59   1     0.00  -0.02   0.00     0.00   0.01   0.00     0.00   0.01   0.00
  60   1     0.00  -0.03   0.00    -0.01   0.02   0.01     0.00   0.01   0.00
  61   1    -0.01  -0.01  -0.01     0.00   0.02   0.02     0.00  -0.01  -0.01
  62   1    -0.02   0.00  -0.04     0.01   0.01   0.04    -0.01  -0.02   0.00
  63   1     0.10   0.05  -0.06    -0.03  -0.01   0.03    -0.04  -0.03   0.01
  64   1    -0.02  -0.02   0.00     0.02   0.03   0.01     0.01   0.00  -0.02
  65   1    -0.05   0.12  -0.03     0.04  -0.04   0.03     0.02  -0.05   0.01
  66   1    -0.04  -0.02   0.02     0.05  -0.02  -0.02    -0.01   0.03  -0.02
  67   1     0.02  -0.04  -0.07    -0.12   0.01   0.13     0.09   0.02  -0.06
  68   1     0.00  -0.11   0.00    -0.07   0.18  -0.03     0.07  -0.05   0.03
  69   1    -0.15   0.17   0.27     0.14  -0.03  -0.13     0.07  -0.09  -0.12
  70   1    -0.01  -0.14  -0.15     0.10   0.02   0.08     0.01   0.04   0.04
  71   1     0.36   0.10   0.14    -0.06  -0.01  -0.08    -0.14  -0.03  -0.09
  72   1    -0.03   0.02   0.00    -0.12  -0.08   0.13    -0.04  -0.04   0.05
  73   1    -0.01   0.03   0.03     0.10  -0.07  -0.09     0.04  -0.04  -0.04
  74   1    -0.01   0.03   0.03    -0.07   0.18  -0.02    -0.03   0.06  -0.01
  75   1    -0.03   0.02   0.01     0.00   0.01   0.00    -0.06   0.03   0.04
  76   1    -0.02   0.02   0.02     0.00   0.03  -0.01     0.00   0.05   0.07
  77   1     0.01   0.00   0.02     0.00   0.01   0.00     0.06   0.00   0.05
  78   1    -0.02   0.01   0.03     0.00  -0.01   0.00    -0.03   0.01   0.02
  79   1     0.00   0.00  -0.01     0.00  -0.01   0.00     0.02   0.00   0.04
  80   1    -0.04  -0.02   0.03     0.01  -0.01   0.00     0.01  -0.02  -0.01
  81   1     0.03  -0.03   0.05     0.18  -0.12  -0.03    -0.02  -0.02  -0.02
  82   1     0.04   0.01   0.02     0.07  -0.03  -0.01    -0.04   0.00   0.00
  83   1    -0.02  -0.02   0.02    -0.03   0.03  -0.02     0.00   0.00   0.03
  84   1     0.00   0.01   0.03    -0.04   0.05   0.03    -0.02  -0.01  -0.05
  85   1     0.12  -0.01   0.09    -0.01   0.01   0.01     0.30  -0.03   0.19
  86   1    -0.08   0.05   0.08     0.00  -0.01   0.02    -0.21   0.14   0.15
  87   1     0.01  -0.04  -0.08    -0.01   0.01   0.03     0.01  -0.14  -0.25
  88   1     0.01   0.04  -0.02     0.00   0.01  -0.01    -0.01   0.26  -0.21
  89   1    -0.04  -0.04   0.05    -0.01   0.00   0.01    -0.19  -0.12   0.22
  90   1     0.07  -0.05   0.00     0.01  -0.01   0.00     0.32  -0.22  -0.08
  91   1     0.00   0.01  -0.03     0.00   0.01  -0.03     0.00   0.05  -0.07
  92   1    -0.01  -0.01  -0.01    -0.01  -0.01  -0.01    -0.05  -0.08   0.04
  93   1    -0.02  -0.01  -0.03    -0.02  -0.02  -0.03    -0.14  -0.01  -0.07
  94   1    -0.01  -0.02  -0.02     0.03  -0.02  -0.01     0.02  -0.09  -0.02
  95   1    -0.02  -0.01  -0.03    -0.03  -0.01   0.00    -0.17  -0.01  -0.04
  96   1    -0.01   0.00  -0.01     0.01   0.03   0.04    -0.01   0.12   0.05
  97   1    -0.01  -0.05  -0.01     0.08  -0.06  -0.07     0.09   0.00  -0.07
  98   1    -0.05   0.02   0.00    -0.03   0.08   0.05     0.04   0.03   0.05
  99   1    -0.08  -0.04  -0.02    -0.14  -0.03  -0.09    -0.03  -0.02  -0.05
 100   1     0.03   0.02   0.00     0.01  -0.13   0.20    -0.02  -0.01  -0.02
 101   1    -0.07  -0.02   0.02     0.10   0.15   0.25     0.04   0.01  -0.03
 102   1     0.02  -0.03   0.08    -0.03   0.08   0.04    -0.02   0.03  -0.07
 103   1     0.27   0.10   0.12    -0.18  -0.11  -0.06    -0.01  -0.03   0.02
 104   1    -0.15  -0.24   0.13     0.05   0.15  -0.02     0.02   0.03   0.04
 105   1    -0.13   0.15  -0.25     0.04  -0.10   0.21     0.03  -0.03   0.07
 106   1     0.05   0.17   0.07     0.08   0.13  -0.02     0.00  -0.02   0.01
 107   1     0.07   0.01  -0.24     0.06   0.05  -0.24    -0.02   0.01   0.05
 108   1    -0.11  -0.14   0.02    -0.09  -0.04  -0.09     0.02   0.03   0.02
 109   1     0.01   0.04  -0.03    -0.03   0.01  -0.02     0.01   0.02  -0.01
 110   1     0.01   0.01  -0.06    -0.03  -0.04  -0.06     0.00   0.02   0.00
 111   1     0.01  -0.02  -0.02    -0.01  -0.07  -0.01     0.00   0.03  -0.02
 112   1     0.01  -0.01  -0.06    -0.01  -0.16  -0.19     0.01   0.04   0.00
 113   1     0.05   0.05  -0.02     0.07   0.05  -0.05     0.05   0.00  -0.02
 114   1     0.01  -0.01   0.02    -0.07  -0.16   0.07     0.03   0.04  -0.04
                    55                     56                     57
                    ?A                     ?A                     ?A
 Frequencies --   249.9215               253.5242               256.2499
 Red. masses --     2.5387                 2.0732                 1.6413
 Frc consts  --     0.0934                 0.0785                 0.0635
 IR Inten    --     1.0881                 6.0149                 1.9269
 Raman Activ --     0.0000                 0.0000                 0.0000
 Depolar     --     0.0000                 0.0000                 0.0000
 Atom AN      X      Y      Z        X      Y      Z        X      Y      Z
   1   8    -0.06   0.02  -0.04    -0.04   0.01  -0.01     0.01   0.00   0.01
   2  12    -0.03  -0.03  -0.05     0.03   0.02  -0.01     0.03   0.01  -0.01
   3   8     0.04  -0.01  -0.02     0.02   0.08   0.01    -0.01  -0.03   0.01
   4   6    -0.02  -0.01   0.00    -0.02  -0.02   0.00     0.01   0.00   0.00
   5   7    -0.01  -0.03  -0.02     0.00   0.01   0.01     0.01   0.03  -0.02
   6   7    -0.02   0.01   0.03     0.01  -0.01  -0.01     0.00  -0.01   0.02
   7   8    -0.03  -0.01  -0.03    -0.02  -0.01  -0.01     0.01   0.00   0.01
   8   6     0.00  -0.03   0.00     0.01   0.02   0.00     0.01   0.03  -0.01
   9   6     0.00  -0.01  -0.01     0.02   0.01   0.01     0.01   0.01   0.00
  10   6    -0.01   0.01   0.00     0.02   0.00   0.00     0.02   0.00   0.01
  11   8     0.01  -0.09   0.04     0.00  -0.05   0.01     0.00   0.01   0.00
  12   6     0.04  -0.01   0.02     0.02   0.02   0.00    -0.01  -0.01   0.00
  13   6     0.03   0.01   0.00     0.02   0.04   0.00     0.00  -0.01   0.01
  14   6    -0.01  -0.04   0.04    -0.01  -0.03   0.02     0.00   0.01  -0.01
  15   8     0.10   0.00   0.02     0.06   0.03   0.00    -0.02  -0.02  -0.01
  16   6     0.00  -0.01   0.03     0.00   0.00   0.01     0.00   0.00   0.00
  17   8    -0.01   0.00  -0.01    -0.02  -0.01   0.00     0.00   0.00   0.00
  18   6    -0.01  -0.02  -0.02    -0.01   0.00   0.02     0.00  -0.01  -0.02
  19   8    -0.01  -0.02  -0.03    -0.03   0.00   0.02     0.02   0.01   0.00
  20   8    -0.02   0.00  -0.01     0.00  -0.02   0.02     0.00   0.00  -0.02
  21   6    -0.02   0.00   0.00     0.00  -0.02   0.00     0.00   0.00   0.00
  22   6    -0.01   0.00   0.00    -0.02  -0.01  -0.02     0.01   0.00   0.00
  23   6    -0.02   0.00   0.00     0.00  -0.02   0.01    -0.01   0.00  -0.01
  24   8    -0.02   0.01   0.02     0.02  -0.01   0.01    -0.01   0.00   0.01
  25   6     0.04   0.06  -0.02    -0.02  -0.02  -0.02     0.02   0.02   0.00
  26   6    -0.06   0.01   0.01     0.11  -0.02  -0.04    -0.07   0.00   0.02
  27   6     0.12   0.04   0.02     0.02   0.01  -0.07     0.01   0.00   0.03
  28   6    -0.06   0.08   0.04    -0.05   0.03   0.03     0.01  -0.01  -0.01
  29   6    -0.01   0.00   0.00     0.00   0.00   0.00     0.00   0.01   0.00
  30   6    -0.02   0.00   0.02    -0.01  -0.01   0.00    -0.02   0.00   0.01
  31   6    -0.02   0.04  -0.01    -0.01   0.00   0.01    -0.01   0.00   0.01
  32   6    -0.02   0.01   0.01    -0.01   0.02  -0.01    -0.01   0.01   0.00
  33   6    -0.02  -0.04   0.03    -0.02   0.01  -0.02    -0.01   0.01   0.00
  34   6     0.00  -0.01   0.02    -0.02  -0.01  -0.02     0.00  -0.01   0.00
  35   6     0.00   0.03   0.00    -0.02  -0.01  -0.01     0.00  -0.01  -0.01
  36   6     0.00   0.03   0.00     0.00   0.00   0.04     0.00   0.00   0.03
  37   6     0.00   0.03   0.00    -0.01  -0.01  -0.03     0.00  -0.01  -0.02
  38   6     0.02   0.00   0.01    -0.03  -0.01   0.01     0.00  -0.01   0.01
  39   6     0.02  -0.01  -0.02    -0.02  -0.01   0.01     0.01  -0.02  -0.01
  40   6    -0.01  -0.01  -0.03    -0.03   0.00   0.01    -0.01  -0.03  -0.03
  41   6    -0.03  -0.01  -0.01    -0.03   0.01   0.01    -0.03  -0.03  -0.01
  42   6    -0.02  -0.02   0.00     0.00  -0.01   0.00    -0.04  -0.02  -0.01
  43   6     0.03   0.00   0.01    -0.02   0.00   0.02     0.01   0.00   0.03
  44   6     0.00  -0.01  -0.01     0.00  -0.01  -0.01    -0.03   0.00  -0.03
  45   6     0.03   0.00  -0.03    -0.01   0.03   0.07    -0.01   0.02   0.06
  46   6     0.02   0.01   0.01    -0.01  -0.01   0.05     0.00  -0.01   0.04
  47   6     0.02   0.02   0.04     0.01  -0.01  -0.06    -0.01  -0.01  -0.05
  48   6    -0.02   0.01  -0.03     0.01  -0.03  -0.03     0.00  -0.02  -0.03
  49   6     0.03   0.00  -0.01     0.00  -0.01  -0.01     0.02   0.01  -0.04
  50   6     0.01   0.02  -0.03     0.00   0.00  -0.03    -0.02   0.01  -0.04
  51   6     0.02   0.00   0.01     0.00  -0.01   0.04     0.02  -0.01   0.05
  52   6     0.01  -0.01   0.06     0.00   0.02   0.00     0.00   0.00   0.07
  53   6     0.02  -0.04   0.02     0.03   0.00  -0.01     0.00   0.04  -0.02
  54   6    -0.01   0.04  -0.01     0.03   0.01   0.00     0.03   0.03  -0.01
  55   1     0.02   0.00  -0.02     0.01   0.00   0.01     0.00   0.00   0.00
  56   1     0.00   0.03  -0.02     0.05   0.02   0.03     0.00  -0.01   0.00
  57   1    -0.06  -0.06   0.04    -0.03  -0.03   0.02     0.01   0.01   0.00
  58   1    -0.01   0.02   0.08     0.00   0.02   0.03     0.00  -0.01  -0.01
  59   1     0.04  -0.06   0.00     0.02  -0.02   0.00    -0.01   0.01   0.00
  60   1     0.02  -0.02   0.05     0.01   0.01   0.03     0.00   0.00  -0.01
  61   1    -0.02   0.00   0.02    -0.02  -0.02  -0.03     0.00   0.00   0.01
  62   1     0.00   0.02   0.01    -0.05  -0.05  -0.02     0.01   0.02   0.01
  63   1     0.14   0.08  -0.08    -0.05  -0.03   0.00     0.05   0.02  -0.02
  64   1     0.02   0.01   0.00     0.01  -0.01  -0.04     0.01   0.01   0.01
  65   1    -0.01   0.17   0.00     0.01  -0.05   0.00     0.00   0.05   0.00
  66   1     0.05  -0.06   0.00    -0.03   0.06  -0.06     0.02  -0.05   0.04
  67   1    -0.16  -0.04   0.11     0.25   0.05  -0.19    -0.14  -0.05   0.10
  68   1    -0.10   0.13  -0.05     0.20  -0.17   0.07    -0.11   0.07  -0.04
  69   1     0.08   0.14   0.05     0.13  -0.07  -0.17    -0.05   0.03   0.08
  70   1     0.14  -0.06   0.00     0.07   0.05   0.04    -0.01  -0.04  -0.04
  71   1     0.23   0.07   0.04    -0.11   0.01  -0.14     0.09   0.01   0.05
  72   1    -0.18   0.05   0.02    -0.18  -0.05   0.12     0.04  -0.01  -0.01
  73   1     0.03   0.11   0.05     0.09  -0.01  -0.04    -0.01  -0.02  -0.01
  74   1    -0.07   0.19   0.04    -0.09   0.22   0.01     0.02  -0.04  -0.01
  75   1    -0.03   0.02   0.01     0.01   0.02  -0.03     0.00   0.01   0.00
  76   1    -0.02  -0.08   0.05    -0.02   0.02  -0.03    -0.01   0.02   0.00
  77   1     0.00  -0.03   0.03    -0.02  -0.01  -0.01     0.00  -0.01   0.00
  78   1    -0.01   0.04   0.03    -0.01   0.00   0.04    -0.01   0.00   0.03
  79   1     0.00   0.03   0.00    -0.01  -0.02  -0.04     0.00  -0.01  -0.02
  80   1     0.04   0.00  -0.03    -0.01  -0.02   0.01     0.03  -0.01  -0.03
  81   1    -0.01  -0.01  -0.05    -0.04   0.01   0.02     0.00  -0.04  -0.05
  82   1    -0.04  -0.02  -0.02    -0.04   0.03   0.02    -0.03  -0.03  -0.01
  83   1     0.02   0.01   0.01    -0.01  -0.01   0.03     0.01   0.00   0.03
  84   1    -0.01  -0.02  -0.03     0.01  -0.02  -0.01    -0.04   0.00  -0.08
  85   1     0.11  -0.05   0.04    -0.14   0.08  -0.02    -0.08   0.06   0.00
  86   1    -0.04   0.06  -0.01     0.09  -0.07   0.04     0.05  -0.05   0.05
  87   1     0.04  -0.04  -0.15    -0.01   0.10   0.23     0.00   0.07   0.16
  88   1     0.03   0.02   0.01     0.04  -0.25   0.23     0.03  -0.16   0.16
  89   1     0.00  -0.02   0.01     0.16   0.05  -0.16     0.11   0.02  -0.10
  90   1     0.05   0.00   0.02    -0.25   0.16   0.12    -0.15   0.10   0.08
  91   1     0.04  -0.01   0.03     0.00   0.01  -0.06     0.00   0.03  -0.06
  92   1     0.02   0.02   0.08     0.01   0.02  -0.09    -0.01  -0.01  -0.05
  93   1     0.00   0.04   0.04     0.04  -0.04  -0.07    -0.02  -0.03  -0.08
  94   1    -0.08   0.02   0.00     0.00  -0.01  -0.03     0.01  -0.04  -0.03
  95   1     0.02   0.02  -0.04     0.05  -0.02  -0.04    -0.01  -0.02  -0.05
  96   1    -0.04  -0.03  -0.09     0.01  -0.06  -0.03     0.00  -0.02  -0.02
  97   1    -0.11   0.06   0.06    -0.07   0.01   0.03     0.38  -0.05  -0.25
  98   1     0.06  -0.15  -0.13     0.01  -0.08  -0.08     0.04   0.27   0.28
  99   1     0.20   0.11   0.02     0.08   0.04   0.01    -0.31  -0.17  -0.14
 100   1    -0.04  -0.05   0.02    -0.01   0.02  -0.04    -0.01   0.03  -0.06
 101   1     0.12   0.05  -0.01     0.00  -0.02  -0.05    -0.03  -0.01  -0.06
 102   1    -0.03   0.07  -0.12     0.00   0.00  -0.03    -0.01   0.01  -0.02
 103   1    -0.17  -0.07  -0.07     0.09   0.01   0.07    -0.07  -0.07   0.00
 104   1     0.12   0.16  -0.07    -0.04  -0.06   0.09     0.07   0.09   0.03
 105   1     0.11  -0.11   0.19    -0.02   0.03  -0.03     0.08  -0.08   0.16
 106   1    -0.05  -0.11  -0.02     0.03   0.04   0.02    -0.04  -0.05   0.02
 107   1    -0.05  -0.01   0.20     0.00   0.03  -0.04    -0.04   0.01   0.15
 108   1     0.09   0.08   0.04    -0.01   0.00   0.00     0.06   0.06   0.06
 109   1     0.03  -0.07   0.02     0.03   0.00  -0.02     0.00   0.04  -0.02
 110   1     0.04  -0.02   0.05     0.04   0.01  -0.02    -0.01   0.03  -0.01
 111   1     0.01  -0.03   0.01     0.02  -0.02  -0.01    -0.01   0.05  -0.02
 112   1    -0.02   0.08   0.03     0.02   0.03   0.01     0.01   0.07   0.03
 113   1    -0.01   0.00  -0.02     0.03   0.00  -0.01     0.04  -0.02  -0.02
 114   1     0.02   0.08  -0.06     0.04   0.03  -0.02     0.05   0.06  -0.06
                    58                     59                     60
                    ?A                     ?A                     ?A
 Frequencies --   260.2218               264.0073               271.1380
 Red. masses --     1.5156                 2.1409                 2.2142
 Frc consts  --     0.0605                 0.0879                 0.0959
 IR Inten    --     1.8987                 1.8766                 4.8351
 Raman Activ --     0.0000                 0.0000                 0.0000
 Depolar     --     0.0000                 0.0000                 0.0000
 Atom AN      X      Y      Z        X      Y      Z        X      Y      Z
   1   8    -0.02   0.00  -0.01    -0.03   0.00  -0.01    -0.02   0.00   0.01
   2  12    -0.02  -0.03   0.01     0.00   0.03  -0.03     0.04   0.00   0.05
   3   8     0.01   0.01  -0.01     0.01   0.03   0.00     0.00  -0.01  -0.04
   4   6    -0.01  -0.01   0.00    -0.01  -0.01   0.00    -0.01  -0.01   0.01
   5   7    -0.01  -0.03   0.01     0.00   0.03   0.01    -0.02   0.00   0.05
   6   7     0.01   0.00  -0.02    -0.02   0.02   0.00     0.03   0.00   0.05
   7   8    -0.01  -0.01  -0.01    -0.01  -0.01  -0.01    -0.02  -0.01   0.01
   8   6     0.00  -0.03   0.01    -0.02   0.02   0.00     0.00   0.01   0.00
   9   6     0.00   0.00  -0.01    -0.02   0.02   0.00     0.00   0.00  -0.04
  10   6     0.00   0.00  -0.01    -0.03   0.02   0.00     0.03  -0.01   0.00
  11   8     0.00  -0.01   0.01     0.00  -0.04   0.01     0.00   0.00   0.00
  12   6     0.01   0.01   0.00     0.02   0.00   0.01     0.01   0.00  -0.02
  13   6     0.01   0.01  -0.01     0.01   0.02   0.00     0.00   0.00  -0.04
  14   6     0.00  -0.01   0.01    -0.01  -0.02   0.02     0.00   0.00   0.00
  15   8     0.02   0.01   0.00     0.05   0.01   0.01     0.03   0.02  -0.01
  16   6     0.00   0.00   0.00     0.00   0.00   0.01     0.01   0.01   0.00
  17   8     0.00   0.00   0.00    -0.01  -0.02   0.00     0.01   0.01   0.01
  18   6     0.00   0.00   0.01     0.00  -0.01  -0.01     0.00   0.01   0.01
  19   8    -0.02  -0.01   0.00     0.00   0.00   0.00     0.00   0.01   0.00
  20   8     0.00   0.01   0.02    -0.01  -0.01  -0.01    -0.01  -0.01  -0.01
  21   6     0.00   0.00   0.00    -0.01  -0.02   0.00     0.01   0.00   0.00
  22   6    -0.01   0.00  -0.01    -0.01  -0.02  -0.01     0.01   0.01   0.02
  23   6     0.01   0.00   0.01    -0.01  -0.01   0.00     0.00   0.00  -0.01
  24   8     0.00   0.00   0.00    -0.01  -0.01   0.03     0.01   0.00  -0.02
  25   6     0.00   0.00   0.00     0.02   0.01  -0.03    -0.02  -0.01   0.03
  26   6     0.04   0.01  -0.01     0.00  -0.03  -0.01    -0.02  -0.01   0.00
  27   6     0.02   0.00  -0.03     0.05   0.02  -0.01     0.00   0.01  -0.02
  28   6    -0.01   0.02   0.01    -0.03   0.02   0.03     0.00   0.01   0.00
  29   6    -0.02   0.00   0.00     0.01  -0.01   0.01    -0.02  -0.01   0.02
  30   6     0.02   0.00  -0.01     0.00   0.01   0.00     0.01   0.01   0.02
  31   6    -0.01   0.03  -0.01     0.04  -0.07   0.00     0.00  -0.01   0.00
  32   6    -0.02   0.00   0.00     0.05  -0.02  -0.03     0.00  -0.02  -0.03
  33   6    -0.02  -0.04   0.01     0.05   0.07  -0.06    -0.02  -0.01  -0.05
  34   6    -0.02  -0.01   0.01     0.02   0.04  -0.03    -0.05   0.01  -0.03
  35   6    -0.02   0.02   0.00     0.01  -0.03   0.02    -0.05   0.01   0.01
  36   6     0.00   0.03  -0.01     0.02  -0.07  -0.03    -0.01   0.00  -0.02
  37   6    -0.01   0.03  -0.01     0.00  -0.03   0.04    -0.03   0.01   0.01
  38   6     0.00   0.00  -0.01     0.01   0.00   0.00     0.02   0.05   0.02
  39   6    -0.02   0.01   0.02     0.00   0.01   0.01     0.03   0.03  -0.04
  40   6    -0.01   0.03   0.03    -0.01   0.02   0.01     0.02   0.00  -0.07
  41   6     0.03   0.01   0.02     0.00   0.01   0.00    -0.03  -0.01  -0.04
  42   6     0.03   0.00   0.00     0.01   0.00   0.00    -0.04   0.00  -0.01
  43   6     0.00   0.00  -0.02     0.01   0.00   0.00     0.00   0.02   0.02
  44   6     0.01  -0.01   0.01     0.01  -0.01   0.00    -0.03   0.01  -0.02
  45   6     0.01   0.00  -0.04    -0.02  -0.04  -0.01    -0.03  -0.01  -0.04
  46   6     0.01   0.01   0.00    -0.01  -0.01  -0.07    -0.01   0.02  -0.04
  47   6     0.03   0.02   0.03    -0.02  -0.03   0.04     0.04   0.00   0.07
  48   6     0.00   0.01  -0.02     0.04   0.03   0.12     0.05   0.02   0.06
  49   6    -0.03   0.00   0.04    -0.01   0.00   0.01     0.03   0.01  -0.04
  50   6    -0.03  -0.04   0.00    -0.02  -0.02  -0.03     0.00   0.03  -0.02
  51   6     0.00   0.02  -0.05     0.01   0.00  -0.01    -0.02  -0.06   0.09
  52   6     0.01   0.01  -0.03     0.00  -0.01   0.02    -0.04  -0.04   0.05
  53   6     0.04  -0.05   0.02    -0.07   0.05  -0.02     0.04  -0.01   0.02
  54   6     0.00  -0.01   0.01    -0.03   0.02   0.00     0.02  -0.04   0.02
  55   1     0.01   0.00   0.00    -0.02   0.01  -0.01    -0.01  -0.01  -0.07
  56   1     0.00   0.00   0.00     0.02   0.02   0.01    -0.01   0.01  -0.05
  57   1    -0.01  -0.01   0.00    -0.02  -0.03   0.02     0.00  -0.01   0.00
  58   1     0.01   0.01   0.01     0.00   0.01   0.03     0.02   0.01   0.00
  59   1     0.02  -0.01  -0.01     0.02  -0.02   0.00     0.02   0.01  -0.01
  60   1     0.01   0.01   0.01     0.01   0.00   0.02     0.01   0.03   0.02
  61   1     0.00   0.00  -0.01    -0.01  -0.02  -0.01     0.01   0.01   0.01
  62   1    -0.01  -0.01   0.00    -0.01  -0.01  -0.01    -0.01  -0.01   0.00
  63   1    -0.01   0.00   0.00     0.06   0.02  -0.05    -0.04  -0.01   0.05
  64   1     0.00  -0.01  -0.01     0.02   0.00  -0.03    -0.02   0.00   0.03
  65   1     0.00  -0.01   0.00     0.01   0.06   0.00    -0.01  -0.04   0.00
  66   1    -0.01   0.04  -0.03     0.01  -0.03   0.00    -0.02  -0.01   0.02
  67   1     0.09   0.04  -0.06     0.00  -0.04  -0.02    -0.02  -0.01   0.00
  68   1     0.07  -0.03   0.02     0.01  -0.03   0.00    -0.03  -0.03   0.00
  69   1     0.05  -0.01  -0.06     0.05   0.04  -0.01     0.02   0.02  -0.04
  70   1     0.03   0.02   0.02     0.06  -0.01  -0.01     0.01   0.04   0.01
  71   1    -0.03   0.00  -0.04     0.08   0.04  -0.02    -0.02   0.00  -0.01
  72   1    -0.04   0.02  -0.01    -0.12  -0.04   0.09    -0.02   0.00   0.00
  73   1    -0.01   0.03   0.02     0.07  -0.01  -0.02     0.01   0.01   0.00
  74   1    -0.01   0.03   0.01    -0.06   0.16   0.01    -0.01   0.02  -0.01
  75   1    -0.02   0.01   0.00     0.05  -0.02  -0.02     0.02  -0.02  -0.04
  76   1    -0.03  -0.08   0.02     0.05   0.13  -0.10    -0.02  -0.01  -0.08
  77   1    -0.02  -0.02   0.01    -0.01   0.06  -0.06    -0.08   0.01  -0.05
  78   1    -0.01   0.04   0.01     0.02  -0.09  -0.08     0.00   0.00  -0.03
  79   1    -0.01   0.02  -0.02     0.00  -0.02   0.04    -0.04   0.00  -0.03
  80   1    -0.04   0.01   0.04     0.00   0.01   0.01     0.07   0.06  -0.07
  81   1    -0.03   0.04   0.05    -0.03   0.03   0.01     0.03  -0.02  -0.11
  82   1     0.04   0.02   0.03     0.01   0.01   0.01    -0.05  -0.02  -0.06
  83   1     0.00  -0.01  -0.01     0.01   0.00   0.00    -0.01   0.04  -0.03
  84   1     0.02   0.00   0.03     0.01  -0.01   0.00    -0.04   0.01  -0.06
  85   1     0.12  -0.05   0.04    -0.24   0.02  -0.16     0.18  -0.04   0.09
  86   1    -0.07   0.08  -0.02     0.15  -0.16  -0.10    -0.22   0.16   0.03
  87   1     0.02  -0.06  -0.18    -0.02   0.07   0.23    -0.07  -0.15  -0.25
  88   1     0.02   0.00   0.02    -0.07   0.20  -0.24     0.00  -0.01  -0.01
  89   1     0.01   0.00  -0.01    -0.15  -0.02   0.14     0.04   0.05  -0.08
  90   1     0.01   0.02   0.02     0.17  -0.17  -0.15    -0.07   0.04  -0.06
  91   1     0.02  -0.03   0.04    -0.06  -0.04   0.06    -0.01  -0.09   0.11
  92   1     0.03   0.05   0.03    -0.02  -0.04   0.00     0.05   0.07   0.00
  93   1     0.06   0.03   0.06     0.01  -0.02   0.06     0.15   0.01   0.13
  94   1    -0.04   0.03   0.00     0.09   0.08   0.07     0.04   0.13   0.04
  95   1     0.06   0.01  -0.02     0.00   0.01   0.18     0.14   0.02   0.12
  96   1    -0.02  -0.05  -0.06     0.05   0.06   0.17     0.04  -0.06   0.06
  97   1     0.34  -0.08  -0.17     0.17  -0.04  -0.09     0.10   0.00  -0.09
  98   1    -0.06   0.36   0.36    -0.02   0.16   0.16     0.05   0.03   0.03
  99   1    -0.42  -0.25  -0.02    -0.19  -0.12  -0.02    -0.02   0.00  -0.09
 100   1     0.01   0.08  -0.06     0.00   0.05  -0.06     0.01   0.02  -0.02
 101   1    -0.17  -0.10  -0.05    -0.08  -0.06  -0.06     0.03   0.04  -0.02
 102   1     0.04  -0.12   0.12     0.01  -0.06   0.03    -0.02   0.07  -0.03
 103   1    -0.06   0.04  -0.05     0.00   0.01  -0.01     0.26  -0.06   0.15
 104   1     0.03   0.05  -0.09     0.01   0.00  -0.02    -0.16  -0.27   0.25
 105   1     0.02   0.00  -0.03     0.01   0.00  -0.01    -0.16   0.07  -0.05
 106   1     0.03  -0.02  -0.04    -0.01  -0.02   0.00    -0.10   0.07   0.11
 107   1     0.00   0.01  -0.01    -0.01  -0.01   0.05     0.04  -0.08  -0.03
 108   1     0.02   0.04  -0.05     0.02   0.01   0.02    -0.11  -0.17   0.12
 109   1     0.05  -0.08   0.02    -0.09   0.09  -0.02     0.05  -0.05   0.03
 110   1     0.07  -0.02   0.03    -0.10   0.02  -0.04     0.06   0.01   0.04
 111   1     0.04  -0.06   0.02    -0.05   0.05  -0.01     0.03  -0.01   0.02
 112   1     0.01  -0.01   0.03    -0.03   0.02   0.02     0.04  -0.06   0.00
 113   1    -0.03  -0.02   0.02    -0.04  -0.01   0.00     0.00  -0.01   0.03
 114   1     0.00   0.00   0.01    -0.03   0.03  -0.02     0.01  -0.06   0.05
                    61                     62                     63
                    ?A                     ?A                     ?A
 Frequencies --   274.0030               275.5852               276.2622
 Red. masses --     2.2320                 2.7065                 2.0717
 Frc consts  --     0.0987                 0.1211                 0.0932
 IR Inten    --     3.7643                 1.5607                 1.7220
 Raman Activ --     0.0000                 0.0000                 0.0000
 Depolar     --     0.0000                 0.0000                 0.0000
 Atom AN      X      Y      Z        X      Y      Z        X      Y      Z
   1   8    -0.02   0.01   0.00    -0.01   0.00   0.00     0.01   0.00   0.01
   2  12    -0.02   0.00   0.05    -0.04   0.00   0.05     0.01  -0.01   0.01
   3   8     0.00  -0.02  -0.04     0.02  -0.01  -0.04     0.01   0.00  -0.01
   4   6    -0.01  -0.01   0.01    -0.01  -0.01   0.00     0.00   0.00   0.00
   5   7     0.01  -0.01   0.01     0.02  -0.01  -0.05    -0.01   0.00   0.07
   6   7     0.00   0.01   0.05    -0.01   0.02   0.09     0.01  -0.01  -0.01
   7   8    -0.02   0.00   0.00    -0.01   0.00   0.01     0.00   0.00   0.01
   8   6     0.00  -0.02  -0.01    -0.01  -0.02  -0.02     0.01   0.00   0.02
   9   6    -0.01  -0.01  -0.03    -0.01  -0.02  -0.02     0.00   0.00  -0.02
  10   6    -0.01   0.00   0.01    -0.02   0.00   0.02     0.01  -0.01  -0.01
  11   8     0.01  -0.02   0.01     0.00   0.00  -0.01    -0.01   0.02  -0.02
  12   6     0.02  -0.01  -0.02     0.01   0.01  -0.01    -0.01   0.02   0.00
  13   6     0.01  -0.01  -0.04     0.00   0.02  -0.02     0.00   0.01   0.00
  14   6     0.00  -0.01   0.02     0.00   0.00   0.00     0.00   0.01  -0.02
  15   8     0.05   0.01  -0.01     0.01   0.03   0.00    -0.02   0.02   0.00
  16   6     0.00   0.01   0.01     0.00   0.01   0.00     0.00   0.00  -0.01
  17   8     0.03   0.04   0.04    -0.03  -0.06  -0.04    -0.03  -0.05  -0.04
  18   6     0.00   0.01  -0.01     0.00   0.00   0.03     0.00   0.00   0.02
  19   8    -0.01   0.01  -0.02     0.01   0.00   0.02     0.00   0.00   0.02
  20   8    -0.01  -0.02  -0.03     0.01   0.01   0.02     0.01   0.01   0.02
  21   6     0.02   0.03   0.01    -0.03  -0.04  -0.01    -0.02  -0.03  -0.01
  22   6     0.02   0.05   0.06    -0.03  -0.07  -0.06    -0.02  -0.05  -0.05
  23   6     0.00  -0.02  -0.04     0.00   0.01   0.04     0.00   0.02   0.04
  24   8     0.02  -0.01  -0.07    -0.03   0.00   0.09    -0.02   0.00   0.07
  25   6    -0.08  -0.02   0.08     0.09   0.02  -0.09     0.08   0.01  -0.08
  26   6    -0.03  -0.06  -0.01     0.02   0.05   0.03     0.02   0.06   0.02
  27   6     0.03   0.02  -0.01    -0.03   0.03   0.00    -0.04   0.01   0.01
  28   6     0.01   0.02   0.00    -0.01   0.00   0.01     0.00  -0.01   0.00
  29   6     0.02   0.01   0.00     0.03   0.00  -0.02    -0.01   0.01   0.02
  30   6     0.00   0.01   0.02     0.01   0.01   0.03     0.01   0.00   0.00
  31   6     0.01   0.02   0.01     0.00  -0.01   0.00     0.02   0.02   0.01
  32   6     0.01   0.02   0.01     0.00   0.00   0.03     0.01   0.01  -0.02
  33   6     0.01  -0.01   0.02     0.04   0.02   0.04    -0.03  -0.04  -0.03
  34   6     0.01  -0.02   0.02     0.06   0.01   0.03    -0.05  -0.03  -0.02
  35   6     0.01   0.00  -0.01     0.06  -0.01   0.00    -0.05   0.02  -0.01
  36   6     0.01   0.01   0.02     0.00   0.00   0.00     0.01   0.02   0.02
  37   6     0.01   0.00  -0.03     0.03  -0.01   0.00    -0.02   0.01  -0.03
  38   6     0.02   0.03   0.00     0.04   0.05  -0.01     0.00   0.00   0.00
  39   6     0.01   0.04  -0.02     0.03   0.06  -0.04     0.01  -0.01   0.00
  40   6     0.00   0.03  -0.04     0.01   0.03  -0.06     0.01  -0.01  -0.01
  41   6    -0.01  -0.01  -0.02     0.00  -0.02  -0.03     0.00   0.00  -0.01
  42   6    -0.01  -0.01   0.01    -0.01  -0.02   0.02    -0.01   0.01  -0.01
  43   6     0.01   0.01  -0.02     0.01   0.02  -0.04     0.00   0.00   0.01
  44   6     0.00   0.00   0.01     0.00  -0.01   0.02    -0.01   0.01  -0.01
  45   6     0.04   0.01   0.03    -0.01   0.01   0.02     0.03   0.00   0.00
  46   6    -0.03   0.00   0.07     0.02  -0.01  -0.01    -0.06   0.02   0.08
  47   6    -0.01   0.01  -0.08    -0.04  -0.01  -0.04     0.04   0.02  -0.03
  48   6    -0.02  -0.04  -0.08    -0.04  -0.01  -0.02     0.02  -0.03  -0.05
  49   6     0.02   0.03   0.04     0.04   0.04   0.07    -0.01  -0.01  -0.03
  50   6     0.00   0.00   0.01     0.01   0.00   0.03     0.00   0.01  -0.01
  51   6    -0.03  -0.02  -0.03    -0.05  -0.02  -0.06     0.01  -0.01   0.04
  52   6    -0.02  -0.04  -0.02    -0.03  -0.06  -0.04    -0.01   0.01   0.02
  53   6    -0.01  -0.01   0.02    -0.04   0.00   0.02     0.04  -0.02   0.01
  54   6    -0.02  -0.01   0.01    -0.03  -0.02   0.01     0.01  -0.02   0.01
  55   1     0.00  -0.01  -0.05     0.00  -0.02  -0.03     0.00   0.00  -0.04
  56   1    -0.01   0.00  -0.05    -0.02   0.03  -0.03    -0.01   0.02   0.00
  57   1    -0.01  -0.02   0.02     0.00   0.00  -0.01     0.01   0.01  -0.02
  58   1     0.01   0.02   0.02     0.01   0.01   0.00     0.01   0.00  -0.02
  59   1     0.02  -0.01   0.00     0.01   0.00  -0.01     0.00   0.01   0.00
  60   1     0.01   0.02   0.02     0.00   0.02   0.01     0.00   0.01  -0.01
  61   1     0.04   0.05   0.03    -0.04  -0.07  -0.03    -0.04  -0.05  -0.03
  62   1    -0.01  -0.01  -0.04     0.01   0.00   0.05     0.00   0.01   0.05
  63   1    -0.17  -0.03   0.13     0.21   0.04  -0.16     0.17   0.03  -0.13
  64   1    -0.10   0.03   0.12     0.12  -0.03  -0.14     0.10  -0.03  -0.12
  65   1    -0.06  -0.12   0.01     0.07   0.16  -0.01     0.06   0.12  -0.01
  66   1    -0.05  -0.04   0.05     0.04   0.02  -0.03     0.04   0.03  -0.04
  67   1    -0.02  -0.06  -0.04     0.00   0.05   0.06     0.01   0.06   0.05
  68   1    -0.06  -0.12  -0.02     0.03   0.12   0.02     0.04   0.12   0.02
  69   1     0.03   0.06  -0.02    -0.05   0.01   0.01    -0.06  -0.01   0.03
  70   1     0.04   0.02   0.02    -0.05   0.05  -0.02    -0.06   0.03  -0.02
  71   1     0.04   0.00   0.02    -0.04   0.02   0.01    -0.04   0.01   0.01
  72   1    -0.02   0.02  -0.01    -0.04  -0.02   0.03     0.01  -0.02   0.01
  73   1     0.05   0.04   0.00     0.02  -0.01  -0.02    -0.02  -0.03  -0.01
  74   1    -0.01   0.05  -0.02    -0.02   0.05   0.00     0.00  -0.02   0.01
  75   1     0.01   0.04   0.01    -0.02   0.00   0.04     0.04   0.01  -0.03
  76   1     0.01  -0.03   0.03     0.04   0.04   0.07    -0.03  -0.08  -0.05
  77   1     0.02  -0.05   0.03     0.09   0.02   0.04    -0.07  -0.05  -0.02
  78   1     0.00  -0.01   0.02     0.00   0.01   0.01     0.00  -0.01   0.00
  79   1     0.01   0.00  -0.02     0.04   0.00   0.05    -0.03   0.00  -0.07
  80   1     0.02   0.06  -0.03     0.03   0.09  -0.05     0.01  -0.01  -0.01
  81   1    -0.02   0.03  -0.06     0.00   0.04  -0.10     0.02  -0.02  -0.01
  82   1    -0.02  -0.03  -0.03    -0.02  -0.05  -0.05     0.00   0.00  -0.01
  83   1     0.00   0.02  -0.05     0.01   0.03  -0.09     0.00   0.00   0.01
  84   1    -0.01   0.00   0.00    -0.01   0.00   0.00    -0.01   0.01  -0.01
  85   1    -0.19   0.03  -0.11     0.02   0.03   0.03    -0.11  -0.01  -0.08
  86   1     0.23  -0.16  -0.05    -0.04   0.03   0.04     0.17  -0.10  -0.06
  87   1     0.08   0.16   0.26    -0.02  -0.01   0.00     0.07   0.10   0.13
  88   1    -0.12   0.18  -0.11     0.09  -0.18   0.14    -0.20   0.29  -0.19
  89   1    -0.21  -0.07   0.29     0.16   0.03  -0.19    -0.32  -0.05   0.41
  90   1     0.21  -0.12   0.08    -0.16   0.10   0.01     0.28  -0.16   0.07
  91   1     0.02   0.07  -0.10    -0.03   0.07  -0.06     0.04  -0.01  -0.02
  92   1    -0.01  -0.01  -0.06    -0.06  -0.08  -0.02     0.05   0.09  -0.06
  93   1    -0.05  -0.02  -0.12    -0.12  -0.01  -0.08     0.10  -0.01  -0.02
  94   1    -0.04  -0.11  -0.06    -0.03  -0.08  -0.01     0.00  -0.01  -0.04
  95   1    -0.05  -0.02  -0.15    -0.13  -0.01  -0.05     0.10  -0.01  -0.08
  96   1    -0.03  -0.03  -0.10    -0.03   0.08  -0.02     0.01  -0.11  -0.07
  97   1     0.10   0.05  -0.02     0.12   0.09  -0.01    -0.03  -0.02  -0.01
  98   1     0.03   0.08   0.13     0.06   0.10   0.17    -0.01  -0.03  -0.06
  99   1    -0.04  -0.02   0.04    -0.01  -0.01   0.09     0.01   0.01  -0.04
 100   1     0.00  -0.02   0.03    -0.01  -0.06   0.06     0.01   0.02  -0.02
 101   1     0.03   0.02   0.03     0.07   0.04   0.06    -0.01   0.00  -0.01
 102   1    -0.01   0.02  -0.01    -0.01   0.03  -0.02     0.00   0.01   0.01
 103   1     0.07   0.01   0.01     0.11   0.03   0.01     0.05  -0.03   0.04
 104   1    -0.08  -0.13   0.00    -0.14  -0.22  -0.02    -0.01  -0.03   0.07
 105   1    -0.11   0.06  -0.10    -0.18   0.10  -0.18     0.00  -0.01   0.03
 106   1    -0.04   0.01   0.01    -0.06   0.02   0.01    -0.02   0.02   0.03
 107   1     0.05  -0.08  -0.07     0.08  -0.12  -0.12    -0.01   0.01   0.02
 108   1    -0.08  -0.11   0.00    -0.12  -0.17  -0.01     0.00   0.00   0.04
 109   1    -0.01  -0.03   0.02    -0.04  -0.01   0.02     0.05  -0.04   0.00
 110   1    -0.02   0.00   0.05    -0.06  -0.01   0.05     0.07   0.00   0.01
 111   1    -0.02   0.02   0.01    -0.04   0.05   0.01     0.03  -0.05   0.01
 112   1    -0.01  -0.03  -0.01    -0.02  -0.06  -0.05     0.03  -0.03   0.02
 113   1    -0.02   0.02   0.02    -0.02   0.03   0.02    -0.01  -0.03   0.02
 114   1    -0.02  -0.03   0.05    -0.06  -0.06   0.07     0.01  -0.02   0.01
                    64                     65                     66
                    ?A                     ?A                     ?A
 Frequencies --   284.1991               290.6156               299.3448
 Red. masses --     2.5049                 3.3501                 2.9475
 Frc consts  --     0.1192                 0.1667                 0.1556
 IR Inten    --     8.7129                11.0044                16.4317
 Raman Activ --     0.0000                 0.0000                 0.0000
 Depolar     --     0.0000                 0.0000                 0.0000
 Atom AN      X      Y      Z        X      Y      Z        X      Y      Z
   1   8    -0.03   0.00   0.01     0.03   0.00  -0.01    -0.03  -0.01   0.02
   2  12     0.01   0.04   0.09     0.04   0.01  -0.10     0.03  -0.01   0.12
   3   8     0.00  -0.04  -0.07    -0.01   0.04   0.07     0.01  -0.04  -0.07
   4   6    -0.02  -0.01   0.01     0.02   0.01  -0.01    -0.02  -0.01   0.01
   5   7     0.02   0.05   0.07    -0.01   0.02   0.00    -0.02   0.01  -0.07
   6   7    -0.02  -0.01  -0.01    -0.01  -0.02   0.07     0.03  -0.03   0.01
   7   8    -0.03   0.00   0.01     0.03   0.00  -0.02    -0.05   0.00   0.04
   8   6     0.02   0.03   0.01     0.02   0.04  -0.01     0.03   0.04  -0.03
   9   6     0.01   0.00  -0.03     0.03   0.01   0.00     0.04   0.01   0.02
  10   6     0.01   0.00  -0.02     0.04  -0.01   0.03     0.07  -0.02   0.01
  11   8     0.00  -0.02   0.00     0.00   0.01   0.01     0.00   0.00  -0.03
  12   6     0.02  -0.01  -0.04    -0.02   0.00   0.04     0.02  -0.01  -0.06
  13   6     0.01  -0.01  -0.06    -0.01   0.01   0.06     0.02  -0.02  -0.08
  14   6     0.00  -0.01   0.01    -0.01   0.01  -0.01     0.01   0.01  -0.01
  15   8     0.05   0.03  -0.02    -0.04  -0.04   0.01     0.04   0.05  -0.03
  16   6     0.01   0.02   0.01    -0.01  -0.02   0.00     0.02   0.03   0.00
  17   8     0.00  -0.01   0.01     0.00   0.00   0.00     0.00  -0.01   0.00
  18   6     0.00   0.02   0.01     0.00  -0.01  -0.02     0.00   0.01   0.01
  19   8     0.02   0.03   0.01     0.00  -0.02  -0.01     0.00   0.02   0.01
  20   8     0.00  -0.02  -0.02     0.00   0.01   0.00     0.00  -0.01   0.00
  21   6     0.00  -0.02   0.00     0.00   0.01   0.00     0.00  -0.01   0.00
  22   6     0.00  -0.02   0.00     0.00   0.00   0.00     0.00  -0.01   0.00
  23   6    -0.01  -0.01  -0.01     0.00   0.00   0.00     0.00   0.00   0.00
  24   8     0.00  -0.01   0.02     0.00   0.00  -0.01     0.00  -0.01   0.01
  25   6     0.02   0.00  -0.01    -0.01   0.00   0.00     0.01   0.00  -0.01
  26   6    -0.05  -0.04   0.02     0.03   0.00  -0.01    -0.02   0.00   0.01
  27   6    -0.01   0.03   0.00     0.02  -0.03   0.01    -0.04   0.03   0.01
  28   6     0.01   0.02   0.00     0.00  -0.01   0.00     0.00   0.00   0.00
  29   6     0.02   0.01   0.02    -0.02   0.01   0.01    -0.04   0.01  -0.03
  30   6    -0.02  -0.02  -0.01    -0.04  -0.02   0.04    -0.01  -0.02   0.00
  31   6     0.05  -0.02   0.02    -0.01   0.01   0.00    -0.08   0.03  -0.03
  32   6     0.05  -0.02  -0.02    -0.02   0.01  -0.04    -0.09   0.04   0.00
  33   6     0.02   0.01  -0.06    -0.04  -0.02  -0.05    -0.06   0.01   0.04
  34   6    -0.02   0.00  -0.04    -0.06  -0.02  -0.03    -0.03  -0.02   0.03
  35   6    -0.02  -0.01   0.00    -0.05   0.01   0.00    -0.02   0.01   0.00
  36   6     0.01  -0.02   0.01    -0.01   0.00   0.01    -0.04   0.00  -0.01
  37   6    -0.01  -0.02  -0.01    -0.03   0.01   0.00    -0.01   0.01   0.01
  38   6    -0.02  -0.04  -0.01     0.00   0.00  -0.01    -0.02  -0.03   0.00
  39   6    -0.03  -0.04   0.02    -0.02   0.00  -0.04    -0.02  -0.04   0.02
  40   6    -0.01  -0.03   0.04    -0.06  -0.02  -0.06    -0.01  -0.04   0.02
  41   6     0.00  -0.02   0.02    -0.07  -0.07  -0.02    -0.02  -0.02   0.02
  42   6     0.00  -0.01   0.01    -0.06  -0.07   0.04    -0.02  -0.01   0.00
  43   6    -0.01  -0.02  -0.02     0.00  -0.01  -0.03    -0.02  -0.01   0.00
  44   6     0.00  -0.01   0.01    -0.02  -0.06   0.04    -0.02   0.00   0.00
  45   6    -0.06   0.02   0.04     0.00   0.00   0.01     0.04  -0.03  -0.01
  46   6    -0.08   0.03   0.03    -0.02   0.00   0.02     0.08  -0.05  -0.07
  47   6     0.01  -0.01  -0.06     0.04   0.01   0.06     0.00  -0.01   0.08
  48   6     0.03  -0.03  -0.01     0.03   0.02   0.04     0.00   0.04   0.05
  49   6     0.00   0.01   0.04     0.09   0.08   0.17     0.00   0.00   0.00
  50   6     0.01  -0.01   0.03     0.04  -0.02   0.06     0.00   0.01   0.01
  51   6     0.00   0.05  -0.08    -0.04   0.02  -0.10    -0.01   0.03  -0.03
  52   6     0.03   0.02  -0.06     0.01  -0.03  -0.08     0.01   0.02  -0.05
  53   6    -0.02   0.05   0.00     0.05   0.03  -0.02     0.06   0.03  -0.01
  54   6     0.02   0.04   0.01     0.07   0.08  -0.02     0.08   0.01   0.00
  55   1     0.00  -0.01  -0.04     0.01  -0.01  -0.02     0.00   0.00   0.04
  56   1    -0.02   0.02  -0.10     0.02  -0.02   0.09     0.01   0.02  -0.11
  57   1     0.00  -0.01   0.01    -0.01   0.01   0.00     0.01   0.01  -0.01
  58   1     0.02   0.02   0.01    -0.03  -0.02   0.00     0.05   0.03  -0.03
  59   1     0.03   0.01  -0.01    -0.03  -0.01   0.02     0.05   0.03  -0.03
  60   1     0.01   0.04   0.03    -0.01  -0.05  -0.02     0.02   0.08   0.03
  61   1     0.00  -0.02   0.01     0.00   0.01  -0.01     0.00  -0.01   0.00
  62   1     0.00  -0.02   0.01     0.00   0.01  -0.01     0.00  -0.01   0.01
  63   1     0.04   0.00  -0.02    -0.02   0.00   0.01     0.03   0.00  -0.02
  64   1     0.02  -0.01  -0.01    -0.01   0.00   0.00     0.01   0.00  -0.01
  65   1     0.01   0.03   0.01     0.00  -0.02   0.00     0.01   0.02   0.00
  66   1     0.01  -0.07   0.06     0.00   0.02  -0.03     0.00  -0.02   0.02
  67   1    -0.11  -0.08   0.06     0.05   0.02  -0.04    -0.04  -0.02   0.04
  68   1    -0.09  -0.01  -0.02     0.05  -0.01   0.01    -0.03   0.02   0.00
  69   1    -0.03   0.06   0.01     0.03  -0.05   0.00    -0.09   0.08   0.06
  70   1    -0.02   0.05  -0.01     0.03  -0.07   0.01    -0.08   0.09  -0.03
  71   1     0.00   0.00   0.04     0.02   0.01  -0.04    -0.01  -0.02   0.09
  72   1    -0.01   0.01   0.00     0.03   0.00  -0.01    -0.01   0.00   0.01
  73   1     0.05   0.02  -0.01    -0.03  -0.02   0.00     0.01   0.00  -0.01
  74   1    -0.01   0.05  -0.02     0.01  -0.05   0.01     0.00   0.02   0.00
  75   1     0.08  -0.03  -0.03     0.01   0.01  -0.05    -0.11   0.05   0.00
  76   1     0.02   0.02  -0.10    -0.04  -0.03  -0.07    -0.06   0.00   0.07
  77   1    -0.04   0.00  -0.05    -0.08  -0.04  -0.04    -0.01  -0.04   0.05
  78   1     0.02  -0.03  -0.04    -0.01   0.00   0.01    -0.06   0.01   0.06
  79   1    -0.02  -0.03  -0.03    -0.04   0.01  -0.04    -0.01   0.00   0.00
  80   1    -0.05  -0.05   0.03     0.01   0.02  -0.06    -0.02  -0.05   0.02
  81   1    -0.02  -0.02   0.05    -0.07  -0.02  -0.10     0.01  -0.05   0.03
  82   1     0.02  -0.02   0.03    -0.09  -0.10  -0.04    -0.01  -0.01   0.03
  83   1    -0.01  -0.03   0.02    -0.01   0.00  -0.04    -0.02  -0.02   0.03
  84   1     0.00  -0.01   0.01    -0.04  -0.07  -0.04    -0.02   0.00  -0.01
  85   1     0.27   0.06   0.21     0.00   0.00   0.01    -0.28  -0.05  -0.19
  86   1    -0.35   0.24   0.19     0.01  -0.01   0.02     0.33  -0.27  -0.13
  87   1    -0.13  -0.19  -0.22     0.01   0.01   0.02     0.12   0.19   0.27
  88   1    -0.14  -0.01   0.00    -0.04   0.07  -0.04     0.18   0.01  -0.02
  89   1    -0.06   0.08   0.07    -0.08  -0.02   0.08     0.07  -0.12  -0.13
  90   1    -0.10   0.05   0.05     0.06  -0.04   0.01     0.11  -0.10  -0.11
  91   1    -0.01   0.02  -0.05     0.03  -0.08   0.08    -0.03  -0.08   0.11
  92   1     0.01   0.03  -0.11     0.05   0.07   0.06     0.00   0.00   0.06
  93   1     0.05  -0.05  -0.08     0.10   0.02   0.11     0.04   0.04   0.13
  94   1     0.05  -0.03  -0.02     0.03   0.10   0.02     0.00   0.11   0.04
  95   1     0.05  -0.03  -0.02     0.10   0.02   0.08     0.03   0.03   0.11
  96   1     0.03  -0.06   0.02     0.02  -0.04   0.04     0.00   0.03   0.04
  97   1    -0.06   0.05   0.06     0.11   0.25   0.07    -0.03   0.02   0.02
  98   1     0.00  -0.02   0.00     0.14   0.09   0.29     0.01  -0.04  -0.03
  99   1     0.06   0.03   0.08     0.12   0.05   0.26     0.05   0.03   0.01
 100   1     0.01  -0.04   0.04     0.01  -0.17   0.14     0.01  -0.01   0.01
 101   1     0.03   0.01   0.05     0.20   0.07   0.14     0.03   0.02   0.02
 102   1     0.00   0.00   0.01    -0.03   0.08  -0.06    -0.01   0.03   0.00
 103   1    -0.19   0.07  -0.11    -0.08   0.07  -0.08    -0.09   0.04  -0.04
 104   1     0.10   0.18  -0.19    -0.02  -0.02  -0.17     0.04   0.09  -0.08
 105   1     0.10  -0.04   0.00    -0.06   0.04  -0.12     0.04  -0.01   0.00
 106   1     0.09  -0.03  -0.08     0.04  -0.03  -0.07     0.07   0.00  -0.05
 107   1    -0.02   0.05  -0.04     0.05  -0.05  -0.13    -0.01   0.04  -0.07
 108   1     0.05   0.09  -0.10    -0.05  -0.05  -0.11     0.01   0.05  -0.09
 109   1    -0.02   0.08  -0.01     0.05   0.02  -0.02     0.07  -0.01   0.00
 110   1    -0.04   0.03  -0.01     0.06   0.04  -0.02     0.08   0.05   0.01
 111   1    -0.01   0.06  -0.01     0.04   0.01  -0.02     0.06   0.03  -0.01
 112   1     0.01   0.06   0.05     0.00   0.12  -0.05     0.06   0.02  -0.01
 113   1    -0.01   0.03   0.02     0.12   0.11  -0.03     0.10   0.01  -0.01
 114   1     0.06   0.05   0.00     0.11   0.08  -0.02     0.09   0.01  -0.01
                    67                     68                     69
                    ?A                     ?A                     ?A
 Frequencies --   316.4500               324.3475               325.4115
 Red. masses --     3.1612                 3.7721                 3.1406
 Frc consts  --     0.1865                 0.2338                 0.1959
 IR Inten    --     2.9453                21.4963                 1.4635
 Raman Activ --     0.0000                 0.0000                 0.0000
 Depolar     --     0.0000                 0.0000                 0.0000
 Atom AN      X      Y      Z        X      Y      Z        X      Y      Z
   1   8    -0.01  -0.01  -0.01     0.02   0.07   0.04     0.02   0.04   0.03
   2  12     0.05   0.04  -0.02    -0.01   0.15  -0.01     0.02   0.00  -0.01
   3   8     0.00   0.01   0.01    -0.04   0.03   0.01    -0.01   0.01  -0.01
   4   6     0.00  -0.01   0.00     0.01   0.03   0.01     0.01   0.02   0.00
   5   7    -0.02   0.02   0.09     0.00   0.02   0.01     0.00   0.00   0.01
   6   7    -0.01   0.00  -0.02    -0.02   0.01  -0.04     0.01   0.02   0.13
   7   8    -0.01   0.00   0.01     0.08  -0.01  -0.06     0.06   0.00  -0.03
   8   6    -0.01   0.02   0.04     0.00   0.02   0.02     0.00   0.00  -0.02
   9   6    -0.01   0.02  -0.02    -0.02   0.03   0.01    -0.01   0.00  -0.04
  10   6    -0.01   0.01  -0.02    -0.03   0.01  -0.02     0.00   0.01   0.04
  11   8     0.01   0.01   0.00    -0.03  -0.05   0.02    -0.02  -0.03   0.01
  12   6     0.00   0.00   0.01    -0.01   0.00  -0.01    -0.01  -0.01   0.01
  13   6     0.00   0.00   0.01    -0.02   0.04  -0.01    -0.02   0.01   0.00
  14   6     0.00   0.00  -0.01    -0.04  -0.02   0.02    -0.03  -0.01   0.01
  15   8     0.01   0.00   0.00     0.04  -0.02  -0.03     0.01  -0.01   0.00
  16   6     0.02   0.00  -0.01    -0.10  -0.02   0.08    -0.07  -0.01   0.05
  17   8    -0.01   0.00   0.00    -0.02  -0.02   0.02    -0.01  -0.01   0.00
  18   6     0.00   0.01   0.01     0.00   0.04   0.03     0.00   0.00  -0.01
  19   8     0.02   0.02   0.02     0.08   0.09   0.06     0.01  -0.01  -0.02
  20   8    -0.01  -0.01  -0.02     0.00  -0.03  -0.05     0.00  -0.01   0.00
  21   6     0.00  -0.01   0.00     0.00  -0.03  -0.02     0.00  -0.01   0.00
  22   6     0.00   0.00   0.00    -0.01  -0.03  -0.02     0.00   0.00   0.00
  23   6    -0.01   0.00  -0.01    -0.01   0.00  -0.02    -0.01   0.01   0.01
  24   8     0.01   0.00   0.00     0.01  -0.01   0.03     0.00   0.00   0.00
  25   6     0.00  -0.01   0.00     0.02  -0.04  -0.02     0.01   0.00   0.00
  26   6    -0.01  -0.03   0.00    -0.04  -0.08   0.02    -0.02   0.02   0.01
  27   6    -0.01   0.00   0.00     0.02   0.03  -0.04     0.03   0.01  -0.01
  28   6    -0.02   0.02   0.01     0.04  -0.03  -0.06     0.02  -0.02  -0.05
  29   6    -0.03   0.00   0.04     0.00  -0.01   0.00     0.00   0.00   0.01
  30   6    -0.01  -0.01   0.00     0.00  -0.02  -0.02     0.00   0.02   0.05
  31   6    -0.02   0.01   0.03     0.00  -0.01   0.00     0.00   0.00   0.01
  32   6    -0.04  -0.12   0.11     0.00   0.08  -0.01     0.00  -0.02   0.01
  33   6    -0.03   0.03   0.07     0.01   0.01   0.02     0.00   0.00   0.00
  34   6    -0.02   0.18   0.03     0.01  -0.08   0.04     0.00   0.02   0.00
  35   6    -0.03   0.00   0.03     0.02   0.00   0.00    -0.01   0.00   0.00
  36   6     0.01   0.06  -0.01    -0.02  -0.03  -0.01     0.01   0.01   0.00
  37   6    -0.01  -0.06   0.01     0.01   0.04  -0.01     0.00  -0.01   0.00
  38   6    -0.01  -0.01   0.00    -0.01  -0.02  -0.01     0.01   0.02   0.03
  39   6    -0.01  -0.01  -0.02    -0.03  -0.01  -0.02     0.14  -0.08   0.04
  40   6    -0.02  -0.01  -0.02    -0.02  -0.01  -0.02     0.04  -0.02   0.07
  41   6    -0.02  -0.01  -0.01     0.00  -0.02  -0.03    -0.10   0.08   0.09
  42   6    -0.01  -0.02   0.00     0.00  -0.01  -0.01    -0.01   0.00   0.03
  43   6     0.00   0.00   0.00     0.00  -0.01   0.00    -0.04   0.04   0.01
  44   6     0.00  -0.02   0.00    -0.01   0.00   0.00     0.02  -0.03   0.00
  45   6     0.04  -0.04  -0.16    -0.02  -0.02   0.01     0.00   0.00  -0.02
  46   6     0.07   0.05  -0.05     0.02  -0.03  -0.06     0.00   0.01   0.00
  47   6    -0.02  -0.03  -0.15     0.01   0.03   0.03     0.00   0.00  -0.02
  48   6     0.01  -0.08   0.01    -0.02   0.01  -0.04     0.00  -0.01   0.00
  49   6     0.01   0.02   0.05     0.00   0.03   0.04     0.03  -0.08  -0.05
  50   6     0.01  -0.01   0.02     0.01  -0.01   0.04    -0.03   0.00  -0.15
  51   6     0.01   0.00   0.01     0.02   0.00   0.02    -0.09   0.04  -0.02
  52   6     0.00   0.01   0.01    -0.01   0.02   0.03     0.01   0.01  -0.15
  53   6     0.06  -0.03   0.01     0.15  -0.07   0.00     0.02   0.00   0.01
  54   6    -0.01   0.00   0.01    -0.07  -0.12   0.01    -0.01  -0.02   0.02
  55   1    -0.01   0.02  -0.04     0.00   0.04   0.02    -0.01  -0.01  -0.08
  56   1     0.01   0.00   0.01    -0.02   0.03   0.00    -0.03   0.01   0.01
  57   1     0.00   0.00  -0.01    -0.07  -0.02   0.04    -0.05  -0.01   0.02
  58   1     0.03   0.00  -0.02    -0.16  -0.01   0.12    -0.11  -0.01   0.07
  59   1     0.03   0.00  -0.02    -0.16   0.01   0.14    -0.11   0.01   0.09
  60   1     0.02   0.02   0.00    -0.09  -0.13   0.01    -0.06  -0.08   0.00
  61   1    -0.01   0.00   0.00    -0.01  -0.02  -0.02     0.00   0.00   0.00
  62   1    -0.01  -0.01   0.00    -0.02  -0.03   0.00     0.01   0.00   0.03
  63   1     0.00   0.00   0.00     0.02  -0.04   0.01     0.00   0.00   0.00
  64   1     0.00  -0.01  -0.01     0.04  -0.06  -0.05     0.01   0.01   0.00
  65   1     0.00  -0.01   0.00     0.04  -0.05  -0.01     0.01   0.00   0.01
  66   1     0.01  -0.04   0.03     0.02  -0.09   0.10     0.02  -0.01  -0.01
  67   1    -0.03  -0.05   0.00    -0.10  -0.13   0.01    -0.06   0.01   0.07
  68   1    -0.02  -0.04   0.00    -0.07  -0.10   0.00    -0.03   0.09  -0.01
  69   1    -0.02  -0.01   0.02     0.04   0.04  -0.05     0.05   0.03  -0.04
  70   1    -0.02   0.00  -0.01     0.05  -0.01  -0.02     0.06  -0.02   0.02
  71   1    -0.01   0.00   0.00     0.04   0.06  -0.07     0.04   0.03  -0.03
  72   1    -0.02   0.04  -0.04     0.14   0.02  -0.09     0.10   0.02  -0.08
  73   1    -0.07   0.04   0.04     0.06   0.00  -0.04     0.00   0.00  -0.02
  74   1     0.01  -0.03   0.04     0.00  -0.12  -0.15     0.00  -0.12  -0.09
  75   1    -0.06  -0.24   0.16     0.00   0.14  -0.03     0.00  -0.03   0.02
  76   1    -0.03   0.04   0.07     0.01   0.01   0.02     0.00   0.01   0.00
  77   1     0.01   0.33   0.00     0.01  -0.14   0.06     0.00   0.04  -0.01
  78   1     0.01   0.07   0.01    -0.02  -0.03   0.00     0.01   0.01   0.00
  79   1    -0.02  -0.07  -0.01     0.02   0.04   0.01     0.00  -0.01   0.00
  80   1     0.00  -0.01  -0.02    -0.04   0.01  -0.02     0.22  -0.17   0.02
  81   1    -0.02  -0.01  -0.02    -0.03   0.00  -0.01     0.06  -0.03   0.04
  82   1    -0.03  -0.01  -0.01     0.01  -0.02  -0.03    -0.18   0.17   0.12
  83   1     0.00  -0.01   0.01     0.00  -0.01   0.01    -0.04   0.04   0.00
  84   1    -0.01  -0.02  -0.01    -0.01   0.00  -0.01     0.03  -0.04   0.00
  85   1    -0.09  -0.21  -0.16    -0.05   0.01  -0.02    -0.01  -0.02  -0.02
  86   1     0.16  -0.02  -0.32     0.00  -0.04   0.01     0.02   0.01  -0.04
  87   1     0.07  -0.01  -0.18    -0.03  -0.01   0.06     0.01   0.00  -0.02
  88   1     0.12   0.07  -0.01     0.07  -0.01  -0.03     0.00   0.01   0.00
  89   1     0.10   0.06  -0.09     0.05  -0.02  -0.09     0.00   0.02   0.01
  90   1     0.03   0.04  -0.09    -0.01  -0.04  -0.10     0.00   0.01   0.00
  91   1    -0.04   0.12  -0.17     0.02   0.00   0.04     0.00   0.01  -0.02
  92   1    -0.03  -0.01  -0.21     0.01   0.03   0.05     0.00   0.00  -0.02
  93   1    -0.03  -0.14  -0.25     0.01   0.06   0.06     0.00  -0.02  -0.03
  94   1     0.05  -0.11  -0.01    -0.05  -0.02  -0.02     0.01  -0.01   0.00
  95   1     0.01  -0.07  -0.03    -0.02   0.02  -0.08     0.00  -0.01   0.00
  96   1     0.02  -0.09   0.06    -0.02   0.01  -0.07     0.00  -0.01   0.01
  97   1     0.01   0.07   0.02    -0.01   0.07   0.02     0.06  -0.14  -0.04
  98   1     0.02   0.03   0.07     0.00   0.05   0.05     0.04  -0.11  -0.06
  99   1     0.03   0.01   0.08     0.01   0.01   0.08     0.02  -0.04  -0.13
 100   1     0.01  -0.04   0.03     0.04  -0.06   0.05    -0.10   0.17  -0.18
 101   1     0.03   0.01   0.04     0.01   0.03   0.08    -0.04  -0.11  -0.28
 102   1     0.00   0.00   0.01     0.01   0.00   0.04    -0.02  -0.01  -0.14
 103   1     0.00   0.00   0.00     0.01  -0.02   0.01    -0.12   0.05  -0.02
 104   1     0.01   0.02   0.01     0.03   0.04   0.04    -0.08   0.00  -0.08
 105   1     0.02  -0.01   0.01     0.05  -0.03   0.04    -0.13   0.06  -0.01
 106   1     0.00   0.00   0.00    -0.02   0.00   0.02     0.15   0.01  -0.13
 107   1    -0.02   0.02   0.01    -0.05   0.04   0.07     0.08  -0.01  -0.26
 108   1     0.01   0.02   0.01     0.04   0.05   0.05    -0.12   0.01  -0.26
 109   1     0.08  -0.05   0.00     0.17  -0.16   0.00     0.02  -0.04   0.02
 110   1     0.12   0.01  -0.02     0.26   0.03  -0.03     0.04   0.02   0.04
 111   1     0.05  -0.10   0.01     0.15  -0.18   0.01     0.02   0.02   0.01
 112   1     0.00   0.00   0.02     0.03  -0.22  -0.02     0.00  -0.04   0.01
 113   1    -0.04   0.00   0.01    -0.11  -0.12   0.02     0.00  -0.03   0.02
 114   1     0.00   0.00   0.01    -0.19  -0.16   0.05    -0.04  -0.03   0.02
                    70                     71                     72
                    ?A                     ?A                     ?A
 Frequencies --   327.8155               331.4427               338.3117
 Red. masses --     3.5877                 5.2817                 3.3606
 Frc consts  --     0.2272                 0.3419                 0.2266
 IR Inten    --    10.5680                12.1289                 2.6260
 Raman Activ --     0.0000                 0.0000                 0.0000
 Depolar     --     0.0000                 0.0000                 0.0000
 Atom AN      X      Y      Z        X      Y      Z        X      Y      Z
   1   8    -0.02  -0.10  -0.08     0.01   0.02   0.06     0.00   0.00  -0.01
   2  12     0.04   0.08  -0.06     0.27   0.00  -0.01     0.02   0.04  -0.02
   3   8     0.01   0.00   0.05     0.00   0.02   0.00    -0.01   0.01   0.01
   4   6     0.00  -0.05  -0.02    -0.02   0.04   0.01     0.01  -0.01  -0.01
   5   7     0.00  -0.02  -0.01     0.00  -0.09   0.05     0.00   0.00  -0.03
   6   7    -0.03   0.03   0.03    -0.05   0.03   0.01     0.00   0.00   0.14
   7   8    -0.10   0.00   0.05     0.00   0.03   0.06     0.01  -0.01  -0.02
   8   6    -0.02  -0.02   0.00    -0.07  -0.13   0.03     0.00   0.00  -0.03
   9   6    -0.03   0.01  -0.01    -0.05  -0.07  -0.02     0.00  -0.01  -0.03
  10   6    -0.06   0.02   0.01    -0.11   0.01   0.00     0.00   0.00   0.05
  11   8     0.04   0.10   0.00    -0.02  -0.04  -0.07     0.00   0.03   0.02
  12   6     0.01   0.02   0.01     0.00  -0.02  -0.03     0.00   0.01   0.02
  13   6     0.02  -0.01   0.03     0.01   0.00  -0.02    -0.01   0.01   0.02
  14   6     0.06   0.02  -0.02    -0.04   0.03  -0.04     0.00   0.00   0.01
  15   8    -0.04   0.00  -0.01     0.02   0.04   0.00    -0.01  -0.02   0.00
  16   6     0.14   0.00  -0.12    -0.04   0.03   0.04     0.00  -0.01  -0.01
  17   8     0.00   0.00   0.00    -0.02  -0.01   0.01     0.00   0.00   0.01
  18   6     0.02   0.02   0.01    -0.02   0.01   0.01     0.00   0.01   0.01
  19   8     0.06   0.05   0.04     0.02   0.03   0.02     0.00   0.02   0.02
  20   8    -0.02  -0.02  -0.05     0.00  -0.01   0.00     0.01   0.00   0.00
  21   6     0.00   0.00  -0.01     0.00  -0.01  -0.01     0.00  -0.01   0.00
  22   6     0.00   0.00   0.00    -0.01  -0.01  -0.01     0.00  -0.01  -0.01
  23   6    -0.01   0.00  -0.02    -0.01   0.00   0.00     0.00  -0.01  -0.02
  24   8     0.00   0.00   0.00     0.01  -0.01   0.00     0.00  -0.01   0.01
  25   6     0.00  -0.01   0.00     0.01  -0.02  -0.01     0.00  -0.01  -0.01
  26   6    -0.05  -0.07   0.02     0.01  -0.02   0.00     0.01  -0.04  -0.01
  27   6    -0.06  -0.03   0.02     0.00   0.01   0.00     0.00   0.00  -0.01
  28   6    -0.05   0.05   0.11     0.00  -0.05  -0.06    -0.01   0.01   0.01
  29   6     0.01  -0.01   0.00     0.00  -0.02   0.01     0.00   0.00  -0.01
  30   6     0.00   0.01   0.01    -0.02   0.03   0.01    -0.02   0.01   0.05
  31   6     0.01   0.00  -0.01     0.00   0.00   0.00    -0.01   0.01   0.00
  32   6     0.01   0.04  -0.02     0.00   0.06  -0.01    -0.01  -0.04   0.00
  33   6     0.02  -0.01   0.00     0.00  -0.01   0.02    -0.01  -0.01  -0.01
  34   6     0.01  -0.06   0.01     0.00  -0.06   0.03     0.00   0.04  -0.02
  35   6     0.02   0.00   0.00     0.00   0.00   0.01     0.00   0.00  -0.01
  36   6     0.00  -0.01   0.00    -0.01  -0.02  -0.01     0.00   0.03   0.00
  37   6     0.01   0.02   0.00     0.00   0.03   0.00    -0.01  -0.02   0.00
  38   6     0.01   0.00   0.01     0.01   0.02   0.00     0.00   0.01   0.03
  39   6     0.06  -0.04   0.00    -0.01   0.03   0.01    -0.13   0.12   0.08
  40   6     0.01   0.00   0.02     0.00   0.03   0.01    -0.01  -0.01   0.04
  41   6    -0.05   0.04   0.03     0.04   0.00   0.00     0.12  -0.13   0.01
  42   6     0.00   0.00   0.01     0.01   0.01   0.00    -0.04   0.00   0.02
  43   6    -0.02   0.02   0.00     0.02  -0.01  -0.01     0.06  -0.04   0.00
  44   6     0.02  -0.02   0.00     0.01   0.01   0.00    -0.07   0.06  -0.01
  45   6    -0.01   0.01   0.02    -0.02  -0.02  -0.01     0.02   0.02  -0.01
  46   6    -0.01  -0.01   0.00     0.02  -0.01  -0.05    -0.01   0.01   0.04
  47   6     0.01   0.02   0.03     0.01   0.03   0.02    -0.01  -0.02   0.00
  48   6    -0.01   0.02  -0.02    -0.01   0.00  -0.04     0.01   0.01   0.03
  49   6     0.02  -0.02   0.01    -0.01  -0.01  -0.01    -0.01  -0.05  -0.17
  50   6     0.00  -0.02  -0.05     0.00   0.00   0.00    -0.03   0.11  -0.01
  51   6    -0.03   0.01   0.00     0.01   0.00  -0.04    -0.01   0.03  -0.13
  52   6     0.00   0.01  -0.05     0.01  -0.03   0.01     0.05  -0.07   0.01
  53   6     0.07  -0.08   0.02    -0.13  -0.13   0.05     0.05  -0.02   0.01
  54   6    -0.08  -0.04   0.01    -0.07   0.24   0.00    -0.01  -0.04   0.01
  55   1     0.00   0.02  -0.02     0.03  -0.04  -0.05    -0.01  -0.01  -0.06
  56   1     0.04  -0.02   0.04     0.05   0.02  -0.03    -0.02   0.00   0.03
  57   1     0.11   0.02  -0.04    -0.04   0.04  -0.02     0.01  -0.01   0.00
  58   1     0.23   0.00  -0.16    -0.05   0.02   0.01     0.00  -0.01   0.00
  59   1     0.23  -0.04  -0.20    -0.07   0.06   0.06     0.00  -0.02  -0.01
  60   1     0.13   0.15  -0.02    -0.05   0.01   0.01     0.01  -0.02  -0.01
  61   1     0.00   0.00   0.00    -0.01  -0.01  -0.01     0.00  -0.01  -0.01
  62   1     0.00   0.00  -0.01    -0.02  -0.02   0.00    -0.01  -0.02  -0.03
  63   1     0.01  -0.01   0.01     0.01  -0.01   0.01     0.00  -0.01   0.01
  64   1     0.00  -0.02   0.00     0.01  -0.02  -0.02     0.01  -0.02  -0.01
  65   1     0.00  -0.01   0.00     0.01  -0.02   0.00     0.01  -0.02  -0.01
  66   1     0.03  -0.10   0.10     0.00  -0.02   0.00    -0.02  -0.01   0.02
  67   1    -0.12  -0.13   0.03     0.01  -0.02  -0.03     0.03  -0.03  -0.06
  68   1    -0.08  -0.07  -0.01     0.02  -0.04   0.01     0.02  -0.10   0.01
  69   1    -0.09  -0.10   0.07    -0.03   0.03   0.02     0.02  -0.02  -0.02
  70   1    -0.10   0.02  -0.03    -0.01   0.02  -0.03     0.01  -0.01   0.01
  71   1    -0.08  -0.04   0.02     0.02   0.00   0.02    -0.02   0.01  -0.03
  72   1    -0.23  -0.05   0.20     0.11  -0.03  -0.05    -0.03   0.01   0.00
  73   1    -0.01  -0.02   0.04    -0.05  -0.08  -0.07    -0.01   0.02   0.02
  74   1    -0.01   0.26   0.21     0.00  -0.15  -0.08     0.00   0.02   0.02
  75   1     0.02   0.09  -0.04     0.00   0.11  -0.02    -0.01  -0.07   0.01
  76   1     0.02  -0.02   0.00     0.00  -0.03   0.03    -0.01  -0.01   0.00
  77   1     0.01  -0.10   0.02     0.00  -0.10   0.05     0.00   0.07  -0.03
  78   1     0.00  -0.02  -0.01    -0.01  -0.02   0.00     0.00   0.03   0.01
  79   1     0.01   0.03   0.01     0.01   0.03   0.00    -0.01  -0.02   0.00
  80   1     0.10  -0.08  -0.01    -0.02   0.04   0.02    -0.22   0.20   0.11
  81   1     0.00   0.00   0.01     0.00   0.03   0.01     0.00  -0.01   0.02
  82   1    -0.09   0.08   0.04     0.06  -0.03  -0.01     0.24  -0.23  -0.01
  83   1    -0.02   0.02   0.00     0.02  -0.01  -0.02     0.06  -0.04   0.00
  84   1     0.02  -0.03   0.00     0.01   0.01   0.01    -0.08   0.06  -0.04
  85   1     0.02   0.04   0.03    -0.06  -0.01  -0.03     0.02   0.00   0.00
  86   1    -0.05   0.01   0.06     0.01  -0.03  -0.02     0.03   0.00  -0.01
  87   1    -0.03  -0.01   0.02    -0.02  -0.01   0.03     0.03   0.03  -0.01
  88   1    -0.01  -0.02   0.00     0.06   0.01  -0.03    -0.03  -0.01   0.03
  89   1     0.00  -0.01   0.00     0.04  -0.01  -0.08    -0.03  -0.01   0.05
  90   1    -0.01  -0.01   0.00     0.00  -0.03  -0.09     0.01   0.02   0.07
  91   1     0.01  -0.01   0.04     0.02   0.01   0.02    -0.01  -0.02   0.01
  92   1     0.01   0.01   0.06     0.02   0.04   0.03    -0.01  -0.02   0.00
  93   1     0.00   0.04   0.05     0.02   0.03   0.02     0.00  -0.01   0.01
  94   1    -0.03   0.00  -0.01    -0.04  -0.04  -0.02     0.02   0.04   0.01
  95   1    -0.02   0.02  -0.03     0.00   0.01  -0.08     0.00   0.00   0.06
  96   1    -0.02   0.03  -0.04    -0.02  -0.02  -0.06     0.01   0.02   0.04
  97   1     0.01  -0.02   0.01    -0.02  -0.03   0.00     0.03  -0.17  -0.13
  98   1     0.02  -0.02   0.01    -0.02  -0.01  -0.03     0.03  -0.14  -0.19
  99   1     0.02  -0.01   0.01    -0.01  -0.01  -0.02    -0.02   0.05  -0.34
 100   1    -0.04   0.04  -0.05    -0.02   0.00   0.00     0.02   0.12  -0.04
 101   1    -0.01  -0.05  -0.09    -0.01   0.00   0.00     0.01   0.09  -0.04
 102   1     0.00  -0.03  -0.05     0.00  -0.02  -0.01    -0.05   0.17   0.02
 103   1    -0.05   0.01  -0.01     0.00   0.02  -0.03    -0.12   0.14  -0.09
 104   1    -0.02   0.01  -0.02     0.01  -0.02  -0.06     0.05   0.00  -0.27
 105   1    -0.04   0.01   0.02     0.00   0.01  -0.05    -0.02   0.05  -0.16
 106   1     0.05   0.01  -0.05    -0.03  -0.01   0.02     0.02  -0.10  -0.02
 107   1     0.02   0.01  -0.08     0.02  -0.04   0.02     0.06  -0.09   0.05
 108   1    -0.04   0.02  -0.09     0.01  -0.05   0.04     0.04  -0.06  -0.01
 109   1     0.09  -0.15   0.03    -0.13  -0.11   0.05     0.06  -0.09   0.03
 110   1     0.15  -0.01   0.01    -0.15  -0.15   0.07     0.10   0.02   0.04
 111   1     0.07  -0.13   0.03    -0.13  -0.09   0.05     0.06  -0.01   0.02
 112   1    -0.04  -0.08   0.00    -0.21   0.40   0.08     0.00  -0.06  -0.02
 113   1    -0.09  -0.04   0.01    -0.05   0.23  -0.01     0.02  -0.04   0.00
 114   1    -0.13  -0.05   0.02     0.14   0.31  -0.08    -0.06  -0.05   0.01
                    73                     74                     75
                    ?A                     ?A                     ?A
 Frequencies --   341.5699               349.9821               371.3959
 Red. masses --     3.4305                 5.6256                 4.8709
 Frc consts  --     0.2358                 0.4060                 0.3959
 IR Inten    --     0.9115                25.7228                30.6970
 Raman Activ --     0.0000                 0.0000                 0.0000
 Depolar     --     0.0000                 0.0000                 0.0000
 Atom AN      X      Y      Z        X      Y      Z        X      Y      Z
   1   8     0.01  -0.02  -0.04    -0.01  -0.01   0.07     0.00   0.00  -0.01
   2  12    -0.02  -0.03   0.00    -0.06  -0.01  -0.08     0.16  -0.06   0.07
   3   8    -0.01  -0.01  -0.02     0.07   0.07   0.07     0.02  -0.04  -0.10
   4   6     0.02  -0.02  -0.01    -0.04   0.07   0.03     0.00  -0.02  -0.01
   5   7     0.00   0.05   0.15     0.00   0.06   0.04    -0.02   0.06  -0.03
   6   7     0.02  -0.01   0.03    -0.01   0.02   0.03    -0.05   0.08  -0.01
   7   8     0.02  -0.03  -0.05    -0.13   0.12   0.22     0.04  -0.04  -0.07
   8   6     0.01   0.04   0.04     0.01   0.07   0.01    -0.04   0.08  -0.01
   9   6     0.01   0.00  -0.04    -0.01   0.06  -0.01    -0.06   0.11   0.01
  10   6     0.04  -0.01  -0.01     0.00   0.03   0.01    -0.09   0.08  -0.01
  11   8     0.00   0.06   0.05     0.02  -0.19  -0.17    -0.01   0.08   0.05
  12   6    -0.01   0.03   0.04     0.03  -0.10  -0.07    -0.01   0.01   0.03
  13   6    -0.03   0.01   0.01     0.10  -0.04   0.00    -0.03  -0.04  -0.03
  14   6     0.02  -0.01   0.02    -0.02   0.05  -0.07     0.00  -0.01   0.00
  15   8    -0.03  -0.02   0.01     0.02   0.05   0.04    -0.03  -0.01   0.01
  16   6     0.02  -0.03  -0.03     0.02   0.08   0.01    -0.01  -0.02   0.00
  17   8     0.00   0.00   0.00     0.00   0.00  -0.04     0.00  -0.01  -0.06
  18   6     0.00  -0.01  -0.01     0.01  -0.04  -0.06    -0.01  -0.05  -0.08
  19   8    -0.03  -0.03  -0.03    -0.04  -0.06  -0.05    -0.10  -0.07  -0.08
  20   8     0.01   0.01   0.02     0.00  -0.01   0.02     0.05   0.01   0.07
  21   6     0.00   0.00   0.01     0.00   0.00   0.03     0.03  -0.03   0.07
  22   6     0.00   0.00   0.00     0.01   0.01   0.04     0.04   0.00   0.07
  23   6     0.00   0.00   0.01     0.02  -0.01   0.01     0.03  -0.03   0.01
  24   8     0.00   0.00   0.00    -0.01  -0.02   0.00    -0.04  -0.07   0.01
  25   6     0.00   0.01   0.00    -0.03   0.06   0.01    -0.04   0.10   0.04
  26   6     0.01   0.02  -0.01     0.05   0.02  -0.02     0.04   0.10  -0.04
  27   6     0.01   0.00  -0.01     0.01  -0.04   0.06     0.02  -0.01   0.01
  28   6     0.00   0.02   0.04     0.02  -0.06  -0.07    -0.02   0.01   0.02
  29   6     0.00  -0.01   0.06     0.01   0.01   0.02     0.00   0.04  -0.02
  30   6     0.00   0.00   0.02    -0.02   0.01   0.02    -0.04   0.03   0.00
  31   6     0.02  -0.03   0.04     0.03  -0.02   0.02     0.02  -0.01  -0.01
  32   6     0.03   0.13   0.02     0.04   0.03   0.00     0.03  -0.01  -0.01
  33   6     0.00   0.04   0.04     0.03   0.01   0.00     0.05   0.02  -0.01
  34   6    -0.03  -0.10   0.09     0.00  -0.05   0.03     0.04  -0.01   0.00
  35   6    -0.03   0.00   0.04     0.00   0.00   0.02     0.04   0.00   0.00
  36   6    -0.02  -0.08   0.01     0.01  -0.04   0.01     0.02  -0.02  -0.01
  37   6    -0.01   0.06   0.00     0.00   0.02   0.01     0.03  -0.01   0.01
  38   6     0.00   0.01   0.01    -0.01   0.00   0.02    -0.03  -0.02   0.01
  39   6    -0.02   0.02   0.02    -0.03   0.02   0.02    -0.03  -0.03   0.00
  40   6     0.00  -0.01   0.01    -0.02  -0.01   0.00    -0.04  -0.03   0.00
  41   6     0.01  -0.03   0.01     0.00  -0.04   0.00    -0.02  -0.02  -0.01
  42   6    -0.02   0.00   0.01    -0.03  -0.01   0.01    -0.03  -0.01  -0.01
  43   6     0.01  -0.01   0.00     0.01  -0.01   0.01     0.00  -0.03   0.01
  44   6    -0.02   0.01   0.00    -0.02   0.00   0.00    -0.01  -0.03  -0.01
  45   6    -0.07  -0.09  -0.03    -0.04  -0.03   0.00    -0.01   0.01   0.02
  46   6     0.07  -0.01  -0.17     0.01   0.01  -0.04    -0.02   0.00   0.01
  47   6     0.03   0.08  -0.04     0.01   0.03  -0.02    -0.01  -0.01   0.00
  48   6    -0.01  -0.06  -0.10    -0.01  -0.03  -0.03    -0.01   0.01   0.01
  49   6     0.00  -0.01  -0.04     0.01  -0.01  -0.02     0.01   0.02   0.04
  50   6    -0.01   0.03  -0.01     0.00   0.02  -0.02     0.01  -0.02   0.00
  51   6    -0.01   0.01  -0.03    -0.01   0.01  -0.02     0.02   0.00   0.00
  52   6     0.01  -0.02  -0.01     0.02  -0.02   0.00     0.01   0.00   0.02
  53   6    -0.04   0.07  -0.02     0.09   0.03  -0.02     0.14  -0.01  -0.01
  54   6     0.05   0.01   0.01    -0.04  -0.10   0.01    -0.16  -0.04   0.01
  55   1    -0.02  -0.02  -0.09    -0.03   0.05  -0.04    -0.04   0.13   0.01
  56   1    -0.08  -0.01   0.02     0.26  -0.01   0.00    -0.10  -0.04  -0.03
  57   1     0.03  -0.02   0.01    -0.06   0.08  -0.02     0.02  -0.01  -0.01
  58   1     0.02  -0.02  -0.01     0.07   0.05  -0.07    -0.03  -0.01   0.02
  59   1     0.03  -0.04  -0.03     0.03   0.11  -0.01    -0.02  -0.02   0.01
  60   1     0.02  -0.03  -0.02     0.00   0.16   0.03    -0.01  -0.04   0.00
  61   1     0.00   0.00   0.00     0.01   0.03   0.03     0.05   0.05   0.05
  62   1     0.00   0.00   0.00     0.03   0.02  -0.01     0.04  -0.01   0.01
  63   1     0.00   0.01   0.00    -0.04   0.04  -0.06    -0.07   0.07  -0.12
  64   1     0.00   0.01   0.01    -0.05   0.11   0.05    -0.07   0.22   0.11
  65   1     0.00   0.01   0.00    -0.04   0.08   0.02    -0.06   0.15   0.04
  66   1    -0.01   0.03  -0.03     0.00   0.04  -0.06    -0.08   0.14  -0.16
  67   1     0.04   0.05   0.00     0.09   0.06  -0.04     0.13   0.20   0.01
  68   1     0.02   0.02   0.00     0.07   0.01   0.00     0.04   0.11  -0.03
  69   1     0.04   0.01  -0.04    -0.08  -0.03   0.15     0.05   0.06  -0.03
  70   1     0.03  -0.01   0.04    -0.05  -0.01  -0.04     0.05  -0.01   0.08
  71   1    -0.01   0.01  -0.03     0.07  -0.08   0.13     0.01  -0.03   0.05
  72   1    -0.09  -0.03   0.09     0.18  -0.02  -0.07    -0.06  -0.02   0.03
  73   1     0.07  -0.01   0.00    -0.09  -0.10  -0.08     0.00   0.00   0.01
  74   1    -0.02   0.14   0.05     0.04  -0.22  -0.08    -0.02   0.06   0.04
  75   1     0.04   0.23  -0.02     0.04   0.06  -0.01     0.02  -0.01   0.00
  76   1     0.00   0.06   0.01     0.03   0.02  -0.02     0.05   0.03  -0.01
  77   1    -0.04  -0.19   0.12    -0.01  -0.09   0.04     0.03  -0.02   0.00
  78   1    -0.01  -0.08  -0.01     0.02  -0.04  -0.02     0.02  -0.02  -0.02
  79   1    -0.01   0.06  -0.01     0.00   0.02   0.01     0.03   0.00   0.03
  80   1    -0.03   0.03   0.02    -0.03   0.03   0.01     0.00  -0.04  -0.01
  81   1     0.01  -0.02   0.00    -0.02  -0.01  -0.01    -0.04  -0.03   0.01
  82   1     0.03  -0.04   0.00     0.03  -0.06  -0.01     0.00  -0.03  -0.01
  83   1     0.01  -0.01   0.00     0.01  -0.01   0.02     0.00  -0.04   0.04
  84   1    -0.02   0.01  -0.01    -0.03  -0.01  -0.02    -0.02  -0.03  -0.03
  85   1    -0.13  -0.09  -0.06     0.00  -0.01   0.02     0.00   0.06   0.00
  86   1    -0.05  -0.04  -0.10    -0.09   0.04   0.00    -0.02   0.01   0.04
  87   1    -0.12  -0.12   0.01    -0.08  -0.09  -0.03    -0.02   0.00   0.05
  88   1     0.18   0.09  -0.12     0.02   0.03  -0.05    -0.05  -0.03  -0.01
  89   1     0.15   0.06  -0.22     0.04   0.05  -0.05    -0.02   0.01   0.03
  90   1    -0.02  -0.09  -0.34    -0.03  -0.01  -0.10    -0.02   0.01   0.03
  91   1     0.07   0.11  -0.07     0.03   0.06  -0.04    -0.02   0.01   0.00
  92   1     0.05   0.14  -0.03     0.01   0.04  -0.01    -0.02  -0.05   0.00
  93   1     0.05   0.02  -0.09     0.00   0.00  -0.05    -0.04   0.00  -0.01
  94   1    -0.05  -0.18  -0.06    -0.02  -0.08  -0.01    -0.02   0.00   0.01
  95   1     0.02  -0.01  -0.25     0.00  -0.01  -0.09    -0.03   0.00   0.02
  96   1    -0.03  -0.13  -0.12    -0.01  -0.04  -0.04    -0.01   0.04  -0.01
  97   1     0.01  -0.04  -0.03     0.04  -0.02  -0.04    -0.01   0.08   0.02
  98   1     0.01  -0.04  -0.04     0.04  -0.03   0.00     0.02   0.01   0.05
  99   1     0.00   0.01  -0.08     0.01   0.01  -0.06     0.03   0.00   0.09
 100   1     0.00   0.04  -0.02     0.01   0.03  -0.02     0.02  -0.04   0.00
 101   1     0.00   0.01  -0.03     0.02   0.01  -0.03     0.03  -0.01   0.01
 102   1    -0.01   0.05   0.00    -0.02   0.06  -0.01     0.00   0.00   0.00
 103   1    -0.03   0.03  -0.02    -0.03   0.04  -0.01     0.00   0.03   0.01
 104   1     0.00   0.00  -0.06     0.01  -0.01  -0.07     0.03   0.03  -0.01
 105   1    -0.01   0.02  -0.03    -0.02   0.02  -0.04     0.05  -0.01  -0.03
 106   1     0.02  -0.02  -0.01     0.03  -0.04  -0.01     0.02  -0.01   0.02
 107   1     0.02  -0.02  -0.01     0.02  -0.02   0.02    -0.02   0.03   0.03
 108   1     0.00  -0.02  -0.02     0.01   0.00  -0.02     0.04   0.03   0.02
 109   1    -0.04   0.13  -0.04     0.11  -0.01  -0.03     0.17  -0.12   0.01
 110   1    -0.09   0.03  -0.03     0.15   0.08  -0.05     0.28   0.11  -0.04
 111   1    -0.06   0.07  -0.03     0.09  -0.04  -0.02     0.15  -0.11   0.01
 112   1     0.04   0.02   0.02     0.04  -0.19  -0.03    -0.05  -0.14  -0.01
 113   1     0.03   0.01   0.02    -0.06  -0.10   0.01    -0.20  -0.06   0.02
 114   1     0.08   0.01   0.01    -0.16  -0.13   0.04    -0.27  -0.07   0.04
                    76                     77                     78
                    ?A                     ?A                     ?A
 Frequencies --   383.1087               394.8714               402.4094
 Red. masses --     4.6259                 5.0782                 8.7797
 Frc consts  --     0.4000                 0.4665                 0.8377
 IR Inten    --    10.7814                 5.9372                10.2982
 Raman Activ --     0.0000                 0.0000                 0.0000
 Depolar     --     0.0000                 0.0000                 0.0000
 Atom AN      X      Y      Z        X      Y      Z        X      Y      Z
   1   8     0.02  -0.03  -0.05    -0.04   0.05   0.08     0.02  -0.01  -0.01
   2  12     0.05  -0.07   0.03     0.02  -0.11  -0.01     0.01  -0.07   0.03
   3   8    -0.10   0.03   0.00     0.15  -0.01   0.02    -0.02  -0.02  -0.04
   4   6     0.03   0.02   0.00    -0.05  -0.03   0.00     0.01   0.01  -0.01
   5   7    -0.01   0.03  -0.01    -0.01   0.02  -0.01    -0.01   0.02  -0.01
   6   7    -0.01   0.03  -0.01    -0.01   0.03   0.00    -0.01   0.02   0.02
   7   8    -0.04   0.06   0.06     0.05  -0.09  -0.08     0.00   0.01   0.01
   8   6    -0.01   0.04  -0.01    -0.01   0.04   0.00     0.00   0.03  -0.01
   9   6    -0.02   0.05   0.00    -0.02   0.05   0.00    -0.01   0.04   0.00
  10   6    -0.02   0.04   0.00    -0.01   0.03   0.00    -0.01   0.03   0.00
  11   8    -0.01  -0.07   0.01     0.04   0.10  -0.03    -0.01  -0.01   0.02
  12   6    -0.02  -0.04   0.02     0.05   0.03  -0.03    -0.01   0.00   0.02
  13   6    -0.08   0.01  -0.01     0.15  -0.02   0.02    -0.03   0.01   0.00
  14   6     0.03   0.00   0.04    -0.02   0.00  -0.08    -0.01   0.01   0.00
  15   8     0.00  -0.02   0.03     0.02   0.04  -0.03    -0.01  -0.03   0.00
  16   6     0.07  -0.02  -0.06    -0.10   0.04   0.10     0.02  -0.01  -0.02
  17   8    -0.02   0.00   0.24     0.13   0.05   0.08    -0.12  -0.04  -0.10
  18   6    -0.09   0.00   0.03     0.07  -0.04   0.06     0.03   0.01   0.01
  19   8    -0.03  -0.06  -0.05    -0.07  -0.08   0.05     0.35  -0.01  -0.13
  20   8     0.05   0.10   0.03    -0.12  -0.01  -0.04    -0.26  -0.14   0.14
  21   6     0.00   0.05  -0.09    -0.08   0.10  -0.08    -0.15   0.04   0.01
  22   6    -0.04  -0.02  -0.13    -0.03   0.02  -0.08    -0.22   0.05   0.03
  23   6    -0.08   0.02   0.00     0.00   0.02   0.01    -0.09   0.04   0.13
  24   8     0.07   0.09  -0.03     0.01   0.14  -0.04     0.31   0.07  -0.15
  25   6     0.08  -0.19  -0.07     0.04  -0.09  -0.04    -0.02   0.08   0.06
  26   6    -0.05   0.05  -0.04    -0.01  -0.07   0.04     0.11  -0.02   0.07
  27   6     0.06   0.04  -0.01    -0.06  -0.05   0.05     0.02   0.02  -0.01
  28   6     0.06   0.03   0.00    -0.09  -0.04   0.00     0.00  -0.01  -0.01
  29   6     0.00   0.01   0.00     0.00   0.02   0.00     0.00   0.00   0.00
  30   6    -0.02   0.02   0.00    -0.02   0.02   0.01     0.00   0.01   0.00
  31   6     0.01  -0.01   0.00     0.01  -0.01   0.00     0.01  -0.01   0.00
  32   6     0.01  -0.01   0.00     0.02   0.01  -0.01     0.01   0.00   0.00
  33   6     0.02   0.01   0.00     0.02   0.01   0.00     0.02   0.01   0.00
  34   6     0.01   0.00   0.00     0.01  -0.01   0.01     0.01  -0.01   0.00
  35   6     0.01   0.00   0.00     0.01   0.00   0.01     0.01   0.00   0.00
  36   6     0.01  -0.01   0.00     0.01  -0.01   0.00     0.01   0.00   0.00
  37   6     0.01   0.00   0.00     0.01   0.00   0.01     0.01   0.00   0.00
  38   6    -0.01  -0.01   0.01    -0.01   0.00   0.01    -0.01  -0.01   0.00
  39   6    -0.01  -0.01   0.00    -0.01  -0.01   0.01    -0.03   0.01   0.01
  40   6    -0.01  -0.02   0.00    -0.01  -0.01   0.00    -0.01  -0.01   0.00
  41   6    -0.01  -0.01   0.00    -0.01  -0.01   0.00     0.02  -0.03   0.00
  42   6    -0.01   0.00   0.00    -0.02   0.00   0.00    -0.01  -0.01   0.00
  43   6     0.00  -0.01   0.01     0.00  -0.01   0.01     0.00  -0.01   0.00
  44   6     0.00  -0.02   0.00    -0.01  -0.01   0.00    -0.01   0.00  -0.01
  45   6     0.00   0.00   0.00    -0.01   0.00   0.00     0.00   0.00   0.00
  46   6    -0.01   0.00   0.00     0.00   0.00   0.00     0.00   0.00   0.01
  47   6     0.00   0.00   0.00     0.00   0.01  -0.01     0.00   0.00   0.01
  48   6     0.00   0.00   0.00     0.00  -0.01   0.00     0.00   0.00   0.00
  49   6     0.01   0.00   0.01     0.01   0.00   0.01     0.00   0.00  -0.01
  50   6     0.00  -0.01  -0.01     0.00   0.00  -0.01     0.00   0.00   0.01
  51   6     0.01   0.00   0.00     0.00   0.01  -0.01     0.01   0.00  -0.01
  52   6     0.01   0.00   0.01     0.01   0.00   0.00     0.00   0.00   0.00
  53   6     0.04   0.02  -0.01     0.03   0.03  -0.01     0.02   0.02  -0.01
  54   6    -0.05  -0.02   0.00    -0.04  -0.02   0.00    -0.03   0.00   0.00
  55   1    -0.02   0.05   0.01    -0.02   0.05   0.00    -0.01   0.04   0.00
  56   1    -0.09   0.02  -0.02     0.17  -0.01   0.02    -0.09   0.01  -0.01
  57   1     0.00   0.01   0.07     0.02  -0.01  -0.11    -0.02   0.01   0.01
  58   1     0.09  -0.02  -0.07    -0.13   0.04   0.11     0.02  -0.01  -0.02
  59   1     0.09  -0.03  -0.09    -0.13   0.05   0.13     0.01  -0.01  -0.02
  60   1     0.06   0.02  -0.04    -0.09  -0.01   0.06     0.01  -0.01  -0.02
  61   1    -0.05  -0.09  -0.12    -0.07  -0.11  -0.03    -0.28   0.00   0.12
  62   1    -0.10  -0.02   0.00     0.03   0.11  -0.03    -0.10   0.07   0.09
  63   1     0.11  -0.15   0.23     0.12  -0.05   0.13     0.09   0.10   0.05
  64   1     0.15  -0.39  -0.21     0.06  -0.26  -0.11     0.06   0.01  -0.07
  65   1     0.14  -0.30  -0.08     0.04  -0.11  -0.06     0.00   0.21   0.21
  66   1    -0.05   0.03  -0.11     0.11  -0.11   0.14     0.15  -0.06  -0.02
  67   1    -0.05   0.06  -0.01    -0.09  -0.17   0.00     0.10  -0.08  -0.07
  68   1    -0.02   0.11  -0.03    -0.01  -0.07   0.04     0.27   0.04   0.20
  69   1     0.09   0.16  -0.06    -0.15  -0.18   0.16     0.04   0.06  -0.04
  70   1     0.14  -0.09   0.07    -0.18   0.12  -0.09     0.05  -0.03   0.02
  71   1     0.14   0.07  -0.02    -0.13  -0.11   0.09     0.04   0.04  -0.02
  72   1     0.11   0.05  -0.02    -0.19  -0.09   0.05     0.02   0.00   0.00
  73   1     0.11   0.06   0.02    -0.18  -0.10  -0.04    -0.01  -0.01  -0.01
  74   1     0.03  -0.02  -0.06    -0.04   0.04   0.12    -0.01  -0.02  -0.01
  75   1     0.01   0.00   0.00     0.02   0.01  -0.01     0.00   0.00   0.00
  76   1     0.02   0.02  -0.01     0.02   0.01  -0.01     0.02   0.02   0.00
  77   1     0.01  -0.01   0.00     0.00  -0.02   0.00     0.01  -0.01   0.00
  78   1     0.01  -0.01  -0.01     0.02  -0.02  -0.01     0.01  -0.01  -0.01
  79   1     0.01   0.00   0.01     0.01   0.00   0.02     0.01   0.00   0.01
  80   1     0.00  -0.01   0.00     0.00  -0.01   0.00    -0.04   0.02   0.01
  81   1     0.00  -0.03   0.00    -0.01  -0.02   0.00    -0.02  -0.01   0.00
  82   1     0.01  -0.01   0.00     0.01  -0.02   0.00     0.04  -0.04  -0.01
  83   1     0.00  -0.02   0.02     0.00  -0.01   0.01     0.00  -0.02   0.00
  84   1    -0.01  -0.02  -0.01    -0.01  -0.01  -0.01    -0.01   0.00  -0.01
  85   1    -0.01   0.01  -0.01     0.00   0.01   0.01     0.00   0.01   0.00
  86   1     0.00   0.01   0.00    -0.03   0.02   0.01     0.00   0.01   0.00
  87   1    -0.01   0.00   0.02    -0.03  -0.03   0.00     0.00   0.00   0.01
  88   1    -0.02   0.00   0.00    -0.01   0.01  -0.01    -0.02  -0.01   0.00
  89   1     0.00   0.02   0.02     0.00   0.02   0.01     0.00   0.01   0.01
  90   1    -0.01   0.01   0.01    -0.01   0.00  -0.01    -0.01   0.01   0.01
  91   1     0.00   0.01  -0.01     0.00   0.03  -0.01    -0.02   0.00   0.02
  92   1    -0.01  -0.01   0.00     0.00   0.00  -0.01    -0.01  -0.01  -0.01
  93   1    -0.01   0.00  -0.01    -0.01  -0.01  -0.02     0.00   0.01   0.01
  94   1    -0.01  -0.01   0.00    -0.01  -0.03   0.01    -0.01  -0.01   0.00
  95   1    -0.01   0.00  -0.01     0.00  -0.01  -0.02    -0.01   0.00  -0.01
  96   1     0.00   0.01  -0.01     0.00  -0.01   0.00     0.00   0.01  -0.01
  97   1     0.00   0.03   0.00     0.00   0.02   0.00     0.00   0.01  -0.01
  98   1     0.02  -0.01   0.02     0.01  -0.01   0.02     0.00   0.00   0.00
  99   1     0.02   0.00   0.03     0.02   0.00   0.02     0.00   0.00   0.00
 100   1     0.01  -0.01  -0.01     0.00   0.00  -0.01     0.01  -0.01   0.00
 101   1     0.01  -0.01  -0.01     0.01  -0.01  -0.01     0.01   0.01   0.01
 102   1     0.00   0.00  -0.01     0.00   0.01  -0.01     0.00   0.01   0.01
 103   1     0.00   0.01   0.00    -0.02   0.02  -0.01     0.00   0.02   0.00
 104   1     0.01   0.01  -0.01     0.01   0.01  -0.04     0.01   0.01  -0.02
 105   1     0.02   0.00  -0.01     0.01   0.00  -0.02     0.02   0.00  -0.03
 106   1     0.01   0.00   0.01     0.01  -0.01   0.00     0.00   0.00   0.00
 107   1     0.00   0.01   0.01     0.00   0.00   0.01    -0.02   0.01   0.00
 108   1     0.02   0.01   0.01     0.01   0.00   0.00     0.01   0.01   0.01
 109   1     0.05  -0.01   0.00     0.04   0.01  -0.01     0.02   0.00   0.00
 110   1     0.08   0.05  -0.02     0.06   0.05  -0.02     0.04   0.04  -0.01
 111   1     0.05  -0.01   0.00     0.03   0.01  -0.01     0.03   0.02   0.00
 112   1    -0.01  -0.06  -0.01     0.00  -0.06  -0.01    -0.01  -0.03   0.00
 113   1    -0.06  -0.03   0.01    -0.05  -0.02   0.00    -0.03  -0.01   0.00
 114   1    -0.10  -0.03   0.02    -0.09  -0.03   0.02    -0.06  -0.01   0.01
                    79                     80                     81
                    ?A                     ?A                     ?A
 Frequencies --   411.4082               430.0877               433.7122
 Red. masses --     5.1005                 3.7886                 4.8159
 Frc consts  --     0.5086                 0.4129                 0.5337
 IR Inten    --    14.5464                 6.0086                19.9895
 Raman Activ --     0.0000                 0.0000                 0.0000
 Depolar     --     0.0000                 0.0000                 0.0000
 Atom AN      X      Y      Z        X      Y      Z        X      Y      Z
   1   8    -0.10   0.04   0.01     0.00   0.00   0.02     0.00   0.00  -0.04
   2  12     0.00  -0.03  -0.05    -0.03   0.05   0.00     0.04  -0.08  -0.01
   3   8    -0.10  -0.06   0.20     0.03   0.05  -0.02    -0.06  -0.10   0.04
   4   6     0.01  -0.08   0.07    -0.02   0.00  -0.01     0.04   0.01   0.03
   5   7     0.00   0.00   0.00     0.04   0.03   0.20     0.00   0.02   0.10
   6   7     0.00   0.00  -0.01     0.00  -0.01  -0.07     0.00   0.01  -0.07
   7   8     0.00  -0.08  -0.11     0.01  -0.02  -0.01    -0.03   0.05   0.02
   8   6     0.00  -0.01   0.01     0.02   0.00   0.11     0.00   0.02   0.06
   9   6    -0.01   0.00   0.00     0.01  -0.02  -0.03    -0.01   0.03  -0.01
  10   6    -0.01   0.00   0.00     0.00  -0.01  -0.07    -0.01   0.01  -0.05
  11   8    -0.01   0.02  -0.08     0.03   0.05   0.02    -0.07  -0.12  -0.03
  12   6    -0.01  -0.01  -0.18     0.02  -0.02   0.00    -0.04   0.04   0.00
  13   6     0.06  -0.06  -0.07     0.03  -0.06  -0.01    -0.06   0.11   0.04
  14   6     0.12  -0.07   0.11    -0.02   0.02  -0.04     0.04  -0.05   0.10
  15   8    -0.02   0.16  -0.05     0.01  -0.01   0.02    -0.04  -0.01  -0.04
  16   6    -0.06   0.03   0.08    -0.01   0.01   0.01     0.03  -0.02  -0.03
  17   8    -0.08  -0.03   0.01    -0.04  -0.01   0.05     0.14   0.04  -0.11
  18   6    -0.05  -0.05  -0.03    -0.04   0.01  -0.04     0.10  -0.04   0.05
  19   8     0.09   0.00   0.01     0.00  -0.01  -0.07    -0.04  -0.03   0.11
  20   8     0.06   0.06   0.07     0.02   0.01   0.03    -0.09  -0.04  -0.04
  21   6     0.03   0.01   0.02     0.00  -0.01   0.00    -0.04   0.05  -0.01
  22   6     0.00  -0.01   0.01    -0.03  -0.01   0.00     0.04   0.02  -0.01
  23   6    -0.04  -0.02  -0.01    -0.03   0.00   0.00     0.07   0.00   0.03
  24   8     0.04  -0.01  -0.03     0.04  -0.01  -0.01    -0.07   0.06   0.00
  25   6     0.00   0.01   0.00     0.01  -0.01   0.00     0.00   0.02  -0.01
  26   6    -0.02   0.05  -0.06    -0.01   0.02  -0.03     0.04  -0.03   0.07
  27   6    -0.06  -0.04   0.03     0.02  -0.04   0.06    -0.04   0.08  -0.11
  28   6     0.15   0.10   0.06    -0.05  -0.02  -0.01     0.11   0.05   0.01
  29   6     0.01   0.03   0.00     0.03   0.06  -0.04     0.00   0.02  -0.02
  30   6     0.00   0.00   0.01     0.00  -0.01   0.01    -0.02   0.03   0.02
  31   6     0.01   0.01   0.00     0.00   0.08  -0.07     0.01   0.02  -0.04
  32   6     0.01   0.00   0.00    -0.01   0.02   0.02     0.00   0.00   0.01
  33   6     0.00  -0.01   0.00    -0.01  -0.04   0.05     0.01  -0.01   0.02
  34   6     0.00   0.01   0.00     0.01   0.05   0.00     0.01   0.03   0.01
  35   6     0.00   0.02   0.00     0.01   0.04  -0.05     0.01   0.02  -0.02
  36   6     0.00  -0.01   0.01    -0.09   0.00  -0.13    -0.04   0.00  -0.07
  37   6    -0.01  -0.01   0.02     0.03  -0.04  -0.05     0.02  -0.02  -0.02
  38   6     0.00   0.01   0.01     0.00   0.01   0.01    -0.01   0.01   0.02
  39   6     0.00   0.01   0.00     0.00   0.02  -0.01    -0.01   0.01   0.00
  40   6     0.00   0.00  -0.01     0.01   0.00  -0.02     0.00  -0.01  -0.01
  41   6     0.00   0.00   0.00     0.00   0.00  -0.01    -0.01   0.00  -0.01
  42   6     0.00   0.00   0.01     0.00   0.01   0.03    -0.03   0.02   0.02
  43   6     0.01   0.01   0.01     0.02   0.02   0.02     0.02   0.00   0.02
  44   6     0.00  -0.01   0.01    -0.02  -0.01   0.05    -0.02  -0.03   0.05
  45   6    -0.02  -0.01   0.01     0.04   0.07   0.04     0.03   0.04   0.02
  46   6     0.00   0.00  -0.01    -0.05  -0.15  -0.07    -0.03  -0.08  -0.03
  47   6     0.00   0.00  -0.01    -0.02  -0.08   0.00    -0.01  -0.04   0.00
  48   6     0.00  -0.02   0.02     0.01   0.05   0.01     0.00   0.03   0.00
  49   6     0.02  -0.02   0.00     0.03  -0.04   0.02     0.04  -0.04   0.03
  50   6     0.00   0.01  -0.01    -0.02   0.04  -0.02    -0.01   0.03  -0.02
  51   6    -0.01   0.00   0.00    -0.02   0.01   0.00    -0.02   0.01  -0.02
  52   6     0.01  -0.01   0.00     0.02  -0.02   0.00     0.03  -0.02   0.01
  53   6     0.01  -0.02   0.00     0.00  -0.02   0.01     0.01   0.01   0.00
  54   6    -0.01   0.01   0.00     0.01   0.00   0.01    -0.02   0.00   0.01
  55   1     0.00   0.00   0.01     0.01  -0.02  -0.05    -0.01   0.03  -0.02
  56   1     0.28  -0.01  -0.08     0.05  -0.06   0.00    -0.12   0.12   0.02
  57   1     0.22  -0.09   0.04    -0.02   0.02  -0.04     0.02  -0.04   0.11
  58   1    -0.08   0.06   0.14    -0.01   0.00   0.00     0.04   0.00  -0.01
  59   1    -0.02  -0.02   0.06    -0.02   0.01   0.02     0.05  -0.04  -0.04
  60   1    -0.04   0.01   0.09    -0.01   0.00   0.00     0.04  -0.01  -0.01
  61   1     0.01   0.04   0.00    -0.02   0.00   0.00     0.02  -0.04   0.02
  62   1    -0.06  -0.03  -0.02    -0.04  -0.02   0.00     0.12   0.09   0.00
  63   1    -0.03   0.00  -0.01     0.01  -0.01   0.02     0.02   0.02  -0.04
  64   1     0.00   0.04   0.01     0.02  -0.03  -0.03    -0.03   0.02   0.03
  65   1     0.00   0.00   0.01     0.02  -0.02   0.02    -0.04   0.05  -0.04
  66   1    -0.09   0.07  -0.16    -0.03   0.02  -0.07     0.10  -0.05   0.15
  67   1     0.04   0.12  -0.03     0.01   0.04  -0.02    -0.01  -0.08   0.06
  68   1     0.00   0.07  -0.05     0.01   0.04  -0.02     0.01  -0.05   0.06
  69   1    -0.17  -0.07   0.15     0.00   0.03   0.07     0.00  -0.07  -0.13
  70   1    -0.17   0.10  -0.10     0.02  -0.02   0.07    -0.03   0.01  -0.13
  71   1    -0.05  -0.12   0.14     0.05  -0.09   0.13    -0.09   0.19  -0.27
  72   1     0.06   0.10  -0.01    -0.07  -0.03   0.01     0.18   0.10  -0.06
  73   1     0.37   0.21   0.11    -0.13  -0.05  -0.02     0.27   0.14   0.06
  74   1     0.06   0.20  -0.07     0.00  -0.02   0.07     0.02   0.01  -0.16
  75   1     0.01  -0.01   0.00    -0.03  -0.05   0.05    -0.02  -0.01   0.03
  76   1     0.00  -0.01  -0.01    -0.02  -0.15   0.09     0.01  -0.04   0.04
  77   1    -0.01  -0.01   0.00     0.04   0.02   0.03     0.02   0.02   0.02
  78   1     0.00  -0.01   0.01    -0.10   0.00  -0.10    -0.04  -0.01  -0.07
  79   1    -0.01  -0.01   0.02     0.02  -0.05  -0.05     0.02  -0.02  -0.02
  80   1     0.00   0.01   0.00     0.00   0.03  -0.01     0.01   0.01  -0.01
  81   1     0.01   0.00  -0.01     0.03  -0.01  -0.03     0.03  -0.03  -0.02
  82   1    -0.01  -0.01   0.00    -0.01  -0.01  -0.02     0.01  -0.03  -0.02
  83   1     0.01   0.01   0.00     0.02   0.02   0.01     0.02   0.00   0.02
  84   1    -0.01  -0.01   0.01    -0.02  -0.01   0.06    -0.02  -0.03   0.04
  85   1     0.00   0.00   0.01     0.14   0.20   0.05     0.07   0.11   0.01
  86   1    -0.03   0.00   0.01     0.00  -0.10   0.25     0.02  -0.05   0.12
  87   1    -0.03  -0.02   0.00     0.13   0.19   0.06     0.08   0.11   0.05
  88   1     0.01   0.02  -0.01     0.00  -0.21   0.01    -0.02  -0.13   0.00
  89   1     0.01   0.01  -0.01    -0.10  -0.30  -0.15    -0.06  -0.16  -0.07
  90   1     0.00  -0.01  -0.03     0.03  -0.11   0.05     0.01  -0.05   0.05
  91   1     0.00   0.03  -0.02    -0.05  -0.10   0.02    -0.03  -0.05   0.01
  92   1     0.00   0.01  -0.02    -0.04  -0.15  -0.01    -0.02  -0.09   0.00
  93   1     0.00  -0.03  -0.04    -0.05  -0.01   0.04    -0.03   0.00   0.02
  94   1     0.01  -0.02   0.01     0.01   0.15  -0.01     0.00   0.07   0.00
  95   1     0.01  -0.02   0.01    -0.02   0.01   0.14    -0.02   0.01   0.06
  96   1     0.00  -0.03   0.03     0.01   0.11  -0.01     0.00   0.06  -0.02
  97   1     0.03  -0.02  -0.01     0.08  -0.07   0.00     0.07  -0.04   0.01
  98   1     0.03  -0.04   0.01     0.07  -0.09   0.05     0.08  -0.09   0.06
  99   1     0.02   0.01  -0.03     0.02  -0.01  -0.06     0.05  -0.01  -0.02
 100   1    -0.01   0.03  -0.01    -0.03   0.11  -0.03    -0.03   0.09  -0.04
 101   1     0.01   0.00  -0.03     0.03  -0.01  -0.09     0.04  -0.02  -0.10
 102   1    -0.01   0.03  -0.01    -0.04   0.09  -0.01    -0.04   0.08  -0.02
 103   1    -0.01   0.01   0.00    -0.04   0.02   0.00    -0.05   0.04  -0.01
 104   1    -0.01  -0.02  -0.02    -0.02  -0.02  -0.04     0.00  -0.01  -0.07
 105   1    -0.03   0.02  -0.01    -0.06   0.03   0.02    -0.03   0.02  -0.02
 106   1     0.01  -0.02   0.00     0.02  -0.04  -0.01     0.03  -0.03   0.00
 107   1     0.02  -0.02   0.00     0.06  -0.05   0.00     0.05  -0.04   0.01
 108   1    -0.01  -0.01  -0.01    -0.01  -0.03  -0.03     0.00  -0.02  -0.01
 109   1     0.01  -0.02   0.00     0.02   0.05  -0.04     0.02   0.05  -0.03
 110   1     0.02  -0.01  -0.01    -0.01  -0.04  -0.05     0.01   0.01  -0.04
 111   1     0.01  -0.03   0.00    -0.04  -0.11   0.00    -0.01  -0.05  -0.01
 112   1    -0.02   0.01   0.00     0.03   0.01   0.06     0.02  -0.02   0.03
 113   1    -0.01   0.01   0.00    -0.08   0.02   0.04    -0.07   0.00   0.03
 114   1    -0.01   0.01   0.00     0.07   0.00   0.03    -0.01  -0.02   0.03
                    82                     83                     84
                    ?A                     ?A                     ?A
 Frequencies --   438.7211               444.6285               448.6696
 Red. masses --     3.4240                 5.8714                 3.0837
 Frc consts  --     0.3883                 0.6839                 0.3657
 IR Inten    --     3.9214                23.6156                 2.7440
 Raman Activ --     0.0000                 0.0000                 0.0000
 Depolar     --     0.0000                 0.0000                 0.0000
 Atom AN      X      Y      Z        X      Y      Z        X      Y      Z
   1   8    -0.01   0.00  -0.01     0.05  -0.02   0.01     0.01   0.00   0.00
   2  12     0.00   0.01  -0.02    -0.01  -0.12  -0.05    -0.02  -0.02   0.00
   3   8     0.01   0.02   0.01    -0.09  -0.15   0.12    -0.02  -0.03   0.02
   4   6     0.01  -0.01   0.02    -0.02   0.05  -0.05     0.00   0.01  -0.01
   5   7     0.02   0.02   0.08     0.00   0.01   0.04    -0.01   0.01  -0.01
   6   7     0.00   0.01   0.21     0.00   0.02   0.06     0.02   0.01  -0.06
   7   8    -0.01   0.00  -0.01     0.02   0.03   0.05     0.00   0.01   0.01
   8   6     0.00   0.00   0.00     0.01   0.01   0.00    -0.01   0.01   0.00
   9   6     0.00  -0.02  -0.06     0.01   0.02  -0.02    -0.02   0.02   0.01
  10   6     0.00   0.00   0.07     0.01   0.02   0.02    -0.02   0.01  -0.02
  11   8    -0.01  -0.02  -0.02     0.02   0.03   0.08     0.00   0.00   0.02
  12   6    -0.01  -0.01  -0.01     0.05   0.06   0.04     0.01   0.01   0.01
  13   6     0.00   0.00   0.01    -0.01   0.07   0.02    -0.01   0.01   0.00
  14   6     0.02  -0.02   0.03    -0.09   0.05  -0.09    -0.02   0.01  -0.01
  15   8    -0.05   0.00   0.00     0.26   0.02  -0.05     0.05   0.00  -0.01
  16   6     0.00   0.00   0.00     0.02  -0.01  -0.03     0.01   0.00  -0.01
  17   8     0.03   0.01   0.00    -0.07  -0.04  -0.03     0.00   0.00  -0.01
  18   6     0.02  -0.01  -0.01    -0.03  -0.05   0.07     0.00  -0.01   0.01
  19   8    -0.03  -0.03  -0.02     0.09   0.03   0.13     0.01   0.00   0.02
  20   8    -0.02  -0.01   0.00     0.08   0.09   0.05     0.01   0.01   0.01
  21   6    -0.01   0.01   0.00     0.05   0.03   0.02     0.00   0.01   0.00
  22   6     0.00   0.00  -0.01     0.05   0.00   0.03     0.01   0.00   0.00
  23   6     0.01   0.00   0.01    -0.06  -0.03  -0.05    -0.01   0.00   0.00
  24   8    -0.01   0.01   0.00     0.00   0.01  -0.03     0.00   0.01   0.00
  25   6     0.00   0.00  -0.01    -0.01   0.02   0.02     0.00   0.00   0.00
  26   6     0.01   0.00   0.01    -0.08   0.01  -0.09    -0.01   0.01  -0.01
  27   6     0.01  -0.01   0.01    -0.07   0.03  -0.08    -0.01   0.01  -0.02
  28   6     0.04   0.02   0.01    -0.13  -0.07  -0.05    -0.02  -0.01  -0.01
  29   6     0.02   0.05  -0.02     0.00   0.03  -0.01     0.00   0.02  -0.01
  30   6     0.02  -0.02  -0.02    -0.05   0.05   0.00     0.11  -0.08   0.00
  31   6     0.01   0.05  -0.03     0.01   0.03  -0.02     0.01   0.00   0.00
  32   6     0.00   0.01   0.01     0.01   0.01  -0.01     0.01   0.00  -0.01
  33   6     0.00  -0.02   0.02     0.01  -0.02   0.01     0.01   0.00   0.00
  34   6     0.00   0.03   0.00     0.01   0.01   0.00     0.01   0.00   0.00
  35   6     0.00   0.03  -0.02     0.01   0.03   0.00     0.01   0.01   0.00
  36   6    -0.04  -0.01  -0.06    -0.03  -0.01  -0.04     0.01  -0.01   0.01
  37   6     0.00  -0.02   0.00    -0.01   0.00   0.03     0.00   0.00   0.01
  38   6     0.02  -0.02  -0.03    -0.03   0.02  -0.01     0.07  -0.07   0.05
  39   6     0.03  -0.03   0.03     0.00   0.00   0.02     0.02  -0.03  -0.02
  40   6    -0.03   0.01   0.05     0.01  -0.01   0.02    -0.07  -0.01  -0.02
  41   6     0.01  -0.01   0.03    -0.01   0.01   0.02     0.00  -0.04  -0.04
  42   6     0.03  -0.04  -0.06    -0.03   0.02  -0.01     0.06  -0.07  -0.03
  43   6    -0.04  -0.01  -0.04    -0.01  -0.03  -0.05     0.03   0.07   0.17
  44   6     0.06   0.05  -0.16     0.02  -0.01  -0.03    -0.01   0.04  -0.07
  45   6     0.01   0.03   0.02     0.01   0.02   0.02    -0.01  -0.01   0.00
  46   6    -0.02  -0.07  -0.04    -0.02  -0.05  -0.03     0.00   0.00   0.00
  47   6    -0.01  -0.02  -0.01     0.00   0.01  -0.01     0.00   0.00   0.00
  48   6     0.00   0.00   0.02     0.00  -0.03   0.03     0.00  -0.01   0.01
  49   6    -0.11   0.13  -0.08     0.00   0.01   0.01    -0.05   0.06  -0.07
  50   6     0.05  -0.11   0.04     0.01  -0.04  -0.02     0.01   0.00   0.05
  51   6     0.03  -0.02   0.01     0.05  -0.03  -0.04    -0.16   0.08   0.09
  52   6    -0.05   0.04  -0.01    -0.03   0.03   0.01     0.10  -0.09  -0.03
  53   6     0.02  -0.01   0.01     0.00   0.03   0.00     0.01  -0.01   0.00
  54   6     0.00   0.01   0.00     0.00  -0.04   0.00    -0.02   0.06  -0.01
  55   1    -0.01  -0.04  -0.13     0.00   0.02  -0.05    -0.01   0.02   0.03
  56   1     0.02   0.00   0.01    -0.05   0.07   0.01    -0.02   0.01   0.00
  57   1     0.03  -0.02   0.02    -0.15   0.05  -0.05    -0.03   0.01   0.00
  58   1     0.00   0.01   0.01     0.02  -0.03  -0.06     0.01  -0.01  -0.01
  59   1     0.01  -0.01   0.00    -0.01   0.02  -0.01     0.00   0.00  -0.01
  60   1     0.00   0.00   0.01     0.01  -0.01  -0.05     0.00   0.00  -0.01
  61   1    -0.01  -0.02   0.00     0.07   0.06   0.00     0.01   0.01   0.00
  62   1     0.03   0.02   0.01    -0.09  -0.06  -0.07    -0.01  -0.01  -0.01
  63   1     0.01   0.00   0.01    -0.05   0.01  -0.04     0.00   0.00   0.00
  64   1     0.01  -0.02  -0.01    -0.04   0.09   0.07     0.00   0.01   0.01
  65   1     0.00   0.00  -0.01    -0.02   0.02  -0.01     0.00   0.00   0.00
  66   1     0.02   0.00   0.02    -0.15   0.04  -0.13    -0.02   0.01  -0.02
  67   1     0.01   0.00   0.01    -0.03   0.08  -0.04     0.00   0.02   0.00
  68   1     0.01   0.01   0.01    -0.11   0.00  -0.12    -0.02   0.01  -0.02
  69   1     0.01   0.00   0.01    -0.06  -0.15  -0.05    -0.01  -0.02  -0.01
  70   1     0.01  -0.01   0.01    -0.11   0.07  -0.13    -0.02   0.01  -0.02
  71   1     0.01   0.00   0.00    -0.16   0.08  -0.18    -0.03   0.02  -0.04
  72   1     0.04   0.03  -0.01    -0.10  -0.08   0.00    -0.01  -0.01   0.00
  73   1     0.08   0.05   0.03    -0.29  -0.15  -0.09    -0.05  -0.03  -0.02
  74   1     0.02   0.02  -0.03    -0.06  -0.11   0.06    -0.01  -0.02   0.01
  75   1     0.00  -0.03   0.02     0.01  -0.02   0.01     0.00  -0.01   0.00
  76   1    -0.01  -0.08   0.03     0.01  -0.08   0.02     0.01  -0.01   0.00
  77   1     0.01   0.00   0.01     0.00  -0.02   0.01     0.00  -0.02   0.00
  78   1    -0.05  -0.01  -0.05    -0.03  -0.02  -0.04     0.01  -0.01   0.00
  79   1    -0.01  -0.02   0.00    -0.01   0.00   0.04     0.01   0.00   0.01
  80   1     0.01  -0.04   0.04     0.02  -0.04   0.02    -0.02   0.06  -0.03
  81   1    -0.08   0.05   0.06     0.05  -0.04   0.01    -0.17   0.08  -0.01
  82   1     0.01   0.03   0.05     0.03   0.00   0.02    -0.07   0.01  -0.03
  83   1    -0.04  -0.01  -0.03    -0.01  -0.03  -0.05     0.02   0.06   0.20
  84   1     0.05   0.05  -0.17     0.02  -0.02  -0.04    -0.02   0.06  -0.08
  85   1     0.06   0.09   0.02     0.04   0.08   0.01    -0.01   0.00   0.00
  86   1    -0.01  -0.05   0.12    -0.01  -0.03   0.09    -0.01   0.00   0.00
  87   1     0.05   0.08   0.03     0.03   0.06   0.04    -0.02  -0.02   0.01
  88   1     0.01  -0.09   0.00    -0.01  -0.07  -0.01     0.00   0.01  -0.01
  89   1    -0.04  -0.14  -0.08    -0.04  -0.10  -0.05     0.00   0.02   0.01
  90   1     0.01  -0.06   0.01     0.00  -0.04   0.00    -0.01   0.00  -0.01
  91   1    -0.01  -0.01  -0.01     0.01   0.05  -0.03     0.00   0.02  -0.01
  92   1    -0.01  -0.03  -0.02     0.01   0.04  -0.03     0.00   0.00  -0.01
  93   1    -0.01  -0.03  -0.02     0.01  -0.03  -0.05     0.00  -0.01  -0.01
  94   1     0.02   0.03   0.01     0.01  -0.04   0.02     0.00  -0.01   0.01
  95   1     0.01  -0.01   0.05     0.02  -0.02   0.00     0.00   0.00   0.00
  96   1     0.01   0.00   0.03     0.00  -0.05   0.05     0.00   0.00   0.00
  97   1    -0.22   0.17  -0.02    -0.05   0.06   0.02    -0.07   0.04  -0.05
  98   1    -0.22   0.27  -0.19    -0.02   0.03  -0.01    -0.09   0.11  -0.10
  99   1    -0.10   0.02   0.11     0.02   0.00   0.07    -0.07   0.03  -0.04
 100   1     0.10  -0.30   0.10     0.00  -0.05  -0.01     0.08  -0.12   0.06
 101   1    -0.09   0.04   0.26    -0.01  -0.03   0.00    -0.03   0.08   0.16
 102   1     0.12  -0.26   0.04     0.03  -0.07  -0.03     0.03  -0.03   0.07
 103   1     0.09  -0.05   0.00     0.08  -0.02  -0.03    -0.27   0.09   0.07
 104   1     0.01   0.03   0.10     0.05   0.02   0.01    -0.12  -0.06  -0.10
 105   1     0.08  -0.05   0.00     0.10  -0.06  -0.07    -0.32   0.18   0.16
 106   1    -0.04   0.07   0.01    -0.07   0.07   0.03     0.23  -0.22  -0.08
 107   1    -0.10   0.09  -0.02    -0.08   0.07   0.02     0.26  -0.20  -0.05
 108   1     0.01   0.05   0.03     0.05   0.01   0.08    -0.12  -0.04  -0.25
 109   1     0.02  -0.05   0.02     0.00   0.04  -0.01     0.02  -0.02   0.00
 110   1     0.03   0.01   0.04    -0.01   0.02   0.01     0.04   0.02  -0.02
 111   1     0.02   0.01   0.01     0.00   0.05  -0.01     0.01  -0.04   0.00
 112   1    -0.02   0.02  -0.01     0.03  -0.08  -0.02    -0.04   0.08   0.01
 113   1     0.04   0.00  -0.02     0.00  -0.04   0.00    -0.03   0.06   0.00
 114   1    -0.02   0.02  -0.02    -0.07  -0.05   0.01     0.02   0.06  -0.01
                    85                     86                     87
                    ?A                     ?A                     ?A
 Frequencies --   450.1890               454.2145               459.6979
 Red. masses --     3.1012                 3.2663                 3.4709
 Frc consts  --     0.3703                 0.3970                 0.4321
 IR Inten    --     2.5432                 1.4792                 3.9684
 Raman Activ --     0.0000                 0.0000                 0.0000
 Depolar     --     0.0000                 0.0000                 0.0000
 Atom AN      X      Y      Z        X      Y      Z        X      Y      Z
   1   8     0.01   0.00  -0.01     0.01  -0.01  -0.01     0.00   0.00   0.00
   2  12    -0.01   0.02   0.02    -0.02   0.02   0.01    -0.01  -0.01  -0.01
   3   8     0.00   0.01  -0.02    -0.01  -0.03   0.02     0.00  -0.02   0.01
   4   6     0.00   0.00   0.00     0.00   0.01  -0.01     0.00   0.00   0.00
   5   7     0.04   0.00  -0.09     0.05   0.02   0.01    -0.04   0.02   0.02
   6   7    -0.01  -0.01  -0.03    -0.01  -0.01   0.02     0.03   0.01   0.06
   7   8     0.00   0.01   0.00     0.00   0.01   0.01     0.00   0.00   0.00
   8   6    -0.01  -0.03  -0.03     0.00  -0.02   0.01    -0.03   0.03   0.00
   9   6     0.00  -0.03   0.03    -0.01  -0.03   0.00    -0.04   0.03  -0.01
  10   6    -0.02  -0.01   0.01    -0.02  -0.02   0.00    -0.03   0.01   0.02
  11   8    -0.01   0.00   0.01    -0.01   0.00   0.02     0.00   0.00   0.00
  12   6    -0.01  -0.01   0.01     0.00   0.01   0.01     0.01   0.01   0.00
  13   6    -0.01  -0.01   0.00    -0.01   0.01   0.01     0.00   0.01   0.00
  14   6    -0.01   0.00   0.01    -0.02   0.00   0.00     0.00   0.00   0.00
  15   8    -0.01  -0.02   0.00     0.03  -0.01  -0.02     0.01   0.00   0.00
  16   6     0.01  -0.01  -0.01     0.01  -0.01  -0.01     0.00   0.00   0.00
  17   8     0.02   0.01   0.00     0.04   0.00  -0.01     0.00   0.00   0.00
  18   6     0.01   0.00  -0.01     0.02  -0.04  -0.01     0.00  -0.01   0.01
  19   8    -0.02  -0.01  -0.01    -0.02  -0.04   0.01    -0.01  -0.01   0.01
  20   8    -0.02  -0.01   0.00    -0.02   0.00   0.03     0.01   0.01   0.01
  21   6    -0.01   0.00   0.00    -0.02   0.02   0.00     0.00   0.01   0.00
  22   6    -0.01   0.00  -0.01    -0.01   0.00   0.00     0.01   0.00   0.00
  23   6     0.01   0.00   0.01     0.01  -0.02   0.00     0.00  -0.01  -0.01
  24   8     0.00   0.01   0.00     0.01   0.02  -0.01     0.00   0.01   0.00
  25   6     0.00   0.00   0.00     0.00   0.00   0.00     0.00   0.00   0.00
  26   6     0.01   0.00   0.01     0.00   0.01  -0.01    -0.01   0.01  -0.01
  27   6     0.01   0.00   0.01    -0.01   0.00  -0.01    -0.01   0.01  -0.01
  28   6     0.00   0.00   0.00    -0.01   0.00  -0.01     0.00   0.00   0.00
  29   6     0.03   0.13  -0.02     0.04   0.16  -0.04    -0.03  -0.04   0.01
  30   6     0.01  -0.02   0.00     0.03  -0.03  -0.01     0.16  -0.13  -0.03
  31   6     0.01   0.09  -0.02     0.00   0.11   0.02     0.01  -0.05  -0.01
  32   6     0.01   0.01  -0.04     0.00   0.04  -0.01     0.01  -0.02   0.01
  33   6     0.01  -0.05  -0.03    -0.03  -0.05   0.00     0.03   0.03   0.01
  34   6     0.01   0.03  -0.04     0.00   0.02  -0.04     0.01  -0.01   0.03
  35   6     0.02   0.09   0.03     0.01   0.09  -0.06     0.00  -0.04   0.02
  36   6    -0.05  -0.02  -0.03     0.01  -0.06   0.15     0.02   0.01  -0.05
  37   6    -0.10   0.02   0.17     0.04  -0.07  -0.08     0.02   0.01   0.00
  38   6     0.01   0.00  -0.01     0.02  -0.01  -0.02     0.10  -0.09  -0.05
  39   6     0.00   0.01  -0.01     0.01   0.00  -0.01     0.03  -0.04  -0.02
  40   6     0.01   0.01  -0.01     0.00   0.02   0.00    -0.06   0.02   0.00
  41   6     0.01   0.00   0.00     0.01   0.00   0.01     0.03  -0.06  -0.01
  42   6     0.01   0.00   0.01     0.02  -0.01   0.01     0.09  -0.09   0.01
  43   6     0.00   0.01  -0.01    -0.02   0.00  -0.03    -0.10  -0.02  -0.07
  44   6    -0.01   0.00   0.04    -0.01   0.01   0.03    -0.09   0.02   0.09
  45   6    -0.02   0.00   0.04    -0.11  -0.12   0.05     0.03   0.04  -0.02
  46   6    -0.02  -0.06  -0.05     0.06   0.09   0.00    -0.02  -0.02   0.01
  47   6     0.03   0.12  -0.05    -0.03  -0.13  -0.03     0.00   0.01   0.01
  48   6     0.00  -0.16   0.12     0.01   0.06   0.01     0.00   0.01  -0.02
  49   6     0.02  -0.03   0.01     0.01  -0.02   0.00     0.04  -0.05  -0.01
  50   6    -0.01   0.03   0.00    -0.01   0.03   0.01    -0.04   0.13   0.05
  51   6     0.00   0.00   0.01     0.02  -0.02   0.00     0.04  -0.03   0.03
  52   6    -0.01   0.01   0.00    -0.03   0.03  -0.01    -0.11   0.10  -0.06
  53   6     0.02  -0.05   0.01     0.03  -0.05   0.00     0.02   0.01   0.00
  54   6    -0.02   0.02   0.00    -0.02   0.03   0.00    -0.02   0.07   0.00
  55   1     0.02  -0.02   0.06     0.00  -0.03   0.00    -0.05   0.02  -0.02
  56   1    -0.02  -0.01   0.00    -0.02   0.00   0.01     0.00   0.01   0.00
  57   1    -0.02   0.00   0.01    -0.04   0.01   0.01     0.00   0.00   0.00
  58   1     0.01  -0.01  -0.01     0.01  -0.01  -0.02     0.00   0.00   0.00
  59   1     0.01  -0.01  -0.01     0.01   0.00  -0.01     0.00   0.00   0.00
  60   1     0.01   0.00  -0.01     0.01  -0.01  -0.02     0.00   0.00   0.00
  61   1    -0.02  -0.02   0.00    -0.02  -0.03   0.01     0.01   0.00   0.00
  62   1     0.02   0.02   0.01     0.03   0.02  -0.02    -0.01  -0.01  -0.01
  63   1     0.01   0.00   0.00     0.02   0.00   0.00     0.00   0.00   0.00
  64   1     0.01  -0.02  -0.01     0.01  -0.01  -0.01     0.00   0.00   0.00
  65   1     0.00   0.00   0.00     0.00   0.02   0.00     0.00   0.00   0.00
  66   1     0.02   0.00   0.01    -0.02   0.02  -0.03    -0.03   0.02  -0.03
  67   1     0.01   0.00   0.01     0.01   0.04   0.02     0.00   0.03   0.00
  68   1     0.01   0.01   0.01    -0.02   0.03  -0.02    -0.02   0.01  -0.02
  69   1     0.01   0.02   0.00     0.00  -0.02  -0.01    -0.01  -0.02  -0.01
  70   1     0.02  -0.02   0.02    -0.01   0.00  -0.01    -0.01   0.01  -0.02
  71   1     0.02   0.00   0.01    -0.01   0.01  -0.02    -0.02   0.01  -0.03
  72   1     0.02   0.01  -0.01     0.01   0.00  -0.01    -0.01  -0.01   0.00
  73   1     0.00   0.01   0.00    -0.03   0.00  -0.01     0.00  -0.01   0.00
  74   1     0.00  -0.02  -0.01    -0.01  -0.03  -0.01     0.00   0.00   0.00
  75   1     0.03  -0.08  -0.02     0.04  -0.08   0.01    -0.02   0.03   0.01
  76   1     0.01  -0.17   0.01    -0.04  -0.20   0.04     0.03   0.10  -0.02
  77   1    -0.03  -0.05  -0.04     0.00  -0.10   0.01     0.00   0.02   0.01
  78   1    -0.06  -0.04  -0.01    -0.01  -0.05   0.19     0.03   0.01  -0.07
  79   1    -0.09   0.01   0.20     0.03  -0.09  -0.10     0.02   0.02   0.00
  80   1    -0.01   0.01  -0.01    -0.01   0.01   0.00    -0.07   0.06   0.01
  81   1     0.00   0.02   0.00    -0.02   0.04   0.01    -0.23   0.16   0.03
  82   1    -0.01   0.00  -0.01    -0.02   0.01   0.00    -0.08   0.01   0.00
  83   1    -0.01   0.01  -0.02    -0.02   0.01  -0.04    -0.12   0.00  -0.08
  84   1    -0.01   0.01   0.05    -0.01   0.01   0.04    -0.09   0.05   0.12
  85   1     0.01   0.07   0.03    -0.20  -0.16   0.01     0.06   0.06  -0.01
  86   1    -0.04  -0.06   0.12    -0.09   0.01  -0.10     0.02   0.01   0.02
  87   1     0.00   0.03   0.07    -0.22  -0.23   0.09     0.05   0.06  -0.02
  88   1     0.04  -0.02  -0.03     0.11   0.26  -0.05    -0.06  -0.08   0.01
  89   1    -0.03  -0.11  -0.08     0.12   0.23   0.04    -0.03  -0.04   0.01
  90   1     0.02  -0.09  -0.07    -0.01  -0.02  -0.22    -0.01   0.02   0.08
  91   1     0.10   0.30  -0.13    -0.08  -0.14   0.00     0.00   0.00   0.02
  92   1     0.06   0.31  -0.08    -0.06  -0.24  -0.04     0.00   0.00   0.02
  93   1     0.08  -0.12  -0.23    -0.07  -0.05   0.02     0.00   0.03   0.02
  94   1     0.08  -0.26   0.10     0.01   0.20  -0.02    -0.03  -0.02   0.00
  95   1     0.10  -0.10  -0.07    -0.03   0.01   0.19    -0.02   0.01  -0.04
  96   1     0.00  -0.33   0.25     0.02   0.14  -0.02    -0.01   0.02  -0.05
  97   1     0.05  -0.06   0.00     0.04  -0.05   0.00     0.14  -0.13  -0.04
  98   1     0.04  -0.05   0.03     0.03  -0.04   0.01     0.12  -0.15   0.06
  99   1     0.01   0.00  -0.05     0.00   0.00  -0.05     0.01   0.04  -0.20
 100   1    -0.02   0.07  -0.01    -0.01   0.05   0.00     0.03   0.15   0.01
 101   1     0.01   0.00  -0.04     0.01   0.01  -0.02     0.05   0.10  -0.01
 102   1    -0.03   0.06   0.00    -0.02   0.05   0.02    -0.09   0.28   0.11
 103   1     0.02  -0.02   0.00     0.06  -0.04   0.00     0.17  -0.10   0.02
 104   1    -0.01   0.00   0.02     0.00   0.01   0.06    -0.01   0.06   0.22
 105   1     0.00  -0.01   0.01     0.04  -0.03   0.00     0.14  -0.09   0.02
 106   1    -0.01   0.01   0.00    -0.04   0.04   0.00    -0.03   0.13  -0.03
 107   1    -0.01   0.01   0.00    -0.06   0.05  -0.02    -0.22   0.20  -0.11
 108   1    -0.01   0.01   0.00     0.00   0.03   0.02    -0.02   0.14  -0.03
 109   1     0.02  -0.10   0.03     0.04  -0.09   0.00     0.03  -0.03   0.01
 110   1     0.06  -0.02   0.03     0.07  -0.02   0.00     0.07   0.05  -0.01
 111   1     0.03  -0.04   0.01     0.02  -0.09   0.00     0.03  -0.02   0.01
 112   1    -0.05   0.04  -0.01    -0.05   0.06   0.01    -0.07   0.13   0.04
 113   1     0.01   0.02  -0.01    -0.01   0.03   0.00    -0.01   0.05  -0.01
 114   1     0.00   0.03  -0.02     0.03   0.04  -0.01     0.04   0.11  -0.04
                    88                     89                     90
                    ?A                     ?A                     ?A
 Frequencies --   471.0930               497.9130               509.6355
 Red. masses --     6.4408                 6.5019                 3.3851
 Frc consts  --     0.8422                 0.9497                 0.5180
 IR Inten    --    37.7461                11.3394                 0.1336
 Raman Activ --     0.0000                 0.0000                 0.0000
 Depolar     --     0.0000                 0.0000                 0.0000
 Atom AN      X      Y      Z        X      Y      Z        X      Y      Z
   1   8     0.01   0.00   0.00     0.04  -0.03  -0.02     0.00   0.00   0.00
   2  12     0.01   0.23   0.02     0.00   0.06   0.01     0.03   0.01  -0.01
   3   8     0.00  -0.09   0.02    -0.21  -0.03   0.16    -0.02   0.00   0.01
   4   6     0.00   0.01   0.00    -0.01   0.03  -0.03     0.00   0.00   0.00
   5   7     0.00  -0.01  -0.02    -0.01   0.01   0.00     0.10  -0.10   0.01
   6   7    -0.02  -0.03  -0.01     0.00  -0.02   0.00    -0.02   0.13   0.02
   7   8     0.00   0.01   0.01     0.04   0.01   0.00     0.00   0.00   0.00
   8   6     0.00  -0.01  -0.01    -0.01   0.01  -0.01     0.13  -0.08   0.02
   9   6     0.01  -0.04   0.01    -0.01  -0.01   0.00     0.13   0.03  -0.02
  10   6     0.00  -0.04   0.01     0.00  -0.02   0.01     0.01   0.14  -0.03
  11   8    -0.01  -0.01   0.01    -0.05   0.09   0.13    -0.01   0.01   0.00
  12   6     0.00   0.02   0.00    -0.04  -0.06  -0.11    -0.01  -0.01  -0.01
  13   6    -0.02   0.02   0.00    -0.06  -0.12  -0.11    -0.01  -0.01  -0.01
  14   6    -0.01   0.00   0.00    -0.08   0.04   0.02     0.00   0.00   0.00
  15   8     0.05   0.01  -0.02     0.22   0.12  -0.03     0.01   0.01   0.00
  16   6     0.01   0.00  -0.01     0.04  -0.04  -0.06     0.00   0.00   0.00
  17   8     0.18  -0.01   0.00     0.06   0.09  -0.01     0.02   0.01   0.00
  18   6     0.08  -0.15  -0.11     0.00  -0.02  -0.11     0.01   0.00  -0.02
  19   8    -0.11  -0.11   0.03    -0.05  -0.05  -0.12    -0.01   0.01   0.00
  20   8    -0.09   0.03   0.25    -0.06  -0.10  -0.09    -0.01  -0.01   0.01
  21   6    -0.10   0.04   0.05    -0.02  -0.01  -0.02    -0.01  -0.01   0.01
  22   6    -0.07  -0.03   0.00     0.01   0.03  -0.04    -0.01   0.00  -0.01
  23   6     0.04  -0.12  -0.07     0.07   0.04   0.12     0.02  -0.01   0.00
  24   8     0.11   0.03  -0.07    -0.08   0.01   0.05     0.00  -0.01   0.00
  25   6     0.03   0.00  -0.01     0.00  -0.03  -0.04     0.00   0.00   0.00
  26   6    -0.09   0.06  -0.13     0.16   0.03   0.17     0.00   0.01   0.00
  27   6    -0.03   0.01  -0.02     0.02  -0.06   0.07     0.00   0.00   0.01
  28   6    -0.01  -0.01  -0.01    -0.05  -0.02  -0.03     0.00   0.00   0.00
  29   6    -0.01  -0.09   0.02    -0.01  -0.03   0.01     0.06  -0.09   0.03
  30   6    -0.02  -0.01   0.00    -0.01  -0.01   0.00     0.01   0.07   0.00
  31   6    -0.02  -0.07   0.02     0.00  -0.04   0.01    -0.03   0.04   0.03
  32   6    -0.02  -0.03   0.02     0.00  -0.02   0.01    -0.03   0.04   0.00
  33   6    -0.02   0.04   0.00     0.00   0.03   0.00    -0.07  -0.06   0.00
  34   6    -0.01  -0.03   0.01    -0.01  -0.02   0.02     0.00   0.03  -0.06
  35   6    -0.02  -0.07   0.02    -0.01  -0.03   0.01     0.00  -0.01  -0.03
  36   6     0.00   0.03  -0.03     0.01   0.01  -0.02    -0.07   0.03   0.04
  37   6    -0.02   0.03   0.00     0.00   0.01  -0.01    -0.05   0.00  -0.01
  38   6    -0.01   0.02   0.00     0.00   0.01   0.00     0.03  -0.06   0.02
  39   6     0.01   0.01  -0.01     0.00   0.01   0.00     0.02  -0.07  -0.01
  40   6     0.03   0.01   0.00     0.01   0.01   0.00    -0.10   0.01   0.00
  41   6    -0.01   0.02   0.01     0.00   0.00   0.01     0.04  -0.04  -0.05
  42   6    -0.01   0.01   0.01     0.00   0.00   0.00     0.03  -0.02  -0.03
  43   6     0.02   0.02   0.00     0.00   0.00  -0.01    -0.04  -0.04   0.03
  44   6     0.03   0.01  -0.01     0.01   0.00   0.00    -0.05  -0.02   0.01
  45   6     0.04   0.03  -0.03     0.01   0.02  -0.02    -0.01  -0.02   0.01
  46   6    -0.01   0.00   0.02     0.00   0.00   0.01     0.02   0.01   0.00
  47   6     0.01   0.04   0.02     0.00   0.01   0.01     0.01   0.01   0.01
  48   6     0.00   0.00  -0.02     0.00   0.01  -0.01     0.01  -0.01   0.01
  49   6    -0.01   0.01   0.00     0.00   0.00  -0.01     0.01  -0.01   0.01
  50   6     0.00  -0.02  -0.01     0.00   0.00   0.00    -0.01   0.03   0.01
  51   6    -0.01   0.00   0.00     0.01   0.00   0.00    -0.01   0.01   0.02
  52   6     0.01  -0.01   0.01     0.00   0.00   0.00    -0.01   0.02  -0.02
  53   6    -0.01  -0.02   0.01     0.00  -0.01   0.00    -0.08   0.05  -0.01
  54   6     0.03   0.00   0.00     0.01   0.01   0.00    -0.06  -0.07   0.01
  55   1     0.00  -0.05   0.02    -0.02  -0.01   0.00     0.23   0.08  -0.04
  56   1    -0.01   0.02   0.01     0.16  -0.10  -0.09     0.01  -0.01  -0.01
  57   1    -0.02   0.00   0.00    -0.11   0.04   0.05     0.00   0.00   0.00
  58   1     0.01  -0.01  -0.01     0.05  -0.05  -0.08     0.00   0.00   0.00
  59   1     0.00   0.00  -0.01     0.04  -0.03  -0.06     0.00   0.00   0.00
  60   1     0.01   0.00  -0.01     0.03  -0.02  -0.05     0.00   0.00   0.00
  61   1    -0.13  -0.18   0.07     0.01   0.03  -0.05    -0.02  -0.01   0.00
  62   1     0.10   0.07  -0.17     0.14   0.09   0.16     0.03   0.01  -0.01
  63   1     0.14   0.02  -0.04     0.00  -0.02   0.06     0.01   0.00   0.01
  64   1     0.06  -0.06  -0.07     0.01  -0.09  -0.06     0.01  -0.02  -0.02
  65   1     0.02   0.12   0.08     0.02  -0.08  -0.07     0.01   0.00   0.01
  66   1    -0.23   0.11  -0.28     0.24  -0.02   0.15    -0.01   0.01   0.00
  67   1     0.00   0.23   0.09     0.12  -0.04   0.08     0.00   0.02   0.02
  68   1    -0.21   0.14  -0.25     0.25   0.07   0.25    -0.02   0.01  -0.01
  69   1    -0.02  -0.07  -0.01    -0.04   0.15   0.09     0.00   0.02   0.01
  70   1    -0.05   0.02  -0.05     0.02  -0.04   0.08     0.00   0.00   0.01
  71   1    -0.06   0.03  -0.06     0.12  -0.17   0.25     0.01  -0.01   0.02
  72   1     0.00  -0.01   0.00     0.02  -0.01   0.00     0.01   0.00   0.00
  73   1    -0.01  -0.01  -0.01    -0.07  -0.05  -0.05     0.00   0.00   0.00
  74   1    -0.01  -0.01  -0.01    -0.06  -0.07  -0.05     0.00   0.00  -0.01
  75   1    -0.02   0.04   0.00    -0.01   0.01   0.01     0.02   0.05  -0.04
  76   1    -0.01   0.14  -0.03     0.01   0.08  -0.02    -0.07  -0.11   0.03
  77   1     0.00   0.04   0.00    -0.01  -0.01   0.02     0.04   0.09  -0.06
  78   1     0.01   0.04  -0.04     0.02   0.01  -0.03    -0.08   0.04   0.06
  79   1    -0.02   0.04   0.00     0.00   0.01  -0.01    -0.05   0.01  -0.01
  80   1     0.02  -0.02   0.00     0.00   0.00   0.00     0.04  -0.03  -0.03
  81   1     0.06  -0.02  -0.01     0.01   0.00   0.00    -0.21   0.09   0.05
  82   1    -0.01   0.01   0.01     0.00   0.00   0.00     0.07  -0.03  -0.04
  83   1     0.02   0.02   0.00     0.00   0.01  -0.01    -0.05  -0.04   0.05
  84   1     0.03   0.00  -0.01     0.01   0.00   0.00    -0.05  -0.01   0.02
  85   1     0.05   0.00  -0.02     0.03   0.02  -0.01    -0.03  -0.10   0.03
  86   1     0.05   0.00  -0.02     0.01   0.01   0.00     0.02  -0.04  -0.01
  87   1     0.07   0.06  -0.07     0.02   0.02  -0.03     0.04   0.01  -0.03
  88   1    -0.02  -0.05   0.03    -0.03  -0.03   0.01     0.09   0.07   0.03
  89   1    -0.02  -0.04   0.01    -0.01   0.00   0.01     0.01  -0.04  -0.05
  90   1     0.01   0.03   0.08     0.00   0.02   0.04     0.04  -0.03  -0.04
  91   1     0.03   0.00   0.02     0.00  -0.01   0.01     0.04  -0.03   0.00
  92   1     0.02   0.08   0.04     0.00   0.00   0.01     0.02   0.07   0.03
  93   1     0.04   0.04   0.03     0.00   0.02   0.02     0.04  -0.01   0.01
  94   1     0.00  -0.04  -0.01    -0.01   0.00  -0.01     0.04   0.01  -0.02
  95   1     0.01   0.01  -0.07    -0.01   0.01  -0.02     0.03   0.00   0.01
  96   1     0.00  -0.03  -0.02     0.00   0.01  -0.02     0.01  -0.04   0.06
  97   1    -0.02   0.00   0.01     0.00  -0.01  -0.01     0.04   0.02  -0.02
  98   1    -0.03   0.03  -0.02     0.00   0.00  -0.01     0.05  -0.04   0.05
  99   1    -0.01   0.00   0.02     0.00   0.00  -0.01     0.02   0.02  -0.02
 100   1    -0.02  -0.02   0.00     0.00   0.00   0.00     0.05   0.02  -0.01
 101   1    -0.02  -0.01   0.01    -0.01   0.00   0.00     0.03   0.03   0.01
 102   1     0.02  -0.06  -0.02     0.00  -0.01  -0.01    -0.03   0.10   0.05
 103   1    -0.01  -0.01  -0.01     0.02  -0.01   0.00    -0.02   0.05   0.04
 104   1    -0.01  -0.02  -0.02     0.00  -0.01   0.01     0.00   0.04   0.03
 105   1    -0.04   0.02   0.02     0.00   0.00   0.00     0.03  -0.01  -0.02
 106   1    -0.01  -0.02   0.00    -0.02   0.01   0.00     0.09   0.00   0.00
 107   1     0.04  -0.04   0.02     0.00   0.00   0.01    -0.05   0.06  -0.05
 108   1    -0.01  -0.03   0.01     0.00  -0.01   0.01     0.00   0.06  -0.05
 109   1    -0.02  -0.03   0.02     0.00  -0.03   0.01    -0.11   0.26  -0.05
 110   1    -0.02  -0.02   0.01     0.02   0.01   0.00    -0.31  -0.13   0.04
 111   1     0.00  -0.01   0.01     0.01  -0.02   0.01    -0.11   0.22  -0.05
 112   1    -0.01   0.02  -0.01    -0.02   0.03  -0.01     0.16  -0.26   0.00
 113   1     0.05   0.00  -0.01     0.03   0.01  -0.01    -0.16  -0.12   0.04
 114   1     0.05   0.00  -0.01     0.03   0.01  -0.01    -0.27  -0.13   0.07
                    91                     92                     93
                    ?A                     ?A                     ?A
 Frequencies --   531.5345               532.8795               541.2663
 Red. masses --     4.7179                 4.0537                 6.0713
 Frc consts  --     0.7853                 0.6782                 1.0480
 IR Inten    --     2.9616                 4.7006                48.0349
 Raman Activ --     0.0000                 0.0000                 0.0000
 Depolar     --     0.0000                 0.0000                 0.0000
 Atom AN      X      Y      Z        X      Y      Z        X      Y      Z
   1   8     0.01   0.00  -0.01    -0.01   0.00   0.01     0.00   0.00   0.00
   2  12    -0.02  -0.01  -0.01     0.01   0.02   0.02     0.01  -0.16  -0.05
   3   8    -0.01   0.03   0.01     0.00  -0.03   0.00    -0.03   0.04   0.02
   4   6     0.00   0.00   0.00     0.00   0.00   0.00     0.00   0.00   0.00
   5   7    -0.09  -0.04   0.01     0.06   0.03  -0.03     0.01   0.04  -0.01
   6   7     0.14   0.07  -0.01    -0.07  -0.04   0.02    -0.09  -0.07   0.03
   7   8     0.00   0.00   0.00     0.00   0.00   0.00     0.01   0.00   0.00
   8   6    -0.06   0.01   0.13     0.07   0.06   0.20     0.03   0.06   0.06
   9   6    -0.05   0.11  -0.02     0.03  -0.06   0.02     0.00  -0.06   0.01
  10   6     0.05   0.05  -0.13    -0.06  -0.07  -0.20    -0.03  -0.07  -0.05
  11   8    -0.01   0.01   0.01     0.01  -0.01  -0.01    -0.02   0.01   0.02
  12   6    -0.01  -0.01  -0.02     0.01   0.01   0.02    -0.01  -0.02  -0.02
  13   6     0.00  -0.02  -0.01     0.00   0.02   0.01     0.00  -0.02  -0.02
  14   6    -0.01   0.00   0.01     0.01   0.00  -0.01    -0.01   0.01   0.01
  15   8     0.01   0.01   0.00     0.00  -0.01   0.00     0.01   0.02   0.00
  16   6     0.01  -0.01  -0.01    -0.01   0.01   0.01     0.01  -0.01  -0.01
  17   8     0.04   0.04   0.00    -0.03  -0.04   0.00     0.07   0.14   0.01
  18   6     0.03   0.04  -0.03    -0.03  -0.04   0.02     0.08   0.13  -0.06
  19   8    -0.02   0.07   0.02     0.02  -0.07  -0.02    -0.04   0.22   0.04
  20   8    -0.01  -0.02   0.04     0.01   0.01  -0.04     0.00  -0.04   0.09
  21   6    -0.03  -0.05   0.02     0.03   0.05  -0.02    -0.08  -0.15   0.05
  22   6    -0.06   0.00  -0.01     0.05   0.00   0.01    -0.17   0.01  -0.04
  23   6     0.05  -0.01  -0.04    -0.05   0.01   0.04     0.14  -0.02  -0.11
  24   8     0.02  -0.05   0.02    -0.03   0.04  -0.02     0.06  -0.14   0.06
  25   6     0.00  -0.01   0.00     0.00   0.01   0.00     0.01  -0.02   0.00
  26   6    -0.02   0.00  -0.02     0.02   0.00   0.02    -0.04   0.01  -0.04
  27   6     0.01  -0.01   0.02    -0.01   0.01  -0.01     0.01  -0.01   0.02
  28   6     0.00   0.00   0.00     0.00   0.00   0.00     0.00   0.00   0.00
  29   6    -0.06  -0.03  -0.02     0.04  -0.02  -0.02     0.00   0.02  -0.01
  30   6     0.14   0.01   0.00    -0.03  -0.04   0.03    -0.12   0.00   0.02
  31   6    -0.05   0.02  -0.05    -0.07   0.00   0.01    -0.01   0.00   0.00
  32   6    -0.04   0.00  -0.10    -0.09  -0.06  -0.04    -0.01  -0.02   0.00
  33   6     0.06  -0.06  -0.02    -0.04   0.05  -0.06     0.00   0.03  -0.01
  34   6     0.08   0.02  -0.05     0.05  -0.06  -0.08     0.01  -0.02  -0.01
  35   6     0.07   0.01   0.03     0.05  -0.08  -0.01     0.01  -0.01   0.00
  36   6     0.01  -0.01   0.03    -0.07   0.05   0.05    -0.01   0.01   0.00
  37   6     0.09   0.00   0.07     0.00   0.03   0.03     0.00   0.00   0.00
  38   6     0.04   0.05   0.05     0.04   0.05  -0.02     0.00   0.00  -0.04
  39   6    -0.01   0.08   0.13     0.07   0.04   0.03     0.06  -0.04  -0.06
  40   6     0.03  -0.12   0.04     0.01   0.04   0.04    -0.03   0.10   0.01
  41   6    -0.10  -0.03   0.05    -0.01  -0.06   0.09     0.05  -0.03   0.02
  42   6    -0.09  -0.02  -0.04    -0.01  -0.06   0.04     0.04  -0.02   0.04
  43   6    -0.02  -0.03  -0.02     0.03   0.07  -0.05     0.03   0.05  -0.02
  44   6    -0.10  -0.08  -0.08     0.01   0.01  -0.03     0.06   0.05   0.03
  45   6    -0.02  -0.02   0.02     0.00  -0.02   0.00     0.00   0.00   0.00
  46   6     0.01   0.03   0.02     0.01   0.03   0.02     0.00   0.00   0.00
  47   6     0.00   0.02   0.00     0.01   0.05   0.02     0.00   0.00   0.00
  48   6    -0.01  -0.02   0.02     0.00  -0.01   0.00     0.00   0.00   0.00
  49   6    -0.01   0.03  -0.01    -0.02   0.02  -0.04    -0.01   0.00  -0.02
  50   6     0.03  -0.04  -0.02     0.00  -0.01   0.00    -0.01   0.02   0.01
  51   6     0.02  -0.01  -0.03     0.01  -0.01  -0.01     0.00   0.00   0.01
  52   6    -0.02   0.02  -0.01    -0.02   0.01  -0.01    -0.01   0.00   0.00
  53   6    -0.07  -0.07   0.02     0.05   0.05  -0.02     0.07   0.07  -0.02
  54   6     0.07   0.01   0.00    -0.07   0.02   0.01    -0.03   0.00   0.00
  55   1    -0.03   0.12  -0.01     0.02  -0.06   0.05    -0.04  -0.07   0.02
  56   1     0.03  -0.02  -0.01    -0.03   0.02   0.01     0.04  -0.02  -0.02
  57   1    -0.02   0.00   0.01     0.02   0.00  -0.02    -0.01   0.01   0.02
  58   1     0.01  -0.01  -0.01    -0.01   0.01   0.01     0.01  -0.01  -0.01
  59   1     0.01  -0.01  -0.01    -0.01   0.01   0.01     0.01  -0.01  -0.01
  60   1     0.01   0.00  -0.01    -0.01   0.00   0.01     0.00   0.00  -0.01
  61   1    -0.07  -0.02   0.00     0.06   0.02   0.00    -0.19  -0.01  -0.03
  62   1     0.05   0.00  -0.05    -0.05  -0.01   0.05     0.15   0.01  -0.12
  63   1     0.04   0.00   0.04    -0.03   0.00  -0.04     0.09   0.02   0.15
  64   1     0.04  -0.06  -0.06    -0.04   0.05   0.06     0.12  -0.18  -0.18
  65   1     0.02   0.00   0.04    -0.02  -0.01  -0.04     0.08  -0.01   0.11
  66   1    -0.04   0.02   0.01     0.04  -0.02  -0.01    -0.09   0.06   0.07
  67   1    -0.02   0.02   0.04     0.02  -0.02  -0.04    -0.06   0.06   0.14
  68   1    -0.09  -0.02  -0.08     0.09   0.01   0.07    -0.24  -0.04  -0.20
  69   1     0.00   0.03   0.01     0.00  -0.02  -0.01     0.00   0.04   0.01
  70   1     0.01  -0.01   0.03    -0.01   0.01  -0.02     0.02  -0.01   0.03
  71   1     0.02  -0.03   0.05    -0.02   0.03  -0.04     0.03  -0.03   0.05
  72   1     0.02   0.01   0.00    -0.02  -0.01   0.00     0.01   0.00   0.00
  73   1     0.01   0.00   0.00    -0.01   0.00   0.00     0.01   0.00   0.00
  74   1    -0.01  -0.01  -0.02     0.01   0.01   0.02    -0.01  -0.01  -0.02
  75   1    -0.06   0.00  -0.09    -0.06  -0.09  -0.05    -0.01  -0.04   0.00
  76   1     0.05  -0.11   0.07    -0.03   0.17   0.00     0.00   0.06  -0.01
  77   1     0.04   0.03  -0.08     0.08  -0.02  -0.08     0.01  -0.03   0.00
  78   1     0.00   0.00   0.07    -0.07   0.06   0.08    -0.01   0.01   0.01
  79   1     0.10   0.01   0.11     0.01   0.05   0.07     0.01   0.01   0.01
  80   1    -0.04   0.15   0.12     0.06   0.01   0.05     0.09  -0.12  -0.05
  81   1     0.10  -0.18  -0.07    -0.03   0.07  -0.04    -0.12   0.17   0.03
  82   1    -0.08   0.05   0.09    -0.03  -0.08   0.07     0.05  -0.09  -0.02
  83   1    -0.02  -0.02  -0.06     0.03   0.08  -0.10     0.02   0.05  -0.02
  84   1    -0.11  -0.11  -0.14     0.00   0.02  -0.06     0.05   0.07   0.04
  85   1    -0.04  -0.02   0.00    -0.03  -0.13   0.03     0.00  -0.01   0.01
  86   1    -0.02   0.00  -0.01     0.05  -0.04  -0.04     0.00   0.00   0.00
  87   1    -0.05  -0.05   0.03     0.05   0.02  -0.05     0.01   0.01  -0.01
  88   1    -0.01   0.05  -0.01     0.08   0.08   0.05     0.01   0.01   0.01
  89   1     0.01   0.07   0.05     0.01  -0.01  -0.01     0.00   0.00   0.00
  90   1    -0.01   0.01  -0.01     0.04  -0.01  -0.01     0.00   0.00   0.00
  91   1    -0.04   0.14   0.00     0.03   0.03   0.01     0.00   0.00   0.00
  92   1    -0.03  -0.06  -0.04     0.02   0.09   0.04     0.00   0.00   0.01
  93   1    -0.05   0.00  -0.05     0.03   0.04   0.02     0.00   0.01   0.01
  94   1    -0.06  -0.10   0.07     0.00  -0.06   0.01     0.00   0.00   0.00
  95   1    -0.05  -0.02  -0.02     0.00   0.00  -0.06     0.00   0.00  -0.01
  96   1    -0.01   0.02  -0.05     0.00  -0.03   0.01     0.00   0.00  -0.01
  97   1    -0.03   0.20  -0.08    -0.04  -0.01  -0.01    -0.01  -0.11   0.04
  98   1     0.05  -0.01   0.08    -0.05   0.04  -0.07    -0.05   0.03  -0.09
  99   1     0.07   0.04   0.08    -0.03   0.01  -0.03    -0.05  -0.01  -0.06
 100   1     0.14  -0.12  -0.04     0.01  -0.04   0.01    -0.07   0.05   0.03
 101   1     0.07   0.00   0.03    -0.02   0.01   0.03    -0.04   0.01   0.00
 102   1     0.00   0.06   0.05     0.02  -0.04   0.00     0.01  -0.05  -0.03
 103   1     0.03   0.03   0.00     0.06  -0.09  -0.05     0.02  -0.07  -0.02
 104   1     0.03   0.03  -0.01    -0.01  -0.04   0.03    -0.02  -0.03   0.03
 105   1     0.08  -0.03  -0.08    -0.03   0.00   0.04    -0.05   0.02   0.06
 106   1     0.02   0.04   0.01    -0.11   0.03  -0.02    -0.07   0.00  -0.01
 107   1    -0.06   0.07  -0.04     0.02  -0.03   0.03     0.04  -0.04   0.03
 108   1     0.02   0.03   0.01    -0.02  -0.03   0.03    -0.02  -0.03   0.01
 109   1    -0.02   0.04  -0.07     0.13   0.28  -0.18     0.10   0.13  -0.08
 110   1    -0.07  -0.08  -0.09     0.02   0.01  -0.20     0.09   0.08  -0.09
 111   1    -0.13  -0.23   0.00    -0.06  -0.21  -0.06     0.03  -0.04  -0.03
 112   1     0.14   0.00   0.08     0.01   0.04   0.16    -0.04   0.04   0.05
 113   1    -0.09   0.05   0.06    -0.35   0.10   0.12    -0.11   0.04   0.04
 114   1     0.16  -0.01   0.05     0.15  -0.01   0.10     0.07   0.00   0.03
                    94                     95                     96
                    ?A                     ?A                     ?A
 Frequencies --   550.0954               550.4911               560.2806
 Red. masses --     5.3116                 4.9875                 4.3543
 Frc consts  --     0.9470                 0.8905                 0.8053
 IR Inten    --    19.6939                 2.4086                 2.0813
 Raman Activ --     0.0000                 0.0000                 0.0000
 Depolar     --     0.0000                 0.0000                 0.0000
 Atom AN      X      Y      Z        X      Y      Z        X      Y      Z
   1   8     0.04  -0.03  -0.04    -0.03   0.02   0.03     0.00   0.00   0.00
   2  12    -0.01  -0.05  -0.01    -0.01  -0.01   0.00    -0.02  -0.04  -0.01
   3   8     0.09   0.17  -0.05    -0.07  -0.11   0.03     0.01   0.01   0.00
   4   6     0.01   0.04   0.00    -0.01  -0.03   0.00     0.00   0.00   0.00
   5   7     0.06  -0.01  -0.07     0.09  -0.01  -0.08     0.09   0.04   0.05
   6   7     0.00   0.01  -0.05     0.02   0.03  -0.07     0.05   0.04   0.09
   7   8     0.03   0.03   0.00    -0.02  -0.02   0.00     0.00   0.00   0.00
   8   6     0.04  -0.03  -0.01     0.04  -0.04  -0.04     0.02  -0.03   0.02
   9   6     0.03  -0.02   0.04     0.03  -0.01   0.04     0.00  -0.03  -0.04
  10   6    -0.03   0.01  -0.04    -0.04   0.03  -0.03    -0.02   0.02   0.04
  11   8    -0.14   0.02   0.12     0.09  -0.01  -0.08    -0.01   0.00   0.01
  12   6    -0.08  -0.02  -0.09     0.06   0.01   0.06    -0.01   0.01   0.00
  13   6     0.05  -0.07  -0.07    -0.03   0.05   0.04     0.01   0.00   0.00
  14   6    -0.12  -0.01   0.13     0.08   0.01  -0.09    -0.01   0.00   0.01
  15   8    -0.03   0.07  -0.03     0.02  -0.05   0.02     0.00   0.00  -0.01
  16   6     0.05  -0.06  -0.08    -0.04   0.04   0.05     0.00  -0.01  -0.01
  17   8     0.02  -0.05  -0.05     0.00   0.07   0.03     0.01   0.02   0.00
  18   6     0.03  -0.03   0.07     0.00   0.05  -0.05     0.01   0.02   0.00
  19   8     0.04   0.00   0.13    -0.03   0.04  -0.08     0.00   0.02   0.00
  20   8    -0.01   0.03   0.02     0.01  -0.03   0.00     0.00   0.00   0.01
  21   6     0.00   0.04   0.00    -0.01  -0.05   0.01    -0.01  -0.02   0.01
  22   6     0.04  -0.03   0.02    -0.06   0.03  -0.02    -0.02   0.00   0.00
  23   6    -0.02  -0.02  -0.03     0.04   0.01   0.00     0.01   0.00  -0.01
  24   8     0.01   0.03  -0.03     0.00  -0.05   0.03     0.01  -0.02   0.01
  25   6     0.00   0.00   0.00     0.00  -0.01   0.00     0.00   0.00   0.00
  26   6    -0.05  -0.02  -0.06     0.03   0.01   0.03    -0.01   0.00  -0.01
  27   6     0.03  -0.06   0.06    -0.02   0.04  -0.04     0.00  -0.01   0.01
  28   6    -0.02  -0.01  -0.02     0.01   0.01   0.01     0.00   0.00   0.00
  29   6     0.04   0.05  -0.01     0.06   0.06  -0.01     0.07   0.12  -0.04
  30   6     0.04  -0.02   0.00     0.10  -0.04  -0.01     0.12  -0.04  -0.03
  31   6     0.06  -0.03   0.03     0.08  -0.02   0.04    -0.04   0.02   0.03
  32   6     0.05   0.00   0.10     0.07   0.01   0.14    -0.06  -0.15   0.03
  33   6    -0.03   0.07   0.03    -0.05   0.08   0.05    -0.04   0.17  -0.08
  34   6    -0.08  -0.02   0.07    -0.10  -0.02   0.08     0.03  -0.14  -0.04
  35   6    -0.06   0.01  -0.03    -0.08   0.01  -0.05     0.04  -0.08  -0.01
  36   6     0.03  -0.01  -0.04     0.03  -0.02  -0.04    -0.09   0.06   0.03
  37   6    -0.10  -0.01  -0.06    -0.14  -0.01  -0.08    -0.02   0.02   0.00
  38   6     0.05   0.04   0.00     0.05   0.05   0.01    -0.06  -0.04   0.04
  39   6     0.03   0.05   0.07     0.01   0.09   0.11    -0.14   0.02  -0.04
  40   6     0.02  -0.02   0.04     0.06  -0.06   0.05     0.08  -0.10  -0.08
  41   6    -0.04  -0.04   0.07    -0.07  -0.03   0.08    -0.05   0.13  -0.09
  42   6    -0.04  -0.04   0.00    -0.07  -0.04  -0.02     0.03   0.07  -0.02
  43   6     0.02   0.04  -0.03     0.02   0.04  -0.04    -0.05  -0.10   0.06
  44   6    -0.05  -0.04  -0.04    -0.08  -0.06  -0.06     0.04   0.02   0.03
  45   6     0.02   0.02  -0.02     0.02   0.02  -0.01     0.00   0.00   0.00
  46   6     0.00  -0.02  -0.01    -0.01  -0.03  -0.02     0.01   0.01   0.01
  47   6     0.00  -0.02   0.00     0.00  -0.02   0.00     0.01   0.04   0.02
  48   6     0.00   0.01  -0.01     0.00   0.01  -0.01     0.00   0.01  -0.02
  49   6    -0.01   0.01  -0.01    -0.01   0.02  -0.01     0.01  -0.01   0.02
  50   6     0.01  -0.02  -0.01     0.02  -0.03  -0.01     0.00   0.00   0.00
  51   6     0.01  -0.01  -0.01     0.02  -0.01  -0.01     0.00   0.00  -0.01
  52   6    -0.01   0.01  -0.01    -0.01   0.01  -0.01     0.02  -0.02   0.02
  53   6     0.01   0.01  -0.01     0.00  -0.01   0.00     0.00  -0.03   0.01
  54   6    -0.06   0.01   0.00    -0.08   0.02   0.00    -0.06   0.03   0.00
  55   1     0.07   0.01   0.08     0.09   0.02   0.10     0.04  -0.01  -0.06
  56   1     0.18  -0.09  -0.02    -0.12   0.06   0.01     0.01  -0.01   0.01
  57   1    -0.15   0.01   0.17     0.10   0.00  -0.10    -0.01   0.00   0.02
  58   1     0.07  -0.06  -0.09    -0.04   0.04   0.05     0.01  -0.01  -0.01
  59   1     0.06  -0.05  -0.09    -0.04   0.04   0.06     0.01  -0.01  -0.01
  60   1     0.05  -0.03  -0.06    -0.03   0.02   0.04     0.00   0.00   0.00
  61   1     0.03  -0.04   0.04    -0.05   0.03  -0.03    -0.02   0.00   0.00
  62   1    -0.05  -0.02  -0.06     0.05   0.00   0.02     0.01   0.00  -0.02
  63   1     0.00  -0.01  -0.10     0.02   0.01   0.10     0.01   0.00   0.02
  64   1    -0.03   0.07   0.05     0.04  -0.08  -0.07     0.01  -0.02  -0.02
  65   1    -0.03   0.05  -0.01     0.03  -0.04   0.02     0.01   0.00   0.01
  66   1    -0.07  -0.01  -0.04     0.03   0.01   0.04    -0.01   0.00   0.01
  67   1    -0.04  -0.01  -0.04     0.02   0.01   0.04    -0.01   0.00   0.00
  68   1    -0.08  -0.05  -0.08     0.01   0.01   0.02    -0.03  -0.02  -0.02
  69   1    -0.01   0.08   0.07     0.00  -0.05  -0.04     0.00  -0.01   0.01
  70   1     0.02   0.03   0.08    -0.01  -0.02  -0.05     0.00   0.00   0.00
  71   1     0.06  -0.17   0.21    -0.04   0.11  -0.14     0.00  -0.01   0.01
  72   1     0.14   0.05  -0.03    -0.09  -0.03   0.02     0.01   0.01   0.00
  73   1     0.12   0.04  -0.01    -0.08  -0.03   0.00     0.01   0.00   0.00
  74   1    -0.13  -0.10  -0.23     0.08   0.07   0.15    -0.01  -0.01  -0.02
  75   1     0.05  -0.01   0.11     0.07  -0.01   0.14    -0.03  -0.27   0.05
  76   1    -0.03   0.09  -0.07    -0.04   0.09  -0.07    -0.03   0.37  -0.08
  77   1    -0.04  -0.07   0.11    -0.04  -0.07   0.14     0.05  -0.20  -0.01
  78   1     0.05  -0.02  -0.08     0.05  -0.03  -0.09    -0.09   0.06   0.04
  79   1    -0.10  -0.01  -0.09    -0.14  -0.02  -0.12    -0.01   0.04   0.02
  80   1     0.00   0.07   0.09    -0.05   0.13   0.13    -0.17   0.10  -0.05
  81   1     0.02  -0.02  -0.04     0.09  -0.10  -0.07     0.21  -0.21  -0.01
  82   1    -0.04  -0.01   0.08    -0.09   0.04   0.11    -0.12   0.20  -0.07
  83   1     0.02   0.05  -0.07     0.02   0.05  -0.08    -0.04  -0.11   0.09
  84   1    -0.06  -0.05  -0.07    -0.09  -0.08  -0.10     0.05   0.02   0.06
  85   1     0.04   0.06  -0.02     0.04   0.07  -0.02     0.00  -0.12   0.04
  86   1    -0.01   0.02   0.01     0.00   0.02   0.02     0.05  -0.04  -0.03
  87   1     0.01   0.02  -0.01     0.01   0.02   0.00     0.09   0.06  -0.08
  88   1    -0.04  -0.06  -0.01    -0.03  -0.07  -0.02     0.10   0.06   0.06
  89   1     0.00  -0.01   0.00     0.00  -0.02  -0.02    -0.01  -0.08  -0.06
  90   1    -0.01   0.01   0.02    -0.01   0.00   0.01     0.05  -0.02  -0.01
  91   1     0.04  -0.12  -0.01     0.06  -0.17  -0.01     0.04  -0.02   0.02
  92   1     0.03   0.08   0.04     0.04   0.11   0.06     0.02   0.08   0.05
  93   1     0.05  -0.01   0.03     0.07  -0.02   0.04     0.03   0.05   0.04
  94   1     0.07   0.10  -0.07     0.10   0.13  -0.09     0.01  -0.02  -0.02
  95   1     0.05   0.01   0.04     0.07   0.01   0.05     0.01   0.02  -0.05
  96   1     0.01  -0.05   0.08     0.02  -0.07   0.12     0.00  -0.01   0.00
  97   1    -0.02   0.08  -0.04    -0.02   0.14  -0.06     0.02  -0.03   0.03
  98   1     0.02  -0.01   0.03     0.04  -0.02   0.06     0.00   0.00   0.01
  99   1     0.02   0.02   0.02     0.05   0.03   0.04     0.00  -0.02   0.02
 100   1     0.07  -0.06  -0.02     0.11  -0.09  -0.03    -0.05   0.04   0.00
 101   1     0.03   0.01   0.02     0.05   0.00   0.02    -0.01  -0.02  -0.03
 102   1     0.00   0.03   0.03    -0.01   0.06   0.04     0.01  -0.03  -0.03
 103   1     0.04  -0.05  -0.03     0.05  -0.05  -0.03    -0.06   0.13   0.05
 104   1    -0.01  -0.02   0.01     0.00  -0.02   0.02     0.04   0.05  -0.06
 105   1    -0.02   0.00   0.02    -0.01   0.00   0.02     0.08  -0.03  -0.10
 106   1    -0.06   0.02  -0.01    -0.07   0.03  -0.01     0.13  -0.03   0.04
 107   1     0.01  -0.01   0.01     0.00  -0.01   0.01    -0.05   0.05  -0.04
 108   1    -0.01  -0.01   0.01    -0.01  -0.01   0.02     0.05   0.03  -0.01
 109   1     0.00   0.04  -0.01    -0.02   0.00   0.02     0.01  -0.03   0.00
 110   1    -0.03  -0.02   0.00    -0.04  -0.03   0.02     0.00  -0.03   0.01
 111   1     0.01   0.03  -0.01     0.02   0.06   0.00    -0.01  -0.04   0.01
 112   1    -0.02  -0.01   0.02    -0.05   0.00   0.00    -0.07   0.03   0.00
 113   1    -0.11   0.02   0.02    -0.11   0.02   0.01    -0.03   0.02  -0.01
 114   1    -0.05   0.00   0.02    -0.09   0.01   0.01    -0.06   0.03  -0.01
                    97                     98                     99
                    ?A                     ?A                     ?A
 Frequencies --   566.5156               573.1580               574.7463
 Red. masses --     3.9953                 3.7647                 5.8581
 Frc consts  --     0.7555                 0.7287                 1.1401
 IR Inten    --     1.6781                 0.0456                 3.4322
 Raman Activ --     0.0000                 0.0000                 0.0000
 Depolar     --     0.0000                 0.0000                 0.0000
 Atom AN      X      Y      Z        X      Y      Z        X      Y      Z
   1   8     0.00   0.00   0.00     0.00   0.00   0.00     0.04   0.01  -0.04
   2  12     0.00   0.02   0.00     0.00   0.01   0.00     0.01   0.02   0.01
   3   8     0.01  -0.02   0.00     0.01  -0.01   0.00     0.16  -0.18   0.02
   4   6     0.00   0.00   0.00     0.00   0.00   0.00     0.04   0.02   0.02
   5   7    -0.02  -0.01  -0.08    -0.01  -0.03  -0.12     0.00   0.00   0.01
   6   7     0.03   0.04   0.05     0.00   0.00   0.14     0.00   0.00  -0.02
   7   8     0.00   0.00   0.00     0.00   0.00   0.00     0.00   0.05   0.02
   8   6    -0.05  -0.03   0.12     0.03   0.04   0.12     0.00   0.00  -0.02
   9   6    -0.01   0.05  -0.01     0.01  -0.01   0.01     0.00   0.00   0.00
  10   6     0.07   0.02  -0.12    -0.03  -0.03  -0.14     0.00   0.00   0.01
  11   8     0.00  -0.01  -0.01    -0.01   0.00   0.00    -0.14  -0.05   0.01
  12   6     0.00   0.01   0.01     0.00   0.01   0.00    -0.04   0.22   0.03
  13   6     0.00   0.01   0.02     0.01   0.00   0.00     0.12   0.04   0.12
  14   6     0.00   0.00   0.00     0.00  -0.01   0.01    -0.08  -0.07   0.11
  15   8     0.00  -0.01  -0.01     0.00   0.01  -0.01     0.03   0.05  -0.15
  16   6     0.00   0.00   0.00     0.00   0.00   0.00     0.03  -0.03  -0.04
  17   8    -0.01  -0.02   0.01     0.00   0.00   0.00    -0.09  -0.05   0.12
  18   6    -0.01   0.00  -0.01     0.00   0.00  -0.01    -0.01   0.04  -0.09
  19   8    -0.01  -0.01  -0.01     0.00   0.00  -0.01    -0.10   0.03  -0.13
  20   8     0.00   0.01  -0.01     0.00   0.00   0.00     0.05   0.06  -0.08
  21   6     0.00   0.00  -0.01     0.00   0.00   0.00    -0.02  -0.07  -0.03
  22   6     0.00  -0.01   0.01     0.00   0.00   0.00    -0.09  -0.05   0.04
  23   6     0.00   0.01   0.00     0.00   0.00   0.00     0.02   0.13  -0.03
  24   8     0.01   0.00   0.00     0.00   0.00   0.00     0.10  -0.04   0.00
  25   6     0.00   0.00   0.01     0.00   0.00   0.00    -0.02   0.02   0.06
  26   6     0.00   0.01   0.01     0.00   0.00   0.00     0.04   0.01   0.05
  27   6     0.00   0.00   0.00     0.00   0.00   0.00    -0.02  -0.08   0.05
  28   6     0.00   0.00   0.00     0.00   0.00   0.00    -0.01  -0.01  -0.02
  29   6    -0.01   0.15  -0.08    -0.02  -0.09   0.00     0.00  -0.02   0.01
  30   6    -0.09   0.12   0.04     0.06  -0.06   0.01     0.00  -0.01   0.00
  31   6     0.02  -0.03  -0.03     0.04  -0.04  -0.02    -0.01  -0.01   0.01
  32   6     0.01  -0.07   0.06     0.04   0.11   0.02    -0.01   0.00  -0.01
  33   6     0.02   0.14   0.01     0.00  -0.10   0.09     0.00  -0.01   0.00
  34   6    -0.03  -0.08   0.08    -0.03   0.10   0.04     0.00   0.00  -0.01
  35   6    -0.03   0.03  -0.02    -0.04   0.05  -0.03     0.01   0.00   0.00
  36   6     0.09  -0.04  -0.03     0.09  -0.05  -0.02    -0.01   0.01   0.00
  37   6    -0.05   0.00  -0.01    -0.07  -0.01  -0.03     0.01   0.00   0.00
  38   6     0.00  -0.02   0.03    -0.06  -0.02   0.03     0.01   0.01  -0.01
  39   6     0.07  -0.08  -0.03    -0.10   0.01  -0.06     0.01   0.01   0.01
  40   6    -0.12   0.06   0.00     0.06  -0.05  -0.08     0.00   0.00   0.01
  41   6     0.08  -0.05  -0.06    -0.05   0.09  -0.06     0.00  -0.01   0.01
  42   6     0.01   0.02  -0.01     0.06   0.02   0.03    -0.01  -0.01   0.00
  43   6    -0.04  -0.06   0.03    -0.04  -0.09   0.04     0.01   0.01  -0.01
[truncated: 1,594,317 more chars]
