# Supplementary material
Source: publisher figshare collection journal article supplement (https://acs.figshare.com/ndownloader/files/5127205)
Supplement: Supplementary file 1 [file 5127205 › supporting_ja043819b/RRSS_fm-5-ts1.mol]

  MacMolPlt                       

114118  0  0  0  0  0  0  0  0  0 v2000
   -5.5665    1.6238    0.9469 O   0  0  0  0  0  0  0  0  0  0  0  0
    0.5647   -0.6574    0.1027 Mg  0  0  0  0  0  0  0  0  0  0  0  0
    0.5516    1.1240   -1.1898 O   0  0  0  0  0  0  0  0  0  0  0  0
   -4.4932    1.9278    0.1878 C   0  0  0  0  0  0  0  0  0  0  0  0
   -0.1765   -2.6004    0.2907 N   0  0  0  0  0  0  0  0  0  0  0  0
    2.4718   -1.4862   -0.0112 N   0  0  0  0  0  0  0  0  0  0  0  0
   -3.9213    2.9931    0.2203 O   0  0  0  0  0  0  0  0  0  0  0  0
    0.5242   -3.7274    0.4469 C   0  0  0  0  0  0  0  0  0  0  0  0
    1.9197   -3.8095    0.3385 C   0  0  0  0  0  0  0  0  0  0  0  0
    2.8333   -2.7541    0.1236 C   0  0  0  0  0  0  0  0  0  0  0  0
   -2.9877    1.1232   -1.4908 O   0  0  0  0  0  0  0  0  0  0  0  0
   -1.7725    0.7396   -1.1076 C   0  0  0  0  0  0  0  0  0  0  0  0
   -0.6134    1.2128   -1.9793 C   0  0  0  0  0  0  0  0  0  0  0  0
   -4.1184    0.7297   -0.6805 C   0  0  0  0  0  0  0  0  0  0  0  0
   -1.5634   -0.0121   -0.1664 O   0  0  0  0  0  0  0  0  0  0  0  0
   -6.0052    2.6644    1.8377 C   0  0  0  0  0  0  0  0  0  0  0  0
   -0.5546    2.5987    0.5035 O   0  0  0  0  0  0  0  0  0  0  0  0
    0.6741    1.9686    0.3230 C   0  0  0  0  0  0  0  0  0  0  0  0
    0.8914    1.0037    1.1411 O   0  0  0  0  0  0  0  0  0  0  0  0
    1.4550    4.0504   -0.7796 O   0  0  0  0  0  0  0  0  0  0  0  0
    0.3221    4.7156   -0.5013 C   0  0  0  0  0  0  0  0  0  0  0  0
   -0.7296    4.0172    0.3546 C   0  0  0  0  0  0  0  0  0  0  0  0
    1.8461    2.9164    0.0437 C   0  0  0  0  0  0  0  0  0  0  0  0
    0.1182    5.8174   -0.9608 O   0  0  0  0  0  0  0  0  0  0  0  0
   -0.9027    4.6845    1.7224 C   0  0  0  0  0  0  0  0  0  0  0  0
    2.5395    3.3918    1.3239 C   0  0  0  0  0  0  0  0  0  0  0  0
   -0.8368    2.5203   -2.7409 C   0  0  0  0  0  0  0  0  0  0  0  0
   -5.2256    0.2772   -1.6279 C   0  0  0  0  0  0  0  0  0  0  0  0
   -1.6228   -2.6848    0.2870 C   0  0  0  0  0  0  0  0  0  0  0  0
    3.4748   -0.4430   -0.0610 C   0  0  0  0  0  0  0  0  0  0  0  0
   -2.2962   -3.0216   -0.9376 C   0  0  0  0  0  0  0  0  0  0  0  0
   -3.7070   -2.9130   -0.9783 C   0  0  0  0  0  0  0  0  0  0  0  0
   -4.4375   -2.4921    0.1573 C   0  0  0  0  0  0  0  0  0  0  0  0
   -3.7639   -2.1869    1.3613 C   0  0  0  0  0  0  0  0  0  0  0  0
   -2.3509   -2.2895    1.4518 C   0  0  0  0  0  0  0  0  0  0  0  0
   -1.4914   -3.5058   -2.1771 C   0  0  0  0  0  0  0  0  0  0  0  0
   -1.6290   -1.9757    2.7868 C   0  0  0  0  0  0  0  0  0  0  0  0
    4.1116   -0.0043    1.1485 C   0  0  0  0  0  0  0  0  0  0  0  0
    4.9991    1.1019    1.0754 C   0  0  0  0  0  0  0  0  0  0  0  0
    5.2320    1.7703   -0.1448 C   0  0  0  0  0  0  0  0  0  0  0  0
    4.6060    1.3250   -1.3299 C   0  0  0  0  0  0  0  0  0  0  0  0
    3.7269    0.2080   -1.3156 C   0  0  0  0  0  0  0  0  0  0  0  0
    3.8758   -0.7034    2.5151 C   0  0  0  0  0  0  0  0  0  0  0  0
    3.1137   -0.3410   -2.6303 C   0  0  0  0  0  0  0  0  0  0  0  0
   -0.9359   -2.3014   -3.0043 C   0  0  0  0  0  0  0  0  0  0  0  0
   -2.3087   -4.4672   -3.0995 C   0  0  0  0  0  0  0  0  0  0  0  0
   -1.8071   -0.4825    3.2073 C   0  0  0  0  0  0  0  0  0  0  0  0
   -2.1099   -2.9353    3.9265 C   0  0  0  0  0  0  0  0  0  0  0  0
    2.7837    0.7752   -3.6679 C   0  0  0  0  0  0  0  0  0  0  0  0
    4.0485   -1.4225   -3.2710 C   0  0  0  0  0  0  0  0  0  0  0  0
    3.1354    0.2355    3.5207 C   0  0  0  0  0  0  0  0  0  0  0  0
    5.2209   -1.2145    3.1338 C   0  0  0  0  0  0  0  0  0  0  0  0
   -0.2090   -5.0197    0.7908 C   0  0  0  0  0  0  0  0  0  0  0  0
    4.3006   -3.1701    0.0951 C   0  0  0  0  0  0  0  0  0  0  0  0
    2.3551   -4.7952    0.4626 H   0  0  0  0  0  0  0  0  0  0  0  0
   -0.5103    0.4239   -2.7412 H   0  0  0  0  0  0  0  0  0  0  0  0
   -3.8528   -0.1090   -0.0281 H   0  0  0  0  0  0  0  0  0  0  0  0
   -6.2778    3.5610    1.2752 H   0  0  0  0  0  0  0  0  0  0  0  0
   -5.2138    2.9160    2.5485 H   0  0  0  0  0  0  0  0  0  0  0  0
   -6.8731    2.2573    2.3571 H   0  0  0  0  0  0  0  0  0  0  0  0
   -1.6753    4.1324   -0.1811 H   0  0  0  0  0  0  0  0  0  0  0  0
    2.5833    2.3939   -0.5618 H   0  0  0  0  0  0  0  0  0  0  0  0
   -1.1250    5.7465    1.5802 H   0  0  0  0  0  0  0  0  0  0  0  0
   -0.0071    4.5901    2.3419 H   0  0  0  0  0  0  0  0  0  0  0  0
   -1.7400    4.2102    2.2417 H   0  0  0  0  0  0  0  0  0  0  0  0
    3.0975    4.3077    1.1017 H   0  0  0  0  0  0  0  0  0  0  0  0
    3.2516    2.6228    1.6194 H   0  0  0  0  0  0  0  0  0  0  0  0
    1.8467    3.5853    2.1467 H   0  0  0  0  0  0  0  0  0  0  0  0
   -1.6084    2.3749   -3.5040 H   0  0  0  0  0  0  0  0  0  0  0  0
    0.0961    2.8021   -3.2355 H   0  0  0  0  0  0  0  0  0  0  0  0
   -1.1584    3.3437   -2.1056 H   0  0  0  0  0  0  0  0  0  0  0  0
   -4.9307   -0.6822   -2.0606 H   0  0  0  0  0  0  0  0  0  0  0  0
   -5.3928    1.0109   -2.4221 H   0  0  0  0  0  0  0  0  0  0  0  0
   -6.1554    0.1337   -1.0719 H   0  0  0  0  0  0  0  0  0  0  0  0
   -4.2505   -3.2007   -1.8876 H   0  0  0  0  0  0  0  0  0  0  0  0
   -5.5347   -2.4424    0.1159 H   0  0  0  0  0  0  0  0  0  0  0  0
   -4.3451   -1.8976    2.2474 H   0  0  0  0  0  0  0  0  0  0  0  0
   -0.6119   -4.0680   -1.8109 H   0  0  0  0  0  0  0  0  0  0  0  0
   -0.5457   -2.1584    2.6305 H   0  0  0  0  0  0  0  0  0  0  0  0
    5.5270    1.4295    1.9804 H   0  0  0  0  0  0  0  0  0  0  0  0
    5.9214    2.6254   -0.1792 H   0  0  0  0  0  0  0  0  0  0  0  0
    4.8248    1.8314   -2.2786 H   0  0  0  0  0  0  0  0  0  0  0  0
    3.2235   -1.5820    2.3422 H   0  0  0  0  0  0  0  0  0  0  0  0
    2.1650   -0.8498   -2.3583 H   0  0  0  0  0  0  0  0  0  0  0  0
   -0.4130   -2.6608   -3.9063 H   0  0  0  0  0  0  0  0  0  0  0  0
   -0.2060   -1.7413   -2.3908 H   0  0  0  0  0  0  0  0  0  0  0  0
   -1.7512   -1.6258   -3.3153 H   0  0  0  0  0  0  0  0  0  0  0  0
   -1.6403   -4.8997   -3.8595 H   0  0  0  0  0  0  0  0  0  0  0  0
   -3.1166   -3.9323   -3.6210 H   0  0  0  0  0  0  0  0  0  0  0  0
   -2.7494   -5.2893   -2.5154 H   0  0  0  0  0  0  0  0  0  0  0  0
   -1.2658   -0.2925    4.1486 H   0  0  0  0  0  0  0  0  0  0  0  0
   -2.8700   -0.2397    3.3596 H   0  0  0  0  0  0  0  0  0  0  0  0
   -1.3996    0.1912    2.4323 H   0  0  0  0  0  0  0  0  0  0  0  0
   -1.5338   -2.7411    4.8440 H   0  0  0  0  0  0  0  0  0  0  0  0
   -1.9624   -3.9880    3.6389 H   0  0  0  0  0  0  0  0  0  0  0  0
   -3.1771   -2.7799    4.1472 H   0  0  0  0  0  0  0  0  0  0  0  0
    2.2065    0.3443   -4.5004 H   0  0  0  0  0  0  0  0  0  0  0  0
    3.7000    1.2221   -4.0836 H   0  0  0  0  0  0  0  0  0  0  0  0
    2.1879    1.5734   -3.1965 H   0  0  0  0  0  0  0  0  0  0  0  0
    3.5974   -1.7992   -4.2020 H   0  0  0  0  0  0  0  0  0  0  0  0
    4.1903   -2.2738   -2.5863 H   0  0  0  0  0  0  0  0  0  0  0  0
    5.0352   -0.9936   -3.5073 H   0  0  0  0  0  0  0  0  0  0  0  0
    2.9348   -0.3060    4.4590 H   0  0  0  0  0  0  0  0  0  0  0  0
    2.1786    0.5737    3.0867 H   0  0  0  0  0  0  0  0  0  0  0  0
    3.7456    1.1218    3.7548 H   0  0  0  0  0  0  0  0  0  0  0  0
    5.0129   -1.7921    4.0475 H   0  0  0  0  0  0  0  0  0  0  0  0
    5.8741   -0.3700    3.4013 H   0  0  0  0  0  0  0  0  0  0  0  0
    5.7631   -1.8616    2.4276 H   0  0  0  0  0  0  0  0  0  0  0  0
   -0.9417   -5.2999    0.0264 H   0  0  0  0  0  0  0  0  0  0  0  0
    0.4960   -5.8500    0.9040 H   0  0  0  0  0  0  0  0  0  0  0  0
   -0.7525   -4.9065    1.7375 H   0  0  0  0  0  0  0  0  0  0  0  0
    4.9472   -2.4101   -0.3502 H   0  0  0  0  0  0  0  0  0  0  0  0
    4.6605   -3.3655    1.1132 H   0  0  0  0  0  0  0  0  0  0  0  0
    4.4142   -4.1028   -0.4704 H   0  0  0  0  0  0  0  0  0  0  0  0
  1  4  1  0  0  0  0
  1 16  1  0  0  0  0
  2  3  1  0  0  0  0
  2  5  1  0  0  0  0
  2  6  1  0  0  0  0
  2 15  1  0  0  0  0
  2 19  2  0  0  0  0
  3 13  1  0  0  0  0
  4  7  2  0  0  0  0
  4 14  1  0  0  0  0
  5  8  1  0  0  0  0
  5 29  1  0  0  0  0
  6 10  1  0  0  0  0
  6 30  1  0  0  0  0
  8  9  1  0  0  0  0
  8 53  1  0  0  0  0
  9 10  1  0  0  0  0
  9 55  1  0  0  0  0
 10 54  1  0  0  0  0
 11 12  1  0  0  0  0
 11 14  1  0  0  0  0
 12 13  1  0  0  0  0
 12 15  2  0  0  0  0
 13 27  1  0  0  0  0
 13 56  1  0  0  0  0
 14 28  1  0  0  0  0
 14 57  1  0  0  0  0
 16 58  1  0  0  0  0
 16 59  1  0  0  0  0
 16 60  1  0  0  0  0
 17 18  1  0  0  0  0
 17 22  1  0  0  0  0
 18 19  2  0  0  0  0
 18 23  1  0  0  0  0
 20 21  1  0  0  0  0
 20 23  1  0  0  0  0
 21 22  1  0  0  0  0
 21 24  2  0  0  0  0
 22 25  1  0  0  0  0
 22 61  1  0  0  0  0
 23 26  1  0  0  0  0
 23 62  1  0  0  0  0
 25 63  1  0  0  0  0
 25 64  1  0  0  0  0
 25 65  1  0  0  0  0
 26 66  1  0  0  0  0
 26 67  1  0  0  0  0
 26 68  1  0  0  0  0
 27 69  1  0  0  0  0
 27 70  1  0  0  0  0
 27 71  1  0  0  0  0
 28 72  1  0  0  0  0
 28 73  1  0  0  0  0
 28 74  1  0  0  0  0
 29 31  1  0  0  0  0
 29 35  1  0  0  0  0
 30 38  1  0  0  0  0
 30 42  1  0  0  0  0
 31 32  1  0  0  0  0
 31 36  1  0  0  0  0
 32 33  1  0  0  0  0
 32 75  1  0  0  0  0
 33 34  1  0  0  0  0
 33 76  1  0  0  0  0
 34 35  1  0  0  0  0
 34 77  1  0  0  0  0
 35 37  1  0  0  0  0
 36 45  1  0  0  0  0
 36 46  1  0  0  0  0
 36 78  1  0  0  0  0
 37 47  1  0  0  0  0
 37 48  1  0  0  0  0
 37 79  1  0  0  0  0
 38 39  1  0  0  0  0
 38 43  1  0  0  0  0
 39 40  1  0  0  0  0
 39 80  1  0  0  0  0
 40 41  1  0  0  0  0
 40 81  1  0  0  0  0
 41 42  1  0  0  0  0
 41 82  1  0  0  0  0
 42 44  1  0  0  0  0
 43 51  1  0  0  0  0
 43 52  1  0  0  0  0
 43 83  1  0  0  0  0
 44 49  1  0  0  0  0
 44 50  1  0  0  0  0
 44 84  1  0  0  0  0
 45 85  1  0  0  0  0
 45 86  1  0  0  0  0
 45 87  1  0  0  0  0
 46 88  1  0  0  0  0
 46 89  1  0  0  0  0
 46 90  1  0  0  0  0
 47 91  1  0  0  0  0
 47 92  1  0  0  0  0
 47 93  1  0  0  0  0
 48 94  1  0  0  0  0
 48 95  1  0  0  0  0
 48 96  1  0  0  0  0
 49 97  1  0  0  0  0
 49 98  1  0  0  0  0
 49 99  1  0  0  0  0
 50100  1  0  0  0  0
 50101  1  0  0  0  0
 50102  1  0  0  0  0
 51103  1  0  0  0  0
 51104  1  0  0  0  0
 51105  1  0  0  0  0
 52106  1  0  0  0  0
 52107  1  0  0  0  0
 52108  1  0  0  0  0
 53109  1  0  0  0  0
 53110  1  0  0  0  0
 53111  1  0  0  0  0
 54112  1  0  0  0  0
 54113  1  0  0  0  0
 54114  1  0  0  0  0
M  END
