# Supplementary material
Source: publisher figshare collection journal article supplement (https://acs.figshare.com/ndownloader/files/5127205)
Supplement: Supplementary file 1 [file 5127205 › supporting_ja043819b/RRSS_fm-5-ts2-49.xyz]

114
O	3.798719	3.110755	-1.50347	0.0147	0.0588	0.0
Mg	-0.306662	-0.093947	-0.017684	0.1029	-0.147	0.1029
O	1.188014	-0.690241	3.203707	-0.0147	0.0588	-0.0735
C	3.783771	2.654181	-0.240729	0.0441	0.0441	-0.0147
N	0.129969	-1.15734	-1.711923	0.0	-0.0735	0.0147
N	-0.997176	1.483318	-1.112304	0.0294	-0.1029	0.1176
O	3.602063	3.331605	0.744263	0.0735	0.0294	0.0
C	0.267443	-0.60892	-2.910916	0.0147	-0.0441	0.0294
C	0.04813	0.765881	-3.174161	0.0294	-0.0294	0.0735
C	-0.617258	1.712157	-2.366846	0.0441	-0.0735	0.1176
O	3.804168	0.610437	1.063272	0.0441	0.0147	-0.0441
C	2.518847	0.385142	1.366674	0.0294	0.0882	-0.0441
C	2.46098	-0.210746	2.779254	0.0	-0.0147	-0.0882
C	4.102664	1.158448	-0.235854	0.0441	0.0441	-0.0294
O	1.611795	0.649416	0.59782	0.0294	0.2058	-0.0147
C	3.585835	4.527118	-1.66216	0.0147	0.0588	0.0147
O	-1.039614	-0.170883	1.708792	0.0441	0.0147	0.1764
C	0.582718	-1.625948	2.409001	-0.2352	0.2793	-0.1911
O	1.060644	-1.956729	1.33776	-0.3675	0.4116	-0.3087
O	-1.710998	-2.638061	2.659931	-0.0882	0.0441	-0.0294
C	-2.620946	-1.60574	2.659463	-0.0882	0.0294	0.0
C	-2.025646	-0.194901	2.679449	-0.0735	0.0147	0.0735
C	-0.403471	-2.4869	3.217604	-0.0441	0.1323	-0.1323
O	-3.789496	-1.887903	2.54324	-0.0882	0.0441	-0.0147
C	-3.113004	0.867165	2.527736	-0.0294	0.0441	-0.0147
C	0.174579	-3.904703	3.258562	0.1029	0.1911	-0.2205
C	2.902252	0.824936	3.817064	0.1029	-0.1029	-0.0294
C	5.590924	0.92059	-0.48111	0.0441	0.0294	-0.0441
C	0.259035	-2.575536	-1.427075	-0.0147	-0.0882	-0.0294
C	-1.948115	2.365455	-0.457731	0.0294	-0.0882	0.0882
C	-0.93803	-3.271449	-1.033888	-0.0147	-0.0882	-0.0441
C	-0.812924	-4.560776	-0.462194	-0.0147	-0.0882	-0.0441
C	0.450989	-5.167355	-0.298291	-0.0147	-0.0735	-0.0294
C	1.606301	-4.50645	-0.755627	-0.0147	-0.0735	0.0
C	1.541339	-3.209056	-1.317455	-0.0147	-0.0735	0.0
C	-2.34032	-2.662513	-1.314959	0.0	-0.0588	-0.0294
C	2.858081	-2.531818	-1.780356	-0.0147	-0.0441	0.0294
C	-1.496497	3.307194	0.522055	0.0147	-0.0441	0.0588
C	-2.459717	4.051831	1.251269	0.0	-0.0147	0.0147
C	-3.837774	3.883508	1.017918	0.0	-0.0147	-0.0147
C	-4.273278	2.967299	0.043351	0.0147	-0.0441	0.0147
C	-3.352888	2.194226	-0.705587	0.0294	-0.0735	0.0588
C	0.006693	3.555267	0.794227	0.0147	-0.0294	0.0588
C	-3.902078	1.190063	-1.752855	0.0441	-0.0735	0.0588
C	-3.491294	-3.36146	-0.527665	-0.0147	-0.0441	-0.0147
C	-2.655458	-2.696616	-2.847949	-0.0294	-0.0441	-0.0294
C	3.914375	-2.481777	-0.63068	-0.0441	-0.0294	0.0735
C	3.472444	-3.276016	-3.016342	0.0294	-0.0294	0.0441
C	-4.841757	0.138277	-1.079873	0.0	-0.0441	0.0441
C	-4.664716	1.92066	-2.909516	0.0882	-0.0735	0.0147
C	0.372545	3.220529	2.27454	0.0147	0.0	0.0588
C	0.413599	5.025732	0.446126	0.0	-0.0294	0.0294
C	0.654867	-1.447837	-4.123467	0.0	-0.0147	0.0
C	-0.941096	3.053532	-3.012713	0.0588	-0.0441	0.1617
H	0.281072	1.088495	-4.184046	0.0441	0.0	0.0882
H	3.163813	-1.053189	2.761654	-0.0441	-0.0588	-0.147
H	3.487855	0.654692	-0.985359	0.0294	0.0588	-0.0441
H	2.619645	4.813689	-1.244555	0.0147	0.0441	0.0294
H	3.612447	4.704385	-2.737154	0.0	0.0735	0.0147
H	4.379081	5.087436	-1.159546	0.0147	0.0588	0.0147
H	-1.564256	-0.048407	3.679121	-0.1764	0.0	0.1176
H	-0.482214	-2.061357	4.223527	0.0	0.0735	-0.1029
H	-3.836797	0.786402	3.347133	-0.1029	0.0294	-0.0882
H	-3.650193	0.760137	1.585402	0.0441	0.0882	-0.0735
H	-2.674937	1.866323	2.530136	-0.0147	0.0441	0.0441
H	-0.486848	-4.550032	3.843746	0.2205	0.1029	-0.1764
H	1.168566	-3.906393	3.720441	0.147	0.2793	-0.3087
H	0.253897	-4.287467	2.234953	0.0441	0.2058	-0.2352
H	3.911342	1.179503	3.595871	0.1323	-0.1764	-0.0147
H	2.888662	0.364793	4.808774	0.0735	-0.1617	-0.0588
H	2.217316	1.675769	3.811291	0.1764	-0.0441	0.0294
H	5.799222	-0.151374	-0.463946	0.0294	0.0294	-0.0588
H	6.190772	1.411996	0.291268	0.0441	0.0147	-0.0294
H	5.87059	1.322863	-1.458453	0.0441	0.0441	-0.0441
H	-1.713236	-5.108779	-0.160195	-0.0147	-0.0882	-0.0588
H	0.524206	-6.176594	0.129516	-0.0294	-0.0735	-0.0147
H	2.580596	-5.004679	-0.669084	-0.0147	-0.0735	0.0147
H	-2.320041	-1.59068	-1.013506	0.0147	-0.0588	-0.0294
H	2.62423	-1.489825	-2.077247	-0.0147	-0.0588	0.0294
H	-2.12091	4.784122	1.996003	0.0	0.0147	-0.0147
H	-4.569246	4.472112	1.588205	0.0	0.0147	-0.0441
H	-5.348414	2.849013	-0.143775	0.0147	-0.0294	-0.0147
H	0.584147	2.878646	0.134819	0.0147	-0.0294	0.0735
H	-3.042104	0.648189	-2.195877	0.0441	-0.1029	0.0882
H	-4.429595	-2.812176	-0.689528	0.0	-0.0294	-0.0147
H	-3.286248	-3.381647	0.553815	0.0	-0.0441	-0.0147
H	-3.636513	-4.393952	-0.88091	-0.0294	-0.0441	-0.0147
H	-3.661833	-2.290014	-3.029825	-0.0147	-0.0147	-0.0147
H	-2.621145	-3.730735	-3.225739	-0.0441	-0.0441	-0.0294
H	-1.931153	-2.091112	-3.416393	-0.0147	-0.0588	-0.0294
H	4.827821	-1.970572	-0.983071	-0.0588	0.0	0.1029
H	4.198373	-3.494079	-0.306536	-0.0294	-0.0147	0.0735
H	3.512724	-1.945107	0.244976	-0.1029	-0.0441	0.0588
H	4.364874	-2.739526	-3.373885	0.0441	-0.0147	0.0735
H	2.750762	-3.342781	-3.843703	0.0588	-0.0294	0.0294
H	3.770894	-4.297977	-2.73634	0.0294	-0.0294	0.0441
H	-5.182211	-0.596834	-1.825843	0.0	-0.0441	0.0294
H	-4.312394	-0.40104	-0.274156	-0.0441	-0.0588	0.0588
H	-5.727215	0.622164	-0.640724	0.0	-0.0294	0.0
H	-4.996006	1.185561	-3.658866	0.0882	-0.0882	0.0294
H	-4.018645	2.657607	-3.409824	0.1176	-0.1029	0.0294
H	-5.551827	2.443937	-2.520976	0.0882	-0.0588	-0.0147
H	1.456932	3.360818	2.42676	0.0147	0.0147	0.0588
H	0.101871	2.172262	2.496491	0.0147	0.0147	0.0882
H	-0.165697	3.875367	2.97711	0.0147	0.0147	0.0441
H	1.484708	5.173551	0.665001	0.0	-0.0147	0.0294
H	-0.15762	5.751945	1.046397	-0.0147	-0.0147	0.0294
H	0.227212	5.241503	-0.619645	-0.0147	-0.0294	0.0294
H	0.546034	-2.518119	-3.930352	0.0	-0.0147	-0.0294
H	0.029434	-1.1829	-4.984126	0.0	0.0147	0.0147
H	1.696732	-1.253859	-4.407983	0.0	-0.0147	0.0
H	-2.014316	3.14972	-3.211338	0.0588	-0.0147	0.1764
H	-0.655394	3.88233	-2.354573	0.0882	-0.0588	0.1764
H	-0.413642	3.168163	-3.965824	0.0441	-0.0294	0.147
114
O	3.8048684381880618	3.135352752752246	-1.50347	0.0147	0.0588	0.0
Mg	-0.2636159326835698	-0.15544138188061454	0.025362067316430183	0.1029	-0.147	0.1029
O	1.1818645618119386	-0.6656432472477541	3.1729598090596927	-0.0147	0.0588	-0.0735
C	3.8022193145641845	2.672629314564184	-0.24687843818806146	0.0441	0.0441	-0.0147
N	0.129969	-1.1880871909403072	-1.7057735618119387	0.0	-0.0735	0.0147
N	-0.984877123623877	1.4402719326835698	-1.0631084944955083	0.0294	-0.1029	0.1176
O	3.632810190940307	3.343903876376123	0.744263	0.0735	0.0294	0.0
C	0.27359243818806145	-0.6273683145641844	-2.898617123623877	0.0147	-0.0441	0.0294
C	0.0604288763761229	0.7535821236238771	-3.1434138090596924	0.0294	-0.0294	0.0735
C	-0.5988096854358156	1.6814098090596927	-2.317650494495508	0.0441	-0.0735	0.1176
O	3.8226163145641845	0.6165864381880615	1.0448236854358157	0.0441	0.0147	-0.0441
C	2.5311458763761228	0.4220386291283687	1.3482256854358157	0.0294	0.0882	-0.0441
C	2.46098	-0.21689543818806145	2.7423573708716313	0.0	-0.0147	-0.0882
C	4.121112314564185	1.1768963145641842	-0.2481528763761229	0.0441	0.0441	-0.0294
O	1.624093876376123	0.7355081346328604	0.5916705618119386	0.0294	0.2058	-0.0147
C	3.5919844381880615	4.551715752752245	-1.6560105618119387	0.0147	0.0588	0.0147
O	-1.0211656854358158	-0.16473356181193854	1.7825852582567374	0.0441	0.0147	0.1764
C	0.48432698899101667	-1.5091086744268323	2.3290583035552013	-0.2352	0.2793	-0.1911
O	0.9069080452984636	-1.7845447307342792	1.2086217980507095	-0.3675	0.4116	-0.3087
O	-1.7478946291283688	-2.6196126854358157	2.647632123623877	-0.0882	0.0441	-0.0294
C	-2.6578426291283686	-1.593441123623877	2.659463	-0.0882	0.0294	0.0
C	-2.0563931909403075	-0.18875156181193853	2.7101961909403074	-0.0735	0.0147	0.0735
C	-0.4219193145641844	-2.4315550563074466	3.162259056307447	-0.0441	0.1323	-0.1323
O	-3.8263926291283687	-1.8694546854358158	2.5370905618119384	-0.0882	0.0441	-0.0147
C	-3.125302876376123	0.8856133145641844	2.5215865618119384	-0.0294	0.0441	-0.0147
C	0.2176250673164302	-3.824760303555201	3.166320427179078	0.1029	0.1911	-0.2205
C	2.94529806731643	0.7818899326835698	3.804765123623877	0.1029	-0.1029	-0.0294
C	5.609372314564185	0.9328888763761229	-0.4995583145641843	0.0441	0.0294	-0.0441
C	0.25288556181193855	-2.6124326291283686	-1.439373876376123	-0.0147	-0.0882	-0.0294
C	-1.9358161236238771	2.3285583708716313	-0.4208343708716313	0.0294	-0.0882	0.0882
C	-0.9441794381880615	-3.3083456291283686	-1.0523363145641842	-0.0147	-0.0882	-0.0441
C	-0.8190734381880614	-4.597672629128368	-0.4806423145641844	-0.0147	-0.0882	-0.0441
C	0.4448395618119385	-5.198102190940307	-0.3105898763761229	-0.0147	-0.0735	-0.0294
C	1.6001515618119386	-4.537197190940307	-0.755627	-0.0147	-0.0735	0.0
C	1.5351895618119387	-3.2398031909403073	-1.317455	-0.0147	-0.0735	0.0
C	-2.34032	-2.687110752752246	-1.327257876376123	0.0	-0.0588	-0.0294
C	2.8519315618119383	-2.550266314564184	-1.7680571236238771	-0.0147	-0.0441	0.0294
C	-1.4903475618119386	3.2887456854358157	0.5466527527522459	0.0147	-0.0441	0.0588
C	-2.459717	4.045681561811938	1.2574184381880613	0.0	-0.0147	0.0147
C	-3.837774	3.8773585618119384	1.0117685618119387	0.0	-0.0147	-0.0147
C	-4.267128561811939	2.948850685435816	0.049500438188061456	0.0147	-0.0441	0.0147
C	-3.3405891236238774	2.1634788090596926	-0.6809892472477541	0.0294	-0.0735	0.0588
C	0.012842438188061453	3.5429681236238775	0.8188247527522459	0.0147	-0.0294	0.0588
C	-3.8836296854358157	1.159315809059693	-1.7282572472477542	0.0441	-0.0735	0.0588
C	-3.4974434381880615	-3.3799083145641844	-0.5338144381880615	-0.0147	-0.0441	-0.0147
C	-2.6677568763761226	-2.7150643145641844	-2.8602478763761225	-0.0294	-0.0441	-0.0294
C	3.895926685435816	-2.494075876376123	-0.5999328090596927	-0.0441	-0.0294	0.0735
C	3.4847428763761226	-3.2883148763761225	-2.9978936854358156	0.0294	-0.0294	0.0441
C	-4.841757	0.11982868543581565	-1.0614246854358158	0.0	-0.0441	0.0441
C	-4.627819370871632	1.8899128090596928	-2.9033665618119384	0.0882	-0.0735	0.0147
C	0.3786944381880615	3.220529	2.299137752752246	0.0147	0.0	0.0588
C	0.413599	5.0134331236238765	0.45842487637612295	0.0	-0.0294	0.0294
C	0.654867	-1.4539864381880614	-4.123467	0.0	-0.0147	0.0
C	-0.9164982472477542	3.035083685435816	-2.945069179931324	0.0588	-0.0441	0.1617
H	0.2995203145641844	1.088495	-4.147149370871632	0.0441	0.0	0.0882
H	3.145364685435816	-1.0777867527522458	2.7001596181193857	-0.0441	-0.0588	-0.147
H	3.500153876376123	0.6792897527522459	-1.0038073145641844	0.0294	0.0588	-0.0441
H	2.6257944381880614	4.832137314564185	-1.2322561236238772	0.0147	0.0441	0.0294
H	3.612447	4.735132190940307	-2.7310045618119383	0.0	0.0735	0.0147
H	4.385230438188062	5.112033752752246	-1.1533965618119386	0.0147	0.0588	0.0147
H	-1.6380492582567374	-0.048407	3.7283165055044916	-0.1764	0.0	0.1176
H	-0.482214	-2.0306098090596927	4.18048093268357	0.0	0.0735	-0.1029
H	-3.87984306731643	0.798700876376123	3.3102363708716314	-0.1029	0.0294	-0.0882
H	-3.6317446854358155	0.7970336291283686	1.5546548090596928	0.0441	0.0882	-0.0735
H	-2.6810864381880615	1.8847713145641842	2.5485843145641844	-0.0147	0.0441	0.0441
H	-0.39460642717907823	-4.50698593268357	3.7699527417432623	0.2205	0.1029	-0.1764
H	1.2300603818806146	-3.7895536744268323	3.5913027980507097	0.147	0.2793	-0.3087
H	0.2723453145641843	-4.20137486536714	2.1365619889910166	0.0441	0.2058	-0.2352
H	3.966686943692553	1.1057097417432624	3.5897215618119382	0.1323	-0.1764	-0.0147
H	2.9194091909403075	0.297149179931324	4.784176247247754	0.0735	-0.1617	-0.0588
H	2.2911092582567374	1.6573206854358158	3.823589876376123	0.1764	-0.0441	0.0294
H	5.8115208763761235	-0.1390751236238771	-0.4885437527522458	0.0294	0.0294	-0.0588
H	6.209220314564185	1.4181454381880614	0.2789691236238771	0.0441	0.0147	-0.0294
H	5.889038314564185	1.3413113145641842	-1.4769013145641843	0.0441	0.0441	-0.0441
H	-1.7193854381880613	-5.145675629128369	-0.18479275275224583	-0.0147	-0.0882	-0.0588
H	0.511907123623877	-6.207341190940307	0.12336656181193854	-0.0294	-0.0735	-0.0147
H	2.5744465618119383	-5.035426190940307	-0.6629345618119385	-0.0147	-0.0735	0.0147
H	-2.3138915618119382	-1.615277752752246	-1.025804876376123	0.0147	-0.0588	-0.0294
H	2.6180805618119383	-1.5144227527522458	-2.064948123623877	-0.0147	-0.0588	0.0294
H	-2.12091	4.790271438188062	1.9898535618119386	0.0	0.0147	-0.0147
H	-4.569246	4.478261438188062	1.5697566854358158	0.0	0.0147	-0.0441
H	-5.342264561811938	2.836714123623877	-0.14992443818806145	0.0147	-0.0294	-0.0147
H	0.5902964381880614	2.866347123623877	0.16556619094030728	0.0147	-0.0294	0.0735
H	-3.023655685435816	0.6051429326835698	-2.1589803708716313	0.0441	-0.1029	0.0882
H	-4.429595	-2.8244748763761227	-0.6956774381880615	0.0	-0.0294	-0.0147
H	-3.286248	-3.4000953145641843	0.5476655618119385	0.0	-0.0441	-0.0147
H	-3.6488118763761226	-4.412400314564184	-0.8870594381880614	-0.0294	-0.0441	-0.0147
H	-3.6679824381880617	-2.296163438188062	-3.035974438188062	-0.0147	-0.0147	-0.0147
H	-2.639593314564184	-3.7491833145641844	-3.2380378763761226	-0.0441	-0.0441	-0.0294
H	-1.9373024381880612	-2.1157097527522457	-3.4286918763761225	-0.0147	-0.0588	-0.0294
H	4.803223247247755	-1.970572	-0.9400249326835699	-0.0588	0.0	0.1029
H	4.186074123623877	-3.5002284381880617	-0.2757888090596927	-0.0294	-0.0147	0.0735
H	3.46967793268357	-1.9635553145641842	0.2695737527522458	-0.1029	-0.0441	0.0588
H	4.383322314564185	-2.7456754381880617	-3.3431378090596926	0.0441	-0.0147	0.0735
H	2.775359752752246	-3.3550798763761227	-3.8314041236238774	0.0588	-0.0294	0.0294
H	3.783192876376123	-4.3102758763761235	-2.717891685435816	0.0294	-0.0294	0.0441
H	-5.182211	-0.6152823145641844	-1.8135441236238772	0.0	-0.0441	0.0294
H	-4.330842314564185	-0.4256377527522458	-0.2495582472477542	-0.0441	-0.0588	0.0588
H	-5.727215	0.6098651236238771	-0.640724	0.0	-0.0294	0.0
H	-4.959109370871632	1.1486643708716313	-3.6465671236238775	0.0882	-0.0882	0.0294
H	-3.9694494944955085	2.61456093268357	-3.3975251236238773	0.1176	-0.1029	0.0294
H	-5.514930370871632	2.419339247247754	-2.5271254381880617	0.0882	-0.0588	-0.0147
H	1.4630814381880612	3.3669674381880617	2.4513577527522457	0.0147	0.0147	0.0588
H	0.10802043818806145	2.1784114381880615	2.5333876291283683	0.0147	0.0147	0.0882
H	-0.15954756181193855	3.8815164381880614	2.9955583145641844	0.0147	0.0147	0.0441
H	1.484708	5.167401561811938	0.6772998763761229	0.0	-0.0147	0.0294
H	-0.16376943818806147	5.7457955618119385	1.058695876376123	-0.0147	-0.0147	0.0294
H	0.22106256181193853	5.229204123623877	-0.6073461236238771	-0.0147	-0.0294	0.0294
H	0.546034	-2.5242684381880616	-3.9426508763761228	0.0	-0.0147	-0.0294
H	0.029434	-1.1767505618119387	-4.977976561811938	0.0	0.0147	0.0147
H	1.696732	-1.2600084381880614	-4.407983	0.0	-0.0147	0.0
H	-1.9897182472477541	3.1435705618119383	-3.1375447417432625	0.0588	-0.0147	0.1764
H	-0.6184973708716313	3.857732247247754	-2.2807797417432623	0.0882	-0.0588	0.1764
H	-0.3951936854358157	3.155864123623877	-3.9043296181193856	0.0441	-0.0294	0.147
114
O	3.8104159265206206	3.157542706082481	-1.50347	0.0147	0.0588	0.0
Mg	-0.22478351435565846	-0.21091626520620216	0.06419448564434152	0.1029	-0.147	0.1029
O	1.1763170734793797	-0.6434532939175192	3.145222367396899	-0.0147	0.0588	-0.0735
C	3.818861779561861	2.6892717795618606	-0.25242592652062024	0.0441	0.0441	-0.0147
N	0.129969	-1.215824632603101	-1.70022607347938	0.0	-0.0735	0.0147
N	-0.9737821469587595	1.4014395143556584	-1.0187285878350383	0.0294	-0.1029	0.1176
O	3.660547632603101	3.3549988530412405	0.744263	0.0735	0.0294	0.0
C	0.2791399265206202	-0.6440107795618607	-2.8875221469587595	0.0147	-0.0441	0.0294
C	0.07152385304124043	0.7424871469587596	-3.115676367396899	0.0294	-0.0294	0.0735
C	-0.5821672204381393	1.653672367396899	-2.273270587835038	0.0441	-0.0735	0.1176
O	3.839258779561861	0.6221339265206203	1.0281812204381393	0.0441	0.0147	-0.0441
C	2.5422408530412404	0.45532355912372124	1.3315832204381393	0.0294	0.0882	-0.0441
C	2.46098	-0.2224429265206202	2.7090724408762785	0.0	-0.0147	-0.0882
C	4.1377547795618606	1.1935387795618606	-0.25924785304124043	0.0441	0.0441	-0.0294
O	1.6351888530412406	0.813172971288683	0.5861230734793798	0.0294	0.2058	-0.0147
C	3.5975319265206203	4.57390570608248	-1.65046307347938	0.0147	0.0588	0.0147
O	-1.0045232204381394	-0.1591860734793798	1.8491551182474426	0.0441	0.0147	0.1764
C	0.3955671756700765	-1.403706396108216	2.2569409552319373	-0.2352	0.2793	-0.1911
O	0.7682208369844945	-1.6292150574226338	1.0921245430669755	-0.3675	0.4116	-0.3087
O	-1.7811795591237214	-2.6029702204381393	2.6365371469587595	-0.0882	0.0441	-0.0294
C	-2.6911275591237214	-1.5823461469587594	2.659463	-0.0882	0.0294	0.0
C	-2.084130632603101	-0.18320407347937978	2.737933632603101	-0.0735	0.0147	0.0735
C	-0.43856177956186065	-2.381627661314418	3.112331661314418	-0.0441	0.1323	-0.1323
O	-3.8596775591237216	-1.8528122204381394	2.5315430734793796	-0.0882	0.0441	-0.0147
C	-3.1363978530412404	0.9022557795618606	2.5160390734793796	-0.0294	0.0441	-0.0147
C	0.2564574856443415	-3.7526429552319374	3.083108102190697	0.1029	0.1911	-0.2205
C	2.984130485644341	0.7430575143556585	3.7936701469587595	0.1029	-0.1029	-0.0294
C	5.626014779561861	0.9439838530412404	-0.5162007795618606	0.0441	0.0294	-0.0441
C	0.2473380734793798	-2.6457175591237214	-1.4504688530412406	-0.0147	-0.0882	-0.0294
C	-1.9247211469587595	2.2952734408762785	-0.38754944087627874	0.0294	-0.0882	0.0882
C	-0.9497269265206203	-3.3416305591237214	-1.0689787795618606	-0.0147	-0.0882	-0.0441
C	-0.8246209265206202	-4.630957559123721	-0.4972847795618606	-0.0147	-0.0882	-0.0441
C	0.43929207347937976	-5.225839632603101	-0.3216848530412404	-0.0147	-0.0735	-0.0294
C	1.5946040734793798	-4.5649346326031015	-0.755627	-0.0147	-0.0735	0.0
C	1.5296420734793799	-3.267540632603101	-1.317455	-0.0147	-0.0735	0.0
C	-2.34032	-2.709300706082481	-1.3383528530412405	0.0	-0.0588	-0.0294
C	2.8463840734793795	-2.5669087795618606	-1.7569621469587595	-0.0147	-0.0441	0.0294
C	-1.4848000734793798	3.2721032204381393	0.5688427060824809	0.0147	-0.0441	0.0588
C	-2.459717	4.04013407347938	1.2629659265206201	0.0	-0.0147	0.0147
C	-3.837774	3.8718110734793796	1.00622107347938	0.0	-0.0147	-0.0147
C	-4.26158107347938	2.9322082204381394	0.05504792652062022	0.0147	-0.0441	0.0147
C	-3.32949414695876	2.135741367396899	-0.6587992939175191	0.0294	-0.0735	0.0588
C	0.018389926520620214	3.53187314695876	0.8410147060824809	0.0147	-0.0294	0.0588
C	-3.8669872204381392	1.131578367396899	-1.7060672939175192	0.0441	-0.0735	0.0588
C	-3.5029909265206203	-3.396550779561861	-0.5393619265206203	-0.0147	-0.0441	-0.0147
C	-2.67885185304124	-2.731706779561861	-2.87134285304124	-0.0294	-0.0441	-0.0294
C	3.8792842204381395	-2.5051708530412404	-0.5721953673968989	-0.0441	-0.0294	0.0735
C	3.49583785304124	-3.29940985304124	-2.981251220438139	0.0294	-0.0294	0.0441
C	-4.841757	0.10318622043813937	-1.0447822204381394	0.0	-0.0441	0.0441
C	-4.594534440876279	1.862175367396899	-2.8978190734793796	0.0882	-0.0735	0.0147
C	0.3842419265206202	3.220529	2.321327706082481	0.0147	0.0	0.0588
C	0.413599	5.002338146958759	0.46951985304124044	0.0	-0.0294	0.0294
C	0.654867	-1.4595339265206202	-4.123467	0.0	-0.0147	0.0
C	-0.8943082939175192	3.0184412204381394	-2.884046808273178	0.0588	-0.0441	0.1617
H	0.3161627795618606	1.088495	-4.113864440876279	0.0441	0.0	0.0882
H	3.1287222204381395	-1.0999767060824808	2.644684734793798	-0.0441	-0.0588	-0.147
H	3.5112488530412405	0.7014797060824809	-1.0204497795618606	0.0294	0.0588	-0.0441
H	2.63134192652062	4.848779779561861	-1.2211611469587595	0.0147	0.0441	0.0294
H	3.612447	4.762869632603102	-2.7254570734793795	0.0	0.0735	0.0147
H	4.39077792652062	5.134223706082481	-1.1478490734793798	0.0147	0.0588	0.0147
H	-1.7046191182474426	-0.048407	3.7726964121649615	-0.1764	0.0	0.1176
H	-0.482214	-2.002872367396899	4.1416485143556585	0.0	0.0735	-0.1029
H	-3.918675485644341	0.8097958530412405	3.2769514408762785	-0.1029	0.0294	-0.0882
H	-3.615102220438139	0.8303185591237212	1.526917367396899	0.0441	0.0882	-0.0735
H	-2.6866339265206203	1.9014137795618606	2.565226779561861	-0.0147	0.0441	0.0441
H	-0.3113941021906968	-4.4681535143556586	3.703382881752557	0.2205	0.1029	-0.1764
H	1.2855352652062022	-3.684151396108216	3.4748055430669758	0.147	0.2793	-0.3087
H	0.2889877795618606	-4.123710028711318	2.0478021756700766	0.0441	0.2058	-0.2352
H	4.0166143386855815	1.0391398817525574	3.5841740734793794	0.1323	-0.1764	-0.0147
H	2.947146632603101	0.2361268082731776	4.761986293917519	0.0735	-0.1617	-0.0588
H	2.3576791182474426	1.6406782204381394	3.8346848530412405	0.1764	-0.0441	0.0294
H	5.822615853041241	-0.1279801469587596	-0.5107337060824809	0.0294	0.0294	-0.0588
H	6.225862779561861	1.4236929265206202	0.2678741469587596	0.0441	0.0147	-0.0294
H	5.905680779561861	1.3579537795618606	-1.4935437795618607	0.0441	0.0441	-0.0441
H	-1.7249329265206201	-5.1789605591237216	-0.20698270608248087	-0.0147	-0.0882	-0.0588
H	0.5008121469587595	-6.235078632603101	0.11781907347937978	-0.0294	-0.0735	-0.0147
H	2.5688990734793795	-5.063163632603102	-0.6573870734793797	-0.0147	-0.0735	0.0147
H	-2.3083440734793794	-1.637467706082481	-1.0368998530412405	0.0147	-0.0588	-0.0294
H	2.6125330734793795	-1.5366127060824808	-2.0538531469587595	-0.0147	-0.0588	0.0294
H	-2.12091	4.79581892652062	1.9843060734793798	0.0	0.0147	-0.0147
H	-4.569246	4.48380892652062	1.5531142204381394	0.0	0.0147	-0.0441
H	-5.33671707347938	2.8256191469587595	-0.1554719265206202	0.0147	-0.0294	-0.0147
H	0.5958439265206202	2.8552521469587595	0.19330363260310107	0.0147	-0.0294	0.0735
H	-3.0070132204381395	0.5663105143556585	-2.1256954408762785	0.0441	-0.1029	0.0882
H	-4.429595	-2.8355698530412403	-0.7012249265206203	0.0	-0.0294	-0.0147
H	-3.286248	-3.4167377795618608	0.5421180734793797	0.0	-0.0441	-0.0147
H	-3.65990685304124	-4.42904277956186	-0.8926069265206202	-0.0294	-0.0441	-0.0147
H	-3.6735299265206205	-2.3017109265206206	-3.0415219265206206	-0.0147	-0.0147	-0.0147
H	-2.6562357795618605	-3.765825779561861	-3.24913285304124	-0.0441	-0.0441	-0.0294
H	-1.94284992652062	-2.137899706082481	-3.43978685304124	-0.0147	-0.0588	-0.0294
H	4.7810332939175195	-1.970572	-0.9011925143556585	-0.0588	0.0	0.1029
H	4.174979146958759	-3.5057759265206205	-0.2480513673968989	-0.0294	-0.0147	0.0735
H	3.4308455143556587	-1.9801977795618606	0.29176370608248087	-0.1029	-0.0441	0.0588
H	4.399964779561861	-2.7512229265206205	-3.315400367396899	0.0441	-0.0147	0.0735
H	2.797549706082481	-3.3661748530412403	-3.82030914695876	0.0588	-0.0294	0.0294
H	3.7942878530412405	-4.321370853041241	-2.7012492204381395	0.0294	-0.0294	0.0441
H	-5.182211	-0.6319247795618607	-1.8024491469587596	0.0	-0.0441	0.0294
H	-4.347484779561861	-0.44782770608248085	-0.22736829391751914	-0.0441	-0.0588	0.0588
H	-5.727215	0.5987701469587596	-0.640724	0.0	-0.0294	0.0
H	-4.925824440876279	1.1153794408762787	-3.63547214695876	0.0882	-0.0882	0.0294
H	-3.9250695878350386	2.5757285143556587	-3.3864301469587597	0.1176	-0.1029	0.0294
H	-5.481645440876279	2.397149293917519	-2.5326729265206205	0.0882	-0.0588	-0.0147
H	1.46862892652062	3.3725149265206205	2.473547706082481	0.0147	0.0147	0.0588
H	0.11356792652062021	2.1839589265206203	2.566672559123721	0.0147	0.0147	0.0882
H	-0.1540000734793798	3.88706392652062	3.012200779561861	0.0147	0.0147	0.0441
H	1.484708	5.16185407347938	0.6883948530412404	0.0	-0.0147	0.0294
H	-0.16931692652062022	5.74024807347938	1.0697908530412406	-0.0147	-0.0147	0.0294
H	0.2155150734793798	5.218109146958759	-0.5962511469587596	-0.0147	-0.0294	0.0294
H	0.546034	-2.5298159265206204	-3.9537458530412404	0.0	-0.0147	-0.0294
H	0.029434	-1.17120307347938	-4.97242907347938	0.0	0.0147	0.0147
H	1.696732	-1.2655559265206202	-4.407983	0.0	-0.0147	0.0
H	-1.9675282939175192	3.1380230734793795	-3.0709748817525573	0.0588	-0.0147	0.1764
H	-0.5852124408762788	3.835542293917519	-2.214209881752557	0.0882	-0.0588	0.1764
H	-0.3785512204381394	3.1447691469587595	-3.848854734793798	0.0441	-0.0294	0.147
114
O	3.8148184381880617	3.175152752752246	-1.50347	0.0147	0.0588	0.0
Mg	-0.1939659326835698	-0.25494138188061455	0.0950120673164302	0.1029	-0.147	0.1029
O	1.1719145618119384	-0.6258432472477542	3.1232098090596927	-0.0147	0.0588	-0.0735
C	3.8320693145641846	2.7024793145641843	-0.25682843818806145	0.0441	0.0441	-0.0147
N	0.129969	-1.2378371909403074	-1.6958235618119386	0.0	-0.0735	0.0147
N	-0.964977123623877	1.3706219326835698	-0.9835084944955084	0.0294	-0.1029	0.1176
O	3.682560190940307	3.363803876376123	0.744263	0.0735	0.0294	0.0
C	0.28354243818806146	-0.6572183145641843	-2.878717123623877	0.0147	-0.0441	0.0294
C	0.0803288763761229	0.7336821236238771	-3.0936638090596924	0.0294	-0.0294	0.0735
C	-0.5689596854358157	1.6316598090596925	-2.238050494495508	0.0441	-0.0735	0.1176
O	3.8524663145641846	0.6265364381880615	1.0149736854358156	0.0441	0.0147	-0.0441
C	2.551045876376123	0.48173862912836873	1.3183756854358155	0.0294	0.0882	-0.0441
C	2.46098	-0.22684543818806144	2.682657370871631	0.0	-0.0147	-0.0882
C	4.150962314564184	1.2067463145641844	-0.2680528763761229	0.0441	0.0441	-0.0294
O	1.643993876376123	0.8748081346328604	0.5817205618119385	0.0294	0.2058	-0.0147
C	3.6019344381880614	4.591515752752246	-1.6460605618119386	0.0147	0.0588	0.0147
O	-0.9913156854358157	-0.15478356181193856	1.9019852582567376	0.0441	0.0147	0.1764
C	0.32512698899101666	-1.3200586744268323	2.199708303555201	-0.2352	0.2793	-0.1911
O	0.6581580452984636	-1.5059447307342793	0.9996717980507095	-0.3675	0.4116	-0.3087
O	-1.8075946291283687	-2.5897626854358156	2.627732123623877	-0.0882	0.0441	-0.0294
C	-2.717542629128369	-1.573541123623877	2.659463	-0.0882	0.0294	0.0
C	-2.1061431909403074	-0.17880156181193854	2.7599461909403074	-0.0735	0.0147	0.0735
C	-0.4517693145641844	-2.3420050563074466	3.072709056307447	-0.0441	0.1323	-0.1323
O	-3.886092629128369	-1.8396046854358157	2.5271405618119385	-0.0882	0.0441	-0.0147
C	-3.145202876376123	0.9154633145641843	2.5116365618119385	-0.0294	0.0441	-0.0147
C	0.2872750673164302	-3.6954103035552013	3.0170704271790783	0.1029	0.1911	-0.2205
C	3.01494806731643	0.7122399326835698	3.784865123623877	0.1029	-0.1029	-0.0294
C	5.639222314564185	0.952788876376123	-0.5294083145641844	0.0441	0.0294	-0.0441
C	0.24293556181193857	-2.672132629128369	-1.459273876376123	-0.0147	-0.0882	-0.0294
C	-1.915916123623877	2.268858370871631	-0.36113437087163125	0.0294	-0.0882	0.0882
C	-0.9541294381880615	-3.368045629128369	-1.0821863145641843	-0.0147	-0.0882	-0.0441
C	-0.8290234381880615	-4.657372629128369	-0.5104923145641843	-0.0147	-0.0882	-0.0441
C	0.4348895618119385	-5.247852190940307	-0.33048987637612287	-0.0147	-0.0735	-0.0294
C	1.5902015618119385	-4.5869471909403075	-0.755627	-0.0147	-0.0735	0.0
C	1.5252395618119385	-3.2895531909403073	-1.317455	-0.0147	-0.0735	0.0
C	-2.34032	-2.726910752752246	-1.347157876376123	0.0	-0.0588	-0.0294
C	2.8419815618119384	-2.5801163145641843	-1.748157123623877	-0.0147	-0.0441	0.0294
C	-1.4803975618119385	3.2588956854358155	0.5864527527522458	0.0147	-0.0441	0.0588
C	-2.459717	4.0357315618119385	1.2673684381880614	0.0	-0.0147	0.0147
C	-3.837774	3.8674085618119385	1.0018185618119386	0.0	-0.0147	-0.0147
C	-4.257178561811939	2.9190006854358157	0.05945043818806146	0.0147	-0.0441	0.0147
C	-3.320689123623877	2.1137288090596926	-0.6411892472477542	0.0294	-0.0735	0.0588
C	0.022792438188061457	3.5230681236238772	0.8586247527522458	0.0147	-0.0294	0.0588
C	-3.8537796854358155	1.109565809059693	-1.6884572472477541	0.0441	-0.0735	0.0588
C	-3.5073934381880614	-3.4097583145641845	-0.5437644381880615	-0.0147	-0.0441	-0.0147
C	-2.687656876376123	-2.7449143145641846	-2.880147876376123	-0.0294	-0.0441	-0.0294
C	3.8660766854358157	-2.513975876376123	-0.5501828090596927	-0.0441	-0.0294	0.0735
C	3.504642876376123	-3.3082148763761228	-2.9680436854358154	0.0294	-0.0294	0.0441
C	-4.841757	0.08997868543581565	-1.0315746854358157	0.0	-0.0441	0.0441
C	-4.5681193708716314	1.8401628090596929	-2.8934165618119385	0.0882	-0.0735	0.0147
C	0.3886444381880615	3.220529	2.338937752752246	0.0147	0.0	0.0588
C	0.413599	4.993533123623877	0.4783248763761229	0.0	-0.0294	0.0294
C	0.654867	-1.4639364381880615	-4.123467	0.0	-0.0147	0.0
C	-0.8766982472477542	3.0052336854358157	-2.8356191799313244	0.0588	-0.0441	0.1617
H	0.32937031456418436	1.088495	-4.0874493708716315	0.0441	0.0	0.0882
H	3.115514685435816	-1.1175867527522458	2.6006596181193853	-0.0441	-0.0588	-0.147
H	3.520053876376123	0.7190897527522458	-1.0336573145641843	0.0294	0.0588	-0.0441
H	2.6357444381880613	4.8619873145641845	-1.2123561236238771	0.0147	0.0441	0.0294
H	3.612447	4.784882190940308	-2.7210545618119384	0.0	0.0735	0.0147
H	4.395180438188062	5.151833752752246	-1.1434465618119385	0.0147	0.0588	0.0147
H	-1.7574492582567376	-0.048407	3.8079165055044917	-0.1764	0.0	0.1176
H	-0.482214	-1.9808598090596927	4.1108309326835695	0.0	0.0735	-0.1029
H	-3.94949306731643	0.818600876376123	3.250536370871631	-0.1029	0.0294	-0.0882
H	-3.6018946854358154	0.8567336291283687	1.5049048090596928	0.0441	0.0882	-0.0735
H	-2.6910364381880614	1.9146213145641844	2.5784343145641846	-0.0147	0.0441	0.0441
H	-0.24535642717907818	-4.4373359326835695	3.6505527417432626	0.2205	0.1029	-0.1764
H	1.3295603818806145	-3.6005036744268324	3.3823527980507095	0.147	0.2793	-0.3087
H	0.30219531456418436	-4.06207486536714	1.9773619889910168	0.0441	0.2058	-0.2352
H	4.056236943692553	0.9863097417432625	3.5797715618119383	0.1323	-0.1764	-0.0147
H	2.9691591909403074	0.18769917993132398	4.744376247247754	0.0735	-0.1617	-0.0588
H	2.410509258256737	1.6274706854358156	3.843489876376123	0.1764	-0.0441	0.0294
H	5.831420876376123	-0.1191751236238771	-0.5283437527522459	0.0294	0.0294	-0.0588
H	6.239070314564184	1.4280954381880615	0.25906912362387713	0.0441	0.0147	-0.0294
H	5.918888314564184	1.3711613145641843	-1.5067513145641844	0.0441	0.0441	-0.0441
H	-1.7293354381880615	-5.205375629128369	-0.22459275275224583	-0.0147	-0.0882	-0.0588
H	0.49200712362387705	-6.257091190940307	0.11341656181193854	-0.0294	-0.0735	-0.0147
H	2.5644965618119384	-5.085176190940308	-0.6529845618119385	-0.0147	-0.0735	0.0147
H	-2.3039415618119383	-1.655077752752246	-1.045704876376123	0.0147	-0.0588	-0.0294
H	2.6081305618119384	-1.5542227527522459	-2.045048123623877	-0.0147	-0.0588	0.0294
H	-2.12091	4.8002214381880615	1.9799035618119385	0.0	0.0147	-0.0147
H	-4.569246	4.488211438188062	1.5399066854358157	0.0	0.0147	-0.0441
H	-5.3323145618119385	2.816814123623877	-0.15987443818806144	0.0147	-0.0294	-0.0147
H	0.6002464381880614	2.846447123623877	0.21531619094030727	0.0147	-0.0294	0.0735
H	-2.9938056854358157	0.5354929326835698	-2.099280370871631	0.0441	-0.1029	0.0882
H	-4.429595	-2.844374876376123	-0.7056274381880615	0.0	-0.0294	-0.0147
H	-3.286248	-3.4299453145641845	0.5377155618119385	0.0	-0.0441	-0.0147
H	-3.668711876376123	-4.442250314564184	-0.8970094381880614	-0.0294	-0.0441	-0.0147
H	-3.6779324381880616	-2.3061134381880617	-3.0459244381880617	-0.0147	-0.0147	-0.0147
H	-2.6694433145641843	-3.7790333145641846	-3.257937876376123	-0.0441	-0.0441	-0.0294
H	-1.9472524381880614	-2.1555097527522458	-3.4485918763761227	-0.0147	-0.0588	-0.0294
H	4.763423247247754	-1.970572	-0.8703749326835698	-0.0588	0.0	0.1029
H	4.166174123623877	-3.5101784381880616	-0.2260388090596927	-0.0294	-0.0147	0.0735
H	3.4000279326835696	-1.9934053145641843	0.3093737527522458	-0.1029	-0.0441	0.0588
H	4.413172314564185	-2.7556254381880616	-3.2933878090596926	0.0441	-0.0147	0.0735
H	2.815159752752246	-3.374979876376123	-3.811504123623877	0.0588	-0.0294	0.0294
H	3.803092876376123	-4.330175876376123	-2.688041685435816	0.0294	-0.0294	0.0441
H	-5.182211	-0.6451323145641843	-1.7936441236238772	0.0	-0.0441	0.0294
H	-4.360692314564185	-0.46543775275224586	-0.2097582472477542	-0.0441	-0.0588	0.0588
H	-5.727215	0.5899651236238771	-0.640724	0.0	-0.0294	0.0
H	-4.8994093708716315	1.0889643708716314	-3.626667123623877	0.0882	-0.0882	0.0294
H	-3.8898494944955084	2.5449109326835697	-3.377625123623877	0.1176	-0.1029	0.0294
H	-5.455230370871631	2.379539247247754	-2.5370754381880616	0.0882	-0.0588	-0.0147
H	1.4730314381880614	3.3769174381880616	2.4911577527522457	0.0147	0.0147	0.0588
H	0.11797043818806147	2.1883614381880614	2.5930876291283687	0.0147	0.0147	0.0882
H	-0.14959756181193856	3.8914664381880613	3.0254083145641846	0.0147	0.0147	0.0441
H	1.484708	5.157451561811938	0.6971998763761229	0.0	-0.0147	0.0294
H	-0.17371943818806146	5.735845561811939	1.078595876376123	-0.0147	-0.0147	0.0294
H	0.21111256181193855	5.209304123623877	-0.587446123623877	-0.0147	-0.0294	0.0294
H	0.546034	-2.5342184381880615	-3.962550876376123	0.0	-0.0147	-0.0294
H	0.029434	-1.1668005618119386	-4.968026561811938	0.0	0.0147	0.0147
H	1.696732	-1.2699584381880615	-4.407983	0.0	-0.0147	0.0
H	-1.949918247247754	3.1336205618119384	-3.0181447417432627	0.0588	-0.0147	0.1764
H	-0.5587973708716313	3.817932247247754	-2.1613797417432625	0.0882	-0.0588	0.1764
H	-0.36534368543581563	3.135964123623877	-3.8048296181193857	0.0441	-0.0294	0.147
114
O	3.817645024674274	3.186459098697094	-1.50347	0.0147	0.0588	0.0
Mg	-0.17417982728008508	-0.28320724674273556	0.11479817271991491	0.1029	-0.147	0.1029
O	1.1690879753257264	-0.6145369013029057	3.1090768766286323	-0.0147	0.0588	-0.0735
C	3.840549074022821	2.7109590740228207	-0.25965502467427354	0.0441	0.0441	-0.0147
N	0.129969	-1.2519701233713678	-1.6929969753257266	0.0	-0.0735	0.0147
N	-0.9593239506514528	1.3508358272800849	-0.9608958026058115	0.0294	-0.1029	0.1176
O	3.6966931233713676	3.369457049348547	0.744263	0.0735	0.0294	0.0
C	0.28636902467427355	-0.6656980740228207	-2.873063950651453	0.0147	-0.0441	0.0294
C	0.08598204934854711	0.7280289506514529	-3.079530876628632	0.0294	-0.0294	0.0735
C	-0.5604799259771793	1.6175268766286321	-2.2154378026058112	0.0441	-0.0735	0.1176
O	3.860946074022821	0.6293630246742735	1.0064939259771792	0.0441	0.0147	-0.0441
C	2.556699049348547	0.49869814804564133	1.3098959259771792	0.0294	0.0882	-0.0441
C	2.46098	-0.22967202467427356	2.6656978519543584	0.0	-0.0147	-0.0882
C	4.15944207402282	1.2152260740228207	-0.27370604934854714	0.0441	0.0441	-0.0294
O	1.6496470493485471	0.9143803454398298	0.5788939753257265	0.0294	0.2058	-0.0147
C	3.6047610246742736	4.602822098697094	-1.6432339753257266	0.0147	0.0588	0.0147
O	-0.9828359259771794	-0.15195697532572644	1.9359042960912827	0.0441	0.0147	0.1764
C	0.27990160521162305	-1.2663535311888023	2.1629626792344436	-0.2352	0.2793	-0.1911
O	0.587493383143161	-1.4268003091203403	0.9403134818402554	-0.3675	0.4116	-0.3087
O	-1.8245541480456413	-2.5812829259771792	2.622078950651453	-0.0882	0.0441	-0.0294
C	-2.7345021480456415	-1.567887950651453	2.659463	-0.0882	0.0294	0.0
C	-2.120276123371368	-0.17597497532572642	2.7740791233713677	-0.0735	0.0147	0.0735
C	-0.46024907402282067	-2.316565777931538	3.0472697779315383	-0.0441	0.1323	-0.1323
O	-3.9030521480456417	-1.8311249259771794	2.524313975325726	-0.0882	0.0441	-0.0147
C	-3.150856049348547	0.9239430740228206	2.5088099753257262	-0.0294	0.0441	-0.0147
C	0.30706117271991495	-3.6586646792344437	2.9746716298858966	0.1029	0.1911	-0.2205
C	3.0347341727199146	0.6924538272800851	3.7792119506514528	0.1029	-0.1029	-0.0294
C	5.6477020740228205	0.9584420493485472	-0.5378880740228207	0.0441	0.0294	-0.0441
C	0.24010897532572645	-2.6890921480456416	-1.4649270493485471	-0.0147	-0.0882	-0.0294
C	-1.910262950651453	2.2518988519543583	-0.34417485195435865	0.0294	-0.0882	0.0882
C	-0.9569560246742735	-3.3850051480456416	-1.0906660740228207	-0.0147	-0.0882	-0.0441
C	-0.8318500246742735	-4.674332148045641	-0.5189720740228206	-0.0147	-0.0882	-0.0441
C	0.4320629753257264	-5.2619851233713675	-0.3361430493485471	-0.0147	-0.0735	-0.0294
C	1.5873749753257265	-4.601080123371368	-0.755627	-0.0147	-0.0735	0.0
C	1.5224129753257265	-3.3036861233713677	-1.317455	-0.0147	-0.0735	0.0
C	-2.34032	-2.738217098697094	-1.352811049348547	0.0	-0.0588	-0.0294
C	2.839154975325726	-2.5885960740228207	-1.742503950651453	-0.0147	-0.0441	0.0294
C	-1.4775709753257265	3.250415925977179	0.5977590986970943	0.0147	-0.0441	0.0588
C	-2.459717	4.032904975325726	1.2701950246742735	0.0	-0.0147	0.0147
C	-3.837774	3.8645819753257262	0.9989919753257266	0.0	-0.0147	-0.0147
C	-4.254351975325727	2.9105209259771794	0.062277024674273554	0.0147	-0.0441	0.0147
C	-3.315035950651453	2.0995958766286322	-0.6298829013029057	0.0294	-0.0735	0.0588
C	0.025619024674273558	3.517414950651453	0.8699310986970943	0.0147	-0.0294	0.0588
C	-3.845299925977179	1.0954328766286323	-1.6771509013029058	0.0441	-0.0735	0.0588
C	-3.5102200246742736	-3.418238074022821	-0.5465910246742736	-0.0147	-0.0441	-0.0147
C	-2.693310049348547	-2.753394074022821	-2.885801049348547	-0.0294	-0.0441	-0.0294
C	3.8575969259771794	-2.519629049348547	-0.5360498766286322	-0.0441	-0.0294	0.0735
C	3.510296049348547	-3.313868049348547	-2.959563925977179	0.0294	-0.0294	0.0441
C	-4.841757	0.08149892597717934	-1.0230949259771793	0.0	-0.0441	0.0441
C	-4.551159851954359	1.8260298766286323	-2.8905899753257263	0.0882	-0.0735	0.0147
C	0.3914710246742736	3.220529	2.350244098697094	0.0147	0.0	0.0588
C	0.413599	4.987879950651452	0.48397804934854716	0.0	-0.0294	0.0294
C	0.654867	-1.4667630246742736	-4.123467	0.0	-0.0147	0.0
C	-0.8653919013029058	2.9967539259771794	-2.804526728582991	0.0588	-0.0441	0.1617
H	0.33785007402282063	1.088495	-4.070489851954359	0.0441	0.0	0.0882
H	3.1070349259771795	-1.1288930986970942	2.5723937532572645	-0.0441	-0.0588	-0.147
H	3.525707049348547	0.7303960986970943	-1.0421370740228206	0.0294	0.0588	-0.0441
H	2.6385710246742735	4.87046707402282	-1.206702950651453	0.0147	0.0441	0.0294
H	3.612447	4.799015123371368	-2.718227975325726	0.0	0.0735	0.0147
H	4.398007024674274	5.163140098697094	-1.1406199753257265	0.0147	0.0588	0.0147
H	-1.7913682960912827	-0.048407	3.8305291973941884	-0.1764	0.0	0.1176
H	-0.482214	-1.9667268766286323	4.091044827280085	0.0	0.0735	-0.1029
H	-3.9692791727199146	0.8242540493485472	3.2335768519543584	-0.1029	0.0294	-0.0882
H	-3.593414925977179	0.8736931480456412	1.4907718766286322	0.0441	0.0882	-0.0735
H	-2.6938630246742736	1.9231010740228207	2.586914074022821	-0.0147	0.0441	0.0441
H	-0.20295762988589666	-4.417549827280085	3.6166337039087173	0.2205	0.1029	-0.1764
H	1.3578262467427356	-3.5467985311888026	3.3229944818402553	0.147	0.2793	-0.3087
H	0.31067507402282063	-4.022502654560171	1.9321366052116231	0.0441	0.2058	-0.2352
H	4.081676222068462	0.9523907039087173	3.576944975325726	0.1323	-0.1764	-0.0147
H	2.983292123371368	0.15660672858299085	4.733069901302906	0.0735	-0.1617	-0.0588
H	2.4444282960912824	1.6189909259771793	3.8491430493485472	0.1764	-0.0441	0.0294
H	5.837074049348548	-0.1135219506514529	-0.5396500986970942	0.0294	0.0294	-0.0588
H	6.24755007402282	1.4309220246742735	0.2534159506514529	0.0441	0.0147	-0.0294
H	5.92736807402282	1.3796410740228207	-1.5152310740228208	0.0441	0.0441	-0.0441
H	-1.7321620246742735	-5.222335148045642	-0.23589909869709424	-0.0147	-0.0882	-0.0588
H	0.4863539506514528	-6.2712241233713675	0.11058997532572644	-0.0294	-0.0735	-0.0147
H	2.561669975325726	-5.099309123371368	-0.6501579753257265	-0.0147	-0.0735	0.0147
H	-2.301114975325726	-1.6663840986970944	-1.051358049348547	0.0147	-0.0588	-0.0294
H	2.605303975325726	-1.5655290986970942	-2.039394950651453	-0.0147	-0.0588	0.0294
H	-2.12091	4.803048024674274	1.9770769753257265	0.0	0.0147	-0.0147
H	-4.569246	4.491038024674274	1.5314269259771793	0.0	0.0147	-0.0441
H	-5.329487975325726	2.8111609506514528	-0.16270102467427355	0.0147	-0.0294	-0.0147
H	0.6030730246742735	2.840793950651453	0.22944912337136777	0.0147	-0.0294	0.0735
H	-2.9853259259771794	0.5157068272800851	-2.0823208519543583	0.0441	-0.1029	0.0882
H	-4.429595	-2.850028049348547	-0.7084540246742735	0.0	-0.0294	-0.0147
H	-3.286248	-3.438425074022821	0.5348889753257264	0.0	-0.0441	-0.0147
H	-3.674365049348547	-4.45073007402282	-0.8998360246742735	-0.0294	-0.0441	-0.0147
H	-3.680759024674274	-2.308940024674274	-3.048751024674274	-0.0147	-0.0147	-0.0147
H	-2.6779230740228206	-3.787513074022821	-3.263591049348547	-0.0441	-0.0441	-0.0294
H	-1.9500790246742734	-2.166816098697094	-3.454245049348547	-0.0147	-0.0588	-0.0294
H	4.752116901302906	-1.970572	-0.8505888272800851	-0.0588	0.0	0.1029
H	4.160520950651453	-3.513005024674274	-0.2119058766286322	-0.0294	-0.0147	0.0735
H	3.380241827280085	-2.0018850740228205	0.32068009869709424	-0.1029	-0.0441	0.0588
H	4.421652074022821	-2.758452024674274	-3.2792548766286322	0.0441	-0.0147	0.0735
H	2.826466098697094	-3.380633049348547	-3.805850950651453	0.0588	-0.0294	0.0294
H	3.808746049348547	-4.335829049348548	-2.6795619259771795	0.0294	-0.0294	0.0441
H	-5.182211	-0.6536120740228206	-1.787990950651453	0.0	-0.0441	0.0294
H	-4.369172074022821	-0.4767440986970942	-0.1984519013029058	-0.0441	-0.0588	0.0588
H	-5.727215	0.5843119506514529	-0.640724	0.0	-0.0294	0.0
H	-4.882449851954359	1.0720048519543588	-3.621013950651453	0.0882	-0.0882	0.0294
H	-3.8672368026058117	2.5251248272800852	-3.371971950651453	0.1176	-0.1029	0.0294
H	-5.438270851954359	2.368232901302906	-2.539902024674274	0.0882	-0.0588	-0.0147
H	1.4758580246742734	3.379744024674274	2.502464098697094	0.0147	0.0147	0.0588
H	0.12079702467427356	2.1911880246742736	2.6100471480456413	0.0147	0.0147	0.0882
H	-0.14677097532572644	3.8942930246742735	3.033888074022821	0.0147	0.0147	0.0441
H	1.484708	5.154624975325726	0.7028530493485471	0.0	-0.0147	0.0294
H	-0.17654602467427358	5.733018975325726	1.084249049348547	-0.0147	-0.0147	0.0294
H	0.20828597532572643	5.203650950651452	-0.5817929506514529	-0.0147	-0.0294	0.0294
H	0.546034	-2.5370450246742737	-3.968204049348547	0.0	-0.0147	-0.0294
H	0.029434	-1.1639739753257266	-4.965199975325726	0.0	0.0147	0.0147
H	1.696732	-1.2727850246742736	-4.407983	0.0	-0.0147	0.0
H	-1.9386119013029057	3.130793975325726	-2.9842257039087174	0.0588	-0.0147	0.1764
H	-0.5418378519543587	3.806625901302906	-2.127460703908717	0.0882	-0.0588	0.1764
H	-0.35686392597717936	3.130310950651453	-3.7765637532572645	0.0441	-0.0294	0.147
114
O	3.818619	3.1903550000000003	-1.50347	0.0147	0.0588	0.0
Mg	-0.16736199999999998	-0.292947	0.121616	0.1029	-0.147	0.1029
O	1.1681139999999999	-0.610641	3.104207	-0.0147	0.0588	-0.0735
C	3.843471	2.7138809999999998	-0.260629	0.0441	0.0441	-0.0147
N	0.129969	-1.25684	-1.692023	0.0	-0.0735	0.0147
N	-0.957376	1.344018	-0.953104	0.0294	-0.1029	0.1176
O	3.7015629999999997	3.371405	0.744263	0.0735	0.0294	0.0
C	0.287343	-0.66862	-2.871116	0.0147	-0.0441	0.0294
C	0.08793000000000001	0.726081	-3.074661	0.0294	-0.0294	0.0735
C	-0.557558	1.612657	-2.2076459999999996	0.0441	-0.0735	0.1176
O	3.863868	0.630337	1.003572	0.0441	0.0147	-0.0441
C	2.558647	0.5045419999999999	1.3069739999999999	0.0294	0.0882	-0.0441
C	2.46098	-0.230646	2.6598539999999997	0.0	-0.0147	-0.0882
C	4.162364	1.218148	-0.275654	0.0441	0.0441	-0.0294
O	1.6515950000000001	0.928016	0.57792	0.0294	0.2058	-0.0147
C	3.6057349999999997	4.606718	-1.64226	0.0147	0.0588	0.0147
O	-0.9799140000000001	-0.150983	1.947592	0.0441	0.0147	0.1764
C	0.26431799999999994	-1.2478479999999998	2.150301	-0.2352	0.2793	-0.1911
O	0.5631439999999999	-1.3995289999999998	0.9198600000000001	-0.3675	0.4116	-0.3087
O	-1.830398	-2.578361	2.6201309999999998	-0.0882	0.0441	-0.0294
C	-2.740346	-1.5659399999999999	2.659463	-0.0882	0.0294	0.0
C	-2.125146	-0.175001	2.778949	-0.0735	0.0147	0.0735
C	-0.463171	-2.3078	3.038504	-0.0441	0.1323	-0.1323
O	-3.9088960000000004	-1.828203	2.52334	-0.0882	0.0441	-0.0147
C	-3.152804	0.9268649999999999	2.507836	-0.0294	0.0441	-0.0147
C	0.313879	-3.646003	2.9600619999999997	0.1029	0.1911	-0.2205
C	3.041552	0.685636	3.7772639999999997	0.1029	-0.1029	-0.0294
C	5.6506240000000005	0.9603900000000001	-0.54081	0.0441	0.0294	-0.0441
C	0.23913500000000001	-2.694936	-1.4668750000000002	-0.0147	-0.0882	-0.0294
C	-1.908315	2.2460549999999997	-0.338331	0.0294	-0.0882	0.0882
C	-0.9579300000000001	-3.3908490000000002	-1.093588	-0.0147	-0.0882	-0.0441
C	-0.832824	-4.6801759999999994	-0.521894	-0.0147	-0.0882	-0.0441
C	0.43108899999999994	-5.266855	-0.338091	-0.0147	-0.0735	-0.0294
C	1.586401	-4.60595	-0.755627	-0.0147	-0.0735	0.0
C	1.521439	-3.308556	-1.317455	-0.0147	-0.0735	0.0
C	-2.34032	-2.7421130000000002	-1.354759	0.0	-0.0588	-0.0294
C	2.838181	-2.5915179999999998	-1.740556	-0.0147	-0.0441	0.0294
C	-1.476597	3.247494	0.601655	0.0147	-0.0441	0.0588
C	-2.459717	4.031931	1.271169	0.0	-0.0147	0.0147
C	-3.837774	3.863608	0.9980180000000001	0.0	-0.0147	-0.0147
C	-4.2533780000000005	2.9075990000000003	0.063251	0.0147	-0.0441	0.0147
C	-3.313088	2.094726	-0.625987	0.0294	-0.0735	0.0588
C	0.026593000000000002	3.515467	0.873827	0.0147	-0.0294	0.0588
C	-3.842378	1.0905630000000002	-1.6732550000000002	0.0441	-0.0735	0.0588
C	-3.5111939999999997	-3.42116	-0.5475650000000001	-0.0147	-0.0441	-0.0147
C	-2.695258	-2.756316	-2.887749	-0.0294	-0.0441	-0.0294
C	3.8546750000000003	-2.521577	-0.53118	-0.0441	-0.0294	0.0735
C	3.512244	-3.315816	-2.956642	0.0294	-0.0294	0.0441
C	-4.841757	0.07857700000000001	-1.020173	0.0	-0.0441	0.0441
C	-4.545316000000001	1.8211600000000001	-2.889616	0.0882	-0.0735	0.0147
C	0.39244500000000004	3.220529	2.35414	0.0147	0.0	0.0588
C	0.413599	4.985932	0.485926	0.0	-0.0294	0.0294
C	0.654867	-1.467737	-4.123467	0.0	-0.0147	0.0
C	-0.861496	2.9938320000000003	-2.793813	0.0588	-0.0441	0.1617
H	0.34077199999999996	1.088495	-4.064646000000001	0.0441	0.0	0.0882
H	3.1041130000000003	-1.1327889999999998	2.562654	-0.0441	-0.0588	-0.147
H	3.527655	0.7342920000000001	-1.045059	0.0294	0.0588	-0.0441
H	2.6395449999999996	4.873389	-1.204755	0.0147	0.0441	0.0294
H	3.612447	4.803885	-2.717254	0.0	0.0735	0.0147
H	4.398981	5.167036	-1.139646	0.0147	0.0588	0.0147
H	-1.803056	-0.048407	3.8383209999999996	-0.1764	0.0	0.1176
H	-0.482214	-1.9618570000000002	4.084226999999999	0.0	0.0735	-0.1029
H	-3.9760969999999998	0.8262020000000001	3.2277329999999997	-0.1029	0.0294	-0.0882
H	-3.590493	0.8795369999999999	1.485902	0.0441	0.0882	-0.0735
H	-2.6948369999999997	1.926023	2.589836	-0.0147	0.0441	0.0441
H	-0.18834800000000002	-4.410731999999999	3.604946	0.2205	0.1029	-0.1764
H	1.367566	-3.528293	3.302541	0.147	0.2793	-0.3087
H	0.31359699999999996	-4.008867	1.916553	0.0441	0.2058	-0.2352
H	4.0904419999999995	0.940703	3.575971	0.1323	-0.1764	-0.0147
H	2.988162	0.14589299999999997	4.7291739999999995	0.0735	-0.1617	-0.0588
H	2.4561159999999997	1.616069	3.8510910000000003	0.1764	-0.0441	0.0294
H	5.839022	-0.111574	-0.5435460000000001	0.0294	0.0294	-0.0588
H	6.250472	1.431896	0.251468	0.0441	0.0147	-0.0294
H	5.93029	1.382563	-1.518153	0.0441	0.0441	-0.0441
H	-1.733136	-5.228179	-0.239795	-0.0147	-0.0882	-0.0588
H	0.48440599999999995	-6.276094	0.10961599999999999	-0.0294	-0.0735	-0.0147
H	2.560696	-5.104179	-0.649184	-0.0147	-0.0735	0.0147
H	-2.300141	-1.67028	-1.053306	0.0147	-0.0588	-0.0294
H	2.60433	-1.5694249999999998	-2.037447	-0.0147	-0.0588	0.0294
H	-2.12091	4.804022	1.976103	0.0	0.0147	-0.0147
H	-4.569246	4.492012	1.528505	0.0	0.0147	-0.0441
H	-5.328514	2.8092129999999997	-0.163675	0.0147	-0.0294	-0.0147
H	0.604047	2.8388459999999998	0.234319	0.0147	-0.0294	0.0735
H	-2.9824040000000003	0.508889	-2.0764769999999997	0.0441	-0.1029	0.0882
H	-4.429595	-2.851976	-0.7094280000000001	0.0	-0.0294	-0.0147
H	-3.286248	-3.441347	0.5339149999999999	0.0	-0.0441	-0.0147
H	-3.676313	-4.453652	-0.90081	-0.0294	-0.0441	-0.0147
H	-3.681733	-2.309914	-3.049725	-0.0147	-0.0147	-0.0147
H	-2.6808449999999997	-3.790435	-3.265539	-0.0441	-0.0441	-0.0294
H	-1.951053	-2.170712	-3.456193	-0.0147	-0.0588	-0.0294
H	4.748221	-1.970572	-0.843771	-0.0588	0.0	0.1029
H	4.1585730000000005	-3.513979	-0.20703599999999997	-0.0294	-0.0147	0.0735
H	3.373424	-2.004807	0.324576	-0.1029	-0.0441	0.0588
H	4.424574000000001	-2.759426	-3.274385	0.0441	-0.0147	0.0735
H	2.830362	-3.382581	-3.803903	0.0588	-0.0294	0.0294
H	3.8106940000000002	-4.337777	-2.6766400000000004	0.0294	-0.0294	0.0441
H	-5.182211	-0.656534	-1.786043	0.0	-0.0441	0.0294
H	-4.372094000000001	-0.48064	-0.194556	-0.0441	-0.0588	0.0588
H	-5.727215	0.5823640000000001	-0.640724	0.0	-0.0294	0.0
H	-4.876606000000001	1.0661610000000001	-3.619066	0.0882	-0.0882	0.0294
H	-3.859445	2.518307	-3.370024	0.1176	-0.1029	0.0294
H	-5.432427000000001	2.364337	-2.540876	0.0882	-0.0588	-0.0147
H	1.476832	3.380718	2.50636	0.0147	0.0147	0.0588
H	0.121771	2.1921619999999997	2.615891	0.0147	0.0147	0.0882
H	-0.145797	3.8952669999999996	3.03681	0.0147	0.0147	0.0441
H	1.484708	5.153651	0.704801	0.0	-0.0147	0.0294
H	-0.17752	5.732045	1.086197	-0.0147	-0.0147	0.0294
H	0.207312	5.201703	-0.5798449999999999	-0.0147	-0.0294	0.0294
H	0.546034	-2.538019	-3.970152	0.0	-0.0147	-0.0294
H	0.029434	-1.163	-4.964226	0.0	0.0147	0.0147
H	1.696732	-1.273759	-4.407983	0.0	-0.0147	0.0
H	-1.9347159999999999	3.12982	-2.972538	0.0588	-0.0147	0.1764
H	-0.5359940000000001	3.80273	-2.115773	0.0882	-0.0588	0.1764
H	-0.35394200000000003	3.128363	-3.766824	0.0441	-0.0294	0.147
114
O	3.817645024674274	3.186459098697094	-1.50347	0.0147	0.0588	0.0
Mg	-0.17417982728008508	-0.28320724674273556	0.11479817271991491	0.1029	-0.147	0.1029
O	1.1690879753257264	-0.6145369013029057	3.1090768766286323	-0.0147	0.0588	-0.0735
C	3.840549074022821	2.7109590740228207	-0.25965502467427354	0.0441	0.0441	-0.0147
N	0.129969	-1.2519701233713678	-1.6929969753257266	0.0	-0.0735	0.0147
N	-0.9593239506514528	1.3508358272800849	-0.9608958026058114	0.0294	-0.1029	0.1176
O	3.6966931233713676	3.369457049348547	0.744263	0.0735	0.0294	0.0
C	0.28636902467427355	-0.6656980740228207	-2.873063950651453	0.0147	-0.0441	0.0294
C	0.08598204934854711	0.7280289506514529	-3.079530876628632	0.0294	-0.0294	0.0735
C	-0.5604799259771793	1.6175268766286321	-2.2154378026058112	0.0441	-0.0735	0.1176
O	3.860946074022821	0.6293630246742735	1.0064939259771792	0.0441	0.0147	-0.0441
C	2.556699049348547	0.49869814804564133	1.3098959259771792	0.0294	0.0882	-0.0441
C	2.46098	-0.22967202467427356	2.6656978519543584	0.0	-0.0147	-0.0882
C	4.15944207402282	1.2152260740228207	-0.27370604934854714	0.0441	0.0441	-0.0294
O	1.6496470493485471	0.9143803454398298	0.5788939753257265	0.0294	0.2058	-0.0147
C	3.6047610246742736	4.602822098697094	-1.6432339753257266	0.0147	0.0588	0.0147
O	-0.9828359259771794	-0.15195697532572644	1.935904296091283	0.0441	0.0147	0.1764
C	0.279901605211623	-1.2663535311888023	2.1629626792344436	-0.2352	0.2793	-0.1911
O	0.587493383143161	-1.4268003091203403	0.9403134818402554	-0.3675	0.4116	-0.3087
O	-1.8245541480456413	-2.5812829259771792	2.622078950651453	-0.0882	0.0441	-0.0294
C	-2.7345021480456415	-1.567887950651453	2.659463	-0.0882	0.0294	0.0
C	-2.120276123371368	-0.17597497532572642	2.7740791233713677	-0.0735	0.0147	0.0735
C	-0.46024907402282067	-2.316565777931538	3.0472697779315383	-0.0441	0.1323	-0.1323
O	-3.9030521480456417	-1.8311249259771794	2.524313975325726	-0.0882	0.0441	-0.0147
C	-3.150856049348547	0.9239430740228206	2.5088099753257262	-0.0294	0.0441	-0.0147
C	0.30706117271991495	-3.6586646792344437	2.9746716298858966	0.1029	0.1911	-0.2205
C	3.0347341727199146	0.6924538272800851	3.7792119506514528	0.1029	-0.1029	-0.0294
C	5.6477020740228205	0.9584420493485472	-0.5378880740228207	0.0441	0.0294	-0.0441
C	0.24010897532572645	-2.6890921480456416	-1.4649270493485471	-0.0147	-0.0882	-0.0294
C	-1.910262950651453	2.2518988519543583	-0.34417485195435865	0.0294	-0.0882	0.0882
C	-0.9569560246742735	-3.3850051480456416	-1.0906660740228207	-0.0147	-0.0882	-0.0441
C	-0.8318500246742735	-4.674332148045641	-0.5189720740228206	-0.0147	-0.0882	-0.0441
C	0.4320629753257264	-5.2619851233713675	-0.3361430493485471	-0.0147	-0.0735	-0.0294
C	1.5873749753257265	-4.601080123371368	-0.755627	-0.0147	-0.0735	0.0
C	1.5224129753257265	-3.3036861233713677	-1.317455	-0.0147	-0.0735	0.0
C	-2.34032	-2.738217098697094	-1.352811049348547	0.0	-0.0588	-0.0294
C	2.839154975325726	-2.5885960740228207	-1.742503950651453	-0.0147	-0.0441	0.0294
C	-1.4775709753257265	3.250415925977179	0.5977590986970943	0.0147	-0.0441	0.0588
C	-2.459717	4.032904975325726	1.2701950246742735	0.0	-0.0147	0.0147
C	-3.837774	3.8645819753257262	0.9989919753257266	0.0	-0.0147	-0.0147
C	-4.254351975325727	2.9105209259771794	0.06227702467427356	0.0147	-0.0441	0.0147
C	-3.315035950651453	2.0995958766286322	-0.6298829013029057	0.0294	-0.0735	0.0588
C	0.02561902467427356	3.517414950651453	0.8699310986970943	0.0147	-0.0294	0.0588
C	-3.845299925977179	1.0954328766286323	-1.6771509013029058	0.0441	-0.0735	0.0588
C	-3.5102200246742736	-3.418238074022821	-0.5465910246742736	-0.0147	-0.0441	-0.0147
C	-2.693310049348547	-2.753394074022821	-2.885801049348547	-0.0294	-0.0441	-0.0294
C	3.8575969259771794	-2.519629049348547	-0.5360498766286322	-0.0441	-0.0294	0.0735
C	3.510296049348547	-3.313868049348547	-2.959563925977179	0.0294	-0.0294	0.0441
C	-4.841757	0.08149892597717934	-1.0230949259771793	0.0	-0.0441	0.0441
C	-4.551159851954359	1.8260298766286323	-2.8905899753257263	0.0882	-0.0735	0.0147
C	0.3914710246742736	3.220529	2.350244098697094	0.0147	0.0	0.0588
C	0.413599	4.987879950651452	0.48397804934854716	0.0	-0.0294	0.0294
C	0.654867	-1.4667630246742736	-4.123467	0.0	-0.0147	0.0
C	-0.8653919013029058	2.9967539259771794	-2.804526728582991	0.0588	-0.0441	0.1617
H	0.33785007402282063	1.088495	-4.070489851954359	0.0441	0.0	0.0882
H	3.1070349259771795	-1.1288930986970942	2.5723937532572645	-0.0441	-0.0588	-0.147
H	3.525707049348547	0.7303960986970943	-1.0421370740228206	0.0294	0.0588	-0.0441
H	2.6385710246742735	4.87046707402282	-1.206702950651453	0.0147	0.0441	0.0294
H	3.612447	4.799015123371368	-2.718227975325726	0.0	0.0735	0.0147
H	4.398007024674274	5.163140098697094	-1.1406199753257265	0.0147	0.0588	0.0147
H	-1.791368296091283	-0.048407	3.8305291973941884	-0.1764	0.0	0.1176
H	-0.482214	-1.9667268766286323	4.091044827280085	0.0	0.0735	-0.1029
H	-3.9692791727199146	0.8242540493485472	3.2335768519543584	-0.1029	0.0294	-0.0882
H	-3.593414925977179	0.8736931480456414	1.4907718766286322	0.0441	0.0882	-0.0735
H	-2.6938630246742736	1.9231010740228207	2.586914074022821	-0.0147	0.0441	0.0441
H	-0.20295762988589666	-4.417549827280085	3.6166337039087173	0.2205	0.1029	-0.1764
H	1.3578262467427356	-3.546798531188802	3.3229944818402553	0.147	0.2793	-0.3087
H	0.3106750740228207	-4.022502654560171	1.932136605211623	0.0441	0.2058	-0.2352
H	4.081676222068462	0.9523907039087173	3.576944975325726	0.1323	-0.1764	-0.0147
H	2.983292123371368	0.15660672858299082	4.733069901302906	0.0735	-0.1617	-0.0588
H	2.4444282960912824	1.6189909259771793	3.8491430493485472	0.1764	-0.0441	0.0294
H	5.837074049348548	-0.11352195065145289	-0.5396500986970942	0.0294	0.0294	-0.0588
H	6.24755007402282	1.4309220246742735	0.2534159506514529	0.0441	0.0147	-0.0294
H	5.92736807402282	1.3796410740228207	-1.5152310740228208	0.0441	0.0441	-0.0441
H	-1.7321620246742735	-5.222335148045642	-0.23589909869709424	-0.0147	-0.0882	-0.0588
H	0.4863539506514528	-6.2712241233713675	0.11058997532572643	-0.0294	-0.0735	-0.0147
H	2.561669975325726	-5.099309123371368	-0.6501579753257265	-0.0147	-0.0735	0.0147
H	-2.301114975325726	-1.6663840986970944	-1.051358049348547	0.0147	-0.0588	-0.0294
H	2.605303975325726	-1.5655290986970942	-2.039394950651453	-0.0147	-0.0588	0.0294
H	-2.12091	4.803048024674274	1.9770769753257265	0.0	0.0147	-0.0147
H	-4.569246	4.491038024674274	1.5314269259771793	0.0	0.0147	-0.0441
H	-5.329487975325726	2.8111609506514528	-0.16270102467427355	0.0147	-0.0294	-0.0147
H	0.6030730246742735	2.840793950651453	0.2294491233713678	0.0147	-0.0294	0.0735
H	-2.9853259259771794	0.5157068272800851	-2.0823208519543583	0.0441	-0.1029	0.0882
H	-4.429595	-2.850028049348547	-0.7084540246742735	0.0	-0.0294	-0.0147
H	-3.286248	-3.438425074022821	0.5348889753257264	0.0	-0.0441	-0.0147
H	-3.674365049348547	-4.45073007402282	-0.8998360246742735	-0.0294	-0.0441	-0.0147
H	-3.680759024674274	-2.308940024674274	-3.048751024674274	-0.0147	-0.0147	-0.0147
H	-2.6779230740228206	-3.787513074022821	-3.263591049348547	-0.0441	-0.0441	-0.0294
H	-1.9500790246742734	-2.166816098697094	-3.454245049348547	-0.0147	-0.0588	-0.0294
H	4.752116901302906	-1.970572	-0.8505888272800851	-0.0588	0.0	0.1029
H	4.160520950651453	-3.513005024674274	-0.2119058766286322	-0.0294	-0.0147	0.0735
H	3.380241827280085	-2.0018850740228205	0.32068009869709424	-0.1029	-0.0441	0.0588
H	4.421652074022821	-2.758452024674274	-3.2792548766286322	0.0441	-0.0147	0.0735
H	2.826466098697094	-3.380633049348547	-3.805850950651453	0.0588	-0.0294	0.0294
H	3.808746049348547	-4.335829049348548	-2.6795619259771795	0.0294	-0.0294	0.0441
H	-5.182211	-0.6536120740228206	-1.787990950651453	0.0	-0.0441	0.0294
H	-4.369172074022821	-0.4767440986970942	-0.19845190130290577	-0.0441	-0.0588	0.0588
H	-5.727215	0.5843119506514529	-0.640724	0.0	-0.0294	0.0
H	-4.882449851954359	1.0720048519543588	-3.621013950651453	0.0882	-0.0882	0.0294
H	-3.8672368026058117	2.5251248272800852	-3.371971950651453	0.1176	-0.1029	0.0294
H	-5.438270851954359	2.368232901302906	-2.539902024674274	0.0882	-0.0588	-0.0147
H	1.4758580246742734	3.379744024674274	2.502464098697094	0.0147	0.0147	0.0588
H	0.12079702467427356	2.1911880246742736	2.6100471480456413	0.0147	0.0147	0.0882
H	-0.14677097532572644	3.8942930246742735	3.033888074022821	0.0147	0.0147	0.0441
H	1.484708	5.154624975325726	0.7028530493485471	0.0	-0.0147	0.0294
H	-0.17654602467427358	5.733018975325726	1.084249049348547	-0.0147	-0.0147	0.0294
H	0.20828597532572643	5.203650950651452	-0.5817929506514529	-0.0147	-0.0294	0.0294
H	0.546034	-2.5370450246742737	-3.968204049348547	0.0	-0.0147	-0.0294
H	0.029434	-1.1639739753257266	-4.965199975325726	0.0	0.0147	0.0147
H	1.696732	-1.2727850246742736	-4.407983	0.0	-0.0147	0.0
H	-1.9386119013029057	3.130793975325726	-2.9842257039087174	0.0588	-0.0147	0.1764
H	-0.5418378519543587	3.806625901302906	-2.127460703908717	0.0882	-0.0588	0.1764
H	-0.3568639259771793	3.130310950651453	-3.7765637532572645	0.0441	-0.0294	0.147
114
O	3.8148184381880617	3.175152752752246	-1.50347	0.0147	0.0588	0.0
Mg	-0.1939659326835698	-0.25494138188061455	0.0950120673164302	0.1029	-0.147	0.1029
O	1.1719145618119384	-0.6258432472477542	3.1232098090596927	-0.0147	0.0588	-0.0735
C	3.8320693145641846	2.7024793145641843	-0.25682843818806145	0.0441	0.0441	-0.0147
N	0.129969	-1.2378371909403074	-1.6958235618119386	0.0	-0.0735	0.0147
N	-0.964977123623877	1.3706219326835698	-0.9835084944955084	0.0294	-0.1029	0.1176
O	3.682560190940307	3.363803876376123	0.744263	0.0735	0.0294	0.0
C	0.28354243818806146	-0.6572183145641843	-2.878717123623877	0.0147	-0.0441	0.0294
C	0.0803288763761229	0.7336821236238771	-3.0936638090596924	0.0294	-0.0294	0.0735
C	-0.5689596854358157	1.6316598090596925	-2.238050494495508	0.0441	-0.0735	0.1176
O	3.8524663145641846	0.6265364381880615	1.0149736854358156	0.0441	0.0147	-0.0441
C	2.551045876376123	0.48173862912836873	1.3183756854358155	0.0294	0.0882	-0.0441
C	2.46098	-0.22684543818806144	2.682657370871631	0.0	-0.0147	-0.0882
C	4.150962314564184	1.2067463145641844	-0.2680528763761229	0.0441	0.0441	-0.0294
O	1.643993876376123	0.8748081346328604	0.5817205618119385	0.0294	0.2058	-0.0147
C	3.6019344381880614	4.591515752752246	-1.6460605618119386	0.0147	0.0588	0.0147
O	-0.9913156854358157	-0.15478356181193856	1.9019852582567376	0.0441	0.0147	0.1764
C	0.32512698899101666	-1.3200586744268323	2.199708303555201	-0.2352	0.2793	-0.1911
O	0.6581580452984636	-1.5059447307342793	0.9996717980507095	-0.3675	0.4116	-0.3087
O	-1.8075946291283687	-2.5897626854358156	2.627732123623877	-0.0882	0.0441	-0.0294
C	-2.717542629128369	-1.573541123623877	2.659463	-0.0882	0.0294	0.0
C	-2.1061431909403074	-0.17880156181193854	2.7599461909403074	-0.0735	0.0147	0.0735
C	-0.4517693145641844	-2.3420050563074466	3.072709056307447	-0.0441	0.1323	-0.1323
O	-3.886092629128369	-1.8396046854358157	2.5271405618119385	-0.0882	0.0441	-0.0147
C	-3.145202876376123	0.9154633145641843	2.5116365618119385	-0.0294	0.0441	-0.0147
C	0.2872750673164302	-3.6954103035552013	3.0170704271790783	0.1029	0.1911	-0.2205
C	3.01494806731643	0.7122399326835698	3.784865123623877	0.1029	-0.1029	-0.0294
C	5.639222314564185	0.952788876376123	-0.5294083145641844	0.0441	0.0294	-0.0441
C	0.24293556181193857	-2.672132629128369	-1.459273876376123	-0.0147	-0.0882	-0.0294
C	-1.915916123623877	2.268858370871631	-0.36113437087163125	0.0294	-0.0882	0.0882
C	-0.9541294381880615	-3.368045629128369	-1.0821863145641843	-0.0147	-0.0882	-0.0441
C	-0.8290234381880615	-4.657372629128369	-0.5104923145641843	-0.0147	-0.0882	-0.0441
C	0.4348895618119385	-5.247852190940307	-0.33048987637612287	-0.0147	-0.0735	-0.0294
C	1.5902015618119385	-4.5869471909403075	-0.755627	-0.0147	-0.0735	0.0
C	1.5252395618119385	-3.2895531909403073	-1.317455	-0.0147	-0.0735	0.0
C	-2.34032	-2.726910752752246	-1.347157876376123	0.0	-0.0588	-0.0294
C	2.8419815618119384	-2.5801163145641843	-1.748157123623877	-0.0147	-0.0441	0.0294
C	-1.4803975618119385	3.2588956854358155	0.5864527527522458	0.0147	-0.0441	0.0588
C	-2.459717	4.0357315618119385	1.2673684381880614	0.0	-0.0147	0.0147
C	-3.837774	3.8674085618119385	1.0018185618119386	0.0	-0.0147	-0.0147
C	-4.257178561811939	2.9190006854358157	0.05945043818806146	0.0147	-0.0441	0.0147
C	-3.320689123623877	2.1137288090596926	-0.6411892472477542	0.0294	-0.0735	0.0588
C	0.022792438188061457	3.5230681236238772	0.8586247527522458	0.0147	-0.0294	0.0588
C	-3.8537796854358155	1.109565809059693	-1.6884572472477541	0.0441	-0.0735	0.0588
C	-3.5073934381880614	-3.4097583145641845	-0.5437644381880615	-0.0147	-0.0441	-0.0147
C	-2.687656876376123	-2.7449143145641846	-2.880147876376123	-0.0294	-0.0441	-0.0294
C	3.8660766854358157	-2.513975876376123	-0.5501828090596927	-0.0441	-0.0294	0.0735
C	3.504642876376123	-3.3082148763761228	-2.9680436854358154	0.0294	-0.0294	0.0441
C	-4.841757	0.08997868543581565	-1.0315746854358157	0.0	-0.0441	0.0441
C	-4.5681193708716314	1.8401628090596929	-2.8934165618119385	0.0882	-0.0735	0.0147
C	0.3886444381880615	3.220529	2.338937752752246	0.0147	0.0	0.0588
C	0.413599	4.993533123623877	0.4783248763761229	0.0	-0.0294	0.0294
C	0.654867	-1.4639364381880615	-4.123467	0.0	-0.0147	0.0
C	-0.8766982472477542	3.0052336854358157	-2.8356191799313244	0.0588	-0.0441	0.1617
H	0.32937031456418436	1.088495	-4.0874493708716315	0.0441	0.0	0.0882
H	3.115514685435816	-1.1175867527522458	2.6006596181193853	-0.0441	-0.0588	-0.147
H	3.520053876376123	0.7190897527522458	-1.0336573145641843	0.0294	0.0588	-0.0441
H	2.6357444381880613	4.8619873145641845	-1.2123561236238771	0.0147	0.0441	0.0294
H	3.612447	4.784882190940308	-2.7210545618119384	0.0	0.0735	0.0147
H	4.395180438188062	5.151833752752246	-1.1434465618119385	0.0147	0.0588	0.0147
H	-1.7574492582567376	-0.048407	3.8079165055044917	-0.1764	0.0	0.1176
H	-0.482214	-1.9808598090596927	4.1108309326835695	0.0	0.0735	-0.1029
H	-3.94949306731643	0.818600876376123	3.250536370871631	-0.1029	0.0294	-0.0882
H	-3.6018946854358154	0.8567336291283687	1.5049048090596928	0.0441	0.0882	-0.0735
H	-2.6910364381880614	1.9146213145641844	2.5784343145641846	-0.0147	0.0441	0.0441
H	-0.24535642717907818	-4.4373359326835695	3.6505527417432626	0.2205	0.1029	-0.1764
H	1.3295603818806145	-3.6005036744268324	3.3823527980507095	0.147	0.2793	-0.3087
H	0.30219531456418436	-4.06207486536714	1.9773619889910168	0.0441	0.2058	-0.2352
H	4.056236943692553	0.9863097417432625	3.5797715618119383	0.1323	-0.1764	-0.0147
H	2.9691591909403074	0.18769917993132398	4.744376247247754	0.0735	-0.1617	-0.0588
H	2.410509258256737	1.6274706854358156	3.843489876376123	0.1764	-0.0441	0.0294
H	5.831420876376123	-0.1191751236238771	-0.5283437527522459	0.0294	0.0294	-0.0588
H	6.239070314564184	1.4280954381880615	0.25906912362387713	0.0441	0.0147	-0.0294
H	5.918888314564184	1.3711613145641843	-1.5067513145641844	0.0441	0.0441	-0.0441
H	-1.7293354381880615	-5.205375629128369	-0.22459275275224583	-0.0147	-0.0882	-0.0588
H	0.49200712362387705	-6.257091190940307	0.11341656181193854	-0.0294	-0.0735	-0.0147
H	2.5644965618119384	-5.085176190940308	-0.6529845618119385	-0.0147	-0.0735	0.0147
H	-2.3039415618119383	-1.655077752752246	-1.045704876376123	0.0147	-0.0588	-0.0294
H	2.6081305618119384	-1.5542227527522459	-2.045048123623877	-0.0147	-0.0588	0.0294
H	-2.12091	4.8002214381880615	1.9799035618119385	0.0	0.0147	-0.0147
H	-4.569246	4.488211438188062	1.5399066854358157	0.0	0.0147	-0.0441
H	-5.3323145618119385	2.816814123623877	-0.15987443818806144	0.0147	-0.0294	-0.0147
H	0.6002464381880614	2.846447123623877	0.21531619094030727	0.0147	-0.0294	0.0735
H	-2.9938056854358157	0.5354929326835698	-2.099280370871631	0.0441	-0.1029	0.0882
H	-4.429595	-2.844374876376123	-0.7056274381880615	0.0	-0.0294	-0.0147
H	-3.286248	-3.4299453145641845	0.5377155618119385	0.0	-0.0441	-0.0147
H	-3.668711876376123	-4.442250314564184	-0.8970094381880614	-0.0294	-0.0441	-0.0147
H	-3.6779324381880616	-2.3061134381880617	-3.0459244381880617	-0.0147	-0.0147	-0.0147
H	-2.6694433145641843	-3.7790333145641846	-3.257937876376123	-0.0441	-0.0441	-0.0294
H	-1.9472524381880614	-2.1555097527522458	-3.4485918763761227	-0.0147	-0.0588	-0.0294
H	4.763423247247754	-1.970572	-0.8703749326835698	-0.0588	0.0	0.1029
H	4.166174123623877	-3.5101784381880616	-0.2260388090596927	-0.0294	-0.0147	0.0735
H	3.4000279326835696	-1.9934053145641843	0.3093737527522458	-0.1029	-0.0441	0.0588
H	4.413172314564185	-2.7556254381880616	-3.2933878090596926	0.0441	-0.0147	0.0735
H	2.815159752752246	-3.374979876376123	-3.811504123623877	0.0588	-0.0294	0.0294
H	3.803092876376123	-4.330175876376123	-2.688041685435816	0.0294	-0.0294	0.0441
H	-5.182211	-0.6451323145641843	-1.7936441236238772	0.0	-0.0441	0.0294
H	-4.360692314564185	-0.46543775275224586	-0.2097582472477542	-0.0441	-0.0588	0.0588
H	-5.727215	0.5899651236238771	-0.640724	0.0	-0.0294	0.0
H	-4.8994093708716315	1.0889643708716314	-3.626667123623877	0.0882	-0.0882	0.0294
H	-3.8898494944955084	2.5449109326835697	-3.377625123623877	0.1176	-0.1029	0.0294
H	-5.455230370871631	2.379539247247754	-2.5370754381880616	0.0882	-0.0588	-0.0147
H	1.4730314381880614	3.3769174381880616	2.4911577527522457	0.0147	0.0147	0.0588
H	0.11797043818806147	2.1883614381880614	2.5930876291283687	0.0147	0.0147	0.0882
H	-0.14959756181193856	3.8914664381880613	3.0254083145641846	0.0147	0.0147	0.0441
H	1.484708	5.157451561811938	0.6971998763761229	0.0	-0.0147	0.0294
H	-0.17371943818806146	5.735845561811939	1.078595876376123	-0.0147	-0.0147	0.0294
H	0.21111256181193855	5.209304123623877	-0.587446123623877	-0.0147	-0.0294	0.0294
H	0.546034	-2.5342184381880615	-3.962550876376123	0.0	-0.0147	-0.0294
H	0.029434	-1.1668005618119386	-4.968026561811938	0.0	0.0147	0.0147
H	1.696732	-1.2699584381880615	-4.407983	0.0	-0.0147	0.0
H	-1.949918247247754	3.1336205618119384	-3.0181447417432627	0.0588	-0.0147	0.1764
H	-0.5587973708716313	3.817932247247754	-2.1613797417432625	0.0882	-0.0588	0.1764
H	-0.36534368543581563	3.135964123623877	-3.8048296181193857	0.0441	-0.0294	0.147
114
O	3.8104159265206206	3.157542706082481	-1.50347	0.0147	0.0588	0.0
Mg	-0.22478351435565846	-0.21091626520620216	0.06419448564434152	0.1029	-0.147	0.1029
O	1.1763170734793797	-0.6434532939175192	3.145222367396899	-0.0147	0.0588	-0.0735
C	3.818861779561861	2.6892717795618606	-0.25242592652062024	0.0441	0.0441	-0.0147
N	0.129969	-1.215824632603101	-1.70022607347938	0.0	-0.0735	0.0147
N	-0.9737821469587595	1.4014395143556584	-1.0187285878350383	0.0294	-0.1029	0.1176
O	3.660547632603101	3.3549988530412405	0.744263	0.0735	0.0294	0.0
C	0.2791399265206202	-0.6440107795618607	-2.8875221469587595	0.0147	-0.0441	0.0294
C	0.07152385304124043	0.7424871469587596	-3.115676367396899	0.0294	-0.0294	0.0735
C	-0.5821672204381393	1.653672367396899	-2.273270587835038	0.0441	-0.0735	0.1176
O	3.839258779561861	0.6221339265206203	1.0281812204381393	0.0441	0.0147	-0.0441
C	2.5422408530412404	0.4553235591237213	1.3315832204381393	0.0294	0.0882	-0.0441
C	2.46098	-0.2224429265206202	2.7090724408762785	0.0	-0.0147	-0.0882
C	4.1377547795618606	1.1935387795618606	-0.25924785304124043	0.0441	0.0441	-0.0294
O	1.6351888530412406	0.813172971288683	0.5861230734793798	0.0294	0.2058	-0.0147
C	3.5975319265206203	4.57390570608248	-1.65046307347938	0.0147	0.0588	0.0147
O	-1.0045232204381394	-0.1591860734793798	1.8491551182474426	0.0441	0.0147	0.1764
C	0.3955671756700765	-1.403706396108216	2.2569409552319373	-0.2352	0.2793	-0.1911
O	0.7682208369844945	-1.6292150574226338	1.0921245430669755	-0.3675	0.4116	-0.3087
O	-1.7811795591237214	-2.6029702204381393	2.6365371469587595	-0.0882	0.0441	-0.0294
C	-2.6911275591237214	-1.5823461469587594	2.659463	-0.0882	0.0294	0.0
C	-2.084130632603101	-0.18320407347937978	2.737933632603101	-0.0735	0.0147	0.0735
C	-0.43856177956186065	-2.381627661314418	3.112331661314418	-0.0441	0.1323	-0.1323
O	-3.8596775591237216	-1.8528122204381394	2.5315430734793796	-0.0882	0.0441	-0.0147
C	-3.1363978530412404	0.9022557795618606	2.5160390734793796	-0.0294	0.0441	-0.0147
C	0.25645748564434157	-3.7526429552319374	3.0831081021906965	0.1029	0.1911	-0.2205
C	2.984130485644341	0.7430575143556585	3.7936701469587595	0.1029	-0.1029	-0.0294
C	5.626014779561861	0.9439838530412404	-0.5162007795618606	0.0441	0.0294	-0.0441
C	0.2473380734793798	-2.6457175591237214	-1.4504688530412406	-0.0147	-0.0882	-0.0294
C	-1.9247211469587595	2.2952734408762785	-0.3875494408762787	0.0294	-0.0882	0.0882
C	-0.9497269265206203	-3.3416305591237214	-1.0689787795618606	-0.0147	-0.0882	-0.0441
C	-0.8246209265206202	-4.630957559123721	-0.4972847795618606	-0.0147	-0.0882	-0.0441
C	0.43929207347937976	-5.225839632603101	-0.3216848530412404	-0.0147	-0.0735	-0.0294
C	1.5946040734793798	-4.5649346326031015	-0.755627	-0.0147	-0.0735	0.0
C	1.5296420734793799	-3.267540632603101	-1.317455	-0.0147	-0.0735	0.0
C	-2.34032	-2.709300706082481	-1.3383528530412405	0.0	-0.0588	-0.0294
C	2.8463840734793795	-2.5669087795618606	-1.7569621469587595	-0.0147	-0.0441	0.0294
C	-1.4848000734793798	3.2721032204381393	0.5688427060824809	0.0147	-0.0441	0.0588
C	-2.459717	4.04013407347938	1.2629659265206201	0.0	-0.0147	0.0147
C	-3.837774	3.8718110734793796	1.00622107347938	0.0	-0.0147	-0.0147
C	-4.26158107347938	2.9322082204381394	0.05504792652062022	0.0147	-0.0441	0.0147
C	-3.32949414695876	2.135741367396899	-0.6587992939175191	0.0294	-0.0735	0.0588
C	0.018389926520620218	3.53187314695876	0.8410147060824809	0.0147	-0.0294	0.0588
C	-3.8669872204381392	1.131578367396899	-1.7060672939175192	0.0441	-0.0735	0.0588
C	-3.5029909265206203	-3.396550779561861	-0.5393619265206203	-0.0147	-0.0441	-0.0147
C	-2.67885185304124	-2.731706779561861	-2.87134285304124	-0.0294	-0.0441	-0.0294
C	3.8792842204381395	-2.5051708530412404	-0.5721953673968989	-0.0441	-0.0294	0.0735
C	3.49583785304124	-3.29940985304124	-2.981251220438139	0.0294	-0.0294	0.0441
C	-4.841757	0.10318622043813935	-1.0447822204381394	0.0	-0.0441	0.0441
C	-4.594534440876279	1.862175367396899	-2.8978190734793796	0.0882	-0.0735	0.0147
C	0.3842419265206202	3.220529	2.321327706082481	0.0147	0.0	0.0588
C	0.413599	5.002338146958759	0.46951985304124044	0.0	-0.0294	0.0294
C	0.654867	-1.4595339265206202	-4.123467	0.0	-0.0147	0.0
C	-0.8943082939175192	3.0184412204381394	-2.884046808273178	0.0588	-0.0441	0.1617
H	0.3161627795618606	1.088495	-4.113864440876279	0.0441	0.0	0.0882
H	3.1287222204381395	-1.0999767060824808	2.644684734793798	-0.0441	-0.0588	-0.147
H	3.5112488530412405	0.7014797060824809	-1.0204497795618606	0.0294	0.0588	-0.0441
H	2.63134192652062	4.848779779561861	-1.2211611469587595	0.0147	0.0441	0.0294
H	3.612447	4.762869632603102	-2.7254570734793795	0.0	0.0735	0.0147
H	4.39077792652062	5.134223706082481	-1.1478490734793798	0.0147	0.0588	0.0147
H	-1.7046191182474426	-0.048407	3.7726964121649615	-0.1764	0.0	0.1176
H	-0.482214	-2.002872367396899	4.1416485143556585	0.0	0.0735	-0.1029
H	-3.918675485644341	0.8097958530412405	3.2769514408762785	-0.1029	0.0294	-0.0882
H	-3.615102220438139	0.8303185591237212	1.526917367396899	0.0441	0.0882	-0.0735
H	-2.6866339265206203	1.9014137795618606	2.565226779561861	-0.0147	0.0441	0.0441
H	-0.31139410219069674	-4.4681535143556586	3.703382881752557	0.2205	0.1029	-0.1764
H	1.2855352652062022	-3.684151396108216	3.4748055430669758	0.147	0.2793	-0.3087
H	0.2889877795618606	-4.123710028711317	2.0478021756700766	0.0441	0.2058	-0.2352
H	4.0166143386855815	1.0391398817525574	3.5841740734793794	0.1323	-0.1764	-0.0147
H	2.947146632603101	0.23612680827317759	4.761986293917519	0.0735	-0.1617	-0.0588
H	2.3576791182474426	1.6406782204381394	3.8346848530412405	0.1764	-0.0441	0.0294
H	5.822615853041241	-0.1279801469587596	-0.5107337060824809	0.0294	0.0294	-0.0588
H	6.225862779561861	1.4236929265206202	0.2678741469587596	0.0441	0.0147	-0.0294
H	5.905680779561861	1.3579537795618606	-1.4935437795618607	0.0441	0.0441	-0.0441
H	-1.7249329265206201	-5.1789605591237216	-0.20698270608248087	-0.0147	-0.0882	-0.0588
H	0.5008121469587595	-6.235078632603101	0.11781907347937978	-0.0294	-0.0735	-0.0147
H	2.5688990734793795	-5.063163632603102	-0.6573870734793797	-0.0147	-0.0735	0.0147
H	-2.3083440734793794	-1.637467706082481	-1.0368998530412405	0.0147	-0.0588	-0.0294
H	2.6125330734793795	-1.5366127060824808	-2.0538531469587595	-0.0147	-0.0588	0.0294
H	-2.12091	4.79581892652062	1.9843060734793798	0.0	0.0147	-0.0147
H	-4.569246	4.48380892652062	1.5531142204381394	0.0	0.0147	-0.0441
H	-5.33671707347938	2.8256191469587595	-0.1554719265206202	0.0147	-0.0294	-0.0147
H	0.5958439265206202	2.8552521469587595	0.19330363260310107	0.0147	-0.0294	0.0735
H	-3.0070132204381395	0.5663105143556585	-2.1256954408762785	0.0441	-0.1029	0.0882
H	-4.429595	-2.8355698530412403	-0.7012249265206203	0.0	-0.0294	-0.0147
H	-3.286248	-3.4167377795618608	0.5421180734793797	0.0	-0.0441	-0.0147
H	-3.65990685304124	-4.42904277956186	-0.8926069265206202	-0.0294	-0.0441	-0.0147
H	-3.6735299265206205	-2.3017109265206206	-3.0415219265206206	-0.0147	-0.0147	-0.0147
H	-2.6562357795618605	-3.765825779561861	-3.24913285304124	-0.0441	-0.0441	-0.0294
H	-1.94284992652062	-2.137899706082481	-3.43978685304124	-0.0147	-0.0588	-0.0294
H	4.7810332939175195	-1.970572	-0.9011925143556585	-0.0588	0.0	0.1029
H	4.174979146958759	-3.5057759265206205	-0.2480513673968989	-0.0294	-0.0147	0.0735
H	3.430845514355658	-1.9801977795618606	0.29176370608248087	-0.1029	-0.0441	0.0588
H	4.399964779561861	-2.7512229265206205	-3.315400367396899	0.0441	-0.0147	0.0735
H	2.797549706082481	-3.3661748530412403	-3.82030914695876	0.0588	-0.0294	0.0294
H	3.7942878530412405	-4.321370853041241	-2.7012492204381395	0.0294	-0.0294	0.0441
H	-5.182211	-0.6319247795618607	-1.8024491469587596	0.0	-0.0441	0.0294
H	-4.347484779561861	-0.4478277060824809	-0.22736829391751914	-0.0441	-0.0588	0.0588
H	-5.727215	0.5987701469587596	-0.640724	0.0	-0.0294	0.0
H	-4.925824440876279	1.1153794408762787	-3.63547214695876	0.0882	-0.0882	0.0294
H	-3.9250695878350386	2.5757285143556583	-3.3864301469587597	0.1176	-0.1029	0.0294
H	-5.481645440876279	2.397149293917519	-2.5326729265206205	0.0882	-0.0588	-0.0147
H	1.46862892652062	3.3725149265206205	2.473547706082481	0.0147	0.0147	0.0588
H	0.11356792652062023	2.1839589265206203	2.566672559123721	0.0147	0.0147	0.0882
H	-0.1540000734793798	3.88706392652062	3.012200779561861	0.0147	0.0147	0.0441
H	1.484708	5.16185407347938	0.6883948530412404	0.0	-0.0147	0.0294
H	-0.16931692652062022	5.74024807347938	1.0697908530412406	-0.0147	-0.0147	0.0294
H	0.2155150734793798	5.218109146958759	-0.5962511469587596	-0.0147	-0.0294	0.0294
H	0.546034	-2.5298159265206204	-3.9537458530412404	0.0	-0.0147	-0.0294
H	0.029434	-1.17120307347938	-4.97242907347938	0.0	0.0147	0.0147
H	1.696732	-1.2655559265206202	-4.407983	0.0	-0.0147	0.0
H	-1.9675282939175192	3.1380230734793795	-3.0709748817525573	0.0588	-0.0147	0.1764
H	-0.5852124408762788	3.835542293917519	-2.214209881752557	0.0882	-0.0588	0.1764
H	-0.3785512204381394	3.1447691469587595	-3.848854734793798	0.0441	-0.0294	0.147
114
O	3.8048684381880618	3.135352752752246	-1.50347	0.0147	0.0588	0.0
Mg	-0.2636159326835698	-0.15544138188061457	0.025362067316430197	0.1029	-0.147	0.1029
O	1.1818645618119386	-0.6656432472477541	3.1729598090596927	-0.0147	0.0588	-0.0735
C	3.8022193145641845	2.672629314564184	-0.24687843818806146	0.0441	0.0441	-0.0147
N	0.129969	-1.1880871909403072	-1.7057735618119387	0.0	-0.0735	0.0147
N	-0.984877123623877	1.4402719326835698	-1.0631084944955083	0.0294	-0.1029	0.1176
O	3.632810190940307	3.343903876376123	0.744263	0.0735	0.0294	0.0
C	0.27359243818806145	-0.6273683145641844	-2.898617123623877	0.0147	-0.0441	0.0294
C	0.06042887637612291	0.7535821236238771	-3.1434138090596924	0.0294	-0.0294	0.0735
C	-0.5988096854358156	1.6814098090596927	-2.317650494495508	0.0441	-0.0735	0.1176
O	3.8226163145641845	0.6165864381880615	1.0448236854358157	0.0441	0.0147	-0.0441
C	2.5311458763761228	0.4220386291283687	1.3482256854358157	0.0294	0.0882	-0.0441
C	2.46098	-0.21689543818806145	2.7423573708716313	0.0	-0.0147	-0.0882
C	4.121112314564185	1.1768963145641842	-0.24815287637612293	0.0441	0.0441	-0.0294
O	1.624093876376123	0.7355081346328604	0.5916705618119386	0.0294	0.2058	-0.0147
C	3.5919844381880615	4.551715752752245	-1.6560105618119387	0.0147	0.0588	0.0147
O	-1.0211656854358158	-0.16473356181193854	1.7825852582567376	0.0441	0.0147	0.1764
C	0.48432698899101667	-1.5091086744268323	2.329058303555201	-0.2352	0.2793	-0.1911
O	0.9069080452984635	-1.7845447307342792	1.2086217980507095	-0.3675	0.4116	-0.3087
O	-1.7478946291283688	-2.6196126854358157	2.647632123623877	-0.0882	0.0441	-0.0294
C	-2.6578426291283686	-1.593441123623877	2.659463	-0.0882	0.0294	0.0
C	-2.0563931909403075	-0.18875156181193853	2.7101961909403074	-0.0735	0.0147	0.0735
C	-0.4219193145641844	-2.4315550563074466	3.162259056307447	-0.0441	0.1323	-0.1323
O	-3.8263926291283687	-1.8694546854358158	2.5370905618119384	-0.0882	0.0441	-0.0147
C	-3.125302876376123	0.8856133145641844	2.5215865618119384	-0.0294	0.0441	-0.0147
C	0.21762506731643022	-3.824760303555201	3.166320427179078	0.1029	0.1911	-0.2205
C	2.94529806731643	0.7818899326835698	3.804765123623877	0.1029	-0.1029	-0.0294
C	5.609372314564185	0.9328888763761229	-0.49955831456418437	0.0441	0.0294	-0.0441
C	0.25288556181193855	-2.6124326291283686	-1.439373876376123	-0.0147	-0.0882	-0.0294
C	-1.9358161236238771	2.3285583708716313	-0.4208343708716313	0.0294	-0.0882	0.0882
C	-0.9441794381880615	-3.3083456291283686	-1.0523363145641842	-0.0147	-0.0882	-0.0441
C	-0.8190734381880614	-4.597672629128368	-0.4806423145641844	-0.0147	-0.0882	-0.0441
C	0.4448395618119385	-5.198102190940307	-0.3105898763761229	-0.0147	-0.0735	-0.0294
C	1.6001515618119386	-4.537197190940307	-0.755627	-0.0147	-0.0735	0.0
C	1.5351895618119387	-3.2398031909403073	-1.317455	-0.0147	-0.0735	0.0
C	-2.34032	-2.687110752752246	-1.327257876376123	0.0	-0.0588	-0.0294
C	2.8519315618119383	-2.550266314564184	-1.7680571236238771	-0.0147	-0.0441	0.0294
C	-1.4903475618119386	3.2887456854358157	0.5466527527522459	0.0147	-0.0441	0.0588
C	-2.459717	4.045681561811938	1.2574184381880613	0.0	-0.0147	0.0147
C	-3.837774	3.8773585618119384	1.0117685618119387	0.0	-0.0147	-0.0147
C	-4.267128561811939	2.948850685435816	0.049500438188061456	0.0147	-0.0441	0.0147
C	-3.3405891236238774	2.1634788090596926	-0.6809892472477541	0.0294	-0.0735	0.0588
C	0.012842438188061456	3.5429681236238775	0.8188247527522459	0.0147	-0.0294	0.0588
C	-3.8836296854358157	1.159315809059693	-1.7282572472477542	0.0441	-0.0735	0.0588
C	-3.4974434381880615	-3.3799083145641844	-0.5338144381880615	-0.0147	-0.0441	-0.0147
C	-2.6677568763761226	-2.7150643145641844	-2.8602478763761225	-0.0294	-0.0441	-0.0294
C	3.895926685435816	-2.494075876376123	-0.5999328090596927	-0.0441	-0.0294	0.0735
C	3.4847428763761226	-3.2883148763761225	-2.9978936854358156	0.0294	-0.0294	0.0441
C	-4.841757	0.11982868543581565	-1.0614246854358158	0.0	-0.0441	0.0441
C	-4.627819370871632	1.8899128090596928	-2.9033665618119384	0.0882	-0.0735	0.0147
C	0.3786944381880615	3.220529	2.299137752752246	0.0147	0.0	0.0588
C	0.413599	5.0134331236238765	0.45842487637612295	0.0	-0.0294	0.0294
C	0.654867	-1.4539864381880614	-4.123467	0.0	-0.0147	0.0
C	-0.9164982472477542	3.035083685435816	-2.945069179931324	0.0588	-0.0441	0.1617
H	0.2995203145641844	1.088495	-4.147149370871632	0.0441	0.0	0.0882
H	3.145364685435816	-1.0777867527522458	2.7001596181193857	-0.0441	-0.0588	-0.147
H	3.500153876376123	0.6792897527522459	-1.0038073145641844	0.0294	0.0588	-0.0441
H	2.6257944381880614	4.832137314564185	-1.2322561236238772	0.0147	0.0441	0.0294
H	3.612447	4.735132190940307	-2.7310045618119383	0.0	0.0735	0.0147
H	4.385230438188062	5.112033752752246	-1.1533965618119386	0.0147	0.0588	0.0147
H	-1.6380492582567376	-0.048407	3.7283165055044916	-0.1764	0.0	0.1176
H	-0.482214	-2.0306098090596927	4.18048093268357	0.0	0.0735	-0.1029
H	-3.87984306731643	0.798700876376123	3.3102363708716314	-0.1029	0.0294	-0.0882
H	-3.6317446854358155	0.7970336291283687	1.5546548090596928	0.0441	0.0882	-0.0735
H	-2.6810864381880615	1.8847713145641842	2.5485843145641844	-0.0147	0.0441	0.0441
H	-0.3946064271790782	-4.50698593268357	3.7699527417432623	0.2205	0.1029	-0.1764
H	1.2300603818806146	-3.7895536744268323	3.5913027980507097	0.147	0.2793	-0.3087
H	0.27234531456418437	-4.20137486536714	2.1365619889910166	0.0441	0.2058	-0.2352
H	3.966686943692553	1.1057097417432624	3.5897215618119382	0.1323	-0.1764	-0.0147
H	2.9194091909403075	0.29714917993132395	4.784176247247754	0.0735	-0.1617	-0.0588
H	2.2911092582567374	1.6573206854358158	3.823589876376123	0.1764	-0.0441	0.0294
H	5.8115208763761235	-0.13907512362387708	-0.4885437527522458	0.0294	0.0294	-0.0588
H	6.209220314564185	1.4181454381880614	0.2789691236238771	0.0441	0.0147	-0.0294
H	5.889038314564185	1.3413113145641842	-1.4769013145641843	0.0441	0.0441	-0.0441
H	-1.7193854381880613	-5.145675629128369	-0.18479275275224583	-0.0147	-0.0882	-0.0588
H	0.511907123623877	-6.207341190940307	0.12336656181193853	-0.0294	-0.0735	-0.0147
H	2.5744465618119383	-5.035426190940307	-0.6629345618119385	-0.0147	-0.0735	0.0147
H	-2.3138915618119382	-1.615277752752246	-1.025804876376123	0.0147	-0.0588	-0.0294
H	2.6180805618119383	-1.5144227527522458	-2.064948123623877	-0.0147	-0.0588	0.0294
H	-2.12091	4.790271438188062	1.9898535618119386	0.0	0.0147	-0.0147
H	-4.569246	4.478261438188062	1.5697566854358158	0.0	0.0147	-0.0441
H	-5.342264561811938	2.836714123623877	-0.14992443818806145	0.0147	-0.0294	-0.0147
H	0.5902964381880614	2.866347123623877	0.16556619094030728	0.0147	-0.0294	0.0735
H	-3.023655685435816	0.6051429326835698	-2.1589803708716313	0.0441	-0.1029	0.0882
H	-4.429595	-2.8244748763761227	-0.6956774381880615	0.0	-0.0294	-0.0147
H	-3.286248	-3.4000953145641843	0.5476655618119385	0.0	-0.0441	-0.0147
H	-3.6488118763761226	-4.412400314564184	-0.8870594381880614	-0.0294	-0.0441	-0.0147
H	-3.6679824381880617	-2.296163438188062	-3.035974438188062	-0.0147	-0.0147	-0.0147
H	-2.639593314564184	-3.7491833145641844	-3.2380378763761226	-0.0441	-0.0441	-0.0294
H	-1.9373024381880612	-2.1157097527522457	-3.4286918763761225	-0.0147	-0.0588	-0.0294
H	4.803223247247755	-1.970572	-0.9400249326835698	-0.0588	0.0	0.1029
H	4.186074123623877	-3.5002284381880617	-0.2757888090596927	-0.0294	-0.0147	0.0735
H	3.46967793268357	-1.9635553145641842	0.2695737527522458	-0.1029	-0.0441	0.0588
H	4.383322314564185	-2.7456754381880617	-3.3431378090596926	0.0441	-0.0147	0.0735
H	2.775359752752246	-3.3550798763761227	-3.8314041236238774	0.0588	-0.0294	0.0294
H	3.783192876376123	-4.3102758763761235	-2.717891685435816	0.0294	-0.0294	0.0441
H	-5.182211	-0.6152823145641844	-1.8135441236238772	0.0	-0.0441	0.0294
H	-4.330842314564185	-0.4256377527522458	-0.2495582472477542	-0.0441	-0.0588	0.0588
H	-5.727215	0.6098651236238771	-0.640724	0.0	-0.0294	0.0
H	-4.959109370871632	1.1486643708716313	-3.6465671236238775	0.0882	-0.0882	0.0294
H	-3.9694494944955085	2.61456093268357	-3.3975251236238773	0.1176	-0.1029	0.0294
H	-5.514930370871632	2.419339247247754	-2.5271254381880617	0.0882	-0.0588	-0.0147
H	1.4630814381880612	3.3669674381880617	2.4513577527522457	0.0147	0.0147	0.0588
H	0.10802043818806145	2.1784114381880615	2.5333876291283683	0.0147	0.0147	0.0882
H	-0.15954756181193855	3.8815164381880614	2.9955583145641844	0.0147	0.0147	0.0441
H	1.484708	5.167401561811938	0.6772998763761229	0.0	-0.0147	0.0294
H	-0.16376943818806147	5.7457955618119385	1.058695876376123	-0.0147	-0.0147	0.0294
H	0.22106256181193853	5.229204123623877	-0.6073461236238771	-0.0147	-0.0294	0.0294
H	0.546034	-2.5242684381880616	-3.9426508763761228	0.0	-0.0147	-0.0294
H	0.029434	-1.1767505618119387	-4.977976561811938	0.0	0.0147	0.0147
H	1.696732	-1.2600084381880614	-4.407983	0.0	-0.0147	0.0
H	-1.9897182472477541	3.1435705618119383	-3.1375447417432625	0.0588	-0.0147	0.1764
H	-0.6184973708716313	3.857732247247754	-2.2807797417432623	0.0882	-0.0588	0.1764
H	-0.3951936854358156	3.155864123623877	-3.9043296181193856	0.0441	-0.0294	0.147
114
O	3.798719	3.110755	-1.50347	0.0147	0.0588	0.0
Mg	-0.306662	-0.09394700000000003	-0.01768399999999998	0.1029	-0.147	0.1029
O	1.188014	-0.690241	3.203707	-0.0147	0.0588	-0.0735
C	3.783771	2.654181	-0.240729	0.0441	0.0441	-0.0147
N	0.129969	-1.15734	-1.711923	0.0	-0.0735	0.0147
N	-0.997176	1.483318	-1.112304	0.0294	-0.1029	0.1176
O	3.602063	3.331605	0.744263	0.0735	0.0294	0.0
C	0.267443	-0.60892	-2.910916	0.0147	-0.0441	0.0294
C	0.048130000000000006	0.765881	-3.174161	0.0294	-0.0294	0.0735
C	-0.617258	1.712157	-2.366846	0.0441	-0.0735	0.1176
O	3.804168	0.610437	1.063272	0.0441	0.0147	-0.0441
C	2.518847	0.385142	1.366674	0.0294	0.0882	-0.0441
C	2.46098	-0.210746	2.779254	0.0	-0.0147	-0.0882
C	4.102664	1.158448	-0.235854	0.0441	0.0441	-0.0294
O	1.611795	0.649416	0.59782	0.0294	0.2058	-0.0147
C	3.585835	4.527118	-1.66216	0.0147	0.0588	0.0147
O	-1.039614	-0.170883	1.708792	0.0441	0.0147	0.1764
C	0.582718	-1.625948	2.409001	-0.2352	0.2793	-0.1911
O	1.060644	-1.956729	1.33776	-0.3675	0.4116	-0.3087
O	-1.710998	-2.638061	2.659931	-0.0882	0.0441	-0.0294
C	-2.620946	-1.60574	2.659463	-0.0882	0.0294	0.0
C	-2.025646	-0.194901	2.679449	-0.0735	0.0147	0.0735
C	-0.403471	-2.4869	3.217604	-0.0441	0.1323	-0.1323
O	-3.789496	-1.887903	2.54324	-0.0882	0.0441	-0.0147
C	-3.113004	0.867165	2.527736	-0.0294	0.0441	-0.0147
C	0.17457900000000004	-3.904703	3.258562	0.1029	0.1911	-0.2205
C	2.902252	0.824936	3.817064	0.1029	-0.1029	-0.0294
C	5.590924	0.92059	-0.48111	0.0441	0.0294	-0.0441
C	0.259035	-2.575536	-1.427075	-0.0147	-0.0882	-0.0294
C	-1.948115	2.365455	-0.457731	0.0294	-0.0882	0.0882
C	-0.93803	-3.271449	-1.033888	-0.0147	-0.0882	-0.0441
C	-0.812924	-4.560776	-0.462194	-0.0147	-0.0882	-0.0441
C	0.450989	-5.167355	-0.298291	-0.0147	-0.0735	-0.0294
C	1.606301	-4.50645	-0.755627	-0.0147	-0.0735	0.0
C	1.541339	-3.209056	-1.317455	-0.0147	-0.0735	0.0
C	-2.34032	-2.662513	-1.314959	0.0	-0.0588	-0.0294
C	2.858081	-2.531818	-1.780356	-0.0147	-0.0441	0.0294
C	-1.496497	3.307194	0.522055	0.0147	-0.0441	0.0588
C	-2.459717	4.051831	1.251269	0.0	-0.0147	0.0147
C	-3.837774	3.883508	1.017918	0.0	-0.0147	-0.0147
C	-4.273278	2.967299	0.043351	0.0147	-0.0441	0.0147
C	-3.352888	2.194226	-0.705587	0.0294	-0.0735	0.0588
C	0.006693000000000003	3.555267	0.794227	0.0147	-0.0294	0.0588
C	-3.902078	1.190063	-1.752855	0.0441	-0.0735	0.0588
C	-3.491294	-3.36146	-0.527665	-0.0147	-0.0441	-0.0147
C	-2.655458	-2.696616	-2.847949	-0.0294	-0.0441	-0.0294
C	3.914375	-2.481777	-0.63068	-0.0441	-0.0294	0.0735
C	3.472444	-3.276016	-3.016342	0.0294	-0.0294	0.0441
C	-4.841757	0.138277	-1.079873	0.0	-0.0441	0.0441
C	-4.664716	1.92066	-2.909516	0.0882	-0.0735	0.0147
C	0.372545	3.220529	2.27454	0.0147	0.0	0.0588
C	0.413599	5.025732	0.446126	0.0	-0.0294	0.0294
C	0.654867	-1.447837	-4.123467	0.0	-0.0147	0.0
C	-0.941096	3.053532	-3.012713	0.0588	-0.0441	0.1617
H	0.281072	1.088495	-4.184046	0.0441	0.0	0.0882
H	3.163813	-1.053189	2.761654	-0.0441	-0.0588	-0.147
H	3.487855	0.654692	-0.985359	0.0294	0.0588	-0.0441
H	2.619645	4.813689	-1.244555	0.0147	0.0441	0.0294
H	3.612447	4.704385	-2.737154	0.0	0.0735	0.0147
H	4.379081	5.087436	-1.159546	0.0147	0.0588	0.0147
H	-1.564256	-0.048407	3.679121	-0.1764	0.0	0.1176
H	-0.482214	-2.061357	4.223527	0.0	0.0735	-0.1029
H	-3.836797	0.786402	3.347133	-0.1029	0.0294	-0.0882
H	-3.650193	0.760137	1.585402	0.0441	0.0882	-0.0735
H	-2.674937	1.866323	2.530136	-0.0147	0.0441	0.0441
H	-0.48684799999999995	-4.550032	3.843746	0.2205	0.1029	-0.1764
H	1.168566	-3.906393	3.720441	0.147	0.2793	-0.3087
H	0.253897	-4.287467	2.234953	0.0441	0.2058	-0.2352
H	3.911342	1.179503	3.595871	0.1323	-0.1764	-0.0147
H	2.888662	0.364793	4.808774	0.0735	-0.1617	-0.0588
H	2.217316	1.675769	3.811291	0.1764	-0.0441	0.0294
H	5.799222	-0.151374	-0.463946	0.0294	0.0294	-0.0588
H	6.190772	1.411996	0.291268	0.0441	0.0147	-0.0294
H	5.87059	1.322863	-1.458453	0.0441	0.0441	-0.0441
H	-1.713236	-5.108779	-0.160195	-0.0147	-0.0882	-0.0588
H	0.524206	-6.176594	0.129516	-0.0294	-0.0735	-0.0147
H	2.580596	-5.004679	-0.669084	-0.0147	-0.0735	0.0147
H	-2.320041	-1.59068	-1.013506	0.0147	-0.0588	-0.0294
H	2.62423	-1.489825	-2.077247	-0.0147	-0.0588	0.0294
H	-2.12091	4.784122	1.996003	0.0	0.0147	-0.0147
H	-4.569246	4.472112	1.588205	0.0	0.0147	-0.0441
H	-5.348414	2.849013	-0.143775	0.0147	-0.0294	-0.0147
H	0.584147	2.878646	0.134819	0.0147	-0.0294	0.0735
H	-3.042104	0.648189	-2.195877	0.0441	-0.1029	0.0882
H	-4.429595	-2.812176	-0.689528	0.0	-0.0294	-0.0147
H	-3.286248	-3.381647	0.553815	0.0	-0.0441	-0.0147
H	-3.636513	-4.393952	-0.88091	-0.0294	-0.0441	-0.0147
H	-3.661833	-2.290014	-3.029825	-0.0147	-0.0147	-0.0147
H	-2.621145	-3.730735	-3.225739	-0.0441	-0.0441	-0.0294
H	-1.931153	-2.091112	-3.416393	-0.0147	-0.0588	-0.0294
H	4.827821	-1.970572	-0.983071	-0.0588	0.0	0.1029
H	4.198373	-3.494079	-0.306536	-0.0294	-0.0147	0.0735
H	3.512724	-1.945107	0.244976	-0.1029	-0.0441	0.0588
H	4.364874	-2.739526	-3.373885	0.0441	-0.0147	0.0735
H	2.750762	-3.342781	-3.843703	0.0588	-0.0294	0.0294
H	3.770894	-4.297977	-2.73634	0.0294	-0.0294	0.0441
H	-5.182211	-0.596834	-1.825843	0.0	-0.0441	0.0294
H	-4.312394	-0.40104	-0.274156	-0.0441	-0.0588	0.0588
H	-5.727215	0.622164	-0.640724	0.0	-0.0294	0.0
H	-4.996006	1.185561	-3.658866	0.0882	-0.0882	0.0294
H	-4.018645	2.657607	-3.409824	0.1176	-0.1029	0.0294
H	-5.551827	2.443937	-2.520976	0.0882	-0.0588	-0.0147
H	1.456932	3.360818	2.42676	0.0147	0.0147	0.0588
H	0.101871	2.172262	2.496491	0.0147	0.0147	0.0882
H	-0.165697	3.875367	2.97711	0.0147	0.0147	0.0441
H	1.484708	5.173551	0.665001	0.0	-0.0147	0.0294
H	-0.15762	5.751945	1.046397	-0.0147	-0.0147	0.0294
H	0.227212	5.241503	-0.619645	-0.0147	-0.0294	0.0294
H	0.546034	-2.518119	-3.930352	0.0	-0.0147	-0.0294
H	0.029434	-1.1829	-4.984126	0.0	0.0147	0.0147
H	1.696732	-1.253859	-4.407983	0.0	-0.0147	0.0
H	-2.014316	3.14972	-3.211338	0.0588	-0.0147	0.1764
H	-0.655394	3.88233	-2.354573	0.0882	-0.0588	0.1764
H	-0.413642	3.168163	-3.965824	0.0441	-0.0294	0.147
114
O	3.7925695618119386	3.0861572472477543	-1.50347	0.0147	0.0588	0.0
Mg	-0.3497080673164301	-0.032452618119385566	-0.06073006731643011	0.1029	-0.147	0.1029
O	1.1941634381880613	-0.7148387527522457	3.2344541909403075	-0.0147	0.0588	-0.0735
C	3.765322685435816	2.6357326854358156	-0.23457956181193856	0.0441	0.0441	-0.0147
N	0.129969	-1.1265928090596928	-1.7180724381880614	0.0	-0.0735	0.0147
N	-1.0094748763761228	1.52636406731643	-1.1614995055044914	0.0294	-0.1029	0.1176
O	3.5713158090596924	3.3193061236238774	0.744263	0.0735	0.0294	0.0
C	0.2612935618119385	-0.5904716854358157	-2.9232148763761225	0.0147	-0.0441	0.0294
C	0.03583112362387711	0.778179876376123	-3.204908190940307	0.0294	-0.0294	0.0735
C	-0.6357063145641842	1.7429041909403071	-2.4160415055044915	0.0441	-0.0735	0.1176
O	3.785719685435816	0.6042875618119385	1.0817203145641843	0.0441	0.0147	-0.0441
C	2.5065481236238774	0.3482453708716313	1.3851223145641842	0.0294	0.0882	-0.0441
C	2.46098	-0.20459656181193855	2.8161506291283684	0.0	-0.0147	-0.0882
C	4.084215685435815	1.1399996854358156	-0.2235551236238771	0.0441	0.0441	-0.0294
O	1.5994961236238772	0.5633238653671397	0.6039694381880615	0.0294	0.2058	-0.0147
C	3.5796855618119383	4.502520247247754	-1.6683094381880614	0.0147	0.0588	0.0147
O	-1.0580623145641843	-0.17703243818806144	1.6349987417432628	0.0441	0.0147	0.1764
C	0.681109011008983	-1.7427873255731674	2.4889436964447986	-0.2352	0.2793	-0.1911
O	1.214379954701536	-2.12891326926572	1.4668982019492904	-0.3675	0.4116	-0.3087
O	-1.6741013708716315	-2.6565093145641843	2.6722298763761225	-0.0882	0.0441	-0.0294
C	-2.5840493708716314	-1.6180388763761229	2.659463	-0.0882	0.0294	0.0
C	-1.9948988090596929	-0.20105043818806143	2.6487018090596925	-0.0735	0.0147	0.0735
C	-0.3850226854358157	-2.5422449436925527	3.272948943692553	-0.0441	0.1323	-0.1323
O	-3.7525993708716316	-1.9063513145641844	2.5493894381880615	-0.0882	0.0441	-0.0147
C	-3.1007051236238774	0.8487166854358157	2.5338854381880616	-0.0294	0.0441	-0.0147
C	0.13153293268356991	-3.9846456964447987	3.350803572820922	0.1029	0.1911	-0.2205
C	2.8592059326835697	0.8679820673164301	3.8293628763761225	0.1029	-0.1029	-0.0294
C	5.5724756854358155	0.9082911236238771	-0.46266168543581565	0.0441	0.0294	-0.0441
C	0.2651844381880615	-2.5386393708716315	-1.4147761236238772	-0.0147	-0.0882	-0.0294
C	-1.960413876376123	2.4023516291283684	-0.49462762912836866	0.0294	-0.0882	0.0882
C	-0.9318805618119386	-3.2345523708716315	-1.0154396854358156	-0.0147	-0.0882	-0.0441
C	-0.8067745618119385	-4.523879370871631	-0.44374568543581566	-0.0147	-0.0882	-0.0441
C	0.45713843818806144	-5.136607809059693	-0.2859921236238771	-0.0147	-0.0735	-0.0294
C	1.6124504381880613	-4.475702809059693	-0.755627	-0.0147	-0.0735	0.0
C	1.5474884381880614	-3.1783088090596925	-1.317455	-0.0147	-0.0735	0.0
C	-2.34032	-2.6379152472477543	-1.302660123623877	0.0	-0.0588	-0.0294
C	2.8642304381880614	-2.5133696854358156	-1.792654876376123	-0.0147	-0.0441	0.0294
C	-1.5026464381880613	3.3256423145641842	0.49745724724775425	0.0147	-0.0441	0.0588
C	-2.459717	4.0579804381880615	1.2451195618119386	0.0	-0.0147	0.0147
C	-3.837774	3.8896574381880615	1.0240674381880615	0.0	-0.0147	-0.0147
C	-4.279427438188062	2.9857473145641844	0.03720156181193856	0.0147	-0.0441	0.0147
C	-3.365186876376123	2.2249731909403074	-0.7301847527522457	0.0294	-0.0735	0.0588
C	5.435618119385569E-4	3.567565876376123	0.7696292472477543	0.0147	-0.0294	0.0588
C	-3.920526314564184	1.2208101909403073	-1.777452752752246	0.0441	-0.0735	0.0588
C	-3.4851445618119383	-3.343011685435816	-0.5215155618119386	-0.0147	-0.0441	-0.0147
C	-2.643159123623877	-2.678167685435816	-2.835650123623877	-0.0294	-0.0441	-0.0294
C	3.9328233145641844	-2.4694781236238774	-0.6614271909403072	-0.0441	-0.0294	0.0735
C	3.460145123623877	-3.263717123623877	-3.034790314564184	0.0294	-0.0294	0.0441
C	-4.841757	0.15672531456418434	-1.0983213145641844	0.0	-0.0441	0.0441
C	-4.701612629128369	1.9514071909403072	-2.9156654381880616	0.0882	-0.0735	0.0147
C	0.36639556181193855	3.220529	2.249942247247754	0.0147	0.0	0.0588
C	0.413599	5.038030876376123	0.43382712362387715	0.0	-0.0294	0.0294
C	0.654867	-1.4416875618119387	-4.123467	0.0	-0.0147	0.0
C	-0.9656937527522458	3.0719803145641844	-3.080356820068676	0.0588	-0.0441	0.1617
H	0.26262368543581566	1.088495	-4.220942629128369	0.0441	0.0	0.0882
H	3.1822613145641845	-1.028591247247754	2.8231483818806145	-0.0441	-0.0588	-0.147
H	3.4755561236238774	0.6300942472477543	-0.9669106854358157	0.0294	0.0588	-0.0441
H	2.613495561811938	4.795240685435815	-1.256853876376123	0.0147	0.0441	0.0294
H	3.612447	4.673637809059693	-2.7433034381880614	0.0	0.0735	0.0147
H	4.372931561811939	5.062838247247755	-1.1656954381880613	0.0147	0.0588	0.0147
H	-1.4904627417432628	-0.048407	3.629925494495508	-0.1764	0.0	0.1176
H	-0.482214	-2.0921041909403075	4.26657306731643	0.0	0.0735	-0.1029
H	-3.7937509326835697	0.7741031236238771	3.3840296291283685	-0.1029	0.0294	-0.0882
H	-3.668641314564184	0.7232403708716313	1.6161491909403072	0.0441	0.0882	-0.0735
H	-2.6687875618119383	1.8478746854358157	2.511687685435816	-0.0147	0.0441	0.0441
H	-0.5790895728209217	-4.59307806731643	3.917539258256737	0.2205	0.1029	-0.1764
H	1.1070716181193856	-4.023232325573168	3.8495792019492905	0.147	0.2793	-0.3087
H	0.23544868543581565	-4.373559134632861	2.333344011008983	0.0441	0.2058	-0.2352
H	3.855997056307447	1.2532962582567373	3.6020204381880614	0.1323	-0.1764	-0.0147
H	2.8579148090596926	0.43243682006867584	4.833371752752245	0.0735	-0.1617	-0.0588
H	2.1435227417432627	1.6942173145641843	3.7989921236238775	0.1764	-0.0441	0.0294
H	5.786923123623877	-0.1636728763761229	-0.43934824724775423	0.0294	0.0294	-0.0588
H	6.172323685435815	1.4058465618119387	0.3035668763761229	0.0441	0.0147	-0.0294
H	5.852141685435815	1.3044146854358156	-1.4400046854358157	0.0441	0.0441	-0.0441
H	-1.7070865618119386	-5.071882370871632	-0.13559724724775424	-0.0147	-0.0882	-0.0588
H	0.5365048763761229	-6.145846809059693	0.13566543818806143	-0.0294	-0.0735	-0.0147
H	2.5867454381880615	-4.973931809059693	-0.6752334381880615	-0.0147	-0.0735	0.0147
H	-2.3261904381880614	-1.5660822472477542	-1.001207123623877	0.0147	-0.0588	-0.0294
H	2.6303794381880614	-1.465227247247754	-2.0895458763761225	-0.0147	-0.0588	0.0294
H	-2.12091	4.777972561811938	2.0021524381880615	0.0	0.0147	-0.0147
H	-4.569246	4.4659625618119385	1.6066533145641844	0.0	0.0147	-0.0441
H	-5.354563438188062	2.8613118763761225	-0.13762556181193855	0.0147	-0.0294	-0.0147
H	0.5779975618119385	2.8909448763761225	0.10407180905969278	0.0147	-0.0294	0.0735
H	-3.0605523145641844	0.6912350673164301	-2.2327736291283684	0.0441	-0.1029	0.0882
H	-4.429595	-2.7998771236238773	-0.6833785618119386	0.0	-0.0294	-0.0147
H	-3.286248	-3.363198685435816	0.5599644381880614	0.0	-0.0441	-0.0147
H	-3.624214123623877	-4.375503685435815	-0.8747605618119385	-0.0294	-0.0441	-0.0147
H	-3.6556835618119385	-2.2838645618119386	-3.0236755618119386	-0.0147	-0.0147	-0.0147
H	-2.6026966854358156	-3.712286685435816	-3.213440123623877	-0.0441	-0.0441	-0.0294
H	-1.9250035618119385	-2.066514247247754	-3.404094123623877	-0.0147	-0.0588	-0.0294
H	4.8524187527522455	-1.970572	-1.0261170673164302	-0.0588	0.0	0.1029
H	4.210671876376123	-3.4879295618119386	-0.3372831909403072	-0.0294	-0.0147	0.0735
H	3.55577006731643	-1.9266586854358156	0.22037824724775423	-0.1029	-0.0441	0.0588
H	4.346425685435816	-2.7333765618119386	-3.4046321909403074	0.0441	-0.0147	0.0735
H	2.726164247247754	-3.3304821236238773	-3.856001876376123	0.0588	-0.0294	0.0294
H	3.7585951236238775	-4.285678123623877	-2.7547883145641845	0.0294	-0.0294	0.0441
H	-5.182211	-0.5783856854358157	-1.838141876376123	0.0	-0.0441	0.0294
H	-4.293945685435816	-0.3764422472477542	-0.2987537527522458	-0.0441	-0.0588	0.0588
H	-5.727215	0.634462876376123	-0.640724	0.0	-0.0294	0.0
H	-5.032902629128369	1.2224576291283686	-3.671164876376123	0.0882	-0.0882	0.0294
H	-4.067840505504492	2.70065306731643	-3.4221228763761227	0.1176	-0.1029	0.0294
H	-5.588723629128369	2.468534752752246	-2.5148265618119385	0.0882	-0.0588	-0.0147
H	1.4507825618119385	3.3546685618119385	2.402162247247754	0.0147	0.0147	0.0588
H	0.09572156181193855	2.1661125618119383	2.4595943708716312	0.0147	0.0147	0.0882
H	-0.17184643818806145	3.869217561811938	2.958661685435816	0.0147	0.0147	0.0441
H	1.484708	5.179700438188061	0.652702123623877	0.0	-0.0147	0.0294
H	-0.15147056181193858	5.758094438188062	1.034098123623877	-0.0147	-0.0147	0.0294
H	0.23336143818806143	5.253801876376123	-0.6319438763761229	-0.0147	-0.0294	0.0294
H	0.546034	-2.5119695618119384	-3.9180531236238774	0.0	-0.0147	-0.0294
H	0.029434	-1.1890494381880614	-4.990275438188061	0.0	0.0147	0.0147
H	1.696732	-1.2477095618119387	-4.407983	0.0	-0.0147	0.0
H	-2.038913752752246	3.1558694381880614	-3.285131258256737	0.0588	-0.0147	0.1764
H	-0.6922906291283687	3.906927752752246	-2.428366258256737	0.0882	-0.0588	0.1764
H	-0.43209031456418434	3.1804618763761225	-4.027318381880614	0.0441	-0.0294	0.147
114
O	3.78702207347938	3.063967293917519	-1.50347	0.0147	0.0588	0.0
Mg	-0.3885404856443415	0.023022265206202125	-0.0995624856443415	0.1029	-0.147	0.1029
O	1.19971092652062	-0.7370287060824808	3.262191632603101	-0.0147	0.0588	-0.0735
C	3.7486802204381395	2.619090220438139	-0.2290320734793798	0.0441	0.0441	-0.0147
N	0.129969	-1.098855367396899	-1.7236199265206202	0.0	-0.0735	0.0147
N	-1.0205698530412404	1.5651964856443414	-1.2058794121649616	0.0294	-0.1029	0.1176
O	3.543578367396899	3.30821114695876	0.744263	0.0735	0.0294	0.0
C	0.2557460734793798	-0.5738292204381393	-2.93430985304124	0.0147	-0.0441	0.0294
C	0.024736146958759576	0.7892748530412405	-3.232645632603101	0.0294	-0.0294	0.0735
C	-0.6523487795618607	1.770641632603101	-2.4604214121649615	0.0441	-0.0735	0.1176
O	3.7690772204381395	0.5987400734793797	1.0983627795618607	0.0441	0.0147	-0.0441
C	2.4954531469587597	0.3149604408762787	1.4017647795618606	0.0294	0.0882	-0.0441
C	2.46098	-0.19904907347937978	2.8494355591237213	0.0	-0.0147	-0.0882
C	4.067573220438139	1.1233572204381392	-0.2124601469587596	0.0441	0.0441	-0.0294
O	1.5884011469587596	0.485659028711317	0.6095169265206203	0.0294	0.2058	-0.0147
C	3.5741380734793795	4.480330293917519	-1.6738569265206202	0.0147	0.0588	0.0147
O	-1.0747047795618607	-0.18257992652062022	1.5684288817525576	0.0441	0.0147	0.1764
C	0.7698688243299233	-1.848189603891784	2.5610610447680626	-0.2352	0.2793	-0.1911
O	1.3530671630155053	-2.284242942577366	1.5833954569330244	-0.3675	0.4116	-0.3087
O	-1.6408164408762786	-2.6731517795618607	2.68332485304124	-0.0882	0.0441	-0.0294
C	-2.5507644408762786	-1.6291338530412405	2.659463	-0.0882	0.0294	0.0
C	-1.967161367396899	-0.2065979265206202	2.620964367396899	-0.0735	0.0147	0.0735
C	-0.3683802204381394	-2.592172338685582	3.322876338685582	-0.0441	0.1323	-0.1323
O	-3.719314440876279	-1.9229937795618608	2.5549369265206203	-0.0882	0.0441	-0.0147
C	-3.08961014695876	0.8320742204381393	2.5394329265206204	-0.0294	0.0441	-0.0147
C	0.09270051435565851	-4.056763044768063	3.434015897809303	0.1029	0.1911	-0.2205
C	2.8203735143556585	0.9068144856443415	3.84045785304124	0.1029	-0.1029	-0.0294
C	5.5558332204381395	0.8971961469587596	-0.44601922043813935	0.0441	0.0294	-0.0441
C	0.2707319265206202	-2.5053544408762787	-1.4036811469587596	-0.0147	-0.0882	-0.0294
C	-1.9715088530412406	2.4356365591237212	-0.5279125591237213	0.0294	-0.0882	0.0882
C	-0.9263330734793798	-3.2012674408762787	-0.9987972204381392	-0.0147	-0.0882	-0.0441
C	-0.8012270734793797	-4.490594440876278	-0.42710322043813936	-0.0147	-0.0882	-0.0441
C	0.4626859265206202	-5.108870367396898	-0.27489714695875955	-0.0147	-0.0735	-0.0294
C	1.6179979265206201	-4.447965367396899	-0.755627	-0.0147	-0.0735	0.0
C	1.5530359265206202	-3.150571367396899	-1.317455	-0.0147	-0.0735	0.0
C	-2.34032	-2.615725293917519	-1.2915651469587595	0.0	-0.0588	-0.0294
C	2.8697779265206202	-2.496727220438139	-1.8037498530412406	-0.0147	-0.0441	0.0294
C	-1.5081939265206201	3.3422847795618607	0.4752672939175192	0.0147	-0.0441	0.0588
C	-2.459717	4.06352792652062	1.2395720734793798	0.0	-0.0147	0.0147
C	-3.837774	3.8952049265206203	1.0296149265206203	0.0	-0.0147	-0.0147
C	-4.28497492652062	3.002389779561861	0.03165407347937979	0.0147	-0.0441	0.0147
C	-3.3762818530412404	2.252710632603101	-0.7523747060824808	0.0294	-0.0735	0.0588
C	-0.0050039265206202116	3.5786608530412405	0.7474392939175192	0.0147	-0.0294	0.0588
C	-3.9371687795618606	1.248547632603101	-1.799642706082481	0.0441	-0.0735	0.0588
C	-3.4795970734793795	-3.3263692204381394	-0.5159680734793798	-0.0147	-0.0441	-0.0147
C	-2.6320641469587596	-2.6615252204381394	-2.8245551469587595	-0.0294	-0.0441	-0.0294
C	3.949465779561861	-2.45838314695876	-0.6891646326031011	-0.0441	-0.0294	0.0735
C	3.4490501469587596	-3.2526221469587595	-3.0514327795618605	0.0294	-0.0294	0.0441
C	-4.841757	0.17336777956186064	-1.1149637795618608	0.0	-0.0441	0.0441
C	-4.734897559123722	1.979144632603101	-2.9212129265206204	0.0882	-0.0735	0.0147
C	0.3608480734793798	3.220529	2.227752293917519	0.0147	0.0	0.0588
C	0.413599	5.04912585304124	0.4227321469587596	0.0	-0.0294	0.0294
C	0.654867	-1.4361400734793799	-4.123467	0.0	-0.0147	0.0
C	-0.9878837060824809	3.088622779561861	-3.1413791917268226	0.0588	-0.0441	0.1617
H	0.24598122043813936	1.088495	-4.254227559123722	0.0441	0.0	0.0882
H	3.198903779561861	-1.006401293917519	2.878623265206202	-0.0441	-0.0588	-0.147
H	3.46446114695876	0.6079042939175192	-0.9502682204381393	0.0294	0.0588	-0.0441
H	2.6079480734793794	4.778598220438139	-1.2679488530412406	0.0147	0.0441	0.0294
H	3.612447	4.645900367396899	-2.7488509265206202	0.0	0.0735	0.0147
H	4.36738407347938	5.04064829391752	-1.1712429265206201	0.0147	0.0588	0.0147
H	-1.4238928817525576	-0.048407	3.585545587835038	-0.1764	0.0	0.1176
H	-0.482214	-2.119841632603101	4.305405485644341	0.0	0.0735	-0.1029
H	-3.7549185143556585	0.7630081469587596	3.4173145591237213	-0.1029	0.0294	-0.0882
H	-3.6852837795618605	0.6899554408762787	1.643886632603101	0.0441	0.0882	-0.0735
H	-2.6632400734793795	1.8312322204381393	2.4950452204381395	-0.0147	0.0441	0.0441
H	-0.6623018978093032	-4.631910485644341	3.9841091182474426	0.2205	0.1029	-0.1764
H	1.0515967347937978	-4.1286346038917845	3.9660764569330245	0.147	0.2793	-0.3087
H	0.21880622043813935	-4.451223971288683	2.4221038243299233	0.0441	0.2058	-0.2352
H	3.806069661314418	1.3198661182474425	3.60756792652062	0.1323	-0.1764	-0.0147
H	2.830177367396899	0.4934591917268223	4.85556170608248	0.0735	-0.1617	-0.0588
H	2.076952881752557	1.7108597795618607	3.78789714695876	0.1764	-0.0441	0.0294
H	5.77582814695876	-0.17476785304124043	-0.4171582939175192	0.0294	0.0294	-0.0588
H	6.155681220438139	1.4002990734793799	0.31466185304124045	0.0441	0.0147	-0.0294
H	5.835499220438139	1.2877722204381392	-1.4233622204381393	0.0441	0.0441	-0.0441
H	-1.7015390734793798	-5.038597440876279	-0.11340729391751916	-0.0147	-0.0882	-0.0588
H	0.5475998530412404	-6.118109367396898	0.1412129265206202	-0.0294	-0.0735	-0.0147
H	2.5922929265206203	-4.946194367396899	-0.6807809265206203	-0.0147	-0.0735	0.0147
H	-2.33173792652062	-1.5438922939175193	-0.9901121469587596	0.0147	-0.0588	-0.0294
H	2.63592692652062	-1.4430372939175191	-2.10064085304124	-0.0147	-0.0588	0.0294
H	-2.12091	4.77242507347938	2.0076999265206203	0.0	0.0147	-0.0147
H	-4.569246	4.46041507347938	1.6232957795618608	0.0	0.0147	-0.0441
H	-5.36011092652062	2.87240685304124	-0.13207807347937978	0.0147	-0.0294	-0.0147
H	0.5724500734793797	2.90203985304124	0.07633436739689893	0.0147	-0.0294	0.0735
H	-3.077194779561861	0.7300674856443415	-2.2660585591237212	0.0441	-0.1029	0.0882
H	-4.429595	-2.7887821469587597	-0.6778310734793798	0.0	-0.0294	-0.0147
H	-3.286248	-3.3465562204381394	0.5655119265206202	0.0	-0.0441	-0.0147
H	-3.6131191469587596	-4.358861220438139	-0.8692130734793797	-0.0294	-0.0441	-0.0147
H	-3.6501360734793797	-2.27831707347938	-3.01812807347938	-0.0147	-0.0147	-0.0147
H	-2.586054220438139	-3.6956442204381394	-3.2023451469587596	-0.0441	-0.0441	-0.0294
H	-1.9194560734793797	-2.044324293917519	-3.3929991469587595	-0.0147	-0.0588	-0.0294
H	4.874608706082481	-1.970572	-1.0649494856443416	-0.0588	0.0	0.1029
H	4.221766853041241	-3.48238207347938	-0.365020632603101	-0.0294	-0.0147	0.0735
H	3.5946024856443413	-1.9100162204381392	0.19818829391751916	-0.1029	-0.0441	0.0588
H	4.32978322043814	-2.7278290734793798	-3.432369632603101	0.0441	-0.0147	0.0735
H	2.703974293917519	-3.3193871469587597	-3.8670968530412404	0.0588	-0.0294	0.0294
H	3.74750014695876	-4.27458314695876	-2.771430779561861	0.0294	-0.0294	0.0441
H	-5.182211	-0.5617432204381393	-1.8492368530412406	0.0	-0.0441	0.0294
H	-4.27730322043814	-0.35425229391751917	-0.32094370608248085	-0.0441	-0.0588	0.0588
H	-5.727215	0.6455578530412405	-0.640724	0.0	-0.0294	0.0
H	-5.066187559123722	1.2557425591237215	-3.6822598530412405	0.0882	-0.0882	0.0294
H	-4.112220412164962	2.7394854856443414	-3.4332178530412403	0.1176	-0.1029	0.0294
H	-5.622008559123722	2.490724706082481	-2.5092790734793797	0.0882	-0.0588	-0.0147
H	1.4452350734793797	3.3491210734793797	2.3799722939175187	0.0147	0.0147	0.0588
H	0.0901740734793798	2.1605650734793795	2.4263094408762784	0.0147	0.0147	0.0882
H	-0.17739392652062022	3.8636700734793794	2.9420192204381395	0.0147	0.0147	0.0441
H	1.484708	5.18524792652062	0.6416071469587595	0.0	-0.0147	0.0294
H	-0.1459230734793798	5.76364192652062	1.0230031469587595	-0.0147	-0.0147	0.0294
H	0.2389089265206202	5.2648968530412406	-0.6430388530412404	-0.0147	-0.0294	0.0294
H	0.546034	-2.5064220734793796	-3.9069581469587598	0.0	-0.0147	-0.0294
H	0.029434	-1.1945969265206202	-4.99582292652062	0.0	0.0147	0.0147
H	1.696732	-1.24216207347938	-4.407983	0.0	-0.0147	0.0
H	-2.061103706082481	3.1614169265206202	-3.3517011182474428	0.0588	-0.0147	0.1764
H	-0.7255755591237213	3.929117706082481	-2.4949361182474425	0.0882	-0.0588	0.1764
H	-0.44873277956186064	3.19155685304124	-4.0827932652062024	0.0441	-0.0294	0.147
114
O	3.7826195618119387	3.0463572472477543	-1.50347	0.0147	0.0588	0.0
Mg	-0.41935806731643016	0.06704738188061454	-0.13038006731643018	0.1029	-0.147	0.1029
O	1.2041134381880614	-0.7546387527522458	3.2842041909403075	-0.0147	0.0588	-0.0735
C	3.735472685435816	2.6058826854358155	-0.22462956181193855	0.0441	0.0441	-0.0147
N	0.129969	-1.0768428090596927	-1.7280224381880616	0.0	-0.0735	0.0147
N	-1.0293748763761228	1.59601406731643	-1.2410995055044916	0.0294	-0.1029	0.1176
O	3.5215658090596924	3.299406123623877	0.744263	0.0735	0.0294	0.0
C	0.2513435618119385	-0.5606216854358157	-2.943114876376123	0.0147	-0.0441	0.0294
C	0.015931123623877094	0.798079876376123	-3.254658190940307	0.0294	-0.0294	0.0735
C	-0.6655563145641843	1.7926541909403073	-2.4956415055044916	0.0441	-0.0735	0.1176
O	3.755869685435816	0.5943375618119385	1.1115703145641844	0.0441	0.0147	-0.0441
C	2.486648123623877	0.2885453708716313	1.4149723145641844	0.0294	0.0882	-0.0441
C	2.46098	-0.19464656181193854	2.8758506291283688	0.0	-0.0147	-0.0882
C	4.054365685435815	1.1101496854358155	-0.2036551236238771	0.0441	0.0441	-0.0294
O	1.5795961236238771	0.42402386536713965	0.6139194381880615	0.0294	0.2058	-0.0147
C	3.5697355618119384	4.462720247247754	-1.6782594381880616	0.0147	0.0588	0.0147
O	-1.0879123145641845	-0.18698243818806146	1.5155987417432626	0.0441	0.0147	0.1764
C	0.8403090110089833	-1.9318373255731676	2.6182936964447987	-0.2352	0.2793	-0.1911
O	1.4631299547015362	-2.4075132692657206	1.6758482019492906	-0.3675	0.4116	-0.3087
O	-1.6144013708716314	-2.6863593145641844	2.6921298763761228	-0.0882	0.0441	-0.0294
C	-2.524349370871631	-1.637938876376123	2.659463	-0.0882	0.0294	0.0
C	-1.9451488090596927	-0.21100043818806144	2.5989518090596926	-0.0735	0.0147	0.0735
C	-0.35517268543581565	-2.6317949436925527	3.362498943692553	-0.0441	0.1323	-0.1323
O	-3.6928993708716313	-1.9362013145641845	2.5593394381880614	-0.0882	0.0441	-0.0147
C	-3.080805123623877	0.8188666854358156	2.5438354381880615	-0.0294	0.0441	-0.0147
C	0.06188293268356984	-4.113995696444799	3.5000535728209217	0.1029	0.1911	-0.2205
C	2.7895559326835695	0.9376320673164302	3.8492628763761227	0.1029	-0.1029	-0.0294
C	5.542625685435816	0.8883911236238771	-0.4328116854358156	0.0441	0.0294	-0.0441
C	0.2751344381880615	-2.478939370871631	-1.3948761236238771	-0.0147	-0.0882	-0.0294
C	-1.980313876376123	2.4620516291283687	-0.5543276291283687	0.0294	-0.0882	0.0882
C	-0.9219305618119386	-3.174852370871631	-0.9855896854358156	-0.0147	-0.0882	-0.0441
C	-0.7968245618119385	-4.464179370871631	-0.4138956854358156	-0.0147	-0.0882	-0.0441
C	0.46708843818806145	-5.086857809059692	-0.2660921236238771	-0.0147	-0.0735	-0.0294
C	1.6224004381880615	-4.425952809059693	-0.755627	-0.0147	-0.0735	0.0
C	1.5574384381880615	-3.1285588090596925	-1.317455	-0.0147	-0.0735	0.0
C	-2.34032	-2.5981152472477542	-1.282760123623877	0.0	-0.0588	-0.0294
C	2.8741804381880613	-2.4835196854358155	-1.812554876376123	-0.0147	-0.0441	0.0294
C	-1.5125964381880614	3.3554923145641844	0.45765724724775425	0.0147	-0.0441	0.0588
C	-2.459717	4.067930438188061	1.2351695618119385	0.0	-0.0147	0.0147
C	-3.837774	3.8996074381880614	1.0340174381880616	0.0	-0.0147	-0.0147
C	-4.289377438188062	3.0155973145641846	0.027251561811938548	0.0147	-0.0441	0.0147
C	-3.385086876376123	2.2747231909403074	-0.7699847527522458	0.0294	-0.0735	0.0588
C	-0.009406438188061451	3.587465876376123	0.7298292472477542	0.0147	-0.0294	0.0588
C	-3.9503763145641844	1.2705601909403073	-1.817252752752246	0.0441	-0.0735	0.0588
C	-3.4751945618119384	-3.3131616854358157	-0.5115655618119386	-0.0147	-0.0441	-0.0147
C	-2.623259123623877	-2.6483176854358157	-2.815750123623877	-0.0294	-0.0441	-0.0294
C	3.9626733145641846	-2.449578123623877	-0.7111771909403073	-0.0441	-0.0294	0.0735
C	3.440245123623877	-3.243817123623877	-3.0646403145641843	0.0294	-0.0294	0.0441
C	-4.841757	0.18657531456418436	-1.1281713145641845	0.0	-0.0441	0.0441
C	-4.761312629128369	2.001157190940307	-2.9256154381880615	0.0882	-0.0735	0.0147
C	0.35644556181193854	3.220529	2.210142247247754	0.0147	0.0	0.0588
C	0.413599	5.057930876376123	0.4139271236238771	0.0	-0.0294	0.0294
C	0.654867	-1.4317375618119386	-4.123467	0.0	-0.0147	0.0
C	-1.0054937527522458	3.1018303145641846	-3.189806820068676	0.0588	-0.0441	0.1617
H	0.23277368543581564	1.088495	-4.280642629128369	0.0441	0.0	0.0882
H	3.2121113145641846	-0.9887912472477541	2.922648381880615	-0.0441	-0.0588	-0.147
H	3.455656123623877	0.5902942472477543	-0.9370606854358157	0.0294	0.0588	-0.0441
H	2.6035455618119383	4.765390685435816	-1.276753876376123	0.0147	0.0441	0.0294
H	3.612447	4.623887809059693	-2.7532534381880613	0.0	0.0735	0.0147
H	4.362981561811939	5.023038247247754	-1.1756454381880614	0.0147	0.0588	0.0147
H	-1.3710627417432626	-0.048407	3.550325494495508	-0.1764	0.0	0.1176
H	-0.482214	-2.1418541909403075	4.33622306731643	0.0	0.0735	-0.1029
H	-3.7241009326835695	0.7542031236238771	3.4437296291283688	-0.1029	0.0294	-0.0882
H	-3.6984913145641842	0.6635403708716312	1.6658991909403071	0.0441	0.0882	-0.0735
H	-2.6588375618119384	1.8180246854358155	2.4818376854358157	-0.0147	0.0441	0.0441
H	-0.7283395728209218	-4.66272806731643	4.036939258256737	0.2205	0.1029	-0.1764
H	1.0075716181193854	-4.212282325573168	4.05852920194929	0.147	0.2793	-0.3087
H	0.20559868543581564	-4.512859134632861	2.492544011008983	0.0441	0.2058	-0.2352
H	3.766447056307447	1.3726962582567375	3.6119704381880613	0.1323	-0.1764	-0.0147
H	2.8081648090596927	0.541886820068676	4.873171752752246	0.0735	-0.1617	-0.0588
H	2.0241227417432626	1.7240673145641845	3.7790921236238773	0.1764	-0.0441	0.0294
H	5.767023123623877	-0.1835728763761229	-0.39954824724775423	0.0294	0.0294	-0.0588
H	6.1424736854358155	1.3958965618119386	0.3234668763761229	0.0441	0.0147	-0.0294
H	5.8222916854358155	1.2745646854358155	-1.4101546854358156	0.0441	0.0441	-0.0441
H	-1.6971365618119385	-5.012182370871631	-0.0957972472477542	-0.0147	-0.0882	-0.0588
H	0.5564048763761229	-6.096096809059692	0.14561543818806144	-0.0294	-0.0735	-0.0147
H	2.5966954381880614	-4.924181809059693	-0.6851834381880615	-0.0147	-0.0735	0.0147
H	-2.3361404381880613	-1.5262822472477542	-0.9813071236238771	0.0147	-0.0588	-0.0294
H	2.6403294381880613	-1.425427247247754	-2.109445876376123	-0.0147	-0.0588	0.0294
H	-2.12091	4.7680225618119385	2.0121024381880614	0.0	0.0147	-0.0147
H	-4.569246	4.456012561811939	1.6365033145641845	0.0	0.0147	-0.0441
H	-5.3645134381880615	2.8812118763761227	-0.12767556181193854	0.0147	-0.0294	-0.0147
H	0.5680475618119385	2.9108448763761228	0.05432180905969272	0.0147	-0.0294	0.0735
H	-3.0904023145641846	0.7608850673164302	-2.2924736291283687	0.0441	-0.1029	0.0882
H	-4.429595	-2.779977123623877	-0.6734285618119386	0.0	-0.0294	-0.0147
H	-3.286248	-3.3333486854358156	0.5699144381880614	0.0	-0.0441	-0.0147
H	-3.604314123623877	-4.345653685435815	-0.8648105618119385	-0.0294	-0.0441	-0.0147
H	-3.6457335618119386	-2.2739145618119387	-3.0137255618119387	-0.0147	-0.0147	-0.0147
H	-2.5728466854358154	-3.6824366854358157	-3.193540123623877	-0.0441	-0.0441	-0.0294
H	-1.9150535618119384	-2.026714247247754	-3.384194123623877	-0.0147	-0.0588	-0.0294
H	4.892218752752246	-1.970572	-1.0957670673164301	-0.0588	0.0	0.1029
H	4.230571876376123	-3.4779795618119387	-0.38703319094030725	-0.0294	-0.0147	0.0735
H	3.6254200673164303	-1.8968086854358155	0.18057824724775418	-0.1029	-0.0441	0.0588
H	4.316575685435816	-2.7234265618119387	-3.4543821909403074	0.0441	-0.0147	0.0735
H	2.686364247247754	-3.310582123623877	-3.875901876376123	0.0588	-0.0294	0.0294
H	3.7386951236238772	-4.265778123623877	-2.7846383145641846	0.0294	-0.0294	0.0441
H	-5.182211	-0.5485356854358157	-1.858041876376123	0.0	-0.0441	0.0294
H	-4.264095685435816	-0.3366422472477542	-0.3385537527522458	-0.0441	-0.0588	0.0588
H	-5.727215	0.654362876376123	-0.640724	0.0	-0.0294	0.0
H	-5.092602629128369	1.2821576291283687	-3.691064876376123	0.0882	-0.0882	0.0294
H	-4.147440505504492	2.7703030673164304	-3.442022876376123	0.1176	-0.1029	0.0294
H	-5.648423629128369	2.508334752752246	-2.5048765618119386	0.0882	-0.0588	-0.0147
H	1.4408325618119384	3.3447185618119386	2.362362247247754	0.0147	0.0147	0.0588
H	0.08577156181193855	2.1561625618119384	2.399894370871631	0.0147	0.0147	0.0882
H	-0.18179643818806146	3.8592675618119383	2.9288116854358157	0.0147	0.0147	0.0441
H	1.484708	5.189650438188061	0.632802123623877	0.0	-0.0147	0.0294
H	-0.14152056181193856	5.768044438188062	1.014198123623877	-0.0147	-0.0147	0.0294
H	0.24331143818806145	5.273701876376123	-0.651843876376123	-0.0147	-0.0294	0.0294
H	0.546034	-2.5020195618119385	-3.898153123623877	0.0	-0.0147	-0.0294
H	0.029434	-1.1989994381880615	-5.000225438188061	0.0	0.0147	0.0147
H	1.696732	-1.2377595618119386	-4.407983	0.0	-0.0147	0.0
H	-2.078713752752246	3.1658194381880613	-3.4045312582567373	0.0588	-0.0147	0.1764
H	-0.7519906291283688	3.946727752752246	-2.547766258256737	0.0882	-0.0588	0.1764
H	-0.4619403145641844	3.200361876376123	-4.126818381880614	0.0441	-0.0294	0.147
114
O	3.7797929753257264	3.035050901302906	-1.50347	0.0147	0.0588	0.0
Mg	-0.4391441727199149	0.09531324674273556	-0.15016617271991492	0.1029	-0.147	0.1029
O	1.2069400246742734	-0.7659450986970943	3.298337123371368	-0.0147	0.0588	-0.0735
C	3.7269929259771795	2.597402925977179	-0.22180297532572643	0.0441	0.0441	-0.0147
N	0.129969	-1.0627098766286323	-1.7308490246742736	0.0	-0.0735	0.0147
N	-1.035028049348547	1.615800172719915	-1.2637121973941885	0.0294	-0.1029	0.1176
O	3.507432876628632	3.293752950651453	0.744263	0.0735	0.0294	0.0
C	0.24851697532572642	-0.5521419259771794	-2.948768049348547	0.0147	-0.0441	0.0294
C	0.010277950651452886	0.8037330493485472	-3.2687911233713676	0.0294	-0.0294	0.0735
C	-0.6740360740228206	1.8067871233713677	-2.5182541973941883	0.0441	-0.0735	0.1176
O	3.7473899259771795	0.5915109753257265	1.1200500740228208	0.0441	0.0147	-0.0441
C	2.480994950651453	0.27158585195435864	1.4234520740228207	0.0294	0.0882	-0.0441
C	2.46098	-0.19181997532572642	2.8928101480456414	0.0	-0.0147	-0.0882
C	4.0458859259771796	1.1016699259771792	-0.1980019506514529	0.0441	0.0441	-0.0294
O	1.573942950651453	0.38445165456017016	0.6167460246742735	0.0294	0.2058	-0.0147
C	3.566908975325726	4.451413901302906	-1.6810860246742736	0.0147	0.0588	0.0147
O	-1.0963920740228208	-0.18980902467427357	1.4816797039087175	0.0441	0.0147	0.1764
C	0.8855343947883769	-1.9855424688111976	2.6550393207655563	-0.2352	0.2793	-0.1911
O	1.5337946168568388	-2.4866576908796594	1.7352065181597447	-0.3675	0.4116	-0.3087
O	-1.5974418519543587	-2.6948390740228207	2.697783049348547	-0.0882	0.0441	-0.0294
C	-2.5073898519543585	-1.643592049348547	2.659463	-0.0882	0.0294	0.0
C	-1.9310158766286323	-0.21382702467427356	2.584818876628632	-0.0735	0.0147	0.0735
C	-0.3466929259771794	-2.6572342220684617	3.387938222068462	-0.0441	0.1323	-0.1323
O	-3.6759398519543587	-1.9446810740228209	2.5621660246742737	-0.0882	0.0441	-0.0147
C	-3.075151950651453	0.8103869259771793	2.5466620246742737	-0.0294	0.0441	-0.0147
C	0.0420968272800851	-4.150741320765556	3.5424523701141033	0.1029	0.1911	-0.2205
C	2.769769827280085	0.9574181727199149	3.854916049348547	0.1029	-0.1029	-0.0294
C	5.53414592597718	0.8827379506514529	-0.42433192597717934	0.0441	0.0294	-0.0441
C	0.2779610246742736	-2.4619798519543585	-1.389222950651453	-0.0147	-0.0882	-0.0294
C	-1.985967049348547	2.4790111480456414	-0.5712871480456413	0.0294	-0.0882	0.0882
C	-0.9191039753257265	-3.1578928519543585	-0.9771099259771793	-0.0147	-0.0882	-0.0441
C	-0.7939979753257265	-4.447219851954358	-0.40541592597717935	-0.0147	-0.0882	-0.0441
C	0.46991502467427354	-5.072724876628632	-0.26043895065145284	-0.0147	-0.0735	-0.0294
C	1.6252270246742735	-4.411819876628632	-0.755627	-0.0147	-0.0735	0.0
C	1.5602650246742735	-3.114425876628632	-1.317455	-0.0147	-0.0735	0.0
C	-2.34032	-2.586808901302906	-1.277106950651453	0.0	-0.0588	-0.0294
C	2.8770070246742736	-2.475039925977179	-1.818208049348547	-0.0147	-0.0441	0.0294
C	-1.5154230246742735	3.3639720740228207	0.44635090130290583	0.0147	-0.0441	0.0588
C	-2.459717	4.070757024674274	1.2323429753257265	0.0	-0.0147	0.0147
C	-3.837774	3.9024340246742737	1.0368440246742736	0.0	-0.0147	-0.0147
C	-4.292204024674274	3.024077074022821	0.024424975325726444	0.0147	-0.0441	0.0147
C	-3.390740049348547	2.288856123371368	-0.7812910986970942	0.0294	-0.0735	0.0588
C	-0.012233024674273556	3.593119049348547	0.7185229013029057	0.0147	-0.0294	0.0588
C	-3.9588560740228207	1.2846931233713679	-1.8285590986970943	0.0441	-0.0735	0.0588
C	-3.472367975325726	-3.3046819259771794	-0.5087389753257265	-0.0147	-0.0441	-0.0147
C	-2.617605950651453	-2.6398379259771794	-2.810096950651453	-0.0294	-0.0441	-0.0294
C	3.971153074022821	-2.443924950651453	-0.7253101233713678	-0.0441	-0.0294	0.0735
C	3.434591950651453	-3.238163950651453	-3.0731200740228206	0.0294	-0.0294	0.0441
C	-4.841757	0.19505507402282068	-1.1366510740228208	0.0	-0.0441	0.0441
C	-4.778272148045642	2.0152901233713676	-2.9284420246742737	0.0882	-0.0735	0.0147
C	0.35361897532572645	3.220529	2.198835901302906	0.0147	0.0	0.0588
C	0.413599	5.063584049348547	0.4082739506514529	0.0	-0.0294	0.0294
C	0.654867	-1.4289109753257265	-4.123467	0.0	-0.0147	0.0
C	-1.0168000986970942	3.110310074022821	-3.2208992714170095	0.0588	-0.0441	0.1617
H	0.22429392597717931	1.088495	-4.297602148045642	0.0441	0.0	0.0882
H	3.220591074022821	-0.9774849013029057	2.9509142467427356	-0.0441	-0.0588	-0.147
H	3.450002950651453	0.5789879013029058	-0.9285809259771793	0.0294	0.0588	-0.0441
H	2.600718975325726	4.75691092597718	-1.282407049348547	0.0147	0.0441	0.0294
H	3.612447	4.6097548766286325	-2.7560800246742736	0.0	0.0735	0.0147
H	4.3601549753257265	5.011731901302906	-1.1784720246742735	0.0147	0.0588	0.0147
H	-1.3371437039087175	-0.048407	3.5277128026058113	-0.1764	0.0	0.1176
H	-0.482214	-2.155987123371368	4.356009172719915	0.0	0.0735	-0.1029
H	-3.704314827280085	0.7485499506514529	3.4606891480456414	-0.1029	0.0294	-0.0882
H	-3.7069710740228206	0.6465808519543587	1.6800321233713678	0.0441	0.0882	-0.0735
H	-2.656010975325726	1.8095449259771792	2.4733579259771794	-0.0147	0.0441	0.0441
H	-0.7707383701141033	-4.682514172719915	4.0708582960912825	0.2205	0.1029	-0.1764
H	0.9793057532572644	-4.265987468811198	4.117887518159745	0.147	0.2793	-0.3087
H	0.1971189259771793	-4.55243134543983	2.537769394788377	0.0441	0.2058	-0.2352
H	3.741007777931538	1.4066152960912826	3.6147970246742736	0.1323	-0.1764	-0.0147
H	2.7940318766286323	0.5729792714170091	4.884478098697094	0.0735	-0.1617	-0.0588
H	1.9902037039087173	1.7325470740228208	3.773438950651453	0.1764	-0.0441	0.0294
H	5.761369950651453	-0.18922604934854712	-0.3882419013029058	0.0294	0.0294	-0.0588
H	6.13399392597718	1.3930699753257265	0.32912004934854716	0.0441	0.0147	-0.0294
H	5.81381192597718	1.2660849259771791	-1.4016749259771792	0.0441	0.0441	-0.0441
H	-1.6943099753257265	-4.995222851954359	-0.08449090130290578	-0.0147	-0.0882	-0.0588
H	0.5620580493485471	-6.081963876628632	0.14844202467427356	-0.0294	-0.0735	-0.0147
H	2.5995220246742736	-4.9100488766286325	-0.6880100246742735	-0.0147	-0.0735	0.0147
H	-2.3389670246742735	-1.5149759013029058	-0.9756539506514529	0.0147	-0.0588	-0.0294
H	2.6431560246742736	-1.4141209013029057	-2.115099049348547	-0.0147	-0.0588	0.0294
H	-2.12091	4.765195975325726	2.0149290246742737	0.0	0.0147	-0.0147
H	-4.569246	4.453185975325726	1.6449830740228208	0.0	0.0147	-0.0441
H	-5.367340024674274	2.886865049348547	-0.12484897532572643	0.0147	-0.0294	-0.0147
H	0.5652209753257265	2.916498049348547	0.040188876628632214	0.0147	-0.0294	0.0735
H	-3.098882074022821	0.7806711727199149	-2.3094331480456414	0.0441	-0.1029	0.0882
H	-4.429595	-2.774323950651453	-0.6706019753257265	0.0	-0.0294	-0.0147
H	-3.286248	-3.3248689259771793	0.5727410246742735	0.0	-0.0441	-0.0147
H	-3.598660950651453	-4.337173925977179	-0.8619839753257265	-0.0294	-0.0441	-0.0147
H	-3.6429069753257264	-2.2710879753257265	-3.0108989753257265	-0.0147	-0.0147	-0.0147
H	-2.564366925977179	-3.6739569259771794	-3.187886950651453	-0.0441	-0.0441	-0.0294
H	-1.9122269753257264	-2.015407901302906	-3.3785409506514528	-0.0147	-0.0588	-0.0294
H	4.903525098697094	-1.970572	-1.115553172719915	-0.0588	0.0	0.1029
H	4.236225049348548	-3.4751529753257264	-0.40116612337136776	-0.0294	-0.0147	0.0735
H	3.6452061727199148	-1.8883289259771792	0.16927190130290576	-0.1029	-0.0441	0.0588
H	4.30809592597718	-2.7205999753257264	-3.468515123371368	0.0441	-0.0147	0.0735
H	2.675057901302906	-3.304928950651453	-3.881555049348547	0.0588	-0.0294	0.0294
H	3.733041950651453	-4.260124950651453	-2.793118074022821	0.0294	-0.0294	0.0441
H	-5.182211	-0.5400559259771793	-1.8636950493485471	0.0	-0.0441	0.0294
H	-4.25561592597718	-0.3253359013029058	-0.3498600986970942	-0.0441	-0.0588	0.0588
H	-5.727215	0.6600160493485472	-0.640724	0.0	-0.0294	0.0
H	-5.109562148045642	1.2991171480456414	-3.696718049348547	0.0882	-0.0882	0.0294
H	-4.170053197394188	2.790089172719915	-3.447676049348547	0.1176	-0.1029	0.0294
H	-5.665383148045642	2.519641098697094	-2.5020499753257264	0.0882	-0.0588	-0.0147
H	1.4380059753257264	3.3418919753257263	2.3510559013029058	0.0147	0.0147	0.0588
H	0.08294497532572645	2.153335975325726	2.3829348519543583	0.0147	0.0147	0.0882
H	-0.18462302467427358	3.856440975325726	2.9203319259771794	0.0147	0.0147	0.0441
H	1.484708	5.1924770246742735	0.6271489506514528	0.0	-0.0147	0.0294
H	-0.13869397532572644	5.770871024674274	1.008544950651453	-0.0147	-0.0147	0.0294
H	0.24613802467427356	5.279355049348547	-0.6574970493485471	-0.0147	-0.0294	0.0294
H	0.546034	-2.4991929753257263	-3.892499950651453	0.0	-0.0147	-0.0294
H	0.029434	-1.2018260246742736	-5.003052024674274	0.0	0.0147	0.0147
H	1.696732	-1.2349329753257265	-4.407983	0.0	-0.0147	0.0
H	-2.090020098697094	3.1686460246742736	-3.4384502960912826	0.0588	-0.0147	0.1764
H	-0.7689501480456413	3.958034098697094	-2.5816852960912824	0.0882	-0.0588	0.1764
H	-0.47042007402282066	3.206015049348547	-4.155084246742735	0.0441	-0.0294	0.147
114
O	3.7788190000000004	3.031155	-1.50347	0.0147	0.0588	0.0
Mg	-0.44596199999999997	0.10505300000000001	-0.156984	0.1029	-0.147	0.1029
O	1.207914	-0.769841	3.303207	-0.0147	0.0588	-0.0735
C	3.7240710000000004	2.594481	-0.220829	0.0441	0.0441	-0.0147
N	0.129969	-1.0578400000000001	-1.7318230000000001	0.0	-0.0735	0.0147
N	-1.036976	1.622618	-1.271504	0.0294	-0.1029	0.1176
O	3.502563	3.291805	0.744263	0.0735	0.0294	0.0
C	0.24754299999999999	-0.54922	-2.950716	0.0147	-0.0441	0.0294
C	0.008329999999999997	0.8056810000000001	-3.2736609999999997	0.0294	-0.0294	0.0735
C	-0.676958	1.8116569999999999	-2.526046	0.0441	-0.0735	0.1176
O	3.7444680000000004	0.590537	1.122972	0.0441	0.0147	-0.0441
C	2.479047	0.265742	1.426374	0.0294	0.0882	-0.0441
C	2.46098	-0.190846	2.898654	0.0	-0.0147	-0.0882
C	4.042964	1.0987479999999998	-0.196054	0.0441	0.0441	-0.0294
O	1.571995	0.370816	0.61772	0.0294	0.2058	-0.0147
C	3.565935	4.447518	-1.68206	0.0147	0.0588	0.0147
O	-1.0993140000000001	-0.190783	1.4699920000000002	0.0441	0.0147	0.1764
C	0.901118	-2.004048	2.667701	-0.2352	0.2793	-0.1911
O	1.558144	-2.513929	1.75566	-0.3675	0.4116	-0.3087
O	-1.591598	-2.697761	2.699731	-0.0882	0.0441	-0.0294
C	-2.501546	-1.64554	2.659463	-0.0882	0.0294	0.0
C	-1.9261460000000001	-0.214801	2.579949	-0.0735	0.0147	0.0735
C	-0.34377100000000005	-2.666	3.396704	-0.0441	0.1323	-0.1323
O	-3.670096	-1.9476030000000002	2.5631399999999998	-0.0882	0.0441	-0.0147
C	-3.073204	0.807465	2.547636	-0.0294	0.0441	-0.0147
C	0.035279000000000005	-4.163403	3.557062	0.1029	0.1911	-0.2205
C	2.762952	0.964236	3.856864	0.1029	-0.1029	-0.0294
C	5.531224	0.88079	-0.42141	0.0441	0.0294	-0.0441
C	0.27893500000000004	-2.456136	-1.387275	-0.0147	-0.0882	-0.0294
C	-1.987915	2.484855	-0.577131	0.0294	-0.0882	0.0882
C	-0.91813	-3.152049	-0.9741879999999999	-0.0147	-0.0882	-0.0441
C	-0.793024	-4.441376	-0.402494	-0.0147	-0.0882	-0.0441
C	0.470889	-5.067855	-0.25849099999999997	-0.0147	-0.0735	-0.0294
C	1.626201	-4.40695	-0.755627	-0.0147	-0.0735	0.0
C	1.561239	-3.109556	-1.317455	-0.0147	-0.0735	0.0
C	-2.34032	-2.582913	-1.275159	0.0	-0.0588	-0.0294
C	2.8779809999999997	-2.472118	-1.820156	-0.0147	-0.0441	0.0294
C	-1.516397	3.366894	0.44245500000000004	0.0147	-0.0441	0.0588
C	-2.459717	4.071731	1.231369	0.0	-0.0147	0.0147
C	-3.837774	3.9034079999999998	1.0378180000000001	0.0	-0.0147	-0.0147
C	-4.293178	3.026999	0.023451	0.0147	-0.0441	0.0147
C	-3.392688	2.293726	-0.785187	0.0294	-0.0735	0.0588
C	-0.013207	3.5950670000000002	0.714627	0.0147	-0.0294	0.0588
C	-3.961778	1.289563	-1.832455	0.0441	-0.0735	0.0588
C	-3.471394	-3.3017600000000003	-0.507765	-0.0147	-0.0441	-0.0147
C	-2.615658	-2.6369160000000003	-2.808149	-0.0294	-0.0441	-0.0294
C	3.974075	-2.441977	-0.73018	-0.0441	-0.0294	0.0735
C	3.432644	-3.2362159999999998	-3.0760419999999997	0.0294	-0.0294	0.0441
C	-4.841757	0.19797700000000001	-1.1395730000000002	0.0	-0.0441	0.0441
C	-4.784116	2.02016	-2.929416	0.0882	-0.0735	0.0147
C	0.352645	3.220529	2.19494	0.0147	0.0	0.0588
C	0.413599	5.065531999999999	0.406326	0.0	-0.0294	0.0294
C	0.654867	-1.427937	-4.123467	0.0	-0.0147	0.0
C	-1.020696	3.113232	-3.2316130000000003	0.0588	-0.0441	0.1617
H	0.22137199999999999	1.088495	-4.303446	0.0441	0.0	0.0882
H	3.223513	-0.9735889999999999	2.960654	-0.0441	-0.0588	-0.147
H	3.448055	0.575092	-0.925659	0.0294	0.0588	-0.0441
H	2.599745	4.753989	-1.2843550000000001	0.0147	0.0441	0.0294
H	3.612447	4.604885	-2.7570539999999997	0.0	0.0735	0.0147
H	4.359181	5.007836	-1.179446	0.0147	0.0588	0.0147
H	-1.3254560000000002	-0.048407	3.519921	-0.1764	0.0	0.1176
H	-0.482214	-2.160857	4.362827	0.0	0.0735	-0.1029
H	-3.697497	0.746602	3.466533	-0.1029	0.0294	-0.0882
H	-3.7098929999999997	0.640737	1.684902	0.0441	0.0882	-0.0735
H	-2.655037	1.8066229999999999	2.4704360000000003	-0.0147	0.0441	0.0441
H	-0.7853479999999999	-4.689332	4.082546	0.2205	0.1029	-0.1764
H	0.9695659999999999	-4.284493	4.1383410000000005	0.147	0.2793	-0.3087
H	0.19419699999999998	-4.566067	2.553353	0.0441	0.2058	-0.2352
H	3.732242	1.4183029999999999	3.6157709999999996	0.1323	-0.1764	-0.0147
H	2.789162	0.583693	4.888374	0.0735	-0.1617	-0.0588
H	1.978516	1.7354690000000002	3.771491	0.1764	-0.0441	0.0294
H	5.759422000000001	-0.191174	-0.384346	0.0294	0.0294	-0.0588
H	6.131072	1.392096	0.33106800000000003	0.0441	0.0147	-0.0294
H	5.81089	1.2631629999999998	-1.398753	0.0441	0.0441	-0.0441
H	-1.693336	-4.9893790000000005	-0.080595	-0.0147	-0.0882	-0.0588
H	0.564006	-6.077094	0.149416	-0.0294	-0.0735	-0.0147
H	2.6004959999999997	-4.905179	-0.688984	-0.0147	-0.0735	0.0147
H	-2.3399409999999996	-1.5110800000000002	-0.973706	0.0147	-0.0588	-0.0294
H	2.6441299999999996	-1.410225	-2.117047	-0.0147	-0.0588	0.0294
H	-2.12091	4.764222	2.015903	0.0	0.0147	-0.0147
H	-4.569246	4.452212	1.6479050000000002	0.0	0.0147	-0.0441
H	-5.368314	2.888813	-0.12387499999999999	0.0147	-0.0294	-0.0147
H	0.5642469999999999	2.918446	0.03531899999999999	0.0147	-0.0294	0.0735
H	-3.101804	0.787489	-2.315277	0.0441	-0.1029	0.0882
H	-4.429595	-2.772376	-0.669628	0.0	-0.0294	-0.0147
H	-3.286248	-3.321947	0.573715	0.0	-0.0441	-0.0147
H	-3.596713	-4.334251999999999	-0.8610099999999999	-0.0294	-0.0441	-0.0147
H	-3.6419330000000003	-2.2701140000000004	-3.0099250000000004	-0.0147	-0.0147	-0.0147
H	-2.561445	-3.6710350000000003	-3.185939	-0.0441	-0.0441	-0.0294
H	-1.9112529999999999	-2.0115119999999997	-3.3765929999999997	-0.0147	-0.0588	-0.0294
H	4.907421	-1.970572	-1.122371	-0.0588	0.0	0.1029
H	4.238173	-3.4741790000000004	-0.40603599999999995	-0.0294	-0.0147	0.0735
H	3.652024	-1.8854069999999998	0.165376	-0.1029	-0.0441	0.0588
H	4.305174	-2.7196260000000003	-3.473385	0.0441	-0.0147	0.0735
H	2.671162	-3.302981	-3.883503	0.0588	-0.0294	0.0294
H	3.731094	-4.258177000000001	-2.79604	0.0294	-0.0294	0.0441
H	-5.182211	-0.537134	-1.8656430000000002	0.0	-0.0441	0.0294
H	-4.252694	-0.32144	-0.353756	-0.0441	-0.0588	0.0588
H	-5.727215	0.661964	-0.640724	0.0	-0.0294	0.0
H	-5.115406	1.304961	-3.6986660000000002	0.0882	-0.0882	0.0294
H	-4.1778450000000005	2.796907	-3.449624	0.1176	-0.1029	0.0294
H	-5.671227	2.523537	-2.5010760000000003	0.0882	-0.0588	-0.0147
H	1.4370319999999999	3.3409180000000003	2.3471599999999997	0.0147	0.0147	0.0588
H	0.081971	2.152362	2.3770909999999996	0.0147	0.0147	0.0882
H	-0.185597	3.855467	2.9174100000000003	0.0147	0.0147	0.0441
H	1.484708	5.193451	0.6252009999999999	0.0	-0.0147	0.0294
H	-0.13772	5.771845	1.006597	-0.0147	-0.0147	0.0294
H	0.247112	5.281302999999999	-0.6594450000000001	-0.0147	-0.0294	0.0294
H	0.546034	-2.498219	-3.890552	0.0	-0.0147	-0.0294
H	0.029434	-1.2028	-5.004026	0.0	0.0147	0.0147
H	1.696732	-1.233959	-4.407983	0.0	-0.0147	0.0
H	-2.093916	3.1696199999999997	-3.450138	0.0588	-0.0147	0.1764
H	-0.774794	3.96193	-2.5933729999999997	0.0882	-0.0588	0.1764
H	-0.473342	3.207963	-4.164824	0.0441	-0.0294	0.147
114
O	3.7797929753257264	3.035050901302906	-1.50347	0.0147	0.0588	0.0
Mg	-0.4391441727199149	0.09531324674273559	-0.15016617271991492	0.1029	-0.147	0.1029
O	1.2069400246742734	-0.7659450986970943	3.298337123371368	-0.0147	0.0588	-0.0735
C	3.7269929259771795	2.597402925977179	-0.22180297532572643	0.0441	0.0441	-0.0147
N	0.129969	-1.0627098766286323	-1.7308490246742736	0.0	-0.0735	0.0147
N	-1.035028049348547	1.615800172719915	-1.2637121973941885	0.0294	-0.1029	0.1176
O	3.507432876628632	3.293752950651453	0.744263	0.0735	0.0294	0.0
C	0.24851697532572642	-0.5521419259771794	-2.948768049348547	0.0147	-0.0441	0.0294
C	0.010277950651452879	0.8037330493485472	-3.2687911233713676	0.0294	-0.0294	0.0735
C	-0.6740360740228206	1.8067871233713677	-2.5182541973941883	0.0441	-0.0735	0.1176
O	3.7473899259771795	0.5915109753257265	1.1200500740228208	0.0441	0.0147	-0.0441
C	2.480994950651453	0.27158585195435864	1.4234520740228207	0.0294	0.0882	-0.0441
C	2.46098	-0.19181997532572642	2.8928101480456414	0.0	-0.0147	-0.0882
C	4.0458859259771796	1.1016699259771792	-0.19800195065145287	0.0441	0.0441	-0.0294
O	1.573942950651453	0.38445165456017016	0.6167460246742735	0.0294	0.2058	-0.0147
C	3.566908975325726	4.451413901302906	-1.6810860246742736	0.0147	0.0588	0.0147
O	-1.0963920740228208	-0.18980902467427357	1.4816797039087173	0.0441	0.0147	0.1764
C	0.8855343947883769	-1.9855424688111976	2.6550393207655563	-0.2352	0.2793	-0.1911
O	1.5337946168568388	-2.4866576908796594	1.7352065181597447	-0.3675	0.4116	-0.3087
O	-1.5974418519543587	-2.6948390740228207	2.697783049348547	-0.0882	0.0441	-0.0294
C	-2.5073898519543585	-1.643592049348547	2.659463	-0.0882	0.0294	0.0
C	-1.9310158766286323	-0.21382702467427356	2.584818876628632	-0.0735	0.0147	0.0735
C	-0.3466929259771794	-2.6572342220684617	3.387938222068462	-0.0441	0.1323	-0.1323
O	-3.6759398519543587	-1.9446810740228209	2.5621660246742737	-0.0882	0.0441	-0.0147
C	-3.075151950651453	0.8103869259771793	2.5466620246742737	-0.0294	0.0441	-0.0147
C	0.0420968272800851	-4.150741320765556	3.5424523701141033	0.1029	0.1911	-0.2205
C	2.769769827280085	0.9574181727199149	3.854916049348547	0.1029	-0.1029	-0.0294
C	5.53414592597718	0.8827379506514529	-0.4243319259771793	0.0441	0.0294	-0.0441
C	0.2779610246742736	-2.4619798519543585	-1.389222950651453	-0.0147	-0.0882	-0.0294
C	-1.985967049348547	2.4790111480456414	-0.5712871480456414	0.0294	-0.0882	0.0882
C	-0.9191039753257265	-3.1578928519543585	-0.9771099259771793	-0.0147	-0.0882	-0.0441
C	-0.7939979753257265	-4.447219851954358	-0.40541592597717935	-0.0147	-0.0882	-0.0441
C	0.46991502467427354	-5.072724876628632	-0.26043895065145284	-0.0147	-0.0735	-0.0294
C	1.6252270246742735	-4.411819876628632	-0.755627	-0.0147	-0.0735	0.0
C	1.5602650246742735	-3.114425876628632	-1.317455	-0.0147	-0.0735	0.0
C	-2.34032	-2.586808901302906	-1.277106950651453	0.0	-0.0588	-0.0294
C	2.8770070246742736	-2.475039925977179	-1.818208049348547	-0.0147	-0.0441	0.0294
C	-1.5154230246742735	3.3639720740228207	0.4463509013029058	0.0147	-0.0441	0.0588
C	-2.459717	4.070757024674274	1.2323429753257265	0.0	-0.0147	0.0147
C	-3.837774	3.9024340246742737	1.0368440246742736	0.0	-0.0147	-0.0147
C	-4.292204024674274	3.024077074022821	0.02442497532572644	0.0147	-0.0441	0.0147
C	-3.390740049348547	2.288856123371368	-0.7812910986970942	0.0294	-0.0735	0.0588
C	-0.01223302467427356	3.593119049348547	0.7185229013029057	0.0147	-0.0294	0.0588
C	-3.9588560740228207	1.2846931233713679	-1.8285590986970943	0.0441	-0.0735	0.0588
C	-3.472367975325726	-3.3046819259771794	-0.5087389753257265	-0.0147	-0.0441	-0.0147
C	-2.617605950651453	-2.6398379259771794	-2.810096950651453	-0.0294	-0.0441	-0.0294
C	3.971153074022821	-2.443924950651453	-0.7253101233713678	-0.0441	-0.0294	0.0735
C	3.434591950651453	-3.238163950651453	-3.0731200740228206	0.0294	-0.0294	0.0441
C	-4.841757	0.19505507402282068	-1.1366510740228208	0.0	-0.0441	0.0441
C	-4.778272148045642	2.015290123371368	-2.9284420246742737	0.0882	-0.0735	0.0147
C	0.35361897532572645	3.220529	2.198835901302906	0.0147	0.0	0.0588
C	0.413599	5.063584049348547	0.4082739506514529	0.0	-0.0294	0.0294
C	0.654867	-1.4289109753257265	-4.123467	0.0	-0.0147	0.0
C	-1.0168000986970942	3.110310074022821	-3.2208992714170095	0.0588	-0.0441	0.1617
H	0.22429392597717931	1.088495	-4.297602148045642	0.0441	0.0	0.0882
H	3.220591074022821	-0.9774849013029057	2.9509142467427356	-0.0441	-0.0588	-0.147
H	3.450002950651453	0.5789879013029058	-0.9285809259771793	0.0294	0.0588	-0.0441
H	2.600718975325726	4.75691092597718	-1.282407049348547	0.0147	0.0441	0.0294
H	3.612447	4.6097548766286325	-2.7560800246742736	0.0	0.0735	0.0147
H	4.3601549753257265	5.011731901302906	-1.1784720246742735	0.0147	0.0588	0.0147
H	-1.3371437039087173	-0.048407	3.5277128026058113	-0.1764	0.0	0.1176
H	-0.482214	-2.155987123371368	4.356009172719915	0.0	0.0735	-0.1029
H	-3.704314827280085	0.7485499506514529	3.4606891480456414	-0.1029	0.0294	-0.0882
H	-3.7069710740228206	0.6465808519543585	1.6800321233713678	0.0441	0.0882	-0.0735
H	-2.656010975325726	1.8095449259771792	2.4733579259771794	-0.0147	0.0441	0.0441
H	-0.7707383701141033	-4.682514172719915	4.0708582960912825	0.2205	0.1029	-0.1764
H	0.9793057532572644	-4.265987468811198	4.117887518159745	0.147	0.2793	-0.3087
H	0.1971189259771793	-4.55243134543983	2.537769394788377	0.0441	0.2058	-0.2352
H	3.741007777931538	1.4066152960912826	3.6147970246742736	0.1323	-0.1764	-0.0147
H	2.7940318766286323	0.5729792714170091	4.884478098697094	0.0735	-0.1617	-0.0588
H	1.9902037039087173	1.7325470740228208	3.773438950651453	0.1764	-0.0441	0.0294
H	5.761369950651453	-0.18922604934854714	-0.3882419013029058	0.0294	0.0294	-0.0588
H	6.13399392597718	1.3930699753257265	0.32912004934854716	0.0441	0.0147	-0.0294
H	5.81381192597718	1.2660849259771791	-1.4016749259771792	0.0441	0.0441	-0.0441
H	-1.6943099753257265	-4.995222851954359	-0.08449090130290576	-0.0147	-0.0882	-0.0588
H	0.5620580493485471	-6.081963876628632	0.14844202467427356	-0.0294	-0.0735	-0.0147
H	2.5995220246742736	-4.9100488766286325	-0.6880100246742735	-0.0147	-0.0735	0.0147
H	-2.3389670246742735	-1.5149759013029058	-0.9756539506514529	0.0147	-0.0588	-0.0294
H	2.6431560246742736	-1.4141209013029057	-2.115099049348547	-0.0147	-0.0588	0.0294
H	-2.12091	4.765195975325726	2.0149290246742737	0.0	0.0147	-0.0147
H	-4.569246	4.453185975325726	1.6449830740228208	0.0	0.0147	-0.0441
H	-5.367340024674274	2.886865049348547	-0.12484897532572642	0.0147	-0.0294	-0.0147
H	0.5652209753257265	2.916498049348547	0.0401888766286322	0.0147	-0.0294	0.0735
H	-3.098882074022821	0.7806711727199149	-2.3094331480456414	0.0441	-0.1029	0.0882
H	-4.429595	-2.774323950651453	-0.6706019753257265	0.0	-0.0294	-0.0147
H	-3.286248	-3.3248689259771793	0.5727410246742735	0.0	-0.0441	-0.0147
H	-3.598660950651453	-4.337173925977179	-0.8619839753257265	-0.0294	-0.0441	-0.0147
H	-3.6429069753257264	-2.2710879753257265	-3.0108989753257265	-0.0147	-0.0147	-0.0147
H	-2.564366925977179	-3.6739569259771794	-3.187886950651453	-0.0441	-0.0441	-0.0294
H	-1.9122269753257264	-2.015407901302906	-3.3785409506514528	-0.0147	-0.0588	-0.0294
H	4.903525098697094	-1.970572	-1.115553172719915	-0.0588	0.0	0.1029
H	4.236225049348548	-3.4751529753257264	-0.40116612337136776	-0.0294	-0.0147	0.0735
H	3.6452061727199148	-1.8883289259771792	0.16927190130290576	-0.1029	-0.0441	0.0588
H	4.30809592597718	-2.7205999753257264	-3.468515123371368	0.0441	-0.0147	0.0735
H	2.675057901302906	-3.304928950651453	-3.881555049348547	0.0588	-0.0294	0.0294
H	3.733041950651453	-4.260124950651453	-2.793118074022821	0.0294	-0.0294	0.0441
H	-5.182211	-0.5400559259771793	-1.8636950493485471	0.0	-0.0441	0.0294
H	-4.25561592597718	-0.3253359013029058	-0.3498600986970942	-0.0441	-0.0588	0.0588
H	-5.727215	0.6600160493485472	-0.640724	0.0	-0.0294	0.0
H	-5.109562148045642	1.2991171480456414	-3.696718049348547	0.0882	-0.0882	0.0294
H	-4.170053197394188	2.790089172719915	-3.447676049348547	0.1176	-0.1029	0.0294
H	-5.665383148045642	2.519641098697094	-2.5020499753257264	0.0882	-0.0588	-0.0147
H	1.4380059753257264	3.3418919753257263	2.3510559013029058	0.0147	0.0147	0.0588
H	0.08294497532572645	2.153335975325726	2.3829348519543583	0.0147	0.0147	0.0882
H	-0.18462302467427358	3.856440975325726	2.9203319259771794	0.0147	0.0147	0.0441
H	1.484708	5.1924770246742735	0.6271489506514528	0.0	-0.0147	0.0294
H	-0.13869397532572644	5.770871024674274	1.008544950651453	-0.0147	-0.0147	0.0294
H	0.24613802467427356	5.279355049348547	-0.6574970493485471	-0.0147	-0.0294	0.0294
H	0.546034	-2.4991929753257263	-3.892499950651453	0.0	-0.0147	-0.0294
H	0.029434	-1.2018260246742736	-5.003052024674274	0.0	0.0147	0.0147
H	1.696732	-1.2349329753257265	-4.407983	0.0	-0.0147	0.0
H	-2.090020098697094	3.1686460246742736	-3.4384502960912826	0.0588	-0.0147	0.1764
H	-0.7689501480456413	3.958034098697094	-2.5816852960912824	0.0882	-0.0588	0.1764
H	-0.4704200740228207	3.206015049348547	-4.155084246742736	0.0441	-0.0294	0.147
114
O	3.7826195618119387	3.0463572472477543	-1.50347	0.0147	0.0588	0.0
Mg	-0.4193580673164302	0.06704738188061457	-0.1303800673164302	0.1029	-0.147	0.1029
O	1.2041134381880614	-0.7546387527522458	3.2842041909403075	-0.0147	0.0588	-0.0735
C	3.735472685435816	2.6058826854358155	-0.22462956181193855	0.0441	0.0441	-0.0147
N	0.129969	-1.0768428090596927	-1.7280224381880616	0.0	-0.0735	0.0147
N	-1.0293748763761228	1.59601406731643	-1.2410995055044916	0.0294	-0.1029	0.1176
O	3.5215658090596924	3.299406123623877	0.744263	0.0735	0.0294	0.0
C	0.2513435618119385	-0.5606216854358157	-2.943114876376123	0.0147	-0.0441	0.0294
C	0.015931123623877087	0.798079876376123	-3.254658190940307	0.0294	-0.0294	0.0735
C	-0.6655563145641843	1.7926541909403073	-2.4956415055044916	0.0441	-0.0735	0.1176
O	3.755869685435816	0.5943375618119385	1.1115703145641844	0.0441	0.0147	-0.0441
C	2.486648123623877	0.28854537087163123	1.4149723145641844	0.0294	0.0882	-0.0441
C	2.46098	-0.19464656181193854	2.8758506291283688	0.0	-0.0147	-0.0882
C	4.054365685435815	1.1101496854358155	-0.2036551236238771	0.0441	0.0441	-0.0294
O	1.5795961236238771	0.42402386536713954	0.6139194381880615	0.0294	0.2058	-0.0147
C	3.5697355618119384	4.462720247247754	-1.6782594381880616	0.0147	0.0588	0.0147
O	-1.0879123145641845	-0.18698243818806146	1.5155987417432626	0.0441	0.0147	0.1764
C	0.8403090110089833	-1.9318373255731676	2.6182936964447987	-0.2352	0.2793	-0.1911
O	1.4631299547015364	-2.4075132692657206	1.6758482019492906	-0.3675	0.4116	-0.3087
O	-1.6144013708716314	-2.6863593145641844	2.6921298763761228	-0.0882	0.0441	-0.0294
C	-2.524349370871631	-1.637938876376123	2.659463	-0.0882	0.0294	0.0
C	-1.9451488090596927	-0.21100043818806144	2.5989518090596926	-0.0735	0.0147	0.0735
C	-0.35517268543581565	-2.631794943692553	3.3624989436925534	-0.0441	0.1323	-0.1323
O	-3.6928993708716313	-1.9362013145641845	2.5593394381880614	-0.0882	0.0441	-0.0147
C	-3.080805123623877	0.8188666854358156	2.5438354381880615	-0.0294	0.0441	-0.0147
C	0.0618829326835698	-4.113995696444799	3.5000535728209217	0.1029	0.1911	-0.2205
C	2.7895559326835695	0.9376320673164302	3.8492628763761227	0.1029	-0.1029	-0.0294
C	5.542625685435816	0.8883911236238771	-0.4328116854358156	0.0441	0.0294	-0.0441
C	0.2751344381880615	-2.478939370871631	-1.3948761236238771	-0.0147	-0.0882	-0.0294
C	-1.980313876376123	2.4620516291283687	-0.5543276291283687	0.0294	-0.0882	0.0882
C	-0.9219305618119386	-3.174852370871631	-0.9855896854358156	-0.0147	-0.0882	-0.0441
C	-0.7968245618119385	-4.464179370871631	-0.4138956854358156	-0.0147	-0.0882	-0.0441
C	0.46708843818806145	-5.086857809059692	-0.2660921236238771	-0.0147	-0.0735	-0.0294
C	1.6224004381880615	-4.425952809059693	-0.755627	-0.0147	-0.0735	0.0
C	1.5574384381880615	-3.1285588090596925	-1.317455	-0.0147	-0.0735	0.0
C	-2.34032	-2.5981152472477542	-1.282760123623877	0.0	-0.0588	-0.0294
C	2.8741804381880613	-2.4835196854358155	-1.812554876376123	-0.0147	-0.0441	0.0294
C	-1.5125964381880614	3.3554923145641844	0.45765724724775425	0.0147	-0.0441	0.0588
C	-2.459717	4.067930438188061	1.2351695618119385	0.0	-0.0147	0.0147
C	-3.837774	3.8996074381880614	1.0340174381880616	0.0	-0.0147	-0.0147
C	-4.289377438188062	3.0155973145641846	0.027251561811938545	0.0147	-0.0441	0.0147
C	-3.385086876376123	2.2747231909403074	-0.7699847527522458	0.0294	-0.0735	0.0588
C	-0.009406438188061455	3.587465876376123	0.7298292472477542	0.0147	-0.0294	0.0588
C	-3.9503763145641844	1.2705601909403075	-1.817252752752246	0.0441	-0.0735	0.0588
[truncated: 300 more rows]
