# Supplementary material
Source: publisher figshare collection journal article supplement (https://acs.figshare.com/ndownloader/files/5127205)
Supplement: Supplementary file 1 [file 5127205 › supporting_ja043819b/RRSS_fm-5-ts2-freq-49.log]

 Entering Gaussian System, Link 0=/homes/rzepa/g98/g98
 Input=RRSS_fm-5-oco.gjf
 Output=RRSS_fm-5-oco.log
 Initial command:
 /homes/rzepa/g98/l1.exe /scratch/Gau-32228.inp -scrdir=/scratch/
 Entering Link 1 = /homes/rzepa/g98/l1.exe PID=     32229.
  
 Copyright (c) 1988,1990,1992,1993,1995,1998 Gaussian, Inc.
                  All Rights Reserved.
  
 This is part of the Gaussian(R) 98 program.  It is based on
 the Gaussian 94(TM) system (copyright 1995 Gaussian, Inc.),
 the Gaussian 92(TM) system (copyright 1992 Gaussian, Inc.),
 the Gaussian 90(TM) system (copyright 1990 Gaussian, Inc.),
 the Gaussian 88(TM) system (copyright 1988 Gaussian, Inc.),
 the Gaussian 86(TM) system (copyright 1986 Carnegie Mellon
 University), and the Gaussian 82(TM) system (copyright 1983
 Carnegie Mellon University). Gaussian is a federally registered
 trademark of Gaussian, Inc.
  
 This software contains proprietary and confidential information,
 including trade secrets, belonging to Gaussian, Inc.
  
 This software is provided under written license and may be
 used, copied, transmitted, or stored only in accord with that
 written license.
  
 The following legend is applicable only to US Government
 contracts under DFARS:
  
                    RESTRICTED RIGHTS LEGEND
  
 Use, duplication or disclosure by the US Government is subject
 to restrictions as set forth in subparagraph (c)(1)(ii) of the
 Rights in Technical Data and Computer Software clause at DFARS
 252.227-7013.
  
 Gaussian, Inc.
 Carnegie Office Park, Building 6, Pittsburgh, PA 15106 USA
  
 The following legend is applicable only to US Government
 contracts under FAR:
  
                    RESTRICTED RIGHTS LEGEND
  
 Use, reproduction and disclosure by the US Government is subject
 to restrictions as set forth in subparagraph (c) of the
 Commercial Computer Software - Restricted Rights clause at FAR
 52.227-19.
  
 Gaussian, Inc.
 Carnegie Office Park, Building 6, Pittsburgh, PA 15106 USA
  
  
 ---------------------------------------------------------------
 Warning -- This program may not be used in any manner that
 competes with the business of Gaussian, Inc. or will provide
 assistance to any competitor of Gaussian, Inc.  The licensee
 of this program is prohibited from giving any competitor of
 Gaussian, Inc. access to this program.  By using this program,
 the user acknowledges that Gaussian, Inc. is engaged in the
 business of creating and licensing software in the field of
 computational chemistry and represents and warrants to the
 licensee that it is not a competitor of Gaussian, Inc. and that
 it will not use this program in any manner prohibited above.
 ---------------------------------------------------------------
  

 Cite this work as:
 Gaussian 98, Revision A.11.3,
 M. J. Frisch, G. W. Trucks, H. B. Schlegel, G. E. Scuseria, 
 M. A. Robb, J. R. Cheeseman, V. G. Zakrzewski, J. A. Montgomery, Jr., 
 R. E. Stratmann, J. C. Burant, S. Dapprich, J. M. Millam, 
 A. D. Daniels, K. N. Kudin, M. C. Strain, O. Farkas, J. Tomasi, 
 V. Barone, M. Cossi, R. Cammi, B. Mennucci, C. Pomelli, C. Adamo, 
 S. Clifford, J. Ochterski, G. A. Petersson, P. Y. Ayala, Q. Cui, 
 K. Morokuma, N. Rega, P. Salvador, J. J. Dannenberg, D. K. Malick, 
 A. D. Rabuck, K. Raghavachari, J. B. Foresman, J. Cioslowski, 
 J. V. Ortiz, A. G. Baboul, B. B. Stefanov, G. Liu, A. Liashenko, 
 P. Piskorz, I. Komaromi, R. Gomperts, R. L. Martin, D. J. Fox, 
 T. Keith, M. A. Al-Laham, C. Y. Peng, A. Nanayakkara, M. Challacombe, 
 P. M. W. Gill, B. Johnson, W. Chen, M. W. Wong, J. L. Andres, 
 C. Gonzalez, M. Head-Gordon, E. S. Replogle, and J. A. Pople, 
 Gaussian, Inc., Pittsburgh PA, 2002.

 ***********************************************
 Gaussian 98:  x86-Linux-G98RevA.11.3 5-Feb-2002
                   14-Mar-2004 
 ***********************************************
 %nproc=2
 Will use up to    2 processors via shared memory.
 %chk=rrss_fm-oco.chk
 %mem=500MB
 %rwf=/scratch/oco51.rwf,1800MB,/scratch/oco52.rwf,1800MB,/scratch/oco53.rwf,1800
 MB,/scratch/oco54.rwf,1800MB,/scratch/oco55.rwf,1800MB,/scratch/oco56.rwf,1800MB
 ,/scratch/oco57.rwf,1800MB,/scratch/oco58.rwf,1800MB,/scratch/oco59.rwf,1800MB
 --------------------------------------------
 # rb3lyp/Gen guess=read geom=checkpoint freq
 --------------------------------------------
 1/10=4,29=2,30=1,38=1/1,3;
 2/40=1/2;
 3/5=7,11=2,25=1,30=1/1,2,3;
 4/5=1,7=1/1;
 5/5=2,42=-5/2;
 8/6=4,11=11/1;
 11/6=1,8=1,9=11,15=111,16=11/1,2,10;
 10/6=1/2;
 6/7=2,8=2,9=2,10=2,18=1,28=1/1;
 7/8=1,10=1,25=1/1,2,3,16;
 1/10=4,30=1/3;
 99//99;
 --------------------------------
 from RRSS_fm-/scratch/oco5-5.gjf
 --------------------------------
 Redundant internal coordinates taken from checkpoint file:
 rrss_fm-oco.chk
 Charge =  0 Multiplicity = 1
 O,0,3.836248232,3.0629735212,-1.5062797815
 Mg,0,-0.3077319451,-0.0903655103,-0.0177538316
 O,0,1.1772876708,-0.6980800163,3.205967306
 C,0,3.8149347547,2.6090088841,-0.2426889599
 N,0,0.1176860735,-1.1620422447,-1.7096248384
 N,0,-0.9787737738,1.4928324107,-1.1159155235
 O,0,3.6404369652,3.2903961767,0.7408723045
 C,0,0.2625476697,-0.6175587316,-2.9095413361
 C,0,0.0596379308,0.7592239474,-3.1755644792
 C,0,-0.595202333,1.7147984192,-2.3705798926
 O,0,3.8102510306,0.5676495205,1.0651924638
 C,0,2.5221288771,0.3580722317,1.3679805701
 C,0,2.4561423255,-0.2344060855,2.781637697
 C,0,4.1161985549,1.1096386825,-0.2347265176
 O,0,1.6188555491,0.6315396695,0.5978939313
 C,0,3.6401737888,4.4814384424,-1.6678208268
 O,0,-1.0428970526,-0.1553881366,1.7082703129
 C,0,0.5616455866,-1.6281089275,2.4125442442
 O,0,1.0364882355,-1.9665277285,1.3423179656
 O,0,-1.7440195029,-2.6126807802,2.6635323943
 C,0,-2.641754712,-1.5697263896,2.6603745911
 C,0,-2.0299065374,-0.1659547623,2.6781727406
 C,0,-0.4352430978,-2.4758570422,3.2219766968
 O,0,-3.8134525452,-1.8383388715,2.5437408629
 C,0,-3.1045707478,0.9085428035,2.5235714897
 C,0,0.1260481057,-3.900284032,3.2660846968
 C,0,2.9087560463,0.7979832308,3.8178436473
 C,0,5.6017481447,0.8538174827,-0.4783273736
 C,0,0.229827901,-2.5811147921,-1.4219893453
 C,0,-1.9197798242,2.3873413726,-0.4637817544
 C,0,-0.9756536689,-3.2621445645,-1.0284544303
 C,0,-0.8661801847,-4.5517650419,-0.4542208219
 C,0,0.390376589,-5.1728622708,-0.2881476356
 C,0,1.5537461015,-4.5264695482,-0.7457983977
 C,0,1.5045001314,-3.2294706899,-1.3101335801
 C,0,-2.3704583903,-2.6372840665,-1.3118116342
 C,0,2.8294852025,-2.5686569249,-1.7732491404
 C,0,-1.4578806079,3.3255624295,0.5145852719
 C,0,-2.4128436097,4.0828673834,1.2416094938
 C,0,-3.7926026702,3.930329602,1.0074624165
 C,0,-4.2380921944,3.0174569358,0.0342793648
 C,0,-3.32627583,2.232184553,-0.7124500958
 C,0,0.0479107145,3.5564454439,0.7875037867
 C,0,-3.8864214654,1.2325636971,-1.7582603349
 C,0,-3.5301976426,-3.3211405025,-0.5241286634
 C,0,-2.684769321,-2.6705909242,-2.8449894406
 C,0,3.8853901994,-2.5288625867,-0.6228153194
 C,0,3.436019421,-3.3223810678,-3.0073277525
 C,0,-4.8389434397,0.1931894913,-1.0840495959
 C,0,-4.6394980351,1.9698841525,-2.9169182167
 C,0,0.4086324397,3.2202415133,2.2687431722
 C,0,0.4723683876,5.0213556799,0.4369503646
 C,0,0.6410262209,-1.4632811128,-4.120189121
 C,0,-0.9027230352,3.0586611781,-3.0192455919
 H,0,0.2971547905,1.0771539407,-4.1858696167
 H,0,3.1490248804,-1.0850937374,2.7662005473
 H,0,3.4960925673,0.611727629,-0.983773213
 H,0,2.6770946918,4.7801533964,-1.2515412144
 H,0,3.6697161731,4.6563354135,-2.7431269552
 H,0,4.4395632183,5.0333376612,-1.1656266152
 H,0,-1.5676114439,-0.022999925,3.6779389554
 H,0,-0.5097640767,-2.0475043892,4.2270282657
 H,0,-3.8299085027,0.837861411,3.3425333086
 H,0,-3.6422404018,0.8060520445,1.581007368
 H,0,-2.6547766407,1.9024789087,2.5244353692
 H,0,-0.5433881196,-4.5366706275,3.8519537262
 H,0,1.1195826813,-3.9127919415,3.7287705061
 H,0,0.2016606818,-4.2858999691,2.243266374
 H,0,3.922122214,1.1402296652,3.596796058
 H,0,2.8889706266,0.3399181751,4.8104111355
 H,0,2.2338859013,1.6568048482,3.8099064486
 H,0,5.7974021692,-0.2204886921,-0.4589665686
 H,0,6.2067305257,1.339598672,0.2936042033
 H,0,5.8868978151,1.2509123952,-1.4562032735
 H,0,-1.7731166407,-5.0885598225,-0.1519146674
 H,0,0.4513746731,-6.1820775219,0.1416267303
 H,0,2.5220420598,-5.0359630313,-0.6575248377
 H,0,-2.3378035263,-1.5651923069,-1.0123711239
 H,0,2.6081482039,-1.5245502397,-2.0723005641
 H,0,-2.0660281038,4.812536043,1.9852306904
 H,0,-4.5175448283,4.5285840056,1.576043201
 H,0,-5.3143980261,2.9114756926,-0.1534929713
 H,0,0.6178795642,2.8718235942,0.1298446725
 H,0,-3.0325364143,0.6797657301,-2.1995604297
 H,0,-4.4618412715,-2.7611609132,-0.6877890324
 H,0,-3.326254528,-3.341682278,0.5575536629
 H,0,-3.6872800748,-4.3525220476,-0.8755364064
 H,0,-3.6861465527,-2.252521605,-3.0284479076
 H,0,-2.6623322653,-3.705759525,-3.2207938847
 H,0,-1.9529414893,-2.0747343708,-3.4139919061
 H,0,4.805066824,-2.0291130824,-0.9754340356
 H,0,4.1571992507,-3.5438181944,-0.2965267805
 H,0,3.4893950073,-1.9858390418,0.2514983047
 H,0,4.3349824023,-2.7971116236,-3.3651629412
 H,0,2.7142527437,-3.3822219876,-3.8351444013
 H,0,3.7222010213,-4.3472491396,-2.725151246
 H,0,-5.1874378238,-0.5392813788,-1.8289026006
 H,0,-4.3165981031,-0.3507862776,-0.2768858887
 H,0,-5.7189903525,0.6882971484,-0.6465336349
 H,0,-4.978826619,1.2373104636,-3.6651440553
 H,0,-3.9844051609,2.6982242148,-3.4180965514
 H,0,-5.5206946,2.5043018006,-2.5300871811
 H,0,1.4944751296,3.3480487837,2.4215747506
 H,0,0.125465949,2.1756558698,2.4924574183
 H,0,-0.1224176864,3.8827026808,2.9696370019
 H,0,1.5449702028,5.1569761115,0.656411916
 H,0,-0.090736363,5.7553812611,1.0353839158
 H,0,0.2893720157,5.2372789916,-0.629377633
 H,0,0.5194519817,-2.5318397471,-3.9251376542
 H,0,0.0194318049,-1.1926397676,-4.9818534921
 H,0,1.6853247675,-1.2821182629,-4.4042287327
 H,0,-1.9745797942,3.1670938459,-3.2189204007
 H,0,-0.6078043195,3.885289788,-2.3624446349
 H,0,-0.3732067004,3.1652644264,-3.9721449613
 Recover connectivity data from disk.

 GradGradGradGradGradGradGradGradGradGradGradGradGradGradGradGradGradGrad
 Berny optimization.
 Initialization pass.
                         ----------------------------
                         !    Initial Parameters    !
                         ! (Angstroms and Degrees)  !
 ------------------------                            -------------------------
 ! Name  Definition              Value          Derivative Info.             !
 -----------------------------------------------------------------------------
 ! R1    R(1,4)                  1.3428         calculate D2E/DX2 analyticall!
 ! R2    R(1,16)                 1.441          calculate D2E/DX2 analyticall!
 ! R3    R(2,5)                  2.0474         calculate D2E/DX2 analyticall!
 ! R4    R(2,6)                  2.0403         calculate D2E/DX2 analyticall!
 ! R5    R(2,15)                 2.1475         calculate D2E/DX2 analyticall!
 ! R6    R(2,17)                 1.8772         calculate D2E/DX2 analyticall!
 ! R7    R(2,19)                 2.6789         calculate D2E/DX2 analyticall!
 ! R8    R(3,13)                 1.425          calculate D2E/DX2 analyticall!
 ! R9    R(3,18)                 1.3688         calculate D2E/DX2 analyticall!
 ! R10   R(4,7)                  1.2092         calculate D2E/DX2 analyticall!
 ! R11   R(4,14)                 1.5294         calculate D2E/DX2 analyticall!
 ! R12   R(5,8)                  1.3256         calculate D2E/DX2 analyticall!
 ! R13   R(5,29)                 1.4523         calculate D2E/DX2 analyticall!
 ! R14   R(6,10)                 1.3306         calculate D2E/DX2 analyticall!
 ! R15   R(6,30)                 1.4529         calculate D2E/DX2 analyticall!
 ! R16   R(8,9)                  1.4169         calculate D2E/DX2 analyticall!
 ! R17   R(8,53)                 1.5245         calculate D2E/DX2 analyticall!
 ! R18   R(9,10)                 1.4107         calculate D2E/DX2 analyticall!
 ! R19   R(9,55)                 1.0855         calculate D2E/DX2 analyticall!
 ! R20   R(10,54)                1.5236         calculate D2E/DX2 analyticall!
 ! R21   R(11,12)                1.3397         calculate D2E/DX2 analyticall!
 ! R22   R(11,14)                1.4412         calculate D2E/DX2 analyticall!
 ! R23   R(12,13)                1.5342         calculate D2E/DX2 analyticall!
 ! R24   R(12,15)                1.2181         calculate D2E/DX2 analyticall!
 ! R25   R(13,27)                1.5311         calculate D2E/DX2 analyticall!
 ! R26   R(13,56)                1.0973         calculate D2E/DX2 analyticall!
 ! R27   R(14,28)                1.527          calculate D2E/DX2 analyticall!
 ! R28   R(14,57)                1.0925         calculate D2E/DX2 analyticall!
 ! R29   R(16,58)                1.0909         calculate D2E/DX2 analyticall!
 ! R30   R(16,59)                1.0898         calculate D2E/DX2 analyticall!
 ! R31   R(16,60)                1.0935         calculate D2E/DX2 analyticall!
 ! R32   R(17,22)                1.3838         calculate D2E/DX2 analyticall!
 ! R33   R(18,19)                1.2188         calculate D2E/DX2 analyticall!
 ! R34   R(18,23)                1.5387         calculate D2E/DX2 analyticall!
 ! R35   R(20,21)                1.3761         calculate D2E/DX2 analyticall!
 ! R36   R(20,23)                1.4295         calculate D2E/DX2 analyticall!
 ! R37   R(21,22)                1.5314         calculate D2E/DX2 analyticall!
 ! R38   R(21,24)                1.2077         calculate D2E/DX2 analyticall!
 ! R39   R(22,25)                1.5275         calculate D2E/DX2 analyticall!
 ! R40   R(22,61)                1.1107         calculate D2E/DX2 analyticall!
 ! R41   R(23,26)                1.5317         calculate D2E/DX2 analyticall!
 ! R42   R(23,62)                1.0951         calculate D2E/DX2 analyticall!
 ! R43   R(25,63)                1.0963         calculate D2E/DX2 analyticall!
 ! R44   R(25,64)                1.09           calculate D2E/DX2 analyticall!
 ! R45   R(25,65)                1.091          calculate D2E/DX2 analyticall!
 ! R46   R(26,66)                1.0938         calculate D2E/DX2 analyticall!
 ! R47   R(26,67)                1.0961         calculate D2E/DX2 analyticall!
 ! R48   R(26,68)                1.0957         calculate D2E/DX2 analyticall!
 ! R49   R(27,69)                1.0922         calculate D2E/DX2 analyticall!
 ! R50   R(27,70)                1.0933         calculate D2E/DX2 analyticall!
 ! R51   R(27,71)                1.0923         calculate D2E/DX2 analyticall!
 ! R52   R(28,72)                1.0921         calculate D2E/DX2 analyticall!
 ! R53   R(28,73)                1.0945         calculate D2E/DX2 analyticall!
 ! R54   R(28,74)                1.0933         calculate D2E/DX2 analyticall!
 ! R55   R(29,31)                1.4394         calculate D2E/DX2 analyticall!
 ! R56   R(29,35)                1.4345         calculate D2E/DX2 analyticall!
 ! R57   R(30,38)                1.4321         calculate D2E/DX2 analyticall!
 ! R58   R(30,42)                1.4367         calculate D2E/DX2 analyticall!
 ! R59   R(31,32)                1.4159         calculate D2E/DX2 analyticall!
 ! R60   R(31,36)                1.5544         calculate D2E/DX2 analyticall!
 ! R61   R(32,33)                1.4115         calculate D2E/DX2 analyticall!
 ! R62   R(32,75)                1.0964         calculate D2E/DX2 analyticall!
 ! R63   R(33,34)                1.4074         calculate D2E/DX2 analyticall!
 ! R64   R(33,76)                1.0986         calculate D2E/DX2 analyticall!
 ! R65   R(34,35)                1.4153         calculate D2E/DX2 analyticall!
 ! R66   R(34,77)                1.0977         calculate D2E/DX2 analyticall!
 ! R67   R(35,37)                1.5514         calculate D2E/DX2 analyticall!
 ! R68   R(36,45)                1.5598         calculate D2E/DX2 analyticall!
 ! R69   R(36,46)                1.5654         calculate D2E/DX2 analyticall!
 ! R70   R(36,78)                1.1136         calculate D2E/DX2 analyticall!
 ! R71   R(37,47)                1.5621         calculate D2E/DX2 analyticall!
 ! R72   R(37,48)                1.5681         calculate D2E/DX2 analyticall!
 ! R73   R(37,79)                1.1084         calculate D2E/DX2 analyticall!
 ! R74   R(38,39)                1.4192         calculate D2E/DX2 analyticall!
 ! R75   R(38,43)                1.5476         calculate D2E/DX2 analyticall!
 ! R76   R(39,40)                1.4078         calculate D2E/DX2 analyticall!
 ! R77   R(39,80)                1.098          calculate D2E/DX2 analyticall!
 ! R78   R(40,41)                1.4067         calculate D2E/DX2 analyticall!
 ! R79   R(40,81)                1.0985         calculate D2E/DX2 analyticall!
 ! R80   R(41,42)                1.4162         calculate D2E/DX2 analyticall!
 ! R81   R(41,82)                1.0977         calculate D2E/DX2 analyticall!
 ! R82   R(42,44)                1.5514         calculate D2E/DX2 analyticall!
 ! R83   R(43,51)                1.5612         calculate D2E/DX2 analyticall!
 ! R84   R(43,52)                1.5649         calculate D2E/DX2 analyticall!
 ! R85   R(43,83)                1.1073         calculate D2E/DX2 analyticall!
 ! R86   R(44,49)                1.5627         calculate D2E/DX2 analyticall!
 ! R87   R(44,50)                1.5663         calculate D2E/DX2 analyticall!
 ! R88   R(44,84)                1.1088         calculate D2E/DX2 analyticall!
 ! R89   R(45,85)                1.0992         calculate D2E/DX2 analyticall!
 ! R90   R(45,86)                1.1009         calculate D2E/DX2 analyticall!
 ! R91   R(45,87)                1.1009         calculate D2E/DX2 analyticall!
 ! R92   R(46,88)                1.1005         calculate D2E/DX2 analyticall!
 ! R93   R(46,89)                1.1015         calculate D2E/DX2 analyticall!
 ! R94   R(46,90)                1.102          calculate D2E/DX2 analyticall!
 ! R95   R(47,91)                1.1045         calculate D2E/DX2 analyticall!
 ! R96   R(47,92)                1.1002         calculate D2E/DX2 analyticall!
 ! R97   R(47,93)                1.1028         calculate D2E/DX2 analyticall!
 ! R98   R(48,94)                1.1009         calculate D2E/DX2 analyticall!
 ! R99   R(48,95)                1.0999         calculate D2E/DX2 analyticall!
 ! R100  R(48,96)                1.1009         calculate D2E/DX2 analyticall!
 ! R101  R(49,97)                1.1013         calculate D2E/DX2 analyticall!
 ! R102  R(49,98)                1.1047         calculate D2E/DX2 analyticall!
 ! R103  R(49,99)                1.1005         calculate D2E/DX2 analyticall!
 ! R104  R(50,100)               1.1007         calculate D2E/DX2 analyticall!
 ! R105  R(50,101)               1.1004         calculate D2E/DX2 analyticall!
 ! R106  R(50,102)               1.1008         calculate D2E/DX2 analyticall!
 ! R107  R(51,103)               1.104          calculate D2E/DX2 analyticall!
 ! R108  R(51,104)               1.1052         calculate D2E/DX2 analyticall!
 ! R109  R(51,105)               1.101          calculate D2E/DX2 analyticall!
 ! R110  R(52,106)               1.1032         calculate D2E/DX2 analyticall!
 ! R111  R(52,107)               1.1018         calculate D2E/DX2 analyticall!
 ! R112  R(52,108)               1.1033         calculate D2E/DX2 analyticall!
 ! R113  R(53,109)               1.093          calculate D2E/DX2 analyticall!
 ! R114  R(53,110)               1.0964         calculate D2E/DX2 analyticall!
 ! R115  R(53,111)               1.0973         calculate D2E/DX2 analyticall!
 ! R116  R(54,112)               1.0957         calculate D2E/DX2 analyticall!
 ! R117  R(54,113)               1.0962         calculate D2E/DX2 analyticall!
 ! R118  R(54,114)               1.0953         calculate D2E/DX2 analyticall!
 ! A1    A(4,1,16)             115.855          calculate D2E/DX2 analyticall!
 ! A2    A(5,2,6)               91.7038         calculate D2E/DX2 analyticall!
 ! A3    A(5,2,15)             103.0877         calculate D2E/DX2 analyticall!
 ! A4    A(5,2,17)             145.3907         calculate D2E/DX2 analyticall!
 ! A5    A(5,2,19)              87.0589         calculate D2E/DX2 analyticall!
 ! A6    A(6,2,15)             100.866          calculate D2E/DX2 analyticall!
 ! A7    A(6,2,17)             113.1393         calculate D2E/DX2 analyticall!
 ! A8    A(6,2,19)             169.0309         calculate D2E/DX2 analyticall!
 ! A9    A(15,2,17)             95.7041         calculate D2E/DX2 analyticall!
 ! A10   A(15,2,19)             68.8832         calculate D2E/DX2 analyticall!
 ! A11   A(17,2,19)             72.8691         calculate D2E/DX2 analyticall!
 ! A12   A(13,3,18)            116.8814         calculate D2E/DX2 analyticall!
 ! A13   A(1,4,7)              125.2535         calculate D2E/DX2 analyticall!
 ! A14   A(1,4,14)             109.4637         calculate D2E/DX2 analyticall!
 ! A15   A(7,4,14)             125.2154         calculate D2E/DX2 analyticall!
 ! A16   A(2,5,8)              123.7592         calculate D2E/DX2 analyticall!
 ! A17   A(2,5,29)             111.3365         calculate D2E/DX2 analyticall!
 ! A18   A(8,5,29)             124.9034         calculate D2E/DX2 analyticall!
 ! A19   A(2,6,10)             122.8297         calculate D2E/DX2 analyticall!
 ! A20   A(2,6,30)             116.6905         calculate D2E/DX2 analyticall!
 ! A21   A(10,6,30)            120.4791         calculate D2E/DX2 analyticall!
 ! A22   A(5,8,9)              123.6025         calculate D2E/DX2 analyticall!
 ! A23   A(5,8,53)             121.2043         calculate D2E/DX2 analyticall!
 ! A24   A(9,8,53)             115.183          calculate D2E/DX2 analyticall!
 ! A25   A(8,9,10)             128.1396         calculate D2E/DX2 analyticall!
 ! A26   A(8,9,55)             115.3431         calculate D2E/DX2 analyticall!
 ! A27   A(10,9,55)            115.7412         calculate D2E/DX2 analyticall!
 ! A28   A(6,10,9)             123.9787         calculate D2E/DX2 analyticall!
 ! A29   A(6,10,54)            119.3666         calculate D2E/DX2 analyticall!
 ! A30   A(9,10,54)            116.6307         calculate D2E/DX2 analyticall!
 ! A31   A(12,11,14)           117.8256         calculate D2E/DX2 analyticall!
 ! A32   A(11,12,13)           108.06           calculate D2E/DX2 analyticall!
 ! A33   A(11,12,15)           122.343          calculate D2E/DX2 analyticall!
 ! A34   A(13,12,15)           129.5937         calculate D2E/DX2 analyticall!
 ! A35   A(3,13,12)            116.0173         calculate D2E/DX2 analyticall!
 ! A36   A(3,13,27)            106.4495         calculate D2E/DX2 analyticall!
 ! A37   A(3,13,56)            108.5803         calculate D2E/DX2 analyticall!
 ! A38   A(12,13,27)           110.5164         calculate D2E/DX2 analyticall!
 ! A39   A(12,13,56)           105.0269         calculate D2E/DX2 analyticall!
 ! A40   A(27,13,56)           110.2182         calculate D2E/DX2 analyticall!
 ! A41   A(4,14,11)            109.3638         calculate D2E/DX2 analyticall!
 ! A42   A(4,14,28)            110.7973         calculate D2E/DX2 analyticall!
 ! A43   A(4,14,57)            109.3564         calculate D2E/DX2 analyticall!
 ! A44   A(11,14,28)           106.703          calculate D2E/DX2 analyticall!
 ! A45   A(11,14,57)           109.0579         calculate D2E/DX2 analyticall!
 ! A46   A(28,14,57)           111.4985         calculate D2E/DX2 analyticall!
 ! A47   A(2,15,12)            140.4466         calculate D2E/DX2 analyticall!
 ! A48   A(1,16,58)            110.2969         calculate D2E/DX2 analyticall!
 ! A49   A(1,16,59)            105.3601         calculate D2E/DX2 analyticall!
 ! A50   A(1,16,60)            110.2332         calculate D2E/DX2 analyticall!
 ! A51   A(58,16,59)           110.8852         calculate D2E/DX2 analyticall!
 ! A52   A(58,16,60)           109.3857         calculate D2E/DX2 analyticall!
 ! A53   A(59,16,60)           110.6285         calculate D2E/DX2 analyticall!
 ! A54   A(2,17,22)            157.5222         calculate D2E/DX2 analyticall!
 ! A55   A(3,18,19)            121.4968         calculate D2E/DX2 analyticall!
 ! A56   A(3,18,23)            111.1507         calculate D2E/DX2 analyticall!
 ! A57   A(19,18,23)           124.1503         calculate D2E/DX2 analyticall!
 ! A58   A(2,19,18)             93.2019         calculate D2E/DX2 analyticall!
 ! A59   A(21,20,23)           121.7106         calculate D2E/DX2 analyticall!
 ! A60   A(20,21,22)           115.7253         calculate D2E/DX2 analyticall!
 ! A61   A(20,21,24)           117.6817         calculate D2E/DX2 analyticall!
 ! A62   A(22,21,24)           126.3418         calculate D2E/DX2 analyticall!
 ! A63   A(17,22,21)           106.488          calculate D2E/DX2 analyticall!
 ! A64   A(17,22,25)           115.181          calculate D2E/DX2 analyticall!
 ! A65   A(17,22,61)           109.4525         calculate D2E/DX2 analyticall!
 ! A66   A(21,22,25)           111.2557         calculate D2E/DX2 analyticall!
 ! A67   A(21,22,61)           107.1413         calculate D2E/DX2 analyticall!
 ! A68   A(25,22,61)           107.0608         calculate D2E/DX2 analyticall!
 ! A69   A(18,23,20)           116.1286         calculate D2E/DX2 analyticall!
 ! A70   A(18,23,26)           106.8641         calculate D2E/DX2 analyticall!
 ! A71   A(18,23,62)           108.1425         calculate D2E/DX2 analyticall!
 ! A72   A(20,23,26)           104.9364         calculate D2E/DX2 analyticall!
 ! A73   A(20,23,62)           109.4923         calculate D2E/DX2 analyticall!
 ! A74   A(26,23,62)           111.2408         calculate D2E/DX2 analyticall!
 ! A75   A(22,25,63)           110.1527         calculate D2E/DX2 analyticall!
 ! A76   A(22,25,64)           111.6185         calculate D2E/DX2 analyticall!
 ! A77   A(22,25,65)           110.5313         calculate D2E/DX2 analyticall!
 ! A78   A(63,25,64)           108.2747         calculate D2E/DX2 analyticall!
 ! A79   A(63,25,65)           109.3255         calculate D2E/DX2 analyticall!
 ! A80   A(64,25,65)           106.8418         calculate D2E/DX2 analyticall!
 ! A81   A(23,26,66)           109.4038         calculate D2E/DX2 analyticall!
 ! A82   A(23,26,67)           110.7904         calculate D2E/DX2 analyticall!
 ! A83   A(23,26,68)           109.008          calculate D2E/DX2 analyticall!
 ! A84   A(66,26,67)           108.7861         calculate D2E/DX2 analyticall!
 ! A85   A(66,26,68)           109.7231         calculate D2E/DX2 analyticall!
 ! A86   A(67,26,68)           109.1162         calculate D2E/DX2 analyticall!
 ! A87   A(13,27,69)           110.4007         calculate D2E/DX2 analyticall!
 ! A88   A(13,27,70)           109.0588         calculate D2E/DX2 analyticall!
 ! A89   A(13,27,71)           110.0345         calculate D2E/DX2 analyticall!
 ! A90   A(69,27,70)           109.3783         calculate D2E/DX2 analyticall!
 ! A91   A(69,27,71)           108.9901         calculate D2E/DX2 analyticall!
 ! A92   A(70,27,71)           108.955          calculate D2E/DX2 analyticall!
 ! A93   A(14,28,72)           109.6489         calculate D2E/DX2 analyticall!
 ! A94   A(14,28,73)           110.5417         calculate D2E/DX2 analyticall!
 ! A95   A(14,28,74)           109.6084         calculate D2E/DX2 analyticall!
 ! A96   A(72,28,73)           108.9699         calculate D2E/DX2 analyticall!
 ! A97   A(72,28,74)           109.0513         calculate D2E/DX2 analyticall!
 ! A98   A(73,28,74)           108.9941         calculate D2E/DX2 analyticall!
 ! A99   A(5,29,31)            116.8594         calculate D2E/DX2 analyticall!
 ! A100  A(5,29,35)            121.7166         calculate D2E/DX2 analyticall!
 ! A101  A(31,29,35)           120.5994         calculate D2E/DX2 analyticall!
 ! A102  A(6,30,38)            120.0732         calculate D2E/DX2 analyticall!
 ! A103  A(6,30,42)            119.3325         calculate D2E/DX2 analyticall!
 ! A104  A(38,30,42)           120.3152         calculate D2E/DX2 analyticall!
 ! A105  A(29,31,32)           118.4935         calculate D2E/DX2 analyticall!
 ! A106  A(29,31,36)           120.7611         calculate D2E/DX2 analyticall!
 ! A107  A(32,31,36)           120.6262         calculate D2E/DX2 analyticall!
 ! A108  A(31,32,33)           121.1531         calculate D2E/DX2 analyticall!
 ! A109  A(31,32,75)           119.5903         calculate D2E/DX2 analyticall!
 ! A110  A(33,32,75)           119.2438         calculate D2E/DX2 analyticall!
 ! A111  A(32,33,34)           119.7048         calculate D2E/DX2 analyticall!
 ! A112  A(32,33,76)           119.9791         calculate D2E/DX2 analyticall!
 ! A113  A(34,33,76)           120.214          calculate D2E/DX2 analyticall!
 ! A114  A(33,34,35)           121.4527         calculate D2E/DX2 analyticall!
 ! A115  A(33,34,77)           119.3303         calculate D2E/DX2 analyticall!
 ! A116  A(35,34,77)           119.2157         calculate D2E/DX2 analyticall!
 ! A117  A(29,35,34)           118.4385         calculate D2E/DX2 analyticall!
 ! A118  A(29,35,37)           122.8974         calculate D2E/DX2 analyticall!
 ! A119  A(34,35,37)           118.6633         calculate D2E/DX2 analyticall!
 ! A120  A(31,36,45)           113.5071         calculate D2E/DX2 analyticall!
 ! A121  A(31,36,46)           110.4965         calculate D2E/DX2 analyticall!
 ! A122  A(31,36,78)           108.1602         calculate D2E/DX2 analyticall!
 ! A123  A(45,36,46)           109.6313         calculate D2E/DX2 analyticall!
 ! A124  A(45,36,78)           107.9441         calculate D2E/DX2 analyticall!
 ! A125  A(46,36,78)           106.8416         calculate D2E/DX2 analyticall!
 ! A126  A(35,37,47)           111.6124         calculate D2E/DX2 analyticall!
 ! A127  A(35,37,48)           111.1337         calculate D2E/DX2 analyticall!
 ! A128  A(35,37,79)           108.1337         calculate D2E/DX2 analyticall!
 ! A129  A(47,37,48)           109.2925         calculate D2E/DX2 analyticall!
 ! A130  A(47,37,79)           108.0406         calculate D2E/DX2 analyticall!
 ! A131  A(48,37,79)           108.5228         calculate D2E/DX2 analyticall!
 ! A132  A(30,38,39)           118.8526         calculate D2E/DX2 analyticall!
 ! A133  A(30,38,43)           122.1429         calculate D2E/DX2 analyticall!
 ! A134  A(39,38,43)           118.9967         calculate D2E/DX2 analyticall!
 ! A135  A(38,39,40)           121.0969         calculate D2E/DX2 analyticall!
 ! A136  A(38,39,80)           119.2755         calculate D2E/DX2 analyticall!
 ! A137  A(40,39,80)           119.6177         calculate D2E/DX2 analyticall!
 ! A138  A(39,40,41)           119.72           calculate D2E/DX2 analyticall!
 ! A139  A(39,40,81)           120.1125         calculate D2E/DX2 analyticall!
 ! A140  A(41,40,81)           120.1651         calculate D2E/DX2 analyticall!
 ! A141  A(40,41,42)           121.3792         calculate D2E/DX2 analyticall!
 ! A142  A(40,41,82)           119.4399         calculate D2E/DX2 analyticall!
 ! A143  A(42,41,82)           119.1807         calculate D2E/DX2 analyticall!
 ! A144  A(30,42,41)           118.6304         calculate D2E/DX2 analyticall!
 ! A145  A(30,42,44)           122.6658         calculate D2E/DX2 analyticall!
 ! A146  A(41,42,44)           118.7024         calculate D2E/DX2 analyticall!
 ! A147  A(38,43,51)           111.1003         calculate D2E/DX2 analyticall!
 ! A148  A(38,43,52)           111.3487         calculate D2E/DX2 analyticall!
 ! A149  A(38,43,83)           107.6888         calculate D2E/DX2 analyticall!
 ! A150  A(51,43,52)           110.5765         calculate D2E/DX2 analyticall!
 ! A151  A(51,43,83)           108.1462         calculate D2E/DX2 analyticall!
 ! A152  A(52,43,83)           107.825          calculate D2E/DX2 analyticall!
 ! A153  A(42,44,49)           110.965          calculate D2E/DX2 analyticall!
 ! A154  A(42,44,50)           111.6515         calculate D2E/DX2 analyticall!
 ! A155  A(42,44,84)           108.1488         calculate D2E/DX2 analyticall!
 ! A156  A(49,44,50)           109.8269         calculate D2E/DX2 analyticall!
 ! A157  A(49,44,84)           108.0296         calculate D2E/DX2 analyticall!
 ! A158  A(50,44,84)           108.0917         calculate D2E/DX2 analyticall!
 ! A159  A(36,45,85)           109.3671         calculate D2E/DX2 analyticall!
 ! A160  A(36,45,86)           111.5059         calculate D2E/DX2 analyticall!
 ! A161  A(36,45,87)           110.8326         calculate D2E/DX2 analyticall!
 ! A162  A(85,45,86)           108.2274         calculate D2E/DX2 analyticall!
 ! A163  A(85,45,87)           107.9876         calculate D2E/DX2 analyticall!
 ! A164  A(86,45,87)           108.819          calculate D2E/DX2 analyticall!
 ! A165  A(36,46,88)           109.7474         calculate D2E/DX2 analyticall!
 ! A166  A(36,46,89)           110.4906         calculate D2E/DX2 analyticall!
 ! A167  A(36,46,90)           111.1532         calculate D2E/DX2 analyticall!
 ! A168  A(88,46,89)           108.5819         calculate D2E/DX2 analyticall!
 ! A169  A(88,46,90)           108.227          calculate D2E/DX2 analyticall!
 ! A170  A(89,46,90)           108.5697         calculate D2E/DX2 analyticall!
 ! A171  A(37,47,91)           109.8317         calculate D2E/DX2 analyticall!
 ! A172  A(37,47,92)           111.2179         calculate D2E/DX2 analyticall!
 ! A173  A(37,47,93)           110.715          calculate D2E/DX2 analyticall!
 ! A174  A(91,47,92)           107.841          calculate D2E/DX2 analyticall!
 ! A175  A(91,47,93)           109.2275         calculate D2E/DX2 analyticall!
 ! A176  A(92,47,93)           107.9292         calculate D2E/DX2 analyticall!
 ! A177  A(37,48,94)           110.0169         calculate D2E/DX2 analyticall!
 ! A178  A(37,48,95)           111.3853         calculate D2E/DX2 analyticall!
 ! A179  A(37,48,96)           110.2619         calculate D2E/DX2 analyticall!
 ! A180  A(94,48,95)           108.4907         calculate D2E/DX2 analyticall!
 ! A181  A(94,48,96)           108.3739         calculate D2E/DX2 analyticall!
 ! A182  A(95,48,96)           108.2313         calculate D2E/DX2 analyticall!
 ! A183  A(44,49,97)           110.0873         calculate D2E/DX2 analyticall!
 ! A184  A(44,49,98)           110.7655         calculate D2E/DX2 analyticall!
 ! A185  A(44,49,99)           111.0834         calculate D2E/DX2 analyticall!
 ! A186  A(97,49,98)           108.4405         calculate D2E/DX2 analyticall!
 ! A187  A(97,49,99)           108.3656         calculate D2E/DX2 analyticall!
 ! A188  A(98,49,99)           108.0106         calculate D2E/DX2 analyticall!
 ! A189  A(44,50,100)          109.7407         calculate D2E/DX2 analyticall!
 ! A190  A(44,50,101)          111.2401         calculate D2E/DX2 analyticall!
 ! A191  A(44,50,102)          110.6998         calculate D2E/DX2 analyticall!
 ! A192  A(100,50,101)         108.3271         calculate D2E/DX2 analyticall!
 ! A193  A(100,50,102)         108.3726         calculate D2E/DX2 analyticall!
 ! A194  A(101,50,102)         108.3781         calculate D2E/DX2 analyticall!
 ! A195  A(43,51,103)          109.4926         calculate D2E/DX2 analyticall!
 ! A196  A(43,51,104)          109.6584         calculate D2E/DX2 analyticall!
 ! A197  A(43,51,105)          111.2842         calculate D2E/DX2 analyticall!
 ! A198  A(103,51,104)         109.4762         calculate D2E/DX2 analyticall!
 ! A199  A(103,51,105)         108.4597         calculate D2E/DX2 analyticall!
 ! A200  A(104,51,105)         108.4376         calculate D2E/DX2 analyticall!
 ! A201  A(43,52,106)          109.5254         calculate D2E/DX2 analyticall!
 ! A202  A(43,52,107)          111.305          calculate D2E/DX2 analyticall!
 ! A203  A(43,52,108)          110.7766         calculate D2E/DX2 analyticall!
 ! A204  A(106,52,107)         107.8756         calculate D2E/DX2 analyticall!
 ! A205  A(106,52,108)         109.2376         calculate D2E/DX2 analyticall!
 ! A206  A(107,52,108)         108.0471         calculate D2E/DX2 analyticall!
 ! A207  A(8,53,109)           111.9016         calculate D2E/DX2 analyticall!
 ! A208  A(8,53,110)           110.2681         calculate D2E/DX2 analyticall!
 ! A209  A(8,53,111)           110.5022         calculate D2E/DX2 analyticall!
 ! A210  A(109,53,110)         108.5731         calculate D2E/DX2 analyticall!
 ! A211  A(109,53,111)         108.2679         calculate D2E/DX2 analyticall!
 ! A212  A(110,53,111)         107.1798         calculate D2E/DX2 analyticall!
 ! A213  A(10,54,112)          111.2435         calculate D2E/DX2 analyticall!
 ! A214  A(10,54,113)          110.8385         calculate D2E/DX2 analyticall!
 ! A215  A(10,54,114)          111.0175         calculate D2E/DX2 analyticall!
 ! A216  A(112,54,113)         107.3224         calculate D2E/DX2 analyticall!
 ! A217  A(112,54,114)         107.7429         calculate D2E/DX2 analyticall!
 ! A218  A(113,54,114)         108.5294         calculate D2E/DX2 analyticall!
 ! D1    D(16,1,4,7)             0.3838         calculate D2E/DX2 analyticall!
 ! D2    D(16,1,4,14)         -176.7538         calculate D2E/DX2 analyticall!
 ! D3    D(4,1,16,58)          -59.2302         calculate D2E/DX2 analyticall!
 ! D4    D(4,1,16,59)         -178.951          calculate D2E/DX2 analyticall!
 ! D5    D(4,1,16,60)           61.6667         calculate D2E/DX2 analyticall!
 ! D6    D(6,2,5,8)             18.8368         calculate D2E/DX2 analyticall!
 ! D7    D(6,2,5,29)          -160.829          calculate D2E/DX2 analyticall!
 ! D8    D(15,2,5,8)           -82.7318         calculate D2E/DX2 analyticall!
 ! D9    D(15,2,5,29)           97.6024         calculate D2E/DX2 analyticall!
 ! D10   D(17,2,5,8)           156.1678         calculate D2E/DX2 analyticall!
 ! D11   D(17,2,5,29)          -23.498          calculate D2E/DX2 analyticall!
 ! D12   D(19,2,5,8)          -150.255          calculate D2E/DX2 analyticall!
 ! D13   D(19,2,5,29)           30.0792         calculate D2E/DX2 analyticall!
 ! D14   D(5,2,6,10)           -23.9043         calculate D2E/DX2 analyticall!
 ! D15   D(5,2,6,30)           155.7714         calculate D2E/DX2 analyticall!
 ! D16   D(15,2,6,10)           79.7692         calculate D2E/DX2 analyticall!
 ! D17   D(15,2,6,30)         -100.5552         calculate D2E/DX2 analyticall!
 ! D18   D(17,2,6,10)         -179.156          calculate D2E/DX2 analyticall!
 ! D19   D(17,2,6,30)            0.5196         calculate D2E/DX2 analyticall!
 ! D20   D(19,2,6,10)           59.4169         calculate D2E/DX2 analyticall!
 ! D21   D(19,2,6,30)         -120.9075         calculate D2E/DX2 analyticall!
 ! D22   D(5,2,15,12)          -97.0602         calculate D2E/DX2 analyticall!
 ! D23   D(6,2,15,12)          168.5979         calculate D2E/DX2 analyticall!
 ! D24   D(17,2,15,12)          53.6808         calculate D2E/DX2 analyticall!
 ! D25   D(19,2,15,12)         -15.4701         calculate D2E/DX2 analyticall!
 ! D26   D(5,2,17,22)          -80.1508         calculate D2E/DX2 analyticall!
 ! D27   D(6,2,17,22)           52.3956         calculate D2E/DX2 analyticall!
 ! D28   D(15,2,17,22)         156.7967         calculate D2E/DX2 analyticall!
 ! D29   D(19,2,17,22)        -137.3867         calculate D2E/DX2 analyticall!
 ! D30   D(5,2,19,18)         -163.246          calculate D2E/DX2 analyticall!
 ! D31   D(6,2,19,18)          112.9895         calculate D2E/DX2 analyticall!
 ! D32   D(15,2,19,18)          91.5115         calculate D2E/DX2 analyticall!
 ! D33   D(17,2,19,18)         -11.8168         calculate D2E/DX2 analyticall!
 ! D34   D(18,3,13,12)          55.7857         calculate D2E/DX2 analyticall!
 ! D35   D(18,3,13,27)         179.2047         calculate D2E/DX2 analyticall!
 ! D36   D(18,3,13,56)         -62.1484         calculate D2E/DX2 analyticall!
 ! D37   D(13,3,18,19)          -5.5078         calculate D2E/DX2 analyticall!
 ! D38   D(13,3,18,23)         155.0488         calculate D2E/DX2 analyticall!
 ! D39   D(1,4,14,11)         -167.5939         calculate D2E/DX2 analyticall!
 ! D40   D(1,4,14,28)           75.0603         calculate D2E/DX2 analyticall!
 ! D41   D(1,4,14,57)          -48.2336         calculate D2E/DX2 analyticall!
 ! D42   D(7,4,14,11)           15.2671         calculate D2E/DX2 analyticall!
 ! D43   D(7,4,14,28)         -102.0787         calculate D2E/DX2 analyticall!
 ! D44   D(7,4,14,57)          134.6274         calculate D2E/DX2 analyticall!
 ! D45   D(2,5,8,9)             -3.9924         calculate D2E/DX2 analyticall!
 ! D46   D(2,5,8,53)           177.2233         calculate D2E/DX2 analyticall!
 ! D47   D(29,5,8,9)           175.6281         calculate D2E/DX2 analyticall!
 ! D48   D(29,5,8,53)           -3.1563         calculate D2E/DX2 analyticall!
 ! D49   D(2,5,29,31)           67.5988         calculate D2E/DX2 analyticall!
 ! D50   D(2,5,29,35)         -102.0566         calculate D2E/DX2 analyticall!
 ! D51   D(8,5,29,31)         -112.0624         calculate D2E/DX2 analyticall!
 ! D52   D(8,5,29,35)           78.2822         calculate D2E/DX2 analyticall!
 ! D53   D(2,6,10,9)            14.6438         calculate D2E/DX2 analyticall!
 ! D54   D(2,6,10,54)         -167.2001         calculate D2E/DX2 analyticall!
 ! D55   D(30,6,10,9)         -165.0199         calculate D2E/DX2 analyticall!
 ! D56   D(30,6,10,54)          13.1362         calculate D2E/DX2 analyticall!
 ! D57   D(2,6,30,38)           75.7359         calculate D2E/DX2 analyticall!
 ! D58   D(2,6,30,42)          -98.2153         calculate D2E/DX2 analyticall!
 ! D59   D(10,6,30,38)        -104.5803         calculate D2E/DX2 analyticall!
 ! D60   D(10,6,30,42)          81.4684         calculate D2E/DX2 analyticall!
 ! D61   D(5,8,9,10)           -15.6429         calculate D2E/DX2 analyticall!
 ! D62   D(5,8,9,55)           174.971          calculate D2E/DX2 analyticall!
 ! D63   D(53,8,9,10)          163.2081         calculate D2E/DX2 analyticall!
 ! D64   D(53,8,9,55)           -6.178          calculate D2E/DX2 analyticall!
 ! D65   D(5,8,53,109)          14.4459         calculate D2E/DX2 analyticall!
 ! D66   D(5,8,53,110)         135.404          calculate D2E/DX2 analyticall!
 ! D67   D(5,8,53,111)        -106.2859         calculate D2E/DX2 analyticall!
 ! D68   D(9,8,53,109)        -164.4352         calculate D2E/DX2 analyticall!
 ! D69   D(9,8,53,110)         -43.4771         calculate D2E/DX2 analyticall!
 ! D70   D(9,8,53,111)          74.833          calculate D2E/DX2 analyticall!
 ! D71   D(8,9,10,6)             9.6366         calculate D2E/DX2 analyticall!
 ! D72   D(8,9,10,54)         -168.5658         calculate D2E/DX2 analyticall!
 ! D73   D(55,9,10,6)          178.9869         calculate D2E/DX2 analyticall!
 ! D74   D(55,9,10,54)           0.7846         calculate D2E/DX2 analyticall!
 ! D75   D(6,10,54,112)        -70.4855         calculate D2E/DX2 analyticall!
 ! D76   D(6,10,54,113)         48.841          calculate D2E/DX2 analyticall!
 ! D77   D(6,10,54,114)        169.5391         calculate D2E/DX2 analyticall!
 ! D78   D(9,10,54,112)        107.8041         calculate D2E/DX2 analyticall!
 ! D79   D(9,10,54,113)       -132.8694         calculate D2E/DX2 analyticall!
 ! D80   D(9,10,54,114)        -12.1714         calculate D2E/DX2 analyticall!
 ! D81   D(14,11,12,13)        179.2237         calculate D2E/DX2 analyticall!
 ! D82   D(14,11,12,15)         -1.3749         calculate D2E/DX2 analyticall!
 ! D83   D(12,11,14,4)          76.8633         calculate D2E/DX2 analyticall!
 ! D84   D(12,11,14,28)       -163.2432         calculate D2E/DX2 analyticall!
 ! D85   D(12,11,14,57)        -42.6811         calculate D2E/DX2 analyticall!
 ! D86   D(11,12,13,3)        -171.5521         calculate D2E/DX2 analyticall!
 ! D87   D(11,12,13,27)         67.1762         calculate D2E/DX2 analyticall!
 ! D88   D(11,12,13,56)        -51.6742         calculate D2E/DX2 analyticall!
 ! D89   D(15,12,13,3)           9.1042         calculate D2E/DX2 analyticall!
 ! D90   D(15,12,13,27)       -112.1674         calculate D2E/DX2 analyticall!
 ! D91   D(15,12,13,56)        128.9821         calculate D2E/DX2 analyticall!
 ! D92   D(11,12,15,2)         144.4755         calculate D2E/DX2 analyticall!
 ! D93   D(13,12,15,2)         -36.2631         calculate D2E/DX2 analyticall!
 ! D94   D(3,13,27,69)         175.5529         calculate D2E/DX2 analyticall!
 ! D95   D(3,13,27,70)          55.3525         calculate D2E/DX2 analyticall!
 ! D96   D(3,13,27,71)         -64.105          calculate D2E/DX2 analyticall!
 ! D97   D(12,13,27,69)        -57.6613         calculate D2E/DX2 analyticall!
 ! D98   D(12,13,27,70)       -177.8617         calculate D2E/DX2 analyticall!
 ! D99   D(12,13,27,71)         62.6808         calculate D2E/DX2 analyticall!
 ! D100  D(56,13,27,69)         57.9858         calculate D2E/DX2 analyticall!
 ! D101  D(56,13,27,70)        -62.2146         calculate D2E/DX2 analyticall!
 ! D102  D(56,13,27,71)        178.3279         calculate D2E/DX2 analyticall!
 ! D103  D(4,14,28,72)         179.4401         calculate D2E/DX2 analyticall!
 ! D104  D(4,14,28,73)          59.2813         calculate D2E/DX2 analyticall!
 ! D105  D(4,14,28,74)         -60.8815         calculate D2E/DX2 analyticall!
 ! D106  D(11,14,28,72)         60.4755         calculate D2E/DX2 analyticall!
 ! D107  D(11,14,28,73)        -59.6833         calculate D2E/DX2 analyticall!
 ! D108  D(11,14,28,74)       -179.8461         calculate D2E/DX2 analyticall!
 ! D109  D(57,14,28,72)        -58.5102         calculate D2E/DX2 analyticall!
 ! D110  D(57,14,28,73)       -178.669          calculate D2E/DX2 analyticall!
 ! D111  D(57,14,28,74)         61.1682         calculate D2E/DX2 analyticall!
 ! D112  D(2,17,22,21)          76.6386         calculate D2E/DX2 analyticall!
 ! D113  D(2,17,22,25)         -47.2059         calculate D2E/DX2 analyticall!
 ! D114  D(2,17,22,61)        -167.8613         calculate D2E/DX2 analyticall!
 ! D115  D(3,18,19,2)          -91.0056         calculate D2E/DX2 analyticall!
 ! D116  D(23,18,19,2)         111.0272         calculate D2E/DX2 analyticall!
 ! D117  D(3,18,23,20)         130.5524         calculate D2E/DX2 analyticall!
 ! D118  D(3,18,23,26)        -112.7886         calculate D2E/DX2 analyticall!
 ! D119  D(3,18,23,62)           7.0596         calculate D2E/DX2 analyticall!
 ! D120  D(19,18,23,20)        -69.5057         calculate D2E/DX2 analyticall!
 ! D121  D(19,18,23,26)         47.1534         calculate D2E/DX2 analyticall!
 ! D122  D(19,18,23,62)        167.0015         calculate D2E/DX2 analyticall!
 ! D123  D(23,20,21,22)         26.4423         calculate D2E/DX2 analyticall!
 ! D124  D(23,20,21,24)       -158.9466         calculate D2E/DX2 analyticall!
 ! D125  D(21,20,23,18)        -72.6632         calculate D2E/DX2 analyticall!
 ! D126  D(21,20,23,26)        169.6089         calculate D2E/DX2 analyticall!
 ! D127  D(21,20,23,62)         50.1251         calculate D2E/DX2 analyticall!
 ! D128  D(20,21,22,17)         47.7254         calculate D2E/DX2 analyticall!
 ! D129  D(20,21,22,25)        173.9713         calculate D2E/DX2 analyticall!
 ! D130  D(20,21,22,61)        -69.3229         calculate D2E/DX2 analyticall!
 ! D131  D(24,21,22,17)       -126.3484         calculate D2E/DX2 analyticall!
 ! D132  D(24,21,22,25)         -0.1025         calculate D2E/DX2 analyticall!
 ! D133  D(24,21,22,61)        116.6034         calculate D2E/DX2 analyticall!
 ! D134  D(17,22,25,63)       -178.8751         calculate D2E/DX2 analyticall!
 ! D135  D(17,22,25,64)         60.811          calculate D2E/DX2 analyticall!
 ! D136  D(17,22,25,65)        -57.9533         calculate D2E/DX2 analyticall!
 ! D137  D(21,22,25,63)         59.833          calculate D2E/DX2 analyticall!
 ! D138  D(21,22,25,64)        -60.4809         calculate D2E/DX2 analyticall!
 ! D139  D(21,22,25,65)       -179.2453         calculate D2E/DX2 analyticall!
 ! D140  D(61,22,25,63)        -56.9221         calculate D2E/DX2 analyticall!
 ! D141  D(61,22,25,64)       -177.236          calculate D2E/DX2 analyticall!
 ! D142  D(61,22,25,65)         63.9997         calculate D2E/DX2 analyticall!
 ! D143  D(18,23,26,66)        178.8479         calculate D2E/DX2 analyticall!
 ! D144  D(18,23,26,67)         58.918          calculate D2E/DX2 analyticall!
 ! D145  D(18,23,26,68)        -61.1673         calculate D2E/DX2 analyticall!
 ! D146  D(20,23,26,66)        -57.2942         calculate D2E/DX2 analyticall!
 ! D147  D(20,23,26,67)       -177.2242         calculate D2E/DX2 analyticall!
 ! D148  D(20,23,26,68)         62.6906         calculate D2E/DX2 analyticall!
 ! D149  D(62,23,26,66)         61.0136         calculate D2E/DX2 analyticall!
 ! D150  D(62,23,26,67)        -58.9164         calculate D2E/DX2 analyticall!
 ! D151  D(62,23,26,68)       -179.0016         calculate D2E/DX2 analyticall!
 ! D152  D(5,29,31,32)        -165.9906         calculate D2E/DX2 analyticall!
 ! D153  D(5,29,31,36)          17.9539         calculate D2E/DX2 analyticall!
 ! D154  D(35,29,31,32)          3.7874         calculate D2E/DX2 analyticall!
 ! D155  D(35,29,31,36)       -172.2682         calculate D2E/DX2 analyticall!
 ! D156  D(5,29,35,34)         166.3123         calculate D2E/DX2 analyticall!
 ! D157  D(5,29,35,37)         -13.3569         calculate D2E/DX2 analyticall!
 ! D158  D(31,29,35,34)         -2.9618         calculate D2E/DX2 analyticall!
 ! D159  D(31,29,35,37)        177.3691         calculate D2E/DX2 analyticall!
 ! D160  D(6,30,38,39)        -173.1128         calculate D2E/DX2 analyticall!
 ! D161  D(6,30,38,43)           7.9144         calculate D2E/DX2 analyticall!
 ! D162  D(42,30,38,39)          0.7785         calculate D2E/DX2 analyticall!
 ! D163  D(42,30,38,43)       -178.1944         calculate D2E/DX2 analyticall!
 ! D164  D(6,30,42,41)         173.5264         calculate D2E/DX2 analyticall!
 ! D165  D(6,30,42,44)          -6.0321         calculate D2E/DX2 analyticall!
 ! D166  D(38,30,42,41)         -0.4099         calculate D2E/DX2 analyticall!
 ! D167  D(38,30,42,44)       -179.9684         calculate D2E/DX2 analyticall!
 ! D168  D(29,31,32,33)         -1.0546         calculate D2E/DX2 analyticall!
 ! D169  D(29,31,32,75)       -179.7381         calculate D2E/DX2 analyticall!
 ! D170  D(36,31,32,33)        175.0064         calculate D2E/DX2 analyticall!
 ! D171  D(36,31,32,75)         -3.677          calculate D2E/DX2 analyticall!
 ! D172  D(29,31,36,45)       -165.8735         calculate D2E/DX2 analyticall!
 ! D173  D(29,31,36,46)         70.5034         calculate D2E/DX2 analyticall!
 ! D174  D(29,31,36,78)        -46.1209         calculate D2E/DX2 analyticall!
 ! D175  D(32,31,36,45)         18.1552         calculate D2E/DX2 analyticall!
 ! D176  D(32,31,36,46)       -105.4678         calculate D2E/DX2 analyticall!
 ! D177  D(32,31,36,78)        137.9078         calculate D2E/DX2 analyticall!
 ! D178  D(31,32,33,34)         -2.4693         calculate D2E/DX2 analyticall!
 ! D179  D(31,32,33,76)       -178.8049         calculate D2E/DX2 analyticall!
 ! D180  D(75,32,33,34)        176.2186         calculate D2E/DX2 analyticall!
 ! D181  D(75,32,33,76)         -0.1169         calculate D2E/DX2 analyticall!
 ! D182  D(32,33,34,35)          3.3461         calculate D2E/DX2 analyticall!
 ! D183  D(32,33,34,77)       -177.0612         calculate D2E/DX2 analyticall!
 ! D184  D(76,33,34,35)        179.673          calculate D2E/DX2 analyticall!
 ! D185  D(76,33,34,77)         -0.7344         calculate D2E/DX2 analyticall!
 ! D186  D(33,34,35,29)         -0.6334         calculate D2E/DX2 analyticall!
 ! D187  D(33,34,35,37)        179.05           calculate D2E/DX2 analyticall!
 ! D188  D(77,34,35,29)        179.7735         calculate D2E/DX2 analyticall!
 ! D189  D(77,34,35,37)         -0.5431         calculate D2E/DX2 analyticall!
 ! D190  D(29,35,37,47)        124.8922         calculate D2E/DX2 analyticall!
 ! D191  D(29,35,37,48)       -112.8221         calculate D2E/DX2 analyticall!
 ! D192  D(29,35,37,79)          6.1893         calculate D2E/DX2 analyticall!
 ! D193  D(34,35,37,47)        -54.7762         calculate D2E/DX2 analyticall!
 ! D194  D(34,35,37,48)         67.5094         calculate D2E/DX2 analyticall!
 ! D195  D(34,35,37,79)       -173.4792         calculate D2E/DX2 analyticall!
 ! D196  D(31,36,45,85)        173.8624         calculate D2E/DX2 analyticall!
 ! D197  D(31,36,45,86)         54.2014         calculate D2E/DX2 analyticall!
 ! D198  D(31,36,45,87)        -67.1916         calculate D2E/DX2 analyticall!
 ! D199  D(46,36,45,85)        -62.0436         calculate D2E/DX2 analyticall!
 ! D200  D(46,36,45,86)        178.2955         calculate D2E/DX2 analyticall!
 ! D201  D(46,36,45,87)         56.9024         calculate D2E/DX2 analyticall!
 ! D202  D(78,36,45,85)         53.9869         calculate D2E/DX2 analyticall!
 ! D203  D(78,36,45,86)        -65.6741         calculate D2E/DX2 analyticall!
 ! D204  D(78,36,45,87)        172.9329         calculate D2E/DX2 analyticall!
 ! D205  D(31,36,46,88)        178.3632         calculate D2E/DX2 analyticall!
 ! D206  D(31,36,46,89)         58.6544         calculate D2E/DX2 analyticall!
 ! D207  D(31,36,46,90)        -61.9513         calculate D2E/DX2 analyticall!
 ! D208  D(45,36,46,88)         52.5293         calculate D2E/DX2 analyticall!
 ! D209  D(45,36,46,89)        -67.1795         calculate D2E/DX2 analyticall!
 ! D210  D(45,36,46,90)        172.2148         calculate D2E/DX2 analyticall!
 ! D211  D(78,36,46,88)        -64.1976         calculate D2E/DX2 analyticall!
 ! D212  D(78,36,46,89)        176.0937         calculate D2E/DX2 analyticall!
 ! D213  D(78,36,46,90)         55.488          calculate D2E/DX2 analyticall!
 ! D214  D(35,37,47,91)       -178.4677         calculate D2E/DX2 analyticall!
 ! D215  D(35,37,47,92)         62.2317         calculate D2E/DX2 analyticall!
 ! D216  D(35,37,47,93)        -57.7596         calculate D2E/DX2 analyticall!
 ! D217  D(48,37,47,91)         58.1952         calculate D2E/DX2 analyticall!
 ! D218  D(48,37,47,92)        -61.1055         calculate D2E/DX2 analyticall!
 ! D219  D(48,37,47,93)        178.9032         calculate D2E/DX2 analyticall!
 ! D220  D(79,37,47,91)        -59.7093         calculate D2E/DX2 analyticall!
 ! D221  D(79,37,47,92)       -179.0099         calculate D2E/DX2 analyticall!
 ! D222  D(79,37,47,93)         60.9988         calculate D2E/DX2 analyticall!
 ! D223  D(35,37,48,94)        175.9634         calculate D2E/DX2 analyticall!
 ! D224  D(35,37,48,95)         55.6214         calculate D2E/DX2 analyticall!
 ! D225  D(35,37,48,96)        -64.5581         calculate D2E/DX2 analyticall!
 ! D226  D(47,37,48,94)        -60.4162         calculate D2E/DX2 analyticall!
 ! D227  D(47,37,48,95)        179.2419         calculate D2E/DX2 analyticall!
 ! D228  D(47,37,48,96)         59.0623         calculate D2E/DX2 analyticall!
 ! D229  D(79,37,48,94)         57.1855         calculate D2E/DX2 analyticall!
 ! D230  D(79,37,48,95)        -63.1565         calculate D2E/DX2 analyticall!
 ! D231  D(79,37,48,96)        176.664          calculate D2E/DX2 analyticall!
 ! D232  D(30,38,39,40)         -0.4487         calculate D2E/DX2 analyticall!
 ! D233  D(30,38,39,80)       -179.3015         calculate D2E/DX2 analyticall!
 ! D234  D(43,38,39,40)        178.5569         calculate D2E/DX2 analyticall!
 ! D235  D(43,38,39,80)         -0.2959         calculate D2E/DX2 analyticall!
 ! D236  D(30,38,43,51)       -119.5937         calculate D2E/DX2 analyticall!
 ! D237  D(30,38,43,52)        116.6754         calculate D2E/DX2 analyticall!
 ! D238  D(30,38,43,83)         -1.3347         calculate D2E/DX2 analyticall!
 ! D239  D(39,38,43,51)         61.4349         calculate D2E/DX2 analyticall!
 ! D240  D(39,38,43,52)        -62.296          calculate D2E/DX2 analyticall!
 ! D241  D(39,38,43,83)        179.6939         calculate D2E/DX2 analyticall!
 ! D242  D(38,39,40,41)         -0.2525         calculate D2E/DX2 analyticall!
 ! D243  D(38,39,40,81)       -179.6897         calculate D2E/DX2 analyticall!
 ! D244  D(80,39,40,41)        178.5965         calculate D2E/DX2 analyticall!
 ! D245  D(80,39,40,81)         -0.8407         calculate D2E/DX2 analyticall!
 ! D246  D(39,40,41,42)          0.6388         calculate D2E/DX2 analyticall!
 ! D247  D(39,40,41,82)       -179.2258         calculate D2E/DX2 analyticall!
 ! D248  D(81,40,41,42)       -179.9243         calculate D2E/DX2 analyticall!
 ! D249  D(81,40,41,82)          0.211          calculate D2E/DX2 analyticall!
 ! D250  D(40,41,42,30)         -0.305          calculate D2E/DX2 analyticall!
 ! D251  D(40,41,42,44)        179.2712         calculate D2E/DX2 analyticall!
 ! D252  D(82,41,42,30)        179.56           calculate D2E/DX2 analyticall!
 ! D253  D(82,41,42,44)         -0.8639         calculate D2E/DX2 analyticall!
 ! D254  D(30,42,44,49)        120.6491         calculate D2E/DX2 analyticall!
 ! D255  D(30,42,44,50)       -116.4695         calculate D2E/DX2 analyticall!
 ! D256  D(30,42,44,84)          2.3287         calculate D2E/DX2 analyticall!
 ! D257  D(41,42,44,49)        -58.909          calculate D2E/DX2 analyticall!
 ! D258  D(41,42,44,50)         63.9724         calculate D2E/DX2 analyticall!
 ! D259  D(41,42,44,84)       -177.2294         calculate D2E/DX2 analyticall!
 ! D260  D(38,43,51,103)       177.3515         calculate D2E/DX2 analyticall!
 ! D261  D(38,43,51,104)        57.2172         calculate D2E/DX2 analyticall!
 ! D262  D(38,43,51,105)       -62.7561         calculate D2E/DX2 analyticall!
 ! D263  D(52,43,51,103)       -58.4782         calculate D2E/DX2 analyticall!
 ! D264  D(52,43,51,104)      -178.6125         calculate D2E/DX2 analyticall!
 ! D265  D(52,43,51,105)        61.4142         calculate D2E/DX2 analyticall!
 ! D266  D(83,43,51,103)        59.3693         calculate D2E/DX2 analyticall!
 ! D267  D(83,43,51,104)       -60.765          calculate D2E/DX2 analyticall!
 ! D268  D(83,43,51,105)       179.2617         calculate D2E/DX2 analyticall!
 ! D269  D(38,43,52,106)       179.1633         calculate D2E/DX2 analyticall!
 ! D270  D(38,43,52,107)        59.9628         calculate D2E/DX2 analyticall!
 ! D271  D(38,43,52,108)       -60.2764         calculate D2E/DX2 analyticall!
 ! D272  D(51,43,52,106)        55.1355         calculate D2E/DX2 analyticall!
 ! D273  D(51,43,52,107)       -64.065          calculate D2E/DX2 analyticall!
 ! D274  D(51,43,52,108)       175.6958         calculate D2E/DX2 analyticall!
 ! D275  D(83,43,52,106)       -62.9086         calculate D2E/DX2 analyticall!
 ! D276  D(83,43,52,107)       177.8909         calculate D2E/DX2 analyticall!
 ! D277  D(83,43,52,108)        57.6517         calculate D2E/DX2 analyticall!
 ! D278  D(42,44,49,97)       -177.135          calculate D2E/DX2 analyticall!
 ! D279  D(42,44,49,98)        -57.2097         calculate D2E/DX2 analyticall!
 ! D280  D(42,44,49,99)         62.8289         calculate D2E/DX2 analyticall!
 ! D281  D(50,44,49,97)         58.936          calculate D2E/DX2 analyticall!
 ! D282  D(50,44,49,98)        178.8613         calculate D2E/DX2 analyticall!
 ! D283  D(50,44,49,99)        -61.1001         calculate D2E/DX2 analyticall!
 ! D284  D(84,44,49,97)        -58.7425         calculate D2E/DX2 analyticall!
 ! D285  D(84,44,49,98)         61.1828         calculate D2E/DX2 analyticall!
 ! D286  D(84,44,49,99)       -178.7786         calculate D2E/DX2 analyticall!
 ! D287  D(42,44,50,100)       177.1558         calculate D2E/DX2 analyticall!
 ! D288  D(42,44,50,101)        57.2946         calculate D2E/DX2 analyticall!
 ! D289  D(42,44,50,102)       -63.2678         calculate D2E/DX2 analyticall!
 ! D290  D(49,44,50,100)       -59.3163         calculate D2E/DX2 analyticall!
 ! D291  D(49,44,50,101)      -179.1775         calculate D2E/DX2 analyticall!
 ! D292  D(49,44,50,102)        60.2602         calculate D2E/DX2 analyticall!
 ! D293  D(84,44,50,100)        58.3236         calculate D2E/DX2 analyticall!
 ! D294  D(84,44,50,101)       -61.5376         calculate D2E/DX2 analyticall!
 ! D295  D(84,44,50,102)       177.9            calculate D2E/DX2 analyticall!
 -----------------------------------------------------------------------------
 Trust Radius=3.00D-01 FncErr=1.00D-07 GrdErr=1.00D-07
 Number of steps in this run= 641 maximum allowed number of steps= 684.
 GradGradGradGradGradGradGradGradGradGradGradGradGradGradGradGradGradGrad

 Stoichiometry    C42H60MgN2O9
 Framework group  C1[X(C42H60MgN2O9)]
 Deg. of freedom  336
 Full point group                 C1      NOp   1
 Largest Abelian subgroup         C1      NOp   1
 Largest concise Abelian subgroup C1      NOp   1
                         Standard orientation:                         
 ---------------------------------------------------------------------
 Center     Atomic     Atomic              Coordinates (Angstroms)
 Number     Number      Type              X           Y           Z
 ---------------------------------------------------------------------
    1          8             0        3.798719    3.110755   -1.503470
    2         12             0       -0.306662   -0.093947   -0.017684
    3          8             0        1.188014   -0.690241    3.203707
    4          6             0        3.783771    2.654181   -0.240729
    5          7             0        0.129969   -1.157340   -1.711923
    6          7             0       -0.997176    1.483318   -1.112304
    7          8             0        3.602063    3.331605    0.744263
    8          6             0        0.267443   -0.608920   -2.910916
    9          6             0        0.048130    0.765881   -3.174161
   10          6             0       -0.617258    1.712157   -2.366846
   11          8             0        3.804168    0.610437    1.063272
   12          6             0        2.518847    0.385142    1.366674
   13          6             0        2.460980   -0.210746    2.779254
   14          6             0        4.102664    1.158448   -0.235854
   15          8             0        1.611795    0.649416    0.597820
   16          6             0        3.585835    4.527118   -1.662160
   17          8             0       -1.039614   -0.170883    1.708792
   18          6             0        0.582718   -1.625948    2.409001
   19          8             0        1.060644   -1.956729    1.337760
   20          8             0       -1.710998   -2.638061    2.659931
   21          6             0       -2.620946   -1.605740    2.659463
   22          6             0       -2.025646   -0.194901    2.679449
   23          6             0       -0.403471   -2.486900    3.217604
   24          8             0       -3.789496   -1.887903    2.543240
   25          6             0       -3.113004    0.867165    2.527736
   26          6             0        0.174579   -3.904703    3.258562
   27          6             0        2.902252    0.824936    3.817064
   28          6             0        5.590924    0.920590   -0.481110
   29          6             0        0.259035   -2.575536   -1.427075
   30          6             0       -1.948115    2.365455   -0.457731
   31          6             0       -0.938030   -3.271449   -1.033888
   32          6             0       -0.812924   -4.560776   -0.462194
   33          6             0        0.450989   -5.167355   -0.298291
   34          6             0        1.606301   -4.506450   -0.755627
   35          6             0        1.541339   -3.209056   -1.317455
   36          6             0       -2.340320   -2.662513   -1.314959
   37          6             0        2.858081   -2.531818   -1.780356
   38          6             0       -1.496497    3.307194    0.522055
   39          6             0       -2.459717    4.051831    1.251269
   40          6             0       -3.837774    3.883508    1.017918
   41          6             0       -4.273278    2.967299    0.043351
   42          6             0       -3.352888    2.194226   -0.705587
   43          6             0        0.006693    3.555267    0.794227
   44          6             0       -3.902078    1.190063   -1.752855
   45          6             0       -3.491294   -3.361460   -0.527665
   46          6             0       -2.655458   -2.696616   -2.847949
   47          6             0        3.914375   -2.481777   -0.630680
   48          6             0        3.472444   -3.276016   -3.016342
   49          6             0       -4.841757    0.138277   -1.079873
   50          6             0       -4.664716    1.920660   -2.909516
   51          6             0        0.372545    3.220529    2.274540
   52          6             0        0.413599    5.025732    0.446126
   53          6             0        0.654867   -1.447837   -4.123467
   54          6             0       -0.941096    3.053532   -3.012713
   55          1             0        0.281072    1.088495   -4.184046
   56          1             0        3.163813   -1.053189    2.761654
   57          1             0        3.487855    0.654692   -0.985359
   58          1             0        2.619645    4.813689   -1.244555
   59          1             0        3.612447    4.704385   -2.737154
   60          1             0        4.379081    5.087436   -1.159546
   61          1             0       -1.564256   -0.048407    3.679121
   62          1             0       -0.482214   -2.061357    4.223527
   63          1             0       -3.836797    0.786402    3.347133
   64          1             0       -3.650193    0.760137    1.585402
   65          1             0       -2.674937    1.866323    2.530136
   66          1             0       -0.486848   -4.550032    3.843746
   67          1             0        1.168566   -3.906393    3.720441
   68          1             0        0.253897   -4.287467    2.234953
   69          1             0        3.911342    1.179503    3.595871
   70          1             0        2.888662    0.364793    4.808774
   71          1             0        2.217316    1.675769    3.811291
   72          1             0        5.799222   -0.151374   -0.463946
   73          1             0        6.190772    1.411996    0.291268
   74          1             0        5.870590    1.322863   -1.458453
   75          1             0       -1.713236   -5.108779   -0.160195
   76          1             0        0.524206   -6.176594    0.129516
   77          1             0        2.580596   -5.004679   -0.669084
   78          1             0       -2.320041   -1.590680   -1.013506
   79          1             0        2.624230   -1.489825   -2.077247
   80          1             0       -2.120910    4.784122    1.996003
   81          1             0       -4.569246    4.472112    1.588205
   82          1             0       -5.348414    2.849013   -0.143775
   83          1             0        0.584147    2.878646    0.134819
   84          1             0       -3.042104    0.648189   -2.195877
   85          1             0       -4.429595   -2.812176   -0.689528
   86          1             0       -3.286248   -3.381647    0.553815
   87          1             0       -3.636513   -4.393952   -0.880910
   88          1             0       -3.661833   -2.290014   -3.029825
   89          1             0       -2.621145   -3.730735   -3.225739
   90          1             0       -1.931153   -2.091112   -3.416393
   91          1             0        4.827821   -1.970572   -0.983071
   92          1             0        4.198373   -3.494079   -0.306536
   93          1             0        3.512724   -1.945107    0.244976
   94          1             0        4.364874   -2.739526   -3.373885
   95          1             0        2.750762   -3.342781   -3.843703
   96          1             0        3.770894   -4.297977   -2.736340
   97          1             0       -5.182211   -0.596834   -1.825843
   98          1             0       -4.312394   -0.401040   -0.274156
   99          1             0       -5.727215    0.622164   -0.640724
  100          1             0       -4.996006    1.185561   -3.658866
  101          1             0       -4.018645    2.657607   -3.409824
  102          1             0       -5.551827    2.443937   -2.520976
  103          1             0        1.456932    3.360818    2.426760
  104          1             0        0.101871    2.172262    2.496491
  105          1             0       -0.165697    3.875367    2.977110
  106          1             0        1.484708    5.173551    0.665001
  107          1             0       -0.157620    5.751945    1.046397
  108          1             0        0.227212    5.241503   -0.619645
  109          1             0        0.546034   -2.518119   -3.930352
  110          1             0        0.029434   -1.182900   -4.984126
  111          1             0        1.696732   -1.253859   -4.407983
  112          1             0       -2.014316    3.149720   -3.211338
  113          1             0       -0.655394    3.882330   -2.354573
  114          1             0       -0.413642    3.168163   -3.965824
 ---------------------------------------------------------------------
 Rotational constants (GHZ):      0.0607137      0.0597420      0.0477743
 Isotopes: O-16,Mg-24,O-16,C-12,N-14,N-14,O-16,C-12,C-12,C-12,O-16,C-12,C-12,C-12
 ,O-16,C-12,O-16,C-12,O-16,O-16,C-12,C-12,C-12,O-16,C-12,C-12,C-12,C-12,C-12,C-12
 ,C-12,C-12,C-12,C-12,C-12,C-12,C-12,C-12,C-12,C-12,C-12,C-12,C-12,C-12,C-12,C-12
 ,C-12,C-12,C-12,C-12,C-12,C-12,C-12,C-12,H-1,H-1,H-1,H-1,H-1,H-1,H-1,H-1,H-1,H-1
 ,H-1,H-1,H-1,H-1,H-1,H-1,H-1,H-1,H-1,H-1,H-1,H-1,H-1,H-1,H-1,H-1,H-1,H-1,H-1,H-1
 ,H-1,H-1,H-1,H-1,H-1,H-1,H-1,H-1,H-1,H-1,H-1,H-1,H-1,H-1,H-1,H-1,H-1,H-1,H-1,H-1
 ,H-1,H-1,H-1,H-1,H-1,H-1,H-1,H-1,H-1,H-1
 General basis read from cards:  (5D, 7F)
 There are   642 symmetry adapted basis functions of A   symmetry.
 Crude estimate of integral set expansion from redundant integrals=1.000.
 Integral buffers will be    262144 words long.
 Raffenetti 2 integral format.
 Two-electron integral symmetry is turned on.
   642 basis functions     1430 primitive gaussians
   205 alpha electrons      205 beta electrons
       nuclear repulsion energy      9219.8894597517 Hartrees.
 One-electron integrals computed using PRISM.
 NBasis=   642 RedAO= T  NBF=   642
 NBsUse=   642 1.00D-04 NBFU=   642
 Initial guess read from the checkpoint file:
 rrss_fm-oco.chk
 Requested convergence on RMS density matrix=1.00D-08 within  64 cycles.
 Requested convergence on MAX density matrix=1.00D-06.
 SCF Done:  E(RB+HF-LYP) =  -2612.17811917     A.U. after    1 cycles
             Convg  =    0.3919D-08             -V/T =  2.0106
             S**2   =   0.0000
 Range of M.O.s used for correlation:     1   642
 NBasis=   642 NAE=   205 NBE=   205 NFC=     0 NFV=     0
 NROrb=    642 NOA=   205 NOB=   205 NVA=   437 NVB=   437
 PrsmSu:  requested number of processors reduced to:   1 ShMem   1 Linda.
 PrsmSu:  requested number of processors reduced to:   1 ShMem   1 Linda.
 G2DrvN: will do   23 atoms at a time, making    5 passes doing MaxLOS=2.
 FoFDir used for L=0 through L=2.
          Differentiating once with respect to electric field.
                with respect to dipole field.
          Differentiating once with respect to nuclear coordinates.
 Integrals replicated using symmetry in FoFDir.
 MinBra= 0 MaxBra= 2 Meth= 1.
 IRaf=       0 NMat=  69 IRICut=      69 DoRegI=T DoRafI=T ISym2E= 2 JSym2E=2.
 Raff turned off since only 55.31% of shell-pairs survive.
          There are 345 degrees of freedom in the 1st order CPHF.
 345 vectors were produced by pass  0.
 AX will form  69 AO Fock derivatives at one time.
 345 vectors were produced by pass  1.
 345 vectors were produced by pass  2.
 342 vectors were produced by pass  3.
 342 vectors were produced by pass  4.
 207 vectors were produced by pass  5.
  38 vectors were produced by pass  6.
   3 vectors were produced by pass  7.
 Inv2:  IOpt= 1 Iter= 1 AM= 7.72D-15 Conv= 1.00D-12.
 Inverted reduced A of dimension1967 with in-core refinement.

 **********************************************************************

            Population analysis using the SCF density.

 **********************************************************************

 Alpha  occ. eigenvalues --  -46.70886 -19.21567 -19.20417 -19.18451 -19.16940
 Alpha  occ. eigenvalues --  -19.15343 -19.14989 -19.12043 -19.10025 -19.05745
 Alpha  occ. eigenvalues --  -14.28322 -14.27259 -10.34689 -10.32651 -10.31153
 Alpha  occ. eigenvalues --  -10.27212 -10.27199 -10.26889 -10.24248 -10.23971
 Alpha  occ. eigenvalues --  -10.20428 -10.20023 -10.19949 -10.19724 -10.18489
 Alpha  occ. eigenvalues --  -10.16142 -10.15811 -10.15570 -10.12315 -10.11951
 Alpha  occ. eigenvalues --  -10.05345 -10.04952 -10.03742 -10.02608 -10.02478
 Alpha  occ. eigenvalues --  -10.02410 -10.02113 -10.01927 -10.01898 -10.01724
 Alpha  occ. eigenvalues --  -10.01701 -10.01310 -10.01185 -10.01054 -10.00972
 Alpha  occ. eigenvalues --  -10.00858 -10.00837 -10.00795 -10.00471 -10.00408
 Alpha  occ. eigenvalues --   -9.99971  -9.99909  -9.99745  -9.98707  -3.01390
 Alpha  occ. eigenvalues --   -1.76180  -1.75993  -1.75807  -1.13951  -1.11644
 Alpha  occ. eigenvalues --   -1.09926  -1.06370  -1.04828  -1.02983  -1.00922
 Alpha  occ. eigenvalues --   -0.98542  -0.92625  -0.88858  -0.87414  -0.82860
 Alpha  occ. eigenvalues --   -0.80748  -0.80143  -0.79402  -0.76714  -0.76348
 Alpha  occ. eigenvalues --   -0.76286  -0.74270  -0.74052  -0.73876  -0.73757
 Alpha  occ. eigenvalues --   -0.71757  -0.70219  -0.69127  -0.68276  -0.67829
 Alpha  occ. eigenvalues --   -0.67644  -0.67426  -0.66796  -0.65672  -0.65458
 Alpha  occ. eigenvalues --   -0.64658  -0.64204  -0.64083  -0.63567  -0.62148
 Alpha  occ. eigenvalues --   -0.60388  -0.58830  -0.58517  -0.58077  -0.58028
 Alpha  occ. eigenvalues --   -0.56579  -0.56501  -0.55016  -0.54810  -0.54535
 Alpha  occ. eigenvalues --   -0.54029  -0.53156  -0.52064  -0.51250  -0.50670
 Alpha  occ. eigenvalues --   -0.49876  -0.49698  -0.49498  -0.49264  -0.48103
 Alpha  occ. eigenvalues --   -0.47550  -0.46735  -0.46699  -0.46136  -0.45465
 Alpha  occ. eigenvalues --   -0.45063  -0.44824  -0.44348  -0.43850  -0.43666
 Alpha  occ. eigenvalues --   -0.43541  -0.43235  -0.42566  -0.42178  -0.41725
 Alpha  occ. eigenvalues --   -0.41421  -0.41091  -0.40947  -0.40886  -0.40548
 Alpha  occ. eigenvalues --   -0.40525  -0.40167  -0.40077  -0.39845  -0.39747
 Alpha  occ. eigenvalues --   -0.39454  -0.39262  -0.39167  -0.38967  -0.38780
 Alpha  occ. eigenvalues --   -0.38689  -0.38291  -0.38152  -0.37982  -0.37563
 Alpha  occ. eigenvalues --   -0.37358  -0.37314  -0.37075  -0.36709  -0.36588
 Alpha  occ. eigenvalues --   -0.36337  -0.36132  -0.36029  -0.35878  -0.35709
 Alpha  occ. eigenvalues --   -0.35346  -0.35087  -0.34896  -0.34823  -0.34664
 Alpha  occ. eigenvalues --   -0.34536  -0.34051  -0.33904  -0.33801  -0.33608
 Alpha  occ. eigenvalues --   -0.32808  -0.32684  -0.32195  -0.32149  -0.31579
 Alpha  occ. eigenvalues --   -0.31445  -0.31086  -0.30919  -0.30559  -0.30537
 Alpha  occ. eigenvalues --   -0.30260  -0.29924  -0.29640  -0.29363  -0.29212
 Alpha  occ. eigenvalues --   -0.28834  -0.28704  -0.28446  -0.28101  -0.27785
 Alpha  occ. eigenvalues --   -0.27447  -0.27395  -0.26784  -0.26651  -0.25981
 Alpha  occ. eigenvalues --   -0.25599  -0.25212  -0.24011  -0.21363  -0.20025
 Alpha  occ. eigenvalues --   -0.18126  -0.17979  -0.17944  -0.17533  -0.15244
 Alpha virt. eigenvalues --   -0.02297  -0.00412   0.01029   0.01392   0.03649
 Alpha virt. eigenvalues --    0.06622   0.07373   0.07704   0.08068   0.08241
 Alpha virt. eigenvalues --    0.08563   0.08842   0.10333   0.10543   0.11171
 Alpha virt. eigenvalues --    0.11642   0.12729   0.12901   0.12964   0.13970
 Alpha virt. eigenvalues --    0.14198   0.14547   0.15347   0.15621   0.16120
 Alpha virt. eigenvalues --    0.16189   0.16440   0.16693   0.16836   0.17581
 Alpha virt. eigenvalues --    0.17948   0.18406   0.18608   0.19831   0.19937
 Alpha virt. eigenvalues --    0.20314   0.20638   0.20974   0.21907   0.22600
 Alpha virt. eigenvalues --    0.22738   0.22928   0.23043   0.23373   0.23651
 Alpha virt. eigenvalues --    0.24420   0.25059   0.25083   0.25475   0.25836
 Alpha virt. eigenvalues --    0.26146   0.26769   0.27140   0.28141   0.28511
 Alpha virt. eigenvalues --    0.28609   0.29568   0.30034   0.30556   0.31253
 Alpha virt. eigenvalues --    0.31636   0.31939   0.32516   0.32829   0.33519
 Alpha virt. eigenvalues --    0.33854   0.34486   0.35178   0.35584   0.35748
 Alpha virt. eigenvalues --    0.36018   0.36430   0.37579   0.37960   0.38043
 Alpha virt. eigenvalues --    0.38582   0.38653   0.38944   0.39161   0.39235
 Alpha virt. eigenvalues --    0.39385   0.39950   0.40565   0.40764   0.41253
 Alpha virt. eigenvalues --    0.41525   0.41714   0.42163   0.42633   0.42820
 Alpha virt. eigenvalues --    0.43279   0.43611   0.43725   0.44532   0.44764
 Alpha virt. eigenvalues --    0.45330   0.45582   0.45642   0.45996   0.46522
 Alpha virt. eigenvalues --    0.46529   0.46791   0.47060   0.47618   0.47695
 Alpha virt. eigenvalues --    0.48048   0.48153   0.48290   0.48489   0.48899
 Alpha virt. eigenvalues --    0.49017   0.49429   0.49677   0.50154   0.50302
 Alpha virt. eigenvalues --    0.50695   0.51048   0.51329   0.51533   0.51785
 Alpha virt. eigenvalues --    0.52373   0.52488   0.52891   0.53336   0.53538
 Alpha virt. eigenvalues --    0.53723   0.54042   0.54390   0.54566   0.54949
 Alpha virt. eigenvalues --    0.55123   0.55594   0.55944   0.56097   0.56688
 Alpha virt. eigenvalues --    0.57069   0.57273   0.57478   0.57798   0.57905
 Alpha virt. eigenvalues --    0.58509   0.58734   0.59105   0.59237   0.59508
 Alpha virt. eigenvalues --    0.59756   0.60051   0.60657   0.60892   0.61194
 Alpha virt. eigenvalues --    0.61598   0.61668   0.63228   0.63894   0.64123
 Alpha virt. eigenvalues --    0.64666   0.65110   0.66130   0.66292   0.66940
 Alpha virt. eigenvalues --    0.67662   0.67980   0.68347   0.68989   0.69138
 Alpha virt. eigenvalues --    0.69801   0.70391   0.71031   0.71119   0.71678
 Alpha virt. eigenvalues --    0.72500   0.73092   0.73330   0.74007   0.74446
 Alpha virt. eigenvalues --    0.74711   0.75463   0.75840   0.76543   0.77182
 Alpha virt. eigenvalues --    0.77519   0.77764   0.78489   0.78927   0.79530
 Alpha virt. eigenvalues --    0.79730   0.80456   0.80963   0.81675   0.83107
 Alpha virt. eigenvalues --    0.83448   0.83954   0.84139   0.84895   0.85939
 Alpha virt. eigenvalues --    0.86654   0.86788   0.87245   0.87557   0.88289
 Alpha virt. eigenvalues --    0.88460   0.89191   0.89932   0.90081   0.90391
 Alpha virt. eigenvalues --    0.90905   0.91546   0.91734   0.92636   0.93669
 Alpha virt. eigenvalues --    0.94494   0.94842   0.95083   0.96319   0.96461
 Alpha virt. eigenvalues --    0.97354   0.97485   0.97916   0.98201   0.99714
 Alpha virt. eigenvalues --    1.00497   1.01076   1.01416   1.02576   1.03359
 Alpha virt. eigenvalues --    1.03760   1.05199   1.06959   1.07475   1.08087
 Alpha virt. eigenvalues --    1.08936   1.09738   1.10597   1.10911   1.11206
 Alpha virt. eigenvalues --    1.12331   1.12907   1.13937   1.14629   1.15782
 Alpha virt. eigenvalues --    1.16379   1.17922   1.19861   1.20684   1.22015
 Alpha virt. eigenvalues --    1.22205   1.23369   1.23599   1.24053   1.25077
 Alpha virt. eigenvalues --    1.26947   1.28047   1.29764   1.30785   1.31159
 Alpha virt. eigenvalues --    1.32244   1.34539   1.35908   1.36759   1.37145
 Alpha virt. eigenvalues --    1.37520   1.38449   1.39830   1.39973   1.41366
 Alpha virt. eigenvalues --    1.42495   1.43348   1.43921   1.44770   1.47052
 Alpha virt. eigenvalues --    1.48449   1.49185   1.49780   1.49919   1.50738
 Alpha virt. eigenvalues --    1.51280   1.52226   1.54271   1.54942   1.57174
 Alpha virt. eigenvalues --    1.57710   1.58705   1.60178   1.61958   1.62662
 Alpha virt. eigenvalues --    1.63935   1.65443   1.66451   1.67692   1.68403
 Alpha virt. eigenvalues --    1.68914   1.69652   1.71142   1.72146   1.73097
 Alpha virt. eigenvalues --    1.73380   1.74588   1.75688   1.75947   1.77130
 Alpha virt. eigenvalues --    1.77369   1.79036   1.79296   1.80093   1.80434
 Alpha virt. eigenvalues --    1.81271   1.82566   1.83075   1.83381   1.83958
 Alpha virt. eigenvalues --    1.84047   1.85017   1.85347   1.87068   1.87386
 Alpha virt. eigenvalues --    1.88966   1.89325   1.90316   1.90530   1.91287
 Alpha virt. eigenvalues --    1.91722   1.92140   1.93669   1.93994   1.94498
 Alpha virt. eigenvalues --    1.94865   1.95651   1.96624   1.97132   1.97866
 Alpha virt. eigenvalues --    1.98962   1.99622   2.00042   2.01059   2.01087
 Alpha virt. eigenvalues --    2.01833   2.02168   2.02897   2.03197   2.04296
 Alpha virt. eigenvalues --    2.05103   2.05861   2.07524   2.07748   2.09022
 Alpha virt. eigenvalues --    2.09986   2.10641   2.11068   2.12561   2.13001
 Alpha virt. eigenvalues --    2.13711   2.14951   2.15676   2.15873   2.16252
 Alpha virt. eigenvalues --    2.17108   2.17690   2.18884   2.19282   2.19552
 Alpha virt. eigenvalues --    2.20145   2.21420   2.21837   2.23165   2.25331
 Alpha virt. eigenvalues --    2.25923   2.26268   2.27541   2.27789   2.28031
 Alpha virt. eigenvalues --    2.28911   2.29522   2.29960   2.30623   2.31568
 Alpha virt. eigenvalues --    2.32250   2.32296   2.34233   2.34857   2.35592
 Alpha virt. eigenvalues --    2.37118   2.37993   2.39007   2.40512   2.41814
 Alpha virt. eigenvalues --    2.42334   2.43370   2.45022   2.47589   2.48166
 Alpha virt. eigenvalues --    2.49129   2.51683   2.55453   2.57485   2.58308
 Alpha virt. eigenvalues --    2.59091   2.61223   2.61897   2.64053   2.64521
 Alpha virt. eigenvalues --    2.65681   2.66922   2.67709   2.68992   2.70409
 Alpha virt. eigenvalues --    2.71719   2.73778   2.74253   2.74968   2.77590
 Alpha virt. eigenvalues --    2.80122   2.81471   2.83472   2.86656   2.87328
 Alpha virt. eigenvalues --    2.88284   2.92882   2.95666   2.97678   3.00257
 Alpha virt. eigenvalues --    3.01943   3.02800   3.05599   3.06509   3.11609
 Alpha virt. eigenvalues --    3.12089   3.15146   3.17814   3.19716   3.23059
 Alpha virt. eigenvalues --    3.23239   3.24934   3.61551   6.07512   6.14316
 Alpha virt. eigenvalues --    6.34085 103.38615
          Condensed to atoms (all electrons):
 Total atomic charges:
              1
  1  O   -0.445751
  2  Mg   0.915033
  3  O   -0.453896
  4  C    0.595064
  5  N   -0.542762
  6  N   -0.551551
  7  O   -0.437361
  8  C    0.330155
  9  C   -0.247154
 10  C    0.348968
 11  O   -0.449754
 12  C    0.637421
 13  C    0.064735
 14  C    0.039217
 15  O   -0.447529
 16  C   -0.217479
 17  O   -0.686691
 18  C    0.656927
 19  O   -0.462312
 20  O   -0.448384
 21  C    0.556934
 22  C    0.110191
 23  C    0.071921
 24  O   -0.424224
 25  C   -0.464335
 26  C   -0.470388
 27  C   -0.470234
 28  C   -0.469196
 29  C    0.015024
 30  C    0.012460
 31  C   -0.005516
 32  C   -0.071428
 33  C   -0.073360
 34  C   -0.074861
 35  C    0.003778
 36  C   -0.056574
 37  C   -0.050515
 38  C   -0.004518
 39  C   -0.077175
 40  C   -0.072212
 41  C   -0.078637
 42  C   -0.002128
 43  C   -0.061534
 44  C   -0.055961
 45  C   -0.224336
 46  C   -0.218789
 47  C   -0.214878
 48  C   -0.218016
 49  C   -0.216249
 50  C   -0.215707
 51  C   -0.227864
 52  C   -0.218141
 53  C   -0.447791
 54  C   -0.449326
 55  H    0.074469
 56  H    0.179410
 57  H    0.218171
 58  H    0.169686
 59  H    0.169674
 60  H    0.168495
 61  H    0.103032
 62  H    0.153959
 63  H    0.125079
 64  H    0.142133
 65  H    0.122569
 66  H    0.158687
 67  H    0.137536
 68  H    0.168551
 69  H    0.174327
 70  H    0.168818
 71  H    0.176748
 72  H    0.159425
 73  H    0.171336
 74  H    0.175047
 75  H    0.091157
 76  H    0.084032
 77  H    0.076904
 78  H    0.091617
 79  H    0.088321
 80  H    0.080164
 81  H    0.083378
 82  H    0.080708
 83  H    0.099867
 84  H    0.101885
 85  H    0.078181
 86  H    0.104461
 87  H    0.066754
 88  H    0.074429
 89  H    0.070931
 90  H    0.086702
 91  H    0.071947
 92  H    0.077221
 93  H    0.093501
 94  H    0.072636
 95  H    0.079418
 96  H    0.073905
 97  H    0.072527
 98  H    0.099377
 99  H    0.074221
100  H    0.075575
101  H    0.071672
102  H    0.072084
103  H    0.082310
104  H    0.105377
105  H    0.071013
106  H    0.086756
107  H    0.075270
108  H    0.072282
109  H    0.127193
110  H    0.129093
111  H    0.129936
112  H    0.128709
113  H    0.125561
114  H    0.122463
 Sum of Mulliken charges=   0.00000
 Atomic charges with hydrogens summed into heavy atoms:
              1
  1  O   -0.445751
  2  Mg   0.915033
  3  O   -0.453896
  4  C    0.595064
  5  N   -0.542762
  6  N   -0.551551
  7  O   -0.437361
  8  C    0.330155
  9  C   -0.172685
 10  C    0.348968
 11  O   -0.449754
 12  C    0.637421
 13  C    0.244145
 14  C    0.257389
 15  O   -0.447529
 16  C    0.290377
 17  O   -0.686691
 18  C    0.656927
 19  O   -0.462312
 20  O   -0.448384
 21  C    0.556934
 22  C    0.213223
 23  C    0.225880
 24  O   -0.424224
 25  C   -0.074555
 26  C   -0.005614
 27  C    0.049660
 28  C    0.036612
 29  C    0.015024
 30  C    0.012460
 31  C   -0.005516
 32  C    0.019729
 33  C    0.010672
 34  C    0.002043
 35  C    0.003778
 36  C    0.035043
 37  C    0.037805
 38  C   -0.004518
 39  C    0.002990
 40  C    0.011166
 41  C    0.002071
 42  C   -0.002128
 43  C    0.038334
 44  C    0.045924
 45  C    0.025060
 46  C    0.013272
 47  C    0.027791
 48  C    0.007943
 49  C    0.029876
 50  C    0.003624
 51  C    0.030836
 52  C    0.016166
 53  C   -0.061569
 54  C   -0.072592
 55  H    0.000000
 56  H    0.000000
 57  H    0.000000
 58  H    0.000000
 59  H    0.000000
 60  H    0.000000
 61  H    0.000000
 62  H    0.000000
 63  H    0.000000
 64  H    0.000000
 65  H    0.000000
 66  H    0.000000
 67  H    0.000000
 68  H    0.000000
 69  H    0.000000
 70  H    0.000000
 71  H    0.000000
 72  H    0.000000
 73  H    0.000000
 74  H    0.000000
 75  H    0.000000
 76  H    0.000000
 77  H    0.000000
 78  H    0.000000
 79  H    0.000000
 80  H    0.000000
 81  H    0.000000
 82  H    0.000000
 83  H    0.000000
 84  H    0.000000
 85  H    0.000000
 86  H    0.000000
 87  H    0.000000
 88  H    0.000000
 89  H    0.000000
 90  H    0.000000
 91  H    0.000000
 92  H    0.000000
 93  H    0.000000
 94  H    0.000000
 95  H    0.000000
 96  H    0.000000
 97  H    0.000000
 98  H    0.000000
 99  H    0.000000
100  H    0.000000
101  H    0.000000
102  H    0.000000
103  H    0.000000
104  H    0.000000
105  H    0.000000
106  H    0.000000
107  H    0.000000
108  H    0.000000
109  H    0.000000
110  H    0.000000
111  H    0.000000
112  H    0.000000
113  H    0.000000
114  H    0.000000
 Sum of Mulliken charges=   0.00000
 Electronic spatial extent (au):  <R**2>= 28025.5404
 Charge=     0.0000 electrons
 Dipole moment (Debye):
    X=     6.7929    Y=     2.3629    Z=    -3.1257  Tot=     7.8420
 Quadrupole moment (Debye-Ang):
   XX=  -301.0986   YY=  -293.8017   ZZ=  -307.3541
   XY=   -10.4153   XZ=    10.1156   YZ=     0.4720
 Octapole moment (Debye-Ang**2):
  XXX=   140.7231  YYY=    36.5681  ZZZ=    44.1946  XYY=    40.3485
  XXY=    62.4645  XXZ=   -75.5176  XZZ=    51.5852  YZZ=     4.6328
  YYZ=   -30.4310  XYZ=   -54.6495
 Hexadecapole moment (Debye-Ang**3):
 XXXX=-13565.3337 YYYY=-13006.6027 ZZZZ= -8285.1638 XXXY=  -105.3428
 XXXZ=   160.2544 YYYX=   113.8667 YYYZ=   -88.1630 ZZZX=    80.5001
 ZZZY=   -74.1942 XXYY= -4463.5037 XXZZ= -3782.5212 YYZZ= -3620.2270
 XXYZ=    38.1754 YYXZ=  -113.4629 ZZXY=   -18.9115
 N-N= 9.219889459752D+03 E-N=-2.453735743508D+04  KE= 2.584799712093D+03
  Exact polarizability: 424.069 -24.510 431.929 -17.039  -5.523 366.430
 Approx polarizability: 626.649 -40.909 619.640 -25.956  11.355 551.271
 Full mass-weighted force constant matrix:
 Low frequencies ---  -48.7673   -4.6071   -4.3032   -0.0116   -0.0095   -0.0078
 Low frequencies ---    6.6477   15.7612   19.3542
 ******    1 imaginary frequencies (negative Signs) ****** 
 Harmonic frequencies (cm**-1), IR intensities (KM/Mole),
 Raman scattering activities (A**4/AMU), Raman depolarization ratios,
 reduced masses (AMU), force constants (mDyne/A) and normal coordinates:
                     1                      2                      3
                    ?A                     ?A                     ?A
 Frequencies --   -48.7318                15.7170                19.3347
 Red. masses --     8.1758                 4.4618                 4.6310
 Frc consts  --     0.0114                 0.0006                 0.0010
 IR Inten    --     0.5838                 0.6374                 0.1972
 Raman Activ --     0.0000                 0.0000                 0.0000
 Depolar     --     0.0000                 0.0000                 0.0000
 Atom AN      X      Y      Z        X      Y      Z        X      Y      Z
   1   8     0.01   0.04   0.00     0.06   0.17   0.07     0.17   0.07   0.10
   2  12     0.07  -0.10   0.07    -0.02  -0.01  -0.01     0.00   0.01  -0.02
   3   8    -0.01   0.04  -0.05     0.03   0.01  -0.02    -0.02  -0.01   0.00
   4   6     0.03   0.03  -0.01     0.01   0.07   0.03     0.08   0.02   0.08
   5   7     0.00  -0.05   0.01    -0.01  -0.02   0.00    -0.03  -0.01  -0.01
   6   7     0.02  -0.07   0.08     0.00  -0.01  -0.01    -0.02  -0.01  -0.02
   7   8     0.05   0.02   0.00     0.00   0.01   0.07     0.04   0.00   0.09
   8   6     0.01  -0.03   0.02     0.01  -0.02   0.01    -0.06  -0.02  -0.02
   9   6     0.02  -0.02   0.05     0.03  -0.01   0.01    -0.07  -0.03  -0.04
  10   6     0.03  -0.05   0.08     0.03  -0.01   0.00    -0.06  -0.02  -0.04
  11   8     0.03   0.01  -0.03    -0.01   0.01  -0.08     0.01   0.00   0.04
  12   6     0.02   0.06  -0.03     0.00   0.00  -0.04     0.00   0.00   0.01
  13   6     0.00  -0.01  -0.06     0.03   0.00  -0.04    -0.02   0.01   0.01
  14   6     0.03   0.03  -0.02    -0.05   0.06  -0.07     0.04   0.02   0.05
  15   8     0.02   0.14  -0.01    -0.02   0.00  -0.02     0.02   0.00  -0.01
  16   6     0.01   0.04   0.01     0.12   0.18   0.16     0.21   0.08   0.14
  17   8     0.03   0.01   0.12    -0.01  -0.02  -0.01     0.01   0.02  -0.01
  18   6    -0.16   0.19  -0.13     0.03  -0.01   0.01     0.00  -0.01  -0.01
  19   8    -0.25   0.28  -0.21     0.02  -0.02   0.01     0.01   0.00  -0.01
  20   8    -0.06   0.03  -0.02     0.04  -0.02   0.05    -0.02   0.02  -0.03
  21   6    -0.06   0.02   0.00     0.02  -0.03   0.04     0.00   0.04  -0.02
  22   6    -0.05   0.01   0.05    -0.01  -0.02   0.00     0.02   0.03   0.00
  23   6    -0.03   0.09  -0.09     0.04   0.01   0.03    -0.02  -0.01  -0.03
  24   8    -0.06   0.03  -0.01     0.02  -0.05   0.07    -0.01   0.06  -0.03
  25   6    -0.02   0.03  -0.01    -0.03  -0.05  -0.03     0.04   0.05   0.03
  26   6     0.07   0.13  -0.15     0.05   0.01   0.06    -0.04  -0.02  -0.05
  27   6     0.07  -0.07  -0.02     0.06   0.00  -0.05    -0.06   0.03   0.01
  28   6     0.03   0.02  -0.03    -0.08   0.00  -0.16     0.04  -0.02   0.07
  29   6    -0.01  -0.06  -0.02    -0.02  -0.02   0.01    -0.01  -0.01  -0.01
  30   6     0.02  -0.06   0.06     0.00  -0.01  -0.02    -0.02  -0.01  -0.01
  31   6    -0.01  -0.06  -0.03    -0.03   0.00   0.03     0.00  -0.02   0.00
  32   6    -0.01  -0.06  -0.03    -0.04   0.01   0.04     0.02  -0.02  -0.01
  33   6    -0.01  -0.05  -0.02    -0.05  -0.01   0.04     0.03  -0.01  -0.03
  34   6    -0.01  -0.05   0.00    -0.04  -0.03   0.03     0.02   0.00  -0.03
  35   6    -0.01  -0.05   0.00    -0.03  -0.03   0.01     0.00   0.00  -0.03
  36   6     0.00  -0.04  -0.02    -0.02   0.01   0.02    -0.01  -0.04   0.02
  37   6    -0.01  -0.03   0.02    -0.02  -0.06   0.00    -0.02   0.02  -0.04
  38   6     0.01  -0.03   0.04    -0.01  -0.02   0.00     0.00   0.01  -0.04
  39   6     0.00  -0.01   0.01    -0.02  -0.02  -0.01     0.01   0.02  -0.04
  40   6     0.00  -0.01  -0.01    -0.02  -0.02  -0.03     0.00   0.01  -0.01
  41   6     0.01  -0.03   0.01    -0.01   0.00  -0.04    -0.01  -0.01   0.02
  42   6     0.02  -0.05   0.04     0.00   0.00  -0.04    -0.02  -0.02   0.02
  43   6     0.01  -0.02   0.04    -0.02  -0.02   0.02     0.00   0.02  -0.06
  44   6     0.03  -0.05   0.04     0.01   0.02  -0.06    -0.03  -0.06   0.05
  45   6    -0.01  -0.03  -0.01    -0.03   0.03   0.02     0.01  -0.05   0.04
  46   6    -0.02  -0.03  -0.02    -0.02   0.01   0.02    -0.03  -0.05   0.02
  47   6    -0.03  -0.02   0.05    -0.01  -0.05  -0.01    -0.01   0.03  -0.05
  48   6     0.02  -0.02   0.03    -0.04  -0.08   0.01    -0.02   0.03  -0.05
  49   6     0.00  -0.03   0.03    -0.02   0.03  -0.09     0.00  -0.05   0.11
  50   6     0.06  -0.05   0.01     0.04   0.05  -0.07    -0.08  -0.09   0.06
  51   6     0.01   0.00   0.04    -0.03  -0.03   0.02     0.01   0.05  -0.06
  52   6     0.00  -0.02   0.02    -0.01  -0.02   0.03     0.00   0.01  -0.10
  53   6     0.00  -0.01   0.00     0.01  -0.02   0.01    -0.08  -0.04  -0.02
  54   6     0.04  -0.03   0.11     0.05   0.00   0.00    -0.09  -0.04  -0.05
  55   1     0.03   0.00   0.06     0.05  -0.01   0.01    -0.10  -0.04  -0.05
  56   1    -0.03  -0.04  -0.10     0.02   0.00  -0.06     0.00   0.02   0.04
  57   1     0.02   0.04  -0.03    -0.11   0.13  -0.06     0.04   0.05   0.03
  58   1     0.01   0.03   0.02     0.11   0.18   0.14     0.19   0.08   0.08
  59   1     0.00   0.05   0.01     0.17   0.27   0.18     0.29   0.12   0.14
  60   1     0.01   0.04   0.01     0.11   0.12   0.24     0.19   0.04   0.21
  61   1    -0.12   0.00   0.08    -0.01   0.02  -0.01     0.04   0.00  -0.01
  62   1     0.00   0.05  -0.07     0.04   0.03   0.02    -0.01  -0.03  -0.02
  63   1    -0.07   0.02  -0.06    -0.03  -0.04  -0.03     0.05   0.05   0.04
  64   1     0.03   0.06  -0.05    -0.03  -0.09  -0.03     0.03   0.08   0.04
  65   1    -0.01   0.03   0.03    -0.05  -0.04  -0.06     0.07   0.04   0.04
  66   1     0.15   0.07  -0.12     0.06   0.02   0.08    -0.05  -0.02  -0.07
  67   1     0.10   0.19  -0.21     0.05   0.03   0.05    -0.04  -0.04  -0.05
  68   1     0.03   0.14  -0.16     0.04  -0.01   0.06    -0.04   0.00  -0.06
  69   1     0.09  -0.12  -0.01     0.05   0.00  -0.08    -0.06   0.05   0.03
  70   1     0.05  -0.11  -0.04     0.08   0.00  -0.05    -0.07   0.04   0.02
  71   1     0.12  -0.03   0.02     0.06   0.00  -0.04    -0.07   0.02  -0.01
  72   1     0.02   0.02  -0.04    -0.13  -0.01  -0.22     0.01  -0.02   0.05
  73   1     0.03   0.01  -0.02    -0.01  -0.07  -0.17     0.04  -0.05   0.09
  74   1     0.03   0.03  -0.03    -0.11   0.04  -0.15     0.07   0.00   0.09
  75   1    -0.01  -0.06  -0.04    -0.05   0.02   0.05     0.03  -0.04   0.00
  76   1    -0.02  -0.05  -0.01    -0.06   0.00   0.05     0.04  -0.01  -0.03
  77   1    -0.01  -0.05   0.01    -0.05  -0.04   0.03     0.02   0.01  -0.05
  78   1     0.01  -0.04  -0.02    -0.01   0.02   0.01    -0.02  -0.04   0.01
  79   1    -0.01  -0.04   0.02    -0.01  -0.06  -0.01    -0.03   0.02  -0.04
  80   1     0.00   0.01  -0.01    -0.03  -0.03   0.01     0.02   0.04  -0.06
  81   1     0.00   0.01  -0.03    -0.02  -0.02  -0.03     0.01   0.02  -0.01
  82   1     0.01  -0.02  -0.01    -0.01   0.01  -0.06    -0.01  -0.02   0.04
  83   1     0.01  -0.02   0.05    -0.01  -0.02   0.02    -0.01   0.00  -0.05
  84   1     0.03  -0.07   0.06     0.01   0.02  -0.05    -0.04  -0.05   0.04
  85   1     0.00  -0.02  -0.01    -0.02   0.04   0.02     0.00  -0.05   0.05
  86   1     0.00  -0.03  -0.01    -0.03   0.03   0.02     0.03  -0.04   0.04
  87   1    -0.02  -0.03  -0.01    -0.04   0.03   0.02     0.01  -0.05   0.04
  88   1    -0.01  -0.01  -0.01    -0.01   0.02   0.01    -0.04  -0.06   0.04
  89   1    -0.03  -0.03  -0.02    -0.02   0.01   0.02    -0.03  -0.05   0.03
  90   1    -0.01  -0.04  -0.02    -0.01   0.00   0.02    -0.05  -0.04   0.01
  91   1    -0.04   0.00   0.07     0.00  -0.08  -0.03    -0.01   0.03  -0.07
  92   1    -0.02  -0.01   0.05    -0.03  -0.05   0.01     0.00   0.03  -0.05
  93   1    -0.07  -0.03   0.04     0.01  -0.03  -0.02     0.00   0.03  -0.05
  94   1     0.03  -0.01   0.05    -0.03  -0.10  -0.01    -0.03   0.04  -0.06
  95   1     0.04  -0.02   0.02    -0.04  -0.08   0.01    -0.03   0.01  -0.04
  96   1     0.02  -0.02   0.03    -0.05  -0.08   0.02     0.00   0.03  -0.05
  97   1     0.00  -0.03   0.02    -0.01   0.04  -0.11    -0.02  -0.07   0.13
  98   1    -0.03  -0.04   0.04    -0.04   0.02  -0.09     0.03  -0.03   0.10
  99   1     0.00  -0.02   0.00    -0.03   0.03  -0.11     0.01  -0.05   0.12
 100   1     0.06  -0.06   0.02     0.04   0.06  -0.08    -0.08  -0.12   0.08
 101   1     0.08  -0.07   0.02     0.06   0.05  -0.05    -0.10  -0.10   0.02
 102   1     0.06  -0.04  -0.01     0.04   0.05  -0.08    -0.07  -0.10   0.07
 103   1     0.01   0.01   0.04    -0.04  -0.03   0.03     0.01   0.04  -0.07
 104   1     0.01   0.01   0.06    -0.03  -0.04   0.00     0.01   0.05  -0.03
 105   1     0.01   0.01   0.03    -0.05  -0.05   0.02     0.02   0.06  -0.07
 106   1     0.00  -0.01   0.02    -0.02  -0.02   0.06     0.00   0.01  -0.09
 107   1    -0.01  -0.01   0.02    -0.03  -0.02   0.03     0.00   0.02  -0.12
 108   1    -0.01  -0.02   0.02     0.01  -0.01   0.03     0.02  -0.02  -0.11
 109   1     0.00  -0.01  -0.02     0.00  -0.02   0.01    -0.07  -0.04  -0.01
 110   1     0.00   0.01   0.01     0.01  -0.02   0.01    -0.09  -0.05  -0.02
 111   1     0.00  -0.01   0.00     0.01  -0.03   0.01    -0.08  -0.04  -0.04
 112   1     0.04  -0.01   0.12     0.06   0.01  -0.03    -0.10  -0.05  -0.02
 113   1     0.06  -0.04   0.12     0.05  -0.01   0.01    -0.08  -0.02  -0.07
 114   1     0.03  -0.02   0.10     0.07   0.00   0.01    -0.12  -0.05  -0.07
                     4                      5                      6
                    ?A                     ?A                     ?A
 Frequencies --    33.7347                36.0454                42.6799
 Red. masses --     4.1686                 3.6839                 5.0517
 Frc consts  --     0.0028                 0.0028                 0.0054
 IR Inten    --     0.3507                 0.2903                 1.7825
 Raman Activ --     0.0000                 0.0000                 0.0000
 Depolar     --     0.0000                 0.0000                 0.0000
 Atom AN      X      Y      Z        X      Y      Z        X      Y      Z
   1   8     0.01   0.02  -0.01    -0.04  -0.02   0.02     0.09  -0.08   0.00
   2  12     0.00  -0.02  -0.01     0.01   0.00   0.00     0.02   0.02   0.01
   3   8    -0.04   0.02  -0.02    -0.01  -0.01   0.00    -0.02   0.05   0.01
   4   6     0.01   0.05   0.01    -0.02  -0.03   0.02     0.06  -0.08   0.00
   5   7    -0.03  -0.02  -0.02    -0.01   0.00  -0.01     0.02   0.02   0.01
   6   7     0.02  -0.01  -0.01     0.03   0.01   0.01    -0.03   0.00   0.00
   7   8    -0.01   0.08  -0.01    -0.03  -0.04   0.03     0.04  -0.07  -0.01
   8   6    -0.05  -0.04  -0.03    -0.01   0.00  -0.01     0.01   0.02   0.01
   9   6    -0.05  -0.04  -0.04     0.02   0.01   0.00    -0.01   0.01   0.01
  10   6    -0.01  -0.02  -0.03     0.05   0.02   0.01    -0.03   0.00   0.00
  11   8     0.00   0.08   0.05     0.01  -0.03   0.01     0.02  -0.07   0.01
  12   6     0.00   0.02   0.01     0.00  -0.02   0.01     0.00   0.03   0.01
  13   6    -0.02  -0.02  -0.01    -0.01  -0.01   0.01    -0.03   0.08   0.03
  14   6     0.02   0.06   0.05     0.01  -0.02   0.02     0.06  -0.08   0.01
  15   8     0.01  -0.02  -0.02     0.01   0.00   0.00     0.02   0.08   0.01
  16   6     0.00   0.01  -0.05    -0.07  -0.03   0.03     0.08  -0.09  -0.01
  17   8    -0.03  -0.05  -0.02     0.00  -0.01   0.00     0.00  -0.06   0.01
  18   6    -0.04   0.01  -0.01    -0.01  -0.01   0.00     0.00   0.05  -0.02
  19   8    -0.04   0.00  -0.01     0.00  -0.01   0.00     0.03   0.09  -0.03
  20   8    -0.03  -0.02   0.04    -0.02   0.02   0.02     0.04  -0.04   0.02
  21   6    -0.03  -0.02   0.04    -0.01   0.03   0.05     0.02  -0.06   0.07
  22   6    -0.03  -0.02  -0.02     0.02   0.02   0.01     0.00  -0.05   0.00
  23   6    -0.02   0.00   0.01    -0.01  -0.01   0.00     0.06  -0.02  -0.03
  24   8    -0.03  -0.03   0.10    -0.02   0.05   0.11     0.02  -0.09   0.19
  25   6    -0.04  -0.03  -0.06     0.03   0.03   0.00    -0.03  -0.08  -0.05
  26   6     0.00   0.01   0.01    -0.03  -0.01  -0.03     0.11   0.00  -0.10
  27   6     0.03  -0.08   0.03    -0.02   0.00   0.00    -0.09   0.13   0.00
  28   6     0.03   0.07   0.10     0.02   0.01   0.03     0.06  -0.09   0.06
  29   6    -0.01  -0.02  -0.01     0.00   0.00  -0.01     0.01   0.02   0.00
  30   6     0.03   0.01  -0.01     0.01   0.00  -0.01    -0.04   0.00  -0.01
  31   6     0.01  -0.03   0.02     0.01   0.00   0.03     0.00   0.03   0.00
  32   6     0.04  -0.03   0.03     0.03   0.00   0.02    -0.01   0.02  -0.02
  33   6     0.06   0.00   0.01     0.04   0.00  -0.03    -0.02   0.00  -0.04
  34   6     0.04   0.02  -0.01     0.02   0.00  -0.06    -0.01  -0.01  -0.03
  35   6     0.01   0.01  -0.02     0.00   0.01  -0.06     0.00   0.00  -0.01
  36   6     0.00  -0.06   0.04     0.00   0.00   0.09     0.01   0.05   0.02
  37   6    -0.02   0.04  -0.04    -0.02   0.01  -0.10     0.01  -0.01   0.01
  38   6     0.04  -0.03   0.02    -0.02   0.02  -0.02    -0.05  -0.01   0.01
  39   6     0.05  -0.02   0.02    -0.04   0.02  -0.04    -0.05  -0.03   0.02
  40   6     0.05   0.02   0.00    -0.03   0.00  -0.07    -0.05  -0.03   0.02
  41   6     0.04   0.06  -0.03     0.00  -0.03  -0.06    -0.04  -0.01  -0.01
  42   6     0.03   0.06  -0.04     0.02  -0.03  -0.02    -0.04   0.01  -0.02
  43   6     0.04  -0.06   0.03    -0.02   0.03   0.01    -0.05   0.00  -0.01
  44   6     0.01   0.10  -0.07     0.05  -0.06  -0.02    -0.04   0.06  -0.06
  45   6     0.02  -0.04   0.08     0.03   0.00   0.13     0.01   0.07   0.04
  46   6    -0.04  -0.10   0.04    -0.05   0.02   0.10    -0.01   0.06   0.03
  47   6    -0.01   0.09  -0.04     0.01   0.03  -0.12     0.01  -0.04   0.01
  48   6     0.00   0.04  -0.03    -0.04   0.01  -0.11     0.01   0.01   0.00
  49   6     0.07   0.04  -0.08    -0.03   0.00  -0.04    -0.04   0.03  -0.10
  50   6    -0.06   0.15   0.00     0.16  -0.09  -0.10    -0.05   0.11  -0.03
  51   6     0.03  -0.07   0.03    -0.05   0.00   0.01    -0.04   0.06   0.00
  52   6     0.07  -0.07   0.03    -0.03   0.04   0.05    -0.06  -0.01  -0.07
  53   6    -0.08  -0.05  -0.03    -0.06   0.00  -0.02     0.01   0.02   0.01
  54   6    -0.02  -0.03  -0.04     0.10   0.05   0.04    -0.05  -0.01  -0.01
  55   1    -0.07  -0.05  -0.04     0.03   0.02   0.01    -0.01   0.02   0.01
  56   1    -0.06  -0.05  -0.04     0.00  -0.01   0.02     0.01   0.10   0.09
  57   1     0.05   0.03   0.04     0.03  -0.03   0.01     0.07  -0.08   0.00
  58   1     0.00   0.02  -0.06    -0.07  -0.05   0.05     0.07  -0.10  -0.01
  59   1     0.01  -0.02  -0.05    -0.08  -0.02   0.03     0.08  -0.09  -0.01
  60   1    -0.01   0.03  -0.06    -0.07  -0.01   0.02     0.07  -0.07  -0.01
  61   1    -0.03   0.02  -0.03     0.03   0.04   0.00    -0.01   0.00   0.00
  62   1     0.00   0.01   0.01     0.01  -0.02   0.00     0.08  -0.06  -0.01
  63   1    -0.04  -0.01  -0.06     0.03   0.05   0.00    -0.04  -0.08  -0.05
  64   1    -0.04  -0.08  -0.06     0.02   0.03   0.00    -0.02  -0.14  -0.05
  65   1    -0.05  -0.03  -0.10     0.04   0.03  -0.01    -0.07  -0.07  -0.08
  66   1     0.02   0.01   0.03    -0.03  -0.01  -0.03     0.16  -0.04  -0.09
  67   1     0.01   0.03   0.00    -0.02  -0.03  -0.04     0.13   0.02  -0.14
  68   1    -0.01   0.01   0.02    -0.04   0.00  -0.03     0.09   0.03  -0.11
  69   1     0.05  -0.12   0.05    -0.02   0.00   0.01    -0.10   0.17   0.01
  70   1     0.01  -0.12   0.01    -0.03   0.01   0.01    -0.09   0.17   0.02
  71   1     0.07  -0.05   0.07    -0.02   0.00  -0.01    -0.13   0.10  -0.04
  72   1     0.05   0.07   0.12     0.04   0.01   0.02     0.05  -0.09   0.07
  73   1     0.00   0.09   0.11     0.00   0.01   0.04     0.04  -0.09   0.07
  74   1     0.06   0.06   0.10     0.02   0.02   0.04     0.09  -0.10   0.06
  75   1     0.06  -0.04   0.04     0.05   0.00   0.05    -0.02   0.02  -0.03
  76   1     0.08   0.00   0.02     0.06   0.00  -0.04    -0.03  -0.01  -0.06
  77   1     0.05   0.04  -0.01     0.03   0.01  -0.10    -0.02  -0.02  -0.03
  78   1     0.00  -0.05   0.01     0.01   0.00   0.10     0.03   0.05   0.02
  79   1    -0.05   0.03  -0.05    -0.03   0.01  -0.10     0.02   0.00   0.02
  80   1     0.06  -0.05   0.04    -0.06   0.03  -0.05    -0.05  -0.04   0.03
  81   1     0.06   0.03   0.01    -0.05   0.00  -0.09    -0.05  -0.05   0.03
  82   1     0.04   0.09  -0.04     0.00  -0.04  -0.07    -0.04   0.00  -0.01
  83   1     0.04  -0.07   0.03     0.00   0.05   0.01    -0.05  -0.01   0.01
  84   1     0.00   0.14  -0.14     0.07  -0.11   0.07    -0.05   0.07  -0.09
  85   1     0.02  -0.05   0.11     0.03   0.01   0.18     0.02   0.09   0.07
  86   1     0.06  -0.03   0.08     0.08  -0.02   0.12     0.04   0.05   0.04
  87   1     0.01  -0.05   0.10     0.01   0.00   0.12    -0.02   0.08   0.03
  88   1    -0.05  -0.12   0.06    -0.06   0.01   0.14    -0.01   0.08   0.04
  89   1    -0.04  -0.11   0.07    -0.06   0.02   0.09    -0.04   0.06   0.02
  90   1    -0.06  -0.11   0.01    -0.08   0.03   0.08    -0.01   0.05   0.02
  91   1    -0.03   0.12  -0.05     0.00   0.04  -0.14     0.02  -0.05   0.02
  92   1     0.03   0.11  -0.03     0.03   0.04  -0.12    -0.01  -0.05   0.00
  93   1    -0.03   0.09  -0.05     0.02   0.03  -0.11     0.02  -0.04   0.02
  94   1    -0.02   0.06  -0.04    -0.05   0.02  -0.13     0.01   0.00   0.01
  95   1    -0.01   0.01  -0.02    -0.06   0.00  -0.09     0.01   0.03  -0.01
  96   1     0.03   0.05  -0.02    -0.02   0.02  -0.11     0.00   0.00  -0.02
  97   1     0.04   0.08  -0.11     0.01  -0.03  -0.03    -0.05   0.06  -0.13
  98   1     0.13   0.00  -0.15    -0.11   0.03   0.04    -0.04   0.00  -0.13
  99   1     0.09   0.00   0.00    -0.05   0.05  -0.13    -0.04   0.01  -0.08
 100   1    -0.05   0.18  -0.04     0.16  -0.12  -0.08    -0.04   0.14  -0.06
 101   1    -0.11   0.21   0.03     0.23  -0.15  -0.11    -0.06   0.14   0.01
 102   1    -0.07   0.08   0.06     0.17  -0.02  -0.18    -0.06   0.08   0.00
 103   1     0.03  -0.10   0.03    -0.05   0.03   0.04    -0.04   0.08  -0.01
 104   1     0.01  -0.07   0.03    -0.03  -0.01  -0.02    -0.02   0.06   0.03
 105   1     0.05  -0.06   0.03    -0.08  -0.03   0.02    -0.04   0.07  -0.02
 106   1     0.07  -0.09   0.04    -0.03   0.04   0.06    -0.06   0.01  -0.08
 107   1     0.08  -0.06   0.03    -0.04   0.02   0.07    -0.06   0.01  -0.08
 108   1     0.08  -0.06   0.03    -0.03   0.07   0.06    -0.07  -0.04  -0.07
 109   1    -0.07  -0.05  -0.01    -0.05   0.00  -0.01     0.00   0.02   0.00
 110   1    -0.11  -0.07  -0.01    -0.11   0.00   0.01     0.02   0.03   0.00
 111   1    -0.09  -0.05  -0.06    -0.08   0.00  -0.07     0.01   0.01   0.02
 112   1    -0.01  -0.07  -0.12     0.09   0.15   0.15    -0.04  -0.05  -0.07
 113   1    -0.10  -0.02  -0.01     0.24   0.02   0.02    -0.12   0.00   0.01
 114   1     0.04  -0.01   0.00     0.03   0.01   0.00    -0.01   0.02   0.02
                     7                      8                      9
                    ?A                     ?A                     ?A
 Frequencies --    48.4210                49.2208                52.7949
 Red. masses --     5.0648                 5.1545                 4.2030
 Frc consts  --     0.0070                 0.0074                 0.0069
 IR Inten    --     0.7040                 0.4020                 0.8243
 Raman Activ --     0.0000                 0.0000                 0.0000
 Depolar     --     0.0000                 0.0000                 0.0000
 Atom AN      X      Y      Z        X      Y      Z        X      Y      Z
   1   8    -0.02   0.05  -0.03     0.00  -0.01   0.01     0.12  -0.01  -0.03
   2  12    -0.02  -0.02  -0.02    -0.02  -0.01   0.00    -0.01  -0.04  -0.02
   3   8    -0.04  -0.03  -0.02    -0.02   0.00  -0.03    -0.03   0.05  -0.02
   4   6    -0.03   0.08  -0.01    -0.02  -0.05  -0.01     0.04   0.01  -0.02
   5   7     0.02  -0.01  -0.01     0.08   0.02   0.00     0.00   0.03  -0.05
   6   7     0.01  -0.01  -0.02    -0.04  -0.01   0.00    -0.02  -0.03   0.00
   7   8    -0.01   0.11  -0.03    -0.04  -0.08   0.01    -0.02   0.03  -0.05
   8   6     0.04  -0.01  -0.01     0.07   0.03   0.00     0.01   0.04  -0.04
   9   6     0.04  -0.01  -0.01     0.01   0.02   0.00     0.00   0.05  -0.02
  10   6     0.03  -0.01  -0.01    -0.04   0.00   0.00    -0.01   0.02   0.01
  11   8    -0.06   0.10   0.03    -0.01  -0.08  -0.06     0.00   0.04   0.03
  12   6    -0.05   0.03   0.01    -0.01  -0.05  -0.04     0.00   0.01  -0.01
  13   6    -0.05   0.00   0.00    -0.01  -0.06  -0.05    -0.02   0.00  -0.01
  14   6    -0.06   0.07   0.02    -0.03  -0.05  -0.06     0.05   0.01   0.03
  15   8    -0.05  -0.01   0.00    -0.02  -0.02  -0.02     0.01  -0.04  -0.04
  16   6     0.02   0.05  -0.06     0.02   0.00   0.05     0.10  -0.02  -0.07
  17   8    -0.02  -0.07  -0.03    -0.04   0.00  -0.01    -0.03  -0.05  -0.02
  18   6    -0.01  -0.05  -0.02    -0.06   0.00   0.00    -0.04   0.02   0.01
  19   8     0.02  -0.04  -0.01    -0.08  -0.03   0.00    -0.04  -0.02   0.02
  20   8    -0.03  -0.03   0.03    -0.08   0.04   0.06    -0.01  -0.02   0.09
  21   6     0.00  -0.01   0.10    -0.06   0.06   0.07    -0.02  -0.02   0.04
  22   6     0.04  -0.02   0.03    -0.02   0.05   0.01    -0.02  -0.02   0.00
  23   6     0.00  -0.08  -0.03    -0.06   0.03   0.03    -0.01   0.03   0.06
  24   8    -0.02   0.02   0.22    -0.07   0.08   0.13    -0.02  -0.03   0.05
  25   6     0.06   0.01   0.06    -0.01   0.06   0.00    -0.02  -0.02  -0.01
  26   6    -0.02  -0.09  -0.11    -0.08   0.02   0.04     0.03   0.05   0.11
  27   6    -0.07  -0.02   0.03     0.07  -0.09  -0.05     0.03  -0.03   0.00
  28   6    -0.07   0.04   0.01    -0.03  -0.04  -0.08     0.06   0.00   0.08
  29   6     0.01  -0.01  -0.02     0.09   0.02  -0.01     0.00   0.04  -0.04
  30   6     0.02  -0.01  -0.01    -0.04  -0.01  -0.01    -0.02  -0.04   0.02
  31   6    -0.01   0.00  -0.04     0.09   0.03   0.00    -0.01   0.06  -0.02
  32   6    -0.03  -0.02  -0.09     0.08   0.02  -0.01    -0.02   0.08   0.05
  33   6    -0.04  -0.05  -0.10     0.08   0.01  -0.03    -0.02   0.09   0.09
  34   6    -0.03  -0.05  -0.06     0.08   0.01  -0.03    -0.02   0.06   0.06
  35   6     0.00  -0.03  -0.01     0.09   0.01  -0.02    -0.01   0.03  -0.01
  36   6     0.00   0.04  -0.02     0.09   0.04   0.02    -0.01   0.04  -0.08
  37   6     0.02  -0.01   0.06     0.09   0.01  -0.01    -0.01   0.01  -0.05
  38   6     0.04   0.01  -0.03    -0.02  -0.01  -0.01    -0.01  -0.03   0.00
  39   6     0.05   0.01  -0.02    -0.01   0.02  -0.02     0.00  -0.03   0.01
  40   6     0.05   0.00   0.01    -0.02   0.04  -0.03    -0.01  -0.03   0.02
  41   6     0.03  -0.02   0.03    -0.03   0.04  -0.02    -0.01  -0.05   0.03
  42   6     0.02  -0.02   0.02    -0.04   0.02  -0.01    -0.02  -0.05   0.03
  43   6     0.04   0.02  -0.07    -0.02  -0.04   0.00    -0.01  -0.05  -0.01
  44   6     0.00  -0.03   0.04    -0.06   0.01   0.01    -0.02  -0.07   0.05
  45   6     0.01   0.09   0.03     0.10   0.06   0.05    -0.03   0.07  -0.08
  46   6    -0.03   0.02  -0.01     0.07   0.03   0.02     0.04  -0.02  -0.09
  47   6    -0.04  -0.02   0.12     0.09  -0.05   0.00     0.01   0.06  -0.08
  48   6     0.08   0.01   0.08     0.09   0.03  -0.02    -0.04  -0.06  -0.03
  49   6    -0.04   0.02   0.06     0.00  -0.01   0.05    -0.09  -0.01   0.04
  50   6     0.05  -0.04   0.01    -0.12   0.00   0.04     0.06  -0.08  -0.01
  51   6     0.07   0.02  -0.07    -0.04  -0.05   0.00     0.00  -0.05  -0.01
  52   6     0.03   0.02  -0.07     0.01  -0.05   0.01     0.01  -0.05  -0.01
  53   6     0.07   0.00   0.00     0.11   0.06   0.00     0.03   0.06  -0.05
  54   6     0.05   0.00  -0.01    -0.09  -0.02  -0.01     0.01   0.05   0.07
  55   1     0.06   0.00   0.00     0.01   0.04   0.01     0.01   0.08  -0.01
  56   1    -0.03   0.01  -0.02    -0.05  -0.10  -0.07    -0.05  -0.03  -0.03
  57   1    -0.08   0.07   0.03    -0.04  -0.03  -0.06     0.07  -0.01   0.02
  58   1     0.03   0.09  -0.08     0.01  -0.01   0.03     0.08  -0.03  -0.10
  59   1     0.03   0.02  -0.07     0.06   0.04   0.06     0.12  -0.04  -0.07
  60   1     0.04   0.04  -0.08     0.01  -0.02   0.10     0.08   0.00  -0.07
  61   1     0.09   0.00   0.00     0.00   0.07   0.00     0.00   0.00  -0.02
  62   1     0.05  -0.12   0.00    -0.03   0.05   0.03     0.00   0.07   0.05
  63   1     0.09   0.04   0.09     0.00   0.09   0.02    -0.01  -0.02   0.00
  64   1     0.02   0.00   0.08    -0.03   0.05   0.02    -0.02  -0.04   0.00
  65   1     0.08   0.00   0.02     0.00   0.06  -0.03    -0.02  -0.02  -0.03
  66   1    -0.02  -0.10  -0.12    -0.09   0.04   0.05     0.04   0.05   0.13
  67   1    -0.01  -0.13  -0.15    -0.08   0.01   0.04     0.03   0.08   0.11
  68   1    -0.06  -0.05  -0.13    -0.09   0.01   0.05     0.04   0.02   0.12
  69   1    -0.07   0.00   0.05     0.08  -0.15  -0.06     0.04  -0.08   0.01
  70   1    -0.07  -0.05   0.02     0.06  -0.10  -0.05     0.00  -0.05   0.00
  71   1    -0.08  -0.03   0.05     0.11  -0.06  -0.03     0.06   0.00   0.01
  72   1    -0.09   0.04   0.03    -0.03  -0.04  -0.10     0.05   0.00   0.11
  73   1    -0.05   0.04   0.00    -0.02  -0.05  -0.09     0.03   0.02   0.10
  74   1    -0.07   0.02   0.00    -0.05  -0.03  -0.08     0.09  -0.01   0.09
  75   1    -0.04  -0.02  -0.11     0.08   0.03   0.00    -0.03   0.10   0.06
  76   1    -0.06  -0.07  -0.14     0.07   0.01  -0.03    -0.03   0.11   0.14
  77   1    -0.04  -0.06  -0.05     0.07   0.00  -0.04    -0.02   0.06   0.09
  78   1     0.04   0.04  -0.04     0.10   0.04   0.01    -0.02   0.06  -0.12
  79   1     0.03  -0.01   0.07     0.11   0.02   0.02    -0.01  -0.01  -0.10
  80   1     0.06   0.02  -0.03     0.00   0.02  -0.03     0.00  -0.02   0.00
  81   1     0.06   0.00   0.03    -0.01   0.06  -0.04     0.00  -0.03   0.02
  82   1     0.03  -0.02   0.06    -0.03   0.05  -0.02    -0.02  -0.05   0.04
  83   1     0.03   0.02  -0.08    -0.03  -0.05   0.00    -0.02  -0.05  -0.01
  84   1     0.00  -0.07   0.08    -0.06   0.03  -0.03    -0.02  -0.12   0.10
  85   1     0.02   0.12   0.05     0.10   0.07   0.06    -0.03   0.05  -0.14
  86   1     0.04   0.10   0.02     0.12   0.07   0.04    -0.06   0.13  -0.07
  87   1    -0.04   0.09   0.05     0.08   0.06   0.06     0.00   0.05  -0.03
  88   1    -0.01   0.06   0.00     0.08   0.05   0.03     0.05  -0.02  -0.13
  89   1    -0.08   0.01   0.01     0.04   0.03   0.03     0.04  -0.03  -0.04
  90   1    -0.01  -0.03  -0.04     0.08   0.01   0.01     0.06  -0.05  -0.09
  91   1    -0.02  -0.03   0.17     0.11  -0.06   0.02     0.00   0.05  -0.11
  92   1    -0.07  -0.03   0.13     0.07  -0.06  -0.03     0.02   0.07  -0.04
  93   1    -0.09  -0.02   0.10     0.10  -0.06   0.01     0.02   0.09  -0.09
  94   1     0.10   0.02   0.14     0.10   0.02   0.00    -0.04  -0.09  -0.07
  95   1     0.13   0.03   0.04     0.09   0.06  -0.03    -0.06  -0.08  -0.02
  96   1     0.07   0.01   0.08     0.07   0.02  -0.05    -0.05  -0.05   0.01
  97   1    -0.04   0.00   0.07    -0.03  -0.02   0.06    -0.08  -0.03   0.05
  98   1    -0.08   0.03   0.09     0.05  -0.01   0.01    -0.16   0.00   0.09
  99   1    -0.04   0.05   0.01     0.01  -0.03   0.10    -0.10   0.04  -0.03
 100   1     0.03  -0.06   0.03    -0.13  -0.01   0.05     0.04  -0.10   0.02
 101   1     0.09  -0.09  -0.01    -0.17   0.03   0.03     0.12  -0.14  -0.03
 102   1     0.07   0.01  -0.02    -0.13  -0.04   0.08     0.08  -0.01  -0.06
 103   1     0.08  -0.01  -0.10    -0.04  -0.07   0.02     0.00  -0.06  -0.02
 104   1     0.05   0.02  -0.06    -0.05  -0.05  -0.01    -0.01  -0.05  -0.01
 105   1     0.10   0.03  -0.06    -0.04  -0.05   0.00     0.01  -0.05   0.00
 106   1     0.03   0.02  -0.08     0.01  -0.07   0.03     0.02  -0.07  -0.04
 107   1     0.03   0.01  -0.06     0.02  -0.04   0.00     0.04  -0.05   0.01
 108   1     0.02   0.02  -0.07     0.03  -0.04   0.01    -0.01  -0.04   0.00
 109   1     0.05   0.00  -0.01     0.12   0.05  -0.02     0.04   0.06  -0.06
 110   1     0.09   0.01  -0.02     0.14   0.06  -0.02     0.04   0.06  -0.05
 111   1     0.08  -0.01   0.03     0.12   0.07   0.04     0.03   0.08  -0.04
 112   1     0.04   0.05   0.07    -0.08  -0.10  -0.09    -0.01   0.14   0.21
 113   1     0.14  -0.01  -0.03    -0.20   0.00   0.01     0.16   0.01   0.05
 114   1    -0.01  -0.03  -0.04    -0.03   0.02   0.02    -0.10   0.02   0.00
                    10                     11                     12
                    ?A                     ?A                     ?A
 Frequencies --    55.4493                60.9268                64.4821
 Red. masses --     3.7493                 4.1007                 4.6027
 Frc consts  --     0.0068                 0.0090                 0.0113
 IR Inten    --     0.5562                 0.8020                 1.4889
 Raman Activ --     0.0000                 0.0000                 0.0000
 Depolar     --     0.0000                 0.0000                 0.0000
 Atom AN      X      Y      Z        X      Y      Z        X      Y      Z
   1   8     0.02   0.01  -0.03     0.08   0.00  -0.01     0.15  -0.01  -0.06
   2  12    -0.02  -0.02   0.01     0.01   0.02   0.00    -0.05   0.00   0.02
   3   8    -0.02  -0.01   0.00     0.06  -0.02  -0.01    -0.02   0.02   0.00
   4   6     0.00   0.03  -0.02     0.03   0.01  -0.01    -0.01  -0.03  -0.07
   5   7     0.03  -0.01   0.01    -0.02   0.01   0.01    -0.04  -0.01   0.02
   6   7    -0.02  -0.03   0.00    -0.04  -0.02  -0.01     0.01   0.02   0.03
   7   8     0.01   0.06  -0.03    -0.06   0.00  -0.02    -0.13  -0.05  -0.08
   8   6     0.04  -0.01   0.01    -0.03  -0.01   0.00    -0.02   0.01   0.03
   9   6     0.03  -0.01   0.01    -0.04  -0.01  -0.01     0.02   0.02   0.04
  10   6     0.00  -0.02   0.01    -0.04  -0.02  -0.01     0.04   0.03   0.04
  11   8    -0.03   0.05   0.02     0.06   0.02   0.00    -0.04  -0.02  -0.05
  12   6    -0.03   0.02   0.01     0.06  -0.02  -0.02    -0.03  -0.01  -0.03
  13   6    -0.02   0.00   0.01     0.07  -0.04  -0.03    -0.02   0.02  -0.02
  14   6    -0.03   0.03   0.01     0.08   0.02   0.01    -0.03  -0.04  -0.06
  15   8    -0.03   0.00   0.01     0.07  -0.04  -0.03    -0.04  -0.02  -0.03
  16   6     0.06   0.01  -0.06     0.01  -0.01  -0.02     0.17   0.00  -0.05
  17   8    -0.01   0.01   0.01     0.05   0.03   0.01    -0.05   0.00   0.01
  18   6    -0.02   0.00   0.00     0.04  -0.02   0.00    -0.02  -0.01   0.02
  19   8    -0.02   0.00   0.00     0.02  -0.03   0.00    -0.03  -0.02   0.03
  20   8    -0.01  -0.02  -0.04     0.03   0.02  -0.01    -0.01  -0.01   0.02
  21   6    -0.02  -0.03  -0.07     0.03   0.03  -0.01    -0.03  -0.02  -0.01
  22   6    -0.04  -0.03  -0.01     0.03   0.03   0.00    -0.05  -0.02   0.01
  23   6    -0.02  -0.01  -0.01     0.02   0.01   0.00    -0.02   0.01   0.04
  24   8    -0.01  -0.04  -0.13     0.03   0.03  -0.03    -0.02  -0.05  -0.05
  25   6    -0.04  -0.03  -0.01     0.03   0.02  -0.01    -0.06  -0.03   0.01
  26   6    -0.01   0.00   0.01     0.00   0.00   0.02    -0.01   0.01   0.07
  27   6    -0.02  -0.02   0.02     0.11  -0.08  -0.01    -0.03   0.05  -0.05
  28   6    -0.03  -0.01   0.01     0.09   0.06   0.05    -0.04  -0.06  -0.06
  29   6     0.03  -0.01   0.01    -0.02   0.01   0.01    -0.01  -0.01   0.00
  30   6    -0.01  -0.02   0.00    -0.04  -0.02  -0.02     0.01   0.02   0.03
  31   6     0.03   0.01   0.06    -0.03   0.00  -0.01     0.01  -0.05  -0.01
  32   6     0.03   0.01   0.05    -0.03  -0.01  -0.05     0.05  -0.06  -0.04
  33   6     0.03  -0.01   0.00    -0.04  -0.02  -0.06     0.06  -0.03  -0.06
  34   6     0.02  -0.02  -0.03    -0.03  -0.01  -0.03     0.04   0.01  -0.05
  35   6     0.02  -0.02  -0.02    -0.02   0.01   0.01     0.01   0.03   0.00
  36   6     0.03   0.05   0.14    -0.02   0.03   0.04    -0.01  -0.08   0.01
  37   6     0.02  -0.03  -0.05    -0.01   0.05   0.09     0.00   0.08   0.05
  38   6     0.01  -0.02   0.00    -0.04  -0.03  -0.01     0.01   0.03   0.02
  39   6     0.02  -0.02   0.01    -0.04  -0.01  -0.03     0.00   0.01   0.03
  40   6     0.02  -0.01   0.03    -0.04   0.01  -0.04     0.00   0.00   0.03
  41   6     0.00   0.00   0.03    -0.04   0.01  -0.04     0.01   0.00   0.03
  42   6    -0.02  -0.01   0.02    -0.04  -0.01  -0.03     0.01   0.01   0.03
  43   6     0.01  -0.03  -0.03    -0.04  -0.06   0.02     0.01   0.04   0.01
  44   6    -0.03   0.01   0.01    -0.05  -0.02  -0.02     0.04   0.01   0.02
  45   6     0.03  -0.06   0.05    -0.02   0.02   0.03     0.02  -0.11   0.02
  46   6     0.01   0.26   0.14    -0.06   0.10   0.04    -0.02  -0.08   0.01
  47   6     0.02   0.00  -0.05    -0.07   0.01   0.14    -0.01   0.01   0.07
  48   6     0.01  -0.07  -0.03     0.06   0.12   0.09     0.03   0.19   0.00
  49   6    -0.08   0.03   0.00    -0.11   0.03  -0.03     0.01   0.01  -0.02
  50   6     0.00   0.03   0.01     0.01  -0.02  -0.07     0.08   0.02   0.00
  51   6     0.03   0.00  -0.03    -0.07  -0.09   0.02     0.02   0.07   0.02
  52   6     0.02  -0.04  -0.06     0.00  -0.07   0.04     0.01   0.03  -0.03
  53   6     0.05   0.00   0.02    -0.03  -0.02   0.01    -0.03   0.02   0.02
  54   6     0.01  -0.01   0.01    -0.04  -0.01   0.00     0.10   0.05   0.06
  55   1     0.04   0.00   0.02    -0.04  -0.02  -0.01     0.04   0.02   0.05
  56   1    -0.02   0.00  -0.01     0.04  -0.06  -0.06    -0.02   0.02  -0.01
  57   1    -0.04   0.03   0.02     0.11  -0.01   0.00    -0.05  -0.04  -0.05
  58   1     0.06   0.04  -0.07    -0.02  -0.06  -0.06     0.14   0.00  -0.11
  59   1     0.07  -0.02  -0.07     0.04  -0.01  -0.02     0.25   0.02  -0.04
  60   1     0.07   0.00  -0.07    -0.04   0.04   0.00     0.14  -0.02   0.02
  61   1    -0.06  -0.05   0.00     0.02   0.02   0.01    -0.06  -0.02   0.01
  62   1    -0.05   0.00  -0.02     0.02   0.02   0.00    -0.03   0.03   0.02
  63   1    -0.06  -0.05  -0.03     0.02   0.02  -0.01    -0.06  -0.04   0.00
  64   1    -0.02  -0.01  -0.02     0.04   0.03  -0.01    -0.05  -0.03   0.01
  65   1    -0.04  -0.03   0.02     0.03   0.02   0.00    -0.07  -0.02   0.02
  66   1    -0.02   0.00   0.00    -0.01   0.01   0.02    -0.02   0.02   0.08
  67   1    -0.02   0.01   0.02     0.00  -0.02   0.02    -0.02   0.03   0.08
  68   1     0.00  -0.01   0.01    -0.01  -0.01   0.02     0.00  -0.01   0.08
  69   1    -0.02  -0.02   0.03     0.12  -0.11  -0.01    -0.03   0.05  -0.06
  70   1    -0.02  -0.04   0.02     0.10  -0.10  -0.02    -0.02   0.07  -0.04
  71   1    -0.02  -0.02   0.04     0.13  -0.06   0.01    -0.03   0.04  -0.06
  72   1    -0.06  -0.01   0.02     0.13   0.06   0.07    -0.05  -0.06  -0.04
  73   1    -0.02  -0.01   0.00     0.06   0.08   0.07    -0.03  -0.05  -0.08
  74   1    -0.03  -0.02   0.00     0.11   0.06   0.06    -0.04  -0.09  -0.08
  75   1     0.04   0.02   0.08    -0.03  -0.02  -0.06     0.06  -0.09  -0.05
  76   1     0.03  -0.01   0.00    -0.04  -0.04  -0.09     0.09  -0.04  -0.09
  77   1     0.02  -0.03  -0.05    -0.03  -0.01  -0.03     0.05   0.03  -0.06
  78   1     0.02   0.01   0.29     0.00   0.02   0.08    -0.03  -0.08   0.02
  79   1     0.02  -0.04  -0.08    -0.02   0.06   0.13    -0.02   0.10   0.12
  80   1     0.03  -0.02   0.01    -0.04  -0.01  -0.02     0.00   0.02   0.03
  81   1     0.03  -0.01   0.04    -0.04   0.02  -0.06     0.00  -0.01   0.04
  82   1     0.00   0.01   0.04    -0.04   0.02  -0.05     0.01  -0.01   0.03
  83   1     0.00  -0.04  -0.02    -0.05  -0.07   0.02     0.00   0.02   0.03
  84   1    -0.04  -0.02   0.02    -0.05  -0.06   0.02     0.05   0.01   0.04
  85   1     0.03  -0.04   0.12    -0.01   0.04   0.08     0.01  -0.12   0.04
  86   1     0.02  -0.19   0.05     0.01  -0.03   0.03     0.04  -0.11   0.02
  87   1     0.03  -0.01  -0.08    -0.04   0.04  -0.01     0.03  -0.10   0.02
  88   1     0.00   0.27   0.22    -0.06   0.12   0.08    -0.03  -0.10   0.02
  89   1     0.01   0.32  -0.01    -0.08   0.12   0.00     0.00  -0.08   0.01
  90   1    -0.01   0.36   0.22    -0.07   0.12   0.05    -0.04  -0.07   0.01
  91   1     0.03  -0.02  -0.08    -0.07   0.07   0.22    -0.01   0.02   0.11
  92   1     0.01   0.02  -0.01    -0.04   0.00   0.09    -0.02  -0.01   0.00
  93   1     0.03   0.05  -0.08    -0.13  -0.06   0.16    -0.02  -0.05   0.10
  94   1     0.01  -0.08  -0.06     0.07   0.15   0.16     0.02   0.24   0.05
  95   1     0.01  -0.10  -0.02     0.10   0.15   0.05     0.05   0.22  -0.01
  96   1     0.02  -0.06   0.00     0.06   0.11   0.05     0.06   0.18  -0.06
  97   1    -0.09   0.05  -0.01    -0.10   0.02  -0.02     0.03   0.02  -0.03
  98   1    -0.10   0.01   0.00    -0.16   0.04   0.01    -0.01   0.00  -0.01
  99   1    -0.06   0.06  -0.01    -0.11   0.07  -0.08     0.01   0.01  -0.03
 100   1    -0.01   0.04   0.00     0.00  -0.03  -0.05     0.09   0.03  -0.01
 101   1     0.03   0.01   0.02     0.06  -0.06  -0.07     0.11   0.01   0.01
 102   1     0.01   0.06   0.00     0.02   0.03  -0.10     0.08   0.04  -0.03
 103   1     0.04  -0.03  -0.05    -0.07  -0.09   0.04     0.02   0.07   0.01
 104   1     0.01   0.01   0.00    -0.07  -0.10  -0.01     0.01   0.07   0.04
 105   1     0.06   0.03  -0.03    -0.08  -0.11   0.02     0.02   0.08   0.01
 106   1     0.02  -0.04  -0.07     0.00  -0.10   0.04     0.02   0.02  -0.07
 107   1     0.03  -0.02  -0.07     0.02  -0.06   0.05     0.03   0.04  -0.03
 108   1     0.01  -0.06  -0.06     0.00  -0.05   0.04    -0.01   0.01  -0.03
 109   1     0.03   0.00   0.01    -0.05  -0.02   0.01     0.00   0.02   0.02
 110   1     0.06   0.01   0.01    -0.01  -0.01   0.00    -0.06   0.01   0.04
 111   1     0.05  -0.02   0.03    -0.02  -0.04   0.02    -0.05   0.04  -0.01
 112   1     0.01   0.00   0.02    -0.04   0.03   0.06     0.09   0.14   0.13
 113   1     0.03  -0.02   0.01     0.03  -0.02  -0.02     0.20   0.03   0.05
 114   1     0.00  -0.02   0.00    -0.08  -0.03  -0.03     0.05   0.02   0.03
                    13                     14                     15
                    ?A                     ?A                     ?A
 Frequencies --    71.5853                75.4810                76.5404
 Red. masses --     4.6690                 3.6288                 4.3136
 Frc consts  --     0.0141                 0.0122                 0.0149
 IR Inten    --     0.8246                 0.4479                 1.8976
 Raman Activ --     0.0000                 0.0000                 0.0000
 Depolar     --     0.0000                 0.0000                 0.0000
 Atom AN      X      Y      Z        X      Y      Z        X      Y      Z
   1   8    -0.15  -0.02   0.02     0.00  -0.01  -0.03     0.01  -0.01  -0.05
   2  12    -0.02   0.01  -0.01     0.00   0.01   0.00    -0.02   0.00   0.02
   3   8    -0.02   0.02   0.00    -0.01   0.03   0.01     0.03  -0.04   0.03
   4   6     0.08   0.00   0.03     0.04   0.02  -0.02     0.05   0.04  -0.03
   5   7    -0.01   0.01  -0.01    -0.01   0.01   0.00     0.01  -0.01   0.03
   6   7    -0.02  -0.01  -0.02     0.03   0.02   0.01    -0.06  -0.02   0.03
   7   8     0.34   0.02   0.06     0.12   0.05  -0.03     0.15   0.09  -0.05
   8   6    -0.04   0.00  -0.02     0.00   0.01   0.00     0.01   0.01   0.03
   9   6    -0.05  -0.01  -0.03     0.01   0.02   0.00     0.00   0.01   0.05
  10   6    -0.02   0.00  -0.03     0.01   0.02   0.00    -0.02   0.00   0.04
  11   8     0.00  -0.03  -0.02    -0.01   0.03   0.01    -0.02   0.06   0.03
  12   6     0.00  -0.01  -0.01    -0.01   0.03   0.02    -0.01   0.03   0.03
  13   6     0.00  -0.02  -0.01    -0.01   0.04   0.02     0.01   0.01   0.03
  14   6     0.00  -0.02  -0.01    -0.02   0.00   0.00    -0.03   0.02   0.01
  15   8    -0.01   0.01   0.01    -0.01   0.02   0.02    -0.02   0.00   0.03
  16   6    -0.02   0.00   0.05     0.06  -0.01  -0.05     0.09   0.00  -0.09
  17   8    -0.03  -0.02  -0.01    -0.03  -0.01  -0.02     0.03   0.07   0.03
  18   6    -0.02   0.01   0.01     0.01   0.01   0.02     0.04  -0.03   0.02
  19   8    -0.03  -0.01   0.02     0.02   0.00   0.03     0.04  -0.01   0.01
  20   8    -0.01  -0.02   0.03     0.02  -0.01   0.02     0.00   0.04  -0.06
  21   6    -0.02  -0.03   0.00     0.00  -0.03   0.01     0.02   0.06  -0.01
  22   6    -0.04  -0.02  -0.02    -0.03  -0.01  -0.02     0.03   0.05   0.03
  23   6    -0.01   0.02   0.04     0.01   0.01   0.02     0.00  -0.02  -0.02
  24   8    -0.02  -0.04  -0.01     0.00  -0.05   0.03     0.01   0.08  -0.03
  25   6    -0.05  -0.03  -0.04    -0.05  -0.04  -0.04     0.04   0.06   0.06
  26   6     0.01   0.03   0.08     0.03   0.01   0.03    -0.06  -0.04  -0.05
  27   6     0.04  -0.04  -0.01    -0.02   0.04   0.02    -0.02   0.02   0.04
  28   6    -0.01  -0.06  -0.04    -0.03  -0.06  -0.03    -0.05  -0.06  -0.03
  29   6     0.01   0.02   0.00    -0.02   0.01  -0.01     0.02  -0.01   0.01
  30   6    -0.01  -0.01  -0.01     0.02   0.02   0.00    -0.05  -0.01   0.02
  31   6     0.01   0.01   0.00    -0.02   0.00  -0.02     0.02  -0.02   0.00
  32   6     0.02   0.01  -0.01    -0.02  -0.01  -0.04     0.02  -0.03  -0.01
  33   6     0.03   0.02  -0.01    -0.02  -0.02  -0.06     0.03  -0.03  -0.02
  34   6     0.02   0.03   0.00    -0.02  -0.01  -0.05     0.02  -0.02  -0.02
  35   6     0.01   0.04   0.01    -0.02   0.00  -0.02     0.02  -0.02  -0.01
  36   6     0.00  -0.01   0.00    -0.02   0.02   0.01     0.02  -0.05  -0.03
  37   6     0.01   0.07   0.05    -0.01   0.01   0.00     0.01  -0.03  -0.03
  38   6     0.00   0.00  -0.03     0.00   0.01   0.01    -0.05  -0.02   0.03
  39   6     0.01  -0.01   0.00    -0.01   0.04  -0.04    -0.05   0.00   0.01
  40   6     0.01  -0.03   0.03    -0.01   0.07  -0.10    -0.05   0.01  -0.01
  41   6     0.00  -0.03   0.03     0.01   0.05  -0.09    -0.05   0.01  -0.01
  42   6    -0.01  -0.02   0.01     0.03   0.02  -0.03    -0.05   0.01   0.00
  43   6     0.01   0.02  -0.07     0.00  -0.03   0.08    -0.05  -0.06   0.05
  44   6    -0.02  -0.01   0.01     0.05  -0.05   0.02    -0.05   0.03  -0.03
  45   6     0.01  -0.02   0.01    -0.01  -0.02  -0.02     0.02   0.01   0.02
  46   6    -0.01  -0.01   0.01    -0.02   0.08   0.01     0.03  -0.17  -0.03
  47   6     0.01   0.00   0.06    -0.03  -0.02   0.01     0.03  -0.02  -0.05
  48   6     0.03   0.14   0.01    -0.01   0.03  -0.01    -0.01  -0.05  -0.04
  49   6    -0.09   0.02  -0.02     0.13  -0.06   0.11    -0.10   0.04  -0.07
  50   6     0.05   0.00  -0.02    -0.03  -0.16   0.00     0.01   0.07  -0.04
  51   6     0.06  -0.01  -0.09    -0.09  -0.05   0.10    -0.08  -0.04   0.06
  52   6    -0.03   0.03  -0.04     0.07  -0.05   0.10     0.01  -0.08   0.03
  53   6    -0.05  -0.02  -0.02    -0.01   0.01   0.00     0.03   0.03   0.03
  54   6     0.01   0.02   0.00    -0.04   0.00  -0.02     0.01   0.01   0.06
  55   1    -0.06  -0.01  -0.04     0.00   0.01   0.00     0.02   0.02   0.05
  56   1    -0.03  -0.05  -0.02    -0.01   0.04   0.02     0.04   0.04   0.02
  57   1    -0.03   0.02  -0.01    -0.05   0.02   0.02    -0.07   0.04   0.04
  58   1     0.10   0.12   0.23     0.11   0.05   0.03     0.16   0.08   0.01
  59   1    -0.20  -0.02   0.04    -0.04  -0.04  -0.06    -0.02  -0.06  -0.11
  60   1     0.15  -0.09  -0.11     0.13  -0.03  -0.15     0.19  -0.03  -0.22
  61   1    -0.04   0.00  -0.02    -0.04   0.02  -0.02     0.03   0.02   0.04
  62   1    -0.02   0.05   0.02     0.01   0.02   0.02    -0.01  -0.04  -0.01
  63   1    -0.05  -0.04  -0.04    -0.04  -0.02  -0.03     0.04   0.05   0.06
  64   1    -0.03  -0.04  -0.04    -0.06  -0.08  -0.03     0.03   0.09   0.06
  65   1    -0.06  -0.03  -0.03    -0.07  -0.03  -0.08     0.04   0.06   0.08
  66   1     0.01   0.04   0.09     0.03   0.01   0.04    -0.10  -0.03  -0.08
  67   1     0.01   0.06   0.08     0.03   0.03   0.03    -0.07  -0.09  -0.03
  68   1     0.02   0.01   0.09     0.02   0.01   0.03    -0.06  -0.02  -0.06
  69   1     0.05  -0.07  -0.02    -0.02   0.05   0.02    -0.04   0.07   0.03
  70   1     0.04  -0.05  -0.01    -0.01   0.03   0.02     0.01   0.00   0.03
  71   1     0.07  -0.02   0.01    -0.03   0.03   0.03    -0.06  -0.02   0.06
  72   1    -0.04  -0.06  -0.05    -0.07  -0.06  -0.02    -0.10  -0.07  -0.01
  73   1     0.01  -0.08  -0.04     0.00  -0.07  -0.05     0.00  -0.07  -0.06
  74   1    -0.02  -0.05  -0.04    -0.04  -0.08  -0.05    -0.06  -0.10  -0.05
  75   1     0.03   0.00  -0.01    -0.02  -0.01  -0.05     0.02  -0.04  -0.03
  76   1     0.04   0.02  -0.01    -0.02  -0.02  -0.08     0.03  -0.03  -0.03
  77   1     0.03   0.05   0.01    -0.02  -0.02  -0.06     0.02  -0.02  -0.03
  78   1     0.00   0.00   0.01    -0.02   0.00   0.05     0.02  -0.02  -0.12
  79   1     0.01   0.08   0.11    -0.01   0.01   0.01     0.02  -0.03  -0.04
  80   1     0.02  -0.01   0.00    -0.03   0.04  -0.03    -0.05   0.00   0.01
  81   1     0.01  -0.04   0.05    -0.02   0.09  -0.14    -0.05   0.02  -0.02
  82   1    -0.01  -0.03   0.05     0.02   0.06  -0.12    -0.05   0.03  -0.02
  83   1     0.00   0.04  -0.11     0.00  -0.05   0.11    -0.06  -0.09   0.07
  84   1    -0.03  -0.05   0.04     0.06  -0.03   0.02    -0.05   0.01  -0.01
  85   1     0.01  -0.02   0.03    -0.02  -0.02   0.00     0.03   0.01   0.00
  86   1     0.03  -0.03   0.01    -0.02  -0.05  -0.02     0.04   0.07   0.02
  87   1     0.01  -0.01   0.00    -0.01  -0.01  -0.05     0.01  -0.01   0.08
  88   1    -0.02  -0.02   0.02    -0.03   0.08   0.03     0.03  -0.17  -0.07
  89   1     0.00   0.00   0.00    -0.02   0.10  -0.04     0.01  -0.20   0.05
  90   1    -0.03   0.01   0.00    -0.03   0.11   0.03     0.04  -0.23  -0.08
  91   1     0.01   0.01   0.09    -0.01  -0.04   0.01     0.05  -0.07  -0.09
  92   1     0.00  -0.02   0.01    -0.05  -0.02   0.01     0.00  -0.01  -0.01
  93   1     0.01  -0.04   0.09    -0.02   0.00   0.00     0.07   0.04  -0.07
  94   1     0.02   0.17   0.05    -0.01   0.04   0.00    -0.02  -0.05  -0.06
  95   1     0.03   0.18   0.00     0.00   0.04  -0.02    -0.03  -0.06  -0.02
  96   1     0.04   0.13  -0.04     0.00   0.03  -0.03    -0.01  -0.04  -0.03
  97   1    -0.08   0.03  -0.03     0.10  -0.09   0.15    -0.06   0.04  -0.09
  98   1    -0.14   0.01   0.00     0.20  -0.03   0.08    -0.15   0.04  -0.04
  99   1    -0.09   0.06  -0.06     0.14  -0.08   0.16    -0.12   0.05  -0.13
 100   1     0.02   0.01  -0.02     0.00  -0.22   0.05     0.01   0.09  -0.06
 101   1     0.10  -0.04  -0.02    -0.08  -0.15  -0.05     0.05   0.05  -0.02
 102   1     0.07   0.06  -0.05    -0.05  -0.20   0.00     0.01   0.09  -0.06
 103   1     0.07  -0.03  -0.13    -0.10  -0.04   0.16    -0.09  -0.04   0.08
 104   1     0.06  -0.01  -0.09    -0.09  -0.05   0.07    -0.09  -0.04   0.07
 105   1     0.10  -0.01  -0.06    -0.13  -0.06   0.08    -0.09  -0.03   0.04
 106   1    -0.03   0.06  -0.04     0.07  -0.10   0.12     0.01  -0.12   0.02
 107   1    -0.03   0.01  -0.02     0.09  -0.02   0.08     0.04  -0.05   0.02
 108   1    -0.04   0.06  -0.03     0.11  -0.04   0.09     0.01  -0.09   0.02
 109   1    -0.06  -0.01  -0.01    -0.03   0.01  -0.01     0.06   0.02   0.02
 110   1    -0.05  -0.02  -0.01    -0.01   0.03   0.00     0.01   0.01   0.03
 111   1    -0.05  -0.03  -0.02    -0.01   0.00   0.00     0.02   0.06   0.02
 112   1    -0.02   0.16   0.21    -0.02  -0.10  -0.15     0.01   0.05   0.08
 113   1     0.24  -0.01  -0.06    -0.19   0.02   0.02     0.06   0.00   0.06
 114   1    -0.16  -0.06  -0.10     0.06   0.05   0.04     0.00   0.01   0.05
                    16                     17                     18
                    ?A                     ?A                     ?A
 Frequencies --    82.6615                85.6770                90.6098
 Red. masses --     3.1387                 5.0188                 4.3124
 Frc consts  --     0.0126                 0.0217                 0.0209
 IR Inten    --     0.0965                 1.2305                 0.1102
 Raman Activ --     0.0000                 0.0000                 0.0000
 Depolar     --     0.0000                 0.0000                 0.0000
 Atom AN      X      Y      Z        X      Y      Z        X      Y      Z
   1   8    -0.03   0.00   0.02    -0.05   0.01   0.04     0.00   0.01  -0.01
   2  12     0.01  -0.02  -0.02     0.01  -0.06   0.00    -0.03  -0.01  -0.05
   3   8    -0.02   0.03   0.01     0.00   0.07   0.04    -0.05   0.06  -0.06
   4   6    -0.05  -0.02   0.01    -0.01   0.01   0.04     0.05   0.00  -0.02
   5   7     0.02  -0.01  -0.02     0.01  -0.04  -0.01    -0.02  -0.01  -0.03
   6   7    -0.02  -0.03  -0.01    -0.02  -0.05   0.02     0.02   0.00  -0.03
   7   8    -0.07  -0.04   0.02    -0.01   0.00   0.04     0.08  -0.01   0.00
   8   6    -0.03  -0.02  -0.03     0.02  -0.02   0.00     0.02   0.00  -0.02
   9   6    -0.07  -0.03  -0.04     0.02  -0.01   0.02     0.04   0.00  -0.01
  10   6    -0.04  -0.03  -0.02     0.00  -0.03   0.03     0.03   0.01  -0.02
  11   8    -0.02  -0.03  -0.02     0.01   0.01   0.02    -0.01  -0.01  -0.05
  12   6    -0.02   0.01   0.00     0.01   0.00   0.01    -0.02   0.00  -0.08
  13   6    -0.03   0.06   0.02     0.00   0.07   0.03    -0.05   0.08  -0.05
  14   6    -0.03  -0.02  -0.01     0.02   0.02   0.03     0.04   0.00  -0.03
  15   8    -0.02   0.02   0.00     0.02  -0.04  -0.02     0.01  -0.04  -0.12
  16   6    -0.03   0.01   0.04    -0.09   0.01   0.04    -0.01   0.01   0.02
  17   8     0.01  -0.02  -0.02     0.02   0.00   0.02    -0.04   0.02  -0.06
  18   6     0.00   0.03  -0.01     0.00   0.04   0.07    -0.01   0.01  -0.02
  19   8     0.03   0.04  -0.01    -0.01  -0.01   0.08     0.01  -0.02  -0.01
  20   8     0.01  -0.01  -0.03     0.02   0.03   0.11    -0.03   0.04  -0.01
  21   6     0.01  -0.02  -0.02     0.01   0.03   0.02    -0.01   0.05   0.00
  22   6     0.00  -0.01  -0.02     0.01   0.03   0.01     0.02   0.04   0.00
  23   6     0.01  -0.01  -0.03     0.01   0.08   0.11    -0.02   0.02  -0.02
  24   8     0.01  -0.02  -0.02     0.02   0.02  -0.04    -0.01   0.08  -0.02
  25   6     0.01  -0.01  -0.03     0.01   0.02  -0.03     0.04   0.06   0.08
  26   6     0.04   0.00  -0.06     0.02   0.08   0.20    -0.04   0.01  -0.02
  27   6    -0.09   0.11  -0.01    -0.04   0.13  -0.01    -0.12   0.15  -0.09
  28   6    -0.03   0.00  -0.03     0.03   0.04   0.05     0.06   0.01   0.03
  29   6     0.02   0.00   0.00     0.00  -0.05  -0.05    -0.01  -0.01  -0.01
  30   6     0.01  -0.01   0.00    -0.01  -0.03   0.01     0.01  -0.02   0.00
  31   6     0.02   0.00   0.00     0.00  -0.05  -0.08    -0.01   0.00   0.02
  32   6     0.02   0.01   0.02    -0.01  -0.08  -0.14     0.00   0.01   0.03
  33   6     0.02   0.02   0.04    -0.02  -0.10  -0.18     0.00   0.01   0.03
  34   6     0.03   0.02   0.05    -0.01  -0.09  -0.16    -0.01   0.00   0.01
  35   6     0.03   0.01   0.03     0.00  -0.06  -0.10    -0.01   0.00   0.00
  36   6     0.02   0.00  -0.01     0.00  -0.02  -0.04    -0.01   0.00   0.04
  37   6     0.03   0.01   0.03     0.00  -0.05  -0.07    -0.01   0.00   0.02
  38   6     0.04  -0.01  -0.01     0.01  -0.01  -0.01     0.01  -0.05   0.03
  39   6     0.06   0.03  -0.02     0.02   0.01  -0.01     0.00  -0.09   0.07
  40   6     0.05   0.08  -0.03     0.02   0.03   0.00     0.00  -0.12   0.09
  41   6     0.03   0.08  -0.01     0.00   0.03   0.01     0.01  -0.09   0.07
  42   6     0.00   0.03   0.01    -0.01   0.00   0.02     0.01  -0.04   0.02
  43   6     0.04  -0.07   0.02     0.01  -0.02  -0.02     0.00  -0.05   0.05
  44   6    -0.03   0.01   0.05    -0.04   0.02   0.01     0.02  -0.01  -0.01
  45   6     0.02   0.01   0.00     0.01  -0.01  -0.03    -0.01  -0.02   0.03
  46   6     0.02  -0.02  -0.01    -0.02   0.01  -0.04    -0.02   0.03   0.04
  47   6     0.04  -0.01   0.02    -0.04  -0.03  -0.04    -0.04   0.02   0.05
  48   6     0.01   0.02   0.01     0.04  -0.05  -0.05     0.03   0.00   0.04
  49   6    -0.10   0.09   0.07    -0.06   0.04   0.00     0.06  -0.06  -0.03
  50   6     0.03   0.00   0.00    -0.03   0.06   0.02    -0.01   0.03   0.03
  51   6    -0.01  -0.10   0.03     0.02   0.01  -0.02    -0.01  -0.12   0.03
  52   6     0.10  -0.08   0.07     0.01  -0.02  -0.04     0.00  -0.03   0.13
  53   6    -0.04  -0.04  -0.02     0.03   0.01  -0.02     0.05   0.01  -0.02
  54   6     0.00   0.00   0.02     0.01  -0.02   0.05     0.04   0.01  -0.02
  55   1    -0.10  -0.03  -0.05     0.03   0.01   0.03     0.06   0.01  -0.01
  56   1     0.00   0.09   0.06     0.02   0.08   0.09    -0.03   0.10   0.02
  57   1    -0.04  -0.02  -0.01     0.04   0.01   0.02     0.08   0.01  -0.06
  58   1    -0.05   0.00   0.00    -0.11  -0.03   0.00     0.02   0.01   0.09
  59   1     0.03   0.03   0.05    -0.05   0.02   0.04    -0.10   0.02   0.02
  60   1    -0.05  -0.01   0.10    -0.12   0.03   0.08     0.02   0.01  -0.04
  61   1     0.00  -0.01  -0.02    -0.01   0.05   0.01     0.09   0.01  -0.03
  62   1     0.01  -0.03  -0.02     0.00   0.13   0.09    -0.01   0.02  -0.02
  63   1     0.01  -0.01  -0.02     0.00   0.03  -0.04     0.08   0.06   0.11
  64   1     0.00  -0.01  -0.02     0.02   0.00  -0.03    -0.01   0.10   0.10
  65   1     0.01  -0.01  -0.03     0.00   0.02  -0.04     0.06   0.05   0.08
  66   1     0.05  -0.02  -0.07     0.03   0.11   0.24    -0.05   0.02  -0.02
  67   1     0.04   0.01  -0.06     0.03   0.12   0.19    -0.04  -0.01  -0.02
  68   1     0.04   0.02  -0.06     0.01   0.02   0.22    -0.05   0.01  -0.02
  69   1    -0.11   0.16  -0.02    -0.05   0.15  -0.02    -0.14   0.20  -0.11
  70   1    -0.06   0.13   0.01    -0.04   0.18   0.01    -0.10   0.20  -0.07
  71   1    -0.13   0.07  -0.02    -0.06   0.11  -0.06    -0.18   0.11  -0.14
  72   1    -0.02   0.00  -0.04     0.04   0.04   0.03     0.06   0.01   0.03
  73   1    -0.03   0.00  -0.04     0.01   0.04   0.07     0.02   0.00   0.07
  74   1    -0.05   0.00  -0.03     0.04   0.06   0.06     0.10   0.02   0.05
  75   1     0.02   0.01   0.02    -0.01  -0.08  -0.15     0.00   0.01   0.05
  76   1     0.02   0.02   0.05    -0.02  -0.11  -0.22     0.00   0.01   0.04
  77   1     0.03   0.02   0.07    -0.02  -0.11  -0.19    -0.01   0.01   0.02
  78   1     0.02   0.00  -0.02     0.03  -0.03  -0.03    -0.02  -0.01   0.06
  79   1     0.03   0.01   0.04    -0.01  -0.06  -0.08    -0.01   0.00   0.01
  80   1     0.08   0.02  -0.02     0.04   0.02  -0.03     0.00  -0.11   0.09
  81   1     0.07   0.12  -0.04     0.03   0.06  -0.01     0.00  -0.15   0.13
  82   1     0.02   0.11   0.00     0.00   0.05   0.01     0.01  -0.12   0.09
  83   1     0.03  -0.08   0.03     0.01  -0.03  -0.02     0.01  -0.01   0.02
  84   1    -0.05  -0.06   0.09    -0.05   0.01   0.00     0.02   0.03  -0.05
  85   1     0.03   0.02   0.00     0.01   0.01  -0.01    -0.01  -0.03   0.04
  86   1     0.03   0.01   0.00     0.02  -0.02  -0.03     0.00  -0.03   0.03
  87   1     0.01   0.01   0.00    -0.02   0.00  -0.04     0.00  -0.02   0.02
  88   1     0.02  -0.02   0.00    -0.01   0.05  -0.02    -0.02   0.04   0.06
  89   1     0.02  -0.02   0.00    -0.07   0.01  -0.05    -0.03   0.04   0.02
  90   1     0.01  -0.02  -0.02    -0.01  -0.01  -0.04    -0.02   0.05   0.05
  91   1     0.04  -0.02   0.01    -0.04   0.00  -0.01    -0.04   0.04   0.08
  92   1     0.04  -0.02   0.00    -0.03  -0.02  -0.03    -0.03   0.02   0.05
  93   1     0.06  -0.02   0.03    -0.08  -0.03  -0.06    -0.07   0.00   0.04
  94   1     0.01   0.02   0.01     0.04  -0.04  -0.03     0.04   0.00   0.07
  95   1     0.01   0.04   0.02     0.06  -0.05  -0.07     0.06  -0.01   0.02
  96   1     0.01   0.02  -0.01     0.04  -0.05  -0.05     0.03   0.00   0.06
  97   1    -0.14   0.08   0.09    -0.09   0.06  -0.01     0.09  -0.06  -0.05
  98   1    -0.15   0.07   0.09    -0.07   0.01  -0.01     0.07  -0.04  -0.04
  99   1    -0.08   0.15   0.05    -0.04   0.05   0.02     0.04  -0.10  -0.03
 100   1    -0.02  -0.03   0.04    -0.04   0.08   0.01    -0.01   0.06   0.00
 101   1     0.09  -0.09  -0.05    -0.01   0.05   0.04    -0.04   0.07   0.06
 102   1     0.07   0.09  -0.04    -0.01   0.07   0.04    -0.02  -0.01   0.07
 103   1    -0.02  -0.11   0.06     0.02   0.03  -0.02    -0.01  -0.07   0.05
 104   1    -0.03  -0.11   0.00     0.03   0.01  -0.01     0.03  -0.14  -0.03
 105   1    -0.03  -0.11   0.03     0.01   0.01  -0.03    -0.05  -0.18   0.06
 106   1     0.10  -0.13   0.10     0.00  -0.01  -0.03     0.00  -0.04   0.13
 107   1     0.12  -0.07   0.07    -0.01  -0.01  -0.06     0.00  -0.06   0.18
 108   1     0.14  -0.05   0.07     0.02  -0.04  -0.05    -0.01   0.04   0.14
 109   1    -0.06  -0.03  -0.02     0.05   0.01  -0.04     0.05   0.00  -0.02
 110   1    -0.02  -0.03  -0.03     0.03   0.02  -0.01     0.07   0.01  -0.03
 111   1    -0.03  -0.06  -0.01     0.03   0.03  -0.01     0.06   0.01   0.01
 112   1    -0.04   0.17   0.30     0.02  -0.02   0.03     0.06  -0.02  -0.11
 113   1     0.30  -0.03  -0.07     0.01  -0.03   0.06    -0.04   0.01   0.02
 114   1    -0.23  -0.10  -0.12     0.03  -0.01   0.06     0.11   0.04   0.02
                    19                     20                     21
                    ?A                     ?A                     ?A
 Frequencies --    91.8956                99.2037               106.2021
 Red. masses --     4.5734                 2.0326                 3.0245
 Frc consts  --     0.0228                 0.0118                 0.0201
 IR Inten    --     0.5682                 0.3955                 1.7412
 Raman Activ --     0.0000                 0.0000                 0.0000
 Depolar     --     0.0000                 0.0000                 0.0000
 Atom AN      X      Y      Z        X      Y      Z        X      Y      Z
   1   8    -0.01  -0.01   0.00    -0.06   0.00   0.01    -0.01   0.00  -0.01
   2  12     0.04  -0.01   0.01    -0.01  -0.03   0.00     0.00  -0.05   0.00
   3   8    -0.01   0.02   0.06     0.01  -0.03   0.00     0.00  -0.03   0.01
   4   6    -0.05  -0.01   0.00    -0.01  -0.01   0.01    -0.01   0.00   0.00
   5   7     0.03   0.03  -0.03    -0.03   0.00  -0.02    -0.02  -0.02  -0.02
   6   7     0.05  -0.02  -0.03    -0.01  -0.03   0.01    -0.01  -0.03   0.02
   7   8    -0.07   0.00   0.00     0.03  -0.01   0.02     0.02   0.01   0.00
   8   6    -0.04  -0.01  -0.05     0.02   0.02   0.00    -0.02  -0.01  -0.01
   9   6    -0.05  -0.02  -0.08     0.06   0.02   0.02    -0.02  -0.01   0.00
  10   6    -0.01  -0.02  -0.05     0.03   0.00   0.02    -0.01  -0.02   0.02
  11   8    -0.02   0.01   0.03     0.00  -0.02  -0.02    -0.02   0.00   0.00
  12   6    -0.01   0.02   0.07     0.00  -0.02  -0.01    -0.02  -0.01  -0.01
  13   6     0.00   0.02   0.07     0.00  -0.01  -0.01    -0.01  -0.01   0.00
  14   6    -0.08  -0.01   0.01     0.00  -0.01  -0.01    -0.02   0.00   0.00
  15   8    -0.03   0.03   0.09     0.00  -0.02  -0.01    -0.02  -0.02  -0.01
  16   6     0.03   0.00  -0.01    -0.01   0.01   0.02     0.04   0.00  -0.01
  17   8     0.03   0.02   0.02     0.02  -0.01   0.02     0.08  -0.08   0.05
  18   6    -0.02   0.04   0.04     0.00  -0.01   0.00    -0.03  -0.01   0.00
  19   8    -0.01   0.04   0.04    -0.02   0.00  -0.02    -0.03  -0.01   0.00
  20   8    -0.01   0.03   0.04     0.00  -0.01   0.01    -0.02  -0.02   0.10
  21   6     0.01   0.05   0.01     0.01  -0.01   0.01     0.02   0.01   0.05
  22   6     0.03   0.03   0.03     0.02  -0.01   0.02     0.07  -0.01   0.05
  23   6    -0.01   0.03   0.03     0.01  -0.02   0.00     0.01  -0.03   0.03
  24   8     0.00   0.07  -0.03     0.01   0.00   0.00     0.01   0.06   0.01
  25   6     0.05   0.05   0.04     0.02   0.00   0.02     0.13   0.04   0.02
  26   6    -0.01   0.04   0.03     0.01  -0.02  -0.02     0.02  -0.03  -0.02
  27   6     0.01   0.00   0.08    -0.03   0.03  -0.03    -0.03   0.01  -0.01
  28   6    -0.10  -0.05  -0.09     0.00   0.03   0.00    -0.02   0.00   0.00
  29   6     0.01   0.03  -0.02    -0.02   0.01  -0.01    -0.01  -0.01  -0.01
  30   6     0.04  -0.05   0.00     0.00  -0.02   0.00    -0.01  -0.01   0.00
  31   6     0.00   0.04  -0.03    -0.01   0.00   0.01    -0.01  -0.02  -0.01
  32   6    -0.01   0.04  -0.04     0.00   0.02   0.03     0.01   0.00   0.02
  33   6    -0.02   0.03  -0.04     0.01   0.03   0.04     0.01   0.02   0.05
  34   6    -0.01   0.02  -0.02     0.00   0.04   0.03     0.01   0.02   0.04
  35   6     0.01   0.03  -0.01    -0.01   0.02   0.00     0.00   0.01   0.01
  36   6     0.01   0.06  -0.03    -0.02  -0.01   0.00    -0.01  -0.01  -0.01
  37   6     0.01   0.03   0.01    -0.02   0.05   0.00    -0.01   0.02   0.01
  38   6     0.03  -0.08   0.03     0.01  -0.03   0.00    -0.02   0.01  -0.02
  39   6     0.02  -0.12   0.05     0.02   0.00  -0.02    -0.02   0.04  -0.05
  40   6     0.02  -0.14   0.05     0.02   0.03  -0.03    -0.02   0.04  -0.06
  41   6     0.03  -0.11   0.02     0.01   0.02  -0.02    -0.01   0.02  -0.05
  42   6     0.04  -0.07  -0.01     0.00   0.00   0.00     0.00   0.01  -0.02
  43   6     0.03  -0.07   0.03     0.01  -0.05   0.00    -0.02   0.02   0.00
  44   6     0.05  -0.03  -0.05    -0.01  -0.01   0.01     0.00   0.03  -0.05
  45   6     0.01   0.08  -0.01    -0.02  -0.02  -0.01    -0.02  -0.09  -0.10
  46   6    -0.01   0.06  -0.02    -0.01   0.00   0.00     0.04   0.12  -0.02
  47   6     0.02  -0.03   0.00    -0.02   0.05   0.00     0.00   0.02   0.00
  48   6    -0.01   0.09  -0.04    -0.01   0.07  -0.01    -0.01   0.04   0.00
  49   6     0.05  -0.05  -0.09    -0.05   0.03   0.01     0.08  -0.04  -0.06
  50   6     0.06   0.00  -0.03     0.02  -0.01  -0.02    -0.07   0.06   0.01
  51   6     0.02   0.01   0.05    -0.01   0.05   0.03    -0.03   0.02   0.00
  52   6     0.02  -0.09  -0.05     0.06  -0.09  -0.11    -0.01   0.01   0.00
  53   6    -0.11  -0.05  -0.05     0.02   0.03  -0.01    -0.02   0.00  -0.02
  54   6    -0.06  -0.03  -0.05     0.01   0.00   0.01     0.02   0.01   0.07
  55   1    -0.10  -0.03  -0.09     0.09   0.04   0.03    -0.03   0.01   0.01
  56   1    -0.01   0.01   0.06     0.02   0.01   0.01     0.00   0.00   0.00
  57   1    -0.13  -0.01   0.05     0.01   0.00  -0.02    -0.02   0.00   0.00
  58   1     0.02   0.02  -0.06    -0.03   0.02  -0.03     0.07   0.05   0.05
  59   1     0.10   0.00   0.00     0.05   0.02   0.03    -0.02  -0.01  -0.01
  60   1     0.02  -0.03   0.04    -0.03  -0.02   0.08     0.09  -0.03  -0.07
  61   1     0.04   0.01   0.02     0.01  -0.02   0.02     0.08  -0.02   0.04
  62   1    -0.02   0.03   0.04     0.02  -0.03   0.00     0.06  -0.05   0.04
  63   1     0.05   0.04   0.04     0.02   0.01   0.02     0.12   0.08   0.03
  64   1     0.06   0.08   0.04     0.02   0.00   0.02     0.12   0.05   0.03
  65   1     0.07   0.04   0.06     0.03   0.00   0.02     0.17   0.02   0.01
  66   1     0.00   0.03   0.03     0.01  -0.03  -0.02     0.04  -0.05  -0.01
  67   1    -0.01   0.04   0.03     0.01  -0.02  -0.02     0.03  -0.04  -0.05
  68   1    -0.01   0.04   0.03     0.01  -0.01  -0.02    -0.01  -0.01  -0.03
  69   1     0.01  -0.01   0.08    -0.04   0.06  -0.04    -0.04   0.03  -0.02
  70   1     0.01  -0.01   0.07    -0.01   0.05  -0.02    -0.02   0.02  -0.01
  71   1     0.02   0.01   0.09    -0.06   0.00  -0.04    -0.05  -0.01  -0.02
  72   1    -0.13  -0.06  -0.07     0.03   0.03   0.00    -0.02   0.00   0.01
  73   1    -0.03  -0.05  -0.14    -0.02   0.03   0.01    -0.02   0.00   0.00
  74   1    -0.16  -0.09  -0.12     0.00   0.04   0.01    -0.02  -0.01   0.00
  75   1    -0.02   0.04  -0.05     0.01   0.01   0.05     0.01  -0.01   0.03
  76   1    -0.03   0.02  -0.04     0.02   0.04   0.06     0.02   0.03   0.07
  77   1    -0.01   0.01  -0.02     0.01   0.05   0.04     0.01   0.03   0.06
  78   1     0.03   0.06  -0.03    -0.03  -0.01   0.01    -0.03  -0.04   0.09
  79   1     0.01   0.05   0.05    -0.04   0.05   0.02    -0.02   0.02   0.02
  80   1     0.01  -0.13   0.07     0.03   0.00  -0.02    -0.03   0.06  -0.06
  81   1     0.01  -0.17   0.08     0.02   0.05  -0.04    -0.02   0.05  -0.08
  82   1     0.03  -0.12   0.02     0.00   0.04  -0.02    -0.01   0.02  -0.06
  83   1     0.03  -0.10   0.07     0.00  -0.11   0.05    -0.01   0.01   0.00
  84   1     0.06  -0.02  -0.06    -0.02  -0.04   0.03     0.01   0.09  -0.11
  85   1     0.01   0.09   0.00    -0.02  -0.03  -0.02    -0.04  -0.13  -0.15
  86   1     0.02   0.08  -0.01    -0.03  -0.01  -0.01    -0.09  -0.11  -0.09
  87   1    -0.01   0.08   0.00     0.00  -0.03  -0.01     0.05  -0.09  -0.15
  88   1    -0.02   0.05   0.00     0.00   0.00  -0.01     0.03   0.10  -0.01
  89   1    -0.01   0.06  -0.02    -0.01   0.00   0.00     0.09   0.16  -0.12
  90   1    -0.03   0.07  -0.03     0.00   0.00   0.01     0.03   0.20   0.06
  91   1     0.04  -0.06   0.00    -0.04   0.08   0.01    -0.01   0.03   0.00
  92   1    -0.02  -0.05  -0.03     0.01   0.05  -0.02     0.01   0.02  -0.01
  93   1     0.05  -0.03   0.01    -0.03   0.02   0.01     0.00   0.00   0.01
  94   1    -0.01   0.10  -0.02    -0.02   0.10   0.00    -0.02   0.05  -0.01
  95   1    -0.02   0.12  -0.03    -0.01   0.06   0.00    -0.02   0.04   0.00
  96   1    -0.01   0.07  -0.09     0.01   0.08  -0.01     0.00   0.04  -0.01
  97   1     0.10  -0.06  -0.11    -0.06   0.02   0.02     0.08  -0.02  -0.07
  98   1     0.02  -0.03  -0.06    -0.09   0.03   0.03     0.14  -0.05  -0.10
  99   1     0.01  -0.07  -0.14    -0.05   0.06  -0.02     0.08  -0.10   0.00
 100   1     0.07   0.02  -0.06     0.03  -0.02  -0.02    -0.06   0.08  -0.01
 101   1     0.05   0.03   0.00     0.04  -0.02  -0.01    -0.11   0.11   0.03
 102   1     0.05  -0.03  -0.02     0.02   0.00  -0.05    -0.08   0.00   0.06
 103   1     0.02   0.00   0.04    -0.01   0.04   0.03    -0.04   0.04   0.02
 104   1     0.01   0.02   0.11    -0.02   0.06   0.09    -0.01   0.01  -0.01
 105   1     0.03   0.05   0.02    -0.01   0.10  -0.02    -0.06   0.01  -0.01
 106   1     0.02  -0.07  -0.03     0.05  -0.09  -0.06    -0.01   0.01  -0.01
 107   1     0.00  -0.06  -0.11     0.03  -0.02  -0.21     0.00   0.02   0.00
 108   1     0.05  -0.16  -0.07     0.12  -0.18  -0.14    -0.02   0.02   0.00
 109   1    -0.15  -0.04  -0.03     0.06   0.03  -0.01    -0.02   0.00  -0.04
 110   1    -0.12  -0.04  -0.04     0.00   0.02   0.00    -0.01   0.02  -0.02
 111   1    -0.11  -0.10  -0.08     0.01   0.06  -0.03    -0.01   0.00  -0.01
 112   1    -0.06  -0.10  -0.11     0.07  -0.22  -0.40    -0.02   0.18   0.35
 113   1    -0.15  -0.02  -0.03    -0.41   0.01   0.16     0.32  -0.02  -0.02
 114   1    -0.02   0.01  -0.02     0.35   0.15   0.21    -0.21  -0.08  -0.07
                    22                     23                     24
                    ?A                     ?A                     ?A
 Frequencies --   108.8500               112.8855               114.6874
 Red. masses --     2.6079                 3.9307                 2.9728
 Frc consts  --     0.0182                 0.0295                 0.0230
 IR Inten    --     1.8279                 2.9531                 0.9042
 Raman Activ --     0.0000                 0.0000                 0.0000
 Depolar     --     0.0000                 0.0000                 0.0000
 Atom AN      X      Y      Z        X      Y      Z        X      Y      Z
   1   8    -0.03   0.01   0.00    -0.02  -0.02   0.01     0.03   0.01  -0.01
   2  12    -0.02  -0.01   0.01    -0.04   0.01   0.03    -0.01   0.02   0.02
   3   8     0.03  -0.04  -0.02     0.06  -0.03   0.05     0.00   0.02  -0.01
   4   6     0.01   0.01   0.00    -0.02  -0.03   0.01     0.02   0.02  -0.01
   5   7     0.01   0.00   0.00    -0.04   0.01   0.01     0.01  -0.02   0.04
   6   7     0.02   0.01   0.02    -0.02  -0.03  -0.04     0.00   0.01   0.00
   7   8     0.03   0.01   0.01    -0.02  -0.03   0.02     0.00   0.02  -0.01
   8   6    -0.02  -0.01   0.00     0.04   0.01   0.02    -0.03  -0.04   0.03
   9   6    -0.06  -0.02  -0.02     0.08   0.02   0.01    -0.03  -0.04   0.01
  10   6    -0.03  -0.01   0.00     0.04   0.00  -0.01    -0.01  -0.02   0.00
  11   8     0.02  -0.01  -0.02     0.02  -0.02   0.01     0.01   0.01   0.00
  12   6     0.02  -0.03  -0.03     0.02   0.00   0.04     0.00   0.01  -0.01
  13   6     0.02  -0.01  -0.03     0.05   0.01   0.04     0.00   0.01  -0.01
  14   6     0.03   0.02  -0.01    -0.01  -0.02   0.00     0.02   0.02   0.00
  15   8     0.02  -0.04  -0.04     0.00   0.01   0.06     0.01   0.00  -0.02
  16   6    -0.02   0.01   0.00     0.00  -0.01   0.02    -0.02   0.01  -0.01
  17   8    -0.05   0.06  -0.01    -0.04   0.12   0.03    -0.05   0.03  -0.01
  18   6     0.02  -0.04   0.00     0.06   0.01   0.03     0.01   0.00   0.01
  19   8    -0.01  -0.03  -0.02     0.02   0.06   0.00     0.01  -0.01   0.01
  20   8     0.00   0.02  -0.05     0.04   0.06  -0.09     0.00   0.03  -0.01
  21   6    -0.02   0.01   0.00     0.00   0.03   0.03    -0.01   0.02   0.05
  22   6    -0.04   0.02   0.00    -0.05   0.06   0.02    -0.02   0.03   0.02
  23   6    -0.01   0.00  -0.01     0.01   0.03  -0.03    -0.01   0.01   0.00
  24   8    -0.02  -0.01   0.06     0.00  -0.01   0.14    -0.02   0.01   0.12
  25   6    -0.07  -0.01   0.02    -0.10   0.00   0.02    -0.03   0.02   0.05
  26   6    -0.05  -0.01   0.02    -0.02   0.02  -0.02    -0.03   0.00  -0.01
  27   6    -0.02   0.02  -0.05     0.03   0.02   0.04     0.01   0.01  -0.01
  28   6     0.04   0.05   0.02    -0.01   0.00  -0.03     0.03   0.01   0.02
  29   6     0.01   0.00   0.00    -0.04   0.01   0.00     0.02  -0.02   0.03
  30   6     0.02   0.00   0.03    -0.01  -0.03  -0.03     0.00   0.01   0.00
  31   6     0.01   0.00  -0.01    -0.03  -0.01   0.00     0.01  -0.04  -0.02
  32   6     0.00   0.00  -0.01    -0.01  -0.01  -0.01     0.01  -0.05  -0.03
  33   6     0.00   0.00   0.00     0.00   0.01  -0.01     0.02  -0.03   0.00
  34   6     0.00  -0.01   0.01    -0.01   0.02  -0.02     0.02  -0.01   0.04
  35   6     0.01  -0.01   0.01    -0.03   0.03  -0.01     0.02  -0.01   0.04
  36   6     0.02   0.02  -0.01    -0.03  -0.02  -0.01     0.02  -0.03  -0.05
  37   6     0.02  -0.02   0.00    -0.04   0.04  -0.03     0.01  -0.01   0.02
  38   6     0.01  -0.02   0.05     0.01  -0.03  -0.04     0.00   0.01   0.01
  39   6     0.00  -0.02   0.04     0.03  -0.03  -0.03     0.00   0.00   0.01
  40   6     0.00  -0.01   0.01     0.02  -0.03   0.00     0.00   0.00   0.02
  41   6     0.01   0.00  -0.01     0.00  -0.03   0.00     0.00   0.00   0.02
  42   6     0.02   0.01   0.00    -0.01  -0.03  -0.02     0.00   0.00   0.01
  43   6     0.00  -0.01   0.07     0.02  -0.07  -0.07     0.00   0.02   0.00
  44   6     0.04   0.01   0.00    -0.02  -0.02  -0.02     0.00   0.00   0.02
  45   6     0.01   0.02  -0.01    -0.04  -0.07  -0.06    -0.01  -0.10  -0.16
  46   6     0.01   0.03  -0.01     0.01   0.03  -0.02     0.09   0.10  -0.06
  47   6     0.01   0.00   0.00    -0.05   0.10  -0.03     0.08  -0.06  -0.04
  48   6     0.01  -0.04   0.02    -0.02   0.03  -0.01    -0.06   0.03  -0.05
  49   6     0.05   0.00  -0.01     0.04  -0.07  -0.01    -0.07   0.05   0.00
  50   6     0.03  -0.01  -0.01    -0.08   0.00   0.03     0.07   0.00  -0.03
  51   6    -0.04   0.16   0.12     0.04  -0.11  -0.08     0.02  -0.03  -0.01
  52   6     0.03  -0.06  -0.10     0.05  -0.07  -0.04    -0.02   0.03   0.05
  53   6    -0.01  -0.02   0.00     0.07   0.01   0.03    -0.08  -0.06   0.02
  54   6    -0.04   0.00   0.01     0.08   0.03   0.02    -0.01  -0.04  -0.04
  55   1    -0.10  -0.03  -0.03     0.12   0.02   0.02    -0.05  -0.06   0.00
  56   1     0.04   0.00   0.00     0.07   0.03   0.04     0.00   0.01  -0.01
  57   1     0.06   0.01  -0.03    -0.02  -0.03   0.02     0.03   0.02  -0.01
  58   1    -0.03   0.01  -0.03    -0.03  -0.02  -0.05    -0.03  -0.03  -0.01
  59   1     0.00   0.02   0.00     0.09   0.01   0.03    -0.03   0.00  -0.01
  60   1    -0.04   0.01   0.02    -0.04  -0.03   0.11    -0.04   0.04  -0.02
  61   1    -0.04   0.02   0.00    -0.07   0.07   0.03     0.01   0.03   0.01
  62   1    -0.03   0.02  -0.02    -0.02   0.02  -0.02     0.00   0.00   0.00
  63   1    -0.06  -0.03   0.02    -0.10  -0.03   0.02    -0.01   0.02   0.07
  64   1    -0.07  -0.02   0.02    -0.10  -0.03   0.02    -0.06   0.01   0.06
  65   1    -0.10   0.00   0.01    -0.15   0.02   0.01    -0.04   0.02   0.03
  66   1    -0.08   0.01   0.02    -0.04   0.02  -0.04    -0.05   0.01  -0.02
  67   1    -0.06  -0.03   0.05    -0.03  -0.01   0.01    -0.03  -0.02   0.00
  68   1    -0.03  -0.03   0.03     0.00   0.02  -0.02    -0.03   0.00  -0.01
  69   1    -0.03   0.05  -0.05     0.02   0.06   0.02     0.01   0.00  -0.01
  70   1    -0.02   0.05  -0.04     0.07   0.02   0.04     0.01   0.01  -0.01
  71   1    -0.04   0.01  -0.08     0.00   0.00   0.05     0.01   0.01  -0.01
  72   1     0.07   0.06   0.01     0.01   0.00  -0.02     0.02   0.01   0.02
  73   1     0.01   0.05   0.05     0.00   0.02  -0.05     0.01   0.00   0.04
  74   1     0.06   0.08   0.04    -0.04  -0.01  -0.04     0.05   0.02   0.03
  75   1     0.00   0.00  -0.02     0.00  -0.02  -0.01     0.01  -0.06  -0.07
  76   1    -0.01   0.00   0.00     0.02   0.01  -0.02     0.02  -0.03   0.00
  77   1     0.00  -0.01   0.02     0.00   0.04  -0.03     0.03  -0.01   0.05
  78   1     0.02   0.01   0.00    -0.06  -0.03   0.03     0.00  -0.06   0.05
  79   1     0.02  -0.02  -0.02    -0.06   0.03  -0.05     0.01   0.01   0.07
  80   1    -0.01  -0.03   0.05     0.04  -0.03  -0.03     0.00   0.00   0.02
  81   1    -0.01  -0.01   0.00     0.03  -0.03   0.01     0.00   0.00   0.02
  82   1     0.02   0.01  -0.03     0.00  -0.03   0.02     0.00   0.00   0.02
  83   1     0.01  -0.10   0.16    -0.01  -0.06  -0.10     0.00   0.05  -0.03
  84   1     0.04   0.01   0.00    -0.02   0.03  -0.07     0.00  -0.04   0.06
  85   1     0.01   0.03  -0.01    -0.05  -0.11  -0.10    -0.02  -0.12  -0.21
  86   1     0.01   0.01  -0.01    -0.08  -0.07  -0.05    -0.09  -0.12  -0.14
  87   1     0.00   0.02  -0.02     0.02  -0.08  -0.07     0.05  -0.09  -0.20
  88   1     0.01   0.03   0.00     0.01   0.03  -0.03     0.07   0.07  -0.06
  89   1     0.02   0.04  -0.02     0.03   0.05  -0.06     0.15   0.14  -0.16
  90   1     0.01   0.04   0.00     0.01   0.07   0.03     0.07   0.20   0.02
  91   1     0.00   0.02   0.01    -0.05   0.09  -0.04     0.06  -0.06  -0.08
  92   1     0.03   0.01   0.01    -0.04   0.11   0.01     0.09  -0.08  -0.10
  93   1     0.00   0.00   0.00    -0.06   0.12  -0.05     0.14  -0.09   0.01
  94   1     0.02  -0.06   0.01    -0.05   0.06  -0.04    -0.09   0.05  -0.09
  95   1     0.02  -0.05   0.01    -0.02  -0.05   0.00    -0.12   0.05   0.00
  96   1     0.00  -0.04   0.03     0.04   0.05   0.03    -0.04   0.03  -0.09
  97   1     0.05  -0.01  -0.01     0.03  -0.05  -0.02    -0.07   0.05  -0.01
  98   1     0.05   0.00  -0.01     0.10  -0.08  -0.06    -0.13   0.04   0.03
  99   1     0.04  -0.01  -0.01     0.05  -0.11   0.05    -0.07   0.09  -0.05
 100   1     0.03  -0.01   0.00    -0.10   0.01   0.02     0.08   0.00  -0.03
 101   1     0.03  -0.01  -0.02    -0.11   0.02   0.02     0.11  -0.02  -0.01
 102   1     0.03   0.00  -0.01    -0.07  -0.02   0.07     0.07   0.04  -0.07
 103   1    -0.05   0.19   0.14     0.05  -0.17  -0.11     0.02  -0.03  -0.02
 104   1    -0.03   0.18   0.22     0.00  -0.10  -0.10     0.02  -0.03  -0.04
 105   1    -0.07   0.22   0.03     0.09  -0.10  -0.06     0.02  -0.05   0.01
 106   1     0.01  -0.03  -0.06     0.05  -0.10  -0.03    -0.01   0.04   0.03
 107   1    -0.01   0.02  -0.24     0.07  -0.07  -0.02    -0.01   0.01   0.09
 108   1     0.09  -0.21  -0.15     0.05  -0.04  -0.03    -0.04   0.07   0.06
 109   1    -0.05  -0.01   0.00     0.12   0.01   0.04    -0.10  -0.06   0.04
 110   1     0.02   0.01  -0.02     0.04  -0.03   0.04    -0.10  -0.06   0.04
 111   1     0.00  -0.05   0.04     0.05   0.06   0.01    -0.09  -0.09   0.00
 112   1    -0.08   0.15   0.33     0.05   0.18   0.26     0.02  -0.16  -0.29
 113   1     0.28  -0.02  -0.11     0.34   0.00  -0.06    -0.26  -0.01   0.03
 114   1    -0.30  -0.12  -0.14    -0.11  -0.06  -0.10     0.19   0.03   0.08
                    25                     26                     27
                    ?A                     ?A                     ?A
 Frequencies --   119.1283               125.7305               130.2839
 Red. masses --     3.1321                 2.8498                 3.1731
 Frc consts  --     0.0262                 0.0265                 0.0317
 IR Inten    --     0.3414                 0.5485                 3.1407
 Raman Activ --     0.0000                 0.0000                 0.0000
 Depolar     --     0.0000                 0.0000                 0.0000
 Atom AN      X      Y      Z        X      Y      Z        X      Y      Z
   1   8    -0.02  -0.03   0.00    -0.01   0.01   0.01    -0.05  -0.01  -0.01
   2  12    -0.02   0.05  -0.01    -0.02   0.07  -0.02    -0.06   0.01   0.04
   3   8    -0.03   0.04   0.00    -0.06   0.09  -0.03     0.02  -0.04   0.02
   4   6    -0.02  -0.04  -0.01     0.01   0.01   0.01    -0.04  -0.01  -0.01
   5   7    -0.04   0.01   0.01    -0.01   0.00   0.03     0.02   0.02   0.04
   6   7     0.01   0.05  -0.02    -0.02   0.03  -0.04     0.00   0.00  -0.01
   7   8     0.00  -0.05   0.00     0.02   0.01   0.01    -0.03  -0.01   0.00
   8   6    -0.01   0.00   0.00     0.03   0.00   0.03     0.01  -0.01   0.03
   9   6    -0.04  -0.01  -0.03     0.06   0.01   0.02     0.00  -0.02   0.00
  10   6    -0.04   0.01  -0.05     0.03   0.02  -0.03     0.00  -0.01  -0.02
  11   8    -0.01  -0.03  -0.01    -0.01   0.00   0.00    -0.03  -0.04  -0.03
  12   6    -0.01   0.01   0.01    -0.02   0.03  -0.01    -0.04  -0.01  -0.03
  13   6    -0.01   0.00   0.00    -0.03   0.01  -0.02     0.00  -0.01  -0.03
  14   6    -0.02  -0.04  -0.02     0.02   0.01   0.01     0.00   0.00  -0.01
  15   8    -0.02   0.04   0.02    -0.01   0.06  -0.01    -0.04   0.02  -0.01
  16   6     0.04  -0.01   0.03    -0.07   0.00   0.01     0.08   0.01   0.00
  17   8    -0.01  -0.02  -0.01    -0.03  -0.04  -0.04    -0.04   0.05   0.06
  18   6    -0.02   0.02   0.01    -0.02   0.03  -0.01    -0.01  -0.01   0.02
  19   8     0.00   0.02   0.01     0.04   0.01   0.03    -0.07   0.03  -0.02
  20   8     0.00  -0.01   0.06    -0.01  -0.01   0.06     0.02  -0.02   0.06
  21   6     0.01   0.00   0.03     0.00  -0.01   0.01     0.01  -0.03   0.02
  22   6     0.02  -0.01   0.02     0.02  -0.01   0.01    -0.01  -0.01   0.09
  23   6     0.02   0.00   0.02     0.01   0.00   0.01     0.03  -0.02   0.04
  24   8     0.01   0.01   0.00     0.01   0.01  -0.05     0.03  -0.04  -0.09
  25   6     0.04   0.01   0.06     0.04   0.01   0.06    -0.03  -0.02   0.17
  26   6     0.04   0.01  -0.03     0.04   0.01  -0.05     0.05  -0.02  -0.01
  27   6     0.05  -0.04   0.01     0.07  -0.06   0.01     0.00   0.02  -0.05
  28   6    -0.02  -0.02  -0.02     0.02   0.00   0.05     0.04   0.09   0.11
  29   6    -0.01   0.01   0.00    -0.01   0.00   0.03     0.01   0.02   0.03
  30   6     0.01   0.03  -0.01    -0.02   0.02  -0.03     0.01   0.01  -0.02
  31   6     0.00  -0.02   0.00    -0.01   0.00   0.03     0.01   0.02   0.01
  32   6     0.02  -0.03  -0.02    -0.01  -0.01   0.01    -0.01   0.01  -0.02
  33   6     0.03  -0.01  -0.04    -0.01  -0.03  -0.02    -0.02   0.00  -0.03
  34   6     0.02   0.01  -0.04    -0.01  -0.02  -0.02    -0.01  -0.01  -0.02
  35   6    -0.01   0.01  -0.03    -0.01  -0.01   0.01     0.01   0.00   0.01
  36   6    -0.01  -0.04   0.00    -0.01  -0.02   0.02     0.02   0.04  -0.01
  37   6    -0.01   0.01  -0.05    -0.01  -0.01   0.01     0.01   0.00  -0.01
  38   6     0.00   0.01   0.01    -0.01   0.00  -0.01     0.01   0.00  -0.02
  39   6     0.00   0.00   0.03    -0.01  -0.01   0.00     0.01  -0.01  -0.01
  40   6     0.00  -0.01   0.03    -0.01  -0.02   0.02     0.01   0.01  -0.03
  41   6     0.00   0.00   0.01    -0.01  -0.01   0.02     0.01   0.02  -0.04
  42   6     0.01   0.02   0.00    -0.02   0.01  -0.01     0.01   0.02  -0.04
  43   6     0.00   0.01   0.03    -0.01  -0.04   0.01     0.01  -0.01  -0.03
  44   6     0.01   0.01   0.01    -0.02   0.00   0.00     0.02   0.01  -0.03
  45   6    -0.01  -0.10  -0.05    -0.02  -0.03  -0.01     0.01   0.10   0.02
  46   6     0.02   0.00  -0.01     0.02  -0.03   0.01     0.02  -0.01  -0.01
  47   6    -0.08   0.18   0.00     0.04  -0.11  -0.02     0.03  -0.01  -0.03
  48   6     0.07  -0.12   0.07    -0.06   0.05  -0.05    -0.02   0.01  -0.03
  49   6    -0.05   0.05   0.00     0.01  -0.01   0.01     0.04   0.00  -0.01
  50   6     0.07  -0.01  -0.05    -0.04  -0.01   0.01     0.00  -0.02  -0.04
  51   6    -0.02   0.03   0.04    -0.06   0.02   0.04     0.03  -0.05  -0.04
  52   6     0.02   0.00   0.01     0.06  -0.08  -0.07     0.01   0.00   0.01
  53   6     0.07  -0.01   0.03     0.03   0.00   0.04    -0.01  -0.03   0.04
  54   6    -0.07  -0.02  -0.09     0.07   0.02  -0.04    -0.01  -0.02  -0.04
  55   1    -0.04  -0.03  -0.04     0.10  -0.01   0.02    -0.01  -0.03  -0.01
  56   1    -0.05  -0.03  -0.03    -0.10  -0.04  -0.06     0.02   0.01  -0.03
  57   1    -0.02  -0.04  -0.01     0.03   0.02  -0.01     0.08  -0.02  -0.05
  58   1     0.08   0.03   0.08    -0.19  -0.09  -0.22     0.24   0.16   0.27
  59   1     0.00   0.00   0.03     0.17   0.04   0.02    -0.20  -0.03  -0.01
  60   1     0.10  -0.06   0.00    -0.24   0.04   0.22     0.31  -0.07  -0.25
  61   1     0.06  -0.02   0.01     0.07  -0.03  -0.02     0.01  -0.06   0.09
  62   1     0.04  -0.02   0.03     0.05  -0.02   0.02     0.05  -0.04   0.04
  63   1     0.06   0.03   0.09     0.08   0.03   0.10     0.00  -0.03   0.20
  64   1     0.00   0.02   0.08    -0.01   0.03   0.09    -0.08  -0.01   0.19
  65   1     0.06   0.00   0.05     0.06   0.00   0.04    -0.04  -0.02   0.15
  66   1     0.07  -0.02  -0.02     0.08  -0.02  -0.04     0.07  -0.04   0.00
  67   1     0.05   0.01  -0.06     0.06   0.02  -0.09     0.06  -0.01  -0.03
  68   1     0.01   0.03  -0.04     0.01   0.03  -0.06     0.02   0.00  -0.01
  69   1     0.07  -0.09   0.00     0.10  -0.16   0.01    -0.02   0.05  -0.09
  70   1     0.04  -0.06   0.00     0.03  -0.09  -0.01     0.05   0.03  -0.04
  71   1     0.10   0.00   0.03     0.15   0.01   0.04    -0.03  -0.01  -0.03
  72   1     0.00  -0.02   0.00     0.00  -0.01   0.03     0.10   0.10   0.10
  73   1    -0.02   0.00  -0.03     0.00  -0.03   0.07    -0.06   0.10   0.17
  74   1    -0.03  -0.03  -0.03     0.06   0.01   0.06     0.10   0.13   0.14
  75   1     0.03  -0.04  -0.03    -0.01  -0.01   0.01    -0.02   0.01  -0.04
  76   1     0.05  -0.02  -0.05    -0.01  -0.03  -0.04    -0.03  -0.02  -0.06
  77   1     0.02   0.02  -0.06    -0.02  -0.03  -0.04    -0.01  -0.02  -0.03
  78   1    -0.05  -0.05   0.04    -0.03  -0.02   0.02     0.04   0.06  -0.05
  79   1    -0.03  -0.03  -0.18     0.01   0.01   0.08     0.00   0.00   0.01
  80   1     0.00  -0.02   0.04     0.00  -0.02   0.01     0.01  -0.02  -0.01
  81   1     0.00  -0.02   0.04     0.00  -0.03   0.03     0.01   0.01  -0.03
  82   1     0.00  -0.01   0.02    -0.02  -0.03   0.04     0.01   0.04  -0.05
  83   1     0.01   0.00   0.05    -0.02  -0.10   0.06     0.00   0.01  -0.05
  84   1     0.01  -0.03   0.05    -0.01   0.01  -0.01     0.02   0.01  -0.03
  85   1    -0.02  -0.13  -0.07    -0.02  -0.05  -0.03     0.02   0.13   0.02
  86   1    -0.04  -0.11  -0.04    -0.04  -0.03   0.00     0.02   0.11   0.02
  87   1     0.03  -0.10  -0.07     0.00  -0.04  -0.01    -0.03   0.10   0.05
  88   1     0.01  -0.02  -0.02     0.02  -0.04  -0.01     0.03   0.01  -0.03
  89   1     0.06   0.02  -0.05     0.04  -0.03   0.02    -0.01  -0.03   0.04
  90   1     0.01   0.04   0.02     0.02  -0.02   0.02     0.03  -0.06  -0.03
  91   1    -0.06   0.13  -0.02     0.03  -0.10  -0.02     0.01   0.03  -0.03
  92   1    -0.09   0.22   0.16     0.03  -0.14  -0.10     0.07  -0.02  -0.08
  93   1    -0.13   0.29  -0.10     0.08  -0.16   0.03     0.04  -0.06   0.00
  94   1     0.07  -0.14   0.05    -0.07   0.06  -0.06    -0.04   0.02  -0.05
  95   1     0.11  -0.25   0.05    -0.09   0.09  -0.03    -0.04   0.01  -0.01
  96   1     0.09  -0.08   0.22    -0.05   0.03  -0.12    -0.01   0.01  -0.05
  97   1    -0.03   0.04   0.00     0.02  -0.03   0.02     0.07  -0.03   0.01
  98   1    -0.10   0.07   0.04     0.03   0.01   0.02     0.05   0.05   0.02
  99   1    -0.06   0.09  -0.07     0.00  -0.03   0.01     0.02  -0.01  -0.03
 100   1     0.07  -0.03  -0.03    -0.06  -0.01   0.02     0.00  -0.04  -0.02
 101   1     0.11  -0.05  -0.05    -0.04  -0.02  -0.02    -0.02  -0.03  -0.06
 102   1     0.08   0.04  -0.09    -0.02   0.01   0.02    -0.01  -0.03  -0.04
 103   1    -0.02   0.02   0.06    -0.05  -0.01   0.05     0.03  -0.07  -0.06
 104   1    -0.03   0.03   0.06    -0.10   0.04   0.09     0.01  -0.05  -0.06
 105   1    -0.03   0.04   0.03    -0.04   0.08  -0.01     0.05  -0.06  -0.02
 106   1     0.01   0.00   0.04     0.05  -0.10  -0.02     0.01  -0.01   0.02
 107   1     0.01   0.01  -0.01     0.05  -0.02  -0.15     0.02  -0.02   0.04
 108   1     0.04  -0.02   0.01     0.13  -0.15  -0.09     0.01   0.03   0.02
 109   1     0.06  -0.01   0.03     0.08   0.00   0.06     0.01  -0.03   0.07
 110   1     0.14  -0.01  -0.02     0.00  -0.03   0.05    -0.04  -0.06   0.05
 111   1     0.10  -0.02   0.11     0.02   0.04   0.00    -0.02  -0.02   0.00
 112   1    -0.07  -0.04  -0.07     0.05   0.13   0.12    -0.02  -0.02   0.00
 113   1    -0.06   0.01  -0.12     0.25   0.02  -0.11     0.01  -0.01  -0.06
 114   1    -0.09  -0.05  -0.10    -0.05  -0.06  -0.12    -0.04  -0.05  -0.05
                    28                     29                     30
                    ?A                     ?A                     ?A
 Frequencies --   133.0814               138.4743               143.7657
 Red. masses --     1.9161                 2.6243                 1.8547
 Frc consts  --     0.0200                 0.0296                 0.0226
 IR Inten    --     2.4136                 0.6105                 0.1477
 Raman Activ --     0.0000                 0.0000                 0.0000
 Depolar     --     0.0000                 0.0000                 0.0000
 Atom AN      X      Y      Z        X      Y      Z        X      Y      Z
   1   8    -0.06  -0.02   0.00     0.02   0.01   0.01     0.01   0.00   0.00
   2  12     0.03   0.02  -0.02     0.01  -0.01   0.00     0.01   0.01   0.01
   3   8    -0.01   0.04   0.00     0.00   0.00   0.00     0.00  -0.01  -0.01
   4   6    -0.06  -0.01   0.00     0.00   0.01   0.01     0.01   0.00   0.00
   5   7     0.01  -0.01   0.00    -0.04  -0.01  -0.01     0.02   0.00   0.02
   6   7    -0.01   0.00  -0.01     0.02   0.01   0.01     0.00   0.00   0.00
   7   8    -0.05  -0.02   0.01    -0.04   0.01   0.01     0.00   0.00   0.00
   8   6     0.01  -0.01   0.00     0.04   0.01   0.01     0.00  -0.02   0.01
   9   6     0.03   0.00   0.01     0.00   0.01   0.00     0.02  -0.01   0.01
  10   6     0.03   0.01   0.00    -0.04  -0.01  -0.01     0.01  -0.01   0.00
  11   8     0.00  -0.02  -0.01     0.01   0.01   0.02     0.01   0.00   0.00
  12   6     0.00   0.00   0.00     0.01   0.00   0.01     0.01   0.00   0.00
  13   6     0.00   0.00   0.00     0.00   0.00   0.01     0.00   0.00   0.00
  14   6    -0.01   0.00   0.00     0.00   0.01   0.01     0.00   0.00   0.00
  15   8     0.00   0.02   0.01     0.02  -0.02   0.00     0.01   0.00   0.00
  16   6     0.09   0.01   0.00    -0.01   0.00  -0.01    -0.01   0.00   0.00
  17   8     0.02  -0.02  -0.03     0.02   0.00   0.01    -0.01   0.00   0.00
  18   6     0.00   0.02   0.00     0.00   0.01  -0.01     0.00  -0.01  -0.01
  19   8     0.05   0.00   0.02     0.00   0.00  -0.01    -0.01  -0.01  -0.01
  20   8     0.00   0.01  -0.03     0.00   0.01  -0.01    -0.01   0.00   0.01
  21   6     0.00   0.01  -0.01     0.00   0.01   0.00    -0.01   0.00   0.00
  22   6     0.01   0.01  -0.05     0.00   0.01  -0.01    -0.01   0.00   0.00
  23   6    -0.01   0.02  -0.02     0.00   0.01  -0.01     0.00  -0.01   0.00
  24   8    -0.01   0.02   0.03     0.00   0.01   0.02    -0.01   0.00   0.00
  25   6     0.01   0.01  -0.08     0.00   0.00  -0.04    -0.01   0.00   0.00
  26   6    -0.01   0.02   0.00     0.00   0.01   0.00    -0.01  -0.01   0.00
  27   6     0.04  -0.02   0.00    -0.02   0.01   0.01    -0.02   0.00   0.00
  28   6     0.01   0.07   0.02     0.00   0.00  -0.01     0.00  -0.01  -0.02
  29   6     0.00  -0.01   0.00    -0.03  -0.01   0.00     0.01   0.00   0.02
  30   6    -0.01   0.00  -0.01     0.02   0.00   0.01     0.00   0.00  -0.01
  31   6     0.00  -0.01  -0.01    -0.02   0.00   0.06     0.01   0.03   0.07
  32   6    -0.01  -0.01  -0.01    -0.01   0.02   0.09     0.00   0.04   0.09
  33   6    -0.01  -0.01   0.00    -0.01   0.00   0.02     0.00   0.00   0.00
  34   6     0.00  -0.01   0.01    -0.03  -0.02  -0.05    -0.01  -0.04  -0.08
  35   6     0.00  -0.01   0.01    -0.03  -0.02  -0.04    -0.01  -0.03  -0.05
  36   6     0.00  -0.01   0.00    -0.03  -0.02   0.03     0.02   0.03   0.01
  37   6     0.00  -0.01   0.01    -0.03   0.00  -0.01    -0.01  -0.01  -0.04
  38   6    -0.01   0.00  -0.01     0.02  -0.02   0.02     0.00   0.00  -0.01
  39   6     0.00   0.00   0.00     0.02  -0.02   0.03     0.00   0.00  -0.01
  40   6    -0.01  -0.02   0.03     0.02   0.00   0.01     0.00   0.00   0.00
  41   6    -0.01  -0.03   0.04     0.02   0.02  -0.01     0.00  -0.01   0.01
  42   6    -0.01  -0.02   0.02     0.02   0.01  -0.01     0.00   0.00   0.00
  43   6    -0.01   0.00   0.01     0.02   0.00   0.01     0.00   0.00   0.00
  44   6    -0.02  -0.01   0.02     0.02   0.00  -0.01    -0.01   0.00   0.01
  45   6     0.00  -0.01  -0.01    -0.04  -0.05  -0.01    -0.02   0.04  -0.05
  46   6    -0.01   0.01   0.00     0.03  -0.04   0.02     0.11  -0.01  -0.01
  47   6     0.01  -0.02   0.00    -0.03  -0.09  -0.01    -0.07   0.02   0.02
  48   6    -0.02  -0.01   0.00    -0.03   0.10  -0.07     0.08   0.02  -0.01
  49   6    -0.03  -0.01   0.02    -0.01   0.03  -0.01    -0.02   0.00   0.01
  50   6    -0.03   0.01   0.04     0.05  -0.02  -0.04    -0.02   0.01   0.02
  51   6    -0.05   0.03   0.03     0.05   0.00   0.00    -0.02   0.01   0.01
  52   6     0.02  -0.02  -0.02    -0.02   0.01   0.01     0.00   0.00   0.01
  53   6    -0.02  -0.01  -0.01     0.17   0.06   0.02    -0.08  -0.03  -0.01
  54   6     0.07   0.02   0.00    -0.14  -0.05  -0.04     0.02  -0.01  -0.01
  55   1     0.05   0.00   0.01     0.00   0.00   0.00     0.02  -0.02   0.00
  56   1    -0.02  -0.02   0.00     0.01   0.01   0.02     0.01   0.00   0.01
  57   1     0.02  -0.03  -0.01    -0.01   0.02   0.02    -0.01   0.00   0.00
  58   1     0.32   0.20   0.40     0.10   0.04   0.22    -0.01  -0.01   0.01
  59   1    -0.33  -0.06  -0.02    -0.28  -0.05  -0.03    -0.03   0.00   0.00
  60   1     0.41  -0.10  -0.38     0.12   0.02  -0.24    -0.01   0.01  -0.02
  61   1    -0.01   0.03  -0.04    -0.01   0.02  -0.01    -0.01   0.00   0.00
  62   1    -0.02   0.02  -0.02     0.00   0.01  -0.01     0.01   0.00   0.00
  63   1     0.00   0.01  -0.10    -0.01   0.00  -0.06    -0.01   0.00  -0.01
  64   1     0.04   0.00  -0.09     0.03   0.00  -0.05    -0.01  -0.01   0.00
  65   1     0.01   0.01  -0.08     0.00   0.00  -0.03    -0.01   0.00   0.00
  66   1    -0.01   0.02   0.00     0.00   0.01   0.00    -0.01   0.00   0.00
  67   1    -0.01   0.02   0.01     0.00   0.01  -0.01     0.00  -0.01  -0.02
  68   1     0.00   0.01   0.00    -0.01   0.00   0.00    -0.02  -0.01  -0.01
  69   1     0.05  -0.06   0.01    -0.02   0.02   0.02    -0.02   0.02   0.01
  70   1     0.02  -0.02   0.00    -0.03   0.02   0.01    -0.03   0.01   0.00
  71   1     0.08   0.01   0.00    -0.03   0.01   0.00    -0.03   0.00  -0.01
  72   1     0.06   0.08   0.02    -0.01   0.00  -0.02     0.00  -0.01  -0.02
  73   1    -0.03   0.10   0.04     0.01  -0.01  -0.01     0.01   0.00  -0.04
  74   1     0.00   0.09   0.03    -0.01   0.01  -0.01    -0.02  -0.01  -0.03
  75   1    -0.01  -0.02  -0.02     0.00   0.04   0.14     0.01   0.07   0.15
  76   1    -0.01  -0.01   0.00     0.00   0.00   0.03     0.00   0.00   0.00
  77   1     0.00  -0.01   0.02    -0.03  -0.04  -0.10    -0.02  -0.07  -0.14
  78   1     0.00  -0.01   0.01    -0.06  -0.02   0.03     0.00   0.03  -0.01
  79   1     0.00  -0.01   0.02    -0.03   0.03   0.07    -0.02  -0.02  -0.05
  80   1     0.00   0.00  -0.01     0.02  -0.03   0.04     0.00   0.00  -0.01
  81   1     0.00  -0.02   0.04     0.02   0.00   0.01     0.00   0.00   0.00
  82   1    -0.01  -0.05   0.06     0.02   0.03  -0.03     0.00  -0.01   0.01
  83   1     0.00  -0.03   0.04     0.02   0.01   0.00     0.00   0.00   0.01
  84   1    -0.03  -0.01   0.01     0.02  -0.02   0.02    -0.02   0.00   0.00
  85   1     0.00  -0.01   0.00    -0.05  -0.09  -0.07    -0.02   0.01  -0.14
  86   1     0.00  -0.02  -0.01    -0.10  -0.02   0.00    -0.10   0.08  -0.03
  87   1     0.00  -0.01  -0.01     0.01  -0.06   0.00     0.03   0.02  -0.02
  88   1    -0.01   0.01   0.01     0.04  -0.04  -0.03     0.12  -0.02  -0.08
  89   1    -0.01   0.01  -0.01     0.06  -0.04   0.03     0.14  -0.02   0.02
  90   1    -0.01   0.01   0.00     0.06  -0.04   0.05     0.15  -0.02   0.02
  91   1    -0.01   0.02   0.01    -0.04  -0.05   0.03    -0.06   0.05   0.07
  92   1     0.04  -0.02  -0.04    -0.02  -0.12  -0.11    -0.06   0.03   0.04
  93   1     0.01  -0.05   0.02    -0.03  -0.18   0.04    -0.14   0.01   0.00
  94   1    -0.01  -0.01   0.00    -0.06   0.17  -0.05     0.14  -0.01   0.11
  95   1    -0.02   0.01   0.00    -0.03   0.12  -0.07     0.16   0.11  -0.09
  96   1    -0.03  -0.01  -0.01     0.02   0.10  -0.14    -0.01  -0.01  -0.04
  97   1    -0.05   0.01   0.01     0.00   0.02  -0.01    -0.02   0.00   0.01
  98   1    -0.02  -0.03   0.00    -0.04   0.03   0.01    -0.02   0.00   0.01
  99   1    -0.01  -0.01   0.04    -0.01   0.05  -0.04    -0.01   0.01   0.01
 100   1    -0.05   0.03   0.04     0.06  -0.03  -0.03    -0.03   0.01   0.02
 101   1    -0.02   0.01   0.05     0.06  -0.03  -0.05    -0.01   0.00   0.01
 102   1    -0.02   0.02   0.06     0.05   0.00  -0.07     0.00   0.02   0.03
 103   1    -0.05   0.03   0.06     0.05   0.01  -0.02    -0.02   0.02   0.03
 104   1    -0.05   0.03   0.05     0.06   0.00   0.01    -0.02   0.01   0.01
 105   1    -0.06   0.05   0.00     0.05   0.00   0.01    -0.03   0.00   0.00
 106   1     0.01  -0.02   0.03    -0.02   0.04   0.01     0.00   0.00   0.02
 107   1    -0.01   0.01  -0.08    -0.03   0.00   0.01    -0.01   0.00   0.00
 108   1     0.08  -0.06  -0.04    -0.03   0.00   0.01     0.01   0.00   0.00
 109   1    -0.01  -0.01   0.00     0.19   0.05  -0.02     0.29  -0.04   0.13
 110   1    -0.06  -0.02   0.01     0.23   0.06  -0.02    -0.41  -0.31   0.15
 111   1    -0.04   0.00  -0.04     0.19   0.11   0.12    -0.23   0.26  -0.33
 112   1     0.07   0.03  -0.04    -0.17  -0.07   0.12     0.02  -0.01   0.00
 113   1     0.05   0.01   0.02    -0.04  -0.01  -0.14     0.03  -0.01  -0.02
 114   1     0.10   0.02   0.02    -0.29  -0.10  -0.13     0.01  -0.03  -0.02
                    31                     32                     33
                    ?A                     ?A                     ?A
 Frequencies --   146.2098               151.5581               153.4043
 Red. masses --     2.4737                 3.0841                 3.2879
 Frc consts  --     0.0312                 0.0417                 0.0456
 IR Inten    --     5.2370                 3.8933                 0.8751
 Raman Activ --     0.0000                 0.0000                 0.0000
 Depolar     --     0.0000                 0.0000                 0.0000
 Atom AN      X      Y      Z        X      Y      Z        X      Y      Z
   1   8    -0.10  -0.02  -0.03     0.07   0.03   0.01    -0.06  -0.01  -0.01
   2  12     0.03   0.04   0.03     0.05   0.05   0.04     0.00  -0.03  -0.02
   3   8     0.01  -0.01   0.02    -0.03   0.03  -0.01    -0.04   0.09   0.00
   4   6    -0.04  -0.01  -0.03     0.04   0.01   0.00    -0.03  -0.02  -0.01
   5   7     0.00   0.01   0.05     0.01   0.02   0.06     0.00  -0.01  -0.02
   6   7     0.00   0.02   0.02     0.00   0.00   0.01    -0.03  -0.02   0.04
   7   8     0.04   0.01  -0.03    -0.01   0.00   0.01     0.00  -0.02   0.00
   8   6     0.00   0.01   0.04     0.03   0.00   0.06    -0.03   0.02  -0.01
   9   6    -0.01   0.00   0.03     0.06   0.00   0.04    -0.04   0.02   0.02
  10   6    -0.02   0.00   0.01     0.02   0.00   0.01    -0.03   0.01   0.04
  11   8    -0.02  -0.02  -0.03     0.03   0.01   0.00    -0.01   0.00   0.00
  12   6    -0.01  -0.01  -0.02     0.03  -0.01  -0.02    -0.01   0.01   0.00
  13   6    -0.01   0.00  -0.01    -0.01   0.01  -0.01    -0.02   0.03   0.01
  14   6    -0.01   0.00  -0.02     0.02   0.01  -0.01    -0.01  -0.01   0.00
  15   8    -0.01   0.01  -0.02     0.05  -0.04  -0.04    -0.01  -0.02  -0.01
  16   6     0.10   0.02   0.00    -0.08   0.01   0.00     0.06   0.01   0.02
  17   8     0.08  -0.04   0.05     0.02  -0.05   0.03    -0.02   0.00  -0.04
  18   6    -0.01   0.00   0.01    -0.03   0.00   0.01     0.02   0.03   0.02
  19   8     0.01  -0.01   0.02     0.00  -0.03   0.03     0.09   0.00   0.06
  20   8    -0.03   0.00   0.01    -0.05  -0.01   0.07     0.01   0.02  -0.04
  21   6    -0.01   0.01  -0.01    -0.03   0.00   0.00     0.00   0.02  -0.01
  22   6     0.00   0.00  -0.02    -0.01  -0.01   0.00     0.01   0.01  -0.01
  23   6    -0.02  -0.01   0.00    -0.02  -0.02   0.02     0.00   0.01  -0.02
  24   8    -0.02   0.02   0.00    -0.03   0.02  -0.04     0.00   0.02   0.01
  25   6     0.01  -0.01  -0.14     0.00  -0.01  -0.07     0.01   0.02   0.04
  26   6    -0.04  -0.02  -0.01    -0.04  -0.04  -0.06     0.00   0.01  -0.06
  27   6    -0.01   0.03  -0.04    -0.04   0.03  -0.02     0.06  -0.01   0.01
  28   6     0.01   0.09   0.04     0.00  -0.04  -0.09     0.00   0.03   0.03
  29   6     0.00   0.01   0.04     0.00   0.02   0.05     0.00  -0.01  -0.02
  30   6     0.00   0.01   0.01    -0.01  -0.01   0.00    -0.02  -0.02   0.04
  31   6     0.00   0.01   0.02     0.00  -0.01  -0.02     0.01  -0.01   0.00
  32   6    -0.01  -0.01  -0.01    -0.01  -0.03  -0.08     0.01   0.00   0.02
  33   6    -0.01  -0.02  -0.03     0.00  -0.01  -0.04     0.00  -0.01   0.01
  34   6    -0.01  -0.01  -0.01     0.01   0.03   0.04     0.00  -0.01   0.00
  35   6     0.00   0.00   0.02     0.01   0.03   0.06     0.00  -0.02  -0.01
  36   6     0.00   0.01   0.00     0.00   0.01  -0.01     0.00  -0.01   0.01
  37   6    -0.01   0.00   0.00    -0.02   0.04   0.01     0.02  -0.03   0.00
  38   6     0.00   0.02   0.01     0.00  -0.05   0.03    -0.02  -0.07   0.08
  39   6    -0.01   0.01   0.01     0.01  -0.06   0.05    -0.01  -0.07   0.09
  40   6    -0.01  -0.02   0.03     0.01  -0.01   0.01    -0.01   0.02  -0.01
  41   6    -0.01  -0.03   0.03     0.00   0.04  -0.04    -0.01   0.10  -0.09
  42   6     0.00  -0.01   0.02     0.00   0.02  -0.03    -0.01   0.06  -0.05
  43   6     0.00   0.00  -0.01     0.00  -0.04   0.00    -0.01  -0.04   0.00
  44   6     0.02  -0.01   0.01    -0.01   0.01  -0.01     0.02   0.03  -0.03
  45   6    -0.01   0.02  -0.01     0.00   0.04   0.00     0.00  -0.04  -0.01
  46   6     0.03  -0.01   0.00    -0.01   0.02  -0.01     0.01   0.00   0.01
  47   6     0.01   0.01  -0.02     0.03   0.11  -0.04    -0.01  -0.04   0.03
  48   6    -0.03   0.00  -0.01    -0.06   0.00   0.02     0.03  -0.04   0.02
  49   6     0.02  -0.03  -0.03     0.01   0.02   0.04     0.06   0.03   0.02
  50   6     0.04  -0.02  -0.01    -0.03  -0.05  -0.03     0.00  -0.07  -0.08
  51   6     0.02  -0.05  -0.02     0.06  -0.01  -0.01     0.14  -0.02  -0.03
  52   6     0.03   0.00   0.02    -0.04  -0.04  -0.05    -0.11  -0.02  -0.05
  53   6     0.01   0.00   0.05    -0.01  -0.03   0.07    -0.05   0.05  -0.04
  54   6    -0.06  -0.02  -0.01     0.00  -0.02   0.00    -0.01   0.04   0.09
  55   1    -0.01  -0.01   0.02     0.07  -0.01   0.04    -0.04   0.05   0.03
  56   1     0.01   0.01   0.00    -0.02   0.00   0.03    -0.07  -0.01  -0.01
  57   1     0.04  -0.03  -0.05    -0.03   0.03   0.01     0.01  -0.03  -0.01
  58   1    -0.03   0.08  -0.34     0.00  -0.05   0.21     0.05   0.06  -0.03
  59   1     0.52   0.10   0.02    -0.34  -0.04  -0.01     0.14   0.04   0.03
  60   1    -0.03  -0.10   0.35     0.00   0.09  -0.22     0.06  -0.07   0.10
  61   1    -0.07   0.03   0.01    -0.04   0.01   0.01     0.04   0.00  -0.02
  62   1    -0.01  -0.01   0.01     0.02  -0.06   0.03    -0.01  -0.02  -0.01
  63   1    -0.07  -0.01  -0.22    -0.04   0.00  -0.10     0.04   0.01   0.06
  64   1     0.10  -0.02  -0.19     0.05  -0.02  -0.09    -0.03   0.03   0.05
  65   1     0.00   0.00  -0.10     0.00  -0.01  -0.05     0.01   0.02   0.03
  66   1    -0.05  -0.01  -0.02    -0.04  -0.05  -0.07    -0.01  -0.01  -0.08
  67   1    -0.04  -0.04  -0.02    -0.03  -0.08  -0.09     0.00  -0.01  -0.05
  68   1    -0.05  -0.01  -0.02    -0.08   0.00  -0.08     0.01   0.03  -0.06
  69   1    -0.03   0.06  -0.07    -0.03   0.03   0.00     0.09  -0.10   0.01
  70   1     0.02   0.05  -0.03    -0.07   0.06  -0.01     0.03  -0.01   0.01
  71   1    -0.04   0.01  -0.04    -0.03   0.03  -0.06     0.14   0.05   0.01
  72   1     0.08   0.10   0.05    -0.03  -0.04  -0.11     0.03   0.03   0.05
  73   1    -0.06   0.13   0.07     0.06  -0.06  -0.13    -0.03   0.05   0.04
  74   1     0.04   0.10   0.06    -0.05  -0.04  -0.11     0.01   0.02   0.03
  75   1    -0.01  -0.01  -0.03    -0.01  -0.07  -0.15     0.01   0.01   0.03
  76   1    -0.02  -0.03  -0.05     0.00  -0.03  -0.08     0.00   0.00   0.02
  77   1    -0.01  -0.02  -0.03     0.02   0.04   0.06     0.00  -0.01  -0.01
  78   1     0.00   0.01  -0.01     0.03   0.01  -0.02    -0.01  -0.02   0.02
  79   1    -0.02   0.00   0.00    -0.04   0.03  -0.02     0.03  -0.03  -0.01
  80   1    -0.01   0.01   0.01     0.01  -0.10   0.09    -0.02  -0.12   0.14
  81   1    -0.01  -0.03   0.04     0.01  -0.02   0.02    -0.01   0.04  -0.03
  82   1    -0.01  -0.04   0.04     0.00   0.07  -0.06    -0.01   0.18  -0.16
  83   1    -0.02   0.00  -0.03    -0.01  -0.04  -0.01    -0.04  -0.02  -0.05
  84   1     0.04   0.00   0.02    -0.01   0.00   0.00     0.04   0.04   0.00
  85   1    -0.01   0.02  -0.03     0.01   0.07   0.03     0.00  -0.04  -0.01
  86   1    -0.03   0.03   0.00     0.02   0.03   0.00     0.00  -0.04   0.00
  87   1    -0.01   0.02   0.00    -0.04   0.05   0.00     0.02  -0.03  -0.02
  88   1     0.03  -0.01  -0.03     0.01   0.07   0.00     0.00  -0.01   0.01
  89   1     0.04  -0.01   0.01    -0.07   0.01   0.00     0.02   0.01  -0.01
  90   1     0.04  -0.01   0.00     0.01  -0.03  -0.02     0.00   0.02   0.02
  91   1    -0.02   0.06  -0.02     0.03   0.05  -0.13    -0.01  -0.02   0.07
  92   1     0.05   0.02  -0.05     0.02   0.13   0.04     0.00  -0.04   0.01
  93   1     0.01  -0.02   0.00     0.09   0.20  -0.07    -0.04  -0.07   0.03
  94   1    -0.05   0.00  -0.04    -0.14   0.05  -0.11     0.12  -0.12   0.12
  95   1    -0.05  -0.03   0.01    -0.13  -0.13   0.09     0.09   0.08  -0.04
  96   1    -0.01   0.00   0.00     0.05   0.05   0.07    -0.11  -0.09  -0.01
  97   1     0.04  -0.02  -0.05    -0.02   0.01   0.06     0.07  -0.01   0.06
  98   1     0.00  -0.04  -0.02     0.03   0.03   0.03     0.10   0.07   0.03
  99   1     0.00  -0.04  -0.04     0.02   0.03   0.06     0.06   0.02   0.03
 100   1     0.09  -0.02  -0.03    -0.06  -0.08   0.02     0.03  -0.13  -0.03
 101   1     0.03   0.01   0.02    -0.03  -0.08  -0.09    -0.02  -0.09  -0.13
 102   1     0.01  -0.05  -0.03    -0.02  -0.02  -0.04    -0.02  -0.07  -0.12
 103   1     0.02  -0.06  -0.03     0.07  -0.01  -0.06     0.16  -0.03  -0.16
 104   1     0.01  -0.05  -0.04     0.08  -0.01   0.02     0.16  -0.01   0.01
 105   1     0.03  -0.06   0.00     0.09   0.00   0.00     0.22  -0.01   0.01
 106   1     0.05  -0.05  -0.03    -0.05   0.00  -0.04    -0.09   0.03  -0.16
 107   1     0.09  -0.01   0.08    -0.06  -0.04  -0.07    -0.08  -0.05   0.01
 108   1    -0.01   0.04   0.04    -0.05  -0.08  -0.05    -0.23  -0.03  -0.03
 109   1     0.05   0.00   0.07     0.09  -0.03   0.12     0.09   0.04  -0.02
 110   1    -0.01  -0.03   0.06    -0.12  -0.12   0.11    -0.16  -0.03   0.02
 111   1     0.00   0.03   0.03    -0.06   0.05  -0.04    -0.10   0.17  -0.14
 112   1    -0.07  -0.04   0.03    -0.01   0.01   0.09     0.00   0.04   0.05
 113   1    -0.05   0.00  -0.04     0.08  -0.01  -0.05    -0.04   0.01   0.14
 114   1    -0.10  -0.03  -0.03    -0.07  -0.06  -0.05     0.03   0.08   0.12
                    34                     35                     36
                    ?A                     ?A                     ?A
 Frequencies --   158.2809               160.2434               161.9210
 Red. masses --     3.0098                 1.6138                 3.1412
 Frc consts  --     0.0444                 0.0244                 0.0485
 IR Inten    --     0.6454                 0.3576                 3.5293
 Raman Activ --     0.0000                 0.0000                 0.0000
 Depolar     --     0.0000                 0.0000                 0.0000
 Atom AN      X      Y      Z        X      Y      Z        X      Y      Z
   1   8     0.00   0.01   0.02    -0.01  -0.01   0.00    -0.05  -0.02  -0.02
   2  12     0.02   0.01   0.03     0.01   0.00  -0.01     0.04  -0.05   0.01
   3   8    -0.03   0.06  -0.02     0.00   0.00  -0.01    -0.06   0.09  -0.03
   4   6     0.00   0.01   0.02    -0.01   0.00   0.00    -0.02  -0.02  -0.02
   5   7     0.01   0.03   0.02     0.00  -0.01  -0.01     0.01  -0.04   0.01
   6   7    -0.01   0.00   0.04     0.01   0.01   0.01     0.02  -0.05   0.04
   7   8    -0.03   0.00   0.02     0.00   0.00   0.00     0.02  -0.01  -0.01
   8   6    -0.04   0.04   0.02     0.03   0.02   0.01     0.03  -0.04   0.01
   9   6    -0.06   0.04   0.02     0.03   0.02   0.02     0.02  -0.04   0.02
  10   6    -0.04   0.02   0.04    -0.01   0.01   0.00     0.01  -0.05   0.03
  11   8     0.04   0.01   0.01     0.01   0.00   0.01     0.04   0.01   0.02
  12   6     0.04  -0.01   0.00     0.01   0.00   0.01     0.04  -0.01   0.01
  13   6     0.00   0.01   0.00     0.00   0.00   0.00    -0.01   0.02   0.02
  14   6     0.02   0.01   0.00     0.00   0.00   0.00     0.00  -0.01  -0.01
  15   8     0.05  -0.04  -0.03     0.01   0.00   0.01     0.05  -0.05  -0.01
  16   6    -0.04   0.01   0.00     0.01   0.00   0.00     0.07   0.00   0.01
  17   8    -0.06  -0.01  -0.02    -0.02   0.00  -0.02    -0.08  -0.02  -0.07
  18   6     0.00   0.01   0.01     0.00   0.00  -0.01     0.01   0.02   0.00
  19   8     0.03  -0.01   0.03    -0.01   0.00  -0.01     0.07  -0.02   0.04
  20   8    -0.01   0.00   0.04     0.01  -0.01  -0.02     0.00   0.00  -0.05
  21   6    -0.02   0.00   0.01     0.00  -0.01   0.00    -0.02  -0.01  -0.02
  22   6    -0.03   0.00   0.00     0.01  -0.01   0.00    -0.02  -0.02   0.00
  23   6     0.00  -0.01   0.00     0.00   0.01  -0.01    -0.01   0.00  -0.02
  24   8    -0.01  -0.02  -0.03     0.00  -0.01   0.01    -0.01  -0.03  -0.02
  25   6    -0.04   0.00   0.03     0.01   0.00   0.05    -0.01   0.01   0.10
  26   6    -0.01  -0.02  -0.08     0.01   0.02   0.04     0.00   0.01  -0.03
  27   6     0.00   0.01   0.00    -0.02   0.00   0.01     0.03  -0.01   0.03
  28   6     0.01   0.01  -0.05     0.00   0.01  -0.01     0.00   0.03  -0.06
  29   6     0.00   0.03   0.02     0.00  -0.01  -0.02     0.00  -0.03   0.01
  30   6    -0.02  -0.01   0.04     0.00   0.00   0.00     0.02  -0.04   0.03
  31   6     0.01   0.03   0.02    -0.01  -0.03  -0.05    -0.01  -0.01   0.01
  32   6     0.00   0.02   0.01     0.00  -0.03  -0.06    -0.02  -0.01   0.01
  33   6     0.00   0.00  -0.02     0.00   0.00   0.01    -0.02  -0.02   0.01
  34   6    -0.01   0.00  -0.03     0.01   0.02   0.07    -0.01  -0.02   0.01
  35   6     0.00   0.01   0.00     0.00   0.01   0.03     0.00  -0.02   0.01
  36   6     0.00   0.00   0.02    -0.01  -0.02  -0.01     0.01   0.03   0.00
  37   6     0.02  -0.02   0.01     0.00   0.00   0.02    -0.04   0.03  -0.01
  38   6     0.00   0.05  -0.03     0.00   0.02  -0.01     0.00   0.00   0.00
  39   6     0.00   0.09  -0.07     0.00   0.02  -0.02     0.00   0.03  -0.05
  40   6     0.00   0.04  -0.03     0.00   0.01  -0.01     0.00   0.03  -0.05
  41   6    -0.01  -0.04   0.04     0.00  -0.01   0.01     0.01  -0.01  -0.02
  42   6    -0.01  -0.04   0.05     0.00  -0.01   0.01     0.02  -0.04   0.02
  43   6     0.01  -0.02  -0.06     0.00   0.01  -0.01     0.00   0.03   0.01
  44   6     0.04  -0.02   0.01     0.01   0.00   0.00     0.00  -0.01   0.00
  45   6     0.01  -0.03   0.00     0.01  -0.03   0.02    -0.02   0.10   0.01
  46   6     0.02  -0.02   0.01    -0.07   0.02   0.01     0.02   0.02  -0.01
  47   6     0.00  -0.03   0.03     0.03  -0.01   0.00    -0.02   0.09  -0.04
  48   6     0.01  -0.06   0.03    -0.03  -0.02   0.01    -0.02   0.09  -0.03
  49   6     0.04  -0.09  -0.11    -0.01   0.00  -0.03    -0.02   0.00  -0.02
  50   6     0.08   0.02   0.01     0.03   0.02   0.00    -0.01   0.05   0.04
  51   6     0.01  -0.06  -0.07    -0.01  -0.01   0.00    -0.02   0.03   0.02
  52   6     0.11  -0.05  -0.06     0.03   0.00   0.01    -0.04   0.05   0.03
  53   6    -0.05   0.04   0.01     0.02   0.05  -0.02     0.05  -0.04   0.02
  54   6    -0.08   0.03   0.07    -0.08  -0.02  -0.02    -0.03  -0.07   0.03
  55   1    -0.08   0.04   0.02     0.04   0.02   0.02     0.01  -0.03   0.03
  56   1    -0.03  -0.01   0.04     0.00   0.00   0.01    -0.06  -0.03   0.04
  57   1     0.00   0.01   0.02    -0.01   0.00   0.01    -0.01  -0.04   0.02
  58   1     0.03   0.01   0.14     0.01   0.01  -0.02     0.03   0.05  -0.10
  59   1    -0.20  -0.03  -0.01     0.03   0.00   0.00     0.22   0.04   0.02
  60   1     0.04   0.03  -0.15     0.01  -0.01   0.01     0.04  -0.08   0.15
  61   1    -0.01   0.00  -0.01     0.03  -0.02  -0.01     0.05  -0.05  -0.03
  62   1     0.03  -0.05   0.02    -0.02   0.03  -0.02    -0.03  -0.01  -0.02
  63   1    -0.01   0.01   0.05     0.04   0.01   0.07     0.06   0.01   0.16
  64   1    -0.06  -0.01   0.04    -0.01   0.02   0.06    -0.09   0.03   0.14
  65   1    -0.04   0.00   0.00     0.03   0.00   0.04     0.02   0.00   0.08
  66   1     0.01  -0.04  -0.08     0.01   0.02   0.04    -0.01   0.00  -0.05
  67   1     0.01  -0.05  -0.11     0.00   0.04   0.06    -0.01   0.00  -0.03
  68   1    -0.04   0.02  -0.10     0.04  -0.01   0.05     0.01   0.02  -0.04
  69   1     0.03  -0.03   0.03    -0.01   0.00   0.03     0.09  -0.13   0.09
  70   1    -0.05   0.03   0.01    -0.03  -0.01   0.01    -0.09   0.01   0.03
  71   1     0.04   0.05  -0.04    -0.02  -0.01   0.00     0.13   0.07  -0.04
  72   1     0.01   0.01  -0.08     0.00   0.01  -0.01     0.05   0.04  -0.02
  73   1     0.04   0.00  -0.08     0.00   0.01  -0.02     0.02   0.09  -0.11
  74   1    -0.03   0.02  -0.06    -0.02   0.00  -0.02    -0.06   0.00  -0.09
  75   1     0.00   0.03   0.02     0.00  -0.05  -0.10    -0.02  -0.01   0.00
  76   1    -0.01  -0.01  -0.04     0.00   0.00   0.03    -0.02  -0.02   0.00
  77   1    -0.01  -0.01  -0.06     0.02   0.05   0.12    -0.01  -0.03   0.02
  78   1    -0.03   0.00   0.01     0.01  -0.03   0.02     0.06   0.04  -0.03
  79   1     0.04  -0.02  -0.01     0.01   0.00   0.01    -0.11   0.02   0.01
  80   1     0.00   0.14  -0.12     0.00   0.04  -0.03    -0.01   0.07  -0.08
  81   1     0.00   0.06  -0.05     0.00   0.01  -0.01     0.00   0.06  -0.09
  82   1    -0.02  -0.06   0.07     0.00  -0.02   0.02     0.01  -0.01  -0.03
  83   1    -0.04  -0.05  -0.06     0.00   0.01  -0.01     0.02   0.05   0.02
  84   1     0.07   0.02   0.01     0.01   0.00   0.00    -0.02  -0.01  -0.03
  85   1    -0.01  -0.05  -0.01     0.01  -0.01   0.09     0.00   0.14  -0.01
  86   1    -0.01  -0.03   0.00     0.07  -0.07   0.01    -0.02   0.12   0.01
  87   1     0.04  -0.03  -0.01    -0.02  -0.02   0.00    -0.06   0.10   0.03
  88   1    -0.02  -0.13   0.00    -0.04   0.14   0.05     0.06   0.11  -0.02
  89   1     0.14  -0.02   0.01    -0.21   0.02   0.00    -0.08   0.01   0.02
  90   1    -0.04   0.06   0.02    -0.02  -0.06  -0.02     0.08  -0.06  -0.02
  91   1     0.02  -0.05   0.04     0.02   0.00  -0.02    -0.05   0.13  -0.07
  92   1    -0.03  -0.03   0.04     0.05  -0.01  -0.02     0.03   0.11  -0.03
  93   1    -0.01  -0.02   0.01     0.05  -0.02   0.01    -0.02   0.09  -0.03
  94   1     0.07  -0.13   0.06     0.04  -0.11   0.07    -0.18   0.26  -0.16
  95   1     0.03   0.01   0.00     0.00   0.09  -0.02    -0.10  -0.11   0.05
  96   1    -0.08  -0.08   0.03    -0.15  -0.07  -0.02     0.22   0.17  -0.01
  97   1     0.12  -0.07  -0.16     0.01   0.00  -0.04    -0.02   0.01  -0.03
  98   1     0.00  -0.10  -0.09    -0.03  -0.01  -0.02    -0.04  -0.02  -0.02
  99   1    -0.02  -0.14  -0.15    -0.01   0.00  -0.05    -0.02   0.00  -0.02
 100   1     0.22   0.07  -0.10     0.05   0.03  -0.03    -0.02   0.10   0.01
 101   1     0.05   0.14   0.15     0.02   0.04   0.02    -0.01   0.08   0.07
 102   1    -0.01  -0.10  -0.02     0.01   0.00  -0.01     0.00   0.04   0.08
 103   1     0.02  -0.12  -0.08    -0.01  -0.01   0.01    -0.04   0.09   0.06
 104   1    -0.04  -0.04  -0.07    -0.02  -0.01  -0.02     0.03   0.01   0.00
 105   1     0.06  -0.03  -0.05    -0.02  -0.01   0.00    -0.09  -0.01   0.01
 106   1     0.11  -0.11   0.00     0.03  -0.01   0.02    -0.03   0.06  -0.01
 107   1     0.13   0.00  -0.10     0.03   0.01   0.01    -0.03   0.02   0.07
 108   1     0.18  -0.05  -0.07     0.04   0.01   0.01    -0.08   0.07   0.04
 109   1    -0.17   0.04  -0.03     0.44   0.03   0.09    -0.01  -0.03   0.00
 110   1     0.02   0.13  -0.02    -0.31  -0.24   0.12     0.10   0.00  -0.01
 111   1    -0.02  -0.06   0.08    -0.13   0.41  -0.31     0.07  -0.08   0.07
 112   1    -0.07  -0.02   0.02    -0.10  -0.05   0.06    -0.03  -0.08   0.07
 113   1    -0.15   0.02   0.11    -0.04   0.01  -0.08     0.00  -0.06   0.00
 114   1    -0.03   0.09   0.10    -0.16  -0.04  -0.07    -0.07  -0.08   0.00
                    37                     38                     39
                    ?A                     ?A                     ?A
 Frequencies --   166.0638               169.2279               187.4702
 Red. masses --     3.5177                 3.8065                 5.1718
 Frc consts  --     0.0572                 0.0642                 0.1071
 IR Inten    --     8.3964                 5.1610                 9.4744
 Raman Activ --     0.0000                 0.0000                 0.0000
 Depolar     --     0.0000                 0.0000                 0.0000
 Atom AN      X      Y      Z        X      Y      Z        X      Y      Z
   1   8     0.07   0.03   0.00    -0.03  -0.02   0.00     0.04   0.04  -0.04
   2  12    -0.07  -0.07   0.00    -0.02  -0.03  -0.02     0.09   0.00   0.00
   3   8     0.00   0.05   0.07     0.04  -0.01   0.04     0.03  -0.05  -0.04
   4   6     0.04   0.00  -0.01    -0.02   0.00   0.00     0.02  -0.01  -0.06
   5   7    -0.01  -0.02  -0.02    -0.01  -0.01  -0.04     0.04   0.00   0.00
   6   7     0.00  -0.04   0.01     0.02   0.00  -0.02     0.02  -0.04   0.03
   7   8     0.01  -0.02   0.00     0.01   0.02   0.00     0.02  -0.05  -0.04
   8   6     0.00  -0.01  -0.01     0.01   0.00  -0.04     0.03   0.01   0.00
   9   6    -0.02  -0.02  -0.01     0.01   0.00  -0.03     0.06   0.02   0.03
  10   6    -0.02  -0.03   0.01     0.01   0.00  -0.02     0.02  -0.01   0.04
  11   8    -0.10   0.00  -0.04     0.04   0.01   0.03    -0.01  -0.05  -0.09
  12   6    -0.10   0.02  -0.04     0.04  -0.03   0.02    -0.02   0.11   0.01
  13   6    -0.02   0.03  -0.03     0.05  -0.01   0.03     0.01   0.02  -0.02
  14   6    -0.02  -0.01  -0.02     0.00   0.01   0.02     0.03  -0.01  -0.07
  15   8    -0.11   0.02  -0.03     0.04  -0.08   0.02    -0.06   0.29   0.13
  16   6    -0.09   0.01   0.02     0.05  -0.01  -0.01    -0.03   0.04   0.03
  17   8     0.04   0.02   0.05    -0.06   0.07  -0.03    -0.09  -0.02  -0.12
  18   6     0.03   0.02   0.07     0.03   0.00   0.05     0.06  -0.08   0.00
  19   8     0.08   0.02   0.09    -0.03   0.02   0.02     0.04  -0.05  -0.02
  20   8     0.02   0.03  -0.04    -0.01   0.04   0.21    -0.02   0.02   0.10
  21   6     0.01   0.02  -0.01     0.00   0.05   0.04     0.00   0.03   0.02
  22   6    -0.01   0.02   0.00    -0.05   0.07  -0.02    -0.01   0.03  -0.04
  23   6     0.01  -0.02   0.00     0.05  -0.03   0.06     0.02  -0.03   0.03
  24   8     0.01   0.00   0.00     0.02   0.03  -0.08     0.00   0.02  -0.04
  25   6    -0.02   0.00  -0.08    -0.13  -0.01  -0.08    -0.04   0.01   0.00
  26   6    -0.02  -0.03  -0.08     0.01  -0.07  -0.19    -0.09  -0.08   0.05
  27   6     0.14  -0.01  -0.07     0.03   0.03   0.01    -0.05  -0.03   0.05
  28   6     0.00  -0.08   0.11     0.00   0.04  -0.02     0.06   0.04   0.04
  29   6     0.00  -0.01   0.00     0.00  -0.01  -0.03     0.00  -0.01  -0.01
  30   6     0.02  -0.02   0.02     0.02  -0.01  -0.01     0.01  -0.06   0.03
  31   6     0.00   0.00  -0.01     0.00  -0.01  -0.02    -0.01   0.00  -0.01
  32   6    -0.01  -0.01  -0.01     0.00   0.00   0.00    -0.01   0.01   0.01
  33   6     0.00   0.00  -0.01     0.01   0.01   0.03    -0.01   0.00   0.02
  34   6     0.00   0.00   0.01     0.01   0.01   0.03    -0.01  -0.01   0.01
  35   6     0.00   0.00   0.01     0.00   0.00   0.00    -0.01  -0.02   0.00
  36   6     0.01   0.02  -0.01    -0.01  -0.02   0.00    -0.02  -0.01   0.00
  37   6    -0.01   0.02   0.00     0.01  -0.01   0.00    -0.02   0.00   0.00
  38   6     0.02   0.00  -0.01     0.01  -0.01   0.00     0.01  -0.05   0.02
  39   6     0.02   0.03  -0.04     0.00  -0.02   0.01     0.02  -0.01  -0.01
  40   6     0.02   0.01  -0.02     0.00  -0.02   0.01     0.02   0.03  -0.05
  41   6     0.02  -0.02   0.02     0.01  -0.02   0.01     0.02   0.01  -0.03
  42   6     0.02  -0.04   0.03     0.01  -0.01   0.00     0.01  -0.04   0.01
  43   6     0.02   0.01   0.01     0.00   0.02   0.02     0.01  -0.02   0.01
  44   6     0.02  -0.02   0.01    -0.02  -0.01   0.01    -0.01  -0.02   0.00
  45   6     0.00   0.06   0.01     0.01  -0.04   0.01     0.00  -0.04   0.00
  46   6     0.00   0.02   0.00    -0.04   0.01   0.00    -0.04  -0.01   0.00
  47   6     0.00   0.05  -0.01     0.02  -0.05   0.00    -0.02   0.03   0.01
  48   6     0.00   0.02   0.00     0.00  -0.01  -0.01     0.00   0.01   0.00
  49   6     0.01  -0.04  -0.03    -0.04   0.02   0.03    -0.03  -0.01  -0.02
  50   6     0.04   0.02   0.03    -0.02   0.02   0.03     0.00   0.03   0.03
  51   6    -0.01   0.03   0.02    -0.03   0.04   0.03     0.05  -0.01   0.00
  52   6     0.02   0.02   0.01    -0.04   0.04   0.04    -0.04  -0.01   0.00
  53   6     0.03   0.00  -0.01     0.02   0.02  -0.05    -0.03   0.02  -0.02
  54   6    -0.04  -0.03   0.02     0.01   0.00  -0.02    -0.06  -0.02   0.05
  55   1    -0.03  -0.01  -0.01     0.01   0.01  -0.03     0.05   0.04   0.03
  56   1    -0.06   0.00  -0.10     0.05   0.00   0.06     0.04   0.05  -0.07
  57   1     0.01   0.02  -0.06     0.00  -0.01   0.03     0.08  -0.02  -0.11
  58   1    -0.07  -0.09   0.13     0.02   0.03  -0.11    -0.02  -0.03   0.09
  59   1    -0.23   0.01   0.02     0.17   0.00  -0.01    -0.09   0.08   0.03
  60   1    -0.09   0.09  -0.07     0.02  -0.05   0.08    -0.03   0.05   0.01
  61   1    -0.06   0.04   0.02    -0.05   0.14  -0.03     0.06   0.06  -0.08
  62   1    -0.01  -0.08   0.03     0.18  -0.14   0.12     0.09   0.01   0.02
  63   1    -0.07  -0.01  -0.13    -0.11  -0.01  -0.06     0.05   0.06   0.08
  64   1     0.04  -0.03  -0.11    -0.14  -0.14  -0.05    -0.13  -0.07   0.06
  65   1    -0.04   0.01  -0.06    -0.21   0.02  -0.16    -0.05   0.02  -0.11
  66   1    -0.05  -0.06  -0.14     0.05  -0.12  -0.20    -0.16  -0.01   0.05
  67   1    -0.03  -0.09  -0.07     0.06  -0.18  -0.31    -0.10  -0.17   0.05
  68   1    -0.02   0.03  -0.11    -0.12   0.07  -0.25    -0.13  -0.09   0.05
  69   1     0.14  -0.07  -0.18     0.04   0.01   0.01    -0.13   0.17  -0.01
  70   1     0.23  -0.01  -0.07     0.01   0.06   0.03     0.13  -0.14   0.00
  71   1     0.19   0.04   0.02     0.04   0.03  -0.03    -0.20  -0.15   0.21
  72   1    -0.07  -0.09   0.10     0.03   0.04  -0.01     0.10   0.05   0.03
  73   1    -0.06  -0.14   0.19     0.02   0.07  -0.05    -0.03   0.05   0.10
  74   1     0.12  -0.07   0.15    -0.04   0.02  -0.04     0.13   0.08   0.07
  75   1    -0.01  -0.01  -0.03     0.01   0.00   0.00    -0.01   0.01   0.02
  76   1     0.00  -0.01  -0.01     0.01   0.02   0.04    -0.02   0.01   0.04
  77   1     0.00   0.01   0.03     0.01   0.02   0.05    -0.01  -0.01   0.02
  78   1     0.03   0.02  -0.02    -0.02  -0.02   0.01    -0.03  -0.02   0.01
  79   1    -0.03   0.01  -0.01     0.03   0.00   0.01    -0.03  -0.01   0.00
  80   1     0.02   0.05  -0.06     0.00  -0.02   0.01     0.02   0.00  -0.02
  81   1     0.02   0.03  -0.03     0.00  -0.03   0.01     0.02   0.07  -0.09
  82   1     0.02  -0.04   0.03     0.01  -0.03   0.01     0.02   0.04  -0.06
  83   1     0.04   0.01   0.02     0.03   0.04   0.03     0.02  -0.01   0.00
  84   1     0.02  -0.01   0.01    -0.04  -0.03   0.00    -0.02  -0.03  -0.01
  85   1     0.01   0.07   0.01     0.00  -0.05   0.01    -0.01  -0.05   0.00
  86   1     0.00   0.06   0.01     0.01  -0.03   0.01     0.00  -0.03   0.00
  87   1    -0.02   0.05   0.02     0.02  -0.04   0.01     0.02  -0.04   0.00
  88   1     0.04   0.11  -0.01    -0.03   0.04   0.03    -0.06  -0.05   0.02
  89   1    -0.10   0.01   0.01    -0.09   0.01  -0.01     0.01   0.00  -0.02
  90   1     0.06  -0.06  -0.02    -0.03  -0.01  -0.01    -0.07   0.03   0.00
  91   1     0.01   0.01  -0.04     0.01  -0.01   0.03    -0.05   0.08   0.02
  92   1    -0.02   0.05   0.03     0.04  -0.06  -0.04     0.02   0.03  -0.01
  93   1     0.02   0.10  -0.03     0.01  -0.10   0.03    -0.05  -0.01   0.01
  94   1    -0.02   0.05  -0.02     0.06  -0.07   0.06    -0.03   0.04  -0.01
  95   1     0.00  -0.02   0.01     0.03   0.09  -0.04    -0.01  -0.03   0.01
  96   1     0.05   0.04   0.01    -0.09  -0.05  -0.04     0.05   0.02   0.01
  97   1     0.01  -0.01  -0.06    -0.11   0.05   0.02    -0.07   0.03  -0.04
  98   1    -0.01  -0.07  -0.05    -0.04  -0.03  -0.01    -0.04  -0.06  -0.05
  99   1     0.01  -0.05  -0.02     0.00   0.05   0.08    -0.01   0.01   0.01
 100   1     0.09   0.05  -0.03    -0.08   0.03   0.05     0.01   0.06  -0.01
 101   1     0.03   0.08   0.10     0.00  -0.02   0.00     0.00   0.06   0.07
 102   1     0.00  -0.04   0.03     0.02   0.06   0.05    -0.01   0.00   0.05
 103   1    -0.01   0.03   0.04    -0.04   0.09   0.07     0.07  -0.07  -0.05
 104   1     0.00   0.03   0.02     0.02   0.02   0.02     0.00   0.01   0.04
 105   1    -0.02   0.03   0.00    -0.08   0.00   0.02     0.12   0.04   0.00
 106   1     0.01   0.03   0.07    -0.04   0.06   0.01    -0.04   0.02  -0.01
 107   1    -0.02   0.02  -0.02    -0.04   0.02   0.06    -0.05  -0.03   0.00
 108   1     0.07   0.01   0.00    -0.07   0.05   0.04    -0.05  -0.02   0.00
 109   1     0.23  -0.01   0.04     0.10   0.01  -0.04    -0.13   0.02  -0.05
 110   1    -0.10  -0.14   0.04    -0.03  -0.03  -0.03    -0.01   0.10  -0.01
 111   1    -0.03   0.17  -0.12     0.00   0.09  -0.09    -0.01  -0.07  -0.01
 112   1    -0.04  -0.05   0.01     0.01   0.00  -0.02    -0.08  -0.06   0.13
 113   1    -0.06  -0.03   0.03     0.02   0.00  -0.03    -0.04  -0.01   0.03
 114   1    -0.03  -0.01   0.03     0.01   0.00  -0.03    -0.14  -0.01   0.01
                    40                     41                     42
                    ?A                     ?A                     ?A
 Frequencies --   188.8727               204.8714               209.9385
 Red. masses --     2.6441                 2.6276                 2.0513
 Frc consts  --     0.0556                 0.0650                 0.0533
 IR Inten    --     1.3552                 2.8359                 1.1330
 Raman Activ --     0.0000                 0.0000                 0.0000
 Depolar     --     0.0000                 0.0000                 0.0000
 Atom AN      X      Y      Z        X      Y      Z        X      Y      Z
   1   8     0.00   0.01  -0.01    -0.06  -0.01  -0.01     0.02  -0.01   0.02
   2  12     0.04   0.01   0.05     0.02   0.01  -0.02     0.02   0.01   0.00
   3   8    -0.02   0.03   0.03    -0.02  -0.01  -0.04     0.00   0.00   0.02
   4   6     0.00   0.01  -0.01    -0.03  -0.02  -0.02     0.00   0.01   0.03
   5   7     0.02   0.05   0.01     0.03   0.01   0.00     0.03  -0.03   0.01
   6   7     0.06  -0.02  -0.01     0.02   0.01   0.01     0.00   0.03   0.01
   7   8     0.01   0.01  -0.01    -0.02  -0.02  -0.01     0.00   0.02   0.03
   8   6     0.04   0.03   0.00     0.04   0.02   0.01     0.04   0.00   0.02
   9   6     0.10   0.04  -0.01     0.09   0.04   0.04     0.12   0.02   0.06
  10   6     0.05   0.00  -0.01     0.03   0.02   0.01     0.04   0.01   0.02
  11   8    -0.01  -0.01  -0.01    -0.04   0.07   0.04    -0.02  -0.02   0.00
  12   6     0.00  -0.02  -0.01    -0.04   0.00  -0.02    -0.02  -0.02   0.00
  13   6    -0.01   0.00   0.00    -0.03   0.00  -0.03     0.00  -0.01   0.00
  14   6     0.00   0.01  -0.01    -0.02  -0.02   0.01    -0.02   0.01   0.01
  15   8     0.00  -0.02  -0.02    -0.01  -0.08  -0.08    -0.01  -0.01   0.00
  16   6     0.01   0.01  -0.01     0.01   0.01   0.06     0.00  -0.02  -0.03
  17   8     0.02  -0.02   0.06     0.01   0.08  -0.03     0.00   0.00   0.00
  18   6    -0.02   0.02   0.04     0.00  -0.01  -0.04     0.00   0.01   0.02
  19   8     0.01   0.00   0.05    -0.03  -0.01  -0.05     0.00   0.01   0.02
  20   8    -0.01  -0.01  -0.06     0.04   0.01   0.01     0.00   0.00  -0.01
  21   6    -0.03  -0.03   0.00     0.06   0.03   0.00     0.00   0.00   0.00
  22   6    -0.01  -0.03   0.04     0.03   0.05  -0.02     0.00   0.00   0.00
  23   6    -0.03  -0.01   0.00     0.04   0.01   0.00     0.00   0.00   0.01
  24   8    -0.03  -0.03   0.02     0.06   0.03   0.01     0.00   0.00   0.00
  25   6     0.02  -0.01   0.05    -0.03  -0.01  -0.03     0.00   0.00   0.01
  26   6    -0.04  -0.01  -0.01     0.08   0.02   0.01     0.00   0.00  -0.02
  27   6     0.04   0.03  -0.05    -0.03  -0.05   0.02     0.03   0.02  -0.04
  28   6     0.00   0.01   0.01    -0.03  -0.10   0.07    -0.02   0.00   0.00
  29   6    -0.01   0.06   0.00     0.01   0.01   0.01     0.00  -0.04  -0.04
  30   6     0.04  -0.05  -0.02     0.00  -0.01   0.01    -0.02   0.03   0.00
  31   6    -0.01   0.05   0.00     0.00   0.01   0.01     0.00  -0.03  -0.04
  32   6     0.00   0.05  -0.01     0.00   0.01   0.00     0.01   0.00   0.03
  33   6     0.00   0.04  -0.03    -0.01  -0.01  -0.02     0.02   0.02   0.07
  34   6    -0.01   0.04  -0.03    -0.01  -0.01   0.00     0.01  -0.01   0.02
  35   6    -0.01   0.05  -0.01     0.00   0.00   0.02     0.01  -0.04  -0.04
  36   6    -0.04  -0.01   0.00     0.00   0.00   0.01     0.01  -0.01  -0.03
  37   6     0.02   0.01   0.00     0.00   0.00   0.03     0.00  -0.01  -0.04
  38   6     0.03  -0.04  -0.02     0.00  -0.01   0.01    -0.02   0.02   0.00
  39   6     0.03  -0.02  -0.04     0.00   0.00   0.00    -0.01   0.00   0.03
  40   6     0.03  -0.01  -0.06     0.00   0.02  -0.02    -0.02   0.00   0.03
  41   6     0.04  -0.02  -0.05     0.00   0.00   0.00    -0.02   0.02   0.02
  42   6     0.04  -0.04  -0.02     0.00  -0.01   0.01    -0.02   0.03   0.00
  43   6     0.02   0.00   0.01     0.00  -0.01   0.01    -0.02   0.00  -0.01
  44   6    -0.03  -0.02  -0.02     0.00  -0.01   0.01     0.00   0.02   0.01
  45   6     0.00  -0.08   0.00     0.01  -0.01   0.01     0.01   0.02  -0.01
  46   6    -0.04  -0.04   0.00     0.03  -0.02   0.00    -0.05   0.02  -0.02
  47   6     0.01  -0.03   0.01     0.00   0.00   0.02    -0.04   0.02  -0.01
  48   6     0.00  -0.04   0.02    -0.02   0.00   0.02     0.06   0.02  -0.03
  49   6    -0.07   0.03   0.01    -0.03   0.00  -0.01    -0.01   0.02   0.01
  50   6    -0.06   0.04   0.03     0.01   0.01   0.02     0.01  -0.02  -0.03
  51   6    -0.01   0.02   0.03     0.02   0.00   0.01    -0.01  -0.02  -0.01
  52   6    -0.04   0.02   0.03    -0.02   0.00  -0.01     0.01  -0.01  -0.01
  53   6    -0.05  -0.01   0.00    -0.07   0.01  -0.02    -0.08  -0.01  -0.01
  54   6    -0.05  -0.02  -0.01    -0.05  -0.02  -0.01    -0.03  -0.05  -0.06
  55   1     0.08   0.03  -0.01     0.08   0.04   0.03     0.12   0.02   0.06
  56   1    -0.03  -0.01   0.01    -0.03   0.00  -0.06    -0.01  -0.01   0.00
  57   1     0.01   0.01  -0.02    -0.03  -0.04   0.03    -0.03   0.03   0.00
  58   1    -0.01   0.01  -0.03     0.03   0.04   0.08    -0.01  -0.02  -0.06
  59   1     0.03   0.01  -0.01     0.02   0.07   0.07     0.01  -0.06  -0.04
  60   1    -0.01   0.01   0.01     0.04  -0.06   0.09    -0.02   0.02  -0.05
  61   1    -0.03  -0.07   0.05     0.03   0.08  -0.03     0.00   0.00   0.00
  62   1    -0.07  -0.03   0.00     0.06   0.02  -0.01    -0.01  -0.02   0.01
  63   1     0.00  -0.02   0.03    -0.01  -0.01  -0.01     0.00  -0.01   0.01
  64   1     0.04   0.05   0.03    -0.05  -0.08  -0.01     0.00   0.00   0.01
  65   1     0.04  -0.02   0.09    -0.08   0.01  -0.08     0.00   0.00   0.01
  66   1    -0.06  -0.02  -0.05     0.12   0.01   0.05     0.00  -0.02  -0.03
  67   1    -0.05  -0.03   0.02     0.09   0.07  -0.02     0.00  -0.01   0.00
  68   1    -0.01   0.01  -0.02     0.06   0.00   0.02     0.02   0.02  -0.02
  69   1     0.07  -0.06  -0.06    -0.05  -0.01   0.02     0.04  -0.02  -0.06
  70   1     0.00   0.08  -0.02     0.00  -0.11  -0.01     0.03   0.06  -0.02
  71   1     0.10   0.08  -0.10    -0.06  -0.07   0.08     0.06   0.04  -0.07
  72   1     0.01   0.01   0.00    -0.09  -0.11   0.16    -0.03   0.00  -0.04
  73   1    -0.01   0.00   0.04    -0.03  -0.08   0.06    -0.02  -0.03   0.02
  74   1     0.02   0.03   0.03     0.03  -0.19   0.05    -0.02   0.03   0.01
  75   1     0.01   0.04  -0.02    -0.01   0.01  -0.01     0.01   0.01   0.05
  76   1     0.00   0.03  -0.05    -0.02  -0.02  -0.04     0.02   0.05   0.14
  77   1    -0.01   0.04  -0.05    -0.01  -0.02  -0.01     0.01   0.00   0.05
  78   1    -0.10  -0.01   0.00    -0.02   0.00   0.00     0.04  -0.01  -0.03
  79   1     0.07   0.02  -0.02    -0.01   0.00   0.02    -0.02  -0.02  -0.04
  80   1     0.02  -0.01  -0.05     0.00   0.01   0.00    -0.01  -0.01   0.04
  81   1     0.03   0.01  -0.09     0.00   0.04  -0.04    -0.02  -0.01   0.05
  82   1     0.04  -0.01  -0.06     0.00   0.01  -0.01    -0.02   0.02   0.02
  83   1     0.06   0.03   0.02     0.00   0.00   0.01    -0.03  -0.01  -0.01
  84   1    -0.07  -0.06  -0.06    -0.01  -0.02   0.02     0.01   0.02   0.04
  85   1    -0.02  -0.11   0.03     0.01  -0.02   0.02     0.01   0.02  -0.01
  86   1     0.02  -0.11   0.00     0.02  -0.03   0.01     0.02   0.03  -0.01
  87   1     0.03  -0.07  -0.03     0.01  -0.01  -0.01    -0.01   0.01   0.01
  88   1    -0.13  -0.27   0.02    -0.07  -0.26   0.00    -0.01   0.13   0.02
  89   1     0.20  -0.03  -0.02     0.29   0.00  -0.03    -0.18   0.01  -0.03
  90   1    -0.18   0.14   0.01    -0.11   0.18   0.04    -0.01  -0.06  -0.06
  91   1     0.02  -0.05   0.03     0.06  -0.14  -0.03    -0.07   0.10   0.04
  92   1    -0.02  -0.05   0.00    -0.12   0.00   0.13     0.03   0.03  -0.04
  93   1     0.01  -0.04   0.02     0.06   0.14  -0.04    -0.11  -0.05   0.00
  94   1     0.13  -0.19   0.12    -0.17   0.13  -0.15     0.12   0.00   0.08
  95   1     0.06   0.13  -0.05    -0.12  -0.21   0.12     0.12   0.12  -0.09
  96   1    -0.22  -0.11  -0.01     0.20   0.08   0.07    -0.02  -0.01  -0.07
  97   1    -0.12   0.04   0.01    -0.04   0.02  -0.02    -0.04   0.04   0.01
  98   1    -0.09   0.00   0.00    -0.04  -0.04  -0.02     0.00   0.00  -0.01
  99   1    -0.04   0.07   0.02    -0.01   0.01   0.01     0.01   0.03   0.04
 100   1    -0.25   0.05   0.11     0.09   0.03  -0.04     0.31  -0.01  -0.17
 101   1    -0.01  -0.08  -0.08    -0.02   0.08   0.09    -0.09   0.20   0.17
 102   1     0.07   0.18   0.12    -0.05  -0.08   0.01    -0.18  -0.28  -0.11
 103   1    -0.03   0.11   0.07     0.02   0.01   0.00    -0.01  -0.04  -0.02
 104   1     0.07   0.00   0.01     0.02   0.00   0.02    -0.03  -0.02  -0.02
 105   1    -0.09  -0.03   0.01     0.02   0.01   0.01     0.01  -0.02   0.00
 106   1    -0.04   0.06   0.02    -0.03   0.02   0.00     0.02  -0.04  -0.03
 107   1    -0.05  -0.01   0.05    -0.04  -0.01  -0.02     0.04   0.00   0.00
 108   1    -0.06   0.03   0.04    -0.02  -0.02  -0.01     0.00  -0.01  -0.01
 109   1    -0.18   0.00   0.00    -0.10   0.02  -0.01    -0.32   0.00  -0.09
 110   1    -0.01   0.06   0.00    -0.12   0.04   0.03     0.01   0.19  -0.02
 111   1    -0.02  -0.14   0.00    -0.08  -0.03  -0.09    -0.03  -0.22   0.04
 112   1    -0.07  -0.07   0.08    -0.07  -0.05   0.08    -0.06  -0.08   0.08
 113   1    -0.03   0.01  -0.06    -0.02   0.02  -0.07     0.04   0.01  -0.17
 114   1    -0.14  -0.03  -0.06    -0.14  -0.04  -0.06    -0.16  -0.13  -0.14
                    43                     44                     45
                    ?A                     ?A                     ?A
 Frequencies --   210.6667               211.7266               217.7729
 Red. masses --     1.4804                 1.6449                 1.7652
 Frc consts  --     0.0387                 0.0434                 0.0493
 IR Inten    --     0.7030                 1.7293                 3.1001
 Raman Activ --     0.0000                 0.0000                 0.0000
 Depolar     --     0.0000                 0.0000                 0.0000
 Atom AN      X      Y      Z        X      Y      Z        X      Y      Z
   1   8    -0.01   0.00  -0.02    -0.02   0.02  -0.04     0.01   0.02  -0.04
   2  12    -0.01   0.02   0.01     0.01   0.01   0.02    -0.05  -0.05  -0.01
   3   8    -0.01   0.01  -0.02    -0.02   0.02  -0.01     0.02   0.00   0.03
   4   6     0.00  -0.01  -0.02     0.00  -0.02  -0.06     0.01  -0.02  -0.06
   5   7    -0.02   0.02   0.01    -0.01  -0.01   0.02     0.01  -0.01  -0.02
   6   7    -0.01  -0.02  -0.02     0.01   0.01   0.02    -0.02   0.00   0.00
   7   8     0.00  -0.01  -0.02     0.00  -0.04  -0.05     0.02  -0.03  -0.05
   8   6    -0.01  -0.01   0.00    -0.01   0.00   0.02     0.02  -0.01  -0.01
   9   6    -0.03  -0.02  -0.03     0.01   0.00   0.02     0.02  -0.01   0.01
  10   6    -0.01  -0.02  -0.02     0.00   0.00   0.02     0.00  -0.01   0.00
  11   8     0.01   0.02   0.01     0.00   0.06   0.02     0.03   0.03   0.00
  12   6     0.01   0.01   0.00     0.00   0.03   0.00     0.03   0.02   0.02
  13   6    -0.01   0.01   0.00    -0.02   0.02   0.00     0.03   0.02   0.03
  14   6     0.01  -0.01  -0.01     0.01  -0.02  -0.02     0.02  -0.01  -0.02
  15   8     0.01   0.00  -0.01     0.01  -0.03  -0.04     0.01  -0.02   0.02
  16   6     0.00   0.01   0.03    -0.02   0.04   0.08    -0.02   0.03   0.06
  17   8     0.02   0.01   0.02     0.01   0.02   0.03     0.00  -0.04   0.02
  18   6    -0.01   0.00  -0.01     0.00   0.00   0.00     0.00   0.02   0.02
  19   8     0.00  -0.01  -0.01     0.00  -0.01   0.00     0.01   0.01   0.02
  20   8     0.00   0.00   0.00     0.01   0.00   0.00    -0.02   0.00   0.00
  21   6     0.01   0.00   0.00     0.01   0.00   0.00    -0.03  -0.01   0.00
  22   6     0.01   0.00   0.01     0.00   0.01   0.01    -0.02  -0.02   0.01
  23   6     0.00   0.00   0.00     0.01  -0.01   0.00    -0.01   0.01   0.00
  24   8     0.00   0.01   0.00     0.01   0.00   0.00    -0.03  -0.02   0.00
  25   6     0.00  -0.01   0.00    -0.01  -0.01  -0.01     0.02   0.01   0.01
  26   6     0.00   0.00   0.01     0.00  -0.01   0.00    -0.03   0.00  -0.02
  27   6    -0.03  -0.02   0.03    -0.02  -0.03   0.05     0.01   0.01   0.05
  28   6     0.01  -0.01   0.00     0.01  -0.04   0.02     0.03   0.02  -0.01
  29   6    -0.01   0.02   0.02     0.00  -0.01  -0.01     0.00  -0.01  -0.01
  30   6     0.00  -0.02   0.00     0.00   0.01   0.00    -0.01   0.03  -0.01
  31   6    -0.01   0.01   0.01     0.00  -0.02  -0.01     0.00   0.00  -0.01
  32   6     0.00   0.01  -0.01     0.01  -0.01   0.01    -0.01   0.00  -0.02
  33   6     0.01   0.02  -0.02     0.02   0.01   0.03    -0.02   0.00   0.01
  34   6     0.00   0.03  -0.01     0.01   0.01   0.01    -0.01  -0.01   0.02
  35   6     0.00   0.03   0.00     0.00  -0.01  -0.02     0.00  -0.01   0.00
  36   6    -0.01   0.01   0.00     0.01  -0.01  -0.01     0.00   0.01  -0.01
  37   6     0.01   0.02  -0.01     0.00   0.00  -0.02    -0.01  -0.01   0.00
  38   6     0.01  -0.04   0.01     0.00   0.02  -0.01    -0.01   0.02  -0.02
  39   6     0.02  -0.01  -0.01    -0.01   0.01   0.00     0.00   0.00   0.02
  40   6     0.02   0.03  -0.03    -0.01  -0.02   0.01     0.00  -0.01   0.05
  41   6     0.01   0.02  -0.01     0.00  -0.02   0.00    -0.01   0.01   0.03
  42   6     0.00  -0.02   0.02     0.00   0.00  -0.01    -0.02   0.04  -0.01
  43   6     0.01  -0.01   0.02     0.00   0.01  -0.01    -0.01   0.01  -0.01
  44   6    -0.01  -0.02   0.02     0.00   0.00  -0.01     0.00   0.03   0.00
  45   6    -0.01   0.00  -0.01    -0.01   0.02  -0.01     0.02   0.02   0.02
  46   6    -0.01   0.00   0.00    -0.02   0.02  -0.01     0.01  -0.01  -0.01
  47   6     0.02  -0.01  -0.02    -0.01   0.00  -0.01     0.00   0.01  -0.01
  48   6    -0.01  -0.01   0.00     0.02   0.01  -0.02     0.00   0.01  -0.01
  49   6    -0.03  -0.01   0.01     0.01   0.00  -0.01     0.01   0.02   0.01
  50   6     0.01   0.00   0.02    -0.01   0.00  -0.01     0.00  -0.03  -0.03
  51   6     0.01   0.01   0.02     0.00   0.00  -0.01    -0.03   0.00  -0.01
  52   6    -0.05   0.00   0.01     0.03   0.00  -0.01     0.02   0.01   0.00
  53   6     0.04  -0.04   0.04    -0.01   0.00   0.02     0.01   0.00  -0.02
  54   6     0.05   0.00  -0.01    -0.01  -0.01   0.00     0.00  -0.02  -0.02
  55   1    -0.02  -0.03  -0.03     0.00  -0.01   0.02     0.03   0.00   0.01
  56   1    -0.01   0.00  -0.01    -0.02   0.01  -0.02     0.03   0.02   0.03
  57   1     0.01  -0.03   0.00     0.02  -0.07   0.01     0.03  -0.06  -0.01
  58   1     0.01   0.01   0.05     0.01   0.02   0.15    -0.01  -0.01   0.11
  59   1     0.00   0.05   0.04    -0.06   0.13   0.09    -0.06   0.11   0.07
  60   1     0.01  -0.01   0.05     0.01  -0.01   0.10    -0.01   0.01   0.07
  61   1    -0.01   0.00   0.02    -0.02   0.01   0.02    -0.02  -0.04   0.01
  62   1     0.00   0.01  -0.01     0.01  -0.01   0.00    -0.02  -0.01   0.01
  63   1    -0.01  -0.01  -0.01    -0.03  -0.02  -0.03    -0.01   0.01  -0.02
  64   1     0.01  -0.02  -0.01     0.01  -0.01  -0.02     0.05   0.07  -0.02
  65   1    -0.01   0.00   0.00    -0.03   0.00   0.00     0.05   0.00   0.05
  66   1     0.00   0.00   0.01     0.00  -0.01  -0.01    -0.03   0.00  -0.03
  67   1     0.00   0.01   0.01     0.00  -0.01   0.00    -0.03  -0.02  -0.01
  68   1     0.01  -0.01   0.01     0.01   0.00  -0.01    -0.02   0.02  -0.02
  69   1    -0.02  -0.01   0.06    -0.04   0.03   0.05    -0.03   0.09   0.01
  70   1    -0.05  -0.05   0.02     0.02  -0.10   0.02     0.09  -0.03   0.03
  71   1    -0.03  -0.02   0.04    -0.06  -0.06   0.13    -0.06  -0.04   0.12
  72   1     0.02  -0.01   0.06     0.02  -0.04   0.18     0.09   0.03   0.14
  73   1     0.01   0.04  -0.03     0.01   0.08  -0.05     0.02   0.16  -0.09
  74   1     0.00  -0.06  -0.03     0.02  -0.19  -0.04     0.00  -0.11  -0.07
  75   1     0.01   0.00  -0.02     0.02  -0.02   0.02    -0.02   0.00  -0.03
  76   1     0.01   0.01  -0.03     0.03   0.02   0.06    -0.03   0.00   0.01
  77   1     0.00   0.03  -0.02     0.02   0.02   0.02    -0.01  -0.01   0.04
  78   1    -0.02   0.01   0.00     0.03  -0.01  -0.01     0.00   0.01  -0.02
  79   1     0.03   0.02  -0.01     0.00   0.00  -0.02    -0.02  -0.01   0.00
  80   1     0.02  -0.01  -0.01    -0.02   0.01  -0.01     0.01  -0.01   0.02
  81   1     0.03   0.07  -0.06    -0.02  -0.04   0.02     0.00  -0.04   0.08
  82   1     0.01   0.04  -0.03     0.00  -0.03   0.01    -0.01   0.01   0.04
  83   1     0.03   0.00   0.02    -0.01   0.00  -0.01    -0.01   0.01   0.00
  84   1    -0.01  -0.02   0.03     0.00   0.00  -0.02     0.01   0.03   0.02
  85   1    -0.02  -0.02  -0.03    -0.01   0.01  -0.05     0.04   0.08   0.13
  86   1    -0.03   0.02   0.00    -0.03   0.05  -0.01     0.09  -0.06   0.01
  87   1     0.02  -0.01   0.01     0.00   0.01   0.02    -0.06   0.05  -0.03
  88   1     0.02   0.06  -0.01     0.07   0.25   0.00    -0.15  -0.40   0.02
  89   1    -0.08  -0.01   0.02    -0.26   0.00   0.02     0.42   0.03  -0.09
  90   1     0.03  -0.06  -0.01     0.11  -0.17  -0.04    -0.23   0.33   0.04
  91   1     0.01   0.00  -0.01    -0.03   0.05   0.01    -0.04   0.09   0.01
  92   1     0.02  -0.01  -0.04     0.03   0.00  -0.05     0.07   0.02  -0.06
  93   1     0.03  -0.03   0.00    -0.04  -0.04   0.00    -0.03  -0.05   0.02
  94   1     0.13  -0.15   0.13     0.17  -0.12   0.15     0.01   0.00   0.01
  95   1     0.07   0.19  -0.08     0.11   0.23  -0.12     0.00   0.04  -0.02
  96   1    -0.23  -0.08  -0.05    -0.21  -0.08  -0.09    -0.02   0.00  -0.03
  97   1    -0.11   0.06  -0.02     0.03  -0.02   0.00     0.07  -0.03   0.03
  98   1    -0.01  -0.10  -0.06     0.01   0.02   0.01     0.01   0.08   0.06
  99   1     0.03   0.01   0.09     0.00  -0.01  -0.02    -0.02   0.01  -0.04
 100   1     0.39   0.07  -0.21    -0.26  -0.03   0.14     0.13  -0.04  -0.07
 101   1    -0.11   0.31   0.33     0.07  -0.19  -0.19    -0.05   0.06   0.03
 102   1    -0.23  -0.35  -0.04     0.15   0.23   0.04    -0.09  -0.13  -0.08
 103   1     0.01   0.06   0.03     0.00  -0.07  -0.03    -0.03  -0.04   0.00
 104   1     0.05   0.00   0.03    -0.06   0.01   0.00    -0.07   0.01  -0.01
 105   1    -0.01   0.00   0.01     0.04   0.03  -0.01    -0.01   0.03  -0.01
 106   1    -0.05   0.04  -0.01     0.01   0.00   0.08     0.00   0.02   0.09
 107   1    -0.07  -0.02   0.02    -0.02   0.02  -0.08    -0.04   0.02  -0.07
 108   1    -0.08  -0.01   0.01     0.12  -0.02  -0.03     0.11  -0.01  -0.02
 109   1     0.06  -0.03   0.06    -0.13   0.00  -0.02     0.05   0.00  -0.02
 110   1     0.07  -0.07   0.00     0.08   0.09  -0.02    -0.03  -0.01   0.00
 111   1     0.05  -0.02   0.07     0.03  -0.10   0.10    -0.01   0.04  -0.06
 112   1     0.05   0.05  -0.03    -0.01  -0.03   0.00     0.00  -0.02   0.00
 113   1     0.07  -0.02   0.01    -0.02   0.00  -0.01     0.03  -0.01  -0.05
 114   1     0.07   0.00   0.00    -0.02  -0.02   0.00    -0.02  -0.05  -0.04
                    46                     47                     48
                    ?A                     ?A                     ?A
 Frequencies --   221.4156               228.6720               232.0513
 Red. masses --     1.6128                 1.3002                 2.2826
 Frc consts  --     0.0466                 0.0401                 0.0724
 IR Inten    --     0.7216                 0.7903                 2.8894
 Raman Activ --     0.0000                 0.0000                 0.0000
 Depolar     --     0.0000                 0.0000                 0.0000
 Atom AN      X      Y      Z        X      Y      Z        X      Y      Z
   1   8     0.02  -0.02   0.04     0.00  -0.01   0.01     0.01   0.01  -0.02
   2  12    -0.02  -0.02  -0.02     0.00   0.00  -0.01    -0.05  -0.06  -0.03
   3   8    -0.02   0.00  -0.03     0.02  -0.01   0.03     0.04  -0.04   0.01
   4   6     0.00   0.01   0.04     0.00   0.00   0.02     0.01   0.00  -0.03
   5   7    -0.01  -0.02   0.01    -0.01   0.00   0.00    -0.01   0.00  -0.02
   6   7    -0.01  -0.01   0.01     0.01   0.01   0.00     0.01   0.00   0.00
   7   8     0.00   0.01   0.04     0.00   0.00   0.02     0.01   0.00  -0.03
   8   6     0.01  -0.02   0.02     0.00   0.00   0.00     0.01   0.02  -0.01
   9   6     0.01  -0.02   0.02     0.01   0.01   0.00     0.05   0.04   0.02
  10   6     0.00  -0.02   0.01     0.01   0.01   0.00     0.02   0.02   0.01
  11   8    -0.02  -0.03  -0.01     0.00   0.00   0.00     0.00   0.00  -0.01
  12   6    -0.02  -0.01  -0.01     0.00  -0.01   0.00     0.01  -0.02   0.02
  13   6    -0.01  -0.01  -0.02     0.01   0.00   0.00     0.04  -0.01   0.02
  14   6    -0.02   0.00   0.01     0.00   0.00   0.01     0.00  -0.01  -0.01
  15   8    -0.02   0.02   0.00     0.01  -0.04  -0.03    -0.03  -0.02   0.07
  16   6     0.01  -0.04  -0.04     0.01  -0.01  -0.02    -0.01   0.02   0.02
  17   8    -0.01   0.02  -0.03    -0.02  -0.03  -0.03    -0.02  -0.04  -0.03
  18   6     0.01  -0.01  -0.03     0.00   0.02   0.01     0.01   0.00  -0.02
  19   8     0.01  -0.01  -0.02     0.01   0.03   0.01     0.00   0.01  -0.03
  20   8     0.02   0.01   0.01    -0.01   0.00   0.00    -0.01   0.01   0.00
  21   6     0.03   0.02   0.00    -0.02  -0.01  -0.01    -0.01   0.00   0.00
  22   6     0.01   0.03  -0.02    -0.01  -0.01  -0.02    -0.01   0.00  -0.02
  23   6     0.02   0.00  -0.01    -0.01   0.02  -0.01     0.00   0.02  -0.02
  24   8     0.03   0.02  -0.01    -0.02  -0.01   0.00    -0.01   0.00  -0.01
  25   6    -0.01   0.00  -0.03     0.02   0.02   0.01     0.02   0.02  -0.01
  26   6     0.04   0.01   0.01     0.01   0.03  -0.01     0.01   0.03   0.00
  27   6    -0.02  -0.02   0.00     0.03   0.00   0.00     0.00   0.03   0.00
  28   6    -0.02   0.00  -0.02     0.00   0.01  -0.01     0.01   0.00   0.02
  29   6    -0.01  -0.01   0.02     0.00   0.00   0.01    -0.01   0.01   0.03
  30   6     0.00  -0.01   0.01     0.00   0.00   0.00     0.01   0.00  -0.01
  31   6     0.00  -0.01   0.01     0.00   0.00   0.02     0.01   0.00   0.06
  32   6    -0.01  -0.03  -0.03     0.00  -0.01   0.00     0.02  -0.03   0.00
  33   6     0.00  -0.01  -0.01     0.01  -0.01  -0.03     0.02  -0.05  -0.07
  34   6     0.00   0.01   0.02     0.00   0.00  -0.01     0.01   0.00  -0.02
  35   6     0.00   0.00   0.02     0.00   0.01   0.02    -0.01   0.02   0.05
  36   6     0.01   0.01   0.00     0.01   0.00   0.02     0.02   0.00   0.05
  37   6    -0.02   0.02   0.00    -0.01   0.01   0.01    -0.02   0.03   0.05
  38   6     0.00   0.00   0.01     0.00   0.00   0.01     0.01   0.00  -0.02
  39   6     0.00   0.01   0.00    -0.01   0.00   0.00     0.01  -0.02   0.00
  40   6     0.00   0.01   0.00    -0.01   0.01  -0.02     0.01  -0.03   0.02
  41   6     0.00   0.00   0.00     0.00   0.00  -0.01     0.01  -0.01   0.00
  42   6     0.00   0.00   0.01     0.01  -0.01   0.00     0.01   0.01  -0.02
  43   6     0.00   0.00   0.01    -0.01   0.00   0.01     0.01   0.01  -0.01
  44   6     0.01   0.00   0.01     0.00  -0.01   0.00    -0.01   0.01  -0.01
  45   6     0.00   0.05   0.02    -0.01   0.00   0.00    -0.02   0.01   0.00
  46   6     0.04   0.01   0.00     0.03   0.00   0.01     0.11  -0.01   0.04
  47   6     0.00   0.06  -0.02     0.00   0.01   0.01     0.01   0.03   0.03
  48   6    -0.04   0.02   0.00    -0.03  -0.01   0.01    -0.10  -0.03   0.04
  49   6     0.01  -0.02  -0.01    -0.01   0.00   0.00    -0.01   0.03   0.01
  50   6     0.01   0.01   0.01     0.00   0.01   0.01    -0.02  -0.02  -0.02
  51   6     0.01   0.00   0.00     0.01   0.01   0.01    -0.02   0.00   0.00
  52   6    -0.01   0.00   0.00    -0.02   0.00   0.00     0.01   0.01   0.00
  53   6     0.02  -0.01   0.02    -0.01   0.00  -0.01    -0.06   0.04  -0.04
  54   6    -0.01  -0.03   0.00     0.00   0.00  -0.01    -0.04   0.01   0.01
  55   1     0.02  -0.01   0.02     0.01   0.00   0.00     0.05   0.04   0.02
  56   1    -0.02  -0.01  -0.02     0.02   0.01  -0.02     0.06   0.00   0.05
  57   1    -0.03   0.04   0.00    -0.01   0.01   0.01     0.01  -0.02  -0.01
  58   1    -0.01  -0.02  -0.08     0.00   0.00  -0.03    -0.01  -0.01   0.05
  59   1     0.02  -0.09  -0.05     0.02  -0.03  -0.02    -0.03   0.05   0.03
  60   1    -0.01   0.00  -0.06     0.00  -0.01  -0.02    -0.01   0.01   0.03
  61   1     0.02   0.05  -0.02     0.01  -0.03  -0.02     0.02   0.00  -0.03
  62   1     0.04   0.02  -0.02    -0.02   0.01   0.00     0.01   0.03  -0.02
  63   1     0.01   0.02  -0.01     0.04   0.03   0.03     0.04   0.07   0.01
  64   1    -0.03  -0.05  -0.02    -0.01   0.04   0.02     0.00   0.02   0.00
  65   1    -0.03   0.01  -0.08     0.05   0.00   0.01     0.06   0.01  -0.04
  66   1     0.06   0.01   0.04     0.04   0.01   0.00     0.04   0.03   0.04
  67   1     0.05   0.04  -0.01     0.02   0.05  -0.03     0.03   0.05  -0.03
  68   1     0.03  -0.01   0.02     0.00   0.03  -0.01    -0.01   0.00   0.01
  69   1     0.00  -0.04   0.03    -0.18   0.39  -0.31     0.10  -0.16   0.15
  70   1    -0.06  -0.03  -0.01     0.55  -0.14  -0.05    -0.26   0.13   0.04
  71   1     0.00  -0.01  -0.02    -0.28  -0.25   0.35     0.14   0.14  -0.21
  72   1    -0.03   0.00  -0.07    -0.01   0.00  -0.04     0.02   0.00   0.07
  73   1    -0.01  -0.03   0.00     0.01  -0.02   0.00    -0.02   0.04   0.02
  74   1    -0.04   0.05   0.00    -0.01   0.03   0.00     0.03  -0.03   0.01
  75   1    -0.01  -0.04  -0.06     0.01  -0.01  -0.01     0.02  -0.04  -0.02
  76   1     0.01  -0.02  -0.03     0.01  -0.02  -0.05     0.02  -0.08  -0.14
  77   1     0.01   0.02   0.05     0.00   0.00  -0.02     0.01   0.01  -0.04
  78   1     0.03   0.01  -0.01     0.00   0.00   0.01     0.01   0.00   0.05
  79   1    -0.04   0.02  -0.01     0.00   0.01   0.01    -0.01   0.02   0.04
  80   1     0.00   0.01   0.00    -0.01   0.01   0.00     0.02  -0.02   0.01
  81   1     0.00   0.02  -0.01    -0.01   0.01  -0.03     0.02  -0.05   0.04
  82   1     0.00   0.00   0.00     0.00  -0.01  -0.02     0.01   0.00   0.01
  83   1     0.00   0.00   0.00    -0.01   0.00   0.01     0.02   0.01   0.00
  84   1     0.01   0.00   0.00    -0.01  -0.01   0.00    -0.01   0.00  -0.01
  85   1     0.02   0.10   0.05    -0.01   0.00  -0.03    -0.02  -0.02  -0.10
  86   1     0.03   0.02   0.01    -0.03   0.02   0.00    -0.10   0.07   0.01
  87   1    -0.06   0.07   0.00     0.01   0.00   0.01     0.04  -0.01   0.04
  88   1    -0.05  -0.23  -0.01     0.07   0.08  -0.02     0.21   0.21  -0.05
  89   1     0.31   0.03  -0.05    -0.05  -0.02   0.04    -0.11  -0.04   0.10
  90   1    -0.09   0.22   0.05     0.10  -0.08   0.01     0.28  -0.22   0.05
  91   1    -0.06   0.15  -0.03     0.01  -0.01  -0.01     0.01  -0.01  -0.01
  92   1     0.09   0.07  -0.07    -0.01   0.01   0.02    -0.02   0.03   0.05
  93   1    -0.03  -0.01   0.01     0.02   0.03   0.00     0.04   0.07   0.02
  94   1     0.20  -0.21   0.24     0.01  -0.06   0.03    -0.03  -0.14   0.05
  95   1     0.09   0.36  -0.14    -0.03   0.05   0.00    -0.11   0.08   0.05
  96   1    -0.41  -0.12  -0.10    -0.10  -0.03   0.00    -0.24  -0.07   0.03
  97   1     0.07  -0.04  -0.01    -0.02   0.00   0.00    -0.05   0.04   0.01
  98   1    -0.01   0.02   0.02    -0.01  -0.01   0.00    -0.01   0.01  -0.01
  99   1    -0.02  -0.04  -0.06     0.00   0.01   0.00     0.01   0.05   0.03
 100   1    -0.11   0.00   0.07     0.01   0.02   0.00     0.06  -0.02  -0.05
 101   1     0.05  -0.08  -0.07     0.00   0.02   0.03    -0.06   0.04   0.01
 102   1     0.08   0.11   0.04     0.00   0.00   0.02    -0.07  -0.09  -0.04
 103   1     0.01   0.01   0.00     0.02  -0.06  -0.02    -0.03   0.06   0.03
 104   1     0.02   0.00   0.01    -0.05   0.03   0.03     0.04  -0.02  -0.04
 105   1     0.01   0.00   0.01     0.06   0.05   0.01    -0.08  -0.05  -0.01
 106   1     0.01  -0.02  -0.06    -0.01   0.00  -0.03    -0.01   0.03   0.07
 107   1     0.04  -0.01   0.05     0.00   0.00   0.01    -0.04   0.01  -0.05
 108   1    -0.07   0.01   0.02    -0.04   0.00   0.00     0.08   0.00  -0.01
 109   1    -0.03  -0.01   0.01    -0.05   0.01  -0.02    -0.19   0.04  -0.11
 110   1     0.07   0.02   0.00     0.01   0.04  -0.01    -0.01   0.17  -0.04
 111   1     0.04  -0.05   0.07     0.00  -0.03   0.01    -0.03  -0.07  -0.01
 112   1    -0.01  -0.03   0.01     0.00   0.00   0.00    -0.06  -0.03   0.07
 113   1    -0.01  -0.02  -0.01     0.01   0.01  -0.02    -0.03   0.03  -0.02
 114   1    -0.01  -0.03   0.00    -0.02  -0.01  -0.02    -0.10   0.01  -0.03
                    49                     50                     51
                    ?A                     ?A                     ?A
 Frequencies --   235.6487               239.1468               241.0095
 Red. masses --     3.7968                 3.0115                 1.4361
 Frc consts  --     0.1242                 0.1015                 0.0491
 IR Inten    --    31.4372                 4.6473                 4.6179
 Raman Activ --     0.0000                 0.0000                 0.0000
 Depolar     --     0.0000                 0.0000                 0.0000
 Atom AN      X      Y      Z        X      Y      Z        X      Y      Z
   1   8    -0.03   0.02  -0.02     0.00   0.03  -0.03     0.04   0.00   0.02
   2  12     0.20   0.07   0.00    -0.05   0.03  -0.02    -0.02   0.02  -0.02
   3   8     0.05  -0.06   0.08     0.07  -0.06   0.02    -0.02   0.00   0.01
   4   6    -0.01   0.01  -0.02     0.00   0.00  -0.04     0.01   0.00   0.01
   5   7     0.00  -0.02  -0.01     0.00   0.00   0.02     0.01   0.00  -0.01
   6   7     0.00   0.01   0.00    -0.01   0.03  -0.01     0.01   0.02  -0.02
   7   8    -0.02   0.01  -0.02     0.01   0.00  -0.04     0.02   0.00   0.02
   8   6    -0.03  -0.02  -0.02     0.01  -0.01   0.03     0.00   0.01  -0.01
   9   6    -0.08  -0.02  -0.03     0.02  -0.01   0.01     0.01   0.02  -0.01
  10   6    -0.03   0.00  -0.01     0.01   0.01  -0.01     0.00   0.03  -0.02
  11   8    -0.03   0.05   0.03    -0.01   0.01   0.00    -0.01  -0.01   0.00
  12   6    -0.02  -0.02   0.00     0.01  -0.04   0.03    -0.01   0.00   0.00
  13   6     0.02  -0.02   0.00     0.06  -0.03   0.03    -0.02   0.00   0.00
  14   6    -0.03   0.00   0.01    -0.01   0.00  -0.01    -0.01   0.00   0.01
  15   8     0.00   0.00  -0.01    -0.03  -0.07   0.07    -0.01   0.02  -0.01
  16   6    -0.01   0.03   0.03    -0.02   0.04   0.03    -0.01  -0.02   0.00
  17   8    -0.04  -0.01  -0.09    -0.04  -0.07  -0.04     0.03   0.02   0.02
  18   6    -0.01  -0.01   0.05     0.02   0.01  -0.03    -0.02   0.00   0.02
  19   8    -0.08   0.06   0.00     0.03   0.01  -0.03    -0.03   0.00   0.01
  20   8     0.00  -0.02   0.00    -0.03   0.01   0.03     0.00  -0.01  -0.01
  21   6    -0.01  -0.02  -0.02    -0.05   0.00  -0.01     0.01   0.00   0.00
  22   6     0.00  -0.02  -0.05    -0.03  -0.02  -0.03     0.01   0.00   0.01
  23   6    -0.02  -0.02   0.03     0.00   0.04  -0.03     0.00  -0.01   0.01
  24   8    -0.01  -0.03   0.01    -0.05  -0.01  -0.01     0.01   0.00   0.01
  25   6     0.00  -0.01   0.05     0.04   0.05  -0.02     0.00  -0.01   0.00
  26   6    -0.04  -0.03   0.01     0.05   0.07  -0.02     0.00  -0.01   0.01
  27   6     0.09   0.08  -0.13     0.01   0.04  -0.01     0.00   0.00  -0.01
  28   6    -0.04  -0.10   0.07     0.00  -0.03   0.05    -0.01   0.05  -0.03
  29   6    -0.01  -0.02   0.00     0.00   0.00   0.00     0.00  -0.01  -0.01
  30   6     0.00   0.00   0.00    -0.01   0.00   0.03     0.00   0.00   0.00
  31   6     0.00  -0.02   0.01    -0.01   0.01  -0.02     0.01  -0.01   0.00
  32   6     0.00  -0.03  -0.01     0.00   0.02   0.00     0.00  -0.01   0.00
  33   6     0.00  -0.03   0.00     0.00   0.03   0.02     0.00  -0.02   0.00
  34   6     0.00  -0.02   0.03     0.00   0.01   0.00     0.00  -0.02   0.01
  35   6    -0.01  -0.02   0.02     0.01   0.00  -0.02     0.00  -0.02   0.01
  36   6     0.02   0.00   0.02    -0.01   0.00  -0.02     0.02   0.00   0.01
  37   6    -0.04   0.00   0.00     0.02   0.00  -0.02    -0.01  -0.02   0.01
  38   6    -0.01   0.00   0.00    -0.02  -0.03   0.06     0.00  -0.02   0.02
  39   6    -0.01   0.00   0.01    -0.02   0.04   0.00     0.00   0.01  -0.01
  40   6    -0.01   0.00   0.00    -0.01   0.09  -0.05     0.00   0.03  -0.04
  41   6    -0.01   0.00   0.00    -0.02   0.03   0.01     0.00   0.00  -0.01
  42   6     0.00   0.01   0.00    -0.01  -0.02   0.06     0.00  -0.02   0.01
  43   6    -0.01  -0.01  -0.01    -0.02  -0.05   0.03     0.00  -0.02   0.02
  44   6     0.00   0.01   0.00     0.02  -0.02   0.05     0.00  -0.02   0.01
  45   6     0.01   0.02   0.02     0.00   0.00  -0.01     0.01   0.00   0.01
  46   6     0.05   0.00   0.01    -0.05   0.01  -0.02     0.03   0.00   0.01
  47   6    -0.03   0.03  -0.01     0.01  -0.01  -0.01    -0.01   0.00   0.01
  48   6    -0.05   0.02  -0.01     0.05   0.01  -0.01    -0.02  -0.02   0.00
  49   6     0.01   0.01   0.02     0.02  -0.07  -0.03    -0.01  -0.03  -0.01
  50   6     0.00   0.01   0.01     0.06   0.05   0.07     0.01   0.02   0.03
  51   6    -0.02  -0.03  -0.02     0.05  -0.03   0.02     0.03   0.00   0.01
  52   6     0.00  -0.02  -0.02    -0.08  -0.05  -0.03    -0.02  -0.02   0.00
  53   6     0.07   0.03  -0.02    -0.01  -0.05   0.05    -0.02   0.03  -0.03
  54   6     0.05   0.03   0.01     0.02  -0.02  -0.07     0.00   0.02  -0.03
  55   1    -0.07  -0.02  -0.02     0.03  -0.02   0.01     0.01   0.01  -0.01
  56   1     0.04   0.00   0.00     0.09   0.00   0.07    -0.02   0.00  -0.01
  57   1    -0.03  -0.01   0.03     0.00  -0.02  -0.01    -0.01  -0.01   0.01
  58   1     0.01   0.03   0.05    -0.01   0.01   0.08    -0.02  -0.05   0.00
  59   1    -0.01   0.06   0.03    -0.06   0.08   0.04    -0.03  -0.03  -0.01
  60   1     0.01   0.00   0.04    -0.01   0.02   0.03    -0.03   0.03  -0.03
  61   1     0.05  -0.04  -0.07    -0.01  -0.03  -0.04     0.00   0.00   0.01
  62   1    -0.04  -0.04   0.04     0.02   0.06  -0.03    -0.02  -0.02   0.01
  63   1     0.09   0.01   0.14     0.01   0.06  -0.05    -0.01  -0.03  -0.01
  64   1    -0.11  -0.01   0.11     0.07   0.14  -0.04     0.01  -0.02  -0.01
  65   1     0.01  -0.01   0.00     0.10   0.02   0.05    -0.01  -0.01   0.01
  66   1    -0.08  -0.03  -0.02     0.12   0.04   0.03    -0.01  -0.02  -0.01
  67   1    -0.06  -0.07   0.04     0.08   0.13  -0.09    -0.01  -0.01   0.02
  68   1    -0.04  -0.02   0.01     0.01   0.05  -0.02     0.02   0.00   0.00
  69   1     0.12  -0.05  -0.17     0.05  -0.03   0.06     0.01  -0.02  -0.02
  70   1     0.03   0.22  -0.06    -0.11   0.13   0.03     0.00   0.01  -0.01
  71   1     0.17   0.14  -0.26     0.06   0.08  -0.15     0.02   0.01  -0.01
  72   1    -0.10  -0.11   0.26    -0.02  -0.03   0.06     0.11   0.08   0.39
  73   1    -0.03  -0.01   0.01    -0.04  -0.05   0.10     0.03   0.43  -0.30
  74   1     0.01  -0.28   0.01     0.07  -0.02   0.08    -0.16  -0.33  -0.23
  75   1    -0.01  -0.03  -0.02     0.00   0.02   0.01     0.00  -0.01  -0.01
  76   1     0.00  -0.03   0.00     0.00   0.04   0.05     0.00  -0.02   0.00
  77   1     0.00  -0.01   0.04     0.00   0.00   0.00     0.00  -0.01   0.02
  78   1     0.05  -0.01   0.02    -0.01   0.00  -0.02     0.02   0.00   0.01
  79   1    -0.06   0.00   0.01     0.02   0.00  -0.02    -0.02  -0.02   0.00
  80   1    -0.01   0.00   0.01    -0.01   0.05  -0.02     0.00   0.01  -0.01
  81   1    -0.02   0.00   0.00    -0.01   0.16  -0.12     0.00   0.06  -0.07
  82   1     0.00   0.00  -0.01    -0.01   0.03   0.00     0.00   0.00  -0.02
  83   1    -0.03  -0.01  -0.02    -0.04  -0.05   0.02     0.00  -0.02   0.01
  84   1     0.00   0.01   0.00     0.04   0.01   0.05     0.00  -0.02   0.01
  85   1     0.03   0.08   0.08     0.00   0.00   0.01     0.02   0.01   0.01
  86   1     0.04  -0.04   0.01     0.02   0.00  -0.01     0.02   0.00   0.01
  87   1    -0.06   0.05  -0.03     0.00   0.00  -0.01     0.01   0.00   0.00
  88   1     0.01  -0.10  -0.01    -0.06   0.01   0.02     0.05   0.03  -0.01
  89   1     0.17   0.02  -0.02    -0.07   0.01  -0.02     0.01   0.00   0.01
  90   1     0.00   0.09   0.04    -0.07   0.01  -0.04     0.06  -0.03   0.01
  91   1    -0.04   0.04  -0.02     0.02  -0.04  -0.01    -0.11   0.23   0.09
  92   1    -0.02   0.04   0.01    -0.01  -0.01   0.00     0.18   0.00  -0.15
  93   1    -0.04   0.04  -0.01     0.02   0.01  -0.02    -0.11  -0.22   0.10
  94   1     0.05  -0.06   0.09     0.04   0.04   0.00    -0.08   0.03  -0.07
  95   1     0.00   0.19  -0.07     0.07  -0.02  -0.02    -0.06  -0.11   0.05
  96   1    -0.20  -0.04  -0.08     0.08   0.02   0.00     0.07   0.01   0.03
  97   1     0.01  -0.01   0.03     0.23  -0.15  -0.04     0.00  -0.01  -0.03
  98   1     0.02   0.03   0.02    -0.05   0.03   0.09    -0.03  -0.04  -0.01
  99   1     0.01   0.01   0.01    -0.10  -0.14  -0.21    -0.02  -0.03  -0.02
 100   1     0.04   0.02  -0.02    -0.11   0.08   0.12    -0.03   0.04   0.03
 101   1     0.00   0.04   0.04     0.14  -0.07   0.01     0.03  -0.01   0.03
 102   1    -0.02  -0.02   0.00     0.17   0.20   0.12     0.04   0.05   0.05
 103   1    -0.02   0.01  -0.01     0.05   0.03  -0.03     0.03   0.01  -0.01
 104   1     0.01  -0.04  -0.05     0.12  -0.04   0.03     0.05   0.00   0.03
 105   1    -0.04  -0.06  -0.01     0.05  -0.05   0.04     0.03   0.00   0.02
 106   1    -0.01  -0.01   0.02    -0.04  -0.04  -0.20     0.00  -0.02  -0.08
 107   1    -0.03   0.00  -0.07     0.02  -0.06   0.06     0.03  -0.02   0.05
 108   1     0.05  -0.04  -0.04    -0.25  -0.06   0.00    -0.10  -0.01   0.02
 109   1     0.14   0.02  -0.05    -0.01  -0.04   0.09    -0.04   0.03  -0.05
 110   1     0.10   0.01  -0.05    -0.02  -0.07   0.05    -0.02   0.07  -0.02
 111   1     0.07   0.11   0.04    -0.01  -0.07   0.03    -0.02   0.02  -0.03
 112   1     0.06   0.08  -0.05     0.02  -0.01  -0.07     0.00   0.02  -0.03
 113   1     0.05   0.00   0.05     0.03   0.01  -0.11     0.00   0.03  -0.04
 114   1     0.11   0.04   0.04     0.02  -0.07  -0.08    -0.01   0.01  -0.04
                    52                     53                     54
                    ?A                     ?A                     ?A
 Frequencies --   247.6532               248.9226               252.5523
 Red. masses --     2.0959                 1.4474                 2.4345
 Frc consts  --     0.0757                 0.0528                 0.0915
 IR Inten    --     0.9952                 0.9971                 6.3466
 Raman Activ --     0.0000                 0.0000                 0.0000
 Depolar     --     0.0000                 0.0000                 0.0000
 Atom AN      X      Y      Z        X      Y      Z        X      Y      Z
   1   8    -0.02  -0.02   0.04     0.02   0.01   0.00    -0.06  -0.02   0.01
   2  12    -0.02  -0.04   0.00    -0.01  -0.01   0.01    -0.06  -0.03  -0.02
   3   8     0.03  -0.02  -0.03     0.01  -0.01   0.00     0.01   0.02   0.00
   4   6    -0.01   0.00   0.05     0.00   0.00   0.00    -0.01  -0.01   0.01
   5   7     0.01   0.02   0.02     0.00   0.01   0.02    -0.02  -0.01  -0.02
   6   7    -0.03  -0.04   0.01     0.03   0.01   0.02     0.00   0.02  -0.01
   7   8    -0.02   0.01   0.04     0.01   0.00   0.00    -0.04  -0.01   0.01
   8   6     0.02  -0.01   0.01    -0.01   0.00   0.01     0.01   0.00  -0.02
   9   6     0.02  -0.01   0.01    -0.02   0.00   0.00     0.03   0.00   0.00
  10   6     0.00  -0.03   0.02     0.00   0.00   0.01     0.01   0.00  -0.01
  11   8     0.00   0.03   0.03    -0.01  -0.01  -0.01     0.05   0.04   0.03
  12   6    -0.01   0.02  -0.01    -0.01  -0.03   0.01     0.02   0.07  -0.01
  13   6     0.02   0.00  -0.04     0.01  -0.01   0.01     0.00   0.04  -0.02
  14   6     0.00   0.01   0.04    -0.01   0.00  -0.01     0.05   0.01   0.02
  15   8     0.00   0.05  -0.01    -0.02  -0.03   0.02     0.06   0.09  -0.04
  16   6     0.02  -0.03  -0.02    -0.01   0.00   0.00     0.02  -0.01   0.02
  17   8    -0.04  -0.04  -0.03    -0.01  -0.03  -0.01     0.03  -0.03   0.04
  18   6     0.03  -0.02  -0.04     0.00   0.01  -0.02     0.00   0.00   0.01
  19   8     0.04  -0.01  -0.04     0.02   0.00  -0.01    -0.03   0.02  -0.01
  20   8     0.00   0.02   0.02    -0.01   0.00  -0.02     0.01   0.00  -0.01
  21   6    -0.01   0.01   0.01     0.00   0.01   0.00     0.01  -0.01   0.01
  22   6    -0.01   0.01  -0.01     0.01   0.00   0.01     0.01  -0.02   0.03
  23   6     0.01   0.01  -0.02    -0.01   0.02  -0.02     0.00  -0.02   0.01
  24   8    -0.01   0.00  -0.01     0.00   0.03  -0.01     0.01  -0.01  -0.01
  25   6     0.01   0.02  -0.02     0.01   0.00   0.00     0.01  -0.03   0.00
  26   6    -0.01   0.01   0.01     0.03   0.03   0.00    -0.10  -0.06   0.03
  27   6     0.04   0.02  -0.07     0.00   0.00   0.00     0.03   0.02  -0.01
  28   6    -0.01  -0.03   0.01    -0.01   0.01   0.01     0.03  -0.03  -0.03
  29   6     0.00   0.03   0.02     0.00   0.01   0.01     0.00  -0.01  -0.01
  30   6    -0.01  -0.01   0.00     0.01   0.00   0.01    -0.01   0.01   0.00
  31   6    -0.01   0.04   0.00     0.00   0.01   0.00     0.00  -0.01   0.00
  32   6    -0.01   0.04   0.01     0.00   0.01   0.00     0.01  -0.01   0.01
  33   6    -0.01   0.03  -0.02    -0.01   0.01   0.00     0.01   0.00  -0.01
  34   6    -0.01   0.02  -0.03     0.00   0.00   0.00     0.00   0.01   0.00
  35   6     0.01   0.03   0.00     0.00   0.00   0.00     0.00   0.01   0.00
  36   6    -0.04   0.01  -0.01    -0.01   0.00  -0.01     0.01   0.00   0.00
  37   6     0.03   0.01   0.00     0.01   0.00  -0.01     0.00   0.01   0.01
  38   6     0.01   0.00  -0.02    -0.02   0.02   0.00    -0.03   0.00   0.02
  39   6     0.02   0.00   0.01    -0.04  -0.01   0.00    -0.03   0.02   0.00
  40   6     0.02  -0.01   0.04    -0.04  -0.03  -0.01    -0.03   0.03  -0.01
  41   6     0.00   0.01   0.02     0.00  -0.03  -0.02    -0.01   0.00   0.01
  42   6    -0.01   0.03   0.00     0.02  -0.01  -0.01     0.00   0.00   0.03
  43   6     0.01   0.01  -0.01    -0.02   0.00  -0.01    -0.03  -0.03   0.00
  44   6     0.00   0.02  -0.01     0.02  -0.01  -0.01     0.03   0.00   0.03
  45   6    -0.02  -0.03  -0.02     0.00   0.00   0.00     0.00   0.02   0.01
  46   6    -0.06  -0.01   0.00    -0.02   0.00  -0.01     0.02   0.00   0.00
  47   6     0.05  -0.01  -0.02     0.01   0.00  -0.01     0.00  -0.01   0.01
  48   6     0.03   0.00   0.00     0.02   0.00   0.00    -0.03   0.01   0.00
  49   6     0.02   0.01  -0.01     0.01   0.04   0.05     0.05   0.00   0.04
  50   6    -0.01  -0.02  -0.04     0.05   0.03   0.01     0.08   0.05   0.03
  51   6    -0.03   0.01   0.00    -0.01  -0.03  -0.02    -0.03  -0.04  -0.01
  52   6     0.01   0.02   0.01     0.01  -0.01  -0.02    -0.04  -0.04  -0.05
  53   6     0.00  -0.06   0.05     0.01  -0.02   0.03    -0.01   0.02  -0.04
  54   6    -0.01  -0.03   0.05    -0.01   0.00   0.01     0.01  -0.03  -0.08
  55   1     0.01   0.00   0.01    -0.03  -0.01   0.00     0.04   0.00   0.01
  56   1     0.03   0.01  -0.05     0.01  -0.01   0.02     0.00   0.04  -0.04
  57   1    -0.01   0.01   0.05    -0.01   0.00  -0.01     0.03   0.00   0.04
  58   1     0.01   0.01  -0.05    -0.01  -0.02   0.00     0.04   0.05   0.02
  59   1     0.04  -0.07  -0.02    -0.02   0.00   0.00     0.02  -0.01   0.02
  60   1     0.02  -0.03  -0.02    -0.02   0.02  -0.01     0.05  -0.06   0.01
  61   1     0.01   0.02  -0.02     0.02   0.02   0.00     0.00  -0.01   0.03
  62   1     0.04   0.04  -0.03    -0.01   0.02  -0.02    -0.01  -0.02   0.01
  63   1     0.03   0.07   0.01     0.12   0.13   0.11     0.05   0.03   0.05
  64   1    -0.03   0.00   0.01    -0.14  -0.16   0.09    -0.05  -0.11   0.04
  65   1     0.03   0.01  -0.06     0.02  -0.01  -0.21     0.00  -0.03  -0.10
  66   1    -0.02   0.03   0.03     0.06   0.02   0.02    -0.22  -0.01  -0.05
  67   1    -0.01   0.00   0.00     0.03   0.07  -0.02    -0.14  -0.17   0.11
  68   1    -0.03  -0.02   0.02     0.02   0.02   0.00    -0.06  -0.04   0.02
  69   1     0.02   0.04  -0.14     0.00   0.00   0.00     0.05  -0.02  -0.01
  70   1     0.11   0.05  -0.06    -0.01   0.02   0.00     0.02   0.01  -0.01
  71   1     0.02   0.01  -0.06    -0.01   0.00  -0.03     0.07   0.05   0.00
  72   1     0.00  -0.02   0.44     0.02   0.02   0.09    -0.02  -0.04  -0.07
  73   1     0.06   0.30  -0.25    -0.02   0.08  -0.02     0.08  -0.08  -0.04
  74   1    -0.11  -0.44  -0.18    -0.01  -0.05  -0.01     0.01  -0.02  -0.03
  75   1     0.00   0.04   0.01     0.00   0.01   0.00     0.01  -0.01   0.01
  76   1    -0.02   0.03  -0.03    -0.01   0.01   0.00     0.02  -0.01  -0.01
  77   1    -0.01   0.00  -0.05    -0.01   0.00  -0.01     0.01   0.01  -0.01
  78   1    -0.07   0.01  -0.01    -0.01   0.01  -0.01     0.02   0.00   0.00
  79   1     0.05   0.02   0.00     0.01   0.00  -0.01     0.01   0.01   0.02
  80   1     0.04  -0.01   0.01    -0.06   0.00   0.01    -0.02   0.02   0.00
  81   1     0.03  -0.03   0.08    -0.06  -0.06  -0.02    -0.03   0.04  -0.03
  82   1     0.00   0.02   0.04     0.00  -0.05  -0.04    -0.01  -0.01   0.01
  83   1     0.03   0.02   0.00    -0.05  -0.01  -0.02    -0.06  -0.04  -0.01
  84   1     0.01   0.03   0.00     0.00  -0.03  -0.01     0.04   0.01   0.04
  85   1    -0.05  -0.09  -0.07    -0.01  -0.02  -0.03     0.00   0.02  -0.02
  86   1    -0.06   0.02  -0.01    -0.02   0.04   0.00    -0.01   0.05   0.01
  87   1     0.04  -0.05   0.01     0.02  -0.01   0.03     0.01   0.01   0.03
  88   1    -0.05   0.03   0.01    -0.06  -0.07   0.02     0.02  -0.02  -0.01
  89   1    -0.11  -0.02   0.02     0.05   0.00  -0.02     0.05   0.01   0.00
  90   1    -0.06  -0.05  -0.03    -0.07   0.06  -0.01     0.02   0.02   0.01
  91   1     0.08  -0.10  -0.06    -0.02   0.07   0.01     0.10  -0.24  -0.05
  92   1    -0.03  -0.01   0.03     0.07   0.00  -0.06    -0.21  -0.01   0.19
  93   1     0.11   0.07  -0.04    -0.01  -0.06   0.02     0.09   0.21  -0.08
  94   1     0.04  -0.01   0.02     0.01   0.02  -0.01     0.00  -0.03   0.02
  95   1     0.05   0.01  -0.01     0.02  -0.03   0.00    -0.02   0.07  -0.01
  96   1     0.02   0.00   0.01     0.05   0.01   0.01    -0.08  -0.01  -0.02
  97   1     0.09  -0.04   0.01    -0.38   0.26   0.01    -0.10   0.09   0.02
  98   1     0.01   0.07   0.04     0.17  -0.23  -0.23     0.13  -0.10  -0.08
  99   1    -0.03  -0.02  -0.07     0.26   0.12   0.45     0.14   0.01   0.21
 100   1     0.01  -0.06  -0.01     0.01   0.06   0.00     0.00   0.08   0.04
 101   1    -0.02  -0.03  -0.06     0.08   0.01   0.01     0.16  -0.03   0.02
 102   1    -0.02  -0.03  -0.06     0.08   0.08   0.01     0.14   0.15   0.03
 103   1    -0.05   0.08   0.06     0.01  -0.11  -0.06    -0.04   0.03   0.01
 104   1     0.03  -0.01  -0.04    -0.08  -0.01  -0.03     0.04  -0.07  -0.05
 105   1    -0.12  -0.05  -0.02     0.06   0.00   0.00    -0.09  -0.11   0.00
 106   1     0.01   0.01   0.01    -0.01   0.00   0.05     0.01  -0.09  -0.26
 107   1     0.01   0.01   0.01    -0.04   0.01  -0.09     0.11  -0.03   0.08
 108   1     0.02   0.03   0.01     0.08  -0.04  -0.04    -0.25  -0.02  -0.01
 109   1     0.01  -0.05   0.11     0.04  -0.01   0.06    -0.05   0.01  -0.07
 110   1    -0.01  -0.11   0.05     0.00  -0.06   0.03    -0.01   0.06  -0.03
 111   1     0.00  -0.08   0.02     0.00   0.01   0.02    -0.01   0.00  -0.04
 112   1    -0.02  -0.04   0.05    -0.01   0.00   0.01     0.00  -0.04  -0.06
 113   1    -0.03  -0.04   0.07    -0.02   0.00   0.02     0.03   0.01  -0.13
 114   1    -0.01   0.00   0.05    -0.01   0.01   0.02    -0.02  -0.09  -0.10
                    55                     56                     57
                    ?A                     ?A                     ?A
 Frequencies --   256.1021               261.0526               261.7064
 Red. masses --     1.8112                 1.5639                 1.2581
 Frc consts  --     0.0700                 0.0628                 0.0508
 IR Inten    --     1.4543                 3.0728                 1.8535
 Raman Activ --     0.0000                 0.0000                 0.0000
 Depolar     --     0.0000                 0.0000                 0.0000
 Atom AN      X      Y      Z        X      Y      Z        X      Y      Z
   1   8     0.03   0.00  -0.01    -0.02   0.00   0.01     0.01   0.03  -0.01
   2  12     0.03   0.00   0.00    -0.02   0.03   0.02     0.03  -0.01   0.01
   3   8    -0.02   0.01   0.02     0.01   0.00  -0.03    -0.01   0.00   0.01
   4   6     0.01   0.00  -0.01     0.00   0.00   0.01     0.01   0.00  -0.02
   5   7     0.02   0.01   0.00    -0.01  -0.01   0.02     0.01   0.00   0.00
   6   7    -0.03  -0.03  -0.01     0.01   0.00   0.00    -0.01  -0.01   0.00
   7   8     0.02   0.00  -0.01    -0.02   0.00   0.01     0.01  -0.02  -0.01
   8   6     0.01   0.00  -0.01    -0.02   0.02   0.02     0.01   0.00  -0.01
   9   6     0.01   0.00   0.00    -0.02   0.02   0.00     0.00   0.00   0.00
  10   6    -0.01  -0.01   0.00    -0.01   0.02   0.00     0.00  -0.01   0.00
  11   8    -0.01  -0.02  -0.01     0.00   0.01   0.01    -0.01  -0.01  -0.02
  12   6    -0.01  -0.01   0.00     0.00   0.01   0.00     0.00  -0.01   0.00
  13   6    -0.02  -0.01   0.01     0.01   0.00  -0.01     0.00   0.00   0.01
  14   6    -0.01   0.00  -0.01     0.00   0.00   0.01    -0.01  -0.01  -0.02
  15   8    -0.01  -0.02   0.00     0.00   0.02   0.00    -0.01  -0.03   0.01
  16   6     0.00   0.00  -0.01     0.01   0.00  -0.01    -0.03   0.03   0.01
  17   8     0.01   0.02  -0.01    -0.02   0.00   0.01     0.00   0.01  -0.01
  18   6    -0.02   0.01   0.02     0.02  -0.01  -0.03    -0.01   0.00   0.01
  19   8    -0.02   0.01   0.02     0.04  -0.03  -0.01    -0.01   0.00   0.01
  20   8     0.01  -0.01  -0.02    -0.01   0.01   0.04     0.00   0.00  -0.01
  21   6     0.02   0.00   0.00    -0.03   0.00   0.00     0.00   0.00   0.00
  22   6     0.01   0.01  -0.01    -0.03   0.00   0.00     0.00   0.00   0.00
  23   6    -0.01  -0.01   0.01     0.01   0.02  -0.01    -0.01   0.00   0.00
  24   8     0.01   0.01   0.01    -0.02  -0.03   0.00     0.00   0.01   0.00
  25   6    -0.01  -0.02   0.00     0.01   0.04   0.01    -0.01  -0.01   0.00
  26   6     0.02   0.00   0.00     0.02   0.02  -0.01     0.01   0.01   0.00
  27   6    -0.01  -0.03   0.03     0.00   0.00  -0.01    -0.01  -0.02   0.03
  28   6    -0.01   0.04  -0.01     0.00  -0.04   0.01     0.00   0.00   0.01
  29   6     0.00   0.01   0.01     0.00  -0.02  -0.01     0.00   0.01   0.00
  30   6    -0.01  -0.01   0.00     0.02  -0.01  -0.01     0.00   0.01  -0.01
  31   6     0.00   0.02   0.01     0.01  -0.03  -0.01     0.00   0.01   0.01
  32   6     0.00   0.01   0.00     0.01  -0.03   0.00     0.00   0.01   0.00
  33   6    -0.01   0.00  -0.02     0.01  -0.01   0.04    -0.01   0.00  -0.01
  34   6     0.00   0.00  -0.01     0.00  -0.01   0.02     0.00   0.00  -0.01
  35   6     0.00   0.01   0.00     0.00  -0.02  -0.01     0.00   0.00   0.00
  36   6    -0.01   0.00   0.01     0.02  -0.01  -0.01    -0.01   0.00   0.00
  37   6     0.00   0.00   0.00    -0.01  -0.02  -0.01     0.00   0.00   0.00
  38   6     0.01  -0.02  -0.02     0.02  -0.02  -0.01     0.00   0.01  -0.01
  39   6     0.04   0.00   0.00     0.02  -0.01  -0.02     0.01   0.01  -0.01
  40   6     0.03   0.03   0.04     0.03  -0.02  -0.01     0.00  -0.02   0.03
  41   6     0.00   0.04   0.04     0.02  -0.02  -0.01     0.00  -0.01   0.02
  42   6    -0.01   0.03   0.03     0.02  -0.02  -0.02    -0.01   0.01  -0.01
  43   6    -0.01  -0.01  -0.03     0.02  -0.01  -0.01     0.00   0.00  -0.01
  44   6     0.03   0.03   0.02     0.00  -0.01  -0.02     0.00   0.02  -0.01
  45   6     0.00  -0.02   0.00     0.02   0.02   0.01     0.00  -0.01   0.00
  46   6    -0.01  -0.01   0.01     0.02   0.01  -0.01    -0.01  -0.01   0.00
  47   6     0.00   0.00   0.00    -0.04   0.00   0.01     0.01   0.01   0.00
  48   6    -0.01  -0.01   0.01     0.00   0.00  -0.01     0.00   0.00   0.00
  49   6     0.07   0.00   0.02     0.00   0.02   0.01     0.01   0.01   0.00
  50   6     0.07   0.02   0.00     0.00   0.00  -0.01    -0.01  -0.02  -0.03
  51   6    -0.09  -0.06  -0.02    -0.03  -0.01  -0.01    -0.03   0.04   0.00
  52   6    -0.09   0.00  -0.06    -0.01   0.00  -0.03     0.04  -0.02  -0.02
  53   6     0.00  -0.01  -0.01    -0.01   0.04   0.01     0.01  -0.01   0.00
  54   6    -0.01  -0.01   0.00    -0.02   0.04   0.03     0.00  -0.01   0.01
  55   1     0.02   0.01   0.00    -0.02   0.00   0.00     0.00   0.00   0.00
  56   1    -0.03  -0.02   0.01     0.02   0.00  -0.02    -0.01  -0.01   0.01
  57   1    -0.01   0.00  -0.02     0.00   0.01   0.01     0.00  -0.01  -0.02
  58   1    -0.01  -0.03  -0.01     0.01   0.02  -0.01    -0.01   0.00   0.06
  59   1     0.01   0.01   0.00     0.01  -0.01  -0.01    -0.09   0.04   0.01
  60   1    -0.02   0.02   0.01     0.01  -0.01  -0.01    -0.01   0.04  -0.03
  61   1     0.01   0.02  -0.01    -0.04  -0.03   0.01     0.01   0.01  -0.01
  62   1    -0.02  -0.02   0.01     0.05   0.03  -0.02    -0.02  -0.01   0.00
  63   1     0.03   0.01   0.04    -0.19  -0.15  -0.19     0.04   0.03   0.05
  64   1    -0.06  -0.08   0.03     0.25   0.31  -0.16    -0.07  -0.07   0.04
  65   1    -0.03  -0.01  -0.07     0.03   0.03   0.36    -0.01  -0.01  -0.08
  66   1     0.03  -0.02  -0.01     0.05   0.02   0.04     0.03  -0.01   0.00
  67   1     0.02   0.02   0.00     0.04   0.03  -0.06     0.02   0.02  -0.01
  68   1     0.03   0.01   0.00    -0.03   0.00  -0.01     0.01   0.01  -0.01
  69   1    -0.05   0.04  -0.01    -0.02   0.05  -0.04    -0.02   0.01   0.02
  70   1     0.07  -0.07   0.01     0.06  -0.02  -0.02     0.01  -0.04   0.02
  71   1    -0.07  -0.07   0.10    -0.04  -0.03   0.03    -0.03  -0.03   0.05
  72   1     0.03   0.04  -0.07    -0.04  -0.04   0.03     0.01   0.01   0.02
  73   1    -0.03   0.01   0.02     0.01  -0.05   0.01    -0.02   0.01   0.03
  74   1    -0.01   0.10   0.02     0.02  -0.06   0.01     0.02   0.01   0.02
  75   1     0.00   0.02   0.00     0.00  -0.03  -0.01     0.00   0.01   0.00
  76   1    -0.01   0.00  -0.03     0.01   0.00   0.06    -0.01   0.00  -0.02
  77   1     0.00   0.00  -0.02     0.01   0.00   0.04     0.00   0.00  -0.01
  78   1    -0.02   0.00   0.01     0.05  -0.01  -0.01    -0.02   0.00   0.00
  79   1     0.00   0.00   0.00    -0.03  -0.02  -0.01     0.00   0.00   0.00
  80   1     0.08   0.00  -0.01     0.02   0.00  -0.03     0.01   0.02  -0.02
  81   1     0.06   0.04   0.06     0.03  -0.02  -0.01     0.01  -0.03   0.05
  82   1     0.00   0.05   0.06     0.02  -0.02   0.00     0.00  -0.02   0.04
  83   1     0.02   0.00  -0.02     0.03   0.00  -0.01     0.00  -0.02   0.00
  84   1     0.05   0.05   0.05    -0.01  -0.02  -0.03     0.00   0.02  -0.01
  85   1    -0.02  -0.05  -0.03     0.04   0.08   0.08    -0.01  -0.03  -0.02
  86   1    -0.02   0.00   0.00     0.07  -0.04   0.00    -0.02   0.00   0.00
  87   1     0.03  -0.03   0.01    -0.06   0.05  -0.03     0.02  -0.02   0.00
  88   1     0.01   0.03   0.00     0.00  -0.02   0.00     0.00   0.00   0.00
  89   1    -0.05  -0.01   0.02     0.06   0.02  -0.03    -0.02  -0.01   0.01
  90   1     0.02  -0.05   0.00     0.00   0.05   0.00     0.00  -0.02   0.00
  91   1    -0.03   0.09   0.03    -0.04   0.03   0.03    -0.01   0.05   0.00
  92   1     0.07   0.00  -0.07    -0.01   0.00   0.00     0.05   0.00  -0.04
  93   1    -0.02  -0.08   0.04    -0.07  -0.02   0.00     0.00  -0.03   0.02
  94   1    -0.02  -0.01  -0.01    -0.01   0.02  -0.01     0.00  -0.01   0.00
  95   1    -0.02  -0.03   0.02     0.01   0.00  -0.02    -0.01  -0.01   0.01
  96   1     0.00   0.00   0.02     0.02   0.01  -0.02     0.00   0.00   0.01
  97   1     0.13  -0.04   0.03    -0.19   0.12   0.00    -0.02   0.03   0.00
  98   1     0.09   0.05   0.04     0.07  -0.11  -0.12     0.03   0.00  -0.02
  99   1     0.03  -0.05  -0.01     0.12   0.07   0.20     0.03   0.01   0.04
 100   1     0.03   0.01   0.02     0.00   0.01  -0.02     0.01  -0.04  -0.01
 101   1     0.11  -0.04  -0.03     0.00   0.01  -0.01    -0.02  -0.02  -0.05
 102   1     0.10   0.09  -0.03     0.00   0.00  -0.01    -0.02  -0.02  -0.05
 103   1    -0.16   0.25   0.17    -0.08   0.25   0.12    -0.05   0.17   0.07
 104   1     0.19  -0.17  -0.20     0.21  -0.10  -0.11     0.09   0.00  -0.01
 105   1    -0.41  -0.33  -0.01    -0.27  -0.21  -0.01    -0.15  -0.03  -0.03
 106   1    -0.14   0.14   0.10     0.00   0.00  -0.09     0.16  -0.20  -0.48
 107   1    -0.28  -0.01  -0.23     0.02  -0.01   0.01     0.43  -0.02   0.36
 108   1     0.06  -0.12  -0.11    -0.07   0.00  -0.02    -0.42   0.16   0.10
 109   1    -0.01  -0.01   0.00    -0.01   0.03  -0.01     0.01  -0.01   0.00
 110   1    -0.01   0.00   0.00     0.00   0.05   0.01     0.00  -0.01   0.00
 111   1     0.00  -0.02  -0.02    -0.01   0.05   0.03     0.00  -0.01  -0.01
 112   1    -0.01  -0.01   0.00    -0.02   0.03   0.02     0.00  -0.01   0.00
 113   1    -0.01  -0.02   0.01    -0.04   0.02   0.05    -0.01  -0.01   0.02
 114   1    -0.01  -0.01   0.01    -0.02   0.07   0.04     0.01   0.01   0.02
                    58                     59                     60
                    ?A                     ?A                     ?A
 Frequencies --   263.6812               276.5581               277.7224
 Red. masses --     1.7313                 1.8175                 1.4040
 Frc consts  --     0.0709                 0.0819                 0.0638
 IR Inten    --     7.3457                 0.1076                 1.6512
 Raman Activ --     0.0000                 0.0000                 0.0000
 Depolar     --     0.0000                 0.0000                 0.0000
 Atom AN      X      Y      Z        X      Y      Z        X      Y      Z
   1   8     0.02   0.00   0.00     0.01   0.01   0.01    -0.03  -0.01   0.00
   2  12     0.04  -0.04   0.00     0.02  -0.02   0.03    -0.01  -0.03   0.01
   3   8    -0.01   0.00   0.00    -0.01   0.01  -0.02     0.01   0.00  -0.02
   4   6     0.00   0.00   0.00     0.00   0.00   0.00     0.00   0.00   0.01
   5   7     0.02   0.00  -0.02    -0.06  -0.01  -0.01     0.00   0.02   0.00
   6   7     0.01   0.00   0.02     0.08   0.04   0.03     0.02   0.00   0.01
   7   8     0.01  -0.01   0.01     0.01  -0.01   0.01    -0.02   0.00   0.00
   8   6     0.02  -0.02  -0.03    -0.03   0.00   0.00     0.00   0.00   0.00
   9   6     0.01  -0.02  -0.01    -0.02   0.00  -0.01     0.00   0.00  -0.01
  10   6     0.01  -0.03   0.01     0.02   0.02   0.01     0.01   0.00   0.00
  11   8    -0.01  -0.02  -0.02    -0.01  -0.02  -0.02     0.00   0.04   0.02
  12   6    -0.01   0.00  -0.01     0.00  -0.01   0.00     0.00   0.03   0.00
  13   6    -0.01   0.00   0.00     0.00   0.00   0.00     0.00   0.02  -0.01
  14   6    -0.01   0.00  -0.01    -0.01   0.00  -0.01     0.00   0.00   0.01
  15   8    -0.01   0.00   0.00    -0.02   0.00   0.01     0.01   0.01  -0.02
  16   6    -0.01   0.00  -0.01    -0.01   0.01  -0.02     0.01   0.00   0.01
  17   8    -0.01   0.05  -0.02     0.01   0.00   0.03    -0.01  -0.02   0.00
  18   6     0.00  -0.01   0.02     0.01   0.00  -0.01     0.02   0.00  -0.01
  19   8    -0.02  -0.01   0.01     0.04  -0.02   0.00     0.01   0.01  -0.02
  20   8     0.02   0.00   0.02     0.00   0.01   0.00     0.01   0.01   0.01
  21   6     0.01   0.00  -0.01     0.00   0.01   0.01     0.00   0.00   0.01
  22   6    -0.01   0.01  -0.03    -0.01   0.01   0.02    -0.01   0.00   0.00
  23   6     0.01  -0.01   0.02     0.00   0.01  -0.01     0.02   0.00   0.00
  24   8     0.01  -0.03   0.02     0.00   0.01  -0.01     0.01  -0.02  -0.01
  25   6     0.01   0.04   0.01    -0.02  -0.01  -0.01     0.01   0.01  -0.01
  26   6     0.02  -0.01   0.00     0.01   0.01   0.00    -0.03  -0.01   0.01
  27   6    -0.02  -0.01   0.01    -0.02  -0.01   0.01     0.01   0.01   0.00
  28   6     0.00   0.03   0.00     0.00   0.02   0.01    -0.01  -0.07   0.00
  29   6     0.00   0.02   0.01    -0.02  -0.01  -0.01     0.00   0.02   0.01
  30   6     0.00   0.01   0.01     0.03   0.01   0.00     0.01   0.00   0.00
  31   6    -0.01   0.03   0.02     0.00  -0.03   0.00     0.00   0.02   0.00
  32   6    -0.01   0.03   0.00     0.01  -0.02   0.01     0.01   0.01  -0.02
  33   6    -0.02   0.01  -0.04     0.03   0.01   0.01     0.01   0.02  -0.02
  34   6    -0.01   0.00  -0.02     0.01   0.02   0.00     0.01   0.03   0.00
  35   6     0.00   0.02   0.02     0.00   0.02  -0.02     0.00   0.02   0.00
  36   6    -0.02   0.01   0.01     0.00  -0.01   0.00     0.00   0.01   0.00
  37   6     0.01   0.02   0.02     0.01   0.00  -0.01    -0.01   0.01   0.00
  38   6    -0.04   0.02   0.01    -0.02   0.02   0.01    -0.01   0.01   0.00
  39   6    -0.05   0.01   0.01    -0.04  -0.01   0.00    -0.02   0.00   0.00
  40   6    -0.04   0.00   0.01    -0.04  -0.05  -0.02    -0.02  -0.02   0.00
  41   6    -0.02   0.00   0.00     0.01  -0.03  -0.05     0.00  -0.01  -0.01
  42   6     0.01   0.01   0.00     0.05  -0.01  -0.03     0.02   0.00  -0.01
  43   6    -0.04   0.00   0.00    -0.02   0.00  -0.01    -0.01   0.00  -0.01
  44   6     0.02   0.02   0.01     0.02   0.00   0.00     0.01   0.01   0.00
  45   6    -0.02  -0.02  -0.01    -0.02   0.02   0.00     0.01  -0.01   0.00
  46   6    -0.02  -0.01   0.01     0.02   0.01  -0.01     0.01   0.00   0.00
  47   6     0.04   0.01  -0.01     0.00  -0.03   0.01    -0.02  -0.01   0.00
  48   6    -0.01   0.00   0.02     0.01   0.00   0.00    -0.01  -0.04   0.02
  49   6     0.03   0.03   0.05    -0.01   0.06   0.07     0.01   0.03   0.03
  50   6     0.04   0.04   0.02    -0.01   0.05   0.05     0.01   0.02   0.02
  51   6    -0.02  -0.03  -0.02    -0.02  -0.05  -0.03    -0.02  -0.01  -0.01
  52   6     0.00  -0.02  -0.02     0.01  -0.02  -0.05     0.00  -0.01  -0.02
  53   6     0.02  -0.02  -0.03     0.01   0.01   0.01     0.00  -0.03   0.02
  54   6     0.02  -0.04  -0.01     0.00   0.01   0.00    -0.01   0.00   0.01
  55   1    -0.01   0.00  -0.01    -0.03  -0.01  -0.01    -0.01   0.00  -0.01
  56   1    -0.02   0.00   0.00    -0.01  -0.01   0.00     0.01   0.02  -0.03
  57   1     0.00   0.00  -0.02     0.01   0.00  -0.03    -0.02   0.01   0.03
  58   1    -0.01  -0.02  -0.01    -0.01   0.00  -0.02     0.01   0.02   0.01
  59   1    -0.02  -0.01  -0.01    -0.01  -0.02  -0.02     0.01   0.00   0.01
  60   1    -0.01   0.02  -0.02    -0.01   0.03  -0.03     0.02  -0.03   0.01
  61   1    -0.02  -0.02  -0.02    -0.02   0.02   0.02     0.00   0.01   0.00
  62   1     0.02  -0.03   0.03     0.01   0.02  -0.01     0.03   0.02  -0.01
  63   1    -0.24  -0.24  -0.24     0.03   0.05   0.04     0.01   0.04  -0.01
  64   1     0.30   0.38  -0.20    -0.09  -0.11   0.04     0.00   0.00  -0.01
  65   1     0.00   0.04   0.45    -0.03  -0.01  -0.13     0.02   0.01  -0.03
  66   1     0.04  -0.02   0.00     0.02   0.01   0.01    -0.07   0.02  -0.01
  67   1     0.03  -0.01  -0.02     0.02   0.03  -0.02    -0.04  -0.05   0.03
  68   1     0.01   0.00  -0.01     0.00   0.00   0.00    -0.03  -0.02   0.01
  69   1     0.01  -0.05   0.06    -0.02   0.01   0.02     0.02  -0.02   0.01
  70   1    -0.08  -0.02   0.01    -0.01  -0.03   0.00    -0.01   0.00  -0.01
  71   1     0.01   0.01  -0.02    -0.03  -0.03   0.03     0.03   0.02  -0.01
  72   1     0.03   0.04   0.06     0.03   0.03   0.14    -0.09  -0.09  -0.15
  73   1    -0.02   0.09  -0.03    -0.01   0.13  -0.04     0.01  -0.23   0.09
  74   1    -0.02  -0.01  -0.03    -0.01  -0.08  -0.03     0.04   0.05   0.07
  75   1    -0.01   0.03   0.01     0.02  -0.03   0.01     0.01   0.00  -0.03
  76   1    -0.03  -0.01  -0.07     0.05   0.01   0.02     0.01   0.01  -0.03
  77   1    -0.01  -0.01  -0.04     0.02   0.03   0.00     0.01   0.04   0.00
  78   1    -0.05   0.01   0.01     0.02  -0.01   0.00    -0.02   0.01   0.00
  79   1     0.02   0.02   0.01     0.03   0.01  -0.01     0.01   0.01  -0.02
  80   1    -0.05   0.02   0.01    -0.07  -0.02   0.02    -0.03   0.00   0.01
  81   1    -0.06  -0.02   0.00    -0.07  -0.08  -0.03    -0.03  -0.03   0.00
  82   1    -0.01  -0.02  -0.02     0.02  -0.06  -0.08     0.01  -0.02  -0.02
  83   1    -0.07  -0.02  -0.02    -0.05  -0.01  -0.03    -0.02  -0.01  -0.01
  84   1     0.02   0.01   0.01    -0.01  -0.03  -0.03     0.00   0.00   0.00
  85   1    -0.04  -0.08  -0.07     0.02   0.12   0.10     0.01  -0.01   0.02
  86   1    -0.07   0.02   0.00     0.04  -0.09  -0.02     0.02  -0.04   0.00
  87   1     0.05  -0.04   0.01    -0.13   0.06  -0.08     0.01  -0.01  -0.02
  88   1    -0.01   0.00   0.00     0.02   0.01  -0.01     0.03   0.03  -0.02
  89   1    -0.03  -0.02   0.04     0.03   0.01  -0.02    -0.02  -0.01   0.02
  90   1     0.00  -0.04   0.00     0.02   0.02   0.01     0.04  -0.04   0.00
  91   1     0.05  -0.03  -0.05     0.08  -0.20  -0.02    -0.19   0.40   0.15
  92   1     0.01   0.01   0.02    -0.16  -0.04   0.12     0.33  -0.02  -0.33
  93   1     0.09   0.06  -0.01     0.06   0.11  -0.05    -0.18  -0.42   0.18
  94   1     0.01  -0.03   0.02     0.00   0.00  -0.01    -0.06  -0.02  -0.06
  95   1    -0.01   0.03   0.02     0.01  -0.02   0.00    -0.04  -0.14   0.05
  96   1    -0.05  -0.01   0.02     0.03   0.00   0.01     0.05   0.00   0.08
  97   1    -0.01   0.02   0.08     0.23  -0.16   0.19     0.09  -0.06   0.08
  98   1     0.07   0.04   0.04    -0.13   0.32   0.32    -0.03   0.13   0.12
  99   1     0.06   0.05   0.09    -0.15   0.09  -0.26    -0.04   0.04  -0.08
 100   1     0.04   0.06   0.00     0.06   0.10  -0.04     0.03   0.05  -0.01
 101   1     0.06   0.04   0.04    -0.07   0.16   0.15     0.00   0.06   0.05
 102   1     0.04   0.05   0.02    -0.07  -0.07   0.10    -0.01  -0.01   0.03
 103   1     0.02  -0.21  -0.09    -0.04   0.04   0.02    -0.01  -0.07  -0.02
 104   1    -0.18   0.02   0.02     0.07  -0.09  -0.11    -0.06   0.00  -0.01
 105   1     0.14   0.08   0.00    -0.11  -0.15   0.00     0.02   0.01  -0.01
 106   1     0.01  -0.05  -0.06     0.02  -0.04  -0.09     0.01  -0.02  -0.05
 107   1     0.04   0.00   0.00     0.04   0.02  -0.06     0.03   0.00   0.00
 108   1    -0.04  -0.01  -0.01    -0.02  -0.04  -0.05    -0.04   0.00  -0.01
 109   1     0.03  -0.02  -0.02     0.04   0.01   0.00     0.01  -0.02   0.06
 110   1     0.01  -0.04  -0.03     0.01  -0.01   0.00    -0.01  -0.07   0.02
 111   1     0.01  -0.02  -0.04     0.00   0.05   0.02     0.00  -0.03   0.00
 112   1     0.02  -0.04  -0.01     0.00   0.00   0.02    -0.01  -0.01   0.02
 113   1     0.03  -0.03  -0.04     0.01   0.02  -0.01    -0.01   0.00   0.01
 114   1     0.01  -0.07  -0.02    -0.01   0.00  -0.01    -0.01   0.01   0.01
                    61                     62                     63
                    ?A                     ?A                     ?A
 Frequencies --   281.0035               283.2860               285.5069
 Red. masses --     2.3112                 2.4909                 1.8441
 Frc consts  --     0.1075                 0.1178                 0.0886
 IR Inten    --     2.5495                 9.2646                 1.3062
 Raman Activ --     0.0000                 0.0000                 0.0000
 Depolar     --     0.0000                 0.0000                 0.0000
 Atom AN      X      Y      Z        X      Y      Z        X      Y      Z
   1   8     0.01  -0.01  -0.01    -0.01  -0.01   0.00    -0.01   0.00   0.00
   2  12    -0.03  -0.01  -0.04    -0.02   0.00   0.01     0.04   0.02   0.03
   3   8     0.00  -0.01   0.03     0.00   0.00  -0.02     0.00   0.01  -0.03
   4   6     0.00  -0.01  -0.01     0.00   0.00   0.01     0.00   0.01   0.01
   5   7    -0.01  -0.01   0.02     0.13   0.01   0.01     0.00  -0.02  -0.03
   6   7     0.04   0.05   0.01     0.01   0.01  -0.01     0.00   0.00  -0.01
   7   8     0.00  -0.01  -0.01    -0.01   0.00   0.00    -0.01   0.01   0.01
   8   6    -0.02   0.01   0.03     0.02   0.01  -0.01    -0.01  -0.01  -0.03
   9   6    -0.02   0.02   0.02    -0.04   0.00  -0.02    -0.01  -0.01  -0.01
  10   6     0.01   0.04   0.01    -0.01   0.01  -0.02     0.00  -0.01  -0.01
  11   8     0.00   0.02   0.02     0.00   0.01   0.01     0.00   0.00   0.00
  12   6    -0.01   0.02   0.00     0.00   0.00   0.00     0.01  -0.01   0.00
  13   6    -0.01   0.02   0.01     0.00   0.00  -0.01     0.01  -0.01  -0.01
  14   6     0.00  -0.01   0.00     0.00   0.00   0.01     0.00   0.00   0.00
  15   8     0.01   0.00  -0.02     0.00   0.00   0.00     0.00   0.00   0.02
  16   6     0.00  -0.01   0.02     0.00  -0.01   0.00     0.00   0.01  -0.01
  17   8    -0.01   0.00  -0.05     0.03   0.01   0.05     0.02  -0.01   0.07
  18   6    -0.01   0.00   0.03     0.01   0.00  -0.03     0.01   0.00  -0.04
  19   8    -0.07   0.05  -0.01     0.04  -0.02   0.00     0.08  -0.04   0.00
  20   8     0.02  -0.01  -0.02    -0.02   0.00   0.01    -0.03   0.00   0.02
  21   6     0.02  -0.01  -0.01    -0.02   0.00   0.01    -0.02   0.00   0.02
  22   6     0.02   0.00  -0.03    -0.01   0.00   0.03    -0.02  -0.01   0.05
  23   6     0.00  -0.02   0.02     0.00   0.02  -0.02    -0.01   0.03  -0.03
  24   8     0.03  -0.02   0.01    -0.02   0.01   0.00    -0.03   0.02  -0.02
  25   6     0.03   0.01  -0.02    -0.02  -0.01   0.01    -0.05  -0.05   0.04
  26   6    -0.02  -0.04   0.02     0.00   0.02   0.00    -0.01   0.03   0.00
  27   6     0.01   0.00   0.02     0.00   0.00  -0.01     0.00   0.00  -0.02
  28   6     0.00   0.01  -0.02     0.00  -0.03   0.00    -0.01  -0.04   0.02
  29   6     0.00  -0.02   0.02     0.05   0.00   0.03     0.00  -0.02  -0.02
  30   6     0.02   0.01   0.01     0.01   0.00  -0.01     0.00   0.00  -0.01
  31   6    -0.02  -0.01   0.02     0.01   0.06   0.02    -0.01  -0.02   0.00
  32   6    -0.03  -0.02   0.00    -0.07   0.05   0.01     0.01  -0.02  -0.01
  33   6    -0.03  -0.03  -0.01    -0.12  -0.04   0.00     0.01  -0.02  -0.01
  34   6    -0.01  -0.03   0.01    -0.06  -0.10   0.03     0.01  -0.01   0.01
  35   6     0.02  -0.03   0.02     0.01  -0.08   0.05     0.01  -0.01   0.01
  36   6    -0.04   0.00   0.02    -0.01   0.01   0.01    -0.01   0.00   0.02
  37   6     0.04  -0.02   0.01    -0.01  -0.03   0.02     0.01   0.00   0.02
  38   6     0.00   0.01   0.02     0.00   0.00   0.00     0.00   0.00  -0.01
  39   6    -0.02   0.00   0.01    -0.01  -0.01   0.00     0.01   0.00   0.00
  40   6    -0.02  -0.02  -0.03    -0.01  -0.01  -0.01     0.01   0.01   0.00
  41   6     0.01  -0.02  -0.03     0.00  -0.01  -0.02     0.00   0.01   0.00
  42   6     0.02  -0.02  -0.02     0.01   0.00  -0.01     0.00   0.01   0.00
  43   6     0.01   0.01   0.01     0.00   0.00   0.00     0.00   0.00  -0.01
  44   6     0.00  -0.02  -0.01     0.01   0.00   0.00     0.00   0.00   0.01
  45   6    -0.08   0.02  -0.01     0.03  -0.10  -0.02    -0.04   0.03   0.01
  46   6    -0.04   0.00   0.02    -0.01  -0.04   0.01    -0.02   0.02   0.02
  47   6     0.12   0.04  -0.06     0.06   0.10  -0.04     0.04   0.02  -0.01
  48   6     0.11   0.02   0.01     0.03   0.06  -0.01     0.01  -0.01   0.02
  49   6    -0.04   0.01  -0.01     0.00   0.01   0.02     0.00  -0.01   0.00
  50   6    -0.04  -0.01   0.01     0.01   0.02   0.02     0.00   0.00   0.00
  51   6     0.05  -0.01   0.00     0.00  -0.01   0.00    -0.02   0.00   0.00
  52   6     0.04  -0.01  -0.02     0.00   0.00  -0.01    -0.01   0.00   0.00
  53   6    -0.01   0.01   0.03     0.00   0.05  -0.06     0.00   0.06  -0.08
  54   6    -0.01   0.04   0.01     0.01   0.02  -0.02     0.02  -0.02  -0.04
  55   1    -0.02  -0.01   0.01    -0.07  -0.01  -0.03     0.00   0.00   0.00
  56   1    -0.01   0.02  -0.01     0.01   0.00  -0.01     0.01  -0.01   0.00
  57   1     0.00  -0.02   0.02    -0.01   0.00   0.01    -0.01   0.01   0.00
  58   1     0.00  -0.02   0.04     0.01   0.00   0.00     0.00   0.02  -0.02
  59   1    -0.02   0.01   0.02     0.01  -0.01   0.00     0.01  -0.01  -0.01
  60   1     0.00  -0.01   0.02     0.01  -0.01   0.00     0.01   0.00  -0.01
  61   1     0.04   0.00  -0.04    -0.04  -0.01   0.04    -0.04  -0.01   0.06
  62   1    -0.02  -0.04   0.03     0.01   0.03  -0.02     0.02   0.06  -0.05
  63   1     0.01  -0.01  -0.04     0.02   0.03   0.05    -0.06  -0.09   0.03
  64   1     0.06   0.06  -0.04    -0.07  -0.09   0.04    -0.04  -0.07   0.03
  65   1     0.05   0.00   0.03    -0.03  -0.01  -0.08    -0.10  -0.02   0.05
  66   1    -0.09  -0.03  -0.06     0.05   0.04   0.08     0.04   0.06   0.08
  67   1    -0.06  -0.08   0.09     0.04   0.05  -0.09     0.03   0.06  -0.09
  68   1     0.04  -0.01   0.01    -0.08  -0.02   0.00    -0.08  -0.02   0.01
  69   1     0.02  -0.01   0.01     0.00   0.01  -0.02    -0.01   0.03  -0.03
  70   1     0.03  -0.01   0.01     0.00   0.01  -0.01     0.02   0.01  -0.01
  71   1     0.03   0.01   0.04    -0.01   0.00  -0.02    -0.03  -0.01  -0.02
  72   1     0.01   0.01  -0.12    -0.03  -0.03  -0.04    -0.05  -0.05   0.04
  73   1     0.00  -0.05   0.01     0.01  -0.07   0.01     0.00  -0.05   0.03
  74   1    -0.01   0.10   0.01     0.01   0.00   0.01     0.03  -0.06   0.02
  75   1    -0.03  -0.01   0.00    -0.10   0.09  -0.01     0.01  -0.03   0.00
  76   1    -0.04  -0.04  -0.03    -0.19  -0.06  -0.03     0.01  -0.03  -0.02
  77   1    -0.02  -0.05   0.02    -0.09  -0.15   0.03     0.02   0.00   0.03
  78   1    -0.04   0.00   0.02    -0.08   0.01   0.01     0.00   0.00   0.02
  79   1     0.01  -0.03   0.00    -0.10  -0.05   0.03     0.00  -0.01   0.01
  80   1    -0.05   0.00   0.01    -0.02  -0.01   0.01     0.01  -0.01   0.00
  81   1    -0.04  -0.03  -0.05    -0.01  -0.01  -0.02     0.01   0.01   0.01
  82   1     0.01  -0.03  -0.05     0.01  -0.01  -0.02     0.00   0.02   0.00
  83   1    -0.01   0.00   0.00    -0.01   0.00   0.00     0.00   0.00  -0.01
  84   1    -0.02  -0.03  -0.03     0.00  -0.01   0.00     0.00   0.01   0.01
  85   1    -0.11  -0.09  -0.26     0.05   0.01   0.24    -0.11  -0.21  -0.39
  86   1    -0.25   0.23   0.02     0.16  -0.40  -0.05    -0.27   0.44   0.06
  87   1     0.06  -0.06   0.15    -0.08   0.00  -0.28     0.24  -0.12   0.34
  88   1    -0.07  -0.08   0.04     0.04   0.07  -0.02    -0.07  -0.08   0.04
  89   1     0.03   0.00   0.01    -0.14  -0.08   0.10     0.08   0.03  -0.02
  90   1    -0.09   0.06   0.03     0.07  -0.18  -0.03    -0.09   0.11   0.04
  91   1     0.05   0.10  -0.15    -0.01   0.15  -0.16    -0.01   0.10  -0.03
  92   1     0.22   0.05  -0.10     0.16   0.14   0.00     0.13   0.02  -0.07
  93   1     0.17   0.01  -0.02     0.09   0.14  -0.05     0.04  -0.05   0.03
  94   1     0.12   0.06   0.09     0.08   0.05   0.12     0.01   0.00   0.02
  95   1     0.17   0.03  -0.04     0.09   0.19  -0.06     0.01  -0.02   0.03
  96   1     0.13   0.02   0.00    -0.04   0.01  -0.10     0.03   0.00   0.04
  97   1    -0.02  -0.01   0.00     0.04  -0.04   0.05     0.05  -0.03   0.00
  98   1    -0.09   0.02   0.03    -0.02   0.06   0.07    -0.02   0.02   0.03
  99   1    -0.05   0.04  -0.07    -0.02   0.02  -0.03    -0.03  -0.02  -0.05
 100   1    -0.02   0.00   0.00     0.02   0.04  -0.01     0.00   0.00   0.00
 101   1    -0.08   0.03   0.03     0.01   0.04   0.05     0.01   0.00   0.00
 102   1    -0.06  -0.06   0.04     0.00   0.00   0.03     0.00   0.01   0.00
 103   1     0.01   0.26   0.05     0.00  -0.02  -0.01    -0.01  -0.05   0.00
 104   1     0.31  -0.10  -0.11    -0.01  -0.01  -0.01    -0.06   0.01   0.01
 105   1    -0.15  -0.22   0.03     0.00  -0.01   0.00     0.01   0.02  -0.01
 106   1     0.03  -0.02   0.02     0.00  -0.01  -0.01    -0.01   0.00   0.00
 107   1     0.02   0.03  -0.07     0.00   0.00   0.00    -0.01   0.00   0.01
 108   1     0.08  -0.04  -0.04    -0.01  -0.01  -0.01    -0.01   0.01   0.00
 109   1    -0.01   0.01   0.04    -0.04   0.04  -0.12     0.02   0.05  -0.16
 110   1    -0.01   0.01   0.03     0.02   0.13  -0.05     0.00   0.12  -0.06
 111   1    -0.01   0.02   0.04     0.01   0.03  -0.03     0.00   0.10  -0.06
 112   1    -0.02   0.03   0.02     0.02   0.04  -0.04     0.03   0.00  -0.04
 113   1    -0.02   0.05   0.01     0.02   0.01  -0.01     0.04   0.00  -0.06
 114   1    -0.03   0.05   0.00     0.03   0.01  -0.01     0.03  -0.05  -0.04
                    64                     65                     66
                    ?A                     ?A                     ?A
 Frequencies --   294.8503               298.3158               301.7669
 Red. masses --     2.1730                 1.9860                 3.8794
 Frc consts  --     0.1113                 0.1041                 0.2081
 IR Inten    --     1.7900                 2.1552                 8.7658
 Raman Activ --     0.0000                 0.0000                 0.0000
 Depolar     --     0.0000                 0.0000                 0.0000
 Atom AN      X      Y      Z        X      Y      Z        X      Y      Z
   1   8     0.00   0.00   0.00     0.00   0.01   0.01     0.03   0.00   0.03
   2  12    -0.01  -0.03   0.00     0.04  -0.02   0.01     0.04   0.02   0.04
   3   8    -0.01   0.01  -0.01     0.01   0.00  -0.01     0.05  -0.03   0.03
   4   6     0.00   0.00   0.00     0.00   0.00   0.01    -0.01  -0.01   0.02
   5   7     0.09   0.02   0.02    -0.05  -0.01  -0.04     0.02   0.00   0.02
   6   7     0.02   0.02   0.03    -0.01   0.01   0.03     0.01   0.01  -0.01
   7   8     0.00   0.00   0.00     0.00  -0.01   0.01     0.04  -0.07   0.07
   8   6     0.03  -0.01   0.00     0.00  -0.02  -0.04    -0.01   0.01   0.01
   9   6    -0.03  -0.03  -0.01     0.02  -0.02   0.01    -0.03   0.00  -0.01
  10   6     0.00  -0.02   0.01     0.01  -0.03   0.02    -0.01   0.01  -0.01
  11   8     0.00   0.00   0.00    -0.01  -0.01  -0.01    -0.06  -0.01  -0.05
  12   6     0.00   0.00   0.01    -0.01   0.00   0.00    -0.06   0.02  -0.05
  13   6     0.00   0.00   0.00     0.00   0.01   0.00    -0.01   0.06   0.00
  14   6     0.00   0.00   0.00    -0.01   0.00  -0.01    -0.04  -0.01  -0.04
  15   8    -0.01   0.00   0.02    -0.01   0.00  -0.01    -0.02  -0.10  -0.14
  16   6     0.00   0.00   0.00     0.00   0.00  -0.02     0.00  -0.02  -0.06
  17   8    -0.01  -0.01  -0.01     0.01   0.00   0.02    -0.03  -0.06   0.02
  18   6     0.00   0.00   0.00     0.02   0.01  -0.02     0.07   0.02  -0.03
  19   8    -0.01  -0.01   0.00     0.05   0.02  -0.01     0.08   0.15  -0.06
  20   8     0.01   0.00  -0.01    -0.01   0.01   0.03     0.04   0.06   0.05
  21   6     0.01   0.00   0.01    -0.01   0.00   0.01    -0.02  -0.01   0.02
  22   6     0.01   0.00   0.01     0.00   0.00   0.01    -0.05   0.00   0.01
  23   6     0.00   0.00   0.00     0.01   0.02  -0.01     0.06   0.04  -0.01
  24   8     0.01   0.01  -0.01    -0.01   0.00   0.00     0.01  -0.13  -0.02
  25   6     0.00  -0.01   0.00    -0.02  -0.02   0.03     0.04   0.09  -0.01
  26   6     0.00   0.00   0.00    -0.03   0.00   0.01    -0.11  -0.02   0.03
  27   6     0.01   0.00   0.00    -0.01  -0.01   0.02    -0.04  -0.06   0.13
  28   6     0.00   0.01   0.00    -0.01  -0.01   0.01    -0.03   0.05   0.01
  29   6     0.03   0.02   0.00    -0.02   0.01  -0.01     0.01   0.00   0.00
  30   6     0.00   0.02   0.02    -0.02   0.02   0.02     0.00   0.00  -0.01
  31   6     0.03   0.04  -0.03    -0.02   0.01   0.02     0.01   0.00  -0.01
  32   6     0.01   0.05   0.00     0.00   0.01   0.01     0.00   0.01   0.00
  33   6    -0.01   0.01   0.00     0.01   0.02  -0.03    -0.01  -0.01   0.01
  34   6     0.00  -0.02  -0.02     0.00   0.04  -0.02    -0.01  -0.03   0.00
  35   6     0.00  -0.01   0.01     0.00   0.04  -0.01     0.00  -0.02   0.01
  36   6     0.03   0.02  -0.04    -0.02   0.01   0.01     0.01   0.00  -0.01
  37   6    -0.04   0.01   0.01     0.02   0.02   0.01    -0.01  -0.01   0.01
  38   6    -0.02   0.03   0.04    -0.02   0.02   0.04     0.01  -0.01  -0.01
  39   6    -0.06   0.00   0.03    -0.04   0.03   0.03     0.02   0.00  -0.01
  40   6    -0.05  -0.01  -0.01    -0.04   0.03   0.01     0.02   0.00   0.01
  41   6    -0.02   0.00  -0.03    -0.03   0.02   0.01     0.01   0.00   0.02
  42   6     0.00   0.00   0.00    -0.03   0.01   0.02     0.00   0.00   0.00
  43   6     0.00   0.02   0.02     0.00   0.02   0.02     0.00  -0.01   0.00
  44   6    -0.01  -0.01   0.00    -0.02   0.00   0.01     0.00   0.00   0.00
  45   6     0.11  -0.05   0.02    -0.05   0.01  -0.02     0.04  -0.01   0.01
  46   6    -0.03   0.01  -0.03     0.02  -0.02   0.01    -0.01   0.01  -0.01
  47   6    -0.09   0.01   0.05     0.05  -0.02  -0.01    -0.02   0.01   0.01
  48   6    -0.12   0.00  -0.02     0.02  -0.02   0.03    -0.02   0.01  -0.01
  49   6    -0.03   0.00  -0.01    -0.02  -0.04  -0.05    -0.01   0.00  -0.01
  50   6    -0.02  -0.01   0.01    -0.02  -0.04  -0.02    -0.01  -0.01  -0.01
  51   6     0.08   0.00  -0.01     0.08   0.01   0.00    -0.02   0.00   0.01
  52   6     0.07   0.00   0.00     0.06   0.00   0.01    -0.04   0.00   0.00
  53   6     0.03  -0.02   0.01     0.00   0.00  -0.05     0.00   0.03   0.00
  54   6     0.04  -0.02  -0.02     0.05  -0.06  -0.06     0.01   0.02  -0.02
  55   1    -0.06  -0.03  -0.01     0.03   0.01   0.02    -0.03  -0.01  -0.01
  56   1     0.00  -0.01   0.00     0.01   0.01  -0.01     0.03   0.09  -0.07
  57   1     0.00   0.00   0.00    -0.01   0.01  -0.02    -0.02   0.00  -0.06
  58   1     0.00   0.00   0.00     0.00   0.01  -0.04    -0.02  -0.01  -0.11
  59   1    -0.01   0.00   0.00     0.01  -0.02  -0.02     0.02  -0.09  -0.08
  60   1     0.00   0.00   0.00     0.00   0.01  -0.03    -0.02   0.04  -0.09
  61   1     0.01   0.02   0.00     0.00  -0.01   0.02    -0.05   0.00   0.02
  62   1     0.00   0.00   0.00     0.03   0.04  -0.02     0.12   0.08  -0.02
  63   1    -0.03  -0.04  -0.02    -0.02  -0.06   0.03     0.09   0.24   0.05
  64   1     0.02   0.00  -0.02    -0.02  -0.01   0.03    -0.04   0.06   0.04
  65   1    -0.02   0.00   0.03    -0.05  -0.01   0.06     0.14   0.04  -0.12
  66   1    -0.01  -0.01  -0.02    -0.04   0.04   0.04    -0.27   0.08  -0.03
  67   1    -0.01   0.00   0.02    -0.02  -0.02  -0.02    -0.15  -0.18   0.13
  68   1     0.02   0.01   0.00    -0.08  -0.02   0.01    -0.09  -0.04   0.04
  69   1    -0.01   0.03  -0.04    -0.01   0.00   0.04     0.05  -0.16   0.34
  70   1     0.06   0.00  -0.01    -0.01  -0.04   0.01    -0.26  -0.18   0.07
  71   1    -0.02  -0.02   0.02    -0.01  -0.01   0.04     0.06   0.03   0.13
  72   1     0.01   0.01   0.00    -0.02  -0.01   0.03     0.03   0.06   0.06
  73   1     0.00   0.01   0.00    -0.02  -0.01   0.02    -0.08   0.12   0.01
  74   1     0.00   0.01   0.00     0.01  -0.03   0.01    -0.03   0.03   0.00
  75   1     0.01   0.07   0.02     0.01   0.00   0.01    -0.01   0.02   0.01
  76   1    -0.04   0.02   0.02     0.03   0.01  -0.05    -0.03  -0.01   0.02
  77   1     0.00  -0.04  -0.04     0.00   0.05  -0.03    -0.01  -0.04   0.00
  78   1     0.00   0.02  -0.04    -0.02   0.01   0.01     0.01   0.00  -0.01
  79   1    -0.05   0.00   0.02     0.05   0.03  -0.01    -0.03  -0.01   0.01
  80   1    -0.09   0.00   0.04    -0.05   0.03   0.03     0.03   0.00  -0.01
  81   1    -0.07  -0.02  -0.03    -0.05   0.04  -0.01     0.03   0.00   0.01
  82   1    -0.02  -0.01  -0.06    -0.03   0.01   0.00     0.01  -0.01   0.03
  83   1    -0.04   0.01   0.00    -0.03   0.01   0.01     0.02   0.00   0.01
  84   1    -0.01  -0.01  -0.01     0.00   0.01   0.01     0.00   0.00   0.00
  85   1     0.01  -0.26  -0.13     0.03   0.20   0.21     0.00  -0.10  -0.06
  86   1     0.07   0.19   0.03     0.06  -0.27  -0.04     0.01   0.10   0.02
  87   1     0.33  -0.14   0.20    -0.25   0.12  -0.24     0.13  -0.05   0.10
  88   1    -0.04   0.02   0.02     0.04   0.01  -0.03    -0.02   0.00   0.02
  89   1    -0.05   0.02  -0.03     0.00  -0.03   0.04    -0.01   0.01  -0.02
  90   1    -0.06   0.02  -0.06     0.06  -0.06   0.01    -0.03   0.02  -0.02
  91   1    -0.06   0.00   0.10     0.01   0.04   0.00     0.00  -0.04   0.00
  92   1    -0.13   0.02   0.10     0.10  -0.03  -0.10    -0.06   0.02   0.07
  93   1    -0.16   0.04   0.00     0.06  -0.10   0.05    -0.01   0.07  -0.03
  94   1    -0.10  -0.05  -0.06     0.01  -0.02   0.00    -0.01   0.01   0.00
  95   1    -0.16   0.07   0.01     0.02  -0.09   0.04    -0.03   0.04  -0.01
  96   1    -0.18  -0.03  -0.07     0.05   0.00   0.09    -0.04   0.00  -0.04
  97   1     0.00  -0.01  -0.02    -0.12   0.08  -0.13    -0.01   0.00  -0.02
  98   1    -0.06   0.00   0.01     0.01  -0.17  -0.16    -0.01  -0.01  -0.01
  99   1    -0.04   0.00  -0.05     0.03  -0.05   0.08    -0.01  -0.01  -0.01
 100   1    -0.02  -0.01   0.01    -0.05  -0.08   0.03     0.00  -0.02   0.00
 101   1    -0.04   0.00   0.01    -0.02  -0.08  -0.07    -0.01  -0.01  -0.01
 102   1    -0.02  -0.02   0.02    -0.01   0.00  -0.03    -0.01  -0.01  -0.01
 103   1     0.04   0.28   0.01     0.05   0.26   0.01    -0.01  -0.07   0.02
 104   1     0.36  -0.09  -0.10     0.34  -0.07  -0.07    -0.09   0.02   0.03
 105   1    -0.11  -0.21   0.05    -0.07  -0.18   0.06     0.02   0.04   0.00
 106   1     0.06  -0.04   0.08     0.04  -0.02   0.12    -0.05   0.05  -0.01
 107   1     0.06   0.05  -0.08     0.02   0.05  -0.08    -0.07  -0.02  -0.01
 108   1     0.18  -0.03  -0.03     0.18  -0.04  -0.02    -0.05  -0.01   0.00
 109   1     0.06  -0.02   0.03     0.01  -0.01  -0.08     0.01   0.03  -0.02
 110   1     0.01  -0.06   0.01     0.00   0.01  -0.05     0.01   0.04   0.00
 111   1     0.02   0.00  -0.01     0.00   0.01  -0.05     0.00   0.05   0.02
 112   1     0.04   0.01  -0.05     0.05  -0.04  -0.06     0.02   0.04  -0.04
 113   1     0.06  -0.02  -0.04     0.08  -0.02  -0.12     0.02   0.01  -0.02
 114   1     0.06  -0.07  -0.02     0.04  -0.14  -0.07     0.03   0.00  -0.01
                    67                     68                     69
                    ?A                     ?A                     ?A
 Frequencies --   310.7919               312.7281               317.0203
 Red. masses --     3.0593                 3.4396                 3.2577
 Frc consts  --     0.1741                 0.1982                 0.1929
 IR Inten    --     0.9319                 7.1872                 1.0774
 Raman Activ --     0.0000                 0.0000                 0.0000
 Depolar     --     0.0000                 0.0000                 0.0000
 Atom AN      X      Y      Z        X      Y      Z        X      Y      Z
   1   8     0.02   0.01  -0.01     0.07  -0.07  -0.01    -0.07   0.07   0.01
   2  12     0.01  -0.01   0.00     0.00   0.03  -0.03    -0.03   0.03  -0.05
   3   8    -0.05   0.10  -0.10     0.03  -0.08   0.06     0.04  -0.03   0.08
   4   6    -0.01   0.00  -0.01     0.00  -0.06  -0.01     0.00   0.05   0.01
   5   7     0.00   0.01   0.01    -0.01   0.00   0.00     0.01   0.01  -0.01
   6   7     0.02   0.02   0.00    -0.02  -0.02  -0.01    -0.04  -0.02  -0.03
   7   8     0.02   0.01  -0.01     0.05  -0.01  -0.04    -0.04   0.00   0.04
   8   6    -0.01   0.01   0.01     0.01   0.00   0.00     0.03   0.00  -0.01
   9   6    -0.01   0.01   0.00     0.02   0.00   0.00     0.04   0.01  -0.01
  10   6     0.00   0.02  -0.01     0.00  -0.01   0.00     0.00   0.00  -0.01
  11   8     0.00  -0.02  -0.01    -0.04   0.08   0.07     0.02  -0.08  -0.07
  12   6     0.03  -0.05   0.05    -0.05   0.04   0.00     0.02  -0.02  -0.03
  13   6     0.02   0.00   0.04    -0.02   0.01  -0.01     0.02   0.00   0.02
  14   6    -0.04  -0.01  -0.01    -0.05  -0.03   0.04     0.05   0.02  -0.04
  15   8    -0.04  -0.11   0.12     0.00   0.01  -0.09     0.03   0.00  -0.05
  16   6    -0.01   0.01   0.00    -0.01  -0.08   0.11     0.01   0.08  -0.10
  17   8    -0.01  -0.07  -0.01     0.00  -0.04  -0.02     0.01  -0.04  -0.03
  18   6    -0.01   0.04  -0.09     0.02   0.00  -0.04     0.00   0.03   0.03
  19   8    -0.03   0.03  -0.10     0.10   0.08  -0.03     0.03   0.08   0.03
  20   8     0.04   0.02   0.00    -0.06  -0.03   0.04    -0.04  -0.03   0.01
  21   6     0.07   0.02   0.05     0.00   0.01   0.02     0.01   0.01   0.01
  22   6     0.06   0.00   0.05     0.03  -0.02   0.01     0.04  -0.03   0.00
  23   6     0.05   0.02  -0.03    -0.02   0.00  -0.05    -0.03   0.00   0.00
  24   8     0.07   0.05  -0.02    -0.03   0.12  -0.01    -0.02   0.10   0.00
  25   6    -0.03  -0.10   0.01    -0.07  -0.12   0.05    -0.04  -0.11   0.04
  26   6    -0.12  -0.04   0.03    -0.02   0.01   0.04     0.00   0.02   0.01
  27   6     0.05   0.05  -0.02     0.04   0.01  -0.03    -0.04  -0.04   0.08
  28   6    -0.03   0.01   0.04    -0.04   0.13  -0.05     0.05  -0.10   0.02
  29   6     0.00   0.00   0.00     0.00   0.00   0.00     0.00   0.01   0.00
  30   6     0.01   0.00   0.00     0.00  -0.01   0.00    -0.01  -0.01   0.00
  31   6     0.00   0.00   0.00     0.00  -0.01  -0.01     0.00   0.01   0.00
  32   6    -0.01   0.00  -0.01     0.01   0.00   0.02    -0.02  -0.01  -0.05
  33   6    -0.02   0.00   0.00     0.01   0.00   0.00    -0.02   0.00   0.00
  34   6    -0.01   0.00   0.01     0.01  -0.01  -0.02    -0.01   0.01   0.04
  35   6     0.00   0.00   0.00     0.00   0.00   0.00    -0.01  -0.01   0.00
  36   6     0.00   0.00   0.01     0.00  -0.01  -0.01     0.00   0.00   0.02
  37   6     0.00  -0.01   0.00     0.00   0.00   0.01    -0.01  -0.01  -0.02
  38   6     0.00   0.00  -0.01     0.00   0.00  -0.01     0.00   0.00  -0.01
  39   6     0.02   0.01   0.00    -0.01  -0.02   0.00    -0.02  -0.04   0.02
  40   6     0.02   0.02   0.00    -0.01  -0.01  -0.01    -0.02  -0.01  -0.02
  41   6     0.01   0.01   0.01    -0.01   0.00  -0.02    -0.02   0.02  -0.05
  42   6     0.00   0.00   0.00     0.00   0.00   0.00    -0.01   0.00   0.00
  43   6     0.00   0.00  -0.01     0.00   0.01  -0.01     0.00   0.02  -0.01
  44   6     0.00   0.00   0.00     0.01   0.00   0.00     0.01  -0.01   0.01
  45   6     0.01  -0.01   0.00     0.00   0.00  -0.01     0.01  -0.02   0.01
  46   6     0.02   0.00   0.00    -0.01   0.01  -0.01     0.04  -0.01   0.01
  47   6     0.00   0.00  -0.01     0.00  -0.01   0.01    -0.02   0.00  -0.01
  48   6     0.01   0.01   0.00    -0.02   0.00   0.00     0.03   0.01  -0.02
  49   6    -0.01  -0.01  -0.02     0.02   0.01   0.03     0.01  -0.01   0.03
  50   6    -0.01  -0.01   0.00     0.02   0.03   0.01     0.04   0.04   0.02
  51   6    -0.04  -0.01   0.00    -0.01   0.02  -0.01     0.00   0.03  -0.01
  52   6    -0.02   0.00  -0.01     0.03   0.00   0.00     0.04   0.02   0.02
  53   6     0.00  -0.01   0.03     0.00  -0.03   0.02     0.00  -0.06   0.02
  54   6     0.00   0.02  -0.01    -0.03   0.01   0.05    -0.05   0.02   0.06
  55   1    -0.01   0.00  -0.01     0.03   0.01   0.00     0.05   0.02   0.00
  56   1    -0.02  -0.04   0.11     0.01   0.04  -0.07     0.03   0.02   0.01
  57   1    -0.03  -0.01  -0.01    -0.05  -0.08   0.08     0.06   0.07  -0.08
  58   1    -0.01  -0.02   0.00    -0.01  -0.18   0.18     0.00   0.17  -0.17
  59   1    -0.02   0.01   0.00    -0.08   0.02   0.12     0.07  -0.02  -0.12
  60   1    -0.02   0.03  -0.01    -0.03  -0.07   0.12     0.02   0.08  -0.12
  61   1     0.10   0.08   0.02     0.06   0.01  -0.01     0.07   0.00  -0.02
  62   1     0.08   0.05  -0.04     0.01   0.05  -0.07    -0.05  -0.01   0.00
  63   1    -0.16  -0.30  -0.13    -0.14  -0.35  -0.05    -0.10  -0.31  -0.04
  64   1     0.15  -0.06  -0.09     0.05  -0.06  -0.02     0.05  -0.06  -0.02
  65   1    -0.17  -0.03   0.20    -0.21  -0.05   0.23    -0.17  -0.05   0.19
  66   1    -0.38   0.04  -0.18     0.04   0.07   0.17    -0.08  -0.03  -0.14
  67   1    -0.24  -0.23   0.29     0.02   0.06  -0.04    -0.08   0.02   0.17
  68   1     0.06  -0.01   0.03    -0.09  -0.09   0.07     0.17   0.07   0.00
  69   1     0.00   0.12  -0.15     0.06  -0.08  -0.04    -0.01  -0.04   0.20
  70   1     0.21   0.08   0.00     0.01   0.03  -0.02    -0.15  -0.09   0.05
  71   1    -0.01   0.00   0.03     0.11   0.07  -0.04    -0.03  -0.03   0.07
  72   1    -0.01   0.01   0.08     0.09   0.15  -0.25    -0.05  -0.11   0.18
  73   1    -0.08   0.03   0.06    -0.06   0.08  -0.02     0.07  -0.05  -0.02
  74   1     0.02  -0.01   0.05    -0.16   0.32   0.00     0.13  -0.26  -0.02
  75   1    -0.02   0.00  -0.02     0.01   0.01   0.04    -0.03  -0.02  -0.09
  76   1    -0.02   0.00   0.00     0.02   0.00   0.01    -0.03  -0.01   0.00
  77   1    -0.01   0.00   0.02     0.01  -0.01  -0.04    -0.01   0.02   0.08
  78   1    -0.01   0.00   0.01     0.01  -0.01  -0.01    -0.01   0.00   0.02
  79   1    -0.01  -0.01   0.00     0.01   0.01   0.01    -0.02  -0.01  -0.02
  80   1     0.03   0.01   0.00    -0.01  -0.02   0.00    -0.03  -0.06   0.04
  81   1     0.02   0.02   0.00    -0.01  -0.01  -0.02    -0.02   0.00  -0.02
  82   1     0.01   0.02   0.01     0.00   0.01  -0.04    -0.01   0.05  -0.08
  83   1     0.00   0.00   0.00     0.00   0.00  -0.01     0.01   0.02  -0.01
  84   1     0.00   0.00   0.00     0.00  -0.01   0.00     0.01  -0.01   0.02
  85   1     0.01   0.01   0.06     0.02   0.04   0.04    -0.01  -0.05  -0.01
  86   1     0.04  -0.07   0.00     0.03  -0.03  -0.01     0.00   0.01   0.02
  87   1    -0.02   0.01  -0.04    -0.03   0.02  -0.03     0.04  -0.03   0.03
  88   1     0.03   0.02  -0.02    -0.02   0.01   0.01     0.05   0.02  -0.03
  89   1     0.00  -0.01   0.01    -0.02   0.01  -0.03     0.02  -0.01   0.03
  90   1     0.04  -0.03   0.01    -0.02   0.02  -0.02     0.07  -0.03   0.03
  91   1     0.01  -0.02  -0.02     0.02  -0.04   0.01    -0.02   0.00  -0.01
  92   1    -0.01   0.01   0.02    -0.03  -0.01   0.03    -0.02   0.01   0.00
  93   1     0.02   0.03  -0.02     0.01   0.02   0.00    -0.03   0.01  -0.02
  94   1     0.01   0.01   0.01    -0.02  -0.02  -0.01     0.03   0.03   0.03
  95   1     0.02   0.01  -0.01    -0.04   0.01   0.01     0.06   0.02  -0.04
  96   1     0.01   0.00  -0.01    -0.04  -0.01  -0.01     0.03   0.01  -0.03
  97   1    -0.01   0.01  -0.03     0.04  -0.03   0.06     0.04  -0.04   0.05
  98   1    -0.02  -0.03  -0.02     0.02   0.06   0.06     0.02   0.03   0.05
  99   1    -0.01  -0.01  -0.01     0.00   0.01   0.00     0.00  -0.01   0.01
 100   1    -0.01  -0.03   0.01     0.02   0.05  -0.01     0.03   0.08  -0.01
 101   1    -0.02  -0.02  -0.02     0.03   0.03   0.04     0.07   0.03   0.06
 102   1    -0.01  -0.02   0.00     0.03   0.03   0.02     0.05   0.05   0.03
 103   1    -0.02  -0.10   0.00    -0.01   0.03   0.00     0.00   0.05  -0.01
 104   1    -0.12   0.01   0.01     0.00   0.02   0.00     0.03   0.02  -0.01
 105   1     0.02   0.05  -0.02    -0.02   0.02  -0.02    -0.02   0.01  -0.02
 106   1    -0.02   0.02  -0.05     0.05  -0.04  -0.03     0.04  -0.02   0.07
 107   1    -0.01  -0.01   0.01     0.09   0.01   0.05     0.04   0.03   0.01
 108   1    -0.06   0.00  -0.01     0.00   0.05   0.02     0.11   0.05   0.01
 109   1     0.00   0.00   0.05     0.00  -0.03   0.05    -0.04  -0.04   0.08
 110   1     0.00  -0.03   0.02     0.00  -0.06   0.01     0.00  -0.08   0.01
 111   1     0.00  -0.01   0.03     0.00  -0.05   0.00     0.00  -0.12   0.00
 112   1     0.00   0.02  -0.01    -0.03  -0.01   0.06    -0.05  -0.01   0.08
 113   1     0.00   0.02  -0.01    -0.05  -0.01   0.08    -0.07  -0.01   0.11
 114   1     0.00   0.02  -0.01    -0.04   0.06   0.05    -0.06   0.10   0.06
                    70                     71                     72
                    ?A                     ?A                     ?A
 Frequencies --   321.3643               324.5606               326.8651
 Red. masses --     3.6124                 2.9988                 1.3254
 Frc consts  --     0.2198                 0.1861                 0.0834
 IR Inten    --     8.9842                 1.6359                 1.1052
 Raman Activ --     0.0000                 0.0000                 0.0000
 Depolar     --     0.0000                 0.0000                 0.0000
 Atom AN      X      Y      Z        X      Y      Z        X      Y      Z
   1   8     0.02  -0.01   0.00    -0.02   0.03   0.00     0.00  -0.01  -0.01
   2  12    -0.02   0.11  -0.01    -0.02   0.02  -0.02     0.00   0.02   0.02
   3   8    -0.02   0.05  -0.06     0.00   0.01   0.01     0.00  -0.02   0.00
   4   6     0.00  -0.01   0.00     0.00   0.02   0.00     0.00   0.00   0.00
   5   7     0.01   0.00  -0.03     0.01  -0.03   0.02     0.01   0.00   0.01
   6   7    -0.13  -0.09  -0.05    -0.02  -0.01  -0.01    -0.02  -0.02   0.00
   7   8     0.01   0.00   0.00    -0.01   0.00   0.01     0.00   0.03  -0.02
   8   6     0.04  -0.02  -0.03     0.00   0.00   0.03     0.00   0.00   0.00
   9   6     0.06   0.00   0.00    -0.01   0.00   0.02    -0.01  -0.01   0.01
  10   6    -0.03  -0.05  -0.02    -0.01   0.00   0.00    -0.01  -0.02   0.00
  11   8    -0.01   0.01   0.01     0.01  -0.03  -0.02     0.00   0.00   0.01
  12   6     0.01  -0.02   0.03     0.01  -0.01   0.00     0.00  -0.01   0.00
  13   6     0.01   0.00   0.01     0.01   0.00   0.01    -0.01  -0.03  -0.01
  14   6    -0.03  -0.01   0.00     0.02   0.01  -0.02     0.00   0.00   0.01
  15   8    -0.02  -0.05   0.05     0.00  -0.02   0.01     0.01   0.01  -0.01
  16   6    -0.01  -0.01   0.01     0.00   0.03  -0.04     0.00  -0.01   0.03
  17   8     0.04   0.04   0.03     0.01   0.00  -0.01    -0.03  -0.01   0.01
  18   6    -0.01   0.01  -0.04    -0.01   0.01   0.01     0.01  -0.01   0.00
  19   8    -0.04  -0.02  -0.04    -0.03   0.02   0.00     0.03   0.01   0.00
  20   8     0.03   0.02   0.03     0.00  -0.01  -0.01    -0.01   0.00   0.02
  21   6     0.00  -0.02  -0.02     0.02   0.00   0.00    -0.02   0.01   0.01
  22   6    -0.01   0.00  -0.02     0.02  -0.01  -0.01    -0.02   0.02   0.01
  23   6     0.03   0.03   0.01     0.00   0.00   0.01     0.01  -0.01  -0.01
  24   8     0.02  -0.11   0.01     0.01   0.01   0.01    -0.01   0.01  -0.01
  25   6     0.04   0.05  -0.01     0.00  -0.03   0.00    -0.01   0.03  -0.02
  26   6    -0.07  -0.01  -0.01    -0.03  -0.01   0.00     0.07   0.01   0.00
  27   6     0.02   0.02   0.00     0.00   0.00   0.02    -0.02  -0.01  -0.02
  28   6    -0.02   0.02   0.01     0.01  -0.05   0.01     0.00   0.00  -0.01
  29   6    -0.01   0.00  -0.01     0.02  -0.03   0.01     0.00   0.00   0.00
  30   6    -0.04  -0.03  -0.02     0.00  -0.01  -0.01     0.00  -0.01   0.00
  31   6     0.00  -0.01   0.00     0.01  -0.04  -0.01     0.00   0.00   0.00
  32   6     0.00  -0.02  -0.02     0.07   0.04   0.18     0.01   0.00   0.01
  33   6     0.01   0.00   0.00     0.07  -0.02   0.00     0.01   0.00  -0.01
  34   6     0.01   0.01   0.03     0.04  -0.09  -0.16     0.00  -0.01  -0.02
  35   6     0.00   0.00   0.00     0.02  -0.01   0.02     0.00   0.00   0.00
  36   6    -0.01  -0.01   0.02     0.01  -0.02  -0.07    -0.01   0.00   0.00
  37   6     0.00   0.00  -0.01     0.01   0.04   0.08     0.00   0.00   0.01
  38   6    -0.01  -0.03  -0.02     0.01  -0.01  -0.01     0.00  -0.01  -0.01
  39   6    -0.05  -0.07  -0.02     0.01  -0.02  -0.01     0.00   0.00  -0.01
  40   6    -0.06  -0.05  -0.03     0.01  -0.01  -0.02     0.00  -0.01   0.00
  41   6    -0.06  -0.01  -0.06     0.00  -0.01  -0.01    -0.01  -0.01   0.00
  42   6    -0.03  -0.01  -0.01     0.00  -0.01  -0.01     0.00   0.00   0.00
  43   6     0.01   0.01  -0.01     0.01   0.00  -0.01     0.00   0.00   0.00
  44   6     0.01  -0.01   0.01     0.01  -0.01  -0.01     0.00   0.00   0.00
  45   6    -0.04   0.01   0.00    -0.03   0.06  -0.06    -0.02   0.00  -0.01
  46   6     0.01  -0.01   0.02    -0.14   0.02  -0.05    -0.01   0.00   0.00
  47   6     0.00  -0.01   0.00     0.07   0.06   0.03     0.01   0.00   0.00
  48   6     0.01   0.00  -0.01    -0.10  -0.02   0.07    -0.01   0.00   0.01
  49   6     0.06   0.01   0.10     0.01   0.00   0.02     0.01   0.01   0.02
  50   6     0.09   0.09   0.02     0.01   0.02   0.01     0.01   0.01   0.00
  51   6     0.08   0.08  -0.01    -0.01   0.01   0.00     0.01   0.01   0.00
  52   6     0.10   0.01   0.07     0.00   0.01   0.01     0.01   0.00   0.01
  53   6     0.00  -0.02  -0.05     0.00   0.04   0.00     0.00   0.04  -0.03
  54   6    -0.04  -0.03   0.07    -0.01   0.01   0.01     0.01  -0.02  -0.01
  55   1     0.10   0.04   0.02     0.00  -0.02   0.02    -0.01  -0.01   0.01
  56   1     0.00  -0.01   0.04     0.00   0.00   0.03    -0.01  -0.03  -0.01
  57   1    -0.02  -0.02   0.01     0.01   0.02  -0.03    -0.01   0.00   0.02
  58   1    -0.01  -0.03   0.02     0.00   0.06  -0.06     0.00  -0.03   0.05
  59   1    -0.02   0.00   0.01     0.02   0.00  -0.04    -0.01   0.02   0.03
  60   1    -0.01   0.00   0.01     0.01   0.03  -0.04     0.00  -0.02   0.04
  61   1    -0.05  -0.04   0.00     0.03  -0.01  -0.01    -0.02   0.03   0.01
  62   1     0.05   0.04   0.00    -0.01   0.00   0.01     0.02  -0.02  -0.01
  63   1     0.09   0.15   0.05    -0.01  -0.07  -0.01    -0.01   0.07  -0.02
  64   1    -0.04   0.03   0.04     0.02  -0.03   0.00     0.00   0.03  -0.02
  65   1     0.11   0.01  -0.10    -0.02  -0.02   0.03     0.02   0.02  -0.03
  66   1    -0.10   0.06   0.04    -0.01   0.02   0.06    -0.19  -0.12  -0.44
  67   1    -0.04  -0.11  -0.07     0.00  -0.03  -0.07    -0.17   0.00   0.52
  68   1    -0.18  -0.02  -0.01    -0.11  -0.02   0.00     0.58   0.16  -0.02
  69   1    -0.01   0.06  -0.06     0.00   0.01   0.03    -0.02   0.00  -0.03
  70   1     0.09   0.02   0.00    -0.01  -0.01   0.02    -0.01   0.00  -0.02
  71   1    -0.01  -0.01   0.03    -0.01   0.00   0.03    -0.03  -0.02  -0.03
  72   1     0.00   0.03   0.01    -0.03  -0.05   0.05     0.00   0.00  -0.02
  73   1    -0.05   0.03   0.03     0.02  -0.05   0.01     0.01   0.00  -0.01
  74   1    -0.02   0.04   0.03     0.05  -0.09   0.00    -0.02   0.01  -0.01
  75   1     0.00  -0.03  -0.04     0.09   0.09   0.33     0.01   0.01   0.03
  76   1     0.01   0.00   0.00     0.08  -0.02   0.01     0.01   0.00  -0.01
  77   1     0.01   0.03   0.05     0.04  -0.13  -0.31     0.00  -0.01  -0.03
  78   1     0.00  -0.01   0.02     0.05  -0.02  -0.08     0.00   0.00   0.00
  79   1     0.01   0.00  -0.01     0.00   0.03   0.07     0.00   0.00   0.00
  80   1    -0.07  -0.08   0.00     0.01  -0.02  -0.01     0.00   0.00  -0.02
  81   1    -0.04  -0.05  -0.02     0.01  -0.01  -0.01     0.00  -0.01   0.00
  82   1    -0.06   0.00  -0.09     0.00   0.00  -0.01    -0.01  -0.02   0.00
  83   1     0.02   0.01  -0.01     0.02   0.00   0.00     0.01   0.00   0.00
  84   1     0.01  -0.01   0.02     0.00  -0.01  -0.01     0.00   0.00  -0.01
  85   1    -0.03   0.01  -0.05     0.04   0.20   0.04    -0.01   0.03   0.00
  86   1    -0.08   0.03   0.01     0.02  -0.07  -0.07    -0.02  -0.03  -0.01
  87   1    -0.03   0.00   0.02    -0.18   0.11  -0.15    -0.04   0.02  -0.03
  88   1     0.01  -0.01   0.00    -0.19  -0.03   0.11    -0.02  -0.01   0.01
  89   1     0.03  -0.01   0.02    -0.13   0.05  -0.12    -0.01   0.00   0.00
  90   1     0.02   0.00   0.03    -0.26   0.11  -0.12    -0.02   0.00   0.00
  91   1     0.01  -0.04  -0.01     0.01   0.13  -0.02     0.00   0.02   0.00
  92   1    -0.03  -0.01   0.02     0.16   0.06  -0.03     0.02   0.01   0.00
  93   1     0.01   0.02  -0.01     0.09   0.00   0.08     0.01   0.00   0.01
  94   1     0.01   0.01   0.00    -0.08  -0.11  -0.02    -0.01  -0.01  -0.01
  95   1     0.02   0.00  -0.01    -0.17   0.01   0.12    -0.02  -0.01   0.02
  96   1     0.02   0.00  -0.01    -0.18  -0.04   0.07    -0.01   0.00   0.01
  97   1     0.10  -0.10   0.19     0.02  -0.03   0.04     0.01  -0.02   0.04
  98   1     0.12   0.14   0.15     0.01   0.04   0.04     0.02   0.03   0.02
  99   1     0.04  -0.01   0.07     0.00   0.01  -0.01     0.01   0.01   0.01
 100   1     0.08   0.18  -0.06     0.01   0.04  -0.01     0.01   0.02  -0.01
 101   1     0.17   0.09   0.12     0.02   0.02   0.03     0.02   0.01   0.01
 102   1     0.11   0.13   0.01     0.01   0.01   0.02     0.01   0.01   0.00
 103   1     0.06   0.26  -0.03     0.00  -0.01   0.01     0.01   0.04   0.00
 104   1     0.25   0.05   0.04    -0.03   0.02   0.02     0.04   0.01   0.01
 105   1    -0.02   0.02  -0.02     0.00   0.03  -0.02     0.00   0.01   0.00
 106   1     0.09  -0.07   0.17     0.00   0.01   0.02     0.01  -0.01   0.02
 107   1     0.10   0.01   0.08    -0.01  -0.01   0.02     0.01  -0.01   0.02
 108   1     0.20   0.10   0.07     0.00   0.02   0.01     0.01   0.01   0.01
 109   1    -0.05  -0.02  -0.07     0.03   0.03  -0.03     0.00   0.03  -0.09
 110   1    -0.01   0.03  -0.03    -0.02   0.05   0.02    -0.01   0.08  -0.01
 111   1     0.00  -0.06  -0.07    -0.01   0.08  -0.01     0.00   0.06  -0.02
 112   1    -0.04  -0.03   0.08    -0.01   0.01   0.01     0.02   0.00  -0.03
 113   1    -0.06  -0.07   0.13    -0.01   0.00   0.02     0.03  -0.02  -0.03
 114   1    -0.05   0.06   0.08     0.00   0.02   0.02     0.03  -0.05  -0.01
                    73                     74                     75
                    ?A                     ?A                     ?A
 Frequencies --   331.9916               338.3796               341.4650
 Red. masses --     3.2953                 5.2164                 3.4971
 Frc consts  --     0.2140                 0.3519                 0.2402
 IR Inten    --     1.9075                22.8063                12.0742
 Raman Activ --     0.0000                 0.0000                 0.0000
 Depolar     --     0.0000                 0.0000                 0.0000
 Atom AN      X      Y      Z        X      Y      Z        X      Y      Z
   1   8     0.01   0.00   0.00     0.00  -0.04  -0.04     0.01  -0.01   0.00
   2  12     0.02  -0.03   0.03    -0.01  -0.03   0.01    -0.02   0.07  -0.07
   3   8     0.01   0.00  -0.01    -0.07   0.01   0.04     0.00   0.01  -0.02
   4   6     0.00  -0.01   0.00     0.00   0.06   0.00     0.00   0.00   0.00
   5   7    -0.02   0.00   0.02    -0.01   0.00   0.01    -0.03  -0.03  -0.08
   6   7     0.00   0.00   0.00     0.00   0.00   0.00     0.08   0.05   0.03
   7   8     0.01  -0.04   0.02    -0.05   0.28  -0.16     0.00   0.03  -0.02
   8   6    -0.02   0.01   0.02    -0.01   0.01   0.01     0.03  -0.04  -0.08
   9   6    -0.02   0.00   0.01    -0.01   0.00   0.01     0.05  -0.01  -0.04
  10   6    -0.01   0.01   0.00     0.00   0.00   0.00     0.07   0.00   0.01
  11   8    -0.01   0.04   0.01     0.03  -0.20  -0.02     0.00  -0.02   0.00
  12   6     0.00   0.02   0.00     0.01  -0.13  -0.03     0.00  -0.01   0.00
  13   6     0.00   0.01  -0.01    -0.05  -0.10   0.00     0.01  -0.01   0.00
  14   6    -0.01   0.00   0.00     0.02   0.02   0.06    -0.01   0.00   0.01
  15   8    -0.01   0.00   0.00     0.05   0.03  -0.03     0.00   0.00   0.02
  16   6     0.00   0.00  -0.01    -0.01  -0.01   0.15     0.00  -0.01   0.03
  17   8    -0.02  -0.01  -0.01    -0.03   0.00  -0.01     0.09   0.11   0.05
  18   6     0.00  -0.01   0.01     0.01   0.02   0.01     0.00   0.02  -0.03
  19   8    -0.02  -0.03   0.00     0.10   0.16   0.01     0.04  -0.01  -0.01
  20   8     0.01   0.01  -0.02     0.05   0.02   0.01    -0.04  -0.02   0.09
  21   6     0.00   0.01   0.00     0.03   0.01   0.02    -0.03  -0.03  -0.05
  22   6    -0.01   0.01   0.00    -0.01   0.03   0.01    -0.01  -0.03  -0.05
  23   6     0.00   0.00   0.01     0.03  -0.01   0.00     0.00   0.03   0.00
  24   8     0.00   0.00   0.00     0.05  -0.06  -0.01    -0.04  -0.08   0.03
  25   6     0.02   0.04  -0.01     0.01   0.05  -0.02     0.01   0.01   0.03
  26   6     0.03   0.00  -0.01    -0.06  -0.04   0.05    -0.03   0.02  -0.02
  27   6     0.01   0.00   0.00    -0.08  -0.08  -0.04    -0.01   0.00  -0.01
  28   6     0.00   0.02   0.00     0.00  -0.05   0.00    -0.01   0.00   0.00
  29   6     0.00   0.00   0.00     0.00   0.00   0.00    -0.01  -0.02  -0.03
  30   6     0.00   0.00   0.00     0.00   0.00   0.00     0.03   0.03   0.02
  31   6     0.00   0.00   0.00     0.00   0.00   0.00     0.00  -0.01  -0.01
  32   6     0.00   0.00   0.01    -0.01   0.00   0.00    -0.01   0.01   0.04
  33   6     0.00   0.01   0.00    -0.01   0.00   0.00    -0.01  -0.02  -0.01
  34   6     0.00   0.00  -0.01    -0.01   0.00   0.00    -0.02  -0.03  -0.03
  35   6     0.00   0.01   0.00     0.00   0.00   0.00    -0.01  -0.01   0.00
  36   6     0.00   0.00   0.00     0.01   0.00  -0.01     0.02   0.00  -0.02
  37   6     0.00   0.00   0.00    -0.01   0.00   0.00    -0.01   0.01   0.03
  38   6     0.01   0.00  -0.02     0.00   0.00  -0.01    -0.01   0.04   0.03
  39   6     0.01  -0.17   0.16     0.00  -0.04   0.03    -0.01   0.01   0.07
  40   6     0.02  -0.01   0.02     0.00  -0.01   0.00     0.00   0.03   0.02
  41   6     0.02   0.17  -0.15     0.00   0.03  -0.03     0.03   0.04  -0.01
  42   6    -0.01  -0.01   0.01     0.00   0.00   0.00     0.02   0.01   0.02
  43   6     0.00   0.06  -0.08     0.00   0.01  -0.02    -0.02   0.02   0.00
  44   6    -0.01  -0.07   0.06     0.00  -0.01   0.01     0.01   0.00   0.02
  45   6     0.00   0.01   0.00     0.03  -0.01   0.01     0.04   0.00   0.02
  46   6     0.00   0.00   0.00     0.01   0.01  -0.01     0.01   0.01  -0.02
  47   6     0.01   0.00   0.00    -0.01   0.01  -0.01     0.03   0.02  -0.01
  48   6     0.01   0.00   0.00     0.01   0.00   0.01    -0.03   0.01   0.02
  49   6    -0.05  -0.11  -0.05    -0.01  -0.02   0.00    -0.04  -0.02  -0.07
  50   6     0.04   0.01   0.09     0.01   0.01   0.02    -0.03  -0.05   0.02
  51   6    -0.12   0.02  -0.07    -0.02   0.01  -0.01    -0.05  -0.05  -0.01
  52   6     0.09   0.06  -0.01     0.03   0.00   0.00    -0.01   0.01  -0.06
  53   6    -0.01   0.04   0.01    -0.01   0.02   0.01     0.04  -0.14  -0.02
  54   6     0.01  -0.01  -0.04     0.01  -0.01  -0.02    -0.06   0.02   0.13
  55   1    -0.01  -0.01   0.01     0.00   0.00   0.01     0.04   0.03  -0.03
  56   1     0.01   0.01  -0.02    -0.10  -0.14   0.05     0.00  -0.01   0.01
  57   1    -0.01  -0.02   0.01     0.01   0.10   0.01    -0.01   0.01   0.01
  58   1     0.00  -0.01  -0.01     0.02  -0.07   0.25     0.00  -0.03   0.05
  59   1    -0.01  -0.01  -0.01    -0.08   0.14   0.17    -0.02   0.02   0.03
  60   1     0.00   0.01  -0.02     0.01  -0.09   0.19     0.00  -0.02   0.03
  61   1     0.00   0.01   0.00     0.01   0.05   0.00    -0.08  -0.12   0.00
  62   1    -0.01  -0.02   0.01     0.06   0.02  -0.01     0.04   0.05  -0.01
  63   1     0.01   0.07  -0.01    -0.01   0.08  -0.03     0.11   0.07   0.13
  64   1     0.03   0.05  -0.01     0.03   0.05  -0.03    -0.11   0.02   0.10
  65   1     0.06   0.02  -0.01     0.04   0.03  -0.02     0.07  -0.01  -0.04
  66   1     0.03  -0.03  -0.03     0.03   0.09   0.30    -0.18   0.00  -0.22
  67   1     0.02   0.02   0.01     0.06  -0.08  -0.19    -0.13  -0.05   0.20
  68   1     0.05   0.02  -0.01    -0.33  -0.18   0.08     0.16   0.10  -0.03
  69   1     0.01   0.00   0.00    -0.10  -0.01  -0.05    -0.01   0.01  -0.01
  70   1     0.01   0.00   0.00    -0.04  -0.07  -0.03     0.00   0.01   0.00
  71   1     0.02   0.01   0.00    -0.14  -0.13  -0.04    -0.02  -0.01  -0.02
  72   1     0.02   0.02  -0.03    -0.07  -0.06   0.08    -0.01   0.00   0.01
  73   1    -0.01   0.01   0.01     0.08  -0.02  -0.08    -0.01   0.00   0.00
  74   1    -0.01   0.05   0.01    -0.04  -0.15  -0.05    -0.01   0.00   0.00
  75   1     0.00   0.00   0.01    -0.01   0.00  -0.01    -0.01   0.03   0.08
  76   1     0.00   0.01   0.00    -0.01   0.00   0.00    -0.02  -0.02   0.00
  77   1     0.00   0.00  -0.02    -0.01   0.00   0.00    -0.02  -0.03  -0.04
  78   1     0.01   0.00  -0.01     0.00   0.00  -0.01     0.02   0.00  -0.02
  79   1     0.01   0.00   0.00    -0.01   0.00  -0.01    -0.02   0.01   0.04
  80   1     0.02  -0.30   0.29     0.00  -0.06   0.05    -0.01  -0.01   0.09
  81   1     0.02  -0.01   0.03     0.00  -0.01   0.01    -0.02   0.02   0.01
  82   1     0.02   0.31  -0.27     0.00   0.05  -0.05     0.03   0.06  -0.03
  83   1     0.01   0.06  -0.07     0.00   0.00  -0.01    -0.05   0.01  -0.01
  84   1     0.00  -0.06   0.06     0.00  -0.01   0.01     0.01   0.00   0.02
  85   1     0.01   0.02   0.03     0.02  -0.03   0.03     0.02  -0.03   0.01
  86   1     0.02  -0.02   0.00     0.06   0.01   0.01     0.06   0.04   0.01
  87   1    -0.02   0.02  -0.02     0.04  -0.01   0.02     0.07  -0.02   0.06
  88   1     0.00   0.00   0.00     0.01   0.02  -0.01     0.01   0.02  -0.01
  89   1     0.00   0.00   0.00     0.00   0.01  -0.02     0.01   0.02  -0.03
  90   1     0.00   0.00   0.00     0.01   0.00  -0.01     0.01   0.02  -0.01
  91   1     0.01   0.00   0.00     0.00   0.00  -0.01     0.01   0.02  -0.06
  92   1     0.02  -0.01  -0.01    -0.01   0.01   0.00     0.05   0.03  -0.01
  93   1     0.01  -0.01   0.01     0.00   0.01  -0.01     0.08   0.03   0.01
  94   1     0.00   0.00   0.00     0.01   0.01   0.02    -0.01  -0.02   0.04
  95   1     0.01  -0.02   0.01     0.02  -0.01   0.00    -0.03   0.04   0.02
  96   1     0.02   0.00   0.01     0.02   0.01   0.02    -0.07   0.00   0.01
  97   1    -0.03  -0.02  -0.15     0.00  -0.01  -0.01    -0.06   0.07  -0.15
  98   1    -0.09  -0.21  -0.09    -0.01  -0.03   0.00    -0.10  -0.12  -0.10
  99   1    -0.06  -0.14  -0.03    -0.01  -0.02   0.00    -0.03  -0.01  -0.05
 100   1    -0.02   0.08   0.06     0.00   0.03   0.00    -0.05  -0.08   0.07
 101   1     0.10  -0.01   0.13     0.03   0.01   0.03    -0.07  -0.05  -0.04
 102   1     0.09   0.07   0.12     0.02   0.02   0.02    -0.03  -0.06   0.04
 103   1    -0.13  -0.05   0.05    -0.03   0.02   0.01    -0.04  -0.12   0.01
 104   1    -0.21   0.03  -0.10    -0.02   0.01  -0.01    -0.10  -0.05  -0.08
 105   1    -0.15   0.04  -0.11    -0.04   0.01  -0.03    -0.02  -0.07   0.02
 106   1     0.11  -0.05  -0.02     0.04  -0.04  -0.04     0.01   0.00  -0.12
 107   1     0.17   0.07   0.06     0.08   0.01   0.05     0.03   0.04  -0.06
 108   1     0.08   0.15   0.01     0.00   0.04   0.01    -0.06  -0.04  -0.06
 109   1     0.00   0.03  -0.02    -0.01   0.02  -0.01     0.05  -0.12   0.10
 110   1    -0.01   0.06   0.01    -0.01   0.04   0.01     0.04  -0.24  -0.05
 111   1    -0.01   0.06   0.02    -0.01   0.03   0.02     0.04  -0.17  -0.05
 112   1     0.02   0.01  -0.06     0.01   0.00  -0.03    -0.08  -0.08   0.19
 113   1     0.03   0.02  -0.08     0.02   0.01  -0.05    -0.12  -0.02   0.20
 114   1     0.02  -0.06  -0.04     0.01  -0.04  -0.03    -0.12   0.18   0.11
                    76                     77                     78
                    ?A                     ?A                     ?A
 Frequencies --   348.1138               352.5261               366.7393
 Red. masses --     3.3441                 5.5684                 5.1082
 Frc consts  --     0.2388                 0.4077                 0.4048
 IR Inten    --    10.3070                 9.3513                10.3360
 Raman Activ --     0.0000                 0.0000                 0.0000
 Depolar     --     0.0000                 0.0000                 0.0000
 Atom AN      X      Y      Z        X      Y      Z        X      Y      Z
   1   8     0.00  -0.01   0.00    -0.01   0.00   0.00    -0.01   0.05  -0.01
   2  12    -0.01  -0.03  -0.03    -0.11   0.23   0.04    -0.07   0.03  -0.04
   3   8     0.00   0.00  -0.01     0.01  -0.01   0.03    -0.06   0.01   0.01
   4   6     0.00   0.00   0.00     0.01   0.00   0.00     0.00   0.00  -0.02
   5   7     0.19   0.03   0.03     0.03  -0.01  -0.04    -0.02  -0.01   0.06
   6   7     0.02   0.02   0.00     0.06  -0.01   0.09    -0.01  -0.03   0.08
   7   8     0.00   0.02  -0.01     0.00   0.00   0.00     0.01  -0.05   0.02
   8   6     0.06   0.01   0.00     0.03  -0.10  -0.07    -0.04  -0.03   0.07
   9   6    -0.04   0.00  -0.03    -0.01  -0.09   0.00    -0.06  -0.06   0.09
  10   6    -0.01   0.01  -0.02     0.05  -0.13   0.07    -0.02  -0.07   0.08
  11   8     0.00  -0.01   0.00     0.00   0.00   0.00     0.02  -0.01   0.01
  12   6     0.00  -0.01  -0.01     0.00   0.00  -0.01     0.02  -0.01   0.03
  13   6     0.00   0.00   0.00    -0.01   0.01   0.01    -0.03   0.01   0.05
  14   6     0.00   0.00   0.00     0.01   0.00   0.00     0.01  -0.01  -0.01
  15   8     0.00  -0.01   0.00     0.01  -0.01  -0.02     0.02  -0.03   0.03
  16   6     0.00  -0.01   0.01     0.00   0.00   0.00     0.00   0.06  -0.06
  17   8     0.04   0.04   0.01    -0.10  -0.15  -0.02     0.05   0.20  -0.05
  18   6     0.00   0.01  -0.02    -0.01  -0.02   0.03     0.00   0.00  -0.06
  19   8     0.02   0.01  -0.01    -0.08   0.02   0.00     0.06   0.11  -0.06
  20   8    -0.01   0.00   0.03     0.06   0.04  -0.11    -0.09  -0.13   0.10
  21   6     0.00  -0.01  -0.02     0.04   0.03   0.07    -0.01  -0.05  -0.09
  22   6     0.01  -0.01  -0.02     0.00   0.04   0.08     0.03  -0.05  -0.12
  23   6     0.00   0.02  -0.01     0.01  -0.02   0.01    -0.01  -0.07  -0.05
  24   8    -0.01  -0.02   0.01     0.05   0.04  -0.04    -0.05   0.04   0.04
  25   6     0.00  -0.01   0.02     0.01   0.03  -0.05     0.05  -0.02  -0.02
  26   6    -0.03   0.01   0.00     0.03  -0.02   0.02    -0.01  -0.08   0.08
  27   6    -0.01  -0.01   0.00     0.00   0.00   0.01     0.06   0.04  -0.01
  28   6     0.00   0.00   0.00     0.01   0.00  -0.01     0.01  -0.01   0.00
  29   6     0.05   0.01   0.04     0.01   0.01   0.01     0.00   0.02   0.04
  30   6     0.01   0.01   0.00     0.04   0.01   0.03     0.01  -0.02   0.03
  31   6     0.02   0.02   0.04     0.00   0.02   0.01    -0.01   0.04   0.01
  32   6     0.07  -0.03  -0.07     0.00   0.01  -0.02    -0.02   0.03  -0.04
  33   6     0.08  -0.01   0.00     0.01   0.02  -0.01    -0.01   0.05  -0.01
  34   6     0.09   0.02   0.07     0.01   0.03   0.02    -0.01   0.05   0.01
  35   6     0.04  -0.01   0.01     0.01   0.02   0.00     0.00   0.04  -0.01
  36   6    -0.04  -0.01   0.07    -0.01   0.01   0.02     0.00   0.04  -0.01
  37   6     0.01  -0.02  -0.04     0.01   0.01  -0.01     0.01   0.01  -0.03
  38   6     0.00   0.01   0.01     0.01   0.03   0.02     0.03   0.00   0.00
  39   6     0.00   0.00   0.02     0.00   0.02   0.03     0.03  -0.01  -0.01
  40   6     0.00   0.01   0.00     0.01  -0.01   0.01     0.03  -0.04  -0.01
  41   6     0.01   0.02  -0.01     0.04   0.00  -0.01     0.03  -0.02  -0.03
  42   6     0.01   0.00   0.01     0.04  -0.01   0.00     0.03  -0.02  -0.02
  43   6     0.00   0.01   0.00     0.00   0.02   0.01     0.02   0.01  -0.01
  44   6     0.01  -0.01   0.01     0.02  -0.01   0.00     0.02  -0.01  -0.02
  45   6    -0.21   0.05  -0.10    -0.03  -0.01  -0.02     0.05  -0.02   0.01
  46   6    -0.09  -0.05   0.08    -0.01  -0.01   0.02     0.00   0.00  -0.01
  47   6    -0.10  -0.01   0.05    -0.01  -0.01   0.01    -0.02  -0.02   0.00
  48   6    -0.03  -0.01  -0.08     0.00   0.00  -0.01     0.03  -0.01  -0.01
  49   6    -0.01  -0.01  -0.03    -0.03   0.01  -0.04     0.00   0.02   0.00
  50   6    -0.01  -0.02   0.01    -0.04  -0.04   0.02    -0.02  -0.01   0.00
  51   6    -0.02  -0.02   0.00    -0.04  -0.05   0.00    -0.03  -0.02   0.00
  52   6     0.00   0.00  -0.02    -0.02   0.01  -0.05    -0.01   0.02  -0.01
  53   6     0.02  -0.01   0.00     0.04   0.02  -0.18    -0.03   0.12  -0.01
  54   6     0.00   0.03   0.00     0.02  -0.14   0.13     0.06  -0.13  -0.02
  55   1    -0.09  -0.02  -0.04    -0.05  -0.02   0.02    -0.08  -0.06   0.09
  56   1     0.00   0.00   0.00     0.00   0.02   0.00    -0.05  -0.01   0.08
  57   1     0.00   0.01   0.00     0.01   0.00   0.00     0.01  -0.04   0.00
  58   1     0.00  -0.01   0.02     0.00   0.01   0.00    -0.01   0.08  -0.08
  59   1    -0.01   0.00   0.01    -0.01   0.00   0.00     0.01   0.01  -0.06
  60   1     0.00  -0.01   0.01     0.00   0.00   0.00    -0.01   0.07  -0.07
  61   1    -0.01  -0.04  -0.01     0.07   0.14   0.03    -0.02  -0.15  -0.08
  62   1     0.02   0.03  -0.01    -0.04  -0.04   0.02     0.04  -0.02  -0.06
  63   1     0.03  -0.02   0.04    -0.10   0.05  -0.14     0.12   0.03   0.05
  64   1    -0.03   0.00   0.03     0.14  -0.02  -0.11    -0.04   0.03   0.03
  65   1     0.01  -0.01   0.01     0.00   0.03  -0.03     0.12  -0.05  -0.05
  66   1    -0.05   0.03  -0.01     0.13  -0.01   0.15    -0.01   0.00   0.17
  67   1    -0.03  -0.02   0.00     0.09   0.03  -0.13    -0.01  -0.04   0.06
  68   1    -0.03   0.01   0.00    -0.10  -0.06   0.02    -0.03  -0.20   0.12
  69   1    -0.01   0.00   0.01     0.01  -0.01   0.03     0.05  -0.01  -0.13
  70   1    -0.01  -0.01   0.00    -0.02   0.00   0.01     0.15   0.09   0.02
  71   1    -0.01  -0.01   0.00     0.02   0.02   0.01     0.09   0.06   0.02
  72   1     0.00   0.00   0.01     0.01   0.00  -0.01     0.02   0.00   0.00
  73   1     0.00   0.00   0.00     0.02   0.00  -0.02    -0.01  -0.01   0.02
  74   1     0.00  -0.01   0.00     0.00   0.00  -0.01     0.03   0.00   0.01
  75   1     0.06  -0.08  -0.15     0.00   0.00  -0.04    -0.01   0.00  -0.08
  76   1     0.08  -0.02  -0.02     0.01   0.01  -0.03    -0.01   0.04  -0.03
  77   1     0.10   0.05   0.10     0.01   0.03   0.03    -0.01   0.04   0.02
  78   1    -0.04   0.00   0.06    -0.02   0.01   0.02    -0.04   0.04  -0.02
  79   1     0.01  -0.02  -0.04     0.02   0.01  -0.02     0.04   0.02  -0.04
  80   1     0.00  -0.01   0.03    -0.01   0.02   0.04     0.01   0.00  -0.01
  81   1    -0.01   0.01   0.00    -0.01  -0.03   0.00     0.03  -0.05  -0.01
  82   1     0.01   0.02  -0.02     0.05   0.00  -0.03     0.03   0.00  -0.03
  83   1    -0.01   0.00   0.00    -0.01   0.02   0.00     0.04   0.01   0.00
  84   1     0.01   0.00   0.00     0.01  -0.02  -0.02     0.00  -0.03  -0.04
  85   1    -0.10   0.21  -0.18    -0.02   0.03   0.00     0.00  -0.09   0.01
  86   1    -0.38  -0.10  -0.07    -0.05  -0.06  -0.02     0.06   0.00   0.00
  87   1    -0.31   0.11  -0.24    -0.05   0.02  -0.08     0.12  -0.03   0.02
  88   1    -0.12  -0.12   0.13    -0.01  -0.03   0.01     0.00   0.00  -0.03
  89   1    -0.06  -0.06   0.12     0.00  -0.02   0.04    -0.01  -0.01   0.02
  90   1    -0.16  -0.03   0.01    -0.01  -0.02   0.00     0.01  -0.02  -0.03
  91   1    -0.05  -0.02   0.18     0.00  -0.02   0.04    -0.01  -0.01   0.05
  92   1    -0.16  -0.01   0.11    -0.03  -0.02   0.00    -0.04  -0.03  -0.03
  93   1    -0.23   0.00  -0.02    -0.04  -0.02   0.00    -0.05  -0.05   0.01
  94   1    -0.04  -0.01  -0.11     0.00   0.00  -0.03     0.01   0.00  -0.03
  95   1    -0.07   0.03  -0.04    -0.01  -0.02   0.00     0.02  -0.06  -0.01
  96   1    -0.04  -0.02  -0.12     0.01   0.00   0.00     0.05   0.00   0.02
  97   1    -0.02   0.03  -0.06    -0.04   0.06  -0.07    -0.02   0.01   0.02
  98   1    -0.03  -0.06  -0.04    -0.09  -0.04  -0.03    -0.03   0.03   0.02
  99   1     0.00  -0.01  -0.01    -0.02   0.05  -0.07     0.01   0.06  -0.02
 100   1    -0.02  -0.03   0.03    -0.05  -0.07   0.05    -0.02   0.00   0.00
 101   1    -0.03  -0.02  -0.01    -0.10  -0.02  -0.03    -0.05   0.02   0.00
 102   1    -0.01  -0.02   0.02    -0.04  -0.07   0.06    -0.02  -0.03   0.03
 103   1    -0.01  -0.04   0.01    -0.03  -0.13   0.03    -0.03  -0.09   0.04
 104   1    -0.04  -0.02  -0.03    -0.11  -0.04  -0.06    -0.11   0.00  -0.02
 105   1    -0.01  -0.02   0.01    -0.01  -0.05   0.03    -0.01   0.02  -0.02
 106   1     0.00   0.00  -0.04    -0.01   0.03  -0.12    -0.01   0.05  -0.03
 107   1     0.01   0.02  -0.02     0.01   0.04  -0.06    -0.02   0.00  -0.01
 108   1    -0.02  -0.01  -0.02    -0.07  -0.05  -0.06    -0.04   0.01  -0.01
 109   1     0.01   0.00   0.02     0.05  -0.01  -0.34     0.00   0.09  -0.19
 110   1    -0.01  -0.02   0.01     0.03   0.15  -0.13    -0.03   0.26   0.03
 111   1     0.01  -0.03  -0.04     0.03   0.08  -0.16    -0.03   0.20   0.03
 112   1     0.01   0.05  -0.01     0.01  -0.18   0.15     0.07  -0.08  -0.06
 113   1     0.00   0.01   0.04    -0.01  -0.17   0.17     0.10  -0.07  -0.10
 114   1     0.02   0.05   0.02     0.00  -0.07   0.13     0.09  -0.26  -0.02
                    79                     80                     81
                    ?A                     ?A                     ?A
 Frequencies --   372.6925               389.5393               406.5987
 Red. masses --     4.1519                 4.7845                 5.3206
 Frc consts  --     0.3398                 0.4278                 0.5183
 IR Inten    --     4.5754                27.8068                29.7973
 Raman Activ --     0.0000                 0.0000                 0.0000
 Depolar     --     0.0000                 0.0000                 0.0000
 Atom AN      X      Y      Z        X      Y      Z        X      Y      Z
   1   8    -0.01   0.07  -0.02    -0.01  -0.06   0.03     0.09   0.06  -0.02
   2  12     0.00  -0.02   0.06     0.03   0.00   0.05    -0.04  -0.02   0.00
   3   8    -0.10   0.01   0.02     0.03   0.01  -0.04     0.02   0.01  -0.03
   4   6     0.00  -0.01  -0.04     0.01   0.03   0.05    -0.11  -0.02  -0.04
   5   7     0.01   0.01  -0.05     0.01   0.01  -0.01     0.00   0.00   0.00
   6   7     0.01   0.02  -0.05     0.00   0.00  -0.02     0.00   0.00   0.00
   7   8     0.02  -0.10   0.03    -0.04   0.15  -0.04     0.07   0.00  -0.01
   8   6     0.04   0.01  -0.06     0.01   0.01  -0.02     0.00   0.00   0.00
   9   6     0.04   0.03  -0.07     0.01   0.01  -0.03     0.00   0.00   0.00
  10   6     0.02   0.03  -0.05     0.00   0.01  -0.02     0.00   0.00   0.00
  11   8     0.03   0.03   0.05    -0.02  -0.12  -0.11     0.09  -0.12   0.02
  12   6     0.03  -0.03   0.03    -0.03   0.08   0.00     0.10   0.00   0.02
  13   6    -0.06  -0.05   0.03     0.01   0.22   0.07     0.03   0.03   0.03
  14   6     0.01  -0.02  -0.01     0.03   0.02  -0.02    -0.24  -0.06  -0.02
  15   8     0.03   0.00   0.04    -0.04  -0.08  -0.04     0.26   0.11  -0.13
  16   6     0.00   0.08  -0.08     0.01  -0.07   0.07    -0.02   0.05  -0.03
  17   8    -0.08   0.02   0.05    -0.03   0.03   0.02     0.00  -0.02   0.01
  18   6     0.01  -0.05  -0.01     0.04  -0.07  -0.04     0.01  -0.02   0.00
  19   8     0.09   0.12  -0.03    -0.06  -0.07  -0.09    -0.03  -0.07  -0.01
  20   8    -0.02  -0.06  -0.02    -0.06  -0.07  -0.01     0.00   0.00  -0.01
  21   6    -0.01   0.01   0.05    -0.04  -0.01  -0.01    -0.01   0.00   0.00
  22   6    -0.05   0.05   0.07    -0.03  -0.01   0.01    -0.01   0.00   0.00
  23   6     0.02  -0.14  -0.05     0.00  -0.10  -0.04     0.00   0.00   0.00
  24   8    -0.01   0.04  -0.02    -0.07   0.09   0.00    -0.02   0.01   0.00
  25   6     0.00   0.10  -0.06     0.00   0.02  -0.03    -0.01   0.00   0.00
  26   6     0.08  -0.13   0.11     0.07  -0.09   0.05     0.02   0.00  -0.01
  27   6     0.02   0.00  -0.07     0.16   0.12   0.17     0.04   0.04   0.04
  28   6     0.02   0.00  -0.01     0.03  -0.02  -0.01    -0.26   0.02   0.16
  29   6     0.00  -0.01  -0.03     0.00   0.00  -0.02     0.00   0.00   0.00
  30   6    -0.01   0.03  -0.03     0.00   0.01  -0.02     0.00   0.00   0.00
  31   6     0.01  -0.03  -0.01     0.00  -0.01  -0.01     0.00   0.00   0.00
  32   6     0.02  -0.02   0.02     0.00   0.00   0.00     0.00   0.00   0.00
  33   6     0.01  -0.04   0.01     0.00  -0.01   0.01     0.00   0.00   0.00
  34   6     0.00  -0.03   0.00     0.00  -0.01   0.00     0.00   0.00   0.00
  35   6     0.00  -0.02   0.00     0.00  -0.01   0.00     0.00   0.00   0.00
  36   6     0.00  -0.02   0.01     0.00  -0.01   0.01     0.00   0.00   0.00
  37   6    -0.01  -0.01   0.02     0.00   0.00   0.01     0.00   0.00   0.00
  38   6    -0.02   0.01   0.00    -0.01   0.01  -0.01     0.00   0.00   0.00
  39   6    -0.02   0.00   0.01    -0.01   0.00   0.00     0.00   0.00   0.00
  40   6    -0.03   0.02   0.02    -0.01   0.01   0.01     0.00   0.00   0.00
  41   6    -0.02   0.02   0.02    -0.01   0.01   0.00     0.00   0.00   0.00
  42   6    -0.02   0.02   0.01    -0.01   0.01   0.00     0.00   0.00   0.00
  43   6    -0.02   0.00   0.01    -0.01   0.00   0.00     0.00   0.00   0.00
  44   6    -0.01   0.01   0.02    -0.01   0.00   0.01     0.00   0.00   0.00
  45   6    -0.03   0.01  -0.01    -0.01   0.00   0.00     0.00   0.00   0.00
  46   6     0.00   0.00   0.01     0.00   0.00   0.01     0.00   0.00   0.00
  47   6     0.01   0.01   0.00     0.01   0.01   0.00     0.00   0.01   0.00
  48   6    -0.02   0.01   0.00    -0.01   0.00   0.01     0.00   0.00   0.00
  49   6     0.00  -0.02  -0.01     0.00  -0.01   0.00     0.00   0.00   0.00
  50   6     0.01   0.00   0.01     0.01   0.00   0.00     0.00   0.00   0.00
  51   6     0.03   0.00   0.00     0.01   0.01   0.00     0.00   0.00   0.00
  52   6     0.00  -0.01   0.01     0.01   0.00   0.00     0.00   0.00   0.00
  53   6     0.02  -0.08  -0.02     0.01  -0.02  -0.01     0.00   0.00   0.00
  54   6    -0.04   0.07   0.02    -0.01   0.02   0.00     0.00   0.00   0.00
  55   1     0.05   0.04  -0.07     0.01   0.01  -0.03     0.00   0.00   0.00
  56   1    -0.11  -0.10   0.07     0.07   0.27   0.03     0.04   0.03   0.07
  57   1     0.01  -0.07   0.03     0.04   0.12  -0.10    -0.27  -0.12   0.05
  58   1    -0.01   0.11  -0.12     0.02  -0.07   0.10    -0.04  -0.03  -0.02
  59   1     0.02   0.02  -0.09     0.00  -0.02   0.08    -0.06   0.03  -0.03
  60   1    -0.01   0.10  -0.10     0.02  -0.10   0.09    -0.06   0.13  -0.06
  61   1    -0.06   0.09   0.07    -0.05  -0.03   0.02    -0.01   0.00   0.00
  62   1     0.03  -0.11  -0.06     0.00  -0.08  -0.05    -0.01  -0.01   0.00
  63   1    -0.07   0.25  -0.10    -0.01   0.11  -0.03    -0.01   0.00   0.01
  64   1     0.06   0.06  -0.09     0.01   0.02  -0.03    -0.01   0.01   0.01
  65   1     0.09   0.06  -0.12     0.07   0.00  -0.06    -0.01   0.00   0.01
  66   1     0.16  -0.08   0.27     0.13  -0.09   0.11     0.03  -0.02  -0.01
  67   1     0.10   0.01   0.05     0.07   0.03   0.06     0.02   0.02   0.00
  68   1     0.05  -0.30   0.17     0.12  -0.17   0.08     0.03   0.01  -0.01
  69   1    -0.01  -0.01  -0.22     0.21  -0.04   0.12     0.04   0.03   0.02
  70   1     0.13   0.10  -0.02     0.19   0.00   0.12     0.07   0.03   0.04
  71   1     0.02   0.00  -0.08     0.32   0.25   0.33     0.06   0.05   0.06
  72   1     0.04   0.00  -0.04    -0.02  -0.03   0.06    -0.22   0.03   0.26
  73   1     0.00  -0.01   0.01     0.06   0.00  -0.05    -0.49   0.05   0.32
  74   1     0.02   0.04   0.01     0.04  -0.10  -0.04    -0.03   0.02   0.23
  75   1     0.01   0.00   0.04     0.00   0.01   0.02     0.00   0.00   0.00
  76   1     0.01  -0.04   0.01     0.00  -0.01   0.01     0.00   0.00   0.00
  77   1     0.01  -0.02   0.00     0.00   0.00   0.00     0.00   0.00   0.00
  78   1     0.02  -0.02   0.01     0.01  -0.01   0.01     0.00   0.00   0.00
  79   1    -0.02  -0.01   0.03    -0.01   0.00   0.01    -0.01   0.00   0.00
  80   1    -0.01  -0.02   0.03     0.00  -0.01   0.01     0.00   0.00   0.00
  81   1    -0.02   0.02   0.02    -0.01   0.00   0.02     0.00   0.00   0.00
  82   1    -0.02   0.00   0.02    -0.01   0.00   0.01     0.00   0.00   0.00
  83   1    -0.03  -0.01   0.01    -0.01   0.00   0.00     0.00   0.00   0.00
  84   1     0.00   0.02   0.04     0.00   0.00   0.02     0.00   0.00   0.00
  85   1     0.00   0.06  -0.02     0.00   0.01  -0.02     0.00   0.00   0.00
  86   1    -0.05   0.01   0.00    -0.03   0.00   0.00     0.00   0.00   0.00
  87   1    -0.07   0.02  -0.01    -0.02   0.00   0.00     0.00   0.00   0.00
  88   1    -0.01   0.00   0.02     0.00   0.00   0.01     0.00   0.00   0.00
  89   1     0.00   0.01  -0.01     0.01   0.00   0.01     0.00   0.00   0.00
  90   1    -0.01   0.02   0.02     0.00   0.00   0.01     0.00   0.00   0.00
  91   1    -0.01   0.02  -0.02     0.00   0.01  -0.02     0.00   0.00  -0.01
  92   1     0.03   0.02   0.02     0.02   0.01   0.00    -0.01   0.01   0.01
  93   1     0.02   0.02   0.00     0.02   0.01   0.00     0.01   0.01   0.00
  94   1    -0.01   0.00   0.01    -0.01   0.00   0.01     0.00   0.00   0.01
  95   1    -0.02   0.04   0.00    -0.01   0.01   0.01     0.00   0.00   0.00
  96   1    -0.03   0.00  -0.02    -0.01   0.00   0.00     0.00   0.00   0.00
  97   1     0.01   0.00  -0.03     0.01   0.00  -0.01     0.00   0.00   0.00
  98   1     0.00  -0.04  -0.03     0.00  -0.02  -0.01     0.00   0.00   0.00
  99   1    -0.01  -0.05   0.01    -0.01  -0.03   0.01     0.00   0.00   0.00
 100   1     0.02   0.00   0.01     0.01   0.01   0.00     0.00   0.00   0.00
 101   1     0.03  -0.01   0.01     0.02   0.00   0.01     0.00   0.00   0.00
 102   1     0.02   0.02  -0.01     0.01   0.01  -0.01     0.00   0.00   0.00
 103   1     0.02   0.05  -0.03     0.00   0.03   0.00     0.00  -0.01   0.00
 104   1     0.08  -0.01   0.01     0.03   0.00   0.01    -0.01   0.00   0.01
 105   1     0.02  -0.02   0.02     0.00   0.00   0.00     0.00   0.01   0.00
 106   1    -0.01  -0.02   0.03     0.01  -0.01   0.00     0.00   0.00   0.00
 107   1    -0.01   0.00  -0.01     0.02   0.00   0.01     0.00   0.00   0.00
 108   1     0.03  -0.02   0.00     0.00   0.00   0.00     0.00   0.00   0.00
 109   1     0.00  -0.06   0.09     0.00  -0.02   0.02     0.00   0.00   0.00
 110   1     0.02  -0.16  -0.04     0.01  -0.05  -0.01     0.00   0.00   0.00
 111   1     0.02  -0.13  -0.05     0.01  -0.04  -0.02     0.00   0.00   0.00
 112   1    -0.05   0.04   0.06    -0.01   0.02   0.01     0.00   0.00   0.00
 113   1    -0.07   0.03   0.09    -0.02   0.01   0.02     0.00   0.00   0.00
 114   1    -0.07   0.18   0.02    -0.01   0.05   0.00     0.00   0.01   0.00
                    82                     83                     84
                    ?A                     ?A                     ?A
 Frequencies --   429.2012               441.5840               441.7412
 Red. masses --     3.1336                 3.8263                 3.2777
 Frc consts  --     0.3401                 0.4396                 0.3768
 IR Inten    --     2.3850                11.8416                 5.3489
 Raman Activ --     0.0000                 0.0000                 0.0000
 Depolar     --     0.0000                 0.0000                 0.0000
 Atom AN      X      Y      Z        X      Y      Z        X      Y      Z
   1   8     0.00   0.00   0.00     0.01  -0.02   0.01     0.00   0.00   0.00
   2  12    -0.01   0.00   0.00     0.01  -0.05   0.04    -0.03   0.01   0.01
   3   8     0.00   0.00   0.01     0.03   0.02  -0.02     0.00   0.00   0.00
   4   6     0.00   0.00   0.00    -0.01   0.00   0.01     0.00   0.00   0.00
   5   7     0.19   0.04   0.05     0.02   0.03   0.03     0.06   0.00   0.01
   6   7    -0.03  -0.02  -0.01    -0.01   0.02  -0.03     0.18   0.11   0.09
   7   8     0.00   0.00   0.00     0.00   0.00   0.01     0.00   0.00   0.00
   8   6     0.08   0.02   0.02     0.02  -0.02  -0.01    -0.02  -0.02  -0.01
   9   6    -0.03  -0.01  -0.01     0.01  -0.03  -0.03    -0.05  -0.03  -0.01
  10   6    -0.05  -0.02  -0.02     0.02  -0.02  -0.02     0.08   0.02   0.05
  11   8     0.00   0.00   0.00     0.00   0.03  -0.02     0.00   0.00   0.00
  12   6     0.00   0.00   0.00     0.02   0.00  -0.02     0.00   0.00   0.00
  13   6     0.00   0.00   0.00     0.04  -0.01  -0.03     0.01   0.00  -0.01
  14   6     0.00   0.00   0.00    -0.02   0.01  -0.02     0.00   0.00   0.00
  15   8     0.00  -0.01  -0.01     0.00   0.00   0.01     0.00   0.00   0.00
  16   6     0.00   0.00   0.00     0.00  -0.03   0.02     0.00   0.00   0.00
  17   8     0.00   0.01   0.00    -0.04   0.05  -0.03     0.00   0.02  -0.01
  18   6     0.00   0.00   0.00     0.01   0.02   0.02     0.00   0.01   0.00
  19   8     0.00   0.00   0.00     0.00   0.02   0.01     0.00   0.01   0.00
  20   8     0.00   0.00   0.00    -0.01  -0.04   0.00     0.00  -0.01   0.00
  21   6     0.00   0.00   0.00     0.01  -0.03   0.00     0.00  -0.01  -0.01
  22   6     0.00   0.00   0.00     0.03  -0.04   0.01     0.01  -0.01  -0.01
  23   6     0.00   0.00   0.00    -0.01   0.01   0.01     0.00   0.01   0.00
  24   8     0.00  -0.01   0.00    -0.01   0.02   0.00     0.00   0.01   0.00
  25   6     0.01   0.00   0.00     0.05  -0.04  -0.01     0.01  -0.01  -0.01
  26   6    -0.01   0.01   0.00    -0.02   0.02  -0.01    -0.01   0.01   0.00
  27   6     0.00   0.00   0.00    -0.02  -0.01  -0.01     0.00  -0.01   0.00
  28   6     0.00   0.00   0.00    -0.02   0.01   0.01     0.00   0.00   0.00
  29   6    -0.03  -0.01  -0.05    -0.02   0.05   0.16     0.00   0.00  -0.01
  30   6     0.01   0.00   0.01     0.01   0.14  -0.14    -0.03  -0.02  -0.01
  31   6    -0.06  -0.04  -0.08    -0.01   0.00   0.09    -0.01   0.00  -0.02
  32   6     0.01   0.00  -0.01     0.03  -0.04   0.04     0.00   0.01  -0.01
  33   6     0.03   0.05   0.04     0.04  -0.05  -0.01     0.01   0.02   0.01
  34   6     0.01   0.00  -0.07     0.02   0.01   0.02     0.01   0.00  -0.01
  35   6    -0.04   0.00  -0.05    -0.04   0.03   0.08     0.00   0.00  -0.01
  36   6    -0.13  -0.11  -0.02     0.01  -0.02  -0.06    -0.04  -0.02   0.00
  37   6    -0.04   0.04   0.02    -0.09   0.02  -0.04     0.00   0.01   0.00
  38   6     0.01   0.01   0.01     0.00   0.08  -0.08    -0.04  -0.04  -0.01
  39   6    -0.01   0.00   0.00     0.00   0.02  -0.03     0.03   0.01   0.02
  40   6     0.00  -0.01  -0.01    -0.01  -0.03   0.03     0.04   0.04   0.02
  41   6     0.00  -0.01  -0.01    -0.01   0.03  -0.03     0.02   0.02   0.04
  42   6     0.02   0.00   0.00     0.00   0.08  -0.08    -0.05  -0.03  -0.01
  43   6     0.01   0.02   0.02     0.00  -0.03   0.05    -0.04  -0.09  -0.09
  44   6     0.03   0.00   0.00    -0.01  -0.04   0.04    -0.14  -0.01  -0.02
  45   6    -0.11  -0.02   0.16     0.04   0.01   0.00    -0.03  -0.01   0.04
  46   6     0.10   0.04  -0.07    -0.04   0.03  -0.07     0.02   0.01  -0.02
  47   6     0.03  -0.02  -0.04    -0.06  -0.07  -0.10     0.00   0.00   0.00
  48   6    -0.01   0.01   0.08     0.06   0.01   0.05    -0.01   0.00   0.01
  49   6     0.00   0.02  -0.02    -0.04  -0.07  -0.01    -0.01  -0.10   0.07
  50   6    -0.01  -0.02   0.02     0.03   0.01   0.05     0.01   0.07  -0.11
  51   6     0.00  -0.03   0.02     0.06  -0.01   0.05    -0.02   0.09  -0.08
  52   6     0.00   0.02  -0.02    -0.04  -0.04   0.00    -0.02  -0.08   0.09
  53   6    -0.01   0.00   0.01     0.00   0.03  -0.07     0.02  -0.01  -0.02
  54   6     0.01   0.00  -0.01    -0.03   0.00   0.07     0.00  -0.02   0.02
  55   1    -0.07  -0.01  -0.03    -0.01  -0.03  -0.04    -0.11  -0.03  -0.02
  56   1     0.00   0.00   0.00     0.03  -0.01  -0.03     0.00   0.00  -0.01
  57   1     0.00   0.00   0.00    -0.02   0.02  -0.02     0.00   0.00   0.00
  58   1     0.00   0.00   0.00     0.00  -0.04   0.02     0.00   0.00  -0.01
  59   1     0.00   0.00   0.00     0.00  -0.02   0.02     0.01  -0.01   0.00
  60   1     0.00   0.00   0.00     0.00  -0.03   0.02     0.00   0.00   0.00
  61   1     0.00  -0.01   0.00     0.05  -0.05   0.01     0.01  -0.02  -0.01
  62   1     0.00   0.01   0.00    -0.03   0.01   0.01    -0.01   0.01   0.00
  63   1     0.01   0.00   0.00     0.01   0.01  -0.05     0.01   0.00  -0.01
  64   1     0.01  -0.01   0.00     0.10  -0.07  -0.04     0.01  -0.02  -0.01
  65   1     0.01  -0.01   0.00     0.08  -0.06  -0.04     0.02  -0.02  -0.02
  66   1     0.00   0.01   0.00    -0.04   0.02  -0.02    -0.01   0.01   0.00
  67   1     0.00   0.00  -0.02    -0.02  -0.01   0.00     0.00   0.00  -0.01
  68   1    -0.02   0.01  -0.01    -0.03   0.03  -0.01    -0.02   0.01  -0.01
  69   1     0.00   0.00   0.00    -0.03   0.03   0.06    -0.01   0.00   0.01
  70   1     0.00   0.00   0.00    -0.06  -0.03  -0.02    -0.01  -0.02   0.00
  71   1     0.00   0.00   0.00    -0.06  -0.04  -0.03    -0.01  -0.01   0.01
  72   1     0.01   0.00   0.00    -0.03   0.01   0.04    -0.01   0.00   0.01
  73   1     0.00   0.01  -0.01    -0.04   0.02   0.03     0.00   0.00   0.00
  74   1     0.00   0.00   0.00     0.02  -0.01   0.02     0.00   0.00   0.00
  75   1     0.03   0.00   0.04     0.04  -0.10  -0.06     0.01   0.00   0.00
  76   1     0.05   0.09   0.15     0.05  -0.09  -0.12     0.01   0.02   0.02
  77   1     0.02   0.03  -0.06     0.02   0.00  -0.09     0.01   0.00  -0.01
  78   1    -0.11  -0.11   0.01     0.01  -0.01  -0.09    -0.04  -0.02   0.00
  79   1    -0.03   0.05   0.03    -0.10   0.01  -0.05     0.00   0.01   0.00
  80   1    -0.02   0.01   0.00    -0.01  -0.06   0.06     0.08   0.00   0.00
  81   1    -0.01  -0.01  -0.01    -0.01  -0.15   0.15     0.04   0.07   0.00
  82   1     0.01  -0.01  -0.02    -0.01  -0.06   0.06     0.01   0.05   0.06
  83   1     0.01   0.02   0.02     0.00  -0.04   0.06    -0.06  -0.09  -0.10
  84   1     0.02   0.00   0.00    -0.01  -0.04   0.06    -0.14  -0.01  -0.03
  85   1    -0.09   0.04   0.24     0.03   0.00   0.06    -0.03   0.01   0.07
  86   1     0.05   0.10   0.13     0.13   0.04  -0.02     0.01   0.02   0.03
  87   1    -0.24  -0.06   0.32     0.02   0.00   0.04    -0.07  -0.01   0.07
  88   1     0.17   0.15  -0.26    -0.05   0.05   0.01     0.04   0.04  -0.07
  89   1     0.13   0.10  -0.22    -0.08   0.05  -0.14     0.03   0.02  -0.06
  90   1     0.28   0.08   0.19    -0.08   0.07  -0.08     0.07   0.02   0.05
  91   1     0.02  -0.06  -0.11    -0.04  -0.12  -0.11     0.00  -0.01  -0.01
  92   1     0.01  -0.04  -0.09    -0.13  -0.11  -0.18     0.00  -0.01  -0.01
  93   1     0.14  -0.02   0.02     0.03  -0.09  -0.04     0.02  -0.01   0.00
  94   1     0.01  -0.02   0.09     0.08   0.06   0.18     0.00  -0.01   0.01
  95   1     0.03  -0.05   0.05     0.20  -0.07  -0.07     0.00  -0.01   0.01
  96   1    -0.02   0.03   0.15     0.10   0.05   0.14    -0.01   0.00   0.02
  97   1    -0.02   0.05  -0.03    -0.01  -0.01  -0.07     0.05  -0.20   0.15
  98   1    -0.04  -0.01  -0.02    -0.06  -0.12  -0.03     0.17   0.03   0.05
  99   1     0.01   0.05  -0.03    -0.05  -0.10   0.00    -0.04  -0.23   0.15
 100   1    -0.02  -0.03   0.04     0.02   0.07   0.00     0.07   0.12  -0.19
 101   1    -0.04   0.00  -0.01     0.08   0.01   0.11     0.17   0.01   0.01
 102   1    -0.01  -0.04   0.05     0.05   0.03   0.06     0.00   0.16  -0.25
 103   1     0.00  -0.07   0.03     0.06   0.04  -0.02    -0.04   0.23  -0.10
 104   1    -0.03  -0.03  -0.03     0.12  -0.02   0.07     0.08   0.10   0.09
 105   1     0.02  -0.04   0.04     0.07  -0.03   0.08    -0.08   0.16  -0.19
 106   1     0.01   0.03  -0.06    -0.05   0.03  -0.04    -0.04  -0.12   0.23
 107   1     0.02   0.05  -0.04    -0.07  -0.05  -0.01    -0.07  -0.18   0.15
 108   1    -0.02  -0.03  -0.03    -0.09  -0.09   0.00     0.10   0.11   0.10
 109   1    -0.05   0.01   0.01     0.00   0.01  -0.17     0.06  -0.02  -0.03
 110   1    -0.04   0.03   0.04     0.00   0.12  -0.04     0.03  -0.03  -0.04
 111   1    -0.01  -0.05  -0.05     0.00   0.05  -0.07     0.02   0.03   0.01
 112   1     0.03   0.08  -0.05    -0.04  -0.03   0.10    -0.01  -0.09   0.04
 113   1     0.04  -0.03   0.03    -0.05  -0.05   0.13    -0.03   0.02  -0.01
 114   1     0.06  -0.01   0.02    -0.05   0.11   0.06    -0.04  -0.01   0.00
                    85                     86                     87
                    ?A                     ?A                     ?A
 Frequencies --   447.4060               453.5661               457.0191
 Red. masses --     3.7785                 3.8107                 2.8137
 Frc consts  --     0.4456                 0.4619                 0.3463
 IR Inten    --     8.4432                19.5885                 1.4439
 Raman Activ --     0.0000                 0.0000                 0.0000
 Depolar     --     0.0000                 0.0000                 0.0000
 Atom AN      X      Y      Z        X      Y      Z        X      Y      Z
   1   8     0.00   0.00   0.00     0.01  -0.05   0.02    -0.01   0.03  -0.01
   2  12     0.01  -0.01   0.02    -0.02   0.01   0.08     0.01  -0.01  -0.03
   3   8     0.00   0.00   0.00     0.06   0.07  -0.04    -0.03  -0.05   0.02
   4   6     0.00   0.00   0.00    -0.01   0.00   0.02     0.01   0.00  -0.01
   5   7    -0.03  -0.04   0.00    -0.03   0.01  -0.01     0.01  -0.01   0.01
   6   7    -0.03   0.02   0.02     0.00  -0.03  -0.02     0.00   0.02   0.00
   7   8     0.00   0.00   0.00     0.00   0.01   0.02     0.00   0.00  -0.01
   8   6    -0.03  -0.01   0.03     0.00   0.01  -0.02    -0.01  -0.01   0.01
   9   6    -0.01  -0.02   0.04     0.01   0.01  -0.03    -0.01  -0.02   0.01
  10   6     0.00  -0.02   0.03     0.00   0.00  -0.02     0.01   0.00   0.01
  11   8     0.00   0.00   0.00     0.01   0.07  -0.06    -0.01  -0.04   0.03
  12   6     0.00   0.00   0.00     0.05   0.00  -0.04    -0.03   0.00   0.02
  13   6     0.00  -0.01   0.00     0.10  -0.02  -0.07    -0.05   0.01   0.04
  14   6     0.00   0.00   0.00    -0.04   0.04  -0.05     0.02  -0.02   0.03
  15   8     0.00   0.01   0.00     0.00  -0.01   0.03     0.00   0.01  -0.02
  16   6     0.00   0.00   0.00     0.01  -0.07   0.04     0.00   0.04  -0.03
  17   8    -0.03   0.03  -0.01    -0.09   0.10  -0.05     0.03  -0.03   0.01
  18   6     0.00   0.01   0.01     0.03   0.04   0.05    -0.01  -0.02  -0.03
  19   8     0.01   0.00   0.01     0.01   0.06   0.04     0.00  -0.04  -0.02
  20   8    -0.01  -0.02   0.00    -0.02  -0.09  -0.01     0.01   0.04   0.01
  21   6     0.01  -0.01   0.02     0.01  -0.05   0.00     0.00   0.02   0.01
  22   6     0.02  -0.02   0.03     0.04  -0.07   0.03     0.00   0.03  -0.01
  23   6    -0.01   0.02   0.00    -0.02   0.00   0.02     0.00   0.01  -0.01
  24   8     0.00   0.00   0.00    -0.02   0.06   0.00     0.02  -0.03   0.00
  25   6     0.03  -0.03  -0.01     0.11  -0.07  -0.06    -0.03   0.02   0.02
  26   6    -0.02   0.02  -0.01    -0.03   0.00   0.00     0.00   0.02  -0.01
  27   6    -0.01   0.00   0.00    -0.05  -0.04  -0.01     0.03   0.02   0.01
  28   6     0.00  -0.01   0.00    -0.05   0.00   0.03     0.03   0.00  -0.02
  29   6     0.02  -0.05  -0.14     0.01   0.00  -0.04     0.00   0.00   0.01
  30   6     0.00   0.15  -0.13     0.01  -0.05   0.04     0.00   0.05  -0.05
  31   6     0.00   0.00  -0.09     0.01  -0.01  -0.03    -0.01   0.01   0.01
  32   6    -0.04   0.04  -0.04    -0.01   0.00   0.00     0.00   0.00   0.00
  33   6    -0.04   0.07   0.01    -0.01   0.00   0.01     0.00   0.01  -0.01
  34   6    -0.02   0.01  -0.03    -0.01  -0.01  -0.01     0.00   0.01   0.00
  35   6     0.04  -0.02  -0.09     0.01  -0.01  -0.02     0.00   0.01   0.00
  36   6    -0.02   0.02   0.05     0.00  -0.01   0.01    -0.01   0.00  -0.01
  37   6     0.12  -0.02   0.03     0.04  -0.03   0.01     0.00   0.01   0.00
  38   6     0.03   0.09  -0.09    -0.03  -0.04   0.02    -0.03   0.01  -0.05
  39   6     0.02   0.03  -0.05    -0.02  -0.01   0.01    -0.01   0.01  -0.02
  40   6     0.02  -0.07   0.02    -0.03   0.03   0.00    -0.01  -0.01   0.02
  41   6     0.00   0.02  -0.05    -0.01   0.00   0.02     0.00   0.01   0.00
  42   6     0.00   0.08  -0.11     0.02   0.00   0.05     0.02   0.05  -0.01
  43   6     0.03  -0.03   0.05    -0.04  -0.04  -0.06    -0.04  -0.12  -0.09
  44   6    -0.03  -0.06   0.02     0.10   0.04   0.02     0.13   0.00   0.04
  45   6    -0.05  -0.01   0.01    -0.02   0.00   0.01     0.00   0.00   0.01
  46   6     0.05  -0.02   0.06     0.01   0.00   0.01     0.00   0.00  -0.01
  47   6     0.07   0.07   0.11     0.03   0.03   0.04     0.00   0.00   0.00
  48   6    -0.05  -0.02  -0.07    -0.01   0.00  -0.03     0.00   0.00   0.00
  49   6    -0.04  -0.09   0.01     0.03   0.10  -0.05     0.01   0.08  -0.07
  50   6     0.04   0.02   0.04    -0.01  -0.05   0.06     0.01  -0.06   0.12
  51   6     0.06  -0.02   0.07    -0.02   0.05  -0.07    -0.01   0.09  -0.08
  52   6    -0.05  -0.03  -0.01     0.00  -0.04   0.05    -0.05  -0.11   0.09
  53   6    -0.01   0.00   0.04     0.00  -0.01   0.00     0.00   0.01   0.00
  54   6    -0.01  -0.03   0.05     0.01   0.01  -0.02     0.00  -0.01   0.02
  55   1    -0.01  -0.02   0.04     0.02   0.01  -0.03    -0.01  -0.02   0.01
  56   1     0.00  -0.01   0.00     0.07  -0.05  -0.06    -0.04   0.03   0.03
  57   1    -0.01   0.00   0.00    -0.06   0.06  -0.05     0.03  -0.03   0.03
  58   1     0.00   0.00   0.00     0.01  -0.09   0.05     0.00   0.05  -0.04
  59   1     0.00   0.00   0.00     0.00  -0.05   0.04     0.01   0.02  -0.03
  60   1     0.00   0.00   0.00     0.00  -0.08   0.05     0.00   0.04  -0.03
  61   1     0.04  -0.02   0.02     0.07  -0.09   0.02    -0.01   0.04  -0.01
  62   1    -0.02   0.02   0.00    -0.07  -0.02   0.03     0.03   0.03  -0.02
  63   1    -0.01   0.01  -0.04     0.01   0.08  -0.13    -0.01  -0.04   0.04
  64   1     0.08  -0.06  -0.03     0.20  -0.13  -0.11    -0.06   0.04   0.03
  65   1     0.04  -0.03  -0.03     0.19  -0.10  -0.12    -0.07   0.04   0.05
  66   1    -0.02   0.02  -0.01    -0.03   0.01   0.00     0.00   0.01  -0.02
  67   1    -0.01   0.01  -0.02    -0.01  -0.04  -0.03     0.00   0.03   0.01
  68   1    -0.03   0.04  -0.02    -0.07   0.02  -0.01     0.02   0.02   0.00
  69   1    -0.01   0.00   0.00    -0.06   0.09   0.14     0.04  -0.05  -0.08
  70   1    -0.01   0.00   0.00    -0.15  -0.09  -0.04     0.09   0.04   0.02
  71   1    -0.01  -0.01  -0.01    -0.16  -0.12  -0.06     0.09   0.06   0.05
  72   1    -0.01  -0.01   0.00    -0.10  -0.01   0.09     0.05   0.00  -0.05
  73   1    -0.01  -0.02   0.01    -0.11  -0.01   0.09     0.06   0.00  -0.05
  74   1     0.00   0.00   0.01     0.07  -0.04   0.05    -0.04   0.02  -0.03
  75   1    -0.04   0.09   0.04    -0.01   0.03   0.01     0.00  -0.01  -0.01
  76   1    -0.04   0.12   0.12    -0.01   0.01   0.04     0.00   0.01  -0.01
  77   1    -0.03   0.00   0.08    -0.01  -0.01   0.01     0.00   0.00   0.00
  78   1    -0.03   0.01   0.07     0.00  -0.02   0.02    -0.02   0.00  -0.01
  79   1     0.13  -0.01   0.04     0.04  -0.02   0.02     0.01   0.01  -0.01
  80   1     0.00  -0.06   0.05    -0.01   0.01  -0.02     0.01  -0.02   0.00
  81   1     0.02  -0.21   0.17    -0.02   0.08  -0.05    -0.01  -0.05   0.06
  82   1    -0.01  -0.06   0.05     0.00   0.01  -0.02     0.00  -0.03   0.02
  83   1     0.05  -0.04   0.07    -0.06  -0.04  -0.08    -0.06  -0.13  -0.09
  84   1    -0.04  -0.08   0.03     0.11   0.06   0.03     0.15   0.02   0.06
  85   1    -0.04  -0.01  -0.02    -0.01   0.01  -0.02    -0.01  -0.01   0.02
  86   1    -0.10  -0.04   0.02    -0.04   0.01   0.01     0.02   0.00   0.00
  87   1    -0.03   0.00  -0.02    -0.02  -0.01   0.02     0.00  -0.01   0.01
  88   1     0.06  -0.04  -0.05     0.02   0.00   0.00     0.01   0.01  -0.02
  89   1     0.09  -0.04   0.12     0.02   0.00   0.01     0.00   0.00  -0.01
  90   1     0.09  -0.06   0.08     0.02   0.00   0.03     0.01   0.00   0.00
  91   1     0.05   0.14   0.16     0.01   0.06   0.05     0.00  -0.01   0.01
  92   1     0.14   0.11   0.19     0.07   0.05   0.08    -0.01  -0.01   0.00
  93   1    -0.06   0.08   0.04    -0.03   0.04   0.01    -0.01  -0.01   0.00
  94   1    -0.08  -0.07  -0.22    -0.03  -0.01  -0.07     0.00  -0.01  -0.01
  95   1    -0.21   0.07   0.07    -0.07   0.04   0.01     0.00  -0.01   0.00
  96   1    -0.09  -0.05  -0.16    -0.02  -0.02  -0.09     0.00   0.00   0.01
  97   1    -0.02  -0.06  -0.03    -0.01   0.15  -0.09    -0.05   0.19  -0.15
  98   1    -0.04  -0.12  -0.01    -0.08   0.03  -0.03    -0.16  -0.05  -0.05
  99   1    -0.06  -0.12   0.03     0.05   0.19  -0.10     0.04   0.21  -0.13
 100   1     0.01   0.12  -0.04    -0.04  -0.13   0.14    -0.05  -0.09   0.18
 101   1     0.11   0.03   0.14    -0.14  -0.02  -0.06    -0.13  -0.01   0.02
 102   1     0.06   0.06   0.06    -0.02  -0.12   0.13     0.03  -0.14   0.26
 103   1     0.06   0.00   0.02    -0.03   0.12  -0.07    -0.03   0.25  -0.11
 104   1     0.09  -0.03   0.08     0.02   0.06   0.02     0.11   0.10   0.13
 105   1     0.07  -0.03   0.09    -0.06   0.08  -0.13    -0.07   0.16  -0.20
 106   1    -0.05   0.08  -0.07    -0.01  -0.09   0.14    -0.08  -0.10   0.22
 107   1    -0.09  -0.05  -0.02    -0.01  -0.08   0.08    -0.14  -0.24   0.16
 108   1    -0.13  -0.11  -0.01     0.08   0.08   0.06     0.04   0.07   0.11
 109   1     0.02   0.00   0.05     0.00  -0.01   0.02     0.01   0.01  -0.03
 110   1     0.00  -0.02   0.04     0.01  -0.03  -0.01     0.00   0.03   0.01
 111   1    -0.01   0.03   0.06     0.00  -0.02  -0.01     0.00   0.03   0.01
 112   1    -0.01  -0.04   0.05     0.01   0.01  -0.02    -0.01  -0.03   0.03
 113   1    -0.02  -0.03   0.05     0.01   0.01  -0.02    -0.01  -0.01   0.03
 114   1    -0.02  -0.01   0.04     0.01   0.00  -0.02    -0.01   0.01   0.02
                    88                     89                     90
                    ?A                     ?A                     ?A
 Frequencies --   462.4714               464.7434               498.6112
 Red. masses --     2.9716                 3.9325                 5.4598
 Frc consts  --     0.3745                 0.5004                 0.7997
 IR Inten    --     2.9693                 5.9292                14.0098
 Raman Activ --     0.0000                 0.0000                 0.0000
 Depolar     --     0.0000                 0.0000                 0.0000
 Atom AN      X      Y      Z        X      Y      Z        X      Y      Z
   1   8     0.00  -0.02   0.01    -0.01   0.04  -0.02    -0.01   0.03  -0.01
   2  12     0.01  -0.01  -0.02     0.00  -0.01   0.05    -0.07  -0.02   0.22
   3   8     0.01   0.03  -0.02    -0.03  -0.10   0.04    -0.02   0.00   0.00
   4   6     0.00   0.00   0.01     0.01   0.00  -0.02     0.00  -0.01  -0.01
   5   7    -0.06   0.00   0.00    -0.05   0.02  -0.01    -0.03   0.07   0.06
   6   7     0.00   0.00  -0.02     0.01  -0.02  -0.02     0.08  -0.06  -0.08
   7   8     0.00   0.00   0.01     0.00   0.00  -0.02     0.00   0.00  -0.01
   8   6    -0.01  -0.02   0.00     0.00   0.00  -0.02     0.00   0.01   0.02
   9   6     0.02  -0.01  -0.01     0.02   0.01  -0.03     0.03  -0.03  -0.13
  10   6     0.02   0.00  -0.01     0.01   0.00  -0.02     0.07  -0.05  -0.09
  11   8     0.00   0.02  -0.02    -0.02  -0.07   0.05    -0.01  -0.04   0.05
  12   6     0.02   0.00  -0.01    -0.05   0.00   0.03    -0.03  -0.01   0.01
  13   6     0.03  -0.01  -0.02    -0.08   0.03   0.06    -0.04   0.00   0.00
  14   6    -0.01   0.01  -0.02     0.03  -0.04   0.05     0.02  -0.03   0.05
  15   8    -0.01  -0.01   0.02     0.01   0.02  -0.05    -0.01   0.00  -0.02
  16   6     0.00  -0.02   0.01    -0.01   0.07  -0.03    -0.01   0.04  -0.02
  17   8     0.05  -0.06   0.02    -0.10   0.11  -0.05     0.07  -0.06  -0.07
  18   6     0.01   0.00   0.01    -0.02  -0.02  -0.05     0.04  -0.03   0.01
  19   8    -0.01   0.02   0.00     0.02  -0.07  -0.02    -0.03   0.01  -0.03
  20   8     0.01   0.02  -0.01    -0.02  -0.02   0.02     0.05   0.04   0.04
  21   6    -0.02   0.02  -0.04     0.03  -0.03   0.08     0.04   0.02  -0.17
  22   6    -0.04   0.02  -0.06     0.07  -0.02   0.11     0.00  -0.05  -0.22
  23   6     0.03  -0.04   0.01    -0.05   0.09  -0.03     0.05   0.04   0.04
  24   8    -0.02   0.02   0.01     0.05  -0.06  -0.02     0.01   0.07   0.05
  25   6    -0.06   0.04   0.03     0.11  -0.07  -0.06    -0.01  -0.03   0.03
  26   6     0.03  -0.06   0.02    -0.06   0.13  -0.05    -0.01   0.03  -0.02
  27   6    -0.01  -0.01   0.00     0.05   0.03   0.02     0.00  -0.01  -0.01
  28   6    -0.01  -0.01   0.01     0.03  -0.01  -0.03     0.02   0.00  -0.01
  29   6     0.01   0.03   0.12     0.01   0.03   0.07     0.00   0.04   0.00
  30   6     0.00   0.00  -0.01     0.01  -0.04   0.02     0.05  -0.02  -0.06
  31   6    -0.03   0.02   0.07    -0.01   0.01   0.04     0.03  -0.05  -0.06
  32   6    -0.01   0.01   0.04     0.00  -0.01   0.02    -0.02  -0.04  -0.04
  33   6    -0.01  -0.01  -0.03     0.00  -0.03  -0.01    -0.02   0.01   0.09
  34   6     0.01   0.00   0.02     0.00  -0.01   0.02    -0.05  -0.02  -0.06
  35   6     0.05   0.03   0.07     0.02   0.01   0.05    -0.02  -0.01  -0.05
  36   6    -0.09  -0.07  -0.06    -0.03  -0.04  -0.04     0.05  -0.02   0.03
  37   6     0.12  -0.08  -0.02     0.06  -0.05  -0.01     0.01  -0.02   0.02
  38   6     0.00   0.00   0.00    -0.01  -0.02   0.03    -0.04  -0.01  -0.01
  39   6     0.00   0.00   0.00    -0.01  -0.01   0.01    -0.05  -0.01   0.00
  40   6     0.00   0.01   0.00    -0.02   0.03  -0.01    -0.05   0.05   0.03
  41   6     0.00   0.00   0.00    -0.01   0.00   0.02    -0.01   0.02   0.04
  42   6     0.00   0.00   0.00     0.00  -0.02   0.03     0.01   0.03   0.03
  43   6     0.00   0.01   0.01    -0.01   0.03   0.01    -0.05   0.03   0.03
  44   6     0.00   0.00   0.00    -0.02   0.02   0.00    -0.03   0.05   0.05
  45   6    -0.05  -0.02   0.09    -0.02   0.00   0.04     0.01   0.01  -0.02
  46   6     0.00   0.05  -0.11    -0.01   0.03  -0.06     0.01  -0.01   0.05
  47   6     0.02   0.05   0.10     0.01   0.03   0.05     0.03   0.02   0.02
  48   6     0.02  -0.03  -0.15     0.02  -0.01  -0.08    -0.01   0.00   0.00
  49   6     0.00   0.00   0.00     0.01   0.00   0.01     0.00  -0.01  -0.01
  50   6     0.00   0.00   0.00    -0.01   0.00  -0.03     0.00   0.00  -0.01
  51   6     0.00   0.00   0.00     0.00  -0.01   0.00     0.01  -0.01   0.01
  52   6     0.00   0.00   0.00     0.02   0.03  -0.02     0.01   0.01  -0.01
  53   6     0.00   0.01  -0.02     0.00   0.00  -0.03    -0.01   0.06  -0.02
  54   6    -0.01   0.00   0.01     0.00   0.01  -0.01     0.00  -0.03   0.04
  55   1     0.02  -0.01  -0.01     0.02   0.01  -0.03    -0.01  -0.09  -0.16
  56   1     0.02  -0.01  -0.01    -0.04   0.05   0.04    -0.05  -0.01   0.00
  57   1    -0.02   0.02  -0.02     0.04  -0.06   0.05     0.02  -0.05   0.06
  58   1     0.00  -0.02   0.01    -0.01   0.08  -0.04    -0.01   0.05  -0.03
  59   1     0.00  -0.02   0.01     0.00   0.04  -0.03     0.00   0.03  -0.02
  60   1     0.00  -0.02   0.01     0.00   0.07  -0.04     0.00   0.05  -0.02
  61   1    -0.08   0.00  -0.03     0.15   0.01   0.06    -0.05  -0.14  -0.17
  62   1     0.02  -0.06   0.02    -0.03   0.15  -0.06     0.07   0.06   0.03
  63   1     0.02  -0.04   0.10    -0.03   0.06  -0.17     0.17  -0.20   0.17
  64   1    -0.15   0.11   0.07     0.27  -0.21  -0.13    -0.20   0.15   0.12
  65   1    -0.07   0.04   0.08     0.12  -0.07  -0.14    -0.02  -0.03   0.14
  66   1     0.05  -0.05   0.05    -0.11   0.12  -0.12    -0.03   0.04  -0.04
  67   1     0.04  -0.03   0.02    -0.09   0.09  -0.01     0.00  -0.05  -0.04
  68   1     0.04  -0.09   0.03    -0.04   0.18  -0.07    -0.05   0.08  -0.04
  69   1    -0.02   0.03   0.04     0.06  -0.08  -0.11     0.00  -0.04  -0.05
  70   1    -0.04  -0.02  -0.01     0.13   0.07   0.04     0.02  -0.01  -0.01
  71   1    -0.05  -0.03  -0.02     0.14   0.11   0.06     0.02   0.01   0.01
  72   1    -0.03  -0.01   0.02     0.08   0.00  -0.09     0.06   0.01  -0.06
  73   1    -0.03  -0.02   0.03     0.09   0.00  -0.07     0.06   0.00  -0.05
  74   1     0.03  -0.02   0.02    -0.07   0.04  -0.04    -0.07   0.03  -0.02
  75   1     0.00  -0.04  -0.03     0.00  -0.03  -0.02    -0.04  -0.01  -0.05
  76   1    -0.02  -0.06  -0.14    -0.01  -0.05  -0.08     0.02   0.06   0.20
  77   1    -0.01  -0.05  -0.06     0.00  -0.03  -0.03    -0.05  -0.01  -0.07
  78   1    -0.12  -0.06  -0.08    -0.05  -0.04  -0.05     0.09  -0.03   0.04
  79   1     0.14  -0.07  -0.04     0.07  -0.05  -0.02     0.02  -0.02   0.03
  80   1     0.00   0.00   0.00    -0.01   0.01  -0.01     0.00  -0.02   0.00
  81   1     0.00   0.01   0.00    -0.01   0.07  -0.04    -0.05   0.07   0.02
  82   1     0.00   0.00   0.00     0.00   0.01  -0.01     0.00  -0.02   0.01
  83   1     0.00   0.00   0.01    -0.01   0.04   0.01    -0.06   0.03   0.03
  84   1     0.00   0.00   0.01    -0.02   0.02   0.00    -0.01   0.06   0.06
  85   1    -0.05   0.00   0.19    -0.02   0.02   0.09     0.03   0.04  -0.10
  86   1     0.12   0.08   0.06     0.06   0.04   0.03    -0.08   0.01  -0.01
  87   1    -0.13  -0.05   0.22    -0.08  -0.02   0.11     0.00   0.01  -0.02
  88   1     0.04   0.13  -0.15     0.01   0.07  -0.05     0.00  -0.03   0.08
  89   1    -0.02   0.10  -0.26    -0.02   0.06  -0.15     0.01  -0.01   0.05
  90   1     0.08   0.09   0.03     0.02   0.06   0.01    -0.02  -0.01   0.03
  91   1     0.01   0.15   0.22     0.00   0.08   0.11     0.01   0.04  -0.02
  92   1     0.08   0.10   0.21     0.05   0.06   0.12     0.07   0.04   0.05
  93   1    -0.20   0.05  -0.01    -0.11   0.04  -0.01     0.04   0.04   0.01
  94   1    -0.02   0.01  -0.21    -0.01   0.02  -0.10    -0.02   0.00  -0.02
  95   1    -0.09   0.09  -0.06    -0.04   0.06  -0.04    -0.04   0.02   0.03
  96   1     0.04  -0.07  -0.31     0.03  -0.04  -0.18    -0.01  -0.01  -0.03
  97   1     0.00   0.01  -0.01     0.03  -0.02   0.02     0.05   0.02  -0.06
  98   1     0.00  -0.01  -0.01     0.04   0.03   0.01     0.02  -0.04  -0.04
  99   1     0.00   0.00   0.00     0.00  -0.03   0.02    -0.03  -0.08   0.01
 100   1     0.00   0.00   0.00     0.01  -0.02  -0.01     0.04  -0.06   0.03
 101   1     0.00   0.00   0.00     0.00  -0.01  -0.04     0.02  -0.03  -0.03
 102   1     0.00   0.00   0.00    -0.02   0.01  -0.07    -0.02   0.01  -0.08
 103   1     0.00  -0.01   0.00     0.00  -0.04   0.01     0.02   0.00  -0.06
 104   1     0.00   0.00   0.00    -0.02  -0.02  -0.04     0.05  -0.02  -0.02
 105   1     0.01  -0.01   0.01     0.01  -0.04   0.04     0.06  -0.05   0.08
 106   1     0.00   0.00  -0.01     0.03  -0.01  -0.03     0.02  -0.06  -0.01
 107   1     0.01   0.01  -0.01     0.05   0.07  -0.04     0.06   0.07  -0.04
 108   1     0.00   0.00   0.00     0.02   0.00  -0.02     0.03  -0.03  -0.02
 109   1    -0.01   0.00  -0.07     0.00   0.00  -0.04     0.00   0.03  -0.14
 110   1     0.00   0.05  -0.02     0.01   0.01  -0.02    -0.02   0.14   0.02
 111   1     0.00   0.02  -0.02     0.00   0.00  -0.02    -0.02   0.10  -0.01
 112   1    -0.01  -0.02   0.03     0.00   0.00   0.00    -0.02  -0.07   0.10
 113   1    -0.02  -0.01   0.03    -0.01   0.01   0.00    -0.03  -0.09   0.13
 114   1    -0.02   0.04   0.01    -0.01   0.03  -0.01    -0.05   0.13   0.03
                    91                     92                     93
                    ?A                     ?A                     ?A
 Frequencies --   509.0601               532.0362               533.3119
 Red. masses --     3.6503                 3.7567                 4.9278
 Frc consts  --     0.5573                 0.6265                 0.8258
 IR Inten    --     2.5073                 6.1095                16.4799
 Raman Activ --     0.0000                 0.0000                 0.0000
 Depolar     --     0.0000                 0.0000                 0.0000
 Atom AN      X      Y      Z        X      Y      Z        X      Y      Z
   1   8     0.00   0.01   0.00     0.00  -0.01   0.00     0.00   0.02  -0.01
   2  12    -0.03   0.03   0.06     0.00   0.01  -0.06    -0.02   0.01   0.13
   3   8     0.00   0.00   0.00     0.00  -0.01   0.01     0.01   0.02  -0.02
   4   6     0.00   0.00   0.00     0.00   0.00   0.00     0.00  -0.01  -0.01
   5   7    -0.02   0.12  -0.11     0.04   0.05   0.02     0.03  -0.13  -0.03
   6   7    -0.05  -0.03   0.12     0.02  -0.07  -0.03    -0.05   0.06   0.00
   7   8     0.00   0.00   0.00     0.00   0.00   0.01     0.00   0.00  -0.02
   8   6     0.00   0.12  -0.12    -0.24   0.00  -0.03    -0.07  -0.08  -0.01
   9   6    -0.03   0.13   0.00    -0.01   0.01  -0.05     0.00  -0.02   0.09
  10   6    -0.03   0.02   0.13     0.24   0.06   0.06     0.03   0.08   0.03
  11   8     0.00  -0.01   0.02     0.01   0.02  -0.02    -0.01  -0.04   0.05
  12   6    -0.01   0.00   0.00     0.01   0.00   0.00    -0.03  -0.01   0.00
  13   6    -0.01   0.00   0.00     0.00   0.00   0.00    -0.01   0.00  -0.01
  14   6     0.00  -0.01   0.02     0.00   0.01  -0.02     0.01  -0.03   0.05
  15   8     0.00   0.00   0.00     0.00   0.00   0.00    -0.01   0.00  -0.01
  16   6     0.00   0.01  -0.01     0.00  -0.02   0.01    -0.01   0.04  -0.02
  17   8     0.01  -0.01  -0.02     0.00   0.00   0.01    -0.01  -0.01  -0.01
  18   6     0.01  -0.01   0.00    -0.02   0.01  -0.01     0.05  -0.02   0.02
  19   8    -0.01   0.00  -0.01     0.01   0.00   0.01    -0.02   0.01  -0.01
  20   8     0.01   0.01   0.01    -0.02  -0.01   0.00     0.04   0.03   0.01
  21   6     0.01   0.00  -0.05     0.00   0.00   0.03     0.00   0.00  -0.08
  22   6     0.00  -0.02  -0.06     0.01   0.03   0.03    -0.02  -0.07  -0.07
  23   6     0.02   0.02   0.01    -0.02  -0.01  -0.01     0.05   0.03   0.04
  24   8     0.00   0.02   0.01     0.01  -0.03  -0.01    -0.03   0.07   0.02
  25   6     0.00  -0.01   0.01    -0.01   0.02   0.00     0.03  -0.04   0.00
  26   6     0.00   0.01  -0.01     0.00  -0.01   0.00     0.00   0.01   0.00
  27   6     0.00   0.00   0.00     0.00   0.01   0.00    -0.01  -0.01  -0.01
  28   6     0.00   0.00   0.00     0.00   0.00   0.00     0.01   0.00   0.00
  29   6     0.01   0.08  -0.03     0.03   0.03   0.01     0.01  -0.12  -0.11
  30   6    -0.03   0.00   0.06     0.00  -0.06  -0.02    -0.04   0.04  -0.02
  31   6     0.05   0.00  -0.01     0.02   0.04  -0.04    -0.05   0.09   0.03
  32   6     0.06   0.00   0.03     0.05   0.04  -0.05     0.05   0.11   0.04
  33   6     0.01  -0.10   0.01     0.03   0.01   0.03     0.04  -0.01  -0.16
  34   6    -0.01  -0.04   0.03     0.04  -0.06  -0.01     0.14  -0.01   0.11
  35   6    -0.03  -0.02   0.05     0.00  -0.05   0.01     0.05  -0.06   0.03
  36   6     0.03  -0.08  -0.01    -0.03   0.00   0.01    -0.11   0.10  -0.02
  37   6    -0.04  -0.08   0.02    -0.04  -0.03   0.02    -0.03   0.02  -0.01
  38   6     0.02   0.04  -0.02     0.02  -0.04  -0.06     0.04  -0.03   0.00
  39   6     0.03   0.05  -0.04    -0.03  -0.06  -0.09     0.02  -0.07  -0.01
  40   6     0.04  -0.09   0.04    -0.06  -0.02   0.02     0.01   0.01  -0.07
  41   6     0.01   0.03  -0.07    -0.10   0.04   0.00    -0.07  -0.04   0.01
  42   6    -0.01   0.01  -0.05    -0.04   0.05   0.05    -0.04  -0.01   0.02
  43   6     0.04  -0.03  -0.01     0.02   0.02   0.03     0.06   0.00  -0.01
  44   6     0.01  -0.04  -0.02     0.00   0.07   0.07     0.03   0.00  -0.01
  45   6    -0.03   0.01   0.01    -0.04  -0.01   0.02    -0.03  -0.02   0.03
  46   6     0.00   0.01  -0.01     0.01   0.00   0.00     0.00   0.01  -0.06
  47   6    -0.01   0.00  -0.01    -0.01  -0.01  -0.02    -0.04  -0.02  -0.03
  48   6     0.01   0.01  -0.01    -0.01   0.01   0.02    -0.01   0.00   0.02
  49   6    -0.01  -0.01   0.00     0.01   0.02  -0.01     0.01   0.03   0.00
  50   6     0.01   0.00   0.02     0.01  -0.01   0.02     0.00   0.00   0.01
  51   6     0.00   0.00   0.01     0.02  -0.02   0.04     0.00  -0.01   0.01
  52   6    -0.02  -0.02   0.01     0.02   0.03  -0.02     0.01   0.03  -0.01
  53   6     0.02  -0.07   0.01    -0.01   0.04   0.06     0.02  -0.06  -0.03
  54   6     0.04  -0.06  -0.06     0.02  -0.07   0.02    -0.03   0.09  -0.03
  55   1    -0.08   0.25   0.03    -0.03  -0.02  -0.06     0.09  -0.01   0.11
  56   1    -0.01   0.00   0.00     0.01   0.00   0.01    -0.01   0.00  -0.02
  57   1     0.01  -0.02   0.02    -0.01   0.02  -0.02     0.02  -0.06   0.07
  58   1     0.00   0.02  -0.01     0.00  -0.02   0.01    -0.01   0.04  -0.02
  59   1     0.00   0.01  -0.01     0.00  -0.01   0.01     0.00   0.02  -0.02
  60   1     0.00   0.01  -0.01     0.00  -0.02   0.01     0.00   0.04  -0.02
  61   1    -0.01  -0.05  -0.04     0.02   0.05   0.02    -0.05  -0.14  -0.04
  62   1     0.02   0.02   0.01    -0.02  -0.02  -0.01     0.05   0.04   0.03
  63   1     0.05  -0.05   0.04    -0.03   0.01  -0.02     0.06  -0.03   0.03
  64   1    -0.05   0.03   0.03     0.01  -0.01  -0.01    -0.02   0.03   0.02
  65   1     0.01  -0.02   0.03    -0.03   0.03   0.00     0.08  -0.07   0.02
  66   1    -0.02   0.01  -0.02     0.01  -0.01   0.01    -0.03   0.02  -0.03
  67   1     0.00  -0.02   0.00     0.00   0.02   0.01     0.01  -0.06  -0.02
  68   1    -0.01   0.03  -0.01     0.01  -0.02   0.01    -0.03   0.05  -0.02
  69   1     0.00  -0.01  -0.01     0.00   0.00   0.00    -0.01  -0.01   0.00
  70   1     0.00   0.00   0.00     0.00   0.01   0.01    -0.02  -0.03  -0.02
  71   1     0.00   0.00   0.00     0.00   0.01   0.00    -0.01  -0.01   0.00
  72   1     0.02   0.00  -0.02    -0.02   0.00   0.02     0.05   0.01  -0.05
  73   1     0.02   0.00  -0.02    -0.02   0.00   0.02     0.05   0.01  -0.04
  74   1    -0.02   0.01  -0.01     0.03  -0.01   0.01    -0.09   0.04  -0.02
  75   1     0.02   0.05   0.00     0.04   0.05  -0.06     0.10   0.08   0.14
  76   1    -0.01  -0.12  -0.03    -0.04   0.02   0.08    -0.07  -0.06  -0.27
  77   1     0.01  -0.01  -0.02     0.04  -0.05  -0.03     0.14   0.01   0.23
  78   1     0.03  -0.08  -0.01    -0.05   0.00   0.01    -0.18   0.11  -0.04
  79   1    -0.06  -0.08   0.03    -0.07  -0.04   0.03    -0.07   0.01   0.00
  80   1     0.00   0.07  -0.04     0.00  -0.07  -0.10    -0.01  -0.08   0.02
  81   1     0.03  -0.19   0.13     0.01   0.00   0.09     0.06   0.09  -0.10
  82   1     0.00   0.06  -0.05    -0.09   0.03  -0.04    -0.07  -0.03   0.05
  83   1     0.04  -0.03   0.00     0.07   0.04   0.05     0.09   0.01   0.00
  84   1     0.01  -0.05  -0.02     0.04   0.09   0.10     0.04   0.02   0.00
  85   1     0.03   0.09  -0.03    -0.03   0.01   0.02    -0.11  -0.12   0.15
  86   1    -0.05   0.05   0.01    -0.03   0.00   0.02     0.08  -0.05   0.01
  87   1    -0.12   0.00   0.06    -0.06  -0.01   0.03     0.07  -0.02   0.00
  88   1     0.00   0.05   0.06     0.02   0.01  -0.04     0.02   0.00  -0.20
  89   1    -0.03   0.04  -0.11     0.03   0.00   0.00     0.04  -0.02   0.03
  90   1    -0.01   0.05   0.03     0.04   0.00   0.03     0.06  -0.04  -0.03
  91   1    -0.05   0.03  -0.08    -0.03  -0.01  -0.07    -0.01  -0.06  -0.01
  92   1     0.05   0.04   0.04     0.01   0.00  -0.01    -0.09  -0.05  -0.05
  93   1     0.00   0.04  -0.03     0.02   0.01  -0.01    -0.01  -0.03  -0.01
  94   1    -0.01   0.09   0.07    -0.01   0.03   0.06     0.01  -0.01   0.04
  95   1     0.04   0.05  -0.04     0.02   0.01   0.00     0.03  -0.03  -0.01
  96   1     0.05   0.00  -0.09     0.01   0.01   0.01    -0.02   0.01   0.07
  97   1    -0.04  -0.02   0.02     0.05   0.07  -0.08    -0.02   0.02   0.02
  98   1    -0.03  -0.01   0.02     0.00  -0.03  -0.04     0.00   0.03   0.01
  99   1     0.00   0.03  -0.01    -0.01  -0.03   0.00     0.04   0.07  -0.01
 100   1    -0.03   0.06  -0.02     0.04  -0.08   0.08    -0.02   0.00   0.02
 101   1     0.01   0.02   0.05     0.00  -0.04  -0.03    -0.02   0.01  -0.01
 102   1     0.03   0.00   0.07    -0.01   0.00  -0.03     0.01  -0.02   0.05
 103   1     0.00   0.02   0.04     0.03  -0.05   0.02    -0.01  -0.05   0.09
 104   1     0.00   0.01   0.04     0.01  -0.02   0.00    -0.05   0.00   0.00
 105   1    -0.02   0.03  -0.03     0.05  -0.03   0.07    -0.03   0.00  -0.02
 106   1    -0.03   0.05   0.00     0.02   0.03  -0.06     0.01   0.08  -0.04
 107   1    -0.07  -0.08   0.03     0.04   0.06  -0.03    -0.01   0.00   0.00
 108   1    -0.05  -0.01   0.02    -0.01  -0.02  -0.02    -0.03   0.02  -0.01
 109   1    -0.02  -0.02   0.29     0.18   0.02   0.04     0.09  -0.07  -0.04
 110   1     0.04  -0.28  -0.08     0.16  -0.08  -0.10     0.08  -0.11  -0.09
 111   1     0.03  -0.18  -0.01     0.02   0.27   0.33     0.03   0.02   0.06
 112   1     0.06  -0.03  -0.14    -0.04  -0.42   0.17    -0.05   0.00   0.01
 113   1     0.08   0.09  -0.25    -0.14   0.12  -0.15    -0.07   0.15  -0.08
 114   1     0.09  -0.32  -0.06    -0.18  -0.06  -0.09    -0.08   0.07  -0.05
                    94                     95                     96
                    ?A                     ?A                     ?A
 Frequencies --   547.8051               555.9675               558.7792
 Red. masses --     4.2661                 4.8191                 5.1178
 Frc consts  --     0.7543                 0.8776                 0.9415
 IR Inten    --     0.5443                 4.6344                 5.0811
 Raman Activ --     0.0000                 0.0000                 0.0000
 Depolar     --     0.0000                 0.0000                 0.0000
 Atom AN      X      Y      Z        X      Y      Z        X      Y      Z
   1   8     0.00   0.00   0.00     0.00  -0.04   0.01     0.00  -0.05   0.01
   2  12    -0.02   0.03   0.00    -0.02  -0.01   0.05    -0.05   0.00   0.11
   3   8     0.00   0.00   0.01    -0.06  -0.06   0.05    -0.09  -0.09   0.07
   4   6     0.00   0.00   0.00     0.01   0.02   0.01     0.01   0.03   0.02
   5   7    -0.03  -0.05   0.00    -0.09   0.03  -0.02     0.04  -0.04   0.00
   6   7     0.08  -0.10  -0.04    -0.07  -0.03  -0.03     0.06   0.06   0.05
   7   8     0.00   0.00   0.00    -0.01   0.00   0.03    -0.01   0.00   0.04
   8   6     0.03   0.02   0.06    -0.03   0.04   0.00     0.06  -0.03   0.00
   9   6     0.02   0.01  -0.05     0.03   0.02  -0.02    -0.03  -0.01   0.03
  10   6    -0.04  -0.03  -0.09    -0.02  -0.06  -0.01    -0.02   0.04   0.01
  11   8     0.00   0.01  -0.01     0.02   0.07  -0.09     0.03   0.10  -0.12
  12   6     0.00   0.00   0.00     0.05   0.02   0.00     0.07   0.03   0.00
  13   6     0.00   0.00   0.00    -0.03  -0.01   0.05    -0.06  -0.02   0.07
  14   6     0.00   0.01  -0.01    -0.01   0.07  -0.10    -0.02   0.09  -0.14
  15   8     0.00   0.00   0.00     0.03   0.00   0.01     0.05   0.00   0.01
  16   6     0.00  -0.01   0.00     0.01  -0.07   0.03     0.01  -0.09   0.04
  17   8     0.00   0.00   0.00     0.03  -0.02  -0.03     0.04  -0.03  -0.04
  18   6    -0.01   0.00   0.00    -0.06  -0.01  -0.03    -0.08  -0.02  -0.04
  19   8     0.00   0.00   0.00     0.02   0.00   0.00     0.03   0.00   0.00
  20   8     0.00  -0.01   0.00    -0.03  -0.03   0.02    -0.04  -0.05   0.03
  21   6     0.01   0.00   0.00     0.05   0.01   0.01     0.08   0.02  -0.01
  22   6     0.01   0.01   0.00     0.03   0.06  -0.04     0.04   0.08  -0.07
  23   6    -0.01   0.00   0.00    -0.06  -0.01  -0.03    -0.08   0.00  -0.04
  24   8     0.01  -0.01   0.00     0.07  -0.05   0.00     0.11  -0.06   0.01
  25   6     0.00   0.00   0.00    -0.03   0.04   0.01    -0.04   0.05   0.01
  26   6     0.00   0.00   0.00    -0.02   0.03  -0.01    -0.03   0.06  -0.01
  27   6     0.00   0.00   0.00     0.01   0.01   0.01     0.01   0.02   0.01
  28   6     0.00   0.00   0.00     0.00   0.01   0.00     0.00   0.00   0.00
  29   6    -0.01  -0.07  -0.10     0.01   0.02  -0.05    -0.01  -0.04  -0.02
  30   6     0.07  -0.17   0.09     0.01   0.11  -0.09    -0.02  -0.04   0.04
  31   6    -0.03   0.05   0.02     0.00   0.09  -0.02    -0.01  -0.04   0.02
  32   6     0.04   0.06   0.05     0.11   0.08  -0.06    -0.06  -0.03   0.06
  33   6     0.03  -0.03  -0.11     0.07  -0.02   0.00    -0.04  -0.01  -0.05
  34   6     0.08   0.00   0.09     0.10  -0.08   0.03    -0.04   0.05   0.02
  35   6     0.01  -0.04   0.01    -0.02  -0.09   0.01     0.02   0.05  -0.01
  36   6    -0.06   0.07  -0.01    -0.06   0.06   0.00     0.02  -0.02   0.00
  37   6    -0.02  -0.01   0.00    -0.06  -0.10   0.05     0.03   0.06  -0.03
  38   6    -0.07   0.03  -0.02    -0.04   0.03   0.05     0.06  -0.03  -0.04
  39   6    -0.03   0.15  -0.07     0.01   0.00   0.15    -0.01  -0.05  -0.11
  40   6    -0.03  -0.09   0.18     0.05   0.11  -0.07    -0.04  -0.07   0.00
  41   6     0.10   0.13  -0.08     0.10  -0.08   0.07    -0.12   0.03  -0.04
  42   6     0.07   0.03  -0.02     0.04  -0.05  -0.03    -0.05   0.04   0.04
  43   6    -0.11   0.01   0.03    -0.07   0.01   0.00     0.10  -0.02  -0.01
  44   6    -0.03   0.02   0.04     0.01  -0.06  -0.06     0.00   0.05   0.05
  45   6    -0.01  -0.01   0.01    -0.03   0.00   0.02     0.02   0.00  -0.01
  46   6     0.00   0.01  -0.03     0.00   0.01  -0.02     0.00   0.00   0.00
  47   6    -0.02  -0.01  -0.01    -0.01  -0.01  -0.02     0.00   0.00   0.01
  48   6     0.00   0.00   0.01    -0.01   0.01   0.03     0.01   0.00  -0.02
  49   6    -0.02  -0.04   0.00     0.00  -0.01   0.01     0.01   0.02  -0.01
  50   6     0.01   0.00   0.00    -0.01   0.01  -0.03     0.01  -0.01   0.02
  51   6     0.02   0.01   0.00    -0.02   0.01  -0.03     0.01  -0.01   0.02
  52   6    -0.02  -0.04   0.01     0.00  -0.01   0.01     0.01   0.02  -0.01
  53   6    -0.03   0.05   0.07    -0.02   0.03   0.04     0.03  -0.05  -0.06
  54   6     0.00   0.02  -0.02     0.01  -0.07   0.04    -0.02   0.08  -0.03
  55   1     0.03  -0.06  -0.06     0.02   0.02  -0.02    -0.02  -0.01   0.03
  56   1     0.00   0.00   0.00    -0.05  -0.02   0.07    -0.07  -0.03   0.10
  57   1     0.00   0.01  -0.01    -0.03   0.11  -0.12    -0.04   0.16  -0.17
  58   1     0.00  -0.01   0.00     0.01  -0.07   0.04     0.02  -0.10   0.05
  59   1     0.00   0.00   0.00     0.00  -0.04   0.03     0.00  -0.05   0.04
  60   1     0.00  -0.01   0.00     0.01  -0.08   0.04     0.01  -0.10   0.05
  61   1     0.01   0.02   0.00     0.05   0.12  -0.06     0.06   0.15  -0.09
  62   1    -0.01   0.00   0.00    -0.04   0.02  -0.04    -0.06   0.04  -0.06
  63   1     0.00  -0.01   0.00     0.02  -0.06   0.04     0.04  -0.09   0.07
  64   1    -0.01   0.00   0.00    -0.08   0.06   0.03    -0.11   0.10   0.04
  65   1    -0.02   0.01   0.00    -0.10   0.07   0.04    -0.12   0.09   0.07
  66   1     0.00   0.00   0.00     0.00   0.01   0.00    -0.01   0.03  -0.02
  67   1     0.00   0.01   0.01    -0.03   0.09   0.01    -0.04   0.12   0.00
  68   1     0.00   0.00   0.00     0.01   0.02   0.00     0.01   0.05  -0.01
  69   1     0.00   0.00   0.00     0.01  -0.03  -0.08     0.01  -0.06  -0.12
  70   1     0.00   0.00   0.00     0.07   0.07   0.04     0.10   0.11   0.05
  71   1     0.00   0.00   0.00     0.05   0.04   0.00     0.08   0.07   0.00
  72   1    -0.01   0.00   0.01    -0.09  -0.01   0.09    -0.12  -0.02   0.13
  73   1    -0.01   0.00   0.01    -0.07  -0.01   0.07    -0.11  -0.02   0.10
  74   1     0.02  -0.01   0.00     0.16  -0.06   0.02     0.22  -0.09   0.03
  75   1     0.07   0.06   0.13     0.12   0.08  -0.05    -0.05  -0.02   0.09
  76   1    -0.03  -0.07  -0.18    -0.05  -0.02   0.03     0.02  -0.02  -0.10
  77   1     0.10   0.04   0.18     0.13  -0.02   0.05    -0.05   0.04   0.06
  78   1    -0.09   0.07  -0.03    -0.11   0.06  -0.01     0.04  -0.02  -0.01
  79   1    -0.04  -0.02   0.01    -0.11  -0.11   0.07     0.06   0.06  -0.04
  80   1     0.04   0.22  -0.17     0.02  -0.07   0.22    -0.04  -0.01  -0.14
  81   1    -0.09  -0.27   0.30    -0.03   0.16  -0.21     0.04  -0.05   0.09
  82   1     0.11   0.17  -0.20     0.09  -0.14   0.16    -0.12   0.05  -0.08
  83   1    -0.14   0.00   0.03    -0.10   0.00  -0.02     0.13   0.00   0.01
  84   1    -0.05   0.00   0.03    -0.02  -0.07  -0.09     0.02   0.07   0.08
  85   1    -0.05  -0.06   0.08    -0.06  -0.04   0.07     0.03   0.01  -0.02
  86   1     0.05  -0.03   0.00     0.01  -0.03   0.01     0.01   0.01  -0.01
  87   1     0.05   0.00  -0.02     0.01   0.00  -0.01     0.01   0.00   0.00
  88   1     0.00  -0.01  -0.11     0.02  -0.01  -0.11    -0.01   0.00   0.04
  89   1     0.02  -0.01   0.02     0.03  -0.02   0.04    -0.02   0.01  -0.02
  90   1     0.03  -0.03  -0.03     0.05  -0.03   0.00    -0.02   0.01  -0.01
  91   1    -0.02  -0.02  -0.03    -0.07   0.01  -0.15     0.04  -0.01   0.08
  92   1    -0.02  -0.01  -0.01     0.08   0.04   0.05    -0.05  -0.02  -0.03
  93   1     0.00   0.00  -0.01     0.04   0.06  -0.03    -0.03  -0.04   0.02
  94   1     0.00   0.01   0.03    -0.03   0.10   0.11     0.02  -0.06  -0.06
  95   1     0.02   0.00  -0.01     0.03   0.05  -0.01    -0.01  -0.03   0.00
  96   1     0.01   0.00   0.01     0.04   0.00  -0.06    -0.03   0.00   0.04
  97   1     0.04  -0.01  -0.06    -0.05  -0.05   0.07     0.04   0.05  -0.06
  98   1     0.00  -0.07  -0.03     0.00   0.03   0.03     0.00  -0.02  -0.03
  99   1    -0.06  -0.12   0.02     0.03   0.05   0.00    -0.01  -0.03   0.00
 100   1     0.04  -0.02   0.00    -0.04   0.06  -0.07     0.03  -0.06   0.06
 101   1     0.04  -0.02   0.01    -0.01   0.03   0.01     0.00  -0.03  -0.01
 102   1    -0.01   0.02  -0.07     0.01   0.00   0.03    -0.01   0.00  -0.02
 103   1     0.03   0.05  -0.15    -0.01   0.03  -0.07     0.00  -0.06   0.11
 104   1     0.10  -0.01   0.01     0.02   0.00  -0.02    -0.05   0.00   0.03
 105   1     0.08  -0.03   0.08     0.00   0.00   0.00    -0.02   0.02  -0.03
 106   1    -0.01  -0.13   0.03     0.00  -0.08   0.04     0.00   0.12  -0.04
 107   1     0.04   0.04  -0.02     0.03   0.03   0.00    -0.04  -0.04   0.01
 108   1     0.03  -0.05   0.00     0.04   0.01   0.00    -0.05   0.01   0.00
 109   1    -0.06   0.05   0.05    -0.03   0.04   0.06    -0.01  -0.05  -0.06
 110   1    -0.05   0.10   0.10    -0.01   0.02   0.03    -0.02  -0.02  -0.02
 111   1    -0.04   0.02   0.03    -0.02   0.03   0.05     0.02  -0.09  -0.12
 112   1     0.01   0.11  -0.05     0.01  -0.05   0.04    -0.01   0.11  -0.06
 113   1     0.04  -0.06   0.05     0.02  -0.11   0.07     0.00   0.07  -0.03
 114   1     0.05   0.06   0.01     0.02  -0.04   0.04     0.01   0.05  -0.02
                    97                     98                     99
                    ?A                     ?A                     ?A
 Frequencies --   565.9960               570.9924               589.9627
 Red. masses --     3.9648                 3.9905                 5.5295
 Frc consts  --     0.7483                 0.7665                 1.1339
 IR Inten    --     0.1607                 1.4179                18.5454
 Raman Activ --     0.0000                 0.0000                 0.0000
 Depolar     --     0.0000                 0.0000                 0.0000
 Atom AN      X      Y      Z        X      Y      Z        X      Y      Z
   1   8     0.00   0.00   0.00     0.00   0.01   0.00     0.00  -0.03   0.00
   2  12     0.00  -0.01   0.02     0.01   0.00  -0.04     0.00   0.00  -0.01
   3   8    -0.01  -0.01   0.00     0.02   0.02  -0.01    -0.11  -0.04   0.03
   4   6     0.00   0.00   0.00     0.00   0.00   0.00     0.01   0.02   0.01
   5   7    -0.07  -0.04   0.00    -0.12   0.02  -0.02     0.00   0.00   0.00
   6   7    -0.03   0.03   0.01     0.14   0.07   0.06     0.00   0.00   0.00
   7   8     0.00   0.00   0.00     0.00   0.00  -0.01    -0.01  -0.01   0.02
   8   6     0.00  -0.08  -0.02     0.16   0.07   0.04     0.00   0.00   0.00
   9   6     0.02  -0.02   0.06    -0.02   0.00  -0.03     0.00   0.00   0.00
  10   6    -0.03   0.06   0.00    -0.11  -0.09  -0.03     0.00   0.00   0.00
  11   8     0.00   0.00   0.00     0.00  -0.02   0.02     0.03   0.05  -0.07
  12   6     0.00   0.00   0.00    -0.01   0.00   0.00     0.04   0.01   0.01
  13   6     0.00   0.00   0.00     0.01   0.00  -0.01    -0.10  -0.01   0.05
  14   6     0.00   0.00  -0.01     0.00  -0.01   0.02    -0.01   0.06  -0.09
  15   8     0.00   0.00   0.00    -0.01   0.00   0.00     0.03  -0.01   0.03
  16   6     0.00   0.00   0.00     0.00   0.01  -0.01     0.01  -0.05   0.02
  17   8     0.00   0.00   0.00     0.00   0.01   0.01     0.01   0.05  -0.02
  18   6     0.00   0.00   0.00     0.01   0.01   0.01     0.07  -0.12   0.04
  19   8     0.00   0.00   0.00     0.00   0.00   0.00    -0.02   0.04  -0.05
  20   8     0.00  -0.01   0.00     0.00   0.01  -0.01     0.03   0.33   0.00
  21   6     0.01   0.00  -0.01    -0.02   0.00   0.01    -0.18   0.11   0.00
  22   6     0.00   0.00  -0.01     0.00   0.00   0.02     0.08  -0.05   0.02
  23   6     0.00   0.00   0.00     0.01  -0.01   0.00     0.05  -0.01   0.04
  24   8     0.01   0.00   0.00    -0.02   0.00  -0.01    -0.16  -0.08  -0.02
  25   6     0.00   0.00   0.00     0.01  -0.01   0.00     0.15  -0.19   0.01
  26   6     0.00   0.01   0.00     0.01  -0.02   0.00     0.08  -0.05   0.02
  27   6     0.00   0.00   0.00     0.00   0.00   0.00    -0.01  -0.01  -0.02
  28   6     0.00   0.00   0.00     0.00   0.00   0.00     0.00   0.00   0.00
  29   6     0.00   0.03   0.17    -0.03   0.02  -0.02     0.00   0.00   0.00
  30   6    -0.02  -0.06   0.09     0.02   0.02  -0.03     0.00   0.00   0.01
  31   6    -0.05   0.06   0.03    -0.01   0.05   0.01     0.00   0.00   0.00
  32   6     0.04  -0.03  -0.18     0.08   0.02  -0.04     0.00   0.00   0.00
  33   6     0.07   0.11   0.17     0.06  -0.02   0.01     0.00   0.00   0.00
  34   6     0.06  -0.09  -0.12     0.06  -0.04   0.01     0.00   0.00   0.00
  35   6    -0.01  -0.07  -0.05    -0.05  -0.06  -0.02     0.00   0.00   0.00
  36   6    -0.06   0.11   0.01    -0.04   0.06   0.00     0.00   0.00   0.00
  37   6    -0.02  -0.05   0.04    -0.04  -0.10   0.05     0.00   0.00   0.00
  38   6     0.01   0.01   0.01     0.07  -0.04  -0.03     0.00   0.00   0.00
  39   6     0.01   0.07  -0.04    -0.03  -0.12  -0.08     0.00   0.01   0.00
  40   6     0.01  -0.07   0.06    -0.07  -0.01  -0.06     0.00   0.00   0.00
  41   6     0.00   0.05  -0.06    -0.13  -0.02   0.01     0.01   0.00  -0.01
  42   6    -0.01  -0.01  -0.01    -0.03   0.06   0.05     0.01   0.00   0.00
  43   6     0.02  -0.01   0.00     0.11  -0.03  -0.03     0.00   0.00   0.00
  44   6     0.01  -0.03  -0.02    -0.04   0.10   0.10     0.00   0.01   0.00
  45   6     0.00   0.00   0.00     0.00   0.00   0.00     0.00   0.00   0.00
  46   6     0.00   0.00  -0.01     0.00   0.00  -0.01     0.00   0.00   0.00
  47   6     0.03   0.01   0.02     0.01   0.00   0.00     0.00   0.00   0.00
  48   6    -0.02   0.01   0.03     0.00   0.00   0.01     0.00   0.00   0.00
  49   6     0.00   0.00   0.00     0.00   0.01  -0.01     0.00   0.00   0.00
  50   6     0.00   0.00   0.01     0.00  -0.01   0.01     0.00   0.00   0.00
  51   6     0.00   0.00   0.00     0.00  -0.01   0.01     0.00   0.00   0.00
  52   6    -0.01  -0.01   0.00     0.01   0.01  -0.01     0.00   0.00   0.00
  53   6     0.04  -0.07  -0.11    -0.02   0.04   0.04     0.00   0.00   0.00
  54   6    -0.03   0.11  -0.05     0.02  -0.07   0.03     0.00   0.00   0.00
  55   1     0.11   0.00   0.08    -0.10   0.00  -0.05     0.00   0.00   0.00
  56   1    -0.01   0.00   0.01     0.02   0.01  -0.02    -0.14  -0.05   0.09
  57   1     0.00   0.01  -0.01     0.01  -0.02   0.03    -0.02   0.10  -0.10
  58   1     0.00   0.00   0.00     0.00   0.01  -0.01     0.01  -0.06   0.03
  59   1     0.00   0.00   0.00     0.00   0.01  -0.01     0.00  -0.02   0.02
  60   1     0.00   0.00   0.00     0.00   0.02  -0.01     0.01  -0.06   0.03
  61   1     0.00   0.00  -0.01     0.00  -0.01   0.02     0.12  -0.25   0.03
  62   1     0.00   0.01   0.00     0.00  -0.02   0.01     0.15  -0.05   0.06
  63   1     0.01   0.00   0.00    -0.02   0.01  -0.02     0.08  -0.26  -0.06
  64   1    -0.01   0.01   0.00     0.03  -0.02  -0.01     0.23  -0.39  -0.02
  65   1     0.00   0.00   0.00     0.00   0.00  -0.01    -0.02  -0.11  -0.07
  66   1     0.00   0.00   0.00     0.01  -0.01   0.01     0.17  -0.12   0.05
  67   1     0.00   0.00  -0.01     0.01  -0.01   0.00     0.08   0.08   0.03
[truncated: 1,639,732 more chars]
