# Supplementary material
Source: publisher figshare collection journal article supplement (https://acs.figshare.com/ndownloader/files/5127205)
Supplement: Supplementary file 1 [file 5127205 › supporting_ja043819b/RRSS_fm-5-ts2-nbo.log]

 Entering Gaussian System, Link 0=/homes/rzepa/g98/g98
 Input=RRSS_fm-5-ts2-nbo.gjf
 Output=RRSS_fm-5-ts2-nbo.log
 Initial command:
 /homes/rzepa/g98/l1.exe /scratch/Gau-1401.inp -scrdir=/scratch/
 Entering Link 1 = /homes/rzepa/g98/l1.exe PID=      1402.
  
 Copyright (c) 1988,1990,1992,1993,1995,1998 Gaussian, Inc.
                  All Rights Reserved.
  
 This is part of the Gaussian(R) 98 program.  It is based on
 the Gaussian 94(TM) system (copyright 1995 Gaussian, Inc.),
 the Gaussian 92(TM) system (copyright 1992 Gaussian, Inc.),
 the Gaussian 90(TM) system (copyright 1990 Gaussian, Inc.),
 the Gaussian 88(TM) system (copyright 1988 Gaussian, Inc.),
 the Gaussian 86(TM) system (copyright 1986 Carnegie Mellon
 University), and the Gaussian 82(TM) system (copyright 1983
 Carnegie Mellon University). Gaussian is a federally registered
 trademark of Gaussian, Inc.
  
 This software contains proprietary and confidential information,
 including trade secrets, belonging to Gaussian, Inc.
  
 This software is provided under written license and may be
 used, copied, transmitted, or stored only in accord with that
 written license.
  
 The following legend is applicable only to US Government
 contracts under DFARS:
  
                    RESTRICTED RIGHTS LEGEND
  
 Use, duplication or disclosure by the US Government is subject
 to restrictions as set forth in subparagraph (c)(1)(ii) of the
 Rights in Technical Data and Computer Software clause at DFARS
 252.227-7013.
  
 Gaussian, Inc.
 Carnegie Office Park, Building 6, Pittsburgh, PA 15106 USA
  
 The following legend is applicable only to US Government
 contracts under FAR:
  
                    RESTRICTED RIGHTS LEGEND
  
 Use, reproduction and disclosure by the US Government is subject
 to restrictions as set forth in subparagraph (c) of the
 Commercial Computer Software - Restricted Rights clause at FAR
 52.227-19.
  
 Gaussian, Inc.
 Carnegie Office Park, Building 6, Pittsburgh, PA 15106 USA
  
  
 ---------------------------------------------------------------
 Warning -- This program may not be used in any manner that
 competes with the business of Gaussian, Inc. or will provide
 assistance to any competitor of Gaussian, Inc.  The licensee
 of this program is prohibited from giving any competitor of
 Gaussian, Inc. access to this program.  By using this program,
 the user acknowledges that Gaussian, Inc. is engaged in the
 business of creating and licensing software in the field of
 computational chemistry and represents and warrants to the
 licensee that it is not a competitor of Gaussian, Inc. and that
 it will not use this program in any manner prohibited above.
 ---------------------------------------------------------------
  

 Cite this work as:
 Gaussian 98, Revision A.11.3,
 M. J. Frisch, G. W. Trucks, H. B. Schlegel, G. E. Scuseria, 
 M. A. Robb, J. R. Cheeseman, V. G. Zakrzewski, J. A. Montgomery, Jr., 
 R. E. Stratmann, J. C. Burant, S. Dapprich, J. M. Millam, 
 A. D. Daniels, K. N. Kudin, M. C. Strain, O. Farkas, J. Tomasi, 
 V. Barone, M. Cossi, R. Cammi, B. Mennucci, C. Pomelli, C. Adamo, 
 S. Clifford, J. Ochterski, G. A. Petersson, P. Y. Ayala, Q. Cui, 
 K. Morokuma, N. Rega, P. Salvador, J. J. Dannenberg, D. K. Malick, 
 A. D. Rabuck, K. Raghavachari, J. B. Foresman, J. Cioslowski, 
 J. V. Ortiz, A. G. Baboul, B. B. Stefanov, G. Liu, A. Liashenko, 
 P. Piskorz, I. Komaromi, R. Gomperts, R. L. Martin, D. J. Fox, 
 T. Keith, M. A. Al-Laham, C. Y. Peng, A. Nanayakkara, M. Challacombe, 
 P. M. W. Gill, B. Johnson, W. Chen, M. W. Wong, J. L. Andres, 
 C. Gonzalez, M. Head-Gordon, E. S. Replogle, and J. A. Pople, 
 Gaussian, Inc., Pittsburgh PA, 2002.

 ***********************************************
 Gaussian 98:  x86-Linux-G98RevA.11.3 5-Feb-2002
                    6-Oct-2004 
 ***********************************************
 %nproc=2
 Will use up to    2 processors via shared memory.
 %chk=rrss_fm-oco.chk
 %mem=500MB
 ----------------------------------------------------
 # rb3lyp/Gen guess=read geom=checkpoint pop(nboread)
 ----------------------------------------------------
 1/29=2,38=1/1;
 2/40=1/2;
 3/5=7,11=2,25=1,30=1/1,2,3;
 4/5=1,7=1/1;
 5/5=2,32=1,42=-5/2;
 6/7=2,8=2,9=2,10=2,28=1,40=1/1,7;
 99/5=1,9=1/99;
 --------------------------------
 from RRSS_fm-/scratch/oco5-5.gjf
 --------------------------------
 Z-Matrix taken from the checkpoint file:
 rrss_fm-oco.chk
 Charge =  0 Multiplicity = 1
 O,0,X1,Y1,Z1
 Mg,0,X2,Y2,Z2
 O,0,X3,Y3,Z3
 C,0,X4,Y4,Z4
 N,0,X5,Y5,Z5
 N,0,X6,Y6,Z6
 O,0,X7,Y7,Z7
 C,0,X8,Y8,Z8
 C,0,X9,Y9,Z9
 C,0,X10,Y10,Z10
 O,0,X11,Y11,Z11
 C,0,X12,Y12,Z12
 C,0,X13,Y13,Z13
 C,0,X14,Y14,Z14
 O,0,X15,Y15,Z15
 C,0,X16,Y16,Z16
 O,0,X17,Y17,Z17
 C,0,X18,Y18,Z18
 O,0,X19,Y19,Z19
 O,0,X20,Y20,Z20
 C,0,X21,Y21,Z21
 C,0,X22,Y22,Z22
 C,0,X23,Y23,Z23
 O,0,X24,Y24,Z24
 C,0,X25,Y25,Z25
 C,0,X26,Y26,Z26
 C,0,X27,Y27,Z27
 C,0,X28,Y28,Z28
 C,0,X29,Y29,Z29
 C,0,X30,Y30,Z30
 C,0,X31,Y31,Z31
 C,0,X32,Y32,Z32
 C,0,X33,Y33,Z33
 C,0,X34,Y34,Z34
 C,0,X35,Y35,Z35
 C,0,X36,Y36,Z36
 C,0,X37,Y37,Z37
 C,0,X38,Y38,Z38
 C,0,X39,Y39,Z39
 C,0,X40,Y40,Z40
 C,0,X41,Y41,Z41
 C,0,X42,Y42,Z42
 C,0,X43,Y43,Z43
 C,0,X44,Y44,Z44
 C,0,X45,Y45,Z45
 C,0,X46,Y46,Z46
 C,0,X47,Y47,Z47
 C,0,X48,Y48,Z48
 C,0,X49,Y49,Z49
 C,0,X50,Y50,Z50
 C,0,X51,Y51,Z51
 C,0,X52,Y52,Z52
 C,0,X53,Y53,Z53
 C,0,X54,Y54,Z54
 H,0,X55,Y55,Z55
 H,0,X56,Y56,Z56
 H,0,X57,Y57,Z57
 H,0,X58,Y58,Z58
 H,0,X59,Y59,Z59
 H,0,X60,Y60,Z60
 H,0,X61,Y61,Z61
 H,0,X62,Y62,Z62
 H,0,X63,Y63,Z63
 H,0,X64,Y64,Z64
 H,0,X65,Y65,Z65
 H,0,X66,Y66,Z66
 H,0,X67,Y67,Z67
 H,0,X68,Y68,Z68
 H,0,X69,Y69,Z69
 H,0,X70,Y70,Z70
 H,0,X71,Y71,Z71
 H,0,X72,Y72,Z72
 H,0,X73,Y73,Z73
 H,0,X74,Y74,Z74
 H,0,X75,Y75,Z75
 H,0,X76,Y76,Z76
 H,0,X77,Y77,Z77
 H,0,X78,Y78,Z78
 H,0,X79,Y79,Z79
 H,0,X80,Y80,Z80
 H,0,X81,Y81,Z81
 H,0,X82,Y82,Z82
 H,0,X83,Y83,Z83
 H,0,X84,Y84,Z84
 H,0,X85,Y85,Z85
 H,0,X86,Y86,Z86
 H,0,X87,Y87,Z87
 H,0,X88,Y88,Z88
 H,0,X89,Y89,Z89
 H,0,X90,Y90,Z90
 H,0,X91,Y91,Z91
 H,0,X92,Y92,Z92
 H,0,X93,Y93,Z93
 H,0,X94,Y94,Z94
 H,0,X95,Y95,Z95
 H,0,X96,Y96,Z96
 H,0,X97,Y97,Z97
 H,0,X98,Y98,Z98
 H,0,X99,Y99,Z99
 H,0,X100,Y100,Z100
 H,0,X101,Y101,Z101
 H,0,X102,Y102,Z102
 H,0,X103,Y103,Z103
 H,0,X104,Y104,Z104
 H,0,X105,Y105,Z105
 H,0,X106,Y106,Z106
 H,0,X107,Y107,Z107
 H,0,X108,Y108,Z108
 H,0,X109,Y109,Z109
 H,0,X110,Y110,Z110
 H,0,X111,Y111,Z111
 H,0,X112,Y112,Z112
 H,0,X113,Y113,Z113
 H,0,X114,Y114,Z114
      Variables:
 X1=3.83528392
 Y1=3.06485281
 Z1=-1.5076746
 X2=-0.30440923
 Y2=-0.09541094
 Z2=-0.01450165
 X3=1.17751098
 Y3=-0.69578345
 Z3=3.20364849
 X4=3.8162214
 Y4=2.61083365
 Z4=-0.2440755
 X5=0.11774371
 Y5=-1.16470785
 Z5=-1.70902054
 X6=-0.97832597
 Y6=1.48884488
 Z6=-1.11264782
 X7=3.64379978
 Y7=3.29214548
 Z7=0.73990266
 X8=0.2626302
 Y8=-0.61957349
 Z8=-2.90858281
 X9=0.06008906
 Y9=0.75739464
 Z9=-3.17332592
 X10=-0.59467135
 Y10=1.7120045
 Z10=-2.36715298
 X11=3.81116197
 Y11=0.56888155
 Z11=1.0629065
 X12=2.52277151
 Y12=0.36192177
 Z12=1.36630467
 X13=2.45663827
 Y13=-0.23383717
 Z13=2.77851197
 X14=4.11722404
 Y14=1.11146614
 Z14=-0.23667409
 X15=1.61946143
 Y15=0.63981735
 Z15=0.59776478
 X16=3.63968993
 Y16=4.48341792
 Z16=-1.66874172
 X17=-1.04148973
 Y17=-0.15406196
 Z17=1.71396698
 X18=0.55480373
 Y18=-1.61864584
 Z18=2.40681789
 X19=1.02536316
 Y19=-1.95319731
 Z19=1.33261076
 X20=-1.74562919
 Y20=-2.6115197
 Z20=2.66246605
 X21=-2.64388453
 Y21=-1.56924212
 Z21=2.66019415
 X22=-2.03217997
 Y22=-0.16539904
 Z22=2.68076339
 X23=-0.43607413
 Y23=-2.47118375
 Z23=3.21830611
 X24=-3.81554957
 Y24=-1.8377765
 Z24=2.54317636
 X25=-3.10615134
 Y25=0.90923711
 Z25=2.52387105
 X26=0.13048898
 Y26=-3.89352922
 Z26=3.26096678
 X27=2.91249528
 Y27=0.79565623
 Z27=3.81629292
 X28=5.60278661
 Y28=0.8555687
 Z28=-0.48025756
 X29=0.22987575
 Y29=-2.58388683
 Z29=-1.42250829
 X30=-1.91945623
 Y30=2.38387205
 Z30=-0.46114804
 X31=-0.97542206
 Y31=-3.2652217
 Z31=-1.02924362
 X32=-0.86563341
 Y32=-4.55474438
 Z32=-0.4549686
 X33=0.39116173
 Y33=-5.1753015
 Z33=-0.28833402
 X34=1.55451875
 Y34=-4.52842814
 Z34=-0.74546926
 X35=1.50478869
 Y35=-3.23159156
 Z35=-1.31003634
 X36=-2.37021704
 Y36=-2.63987116
 Z36=-1.31133459
 X37=2.82944261
 Y37=-2.56954665
 Z37=-1.77225976
 X38=-1.45807351
 Y38=3.32357291
 Z38=0.51609953
 X39=-2.41346746
 Y39=4.08136505
 Z39=1.24214156
 X40=-3.7931339
 Y40=3.92867898
 Z40=1.00750176
 X41=-4.23806749
 Y41=3.01513809
 Z41=0.0346519
 X42=-3.3258777
 Y42=2.22891863
 Z42=-0.7106568
 X43=0.0475876
 Y43=3.55609165
 Z43=0.78864467
 X44=-3.88573822
 Y44=1.22895208
 Z44=-1.75630004
 X45=-3.52955402
 Y45=-3.32376324
 Z45=-0.52312489
 X46=-2.68546908
 Y46=-2.67182972
 Z46=-2.84433163
 X47=3.88397746
 Y47=-2.52797181
 Z47=-0.62071468
 X48=3.43782619
 Y48=-3.32296283
 Z48=-3.00559405
 X49=-4.8402096
 Y49=0.1909645
 Z49=-1.08263081
 X50=-4.63686363
 Y50=1.96613509
 Z50=-2.91639068
 X51=0.40887008
 Y51=3.22203446
 Z51=2.27021987
 X52=0.47057887
 Y52=5.02103867
 Z52=0.43636875
 X53=0.64064297
 Y53=-1.46454707
 Z53=-4.11991615
 X54=-0.90185097
 Y54=3.0564942
 Z54=-3.01482667
 X55=0.29760045
 Y55=1.07634553
 Z55=-4.18329462
 X56=3.14795186
 Y56=-1.08576029
 Z56=2.76063923
 X57=3.49725481
 Y57=0.61384393
 Z57=-0.98602873
 X58=2.6783077
 Y58=4.78295509
 Z58=-1.2491387
 X59=3.66561917
 Y59=4.65814722
 Z59=-2.74419149
 X60=4.4412668
 Y60=5.0347937
 Z60=-1.16945849
 X61=-1.57268941
 Y61=-0.02320489
 Z61=3.68186088
 X62=-0.50996841
 Y62=-2.04375564
 Z62=4.22381596
 X63=-3.83346283
 Y63=0.83754136
 Z63=3.34088919
 X64=-3.64136586
 Y64=0.80755426
 Z64=1.57998963
 X65=-2.65649089
 Y65=1.90317818
 Z65=2.52682128
 X66=-0.5348399
 Y66=-4.53217007
 Z66=3.84906966
 X67=1.12525277
 Y67=-3.90192796
 Z67=3.72113231
 X68=0.20489121
 Y68=-4.27971147
 Z68=2.23831906
 X69=3.92655515
 Y69=1.13586046
 Z69=3.59519562
 X70=2.89218811
 Y70=0.33595884
 Z70=4.80807834
 X71=2.23968032
 Y71=1.65611092
 Z71=3.8102477
 X72=5.79834391
 Y72=-0.21871356
 Z72=-0.46095178
 X73=6.20784642
 Y73=1.34124066
 Z73=0.2916609
 X74=5.88802612
 Y74=1.252599
 Z74=-1.45818232
 X75=-1.77237942
 Y75=-5.09180652
 Z75=-0.15253282
 X76=0.45240962
 Y76=-6.18437236
 Z76=0.14172097
 X77=2.52306376
 Y77=-5.03746893
 Z77=-0.65679907
 X78=-2.33680967
 Y78=-1.56812072
 Z78=-1.01116453
 X79=2.6071569
 Y79=-1.52580742
 Z79=-2.07187524
 X80=-2.06703793
 Y80=4.81171971
 Z80=1.98501227
 X81=-4.51835151
 Y81=4.52747138
 Z81=1.57510487
 X82=-5.31409388
 Y82=2.90933598
 Z82=-0.15399185
 X83=0.61823108
 Y83=2.87127356
 Z83=0.13176576
 X84=-3.03188598
 Y84=0.67512038
 Z84=-2.19608658
 X85=-4.46102549
 Y85=-2.76303448
 Z85=-0.68516637
 X86=-3.32432757
 Y86=-3.34545646
 Z86=0.55835016
 X87=-3.68767625
 Y87=-4.35471863
 Z87=-0.87530347
 X88=-3.68732166
 Y88=-2.25450702
 Z88=-3.02684789
 X89=-2.66227947
 Y89=-3.7065672
 Z89=-3.22136812
 X90=-1.95448746
 Y90=-2.0746276
 Z90=-3.41298574
 X91=4.80330894
 Y91=-2.02665491
 Z91=-0.97213685
 X92=4.15704032
 Y92=-3.5424594
 Z92=-0.29389431
 X93=3.48581865
 Y93=-1.98530826
 Z93=0.25299694
 X94=4.33738055
 Y94=-2.79768981
 Z94=-3.36198119
 X95=2.71726425
 Y95=-3.38247484
 Z95=-3.83445841
 X96=3.72348796
 Y96=-4.3479678
 Z96=-2.72326731
 X97=-5.18746153
 Y97=-0.54241979
 Z97=-1.82723675
 X98=-4.31999065
 Y98=-0.35213562
 Z98=-0.2735009
 X99=-5.7209791
 Y99=0.68721779
 Z99=-0.64789557
 X100=-4.97490534
 Y100=1.23335897
 Z100=-3.66514159
 X101=-3.98104315
 Y101=2.69452842
 Z101=-3.41658847
 X102=-5.51882279
 Y102=2.5004643
 Z102=-2.53110545
 X103=1.49494317
 Y103=3.34885958
 Z103=2.42209518
 X104=0.12465975
 Y104=2.17818611
 Z104=2.49604599
 X105=-0.12097545
 Y105=3.88634186
 Z105=2.97037988
 X106=1.54322876
 Y106=5.15798081
 Z106=0.65531833
 X107=-0.09287589
 Y107=5.75517352
 Z107=1.03423962
 X108=0.28702514
 Y108=5.23576771
 Z108=-0.63013959
 X109=0.52141155
 Y109=-2.53333847
 Z109=-3.92483355
 X110=0.01714023
 Y110=-1.19488107
 Z110=-4.98052529
 X111=1.68413786
 Y111=-1.28137106
 Z111=-4.40569512
 X112=-1.97349938
 Y112=3.164932
 Z112=-3.21587531
 X113=-0.60783027
 Y113=3.88261844
 Z113=-2.3570346
 X114=-0.37114396
 Y114=3.16386458
 Z114=-3.96693251
 Recover connectivity data from disk.
 Stoichiometry    C42H60MgN2O9
 Framework group  C1[X(C42H60MgN2O9)]
 Deg. of freedom  336
 Full point group                 C1      NOp   1
 Largest Abelian subgroup         C1      NOp   1
 Largest concise Abelian subgroup C1      NOp   1
                         Standard orientation:                         
 ---------------------------------------------------------------------
 Center     Atomic     Atomic              Coordinates (Angstroms)
 Number     Number      Type              X           Y           Z
 ---------------------------------------------------------------------
    1          8             0        3.853649    3.042295   -1.506508
    2         12             0       -0.305006   -0.093562   -0.014569
    3          8             0        1.173004   -0.703664    3.203549
    4          6             0        3.831756    2.588053   -0.243035
    5          7             0        0.110899   -1.164903   -1.709343
    6          7             0       -0.969336    1.494995   -1.112343
    7          8             0        3.663323    3.270116    0.741114
    8          6             0        0.259153   -0.620317   -2.908743
    9          6             0        0.064874    0.757910   -3.173128
   10          6             0       -0.584239    1.716198   -2.366753
   11          8             0        3.814366    0.545812    1.063389
   12          6             0        2.524733    0.346478    1.366615
   13          6             0        2.454910   -0.249260    2.778654
   14          6             0        4.123786    1.086911   -0.236016
   15          8             0        1.623172    0.629980    0.598070
   16          6             0        3.666557    4.462048   -1.667205
   17          8             0       -1.042581   -0.148276    1.713817
   18          6             0        0.544862   -1.622569    2.406411
   19          8             0        1.013510   -1.959635    1.332154
   20          8             0       -1.761491   -2.601737    2.661582
   21          6             0       -2.653497   -1.554106    2.659514
   22          6             0       -2.033410   -0.153952    2.680522
   23          6             0       -0.451171   -2.469387    3.217577
   24          8             0       -3.826737   -1.815596    2.542318
   25          6             0       -3.100921    0.927131    2.523827
   26          6             0        0.106872   -3.895107    3.259900
   27          6             0        2.916821    0.777206    3.816757
   28          6             0        5.607814    0.822200   -0.479536
   29          6             0        0.214516   -2.584805   -1.423208
   30          6             0       -1.905156    2.395457   -0.460683
   31          6             0       -0.994871   -3.259027   -1.030238
   32          6             0       -0.892848   -4.549339   -0.456305
   33          6             0        0.360198   -5.177447   -0.289728
   34          6             0        1.527445   -4.537418   -0.746582
   35          6             0        1.485523   -3.240153   -1.310799
   36          6             0       -2.385875   -2.625269   -1.312283
   37          6             0        2.814154   -2.585916   -1.772723
   38          6             0       -1.438251    3.332115    0.516863
   39          6             0       -2.389162    4.095409    1.243026
   40          6             0       -3.769696    3.951041    1.008221
   41          6             0       -4.219996    3.040442    0.035082
   42          6             0       -3.312456    2.248985   -0.710360
   43          6             0        0.068749    3.555551    0.789606
   44          6             0       -3.878192    1.252670   -1.756327
   45          6             0       -3.549353   -3.302431   -0.524364
   46          6             0       -2.701173   -2.654924   -2.845317
   47          6             0        3.868814   -2.550962   -0.621072
   48          6             0        3.418134   -3.342621   -3.006208
   49          6             0       -4.838915    0.220225   -1.083027
   50          6             0       -4.624789    1.994648   -2.916283
   51          6             0        0.427892    3.218935    2.271122
   52          6             0        0.500525    5.018038    0.437768
   53          6             0        0.632216   -1.467206   -4.120273
   54          6             0       -0.883314    3.062677   -3.014087
   55          1             0        0.304381    1.075710   -4.182988
   56          1             0        3.141118   -1.105297    2.760610
   57          1             0        3.500920    0.593209   -0.985562
   58          1             0        2.706945    4.767215   -1.247606
   59          1             0        3.693628    4.636913   -2.742605
   60          1             0        4.471371    5.008484   -1.167699
   61          1             0       -1.573169   -0.014781    3.681699
   62          1             0       -0.522600   -2.041799    4.223197
   63          1             0       -3.828723    0.859563    3.340760
   64          1             0       -3.636648    0.828908    1.579870
   65          1             0       -2.645325    1.918364    2.527089
   66          1             0       -0.562318   -4.529918    3.847769
   67          1             0        1.101526   -3.909580    3.720152
   68          1             0        0.179057   -4.281448    2.237153
   69          1             0        3.932917    1.111400    3.595843
   70          1             0        2.893674    0.317368    4.808415
   71          1             0        2.249164    1.641671    3.810886
   72          1             0        5.796942   -0.253238   -0.460507
   73          1             0        6.215697    1.304034    0.292569
   74          1             0        5.895512    1.217784   -1.457327
   75          1             0       -1.802817   -5.081052   -0.154097
   76          1             0        0.415371   -6.186983    0.140057
   77          1             0        2.492920   -5.052266   -0.657964
   78          1             0       -2.346086   -1.553819   -1.011817
   79          1             0        2.598142   -1.540784   -2.072073
   80          1             0       -2.038439    4.823476    1.986127
   81          1             0       -4.491371    4.554005    1.575923
   82          1             0       -5.296619    2.941128   -0.153687
   83          1             0        0.635346    2.867511    0.132591
   84          1             0       -3.027627    0.693861   -2.196188
   85          1             0       -4.477440   -2.736097   -0.686335
   86          1             0       -3.344359   -3.325646    0.557124
   87          1             0       -3.713606   -4.332326   -0.876838
   88          1             0       -3.700495   -2.231567   -3.027809
   89          1             0       -2.684137   -3.689678   -3.222634
   90          1             0       -1.966581   -2.061949   -3.413742
   91          1             0        4.791159   -2.055057   -0.972275
   92          1             0        4.135775   -3.567154   -0.294504
   93          1             0        3.473828   -2.006166    0.252752
   94          1             0        4.320846   -2.822640   -3.362371
   95          1             0        2.697304   -3.397596   -3.835154
   96          1             0        3.697635   -4.369393   -2.724136
   97          1             0       -5.190479   -0.510866   -1.827864
   98          1             0       -4.322027   -0.326197   -0.273999
   99          1             0       -5.716741    0.721618   -0.648235
  100          1             0       -4.967139    1.264111   -3.665264
  101          1             0       -3.964579    2.719242   -3.416223
  102          1             0       -5.503572    2.534137   -2.530931
  103          1             0        1.514690    3.339221    2.423130
  104          1             0        0.137423    2.176743    2.496638
  105          1             0       -0.098035    3.886208    2.971416
  106          1             0        1.573955    5.148503    0.656851
  107          1             0       -0.058583    5.755366    1.035789
  108          1             0        0.318356    5.234152   -0.628698
  109          1             0        0.506577   -2.535319   -3.925493
  110          1             0        0.010416   -1.193582   -4.980864
  111          1             0        1.676814   -1.290196   -4.405909
  112          1             0       -1.954276    3.177577   -3.215202
  113          1             0       -0.584418    3.886849   -2.356043
  114          1             0       -0.351887    3.167132   -3.966116
 ---------------------------------------------------------------------
 Rotational constants (GHZ):      0.0607531      0.0597484      0.0477739
 Isotopes: O-16,Mg-24,O-16,C-12,N-14,N-14,O-16,C-12,C-12,C-12,O-16,C-12,C-12,C-12
 ,O-16,C-12,O-16,C-12,O-16,O-16,C-12,C-12,C-12,O-16,C-12,C-12,C-12,C-12,C-12,C-12
 ,C-12,C-12,C-12,C-12,C-12,C-12,C-12,C-12,C-12,C-12,C-12,C-12,C-12,C-12,C-12,C-12
 ,C-12,C-12,C-12,C-12,C-12,C-12,C-12,C-12,H-1,H-1,H-1,H-1,H-1,H-1,H-1,H-1,H-1,H-1
 ,H-1,H-1,H-1,H-1,H-1,H-1,H-1,H-1,H-1,H-1,H-1,H-1,H-1,H-1,H-1,H-1,H-1,H-1,H-1,H-1
 ,H-1,H-1,H-1,H-1,H-1,H-1,H-1,H-1,H-1,H-1,H-1,H-1,H-1,H-1,H-1,H-1,H-1,H-1,H-1,H-1
 ,H-1,H-1,H-1,H-1,H-1,H-1,H-1,H-1,H-1,H-1
 General basis read from cards:  (5D, 7F)
 There are   642 symmetry adapted basis functions of A   symmetry.
 Crude estimate of integral set expansion from redundant integrals=1.000.
 Integral buffers will be    262144 words long.
 Raffenetti 2 integral format.
 Two-electron integral symmetry is turned on.
   642 basis functions     1430 primitive gaussians
   205 alpha electrons      205 beta electrons
       nuclear repulsion energy      9221.2299200182 Hartrees.
 One-electron integrals computed using PRISM.
 NBasis=   642 RedAO= T  NBF=   642
 NBsUse=   642 1.00D-04 NBFU=   642
 Initial guess read from the checkpoint file:
 rrss_fm-oco.chk
 Requested convergence on RMS density matrix=1.00D-04 within  64 cycles.
 Requested convergence on MAX density matrix=1.00D-02.
 Requested convergence on             energy=5.00D-05.
 SCF Done:  E(RB+HF-LYP) =  -2612.17810243     A.U. after    2 cycles
             Convg  =    0.6764D-05             -V/T =  2.0106
             S**2   =   0.0000

 **********************************************************************

            Population analysis using the SCF density.

 **********************************************************************

 Alpha  occ. eigenvalues --  -46.70927 -19.21565 -19.20407 -19.18426 -19.16930
 Alpha  occ. eigenvalues --  -19.15372 -19.14985 -19.11983 -19.10046 -19.05833
 Alpha  occ. eigenvalues --  -14.28308 -14.27253 -10.34682 -10.32644 -10.31174
 Alpha  occ. eigenvalues --  -10.27225 -10.27201 -10.26888 -10.24242 -10.23953
 Alpha  occ. eigenvalues --  -10.20411 -10.20061 -10.19936 -10.19713 -10.18488
 Alpha  occ. eigenvalues --  -10.16138 -10.15804 -10.15565 -10.12296 -10.11960
 Alpha  occ. eigenvalues --  -10.05336 -10.04942 -10.03740 -10.02598 -10.02469
 Alpha  occ. eigenvalues --  -10.02406 -10.02107 -10.01922 -10.01888 -10.01722
 Alpha  occ. eigenvalues --  -10.01712 -10.01310 -10.01186 -10.01054 -10.00973
 Alpha  occ. eigenvalues --  -10.00854 -10.00833 -10.00800 -10.00471 -10.00411
 Alpha  occ. eigenvalues --   -9.99969  -9.99906  -9.99749  -9.98711  -3.01422
 Alpha  occ. eigenvalues --   -1.76212  -1.76022  -1.75839  -1.13946  -1.11635
 Alpha  occ. eigenvalues --   -1.09899  -1.06396  -1.04820  -1.02976  -1.00887
 Alpha  occ. eigenvalues --   -0.98563  -0.92683  -0.88848  -0.87402  -0.82855
 Alpha  occ. eigenvalues --   -0.80744  -0.80138  -0.79399  -0.76713  -0.76343
 Alpha  occ. eigenvalues --   -0.76283  -0.74264  -0.74046  -0.73873  -0.73753
 Alpha  occ. eigenvalues --   -0.71748  -0.70259  -0.69122  -0.68271  -0.67828
 Alpha  occ. eigenvalues --   -0.67641  -0.67422  -0.66794  -0.65669  -0.65454
 Alpha  occ. eigenvalues --   -0.64654  -0.64203  -0.64080  -0.63567  -0.62156
 Alpha  occ. eigenvalues --   -0.60405  -0.58827  -0.58514  -0.58070  -0.58036
 Alpha  occ. eigenvalues --   -0.56572  -0.56491  -0.55013  -0.54805  -0.54531
 Alpha  occ. eigenvalues --   -0.54027  -0.53138  -0.52058  -0.51244  -0.50666
 Alpha  occ. eigenvalues --   -0.49874  -0.49692  -0.49495  -0.49258  -0.48096
 Alpha  occ. eigenvalues --   -0.47583  -0.46728  -0.46691  -0.46134  -0.45501
 Alpha  occ. eigenvalues --   -0.45059  -0.44831  -0.44344  -0.43846  -0.43666
 Alpha  occ. eigenvalues --   -0.43536  -0.43232  -0.42588  -0.42172  -0.41722
 Alpha  occ. eigenvalues --   -0.41415  -0.41080  -0.40941  -0.40884  -0.40543
 Alpha  occ. eigenvalues --   -0.40523  -0.40165  -0.40070  -0.39842  -0.39738
 Alpha  occ. eigenvalues --   -0.39450  -0.39265  -0.39177  -0.38969  -0.38778
 Alpha  occ. eigenvalues --   -0.38687  -0.38291  -0.38151  -0.37984  -0.37565
 Alpha  occ. eigenvalues --   -0.37360  -0.37309  -0.37072  -0.36709  -0.36585
 Alpha  occ. eigenvalues --   -0.36340  -0.36128  -0.36030  -0.35871  -0.35709
 Alpha  occ. eigenvalues --   -0.35350  -0.35088  -0.34890  -0.34821  -0.34665
 Alpha  occ. eigenvalues --   -0.34547  -0.34049  -0.33902  -0.33802  -0.33608
 Alpha  occ. eigenvalues --   -0.32824  -0.32687  -0.32192  -0.32142  -0.31573
 Alpha  occ. eigenvalues --   -0.31447  -0.31093  -0.30923  -0.30557  -0.30531
 Alpha  occ. eigenvalues --   -0.30258  -0.29924  -0.29634  -0.29362  -0.29210
 Alpha  occ. eigenvalues --   -0.28829  -0.28699  -0.28439  -0.28097  -0.27788
 Alpha  occ. eigenvalues --   -0.27443  -0.27390  -0.26780  -0.26645  -0.26006
 Alpha  occ. eigenvalues --   -0.25590  -0.25219  -0.23995  -0.21412  -0.20069
 Alpha  occ. eigenvalues --   -0.18124  -0.17975  -0.17942  -0.17526  -0.15234
 Alpha virt. eigenvalues --   -0.02294  -0.00404   0.01043   0.01424   0.03629
 Alpha virt. eigenvalues --    0.06631   0.07376   0.07705   0.08070   0.08245
 Alpha virt. eigenvalues --    0.08550   0.08848   0.10335   0.10542   0.11175
 Alpha virt. eigenvalues --    0.11630   0.12734   0.12902   0.12951   0.13982
 Alpha virt. eigenvalues --    0.14199   0.14555   0.15352   0.15621   0.16130
 Alpha virt. eigenvalues --    0.16203   0.16447   0.16688   0.16839   0.17581
 Alpha virt. eigenvalues --    0.17960   0.18422   0.18613   0.19837   0.19936
 Alpha virt. eigenvalues --    0.20320   0.20631   0.20980   0.21928   0.22604
 Alpha virt. eigenvalues --    0.22739   0.22928   0.23044   0.23372   0.23667
 Alpha virt. eigenvalues --    0.24426   0.25066   0.25099   0.25481   0.25850
 Alpha virt. eigenvalues --    0.26161   0.26786   0.27158   0.28142   0.28494
 Alpha virt. eigenvalues --    0.28619   0.29578   0.30036   0.30552   0.31246
 Alpha virt. eigenvalues --    0.31640   0.31927   0.32508   0.32825   0.33525
 Alpha virt. eigenvalues --    0.33856   0.34498   0.35183   0.35590   0.35749
 Alpha virt. eigenvalues --    0.36024   0.36452   0.37573   0.37964   0.38041
 Alpha virt. eigenvalues --    0.38582   0.38655   0.38946   0.39158   0.39227
 Alpha virt. eigenvalues --    0.39389   0.39951   0.40562   0.40774   0.41251
 Alpha virt. eigenvalues --    0.41532   0.41720   0.42159   0.42634   0.42830
 Alpha virt. eigenvalues --    0.43281   0.43610   0.43726   0.44536   0.44767
 Alpha virt. eigenvalues --    0.45330   0.45572   0.45642   0.45996   0.46519
 Alpha virt. eigenvalues --    0.46533   0.46783   0.47060   0.47622   0.47697
 Alpha virt. eigenvalues --    0.48049   0.48155   0.48294   0.48490   0.48894
 Alpha virt. eigenvalues --    0.49014   0.49420   0.49676   0.50163   0.50318
 Alpha virt. eigenvalues --    0.50700   0.51050   0.51331   0.51535   0.51790
 Alpha virt. eigenvalues --    0.52362   0.52496   0.52893   0.53345   0.53555
 Alpha virt. eigenvalues --    0.53719   0.54056   0.54387   0.54564   0.54958
 Alpha virt. eigenvalues --    0.55127   0.55597   0.55944   0.56098   0.56691
 Alpha virt. eigenvalues --    0.57076   0.57283   0.57484   0.57800   0.57908
 Alpha virt. eigenvalues --    0.58509   0.58710   0.59105   0.59229   0.59497
 Alpha virt. eigenvalues --    0.59760   0.60043   0.60673   0.60896   0.61201
 Alpha virt. eigenvalues --    0.61619   0.61695   0.63211   0.63899   0.64108
 Alpha virt. eigenvalues --    0.64663   0.65125   0.66135   0.66300   0.66939
 Alpha virt. eigenvalues --    0.67679   0.67989   0.68378   0.69007   0.69128
 Alpha virt. eigenvalues --    0.69787   0.70375   0.71047   0.71111   0.71677
 Alpha virt. eigenvalues --    0.72505   0.73092   0.73325   0.74019   0.74459
 Alpha virt. eigenvalues --    0.74719   0.75445   0.75849   0.76555   0.77196
 Alpha virt. eigenvalues --    0.77520   0.77772   0.78447   0.78912   0.79536
 Alpha virt. eigenvalues --    0.79718   0.80452   0.80959   0.81681   0.83075
 Alpha virt. eigenvalues --    0.83473   0.83971   0.84144   0.84937   0.85942
 Alpha virt. eigenvalues --    0.86664   0.86796   0.87279   0.87562   0.88304
 Alpha virt. eigenvalues --    0.88478   0.89191   0.89943   0.90067   0.90384
 Alpha virt. eigenvalues --    0.90904   0.91553   0.91756   0.92632   0.93689
 Alpha virt. eigenvalues --    0.94523   0.94878   0.95084   0.96306   0.96482
 Alpha virt. eigenvalues --    0.97367   0.97501   0.97920   0.98234   0.99725
 Alpha virt. eigenvalues --    1.00489   1.01077   1.01418   1.02582   1.03384
 Alpha virt. eigenvalues --    1.03770   1.05241   1.07016   1.07484   1.08144
 Alpha virt. eigenvalues --    1.08943   1.09741   1.10649   1.10929   1.11205
 Alpha virt. eigenvalues --    1.12392   1.12926   1.13942   1.14653   1.15904
 Alpha virt. eigenvalues --    1.16393   1.17904   1.19929   1.20728   1.22041
 Alpha virt. eigenvalues --    1.22318   1.23421   1.23708   1.24115   1.25164
 Alpha virt. eigenvalues --    1.26996   1.28143   1.29824   1.30891   1.31161
 Alpha virt. eigenvalues --    1.32288   1.34509   1.35915   1.36749   1.37174
 Alpha virt. eigenvalues --    1.37544   1.38476   1.39802   1.39931   1.41359
 Alpha virt. eigenvalues --    1.42463   1.43360   1.43964   1.44789   1.46972
 Alpha virt. eigenvalues --    1.48450   1.49144   1.49796   1.49919   1.50821
 Alpha virt. eigenvalues --    1.51280   1.52315   1.54262   1.54881   1.57184
 Alpha virt. eigenvalues --    1.57722   1.58712   1.60245   1.61968   1.62672
 Alpha virt. eigenvalues --    1.63875   1.65486   1.66466   1.67749   1.68403
 Alpha virt. eigenvalues --    1.69028   1.69647   1.71173   1.72145   1.73086
 Alpha virt. eigenvalues --    1.73374   1.74634   1.75734   1.75883   1.77137
 Alpha virt. eigenvalues --    1.77334   1.79048   1.79281   1.80126   1.80452
 Alpha virt. eigenvalues --    1.81292   1.82597   1.83052   1.83328   1.83947
 Alpha virt. eigenvalues --    1.84106   1.85020   1.85356   1.87117   1.87408
 Alpha virt. eigenvalues --    1.88991   1.89340   1.90323   1.90544   1.91364
 Alpha virt. eigenvalues --    1.91788   1.92236   1.93700   1.93995   1.94511
 Alpha virt. eigenvalues --    1.94879   1.95690   1.96655   1.97125   1.97864
 Alpha virt. eigenvalues --    1.98982   1.99681   2.00041   2.01085   2.01115
 Alpha virt. eigenvalues --    2.01875   2.02218   2.02909   2.03197   2.04267
 Alpha virt. eigenvalues --    2.05122   2.05859   2.07547   2.07854   2.09078
 Alpha virt. eigenvalues --    2.10011   2.10628   2.11077   2.12625   2.13044
 Alpha virt. eigenvalues --    2.13739   2.14930   2.15696   2.15900   2.16241
 Alpha virt. eigenvalues --    2.17159   2.17731   2.18886   2.19309   2.19553
 Alpha virt. eigenvalues --    2.20281   2.21409   2.21865   2.23164   2.25264
 Alpha virt. eigenvalues --    2.25918   2.26311   2.27613   2.27815   2.28053
 Alpha virt. eigenvalues --    2.29026   2.29533   2.29976   2.30690   2.31621
 Alpha virt. eigenvalues --    2.32296   2.32367   2.34376   2.34873   2.35603
 Alpha virt. eigenvalues --    2.37142   2.38025   2.39145   2.40519   2.41883
 Alpha virt. eigenvalues --    2.42378   2.43343   2.45018   2.47646   2.48181
 Alpha virt. eigenvalues --    2.49172   2.51838   2.55442   2.57564   2.58308
 Alpha virt. eigenvalues --    2.59092   2.61241   2.61911   2.64070   2.64547
 Alpha virt. eigenvalues --    2.65700   2.66957   2.67704   2.68987   2.70457
 Alpha virt. eigenvalues --    2.71821   2.73799   2.74231   2.74978   2.77602
 Alpha virt. eigenvalues --    2.80057   2.81479   2.83475   2.86665   2.87336
 Alpha virt. eigenvalues --    2.88307   2.92899   2.95662   2.97704   3.00202
 Alpha virt. eigenvalues --    3.01950   3.02656   3.05596   3.06486   3.11603
 Alpha virt. eigenvalues --    3.12064   3.15164   3.17827   3.19784   3.23084
 Alpha virt. eigenvalues --    3.23300   3.24961   3.62395   6.07482   6.14212
 Alpha virt. eigenvalues --    6.33976 103.39224
          Condensed to atoms (all electrons):
 Total atomic charges:
              1
  1  O   -0.445687
  2  Mg   0.914264
  3  O   -0.454280
  4  C    0.595066
  5  N   -0.542619
  6  N   -0.550945
  7  O   -0.437465
  8  C    0.329976
  9  C   -0.246950
 10  C    0.348748
 11  O   -0.449868
 12  C    0.637472
 13  C    0.065053
 14  C    0.039485
 15  O   -0.447447
 16  C   -0.217491
 17  O   -0.685811
 18  C    0.658407
 19  O   -0.464635
 20  O   -0.448537
 21  C    0.557076
 22  C    0.109713
 23  C    0.072210
 24  O   -0.424254
 25  C   -0.464044
 26  C   -0.470442
 27  C   -0.470262
 28  C   -0.469053
 29  C    0.015089
 30  C    0.012718
 31  C   -0.005516
 32  C   -0.071434
 33  C   -0.073383
 34  C   -0.075075
 35  C    0.003668
 36  C   -0.056441
 37  C   -0.050590
 38  C   -0.004419
 39  C   -0.077123
 40  C   -0.072274
 41  C   -0.078622
 42  C   -0.002101
 43  C   -0.061528
 44  C   -0.055915
 45  C   -0.224394
 46  C   -0.218801
 47  C   -0.215002
 48  C   -0.218031
 49  C   -0.216247
 50  C   -0.215762
 51  C   -0.227809
 52  C   -0.218189
 53  C   -0.447790
 54  C   -0.449446
 55  H    0.074376
 56  H    0.179466
 57  H    0.218130
 58  H    0.169643
 59  H    0.169664
 60  H    0.168436
 61  H    0.103568
 62  H    0.153928
 63  H    0.125265
 64  H    0.141886
 65  H    0.122529
 66  H    0.158606
 67  H    0.137631
 68  H    0.168597
 69  H    0.174289
 70  H    0.168857
 71  H    0.176784
 72  H    0.159327
 73  H    0.171311
 74  H    0.174971
 75  H    0.091108
 76  H    0.084018
 77  H    0.076906
 78  H    0.091561
 79  H    0.088385
 80  H    0.080165
 81  H    0.083371
 82  H    0.080714
 83  H    0.100021
 84  H    0.101951
 85  H    0.078208
 86  H    0.104392
 87  H    0.066775
 88  H    0.074401
 89  H    0.070926
 90  H    0.086729
 91  H    0.071978
 92  H    0.077226
 93  H    0.093556
 94  H    0.072636
 95  H    0.079417
 96  H    0.073890
 97  H    0.072548
 98  H    0.099333
 99  H    0.074200
100  H    0.075582
101  H    0.071693
102  H    0.072078
103  H    0.082254
104  H    0.105379
105  H    0.070956
106  H    0.086726
107  H    0.075271
108  H    0.072282
109  H    0.127151
110  H    0.129108
111  H    0.129900
112  H    0.128683
113  H    0.125536
114  H    0.122457
 Sum of Mulliken charges=   0.00000
 Atomic charges with hydrogens summed into heavy atoms:
              1
  1  O   -0.445687
  2  Mg   0.914264
  3  O   -0.454280
  4  C    0.595066
  5  N   -0.542619
  6  N   -0.550945
  7  O   -0.437465
  8  C    0.329976
  9  C   -0.172574
 10  C    0.348748
 11  O   -0.449868
 12  C    0.637472
 13  C    0.244519
 14  C    0.257615
 15  O   -0.447447
 16  C    0.290252
 17  O   -0.685811
 18  C    0.658407
 19  O   -0.464635
 20  O   -0.448537
 21  C    0.557076
 22  C    0.213281
 23  C    0.226138
 24  O   -0.424254
 25  C   -0.074363
 26  C   -0.005608
 27  C    0.049669
 28  C    0.036556
 29  C    0.015089
 30  C    0.012718
 31  C   -0.005516
 32  C    0.019674
 33  C    0.010635
 34  C    0.001831
 35  C    0.003668
 36  C    0.035120
 37  C    0.037795
 38  C   -0.004419
 39  C    0.003042
 40  C    0.011097
 41  C    0.002092
 42  C   -0.002101
 43  C    0.038494
 44  C    0.046036
 45  C    0.024981
 46  C    0.013255
 47  C    0.027759
 48  C    0.007913
 49  C    0.029834
 50  C    0.003592
 51  C    0.030780
 52  C    0.016091
 53  C   -0.061630
 54  C   -0.072770
 55  H    0.000000
 56  H    0.000000
 57  H    0.000000
 58  H    0.000000
 59  H    0.000000
 60  H    0.000000
 61  H    0.000000
 62  H    0.000000
 63  H    0.000000
 64  H    0.000000
 65  H    0.000000
 66  H    0.000000
 67  H    0.000000
 68  H    0.000000
 69  H    0.000000
 70  H    0.000000
 71  H    0.000000
 72  H    0.000000
 73  H    0.000000
 74  H    0.000000
 75  H    0.000000
 76  H    0.000000
 77  H    0.000000
 78  H    0.000000
 79  H    0.000000
 80  H    0.000000
 81  H    0.000000
 82  H    0.000000
 83  H    0.000000
 84  H    0.000000
 85  H    0.000000
 86  H    0.000000
 87  H    0.000000
 88  H    0.000000
 89  H    0.000000
 90  H    0.000000
 91  H    0.000000
 92  H    0.000000
 93  H    0.000000
 94  H    0.000000
 95  H    0.000000
 96  H    0.000000
 97  H    0.000000
 98  H    0.000000
 99  H    0.000000
100  H    0.000000
101  H    0.000000
102  H    0.000000
103  H    0.000000
104  H    0.000000
105  H    0.000000
106  H    0.000000
107  H    0.000000
108  H    0.000000
109  H    0.000000
110  H    0.000000
111  H    0.000000
112  H    0.000000
113  H    0.000000
114  H    0.000000
 Sum of Mulliken charges=   0.00000
 Electronic spatial extent (au):  <R**2>= 28019.5807
 Charge=     0.0000 electrons
 Dipole moment (Debye):
    X=     6.8257    Y=     2.2229    Z=    -3.1162  Tot=     7.8257
 Quadrupole moment (Debye-Ang):
   XX=  -301.5082   YY=  -293.4884   ZZ=  -307.3852
   XY=   -10.2900   XZ=    10.0851   YZ=     0.2415
 Octapole moment (Debye-Ang**2):
  XXX=   144.2785  YYY=    34.3479  ZZZ=    44.1273  XYY=    38.6023
  XXY=    61.2291  XXZ=   -77.5614  XZZ=    51.4870  YZZ=     3.9038
  YYZ=   -28.5899  XYZ=   -53.8644
 Hexadecapole moment (Debye-Ang**3):
 XXXX=-13577.3764 YYYY=-13013.1940 ZZZZ= -8277.1878 XXXY=  -105.4455
 XXXZ=   162.2637 YYYX=   116.1048 YYYZ=   -83.0744 ZZZX=    78.3163
 ZZZY=   -75.1865 XXYY= -4456.0813 XXZZ= -3782.2952 YYZZ= -3618.6018
 XXYZ=    30.5225 YYXZ=  -116.4022 ZZXY=   -16.3398
 N-N= 9.221229920018D+03 E-N=-2.454002322345D+04  KE= 2.584797883968D+03
 ******************************Gaussian NBO Version 3.1******************************
             N A T U R A L   A T O M I C   O R B I T A L   A N D
          N A T U R A L   B O N D   O R B I T A L   A N A L Y S I S
 ******************************Gaussian NBO Version 3.1******************************

       /RESON  / : Allow strongly delocalized NBO set
       /BNDIDX / : Print bond indices based on the NAO density matrix

 Analyzing the SCF density

 Job title: from RRSS_fm-/scratch/oco5-5.gjf                                

 Storage needed:   1276236 in NPA,   1663614 in NBO (  65536000 available)


 NATURAL POPULATIONS:  Natural atomic orbital occupancies 
                                                          
  NAO Atom No lang   Type(AO)    Occupancy      Energy    
 ---------------------------------------------------------
   1    O  1  s      Cor( 1s)     1.99966     -18.99394
   2    O  1  s      Val( 2s)     1.61911      -0.90412
   3    O  1  s      Ryd( 3s)     0.00147       1.94924
   4    O  1  px     Val( 2p)     1.78077      -0.33322
   5    O  1  px     Ryd( 3p)     0.00170       1.06580
   6    O  1  py     Val( 2p)     1.50789      -0.33303
   7    O  1  py     Ryd( 3p)     0.00113       1.38227
   8    O  1  pz     Val( 2p)     1.62899      -0.35578
   9    O  1  pz     Ryd( 3p)     0.00144       1.11355
  10    O  1  dxy    Ryd( 3d)     0.00048       1.90423
  11    O  1  dxz    Ryd( 3d)     0.00196       1.91520
  12    O  1  dyz    Ryd( 3d)     0.00182       2.15776
  13    O  1  dx2y2  Ryd( 3d)     0.00147       2.13848
  14    O  1  dz2    Ryd( 3d)     0.00293       2.39822

  15   Mg  2  s      Cor( 1s)     2.00000     -46.35063
  16   Mg  2  s      Cor( 2s)     1.99839      -3.35008
  17   Mg  2  s      Val( 3s)     0.20117       0.13097
  18   Mg  2  s      Ryd( 4s)     0.00487       0.95036
  19   Mg  2  s      Ryd( 5s)     0.00010       5.96062
  20   Mg  2  s      Ryd( 6s)     0.00000     100.71674
  21   Mg  2  px     Cor( 2p)     1.99957      -1.75821
  22   Mg  2  px     Ryd( 3p)     0.01132       0.57998
  23   Mg  2  px     Ryd( 4p)     0.00456       0.67949
  24   Mg  2  px     Ryd( 5p)     0.00227       1.00361
  25   Mg  2  px     Ryd( 6p)     0.00003       6.04949
  26   Mg  2  py     Cor( 2p)     1.99952      -1.75634
  27   Mg  2  py     Ryd( 3p)     0.01021       0.57186
  28   Mg  2  py     Ryd( 4p)     0.00723       0.63332
  29   Mg  2  py     Ryd( 5p)     0.00279       1.08554
  30   Mg  2  py     Ryd( 6p)     0.00004       6.07913
  31   Mg  2  pz     Cor( 2p)     1.99890      -1.74989
  32   Mg  2  pz     Ryd( 4p)     0.01121       0.70796
  33   Mg  2  pz     Ryd( 3p)     0.00369       0.70556
  34   Mg  2  pz     Ryd( 5p)     0.00172       1.38511
  35   Mg  2  pz     Ryd( 6p)     0.00007       6.21654
  36   Mg  2  dxy    Ryd( 3d)     0.00813       0.53100
  37   Mg  2  dxy    Ryd( 4d)     0.00185       1.22412
  38   Mg  2  dxy    Ryd( 5d)     0.00073       1.34530
  39   Mg  2  dxz    Ryd( 3d)     0.00703       0.57827
  40   Mg  2  dxz    Ryd( 4d)     0.00086       1.36909
  41   Mg  2  dxz    Ryd( 5d)     0.00131       1.44774
  42   Mg  2  dyz    Ryd( 3d)     0.01384       0.58009
  43   Mg  2  dyz    Ryd( 5d)     0.00183       1.50469
  44   Mg  2  dyz    Ryd( 4d)     0.00155       1.42363
  45   Mg  2  dx2y2  Ryd( 3d)     0.01080       0.48108
  46   Mg  2  dx2y2  Ryd( 4d)     0.00175       1.20119
  47   Mg  2  dx2y2  Ryd( 5d)     0.00077       1.34288
  48   Mg  2  dz2    Ryd( 3d)     0.00781       0.60454
  49   Mg  2  dz2    Ryd( 5d)     0.00205       1.62604
  50   Mg  2  dz2    Ryd( 4d)     0.00090       1.55676

  51    O  3  s      Cor( 1s)     1.99963     -18.95883
  52    O  3  s      Val( 2s)     1.60618      -0.88569
  53    O  3  s      Ryd( 3s)     0.00143       2.05606
  54    O  3  px     Val( 2p)     1.50348      -0.31405
  55    O  3  px     Ryd( 3p)     0.00110       1.39299
  56    O  3  py     Val( 2p)     1.67228      -0.32295
  57    O  3  py     Ryd( 3p)     0.00229       1.29939
  58    O  3  pz     Val( 2p)     1.76365      -0.33443
  59    O  3  pz     Ryd( 3p)     0.00232       1.17767
  60    O  3  dxy    Ryd( 3d)     0.00123       2.17572
  61    O  3  dxz    Ryd( 3d)     0.00207       2.17963
  62    O  3  dyz    Ryd( 3d)     0.00224       2.15849
  63    O  3  dx2y2  Ryd( 3d)     0.00110       2.14679
  64    O  3  dz2    Ryd( 3d)     0.00197       2.05413

  65    C  4  s      Cor( 1s)     1.99926     -10.21318
  66    C  4  s      Val( 2s)     0.76114      -0.15663
  67    C  4  s      Ryd( 3s)     0.00583       0.89705
  68    C  4  px     Val( 2p)     0.76973      -0.13660
  69    C  4  px     Ryd( 3p)     0.00375       0.64953
  70    C  4  py     Val( 2p)     0.90530      -0.05838
  71    C  4  py     Ryd( 3p)     0.00965       0.82531
  72    C  4  pz     Val( 2p)     0.68816       0.01206
  73    C  4  pz     Ryd( 3p)     0.01932       0.72508
  74    C  4  dxy    Ryd( 3d)     0.00096       2.03300
  75    C  4  dxz    Ryd( 3d)     0.00287       2.13234
  76    C  4  dyz    Ryd( 3d)     0.00268       2.42124
  77    C  4  dx2y2  Ryd( 3d)     0.00125       2.21439
  78    C  4  dz2    Ryd( 3d)     0.00381       2.56826

  79    N  5  s      Cor( 1s)     1.99921     -14.12186
  80    N  5  s      Val( 2s)     1.42208      -0.52188
  81    N  5  s      Ryd( 3s)     0.00282       1.61455
  82    N  5  px     Val( 2p)     1.50576      -0.17960
  83    N  5  px     Ryd( 3p)     0.00324       0.94023
  84    N  5  py     Val( 2p)     1.37042      -0.17032
  85    N  5  py     Ryd( 3p)     0.00590       1.22073
  86    N  5  pz     Val( 2p)     1.56409      -0.22121
  87    N  5  pz     Ryd( 3p)     0.00740       1.01255
  88    N  5  dxy    Ryd( 3d)     0.00029       1.88696
  89    N  5  dxz    Ryd( 3d)     0.00097       1.98590
  90    N  5  dyz    Ryd( 3d)     0.00093       2.24833
  91    N  5  dx2y2  Ryd( 3d)     0.00095       2.11119
  92    N  5  dz2    Ryd( 3d)     0.00143       2.35311

  93    N  6  s      Cor( 1s)     1.99925     -14.11060
  94    N  6  s      Val( 2s)     1.43353      -0.51909
  95    N  6  s      Ryd( 3s)     0.00251       1.63745
  96    N  6  px     Val( 2p)     1.43240      -0.16617
  97    N  6  px     Ryd( 3p)     0.00431       1.02937
  98    N  6  py     Val( 2p)     1.59510      -0.19080
  99    N  6  py     Ryd( 3p)     0.00621       1.08002
 100    N  6  pz     Val( 2p)     1.41619      -0.18733
 101    N  6  pz     Ryd( 3p)     0.00605       1.05538
 102    N  6  dxy    Ryd( 3d)     0.00104       2.05271
 103    N  6  dxz    Ryd( 3d)     0.00107       2.16324
 104    N  6  dyz    Ryd( 3d)     0.00062       2.14350
 105    N  6  dx2y2  Ryd( 3d)     0.00037       1.90614
 106    N  6  dz2    Ryd( 3d)     0.00166       2.37525

 107    O  7  s      Cor( 1s)     1.99970     -18.88016
 108    O  7  s      Val( 2s)     1.69860      -0.90319
 109    O  7  s      Ryd( 3s)     0.00039       1.95421
 110    O  7  px     Val( 2p)     1.44970      -0.25801
 111    O  7  px     Ryd( 3p)     0.00072       1.06836
 112    O  7  py     Val( 2p)     1.75092      -0.28520
 113    O  7  py     Ryd( 3p)     0.00165       1.09808
 114    O  7  pz     Val( 2p)     1.67970      -0.30693
 115    O  7  pz     Ryd( 3p)     0.00113       1.05645
 116    O  7  dxy    Ryd( 3d)     0.00144       1.89439
 117    O  7  dxz    Ryd( 3d)     0.00286       1.97258
 118    O  7  dyz    Ryd( 3d)     0.00408       2.35692
 119    O  7  dx2y2  Ryd( 3d)     0.00134       1.96166
 120    O  7  dz2    Ryd( 3d)     0.00421       2.22645

 121    C  8  s      Cor( 1s)     1.99895     -10.06067
 122    C  8  s      Val( 2s)     0.84070      -0.09503
 123    C  8  s      Ryd( 3s)     0.00325       0.99727
 124    C  8  px     Val( 2p)     0.88370      -0.06624
 125    C  8  px     Ryd( 3p)     0.00306       0.75618
 126    C  8  py     Val( 2p)     1.05031      -0.01701
 127    C  8  py     Ryd( 3p)     0.00621       0.85361
 128    C  8  pz     Val( 2p)     0.94043      -0.00650
 129    C  8  pz     Ryd( 3p)     0.01050       0.93311
 130    C  8  dxy    Ryd( 3d)     0.00096       2.01233
 131    C  8  dxz    Ryd( 3d)     0.00125       2.05510
 132    C  8  dyz    Ryd( 3d)     0.00130       2.43490
 133    C  8  dx2y2  Ryd( 3d)     0.00076       2.28679
 134    C  8  dz2    Ryd( 3d)     0.00135       2.38313

 135    C  9  s      Cor( 1s)     1.99877      -9.97817
 136    C  9  s      Val( 2s)     0.92878      -0.09837
 137    C  9  s      Ryd( 3s)     0.00139       1.10419
 138    C  9  px     Val( 2p)     1.23665      -0.05932
 139    C  9  px     Ryd( 3p)     0.00217       0.71370
 140    C  9  py     Val( 2p)     1.08836      -0.00767
 141    C  9  py     Ryd( 3p)     0.00310       0.81874
 142    C  9  pz     Val( 2p)     1.18273      -0.02133
 143    C  9  pz     Ryd( 3p)     0.00474       1.09733
 144    C  9  dxy    Ryd( 3d)     0.00044       2.13736
 145    C  9  dxz    Ryd( 3d)     0.00043       2.04469
 146    C  9  dyz    Ryd( 3d)     0.00081       2.30361
 147    C  9  dx2y2  Ryd( 3d)     0.00067       2.28486
 148    C  9  dz2    Ryd( 3d)     0.00092       2.20085

 149    C 10  s      Cor( 1s)     1.99895     -10.05576
 150    C 10  s      Val( 2s)     0.84132      -0.09040
 151    C 10  s      Ryd( 3s)     0.00299       1.01148
 152    C 10  px     Val( 2p)     0.91718      -0.05250
 153    C 10  px     Ryd( 3p)     0.00405       0.75559
 154    C 10  py     Val( 2p)     1.02634      -0.02585
 155    C 10  py     Ryd( 3p)     0.00499       0.94860
 156    C 10  pz     Val( 2p)     0.93275      -0.00087
 157    C 10  pz     Ryd( 3p)     0.01015       0.86110
 158    C 10  dxy    Ryd( 3d)     0.00063       2.11395
 159    C 10  dxz    Ryd( 3d)     0.00117       2.23272
 160    C 10  dyz    Ryd( 3d)     0.00164       2.36259
 161    C 10  dx2y2  Ryd( 3d)     0.00077       2.12431
 162    C 10  dz2    Ryd( 3d)     0.00141       2.35686

 163    O 11  s      Cor( 1s)     1.99964     -18.99475
 164    O 11  s      Val( 2s)     1.60524      -0.91297
 165    O 11  s      Ryd( 3s)     0.00149       1.98118
 166    O 11  px     Val( 2p)     1.60523      -0.36916
 167    O 11  px     Ryd( 3p)     0.00182       1.28298
 168    O 11  py     Val( 2p)     1.73444      -0.34532
 169    O 11  py     Ryd( 3p)     0.00207       1.15645
 170    O 11  pz     Val( 2p)     1.58488      -0.34873
 171    O 11  pz     Ryd( 3p)     0.00162       1.35017
 172    O 11  dxy    Ryd( 3d)     0.00183       1.96195
 173    O 11  dxz    Ryd( 3d)     0.00172       2.11131
 174    O 11  dyz    Ryd( 3d)     0.00111       2.03114
 175    O 11  dx2y2  Ryd( 3d)     0.00209       2.24794
 176    O 11  dz2    Ryd( 3d)     0.00176       2.21813

 177    C 12  s      Cor( 1s)     1.99918     -10.23191
 178    C 12  s      Val( 2s)     0.76992      -0.17117
 179    C 12  s      Ryd( 3s)     0.00660       0.94564
 180    C 12  px     Val( 2p)     0.67355      -0.00500
 181    C 12  px     Ryd( 3p)     0.01676       0.77138
 182    C 12  py     Val( 2p)     0.74317      -0.13483
 183    C 12  py     Ryd( 3p)     0.00541       0.71938
 184    C 12  pz     Val( 2p)     0.88326      -0.07268
 185    C 12  pz     Ryd( 3p)     0.00999       0.84843
 186    C 12  dxy    Ryd( 3d)     0.00265       2.15182
 187    C 12  dxz    Ryd( 3d)     0.00238       2.40991
 188    C 12  dyz    Ryd( 3d)     0.00122       2.15037
 189    C 12  dx2y2  Ryd( 3d)     0.00221       2.39429
 190    C 12  dz2    Ryd( 3d)     0.00285       2.32499

 191    C 13  s      Cor( 1s)     1.99887     -10.14732
 192    C 13  s      Val( 2s)     0.97152      -0.25412
 193    C 13  s      Ryd( 3s)     0.00252       1.41832
 194    C 13  px     Val( 2p)     0.83914      -0.09011
 195    C 13  px     Ryd( 3p)     0.00503       0.81654
 196    C 13  py     Val( 2p)     1.13111      -0.12273
 197    C 13  py     Ryd( 3p)     0.00231       0.81967
 198    C 13  pz     Val( 2p)     1.03574      -0.12084
 199    C 13  pz     Ryd( 3p)     0.00478       0.67927
 200    C 13  dxy    Ryd( 3d)     0.00206       2.19751
 201    C 13  dxz    Ryd( 3d)     0.00091       2.10684
 202    C 13  dyz    Ryd( 3d)     0.00110       2.17634
 203    C 13  dx2y2  Ryd( 3d)     0.00135       2.11437
 204    C 13  dz2    Ryd( 3d)     0.00157       2.15909

 205    C 14  s      Cor( 1s)     1.99889     -10.15001
 206    C 14  s      Val( 2s)     0.98762      -0.26322
 207    C 14  s      Ryd( 3s)     0.00239       1.41872
 208    C 14  px     Val( 2p)     1.10806      -0.12781
 209    C 14  px     Ryd( 3p)     0.00432       0.84236
 210    C 14  py     Val( 2p)     1.05778      -0.12983
 211    C 14  py     Ryd( 3p)     0.00301       0.65462
 212    C 14  pz     Val( 2p)     0.83745      -0.09503
 213    C 14  pz     Ryd( 3p)     0.00540       0.81181
 214    C 14  dxy    Ryd( 3d)     0.00078       2.00287
 215    C 14  dxz    Ryd( 3d)     0.00143       2.08702
 216    C 14  dyz    Ryd( 3d)     0.00127       2.13095
 217    C 14  dx2y2  Ryd( 3d)     0.00132       2.25673
 218    C 14  dz2    Ryd( 3d)     0.00179       2.23576

 219    O 15  s      Cor( 1s)     1.99966     -18.90924
 220    O 15  s      Val( 2s)     1.68182      -0.92657
 221    O 15  s      Ryd( 3s)     0.00066       2.01252
 222    O 15  px     Val( 2p)     1.73318      -0.34851
 223    O 15  px     Ryd( 3p)     0.00324       1.32723
 224    O 15  py     Val( 2p)     1.56386      -0.29632
 225    O 15  py     Ryd( 3p)     0.00147       1.20083
 226    O 15  pz     Val( 2p)     1.70215      -0.32207
 227    O 15  pz     Ryd( 3p)     0.00177       1.29374
 228    O 15  dxy    Ryd( 3d)     0.00212       1.99064
 229    O 15  dxz    Ryd( 3d)     0.00297       2.36905
 230    O 15  dyz    Ryd( 3d)     0.00167       1.97308
 231    O 15  dx2y2  Ryd( 3d)     0.00166       2.09079
 232    O 15  dz2    Ryd( 3d)     0.00231       2.02360

 233    C 16  s      Cor( 1s)     1.99925     -10.13398
 234    C 16  s      Val( 2s)     1.10784      -0.28502
 235    C 16  s      Ryd( 3s)     0.00141       1.13852
 236    C 16  px     Val( 2p)     1.23726      -0.10955
 237    C 16  px     Ryd( 3p)     0.00032       0.58065
 238    C 16  py     Val( 2p)     0.72797      -0.08198
 239    C 16  py     Ryd( 3p)     0.00280       0.54089
 240    C 16  pz     Val( 2p)     1.23096      -0.11108
 241    C 16  pz     Ryd( 3p)     0.00343       0.69206
 242    C 16  dxy    Ryd( 3d)     0.00144       1.98654
 243    C 16  dxz    Ryd( 3d)     0.00084       1.93388
 244    C 16  dyz    Ryd( 3d)     0.00081       1.92485
 245    C 16  dx2y2  Ryd( 3d)     0.00172       2.16026
 246    C 16  dz2    Ryd( 3d)     0.00179       2.14793

 247    O 17  s      Cor( 1s)     1.99980     -18.85282
 248    O 17  s      Val( 2s)     1.71807      -0.84768
 249    O 17  s      Ryd( 3s)     0.00106       1.94527
 250    O 17  px     Val( 2p)     1.68520      -0.23243
 251    O 17  px     Ryd( 3p)     0.00144       1.47137
 252    O 17  py     Val( 2p)     1.87761      -0.22097
 253    O 17  py     Ryd( 3p)     0.00187       1.36736
 254    O 17  pz     Val( 2p)     1.73518      -0.26371
 255    O 17  pz     Ryd( 3p)     0.00217       1.36403
 256    O 17  dxy    Ryd( 3d)     0.00039       2.12605
 257    O 17  dxz    Ryd( 3d)     0.00099       2.43471
 258    O 17  dyz    Ryd( 3d)     0.00019       2.10294
 259    O 17  dx2y2  Ryd( 3d)     0.00054       2.13458
 260    O 17  dz2    Ryd( 3d)     0.00044       2.16783

 261    C 18  s      Cor( 1s)     1.99910     -10.19896
 262    C 18  s      Val( 2s)     0.79073      -0.15149
 263    C 18  s      Ryd( 3s)     0.00654       1.14618
 264    C 18  px     Val( 2p)     0.82332      -0.07102
 265    C 18  px     Ryd( 3p)     0.00737       0.87255
 266    C 18  py     Val( 2p)     0.75057      -0.05963
 267    C 18  py     Ryd( 3p)     0.00907       0.84300
 268    C 18  pz     Val( 2p)     0.74939      -0.00540
 269    C 18  pz     Ryd( 3p)     0.02404       0.79783
 270    C 18  dxy    Ryd( 3d)     0.00158       2.31946
 271    C 18  dxz    Ryd( 3d)     0.00295       2.41956
 272    C 18  dyz    Ryd( 3d)     0.00275       2.45806
 273    C 18  dx2y2  Ryd( 3d)     0.00152       2.08225
 274    C 18  dz2    Ryd( 3d)     0.00235       2.36915

 275    O 19  s      Cor( 1s)     1.99969     -18.84196
 276    O 19  s      Val( 2s)     1.68736      -0.88912
 277    O 19  s      Ryd( 3s)     0.00032       2.13299
 278    O 19  px     Val( 2p)     1.66904      -0.25456
 279    O 19  px     Ryd( 3p)     0.00137       1.20490
 280    O 19  py     Val( 2p)     1.69917      -0.25197
 281    O 19  py     Ryd( 3p)     0.00182       1.23446
 282    O 19  pz     Val( 2p)     1.60384      -0.29957
 283    O 19  pz     Ryd( 3p)     0.00137       1.30780
 284    O 19  dxy    Ryd( 3d)     0.00117       1.96653
 285    O 19  dxz    Ryd( 3d)     0.00367       2.24716
 286    O 19  dyz    Ryd( 3d)     0.00351       2.17205
 287    O 19  dx2y2  Ryd( 3d)     0.00104       1.94148
 288    O 19  dz2    Ryd( 3d)     0.00452       2.30011

 289    O 20  s      Cor( 1s)     1.99964     -18.94012
 290    O 20  s      Val( 2s)     1.61228      -0.85370
 291    O 20  s      Ryd( 3s)     0.00142       1.96769
 292    O 20  px     Val( 2p)     1.44634      -0.28422
 293    O 20  px     Ryd( 3p)     0.00145       1.52000
 294    O 20  py     Val( 2p)     1.72499      -0.30330
 295    O 20  py     Ryd( 3p)     0.00289       1.25984
 296    O 20  pz     Val( 2p)     1.77046      -0.28785
 297    O 20  pz     Ryd( 3p)     0.00232       1.18352
 298    O 20  dxy    Ryd( 3d)     0.00219       2.34955
 299    O 20  dxz    Ryd( 3d)     0.00085       2.13911
 300    O 20  dyz    Ryd( 3d)     0.00192       1.94490
 301    O 20  dx2y2  Ryd( 3d)     0.00175       2.28569
 302    O 20  dz2    Ryd( 3d)     0.00139       2.07800

 303    C 21  s      Cor( 1s)     1.99920     -10.16044
 304    C 21  s      Val( 2s)     0.79518      -0.11602
 305    C 21  s      Ryd( 3s)     0.00882       0.96562
 306    C 21  px     Val( 2p)     0.71933       0.06127
 307    C 21  px     Ryd( 3p)     0.01695       0.79954
 308    C 21  py     Val( 2p)     0.85538       0.00851
 309    C 21  py     Ryd( 3p)     0.00926       0.77618
 310    C 21  pz     Val( 2p)     0.75024      -0.08693
 311    C 21  pz     Ryd( 3p)     0.00300       0.67344
 312    C 21  dxy    Ryd( 3d)     0.00448       2.58544
 313    C 21  dxz    Ryd( 3d)     0.00261       2.19052
 314    C 21  dyz    Ryd( 3d)     0.00086       2.01587
 315    C 21  dx2y2  Ryd( 3d)     0.00257       2.51748
 316    C 21  dz2    Ryd( 3d)     0.00071       2.30444

 317    C 22  s      Cor( 1s)     1.99897     -10.07607
 318    C 22  s      Val( 2s)     0.95235      -0.17609
 319    C 22  s      Ryd( 3s)     0.00373       1.43389
 320    C 22  px     Val( 2p)     0.94065      -0.03296
 321    C 22  px     Ryd( 3p)     0.00622       0.84557
 322    C 22  py     Val( 2p)     1.05898      -0.05503
 323    C 22  py     Ryd( 3p)     0.00261       0.80922
 324    C 22  pz     Val( 2p)     1.00953      -0.03969
 325    C 22  pz     Ryd( 3p)     0.00347       0.87073
 326    C 22  dxy    Ryd( 3d)     0.00174       2.32918
 327    C 22  dxz    Ryd( 3d)     0.00172       2.30040
 328    C 22  dyz    Ryd( 3d)     0.00077       2.00872
 329    C 22  dx2y2  Ryd( 3d)     0.00125       2.16038
 330    C 22  dz2    Ryd( 3d)     0.00231       2.24507

 331    C 23  s      Cor( 1s)     1.99880     -10.11569
 332    C 23  s      Val( 2s)     0.96955      -0.22404
 333    C 23  s      Ryd( 3s)     0.00246       1.44351
 334    C 23  px     Val( 2p)     0.79236      -0.06638
 335    C 23  px     Ryd( 3p)     0.00369       0.71863
 336    C 23  py     Val( 2p)     1.08818      -0.09491
 337    C 23  py     Ryd( 3p)     0.00473       0.86174
 338    C 23  pz     Val( 2p)     1.11124      -0.08895
 339    C 23  pz     Ryd( 3p)     0.00323       0.86521
 340    C 23  dxy    Ryd( 3d)     0.00142       2.18784
 341    C 23  dxz    Ryd( 3d)     0.00160       2.17788
 342    C 23  dyz    Ryd( 3d)     0.00120       2.07564
 343    C 23  dx2y2  Ryd( 3d)     0.00144       2.24213
 344    C 23  dz2    Ryd( 3d)     0.00145       2.19739

 345    O 24  s      Cor( 1s)     1.99970     -18.83023
 346    O 24  s      Val( 2s)     1.69770      -0.85639
 347    O 24  s      Ryd( 3s)     0.00055       1.98016
 348    O 24  px     Val( 2p)     1.61459      -0.27534
 349    O 24  px     Ryd( 3p)     0.00045       1.06361
 350    O 24  py     Val( 2p)     1.83342      -0.22065
 351    O 24  py     Ryd( 3p)     0.00199       1.20377
 352    O 24  pz     Val( 2p)     1.42228      -0.20881
 353    O 24  pz     Ryd( 3p)     0.00059       1.08881
 354    O 24  dxy    Ryd( 3d)     0.00389       2.21681
 355    O 24  dxz    Ryd( 3d)     0.00394       2.05583
 356    O 24  dyz    Ryd( 3d)     0.00029       1.87117
 357    O 24  dx2y2  Ryd( 3d)     0.00443       2.39501
 358    O 24  dz2    Ryd( 3d)     0.00145       2.07844

 359    C 25  s      Cor( 1s)     1.99923      -9.98748
 360    C 25  s      Val( 2s)     1.09764      -0.19930
 361    C 25  s      Ryd( 3s)     0.00075       1.34479
 362    C 25  px     Val( 2p)     1.16067      -0.03109
 363    C 25  px     Ryd( 3p)     0.00417       0.67413
 364    C 25  py     Val( 2p)     1.17226      -0.03238
 365    C 25  py     Ryd( 3p)     0.00432       0.71078
 366    C 25  pz     Val( 2p)     1.24861      -0.03582
 367    C 25  pz     Ryd( 3p)     0.00255       0.72408
 368    C 25  dxy    Ryd( 3d)     0.00110       2.23703
 369    C 25  dxz    Ryd( 3d)     0.00147       2.22772
 370    C 25  dyz    Ryd( 3d)     0.00015       1.88980
 371    C 25  dx2y2  Ryd( 3d)     0.00060       2.00895
 372    C 25  dz2    Ryd( 3d)     0.00110       2.14902

 373    C 26  s      Cor( 1s)     1.99924     -10.03152
 374    C 26  s      Val( 2s)     1.10737      -0.24560
 375    C 26  s      Ryd( 3s)     0.00087       1.30753
 376    C 26  px     Val( 2p)     1.21535      -0.07236
 377    C 26  px     Ryd( 3p)     0.00254       0.70539
 378    C 26  py     Val( 2p)     1.07730      -0.07012
 379    C 26  py     Ryd( 3p)     0.00173       0.60315
 380    C 26  pz     Val( 2p)     1.27447      -0.07499
 381    C 26  pz     Ryd( 3p)     0.00185       0.68806
 382    C 26  dxy    Ryd( 3d)     0.00068       2.05220
 383    C 26  dxz    Ryd( 3d)     0.00098       2.04648
 384    C 26  dyz    Ryd( 3d)     0.00073       2.02768
 385    C 26  dx2y2  Ryd( 3d)     0.00096       2.10089
 386    C 26  dz2    Ryd( 3d)     0.00106       2.09916

 387    C 27  s      Cor( 1s)     1.99924     -10.05518
 388    C 27  s      Val( 2s)     1.10609      -0.26701
 389    C 27  s      Ryd( 3s)     0.00053       1.28362
 390    C 27  px     Val( 2p)     1.24298      -0.09562
 391    C 27  px     Ryd( 3p)     0.00233       0.66257
 392    C 27  py     Val( 2p)     1.17059      -0.09292
 393    C 27  py     Ryd( 3p)     0.00151       0.60160
 394    C 27  pz     Val( 2p)     1.15408      -0.09556
 395    C 27  pz     Ryd( 3p)     0.00210       0.64390
 396    C 27  dxy    Ryd( 3d)     0.00112       2.10546
 397    C 27  dxz    Ryd( 3d)     0.00037       1.89904
 398    C 27  dyz    Ryd( 3d)     0.00105       2.11831
 399    C 27  dx2y2  Ryd( 3d)     0.00076       1.98886
 400    C 27  dz2    Ryd( 3d)     0.00107       2.09186

 401    C 28  s      Cor( 1s)     1.99924     -10.06732
 402    C 28  s      Val( 2s)     1.10545      -0.27856
 403    C 28  s      Ryd( 3s)     0.00049       1.26636
 404    C 28  px     Val( 2p)     1.06432      -0.10244
 405    C 28  px     Ryd( 3p)     0.00136       0.52858
 406    C 28  py     Val( 2p)     1.25489      -0.10981
 407    C 28  py     Ryd( 3p)     0.00206       0.67925
 408    C 28  pz     Val( 2p)     1.25220      -0.10911
 409    C 28  pz     Ryd( 3p)     0.00198       0.65162
 410    C 28  dxy    Ryd( 3d)     0.00044       1.91242
 411    C 28  dxz    Ryd( 3d)     0.00067       2.01370
 412    C 28  dyz    Ryd( 3d)     0.00084       1.96883
 413    C 28  dx2y2  Ryd( 3d)     0.00126       2.17234
 414    C 28  dz2    Ryd( 3d)     0.00114       2.08340

 415    C 29  s      Cor( 1s)     1.99974      -9.98263
 416    C 29  s      Val( 2s)     0.99978      -0.16952
 417    C 29  px     Val( 2p)     0.95431       0.08189
 418    C 29  py     Val( 2p)     0.79302       0.08851
 419    C 29  pz     Val( 2p)     1.00007      -0.03291

 420    C 30  s      Cor( 1s)     1.99974      -9.97844
 421    C 30  s      Val( 2s)     0.99803      -0.16542
 422    C 30  px     Val( 2p)     0.88208       0.09156
 423    C 30  py     Val( 2p)     0.90998       0.03695
 424    C 30  pz     Val( 2p)     0.96021       0.02062

 425    C 31  s      Cor( 1s)     1.99984      -9.96538
 426    C 31  s      Val( 2s)     1.11802      -0.20149
 427    C 31  px     Val( 2p)     0.93917       0.08317
 428    C 31  py     Val( 2p)     0.95980       0.06884
 429    C 31  pz     Val( 2p)     0.97136      -0.01085

 430    C 32  s      Cor( 1s)     1.99993      -9.94713
 431    C 32  s      Val( 2s)     1.10335      -0.18532
 432    C 32  px     Val( 2p)     0.98495       0.08218
 433    C 32  py     Val( 2p)     0.97667       0.06590
 434    C 32  pz     Val( 2p)     0.99050      -0.02041

 435    C 33  s      Cor( 1s)     1.99993      -9.95008
 436    C 33  s      Val( 2s)     1.09850      -0.18535
 437    C 33  px     Val( 2p)     0.97137       0.08431
 438    C 33  py     Val( 2p)     0.99325       0.05807
 439    C 33  pz     Val( 2p)     0.99764      -0.02138

 440    C 34  s      Cor( 1s)     1.99993      -9.94671
 441    C 34  s      Val( 2s)     1.09864      -0.18615
 442    C 34  px     Val( 2p)     0.98269       0.07740
 443    C 34  py     Val( 2p)     0.97763       0.06391
 444    C 34  pz     Val( 2p)     0.99567      -0.02163

 445    C 35  s      Cor( 1s)     1.99986      -9.96745
 446    C 35  s      Val( 2s)     1.11215      -0.20245
 447    C 35  px     Val( 2p)     0.93431       0.08204
 448    C 35  py     Val( 2p)     0.95753       0.06775
 449    C 35  pz     Val( 2p)     0.97547      -0.01602

 450    C 36  s      Cor( 1s)     1.99993      -9.97931
 451    C 36  s      Val( 2s)     1.11510      -0.19379
 452    C 36  px     Val( 2p)     0.93555       0.05098
 453    C 36  py     Val( 2p)     0.98496       0.04502
 454    C 36  pz     Val( 2p)     0.95139       0.04707

 455    C 37  s      Cor( 1s)     1.99994      -9.99213
 456    C 37  s      Val( 2s)     1.11220      -0.20603
 457    C 37  px     Val( 2p)     0.94332       0.03439
 458    C 37  py     Val( 2p)     0.99313       0.03255
 459    C 37  pz     Val( 2p)     0.94926       0.03284

 460    C 38  s      Cor( 1s)     1.99985      -9.96507
 461    C 38  s      Val( 2s)     1.11487      -0.20098
 462    C 38  px     Val( 2p)     0.94687       0.08143
 463    C 38  py     Val( 2p)     0.96034       0.02873
 464    C 38  pz     Val( 2p)     0.95687       0.02975

 465    C 39  s      Cor( 1s)     1.99993      -9.94766
 466    C 39  s      Val( 2s)     1.10142      -0.18706
 467    C 39  px     Val( 2p)     0.97021       0.08591
 468    C 39  py     Val( 2p)     0.99910       0.01727
 469    C 39  pz     Val( 2p)     0.99860       0.01687

 470    C 40  s      Cor( 1s)     1.99994      -9.94740
 471    C 40  s      Val( 2s)     1.09646      -0.18317
 472    C 40  px     Val( 2p)     0.97719       0.08433
 473    C 40  py     Val( 2p)     0.98831       0.01848
 474    C 40  pz     Val( 2p)     0.98507       0.02206

 475    C 41  s      Cor( 1s)     1.99993      -9.94347
 476    C 41  s      Val( 2s)     1.09983      -0.18388
 477    C 41  px     Val( 2p)     0.98868       0.07875
 478    C 41  py     Val( 2p)     0.98762       0.02212
 479    C 41  pz     Val( 2p)     0.98817       0.02603

 480    C 42  s      Cor( 1s)     1.99986      -9.96364
 481    C 42  s      Val( 2s)     1.11783      -0.20126
 482    C 42  px     Val( 2p)     0.94210       0.09382
 483    C 42  py     Val( 2p)     0.95944       0.02366
 484    C 42  pz     Val( 2p)     0.95944       0.02506

 485    C 43  s      Cor( 1s)     1.99993      -9.98003
 486    C 43  s      Val( 2s)     1.11278      -0.19446
 487    C 43  px     Val( 2p)     0.95077       0.04414
 488    C 43  py     Val( 2p)     0.96190       0.04478
 489    C 43  pz     Val( 2p)     0.97233       0.04382

 490    C 44  s      Cor( 1s)     1.99994      -9.97870
 491    C 44  s      Val( 2s)     1.11413      -0.19428
 492    C 44  px     Val( 2p)     0.98266       0.04549
 493    C 44  py     Val( 2p)     0.95673       0.04450
 494    C 44  pz     Val( 2p)     0.94940       0.04599

 495    C 45  s      Cor( 1s)     1.99995      -9.93154
 496    C 45  s      Val( 2s)     1.10424      -0.16298
 497    C 45  px     Val( 2p)     1.00602       0.04523
 498    C 45  py     Val( 2p)     1.02547       0.04806
 499    C 45  pz     Val( 2p)     1.04077       0.04671

 500    C 46  s      Cor( 1s)     1.99994      -9.94442
 501    C 46  s      Val( 2s)     1.10725      -0.17556
 502    C 46  px     Val( 2p)     1.03942       0.03577
 503    C 46  py     Val( 2p)     1.03859       0.03750
 504    C 46  pz     Val( 2p)     0.97925       0.03289

 505    C 47  s      Cor( 1s)     1.99994      -9.96170
 506    C 47  s      Val( 2s)     1.10877      -0.19116
 507    C 47  px     Val( 2p)     1.00030       0.02068
 508    C 47  py     Val( 2p)     1.04115       0.01824
 509    C 47  pz     Val( 2p)     1.00774       0.01963

 510    C 48  s      Cor( 1s)     1.99995      -9.95813
 511    C 48  s      Val( 2s)     1.10272      -0.18968
 512    C 48  px     Val( 2p)     1.03174       0.02108
 513    C 48  py     Val( 2p)     1.02911       0.02118
 514    C 48  pz     Val( 2p)     1.00444       0.01969

 515    C 49  s      Cor( 1s)     1.99995      -9.94226
 516    C 49  s      Val( 2s)     1.10838      -0.17333
 517    C 49  px     Val( 2p)     1.01647       0.03807
 518    C 49  py     Val( 2p)     1.01175       0.03637
 519    C 49  pz     Val( 2p)     1.02893       0.03917

 520    C 50  s      Cor( 1s)     1.99995      -9.94910
 521    C 50  s      Val( 2s)     1.10178      -0.17940
 522    C 50  px     Val( 2p)     1.02648       0.03078
 523    C 50  py     Val( 2p)     1.02834       0.03211
 524    C 50  pz     Val( 2p)     1.00824       0.02855

 525    C 51  s      Cor( 1s)     1.99994      -9.94354
 526    C 51  s      Val( 2s)     1.11440      -0.17645
 527    C 51  px     Val( 2p)     1.03239       0.03725
 528    C 51  py     Val( 2p)     1.04224       0.03538
 529    C 51  pz     Val( 2p)     0.98080       0.03538

 530    C 52  s      Cor( 1s)     1.99995      -9.95571
 531    C 52  s      Val( 2s)     1.10632      -0.18692
 532    C 52  px     Val( 2p)     1.03872       0.02343
 533    C 52  py     Val( 2p)     0.99152       0.02314
 534    C 52  pz     Val( 2p)     1.03223       0.02602

 535    C 53  s      Cor( 1s)     1.99953     -10.04016
 536    C 53  s      Val( 2s)     1.12683      -0.22952
 537    C 53  s      Ryd( 3s)     0.00068       1.27938
 538    C 53  px     Val( 2p)     1.23413      -0.07101
 539    C 53  px     Ryd( 3p)     0.00132       0.65807
 540    C 53  py     Val( 2p)     1.20422      -0.06658
 541    C 53  py     Ryd( 3p)     0.00244       0.67123
 542    C 53  pz     Val( 2p)     1.15976      -0.06947
 543    C 53  pz     Ryd( 3p)     0.00299       0.57282
 544    C 53  dxy    Ryd( 3d)     0.00034       1.88249
 545    C 53  dxz    Ryd( 3d)     0.00090       2.06266
 546    C 53  dyz    Ryd( 3d)     0.00073       2.10893
 547    C 53  dx2y2  Ryd( 3d)     0.00130       2.17991
 548    C 53  dz2    Ryd( 3d)     0.00077       2.10383

 549    C 54  s      Cor( 1s)     1.99953     -10.03772
 550    C 54  s      Val( 2s)     1.12533      -0.22483
 551    C 54  s      Ryd( 3s)     0.00088       1.26607
 552    C 54  px     Val( 2p)     1.23589      -0.06540
 553    C 54  px     Ryd( 3p)     0.00134       0.64293
 554    C 54  py     Val( 2p)     1.13755      -0.06283
 555    C 54  py     Ryd( 3p)     0.00143       0.55501
 556    C 54  pz     Val( 2p)     1.21736      -0.06526
 557    C 54  pz     Ryd( 3p)     0.00440       0.64849
 558    C 54  dxy    Ryd( 3d)     0.00035       1.92289
 559    C 54  dxz    Ryd( 3d)     0.00074       2.03543
 560    C 54  dyz    Ryd( 3d)     0.00099       2.17755
 561    C 54  dx2y2  Ryd( 3d)     0.00121       2.19979
 562    C 54  dz2    Ryd( 3d)     0.00070       2.01428

 563    H 55  s      Val( 1s)     0.78140       0.11497
 564    H 55  s      Ryd( 2s)     0.00129       0.65309

 565    H 56  s      Val( 1s)     0.74240       0.07133
 566    H 56  s      Ryd( 2s)     0.00325       0.65481

 567    H 57  s      Val( 1s)     0.72696       0.08797
 568    H 57  s      Ryd( 2s)     0.00403       0.76433

 569    H 58  s      Val( 1s)     0.77601       0.06981
 570    H 58  s      Ryd( 2s)     0.00456       0.69068

 571    H 59  s      Val( 1s)     0.77415       0.06861
 572    H 59  s      Ryd( 2s)     0.00078       0.59154

 573    H 60  s      Val( 1s)     0.78218       0.05962
 574    H 60  s      Ryd( 2s)     0.00168       0.62377

 575    H 61  s      Val( 1s)     0.79441       0.09352
 576    H 61  s      Ryd( 2s)     0.00335       0.77705

 577    H 62  s      Val( 1s)     0.76305       0.09190
 578    H 62  s      Ryd( 2s)     0.00240       0.67417

 579    H 63  s      Val( 1s)     0.77457       0.12018
 580    H 63  s      Ryd( 2s)     0.00164       0.70772

 581    H 64  s      Val( 1s)     0.77068       0.13721
 582    H 64  s      Ryd( 2s)     0.00859       0.83635

 583    H 65  s      Val( 1s)     0.76913       0.13276
 584    H 65  s      Ryd( 2s)     0.01151       0.81534

 585    H 66  s      Val( 1s)     0.75603       0.10585
 586    H 66  s      Ryd( 2s)     0.00129       0.66579

 587    H 67  s      Val( 1s)     0.77120       0.08623
 588    H 67  s      Ryd( 2s)     0.00110       0.67713

 589    H 68  s      Val( 1s)     0.74590       0.11540
 590    H 68  s      Ryd( 2s)     0.01273       0.76589

 591    H 69  s      Val( 1s)     0.74897       0.08752
 592    H 69  s      Ryd( 2s)     0.00126       0.66800

 593    H 70  s      Val( 1s)     0.75200       0.08568
 594    H 70  s      Ryd( 2s)     0.00126       0.64818

 595    H 71  s      Val( 1s)     0.75068       0.09295
 596    H 71  s      Ryd( 2s)     0.00421       0.71449

 597    H 72  s      Val( 1s)     0.75517       0.07647
 598    H 72  s      Ryd( 2s)     0.00350       0.69807

 599    H 73  s      Val( 1s)     0.75574       0.07247
 600    H 73  s      Ryd( 2s)     0.00162       0.64196

 601    H 74  s      Val( 1s)     0.74787       0.07357
 602    H 74  s      Ryd( 2s)     0.00116       0.64688

 603    H 75  s      Val( 1s)     0.93826       0.03275

 604    H 76  s      Val( 1s)     0.94364       0.02088

 605    H 77  s      Val( 1s)     0.95112       0.01927

 606    H 78  s      Val( 1s)     0.95724       0.05162

 607    H 79  s      Val( 1s)     0.95085       0.03543

 608    H 80  s      Val( 1s)     0.94763       0.02194

 609    H 81  s      Val( 1s)     0.94460       0.02165

 610    H 82  s      Val( 1s)     0.94725       0.02533

 611    H 83  s      Val( 1s)     0.93983       0.05808

 612    H 84  s      Val( 1s)     0.94414       0.05440

 613    H 85  s      Val( 1s)     0.93962       0.05417

 614    H 86  s      Val( 1s)     0.92378       0.07523

 615    H 87  s      Val( 1s)     0.94837       0.04362

 616    H 88  s      Val( 1s)     0.94279       0.03943

 617    H 89  s      Val( 1s)     0.94491       0.03510

 618    H 90  s      Val( 1s)     0.94471       0.05169

 619    H 91  s      Val( 1s)     0.95604       0.02074

 620    H 92  s      Val( 1s)     0.94028       0.02493

 621    H 93  s      Val( 1s)     0.94431       0.03759

 622    H 94  s      Val( 1s)     0.94611       0.02202

 623    H 95  s      Val( 1s)     0.94348       0.02948

 624    H 96  s      Val( 1s)     0.94541       0.02442

 625    H 97  s      Val( 1s)     0.94480       0.03948

 626    H 98  s      Val( 1s)     0.93782       0.05941

 627    H 99  s      Val( 1s)     0.94250       0.04198

 628    H100  s      Val( 1s)     0.94332       0.03400

 629    H101  s      Val( 1s)     0.94924       0.03604

 630    H102  s      Val( 1s)     0.94725       0.03309

 631    H103  s      Val( 1s)     0.94083       0.04415

 632    H104  s      Val( 1s)     0.93268       0.06356

 633    H105  s      Val( 1s)     0.94330       0.03696

 634    H106  s      Val( 1s)     0.93867       0.03577

 635    H107  s      Val( 1s)     0.94279       0.02742

 636    H108  s      Val( 1s)     0.95114       0.02528

 637    H109  s      Val( 1s)     0.75298       0.12066

 638    H110  s      Val( 1s)     0.74800       0.11884

 639    H111  s      Val( 1s)     0.74601       0.11365

 640    H112  s      Val( 1s)     0.74929       0.12291

 641    H113  s      Val( 1s)     0.75362       0.11948

 642    H114  s      Val( 1s)     0.75714       0.12182

 WARNING:  2 low occupancy (<1.9990e) core orbitals found on Mg 2
           1 low occupancy (<1.9990e) core orbital  found on  C 8
           1 low occupancy (<1.9990e) core orbital  found on  C 9
           1 low occupancy (<1.9990e) core orbital  found on  C10
           1 low occupancy (<1.9990e) core orbital  found on  C13
           1 low occupancy (<1.9990e) core orbital  found on  C14
           1 low occupancy (<1.9990e) core orbital  found on  C22
           1 low occupancy (<1.9990e) core orbital  found on  C23

 WARNING:  Population inversion found on atom Mg 2


 Summary of Natural Population Analysis:                  
                                                          
                                       Natural Population 
               Natural   -----------------------------------------------
    Atom No    Charge        Core      Valence    Rydberg      Total
 -----------------------------------------------------------------------
      O  1   -0.55082      1.99966     6.53677    0.01440     8.55082
     Mg  2    1.68114      9.99638     0.20117    0.12130    10.31886
      O  3   -0.56098      1.99963     6.54559    0.01576     8.56098
      C  4    0.82629      1.99926     3.12433    0.05012     5.17371
      N  5   -0.88550      1.99921     5.86235    0.02393     7.88550
      N  6   -0.90028      1.99925     5.87722    0.02382     7.90028
      O  7   -0.59645      1.99970     6.57892    0.01783     8.59645
      C  8    0.25727      1.99895     3.71514    0.02863     5.74273
      C  9   -0.44997      1.99877     4.43653    0.01467     6.44997
      C 10    0.25564      1.99895     3.71760    0.02781     5.74436
      O 11   -0.54493      1.99964     6.52978    0.01551     8.54493
      C 12    0.88085      1.99918     3.06989    0.05007     5.11915
      C 13    0.00199      1.99887     3.97751    0.02164     5.99801
      C 14   -0.01150      1.99889     3.99090    0.02171     6.01150
      O 15   -0.69855      1.99966     6.68101    0.01788     8.69855
      C 16   -0.31785      1.99925     4.30403    0.01457     6.31785
      O 17   -1.02494      1.99980     7.01605    0.00909     9.02494
      C 18    0.82875      1.99910     3.11400    0.05816     5.17125
      O 19   -0.67788      1.99969     6.65941    0.01878     8.67788
      O 20   -0.56989      1.99964     6.55406    0.01618     8.56989
      C 21    0.83142      1.99920     3.12013    0.04925     5.16858
      C 22    0.01573      1.99897     3.96150    0.02381     5.98427
      C 23    0.01864      1.99880     3.96133    0.02123     5.98136
      O 24   -0.58526      1.99970     6.56799    0.01757     8.58526
      C 25   -0.69462      1.99923     4.67919    0.01621     6.69462
      C 26   -0.68512      1.99924     4.67450    0.01138     6.68512
      C 27   -0.68382      1.99924     4.67374    0.01084     6.68382
      C 28   -0.68632      1.99924     4.67686    0.01022     6.68632
      C 29    0.25308      1.99974     3.74718    0.00000     5.74692
      C 30    0.24996      1.99974     3.75030    0.00000     5.75004
      C 31    0.01180      1.99984     3.98836    0.00000     5.98820
      C 32   -0.05539      1.99993     4.05547    0.00000     6.05539
      C 33   -0.06069      1.99993     4.06076    0.00000     6.06069
      C 34   -0.05457      1.99993     4.05463    0.00000     6.05457
      C 35    0.02068      1.99986     3.97946    0.00000     5.97932
      C 36    0.01306      1.99993     3.98700    0.00000     5.98694
      C 37    0.00215      1.99994     3.99791    0.00000     5.99785
      C 38    0.02120      1.99985     3.97895    0.00000     5.97880
      C 39   -0.06927      1.99993     4.06934    0.00000     6.06927
      C 40   -0.04697      1.99994     4.04703    0.00000     6.04697
      C 41   -0.06423      1.99993     4.06430    0.00000     6.06423
      C 42    0.02133      1.99986     3.97881    0.00000     5.97867
      C 43    0.00229      1.99993     3.99778    0.00000     5.99771
      C 44   -0.00287      1.99994     4.00293    0.00000     6.00287
      C 45   -0.17644      1.99995     4.17649    0.00000     6.17644
      C 46   -0.16446      1.99994     4.16451    0.00000     6.16446
      C 47   -0.15791      1.99994     4.15797    0.00000     6.15791
      C 48   -0.16797      1.99995     4.16802    0.00000     6.16797
      C 49   -0.16546      1.99995     4.16552    0.00000     6.16546
      C 50   -0.16479      1.99995     4.16484    0.00000     6.16479
      C 51   -0.16977      1.99994     4.16983    0.00000     6.16977
      C 52   -0.16874      1.99995     4.16879    0.00000     6.16874
      C 53   -0.73594      1.99953     4.72494    0.01147     6.73594
      C 54   -0.72769      1.99953     4.71613    0.01204     6.72769
      H 55    0.21731      0.00000     0.78140    0.00129     0.78269
      H 56    0.25435      0.00000     0.74240    0.00325     0.74565
      H 57    0.26901      0.00000     0.72696    0.00403     0.73099
      H 58    0.21943      0.00000     0.77601    0.00456     0.78057
      H 59    0.22507      0.00000     0.77415    0.00078     0.77493
      H 60    0.21614      0.00000     0.78218    0.00168     0.78386
      H 61    0.20224      0.00000     0.79441    0.00335     0.79776
      H 62    0.23454      0.00000     0.76305    0.00240     0.76546
      H 63    0.22379      0.00000     0.77457    0.00164     0.77621
      H 64    0.22074      0.00000     0.77068    0.00859     0.77926
      H 65    0.21936      0.00000     0.76913    0.01151     0.78064
      H 66    0.24268      0.00000     0.75603    0.00129     0.75732
      H 67    0.22769      0.00000     0.77120    0.00110     0.77231
      H 68    0.24137      0.00000     0.74590    0.01273     0.75863
      H 69    0.24977      0.00000     0.74897    0.00126     0.75023
      H 70    0.24673      0.00000     0.75200    0.00126     0.75327
      H 71    0.24512      0.00000     0.75068    0.00421     0.75488
      H 72    0.24133      0.00000     0.75517    0.00350     0.75867
      H 73    0.24264      0.00000     0.75574    0.00162     0.75736
      H 74    0.25097      0.00000     0.74787    0.00116     0.74903
      H 75    0.06174      0.00000     0.93826    0.00000     0.93826
      H 76    0.05636      0.00000     0.94364    0.00000     0.94364
      H 77    0.04888      0.00000     0.95112    0.00000     0.95112
      H 78    0.04276      0.00000     0.95724    0.00000     0.95724
      H 79    0.04915      0.00000     0.95085    0.00000     0.95085
      H 80    0.05237      0.00000     0.94763    0.00000     0.94763
      H 81    0.05540      0.00000     0.94460    0.00000     0.94460
      H 82    0.05275      0.00000     0.94725    0.00000     0.94725
      H 83    0.06017      0.00000     0.93983    0.00000     0.93983
      H 84    0.05586      0.00000     0.94414    0.00000     0.94414
      H 85    0.06038      0.00000     0.93962    0.00000     0.93962
      H 86    0.07622      0.00000     0.92378    0.00000     0.92378
      H 87    0.05163      0.00000     0.94837    0.00000     0.94837
      H 88    0.05721      0.00000     0.94279    0.00000     0.94279
      H 89    0.05509      0.00000     0.94491    0.00000     0.94491
      H 90    0.05529      0.00000     0.94471    0.00000     0.94471
      H 91    0.04396      0.00000     0.95604    0.00000     0.95604
      H 92    0.05972      0.00000     0.94028    0.00000     0.94028
      H 93    0.05569      0.00000     0.94431    0.00000     0.94431
      H 94    0.05389      0.00000     0.94611    0.00000     0.94611
      H 95    0.05652      0.00000     0.94348    0.00000     0.94348
      H 96    0.05459      0.00000     0.94541    0.00000     0.94541
      H 97    0.05520      0.00000     0.94480    0.00000     0.94480
      H 98    0.06218      0.00000     0.93782    0.00000     0.93782
      H 99    0.05750      0.00000     0.94250    0.00000     0.94250
      H100    0.05668      0.00000     0.94332    0.00000     0.94332
      H101    0.05076      0.00000     0.94924    0.00000     0.94924
      H102    0.05275      0.00000     0.94725    0.00000     0.94725
      H103    0.05917      0.00000     0.94083    0.00000     0.94083
      H104    0.06732      0.00000     0.93268    0.00000     0.93268
      H105    0.05670      0.00000     0.94330    0.00000     0.94330
      H106    0.06133      0.00000     0.93867    0.00000     0.93867
      H107    0.05721      0.00000     0.94279    0.00000     0.94279
      H108    0.04886      0.00000     0.95114    0.00000     0.95114
      H109    0.24702      0.00000     0.75298    0.00000     0.75298
      H110    0.25200      0.00000     0.74800    0.00000     0.74800
      H111    0.25399      0.00000     0.74601    0.00000     0.74601
      H112    0.25071      0.00000     0.74929    0.00000     0.74929
      H113    0.24638      0.00000     0.75362    0.00000     0.75362
      H114    0.24286      0.00000     0.75714    0.00000     0.75714
 =======================================================================
   * Total *  0.00000    115.97395   293.18897    0.83707   410.00000

                                 Natural Population      
 --------------------------------------------------------
   Core                     115.97395 ( 99.9775% of 116)
   Valence                  293.18897 ( 99.7241% of 294)
   Natural Minimal Basis    409.16293 ( 99.7958% of 410)
   Natural Rydberg Basis      0.83707 (  0.2042% of 410)
 --------------------------------------------------------

    Atom No         Natural Electron Configuration
 ----------------------------------------------------------------------------
      O  1      [core]2s( 1.62)2p( 4.92)3d( 0.01)
     Mg  2      [core]3s( 0.20)3p( 0.03)3d( 0.05)4p( 0.02)4d( 0.01)5p( 0.01)5d( 0.01)
      O  3      [core]2s( 1.61)2p( 4.94)3p( 0.01)3d( 0.01)
      C  4      [core]2s( 0.76)2p( 2.36)3s( 0.01)3p( 0.03)3d( 0.01)
      N  5      [core]2s( 1.42)2p( 4.44)3p( 0.02)
      N  6      [core]2s( 1.43)2p( 4.44)3p( 0.02)
      O  7      [core]2s( 1.70)2p( 4.88)3d( 0.01)
      C  8      [core]2s( 0.84)2p( 2.87)3p( 0.02)3d( 0.01)
      C  9      [core]2s( 0.93)2p( 3.51)3p( 0.01)
      C 10      [core]2s( 0.84)2p( 2.88)3p( 0.02)3d( 0.01)
      O 11      [core]2s( 1.61)2p( 4.92)3p( 0.01)3d( 0.01)
      C 12      [core]2s( 0.77)2p( 2.30)3s( 0.01)3p( 0.03)3d( 0.01)
      C 13      [core]2s( 0.97)2p( 3.01)3p( 0.01)3d( 0.01)
      C 14      [core]2s( 0.99)2p( 3.00)3p( 0.01)3d( 0.01)
      O 15      [core]2s( 1.68)2p( 5.00)3p( 0.01)3d( 0.01)
      C 16      [core]2s( 1.11)2p( 3.20)3p( 0.01)3d( 0.01)
      O 17      [core]2s( 1.72)2p( 5.30)3p( 0.01)
      C 18      [core]2s( 0.79)2p( 2.32)3s( 0.01)3p( 0.04)3d( 0.01)
      O 19      [core]2s( 1.69)2p( 4.97)3d( 0.01)
      O 20      [core]2s( 1.61)2p( 4.94)3p( 0.01)3d( 0.01)
      C 21      [core]2s( 0.80)2p( 2.32)3s( 0.01)3p( 0.03)3d( 0.01)
      C 22      [core]2s( 0.95)2p( 3.01)3p( 0.01)3d( 0.01)
      C 23      [core]2s( 0.97)2p( 2.99)3p( 0.01)3d( 0.01)
      O 24      [core]2s( 1.70)2p( 4.87)3d( 0.01)
      C 25      [core]2s( 1.10)2p( 3.58)3p( 0.01)
      C 26      [core]2s( 1.11)2p( 3.57)3p( 0.01)
      C 27      [core]2s( 1.11)2p( 3.57)3p( 0.01)
      C 28      [core]2s( 1.11)2p( 3.57)3p( 0.01)
      C 29      [core]2s( 1.00)2p( 2.75)
      C 30      [core]2s( 1.00)2p( 2.75)
      C 31      [core]2s( 1.12)2p( 2.87)
      C 32      [core]2s( 1.10)2p( 2.95)
      C 33      [core]2s( 1.10)2p( 2.96)
      C 34      [core]2s( 1.10)2p( 2.96)
      C 35      [core]2s( 1.11)2p( 2.87)
      C 36      [core]2s( 1.12)2p( 2.87)
      C 37      [core]2s( 1.11)2p( 2.89)
      C 38      [core]2s( 1.11)2p( 2.86)
      C 39      [core]2s( 1.10)2p( 2.97)
      C 40      [core]2s( 1.10)2p( 2.95)
      C 41      [core]2s( 1.10)2p( 2.96)
      C 42      [core]2s( 1.12)2p( 2.86)
      C 43      [core]2s( 1.11)2p( 2.88)
      C 44      [core]2s( 1.11)2p( 2.89)
      C 45      [core]2s( 1.10)2p( 3.07)
      C 46      [core]2s( 1.11)2p( 3.06)
      C 47      [core]2s( 1.11)2p( 3.05)
      C 48      [core]2s( 1.10)2p( 3.07)
      C 49      [core]2s( 1.11)2p( 3.06)
      C 50      [core]2s( 1.10)2p( 3.06)
      C 51      [core]2s( 1.11)2p( 3.06)
      C 52      [core]2s( 1.11)2p( 3.06)
      C 53      [core]2s( 1.13)2p( 3.60)3p( 0.01)
      C 54      [core]2s( 1.13)2p( 3.59)3p( 0.01)
      H 55            1s( 0.78)
      H 56            1s( 0.74)
      H 57            1s( 0.73)
      H 58            1s( 0.78)
      H 59            1s( 0.77)
      H 60            1s( 0.78)
      H 61            1s( 0.79)
      H 62            1s( 0.76)
      H 63            1s( 0.77)
      H 64            1s( 0.77)2s( 0.01)
      H 65            1s( 0.77)2s( 0.01)
      H 66            1s( 0.76)
      H 67            1s( 0.77)
      H 68            1s( 0.75)2s( 0.01)
      H 69            1s( 0.75)
      H 70            1s( 0.75)
      H 71            1s( 0.75)
      H 72            1s( 0.76)
      H 73            1s( 0.76)
      H 74            1s( 0.75)
      H 75            1s( 0.94)
      H 76            1s( 0.94)
      H 77            1s( 0.95)
      H 78            1s( 0.96)
      H 79            1s( 0.95)
      H 80            1s( 0.95)
      H 81            1s( 0.94)
      H 82            1s( 0.95)
      H 83            1s( 0.94)
      H 84            1s( 0.94)
      H 85            1s( 0.94)
      H 86            1s( 0.92)
      H 87            1s( 0.95)
      H 88            1s( 0.94)
      H 89            1s( 0.94)
      H 90            1s( 0.94)
      H 91            1s( 0.96)
      H 92            1s( 0.94)
      H 93            1s( 0.94)
      H 94            1s( 0.95)
      H 95            1s( 0.94)
      H 96            1s( 0.95)
      H 97            1s( 0.94)
      H 98            1s( 0.94)
      H 99            1s( 0.94)
      H100            1s( 0.94)
      H101            1s( 0.95)
      H102            1s( 0.95)
      H103            1s( 0.94)
      H104            1s( 0.93)
      H105            1s( 0.94)
      H106            1s( 0.94)
      H107            1s( 0.94)
      H108            1s( 0.95)
      H109            1s( 0.75)
      H110            1s( 0.75)
      H111            1s( 0.75)
      H112            1s( 0.75)
      H113            1s( 0.75)
      H114            1s( 0.76)


 Wiberg bond index matrix in the NAO basis:                                    

     Atom    1       2       3       4       5       6       7       8       9
     ---- ------  ------  ------  ------  ------  ------  ------  ------  ------
   1.  O  0.0000  0.0008  0.0000  1.0465  0.0000  0.0000  0.1682  0.0000  0.0000
   2. Mg  0.0008  0.0000  0.0041  0.0002  0.0626  0.0618  0.0007  0.0072  0.0042
   3.  O  0.0000  0.0041  0.0000  0.0001  0.0002  0.0001  0.0000  0.0000  0.0000
   4.  C  1.0465  0.0002  0.0001  0.0000  0.0000  0.0000  1.7553  0.0000  0.0001
   5.  N  0.0000  0.0626  0.0002  0.0000  0.0000  0.0571  0.0000  1.4807  0.0928
   6.  N  0.0000  0.0618  0.0001  0.0000  0.0571  0.0000  0.0000  0.0492  0.0992
   7.  O  0.1682  0.0007  0.0000  1.7553  0.0000  0.0000  0.0000  0.0000  0.0000
   8.  C  0.0000  0.0072  0.0000  0.0000  1.4807  0.0492  0.0000  0.0000  1.3202
   9.  C  0.0000  0.0042  0.0000  0.0001  0.0928  0.0992  0.0000  1.3202  0.0000
  10.  C  0.0000  0.0073  0.0000  0.0001  0.0478  1.4555  0.0000  0.0235  1.3543
  11.  O  0.0065  0.0023  0.0075  0.0164  0.0003  0.0001  0.0042  0.0001  0.0001
  12.  C  0.0015  0.0040  0.0249  0.0050  0.0019  0.0010  0.0032  0.0002  0.0003
  13.  C  0.0003  0.0032  0.8861  0.0007  0.0001  0.0001  0.0003  0.0000  0.0000
  14.  C  0.0166  0.0009  0.0023  0.9435  0.0001  0.0000  0.0524  0.0001  0.0001
  15.  O  0.0008  0.0448  0.0027  0.0054  0.0031  0.0025  0.0021  0.0004  0.0004
  16.  C  0.8675  0.0001  0.0000  0.0107  0.0000  0.0000  0.0111  0.0000  0.0000
  17.  O  0.0000  0.0943  0.0192  0.0000  0.0018  0.0046  0.0000  0.0006  0.0002
  18.  C  0.0000  0.0049  0.9729  0.0000  0.0007  0.0002  0.0000  0.0001  0.0001
  19.  O  0.0000  0.0266  0.1318  0.0001  0.0017  0.0005  0.0000  0.0004  0.0001
  20.  O  0.0000  0.0036  0.0075  0.0000  0.0001  0.0001  0.0000  0.0000  0.0000
  21.  C  0.0000  0.0027  0.0004  0.0000  0.0001  0.0002  0.0000  0.0000  0.0000
  22.  C  0.0000  0.0086  0.0013  0.0000  0.0002  0.0003  0.0000  0.0001  0.0000
  23.  C  0.0000  0.0034  0.0143  0.0000  0.0001  0.0001  0.0000  0.0000  0.0000
  24.  O  0.0000  0.0021  0.0006  0.0000  0.0000  0.0001  0.0000  0.0000  0.0000
  25.  C  0.0000  0.0029  0.0004  0.0000  0.0001  0.0002  0.0000  0.0000  0.0000
  26.  C  0.0000  0.0005  0.0054  0.0000  0.0001  0.0000  0.0000  0.0000  0.0000
  27.  C  0.0000  0.0005  0.0143  0.0001  0.0001  0.0000  0.0004  0.0000  0.0000
  28.  C  0.0043  0.0001  0.0002  0.0129  0.0000  0.0000  0.0123  0.0000  0.0000
  29.  C  0.0000  0.0223  0.0001  0.0000  0.9540  0.0019  0.0000  0.0123  0.0132
  30.  C  0.0000  0.0202  0.0000  0.0000  0.0023  0.9490  0.0000  0.0005  0.0136
  31.  C  0.0000  0.0233  0.0001  0.0000  0.0182  0.0022  0.0000  0.0147  0.0031
  32.  C  0.0000  0.0094  0.0000  0.0000  0.0057  0.0002  0.0000  0.0013  0.0004
  33.  C  0.0000  0.0031  0.0001  0.0000  0.0073  0.0008  0.0000  0.0038  0.0008
  34.  C  0.0000  0.0049  0.0001  0.0000  0.0060  0.0002  0.0000  0.0009  0.0004
  35.  C  0.0000  0.0104  0.0001  0.0000  0.0170  0.0024  0.0000  0.0151  0.0028
  36.  C  0.0000  0.0181  0.0000  0.0000  0.0051  0.0021  0.0000  0.0013  0.0011
  37.  C  0.0000  0.0047  0.0000  0.0000  0.0042  0.0001  0.0001  0.0015  0.0002
  38.  C  0.0000  0.0125  0.0000  0.0002  0.0016  0.0168  0.0000  0.0016  0.0022
  39.  C  0.0000  0.0020  0.0000  0.0001  0.0001  0.0056  0.0000  0.0001  0.0003
  40.  C  0.0000  0.0018  0.0000  0.0000  0.0003  0.0071  0.0000  0.0003  0.0004
  41.  C  0.0000  0.0014  0.0000  0.0000  0.0002  0.0057  0.0000  0.0002  0.0006
  42.  C  0.0000  0.0081  0.0000  0.0000  0.0020  0.0153  0.0000  0.0020  0.0030
  43.  C  0.0001  0.0100  0.0000  0.0006  0.0004  0.0045  0.0003  0.0004  0.0004
  44.  C  0.0000  0.0066  0.0000  0.0000  0.0003  0.0047  0.0000  0.0001  0.0002
  45.  C  0.0000  0.0028  0.0000  0.0000  0.0004  0.0001  0.0000  0.0001  0.0001
  46.  C  0.0000  0.0048  0.0000  0.0000  0.0015  0.0001  0.0000  0.0016  0.0004
  47.  C  0.0000  0.0031  0.0002  0.0002  0.0004  0.0000  0.0001  0.0004  0.0000
  48.  C  0.0000  0.0011  0.0000  0.0000  0.0003  0.0001  0.0000  0.0005  0.0001
  49.  C  0.0000  0.0040  0.0000  0.0000  0.0001  0.0004  0.0000  0.0000  0.0001
  50.  C  0.0000  0.0013  0.0000  0.0000  0.0000  0.0003  0.0000  0.0000  0.0001
  51.  C  0.0002  0.0090  0.0004  0.0006  0.0001  0.0004  0.0008  0.0000  0.0000
  52.  C  0.0003  0.0016  0.0000  0.0003  0.0001  0.0003  0.0008  0.0000  0.0001
  53.  C  0.0000  0.0050  0.0000  0.0000  0.0280  0.0015  0.0000  1.0113  0.0093
  54.  C  0.0000  0.0048  0.0000  0.0000  0.0010  0.0290  0.0000  0.0080  0.0089
  55.  H  0.0000  0.0006  0.0000  0.0000  0.0071  0.0072  0.0000  0.0048  0.9223
  56.  H  0.0000  0.0003  0.0159  0.0001  0.0001  0.0000  0.0000  0.0000  0.0000
  57.  H  0.0010  0.0004  0.0000  0.0036  0.0001  0.0000  0.0111  0.0003  0.0003
  58.  H  0.0126  0.0000  0.0000  0.0025  0.0000  0.0000  0.0038  0.0000  0.0000
  59.  H  0.0057  0.0000  0.0000  0.0068  0.0000  0.0000  0.0016  0.0000  0.0000
  60.  H  0.0140  0.0001  0.0000  0.0027  0.0000  0.0000  0.0043  0.0000  0.0000
  61.  H  0.0000  0.0052  0.0017  0.0000  0.0002  0.0002  0.0000  0.0000  0.0000
  62.  H  0.0000  0.0004  0.0009  0.0000  0.0000  0.0000  0.0000  0.0000  0.0000
  63.  H  0.0000  0.0002  0.0002  0.0000  0.0000  0.0000  0.0000  0.0000  0.0000
  64.  H  0.0000  0.0010  0.0000  0.0000  0.0000  0.0002  0.0000  0.0000  0.0000
  65.  H  0.0000  0.0005  0.0000  0.0000  0.0000  0.0001  0.0000  0.0000  0.0000
  66.  H  0.0000  0.0000  0.0003  0.0000  0.0000  0.0000  0.0000  0.0000  0.0000
  67.  H  0.0000  0.0000  0.0002  0.0000  0.0000  0.0000  0.0000  0.0000  0.0000
  68.  H  0.0000  0.0001  0.0006  0.0000  0.0001  0.0000  0.0000  0.0001  0.0000
  69.  H  0.0000  0.0000  0.0091  0.0000  0.0000  0.0000  0.0003  0.0000  0.0000
  70.  H  0.0000  0.0001  0.0017  0.0001  0.0000  0.0000  0.0001  0.0000  0.0000
  71.  H  0.0000  0.0001  0.0013  0.0000  0.0000  0.0000  0.0001  0.0000  0.0000
  72.  H  0.0013  0.0000  0.0000  0.0088  0.0000  0.0000  0.0023  0.0000  0.0000
  73.  H  0.0002  0.0000  0.0000  0.0009  0.0000  0.0000  0.0008  0.0000  0.0000
  74.  H  0.0010  0.0000  0.0001  0.0005  0.0000  0.0000  0.0005  0.0000  0.0000
  75.  H  0.0000  0.0001  0.0000  0.0000  0.0007  0.0001  0.0000  0.0004  0.0001
  76.  H  0.0000  0.0000  0.0000  0.0000  0.0001  0.0000  0.0000  0.0000  0.0000
  77.  H  0.0000  0.0001  0.0000  0.0000  0.0008  0.0001  0.0000  0.0004  0.0001
  78.  H  0.0000  0.0171  0.0000  0.0000  0.0034  0.0004  0.0000  0.0004  0.0000
  79.  H  0.0000  0.0025  0.0000  0.0000  0.0012  0.0001  0.0000  0.0024  0.0003
  80.  H  0.0000  0.0001  0.0000  0.0000  0.0001  0.0007  0.0000  0.0001  0.0001
  81.  H  0.0000  0.0000  0.0000  0.0000  0.0000  0.0001  0.0000  0.0000  0.0000
  82.  H  0.0000  0.0001  0.0000  0.0000  0.0001  0.0007  0.0000  0.0001  0.0002
  83.  H  0.0000  0.0063  0.0000  0.0007  0.0001  0.0041  0.0001  0.0000  0.0001
  84.  H  0.0000  0.0041  0.0000  0.0000  0.0001  0.0017  0.0000  0.0001  0.0001
  85.  H  0.0000  0.0001  0.0000  0.0000  0.0000  0.0000  0.0000  0.0000  0.0000
  86.  H  0.0000  0.0006  0.0000  0.0000  0.0000  0.0000  0.0000  0.0000  0.0000
  87.  H  0.0000  0.0011  0.0000  0.0000  0.0001  0.0001  0.0000  0.0001  0.0001
  88.  H  0.0000  0.0003  0.0000  0.0000  0.0001  0.0000  0.0000  0.0001  0.0000
  89.  H  0.0000  0.0013  0.0000  0.0000  0.0001  0.0000  0.0000  0.0003  0.0001
  90.  H  0.0000  0.0012  0.0000  0.0000  0.0001  0.0000  0.0000  0.0020  0.0002
  91.  H  0.0000  0.0004  0.0000  0.0001  0.0001  0.0000  0.0000  0.0000  0.0000
  92.  H  0.0000  0.0004  0.0000  0.0001  0.0000  0.0000  0.0000  0.0001  0.0000
  93.  H  0.0000  0.0013  0.0001  0.0002  0.0001  0.0000  0.0000  0.0000  0.0000
  94.  H  0.0000  0.0000  0.0000  0.0000  0.0001  0.0000  0.0000  0.0000  0.0000
  95.  H  0.0000  0.0000  0.0000  0.0000  0.0000  0.0000  0.0000  0.0001  0.0000
  96.  H  0.0000  0.0002  0.0000  0.0000  0.0001  0.0000  0.0000  0.0001  0.0000
  97.  H  0.0000  0.0002  0.0000  0.0000  0.0000  0.0001  0.0000  0.0000  0.0000
  98.  H  0.0000  0.0022  0.0000  0.0000  0.0000  0.0001  0.0000  0.0000  0.0000
  99.  H  0.0000  0.0009  0.0000  0.0000  0.0000  0.0001  0.0000  0.0000  0.0000
 100.  H  0.0000  0.0000  0.0000  0.0000  0.0000  0.0001  0.0000  0.0000  0.0000
 101.  H  0.0000  0.0001  0.0000  0.0000  0.0000  0.0000  0.0000  0.0000  0.0000
 102.  H  0.0000  0.0002  0.0000  0.0000  0.0000  0.0001  0.0000  0.0000  0.0000
 103.  H  0.0000  0.0006  0.0000  0.0002  0.0000  0.0001  0.0012  0.0000  0.0000
 104.  H  0.0000  0.0049  0.0004  0.0000  0.0001  0.0001  0.0000  0.0000  0.0000
 105.  H  0.0000  0.0011  0.0000  0.0001  0.0000  0.0000  0.0000  0.0000  0.0000
 106.  H  0.0000  0.0001  0.0000  0.0001  0.0000  0.0001  0.0008  0.0000  0.0000
 107.  H  0.0001  0.0003  0.0000  0.0000  0.0000  0.0001  0.0000  0.0000  0.0000
 108.  H  0.0000  0.0002  0.0000  0.0000  0.0000  0.0000  0.0000  0.0000  0.0000
 109.  H  0.0000  0.0003  0.0000  0.0000  0.0025  0.0001  0.0000  0.0011  0.0053
 110.  H  0.0000  0.0001  0.0000  0.0000  0.0096  0.0011  0.0000  0.0028  0.0024
 111.  H  0.0000  0.0001  0.0000  0.0000  0.0116  0.0020  0.0000  0.0031  0.0053
 112.  H  0.0000  0.0001  0.0000  0.0000  0.0020  0.0077  0.0000  0.0005  0.0095
 113.  H  0.0000  0.0002  0.0000  0.0000  0.0018  0.0056  0.0000  0.0007  0.0079
 114.  H  0.0000  0.0002  0.0000  0.0000  0.0000  0.0062  0.0000  0.0005  0.0012

     Atom   10      11      12      13      14      15      16      17      18
     ---- ------  ------  ------  ------  ------  ------  ------  ------  ------
   1.  O  0.0000  0.0065  0.0015  0.0003  0.0166  0.0008  0.8675  0.0000  0.0000
   2. Mg  0.0073  0.0023  0.0040  0.0032  0.0009  0.0448  0.0001  0.0943  0.0049
   3.  O  0.0000  0.0075  0.0249  0.8861  0.0023  0.0027  0.0000  0.0192  0.9729
   4.  C  0.0001  0.0164  0.0050  0.0007  0.9435  0.0054  0.0107  0.0000  0.0000
   5.  N  0.0478  0.0003  0.0019  0.0001  0.0001  0.0031  0.0000  0.0018  0.0007
   6.  N  1.4555  0.0001  0.0010  0.0001  0.0000  0.0025  0.0000  0.0046  0.0002
   7.  O  0.0000  0.0042  0.0032  0.0003  0.0524  0.0021  0.0111  0.0000  0.0000
   8.  C  0.0235  0.0001  0.0002  0.0000  0.0001  0.0004  0.0000  0.0006  0.0001
   9.  C  1.3543  0.0001  0.0003  0.0000  0.0001  0.0004  0.0000  0.0002  0.0001
  10.  C  0.0000  0.0000  0.0001  0.0000  0.0000  0.0004  0.0000  0.0012  0.0001
  11.  O  0.0000  0.0000  1.0654  0.0166  0.8473  0.1475  0.0019  0.0002  0.0009
  12.  C  0.0001  1.0654  0.0000  0.9552  0.0104  1.6340  0.0003  0.0024  0.0035
  13.  C  0.0000  0.0166  0.9552  0.0000  0.0147  0.0439  0.0001  0.0021  0.0093
  14.  C  0.0000  0.8473  0.0104  0.0147  0.0000  0.0101  0.0175  0.0001  0.0001
  15.  O  0.0004  0.1475  1.6340  0.0439  0.0101  0.0000  0.0002  0.0033  0.0028
  16.  C  0.0000  0.0019  0.0003  0.0001  0.0175  0.0002  0.0000  0.0000  0.0000
  17.  O  0.0012  0.0002  0.0024  0.0021  0.0001  0.0033  0.0000  0.0000  0.1502
  18.  C  0.0001  0.0009  0.0035  0.0093  0.0001  0.0028  0.0000  0.1502  0.0000
  19.  O  0.0001  0.0017  0.0139  0.0104  0.0002  0.0060  0.0000  0.0511  1.6450
  20.  O  0.0000  0.0001  0.0003  0.0015  0.0000  0.0001  0.0000  0.0074  0.0249
  21.  C  0.0000  0.0000  0.0001  0.0001  0.0000  0.0002  0.0000  0.0510  0.0025
  22.  C  0.0001  0.0001  0.0001  0.0001  0.0000  0.0008  0.0000  0.9558  0.0029
  23.  C  0.0000  0.0005  0.0019  0.0130  0.0001  0.0006  0.0000  0.0064  0.9412
  24.  O  0.0000  0.0000  0.0001  0.0001  0.0000  0.0001  0.0000  0.0220  0.0028
  25.  C  0.0001  0.0000  0.0001  0.0000  0.0000  0.0001  0.0000  0.0286  0.0046
  26.  C  0.0000  0.0000  0.0001  0.0007  0.0000  0.0001  0.0000  0.0061  0.0157
  27.  C  0.0000  0.0045  0.0151  1.0027  0.0003  0.0116  0.0000  0.0001  0.0083
  28.  C  0.0000  0.0135  0.0075  0.0003  1.0090  0.0018  0.0003  0.0000  0.0000
  29.  C  0.0006  0.0000  0.0001  0.0000  0.0000  0.0004  0.0000  0.0003  0.0020
  30.  C  0.0104  0.0000  0.0001  0.0000  0.0000  0.0002  0.0000  0.0004  0.0001
  31.  C  0.0019  0.0000  0.0003  0.0000  0.0000  0.0003  0.0000  0.0002  0.0010
  32.  C  0.0003  0.0000  0.0001  0.0000  0.0000  0.0000  0.0000  0.0001  0.0002
  33.  C  0.0004  0.0000  0.0001  0.0000  0.0000  0.0000  0.0000  0.0001  0.0004
  34.  C  0.0002  0.0000  0.0000  0.0000  0.0000  0.0000  0.0000  0.0001  0.0007
  35.  C  0.0021  0.0000  0.0001  0.0000  0.0001  0.0001  0.0000  0.0001  0.0013
  36.  C  0.0001  0.0000  0.0001  0.0000  0.0000  0.0001  0.0000  0.0021  0.0001
  37.  C  0.0001  0.0001  0.0001  0.0001  0.0009  0.0002  0.0000  0.0000  0.0000
  38.  C  0.0125  0.0000  0.0002  0.0000  0.0000  0.0001  0.0000  0.0003  0.0000
  39.  C  0.0009  0.0000  0.0001  0.0000  0.0000  0.0000  0.0000  0.0002  0.0000
  40.  C  0.0031  0.0000  0.0000  0.0000  0.0000  0.0000  0.0000  0.0001  0.0000
  41.  C  0.0009  0.0000  0.0000  0.0000  0.0000  0.0000  0.0000  0.0001  0.0000
  42.  C  0.0140  0.0000  0.0001  0.0000  0.0000  0.0001  0.0000  0.0003  0.0000
  43.  C  0.0020  0.0004  0.0014  0.0001  0.0000  0.0018  0.0002  0.0001  0.0000
  44.  C  0.0016  0.0000  0.0000  0.0000  0.0000  0.0000  0.0000  0.0000  0.0000
  45.  C  0.0000  0.0000  0.0000  0.0000  0.0000  0.0000  0.0000  0.0001  0.0000
  46.  C  0.0000  0.0000  0.0000  0.0000  0.0000  0.0000  0.0000  0.0001  0.0001
  47.  C  0.0000  0.0013  0.0018  0.0004  0.0014  0.0003  0.0000  0.0001  0.0004
  48.  C  0.0000  0.0001  0.0001  0.0000  0.0001  0.0000  0.0000  0.0000  0.0000
  49.  C  0.0005  0.0000  0.0000  0.0000  0.0000  0.0000  0.0000  0.0003  0.0000
  50.  C  0.0002  0.0000  0.0000  0.0000  0.0000  0.0000  0.0000  0.0000  0.0000
  51.  C  0.0003  0.0001  0.0012  0.0003  0.0000  0.0009  0.0000  0.0032  0.0000
  52.  C  0.0003  0.0000  0.0002  0.0000  0.0000  0.0001  0.0038  0.0000  0.0000
  53.  C  0.0087  0.0000  0.0001  0.0000  0.0000  0.0001  0.0000  0.0002  0.0001
  54.  C  1.0131  0.0000  0.0000  0.0000  0.0000  0.0001  0.0000  0.0002  0.0000
  55.  H  0.0051  0.0000  0.0000  0.0000  0.0000  0.0000  0.0000  0.0000  0.0000
  56.  H  0.0000  0.0019  0.0068  0.8770  0.0001  0.0122  0.0000  0.0003  0.0024
  57.  H  0.0001  0.0119  0.0017  0.0006  0.8754  0.0047  0.0001  0.0002  0.0000
  58.  H  0.0000  0.0000  0.0000  0.0000  0.0003  0.0000  0.9230  0.0000  0.0000
  59.  H  0.0000  0.0002  0.0000  0.0000  0.0001  0.0000  0.9350  0.0000  0.0000
  60.  H  0.0000  0.0000  0.0000  0.0000  0.0003  0.0000  0.9336  0.0000  0.0000
  61.  H  0.0000  0.0000  0.0001  0.0001  0.0000  0.0001  0.0000  0.0361  0.0014
  62.  H  0.0000  0.0000  0.0001  0.0002  0.0000  0.0000  0.0000  0.0004  0.0036
  63.  H  0.0000  0.0000  0.0000  0.0000  0.0000  0.0000  0.0000  0.0128  0.0004
  64.  H  0.0000  0.0000  0.0000  0.0000  0.0000  0.0000  0.0000  0.0012  0.0000
  65.  H  0.0000  0.0000  0.0000  0.0000  0.0000  0.0000  0.0000  0.0013  0.0000
  66.  H  0.0000  0.0000  0.0000  0.0003  0.0000  0.0000  0.0000  0.0004  0.0095
  67.  H  0.0000  0.0000  0.0000  0.0000  0.0000  0.0000  0.0000  0.0002  0.0005
  68.  H  0.0000  0.0000  0.0000  0.0000  0.0000  0.0000  0.0000  0.0002  0.0013
  69.  H  0.0000  0.0011  0.0004  0.0038  0.0001  0.0003  0.0000  0.0001  0.0005
  70.  H  0.0000  0.0014  0.0095  0.0023  0.0001  0.0016  0.0000  0.0000  0.0001
  71.  H  0.0000  0.0001  0.0010  0.0028  0.0001  0.0003  0.0000  0.0000  0.0001
  72.  H  0.0000  0.0013  0.0001  0.0000  0.0024  0.0000  0.0002  0.0000  0.0000
  73.  H  0.0000  0.0015  0.0001  0.0001  0.0033  0.0002  0.0001  0.0000  0.0000
  74.  H  0.0000  0.0094  0.0006  0.0005  0.0047  0.0007  0.0000  0.0000  0.0000
  75.  H  0.0001  0.0000  0.0000  0.0000  0.0000  0.0000  0.0000  0.0000  0.0000
  76.  H  0.0000  0.0000  0.0000  0.0000  0.0000  0.0000  0.0000  0.0000  0.0000
  77.  H  0.0001  0.0000  0.0000  0.0000  0.0000  0.0000  0.0000  0.0000  0.0000
  78.  H  0.0001  0.0000  0.0001  0.0000  0.0000  0.0003  0.0000  0.0008  0.0001
  79.  H  0.0000  0.0000  0.0000  0.0000  0.0003  0.0001  0.0000  0.0001  0.0000
  80.  H  0.0003  0.0000  0.0000  0.0000  0.0000  0.0000  0.0000  0.0000  0.0000
  81.  H  0.0000  0.0000  0.0000  0.0000  0.0000  0.0000  0.0000  0.0000  0.0000
  82.  H  0.0004  0.0000  0.0000  0.0000  0.0000  0.0000  0.0000  0.0000  0.0000
  83.  H  0.0003  0.0000  0.0004  0.0000  0.0000  0.0024  0.0000  0.0002  0.0000
  84.  H  0.0022  0.0000  0.0000  0.0000  0.0000  0.0001  0.0000  0.0001  0.0000
  85.  H  0.0000  0.0000  0.0000  0.0000  0.0000  0.0000  0.0000  0.0000  0.0000
  86.  H  0.0000  0.0000  0.0000  0.0000  0.0000  0.0000  0.0000  0.0000  0.0000
  87.  H  0.0000  0.0000  0.0000  0.0000  0.0000  0.0000  0.0000  0.0000  0.0000
  88.  H  0.0000  0.0000  0.0000  0.0000  0.0000  0.0000  0.0000  0.0000  0.0000
  89.  H  0.0000  0.0000  0.0000  0.0000  0.0000  0.0000  0.0000  0.0001  0.0000
  90.  H  0.0000  0.0000  0.0000  0.0000  0.0000  0.0000  0.0000  0.0000  0.0000
  91.  H  0.0000  0.0000  0.0000  0.0000  0.0003  0.0000  0.0000  0.0000  0.0000
  92.  H  0.0000  0.0001  0.0002  0.0000  0.0004  0.0000  0.0000  0.0000  0.0000
  93.  H  0.0000  0.0006  0.0024  0.0002  0.0005  0.0004  0.0000  0.0001  0.0001
  94.  H  0.0000  0.0000  0.0000  0.0000  0.0000  0.0000  0.0000  0.0000  0.0000
  95.  H  0.0000  0.0000  0.0000  0.0000  0.0000  0.0000  0.0000  0.0000  0.0000
  96.  H  0.0000  0.0000  0.0000  0.0000  0.0000  0.0000  0.0000  0.0000  0.0000
  97.  H  0.0000  0.0000  0.0000  0.0000  0.0000  0.0000  0.0000  0.0000  0.0000
  98.  H  0.0000  0.0000  0.0000  0.0000  0.0000  0.0000  0.0000  0.0001  0.0000
  99.  H  0.0001  0.0000  0.0000  0.0000  0.0000  0.0000  0.0000  0.0000  0.0000
 100.  H  0.0000  0.0000  0.0000  0.0000  0.0000  0.0000  0.0000  0.0000  0.0000
 101.  H  0.0000  0.0000  0.0000  0.0000  0.0000  0.0000  0.0000  0.0000  0.0000
 102.  H  0.0000  0.0000  0.0000  0.0000  0.0000  0.0000  0.0000  0.0000  0.0000
 103.  H  0.0000  0.0000  0.0006  0.0000  0.0000  0.0000  0.0000  0.0000  0.0000
 104.  H  0.0000  0.0001  0.0003  0.0002  0.0000  0.0003  0.0000  0.0033  0.0000
 105.  H  0.0001  0.0000  0.0003  0.0000  0.0000  0.0002  0.0000  0.0001  0.0000
 106.  H  0.0000  0.0000  0.0000  0.0000  0.0000  0.0000  0.0009  0.0000  0.0000
 107.  H  0.0001  0.0000  0.0001  0.0000  0.0000  0.0000  0.0008  0.0000  0.0000
 108.  H  0.0000  0.0000  0.0000  0.0000  0.0000  0.0000  0.0005  0.0000  0.0000
 109.  H  0.0003  0.0000  0.0000  0.0000  0.0000  0.0000  0.0000  0.0000  0.0000
 110.  H  0.0006  0.0000  0.0000  0.0000  0.0000  0.0000  0.0000  0.0000  0.0000
 111.  H  0.0008  0.0000  0.0000  0.0000  0.0000  0.0000  0.0000  0.0000  0.0000
 112.  H  0.0023  0.0000  0.0000  0.0000  0.0000  0.0000  0.0000  0.0000  0.0000
 113.  H  0.0018  0.0000  0.0000  0.0000  0.0000  0.0000  0.0000  0.0000  0.0000
 114.  H  0.0030  0.0000  0.0000  0.0000  0.0000  0.0000  0.0000  0.0000  0.0000

     Atom   19      20      21      22      23      24      25      26      27
     ---- ------  ------  ------  ------  ------  ------  ------  ------  ------
   1.  O  0.0000  0.0000  0.0000  0.0000  0.0000  0.0000  0.0000  0.0000  0.0000
   2. Mg  0.0266  0.0036  0.0027  0.0086  0.0034  0.0021  0.0029  0.0005  0.0005
   3.  O  0.1318  0.0075  0.0004  0.0013  0.0143  0.0006  0.0004  0.0054  0.0143
   4.  C  0.0001  0.0000  0.0000  0.0000  0.0000  0.0000  0.0000  0.0000  0.0001
   5.  N  0.0017  0.0001  0.0001  0.0002  0.0001  0.0000  0.0001  0.0001  0.0001
   6.  N  0.0005  0.0001  0.0002  0.0003  0.0001  0.0001  0.0002  0.0000  0.0000
   7.  O  0.0000  0.0000  0.0000  0.0000  0.0000  0.0000  0.0000  0.0000  0.0004
   8.  C  0.0004  0.0000  0.0000  0.0001  0.0000  0.0000  0.0000  0.0000  0.0000
   9.  C  0.0001  0.0000  0.0000  0.0000  0.0000  0.0000  0.0000  0.0000  0.0000
  10.  C  0.0001  0.0000  0.0000  0.0001  0.0000  0.0000  0.0001  0.0000  0.0000
  11.  O  0.0017  0.0001  0.0000  0.0001  0.0005  0.0000  0.0000  0.0000  0.0045
  12.  C  0.0139  0.0003  0.0001  0.0001  0.0019  0.0001  0.0001  0.0001  0.0151
  13.  C  0.0104  0.0015  0.0001  0.0001  0.0130  0.0001  0.0000  0.0007  1.0027
  14.  C  0.0002  0.0000  0.0000  0.0000  0.0001  0.0000  0.0000  0.0000  0.0003
  15.  O  0.0060  0.0001  0.0002  0.0008  0.0006  0.0001  0.0001  0.0001  0.0116
  16.  C  0.0000  0.0000  0.0000  0.0000  0.0000  0.0000  0.0000  0.0000  0.0000
  17.  O  0.0511  0.0074  0.0510  0.9558  0.0064  0.0220  0.0286  0.0061  0.0001
  18.  C  1.6450  0.0249  0.0025  0.0029  0.9412  0.0028  0.0046  0.0157  0.0083
  19.  O  0.0000  0.0053  0.0010  0.0017  0.0454  0.0008  0.0022  0.0079  0.0027
  20.  O  0.0053  0.0000  0.9619  0.0190  0.8842  0.1411  0.0082  0.0175  0.0001
  21.  C  0.0010  0.9619  0.0000  0.9503  0.0071  1.7799  0.0109  0.0066  0.0000
  22.  C  0.0017  0.0190  0.9503  0.0000  0.0041  0.0438  0.9973  0.0010  0.0000
  23.  C  0.0454  0.8842  0.0071  0.0041  0.0000  0.0182  0.0008  1.0022  0.0002
  24.  O  0.0008  0.1411  1.7799  0.0438  0.0182  0.0000  0.0060  0.0011  0.0000
  25.  C  0.0022  0.0082  0.0109  0.9973  0.0008  0.0060  0.0000  0.0003  0.0000
  26.  C  0.0079  0.0175  0.0066  0.0010  1.0022  0.0011  0.0003  0.0000  0.0000
  27.  C  0.0027  0.0001  0.0000  0.0000  0.0002  0.0000  0.0000  0.0000  0.0000
  28.  C  0.0001  0.0000  0.0000  0.0000  0.0000  0.0000  0.0000  0.0000  0.0000
  29.  C  0.0021  0.0001  0.0000  0.0000  0.0000  0.0000  0.0000  0.0010  0.0000
  30.  C  0.0001  0.0000  0.0000  0.0002  0.0000  0.0000  0.0037  0.0000  0.0001
  31.  C  0.0007  0.0002  0.0002  0.0000  0.0002  0.0000  0.0000  0.0003  0.0000
  32.  C  0.0003  0.0002  0.0002  0.0000  0.0003  0.0000  0.0000  0.0045  0.0000
  33.  C  0.0001  0.0001  0.0000  0.0000  0.0001  0.0000  0.0000  0.0053  0.0000
  34.  C  0.0009  0.0000  0.0001  0.0000  0.0001  0.0000  0.0000  0.0021  0.0000
  35.  C  0.0017  0.0000  0.0000  0.0000  0.0001  0.0000  0.0000  0.0003  0.0000
  36.  C  0.0001  0.0000  0.0001  0.0001  0.0000  0.0002  0.0000  0.0000  0.0000
  37.  C  0.0001  0.0000  0.0000  0.0000  0.0000  0.0000  0.0000  0.0000  0.0000
  38.  C  0.0000  0.0000  0.0001  0.0001  0.0000  0.0000  0.0058  0.0000  0.0001
  39.  C  0.0000  0.0001  0.0003  0.0002  0.0000  0.0000  0.0073  0.0000  0.0000
  40.  C  0.0000  0.0000  0.0001  0.0011  0.0000  0.0000  0.0065  0.0000  0.0000
  41.  C  0.0000  0.0000  0.0000  0.0009  0.0000  0.0000  0.0051  0.0000  0.0000
  42.  C  0.0001  0.0000  0.0000  0.0001  0.0000  0.0000  0.0050  0.0000  0.0000
  43.  C  0.0001  0.0000  0.0000  0.0000  0.0000  0.0000  0.0000  0.0000  0.0009
  44.  C  0.0000  0.0000  0.0000  0.0000  0.0000  0.0000  0.0000  0.0000  0.0000
  45.  C  0.0000  0.0007  0.0016  0.0002  0.0001  0.0018  0.0000  0.0000  0.0000
  46.  C  0.0000  0.0000  0.0001  0.0000  0.0000  0.0000  0.0000  0.0000  0.0000
  47.  C  0.0017  0.0000  0.0000  0.0000  0.0001  0.0000  0.0000  0.0000  0.0001
  48.  C  0.0000  0.0000  0.0000  0.0000  0.0000  0.0000  0.0000  0.0000  0.0000
  49.  C  0.0000  0.0000  0.0002  0.0001  0.0000  0.0004  0.0027  0.0000  0.0000
  50.  C  0.0000  0.0000  0.0000  0.0000  0.0000  0.0000  0.0002  0.0000  0.0000
  51.  C  0.0000  0.0001  0.0001  0.0005  0.0000  0.0001  0.0006  0.0000  0.0032
  52.  C  0.0000  0.0000  0.0000  0.0001  0.0000  0.0000  0.0001  0.0000  0.0001
  53.  C  0.0001  0.0000  0.0000  0.0000  0.0000  0.0000  0.0000  0.0000  0.0000
  54.  C  0.0000  0.0000  0.0000  0.0000  0.0000  0.0000  0.0000  0.0000  0.0000
  55.  H  0.0000  0.0000  0.0000  0.0000  0.0000  0.0000  0.0000  0.0000  0.0000
  56.  H  0.0034  0.0001  0.0000  0.0001  0.0002  0.0000  0.0000  0.0001  0.0046
  57.  H  0.0000  0.0000  0.0000  0.0000  0.0000  0.0000  0.0000  0.0000  0.0001
  58.  H  0.0000  0.0000  0.0000  0.0000  0.0000  0.0000  0.0000  0.0000  0.0000
  59.  H  0.0000  0.0000  0.0000  0.0000  0.0000  0.0000  0.0000  0.0000  0.0000
  60.  H  0.0000  0.0000  0.0000  0.0000  0.0000  0.0000  0.0000  0.0000  0.0000
  61.  H  0.0004  0.0021  0.0044  0.8815  0.0004  0.0122  0.0032  0.0001  0.0000
  62.  H  0.0078  0.0162  0.0016  0.0004  0.8975  0.0026  0.0001  0.0038  0.0001
  63.  H  0.0006  0.0004  0.0005  0.0042  0.0001  0.0005  0.9283  0.0000  0.0000
  64.  H  0.0000  0.0003  0.0010  0.0027  0.0001  0.0008  0.9135  0.0001  0.0000
  65.  H  0.0000  0.0008  0.0093  0.0023  0.0000  0.0014  0.9067  0.0000  0.0000
  66.  H  0.0031  0.0017  0.0001  0.0000  0.0022  0.0002  0.0000  0.9226  0.0000
  67.  H  0.0004  0.0099  0.0007  0.0003  0.0037  0.0011  0.0000  0.9305  0.0000
  68.  H  0.0021  0.0016  0.0000  0.0001  0.0030  0.0002  0.0001  0.8960  0.0000
  69.  H  0.0008  0.0001  0.0000  0.0000  0.0005  0.0000  0.0000  0.0000  0.9199
  70.  H  0.0001  0.0000  0.0000  0.0000  0.0001  0.0000  0.0000  0.0000  0.9204
  71.  H  0.0001  0.0000  0.0000  0.0000  0.0000  0.0000  0.0000  0.0000  0.9143
  72.  H  0.0000  0.0000  0.0000  0.0000  0.0000  0.0000  0.0000  0.0000  0.0000
  73.  H  0.0000  0.0000  0.0000  0.0000  0.0000  0.0000  0.0000  0.0000  0.0000
  74.  H  0.0000  0.0000  0.0000  0.0000  0.0000  0.0000  0.0000  0.0000  0.0000
  75.  H  0.0000  0.0000  0.0000  0.0000  0.0000  0.0000  0.0000  0.0000  0.0000
  76.  H  0.0000  0.0000  0.0000  0.0000  0.0000  0.0000  0.0000  0.0002  0.0000
  77.  H  0.0000  0.0000  0.0000  0.0000  0.0000  0.0000  0.0000  0.0000  0.0000
  78.  H  0.0001  0.0000  0.0002  0.0000  0.0000  0.0000  0.0000  0.0000  0.0000
  79.  H  0.0000  0.0000  0.0000  0.0000  0.0000  0.0000  0.0000  0.0000  0.0000
  80.  H  0.0000  0.0000  0.0000  0.0000  0.0000  0.0000  0.0000  0.0000  0.0000
  81.  H  0.0000  0.0000  0.0000  0.0000  0.0000  0.0000  0.0000  0.0000  0.0000
  82.  H  0.0000  0.0000  0.0000  0.0000  0.0000  0.0000  0.0000  0.0000  0.0000
  83.  H  0.0001  0.0000  0.0000  0.0000  0.0000  0.0000  0.0000  0.0000  0.0000
  84.  H  0.0000  0.0000  0.0000  0.0000  0.0000  0.0000  0.0000  0.0000  0.0000
  85.  H  0.0000  0.0000  0.0000  0.0000  0.0000  0.0000  0.0000  0.0000  0.0000
  86.  H  0.0000  0.0009  0.0010  0.0003  0.0001  0.0018  0.0000  0.0000  0.0000
  87.  H  0.0000  0.0000  0.0003  0.0000  0.0000  0.0001  0.0000  0.0000  0.0000
  88.  H  0.0000  0.0000  0.0000  0.0000  0.0000  0.0000  0.0000  0.0000  0.0000
  89.  H  0.0000  0.0000  0.0000  0.0000  0.0000  0.0000  0.0000  0.0000  0.0000
  90.  H  0.0000  0.0000  0.0000  0.0000  0.0000  0.0000  0.0000  0.0000  0.0000
  91.  H  0.0000  0.0000  0.0000  0.0000  0.0000  0.0000  0.0000  0.0000  0.0000
  92.  H  0.0000  0.0000  0.0000  0.0000  0.0000  0.0000  0.0000  0.0000  0.0000
  93.  H  0.0016  0.0000  0.0000  0.0000  0.0000  0.0000  0.0000  0.0000  0.0001
  94.  H  0.0000  0.0000  0.0000  0.0000  0.0000  0.0000  0.0000  0.0000  0.0000
  95.  H  0.0000  0.0000  0.0000  0.0000  0.0000  0.0000  0.0000  0.0000  0.0000
  96.  H  0.0000  0.0000  0.0000  0.0000  0.0000  0.0000  0.0000  0.0000  0.0000
  97.  H  0.0000  0.0000  0.0000  0.0000  0.0000  0.0000  0.0003  0.0000  0.0000
  98.  H  0.0000  0.0000  0.0001  0.0000  0.0000  0.0003  0.0005  0.0000  0.0000
  99.  H  0.0000  0.0000  0.0000  0.0000  0.0000  0.0000  0.0000  0.0000  0.0000
 100.  H  0.0000  0.0000  0.0000  0.0000  0.0000  0.0000  0.0000  0.0000  0.0000
 101.  H  0.0000  0.0000  0.0000  0.0000  0.0000  0.0000  0.0000  0.0000  0.0000
 102.  H  0.0000  0.0000  0.0000  0.0000  0.0000  0.0000  0.0000  0.0000  0.0000
 103.  H  0.0000  0.0000  0.0000  0.0001  0.0000  0.0000  0.0001  0.0000  0.0007
 104.  H  0.0001  0.0000  0.0003  0.0003  0.0000  0.0000  0.0001  0.0000  0.0004
 105.  H  0.0000  0.0000  0.0000  0.0000  0.0000  0.0000  0.0000  0.0000  0.0001
 106.  H  0.0000  0.0000  0.0000  0.0000  0.0000  0.0000  0.0000  0.0000  0.0000
 107.  H  0.0000  0.0000  0.0000  0.0000  0.0000  0.0000  0.0000  0.0000  0.0000
 108.  H  0.0000  0.0000  0.0000  0.0000  0.0000  0.0000  0.0000  0.0000  0.0000
 109.  H  0.0000  0.0000  0.0000  0.0000  0.0000  0.0000  0.0000  0.0000  0.0000
 110.  H  0.0000  0.0000  0.0000  0.0000  0.0000  0.0000  0.0000  0.0000  0.0000
 111.  H  0.0000  0.0000  0.0000  0.0000  0.0000  0.0000  0.0000  0.0000  0.0000
 112.  H  0.0000  0.0000  0.0000  0.0000  0.0000  0.0000  0.0000  0.0000  0.0000
 113.  H  0.0000  0.0000  0.0000  0.0000  0.0000  0.0000  0.0000  0.0000  0.0000
 114.  H  0.0000  0.0000  0.0000  0.0000  0.0000  0.0000  0.0000  0.0000  0.0000

     Atom   28      29      30      31      32      33      34      35      36
     ---- ------  ------  ------  ------  ------  ------  ------  ------  ------
   1.  O  0.0043  0.0000  0.0000  0.0000  0.0000  0.0000  0.0000  0.0000  0.0000
   2. Mg  0.0001  0.0223  0.0202  0.0233  0.0094  0.0031  0.0049  0.0104  0.0181
   3.  O  0.0002  0.0001  0.0000  0.0001  0.0000  0.0001  0.0001  0.0001  0.0000
   4.  C  0.0129  0.0000  0.0000  0.0000  0.0000  0.0000  0.0000  0.0000  0.0000
   5.  N  0.0000  0.9540  0.0023  0.0182  0.0057  0.0073  0.0060  0.0170  0.0051
   6.  N  0.0000  0.0019  0.9490  0.0022  0.0002  0.0008  0.0002  0.0024  0.0021
   7.  O  0.0123  0.0000  0.0000  0.0000  0.0000  0.0000  0.0000  0.0000  0.0000
   8.  C  0.0000  0.0123  0.0005  0.0147  0.0013  0.0038  0.0009  0.0151  0.0013
   9.  C  0.0000  0.0132  0.0136  0.0031  0.0004  0.0008  0.0004  0.0028  0.0011
  10.  C  0.0000  0.0006  0.0104  0.0019  0.0003  0.0004  0.0002  0.0021  0.0001
  11.  O  0.0135  0.0000  0.0000  0.0000  0.0000  0.0000  0.0000  0.0000  0.0000
  12.  C  0.0075  0.0001  0.0001  0.0003  0.0001  0.0001  0.0000  0.0001  0.0001
  13.  C  0.0003  0.0000  0.0000  0.0000  0.0000  0.0000  0.0000  0.0000  0.0000
  14.  C  1.0090  0.0000  0.0000  0.0000  0.0000  0.0000  0.0000  0.0001  0.0000
  15.  O  0.0018  0.0004  0.0002  0.0003  0.0000  0.0000  0.0000  0.0001  0.0001
  16.  C  0.0003  0.0000  0.0000  0.0000  0.0000  0.0000  0.0000  0.0000  0.0000
  17.  O  0.0000  0.0003  0.0004  0.0002  0.0001  0.0001  0.0001  0.0001  0.0021
  18.  C  0.0000  0.0020  0.0001  0.0010  0.0002  0.0004  0.0007  0.0013  0.0001
  19.  O  0.0001  0.0021  0.0001  0.0007  0.0003  0.0001  0.0009  0.0017  0.0001
  20.  O  0.0000  0.0001  0.0000  0.0002  0.0002  0.0001  0.0000  0.0000  0.0000
  21.  C  0.0000  0.0000  0.0000  0.0002  0.0002  0.0000  0.0001  0.0000  0.0001
  22.  C  0.0000  0.0000  0.0002  0.0000  0.0000  0.0000  0.0000  0.0000  0.0001
  23.  C  0.0000  0.0000  0.0000  0.0002  0.0003  0.0001  0.0001  0.0001  0.0000
  24.  O  0.0000  0.0000  0.0000  0.0000  0.0000  0.0000  0.0000  0.0000  0.0002
  25.  C  0.0000  0.0000  0.0037  0.0000  0.0000  0.0000  0.0000  0.0000  0.0000
  26.  C  0.0000  0.0010  0.0000  0.0003  0.0045  0.0053  0.0021  0.0003  0.0000
  27.  C  0.0000  0.0000  0.0001  0.0000  0.0000  0.0000  0.0000  0.0000  0.0000
  28.  C  0.0000  0.0000  0.0000  0.0000  0.0000  0.0000  0.0000  0.0002  0.0000
  29.  C  0.0000  0.0000  0.0001  1.3467  0.0038  0.1055  0.0040  1.3586  0.0054
  30.  C  0.0000  0.0001  0.0000  0.0001  0.0000  0.0001  0.0000  0.0001  0.0000
  31.  C  0.0000  1.3467  0.0001  0.0000  1.4157  0.0019  0.1054  0.0033  0.9879
  32.  C  0.0000  0.0038  0.0000  1.4157  0.0000  1.4126  0.0021  0.1039  0.0039
  33.  C  0.0000  0.1055  0.0001  0.0019  1.4126  0.0000  1.4268  0.0017  0.0074
  34.  C  0.0000  0.0040  0.0000  0.1054  0.0021  1.4268  0.0000  1.4178  0.0005
  35.  C  0.0002  1.3586  0.0001  0.0033  0.1039  0.0017  1.4178  0.0000  0.0064
  36.  C  0.0000  0.0054  0.0000  0.9879  0.0039  0.0074  0.0005  0.0064  0.0000
  37.  C  0.0003  0.0048  0.0000  0.0067  0.0003  0.0074  0.0038  0.9896  0.0012
  38.  C  0.0000  0.0001  1.3659  0.0001  0.0000  0.0001  0.0000  0.0001  0.0001
  39.  C  0.0000  0.0000  0.0037  0.0000  0.0000  0.0000  0.0000  0.0000  0.0000
  40.  C  0.0000  0.0001  0.1042  0.0000  0.0000  0.0000  0.0000  0.0000  0.0000
  41.  C  0.0000  0.0000  0.0038  0.0000  0.0000  0.0000  0.0000  0.0000  0.0000
  42.  C  0.0000  0.0001  1.3526  0.0001  0.0000  0.0000  0.0000  0.0001  0.0000
  43.  C  0.0000  0.0000  0.0047  0.0000  0.0000  0.0000  0.0000  0.0000  0.0000
  44.  C  0.0000  0.0001  0.0049  0.0001  0.0001  0.0000  0.0000  0.0000  0.0009
  45.  C  0.0000  0.0063  0.0000  0.0036  0.0046  0.0004  0.0004  0.0007  1.0007
  46.  C  0.0000  0.0076  0.0000  0.0054  0.0096  0.0003  0.0042  0.0001  0.9854
  47.  C  0.0043  0.0080  0.0000  0.0005  0.0025  0.0003  0.0072  0.0038  0.0001
  48.  C  0.0000  0.0085  0.0000  0.0002  0.0034  0.0002  0.0075  0.0043  0.0001
  49.  C  0.0000  0.0000  0.0084  0.0001  0.0001  0.0000  0.0000  0.0000  0.0016
  50.  C  0.0000  0.0000  0.0082  0.0000  0.0000  0.0000  0.0000  0.0000  0.0001
  51.  C  0.0000  0.0000  0.0086  0.0000  0.0000  0.0000  0.0000  0.0000  0.0000
  52.  C  0.0000  0.0000  0.0084  0.0000  0.0000  0.0000  0.0000  0.0000  0.0000
  53.  C  0.0000  0.0053  0.0004  0.0025  0.0002  0.0014  0.0003  0.0036  0.0003
  54.  C  0.0000  0.0004  0.0080  0.0001  0.0000  0.0000  0.0000  0.0000  0.0001
  55.  H  0.0000  0.0008  0.0007  0.0001  0.0000  0.0000  0.0000  0.0001  0.0000
  56.  H  0.0000  0.0000  0.0000  0.0000  0.0000  0.0000  0.0000  0.0000  0.0000
  57.  H  0.0042  0.0001  0.0000  0.0000  0.0000  0.0000  0.0001  0.0003  0.0000
  58.  H  0.0001  0.0000  0.0000  0.0000  0.0000  0.0000  0.0000  0.0000  0.0000
  59.  H  0.0000  0.0000  0.0000  0.0000  0.0000  0.0000  0.0000  0.0000  0.0000
  60.  H  0.0001  0.0000  0.0000  0.0000  0.0000  0.0000  0.0000  0.0000  0.0000
  61.  H  0.0000  0.0000  0.0000  0.0000  0.0000  0.0000  0.0000  0.0000  0.0001
  62.  H  0.0000  0.0001  0.0000  0.0000  0.0000  0.0001  0.0000  0.0000  0.0000
  63.  H  0.0000  0.0000  0.0012  0.0000  0.0000  0.0000  0.0000  0.0000  0.0000
  64.  H  0.0000  0.0000  0.0014  0.0000  0.0000  0.0000  0.0000  0.0000  0.0000
  65.  H  0.0000  0.0000  0.0002  0.0000  0.0000  0.0000  0.0000  0.0000  0.0000
  66.  H  0.0000  0.0000  0.0000  0.0000  0.0000  0.0000  0.0000  0.0000  0.0000
  67.  H  0.0000  0.0000  0.0000  0.0000  0.0001  0.0000  0.0000  0.0000  0.0000
  68.  H  0.0000  0.0022  0.0000  0.0002  0.0128  0.0223  0.0043  0.0006  0.0000
  69.  H  0.0000  0.0000  0.0000  0.0000  0.0000  0.0000  0.0000  0.0000  0.0000
  70.  H  0.0000  0.0000  0.0000  0.0000  0.0000  0.0000  0.0000  0.0000  0.0000
  71.  H  0.0000  0.0000  0.0001  0.0000  0.0000  0.0000  0.0000  0.0000  0.0000
  72.  H  0.9151  0.0001  0.0000  0.0000  0.0000  0.0000  0.0001  0.0003  0.0000
  73.  H  0.9239  0.0000  0.0000  0.0000  0.0000  0.0000  0.0000  0.0000  0.0000
  74.  H  0.9186  0.0000  0.0000  0.0000  0.0000  0.0000  0.0000  0.0000  0.0000
  75.  H  0.0000  0.0070  0.0000  0.0019  0.9654  0.0016  0.0068  0.0002  0.0037
  76.  H  0.0000  0.0002  0.0000  0.0069  0.0017  0.9710  0.0017  0.0070  0.0009
  77.  H  0.0000  0.0070  0.0000  0.0002  0.0070  0.0016  0.9676  0.0020  0.0001
  78.  H  0.0000  0.0056  0.0001  0.0017  0.0076  0.0004  0.0017  0.0001  0.9361
  79.  H  0.0000  0.0031  0.0000  0.0002  0.0000  0.0006  0.0050  0.0009  0.0000
  80.  H  0.0000  0.0000  0.0070  0.0000  0.0000  0.0000  0.0000  0.0000  0.0000
  81.  H  0.0000  0.0000  0.0002  0.0000  0.0000  0.0000  0.0000  0.0000  0.0000
  82.  H  0.0000  0.0000  0.0071  0.0000  0.0000  0.0000  0.0000  0.0000  0.0000
  83.  H  0.0000  0.0000  0.0034  0.0000  0.0000  0.0000  0.0000  0.0000  0.0000
  84.  H  0.0000  0.0000  0.0032  0.0001  0.0000  0.0000  0.0000  0.0000  0.0001
  85.  H  0.0000  0.0006  0.0000  0.0070  0.0011  0.0000  0.0001  0.0002  0.0008
  86.  H  0.0000  0.0000  0.0000  0.0012  0.0006  0.0000  0.0000  0.0000  0.0006
  87.  H  0.0000  0.0000  0.0000  0.0009  0.0005  0.0000  0.0000  0.0000  0.0010
  88.  H  0.0000  0.0012  0.0000  0.0066  0.0011  0.0001  0.0005  0.0001  0.0005
  89.  H  0.0000  0.0001  0.0000  0.0013  0.0002  0.0000  0.0000  0.0000  0.0009
  90.  H  0.0000  0.0003  0.0000  0.0007  0.0000  0.0000  0.0000  0.0000  0.0006
  91.  H  0.0009  0.0010  0.0000  0.0002  0.0004  0.0001  0.0010  0.0071  0.0000
  92.  H  0.0003  0.0000  0.0000  0.0000  0.0000  0.0001  0.0004  0.0012  0.0000
  93.  H  0.0000  0.0001  0.0000  0.0000  0.0000  0.0000  0.0001  0.0009  0.0000
  94.  H  0.0000  0.0011  0.0000  0.0001  0.0003  0.0001  0.0007  0.0068  0.0000
  95.  H  0.0000  0.0000  0.0000  0.0000  0.0000  0.0000  0.0000  0.0009  0.0000
  96.  H  0.0000  0.0000  0.0000  0.0000  0.0000  0.0000  0.0003  0.0009  0.0000
  97.  H  0.0000  0.0000  0.0011  0.0000  0.0000  0.0000  0.0000  0.0000  0.0000
  98.  H  0.0000  0.0000  0.0000  0.0000  0.0000  0.0000  0.0000  0.0000  0.0002
  99.  H  0.0000  0.0000  0.0000  0.0000  0.0000  0.0000  0.0000  0.0000  0.0002
 100.  H  0.0000  0.0000  0.0010  0.0000  0.0000  0.0000  0.0000  0.0000  0.0000
 101.  H  0.0000  0.0000  0.0000  0.0000  0.0000  0.0000  0.0000  0.0000  0.0000
 102.  H  0.0000  0.0000  0.0000  0.0000  0.0000  0.0000  0.0000  0.0000  0.0000
 103.  H  0.0000  0.0000  0.0011  0.0000  0.0000  0.0000  0.0000  0.0000  0.0000
 104.  H  0.0000  0.0000  0.0001  0.0000  0.0000  0.0000  0.0000  0.0000  0.0000
 105.  H  0.0000  0.0000  0.0000  0.0000  0.0000  0.0000  0.0000  0.0000  0.0000
 106.  H  0.0000  0.0000  0.0010  0.0000  0.0000  0.0000  0.0000  0.0000  0.0000
 107.  H  0.0000  0.0000  0.0000  0.0000  0.0000  0.0000  0.0000  0.0000  0.0000
 108.  H  0.0000  0.0000  0.0000  0.0000  0.0000  0.0000  0.0000  0.0000  0.0000
 109.  H  0.0000  0.0027  0.0000  0.0002  0.0000  0.0001  0.0000  0.0008  0.0000
 110.  H  0.0000  0.0007  0.0000  0.0002  0.0001  0.0001  0.0000  0.0003  0.0001
 111.  H  0.0000  0.0000  0.0000  0.0001  0.0000  0.0000  0.0000  0.0002  0.0001
 112.  H  0.0000  0.0000  0.0001  0.0001  0.0000  0.0000  0.0000  0.0001  0.0000
 113.  H  0.0000  0.0000  0.0004  0.0001  0.0000  0.0000  0.0000  0.0001  0.0000
 114.  H  0.0000  0.0000  0.0019  0.0000  0.0000  0.0000  0.0000  0.0000  0.0000

     Atom   37      38      39      40      41      42      43      44      45
     ---- ------  ------  ------  ------  ------  ------  ------  ------  ------
   1.  O  0.0000  0.0000  0.0000  0.0000  0.0000  0.0000  0.0001  0.0000  0.0000
   2. Mg  0.0047  0.0125  0.0020  0.0018  0.0014  0.0081  0.0100  0.0066  0.0028
   3.  O  0.0000  0.0000  0.0000  0.0000  0.0000  0.0000  0.0000  0.0000  0.0000
   4.  C  0.0000  0.0002  0.0001  0.0000  0.0000  0.0000  0.0006  0.0000  0.0000
   5.  N  0.0042  0.0016  0.0001  0.0003  0.0002  0.0020  0.0004  0.0003  0.0004
   6.  N  0.0001  0.0168  0.0056  0.0071  0.0057  0.0153  0.0045  0.0047  0.0001
   7.  O  0.0001  0.0000  0.0000  0.0000  0.0000  0.0000  0.0003  0.0000  0.0000
   8.  C  0.0015  0.0016  0.0001  0.0003  0.0002  0.0020  0.0004  0.0001  0.0001
   9.  C  0.0002  0.0022  0.0003  0.0004  0.0006  0.0030  0.0004  0.0002  0.0001
  10.  C  0.0001  0.0125  0.0009  0.0031  0.0009  0.0140  0.0020  0.0016  0.0000
  11.  O  0.0001  0.0000  0.0000  0.0000  0.0000  0.0000  0.0004  0.0000  0.0000
  12.  C  0.0001  0.0002  0.0001  0.0000  0.0000  0.0001  0.0014  0.0000  0.0000
  13.  C  0.0001  0.0000  0.0000  0.0000  0.0000  0.0000  0.0001  0.0000  0.0000
  14.  C  0.0009  0.0000  0.0000  0.0000  0.0000  0.0000  0.0000  0.0000  0.0000
  15.  O  0.0002  0.0001  0.0000  0.0000  0.0000  0.0001  0.0018  0.0000  0.0000
  16.  C  0.0000  0.0000  0.0000  0.0000  0.0000  0.0000  0.0002  0.0000  0.0000
  17.  O  0.0000  0.0003  0.0002  0.0001  0.0001  0.0003  0.0001  0.0000  0.0001
  18.  C  0.0000  0.0000  0.0000  0.0000  0.0000  0.0000  0.0000  0.0000  0.0000
  19.  O  0.0001  0.0000  0.0000  0.0000  0.0000  0.0001  0.0001  0.0000  0.0000
  20.  O  0.0000  0.0000  0.0001  0.0000  0.0000  0.0000  0.0000  0.0000  0.0007
  21.  C  0.0000  0.0001  0.0003  0.0001  0.0000  0.0000  0.0000  0.0000  0.0016
  22.  C  0.0000  0.0001  0.0002  0.0011  0.0009  0.0001  0.0000  0.0000  0.0002
  23.  C  0.0000  0.0000  0.0000  0.0000  0.0000  0.0000  0.0000  0.0000  0.0001
  24.  O  0.0000  0.0000  0.0000  0.0000  0.0000  0.0000  0.0000  0.0000  0.0018
  25.  C  0.0000  0.0058  0.0073  0.0065  0.0051  0.0050  0.0000  0.0000  0.0000
  26.  C  0.0000  0.0000  0.0000  0.0000  0.0000  0.0000  0.0000  0.0000  0.0000
  27.  C  0.0000  0.0001  0.0000  0.0000  0.0000  0.0000  0.0009  0.0000  0.0000
  28.  C  0.0003  0.0000  0.0000  0.0000  0.0000  0.0000  0.0000  0.0000  0.0000
  29.  C  0.0048  0.0001  0.0000  0.0001  0.0000  0.0001  0.0000  0.0001  0.0063
  30.  C  0.0000  1.3659  0.0037  0.1042  0.0038  1.3526  0.0047  0.0049  0.0000
  31.  C  0.0067  0.0001  0.0000  0.0000  0.0000  0.0001  0.0000  0.0001  0.0036
  32.  C  0.0003  0.0000  0.0000  0.0000  0.0000  0.0000  0.0000  0.0001  0.0046
  33.  C  0.0074  0.0001  0.0000  0.0000  0.0000  0.0000  0.0000  0.0000  0.0004
  34.  C  0.0038  0.0000  0.0000  0.0000  0.0000  0.0000  0.0000  0.0000  0.0004
  35.  C  0.9896  0.0001  0.0000  0.0000  0.0000  0.0001  0.0000  0.0000  0.0007
  36.  C  0.0012  0.0001  0.0000  0.0000  0.0000  0.0000  0.0000  0.0009  1.0007
  37.  C  0.0000  0.0000  0.0000  0.0000  0.0000  0.0000  0.0000  0.0000  0.0002
  38.  C  0.0000  0.0000  1.3971  0.0018  0.1049  0.0035  0.9896  0.0065  0.0000
  39.  C  0.0000  1.3971  0.0000  1.4278  0.0019  0.1049  0.0039  0.0004  0.0000
  40.  C  0.0000  0.0018  1.4278  0.0000  1.4286  0.0017  0.0074  0.0074  0.0000
  41.  C  0.0000  0.1049  0.0019  1.4286  0.0000  1.4136  0.0004  0.0039  0.0000
  42.  C  0.0000  0.0035  0.1049  0.0017  1.4136  0.0000  0.0065  0.9898  0.0000
  43.  C  0.0000  0.9896  0.0039  0.0074  0.0004  0.0065  0.0000  0.0013  0.0000
  44.  C  0.0000  0.0065  0.0004  0.0074  0.0039  0.9898  0.0013  0.0000  0.0002
  45.  C  0.0002  0.0000  0.0000  0.0000  0.0000  0.0000  0.0000  0.0002  0.0000
  46.  C  0.0001  0.0000  0.0000  0.0000  0.0000  0.0000  0.0000  0.0003  0.0035
  47.  C  0.9926  0.0000  0.0000  0.0000  0.0000  0.0000  0.0000  0.0000  0.0000
  48.  C  0.9890  0.0000  0.0000  0.0000  0.0000  0.0000  0.0000  0.0000  0.0000
  49.  C  0.0000  0.0004  0.0028  0.0003  0.0071  0.0044  0.0001  0.9921  0.0016
  50.  C  0.0000  0.0003  0.0032  0.0003  0.0072  0.0046  0.0001  0.9899  0.0000
  51.  C  0.0000  0.0045  0.0068  0.0003  0.0029  0.0004  0.9891  0.0001  0.0000
  52.  C  0.0000  0.0046  0.0069  0.0003  0.0031  0.0003  0.9887  0.0001  0.0000
  53.  C  0.0008  0.0000  0.0000  0.0000  0.0000  0.0001  0.0000  0.0000  0.0001
  54.  C  0.0000  0.0032  0.0003  0.0014  0.0003  0.0034  0.0002  0.0002  0.0000
  55.  H  0.0000  0.0001  0.0001  0.0000  0.0000  0.0001  0.0000  0.0000  0.0000
  56.  H  0.0001  0.0000  0.0000  0.0000  0.0000  0.0000  0.0000  0.0000  0.0000
  57.  H  0.0015  0.0000  0.0000  0.0000  0.0000  0.0000  0.0000  0.0000  0.0000
  58.  H  0.0000  0.0001  0.0001  0.0000  0.0000  0.0000  0.0005  0.0000  0.0000
  59.  H  0.0000  0.0000  0.0000  0.0000  0.0000  0.0000  0.0000  0.0000  0.0000
  60.  H  0.0000  0.0000  0.0000  0.0000  0.0000  0.0000  0.0000  0.0000  0.0000
  61.  H  0.0000  0.0001  0.0001  0.0000  0.0002  0.0001  0.0000  0.0000  0.0000
  62.  H  0.0000  0.0000  0.0000  0.0000  0.0000  0.0000  0.0000  0.0000  0.0000
  63.  H  0.0000  0.0006  0.0000  0.0000  0.0000  0.0003  0.0000  0.0000  0.0000
  64.  H  0.0000  0.0005  0.0013  0.0005  0.0089  0.0099  0.0000  0.0001  0.0000
  65.  H  0.0000  0.0105  0.0228  0.0071  0.0002  0.0016  0.0001  0.0000  0.0000
  66.  H  0.0000  0.0000  0.0000  0.0000  0.0000  0.0000  0.0000  0.0000  0.0000
  67.  H  0.0000  0.0000  0.0000  0.0000  0.0000  0.0000  0.0000  0.0000  0.0000
  68.  H  0.0000  0.0000  0.0000  0.0000  0.0000  0.0000  0.0000  0.0000  0.0000
  69.  H  0.0000  0.0000  0.0000  0.0000  0.0000  0.0000  0.0000  0.0000  0.0000
  70.  H  0.0000  0.0000  0.0000  0.0000  0.0000  0.0000  0.0000  0.0000  0.0000
  71.  H  0.0000  0.0003  0.0001  0.0000  0.0000  0.0000  0.0018  0.0000  0.0000
  72.  H  0.0008  0.0000  0.0000  0.0000  0.0000  0.0000  0.0000  0.0000  0.0000
  73.  H  0.0000  0.0000  0.0000  0.0000  0.0000  0.0000  0.0000  0.0000  0.0000
  74.  H  0.0000  0.0000  0.0000  0.0000  0.0000  0.0000  0.0000  0.0000  0.0000
  75.  H  0.0001  0.0000  0.0000  0.0000  0.0000  0.0000  0.0000  0.0000  0.0017
  76.  H  0.0009  0.0000  0.0000  0.0000  0.0000  0.0000  0.0000  0.0000  0.0001
  77.  H  0.0034  0.0000  0.0000  0.0000  0.0000  0.0000  0.0000  0.0000  0.0000
  78.  H  0.0000  0.0000  0.0000  0.0000  0.0000  0.0000  0.0000  0.0001  0.0007
  79.  H  0.9591  0.0000  0.0000  0.0000  0.0000  0.0000  0.0000  0.0000  0.0000
  80.  H  0.0000  0.0020  0.9677  0.0016  0.0069  0.0002  0.0034  0.0001  0.0000
  81.  H  0.0000  0.0071  0.0017  0.9715  0.0017  0.0071  0.0009  0.0009  0.0000
  82.  H  0.0000  0.0002  0.0069  0.0016  0.9675  0.0019  0.0001  0.0034  0.0000
  83.  H  0.0000  0.0011  0.0052  0.0006  0.0000  0.0002  0.9513  0.0000  0.0000
  84.  H  0.0000  0.0002  0.0000  0.0006  0.0051  0.0011  0.0000  0.9580  0.0000
  85.  H  0.0001  0.0000  0.0000  0.0000  0.0000  0.0000  0.0000  0.0000  0.9816
  86.  H  0.0000  0.0000  0.0000  0.0000  0.0000  0.0000  0.0000  0.0000  0.9771
  87.  H  0.0000  0.0000  0.0000  0.0000  0.0000  0.0000  0.0000  0.0000  0.9812
  88.  H  0.0000  0.0000  0.0000  0.0000  0.0000  0.0000  0.0000  0.0000  0.0013
  89.  H  0.0000  0.0000  0.0000  0.0000  0.0000  0.0000  0.0000  0.0001  0.0009
  90.  H  0.0000  0.0000  0.0000  0.0000  0.0000  0.0000  0.0000  0.0000  0.0070
  91.  H  0.0007  0.0000  0.0000  0.0000  0.0000  0.0000  0.0000  0.0000  0.0000
  92.  H  0.0010  0.0000  0.0000  0.0000  0.0000  0.0000  0.0000  0.0000  0.0000
  93.  H  0.0006  0.0000  0.0000  0.0000  0.0000  0.0000  0.0000  0.0000  0.0000
  94.  H  0.0006  0.0000  0.0000  0.0000  0.0000  0.0000  0.0000  0.0000  0.0000
  95.  H  0.0006  0.0000  0.0000  0.0000  0.0000  0.0000  0.0000  0.0000  0.0000
  96.  H  0.0008  0.0000  0.0000  0.0000  0.0000  0.0000  0.0000  0.0000  0.0000
  97.  H  0.0000  0.0002  0.0005  0.0001  0.0010  0.0068  0.0000  0.0006  0.0000
  98.  H  0.0000  0.0000  0.0000  0.0000  0.0000  0.0009  0.0000  0.0006  0.0002
  99.  H  0.0000  0.0000  0.0000  0.0001  0.0004  0.0011  0.0000  0.0011  0.0001
 100.  H  0.0000  0.0001  0.0003  0.0001  0.0007  0.0069  0.0000  0.0005  0.0000
 101.  H  0.0000  0.0000  0.0000  0.0000  0.0000  0.0008  0.0000  0.0007  0.0000
 102.  H  0.0000  0.0000  0.0000  0.0001  0.0003  0.0010  0.0000  0.0009  0.0000
 103.  H  0.0000  0.0067  0.0010  0.0001  0.0005  0.0002  0.0006  0.0000  0.0000
 104.  H  0.0000  0.0010  0.0000  0.0000  0.0000  0.0000  0.0005  0.0000  0.0000
 105.  H  0.0000  0.0011  0.0004  0.0001  0.0000  0.0000  0.0013  0.0000  0.0000
 106.  H  0.0000  0.0068  0.0007  0.0001  0.0004  0.0001  0.0004  0.0000  0.0000
 107.  H  0.0000  0.0012  0.0004  0.0001  0.0000  0.0000  0.0011  0.0000  0.0000
 108.  H  0.0000  0.0006  0.0000  0.0000  0.0000  0.0000  0.0006  0.0000  0.0000
 109.  H  0.0000  0.0000  0.0000  0.0000  0.0000  0.0000  0.0000  0.0000  0.0000
 110.  H  0.0004  0.0000  0.0000  0.0000  0.0000  0.0001  0.0000  0.0000  0.0000
 111.  H  0.0000  0.0001  0.0000  0.0000  0.0000  0.0001  0.0000  0.0000  0.0001
 112.  H  0.0000  0.0003  0.0000  0.0001  0.0000  0.0002  0.0000  0.0001  0.0000
 113.  H  0.0000  0.0004  0.0000  0.0000  0.0000  0.0002  0.0001  0.0000  0.0000
 114.  H  0.0000  0.0004  0.0000  0.0001  0.0000  0.0005  0.0000  0.0000  0.0000

     Atom   46      47      48      49      50      51      52      53      54
     ---- ------  ------  ------  ------  ------  ------  ------  ------  ------
   1.  O  0.0000  0.0000  0.0000  0.0000  0.0000  0.0002  0.0003  0.0000  0.0000
   2. Mg  0.0048  0.0031  0.0011  0.0040  0.0013  0.0090  0.0016  0.0050  0.0048
   3.  O  0.0000  0.0002  0.0000  0.0000  0.0000  0.0004  0.0000  0.0000  0.0000
   4.  C  0.0000  0.0002  0.0000  0.0000  0.0000  0.0006  0.0003  0.0000  0.0000
   5.  N  0.0015  0.0004  0.0003  0.0001  0.0000  0.0001  0.0001  0.0280  0.0010
   6.  N  0.0001  0.0000  0.0001  0.0004  0.0003  0.0004  0.0003  0.0015  0.0290
   7.  O  0.0000  0.0001  0.0000  0.0000  0.0000  0.0008  0.0008  0.0000  0.0000
   8.  C  0.0016  0.0004  0.0005  0.0000  0.0000  0.0000  0.0000  1.0113  0.0080
   9.  C  0.0004  0.0000  0.0001  0.0001  0.0001  0.0000  0.0001  0.0093  0.0089
  10.  C  0.0000  0.0000  0.0000  0.0005  0.0002  0.0003  0.0003  0.0087  1.0131
  11.  O  0.0000  0.0013  0.0001  0.0000  0.0000  0.0001  0.0000  0.0000  0.0000
  12.  C  0.0000  0.0018  0.0001  0.0000  0.0000  0.0012  0.0002  0.0001  0.0000
  13.  C  0.0000  0.0004  0.0000  0.0000  0.0000  0.0003  0.0000  0.0000  0.0000
  14.  C  0.0000  0.0014  0.0001  0.0000  0.0000  0.0000  0.0000  0.0000  0.0000
  15.  O  0.0000  0.0003  0.0000  0.0000  0.0000  0.0009  0.0001  0.0001  0.0001
  16.  C  0.0000  0.0000  0.0000  0.0000  0.0000  0.0000  0.0038  0.0000  0.0000
  17.  O  0.0001  0.0001  0.0000  0.0003  0.0000  0.0032  0.0000  0.0002  0.0002
  18.  C  0.0001  0.0004  0.0000  0.0000  0.0000  0.0000  0.0000  0.0001  0.0000
  19.  O  0.0000  0.0017  0.0000  0.0000  0.0000  0.0000  0.0000  0.0001  0.0000
  20.  O  0.0000  0.0000  0.0000  0.0000  0.0000  0.0001  0.0000  0.0000  0.0000
  21.  C  0.0001  0.0000  0.0000  0.0002  0.0000  0.0001  0.0000  0.0000  0.0000
  22.  C  0.0000  0.0000  0.0000  0.0001  0.0000  0.0005  0.0001  0.0000  0.0000
  23.  C  0.0000  0.0001  0.0000  0.0000  0.0000  0.0000  0.0000  0.0000  0.0000
  24.  O  0.0000  0.0000  0.0000  0.0004  0.0000  0.0001  0.0000  0.0000  0.0000
  25.  C  0.0000  0.0000  0.0000  0.0027  0.0002  0.0006  0.0001  0.0000  0.0000
  26.  C  0.0000  0.0000  0.0000  0.0000  0.0000  0.0000  0.0000  0.0000  0.0000
  27.  C  0.0000  0.0001  0.0000  0.0000  0.0000  0.0032  0.0001  0.0000  0.0000
  28.  C  0.0000  0.0043  0.0000  0.0000  0.0000  0.0000  0.0000  0.0000  0.0000
  29.  C  0.0076  0.0080  0.0085  0.0000  0.0000  0.0000  0.0000  0.0053  0.0004
  30.  C  0.0000  0.0000  0.0000  0.0084  0.0082  0.0086  0.0084  0.0004  0.0080
  31.  C  0.0054  0.0005  0.0002  0.0001  0.0000  0.0000  0.0000  0.0025  0.0001
  32.  C  0.0096  0.0025  0.0034  0.0001  0.0000  0.0000  0.0000  0.0002  0.0000
  33.  C  0.0003  0.0003  0.0002  0.0000  0.0000  0.0000  0.0000  0.0014  0.0000
  34.  C  0.0042  0.0072  0.0075  0.0000  0.0000  0.0000  0.0000  0.0003  0.0000
  35.  C  0.0001  0.0038  0.0043  0.0000  0.0000  0.0000  0.0000  0.0036  0.0000
  36.  C  0.9854  0.0001  0.0001  0.0016  0.0001  0.0000  0.0000  0.0003  0.0001
  37.  C  0.0001  0.9926  0.9890  0.0000  0.0000  0.0000  0.0000  0.0008  0.0000
  38.  C  0.0000  0.0000  0.0000  0.0004  0.0003  0.0045  0.0046  0.0000  0.0032
  39.  C  0.0000  0.0000  0.0000  0.0028  0.0032  0.0068  0.0069  0.0000  0.0003
  40.  C  0.0000  0.0000  0.0000  0.0003  0.0003  0.0003  0.0003  0.0000  0.0014
  41.  C  0.0000  0.0000  0.0000  0.0071  0.0072  0.0029  0.0031  0.0000  0.0003
  42.  C  0.0000  0.0000  0.0000  0.0044  0.0046  0.0004  0.0003  0.0001  0.0034
  43.  C  0.0000  0.0000  0.0000  0.0001  0.0001  0.9891  0.9887  0.0000  0.0002
  44.  C  0.0003  0.0000  0.0000  0.9921  0.9899  0.0001  0.0001  0.0000  0.0002
  45.  C  0.0035  0.0000  0.0000  0.0016  0.0000  0.0000  0.0000  0.0001  0.0000
  46.  C  0.0000  0.0000  0.0000  0.0010  0.0000  0.0000  0.0000  0.0009  0.0000
  47.  C  0.0000  0.0000  0.0034  0.0000  0.0000  0.0000  0.0000  0.0001  0.0000
  48.  C  0.0000  0.0034  0.0000  0.0000  0.0000  0.0000  0.0000  0.0015  0.0000
  49.  C  0.0010  0.0000  0.0000  0.0000  0.0032  0.0000  0.0000  0.0000  0.0001
  50.  C  0.0000  0.0000  0.0000  0.0032  0.0000  0.0000  0.0000  0.0000  0.0037
  51.  C  0.0000  0.0000  0.0000  0.0000  0.0000  0.0000  0.0033  0.0000  0.0001
  52.  C  0.0000  0.0000  0.0000  0.0000  0.0000  0.0033  0.0000  0.0000  0.0016
  53.  C  0.0009  0.0001  0.0015  0.0000  0.0000  0.0000  0.0000  0.0000  0.0003
  54.  C  0.0000  0.0000  0.0000  0.0001  0.0037  0.0001  0.0016  0.0003  0.0000
  55.  H  0.0000  0.0000  0.0000  0.0000  0.0000  0.0000  0.0000  0.0020  0.0020
  56.  H  0.0000  0.0005  0.0001  0.0000  0.0000  0.0000  0.0000  0.0000  0.0000
  57.  H  0.0000  0.0005  0.0003  0.0000  0.0000  0.0000  0.0000  0.0000  0.0000
  58.  H  0.0000  0.0000  0.0000  0.0000  0.0000  0.0001  0.0071  0.0000  0.0000
  59.  H  0.0000  0.0000  0.0000  0.0000  0.0000  0.0000  0.0001  0.0000  0.0000
  60.  H  0.0000  0.0000  0.0000  0.0000  0.0000  0.0000  0.0000  0.0000  0.0000
  61.  H  0.0000  0.0000  0.0000  0.0001  0.0000  0.0002  0.0000  0.0000  0.0000
  62.  H  0.0000  0.0000  0.0000  0.0000  0.0000  0.0000  0.0000  0.0000  0.0000
  63.  H  0.0000  0.0000  0.0000  0.0000  0.0000  0.0000  0.0000  0.0000  0.0000
  64.  H  0.0000  0.0000  0.0000  0.0028  0.0003  0.0000  0.0000  0.0000  0.0000
  65.  H  0.0000  0.0000  0.0000  0.0001  0.0000  0.0007  0.0003  0.0000  0.0000
  66.  H  0.0000  0.0000  0.0000  0.0000  0.0000  0.0000  0.0000  0.0000  0.0000
  67.  H  0.0000  0.0000  0.0000  0.0000  0.0000  0.0000  0.0000  0.0000  0.0000
  68.  H  0.0000  0.0000  0.0000  0.0000  0.0000  0.0000  0.0000  0.0000  0.0000
  69.  H  0.0000  0.0000  0.0000  0.0000  0.0000  0.0000  0.0000  0.0000  0.0000
  70.  H  0.0000  0.0000  0.0000  0.0000  0.0000  0.0002  0.0000  0.0000  0.0000
  71.  H  0.0000  0.0000  0.0000  0.0000  0.0000  0.0056  0.0002  0.0000  0.0000
  72.  H  0.0000  0.0044  0.0000  0.0000  0.0000  0.0000  0.0000  0.0000  0.0000
  73.  H  0.0000  0.0003  0.0000  0.0000  0.0000  0.0000  0.0000  0.0000  0.0000
  74.  H  0.0000  0.0001  0.0000  0.0000  0.0000  0.0000  0.0000  0.0000  0.0000
  75.  H  0.0001  0.0000  0.0000  0.0000  0.0000  0.0000  0.0000  0.0000  0.0000
  76.  H  0.0000  0.0000  0.0000  0.0000  0.0000  0.0000  0.0000  0.0000  0.0000
  77.  H  0.0000  0.0003  0.0002  0.0000  0.0000  0.0000  0.0000  0.0000  0.0000
  78.  H  0.0006  0.0000  0.0000  0.0003  0.0000  0.0000  0.0000  0.0000  0.0000
  79.  H  0.0000  0.0007  0.0008  0.0000  0.0000  0.0000  0.0000  0.0004  0.0000
  80.  H  0.0000  0.0000  0.0000  0.0000  0.0000  0.0002  0.0002  0.0000  0.0000
  81.  H  0.0000  0.0000  0.0000  0.0000  0.0000  0.0000  0.0000  0.0000  0.0000
  82.  H  0.0000  0.0000  0.0000  0.0002  0.0002  0.0000  0.0000  0.0000  0.0000
  83.  H  0.0000  0.0000  0.0000  0.0000  0.0000  0.0006  0.0009  0.0000  0.0000
  84.  H  0.0001  0.0000  0.0000  0.0006  0.0009  0.0000  0.0000  0.0000  0.0000
  85.  H  0.0008  0.0000  0.0000  0.0004  0.0000  0.0000  0.0000  0.0000  0.0000
  86.  H  0.0071  0.0000  0.0000  0.0000  0.0000  0.0000  0.0000  0.0000  0.0000
  87.  H  0.0015  0.0000  0.0000  0.0001  0.0000  0.0000  0.0000  0.0000  0.0000
  88.  H  0.9819  0.0000  0.0000  0.0001  0.0000  0.0000  0.0000  0.0001  0.0000
  89.  H  0.9834  0.0000  0.0000  0.0001  0.0000  0.0000  0.0000  0.0000  0.0000
  90.  H  0.9805  0.0000  0.0000  0.0000  0.0000  0.0000  0.0000  0.0009  0.0000
  91.  H  0.0000  0.9765  0.0009  0.0000  0.0000  0.0000  0.0000  0.0000  0.0000
  92.  H  0.0000  0.9802  0.0012  0.0000  0.0000  0.0000  0.0000  0.0000  0.0000
  93.  H  0.0000  0.9771  0.0075  0.0000  0.0000  0.0000  0.0000  0.0000  0.0000
  94.  H  0.0000  0.0008  0.9846  0.0000  0.0000  0.0000  0.0000  0.0001  0.0000
  95.  H  0.0000  0.0071  0.9842  0.0000  0.0000  0.0000  0.0000  0.0010  0.0000
  96.  H  0.0000  0.0013  0.9840  0.0000  0.0000  0.0000  0.0000  0.0002  0.0000
  97.  H  0.0001  0.0000  0.0000  0.9812  0.0009  0.0000  0.0000  0.0000  0.0000
  98.  H  0.0000  0.0000  0.0000  0.9747  0.0076  0.0000  0.0000  0.0000  0.0000
  99.  H  0.0001  0.0000  0.0000  0.9814  0.0013  0.0000  0.0000  0.0000  0.0000
 100.  H  0.0000  0.0000  0.0000  0.0009  0.9843  0.0000  0.0000  0.0000  0.0001
 101.  H  0.0000  0.0000  0.0000  0.0071  0.9825  0.0000  0.0000  0.0000  0.0003
 102.  H  0.0000  0.0000  0.0000  0.0013  0.9841  0.0000  0.0000  0.0000  0.0001
 103.  H  0.0000  0.0000  0.0000  0.0000  0.0000  0.9760  0.0009  0.0000  0.0000
 104.  H  0.0000  0.0000  0.0000  0.0000  0.0000  0.9702  0.0077  0.0000  0.0000
 105.  H  0.0000  0.0000  0.0000  0.0000  0.0000  0.9808  0.0011  0.0000  0.0000
 106.  H  0.0000  0.0000  0.0000  0.0000  0.0000  0.0012  0.9778  0.0000  0.0000
 107.  H  0.0000  0.0000  0.0000  0.0000  0.0000  0.0010  0.9806  0.0000  0.0001
 108.  H  0.0000  0.0000  0.0000  0.0000  0.0000  0.0072  0.9824  0.0000  0.0001
 109.  H  0.0001  0.0000  0.0001  0.0000  0.0000  0.0000  0.0000  0.9241  0.0002
 110.  H  0.0001  0.0001  0.0003  0.0000  0.0000  0.0000  0.0000  0.9166  0.0000
 111.  H  0.0008  0.0000  0.0001  0.0000  0.0000  0.0000  0.0000  0.9096  0.0000
 112.  H  0.0000  0.0000  0.0000  0.0000  0.0006  0.0000  0.0000  0.0001  0.9088
 113.  H  0.0000  0.0000  0.0000  0.0000  0.0001  0.0000  0.0002  0.0001  0.9174
 114.  H  0.0000  0.0000  0.0000  0.0000  0.0001  0.0000  0.0000  0.0001  0.9260

     Atom   55      56      57      58      59      60      61      62      63
     ---- ------  ------  ------  ------  ------  ------  ------  ------  ------
   1.  O  0.0000  0.0000  0.0010  0.0126  0.0057  0.0140  0.0000  0.0000  0.0000
   2. Mg  0.0006  0.0003  0.0004  0.0000  0.0000  0.0001  0.0052  0.0004  0.0002
   3.  O  0.0000  0.0159  0.0000  0.0000  0.0000  0.0000  0.0017  0.0009  0.0002
   4.  C  0.0000  0.0001  0.0036  0.0025  0.0068  0.0027  0.0000  0.0000  0.0000
   5.  N  0.0071  0.0001  0.0001  0.0000  0.0000  0.0000  0.0002  0.0000  0.0000
   6.  N  0.0072  0.0000  0.0000  0.0000  0.0000  0.0000  0.0002  0.0000  0.0000
   7.  O  0.0000  0.0000  0.0111  0.0038  0.0016  0.0043  0.0000  0.0000  0.0000
   8.  C  0.0048  0.0000  0.0003  0.0000  0.0000  0.0000  0.0000  0.0000  0.0000
   9.  C  0.9223  0.0000  0.0003  0.0000  0.0000  0.0000  0.0000  0.0000  0.0000
  10.  C  0.0051  0.0000  0.0001  0.0000  0.0000  0.0000  0.0000  0.0000  0.0000
  11.  O  0.0000  0.0019  0.0119  0.0000  0.0002  0.0000  0.0000  0.0000  0.0000
  12.  C  0.0000  0.0068  0.0017  0.0000  0.0000  0.0000  0.0001  0.0001  0.0000
  13.  C  0.0000  0.8770  0.0006  0.0000  0.0000  0.0000  0.0001  0.0002  0.0000
  14.  C  0.0000  0.0001  0.8754  0.0003  0.0001  0.0003  0.0000  0.0000  0.0000
  15.  O  0.0000  0.0122  0.0047  0.0000  0.0000  0.0000  0.0001  0.0000  0.0000
  16.  C  0.0000  0.0000  0.0001  0.9230  0.9350  0.9336  0.0000  0.0000  0.0000
  17.  O  0.0000  0.0003  0.0002  0.0000  0.0000  0.0000  0.0361  0.0004  0.0128
  18.  C  0.0000  0.0024  0.0000  0.0000  0.0000  0.0000  0.0014  0.0036  0.0004
  19.  O  0.0000  0.0034  0.0000  0.0000  0.0000  0.0000  0.0004  0.0078  0.0006
  20.  O  0.0000  0.0001  0.0000  0.0000  0.0000  0.0000  0.0021  0.0162  0.0004
  21.  C  0.0000  0.0000  0.0000  0.0000  0.0000  0.0000  0.0044  0.0016  0.0005
  22.  C  0.0000  0.0001  0.0000  0.0000  0.0000  0.0000  0.8815  0.0004  0.0042
  23.  C  0.0000  0.0002  0.0000  0.0000  0.0000  0.0000  0.0004  0.8975  0.0001
  24.  O  0.0000  0.0000  0.0000  0.0000  0.0000  0.0000  0.0122  0.0026  0.0005
  25.  C  0.0000  0.0000  0.0000  0.0000  0.0000  0.0000  0.0032  0.0001  0.9283
  26.  C  0.0000  0.0001  0.0000  0.0000  0.0000  0.0000  0.0001  0.0038  0.0000
  27.  C  0.0000  0.0046  0.0001  0.0000  0.0000  0.0000  0.0000  0.0001  0.0000
  28.  C  0.0000  0.0000  0.0042  0.0001  0.0000  0.0001  0.0000  0.0000  0.0000
  29.  C  0.0008  0.0000  0.0001  0.0000  0.0000  0.0000  0.0000  0.0001  0.0000
  30.  C  0.0007  0.0000  0.0000  0.0000  0.0000  0.0000  0.0000  0.0000  0.0012
  31.  C  0.0001  0.0000  0.0000  0.0000  0.0000  0.0000  0.0000  0.0000  0.0000
  32.  C  0.0000  0.0000  0.0000  0.0000  0.0000  0.0000  0.0000  0.0000  0.0000
  33.  C  0.0000  0.0000  0.0000  0.0000  0.0000  0.0000  0.0000  0.0001  0.0000
  34.  C  0.0000  0.0000  0.0001  0.0000  0.0000  0.0000  0.0000  0.0000  0.0000
  35.  C  0.0001  0.0000  0.0003  0.0000  0.0000  0.0000  0.0000  0.0000  0.0000
  36.  C  0.0000  0.0000  0.0000  0.0000  0.0000  0.0000  0.0001  0.0000  0.0000
  37.  C  0.0000  0.0001  0.0015  0.0000  0.0000  0.0000  0.0000  0.0000  0.0000
  38.  C  0.0001  0.0000  0.0000  0.0001  0.0000  0.0000  0.0001  0.0000  0.0006
  39.  C  0.0001  0.0000  0.0000  0.0001  0.0000  0.0000  0.0001  0.0000  0.0000
  40.  C  0.0000  0.0000  0.0000  0.0000  0.0000  0.0000  0.0000  0.0000  0.0000
  41.  C  0.0000  0.0000  0.0000  0.0000  0.0000  0.0000  0.0002  0.0000  0.0000
  42.  C  0.0001  0.0000  0.0000  0.0000  0.0000  0.0000  0.0001  0.0000  0.0003
  43.  C  0.0000  0.0000  0.0000  0.0005  0.0000  0.0000  0.0000  0.0000  0.0000
  44.  C  0.0000  0.0000  0.0000  0.0000  0.0000  0.0000  0.0000  0.0000  0.0000
  45.  C  0.0000  0.0000  0.0000  0.0000  0.0000  0.0000  0.0000  0.0000  0.0000
  46.  C  0.0000  0.0000  0.0000  0.0000  0.0000  0.0000  0.0000  0.0000  0.0000
  47.  C  0.0000  0.0005  0.0005  0.0000  0.0000  0.0000  0.0000  0.0000  0.0000
  48.  C  0.0000  0.0001  0.0003  0.0000  0.0000  0.0000  0.0000  0.0000  0.0000
  49.  C  0.0000  0.0000  0.0000  0.0000  0.0000  0.0000  0.0001  0.0000  0.0000
  50.  C  0.0000  0.0000  0.0000  0.0000  0.0000  0.0000  0.0000  0.0000  0.0000
  51.  C  0.0000  0.0000  0.0000  0.0001  0.0000  0.0000  0.0002  0.0000  0.0000
  52.  C  0.0000  0.0000  0.0000  0.0071  0.0001  0.0000  0.0000  0.0000  0.0000
  53.  C  0.0020  0.0000  0.0000  0.0000  0.0000  0.0000  0.0000  0.0000  0.0000
  54.  C  0.0020  0.0000  0.0000  0.0000  0.0000  0.0000  0.0000  0.0000  0.0000
  55.  H  0.0000  0.0000  0.0000  0.0000  0.0000  0.0000  0.0000  0.0000  0.0000
  56.  H  0.0000  0.0000  0.0000  0.0000  0.0000  0.0000  0.0001  0.0000  0.0000
  57.  H  0.0000  0.0000  0.0000  0.0000  0.0000  0.0000  0.0000  0.0000  0.0000
  58.  H  0.0000  0.0000  0.0000  0.0000  0.0005  0.0003  0.0000  0.0000  0.0000
  59.  H  0.0000  0.0000  0.0000  0.0005  0.0000  0.0004  0.0000  0.0000  0.0000
  60.  H  0.0000  0.0000  0.0000  0.0003  0.0004  0.0000  0.0000  0.0000  0.0000
  61.  H  0.0000  0.0001  0.0000  0.0000  0.0000  0.0000  0.0000  0.0007  0.0003
  62.  H  0.0000  0.0000  0.0000  0.0000  0.0000  0.0000  0.0007  0.0000  0.0000
  63.  H  0.0000  0.0000  0.0000  0.0000  0.0000  0.0000  0.0003  0.0000  0.0000
  64.  H  0.0000  0.0000  0.0000  0.0000  0.0000  0.0000  0.0116  0.0000  0.0008
  65.  H  0.0000  0.0000  0.0000  0.0000  0.0000  0.0000  0.0010  0.0000  0.0008
  66.  H  0.0000  0.0000  0.0000  0.0000  0.0000  0.0000  0.0000  0.0010  0.0000
  67.  H  0.0000  0.0000  0.0000  0.0000  0.0000  0.0000  0.0000  0.0003  0.0000
  68.  H  0.0000  0.0000  0.0000  0.0000  0.0000  0.0000  0.0000  0.0106  0.0000
  69.  H  0.0000  0.0003  0.0001  0.0000  0.0000  0.0000  0.0000  0.0000  0.0000
  70.  H  0.0000  0.0014  0.0001  0.0000  0.0000  0.0000  0.0000  0.0000  0.0000
  71.  H  0.0000  0.0108  0.0000  0.0000  0.0000  0.0000  0.0000  0.0000  0.0000
  72.  H  0.0000  0.0000  0.0012  0.0001  0.0000  0.0000  0.0000  0.0000  0.0000
  73.  H  0.0000  0.0000  0.0107  0.0000  0.0000  0.0000  0.0000  0.0000  0.0000
  74.  H  0.0000  0.0000  0.0003  0.0000  0.0000  0.0000  0.0000  0.0000  0.0000
  75.  H  0.0000  0.0000  0.0000  0.0000  0.0000  0.0000  0.0000  0.0000  0.0000
  76.  H  0.0000  0.0000  0.0000  0.0000  0.0000  0.0000  0.0000  0.0000  0.0000
  77.  H  0.0000  0.0000  0.0000  0.0000  0.0000  0.0000  0.0000  0.0000  0.0000
  78.  H  0.0000  0.0000  0.0000  0.0000  0.0000  0.0000  0.0000  0.0000  0.0000
  79.  H  0.0000  0.0000  0.0019  0.0000  0.0000  0.0000  0.0000  0.0000  0.0000
  80.  H  0.0000  0.0000  0.0000  0.0000  0.0000  0.0000  0.0000  0.0000  0.0000
  81.  H  0.0000  0.0000  0.0000  0.0000  0.0000  0.0000  0.0000  0.0000  0.0000
  82.  H  0.0000  0.0000  0.0000  0.0000  0.0000  0.0000  0.0000  0.0000  0.0000
  83.  H  0.0000  0.0000  0.0000  0.0000  0.0000  0.0000  0.0000  0.0000  0.0000
  84.  H  0.0000  0.0000  0.0000  0.0000  0.0000  0.0000  0.0000  0.0000  0.0000
  85.  H  0.0000  0.0000  0.0000  0.0000  0.0000  0.0000  0.0000  0.0000  0.0000
  86.  H  0.0000  0.0000  0.0000  0.0000  0.0000  0.0000  0.0000  0.0000  0.0000
  87.  H  0.0000  0.0000  0.0000  0.0000  0.0000  0.0000  0.0000  0.0000  0.0000
  88.  H  0.0000  0.0000  0.0000  0.0000  0.0000  0.0000  0.0000  0.0000  0.0000
  89.  H  0.0000  0.0000  0.0000  0.0000  0.0000  0.0000  0.0000  0.0000  0.0000
  90.  H  0.0000  0.0000  0.0000  0.0000  0.0000  0.0000  0.0000  0.0000  0.0000
  91.  H  0.0000  0.0000  0.0001  0.0000  0.0000  0.0000  0.0000  0.0000  0.0000
  92.  H  0.0000  0.0000  0.0001  0.0000  0.0000  0.0000  0.0000  0.0000  0.0000
  93.  H  0.0000  0.0007  0.0000  0.0000  0.0000  0.0000  0.0000  0.0000  0.0000
  94.  H  0.0000  0.0000  0.0000  0.0000  0.0000  0.0000  0.0000  0.0000  0.0000
  95.  H  0.0000  0.0000  0.0000  0.0000  0.0000  0.0000  0.0000  0.0000  0.0000
  96.  H  0.0000  0.0000  0.0001  0.0000  0.0000  0.0000  0.0000  0.0000  0.0000
  97.  H  0.0000  0.0000  0.0000  0.0000  0.0000  0.0000  0.0000  0.0000  0.0000
  98.  H  0.0000  0.0000  0.0000  0.0000  0.0000  0.0000  0.0000  0.0000  0.0000
  99.  H  0.0000  0.0000  0.0000  0.0000  0.0000  0.0000  0.0000  0.0000  0.0000
 100.  H  0.0000  0.0000  0.0000  0.0000  0.0000  0.0000  0.0000  0.0000  0.0000
 101.  H  0.0000  0.0000  0.0000  0.0000  0.0000  0.0000  0.0000  0.0000  0.0000
 102.  H  0.0000  0.0000  0.0000  0.0000  0.0000  0.0000  0.0000  0.0000  0.0000
 103.  H  0.0000  0.0000  0.0000  0.0000  0.0000  0.0000  0.0000  0.0000  0.0000
 104.  H  0.0000  0.0001  0.0000  0.0000  0.0000  0.0000  0.0000  0.0000  0.0000
 105.  H  0.0000  0.0000  0.0000  0.0000  0.0000  0.0000  0.0000  0.0000  0.0000
 106.  H  0.0000  0.0000  0.0000  0.0039  0.0000  0.0000  0.0000  0.0000  0.0000
 107.  H  0.0000  0.0000  0.0000  0.0018  0.0000  0.0000  0.0000  0.0000  0.0000
 108.  H  0.0000  0.0000  0.0000  0.0019  0.0000  0.0000  0.0000  0.0000  0.0000
 109.  H  0.0006  0.0000  0.0000  0.0000  0.0000  0.0000  0.0000  0.0000  0.0000
 110.  H  0.0000  0.0000  0.0000  0.0000  0.0000  0.0000  0.0000  0.0000  0.0000
 111.  H  0.0000  0.0000  0.0000  0.0000  0.0000  0.0000  0.0000  0.0000  0.0000
 112.  H  0.0000  0.0000  0.0000  0.0000  0.0000  0.0000  0.0000  0.0000  0.0000
 113.  H  0.0003  0.0000  0.0000  0.0000  0.0000  0.0000  0.0000  0.0000  0.0000
 114.  H  0.0004  0.0000  0.0000  0.0000  0.0000  0.0000  0.0000  0.0000  0.0000

     Atom   64      65      66      67      68      69      70      71      72
     ---- ------  ------  ------  ------  ------  ------  ------  ------  ------
   1.  O  0.0000  0.0000  0.0000  0.0000  0.0000  0.0000  0.0000  0.0000  0.0013
   2. Mg  0.0010  0.0005  0.0000  0.0000  0.0001  0.0000  0.0001  0.0001  0.0000
   3.  O  0.0000  0.0000  0.0003  0.0002  0.0006  0.0091  0.0017  0.0013  0.0000
   4.  C  0.0000  0.0000  0.0000  0.0000  0.0000  0.0000  0.0001  0.0000  0.0088
   5.  N  0.0000  0.0000  0.0000  0.0000  0.0001  0.0000  0.0000  0.0000  0.0000
   6.  N  0.0002  0.0001  0.0000  0.0000  0.0000  0.0000  0.0000  0.0000  0.0000
   7.  O  0.0000  0.0000  0.0000  0.0000  0.0000  0.0003  0.0001  0.0001  0.0023
   8.  C  0.0000  0.0000  0.0000  0.0000  0.0001  0.0000  0.0000  0.0000  0.0000
   9.  C  0.0000  0.0000  0.0000  0.0000  0.0000  0.0000  0.0000  0.0000  0.0000
  10.  C  0.0000  0.0000  0.0000  0.0000  0.0000  0.0000  0.0000  0.0000  0.0000
  11.  O  0.0000  0.0000  0.0000  0.0000  0.0000  0.0011  0.0014  0.0001  0.0013
  12.  C  0.0000  0.0000  0.0000  0.0000  0.0000  0.0004  0.0095  0.0010  0.0001
  13.  C  0.0000  0.0000  0.0003  0.0000  0.0000  0.0038  0.0023  0.0028  0.0000
  14.  C  0.0000  0.0000  0.0000  0.0000  0.0000  0.0001  0.0001  0.0001  0.0024
  15.  O  0.0000  0.0000  0.0000  0.0000  0.0000  0.0003  0.0016  0.0003  0.0000
  16.  C  0.0000  0.0000  0.0000  0.0000  0.0000  0.0000  0.0000  0.0000  0.0002
  17.  O  0.0012  0.0013  0.0004  0.0002  0.0002  0.0001  0.0000  0.0000  0.0000
  18.  C  0.0000  0.0000  0.0095  0.0005  0.0013  0.0005  0.0001  0.0001  0.0000
  19.  O  0.0000  0.0000  0.0031  0.0004  0.0021  0.0008  0.0001  0.0001  0.0000
  20.  O  0.0003  0.0008  0.0017  0.0099  0.0016  0.0001  0.0000  0.0000  0.0000
  21.  C  0.0010  0.0093  0.0001  0.0007  0.0000  0.0000  0.0000  0.0000  0.0000
  22.  C  0.0027  0.0023  0.0000  0.0003  0.0001  0.0000  0.0000  0.0000  0.0000
  23.  C  0.0001  0.0000  0.0022  0.0037  0.0030  0.0005  0.0001  0.0000  0.0000
  24.  O  0.0008  0.0014  0.0002  0.0011  0.0002  0.0000  0.0000  0.0000  0.0000
  25.  C  0.9135  0.9067  0.0000  0.0000  0.0001  0.0000  0.0000  0.0000  0.0000
  26.  C  0.0001  0.0000  0.9226  0.9305  0.8960  0.0000  0.0000  0.0000  0.0000
  27.  C  0.0000  0.0000  0.0000  0.0000  0.0000  0.9199  0.9204  0.9143  0.0000
  28.  C  0.0000  0.0000  0.0000  0.0000  0.0000  0.0000  0.0000  0.0000  0.9151
  29.  C  0.0000  0.0000  0.0000  0.0000  0.0022  0.0000  0.0000  0.0000  0.0001
  30.  C  0.0014  0.0002  0.0000  0.0000  0.0000  0.0000  0.0000  0.0001  0.0000
  31.  C  0.0000  0.0000  0.0000  0.0000  0.0002  0.0000  0.0000  0.0000  0.0000
  32.  C  0.0000  0.0000  0.0000  0.0001  0.0128  0.0000  0.0000  0.0000  0.0000
  33.  C  0.0000  0.0000  0.0000  0.0000  0.0223  0.0000  0.0000  0.0000  0.0000
  34.  C  0.0000  0.0000  0.0000  0.0000  0.0043  0.0000  0.0000  0.0000  0.0001
  35.  C  0.0000  0.0000  0.0000  0.0000  0.0006  0.0000  0.0000  0.0000  0.0003
  36.  C  0.0000  0.0000  0.0000  0.0000  0.0000  0.0000  0.0000  0.0000  0.0000
  37.  C  0.0000  0.0000  0.0000  0.0000  0.0000  0.0000  0.0000  0.0000  0.0008
  38.  C  0.0005  0.0105  0.0000  0.0000  0.0000  0.0000  0.0000  0.0003  0.0000
  39.  C  0.0013  0.0228  0.0000  0.0000  0.0000  0.0000  0.0000  0.0001  0.0000
  40.  C  0.0005  0.0071  0.0000  0.0000  0.0000  0.0000  0.0000  0.0000  0.0000
  41.  C  0.0089  0.0002  0.0000  0.0000  0.0000  0.0000  0.0000  0.0000  0.0000
  42.  C  0.0099  0.0016  0.0000  0.0000  0.0000  0.0000  0.0000  0.0000  0.0000
  43.  C  0.0000  0.0001  0.0000  0.0000  0.0000  0.0000  0.0000  0.0018  0.0000
  44.  C  0.0001  0.0000  0.0000  0.0000  0.0000  0.0000  0.0000  0.0000  0.0000
  45.  C  0.0000  0.0000  0.0000  0.0000  0.0000  0.0000  0.0000  0.0000  0.0000
  46.  C  0.0000  0.0000  0.0000  0.0000  0.0000  0.0000  0.0000  0.0000  0.0000
  47.  C  0.0000  0.0000  0.0000  0.0000  0.0000  0.0000  0.0000  0.0000  0.0044
  48.  C  0.0000  0.0000  0.0000  0.0000  0.0000  0.0000  0.0000  0.0000  0.0000
  49.  C  0.0028  0.0001  0.0000  0.0000  0.0000  0.0000  0.0000  0.0000  0.0000
  50.  C  0.0003  0.0000  0.0000  0.0000  0.0000  0.0000  0.0000  0.0000  0.0000
  51.  C  0.0000  0.0007  0.0000  0.0000  0.0000  0.0000  0.0002  0.0056  0.0000
  52.  C  0.0000  0.0003  0.0000  0.0000  0.0000  0.0000  0.0000  0.0002  0.0000
  53.  C  0.0000  0.0000  0.0000  0.0000  0.0000  0.0000  0.0000  0.0000  0.0000
  54.  C  0.0000  0.0000  0.0000  0.0000  0.0000  0.0000  0.0000  0.0000  0.0000
  55.  H  0.0000  0.0000  0.0000  0.0000  0.0000  0.0000  0.0000  0.0000  0.0000
  56.  H  0.0000  0.0000  0.0000  0.0000  0.0000  0.0003  0.0014  0.0108  0.0000
  57.  H  0.0000  0.0000  0.0000  0.0000  0.0000  0.0001  0.0001  0.0000  0.0012
  58.  H  0.0000  0.0000  0.0000  0.0000  0.0000  0.0000  0.0000  0.0000  0.0001
  59.  H  0.0000  0.0000  0.0000  0.0000  0.0000  0.0000  0.0000  0.0000  0.0000
  60.  H  0.0000  0.0000  0.0000  0.0000  0.0000  0.0000  0.0000  0.0000  0.0000
  61.  H  0.0116  0.0010  0.0000  0.0000  0.0000  0.0000  0.0000  0.0000  0.0000
  62.  H  0.0000  0.0000  0.0010  0.0003  0.0106  0.0000  0.0000  0.0000  0.0000
  63.  H  0.0008  0.0008  0.0000  0.0000  0.0000  0.0000  0.0000  0.0000  0.0000
  64.  H  0.0000  0.0007  0.0000  0.0000  0.0000  0.0000  0.0000  0.0000  0.0000
  65.  H  0.0007  0.0000  0.0000  0.0000  0.0000  0.0000  0.0000  0.0000  0.0000
  66.  H  0.0000  0.0000  0.0000  0.0008  0.0006  0.0000  0.0000  0.0000  0.0000
  67.  H  0.0000  0.0000  0.0008  0.0000  0.0008  0.0000  0.0000  0.0000  0.0000
  68.  H  0.0000  0.0000  0.0006  0.0008  0.0000  0.0000  0.0000  0.0000  0.0000
  69.  H  0.0000  0.0000  0.0000  0.0000  0.0000  0.0000  0.0008  0.0008  0.0000
  70.  H  0.0000  0.0000  0.0000  0.0000  0.0000  0.0008  0.0000  0.0007  0.0000
  71.  H  0.0000  0.0000  0.0000  0.0000  0.0000  0.0008  0.0007  0.0000  0.0000
  72.  H  0.0000  0.0000  0.0000  0.0000  0.0000  0.0000  0.0000  0.0000  0.0000
  73.  H  0.0000  0.0000  0.0000  0.0000  0.0000  0.0000  0.0000  0.0000  0.0006
  74.  H  0.0000  0.0000  0.0000  0.0000  0.0000  0.0000  0.0000  0.0000  0.0009
  75.  H  0.0000  0.0000  0.0000  0.0000  0.0000  0.0000  0.0000  0.0000  0.0000
  76.  H  0.0000  0.0000  0.0000  0.0000  0.0003  0.0000  0.0000  0.0000  0.0000
  77.  H  0.0000  0.0000  0.0000  0.0000  0.0000  0.0000  0.0000  0.0000  0.0000
  78.  H  0.0000  0.0000  0.0000  0.0000  0.0000  0.0000  0.0000  0.0000  0.0000
  79.  H  0.0000  0.0000  0.0000  0.0000  0.0000  0.0000  0.0000  0.0000  0.0000
  80.  H  0.0000  0.0001  0.0000  0.0000  0.0000  0.0000  0.0000  0.0000  0.0000
  81.  H  0.0000  0.0000  0.0000  0.0000  0.0000  0.0000  0.0000  0.0000  0.0000
  82.  H  0.0000  0.0000  0.0000  0.0000  0.0000  0.0000  0.0000  0.0000  0.0000
  83.  H  0.0000  0.0000  0.0000  0.0000  0.0000  0.0000  0.0000  0.0000  0.0000
  84.  H  0.0000  0.0000  0.0000  0.0000  0.0000  0.0000  0.0000  0.0000  0.0000
  85.  H  0.0000  0.0000  0.0000  0.0000  0.0000  0.0000  0.0000  0.0000  0.0000
  86.  H  0.0000  0.0000  0.0000  0.0000  0.0000  0.0000  0.0000  0.0000  0.0000
  87.  H  0.0000  0.0000  0.0000  0.0000  0.0000  0.0000  0.0000  0.0000  0.0000
  88.  H  0.0000  0.0000  0.0000  0.0000  0.0000  0.0000  0.0000  0.0000  0.0000
  89.  H  0.0000  0.0000  0.0000  0.0000  0.0000  0.0000  0.0000  0.0000  0.0000
  90.  H  0.0000  0.0000  0.0000  0.0000  0.0000  0.0000  0.0000  0.0000  0.0000
  91.  H  0.0000  0.0000  0.0000  0.0000  0.0000  0.0000  0.0000  0.0000  0.0063
  92.  H  0.0000  0.0000  0.0000  0.0000  0.0000  0.0000  0.0000  0.0000  0.0006
  93.  H  0.0000  0.0000  0.0000  0.0000  0.0000  0.0000  0.0000  0.0000  0.0000
  94.  H  0.0000  0.0000  0.0000  0.0000  0.0000  0.0000  0.0000  0.0000  0.0000
  95.  H  0.0000  0.0000  0.0000  0.0000  0.0000  0.0000  0.0000  0.0000  0.0000
  96.  H  0.0000  0.0000  0.0000  0.0000  0.0000  0.0000  0.0000  0.0000  0.0000
  97.  H  0.0005  0.0000  0.0000  0.0000  0.0000  0.0000  0.0000  0.0000  0.0000
  98.  H  0.0037  0.0000  0.0000  0.0000  0.0000  0.0000  0.0000  0.0000  0.0000
  99.  H  0.0001  0.0000  0.0000  0.0000  0.0000  0.0000  0.0000  0.0000  0.0000
 100.  H  0.0000  0.0000  0.0000  0.0000  0.0000  0.0000  0.0000  0.0000  0.0000
 101.  H  0.0000  0.0000  0.0000  0.0000  0.0000  0.0000  0.0000  0.0000  0.0000
 102.  H  0.0000  0.0000  0.0000  0.0000  0.0000  0.0000  0.0000  0.0000  0.0000
 103.  H  0.0000  0.0001  0.0000  0.0000  0.0000  0.0000  0.0000  0.0036  0.0000
 104.  H  0.0000  0.0006  0.0000  0.0000  0.0000  0.0000  0.0000  0.0014  0.0000
 105.  H  0.0000  0.0001  0.0000  0.0000  0.0000  0.0000  0.0000  0.0002  0.0000
 106.  H  0.0000  0.0000  0.0000  0.0000  0.0000  0.0000  0.0000  0.0000  0.0000
 107.  H  0.0000  0.0000  0.0000  0.0000  0.0000  0.0000  0.0000  0.0000  0.0000
 108.  H  0.0000  0.0000  0.0000  0.0000  0.0000  0.0000  0.0000  0.0001  0.0000
 109.  H  0.0000  0.0000  0.0000  0.0000  0.0000  0.0000  0.0000  0.0000  0.0000
 110.  H  0.0000  0.0000  0.0000  0.0000  0.0000  0.0000  0.0000  0.0000  0.0000
 111.  H  0.0000  0.0000  0.0000  0.0000  0.0000  0.0000  0.0000  0.0000  0.0000
 112.  H  0.0000  0.0000  0.0000  0.0000  0.0000  0.0000  0.0000  0.0000  0.0000
 113.  H  0.0000  0.0000  0.0000  0.0000  0.0000  0.0000  0.0000  0.0000  0.0000
 114.  H  0.0000  0.0000  0.0000  0.0000  0.0000  0.0000  0.0000  0.0000  0.0000

     Atom   73      74      75      76      77      78      79      80      81
     ---- ------  ------  ------  ------  ------  ------  ------  ------  ------
   1.  O  0.0002  0.0010  0.0000  0.0000  0.0000  0.0000  0.0000  0.0000  0.0000
   2. Mg  0.0000  0.0000  0.0001  0.0000  0.0001  0.0171  0.0025  0.0001  0.0000
   3.  O  0.0000  0.0001  0.0000  0.0000  0.0000  0.0000  0.0000  0.0000  0.0000
   4.  C  0.0009  0.0005  0.0000  0.0000  0.0000  0.0000  0.0000  0.0000  0.0000
   5.  N  0.0000  0.0000  0.0007  0.0001  0.0008  0.0034  0.0012  0.0001  0.0000
   6.  N  0.0000  0.0000  0.0001  0.0000  0.0001  0.0004  0.0001  0.0007  0.0001
   7.  O  0.0008  0.0005  0.0000  0.0000  0.0000  0.0000  0.0000  0.0000  0.0000
   8.  C  0.0000  0.0000  0.0004  0.0000  0.0004  0.0004  0.0024  0.0001  0.0000
   9.  C  0.0000  0.0000  0.0001  0.0000  0.0001  0.0000  0.0003  0.0001  0.0000
  10.  C  0.0000  0.0000  0.0001  0.0000  0.0001  0.0001  0.0000  0.0003  0.0000
  11.  O  0.0015  0.0094  0.0000  0.0000  0.0000  0.0000  0.0000  0.0000  0.0000
  12.  C  0.0001  0.0006  0.0000  0.0000  0.0000  0.0001  0.0000  0.0000  0.0000
  13.  C  0.0001  0.0005  0.0000  0.0000  0.0000  0.0000  0.0000  0.0000  0.0000
  14.  C  0.0033  0.0047  0.0000  0.0000  0.0000  0.0000  0.0003  0.0000  0.0000
  15.  O  0.0002  0.0007  0.0000  0.0000  0.0000  0.0003  0.0001  0.0000  0.0000
  16.  C  0.0001  0.0000  0.0000  0.0000  0.0000  0.0000  0.0000  0.0000  0.0000
  17.  O  0.0000  0.0000  0.0000  0.0000  0.0000  0.0008  0.0001  0.0000  0.0000
  18.  C  0.0000  0.0000  0.0000  0.0000  0.0000  0.0001  0.0000  0.0000  0.0000
  19.  O  0.0000  0.0000  0.0000  0.0000  0.0000  0.0001  0.0000  0.0000  0.0000
  20.  O  0.0000  0.0000  0.0000  0.0000  0.0000  0.0000  0.0000  0.0000  0.0000
  21.  C  0.0000  0.0000  0.0000  0.0000  0.0000  0.0002  0.0000  0.0000  0.0000
  22.  C  0.0000  0.0000  0.0000  0.0000  0.0000  0.0000  0.0000  0.0000  0.0000
  23.  C  0.0000  0.0000  0.0000  0.0000  0.0000  0.0000  0.0000  0.0000  0.0000
  24.  O  0.0000  0.0000  0.0000  0.0000  0.0000  0.0000  0.0000  0.0000  0.0000
  25.  C  0.0000  0.0000  0.0000  0.0000  0.0000  0.0000  0.0000  0.0000  0.0000
  26.  C  0.0000  0.0000  0.0000  0.0002  0.0000  0.0000  0.0000  0.0000  0.0000
  27.  C  0.0000  0.0000  0.0000  0.0000  0.0000  0.0000  0.0000  0.0000  0.0000
  28.  C  0.9239  0.9186  0.0000  0.0000  0.0000  0.0000  0.0000  0.0000  0.0000
  29.  C  0.0000  0.0000  0.0070  0.0002  0.0070  0.0056  0.0031  0.0000  0.0000
  30.  C  0.0000  0.0000  0.0000  0.0000  0.0000  0.0001  0.0000  0.0070  0.0002
  31.  C  0.0000  0.0000  0.0019  0.0069  0.0002  0.0017  0.0002  0.0000  0.0000
  32.  C  0.0000  0.0000  0.9654  0.0017  0.0070  0.0076  0.0000  0.0000  0.0000
  33.  C  0.0000  0.0000  0.0016  0.9710  0.0016  0.0004  0.0006  0.0000  0.0000
  34.  C  0.0000  0.0000  0.0068  0.0017  0.9676  0.0017  0.0050  0.0000  0.0000
  35.  C  0.0000  0.0000  0.0002  0.0070  0.0020  0.0001  0.0009  0.0000  0.0000
  36.  C  0.0000  0.0000  0.0037  0.0009  0.0001  0.9361  0.0000  0.0000  0.0000
  37.  C  0.0000  0.0000  0.0001  0.0009  0.0034  0.0000  0.9591  0.0000  0.0000
  38.  C  0.0000  0.0000  0.0000  0.0000  0.0000  0.0000  0.0000  0.0020  0.0071
  39.  C  0.0000  0.0000  0.0000  0.0000  0.0000  0.0000  0.0000  0.9677  0.0017
  40.  C  0.0000  0.0000  0.0000  0.0000  0.0000  0.0000  0.0000  0.0016  0.9715
  41.  C  0.0000  0.0000  0.0000  0.0000  0.0000  0.0000  0.0000  0.0069  0.0017
  42.  C  0.0000  0.0000  0.0000  0.0000  0.0000  0.0000  0.0000  0.0002  0.0071
  43.  C  0.0000  0.0000  0.0000  0.0000  0.0000  0.0000  0.0000  0.0034  0.0009
  44.  C  0.0000  0.0000  0.0000  0.0000  0.0000  0.0001  0.0000  0.0001  0.0009
  45.  C  0.0000  0.0000  0.0017  0.0001  0.0000  0.0007  0.0000  0.0000  0.0000
  46.  C  0.0000  0.0000  0.0001  0.0000  0.0000  0.0006  0.0000  0.0000  0.0000
  47.  C  0.0003  0.0001  0.0000  0.0000  0.0003  0.0000  0.0007  0.0000  0.0000
  48.  C  0.0000  0.0000  0.0000  0.0000  0.0002  0.0000  0.0008  0.0000  0.0000
  49.  C  0.0000  0.0000  0.0000  0.0000  0.0000  0.0003  0.0000  0.0000  0.0000
  50.  C  0.0000  0.0000  0.0000  0.0000  0.0000  0.0000  0.0000  0.0000  0.0000
  51.  C  0.0000  0.0000  0.0000  0.0000  0.0000  0.0000  0.0000  0.0002  0.0000
  52.  C  0.0000  0.0000  0.0000  0.0000  0.0000  0.0000  0.0000  0.0002  0.0000
  53.  C  0.0000  0.0000  0.0000  0.0000  0.0000  0.0000  0.0004  0.0000  0.0000
  54.  C  0.0000  0.0000  0.0000  0.0000  0.0000  0.0000  0.0000  0.0000  0.0000
  55.  H  0.0000  0.0000  0.0000  0.0000  0.0000  0.0000  0.0000  0.0000  0.0000
  56.  H  0.0000  0.0000  0.0000  0.0000  0.0000  0.0000  0.0000  0.0000  0.0000
  57.  H  0.0107  0.0003  0.0000  0.0000  0.0000  0.0000  0.0019  0.0000  0.0000
  58.  H  0.0000  0.0000  0.0000  0.0000  0.0000  0.0000  0.0000  0.0000  0.0000
  59.  H  0.0000  0.0000  0.0000  0.0000  0.0000  0.0000  0.0000  0.0000  0.0000
  60.  H  0.0000  0.0000  0.0000  0.0000  0.0000  0.0000  0.0000  0.0000  0.0000
  61.  H  0.0000  0.0000  0.0000  0.0000  0.0000  0.0000  0.0000  0.0000  0.0000
  62.  H  0.0000  0.0000  0.0000  0.0000  0.0000  0.0000  0.0000  0.0000  0.0000
  63.  H  0.0000  0.0000  0.0000  0.0000  0.0000  0.0000  0.0000  0.0000  0.0000
  64.  H  0.0000  0.0000  0.0000  0.0000  0.0000  0.0000  0.0000  0.0000  0.0000
  65.  H  0.0000  0.0000  0.0000  0.0000  0.0000  0.0000  0.0000  0.0001  0.0000
  66.  H  0.0000  0.0000  0.0000  0.0000  0.0000  0.0000  0.0000  0.0000  0.0000
  67.  H  0.0000  0.0000  0.0000  0.0000  0.0000  0.0000  0.0000  0.0000  0.0000
  68.  H  0.0000  0.0000  0.0000  0.0003  0.0000  0.0000  0.0000  0.0000  0.0000
  69.  H  0.0000  0.0000  0.0000  0.0000  0.0000  0.0000  0.0000  0.0000  0.0000
  70.  H  0.0000  0.0000  0.0000  0.0000  0.0000  0.0000  0.0000  0.0000  0.0000
  71.  H  0.0000  0.0000  0.0000  0.0000  0.0000  0.0000  0.0000  0.0000  0.0000
  72.  H  0.0006  0.0009  0.0000  0.0000  0.0000  0.0000  0.0000  0.0000  0.0000
  73.  H  0.0000  0.0007  0.0000  0.0000  0.0000  0.0000  0.0000  0.0000  0.0000
  74.  H  0.0007  0.0000  0.0000  0.0000  0.0000  0.0000  0.0000  0.0000  0.0000
  75.  H  0.0000  0.0000  0.0000  0.0026  0.0009  0.0001  0.0000  0.0000  0.0000
  76.  H  0.0000  0.0000  0.0026  0.0000  0.0026  0.0001  0.0002  0.0000  0.0000
  77.  H  0.0000  0.0000  0.0009  0.0026  0.0000  0.0000  0.0001  0.0000  0.0000
  78.  H  0.0000  0.0000  0.0001  0.0001  0.0000  0.0000  0.0000  0.0000  0.0000
  79.  H  0.0000  0.0000  0.0000  0.0002  0.0001  0.0000  0.0000  0.0000  0.0000
  80.  H  0.0000  0.0000  0.0000  0.0000  0.0000  0.0000  0.0000  0.0000  0.0026
  81.  H  0.0000  0.0000  0.0000  0.0000  0.0000  0.0000  0.0000  0.0026  0.0000
  82.  H  0.0000  0.0000  0.0000  0.0000  0.0000  0.0000  0.0000  0.0009  0.0026
  83.  H  0.0000  0.0000  0.0000  0.0000  0.0000  0.0001  0.0000  0.0001  0.0002
  84.  H  0.0000  0.0000  0.0000  0.0000  0.0000  0.0005  0.0000  0.0000  0.0002
  85.  H  0.0000  0.0000  0.0001  0.0000  0.0000  0.0010  0.0000  0.0000  0.0000
  86.  H  0.0000  0.0000  0.0004  0.0000  0.0000  0.0006  0.0000  0.0000  0.0000
  87.  H  0.0000  0.0000  0.0020  0.0000  0.0000  0.0072  0.0000  0.0000  0.0000
  88.  H  0.0000  0.0000  0.0001  0.0000  0.0000  0.0006  0.0000  0.0000  0.0000
  89.  H  0.0000  0.0000  0.0000  0.0000  0.0000  0.0070  0.0000  0.0000  0.0000
  90.  H  0.0000  0.0000  0.0000  0.0000  0.0000  0.0011  0.0000  0.0000  0.0000
  91.  H  0.0000  0.0000  0.0000  0.0000  0.0001  0.0000  0.0008  0.0000  0.0000
  92.  H  0.0000  0.0000  0.0000  0.0000  0.0021  0.0000  0.0070  0.0000  0.0000
  93.  H  0.0000  0.0000  0.0000  0.0000  0.0000  0.0000  0.0007  0.0000  0.0000
  94.  H  0.0000  0.0000  0.0000  0.0000  0.0001  0.0000  0.0008  0.0000  0.0000
  95.  H  0.0000  0.0000  0.0000  0.0000  0.0000  0.0000  0.0006  0.0000  0.0000
  96.  H  0.0000  0.0000  0.0000  0.0000  0.0009  0.0000  0.0070  0.0000  0.0000
  97.  H  0.0000  0.0000  0.0000  0.0000  0.0000  0.0000  0.0000  0.0000  0.0000
  98.  H  0.0000  0.0000  0.0000  0.0000  0.0000  0.0012  0.0000  0.0000  0.0000
  99.  H  0.0000  0.0000  0.0000  0.0000  0.0000  0.0000  0.0000  0.0000  0.0000
 100.  H  0.0000  0.0000  0.0000  0.0000  0.0000  0.0000  0.0000  0.0000  0.0000
 101.  H  0.0000  0.0000  0.0000  0.0000  0.0000  0.0000  0.0000  0.0000  0.0000
 102.  H  0.0000  0.0000  0.0000  0.0000  0.0000  0.0000  0.0000  0.0000  0.0000
 103.  H  0.0000  0.0000  0.0000  0.0000  0.0000  0.0000  0.0000  0.0001  0.0000
 104.  H  0.0000  0.0000  0.0000  0.0000  0.0000  0.0001  0.0000  0.0000  0.0000
 105.  H  0.0000  0.0000  0.0000  0.0000  0.0000  0.0000  0.0000  0.0014  0.0000
 106.  H  0.0000  0.0000  0.0000  0.0000  0.0000  0.0000  0.0000  0.0001  0.0000
 107.  H  0.0000  0.0000  0.0000  0.0000  0.0000  0.0000  0.0000  0.0013  0.0000
 108.  H  0.0000  0.0000  0.0000  0.0000  0.0000  0.0000  0.0000  0.0000  0.0000
 109.  H  0.0000  0.0000  0.0000  0.0000  0.0000  0.0000  0.0000  0.0000  0.0000
 110.  H  0.0000  0.0000  0.0000  0.0000  0.0000  0.0000  0.0003  0.0000  0.0000
 111.  H  0.0000  0.0000  0.0000  0.0000  0.0000  0.0000  0.0001  0.0000  0.0000
 112.  H  0.0000  0.0000  0.0000  0.0000  0.0000  0.0000  0.0000  0.0000  0.0000
 113.  H  0.0000  0.0000  0.0000  0.0000  0.0000  0.0000  0.0000  0.0000  0.0000
 114.  H  0.0000  0.0000  0.0000  0.0000  0.0000  0.0000  0.0000  0.0000  0.0000

     Atom   82      83      84      85      86      87      88      89      90
     ---- ------  ------  ------  ------  ------  ------  ------  ------  ------
   1.  O  0.0000  0.0000  0.0000  0.0000  0.0000  0.0000  0.0000  0.0000  0.0000
   2. Mg  0.0001  0.0063  0.0041  0.0001  0.0006  0.0011  0.0003  0.0013  0.0012
   3.  O  0.0000  0.0000  0.0000  0.0000  0.0000  0.0000  0.0000  0.0000  0.0000
   4.  C  0.0000  0.0007  0.0000  0.0000  0.0000  0.0000  0.0000  0.0000  0.0000
   5.  N  0.0001  0.0001  0.0001  0.0000  0.0000  0.0001  0.0001  0.0001  0.0001
   6.  N  0.0007  0.0041  0.0017  0.0000  0.0000  0.0001  0.0000  0.0000  0.0000
   7.  O  0.0000  0.0001  0.0000  0.0000  0.0000  0.0000  0.0000  0.0000  0.0000
   8.  C  0.0001  0.0000  0.0001  0.0000  0.0000  0.0001  0.0001  0.0003  0.0020
   9.  C  0.0002  0.0001  0.0001  0.0000  0.0000  0.0001  0.0000  0.0001  0.0002
  10.  C  0.0004  0.0003  0.0022  0.0000  0.0000  0.0000  0.0000  0.0000  0.0000
  11.  O  0.0000  0.0000  0.0000  0.0000  0.0000  0.0000  0.0000  0.0000  0.0000
  12.  C  0.0000  0.0004  0.0000  0.0000  0.0000  0.0000  0.0000  0.0000  0.0000
  13.  C  0.0000  0.0000  0.0000  0.0000  0.0000  0.0000  0.0000  0.0000  0.0000
  14.  C  0.0000  0.0000  0.0000  0.0000  0.0000  0.0000  0.0000  0.0000  0.0000
  15.  O  0.0000  0.0024  0.0001  0.0000  0.0000  0.0000  0.0000  0.0000  0.0000
  16.  C  0.0000  0.0000  0.0000  0.0000  0.0000  0.0000  0.0000  0.0000  0.0000
  17.  O  0.0000  0.0002  0.0001  0.0000  0.0000  0.0000  0.0000  0.0001  0.0000
  18.  C  0.0000  0.0000  0.0000  0.0000  0.0000  0.0000  0.0000  0.0000  0.0000
  19.  O  0.0000  0.0001  0.0000  0.0000  0.0000  0.0000  0.0000  0.0000  0.0000
  20.  O  0.0000  0.0000  0.0000  0.0000  0.0009  0.0000  0.0000  0.0000  0.0000
  21.  C  0.0000  0.0000  0.0000  0.0000  0.0010  0.0003  0.0000  0.0000  0.0000
  22.  C  0.0000  0.0000  0.0000  0.0000  0.0003  0.0000  0.0000  0.0000  0.0000
  23.  C  0.0000  0.0000  0.0000  0.0000  0.0001  0.0000  0.0000  0.0000  0.0000
  24.  O  0.0000  0.0000  0.0000  0.0000  0.0018  0.0001  0.0000  0.0000  0.0000
  25.  C  0.0000  0.0000  0.0000  0.0000  0.0000  0.0000  0.0000  0.0000  0.0000
  26.  C  0.0000  0.0000  0.0000  0.0000  0.0000  0.0000  0.0000  0.0000  0.0000
  27.  C  0.0000  0.0000  0.0000  0.0000  0.0000  0.0000  0.0000  0.0000  0.0000
  28.  C  0.0000  0.0000  0.0000  0.0000  0.0000  0.0000  0.0000  0.0000  0.0000
  29.  C  0.0000  0.0000  0.0000  0.0006  0.0000  0.0000  0.0012  0.0001  0.0003
  30.  C  0.0071  0.0034  0.0032  0.0000  0.0000  0.0000  0.0000  0.0000  0.0000
  31.  C  0.0000  0.0000  0.0001  0.0070  0.0012  0.0009  0.0066  0.0013  0.0007
  32.  C  0.0000  0.0000  0.0000  0.0011  0.0006  0.0005  0.0011  0.0002  0.0000
  33.  C  0.0000  0.0000  0.0000  0.0000  0.0000  0.0000  0.0001  0.0000  0.0000
  34.  C  0.0000  0.0000  0.0000  0.0001  0.0000  0.0000  0.0005  0.0000  0.0000
  35.  C  0.0000  0.0000  0.0000  0.0002  0.0000  0.0000  0.0001  0.0000  0.0000
  36.  C  0.0000  0.0000  0.0001  0.0008  0.0006  0.0010  0.0005  0.0009  0.0006
  37.  C  0.0000  0.0000  0.0000  0.0001  0.0000  0.0000  0.0000  0.0000  0.0000
  38.  C  0.0002  0.0011  0.0002  0.0000  0.0000  0.0000  0.0000  0.0000  0.0000
  39.  C  0.0069  0.0052  0.0000  0.0000  0.0000  0.0000  0.0000  0.0000  0.0000
  40.  C  0.0016  0.0006  0.0006  0.0000  0.0000  0.0000  0.0000  0.0000  0.0000
  41.  C  0.9675  0.0000  0.0051  0.0000  0.0000  0.0000  0.0000  0.0000  0.0000
  42.  C  0.0019  0.0002  0.0011  0.0000  0.0000  0.0000  0.0000  0.0000  0.0000
  43.  C  0.0001  0.9513  0.0000  0.0000  0.0000  0.0000  0.0000  0.0000  0.0000
  44.  C  0.0034  0.0000  0.9580  0.0000  0.0000  0.0000  0.0000  0.0001  0.0000
  45.  C  0.0000  0.0000  0.0000  0.9816  0.9771  0.9812  0.0013  0.0009  0.0070
  46.  C  0.0000  0.0000  0.0001  0.0008  0.0071  0.0015  0.9819  0.9834  0.9805
  47.  C  0.0000  0.0000  0.0000  0.0000  0.0000  0.0000  0.0000  0.0000  0.0000
  48.  C  0.0000  0.0000  0.0000  0.0000  0.0000  0.0000  0.0000  0.0000  0.0000
  49.  C  0.0002  0.0000  0.0006  0.0004  0.0000  0.0001  0.0001  0.0001  0.0000
  50.  C  0.0002  0.0000  0.0009  0.0000  0.0000  0.0000  0.0000  0.0000  0.0000
  51.  C  0.0000  0.0006  0.0000  0.0000  0.0000  0.0000  0.0000  0.0000  0.0000
  52.  C  0.0000  0.0009  0.0000  0.0000  0.0000  0.0000  0.0000  0.0000  0.0000
  53.  C  0.0000  0.0000  0.0000  0.0000  0.0000  0.0000  0.0001  0.0000  0.0009
  54.  C  0.0000  0.0000  0.0000  0.0000  0.0000  0.0000  0.0000  0.0000  0.0000
  55.  H  0.0000  0.0000  0.0000  0.0000  0.0000  0.0000  0.0000  0.0000  0.0000
  56.  H  0.0000  0.0000  0.0000  0.0000  0.0000  0.0000  0.0000  0.0000  0.0000
  57.  H  0.0000  0.0000  0.0000  0.0000  0.0000  0.0000  0.0000  0.0000  0.0000
  58.  H  0.0000  0.0000  0.0000  0.0000  0.0000  0.0000  0.0000  0.0000  0.0000
  59.  H  0.0000  0.0000  0.0000  0.0000  0.0000  0.0000  0.0000  0.0000  0.0000
  60.  H  0.0000  0.0000  0.0000  0.0000  0.0000  0.0000  0.0000  0.0000  0.0000
  61.  H  0.0000  0.0000  0.0000  0.0000  0.0000  0.0000  0.0000  0.0000  0.0000
  62.  H  0.0000  0.0000  0.0000  0.0000  0.0000  0.0000  0.0000  0.0000  0.0000
  63.  H  0.0000  0.0000  0.0000  0.0000  0.0000  0.0000  0.0000  0.0000  0.0000
  64.  H  0.0000  0.0000  0.0000  0.0000  0.0000  0.0000  0.0000  0.0000  0.0000
  65.  H  0.0000  0.0000  0.0000  0.0000  0.0000  0.0000  0.0000  0.0000  0.0000
  66.  H  0.0000  0.0000  0.0000  0.0000  0.0000  0.0000  0.0000  0.0000  0.0000
  67.  H  0.0000  0.0000  0.0000  0.0000  0.0000  0.0000  0.0000  0.0000  0.0000
  68.  H  0.0000  0.0000  0.0000  0.0000  0.0000  0.0000  0.0000  0.0000  0.0000
  69.  H  0.0000  0.0000  0.0000  0.0000  0.0000  0.0000  0.0000  0.0000  0.0000
  70.  H  0.0000  0.0000  0.0000  0.0000  0.0000  0.0000  0.0000  0.0000  0.0000
  71.  H  0.0000  0.0000  0.0000  0.0000  0.0000  0.0000  0.0000  0.0000  0.0000
  72.  H  0.0000  0.0000  0.0000  0.0000  0.0000  0.0000  0.0000  0.0000  0.0000
  73.  H  0.0000  0.0000  0.0000  0.0000  0.0000  0.0000  0.0000  0.0000  0.0000
  74.  H  0.0000  0.0000  0.0000  0.0000  0.0000  0.0000  0.0000  0.0000  0.0000
  75.  H  0.0000  0.0000  0.0000  0.0001  0.0004  0.0020  0.0001  0.0000  0.0000
  76.  H  0.0000  0.0000  0.0000  0.0000  0.0000  0.0000  0.0000  0.0000  0.0000
  77.  H  0.0000  0.0000  0.0000  0.0000  0.0000  0.0000  0.0000  0.0000  0.0000
  78.  H  0.0000  0.0001  0.0005  0.0010  0.0006  0.0072  0.0006  0.0070  0.0011
  79.  H  0.0000  0.0000  0.0000  0.0000  0.0000  0.0000  0.0000  0.0000  0.0000
  80.  H  0.0009  0.0001  0.0000  0.0000  0.0000  0.0000  0.0000  0.0000  0.0000
  81.  H  0.0026  0.0002  0.0002  0.0000  0.0000  0.0000  0.0000  0.0000  0.0000
  82.  H  0.0000  0.0000  0.0001  0.0000  0.0000  0.0000  0.0000  0.0000  0.0000
  83.  H  0.0000  0.0000  0.0000  0.0000  0.0000  0.0000  0.0000  0.0000  0.0000
  84.  H  0.0001  0.0000  0.0000  0.0000  0.0000  0.0000  0.0001  0.0000  0.0001
  85.  H  0.0000  0.0000  0.0000  0.0000  0.0000  0.0001  0.0005  0.0000  0.0000
  86.  H  0.0000  0.0000  0.0000  0.0000  0.0000  0.0002  0.0001  0.0000  0.0012
  87.  H  0.0000  0.0000  0.0000  0.0001  0.0002  0.0000  0.0000  0.0005  0.0000
  88.  H  0.0000  0.0000  0.0001  0.0005  0.0001  0.0000  0.0000  0.0002  0.0001
  89.  H  0.0000  0.0000  0.0000  0.0000  0.0000  0.0005  0.0002  0.0000  0.0002
  90.  H  0.0000  0.0000  0.0001  0.0000  0.0012  0.0000  0.0001  0.0002  0.0000
  91.  H  0.0000  0.0000  0.0000  0.0000  0.0000  0.0000  0.0000  0.0000  0.0000
  92.  H  0.0000  0.0000  0.0000  0.0000  0.0000  0.0000  0.0000  0.0000  0.0000
  93.  H  0.0000  0.0000  0.0000  0.0000  0.0000  0.0000  0.0000  0.0000  0.0000
  94.  H  0.0000  0.0000  0.0000  0.0000  0.0000  0.0000  0.0000  0.0000  0.0000
  95.  H  0.0000  0.0000  0.0000  0.0000  0.0000  0.0000  0.0000  0.0000  0.0000
  96.  H  0.0000  0.0000  0.0000  0.0000  0.0000  0.0000  0.0000  0.0000  0.0000
  97.  H  0.0001  0.0000  0.0007  0.0006  0.0000  0.0000  0.0009  0.0000  0.0000
  98.  H  0.0000  0.0000  0.0008  0.0010  0.0000  0.0000  0.0000  0.0000  0.0000
  99.  H  0.0016  0.0000  0.0070  0.0000  0.0000  0.0000  0.0000  0.0000  0.0000
 100.  H  0.0001  0.0000  0.0007  0.0000  0.0000  0.0000  0.0000  0.0000  0.0000
 101.  H  0.0000  0.0000  0.0006  0.0000  0.0000  0.0000  0.0000  0.0000  0.0000
 102.  H  0.0011  0.0000  0.0070  0.0000  0.0000  0.0000  0.0000  0.0000  0.0000
 103.  H  0.0000  0.0008  0.0000  0.0000  0.0000  0.0000  0.0000  0.0000  0.0000
 104.  H  0.0000  0.0011  0.0000  0.0000  0.0000  0.0000  0.0000  0.0000  0.0000
 105.  H  0.0000  0.0070  0.0000  0.0000  0.0000  0.0000  0.0000  0.0000  0.0000
 106.  H  0.0000  0.0006  0.0000  0.0000  0.0000  0.0000  0.0000  0.0000  0.0000
 107.  H  0.0000  0.0069  0.0000  0.0000  0.0000  0.0000  0.0000  0.0000  0.0000
 108.  H  0.0000  0.0007  0.0000  0.0000  0.0000  0.0000  0.0000  0.0000  0.0000
 109.  H  0.0000  0.0000  0.0000  0.0000  0.0000  0.0000  0.0000  0.0000  0.0000
 110.  H  0.0000  0.0000  0.0000  0.0000  0.0000  0.0000  0.0000  0.0000  0.0000
 111.  H  0.0000  0.0000  0.0000  0.0000  0.0000  0.0000  0.0001  0.0000  0.0004
 112.  H  0.0000  0.0000  0.0000  0.0000  0.0000  0.0000  0.0000  0.0000  0.0000
 113.  H  0.0000  0.0000  0.0000  0.0000  0.0000  0.0000  0.0000  0.0000  0.0000
 114.  H  0.0000  0.0000  0.0000  0.0000  0.0000  0.0000  0.0000  0.0000  0.0000

     Atom   91      92      93      94      95      96      97      98      99
     ---- ------  ------  ------  ------  ------  ------  ------  ------  ------
   1.  O  0.0000  0.0000  0.0000  0.0000  0.0000  0.0000  0.0000  0.0000  0.0000
   2. Mg  0.0004  0.0004  0.0013  0.0000  0.0000  0.0002  0.0002  0.0022  0.0009
   3.  O  0.0000  0.0000  0.0001  0.0000  0.0000  0.0000  0.0000  0.0000  0.0000
   4.  C  0.0001  0.0001  0.0002  0.0000  0.0000  0.0000  0.0000  0.0000  0.0000
   5.  N  0.0001  0.0000  0.0001  0.0001  0.0000  0.0001  0.0000  0.0000  0.0000
   6.  N  0.0000  0.0000  0.0000  0.0000  0.0000  0.0000  0.0001  0.0001  0.0001
   7.  O  0.0000  0.0000  0.0000  0.0000  0.0000  0.0000  0.0000  0.0000  0.0000
   8.  C  0.0000  0.0001  0.0000  0.0000  0.0001  0.0001  0.0000  0.0000  0.0000
   9.  C  0.0000  0.0000  0.0000  0.0000  0.0000  0.0000  0.0000  0.0000  0.0000
  10.  C  0.0000  0.0000  0.0000  0.0000  0.0000  0.0000  0.0000  0.0000  0.0001
  11.  O  0.0000  0.0001  0.0006  0.0000  0.0000  0.0000  0.0000  0.0000  0.0000
  12.  C  0.0000  0.0002  0.0024  0.0000  0.0000  0.0000  0.0000  0.0000  0.0000
  13.  C  0.0000  0.0000  0.0002  0.0000  0.0000  0.0000  0.0000  0.0000  0.0000
  14.  C  0.0003  0.0004  0.0005  0.0000  0.0000  0.0000  0.0000  0.0000  0.0000
  15.  O  0.0000  0.0000  0.0004  0.0000  0.0000  0.0000  0.0000  0.0000  0.0000
  16.  C  0.0000  0.0000  0.0000  0.0000  0.0000  0.0000  0.0000  0.0000  0.0000
  17.  O  0.0000  0.0000  0.0001  0.0000  0.0000  0.0000  0.0000  0.0001  0.0000
  18.  C  0.0000  0.0000  0.0001  0.0000  0.0000  0.0000  0.0000  0.0000  0.0000
  19.  O  0.0000  0.0000  0.0016  0.0000  0.0000  0.0000  0.0000  0.0000  0.0000
  20.  O  0.0000  0.0000  0.0000  0.0000  0.0000  0.0000  0.0000  0.0000  0.0000
  21.  C  0.0000  0.0000  0.0000  0.0000  0.0000  0.0000  0.0000  0.0001  0.0000
  22.  C  0.0000  0.0000  0.0000  0.0000  0.0000  0.0000  0.0000  0.0000  0.0000
  23.  C  0.0000  0.0000  0.0000  0.0000  0.0000  0.0000  0.0000  0.0000  0.0000
  24.  O  0.0000  0.0000  0.0000  0.0000  0.0000  0.0000  0.0000  0.0003  0.0000
  25.  C  0.0000  0.0000  0.0000  0.0000  0.0000  0.0000  0.0003  0.0005  0.0000
  26.  C  0.0000  0.0000  0.0000  0.0000  0.0000  0.0000  0.0000  0.0000  0.0000
  27.  C  0.0000  0.0000  0.0001  0.0000  0.0000  0.0000  0.0000  0.0000  0.0000
  28.  C  0.0009  0.0003  0.0000  0.0000  0.0000  0.0000  0.0000  0.0000  0.0000
  29.  C  0.0010  0.0000  0.0001  0.0011  0.0000  0.0000  0.0000  0.0000  0.0000
  30.  C  0.0000  0.0000  0.0000  0.0000  0.0000  0.0000  0.0011  0.0000  0.0000
  31.  C  0.0002  0.0000  0.0000  0.0001  0.0000  0.0000  0.0000  0.0000  0.0000
  32.  C  0.0004  0.0000  0.0000  0.0003  0.0000  0.0000  0.0000  0.0000  0.0000
  33.  C  0.0001  0.0001  0.0000  0.0001  0.0000  0.0000  0.0000  0.0000  0.0000
  34.  C  0.0010  0.0004  0.0001  0.0007  0.0000  0.0003  0.0000  0.0000  0.0000
  35.  C  0.0071  0.0012  0.0009  0.0068  0.0009  0.0009  0.0000  0.0000  0.0000
  36.  C  0.0000  0.0000  0.0000  0.0000  0.0000  0.0000  0.0000  0.0002  0.0002
  37.  C  0.0007  0.0010  0.0006  0.0006  0.0006  0.0008  0.0000  0.0000  0.0000
  38.  C  0.0000  0.0000  0.0000  0.0000  0.0000  0.0000  0.0002  0.0000  0.0000
  39.  C  0.0000  0.0000  0.0000  0.0000  0.0000  0.0000  0.0005  0.0000  0.0000
  40.  C  0.0000  0.0000  0.0000  0.0000  0.0000  0.0000  0.0001  0.0000  0.0001
  41.  C  0.0000  0.0000  0.0000  0.0000  0.0000  0.0000  0.0010  0.0000  0.0004
  42.  C  0.0000  0.0000  0.0000  0.0000  0.0000  0.0000  0.0068  0.0009  0.0011
  43.  C  0.0000  0.0000  0.0000  0.0000  0.0000  0.0000  0.0000  0.0000  0.0000
  44.  C  0.0000  0.0000  0.0000  0.0000  0.0000  0.0000  0.0006  0.0006  0.0011
  45.  C  0.0000  0.0000  0.0000  0.0000  0.0000  0.0000  0.0000  0.0002  0.0001
  46.  C  0.0000  0.0000  0.0000  0.0000  0.0000  0.0000  0.0001  0.0000  0.0001
  47.  C  0.9765  0.9802  0.9771  0.0008  0.0071  0.0013  0.0000  0.0000  0.0000
  48.  C  0.0009  0.0012  0.0075  0.9846  0.9842  0.9840  0.0000  0.0000  0.0000
  49.  C  0.0000  0.0000  0.0000  0.0000  0.0000  0.0000  0.9812  0.9747  0.9814
  50.  C  0.0000  0.0000  0.0000  0.0000  0.0000  0.0000  0.0009  0.0076  0.0013
  51.  C  0.0000  0.0000  0.0000  0.0000  0.0000  0.0000  0.0000  0.0000  0.0000
  52.  C  0.0000  0.0000  0.0000  0.0000  0.0000  0.0000  0.0000  0.0000  0.0000
  53.  C  0.0000  0.0000  0.0000  0.0001  0.0010  0.0002  0.0000  0.0000  0.0000
  54.  C  0.0000  0.0000  0.0000  0.0000  0.0000  0.0000  0.0000  0.0000  0.0000
  55.  H  0.0000  0.0000  0.0000  0.0000  0.0000  0.0000  0.0000  0.0000  0.0000
  56.  H  0.0000  0.0000  0.0007  0.0000  0.0000  0.0000  0.0000  0.0000  0.0000
  57.  H  0.0001  0.0001  0.0000  0.0000  0.0000  0.0001  0.0000  0.0000  0.0000
  58.  H  0.0000  0.0000  0.0000  0.0000  0.0000  0.0000  0.0000  0.0000  0.0000
  59.  H  0.0000  0.0000  0.0000  0.0000  0.0000  0.0000  0.0000  0.0000  0.0000
  60.  H  0.0000  0.0000  0.0000  0.0000  0.0000  0.0000  0.0000  0.0000  0.0000
  61.  H  0.0000  0.0000  0.0000  0.0000  0.0000  0.0000  0.0000  0.0000  0.0000
  62.  H  0.0000  0.0000  0.0000  0.0000  0.0000  0.0000  0.0000  0.0000  0.0000
  63.  H  0.0000  0.0000  0.0000  0.0000  0.0000  0.0000  0.0000  0.0000  0.0000
  64.  H  0.0000  0.0000  0.0000  0.0000  0.0000  0.0000  0.0005  0.0037  0.0001
  65.  H  0.0000  0.0000  0.0000  0.0000  0.0000  0.0000  0.0000  0.0000  0.0000
  66.  H  0.0000  0.0000  0.0000  0.0000  0.0000  0.0000  0.0000  0.0000  0.0000
  67.  H  0.0000  0.0000  0.0000  0.0000  0.0000  0.0000  0.0000  0.0000  0.0000
  68.  H  0.0000  0.0000  0.0000  0.0000  0.0000  0.0000  0.0000  0.0000  0.0000
  69.  H  0.0000  0.0000  0.0000  0.0000  0.0000  0.0000  0.0000  0.0000  0.0000
  70.  H  0.0000  0.0000  0.0000  0.0000  0.0000  0.0000  0.0000  0.0000  0.0000
  71.  H  0.0000  0.0000  0.0000  0.0000  0.0000  0.0000  0.0000  0.0000  0.0000
  72.  H  0.0063  0.0006  0.0000  0.0000  0.0000  0.0000  0.0000  0.0000  0.0000
  73.  H  0.0000  0.0000  0.0000  0.0000  0.0000  0.0000  0.0000  0.0000  0.0000
  74.  H  0.0000  0.0000  0.0000  0.0000  0.0000  0.0000  0.0000  0.0000  0.0000
  75.  H  0.0000  0.0000  0.0000  0.0000  0.0000  0.0000  0.0000  0.0000  0.0000
  76.  H  0.0000  0.0000  0.0000  0.0000  0.0000  0.0000  0.0000  0.0000  0.0000
  77.  H  0.0001  0.0021  0.0000  0.0001  0.0000  0.0009  0.0000  0.0000  0.0000
  78.  H  0.0000  0.0000  0.0000  0.0000  0.0000  0.0000  0.0000  0.0012  0.0000
  79.  H  0.0008  0.0070  0.0007  0.0008  0.0006  0.0070  0.0000  0.0000  0.0000
  80.  H  0.0000  0.0000  0.0000  0.0000  0.0000  0.0000  0.0000  0.0000  0.0000
  81.  H  0.0000  0.0000  0.0000  0.0000  0.0000  0.0000  0.0000  0.0000  0.0000
  82.  H  0.0000  0.0000  0.0000  0.0000  0.0000  0.0000  0.0001  0.0000  0.0016
  83.  H  0.0000  0.0000  0.0000  0.0000  0.0000  0.0000  0.0000  0.0000  0.0000
  84.  H  0.0000  0.0000  0.0000  0.0000  0.0000  0.0000  0.0007  0.0008  0.0070
  85.  H  0.0000  0.0000  0.0000  0.0000  0.0000  0.0000  0.0006  0.0010  0.0000
  86.  H  0.0000  0.0000  0.0000  0.0000  0.0000  0.0000  0.0000  0.0000  0.0000
  87.  H  0.0000  0.0000  0.0000  0.0000  0.0000  0.0000  0.0000  0.0000  0.0000
  88.  H  0.0000  0.0000  0.0000  0.0000  0.0000  0.0000  0.0009  0.0000  0.0000
  89.  H  0.0000  0.0000  0.0000  0.0000  0.0000  0.0000  0.0000  0.0000  0.0000
  90.  H  0.0000  0.0000  0.0000  0.0000  0.0000  0.0000  0.0000  0.0000  0.0000
  91.  H  0.0000  0.0002  0.0002  0.0005  0.0000  0.0000  0.0000  0.0000  0.0000
  92.  H  0.0002  0.0000  0.0001  0.0000  0.0000  0.0005  0.0000  0.0000  0.0000
  93.  H  0.0002  0.0001  0.0000  0.0000  0.0011  0.0000  0.0000  0.0000  0.0000
  94.  H  0.0005  0.0000  0.0000  0.0000  0.0001  0.0001  0.0000  0.0000  0.0000
  95.  H  0.0000  0.0000  0.0011  0.0001  0.0000  0.0001  0.0000  0.0000  0.0000
  96.  H  0.0000  0.0005  0.0000  0.0001  0.0001  0.0000  0.0000  0.0000  0.0000
  97.  H  0.0000  0.0000  0.0000  0.0000  0.0000  0.0000  0.0000  0.0001  0.0002
  98.  H  0.0000  0.0000  0.0000  0.0000  0.0000  0.0000  0.0001  0.0000  0.0001
  99.  H  0.0000  0.0000  0.0000  0.0000  0.0000  0.0000  0.0002  0.0001  0.0000
 100.  H  0.0000  0.0000  0.0000  0.0000  0.0000  0.0000  0.0005  0.0000  0.0000
 101.  H  0.0000  0.0000  0.0000  0.0000  0.0000  0.0000  0.0000  0.0011  0.0000
 102.  H  0.0000  0.0000  0.0000  0.0000  0.0000  0.0000  0.0000  0.0000  0.0005
 103.  H  0.0000  0.0000  0.0000  0.0000  0.0000  0.0000  0.0000  0.0000  0.0000
 104.  H  0.0000  0.0000  0.0000  0.0000  0.0000  0.0000  0.0000  0.0000  0.0000
 105.  H  0.0000  0.0000  0.0000  0.0000  0.0000  0.0000  0.0000  0.0000  0.0000
 106.  H  0.0000  0.0000  0.0000  0.0000  0.0000  0.0000  0.0000  0.0000  0.0000
 107.  H  0.0000  0.0000  0.0000  0.0000  0.0000  0.0000  0.0000  0.0000  0.0000
 108.  H  0.0000  0.0000  0.0000  0.0000  0.0000  0.0000  0.0000  0.0000  0.0000
 109.  H  0.0000  0.0000  0.0000  0.0000  0.0004  0.0000  0.0000  0.0000  0.0000
 110.  H  0.0000  0.0000  0.0000  0.0000  0.0000  0.0000  0.0000  0.0000  0.0000
 111.  H  0.0000  0.0000  0.0000  0.0000  0.0002  0.0000  0.0000  0.0000  0.0000
 112.  H  0.0000  0.0000  0.0000  0.0000  0.0000  0.0000  0.0000  0.0000  0.0000
 113.  H  0.0000  0.0000  0.0000  0.0000  0.0000  0.0000  0.0000  0.0000  0.0000
 114.  H  0.0000  0.0000  0.0000  0.0000  0.0000  0.0000  0.0000  0.0000  0.0000

     Atom  100     101     102     103     104     105     106     107     108
     ---- ------  ------  ------  ------  ------  ------  ------  ------  ------
   1.  O  0.0000  0.0000  0.0000  0.0000  0.0000  0.0000  0.0000  0.0001  0.0000
   2. Mg  0.0000  0.0001  0.0002  0.0006  0.0049  0.0011  0.0001  0.0003  0.0002
   3.  O  0.0000  0.0000  0.0000  0.0000  0.0004  0.0000  0.0000  0.0000  0.0000
   4.  C  0.0000  0.0000  0.0000  0.0002  0.0000  0.0001  0.0001  0.0000  0.0000
   5.  N  0.0000  0.0000  0.0000  0.0000  0.0001  0.0000  0.0000  0.0000  0.0000
   6.  N  0.0001  0.0000  0.0001  0.0001  0.0001  0.0000  0.0001  0.0001  0.0000
   7.  O  0.0000  0.0000  0.0000  0.0012  0.0000  0.0000  0.0008  0.0000  0.0000
   8.  C  0.0000  0.0000  0.0000  0.0000  0.0000  0.0000  0.0000  0.0000  0.0000
   9.  C  0.0000  0.0000  0.0000  0.0000  0.0000  0.0000  0.0000  0.0000  0.0000
  10.  C  0.0000  0.0000  0.0000  0.0000  0.0000  0.0001  0.0000  0.0001  0.0000
  11.  O  0.0000  0.0000  0.0000  0.0000  0.0001  0.0000  0.0000  0.0000  0.0000
  12.  C  0.0000  0.0000  0.0000  0.0006  0.0003  0.0003  0.0000  0.0001  0.0000
  13.  C  0.0000  0.0000  0.0000  0.0000  0.0002  0.0000  0.0000  0.0000  0.0000
  14.  C  0.0000  0.0000  0.0000  0.0000  0.0000  0.0000  0.0000  0.0000  0.0000
  15.  O  0.0000  0.0000  0.0000  0.0000  0.0003  0.0002  0.0000  0.0000  0.0000
  16.  C  0.0000  0.0000  0.0000  0.0000  0.0000  0.0000  0.0009  0.0008  0.0005
  17.  O  0.0000  0.0000  0.0000  0.0000  0.0033  0.0001  0.0000  0.0000  0.0000
  18.  C  0.0000  0.0000  0.0000  0.0000  0.0000  0.0000  0.0000  0.0000  0.0000
  19.  O  0.0000  0.0000  0.0000  0.0000  0.0001  0.0000  0.0000  0.0000  0.0000
  20.  O  0.0000  0.0000  0.0000  0.0000  0.0000  0.0000  0.0000  0.0000  0.0000
  21.  C  0.0000  0.0000  0.0000  0.0000  0.0003  0.0000  0.0000  0.0000  0.0000
  22.  C  0.0000  0.0000  0.0000  0.0001  0.0003  0.0000  0.0000  0.0000  0.0000
  23.  C  0.0000  0.0000  0.0000  0.0000  0.0000  0.0000  0.0000  0.0000  0.0000
  24.  O  0.0000  0.0000  0.0000  0.0000  0.0000  0.0000  0.0000  0.0000  0.0000
  25.  C  0.0000  0.0000  0.0000  0.0001  0.0001  0.0000  0.0000  0.0000  0.0000
  26.  C  0.0000  0.0000  0.0000  0.0000  0.0000  0.0000  0.0000  0.0000  0.0000
  27.  C  0.0000  0.0000  0.0000  0.0007  0.0004  0.0001  0.0000  0.0000  0.0000
  28.  C  0.0000  0.0000  0.0000  0.0000  0.0000  0.0000  0.0000  0.0000  0.0000
  29.  C  0.0000  0.0000  0.0000  0.0000  0.0000  0.0000  0.0000  0.0000  0.0000
  30.  C  0.0010  0.0000  0.0000  0.0011  0.0001  0.0000  0.0010  0.0000  0.0000
  31.  C  0.0000  0.0000  0.0000  0.0000  0.0000  0.0000  0.0000  0.0000  0.0000
  32.  C  0.0000  0.0000  0.0000  0.0000  0.0000  0.0000  0.0000  0.0000  0.0000
  33.  C  0.0000  0.0000  0.0000  0.0000  0.0000  0.0000  0.0000  0.0000  0.0000
  34.  C  0.0000  0.0000  0.0000  0.0000  0.0000  0.0000  0.0000  0.0000  0.0000
  35.  C  0.0000  0.0000  0.0000  0.0000  0.0000  0.0000  0.0000  0.0000  0.0000
  36.  C  0.0000  0.0000  0.0000  0.0000  0.0000  0.0000  0.0000  0.0000  0.0000
  37.  C  0.0000  0.0000  0.0000  0.0000  0.0000  0.0000  0.0000  0.0000  0.0000
  38.  C  0.0001  0.0000  0.0000  0.0067  0.0010  0.0011  0.0068  0.0012  0.0006
  39.  C  0.0003  0.0000  0.0000  0.0010  0.0000  0.0004  0.0007  0.0004  0.0000
  40.  C  0.0001  0.0000  0.0001  0.0001  0.0000  0.0001  0.0001  0.0001  0.0000
  41.  C  0.0007  0.0000  0.0003  0.0005  0.0000  0.0000  0.0004  0.0000  0.0000
  42.  C  0.0069  0.0008  0.0010  0.0002  0.0000  0.0000  0.0001  0.0000  0.0000
  43.  C  0.0000  0.0000  0.0000  0.0006  0.0005  0.0013  0.0004  0.0011  0.0006
  44.  C  0.0005  0.0007  0.0009  0.0000  0.0000  0.0000  0.0000  0.0000  0.0000
  45.  C  0.0000  0.0000  0.0000  0.0000  0.0000  0.0000  0.0000  0.0000  0.0000
  46.  C  0.0000  0.0000  0.0000  0.0000  0.0000  0.0000  0.0000  0.0000  0.0000
  47.  C  0.0000  0.0000  0.0000  0.0000  0.0000  0.0000  0.0000  0.0000  0.0000
  48.  C  0.0000  0.0000  0.0000  0.0000  0.0000  0.0000  0.0000  0.0000  0.0000
  49.  C  0.0009  0.0071  0.0013  0.0000  0.0000  0.0000  0.0000  0.0000  0.0000
  50.  C  0.9843  0.9825  0.9841  0.0000  0.0000  0.0000  0.0000  0.0000  0.0000
  51.  C  0.0000  0.0000  0.0000  0.9760  0.9702  0.9808  0.0012  0.0010  0.0072
  52.  C  0.0000  0.0000  0.0000  0.0009  0.0077  0.0011  0.9778  0.9806  0.9824
  53.  C  0.0000  0.0000  0.0000  0.0000  0.0000  0.0000  0.0000  0.0000  0.0000
  54.  C  0.0001  0.0003  0.0001  0.0000  0.0000  0.0000  0.0000  0.0001  0.0001
  55.  H  0.0000  0.0000  0.0000  0.0000  0.0000  0.0000  0.0000  0.0000  0.0000
  56.  H  0.0000  0.0000  0.0000  0.0000  0.0001  0.0000  0.0000  0.0000  0.0000
  57.  H  0.0000  0.0000  0.0000  0.0000  0.0000  0.0000  0.0000  0.0000  0.0000
  58.  H  0.0000  0.0000  0.0000  0.0000  0.0000  0.0000  0.0039  0.0018  0.0019
  59.  H  0.0000  0.0000  0.0000  0.0000  0.0000  0.0000  0.0000  0.0000  0.0000
  60.  H  0.0000  0.0000  0.0000  0.0000  0.0000  0.0000  0.0000  0.0000  0.0000
  61.  H  0.0000  0.0000  0.0000  0.0000  0.0000  0.0000  0.0000  0.0000  0.0000
  62.  H  0.0000  0.0000  0.0000  0.0000  0.0000  0.0000  0.0000  0.0000  0.0000
  63.  H  0.0000  0.0000  0.0000  0.0000  0.0000  0.0000  0.0000  0.0000  0.0000
  64.  H  0.0000  0.0000  0.0000  0.0000  0.0000  0.0000  0.0000  0.0000  0.0000
  65.  H  0.0000  0.0000  0.0000  0.0001  0.0006  0.0001  0.0000  0.0000  0.0000
  66.  H  0.0000  0.0000  0.0000  0.0000  0.0000  0.0000  0.0000  0.0000  0.0000
  67.  H  0.0000  0.0000  0.0000  0.0000  0.0000  0.0000  0.0000  0.0000  0.0000
  68.  H  0.0000  0.0000  0.0000  0.0000  0.0000  0.0000  0.0000  0.0000  0.0000
  69.  H  0.0000  0.0000  0.0000  0.0000  0.0000  0.0000  0.0000  0.0000  0.0000
  70.  H  0.0000  0.0000  0.0000  0.0000  0.0000  0.0000  0.0000  0.0000  0.0000
  71.  H  0.0000  0.0000  0.0000  0.0036  0.0014  0.0002  0.0000  0.0000  0.0001
  72.  H  0.0000  0.0000  0.0000  0.0000  0.0000  0.0000  0.0000  0.0000  0.0000
  73.  H  0.0000  0.0000  0.0000  0.0000  0.0000  0.0000  0.0000  0.0000  0.0000
  74.  H  0.0000  0.0000  0.0000  0.0000  0.0000  0.0000  0.0000  0.0000  0.0000
  75.  H  0.0000  0.0000  0.0000  0.0000  0.0000  0.0000  0.0000  0.0000  0.0000
  76.  H  0.0000  0.0000  0.0000  0.0000  0.0000  0.0000  0.0000  0.0000  0.0000
  77.  H  0.0000  0.0000  0.0000  0.0000  0.0000  0.0000  0.0000  0.0000  0.0000
  78.  H  0.0000  0.0000  0.0000  0.0000  0.0001  0.0000  0.0000  0.0000  0.0000
  79.  H  0.0000  0.0000  0.0000  0.0000  0.0000  0.0000  0.0000  0.0000  0.0000
  80.  H  0.0000  0.0000  0.0000  0.0001  0.0000  0.0014  0.0001  0.0013  0.0000
  81.  H  0.0000  0.0000  0.0000  0.0000  0.0000  0.0000  0.0000  0.0000  0.0000
  82.  H  0.0001  0.0000  0.0011  0.0000  0.0000  0.0000  0.0000  0.0000  0.0000
  83.  H  0.0000  0.0000  0.0000  0.0008  0.0011  0.0070  0.0006  0.0069  0.0007
  84.  H  0.0007  0.0006  0.0070  0.0000  0.0000  0.0000  0.0000  0.0000  0.0000
  85.  H  0.0000  0.0000  0.0000  0.0000  0.0000  0.0000  0.0000  0.0000  0.0000
  86.  H  0.0000  0.0000  0.0000  0.0000  0.0000  0.0000  0.0000  0.0000  0.0000
  87.  H  0.0000  0.0000  0.0000  0.0000  0.0000  0.0000  0.0000  0.0000  0.0000
  88.  H  0.0000  0.0000  0.0000  0.0000  0.0000  0.0000  0.0000  0.0000  0.0000
  89.  H  0.0000  0.0000  0.0000  0.0000  0.0000  0.0000  0.0000  0.0000  0.0000
  90.  H  0.0000  0.0000  0.0000  0.0000  0.0000  0.0000  0.0000  0.0000  0.0000
  91.  H  0.0000  0.0000  0.0000  0.0000  0.0000  0.0000  0.0000  0.0000  0.0000
  92.  H  0.0000  0.0000  0.0000  0.0000  0.0000  0.0000  0.0000  0.0000  0.0000
  93.  H  0.0000  0.0000  0.0000  0.0000  0.0000  0.0000  0.0000  0.0000  0.0000
  94.  H  0.0000  0.0000  0.0000  0.0000  0.0000  0.0000  0.0000  0.0000  0.0000
  95.  H  0.0000  0.0000  0.0000  0.0000  0.0000  0.0000  0.0000  0.0000  0.0000
  96.  H  0.0000  0.0000  0.0000  0.0000  0.0000  0.0000  0.0000  0.0000  0.0000
  97.  H  0.0005  0.0000  0.0000  0.0000  0.0000  0.0000  0.0000  0.0000  0.0000
  98.  H  0.0000  0.0011  0.0000  0.0000  0.0000  0.0000  0.0000  0.0000  0.0000
  99.  H  0.0000  0.0000  0.0005  0.0000  0.0000  0.0000  0.0000  0.0000  0.0000
 100.  H  0.0000  0.0001  0.0001  0.0000  0.0000  0.0000  0.0000  0.0000  0.0000
 101.  H  0.0001  0.0000  0.0001  0.0000  0.0000  0.0000  0.0000  0.0000  0.0000
 102.  H  0.0001  0.0001  0.0000  0.0000  0.0000  0.0000  0.0000  0.0000  0.0000
 103.  H  0.0000  0.0000  0.0000  0.0000  0.0002  0.0002  0.0005  0.0000  0.0000
 104.  H  0.0000  0.0000  0.0000  0.0002  0.0000  0.0001  0.0000  0.0000  0.0011
 105.  H  0.0000  0.0000  0.0000  0.0002  0.0001  0.0000  0.0000  0.0004  0.0000
 106.  H  0.0000  0.0000  0.0000  0.0005  0.0000  0.0000  0.0000  0.0001  0.0002
 107.  H  0.0000  0.0000  0.0000  0.0000  0.0000  0.0004  0.0001  0.0000  0.0001
 108.  H  0.0000  0.0000  0.0000  0.0000  0.0011  0.0000  0.0002  0.0001  0.0000
 109.  H  0.0000  0.0000  0.0000  0.0000  0.0000  0.0000  0.0000  0.0000  0.0000
 110.  H  0.0000  0.0000  0.0000  0.0000  0.0000  0.0000  0.0000  0.0000  0.0000
 111.  H  0.0000  0.0000  0.0000  0.0000  0.0000  0.0000  0.0000  0.0000  0.0000
 112.  H  0.0001  0.0038  0.0000  0.0000  0.0000  0.0000  0.0000  0.0000  0.0000
 113.  H  0.0000  0.0000  0.0000  0.0000  0.0000  0.0000  0.0000  0.0000  0.0015
 114.  H  0.0000  0.0000  0.0000  0.0000  0.0000  0.0000  0.0000  0.0000  0.0000

     Atom  109     110     111     112     113     114
     ---- ------  ------  ------  ------  ------  ------
   1.  O  0.0000  0.0000  0.0000  0.0000  0.0000  0.0000
   2. Mg  0.0003  0.0001  0.0001  0.0001  0.0002  0.0002
   3.  O  0.0000  0.0000  0.0000  0.0000  0.0000  0.0000
   4.  C  0.0000  0.0000  0.0000  0.0000  0.0000  0.0000
   5.  N  0.0025  0.0096  0.0116  0.0020  0.0018  0.0000
   6.  N  0.0001  0.0011  0.0020  0.0077  0.0056  0.0062
   7.  O  0.0000  0.0000  0.0000  0.0000  0.0000  0.0000
   8.  C  0.0011  0.0028  0.0031  0.0005  0.0007  0.0005
   9.  C  0.0053  0.0024  0.0053  0.0095  0.0079  0.0012
  10.  C  0.0003  0.0006  0.0008  0.0023  0.0018  0.0030
  11.  O  0.0000  0.0000  0.0000  0.0000  0.0000  0.0000
  12.  C  0.0000  0.0000  0.0000  0.0000  0.0000  0.0000
  13.  C  0.0000  0.0000  0.0000  0.0000  0.0000  0.0000
  14.  C  0.0000  0.0000  0.0000  0.0000  0.0000  0.0000
  15.  O  0.0000  0.0000  0.0000  0.0000  0.0000  0.0000
  16.  C  0.0000  0.0000  0.0000  0.0000  0.0000  0.0000
  17.  O  0.0000  0.0000  0.0000  0.0000  0.0000  0.0000
  18.  C  0.0000  0.0000  0.0000  0.0000  0.0000  0.0000
  19.  O  0.0000  0.0000  0.0000  0.0000  0.0000  0.0000
  20.  O  0.0000  0.0000  0.0000  0.0000  0.0000  0.0000
  21.  C  0.0000  0.0000  0.0000  0.0000  0.0000  0.0000
  22.  C  0.0000  0.0000  0.0000  0.0000  0.0000  0.0000
  23.  C  0.0000  0.0000  0.0000  0.0000  0.0000  0.0000
  24.  O  0.0000  0.0000  0.0000  0.0000  0.0000  0.0000
  25.  C  0.0000  0.0000  0.0000  0.0000  0.0000  0.0000
  26.  C  0.0000  0.0000  0.0000  0.0000  0.0000  0.0000
  27.  C  0.0000  0.0000  0.0000  0.0000  0.0000  0.0000
  28.  C  0.0000  0.0000  0.0000  0.0000  0.0000  0.0000
  29.  C  0.0027  0.0007  0.0000  0.0000  0.0000  0.0000
  30.  C  0.0000  0.0000  0.0000  0.0001  0.0004  0.0019
  31.  C  0.0002  0.0002  0.0001  0.0001  0.0001  0.0000
  32.  C  0.0000  0.0001  0.0000  0.0000  0.0000  0.0000
  33.  C  0.0001  0.0001  0.0000  0.0000  0.0000  0.0000
  34.  C  0.0000  0.0000  0.0000  0.0000  0.0000  0.0000
  35.  C  0.0008  0.0003  0.0002  0.0001  0.0001  0.0000
  36.  C  0.0000  0.0001  0.0001  0.0000  0.0000  0.0000
  37.  C  0.0000  0.0004  0.0000  0.0000  0.0000  0.0000
  38.  C  0.0000  0.0000  0.0001  0.0003  0.0004  0.0004
  39.  C  0.0000  0.0000  0.0000  0.0000  0.0000  0.0000
  40.  C  0.0000  0.0000  0.0000  0.0001  0.0000  0.0001
  41.  C  0.0000  0.0000  0.0000  0.0000  0.0000  0.0000
  42.  C  0.0000  0.0001  0.0001  0.0002  0.0002  0.0005
  43.  C  0.0000  0.0000  0.0000  0.0000  0.0001  0.0000
  44.  C  0.0000  0.0000  0.0000  0.0001  0.0000  0.0000
  45.  C  0.0000  0.0000  0.0001  0.0000  0.0000  0.0000
  46.  C  0.0001  0.0001  0.0008  0.0000  0.0000  0.0000
  47.  C  0.0000  0.0001  0.0000  0.0000  0.0000  0.0000
  48.  C  0.0001  0.0003  0.0001  0.0000  0.0000  0.0000
  49.  C  0.0000  0.0000  0.0000  0.0000  0.0000  0.0000
  50.  C  0.0000  0.0000  0.0000  0.0006  0.0001  0.0001
  51.  C  0.0000  0.0000  0.0000  0.0000  0.0000  0.0000
  52.  C  0.0000  0.0000  0.0000  0.0000  0.0002  0.0000
  53.  C  0.9241  0.9166  0.9096  0.0001  0.0001  0.0001
  54.  C  0.0002  0.0000  0.0000  0.9088  0.9174  0.9260
  55.  H  0.0006  0.0000  0.0000  0.0000  0.0003  0.0004
  56.  H  0.0000  0.0000  0.0000  0.0000  0.0000  0.0000
  57.  H  0.0000  0.0000  0.0000  0.0000  0.0000  0.0000
  58.  H  0.0000  0.0000  0.0000  0.0000  0.0000  0.0000
  59.  H  0.0000  0.0000  0.0000  0.0000  0.0000  0.0000
  60.  H  0.0000  0.0000  0.0000  0.0000  0.0000  0.0000
  61.  H  0.0000  0.0000  0.0000  0.0000  0.0000  0.0000
  62.  H  0.0000  0.0000  0.0000  0.0000  0.0000  0.0000
  63.  H  0.0000  0.0000  0.0000  0.0000  0.0000  0.0000
  64.  H  0.0000  0.0000  0.0000  0.0000  0.0000  0.0000
  65.  H  0.0000  0.0000  0.0000  0.0000  0.0000  0.0000
  66.  H  0.0000  0.0000  0.0000  0.0000  0.0000  0.0000
  67.  H  0.0000  0.0000  0.0000  0.0000  0.0000  0.0000
  68.  H  0.0000  0.0000  0.0000  0.0000  0.0000  0.0000
  69.  H  0.0000  0.0000  0.0000  0.0000  0.0000  0.0000
  70.  H  0.0000  0.0000  0.0000  0.0000  0.0000  0.0000
  71.  H  0.0000  0.0000  0.0000  0.0000  0.0000  0.0000
  72.  H  0.0000  0.0000  0.0000  0.0000  0.0000  0.0000
  73.  H  0.0000  0.0000  0.0000  0.0000  0.0000  0.0000
  74.  H  0.0000  0.0000  0.0000  0.0000  0.0000  0.0000
  75.  H  0.0000  0.0000  0.0000  0.0000  0.0000  0.0000
  76.  H  0.0000  0.0000  0.0000  0.0000  0.0000  0.0000
  77.  H  0.0000  0.0000  0.0000  0.0000  0.0000  0.0000
  78.  H  0.0000  0.0000  0.0000  0.0000  0.0000  0.0000
  79.  H  0.0000  0.0003  0.0001  0.0000  0.0000  0.0000
  80.  H  0.0000  0.0000  0.0000  0.0000  0.0000  0.0000
  81.  H  0.0000  0.0000  0.0000  0.0000  0.0000  0.0000
  82.  H  0.0000  0.0000  0.0000  0.0000  0.0000  0.0000
  83.  H  0.0000  0.0000  0.0000  0.0000  0.0000  0.0000
  84.  H  0.0000  0.0000  0.0000  0.0000  0.0000  0.0000
  85.  H  0.0000  0.0000  0.0000  0.0000  0.0000  0.0000
  86.  H  0.0000  0.0000  0.0000  0.0000  0.0000  0.0000
  87.  H  0.0000  0.0000  0.0000  0.0000  0.0000  0.0000
  88.  H  0.0000  0.0000  0.0001  0.0000  0.0000  0.0000
  89.  H  0.0000  0.0000  0.0000  0.0000  0.0000  0.0000
  90.  H  0.0000  0.0000  0.0004  0.0000  0.0000  0.0000
  91.  H  0.0000  0.0000  0.0000  0.0000  0.0000  0.0000
  92.  H  0.0000  0.0000  0.0000  0.0000  0.0000  0.0000
  93.  H  0.0000  0.0000  0.0000  0.0000  0.0000  0.0000
  94.  H  0.0000  0.0000  0.0000  0.0000  0.0000  0.0000
  95.  H  0.0004  0.0000  0.0002  0.0000  0.0000  0.0000
  96.  H  0.0000  0.0000  0.0000  0.0000  0.0000  0.0000
  97.  H  0.0000  0.0000  0.0000  0.0000  0.0000  0.0000
  98.  H  0.0000  0.0000  0.0000  0.0000  0.0000  0.0000
  99.  H  0.0000  0.0000  0.0000  0.0000  0.0000  0.0000
 100.  H  0.0000  0.0000  0.0000  0.0001  0.0000  0.0000
 101.  H  0.0000  0.0000  0.0000  0.0038  0.0000  0.0000
 102.  H  0.0000  0.0000  0.0000  0.0000  0.0000  0.0000
 103.  H  0.0000  0.0000  0.0000  0.0000  0.0000  0.0000
 104.  H  0.0000  0.0000  0.0000  0.0000  0.0000  0.0000
 105.  H  0.0000  0.0000  0.0000  0.0000  0.0000  0.0000
 106.  H  0.0000  0.0000  0.0000  0.0000  0.0000  0.0000
 107.  H  0.0000  0.0000  0.0000  0.0000  0.0000  0.0000
 108.  H  0.0000  0.0000  0.0000  0.0000  0.0015  0.0000
 109.  H  0.0000  0.0001  0.0001  0.0000  0.0000  0.0000
 110.  H  0.0001  0.0000  0.0002  0.0000  0.0000  0.0000
 111.  H  0.0001  0.0002  0.0000  0.0000  0.0000  0.0000
 112.  H  0.0000  0.0000  0.0000  0.0000  0.0002  0.0001
 113.  H  0.0000  0.0000  0.0000  0.0002  0.0000  0.0000
 114.  H  0.0000  0.0000  0.0000  0.0001  0.0000  0.0000


 Wiberg bond index, Totals by atom:                                            

     Atom    1
     ---- ------
   1.  O  2.1499
   2. Mg  0.6090
   3.  O  2.1305
   4.  C  3.8270
   5.  N  2.8513
   6.  N  2.8231
   7.  O  2.0399
   8.  C  3.9818
   9.  C  3.8901
  10.  C  3.9830
  11.  O  2.1697
  12.  C  3.7837
  13.  C  3.8511
  14.  C  3.8172
  15.  O  1.9552
  16.  C  3.7083
  17.  O  1.4762
  18.  C  3.8205
  19.  O  1.9861
  20.  O  2.1187
  21.  C  3.7978
  22.  C  3.8841
  23.  C  3.8531
  24.  O  2.0428
  25.  C  3.8533
  26.  C  3.8329
  27.  C  3.8268
  28.  C  3.8306
  29.  C  3.9101
  30.  C  3.9150
  31.  C  3.9781
  32.  C  3.9855
  33.  C  3.9872
  34.  C  3.9873
  35.  C  3.9795
  36.  C  3.9796
  37.  C  3.9805
  38.  C  3.9791
  39.  C  3.9868
  40.  C  3.9873
  41.  C  3.9870
  42.  C  3.9780
  43.  C  3.9789
  44.  C  3.9793
  45.  C  3.9828
  46.  C  3.9846
  47.  C  3.9851
  48.  C  3.9851
  49.  C  3.9839
  50.  C  3.9857
  51.  C  3.9827
  52.  C  3.9852
  53.  C  3.8377
  54.  C  3.8440
  55.  H  0.9548
  56.  H  0.9401
  57.  H  0.9335
  58.  H  0.9589
  59.  H  0.9505
  60.  H  0.9559
  61.  H  0.9644
  62.  H  0.9487
  63.  H  0.9525
  64.  H  0.9645
  65.  H  0.9696
  66.  H  0.9431
  67.  H  0.9499
  68.  H  0.9607
  69.  H  0.9395
  70.  H  0.9410
  71.  H  0.9462
  72.  H  0.9470
  73.  H  0.9436
  74.  H  0.9387
  75.  H  0.9962
  76.  H  0.9968
  77.  H  0.9976
  78.  H  0.9982
  79.  H  0.9976
  80.  H  0.9973
  81.  H  0.9969
  82.  H  0.9972
  83.  H  0.9964
  84.  H  0.9969
  85.  H  0.9964
  86.  H  0.9942
  87.  H  0.9973
  88.  H  0.9967
  89.  H  0.9970
  90.  H  0.9969
  91.  H  0.9981
  92.  H  0.9964
  93.  H  0.9969
  94.  H  0.9971
  95.  H  0.9968
  96.  H  0.9970
  97.  H  0.9970
  98.  H  0.9961
  99.  H  0.9967
 100.  H  0.9968
 101.  H  0.9974
 102.  H  0.9972
 103.  H  0.9965
 104.  H  0.9955
 105.  H  0.9968
 106.  H  0.9962
 107.  H  0.9967
 108.  H  0.9976
 109.  H  0.9390
 110.  H  0.9365
 111.  H  0.9355
 112.  H  0.9371
 113.  H  0.9393
 114.  H  0.9410


 Atom-atom overlap-weighted NAO bond order:                                    

     Atom    1       2       3       4       5       6       7       8       9
     ---- ------  ------  ------  ------  ------  ------  ------  ------  ------
   1.  O  0.0000  0.0017  0.0000  0.8880  0.0000  0.0000 -0.0429  0.0000  0.0000
   2. Mg  0.0017  0.0000  0.0034 -0.0024  0.0408  0.0434  0.0003 -0.0209 -0.0154
   3.  O  0.0000  0.0034  0.0000  0.0000  0.0000  0.0000  0.0000  0.0000  0.0000
   4.  C  0.8880 -0.0024  0.0000  0.0000  0.0000  0.0000  1.3070  0.0000  0.0000
   5.  N  0.0000  0.0408  0.0000  0.0000  0.0000  0.0128  0.0000  1.1887 -0.0126
   6.  N  0.0000  0.0434  0.0000  0.0000  0.0128  0.0000  0.0000 -0.0105 -0.0129
   7.  O -0.0429  0.0003  0.0000  1.3070  0.0000  0.0000  0.0000  0.0000  0.0000
   8.  C  0.0000 -0.0209  0.0000  0.0000  1.1887 -0.0105  0.0000  0.0000  1.1083
   9.  C  0.0000 -0.0154  0.0000  0.0000 -0.0126 -0.0129  0.0000  1.1083  0.0000
  10.  C  0.0000 -0.0191  0.0000  0.0001 -0.0093  1.1754  0.0000  0.0437  1.1279
  11.  O  0.0006 -0.0007  0.0006 -0.0176  0.0000  0.0000 -0.0006  0.0000  0.0000
  12.  C  0.0002 -0.0063 -0.0172 -0.0069  0.0002  0.0002  0.0050  0.0000  0.0000
  13.  C  0.0000 -0.0073  0.7108  0.0004  0.0000  0.0000 -0.0001  0.0000  0.0000
  14.  C -0.0199 -0.0078 -0.0001  0.8550  0.0000  0.0000 -0.0182  0.0000  0.0000
  15.  O  0.0000  0.0376  0.0005  0.0057  0.0032  0.0028 -0.0006  0.0002  0.0001
  16.  C  0.6687 -0.0007  0.0000 -0.0060  0.0000  0.0000  0.0060  0.0000  0.0000
  17.  O  0.0000  0.0942 -0.0084  0.0000  0.0002  0.0028  0.0000  0.0000  0.0000
  18.  C  0.0000 -0.0023  0.8514  0.0000  0.0001  0.0000  0.0000  0.0000  0.0000
  19.  O  0.0000  0.0408 -0.0450  0.0000  0.0021  0.0000  0.0000  0.0000  0.0000
  20.  O  0.0000  0.0046  0.0006  0.0000  0.0000  0.0000  0.0000  0.0000  0.0000
  21.  C  0.0000 -0.0051  0.0003  0.0000  0.0000  0.0000  0.0000  0.0000  0.0000
  22.  C  0.0000 -0.0270  0.0004  0.0000  0.0000  0.0002  0.0000  0.0000  0.0000
  23.  C  0.0000 -0.0105 -0.0212  0.0000  0.0000  0.0000  0.0000  0.0000  0.0000
  24.  O  0.0000 -0.0007  0.0000  0.0000  0.0000  0.0000  0.0000  0.0000  0.0000
  25.  C  0.0000 -0.0202  0.0000  0.0000  0.0000  0.0001  0.0000  0.0000  0.0000
  26.  C  0.0000 -0.0052  0.0002  0.0000  0.0000  0.0000  0.0000  0.0000  0.0000
  27.  C  0.0000 -0.0060 -0.0183  0.0001  0.0000  0.0000  0.0003  0.0000  0.0000
  28.  C -0.0021 -0.0001  0.0000  0.0045  0.0000  0.0000 -0.0005  0.0000  0.0000
  29.  C  0.0000  0.0142  0.0000  0.0000  0.7425  0.0000  0.0000  0.0034  0.0032
  30.  C  0.0000  0.0112  0.0000  0.0000  0.0001  0.7377  0.0000  0.0001  0.0033
  31.  C  0.0000  0.0165  0.0000  0.0000 -0.0041  0.0000  0.0000 -0.0001  0.0000
  32.  C  0.0000  0.0025  0.0000  0.0000  0.0007  0.0000  0.0000  0.0000  0.0000
  33.  C  0.0000 -0.0011  0.0000  0.0000  0.0000  0.0000  0.0000  0.0000  0.0000
  34.  C  0.0000 -0.0012  0.0000  0.0000  0.0008  0.0000  0.0000  0.0000  0.0000
  35.  C  0.0000  0.0033  0.0000  0.0000 -0.0059  0.0000  0.0000 -0.0004  0.0000
  36.  C  0.0000  0.0108  0.0000  0.0000 -0.0004 -0.0001  0.0000 -0.0001  0.0000
  37.  C  0.0000 -0.0002  0.0000  0.0000 -0.0023  0.0000  0.0000  0.0022  0.0000
  38.  C  0.0000  0.0061  0.0000  0.0000  0.0000 -0.0056  0.0000  0.0000  0.0000
  39.  C  0.0000 -0.0017  0.0000  0.0000  0.0000  0.0008  0.0000  0.0000  0.0000
  40.  C  0.0000 -0.0025  0.0000  0.0000  0.0000  0.0000  0.0000  0.0000  0.0000
  41.  C  0.0000 -0.0025  0.0000  0.0000  0.0000  0.0008  0.0000  0.0000  0.0000
  42.  C  0.0000  0.0026  0.0000  0.0000  0.0000 -0.0063  0.0000  0.0000  0.0001
  43.  C  0.0000  0.0010  0.0000  0.0005  0.0000 -0.0016 -0.0001  0.0000  0.0000
  44.  C  0.0000  0.0011  0.0000  0.0000  0.0000 -0.0023  0.0000  0.0000  0.0000
  45.  C  0.0000 -0.0043  0.0000  0.0000  0.0000  0.0000  0.0000  0.0000  0.0000
  46.  C  0.0000 -0.0046  0.0000  0.0000 -0.0004  0.0000  0.0000  0.0023  0.0000
  47.  C  0.0000 -0.0013  0.0000  0.0000  0.0000  0.0000  0.0000 -0.0001  0.0000
  48.  C  0.0000 -0.0020  0.0000  0.0000  0.0000  0.0000  0.0000 -0.0002  0.0000
  49.  C  0.0000 -0.0002  0.0000  0.0000  0.0000  0.0000  0.0000  0.0000  0.0000
  50.  C  0.0000 -0.0026  0.0000  0.0000  0.0000  0.0000  0.0000  0.0000  0.0000
  51.  C  0.0000 -0.0016  0.0000  0.0000  0.0000 -0.0001  0.0000  0.0000  0.0000
  52.  C  0.0000 -0.0034  0.0000  0.0001  0.0000  0.0000 -0.0001  0.0000  0.0000
  53.  C  0.0000 -0.0038  0.0000  0.0000 -0.0182  0.0001  0.0000  0.8806 -0.0056
  54.  C  0.0000 -0.0061  0.0000  0.0000  0.0001 -0.0195  0.0000  0.0054 -0.0026
  55.  H  0.0000 -0.0013  0.0000  0.0000  0.0031  0.0033  0.0000  0.0151  0.7665
  56.  H  0.0000  0.0005 -0.0188  0.0000  0.0000  0.0000  0.0000  0.0000  0.0000
  57.  H -0.0002 -0.0041  0.0000  0.0040  0.0002  0.0000  0.0013  0.0006  0.0004
  58.  H -0.0159 -0.0003  0.0000 -0.0064  0.0000  0.0000  0.0035  0.0000  0.0000
  59.  H -0.0128 -0.0002  0.0000  0.0058  0.0000  0.0000  0.0003  0.0000  0.0000
  60.  H -0.0176  0.0001  0.0000 -0.0059  0.0000  0.0000  0.0037  0.0000  0.0000
  61.  H  0.0000  0.0027  0.0026  0.0000  0.0000  0.0000  0.0000  0.0000  0.0000
  62.  H  0.0000  0.0020  0.0015  0.0000  0.0000  0.0000  0.0000  0.0000  0.0000
  63.  H  0.0000  0.0024  0.0000  0.0000  0.0000  0.0000  0.0000  0.0000  0.0000
  64.  H  0.0000  0.0018  0.0000  0.0000  0.0000  0.0000  0.0000  0.0000  0.0000
  65.  H  0.0000 -0.0019  0.0000  0.0000  0.0000  0.0000  0.0000  0.0000  0.0000
  66.  H  0.0000 -0.0003  0.0000  0.0000  0.0000  0.0000  0.0000  0.0000  0.0000
  67.  H  0.0000  0.0004  0.0004  0.0000  0.0000  0.0000  0.0000  0.0000  0.0000
  68.  H  0.0000  0.0006  0.0002  0.0000  0.0000  0.0000  0.0000  0.0000  0.0000
  69.  H  0.0000  0.0002  0.0024  0.0001  0.0000  0.0000  0.0004  0.0000  0.0000
  70.  H  0.0000 -0.0003 -0.0011  0.0000  0.0000  0.0000  0.0000  0.0000  0.0000
  71.  H  0.0000 -0.0001 -0.0009  0.0000  0.0000  0.0000  0.0001  0.0000  0.0000
  72.  H  0.0000  0.0000  0.0000  0.0048  0.0000  0.0000 -0.0001  0.0000  0.0000
  73.  H  0.0003 -0.0001  0.0000 -0.0045  0.0000  0.0000  0.0010  0.0000  0.0000
  74.  H  0.0028  0.0001  0.0000 -0.0040  0.0000  0.0000  0.0001  0.0000  0.0000
  75.  H  0.0000  0.0004  0.0000  0.0000  0.0000  0.0000  0.0000  0.0000  0.0000
  76.  H  0.0000 -0.0003  0.0000  0.0000  0.0000  0.0000  0.0000  0.0000  0.0000
  77.  H  0.0000  0.0002  0.0000  0.0000  0.0000  0.0000  0.0000  0.0000  0.0000
  78.  H  0.0000  0.0462  0.0000  0.0000  0.0077  0.0005  0.0000 -0.0005  0.0000
  79.  H  0.0000  0.0116  0.0000  0.0000  0.0041  0.0000  0.0000  0.0089  0.0001
  80.  H  0.0000  0.0005  0.0000  0.0000  0.0000  0.0000  0.0000  0.0000  0.0000
  81.  H  0.0000 -0.0001  0.0000  0.0000  0.0000  0.0000  0.0000  0.0000  0.0000
  82.  H  0.0000  0.0002  0.0000  0.0000  0.0000  0.0000  0.0000  0.0000  0.0000
  83.  H  0.0000  0.0229  0.0000  0.0020  0.0000  0.0099  0.0000  0.0000  0.0000
  84.  H  0.0000  0.0175  0.0000  0.0000  0.0001  0.0057  0.0000  0.0002  0.0002
  85.  H  0.0000 -0.0006  0.0000  0.0000  0.0000  0.0000  0.0000  0.0000  0.0000
  86.  H  0.0000  0.0042  0.0000  0.0000  0.0000  0.0000  0.0000  0.0000  0.0000
  87.  H  0.0000 -0.0015  0.0000  0.0000  0.0000  0.0000  0.0000  0.0000  0.0000
  88.  H  0.0000 -0.0008  0.0000  0.0000  0.0000  0.0000  0.0000 -0.0001  0.0000
  89.  H  0.0000 -0.0012  0.0000  0.0000  0.0000  0.0000  0.0000 -0.0001  0.0000
  90.  H  0.0000  0.0069  0.0000  0.0000  0.0002  0.0000  0.0000  0.0076  0.0000
  91.  H  0.0000 -0.0018  0.0000  0.0000  0.0000  0.0000  0.0000  0.0000  0.0000
  92.  H  0.0000 -0.0013  0.0000  0.0000  0.0000  0.0000  0.0000  0.0000  0.0000
  93.  H  0.0000  0.0087  0.0000  0.0000  0.0000  0.0000  0.0000  0.0000  0.0000
  94.  H  0.0000 -0.0001  0.0000  0.0000  0.0000  0.0000  0.0000  0.0000  0.0000
  95.  H  0.0000  0.0004  0.0000  0.0000  0.0000  0.0000  0.0000 -0.0001  0.0000
  96.  H  0.0000  0.0003  0.0000  0.0000  0.0000  0.0000  0.0000  0.0000  0.0000
  97.  H  0.0000 -0.0012  0.0000  0.0000  0.0000  0.0000  0.0000  0.0000  0.0000
  98.  H  0.0000  0.0123  0.0000  0.0000  0.0000  0.0000  0.0000  0.0000  0.0000
  99.  H  0.0000 -0.0026  0.0000  0.0000  0.0000  0.0000  0.0000  0.0000  0.0000
 100.  H  0.0000 -0.0001  0.0000  0.0000  0.0000  0.0000  0.0000  0.0000  0.0000
 101.  H  0.0000  0.0007  0.0000  0.0000  0.0000  0.0000  0.0000  0.0000  0.0000
 102.  H  0.0000  0.0003  0.0000  0.0000  0.0000  0.0000  0.0000  0.0000  0.0000
 103.  H  0.0000 -0.0022  0.0000  0.0003  0.0000  0.0000  0.0021  0.0000  0.0000
 104.  H  0.0000  0.0195  0.0004  0.0000  0.0000  0.0000  0.0000  0.0000  0.0000
 105.  H  0.0000 -0.0035  0.0000  0.0000  0.0000  0.0000  0.0000  0.0000  0.0000
 106.  H  0.0000 -0.0005  0.0000  0.0004  0.0000  0.0000  0.0014  0.0000  0.0000
 107.  H  0.0000  0.0002  0.0000  0.0000  0.0000  0.0000  0.0000  0.0000  0.0000
 108.  H  0.0000  0.0010  0.0000  0.0000  0.0000  0.0000  0.0000  0.0000  0.0000
 109.  H  0.0000 -0.0008  0.0000  0.0000 -0.0033  0.0000  0.0000  0.0074  0.0021
 110.  H  0.0000 -0.0008  0.0000  0.0000  0.0011  0.0000  0.0000  0.0116 -0.0042
 111.  H  0.0000 -0.0014  0.0000  0.0000 -0.0002  0.0000  0.0000  0.0133 -0.0025
 112.  H  0.0000 -0.0009  0.0000  0.0000  0.0000 -0.0020  0.0000 -0.0001 -0.0006
 113.  H  0.0000 -0.0008  0.0000  0.0000  0.0000 -0.0038  0.0000  0.0000  0.0011
 114.  H  0.0000 -0.0016  0.0000  0.0000  0.0000  0.0017  0.0000  0.0001 -0.0022

     Atom   10      11      12      13      14      15      16      17      18
     ---- ------  ------  ------  ------  ------  ------  ------  ------  ------
   1.  O  0.0000  0.0006  0.0002  0.0000 -0.0199  0.0000  0.6687  0.0000  0.0000
   2. Mg -0.0191 -0.0007 -0.0063 -0.0073 -0.0078  0.0376 -0.0007  0.0942 -0.0023
   3.  O  0.0000  0.0006 -0.0172  0.7108 -0.0001  0.0005  0.0000 -0.0084  0.8514
   4.  C  0.0001 -0.0176 -0.0069  0.0004  0.8550  0.0057 -0.0060  0.0000  0.0000
   5.  N -0.0093  0.0000  0.0002  0.0000  0.0000  0.0032  0.0000  0.0002  0.0001
   6.  N  1.1754  0.0000  0.0002  0.0000  0.0000  0.0028  0.0000  0.0028  0.0000
   7.  O  0.0000 -0.0006  0.0050 -0.0001 -0.0182 -0.0006  0.0060  0.0000  0.0000
   8.  C  0.0437  0.0000  0.0000  0.0000  0.0000  0.0002  0.0000  0.0000  0.0000
   9.  C  1.1279  0.0000  0.0000  0.0000  0.0000  0.0001  0.0000  0.0000  0.0000
  10.  C  0.0000  0.0000  0.0000  0.0000  0.0000  0.0002  0.0000  0.0000  0.0000
  11.  O  0.0000  0.0000  0.8993 -0.0189  0.6767 -0.0445 -0.0001  0.0000  0.0002
  12.  C  0.0000  0.8993  0.0000  0.8717 -0.0025  1.2571  0.0000  0.0014 -0.0089
  13.  C  0.0000 -0.0189  0.8717  0.0000  0.0108 -0.0143  0.0000  0.0015  0.0024
  14.  C  0.0000  0.6767 -0.0025  0.0108  0.0000  0.0024  0.0114  0.0000  0.0000
  15.  O  0.0002 -0.0445  1.2571 -0.0143  0.0024  0.0000  0.0000  0.0031  0.0053
  16.  C  0.0000 -0.0001  0.0000  0.0000  0.0114  0.0000  0.0000  0.0000  0.0000
  17.  O  0.0000  0.0000  0.0014  0.0015  0.0000  0.0031  0.0000  0.0000  0.1466
  18.  C  0.0000  0.0002 -0.0089  0.0024  0.0000  0.0053  0.0000  0.1466  0.0000
  19.  O  0.0000 -0.0001  0.0193  0.0073  0.0000 -0.0022  0.0000 -0.0128  1.2879
  20.  O  0.0000  0.0000  0.0000 -0.0001  0.0000  0.0000  0.0000 -0.0018 -0.0116
  21.  C  0.0000  0.0000  0.0000  0.0000  0.0000  0.0000  0.0000 -0.0020 -0.0047
  22.  C  0.0000  0.0000  0.0000 -0.0001  0.0000  0.0001  0.0000  0.8154 -0.0092
  23.  C  0.0000  0.0000  0.0006  0.0098  0.0000  0.0000  0.0000  0.0007  0.8665
  24.  O  0.0000  0.0000  0.0000  0.0000  0.0000  0.0000  0.0000  0.0002  0.0000
  25.  C  0.0000  0.0000  0.0000  0.0000  0.0000  0.0000  0.0000 -0.0156  0.0012
  26.  C  0.0000  0.0000  0.0000 -0.0003  0.0000  0.0000  0.0000  0.0007  0.0107
  27.  C  0.0000 -0.0041  0.0052  0.8400 -0.0002  0.0004  0.0000  0.0000  0.0083
  28.  C  0.0000 -0.0199  0.0072  0.0000  0.8444  0.0003 -0.0003  0.0000  0.0000
  29.  C  0.0000  0.0000  0.0000  0.0000  0.0000  0.0000  0.0000  0.0000  0.0006
  30.  C  0.0057  0.0000  0.0000  0.0000  0.0000  0.0000  0.0000  0.0002  0.0000
  31.  C  0.0000  0.0000  0.0000  0.0000  0.0000  0.0000  0.0000  0.0000  0.0003
  32.  C  0.0000  0.0000  0.0000  0.0000  0.0000  0.0000  0.0000  0.0000  0.0001
  33.  C  0.0000  0.0000  0.0000  0.0000  0.0000  0.0000  0.0000  0.0000  0.0000
  34.  C  0.0000  0.0000  0.0000  0.0000  0.0000  0.0000  0.0000  0.0000  0.0000
  35.  C  0.0000  0.0000  0.0000  0.0000  0.0000  0.0000  0.0000  0.0000  0.0003
  36.  C  0.0000  0.0000  0.0000  0.0000  0.0000  0.0000  0.0000 -0.0001  0.0000
  37.  C  0.0000  0.0000  0.0000  0.0000 -0.0002  0.0000  0.0000  0.0000  0.0000
  38.  C  0.0003  0.0000  0.0000  0.0000  0.0000  0.0000  0.0000  0.0001  0.0000
  39.  C  0.0000  0.0000  0.0000  0.0000  0.0000  0.0000  0.0000  0.0000  0.0000
  40.  C  0.0000  0.0000  0.0000  0.0000  0.0000  0.0000  0.0000  0.0000  0.0000
  41.  C  0.0000  0.0000  0.0000  0.0000  0.0000  0.0000  0.0000  0.0000  0.0000
  42.  C -0.0008  0.0000  0.0000  0.0000  0.0000  0.0000  0.0000  0.0000  0.0000
  43.  C  0.0003  0.0000 -0.0001  0.0000  0.0000  0.0000  0.0000  0.0000  0.0000
  44.  C  0.0024  0.0000  0.0000  0.0000  0.0000  0.0000  0.0000  0.0000  0.0000
  45.  C  0.0000  0.0000  0.0000  0.0000  0.0000  0.0000  0.0000  0.0000  0.0000
  46.  C  0.0000  0.0000  0.0000  0.0000  0.0000  0.0000  0.0000  0.0000  0.0000
  47.  C  0.0000 -0.0003  0.0017  0.0000  0.0015  0.0000  0.0000  0.0000  0.0000
  48.  C  0.0000  0.0000  0.0000  0.0000  0.0000  0.0000  0.0000  0.0000  0.0000
  49.  C -0.0001  0.0000  0.0000  0.0000  0.0000  0.0000  0.0000  0.0000  0.0000
  50.  C  0.0000  0.0000  0.0000  0.0000  0.0000  0.0000  0.0000  0.0000  0.0000
  51.  C  0.0000  0.0000  0.0017  0.0003  0.0000 -0.0002  0.0000 -0.0004  0.0000
  52.  C  0.0000  0.0000  0.0000  0.0000  0.0000  0.0000 -0.0013  0.0000  0.0000
  53.  C  0.0050  0.0000  0.0000  0.0000  0.0000  0.0000  0.0000  0.0000  0.0000
  54.  C  0.8799  0.0000  0.0000  0.0000  0.0000  0.0000  0.0000  0.0000  0.0000
  55.  H  0.0153  0.0000  0.0000  0.0000  0.0000  0.0000  0.0000  0.0000  0.0000
  56.  H  0.0000 -0.0009  0.0044  0.7471  0.0000  0.0011  0.0000  0.0000 -0.0055
  57.  H  0.0001 -0.0158 -0.0066  0.0005  0.7537  0.0075  0.0000  0.0000  0.0000
  58.  H  0.0000  0.0000  0.0000  0.0000  0.0003  0.0000  0.7542  0.0000  0.0000
  59.  H  0.0000  0.0000  0.0000  0.0000  0.0000  0.0000  0.7523  0.0000  0.0000
  60.  H  0.0000  0.0000  0.0000  0.0000  0.0003  0.0000  0.7524  0.0000  0.0000
  61.  H  0.0000  0.0000  0.0000 -0.0001  0.0000  0.0000  0.0000 -0.0246 -0.0060
  62.  H  0.0000  0.0000  0.0000  0.0003  0.0000  0.0000  0.0000 -0.0005  0.0006
  63.  H  0.0000  0.0000  0.0000  0.0000  0.0000  0.0000  0.0000  0.0026  0.0000
  64.  H  0.0000  0.0000  0.0000  0.0000  0.0000  0.0000  0.0000  0.0004  0.0000
  65.  H  0.0000  0.0000  0.0000  0.0000  0.0000  0.0000  0.0000 -0.0006  0.0000
  66.  H  0.0000  0.0000  0.0000  0.0000  0.0000  0.0000  0.0000  0.0000  0.0053
  67.  H  0.0000  0.0000  0.0000  0.0000  0.0000  0.0000  0.0000  0.0000 -0.0008
  68.  H  0.0000  0.0000  0.0000  0.0000  0.0000  0.0000  0.0000  0.0000 -0.0071
  69.  H  0.0000  0.0034 -0.0040  0.0070  0.0000  0.0001  0.0000  0.0000 -0.0001
  70.  H  0.0000  0.0000  0.0048  0.0018  0.0000  0.0000  0.0000  0.0000  0.0001
  71.  H  0.0000  0.0003 -0.0054 -0.0009 -0.0001  0.0004  0.0000  0.0000  0.0001
  72.  H  0.0000 -0.0013  0.0001  0.0000  0.0019  0.0000  0.0000  0.0000  0.0000
  73.  H  0.0000 -0.0011  0.0001  0.0000 -0.0028  0.0000  0.0000  0.0000  0.0000
  74.  H  0.0000  0.0024 -0.0001  0.0000  0.0080  0.0000  0.0000  0.0000  0.0000
  75.  H  0.0000  0.0000  0.0000  0.0000  0.0000  0.0000  0.0000  0.0000  0.0000
  76.  H  0.0000  0.0000  0.0000  0.0000  0.0000  0.0000  0.0000  0.0000  0.0000
  77.  H  0.0000  0.0000  0.0000  0.0000  0.0000  0.0000  0.0000  0.0000  0.0000
  78.  H  0.0000  0.0000  0.0000  0.0000  0.0000  0.0000  0.0000  0.0003  0.0000
  79.  H  0.0000  0.0000  0.0001  0.0000 -0.0003  0.0000  0.0000  0.0000  0.0000
  80.  H  0.0000  0.0000  0.0000  0.0000  0.0000  0.0000  0.0000  0.0000  0.0000
  81.  H  0.0000  0.0000  0.0000  0.0000  0.0000  0.0000  0.0000  0.0000  0.0000
  82.  H  0.0000  0.0000  0.0000  0.0000  0.0000  0.0000  0.0000  0.0000  0.0000
  83.  H  0.0017  0.0000  0.0002  0.0000  0.0000  0.0045  0.0001  0.0000  0.0000
  84.  H  0.0089  0.0000  0.0000  0.0000  0.0000  0.0000  0.0000  0.0000  0.0000
  85.  H  0.0000  0.0000  0.0000  0.0000  0.0000  0.0000  0.0000  0.0000  0.0000
  86.  H  0.0000  0.0000  0.0000  0.0000  0.0000  0.0000  0.0000  0.0000  0.0000
  87.  H  0.0000  0.0000  0.0000  0.0000  0.0000  0.0000  0.0000  0.0000  0.0000
  88.  H  0.0000  0.0000  0.0000  0.0000  0.0000  0.0000  0.0000  0.0000  0.0000
  89.  H  0.0000  0.0000  0.0000  0.0000  0.0000  0.0000  0.0000  0.0000  0.0000
  90.  H  0.0000  0.0000  0.0000  0.0000  0.0000  0.0000  0.0000  0.0000  0.0000
  91.  H  0.0000  0.0000 -0.0001  0.0000  0.0006  0.0000  0.0000  0.0000  0.0000
  92.  H  0.0000  0.0000 -0.0001  0.0000  0.0000  0.0000  0.0000  0.0000  0.0000
  93.  H  0.0000  0.0005  0.0079  0.0000  0.0014 -0.0003  0.0000  0.0000  0.0002
  94.  H  0.0000  0.0000  0.0000  0.0000  0.0000  0.0000  0.0000  0.0000  0.0000
  95.  H  0.0000  0.0000  0.0000  0.0000  0.0000  0.0000  0.0000  0.0000  0.0000
  96.  H  0.0000  0.0000  0.0000  0.0000  0.0000  0.0000  0.0000  0.0000  0.0000
  97.  H  0.0000  0.0000  0.0000  0.0000  0.0000  0.0000  0.0000  0.0000  0.0000
  98.  H  0.0000  0.0000  0.0000  0.0000  0.0000  0.0000  0.0000  0.0000  0.0000
  99.  H  0.0000  0.0000  0.0000  0.0000  0.0000  0.0000  0.0000  0.0000  0.0000
 100.  H  0.0000  0.0000  0.0000  0.0000  0.0000  0.0000  0.0000  0.0000  0.0000
 101.  H -0.0001  0.0000  0.0000  0.0000  0.0000  0.0000  0.0000  0.0000  0.0000
 102.  H  0.0000  0.0000  0.0000  0.0000  0.0000  0.0000  0.0000  0.0000  0.0000
 103.  H  0.0000  0.0000  0.0015 -0.0001  0.0000 -0.0001  0.0000  0.0000  0.0000
 104.  H  0.0000  0.0000  0.0013  0.0005  0.0000  0.0006  0.0000  0.0027  0.0000
 105.  H  0.0000  0.0000  0.0000  0.0000  0.0000  0.0000  0.0000  0.0000  0.0000
 106.  H  0.0000  0.0000  0.0000  0.0000  0.0000  0.0000 -0.0009  0.0000  0.0000
 107.  H  0.0000  0.0000  0.0000  0.0000  0.0000  0.0000  0.0000  0.0000  0.0000
 108.  H  0.0000  0.0000  0.0000  0.0000  0.0000  0.0000 -0.0005  0.0000  0.0000
 109.  H  0.0000  0.0000  0.0000  0.0000  0.0000  0.0000  0.0000  0.0000  0.0000
 110.  H  0.0000  0.0000  0.0000  0.0000  0.0000  0.0000  0.0000  0.0000  0.0000
 111.  H  0.0000  0.0000  0.0000  0.0000  0.0000  0.0000  0.0000  0.0000  0.0000
 112.  H  0.0112  0.0000  0.0000  0.0000  0.0000  0.0000  0.0000  0.0000  0.0000
 113.  H  0.0096  0.0000  0.0000  0.0000  0.0000  0.0000  0.0000  0.0000  0.0000
 114.  H  0.0105  0.0000  0.0000  0.0000  0.0000  0.0000  0.0000  0.0000  0.0000

     Atom   19      20      21      22      23      24      25      26      27
     ---- ------  ------  ------  ------  ------  ------  ------  ------  ------
   1.  O  0.0000  0.0000  0.0000  0.0000  0.0000  0.0000  0.0000  0.0000  0.0000
   2. Mg  0.0408  0.0046 -0.0051 -0.0270 -0.0105 -0.0007 -0.0202 -0.0052 -0.0060
   3.  O -0.0450  0.0006  0.0003  0.0004 -0.0212  0.0000  0.0000  0.0002 -0.0183
   4.  C  0.0000  0.0000  0.0000  0.0000  0.0000  0.0000  0.0000  0.0000  0.0001
   5.  N  0.0021  0.0000  0.0000  0.0000  0.0000  0.0000  0.0000  0.0000  0.0000
   6.  N  0.0000  0.0000  0.0000  0.0002  0.0000  0.0000  0.0001  0.0000  0.0000
   7.  O  0.0000  0.0000  0.0000  0.0000  0.0000  0.0000  0.0000  0.0000  0.0003
   8.  C  0.0000  0.0000  0.0000  0.0000  0.0000  0.0000  0.0000  0.0000  0.0000
   9.  C  0.0000  0.0000  0.0000  0.0000  0.0000  0.0000  0.0000  0.0000  0.0000
  10.  C  0.0000  0.0000  0.0000  0.0000  0.0000  0.0000  0.0000  0.0000  0.0000
  11.  O -0.0001  0.0000  0.0000  0.0000  0.0000  0.0000  0.0000  0.0000 -0.0041
  12.  C  0.0193  0.0000  0.0000  0.0000  0.0006  0.0000  0.0000  0.0000  0.0052
  13.  C  0.0073 -0.0001  0.0000 -0.0001  0.0098  0.0000  0.0000 -0.0003  0.8400
  14.  C  0.0000  0.0000  0.0000  0.0000  0.0000  0.0000  0.0000  0.0000 -0.0002
  15.  O -0.0022  0.0000  0.0000  0.0001  0.0000  0.0000  0.0000  0.0000  0.0004
  16.  C  0.0000  0.0000  0.0000  0.0000  0.0000  0.0000  0.0000  0.0000  0.0000
  17.  O -0.0128 -0.0018 -0.0020  0.8154  0.0007  0.0002 -0.0156  0.0007  0.0000
  18.  C  1.2879 -0.0116 -0.0047 -0.0092  0.8665  0.0000  0.0012  0.0107  0.0083
  19.  O  0.0000  0.0006  0.0003  0.0002 -0.0175  0.0000  0.0000 -0.0063  0.0004
  20.  O  0.0006  0.0000  0.8260 -0.0285  0.7120 -0.0387  0.0026 -0.0196  0.0000
  21.  C  0.0003  0.8260  0.0000  0.8704  0.0019  1.3100 -0.0054  0.0061  0.0000
  22.  C  0.0002 -0.0285  0.8704  0.0000 -0.0094 -0.0171  0.8461  0.0004  0.0000
  23.  C -0.0175  0.7120  0.0019 -0.0094  0.0000  0.0041  0.0002  0.8400  0.0000
  24.  O  0.0000 -0.0387  1.3100 -0.0171  0.0041  0.0000 -0.0001 -0.0001  0.0000
  25.  C  0.0000  0.0026 -0.0054  0.8461  0.0002 -0.0001  0.0000  0.0000  0.0000
  26.  C -0.0063 -0.0196  0.0061  0.0004  0.8400 -0.0001  0.0000  0.0000  0.0000
  27.  C  0.0004  0.0000  0.0000  0.0000  0.0000  0.0000  0.0000  0.0000  0.0000
  28.  C  0.0000  0.0000  0.0000  0.0000  0.0000  0.0000  0.0000  0.0000  0.0000
  29.  C  0.0027  0.0000  0.0000  0.0000  0.0000  0.0000  0.0000  0.0000  0.0000
  30.  C  0.0000  0.0000  0.0000  0.0001  0.0000  0.0000  0.0014  0.0000  0.0000
  31.  C  0.0003  0.0001  0.0001  0.0000  0.0001  0.0000  0.0000  0.0000  0.0000
  32.  C  0.0000  0.0001  0.0000  0.0000  0.0002  0.0000  0.0000 -0.0012  0.0000
  33.  C  0.0001  0.0000  0.0000  0.0000  0.0000  0.0000  0.0000 -0.0021  0.0000
  34.  C  0.0006  0.0000  0.0000  0.0000  0.0000  0.0000  0.0000 -0.0003  0.0000
  35.  C  0.0027  0.0000  0.0000  0.0000  0.0000  0.0000  0.0000  0.0000  0.0000
  36.  C  0.0000  0.0000  0.0002  0.0000  0.0000  0.0000  0.0000  0.0000  0.0000
  37.  C  0.0000  0.0000  0.0000  0.0000  0.0000  0.0000  0.0000  0.0000  0.0000
  38.  C  0.0000  0.0000  0.0000  0.0001  0.0000  0.0000 -0.0008  0.0000  0.0000
  39.  C  0.0000  0.0000  0.0000  0.0000  0.0000  0.0000 -0.0026  0.0000  0.0000
  40.  C  0.0000  0.0000  0.0000  0.0000  0.0000  0.0000  0.0005  0.0000  0.0000
  41.  C  0.0000  0.0000  0.0000  0.0000  0.0000  0.0000  0.0008  0.0000  0.0000
  42.  C  0.0000  0.0000  0.0000  0.0000  0.0000  0.0000  0.0001  0.0000  0.0000
  43.  C  0.0000  0.0000  0.0000  0.0000  0.0000  0.0000  0.0000  0.0000  0.0000
  44.  C  0.0000  0.0000  0.0000  0.0000  0.0000  0.0000  0.0000  0.0000  0.0000
  45.  C  0.0000  0.0000  0.0011  0.0000  0.0000 -0.0003  0.0000  0.0000  0.0000
  46.  C  0.0000  0.0000  0.0000  0.0000  0.0000  0.0000  0.0000  0.0000  0.0000
  47.  C -0.0002  0.0000  0.0000  0.0000  0.0000  0.0000  0.0000  0.0000  0.0000
  48.  C  0.0000  0.0000  0.0000  0.0000  0.0000  0.0000  0.0000  0.0000  0.0000
  49.  C  0.0000  0.0000  0.0000  0.0000  0.0000  0.0000 -0.0006  0.0000  0.0000
  50.  C  0.0000  0.0000  0.0000  0.0000  0.0000  0.0000  0.0000  0.0000  0.0000
  51.  C  0.0000  0.0000  0.0000  0.0003  0.0000  0.0000 -0.0001  0.0000 -0.0010
  52.  C  0.0000  0.0000  0.0000  0.0000  0.0000  0.0000  0.0000  0.0000  0.0000
  53.  C  0.0000  0.0000  0.0000  0.0000  0.0000  0.0000  0.0000  0.0000  0.0000
  54.  C  0.0000  0.0000  0.0000  0.0000  0.0000  0.0000  0.0000  0.0000  0.0000
  55.  H  0.0000  0.0000  0.0000  0.0000  0.0000  0.0000  0.0000  0.0000  0.0000
  56.  H  0.0039  0.0000  0.0000  0.0000  0.0002  0.0000  0.0000  0.0002 -0.0014
  57.  H  0.0000  0.0000  0.0000  0.0000  0.0000  0.0000  0.0000  0.0000  0.0000
  58.  H  0.0000  0.0000  0.0000  0.0000  0.0000  0.0000  0.0000  0.0000  0.0000
  59.  H  0.0000  0.0000  0.0000  0.0000  0.0000  0.0000  0.0000  0.0000  0.0000
  60.  H  0.0000  0.0000  0.0000  0.0000  0.0000  0.0000  0.0000  0.0000  0.0000
  61.  H  0.0001 -0.0009  0.0013  0.7418 -0.0005  0.0013 -0.0080  0.0000  0.0000
  62.  H  0.0023 -0.0182 -0.0059  0.0010  0.7572  0.0003 -0.0001 -0.0030 -0.0001
  63.  H  0.0000  0.0001 -0.0022  0.0093  0.0000  0.0014  0.7428  0.0000  0.0000
  64.  H  0.0000  0.0001 -0.0053  0.0017  0.0000  0.0024  0.7486  0.0000  0.0000
  65.  H  0.0000  0.0000  0.0048  0.0059  0.0000  0.0001  0.7456  0.0000  0.0000
  66.  H  0.0001 -0.0008  0.0000  0.0000  0.0015  0.0000  0.0000  0.7472  0.0000
  67.  H -0.0003  0.0025 -0.0001  0.0000  0.0064  0.0000  0.0000  0.7456  0.0000
  68.  H  0.0049 -0.0013  0.0001  0.0000  0.0014  0.0000  0.0000  0.7405  0.0000
  69.  H  0.0000  0.0000  0.0000  0.0000  0.0000  0.0000  0.0000  0.0000  0.7466
  70.  H  0.0000  0.0000  0.0000  0.0000  0.0000  0.0000  0.0000  0.0000  0.7466
  71.  H  0.0000  0.0000  0.0000  0.0000  0.0000  0.0000  0.0000  0.0000  0.7466
  72.  H  0.0000  0.0000  0.0000  0.0000  0.0000  0.0000  0.0000  0.0000  0.0000
  73.  H  0.0000  0.0000  0.0000  0.0000  0.0000  0.0000  0.0000  0.0000  0.0000
  74.  H  0.0000  0.0000  0.0000  0.0000  0.0000  0.0000  0.0000  0.0000  0.0000
  75.  H  0.0000  0.0000  0.0000  0.0000  0.0000  0.0000  0.0000  0.0000  0.0000
  76.  H  0.0000  0.0000  0.0000  0.0000  0.0000  0.0000  0.0000 -0.0001  0.0000
  77.  H  0.0000  0.0000  0.0000  0.0000  0.0000  0.0000  0.0000  0.0000  0.0000
  78.  H  0.0000  0.0000  0.0003  0.0000  0.0000  0.0000  0.0000  0.0000  0.0000
  79.  H  0.0000  0.0000  0.0000  0.0000  0.0000  0.0000  0.0000  0.0000  0.0000
  80.  H  0.0000  0.0000  0.0000  0.0000  0.0000  0.0000  0.0000  0.0000  0.0000
  81.  H  0.0000  0.0000  0.0000  0.0000  0.0000  0.0000  0.0000  0.0000  0.0000
  82.  H  0.0000  0.0000  0.0000  0.0000  0.0000  0.0000  0.0000  0.0000  0.0000
  83.  H  0.0000  0.0000  0.0000  0.0000  0.0000  0.0000  0.0000  0.0000  0.0000
  84.  H  0.0000  0.0000  0.0000  0.0000  0.0000  0.0000  0.0000  0.0000  0.0000
  85.  H  0.0000  0.0000  0.0000  0.0000  0.0000  0.0001  0.0000  0.0000  0.0000
  86.  H  0.0000  0.0013  0.0046  0.0001  0.0001  0.0026  0.0000  0.0000  0.0000
  87.  H  0.0000  0.0000  0.0000  0.0000  0.0000  0.0000  0.0000  0.0000  0.0000
  88.  H  0.0000  0.0000  0.0000  0.0000  0.0000  0.0000  0.0000  0.0000  0.0000
  89.  H  0.0000  0.0000  0.0000  0.0000  0.0000  0.0000  0.0000  0.0000  0.0000
  90.  H  0.0000  0.0000  0.0000  0.0000  0.0000  0.0000  0.0000  0.0000  0.0000
  91.  H  0.0000  0.0000  0.0000  0.0000  0.0000  0.0000  0.0000  0.0000  0.0000
  92.  H  0.0000  0.0000  0.0000  0.0000  0.0000  0.0000  0.0000  0.0000  0.0000
  93.  H  0.0025  0.0000  0.0000  0.0000  0.0000  0.0000  0.0000  0.0000  0.0000
  94.  H  0.0000  0.0000  0.0000  0.0000  0.0000  0.0000  0.0000  0.0000  0.0000
  95.  H  0.0000  0.0000  0.0000  0.0000  0.0000  0.0000  0.0000  0.0000  0.0000
  96.  H  0.0000  0.0000  0.0000  0.0000  0.0000  0.0000  0.0000  0.0000  0.0000
  97.  H  0.0000  0.0000  0.0000  0.0000  0.0000  0.0000  0.0000  0.0000  0.0000
  98.  H  0.0000  0.0000  0.0004  0.0000  0.0000  0.0003 -0.0007  0.0000  0.0000
  99.  H  0.0000  0.0000  0.0000  0.0000  0.0000  0.0000  0.0000  0.0000  0.0000
 100.  H  0.0000  0.0000  0.0000  0.0000  0.0000  0.0000  0.0000  0.0000  0.0000
 101.  H  0.0000  0.0000  0.0000  0.0000  0.0000  0.0000  0.0000  0.0000  0.0000
 102.  H  0.0000  0.0000  0.0000  0.0000  0.0000  0.0000  0.0000  0.0000  0.0000
 103.  H  0.0000  0.0000  0.0000  0.0000  0.0000  0.0000  0.0000  0.0000 -0.0006
 104.  H  0.0000  0.0000  0.0000  0.0011  0.0000  0.0000 -0.0001  0.0000 -0.0003
 105.  H  0.0000  0.0000  0.0000  0.0000  0.0000  0.0000  0.0000  0.0000  0.0000
 106.  H  0.0000  0.0000  0.0000  0.0000  0.0000  0.0000  0.0000  0.0000  0.0000
 107.  H  0.0000  0.0000  0.0000  0.0000  0.0000  0.0000  0.0000  0.0000  0.0000
 108.  H  0.0000  0.0000  0.0000  0.0000  0.0000  0.0000  0.0000  0.0000  0.0000
 109.  H  0.0000  0.0000  0.0000  0.0000  0.0000  0.0000  0.0000  0.0000  0.0000
 110.  H  0.0000  0.0000  0.0000  0.0000  0.0000  0.0000  0.0000  0.0000  0.0000
 111.  H  0.0000  0.0000  0.0000  0.0000  0.0000  0.0000  0.0000  0.0000  0.0000
 112.  H  0.0000  0.0000  0.0000  0.0000  0.0000  0.0000  0.0000  0.0000  0.0000
 113.  H  0.0000  0.0000  0.0000  0.0000  0.0000  0.0000  0.0000  0.0000  0.0000
 114.  H  0.0000  0.0000  0.0000  0.0000  0.0000  0.0000  0.0000  0.0000  0.0000

     Atom   28      29      30      31      32      33      34      35      36
     ---- ------  ------  ------  ------  ------  ------  ------  ------  ------
   1.  O -0.0021  0.0000  0.0000  0.0000  0.0000  0.0000  0.0000  0.0000  0.0000
   2. Mg -0.0001  0.0142  0.0112  0.0165  0.0025 -0.0011 -0.0012  0.0033  0.0108
   3.  O  0.0000  0.0000  0.0000  0.0000  0.0000  0.0000  0.0000  0.0000  0.0000
   4.  C  0.0045  0.0000  0.0000  0.0000  0.0000  0.0000  0.0000  0.0000  0.0000
   5.  N  0.0000  0.7425  0.0001 -0.0041  0.0007  0.0000  0.0008 -0.0059 -0.0004
   6.  N  0.0000  0.0000  0.7377  0.0000  0.0000  0.0000  0.0000  0.0000 -0.0001
   7.  O -0.0005  0.0000  0.0000  0.0000  0.0000  0.0000  0.0000  0.0000  0.0000
   8.  C  0.0000  0.0034  0.0001 -0.0001  0.0000  0.0000  0.0000 -0.0004 -0.0001
   9.  C  0.0000  0.0032  0.0033  0.0000  0.0000  0.0000  0.0000  0.0000  0.0000
  10.  C  0.0000  0.0000  0.0057  0.0000  0.0000  0.0000  0.0000  0.0000  0.0000
  11.  O -0.0199  0.0000  0.0000  0.0000  0.0000  0.0000  0.0000  0.0000  0.0000
  12.  C  0.0072  0.0000  0.0000  0.0000  0.0000  0.0000  0.0000  0.0000  0.0000
  13.  C  0.0000  0.0000  0.0000  0.0000  0.0000  0.0000  0.0000  0.0000  0.0000
  14.  C  0.8444  0.0000  0.0000  0.0000  0.0000  0.0000  0.0000  0.0000  0.0000
  15.  O  0.0003  0.0000  0.0000  0.0000  0.0000  0.0000  0.0000  0.0000  0.0000
  16.  C -0.0003  0.0000  0.0000  0.0000  0.0000  0.0000  0.0000  0.0000  0.0000
  17.  O  0.0000  0.0000  0.0002  0.0000  0.0000  0.0000  0.0000  0.0000 -0.0001
  18.  C  0.0000  0.0006  0.0000  0.0003  0.0001  0.0000  0.0000  0.0003  0.0000
  19.  O  0.0000  0.0027  0.0000  0.0003  0.0000  0.0001  0.0006  0.0027  0.0000
  20.  O  0.0000  0.0000  0.0000  0.0001  0.0001  0.0000  0.0000  0.0000  0.0000
  21.  C  0.0000  0.0000  0.0000  0.0001  0.0000  0.0000  0.0000  0.0000  0.0002
  22.  C  0.0000  0.0000  0.0001  0.0000  0.0000  0.0000  0.0000  0.0000  0.0000
  23.  C  0.0000  0.0000  0.0000  0.0001  0.0002  0.0000  0.0000  0.0000  0.0000
  24.  O  0.0000  0.0000  0.0000  0.0000  0.0000  0.0000  0.0000  0.0000  0.0000
  25.  C  0.0000  0.0000  0.0014  0.0000  0.0000  0.0000  0.0000  0.0000  0.0000
  26.  C  0.0000  0.0000  0.0000  0.0000 -0.0012 -0.0021 -0.0003  0.0000  0.0000
  27.  C  0.0000  0.0000  0.0000  0.0000  0.0000  0.0000  0.0000  0.0000  0.0000
  28.  C  0.0000  0.0000  0.0000  0.0000  0.0000  0.0000  0.0000  0.0000  0.0000
  29.  C  0.0000  0.0000  0.0000  0.8093 -0.0039 -0.0075 -0.0033  0.8190 -0.0072
  30.  C  0.0000  0.0000  0.0000  0.0000  0.0000  0.0000  0.0000  0.0000  0.0000
  31.  C  0.0000  0.8093  0.0000  0.0000  0.8469 -0.0038 -0.0074 -0.0057  0.6300
  32.  C  0.0000 -0.0039  0.0000  0.8469  0.0000  0.8488 -0.0039 -0.0073 -0.0068
  33.  C  0.0000 -0.0075  0.0000 -0.0038  0.8488  0.0000  0.8556 -0.0036  0.0005
  34.  C  0.0000 -0.0033  0.0000 -0.0074 -0.0039  0.8556  0.0000  0.8472  0.0000
  35.  C  0.0000  0.8190  0.0000 -0.0057 -0.0073 -0.0036  0.8472  0.0000  0.0004
  36.  C  0.0000 -0.0072  0.0000  0.6300 -0.0068  0.0005  0.0000  0.0004  0.0000
  37.  C  0.0000 -0.0068  0.0000  0.0004  0.0000  0.0005 -0.0064  0.6325  0.0000
  38.  C  0.0000  0.0000  0.8215  0.0000  0.0000  0.0000  0.0000  0.0000  0.0000
  39.  C  0.0000  0.0000 -0.0041  0.0000  0.0000  0.0000  0.0000  0.0000  0.0000
  40.  C  0.0000  0.0000 -0.0073  0.0000  0.0000  0.0000  0.0000  0.0000  0.0000
  41.  C  0.0000  0.0000 -0.0040  0.0000  0.0000  0.0000  0.0000  0.0000  0.0000
  42.  C  0.0000  0.0000  0.8151  0.0000  0.0000  0.0000  0.0000  0.0000  0.0000
  43.  C  0.0000  0.0000 -0.0069  0.0000  0.0000  0.0000  0.0000  0.0000  0.0000
  44.  C  0.0000  0.0000 -0.0069  0.0000  0.0000  0.0000  0.0000  0.0000 -0.0001
  45.  C  0.0000  0.0003  0.0000 -0.0050 -0.0025  0.0000  0.0000  0.0000  0.6166
  46.  C  0.0000 -0.0012  0.0000 -0.0024 -0.0003  0.0000  0.0000  0.0000  0.6071
  47.  C -0.0009  0.0001  0.0000  0.0000  0.0000  0.0000 -0.0021 -0.0030  0.0000
  48.  C  0.0000 -0.0001  0.0000  0.0000  0.0000  0.0000 -0.0015 -0.0028  0.0000
  49.  C  0.0000  0.0000  0.0001  0.0000  0.0000  0.0000  0.0000  0.0000 -0.0002
  50.  C  0.0000  0.0000  0.0000  0.0000  0.0000  0.0000  0.0000  0.0000  0.0000
  51.  C  0.0000  0.0000  0.0001  0.0000  0.0000  0.0000  0.0000  0.0000  0.0000
  52.  C  0.0000  0.0000  0.0000  0.0000  0.0000  0.0000  0.0000  0.0000  0.0000
  53.  C  0.0000  0.0013  0.0000  0.0003  0.0000  0.0000  0.0000  0.0019 -0.0001
  54.  C  0.0000  0.0000  0.0079  0.0000  0.0000  0.0000  0.0000  0.0000  0.0000
  55.  H  0.0000  0.0000  0.0000  0.0000  0.0000  0.0000  0.0000  0.0000  0.0000
  56.  H  0.0000  0.0000  0.0000  0.0000  0.0000  0.0000  0.0000  0.0000  0.0000
  57.  H  0.0001  0.0000  0.0000  0.0000  0.0000  0.0000  0.0000 -0.0001  0.0000
  58.  H  0.0000  0.0000  0.0000  0.0000  0.0000  0.0000  0.0000  0.0000  0.0000
  59.  H  0.0000  0.0000  0.0000  0.0000  0.0000  0.0000  0.0000  0.0000  0.0000
  60.  H  0.0000  0.0000  0.0000  0.0000  0.0000  0.0000  0.0000  0.0000  0.0000
  61.  H  0.0000  0.0000  0.0000  0.0000  0.0000  0.0000  0.0000  0.0000  0.0000
  62.  H  0.0000  0.0000  0.0000  0.0000  0.0000  0.0000  0.0000  0.0000  0.0000
  63.  H  0.0000  0.0000  0.0000  0.0000  0.0000  0.0000  0.0000  0.0000  0.0000
  64.  H  0.0000  0.0000  0.0019  0.0000  0.0000  0.0000  0.0000  0.0000  0.0000
  65.  H  0.0000  0.0000  0.0005  0.0000  0.0000  0.0000  0.0000  0.0000  0.0000
  66.  H  0.0000  0.0000  0.0000  0.0000  0.0000  0.0000  0.0000  0.0000  0.0000
  67.  H  0.0000  0.0000  0.0000  0.0000  0.0000  0.0000  0.0000  0.0000  0.0000
  68.  H  0.0000 -0.0002  0.0000  0.0002  0.0086  0.0180  0.0021 -0.0002  0.0000
  69.  H  0.0000  0.0000  0.0000  0.0000  0.0000  0.0000  0.0000  0.0000  0.0000
  70.  H  0.0000  0.0000  0.0000  0.0000  0.0000  0.0000  0.0000  0.0000  0.0000
  71.  H  0.0000  0.0000  0.0000  0.0000  0.0000  0.0000  0.0000  0.0000  0.0000
  72.  H  0.7475  0.0000  0.0000  0.0000  0.0000  0.0000  0.0000  0.0000  0.0000
  73.  H  0.7467  0.0000  0.0000  0.0000  0.0000  0.0000  0.0000  0.0000  0.0000
  74.  H  0.7451  0.0000  0.0000  0.0000  0.0000  0.0000  0.0000  0.0000  0.0000
  75.  H  0.0000  0.0009  0.0000 -0.0061  0.6448 -0.0057  0.0009  0.0000 -0.0025
  76.  H  0.0000  0.0000  0.0000  0.0009 -0.0060  0.6455 -0.0060  0.0009  0.0000
  77.  H  0.0000  0.0009  0.0000  0.0000  0.0010 -0.0058  0.6443 -0.0062  0.0000
  78.  H  0.0000 -0.0024  0.0000 -0.0041  0.0005  0.0000  0.0000  0.0000  0.6131
  79.  H  0.0000 -0.0027  0.0000  0.0000  0.0000  0.0000  0.0008 -0.0037  0.0000
  80.  H  0.0000  0.0000  0.0009  0.0000  0.0000  0.0000  0.0000  0.0000  0.0000
  81.  H  0.0000  0.0000  0.0000  0.0000  0.0000  0.0000  0.0000  0.0000  0.0000
  82.  H  0.0000  0.0000  0.0009  0.0000  0.0000  0.0000  0.0000  0.0000  0.0000
  83.  H  0.0000  0.0000 -0.0031  0.0000  0.0000  0.0000  0.0000  0.0000  0.0000
  84.  H  0.0000  0.0000 -0.0029  0.0000  0.0000  0.0000  0.0000  0.0000  0.0000
  85.  H  0.0000  0.0000  0.0000  0.0007  0.0001  0.0000  0.0000  0.0000 -0.0025
  86.  H  0.0000  0.0000  0.0000 -0.0012  0.0003  0.0000  0.0000  0.0000 -0.0028
  87.  H  0.0000  0.0000  0.0000 -0.0010 -0.0001  0.0000  0.0000  0.0000 -0.0042
  88.  H  0.0000  0.0000  0.0000  0.0007  0.0000  0.0000  0.0000  0.0000 -0.0028
  89.  H  0.0000  0.0000  0.0000 -0.0010  0.0002  0.0000  0.0000  0.0000 -0.0041
  90.  H  0.0000  0.0004  0.0000 -0.0007  0.0000  0.0000  0.0000  0.0000 -0.0033
  91.  H -0.0008  0.0000  0.0000  0.0000  0.0000  0.0000  0.0000  0.0008  0.0000
  92.  H  0.0000  0.0000  0.0000  0.0000  0.0000  0.0000  0.0007 -0.0012  0.0000
  93.  H  0.0000  0.0000  0.0000  0.0000  0.0000  0.0000  0.0001 -0.0007  0.0000
  94.  H  0.0000  0.0000  0.0000  0.0000  0.0000  0.0000  0.0000  0.0007  0.0000
  95.  H  0.0000  0.0000  0.0000  0.0000  0.0000  0.0000  0.0000 -0.0009  0.0000
  96.  H  0.0000  0.0000  0.0000  0.0000  0.0000  0.0000  0.0005 -0.0011  0.0000
  97.  H  0.0000  0.0000  0.0000  0.0000  0.0000  0.0000  0.0000  0.0000  0.0000
  98.  H  0.0000  0.0000  0.0000  0.0000  0.0000  0.0000  0.0000  0.0000  0.0000
  99.  H  0.0000  0.0000  0.0000  0.0000  0.0000  0.0000  0.0000  0.0000  0.0000
 100.  H  0.0000  0.0000  0.0000  0.0000  0.0000  0.0000  0.0000  0.0000  0.0000
 101.  H  0.0000  0.0000  0.0000  0.0000  0.0000  0.0000  0.0000  0.0000  0.0000
 102.  H  0.0000  0.0000  0.0000  0.0000  0.0000  0.0000  0.0000  0.0000  0.0000
 103.  H  0.0000  0.0000  0.0000  0.0000  0.0000  0.0000  0.0000  0.0000  0.0000
 104.  H  0.0000  0.0000  0.0000  0.0000  0.0000  0.0000  0.0000  0.0000  0.0000
 105.  H  0.0000  0.0000  0.0000  0.0000  0.0000  0.0000  0.0000  0.0000  0.0000
 106.  H  0.0000  0.0000  0.0000  0.0000  0.0000  0.0000  0.0000  0.0000  0.0000
 107.  H  0.0000  0.0000  0.0000  0.0000  0.0000  0.0000  0.0000  0.0000  0.0000
 108.  H  0.0000  0.0000  0.0000  0.0000  0.0000  0.0000  0.0000  0.0000  0.0000
 109.  H  0.0000  0.0039  0.0000  0.0001  0.0000  0.0000  0.0000  0.0007  0.0000
 110.  H  0.0000  0.0001  0.0000  0.0000  0.0000  0.0000  0.0000  0.0000  0.0000
 111.  H  0.0000  0.0001  0.0000  0.0000  0.0000  0.0000  0.0000  0.0000  0.0000
 112.  H  0.0000  0.0000  0.0002  0.0000  0.0000  0.0000  0.0000  0.0000  0.0000
 113.  H  0.0000  0.0000  0.0009  0.0000  0.0000  0.0000  0.0000  0.0000  0.0000
 114.  H  0.0000  0.0000  0.0001  0.0000  0.0000  0.0000  0.0000  0.0000  0.0000

     Atom   37      38      39      40      41      42      43      44      45
     ---- ------  ------  ------  ------  ------  ------  ------  ------  ------
   1.  O  0.0000  0.0000  0.0000  0.0000  0.0000  0.0000  0.0000  0.0000  0.0000
   2. Mg -0.0002  0.0061 -0.0017 -0.0025 -0.0025  0.0026  0.0010  0.0011 -0.0043
   3.  O  0.0000  0.0000  0.0000  0.0000  0.0000  0.0000  0.0000  0.0000  0.0000
   4.  C  0.0000  0.0000  0.0000  0.0000  0.0000  0.0000  0.0005  0.0000  0.0000
   5.  N -0.0023  0.0000  0.0000  0.0000  0.0000  0.0000  0.0000  0.0000  0.0000
   6.  N  0.0000 -0.0056  0.0008  0.0000  0.0008 -0.0063 -0.0016 -0.0023  0.0000
   7.  O  0.0000  0.0000  0.0000  0.0000  0.0000  0.0000 -0.0001  0.0000  0.0000
   8.  C  0.0022  0.0000  0.0000  0.0000  0.0000  0.0000  0.0000  0.0000  0.0000
   9.  C  0.0000  0.0000  0.0000  0.0000  0.0000  0.0001  0.0000  0.0000  0.0000
  10.  C  0.0000  0.0003  0.0000  0.0000  0.0000 -0.0008  0.0003  0.0024  0.0000
  11.  O  0.0000  0.0000  0.0000  0.0000  0.0000  0.0000  0.0000  0.0000  0.0000
  12.  C  0.0000  0.0000  0.0000  0.0000  0.0000  0.0000 -0.0001  0.0000  0.0000
  13.  C  0.0000  0.0000  0.0000  0.0000  0.0000  0.0000  0.0000  0.0000  0.0000
  14.  C -0.0002  0.0000  0.0000  0.0000  0.0000  0.0000  0.0000  0.0000  0.0000
  15.  O  0.0000  0.0000  0.0000  0.0000  0.0000  0.0000  0.0000  0.0000  0.0000
  16.  C  0.0000  0.0000  0.0000  0.0000  0.0000  0.0000  0.0000  0.0000  0.0000
  17.  O  0.0000  0.0001  0.0000  0.0000  0.0000  0.0000  0.0000  0.0000  0.0000
  18.  C  0.0000  0.0000  0.0000  0.0000  0.0000  0.0000  0.0000  0.0000  0.0000
  19.  O  0.0000  0.0000  0.0000  0.0000  0.0000  0.0000  0.0000  0.0000  0.0000
  20.  O  0.0000  0.0000  0.0000  0.0000  0.0000  0.0000  0.0000  0.0000  0.0000
  21.  C  0.0000  0.0000  0.0000  0.0000  0.0000  0.0000  0.0000  0.0000  0.0011
  22.  C  0.0000  0.0001  0.0000  0.0000  0.0000  0.0000  0.0000  0.0000  0.0000
  23.  C  0.0000  0.0000  0.0000  0.0000  0.0000  0.0000  0.0000  0.0000  0.0000
  24.  O  0.0000  0.0000  0.0000  0.0000  0.0000  0.0000  0.0000  0.0000 -0.0003
  25.  C  0.0000 -0.0008 -0.0026  0.0005  0.0008  0.0001  0.0000  0.0000  0.0000
  26.  C  0.0000  0.0000  0.0000  0.0000  0.0000  0.0000  0.0000  0.0000  0.0000
  27.  C  0.0000  0.0000  0.0000  0.0000  0.0000  0.0000  0.0000  0.0000  0.0000
  28.  C  0.0000  0.0000  0.0000  0.0000  0.0000  0.0000  0.0000  0.0000  0.0000
  29.  C -0.0068  0.0000  0.0000  0.0000  0.0000  0.0000  0.0000  0.0000  0.0003
  30.  C  0.0000  0.8215 -0.0041 -0.0073 -0.0040  0.8151 -0.0069 -0.0069  0.0000
  31.  C  0.0004  0.0000  0.0000  0.0000  0.0000  0.0000  0.0000  0.0000 -0.0050
  32.  C  0.0000  0.0000  0.0000  0.0000  0.0000  0.0000  0.0000  0.0000 -0.0025
  33.  C  0.0005  0.0000  0.0000  0.0000  0.0000  0.0000  0.0000  0.0000  0.0000
  34.  C -0.0064  0.0000  0.0000  0.0000  0.0000  0.0000  0.0000  0.0000  0.0000
  35.  C  0.6325  0.0000  0.0000  0.0000  0.0000  0.0000  0.0000  0.0000  0.0000
  36.  C  0.0000  0.0000  0.0000  0.0000  0.0000  0.0000  0.0000 -0.0001  0.6166
  37.  C  0.0000  0.0000  0.0000  0.0000  0.0000  0.0000  0.0000  0.0000  0.0000
  38.  C  0.0000  0.0000  0.8399 -0.0039 -0.0074 -0.0056  0.6346  0.0004  0.0000
  39.  C  0.0000  0.8399  0.0000  0.8552 -0.0036 -0.0074 -0.0065  0.0000  0.0000
  40.  C  0.0000 -0.0039  0.8552  0.0000  0.8565 -0.0035  0.0005  0.0005  0.0000
  41.  C  0.0000 -0.0074 -0.0036  0.8565  0.0000  0.8454  0.0000 -0.0065  0.0000
  42.  C  0.0000 -0.0056 -0.0074 -0.0035  0.8454  0.0000  0.0004  0.6324  0.0000
  43.  C  0.0000  0.6346 -0.0065  0.0005  0.0000  0.0004  0.0000  0.0000  0.0000
  44.  C  0.0000  0.0004  0.0000  0.0005 -0.0065  0.6324  0.0000  0.0000  0.0000
  45.  C  0.0000  0.0000  0.0000  0.0000  0.0000  0.0000  0.0000  0.0000  0.0000
  46.  C  0.0000  0.0000  0.0000  0.0000  0.0000  0.0000  0.0000  0.0000 -0.0047
  47.  C  0.6122  0.0000  0.0000  0.0000  0.0000  0.0000  0.0000  0.0000  0.0000
  48.  C  0.6063  0.0000  0.0000  0.0000  0.0000  0.0000  0.0000  0.0000  0.0000
  49.  C  0.0000  0.0000  0.0000  0.0000 -0.0019 -0.0029  0.0000  0.6112 -0.0003
  50.  C  0.0000  0.0000  0.0000  0.0000 -0.0016 -0.0030  0.0000  0.6080  0.0000
  51.  C  0.0000 -0.0031 -0.0017  0.0000  0.0000  0.0000  0.6118  0.0000  0.0000
  52.  C  0.0000 -0.0031 -0.0017  0.0000  0.0000  0.0000  0.6089  0.0000  0.0000
  53.  C  0.0017  0.0000  0.0000  0.0000  0.0000  0.0000  0.0000  0.0000  0.0000
  54.  C  0.0000  0.0018  0.0000  0.0000  0.0000  0.0031  0.0000  0.0001  0.0000
  55.  H  0.0000  0.0000  0.0000  0.0000  0.0000  0.0000  0.0000  0.0000  0.0000
  56.  H  0.0000  0.0000  0.0000  0.0000  0.0000  0.0000  0.0000  0.0000  0.0000
  57.  H  0.0013  0.0000  0.0000  0.0000  0.0000  0.0000  0.0000  0.0000  0.0000
  58.  H  0.0000  0.0000  0.0000  0.0000  0.0000  0.0000 -0.0003  0.0000  0.0000
  59.  H  0.0000  0.0000  0.0000  0.0000  0.0000  0.0000  0.0000  0.0000  0.0000
  60.  H  0.0000  0.0000  0.0000  0.0000  0.0000  0.0000  0.0000  0.0000  0.0000
  61.  H  0.0000  0.0000  0.0000  0.0000  0.0000  0.0000  0.0000  0.0000  0.0000
  62.  H  0.0000  0.0000  0.0000  0.0000  0.0000  0.0000  0.0000  0.0000  0.0000
  63.  H  0.0000  0.0000  0.0000  0.0000  0.0000  0.0001  0.0000  0.0000  0.0000
  64.  H  0.0000 -0.0005 -0.0007  0.0008  0.0097  0.0111  0.0000 -0.0001  0.0000
  65.  H  0.0000  0.0102  0.0217  0.0078 -0.0004 -0.0011 -0.0001  0.0000  0.0000
  66.  H  0.0000  0.0000  0.0000  0.0000  0.0000  0.0000  0.0000  0.0000  0.0000
  67.  H  0.0000  0.0000  0.0000  0.0000  0.0000  0.0000  0.0000  0.0000  0.0000
  68.  H  0.0000  0.0000  0.0000  0.0000  0.0000  0.0000  0.0000  0.0000  0.0000
  69.  H  0.0000  0.0000  0.0000  0.0000  0.0000  0.0000  0.0000  0.0000  0.0000
  70.  H  0.0000  0.0000  0.0000  0.0000  0.0000  0.0000  0.0000  0.0000  0.0000
  71.  H  0.0000  0.0000  0.0000  0.0000  0.0000  0.0000 -0.0002  0.0000  0.0000
  72.  H -0.0002  0.0000  0.0000  0.0000  0.0000  0.0000  0.0000  0.0000  0.0000
  73.  H  0.0000  0.0000  0.0000  0.0000  0.0000  0.0000  0.0000  0.0000  0.0000
  74.  H  0.0000  0.0000  0.0000  0.0000  0.0000  0.0000  0.0000  0.0000  0.0000
  75.  H  0.0000  0.0000  0.0000  0.0000  0.0000  0.0000  0.0000  0.0000  0.0029
  76.  H  0.0000  0.0000  0.0000  0.0000  0.0000  0.0000  0.0000  0.0000  0.0000
  77.  H -0.0023  0.0000  0.0000  0.0000  0.0000  0.0000  0.0000  0.0000  0.0000
  78.  H  0.0000  0.0000  0.0000  0.0000  0.0000  0.0000  0.0000  0.0000 -0.0037
  79.  H  0.6250  0.0000  0.0000  0.0000  0.0000  0.0000  0.0000  0.0000  0.0000
  80.  H  0.0000 -0.0063  0.6444 -0.0058  0.0010  0.0000 -0.0022  0.0000  0.0000
  81.  H  0.0000  0.0009 -0.0059  0.6456 -0.0059  0.0009  0.0000  0.0000  0.0000
  82.  H  0.0000  0.0000  0.0010 -0.0057  0.6445 -0.0062  0.0000 -0.0023  0.0000
  83.  H  0.0000 -0.0041  0.0008  0.0000  0.0000  0.0000  0.6228  0.0000  0.0000
  84.  H  0.0000  0.0000  0.0000  0.0000  0.0008 -0.0040  0.0000  0.6242  0.0000
  85.  H  0.0000  0.0000  0.0000  0.0000  0.0000  0.0000  0.0000  0.0000  0.6362
  86.  H  0.0000  0.0000  0.0000  0.0000  0.0000  0.0000  0.0000  0.0000  0.6345
  87.  H  0.0000  0.0000  0.0000  0.0000  0.0000  0.0000  0.0000  0.0000  0.6352
  88.  H  0.0000  0.0000  0.0000  0.0000  0.0000  0.0000  0.0000  0.0000 -0.0012
  89.  H  0.0000  0.0000  0.0000  0.0000  0.0000  0.0000  0.0000  0.0000 -0.0010
  90.  H  0.0000  0.0000  0.0000  0.0000  0.0000  0.0000  0.0000  0.0000  0.0008
  91.  H -0.0032  0.0000  0.0000  0.0000  0.0000  0.0000  0.0000  0.0000  0.0000
  92.  H -0.0042  0.0000  0.0000  0.0000  0.0000  0.0000  0.0000  0.0000  0.0000
  93.  H -0.0031  0.0000  0.0000  0.0000  0.0000  0.0000  0.0000  0.0000  0.0000
  94.  H -0.0029  0.0000  0.0000  0.0000  0.0000  0.0000  0.0000  0.0000  0.0000
  95.  H -0.0033  0.0000  0.0000  0.0000  0.0000  0.0000  0.0000  0.0000  0.0000
  96.  H -0.0038  0.0000  0.0000  0.0000  0.0000  0.0000  0.0000  0.0000  0.0000
  97.  H  0.0000  0.0000  0.0000  0.0000  0.0000  0.0008  0.0000 -0.0030 -0.0001
  98.  H  0.0000  0.0000  0.0000  0.0000  0.0000 -0.0008  0.0000 -0.0032  0.0001
  99.  H  0.0000  0.0000  0.0000  0.0000  0.0006 -0.0012  0.0000 -0.0044  0.0000
 100.  H  0.0000  0.0000  0.0000  0.0000  0.0000  0.0007  0.0000 -0.0026  0.0000
 101.  H  0.0000  0.0000  0.0000  0.0000  0.0000 -0.0009  0.0000 -0.0034  0.0000
 102.  H  0.0000  0.0000  0.0000  0.0000  0.0005 -0.0011  0.0000 -0.0041  0.0000
 103.  H  0.0000  0.0008  0.0000  0.0000  0.0000  0.0000 -0.0028  0.0000  0.0000
 104.  H  0.0000 -0.0008  0.0000  0.0000  0.0000  0.0000 -0.0028  0.0000  0.0000
 105.  H  0.0000 -0.0012  0.0006  0.0000  0.0000  0.0000 -0.0047  0.0000  0.0000
 106.  H  0.0000  0.0008  0.0000  0.0000  0.0000  0.0000 -0.0025  0.0000  0.0000
 107.  H  0.0000 -0.0013  0.0007  0.0000  0.0000  0.0000 -0.0044  0.0000  0.0000
 108.  H  0.0000 -0.0008  0.0000  0.0000  0.0000  0.0000 -0.0033  0.0000  0.0000
 109.  H -0.0001  0.0000  0.0000  0.0000  0.0000  0.0000  0.0000  0.0000  0.0000
 110.  H  0.0000  0.0000  0.0000  0.0000  0.0000  0.0000  0.0000  0.0000  0.0000
 111.  H  0.0000  0.0000  0.0000  0.0000  0.0000  0.0000  0.0000  0.0000  0.0000
 112.  H  0.0000 -0.0001  0.0000  0.0000  0.0000  0.0003  0.0000  0.0001  0.0000
 113.  H  0.0000  0.0005  0.0000  0.0000  0.0000 -0.0001  0.0001  0.0000  0.0000
 114.  H  0.0000  0.0000  0.0000  0.0000  0.0000  0.0000  0.0000  0.0000  0.0000

     Atom   46      47      48      49      50      51      52      53      54
     ---- ------  ------  ------  ------  ------  ------  ------  ------  ------
   1.  O  0.0000  0.0000  0.0000  0.0000  0.0000  0.0000  0.0000  0.0000  0.0000
   2. Mg -0.0046 -0.0013 -0.0020 -0.0002 -0.0026 -0.0016 -0.0034 -0.0038 -0.0061
   3.  O  0.0000  0.0000  0.0000  0.0000  0.0000  0.0000  0.0000  0.0000  0.0000
   4.  C  0.0000  0.0000  0.0000  0.0000  0.0000  0.0000  0.0001  0.0000  0.0000
   5.  N -0.0004  0.0000  0.0000  0.0000  0.0000  0.0000  0.0000 -0.0182  0.0001
   6.  N  0.0000  0.0000  0.0000  0.0000  0.0000 -0.0001  0.0000  0.0001 -0.0195
   7.  O  0.0000  0.0000  0.0000  0.0000  0.0000  0.0000 -0.0001  0.0000  0.0000
   8.  C  0.0023 -0.0001 -0.0002  0.0000  0.0000  0.0000  0.0000  0.8806  0.0054
   9.  C  0.0000  0.0000  0.0000  0.0000  0.0000  0.0000  0.0000 -0.0056 -0.0026
  10.  C  0.0000  0.0000  0.0000 -0.0001  0.0000  0.0000  0.0000  0.0050  0.8799
  11.  O  0.0000 -0.0003  0.0000  0.0000  0.0000  0.0000  0.0000  0.0000  0.0000
  12.  C  0.0000  0.0017  0.0000  0.0000  0.0000  0.0017  0.0000  0.0000  0.0000
  13.  C  0.0000  0.0000  0.0000  0.0000  0.0000  0.0003  0.0000  0.0000  0.0000
  14.  C  0.0000  0.0015  0.0000  0.0000  0.0000  0.0000  0.0000  0.0000  0.0000
  15.  O  0.0000  0.0000  0.0000  0.0000  0.0000 -0.0002  0.0000  0.0000  0.0000
  16.  C  0.0000  0.0000  0.0000  0.0000  0.0000  0.0000 -0.0013  0.0000  0.0000
  17.  O  0.0000  0.0000  0.0000  0.0000  0.0000 -0.0004  0.0000  0.0000  0.0000
  18.  C  0.0000  0.0000  0.0000  0.0000  0.0000  0.0000  0.0000  0.0000  0.0000
  19.  O  0.0000 -0.0002  0.0000  0.0000  0.0000  0.0000  0.0000  0.0000  0.0000
  20.  O  0.0000  0.0000  0.0000  0.0000  0.0000  0.0000  0.0000  0.0000  0.0000
  21.  C  0.0000  0.0000  0.0000  0.0000  0.0000  0.0000  0.0000  0.0000  0.0000
  22.  C  0.0000  0.0000  0.0000  0.0000  0.0000  0.0003  0.0000  0.0000  0.0000
  23.  C  0.0000  0.0000  0.0000  0.0000  0.0000  0.0000  0.0000  0.0000  0.0000
  24.  O  0.0000  0.0000  0.0000  0.0000  0.0000  0.0000  0.0000  0.0000  0.0000
  25.  C  0.0000  0.0000  0.0000 -0.0006  0.0000 -0.0001  0.0000  0.0000  0.0000
  26.  C  0.0000  0.0000  0.0000  0.0000  0.0000  0.0000  0.0000  0.0000  0.0000
  27.  C  0.0000  0.0000  0.0000  0.0000  0.0000 -0.0010  0.0000  0.0000  0.0000
  28.  C  0.0000 -0.0009  0.0000  0.0000  0.0000  0.0000  0.0000  0.0000  0.0000
  29.  C -0.0012  0.0001 -0.0001  0.0000  0.0000  0.0000  0.0000  0.0013  0.0000
  30.  C  0.0000  0.0000  0.0000  0.0001  0.0000  0.0001  0.0000  0.0000  0.0079
  31.  C -0.0024  0.0000  0.0000  0.0000  0.0000  0.0000  0.0000  0.0003  0.0000
  32.  C -0.0003  0.0000  0.0000  0.0000  0.0000  0.0000  0.0000  0.0000  0.0000
  33.  C  0.0000  0.0000  0.0000  0.0000  0.0000  0.0000  0.0000  0.0000  0.0000
  34.  C  0.0000 -0.0021 -0.0015  0.0000  0.0000  0.0000  0.0000  0.0000  0.0000
  35.  C  0.0000 -0.0030 -0.0028  0.0000  0.0000  0.0000  0.0000  0.0019  0.0000
  36.  C  0.6071  0.0000  0.0000 -0.0002  0.0000  0.0000  0.0000 -0.0001  0.0000
  37.  C  0.0000  0.6122  0.6063  0.0000  0.0000  0.0000  0.0000  0.0017  0.0000
  38.  C  0.0000  0.0000  0.0000  0.0000  0.0000 -0.0031 -0.0031  0.0000  0.0018
  39.  C  0.0000  0.0000  0.0000  0.0000  0.0000 -0.0017 -0.0017  0.0000  0.0000
  40.  C  0.0000  0.0000  0.0000  0.0000  0.0000  0.0000  0.0000  0.0000  0.0000
  41.  C  0.0000  0.0000  0.0000 -0.0019 -0.0016  0.0000  0.0000  0.0000  0.0000
  42.  C  0.0000  0.0000  0.0000 -0.0029 -0.0030  0.0000  0.0000  0.0000  0.0031
  43.  C  0.0000  0.0000  0.0000  0.0000  0.0000  0.6118  0.6089  0.0000  0.0000
  44.  C  0.0000  0.0000  0.0000  0.6112  0.6080  0.0000  0.0000  0.0000  0.0001
  45.  C -0.0047  0.0000  0.0000 -0.0003  0.0000  0.0000  0.0000  0.0000  0.0000
  46.  C  0.0000  0.0000  0.0000 -0.0001  0.0000  0.0000  0.0000  0.0007  0.0000
  47.  C  0.0000  0.0000 -0.0046  0.0000  0.0000  0.0000  0.0000  0.0000  0.0000
  48.  C  0.0000 -0.0046  0.0000  0.0000  0.0000  0.0000  0.0000  0.0007  0.0000
  49.  C -0.0001  0.0000  0.0000  0.0000 -0.0045  0.0000  0.0000  0.0000  0.0000
  50.  C  0.0000  0.0000  0.0000 -0.0045  0.0000  0.0000  0.0000  0.0000 -0.0007
  51.  C  0.0000  0.0000  0.0000  0.0000  0.0000  0.0000 -0.0048  0.0000  0.0000
  52.  C  0.0000  0.0000  0.0000  0.0000  0.0000 -0.0048  0.0000  0.0000 -0.0002
  53.  C  0.0007  0.0000  0.0007  0.0000  0.0000  0.0000  0.0000  0.0000 -0.0001
  54.  C  0.0000  0.0000  0.0000  0.0000 -0.0007  0.0000 -0.0002 -0.0001  0.0000
  55.  H  0.0000  0.0000  0.0000  0.0000  0.0000  0.0000  0.0000 -0.0067 -0.0057
  56.  H  0.0000  0.0003  0.0000  0.0000  0.0000  0.0000  0.0000  0.0000  0.0000
  57.  H  0.0000  0.0011  0.0000  0.0000  0.0000  0.0000  0.0000  0.0000  0.0000
  58.  H  0.0000  0.0000  0.0000  0.0000  0.0000  0.0000  0.0083  0.0000  0.0000
  59.  H  0.0000  0.0000  0.0000  0.0000  0.0000  0.0000  0.0000  0.0000  0.0000
  60.  H  0.0000  0.0000  0.0000  0.0000  0.0000  0.0000  0.0000  0.0000  0.0000
  61.  H  0.0000  0.0000  0.0000  0.0000  0.0000  0.0001  0.0000  0.0000  0.0000
  62.  H  0.0000  0.0000  0.0000  0.0000  0.0000  0.0000  0.0000  0.0000  0.0000
  63.  H  0.0000  0.0000  0.0000  0.0000  0.0000  0.0000  0.0000  0.0000  0.0000
  64.  H  0.0000  0.0000  0.0000  0.0033  0.0000  0.0000  0.0000  0.0000  0.0000
  65.  H  0.0000  0.0000  0.0000  0.0000  0.0000  0.0006  0.0000  0.0000  0.0000
  66.  H  0.0000  0.0000  0.0000  0.0000  0.0000  0.0000  0.0000  0.0000  0.0000
  67.  H  0.0000  0.0000  0.0000  0.0000  0.0000  0.0000  0.0000  0.0000  0.0000
  68.  H  0.0000  0.0000  0.0000  0.0000  0.0000  0.0000  0.0000  0.0000  0.0000
  69.  H  0.0000  0.0000  0.0000  0.0000  0.0000  0.0000  0.0000  0.0000  0.0000
  70.  H  0.0000  0.0000  0.0000  0.0000  0.0000  0.0000  0.0000  0.0000  0.0000
  71.  H  0.0000  0.0000  0.0000  0.0000  0.0000  0.0066  0.0000  0.0000  0.0000
  72.  H  0.0000  0.0044  0.0000  0.0000  0.0000  0.0000  0.0000  0.0000  0.0000
  73.  H  0.0000  0.0000  0.0000  0.0000  0.0000  0.0000  0.0000  0.0000  0.0000
  74.  H  0.0000  0.0000  0.0000  0.0000  0.0000  0.0000  0.0000  0.0000  0.0000
  75.  H  0.0000  0.0000  0.0000  0.0000  0.0000  0.0000  0.0000  0.0000  0.0000
  76.  H  0.0000  0.0000  0.0000  0.0000  0.0000  0.0000  0.0000  0.0000  0.0000
  77.  H  0.0000  0.0004  0.0002  0.0000  0.0000  0.0000  0.0000  0.0000  0.0000
  78.  H -0.0032  0.0000  0.0000  0.0003  0.0000  0.0000  0.0000  0.0000  0.0000
  79.  H  0.0000 -0.0033 -0.0038  0.0000  0.0000  0.0000  0.0000  0.0024  0.0000
  80.  H  0.0000  0.0000  0.0000  0.0000  0.0000  0.0002  0.0002  0.0000  0.0000
  81.  H  0.0000  0.0000  0.0000  0.0000  0.0000  0.0000  0.0000  0.0000  0.0000
  82.  H  0.0000  0.0000  0.0000  0.0003  0.0002  0.0000  0.0000  0.0000  0.0000
  83.  H  0.0000  0.0000  0.0000  0.0000  0.0000 -0.0031 -0.0035  0.0000  0.0001
  84.  H  0.0001  0.0000  0.0000 -0.0031 -0.0036  0.0000  0.0000  0.0000  0.0001
  85.  H -0.0011  0.0000  0.0000  0.0004  0.0000  0.0000  0.0000  0.0000  0.0000
  86.  H  0.0008  0.0000  0.0000  0.0000  0.0000  0.0000  0.0000  0.0000  0.0000
  87.  H -0.0012  0.0000  0.0000  0.0000  0.0000  0.0000  0.0000  0.0000  0.0000
  88.  H  0.6358  0.0000  0.0000  0.0001  0.0000  0.0000  0.0000  0.0000  0.0000
  89.  H  0.6358  0.0000  0.0000  0.0000  0.0000  0.0000  0.0000  0.0000  0.0000
  90.  H  0.6340  0.0000  0.0000  0.0000  0.0000  0.0000  0.0000  0.0046  0.0000
  91.  H  0.0000  0.6310 -0.0010  0.0000  0.0000  0.0000  0.0000  0.0000  0.0000
  92.  H  0.0000  0.6358 -0.0012  0.0000  0.0000  0.0000  0.0000  0.0000  0.0000
  93.  H  0.0000  0.6322  0.0008  0.0000  0.0000  0.0000  0.0000  0.0000  0.0000
  94.  H  0.0000 -0.0010  0.6364  0.0000  0.0000  0.0000  0.0000 -0.0001  0.0000
  95.  H  0.0000  0.0008  0.6371  0.0000  0.0000  0.0000  0.0000  0.0041  0.0000
  96.  H  0.0000 -0.0012  0.6361  0.0000  0.0000  0.0000  0.0000  0.0000  0.0000
  97.  H  0.0000  0.0000  0.0000  0.6351 -0.0010  0.0000  0.0000  0.0000  0.0000
  98.  H  0.0000  0.0000  0.0000  0.6302  0.0008  0.0000  0.0000  0.0000  0.0000
  99.  H  0.0000  0.0000  0.0000  0.6360 -0.0012  0.0000  0.0000  0.0000  0.0000
 100.  H  0.0000  0.0000  0.0000 -0.0010  0.6363  0.0000  0.0000  0.0000  0.0000
 101.  H  0.0000  0.0000  0.0000  0.0008  0.6361  0.0000  0.0000  0.0000  0.0008
 102.  H  0.0000  0.0000  0.0000 -0.0012  0.6362  0.0000  0.0000  0.0000  0.0000
 103.  H  0.0000  0.0000  0.0000  0.0000  0.0000  0.6318 -0.0011  0.0000  0.0000
 104.  H  0.0000  0.0000  0.0000  0.0000  0.0000  0.6283  0.0008  0.0000  0.0000
 105.  H  0.0000  0.0000  0.0000  0.0000  0.0000  0.6357 -0.0010  0.0000  0.0000
 106.  H  0.0000  0.0000  0.0000  0.0000  0.0000 -0.0012  0.6326  0.0000  0.0000
 107.  H  0.0000  0.0000  0.0000  0.0000  0.0000 -0.0010  0.6349  0.0000  0.0000
 108.  H  0.0000  0.0000  0.0000  0.0000  0.0000  0.0008  0.6340  0.0000  0.0003
 109.  H -0.0001  0.0000 -0.0001  0.0000  0.0000  0.0000  0.0000  0.7313  0.0000
 110.  H  0.0000  0.0000  0.0000  0.0000  0.0000  0.0000  0.0000  0.7254  0.0000
 111.  H  0.0000  0.0000  0.0000  0.0000  0.0000  0.0000  0.0000  0.7220  0.0000
 112.  H  0.0000  0.0000  0.0000  0.0000  0.0006  0.0000  0.0000  0.0000  0.7220
 113.  H  0.0000  0.0000  0.0000  0.0000  0.0000  0.0000  0.0002  0.0000  0.7260
 114.  H  0.0000  0.0000  0.0000  0.0000  0.0000  0.0000  0.0000  0.0000  0.7294

     Atom   55      56      57      58      59      60      61      62      63
     ---- ------  ------  ------  ------  ------  ------  ------  ------  ------
   1.  O  0.0000  0.0000 -0.0002 -0.0159 -0.0128 -0.0176  0.0000  0.0000  0.0000
   2. Mg -0.0013  0.0005 -0.0041 -0.0003 -0.0002  0.0001  0.0027  0.0020  0.0024
   3.  O  0.0000 -0.0188  0.0000  0.0000  0.0000  0.0000  0.0026  0.0015  0.0000
   4.  C  0.0000  0.0000  0.0040 -0.0064  0.0058 -0.0059  0.0000  0.0000  0.0000
   5.  N  0.0031  0.0000  0.0002  0.0000  0.0000  0.0000  0.0000  0.0000  0.0000
   6.  N  0.0033  0.0000  0.0000  0.0000  0.0000  0.0000  0.0000  0.0000  0.0000
   7.  O  0.0000  0.0000  0.0013  0.0035  0.0003  0.0037  0.0000  0.0000  0.0000
   8.  C  0.0151  0.0000  0.0006  0.0000  0.0000  0.0000  0.0000  0.0000  0.0000
   9.  C  0.7665  0.0000  0.0004  0.0000  0.0000  0.0000  0.0000  0.0000  0.0000
  10.  C  0.0153  0.0000  0.0001  0.0000  0.0000  0.0000  0.0000  0.0000  0.0000
  11.  O  0.0000 -0.0009 -0.0158  0.0000  0.0000  0.0000  0.0000  0.0000  0.0000
  12.  C  0.0000  0.0044 -0.0066  0.0000  0.0000  0.0000  0.0000  0.0000  0.0000
  13.  C  0.0000  0.7471  0.0005  0.0000  0.0000  0.0000 -0.0001  0.0003  0.0000
  14.  C  0.0000  0.0000  0.7537  0.0003  0.0000  0.0003  0.0000  0.0000  0.0000
  15.  O  0.0000  0.0011  0.0075  0.0000  0.0000  0.0000  0.0000  0.0000  0.0000
  16.  C  0.0000  0.0000  0.0000  0.7542  0.7523  0.7524  0.0000  0.0000  0.0000
  17.  O  0.0000  0.0000  0.0000  0.0000  0.0000  0.0000 -0.0246 -0.0005  0.0026
  18.  C  0.0000 -0.0055  0.0000  0.0000  0.0000  0.0000 -0.0060  0.0006  0.0000
  19.  O  0.0000  0.0039  0.0000  0.0000  0.0000  0.0000  0.0001  0.0023  0.0000
  20.  O  0.0000  0.0000  0.0000  0.0000  0.0000  0.0000 -0.0009 -0.0182  0.0001
  21.  C  0.0000  0.0000  0.0000  0.0000  0.0000  0.0000  0.0013 -0.0059 -0.0022
  22.  C  0.0000  0.0000  0.0000  0.0000  0.0000  0.0000  0.7418  0.0010  0.0093
  23.  C  0.0000  0.0002  0.0000  0.0000  0.0000  0.0000 -0.0005  0.7572  0.0000
  24.  O  0.0000  0.0000  0.0000  0.0000  0.0000  0.0000  0.0013  0.0003  0.0014
  25.  C  0.0000  0.0000  0.0000  0.0000  0.0000  0.0000 -0.0080 -0.0001  0.7428
  26.  C  0.0000  0.0002  0.0000  0.0000  0.0000  0.0000  0.0000 -0.0030  0.0000
  27.  C  0.0000 -0.0014  0.0000  0.0000  0.0000  0.0000  0.0000 -0.0001  0.0000
  28.  C  0.0000  0.0000  0.0001  0.0000  0.0000  0.0000  0.0000  0.0000  0.0000
  29.  C  0.0000  0.0000  0.0000  0.0000  0.0000  0.0000  0.0000  0.0000  0.0000
  30.  C  0.0000  0.0000  0.0000  0.0000  0.0000  0.0000  0.0000  0.0000  0.0000
  31.  C  0.0000  0.0000  0.0000  0.0000  0.0000  0.0000  0.0000  0.0000  0.0000
  32.  C  0.0000  0.0000  0.0000  0.0000  0.0000  0.0000  0.0000  0.0000  0.0000
  33.  C  0.0000  0.0000  0.0000  0.0000  0.0000  0.0000  0.0000  0.0000  0.0000
  34.  C  0.0000  0.0000  0.0000  0.0000  0.0000  0.0000  0.0000  0.0000  0.0000
  35.  C  0.0000  0.0000 -0.0001  0.0000  0.0000  0.0000  0.0000  0.0000  0.0000
  36.  C  0.0000  0.0000  0.0000  0.0000  0.0000  0.0000  0.0000  0.0000  0.0000
  37.  C  0.0000  0.0000  0.0013  0.0000  0.0000  0.0000  0.0000  0.0000  0.0000
  38.  C  0.0000  0.0000  0.0000  0.0000  0.0000  0.0000  0.0000  0.0000  0.0000
  39.  C  0.0000  0.0000  0.0000  0.0000  0.0000  0.0000  0.0000  0.0000  0.0000
  40.  C  0.0000  0.0000  0.0000  0.0000  0.0000  0.0000  0.0000  0.0000  0.0000
  41.  C  0.0000  0.0000  0.0000  0.0000  0.0000  0.0000  0.0000  0.0000  0.0000
  42.  C  0.0000  0.0000  0.0000  0.0000  0.0000  0.0000  0.0000  0.0000  0.0001
  43.  C  0.0000  0.0000  0.0000 -0.0003  0.0000  0.0000  0.0000  0.0000  0.0000
  44.  C  0.0000  0.0000  0.0000  0.0000  0.0000  0.0000  0.0000  0.0000  0.0000
  45.  C  0.0000  0.0000  0.0000  0.0000  0.0000  0.0000  0.0000  0.0000  0.0000
  46.  C  0.0000  0.0000  0.0000  0.0000  0.0000  0.0000  0.0000  0.0000  0.0000
  47.  C  0.0000  0.0003  0.0011  0.0000  0.0000  0.0000  0.0000  0.0000  0.0000
  48.  C  0.0000  0.0000  0.0000  0.0000  0.0000  0.0000  0.0000  0.0000  0.0000
  49.  C  0.0000  0.0000  0.0000  0.0000  0.0000  0.0000  0.0000  0.0000  0.0000
  50.  C  0.0000  0.0000  0.0000  0.0000  0.0000  0.0000  0.0000  0.0000  0.0000
  51.  C  0.0000  0.0000  0.0000  0.0000  0.0000  0.0000  0.0001  0.0000  0.0000
  52.  C  0.0000  0.0000  0.0000  0.0083  0.0000  0.0000  0.0000  0.0000  0.0000
  53.  C -0.0067  0.0000  0.0000  0.0000  0.0000  0.0000  0.0000  0.0000  0.0000
  54.  C -0.0057  0.0000  0.0000  0.0000  0.0000  0.0000  0.0000  0.0000  0.0000
  55.  H  0.0000  0.0000  0.0000  0.0000  0.0000  0.0000  0.0000  0.0000  0.0000
  56.  H  0.0000  0.0000  0.0000  0.0000  0.0000  0.0000  0.0000  0.0000  0.0000
  57.  H  0.0000  0.0000  0.0000  0.0000  0.0000  0.0000  0.0000  0.0000  0.0000
  58.  H  0.0000  0.0000  0.0000  0.0000 -0.0018 -0.0032  0.0000  0.0000  0.0000
  59.  H  0.0000  0.0000  0.0000 -0.0018  0.0000 -0.0035  0.0000  0.0000  0.0000
  60.  H  0.0000  0.0000  0.0000 -0.0032 -0.0035  0.0000  0.0000  0.0000  0.0000
  61.  H  0.0000  0.0000  0.0000  0.0000  0.0000  0.0000  0.0000  0.0031 -0.0018
  62.  H  0.0000  0.0000  0.0000  0.0000  0.0000  0.0000  0.0031  0.0000  0.0000
  63.  H  0.0000  0.0000  0.0000  0.0000  0.0000  0.0000 -0.0018  0.0000  0.0000
  64.  H  0.0000  0.0000  0.0000  0.0000  0.0000  0.0000  0.0052  0.0000  0.0031
  65.  H  0.0000  0.0000  0.0000  0.0000  0.0000  0.0000 -0.0041  0.0000  0.0028
  66.  H  0.0000  0.0000  0.0000  0.0000  0.0000  0.0000  0.0000 -0.0040  0.0000
  67.  H  0.0000  0.0001  0.0000  0.0000  0.0000  0.0000  0.0000 -0.0017  0.0000
  68.  H  0.0000  0.0000  0.0000  0.0000  0.0000  0.0000  0.0000  0.0047  0.0000
  69.  H  0.0000 -0.0019  0.0000  0.0000  0.0000  0.0000  0.0000  0.0000  0.0000
  70.  H  0.0000 -0.0048  0.0000  0.0000  0.0000  0.0000  0.0000  0.0000  0.0000
  71.  H  0.0000  0.0048  0.0000  0.0000  0.0000  0.0000  0.0000  0.0000  0.0000
  72.  H  0.0000  0.0000 -0.0046  0.0000  0.0000  0.0000  0.0000  0.0000  0.0000
  73.  H  0.0000  0.0000  0.0046  0.0000  0.0000  0.0000  0.0000  0.0000  0.0000
  74.  H  0.0000  0.0000 -0.0017  0.0000  0.0000  0.0000  0.0000  0.0000  0.0000
  75.  H  0.0000  0.0000  0.0000  0.0000  0.0000  0.0000  0.0000  0.0000  0.0000
  76.  H  0.0000  0.0000  0.0000  0.0000  0.0000  0.0000  0.0000  0.0000  0.0000
  77.  H  0.0000  0.0000  0.0000  0.0000  0.0000  0.0000  0.0000  0.0000  0.0000
  78.  H  0.0000  0.0000  0.0000  0.0000  0.0000  0.0000  0.0000  0.0000  0.0000
  79.  H  0.0000  0.0000  0.0041  0.0000  0.0000  0.0000  0.0000  0.0000  0.0000
  80.  H  0.0000  0.0000  0.0000  0.0000  0.0000  0.0000  0.0000  0.0000  0.0000
  81.  H  0.0000  0.0000  0.0000  0.0000  0.0000  0.0000  0.0000  0.0000  0.0000
  82.  H  0.0000  0.0000  0.0000  0.0000  0.0000  0.0000  0.0000  0.0000  0.0000
  83.  H  0.0000  0.0000  0.0000  0.0002  0.0000  0.0000  0.0000  0.0000  0.0000
  84.  H  0.0000  0.0000  0.0000  0.0000  0.0000  0.0000  0.0000  0.0000  0.0000
  85.  H  0.0000  0.0000  0.0000  0.0000  0.0000  0.0000  0.0000  0.0000  0.0000
  86.  H  0.0000  0.0000  0.0000  0.0000  0.0000  0.0000  0.0000  0.0000  0.0000
  87.  H  0.0000  0.0000  0.0000  0.0000  0.0000  0.0000  0.0000  0.0000  0.0000
  88.  H  0.0000  0.0000  0.0000  0.0000  0.0000  0.0000  0.0000  0.0000  0.0000
  89.  H  0.0000  0.0000  0.0000  0.0000  0.0000  0.0000  0.0000  0.0000  0.0000
  90.  H  0.0000  0.0000  0.0000  0.0000  0.0000  0.0000  0.0000  0.0000  0.0000
  91.  H  0.0000  0.0000  0.0005  0.0000  0.0000  0.0000  0.0000  0.0000  0.0000
  92.  H  0.0000  0.0000  0.0000  0.0000  0.0000  0.0000  0.0000  0.0000  0.0000
  93.  H  0.0000  0.0021  0.0004  0.0000  0.0000  0.0000  0.0000  0.0000  0.0000
  94.  H  0.0000  0.0000  0.0000  0.0000  0.0000  0.0000  0.0000  0.0000  0.0000
  95.  H  0.0000  0.0000  0.0000  0.0000  0.0000  0.0000  0.0000  0.0000  0.0000
  96.  H  0.0000  0.0000  0.0000  0.0000  0.0000  0.0000  0.0000  0.0000  0.0000
  97.  H  0.0000  0.0000  0.0000  0.0000  0.0000  0.0000  0.0000  0.0000  0.0000
  98.  H  0.0000  0.0000  0.0000  0.0000  0.0000  0.0000  0.0000  0.0000  0.0000
  99.  H  0.0000  0.0000  0.0000  0.0000  0.0000  0.0000  0.0000  0.0000  0.0000
 100.  H  0.0000  0.0000  0.0000  0.0000  0.0000  0.0000  0.0000  0.0000  0.0000
 101.  H  0.0000  0.0000  0.0000  0.0000  0.0000  0.0000  0.0000  0.0000  0.0000
 102.  H  0.0000  0.0000  0.0000  0.0000  0.0000  0.0000  0.0000  0.0000  0.0000
 103.  H  0.0000  0.0000  0.0000  0.0000  0.0000  0.0000  0.0000  0.0000  0.0000
 104.  H  0.0000  0.0000  0.0000  0.0000  0.0000  0.0000  0.0002  0.0000  0.0000
 105.  H  0.0000  0.0000  0.0000  0.0000  0.0000  0.0000  0.0000  0.0000  0.0000
 106.  H  0.0000  0.0000  0.0000  0.0096  0.0000  0.0000  0.0000  0.0000  0.0000
 107.  H  0.0000  0.0000  0.0000 -0.0004  0.0000  0.0000  0.0000  0.0000  0.0000
 108.  H  0.0000  0.0000  0.0000  0.0046  0.0000  0.0000  0.0000  0.0000  0.0000
 109.  H  0.0002  0.0000  0.0000  0.0000  0.0000  0.0000  0.0000  0.0000  0.0000
 110.  H  0.0005  0.0000  0.0000  0.0000  0.0000  0.0000  0.0000  0.0000  0.0000
 111.  H  0.0000  0.0000  0.0000  0.0000  0.0000  0.0000  0.0000  0.0000  0.0000
 112.  H  0.0000  0.0000  0.0000  0.0000  0.0000  0.0000  0.0000  0.0000  0.0000
 113.  H  0.0002  0.0000  0.0000  0.0001  0.0000  0.0000  0.0000  0.0000  0.0000
 114.  H  0.0027  0.0000  0.0000  0.0000  0.0000  0.0000  0.0000  0.0000  0.0000

     Atom   64      65      66      67      68      69      70      71      72
     ---- ------  ------  ------  ------  ------  ------  ------  ------  ------
   1.  O  0.0000  0.0000  0.0000  0.0000  0.0000  0.0000  0.0000  0.0000  0.0000
   2. Mg  0.0018 -0.0019 -0.0003  0.0004  0.0006  0.0002 -0.0003 -0.0001  0.0000
   3.  O  0.0000  0.0000  0.0000  0.0004  0.0002  0.0024 -0.0011 -0.0009  0.0000
   4.  C  0.0000  0.0000  0.0000  0.0000  0.0000  0.0001  0.0000  0.0000  0.0048
   5.  N  0.0000  0.0000  0.0000  0.0000  0.0000  0.0000  0.0000  0.0000  0.0000
   6.  N  0.0000  0.0000  0.0000  0.0000  0.0000  0.0000  0.0000  0.0000  0.0000
   7.  O  0.0000  0.0000  0.0000  0.0000  0.0000  0.0004  0.0000  0.0001 -0.0001
   8.  C  0.0000  0.0000  0.0000  0.0000  0.0000  0.0000  0.0000  0.0000  0.0000
   9.  C  0.0000  0.0000  0.0000  0.0000  0.0000  0.0000  0.0000  0.0000  0.0000
  10.  C  0.0000  0.0000  0.0000  0.0000  0.0000  0.0000  0.0000  0.0000  0.0000
  11.  O  0.0000  0.0000  0.0000  0.0000  0.0000  0.0034  0.0000  0.0003 -0.0013
  12.  C  0.0000  0.0000  0.0000  0.0000  0.0000 -0.0040  0.0048 -0.0054  0.0001
  13.  C  0.0000  0.0000  0.0000  0.0000  0.0000  0.0070  0.0018 -0.0009  0.0000
  14.  C  0.0000  0.0000  0.0000  0.0000  0.0000  0.0000  0.0000 -0.0001  0.0019
  15.  O  0.0000  0.0000  0.0000  0.0000  0.0000  0.0001  0.0000  0.0004  0.0000
  16.  C  0.0000  0.0000  0.0000  0.0000  0.0000  0.0000  0.0000  0.0000  0.0000
  17.  O  0.0004 -0.0006  0.0000  0.0000  0.0000  0.0000  0.0000  0.0000  0.0000
  18.  C  0.0000  0.0000  0.0053 -0.0008 -0.0071 -0.0001  0.0001  0.0001  0.0000
  19.  O  0.0000  0.0000  0.0001 -0.0003  0.0049  0.0000  0.0000  0.0000  0.0000
  20.  O  0.0001  0.0000 -0.0008  0.0025 -0.0013  0.0000  0.0000  0.0000  0.0000
  21.  C -0.0053  0.0048  0.0000 -0.0001  0.0001  0.0000  0.0000  0.0000  0.0000
  22.  C  0.0017  0.0059  0.0000  0.0000  0.0000  0.0000  0.0000  0.0000  0.0000
  23.  C  0.0000  0.0000  0.0015  0.0064  0.0014  0.0000  0.0000  0.0000  0.0000
  24.  O  0.0024  0.0001  0.0000  0.0000  0.0000  0.0000  0.0000  0.0000  0.0000
  25.  C  0.7486  0.7456  0.0000  0.0000  0.0000  0.0000  0.0000  0.0000  0.0000
  26.  C  0.0000  0.0000  0.7472  0.7456  0.7405  0.0000  0.0000  0.0000  0.0000
  27.  C  0.0000  0.0000  0.0000  0.0000  0.0000  0.7466  0.7466  0.7466  0.0000
  28.  C  0.0000  0.0000  0.0000  0.0000  0.0000  0.0000  0.0000  0.0000  0.7475
  29.  C  0.0000  0.0000  0.0000  0.0000 -0.0002  0.0000  0.0000  0.0000  0.0000
  30.  C  0.0019  0.0005  0.0000  0.0000  0.0000  0.0000  0.0000  0.0000  0.0000
  31.  C  0.0000  0.0000  0.0000  0.0000  0.0002  0.0000  0.0000  0.0000  0.0000
  32.  C  0.0000  0.0000  0.0000  0.0000  0.0086  0.0000  0.0000  0.0000  0.0000
  33.  C  0.0000  0.0000  0.0000  0.0000  0.0180  0.0000  0.0000  0.0000  0.0000
  34.  C  0.0000  0.0000  0.0000  0.0000  0.0021  0.0000  0.0000  0.0000  0.0000
  35.  C  0.0000  0.0000  0.0000  0.0000 -0.0002  0.0000  0.0000  0.0000  0.0000
  36.  C  0.0000  0.0000  0.0000  0.0000  0.0000  0.0000  0.0000  0.0000  0.0000
  37.  C  0.0000  0.0000  0.0000  0.0000  0.0000  0.0000  0.0000  0.0000 -0.0002
  38.  C -0.0005  0.0102  0.0000  0.0000  0.0000  0.0000  0.0000  0.0000  0.0000
  39.  C -0.0007  0.0217  0.0000  0.0000  0.0000  0.0000  0.0000  0.0000  0.0000
  40.  C  0.0008  0.0078  0.0000  0.0000  0.0000  0.0000  0.0000  0.0000  0.0000
  41.  C  0.0097 -0.0004  0.0000  0.0000  0.0000  0.0000  0.0000  0.0000  0.0000
  42.  C  0.0111 -0.0011  0.0000  0.0000  0.0000  0.0000  0.0000  0.0000  0.0000
  43.  C  0.0000 -0.0001  0.0000  0.0000  0.0000  0.0000  0.0000 -0.0002  0.0000
  44.  C -0.0001  0.0000  0.0000  0.0000  0.0000  0.0000  0.0000  0.0000  0.0000
  45.  C  0.0000  0.0000  0.0000  0.0000  0.0000  0.0000  0.0000  0.0000  0.0000
  46.  C  0.0000  0.0000  0.0000  0.0000  0.0000  0.0000  0.0000  0.0000  0.0000
  47.  C  0.0000  0.0000  0.0000  0.0000  0.0000  0.0000  0.0000  0.0000  0.0044
  48.  C  0.0000  0.0000  0.0000  0.0000  0.0000  0.0000  0.0000  0.0000  0.0000
  49.  C  0.0033  0.0000  0.0000  0.0000  0.0000  0.0000  0.0000  0.0000  0.0000
  50.  C  0.0000  0.0000  0.0000  0.0000  0.0000  0.0000  0.0000  0.0000  0.0000
  51.  C  0.0000  0.0006  0.0000  0.0000  0.0000  0.0000  0.0000  0.0066  0.0000
  52.  C  0.0000  0.0000  0.0000  0.0000  0.0000  0.0000  0.0000  0.0000  0.0000
  53.  C  0.0000  0.0000  0.0000  0.0000  0.0000  0.0000  0.0000  0.0000  0.0000
  54.  C  0.0000  0.0000  0.0000  0.0000  0.0000  0.0000  0.0000  0.0000  0.0000
  55.  H  0.0000  0.0000  0.0000  0.0000  0.0000  0.0000  0.0000  0.0000  0.0000
  56.  H  0.0000  0.0000  0.0000  0.0001  0.0000 -0.0019 -0.0048  0.0048  0.0000
  57.  H  0.0000  0.0000  0.0000  0.0000  0.0000  0.0000  0.0000  0.0000 -0.0046
  58.  H  0.0000  0.0000  0.0000  0.0000  0.0000  0.0000  0.0000  0.0000  0.0000
  59.  H  0.0000  0.0000  0.0000  0.0000  0.0000  0.0000  0.0000  0.0000  0.0000
  60.  H  0.0000  0.0000  0.0000  0.0000  0.0000  0.0000  0.0000  0.0000  0.0000
  61.  H  0.0052 -0.0041  0.0000  0.0000  0.0000  0.0000  0.0000  0.0000  0.0000
  62.  H  0.0000  0.0000 -0.0040 -0.0017  0.0047  0.0000  0.0000  0.0000  0.0000
  63.  H  0.0031  0.0028  0.0000  0.0000  0.0000  0.0000  0.0000  0.0000  0.0000
  64.  H  0.0000  0.0003  0.0000  0.0000  0.0000  0.0000  0.0000  0.0000  0.0000
  65.  H  0.0003  0.0000  0.0000  0.0000  0.0000  0.0000  0.0000  0.0000  0.0000
  66.  H  0.0000  0.0000  0.0000  0.0011  0.0020  0.0000  0.0000  0.0000  0.0000
  67.  H  0.0000  0.0000  0.0011  0.0000  0.0039  0.0000  0.0000  0.0000  0.0000
  68.  H  0.0000  0.0000  0.0020  0.0039  0.0000  0.0000  0.0000  0.0000  0.0000
  69.  H  0.0000  0.0000  0.0000  0.0000  0.0000  0.0000  0.0025  0.0034  0.0000
  70.  H  0.0000  0.0000  0.0000  0.0000  0.0000  0.0025  0.0000  0.0014  0.0000
  71.  H  0.0000  0.0000  0.0000  0.0000  0.0000  0.0034  0.0014  0.0000  0.0000
  72.  H  0.0000  0.0000  0.0000  0.0000  0.0000  0.0000  0.0000  0.0000  0.0000
  73.  H  0.0000  0.0000  0.0000  0.0000  0.0000  0.0000  0.0000  0.0000  0.0005
  74.  H  0.0000  0.0000  0.0000  0.0000  0.0000  0.0000  0.0000  0.0000  0.0034
  75.  H  0.0000  0.0000  0.0000  0.0000  0.0001  0.0000  0.0000  0.0000  0.0000
  76.  H  0.0000  0.0000  0.0000  0.0000  0.0010  0.0000  0.0000  0.0000  0.0000
  77.  H  0.0000  0.0000  0.0000  0.0000  0.0000  0.0000  0.0000  0.0000  0.0000
  78.  H  0.0000  0.0000  0.0000  0.0000  0.0000  0.0000  0.0000  0.0000  0.0000
  79.  H  0.0000  0.0000  0.0000  0.0000  0.0000  0.0000  0.0000  0.0000  0.0000
  80.  H  0.0000  0.0003  0.0000  0.0000  0.0000  0.0000  0.0000  0.0000  0.0000
  81.  H  0.0000  0.0000  0.0000  0.0000  0.0000  0.0000  0.0000  0.0000  0.0000
  82.  H  0.0001  0.0000  0.0000  0.0000  0.0000  0.0000  0.0000  0.0000  0.0000
  83.  H  0.0000  0.0000  0.0000  0.0000  0.0000  0.0000  0.0000  0.0000  0.0000
  84.  H  0.0000  0.0000  0.0000  0.0000  0.0000  0.0000  0.0000  0.0000  0.0000
  85.  H  0.0000  0.0000  0.0000  0.0000  0.0000  0.0000  0.0000  0.0000  0.0000
  86.  H  0.0000  0.0000  0.0000  0.0000  0.0000  0.0000  0.0000  0.0000  0.0000
  87.  H  0.0000  0.0000  0.0000  0.0000  0.0000  0.0000  0.0000  0.0000  0.0000
  88.  H  0.0000  0.0000  0.0000  0.0000  0.0000  0.0000  0.0000  0.0000  0.0000
  89.  H  0.0000  0.0000  0.0000  0.0000  0.0000  0.0000  0.0000  0.0000  0.0000
  90.  H  0.0000  0.0000  0.0000  0.0000  0.0000  0.0000  0.0000  0.0000  0.0000
  91.  H  0.0000  0.0000  0.0000  0.0000  0.0000  0.0000  0.0000  0.0000  0.0145
  92.  H  0.0000  0.0000  0.0000  0.0000  0.0000  0.0000  0.0000  0.0000 -0.0003
  93.  H  0.0000  0.0000  0.0000  0.0000  0.0000  0.0000  0.0000  0.0000  0.0002
  94.  H  0.0000  0.0000  0.0000  0.0000  0.0000  0.0000  0.0000  0.0000  0.0000
  95.  H  0.0000  0.0000  0.0000  0.0000  0.0000  0.0000  0.0000  0.0000  0.0000
  96.  H  0.0000  0.0000  0.0000  0.0000  0.0000  0.0000  0.0000  0.0000  0.0000
  97.  H -0.0001  0.0000  0.0000  0.0000  0.0000  0.0000  0.0000  0.0000  0.0000
  98.  H  0.0085  0.0000  0.0000  0.0000  0.0000  0.0000  0.0000  0.0000  0.0000
  99.  H  0.0003  0.0000  0.0000  0.0000  0.0000  0.0000  0.0000  0.0000  0.0000
 100.  H  0.0000  0.0000  0.0000  0.0000  0.0000  0.0000  0.0000  0.0000  0.0000
 101.  H  0.0000  0.0000  0.0000  0.0000  0.0000  0.0000  0.0000  0.0000  0.0000
 102.  H  0.0000  0.0000  0.0000  0.0000  0.0000  0.0000  0.0000  0.0000  0.0000
 103.  H  0.0000  0.0000  0.0000  0.0000  0.0000  0.0000  0.0000  0.0085  0.0000
 104.  H  0.0000  0.0015  0.0000  0.0000  0.0000  0.0000  0.0000  0.0036  0.0000
 105.  H  0.0000  0.0003  0.0000  0.0000  0.0000  0.0000  0.0000 -0.0004  0.0000
 106.  H  0.0000  0.0000  0.0000  0.0000  0.0000  0.0000  0.0000  0.0000  0.0000
 107.  H  0.0000  0.0000  0.0000  0.0000  0.0000  0.0000  0.0000  0.0000  0.0000
 108.  H  0.0000  0.0000  0.0000  0.0000  0.0000  0.0000  0.0000  0.0000  0.0000
 109.  H  0.0000  0.0000  0.0000  0.0000  0.0000  0.0000  0.0000  0.0000  0.0000
 110.  H  0.0000  0.0000  0.0000  0.0000  0.0000  0.0000  0.0000  0.0000  0.0000
 111.  H  0.0000  0.0000  0.0000  0.0000  0.0000  0.0000  0.0000  0.0000  0.0000
 112.  H  0.0000  0.0000  0.0000  0.0000  0.0000  0.0000  0.0000  0.0000  0.0000
 113.  H  0.0000  0.0000  0.0000  0.0000  0.0000  0.0000  0.0000  0.0000  0.0000
 114.  H  0.0000  0.0000  0.0000  0.0000  0.0000  0.0000  0.0000  0.0000  0.0000

     Atom   73      74      75      76      77      78      79      80      81
     ---- ------  ------  ------  ------  ------  ------  ------  ------  ------
   1.  O  0.0003  0.0028  0.0000  0.0000  0.0000  0.0000  0.0000  0.0000  0.0000
   2. Mg -0.0001  0.0001  0.0004 -0.0003  0.0002  0.0462  0.0116  0.0005 -0.0001
   3.  O  0.0000  0.0000  0.0000  0.0000  0.0000  0.0000  0.0000  0.0000  0.0000
   4.  C -0.0045 -0.0040  0.0000  0.0000  0.0000  0.0000  0.0000  0.0000  0.0000
   5.  N  0.0000  0.0000  0.0000  0.0000  0.0000  0.0077  0.0041  0.0000  0.0000
   6.  N  0.0000  0.0000  0.0000  0.0000  0.0000  0.0005  0.0000  0.0000  0.0000
   7.  O  0.0010  0.0001  0.0000  0.0000  0.0000  0.0000  0.0000  0.0000  0.0000
   8.  C  0.0000  0.0000  0.0000  0.0000  0.0000 -0.0005  0.0089  0.0000  0.0000
   9.  C  0.0000  0.0000  0.0000  0.0000  0.0000  0.0000  0.0001  0.0000  0.0000
  10.  C  0.0000  0.0000  0.0000  0.0000  0.0000  0.0000  0.0000  0.0000  0.0000
  11.  O -0.0011  0.0024  0.0000  0.0000  0.0000  0.0000  0.0000  0.0000  0.0000
  12.  C  0.0001 -0.0001  0.0000  0.0000  0.0000  0.0000  0.0001  0.0000  0.0000
  13.  C  0.0000  0.0000  0.0000  0.0000  0.0000  0.0000  0.0000  0.0000  0.0000
  14.  C -0.0028  0.0080  0.0000  0.0000  0.0000  0.0000 -0.0003  0.0000  0.0000
  15.  O  0.0000  0.0000  0.0000  0.0000  0.0000  0.0000  0.0000  0.0000  0.0000
  16.  C  0.0000  0.0000  0.0000  0.0000  0.0000  0.0000  0.0000  0.0000  0.0000
  17.  O  0.0000  0.0000  0.0000  0.0000  0.0000  0.0003  0.0000  0.0000  0.0000
  18.  C  0.0000  0.0000  0.0000  0.0000  0.0000  0.0000  0.0000  0.0000  0.0000
  19.  O  0.0000  0.0000  0.0000  0.0000  0.0000  0.0000  0.0000  0.0000  0.0000
  20.  O  0.0000  0.0000  0.0000  0.0000  0.0000  0.0000  0.0000  0.0000  0.0000
  21.  C  0.0000  0.0000  0.0000  0.0000  0.0000  0.0003  0.0000  0.0000  0.0000
  22.  C  0.0000  0.0000  0.0000  0.0000  0.0000  0.0000  0.0000  0.0000  0.0000
  23.  C  0.0000  0.0000  0.0000  0.0000  0.0000  0.0000  0.0000  0.0000  0.0000
  24.  O  0.0000  0.0000  0.0000  0.0000  0.0000  0.0000  0.0000  0.0000  0.0000
  25.  C  0.0000  0.0000  0.0000  0.0000  0.0000  0.0000  0.0000  0.0000  0.0000
  26.  C  0.0000  0.0000  0.0000 -0.0001  0.0000  0.0000  0.0000  0.0000  0.0000
  27.  C  0.0000  0.0000  0.0000  0.0000  0.0000  0.0000  0.0000  0.0000  0.0000
  28.  C  0.7467  0.7451  0.0000  0.0000  0.0000  0.0000  0.0000  0.0000  0.0000
  29.  C  0.0000  0.0000  0.0009  0.0000  0.0009 -0.0024 -0.0027  0.0000  0.0000
  30.  C  0.0000  0.0000  0.0000  0.0000  0.0000  0.0000  0.0000  0.0009  0.0000
  31.  C  0.0000  0.0000 -0.0061  0.0009  0.0000 -0.0041  0.0000  0.0000  0.0000
  32.  C  0.0000  0.0000  0.6448 -0.0060  0.0010  0.0005  0.0000  0.0000  0.0000
  33.  C  0.0000  0.0000 -0.0057  0.6455 -0.0058  0.0000  0.0000  0.0000  0.0000
  34.  C  0.0000  0.0000  0.0009 -0.0060  0.6443  0.0000  0.0008  0.0000  0.0000
  35.  C  0.0000  0.0000  0.0000  0.0009 -0.0062  0.0000 -0.0037  0.0000  0.0000
  36.  C  0.0000  0.0000 -0.0025  0.0000  0.0000  0.6131  0.0000  0.0000  0.0000
  37.  C  0.0000  0.0000  0.0000  0.0000 -0.0023  0.0000  0.6250  0.0000  0.0000
  38.  C  0.0000  0.0000  0.0000  0.0000  0.0000  0.0000  0.0000 -0.0063  0.0009
  39.  C  0.0000  0.0000  0.0000  0.0000  0.0000  0.0000  0.0000  0.6444 -0.0059
  40.  C  0.0000  0.0000  0.0000  0.0000  0.0000  0.0000  0.0000 -0.0058  0.6456
  41.  C  0.0000  0.0000  0.0000  0.0000  0.0000  0.0000  0.0000  0.0010 -0.0059
  42.  C  0.0000  0.0000  0.0000  0.0000  0.0000  0.0000  0.0000  0.0000  0.0009
  43.  C  0.0000  0.0000  0.0000  0.0000  0.0000  0.0000  0.0000 -0.0022  0.0000
  44.  C  0.0000  0.0000  0.0000  0.0000  0.0000  0.0000  0.0000  0.0000  0.0000
  45.  C  0.0000  0.0000  0.0029  0.0000  0.0000 -0.0037  0.0000  0.0000  0.0000
  46.  C  0.0000  0.0000  0.0000  0.0000  0.0000 -0.0032  0.0000  0.0000  0.0000
  47.  C  0.0000  0.0000  0.0000  0.0000  0.0004  0.0000 -0.0033  0.0000  0.0000
  48.  C  0.0000  0.0000  0.0000  0.0000  0.0002  0.0000 -0.0038  0.0000  0.0000
  49.  C  0.0000  0.0000  0.0000  0.0000  0.0000  0.0003  0.0000  0.0000  0.0000
  50.  C  0.0000  0.0000  0.0000  0.0000  0.0000  0.0000  0.0000  0.0000  0.0000
  51.  C  0.0000  0.0000  0.0000  0.0000  0.0000  0.0000  0.0000  0.0002  0.0000
  52.  C  0.0000  0.0000  0.0000  0.0000  0.0000  0.0000  0.0000  0.0002  0.0000
  53.  C  0.0000  0.0000  0.0000  0.0000  0.0000  0.0000  0.0024  0.0000  0.0000
  54.  C  0.0000  0.0000  0.0000  0.0000  0.0000  0.0000  0.0000  0.0000  0.0000
  55.  H  0.0000  0.0000  0.0000  0.0000  0.0000  0.0000  0.0000  0.0000  0.0000
  56.  H  0.0000  0.0000  0.0000  0.0000  0.0000  0.0000  0.0000  0.0000  0.0000
  57.  H  0.0046 -0.0017  0.0000  0.0000  0.0000  0.0000  0.0041  0.0000  0.0000
  58.  H  0.0000  0.0000  0.0000  0.0000  0.0000  0.0000  0.0000  0.0000  0.0000
  59.  H  0.0000  0.0000  0.0000  0.0000  0.0000  0.0000  0.0000  0.0000  0.0000
  60.  H  0.0000  0.0000  0.0000  0.0000  0.0000  0.0000  0.0000  0.0000  0.0000
  61.  H  0.0000  0.0000  0.0000  0.0000  0.0000  0.0000  0.0000  0.0000  0.0000
  62.  H  0.0000  0.0000  0.0000  0.0000  0.0000  0.0000  0.0000  0.0000  0.0000
  63.  H  0.0000  0.0000  0.0000  0.0000  0.0000  0.0000  0.0000  0.0000  0.0000
  64.  H  0.0000  0.0000  0.0000  0.0000  0.0000  0.0000  0.0000  0.0000  0.0000
  65.  H  0.0000  0.0000  0.0000  0.0000  0.0000  0.0000  0.0000  0.0003  0.0000
  66.  H  0.0000  0.0000  0.0000  0.0000  0.0000  0.0000  0.0000  0.0000  0.0000
  67.  H  0.0000  0.0000  0.0000  0.0000  0.0000  0.0000  0.0000  0.0000  0.0000
  68.  H  0.0000  0.0000  0.0001  0.0010  0.0000  0.0000  0.0000  0.0000  0.0000
  69.  H  0.0000  0.0000  0.0000  0.0000  0.0000  0.0000  0.0000  0.0000  0.0000
  70.  H  0.0000  0.0000  0.0000  0.0000  0.0000  0.0000  0.0000  0.0000  0.0000
  71.  H  0.0000  0.0000  0.0000  0.0000  0.0000  0.0000  0.0000  0.0000  0.0000
  72.  H  0.0005  0.0034  0.0000  0.0000  0.0000  0.0000  0.0000  0.0000  0.0000
  73.  H  0.0000  0.0023  0.0000  0.0000  0.0000  0.0000  0.0000  0.0000  0.0000
  74.  H  0.0023  0.0000  0.0000  0.0000  0.0000  0.0000  0.0000  0.0000  0.0000
  75.  H  0.0000  0.0000  0.0000 -0.0025  0.0000  0.0000  0.0000  0.0000  0.0000
  76.  H  0.0000  0.0000 -0.0025  0.0000 -0.0025  0.0000  0.0000  0.0000  0.0000
  77.  H  0.0000  0.0000  0.0000 -0.0025  0.0000  0.0000  0.0000  0.0000  0.0000
  78.  H  0.0000  0.0000  0.0000  0.0000  0.0000  0.0000  0.0000  0.0000  0.0000
  79.  H  0.0000  0.0000  0.0000  0.0000  0.0000  0.0000  0.0000  0.0000  0.0000
  80.  H  0.0000  0.0000  0.0000  0.0000  0.0000  0.0000  0.0000  0.0000 -0.0025
  81.  H  0.0000  0.0000  0.0000  0.0000  0.0000  0.0000  0.0000 -0.0025  0.0000
  82.  H  0.0000  0.0000  0.0000  0.0000  0.0000  0.0000  0.0000  0.0000 -0.0025
  83.  H  0.0000  0.0000  0.0000  0.0000  0.0000  0.0000  0.0000  0.0000  0.0000
  84.  H  0.0000  0.0000  0.0000  0.0000  0.0000  0.0009  0.0000  0.0000  0.0000
  85.  H  0.0000  0.0000  0.0000  0.0000  0.0000 -0.0017  0.0000  0.0000  0.0000
  86.  H  0.0000  0.0000  0.0012  0.0000  0.0000 -0.0011  0.0000  0.0000  0.0000
  87.  H  0.0000  0.0000  0.0040  0.0000  0.0000  0.0013  0.0000  0.0000  0.0000
  88.  H  0.0000  0.0000  0.0000  0.0000  0.0000 -0.0011  0.0000  0.0000  0.0000
  89.  H  0.0000  0.0000  0.0000  0.0000  0.0000  0.0013  0.0000  0.0000  0.0000
  90.  H  0.0000  0.0000  0.0000  0.0000  0.0000 -0.0017  0.0000  0.0000  0.0000
  91.  H  0.0000  0.0000  0.0000  0.0000  0.0000  0.0000 -0.0013  0.0000  0.0000
  92.  H  0.0000  0.0000  0.0000  0.0000  0.0036  0.0000  0.0012  0.0000  0.0000
  93.  H  0.0000  0.0000  0.0000  0.0000  0.0000  0.0000 -0.0013  0.0000  0.0000
  94.  H  0.0000  0.0000  0.0000  0.0000  0.0000  0.0000 -0.0014  0.0000  0.0000
  95.  H  0.0000  0.0000  0.0000  0.0000  0.0000  0.0000 -0.0011  0.0000  0.0000
  96.  H  0.0000  0.0000  0.0000  0.0000  0.0015  0.0000  0.0012  0.0000  0.0000
  97.  H  0.0000  0.0000  0.0000  0.0000  0.0000  0.0000  0.0000  0.0000  0.0000
  98.  H  0.0000  0.0000  0.0000  0.0000  0.0000  0.0019  0.0000  0.0000  0.0000
  99.  H  0.0000  0.0000  0.0000  0.0000  0.0000  0.0000  0.0000  0.0000  0.0000
 100.  H  0.0000  0.0000  0.0000  0.0000  0.0000  0.0000  0.0000  0.0000  0.0000
 101.  H  0.0000  0.0000  0.0000  0.0000  0.0000  0.0000  0.0000  0.0000  0.0000
 102.  H  0.0000  0.0000  0.0000  0.0000  0.0000  0.0000  0.0000  0.0000  0.0000
 103.  H  0.0000  0.0000  0.0000  0.0000  0.0000  0.0000  0.0000  0.0000  0.0000
 104.  H  0.0000  0.0000  0.0000  0.0000  0.0000  0.0000  0.0000  0.0000  0.0000
 105.  H  0.0000  0.0000  0.0000  0.0000  0.0000  0.0000  0.0000  0.0023  0.0000
 106.  H  0.0000  0.0000  0.0000  0.0000  0.0000  0.0000  0.0000  0.0000  0.0000
 107.  H  0.0000  0.0000  0.0000  0.0000  0.0000  0.0000  0.0000  0.0022  0.0000
 108.  H  0.0000  0.0000  0.0000  0.0000  0.0000  0.0000  0.0000  0.0000  0.0000
 109.  H  0.0000  0.0000  0.0000  0.0000  0.0000  0.0000 -0.0001  0.0000  0.0000
 110.  H  0.0000  0.0000  0.0000  0.0000  0.0000  0.0000  0.0000  0.0000  0.0000
 111.  H  0.0000  0.0000  0.0000  0.0000  0.0000  0.0000  0.0004  0.0000  0.0000
 112.  H  0.0000  0.0000  0.0000  0.0000  0.0000  0.0000  0.0000  0.0000  0.0000
 113.  H  0.0000  0.0000  0.0000  0.0000  0.0000  0.0000  0.0000  0.0000  0.0000
 114.  H  0.0000  0.0000  0.0000  0.0000  0.0000  0.0000  0.0000  0.0000  0.0000

     Atom   82      83      84      85      86      87      88      89      90
     ---- ------  ------  ------  ------  ------  ------  ------  ------  ------
   1.  O  0.0000  0.0000  0.0000  0.0000  0.0000  0.0000  0.0000  0.0000  0.0000
   2. Mg  0.0002  0.0229  0.0175 -0.0006  0.0042 -0.0015 -0.0008 -0.0012  0.0069
   3.  O  0.0000  0.0000  0.0000  0.0000  0.0000  0.0000  0.0000  0.0000  0.0000
   4.  C  0.0000  0.0020  0.0000  0.0000  0.0000  0.0000  0.0000  0.0000  0.0000
   5.  N  0.0000  0.0000  0.0001  0.0000  0.0000  0.0000  0.0000  0.0000  0.0002
   6.  N  0.0000  0.0099  0.0057  0.0000  0.0000  0.0000  0.0000  0.0000  0.0000
   7.  O  0.0000  0.0000  0.0000  0.0000  0.0000  0.0000  0.0000  0.0000  0.0000
   8.  C  0.0000  0.0000  0.0002  0.0000  0.0000  0.0000 -0.0001 -0.0001  0.0076
   9.  C  0.0000  0.0000  0.0002  0.0000  0.0000  0.0000  0.0000  0.0000  0.0000
  10.  C  0.0000  0.0017  0.0089  0.0000  0.0000  0.0000  0.0000  0.0000  0.0000
  11.  O  0.0000  0.0000  0.0000  0.0000  0.0000  0.0000  0.0000  0.0000  0.0000
  12.  C  0.0000  0.0002  0.0000  0.0000  0.0000  0.0000  0.0000  0.0000  0.0000
  13.  C  0.0000  0.0000  0.0000  0.0000  0.0000  0.0000  0.0000  0.0000  0.0000
  14.  C  0.0000  0.0000  0.0000  0.0000  0.0000  0.0000  0.0000  0.0000  0.0000
  15.  O  0.0000  0.0045  0.0000  0.0000  0.0000  0.0000  0.0000  0.0000  0.0000
  16.  C  0.0000  0.0001  0.0000  0.0000  0.0000  0.0000  0.0000  0.0000  0.0000
  17.  O  0.0000  0.0000  0.0000  0.0000  0.0000  0.0000  0.0000  0.0000  0.0000
  18.  C  0.0000  0.0000  0.0000  0.0000  0.0000  0.0000  0.0000  0.0000  0.0000
  19.  O  0.0000  0.0000  0.0000  0.0000  0.0000  0.0000  0.0000  0.0000  0.0000
  20.  O  0.0000  0.0000  0.0000  0.0000  0.0013  0.0000  0.0000  0.0000  0.0000
  21.  C  0.0000  0.0000  0.0000  0.0000  0.0046  0.0000  0.0000  0.0000  0.0000
  22.  C  0.0000  0.0000  0.0000  0.0000  0.0001  0.0000  0.0000  0.0000  0.0000
  23.  C  0.0000  0.0000  0.0000  0.0000  0.0001  0.0000  0.0000  0.0000  0.0000
  24.  O  0.0000  0.0000  0.0000  0.0001  0.0026  0.0000  0.0000  0.0000  0.0000
  25.  C  0.0000  0.0000  0.0000  0.0000  0.0000  0.0000  0.0000  0.0000  0.0000
  26.  C  0.0000  0.0000  0.0000  0.0000  0.0000  0.0000  0.0000  0.0000  0.0000
  27.  C  0.0000  0.0000  0.0000  0.0000  0.0000  0.0000  0.0000  0.0000  0.0000
  28.  C  0.0000  0.0000  0.0000  0.0000  0.0000  0.0000  0.0000  0.0000  0.0000
  29.  C  0.0000  0.0000  0.0000  0.0000  0.0000  0.0000  0.0000  0.0000  0.0004
  30.  C  0.0009 -0.0031 -0.0029  0.0000  0.0000  0.0000  0.0000  0.0000  0.0000
  31.  C  0.0000  0.0000  0.0000  0.0007 -0.0012 -0.0010  0.0007 -0.0010 -0.0007
  32.  C  0.0000  0.0000  0.0000  0.0001  0.0003 -0.0001  0.0000  0.0002  0.0000
  33.  C  0.0000  0.0000  0.0000  0.0000  0.0000  0.0000  0.0000  0.0000  0.0000
  34.  C  0.0000  0.0000  0.0000  0.0000  0.0000  0.0000  0.0000  0.0000  0.0000
  35.  C  0.0000  0.0000  0.0000  0.0000  0.0000  0.0000  0.0000  0.0000  0.0000
  36.  C  0.0000  0.0000  0.0000 -0.0025 -0.0028 -0.0042 -0.0028 -0.0041 -0.0033
  37.  C  0.0000  0.0000  0.0000  0.0000  0.0000  0.0000  0.0000  0.0000  0.0000
  38.  C  0.0000 -0.0041  0.0000  0.0000  0.0000  0.0000  0.0000  0.0000  0.0000
  39.  C  0.0010  0.0008  0.0000  0.0000  0.0000  0.0000  0.0000  0.0000  0.0000
  40.  C -0.0057  0.0000  0.0000  0.0000  0.0000  0.0000  0.0000  0.0000  0.0000
  41.  C  0.6445  0.0000  0.0008  0.0000  0.0000  0.0000  0.0000  0.0000  0.0000
  42.  C -0.0062  0.0000 -0.0040  0.0000  0.0000  0.0000  0.0000  0.0000  0.0000
  43.  C  0.0000  0.6228  0.0000  0.0000  0.0000  0.0000  0.0000  0.0000  0.0000
  44.  C -0.0023  0.0000  0.6242  0.0000  0.0000  0.0000  0.0000  0.0000  0.0000
  45.  C  0.0000  0.0000  0.0000  0.6362  0.6345  0.6352 -0.0012 -0.0010  0.0008
  46.  C  0.0000  0.0000  0.0001 -0.0011  0.0008 -0.0012  0.6358  0.6358  0.6340
  47.  C  0.0000  0.0000  0.0000  0.0000  0.0000  0.0000  0.0000  0.0000  0.0000
  48.  C  0.0000  0.0000  0.0000  0.0000  0.0000  0.0000  0.0000  0.0000  0.0000
  49.  C  0.0003  0.0000 -0.0031  0.0004  0.0000  0.0000  0.0001  0.0000  0.0000
  50.  C  0.0002  0.0000 -0.0036  0.0000  0.0000  0.0000  0.0000  0.0000  0.0000
  51.  C  0.0000 -0.0031  0.0000  0.0000  0.0000  0.0000  0.0000  0.0000  0.0000
  52.  C  0.0000 -0.0035  0.0000  0.0000  0.0000  0.0000  0.0000  0.0000  0.0000
  53.  C  0.0000  0.0000  0.0000  0.0000  0.0000  0.0000  0.0000  0.0000  0.0046
  54.  C  0.0000  0.0001  0.0001  0.0000  0.0000  0.0000  0.0000  0.0000  0.0000
  55.  H  0.0000  0.0000  0.0000  0.0000  0.0000  0.0000  0.0000  0.0000  0.0000
  56.  H  0.0000  0.0000  0.0000  0.0000  0.0000  0.0000  0.0000  0.0000  0.0000
  57.  H  0.0000  0.0000  0.0000  0.0000  0.0000  0.0000  0.0000  0.0000  0.0000
  58.  H  0.0000  0.0002  0.0000  0.0000  0.0000  0.0000  0.0000  0.0000  0.0000
  59.  H  0.0000  0.0000  0.0000  0.0000  0.0000  0.0000  0.0000  0.0000  0.0000
  60.  H  0.0000  0.0000  0.0000  0.0000  0.0000  0.0000  0.0000  0.0000  0.0000
  61.  H  0.0000  0.0000  0.0000  0.0000  0.0000  0.0000  0.0000  0.0000  0.0000
  62.  H  0.0000  0.0000  0.0000  0.0000  0.0000  0.0000  0.0000  0.0000  0.0000
  63.  H  0.0000  0.0000  0.0000  0.0000  0.0000  0.0000  0.0000  0.0000  0.0000
  64.  H  0.0001  0.0000  0.0000  0.0000  0.0000  0.0000  0.0000  0.0000  0.0000
  65.  H  0.0000  0.0000  0.0000  0.0000  0.0000  0.0000  0.0000  0.0000  0.0000
  66.  H  0.0000  0.0000  0.0000  0.0000  0.0000  0.0000  0.0000  0.0000  0.0000
  67.  H  0.0000  0.0000  0.0000  0.0000  0.0000  0.0000  0.0000  0.0000  0.0000
  68.  H  0.0000  0.0000  0.0000  0.0000  0.0000  0.0000  0.0000  0.0000  0.0000
  69.  H  0.0000  0.0000  0.0000  0.0000  0.0000  0.0000  0.0000  0.0000  0.0000
  70.  H  0.0000  0.0000  0.0000  0.0000  0.0000  0.0000  0.0000  0.0000  0.0000
  71.  H  0.0000  0.0000  0.0000  0.0000  0.0000  0.0000  0.0000  0.0000  0.0000
  72.  H  0.0000  0.0000  0.0000  0.0000  0.0000  0.0000  0.0000  0.0000  0.0000
  73.  H  0.0000  0.0000  0.0000  0.0000  0.0000  0.0000  0.0000  0.0000  0.0000
  74.  H  0.0000  0.0000  0.0000  0.0000  0.0000  0.0000  0.0000  0.0000  0.0000
  75.  H  0.0000  0.0000  0.0000  0.0000  0.0012  0.0040  0.0000  0.0000  0.0000
  76.  H  0.0000  0.0000  0.0000  0.0000  0.0000  0.0000  0.0000  0.0000  0.0000
  77.  H  0.0000  0.0000  0.0000  0.0000  0.0000  0.0000  0.0000  0.0000  0.0000
  78.  H  0.0000  0.0000  0.0009 -0.0017 -0.0011  0.0013 -0.0011  0.0013 -0.0017
  79.  H  0.0000  0.0000  0.0000  0.0000  0.0000  0.0000  0.0000  0.0000  0.0000
  80.  H  0.0000  0.0000  0.0000  0.0000  0.0000  0.0000  0.0000  0.0000  0.0000
  81.  H -0.0025  0.0000  0.0000  0.0000  0.0000  0.0000  0.0000  0.0000  0.0000
  82.  H  0.0000  0.0000  0.0000  0.0000  0.0000  0.0000  0.0000  0.0000  0.0000
  83.  H  0.0000  0.0000  0.0000  0.0000  0.0000  0.0000  0.0000  0.0000  0.0000
  84.  H  0.0000  0.0000  0.0000  0.0000  0.0000  0.0000  0.0001  0.0000  0.0001
  85.  H  0.0000  0.0000  0.0000  0.0000 -0.0008 -0.0017  0.0011  0.0000  0.0000
  86.  H  0.0000  0.0000  0.0000 -0.0008  0.0000 -0.0022  0.0000  0.0000  0.0000
  87.  H  0.0000  0.0000  0.0000 -0.0017 -0.0022  0.0000  0.0000  0.0009  0.0000
  88.  H  0.0000  0.0000  0.0001  0.0011  0.0000  0.0000  0.0000 -0.0022 -0.0015
  89.  H  0.0000  0.0000  0.0000  0.0000  0.0000  0.0009 -0.0022  0.0000 -0.0022
  90.  H  0.0000  0.0000  0.0001  0.0000  0.0000  0.0000 -0.0015 -0.0022  0.0000
  91.  H  0.0000  0.0000  0.0000  0.0000  0.0000  0.0000  0.0000  0.0000  0.0000
  92.  H  0.0000  0.0000  0.0000  0.0000  0.0000  0.0000  0.0000  0.0000  0.0000
  93.  H  0.0000  0.0000  0.0000  0.0000  0.0000  0.0000  0.0000  0.0000  0.0000
  94.  H  0.0000  0.0000  0.0000  0.0000  0.0000  0.0000  0.0000  0.0000  0.0000
  95.  H  0.0000  0.0000  0.0000  0.0000  0.0000  0.0000  0.0000  0.0000  0.0000
  96.  H  0.0000  0.0000  0.0000  0.0000  0.0000  0.0000  0.0000  0.0000  0.0000
  97.  H  0.0000  0.0000 -0.0013  0.0010  0.0000  0.0000  0.0013  0.0000  0.0000
  98.  H  0.0000  0.0000 -0.0013  0.0017  0.0000  0.0000  0.0000  0.0000  0.0000
  99.  H  0.0028  0.0000  0.0012  0.0000  0.0000  0.0000  0.0000  0.0000  0.0000
 100.  H  0.0000  0.0000 -0.0014  0.0000  0.0000  0.0000  0.0000  0.0000  0.0000
 101.  H  0.0000  0.0000 -0.0011  0.0000  0.0000  0.0000  0.0000  0.0000  0.0000
 102.  H  0.0019  0.0000  0.0012  0.0000  0.0000  0.0000  0.0000  0.0000  0.0000
 103.  H  0.0000 -0.0014  0.0000  0.0000  0.0000  0.0000  0.0000  0.0000  0.0000
 104.  H  0.0000 -0.0016  0.0000  0.0000  0.0000  0.0000  0.0000  0.0000  0.0000
 105.  H  0.0000  0.0012  0.0000  0.0000  0.0000  0.0000  0.0000  0.0000  0.0000
 106.  H  0.0000 -0.0012  0.0000  0.0000  0.0000  0.0000  0.0000  0.0000  0.0000
 107.  H  0.0000  0.0012  0.0000  0.0000  0.0000  0.0000  0.0000  0.0000  0.0000
 108.  H  0.0000 -0.0013  0.0000  0.0000  0.0000  0.0000  0.0000  0.0000  0.0000
 109.  H  0.0000  0.0000  0.0000  0.0000  0.0000  0.0000  0.0000  0.0000  0.0003
 110.  H  0.0000  0.0000  0.0000  0.0000  0.0000  0.0000  0.0000  0.0000  0.0001
 111.  H  0.0000  0.0000  0.0000  0.0000  0.0000  0.0000  0.0000  0.0000  0.0001
 112.  H  0.0000  0.0000  0.0001  0.0000  0.0000  0.0000  0.0000  0.0000  0.0000
 113.  H  0.0000  0.0001  0.0000  0.0000  0.0000  0.0000  0.0000  0.0000  0.0000
 114.  H  0.0000  0.0000  0.0000  0.0000  0.0000  0.0000  0.0000  0.0000  0.0000

     Atom   91      92      93      94      95      96      97      98      99
     ---- ------  ------  ------  ------  ------  ------  ------  ------  ------
   1.  O  0.0000  0.0000  0.0000  0.0000  0.0000  0.0000  0.0000  0.0000  0.0000
   2. Mg -0.0018 -0.0013  0.0087 -0.0001  0.0004  0.0003 -0.0012  0.0123 -0.0026
   3.  O  0.0000  0.0000  0.0000  0.0000  0.0000  0.0000  0.0000  0.0000  0.0000
   4.  C  0.0000  0.0000  0.0000  0.0000  0.0000  0.0000  0.0000  0.0000  0.0000
   5.  N  0.0000  0.0000  0.0000  0.0000  0.0000  0.0000  0.0000  0.0000  0.0000
   6.  N  0.0000  0.0000  0.0000  0.0000  0.0000  0.0000  0.0000  0.0000  0.0000
   7.  O  0.0000  0.0000  0.0000  0.0000  0.0000  0.0000  0.0000  0.0000  0.0000
   8.  C  0.0000  0.0000  0.0000  0.0000 -0.0001  0.0000  0.0000  0.0000  0.0000
   9.  C  0.0000  0.0000  0.0000  0.0000  0.0000  0.0000  0.0000  0.0000  0.0000
  10.  C  0.0000  0.0000  0.0000  0.0000  0.0000  0.0000  0.0000  0.0000  0.0000
  11.  O  0.0000  0.0000  0.0005  0.0000  0.0000  0.0000  0.0000  0.0000  0.0000
  12.  C -0.0001 -0.0001  0.0079  0.0000  0.0000  0.0000  0.0000  0.0000  0.0000
  13.  C  0.0000  0.0000  0.0000  0.0000  0.0000  0.0000  0.0000  0.0000  0.0000
  14.  C  0.0006  0.0000  0.0014  0.0000  0.0000  0.0000  0.0000  0.0000  0.0000
  15.  O  0.0000  0.0000 -0.0003  0.0000  0.0000  0.0000  0.0000  0.0000  0.0000
  16.  C  0.0000  0.0000  0.0000  0.0000  0.0000  0.0000  0.0000  0.0000  0.0000
  17.  O  0.0000  0.0000  0.0000  0.0000  0.0000  0.0000  0.0000  0.0000  0.0000
  18.  C  0.0000  0.0000  0.0002  0.0000  0.0000  0.0000  0.0000  0.0000  0.0000
  19.  O  0.0000  0.0000  0.0025  0.0000  0.0000  0.0000  0.0000  0.0000  0.0000
  20.  O  0.0000  0.0000  0.0000  0.0000  0.0000  0.0000  0.0000  0.0000  0.0000
  21.  C  0.0000  0.0000  0.0000  0.0000  0.0000  0.0000  0.0000  0.0004  0.0000
  22.  C  0.0000  0.0000  0.0000  0.0000  0.0000  0.0000  0.0000  0.0000  0.0000
  23.  C  0.0000  0.0000  0.0000  0.0000  0.0000  0.0000  0.0000  0.0000  0.0000
  24.  O  0.0000  0.0000  0.0000  0.0000  0.0000  0.0000  0.0000  0.0003  0.0000
  25.  C  0.0000  0.0000  0.0000  0.0000  0.0000  0.0000  0.0000 -0.0007  0.0000
  26.  C  0.0000  0.0000  0.0000  0.0000  0.0000  0.0000  0.0000  0.0000  0.0000
  27.  C  0.0000  0.0000  0.0000  0.0000  0.0000  0.0000  0.0000  0.0000  0.0000
  28.  C -0.0008  0.0000  0.0000  0.0000  0.0000  0.0000  0.0000  0.0000  0.0000
  29.  C  0.0000  0.0000  0.0000  0.0000  0.0000  0.0000  0.0000  0.0000  0.0000
  30.  C  0.0000  0.0000  0.0000  0.0000  0.0000  0.0000  0.0000  0.0000  0.0000
  31.  C  0.0000  0.0000  0.0000  0.0000  0.0000  0.0000  0.0000  0.0000  0.0000
  32.  C  0.0000  0.0000  0.0000  0.0000  0.0000  0.0000  0.0000  0.0000  0.0000
  33.  C  0.0000  0.0000  0.0000  0.0000  0.0000  0.0000  0.0000  0.0000  0.0000
  34.  C  0.0000  0.0007  0.0001  0.0000  0.0000  0.0005  0.0000  0.0000  0.0000
  35.  C  0.0008 -0.0012 -0.0007  0.0007 -0.0009 -0.0011  0.0000  0.0000  0.0000
  36.  C  0.0000  0.0000  0.0000  0.0000  0.0000  0.0000  0.0000  0.0000  0.0000
  37.  C -0.0032 -0.0042 -0.0031 -0.0029 -0.0033 -0.0038  0.0000  0.0000  0.0000
  38.  C  0.0000  0.0000  0.0000  0.0000  0.0000  0.0000  0.0000  0.0000  0.0000
  39.  C  0.0000  0.0000  0.0000  0.0000  0.0000  0.0000  0.0000  0.0000  0.0000
  40.  C  0.0000  0.0000  0.0000  0.0000  0.0000  0.0000  0.0000  0.0000  0.0000
  41.  C  0.0000  0.0000  0.0000  0.0000  0.0000  0.0000  0.0000  0.0000  0.0006
  42.  C  0.0000  0.0000  0.0000  0.0000  0.0000  0.0000  0.0008 -0.0008 -0.0012
  43.  C  0.0000  0.0000  0.0000  0.0000  0.0000  0.0000  0.0000  0.0000  0.0000
  44.  C  0.0000  0.0000  0.0000  0.0000  0.0000  0.0000 -0.0030 -0.0032 -0.0044
  45.  C  0.0000  0.0000  0.0000  0.0000  0.0000  0.0000 -0.0001  0.0001  0.0000
  46.  C  0.0000  0.0000  0.0000  0.0000  0.0000  0.0000  0.0000  0.0000  0.0000
  47.  C  0.6310  0.6358  0.6322 -0.0010  0.0008 -0.0012  0.0000  0.0000  0.0000
  48.  C -0.0010 -0.0012  0.0008  0.6364  0.6371  0.6361  0.0000  0.0000  0.0000
  49.  C  0.0000  0.0000  0.0000  0.0000  0.0000  0.0000  0.6351  0.6302  0.6360
  50.  C  0.0000  0.0000  0.0000  0.0000  0.0000  0.0000 -0.0010  0.0008 -0.0012
  51.  C  0.0000  0.0000  0.0000  0.0000  0.0000  0.0000  0.0000  0.0000  0.0000
  52.  C  0.0000  0.0000  0.0000  0.0000  0.0000  0.0000  0.0000  0.0000  0.0000
  53.  C  0.0000  0.0000  0.0000 -0.0001  0.0041  0.0000  0.0000  0.0000  0.0000
  54.  C  0.0000  0.0000  0.0000  0.0000  0.0000  0.0000  0.0000  0.0000  0.0000
  55.  H  0.0000  0.0000  0.0000  0.0000  0.0000  0.0000  0.0000  0.0000  0.0000
  56.  H  0.0000  0.0000  0.0021  0.0000  0.0000  0.0000  0.0000  0.0000  0.0000
  57.  H  0.0005  0.0000  0.0004  0.0000  0.0000  0.0000  0.0000  0.0000  0.0000
  58.  H  0.0000  0.0000  0.0000  0.0000  0.0000  0.0000  0.0000  0.0000  0.0000
  59.  H  0.0000  0.0000  0.0000  0.0000  0.0000  0.0000  0.0000  0.0000  0.0000
  60.  H  0.0000  0.0000  0.0000  0.0000  0.0000  0.0000  0.0000  0.0000  0.0000
  61.  H  0.0000  0.0000  0.0000  0.0000  0.0000  0.0000  0.0000  0.0000  0.0000
  62.  H  0.0000  0.0000  0.0000  0.0000  0.0000  0.0000  0.0000  0.0000  0.0000
  63.  H  0.0000  0.0000  0.0000  0.0000  0.0000  0.0000  0.0000  0.0000  0.0000
  64.  H  0.0000  0.0000  0.0000  0.0000  0.0000  0.0000 -0.0001  0.0085  0.0003
  65.  H  0.0000  0.0000  0.0000  0.0000  0.0000  0.0000  0.0000  0.0000  0.0000
  66.  H  0.0000  0.0000  0.0000  0.0000  0.0000  0.0000  0.0000  0.0000  0.0000
  67.  H  0.0000  0.0000  0.0000  0.0000  0.0000  0.0000  0.0000  0.0000  0.0000
  68.  H  0.0000  0.0000  0.0000  0.0000  0.0000  0.0000  0.0000  0.0000  0.0000
  69.  H  0.0000  0.0000  0.0000  0.0000  0.0000  0.0000  0.0000  0.0000  0.0000
  70.  H  0.0000  0.0000  0.0000  0.0000  0.0000  0.0000  0.0000  0.0000  0.0000
  71.  H  0.0000  0.0000  0.0000  0.0000  0.0000  0.0000  0.0000  0.0000  0.0000
  72.  H  0.0145 -0.0003  0.0002  0.0000  0.0000  0.0000  0.0000  0.0000  0.0000
  73.  H  0.0000  0.0000  0.0000  0.0000  0.0000  0.0000  0.0000  0.0000  0.0000
  74.  H  0.0000  0.0000  0.0000  0.0000  0.0000  0.0000  0.0000  0.0000  0.0000
  75.  H  0.0000  0.0000  0.0000  0.0000  0.0000  0.0000  0.0000  0.0000  0.0000
  76.  H  0.0000  0.0000  0.0000  0.0000  0.0000  0.0000  0.0000  0.0000  0.0000
  77.  H  0.0000  0.0036  0.0000  0.0000  0.0000  0.0015  0.0000  0.0000  0.0000
  78.  H  0.0000  0.0000  0.0000  0.0000  0.0000  0.0000  0.0000  0.0019  0.0000
  79.  H -0.0013  0.0012 -0.0013 -0.0014 -0.0011  0.0012  0.0000  0.0000  0.0000
  80.  H  0.0000  0.0000  0.0000  0.0000  0.0000  0.0000  0.0000  0.0000  0.0000
  81.  H  0.0000  0.0000  0.0000  0.0000  0.0000  0.0000  0.0000  0.0000  0.0000
  82.  H  0.0000  0.0000  0.0000  0.0000  0.0000  0.0000  0.0000  0.0000  0.0028
  83.  H  0.0000  0.0000  0.0000  0.0000  0.0000  0.0000  0.0000  0.0000  0.0000
  84.  H  0.0000  0.0000  0.0000  0.0000  0.0000  0.0000 -0.0013 -0.0013  0.0012
  85.  H  0.0000  0.0000  0.0000  0.0000  0.0000  0.0000  0.0010  0.0017  0.0000
  86.  H  0.0000  0.0000  0.0000  0.0000  0.0000  0.0000  0.0000  0.0000  0.0000
  87.  H  0.0000  0.0000  0.0000  0.0000  0.0000  0.0000  0.0000  0.0000  0.0000
  88.  H  0.0000  0.0000  0.0000  0.0000  0.0000  0.0000  0.0013  0.0000  0.0000
  89.  H  0.0000  0.0000  0.0000  0.0000  0.0000  0.0000  0.0000  0.0000  0.0000
  90.  H  0.0000  0.0000  0.0000  0.0000  0.0000  0.0000  0.0000  0.0000  0.0000
  91.  H  0.0000 -0.0022 -0.0025  0.0010  0.0000  0.0000  0.0000  0.0000  0.0000
  92.  H -0.0022  0.0000 -0.0016  0.0000  0.0000  0.0010  0.0000  0.0000  0.0000
  93.  H -0.0025 -0.0016  0.0000  0.0000  0.0000  0.0000  0.0000  0.0000  0.0000
  94.  H  0.0010  0.0000  0.0000  0.0000 -0.0017 -0.0018  0.0000  0.0000  0.0000
  95.  H  0.0000  0.0000  0.0000 -0.0017  0.0000 -0.0016  0.0000  0.0000  0.0000
  96.  H  0.0000  0.0010  0.0000 -0.0018 -0.0016  0.0000  0.0000  0.0000  0.0000
  97.  H  0.0000  0.0000  0.0000  0.0000  0.0000  0.0000  0.0000 -0.0017 -0.0021
  98.  H  0.0000  0.0000  0.0000  0.0000  0.0000  0.0000 -0.0017  0.0000 -0.0018
  99.  H  0.0000  0.0000  0.0000  0.0000  0.0000  0.0000 -0.0021 -0.0018  0.0000
 100.  H  0.0000  0.0000  0.0000  0.0000  0.0000  0.0000  0.0009  0.0000  0.0000
 101.  H  0.0000  0.0000  0.0000  0.0000  0.0000  0.0000  0.0000  0.0000  0.0000
 102.  H  0.0000  0.0000  0.0000  0.0000  0.0000  0.0000  0.0000  0.0000  0.0009
 103.  H  0.0000  0.0000  0.0000  0.0000  0.0000  0.0000  0.0000  0.0000  0.0000
 104.  H  0.0000  0.0000  0.0000  0.0000  0.0000  0.0000  0.0000  0.0000  0.0000
 105.  H  0.0000  0.0000  0.0000  0.0000  0.0000  0.0000  0.0000  0.0000  0.0000
 106.  H  0.0000  0.0000  0.0000  0.0000  0.0000  0.0000  0.0000  0.0000  0.0000
 107.  H  0.0000  0.0000  0.0000  0.0000  0.0000  0.0000  0.0000  0.0000  0.0000
 108.  H  0.0000  0.0000  0.0000  0.0000  0.0000  0.0000  0.0000  0.0000  0.0000
 109.  H  0.0000  0.0000  0.0000  0.0000  0.0013  0.0000  0.0000  0.0000  0.0000
 110.  H  0.0000  0.0000  0.0000  0.0000  0.0000  0.0000  0.0000  0.0000  0.0000
 111.  H  0.0000  0.0000  0.0000  0.0000  0.0009  0.0000  0.0000  0.0000  0.0000
 112.  H  0.0000  0.0000  0.0000  0.0000  0.0000  0.0000  0.0000  0.0000  0.0000
 113.  H  0.0000  0.0000  0.0000  0.0000  0.0000  0.0000  0.0000  0.0000  0.0000
 114.  H  0.0000  0.0000  0.0000  0.0000  0.0000  0.0000  0.0000  0.0000  0.0000

     Atom  100     101     102     103     104     105     106     107     108
     ---- ------  ------  ------  ------  ------  ------  ------  ------  ------
   1.  O  0.0000  0.0000  0.0000  0.0000  0.0000  0.0000  0.0000  0.0000  0.0000
   2. Mg -0.0001  0.0007  0.0003 -0.0022  0.0195 -0.0035 -0.0005  0.0002  0.0010
   3.  O  0.0000  0.0000  0.0000  0.0000  0.0004  0.0000  0.0000  0.0000  0.0000
   4.  C  0.0000  0.0000  0.0000  0.0003  0.0000  0.0000  0.0004  0.0000  0.0000
   5.  N  0.0000  0.0000  0.0000  0.0000  0.0000  0.0000  0.0000  0.0000  0.0000
   6.  N  0.0000  0.0000  0.0000  0.0000  0.0000  0.0000  0.0000  0.0000  0.0000
   7.  O  0.0000  0.0000  0.0000  0.0021  0.0000  0.0000  0.0014  0.0000  0.0000
   8.  C  0.0000  0.0000  0.0000  0.0000  0.0000  0.0000  0.0000  0.0000  0.0000
   9.  C  0.0000  0.0000  0.0000  0.0000  0.0000  0.0000  0.0000  0.0000  0.0000
  10.  C  0.0000 -0.0001  0.0000  0.0000  0.0000  0.0000  0.0000  0.0000  0.0000
  11.  O  0.0000  0.0000  0.0000  0.0000  0.0000  0.0000  0.0000  0.0000  0.0000
  12.  C  0.0000  0.0000  0.0000  0.0015  0.0013  0.0000  0.0000  0.0000  0.0000
  13.  C  0.0000  0.0000  0.0000 -0.0001  0.0005  0.0000  0.0000  0.0000  0.0000
  14.  C  0.0000  0.0000  0.0000  0.0000  0.0000  0.0000  0.0000  0.0000  0.0000
  15.  O  0.0000  0.0000  0.0000 -0.0001  0.0006  0.0000  0.0000  0.0000  0.0000
  16.  C  0.0000  0.0000  0.0000  0.0000  0.0000  0.0000 -0.0009  0.0000 -0.0005
  17.  O  0.0000  0.0000  0.0000  0.0000  0.0027  0.0000  0.0000  0.0000  0.0000
  18.  C  0.0000  0.0000  0.0000  0.0000  0.0000  0.0000  0.0000  0.0000  0.0000
  19.  O  0.0000  0.0000  0.0000  0.0000  0.0000  0.0000  0.0000  0.0000  0.0000
  20.  O  0.0000  0.0000  0.0000  0.0000  0.0000  0.0000  0.0000  0.0000  0.0000
  21.  C  0.0000  0.0000  0.0000  0.0000  0.0000  0.0000  0.0000  0.0000  0.0000
  22.  C  0.0000  0.0000  0.0000  0.0000  0.0011  0.0000  0.0000  0.0000  0.0000
  23.  C  0.0000  0.0000  0.0000  0.0000  0.0000  0.0000  0.0000  0.0000  0.0000
  24.  O  0.0000  0.0000  0.0000  0.0000  0.0000  0.0000  0.0000  0.0000  0.0000
  25.  C  0.0000  0.0000  0.0000  0.0000 -0.0001  0.0000  0.0000  0.0000  0.0000
  26.  C  0.0000  0.0000  0.0000  0.0000  0.0000  0.0000  0.0000  0.0000  0.0000
  27.  C  0.0000  0.0000  0.0000 -0.0006 -0.0003  0.0000  0.0000  0.0000  0.0000
  28.  C  0.0000  0.0000  0.0000  0.0000  0.0000  0.0000  0.0000  0.0000  0.0000
  29.  C  0.0000  0.0000  0.0000  0.0000  0.0000  0.0000  0.0000  0.0000  0.0000
  30.  C  0.0000  0.0000  0.0000  0.0000  0.0000  0.0000  0.0000  0.0000  0.0000
  31.  C  0.0000  0.0000  0.0000  0.0000  0.0000  0.0000  0.0000  0.0000  0.0000
  32.  C  0.0000  0.0000  0.0000  0.0000  0.0000  0.0000  0.0000  0.0000  0.0000
  33.  C  0.0000  0.0000  0.0000  0.0000  0.0000  0.0000  0.0000  0.0000  0.0000
  34.  C  0.0000  0.0000  0.0000  0.0000  0.0000  0.0000  0.0000  0.0000  0.0000
  35.  C  0.0000  0.0000  0.0000  0.0000  0.0000  0.0000  0.0000  0.0000  0.0000
  36.  C  0.0000  0.0000  0.0000  0.0000  0.0000  0.0000  0.0000  0.0000  0.0000
  37.  C  0.0000  0.0000  0.0000  0.0000  0.0000  0.0000  0.0000  0.0000  0.0000
  38.  C  0.0000  0.0000  0.0000  0.0008 -0.0008 -0.0012  0.0008 -0.0013 -0.0008
  39.  C  0.0000  0.0000  0.0000  0.0000  0.0000  0.0006  0.0000  0.0007  0.0000
  40.  C  0.0000  0.0000  0.0000  0.0000  0.0000  0.0000  0.0000  0.0000  0.0000
  41.  C  0.0000  0.0000  0.0005  0.0000  0.0000  0.0000  0.0000  0.0000  0.0000
  42.  C  0.0007 -0.0009 -0.0011  0.0000  0.0000  0.0000  0.0000  0.0000  0.0000
  43.  C  0.0000  0.0000  0.0000 -0.0028 -0.0028 -0.0047 -0.0025 -0.0044 -0.0033
  44.  C -0.0026 -0.0034 -0.0041  0.0000  0.0000  0.0000  0.0000  0.0000  0.0000
  45.  C  0.0000  0.0000  0.0000  0.0000  0.0000  0.0000  0.0000  0.0000  0.0000
  46.  C  0.0000  0.0000  0.0000  0.0000  0.0000  0.0000  0.0000  0.0000  0.0000
  47.  C  0.0000  0.0000  0.0000  0.0000  0.0000  0.0000  0.0000  0.0000  0.0000
  48.  C  0.0000  0.0000  0.0000  0.0000  0.0000  0.0000  0.0000  0.0000  0.0000
  49.  C -0.0010  0.0008 -0.0012  0.0000  0.0000  0.0000  0.0000  0.0000  0.0000
  50.  C  0.6363  0.6361  0.6362  0.0000  0.0000  0.0000  0.0000  0.0000  0.0000
  51.  C  0.0000  0.0000  0.0000  0.6318  0.6283  0.6357 -0.0012 -0.0010  0.0008
  52.  C  0.0000  0.0000  0.0000 -0.0011  0.0008 -0.0010  0.6326  0.6349  0.6340
  53.  C  0.0000  0.0000  0.0000  0.0000  0.0000  0.0000  0.0000  0.0000  0.0000
  54.  C  0.0000  0.0008  0.0000  0.0000  0.0000  0.0000  0.0000  0.0000  0.0003
  55.  H  0.0000  0.0000  0.0000  0.0000  0.0000  0.0000  0.0000  0.0000  0.0000
  56.  H  0.0000  0.0000  0.0000  0.0000  0.0000  0.0000  0.0000  0.0000  0.0000
  57.  H  0.0000  0.0000  0.0000  0.0000  0.0000  0.0000  0.0000  0.0000  0.0000
  58.  H  0.0000  0.0000  0.0000  0.0000  0.0000  0.0000  0.0096 -0.0004  0.0046
  59.  H  0.0000  0.0000  0.0000  0.0000  0.0000  0.0000  0.0000  0.0000  0.0000
  60.  H  0.0000  0.0000  0.0000  0.0000  0.0000  0.0000  0.0000  0.0000  0.0000
  61.  H  0.0000  0.0000  0.0000  0.0000  0.0002  0.0000  0.0000  0.0000  0.0000
  62.  H  0.0000  0.0000  0.0000  0.0000  0.0000  0.0000  0.0000  0.0000  0.0000
  63.  H  0.0000  0.0000  0.0000  0.0000  0.0000  0.0000  0.0000  0.0000  0.0000
  64.  H  0.0000  0.0000  0.0000  0.0000  0.0000  0.0000  0.0000  0.0000  0.0000
  65.  H  0.0000  0.0000  0.0000  0.0000  0.0015  0.0003  0.0000  0.0000  0.0000
  66.  H  0.0000  0.0000  0.0000  0.0000  0.0000  0.0000  0.0000  0.0000  0.0000
  67.  H  0.0000  0.0000  0.0000  0.0000  0.0000  0.0000  0.0000  0.0000  0.0000
  68.  H  0.0000  0.0000  0.0000  0.0000  0.0000  0.0000  0.0000  0.0000  0.0000
  69.  H  0.0000  0.0000  0.0000  0.0000  0.0000  0.0000  0.0000  0.0000  0.0000
  70.  H  0.0000  0.0000  0.0000  0.0000  0.0000  0.0000  0.0000  0.0000  0.0000
  71.  H  0.0000  0.0000  0.0000  0.0085  0.0036 -0.0004  0.0000  0.0000  0.0000
  72.  H  0.0000  0.0000  0.0000  0.0000  0.0000  0.0000  0.0000  0.0000  0.0000
  73.  H  0.0000  0.0000  0.0000  0.0000  0.0000  0.0000  0.0000  0.0000  0.0000
  74.  H  0.0000  0.0000  0.0000  0.0000  0.0000  0.0000  0.0000  0.0000  0.0000
  75.  H  0.0000  0.0000  0.0000  0.0000  0.0000  0.0000  0.0000  0.0000  0.0000
  76.  H  0.0000  0.0000  0.0000  0.0000  0.0000  0.0000  0.0000  0.0000  0.0000
  77.  H  0.0000  0.0000  0.0000  0.0000  0.0000  0.0000  0.0000  0.0000  0.0000
  78.  H  0.0000  0.0000  0.0000  0.0000  0.0000  0.0000  0.0000  0.0000  0.0000
  79.  H  0.0000  0.0000  0.0000  0.0000  0.0000  0.0000  0.0000  0.0000  0.0000
  80.  H  0.0000  0.0000  0.0000  0.0000  0.0000  0.0023  0.0000  0.0022  0.0000
  81.  H  0.0000  0.0000  0.0000  0.0000  0.0000  0.0000  0.0000  0.0000  0.0000
  82.  H  0.0000  0.0000  0.0019  0.0000  0.0000  0.0000  0.0000  0.0000  0.0000
  83.  H  0.0000  0.0000  0.0000 -0.0014 -0.0016  0.0012 -0.0012  0.0012 -0.0013
  84.  H -0.0014 -0.0011  0.0012  0.0000  0.0000  0.0000  0.0000  0.0000  0.0000
  85.  H  0.0000  0.0000  0.0000  0.0000  0.0000  0.0000  0.0000  0.0000  0.0000
  86.  H  0.0000  0.0000  0.0000  0.0000  0.0000  0.0000  0.0000  0.0000  0.0000
  87.  H  0.0000  0.0000  0.0000  0.0000  0.0000  0.0000  0.0000  0.0000  0.0000
  88.  H  0.0000  0.0000  0.0000  0.0000  0.0000  0.0000  0.0000  0.0000  0.0000
  89.  H  0.0000  0.0000  0.0000  0.0000  0.0000  0.0000  0.0000  0.0000  0.0000
  90.  H  0.0000  0.0000  0.0000  0.0000  0.0000  0.0000  0.0000  0.0000  0.0000
  91.  H  0.0000  0.0000  0.0000  0.0000  0.0000  0.0000  0.0000  0.0000  0.0000
  92.  H  0.0000  0.0000  0.0000  0.0000  0.0000  0.0000  0.0000  0.0000  0.0000
  93.  H  0.0000  0.0000  0.0000  0.0000  0.0000  0.0000  0.0000  0.0000  0.0000
  94.  H  0.0000  0.0000  0.0000  0.0000  0.0000  0.0000  0.0000  0.0000  0.0000
  95.  H  0.0000  0.0000  0.0000  0.0000  0.0000  0.0000  0.0000  0.0000  0.0000
  96.  H  0.0000  0.0000  0.0000  0.0000  0.0000  0.0000  0.0000  0.0000  0.0000
  97.  H  0.0009  0.0000  0.0000  0.0000  0.0000  0.0000  0.0000  0.0000  0.0000
  98.  H  0.0000  0.0000  0.0000  0.0000  0.0000  0.0000  0.0000  0.0000  0.0000
  99.  H  0.0000  0.0000  0.0009  0.0000  0.0000  0.0000  0.0000  0.0000  0.0000
 100.  H  0.0000 -0.0016 -0.0018  0.0000  0.0000  0.0000  0.0000  0.0000  0.0000
 101.  H -0.0016  0.0000 -0.0018  0.0000  0.0000  0.0000  0.0000  0.0000  0.0000
 102.  H -0.0018 -0.0018  0.0000  0.0000  0.0000  0.0000  0.0000  0.0000  0.0000
 103.  H  0.0000  0.0000  0.0000  0.0000 -0.0024 -0.0025  0.0011  0.0000  0.0000
 104.  H  0.0000  0.0000  0.0000 -0.0024  0.0000 -0.0020  0.0000  0.0000  0.0000
 105.  H  0.0000  0.0000  0.0000 -0.0025 -0.0020  0.0000  0.0000  0.0007  0.0000
 106.  H  0.0000  0.0000  0.0000  0.0011  0.0000  0.0000  0.0000 -0.0016 -0.0022
 107.  H  0.0000  0.0000  0.0000  0.0000  0.0000  0.0007 -0.0016  0.0000 -0.0018
 108.  H  0.0000  0.0000  0.0000  0.0000  0.0000  0.0000 -0.0022 -0.0018  0.0000
 109.  H  0.0000  0.0000  0.0000  0.0000  0.0000  0.0000  0.0000  0.0000  0.0000
 110.  H  0.0000  0.0000  0.0000  0.0000  0.0000  0.0000  0.0000  0.0000  0.0000
 111.  H  0.0000  0.0000  0.0000  0.0000  0.0000  0.0000  0.0000  0.0000  0.0000
 112.  H  0.0000  0.0065  0.0000  0.0000  0.0000  0.0000  0.0000  0.0000  0.0000
 113.  H  0.0000  0.0000  0.0000  0.0000  0.0000  0.0000  0.0000  0.0000  0.0025
 114.  H  0.0000  0.0000  0.0000  0.0000  0.0000  0.0000  0.0000  0.0000  0.0000

     Atom  109     110     111     112     113     114
     ---- ------  ------  ------  ------  ------  ------
   1.  O  0.0000  0.0000  0.0000  0.0000  0.0000  0.0000
   2. Mg -0.0008 -0.0008 -0.0014 -0.0009 -0.0008 -0.0016
   3.  O  0.0000  0.0000  0.0000  0.0000  0.0000  0.0000
   4.  C  0.0000  0.0000  0.0000  0.0000  0.0000  0.0000
   5.  N -0.0033  0.0011 -0.0002  0.0000  0.0000  0.0000
   6.  N  0.0000  0.0000  0.0000 -0.0020 -0.0038  0.0017
   7.  O  0.0000  0.0000  0.0000  0.0000  0.0000  0.0000
   8.  C  0.0074  0.0116  0.0133 -0.0001  0.0000  0.0001
   9.  C  0.0021 -0.0042 -0.0025 -0.0006  0.0011 -0.0022
  10.  C  0.0000  0.0000  0.0000  0.0112  0.0096  0.0105
  11.  O  0.0000  0.0000  0.0000  0.0000  0.0000  0.0000
  12.  C  0.0000  0.0000  0.0000  0.0000  0.0000  0.0000
  13.  C  0.0000  0.0000  0.0000  0.0000  0.0000  0.0000
  14.  C  0.0000  0.0000  0.0000  0.0000  0.0000  0.0000
  15.  O  0.0000  0.0000  0.0000  0.0000  0.0000  0.0000
  16.  C  0.0000  0.0000  0.0000  0.0000  0.0000  0.0000
  17.  O  0.0000  0.0000  0.0000  0.0000  0.0000  0.0000
  18.  C  0.0000  0.0000  0.0000  0.0000  0.0000  0.0000
  19.  O  0.0000  0.0000  0.0000  0.0000  0.0000  0.0000
  20.  O  0.0000  0.0000  0.0000  0.0000  0.0000  0.0000
  21.  C  0.0000  0.0000  0.0000  0.0000  0.0000  0.0000
  22.  C  0.0000  0.0000  0.0000  0.0000  0.0000  0.0000
  23.  C  0.0000  0.0000  0.0000  0.0000  0.0000  0.0000
  24.  O  0.0000  0.0000  0.0000  0.0000  0.0000  0.0000
  25.  C  0.0000  0.0000  0.0000  0.0000  0.0000  0.0000
  26.  C  0.0000  0.0000  0.0000  0.0000  0.0000  0.0000
  27.  C  0.0000  0.0000  0.0000  0.0000  0.0000  0.0000
  28.  C  0.0000  0.0000  0.0000  0.0000  0.0000  0.0000
  29.  C  0.0039  0.0001  0.0001  0.0000  0.0000  0.0000
  30.  C  0.0000  0.0000  0.0000  0.0002  0.0009  0.0001
  31.  C  0.0001  0.0000  0.0000  0.0000  0.0000  0.0000
  32.  C  0.0000  0.0000  0.0000  0.0000  0.0000  0.0000
  33.  C  0.0000  0.0000  0.0000  0.0000  0.0000  0.0000
  34.  C  0.0000  0.0000  0.0000  0.0000  0.0000  0.0000
  35.  C  0.0007  0.0000  0.0000  0.0000  0.0000  0.0000
  36.  C  0.0000  0.0000  0.0000  0.0000  0.0000  0.0000
  37.  C -0.0001  0.0000  0.0000  0.0000  0.0000  0.0000
  38.  C  0.0000  0.0000  0.0000 -0.0001  0.0005  0.0000
  39.  C  0.0000  0.0000  0.0000  0.0000  0.0000  0.0000
  40.  C  0.0000  0.0000  0.0000  0.0000  0.0000  0.0000
  41.  C  0.0000  0.0000  0.0000  0.0000  0.0000  0.0000
  42.  C  0.0000  0.0000  0.0000  0.0003 -0.0001  0.0000
  43.  C  0.0000  0.0000  0.0000  0.0000  0.0001  0.0000
  44.  C  0.0000  0.0000  0.0000  0.0001  0.0000  0.0000
  45.  C  0.0000  0.0000  0.0000  0.0000  0.0000  0.0000
  46.  C -0.0001  0.0000  0.0000  0.0000  0.0000  0.0000
  47.  C  0.0000  0.0000  0.0000  0.0000  0.0000  0.0000
  48.  C -0.0001  0.0000  0.0000  0.0000  0.0000  0.0000
  49.  C  0.0000  0.0000  0.0000  0.0000  0.0000  0.0000
  50.  C  0.0000  0.0000  0.0000  0.0006  0.0000  0.0000
  51.  C  0.0000  0.0000  0.0000  0.0000  0.0000  0.0000
  52.  C  0.0000  0.0000  0.0000  0.0000  0.0002  0.0000
  53.  C  0.7313  0.7254  0.7220  0.0000  0.0000  0.0000
  54.  C  0.0000  0.0000  0.0000  0.7220  0.7260  0.7294
  55.  H  0.0002  0.0005  0.0000  0.0000  0.0002  0.0027
  56.  H  0.0000  0.0000  0.0000  0.0000  0.0000  0.0000
  57.  H  0.0000  0.0000  0.0000  0.0000  0.0000  0.0000
  58.  H  0.0000  0.0000  0.0000  0.0000  0.0001  0.0000
  59.  H  0.0000  0.0000  0.0000  0.0000  0.0000  0.0000
  60.  H  0.0000  0.0000  0.0000  0.0000  0.0000  0.0000
  61.  H  0.0000  0.0000  0.0000  0.0000  0.0000  0.0000
  62.  H  0.0000  0.0000  0.0000  0.0000  0.0000  0.0000
  63.  H  0.0000  0.0000  0.0000  0.0000  0.0000  0.0000
  64.  H  0.0000  0.0000  0.0000  0.0000  0.0000  0.0000
  65.  H  0.0000  0.0000  0.0000  0.0000  0.0000  0.0000
  66.  H  0.0000  0.0000  0.0000  0.0000  0.0000  0.0000
  67.  H  0.0000  0.0000  0.0000  0.0000  0.0000  0.0000
  68.  H  0.0000  0.0000  0.0000  0.0000  0.0000  0.0000
  69.  H  0.0000  0.0000  0.0000  0.0000  0.0000  0.0000
  70.  H  0.0000  0.0000  0.0000  0.0000  0.0000  0.0000
  71.  H  0.0000  0.0000  0.0000  0.0000  0.0000  0.0000
  72.  H  0.0000  0.0000  0.0000  0.0000  0.0000  0.0000
  73.  H  0.0000  0.0000  0.0000  0.0000  0.0000  0.0000
  74.  H  0.0000  0.0000  0.0000  0.0000  0.0000  0.0000
  75.  H  0.0000  0.0000  0.0000  0.0000  0.0000  0.0000
  76.  H  0.0000  0.0000  0.0000  0.0000  0.0000  0.0000
  77.  H  0.0000  0.0000  0.0000  0.0000  0.0000  0.0000
  78.  H  0.0000  0.0000  0.0000  0.0000  0.0000  0.0000
  79.  H -0.0001  0.0000  0.0004  0.0000  0.0000  0.0000
  80.  H  0.0000  0.0000  0.0000  0.0000  0.0000  0.0000
  81.  H  0.0000  0.0000  0.0000  0.0000  0.0000  0.0000
  82.  H  0.0000  0.0000  0.0000  0.0000  0.0000  0.0000
  83.  H  0.0000  0.0000  0.0000  0.0000  0.0001  0.0000
  84.  H  0.0000  0.0000  0.0000  0.0001  0.0000  0.0000
  85.  H  0.0000  0.0000  0.0000  0.0000  0.0000  0.0000
  86.  H  0.0000  0.0000  0.0000  0.0000  0.0000  0.0000
  87.  H  0.0000  0.0000  0.0000  0.0000  0.0000  0.0000
  88.  H  0.0000  0.0000  0.0000  0.0000  0.0000  0.0000
  89.  H  0.0000  0.0000  0.0000  0.0000  0.0000  0.0000
  90.  H  0.0003  0.0001  0.0001  0.0000  0.0000  0.0000
  91.  H  0.0000  0.0000  0.0000  0.0000  0.0000  0.0000
  92.  H  0.0000  0.0000  0.0000  0.0000  0.0000  0.0000
  93.  H  0.0000  0.0000  0.0000  0.0000  0.0000  0.0000
  94.  H  0.0000  0.0000  0.0000  0.0000  0.0000  0.0000
  95.  H  0.0013  0.0000  0.0009  0.0000  0.0000  0.0000
  96.  H  0.0000  0.0000  0.0000  0.0000  0.0000  0.0000
  97.  H  0.0000  0.0000  0.0000  0.0000  0.0000  0.0000
  98.  H  0.0000  0.0000  0.0000  0.0000  0.0000  0.0000
  99.  H  0.0000  0.0000  0.0000  0.0000  0.0000  0.0000
 100.  H  0.0000  0.0000  0.0000  0.0000  0.0000  0.0000
 101.  H  0.0000  0.0000  0.0000  0.0065  0.0000  0.0000
 102.  H  0.0000  0.0000  0.0000  0.0000  0.0000  0.0000
 103.  H  0.0000  0.0000  0.0000  0.0000  0.0000  0.0000
 104.  H  0.0000  0.0000  0.0000  0.0000  0.0000  0.0000
 105.  H  0.0000  0.0000  0.0000  0.0000  0.0000  0.0000
 106.  H  0.0000  0.0000  0.0000  0.0000  0.0000  0.0000
 107.  H  0.0000  0.0000  0.0000  0.0000  0.0000  0.0000
 108.  H  0.0000  0.0000  0.0000  0.0000  0.0025  0.0000
 109.  H  0.0000  0.0013  0.0018  0.0000  0.0000  0.0000
 110.  H  0.0013  0.0000  0.0023  0.0000  0.0000  0.0000
 111.  H  0.0018  0.0023  0.0000  0.0000  0.0000  0.0000
 112.  H  0.0000  0.0000  0.0000  0.0000  0.0021  0.0018
 113.  H  0.0000  0.0000  0.0000  0.0021  0.0000  0.0010
 114.  H  0.0000  0.0000  0.0000  0.0018  0.0010  0.0000


 Atom-atom overlap-weighted NAO bond order, Totals by atom:                    

     Atom    1
     ---- ------
   1.  O  1.4507
   2. Mg  0.2715
   3.  O  1.4448
   4.  C  3.0251
   5.  N  1.9521
   6.  N  1.9333
   7.  O  1.2695
   8.  C  3.2668
   9.  C  2.9549
  10.  C  3.2688
  11.  O  1.4582
  12.  C  3.0332
  13.  C  3.1702
  14.  C  3.1161
  15.  O  1.2709
  16.  C  2.9353
  17.  O  1.0062
  18.  C  3.1322
  19.  O  1.2945
  20.  O  1.4291
  21.  C  2.9972
  22.  C  3.2032
  23.  C  3.1436
  24.  O  1.2657
  25.  C  3.0356
  26.  C  3.0535
  27.  C  3.0626
  28.  C  3.0710
  29.  C  2.3680
  30.  C  2.3748
  31.  C  2.2643
  32.  C  2.3228
  33.  C  2.3393
  34.  C  2.3216
  35.  C  2.2677
  36.  C  2.4415
  37.  C  2.4431
  38.  C  2.2737
  39.  C  2.3292
  40.  C  2.3386
  41.  C  2.3269
  42.  C  2.2682
  43.  C  2.4425
  44.  C  2.4416
  45.  C  2.5046
  46.  C  2.4972
  47.  C  2.5033
  48.  C  2.5006
  49.  C  2.5017
  50.  C  2.5002
  51.  C  2.5002
  52.  C  2.4999
  53.  C  3.0473
  54.  C  3.0419
  55.  H  0.7932
  56.  H  0.7313
  57.  H  0.7472
  58.  H  0.7526
  59.  H  0.7402
  60.  H  0.7264
  61.  H  0.7125
  62.  H  0.7395
  63.  H  0.7606
  64.  H  0.7925
  65.  H  0.7943
  66.  H  0.7522
  67.  H  0.7580
  68.  H  0.7796
  69.  H  0.7603
  70.  H  0.7511
  71.  H  0.7681
  72.  H  0.7708
  73.  H  0.7470
  74.  H  0.7583
  75.  H  0.6384
  76.  H  0.6309
  77.  H  0.6351
  78.  H  0.6547
  79.  H  0.6410
  80.  H  0.6350
  81.  H  0.6306
  82.  H  0.6351
  83.  H  0.6485
  84.  H  0.6427
  85.  H  0.6328
  86.  H  0.6416
  87.  H  0.6294
  88.  H  0.6293
  89.  H  0.6263
  90.  H  0.6457
  91.  H  0.6354
  92.  H  0.6302
  93.  H  0.6477
  94.  H  0.6292
  95.  H  0.6360
  96.  H  0.6310
  97.  H  0.6288
  98.  H  0.6468
  99.  H  0.6285
 100.  H  0.6295
 101.  H  0.6361
 102.  H  0.6311
 103.  H  0.6329
 104.  H  0.6507
 105.  H  0.6255
 106.  H  0.6358
 107.  H  0.6295
 108.  H  0.6332
 109.  H  0.7461
 110.  H  0.7375
 111.  H  0.7368
 112.  H  0.7412
 113.  H  0.7396
 114.  H  0.7435


 MO bond order:                                                                

     Atom    1       2       3       4       5       6       7       8       9
     ---- ------  ------  ------  ------  ------  ------  ------  ------  ------
   1.  O  0.0000  0.0052 -0.0008  0.9050 -0.0111  0.0013 -0.4891  0.0080  0.0227
   2. Mg  0.0052  0.0000  0.0683 -0.0004  0.3530  0.2916  0.0103  0.0374 -0.0045
   3.  O -0.0008  0.0683  0.0000 -0.0005  0.0048 -0.0013  0.0029 -0.0043 -0.0011
   4.  C  0.9050 -0.0004 -0.0005  0.0000  0.0008  0.0040  0.3673  0.0062  0.0118
   5.  N -0.0111  0.3530  0.0048  0.0008  0.0000  0.2993  0.0020  1.7825 -0.4584
   6.  N  0.0013  0.2916 -0.0013  0.0040  0.2993  0.0000  0.0046 -0.4180 -0.5403
   7.  O -0.4891  0.0103  0.0029  0.3673  0.0020  0.0046  0.0000 -0.0012 -0.0044
   8.  C  0.0080  0.0374 -0.0043  0.0062  1.7825 -0.4180 -0.0012  0.0000  1.2376
   9.  C  0.0227 -0.0045 -0.0011  0.0118 -0.4584 -0.5403 -0.0044  1.2376  0.0000
  10.  C  0.0173  0.0611 -0.0016  0.0097 -0.3521  2.0650 -0.0016  0.1721  1.3372
  11.  O  0.0224 -0.0654  0.0352 -0.0543 -0.0291  0.0061  0.0131 -0.0218 -0.0031
  12.  C  0.0126  0.0534  0.0315  0.0451  0.0713  0.0026 -0.0512  0.0160 -0.0176
  13.  C -0.0052 -0.0118 -0.1166 -0.0014 -0.0141 -0.0037  0.0042 -0.0031  0.0039
  14.  C -0.0751 -0.0080  0.0010  0.3762  0.0134 -0.0045 -0.0319  0.0154  0.0114
  15.  O -0.0180 -0.1423  0.0278 -0.0276  0.0451  0.0073  0.0504  0.0309 -0.0165
  16.  C  0.0756 -0.0010 -0.0007  0.0694 -0.0023  0.0026 -0.0488  0.0002  0.0043
  17.  O  0.0029  0.5032 -0.0031  0.0039  0.0001 -0.0623  0.0029 -0.0340  0.0155
  18.  C -0.0002  0.0138 -1.6924 -0.0023 -0.0008  0.0019  0.0006 -0.0049 -0.0010
  19.  O  0.0028  0.0966  0.1699  0.0000 -0.0129 -0.0042  0.0034 -0.0184 -0.0006
  20.  O  0.0009 -0.0052 -0.0132  0.0013  0.0004  0.0012 -0.0009 -0.0049 -0.0041
  21.  C  0.0010  0.1622  0.0105  0.0001 -0.0081 -0.0207  0.0007 -0.0054  0.0056
  22.  C -0.0027 -0.0199 -0.0622  0.0002 -0.0032 -0.0054 -0.0011 -0.0015 -0.0017
  23.  C -0.0015  0.0593 -0.1861 -0.0003 -0.0059 -0.0071 -0.0013 -0.0058 -0.0022
  24.  O  0.0002 -0.0963 -0.0091  0.0005  0.0046  0.0120 -0.0013  0.0004 -0.0073
  25.  C -0.0005 -0.0018  0.0123  0.0015 -0.0042 -0.0011 -0.0003 -0.0055 -0.0033
  26.  C -0.0001 -0.0053 -0.0098  0.0004 -0.0081  0.0008  0.0004  0.0014 -0.0003
  27.  C  0.0030  0.0175 -0.1121  0.0028  0.0113 -0.0016 -0.0032  0.0046 -0.0012
  28.  C -0.0138  0.0080 -0.0036  0.0197 -0.0013 -0.0034  0.0002 -0.0023 -0.0022
  29.  C  0.0004 -0.0763 -0.0015  0.0003  0.4074 -0.0185 -0.0019 -0.0180 -0.0214
  30.  C  0.0005  0.1059 -0.0005 -0.0046 -0.0212  0.6395 -0.0026  0.0129  0.0058
  31.  C  0.0006 -0.1495  0.0032  0.0013 -0.2802  0.0321 -0.0010  0.2239 -0.0059
  32.  C  0.0027 -0.0402  0.0032  0.0006 -0.0776 -0.0065  0.0017 -0.0101  0.0046
  33.  C -0.0011  0.0938  0.0034 -0.0023  0.1854  0.0403  0.0024  0.0272 -0.0597
  34.  C -0.0033  0.0866  0.0091 -0.0001 -0.0667 -0.0082 -0.0023 -0.0151  0.0113
  35.  C -0.0027 -0.0513  0.0051 -0.0009 -0.2519 -0.0599 -0.0047 -0.0454  0.0841
  36.  C -0.0026  0.1937  0.0048  0.0001 -0.0299  0.0765  0.0002  0.0853 -0.0552
  37.  C  0.0032  0.0473  0.0014  0.0005 -0.0684 -0.0075 -0.0003 -0.0514 -0.0065
  38.  C -0.0028  0.0295  0.0015  0.0033  0.0232  0.0159 -0.0080 -0.0341 -0.0143
  39.  C -0.0016  0.0134 -0.0008  0.0043 -0.0008  0.0361 -0.0013  0.0019  0.0003
  40.  C -0.0003  0.0095  0.0011 -0.0024  0.0085  0.0103 -0.0015 -0.0082 -0.0039
  41.  C -0.0007  0.0083 -0.0004  0.0011 -0.0087  0.0173 -0.0016  0.0049  0.0043
  42.  C -0.0002  0.1002 -0.0005  0.0022  0.0410  0.0430 -0.0008 -0.0663 -0.1059
  43.  C  0.0014 -0.0305  0.0013 -0.0077  0.0026  0.0362 -0.0048 -0.0090  0.0074
  44.  C  0.0002  0.0344 -0.0008 -0.0008 -0.0123 -0.0295 -0.0005 -0.0019 -0.0147
  45.  C  0.0005  0.0021 -0.0009 -0.0005  0.0093 -0.0161  0.0014 -0.0192  0.0016
  46.  C  0.0026 -0.0167 -0.0025 -0.0006  0.0098 -0.0295  0.0023 -0.0060  0.0447
  47.  C -0.0130  0.0247 -0.0055  0.0073 -0.0307 -0.0003 -0.0125 -0.0054  0.0014
  48.  C  0.0007 -0.0147 -0.0006 -0.0018 -0.0151 -0.0013  0.0006  0.0173  0.0050
  49.  C -0.0016  0.0178 -0.0008  0.0012 -0.0094 -0.0124 -0.0008 -0.0042 -0.0112
  50.  C  0.0004 -0.0225  0.0004 -0.0003  0.0114 -0.0313  0.0001 -0.0065 -0.0182
  51.  C -0.0272 -0.0970  0.0104  0.0567  0.0036 -0.0106 -0.0299 -0.0055 -0.0096
  52.  C -0.0050  0.0499 -0.0005  0.0392 -0.0042 -0.0184 -0.0269  0.0015  0.0024
  53.  C  0.0000  0.0723  0.0013  0.0000  0.1480 -0.0224 -0.0006 -0.1069 -0.0706
  54.  C  0.0059  0.0343  0.0025  0.0034  0.0176 -0.1496 -0.0015 -0.0203  0.0203
  55.  H  0.0020  0.0124  0.0005  0.0002  0.0303  0.0232 -0.0005  0.0015  0.1724
  56.  H  0.0062  0.0300  0.0198 -0.0001  0.0146  0.0005 -0.0014  0.0021 -0.0036
  57.  H  0.0390  0.0049  0.0023 -0.0990 -0.0133 -0.0030  0.0682 -0.0123 -0.0078
  58.  H  0.0250  0.0036  0.0000  0.0608  0.0000 -0.0018 -0.0740 -0.0004 -0.0022
  59.  H -0.0025  0.0010  0.0000 -0.0085 -0.0005 -0.0003  0.0277 -0.0004 -0.0004
  60.  H -0.0757 -0.0009 -0.0002 -0.0059  0.0003  0.0003  0.0435 -0.0005 -0.0007
  61.  H -0.0011 -0.0147 -0.0072 -0.0007 -0.0100 -0.0036 -0.0005  0.0024 -0.0019
  62.  H -0.0001 -0.0033  0.0106  0.0003 -0.0011 -0.0014 -0.0005 -0.0015 -0.0011
  63.  H  0.0004  0.0052 -0.0027 -0.0004  0.0035 -0.0025 -0.0006 -0.0005  0.0005
  64.  H  0.0001  0.0199 -0.0027  0.0000 -0.0062 -0.0056 -0.0001 -0.0041 -0.0021
  65.  H  0.0000  0.0192  0.0041  0.0005 -0.0056 -0.0064  0.0000 -0.0036 -0.0016
  66.  H  0.0000  0.0037  0.0008  0.0000  0.0024 -0.0003 -0.0005 -0.0006 -0.0011
  67.  H -0.0001 -0.0021 -0.0038 -0.0001 -0.0021 -0.0003  0.0000  0.0001 -0.0001
  68.  H -0.0003  0.0034 -0.0111 -0.0001 -0.0012 -0.0033  0.0000 -0.0019 -0.0004
  69.  H -0.0011  0.0030  0.1066 -0.0001 -0.0007 -0.0001 -0.0019 -0.0002  0.0000
  70.  H  0.0054  0.0002 -0.0312 -0.0021  0.0026 -0.0010  0.0029 -0.0008 -0.0015
  71.  H -0.0025 -0.0013 -0.0303  0.0016 -0.0003  0.0001 -0.0021 -0.0006 -0.0005
  72.  H  0.0205  0.0002  0.0008 -0.0306  0.0005 -0.0005  0.0432  0.0009  0.0016
  73.  H  0.0081  0.0043 -0.0003  0.0075 -0.0021 -0.0008 -0.0062 -0.0021 -0.0022
  74.  H -0.0034 -0.0043 -0.0030  0.0125  0.0016  0.0000 -0.0098 -0.0003 -0.0008
  75.  H -0.0002  0.0086 -0.0002  0.0000  0.0120  0.0127 -0.0001  0.0303 -0.0123
  76.  H  0.0002  0.0076  0.0000  0.0005 -0.0040 -0.0001 -0.0004 -0.0044 -0.0001
  77.  H  0.0002  0.0029 -0.0001 -0.0001  0.0058 -0.0133 -0.0001 -0.0166  0.0100
  78.  H  0.0007  0.1186 -0.0010 -0.0016 -0.0172 -0.0248 -0.0015  0.0182  0.0061
  79.  H -0.0013  0.0475 -0.0004  0.0063  0.0258  0.0035 -0.0025  0.0155 -0.0172
  80.  H  0.0002  0.0039 -0.0003  0.0003 -0.0114 -0.0332  0.0000  0.0085  0.0023
  81.  H  0.0005  0.0051 -0.0003  0.0003 -0.0003  0.0090  0.0009  0.0012  0.0027
  82.  H  0.0001  0.0073  0.0001 -0.0003  0.0079 -0.0133  0.0001 -0.0117 -0.0200
  83.  H  0.0006  0.0741  0.0008 -0.0106 -0.0101  0.0936  0.0071  0.0004 -0.0083
  84.  H  0.0001  0.0669  0.0007  0.0003 -0.0147 -0.0268 -0.0002 -0.0023  0.0120
  85.  H  0.0006  0.0078 -0.0006  0.0000  0.0014 -0.0046 -0.0001 -0.0040  0.0022
  86.  H  0.0000  0.0030 -0.0012  0.0000 -0.0057 -0.0027  0.0001 -0.0022  0.0002
  87.  H  0.0003  0.0138 -0.0002  0.0002 -0.0035  0.0104 -0.0007  0.0123 -0.0056
  88.  H  0.0003  0.0103 -0.0016  0.0004  0.0015  0.0002 -0.0005 -0.0027 -0.0064
  89.  H -0.0004 -0.0099 -0.0003  0.0003 -0.0155  0.0095 -0.0009  0.0036 -0.0119
  90.  H  0.0001  0.0280 -0.0006  0.0001  0.0069 -0.0097  0.0003 -0.0238  0.0160
  91.  H -0.0014  0.0008 -0.0003  0.0036 -0.0041 -0.0009 -0.0008  0.0047  0.0014
  92.  H  0.0034 -0.0004 -0.0008  0.0003 -0.0096 -0.0006  0.0027 -0.0100 -0.0017
  93.  H  0.0021  0.0224  0.0089 -0.0023  0.0012 -0.0020 -0.0009  0.0040  0.0004
  94.  H -0.0001  0.0060 -0.0008  0.0001  0.0158  0.0028  0.0001  0.0067 -0.0027
  95.  H  0.0002 -0.0021  0.0001 -0.0003  0.0025 -0.0006  0.0006 -0.0010 -0.0032
  96.  H -0.0006  0.0088  0.0001  0.0013 -0.0158  0.0016 -0.0014 -0.0105 -0.0034
  97.  H  0.0005  0.0011 -0.0004  0.0000  0.0005 -0.0076 -0.0003 -0.0013 -0.0040
  98.  H  0.0004  0.0338 -0.0001 -0.0005 -0.0069 -0.0090 -0.0006  0.0015  0.0025
  99.  H  0.0014 -0.0109 -0.0011  0.0005  0.0002  0.0147  0.0003 -0.0017  0.0010
 100.  H -0.0002  0.0052 -0.0003  0.0001 -0.0052 -0.0036 -0.0002  0.0015  0.0000
 101.  H -0.0001 -0.0058 -0.0001  0.0004 -0.0010 -0.0013  0.0000 -0.0011  0.0037
 102.  H -0.0002  0.0113 -0.0001  0.0000  0.0020  0.0163 -0.0002 -0.0012  0.0031
 103.  H  0.0061 -0.0029  0.0028  0.0124  0.0003 -0.0038  0.0076 -0.0049 -0.0052
 104.  H  0.0031  0.0853  0.0007 -0.0068 -0.0079  0.0037 -0.0007 -0.0022 -0.0032
 105.  H  0.0071 -0.0406  0.0040 -0.0099 -0.0032 -0.0117  0.0088  0.0024  0.0010
 106.  H -0.0006  0.0118 -0.0002  0.0023 -0.0024 -0.0051  0.0128 -0.0026 -0.0022
 107.  H  0.0031  0.0219 -0.0011 -0.0037 -0.0037 -0.0145  0.0003  0.0046  0.0063
 108.  H  0.0009 -0.0098  0.0016 -0.0058  0.0004  0.0082  0.0020 -0.0011 -0.0020
 109.  H -0.0001  0.0116 -0.0014  0.0003  0.0603 -0.0133 -0.0005 -0.0276  0.0491
 110.  H  0.0001  0.0023 -0.0017  0.0013  0.1040 -0.0534 -0.0005 -0.0423  0.0641
 111.  H -0.0018  0.0030 -0.0010 -0.0001 -0.1213  0.0696  0.0002  0.0547 -0.1048
 112.  H -0.0020  0.0098 -0.0005  0.0002 -0.0567  0.1391  0.0003  0.0230  0.1829
 113.  H -0.0021  0.0126 -0.0004 -0.0003  0.0450 -0.1228  0.0004 -0.0385 -0.0432
 114.  H -0.0004 -0.0048 -0.0012  0.0001  0.0100 -0.0099  0.0000  0.0228 -0.0676

     Atom   10      11      12      13      14      15      16      17      18
     ---- ------  ------  ------  ------  ------  ------  ------  ------  ------
   1.  O  0.0173  0.0224  0.0126 -0.0052 -0.0751 -0.0180  0.0756  0.0029 -0.0002
   2. Mg  0.0611 -0.0654  0.0534 -0.0118 -0.0080 -0.1423 -0.0010  0.5032  0.0138
   3.  O -0.0016  0.0352  0.0315 -0.1166  0.0010  0.0278 -0.0007 -0.0031 -1.6924
   4.  C  0.0097 -0.0543  0.0451 -0.0014  0.3762 -0.0276  0.0694  0.0039 -0.0023
   5.  N -0.3521 -0.0291  0.0713 -0.0141  0.0134  0.0451 -0.0023  0.0001 -0.0008
   6.  N  2.0650  0.0061  0.0026 -0.0037 -0.0045  0.0073  0.0026 -0.0623  0.0019
   7.  O -0.0016  0.0131 -0.0512  0.0042 -0.0319  0.0504 -0.0488  0.0029  0.0006
   8.  C  0.1721 -0.0218  0.0160 -0.0031  0.0154  0.0309  0.0002 -0.0340 -0.0049
   9.  C  1.3372 -0.0031 -0.0176  0.0039  0.0114 -0.0165  0.0043  0.0155 -0.0010
  10.  C  0.0000  0.0078 -0.0213  0.0032  0.0057 -0.0140  0.0025 -0.0439  0.0015
  11.  O  0.0078  0.0000  0.6669 -0.0620  0.7341 -0.2391  0.0022  0.0213 -0.0045
  12.  C -0.0213  0.6669  0.0000  0.5613  0.0948  0.6814  0.0107  0.0144  0.0273
  13.  C  0.0032 -0.0620  0.5613  0.0000 -0.0472 -0.0152 -0.0026 -0.0329  0.0454
  14.  C  0.0057  0.7341  0.0948 -0.0472  0.0000 -0.0448 -0.0376  0.0064 -0.0021
  15.  O -0.0140 -0.2391  0.6814 -0.0152 -0.0448  0.0000 -0.0084  0.0017  0.0240
  16.  C  0.0025  0.0022  0.0107 -0.0026 -0.0376 -0.0084  0.0000  0.0000 -0.0007
  17.  O -0.0439  0.0213  0.0144 -0.0329  0.0064  0.0017  0.0000  0.0000  0.0470
  18.  C  0.0015 -0.0045  0.0273  0.0454 -0.0021  0.0240 -0.0007  0.0470  0.0000
  19.  O -0.0007  0.0723 -0.2161 -0.1378 -0.0023  0.0799  0.0003 -0.0234  0.9127
  20.  O -0.0030 -0.0027  0.0234  0.0074  0.0054 -0.0125  0.0005 -0.0324 -0.1100
  21.  C -0.0021  0.0068 -0.0032 -0.0094  0.0006  0.0079  0.0000  0.3659 -0.0151
  22.  C  0.0012 -0.0067 -0.0002 -0.0066 -0.0011 -0.0141 -0.0004  0.8447  0.0518
  23.  C -0.0028  0.0130 -0.0348 -0.0356 -0.0050 -0.0004 -0.0004 -0.0011  0.4701
  24.  O -0.0033 -0.0073  0.0013  0.0081 -0.0005 -0.0062  0.0007 -0.1445  0.0121
  25.  C -0.0028  0.0003  0.0033 -0.0009  0.0007 -0.0006 -0.0001 -0.0841 -0.0047
  26.  C -0.0007 -0.0011 -0.0051  0.0008  0.0014  0.0043  0.0000  0.0143 -0.0159
  27.  C -0.0052  0.0006 -0.2356 -1.6264  0.0198  0.0843  0.0009  0.0034 -0.1481
  28.  C -0.0037 -0.0612 -0.0543  0.0015  0.4539  0.0009 -0.0059 -0.0027  0.0010
  29.  C  0.0262  0.0030 -0.0190 -0.0024 -0.0063  0.0132  0.0003  0.0097  0.0265
  30.  C -0.0387 -0.0020  0.0053 -0.0014  0.0012  0.0099  0.0016 -0.0145 -0.0013
  31.  C -0.0473  0.0040 -0.0239  0.0000 -0.0041 -0.0009  0.0003 -0.0048  0.0311
  32.  C -0.0058  0.0028 -0.0116  0.0012 -0.0024  0.0018 -0.0001  0.0143  0.0145
  33.  C -0.0421 -0.0039  0.0119 -0.0010 -0.0025  0.0050 -0.0008 -0.0155 -0.0062
  34.  C  0.0044 -0.0018  0.0067 -0.0026  0.0075 -0.0077 -0.0008 -0.0192 -0.0088
  35.  C  0.0573  0.0025 -0.0105 -0.0046 -0.0072 -0.0132  0.0001  0.0082  0.0172
  36.  C -0.0024  0.0011 -0.0033 -0.0009  0.0014 -0.0097 -0.0006  0.1056 -0.0023
  37.  C  0.0080 -0.0125  0.0072 -0.0038  0.0265  0.0165 -0.0011 -0.0022 -0.0016
  38.  C  0.0617 -0.0088  0.0163  0.0004  0.0025  0.0107 -0.0069  0.0067 -0.0012
  39.  C -0.0089  0.0014 -0.0049 -0.0001 -0.0007 -0.0044 -0.0004 -0.0029  0.0002
  40.  C  0.0269 -0.0029  0.0068 -0.0004  0.0010  0.0043 -0.0009  0.0027 -0.0007
  41.  C -0.0137 -0.0003 -0.0003 -0.0003  0.0004  0.0004 -0.0002 -0.0017  0.0002
  42.  C  0.1838 -0.0002 -0.0016 -0.0004 -0.0005  0.0042 -0.0012  0.0018 -0.0012
  43.  C  0.0422 -0.0037  0.0204 -0.0063  0.0005  0.0143  0.0061  0.0012 -0.0014
  44.  C  0.0175 -0.0003 -0.0018 -0.0008  0.0003  0.0034  0.0006 -0.0025 -0.0014
  45.  C -0.0071 -0.0030  0.0040  0.0005  0.0004  0.0039 -0.0002 -0.0049 -0.0054
  46.  C  0.0024 -0.0023  0.0014 -0.0008  0.0002  0.0073  0.0006 -0.0330  0.0015
  47.  C  0.0023  0.0274  0.0059  0.0082  0.0274 -0.0020 -0.0005 -0.0020 -0.0129
  48.  C  0.0003  0.0086 -0.0086  0.0024 -0.0066 -0.0040  0.0001  0.0005  0.0015
  49.  C -0.0317 -0.0008  0.0000 -0.0007  0.0002  0.0010  0.0000  0.0267 -0.0014
  50.  C  0.0295 -0.0015  0.0023 -0.0003  0.0003  0.0011 -0.0005 -0.0028 -0.0009
  51.  C -0.0098 -0.0079  0.0087  0.0163 -0.0004 -0.0133  0.0033  0.0297 -0.0047
  52.  C -0.0148  0.0040 -0.0097  0.0007 -0.0109 -0.0066 -0.0152 -0.0046  0.0000
  53.  C -0.0025 -0.0019  0.0066 -0.0021  0.0006  0.0010 -0.0003  0.0056 -0.0013
  54.  C  0.8450 -0.0010  0.0022 -0.0001 -0.0014 -0.0055  0.0041 -0.0014 -0.0011
  55.  H -0.0233  0.0002  0.0003 -0.0002  0.0001 -0.0014  0.0005 -0.0011 -0.0005
  56.  H -0.0011  0.0382 -0.0525  0.2997 -0.0044  0.1477  0.0011 -0.0152  0.0116
  57.  H -0.0039  0.1054  0.0224  0.0011 -0.7896 -0.0326  0.0021 -0.0124  0.0007
  58.  H -0.0018  0.0006  0.0023 -0.0007  0.0067 -0.0003  0.3041  0.0001  0.0002
  59.  H -0.0002  0.0064  0.0038 -0.0009 -0.0131 -0.0034 -0.1166  0.0006 -0.0001
  60.  H -0.0008 -0.0015  0.0018 -0.0004  0.0070 -0.0009  1.9311 -0.0009 -0.0003
  61.  H  0.0061 -0.0020 -0.0044  0.0009 -0.0009 -0.0027 -0.0003 -0.1624  0.0142
  62.  H -0.0012  0.0002 -0.0056 -0.0161 -0.0006 -0.0055  0.0001 -0.0039  0.0951
  63.  H  0.0054 -0.0010 -0.0029  0.0007 -0.0002  0.0000 -0.0002  0.0376  0.0009
  64.  H -0.0016 -0.0002  0.0036 -0.0019  0.0014 -0.0002 -0.0001  0.0034  0.0010
  65.  H -0.0024 -0.0006  0.0008 -0.0018  0.0004  0.0008 -0.0001 -0.0292  0.0009
  66.  H -0.0007  0.0012 -0.0003 -0.0051 -0.0006 -0.0018  0.0000 -0.0080  0.0181
  67.  H -0.0003 -0.0001 -0.0008 -0.0001  0.0002 -0.0001 -0.0001 -0.0018 -0.0006
  68.  H -0.0010 -0.0009  0.0007  0.0036  0.0004 -0.0003  0.0000 -0.0023 -0.0051
  69.  H  0.0000  0.0198  0.0231  0.1024  0.0016  0.0080 -0.0002  0.0074 -0.0437
  70.  H -0.0016  0.0408  0.0002  0.0836  0.0057  0.0300  0.0005 -0.0036  0.0164
  71.  H -0.0008  0.0000  0.0045  0.0089 -0.0063 -0.0080 -0.0005 -0.0051  0.0096
  72.  H  0.0009 -0.0051  0.0069 -0.0006  0.0147 -0.0066 -0.0047 -0.0006 -0.0005
  73.  H -0.0017 -0.0084  0.0019  0.0013  0.1023  0.0005  0.0020 -0.0024  0.0005
  74.  H -0.0007  0.0375 -0.0373 -0.0031 -0.0077  0.0148  0.0000  0.0023  0.0012
  75.  H -0.0126 -0.0005  0.0008 -0.0002 -0.0002  0.0002 -0.0002 -0.0006  0.0003
  76.  H  0.0014  0.0000 -0.0007  0.0002  0.0012 -0.0003  0.0000  0.0011 -0.0004
  77.  H  0.0119 -0.0005 -0.0004  0.0000  0.0010  0.0002 -0.0001  0.0009  0.0002
  78.  H -0.0053 -0.0013 -0.0055  0.0007 -0.0002 -0.0005 -0.0009 -0.0456 -0.0061
  79.  H -0.0064  0.0067  0.0000 -0.0007  0.0034 -0.0036  0.0002 -0.0003 -0.0020
  80.  H -0.0187  0.0007 -0.0020 -0.0001 -0.0001 -0.0012  0.0001  0.0001 -0.0001
  81.  H -0.0020  0.0010 -0.0027  0.0002 -0.0003 -0.0012  0.0003  0.0001  0.0000
  82.  H  0.0296 -0.0001  0.0004  0.0000 -0.0001  0.0007 -0.0002  0.0007 -0.0002
  83.  H -0.0245 -0.0008 -0.0183 -0.0028  0.0024  0.0198  0.0011  0.0085 -0.0028
  84.  H -0.0360  0.0006 -0.0040  0.0003 -0.0008  0.0011  0.0002  0.0009 -0.0022
  85.  H  0.0007 -0.0002  0.0003  0.0000  0.0001  0.0007  0.0000 -0.0045  0.0004
  86.  H -0.0008 -0.0002 -0.0008 -0.0003 -0.0003  0.0010 -0.0003 -0.0020 -0.0012
  87.  H  0.0005  0.0004 -0.0008 -0.0004  0.0002 -0.0008  0.0002  0.0043  0.0007
  88.  H -0.0032 -0.0004  0.0010  0.0002 -0.0002 -0.0001 -0.0001 -0.0018 -0.0016
  89.  H -0.0030  0.0002 -0.0013  0.0000 -0.0001 -0.0011 -0.0004  0.0114  0.0001
  90.  H  0.0026 -0.0006  0.0004  0.0000  0.0000  0.0012  0.0002 -0.0008 -0.0009
  91.  H -0.0011 -0.0010  0.0012 -0.0007  0.0003 -0.0004 -0.0014  0.0004  0.0026
  92.  H  0.0014 -0.0055  0.0004 -0.0004 -0.0115 -0.0007  0.0010  0.0009  0.0013
  93.  H -0.0007 -0.0019 -0.0297 -0.0019  0.0079  0.0200 -0.0017 -0.0008  0.0003
  94.  H -0.0042  0.0007  0.0008  0.0002 -0.0027 -0.0005  0.0002 -0.0006 -0.0007
  95.  H  0.0021 -0.0018  0.0015 -0.0008 -0.0015  0.0001  0.0001  0.0002  0.0007
  96.  H  0.0009 -0.0010  0.0005  0.0001  0.0061  0.0000 -0.0002 -0.0005 -0.0006
  97.  H  0.0018 -0.0001  0.0001  0.0000  0.0000  0.0009 -0.0001 -0.0051  0.0004
  98.  H  0.0000  0.0000 -0.0023  0.0004 -0.0001 -0.0002 -0.0006 -0.0151 -0.0022
  99.  H  0.0036 -0.0007  0.0004 -0.0003 -0.0002  0.0023  0.0003 -0.0050  0.0006
 100.  H -0.0135  0.0002 -0.0005  0.0000  0.0001  0.0001  0.0000  0.0003  0.0001
 101.  H  0.0023  0.0000  0.0001  0.0001 -0.0002  0.0001  0.0002 -0.0008  0.0000
 102.  H  0.0076  0.0005 -0.0012  0.0002  0.0000 -0.0012 -0.0001  0.0004 -0.0002
 103.  H  0.0122 -0.0067  0.0044 -0.0052  0.0034 -0.0113 -0.0003  0.0106 -0.0026
 104.  H  0.0078 -0.0071 -0.0082 -0.0131 -0.0005 -0.0072 -0.0008  0.0817 -0.0036
 105.  H -0.0219 -0.0027  0.0055  0.0020 -0.0024  0.0180  0.0004  0.0147 -0.0012
 106.  H  0.0010 -0.0016  0.0028 -0.0002  0.0066  0.0025 -0.0193 -0.0003  0.0001
 107.  H -0.0132  0.0054 -0.0116  0.0008  0.0013 -0.0061  0.0035 -0.0032  0.0001
 108.  H -0.0062 -0.0011  0.0027  0.0006 -0.0002  0.0041 -0.0067  0.0048 -0.0007
 109.  H -0.0017 -0.0008  0.0021 -0.0001  0.0001  0.0027 -0.0003  0.0021  0.0003
 110.  H  0.0250 -0.0012  0.0005  0.0003  0.0010  0.0015  0.0002 -0.0021 -0.0019
 111.  H -0.0356  0.0036 -0.0038  0.0007 -0.0020 -0.0050  0.0003 -0.0026 -0.0005
 112.  H -0.0602  0.0018 -0.0024  0.0004  0.0006  0.0006 -0.0004 -0.0035  0.0003
 113.  H  0.0802 -0.0007  0.0027 -0.0003 -0.0006  0.0014  0.0002  0.0025 -0.0002
 114.  H  0.0084 -0.0010  0.0013 -0.0001  0.0002  0.0001  0.0000 -0.0004  0.0001

     Atom   19      20      21      22      23      24      25      26      27
     ---- ------  ------  ------  ------  ------  ------  ------  ------  ------
   1.  O  0.0028  0.0009  0.0010 -0.0027 -0.0015  0.0002 -0.0005 -0.0001  0.0030
   2. Mg  0.0966 -0.0052  0.1622 -0.0199  0.0593 -0.0963 -0.0018 -0.0053  0.0175
   3.  O  0.1699 -0.0132  0.0105 -0.0622 -0.1861 -0.0091  0.0123 -0.0098 -0.1121
   4.  C  0.0000  0.0013  0.0001  0.0002 -0.0003  0.0005  0.0015  0.0004  0.0028
   5.  N -0.0129  0.0004 -0.0081 -0.0032 -0.0059  0.0046 -0.0042 -0.0081  0.0113
   6.  N -0.0042  0.0012 -0.0207 -0.0054 -0.0071  0.0120 -0.0011  0.0008 -0.0016
   7.  O  0.0034 -0.0009  0.0007 -0.0011 -0.0013 -0.0013 -0.0003  0.0004 -0.0032
   8.  C -0.0184 -0.0049 -0.0054 -0.0015 -0.0058  0.0004 -0.0055  0.0014  0.0046
   9.  C -0.0006 -0.0041  0.0056 -0.0017 -0.0022 -0.0073 -0.0033 -0.0003 -0.0012
  10.  C -0.0007 -0.0030 -0.0021  0.0012 -0.0028 -0.0033 -0.0028 -0.0007 -0.0052
  11.  O  0.0723 -0.0027  0.0068 -0.0067  0.0130 -0.0073  0.0003 -0.0011  0.0006
  12.  C -0.2161  0.0234 -0.0032 -0.0002 -0.0348  0.0013  0.0033 -0.0051 -0.2356
  13.  C -0.1378  0.0074 -0.0094 -0.0066 -0.0356  0.0081 -0.0009  0.0008 -1.6264
  14.  C -0.0023  0.0054  0.0006 -0.0011 -0.0050 -0.0005  0.0007  0.0014  0.0198
  15.  O  0.0799 -0.0125  0.0079 -0.0141 -0.0004 -0.0062 -0.0006  0.0043  0.0843
  16.  C  0.0003  0.0005  0.0000 -0.0004 -0.0004  0.0007 -0.0001  0.0000  0.0009
  17.  O -0.0234 -0.0324  0.3659  0.8447 -0.0011 -0.1445 -0.0841  0.0143  0.0034
  18.  C  0.9127 -0.1100 -0.0151  0.0518  0.4701  0.0121 -0.0047 -0.0159 -0.1481
  19.  O  0.0000  0.1301 -0.0128 -0.0216  0.3549  0.0061  0.0108 -0.0227 -0.0531
  20.  O  0.1301  0.0000  0.8255 -0.0338 -1.0766  0.0529  0.0343  0.1549 -0.0148
  21.  C -0.0128  0.8255  0.0000 -0.7892 -0.0245 -0.0892  0.0282  0.0041  0.0009
  22.  C -0.0216 -0.0338 -0.7892  0.0000 -0.0404  0.0860  0.7879  0.0431 -0.0017
  23.  C  0.3549 -1.0766 -0.0245 -0.0404  0.0000  0.0324  0.0000  0.5486  0.0011
  24.  O  0.0061  0.0529 -0.0892  0.0860  0.0324  0.0000 -0.0290  0.0424 -0.0029
  25.  C  0.0108  0.0343  0.0282  0.7879  0.0000 -0.0290  0.0000  0.0079  0.0023
  26.  C -0.0227  0.1549  0.0041  0.0431  0.5486  0.0424  0.0079  0.0000 -0.0016
  27.  C -0.0531 -0.0148  0.0009 -0.0017  0.0011 -0.0029  0.0023 -0.0016  0.0000
  28.  C -0.0057  0.0005 -0.0005  0.0001 -0.0008  0.0007 -0.0001  0.0000 -0.0071
  29.  C -0.0131  0.0123  0.0021 -0.0119 -0.0020 -0.0032  0.0011 -0.0177 -0.0036
  30.  C  0.0060  0.0019 -0.0078 -0.0043 -0.0030  0.0003 -0.0208 -0.0002  0.0041
  31.  C  0.0369  0.0202  0.0045 -0.0060  0.0018  0.0019  0.0043  0.0181 -0.0026
  32.  C  0.0413  0.0176  0.0152 -0.0017  0.0089 -0.0056  0.0017  0.0376 -0.0008
  33.  C  0.0000  0.0197  0.0017  0.0060  0.0058 -0.0016  0.0011  0.0224  0.0016
  34.  C -0.0072 -0.0021 -0.0094  0.0033 -0.0053  0.0044  0.0000  0.0253 -0.0006
  35.  C  0.0249 -0.0053 -0.0030 -0.0090 -0.0004  0.0000 -0.0006 -0.0138 -0.0034
  36.  C  0.0051  0.0040  0.0081 -0.0084 -0.0043  0.0118  0.0042 -0.0006 -0.0005
  37.  C  0.0083 -0.0013 -0.0004 -0.0017  0.0005 -0.0004  0.0002  0.0004  0.0035
  38.  C  0.0046  0.0024 -0.0005  0.0005  0.0005 -0.0022 -0.0125 -0.0002 -0.0041
  39.  C -0.0009 -0.0010 -0.0016 -0.0018 -0.0001  0.0002 -0.0174 -0.0002 -0.0015
  40.  C  0.0016  0.0005 -0.0041  0.0038 -0.0005 -0.0014 -0.0381  0.0006  0.0006
  41.  C  0.0009  0.0010 -0.0041  0.0029 -0.0008  0.0004 -0.0168  0.0003 -0.0006
  42.  C  0.0009  0.0002 -0.0020 -0.0003 -0.0018 -0.0004  0.0046 -0.0006 -0.0025
  43.  C  0.0066  0.0012 -0.0024  0.0031 -0.0003  0.0002  0.0036  0.0006  0.0152
  44.  C  0.0003 -0.0010  0.0002 -0.0037 -0.0023  0.0004  0.0084  0.0003  0.0008
  45.  C  0.0042  0.0468  0.0155  0.0098 -0.0199  0.0447  0.0020  0.0051  0.0007
  46.  C  0.0035  0.0052  0.0018 -0.0046 -0.0010 -0.0017 -0.0017  0.0025  0.0010
  47.  C -0.0672 -0.0038  0.0010  0.0021 -0.0100 -0.0010 -0.0013 -0.0008 -0.0126
  48.  C -0.0008 -0.0012 -0.0001 -0.0003 -0.0017  0.0000 -0.0002 -0.0022 -0.0042
  49.  C -0.0011 -0.0028  0.0104 -0.0077 -0.0023  0.0027  0.0364 -0.0003 -0.0004
  50.  C  0.0019 -0.0012  0.0032  0.0013 -0.0006 -0.0008  0.0095  0.0001  0.0003
  51.  C  0.0025 -0.0046  0.0043  0.0206  0.0005 -0.0051  0.0082  0.0012 -0.0320
  52.  C -0.0026 -0.0009 -0.0003  0.0026 -0.0002  0.0013  0.0051  0.0002 -0.0022
  53.  C  0.0001 -0.0008 -0.0017 -0.0016 -0.0016  0.0003 -0.0007 -0.0012  0.0015
  54.  C  0.0033 -0.0009 -0.0027 -0.0015 -0.0015 -0.0017 -0.0063  0.0002  0.0002
  55.  H  0.0002  0.0000 -0.0008 -0.0013 -0.0009 -0.0009 -0.0006 -0.0004  0.0001
  56.  H  0.0116 -0.0116  0.0005 -0.0066 -0.0078 -0.0001 -0.0014  0.0063 -0.0560
  57.  H  0.0023 -0.0005 -0.0021  0.0014 -0.0005 -0.0007 -0.0010 -0.0006 -0.0031
  58.  H  0.0000 -0.0002  0.0000  0.0002 -0.0001 -0.0004 -0.0002  0.0001  0.0006
  59.  H  0.0005  0.0001  0.0001 -0.0001 -0.0002 -0.0002  0.0000  0.0000  0.0012
  60.  H -0.0005  0.0000 -0.0002  0.0004  0.0000  0.0002  0.0001  0.0000 -0.0005
  61.  H  0.0012 -0.0684  0.1264  1.6959  0.0210 -0.0084  0.0585  0.0092 -0.0008
  62.  H  0.0140 -0.0322  0.0001 -0.0067  1.4557  0.0365 -0.0039  0.0646  0.0068
  63.  H -0.0018  0.0151 -0.0202 -0.0042  0.0092 -0.0121  0.4926 -0.0006 -0.0002
  64.  H -0.0006 -0.0016 -0.0193  0.0032 -0.0093  0.0097 -0.6693  0.0062 -0.0001
  65.  H  0.0035 -0.0134  0.1285  0.0571  0.0073  0.0219  1.5889  0.0001  0.0011
  66.  H  0.0189 -0.0510  0.0028  0.0079 -0.0417  0.0089 -0.0003 -0.0661  0.0028
  67.  H -0.0157  0.1252  0.0111 -0.0015  0.0923 -0.0102 -0.0010  1.5801  0.0003
  68.  H -0.0152 -0.0474  0.0030 -0.0051 -0.0343  0.0024  0.0026 -0.4954 -0.0027
  69.  H  0.0334 -0.0074  0.0005 -0.0002  0.0145 -0.0021  0.0003 -0.0016  1.3681
  70.  H -0.0118  0.0035 -0.0004 -0.0007 -0.0065  0.0003  0.0000  0.0020  0.8865
  71.  H -0.0144  0.0021 -0.0003 -0.0043 -0.0079  0.0002 -0.0005 -0.0010  0.6230
  72.  H  0.0007 -0.0002 -0.0001  0.0003  0.0008  0.0001  0.0001  0.0000  0.0002
  73.  H -0.0003 -0.0001 -0.0005  0.0003  0.0006  0.0004  0.0000 -0.0002 -0.0027
  74.  H -0.0018  0.0015  0.0004 -0.0005 -0.0019 -0.0003  0.0001  0.0003  0.0002
  75.  H  0.0003  0.0008  0.0002  0.0001 -0.0002  0.0014  0.0005  0.0028  0.0000
  76.  H  0.0000  0.0008 -0.0002  0.0004 -0.0001  0.0001  0.0002  0.0067 -0.0001
  77.  H -0.0010 -0.0001  0.0000 -0.0001  0.0000  0.0002 -0.0001 -0.0006 -0.0001
  78.  H -0.0066 -0.0004 -0.0137  0.0086 -0.0032  0.0027  0.0017 -0.0020 -0.0006
  79.  H  0.0016  0.0021 -0.0014 -0.0013 -0.0012 -0.0001  0.0002 -0.0001  0.0001
  80.  H -0.0001  0.0003 -0.0015 -0.0003 -0.0004 -0.0001 -0.0114  0.0000  0.0001
  81.  H -0.0003  0.0002 -0.0002  0.0004 -0.0001 -0.0002 -0.0028 -0.0002 -0.0003
  82.  H -0.0002  0.0003 -0.0001  0.0000 -0.0001 -0.0005  0.0032  0.0000 -0.0001
  83.  H  0.0019  0.0015 -0.0009 -0.0020 -0.0018 -0.0013 -0.0003 -0.0005  0.0013
  84.  H  0.0002  0.0021 -0.0024 -0.0021 -0.0015  0.0006 -0.0002 -0.0004 -0.0002
  85.  H -0.0006 -0.0034 -0.0018 -0.0006  0.0016 -0.0087 -0.0005 -0.0007 -0.0001
  86.  H -0.0029 -0.0289  0.0193 -0.0111  0.0007 -0.0771 -0.0005 -0.0009  0.0003
  87.  H -0.0019 -0.0024 -0.0110  0.0000  0.0028  0.0016 -0.0008 -0.0011 -0.0003
  88.  H -0.0030 -0.0002 -0.0009  0.0001 -0.0005 -0.0002  0.0002 -0.0007 -0.0001
  89.  H -0.0005  0.0002  0.0025  0.0007 -0.0009  0.0003  0.0003  0.0006 -0.0004
  90.  H -0.0027 -0.0003 -0.0039 -0.0018  0.0001  0.0006 -0.0004 -0.0006  0.0002
  91.  H  0.0110  0.0003 -0.0001 -0.0009  0.0016  0.0005 -0.0003 -0.0008  0.0014
  92.  H  0.0062  0.0004  0.0005 -0.0005  0.0005  0.0002 -0.0004  0.0000  0.0023
  93.  H  0.0291 -0.0002 -0.0017 -0.0018  0.0005  0.0008  0.0007 -0.0005 -0.0041
  94.  H -0.0026  0.0004  0.0000  0.0002 -0.0003  0.0000  0.0001  0.0003 -0.0001
  95.  H  0.0031  0.0003  0.0000 -0.0003  0.0005 -0.0001 -0.0001  0.0001  0.0010
  96.  H -0.0020 -0.0001 -0.0003  0.0000  0.0001  0.0001  0.0002  0.0000 -0.0003
  97.  H  0.0000  0.0008 -0.0025  0.0014 -0.0004  0.0020 -0.0099  0.0000  0.0000
  98.  H  0.0011  0.0030 -0.0025  0.0096 -0.0008 -0.0173 -0.0044 -0.0004 -0.0004
  99.  H -0.0001  0.0009 -0.0011 -0.0012  0.0004  0.0002  0.0012 -0.0003  0.0000
 100.  H  0.0000  0.0004 -0.0002 -0.0003 -0.0003 -0.0002 -0.0016  0.0000 -0.0001
 101.  H -0.0007  0.0004 -0.0012  0.0000  0.0002  0.0011 -0.0023 -0.0001 -0.0001
 102.  H -0.0003  0.0000  0.0001  0.0001 -0.0001  0.0000  0.0005  0.0000 -0.0003
 103.  H  0.0022 -0.0001  0.0031  0.0069 -0.0002 -0.0010  0.0078 -0.0004 -0.0174
 104.  H  0.0028  0.0019  0.0161 -0.0259  0.0009 -0.0052 -0.0179  0.0002 -0.0056
 105.  H  0.0047  0.0005  0.0026 -0.0003 -0.0011 -0.0034 -0.0062  0.0009  0.0028
 106.  H  0.0008  0.0004  0.0011 -0.0002  0.0001  0.0001  0.0050 -0.0002 -0.0001
 107.  H -0.0024  0.0002 -0.0006  0.0004 -0.0004  0.0009  0.0004  0.0001 -0.0021
 108.  H  0.0002 -0.0002  0.0009  0.0031  0.0000 -0.0001  0.0013  0.0001  0.0020
 109.  H -0.0032  0.0003 -0.0001 -0.0007 -0.0007  0.0002 -0.0001  0.0001 -0.0001
 110.  H -0.0029  0.0002 -0.0004 -0.0006 -0.0007  0.0001 -0.0001  0.0010  0.0001
 111.  H -0.0003  0.0001 -0.0009 -0.0009 -0.0002  0.0000 -0.0001 -0.0002 -0.0009
 112.  H  0.0004  0.0001 -0.0009 -0.0004 -0.0008  0.0015  0.0003  0.0000 -0.0007
 113.  H -0.0009  0.0001 -0.0002 -0.0007 -0.0007  0.0012  0.0003 -0.0001  0.0004
 114.  H  0.0001  0.0012  0.0015 -0.0008  0.0002 -0.0013 -0.0007 -0.0004  0.0003

     Atom   28      29      30      31      32      33      34      35      36
     ---- ------  ------  ------  ------  ------  ------  ------  ------  ------
   1.  O -0.0138  0.0004  0.0005  0.0006  0.0027 -0.0011 -0.0033 -0.0027 -0.0026
   2. Mg  0.0080 -0.0763  0.1059 -0.1495 -0.0402  0.0938  0.0866 -0.0513  0.1937
   3.  O -0.0036 -0.0015 -0.0005  0.0032  0.0032  0.0034  0.0091  0.0051  0.0048
   4.  C  0.0197  0.0003 -0.0046  0.0013  0.0006 -0.0023 -0.0001 -0.0009  0.0001
   5.  N -0.0013  0.4074 -0.0212 -0.2802 -0.0776  0.1854 -0.0667 -0.2519 -0.0299
   6.  N -0.0034 -0.0185  0.6395  0.0321 -0.0065  0.0403 -0.0082 -0.0599  0.0765
   7.  O  0.0002 -0.0019 -0.0026 -0.0010  0.0017  0.0024 -0.0023 -0.0047  0.0002
   8.  C -0.0023 -0.0180  0.0129  0.2239 -0.0101  0.0272 -0.0151 -0.0454  0.0853
   9.  C -0.0022 -0.0214  0.0058 -0.0059  0.0046 -0.0597  0.0113  0.0841 -0.0552
  10.  C -0.0037  0.0262 -0.0387 -0.0473 -0.0058 -0.0421  0.0044  0.0573 -0.0024
  11.  O -0.0612  0.0030 -0.0020  0.0040  0.0028 -0.0039 -0.0018  0.0025  0.0011
  12.  C -0.0543 -0.0190  0.0053 -0.0239 -0.0116  0.0119  0.0067 -0.0105 -0.0033
  13.  C  0.0015 -0.0024 -0.0014  0.0000  0.0012 -0.0010 -0.0026 -0.0046 -0.0009
  14.  C  0.4539 -0.0063  0.0012 -0.0041 -0.0024 -0.0025  0.0075 -0.0072  0.0014
  15.  O  0.0009  0.0132  0.0099 -0.0009  0.0018  0.0050 -0.0077 -0.0132 -0.0097
  16.  C -0.0059  0.0003  0.0016  0.0003 -0.0001 -0.0008 -0.0008  0.0001 -0.0006
  17.  O -0.0027  0.0097 -0.0145 -0.0048  0.0143 -0.0155 -0.0192  0.0082  0.1056
  18.  C  0.0010  0.0265 -0.0013  0.0311  0.0145 -0.0062 -0.0088  0.0172 -0.0023
  19.  O -0.0057 -0.0131  0.0060  0.0369  0.0413  0.0000 -0.0072  0.0249  0.0051
  20.  O  0.0005  0.0123  0.0019  0.0202  0.0176  0.0197 -0.0021 -0.0053  0.0040
  21.  C -0.0005  0.0021 -0.0078  0.0045  0.0152  0.0017 -0.0094 -0.0030  0.0081
  22.  C  0.0001 -0.0119 -0.0043 -0.0060 -0.0017  0.0060  0.0033 -0.0090 -0.0084
  23.  C -0.0008 -0.0020 -0.0030  0.0018  0.0089  0.0058 -0.0053 -0.0004 -0.0043
  24.  O  0.0007 -0.0032  0.0003  0.0019 -0.0056 -0.0016  0.0044  0.0000  0.0118
  25.  C -0.0001  0.0011 -0.0208  0.0043  0.0017  0.0011  0.0000 -0.0006  0.0042
  26.  C  0.0000 -0.0177 -0.0002  0.0181  0.0376  0.0224  0.0253 -0.0138 -0.0006
  27.  C -0.0071 -0.0036  0.0041 -0.0026 -0.0008  0.0016 -0.0006 -0.0034 -0.0005
  28.  C  0.0000  0.0003  0.0003  0.0002 -0.0013  0.0018  0.0041  0.0054 -0.0014
  29.  C  0.0003  0.0000 -0.0064  0.7810  0.0058 -0.6562 -0.0080  1.4471 -0.0366
  30.  C  0.0003 -0.0064  0.0000 -0.0092 -0.0022 -0.0023  0.0012 -0.0006 -0.0118
  31.  C  0.0002  0.7810 -0.0092  0.0000  1.5606 -0.0309 -0.6887  0.0038  0.4351
  32.  C -0.0013  0.0058 -0.0022  1.5606  0.0000  1.5286 -0.0462 -0.6428 -0.0603
  33.  C  0.0018 -0.6562 -0.0023 -0.0309  1.5286  0.0000  1.1079 -0.0083 -0.0273
  34.  C  0.0041 -0.0080  0.0012 -0.6887 -0.0462  1.1079  0.0000  1.6227  0.0441
  35.  C  0.0054  1.4471 -0.0006  0.0038 -0.6428 -0.0083  1.6227  0.0000 -0.0005
  36.  C -0.0014 -0.0366 -0.0118  0.4351 -0.0603 -0.0273  0.0441 -0.0005  0.0000
  37.  C -0.0095 -0.0164 -0.0015 -0.0586  0.0095 -0.0878 -0.0318 -0.1069  0.0064
  38.  C  0.0010 -0.0040 -1.3600 -0.0023 -0.0016  0.0031 -0.0027 -0.0071  0.0039
  39.  C -0.0008 -0.0028 -0.0036 -0.0023 -0.0003  0.0016  0.0012 -0.0016 -0.0013
  40.  C  0.0009 -0.0002 -0.1437  0.0001  0.0007  0.0008 -0.0015 -0.0015 -0.0026
  41.  C -0.0001  0.0001  0.0154  0.0002 -0.0006 -0.0015  0.0004  0.0014  0.0006
  42.  C -0.0007 -0.0032 -0.4688  0.0051 -0.0011  0.0044 -0.0021 -0.0078 -0.0028
  43.  C  0.0011  0.0030  0.0832  0.0030  0.0009  0.0008 -0.0002  0.0013  0.0046
  44.  C -0.0004  0.0004  0.0595  0.0044  0.0009 -0.0048 -0.0028  0.0003 -0.0085
  45.  C -0.0002 -0.0873 -0.0008 -0.0748 -0.0985 -0.0190  0.0378  0.0083  0.1892
  46.  C -0.0003  0.1692 -0.0010 -0.0706  0.2443 -0.0081 -0.1464  0.0135 -0.6520
  47.  C  0.0380  0.0238 -0.0016  0.0375 -0.0435  0.0008  0.0545 -0.0691 -0.0146
  48.  C -0.0011  0.1609  0.0002 -0.0321 -0.0883 -0.0025  0.1060 -0.0167  0.0131
  49.  C -0.0005  0.0019  0.0031 -0.0029 -0.0016 -0.0002  0.0009  0.0020 -0.0547
  50.  C -0.0002 -0.0040 -0.0059 -0.0052 -0.0034  0.0029  0.0028 -0.0008  0.0111
  51.  C -0.0024  0.0002 -0.0153  0.0042  0.0048  0.0043  0.0008 -0.0020  0.0027
  52.  C -0.0028 -0.0013 -0.0136 -0.0001  0.0015 -0.0003  0.0007  0.0008 -0.0023
  53.  C  0.0000 -0.0278  0.0083 -0.0435 -0.0246  0.0359 -0.0233 -0.0328 -0.0164
  54.  C -0.0007 -0.0061 -0.0175 -0.0087 -0.0036  0.0071  0.0045 -0.0077 -0.0040
  55.  H  0.0000 -0.0166  0.0011  0.0165 -0.0035 -0.0104 -0.0040  0.0123 -0.0009
  56.  H  0.0002 -0.0013  0.0008 -0.0010 -0.0017 -0.0001  0.0008  0.0007 -0.0004
  57.  H  0.0010  0.0002 -0.0017  0.0022 -0.0008 -0.0014 -0.0007  0.0041  0.0020
  58.  H -0.0017 -0.0001  0.0008  0.0005  0.0007  0.0003 -0.0006 -0.0006  0.0002
  59.  H  0.0008  0.0002 -0.0005  0.0000 -0.0002  0.0000  0.0003  0.0005  0.0000
  60.  H -0.0035  0.0004 -0.0005  0.0007  0.0002 -0.0003 -0.0004  0.0001  0.0002
  61.  H  0.0001 -0.0072 -0.0002 -0.0043 -0.0040  0.0009  0.0035 -0.0029 -0.0146
  62.  H  0.0001  0.0080 -0.0005  0.0009 -0.0100 -0.0099 -0.0050  0.0044 -0.0015
  63.  H  0.0000 -0.0007  0.0014 -0.0018 -0.0011 -0.0002 -0.0001 -0.0001  0.0038
  64.  H -0.0001 -0.0021 -0.0041  0.0005 -0.0002 -0.0009  0.0001 -0.0003 -0.0032
  65.  H -0.0001 -0.0024  0.0022 -0.0009 -0.0010 -0.0012  0.0000  0.0007  0.0002
  66.  H -0.0001  0.0031  0.0001  0.0067  0.0049 -0.0020  0.0027  0.0044 -0.0009
  67.  H  0.0000 -0.0014 -0.0002  0.0055  0.0059  0.0008  0.0021 -0.0031  0.0005
  68.  H  0.0000  0.0072 -0.0009 -0.0033  0.0093  0.0223 -0.0108  0.0024  0.0010
  69.  H -0.0018  0.0010  0.0001  0.0012  0.0009  0.0000  0.0004  0.0010  0.0004
  70.  H -0.0009 -0.0002 -0.0003 -0.0018 -0.0021 -0.0004  0.0013  0.0010 -0.0001
  71.  H  0.0006 -0.0034  0.0018 -0.0027 -0.0006  0.0005 -0.0009 -0.0021 -0.0001
  72.  H -0.1833 -0.0006  0.0000 -0.0004  0.0009 -0.0008 -0.0017 -0.0032  0.0004
  73.  H  1.9307  0.0007  0.0001 -0.0001 -0.0008  0.0005  0.0011  0.0029 -0.0004
  74.  H  0.2727  0.0002  0.0001 -0.0001 -0.0004  0.0002  0.0010  0.0002  0.0000
  75.  H -0.0001 -0.0252 -0.0010 -0.0015 -0.2845 -0.0102 -0.0148 -0.0001 -0.0580
  76.  H -0.0002  0.0015 -0.0001  0.0070 -0.0474  0.1762  0.0063  0.0060 -0.0297
  77.  H -0.0006  0.0906  0.0004  0.0145  0.0872 -0.0550  0.9558  0.0029  0.0070
  78.  H -0.0005 -0.0798 -0.0008  0.0228 -0.0426 -0.0051  0.0584 -0.0117  1.5538
  79.  H  0.0036 -0.0841 -0.0016 -0.0036 -0.0027 -0.0293  0.0540 -0.0378 -0.0097
  80.  H -0.0001  0.0012  0.1625  0.0006 -0.0003 -0.0027 -0.0001  0.0025 -0.0023
  81.  H -0.0003  0.0006  0.0089 -0.0001 -0.0002  0.0000 -0.0004  0.0001 -0.0016
  82.  H  0.0000  0.0000 -0.0465  0.0016 -0.0001  0.0001 -0.0007 -0.0008 -0.0002
  83.  H -0.0023 -0.0046 -0.1095 -0.0050 -0.0022 -0.0018 -0.0027 -0.0037 -0.0106
  84.  H -0.0001 -0.0085  0.0265 -0.0176 -0.0064  0.0008  0.0040 -0.0004 -0.0144
  85.  H -0.0003  0.0171  0.0007  0.0032  0.0020  0.0036 -0.0096  0.0010 -0.0156
  86.  H -0.0001 -0.0028 -0.0007 -0.0005  0.0328 -0.0019 -0.0107 -0.0005  0.0111
  87.  H  0.0001 -0.0071 -0.0003  0.0123 -0.0144  0.0056  0.0025 -0.0043  0.0139
  88.  H  0.0000 -0.0417  0.0008 -0.0006 -0.0558  0.0039  0.0323 -0.0073 -0.0009
  89.  H -0.0001 -0.0129  0.0006 -0.0065 -0.0111  0.0006  0.0072 -0.0060  0.0269
  90.  H -0.0001 -0.0244 -0.0002 -0.0134  0.0036  0.0001 -0.0010 -0.0049  0.0129
  91.  H -0.0087  0.0206  0.0002  0.0117 -0.0229  0.0143  0.0540  0.1221 -0.0063
  92.  H -0.0054  0.0003 -0.0002 -0.0003 -0.0015 -0.0137  0.0344 -0.0425  0.0003
  93.  H -0.0003  0.0096 -0.0008 -0.0097 -0.0081 -0.0065  0.0171 -0.0270 -0.0008
  94.  H  0.0006 -0.0483  0.0000  0.0198  0.0294 -0.0032 -0.0268  0.1125 -0.0061
  95.  H  0.0001  0.0031 -0.0001 -0.0097  0.0002 -0.0063  0.0039 -0.0429  0.0033
  96.  H -0.0001  0.0016 -0.0003 -0.0083  0.0026 -0.0024 -0.0088 -0.0368 -0.0008
  97.  H  0.0001 -0.0019  0.0054 -0.0031 -0.0018  0.0000  0.0007  0.0003  0.0023
  98.  H -0.0003 -0.0048 -0.0057 -0.0084 -0.0030 -0.0007 -0.0020 -0.0025 -0.0163
  99.  H  0.0000 -0.0027 -0.0047 -0.0006 -0.0032 -0.0003  0.0023 -0.0006  0.0222
 100.  H  0.0000 -0.0004  0.0084 -0.0008 -0.0007 -0.0010  0.0009  0.0013  0.0013
 101.  H  0.0000  0.0001 -0.0047 -0.0001 -0.0006 -0.0001  0.0004  0.0003  0.0036
 102.  H  0.0000  0.0008 -0.0047 -0.0002  0.0004  0.0000 -0.0014 -0.0005 -0.0111
 103.  H -0.0007 -0.0011 -0.0322 -0.0010 -0.0013 -0.0016 -0.0018 -0.0002 -0.0008
 104.  H  0.0010 -0.0053  0.0078 -0.0051 -0.0021 -0.0024 -0.0031 -0.0037 -0.0062
 105.  H  0.0001  0.0002  0.0056 -0.0022 -0.0022 -0.0017  0.0006  0.0013  0.0002
 106.  H -0.0007  0.0011 -0.0268  0.0010 -0.0001 -0.0014 -0.0004  0.0011 -0.0009
 107.  H  0.0000  0.0002  0.0042 -0.0003  0.0000 -0.0018 -0.0010  0.0007 -0.0015
 108.  H  0.0006  0.0015  0.0098  0.0019  0.0006 -0.0009 -0.0012  0.0005  0.0007
 109.  H  0.0000 -0.0480  0.0007 -0.0196  0.0018  0.0143  0.0055 -0.0377 -0.0023
 110.  H  0.0000 -0.0201  0.0037  0.0004  0.0074  0.0133 -0.0062 -0.0232  0.0131
 111.  H  0.0000  0.0071 -0.0034 -0.0156 -0.0032 -0.0100  0.0031  0.0092 -0.0076
 112.  H  0.0000  0.0068 -0.0109 -0.0028  0.0003 -0.0086 -0.0007  0.0106 -0.0027
 113.  H  0.0002 -0.0035  0.0139  0.0102  0.0009  0.0038 -0.0027 -0.0065 -0.0008
 114.  H -0.0001  0.0041  0.0135  0.0002 -0.0003  0.0012 -0.0001 -0.0008  0.0031

     Atom   37      38      39      40      41      42      43      44      45
     ---- ------  ------  ------  ------  ------  ------  ------  ------  ------
   1.  O  0.0032 -0.0028 -0.0016 -0.0003 -0.0007 -0.0002  0.0014  0.0002  0.0005
   2. Mg  0.0473  0.0295  0.0134  0.0095  0.0083  0.1002 -0.0305  0.0344  0.0021
   3.  O  0.0014  0.0015 -0.0008  0.0011 -0.0004 -0.0005  0.0013 -0.0008 -0.0009
   4.  C  0.0005  0.0033  0.0043 -0.0024  0.0011  0.0022 -0.0077 -0.0008 -0.0005
   5.  N -0.0684  0.0232 -0.0008  0.0085 -0.0087  0.0410  0.0026 -0.0123  0.0093
   6.  N -0.0075  0.0159  0.0361  0.0103  0.0173  0.0430  0.0362 -0.0295 -0.0161
   7.  O -0.0003 -0.0080 -0.0013 -0.0015 -0.0016 -0.0008 -0.0048 -0.0005  0.0014
   8.  C -0.0514 -0.0341  0.0019 -0.0082  0.0049 -0.0663 -0.0090 -0.0019 -0.0192
   9.  C -0.0065 -0.0143  0.0003 -0.0039  0.0043 -0.1059  0.0074 -0.0147  0.0016
  10.  C  0.0080  0.0617 -0.0089  0.0269 -0.0137  0.1838  0.0422  0.0175 -0.0071
  11.  O -0.0125 -0.0088  0.0014 -0.0029 -0.0003 -0.0002 -0.0037 -0.0003 -0.0030
  12.  C  0.0072  0.0163 -0.0049  0.0068 -0.0003 -0.0016  0.0204 -0.0018  0.0040
  13.  C -0.0038  0.0004 -0.0001 -0.0004 -0.0003 -0.0004 -0.0063 -0.0008  0.0005
  14.  C  0.0265  0.0025 -0.0007  0.0010  0.0004 -0.0005  0.0005  0.0003  0.0004
  15.  O  0.0165  0.0107 -0.0044  0.0043  0.0004  0.0042  0.0143  0.0034  0.0039
  16.  C -0.0011 -0.0069 -0.0004 -0.0009 -0.0002 -0.0012  0.0061  0.0006 -0.0002
  17.  O -0.0022  0.0067 -0.0029  0.0027 -0.0017  0.0018  0.0012 -0.0025 -0.0049
  18.  C -0.0016 -0.0012  0.0002 -0.0007  0.0002 -0.0012 -0.0014 -0.0014 -0.0054
  19.  O  0.0083  0.0046 -0.0009  0.0016  0.0009  0.0009  0.0066  0.0003  0.0042
  20.  O -0.0013  0.0024 -0.0010  0.0005  0.0010  0.0002  0.0012 -0.0010  0.0468
  21.  C -0.0004 -0.0005 -0.0016 -0.0041 -0.0041 -0.0020 -0.0024  0.0002  0.0155
  22.  C -0.0017  0.0005 -0.0018  0.0038  0.0029 -0.0003  0.0031 -0.0037  0.0098
  23.  C  0.0005  0.0005 -0.0001 -0.0005 -0.0008 -0.0018 -0.0003 -0.0023 -0.0199
  24.  O -0.0004 -0.0022  0.0002 -0.0014  0.0004 -0.0004  0.0002  0.0004  0.0447
  25.  C  0.0002 -0.0125 -0.0174 -0.0381 -0.0168  0.0046  0.0036  0.0084  0.0020
  26.  C  0.0004 -0.0002 -0.0002  0.0006  0.0003 -0.0006  0.0006  0.0003  0.0051
  27.  C  0.0035 -0.0041 -0.0015  0.0006 -0.0006 -0.0025  0.0152  0.0008  0.0007
  28.  C -0.0095  0.0010 -0.0008  0.0009 -0.0001 -0.0007  0.0011 -0.0004 -0.0002
  29.  C -0.0164 -0.0040 -0.0028 -0.0002  0.0001 -0.0032  0.0030  0.0004 -0.0873
  30.  C -0.0015 -1.3600 -0.0036 -0.1437  0.0154 -0.4688  0.0832  0.0595 -0.0008
  31.  C -0.0586 -0.0023 -0.0023  0.0001  0.0002  0.0051  0.0030  0.0044 -0.0748
  32.  C  0.0095 -0.0016 -0.0003  0.0007 -0.0006 -0.0011  0.0009  0.0009 -0.0985
  33.  C -0.0878  0.0031  0.0016  0.0008 -0.0015  0.0044  0.0008 -0.0048 -0.0190
  34.  C -0.0318 -0.0027  0.0012 -0.0015  0.0004 -0.0021 -0.0002 -0.0028  0.0378
  35.  C -0.1069 -0.0071 -0.0016 -0.0015  0.0014 -0.0078  0.0013  0.0003  0.0083
  36.  C  0.0064  0.0039 -0.0013 -0.0026  0.0006 -0.0028  0.0046 -0.0085  0.1892
  37.  C  0.0000 -0.0007 -0.0001 -0.0005 -0.0002 -0.0020 -0.0009 -0.0015 -0.0054
  38.  C -0.0007  0.0000  0.6388  0.0126 -0.0559  0.0090 -0.7801 -0.1332 -0.0020
  39.  C -0.0001  0.6388  0.0000 -0.4805  0.0013  0.0297 -0.0122 -0.0140  0.0006
  40.  C -0.0005  0.0126 -0.4805  0.0000 -1.4097  0.0003 -0.0814 -0.1470 -0.0003
  41.  C -0.0002 -0.0559  0.0013 -1.4097  0.0000  0.5898 -0.0179 -0.0057  0.0000
  42.  C -0.0020  0.0090  0.0297  0.0003  0.5898  0.0000 -0.0755 -1.5288 -0.0023
  43.  C -0.0009 -0.7801 -0.0122 -0.0814 -0.0179 -0.0755  0.0000  0.0500 -0.0003
  44.  C -0.0015 -0.1332 -0.0140 -0.1470 -0.0057 -1.5288  0.0500  0.0000  0.0008
  45.  C -0.0054 -0.0020  0.0006 -0.0003  0.0000 -0.0023 -0.0003  0.0008  0.0000
  46.  C -0.0070 -0.0042  0.0003 -0.0016  0.0002 -0.0057 -0.0010 -0.0022  0.0019
  47.  C -1.1733 -0.0012 -0.0003 -0.0001 -0.0006 -0.0008  0.0000 -0.0003  0.0061
  48.  C -0.1009  0.0000 -0.0002  0.0001  0.0002  0.0006  0.0007  0.0006 -0.0037
  49.  C -0.0011  0.0104 -0.0022 -0.0055  0.0161  0.0016 -0.0067  0.0053 -0.0139
  50.  C -0.0005  0.0065  0.0025 -0.0047  0.0048  0.0155 -0.0064  0.1400 -0.0052
  51.  C  0.0007  0.0090 -0.0674  0.0269 -0.0087  0.0081 -0.2257 -0.0079  0.0017
  52.  C -0.0007  0.0088 -0.0598  0.0246 -0.0129  0.0071 -0.2708 -0.0109  0.0005
  53.  C -0.0153 -0.0008  0.0009  0.0001 -0.0008 -0.0034  0.0000 -0.0049  0.0078
  54.  C -0.0010  0.0057 -0.0075  0.0038 -0.0002 -0.0095  0.0130  0.0000  0.0004
  55.  H -0.0010 -0.0064 -0.0007 -0.0003  0.0003  0.0069 -0.0039  0.0068 -0.0005
  56.  H  0.0055  0.0004  0.0001  0.0005  0.0001  0.0003  0.0046 -0.0005 -0.0012
  57.  H -0.0060 -0.0008  0.0010 -0.0006  0.0003  0.0000 -0.0017  0.0006 -0.0009
  58.  H  0.0003 -0.0020 -0.0019  0.0007 -0.0003 -0.0007  0.0031  0.0005  0.0001
  59.  H -0.0002  0.0003  0.0007 -0.0004  0.0001  0.0001 -0.0006 -0.0001  0.0000
  60.  H -0.0004 -0.0007  0.0006 -0.0004  0.0001 -0.0001 -0.0011  0.0001 -0.0001
  61.  H -0.0004 -0.0003 -0.0002  0.0017  0.0000 -0.0038  0.0012 -0.0030 -0.0030
  62.  H  0.0000  0.0002  0.0002  0.0000  0.0002  0.0002 -0.0003  0.0002 -0.0069
  63.  H  0.0001 -0.0031 -0.0012 -0.0010 -0.0012  0.0023 -0.0012  0.0014 -0.0016
  64.  H -0.0002 -0.0012 -0.0005 -0.0024  0.0074  0.0145  0.0001  0.0000 -0.0003
  65.  H -0.0004  0.0116  0.0148  0.0187  0.0019 -0.0036 -0.0034  0.0014  0.0001
  66.  H -0.0007  0.0008 -0.0001  0.0002  0.0002  0.0002  0.0002 -0.0001 -0.0003
  67.  H  0.0001  0.0001  0.0001  0.0000  0.0000 -0.0002  0.0001  0.0000  0.0009
  68.  H -0.0003 -0.0004  0.0002 -0.0001  0.0003 -0.0004 -0.0006  0.0004 -0.0016
  69.  H -0.0003 -0.0004  0.0002 -0.0001  0.0002  0.0003 -0.0029  0.0001 -0.0006
  70.  H -0.0023  0.0025  0.0006  0.0003  0.0004  0.0004 -0.0034 -0.0005 -0.0005
  71.  H  0.0022 -0.0048 -0.0002 -0.0003  0.0000 -0.0002  0.0062  0.0007 -0.0008
  72.  H  0.0071  0.0002  0.0001  0.0000  0.0001  0.0000 -0.0003  0.0001 -0.0004
  73.  H -0.0058  0.0001 -0.0002  0.0001  0.0000 -0.0001  0.0007 -0.0001  0.0000
  74.  H -0.0013  0.0005  0.0000  0.0002  0.0001  0.0001 -0.0002  0.0000  0.0000
  75.  H -0.0021  0.0010 -0.0002  0.0003 -0.0002  0.0016  0.0004  0.0000  0.0136
  76.  H  0.0156 -0.0001  0.0000 -0.0001  0.0001 -0.0003  0.0002 -0.0002 -0.0068
  77.  H  0.0226 -0.0008  0.0000 -0.0001  0.0002 -0.0024  0.0002 -0.0004 -0.0010
  78.  H -0.0010 -0.0023 -0.0006  0.0011 -0.0021 -0.0021  0.0030 -0.0110 -0.0287
  79.  H  0.9035  0.0002 -0.0005  0.0004 -0.0002 -0.0006  0.0028 -0.0016  0.0021
  80.  H  0.0002 -0.0371  1.9019 -0.0625  0.1582  0.0244  0.0425  0.0159  0.0002
  81.  H  0.0000  0.0716  0.0172  0.8891 -0.0745  0.0716  0.0221 -0.0575  0.0003
  82.  H  0.0000 -0.0050 -0.0417  0.0310 -0.4568 -0.0401 -0.0044 -0.1129 -0.0004
  83.  H -0.0016 -0.0579  0.0156 -0.0405 -0.0089  0.0220 -0.0886 -0.0130 -0.0013
  84.  H -0.0008 -0.0100  0.0012  0.0219  0.0146  0.0243  0.0034  0.3818 -0.0065
  85.  H  0.0035 -0.0004 -0.0005  0.0003 -0.0007 -0.0023  0.0006  0.0034  0.0990
  86.  H -0.0001 -0.0004 -0.0004  0.0002 -0.0002 -0.0007  0.0008  0.0003  1.5008
  87.  H -0.0019  0.0010 -0.0004  0.0004 -0.0006  0.0010  0.0010 -0.0019 -0.6976
  88.  H  0.0043 -0.0001 -0.0003  0.0007 -0.0011  0.0001  0.0010 -0.0035 -0.0472
  89.  H  0.0003  0.0011 -0.0005  0.0012 -0.0005  0.0026  0.0009  0.0012 -0.0318
  90.  H -0.0027 -0.0007 -0.0003  0.0007 -0.0007 -0.0001  0.0011 -0.0056  0.0753
  91.  H -0.0415  0.0004 -0.0004  0.0001  0.0002  0.0000  0.0003  0.0002  0.0040
  92.  H -0.0411  0.0001  0.0001 -0.0001  0.0001 -0.0003  0.0000 -0.0002 -0.0009
  93.  H -0.0416  0.0005 -0.0001  0.0001  0.0001 -0.0007  0.0011 -0.0011 -0.0018
  94.  H  0.0081  0.0004  0.0000  0.0002  0.0000  0.0005  0.0004  0.0000  0.0014
  95.  H  0.0049 -0.0001 -0.0001  0.0000  0.0001  0.0000  0.0001  0.0000 -0.0014
  96.  H  0.0151  0.0000  0.0000  0.0000  0.0000  0.0000  0.0003 -0.0001  0.0002
  97.  H  0.0003 -0.0090 -0.0004 -0.0036 -0.0123 -0.0692  0.0043 -0.0104 -0.0043
  98.  H  0.0006  0.0043 -0.0007  0.0053 -0.0031  0.0286  0.0002  0.0091  0.0109
  99.  H -0.0001  0.0031 -0.0022  0.0093 -0.0195  0.0280 -0.0009  0.0147 -0.0005
 100.  H  0.0001 -0.0087 -0.0017 -0.0037 -0.0069 -0.0697  0.0044 -0.0129 -0.0006
 101.  H  0.0002  0.0047 -0.0005  0.0044 -0.0014  0.0319 -0.0023  0.0069  0.0003
 102.  H  0.0001  0.0030 -0.0017  0.0077 -0.0142  0.0273 -0.0009  0.0112  0.0011
 103.  H -0.0001  0.1320  0.0228  0.0056  0.0075  0.0172 -0.0216 -0.0113 -0.0010
 104.  H -0.0014 -0.0459  0.0078 -0.0087  0.0014 -0.0094 -0.0353  0.0032 -0.0017
 105.  H -0.0002 -0.0592  0.0106 -0.0124  0.0013 -0.0043 -0.0439  0.0028 -0.0015
 106.  H -0.0001  0.1334  0.0210  0.0084  0.0036  0.0158 -0.0212 -0.0118 -0.0004
 107.  H  0.0001 -0.0612  0.0140 -0.0134  0.0005 -0.0056 -0.0431  0.0024 -0.0004
 108.  H -0.0001 -0.0386  0.0084 -0.0071  0.0010 -0.0062 -0.0353  0.0037 -0.0005
 109.  H -0.0027 -0.0021 -0.0001  0.0001  0.0003 -0.0007  0.0004  0.0003 -0.0013
 110.  H -0.0006 -0.0041  0.0002 -0.0007  0.0008 -0.0079  0.0002 -0.0005 -0.0047
 111.  H -0.0003  0.0066 -0.0007  0.0018 -0.0011  0.0115  0.0021 -0.0007  0.0061
 112.  H  0.0012  0.0115 -0.0006  0.0030 -0.0025  0.0148 -0.0003  0.0019 -0.0007
 113.  H -0.0014 -0.0047  0.0018 -0.0022  0.0010 -0.0184 -0.0105  0.0000 -0.0003
 114.  H  0.0002 -0.0065  0.0011 -0.0016 -0.0002  0.0051 -0.0030  0.0061 -0.0007

     Atom   46      47      48      49      50      51      52      53      54
     ---- ------  ------  ------  ------  ------  ------  ------  ------  ------
   1.  O  0.0026 -0.0130  0.0007 -0.0016  0.0004 -0.0272 -0.0050  0.0000  0.0059
   2. Mg -0.0167  0.0247 -0.0147  0.0178 -0.0225 -0.0970  0.0499  0.0723  0.0343
   3.  O -0.0025 -0.0055 -0.0006 -0.0008  0.0004  0.0104 -0.0005  0.0013  0.0025
   4.  C -0.0006  0.0073 -0.0018  0.0012 -0.0003  0.0567  0.0392  0.0000  0.0034
   5.  N  0.0098 -0.0307 -0.0151 -0.0094  0.0114  0.0036 -0.0042  0.1480  0.0176
   6.  N -0.0295 -0.0003 -0.0013 -0.0124 -0.0313 -0.0106 -0.0184 -0.0224 -0.1496
   7.  O  0.0023 -0.0125  0.0006 -0.0008  0.0001 -0.0299 -0.0269 -0.0006 -0.0015
   8.  C -0.0060 -0.0054  0.0173 -0.0042 -0.0065 -0.0055  0.0015 -0.1069 -0.0203
   9.  C  0.0447  0.0014  0.0050 -0.0112 -0.0182 -0.0096  0.0024 -0.0706  0.0203
  10.  C  0.0024  0.0023  0.0003 -0.0317  0.0295 -0.0098 -0.0148 -0.0025  0.8450
  11.  O -0.0023  0.0274  0.0086 -0.0008 -0.0015 -0.0079  0.0040 -0.0019 -0.0010
  12.  C  0.0014  0.0059 -0.0086  0.0000  0.0023  0.0087 -0.0097  0.0066  0.0022
  13.  C -0.0008  0.0082  0.0024 -0.0007 -0.0003  0.0163  0.0007 -0.0021 -0.0001
  14.  C  0.0002  0.0274 -0.0066  0.0002  0.0003 -0.0004 -0.0109  0.0006 -0.0014
  15.  O  0.0073 -0.0020 -0.0040  0.0010  0.0011 -0.0133 -0.0066  0.0010 -0.0055
  16.  C  0.0006 -0.0005  0.0001  0.0000 -0.0005  0.0033 -0.0152 -0.0003  0.0041
  17.  O -0.0330 -0.0020  0.0005  0.0267 -0.0028  0.0297 -0.0046  0.0056 -0.0014
  18.  C  0.0015 -0.0129  0.0015 -0.0014 -0.0009 -0.0047  0.0000 -0.0013 -0.0011
  19.  O  0.0035 -0.0672 -0.0008 -0.0011  0.0019  0.0025 -0.0026  0.0001  0.0033
  20.  O  0.0052 -0.0038 -0.0012 -0.0028 -0.0012 -0.0046 -0.0009 -0.0008 -0.0009
  21.  C  0.0018  0.0010 -0.0001  0.0104  0.0032  0.0043 -0.0003 -0.0017 -0.0027
  22.  C -0.0046  0.0021 -0.0003 -0.0077  0.0013  0.0206  0.0026 -0.0016 -0.0015
  23.  C -0.0010 -0.0100 -0.0017 -0.0023 -0.0006  0.0005 -0.0002 -0.0016 -0.0015
  24.  O -0.0017 -0.0010  0.0000  0.0027 -0.0008 -0.0051  0.0013  0.0003 -0.0017
  25.  C -0.0017 -0.0013 -0.0002  0.0364  0.0095  0.0082  0.0051 -0.0007 -0.0063
  26.  C  0.0025 -0.0008 -0.0022 -0.0003  0.0001  0.0012  0.0002 -0.0012  0.0002
  27.  C  0.0010 -0.0126 -0.0042 -0.0004  0.0003 -0.0320 -0.0022  0.0015  0.0002
  28.  C -0.0003  0.0380 -0.0011 -0.0005 -0.0002 -0.0024 -0.0028  0.0000 -0.0007
  29.  C  0.1692  0.0238  0.1609  0.0019 -0.0040  0.0002 -0.0013 -0.0278 -0.0061
  30.  C -0.0010 -0.0016  0.0002  0.0031 -0.0059 -0.0153 -0.0136  0.0083 -0.0175
  31.  C -0.0706  0.0375 -0.0321 -0.0029 -0.0052  0.0042 -0.0001 -0.0435 -0.0087
  32.  C  0.2443 -0.0435 -0.0883 -0.0016 -0.0034  0.0048  0.0015 -0.0246 -0.0036
  33.  C -0.0081  0.0008 -0.0025 -0.0002  0.0029  0.0043 -0.0003  0.0359  0.0071
  34.  C -0.1464  0.0545  0.1060  0.0009  0.0028  0.0008  0.0007 -0.0233  0.0045
  35.  C  0.0135 -0.0691 -0.0167  0.0020 -0.0008 -0.0020  0.0008 -0.0328 -0.0077
  36.  C -0.6520 -0.0146  0.0131 -0.0547  0.0111  0.0027 -0.0023 -0.0164 -0.0040
  37.  C -0.0070 -1.1733 -0.1009 -0.0011 -0.0005  0.0007 -0.0007 -0.0153 -0.0010
  38.  C -0.0042 -0.0012  0.0000  0.0104  0.0065  0.0090  0.0088 -0.0008  0.0057
  39.  C  0.0003 -0.0003 -0.0002 -0.0022  0.0025 -0.0674 -0.0598  0.0009 -0.0075
  40.  C -0.0016 -0.0001  0.0001 -0.0055 -0.0047  0.0269  0.0246  0.0001  0.0038
  41.  C  0.0002 -0.0006  0.0002  0.0161  0.0048 -0.0087 -0.0129 -0.0008 -0.0002
  42.  C -0.0057 -0.0008  0.0006  0.0016  0.0155  0.0081  0.0071 -0.0034 -0.0095
  43.  C -0.0010  0.0000  0.0007 -0.0067 -0.0064 -0.2257 -0.2708  0.0000  0.0130
  44.  C -0.0022 -0.0003  0.0006  0.0053  0.1400 -0.0079 -0.0109 -0.0049  0.0000
  45.  C  0.0019  0.0061 -0.0037 -0.0139 -0.0052  0.0017  0.0005  0.0078  0.0004
  46.  C  0.0000  0.0019  0.0023  0.0098 -0.0007  0.0033  0.0011  0.0009 -0.0036
  47.  C  0.0019  0.0000 -0.0357 -0.0005  0.0003 -0.0016 -0.0024 -0.0169 -0.0002
  48.  C  0.0023 -0.0357  0.0000  0.0004  0.0004 -0.0012 -0.0001  0.0044 -0.0006
  49.  C  0.0098 -0.0005  0.0004  0.0000 -0.0216 -0.0029  0.0026 -0.0021 -0.0124
  50.  C -0.0007  0.0003  0.0004 -0.0216  0.0000  0.0030 -0.0011 -0.0018  0.0572
  51.  C  0.0033 -0.0016 -0.0012 -0.0029  0.0030  0.0000 -0.0444 -0.0020 -0.0127
  52.  C  0.0011 -0.0024 -0.0001  0.0026 -0.0011 -0.0444  0.0000  0.0010  0.0573
  53.  C  0.0009 -0.0169  0.0044 -0.0021 -0.0018 -0.0020  0.0010  0.0000  0.0013
  54.  C -0.0036 -0.0002 -0.0006 -0.0124  0.0572 -0.0127  0.0573  0.0013  0.0000
  55.  H  0.0033  0.0017  0.0036 -0.0028 -0.0007  0.0021  0.0013 -0.0271 -0.0050
  56.  H -0.0001 -0.0074 -0.0049 -0.0003 -0.0006 -0.0071  0.0001  0.0015  0.0002
  57.  H -0.0037  0.0066  0.0018  0.0009  0.0004  0.0038  0.0054 -0.0052  0.0003
  58.  H -0.0004 -0.0020  0.0001  0.0001 -0.0001 -0.0033  0.0094  0.0001 -0.0028
  59.  H -0.0001  0.0002  0.0001  0.0000  0.0000  0.0001  0.0102  0.0000 -0.0005
  60.  H -0.0003  0.0017  0.0000  0.0001 -0.0001  0.0029  0.0021  0.0000  0.0016
  61.  H  0.0009  0.0016 -0.0002 -0.0103 -0.0009 -0.0027  0.0008 -0.0027 -0.0001
  62.  H  0.0008  0.0050  0.0014  0.0006 -0.0002  0.0000  0.0006 -0.0001 -0.0004
  63.  H -0.0028  0.0007 -0.0006  0.0033  0.0010 -0.0040 -0.0007  0.0000  0.0028
  64.  H -0.0026  0.0002 -0.0006  0.0140 -0.0028 -0.0015  0.0006 -0.0005 -0.0013
  65.  H -0.0010  0.0001 -0.0001  0.0066 -0.0001 -0.0035  0.0010 -0.0010 -0.0024
  66.  H  0.0017 -0.0011  0.0008 -0.0002 -0.0003 -0.0002  0.0002  0.0003 -0.0003
  67.  H  0.0005 -0.0006 -0.0007  0.0003  0.0000  0.0005  0.0001 -0.0004  0.0000
  68.  H -0.0030  0.0003  0.0005 -0.0001  0.0003  0.0000  0.0001  0.0002 -0.0005
  69.  H  0.0000  0.0004  0.0007  0.0000 -0.0001 -0.0032 -0.0003  0.0000  0.0000
  70.  H -0.0004  0.0018  0.0009  0.0000 -0.0002  0.0078 -0.0003  0.0006  0.0002
  71.  H -0.0009 -0.0059 -0.0018 -0.0001 -0.0002  0.0081  0.0011  0.0001  0.0003
  72.  H -0.0002  0.0000 -0.0025  0.0001  0.0000  0.0015 -0.0009  0.0001  0.0002
  73.  H -0.0001  0.0134  0.0002 -0.0001  0.0000 -0.0003  0.0002 -0.0001 -0.0002
  74.  H -0.0001  0.0091 -0.0002  0.0000  0.0000  0.0000  0.0009  0.0001  0.0000
  75.  H  0.0141  0.0006 -0.0007 -0.0020  0.0005  0.0004  0.0000  0.0043  0.0007
  76.  H  0.0104  0.0015 -0.0024 -0.0016  0.0002  0.0000  0.0001 -0.0029  0.0002
  77.  H -0.0016 -0.0314  0.0015  0.0000  0.0001  0.0001  0.0001  0.0054 -0.0013
  78.  H -0.0355 -0.0044  0.0015 -0.0074 -0.0003  0.0028  0.0000  0.0061  0.0036
  79.  H -0.0010  0.0202 -0.0354 -0.0008  0.0005  0.0016  0.0001 -0.0103  0.0016
  80.  H  0.0009  0.0000  0.0001  0.0010  0.0025 -0.0191 -0.0200 -0.0009 -0.0022
  81.  H -0.0003 -0.0001 -0.0001 -0.0007  0.0003  0.0015  0.0011  0.0000 -0.0004
  82.  H -0.0009 -0.0001  0.0001  0.0139  0.0128  0.0036  0.0027 -0.0008  0.0004
  83.  H -0.0004 -0.0018  0.0013  0.0014  0.0003  0.0036  0.0006 -0.0020 -0.0088
  84.  H  0.0043 -0.0006  0.0007 -0.0351 -0.0355  0.0027 -0.0003  0.0021  0.0042
  85.  H -0.0450 -0.0022  0.0021 -0.0238  0.0010 -0.0001  0.0003  0.0006 -0.0004
  86.  H  0.1220  0.0006 -0.0005 -0.0045 -0.0002  0.0012  0.0005 -0.0025  0.0000
  87.  H -0.0665 -0.0019 -0.0002  0.0078  0.0039 -0.0003  0.0000 -0.0029 -0.0005
  88.  H -0.0766 -0.0022 -0.0007 -0.0107 -0.0008 -0.0005  0.0004 -0.0016 -0.0003
  89.  H -0.5730 -0.0001 -0.0018 -0.0152 -0.0022 -0.0011  0.0000 -0.0006 -0.0001
  90.  H  1.1134  0.0003 -0.0021 -0.0017 -0.0022  0.0007  0.0005 -0.0190 -0.0007
  91.  H -0.0001  1.3148 -0.0342 -0.0002 -0.0002 -0.0001 -0.0001  0.0006 -0.0008
  92.  H -0.0009  0.1465 -0.0353  0.0005 -0.0003  0.0013  0.0009 -0.0112  0.0000
  93.  H  0.0009  1.2799  0.1169  0.0000  0.0001  0.0008  0.0003 -0.0005  0.0003
  94.  H  0.0011  0.0131  1.3510 -0.0004  0.0002  0.0001  0.0000  0.0022  0.0002
  95.  H -0.0008 -0.0563 -0.7404  0.0000 -0.0001  0.0001  0.0002 -0.0110 -0.0002
  96.  H -0.0018  0.0224  0.1491 -0.0003  0.0002  0.0001 -0.0001  0.0109  0.0007
  97.  H -0.0027 -0.0005  0.0001 -0.9166 -0.0345 -0.0001 -0.0010  0.0000  0.0023
  98.  H -0.0077 -0.0005  0.0003  1.1160  0.0934  0.0018  0.0005 -0.0019 -0.0006
  99.  H -0.0081 -0.0002  0.0000  0.5633 -0.0501  0.0011  0.0001  0.0001  0.0000
 100.  H  0.0007 -0.0001  0.0001 -0.0373 -0.9175 -0.0005 -0.0007  0.0001 -0.0067
 101.  H -0.0005 -0.0003  0.0001  0.0958  1.2095  0.0007  0.0000  0.0004 -0.0154
 102.  H -0.0001 -0.0005  0.0001 -0.0527  0.5505  0.0004  0.0000  0.0003 -0.0090
 103.  H -0.0008 -0.0020  0.0003  0.0035  0.0010  1.5401  0.0104 -0.0018  0.0009
 104.  H  0.0000 -0.0007  0.0008 -0.0021 -0.0005 -0.3751 -0.0156 -0.0023  0.0057
 105.  H -0.0007  0.0022  0.0003 -0.0003  0.0002  1.1423  0.0164 -0.0002 -0.0068
 106.  H -0.0001 -0.0003  0.0004  0.0006  0.0029  0.0163  1.5875 -0.0001  0.0150
 107.  H  0.0002 -0.0006  0.0001  0.0000 -0.0002  0.0122  1.0885  0.0006  0.0171
 108.  H  0.0001  0.0005  0.0003  0.0001 -0.0010 -0.0121 -0.3268  0.0002 -0.0118
 109.  H -0.0111 -0.0055 -0.0064 -0.0015  0.0005 -0.0004 -0.0003 -0.3414  0.0019
 110.  H -0.0127  0.0084 -0.0160 -0.0007 -0.0018 -0.0004  0.0003 -0.4553 -0.0021
 111.  H  0.0281 -0.0022  0.0053 -0.0004  0.0010  0.0002 -0.0004  1.1426  0.0064
 112.  H  0.0031  0.0001  0.0004  0.0000  0.0228  0.0041 -0.0051  0.0074 -0.3871
 113.  H  0.0004 -0.0007  0.0001 -0.0021  0.0090  0.0033 -0.0245  0.0120  1.8411
 114.  H -0.0006 -0.0004  0.0004  0.0006  0.0052  0.0000 -0.0004 -0.0050  0.2376

     Atom   55      56      57      58      59      60      61      62      63
     ---- ------  ------  ------  ------  ------  ------  ------  ------  ------
   1.  O  0.0020  0.0062  0.0390  0.0250 -0.0025 -0.0757 -0.0011 -0.0001  0.0004
   2. Mg  0.0124  0.0300  0.0049  0.0036  0.0010 -0.0009 -0.0147 -0.0033  0.0052
   3.  O  0.0005  0.0198  0.0023  0.0000  0.0000 -0.0002 -0.0072  0.0106 -0.0027
   4.  C  0.0002 -0.0001 -0.0990  0.0608 -0.0085 -0.0059 -0.0007  0.0003 -0.0004
   5.  N  0.0303  0.0146 -0.0133  0.0000 -0.0005  0.0003 -0.0100 -0.0011  0.0035
   6.  N  0.0232  0.0005 -0.0030 -0.0018 -0.0003  0.0003 -0.0036 -0.0014 -0.0025
   7.  O -0.0005 -0.0014  0.0682 -0.0740  0.0277  0.0435 -0.0005 -0.0005 -0.0006
   8.  C  0.0015  0.0021 -0.0123 -0.0004 -0.0004 -0.0005  0.0024 -0.0015 -0.0005
   9.  C  0.1724 -0.0036 -0.0078 -0.0022 -0.0004 -0.0007 -0.0019 -0.0011  0.0005
  10.  C -0.0233 -0.0011 -0.0039 -0.0018 -0.0002 -0.0008  0.0061 -0.0012  0.0054
  11.  O  0.0002  0.0382  0.1054  0.0006  0.0064 -0.0015 -0.0020  0.0002 -0.0010
  12.  C  0.0003 -0.0525  0.0224  0.0023  0.0038  0.0018 -0.0044 -0.0056 -0.0029
  13.  C -0.0002  0.2997  0.0011 -0.0007 -0.0009 -0.0004  0.0009 -0.0161  0.0007
  14.  C  0.0001 -0.0044 -0.7896  0.0067 -0.0131  0.0070 -0.0009 -0.0006 -0.0002
  15.  O -0.0014  0.1477 -0.0326 -0.0003 -0.0034 -0.0009 -0.0027 -0.0055  0.0000
  16.  C  0.0005  0.0011  0.0021  0.3041 -0.1166  1.9311 -0.0003  0.0001 -0.0002
  17.  O -0.0011 -0.0152 -0.0124  0.0001  0.0006 -0.0009 -0.1624 -0.0039  0.0376
  18.  C -0.0005  0.0116  0.0007  0.0002 -0.0001 -0.0003  0.0142  0.0951  0.0009
  19.  O  0.0002  0.0116  0.0023  0.0000  0.0005 -0.0005  0.0012  0.0140 -0.0018
  20.  O  0.0000 -0.0116 -0.0005 -0.0002  0.0001  0.0000 -0.0684 -0.0322  0.0151
  21.  C -0.0008  0.0005 -0.0021  0.0000  0.0001 -0.0002  0.1264  0.0001 -0.0202
  22.  C -0.0013 -0.0066  0.0014  0.0002 -0.0001  0.0004  1.6959 -0.0067 -0.0042
  23.  C -0.0009 -0.0078 -0.0005 -0.0001 -0.0002  0.0000  0.0210  1.4557  0.0092
  24.  O -0.0009 -0.0001 -0.0007 -0.0004 -0.0002  0.0002 -0.0084  0.0365 -0.0121
  25.  C -0.0006 -0.0014 -0.0010 -0.0002  0.0000  0.0001  0.0585 -0.0039  0.4926
  26.  C -0.0004  0.0063 -0.0006  0.0001  0.0000  0.0000  0.0092  0.0646 -0.0006
  27.  C  0.0001 -0.0560 -0.0031  0.0006  0.0012 -0.0005 -0.0008  0.0068 -0.0002
  28.  C  0.0000  0.0002  0.0010 -0.0017  0.0008 -0.0035  0.0001  0.0001  0.0000
  29.  C -0.0166 -0.0013  0.0002 -0.0001  0.0002  0.0004 -0.0072  0.0080 -0.0007
  30.  C  0.0011  0.0008 -0.0017  0.0008 -0.0005 -0.0005 -0.0002 -0.0005  0.0014
  31.  C  0.0165 -0.0010  0.0022  0.0005  0.0000  0.0007 -0.0043  0.0009 -0.0018
  32.  C -0.0035 -0.0017 -0.0008  0.0007 -0.0002  0.0002 -0.0040 -0.0100 -0.0011
  33.  C -0.0104 -0.0001 -0.0014  0.0003  0.0000 -0.0003  0.0009 -0.0099 -0.0002
  34.  C -0.0040  0.0008 -0.0007 -0.0006  0.0003 -0.0004  0.0035 -0.0050 -0.0001
  35.  C  0.0123  0.0007  0.0041 -0.0006  0.0005  0.0001 -0.0029  0.0044 -0.0001
  36.  C -0.0009 -0.0004  0.0020  0.0002  0.0000  0.0002 -0.0146 -0.0015  0.0038
  37.  C -0.0010  0.0055 -0.0060  0.0003 -0.0002 -0.0004 -0.0004  0.0000  0.0001
  38.  C -0.0064  0.0004 -0.0008 -0.0020  0.0003 -0.0007 -0.0003  0.0002 -0.0031
  39.  C -0.0007  0.0001  0.0010 -0.0019  0.0007  0.0006 -0.0002  0.0002 -0.0012
  40.  C -0.0003  0.0005 -0.0006  0.0007 -0.0004 -0.0004  0.0017  0.0000 -0.0010
  41.  C  0.0003  0.0001  0.0003 -0.0003  0.0001  0.0001  0.0000  0.0002 -0.0012
  42.  C  0.0069  0.0003  0.0000 -0.0007  0.0001 -0.0001 -0.0038  0.0002  0.0023
  43.  C -0.0039  0.0046 -0.0017  0.0031 -0.0006 -0.0011  0.0012 -0.0003 -0.0012
  44.  C  0.0068 -0.0005  0.0006  0.0005 -0.0001  0.0001 -0.0030  0.0002  0.0014
  45.  C -0.0005 -0.0012 -0.0009  0.0001  0.0000 -0.0001 -0.0030 -0.0069 -0.0016
  46.  C  0.0033 -0.0001 -0.0037 -0.0004 -0.0001 -0.0003  0.0009  0.0008 -0.0028
  47.  C  0.0017 -0.0074  0.0066 -0.0020  0.0002  0.0017  0.0016  0.0050  0.0007
  48.  C  0.0036 -0.0049  0.0018  0.0001  0.0001  0.0000 -0.0002  0.0014 -0.0006
  49.  C -0.0028 -0.0003  0.0009  0.0001  0.0000  0.0001 -0.0103  0.0006  0.0033
  50.  C -0.0007 -0.0006  0.0004 -0.0001  0.0000 -0.0001 -0.0009 -0.0002  0.0010
  51.  C  0.0021 -0.0071  0.0038 -0.0033  0.0001  0.0029 -0.0027  0.0000 -0.0040
  52.  C  0.0013  0.0001  0.0054  0.0094  0.0102  0.0021  0.0008  0.0006 -0.0007
  53.  C -0.0271  0.0015 -0.0052  0.0001  0.0000  0.0000 -0.0027 -0.0001  0.0000
  54.  C -0.0050  0.0002  0.0003 -0.0028 -0.0005  0.0016 -0.0001 -0.0004  0.0028
  55.  H  0.0000 -0.0003 -0.0012 -0.0002 -0.0003 -0.0001 -0.0008 -0.0003  0.0003
  56.  H -0.0003  0.0000  0.0052  0.0003  0.0009 -0.0002  0.0027  0.0016  0.0021
  57.  H -0.0012  0.0052  0.0000  0.0060 -0.0013 -0.0039  0.0016 -0.0006  0.0002
  58.  H -0.0002  0.0003  0.0060  0.0000  0.0369  0.0304  0.0002  0.0000  0.0001
  59.  H -0.0003  0.0009 -0.0013  0.0369  0.0000  0.0352  0.0000  0.0000  0.0001
  60.  H -0.0001 -0.0002 -0.0039  0.0304  0.0352  0.0000  0.0001  0.0001 -0.0001
  61.  H -0.0008  0.0027  0.0016  0.0002  0.0000  0.0001  0.0000  0.0273 -0.0141
  62.  H -0.0003  0.0016 -0.0006  0.0000  0.0000  0.0001  0.0273  0.0000  0.0005
  63.  H  0.0003  0.0021  0.0002  0.0001  0.0001 -0.0001 -0.0141  0.0005  0.0000
  64.  H -0.0005 -0.0015 -0.0012  0.0001  0.0001  0.0000  0.0704  0.0014  0.0434
  65.  H -0.0004  0.0004 -0.0007  0.0000  0.0001  0.0000 -0.0189  0.0021  0.0431
  66.  H -0.0001 -0.0013  0.0003  0.0000  0.0000  0.0000  0.0036 -0.0172  0.0016
  67.  H  0.0000  0.0015 -0.0001  0.0000  0.0000  0.0000  0.0029 -0.0113  0.0002
  68.  H  0.0000 -0.0031 -0.0001  0.0000  0.0000  0.0000  0.0016  0.0698  0.0006
  69.  H  0.0000 -0.0126 -0.0013  0.0000  0.0000  0.0000 -0.0009  0.0026 -0.0004
  70.  H  0.0000 -0.0193  0.0039  0.0003  0.0003 -0.0003 -0.0001 -0.0006  0.0001
  71.  H  0.0000  0.0679  0.0011 -0.0002  0.0000  0.0000 -0.0009 -0.0003  0.0003
  72.  H -0.0001 -0.0004 -0.0171  0.0042 -0.0012 -0.0026  0.0001  0.0001  0.0001
  73.  H  0.0000  0.0006  0.0679  0.0016  0.0013 -0.0009  0.0001  0.0000  0.0001
  74.  H -0.0001  0.0004 -0.0107 -0.0015  0.0008  0.0008 -0.0002 -0.0003 -0.0002
  75.  H  0.0021  0.0001  0.0000  0.0000  0.0000  0.0000 -0.0004  0.0001  0.0001
  76.  H -0.0006  0.0000 -0.0003  0.0000  0.0000  0.0000  0.0000 -0.0013  0.0001
  77.  H  0.0028  0.0000  0.0000  0.0000  0.0000  0.0000 -0.0002  0.0002  0.0000
  78.  H -0.0026  0.0008  0.0021  0.0002  0.0001 -0.0002  0.0054 -0.0004  0.0004
  79.  H -0.0008 -0.0005  0.0119  0.0000 -0.0001  0.0002 -0.0012 -0.0012  0.0000
  80.  H  0.0026  0.0000  0.0002 -0.0001  0.0000  0.0000 -0.0001  0.0000  0.0002
  81.  H -0.0007 -0.0001  0.0001 -0.0001  0.0001  0.0000 -0.0001  0.0000 -0.0010
  82.  H  0.0022  0.0001  0.0001  0.0001  0.0000 -0.0001 -0.0007  0.0000 -0.0001
  83.  H -0.0010 -0.0020 -0.0004  0.0023  0.0001 -0.0002 -0.0036 -0.0007 -0.0018
  84.  H -0.0001  0.0001 -0.0001 -0.0001 -0.0001  0.0000 -0.0022 -0.0004 -0.0018
  85.  H  0.0005  0.0001  0.0000 -0.0001  0.0000 -0.0001  0.0001  0.0003  0.0004
  86.  H -0.0002 -0.0004  0.0001  0.0001  0.0000  0.0000  0.0009  0.0037 -0.0005
  87.  H -0.0008  0.0005  0.0002 -0.0001  0.0000  0.0000 -0.0004  0.0006  0.0004
  88.  H -0.0002  0.0000  0.0001  0.0000  0.0000  0.0000  0.0000  0.0000  0.0002
  89.  H -0.0009 -0.0002  0.0017  0.0003  0.0001  0.0001 -0.0012 -0.0002  0.0012
  90.  H  0.0001  0.0001 -0.0004 -0.0002 -0.0001  0.0000 -0.0004  0.0000 -0.0006
  91.  H  0.0008  0.0011 -0.0008  0.0000 -0.0003  0.0001 -0.0002 -0.0008  0.0001
  92.  H  0.0001  0.0000  0.0015  0.0004  0.0003 -0.0004  0.0000 -0.0004  0.0000
  93.  H -0.0005  0.0020  0.0022  0.0000 -0.0002 -0.0002 -0.0018 -0.0010 -0.0007
  94.  H  0.0004 -0.0001  0.0005  0.0000  0.0000  0.0000  0.0000  0.0000  0.0000
  95.  H -0.0009  0.0012 -0.0006  0.0001  0.0000  0.0000 -0.0001 -0.0004  0.0001
  96.  H  0.0010  0.0003 -0.0011 -0.0001  0.0000  0.0000  0.0001  0.0000  0.0002
  97.  H  0.0008 -0.0001 -0.0006  0.0000  0.0000  0.0000  0.0022 -0.0002 -0.0024
  98.  H -0.0008 -0.0002  0.0011  0.0001  0.0001 -0.0002  0.0039 -0.0011 -0.0014
  99.  H  0.0002 -0.0002 -0.0008 -0.0001 -0.0001  0.0001  0.0002  0.0003 -0.0015
 100.  H  0.0003  0.0000  0.0001  0.0001  0.0000  0.0000  0.0002  0.0000 -0.0002
 101.  H -0.0005  0.0000 -0.0001 -0.0001  0.0000  0.0001  0.0002  0.0000 -0.0002
 102.  H  0.0006  0.0002  0.0004  0.0000  0.0000  0.0000 -0.0001  0.0000  0.0001
 103.  H  0.0009  0.0020  0.0007  0.0002  0.0005 -0.0001 -0.0016 -0.0006 -0.0028
 104.  H -0.0012  0.0075 -0.0015  0.0008  0.0000 -0.0008 -0.0048  0.0005  0.0022
 105.  H -0.0001 -0.0011 -0.0010 -0.0007  0.0000 -0.0004 -0.0021 -0.0005  0.0000
 106.  H  0.0005  0.0000 -0.0005  0.0235  0.0011 -0.0033 -0.0003  0.0001 -0.0006
 107.  H  0.0004 -0.0007  0.0001  0.0071 -0.0026 -0.0024  0.0004  0.0001 -0.0001
 108.  H -0.0004  0.0003 -0.0006  0.0125 -0.0013 -0.0002 -0.0003 -0.0002 -0.0002
 109.  H  0.0205  0.0003 -0.0004  0.0001  0.0000  0.0000 -0.0011 -0.0001  0.0002
 110.  H  0.0067 -0.0002 -0.0001 -0.0001  0.0000  0.0000 -0.0001 -0.0003 -0.0003
 111.  H  0.0049 -0.0013 -0.0002  0.0000  0.0000  0.0002 -0.0002 -0.0002  0.0001
 112.  H  0.0081 -0.0004 -0.0003  0.0003  0.0001 -0.0002 -0.0004  0.0000  0.0001
 113.  H  0.0168 -0.0001 -0.0001  0.0004 -0.0004  0.0002 -0.0010 -0.0001 -0.0002
 114.  H  0.0148 -0.0001 -0.0007  0.0001 -0.0002 -0.0001  0.0008 -0.0001 -0.0016

     Atom   64      65      66      67      68      69      70      71      72
     ---- ------  ------  ------  ------  ------  ------  ------  ------  ------
   1.  O  0.0001  0.0000  0.0000 -0.0001 -0.0003 -0.0011  0.0054 -0.0025  0.0205
   2. Mg  0.0199  0.0192  0.0037 -0.0021  0.0034  0.0030  0.0002 -0.0013  0.0002
   3.  O -0.0027  0.0041  0.0008 -0.0038 -0.0111  0.1066 -0.0312 -0.0303  0.0008
   4.  C  0.0000  0.0005  0.0000 -0.0001 -0.0001 -0.0001 -0.0021  0.0016 -0.0306
   5.  N -0.0062 -0.0056  0.0024 -0.0021 -0.0012 -0.0007  0.0026 -0.0003  0.0005
   6.  N -0.0056 -0.0064 -0.0003 -0.0003 -0.0033 -0.0001 -0.0010  0.0001 -0.0005
   7.  O -0.0001  0.0000 -0.0005  0.0000  0.0000 -0.0019  0.0029 -0.0021  0.0432
   8.  C -0.0041 -0.0036 -0.0006  0.0001 -0.0019 -0.0002 -0.0008 -0.0006  0.0009
   9.  C -0.0021 -0.0016 -0.0011 -0.0001 -0.0004  0.0000 -0.0015 -0.0005  0.0016
  10.  C -0.0016 -0.0024 -0.0007 -0.0003 -0.0010  0.0000 -0.0016 -0.0008  0.0009
  11.  O -0.0002 -0.0006  0.0012 -0.0001 -0.0009  0.0198  0.0408  0.0000 -0.0051
  12.  C  0.0036  0.0008 -0.0003 -0.0008  0.0007  0.0231  0.0002  0.0045  0.0069
  13.  C -0.0019 -0.0018 -0.0051 -0.0001  0.0036  0.1024  0.0836  0.0089 -0.0006
  14.  C  0.0014  0.0004 -0.0006  0.0002  0.0004  0.0016  0.0057 -0.0063  0.0147
  15.  O -0.0002  0.0008 -0.0018 -0.0001 -0.0003  0.0080  0.0300 -0.0080 -0.0066
  16.  C -0.0001 -0.0001  0.0000 -0.0001  0.0000 -0.0002  0.0005 -0.0005 -0.0047
  17.  O  0.0034 -0.0292 -0.0080 -0.0018 -0.0023  0.0074 -0.0036 -0.0051 -0.0006
  18.  C  0.0010  0.0009  0.0181 -0.0006 -0.0051 -0.0437  0.0164  0.0096 -0.0005
  19.  O -0.0006  0.0035  0.0189 -0.0157 -0.0152  0.0334 -0.0118 -0.0144  0.0007
[truncated: 502,466 more chars]
