# Supplementary material
Source: publisher figshare collection journal article supplement (https://acs.figshare.com/ndownloader/files/5127205)
Supplement: Supplementary file 1 [file 5127205 › supporting_ja043819b/RRSS_fm-5-ts2.mol]

  MacMolPlt                       

114117  0  0  0  0  0  0  0  0  0 v2000
    3.7987    3.1108   -1.5035 O   0  0  0  0  0  0  0  0  0  0  0  0
   -0.3067   -0.0939   -0.0177 Mg  0  0  0  0  0  0  0  0  0  0  0  0
    1.1880   -0.6902    3.2037 O   0  0  0  0  0  0  0  0  0  0  0  0
    3.7838    2.6542   -0.2407 C   0  0  0  0  0  0  0  0  0  0  0  0
    0.1300   -1.1573   -1.7119 N   0  0  0  0  0  0  0  0  0  0  0  0
   -0.9972    1.4833   -1.1123 N   0  0  0  0  0  0  0  0  0  0  0  0
    3.6021    3.3316    0.7443 O   0  0  0  0  0  0  0  0  0  0  0  0
    0.2674   -0.6089   -2.9109 C   0  0  0  0  0  0  0  0  0  0  0  0
    0.0481    0.7659   -3.1742 C   0  0  0  0  0  0  0  0  0  0  0  0
   -0.6173    1.7122   -2.3668 C   0  0  0  0  0  0  0  0  0  0  0  0
    3.8042    0.6104    1.0633 O   0  0  0  0  0  0  0  0  0  0  0  0
    2.5188    0.3851    1.3667 C   0  0  0  0  0  0  0  0  0  0  0  0
    2.4610   -0.2107    2.7793 C   0  0  0  0  0  0  0  0  0  0  0  0
    4.1027    1.1584   -0.2359 C   0  0  0  0  0  0  0  0  0  0  0  0
    1.6118    0.6494    0.5978 O   0  0  0  0  0  0  0  0  0  0  0  0
    3.5858    4.5271   -1.6622 C   0  0  0  0  0  0  0  0  0  0  0  0
   -1.0396   -0.1709    1.7088 O   0  0  0  0  0  0  0  0  0  0  0  0
    0.5827   -1.6259    2.4090 C   0  0  0  0  0  0  0  0  0  0  0  0
    1.0606   -1.9567    1.3378 O   0  0  0  0  0  0  0  0  0  0  0  0
   -1.7110   -2.6381    2.6599 O   0  0  0  0  0  0  0  0  0  0  0  0
   -2.6209   -1.6057    2.6595 C   0  0  0  0  0  0  0  0  0  0  0  0
   -2.0256   -0.1949    2.6794 C   0  0  0  0  0  0  0  0  0  0  0  0
   -0.4035   -2.4869    3.2176 C   0  0  0  0  0  0  0  0  0  0  0  0
   -3.7895   -1.8879    2.5432 O   0  0  0  0  0  0  0  0  0  0  0  0
   -3.1130    0.8672    2.5277 C   0  0  0  0  0  0  0  0  0  0  0  0
    0.1746   -3.9047    3.2586 C   0  0  0  0  0  0  0  0  0  0  0  0
    2.9023    0.8249    3.8171 C   0  0  0  0  0  0  0  0  0  0  0  0
    5.5909    0.9206   -0.4811 C   0  0  0  0  0  0  0  0  0  0  0  0
    0.2590   -2.5755   -1.4271 C   0  0  0  0  0  0  0  0  0  0  0  0
   -1.9481    2.3655   -0.4577 C   0  0  0  0  0  0  0  0  0  0  0  0
   -0.9380   -3.2714   -1.0339 C   0  0  0  0  0  0  0  0  0  0  0  0
   -0.8129   -4.5608   -0.4622 C   0  0  0  0  0  0  0  0  0  0  0  0
    0.4510   -5.1674   -0.2983 C   0  0  0  0  0  0  0  0  0  0  0  0
    1.6063   -4.5065   -0.7556 C   0  0  0  0  0  0  0  0  0  0  0  0
    1.5413   -3.2091   -1.3175 C   0  0  0  0  0  0  0  0  0  0  0  0
   -2.3403   -2.6625   -1.3150 C   0  0  0  0  0  0  0  0  0  0  0  0
    2.8581   -2.5318   -1.7804 C   0  0  0  0  0  0  0  0  0  0  0  0
   -1.4965    3.3072    0.5221 C   0  0  0  0  0  0  0  0  0  0  0  0
   -2.4597    4.0518    1.2513 C   0  0  0  0  0  0  0  0  0  0  0  0
   -3.8378    3.8835    1.0179 C   0  0  0  0  0  0  0  0  0  0  0  0
   -4.2733    2.9673    0.0434 C   0  0  0  0  0  0  0  0  0  0  0  0
   -3.3529    2.1942   -0.7056 C   0  0  0  0  0  0  0  0  0  0  0  0
    0.0067    3.5553    0.7942 C   0  0  0  0  0  0  0  0  0  0  0  0
   -3.9021    1.1901   -1.7529 C   0  0  0  0  0  0  0  0  0  0  0  0
   -3.4913   -3.3615   -0.5277 C   0  0  0  0  0  0  0  0  0  0  0  0
   -2.6555   -2.6966   -2.8479 C   0  0  0  0  0  0  0  0  0  0  0  0
    3.9144   -2.4818   -0.6307 C   0  0  0  0  0  0  0  0  0  0  0  0
    3.4724   -3.2760   -3.0163 C   0  0  0  0  0  0  0  0  0  0  0  0
   -4.8418    0.1383   -1.0799 C   0  0  0  0  0  0  0  0  0  0  0  0
   -4.6647    1.9207   -2.9095 C   0  0  0  0  0  0  0  0  0  0  0  0
    0.3725    3.2205    2.2745 C   0  0  0  0  0  0  0  0  0  0  0  0
    0.4136    5.0257    0.4461 C   0  0  0  0  0  0  0  0  0  0  0  0
    0.6549   -1.4478   -4.1235 C   0  0  0  0  0  0  0  0  0  0  0  0
   -0.9411    3.0535   -3.0127 C   0  0  0  0  0  0  0  0  0  0  0  0
    0.2811    1.0885   -4.1840 H   0  0  0  0  0  0  0  0  0  0  0  0
    3.1638   -1.0532    2.7617 H   0  0  0  0  0  0  0  0  0  0  0  0
    3.4879    0.6547   -0.9854 H   0  0  0  0  0  0  0  0  0  0  0  0
    2.6196    4.8137   -1.2446 H   0  0  0  0  0  0  0  0  0  0  0  0
    3.6124    4.7044   -2.7372 H   0  0  0  0  0  0  0  0  0  0  0  0
    4.3791    5.0874   -1.1595 H   0  0  0  0  0  0  0  0  0  0  0  0
   -1.5643   -0.0484    3.6791 H   0  0  0  0  0  0  0  0  0  0  0  0
   -0.4822   -2.0614    4.2235 H   0  0  0  0  0  0  0  0  0  0  0  0
   -3.8368    0.7864    3.3471 H   0  0  0  0  0  0  0  0  0  0  0  0
   -3.6502    0.7601    1.5854 H   0  0  0  0  0  0  0  0  0  0  0  0
   -2.6749    1.8663    2.5301 H   0  0  0  0  0  0  0  0  0  0  0  0
   -0.4868   -4.5500    3.8437 H   0  0  0  0  0  0  0  0  0  0  0  0
    1.1686   -3.9064    3.7204 H   0  0  0  0  0  0  0  0  0  0  0  0
    0.2539   -4.2875    2.2350 H   0  0  0  0  0  0  0  0  0  0  0  0
    3.9113    1.1795    3.5959 H   0  0  0  0  0  0  0  0  0  0  0  0
    2.8887    0.3648    4.8088 H   0  0  0  0  0  0  0  0  0  0  0  0
    2.2173    1.6758    3.8113 H   0  0  0  0  0  0  0  0  0  0  0  0
    5.7992   -0.1514   -0.4639 H   0  0  0  0  0  0  0  0  0  0  0  0
    6.1908    1.4120    0.2913 H   0  0  0  0  0  0  0  0  0  0  0  0
    5.8706    1.3229   -1.4585 H   0  0  0  0  0  0  0  0  0  0  0  0
   -1.7132   -5.1088   -0.1602 H   0  0  0  0  0  0  0  0  0  0  0  0
    0.5242   -6.1766    0.1295 H   0  0  0  0  0  0  0  0  0  0  0  0
    2.5806   -5.0047   -0.6691 H   0  0  0  0  0  0  0  0  0  0  0  0
   -2.3200   -1.5907   -1.0135 H   0  0  0  0  0  0  0  0  0  0  0  0
    2.6242   -1.4898   -2.0772 H   0  0  0  0  0  0  0  0  0  0  0  0
   -2.1209    4.7841    1.9960 H   0  0  0  0  0  0  0  0  0  0  0  0
   -4.5692    4.4721    1.5882 H   0  0  0  0  0  0  0  0  0  0  0  0
   -5.3484    2.8490   -0.1438 H   0  0  0  0  0  0  0  0  0  0  0  0
    0.5841    2.8786    0.1348 H   0  0  0  0  0  0  0  0  0  0  0  0
   -3.0421    0.6482   -2.1959 H   0  0  0  0  0  0  0  0  0  0  0  0
   -4.4296   -2.8122   -0.6895 H   0  0  0  0  0  0  0  0  0  0  0  0
   -3.2862   -3.3816    0.5538 H   0  0  0  0  0  0  0  0  0  0  0  0
   -3.6365   -4.3940   -0.8809 H   0  0  0  0  0  0  0  0  0  0  0  0
   -3.6618   -2.2900   -3.0298 H   0  0  0  0  0  0  0  0  0  0  0  0
   -2.6211   -3.7307   -3.2257 H   0  0  0  0  0  0  0  0  0  0  0  0
   -1.9312   -2.0911   -3.4164 H   0  0  0  0  0  0  0  0  0  0  0  0
    4.8278   -1.9706   -0.9831 H   0  0  0  0  0  0  0  0  0  0  0  0
    4.1984   -3.4941   -0.3065 H   0  0  0  0  0  0  0  0  0  0  0  0
    3.5127   -1.9451    0.2450 H   0  0  0  0  0  0  0  0  0  0  0  0
    4.3649   -2.7395   -3.3739 H   0  0  0  0  0  0  0  0  0  0  0  0
    2.7508   -3.3428   -3.8437 H   0  0  0  0  0  0  0  0  0  0  0  0
    3.7709   -4.2980   -2.7363 H   0  0  0  0  0  0  0  0  0  0  0  0
   -5.1822   -0.5968   -1.8258 H   0  0  0  0  0  0  0  0  0  0  0  0
   -4.3124   -0.4010   -0.2742 H   0  0  0  0  0  0  0  0  0  0  0  0
   -5.7272    0.6222   -0.6407 H   0  0  0  0  0  0  0  0  0  0  0  0
   -4.9960    1.1856   -3.6589 H   0  0  0  0  0  0  0  0  0  0  0  0
   -4.0186    2.6576   -3.4098 H   0  0  0  0  0  0  0  0  0  0  0  0
   -5.5518    2.4439   -2.5210 H   0  0  0  0  0  0  0  0  0  0  0  0
    1.4569    3.3608    2.4268 H   0  0  0  0  0  0  0  0  0  0  0  0
    0.1019    2.1723    2.4965 H   0  0  0  0  0  0  0  0  0  0  0  0
   -0.1657    3.8754    2.9771 H   0  0  0  0  0  0  0  0  0  0  0  0
    1.4847    5.1736    0.6650 H   0  0  0  0  0  0  0  0  0  0  0  0
   -0.1576    5.7519    1.0464 H   0  0  0  0  0  0  0  0  0  0  0  0
    0.2272    5.2415   -0.6196 H   0  0  0  0  0  0  0  0  0  0  0  0
    0.5460   -2.5181   -3.9304 H   0  0  0  0  0  0  0  0  0  0  0  0
    0.0294   -1.1829   -4.9841 H   0  0  0  0  0  0  0  0  0  0  0  0
    1.6967   -1.2539   -4.4080 H   0  0  0  0  0  0  0  0  0  0  0  0
   -2.0143    3.1497   -3.2113 H   0  0  0  0  0  0  0  0  0  0  0  0
   -0.6554    3.8823   -2.3546 H   0  0  0  0  0  0  0  0  0  0  0  0
   -0.4136    3.1682   -3.9658 H   0  0  0  0  0  0  0  0  0  0  0  0
  1  4  1  0  0  0  0
  1 16  1  0  0  0  0
  2  5  1  0  0  0  0
  2  6  1  0  0  0  0
  2 15  1  0  0  0  0
  2 17  2  0  0  0  0
  3 13  1  0  0  0  0
  3 18  1  0  0  0  0
  4  7  2  0  0  0  0
  4 14  1  0  0  0  0
  5  8  1  0  0  0  0
  5 29  1  0  0  0  0
  6 10  1  0  0  0  0
  6 30  1  0  0  0  0
  8  9  1  0  0  0  0
  8 53  1  0  0  0  0
  9 10  1  0  0  0  0
  9 55  1  0  0  0  0
 10 54  1  0  0  0  0
 11 12  1  0  0  0  0
 11 14  1  0  0  0  0
 12 13  1  0  0  0  0
 12 15  2  0  0  0  0
 13 27  1  0  0  0  0
 13 56  1  0  0  0  0
 14 28  1  0  0  0  0
 14 57  1  0  0  0  0
 16 58  1  0  0  0  0
 16 59  1  0  0  0  0
 16 60  1  0  0  0  0
 17 22  1  0  0  0  0
 18 19  2  0  0  0  0
 18 23  1  0  0  0  0
 20 21  1  0  0  0  0
 20 23  1  0  0  0  0
 21 22  1  0  0  0  0
 21 24  2  0  0  0  0
 22 25  1  0  0  0  0
 22 61  1  0  0  0  0
 23 26  1  0  0  0  0
 23 62  1  0  0  0  0
 25 63  1  0  0  0  0
 25 64  1  0  0  0  0
 25 65  1  0  0  0  0
 26 66  1  0  0  0  0
 26 67  1  0  0  0  0
 26 68  1  0  0  0  0
 27 69  1  0  0  0  0
 27 70  1  0  0  0  0
 27 71  1  0  0  0  0
 28 72  1  0  0  0  0
 28 73  1  0  0  0  0
 28 74  1  0  0  0  0
 29 31  1  0  0  0  0
 29 35  1  0  0  0  0
 30 38  1  0  0  0  0
 30 42  1  0  0  0  0
 31 32  1  0  0  0  0
 31 36  1  0  0  0  0
 32 33  1  0  0  0  0
 32 75  1  0  0  0  0
 33 34  1  0  0  0  0
 33 76  1  0  0  0  0
 34 35  1  0  0  0  0
 34 77  1  0  0  0  0
 35 37  1  0  0  0  0
 36 45  1  0  0  0  0
 36 46  1  0  0  0  0
 36 78  1  0  0  0  0
 37 47  1  0  0  0  0
 37 48  1  0  0  0  0
 37 79  1  0  0  0  0
 38 39  1  0  0  0  0
 38 43  1  0  0  0  0
 39 40  1  0  0  0  0
 39 80  1  0  0  0  0
 40 41  1  0  0  0  0
 40 81  1  0  0  0  0
 41 42  1  0  0  0  0
 41 82  1  0  0  0  0
 42 44  1  0  0  0  0
 43 51  1  0  0  0  0
 43 52  1  0  0  0  0
 43 83  1  0  0  0  0
 44 49  1  0  0  0  0
 44 50  1  0  0  0  0
 44 84  1  0  0  0  0
 45 85  1  0  0  0  0
 45 86  1  0  0  0  0
 45 87  1  0  0  0  0
 46 88  1  0  0  0  0
 46 89  1  0  0  0  0
 46 90  1  0  0  0  0
 47 91  1  0  0  0  0
 47 92  1  0  0  0  0
 47 93  1  0  0  0  0
 48 94  1  0  0  0  0
 48 95  1  0  0  0  0
 48 96  1  0  0  0  0
 49 97  1  0  0  0  0
 49 98  1  0  0  0  0
 49 99  1  0  0  0  0
 50100  1  0  0  0  0
 50101  1  0  0  0  0
 50102  1  0  0  0  0
 51103  1  0  0  0  0
 51104  1  0  0  0  0
 51105  1  0  0  0  0
 52106  1  0  0  0  0
 52107  1  0  0  0  0
 52108  1  0  0  0  0
 53109  1  0  0  0  0
 53110  1  0  0  0  0
 53111  1  0  0  0  0
 54112  1  0  0  0  0
 54113  1  0  0  0  0
 54114  1  0  0  0  0
M  END
