# Supplementary material
Source: publisher figshare collection journal article supplement (https://acs.figshare.com/ndownloader/files/5127205)
Supplement: Supplementary file 1 [file 5127205 › supporting_ja043819b/RRSS_fm-product-solv.log]

 Entering Gaussian System, Link 0=g03
 Input=RRSS_fm-product-solv.gjf
 Output=RRSS_fm-product-solv.log
 Initial command:
 /usr/local/g03/l1.exe /home/rzepa/Gau-29177.inp -scrdir=/home/rzepa/
 Entering Link 1 = /usr/local/g03/l1.exe PID=     29178.
  
 Copyright (c) 1988,1990,1992,1993,1995,1998,2003, Gaussian, Inc.
                  All Rights Reserved.
  
 This is the Gaussian(R) 03 program.  It is based on the
 the Gaussian(R) 98 system (copyright 1998, Gaussian, Inc.),
 the Gaussian(R) 94 system (copyright 1995, Gaussian, Inc.),
 the Gaussian 92(TM) system (copyright 1992, Gaussian, Inc.),
 the Gaussian 90(TM) system (copyright 1990, Gaussian, Inc.),
 the Gaussian 88(TM) system (copyright 1988, Gaussian, Inc.),
 the Gaussian 86(TM) system (copyright 1986, Carnegie Mellon
 University), and the Gaussian 82(TM) system (copyright 1983,
 Carnegie Mellon University). Gaussian is a federally registered
 trademark of Gaussian, Inc.
  
 This software contains proprietary and confidential information,
 including trade secrets, belonging to Gaussian, Inc.
  
 This software is provided under written license and may be
 used, copied, transmitted, or stored only in accord with that
 written license.
  
 The following legend is applicable only to US Government
 contracts under DFARS:
  
                    RESTRICTED RIGHTS LEGEND
  
 Use, duplication or disclosure by the US Government is subject
 to restrictions as set forth in subparagraph (c)(1)(ii) of the
 Rights in Technical Data and Computer Software clause at DFARS
 252.227-7013.
  
 Gaussian, Inc.
 Carnegie Office Park, Building 6, Pittsburgh, PA 15106 USA
  
 The following legend is applicable only to US Government
 contracts under FAR:
  
                    RESTRICTED RIGHTS LEGEND
  
 Use, reproduction and disclosure by the US Government is subject
 to restrictions as set forth in subparagraph (c) of the
 Commercial Computer Software - Restricted Rights clause at FAR
 52.227-19.
  
 Gaussian, Inc.
 Carnegie Office Park, Building 6, Pittsburgh, PA 15106 USA
  
  
 ---------------------------------------------------------------
 Warning -- This program may not be used in any manner that
 competes with the business of Gaussian, Inc. or will provide
 assistance to any competitor of Gaussian, Inc.  The licensee
 of this program is prohibited from giving any competitor of
 Gaussian, Inc. access to this program.  By using this program,
 the user acknowledges that Gaussian, Inc. is engaged in the
 business of creating and licensing software in the field of
 computational chemistry and represents and warrants to the
 licensee that it is not a competitor of Gaussian, Inc. and that
 it will not use this program in any manner prohibited above.
 ---------------------------------------------------------------
  

 Cite this work as:
 Gaussian 03, Revision B.04,
 M. J. Frisch, G. W. Trucks, H. B. Schlegel, G. E. Scuseria, 
 M. A. Robb, J. R. Cheeseman, J. A. Montgomery, Jr., T. Vreven, 
 K. N. Kudin, J. C. Burant, J. M. Millam, S. S. Iyengar, J. Tomasi, 
 V. Barone, B. Mennucci, M. Cossi, G. Scalmani, N. Rega, 
 G. A. Petersson, H. Nakatsuji, M. Hada, M. Ehara, K. Toyota, 
 R. Fukuda, J. Hasegawa, M. Ishida, T. Nakajima, Y. Honda, O. Kitao, 
 H. Nakai, M. Klene, X. Li, J. E. Knox, H. P. Hratchian, J. B. Cross, 
 C. Adamo, J. Jaramillo, R. Gomperts, R. E. Stratmann, O. Yazyev, 
 A. J. Austin, R. Cammi, C. Pomelli, J. W. Ochterski, P. Y. Ayala, 
 K. Morokuma, G. A. Voth, P. Salvador, J. J. Dannenberg, 
 V. G. Zakrzewski, S. Dapprich, A. D. Daniels, M. C. Strain, 
 O. Farkas, D. K. Malick, A. D. Rabuck, K. Raghavachari, 
 J. B. Foresman, J. V. Ortiz, Q. Cui, A. G. Baboul, S. Clifford, 
 J. Cioslowski, B. B. Stefanov, G. Liu, A. Liashenko, P. Piskorz, 
 I. Komaromi, R. L. Martin, D. J. Fox, T. Keith, M. A. Al-Laham, 
 C. Y. Peng, A. Nanayakkara, M. Challacombe, P. M. W. Gill, 
 B. Johnson, W. Chen, M. W. Wong, C. Gonzalez, and J. A. Pople, 
 Gaussian, Inc., Pittsburgh PA, 2003.
 
 *********************************************
 Gaussian 03:  x86-Linux-G03RevB.04 2-Jun-2003
                  22-Nov-2004 
 *********************************************
 %nproc=2
 Will use up to    2 processors via shared memory.
 %mem=500MB
 %chk=rrss_fm-product.chk
 %rwf=re1.rwf,1800MB,re2.rwf,1800MB,re3.rwf,1800MB,re4.rwf,1800MB,re5.rwf,1800MB
 -------------------------------------
 # RB3LYP/Gen scrf(IEFPCM,solvent=thf)
 -------------------------------------
 1/38=1/1;
 2/17=6,18=5,40=1/2;
 3/5=7,11=2,16=1,25=1,30=1,70=2201,72=20,74=-5/1,2,3;
 4/7=1/1;
 5/5=2,32=1,38=5,53=20/2;
 6/7=2,8=2,9=2,10=2,28=1/1;
 99/5=1,9=1/99;
 ------------------------
 from RRSS_fm-product.mop
 ------------------------
 Symbolic Z-matrix:
 Charge =  0 Multiplicity = 1
 O                    0     6.32052   1.41833   0.28373 
 Mg                   0    -1.54742   0.82011  -0.34061 
 O                    0     2.07681  -3.06248   0.0705 
 C                    0     6.06845   0.17464  -0.17231 
 N                    0    -1.16715   2.30985   0.94381 
 N                    0    -3.41931   0.67164   0.3929 
 O                    0     6.85796  -0.74034  -0.13582 
 C                    0    -2.0293    2.94571   1.72973 
 C                    0    -3.38963   2.5836    1.84154 
 C                    0    -4.03324   1.47107   1.25014 
 O                    0     4.2017   -1.23805  -0.81581 
 C                    0     4.03423  -1.7968    0.39532 
 C                    0     3.50655  -3.23186   0.27799 
 C                    0     4.68498   0.1229   -0.82181 
 O                    0     4.25996  -1.23774   1.44548 
 C                    0     7.62817   1.6081    0.85163 
 O                    0    -0.97105   0.75683  -2.15294 
 C                    0     1.39248  -4.08879  -0.47816 
 O                    0     1.86409  -5.16108  -0.77742 
 O                    0    -0.06032  -2.66101  -1.70775 
 C                    0    -0.39383  -1.41455  -1.39764 
 C                    0    -0.41416  -0.42073  -2.56531 
 C                    0    -0.06941  -3.67273  -0.65664 
 O                    0    -0.68955  -1.06968  -0.24818 
 C                    0     1.02901  -0.24478  -3.08591 
 C                    0    -1.00793  -4.78027  -1.08895 
 C                    0     3.78472  -4.03813   1.53575 
 C                    0     4.78996   0.54518  -2.28553 
 C                    0     0.24644   2.62015   0.86556 
 C                    0    -3.91953  -0.56792  -0.15285 
 C                    0     0.71481   3.48193  -0.18854 
 C                    0     2.11      3.60351  -0.38317 
 C                    0     3.02807   2.91447   0.44197 
 C                    0     2.55741   2.08322   1.48143 
 C                    0     1.16509   1.91707   1.71173 
 C                    0    -0.26736   4.31701  -1.0528 
 C                    0     0.67789   1.04451   2.89732 
 C                    0    -3.8446   -1.77837   0.61223 
 C                    0    -4.05803  -3.01315  -0.05602 
 C                    0    -4.31853  -3.05989  -1.44157 
 C                    0    -4.42071  -1.85886  -2.18124 
 C                    0    -4.23905  -0.59796  -1.56121 
 C                    0    -3.57101  -1.77124   2.13891 
 C                    0    -4.51232   0.71661  -2.34139 
 C                    0    -0.13461   3.99201  -2.57356 
 C                    0    -0.06549   5.84902  -0.79494 
 C                    0     1.13028  -0.44139   2.74492 
 C                    0     1.1704    1.62922   4.26414 
 C                    0    -3.8874    0.73583  -3.76819 
 C                    0    -6.05695   0.97587  -2.40514 
 C                    0    -2.28321  -2.57614   2.50415 
 C                    0    -4.80698  -2.32414   2.92673 
 C                    0    -1.54248   4.11466   2.57111 
 C                    0    -5.47443   1.20843   1.66189 
 H                    0    -3.99763   3.19328   2.50125 
 H                    0     3.92409  -3.71135  -0.61082 
 H                    0     3.98643   0.76579  -0.27722 
 H                    0     8.4035    1.39197   0.11181 
 H                    0     7.76557   0.95171   1.7146 
 H                    0     7.66667   2.65481   1.15461 
 H                    0    -0.99944  -0.92203  -3.36395 
 H                    0    -0.41164  -3.20017   0.26514 
 H                    0     1.47001  -1.18545  -3.43419 
 H                    0     1.64853   0.17415  -2.28614 
 H                    0     1.00481   0.47259  -3.91145 
 H                    0    -2.01768  -4.36154  -1.1537 
 H                    0    -0.99939  -5.58796  -0.34988 
 H                    0    -0.70829  -5.19522  -2.05488 
 H                    0     4.86549  -4.12051   1.69013 
 H                    0     3.36761  -5.04238   1.43396 
 H                    0     3.35328  -3.53818   2.40642 
 H                    0     3.81266   0.47936  -2.76894 
 H                    0     5.4948   -0.0992   -2.82005 
 H                    0     5.13946   1.58045  -2.34408 
 H                    0     2.48638   4.27569  -1.16574 
 H                    0     4.1089    3.07222   0.31872 
 H                    0     3.2787    1.59065   2.14769 
 H                    0    -1.29861   4.0531   -0.73879 
 H                    0    -0.43103   1.06503   2.89719 
 H                    0    -4.04918  -3.94601   0.52346 
 H                    0    -4.50839  -4.02448  -1.93309 
 H                    0    -4.69315  -1.90179  -3.24409 
 H                    0    -3.40451  -0.72215   2.45149 
 H                    0    -4.06108   1.54945  -1.76198 
 H                    0    -0.86405   4.58702  -3.14529 
 H                    0    -0.33472   2.91989  -2.74662 
 H                    0     0.87476   4.2313   -2.94078 
 H                    0    -0.81851   6.42315  -1.35611 
 H                    0     0.93392   6.17132  -1.12516 
 H                    0    -0.17231   6.08774   0.27468 
 H                    0     0.73062  -1.04314   3.57582 
 H                    0     2.22788  -0.5255    2.74472 
 H                    0     0.75262  -0.85998   1.7942 
 H                    0     0.75308   1.03882   5.09415 
 H                    0     0.84779   2.67509   4.38418 
 H                    0     2.26852   1.59312   4.33032 
 H                    0    -4.11444   1.69713  -4.25454 
 H                    0    -2.79161   0.63489  -3.6933 
 H                    0    -4.28777  -0.07287  -4.39729 
 H                    0    -6.25346   1.9315   -2.91461 
 H                    0    -6.48684   1.02712  -1.39214 
 H                    0    -6.56363   0.1711   -2.96061 
 H                    0    -2.116    -2.55066   3.59261 
 H                    0    -1.40489  -2.12467   2.00932 
 H                    0    -2.36895  -3.62816   2.19059 
 H                    0    -4.62912  -2.24005   4.00982 
 H                    0    -4.98092  -3.38383   2.68484 
 H                    0    -5.71669  -1.75685   2.67657 
 H                    0    -1.0657    4.87671   1.94318 
 H                    0    -2.36765   4.58509   3.11601 
 H                    0    -0.79771   3.78038   3.30397 
 H                    0    -6.00956   0.62255   0.90726 
 H                    0    -5.51164   0.65469   2.60924 
 H                    0    -6.00914   2.15318   1.81571 
 
 Stoichiometry    C42H60MgN2O9
 Framework group  C1[X(C42H60MgN2O9)]
 Deg. of freedom   336
 Full point group                 C1      NOp   1
 Largest Abelian subgroup         C1      NOp   1
 Largest concise Abelian subgroup C1      NOp   1
                         Standard orientation:                         
 ---------------------------------------------------------------------
 Center     Atomic     Atomic              Coordinates (Angstroms)
 Number     Number      Type              X           Y           Z
 ---------------------------------------------------------------------
    1          8             0        6.337621    1.362996   -0.134055
    2         12             0       -1.556028    0.809904   -0.325482
    3          8             0        2.053939   -3.072164    0.200104
    4          6             0        6.053573    0.091536   -0.481871
    5          7             0       -1.100878    2.387479    0.822457
    6          7             0       -3.390256    0.738467    0.507900
    7          8             0        6.836804   -0.827116   -0.414991
    8          6             0       -1.917971    3.090445    1.599306
    9          6             0       -3.273831    2.753398    1.804630
   10          6             0       -3.954633    1.607036    1.331259
   11          8             0        4.146262   -1.343986   -0.924565
   12          6             0        4.034837   -1.808201    0.332087
   13          6             0        3.490870   -3.241870    0.349571
   14          6             0        4.639178    0.007022   -1.057092
   15          8             0        4.316786   -1.174447    1.324659
   16          6             0        7.673292    1.579884    0.353176
   17          8             0       -1.070903    0.604022   -2.153879
   18          6             0        1.335264   -4.128875   -0.235227
   19          8             0        1.783101   -5.225959   -0.475275
   20          8             0       -0.165708   -2.780930   -1.496660
   21          6             0       -0.473725   -1.510953   -1.265727
   22          6             0       -0.544340   -0.607500   -2.502793
   23          6             0       -0.130416   -3.710641   -0.372873
   24          8             0       -0.709299   -1.077322   -0.132540
   25          6             0        0.872510   -0.487745   -3.105232
   26          6             0       -1.097813   -4.836695   -0.673744
   27          6             0        3.824913   -3.954499    1.649571
   28          6             0        4.674585    0.316903   -2.551935
   29          6             0        0.309443    2.674775    0.651865
   30          6             0       -3.926572   -0.532771    0.082581
   31          6             0        0.731538    3.449485   -0.486037
   32          6             0        2.116240    3.540083   -0.757358
   33          6             0        3.068793    2.904487    0.071578
   34          6             0        2.643921    2.159144    1.192710
   35          6             0        1.263513    2.026761    1.502793
   36          6             0       -0.285850    4.228491   -1.361842
   37          6             0        0.829061    1.251400    2.773379
   38          6             0       -3.823114   -1.683096    0.932404
   39          6             0       -4.079044   -2.962070    0.370678
   40          6             0       -4.408401   -3.109781   -0.992953
   41          6             0       -4.537888   -1.966636   -1.815427
   42          6             0       -4.315878   -0.664874   -1.302148
   43          6             0       -3.473974   -1.564426    2.438943
   44          6             0       -4.617376    0.590410   -2.165176
   45          6             0       -0.231336    3.788643   -2.858348
   46          6             0       -0.059552    5.773121   -1.230749
   47          6             0        1.261790   -0.246845    2.711812
   48          6             0        1.393378    1.931460    4.066326
   49          6             0       -4.063968    0.495198   -3.618217
   50          6             0       -6.161203    0.861853   -2.172656
   51          6             0       -2.175897   -2.354330    2.800515
   52          6             0       -4.673531   -2.042348    3.325865
   53          6             0       -1.380901    4.313647    2.325051
   54          6             0       -5.375583    1.392633    1.831741
   55          1             0       -3.843563    3.417857    2.445326
   56          1             0        3.860005   -3.791546   -0.519810
   57          1             0        3.973549    0.696993   -0.529138
   58          1             0        8.409222    1.299887   -0.405253
   59          1             0        7.848302    0.988655    1.255538
   60          1             0        7.734913    2.645885    0.573893
   61          1             0       -1.172433   -1.160645   -3.231634
   62          1             0       -0.422754   -3.166262    0.526178
   63          1             0        1.288358   -1.456925   -3.402557
   64          1             0        1.534225   -0.017046   -2.370709
   65          1             0        0.812896    0.165804   -3.980472
   66          1             0       -2.106261   -4.412449   -0.720464
   67          1             0       -1.058831   -5.586611    0.122970
   68          1             0       -0.849752   -5.326453   -1.619044
   69          1             0        4.911348   -4.037449    1.756644
   70          1             0        3.395492   -4.958701    1.644544
   71          1             0        3.441153   -3.385623    2.500017
   72          1             0        3.673999    0.226171   -2.980561
   73          1             0        5.346989   -0.373862   -3.070061
   74          1             0        5.028770    1.340770   -2.705634
   75          1             0        2.458471    4.147191   -1.605999
   76          1             0        4.143354    3.040117   -0.115997
   77          1             0        3.393572    1.709787    1.858191
   78          1             0       -1.302249    4.000772   -0.978676
   79          1             0       -0.278302    1.284582    2.825986
   80          1             0       -4.048644   -3.848792    1.017900
   81          1             0       -4.629918   -4.106332   -1.400248
   82          1             0       -4.863119   -2.086166   -2.857375
   83          1             0       -3.284022   -0.496790    2.662782
   84          1             0       -4.131458    1.459193   -1.673176
   85          1             0       -0.983643    4.347351   -3.437031
   86          1             0       -0.448098    2.708917   -2.939845
   87          1             0        0.760372    3.988067   -3.291579
   88          1             0       -0.835046    6.312069   -1.796190
   89          1             0        0.924690    6.058215   -1.632917
   90          1             0       -0.111248    6.092749   -0.178298
   91          1             0        0.899244   -0.779837    3.604393
   92          1             0        2.357339   -0.343321    2.664243
   93          1             0        0.834135   -0.731323    1.815087
   94          1             0        1.013244    1.409926    4.958038
   95          1             0        1.085256    2.987024    4.122590
   96          1             0        2.493121    1.887830    4.081217
   97          1             0       -4.307430    1.419782   -4.164159
   98          1             0       -2.966634    0.387595   -3.589641
   99          1             0       -4.501356   -0.353842   -4.164013
  100          1             0       -6.375365    1.778701   -2.742692
  101          1             0       -6.539831    0.994001   -1.146600
  102          1             0       -6.701075    0.023491   -2.640215
  103          1             0       -1.954628   -2.249065    3.874445
  104          1             0       -1.319766   -1.951426    2.230573
  105          1             0       -2.285265   -3.425884    2.571970
  106          1             0       -4.441431   -1.879157    4.389492
  107          1             0       -4.867483   -3.115149    3.173597
  108          1             0       -5.590114   -1.485049    3.078364
  109          1             0       -0.930012    5.020838    1.618713
  110          1             0       -2.174317    4.833123    2.872561
  111          1             0       -0.603262    4.026842    3.043749
  112          1             0       -5.952061    0.757891    1.150670
  113          1             0       -5.369972    0.912103    2.818933
  114          1             0       -5.894646    2.352346    1.939676
 ---------------------------------------------------------------------
 Rotational constants (GHZ):      0.0691157      0.0438689      0.0358175
 General basis read from cards:  (5D, 7F)
 There are   642 symmetry adapted basis functions of A   symmetry.
 Integral buffers will be    262144 words long.
 Raffenetti 2 integral format.
 Two-electron integral symmetry is turned on.
   642 basis functions,  1430 primitive gaussians,   674 cartesian basis functions
   205 alpha electrons      205 beta electrons
       nuclear repulsion energy      8774.0289522187 Hartrees.
 NAtoms=  114 NActive=  114 NUniq=  114 SFac= 1.00D+00 NAtFMM=   60 Big=T
 ------------------------------------------------------------------------------
 United Atom Topological Model (UA0  parameters set).
  Nord Group  Hybr  Charge Alpha Radius          Bonded to
    1   O     *     0.00   1.00  1.750   C4   [s]  C16  [s]
    2  Mg     *     0.00   1.00  1.511   N5   [s]  N6   [s]  O17  [d]  O24  [s]
    3   O     *     0.00   1.00  1.750   C13  [s]  C18  [s]
    4   C     *     0.00   1.00  1.925   O1   [s]  O7   [d]  C14  [s]
    5   N     *     0.00   1.00  1.830  Mg2   [s]  C8   [d]  C29  [s]
    6   N     *     0.00   1.00  1.830  Mg2   [s]  C10  [d]  C30  [s]
    7   O     *     0.00   1.00  1.750   C4   [d]
    8   C     *     0.00   1.00  1.925   N5   [d]  C9   [s]  C53  [s]
    9   CH    *     0.00   1.00  2.125   C8   [s]  C10  [s]
   10   C     *     0.00   1.00  1.925   N6   [d]  C9   [s]  C54  [s]
   11   O     *     0.00   1.00  1.750   C12  [s]  C14  [s]
   12   C     *     0.00   1.00  1.925   O11  [s]  C13  [s]  O15  [d]
   13   CH    *     0.00   1.00  2.125   O3   [s]  C12  [s]  C27  [s]
   14   CH    *     0.00   1.00  2.125   C4   [s]  O11  [s]  C28  [s]
   15   O     *     0.00   1.00  1.750   C12  [d]
   16   CH3   *     0.00   1.00  2.525   O1   [s]
   17   O     *     0.00   1.00  1.750  Mg2   [d]  C22  [s]
   18   C     *     0.00   1.00  1.925   O3   [s]  O19  [d]  C23  [s]
   19   O     *     0.00   1.00  1.750   C18  [d]
   20   O     *     0.00   1.00  1.750   C21  [s]  C23  [s]
   21   C     *     0.00   1.00  1.925   O20  [s]  C22  [s]  O24  [d]
   22   CH    *     0.00   1.00  2.125   O17  [s]  C21  [s]  C25  [s]
   23   CH    *     0.00   1.00  2.125   C18  [s]  O20  [s]  C26  [s]
   24   O     *     0.00   1.00  1.750  Mg2   [s]  C21  [d]
   25   CH3   *     0.00   1.00  2.525   C22  [s]
   26   CH3   *     0.00   1.00  2.525   C23  [s]
   27   CH3   *     0.00   1.00  2.525   C13  [s]
   28   CH3   *     0.00   1.00  2.525   C14  [s]
   29   C     *     0.00   1.00  1.925   N5   [s]  C31  [s]  C35  [s]
   30   C     *     0.00   1.00  1.925   N6   [s]  C38  [s]  C42  [s]
   31   C     *     0.00   1.00  1.925   C29  [s]  C32  [s]  C36  [s]
   32   CH    *     0.00   1.00  2.125   C31  [s]  C33  [s]
   33   CH    *     0.00   1.00  2.125   C32  [s]  C34  [s]
   34   CH    *     0.00   1.00  2.125   C33  [s]  C35  [s]
   35   C     *     0.00   1.00  1.925   C29  [s]  C34  [s]  C37  [s]
   36   CH    *     0.00   1.00  2.125   C31  [s]  C45  [s]  C46  [s]
   37   CH    *     0.00   1.00  2.125   C35  [s]  C47  [s]  C48  [s]
   38   C     *     0.00   1.00  1.925   C30  [s]  C39  [s]  C43  [s]
   39   CH    *     0.00   1.00  2.125   C38  [s]  C40  [s]
   40   CH    *     0.00   1.00  2.125   C39  [s]  C41  [s]
   41   CH    *     0.00   1.00  2.125   C40  [s]  C42  [s]
   42   C     *     0.00   1.00  1.925   C30  [s]  C41  [s]  C44  [s]
   43   CH    *     0.00   1.00  2.125   C38  [s]  C51  [s]  C52  [s]
   44   CH    *     0.00   1.00  2.125   C42  [s]  C49  [s]  C50  [s]
   45   CH3   *     0.00   1.00  2.525   C36  [s]
   46   CH3   *     0.00   1.00  2.525   C36  [s]
   47   CH3   *     0.00   1.00  2.525   C37  [s]
   48   CH3   *     0.00   1.00  2.525   C37  [s]
   49   CH3   *     0.00   1.00  2.525   C44  [s]
   50   CH3   *     0.00   1.00  2.525   C44  [s]
   51   CH3   *     0.00   1.00  2.525   C43  [s]
   52   CH3   *     0.00   1.00  2.525   C43  [s]
   53   CH3   *     0.00   1.00  2.525   C8   [s]
   54   CH3   *     0.00   1.00  2.525   C10  [s]
 ------------------------------------------------------------------------------
 Polarizable Continuum Model (PCM)
 =================================
 Model                : PCM.
 Atomic radii         : UA0 (Simple United Atom Topological Model).
 Polarization charges : Total charges.
 Charge compensation  : None.
 Solution method      : Matrix inversion.
 Cavity               : GePol (RMin=0.200 OFac=0.890).
                        Default sphere list used, NSphG=   54.
                        Tesserae with average area of 0.200 Ang**2.
 Solvent              : THF, Eps=   7.580000.
 ------------------------------------------------------------------------------
 DisRep: Neglecting contributions from atom    2
 One-electron integrals computed using PRISM.
 NBasis=   642 RedAO= T  NBF=   642
 NBsUse=   642 1.00D-06 NBFU=   642
 Harris functional with IExCor=  402 diagonalized for initial guess.
 ExpMin= 3.48D-02 ExpMax= 4.39D+04 ExpMxC= 1.51D+03 IAcc=3 IRadAn=         5 AccDes= 0.00D+00
 HarFok:  IExCor= 402 AccDes= 0.00D+00 IRadAn=         5 IDoV=1
 ScaDFX=  1.000000  1.000000  1.000000  1.000000
 Initial guess orbital symmetries:
       Occupied  (A) (A) (A) (A) (A) (A) (A) (A) (A) (A) (A) (A)
                 (A) (A) (A) (A) (A) (A) (A) (A) (A) (A) (A) (A)
                 (A) (A) (A) (A) (A) (A) (A) (A) (A) (A) (A) (A)
                 (A) (A) (A) (A) (A) (A) (A) (A) (A) (A) (A) (A)
                 (A) (A) (A) (A) (A) (A) (A) (A) (A) (A) (A) (A)
                 (A) (A) (A) (A) (A) (A) (A) (A) (A) (A) (A) (A)
                 (A) (A) (A) (A) (A) (A) (A) (A) (A) (A) (A) (A)
                 (A) (A) (A) (A) (A) (A) (A) (A) (A) (A) (A) (A)
                 (A) (A) (A) (A) (A) (A) (A) (A) (A) (A) (A) (A)
                 (A) (A) (A) (A) (A) (A) (A) (A) (A) (A) (A) (A)
                 (A) (A) (A) (A) (A) (A) (A) (A) (A) (A) (A) (A)
                 (A) (A) (A) (A) (A) (A) (A) (A) (A) (A) (A) (A)
                 (A) (A) (A) (A) (A) (A) (A) (A) (A) (A) (A) (A)
                 (A) (A) (A) (A) (A) (A) (A) (A) (A) (A) (A) (A)
                 (A) (A) (A) (A) (A) (A) (A) (A) (A) (A) (A) (A)
                 (A) (A) (A) (A) (A) (A) (A) (A) (A) (A) (A) (A)
                 (A) (A) (A) (A) (A) (A) (A) (A) (A) (A) (A) (A)
                 (A)
       Virtual   (A) (A) (A) (A) (A) (A) (A) (A) (A) (A) (A) (A)
                 (A) (A) (A) (A) (A) (A) (A) (A) (A) (A) (A) (A)
                 (A) (A) (A) (A) (A) (A) (A) (A) (A) (A) (A) (A)
                 (A) (A) (A) (A) (A) (A) (A) (A) (A) (A) (A) (A)
                 (A) (A) (A) (A) (A) (A) (A) (A) (A) (A) (A) (A)
                 (A) (A) (A) (A) (A) (A) (A) (A) (A) (A) (A) (A)
                 (A) (A) (A) (A) (A) (A) (A) (A) (A) (A) (A) (A)
                 (A) (A) (A) (A) (A) (A) (A) (A) (A) (A) (A) (A)
                 (A) (A) (A) (A) (A) (A) (A) (A) (A) (A) (A) (A)
                 (A) (A) (A) (A) (A) (A) (A) (A) (A) (A) (A) (A)
                 (A) (A) (A) (A) (A) (A) (A) (A) (A) (A) (A) (A)
                 (A) (A) (A) (A) (A) (A) (A) (A) (A) (A) (A) (A)
                 (A) (A) (A) (A) (A) (A) (A) (A) (A) (A) (A) (A)
                 (A) (A) (A) (A) (A) (A) (A) (A) (A) (A) (A) (A)
                 (A) (A) (A) (A) (A) (A) (A) (A) (A) (A) (A) (A)
                 (A) (A) (A) (A) (A) (A) (A) (A) (A) (A) (A) (A)
                 (A) (A) (A) (A) (A) (A) (A) (A) (A) (A) (A) (A)
                 (A) (A) (A) (A) (A) (A) (A) (A) (A) (A) (A) (A)
                 (A) (A) (A) (A) (A) (A) (A) (A) (A) (A) (A) (A)
                 (A) (A) (A) (A) (A) (A) (A) (A) (A) (A) (A) (A)
                 (A) (A) (A) (A) (A) (A) (A) (A) (A) (A) (A) (A)
                 (A) (A) (A) (A) (A) (A) (A) (A) (A) (A) (A) (A)
                 (A) (A) (A) (A) (A) (A) (A) (A) (A) (A) (A) (A)
                 (A) (A) (A) (A) (A) (A) (A) (A) (A) (A) (A) (A)
                 (A) (A) (A) (A) (A) (A) (A) (A) (A) (A) (A) (A)
                 (A) (A) (A) (A) (A) (A) (A) (A) (A) (A) (A) (A)
                 (A) (A) (A) (A) (A) (A) (A) (A) (A) (A) (A) (A)
                 (A) (A) (A) (A) (A) (A) (A) (A) (A) (A) (A) (A)
                 (A) (A) (A) (A) (A) (A) (A) (A) (A) (A) (A) (A)
                 (A) (A) (A) (A) (A) (A) (A) (A) (A) (A) (A) (A)
                 (A) (A) (A) (A) (A) (A) (A) (A) (A) (A) (A) (A)
                 (A) (A) (A) (A) (A) (A) (A) (A) (A) (A) (A) (A)
                 (A) (A) (A) (A) (A) (A) (A) (A) (A) (A) (A) (A)
                 (A) (A) (A) (A) (A) (A) (A) (A) (A) (A) (A) (A)
                 (A) (A) (A) (A) (A) (A) (A) (A) (A) (A) (A) (A)
                 (A) (A) (A) (A) (A) (A) (A) (A) (A) (A) (A) (A)
                 (A) (A) (A) (A) (A)
 The electronic state of the initial guess is 1-A.
 Requested convergence on RMS density matrix=1.00D-04 within 128 cycles.
 Requested convergence on MAX density matrix=1.00D-02.
 Requested convergence on             energy=1.00D-02.
 No special actions if energy rises.
 Warning! T( 173,  80)=0.22670950D+02 is big!
          T( 173, 173)=0.14260494D+02 T(  80,  80)=0.17949345D+02
 Warning! T(  80, 173)=0.30740502D+02 is big!
          T(  80,  80)=0.17949345D+02 T( 173, 173)=0.14260494D+02
 Error on total polarization charges =  0.00729
 SCF Done:  E(RB+HF-LYP) =  -2612.22588236     A.U. after    7 cycles
             Convg  =    0.9216D-05             -V/T =  2.0106
             S**2   =   0.0000
 --------------------------------------------------------------------
 Variational PCM results
 =======================
 <psi(f)|   H    |psi(f)>                     (a.u.) =   -2612.213231
 <psi(f)|H+V(f)/2|psi(f)>                     (a.u.) =   -2612.225882
 Total free energy in solution:
  with all non electrostatic terms            (a.u.) =   -2612.155228
 --------------------------------------------------------------------
 (Polarized solute)-Solvent               (kcal/mol) =      -7.94
 --------------------------------------------------------------------
 Cavitation energy                        (kcal/mol) =      80.92
 Dispersion energy                        (kcal/mol) =     -37.80
 Repulsion energy                         (kcal/mol) =       1.22
 Total non electrostatic                  (kcal/mol) =      44.34
 --------------------------------------------------------------------
 Partition over spheres:
 Sphere  on Atom  Surface  Charge   GEl     GCav    GDR
    1      O1       0.00   0.000    0.00    0.33    0.00
    2     Mg2       0.00   0.000    0.00    0.33    0.00
    3      O3       0.00   0.000    0.00    0.49    0.00
    4      C4       0.00   0.000    0.00    0.12    0.00
    5      N5       0.00   0.000    0.00    0.32    0.00
    6      N6       0.00   0.000    0.00    0.30    0.00
    7      O7       7.36   0.069   -1.16    1.74   -0.93
    8      C8       0.00   0.000    0.00    0.13    0.00
    9      C9       3.86   0.008   -0.19    1.47   -0.50
   10      C10      0.00   0.000    0.00    0.13    0.00
   11      O11      0.03   0.000    0.00    0.62   -0.05
   12      C12      0.00   0.000    0.00    0.30    0.00
   13      C13      2.92  -0.037   -0.28    0.73   -0.43
   14      C14      0.00   0.000    0.00    0.26    0.00
   15      O15      1.73   0.018   -0.27    1.13   -0.26
   16      C16     46.94  -0.095   -0.42    5.58   -3.00
   17      O17      0.00   0.000    0.00    0.36    0.00
   18      C18      0.00   0.000    0.00    0.45   -0.02
   19      O19      9.04   0.073   -1.02    1.69   -1.13
   20      O20      0.00   0.000    0.00    0.49   -0.02
   21      C21      0.00   0.000    0.00    0.36    0.00
   22      C22      0.70  -0.007   -0.02    0.63   -0.07
   23      C23      0.00   0.000    0.00    0.28    0.00
   24      O24      0.00   0.000    0.00    0.49    0.00
   25      C25     17.59  -0.002   -0.01    3.85   -1.54
   26      C26     28.21  -0.030   -0.08    3.93   -2.30
   27      C27     35.30  -0.043   -0.03    4.46   -2.53
   28      C28     27.39  -0.036   -0.08    4.01   -1.98
   29      C29      0.00   0.000    0.00    0.27    0.00
   30      C30      0.00   0.000    0.00    0.13    0.00
   31      C31      0.00   0.000    0.00    0.12    0.00
   32      C32      5.42  -0.019   -0.20    1.43   -0.51
   33      C33      6.23   0.000   -0.02    1.38   -0.65
   34      C34      1.23   0.001    0.00    1.20   -0.16
   35      C35      0.00   0.000    0.00    0.12    0.00
   36      C36      0.00   0.000    0.00    0.25    0.00
   37      C37      0.00   0.000    0.00    0.24    0.00
   38      C38      0.00   0.000    0.00    0.06    0.00
   39      C39      4.38  -0.013   -0.18    1.03   -0.42
   40      C40     11.49  -0.028   -0.34    1.64   -1.24
   41      C41      7.16  -0.019   -0.23    1.49   -0.69
   42      C42      0.00   0.000    0.00    0.11    0.00
   43      C43      0.00   0.000    0.00    0.19    0.00
   44      C44      0.00   0.000    0.00    0.30    0.00
   45      C45     19.88   0.003   -0.06    3.71   -1.56
   46      C46     31.42  -0.009   -0.04    3.99   -2.34
   47      C47      5.87  -0.001   -0.01    2.48   -0.50
   48      C48     29.91  -0.010   -0.04    3.99   -2.33
   49      C49     25.66   0.004   -0.08    3.75   -1.79
   50      C50     32.82  -0.010   -0.05    3.99   -2.26
   51      C51     13.70  -0.012   -0.06    2.92   -1.19
   52      C52     32.45  -0.017   -0.10    3.89   -2.34
   53      C53     21.81  -0.004   -0.03    3.67   -1.92
   54      C54     25.71  -0.013   -0.04    3.61   -1.92
 Added spheres:   235.96   0.220   -2.89    0.00    0.00
 --------------------------------------------------------------------

 **********************************************************************

            Population analysis using the SCF density.

 **********************************************************************

 Orbital symmetries:
       Occupied  (A) (A) (A) (A) (A) (A) (A) (A) (A) (A) (A) (A)
                 (A) (A) (A) (A) (A) (A) (A) (A) (A) (A) (A) (A)
                 (A) (A) (A) (A) (A) (A) (A) (A) (A) (A) (A) (A)
                 (A) (A) (A) (A) (A) (A) (A) (A) (A) (A) (A) (A)
                 (A) (A) (A) (A) (A) (A) (A) (A) (A) (A) (A) (A)
                 (A) (A) (A) (A) (A) (A) (A) (A) (A) (A) (A) (A)
                 (A) (A) (A) (A) (A) (A) (A) (A) (A) (A) (A) (A)
                 (A) (A) (A) (A) (A) (A) (A) (A) (A) (A) (A) (A)
                 (A) (A) (A) (A) (A) (A) (A) (A) (A) (A) (A) (A)
                 (A) (A) (A) (A) (A) (A) (A) (A) (A) (A) (A) (A)
                 (A) (A) (A) (A) (A) (A) (A) (A) (A) (A) (A) (A)
                 (A) (A) (A) (A) (A) (A) (A) (A) (A) (A) (A) (A)
                 (A) (A) (A) (A) (A) (A) (A) (A) (A) (A) (A) (A)
                 (A) (A) (A) (A) (A) (A) (A) (A) (A) (A) (A) (A)
                 (A) (A) (A) (A) (A) (A) (A) (A) (A) (A) (A) (A)
                 (A) (A) (A) (A) (A) (A) (A) (A) (A) (A) (A) (A)
                 (A) (A) (A) (A) (A) (A) (A) (A) (A) (A) (A) (A)
                 (A)
       Virtual   (A) (A) (A) (A) (A) (A) (A) (A) (A) (A) (A) (A)
                 (A) (A) (A) (A) (A) (A) (A) (A) (A) (A) (A) (A)
                 (A) (A) (A) (A) (A) (A) (A) (A) (A) (A) (A) (A)
                 (A) (A) (A) (A) (A) (A) (A) (A) (A) (A) (A) (A)
                 (A) (A) (A) (A) (A) (A) (A) (A) (A) (A) (A) (A)
                 (A) (A) (A) (A) (A) (A) (A) (A) (A) (A) (A) (A)
                 (A) (A) (A) (A) (A) (A) (A) (A) (A) (A) (A) (A)
                 (A) (A) (A) (A) (A) (A) (A) (A) (A) (A) (A) (A)
                 (A) (A) (A) (A) (A) (A) (A) (A) (A) (A) (A) (A)
                 (A) (A) (A) (A) (A) (A) (A) (A) (A) (A) (A) (A)
                 (A) (A) (A) (A) (A) (A) (A) (A) (A) (A) (A) (A)
                 (A) (A) (A) (A) (A) (A) (A) (A) (A) (A) (A) (A)
                 (A) (A) (A) (A) (A) (A) (A) (A) (A) (A) (A) (A)
                 (A) (A) (A) (A) (A) (A) (A) (A) (A) (A) (A) (A)
                 (A) (A) (A) (A) (A) (A) (A) (A) (A) (A) (A) (A)
                 (A) (A) (A) (A) (A) (A) (A) (A) (A) (A) (A) (A)
                 (A) (A) (A) (A) (A) (A) (A) (A) (A) (A) (A) (A)
                 (A) (A) (A) (A) (A) (A) (A) (A) (A) (A) (A) (A)
                 (A) (A) (A) (A) (A) (A) (A) (A) (A) (A) (A) (A)
                 (A) (A) (A) (A) (A) (A) (A) (A) (A) (A) (A) (A)
                 (A) (A) (A) (A) (A) (A) (A) (A) (A) (A) (A) (A)
                 (A) (A) (A) (A) (A) (A) (A) (A) (A) (A) (A) (A)
                 (A) (A) (A) (A) (A) (A) (A) (A) (A) (A) (A) (A)
                 (A) (A) (A) (A) (A) (A) (A) (A) (A) (A) (A) (A)
                 (A) (A) (A) (A) (A) (A) (A) (A) (A) (A) (A) (A)
                 (A) (A) (A) (A) (A) (A) (A) (A) (A) (A) (A) (A)
                 (A) (A) (A) (A) (A) (A) (A) (A) (A) (A) (A) (A)
                 (A) (A) (A) (A) (A) (A) (A) (A) (A) (A) (A) (A)
                 (A) (A) (A) (A) (A) (A) (A) (A) (A) (A) (A) (A)
                 (A) (A) (A) (A) (A) (A) (A) (A) (A) (A) (A) (A)
                 (A) (A) (A) (A) (A) (A) (A) (A) (A) (A) (A) (A)
                 (A) (A) (A) (A) (A) (A) (A) (A) (A) (A) (A) (A)
                 (A) (A) (A) (A) (A) (A) (A) (A) (A) (A) (A) (A)
                 (A) (A) (A) (A) (A) (A) (A) (A) (A) (A) (A) (A)
                 (A) (A) (A) (A) (A) (A) (A) (A) (A) (A) (A) (A)
                 (A) (A) (A) (A) (A) (A) (A) (A) (A) (A) (A) (A)
                 (A) (A) (A) (A) (A)
 The electronic state is 1-A.
 Alpha  occ. eigenvalues --  -46.69985 -19.21073 -19.20551 -19.20107 -19.19556
 Alpha  occ. eigenvalues --  -19.16241 -19.15684 -19.14960 -19.14416 -19.05137
 Alpha  occ. eigenvalues --  -14.28472 -14.28178 -10.33140 -10.32492 -10.32438
 Alpha  occ. eigenvalues --  -10.31984 -10.26224 -10.26208 -10.25504 -10.23373
 Alpha  occ. eigenvalues --  -10.22090 -10.20919 -10.20771 -10.18304 -10.17832
 Alpha  occ. eigenvalues --  -10.17732 -10.16181 -10.16056 -10.15760 -10.12962
 Alpha  occ. eigenvalues --  -10.06563 -10.06137 -10.03516 -10.03366 -10.03116
 Alpha  occ. eigenvalues --  -10.03032 -10.02970 -10.02835 -10.02743 -10.02717
 Alpha  occ. eigenvalues --  -10.02344 -10.02110 -10.02059 -10.01954 -10.01847
 Alpha  occ. eigenvalues --  -10.01435 -10.00955 -10.00933 -10.00721 -10.00627
 Alpha  occ. eigenvalues --  -10.00546  -9.99984  -9.99565  -9.99116  -3.00800
 Alpha  occ. eigenvalues --   -1.75583  -1.75508  -1.75138  -1.13135  -1.12323
 Alpha  occ. eigenvalues --   -1.11373  -1.10491  -1.03896  -1.03650  -1.03063
 Alpha  occ. eigenvalues --   -1.02283  -0.93221  -0.89735  -0.88292  -0.82070
 Alpha  occ. eigenvalues --   -0.81679  -0.80969  -0.80307  -0.78122  -0.76993
 Alpha  occ. eigenvalues --   -0.76651  -0.75059  -0.74354  -0.74048  -0.73035
 Alpha  occ. eigenvalues --   -0.72738  -0.72496  -0.69473  -0.68805  -0.68569
 Alpha  occ. eigenvalues --   -0.68243  -0.68109  -0.67745  -0.66241  -0.65330
 Alpha  occ. eigenvalues --   -0.65136  -0.64558  -0.64352  -0.64101  -0.62968
 Alpha  occ. eigenvalues --   -0.60062  -0.59424  -0.59058  -0.58942  -0.57869
 Alpha  occ. eigenvalues --   -0.57372  -0.56803  -0.55330  -0.55262  -0.54850
 Alpha  occ. eigenvalues --   -0.54303  -0.52859  -0.52673  -0.51833  -0.51522
 Alpha  occ. eigenvalues --   -0.50362  -0.50163  -0.50006  -0.49423  -0.48975
 Alpha  occ. eigenvalues --   -0.48471  -0.48136  -0.47427  -0.47252  -0.46428
 Alpha  occ. eigenvalues --   -0.46238  -0.45540  -0.44878  -0.44708  -0.44536
 Alpha  occ. eigenvalues --   -0.44096  -0.43848  -0.43658  -0.42518  -0.42127
 Alpha  occ. eigenvalues --   -0.41694  -0.41579  -0.41232  -0.41162  -0.41147
 Alpha  occ. eigenvalues --   -0.40963  -0.40824  -0.40701  -0.40185  -0.40030
 Alpha  occ. eigenvalues --   -0.39883  -0.39649  -0.39615  -0.39476  -0.39393
 Alpha  occ. eigenvalues --   -0.38945  -0.38798  -0.38723  -0.38382  -0.38309
 Alpha  occ. eigenvalues --   -0.37791  -0.37705  -0.37592  -0.37307  -0.37035
 Alpha  occ. eigenvalues --   -0.36976  -0.36809  -0.36376  -0.36329  -0.36146
 Alpha  occ. eigenvalues --   -0.36056  -0.35715  -0.35460  -0.35452  -0.35366
 Alpha  occ. eigenvalues --   -0.35158  -0.34992  -0.34798  -0.34642  -0.34357
 Alpha  occ. eigenvalues --   -0.34204  -0.34085  -0.33206  -0.32599  -0.32306
 Alpha  occ. eigenvalues --   -0.31940  -0.31519  -0.31465  -0.31121  -0.30914
 Alpha  occ. eigenvalues --   -0.30898  -0.30640  -0.30453  -0.29923  -0.29863
 Alpha  occ. eigenvalues --   -0.29662  -0.29176  -0.29065  -0.28780  -0.28539
 Alpha  occ. eigenvalues --   -0.28479  -0.28330  -0.27959  -0.27700  -0.27560
 Alpha  occ. eigenvalues --   -0.27150  -0.25718  -0.25289  -0.23036  -0.21046
 Alpha  occ. eigenvalues --   -0.19304  -0.19146  -0.18888  -0.17983  -0.16276
 Alpha virt. eigenvalues --   -0.02345  -0.01389  -0.00320   0.00420   0.00496
 Alpha virt. eigenvalues --    0.05695   0.06209   0.06432   0.06903   0.07223
 Alpha virt. eigenvalues --    0.07498   0.09198   0.09624   0.10671   0.11111
 Alpha virt. eigenvalues --    0.11668   0.12070   0.12631   0.12895   0.13164
 Alpha virt. eigenvalues --    0.13520   0.13931   0.14240   0.15051   0.15150
 Alpha virt. eigenvalues --    0.15610   0.15934   0.16175   0.16617   0.17145
 Alpha virt. eigenvalues --    0.17433   0.17681   0.17885   0.18207   0.18302
 Alpha virt. eigenvalues --    0.18951   0.19186   0.19958   0.20581   0.20761
 Alpha virt. eigenvalues --    0.21134   0.21530   0.21670   0.22351   0.22658
 Alpha virt. eigenvalues --    0.22694   0.23119   0.23535   0.24140   0.25057
 Alpha virt. eigenvalues --    0.25243   0.25282   0.25887   0.26170   0.26869
 Alpha virt. eigenvalues --    0.27454   0.27707   0.29258   0.29662   0.29893
 Alpha virt. eigenvalues --    0.30364   0.30775   0.31617   0.32014   0.32720
 Alpha virt. eigenvalues --    0.33045   0.33500   0.34290   0.34704   0.34829
 Alpha virt. eigenvalues --    0.34910   0.35096   0.35520   0.36503   0.36710
 Alpha virt. eigenvalues --    0.37340   0.37852   0.38024   0.38353   0.38449
 Alpha virt. eigenvalues --    0.38842   0.39431   0.39698   0.40102   0.40283
 Alpha virt. eigenvalues --    0.40662   0.40799   0.41179   0.42013   0.42543
 Alpha virt. eigenvalues --    0.42648   0.43318   0.43790   0.44090   0.44817
 Alpha virt. eigenvalues --    0.45164   0.45451   0.45761   0.46041   0.46112
 Alpha virt. eigenvalues --    0.46470   0.46587   0.46808   0.47162   0.47810
 Alpha virt. eigenvalues --    0.48055   0.48423   0.48614   0.48744   0.49035
 Alpha virt. eigenvalues --    0.49082   0.49222   0.49268   0.49431   0.49687
 Alpha virt. eigenvalues --    0.49747   0.49853   0.50223   0.50236   0.50837
 Alpha virt. eigenvalues --    0.51141   0.51252   0.51548   0.51882   0.52546
 Alpha virt. eigenvalues --    0.52569   0.53423   0.53643   0.53806   0.53846
 Alpha virt. eigenvalues --    0.54335   0.54708   0.54878   0.55251   0.55694
 Alpha virt. eigenvalues --    0.56064   0.56252   0.56562   0.56799   0.56933
 Alpha virt. eigenvalues --    0.57147   0.57513   0.57978   0.58083   0.58146
 Alpha virt. eigenvalues --    0.58581   0.58913   0.59254   0.59720   0.60388
 Alpha virt. eigenvalues --    0.60595   0.61105   0.61642   0.62289   0.62691
 Alpha virt. eigenvalues --    0.62815   0.63065   0.63343   0.64123   0.64231
 Alpha virt. eigenvalues --    0.65029   0.65530   0.65926   0.66261   0.66656
 Alpha virt. eigenvalues --    0.66836   0.67544   0.68746   0.69961   0.69999
 Alpha virt. eigenvalues --    0.70044   0.70649   0.70890   0.71416   0.71748
 Alpha virt. eigenvalues --    0.72289   0.72417   0.72905   0.73440   0.73877
 Alpha virt. eigenvalues --    0.74639   0.74959   0.75472   0.75866   0.75968
 Alpha virt. eigenvalues --    0.76558   0.76800   0.77688   0.78013   0.78970
 Alpha virt. eigenvalues --    0.79483   0.80179   0.81009   0.81651   0.82957
 Alpha virt. eigenvalues --    0.83144   0.83601   0.84810   0.85263   0.85722
 Alpha virt. eigenvalues --    0.86055   0.86736   0.87289   0.88313   0.88491
 Alpha virt. eigenvalues --    0.89465   0.89823   0.90246   0.90752   0.91066
 Alpha virt. eigenvalues --    0.91956   0.92122   0.92356   0.92725   0.93580
 Alpha virt. eigenvalues --    0.94056   0.94778   0.95863   0.96409   0.96949
 Alpha virt. eigenvalues --    0.97167   0.97482   0.98697   0.99368   1.00537
 Alpha virt. eigenvalues --    1.01178   1.02320   1.02947   1.04093   1.05083
 Alpha virt. eigenvalues --    1.05439   1.06006   1.07571   1.08165   1.09046
 Alpha virt. eigenvalues --    1.09486   1.10244   1.11357   1.12071   1.12700
 Alpha virt. eigenvalues --    1.13735   1.14490   1.15011   1.16841   1.16936
 Alpha virt. eigenvalues --    1.17167   1.18322   1.20428   1.22138   1.23104
 Alpha virt. eigenvalues --    1.24326   1.24661   1.25068   1.26087   1.27259
 Alpha virt. eigenvalues --    1.29452   1.30654   1.31847   1.33116   1.34110
 Alpha virt. eigenvalues --    1.34910   1.36314   1.36599   1.38088   1.39047
 Alpha virt. eigenvalues --    1.40276   1.41628   1.41785   1.43686   1.44631
 Alpha virt. eigenvalues --    1.45192   1.45993   1.46603   1.47972   1.48169
 Alpha virt. eigenvalues --    1.49094   1.49959   1.50626   1.51535   1.52394
 Alpha virt. eigenvalues --    1.53200   1.54911   1.54985   1.58419   1.59282
 Alpha virt. eigenvalues --    1.60192   1.61604   1.62422   1.63801   1.64648
 Alpha virt. eigenvalues --    1.65605   1.67815   1.68402   1.69736   1.70491
 Alpha virt. eigenvalues --    1.71001   1.72109   1.72798   1.73824   1.74215
 Alpha virt. eigenvalues --    1.75345   1.76179   1.76987   1.78539   1.78782
 Alpha virt. eigenvalues --    1.79163   1.80187   1.81420   1.82508   1.82912
 Alpha virt. eigenvalues --    1.83277   1.83708   1.85053   1.85590   1.86314
 Alpha virt. eigenvalues --    1.86695   1.86827   1.87252   1.87700   1.88720
 Alpha virt. eigenvalues --    1.89507   1.89740   1.90787   1.90958   1.92186
 Alpha virt. eigenvalues --    1.93486   1.93980   1.94600   1.95510   1.95695
 Alpha virt. eigenvalues --    1.96989   1.98379   1.98565   1.99031   1.99293
 Alpha virt. eigenvalues --    1.99861   2.00091   2.01156   2.01806   2.02223
 Alpha virt. eigenvalues --    2.02413   2.03248   2.03861   2.04862   2.07609
 Alpha virt. eigenvalues --    2.07867   2.08695   2.09610   2.10926   2.11065
 Alpha virt. eigenvalues --    2.11458   2.12041   2.14474   2.15062   2.15104
 Alpha virt. eigenvalues --    2.16038   2.16522   2.17280   2.17765   2.18336
 Alpha virt. eigenvalues --    2.19470   2.20184   2.20731   2.21544   2.21998
 Alpha virt. eigenvalues --    2.22786   2.23321   2.24913   2.26389   2.27402
 Alpha virt. eigenvalues --    2.28279   2.29207   2.29781   2.31066   2.31490
 Alpha virt. eigenvalues --    2.31756   2.32320   2.32544   2.33202   2.34118
 Alpha virt. eigenvalues --    2.34991   2.35544   2.37747   2.41575   2.42168
 Alpha virt. eigenvalues --    2.42687   2.43322   2.45830   2.46683   2.47554
 Alpha virt. eigenvalues --    2.47968   2.50105   2.51818   2.52398   2.54626
 Alpha virt. eigenvalues --    2.56655   2.57882   2.58523   2.60108   2.63729
 Alpha virt. eigenvalues --    2.64680   2.66045   2.66759   2.67200   2.68578
 Alpha virt. eigenvalues --    2.70307   2.70596   2.74365   2.75470   2.76561
 Alpha virt. eigenvalues --    2.77666   2.79872   2.80744   2.84607   2.86137
 Alpha virt. eigenvalues --    2.86920   2.89834   2.94233   2.95686   2.96593
 Alpha virt. eigenvalues --    2.97754   3.01757   3.01939   3.02173   3.05682
 Alpha virt. eigenvalues --    3.09452   3.11992   3.15406   3.16941   3.17735
 Alpha virt. eigenvalues --    3.20256   3.25216   3.60285   5.99611   6.13175
 Alpha virt. eigenvalues --    6.39738 103.35490
          Condensed to atoms (all electrons):
 Mulliken atomic charges:
              1
     1  O   -0.449451
     2  Mg   0.782630
     3  O   -0.461215
     4  C    0.588943
     5  N   -0.556451
     6  N   -0.540359
     7  O   -0.469931
     8  C    0.341158
     9  C   -0.264020
    10  C    0.337657
    11  O   -0.458599
    12  C    0.604152
    13  C    0.053346
    14  C    0.069072
    15  O   -0.448447
    16  C   -0.226236
    17  O   -0.663601
    18  C    0.600500
    19  O   -0.447311
    20  O   -0.450724
    21  C    0.642106
    22  C    0.128863
    23  C    0.025142
    24  O   -0.496132
    25  C   -0.478436
    26  C   -0.459165
    27  C   -0.474517
    28  C   -0.491560
    29  C    0.007630
    30  C    0.009177
    31  C    0.002122
    32  C   -0.079066
    33  C   -0.073528
    34  C   -0.073454
    35  C   -0.004335
    36  C   -0.055301
    37  C   -0.055991
    38  C    0.001044
    39  C   -0.077416
    40  C   -0.073426
    41  C   -0.077388
    42  C    0.001824
    43  C   -0.052344
    44  C   -0.056013
    45  C   -0.226965
    46  C   -0.217660
    47  C   -0.223482
    48  C   -0.217542
    49  C   -0.225559
    50  C   -0.217729
    51  C   -0.219046
    52  C   -0.218761
    53  C   -0.439359
    54  C   -0.439198
    55  H    0.087825
    56  H    0.202107
    57  H    0.140075
    58  H    0.176132
    59  H    0.179460
    60  H    0.177613
    61  H    0.134115
    62  H    0.203894
    63  H    0.142319
    64  H    0.181313
    65  H    0.163144
    66  H    0.139029
    67  H    0.165656
    68  H    0.170414
    69  H    0.172408
    70  H    0.174755
    71  H    0.174956
    72  H    0.188434
    73  H    0.172620
    74  H    0.172951
    75  H    0.090690
    76  H    0.096563
    77  H    0.093881
    78  H    0.095163
    79  H    0.096705
    80  H    0.092149
    81  H    0.097679
    82  H    0.094658
    83  H    0.095249
    84  H    0.097520
    85  H    0.069765
    86  H    0.121471
    87  H    0.067189
    88  H    0.076883
    89  H    0.073878
    90  H    0.071987
    91  H    0.073192
    92  H    0.084641
    93  H    0.098621
    94  H    0.077322
    95  H    0.073013
    96  H    0.075026
    97  H    0.072574
    98  H    0.110935
    99  H    0.067875
   100  H    0.077158
   101  H    0.075757
   102  H    0.073890
   103  H    0.078194
   104  H    0.097359
   105  H    0.073126
   106  H    0.077907
   107  H    0.075533
   108  H    0.076706
   109  H    0.129226
   110  H    0.125751
   111  H    0.130075
   112  H    0.126790
   113  H    0.133215
   114  H    0.129815
 Sum of Mulliken charges=   0.00000
 Atomic charges with hydrogens summed into heavy atoms:
              1
     1  O   -0.449451
     2  Mg   0.782630
     3  O   -0.461215
     4  C    0.588943
     5  N   -0.556451
     6  N   -0.540359
     7  O   -0.469931
     8  C    0.341158
     9  C   -0.176195
    10  C    0.337657
    11  O   -0.458599
    12  C    0.604152
    13  C    0.255453
    14  C    0.209147
    15  O   -0.448447
    16  C    0.306969
    17  O   -0.663601
    18  C    0.600500
    19  O   -0.447311
    20  O   -0.450724
    21  C    0.642106
    22  C    0.262978
    23  C    0.229036
    24  O   -0.496132
    25  C    0.008341
    26  C    0.015934
    27  C    0.047602
    28  C    0.042446
    29  C    0.007630
    30  C    0.009177
    31  C    0.002122
    32  C    0.011625
    33  C    0.023035
    34  C    0.020427
    35  C   -0.004335
    36  C    0.039862
    37  C    0.040714
    38  C    0.001044
    39  C    0.014732
    40  C    0.024253
    41  C    0.017270
    42  C    0.001824
    43  C    0.042905
    44  C    0.041507
    45  C    0.031460
    46  C    0.005088
    47  C    0.032972
    48  C    0.007819
    49  C    0.025826
    50  C    0.009076
    51  C    0.029633
    52  C    0.011385
    53  C   -0.054307
    54  C   -0.049379
    55  H    0.000000
    56  H    0.000000
    57  H    0.000000
    58  H    0.000000
    59  H    0.000000
    60  H    0.000000
    61  H    0.000000
    62  H    0.000000
    63  H    0.000000
    64  H    0.000000
    65  H    0.000000
    66  H    0.000000
    67  H    0.000000
    68  H    0.000000
    69  H    0.000000
    70  H    0.000000
    71  H    0.000000
    72  H    0.000000
    73  H    0.000000
    74  H    0.000000
    75  H    0.000000
    76  H    0.000000
    77  H    0.000000
    78  H    0.000000
    79  H    0.000000
    80  H    0.000000
    81  H    0.000000
    82  H    0.000000
    83  H    0.000000
    84  H    0.000000
    85  H    0.000000
    86  H    0.000000
    87  H    0.000000
    88  H    0.000000
    89  H    0.000000
    90  H    0.000000
    91  H    0.000000
    92  H    0.000000
    93  H    0.000000
    94  H    0.000000
    95  H    0.000000
    96  H    0.000000
    97  H    0.000000
    98  H    0.000000
    99  H    0.000000
   100  H    0.000000
   101  H    0.000000
   102  H    0.000000
   103  H    0.000000
   104  H    0.000000
   105  H    0.000000
   106  H    0.000000
   107  H    0.000000
   108  H    0.000000
   109  H    0.000000
   110  H    0.000000
   111  H    0.000000
   112  H    0.000000
   113  H    0.000000
   114  H    0.000000
 Sum of Mulliken charges=   0.00000
 Electronic spatial extent (au):  <R**2>= 33351.3625
 Charge=     0.0000 electrons
 Dipole moment (field-independent basis, Debye):
    X=    -1.7394    Y=     1.2809    Z=     2.0071  Tot=     2.9487
 Quadrupole moment (field-independent basis, Debye-Ang):
   XX=  -293.2998   YY=  -308.4079   ZZ=  -309.2748
   XY=    35.1111   XZ=    -2.4518   YZ=    -4.7455
 Traceless Quadrupole moment (field-independent basis, Debye-Ang):
   XX=    10.3610   YY=    -4.7471   ZZ=    -5.6139
   XY=    35.1111   XZ=    -2.4518   YZ=    -4.7455
 Octapole moment (field-independent basis, Debye-Ang**2):
  XXX=    32.9599  YYY=    61.4117  ZZZ=    10.5450  XYY=    -8.0107
  XXY=    91.2604  XXZ=    -9.4774  XZZ=     6.9164  YZZ=   -13.3991
  YYZ=    27.1511  XYZ=   -18.0173
 Hexadecapole moment (field-independent basis, Debye-Ang**3):
 XXXX=-22080.4421 YYYY=-13298.3997 ZZZZ= -6664.4953 XXXY=  1133.2603
 XXXZ=   206.5663 YYYX=   363.4006 YYYZ=  -215.5215 ZZZX=    -2.5818
 ZZZY=   -13.3803 XXYY= -5778.0660 XXZZ= -4785.1808 YYZZ= -3209.8945
 XXYZ=   -11.3271 YYXZ=    69.0864 ZZXY=    59.9056
 N-N= 8.774028952219D+03 E-N=-2.364402535710D+04  KE= 2.584813052016D+03
 1\1\GINC-DEWAR\SP\RB3LYP\Gen\C42H60Mg1N2O9\RZEPA\23-Nov-2004\0\\# RB3L
 YP/GEN SCRF(IEFPCM,SOLVENT=THF)\\from RRSS_fm-product.mop\\0,1\O,0,6.3
 205235231,1.4183251869,0.2837347198\Mg,0,-1.5474227735,0.8201073266,-0
 .3406062704\O,0,2.0768073703,-3.0624823951,0.0704971305\C,0,6.06845392
 31,0.1746392005,-0.1723094156\N,0,-1.1671484167,2.3098507941,0.9438093
 963\N,0,-3.4193059863,0.671643861,0.3929012733\O,0,6.857964463,-0.7403
 390658,-0.1358161104\C,0,-2.0293038304,2.9457106603,1.7297272628\C,0,-
 3.3896318247,2.5836021799,1.841536626\C,0,-4.0332432126,1.4710700619,1
 .2501377467\O,0,4.2017017317,-1.2380451705,-0.815813044\C,0,4.03423215
 04,-1.7967972433,0.3953172332\C,0,3.5065525171,-3.2318587078,0.2779885
 392\C,0,4.6849755299,0.122896579,-0.8218053168\O,0,4.2599628759,-1.237
 7390262,1.4454779732\C,0,7.6281650967,1.6081013678,0.8516339295\O,0,-0
 .9710466618,0.756827407,-2.1529405219\C,0,1.3924793094,-4.0887931198,-
 0.4781628886\O,0,1.8640926134,-5.1610813315,-0.7774178412\O,0,-0.06031
 67514,-2.6610074011,-1.7077540214\C,0,-0.3938251883,-1.4145528555,-1.3
 976409971\C,0,-0.4141643611,-0.4207252624,-2.5653057876\C,0,-0.0694091
 021,-3.6727254101,-0.6566360143\O,0,-0.6895486712,-1.0696836503,-0.248
 1824087\C,0,1.0290093939,-0.2447810888,-3.0859130917\C,0,-1.0079295361
 ,-4.7802730998,-1.0889482231\C,0,3.7847154763,-4.0381297665,1.53575454
 6\C,0,4.7899553962,0.5451815713,-2.285530484\C,0,0.2464423005,2.620149
 1851,0.8655575185\C,0,-3.9195333647,-0.5679166847,-0.1528455183\C,0,0.
 71481285,3.4819282096,-0.1885423272\C,0,2.1100048327,3.6035139483,-0.3
 831654959\C,0,3.0280711911,2.9144660576,0.4419663477\C,0,2.5574103034,
 2.0832154952,1.48143293\C,0,1.1650887096,1.917067332,1.7117335364\C,0,
 -0.2673581226,4.3170125953,-1.0527973275\C,0,0.6778895396,1.0445112062
 ,2.8973158487\C,0,-3.8446028016,-1.7783680812,0.6122317793\C,0,-4.0580
 324418,-3.0131542969,-0.0560204228\C,0,-4.3185258531,-3.0598864299,-1.
 4415683694\C,0,-4.4207091468,-1.8588641465,-2.1812415792\C,0,-4.239046
 194,-0.5979563573,-1.5612110945\C,0,-3.5710130543,-1.7712443708,2.1389
 074712\C,0,-4.5123249701,0.7166128492,-2.3413928544\C,0,-0.1346091101,
 3.9920110217,-2.5735608575\C,0,-0.0654919975,5.8490165886,-0.794939806
 9\C,0,1.1302811481,-0.4413900133,2.7449248146\C,0,1.1703961715,1.62921
 89583,4.2641367313\C,0,-3.8873960316,0.7358321329,-3.768189524\C,0,-6.
 0569487343,0.9758668491,-2.4051412954\C,0,-2.2832104565,-2.5761373245,
 2.5041458165\C,0,-4.8069834197,-2.3241441894,2.9267256318\C,0,-1.54247
 93206,4.1146644994,2.5711074662\C,0,-5.474433499,1.2084287188,1.661886
 3817\H,0,-3.9976318666,3.1932786611,2.5012495834\H,0,3.9240864238,-3.7
 11348178,-0.6108218579\H,0,3.9864251253,0.765792244,-0.2772228951\H,0,
 8.4035042049,1.3919654459,0.1118086913\H,0,7.7655679716,0.9517120334,1
 .7145997667\H,0,7.6666685476,2.6548087532,1.1546092693\H,0,-0.99943722
 45,-0.9220322141,-3.3639463144\H,0,-0.4116353758,-3.2001654593,0.26514
 02643\H,0,1.4700097962,-1.1854532067,-3.4341905567\H,0,1.6485287583,0.
 1741489314,-2.2861373894\H,0,1.0048130816,0.4725922569,-3.9114516957\H
 ,0,-2.0176848016,-4.3615406226,-1.1536992983\H,0,-0.999389778,-5.58795
 79183,-0.3498811413\H,0,-0.7082879173,-5.1952171766,-2.0548808435\H,0,
 4.8654874854,-4.1205124712,1.6901311291\H,0,3.3676095891,-5.0423762621
 ,1.4339647909\H,0,3.353281761,-3.5381771001,2.4064224706\H,0,3.8126584
 185,0.4793631328,-2.7689378109\H,0,5.4947998351,-0.0991958777,-2.82004
 8491\H,0,5.1394647607,1.5804543574,-2.3440816528\H,0,2.4863763525,4.27
 56854227,-1.1657402409\H,0,4.108898749,3.072217086,0.3187247933\H,0,3.
 2786952212,1.5906526897,2.1476869108\H,0,-1.2986147091,4.0531009393,-0
 .7387904107\H,0,-0.4310294071,1.0650341195,2.8971905745\H,0,-4.0491753
 129,-3.9460117302,0.5234561755\H,0,-4.508387436,-4.0244762713,-1.93308
 8414\H,0,-4.6931525003,-1.9017878316,-3.2440912436\H,0,-3.4045126771,-
 0.7221481234,2.4514908462\H,0,-4.0610772883,1.5494501393,-1.7619780395
 \H,0,-0.864050481,4.587024597,-3.1452857711\H,0,-0.3347151946,2.919889
 2199,-2.7466198812\H,0,0.874762698,4.2313034166,-2.9407814472\H,0,-0.8
 185121178,6.4231469387,-1.3561123253\H,0,0.933919609,6.1713247345,-1.1
 251571916\H,0,-0.1723103794,6.0877434682,0.2746808253\H,0,0.7306190368
 ,-1.0431385642,3.575820241\H,0,2.2278803143,-0.525496334,2.7447242218\
 H,0,0.7526230562,-0.8599797263,1.79419849\H,0,0.7530790307,1.038824008
 8,5.0941545413\H,0,0.8477945175,2.6750868794,4.3841754374\H,0,2.268519
 6029,1.5931159212,4.3303217272\H,0,-4.1144374848,1.6971329502,-4.25453
 77105\H,0,-2.7916142853,0.634887978,-3.6933018351\H,0,-4.2877682818,-0
 .0728749462,-4.3972885483\H,0,-6.2534592099,1.931503175,-2.9146111524\
 H,0,-6.486840915,1.0271163404,-1.3921355988\H,0,-6.5636280861,0.171097
 4274,-2.9606094604\H,0,-2.1159998462,-2.5506622189,3.5926113157\H,0,-1
 .4048877006,-2.1246674686,2.0093230492\H,0,-2.36895435,-3.6281600638,2
 .1905851736\H,0,-4.6291156279,-2.2400477196,4.009819782\H,0,-4.9809231
 857,-3.3838330763,2.6848357032\H,0,-5.7166876118,-1.7568499551,2.67656
 94594\H,0,-1.0657005873,4.8767122185,1.9431750665\H,0,-2.3676546015,4.
 5850888098,3.1160082707\H,0,-0.7977124803,3.7803771147,3.3039664945\H,
 0,-6.0095587754,0.6225496074,0.9072552434\H,0,-5.5116389604,0.65468964
 76,2.6092395187\H,0,-6.0091389265,2.1531800016,1.815706149\\Version=x8
 6-Linux-G03RevB.04\State=1-A\HF=-2612.2258824\RMSD=9.216e-06\Dipole=-0
 .7279243,0.4374808,0.7902956\PG=C01 [X(C42H60Mg1N2O9)]\\@


 IT PROBABLY IS NOT POSSIBLE FOR A SCIENTIST TO INTERROGATE NATURE 
 FROM A WHOLLY DISINTERESTED VIEWPOINT.
 EVEN IF HE HAS NO PARTICULAR AXE TO GRIND, HE IS LIKELY TO HAVE 
 A DISTINCTIVE WAY OF VIEWING NATURE.

                                                   -- JOHN LOSEE
 Job cpu time:  0 days 11 hours 52 minutes 19.0 seconds.
 File lengths (MBytes):  RWF=   1171 Int=      0 D2E=      0 Chk=     38 Scr=      1
 Normal termination of Gaussian 03 at Tue Nov 23 03:03:32 2004.
