# Supplementary material
Source: publisher figshare collection journal article supplement (https://acs.figshare.com/ndownloader/files/5127205)
Supplement: Supplementary file 1 [file 5127205 › supporting_ja043819b/RRSS_fm-product.log]

 Entering Gaussian System, Link 0=g03
 Input=RRSS_fm-product.gjf
 Output=RRSS_fm-product.log
 Initial command:
 /usr/local/g03/l1.exe /home/rzepa/Gau-7092.inp -scrdir=/home/rzepa/
 Entering Link 1 = /usr/local/g03/l1.exe PID=      7093.
  
 Copyright (c) 1988,1990,1992,1993,1995,1998,2003, Gaussian, Inc.
                  All Rights Reserved.
  
 This is the Gaussian(R) 03 program.  It is based on the
 the Gaussian(R) 98 system (copyright 1998, Gaussian, Inc.),
 the Gaussian(R) 94 system (copyright 1995, Gaussian, Inc.),
 the Gaussian 92(TM) system (copyright 1992, Gaussian, Inc.),
 the Gaussian 90(TM) system (copyright 1990, Gaussian, Inc.),
 the Gaussian 88(TM) system (copyright 1988, Gaussian, Inc.),
 the Gaussian 86(TM) system (copyright 1986, Carnegie Mellon
 University), and the Gaussian 82(TM) system (copyright 1983,
 Carnegie Mellon University). Gaussian is a federally registered
 trademark of Gaussian, Inc.
  
 This software contains proprietary and confidential information,
 including trade secrets, belonging to Gaussian, Inc.
  
 This software is provided under written license and may be
 used, copied, transmitted, or stored only in accord with that
 written license.
  
 The following legend is applicable only to US Government
 contracts under DFARS:
  
                    RESTRICTED RIGHTS LEGEND
  
 Use, duplication or disclosure by the US Government is subject
 to restrictions as set forth in subparagraph (c)(1)(ii) of the
 Rights in Technical Data and Computer Software clause at DFARS
 252.227-7013.
  
 Gaussian, Inc.
 Carnegie Office Park, Building 6, Pittsburgh, PA 15106 USA
  
 The following legend is applicable only to US Government
 contracts under FAR:
  
                    RESTRICTED RIGHTS LEGEND
  
 Use, reproduction and disclosure by the US Government is subject
 to restrictions as set forth in subparagraph (c) of the
 Commercial Computer Software - Restricted Rights clause at FAR
 52.227-19.
  
 Gaussian, Inc.
 Carnegie Office Park, Building 6, Pittsburgh, PA 15106 USA
  
  
 ---------------------------------------------------------------
 Warning -- This program may not be used in any manner that
 competes with the business of Gaussian, Inc. or will provide
 assistance to any competitor of Gaussian, Inc.  The licensee
 of this program is prohibited from giving any competitor of
 Gaussian, Inc. access to this program.  By using this program,
 the user acknowledges that Gaussian, Inc. is engaged in the
 business of creating and licensing software in the field of
 computational chemistry and represents and warrants to the
 licensee that it is not a competitor of Gaussian, Inc. and that
 it will not use this program in any manner prohibited above.
 ---------------------------------------------------------------
  

 Cite this work as:
 Gaussian 03, Revision B.04,
 M. J. Frisch, G. W. Trucks, H. B. Schlegel, G. E. Scuseria, 
 M. A. Robb, J. R. Cheeseman, J. A. Montgomery, Jr., T. Vreven, 
 K. N. Kudin, J. C. Burant, J. M. Millam, S. S. Iyengar, J. Tomasi, 
 V. Barone, B. Mennucci, M. Cossi, G. Scalmani, N. Rega, 
 G. A. Petersson, H. Nakatsuji, M. Hada, M. Ehara, K. Toyota, 
 R. Fukuda, J. Hasegawa, M. Ishida, T. Nakajima, Y. Honda, O. Kitao, 
 H. Nakai, M. Klene, X. Li, J. E. Knox, H. P. Hratchian, J. B. Cross, 
 C. Adamo, J. Jaramillo, R. Gomperts, R. E. Stratmann, O. Yazyev, 
 A. J. Austin, R. Cammi, C. Pomelli, J. W. Ochterski, P. Y. Ayala, 
 K. Morokuma, G. A. Voth, P. Salvador, J. J. Dannenberg, 
 V. G. Zakrzewski, S. Dapprich, A. D. Daniels, M. C. Strain, 
 O. Farkas, D. K. Malick, A. D. Rabuck, K. Raghavachari, 
 J. B. Foresman, J. V. Ortiz, Q. Cui, A. G. Baboul, S. Clifford, 
 J. Cioslowski, B. B. Stefanov, G. Liu, A. Liashenko, P. Piskorz, 
 I. Komaromi, R. L. Martin, D. J. Fox, T. Keith, M. A. Al-Laham, 
 C. Y. Peng, A. Nanayakkara, M. Challacombe, P. M. W. Gill, 
 B. Johnson, W. Chen, M. W. Wong, C. Gonzalez, and J. A. Pople, 
 Gaussian, Inc., Pittsburgh PA, 2003.
 
 *********************************************
 Gaussian 03:  x86-Linux-G03RevB.04 2-Jun-2003
                  12-Aug-2004 
 *********************************************
 %nproc=2
 Will use up to    2 processors via shared memory.
 %mem=500MB
 %chk=rrss_fm-product.chk
 %rwf=re1.rwf,1800MB,re2.rwf,1800MB,re3.rwf,1800MB,re4.rwf,1800MB,re5.rwf,1800MB
 ----------------------------------------------------------
 # RB3LYP/Gen freq Pop=(Minimal) geom=checkpoint guess=read
 ----------------------------------------------------------
 1/10=4,29=2,30=1,38=1/1,3;
 2/40=1/2;
 3/5=7,11=2,16=1,25=1,30=1,74=-5/1,2,3;
 4/5=1,7=1/1;
 5/5=2,38=6/2;
 8/6=4,10=90,11=11,27=1179648000/1;
 11/6=1,8=1,9=11,15=111,16=1/1,2,10;
 10/6=1/2;
 6/7=2,8=2,9=2,10=2,18=1,28=1/1;
 7/8=1,10=1,25=1/1,2,3,16;
 1/10=4,30=1/3;
 99//99;
 ------------------------
 from RRSS_fm-product.mop
 ------------------------
 Redundant internal coordinates taken from checkpoint file:
 rrss_fm-product.chk
 Charge =  0 Multiplicity = 1
 O,0,6.3205235231,1.4183251869,0.2837347198
 Mg,0,-1.5474227735,0.8201073266,-0.3406062704
 O,0,2.0768073703,-3.0624823951,0.0704971305
 C,0,6.0684539231,0.1746392005,-0.1723094156
 N,0,-1.1671484167,2.3098507941,0.9438093963
 N,0,-3.4193059863,0.671643861,0.3929012733
 O,0,6.857964463,-0.7403390658,-0.1358161104
 C,0,-2.0293038304,2.9457106603,1.7297272628
 C,0,-3.3896318247,2.5836021799,1.841536626
 C,0,-4.0332432126,1.4710700619,1.2501377467
 O,0,4.2017017317,-1.2380451705,-0.815813044
 C,0,4.0342321504,-1.7967972433,0.3953172332
 C,0,3.5065525171,-3.2318587078,0.2779885392
 C,0,4.6849755299,0.122896579,-0.8218053168
 O,0,4.2599628759,-1.2377390262,1.4454779732
 C,0,7.6281650967,1.6081013678,0.8516339295
 O,0,-0.9710466618,0.756827407,-2.1529405219
 C,0,1.3924793094,-4.0887931198,-0.4781628886
 O,0,1.8640926134,-5.1610813315,-0.7774178412
 O,0,-0.0603167514,-2.6610074011,-1.7077540214
 C,0,-0.3938251883,-1.4145528555,-1.3976409971
 C,0,-0.4141643611,-0.4207252624,-2.5653057876
 C,0,-0.0694091021,-3.6727254101,-0.6566360143
 O,0,-0.6895486712,-1.0696836503,-0.2481824087
 C,0,1.0290093939,-0.2447810888,-3.0859130917
 C,0,-1.0079295361,-4.7802730998,-1.0889482231
 C,0,3.7847154763,-4.0381297665,1.535754546
 C,0,4.7899553962,0.5451815713,-2.285530484
 C,0,0.2464423005,2.6201491851,0.8655575185
 C,0,-3.9195333647,-0.5679166847,-0.1528455183
 C,0,0.71481285,3.4819282096,-0.1885423272
 C,0,2.1100048327,3.6035139483,-0.3831654959
 C,0,3.0280711911,2.9144660576,0.4419663477
 C,0,2.5574103034,2.0832154952,1.48143293
 C,0,1.1650887096,1.917067332,1.7117335364
 C,0,-0.2673581226,4.3170125953,-1.0527973275
 C,0,0.6778895396,1.0445112062,2.8973158487
 C,0,-3.8446028016,-1.7783680812,0.6122317793
 C,0,-4.0580324418,-3.0131542969,-0.0560204228
 C,0,-4.3185258531,-3.0598864299,-1.4415683694
 C,0,-4.4207091468,-1.8588641465,-2.1812415792
 C,0,-4.239046194,-0.5979563573,-1.5612110945
 C,0,-3.5710130543,-1.7712443708,2.1389074712
 C,0,-4.5123249701,0.7166128492,-2.3413928544
 C,0,-0.1346091101,3.9920110217,-2.5735608575
 C,0,-0.0654919975,5.8490165886,-0.7949398069
 C,0,1.1302811481,-0.4413900133,2.7449248146
 C,0,1.1703961715,1.6292189583,4.2641367313
 C,0,-3.8873960316,0.7358321329,-3.768189524
 C,0,-6.0569487343,0.9758668491,-2.4051412954
 C,0,-2.2832104565,-2.5761373245,2.5041458165
 C,0,-4.8069834197,-2.3241441894,2.9267256318
 C,0,-1.5424793206,4.1146644994,2.5711074662
 C,0,-5.474433499,1.2084287188,1.6618863817
 H,0,-3.9976318666,3.1932786611,2.5012495834
 H,0,3.9240864238,-3.711348178,-0.6108218579
 H,0,3.9864251253,0.765792244,-0.2772228951
 H,0,8.4035042049,1.3919654459,0.1118086913
 H,0,7.7655679716,0.9517120334,1.7145997667
 H,0,7.6666685476,2.6548087532,1.1546092693
 H,0,-0.9994372245,-0.9220322141,-3.3639463144
 H,0,-0.4116353758,-3.2001654593,0.2651402643
 H,0,1.4700097962,-1.1854532067,-3.4341905567
 H,0,1.6485287583,0.1741489314,-2.2861373894
 H,0,1.0048130816,0.4725922569,-3.9114516957
 H,0,-2.0176848016,-4.3615406226,-1.1536992983
 H,0,-0.999389778,-5.5879579183,-0.3498811413
 H,0,-0.7082879173,-5.1952171766,-2.0548808435
 H,0,4.8654874854,-4.1205124712,1.6901311291
 H,0,3.3676095891,-5.0423762621,1.4339647909
 H,0,3.353281761,-3.5381771001,2.4064224706
 H,0,3.8126584185,0.4793631328,-2.7689378109
 H,0,5.4947998351,-0.0991958777,-2.820048491
 H,0,5.1394647607,1.5804543574,-2.3440816528
 H,0,2.4863763525,4.2756854227,-1.1657402409
 H,0,4.108898749,3.072217086,0.3187247933
 H,0,3.2786952212,1.5906526897,2.1476869108
 H,0,-1.2986147091,4.0531009393,-0.7387904107
 H,0,-0.4310294071,1.0650341195,2.8971905745
 H,0,-4.0491753129,-3.9460117302,0.5234561755
 H,0,-4.508387436,-4.0244762713,-1.933088414
 H,0,-4.6931525003,-1.9017878316,-3.2440912436
 H,0,-3.4045126771,-0.7221481234,2.4514908462
 H,0,-4.0610772883,1.5494501393,-1.7619780395
 H,0,-0.864050481,4.587024597,-3.1452857711
 H,0,-0.3347151946,2.9198892199,-2.7466198812
 H,0,0.874762698,4.2313034166,-2.9407814472
 H,0,-0.8185121178,6.4231469387,-1.3561123253
 H,0,0.933919609,6.1713247345,-1.1251571916
 H,0,-0.1723103794,6.0877434682,0.2746808253
 H,0,0.7306190368,-1.0431385642,3.575820241
 H,0,2.2278803143,-0.525496334,2.7447242218
 H,0,0.7526230562,-0.8599797263,1.79419849
 H,0,0.7530790307,1.0388240088,5.0941545413
 H,0,0.8477945175,2.6750868794,4.3841754374
 H,0,2.2685196029,1.5931159212,4.3303217272
 H,0,-4.1144374848,1.6971329502,-4.2545377105
 H,0,-2.7916142853,0.634887978,-3.6933018351
 H,0,-4.2877682818,-0.0728749462,-4.3972885483
 H,0,-6.2534592099,1.931503175,-2.9146111524
 H,0,-6.486840915,1.0271163404,-1.3921355988
 H,0,-6.5636280861,0.1710974274,-2.9606094604
 H,0,-2.1159998462,-2.5506622189,3.5926113157
 H,0,-1.4048877006,-2.1246674686,2.0093230492
 H,0,-2.36895435,-3.6281600638,2.1905851736
 H,0,-4.6291156279,-2.2400477196,4.009819782
 H,0,-4.9809231857,-3.3838330763,2.6848357032
 H,0,-5.7166876118,-1.7568499551,2.6765694594
 H,0,-1.0657005873,4.8767122185,1.9431750665
 H,0,-2.3676546015,4.5850888098,3.1160082707
 H,0,-0.7977124803,3.7803771147,3.3039664945
 H,0,-6.0095587754,0.6225496074,0.9072552434
 H,0,-5.5116389604,0.6546896476,2.6092395187
 H,0,-6.0091389265,2.1531800016,1.815706149
 Recover connectivity data from disk.

 GradGradGradGradGradGradGradGradGradGradGradGradGradGradGradGradGradGrad
 Berny optimization.
 Initialization pass.
                           ----------------------------
                           !    Initial Parameters    !
                           ! (Angstroms and Degrees)  !
 --------------------------                            --------------------------
 ! Name  Definition              Value          Derivative Info.                !
 --------------------------------------------------------------------------------
 ! R1    R(1,4)                  1.3484         calculate D2E/DX2 analytically  !
 ! R2    R(1,16)                 1.4382         calculate D2E/DX2 analytically  !
 ! R3    R(2,5)                  2.0034         calculate D2E/DX2 analytically  !
 ! R4    R(2,6)                  2.0159         calculate D2E/DX2 analytically  !
 ! R5    R(2,17)                 1.9028         calculate D2E/DX2 analytically  !
 ! R6    R(2,24)                 2.0775         calculate D2E/DX2 analytically  !
 ! R7    R(3,13)                 1.4546         calculate D2E/DX2 analytically  !
 ! R8    R(3,18)                 1.3501         calculate D2E/DX2 analytically  !
 ! R9    R(4,7)                  1.2091         calculate D2E/DX2 analytically  !
 ! R10   R(4,14)                 1.5292         calculate D2E/DX2 analytically  !
 ! R11   R(5,8)                  1.3286         calculate D2E/DX2 analytically  !
 ! R12   R(5,29)                 1.4494         calculate D2E/DX2 analytically  !
 ! R13   R(6,10)                 1.3232         calculate D2E/DX2 analytically  !
 ! R14   R(6,30)                 1.4438         calculate D2E/DX2 analytically  !
 ! R15   R(8,9)                  1.4121         calculate D2E/DX2 analytically  !
 ! R16   R(8,53)                 1.5203         calculate D2E/DX2 analytically  !
 ! R17   R(9,10)                 1.4148         calculate D2E/DX2 analytically  !
 ! R18   R(9,55)                 1.0847         calculate D2E/DX2 analytically  !
 ! R19   R(10,54)                1.5217         calculate D2E/DX2 analytically  !
 ! R20   R(11,12)                1.3443         calculate D2E/DX2 analytically  !
 ! R21   R(11,14)                1.4442         calculate D2E/DX2 analytically  !
 ! R22   R(12,13)                1.5335         calculate D2E/DX2 analytically  !
 ! R23   R(12,15)                1.2109         calculate D2E/DX2 analytically  !
 ! R24   R(13,27)                1.5197         calculate D2E/DX2 analytically  !
 ! R25   R(13,56)                1.0928         calculate D2E/DX2 analytically  !
 ! R26   R(14,28)                1.527          calculate D2E/DX2 analytically  !
 ! R27   R(14,57)                1.0945         calculate D2E/DX2 analytically  !
 ! R28   R(16,58)                1.0933         calculate D2E/DX2 analytically  !
 ! R29   R(16,59)                1.0929         calculate D2E/DX2 analytically  !
 ! R30   R(16,60)                1.0904         calculate D2E/DX2 analytically  !
 ! R31   R(17,22)                1.3663         calculate D2E/DX2 analytically  !
 ! R32   R(18,19)                1.209          calculate D2E/DX2 analytically  !
 ! R33   R(18,23)                1.5304         calculate D2E/DX2 analytically  !
 ! R34   R(20,21)                1.327          calculate D2E/DX2 analytically  !
 ! R35   R(20,23)                1.4589         calculate D2E/DX2 analytically  !
 ! R36   R(21,22)                1.5335         calculate D2E/DX2 analytically  !
 ! R37   R(21,24)                1.236          calculate D2E/DX2 analytically  !
 ! R38   R(22,25)                1.5443         calculate D2E/DX2 analytically  !
 ! R39   R(22,61)                1.1098         calculate D2E/DX2 analytically  !
 ! R40   R(23,26)                1.5147         calculate D2E/DX2 analytically  !
 ! R41   R(23,62)                1.0909         calculate D2E/DX2 analytically  !
 ! R42   R(25,63)                1.0957         calculate D2E/DX2 analytically  !
 ! R43   R(25,64)                1.095          calculate D2E/DX2 analytically  !
 ! R44   R(25,65)                1.0939         calculate D2E/DX2 analytically  !
 ! R45   R(26,66)                1.0951         calculate D2E/DX2 analytically  !
 ! R46   R(26,67)                1.0948         calculate D2E/DX2 analytically  !
 ! R47   R(26,68)                1.0932         calculate D2E/DX2 analytically  !
 ! R48   R(27,69)                1.0948         calculate D2E/DX2 analytically  !
 ! R49   R(27,70)                1.0922         calculate D2E/DX2 analytically  !
 ! R50   R(27,71)                1.0928         calculate D2E/DX2 analytically  !
 ! R51   R(28,72)                1.0923         calculate D2E/DX2 analytically  !
 ! R52   R(28,73)                1.0944         calculate D2E/DX2 analytically  !
 ! R53   R(28,74)                1.0942         calculate D2E/DX2 analytically  !
 ! R54   R(29,31)                1.4398         calculate D2E/DX2 analytically  !
 ! R55   R(29,35)                1.4333         calculate D2E/DX2 analytically  !
 ! R56   R(30,38)                1.4339         calculate D2E/DX2 analytically  !
 ! R57   R(30,42)                1.4445         calculate D2E/DX2 analytically  !
 ! R58   R(31,32)                1.4139         calculate D2E/DX2 analytically  !
 ! R59   R(31,36)                1.5521         calculate D2E/DX2 analytically  !
 ! R60   R(32,33)                1.4137         calculate D2E/DX2 analytically  !
 ! R61   R(32,75)                1.0981         calculate D2E/DX2 analytically  !
 ! R62   R(33,34)                1.4117         calculate D2E/DX2 analytically  !
 ! R63   R(33,76)                1.0992         calculate D2E/DX2 analytically  !
 ! R64   R(34,35)                1.421          calculate D2E/DX2 analytically  !
 ! R65   R(34,77)                1.0985         calculate D2E/DX2 analytically  !
 ! R66   R(35,37)                1.5506         calculate D2E/DX2 analytically  !
 ! R67   R(36,45)                1.5608         calculate D2E/DX2 analytically  !
 ! R68   R(36,46)                1.5666         calculate D2E/DX2 analytically  !
 ! R69   R(36,78)                1.1098         calculate D2E/DX2 analytically  !
 ! R70   R(37,47)                1.5607         calculate D2E/DX2 analytically  !
 ! R71   R(37,48)                1.5661         calculate D2E/DX2 analytically  !
 ! R72   R(37,79)                1.1091         calculate D2E/DX2 analytically  !
 ! R73   R(38,39)                1.4201         calculate D2E/DX2 analytically  !
 ! R74   R(38,43)                1.551          calculate D2E/DX2 analytically  !
 ! R75   R(39,40)                1.4106         calculate D2E/DX2 analytically  !
 ! R76   R(39,80)                1.0982         calculate D2E/DX2 analytically  !
 ! R77   R(40,41)                1.4142         calculate D2E/DX2 analytically  !
 ! R78   R(40,81)                1.0991         calculate D2E/DX2 analytically  !
 ! R79   R(41,42)                1.4168         calculate D2E/DX2 analytically  !
 ! R80   R(41,82)                1.0981         calculate D2E/DX2 analytically  !
 ! R81   R(42,44)                1.5529         calculate D2E/DX2 analytically  !
 ! R82   R(43,51)                1.5619         calculate D2E/DX2 analytically  !
 ! R83   R(43,52)                1.5665         calculate D2E/DX2 analytically  !
 ! R84   R(43,83)                1.1073         calculate D2E/DX2 analytically  !
 ! R85   R(44,49)                1.5578         calculate D2E/DX2 analytically  !
 ! R86   R(44,50)                1.5675         calculate D2E/DX2 analytically  !
 ! R87   R(44,84)                1.1104         calculate D2E/DX2 analytically  !
 ! R88   R(45,85)                1.1014         calculate D2E/DX2 analytically  !
 ! R89   R(45,86)                1.1043         calculate D2E/DX2 analytically  !
 ! R90   R(45,87)                1.1004         calculate D2E/DX2 analytically  !
 ! R91   R(46,88)                1.1007         calculate D2E/DX2 analytically  !
 ! R92   R(46,89)                1.1008         calculate D2E/DX2 analytically  !
 ! R93   R(46,90)                1.1011         calculate D2E/DX2 analytically  !
 ! R94   R(47,91)                1.101          calculate D2E/DX2 analytically  !
 ! R95   R(47,92)                1.1008         calculate D2E/DX2 analytically  !
 ! R96   R(47,93)                1.1053         calculate D2E/DX2 analytically  !
 ! R97   R(48,94)                1.1007         calculate D2E/DX2 analytically  !
 ! R98   R(48,95)                1.1011         calculate D2E/DX2 analytically  !
 ! R99   R(48,96)                1.1007         calculate D2E/DX2 analytically  !
 ! R100  R(49,97)                1.101          calculate D2E/DX2 analytically  !
 ! R101  R(49,98)                1.103          calculate D2E/DX2 analytically  !
 ! R102  R(49,99)                1.1            calculate D2E/DX2 analytically  !
 ! R103  R(50,100)               1.1006         calculate D2E/DX2 analytically  !
 ! R104  R(50,101)               1.1016         calculate D2E/DX2 analytically  !
 ! R105  R(50,102)               1.1013         calculate D2E/DX2 analytically  !
 ! R106  R(51,103)               1.1015         calculate D2E/DX2 analytically  !
 ! R107  R(51,104)               1.1046         calculate D2E/DX2 analytically  !
 ! R108  R(51,105)               1.1011         calculate D2E/DX2 analytically  !
 ! R109  R(52,106)               1.1008         calculate D2E/DX2 analytically  !
 ! R110  R(52,107)               1.1008         calculate D2E/DX2 analytically  !
 ! R111  R(52,108)               1.1009         calculate D2E/DX2 analytically  !
 ! R112  R(53,109)               1.0965         calculate D2E/DX2 analytically  !
 ! R113  R(53,110)               1.095          calculate D2E/DX2 analytically  !
 ! R114  R(53,111)               1.097          calculate D2E/DX2 analytically  !
 ! R115  R(54,112)               1.095          calculate D2E/DX2 analytically  !
 ! R116  R(54,113)               1.0979         calculate D2E/DX2 analytically  !
 ! R117  R(54,114)               1.0964         calculate D2E/DX2 analytically  !
 ! A1    A(4,1,16)             115.1641         calculate D2E/DX2 analytically  !
 ! A2    A(5,2,6)               89.8705         calculate D2E/DX2 analytically  !
 ! A3    A(5,2,17)             125.2999         calculate D2E/DX2 analytically  !
 ! A4    A(5,2,24)             124.7172         calculate D2E/DX2 analytically  !
 ! A5    A(6,2,17)             128.7085         calculate D2E/DX2 analytically  !
 ! A6    A(6,2,24)             107.473          calculate D2E/DX2 analytically  !
 ! A7    A(17,2,24)             83.5139         calculate D2E/DX2 analytically  !
 ! A8    A(13,3,18)            117.8834         calculate D2E/DX2 analytically  !
 ! A9    A(1,4,7)              124.4511         calculate D2E/DX2 analytically  !
 ! A10   A(1,4,14)             110.1188         calculate D2E/DX2 analytically  !
 ! A11   A(7,4,14)             125.3078         calculate D2E/DX2 analytically  !
 ! A12   A(2,5,8)              127.7294         calculate D2E/DX2 analytically  !
 ! A13   A(2,5,29)             108.042          calculate D2E/DX2 analytically  !
 ! A14   A(8,5,29)             124.2191         calculate D2E/DX2 analytically  !
 ! A15   A(2,6,10)             128.4662         calculate D2E/DX2 analytically  !
 ! A16   A(2,6,30)             104.3237         calculate D2E/DX2 analytically  !
 ! A17   A(10,6,30)            127.0725         calculate D2E/DX2 analytically  !
 ! A18   A(5,8,9)              123.3127         calculate D2E/DX2 analytically  !
 ! A19   A(5,8,53)             119.1795         calculate D2E/DX2 analytically  !
 ! A20   A(9,8,53)             117.5039         calculate D2E/DX2 analytically  !
 ! A21   A(8,9,10)             127.3557         calculate D2E/DX2 analytically  !
 ! A22   A(8,9,55)             116.3584         calculate D2E/DX2 analytically  !
 ! A23   A(10,9,55)            116.1816         calculate D2E/DX2 analytically  !
 ! A24   A(6,10,9)             122.3313         calculate D2E/DX2 analytically  !
 ! A25   A(6,10,54)            120.6942         calculate D2E/DX2 analytically  !
 ! A26   A(9,10,54)            116.9657         calculate D2E/DX2 analytically  !
 ! A27   A(12,11,14)           115.9197         calculate D2E/DX2 analytically  !
 ! A28   A(11,12,13)           111.2788         calculate D2E/DX2 analytically  !
 ! A29   A(11,12,15)           124.487          calculate D2E/DX2 analytically  !
 ! A30   A(13,12,15)           124.2317         calculate D2E/DX2 analytically  !
 ! A31   A(3,13,12)            103.8963         calculate D2E/DX2 analytically  !
 ! A32   A(3,13,27)            111.0847         calculate D2E/DX2 analytically  !
 ! A33   A(3,13,56)            108.0964         calculate D2E/DX2 analytically  !
 ! A34   A(12,13,27)           111.7272         calculate D2E/DX2 analytically  !
 ! A35   A(12,13,56)           109.9597         calculate D2E/DX2 analytically  !
 ! A36   A(27,13,56)           111.742          calculate D2E/DX2 analytically  !
 ! A37   A(4,14,11)            109.4423         calculate D2E/DX2 analytically  !
 ! A38   A(4,14,28)            109.6066         calculate D2E/DX2 analytically  !
 ! A39   A(4,14,57)            110.2561         calculate D2E/DX2 analytically  !
 ! A40   A(11,14,28)           106.7129         calculate D2E/DX2 analytically  !
 ! A41   A(11,14,57)           109.7486         calculate D2E/DX2 analytically  !
 ! A42   A(28,14,57)           111.0011         calculate D2E/DX2 analytically  !
 ! A43   A(1,16,58)            110.5802         calculate D2E/DX2 analytically  !
 ! A44   A(1,16,59)            110.2946         calculate D2E/DX2 analytically  !
 ! A45   A(1,16,60)            105.5749         calculate D2E/DX2 analytically  !
 ! A46   A(58,16,59)           109.053          calculate D2E/DX2 analytically  !
 ! A47   A(58,16,60)           110.6575         calculate D2E/DX2 analytically  !
 ! A48   A(59,16,60)           110.6528         calculate D2E/DX2 analytically  !
 ! A49   A(2,17,22)            116.0768         calculate D2E/DX2 analytically  !
 ! A50   A(3,18,19)            125.2455         calculate D2E/DX2 analytically  !
 ! A51   A(3,18,23)            108.9607         calculate D2E/DX2 analytically  !
 ! A52   A(19,18,23)           125.7938         calculate D2E/DX2 analytically  !
 ! A53   A(21,20,23)           118.7781         calculate D2E/DX2 analytically  !
 ! A54   A(20,21,22)           115.7295         calculate D2E/DX2 analytically  !
 ! A55   A(20,21,24)           122.6523         calculate D2E/DX2 analytically  !
 ! A56   A(22,21,24)           121.6104         calculate D2E/DX2 analytically  !
 ! A57   A(17,22,21)           109.5207         calculate D2E/DX2 analytically  !
 ! A58   A(17,22,25)           112.6099         calculate D2E/DX2 analytically  !
 ! A59   A(17,22,61)           113.0508         calculate D2E/DX2 analytically  !
 ! A60   A(21,22,25)           108.5509         calculate D2E/DX2 analytically  !
 ! A61   A(21,22,61)           105.2009         calculate D2E/DX2 analytically  !
 ! A62   A(25,22,61)           107.5601         calculate D2E/DX2 analytically  !
 ! A63   A(18,23,20)           105.462          calculate D2E/DX2 analytically  !
 ! A64   A(18,23,26)           115.2369         calculate D2E/DX2 analytically  !
 ! A65   A(18,23,62)           108.596          calculate D2E/DX2 analytically  !
 ! A66   A(20,23,26)           107.7754         calculate D2E/DX2 analytically  !
 ! A67   A(20,23,62)           108.0789         calculate D2E/DX2 analytically  !
 ! A68   A(26,23,62)           111.3165         calculate D2E/DX2 analytically  !
 ! A69   A(2,24,21)            108.1345         calculate D2E/DX2 analytically  !
 ! A70   A(22,25,63)           112.6727         calculate D2E/DX2 analytically  !
 ! A71   A(22,25,64)           109.0325         calculate D2E/DX2 analytically  !
 ! A72   A(22,25,65)           107.9659         calculate D2E/DX2 analytically  !
 ! A73   A(63,25,64)           109.4449         calculate D2E/DX2 analytically  !
 ! A74   A(63,25,65)           109.3905         calculate D2E/DX2 analytically  !
 ! A75   A(64,25,65)           108.2292         calculate D2E/DX2 analytically  !
 ! A76   A(23,26,66)           107.9759         calculate D2E/DX2 analytically  !
 ! A77   A(23,26,67)           109.9939         calculate D2E/DX2 analytically  !
 ! A78   A(23,26,68)           111.0942         calculate D2E/DX2 analytically  !
 ! A79   A(66,26,67)           109.2206         calculate D2E/DX2 analytically  !
 ! A80   A(66,26,68)           110.2218         calculate D2E/DX2 analytically  !
 ! A81   A(67,26,68)           108.3199         calculate D2E/DX2 analytically  !
 ! A82   A(13,27,69)           109.7131         calculate D2E/DX2 analytically  !
 ! A83   A(13,27,70)           109.9256         calculate D2E/DX2 analytically  !
 ! A84   A(13,27,71)           110.1473         calculate D2E/DX2 analytically  !
 ! A85   A(69,27,70)           108.7202         calculate D2E/DX2 analytically  !
 ! A86   A(69,27,71)           108.1685         calculate D2E/DX2 analytically  !
 ! A87   A(70,27,71)           110.1301         calculate D2E/DX2 analytically  !
 ! A88   A(14,28,72)           110.2451         calculate D2E/DX2 analytically  !
 ! A89   A(14,28,73)           110.4635         calculate D2E/DX2 analytically  !
 ! A90   A(14,28,74)           109.5655         calculate D2E/DX2 analytically  !
 ! A91   A(72,28,73)           108.9416         calculate D2E/DX2 analytically  !
 ! A92   A(72,28,74)           108.6089         calculate D2E/DX2 analytically  !
 ! A93   A(73,28,74)           108.9784         calculate D2E/DX2 analytically  !
 ! A94   A(5,29,31)            119.0078         calculate D2E/DX2 analytically  !
 ! A95   A(5,29,35)            119.2243         calculate D2E/DX2 analytically  !
 ! A96   A(31,29,35)           121.1528         calculate D2E/DX2 analytically  !
 ! A97   A(6,30,38)            120.3281         calculate D2E/DX2 analytically  !
 ! A98   A(6,30,42)            117.5832         calculate D2E/DX2 analytically  !
 ! A99   A(38,30,42)           120.9455         calculate D2E/DX2 analytically  !
 ! A100  A(29,31,32)           118.2432         calculate D2E/DX2 analytically  !
 ! A101  A(29,31,36)           121.5899         calculate D2E/DX2 analytically  !
 ! A102  A(32,31,36)           120.0996         calculate D2E/DX2 analytically  !
 ! A103  A(31,32,33)           121.2353         calculate D2E/DX2 analytically  !
 ! A104  A(31,32,75)           119.2697         calculate D2E/DX2 analytically  !
 ! A105  A(33,32,75)           119.4539         calculate D2E/DX2 analytically  !
 ! A106  A(32,33,34)           120.0167         calculate D2E/DX2 analytically  !
 ! A107  A(32,33,76)           120.2097         calculate D2E/DX2 analytically  !
 ! A108  A(34,33,76)           119.6614         calculate D2E/DX2 analytically  !
 ! A109  A(33,34,35)           120.9873         calculate D2E/DX2 analytically  !
 ! A110  A(33,34,77)           119.4511         calculate D2E/DX2 analytically  !
 ! A111  A(35,34,77)           119.5132         calculate D2E/DX2 analytically  !
 ! A112  A(29,35,34)           118.3578         calculate D2E/DX2 analytically  !
 ! A113  A(29,35,37)           121.7399         calculate D2E/DX2 analytically  !
 ! A114  A(34,35,37)           119.8401         calculate D2E/DX2 analytically  !
 ! A115  A(31,36,45)           112.1297         calculate D2E/DX2 analytically  !
 ! A116  A(31,36,46)           110.6686         calculate D2E/DX2 analytically  !
 ! A117  A(31,36,78)           107.6087         calculate D2E/DX2 analytically  !
 ! A118  A(45,36,46)           110.674          calculate D2E/DX2 analytically  !
 ! A119  A(45,36,78)           107.7699         calculate D2E/DX2 analytically  !
 ! A120  A(46,36,78)           107.8004         calculate D2E/DX2 analytically  !
 ! A121  A(35,37,47)           111.717          calculate D2E/DX2 analytically  !
 ! A122  A(35,37,48)           111.0023         calculate D2E/DX2 analytically  !
 ! A123  A(35,37,79)           107.677          calculate D2E/DX2 analytically  !
 ! A124  A(47,37,48)           110.4581         calculate D2E/DX2 analytically  !
 ! A125  A(47,37,79)           107.9039         calculate D2E/DX2 analytically  !
 ! A126  A(48,37,79)           107.9157         calculate D2E/DX2 analytically  !
 ! A127  A(30,38,39)           118.3628         calculate D2E/DX2 analytically  !
 ! A128  A(30,38,43)           122.0407         calculate D2E/DX2 analytically  !
 ! A129  A(39,38,43)           119.5822         calculate D2E/DX2 analytically  !
 ! A130  A(38,39,40)           121.2488         calculate D2E/DX2 analytically  !
 ! A131  A(38,39,80)           119.2787         calculate D2E/DX2 analytically  !
 ! A132  A(40,39,80)           119.4476         calculate D2E/DX2 analytically  !
 ! A133  A(39,40,41)           119.9303         calculate D2E/DX2 analytically  !
 ! A134  A(39,40,81)           120.0149         calculate D2E/DX2 analytically  !
 ! A135  A(41,40,81)           119.9289         calculate D2E/DX2 analytically  !
 ! A136  A(40,41,42)           121.1747         calculate D2E/DX2 analytically  !
 ! A137  A(40,41,82)           119.4056         calculate D2E/DX2 analytically  !
 ! A138  A(42,41,82)           119.3537         calculate D2E/DX2 analytically  !
 ! A139  A(30,42,41)           118.2656         calculate D2E/DX2 analytically  !
 ! A140  A(30,42,44)           120.742          calculate D2E/DX2 analytically  !
 ! A141  A(41,42,44)           120.7275         calculate D2E/DX2 analytically  !
 ! A142  A(38,43,51)           111.9152         calculate D2E/DX2 analytically  !
 ! A143  A(38,43,52)           110.7459         calculate D2E/DX2 analytically  !
 ! A144  A(38,43,83)           107.9839         calculate D2E/DX2 analytically  !
 ! A145  A(51,43,52)           110.5506         calculate D2E/DX2 analytically  !
 ! A146  A(51,43,83)           107.3526         calculate D2E/DX2 analytically  !
 ! A147  A(52,43,83)           108.1241         calculate D2E/DX2 analytically  !
 ! A148  A(42,44,49)           113.5789         calculate D2E/DX2 analytically  !
 ! A149  A(42,44,50)           109.5026         calculate D2E/DX2 analytically  !
 ! A150  A(42,44,84)           107.533          calculate D2E/DX2 analytically  !
 ! A151  A(49,44,50)           110.8558         calculate D2E/DX2 analytically  !
 ! A152  A(49,44,84)           107.7976         calculate D2E/DX2 analytically  !
 ! A153  A(50,44,84)           107.3148         calculate D2E/DX2 analytically  !
 ! A154  A(36,45,85)           109.6927         calculate D2E/DX2 analytically  !
 ! A155  A(36,45,86)           109.8438         calculate D2E/DX2 analytically  !
 ! A156  A(36,45,87)           110.9707         calculate D2E/DX2 analytically  !
 ! A157  A(85,45,86)           108.8535         calculate D2E/DX2 analytically  !
 ! A158  A(85,45,87)           108.4692         calculate D2E/DX2 analytically  !
 ! A159  A(86,45,87)           108.9679         calculate D2E/DX2 analytically  !
 ! A160  A(36,46,88)           109.7555         calculate D2E/DX2 analytically  !
 ! A161  A(36,46,89)           110.7285         calculate D2E/DX2 analytically  !
 ! A162  A(36,46,90)           111.0632         calculate D2E/DX2 analytically  !
 ! A163  A(88,46,89)           108.3881         calculate D2E/DX2 analytically  !
 ! A164  A(88,46,90)           108.4083         calculate D2E/DX2 analytically  !
 ! A165  A(89,46,90)           108.4207         calculate D2E/DX2 analytically  !
 ! A166  A(37,47,91)           109.9647         calculate D2E/DX2 analytically  !
 ! A167  A(37,47,92)           111.2094         calculate D2E/DX2 analytically  !
 ! A168  A(37,47,93)           110.2125         calculate D2E/DX2 analytically  !
 ! A169  A(91,47,92)           108.682          calculate D2E/DX2 analytically  !
 ! A170  A(91,47,93)           108.5489         calculate D2E/DX2 analytically  !
 ! A171  A(92,47,93)           108.1547         calculate D2E/DX2 analytically  !
 ! A172  A(37,48,94)           109.7931         calculate D2E/DX2 analytically  !
 ! A173  A(37,48,95)           110.956          calculate D2E/DX2 analytically  !
 ! A174  A(37,48,96)           110.7307         calculate D2E/DX2 analytically  !
 ! A175  A(94,48,95)           108.4325         calculate D2E/DX2 analytically  !
 ! A176  A(94,48,96)           108.3788         calculate D2E/DX2 analytically  !
 ! A177  A(95,48,96)           108.4759         calculate D2E/DX2 analytically  !
 ! A178  A(44,49,97)           109.4292         calculate D2E/DX2 analytically  !
 ! A179  A(44,49,98)           109.587          calculate D2E/DX2 analytically  !
 ! A180  A(44,49,99)           111.6371         calculate D2E/DX2 analytically  !
 ! A181  A(97,49,98)           108.3471         calculate D2E/DX2 analytically  !
 ! A182  A(97,49,99)           108.3132         calculate D2E/DX2 analytically  !
 ! A183  A(98,49,99)           109.4595         calculate D2E/DX2 analytically  !
 ! A184  A(44,50,100)          109.7769         calculate D2E/DX2 analytically  !
 ! A185  A(44,50,101)          110.7827         calculate D2E/DX2 analytically  !
 ! A186  A(44,50,102)          110.6707         calculate D2E/DX2 analytically  !
 ! A187  A(100,50,101)         108.3956         calculate D2E/DX2 analytically  !
 ! A188  A(100,50,102)         108.5936         calculate D2E/DX2 analytically  !
 ! A189  A(101,50,102)         108.5569         calculate D2E/DX2 analytically  !
 ! A190  A(43,51,103)          110.1391         calculate D2E/DX2 analytically  !
 ! A191  A(43,51,104)          109.8905         calculate D2E/DX2 analytically  !
 ! A192  A(43,51,105)          111.1955         calculate D2E/DX2 analytically  !
 ! A193  A(103,51,104)         108.21           calculate D2E/DX2 analytically  !
 ! A194  A(103,51,105)         108.3795         calculate D2E/DX2 analytically  !
 ! A195  A(104,51,105)         108.9568         calculate D2E/DX2 analytically  !
 ! A196  A(43,52,106)          109.8992         calculate D2E/DX2 analytically  !
 ! A197  A(43,52,107)          110.7282         calculate D2E/DX2 analytically  !
 ! A198  A(43,52,108)          110.8436         calculate D2E/DX2 analytically  !
 ! A199  A(106,52,107)         108.3778         calculate D2E/DX2 analytically  !
 ! A200  A(106,52,108)         108.5252         calculate D2E/DX2 analytically  !
 ! A201  A(107,52,108)         108.3949         calculate D2E/DX2 analytically  !
 ! A202  A(8,53,109)           110.8955         calculate D2E/DX2 analytically  !
 ! A203  A(8,53,110)           111.3705         calculate D2E/DX2 analytically  !
 ! A204  A(8,53,111)           110.6585         calculate D2E/DX2 analytically  !
 ! A205  A(109,53,110)         108.3041         calculate D2E/DX2 analytically  !
 ! A206  A(109,53,111)         107.4059         calculate D2E/DX2 analytically  !
 ! A207  A(110,53,111)         108.0631         calculate D2E/DX2 analytically  !
 ! A208  A(10,54,112)          111.636          calculate D2E/DX2 analytically  !
 ! A209  A(10,54,113)          110.6473         calculate D2E/DX2 analytically  !
 ! A210  A(10,54,114)          110.5561         calculate D2E/DX2 analytically  !
 ! A211  A(112,54,113)         107.9521         calculate D2E/DX2 analytically  !
 ! A212  A(112,54,114)         108.6257         calculate D2E/DX2 analytically  !
 ! A213  A(113,54,114)         107.2775         calculate D2E/DX2 analytically  !
 ! D1    D(16,1,4,7)            -0.5575         calculate D2E/DX2 analytically  !
 ! D2    D(16,1,4,14)         -176.7167         calculate D2E/DX2 analytically  !
 ! D3    D(4,1,16,58)           59.6528         calculate D2E/DX2 analytically  !
 ! D4    D(4,1,16,59)          -61.053          calculate D2E/DX2 analytically  !
 ! D5    D(4,1,16,60)          179.3788         calculate D2E/DX2 analytically  !
 ! D6    D(6,2,5,8)             -9.0202         calculate D2E/DX2 analytically  !
 ! D7    D(6,2,5,29)           172.0703         calculate D2E/DX2 analytically  !
 ! D8    D(17,2,5,8)           130.855          calculate D2E/DX2 analytically  !
 ! D9    D(17,2,5,29)          -48.0545         calculate D2E/DX2 analytically  !
 ! D10   D(24,2,5,8)          -120.3492         calculate D2E/DX2 analytically  !
 ! D11   D(24,2,5,29)           60.7413         calculate D2E/DX2 analytically  !
 ! D12   D(5,2,6,10)             8.1178         calculate D2E/DX2 analytically  !
 ! D13   D(5,2,6,30)          -167.8108         calculate D2E/DX2 analytically  !
 ! D14   D(17,2,6,10)         -129.504          calculate D2E/DX2 analytically  !
 ! D15   D(17,2,6,30)           54.5674         calculate D2E/DX2 analytically  !
 ! D16   D(24,2,6,10)          134.7279         calculate D2E/DX2 analytically  !
 ! D17   D(24,2,6,30)          -41.2007         calculate D2E/DX2 analytically  !
 ! D18   D(5,2,17,22)          133.3265         calculate D2E/DX2 analytically  !
 ! D19   D(6,2,17,22)         -102.3497         calculate D2E/DX2 analytically  !
 ! D20   D(24,2,17,22)           4.8766         calculate D2E/DX2 analytically  !
 ! D21   D(5,2,24,21)         -138.0588         calculate D2E/DX2 analytically  !
 ! D22   D(6,2,24,21)          119.5126         calculate D2E/DX2 analytically  !
 ! D23   D(17,2,24,21)          -9.0996         calculate D2E/DX2 analytically  !
 ! D24   D(18,3,13,12)         159.6732         calculate D2E/DX2 analytically  !
 ! D25   D(18,3,13,27)         -80.0549         calculate D2E/DX2 analytically  !
 ! D26   D(18,3,13,56)          42.8783         calculate D2E/DX2 analytically  !
 ! D27   D(13,3,18,19)           2.3686         calculate D2E/DX2 analytically  !
 ! D28   D(13,3,18,23)        -177.6569         calculate D2E/DX2 analytically  !
 ! D29   D(1,4,14,11)         -157.1242         calculate D2E/DX2 analytically  !
 ! D30   D(1,4,14,28)           86.1657         calculate D2E/DX2 analytically  !
 ! D31   D(1,4,14,57)          -36.3128         calculate D2E/DX2 analytically  !
 ! D32   D(7,4,14,11)           26.7569         calculate D2E/DX2 analytically  !
 ! D33   D(7,4,14,28)          -89.9531         calculate D2E/DX2 analytically  !
 ! D34   D(7,4,14,57)          147.5684         calculate D2E/DX2 analytically  !
 ! D35   D(2,5,8,9)              4.5746         calculate D2E/DX2 analytically  !
 ! D36   D(2,5,8,53)          -176.1564         calculate D2E/DX2 analytically  !
 ! D37   D(29,5,8,9)          -176.6794         calculate D2E/DX2 analytically  !
 ! D38   D(29,5,8,53)            2.5896         calculate D2E/DX2 analytically  !
 ! D39   D(2,5,29,31)           82.2082         calculate D2E/DX2 analytically  !
 ! D40   D(2,5,29,35)          -88.9076         calculate D2E/DX2 analytically  !
 ! D41   D(8,5,29,31)          -96.7488         calculate D2E/DX2 analytically  !
 ! D42   D(8,5,29,35)           92.1354         calculate D2E/DX2 analytically  !
 ! D43   D(2,6,10,9)            -2.6167         calculate D2E/DX2 analytically  !
 ! D44   D(2,6,10,54)          178.4976         calculate D2E/DX2 analytically  !
 ! D45   D(30,6,10,9)          172.4372         calculate D2E/DX2 analytically  !
 ! D46   D(30,6,10,54)          -6.4486         calculate D2E/DX2 analytically  !
 ! D47   D(2,6,30,38)           95.6858         calculate D2E/DX2 analytically  !
 ! D48   D(2,6,30,42)          -72.2095         calculate D2E/DX2 analytically  !
 ! D49   D(10,6,30,38)         -80.3189         calculate D2E/DX2 analytically  !
 ! D50   D(10,6,30,42)         111.7858         calculate D2E/DX2 analytically  !
 ! D51   D(5,8,9,10)             5.1105         calculate D2E/DX2 analytically  !
 ! D52   D(5,8,9,55)          -178.7706         calculate D2E/DX2 analytically  !
 ! D53   D(53,8,9,10)         -174.17           calculate D2E/DX2 analytically  !
 ! D54   D(53,8,9,55)            1.949          calculate D2E/DX2 analytically  !
 ! D55   D(5,8,53,109)          55.4847         calculate D2E/DX2 analytically  !
 ! D56   D(5,8,53,110)         176.1737         calculate D2E/DX2 analytically  !
 ! D57   D(5,8,53,111)         -63.6029         calculate D2E/DX2 analytically  !
 ! D58   D(9,8,53,109)        -125.204          calculate D2E/DX2 analytically  !
 ! D59   D(9,8,53,110)          -4.5151         calculate D2E/DX2 analytically  !
 ! D60   D(9,8,53,111)         115.7084         calculate D2E/DX2 analytically  !
 ! D61   D(8,9,10,6)            -6.1121         calculate D2E/DX2 analytically  !
 ! D62   D(8,9,10,54)          172.8128         calculate D2E/DX2 analytically  !
 ! D63   D(55,9,10,6)          177.763          calculate D2E/DX2 analytically  !
 ! D64   D(55,9,10,54)          -3.312          calculate D2E/DX2 analytically  !
 ! D65   D(6,10,54,112)        -23.8293         calculate D2E/DX2 analytically  !
 ! D66   D(6,10,54,113)         96.4231         calculate D2E/DX2 analytically  !
 ! D67   D(6,10,54,114)       -144.8736         calculate D2E/DX2 analytically  !
 ! D68   D(9,10,54,112)        157.2271         calculate D2E/DX2 analytically  !
 ! D69   D(9,10,54,113)        -82.5206         calculate D2E/DX2 analytically  !
 ! D70   D(9,10,54,114)         36.1828         calculate D2E/DX2 analytically  !
 ! D71   D(14,11,12,13)        179.4364         calculate D2E/DX2 analytically  !
 ! D72   D(14,11,12,15)         -0.014          calculate D2E/DX2 analytically  !
 ! D73   D(12,11,14,4)          61.754          calculate D2E/DX2 analytically  !
 ! D74   D(12,11,14,28)       -179.7215         calculate D2E/DX2 analytically  !
 ! D75   D(12,11,14,57)        -59.3653         calculate D2E/DX2 analytically  !
 ! D76   D(11,12,13,3)         -80.9924         calculate D2E/DX2 analytically  !
 ! D77   D(11,12,13,27)        159.171          calculate D2E/DX2 analytically  !
 ! D78   D(11,12,13,56)         34.4931         calculate D2E/DX2 analytically  !
 ! D79   D(15,12,13,3)          98.4597         calculate D2E/DX2 analytically  !
 ! D80   D(15,12,13,27)        -21.3769         calculate D2E/DX2 analytically  !
 ! D81   D(15,12,13,56)       -146.0549         calculate D2E/DX2 analytically  !
 ! D82   D(3,13,27,69)        -177.9315         calculate D2E/DX2 analytically  !
 ! D83   D(3,13,27,70)          62.5618         calculate D2E/DX2 analytically  !
 ! D84   D(3,13,27,71)         -58.9667         calculate D2E/DX2 analytically  !
 ! D85   D(12,13,27,69)        -62.4176         calculate D2E/DX2 analytically  !
 ! D86   D(12,13,27,70)        178.0757         calculate D2E/DX2 analytically  !
 ! D87   D(12,13,27,71)         56.5472         calculate D2E/DX2 analytically  !
 ! D88   D(56,13,27,69)         61.2606         calculate D2E/DX2 analytically  !
 ! D89   D(56,13,27,70)        -58.2461         calculate D2E/DX2 analytically  !
 ! D90   D(56,13,27,71)       -179.7746         calculate D2E/DX2 analytically  !
 ! D91   D(4,14,28,72)         178.0808         calculate D2E/DX2 analytically  !
 ! D92   D(4,14,28,73)          57.6225         calculate D2E/DX2 analytically  !
 ! D93   D(4,14,28,74)         -62.4444         calculate D2E/DX2 analytically  !
 ! D94   D(11,14,28,72)         59.6637         calculate D2E/DX2 analytically  !
 ! D95   D(11,14,28,73)        -60.7946         calculate D2E/DX2 analytically  !
 ! D96   D(11,14,28,74)        179.1386         calculate D2E/DX2 analytically  !
 ! D97   D(57,14,28,72)        -59.8851         calculate D2E/DX2 analytically  !
 ! D98   D(57,14,28,73)        179.6566         calculate D2E/DX2 analytically  !
 ! D99   D(57,14,28,74)         59.5897         calculate D2E/DX2 analytically  !
 ! D100  D(2,17,22,21)          -0.4655         calculate D2E/DX2 analytically  !
 ! D101  D(2,17,22,25)        -121.3493         calculate D2E/DX2 analytically  !
 ! D102  D(2,17,22,61)         116.4831         calculate D2E/DX2 analytically  !
 ! D103  D(3,18,23,20)          69.1684         calculate D2E/DX2 analytically  !
 ! D104  D(3,18,23,26)        -172.11           calculate D2E/DX2 analytically  !
 ! D105  D(3,18,23,62)         -46.476          calculate D2E/DX2 analytically  !
 ! D106  D(19,18,23,20)       -110.8573         calculate D2E/DX2 analytically  !
 ! D107  D(19,18,23,26)          7.8643         calculate D2E/DX2 analytically  !
 ! D108  D(19,18,23,62)        133.4983         calculate D2E/DX2 analytically  !
 ! D109  D(23,20,21,22)       -177.6857         calculate D2E/DX2 analytically  !
 ! D110  D(23,20,21,24)          1.3163         calculate D2E/DX2 analytically  !
 ! D111  D(21,20,23,18)       -113.7206         calculate D2E/DX2 analytically  !
 ! D112  D(21,20,23,26)        122.6906         calculate D2E/DX2 analytically  !
 ! D113  D(21,20,23,62)          2.278          calculate D2E/DX2 analytically  !
 ! D114  D(20,21,22,17)        170.4932         calculate D2E/DX2 analytically  !
 ! D115  D(20,21,22,25)        -66.1926         calculate D2E/DX2 analytically  !
 ! D116  D(20,21,22,61)         48.7026         calculate D2E/DX2 analytically  !
 ! D117  D(24,21,22,17)         -8.5202         calculate D2E/DX2 analytically  !
 ! D118  D(24,21,22,25)        114.794          calculate D2E/DX2 analytically  !
 ! D119  D(24,21,22,61)       -130.3107         calculate D2E/DX2 analytically  !
 ! D120  D(20,21,24,2)        -167.0788         calculate D2E/DX2 analytically  !
 ! D121  D(22,21,24,2)          11.8656         calculate D2E/DX2 analytically  !
 ! D122  D(17,22,25,63)       -178.9365         calculate D2E/DX2 analytically  !
 ! D123  D(17,22,25,64)         59.3447         calculate D2E/DX2 analytically  !
 ! D124  D(17,22,25,65)        -58.025          calculate D2E/DX2 analytically  !
 ! D125  D(21,22,25,63)         59.6263         calculate D2E/DX2 analytically  !
 ! D126  D(21,22,25,64)        -62.0925         calculate D2E/DX2 analytically  !
 ! D127  D(21,22,25,65)       -179.4622         calculate D2E/DX2 analytically  !
 ! D128  D(61,22,25,63)        -53.72           calculate D2E/DX2 analytically  !
 ! D129  D(61,22,25,64)       -175.4389         calculate D2E/DX2 analytically  !
 ! D130  D(61,22,25,65)         67.1915         calculate D2E/DX2 analytically  !
 ! D131  D(18,23,26,66)        178.515          calculate D2E/DX2 analytically  !
 ! D132  D(18,23,26,67)         59.4139         calculate D2E/DX2 analytically  !
 ! D133  D(18,23,26,68)        -60.5107         calculate D2E/DX2 analytically  !
 ! D134  D(20,23,26,66)        -64.058          calculate D2E/DX2 analytically  !
 ! D135  D(20,23,26,67)        176.8409         calculate D2E/DX2 analytically  !
 ! D136  D(20,23,26,68)         56.9162         calculate D2E/DX2 analytically  !
 ! D137  D(62,23,26,66)         54.2958         calculate D2E/DX2 analytically  !
 ! D138  D(62,23,26,67)        -64.8053         calculate D2E/DX2 analytically  !
 ! D139  D(62,23,26,68)        175.27           calculate D2E/DX2 analytically  !
 ! D140  D(5,29,31,32)        -170.0104         calculate D2E/DX2 analytically  !
 ! D141  D(5,29,31,36)          12.9689         calculate D2E/DX2 analytically  !
 ! D142  D(35,29,31,32)          0.9282         calculate D2E/DX2 analytically  !
 ! D143  D(35,29,31,36)       -176.0924         calculate D2E/DX2 analytically  !
 ! D144  D(5,29,35,34)         170.534          calculate D2E/DX2 analytically  !
 ! D145  D(5,29,35,37)         -12.3411         calculate D2E/DX2 analytically  !
 ! D146  D(31,29,35,34)         -0.3853         calculate D2E/DX2 analytically  !
 ! D147  D(31,29,35,37)        176.7395         calculate D2E/DX2 analytically  !
 ! D148  D(6,30,38,39)        -165.8645         calculate D2E/DX2 analytically  !
 ! D149  D(6,30,38,43)          15.5147         calculate D2E/DX2 analytically  !
 ! D150  D(42,30,38,39)          1.6196         calculate D2E/DX2 analytically  !
 ! D151  D(42,30,38,43)       -177.0013         calculate D2E/DX2 analytically  !
 ! D152  D(6,30,42,41)         165.1664         calculate D2E/DX2 analytically  !
 ! D153  D(6,30,42,44)         -20.7038         calculate D2E/DX2 analytically  !
 ! D154  D(38,30,42,41)         -2.6502         calculate D2E/DX2 analytically  !
 ! D155  D(38,30,42,44)        171.4796         calculate D2E/DX2 analytically  !
 ! D156  D(29,31,32,33)         -0.8159         calculate D2E/DX2 analytically  !
 ! D157  D(29,31,32,75)       -178.4724         calculate D2E/DX2 analytically  !
 ! D158  D(36,31,32,33)        176.2507         calculate D2E/DX2 analytically  !
 ! D159  D(36,31,32,75)         -1.4058         calculate D2E/DX2 analytically  !
 ! D160  D(29,31,36,45)       -122.0764         calculate D2E/DX2 analytically  !
 ! D161  D(29,31,36,46)        113.8156         calculate D2E/DX2 analytically  !
 ! D162  D(29,31,36,78)         -3.7345         calculate D2E/DX2 analytically  !
 ! D163  D(32,31,36,45)         60.9573         calculate D2E/DX2 analytically  !
 ! D164  D(32,31,36,46)        -63.1507         calculate D2E/DX2 analytically  !
 ! D165  D(32,31,36,78)        179.2992         calculate D2E/DX2 analytically  !
 ! D166  D(31,32,33,34)          0.1659         calculate D2E/DX2 analytically  !
 ! D167  D(31,32,33,76)       -175.9711         calculate D2E/DX2 analytically  !
 ! D168  D(75,32,33,34)        177.8182         calculate D2E/DX2 analytically  !
 ! D169  D(75,32,33,76)          1.6811         calculate D2E/DX2 analytically  !
 ! D170  D(32,33,34,35)          0.4055         calculate D2E/DX2 analytically  !
 ! D171  D(32,33,34,77)       -177.0501         calculate D2E/DX2 analytically  !
 ! D172  D(76,33,34,35)        176.5638         calculate D2E/DX2 analytically  !
 ! D173  D(76,33,34,77)         -0.8918         calculate D2E/DX2 analytically  !
 ! D174  D(33,34,35,29)         -0.2897         calculate D2E/DX2 analytically  !
 ! D175  D(33,34,35,37)       -177.4709         calculate D2E/DX2 analytically  !
 ! D176  D(77,34,35,29)        177.1644         calculate D2E/DX2 analytically  !
 ! D177  D(77,34,35,37)         -0.0168         calculate D2E/DX2 analytically  !
 ! D178  D(29,35,37,47)        120.4599         calculate D2E/DX2 analytically  !
 ! D179  D(29,35,37,48)       -115.7668         calculate D2E/DX2 analytically  !
 ! D180  D(29,35,37,79)          2.15           calculate D2E/DX2 analytically  !
 ! D181  D(34,35,37,47)        -62.4569         calculate D2E/DX2 analytically  !
 ! D182  D(34,35,37,48)         61.3163         calculate D2E/DX2 analytically  !
 ! D183  D(34,35,37,79)        179.2331         calculate D2E/DX2 analytically  !
 ! D184  D(31,36,45,85)        178.6424         calculate D2E/DX2 analytically  !
 ! D185  D(31,36,45,86)         59.035          calculate D2E/DX2 analytically  !
 ! D186  D(31,36,45,87)        -61.5215         calculate D2E/DX2 analytically  !
 ! D187  D(46,36,45,85)        -57.2526         calculate D2E/DX2 analytically  !
 ! D188  D(46,36,45,86)       -176.86           calculate D2E/DX2 analytically  !
 ! D189  D(46,36,45,87)         62.5835         calculate D2E/DX2 analytically  !
 ! D190  D(78,36,45,85)         60.3961         calculate D2E/DX2 analytically  !
 ! D191  D(78,36,45,86)        -59.2113         calculate D2E/DX2 analytically  !
 ! D192  D(78,36,45,87)       -179.7678         calculate D2E/DX2 analytically  !
 ! D193  D(31,36,46,88)       -175.7428         calculate D2E/DX2 analytically  !
 ! D194  D(31,36,46,89)         64.6342         calculate D2E/DX2 analytically  !
 ! D195  D(31,36,46,90)        -55.8832         calculate D2E/DX2 analytically  !
 ! D196  D(45,36,46,88)         59.3197         calculate D2E/DX2 analytically  !
 ! D197  D(45,36,46,89)        -60.3033         calculate D2E/DX2 analytically  !
 ! D198  D(45,36,46,90)        179.1793         calculate D2E/DX2 analytically  !
 ! D199  D(78,36,46,88)        -58.3103         calculate D2E/DX2 analytically  !
 ! D200  D(78,36,46,89)       -177.9333         calculate D2E/DX2 analytically  !
 ! D201  D(78,36,46,90)         61.5493         calculate D2E/DX2 analytically  !
 ! D202  D(35,37,47,91)       -177.394          calculate D2E/DX2 analytically  !
 ! D203  D(35,37,47,92)         62.1731         calculate D2E/DX2 analytically  !
 ! D204  D(35,37,47,93)        -57.7629         calculate D2E/DX2 analytically  !
 ! D205  D(48,37,47,91)         58.5266         calculate D2E/DX2 analytically  !
 ! D206  D(48,37,47,92)        -61.9064         calculate D2E/DX2 analytically  !
 ! D207  D(48,37,47,93)        178.1577         calculate D2E/DX2 analytically  !
 ! D208  D(79,37,47,91)        -59.2195         calculate D2E/DX2 analytically  !
 ! D209  D(79,37,47,92)       -179.6525         calculate D2E/DX2 analytically  !
 ! D210  D(79,37,47,93)         60.4116         calculate D2E/DX2 analytically  !
 ! D211  D(35,37,48,94)        175.8639         calculate D2E/DX2 analytically  !
 ! D212  D(35,37,48,95)         56.0179         calculate D2E/DX2 analytically  !
 ! D213  D(35,37,48,96)        -64.4992         calculate D2E/DX2 analytically  !
 ! D214  D(47,37,48,94)        -59.6467         calculate D2E/DX2 analytically  !
 ! D215  D(47,37,48,95)       -179.4927         calculate D2E/DX2 analytically  !
 ! D216  D(47,37,48,96)         59.9902         calculate D2E/DX2 analytically  !
 ! D217  D(79,37,48,94)         58.0922         calculate D2E/DX2 analytically  !
 ! D218  D(79,37,48,95)        -61.7538         calculate D2E/DX2 analytically  !
 ! D219  D(79,37,48,96)        177.7291         calculate D2E/DX2 analytically  !
 ! D220  D(30,38,39,40)          0.9184         calculate D2E/DX2 analytically  !
 ! D221  D(30,38,39,80)       -177.2561         calculate D2E/DX2 analytically  !
 ! D222  D(43,38,39,40)        179.5741         calculate D2E/DX2 analytically  !
 ! D223  D(43,38,39,80)          1.3995         calculate D2E/DX2 analytically  !
 ! D224  D(30,38,43,51)       -120.9835         calculate D2E/DX2 analytically  !
 ! D225  D(30,38,43,52)        115.168          calculate D2E/DX2 analytically  !
 ! D226  D(30,38,43,83)         -3.0409         calculate D2E/DX2 analytically  !
 ! D227  D(39,38,43,51)         60.412          calculate D2E/DX2 analytically  !
 ! D228  D(39,38,43,52)        -63.4365         calculate D2E/DX2 analytically  !
 ! D229  D(39,38,43,83)        178.3546         calculate D2E/DX2 analytically  !
 ! D230  D(38,39,40,41)         -2.3805         calculate D2E/DX2 analytically  !
 ! D231  D(38,39,40,81)       -178.2996         calculate D2E/DX2 analytically  !
 ! D232  D(80,39,40,41)        175.791          calculate D2E/DX2 analytically  !
 ! D233  D(80,39,40,81)         -0.1281         calculate D2E/DX2 analytically  !
 ! D234  D(39,40,41,42)          1.2907         calculate D2E/DX2 analytically  !
 ! D235  D(39,40,41,82)       -175.7349         calculate D2E/DX2 analytically  !
 ! D236  D(81,40,41,42)        177.2133         calculate D2E/DX2 analytically  !
 ! D237  D(81,40,41,82)          0.1877         calculate D2E/DX2 analytically  !
 ! D238  D(40,41,42,30)          1.1837         calculate D2E/DX2 analytically  !
 ! D239  D(40,41,42,44)       -172.9469         calculate D2E/DX2 analytically  !
 ! D240  D(82,41,42,30)        178.2109         calculate D2E/DX2 analytically  !
 ! D241  D(82,41,42,44)          4.0802         calculate D2E/DX2 analytically  !
 ! D242  D(30,42,44,49)        139.5643         calculate D2E/DX2 analytically  !
 ! D243  D(30,42,44,50)        -95.9173         calculate D2E/DX2 analytically  !
 ! D244  D(30,42,44,84)         20.3789         calculate D2E/DX2 analytically  !
 ! D245  D(41,42,44,49)        -46.4509         calculate D2E/DX2 analytically  !
 ! D246  D(41,42,44,50)         78.0675         calculate D2E/DX2 analytically  !
 ! D247  D(41,42,44,84)       -165.6363         calculate D2E/DX2 analytically  !
 ! D248  D(38,43,51,103)       179.9071         calculate D2E/DX2 analytically  !
 ! D249  D(38,43,51,104)        60.7866         calculate D2E/DX2 analytically  !
 ! D250  D(38,43,51,105)       -59.9327         calculate D2E/DX2 analytically  !
 ! D251  D(52,43,51,103)       -56.1349         calculate D2E/DX2 analytically  !
 ! D252  D(52,43,51,104)      -175.2554         calculate D2E/DX2 analytically  !
 ! D253  D(52,43,51,105)        64.0253         calculate D2E/DX2 analytically  !
 ! D254  D(83,43,51,103)        61.5884         calculate D2E/DX2 analytically  !
 ! D255  D(83,43,51,104)       -57.5321         calculate D2E/DX2 analytically  !
 ! D256  D(83,43,51,105)      -178.2514         calculate D2E/DX2 analytically  !
 ! D257  D(38,43,52,106)      -175.6112         calculate D2E/DX2 analytically  !
 ! D258  D(38,43,52,107)        64.6866         calculate D2E/DX2 analytically  !
 ! D259  D(38,43,52,108)       -55.6524         calculate D2E/DX2 analytically  !
 ! D260  D(51,43,52,106)        59.7612         calculate D2E/DX2 analytically  !
 ! D261  D(51,43,52,107)       -59.941          calculate D2E/DX2 analytically  !
 ! D262  D(51,43,52,108)       179.7201         calculate D2E/DX2 analytically  !
 ! D263  D(83,43,52,106)       -57.4877         calculate D2E/DX2 analytically  !
 ! D264  D(83,43,52,107)      -177.1899         calculate D2E/DX2 analytically  !
 ! D265  D(83,43,52,108)        62.4711         calculate D2E/DX2 analytically  !
 ! D266  D(42,44,49,97)       -179.5276         calculate D2E/DX2 analytically  !
 ! D267  D(42,44,49,98)        -60.8558         calculate D2E/DX2 analytically  !
 ! D268  D(42,44,49,99)         60.5808         calculate D2E/DX2 analytically  !
 ! D269  D(50,44,49,97)         56.6871         calculate D2E/DX2 analytically  !
 ! D270  D(50,44,49,98)        175.359          calculate D2E/DX2 analytically  !
 ! D271  D(50,44,49,99)        -63.2044         calculate D2E/DX2 analytically  !
 ! D272  D(84,44,49,97)        -60.4936         calculate D2E/DX2 analytically  !
 ! D273  D(84,44,49,98)         58.1783         calculate D2E/DX2 analytically  !
 ! D274  D(84,44,49,99)        179.6149         calculate D2E/DX2 analytically  !
 ! D275  D(42,44,50,100)       177.2672         calculate D2E/DX2 analytically  !
 ! D276  D(42,44,50,101)        57.587          calculate D2E/DX2 analytically  !
 ! D277  D(42,44,50,102)       -62.8774         calculate D2E/DX2 analytically  !
 ! D278  D(49,44,50,100)       -56.6435         calculate D2E/DX2 analytically  !
 ! D279  D(49,44,50,101)      -176.3238         calculate D2E/DX2 analytically  !
 ! D280  D(49,44,50,102)        63.2118         calculate D2E/DX2 analytically  !
 ! D281  D(84,44,50,100)        60.8328         calculate D2E/DX2 analytically  !
 ! D282  D(84,44,50,101)       -58.8474         calculate D2E/DX2 analytically  !
 ! D283  D(84,44,50,102)      -179.3119         calculate D2E/DX2 analytically  !
 --------------------------------------------------------------------------------
 Trust Radius=3.00D-01 FncErr=1.00D-07 GrdErr=1.00D-07
 Number of steps in this run=   2 maximum allowed number of steps=   2.
 GradGradGradGradGradGradGradGradGradGradGradGradGradGradGradGradGradGrad

 Stoichiometry    C42H60MgN2O9
 Framework group  C1[X(C42H60MgN2O9)]
 Deg. of freedom   336
 Full point group                 C1      NOp   1
 Largest Abelian subgroup         C1      NOp   1
 Largest concise Abelian subgroup C1      NOp   1
                         Standard orientation:                         
 ---------------------------------------------------------------------
 Center     Atomic     Atomic              Coordinates (Angstroms)
 Number     Number      Type              X           Y           Z
 ---------------------------------------------------------------------
    1          8             0        6.337621    1.362996   -0.134055
    2         12             0       -1.556028    0.809904   -0.325482
    3          8             0        2.053939   -3.072164    0.200104
    4          6             0        6.053573    0.091536   -0.481871
    5          7             0       -1.100878    2.387479    0.822457
    6          7             0       -3.390256    0.738467    0.507900
    7          8             0        6.836804   -0.827116   -0.414991
    8          6             0       -1.917971    3.090445    1.599306
    9          6             0       -3.273831    2.753398    1.804630
   10          6             0       -3.954633    1.607036    1.331259
   11          8             0        4.146262   -1.343986   -0.924565
   12          6             0        4.034837   -1.808201    0.332087
   13          6             0        3.490870   -3.241870    0.349571
   14          6             0        4.639178    0.007022   -1.057092
   15          8             0        4.316786   -1.174447    1.324659
   16          6             0        7.673292    1.579884    0.353176
   17          8             0       -1.070903    0.604022   -2.153879
   18          6             0        1.335264   -4.128875   -0.235227
   19          8             0        1.783101   -5.225959   -0.475275
   20          8             0       -0.165708   -2.780930   -1.496660
   21          6             0       -0.473725   -1.510953   -1.265727
   22          6             0       -0.544340   -0.607500   -2.502793
   23          6             0       -0.130416   -3.710641   -0.372873
   24          8             0       -0.709299   -1.077322   -0.132540
   25          6             0        0.872510   -0.487745   -3.105232
   26          6             0       -1.097813   -4.836695   -0.673744
   27          6             0        3.824913   -3.954499    1.649571
   28          6             0        4.674585    0.316903   -2.551935
   29          6             0        0.309443    2.674775    0.651865
   30          6             0       -3.926572   -0.532771    0.082581
   31          6             0        0.731538    3.449485   -0.486037
   32          6             0        2.116240    3.540083   -0.757358
   33          6             0        3.068793    2.904487    0.071578
   34          6             0        2.643921    2.159144    1.192710
   35          6             0        1.263513    2.026761    1.502793
   36          6             0       -0.285850    4.228491   -1.361842
   37          6             0        0.829061    1.251400    2.773379
   38          6             0       -3.823114   -1.683096    0.932404
   39          6             0       -4.079044   -2.962070    0.370678
   40          6             0       -4.408401   -3.109781   -0.992953
   41          6             0       -4.537888   -1.966636   -1.815427
   42          6             0       -4.315878   -0.664874   -1.302148
   43          6             0       -3.473974   -1.564426    2.438943
   44          6             0       -4.617376    0.590410   -2.165176
   45          6             0       -0.231336    3.788643   -2.858348
   46          6             0       -0.059552    5.773121   -1.230749
   47          6             0        1.261790   -0.246845    2.711812
   48          6             0        1.393378    1.931460    4.066326
   49          6             0       -4.063968    0.495198   -3.618217
   50          6             0       -6.161203    0.861853   -2.172656
   51          6             0       -2.175897   -2.354330    2.800515
   52          6             0       -4.673531   -2.042348    3.325865
   53          6             0       -1.380901    4.313647    2.325051
   54          6             0       -5.375583    1.392633    1.831741
   55          1             0       -3.843563    3.417857    2.445326
   56          1             0        3.860005   -3.791546   -0.519810
   57          1             0        3.973549    0.696993   -0.529138
   58          1             0        8.409222    1.299887   -0.405253
   59          1             0        7.848302    0.988655    1.255538
   60          1             0        7.734913    2.645885    0.573893
   61          1             0       -1.172433   -1.160645   -3.231634
   62          1             0       -0.422754   -3.166262    0.526178
   63          1             0        1.288358   -1.456925   -3.402557
   64          1             0        1.534225   -0.017046   -2.370709
   65          1             0        0.812896    0.165804   -3.980472
   66          1             0       -2.106261   -4.412449   -0.720464
   67          1             0       -1.058831   -5.586611    0.122970
   68          1             0       -0.849752   -5.326453   -1.619044
   69          1             0        4.911348   -4.037449    1.756644
   70          1             0        3.395492   -4.958701    1.644544
   71          1             0        3.441153   -3.385623    2.500017
   72          1             0        3.673999    0.226171   -2.980561
   73          1             0        5.346989   -0.373862   -3.070061
   74          1             0        5.028770    1.340770   -2.705634
   75          1             0        2.458471    4.147191   -1.605999
   76          1             0        4.143354    3.040117   -0.115997
   77          1             0        3.393572    1.709787    1.858191
   78          1             0       -1.302249    4.000772   -0.978676
   79          1             0       -0.278302    1.284582    2.825986
   80          1             0       -4.048644   -3.848792    1.017900
   81          1             0       -4.629918   -4.106332   -1.400248
   82          1             0       -4.863119   -2.086166   -2.857375
   83          1             0       -3.284022   -0.496790    2.662782
   84          1             0       -4.131458    1.459193   -1.673176
   85          1             0       -0.983643    4.347351   -3.437031
   86          1             0       -0.448098    2.708917   -2.939845
   87          1             0        0.760372    3.988067   -3.291579
   88          1             0       -0.835046    6.312069   -1.796190
   89          1             0        0.924690    6.058215   -1.632917
   90          1             0       -0.111248    6.092749   -0.178298
   91          1             0        0.899244   -0.779837    3.604393
   92          1             0        2.357339   -0.343321    2.664243
   93          1             0        0.834135   -0.731323    1.815087
   94          1             0        1.013244    1.409926    4.958038
   95          1             0        1.085256    2.987024    4.122590
   96          1             0        2.493121    1.887830    4.081217
   97          1             0       -4.307430    1.419782   -4.164159
   98          1             0       -2.966634    0.387595   -3.589641
   99          1             0       -4.501356   -0.353842   -4.164013
  100          1             0       -6.375365    1.778701   -2.742692
  101          1             0       -6.539831    0.994001   -1.146600
  102          1             0       -6.701075    0.023491   -2.640215
  103          1             0       -1.954628   -2.249065    3.874445
  104          1             0       -1.319766   -1.951426    2.230573
  105          1             0       -2.285265   -3.425884    2.571970
  106          1             0       -4.441431   -1.879157    4.389492
  107          1             0       -4.867483   -3.115149    3.173597
  108          1             0       -5.590114   -1.485049    3.078364
  109          1             0       -0.930012    5.020838    1.618713
  110          1             0       -2.174317    4.833123    2.872561
  111          1             0       -0.603262    4.026842    3.043749
  112          1             0       -5.952061    0.757891    1.150670
  113          1             0       -5.369972    0.912103    2.818933
  114          1             0       -5.894646    2.352346    1.939676
 ---------------------------------------------------------------------
 Rotational constants (GHZ):      0.0691157      0.0438689      0.0358175
 General basis read from cards:  (5D, 7F)
 There are   642 symmetry adapted basis functions of A   symmetry.
 Integral buffers will be    262144 words long.
 Raffenetti 2 integral format.
 Two-electron integral symmetry is turned on.
   642 basis functions,  1430 primitive gaussians,   674 cartesian basis functions
   205 alpha electrons      205 beta electrons
       nuclear repulsion energy      8774.0289522138 Hartrees.
 NAtoms=  114 NActive=  114 NUniq=  114 SFac= 1.00D+00 NAtFMM=   60 Big=T
 One-electron integrals computed using PRISM.
 NBasis=   642 RedAO= T  NBF=   642
 NBsUse=   642 1.00D-06 NBFU=   642
 Initial guess read from the checkpoint file:
 rrss_fm-product.chk
 Initial guess orbital symmetries:
       Occupied  (A) (A) (A) (A) (A) (A) (A) (A) (A) (A) (A) (A)
                 (A) (A) (A) (A) (A) (A) (A) (A) (A) (A) (A) (A)
                 (A) (A) (A) (A) (A) (A) (A) (A) (A) (A) (A) (A)
                 (A) (A) (A) (A) (A) (A) (A) (A) (A) (A) (A) (A)
                 (A) (A) (A) (A) (A) (A) (A) (A) (A) (A) (A) (A)
                 (A) (A) (A) (A) (A) (A) (A) (A) (A) (A) (A) (A)
                 (A) (A) (A) (A) (A) (A) (A) (A) (A) (A) (A) (A)
                 (A) (A) (A) (A) (A) (A) (A) (A) (A) (A) (A) (A)
                 (A) (A) (A) (A) (A) (A) (A) (A) (A) (A) (A) (A)
                 (A) (A) (A) (A) (A) (A) (A) (A) (A) (A) (A) (A)
                 (A) (A) (A) (A) (A) (A) (A) (A) (A) (A) (A) (A)
                 (A) (A) (A) (A) (A) (A) (A) (A) (A) (A) (A) (A)
                 (A) (A) (A) (A) (A) (A) (A) (A) (A) (A) (A) (A)
                 (A) (A) (A) (A) (A) (A) (A) (A) (A) (A) (A) (A)
                 (A) (A) (A) (A) (A) (A) (A) (A) (A) (A) (A) (A)
                 (A) (A) (A) (A) (A) (A) (A) (A) (A) (A) (A) (A)
                 (A) (A) (A) (A) (A) (A) (A) (A) (A) (A) (A) (A)
                 (A)
       Virtual   (A) (A) (A) (A) (A) (A) (A) (A) (A) (A) (A) (A)
                 (A) (A) (A) (A) (A) (A) (A) (A) (A) (A) (A) (A)
                 (A) (A) (A) (A) (A) (A) (A) (A) (A) (A) (A) (A)
                 (A) (A) (A) (A) (A) (A) (A) (A) (A) (A) (A) (A)
                 (A) (A) (A) (A) (A) (A) (A) (A) (A) (A) (A) (A)
                 (A) (A) (A) (A) (A) (A) (A) (A) (A) (A) (A) (A)
                 (A) (A) (A) (A) (A) (A) (A) (A) (A) (A) (A) (A)
                 (A) (A) (A) (A) (A) (A) (A) (A) (A) (A) (A) (A)
                 (A) (A) (A) (A) (A) (A) (A) (A) (A) (A) (A) (A)
                 (A) (A) (A) (A) (A) (A) (A) (A) (A) (A) (A) (A)
                 (A) (A) (A) (A) (A) (A) (A) (A) (A) (A) (A) (A)
                 (A) (A) (A) (A) (A) (A) (A) (A) (A) (A) (A) (A)
                 (A) (A) (A) (A) (A) (A) (A) (A) (A) (A) (A) (A)
                 (A) (A) (A) (A) (A) (A) (A) (A) (A) (A) (A) (A)
                 (A) (A) (A) (A) (A) (A) (A) (A) (A) (A) (A) (A)
                 (A) (A) (A) (A) (A) (A) (A) (A) (A) (A) (A) (A)
                 (A) (A) (A) (A) (A) (A) (A) (A) (A) (A) (A) (A)
                 (A) (A) (A) (A) (A) (A) (A) (A) (A) (A) (A) (A)
                 (A) (A) (A) (A) (A) (A) (A) (A) (A) (A) (A) (A)
                 (A) (A) (A) (A) (A) (A) (A) (A) (A) (A) (A) (A)
                 (A) (A) (A) (A) (A) (A) (A) (A) (A) (A) (A) (A)
                 (A) (A) (A) (A) (A) (A) (A) (A) (A) (A) (A) (A)
                 (A) (A) (A) (A) (A) (A) (A) (A) (A) (A) (A) (A)
                 (A) (A) (A) (A) (A) (A) (A) (A) (A) (A) (A) (A)
                 (A) (A) (A) (A) (A) (A) (A) (A) (A) (A) (A) (A)
                 (A) (A) (A) (A) (A) (A) (A) (A) (A) (A) (A) (A)
                 (A) (A) (A) (A) (A) (A) (A) (A) (A) (A) (A) (A)
                 (A) (A) (A) (A) (A) (A) (A) (A) (A) (A) (A) (A)
                 (A) (A) (A) (A) (A) (A) (A) (A) (A) (A) (A) (A)
                 (A) (A) (A) (A) (A) (A) (A) (A) (A) (A) (A) (A)
                 (A) (A) (A) (A) (A) (A) (A) (A) (A) (A) (A) (A)
                 (A) (A) (A) (A) (A) (A) (A) (A) (A) (A) (A) (A)
                 (A) (A) (A) (A) (A) (A) (A) (A) (A) (A) (A) (A)
                 (A) (A) (A) (A) (A) (A) (A) (A) (A) (A) (A) (A)
                 (A) (A) (A) (A) (A) (A) (A) (A) (A) (A) (A) (A)
                 (A) (A) (A) (A) (A) (A) (A) (A) (A) (A) (A) (A)
                 (A) (A) (A) (A) (A)
 Requested convergence on RMS density matrix=1.00D-08 within 128 cycles.
 Requested convergence on MAX density matrix=1.00D-06.
 Requested convergence on             energy=1.00D-06.
 No special actions if energy rises.
 SCF Done:  E(RB+HF-LYP) =  -2612.21424371     A.U. after    1 cycles
             Convg  =    0.5595D-08             -V/T =  2.0106
             S**2   =   0.0000
 Range of M.O.s used for correlation:     1   642
 NBasis=   642 NAE=   205 NBE=   205 NFC=     0 NFV=     0
 NROrb=    642 NOA=   205 NOB=   205 NVA=   437 NVB=   437
 PrsmSu:  requested number of processors reduced to:   1 ShMem   1 Linda.
 PrsmSu:  requested number of processors reduced to:   1 ShMem   1 Linda.
 Symmetrizing basis deriv contribution to polar:
 IMax=3 JMax=2 DiffMx= 0.00D+00
 G2DrvN: will do   29 centers at a time, making    4 passes doing MaxLOS=2.
 Calling FoFCou, ICntrl=  3107 FMM=T I1Cent=   0.
 Number of processors reduced from  2 to  1 for far-field.
 Calling FoFCou, ICntrl=  3107 FMM=T I1Cent=   0.
 Number of processors reduced from  2 to  1 for far-field.
 Calling FoFCou, ICntrl=  3107 FMM=T I1Cent=   0.
 Number of processors reduced from  2 to  1 for far-field.
 Calling FoFCou, ICntrl=  3107 FMM=T I1Cent=   0.
 Number of processors reduced from  2 to  1 for far-field.
 FoFDir/FoFCou used for L=0 through L=2.
          Differentiating once with respect to electric field.
                with respect to dipole field.
          Differentiating once with respect to nuclear coordinates.
 FoFCou: FMM=T IPFlag=           0 FMFlag=      100000 FMFlg1=        8193
 NFxFlg=           0 DoJE=F BraDBF=F KetDBF=F FulRan=T.
 Symmetry not used in FoFCou.
 FMM levels:  10  Number of levels for PrismC:   9
 Number of processors reduced from  2 to  1 for far-field.
 PrismC:  NFx=      2048 NFxT=         6 NFxU=         6.
 PrismC:  NFx=      2048 NFxT=         6 NFxU=         6.
 Number of processors reduced from  2 to  1 for far-field.
 PrismC:  NFx=      2048 NFxT=         6 NFxU=         6.
 PrismC:  NFx=      2048 NFxT=         6 NFxU=         6.
 Number of processors reduced from  2 to  1 for far-field.
 PrismC:  NFx=      2048 NFxT=         6 NFxU=         6.
 PrismC:  NFx=      2048 NFxT=         6 NFxU=         6.
 Number of processors reduced from  2 to  1 for far-field.
 PrismC:  NFx=      2048 NFxT=         6 NFxU=         6.
 PrismC:  NFx=      2048 NFxT=         6 NFxU=         6.
          There are 345 degrees of freedom in the 1st order CPHF.
   345 vectors were produced by pass  0.
 AX will form  87 AO Fock derivatives at one time.
 Number of processors reduced from  2 to  1 for far-field.
 PrismC:  NFx=      2048 NFxT=         6 NFxU=         6.
 PrismC:  NFx=      2048 NFxT=         6 NFxU=         6.
 Number of processors reduced from  2 to  1 for far-field.
 PrismC:  NFx=      2048 NFxT=         6 NFxU=         6.
 PrismC:  NFx=      2048 NFxT=         6 NFxU=         6.
 Number of processors reduced from  2 to  1 for far-field.
 PrismC:  NFx=      2048 NFxT=         6 NFxU=         6.
 PrismC:  NFx=      2048 NFxT=         6 NFxU=         6.
 Number of processors reduced from  2 to  1 for far-field.
 PrismC:  NFx=      2048 NFxT=         6 NFxU=         6.
 PrismC:  NFx=      2048 NFxT=         6 NFxU=         6.
   344 vectors were produced by pass  1.
 Number of processors reduced from  2 to  1 for far-field.
 PrismC:  NFx=      2048 NFxT=         6 NFxU=         6.
 PrismC:  NFx=      2048 NFxT=         6 NFxU=         6.
 Number of processors reduced from  2 to  1 for far-field.
 PrismC:  NFx=      2048 NFxT=         6 NFxU=         6.
 PrismC:  NFx=      2048 NFxT=         6 NFxU=         6.
 Number of processors reduced from  2 to  1 for far-field.
 PrismC:  NFx=      2048 NFxT=         6 NFxU=         6.
 PrismC:  NFx=      2048 NFxT=         6 NFxU=         6.
 Number of processors reduced from  2 to  1 for far-field.
 PrismC:  NFx=      2048 NFxT=         6 NFxU=         6.
 PrismC:  NFx=      2048 NFxT=         6 NFxU=         6.
   342 vectors were produced by pass  2.
 Number of processors reduced from  2 to  1 for far-field.
 PrismC:  NFx=      2048 NFxT=         6 NFxU=         6.
 PrismC:  NFx=      2048 NFxT=         6 NFxU=         6.
 Number of processors reduced from  2 to  1 for far-field.
 PrismC:  NFx=      2048 NFxT=         6 NFxU=         6.
 PrismC:  NFx=      2048 NFxT=         6 NFxU=         6.
 Number of processors reduced from  2 to  1 for far-field.
 PrismC:  NFx=      2048 NFxT=         6 NFxU=         6.
 PrismC:  NFx=      2048 NFxT=         6 NFxU=         6.
 Number of processors reduced from  2 to  1 for far-field.
 PrismC:  NFx=      2048 NFxT=         6 NFxU=         6.
 PrismC:  NFx=      2048 NFxT=         6 NFxU=         6.
   342 vectors were produced by pass  3.
 Number of processors reduced from  2 to  1 for far-field.
 PrismC:  NFx=      2048 NFxT=         6 NFxU=         6.
 PrismC:  NFx=      2048 NFxT=         6 NFxU=         6.
 Number of processors reduced from  2 to  1 for far-field.
 PrismC:  NFx=      2048 NFxT=         6 NFxU=         6.
 PrismC:  NFx=      2048 NFxT=         6 NFxU=         6.
 Number of processors reduced from  2 to  1 for far-field.
 PrismC:  NFx=      2048 NFxT=         6 NFxU=         5.
 PrismC:  NFx=      2048 NFxT=         6 NFxU=         6.
 Number of processors reduced from  2 to  1 for far-field.
 PrismC:  NFx=      2048 NFxT=         6 NFxU=         5.
 PrismC:  NFx=      2048 NFxT=         6 NFxU=         5.
   342 vectors were produced by pass  4.
 Number of processors reduced from  2 to  1 for far-field.
 PrismC:  NFx=      2048 NFxT=         6 NFxU=         6.
 PrismC:  NFx=      2048 NFxT=         6 NFxU=         6.
 Number of processors reduced from  2 to  1 for far-field.
 PrismC:  NFx=      2048 NFxT=         6 NFxU=         5.
 PrismC:  NFx=      2048 NFxT=         6 NFxU=         5.
 Number of processors reduced from  2 to  1 for far-field.
 PrismC:  NFx=      2048 NFxT=         6 NFxU=         4.
 PrismC:  NFx=      2048 NFxT=         6 NFxU=         4.
 Number of processors reduced from  2 to  1 for far-field.
 PrismC:  NFx=      2048 NFxT=         6 NFxU=         4.
 PrismC:  NFx=      2048 NFxT=         6 NFxU=         4.
   203 vectors were produced by pass  5.
 Number of processors reduced from  2 to  1 for far-field.
 PrismC:  NFx=      2048 NFxT=         6 NFxU=         6.
 PrismC:  NFx=      2048 NFxT=         6 NFxU=         6.
 Number of processors reduced from  2 to  1 for far-field.
 PrismC:  NFx=      2048 NFxT=         6 NFxU=         3.
 PrismC:  NFx=      2048 NFxT=         6 NFxU=         4.
 Number of processors reduced from  2 to  1 for far-field.
 PrismC:  NFx=      2048 NFxT=         6 NFxU=         3.
 PrismC:  NFx=      2048 NFxT=         6 NFxU=         3.
    54 vectors were produced by pass  6.
 Number of processors reduced from  2 to  1 for far-field.
 PrismC:  NFx=      2048 NFxT=         6 NFxU=         5.
 PrismC:  NFx=      2048 NFxT=         6 NFxU=         5.
     3 vectors were produced by pass  7.
 Number of processors reduced from  2 to  1 for far-field.
 PrismC:  NFx=      2048 NFxT=         6 NFxU=         5.
 PrismC:  NFx=      2048 NFxT=         6 NFxU=         5.
 Inv2:  IOpt= 1 Iter= 1 AM= 7.33D-15 Conv= 1.00D-12.
 Inverted reduced A of dimension 1975 with in-core refinement.
 Number of processors reduced from  2 to  1 for far-field.
 PrismC:  NFx=      2048 NFxT=         6 NFxU=         6.
 PrismC:  NFx=      2048 NFxT=         6 NFxU=         6.
 Number of processors reduced from  2 to  1 for far-field.
 PrismC:  NFx=      2048 NFxT=         6 NFxU=         6.
 PrismC:  NFx=      2048 NFxT=         6 NFxU=         6.
 Number of processors reduced from  2 to  1 for far-field.
 PrismC:  NFx=      2048 NFxT=         6 NFxU=         6.
 PrismC:  NFx=      2048 NFxT=         6 NFxU=         6.
 Number of processors reduced from  2 to  1 for far-field.
 PrismC:  NFx=      2048 NFxT=         6 NFxU=         6.
 PrismC:  NFx=      2048 NFxT=         6 NFxU=         6.
 Isotropic polarizability for W=    0.000000      414.12 Bohr**3.
 End of Minotr Frequency-dependent properties file   721 does not exist.

 **********************************************************************

            Population analysis using the SCF density.

 **********************************************************************

 Orbital symmetries:
       Occupied  (A) (A) (A) (A) (A) (A) (A) (A) (A) (A) (A) (A)
                 (A) (A) (A) (A) (A) (A) (A) (A) (A) (A) (A) (A)
                 (A) (A) (A) (A) (A) (A) (A) (A) (A) (A) (A) (A)
                 (A) (A) (A) (A) (A) (A) (A) (A) (A) (A) (A) (A)
                 (A) (A) (A) (A) (A) (A) (A) (A) (A) (A) (A) (A)
                 (A) (A) (A) (A) (A) (A) (A) (A) (A) (A) (A) (A)
                 (A) (A) (A) (A) (A) (A) (A) (A) (A) (A) (A) (A)
                 (A) (A) (A) (A) (A) (A) (A) (A) (A) (A) (A) (A)
                 (A) (A) (A) (A) (A) (A) (A) (A) (A) (A) (A) (A)
                 (A) (A) (A) (A) (A) (A) (A) (A) (A) (A) (A) (A)
                 (A) (A) (A) (A) (A) (A) (A) (A) (A) (A) (A) (A)
                 (A) (A) (A) (A) (A) (A) (A) (A) (A) (A) (A) (A)
                 (A) (A) (A) (A) (A) (A) (A) (A) (A) (A) (A) (A)
                 (A) (A) (A) (A) (A) (A) (A) (A) (A) (A) (A) (A)
                 (A) (A) (A) (A) (A) (A) (A) (A) (A) (A) (A) (A)
                 (A) (A) (A) (A) (A) (A) (A) (A) (A) (A) (A) (A)
                 (A) (A) (A) (A) (A) (A) (A) (A) (A) (A) (A) (A)
                 (A)
       Virtual   (A) (A) (A) (A) (A) (A) (A) (A) (A) (A) (A) (A)
                 (A) (A) (A) (A) (A) (A) (A) (A) (A) (A) (A) (A)
                 (A) (A) (A) (A) (A) (A) (A) (A) (A) (A) (A) (A)
                 (A) (A) (A) (A) (A) (A) (A) (A) (A) (A) (A) (A)
                 (A) (A) (A) (A) (A) (A) (A) (A) (A) (A) (A) (A)
                 (A) (A) (A) (A) (A) (A) (A) (A) (A) (A) (A) (A)
                 (A) (A) (A) (A) (A) (A) (A) (A) (A) (A) (A) (A)
                 (A) (A) (A) (A) (A) (A) (A) (A) (A) (A) (A) (A)
                 (A) (A) (A) (A) (A) (A) (A) (A) (A) (A) (A) (A)
                 (A) (A) (A) (A) (A) (A) (A) (A) (A) (A) (A) (A)
                 (A) (A) (A) (A) (A) (A) (A) (A) (A) (A) (A) (A)
                 (A) (A) (A) (A) (A) (A) (A) (A) (A) (A) (A) (A)
                 (A) (A) (A) (A) (A) (A) (A) (A) (A) (A) (A) (A)
                 (A) (A) (A) (A) (A) (A) (A) (A) (A) (A) (A) (A)
                 (A) (A) (A) (A) (A) (A) (A) (A) (A) (A) (A) (A)
                 (A) (A) (A) (A) (A) (A) (A) (A) (A) (A) (A) (A)
                 (A) (A) (A) (A) (A) (A) (A) (A) (A) (A) (A) (A)
                 (A) (A) (A) (A) (A) (A) (A) (A) (A) (A) (A) (A)
                 (A) (A) (A) (A) (A) (A) (A) (A) (A) (A) (A) (A)
                 (A) (A) (A) (A) (A) (A) (A) (A) (A) (A) (A) (A)
                 (A) (A) (A) (A) (A) (A) (A) (A) (A) (A) (A) (A)
                 (A) (A) (A) (A) (A) (A) (A) (A) (A) (A) (A) (A)
                 (A) (A) (A) (A) (A) (A) (A) (A) (A) (A) (A) (A)
                 (A) (A) (A) (A) (A) (A) (A) (A) (A) (A) (A) (A)
                 (A) (A) (A) (A) (A) (A) (A) (A) (A) (A) (A) (A)
                 (A) (A) (A) (A) (A) (A) (A) (A) (A) (A) (A) (A)
                 (A) (A) (A) (A) (A) (A) (A) (A) (A) (A) (A) (A)
                 (A) (A) (A) (A) (A) (A) (A) (A) (A) (A) (A) (A)
                 (A) (A) (A) (A) (A) (A) (A) (A) (A) (A) (A) (A)
                 (A) (A) (A) (A) (A) (A) (A) (A) (A) (A) (A) (A)
                 (A) (A) (A) (A) (A) (A) (A) (A) (A) (A) (A) (A)
                 (A) (A) (A) (A) (A) (A) (A) (A) (A) (A) (A) (A)
                 (A) (A) (A) (A) (A) (A) (A) (A) (A) (A) (A) (A)
                 (A) (A) (A) (A) (A) (A) (A) (A) (A) (A) (A) (A)
                 (A) (A) (A) (A) (A) (A) (A) (A) (A) (A) (A) (A)
                 (A) (A) (A) (A) (A) (A) (A) (A) (A) (A) (A) (A)
                 (A) (A) (A) (A) (A)
 The electronic state is 1-A.
 Alpha  occ. eigenvalues --  -46.69807 -19.20736 -19.19974 -19.19447 -19.19241
 Alpha  occ. eigenvalues --  -19.15993 -19.14898 -19.14216 -19.13439 -19.04858
 Alpha  occ. eigenvalues --  -14.28444 -14.28040 -10.32400 -10.32137 -10.31784
 Alpha  occ. eigenvalues --  -10.31188 -10.25923 -10.25870 -10.25019 -10.23574
 Alpha  occ. eigenvalues --  -10.21767 -10.20854 -10.20620 -10.18046 -10.17672
 Alpha  occ. eigenvalues --  -10.17498 -10.16269 -10.15953 -10.15337 -10.12816
 Alpha  occ. eigenvalues --  -10.06783 -10.06030 -10.03857 -10.03589 -10.03421
 Alpha  occ. eigenvalues --  -10.02956 -10.02943 -10.02865 -10.02748 -10.02651
 Alpha  occ. eigenvalues --  -10.02545 -10.02533 -10.02390 -10.02123 -10.01786
 Alpha  occ. eigenvalues --  -10.01504 -10.01499 -10.01326 -10.00778 -10.00757
 Alpha  occ. eigenvalues --  -10.00548  -9.99838  -9.99429  -9.98823  -3.00624
 Alpha  occ. eigenvalues --   -1.75406  -1.75334  -1.74961  -1.12722  -1.11734
 Alpha  occ. eigenvalues --   -1.10808  -1.09923  -1.03614  -1.02922  -1.02334
 Alpha  occ. eigenvalues --   -1.01505  -0.92914  -0.89678  -0.88221  -0.81885
 Alpha  occ. eigenvalues --   -0.81632  -0.80964  -0.79938  -0.77771  -0.77256
 Alpha  occ. eigenvalues --   -0.76555  -0.75130  -0.74483  -0.73968  -0.72939
 Alpha  occ. eigenvalues --   -0.72480  -0.72392  -0.69143  -0.68970  -0.68810
 Alpha  occ. eigenvalues --   -0.68201  -0.68087  -0.67439  -0.66217  -0.65580
 Alpha  occ. eigenvalues --   -0.64954  -0.64507  -0.64313  -0.63922  -0.62621
 Alpha  occ. eigenvalues --   -0.59761  -0.59663  -0.59084  -0.58922  -0.57542
 Alpha  occ. eigenvalues --   -0.57389  -0.56426  -0.55514  -0.54993  -0.54655
 Alpha  occ. eigenvalues --   -0.53889  -0.52802  -0.52262  -0.51456  -0.51125
 Alpha  occ. eigenvalues --   -0.50572  -0.50251  -0.49901  -0.48766  -0.48534
 Alpha  occ. eigenvalues --   -0.48063  -0.47680  -0.47448  -0.46641  -0.45955
 Alpha  occ. eigenvalues --   -0.45684  -0.45468  -0.45028  -0.44488  -0.44333
 Alpha  occ. eigenvalues --   -0.44300  -0.43771  -0.43285  -0.42155  -0.41832
 Alpha  occ. eigenvalues --   -0.41659  -0.41326  -0.41162  -0.41113  -0.40932
 Alpha  occ. eigenvalues --   -0.40908  -0.40755  -0.40552  -0.40341  -0.40133
 Alpha  occ. eigenvalues --   -0.39970  -0.39606  -0.39366  -0.39291  -0.39229
 Alpha  occ. eigenvalues --   -0.38990  -0.38801  -0.38467  -0.38277  -0.37978
 Alpha  occ. eigenvalues --   -0.37925  -0.37504  -0.37366  -0.37092  -0.36956
 Alpha  occ. eigenvalues --   -0.36815  -0.36711  -0.36275  -0.36082  -0.36002
 Alpha  occ. eigenvalues --   -0.35793  -0.35737  -0.35579  -0.35384  -0.35203
 Alpha  occ. eigenvalues --   -0.35049  -0.34922  -0.34727  -0.34506  -0.34348
 Alpha  occ. eigenvalues --   -0.34286  -0.34026  -0.32986  -0.32456  -0.32056
 Alpha  occ. eigenvalues --   -0.31659  -0.31437  -0.31255  -0.31029  -0.30925
 Alpha  occ. eigenvalues --   -0.30606  -0.30412  -0.30272  -0.29910  -0.29870
 Alpha  occ. eigenvalues --   -0.29518  -0.29041  -0.28939  -0.28532  -0.28445
 Alpha  occ. eigenvalues --   -0.28130  -0.27805  -0.27689  -0.27643  -0.27150
 Alpha  occ. eigenvalues --   -0.27078  -0.25706  -0.25241  -0.22723  -0.20763
 Alpha  occ. eigenvalues --   -0.19592  -0.19241  -0.18814  -0.17967  -0.16125
 Alpha virt. eigenvalues --   -0.01767  -0.00736   0.00053   0.00558   0.01218
 Alpha virt. eigenvalues --    0.05503   0.06156   0.06342   0.07118   0.07460
 Alpha virt. eigenvalues --    0.07860   0.09358   0.09808   0.10803   0.11349
 Alpha virt. eigenvalues --    0.11533   0.12287   0.12875   0.12961   0.13378
 Alpha virt. eigenvalues --    0.13622   0.14216   0.14463   0.15149   0.15257
 Alpha virt. eigenvalues --    0.15438   0.15821   0.16329   0.16833   0.16965
 Alpha virt. eigenvalues --    0.17584   0.17965   0.18112   0.18434   0.18564
 Alpha virt. eigenvalues --    0.19128   0.19478   0.20074   0.20803   0.21004
 Alpha virt. eigenvalues --    0.21231   0.21546   0.21989   0.22598   0.22869
 Alpha virt. eigenvalues --    0.23001   0.23345   0.23858   0.24499   0.25200
 Alpha virt. eigenvalues --    0.25316   0.25391   0.26265   0.26410   0.27068
 Alpha virt. eigenvalues --    0.27553   0.28046   0.29397   0.29806   0.30042
 Alpha virt. eigenvalues --    0.30923   0.31113   0.31856   0.32136   0.33018
 Alpha virt. eigenvalues --    0.33122   0.33617   0.34236   0.34492   0.34889
 Alpha virt. eigenvalues --    0.35027   0.35154   0.35878   0.36542   0.36880
 Alpha virt. eigenvalues --    0.37356   0.37780   0.38209   0.38456   0.38683
 Alpha virt. eigenvalues --    0.38939   0.39203   0.39790   0.40040   0.40306
 Alpha virt. eigenvalues --    0.40381   0.40822   0.41217   0.41813   0.42446
 Alpha virt. eigenvalues --    0.42660   0.43162   0.43771   0.44035   0.44795
 Alpha virt. eigenvalues --    0.45016   0.45196   0.45679   0.46003   0.46077
 Alpha virt. eigenvalues --    0.46376   0.46555   0.46810   0.47211   0.47706
 Alpha virt. eigenvalues --    0.47996   0.48183   0.48567   0.48676   0.49016
 Alpha virt. eigenvalues --    0.49067   0.49243   0.49399   0.49604   0.49753
 Alpha virt. eigenvalues --    0.49907   0.49975   0.50263   0.50441   0.50878
 Alpha virt. eigenvalues --    0.51227   0.51328   0.51639   0.52024   0.52554
 Alpha virt. eigenvalues --    0.52958   0.53513   0.53752   0.53914   0.54010
 Alpha virt. eigenvalues --    0.54597   0.54859   0.54927   0.55376   0.55763
 Alpha virt. eigenvalues --    0.56186   0.56362   0.56559   0.56701   0.56973
 Alpha virt. eigenvalues --    0.57346   0.57635   0.57981   0.58160   0.58342
 Alpha virt. eigenvalues --    0.58744   0.59027   0.59493   0.59820   0.60689
 Alpha virt. eigenvalues --    0.60832   0.61288   0.61880   0.62557   0.62957
 Alpha virt. eigenvalues --    0.63156   0.63520   0.63690   0.64294   0.64587
 Alpha virt. eigenvalues --    0.65343   0.65773   0.66263   0.66506   0.66845
 Alpha virt. eigenvalues --    0.67276   0.67894   0.68982   0.70151   0.70294
 Alpha virt. eigenvalues --    0.70354   0.70932   0.71084   0.71612   0.71925
 Alpha virt. eigenvalues --    0.72549   0.72724   0.73052   0.73767   0.73886
 Alpha virt. eigenvalues --    0.74834   0.75243   0.75603   0.76036   0.76209
 Alpha virt. eigenvalues --    0.76624   0.77079   0.77992   0.78371   0.79296
 Alpha virt. eigenvalues --    0.79794   0.80386   0.81481   0.82325   0.83079
 Alpha virt. eigenvalues --    0.83688   0.83868   0.84754   0.85489   0.86221
 Alpha virt. eigenvalues --    0.86582   0.87030   0.87599   0.88502   0.88818
 Alpha virt. eigenvalues --    0.89707   0.90053   0.90669   0.90985   0.91368
 Alpha virt. eigenvalues --    0.92200   0.92386   0.92759   0.93118   0.93769
 Alpha virt. eigenvalues --    0.94338   0.95009   0.96187   0.96596   0.97249
 Alpha virt. eigenvalues --    0.97531   0.98092   0.99286   0.99631   1.01006
 Alpha virt. eigenvalues --    1.01457   1.02659   1.03405   1.04580   1.05583
 Alpha virt. eigenvalues --    1.05845   1.06436   1.07956   1.08641   1.09480
 Alpha virt. eigenvalues --    1.10041   1.10691   1.11925   1.12533   1.13423
 Alpha virt. eigenvalues --    1.14018   1.14751   1.15463   1.17056   1.17420
 Alpha virt. eigenvalues --    1.17881   1.18853   1.20736   1.22621   1.23471
 Alpha virt. eigenvalues --    1.24737   1.25140   1.25547   1.26542   1.27562
 Alpha virt. eigenvalues --    1.29673   1.30982   1.32104   1.33643   1.34476
 Alpha virt. eigenvalues --    1.35360   1.36505   1.36917   1.38567   1.39224
 Alpha virt. eigenvalues --    1.40856   1.41809   1.42020   1.43940   1.44867
 Alpha virt. eigenvalues --    1.45551   1.46334   1.47071   1.48163   1.48409
 Alpha virt. eigenvalues --    1.49365   1.50236   1.50996   1.51779   1.52865
 Alpha virt. eigenvalues --    1.53571   1.55210   1.55381   1.58702   1.59725
 Alpha virt. eigenvalues --    1.60453   1.62080   1.62784   1.64106   1.65101
 Alpha virt. eigenvalues --    1.66058   1.68332   1.68824   1.70305   1.71028
 Alpha virt. eigenvalues --    1.71294   1.72426   1.73052   1.74331   1.74506
 Alpha virt. eigenvalues --    1.75855   1.76452   1.77499   1.79124   1.79299
 Alpha virt. eigenvalues --    1.79599   1.80584   1.81913   1.83071   1.83477
 Alpha virt. eigenvalues --    1.83885   1.84029   1.85544   1.85744   1.86748
 Alpha virt. eigenvalues --    1.87027   1.87326   1.87555   1.87912   1.88939
 Alpha virt. eigenvalues --    1.90119   1.90281   1.90988   1.91374   1.92505
 Alpha virt. eigenvalues --    1.93874   1.94127   1.94918   1.95916   1.96145
 Alpha virt. eigenvalues --    1.97246   1.98609   1.98939   1.99394   1.99584
 Alpha virt. eigenvalues --    2.00016   2.00649   2.01582   2.02182   2.02493
 Alpha virt. eigenvalues --    2.02792   2.03693   2.04132   2.05383   2.07997
 Alpha virt. eigenvalues --    2.08453   2.09128   2.09931   2.11103   2.11229
 Alpha virt. eigenvalues --    2.11690   2.12351   2.14610   2.15076   2.15544
 Alpha virt. eigenvalues --    2.16451   2.16869   2.17522   2.18021   2.18710
 Alpha virt. eigenvalues --    2.19721   2.20562   2.20995   2.21971   2.22258
 Alpha virt. eigenvalues --    2.23067   2.23575   2.25271   2.26717   2.27640
 Alpha virt. eigenvalues --    2.28443   2.29414   2.30004   2.31400   2.31729
 Alpha virt. eigenvalues --    2.31970   2.32694   2.32899   2.33338   2.34275
 Alpha virt. eigenvalues --    2.35157   2.35723   2.38216   2.41794   2.42472
 Alpha virt. eigenvalues --    2.43219   2.43770   2.46299   2.47158   2.47675
 Alpha virt. eigenvalues --    2.48417   2.50379   2.52260   2.52770   2.55123
 Alpha virt. eigenvalues --    2.56980   2.58240   2.58878   2.60306   2.64288
 Alpha virt. eigenvalues --    2.64889   2.66508   2.67159   2.67799   2.69185
 Alpha virt. eigenvalues --    2.70840   2.71126   2.74798   2.75627   2.77070
 Alpha virt. eigenvalues --    2.77787   2.80390   2.81298   2.85163   2.86259
 Alpha virt. eigenvalues --    2.87050   2.90229   2.95027   2.96333   2.97320
 Alpha virt. eigenvalues --    2.98702   3.01874   3.02443   3.02826   3.06252
 Alpha virt. eigenvalues --    3.09990   3.12451   3.16052   3.17520   3.18086
 Alpha virt. eigenvalues --    3.20910   3.25338   3.60473   5.99792   6.13345
 Alpha virt. eigenvalues --    6.39917 103.35668
          Condensed to atoms (all electrons):
 Mulliken atomic charges:
              1
     1  O   -0.454695
     2  Mg   0.799595
     3  O   -0.463170
     4  C    0.582025
     5  N   -0.557498
     6  N   -0.543565
     7  O   -0.441843
     8  C    0.341905
     9  C   -0.240199
    10  C    0.337799
    11  O   -0.457041
    12  C    0.605291
    13  C    0.061982
    14  C    0.072297
    15  O   -0.439806
    16  C   -0.214719
    17  O   -0.663381
    18  C    0.592849
    19  O   -0.425093
    20  O   -0.447298
    21  C    0.641401
    22  C    0.131592
    23  C    0.026806
    24  O   -0.498318
    25  C   -0.478319
    26  C   -0.452606
    27  C   -0.470614
    28  C   -0.487031
    29  C    0.008164
    30  C    0.010378
    31  C    0.002877
    32  C   -0.078059
    33  C   -0.073403
    34  C   -0.073175
    35  C   -0.003969
    36  C   -0.056266
    37  C   -0.056271
    38  C    0.001282
    39  C   -0.076274
    40  C   -0.071515
    41  C   -0.075119
    42  C    0.003316
    43  C   -0.053106
    44  C   -0.056952
    45  C   -0.226119
    46  C   -0.216427
    47  C   -0.223744
    48  C   -0.216443
    49  C   -0.224725
    50  C   -0.216621
    51  C   -0.218386
    52  C   -0.217679
    53  C   -0.439215
    54  C   -0.441020
    55  H    0.078202
    56  H    0.184588
    57  H    0.137949
    58  H    0.170370
    59  H    0.177703
    60  H    0.162581
    61  H    0.131254
    62  H    0.198945
    63  H    0.143238
    64  H    0.180035
    65  H    0.165485
    66  H    0.133774
    67  H    0.156801
    68  H    0.172423
    69  H    0.168131
    70  H    0.173477
    71  H    0.174260
    72  H    0.189049
    73  H    0.170495
    74  H    0.162051
    75  H    0.082983
    76  H    0.094381
    77  H    0.094996
    78  H    0.097204
    79  H    0.097173
    80  H    0.084164
    81  H    0.088920
    82  H    0.087822
    83  H    0.097398
    84  H    0.100149
    85  H    0.070704
    86  H    0.123249
    87  H    0.065136
    88  H    0.076528
    89  H    0.071100
    90  H    0.071238
    91  H    0.071180
    92  H    0.087508
    93  H    0.098922
    94  H    0.075853
    95  H    0.072026
    96  H    0.074532
    97  H    0.073799
    98  H    0.113727
    99  H    0.064557
   100  H    0.077329
   101  H    0.075331
   102  H    0.071230
   103  H    0.076641
   104  H    0.099591
   105  H    0.070042
   106  H    0.076648
   107  H    0.072718
   108  H    0.076683
   109  H    0.128678
   110  H    0.124197
   111  H    0.129056
   112  H    0.125369
   113  H    0.131580
   114  H    0.128968
 Sum of Mulliken charges=   0.00000
 Atomic charges with hydrogens summed into heavy atoms:
              1
     1  O   -0.454695
     2  Mg   0.799595
     3  O   -0.463170
     4  C    0.582025
     5  N   -0.557498
     6  N   -0.543565
     7  O   -0.441843
     8  C    0.341905
     9  C   -0.161997
    10  C    0.337799
    11  O   -0.457041
    12  C    0.605291
    13  C    0.246570
    14  C    0.210246
    15  O   -0.439806
    16  C    0.295936
    17  O   -0.663381
    18  C    0.592849
    19  O   -0.425093
    20  O   -0.447298
    21  C    0.641401
    22  C    0.262846
    23  C    0.225751
    24  O   -0.498318
    25  C    0.010439
    26  C    0.010392
    27  C    0.045254
    28  C    0.034564
    29  C    0.008164
    30  C    0.010378
    31  C    0.002877
    32  C    0.004924
    33  C    0.020979
    34  C    0.021821
    35  C   -0.003969
    36  C    0.040938
    37  C    0.040902
    38  C    0.001282
    39  C    0.007890
    40  C    0.017405
    41  C    0.012703
    42  C    0.003316
    43  C    0.044292
    44  C    0.043197
    45  C    0.032970
    46  C    0.002440
    47  C    0.033866
    48  C    0.005968
    49  C    0.027358
    50  C    0.007269
    51  C    0.027888
    52  C    0.008370
    53  C   -0.057284
    54  C   -0.055103
    55  H    0.000000
    56  H    0.000000
    57  H    0.000000
    58  H    0.000000
    59  H    0.000000
    60  H    0.000000
    61  H    0.000000
    62  H    0.000000
    63  H    0.000000
    64  H    0.000000
    65  H    0.000000
    66  H    0.000000
    67  H    0.000000
    68  H    0.000000
    69  H    0.000000
    70  H    0.000000
    71  H    0.000000
    72  H    0.000000
    73  H    0.000000
    74  H    0.000000
    75  H    0.000000
    76  H    0.000000
    77  H    0.000000
    78  H    0.000000
    79  H    0.000000
    80  H    0.000000
    81  H    0.000000
    82  H    0.000000
    83  H    0.000000
    84  H    0.000000
    85  H    0.000000
    86  H    0.000000
    87  H    0.000000
    88  H    0.000000
    89  H    0.000000
    90  H    0.000000
    91  H    0.000000
    92  H    0.000000
    93  H    0.000000
    94  H    0.000000
    95  H    0.000000
    96  H    0.000000
    97  H    0.000000
    98  H    0.000000
    99  H    0.000000
   100  H    0.000000
   101  H    0.000000
   102  H    0.000000
   103  H    0.000000
   104  H    0.000000
   105  H    0.000000
   106  H    0.000000
   107  H    0.000000
   108  H    0.000000
   109  H    0.000000
   110  H    0.000000
   111  H    0.000000
   112  H    0.000000
   113  H    0.000000
   114  H    0.000000
 Sum of Mulliken charges=   0.00000
 APT atomic charges:
              1
     1  O   -0.846153
     2  Mg   1.162675
     3  O   -0.872088
     4  C    1.057703
     5  N   -0.969053
     6  N   -0.937981
     7  O   -0.688398
     8  C    0.943372
     9  C   -0.884728
    10  C    0.956895
    11  O   -0.806729
    12  C    0.965991
    13  C    0.486823
    14  C    0.389399
    15  O   -0.653790
    16  C    0.511563
    17  O   -0.914776
    18  C    1.062729
    19  O   -0.685229
    20  O   -0.818115
    21  C    0.978302
    22  C    0.510202
    23  C    0.379699
    24  O   -0.766973
    25  C    0.017991
    26  C    0.001785
    27  C   -0.031076
    28  C    0.019717
    29  C    0.311846
    30  C    0.297117
    31  C   -0.059025
    32  C   -0.076431
    33  C   -0.126276
    34  C   -0.148397
    35  C   -0.042909
    36  C    0.183426
    37  C    0.172450
    38  C   -0.055572
    39  C   -0.133572
    40  C   -0.108392
    41  C   -0.099787
    42  C   -0.051592
    43  C    0.166811
    44  C    0.177663
    45  C   -0.025522
    46  C   -0.050236
    47  C   -0.012802
    48  C   -0.049648
    49  C   -0.015841
    50  C   -0.045052
    51  C   -0.022824
    52  C   -0.047368
    53  C   -0.207978
    54  C   -0.229134
    55  H   -0.020371
    56  H   -0.014399
    57  H    0.060936
    58  H   -0.026328
    59  H   -0.017800
    60  H   -0.007837
    61  H   -0.088507
    62  H    0.041278
    63  H   -0.021553
    64  H   -0.017770
    65  H   -0.007224
    66  H    0.056899
    67  H    0.003870
    68  H    0.013726
    69  H    0.010780
    70  H    0.021519
    71  H    0.027565
    72  H    0.015802
    73  H    0.003156
    74  H    0.011845
    75  H    0.062750
    76  H    0.087501
    77  H    0.079777
    78  H   -0.052461
    79  H   -0.053843
    80  H    0.069860
    81  H    0.082781
    82  H    0.073935
    83  H   -0.037495
    84  H   -0.054938
    85  H   -0.006235
    86  H    0.038963
    87  H    0.001889
    88  H    0.002522
    89  H    0.007078
    90  H    0.001510
    91  H   -0.004253
    92  H    0.023901
    93  H   -0.012579
    94  H    0.004586
    95  H    0.002407
    96  H    0.012144
    97  H   -0.000668
    98  H    0.018384
    99  H    0.002390
   100  H    0.002822
   101  H    0.002079
   102  H    0.004323
   103  H    0.000613
   104  H   -0.014110
   105  H    0.009585
   106  H    0.004188
   107  H    0.010043
   108  H    0.007790
   109  H    0.051524
   110  H    0.049466
   111  H    0.052519
   112  H    0.046527
   113  H    0.052429
   114  H    0.053996
 Sum of APT charges=   0.00000
 APT Atomic charges with hydrogens summed into heavy atoms:
              1
     1  O   -0.846153
     2  Mg   1.162675
     3  O   -0.872088
     4  C    1.057703
     5  N   -0.969053
     6  N   -0.937981
     7  O   -0.688398
     8  C    0.943372
     9  C   -0.905099
    10  C    0.956895
    11  O   -0.806729
    12  C    0.965991
    13  C    0.472424
    14  C    0.450335
    15  O   -0.653790
    16  C    0.459599
    17  O   -0.914776
    18  C    1.062729
    19  O   -0.685229
    20  O   -0.818115
    21  C    0.978302
    22  C    0.421695
    23  C    0.420977
    24  O   -0.766973
    25  C   -0.028556
    26  C    0.076280
    27  C    0.028788
    28  C    0.050521
    29  C    0.311846
    30  C    0.297117
    31  C   -0.059025
    32  C   -0.013680
    33  C   -0.038775
    34  C   -0.068621
    35  C   -0.042909
    36  C    0.130965
    37  C    0.118607
    38  C   -0.055572
    39  C   -0.063711
    40  C   -0.025611
    41  C   -0.025852
    42  C   -0.051592
    43  C    0.129316
    44  C    0.122725
    45  C    0.009096
    46  C   -0.039126
    47  C   -0.005733
    48  C   -0.030512
    49  C    0.004265
    50  C   -0.035827
    51  C   -0.026735
    52  C   -0.025347
    53  C   -0.054469
    54  C   -0.076182
    55  H    0.000000
    56  H    0.000000
    57  H    0.000000
    58  H    0.000000
    59  H    0.000000
    60  H    0.000000
    61  H    0.000000
    62  H    0.000000
    63  H    0.000000
    64  H    0.000000
    65  H    0.000000
    66  H    0.000000
    67  H    0.000000
    68  H    0.000000
    69  H    0.000000
    70  H    0.000000
    71  H    0.000000
    72  H    0.000000
    73  H    0.000000
    74  H    0.000000
    75  H    0.000000
    76  H    0.000000
    77  H    0.000000
    78  H    0.000000
    79  H    0.000000
    80  H    0.000000
    81  H    0.000000
    82  H    0.000000
    83  H    0.000000
    84  H    0.000000
    85  H    0.000000
    86  H    0.000000
    87  H    0.000000
    88  H    0.000000
    89  H    0.000000
    90  H    0.000000
    91  H    0.000000
    92  H    0.000000
    93  H    0.000000
    94  H    0.000000
    95  H    0.000000
    96  H    0.000000
    97  H    0.000000
    98  H    0.000000
    99  H    0.000000
   100  H    0.000000
   101  H    0.000000
   102  H    0.000000
   103  H    0.000000
   104  H    0.000000
   105  H    0.000000
   106  H    0.000000
   107  H    0.000000
   108  H    0.000000
   109  H    0.000000
   110  H    0.000000
   111  H    0.000000
   112  H    0.000000
   113  H    0.000000
   114  H    0.000000
 Sum of APT charges=   0.00000
 Electronic spatial extent (au):  <R**2>= 33353.9282
 Charge=     0.0000 electrons
 Dipole moment (field-independent basis, Debye):
    X=    -1.4385    Y=     1.1943    Z=     1.8963  Tot=     2.6630
 Quadrupole moment (field-independent basis, Debye-Ang):
   XX=  -295.1837   YY=  -309.4655   ZZ=  -309.7844
   XY=    29.2698   XZ=    -2.0309   YZ=    -4.0272
 Traceless Quadrupole moment (field-independent basis, Debye-Ang):
   XX=     9.6275   YY=    -4.6543   ZZ=    -4.9732
   XY=    29.2698   XZ=    -2.0309   YZ=    -4.0272
 Octapole moment (field-independent basis, Debye-Ang**2):
  XXX=    42.6062  YYY=    55.2696  ZZZ=     8.3543  XYY=    -6.5683
  XXY=    81.5661  XXZ=    -8.0497  XZZ=     7.8323  YZZ=   -12.8256
  YYZ=    24.4067  XYZ=   -15.6674
 Hexadecapole moment (field-independent basis, Debye-Ang**3):
 XXXX=-22188.8525 YYYY=-13302.0653 ZZZZ= -6673.8410 XXXY=   957.7832
 XXXZ=   198.9358 YYYX=   293.2418 YYYZ=  -195.5727 ZZZX=     3.3789
 ZZZY=   -13.4855 XXYY= -5829.9924 XXZZ= -4808.4540 YYZZ= -3218.3353
 XXYZ=   -11.9348 YYXZ=    68.7643 ZZXY=    45.9537
 N-N= 8.774028952214D+03 E-N=-2.364364106377D+04  KE= 2.584818693966D+03
  Exact polarizability: 447.520  21.678 432.631   4.037   0.477 362.220
 Approx polarizability: 586.548  21.212 633.566   9.389   6.541 570.177
 Full mass-weighted force constant matrix:
 Low frequencies ---   -4.7952   -4.5723   -0.0002    0.0001    0.0006    3.0659
 Low frequencies ---   12.5648   18.1224   22.2079
 Diagonal vibrational polarizability:
      162.1321301     105.3434206     126.2613918
 Harmonic frequencies (cm**-1), IR intensities (KM/Mole), Raman scattering
 activities (A**4/AMU), depolarization ratios for plane and unpolarized
 incident light, reduced masses (AMU), force constants (mDyne/A),
 and normal coordinates:
                     1                      2                      3
                     A                      A                      A
 Frequencies --    12.5261                18.1085                22.1668
 Red. masses --     4.7565                 4.3825                 4.3860
 Frc consts  --     0.0004                 0.0008                 0.0013
 IR Inten    --     0.3434                 0.0344                 0.2780
 Atom AN      X      Y      Z        X      Y      Z        X      Y      Z
   1   8    -0.03  -0.01   0.17     0.03   0.05  -0.06    -0.03   0.02   0.00
   2  12     0.01   0.00  -0.01    -0.01  -0.02  -0.01    -0.01   0.00   0.03
   3   8     0.00  -0.05  -0.02     0.02   0.00   0.01     0.05  -0.05   0.01
   4   6    -0.02   0.01   0.10     0.00   0.05  -0.05     0.02   0.01   0.00
   5   7     0.02   0.01  -0.03     0.01  -0.02   0.00    -0.03   0.00   0.03
   6   7     0.02   0.00   0.00    -0.02   0.02  -0.03    -0.03   0.02   0.00
   7   8    -0.02   0.01   0.04    -0.01   0.04  -0.06     0.05   0.04   0.03
   8   6     0.02   0.02  -0.03     0.01   0.00  -0.02    -0.02   0.01   0.02
   9   6     0.02   0.01  -0.02     0.00   0.02  -0.04    -0.03   0.01   0.01
  10   6     0.02   0.00   0.00    -0.01   0.03  -0.04    -0.03   0.02   0.00
  11   8    -0.01   0.03   0.01    -0.01   0.07  -0.03     0.08  -0.04  -0.06
  12   6    -0.01  -0.04  -0.01     0.01   0.04  -0.04     0.04  -0.05  -0.06
  13   6     0.01  -0.05  -0.09     0.03   0.02  -0.06     0.06  -0.05  -0.08
  14   6    -0.02   0.04   0.09    -0.02   0.07   0.00     0.04  -0.03  -0.05
  15   8    -0.01  -0.10   0.02     0.01   0.02  -0.03    -0.01  -0.04  -0.05
  16   6    -0.03  -0.03   0.19     0.05   0.03  -0.10    -0.05   0.07   0.04
  17   8    -0.01  -0.01  -0.02    -0.01  -0.04  -0.01     0.03   0.00   0.04
  18   6    -0.01  -0.02  -0.06     0.02   0.00   0.02     0.02  -0.03   0.01
  19   8    -0.02  -0.01  -0.14     0.03   0.01  -0.01     0.00  -0.03  -0.03
  20   8    -0.03  -0.02  -0.02    -0.02  -0.04   0.04     0.02   0.00   0.06
  21   6    -0.02  -0.01  -0.02    -0.03  -0.04   0.02     0.01   0.00   0.06
  22   6    -0.03  -0.02  -0.02    -0.04  -0.06   0.01     0.06   0.00   0.06
  23   6    -0.01  -0.01  -0.01     0.01  -0.01   0.06     0.02   0.00   0.06
  24   8     0.01   0.00  -0.01    -0.02  -0.02   0.02    -0.03  -0.01   0.05
  25   6    -0.04  -0.04  -0.05    -0.06  -0.10  -0.03     0.09   0.02   0.13
  26   6    -0.03   0.00   0.02     0.01  -0.02   0.12    -0.01   0.02   0.09
  27   6     0.07  -0.14  -0.16     0.11  -0.01  -0.10     0.15  -0.10  -0.13
  28   6    -0.02   0.12   0.10    -0.07   0.12   0.01     0.08  -0.03  -0.05
  29   6     0.01   0.03  -0.03     0.02  -0.03   0.03    -0.03   0.00   0.00
  30   6     0.01  -0.01   0.02    -0.02   0.01  -0.02    -0.02   0.02   0.00
  31   6     0.01   0.02  -0.04     0.05  -0.01   0.06    -0.05  -0.01  -0.01
  32   6     0.01   0.04  -0.02     0.06   0.00   0.11    -0.05  -0.03  -0.04
  33   6     0.01   0.07  -0.01     0.04   0.00   0.13    -0.04  -0.04  -0.07
  34   6     0.02   0.08   0.00     0.01  -0.02   0.10    -0.02  -0.04  -0.06
  35   6     0.02   0.05  -0.02     0.00  -0.03   0.06    -0.02  -0.02  -0.02
  36   6     0.00  -0.01  -0.05     0.08  -0.02   0.02    -0.06   0.01   0.02
  37   6     0.02   0.05  -0.02    -0.04  -0.06   0.03     0.01  -0.01  -0.01
  38   6     0.01   0.00   0.03    -0.03   0.02   0.00    -0.05   0.02   0.00
  39   6     0.00   0.00   0.04    -0.02   0.02   0.01    -0.04   0.02   0.00
  40   6    -0.03  -0.01   0.05    -0.01   0.00   0.01    -0.01   0.02  -0.01
  41   6    -0.03  -0.02   0.04    -0.01  -0.01   0.00     0.02   0.02  -0.02
  42   6    -0.02  -0.02   0.03    -0.01   0.00  -0.02     0.02   0.02  -0.01
  43   6     0.04   0.01   0.02    -0.04   0.04   0.00    -0.08   0.03   0.01
  44   6    -0.03  -0.02   0.02    -0.01  -0.01  -0.03     0.05   0.02  -0.03
  45   6     0.03  -0.02  -0.05     0.11  -0.05   0.03    -0.10   0.02   0.02
  46   6    -0.02   0.00  -0.07     0.09  -0.02   0.00    -0.04   0.01   0.02
  47   6     0.02   0.05  -0.03    -0.02  -0.05   0.02     0.00  -0.01   0.00
  48   6     0.02   0.04  -0.02    -0.08  -0.08   0.06     0.03   0.00  -0.03
  49   6    -0.03  -0.03   0.02     0.00  -0.02  -0.02     0.06  -0.01  -0.02
  50   6    -0.03  -0.03   0.03    -0.02  -0.02  -0.05     0.06   0.06  -0.04
  51   6     0.05   0.01   0.01    -0.06   0.03   0.03    -0.09   0.02   0.04
  52   6     0.05   0.02   0.05    -0.06   0.07  -0.01    -0.10   0.04  -0.01
  53   6     0.02   0.02  -0.04     0.02  -0.01  -0.02    -0.02   0.01   0.02
  54   6     0.03   0.00   0.01    -0.02   0.06  -0.05    -0.04   0.03  -0.02
  55   1     0.02   0.02  -0.02     0.00   0.04  -0.06    -0.03   0.01   0.01
  56   1    -0.03   0.02  -0.15     0.01   0.06  -0.09     0.01  -0.02  -0.13
  57   1    -0.02   0.01   0.12     0.00   0.06   0.04     0.01  -0.05  -0.07
  58   1    -0.03   0.02   0.18     0.02   0.02  -0.12    -0.02   0.08   0.07
  59   1    -0.03  -0.09   0.16     0.07   0.03  -0.10    -0.06   0.08   0.05
  60   1    -0.04  -0.04   0.26     0.07   0.03  -0.11    -0.09   0.07   0.04
  61   1    -0.06  -0.02   0.00    -0.07  -0.06   0.03     0.10   0.00   0.02
  62   1     0.02   0.00   0.00     0.04   0.01   0.06     0.06   0.01   0.07
  63   1    -0.06  -0.05  -0.06    -0.08  -0.11  -0.03     0.11   0.03   0.14
  64   1    -0.02  -0.05  -0.07    -0.03  -0.10  -0.06     0.05   0.02   0.16
  65   1    -0.05  -0.04  -0.05    -0.07  -0.11  -0.04     0.12   0.03   0.13
  66   1    -0.03   0.01   0.04     0.01  -0.03   0.12     0.00   0.04   0.10
  67   1    -0.02   0.00   0.03     0.02   0.00   0.14    -0.02   0.03   0.10
  68   1    -0.06  -0.01   0.02    -0.01  -0.06   0.13    -0.04   0.00   0.09
  69   1     0.08  -0.14  -0.22     0.11   0.01  -0.15     0.16  -0.10  -0.21
  70   1     0.08  -0.14  -0.21     0.12  -0.02  -0.11     0.15  -0.10  -0.14
  71   1     0.12  -0.20  -0.10     0.13  -0.04  -0.06     0.21  -0.13  -0.09
  72   1    -0.02   0.14   0.10    -0.09   0.14   0.04     0.09  -0.07  -0.08
  73   1    -0.01   0.16   0.07    -0.09   0.13  -0.04     0.12  -0.01  -0.02
  74   1    -0.03   0.13   0.16    -0.07   0.12   0.03     0.05  -0.02  -0.04
  75   1     0.01   0.04  -0.03     0.09   0.02   0.12    -0.07  -0.03  -0.05
  76   1     0.01   0.08   0.00     0.04   0.02   0.17    -0.04  -0.06  -0.10
  77   1     0.02   0.10   0.01    -0.01  -0.03   0.12    -0.01  -0.05  -0.08
  78   1     0.01  -0.02  -0.06     0.07   0.00   0.01    -0.05   0.02   0.04
  79   1     0.02   0.04  -0.02    -0.04  -0.07   0.00     0.01   0.00   0.01
  80   1     0.00   0.00   0.05    -0.03   0.02   0.02    -0.06   0.03   0.01
  81   1    -0.04  -0.01   0.06    -0.01   0.00   0.02     0.00   0.02  -0.01
  82   1    -0.05  -0.03   0.05     0.00  -0.02   0.00     0.05   0.02  -0.02
  83   1     0.04   0.01   0.01    -0.03   0.04  -0.02    -0.08   0.03   0.01
  84   1    -0.03  -0.02   0.01    -0.02   0.00  -0.03     0.07   0.01  -0.03
  85   1     0.02  -0.04  -0.06     0.13  -0.05   0.00    -0.12   0.02   0.04
  86   1     0.04  -0.03  -0.04     0.09  -0.05   0.05    -0.11   0.02   0.02
  87   1     0.03  -0.02  -0.04     0.12  -0.08   0.05    -0.12   0.02  -0.01
  88   1    -0.03  -0.02  -0.09     0.10  -0.02  -0.03    -0.05   0.02   0.04
  89   1    -0.03   0.01  -0.07     0.09  -0.03   0.01    -0.05   0.00   0.00
  90   1    -0.04   0.01  -0.08     0.07   0.00  -0.01    -0.01   0.00   0.03
  91   1     0.03   0.04  -0.03    -0.04  -0.07   0.00     0.02   0.00   0.01
  92   1     0.02   0.05  -0.03    -0.02  -0.04   0.04     0.00  -0.02  -0.03
  93   1     0.02   0.05  -0.03     0.01  -0.04   0.00    -0.03  -0.02   0.01
  94   1     0.02   0.04  -0.02    -0.11  -0.10   0.04     0.05   0.02  -0.01
  95   1     0.02   0.04  -0.01    -0.10  -0.08   0.07     0.04   0.01  -0.03
  96   1     0.02   0.04  -0.01    -0.08  -0.06   0.09     0.03   0.00  -0.05
  97   1    -0.05  -0.04   0.01    -0.01  -0.03  -0.04     0.10   0.00  -0.03
  98   1    -0.03  -0.02   0.02     0.00   0.00  -0.01     0.06  -0.05  -0.01
  99   1    -0.02  -0.04   0.03     0.02  -0.03  -0.02     0.03   0.01  -0.02
 100   1    -0.03  -0.03   0.02    -0.02  -0.03  -0.06     0.09   0.06  -0.05
 101   1    -0.02  -0.03   0.03    -0.03  -0.02  -0.05     0.06   0.08  -0.04
 102   1    -0.02  -0.03   0.03    -0.01  -0.03  -0.05     0.04   0.07  -0.03
 103   1     0.06   0.02   0.00    -0.07   0.05   0.03    -0.11   0.03   0.04
 104   1     0.04   0.01  -0.01    -0.05   0.01   0.03    -0.08   0.01   0.05
 105   1     0.04   0.01   0.01    -0.07   0.03   0.04    -0.09   0.02   0.04
 106   1     0.07   0.03   0.04    -0.07   0.08  -0.01    -0.12   0.04  -0.01
 107   1     0.06   0.01   0.06    -0.07   0.07   0.00    -0.11   0.04  -0.01
 108   1     0.05   0.01   0.06    -0.05   0.08  -0.03    -0.09   0.05  -0.03
 109   1     0.01   0.02  -0.05     0.04  -0.02  -0.02    -0.02   0.01   0.02
 110   1     0.02   0.03  -0.05     0.02   0.01  -0.03    -0.02   0.01   0.02
 111   1     0.02   0.03  -0.04     0.00  -0.02  -0.01    -0.02   0.00   0.02
 112   1     0.01   0.02   0.01    -0.02   0.04  -0.04    -0.02  -0.01   0.00
 113   1     0.03  -0.01   0.00    -0.04   0.09  -0.04    -0.05   0.08   0.01
 114   1     0.03   0.01   0.03    -0.02   0.06  -0.10    -0.05   0.03  -0.07
                     4                      5                      6
                     A                      A                      A
 Frequencies --    26.0486                31.7591                34.0576
 Red. masses --     4.2382                 5.5042                 4.1787
 Frc consts  --     0.0017                 0.0033                 0.0029
 IR Inten    --     0.3384                 0.8385                 0.3012
 Atom AN      X      Y      Z        X      Y      Z        X      Y      Z
   1   8    -0.02   0.03   0.00    -0.01  -0.01   0.08     0.01   0.07  -0.05
   2  12     0.00  -0.02   0.01    -0.06   0.00  -0.04    -0.04  -0.01  -0.02
   3   8     0.01  -0.01   0.04     0.08   0.00   0.05     0.01   0.00  -0.01
   4   6    -0.02   0.03   0.01     0.04   0.00   0.01     0.02   0.04   0.04
   5   7     0.02  -0.02   0.00    -0.01  -0.03  -0.02    -0.01  -0.01  -0.04
   6   7     0.01   0.00   0.02    -0.05   0.03  -0.02    -0.02   0.00   0.03
   7   8    -0.01   0.03  -0.01     0.08   0.03  -0.07     0.02   0.04   0.15
   8   6     0.03  -0.03   0.03     0.01  -0.01  -0.01     0.01   0.00  -0.02
   9   6     0.04  -0.03   0.05     0.00   0.01   0.00     0.01   0.00   0.01
  10   6     0.02  -0.02   0.05    -0.02   0.03   0.00     0.00   0.00   0.04
  11   8    -0.02   0.02   0.03     0.05  -0.04   0.07     0.07  -0.01   0.01
  12   6     0.00   0.01   0.03     0.11  -0.05   0.07     0.00   0.01   0.01
  13   6     0.01   0.01   0.03     0.08  -0.03   0.08     0.01   0.00  -0.01
  14   6    -0.03   0.02   0.03     0.03  -0.03   0.05     0.04  -0.01   0.01
  15   8     0.02   0.01   0.03     0.18  -0.06   0.06    -0.07   0.03   0.01
  16   6    -0.01   0.03  -0.02    -0.01   0.03   0.06    -0.01   0.11  -0.02
  17   8    -0.01  -0.04   0.01    -0.09  -0.02  -0.05    -0.06   0.00  -0.03
  18   6     0.02  -0.01   0.04     0.07   0.03   0.01     0.02   0.01  -0.04
  19   8     0.03  -0.01   0.04     0.06   0.03  -0.01     0.02   0.02  -0.07
  20   8     0.00  -0.04   0.04     0.08   0.03   0.00     0.02   0.02  -0.04
  21   6    -0.02  -0.04   0.02     0.00   0.02  -0.02     0.00   0.02  -0.03
  22   6    -0.05  -0.06   0.01    -0.06  -0.01  -0.04     0.01   0.03  -0.02
  23   6     0.01  -0.02   0.05     0.08   0.05   0.02     0.02   0.01  -0.05
  24   8     0.00  -0.02   0.02    -0.01   0.03  -0.03    -0.02   0.00  -0.03
  25   6    -0.07  -0.10  -0.05    -0.09   0.03  -0.10     0.03   0.10   0.04
  26   6     0.02  -0.04   0.07     0.06   0.06   0.05     0.02   0.02  -0.06
  27   6     0.03   0.01   0.02     0.03  -0.03   0.10     0.00   0.00  -0.01
  28   6    -0.06   0.04   0.03    -0.01  -0.05   0.04     0.07  -0.02   0.00
  29   6     0.01  -0.01  -0.02    -0.01  -0.03  -0.02     0.00  -0.03  -0.03
  30   6     0.00   0.02  -0.02    -0.05   0.03  -0.01    -0.02   0.00   0.03
  31   6    -0.01  -0.03  -0.04    -0.01   0.01   0.00     0.03  -0.07  -0.04
  32   6    -0.01   0.00  -0.04    -0.02   0.01  -0.01     0.04  -0.08  -0.01
  33   6     0.00   0.04  -0.03    -0.01  -0.01  -0.03     0.01  -0.07   0.03
  34   6     0.02   0.05  -0.01     0.00  -0.05  -0.05    -0.02  -0.05   0.03
  35   6     0.03   0.03   0.00     0.00  -0.06  -0.05    -0.02  -0.03   0.00
  36   6    -0.03  -0.07  -0.05    -0.02   0.04   0.03     0.06  -0.07  -0.08
  37   6     0.05   0.04   0.01     0.01  -0.11  -0.08    -0.06  -0.01   0.01
  38   6    -0.02  -0.01  -0.05    -0.02   0.03  -0.01    -0.01   0.00   0.02
  39   6    -0.02   0.01  -0.10     0.00   0.03   0.00    -0.01   0.00   0.01
  40   6     0.00   0.06  -0.11    -0.01   0.02   0.00    -0.01   0.00   0.01
  41   6     0.01   0.09  -0.07    -0.04   0.01   0.00    -0.02   0.01   0.02
  42   6     0.01   0.07  -0.02    -0.06   0.02   0.00    -0.02   0.01   0.03
  43   6    -0.04  -0.06  -0.05    -0.02   0.04  -0.01    -0.01  -0.01   0.02
  44   6     0.03   0.10   0.02    -0.09   0.01   0.00    -0.01   0.02   0.04
  45   6     0.00  -0.07  -0.05    -0.09   0.02   0.04     0.11  -0.08  -0.07
  46   6    -0.09  -0.06  -0.05     0.04   0.03   0.01     0.04  -0.07  -0.07
  47   6     0.02   0.03   0.00     0.05  -0.10  -0.11    -0.08  -0.02   0.02
  48   6     0.09   0.03  -0.01    -0.02  -0.13  -0.06    -0.06  -0.02   0.01
  49   6     0.00   0.14   0.01    -0.12   0.01  -0.01    -0.11  -0.02   0.00
  50   6     0.03   0.15   0.06    -0.09   0.00   0.03     0.00   0.10   0.14
  51   6    -0.05  -0.08  -0.05    -0.01   0.05  -0.01    -0.02  -0.04   0.01
  52   6    -0.05  -0.09  -0.08    -0.01   0.04   0.00    -0.01   0.01   0.02
  53   6     0.05  -0.03   0.03     0.04  -0.03  -0.01     0.03   0.00  -0.03
  54   6     0.03  -0.01   0.06    -0.02   0.04   0.02     0.02   0.00   0.09
  55   1     0.05  -0.03   0.07     0.02   0.02   0.01     0.03   0.01   0.02
  56   1     0.01   0.01   0.02     0.08  -0.05   0.10     0.02   0.01  -0.01
  57   1    -0.02   0.02   0.05     0.02  -0.04   0.05     0.02  -0.01  -0.02
  58   1    -0.02   0.03  -0.03    -0.01   0.10   0.02     0.02   0.05   0.02
  59   1     0.01   0.03  -0.02     0.04  -0.02   0.02    -0.03   0.19   0.03
  60   1    -0.01   0.03  -0.02    -0.05   0.02   0.12    -0.01   0.13  -0.11
  61   1    -0.09  -0.07   0.05    -0.07  -0.04   0.00     0.07   0.01  -0.06
  62   1     0.02  -0.02   0.05     0.09   0.07   0.01     0.02   0.01  -0.04
  63   1    -0.10  -0.11  -0.05    -0.06   0.04  -0.08     0.09   0.12   0.05
  64   1    -0.03  -0.10  -0.09    -0.08   0.08  -0.14    -0.02   0.12   0.08
  65   1    -0.10  -0.12  -0.06    -0.15   0.00  -0.12     0.04   0.11   0.05
  66   1     0.02  -0.04   0.05     0.06   0.06   0.05     0.01   0.02  -0.05
  67   1     0.02  -0.02   0.09     0.06   0.07   0.06     0.02   0.01  -0.07
  68   1     0.03  -0.06   0.08     0.04   0.04   0.06     0.01   0.03  -0.06
  69   1     0.03   0.02   0.02     0.02  -0.06   0.12     0.00   0.00   0.00
  70   1     0.04   0.00   0.02     0.00  -0.01   0.10     0.00   0.00  -0.01
  71   1     0.03   0.00   0.03     0.02  -0.01   0.08     0.00   0.00  -0.01
  72   1    -0.07   0.04   0.05    -0.02  -0.09   0.06     0.08  -0.05  -0.01
  73   1    -0.07   0.04   0.01     0.00  -0.03   0.04     0.10   0.00   0.02
  74   1    -0.06   0.04   0.04    -0.05  -0.04   0.02     0.04  -0.01   0.00
  75   1    -0.03  -0.02  -0.06    -0.02   0.04   0.01     0.06  -0.10  -0.01
  76   1     0.00   0.05  -0.04    -0.01  -0.01  -0.03     0.02  -0.07   0.05
  77   1     0.04   0.09  -0.01     0.00  -0.06  -0.07    -0.04  -0.05   0.05
  78   1    -0.02  -0.11  -0.06    -0.01   0.08   0.07     0.04  -0.08  -0.11
  79   1     0.05   0.06   0.04     0.01  -0.14  -0.08    -0.06   0.01  -0.01
  80   1    -0.03  -0.02  -0.13     0.02   0.03   0.00     0.00  -0.01   0.01
  81   1     0.00   0.07  -0.15     0.01   0.01   0.00    -0.01   0.01   0.01
  82   1     0.02   0.12  -0.08    -0.05   0.01   0.00    -0.02   0.01   0.02
  83   1    -0.03  -0.07  -0.01    -0.03   0.04  -0.02     0.01  -0.02   0.02
  84   1     0.06   0.07   0.04    -0.08   0.02  -0.01     0.07  -0.01   0.00
  85   1    -0.01  -0.09  -0.06    -0.09   0.04   0.06     0.14  -0.07  -0.10
  86   1     0.04  -0.07  -0.05    -0.12   0.02   0.06     0.10  -0.08  -0.08
  87   1     0.00  -0.03  -0.04    -0.10  -0.02   0.00     0.13  -0.09  -0.03
  88   1    -0.10  -0.09  -0.07     0.03   0.05   0.04     0.06  -0.08  -0.11
  89   1    -0.10  -0.02  -0.03     0.03  -0.01  -0.04     0.06  -0.07  -0.03
  90   1    -0.13  -0.06  -0.05     0.10   0.04   0.01     0.00  -0.07  -0.08
  91   1     0.03   0.04   0.01     0.05  -0.13  -0.13    -0.10  -0.01   0.02
  92   1     0.02   0.02  -0.03     0.05  -0.06  -0.09    -0.08  -0.04   0.03
  93   1    -0.01   0.04   0.01     0.08  -0.08  -0.13    -0.08  -0.02   0.02
  94   1     0.09   0.04   0.00     0.00  -0.17  -0.07    -0.08   0.00   0.01
  95   1     0.12   0.04   0.00    -0.05  -0.14  -0.02    -0.03  -0.01   0.00
  96   1     0.09   0.00  -0.03    -0.02  -0.09  -0.05    -0.06  -0.04   0.03
  97   1     0.02   0.17   0.05    -0.13   0.02  -0.01    -0.06   0.00   0.03
  98   1    -0.01   0.10  -0.01    -0.12   0.01  -0.04    -0.12  -0.12  -0.07
  99   1    -0.04   0.18  -0.02    -0.14   0.02  -0.01    -0.22   0.02   0.02
 100   1     0.05   0.17   0.09    -0.11   0.00   0.03     0.02   0.10   0.14
 101   1     0.06   0.12   0.07    -0.07   0.00   0.04     0.08   0.14   0.16
 102   1     0.00   0.17   0.04    -0.10   0.00   0.05    -0.07   0.12   0.19
 103   1    -0.07  -0.13  -0.04    -0.01   0.07  -0.01    -0.01  -0.03   0.01
 104   1    -0.03  -0.06  -0.01    -0.02   0.05  -0.02    -0.02  -0.06   0.00
 105   1    -0.04  -0.07  -0.10     0.00   0.05   0.00    -0.05  -0.04   0.02
 106   1    -0.07  -0.12  -0.07    -0.01   0.04  -0.01    -0.01   0.00   0.02
 107   1    -0.06  -0.08  -0.12    -0.01   0.04   0.00    -0.04   0.02   0.01
 108   1    -0.05  -0.07  -0.08    -0.02   0.04   0.00     0.00   0.04   0.03
 109   1     0.05  -0.04   0.03     0.03  -0.02  -0.01     0.05  -0.02  -0.04
 110   1     0.05  -0.03   0.03     0.05  -0.03   0.02     0.04   0.02  -0.04
 111   1     0.05  -0.04   0.02     0.05  -0.04  -0.03     0.02  -0.01  -0.03
 112   1     0.02  -0.02   0.07    -0.03   0.02   0.04     0.03  -0.10   0.17
 113   1     0.04   0.00   0.07    -0.01   0.08   0.04     0.05   0.13   0.15
 114   1     0.02  -0.01   0.05    -0.02   0.05  -0.01    -0.02   0.00  -0.02
                     7                      8                      9
                     A                      A                      A
 Frequencies --    37.2406                39.6841                41.1370
 Red. masses --     3.9526                 3.6430                 3.5123
 Frc consts  --     0.0032                 0.0034                 0.0035
 IR Inten    --     1.1476                 0.0358                 0.2447
 Atom AN      X      Y      Z        X      Y      Z        X      Y      Z
   1   8    -0.11   0.01   0.11    -0.13   0.08   0.00    -0.01   0.02  -0.06
   2  12     0.01  -0.01  -0.02     0.03  -0.01   0.02     0.02   0.01   0.00
   3   8    -0.03   0.04  -0.05    -0.01  -0.02  -0.01    -0.01  -0.03   0.04
   4   6    -0.06   0.04  -0.02    -0.05   0.05   0.02    -0.02   0.00   0.01
   5   7     0.02  -0.02  -0.02     0.02   0.00   0.01    -0.01   0.04  -0.03
   6   7     0.01   0.00   0.00     0.02   0.01   0.01     0.03  -0.03   0.02
   7   8    -0.02   0.06  -0.11     0.00   0.10   0.07    -0.02   0.00   0.06
   8   6     0.03  -0.02  -0.01     0.03   0.01  -0.01    -0.02   0.03  -0.04
   9   6     0.03  -0.01   0.00     0.02   0.02  -0.01    -0.01   0.00  -0.02
  10   6     0.02  -0.01   0.01     0.02   0.02  -0.01     0.01  -0.03   0.00
  11   8    -0.05   0.03  -0.04     0.02  -0.04  -0.02     0.00  -0.03   0.03
  12   6    -0.02   0.04  -0.04    -0.01  -0.01  -0.01    -0.01  -0.03   0.02
  13   6    -0.03   0.04  -0.01    -0.01  -0.02   0.00     0.00  -0.03   0.01
  14   6    -0.04   0.03  -0.05    -0.02  -0.03  -0.04    -0.02  -0.02   0.02
  15   8     0.02   0.04  -0.05    -0.06   0.01  -0.02    -0.03  -0.03   0.03
  16   6    -0.13   0.01   0.17    -0.16   0.16   0.05    -0.01   0.05  -0.09
  17   8     0.00  -0.02  -0.02     0.03  -0.01   0.02     0.01  -0.01   0.00
  18   6    -0.02   0.00   0.02    -0.01  -0.02   0.01    -0.01  -0.02   0.01
  19   8    -0.02  -0.01   0.10    -0.01  -0.03   0.03    -0.01  -0.01  -0.03
  20   8    -0.02  -0.02  -0.01    -0.01  -0.02   0.00    -0.01  -0.01   0.01
  21   6    -0.01  -0.02  -0.01     0.00  -0.02   0.00     0.00  -0.01   0.01
  22   6     0.01  -0.02  -0.01    -0.01  -0.02   0.00    -0.02  -0.02   0.00
  23   6    -0.02  -0.02  -0.01    -0.01  -0.03   0.00    -0.01  -0.01   0.02
  24   8    -0.01  -0.02  -0.01     0.01  -0.02   0.01     0.03   0.00   0.01
  25   6     0.03  -0.01   0.02    -0.03  -0.06  -0.04    -0.04  -0.05  -0.05
  26   6    -0.01  -0.03  -0.01     0.00  -0.03  -0.01    -0.02   0.00   0.03
  27   6    -0.06   0.09   0.02    -0.02   0.00   0.01     0.02  -0.05   0.00
  28   6    -0.01   0.01  -0.05     0.02  -0.07  -0.04    -0.04  -0.02   0.02
  29   6     0.02  -0.01  -0.01     0.03  -0.01   0.00    -0.01   0.04  -0.01
  30   6     0.02  -0.01   0.00     0.00   0.02   0.01     0.04  -0.03   0.00
  31   6     0.02   0.01   0.01     0.03  -0.01   0.01     0.01   0.08   0.02
  32   6     0.02   0.02   0.02     0.03  -0.03   0.00     0.01   0.06   0.02
  33   6     0.02   0.01   0.01     0.03  -0.05  -0.01    -0.01   0.01   0.00
  34   6     0.02  -0.01  -0.01     0.02  -0.05  -0.01    -0.02  -0.01  -0.02
  35   6     0.02  -0.03  -0.02     0.02  -0.03   0.00    -0.02   0.01  -0.02
  36   6     0.02   0.01   0.01     0.04   0.01   0.02     0.02   0.13   0.05
  37   6     0.01  -0.05  -0.03     0.01  -0.02   0.00    -0.04   0.00  -0.03
  38   6     0.00   0.00   0.02     0.02   0.01  -0.01     0.02  -0.03   0.00
  39   6     0.00   0.00   0.03     0.01   0.01  -0.01     0.00  -0.02  -0.02
  40   6     0.03  -0.01   0.02    -0.01   0.02  -0.01     0.01  -0.01  -0.02
  41   6     0.05  -0.02   0.01    -0.04   0.03   0.01     0.03   0.00  -0.01
  42   6     0.05  -0.02   0.00    -0.03   0.03   0.02     0.04  -0.01   0.00
  43   6    -0.02   0.01   0.02     0.04  -0.01  -0.01     0.02  -0.05   0.00
  44   6     0.09  -0.02  -0.02    -0.07   0.03   0.03     0.07   0.01   0.01
  45   6     0.01   0.00   0.01     0.01   0.00   0.02    -0.10   0.06   0.07
  46   6     0.04   0.01  -0.01     0.08   0.01   0.00     0.15   0.11  -0.03
  47   6     0.01  -0.05  -0.05     0.00  -0.02   0.01    -0.01   0.01  -0.01
  48   6     0.01  -0.07  -0.02     0.02  -0.01   0.00    -0.09   0.02  -0.02
  49   6    -0.01  -0.09  -0.05     0.04   0.10   0.06     0.00  -0.02  -0.01
  50   6     0.11   0.09   0.07    -0.09  -0.09  -0.07     0.08   0.09   0.08
  51   6    -0.03  -0.01   0.04     0.05  -0.01  -0.03     0.02  -0.06  -0.01
  52   6    -0.04   0.04   0.01     0.05  -0.02   0.00     0.02  -0.05  -0.01
  53   6     0.04  -0.02  -0.01     0.03   0.01  -0.01    -0.05   0.07  -0.08
  54   6     0.03   0.00   0.04     0.01   0.03  -0.03     0.02  -0.05   0.02
  55   1     0.04  -0.01   0.01     0.02   0.03  -0.02    -0.03   0.00  -0.03
  56   1    -0.01   0.01   0.02     0.00  -0.03   0.01    -0.02  -0.02   0.00
  57   1    -0.05   0.04  -0.07    -0.06  -0.04  -0.07    -0.03  -0.03   0.03
  58   1    -0.10   0.12   0.16    -0.11   0.18   0.09    -0.02  -0.01  -0.08
  59   1    -0.13  -0.09   0.11    -0.17   0.20   0.08     0.00   0.10  -0.05
  60   1    -0.18  -0.02   0.29    -0.23   0.17   0.02     0.00   0.06  -0.16
  61   1     0.03  -0.01  -0.03    -0.05   0.00   0.03    -0.05  -0.03   0.02
  62   1    -0.04  -0.02  -0.01    -0.01  -0.03   0.00     0.00   0.00   0.02
  63   1     0.03  -0.01   0.03    -0.06  -0.07  -0.05    -0.06  -0.06  -0.05
  64   1     0.01  -0.02   0.04     0.01  -0.08  -0.06    -0.01  -0.05  -0.08
  65   1     0.05  -0.01   0.03    -0.04  -0.06  -0.04    -0.06  -0.06  -0.06
  66   1    -0.01  -0.04  -0.02     0.00  -0.03  -0.01    -0.01   0.00   0.03
  67   1     0.00  -0.03  -0.01    -0.01  -0.03  -0.01    -0.02   0.00   0.03
  68   1     0.00  -0.03  -0.01     0.00  -0.02  -0.01    -0.02  -0.01   0.03
  69   1    -0.06   0.10   0.06    -0.02   0.01   0.02     0.02  -0.06  -0.02
  70   1    -0.05   0.08   0.04    -0.02   0.00   0.03     0.02  -0.05  -0.01
  71   1    -0.09   0.11  -0.01    -0.03   0.02   0.00     0.03  -0.07   0.01
  72   1     0.00   0.01  -0.08     0.04  -0.13  -0.08    -0.04  -0.04   0.03
  73   1     0.00   0.00  -0.03     0.07  -0.05   0.00    -0.03  -0.01   0.02
  74   1     0.00   0.01  -0.06    -0.03  -0.05  -0.06    -0.05  -0.02   0.02
  75   1     0.03   0.04   0.03     0.04  -0.03   0.00     0.02   0.07   0.04
  76   1     0.02   0.02   0.02     0.03  -0.07  -0.01     0.00  -0.01   0.00
  77   1     0.02  -0.02  -0.01     0.02  -0.07  -0.02    -0.03  -0.03  -0.02
  78   1     0.03   0.03   0.02     0.04   0.04   0.03     0.02   0.22   0.11
  79   1     0.01  -0.05  -0.03     0.01  -0.01   0.00    -0.04  -0.02  -0.06
  80   1    -0.01   0.00   0.03     0.03   0.01  -0.02    -0.01  -0.03  -0.02
  81   1     0.02  -0.02   0.03    -0.02   0.03  -0.01    -0.01   0.00  -0.03
  82   1     0.07  -0.03   0.00    -0.07   0.04   0.01     0.03   0.01  -0.01
  83   1     0.00   0.01   0.01     0.04  -0.01  -0.01     0.02  -0.05   0.01
  84   1     0.18  -0.04  -0.07    -0.16   0.05   0.08     0.14  -0.02  -0.01
  85   1     0.01   0.00   0.01     0.01   0.02   0.02    -0.09   0.09   0.08
  86   1    -0.01   0.00   0.03    -0.01   0.01   0.03    -0.18   0.07   0.12
  87   1     0.00  -0.02   0.00     0.01  -0.02   0.00    -0.11  -0.03   0.00
  88   1     0.04   0.02   0.00     0.09   0.02   0.02     0.15   0.15   0.02
  89   1     0.04   0.00  -0.03     0.08  -0.02  -0.02     0.14   0.02  -0.12
  90   1     0.06   0.02  -0.01     0.11   0.01   0.00     0.26   0.16  -0.03
  91   1     0.01  -0.06  -0.06    -0.01  -0.01   0.02    -0.03   0.01  -0.02
  92   1     0.01  -0.05  -0.05     0.00  -0.03   0.02    -0.01   0.03   0.02
  93   1     0.01  -0.03  -0.06     0.00  -0.02   0.01     0.03  -0.01  -0.02
  94   1     0.01  -0.09  -0.03     0.02   0.00   0.00    -0.09   0.01  -0.03
  95   1     0.01  -0.07   0.00     0.03  -0.01  -0.01    -0.12   0.01  -0.03
  96   1     0.01  -0.07  -0.02     0.02  -0.02  -0.01    -0.09   0.06   0.00
  97   1     0.05  -0.07  -0.04    -0.02   0.08   0.06     0.03   0.00   0.00
  98   1    -0.01  -0.19  -0.11     0.05   0.22   0.14    -0.01  -0.09  -0.07
  99   1    -0.12  -0.05  -0.01     0.16   0.06   0.03    -0.08   0.01   0.00
 100   1     0.14   0.09   0.05    -0.12  -0.08  -0.05     0.11   0.10   0.08
 101   1     0.19   0.16   0.09    -0.17  -0.16  -0.09     0.14   0.12   0.10
 102   1     0.02   0.12   0.14     0.01  -0.11  -0.14     0.02   0.12   0.12
 103   1    -0.04   0.01   0.04     0.05  -0.02  -0.03     0.02  -0.07  -0.01
 104   1    -0.02  -0.03   0.04     0.04   0.00  -0.03     0.02  -0.05   0.00
 105   1    -0.05  -0.01   0.06     0.04  -0.01  -0.04     0.02  -0.05  -0.03
 106   1    -0.04   0.04   0.01     0.06  -0.02   0.00     0.02  -0.07  -0.01
 107   1    -0.06   0.05   0.02     0.06  -0.02   0.00     0.01  -0.05  -0.02
 108   1    -0.02   0.07   0.00     0.05  -0.02   0.01     0.02  -0.04   0.00
 109   1     0.02  -0.01  -0.01     0.03   0.01  -0.02    -0.14   0.09  -0.11
 110   1     0.05  -0.02   0.01     0.03   0.02  -0.02    -0.05   0.03  -0.03
 111   1     0.05  -0.02  -0.02     0.03   0.01  -0.01     0.01   0.12  -0.12
 112   1     0.07  -0.15   0.15    -0.03   0.18  -0.14     0.05  -0.13   0.07
 113   1     0.05   0.18   0.13    -0.01  -0.15  -0.12     0.05   0.02   0.06
 114   1    -0.02  -0.01  -0.14     0.07   0.04   0.14    -0.02  -0.07  -0.04
                    10                     11                     12
                     A                      A                      A
 Frequencies --    44.2925                49.5769                49.9283
 Red. masses --     4.0271                 5.5907                 4.1901
 Frc consts  --     0.0047                 0.0081                 0.0062
 IR Inten    --     0.2769                 0.8871                 0.6409
 Atom AN      X      Y      Z        X      Y      Z        X      Y      Z
   1   8    -0.04   0.06  -0.08     0.13   0.02  -0.02     0.06  -0.01   0.00
   2  12     0.01   0.01  -0.02    -0.01   0.01  -0.05    -0.02  -0.05   0.05
   3   8    -0.02  -0.02   0.01    -0.02   0.06  -0.06     0.00   0.00  -0.04
   4   6    -0.04   0.03   0.04     0.08   0.01   0.07     0.01  -0.01   0.03
   5   7     0.03  -0.03   0.02     0.02  -0.01  -0.03     0.00  -0.01  -0.01
   6   7     0.00   0.02  -0.04     0.01  -0.02  -0.02    -0.02   0.02   0.05
   7   8    -0.04   0.04   0.12     0.03  -0.02   0.18    -0.02  -0.03   0.05
   8   6     0.03  -0.04   0.04     0.03  -0.04   0.01     0.01   0.02  -0.03
   9   6     0.03  -0.02   0.02     0.03  -0.04   0.02     0.00   0.04   0.00
  10   6     0.01   0.00  -0.02     0.02  -0.03   0.01    -0.01   0.04   0.02
  11   8    -0.01  -0.02   0.05     0.07   0.05  -0.03    -0.01   0.04   0.01
  12   6    -0.02  -0.03   0.05    -0.02   0.06  -0.03    -0.02   0.03   0.01
  13   6    -0.02  -0.03   0.03    -0.02   0.06  -0.05    -0.01   0.03   0.00
  14   6    -0.04  -0.01   0.06     0.10   0.05   0.01     0.01   0.03   0.02
  15   8    -0.04  -0.04   0.06    -0.10   0.07  -0.02    -0.04   0.03   0.01
  16   6    -0.03   0.12  -0.13     0.12  -0.01   0.04     0.06  -0.05   0.00
  17   8     0.01   0.01  -0.02     0.02  -0.01  -0.04     0.03  -0.02   0.06
  18   6    -0.02  -0.01  -0.03    -0.04   0.02   0.06     0.03  -0.03  -0.05
  19   8    -0.01   0.00  -0.07    -0.06  -0.01   0.17     0.07  -0.01  -0.05
  20   8    -0.01   0.00  -0.03    -0.05  -0.02   0.01     0.00  -0.04  -0.03
  21   6    -0.01   0.00  -0.03    -0.03  -0.01  -0.02    -0.03  -0.05   0.00
  22   6    -0.02   0.00  -0.03     0.00  -0.03  -0.03     0.00  -0.02   0.03
  23   6    -0.02  -0.01  -0.03    -0.04   0.02   0.05     0.02  -0.08  -0.07
  24   8    -0.01   0.00  -0.03    -0.04   0.01  -0.03    -0.08  -0.10   0.01
  25   6    -0.03  -0.02  -0.06     0.00  -0.07  -0.02     0.01  -0.04   0.04
  26   6    -0.02   0.00  -0.04    -0.05   0.01   0.11     0.07  -0.11  -0.13
  27   6    -0.05  -0.04   0.03    -0.02   0.06  -0.05    -0.03   0.04   0.02
  28   6    -0.06   0.00   0.06     0.14   0.07   0.01     0.02   0.05   0.03
  29   6     0.02  -0.01   0.01     0.01   0.00  -0.03    -0.01   0.00  -0.02
  30   6     0.01   0.01  -0.02    -0.02  -0.02  -0.01    -0.01   0.02   0.04
  31   6     0.00   0.00   0.01     0.00   0.03  -0.01    -0.02   0.03  -0.01
  32   6    -0.01   0.02  -0.01     0.00   0.05  -0.01    -0.02   0.04  -0.01
  33   6     0.01   0.03  -0.02     0.01   0.03  -0.03    -0.01   0.04  -0.02
  34   6     0.04   0.03  -0.02     0.02   0.00  -0.05     0.00   0.01  -0.03
  35   6     0.04   0.00   0.00     0.02  -0.02  -0.05     0.00  -0.01  -0.04
  36   6    -0.03  -0.01   0.03    -0.01   0.05   0.03    -0.02   0.03   0.00
  37   6     0.07   0.00   0.01     0.03  -0.04  -0.06     0.00  -0.03  -0.05
  38   6     0.00   0.03   0.01    -0.04  -0.02   0.00     0.01   0.01   0.03
  39   6     0.01   0.02   0.04    -0.08  -0.01   0.01     0.07   0.01   0.01
  40   6     0.03  -0.02   0.04    -0.11  -0.01   0.01     0.11   0.02  -0.01
  41   6     0.05  -0.04   0.00    -0.10  -0.01   0.01     0.08   0.02   0.01
  42   6     0.04  -0.02  -0.02    -0.05  -0.02   0.00     0.02   0.02   0.03
  43   6    -0.01   0.07   0.01    -0.01  -0.03  -0.01    -0.04   0.01   0.04
  44   6     0.05  -0.04  -0.06    -0.04  -0.02   0.00    -0.02   0.03   0.05
  45   6    -0.02   0.03   0.02    -0.06   0.06   0.02    -0.09  -0.02   0.02
  46   6    -0.09  -0.01   0.08     0.01   0.05   0.03     0.03   0.03  -0.06
  47   6     0.02  -0.01  -0.03    -0.01  -0.05  -0.11    -0.03  -0.03  -0.08
  48   6     0.14  -0.04   0.00     0.08  -0.10  -0.05     0.02  -0.06  -0.04
  49   6     0.02  -0.10  -0.06    -0.03  -0.03   0.00     0.04   0.09   0.06
  50   6     0.06  -0.01  -0.03    -0.04   0.00  -0.01    -0.03  -0.06   0.00
  51   6    -0.02   0.06   0.04     0.00  -0.03  -0.04    -0.08  -0.03   0.09
  52   6    -0.03   0.11   0.01     0.01  -0.04   0.01    -0.09   0.06  -0.01
  53   6     0.05  -0.07   0.09     0.04  -0.06   0.03     0.02   0.04  -0.07
  54   6     0.00   0.02  -0.02     0.03  -0.04   0.02    -0.02   0.08   0.02
  55   1     0.03  -0.03   0.03     0.04  -0.06   0.04     0.02   0.07  -0.02
  56   1    -0.01  -0.02   0.03    -0.02   0.07  -0.05     0.03   0.03   0.02
  57   1    -0.05  -0.02   0.06     0.09   0.05   0.00     0.02   0.04   0.03
  58   1    -0.04   0.03  -0.11     0.14  -0.12   0.10     0.06  -0.09   0.01
  59   1    -0.01   0.22  -0.07     0.03   0.05   0.10     0.04  -0.03   0.02
  60   1    -0.02   0.14  -0.25     0.16   0.00  -0.05     0.10  -0.04  -0.03
  61   1    -0.04   0.01  -0.01    -0.01  -0.02  -0.02    -0.01   0.02   0.01
  62   1    -0.02  -0.01  -0.03    -0.03   0.05   0.03    -0.02  -0.12  -0.05
  63   1    -0.05  -0.03  -0.06    -0.03  -0.09  -0.02    -0.02  -0.04   0.00
  64   1    -0.01  -0.03  -0.07     0.02  -0.09  -0.03     0.02  -0.09   0.06
  65   1    -0.04  -0.03  -0.06     0.02  -0.07  -0.02     0.03   0.00   0.07
  66   1    -0.02   0.00  -0.04    -0.05   0.01   0.11     0.06  -0.14  -0.14
  67   1    -0.02  -0.01  -0.05    -0.04   0.04   0.13     0.08  -0.13  -0.15
  68   1    -0.01   0.00  -0.04    -0.07  -0.02   0.12     0.11  -0.06  -0.14
  69   1    -0.05  -0.05   0.04    -0.02   0.07  -0.05    -0.03   0.06   0.05
  70   1    -0.06  -0.04   0.01    -0.01   0.06  -0.05    -0.01   0.03   0.01
  71   1    -0.06  -0.05   0.03    -0.03   0.06  -0.05    -0.07   0.04   0.00
  72   1    -0.06  -0.03   0.07     0.15   0.10  -0.01     0.01   0.08   0.03
  73   1    -0.05   0.02   0.05     0.14   0.07   0.01     0.00   0.04   0.02
  74   1    -0.09   0.01   0.06     0.17   0.07   0.04     0.04   0.04   0.04
  75   1    -0.03   0.02  -0.01    -0.01   0.07   0.00    -0.02   0.06   0.00
  76   1     0.01   0.04  -0.04     0.01   0.05  -0.03    -0.01   0.05  -0.02
  77   1     0.05   0.04  -0.02     0.03   0.00  -0.06     0.00   0.01  -0.04
  78   1    -0.02  -0.06   0.02     0.00   0.06   0.05    -0.02   0.07   0.05
  79   1     0.07   0.03   0.05     0.03  -0.02  -0.04     0.00  -0.01  -0.04
  80   1     0.00   0.03   0.06    -0.09  -0.01   0.01     0.09   0.00  -0.01
  81   1     0.03  -0.03   0.06    -0.14  -0.01   0.02     0.15   0.01  -0.02
  82   1     0.07  -0.06   0.00    -0.12  -0.01   0.02     0.10   0.03   0.00
  83   1     0.00   0.07  -0.01    -0.01  -0.03   0.00    -0.01   0.01   0.03
  84   1     0.08  -0.04  -0.09    -0.03  -0.02   0.00    -0.08   0.04   0.08
  85   1    -0.04   0.02   0.04    -0.07   0.07   0.05    -0.09  -0.02   0.02
  86   1     0.02   0.03  -0.02    -0.06   0.06   0.02    -0.12  -0.02   0.06
  87   1    -0.03   0.08   0.02    -0.07   0.06   0.00    -0.10  -0.06  -0.02
  88   1    -0.10  -0.02   0.09     0.00   0.06   0.06     0.01   0.03  -0.04
  89   1    -0.09   0.04   0.10     0.01   0.04   0.01     0.01  -0.01  -0.12
  90   1    -0.11  -0.04   0.09     0.05   0.04   0.04     0.09   0.07  -0.07
  91   1     0.04  -0.02  -0.03    -0.01  -0.07  -0.12    -0.03  -0.04  -0.09
  92   1     0.02  -0.04  -0.07    -0.01  -0.08  -0.12    -0.03  -0.05  -0.10
  93   1    -0.02   0.01  -0.03    -0.03  -0.01  -0.12    -0.05  -0.01  -0.08
  94   1     0.15  -0.04   0.00     0.07  -0.11  -0.06     0.02  -0.08  -0.05
  95   1     0.18  -0.03   0.02     0.11  -0.09  -0.02     0.03  -0.06  -0.02
  96   1     0.14  -0.09  -0.04     0.07  -0.13  -0.07     0.02  -0.08  -0.05
  97   1     0.03  -0.11  -0.08    -0.02  -0.03  -0.01     0.00   0.09   0.07
  98   1     0.02  -0.11  -0.08    -0.03  -0.03   0.01     0.04   0.16   0.10
  99   1    -0.01  -0.10  -0.03    -0.03  -0.03   0.01     0.11   0.07   0.03
 100   1     0.07  -0.02  -0.06    -0.02   0.00  -0.01    -0.07  -0.06   0.02
 101   1     0.09   0.04  -0.03    -0.04   0.00  -0.01    -0.08  -0.12  -0.01
 102   1     0.03  -0.01   0.01    -0.04   0.00  -0.01     0.03  -0.08  -0.04
 103   1    -0.02   0.10   0.04     0.01  -0.05  -0.04    -0.10   0.00   0.09
 104   1    -0.02   0.03   0.03    -0.01   0.00  -0.04    -0.05  -0.08   0.09
 105   1    -0.04   0.05   0.08     0.01  -0.02  -0.06    -0.11  -0.03   0.13
 106   1    -0.03   0.13   0.01     0.03  -0.04   0.01    -0.12   0.05   0.00
 107   1    -0.04   0.11   0.04     0.02  -0.04   0.02    -0.13   0.07  -0.02
 108   1    -0.01   0.12  -0.01     0.00  -0.05   0.03    -0.06   0.10  -0.04
 109   1     0.10  -0.07   0.12     0.04  -0.04   0.05    -0.02   0.04  -0.11
 110   1     0.05  -0.06   0.07     0.05  -0.07   0.05     0.04   0.04  -0.04
 111   1     0.01  -0.12   0.11     0.04  -0.08   0.02     0.06   0.07  -0.10
 112   1     0.04  -0.09   0.05     0.00   0.02  -0.01    -0.01   0.04   0.04
 113   1    -0.01   0.16   0.04     0.04  -0.11  -0.01    -0.03   0.13   0.05
 114   1    -0.02   0.02  -0.17     0.05  -0.04   0.11    -0.02   0.08  -0.04
                    13                     14                     15
                     A                      A                      A
 Frequencies --    56.4624                62.2079                64.4497
 Red. masses --     3.6121                 3.7634                 5.8546
 Frc consts  --     0.0068                 0.0086                 0.0143
 IR Inten    --     0.3752                 0.4918                 1.1595
 Atom AN      X      Y      Z        X      Y      Z        X      Y      Z
   1   8    -0.03   0.03  -0.02    -0.01  -0.01  -0.01     0.03   0.02   0.01
   2  12    -0.01  -0.01   0.00    -0.01   0.04  -0.02     0.00   0.01   0.02
   3   8     0.00  -0.02  -0.01    -0.01   0.01   0.08     0.03   0.00  -0.19
   4   6    -0.04   0.02   0.00    -0.01  -0.01  -0.01     0.06   0.01   0.01
   5   7     0.01   0.00  -0.03    -0.02   0.05  -0.04    -0.03   0.03   0.01
   6   7     0.00  -0.01   0.01     0.01  -0.01   0.03     0.00   0.01   0.03
   7   8    -0.02   0.03  -0.04    -0.01  -0.01   0.00     0.09   0.04  -0.01
   8   6     0.02   0.00  -0.02     0.00   0.02   0.01    -0.04   0.03   0.00
   9   6     0.02   0.00  -0.01     0.01  -0.01   0.04    -0.03   0.02   0.00
  10   6     0.01   0.00   0.01     0.02  -0.02   0.05    -0.02   0.01   0.01
  11   8    -0.04   0.00   0.04    -0.01  -0.01   0.00     0.10  -0.04  -0.02
  12   6     0.01  -0.04   0.03     0.00   0.01   0.01     0.06  -0.07  -0.04
  13   6     0.00  -0.03   0.01     0.00   0.01   0.03     0.02  -0.06  -0.08
  14   6    -0.06   0.01   0.05     0.00  -0.02  -0.02     0.05  -0.02   0.04
  15   8     0.06  -0.07   0.04     0.00   0.02   0.00     0.06  -0.11  -0.01
  16   6    -0.01   0.05  -0.11    -0.02  -0.01   0.01     0.04   0.07  -0.04
  17   8     0.03   0.00   0.01     0.07   0.05   0.00     0.02   0.03   0.02
  18   6    -0.01  -0.03   0.02     0.00   0.03   0.00    -0.03  -0.04   0.03
  19   8    -0.03  -0.05   0.08     0.01   0.06  -0.09    -0.10  -0.13   0.29
  20   8     0.03   0.00   0.01    -0.01   0.02   0.02     0.03   0.02  -0.02
  21   6     0.02   0.00   0.01    -0.03   0.02   0.00     0.01   0.01  -0.01
  22   6     0.09   0.03   0.02    -0.01   0.01  -0.01    -0.05   0.01  -0.01
  23   6    -0.01  -0.01   0.00     0.00   0.04   0.03    -0.01   0.00  -0.04
  24   8    -0.03  -0.02   0.00    -0.05   0.03  -0.01     0.01   0.00   0.00
  25   6     0.15   0.08   0.17    -0.03  -0.08  -0.07    -0.10  -0.04  -0.13
  26   6    -0.02   0.01  -0.02    -0.01   0.04   0.06    -0.02   0.02  -0.09
  27   6    -0.02  -0.05   0.01     0.04   0.00   0.01    -0.09  -0.07  -0.06
  28   6    -0.10   0.05   0.06     0.02  -0.06  -0.03     0.00   0.06   0.05
  29   6     0.01   0.01  -0.03    -0.02   0.03  -0.04    -0.03   0.01   0.00
  30   6    -0.02   0.00   0.01     0.02  -0.01   0.03     0.02   0.01   0.02
  31   6     0.01   0.03  -0.01     0.00   0.02  -0.03    -0.02  -0.01  -0.01
  32   6     0.02   0.07   0.02     0.01   0.01  -0.01    -0.02  -0.02   0.00
  33   6     0.01   0.07   0.02    -0.01  -0.01   0.00    -0.03  -0.02   0.01
  34   6     0.01   0.04   0.00    -0.03  -0.02  -0.02    -0.04  -0.01   0.01
  35   6     0.01   0.01  -0.03    -0.04   0.00  -0.04    -0.04   0.00   0.01
  36   6     0.01   0.01  -0.03     0.02   0.01  -0.06    -0.02  -0.02  -0.03
  37   6     0.00  -0.05  -0.06    -0.06  -0.03  -0.06    -0.05   0.00   0.00
  38   6    -0.03  -0.01   0.01    -0.01  -0.01   0.03     0.03   0.01   0.02
  39   6    -0.04   0.00   0.00     0.00  -0.01   0.03     0.05   0.01   0.01
  40   6    -0.06   0.01   0.01     0.04  -0.01   0.02     0.08   0.01   0.00
  41   6    -0.05   0.01   0.01     0.07  -0.01   0.01     0.08   0.01   0.00
  42   6    -0.03   0.01   0.02     0.06  -0.01   0.02     0.05   0.01   0.01
  43   6     0.00  -0.02   0.00    -0.04  -0.02   0.04     0.00   0.01   0.02
  44   6     0.00   0.01   0.01     0.05  -0.01   0.02     0.03   0.01   0.02
  45   6     0.06  -0.01  -0.03     0.15   0.10  -0.08     0.06   0.02  -0.04
  46   6    -0.03   0.01  -0.04    -0.07   0.02   0.04    -0.09  -0.02   0.02
  47   6     0.03  -0.04  -0.11    -0.07  -0.04  -0.10     0.00   0.01   0.01
  48   6    -0.03  -0.09  -0.03    -0.08  -0.08  -0.03    -0.10   0.02   0.01
  49   6     0.04   0.01   0.03     0.10   0.03   0.04     0.02   0.04   0.02
  50   6     0.00   0.01  -0.04     0.04  -0.06  -0.02     0.03  -0.01   0.04
  51   6     0.02  -0.01  -0.03    -0.03   0.00   0.05    -0.01   0.01   0.05
  52   6     0.02  -0.06   0.02    -0.04  -0.05   0.02    -0.02   0.03   0.00
  53   6     0.02   0.01  -0.03     0.00   0.00   0.04    -0.04   0.04  -0.01
  54   6     0.01   0.00   0.02     0.03  -0.05   0.08    -0.02   0.00   0.01
  55   1     0.03   0.01  -0.01     0.01  -0.03   0.06    -0.04   0.02   0.00
  56   1     0.01  -0.03   0.01    -0.03   0.01   0.01     0.06  -0.07  -0.06
  57   1    -0.05   0.00   0.08     0.00   0.00  -0.05     0.04  -0.06   0.08
  58   1    -0.05   0.05  -0.15    -0.01  -0.01   0.02     0.02   0.10  -0.06
  59   1     0.06   0.07  -0.11    -0.03  -0.01   0.01     0.09   0.07  -0.04
  60   1    -0.01   0.06  -0.13    -0.03  -0.01   0.02     0.01   0.07  -0.03
  61   1     0.18   0.03  -0.05    -0.07   0.04   0.02    -0.12   0.02   0.05
  62   1    -0.01  -0.01   0.00     0.01   0.05   0.03    -0.03  -0.01  -0.03
  63   1     0.21   0.11   0.19    -0.10  -0.11  -0.07    -0.15  -0.06  -0.15
  64   1     0.06   0.09   0.25     0.03  -0.11  -0.10    -0.02  -0.04  -0.20
  65   1     0.22   0.11   0.18    -0.03  -0.09  -0.07    -0.15  -0.06  -0.14
  66   1    -0.02   0.02  -0.01    -0.01   0.04   0.06    -0.01   0.03  -0.09
  67   1    -0.03   0.00  -0.03    -0.01   0.06   0.08    -0.03  -0.01  -0.11
  68   1    -0.03   0.02  -0.03    -0.02   0.01   0.07    -0.01   0.04  -0.10
  69   1    -0.02  -0.05   0.02     0.04  -0.01  -0.02    -0.10  -0.09   0.02
  70   1    -0.03  -0.05  -0.01     0.03   0.00   0.02    -0.11  -0.05  -0.08
  71   1    -0.03  -0.05   0.01     0.07   0.00   0.03    -0.13  -0.05  -0.08
  72   1    -0.10   0.04   0.08     0.02  -0.06  -0.04     0.00   0.04   0.07
  73   1    -0.10   0.07   0.03     0.02  -0.08   0.00     0.02   0.12   0.00
  74   1    -0.11   0.06   0.08     0.03  -0.06  -0.06    -0.05   0.08   0.10
  75   1     0.02   0.08   0.03     0.03   0.01   0.00    -0.02  -0.03  -0.01
  76   1     0.02   0.09   0.04     0.00  -0.02   0.01    -0.03  -0.03   0.01
  77   1     0.01   0.04   0.00    -0.05  -0.04  -0.02    -0.04  -0.01   0.01
  78   1     0.01  -0.02  -0.05     0.01  -0.06  -0.14    -0.03  -0.07  -0.08
  79   1     0.00  -0.07  -0.08    -0.06  -0.03  -0.08    -0.05  -0.04  -0.03
  80   1    -0.05  -0.01   0.00    -0.03  -0.01   0.03     0.05   0.00   0.01
  81   1    -0.07   0.01   0.00     0.05  -0.01   0.01     0.09   0.00   0.00
  82   1    -0.06   0.02   0.01     0.10   0.00   0.00     0.10   0.00   0.00
  83   1    -0.02  -0.02   0.01    -0.06  -0.02   0.06     0.00   0.02   0.02
  84   1    -0.02   0.01   0.03     0.00   0.01   0.05     0.02   0.01   0.03
  85   1     0.06  -0.03  -0.05     0.17   0.09  -0.10     0.07   0.01  -0.05
  86   1     0.08  -0.01  -0.02     0.21   0.09  -0.15     0.10   0.02  -0.08
  87   1     0.06   0.01   0.00     0.17   0.17   0.00     0.07   0.07   0.01
  88   1    -0.03  -0.01  -0.07    -0.04   0.01   0.00    -0.08  -0.03  -0.01
  89   1    -0.03   0.04  -0.02    -0.04   0.09   0.15    -0.08   0.03   0.08
  90   1    -0.07   0.02  -0.05    -0.19  -0.04   0.05    -0.16  -0.04   0.03
  91   1     0.03  -0.07  -0.13    -0.09  -0.06  -0.13     0.00   0.00   0.01
  92   1     0.03  -0.01  -0.10    -0.07  -0.04  -0.08     0.00   0.04   0.03
  93   1     0.05  -0.01  -0.13    -0.05  -0.01  -0.13     0.03  -0.01   0.00
  94   1    -0.03  -0.13  -0.05    -0.10  -0.11  -0.06    -0.10   0.00   0.00
  95   1    -0.06  -0.10   0.01    -0.07  -0.08   0.00    -0.15   0.01   0.00
  96   1    -0.03  -0.06  -0.01    -0.08  -0.09  -0.02    -0.10   0.06   0.03
  97   1     0.07   0.01   0.02     0.05   0.02   0.03    -0.01   0.03   0.03
  98   1     0.04   0.00   0.06     0.11   0.11   0.07     0.03   0.07   0.01
  99   1     0.05   0.01   0.01     0.18   0.00   0.02     0.05   0.03   0.01
 100   1     0.02   0.02  -0.04     0.03  -0.06  -0.01     0.01  -0.01   0.05
 101   1    -0.04   0.01  -0.05     0.00  -0.10  -0.03     0.03  -0.03   0.04
 102   1     0.01   0.02  -0.06     0.09  -0.07  -0.06     0.04  -0.01   0.03
 103   1     0.03  -0.03  -0.03    -0.04  -0.01   0.05    -0.02   0.03   0.05
 104   1     0.00   0.02  -0.03    -0.03   0.02   0.06     0.00  -0.01   0.05
 105   1     0.03   0.00  -0.05    -0.01   0.00   0.04    -0.01   0.01   0.07
 106   1     0.04  -0.07   0.02    -0.06  -0.06   0.02    -0.04   0.02   0.01
 107   1     0.05  -0.07   0.01    -0.01  -0.06   0.01    -0.03   0.03   0.00
 108   1     0.00  -0.08   0.04    -0.05  -0.07   0.01    -0.01   0.04  -0.01
 109   1     0.00   0.01  -0.04     0.03   0.00   0.06    -0.04   0.03  -0.01
 110   1     0.03   0.00  -0.01     0.00   0.00   0.03    -0.05   0.04  -0.02
 111   1     0.04   0.01  -0.05    -0.01  -0.03   0.05    -0.05   0.05   0.00
 112   1    -0.04   0.14  -0.07     0.00   0.02   0.04     0.02  -0.09   0.06
 113   1     0.02  -0.17  -0.06     0.05  -0.14   0.03    -0.01   0.10   0.06
 114   1     0.06   0.01   0.19     0.04  -0.05   0.18    -0.06  -0.01  -0.09
                    16                     17                     18
                     A                      A                      A
 Frequencies --    67.7018                71.3871                72.4123
 Red. masses --     3.5862                 3.2818                 3.2044
 Frc consts  --     0.0097                 0.0099                 0.0099
 IR Inten    --     0.9115                 0.1296                 0.0798
 Atom AN      X      Y      Z        X      Y      Z        X      Y      Z
   1   8     0.01  -0.01  -0.02    -0.02  -0.02  -0.02     0.00   0.01   0.00
   2  12    -0.02  -0.01   0.00     0.00   0.02  -0.03    -0.04   0.02  -0.03
   3   8    -0.01  -0.01   0.02    -0.01  -0.03   0.07    -0.02   0.02   0.00
   4   6    -0.02  -0.01   0.02    -0.04  -0.02   0.00    -0.01   0.01   0.01
   5   7    -0.03  -0.01   0.02     0.00   0.01  -0.02     0.01  -0.01  -0.01
   6   7    -0.02   0.06  -0.01     0.00   0.02  -0.03    -0.03   0.01   0.00
   7   8    -0.04  -0.03   0.07    -0.06  -0.04   0.04    -0.01   0.00   0.00
   8   6    -0.02   0.01   0.01     0.00  -0.01   0.00     0.02  -0.02   0.02
   9   6    -0.02   0.03   0.01     0.01  -0.01   0.01     0.03  -0.03   0.05
  10   6    -0.03   0.04   0.00     0.01  -0.01   0.00     0.01  -0.01   0.05
  11   8    -0.02   0.01  -0.01    -0.04   0.00  -0.01    -0.01   0.01   0.00
  12   6    -0.03   0.02  -0.01    -0.03   0.00  -0.01    -0.01   0.00   0.00
  13   6    -0.01   0.01  -0.01     0.00  -0.01  -0.01    -0.02   0.00  -0.02
  14   6    -0.01   0.01  -0.01    -0.04  -0.01  -0.01    -0.01   0.01   0.02
  15   8    -0.05   0.03  -0.01    -0.05   0.00  -0.01    -0.01  -0.01   0.00
  16   6     0.00  -0.03   0.02    -0.03  -0.04   0.00     0.00   0.00  -0.01
  17   8    -0.01  -0.03   0.00    -0.02  -0.01  -0.03    -0.06   0.01  -0.03
  18   6     0.00  -0.01   0.01    -0.02  -0.02   0.08    -0.03   0.02   0.02
  19   8     0.01   0.00   0.01    -0.04  -0.03   0.09    -0.05   0.01   0.04
  20   8    -0.01  -0.02   0.01     0.03   0.01   0.03    -0.01   0.03   0.00
  21   6    -0.01  -0.02   0.01     0.02   0.01   0.01    -0.01   0.03  -0.01
  22   6    -0.01  -0.03   0.01     0.03   0.00   0.00    -0.02   0.02  -0.02
  23   6    -0.01  -0.02   0.01    -0.01   0.01   0.04    -0.03   0.04   0.01
  24   8    -0.01  -0.01   0.01     0.01   0.03   0.01     0.00   0.04  -0.01
  25   6    -0.01  -0.03   0.01     0.05   0.03   0.05    -0.01   0.07   0.01
  26   6     0.01  -0.04   0.00    -0.01   0.02   0.01    -0.03   0.04   0.01
  27   6     0.03   0.01  -0.02     0.10  -0.04  -0.05     0.00  -0.02  -0.04
  28   6     0.01   0.01  -0.01    -0.02  -0.01  -0.01    -0.03   0.04   0.02
  29   6    -0.03  -0.03   0.01     0.00   0.01  -0.01     0.01  -0.01  -0.01
  30   6     0.00   0.05  -0.01     0.03   0.00  -0.03    -0.01   0.00   0.00
  31   6    -0.04  -0.02   0.01     0.01   0.02   0.00     0.02  -0.02  -0.01
  32   6    -0.04  -0.01   0.01     0.01   0.03   0.01     0.02  -0.04  -0.02
  33   6    -0.03  -0.01   0.01     0.00   0.02   0.01     0.02  -0.03  -0.01
  34   6    -0.03  -0.03   0.00     0.00   0.01   0.00     0.01   0.00   0.00
  35   6    -0.03  -0.04   0.00     0.00   0.01  -0.01     0.01   0.00   0.00
  36   6    -0.05  -0.04   0.00     0.01   0.02   0.00     0.03   0.00   0.00
  37   6    -0.03  -0.07  -0.02    -0.01   0.00  -0.02     0.02   0.02   0.02
  38   6     0.04   0.05  -0.01     0.08   0.00  -0.04    -0.02   0.01   0.00
  39   6     0.07   0.05   0.00     0.11   0.00  -0.04     0.03   0.00  -0.01
  40   6     0.08   0.04   0.00     0.10   0.00  -0.04     0.11  -0.01  -0.02
  41   6     0.06   0.03  -0.01     0.06   0.00  -0.03     0.12  -0.02  -0.03
  42   6     0.03   0.04  -0.01     0.01   0.00  -0.02     0.05  -0.01  -0.02
  43   6     0.08   0.07  -0.01     0.07   0.01  -0.04    -0.09   0.00   0.02
  44   6     0.04   0.04  -0.02    -0.08   0.00   0.01     0.01  -0.03  -0.02
  45   6    -0.04  -0.06   0.01     0.03   0.04  -0.01    -0.06  -0.06   0.01
  46   6    -0.08  -0.04  -0.01    -0.02   0.02   0.03     0.13  -0.01  -0.07
  47   6     0.04  -0.05  -0.03    -0.02   0.00  -0.03     0.00   0.02   0.03
  48   6    -0.09  -0.07   0.00     0.00  -0.02  -0.01     0.04   0.03   0.00
  49   6     0.00   0.00  -0.04    -0.11   0.06  -0.01     0.01   0.00  -0.02
  50   6     0.05   0.09   0.01    -0.09  -0.09   0.07    -0.01  -0.11  -0.03
  51   6     0.16   0.18  -0.06     0.02  -0.05   0.01    -0.02   0.12   0.04
  52   6     0.15  -0.05   0.03     0.02   0.09  -0.05    -0.07  -0.13  -0.03
  53   6     0.01   0.00   0.01     0.01  -0.03   0.03     0.04  -0.02   0.01
  54   6    -0.02   0.02   0.01     0.02  -0.01   0.02     0.03  -0.04   0.09
  55   1    -0.01   0.04   0.01     0.01  -0.03   0.03     0.05  -0.04   0.08
  56   1    -0.02   0.02  -0.02    -0.04   0.01  -0.04    -0.03   0.01  -0.03
  57   1    -0.01   0.02  -0.02    -0.04   0.00  -0.02    -0.01   0.00   0.03
  58   1     0.02  -0.08   0.05    -0.02  -0.08   0.03     0.00   0.00  -0.01
  59   1    -0.05   0.00   0.05    -0.06  -0.02   0.02     0.01   0.00  -0.01
  60   1     0.03  -0.02  -0.03     0.00  -0.04  -0.03     0.01   0.00  -0.01
  61   1    -0.01  -0.03   0.01     0.07  -0.03  -0.01     0.01   0.00  -0.02
  62   1    -0.02  -0.03   0.01    -0.03   0.01   0.03    -0.03   0.04   0.00
  63   1    -0.01  -0.03   0.01     0.09   0.04   0.08     0.03   0.08   0.03
  64   1    -0.01  -0.03   0.01     0.00   0.07   0.07    -0.04   0.10   0.02
  65   1    -0.01  -0.03   0.01     0.06   0.02   0.04    -0.02   0.06   0.01
  66   1     0.01  -0.05  -0.03     0.00   0.03  -0.03    -0.02   0.04  -0.02
  67   1     0.01  -0.03   0.00    -0.04   0.02   0.01    -0.04   0.05   0.02
  68   1     0.04  -0.04   0.00     0.03   0.01   0.02    -0.01   0.03   0.02
  69   1     0.03   0.02  -0.04     0.11  -0.02  -0.13     0.00  -0.03  -0.06
  70   1     0.04   0.00  -0.02     0.12  -0.05  -0.04    -0.01  -0.02  -0.05
  71   1     0.04   0.00  -0.01     0.15  -0.07  -0.01     0.02  -0.03  -0.02
  72   1     0.02   0.02  -0.02    -0.01  -0.01  -0.03    -0.03   0.04   0.03
  73   1     0.01   0.00   0.00    -0.02  -0.02   0.00    -0.03   0.05   0.00
  74   1     0.03   0.00   0.00    -0.01  -0.02  -0.01    -0.04   0.05   0.04
  75   1    -0.04  -0.01   0.01     0.01   0.04   0.02     0.02  -0.05  -0.03
  76   1    -0.03   0.00   0.01     0.00   0.02   0.01     0.02  -0.03  -0.01
  77   1    -0.02  -0.03  -0.01    -0.01   0.00   0.00     0.01   0.01   0.01
  78   1    -0.04  -0.06   0.00     0.00   0.00  -0.02     0.03   0.08   0.05
  79   1    -0.03  -0.12  -0.05    -0.01   0.01  -0.01     0.02   0.03   0.03
  80   1     0.10   0.05   0.00     0.13   0.00  -0.05     0.02   0.00   0.00
  81   1     0.10   0.03   0.00     0.12  -0.01  -0.05     0.15  -0.02  -0.03
  82   1     0.07   0.02  -0.01     0.04   0.00  -0.03     0.17  -0.03  -0.04
  83   1    -0.01   0.08  -0.01     0.12   0.01  -0.05    -0.19   0.01   0.05
  84   1     0.08   0.03  -0.05    -0.11   0.02   0.01    -0.04   0.00  -0.02
  85   1    -0.05  -0.07   0.00     0.03   0.04  -0.01    -0.05  -0.03   0.02
  86   1    -0.02  -0.06   0.01     0.05   0.04  -0.02    -0.13  -0.05   0.06
  87   1    -0.04  -0.04   0.00     0.04   0.06   0.01    -0.07  -0.14  -0.04
  88   1    -0.08  -0.06  -0.02    -0.02   0.02   0.02     0.14   0.02  -0.04
  89   1    -0.08  -0.02  -0.01    -0.02   0.04   0.06     0.13  -0.09  -0.14
  90   1    -0.09  -0.03  -0.02    -0.05   0.01   0.03     0.21   0.03  -0.08
  91   1     0.02  -0.09  -0.06    -0.02  -0.01  -0.04     0.01   0.03   0.04
  92   1     0.05  -0.01   0.02    -0.02  -0.01  -0.03     0.00   0.00   0.01
  93   1     0.11  -0.05  -0.06    -0.02   0.01  -0.03    -0.02   0.01   0.04
  94   1    -0.08  -0.12  -0.02    -0.01  -0.03  -0.01     0.04   0.05   0.01
  95   1    -0.15  -0.09   0.02     0.01  -0.02   0.00     0.07   0.04  -0.01
  96   1    -0.09  -0.01   0.02     0.00  -0.04  -0.01     0.04   0.01  -0.01
  97   1     0.04   0.01  -0.03    -0.16   0.06   0.02    -0.04  -0.01  -0.02
  98   1     0.00  -0.06  -0.06    -0.11   0.09  -0.04     0.01   0.05  -0.02
  99   1    -0.05   0.02  -0.02    -0.10   0.06  -0.02     0.05  -0.01  -0.03
 100   1     0.07   0.09  -0.01    -0.17  -0.09   0.09    -0.06  -0.12  -0.02
 101   1     0.08   0.13   0.01    -0.06  -0.13   0.08    -0.02  -0.13  -0.03
 102   1     0.01   0.10   0.04    -0.06  -0.11   0.07     0.04  -0.13  -0.03
 103   1     0.18   0.19  -0.07    -0.01  -0.05   0.01    -0.06   0.12   0.04
 104   1     0.10   0.25  -0.09     0.05  -0.10   0.02    -0.05   0.20   0.06
 105   1     0.23   0.17  -0.06    -0.03  -0.05   0.02     0.08   0.11   0.02
 106   1     0.18  -0.03   0.02     0.01   0.09  -0.05    -0.12  -0.13  -0.02
 107   1     0.25  -0.07   0.03    -0.05   0.11  -0.05     0.04  -0.15  -0.06
 108   1     0.09  -0.13   0.06     0.06   0.15  -0.08    -0.12  -0.22  -0.05
 109   1     0.01  -0.01   0.00     0.04  -0.02   0.06    -0.01  -0.01   0.00
 110   1     0.01   0.02   0.01     0.01  -0.02   0.02     0.06  -0.04   0.06
 111   1     0.00  -0.01   0.01    -0.01  -0.05   0.05     0.08  -0.02  -0.03
 112   1    -0.06   0.15  -0.08     0.09  -0.26   0.20    -0.03   0.11   0.01
 113   1    -0.01  -0.15  -0.07     0.04   0.29   0.17     0.05  -0.21   0.01
 114   1     0.02   0.01   0.19    -0.08  -0.03  -0.28     0.07  -0.03   0.29
                    19                     20                     21
                     A                      A                      A
 Frequencies --    83.0309                84.4592                87.4654
 Red. masses --     4.2571                 3.3998                 3.1721
 Frc consts  --     0.0173                 0.0143                 0.0143
 IR Inten    --     1.0840                 0.0804                 0.3094
 Atom AN      X      Y      Z        X      Y      Z        X      Y      Z
   1   8    -0.02  -0.02  -0.04     0.00   0.00  -0.03     0.00   0.00   0.02
   2  12    -0.01  -0.03   0.01     0.02  -0.02   0.03    -0.03  -0.02  -0.03
   3   8     0.04  -0.05   0.06    -0.01   0.01  -0.02     0.01  -0.02  -0.02
   4   6    -0.06  -0.02   0.00     0.01  -0.01   0.01     0.02   0.00  -0.01
   5   7     0.01  -0.01  -0.01     0.04  -0.02   0.02     0.00   0.00  -0.04
   6   7    -0.01  -0.01   0.02     0.01  -0.02   0.00    -0.03   0.01  -0.02
   7   8    -0.10  -0.05   0.06     0.00  -0.01   0.07     0.04   0.02  -0.05
   8   6     0.01   0.00  -0.02     0.01   0.01  -0.03     0.00   0.00  -0.03
   9   6     0.00   0.01  -0.02     0.01   0.01  -0.04     0.00   0.01  -0.02
  10   6    -0.01   0.01  -0.01     0.00   0.00  -0.03    -0.01   0.01  -0.01
  11   8    -0.06   0.01  -0.02     0.01  -0.02  -0.02     0.03  -0.02   0.00
  12   6    -0.02   0.02  -0.01     0.00  -0.01  -0.02     0.01  -0.01   0.00
  13   6     0.05  -0.01   0.00    -0.02   0.00  -0.01     0.01  -0.01   0.00
  14   6    -0.05   0.01  -0.03     0.02  -0.02  -0.03     0.01  -0.01   0.01
  15   8    -0.05   0.04  -0.02     0.01  -0.01  -0.02     0.00  -0.01   0.01
  16   6    -0.03  -0.07   0.03    -0.02   0.02   0.02     0.01   0.02  -0.01
  17   8     0.00   0.00   0.01    -0.05  -0.02   0.01     0.02  -0.03  -0.01
  18   6     0.05  -0.05   0.05    -0.01   0.01  -0.02     0.02  -0.03  -0.01
  19   8     0.03  -0.07   0.12    -0.01   0.01  -0.05     0.03  -0.02   0.00
  20   8     0.17   0.04  -0.02    -0.05  -0.01   0.00    -0.01  -0.05   0.00
  21   6     0.08   0.01  -0.02     0.00   0.00   0.01    -0.05  -0.05   0.00
  22   6     0.01   0.02  -0.02    -0.02   0.00   0.01     0.01  -0.04   0.00
  23   6     0.07   0.00  -0.05    -0.02   0.00   0.01     0.01  -0.05  -0.01
  24   8     0.03  -0.01  -0.02     0.07   0.01   0.02    -0.10  -0.06  -0.01
  25   6    -0.05   0.04  -0.14    -0.01   0.03   0.02     0.04  -0.08   0.07
  26   6     0.05   0.04  -0.16    -0.02  -0.01   0.04     0.04  -0.08  -0.01
  27   6     0.15   0.00  -0.02    -0.05   0.01   0.01    -0.01  -0.01   0.01
  28   6    -0.02  -0.01  -0.03     0.07  -0.07  -0.04    -0.01   0.00   0.01
  29   6     0.01   0.00  -0.01     0.03   0.01   0.01     0.00   0.00  -0.02
  30   6    -0.04  -0.01   0.02     0.00  -0.02   0.00    -0.03   0.01  -0.01
  31   6     0.01   0.01   0.00     0.02   0.04   0.03     0.01   0.01  -0.01
  32   6     0.01   0.03   0.01     0.02   0.09   0.05     0.02   0.01   0.00
  33   6     0.01   0.03   0.01     0.03   0.08   0.02     0.01  -0.01   0.00
  34   6     0.01   0.02   0.00     0.04   0.03   0.00    -0.01   0.00   0.00
  35   6     0.01   0.01   0.00     0.05   0.00  -0.01    -0.01   0.02  -0.01
  36   6     0.01   0.02   0.01     0.00   0.00   0.01     0.03   0.06   0.01
  37   6     0.01   0.01   0.00     0.06  -0.03  -0.02    -0.02   0.06   0.02
  38   6    -0.06   0.00   0.03    -0.02  -0.02   0.00    -0.01   0.01   0.00
  39   6    -0.06   0.00   0.03     0.00  -0.02  -0.01     0.02   0.01  -0.01
  40   6    -0.05  -0.01   0.03     0.03  -0.02  -0.02     0.04   0.00  -0.01
  41   6    -0.05  -0.01   0.03     0.02  -0.01  -0.01     0.01   0.00  -0.01
  42   6    -0.03  -0.01   0.02     0.01  -0.01   0.00    -0.02   0.00  -0.01
  43   6    -0.07  -0.01   0.03    -0.08  -0.01   0.01    -0.03   0.02   0.00
  44   6     0.01  -0.01   0.01    -0.03  -0.01   0.02    -0.04   0.00   0.00
  45   6     0.03   0.04   0.00     0.09   0.01   0.01     0.06   0.16  -0.01
  46   6    -0.01   0.02   0.04    -0.10   0.01   0.03     0.02   0.05   0.12
  47   6    -0.01   0.01   0.01     0.18   0.00   0.00    -0.06   0.05   0.05
  48   6     0.03   0.01  -0.01    -0.05   0.02   0.00     0.03   0.09  -0.01
  49   6     0.00  -0.05   0.01    -0.08   0.01   0.00    -0.10  -0.02  -0.02
  50   6     0.02   0.06   0.00    -0.03  -0.02   0.08    -0.03   0.03   0.06
  51   6    -0.04   0.04   0.03    -0.04   0.07   0.05     0.03   0.10  -0.01
  52   6    -0.06  -0.06   0.02    -0.09  -0.10  -0.05     0.00  -0.07  -0.01
  53   6     0.02   0.00  -0.02    -0.02   0.04  -0.07     0.02  -0.04   0.01
  54   6    -0.01   0.03  -0.02    -0.01   0.03  -0.05     0.00   0.01   0.02
  55   1     0.01   0.03  -0.04     0.00   0.03  -0.07     0.01   0.02  -0.01
  56   1     0.04   0.02  -0.02    -0.01  -0.02   0.00     0.02  -0.02   0.01
  57   1    -0.04   0.02  -0.04     0.02  -0.01  -0.06     0.01  -0.02   0.02
  58   1     0.00  -0.15   0.09     0.01  -0.05   0.07    -0.01   0.08  -0.05
  59   1    -0.12  -0.03   0.07    -0.08   0.08   0.07     0.06  -0.03  -0.05
  60   1     0.01  -0.06  -0.02    -0.02   0.03  -0.06    -0.02   0.01   0.04
  61   1    -0.04  -0.01   0.04     0.00  -0.02   0.01     0.03  -0.02  -0.03
  62   1     0.02  -0.02  -0.05     0.00   0.00   0.01     0.00  -0.06   0.00
  63   1    -0.04   0.05  -0.14     0.01   0.04   0.03     0.02  -0.08   0.07
  64   1    -0.01   0.09  -0.20    -0.03   0.05   0.03     0.03  -0.11   0.11
  65   1    -0.14   0.02  -0.15    -0.02   0.03   0.02     0.10  -0.05   0.08
  66   1     0.06   0.05  -0.15    -0.02  -0.02   0.04     0.03  -0.10  -0.02
  67   1     0.02  -0.03  -0.21    -0.01   0.00   0.06     0.05  -0.07  -0.01
  68   1     0.07   0.11  -0.19    -0.02  -0.03   0.05     0.05  -0.07  -0.01
  69   1     0.16   0.05  -0.08    -0.05   0.00   0.03    -0.02   0.00   0.03
  70   1     0.20  -0.02   0.00    -0.06   0.02   0.01    -0.01  -0.01   0.01
  71   1     0.17  -0.03   0.01    -0.05   0.03  -0.01    -0.03   0.00   0.00
  72   1    -0.02   0.00  -0.05     0.08  -0.08  -0.07    -0.01   0.00   0.02
  73   1    -0.02  -0.02  -0.01     0.08  -0.09   0.00    -0.01   0.01   0.00
  74   1    -0.01  -0.02  -0.04     0.08  -0.08  -0.07    -0.02   0.01   0.01
  75   1     0.01   0.04   0.02     0.01   0.12   0.06     0.03   0.01   0.01
  76   1     0.01   0.03   0.01     0.03   0.09   0.02     0.01  -0.02   0.00
  77   1     0.01   0.01   0.00     0.05   0.02  -0.02    -0.01   0.01   0.01
  78   1     0.01   0.00  -0.01     0.00  -0.07  -0.03     0.02   0.03  -0.02
  79   1     0.01   0.03   0.01     0.06  -0.12  -0.07    -0.01   0.10   0.03
  80   1    -0.05   0.00   0.03    -0.01  -0.02  -0.01     0.04   0.01  -0.01
  81   1    -0.05  -0.01   0.03     0.04  -0.02  -0.03     0.07  -0.01  -0.01
  82   1    -0.05  -0.01   0.03     0.03  -0.01  -0.02     0.02  -0.01  -0.01
  83   1    -0.12   0.00   0.04    -0.16  -0.01   0.03    -0.09   0.03   0.01
  84   1     0.04  -0.02  -0.01    -0.02  -0.01   0.01     0.00  -0.01  -0.03
  85   1     0.04   0.05   0.00     0.08  -0.03  -0.02     0.07   0.19   0.01
  86   1     0.04   0.04  -0.02     0.15   0.00   0.00     0.06   0.16  -0.08
  87   1     0.04   0.05   0.02     0.09   0.06   0.05     0.07   0.18   0.02
  88   1    -0.01   0.02   0.04    -0.11  -0.04   0.00     0.04   0.09   0.14
  89   1    -0.01   0.03   0.05    -0.10   0.08   0.07     0.04   0.08   0.18
  90   1    -0.02   0.00   0.04    -0.16   0.01   0.02    -0.01  -0.02   0.14
  91   1    -0.01   0.02   0.01     0.19  -0.02  -0.01    -0.05   0.08   0.08
  92   1    -0.01  -0.01   0.00     0.19   0.08   0.04    -0.07   0.01   0.02
  93   1    -0.02   0.01   0.01     0.25  -0.04  -0.01    -0.11   0.04   0.08
  94   1     0.03   0.03   0.00    -0.01  -0.03  -0.02     0.00   0.15   0.01
  95   1     0.06   0.02  -0.01    -0.17  -0.02   0.00     0.10   0.11  -0.06
  96   1     0.03  -0.01  -0.01    -0.04   0.15   0.02     0.03   0.02  -0.02
  97   1     0.04  -0.04   0.00    -0.10   0.02   0.02    -0.07  -0.01  -0.01
  98   1     0.00  -0.09   0.01    -0.08   0.00  -0.04    -0.10  -0.08  -0.07
  99   1    -0.03  -0.04   0.02    -0.11   0.02   0.00    -0.16   0.00  -0.01
 100   1     0.06   0.06  -0.02    -0.06  -0.02   0.09    -0.04   0.03   0.06
 101   1     0.02   0.09   0.00     0.00  -0.04   0.09     0.02   0.06   0.08
 102   1    -0.01   0.07   0.01    -0.04  -0.02   0.09    -0.07   0.03   0.10
 103   1    -0.04   0.05   0.03    -0.09   0.07   0.06     0.02   0.12  -0.01
 104   1    -0.06   0.07   0.02    -0.05   0.13   0.09     0.00   0.15  -0.01
 105   1    -0.01   0.04   0.03     0.04   0.06   0.03     0.09   0.09   0.00
 106   1    -0.07  -0.06   0.02    -0.14  -0.10  -0.03    -0.01  -0.07  -0.01
 107   1    -0.01  -0.07   0.02    -0.02  -0.11  -0.07     0.08  -0.08  -0.02
 108   1    -0.08  -0.10   0.02    -0.11  -0.14  -0.08    -0.03  -0.13  -0.01
 109   1     0.06  -0.03  -0.02    -0.12   0.07  -0.11     0.23  -0.11   0.07
 110   1     0.01   0.03  -0.06    -0.01  -0.01  -0.01    -0.01   0.07  -0.14
 111   1    -0.02  -0.01   0.01     0.06   0.10  -0.13    -0.14  -0.11   0.16
 112   1    -0.07   0.21  -0.14     0.00   0.02  -0.05    -0.05   0.11  -0.04
 113   1    -0.03  -0.17  -0.12    -0.03   0.05  -0.05     0.01  -0.11  -0.04
 114   1     0.06   0.05   0.18     0.00   0.04  -0.08     0.03   0.01   0.15
                    22                     23                     24
                     A                      A                      A
 Frequencies --    92.5152                94.3830                98.8070
 Red. masses --     3.5508                 2.4942                 1.5302
 Frc consts  --     0.0179                 0.0131                 0.0088
 IR Inten    --     1.2376                 0.3851                 0.9748
 Atom AN      X      Y      Z        X      Y      Z        X      Y      Z
   1   8     0.01   0.02   0.01     0.00  -0.01  -0.01     0.00   0.00   0.01
   2  12     0.00  -0.02  -0.01    -0.02   0.00  -0.02     0.00   0.00   0.01
   3   8    -0.01   0.02   0.01     0.02  -0.02  -0.02    -0.01   0.01   0.02
   4   6    -0.03   0.02   0.02     0.00  -0.01   0.00     0.00   0.01   0.00
   5   7     0.00  -0.03  -0.02     0.00  -0.01  -0.01     0.00  -0.01   0.02
   6   7     0.01  -0.01   0.01    -0.04   0.03  -0.03     0.00   0.00   0.00
   7   8    -0.05   0.00   0.03     0.00  -0.01   0.01     0.00   0.01  -0.02
   8   6     0.02  -0.02  -0.01     0.02  -0.04   0.04    -0.01   0.01  -0.01
   9   6     0.02   0.00   0.00     0.03  -0.06   0.09    -0.01   0.01  -0.01
  10   6     0.02   0.00   0.01     0.01  -0.03   0.06    -0.01   0.00  -0.01
  11   8    -0.04   0.05   0.01     0.00  -0.01  -0.01     0.00   0.01   0.01
  12   6    -0.02   0.03   0.01     0.01  -0.01  -0.01    -0.01   0.01   0.01
  13   6    -0.01   0.03   0.00     0.02  -0.01   0.00    -0.01   0.01   0.00
  14   6    -0.04   0.05   0.04     0.01  -0.01  -0.02     0.00   0.01   0.01
  15   8     0.01   0.01   0.01     0.01   0.00  -0.01    -0.01   0.01   0.01
  16   6     0.02  -0.02  -0.01    -0.01   0.00   0.01     0.01   0.00   0.00
  17   8     0.02   0.00  -0.01     0.03  -0.01  -0.01     0.00   0.01   0.01
  18   6     0.00   0.01   0.00     0.02  -0.02  -0.01    -0.01   0.01   0.01
  19   8     0.00   0.02  -0.01     0.02  -0.03   0.00    -0.01   0.01   0.01
  20   8    -0.01   0.00   0.00     0.02  -0.01  -0.01     0.00   0.01   0.00
  21   6     0.03   0.01   0.00    -0.01  -0.02   0.00    -0.01   0.00   0.00
  22   6     0.03   0.00   0.00     0.01  -0.02   0.00    -0.01   0.01   0.01
  23   6    -0.01   0.00   0.00     0.02  -0.03  -0.02    -0.01   0.01   0.01
  24   8     0.06   0.01   0.00    -0.05  -0.03  -0.01    -0.02   0.00   0.00
  25   6     0.03   0.00   0.01     0.01  -0.05   0.00    -0.01   0.00   0.00
  26   6     0.00   0.00   0.00     0.02  -0.02  -0.04     0.00   0.00   0.00
  27   6     0.00   0.02  -0.01     0.00   0.00   0.01     0.01   0.00  -0.01
  28   6    -0.06   0.11   0.05     0.03  -0.04  -0.02    -0.02   0.03   0.02
  29   6     0.01  -0.07  -0.04     0.00   0.01   0.00     0.00  -0.02   0.01
  30   6     0.00   0.00   0.01    -0.03   0.02  -0.02     0.00   0.00   0.00
  31   6     0.00  -0.08  -0.05     0.00   0.02   0.01     0.00  -0.03   0.00
  32   6     0.00  -0.10  -0.08     0.00   0.04   0.03     0.00  -0.04  -0.01
  33   6     0.00  -0.10  -0.08     0.00   0.04   0.03     0.00  -0.04  -0.02
  34   6     0.00  -0.09  -0.07     0.00   0.04   0.02     0.01  -0.03  -0.01
  35   6     0.01  -0.09  -0.06     0.00   0.02   0.01     0.01  -0.02   0.00
  36   6     0.00  -0.01   0.00     0.00   0.01   0.00     0.00  -0.01   0.01
  37   6     0.01  -0.06  -0.04    -0.01   0.02   0.01     0.01   0.00   0.01
  38   6    -0.01   0.00   0.01    -0.03   0.03  -0.01     0.01   0.00   0.00
  39   6    -0.02   0.00   0.00    -0.03   0.03   0.00     0.01   0.00   0.00
  40   6    -0.02   0.00   0.00    -0.04   0.01   0.01     0.01   0.00   0.00
  41   6    -0.02   0.01   0.01    -0.04   0.01  -0.01     0.01   0.00   0.00
  42   6     0.00   0.00   0.01    -0.03   0.01  -0.02     0.00   0.00   0.00
  43   6    -0.01   0.00   0.01    -0.01   0.04  -0.02     0.01   0.00   0.00
  44   6     0.00   0.01   0.01    -0.02   0.00  -0.04     0.00   0.00   0.00
  45   6    -0.03   0.10  -0.03     0.01   0.00   0.01     0.04   0.04  -0.01
  46   6     0.03  -0.03   0.12    -0.01   0.02  -0.01    -0.01  -0.01   0.06
  47   6     0.15  -0.02   0.09     0.06   0.04   0.04    -0.05  -0.02   0.00
  48   6    -0.13   0.09  -0.06    -0.09   0.07   0.02     0.08  -0.03  -0.01
  49   6     0.03   0.03   0.03     0.02  -0.01  -0.03    -0.02  -0.01  -0.01
  50   6     0.00   0.00  -0.01    -0.02  -0.01  -0.08     0.00   0.00   0.01
  51   6    -0.02  -0.02   0.01    -0.01   0.04  -0.03     0.02   0.01  -0.01
  52   6    -0.02   0.02   0.00     0.00   0.07   0.01     0.01  -0.02   0.00
  53   6     0.04  -0.02  -0.02     0.02  -0.01   0.00    -0.03   0.06  -0.09
  54   6     0.02   0.01   0.02     0.04  -0.06   0.14    -0.01   0.01  -0.02
  55   1     0.03   0.00   0.00     0.06  -0.09   0.15    -0.01   0.01  -0.02
  56   1    -0.01   0.04   0.00     0.03  -0.02   0.01    -0.02   0.01  -0.01
  57   1    -0.03   0.03   0.06     0.01   0.00  -0.03     0.00   0.00   0.02
  58   1     0.00  -0.05  -0.01     0.00  -0.02   0.03     0.00   0.03  -0.03
  59   1     0.01  -0.01   0.00    -0.03   0.02   0.02     0.03  -0.03  -0.03
  60   1     0.06  -0.02  -0.02    -0.01   0.00  -0.02     0.00  -0.01   0.03
  61   1     0.03   0.00   0.00     0.00  -0.01   0.00    -0.01   0.01   0.00
  62   1    -0.01   0.01   0.00     0.02  -0.04  -0.01    -0.01   0.01   0.00
  63   1     0.04   0.01   0.01    -0.01  -0.05  -0.01    -0.01   0.00   0.00
  64   1     0.02   0.01   0.01     0.02  -0.06  -0.01     0.00   0.00   0.01
  65   1     0.03   0.00   0.00     0.02  -0.04   0.00     0.00   0.01   0.01
  66   1     0.00  -0.01   0.00     0.02  -0.03  -0.03     0.00   0.00  -0.01
  67   1     0.00   0.00   0.00     0.03  -0.04  -0.05    -0.01   0.01   0.00
  68   1     0.00   0.00   0.00     0.02   0.00  -0.05     0.01   0.00   0.00
  69   1     0.00   0.03  -0.01     0.00   0.01   0.03     0.02   0.00  -0.02
  70   1     0.01   0.02  -0.01     0.01   0.00   0.02     0.01   0.00  -0.01
  71   1     0.00   0.01   0.00    -0.01   0.01   0.00     0.03  -0.01   0.00
  72   1    -0.07   0.13   0.06     0.03  -0.04  -0.03    -0.02   0.03   0.03
  73   1    -0.07   0.13   0.01     0.03  -0.05   0.00    -0.02   0.04   0.00
  74   1    -0.06   0.11   0.09     0.04  -0.04  -0.04    -0.03   0.03   0.03
  75   1    -0.01  -0.11  -0.08     0.01   0.05   0.04     0.00  -0.04  -0.02
  76   1     0.00  -0.09  -0.08     0.00   0.05   0.04     0.00  -0.04  -0.03
  77   1     0.01  -0.08  -0.07     0.00   0.04   0.03     0.01  -0.03  -0.02
  78   1     0.00  -0.03   0.00     0.00   0.01   0.00     0.00  -0.04  -0.02
  79   1     0.00  -0.16  -0.11    -0.01  -0.03  -0.03     0.02   0.04   0.04
  80   1    -0.02   0.00   0.00    -0.03   0.03   0.01     0.01   0.00  -0.01
  81   1    -0.03   0.01   0.00    -0.04   0.01   0.02     0.02  -0.01   0.00
  82   1    -0.02   0.01   0.01    -0.04   0.00   0.00     0.01  -0.01   0.00
  83   1     0.00   0.00   0.00     0.01   0.04  -0.03     0.00   0.00   0.00
  84   1    -0.01   0.01   0.03    -0.04   0.01  -0.03     0.01  -0.01  -0.01
  85   1    -0.03   0.15   0.02     0.01  -0.01   0.00     0.04   0.06   0.00
  86   1    -0.04   0.11  -0.11     0.02   0.00   0.02     0.05   0.04  -0.05
  87   1    -0.03   0.12  -0.03     0.01   0.00   0.01     0.04   0.07   0.02
  88   1     0.02   0.03   0.18    -0.02   0.01  -0.01    -0.02   0.00   0.09
  89   1     0.02  -0.01   0.12    -0.01   0.02  -0.02    -0.02   0.01   0.07
  90   1     0.05  -0.11   0.14     0.00   0.02  -0.02    -0.01  -0.05   0.07
  91   1     0.15   0.01   0.11     0.06   0.04   0.04    -0.04  -0.01   0.01
  92   1     0.17   0.07   0.16     0.06   0.08   0.07    -0.05  -0.06  -0.03
  93   1     0.25  -0.13   0.10     0.10   0.00   0.04    -0.09   0.00   0.01
  94   1    -0.12   0.11  -0.04    -0.08   0.05   0.01     0.10  -0.02   0.01
  95   1    -0.26   0.06  -0.14    -0.15   0.05   0.00     0.12  -0.02   0.01
  96   1    -0.13   0.22   0.00    -0.08   0.14   0.05     0.08  -0.06  -0.04
  97   1     0.02   0.03   0.03     0.02  -0.02  -0.04    -0.01  -0.01  -0.01
  98   1     0.03   0.05   0.05     0.02   0.01   0.00    -0.02  -0.02  -0.02
  99   1     0.06   0.02   0.01     0.05  -0.03  -0.02    -0.03  -0.01   0.00
 100   1     0.00   0.00   0.00    -0.02  -0.02  -0.09     0.00   0.00   0.01
 101   1    -0.02  -0.02  -0.01    -0.04   0.00  -0.08     0.01   0.01   0.02
 102   1     0.02   0.00  -0.03     0.00  -0.02  -0.07    -0.01   0.01   0.02
 103   1    -0.03  -0.02   0.02     0.01   0.05  -0.03     0.02   0.01  -0.01
 104   1    -0.01  -0.02   0.02    -0.01   0.02  -0.05     0.01   0.01  -0.01
 105   1    -0.03  -0.01   0.01    -0.02   0.03  -0.01     0.02   0.01  -0.01
 106   1    -0.02   0.02   0.01     0.02   0.08   0.00     0.02  -0.02   0.00
 107   1    -0.04   0.03   0.01    -0.01   0.07   0.03     0.02  -0.02  -0.01
 108   1    -0.01   0.04   0.00     0.00   0.07   0.02     0.01  -0.02   0.00
 109   1     0.09  -0.05  -0.02    -0.35   0.14  -0.09    -0.51   0.25  -0.21
 110   1     0.03   0.02  -0.06     0.09  -0.21   0.30     0.05  -0.19   0.27
 111   1     0.00  -0.03   0.02     0.31   0.08  -0.28     0.34   0.21  -0.43
 112   1     0.04  -0.07   0.07     0.05  -0.16   0.23    -0.01   0.01  -0.03
 113   1     0.02   0.11   0.07     0.11   0.05   0.20    -0.02   0.00  -0.02
 114   1    -0.01   0.01  -0.09     0.00  -0.08   0.06    -0.01   0.01  -0.01
                    25                     26                     27
                     A                      A                      A
 Frequencies --   106.9392               109.4325               112.8407
 Red. masses --     1.5843                 3.1497                 3.1728
 Frc consts  --     0.0107                 0.0222                 0.0238
 IR Inten    --     1.0228                 0.5782                 0.3561
 Atom AN      X      Y      Z        X      Y      Z        X      Y      Z
   1   8     0.00   0.00   0.01     0.01   0.00   0.07    -0.01   0.00  -0.01
   2  12     0.01   0.00   0.00     0.01   0.00  -0.01     0.07   0.03  -0.04
   3   8    -0.01   0.00   0.02    -0.08  -0.01   0.14     0.02   0.00  -0.04
   4   6     0.00   0.00   0.00     0.05   0.01  -0.01    -0.03   0.00   0.00
   5   7     0.00   0.00   0.00     0.01  -0.01   0.00    -0.01   0.02   0.01
   6   7     0.01  -0.02   0.00     0.01   0.00  -0.01     0.06   0.00  -0.02
   7   8     0.01   0.01  -0.02     0.10   0.05  -0.11    -0.04  -0.01   0.01
   8   6    -0.01   0.00   0.00     0.02  -0.01   0.00     0.00  -0.01   0.03
   9   6    -0.01  -0.01   0.00     0.01   0.00   0.00     0.00  -0.02   0.01
  10   6     0.00  -0.01  -0.01     0.01   0.00   0.00     0.03  -0.01  -0.03
  11   8     0.00   0.00   0.00     0.04  -0.01   0.03    -0.03   0.01   0.00
  12   6    -0.01   0.00   0.00    -0.06   0.02   0.03     0.01   0.00   0.00
  13   6     0.00   0.00   0.01    -0.06   0.02   0.02     0.02  -0.01   0.00
  14   6     0.00   0.00   0.00     0.05  -0.01   0.02    -0.02   0.01   0.00
  15   8    -0.01   0.01   0.00    -0.11   0.04   0.03     0.04  -0.01  -0.01
  16   6     0.01   0.01  -0.01     0.05   0.06  -0.06    -0.01  -0.01  -0.01
  17   8     0.07   0.02   0.01     0.04   0.01  -0.01     0.14   0.02  -0.03
  18   6     0.00   0.00   0.00    -0.06   0.01   0.06     0.02  -0.01  -0.03
  19   8     0.00   0.00   0.00    -0.03   0.03   0.01     0.01  -0.01  -0.02
  20   8     0.02   0.00  -0.01     0.00   0.00  -0.01     0.02  -0.01  -0.02
  21   6     0.01   0.00  -0.01     0.01   0.00  -0.01     0.05   0.00  -0.03
  22   6     0.03   0.01   0.00     0.02   0.00  -0.01     0.09  -0.01  -0.04
  23   6     0.00   0.00  -0.01    -0.06  -0.01  -0.02     0.02   0.01  -0.01
  24   8    -0.01  -0.01  -0.01     0.01   0.00  -0.01     0.05   0.01  -0.04
  25   6     0.02  -0.03  -0.02     0.02  -0.03  -0.03     0.10  -0.08  -0.03
  26   6    -0.01   0.01  -0.02    -0.02  -0.02  -0.12    -0.01   0.02   0.04
  27   6     0.01   0.00   0.00     0.06  -0.03  -0.04    -0.03   0.01   0.02
  28   6     0.01   0.00   0.00     0.06  -0.04   0.01    -0.01   0.02   0.00
  29   6     0.00   0.00   0.00     0.01  -0.01   0.00    -0.01   0.01   0.01
  30   6     0.00  -0.01   0.00     0.01   0.00   0.00     0.04   0.00  -0.01
  31   6     0.00  -0.01   0.00     0.00   0.01   0.01    -0.02  -0.02  -0.01
  32   6     0.00  -0.01  -0.01     0.00   0.02   0.01    -0.02  -0.04  -0.02
  33   6     0.00  -0.01   0.00     0.00   0.02   0.01    -0.02  -0.02   0.00
  34   6     0.00   0.01   0.01     0.01   0.00   0.00    -0.02   0.01   0.02
  35   6     0.00   0.01   0.01     0.01  -0.01   0.00    -0.02   0.02   0.03
  36   6     0.00  -0.01  -0.01    -0.02  -0.01   0.01    -0.03  -0.02   0.00
  37   6     0.00   0.00   0.00     0.01  -0.02  -0.01    -0.03   0.01   0.02
  38   6    -0.02  -0.01   0.01     0.01   0.00   0.00     0.02   0.01   0.01
  39   6    -0.03   0.00   0.01     0.01   0.00   0.00     0.00   0.01   0.02
  40   6    -0.04   0.00   0.01     0.00   0.00   0.01    -0.01   0.01   0.02
  41   6    -0.03   0.00   0.01    -0.01   0.00   0.01    -0.02   0.01   0.01
  42   6    -0.01   0.00   0.01    -0.01   0.00   0.00     0.00   0.00   0.01
  43   6    -0.03   0.01   0.01    -0.01   0.00   0.00    -0.03   0.04   0.01
  44   6    -0.01   0.01   0.02    -0.01   0.00   0.01    -0.04   0.02   0.04
  45   6    -0.01  -0.02   0.00    -0.04  -0.03   0.02    -0.07  -0.04   0.00
  46   6     0.02  -0.01  -0.02    -0.04  -0.01  -0.02    -0.01  -0.02  -0.02
  47   6    -0.01   0.00  -0.02     0.06  -0.01   0.01    -0.04   0.00  -0.01
  48   6     0.01  -0.02   0.01    -0.05   0.00   0.00    -0.05  -0.03   0.04
  49   6     0.01   0.04   0.03    -0.03  -0.01   0.00    -0.10   0.04   0.01
  50   6    -0.01  -0.01   0.01    -0.01   0.01   0.03    -0.04   0.01   0.12
  51   6     0.04   0.11  -0.01    -0.02  -0.01   0.03    -0.04   0.06   0.08
  52   6     0.01  -0.10   0.01    -0.03   0.03  -0.01    -0.06   0.04  -0.03
  53   6    -0.01  -0.01   0.01     0.02  -0.01   0.00    -0.01  -0.02   0.05
  54   6    -0.01   0.02  -0.03     0.02  -0.01  -0.01     0.02  -0.05  -0.07
  55   1    -0.01  -0.01  -0.01     0.02   0.00   0.00    -0.02  -0.04   0.02
  56   1    -0.01   0.01   0.00    -0.13   0.06  -0.03     0.04  -0.02   0.02
  57   1     0.00   0.00   0.00     0.04   0.00   0.00    -0.02   0.01   0.00
  58   1    -0.01   0.04  -0.04    -0.03   0.38  -0.26    -0.01  -0.07   0.01
  59   1     0.04  -0.02  -0.04     0.27  -0.17  -0.26    -0.04   0.03   0.02
  60   1    -0.01   0.00   0.02    -0.08   0.01   0.22     0.02   0.00  -0.07
  61   1     0.00   0.03   0.00     0.01   0.00   0.00     0.07   0.02  -0.03
  62   1    -0.01   0.00  -0.01    -0.13  -0.03  -0.03     0.05   0.03  -0.01
  63   1    -0.01  -0.04  -0.03     0.00  -0.04  -0.03     0.05  -0.10  -0.03
  64   1     0.05  -0.06  -0.02     0.03  -0.03  -0.04     0.12  -0.12  -0.03
  65   1     0.04  -0.02  -0.01     0.02  -0.03  -0.03     0.14  -0.08  -0.03
  66   1    -0.01   0.01  -0.02    -0.02  -0.04  -0.16     0.00   0.04   0.05
  67   1    -0.01   0.00  -0.03    -0.05  -0.06  -0.15     0.00   0.04   0.06
  68   1    -0.01   0.02  -0.03     0.05   0.03  -0.13    -0.04  -0.01   0.05
  69   1     0.01   0.00  -0.01     0.08  -0.04  -0.16    -0.03   0.02   0.06
  70   1     0.01   0.00   0.00     0.07  -0.03  -0.04    -0.02   0.01   0.02
  71   1     0.02   0.00   0.01     0.15  -0.07   0.02    -0.06   0.02   0.00
  72   1     0.01   0.00   0.00     0.06  -0.04   0.00    -0.01   0.04  -0.01
  73   1     0.00  -0.01   0.01     0.06  -0.06   0.03    -0.01   0.02   0.00
  74   1     0.01   0.00   0.00     0.07  -0.05  -0.01     0.00   0.02   0.01
  75   1     0.00  -0.02  -0.01    -0.01   0.03   0.02    -0.01  -0.06  -0.03
  76   1     0.00  -0.01   0.00     0.00   0.03   0.01    -0.02  -0.03   0.00
  77   1     0.00   0.01   0.01     0.02   0.00  -0.01    -0.02   0.02   0.03
  78   1     0.00   0.01   0.00    -0.01  -0.02   0.03    -0.02  -0.01   0.03
  79   1     0.00   0.01   0.01     0.00  -0.06  -0.04    -0.03   0.01   0.00
  80   1    -0.04  -0.01   0.01     0.02   0.00   0.00    -0.01   0.02   0.02
  81   1    -0.05   0.00   0.01    -0.01   0.00   0.01    -0.02   0.01   0.03
  82   1    -0.04   0.00   0.01    -0.02   0.00   0.01    -0.04   0.00   0.02
  83   1    -0.12   0.02   0.02     0.00   0.00   0.00    -0.05   0.04   0.00
  84   1    -0.03   0.00   0.04     0.00   0.00   0.00    -0.02   0.01   0.03
  85   1    -0.01  -0.02   0.00    -0.06  -0.06   0.02    -0.10  -0.04   0.02
  86   1    -0.02  -0.02   0.01    -0.02  -0.04   0.04    -0.07  -0.04   0.02
  87   1    -0.01  -0.03  -0.01    -0.05  -0.02   0.00    -0.09  -0.03  -0.03
  88   1     0.03   0.00  -0.02    -0.06  -0.03  -0.01    -0.02  -0.02   0.00
  89   1     0.02  -0.03  -0.03    -0.05   0.00  -0.04    -0.02  -0.04  -0.06
  90   1     0.03   0.00  -0.03    -0.02   0.01  -0.02     0.03  -0.02  -0.02
  91   1    -0.01  -0.01  -0.02     0.04  -0.01   0.01    -0.06  -0.01  -0.02
  92   1    -0.01  -0.01  -0.02     0.06   0.02   0.05    -0.04   0.00   0.00
  93   1    -0.01   0.01  -0.02     0.10  -0.03   0.00    -0.04   0.02  -0.02
  94   1     0.01  -0.03   0.00    -0.05  -0.01  -0.01    -0.06  -0.05   0.02
  95   1     0.02  -0.02   0.02    -0.10  -0.01  -0.01    -0.04  -0.03   0.06
  96   1     0.01  -0.03   0.00    -0.05   0.06   0.02    -0.05  -0.03   0.05
  97   1     0.00   0.04   0.04    -0.02   0.00   0.00    -0.11   0.06   0.04
  98   1     0.02   0.07   0.05    -0.03  -0.02  -0.01    -0.10   0.02  -0.04
  99   1     0.05   0.03   0.01    -0.05   0.00   0.00    -0.14   0.06   0.01
 100   1    -0.02   0.00   0.03    -0.01   0.01   0.03    -0.07   0.03   0.15
 101   1    -0.02  -0.04   0.01     0.00   0.02   0.03     0.01  -0.01   0.14
 102   1     0.00   0.00  -0.01    -0.02   0.02   0.03    -0.06   0.02   0.12
 103   1     0.04   0.12  -0.01    -0.04  -0.01   0.03    -0.07   0.10   0.08
 104   1     0.00   0.19  -0.02    -0.01  -0.02   0.04    -0.02   0.05   0.09
 105   1     0.12   0.11  -0.02    -0.03  -0.01   0.03    -0.02   0.05   0.11
 106   1     0.01  -0.12   0.01    -0.05   0.04  -0.01    -0.13   0.10  -0.02
 107   1     0.06  -0.10  -0.03    -0.03   0.02   0.00    -0.01   0.02   0.01
 108   1    -0.02  -0.13   0.04    -0.02   0.02  -0.04    -0.07  -0.01  -0.10
 109   1     0.01  -0.01   0.02     0.03  -0.02   0.00    -0.18   0.08   0.04
 110   1    -0.02   0.00  -0.01     0.02   0.00  -0.01     0.02  -0.13   0.21
 111   1    -0.03  -0.01   0.03     0.02  -0.01   0.00     0.12   0.00  -0.08
 112   1     0.12  -0.36   0.22    -0.03   0.12  -0.09    -0.02   0.17  -0.24
 113   1    -0.03   0.48   0.20     0.02  -0.17  -0.08     0.00  -0.33  -0.21
 114   1    -0.14   0.00  -0.51     0.06   0.00   0.16     0.08  -0.05   0.20
                    28                     29                     30
                     A                      A                      A
 Frequencies --   115.5063               119.2621               124.3230
 Red. masses --     4.2288                 3.7509                 2.8196
 Frc consts  --     0.0332                 0.0314                 0.0257
 IR Inten    --     1.1977                 2.6338                 0.4501
 Atom AN      X      Y      Z        X      Y      Z        X      Y      Z
   1   8     0.01   0.00   0.01     0.00  -0.01   0.02     0.00   0.00   0.00
   2  12     0.05   0.01   0.10     0.02  -0.04  -0.02     0.03   0.01   0.03
   3   8     0.00  -0.02  -0.01     0.03  -0.05  -0.05     0.01  -0.02  -0.02
   4   6     0.01   0.00   0.00     0.01  -0.01  -0.01     0.00   0.00   0.00
   5   7    -0.01   0.09  -0.01     0.00  -0.01  -0.04     0.01   0.00   0.04
   6   7     0.01   0.00  -0.01     0.03   0.00   0.01    -0.01   0.03  -0.04
   7   8     0.01   0.01  -0.01     0.02   0.00  -0.04    -0.01   0.00   0.00
   8   6     0.00   0.00   0.09     0.02  -0.02  -0.01    -0.02   0.05  -0.03
   9   6     0.01  -0.05   0.08     0.02  -0.01   0.01    -0.01   0.02  -0.02
  10   6     0.01  -0.02   0.00     0.02   0.00   0.01     0.02  -0.02   0.02
  11   8     0.03  -0.01  -0.01     0.05  -0.04  -0.01     0.02  -0.02  -0.01
  12   6    -0.01   0.00   0.00    -0.03   0.00   0.00    -0.01   0.00  -0.01
  13   6     0.00   0.00   0.00     0.02  -0.02   0.01     0.01  -0.01   0.01
  14   6     0.00   0.00   0.01     0.00  -0.02   0.01    -0.01   0.00   0.01
  15   8    -0.05   0.02   0.00    -0.15   0.05   0.00    -0.05   0.02  -0.01
  16   6     0.01   0.00   0.00     0.01  -0.01  -0.01     0.00  -0.01   0.00
  17   8    -0.05  -0.01   0.09    -0.12  -0.09  -0.06     0.06   0.02   0.04
  18   6     0.01  -0.03  -0.01     0.03  -0.05  -0.03     0.01  -0.02  -0.02
  19   8     0.03  -0.02  -0.02     0.01  -0.06  -0.03     0.01  -0.02  -0.03
  20   8    -0.03   0.00   0.05     0.01  -0.05  -0.03     0.02   0.01   0.02
  21   6     0.03   0.01   0.09     0.07  -0.03  -0.04     0.04   0.02   0.04
  22   6    -0.04   0.00   0.09     0.00  -0.04  -0.05     0.02   0.01   0.03
  23   6     0.00  -0.05   0.01     0.03  -0.02   0.00     0.01   0.00   0.01
  24   8     0.12   0.01   0.11     0.16   0.01  -0.03     0.05   0.02   0.04
  25   6    -0.06   0.02   0.03     0.01   0.11  -0.01     0.00  -0.03  -0.01
  26   6     0.03  -0.06  -0.07    -0.02   0.00   0.11    -0.01   0.02   0.00
  27   6    -0.02   0.02   0.02    -0.03   0.03   0.05    -0.02   0.03   0.04
  28   6    -0.03   0.05   0.02    -0.04   0.02   0.02    -0.04   0.05   0.02
  29   6    -0.01   0.06  -0.02    -0.01  -0.01  -0.02     0.00   0.00   0.03
  30   6     0.00   0.00  -0.03     0.02   0.01   0.01     0.00   0.02  -0.03
  31   6     0.01   0.02  -0.04    -0.01   0.03   0.00     0.00   0.01   0.03
  32   6     0.01  -0.03  -0.06     0.00   0.05   0.03     0.00   0.00   0.01
  33   6     0.00  -0.04  -0.05    -0.01   0.02   0.02     0.00  -0.03  -0.01
  34   6    -0.01  -0.01  -0.04    -0.02   0.00   0.00     0.01  -0.05  -0.02
  35   6    -0.01   0.03  -0.03    -0.02  -0.01  -0.01     0.01  -0.03   0.00
  36   6     0.05   0.04  -0.07    -0.02   0.02   0.02     0.00  -0.01   0.01
  37   6    -0.02   0.00  -0.05    -0.05   0.01  -0.01     0.02  -0.03   0.00
  38   6     0.02   0.00  -0.03    -0.01   0.01   0.02     0.00   0.02  -0.02
  39   6     0.02   0.00  -0.02    -0.03   0.01   0.02    -0.01   0.02  -0.01
  40   6    -0.02  -0.01   0.00    -0.01   0.02   0.01    -0.03   0.01  -0.01
  41   6    -0.06  -0.01   0.00     0.02   0.02   0.01    -0.03   0.00  -0.01
  42   6    -0.04   0.00  -0.01     0.03   0.02   0.01    -0.01   0.00  -0.03
  43   6    -0.01   0.01  -0.02    -0.01   0.02   0.02    -0.01   0.03  -0.02
  44   6    -0.03  -0.02  -0.03     0.03   0.03   0.02    -0.03  -0.01  -0.04
  45   6     0.07   0.03  -0.06    -0.02   0.03   0.01     0.02  -0.03   0.02
  46   6     0.09   0.03  -0.06    -0.07   0.02   0.03    -0.04   0.00  -0.01
  47   6     0.00   0.01  -0.09    -0.11   0.00   0.02    -0.01  -0.04   0.00
  48   6    -0.04  -0.04  -0.03    -0.02   0.01  -0.02     0.07  -0.04  -0.02
  49   6    -0.05  -0.08  -0.04     0.06   0.08   0.03    -0.05  -0.03  -0.04
  50   6    -0.02   0.02  -0.03     0.02  -0.02  -0.01    -0.03  -0.03  -0.01
  51   6     0.00   0.04   0.02     0.00   0.05   0.01    -0.01   0.04   0.00
  52   6    -0.02  -0.01  -0.05     0.00   0.01   0.03    -0.02   0.02  -0.04
  53   6    -0.01  -0.05   0.18     0.05  -0.03  -0.01    -0.06   0.11  -0.10
  54   6    -0.02   0.00  -0.07     0.01   0.01  -0.01     0.08  -0.11   0.15
  55   1     0.00  -0.09   0.12     0.03  -0.01   0.02    -0.02   0.01  -0.02
  56   1     0.01  -0.01   0.01     0.07  -0.04   0.04     0.03  -0.03   0.03
  57   1     0.00  -0.02   0.04    -0.01  -0.05   0.04    -0.01  -0.03   0.04
  58   1     0.01   0.07  -0.03    -0.01   0.25  -0.14     0.00   0.10  -0.05
  59   1     0.04  -0.06  -0.04     0.13  -0.23  -0.18     0.04  -0.10  -0.07
  60   1    -0.01  -0.01   0.07    -0.07  -0.06   0.25    -0.03  -0.03   0.11
  61   1    -0.05  -0.03   0.12     0.08  -0.10  -0.06    -0.01   0.02   0.06
  62   1    -0.02  -0.10   0.04     0.09   0.03   0.00     0.03  -0.01   0.02
  63   1    -0.04   0.03   0.04     0.14   0.15   0.02    -0.02  -0.04  -0.01
  64   1    -0.05   0.06   0.00    -0.07   0.20   0.00     0.03  -0.03  -0.04
  65   1    -0.12   0.00   0.02    -0.04   0.08  -0.02    -0.01  -0.04  -0.02
  66   1     0.02  -0.08  -0.06    -0.01   0.04   0.13     0.00   0.03   0.02
  67   1     0.05  -0.11  -0.12    -0.02   0.05   0.15    -0.01   0.00  -0.02
  68   1     0.06   0.01  -0.10    -0.09  -0.07   0.13    -0.03   0.03  -0.01
  69   1    -0.02   0.03   0.04    -0.03   0.06   0.11    -0.02   0.04   0.08
  70   1    -0.01   0.02   0.02     0.00   0.02   0.06    -0.01   0.03   0.05
  71   1    -0.04   0.03   0.00    -0.09   0.05   0.01    -0.06   0.05   0.01
  72   1    -0.04   0.04   0.04    -0.04  -0.01   0.04    -0.04   0.05   0.03
  73   1    -0.03   0.08  -0.02    -0.02   0.07  -0.02    -0.03   0.09  -0.02
  74   1    -0.06   0.06   0.05    -0.09   0.04   0.04    -0.07   0.07   0.06
  75   1     0.02  -0.07  -0.08     0.01   0.08   0.05    -0.01   0.01   0.02
  76   1     0.00  -0.07  -0.06    -0.01   0.03   0.03     0.00  -0.04  -0.02
  77   1    -0.02  -0.02  -0.04    -0.02  -0.01   0.00     0.01  -0.07  -0.04
  78   1     0.03   0.06  -0.09    -0.01  -0.01   0.02    -0.01  -0.03   0.00
  79   1    -0.02  -0.01  -0.06    -0.04   0.06  -0.01     0.02  -0.01   0.03
  80   1     0.04   0.00  -0.01    -0.06   0.01   0.02    -0.02   0.02   0.00
  81   1    -0.03  -0.01   0.00    -0.02   0.02   0.01    -0.04   0.00   0.01
  82   1    -0.09  -0.01   0.01     0.03   0.02   0.00    -0.04   0.00  -0.01
  83   1    -0.04   0.02  -0.02    -0.03   0.03   0.01    -0.02   0.03  -0.02
  84   1     0.00  -0.02  -0.07    -0.01   0.03   0.05    -0.03   0.00  -0.05
  85   1     0.12   0.07  -0.09    -0.04   0.01   0.02     0.02  -0.05   0.01
  86   1     0.03   0.04  -0.07     0.01   0.02   0.01     0.05  -0.03   0.03
  87   1     0.10  -0.01  -0.03    -0.02   0.06   0.01     0.02   0.00   0.03
  88   1     0.14   0.06  -0.09    -0.08   0.01   0.04    -0.04  -0.03  -0.03
  89   1     0.12   0.00   0.00    -0.08   0.06   0.03    -0.04   0.01   0.01
  90   1     0.05   0.03  -0.06    -0.07   0.01   0.03    -0.07   0.02  -0.01
  91   1    -0.02  -0.03  -0.12    -0.15   0.02   0.02    -0.01  -0.03   0.00
  92   1     0.01   0.03  -0.05    -0.11  -0.05   0.04    -0.01  -0.06  -0.01
  93   1     0.05   0.03  -0.12    -0.11   0.00   0.02    -0.02  -0.03   0.00
  94   1    -0.03  -0.08  -0.05    -0.07   0.05  -0.01     0.09  -0.03   0.00
  95   1    -0.06  -0.04   0.02     0.05   0.03  -0.04     0.08  -0.03  -0.01
  96   1    -0.04  -0.02  -0.03    -0.02  -0.07   0.00     0.07  -0.05  -0.05
  97   1    -0.02  -0.08  -0.06     0.03   0.07   0.04    -0.05  -0.03  -0.05
  98   1    -0.06  -0.12  -0.05     0.07   0.13   0.06    -0.05  -0.03  -0.06
  99   1    -0.10  -0.07  -0.01     0.11   0.07   0.01    -0.05  -0.04  -0.03
 100   1    -0.01   0.00  -0.06     0.01   0.00   0.02    -0.06  -0.04  -0.03
 101   1    -0.01   0.07  -0.03    -0.02  -0.07  -0.02    -0.01  -0.01  -0.01
 102   1    -0.05   0.01   0.02     0.06  -0.01  -0.07    -0.03  -0.04   0.02
 103   1    -0.03   0.05   0.02     0.02   0.07   0.01    -0.03   0.05   0.00
 104   1     0.01   0.06   0.04    -0.01   0.05  -0.01    -0.01   0.04   0.00
 105   1     0.03   0.04   0.02     0.02   0.04   0.04     0.00   0.04   0.00
 106   1    -0.06   0.01  -0.05     0.01   0.02   0.03    -0.05   0.05  -0.03
 107   1     0.01  -0.02  -0.05     0.01   0.01   0.04     0.01   0.01  -0.02
 108   1    -0.03  -0.04  -0.09    -0.01   0.00   0.03    -0.03  -0.01  -0.07
 109   1    -0.15   0.07   0.21    -0.03   0.01  -0.02     0.19  -0.06  -0.09
 110   1     0.01  -0.18   0.33     0.08  -0.07   0.07    -0.14   0.28  -0.37
 111   1     0.09  -0.07   0.05     0.11  -0.03  -0.08    -0.27   0.12   0.14
 112   1     0.00   0.01  -0.10     0.03  -0.04   0.01     0.05  -0.15   0.21
 113   1    -0.08  -0.02  -0.07     0.00   0.06   0.02     0.21  -0.12   0.15
 114   1    -0.01   0.00  -0.08     0.00   0.01  -0.08     0.02  -0.15   0.22
                    31                     32                     33
                     A                      A                      A
 Frequencies --   130.3890               132.2715               136.2719
 Red. masses --     1.4754                 3.7891                 3.2105
 Frc consts  --     0.0148                 0.0391                 0.0351
 IR Inten    --     0.2242                 0.8866                 0.1487
 Atom AN      X      Y      Z        X      Y      Z        X      Y      Z
   1   8    -0.01   0.00  -0.02    -0.01   0.02   0.03     0.00  -0.01  -0.01
   2  12    -0.02   0.01   0.00     0.02  -0.03   0.02     0.00   0.00   0.01
   3   8     0.03   0.00  -0.04    -0.02   0.05  -0.02     0.00  -0.02   0.01
   4   6    -0.03   0.00   0.02    -0.03   0.02   0.04     0.02  -0.01  -0.02
   5   7     0.00   0.00   0.01    -0.01   0.00  -0.01     0.02  -0.01   0.01
   6   7    -0.01   0.00   0.01     0.01   0.00  -0.01     0.00   0.00   0.00
   7   8    -0.05  -0.02   0.08    -0.05   0.00   0.05     0.03   0.00  -0.02
   8   6     0.00   0.00   0.01    -0.01   0.01  -0.02     0.01   0.02  -0.02
   9   6     0.00   0.00   0.00     0.00   0.00   0.00     0.01   0.02  -0.02
  10   6    -0.01   0.01   0.00     0.01  -0.02   0.01     0.01   0.01   0.00
  11   8    -0.02   0.01  -0.01    -0.11   0.09   0.04     0.03  -0.03  -0.01
  12   6     0.00   0.00  -0.01     0.01   0.03   0.03    -0.01  -0.01  -0.01
  13   6     0.02  -0.01  -0.01    -0.02   0.04  -0.03     0.00  -0.01   0.01
  14   6    -0.02   0.00  -0.01    -0.01   0.04  -0.01     0.01  -0.02  -0.01
  15   8     0.00   0.00  -0.01     0.16  -0.06   0.04    -0.06   0.02  -0.01
  16   6     0.00  -0.01  -0.03     0.02   0.02  -0.07    -0.01   0.00   0.02
  17   8     0.02   0.02   0.01    -0.06  -0.05   0.00    -0.03  -0.01   0.00
  18   6     0.02  -0.01  -0.02    -0.01   0.02   0.01     0.00  -0.02   0.00
  19   8     0.00  -0.01   0.00     0.02   0.03   0.04     0.00  -0.02  -0.01
  20   8     0.02   0.02   0.01    -0.06  -0.04  -0.02     0.01  -0.01   0.00
  21   6    -0.02   0.01   0.01     0.03  -0.02  -0.01     0.00  -0.01   0.00
  22   6     0.00   0.01   0.01    -0.01  -0.02  -0.01    -0.01   0.00   0.00
  23   6     0.02   0.02   0.00    -0.02  -0.03  -0.01     0.00  -0.01   0.00
  24   8    -0.06   0.00   0.00     0.13   0.00   0.01    -0.01  -0.01   0.00
  25   6     0.00  -0.02   0.00    -0.01   0.04  -0.01    -0.01   0.02   0.01
  26   6     0.00   0.03   0.03     0.04  -0.08  -0.01    -0.01   0.00   0.01
  27   6    -0.01   0.01   0.01     0.00  -0.05  -0.09     0.01   0.01   0.02
  28   6     0.02  -0.01  -0.01     0.13  -0.12  -0.04    -0.02  -0.01   0.00
  29   6     0.00   0.00   0.00    -0.01   0.00  -0.01     0.02   0.01   0.01
  30   6    -0.01   0.00   0.00     0.01   0.01  -0.01     0.00   0.00   0.00
  31   6     0.00  -0.01   0.00    -0.01  -0.02  -0.02     0.00  -0.08  -0.06
  32   6     0.00  -0.01  -0.01    -0.01  -0.03  -0.02     0.00  -0.11  -0.09
  33   6     0.00   0.00   0.00    -0.01  -0.01   0.00     0.01   0.02   0.00
  34   6     0.01   0.01   0.00    -0.02   0.01   0.02     0.03   0.15   0.10
  35   6     0.01   0.01   0.00    -0.02   0.01   0.01     0.03   0.12   0.08
  36   6     0.01   0.00  -0.01     0.00   0.00   0.00    -0.01  -0.04   0.00
  37   6     0.01   0.00   0.00    -0.02   0.02   0.01     0.01   0.04   0.03
  38   6    -0.01   0.00   0.00     0.01   0.01  -0.01     0.00   0.00   0.00
  39   6     0.00   0.00   0.00     0.01   0.01   0.00    -0.01   0.00   0.00
  40   6     0.02  -0.01  -0.01    -0.03   0.01   0.01     0.00   0.00   0.00
  41   6     0.02  -0.01  -0.01    -0.05   0.01   0.01     0.00   0.00   0.00
  42   6     0.01   0.00   0.00    -0.02   0.01   0.00     0.00   0.00   0.00
  43   6     0.01  -0.01   0.00    -0.01   0.03   0.00     0.00  -0.01   0.00
  44   6     0.00  -0.01   0.00     0.00   0.01   0.00     0.00  -0.01  -0.01
  45   6     0.00   0.00  -0.01    -0.01   0.05  -0.02    -0.09   0.08  -0.04
  46   6     0.02  -0.01  -0.01     0.01  -0.01   0.05     0.04  -0.05   0.11
  47   6     0.04   0.01  -0.01    -0.08   0.00  -0.02     0.05   0.06  -0.12
  48   6     0.00   0.00   0.01     0.02  -0.03   0.02    -0.08  -0.09   0.13
  49   6    -0.01  -0.01  -0.01     0.03   0.01   0.01     0.00  -0.01  -0.01
  50   6     0.00  -0.01   0.01     0.00   0.02  -0.04     0.00  -0.02  -0.01
  51   6     0.00  -0.03  -0.02     0.00   0.05   0.03    -0.01  -0.02  -0.01
  52   6     0.01  -0.01   0.01    -0.02   0.02  -0.02    -0.01  -0.01  -0.01
  53   6     0.00  -0.01   0.02    -0.02   0.03  -0.04     0.00   0.04  -0.06
  54   6    -0.02   0.03  -0.02     0.03  -0.06   0.06     0.03   0.00   0.03
  55   1     0.00   0.01   0.00     0.00  -0.01   0.01     0.01   0.03  -0.03
  56   1     0.05  -0.01   0.01    -0.03   0.09  -0.07     0.01  -0.02   0.02
  57   1    -0.02   0.01  -0.02     0.00   0.13  -0.11     0.02  -0.02   0.01
  58   1    -0.03   0.49  -0.24    -0.04   0.21  -0.20     0.01  -0.03   0.05
  59   1     0.19  -0.43  -0.34     0.16  -0.13  -0.19    -0.04   0.04   0.05
  60   1    -0.16  -0.11   0.47    -0.03  -0.02   0.11    -0.01   0.01  -0.02
  61   1    -0.02   0.03   0.01     0.02  -0.05  -0.01     0.00  -0.01   0.00
  62   1     0.05   0.02   0.01    -0.05  -0.03  -0.01     0.01   0.00   0.00
  63   1    -0.03  -0.02  -0.01     0.03   0.06  -0.01     0.01   0.03   0.01
  64   1     0.01  -0.04   0.00    -0.03   0.07  -0.01    -0.02   0.03   0.01
  65   1     0.01  -0.01   0.00    -0.05   0.04   0.00    -0.02   0.02   0.01
  66   1     0.00   0.05   0.04     0.02  -0.12  -0.03     0.00   0.01   0.01
  67   1     0.00   0.04   0.04     0.06  -0.07   0.00    -0.01   0.01   0.01
  68   1    -0.03   0.02   0.03     0.07  -0.07   0.00    -0.02   0.00   0.01
  69   1    -0.01   0.02   0.04     0.01  -0.06  -0.12     0.01   0.02   0.02
  70   1     0.00   0.01   0.01     0.01  -0.05  -0.16     0.01   0.01   0.03
  71   1    -0.04   0.02  -0.01     0.03  -0.12  -0.04     0.00   0.02   0.01
  72   1     0.02   0.00  -0.03     0.16  -0.07  -0.11    -0.02  -0.02   0.01
  73   1     0.02  -0.02   0.01     0.11  -0.25   0.10    -0.01   0.01  -0.02
  74   1     0.03  -0.01  -0.01     0.25  -0.17  -0.14    -0.04   0.00   0.00
  75   1     0.00  -0.02  -0.01     0.00  -0.05  -0.03    -0.01  -0.19  -0.15
  76   1     0.00   0.00   0.00    -0.01   0.00   0.01     0.01   0.02  -0.01
  77   1     0.01   0.02   0.01    -0.02   0.02   0.03     0.03   0.24   0.15
  78   1     0.00   0.01  -0.01     0.00   0.00  -0.01     0.00  -0.04   0.02
  79   1     0.01  -0.02   0.00    -0.02   0.06   0.03     0.00   0.00  -0.02
  80   1     0.00   0.00   0.00     0.02   0.01   0.00    -0.01   0.00   0.00
  81   1     0.03  -0.01  -0.01    -0.04   0.01   0.01    -0.01   0.00   0.00
  82   1     0.04  -0.01  -0.01    -0.08   0.01   0.02     0.01   0.00   0.00
  83   1     0.02  -0.02   0.00    -0.03   0.03  -0.01     0.00  -0.01   0.00
  84   1     0.01  -0.01  -0.01    -0.01   0.01   0.01     0.00   0.00  -0.02
  85   1     0.01   0.01  -0.01     0.00   0.08   0.00    -0.10   0.15   0.04
  86   1    -0.01   0.00  -0.01    -0.03   0.05  -0.05    -0.13   0.09  -0.12
  87   1     0.01  -0.01   0.00    -0.01   0.04  -0.01    -0.11   0.08  -0.08
  88   1     0.03   0.00  -0.01     0.01   0.02   0.08     0.01   0.02   0.22
  89   1     0.03  -0.02  -0.01     0.01   0.00   0.05     0.02  -0.05   0.04
  90   1     0.03   0.00  -0.01     0.03  -0.04   0.06     0.15  -0.14   0.14
  91   1     0.05   0.00  -0.01    -0.10   0.00  -0.03     0.02  -0.06  -0.20
  92   1     0.04   0.03  -0.01    -0.08  -0.03  -0.03     0.05   0.09  -0.09
  93   1     0.05   0.00  -0.01    -0.10   0.04  -0.03     0.10   0.15  -0.20
  94   1     0.01  -0.02   0.00     0.01  -0.02   0.01    -0.05  -0.26   0.04
  95   1    -0.04  -0.01   0.02     0.08  -0.01   0.03    -0.18  -0.13   0.28
  96   1     0.00   0.04   0.01     0.02  -0.09   0.00    -0.07   0.01   0.15
  97   1    -0.01  -0.01  -0.01     0.04   0.01   0.00     0.00  -0.02  -0.02
  98   1    -0.01  -0.02  -0.02     0.03   0.02   0.04     0.00  -0.01  -0.01
  99   1    -0.03  -0.01   0.00     0.05   0.00   0.00     0.00  -0.02   0.00
 100   1    -0.01  -0.01   0.01     0.02   0.03  -0.04    -0.01  -0.03  -0.03
 101   1     0.01   0.00   0.02    -0.03   0.02  -0.05     0.00  -0.01  -0.02
 102   1     0.00  -0.01   0.02     0.00   0.03  -0.06     0.01  -0.03   0.00
 103   1     0.01  -0.04  -0.02    -0.02   0.08   0.04    -0.01  -0.04   0.00
 104   1     0.00  -0.03  -0.02     0.00   0.05   0.04     0.00  -0.01   0.00
 105   1    -0.01  -0.03  -0.03     0.02   0.05   0.06    -0.01  -0.01  -0.02
 106   1     0.03  -0.02   0.01    -0.05   0.05  -0.02    -0.01  -0.02  -0.01
 107   1    -0.01   0.00   0.00     0.01   0.01   0.00    -0.02   0.00  -0.02
 108   1     0.02   0.01   0.03    -0.03  -0.01  -0.06     0.00   0.00   0.00
 109   1    -0.02   0.01   0.02     0.04  -0.02  -0.05     0.06  -0.01  -0.07
 110   1     0.00  -0.02   0.03    -0.03   0.07  -0.11    -0.02   0.10  -0.14
 111   1     0.01  -0.01   0.00    -0.06   0.04   0.01    -0.05   0.06   0.00
 112   1    -0.02   0.04  -0.03     0.03  -0.09   0.09     0.01  -0.01   0.06
 113   1    -0.04   0.01  -0.02     0.08  -0.03   0.07     0.05   0.02   0.04
 114   1    -0.01   0.03  -0.01     0.00  -0.07   0.05     0.02   0.00   0.03
                    34                     35                     36
                     A                      A                      A
 Frequencies --   143.3721               146.2562               149.8479
 Red. masses --     3.2789                 3.1422                 3.3692
 Frc consts  --     0.0397                 0.0396                 0.0446
 IR Inten    --     0.2650                 0.9257                 0.6470
 Atom AN      X      Y      Z        X      Y      Z        X      Y      Z
   1   8     0.02   0.00  -0.08     0.02   0.01  -0.06    -0.05  -0.02   0.14
   2  12     0.00   0.02  -0.04     0.00   0.00  -0.02    -0.04  -0.02   0.00
   3   8     0.00   0.02   0.03    -0.02   0.01   0.05     0.03  -0.04  -0.06
   4   6     0.01  -0.01  -0.03     0.02   0.00  -0.02    -0.03   0.00   0.05
   5   7     0.00   0.00   0.00    -0.03  -0.01   0.01    -0.03  -0.02   0.00
   6   7     0.02   0.00   0.01     0.01  -0.04  -0.02    -0.04  -0.01   0.00
   7   8     0.00  -0.02   0.04     0.01  -0.01   0.03    -0.01   0.01  -0.06
   8   6     0.00   0.00  -0.01    -0.06  -0.02   0.00    -0.04  -0.03   0.00
   9   6     0.00   0.01  -0.01    -0.06  -0.05  -0.01    -0.04  -0.02   0.00
  10   6     0.01   0.00   0.00    -0.03  -0.06  -0.02    -0.05  -0.02   0.01
  11   8     0.04  -0.04  -0.02     0.03  -0.02  -0.01    -0.04   0.02   0.01
  12   6     0.02  -0.02  -0.02     0.01  -0.01  -0.01    -0.04   0.02   0.00
  13   6     0.00  -0.01   0.01    -0.01   0.00   0.01     0.02  -0.01  -0.01
  14   6     0.01  -0.02  -0.01     0.01  -0.01   0.00    -0.02   0.02   0.01
  15   8     0.01  -0.01  -0.02     0.02   0.00  -0.01    -0.10   0.03   0.01
  16   6    -0.03  -0.01   0.05    -0.01   0.00   0.04     0.04   0.00  -0.10
  17   8    -0.02   0.00  -0.04    -0.06  -0.03  -0.03     0.01   0.01   0.01
  18   6    -0.01   0.03   0.02    -0.01   0.01   0.02     0.01  -0.04  -0.03
  19   8    -0.01   0.03   0.01     0.01   0.02   0.02    -0.01  -0.05  -0.02
  20   8    -0.02   0.00  -0.01    -0.02  -0.02  -0.02     0.04   0.01   0.00
  21   6    -0.04   0.00  -0.02    -0.03  -0.02  -0.03     0.01   0.00  -0.01
  22   6    -0.01   0.00  -0.03    -0.03  -0.02  -0.03     0.01   0.01   0.00
  23   6    -0.01   0.02   0.00    -0.01  -0.01  -0.01     0.03   0.02   0.01
  24   8    -0.05   0.01  -0.03    -0.04  -0.02  -0.03    -0.04  -0.01  -0.01
  25   6     0.00   0.00   0.01    -0.01   0.03   0.03    -0.01   0.02  -0.03
  26   6     0.02  -0.01   0.00     0.02  -0.04  -0.03    -0.05   0.07   0.09
  27   6     0.00  -0.01   0.01     0.03   0.00   0.01    -0.01   0.02   0.01
  28   6    -0.07   0.04   0.01    -0.05   0.03   0.01     0.09  -0.04   0.00
  29   6     0.00   0.00   0.00    -0.02   0.01   0.02    -0.02  -0.01   0.00
  30   6     0.02  -0.01   0.01     0.01  -0.03  -0.02    -0.01  -0.02   0.00
  31   6     0.00   0.00   0.01    -0.01   0.00   0.01    -0.02  -0.01   0.00
  32   6     0.00   0.01   0.01    -0.02  -0.02  -0.01    -0.02   0.00   0.00
  33   6     0.00   0.00   0.01    -0.01  -0.01  -0.01    -0.01   0.02   0.00
  34   6     0.00   0.00   0.01    -0.01   0.01   0.00    -0.01   0.02   0.00
  35   6     0.00   0.00   0.01    -0.01   0.02   0.01    -0.01   0.00   0.00
  36   6    -0.01  -0.01   0.01     0.02   0.02  -0.02     0.02   0.01  -0.02
  37   6     0.00   0.00   0.01     0.04  -0.01   0.01     0.04  -0.01   0.01
  38   6     0.13  -0.02  -0.01    -0.03  -0.01   0.01     0.06  -0.02  -0.01
  39   6     0.16  -0.02  -0.02    -0.06  -0.01   0.01     0.10  -0.02  -0.02
  40   6     0.00   0.00   0.01    -0.03  -0.01   0.00     0.04  -0.01  -0.01
  41   6    -0.14   0.01   0.06     0.01  -0.01  -0.02    -0.04  -0.01   0.01
  42   6    -0.08   0.01   0.04     0.03  -0.01  -0.02    -0.05  -0.01   0.01
  43   6     0.04  -0.01   0.01    -0.01   0.05   0.00     0.03   0.01  -0.01
  44   6    -0.02   0.01   0.02     0.03   0.03   0.04    -0.01   0.01   0.02
  45   6    -0.02  -0.01   0.01     0.07   0.01  -0.01     0.06   0.01  -0.02
  46   6    -0.03   0.00   0.00     0.07   0.01  -0.01     0.08   0.00  -0.01
  47   6    -0.01   0.00   0.01     0.10   0.01  -0.03     0.09   0.00  -0.01
  48   6    -0.01   0.00   0.01     0.07  -0.01   0.00     0.06   0.00  -0.01
  49   6     0.07  -0.05   0.05     0.04   0.14   0.04     0.04   0.01   0.04
  50   6     0.00   0.10  -0.09     0.03   0.02   0.05     0.00   0.08  -0.03
  51   6     0.02   0.02   0.15     0.00   0.08   0.02     0.02   0.02   0.08
  52   6    -0.05  -0.04  -0.13     0.01   0.11   0.06    -0.01   0.04  -0.05
  53   6     0.01   0.00  -0.01    -0.11  -0.01   0.01    -0.05  -0.02   0.00
  54   6     0.02  -0.01   0.01    -0.02  -0.13  -0.03    -0.04  -0.03   0.01
  55   1     0.00   0.01  -0.01    -0.07  -0.06  -0.02    -0.03  -0.02   0.00
  56   1    -0.03  -0.03   0.01    -0.04  -0.01   0.01     0.07   0.00   0.01
  57   1     0.01  -0.06   0.04     0.02  -0.04   0.03    -0.03   0.04  -0.04
  58   1     0.04   0.15   0.06     0.04   0.10   0.06    -0.09  -0.21  -0.15
  59   1    -0.07  -0.15  -0.03    -0.05  -0.09  -0.01     0.14   0.19   0.01
  60   1    -0.10  -0.04   0.23    -0.06  -0.02   0.16     0.13   0.05  -0.34
  61   1     0.01   0.00  -0.05     0.01  -0.02  -0.05     0.00   0.02   0.00
  62   1    -0.03   0.02  -0.01    -0.05  -0.01  -0.02     0.10   0.05   0.01
  63   1     0.02   0.00   0.03     0.03   0.04   0.03    -0.02   0.02  -0.05
  64   1    -0.02   0.00   0.03    -0.05   0.04   0.07     0.01   0.02  -0.05
  65   1     0.03   0.00   0.01     0.01   0.04   0.04    -0.03   0.02  -0.03
  66   1     0.02  -0.03  -0.03     0.01  -0.07  -0.04    -0.02   0.12   0.10
  67   1     0.02   0.01   0.02     0.03  -0.05  -0.04    -0.07   0.11   0.13
  68   1     0.06  -0.02   0.02     0.05  -0.02  -0.04    -0.11   0.00   0.11
  69   1     0.00  -0.04  -0.02     0.03  -0.01  -0.04    -0.02   0.08   0.07
  70   1    -0.03   0.01   0.03     0.02   0.01   0.03     0.04   0.00   0.00
  71   1     0.04   0.02   0.01     0.08   0.02   0.02    -0.09   0.00  -0.01
  72   1    -0.09   0.02   0.05    -0.06   0.02   0.04     0.12  -0.03  -0.07
  73   1    -0.07   0.10  -0.06    -0.05   0.07  -0.04     0.11  -0.08   0.08
  74   1    -0.13   0.06   0.04    -0.08   0.05   0.03     0.13  -0.06  -0.02
  75   1     0.00   0.01   0.01    -0.02  -0.03  -0.02    -0.02   0.00   0.00
  76   1     0.00  -0.01   0.00    -0.01  -0.02  -0.02    -0.01   0.03   0.01
  77   1     0.00  -0.01   0.00    -0.01   0.01   0.00    -0.01   0.03   0.01
  78   1     0.00  -0.01   0.02     0.00   0.04  -0.05     0.00   0.04  -0.05
  79   1     0.00   0.00   0.00     0.04  -0.04   0.05     0.04  -0.05   0.04
  80   1     0.25  -0.03  -0.04    -0.09  -0.01   0.02     0.15  -0.03  -0.03
  81   1    -0.01   0.00   0.02    -0.05   0.00   0.01     0.05  -0.01  -0.01
  82   1    -0.24   0.02   0.09     0.03  -0.01  -0.02    -0.07  -0.01   0.02
  83   1    -0.01  -0.01   0.02     0.00   0.06  -0.06     0.02   0.02  -0.03
  84   1     0.00  -0.01   0.03     0.02   0.00   0.10     0.00  -0.01   0.04
  85   1    -0.03  -0.03   0.02     0.12   0.04  -0.05     0.11   0.06  -0.05
  86   1     0.01  -0.02   0.02     0.04   0.02  -0.02     0.00   0.02  -0.03
  87   1    -0.02   0.01   0.00     0.10  -0.03   0.03     0.09  -0.04   0.02
  88   1    -0.04  -0.02   0.01     0.13   0.04  -0.06     0.12   0.04  -0.04
  89   1    -0.04   0.01  -0.01     0.11  -0.03   0.05     0.11  -0.04   0.03
  90   1    -0.02   0.00   0.00     0.02   0.01  -0.01     0.05   0.00  -0.01
  91   1     0.00   0.01   0.02     0.16  -0.02  -0.03     0.14  -0.02  -0.01
  92   1    -0.01   0.00   0.00     0.10   0.06  -0.08     0.09   0.04  -0.05
  93   1    -0.02   0.00   0.02     0.09   0.01  -0.03     0.08  -0.01   0.00
  94   1    -0.02   0.01   0.01     0.16  -0.06   0.01     0.14  -0.04   0.00
  95   1     0.00   0.01   0.00    -0.01  -0.03   0.05     0.00  -0.02   0.02
  96   1    -0.01   0.00   0.02     0.07   0.08  -0.07     0.06   0.07  -0.07
  97   1     0.14  -0.06   0.01    -0.01   0.15   0.09     0.09   0.02   0.04
  98   1     0.06  -0.09   0.13     0.05   0.20   0.04     0.03  -0.02   0.08
  99   1     0.08  -0.05   0.05     0.10   0.14  -0.01     0.03   0.03   0.02
 100   1     0.10   0.10  -0.13     0.03   0.09   0.16     0.07   0.10  -0.01
 101   1    -0.06   0.15  -0.12     0.02  -0.11   0.06    -0.03   0.07  -0.04
 102   1    -0.02   0.12  -0.11     0.04   0.08  -0.06    -0.02   0.11  -0.07
 103   1    -0.10   0.04   0.17     0.02   0.15   0.01    -0.03   0.07   0.08
 104   1     0.07   0.04   0.23    -0.02   0.04  -0.03     0.04   0.00   0.10
 105   1     0.07   0.02   0.15    -0.01   0.06   0.09     0.03   0.02   0.12
 106   1    -0.19  -0.02  -0.10     0.02   0.23   0.04    -0.07   0.10  -0.04
 107   1     0.01  -0.05  -0.14     0.03   0.10   0.17     0.02   0.03   0.00
 108   1    -0.04  -0.08  -0.25    -0.01   0.07   0.02     0.00   0.01  -0.13
 109   1     0.00   0.00  -0.01    -0.08  -0.01   0.02    -0.04  -0.03   0.00
 110   1     0.01   0.00  -0.01    -0.15  -0.01  -0.04    -0.05  -0.02  -0.02
 111   1     0.01   0.01  -0.02    -0.15   0.01   0.05    -0.06  -0.02   0.01
 112   1     0.04  -0.07   0.04    -0.01  -0.09  -0.08    -0.05  -0.02   0.00
 113   1     0.03   0.05   0.04    -0.01  -0.21  -0.07    -0.04  -0.06   0.00
 114   1    -0.01  -0.02  -0.05    -0.04  -0.15   0.05    -0.04  -0.04   0.04
                    37                     38                     39
                     A                      A                      A
 Frequencies --   157.4334               160.6826               166.5067
 Red. masses --     5.3215                 4.4245                 4.8316
 Frc consts  --     0.0777                 0.0673                 0.0789
 IR Inten    --     6.9037                 3.6443                 1.2029
 Atom AN      X      Y      Z        X      Y      Z        X      Y      Z
   1   8    -0.02  -0.02   0.00    -0.08  -0.06   0.15    -0.02  -0.02   0.00
   2  12    -0.10  -0.04  -0.05     0.04   0.07  -0.04     0.05  -0.13   0.15
   3   8    -0.05  -0.01   0.07     0.00  -0.03   0.06    -0.04   0.01   0.11
   4   6     0.01  -0.04   0.02    -0.04  -0.05   0.10     0.01  -0.03   0.02
   5   7    -0.04  -0.06  -0.05     0.01   0.05   0.02     0.01  -0.03   0.01
   6   7    -0.09   0.00   0.01     0.06   0.01   0.00    -0.01  -0.01   0.01
   7   8     0.02  -0.03   0.06    -0.02  -0.03   0.05     0.02  -0.02   0.04
   8   6    -0.02  -0.05  -0.05     0.00   0.05   0.02     0.02  -0.03   0.02
   9   6    -0.03   0.00  -0.03     0.01   0.03  -0.01     0.03  -0.05   0.07
  10   6    -0.07   0.01   0.01     0.04   0.01  -0.01     0.01  -0.02   0.03
  11   8     0.02  -0.04  -0.10    -0.02  -0.03  -0.09     0.01  -0.03  -0.05
  12   6     0.02  -0.05  -0.09     0.02  -0.03  -0.09     0.02  -0.02  -0.05
  13   6    -0.05  -0.02   0.01     0.01  -0.02   0.01    -0.03   0.00   0.03
  14   6     0.02  -0.03  -0.01    -0.01  -0.02   0.01     0.01  -0.02   0.00
  15   8     0.10  -0.05  -0.12     0.08  -0.01  -0.12     0.08  -0.02  -0.07
  16   6    -0.02   0.04  -0.03     0.01   0.03  -0.14    -0.02   0.03  -0.02
  17   8     0.07  -0.01  -0.02    -0.11  -0.05  -0.07     0.07   0.05   0.14
  18   6    -0.05   0.00   0.02     0.01  -0.02   0.02    -0.04   0.03   0.04
  19   8    -0.03   0.03  -0.08     0.02  -0.01   0.00    -0.03   0.03   0.02
  20   8    -0.01   0.02   0.08     0.01  -0.01   0.01     0.00  -0.06  -0.12
  21   6     0.11   0.04   0.08    -0.06  -0.02  -0.01     0.01  -0.05  -0.10
  22   6     0.07  -0.03   0.03    -0.05  -0.04  -0.03     0.02   0.08  -0.02
  23   6    -0.05  -0.01   0.04     0.00  -0.02  -0.01    -0.03   0.03  -0.03
  24   8     0.19   0.09   0.07    -0.09  -0.01  -0.03    -0.02  -0.13  -0.08
  25   6     0.04  -0.08  -0.05    -0.02   0.01   0.04    -0.01   0.13  -0.08
  26   6    -0.02  -0.01  -0.07     0.02  -0.03  -0.05    -0.05   0.01   0.13
  27   6    -0.04   0.08   0.06     0.06   0.10   0.07     0.04   0.04   0.03
  28   6     0.05   0.12   0.02     0.11   0.11   0.04     0.01   0.08   0.02
  29   6    -0.03  -0.04  -0.03     0.01   0.04   0.03     0.00   0.00  -0.02
  30   6    -0.06  -0.01   0.02     0.05   0.01   0.00    -0.02   0.00  -0.02
  31   6    -0.02  -0.02  -0.01     0.01   0.02   0.02     0.00   0.01  -0.01
  32   6    -0.02   0.03   0.03     0.01  -0.02  -0.01     0.00   0.02   0.00
  33   6    -0.02   0.06   0.05     0.01  -0.05  -0.03     0.00   0.02   0.00
  34   6    -0.03   0.07   0.05     0.01  -0.03  -0.01     0.01   0.01   0.00
  35   6    -0.03   0.02   0.01     0.01   0.01   0.01     0.01   0.01  -0.01
  36   6     0.00   0.00  -0.01     0.00   0.00   0.02     0.00   0.01  -0.01
  37   6     0.00   0.01   0.02    -0.01   0.01   0.01    -0.02   0.02  -0.02
  38   6    -0.02  -0.01   0.01     0.01   0.02   0.01     0.00   0.00  -0.02
  39   6     0.04  -0.02  -0.01    -0.03   0.02   0.02     0.02  -0.01  -0.02
  40   6     0.05  -0.01  -0.01    -0.04   0.02   0.02     0.03  -0.01  -0.03
  41   6     0.02  -0.01   0.00    -0.01   0.02   0.02     0.01   0.00  -0.02
  42   6    -0.04  -0.01   0.01     0.03   0.01   0.01    -0.02   0.00  -0.02
  43   6     0.00  -0.01   0.01    -0.01  -0.01   0.01     0.01   0.02  -0.03
  44   6    -0.01   0.00   0.02     0.02   0.00  -0.01    -0.02  -0.01  -0.02
  45   6     0.00   0.03  -0.02     0.00  -0.02   0.03     0.01   0.01  -0.01
  46   6     0.05   0.00   0.01    -0.05   0.01   0.01     0.01   0.01  -0.02
  47   6    -0.01   0.01  -0.01    -0.01   0.01   0.00    -0.05   0.01  -0.01
  48   6     0.07  -0.02   0.01    -0.03   0.00   0.02    -0.05   0.02  -0.01
  49   6     0.02   0.01   0.03     0.01   0.00  -0.01    -0.04  -0.03  -0.03
  50   6     0.00   0.05  -0.01     0.01  -0.04   0.00    -0.02   0.01  -0.01
  51   6     0.00  -0.02  -0.01    -0.01  -0.02   0.01     0.01   0.04  -0.02
  52   6     0.02   0.02   0.04    -0.01  -0.05  -0.01     0.01   0.05  -0.01
  53   6     0.03  -0.07  -0.05    -0.02   0.05   0.03     0.02   0.00  -0.02
  54   6    -0.06   0.05   0.05     0.04  -0.02  -0.03    -0.01   0.01   0.00
  55   1     0.01   0.03  -0.02    -0.01   0.01  -0.01     0.04  -0.05   0.08
  56   1    -0.10  -0.10   0.04    -0.03  -0.09   0.05    -0.10  -0.05   0.02
  57   1     0.02  -0.07   0.04    -0.04  -0.05   0.01     0.01  -0.05   0.03
  58   1    -0.03   0.10  -0.05    -0.14  -0.04  -0.26    -0.02   0.06  -0.03
  59   1     0.03   0.03  -0.05     0.22   0.14  -0.10     0.02   0.03  -0.02
  60   1    -0.08   0.04   0.00     0.03   0.06  -0.28    -0.06   0.03  -0.01
  61   1     0.04  -0.08   0.10     0.00  -0.06  -0.05    -0.03   0.17  -0.06
  62   1    -0.09  -0.05   0.06    -0.02  -0.04   0.00    -0.02   0.12  -0.09
  63   1     0.03  -0.11   0.04     0.02   0.02   0.06    -0.07   0.17  -0.28
  64   1     0.07   0.01  -0.13    -0.07   0.03   0.07     0.05  -0.03  -0.03
  65   1     0.00  -0.18  -0.12    -0.01   0.01   0.04    -0.05   0.29   0.05
  66   1    -0.02  -0.01  -0.10     0.01  -0.04  -0.04    -0.04   0.04   0.05
  67   1    -0.06  -0.06  -0.12     0.03  -0.06  -0.09    -0.09   0.15   0.26
  68   1     0.04   0.06  -0.09     0.03   0.02  -0.07    -0.06  -0.16   0.22
  69   1    -0.04   0.03   0.04     0.06   0.12   0.04     0.05   0.00  -0.06
  70   1    -0.10   0.10   0.17     0.06   0.10   0.19     0.00   0.06   0.12
  71   1     0.01   0.18   0.02     0.09   0.19   0.03     0.14   0.10   0.04
  72   1     0.06   0.14  -0.01     0.15   0.13  -0.05     0.02   0.09   0.01
  73   1     0.08   0.20  -0.04     0.18   0.19   0.03     0.03   0.14  -0.03
  74   1     0.02   0.15   0.15     0.09   0.14   0.18    -0.01   0.10   0.11
  75   1    -0.02   0.04   0.04     0.02  -0.04  -0.02     0.00   0.02   0.00
  76   1    -0.02   0.09   0.08     0.01  -0.09  -0.05     0.00   0.02  -0.01
  77   1    -0.03   0.10   0.08     0.01  -0.06  -0.03     0.01   0.02   0.00
  78   1    -0.01   0.03  -0.03     0.01  -0.02   0.03     0.00   0.01  -0.02
  79   1     0.00   0.02   0.06    -0.01   0.01  -0.01    -0.02   0.04  -0.04
  80   1     0.07  -0.02  -0.02    -0.06   0.02   0.02     0.03  -0.01  -0.02
  81   1     0.09  -0.02  -0.02    -0.08   0.02   0.03     0.05  -0.01  -0.03
  82   1     0.04  -0.02  -0.01    -0.02   0.02   0.02     0.02  -0.01  -0.02
  83   1     0.02   0.00  -0.01    -0.01  -0.02   0.04     0.01   0.03  -0.05
  84   1    -0.01  -0.01   0.04     0.00   0.02  -0.02     0.00  -0.01  -0.03
  85   1     0.04   0.07  -0.02    -0.04  -0.07   0.03     0.04   0.05  -0.02
  86   1    -0.04   0.04  -0.05     0.05  -0.03   0.05    -0.04   0.02  -0.02
  87   1     0.02   0.00   0.00    -0.02   0.03   0.00     0.02  -0.03   0.00
  88   1     0.07   0.03   0.03    -0.06  -0.02  -0.01     0.01   0.01  -0.02
  89   1     0.06  -0.03   0.01    -0.05   0.03   0.02     0.01   0.01  -0.02
  90   1     0.08  -0.02   0.02    -0.07   0.02   0.00     0.01   0.02  -0.02
  91   1     0.02   0.00   0.00     0.00   0.00   0.00    -0.07   0.02  -0.01
  92   1    -0.01   0.01  -0.05    -0.01   0.00  -0.01    -0.06  -0.01   0.00
  93   1    -0.04   0.02   0.00    -0.01   0.01   0.00    -0.06   0.02  -0.01
  94   1     0.08  -0.01   0.02    -0.02  -0.02   0.01    -0.11   0.06  -0.01
  95   1     0.11   0.00   0.03    -0.05  -0.01   0.03    -0.01   0.04  -0.05
  96   1     0.07  -0.06  -0.03    -0.02   0.02   0.03    -0.05  -0.02   0.04
  97   1     0.08   0.04   0.05    -0.04  -0.02  -0.03    -0.01  -0.02  -0.03
  98   1     0.02  -0.04   0.06     0.01   0.05  -0.02    -0.04  -0.07  -0.04
  99   1    -0.01   0.05   0.00     0.04  -0.03   0.01    -0.08  -0.02  -0.02
 100   1     0.04   0.07   0.01    -0.02  -0.06  -0.02    -0.02   0.00  -0.03
 101   1    -0.02   0.04  -0.01     0.01  -0.04   0.00    -0.01   0.05  -0.01
 102   1    -0.02   0.08  -0.04     0.04  -0.07   0.01    -0.04   0.00   0.02
 103   1     0.02  -0.01  -0.02    -0.02  -0.05   0.01     0.02   0.07  -0.02
 104   1    -0.01  -0.03  -0.03     0.00   0.00   0.03     0.01   0.02  -0.03
 105   1    -0.01  -0.02   0.01     0.00  -0.01  -0.03     0.02   0.03   0.01
 106   1     0.06   0.01   0.03    -0.02  -0.08  -0.01     0.01   0.09  -0.02
 107   1    -0.01   0.02   0.05    -0.01  -0.04  -0.05     0.01   0.04   0.03
 108   1     0.02   0.04   0.07    -0.01  -0.04   0.00     0.01   0.04  -0.03
 109   1     0.00  -0.06  -0.05    -0.03   0.07   0.04     0.07  -0.06  -0.04
 110   1     0.07  -0.08   0.01    -0.03   0.03   0.04     0.01   0.05  -0.09
 111   1     0.07  -0.10  -0.10    -0.01   0.05   0.03    -0.03   0.02   0.03
 112   1    -0.10   0.07   0.05     0.07  -0.05  -0.01    -0.02   0.05  -0.02
 113   1    -0.05   0.03   0.04     0.04   0.02  -0.01    -0.04  -0.02  -0.01
 114   1    -0.03   0.06   0.07     0.01  -0.03  -0.07     0.02   0.03   0.02
                    40                     41                     42
                     A                      A                      A
 Frequencies --   171.1843               184.3253               204.7559
 Red. masses --     3.3380                 4.2790                 2.3772
 Frc consts  --     0.0576                 0.0857                 0.0587
 IR Inten    --     0.2000                 3.8644                 1.3147
 Atom AN      X      Y      Z        X      Y      Z        X      Y      Z
   1   8     0.00   0.00   0.01    -0.09  -0.06   0.10     0.01   0.01  -0.01
   2  12     0.00  -0.01   0.03    -0.02   0.01   0.00     0.00   0.02  -0.01
   3   8     0.01  -0.01  -0.02     0.05   0.13  -0.05    -0.01  -0.02   0.00
   4   6     0.00   0.01   0.00    -0.06  -0.04   0.04     0.01   0.01   0.00
   5   7     0.05  -0.03  -0.03     0.03  -0.01  -0.01     0.04   0.02   0.01
   6   7     0.01  -0.06  -0.03    -0.02  -0.03  -0.01    -0.02  -0.03   0.00
   7   8     0.00   0.00   0.01    -0.05  -0.04   0.01     0.01   0.01  -0.01
   8   6     0.04  -0.04  -0.03     0.02  -0.02  -0.01     0.01   0.00   0.00
   9   6     0.05  -0.06  -0.03     0.02  -0.03  -0.01     0.02  -0.03   0.00
  10   6     0.03  -0.05  -0.03     0.00  -0.02  -0.01     0.01  -0.02   0.00
  11   8    -0.01   0.01  -0.01     0.07  -0.09  -0.02    -0.03   0.02   0.01
  12   6     0.01   0.00  -0.01     0.03  -0.03  -0.01    -0.01   0.01   0.01
  13   6     0.01   0.00   0.00     0.04  -0.01  -0.03    -0.01   0.00   0.00
  14   6     0.00   0.01  -0.01    -0.04  -0.06   0.00     0.00   0.02   0.00
  15   8     0.03  -0.01  -0.01    -0.11   0.04  -0.01     0.02  -0.01   0.01
  16   6     0.01   0.00   0.00    -0.02  -0.04  -0.09     0.01   0.01   0.01
  17   8    -0.04   0.03   0.04     0.05   0.07   0.01     0.00  -0.02  -0.02
  18   6     0.00  -0.01  -0.01     0.05   0.13   0.01    -0.01  -0.02   0.00
  19   8    -0.02  -0.01  -0.03     0.07   0.12   0.08    -0.01  -0.02  -0.02
  20   8     0.04   0.07   0.07    -0.08   0.02  -0.01     0.01  -0.01   0.00
  21   6    -0.04   0.04   0.08    -0.02   0.04   0.00     0.02  -0.01  -0.01
  22   6    -0.05   0.02   0.07     0.00   0.05   0.00     0.02  -0.02  -0.01
  23   6     0.00   0.02   0.03     0.03   0.04   0.00    -0.01  -0.01   0.00
  24   8    -0.09   0.01   0.09     0.04   0.05   0.01     0.01   0.01  -0.01
  25   6    -0.06   0.00   0.05     0.00   0.00   0.00     0.01   0.00  -0.02
  26   6    -0.04   0.08  -0.05     0.18  -0.10   0.03    -0.02   0.00   0.01
  27   6    -0.01   0.02   0.01    -0.02  -0.08  -0.05     0.00   0.01   0.00
  28   6     0.02   0.00  -0.01    -0.04  -0.01   0.02     0.01   0.01   0.00
  29   6     0.05  -0.02  -0.04     0.03   0.00   0.00     0.04   0.05   0.03
  30   6     0.01  -0.06  -0.04    -0.04  -0.03   0.00    -0.06  -0.03   0.01
  31   6     0.04  -0.01  -0.03     0.02   0.01   0.00     0.04   0.04   0.02
  32   6     0.05   0.02   0.00     0.02   0.01   0.00     0.04  -0.04  -0.03
  33   6     0.04   0.03   0.01     0.02   0.00   0.00     0.03  -0.09  -0.07
  34   6     0.04   0.01   0.00     0.02   0.01   0.00     0.03  -0.04  -0.03
  35   6     0.04  -0.02  -0.02     0.02   0.01   0.00     0.04   0.03   0.02
  36   6     0.00  -0.02   0.01     0.00  -0.01   0.01     0.02   0.02   0.04
  37   6    -0.03   0.01  -0.03     0.00   0.01  -0.01     0.00   0.03   0.00
  38   6     0.02  -0.05  -0.03    -0.04  -0.02   0.00    -0.05  -0.03   0.01
  39   6     0.00  -0.05  -0.02    -0.01  -0.03  -0.01     0.03  -0.03  -0.01
  40   6    -0.03  -0.04  -0.02     0.02  -0.03  -0.01     0.10  -0.04  -0.03
  41   6    -0.02  -0.04  -0.03     0.00  -0.03  -0.01     0.03  -0.03  -0.02
  42   6     0.01  -0.05  -0.03    -0.03  -0.03   0.00    -0.07  -0.02   0.01
  43   6     0.02   0.03  -0.04    -0.02   0.00  -0.01    -0.04   0.00   0.01
  44   6     0.02  -0.01   0.02    -0.01  -0.01   0.01    -0.05  -0.01   0.02
  45   6    -0.07   0.00   0.00    -0.02  -0.01   0.01     0.00  -0.03   0.05
  46   6    -0.04  -0.02   0.03    -0.02   0.00  -0.01    -0.05   0.04  -0.01
  47   6    -0.10  -0.01   0.02    -0.01   0.00  -0.01    -0.03   0.03  -0.02
  48   6    -0.07   0.01  -0.02    -0.02  -0.01   0.01    -0.03   0.00   0.04
  49   6     0.02   0.08   0.01     0.01   0.02   0.02     0.00   0.00   0.04
  50   6     0.03   0.02   0.04     0.00   0.04   0.00    -0.03   0.08  -0.05
  51   6     0.03   0.09   0.03    -0.01   0.02  -0.03    -0.02   0.01  -0.02
  52   6     0.02   0.08  -0.01     0.00   0.03   0.05     0.00   0.02   0.07
  53   6     0.04  -0.04  -0.04     0.00  -0.01  -0.02    -0.03   0.02   0.01
  54   6     0.03  -0.04  -0.04     0.00   0.01   0.00     0.00   0.02   0.01
  55   1     0.05  -0.06  -0.03     0.02  -0.02  -0.01     0.02  -0.03   0.00
  56   1     0.02  -0.01   0.01     0.00   0.00  -0.04     0.00   0.01   0.00
  57   1     0.01   0.02  -0.02    -0.08  -0.11   0.02     0.01   0.02   0.00
  58   1     0.00   0.00  -0.01    -0.13  -0.10  -0.16     0.02   0.01   0.02
  59   1     0.01   0.01   0.00     0.09   0.02  -0.07    -0.01   0.00   0.01
  60   1     0.01   0.01   0.00     0.02  -0.03  -0.16     0.00   0.01   0.02
  61   1    -0.07   0.00   0.10    -0.03   0.08   0.00     0.03  -0.03  -0.01
  62   1     0.02  -0.02   0.06    -0.02   0.02   0.00     0.00   0.00   0.00
  63   1    -0.07  -0.01   0.07    -0.04  -0.01  -0.01     0.05   0.00   0.03
  64   1    -0.05   0.02   0.02     0.02  -0.04   0.01     0.00   0.06  -0.04
  65   1    -0.08  -0.03   0.03     0.03   0.02   0.01     0.00  -0.05  -0.06
  66   1    -0.03   0.12  -0.01     0.12  -0.24   0.00    -0.01   0.03  -0.03
  67   1    -0.06   0.00  -0.12     0.28  -0.06   0.06    -0.06   0.03   0.03
  68   1    -0.07   0.16  -0.10     0.26  -0.10   0.06    -0.01  -0.03   0.03
  69   1    -0.02   0.03   0.04    -0.03  -0.22  -0.09     0.00   0.05   0.02
  70   1     0.00   0.02   0.02    -0.14  -0.03  -0.07     0.03  -0.01  -0.01
  71   1    -0.04   0.03  -0.01     0.07  -0.06  -0.03    -0.04  -0.01   0.00
  72   1     0.03   0.01  -0.02    -0.01  -0.22  -0.02    -0.01   0.10   0.01
  73   1     0.02  -0.02   0.01     0.12   0.14   0.02    -0.06  -0.04  -0.01
  74   1     0.04  -0.01  -0.02    -0.26   0.07   0.06     0.09  -0.02   0.00
  75   1     0.05   0.04   0.01     0.02   0.01   0.00     0.04  -0.07  -0.06
  76   1     0.05   0.06   0.03     0.02  -0.01  -0.01     0.03  -0.16  -0.11
  77   1     0.04   0.02   0.01     0.03   0.01   0.00     0.04  -0.07  -0.05
  78   1     0.02  -0.06   0.05     0.01  -0.02   0.02     0.03   0.00   0.06
  79   1    -0.03   0.05  -0.08     0.00   0.02  -0.03     0.00   0.05  -0.02
  80   1    -0.01  -0.05  -0.02     0.01  -0.03  -0.01     0.07  -0.04  -0.02
  81   1    -0.05  -0.04  -0.01     0.06  -0.03  -0.03     0.19  -0.05  -0.05
  82   1    -0.03  -0.04  -0.03     0.01  -0.03  -0.02     0.06  -0.04  -0.03
  83   1    -0.01   0.04  -0.10    -0.02   0.01  -0.04    -0.03   0.00  -0.02
  84   1     0.03  -0.04   0.06     0.00  -0.03   0.04    -0.03  -0.03   0.05
  85   1    -0.12  -0.01   0.06    -0.05  -0.04   0.03    -0.15  -0.20   0.08
  86   1    -0.04   0.00   0.00     0.01  -0.02   0.02     0.20  -0.07   0.11
  87   1    -0.10   0.04  -0.06    -0.04   0.02  -0.02    -0.07   0.15  -0.03
  88   1    -0.14  -0.04   0.14    -0.06  -0.02   0.03     0.01  -0.02  -0.15
  89   1    -0.11   0.03  -0.09    -0.05   0.02  -0.06     0.00   0.05   0.12
  90   1     0.08  -0.05   0.04     0.02   0.00  -0.01    -0.22   0.09  -0.04
  91   1    -0.16   0.03   0.01    -0.05   0.00  -0.03    -0.13  -0.01  -0.09
  92   1    -0.10  -0.07   0.06    -0.01  -0.01   0.03    -0.03   0.00   0.08
  93   1    -0.09  -0.01   0.01     0.01   0.02  -0.03     0.05   0.08  -0.09
  94   1    -0.24   0.13  -0.02    -0.06  -0.01   0.00     0.06  -0.13   0.01
  95   1     0.08   0.06  -0.12    -0.01   0.00   0.01    -0.16  -0.05   0.14
  96   1    -0.07  -0.14   0.10    -0.02  -0.02   0.05    -0.02   0.13   0.00
  97   1    -0.02   0.09   0.05     0.03   0.03   0.04     0.15   0.06   0.08
  98   1     0.03   0.13   0.01     0.01   0.01   0.03    -0.01  -0.15   0.07
  99   1     0.06   0.08  -0.02     0.01   0.03  -0.01    -0.09   0.09  -0.03
 100   1     0.05   0.11   0.18     0.04   0.09   0.07     0.07   0.15   0.03
 101   1     0.02  -0.13   0.06    -0.02  -0.03   0.00    -0.10  -0.01  -0.07
 102   1     0.01   0.10  -0.09    -0.02   0.09  -0.08    -0.05   0.16  -0.19
 103   1     0.02   0.19   0.02     0.03   0.07  -0.04     0.07   0.11  -0.05
 104   1     0.02   0.07   0.00    -0.03   0.00  -0.08    -0.06  -0.05  -0.13
 105   1     0.06   0.07   0.13    -0.02   0.01   0.02    -0.05  -0.01   0.08
 106   1    -0.03   0.24  -0.03     0.04   0.07   0.03     0.09  -0.03   0.06
 107   1     0.08   0.04   0.13    -0.01   0.03   0.08    -0.06   0.03   0.05
 108   1    -0.01  -0.01  -0.12     0.00   0.03   0.06     0.01   0.07   0.16
 109   1     0.05  -0.05  -0.05     0.01  -0.02  -0.02    -0.03   0.02   0.01
 110   1     0.03  -0.03  -0.06     0.00   0.00  -0.03    -0.06   0.01  -0.02
 111   1     0.03  -0.03  -0.03     0.00   0.00  -0.01    -0.05   0.05   0.04
 112   1     0.01   0.01  -0.07    -0.02   0.02   0.00    -0.02   0.03   0.02
 113   1     0.02  -0.09  -0.06     0.00   0.00   0.00    -0.01   0.02   0.01
 114   1     0.05  -0.03   0.01     0.02   0.02   0.02     0.03   0.03   0.00
                    43                     44                     45
                     A                      A                      A
 Frequencies --   205.5633               210.5174               212.7233
 Red. masses --     2.8444                 1.3784                 1.3640
 Frc consts  --     0.0708                 0.0360                 0.0364
 IR Inten    --     4.6662                 1.6029                 0.0913
 Atom AN      X      Y      Z        X      Y      Z        X      Y      Z
   1   8     0.00   0.00   0.01    -0.01  -0.02  -0.01    -0.02  -0.05  -0.01
   2  12     0.01   0.01  -0.03     0.01   0.03  -0.01    -0.01   0.00   0.00
   3   8     0.01   0.01  -0.01     0.01  -0.01   0.00     0.01   0.01  -0.02
   4   6    -0.01   0.00   0.00     0.01  -0.02   0.00     0.02  -0.06   0.00
   5   7     0.00  -0.04   0.04     0.00   0.02   0.01     0.00  -0.01   0.00
   6   7     0.04  -0.02   0.05     0.00   0.00   0.00     0.00   0.00   0.00
   7   8    -0.01   0.00   0.00     0.02  -0.02   0.00     0.04  -0.05   0.00
   8   6     0.02  -0.05   0.08    -0.01   0.01   0.01     0.01  -0.01   0.00
   9   6     0.06  -0.13   0.21    -0.01   0.00   0.00     0.01  -0.01   0.02
  10   6     0.04  -0.07   0.09     0.00  -0.01   0.00     0.00   0.00   0.01
  11   8     0.01   0.00   0.00    -0.02   0.00   0.00    -0.03   0.00   0.00
  12   6     0.01   0.00   0.00    -0.01   0.00   0.00    -0.01   0.00   0.00
  13   6     0.00   0.00   0.00     0.01  -0.01   0.00     0.01   0.00   0.00
  14   6     0.00   0.00   0.00     0.01  -0.01   0.01     0.02  -0.02   0.01
  15   8     0.00   0.00   0.00    -0.01   0.00   0.00    -0.02   0.01   0.00
  16   6     0.00  -0.01   0.00    -0.02   0.03   0.00    -0.05   0.06   0.00
  17   8    -0.02  -0.01  -0.05     0.00   0.01  -0.01     0.00   0.01   0.00
  18   6     0.00   0.01   0.00     0.00  -0.01  -0.01     0.01   0.01  -0.01
  19   8     0.00   0.01  -0.01    -0.01  -0.02   0.01     0.02   0.01   0.01
  20   8     0.01   0.02   0.02    -0.02   0.00  -0.01     0.00   0.01   0.00
  21   6    -0.01   0.01   0.01    -0.01   0.00  -0.01    -0.01   0.01   0.00
  22   6     0.00  -0.02  -0.01    -0.01   0.00  -0.01    -0.01   0.01   0.00
  23   6     0.00   0.01   0.01     0.00   0.00  -0.01     0.01   0.01   0.00
  24   8     0.00   0.03   0.00     0.01   0.01  -0.01     0.01   0.01   0.00
  25   6     0.01  -0.05   0.02     0.00   0.00   0.01     0.00   0.00   0.01
  26   6     0.00   0.02  -0.03     0.01  -0.01   0.01     0.02   0.00   0.01
  27   6    -0.01   0.00   0.00     0.02   0.01   0.01     0.01  -0.01  -0.01
  28   6     0.00  -0.01   0.00     0.00   0.01   0.01    -0.01   0.02   0.02
  29   6    -0.01  -0.01   0.00     0.01   0.00   0.00    -0.01  -0.01   0.00
  30   6     0.01   0.01   0.01    -0.02   0.00   0.01     0.01   0.00   0.00
  31   6    -0.02  -0.01   0.00     0.01  -0.01  -0.01    -0.01   0.00   0.00
  32   6    -0.02   0.01   0.01     0.01   0.01   0.00    -0.01   0.00   0.00
  33   6    -0.02   0.02   0.00     0.02   0.03   0.02    -0.01   0.00   0.00
  34   6    -0.01   0.01   0.00     0.01   0.01   0.00    -0.01  -0.01   0.00
  35   6     0.00  -0.01   0.00     0.01  -0.01  -0.01    -0.01   0.00   0.00
  36   6    -0.01   0.01  -0.01     0.01  -0.02  -0.01     0.00   0.01   0.00
  37   6    -0.01   0.00   0.00     0.01  -0.02  -0.02    -0.01   0.00   0.01
  38   6     0.00   0.00   0.01    -0.02   0.01   0.01     0.01   0.00  -0.01
  39   6     0.00   0.01  -0.01     0.01   0.00   0.00    -0.01   0.00   0.00
  40   6     0.02   0.02  -0.01     0.05   0.00   0.00    -0.03   0.00   0.00
  41   6     0.01   0.03   0.00     0.01   0.00   0.00    -0.01   0.00   0.00
  42   6     0.00   0.03   0.01    -0.03   0.01   0.01     0.01  -0.01  -0.01
  43   6     0.00   0.01   0.01    -0.02   0.00   0.02     0.01   0.00  -0.01
  44   6    -0.01   0.02  -0.01    -0.02   0.01   0.01     0.01  -0.01   0.00
  45   6     0.02   0.02  -0.01     0.01   0.00  -0.01     0.00   0.00   0.00
  46   6     0.02   0.00   0.00     0.00  -0.02   0.01     0.00   0.01  -0.01
  47   6    -0.02  -0.01   0.00     0.02  -0.01   0.00    -0.02   0.00   0.01
  48   6     0.00   0.00  -0.01    -0.01   0.00  -0.02     0.01   0.00   0.00
  49   6    -0.02  -0.02  -0.01     0.00   0.00   0.01     0.00   0.00  -0.01
  50   6    -0.02   0.00  -0.03    -0.02   0.03  -0.03     0.01  -0.01   0.02
  51   6     0.00   0.01   0.01    -0.02   0.00  -0.01     0.01   0.00   0.00
  52   6     0.01   0.02   0.02     0.00  -0.01   0.04     0.00   0.00  -0.02
  53   6    -0.01   0.08  -0.13    -0.05   0.02   0.03     0.03   0.00  -0.02
  54   6    -0.05   0.01  -0.12     0.00  -0.03  -0.01     0.00   0.02   0.00
  55   1     0.06  -0.13   0.20    -0.02  -0.01   0.00     0.02   0.00   0.02
  56   1     0.01   0.00   0.00     0.02   0.00   0.01     0.02   0.01  -0.01
  57   1    -0.01   0.00   0.00     0.03   0.01   0.02     0.06   0.00   0.04
  58   1     0.00  -0.02  -0.01     0.00   0.05   0.01    -0.02   0.10   0.01
  59   1     0.01  -0.01  -0.01    -0.01   0.04   0.01    -0.01   0.10   0.01
  60   1     0.01  -0.01   0.00    -0.06   0.03  -0.01    -0.12   0.07  -0.03
  61   1     0.01  -0.04   0.00     0.00   0.01  -0.02    -0.01   0.02   0.00
  62   1     0.00   0.00   0.02     0.01   0.00  -0.01     0.02   0.01   0.00
  63   1     0.02  -0.07   0.09    -0.02   0.00  -0.04    -0.04   0.00  -0.04
  64   1    -0.01  -0.01   0.01     0.01  -0.05   0.03     0.01  -0.07   0.04
  65   1     0.04  -0.11  -0.02     0.02   0.04   0.04     0.02   0.04   0.05
  66   1     0.00   0.03  -0.02     0.01  -0.02   0.00     0.02  -0.02   0.02
  67   1    -0.01  -0.01  -0.05     0.02   0.00   0.02     0.05   0.00   0.00
  68   1     0.00   0.06  -0.04     0.02  -0.03   0.02     0.02   0.00   0.00
  69   1    -0.01  -0.02   0.00     0.02   0.05   0.02     0.01   0.01   0.00
  70   1    -0.02   0.00   0.00     0.06  -0.01   0.01     0.03  -0.02  -0.03
  71   1    -0.01   0.00   0.00    -0.01  -0.01   0.00    -0.02  -0.03  -0.01
  72   1     0.01  -0.05  -0.01    -0.04   0.23   0.05    -0.10   0.50   0.11
  73   1     0.03   0.02   0.01    -0.17  -0.13  -0.03    -0.37  -0.26  -0.07
  74   1    -0.04   0.01  -0.01     0.21  -0.07   0.00     0.44  -0.14   0.02
  75   1    -0.03   0.02   0.01     0.01   0.01   0.00     0.00   0.01   0.01
  76   1    -0.02   0.03   0.00     0.02   0.05   0.03    -0.01  -0.01   0.00
  77   1     0.00   0.01   0.00     0.01   0.01   0.01    -0.01  -0.01   0.00
  78   1    -0.02   0.02  -0.02     0.01  -0.03   0.00    -0.01   0.01   0.00
  79   1     0.00   0.00   0.00     0.01  -0.02  -0.03    -0.01   0.01   0.02
  80   1     0.00   0.00  -0.02     0.03   0.00   0.00    -0.01   0.00   0.00
  81   1     0.03   0.03  -0.03     0.09   0.00  -0.01    -0.04   0.00   0.01
  82   1     0.02   0.04   0.00     0.03   0.00   0.00    -0.02   0.00   0.00
  83   1     0.00   0.01   0.00    -0.01   0.00   0.02     0.01   0.00  -0.01
  84   1    -0.02   0.04  -0.03    -0.02   0.00   0.01     0.02  -0.01  -0.01
  85   1     0.07   0.06  -0.03     0.06   0.07  -0.02    -0.01   0.00   0.00
  86   1    -0.02   0.03  -0.03    -0.08   0.01  -0.04     0.00   0.00   0.00
  87   1     0.05  -0.01   0.03     0.03  -0.07   0.01    -0.01   0.01   0.00
  88   1     0.05   0.02  -0.03    -0.19  -0.01   0.28     0.04   0.00  -0.06
  89   1     0.03  -0.02   0.03    -0.13   0.03  -0.27     0.03  -0.01   0.05
  90   1    -0.01   0.01   0.00     0.31  -0.08   0.04    -0.07   0.02  -0.02
  91   1    -0.02   0.00   0.00     0.07   0.00   0.02    -0.05   0.00  -0.01
  92   1    -0.02  -0.02  -0.01     0.02   0.00  -0.05    -0.01  -0.01   0.04
  93   1    -0.03   0.00   0.00    -0.01  -0.04   0.03     0.01   0.01  -0.01
  94   1     0.01  -0.01   0.00    -0.26   0.21  -0.01     0.18  -0.12   0.00
  95   1    -0.02  -0.01   0.00     0.25   0.09  -0.20    -0.16  -0.05   0.11
  96   1     0.00   0.02  -0.01    -0.02  -0.27   0.14     0.02   0.18  -0.11
  97   1     0.05   0.00   0.00     0.07   0.03   0.03    -0.06  -0.03  -0.03
  98   1    -0.03  -0.11  -0.02    -0.01  -0.08   0.03     0.01   0.07  -0.02
  99   1    -0.09   0.02  -0.01    -0.05   0.04  -0.01     0.05  -0.04   0.01
 100   1    -0.04  -0.12  -0.22     0.01   0.01  -0.08     0.01   0.03   0.08
 101   1     0.00   0.20  -0.05    -0.04   0.09  -0.05     0.01  -0.09   0.03
 102   1    -0.01  -0.10   0.15    -0.03   0.02   0.00     0.02   0.02  -0.04
 103   1     0.01   0.03   0.00     0.02   0.02  -0.02    -0.01  -0.01   0.01
 104   1    -0.01   0.00  -0.01    -0.03  -0.03  -0.05     0.01   0.01   0.02
 105   1     0.00   0.01   0.03    -0.04  -0.01   0.03     0.02   0.00  -0.01
 106   1     0.02   0.03   0.02     0.06  -0.10   0.04    -0.03   0.05  -0.02
 107   1     0.00   0.01   0.04    -0.06   0.02  -0.03     0.03  -0.01   0.02
 108   1     0.01   0.02   0.03     0.01   0.06   0.13    -0.01  -0.03  -0.07
 109   1     0.11  -0.11  -0.24    -0.06   0.04   0.04     0.04  -0.02  -0.03
 110   1    -0.06   0.25  -0.35    -0.07   0.00   0.01     0.03   0.02  -0.03
 111   1    -0.12   0.22   0.04    -0.06   0.03   0.04     0.02   0.00  -0.01
 112   1     0.02   0.06  -0.23     0.01  -0.05  -0.01    -0.01   0.04  -0.01
 113   1    -0.26   0.00  -0.13     0.00  -0.02  -0.01    -0.02   0.01   0.00
 114   1     0.00   0.05  -0.21    -0.02  -0.04  -0.02     0.01   0.03   0.00
                    46                     47                     48
                     A                      A                      A
 Frequencies --   213.1061               216.8168               222.3244
 Red. masses --     1.0850                 1.2170                 2.2929
 Frc consts  --     0.0290                 0.0337                 0.0668
 IR Inten    --     0.0276                 0.3055                 0.3042
 Atom AN      X      Y      Z        X      Y      Z        X      Y      Z
   1   8     0.00   0.01   0.00    -0.01  -0.01   0.00    -0.01  -0.02  -0.01
   2  12     0.00   0.00   0.00     0.00  -0.01   0.00     0.02  -0.02   0.01
   3   8     0.00   0.00   0.00    -0.01   0.02   0.00    -0.04   0.06   0.00
   4   6     0.00   0.01   0.00     0.00  -0.01   0.00     0.01  -0.03   0.00
   5   7     0.00   0.02  -0.02     0.00   0.00  -0.02     0.00   0.00   0.01
   6   7     0.00   0.00   0.00     0.01  -0.02   0.01     0.01   0.02  -0.01
   7   8    -0.01   0.01   0.00     0.00  -0.01   0.00     0.01  -0.02   0.00
   8   6     0.00   0.00   0.00    -0.01   0.00  -0.02    -0.01   0.00   0.01
   9   6     0.00   0.00   0.00    -0.01   0.02  -0.05     0.00  -0.01   0.01
  10   6     0.00   0.00   0.00     0.00   0.00  -0.02     0.00   0.00   0.00
  11   8     0.00   0.00   0.00     0.00   0.00   0.00    -0.01   0.00  -0.01
  12   6     0.00   0.00   0.00     0.00   0.00   0.00    -0.02   0.00  -0.01
  13   6     0.00   0.00   0.00    -0.01   0.01  -0.01    -0.05   0.02  -0.02
  14   6     0.00   0.00   0.00     0.00   0.00   0.00     0.01  -0.01   0.00
  15   8     0.01   0.00   0.00    -0.01   0.00   0.00    -0.01   0.00  -0.01
  16   6     0.01  -0.01   0.00    -0.01   0.01   0.00    -0.02   0.02   0.00
  17   8     0.00   0.00   0.00     0.00  -0.01   0.01     0.00  -0.06   0.00
  18   6     0.00   0.00   0.00     0.00   0.01   0.01     0.00   0.02   0.03
  19   8     0.00   0.00   0.00     0.02   0.02   0.00     0.07   0.06  -0.01
  20   8     0.00   0.00   0.00     0.02   0.00   0.01     0.11  -0.01   0.05
  21   6     0.00   0.00   0.00     0.01   0.00   0.01     0.06  -0.02   0.03
  22   6     0.00   0.00   0.00     0.01   0.00   0.01     0.06  -0.03   0.02
  23   6     0.00   0.00   0.00     0.00   0.00   0.01     0.01  -0.01   0.04
  24   8     0.00   0.00   0.00    -0.02  -0.01   0.01    -0.09  -0.05   0.01
  25   6     0.00   0.00   0.00     0.00   0.01  -0.01     0.01   0.05  -0.07
  26   6    -0.01   0.00   0.00     0.00   0.01   0.00    -0.01   0.02   0.02
  27   6     0.00   0.00   0.00    -0.02  -0.01  -0.01    -0.12  -0.05  -0.05
  28   6     0.00   0.00   0.00     0.00   0.01   0.00     0.01   0.02   0.00
  29   6     0.00   0.01  -0.01     0.01   0.00   0.00     0.00   0.01   0.01
  30   6     0.00   0.00   0.00     0.00  -0.01   0.01     0.01   0.02   0.00
  31   6     0.01   0.00   0.00     0.01   0.00   0.00     0.00   0.01   0.01
  32   6     0.02   0.01   0.02     0.01   0.00   0.00     0.00   0.00   0.00
  33   6     0.01  -0.01   0.02     0.01  -0.01   0.00     0.00  -0.01  -0.01
  34   6    -0.01  -0.03   0.00     0.01   0.00   0.00     0.00   0.00   0.00
  35   6    -0.01   0.00   0.00     0.00   0.00   0.00     0.00   0.01   0.00
  36   6     0.01  -0.01  -0.01     0.00   0.00   0.01     0.00   0.00   0.00
  37   6    -0.01   0.00   0.01     0.00   0.01   0.00     0.00   0.00   0.00
  38   6     0.00   0.00   0.00    -0.01  -0.02   0.00     0.01   0.03   0.01
  39   6     0.00   0.00   0.00    -0.01  -0.01  -0.02     0.00   0.02   0.02
  40   6     0.00   0.00   0.00     0.00   0.01  -0.03     0.00   0.01   0.02
  41   6     0.00   0.00   0.00     0.01   0.02  -0.01     0.00   0.00   0.01
  42   6     0.00   0.00   0.00     0.00   0.01   0.01     0.01   0.01   0.00
  43   6     0.00   0.00   0.00     0.00   0.00   0.00     0.01   0.01   0.01
  44   6     0.00   0.00   0.00     0.00   0.01   0.01     0.00   0.00  -0.01
  45   6     0.01   0.00  -0.01    -0.01  -0.01   0.01     0.02   0.00   0.01
  46   6    -0.03   0.00  -0.01    -0.01   0.00   0.00     0.00   0.01   0.00
  47   6    -0.02   0.00   0.00     0.00   0.01   0.00     0.01   0.01  -0.01
  48   6     0.02   0.01  -0.01     0.00   0.00   0.00    -0.01   0.00   0.00
  49   6     0.00   0.00   0.00     0.02   0.02   0.02    -0.01   0.00  -0.01
  50   6     0.00   0.00   0.00    -0.01  -0.03   0.00     0.00   0.00   0.00
  51   6     0.00   0.00   0.00     0.00   0.01   0.01     0.00  -0.01   0.00
  52   6     0.00   0.00   0.00     0.01   0.02   0.02     0.00  -0.02  -0.01
  53   6     0.00   0.00   0.01     0.00  -0.02   0.02    -0.02   0.01   0.00
  54   6     0.00   0.00   0.00     0.01  -0.02   0.01     0.00  -0.02  -0.02
  55   1     0.00  -0.01   0.01    -0.01   0.02  -0.05     0.00  -0.01   0.02
  56   1     0.00   0.00   0.00    -0.01   0.01  -0.01    -0.07   0.04  -0.04
  57   1    -0.01   0.00  -0.01     0.01   0.00   0.01     0.02  -0.01   0.01
  58   1     0.00  -0.01   0.00    -0.01   0.02   0.00    -0.01   0.04   0.00
  59   1     0.00  -0.01   0.00     0.00   0.02   0.00    -0.01   0.03   0.00
  60   1     0.02  -0.01   0.01    -0.02   0.01  -0.01    -0.06   0.02  -0.01
  61   1     0.00   0.00   0.00     0.01  -0.02   0.02     0.06  -0.09   0.05
  62   1     0.00   0.00   0.00     0.00   0.00   0.01     0.00  -0.01   0.04
  63   1     0.00   0.00  -0.01     0.03   0.01   0.03     0.20   0.04   0.20
  64   1     0.00   0.00   0.00    -0.01   0.07  -0.04    -0.07   0.40  -0.22
  65   1     0.00   0.01   0.00    -0.04  -0.03  -0.05    -0.13  -0.23  -0.26
  66   1     0.00   0.00   0.00     0.00   0.01   0.00     0.00   0.04   0.00
  67   1    -0.01   0.00   0.00     0.00   0.00   0.00    -0.05   0.02   0.02
  68   1     0.00   0.00   0.00     0.00   0.01   0.00     0.00   0.01   0.02
  69   1     0.00   0.00   0.00    -0.03  -0.05  -0.02    -0.13  -0.23  -0.08
  70   1     0.00   0.00   0.01    -0.05   0.00  -0.02    -0.27   0.01  -0.08
  71   1     0.00   0.00   0.00    -0.01  -0.01  -0.01    -0.02  -0.02  -0.03
  72   1     0.01  -0.07  -0.02    -0.01   0.07   0.02     0.00   0.09   0.01
  73   1     0.05   0.04   0.01    -0.05  -0.03  -0.01    -0.04   0.00  -0.02
  74   1    -0.06   0.02   0.00     0.06  -0.01   0.01     0.06   0.01   0.03
  75   1     0.03   0.02   0.03     0.01  -0.01   0.00     0.00  -0.01  -0.01
  76   1     0.01  -0.02   0.03     0.01  -0.02   0.00     0.00  -0.02  -0.02
  77   1    -0.02  -0.05   0.00     0.00   0.00   0.00     0.00  -0.01  -0.01
  78   1     0.02  -0.03   0.00     0.01   0.00   0.01     0.00   0.00   0.00
  79   1    -0.01   0.01   0.03     0.00   0.01   0.00     0.00   0.00  -0.01
  80   1     0.00   0.00   0.00    -0.03  -0.02  -0.03     0.00   0.03   0.03
  81   1     0.01   0.00  -0.01     0.00   0.02  -0.04    -0.01   0.01   0.04
  82   1     0.00   0.00   0.00     0.01   0.04  -0.02     0.00  -0.01   0.01
  83   1     0.00   0.00   0.00     0.00   0.00  -0.03     0.01   0.00   0.04
  84   1     0.00   0.00   0.00    -0.02   0.03   0.01     0.00   0.00  -0.01
  85   1     0.07   0.06  -0.02    -0.05  -0.04   0.02     0.04   0.01  -0.01
  86   1    -0.06   0.02  -0.02     0.04  -0.02   0.02     0.01   0.00   0.01
  87   1     0.04  -0.06   0.02    -0.03   0.04  -0.02     0.03  -0.02   0.03
  88   1    -0.28  -0.01   0.33     0.01  -0.01  -0.03    -0.07   0.00   0.10
  89   1    -0.20   0.08  -0.38     0.01   0.00   0.04    -0.05   0.02  -0.10
  90   1     0.37  -0.06   0.03    -0.04   0.01   0.00     0.11  -0.01   0.02
  91   1    -0.06   0.00  -0.01    -0.01   0.00  -0.01     0.04   0.00  -0.01
  92   1    -0.02  -0.01   0.04     0.00   0.00   0.01     0.01   0.02  -0.05
  93   1     0.00   0.02  -0.01     0.01   0.01  -0.01    -0.01   0.01   0.00
  94   1     0.34  -0.20  -0.01     0.02  -0.02   0.00    -0.07   0.05   0.00
  95   1    -0.28  -0.08   0.17    -0.02  -0.01   0.02     0.05   0.02  -0.04
  96   1     0.04   0.33  -0.21     0.00   0.03  -0.01    -0.01  -0.06   0.04
  97   1     0.02   0.01   0.01     0.17   0.08   0.07    -0.02   0.00  -0.01
  98   1     0.00  -0.02   0.00     0.00  -0.14   0.04    -0.01   0.00  -0.03
  99   1    -0.02   0.01   0.00    -0.09   0.11  -0.04    -0.02   0.00   0.00
 100   1     0.00  -0.01  -0.02    -0.08  -0.30  -0.42     0.01   0.09   0.15
 101   1     0.00   0.02  -0.01     0.07   0.46  -0.03    -0.03  -0.18   0.01
 102   1     0.00   0.00   0.01    -0.03  -0.26   0.45     0.02   0.08  -0.16
 103   1     0.01   0.02   0.00     0.00   0.04   0.01    -0.03  -0.07   0.01
 104   1     0.00   0.00  -0.01     0.00   0.00   0.00     0.01   0.02   0.05
 105   1     0.00   0.00   0.01     0.01   0.01   0.04     0.01   0.00  -0.06
 106   1     0.00   0.01   0.00    -0.03   0.15   0.01     0.04  -0.17   0.00
 107   1     0.00   0.00   0.01     0.08  -0.01   0.13    -0.08   0.02  -0.14
 108   1     0.00   0.00   0.01    -0.02  -0.07  -0.06     0.03   0.08   0.09
 109   1     0.02  -0.01   0.02    -0.02   0.01   0.04    -0.01   0.00   0.00
 110   1     0.00   0.00   0.00     0.01  -0.06   0.06    -0.02   0.01  -0.01
 111   1    -0.02  -0.01   0.03     0.02  -0.05  -0.01    -0.02   0.01   0.02
 112   1     0.00   0.00   0.00     0.01  -0.04   0.02     0.02  -0.03  -0.02
 113   1     0.00   0.00   0.00     0.04  -0.02   0.01     0.00  -0.03  -0.02
 114   1     0.00   0.00  -0.01    -0.01  -0.04   0.01    -0.02  -0.03  -0.02
                    49                     50                     51
                     A                      A                      A
 Frequencies --   224.5897               231.1589               233.2602
 Red. masses --     1.4038                 1.4038                 1.9012
 Frc consts  --     0.0417                 0.0442                 0.0609
 IR Inten    --     2.0748                 0.7488                 1.7904
 Atom AN      X      Y      Z        X      Y      Z        X      Y      Z
   1   8     0.01   0.01  -0.01    -0.01   0.00   0.01     0.00  -0.01  -0.01
   2  12    -0.04   0.02  -0.02     0.04  -0.01   0.01     0.02   0.04  -0.01
   3   8    -0.01  -0.01   0.00     0.00   0.02   0.00     0.00  -0.03   0.00
   4   6     0.00   0.00   0.00     0.00   0.00   0.00     0.01  -0.01   0.00
   5   7     0.00   0.01   0.01     0.00   0.00   0.01    -0.01   0.02  -0.01
   6   7    -0.03   0.00   0.03     0.03   0.00   0.00     0.02   0.00   0.00
   7   8     0.00   0.00   0.00     0.00   0.00   0.00     0.01  -0.01  -0.01
   8   6     0.00   0.00   0.02     0.00   0.02   0.00     0.00   0.02   0.01
   9   6     0.00   0.00   0.03     0.00   0.03  -0.02     0.01   0.00   0.01
  10   6    -0.02   0.01   0.03     0.02   0.01  -0.01     0.02   0.00   0.00
  11   8    -0.01   0.01   0.00     0.01  -0.01   0.00    -0.01   0.00   0.00
  12   6    -0.01   0.00   0.00     0.00   0.00   0.00    -0.01   0.00   0.00
  13   6     0.00   0.00   0.00     0.00   0.00   0.00     0.00  -0.01   0.00
  14   6     0.00   0.00   0.00     0.00   0.00   0.00     0.01   0.00   0.00
  15   8     0.00   0.00   0.00     0.00   0.01   0.00     0.00  -0.01   0.00
  16   6     0.00   0.00   0.00     0.00   0.00   0.00    -0.01   0.02   0.01
  17   8     0.02   0.00  -0.01    -0.03  -0.02  -0.01     0.03   0.04   0.01
  18   6     0.00  -0.01   0.00     0.00   0.01   0.00    -0.01  -0.02   0.00
  19   8     0.00  -0.01   0.00     0.01   0.02   0.00    -0.02  -0.02  -0.01
  20   8    -0.01  -0.01   0.00     0.03   0.01   0.00    -0.05  -0.01   0.01
  21   6     0.01   0.00  -0.01     0.00  -0.01   0.00    -0.01   0.01   0.01
  22   6     0.02   0.00  -0.01    -0.02  -0.02   0.00     0.02   0.03   0.01
  23   6     0.00  -0.01   0.00     0.01   0.02   0.00    -0.01  -0.02   0.01
  24   8     0.00   0.00  -0.01     0.01  -0.01   0.00    -0.05   0.00   0.01
  25   6     0.02   0.01  -0.03     0.00  -0.04   0.03    -0.01   0.08  -0.05
  26   6     0.01  -0.03   0.01    -0.02   0.05  -0.02     0.04  -0.07   0.03
  27   6     0.00   0.00   0.00    -0.02  -0.01  -0.01     0.02   0.02   0.01
  28   6     0.00   0.00   0.00     0.00   0.00   0.00     0.01   0.00   0.00
  29   6     0.00   0.02   0.02    -0.01  -0.01   0.00     0.00  -0.02  -0.02
  30   6    -0.01  -0.01   0.00     0.00   0.00   0.01     0.00   0.01   0.00
  31   6     0.01   0.02   0.01    -0.02  -0.01   0.00     0.01  -0.03  -0.03
  32   6     0.01  -0.02  -0.01    -0.02   0.01   0.00     0.02   0.02   0.03
  33   6     0.00  -0.04  -0.03    -0.01   0.02   0.00     0.01   0.06   0.07
  34   6     0.00  -0.02  -0.01    -0.01   0.01   0.00    -0.01   0.01   0.03
  35   6     0.00   0.02   0.01     0.00  -0.01   0.00    -0.02  -0.03  -0.02
  36   6     0.01   0.01   0.01    -0.02   0.00  -0.01     0.00  -0.03  -0.02
  37   6     0.01   0.01   0.01     0.00  -0.01   0.00    -0.01  -0.03  -0.01
  38   6     0.01  -0.02  -0.01    -0.02   0.00   0.01    -0.01   0.01   0.01
  39   6    -0.02  -0.01  -0.01    -0.01   0.00   0.01    -0.01   0.01   0.01
  40   6    -0.03  -0.01  -0.01     0.04   0.00  -0.01     0.02   0.00   0.00
  41   6     0.00   0.00  -0.01     0.03   0.00   0.00     0.01   0.00   0.00
  42   6     0.01  -0.01   0.00    -0.02   0.01   0.01    -0.01   0.01   0.00
  43   6     0.01  -0.01  -0.02    -0.01  -0.01   0.01    -0.01   0.00   0.01
  44   6     0.02  -0.01   0.00    -0.02   0.00   0.00    -0.01   0.00   0.00
  45   6     0.03  -0.01   0.02     0.00   0.00  -0.01    -0.06   0.01  -0.04
  46   6    -0.02   0.02  -0.01     0.00  -0.01   0.01     0.03  -0.04   0.02
  47   6     0.02   0.02  -0.02    -0.01  -0.01   0.01    -0.01  -0.03   0.02
  48   6    -0.01  -0.01   0.02     0.00   0.00   0.00     0.02   0.02  -0.06
  49   6     0.00  -0.01   0.00    -0.02  -0.01   0.00    -0.02  -0.01   0.00
  50   6     0.01  -0.02   0.02    -0.02   0.02  -0.06    -0.01   0.01  -0.03
  51   6     0.01  -0.01  -0.01    -0.01  -0.02  -0.01    -0.01  -0.02  -0.01
  52   6     0.01   0.02  -0.02     0.01  -0.01   0.04     0.01  -0.01   0.03
  53   6    -0.02   0.02   0.00     0.02   0.00   0.01    -0.01   0.02   0.01
  54   6    -0.03   0.07   0.02     0.03  -0.01   0.00     0.02  -0.03  -0.03
  55   1     0.01   0.00   0.03    -0.01   0.02  -0.03     0.00  -0.01   0.01
  56   1     0.00   0.00   0.00    -0.01   0.00  -0.01     0.01  -0.01   0.01
  57   1     0.00   0.00   0.00     0.00  -0.01   0.00     0.02   0.01   0.01
  58   1     0.01   0.00   0.01    -0.01  -0.01  -0.01     0.01   0.03   0.02
  59   1    -0.01   0.00   0.00     0.00   0.00   0.00    -0.01   0.02   0.01
  60   1     0.00   0.00   0.01     0.00   0.00  -0.01    -0.03   0.02   0.01
  61   1     0.02   0.00  -0.01     0.00  -0.02  -0.01     0.01   0.03   0.02
  62   1    -0.01  -0.01   0.00     0.01   0.02   0.00    -0.02  -0.04   0.02
  63   1     0.05   0.01   0.03    -0.06  -0.04  -0.06     0.11   0.08   0.13
  64   1     0.00   0.09  -0.06     0.03  -0.16   0.08    -0.07   0.32  -0.15
  65   1    -0.01  -0.05  -0.07     0.05   0.05   0.09    -0.11  -0.11  -0.18
  66   1     0.00  -0.05   0.01    -0.01   0.08  -0.01     0.02  -0.13   0.01
  67   1     0.03  -0.02   0.02    -0.05   0.03  -0.03     0.08  -0.05   0.05
  68   1     0.02  -0.04   0.02    -0.04   0.06  -0.03     0.07  -0.09   0.04
  69   1     0.00   0.04   0.02    -0.02  -0.12  -0.05     0.03   0.18   0.08
  70   1     0.03  -0.01  -0.01    -0.11   0.03   0.01     0.16  -0.04  -0.03
  71   1    -0.03  -0.01   0.00     0.07   0.03   0.00    -0.12  -0.05  -0.01
  72   1     0.00   0.01   0.00    -0.01   0.01   0.00     0.02  -0.05  -0.01
  73   1     0.00   0.00   0.00    -0.01  -0.01  -0.01     0.05   0.03   0.01
  74   1     0.00   0.00   0.00     0.00   0.00   0.00    -0.04   0.02   0.01
  75   1     0.01  -0.03  -0.02    -0.02   0.02   0.00     0.03   0.03   0.04
  76   1     0.00  -0.07  -0.04    -0.02   0.04   0.00     0.01   0.11   0.12
  77   1     0.00  -0.03  -0.02     0.00   0.01  -0.01    -0.02   0.02   0.05
  78   1     0.01   0.00   0.01    -0.02   0.01  -0.02     0.01  -0.03   0.00
  79   1     0.01   0.00   0.00     0.00   0.00   0.00    -0.01  -0.03   0.01
  80   1    -0.03  -0.01  -0.01    -0.02   0.00   0.00    -0.01   0.01   0.01
  81   1    -0.05   0.00  -0.01     0.07   0.00  -0.02     0.04   0.00   0.00
  82   1     0.00   0.01  -0.01     0.05   0.00  -0.01     0.02   0.00   0.00
  83   1     0.01  -0.01  -0.04     0.00  -0.01   0.01     0.00   0.00   0.02
  84   1     0.01  -0.01   0.00    -0.03   0.00   0.00    -0.01   0.00   0.00
  85   1     0.01  -0.04   0.01     0.17   0.16  -0.06    -0.22  -0.09   0.06
  86   1     0.07  -0.02   0.03    -0.22   0.04  -0.03     0.10  -0.02  -0.05
  87   1     0.02   0.03   0.02     0.08  -0.22   0.07    -0.14   0.20  -0.14
  88   1    -0.13  -0.01   0.12     0.06   0.01  -0.05     0.12  -0.01  -0.07
  89   1    -0.10   0.05  -0.18     0.04  -0.02   0.09     0.09  -0.07   0.15
  90   1     0.14   0.01   0.00    -0.07  -0.01   0.01    -0.09  -0.06   0.02
  91   1     0.04   0.00  -0.02    -0.01   0.00   0.02     0.06   0.01   0.07
  92   1     0.02   0.03  -0.03    -0.01  -0.01   0.01    -0.01  -0.03  -0.06
  93   1     0.02   0.02  -0.02    -0.01  -0.02   0.02    -0.07  -0.07   0.07
  94   1    -0.15   0.08   0.01     0.03  -0.02   0.00     0.15  -0.02  -0.02
  95   1     0.13   0.03  -0.05    -0.03  -0.01   0.01    -0.08  -0.01  -0.03
  96   1    -0.01  -0.16   0.11     0.00   0.03  -0.02     0.03   0.14  -0.15
  97   1    -0.03  -0.03  -0.02     0.20   0.10   0.08     0.09   0.05   0.03
  98   1     0.01   0.02  -0.01    -0.05  -0.27   0.00    -0.03  -0.14  -0.01
  99   1     0.03  -0.03   0.01    -0.22   0.14  -0.07    -0.12   0.07  -0.04
 100   1     0.00   0.01   0.08     0.03   0.10   0.07     0.01   0.06   0.05
 101   1     0.02  -0.09   0.03    -0.10  -0.14  -0.06    -0.05  -0.08  -0.03
 102   1     0.02   0.00  -0.02     0.01   0.09  -0.23     0.00   0.06  -0.13
 103   1    -0.06  -0.11   0.02    -0.06  -0.13   0.01    -0.03  -0.08   0.00
 104   1     0.04   0.06   0.08     0.00   0.04   0.07     0.00   0.02   0.03
 105   1     0.05   0.01  -0.12     0.00   0.00  -0.11    -0.01   0.00  -0.07
 106   1    -0.18   0.44  -0.04    -0.08   0.28   0.02    -0.04   0.14   0.01
 107   1     0.28  -0.08   0.33     0.20  -0.08   0.28     0.11  -0.05   0.15
 108   1    -0.09  -0.28  -0.34    -0.07  -0.22  -0.14    -0.04  -0.13  -0.07
 109   1    -0.01   0.01  -0.01     0.01   0.02   0.02    -0.01   0.03   0.01
 110   1    -0.03   0.03  -0.03     0.03  -0.01   0.04    -0.02   0.02   0.00
 111   1    -0.03   0.04   0.02     0.03  -0.02  -0.01    -0.01   0.03   0.01
 112   1    -0.05   0.08   0.02     0.05  -0.07   0.03     0.05  -0.06  -0.03
 113   1    -0.06   0.08   0.03     0.06   0.03   0.02     0.00   0.00  -0.02
 114   1     0.01   0.09   0.00     0.00  -0.03  -0.04    -0.01  -0.04  -0.07
                    52                     53                     54
                     A                      A                      A
 Frequencies --   235.8754               239.5378               240.3146
 Red. masses --     1.3489                 1.3274                 1.3387
 Frc consts  --     0.0442                 0.0449                 0.0455
 IR Inten    --     0.2883                 0.4114                 0.6139
 Atom AN      X      Y      Z        X      Y      Z        X      Y      Z
   1   8     0.00   0.00   0.01     0.01   0.04   0.01     0.01   0.03   0.01
   2  12     0.01  -0.02   0.01    -0.01   0.01   0.00     0.00   0.01  -0.01
   3   8     0.00   0.01   0.00     0.01  -0.02   0.00     0.01  -0.02   0.00
   4   6    -0.01   0.01   0.00    -0.02   0.04   0.00    -0.01   0.04   0.00
   5   7    -0.01   0.02  -0.02    -0.01   0.02  -0.01     0.01  -0.01   0.02
   6   7     0.00   0.01   0.00     0.00  -0.01   0.01     0.00   0.00  -0.01
   7   8    -0.01   0.01   0.00    -0.02   0.04   0.00    -0.01   0.04   0.00
   8   6    -0.01   0.00  -0.01     0.00   0.01   0.01     0.00   0.00   0.00
   9   6    -0.01  -0.01   0.01     0.01   0.00   0.01     0.00   0.00  -0.01
  10   6    -0.01  -0.01   0.01     0.01   0.00   0.01     0.00   0.00  -0.01
  11   8     0.01   0.00   0.00     0.02   0.00   0.00     0.01   0.00   0.00
  12   6     0.00   0.00   0.00     0.01  -0.01  -0.01     0.01  -0.01  -0.01
  13   6     0.00   0.00   0.00     0.01  -0.02   0.00     0.01  -0.02   0.00
  14   6     0.00   0.00   0.00    -0.01   0.01   0.00    -0.01   0.01   0.00
  15   8    -0.01   0.00   0.00    -0.01  -0.01   0.00    -0.01  -0.02  -0.01
  16   6     0.00  -0.01   0.00     0.03  -0.03   0.00     0.03  -0.03   0.00
  17   8    -0.02  -0.02   0.00     0.01   0.01   0.00     0.01   0.01   0.00
  18   6     0.00   0.01   0.00     0.00  -0.01   0.00     0.00  -0.01   0.00
  19   8     0.01   0.01   0.00    -0.01  -0.02   0.00    -0.02  -0.02  -0.01
  20   8     0.03   0.00  -0.01    -0.02  -0.01   0.00    -0.02   0.00   0.01
  21   6     0.00  -0.01  -0.01     0.00   0.00   0.00     0.00   0.00   0.00
  22   6    -0.02  -0.02   0.00     0.00   0.01   0.00     0.01   0.01   0.00
  23   6     0.01   0.01  -0.01     0.00  -0.01   0.00    -0.01  -0.01   0.00
  24   8     0.03  -0.01   0.00     0.00   0.00   0.00    -0.02   0.01   0.00
  25   6     0.00  -0.04   0.03     0.00   0.02  -0.01     0.00   0.03  -0.02
  26   6    -0.02   0.04  -0.01     0.01  -0.02   0.00     0.02  -0.03   0.01
  27   6    -0.02  -0.01   0.00     0.00   0.01   0.02     0.00   0.01   0.02
  28   6     0.00   0.00   0.00    -0.01  -0.02  -0.01     0.00  -0.01  -0.01
  29   6     0.00   0.00  -0.01    -0.01   0.00   0.00     0.01  -0.01   0.00
  30   6     0.00   0.01   0.00     0.01  -0.01   0.00    -0.01   0.00   0.00
  31   6     0.03  -0.01  -0.01     0.00   0.00   0.00     0.00  -0.01   0.00
  32   6     0.03  -0.01   0.01     0.00  -0.01   0.01    -0.01   0.02  -0.01
  33   6     0.02   0.00   0.04    -0.01  -0.01   0.02     0.01   0.03  -0.02
  34   6    -0.01   0.00   0.03    -0.02  -0.01   0.02     0.02   0.01  -0.02
  35   6    -0.02   0.00   0.00    -0.02   0.00   0.01     0.03   0.00  -0.01
  36   6     0.02  -0.01  -0.01     0.00   0.00  -0.01    -0.01  -0.01   0.00
  37   6    -0.01  -0.01  -0.01    -0.01  -0.01   0.01     0.01   0.00  -0.01
  38   6    -0.01   0.02   0.01     0.01  -0.02  -0.01    -0.01   0.01   0.01
  39   6     0.01   0.01   0.01    -0.01  -0.01  -0.01     0.01   0.00   0.00
  40   6     0.03   0.01   0.01    -0.04  -0.01  -0.01     0.03   0.00   0.00
  41   6     0.01   0.01   0.01    -0.01  -0.01  -0.01     0.00   0.00   0.00
  42   6    -0.01   0.02   0.00     0.02  -0.01   0.00    -0.02   0.00   0.00
  43   6     0.00   0.00   0.01     0.01   0.00  -0.02    -0.01   0.00   0.01
  44   6    -0.01   0.01  -0.01     0.02  -0.01   0.00    -0.01   0.01   0.00
  45   6    -0.03   0.01  -0.01    -0.01   0.01  -0.01     0.00  -0.02   0.01
  46   6     0.01  -0.01   0.00     0.00   0.00  -0.01     0.01  -0.02   0.02
  47   6     0.02   0.00  -0.02     0.02   0.00   0.00    -0.03  -0.01   0.01
  48   6     0.02   0.01  -0.02     0.01  -0.01   0.00    -0.01   0.01  -0.01
  49   6    -0.01  -0.01  -0.01     0.00   0.01   0.00     0.00  -0.01   0.01
  50   6    -0.01   0.03  -0.01     0.01  -0.04   0.01    -0.01   0.04   0.00
  51   6    -0.01  -0.02   0.00     0.01   0.02   0.01    -0.01  -0.01  -0.01
  52   6     0.00  -0.01   0.02     0.00   0.01  -0.03     0.00  -0.01   0.02
  53   6    -0.03   0.00   0.01     0.01   0.02   0.00    -0.01   0.00   0.01
  54   6    -0.01  -0.03  -0.01     0.00   0.04   0.01     0.00  -0.02  -0.01
  55   1    -0.01  -0.01   0.02     0.01   0.00   0.01    -0.01   0.00  -0.02
  56   1    -0.01   0.00   0.00     0.00  -0.04   0.01     0.00  -0.04   0.01
  57   1    -0.01   0.00   0.00    -0.03   0.00  -0.01    -0.02   0.01  -0.01
  58   1    -0.01  -0.02  -0.01     0.00  -0.06  -0.01     0.01  -0.06  -0.01
  59   1     0.01  -0.01  -0.01     0.01  -0.05  -0.01     0.00  -0.05  -0.01
  60   1     0.02  -0.01   0.00     0.08  -0.04   0.01     0.07  -0.03   0.01
  61   1    -0.01  -0.01  -0.01     0.00   0.01   0.00     0.01   0.01   0.01
  62   1     0.01   0.02  -0.01     0.00  -0.01   0.00    -0.01  -0.01   0.01
  63   1    -0.07  -0.03  -0.08     0.01   0.02  -0.01     0.07   0.02   0.09
  64   1     0.03  -0.17   0.09     0.00   0.03  -0.02    -0.03   0.15  -0.06
  65   1     0.05   0.08   0.11    -0.02   0.01  -0.02    -0.03  -0.08  -0.09
  66   1    -0.01   0.08  -0.02     0.00  -0.04   0.02     0.01  -0.05  -0.02
  67   1    -0.06   0.04  -0.02     0.03  -0.02   0.00     0.02  -0.01   0.03
  68   1    -0.04   0.04  -0.02     0.01  -0.02   0.00     0.05  -0.05   0.02
  69   1    -0.02  -0.19  -0.09     0.00  -0.31  -0.15     0.00  -0.26  -0.12
  70   1    -0.18   0.06   0.06    -0.29   0.14   0.19    -0.24   0.12   0.17
  71   1     0.14   0.08   0.01     0.31   0.21   0.03     0.26   0.19   0.02
  72   1    -0.01   0.02   0.00    -0.03   0.13   0.02    -0.02   0.12   0.01
  73   1    -0.03  -0.03   0.00    -0.13  -0.14   0.00    -0.10  -0.12   0.00
  74   1     0.03  -0.02  -0.01     0.15  -0.08  -0.05     0.15  -0.07  -0.04
  75   1     0.05  -0.01   0.02     0.01  -0.01   0.01    -0.02   0.02  -0.01
  76   1     0.02   0.00   0.06    -0.01  -0.01   0.03     0.00   0.04  -0.02
  77   1    -0.03  -0.01   0.04    -0.02  -0.01   0.02     0.03   0.02  -0.02
  78   1     0.03  -0.02   0.01     0.00   0.00   0.00    -0.01   0.00   0.00
  79   1    -0.01  -0.02   0.01    -0.01  -0.02   0.03     0.01   0.02  -0.03
  80   1     0.01   0.01   0.01    -0.02  -0.01  -0.01     0.02   0.00   0.00
  81   1     0.04   0.01   0.00    -0.06   0.00  -0.01     0.05   0.00  -0.01
  82   1     0.02   0.00   0.00    -0.01   0.01  -0.01     0.00  -0.01   0.00
  83   1     0.00   0.00   0.03     0.00   0.00  -0.03    -0.01   0.00   0.01
  84   1    -0.01   0.02  -0.02     0.01  -0.01   0.01    -0.01   0.01  -0.01
  85   1    -0.32  -0.26   0.11    -0.07  -0.04   0.02     0.13   0.11  -0.04
  86   1     0.35  -0.06   0.01     0.06   0.00  -0.01    -0.16   0.02   0.00
  87   1    -0.17   0.39  -0.16    -0.04   0.09  -0.04     0.06  -0.18   0.06
  88   1    -0.02  -0.01   0.04    -0.01   0.00   0.00     0.05   0.00  -0.02
  89   1    -0.01   0.01  -0.04    -0.01   0.01  -0.02     0.04  -0.03   0.07
  90   1     0.06  -0.02   0.00     0.01   0.01  -0.01    -0.04  -0.02   0.02
  91   1     0.11   0.01   0.03     0.14   0.01   0.06    -0.17  -0.01  -0.05
  92   1     0.02   0.03  -0.11     0.02   0.03  -0.13    -0.03  -0.05   0.15
  93   1    -0.05  -0.02   0.03    -0.07  -0.03   0.06     0.06   0.02  -0.05
  94   1     0.03   0.02  -0.01     0.00   0.01   0.01     0.02  -0.02  -0.01
  95   1     0.02   0.01  -0.04     0.04   0.00  -0.01    -0.06  -0.01   0.01
  96   1     0.02   0.01  -0.04     0.01  -0.03   0.00    -0.01   0.06  -0.02
  97   1    -0.17  -0.10  -0.08     0.25   0.14   0.11    -0.25  -0.14  -0.10
  98   1     0.01   0.17   0.00    -0.03  -0.28  -0.02     0.03   0.28   0.03
  99   1     0.13  -0.13   0.07    -0.22   0.18  -0.10     0.23  -0.19   0.11
 100   1     0.01   0.03  -0.02    -0.01  -0.01   0.07     0.01   0.00  -0.06
 101   1    -0.01   0.04  -0.02     0.00  -0.13   0.01     0.02   0.13   0.00
 102   1    -0.02   0.03  -0.01     0.04  -0.02  -0.06    -0.04   0.02   0.08
 103   1    -0.05  -0.12   0.01     0.07   0.15  -0.01    -0.02  -0.06  -0.01
 104   1     0.01   0.04   0.07    -0.01  -0.06  -0.07    -0.01   0.01   0.01
 105   1     0.01   0.00  -0.11    -0.01  -0.01   0.15    -0.01   0.00  -0.06
 106   1    -0.02   0.08   0.02     0.02  -0.07  -0.02    -0.02   0.08   0.02
 107   1     0.07  -0.03   0.09    -0.06   0.03  -0.09     0.06  -0.03   0.09
 108   1    -0.02  -0.08  -0.03     0.03   0.08   0.02    -0.03  -0.07  -0.02
 109   1    -0.03   0.01   0.01     0.02   0.01  -0.01    -0.02   0.01   0.01
 110   1    -0.03  -0.01   0.00     0.02   0.02   0.00    -0.02  -0.01   0.00
 111   1    -0.03   0.00   0.01     0.01   0.02   0.00    -0.01   0.01   0.01
 112   1     0.01  -0.05  -0.01    -0.02   0.06   0.00     0.02  -0.04   0.00
 113   1    -0.02  -0.01   0.00    -0.01   0.02   0.01     0.01  -0.01   0.00
 114   1    -0.04  -0.03  -0.04     0.03   0.05   0.03    -0.01  -0.03  -0.02
                    55                     56                     57
                     A                      A                      A
 Frequencies --   242.8798               246.1642               250.3950
 Red. masses --     1.4194                 2.0920                 1.5224
 Frc consts  --     0.0493                 0.0747                 0.0562
 IR Inten    --     2.0581                 3.8971                 0.2928
 Atom AN      X      Y      Z        X      Y      Z        X      Y      Z
   1   8     0.00   0.01   0.01     0.00   0.02   0.04    -0.01  -0.03   0.02
   2  12    -0.02  -0.01   0.00     0.03  -0.04   0.02     0.01  -0.03   0.02
   3   8     0.01  -0.01   0.00     0.01   0.00   0.00     0.01   0.01  -0.02
   4   6    -0.01   0.01   0.00    -0.01   0.03   0.01     0.01  -0.02   0.01
   5   7     0.01  -0.03   0.00    -0.01  -0.03  -0.03     0.00  -0.02   0.02
   6   7    -0.03   0.03  -0.04     0.03  -0.01  -0.02    -0.01   0.01   0.01
   7   8    -0.01   0.01   0.00    -0.01   0.03   0.03     0.01  -0.02   0.02
   8   6    -0.01  -0.03  -0.01     0.01  -0.02  -0.03    -0.01   0.00   0.00
   9   6    -0.01  -0.02   0.01     0.01   0.00  -0.02    -0.02   0.01  -0.01
  10   6    -0.03  -0.01  -0.01     0.02  -0.01  -0.02    -0.02   0.01   0.00
  11   8     0.01   0.00   0.00     0.04  -0.02  -0.01     0.00   0.00   0.01
  12   6     0.01   0.00   0.00     0.02  -0.01  -0.01     0.01   0.02   0.01
  13   6     0.01  -0.01   0.00     0.02   0.00   0.00     0.01   0.02   0.00
  14   6     0.00   0.00   0.00    -0.01   0.00  -0.01     0.01  -0.01   0.00
  15   8     0.00   0.00   0.00     0.01   0.00  -0.01     0.02   0.03   0.00
  16   6     0.01  -0.01   0.00     0.03  -0.03  -0.01    -0.01   0.02  -0.01
  17   8     0.01   0.01   0.01     0.01   0.03   0.01     0.00   0.01   0.00
  18   6     0.00   0.00   0.00    -0.01   0.02   0.00     0.00   0.01  -0.02
  19   8    -0.02  -0.01   0.00    -0.03   0.01   0.00    -0.01   0.00   0.02
  20   8    -0.02   0.00   0.00    -0.04   0.01   0.00    -0.03   0.00  -0.05
  21   6     0.00   0.00   0.00    -0.02   0.01   0.01    -0.02   0.00  -0.02
  22   6     0.00   0.01   0.00    -0.01   0.02   0.01    -0.02   0.00   0.00
  23   6     0.00   0.00   0.00    -0.01   0.02   0.00     0.00   0.02  -0.04
  24   8     0.01   0.00   0.01    -0.01  -0.01   0.01     0.02  -0.01  -0.01
  25   6    -0.01   0.01   0.00    -0.01   0.00   0.01     0.01  -0.06   0.04
  26   6     0.01  -0.01   0.00     0.00   0.00  -0.01    -0.04   0.04  -0.01
  27   6     0.01   0.01   0.01     0.03   0.02   0.01     0.06   0.03   0.00
  28   6    -0.01  -0.01   0.00    -0.05  -0.03  -0.01    -0.04  -0.02   0.00
  29   6     0.01   0.00   0.00    -0.02   0.00   0.00     0.00  -0.01   0.01
  30   6     0.01   0.02  -0.01     0.00   0.00   0.00     0.01   0.01   0.01
  31   6     0.01   0.00   0.01    -0.02   0.03   0.01    -0.01   0.00   0.00
  32   6     0.01   0.00  -0.01    -0.02  -0.02   0.00    -0.02   0.01  -0.01
  33   6     0.02   0.00  -0.02    -0.04  -0.06  -0.01     0.00   0.03  -0.01
  34   6     0.03   0.00  -0.02    -0.04  -0.02   0.01     0.01   0.02  -0.01
  35   6     0.03   0.01  -0.01    -0.03   0.01   0.03     0.01   0.00   0.00
  36   6     0.01   0.00   0.01    -0.01   0.04  -0.01     0.00   0.00  -0.01
  37   6     0.01   0.02  -0.01    -0.01   0.00   0.04     0.01   0.00   0.00
  38   6     0.02   0.04   0.02    -0.01   0.01   0.01     0.01   0.00   0.00
  39   6     0.00   0.03   0.05     0.00   0.01   0.01    -0.01   0.00  -0.01
  40   6    -0.01   0.00   0.06     0.03   0.00   0.00    -0.01   0.01  -0.01
  41   6     0.01  -0.02   0.02     0.01   0.00   0.00     0.00   0.02   0.00
  42   6     0.01  -0.01  -0.01    -0.01   0.01   0.00     0.01   0.01   0.00
  43   6     0.02   0.02   0.02    -0.01   0.00   0.01     0.01  -0.01   0.00
  44   6     0.01   0.00   0.00    -0.02   0.01   0.00     0.00   0.01  -0.01
  45   6     0.01  -0.01   0.01     0.02   0.04  -0.01     0.02   0.01  -0.01
  46   6     0.01   0.00   0.00    -0.03   0.06  -0.07     0.03   0.00  -0.01
  47   6    -0.03   0.01  -0.01     0.04   0.02   0.02    -0.01  -0.01   0.02
  48   6    -0.01   0.01   0.00     0.00  -0.04   0.07     0.01   0.00   0.00
  49   6     0.01   0.05   0.00    -0.01   0.00   0.00    -0.01  -0.01  -0.01
  50   6     0.01  -0.01   0.01    -0.02   0.03  -0.03     0.00  -0.01  -0.01
  51   6     0.00  -0.02  -0.02    -0.01  -0.01   0.00     0.00  -0.01   0.03
  52   6    -0.01   0.00  -0.03     0.00   0.00   0.03     0.01  -0.01   0.00
  53   6    -0.02  -0.03  -0.02     0.09  -0.05  -0.05    -0.01  -0.01   0.01
  54   6    -0.03  -0.04  -0.02     0.03  -0.06  -0.03    -0.01   0.00   0.02
  55   1     0.00  -0.02   0.01     0.01   0.00  -0.02    -0.02   0.02  -0.02
  56   1     0.01  -0.01   0.01     0.01  -0.01   0.00     0.02   0.03   0.00
  57   1    -0.01   0.00   0.00    -0.03  -0.02  -0.01     0.02  -0.01   0.01
  58   1     0.00  -0.02  -0.01    -0.02  -0.07  -0.04    -0.01   0.03  -0.02
  59   1     0.01  -0.02   0.00     0.04  -0.05  -0.02     0.03   0.04   0.00
  60   1     0.03  -0.01   0.00     0.09  -0.04  -0.01    -0.03   0.03  -0.03
  61   1    -0.01   0.01   0.00    -0.02   0.02   0.01    -0.01   0.01  -0.01
  62   1    -0.01   0.00   0.00    -0.02   0.01   0.00     0.02   0.03  -0.04
  63   1    -0.03   0.02  -0.06     0.08  -0.02   0.23     0.12  -0.12   0.39
  64   1     0.01  -0.04   0.01    -0.08   0.22  -0.06    -0.11   0.24  -0.05
  65   1    -0.01   0.06   0.03    -0.03  -0.19  -0.13     0.04  -0.36  -0.18
  66   1     0.00  -0.03   0.01     0.00   0.00  -0.02    -0.03   0.07   0.02
  67   1     0.03  -0.02  -0.02     0.00   0.00  -0.02    -0.04   0.03  -0.02
  68   1     0.01   0.01  -0.01     0.01   0.01  -0.01    -0.09   0.04  -0.03
  69   1     0.01   0.01   0.00     0.04   0.20   0.08     0.06  -0.02  -0.09
  70   1     0.01   0.01   0.03     0.19  -0.04  -0.03     0.02   0.04   0.05
  71   1     0.02   0.02   0.00    -0.11  -0.05  -0.01     0.15   0.06   0.01
  72   1    -0.01   0.04   0.01    -0.09   0.12   0.05    -0.06  -0.07   0.04
  73   1    -0.04  -0.04   0.00    -0.19  -0.15  -0.03    -0.04  -0.01  -0.02
  74   1     0.04  -0.03  -0.01     0.11  -0.09  -0.07    -0.09  -0.01  -0.03
  75   1     0.00   0.01  -0.01    -0.01  -0.03   0.00    -0.03   0.02  -0.01
  76   1     0.02  -0.01  -0.04    -0.04  -0.10  -0.03    -0.01   0.04  -0.02
  77   1     0.03   0.00  -0.02    -0.03  -0.02   0.01     0.02   0.02  -0.02
  78   1     0.01   0.00   0.01    -0.02   0.05  -0.02    -0.01   0.01  -0.02
  79   1     0.01   0.03  -0.03    -0.01  -0.02   0.07     0.01   0.01  -0.02
  80   1     0.00   0.05   0.07     0.00   0.01   0.01    -0.02   0.00  -0.01
  81   1    -0.02  -0.01   0.09     0.05   0.00   0.00    -0.02   0.02  -0.01
  82   1     0.01  -0.04   0.02     0.02  -0.01   0.00     0.01   0.02   0.00
  83   1     0.02   0.01   0.06    -0.01   0.00   0.02     0.01  -0.01   0.00
  84   1     0.00  -0.01   0.02    -0.01   0.01  -0.01     0.00   0.01  -0.02
  85   1    -0.04  -0.07   0.02     0.02   0.03  -0.02    -0.08  -0.09   0.01
  86   1     0.09  -0.03   0.03     0.04   0.04  -0.01     0.16  -0.02  -0.01
  87   1    -0.01   0.06  -0.01     0.02   0.06   0.02    -0.02   0.15  -0.04
  88   1    -0.01   0.00   0.02    -0.09   0.01  -0.03     0.01   0.02   0.04
  89   1    -0.01   0.00  -0.02    -0.07   0.07  -0.16     0.01  -0.02  -0.07
  90   1     0.03   0.00   0.00     0.04   0.10  -0.08     0.10  -0.01   0.00
  91   1    -0.20  -0.02  -0.10     0.28   0.04   0.12    -0.27  -0.04  -0.10
  92   1    -0.02  -0.03   0.18     0.04   0.07  -0.23     0.00  -0.04   0.32
  93   1     0.12   0.06  -0.11    -0.14  -0.05   0.14     0.22   0.05  -0.12
  94   1    -0.02   0.00  -0.01    -0.05  -0.04   0.05    -0.02   0.01   0.00
  95   1    -0.02   0.01   0.00     0.06  -0.03   0.09     0.03   0.00  -0.01
  96   1    -0.01   0.02   0.01     0.00  -0.11   0.09     0.00  -0.03   0.01
  97   1     0.21   0.16   0.11    -0.06  -0.02  -0.02     0.04   0.02   0.00
  98   1    -0.01  -0.18   0.00    -0.01   0.06   0.00    -0.02  -0.08  -0.03
  99   1    -0.16   0.20  -0.10     0.03  -0.03   0.02    -0.08   0.03  -0.02
 100   1     0.00  -0.03  -0.01     0.01   0.02  -0.05     0.00   0.01   0.03
 101   1     0.01   0.00   0.00    -0.03   0.06  -0.03    -0.02  -0.07  -0.01
 102   1     0.01  -0.03   0.02    -0.03   0.03  -0.02     0.02   0.00  -0.07
 103   1    -0.20  -0.40   0.06    -0.07  -0.12   0.02     0.06   0.12   0.00
 104   1     0.08   0.23   0.28     0.01   0.07   0.08    -0.01  -0.10  -0.06
 105   1     0.11   0.06  -0.42     0.02   0.01  -0.12    -0.04  -0.03   0.16
 106   1    -0.02  -0.10  -0.01     0.02   0.00   0.03    -0.01   0.01   0.00
 107   1    -0.05   0.02  -0.12     0.01   0.00   0.04     0.03  -0.02   0.02
 108   1     0.02   0.06   0.01     0.00  -0.01   0.05     0.00  -0.04  -0.02
 109   1    -0.02  -0.04  -0.02     0.11  -0.07  -0.06    -0.02   0.00   0.02
 110   1    -0.03  -0.02  -0.03     0.15   0.00  -0.01    -0.01  -0.02   0.02
 111   1    -0.03  -0.01   0.00     0.11  -0.10  -0.08    -0.01  -0.02   0.01
 112   1    -0.01  -0.05  -0.03     0.07  -0.09  -0.02    -0.02   0.00   0.03
 113   1    -0.03  -0.05  -0.02     0.05  -0.04  -0.02     0.00   0.01   0.02
 114   1    -0.05  -0.05  -0.02    -0.02  -0.08  -0.05    -0.02   0.00   0.02
                    58                     59                     60
                     A                      A                      A
 Frequencies --   252.9310               254.1706               257.2660
 Red. masses --     2.2204                 1.6736                 2.3676
 Frc consts  --     0.0837                 0.0637                 0.0923
 IR Inten    --     3.6430                 2.6423                 4.9191
 Atom AN      X      Y      Z        X      Y      Z        X      Y      Z
   1   8    -0.01   0.05   0.06     0.00   0.03  -0.01     0.00   0.02   0.01
   2  12     0.00  -0.02   0.02    -0.02   0.00  -0.02     0.03   0.02   0.00
   3   8    -0.01   0.03   0.03    -0.01   0.00   0.02    -0.01   0.01   0.02
   4   6    -0.03   0.06   0.02    -0.02   0.03   0.00    -0.01   0.03   0.00
   5   7     0.00   0.01   0.01     0.00  -0.03   0.01    -0.01   0.03   0.02
   6   7    -0.01   0.00   0.02     0.01   0.01   0.01     0.01  -0.02   0.01
   7   8    -0.03   0.07   0.04    -0.01   0.03  -0.01    -0.01   0.03   0.01
   8   6    -0.01   0.01   0.01    -0.01  -0.02  -0.01     0.01   0.04   0.03
   9   6    -0.01   0.00   0.01    -0.02   0.01  -0.01     0.02   0.02   0.01
  10   6    -0.02   0.01   0.01    -0.01   0.00   0.00     0.03   0.01   0.00
  11   8     0.08  -0.05  -0.03     0.02  -0.01  -0.01     0.03  -0.02  -0.02
  12   6     0.03  -0.02  -0.03     0.00  -0.02  -0.01     0.01  -0.02  -0.02
  13   6    -0.01  -0.01  -0.01    -0.01  -0.02   0.00    -0.01  -0.01   0.00
  14   6    -0.01   0.00  -0.02    -0.01   0.00  -0.01    -0.01   0.00  -0.01
  15   8     0.01  -0.01  -0.03    -0.01  -0.02  -0.01     0.00  -0.01  -0.02
  16   6     0.04  -0.07  -0.02     0.01  -0.03   0.00     0.01  -0.03   0.00
  17   8    -0.01  -0.03   0.00     0.01   0.00   0.00    -0.02  -0.03  -0.01
  18   6    -0.01   0.03   0.02     0.00   0.00   0.02     0.00   0.00   0.02
  19   8     0.00   0.04   0.00     0.00   0.01  -0.01     0.01   0.02   0.00
  20   8     0.02  -0.01  -0.01     0.01   0.00   0.03     0.04  -0.01   0.00
  21   6     0.01  -0.01  -0.02     0.01   0.00   0.02     0.00  -0.01  -0.01
  22   6     0.01  -0.02  -0.01     0.01   0.01   0.01     0.00  -0.02  -0.01
  23   6    -0.01   0.01   0.00     0.00  -0.01   0.03     0.00   0.00   0.01
  24   8     0.02  -0.01  -0.02    -0.02   0.00   0.01    -0.02  -0.01  -0.02
  25   6     0.02  -0.03   0.00    -0.01   0.04  -0.03     0.00   0.00   0.00
  26   6    -0.01   0.02  -0.02     0.03  -0.03   0.01     0.00   0.01   0.00
  27   6    -0.02  -0.01  -0.01    -0.04  -0.02   0.00    -0.04  -0.02   0.00
  28   6    -0.06  -0.04  -0.03     0.02   0.01  -0.01     0.01   0.00  -0.01
  29   6     0.01   0.00   0.00     0.00  -0.01   0.00    -0.02   0.00   0.00
  30   6     0.00   0.00   0.00     0.02   0.02   0.00    -0.02  -0.02   0.00
  31   6     0.02  -0.02   0.00    -0.01   0.00   0.00    -0.03  -0.01  -0.02
  32   6     0.02   0.01   0.01    -0.02   0.01  -0.01    -0.03   0.02   0.01
  33   6     0.03   0.03   0.02    -0.01   0.01  -0.03    -0.03   0.04   0.03
  34   6     0.02   0.01   0.00     0.01   0.01  -0.01    -0.02   0.01   0.01
  35   6     0.01   0.00  -0.02     0.02   0.00   0.00    -0.02  -0.02   0.01
  36   6     0.01  -0.03   0.02     0.00   0.01  -0.01    -0.02   0.01  -0.05
  37   6    -0.01   0.01  -0.04     0.02   0.00   0.01     0.01  -0.04   0.03
  38   6     0.01   0.00  -0.01     0.01   0.01   0.01    -0.03  -0.03  -0.02
  39   6     0.00   0.00  -0.01    -0.01   0.02   0.00     0.01  -0.04  -0.02
  40   6    -0.02   0.01  -0.01    -0.02   0.04   0.00     0.02  -0.04  -0.02
  41   6     0.00   0.01   0.00     0.01   0.04   0.00    -0.01  -0.03   0.00
  42   6     0.01   0.01   0.00     0.02   0.04   0.00    -0.03  -0.03   0.01
  43   6     0.01   0.00  -0.01     0.01  -0.02   0.03    -0.02   0.01  -0.04
  44   6     0.01   0.00   0.00     0.00   0.02  -0.03    -0.01  -0.03   0.03
  45   6    -0.01  -0.06   0.03     0.02   0.02  -0.01    -0.02   0.08  -0.08
  46   6     0.02  -0.05   0.07     0.01   0.01  -0.03     0.02   0.01  -0.06
  47   6    -0.03   0.01  -0.07     0.00  -0.01   0.04     0.02  -0.05   0.11
  48   6    -0.01   0.06  -0.06     0.00  -0.02   0.03     0.04  -0.06   0.03
  49   6     0.00  -0.01   0.00    -0.04   0.00  -0.04     0.04  -0.03   0.06
  50   6     0.01  -0.02   0.01     0.00  -0.01  -0.04     0.00   0.00   0.04
  51   6     0.01   0.01   0.01    -0.01  -0.03   0.07     0.00   0.04  -0.09
  52   6     0.00   0.00  -0.01     0.03  -0.04   0.04    -0.03   0.05  -0.03
  53   6    -0.06   0.02   0.03     0.02  -0.03  -0.02     0.00   0.05   0.03
  54   6    -0.02   0.03   0.03    -0.01  -0.05  -0.02     0.04   0.05   0.02
  55   1    -0.01   0.00   0.01    -0.01   0.02  -0.02    -0.01   0.00   0.00
  56   1    -0.04  -0.02  -0.01    -0.02  -0.03   0.00    -0.03  -0.02   0.00
  57   1    -0.05  -0.04  -0.02    -0.03  -0.01  -0.01    -0.02  -0.01  -0.01
  58   1    -0.03  -0.14  -0.07     0.00  -0.06   0.00    -0.01  -0.06  -0.01
  59   1     0.05  -0.10  -0.04    -0.02  -0.06  -0.01     0.00  -0.05  -0.01
  60   1     0.16  -0.08  -0.01     0.06  -0.04   0.02     0.06  -0.04   0.01
  61   1     0.02  -0.02  -0.02     0.01   0.00   0.01     0.01  -0.03  -0.02
  62   1    -0.03   0.03  -0.01    -0.02  -0.02   0.03    -0.01   0.01   0.00
  63   1     0.04  -0.05   0.09    -0.07   0.08  -0.25     0.00   0.01  -0.03
  64   1    -0.01   0.03  -0.01     0.07  -0.14   0.02     0.00  -0.03   0.02
  65   1     0.03  -0.10  -0.05    -0.03   0.22   0.11     0.01   0.02   0.02
  66   1    -0.01   0.04  -0.05     0.01  -0.06   0.00     0.01   0.02  -0.05
  67   1    -0.05   0.03  -0.01     0.04  -0.03   0.01    -0.05   0.03   0.02
  68   1     0.01   0.02  -0.01     0.06  -0.02   0.01     0.03  -0.02   0.02
  69   1    -0.01   0.30   0.18    -0.04   0.07   0.09    -0.04   0.07   0.09
  70   1     0.26  -0.12  -0.14     0.04  -0.06  -0.06     0.05  -0.06  -0.07
  71   1    -0.32  -0.17  -0.03    -0.16  -0.08  -0.01    -0.16  -0.09  -0.02
  72   1    -0.11   0.19   0.05     0.02   0.10  -0.02     0.00   0.09  -0.01
  73   1    -0.26  -0.21  -0.06    -0.03  -0.04   0.00    -0.05  -0.05  -0.01
  74   1     0.17  -0.12  -0.09     0.11  -0.02   0.01     0.09  -0.02  -0.01
  75   1     0.02   0.02   0.01    -0.03   0.01  -0.01    -0.03   0.02   0.01
  76   1     0.03   0.03   0.03    -0.01   0.01  -0.04    -0.03   0.07   0.04
  77   1     0.01   0.00   0.01     0.02   0.02  -0.02    -0.01   0.02   0.01
  78   1     0.02  -0.04   0.03    -0.01   0.02  -0.02    -0.03   0.02  -0.06
  79   1    -0.01   0.02  -0.04     0.02   0.01   0.00     0.01  -0.04   0.04
  80   1     0.00   0.00  -0.01    -0.03   0.02  -0.01     0.03  -0.03  -0.01
  81   1    -0.03   0.01  -0.01    -0.04   0.05  -0.01     0.05  -0.05  -0.03
  82   1    -0.01   0.02   0.00     0.00   0.04   0.00    -0.01  -0.03   0.00
  83   1     0.00   0.00  -0.01     0.01  -0.02   0.04    -0.02   0.01  -0.06
  84   1     0.01   0.01  -0.01     0.00   0.04  -0.05     0.00  -0.04   0.05
  85   1     0.01  -0.04   0.02    -0.06  -0.07   0.01    -0.10   0.04  -0.01
  86   1    -0.05  -0.05   0.06     0.15  -0.01  -0.01     0.08   0.06  -0.14
  87   1     0.00  -0.11   0.02    -0.01   0.15  -0.03    -0.06   0.21  -0.10
  88   1     0.06  -0.01   0.06    -0.02   0.01   0.01     0.01   0.02  -0.04
  89   1     0.05  -0.04   0.14    -0.01   0.00  -0.09     0.01  -0.02  -0.10
  90   1    -0.03  -0.09   0.08     0.08   0.02  -0.03     0.06   0.02  -0.06
  91   1     0.02   0.00  -0.05    -0.24  -0.04  -0.08    -0.26  -0.05  -0.01
  92   1    -0.03   0.00  -0.14     0.01  -0.03   0.31     0.03  -0.05   0.45
  93   1    -0.09   0.03  -0.05     0.21   0.04  -0.09     0.29  -0.04  -0.03
  94   1     0.03   0.06  -0.04    -0.04  -0.02   0.01     0.01  -0.04   0.03
  95   1    -0.07   0.04  -0.09     0.04  -0.01   0.03     0.10  -0.04   0.03
  96   1    -0.01   0.12  -0.08     0.00  -0.06   0.06     0.04  -0.13   0.03
  97   1     0.01  -0.01  -0.01    -0.04   0.00  -0.04     0.05  -0.04   0.04
  98   1     0.00  -0.02  -0.01    -0.04  -0.03  -0.09     0.04  -0.01   0.11
  99   1    -0.01  -0.01   0.00    -0.08   0.01  -0.02     0.09  -0.04   0.05
 100   1    -0.01  -0.01   0.04    -0.01   0.03   0.02     0.01  -0.01   0.02
 101   1     0.01  -0.06   0.01    -0.04  -0.09  -0.04     0.03   0.04   0.05
 102   1     0.02  -0.02  -0.01     0.03   0.01  -0.11    -0.03   0.00   0.08
 103   1     0.03   0.06   0.00     0.09   0.20   0.03    -0.02  -0.09  -0.07
 104   1     0.00  -0.03  -0.03    -0.03  -0.23  -0.09    -0.01   0.17  -0.03
 105   1     0.00  -0.01   0.06    -0.12  -0.08   0.34     0.08   0.06  -0.23
 106   1     0.00   0.00  -0.01     0.01   0.02   0.03    -0.02   0.02  -0.03
 107   1     0.00   0.00  -0.02     0.10  -0.07   0.09    -0.10   0.07  -0.05
 108   1     0.01   0.01  -0.02    -0.01  -0.12   0.00     0.00   0.11  -0.02
 109   1    -0.07   0.05   0.05     0.02  -0.03  -0.02     0.00   0.05   0.03
 110   1    -0.09  -0.02   0.02     0.03  -0.01  -0.01    -0.01   0.04   0.02
 111   1    -0.07   0.04   0.05     0.02  -0.04  -0.03     0.00   0.05   0.03
 112   1    -0.04   0.05   0.03     0.04  -0.10  -0.02    -0.01   0.10   0.03
 113   1    -0.02   0.03   0.02    -0.01  -0.03  -0.01     0.04   0.03   0.01
 114   1     0.01   0.05   0.04    -0.06  -0.08  -0.06     0.08   0.08   0.06
                    61                     62                     63
                     A                      A                      A
 Frequencies --   268.1200               270.2058               274.0400
 Red. masses --     1.9841                 2.7020                 2.4853
 Frc consts  --     0.0840                 0.1162                 0.1100
 IR Inten    --     1.4457                 2.5096                 3.5065
 Atom AN      X      Y      Z        X      Y      Z        X      Y      Z
   1   8     0.00  -0.01   0.02     0.00   0.03  -0.09    -0.01   0.02  -0.06
   2  12    -0.02  -0.01  -0.01     0.01  -0.03   0.02     0.00  -0.02   0.03
   3   8     0.00   0.00  -0.01     0.03  -0.01   0.03     0.01   0.00   0.03
   4   6     0.01   0.00   0.01    -0.03   0.02  -0.02    -0.03   0.02  -0.01
   5   7    -0.02   0.05  -0.08    -0.01  -0.01   0.00     0.01   0.03  -0.03
   6   7     0.02  -0.03   0.05     0.04  -0.04   0.07    -0.05   0.04  -0.06
   7   8     0.01   0.00   0.02    -0.03   0.01  -0.08    -0.02   0.02  -0.05
   8   6    -0.01   0.01  -0.03    -0.01   0.00  -0.01     0.00  -0.01   0.00
   9   6     0.00  -0.01   0.01    -0.01   0.03  -0.03     0.01  -0.03   0.03
  10   6     0.00  -0.02   0.02     0.01   0.00   0.01    -0.02   0.00   0.00
  11   8     0.00   0.00   0.00    -0.02   0.00   0.01     0.00  -0.01   0.00
  12   6     0.00   0.01   0.00     0.00  -0.03   0.01     0.00  -0.02   0.01
  13   6     0.00   0.01  -0.01     0.03  -0.04   0.03     0.01  -0.02   0.02
  14   6     0.01   0.00   0.00    -0.03   0.01   0.02    -0.02   0.00   0.01
  15   8     0.01   0.01   0.00    -0.05  -0.03   0.02    -0.03  -0.02   0.01
  16   6     0.01   0.01   0.00    -0.03  -0.02   0.01    -0.02  -0.03   0.00
  17   8     0.01   0.00   0.01    -0.02   0.02  -0.01    -0.02   0.01   0.01
  18   6     0.00   0.00  -0.01     0.00   0.03   0.01     0.01   0.02   0.00
  19   8     0.00   0.00   0.00    -0.04   0.01   0.01     0.01   0.01   0.02
  20   8     0.00   0.00   0.00    -0.01   0.02  -0.02     0.00   0.01  -0.04
  21   6     0.00   0.00   0.01    -0.02   0.02  -0.02    -0.01   0.00  -0.02
  22   6     0.01   0.00   0.01    -0.03   0.02  -0.01    -0.03   0.01   0.00
  23   6     0.00  -0.01   0.00     0.01   0.04  -0.01     0.01   0.02  -0.03
  24   8    -0.01  -0.01   0.01     0.01   0.01  -0.01     0.03  -0.01  -0.01
  25   6     0.00   0.01  -0.01     0.00  -0.05   0.03     0.00  -0.05   0.04
  26   6    -0.01   0.00   0.00     0.06   0.00   0.00     0.01   0.02   0.00
  27   6     0.01   0.01  -0.01    -0.02  -0.05   0.04    -0.02  -0.05   0.02
  28   6    -0.04  -0.02  -0.01     0.16   0.08   0.03     0.11   0.06   0.02
  29   6    -0.01   0.02  -0.02    -0.02  -0.01   0.01     0.02   0.02  -0.02
  30   6     0.01  -0.01   0.02     0.01  -0.01   0.02    -0.01   0.01  -0.02
  31   6     0.05   0.01  -0.01    -0.02   0.00   0.02     0.05   0.01  -0.02
  32   6     0.07  -0.03   0.03    -0.03   0.00   0.00     0.06  -0.02   0.02
  33   6     0.02  -0.06   0.07    -0.02   0.00  -0.02     0.04  -0.03   0.05
  34   6    -0.04  -0.04   0.05    -0.01   0.01  -0.01     0.00  -0.03   0.04
  35   6    -0.05   0.01   0.01    -0.01   0.01   0.00    -0.01   0.00   0.01
  36   6     0.02   0.00   0.00    -0.01  -0.01   0.02     0.02   0.01  -0.02
  37   6    -0.01   0.01   0.01    -0.01   0.01  -0.01     0.00  -0.01   0.01
  38   6     0.00  -0.03   0.00    -0.01  -0.04  -0.01     0.01   0.04   0.01
  39   6    -0.01  -0.01  -0.03    -0.02  -0.02  -0.05     0.01   0.03   0.06
  40   6    -0.01   0.03  -0.04    -0.01   0.03  -0.06     0.00  -0.02   0.07
  41   6     0.01   0.04  -0.02     0.00   0.05  -0.02     0.00  -0.05   0.02
  42   6     0.01   0.03   0.01     0.01   0.03   0.02     0.00  -0.03  -0.03
  43   6     0.00  -0.01   0.00    -0.01  -0.01  -0.01     0.02   0.01   0.02
  44   6     0.00   0.02  -0.01     0.01   0.02   0.00     0.00  -0.01  -0.02
  45   6    -0.07   0.00   0.00     0.04  -0.04   0.03    -0.07   0.05  -0.04
  46   6    -0.07   0.01   0.00     0.03  -0.01   0.03    -0.06   0.02  -0.04
  47   6     0.06   0.03  -0.03    -0.01   0.02  -0.04     0.03   0.00   0.02
  48   6     0.06   0.01  -0.02    -0.01   0.03  -0.02     0.03  -0.02   0.00
  49   6    -0.03  -0.04  -0.02    -0.02  -0.06   0.00     0.00   0.09  -0.03
  50   6     0.00  -0.01  -0.02     0.00  -0.02  -0.02     0.01   0.02   0.00
  51   6     0.01   0.02   0.04     0.02   0.04   0.02    -0.01  -0.05   0.00
  52   6     0.01   0.03   0.03     0.00   0.05   0.03     0.01  -0.05  -0.03
  53   6     0.00   0.00  -0.01     0.02  -0.02   0.00    -0.04   0.01   0.00
  54   6    -0.01  -0.02  -0.01     0.01  -0.01   0.01    -0.02   0.02   0.00
  55   1     0.00  -0.01   0.01    -0.02   0.04  -0.05     0.02  -0.04   0.05
  56   1     0.00   0.01  -0.01     0.02  -0.06   0.04    -0.01  -0.03   0.02
  57   1     0.01   0.00   0.00    -0.05   0.01  -0.01    -0.04  -0.01  -0.01
  58   1     0.00   0.01  -0.01     0.02  -0.02   0.06     0.00  -0.04   0.03
  59   1     0.03   0.02   0.00    -0.12  -0.06   0.01    -0.08  -0.06   0.00
  60   1     0.00   0.01  -0.01    -0.02  -0.03   0.05     0.01  -0.04   0.03
  61   1     0.00   0.01   0.01    -0.02   0.02  -0.02    -0.03   0.02  -0.02
  62   1     0.00  -0.01   0.00     0.00   0.05  -0.02     0.02   0.04  -0.04
  63   1     0.00   0.02  -0.04     0.02  -0.09   0.21     0.04  -0.10   0.24
  64   1     0.01   0.00  -0.01    -0.04   0.07   0.00    -0.06   0.10   0.00
  65   1    -0.01   0.03   0.01     0.05  -0.19  -0.08     0.04  -0.22  -0.09
  66   1    -0.01   0.00   0.01     0.04  -0.04  -0.05     0.01   0.03  -0.03
  67   1     0.00  -0.01  -0.01     0.06   0.03   0.02    -0.01   0.06   0.04
  68   1    -0.02   0.00  -0.01     0.11  -0.02   0.02     0.02  -0.03   0.03
  69   1     0.01   0.01  -0.03    -0.03  -0.05   0.10    -0.02  -0.02   0.07
  70   1     0.00   0.02   0.01    -0.02  -0.05   0.01     0.01  -0.06  -0.03
  71   1     0.03   0.02   0.00    -0.07  -0.06   0.03    -0.07  -0.08   0.02
  72   1    -0.05  -0.04   0.03     0.22   0.18  -0.13     0.14   0.15  -0.09
  73   1    -0.05  -0.02  -0.02     0.21   0.09   0.09     0.12   0.05   0.05
  74   1    -0.06  -0.01  -0.04     0.25   0.07   0.17     0.19   0.04   0.12
  75   1     0.12  -0.04   0.05    -0.04   0.00   0.00     0.10  -0.03   0.02
  76   1     0.04  -0.09   0.11    -0.02   0.00  -0.03     0.04  -0.05   0.08
  77   1    -0.07  -0.07   0.08    -0.01   0.01  -0.01    -0.02  -0.04   0.05
  78   1     0.05  -0.03   0.04    -0.02   0.01   0.00     0.04  -0.02   0.01
  79   1    -0.01  -0.02   0.05    -0.01   0.01  -0.01     0.00  -0.02   0.02
  80   1    -0.03  -0.03  -0.05    -0.03  -0.05  -0.08     0.03   0.05   0.09
  81   1    -0.02   0.04  -0.06    -0.02   0.04  -0.10    -0.01  -0.04   0.11
  82   1     0.01   0.06  -0.02    -0.01   0.09  -0.02     0.00  -0.09   0.02
  83   1     0.00   0.00  -0.02    -0.01   0.00  -0.05     0.02   0.00   0.06
  84   1     0.00   0.04  -0.04     0.00   0.04  -0.03     0.01  -0.04   0.01
  85   1     0.04   0.15   0.01    -0.01  -0.13   0.01     0.01   0.21   0.00
  86   1    -0.28   0.04   0.00     0.13  -0.06   0.07    -0.26   0.09  -0.08
  87   1    -0.03  -0.20  -0.01     0.02   0.03   0.04    -0.05  -0.11  -0.06
  88   1    -0.05  -0.05  -0.08     0.02   0.02   0.08    -0.04  -0.05  -0.13
  89   1    -0.05   0.07   0.10     0.02  -0.03   0.00    -0.04   0.07   0.04
  90   1    -0.20   0.02  -0.01     0.09  -0.04   0.04    -0.18   0.05  -0.06
  91   1    -0.18  -0.09  -0.20    -0.01  -0.01  -0.06     0.00  -0.01   0.00
  92   1     0.08   0.09   0.29     0.00   0.02  -0.03     0.03   0.02   0.07
  93   1     0.36   0.11  -0.22     0.01   0.05  -0.06     0.08  -0.01   0.00
  94   1     0.02   0.10   0.01    -0.01   0.04  -0.01     0.02   0.00   0.01
  95   1     0.19   0.05  -0.08     0.00   0.03  -0.04     0.06  -0.01   0.00
  96   1     0.06  -0.11  -0.04    -0.01   0.03  -0.02     0.02  -0.05  -0.01
  97   1    -0.06  -0.07  -0.06     0.00  -0.08  -0.04     0.00   0.13   0.05
  98   1    -0.02  -0.01  -0.04    -0.02  -0.09  -0.02     0.00   0.09  -0.04
  99   1    -0.02  -0.07   0.04    -0.05  -0.08   0.05     0.00   0.13  -0.09
 100   1    -0.01   0.02   0.02    -0.02   0.01   0.05     0.02  -0.02  -0.07
 101   1    -0.03  -0.07  -0.03    -0.04  -0.12  -0.02     0.04   0.11   0.00
 102   1     0.03   0.00  -0.08     0.04  -0.01  -0.10    -0.03   0.00   0.08
 103   1    -0.09  -0.07   0.07    -0.11  -0.09   0.06     0.08   0.07  -0.03
 104   1     0.04   0.12   0.16     0.04   0.20   0.17    -0.02  -0.20  -0.12
 105   1     0.09   0.04  -0.07     0.14   0.07  -0.15    -0.13  -0.07   0.15
 106   1     0.07  -0.03   0.03     0.08  -0.02   0.02    -0.06   0.00  -0.02
 107   1    -0.08   0.05  -0.01    -0.12   0.08  -0.01     0.11  -0.07   0.00
 108   1     0.03   0.10   0.09     0.04   0.15   0.11    -0.03  -0.14  -0.09
 109   1    -0.01   0.01   0.00     0.02  -0.01   0.02    -0.04   0.01   0.00
 110   1     0.01  -0.01   0.01     0.04  -0.02   0.04    -0.06   0.00  -0.03
 111   1     0.01  -0.02  -0.03     0.04  -0.05  -0.02    -0.05   0.04   0.02
 112   1     0.01  -0.02  -0.03     0.01  -0.01   0.01    -0.03   0.02   0.00
 113   1    -0.04  -0.02  -0.02     0.03  -0.02   0.01    -0.03   0.02   0.01
 114   1    -0.01  -0.02  -0.02     0.01  -0.01   0.03    -0.01   0.03  -0.01
                    64                     65                     66
                     A                      A                      A
 Frequencies --   276.4106               285.8569               291.8837
 Red. masses --     2.2343                 2.7274                 1.2817
 Frc consts  --     0.1006                 0.1313                 0.0643
 IR Inten    --     3.7825                 1.5333                 2.6750
 Atom AN      X      Y      Z        X      Y      Z        X      Y      Z
   1   8     0.00   0.00   0.01     0.00   0.00   0.00    -0.01   0.01  -0.01
   2  12    -0.03   0.01   0.00    -0.03  -0.02   0.00     0.00   0.00   0.00
   3   8     0.00   0.00   0.00     0.00   0.00   0.00    -0.01   0.01   0.01
   4   6     0.00   0.00   0.00     0.00   0.00   0.00    -0.01   0.00   0.00
   5   7     0.03   0.00   0.02     0.02  -0.02  -0.02     0.00   0.00   0.00
   6   7    -0.02  -0.02   0.03     0.01   0.02   0.05     0.00   0.00   0.01
   7   8     0.00   0.00   0.01     0.00   0.00   0.00    -0.01   0.01  -0.01
   8   6     0.00  -0.01   0.00    -0.02  -0.04  -0.03     0.00   0.00   0.00
   9   6     0.00  -0.01  -0.02    -0.04   0.00  -0.01     0.00   0.00   0.00
  10   6    -0.02  -0.01   0.01    -0.05   0.00   0.02     0.00   0.00   0.00
  11   8     0.00   0.00   0.00     0.00   0.00   0.00     0.02  -0.02   0.00
  12   6     0.00   0.00   0.00     0.00   0.00   0.00     0.01   0.00   0.01
  13   6     0.00   0.00   0.00     0.00   0.00   0.00     0.00   0.00   0.01
  14   6     0.00   0.00   0.00     0.00   0.00   0.00    -0.01  -0.01   0.00
  15   8     0.00   0.00   0.00     0.00   0.00   0.00     0.01   0.01   0.00
  16   6     0.00   0.00   0.00     0.00   0.00   0.00    -0.01  -0.02   0.00
  17   8     0.00  -0.01   0.00    -0.01   0.00   0.00     0.01   0.00   0.00
  18   6     0.00   0.00   0.00     0.00   0.01   0.00     0.01   0.00   0.00
  19   8     0.01   0.00   0.00    -0.02   0.00   0.00     0.05   0.00   0.02
  20   8     0.01  -0.01  -0.01     0.00   0.01   0.00    -0.05  -0.02   0.00
  21   6     0.01  -0.01  -0.01     0.00   0.00   0.00    -0.01  -0.01  -0.01
  22   6     0.01  -0.01  -0.01     0.00   0.00   0.00     0.01   0.00  -0.01
  23   6     0.00   0.00  -0.01     0.00   0.01   0.00     0.00  -0.02   0.01
  24   8     0.01   0.00  -0.01     0.01   0.01   0.00     0.00   0.00  -0.01
  25   6     0.01  -0.01   0.00     0.00  -0.01   0.00     0.00   0.03  -0.02
  26   6     0.00   0.00   0.00     0.01   0.00   0.00    -0.05   0.02   0.01
  27   6     0.00   0.00   0.00     0.00   0.00   0.00     0.01  -0.02   0.00
  28   6    -0.01  -0.01   0.00     0.00   0.00   0.00     0.03   0.02   0.01
  29   6     0.04   0.00   0.00     0.04   0.00  -0.01     0.00   0.00   0.00
  30   6     0.00  -0.02   0.00     0.01   0.04   0.04     0.00   0.00   0.01
  31   6     0.02   0.00  -0.02     0.05   0.01  -0.02     0.00   0.00   0.00
  32   6     0.02   0.02  -0.02     0.06   0.00  -0.02     0.00   0.00   0.00
  33   6     0.03   0.03  -0.02     0.06   0.00  -0.01     0.00   0.00   0.00
  34   6     0.05   0.01  -0.02     0.06   0.00  -0.01     0.00   0.00   0.00
  35   6     0.05  -0.02  -0.01     0.05   0.00  -0.01     0.00   0.00   0.00
  36   6     0.01   0.01  -0.03     0.03   0.01  -0.01     0.00   0.00   0.00
  37   6     0.03  -0.02   0.01     0.03   0.00   0.00     0.00   0.00   0.00
  38   6     0.02  -0.04   0.00    -0.01   0.04   0.00     0.01   0.00   0.00
  39   6    -0.02  -0.02  -0.03     0.01   0.05  -0.01    -0.02   0.00   0.01
  40   6    -0.04   0.02  -0.04     0.01   0.07  -0.01     0.02   0.00   0.00
  41   6     0.00   0.03  -0.03     0.00   0.09   0.02     0.04   0.00   0.00
  42   6     0.02   0.02  -0.01     0.01   0.06   0.06    -0.01   0.00   0.01
  43   6     0.02  -0.02   0.02    -0.01   0.03  -0.02     0.01   0.00  -0.01
  44   6     0.01   0.02  -0.03     0.01   0.03   0.05    -0.02   0.00   0.01
  45   6    -0.03   0.06  -0.05    -0.04   0.04  -0.02     0.00   0.00   0.00
  46   6    -0.02   0.01  -0.05    -0.04   0.02  -0.04     0.00   0.00   0.00
  47   6    -0.04  -0.05   0.10    -0.02  -0.02   0.05     0.00   0.00   0.00
  48   6    -0.03  -0.06   0.05    -0.02  -0.03   0.04     0.00   0.00   0.00
  49   6    -0.04   0.02  -0.06     0.05  -0.14   0.09    -0.01  -0.02   0.02
  50   6     0.01  -0.01  -0.04     0.00  -0.06   0.07    -0.02   0.02  -0.01
  51   6     0.02   0.01   0.12     0.00   0.02  -0.11     0.01   0.00   0.00
  52   6     0.04   0.01   0.07    -0.04   0.03  -0.07    -0.01   0.01  -0.03
  53   6    -0.09   0.01   0.04    -0.05  -0.04   0.00    -0.01   0.00   0.00
  54   6    -0.02   0.05   0.04    -0.06  -0.10  -0.03     0.00   0.00   0.00
  55   1     0.00   0.00  -0.03    -0.01   0.02  -0.02     0.00   0.00   0.00
  56   1    -0.01   0.00   0.00     0.01   0.00   0.00    -0.01   0.01   0.01
  57   1     0.00   0.00   0.00     0.00   0.00   0.00    -0.02  -0.02   0.00
  58   1     0.00   0.00   0.00     0.00   0.00   0.00    -0.01  -0.03   0.00
  59   1     0.01   0.00   0.00     0.00   0.00   0.00    -0.03  -0.03  -0.01
  60   1     0.00   0.00   0.00     0.00   0.00   0.00     0.01  -0.02   0.01
  61   1     0.01  -0.01  -0.01     0.00   0.00   0.00     0.01   0.01  -0.01
  62   1     0.00   0.00  -0.01    -0.01   0.01   0.00     0.03  -0.02   0.02
  63   1     0.01  -0.02   0.02    -0.01  -0.02   0.02     0.02   0.04  -0.03
  64   1     0.01   0.00   0.00     0.00  -0.01   0.00     0.00   0.04  -0.03
  65   1     0.02  -0.03  -0.01     0.01  -0.03  -0.01    -0.02   0.03  -0.02
  66   1     0.00   0.00  -0.01     0.01   0.00  -0.06    -0.08  -0.01   0.51
  67   1    -0.01   0.01   0.01    -0.03   0.04   0.03     0.31  -0.28  -0.30
  68   1     0.00  -0.02   0.01     0.05  -0.04   0.03    -0.39   0.39  -0.28
  69   1     0.00   0.00   0.00     0.00   0.00   0.00     0.01   0.00  -0.01
  70   1     0.00   0.00   0.00     0.00   0.00   0.01     0.02  -0.02  -0.02
  71   1     0.00   0.00   0.00     0.01   0.01   0.00     0.01  -0.04   0.02
  72   1    -0.02  -0.01   0.01     0.00   0.00   0.00     0.03   0.06  -0.02
  73   1    -0.02  -0.01  -0.01     0.00   0.00   0.00     0.02   0.01   0.01
  74   1    -0.01  -0.01  -0.01     0.00   0.00   0.00     0.06   0.01   0.04
  75   1     0.02   0.02  -0.03     0.06   0.00  -0.02     0.00   0.01   0.00
  76   1     0.03   0.05  -0.03     0.06   0.00  -0.02     0.00   0.00   0.00
  77   1     0.07   0.02  -0.04     0.06   0.00  -0.01     0.01   0.00   0.00
  78   1     0.01   0.00  -0.02     0.04  -0.02   0.01     0.00   0.00   0.00
  79   1     0.03   0.01  -0.03     0.03   0.02  -0.03     0.00   0.00   0.00
  80   1    -0.03  -0.04  -0.06     0.02   0.04  -0.03    -0.07   0.00   0.02
  81   1    -0.06   0.03  -0.05     0.02   0.08  -0.03     0.03   0.00  -0.01
  82   1     0.00   0.05  -0.03    -0.01   0.11   0.03     0.07   0.00  -0.01
  83   1     0.01  -0.01  -0.01     0.00   0.02   0.00     0.01   0.00  -0.01
  84   1     0.01   0.03  -0.05    -0.01   0.06   0.00    -0.02   0.01   0.01
  85   1     0.00   0.15  -0.01     0.00   0.13   0.01     0.00   0.01   0.00
  86   1    -0.12   0.08  -0.11    -0.14   0.06  -0.05    -0.01   0.00  -0.01
  87   1    -0.03   0.01  -0.06    -0.03  -0.05  -0.04     0.00   0.00   0.00
  88   1    -0.01  -0.02  -0.10    -0.04  -0.04  -0.09     0.00   0.00   0.00
  89   1    -0.01   0.02  -0.03    -0.03   0.06   0.00     0.00   0.00   0.00
  90   1    -0.06   0.04  -0.06    -0.11   0.05  -0.05     0.00   0.00   0.00
  91   1     0.11   0.09   0.24     0.07   0.06   0.13     0.01   0.01   0.01
  92   1    -0.05  -0.10  -0.09    -0.03  -0.05  -0.07     0.00  -0.01  -0.01
  93   1    -0.22  -0.15   0.24    -0.14  -0.07   0.14    -0.01  -0.01   0.01
  94   1     0.00  -0.16   0.00    -0.02  -0.10   0.00     0.00  -0.01   0.00
  95   1    -0.10  -0.09   0.13    -0.07  -0.05   0.09    -0.01   0.00   0.01
  96   1    -0.02   0.01   0.06    -0.02   0.01   0.06     0.00   0.00   0.01
  97   1    -0.11   0.01  -0.05     0.18  -0.17  -0.02    -0.02  -0.03  -0.01
  98   1    -0.04   0.06  -0.12     0.04  -0.25   0.15     0.00   0.00   0.03
  99   1    -0.04   0.00  -0.03    -0.01  -0.15   0.15     0.01  -0.04   0.03
 100   1     0.00  -0.01  -0.04    -0.07   0.01   0.20     0.01   0.02  -0.02
 101   1    -0.01  -0.01  -0.05    -0.02  -0.24   0.09    -0.03   0.03  -0.02
 102   1     0.03  -0.01  -0.05     0.06  -0.04  -0.05    -0.02   0.03  -0.02
 103   1    -0.20  -0.13   0.18     0.16   0.08  -0.15     0.02   0.01  -0.01
 104   1     0.10   0.16   0.35    -0.07  -0.04  -0.26     0.01   0.01  -0.01
 105   1     0.14   0.04  -0.06    -0.06   0.01  -0.03     0.02   0.00   0.00
 106   1     0.14  -0.07   0.06    -0.13   0.06  -0.06    -0.03  -0.01  -0.02
 107   1    -0.05   0.03   0.02    -0.01   0.02  -0.05    -0.02   0.01  -0.04
 108   1     0.06   0.09   0.18    -0.04   0.00  -0.15     0.01   0.02  -0.04
 109   1    -0.11   0.06   0.08    -0.06  -0.02   0.02    -0.01   0.00   0.01
 110   1    -0.15  -0.06   0.02    -0.07  -0.07   0.00    -0.02  -0.01   0.00
 111   1    -0.11   0.04   0.07    -0.05  -0.04   0.00    -0.01   0.00   0.00
 112   1    -0.07   0.08   0.05     0.03  -0.15  -0.06    -0.01   0.00   0.00
 113   1    -0.02   0.04   0.04    -0.06  -0.10  -0.04     0.00   0.00   0.00
 114   1     0.03   0.07   0.06    -0.14  -0.14  -0.06     0.00   0.00   0.00
                    67                     68                     69
                     A                      A                      A
 Frequencies --   303.7239               312.9511               313.8575
 Red. masses --     4.1469                 4.1509                 3.8434
 Frc consts  --     0.2254                 0.2395                 0.2231
 IR Inten    --    24.5139                 3.6057                 1.7518
 Atom AN      X      Y      Z        X      Y      Z        X      Y      Z
   1   8    -0.02   0.02  -0.01    -0.04  -0.01   0.00    -0.01  -0.01   0.03
   2  12    -0.08   0.11  -0.05     0.04   0.00   0.00    -0.02  -0.01   0.00
   3   8    -0.07  -0.02   0.06     0.03  -0.03  -0.02     0.02  -0.06   0.03
   4   6    -0.01   0.02   0.00    -0.02  -0.01  -0.01     0.01   0.00  -0.01
   5   7     0.00   0.02  -0.01     0.01  -0.03   0.04    -0.01   0.03  -0.05
   6   7     0.00   0.00   0.00    -0.04   0.05  -0.09     0.04  -0.05   0.09
   7   8     0.02   0.04   0.02    -0.02  -0.01   0.01     0.01   0.00   0.03
   8   6     0.01   0.02   0.00     0.01  -0.02   0.02    -0.01   0.02  -0.03
   9   6     0.00   0.01   0.01     0.01  -0.01   0.01     0.00   0.01  -0.01
  10   6     0.00   0.00   0.00    -0.01   0.01  -0.03     0.01  -0.02   0.03
  11   8     0.02  -0.03  -0.01     0.07  -0.03   0.02     0.01   0.00  -0.01
  12   6    -0.02   0.01   0.01     0.06   0.09   0.08     0.03   0.08   0.04
  13   6    -0.06   0.02   0.03     0.05   0.05   0.08     0.03   0.03   0.06
  14   6     0.00  -0.02  -0.01     0.01  -0.02  -0.03     0.02   0.00  -0.05
  15   8     0.04   0.04  -0.03     0.09   0.21  -0.01     0.08   0.18  -0.04
  16   6     0.00  -0.05  -0.01    -0.03  -0.04  -0.03     0.00   0.00  -0.01
  17   8     0.03   0.08   0.04     0.00  -0.02  -0.01     0.00   0.01   0.00
  18   6     0.06  -0.08  -0.04    -0.01  -0.02  -0.01    -0.02  -0.03   0.00
  19   8     0.23  -0.04   0.08    -0.09  -0.05  -0.03    -0.12  -0.07  -0.04
  20   8    -0.03  -0.02  -0.07    -0.06  -0.02   0.02     0.02   0.01   0.00
  21   6    -0.02  -0.01   0.02    -0.01  -0.01   0.01     0.00   0.01  -0.01
  22   6    -0.05   0.04   0.04     0.02  -0.02   0.00    -0.01   0.01   0.00
  23   6     0.03  -0.09  -0.11    -0.03  -0.01   0.02     0.00   0.01   0.00
  24   8     0.06  -0.01   0.03    -0.02   0.00   0.00     0.00   0.01  -0.01
  25   6    -0.06   0.01   0.05     0.01   0.03  -0.03     0.00  -0.01   0.01
  26   6    -0.13   0.01   0.02    -0.04   0.00  -0.03     0.05  -0.03   0.00
  27   6    -0.03  -0.06  -0.02    -0.01  -0.13   0.00    -0.07  -0.14   0.00
  28   6     0.02   0.03   0.00     0.03   0.06  -0.01    -0.02   0.05  -0.05
  29   6     0.00   0.00   0.00     0.00  -0.01   0.01     0.00   0.01  -0.02
  30   6     0.00  -0.01   0.00    -0.02   0.02  -0.03     0.02  -0.02   0.03
  31   6     0.00   0.00   0.00    -0.01  -0.01   0.01     0.01   0.01  -0.01
  32   6    -0.01   0.02   0.00     0.00   0.00   0.03     0.00   0.03  -0.01
  33   6     0.00   0.02  -0.01     0.00  -0.01   0.02     0.00   0.02  -0.02
  34   6     0.00   0.00  -0.02     0.00  -0.02   0.02    -0.01   0.00  -0.03
  35   6     0.00   0.00   0.00     0.00   0.00   0.01     0.00   0.01  -0.01
  36   6     0.00  -0.01   0.01     0.00   0.00  -0.01     0.00  -0.01   0.00
  37   6     0.00   0.00   0.00     0.00   0.00   0.00     0.00   0.01   0.00
  38   6     0.00  -0.01   0.00    -0.01   0.02  -0.01     0.01  -0.02   0.02
  39   6     0.00  -0.01  -0.02     0.10   0.02  -0.08    -0.09  -0.02   0.08
  40   6     0.00   0.00  -0.02     0.01   0.02  -0.06    -0.01  -0.02   0.06
  41   6    -0.01   0.00  -0.01    -0.11   0.03  -0.03     0.10  -0.02   0.03
  42   6     0.00   0.00   0.00    -0.01   0.00  -0.02     0.02   0.00   0.02
  43   6    -0.01   0.00   0.00    -0.05   0.00   0.01     0.04   0.00  -0.01
  44   6     0.00   0.00   0.01     0.03   0.00  -0.01    -0.02   0.01   0.01
  45   6     0.01  -0.03   0.01    -0.01   0.04  -0.02     0.00  -0.04   0.01
  46   6     0.01  -0.02   0.03     0.00   0.00  -0.03     0.01  -0.02   0.04
  47   6    -0.01   0.00   0.01     0.00   0.01  -0.04     0.01   0.01   0.04
  48   6    -0.01  -0.01   0.01     0.00   0.03  -0.02     0.00  -0.04   0.03
  49   6     0.00  -0.02   0.01     0.07  -0.03   0.01    -0.07   0.04  -0.02
  50   6     0.00   0.00   0.01     0.02  -0.06   0.09    -0.02   0.06  -0.09
  51   6     0.00   0.01   0.01    -0.06  -0.01   0.04     0.06   0.01  -0.04
  52   6     0.00   0.01   0.02     0.04  -0.03   0.12    -0.04   0.03  -0.12
  53   6     0.08   0.01  -0.03     0.00   0.00   0.00    -0.01   0.00   0.01
  54   6    -0.01  -0.07  -0.05     0.00   0.02   0.00     0.00   0.00   0.00
  55   1     0.00   0.01   0.00     0.01  -0.02   0.02    -0.01   0.01  -0.02
  56   1    -0.08   0.05   0.01     0.13   0.13   0.05     0.08   0.09   0.04
  57   1    -0.02  -0.04  -0.01    -0.01  -0.04  -0.02     0.02   0.00  -0.04
  58   1    -0.03  -0.09  -0.02    -0.06  -0.06  -0.04    -0.03  -0.01  -0.04
  59   1    -0.03  -0.08  -0.03    -0.03  -0.04  -0.03     0.04   0.00  -0.01
  60   1     0.06  -0.06   0.01    -0.01  -0.04  -0.03     0.01   0.00  -0.03
  61   1    -0.09   0.09   0.04     0.03  -0.03   0.00    -0.01   0.02   0.00
  62   1     0.11  -0.08  -0.09    -0.03  -0.03   0.03    -0.02   0.01   0.00
  63   1    -0.03  -0.01   0.14     0.03   0.06  -0.08    -0.01  -0.02   0.03
  64   1    -0.09   0.08   0.04     0.02   0.03  -0.04     0.00   0.00   0.01
  65   1    -0.04  -0.06   0.00    -0.05   0.06   0.00     0.02  -0.03  -0.01
  66   1    -0.04   0.19  -0.16    -0.03   0.03  -0.01     0.03  -0.08  -0.09
  67   1    -0.37   0.21   0.23    -0.06  -0.05  -0.08     0.03   0.02   0.05
  68   1    -0.15  -0.29   0.17    -0.05   0.06  -0.06     0.14  -0.09   0.05
  69   1    -0.02  -0.07  -0.06    -0.02  -0.24   0.00    -0.08  -0.28   0.05
  70   1    -0.02  -0.06  -0.10    -0.10  -0.09  -0.16    -0.17  -0.09  -0.18
  71   1    -0.01  -0.14   0.04     0.02  -0.23   0.09    -0.08  -0.23   0.06
  72   1     0.02   0.08  -0.02     0.03   0.16  -0.04    -0.03   0.07  -0.02
  73   1     0.00   0.03  -0.02     0.00   0.08  -0.07    -0.03   0.08  -0.10
  74   1     0.06   0.02   0.05     0.08   0.06   0.08    -0.03   0.06  -0.01
  75   1    -0.02   0.03   0.00     0.00   0.00   0.03     0.00   0.05   0.00
  76   1     0.00   0.02  -0.02     0.00  -0.01   0.02     0.00   0.01  -0.02
  77   1     0.01   0.00  -0.03     0.00  -0.02   0.01     0.00  -0.01  -0.05
  78   1    -0.01  -0.01   0.00    -0.01   0.00  -0.01     0.01  -0.01   0.00
  79   1     0.00   0.01  -0.01     0.00   0.00   0.00     0.00   0.01   0.00
  80   1     0.01  -0.01  -0.02     0.18   0.00  -0.11    -0.16   0.00   0.10
  81   1    -0.01   0.00  -0.02     0.03   0.01  -0.05    -0.03  -0.01   0.06
  82   1    -0.01   0.01  -0.01    -0.19   0.05   0.00     0.18  -0.05   0.01
  83   1    -0.01   0.00  -0.01    -0.05   0.00   0.01     0.04   0.00  -0.01
  84   1     0.00   0.00   0.00     0.03  -0.01  -0.01    -0.03   0.01   0.01
  85   1     0.01  -0.04   0.00    -0.01   0.06   0.00     0.00  -0.07  -0.01
  86   1     0.02  -0.03   0.03    -0.01   0.04  -0.06     0.01  -0.04   0.05
  87   1     0.01  -0.03   0.02    -0.01   0.05  -0.02     0.00  -0.05   0.00
  88   1     0.02   0.01   0.04     0.00  -0.01  -0.05     0.02   0.02   0.07
  89   1     0.02  -0.03   0.04     0.00  -0.01  -0.04     0.02  -0.01   0.06
  90   1     0.02  -0.04   0.04     0.00   0.03  -0.04     0.01  -0.06   0.06
  91   1     0.02   0.02   0.03     0.00  -0.03  -0.06     0.03   0.04   0.07
  92   1    -0.01   0.00  -0.02     0.00   0.01  -0.04     0.01   0.01   0.03
  93   1    -0.03  -0.01   0.03    -0.01   0.04  -0.06    -0.01  -0.04   0.07
  94   1    -0.01  -0.03   0.00     0.00   0.06   0.00    -0.01  -0.08   0.00
  95   1    -0.01  -0.01   0.03    -0.01   0.03  -0.05     0.02  -0.04   0.09
  96   1    -0.01  -0.01   0.01     0.00   0.04  -0.02     0.00  -0.06   0.04
  97   1     0.02  -0.01   0.00     0.14  -0.03  -0.01    -0.15   0.03   0.01
  98   1     0.00  -0.03   0.02     0.06  -0.08   0.07    -0.06   0.08  -0.08
  99   1     0.00  -0.01   0.01     0.06  -0.02  -0.01    -0.07   0.02   0.00
 100   1     0.00   0.00   0.02    -0.08  -0.04   0.16     0.08   0.04  -0.16
 101   1     0.00  -0.01   0.01     0.11  -0.14   0.14    -0.10   0.13  -0.13
 102   1     0.00   0.00   0.00     0.03  -0.07   0.10    -0.02   0.06  -0.10
 103   1    -0.05  -0.05   0.02    -0.12  -0.05   0.05     0.12   0.05  -0.05
 104   1     0.01   0.07   0.07    -0.03  -0.01   0.09     0.02   0.01  -0.10
 105   1     0.04   0.02  -0.06    -0.07  -0.01   0.00     0.06   0.00   0.00
 106   1     0.02   0.00   0.01     0.15   0.00   0.09    -0.15   0.00  -0.09
 107   1    -0.03   0.01   0.01     0.07  -0.04   0.17    -0.07   0.04  -0.16
 108   1     0.00   0.03   0.04    -0.02  -0.08   0.22     0.02   0.07  -0.22
 109   1     0.10  -0.04  -0.06    -0.01  -0.02  -0.02    -0.01   0.02   0.03
 110   1     0.13   0.06  -0.01    -0.01   0.01  -0.03    -0.02  -0.03   0.02
 111   1     0.09  -0.03  -0.06    -0.01   0.03   0.01    -0.02  -0.03   0.00
 112   1     0.07  -0.11  -0.08    -0.02   0.02   0.02     0.01   0.00  -0.01
 113   1    -0.02  -0.08  -0.05     0.02   0.02   0.00    -0.03   0.00   0.01
 114   1    -0.08  -0.11  -0.07     0.01   0.02   0.02     0.00   0.00  -0.01
                    70                     71                     72
                     A                      A                      A
 Frequencies --   317.2337               321.0094               324.4536
 Red. masses --     3.5078                 2.8685                 3.2913
 Frc consts  --     0.2080                 0.1742                 0.2041
 IR Inten    --     1.2541                 1.6203                 0.4616
 Atom AN      X      Y      Z        X      Y      Z        X      Y      Z
   1   8     0.04   0.01   0.05     0.03   0.00   0.03     0.00   0.00   0.00
   2  12     0.01   0.02   0.01    -0.01  -0.01   0.02    -0.01   0.00   0.00
   3   8    -0.03  -0.06   0.09    -0.01  -0.03   0.06     0.00   0.00   0.01
   4   6     0.04   0.01   0.00     0.03   0.01   0.00     0.00   0.00   0.00
   5   7     0.03  -0.09   0.12    -0.03   0.08  -0.09    -0.01   0.04  -0.05
   6   7     0.00   0.00   0.00    -0.02   0.02  -0.03     0.00   0.00   0.00
   7   8     0.05   0.02   0.04     0.02   0.00   0.02     0.00   0.00   0.00
   8   6     0.01  -0.03   0.03     0.00   0.03  -0.02     0.00   0.02  -0.01
   9   6    -0.02   0.02  -0.03     0.01  -0.01   0.04     0.00   0.00   0.01
  10   6    -0.02   0.01  -0.02     0.00   0.00   0.01     0.00   0.00   0.01
  11   8    -0.09   0.04  -0.05    -0.06   0.03  -0.03     0.00   0.00  -0.01
  12   6    -0.04   0.00  -0.05    -0.03  -0.01  -0.04     0.00   0.00   0.00
  13   6    -0.03  -0.02   0.00    -0.01  -0.02   0.00     0.00   0.00   0.01
  14   6     0.02   0.03  -0.04     0.01   0.02  -0.02     0.00   0.00   0.00
  15   8    -0.01   0.00  -0.06    -0.02  -0.02  -0.03     0.01   0.02  -0.02
  16   6     0.05   0.03   0.02     0.04   0.03   0.01     0.00  -0.01   0.00
  17   8    -0.01   0.06  -0.01     0.00   0.02   0.02     0.00   0.00   0.01
  18   6     0.01  -0.04   0.02     0.00  -0.01   0.01     0.00   0.00   0.00
  19   8     0.01  -0.04   0.01    -0.03  -0.01   0.00    -0.01   0.00   0.00
  20   8     0.07   0.02  -0.02     0.05   0.01  -0.03     0.00   0.00  -0.01
  21   6    -0.01   0.02  -0.03    -0.01   0.00  -0.03     0.00   0.00   0.00
  22   6    -0.05   0.04  -0.02    -0.03   0.02  -0.01     0.00   0.00   0.00
  23   6     0.05   0.01  -0.01     0.03   0.03   0.00     0.00   0.00   0.00
  24   8     0.03   0.03  -0.03     0.02   0.00  -0.03     0.00  -0.01   0.00
  25   6    -0.02  -0.03   0.05    -0.01  -0.03   0.03     0.00   0.00   0.00
  26   6     0.08  -0.02   0.05     0.07   0.00   0.04     0.00   0.00   0.00
  27   6    -0.10  -0.07   0.00    -0.06  -0.03   0.01    -0.01  -0.02   0.00
  28   6    -0.06  -0.01  -0.05    -0.04  -0.01  -0.03     0.00  -0.01   0.00
  29   6     0.01  -0.03   0.04    -0.01   0.03  -0.04     0.00   0.01  -0.01
  30   6     0.00   0.00   0.00    -0.01   0.01  -0.02     0.00   0.00   0.00
  31   6    -0.02  -0.02   0.03     0.02   0.02  -0.03     0.01   0.01   0.00
  32   6    -0.01  -0.06   0.03     0.01   0.07  -0.02    -0.01  -0.18  -0.15
  33   6     0.01  -0.03   0.04     0.00   0.02  -0.04     0.00   0.02   0.00
  34   6     0.03  -0.01   0.06    -0.03  -0.02  -0.07     0.00   0.21   0.12
  35   6     0.03  -0.01   0.02    -0.02   0.02  -0.02    -0.01  -0.01  -0.01
  36   6    -0.01   0.01   0.01     0.01  -0.01  -0.01     0.01   0.07   0.06
  37   6     0.00  -0.01  -0.01     0.00   0.02   0.01    -0.01  -0.09  -0.05
  38   6     0.00  -0.01   0.00     0.00   0.01  -0.01     0.00   0.00   0.00
  39   6    -0.01   0.00  -0.01     0.09   0.00  -0.04     0.03   0.00   0.00
  40   6     0.00   0.00  -0.01     0.01   0.00  -0.02     0.00   0.00   0.00
  41   6     0.01   0.01  -0.01    -0.09   0.00   0.00    -0.02   0.00   0.01
  42   6     0.00   0.00   0.00    -0.01   0.00  -0.02     0.00   0.00   0.00
  43   6     0.00   0.00   0.00    -0.04   0.00   0.01    -0.01   0.00   0.00
  44   6     0.00   0.00   0.01     0.03  -0.01  -0.02     0.01   0.00  -0.01
  45   6    -0.01   0.09  -0.02     0.00  -0.08   0.01     0.06  -0.05   0.11
  46   6    -0.03   0.03  -0.10     0.02  -0.03   0.09    -0.05   0.10   0.00
  47   6    -0.03  -0.01  -0.10     0.03   0.02   0.07    -0.02  -0.11   0.09
  48   6    -0.02   0.09  -0.06     0.01  -0.08   0.06     0.02  -0.01  -0.12
  49   6     0.00  -0.01   0.01     0.03   0.01  -0.02     0.00   0.01  -0.01
  50   6     0.00   0.00   0.00     0.03  -0.04   0.04     0.01  -0.01   0.00
  51   6     0.00   0.00   0.01    -0.04  -0.01   0.00    -0.01   0.00  -0.01
  52   6     0.00   0.00   0.00     0.01  -0.01   0.07     0.00   0.00   0.01
  53   6     0.02  -0.02   0.00     0.02   0.02  -0.01     0.00   0.01   0.00
  54   6     0.00  -0.01   0.01    -0.01  -0.02  -0.02     0.00  -0.01  -0.01
  55   1    -0.02   0.04  -0.06     0.02  -0.04   0.07     0.01  -0.01   0.02
  56   1    -0.06  -0.03   0.00    -0.04  -0.04   0.00     0.00   0.00   0.00
  57   1     0.05   0.05  -0.04     0.03   0.04  -0.03     0.01   0.00   0.01
  58   1     0.04   0.04   0.00     0.04   0.04   0.01     0.00  -0.01   0.00
  59   1     0.09   0.05   0.02     0.06   0.05   0.02     0.00  -0.01   0.00
  60   1     0.04   0.04   0.00     0.02   0.04   0.00     0.00  -0.01   0.00
  61   1    -0.06   0.07  -0.04    -0.04   0.05  -0.03     0.00   0.01   0.00
  62   1     0.07   0.03  -0.01     0.04   0.06  -0.02     0.00   0.01  -0.01
  63   1    -0.03  -0.07   0.16    -0.01  -0.05   0.11     0.00   0.00   0.01
  64   1    -0.06  -0.01   0.08    -0.04   0.00   0.04     0.00   0.00   0.00
  65   1     0.08  -0.09   0.00     0.06  -0.08  -0.01     0.00  -0.01   0.00
  66   1     0.03  -0.12   0.24     0.02  -0.10   0.32     0.00  -0.01   0.05
  67   1     0.29  -0.08  -0.01     0.34  -0.13  -0.09     0.04  -0.02  -0.02
  68   1    -0.03   0.07  -0.02    -0.09   0.18  -0.09    -0.02   0.03  -0.02
  69   1    -0.12  -0.13   0.08    -0.07  -0.06   0.07    -0.01  -0.03   0.01
  70   1    -0.16  -0.04  -0.09    -0.09  -0.02  -0.03    -0.02  -0.01  -0.02
  71   1    -0.15  -0.09  -0.01    -0.10  -0.03  -0.01    -0.02  -0.03   0.01
  72   1    -0.08  -0.10   0.02    -0.05  -0.07   0.01     0.00  -0.01   0.00
  73   1    -0.05   0.02  -0.08    -0.03   0.00  -0.04     0.00  -0.01   0.00
  74   1    -0.14   0.01  -0.11    -0.09   0.00  -0.08     0.00  -0.01  -0.01
  75   1     0.00  -0.08   0.02     0.01   0.10   0.00    -0.02  -0.33  -0.26
  76   1     0.00  -0.01   0.03     0.00   0.01  -0.02     0.00   0.04   0.01
  77   1     0.02   0.00   0.07    -0.03  -0.05  -0.09     0.01   0.37   0.23
  78   1    -0.01   0.02   0.00     0.01  -0.02   0.00     0.02   0.07   0.07
  79   1     0.00   0.00  -0.02     0.00   0.01   0.02    -0.01  -0.09  -0.04
  80   1    -0.03  -0.01  -0.01     0.14   0.00  -0.05     0.04   0.00  -0.01
  81   1     0.00   0.01  -0.02     0.03   0.00  -0.01     0.01   0.00   0.00
  82   1     0.02   0.01  -0.01    -0.16   0.01   0.02    -0.04   0.00   0.01
  83   1     0.00   0.00  -0.01    -0.04   0.00   0.01    -0.01   0.00   0.00
  84   1     0.00   0.00   0.00     0.03  -0.01  -0.01     0.01   0.00  -0.01
  85   1     0.01   0.16   0.03    -0.02  -0.13  -0.02     0.09  -0.12   0.01
  86   1    -0.03   0.10  -0.12     0.01  -0.09   0.09     0.07  -0.06   0.22
  87   1     0.00   0.12   0.00    -0.01  -0.11  -0.01     0.08  -0.09   0.13
  88   1    -0.04  -0.05  -0.16     0.04   0.04   0.14    -0.10   0.02  -0.01
  89   1    -0.04   0.00  -0.14     0.04  -0.01   0.14    -0.08   0.14  -0.04
  90   1    -0.03   0.14  -0.14     0.02  -0.13   0.12    -0.05   0.14  -0.02
  91   1    -0.04  -0.08  -0.15     0.03   0.07   0.11    -0.05   0.01   0.15
  92   1    -0.03  -0.04  -0.12     0.03   0.05   0.10    -0.02  -0.13   0.13
  93   1    -0.05   0.09  -0.14     0.05  -0.05   0.10    -0.01  -0.22   0.15
  94   1     0.01   0.17   0.00    -0.02  -0.15   0.01     0.10   0.03  -0.06
  95   1    -0.06   0.09  -0.17     0.06  -0.07   0.16    -0.02  -0.02  -0.16
  96   1    -0.01   0.15  -0.06     0.01  -0.13   0.07     0.02   0.04  -0.18
  97   1     0.02  -0.01   0.00     0.06   0.03   0.00    -0.01   0.02   0.00
  98   1     0.00  -0.03   0.02     0.03  -0.02  -0.01     0.00   0.01  -0.02
  99   1    -0.01  -0.01   0.01     0.01   0.03  -0.04    -0.01   0.02  -0.02
 100   1     0.00   0.00   0.00    -0.04  -0.03   0.08     0.00  -0.01   0.01
 101   1    -0.01   0.00   0.00     0.08  -0.08   0.07     0.01  -0.01   0.01
 102   1     0.00   0.00  -0.01     0.03  -0.05   0.06     0.01  -0.01   0.01
 103   1    -0.01   0.00   0.01    -0.05  -0.03   0.00     0.00  -0.01  -0.01
 104   1     0.01   0.01   0.03    -0.04  -0.01   0.01    -0.01   0.01  -0.01
 105   1     0.02   0.00   0.00    -0.06   0.00  -0.02    -0.01   0.01  -0.03
 106   1     0.01   0.00   0.00     0.08   0.01   0.05     0.01   0.00   0.01
 107   1    -0.01   0.00   0.00     0.03  -0.02   0.10     0.00   0.00   0.02
 108   1     0.00   0.01   0.01    -0.02  -0.04   0.13    -0.01   0.00   0.02
 109   1     0.01  -0.04  -0.02     0.04   0.01  -0.01     0.00   0.02   0.01
 110   1     0.03  -0.01   0.01     0.04   0.04  -0.01     0.00   0.00   0.01
 111   1     0.03  -0.01  -0.01     0.02   0.00  -0.01     0.00   0.00   0.00
 112   1    -0.01  -0.02   0.03     0.03  -0.03  -0.05     0.01  -0.01  -0.02
 113   1     0.04   0.00   0.01    -0.04  -0.03  -0.03    -0.02  -0.01  -0.01
 114   1    -0.02  -0.02   0.03    -0.03  -0.03  -0.04    -0.01  -0.01  -0.02
                    73                     74                     75
                     A                      A                      A
 Frequencies --   332.3163               340.6450               348.8321
 Red. masses --     3.2970                 4.1216                 5.4432
 Frc consts  --     0.2145                 0.2818                 0.3902
 IR Inten    --     4.6906                 8.4662                15.5516
 Atom AN      X      Y      Z        X      Y      Z        X      Y      Z
   1   8    -0.01   0.00  -0.01     0.01   0.01   0.01    -0.13   0.02  -0.08
   2  12    -0.01  -0.02  -0.01     0.14  -0.06  -0.03     0.00  -0.01   0.01
   3   8    -0.01   0.00  -0.01    -0.01  -0.03   0.03    -0.03   0.02  -0.08
   4   6     0.00   0.00   0.00     0.01   0.00   0.00     0.03  -0.04   0.02
   5   7     0.01  -0.03   0.02     0.00  -0.06  -0.10     0.00   0.00   0.00
   6   7     0.06  -0.06   0.13     0.04  -0.01  -0.04     0.00   0.00  -0.01
   7   8     0.01   0.01   0.00     0.04   0.03   0.02     0.30   0.19   0.10
   8   6    -0.01  -0.01  -0.02    -0.01  -0.11  -0.07     0.00   0.00   0.00
   9   6    -0.02   0.02  -0.04     0.03  -0.10  -0.03     0.00   0.00   0.00
  10   6     0.01  -0.02   0.04     0.02  -0.05  -0.02     0.00   0.00   0.00
  11   8     0.01  -0.01   0.00    -0.05   0.01  -0.02    -0.14  -0.01   0.02
  12   6     0.00   0.00   0.01    -0.02  -0.01  -0.02    -0.08   0.02   0.02
  13   6    -0.01   0.01   0.00    -0.01  -0.02   0.01    -0.05   0.04  -0.01
  14   6     0.00  -0.01   0.00     0.00   0.00  -0.01     0.01  -0.10   0.05
  15   8     0.00   0.00   0.00    -0.01  -0.01  -0.03     0.02   0.04  -0.02
  16   6    -0.01  -0.01   0.00     0.02  -0.01   0.00    -0.10  -0.25  -0.07
  17   8     0.01   0.01  -0.01     0.02   0.09  -0.07    -0.03  -0.01  -0.01
  18   6     0.01  -0.01   0.00     0.04  -0.04  -0.01    -0.02   0.01  -0.03
  19   8     0.03   0.00   0.01     0.11  -0.02   0.03    -0.05  -0.01  -0.01
  20   8    -0.02   0.00   0.02    -0.06   0.03   0.04     0.07   0.03   0.00
  21   6     0.00   0.00   0.01    -0.05   0.03   0.03     0.02   0.02   0.01
  22   6     0.01   0.01   0.00    -0.04   0.04  -0.01     0.01   0.00   0.01
  23   6     0.00  -0.02   0.01     0.01  -0.03   0.01     0.01   0.03  -0.01
  24   8    -0.01   0.01   0.00    -0.03   0.05   0.03    -0.01   0.00   0.01
  25   6     0.00   0.01  -0.01    -0.04   0.04   0.01     0.01  -0.03   0.00
  26   6    -0.03   0.01   0.00    -0.02   0.00  -0.01     0.07  -0.02   0.04
  27   6     0.01   0.01  -0.01    -0.02  -0.03   0.01     0.05   0.05  -0.04
  28   6     0.00   0.00   0.01    -0.01   0.00  -0.01     0.00  -0.01   0.09
  29   6     0.00  -0.01   0.01    -0.02  -0.02  -0.04     0.00   0.00   0.00
  30   6     0.03  -0.01   0.03     0.03   0.01  -0.01     0.00   0.00   0.00
  31   6     0.00  -0.01   0.01    -0.01   0.01  -0.01     0.00   0.00   0.00
  32   6     0.00   0.00   0.02    -0.02   0.01  -0.01     0.00   0.01   0.00
  33   6     0.01  -0.01   0.00    -0.03  -0.02  -0.01     0.00   0.00   0.00
  34   6     0.01  -0.01   0.00    -0.04   0.01   0.00     0.00   0.00   0.00
  35   6     0.01   0.00   0.00    -0.04   0.00   0.00     0.00   0.00   0.00
  36   6     0.00   0.00   0.00    -0.01   0.02   0.01     0.00   0.00   0.00
  37   6     0.01   0.01   0.00    -0.02   0.01   0.01     0.00   0.00   0.00
  38   6     0.00  -0.02   0.03     0.01   0.04   0.02     0.00   0.00   0.00
  39   6     0.18  -0.04   0.01     0.00   0.05   0.01     0.00   0.00   0.00
  40   6     0.03  -0.01   0.05     0.02   0.05   0.01     0.00   0.00   0.00
  41   6    -0.14   0.01   0.10     0.01   0.04   0.00     0.00   0.00   0.00
  42   6     0.04   0.01   0.02     0.01   0.03   0.01     0.00   0.00   0.00
  43   6    -0.07   0.00   0.03     0.00   0.02   0.02     0.00   0.00   0.00
  44   6     0.07   0.01  -0.04    -0.01   0.03   0.01     0.00   0.00   0.00
  45   6     0.00   0.02  -0.01     0.02  -0.04   0.03     0.00   0.00   0.00
  46   6     0.00   0.00  -0.02     0.00   0.01   0.02     0.00   0.00   0.00
  47   6     0.00   0.00  -0.02     0.02   0.02   0.01     0.00   0.00   0.00
  48   6    -0.01   0.02   0.00     0.02  -0.03   0.02     0.00   0.00   0.00
  49   6    -0.09   0.10  -0.12     0.01  -0.04   0.03     0.00   0.00   0.00
  50   6     0.07  -0.04  -0.07    -0.01  -0.01   0.01     0.00   0.00   0.00
  51   6    -0.02   0.02  -0.15    -0.01  -0.01  -0.01     0.00   0.00   0.00
  52   6    -0.08   0.03   0.04     0.00  -0.02   0.00     0.00   0.00   0.00
  53   6    -0.02  -0.02   0.01    -0.17  -0.10  -0.02     0.00   0.01   0.00
  54   6     0.00   0.00   0.02     0.03   0.16   0.08     0.00   0.00   0.00
  55   1    -0.02   0.05  -0.07     0.06  -0.10  -0.01     0.00   0.00   0.00
  56   1     0.00   0.01   0.00    -0.01  -0.02   0.01     0.00   0.08  -0.02
  57   1     0.00  -0.01   0.01     0.02   0.01  -0.01     0.09  -0.05   0.08
  58   1    -0.01  -0.02   0.00     0.01  -0.02   0.00    -0.16  -0.37  -0.09
  59   1    -0.01  -0.02  -0.01     0.01  -0.01   0.00    -0.22  -0.36  -0.13
  60   1     0.00  -0.01   0.00     0.03  -0.01   0.01     0.12  -0.28   0.00
  61   1     0.01   0.00   0.00    -0.05   0.04   0.00     0.02  -0.03   0.02
  62   1     0.01  -0.03   0.02     0.05  -0.07   0.04     0.02   0.03  -0.01
  63   1     0.01   0.01  -0.02    -0.02   0.06  -0.01    -0.03  -0.04  -0.01
  64   1     0.01   0.01  -0.01    -0.05   0.04   0.03     0.03  -0.06   0.00
  65   1     0.00   0.02   0.00    -0.04   0.07   0.03     0.03  -0.02   0.00
  66   1    -0.02   0.04   0.05     0.01   0.06  -0.13     0.03  -0.10   0.10
  67   1    -0.02  -0.03  -0.03    -0.16   0.07   0.06     0.19  -0.01   0.04
  68   1    -0.08   0.05  -0.03     0.04  -0.09   0.06     0.05  -0.01   0.03
  69   1     0.01   0.01  -0.02    -0.03  -0.05   0.02     0.06   0.09  -0.16
  70   1     0.01   0.00   0.00    -0.04  -0.03  -0.02     0.08   0.04   0.02
  71   1     0.02   0.00   0.00    -0.03  -0.04   0.01     0.13   0.05   0.00
  72   1     0.00   0.01   0.00    -0.01  -0.02   0.00     0.01  -0.03   0.08
  73   1     0.00   0.00   0.00     0.00   0.01  -0.02     0.04   0.07   0.02
  74   1     0.01   0.00   0.02    -0.03   0.01  -0.02    -0.05   0.02   0.17
  75   1     0.00   0.01   0.02    -0.01   0.02   0.00     0.00   0.01   0.01
  76   1     0.00   0.00   0.00    -0.03  -0.03   0.00     0.00   0.00   0.00
  77   1     0.01  -0.02   0.00    -0.04   0.02   0.01     0.00   0.00   0.00
  78   1     0.00   0.00   0.00    -0.01   0.02   0.00     0.00   0.00   0.00
  79   1     0.01   0.01   0.00    -0.02   0.00   0.03     0.00   0.00   0.00
  80   1     0.30  -0.05  -0.01    -0.01   0.04   0.01    -0.01   0.00   0.00
  81   1     0.02  -0.01   0.04     0.02   0.05   0.01     0.00   0.00   0.00
  82   1    -0.28   0.01   0.14     0.00   0.04   0.01     0.00   0.00   0.00
  83   1    -0.07   0.00   0.03     0.01   0.01   0.05     0.00   0.00   0.00
  84   1     0.07   0.02  -0.05    -0.01   0.04   0.00     0.00   0.00   0.00
  85   1     0.00   0.04   0.01     0.01  -0.09  -0.02     0.00   0.00   0.00
  86   1    -0.01   0.03  -0.04     0.04  -0.05   0.08     0.00   0.00   0.00
  87   1    -0.01   0.03  -0.01     0.02  -0.05   0.03     0.00   0.00   0.00
  88   1     0.00  -0.02  -0.04     0.00   0.03   0.04     0.00   0.00   0.00
  89   1     0.00  -0.01  -0.03     0.00   0.01   0.02     0.00   0.00   0.00
  90   1     0.00   0.02  -0.03     0.02  -0.01   0.03     0.00   0.00   0.00
  91   1     0.00  -0.01  -0.03     0.02   0.00   0.00     0.01   0.00   0.00
  92   1    -0.01  -0.01  -0.04     0.02   0.06   0.04     0.00   0.01  -0.01
  93   1    -0.02   0.03  -0.03     0.06   0.01   0.00     0.00   0.00   0.00
  94   1    -0.01   0.02   0.01     0.01  -0.04   0.01     0.00  -0.01   0.00
  95   1    -0.02   0.02  -0.01     0.05  -0.02   0.05     0.00   0.00   0.01
  96   1    -0.01   0.03   0.01     0.01  -0.07   0.00     0.00   0.00   0.00
  97   1    -0.20   0.14  -0.01     0.07  -0.05  -0.02     0.01   0.00   0.00
  98   1    -0.08   0.13  -0.31     0.01  -0.09   0.06     0.00   0.00   0.01
  99   1    -0.16   0.14  -0.12    -0.01  -0.04   0.06     0.01   0.00   0.00
 100   1     0.05  -0.07  -0.10    -0.04   0.00   0.02     0.00   0.00   0.01
 101   1     0.03  -0.03  -0.09    -0.02  -0.03   0.01     0.00   0.00   0.01
 102   1     0.13  -0.07  -0.07     0.01  -0.01  -0.01     0.00   0.00   0.01
 103   1     0.15  -0.02  -0.18     0.02  -0.01  -0.01    -0.01   0.00   0.01
 104   1    -0.14   0.08  -0.28    -0.01  -0.04  -0.03     0.00   0.00   0.01
 105   1    -0.03   0.03  -0.19    -0.05  -0.01   0.00     0.00   0.00   0.01
 106   1    -0.09   0.08   0.04    -0.03  -0.01   0.00     0.01   0.00   0.00
 107   1    -0.09   0.02   0.09     0.04  -0.02  -0.01     0.01   0.00   0.00
 108   1    -0.07   0.03   0.01    -0.01  -0.05  -0.02     0.00   0.00   0.00
 109   1    -0.03   0.01   0.04    -0.20  -0.02   0.04     0.00   0.01   0.01
 110   1    -0.03  -0.05   0.03    -0.28  -0.21  -0.07     0.00   0.00   0.00
 111   1    -0.02  -0.03   0.00    -0.20  -0.02   0.04     0.00   0.01   0.01
 112   1    -0.01   0.01   0.01    -0.17   0.27   0.15     0.01  -0.01   0.00
 113   1    -0.02   0.00   0.02     0.03   0.19   0.09     0.01   0.00   0.00
 114   1     0.01   0.01   0.02     0.24   0.27   0.12     0.00  -0.01   0.00
                    76                     77                     78
                     A                      A                      A
 Frequencies --   361.8130               370.2339               379.4492
 Red. masses --     5.0940                 5.4157                 5.2185
 Frc consts  --     0.3929                 0.4374                 0.4427
 IR Inten    --    14.5362                 7.9201                11.6676
 Atom AN      X      Y      Z        X      Y      Z        X      Y      Z
   1   8     0.00   0.00   0.00    -0.04  -0.01  -0.01    -0.11  -0.05   0.07
   2  12     0.21   0.10   0.09     0.09   0.10  -0.01    -0.03  -0.05   0.01
   3   8     0.03  -0.01  -0.01    -0.13  -0.01  -0.01     0.01  -0.02   0.03
   4   6     0.01   0.00   0.00    -0.04   0.00  -0.01     0.04  -0.02  -0.10
   5   7    -0.02   0.03   0.00     0.00  -0.02  -0.03     0.00   0.01   0.01
   6   7    -0.09   0.03   0.06     0.00   0.00   0.00     0.00   0.00   0.00
   7   8     0.03   0.02   0.02    -0.11  -0.06  -0.04     0.05   0.00   0.09
   8   6    -0.09  -0.02  -0.01    -0.03  -0.06  -0.03     0.01   0.02   0.01
   9   6    -0.11   0.01   0.03    -0.02  -0.04  -0.01     0.01   0.01   0.01
  10   6    -0.17  -0.01   0.05    -0.04  -0.03   0.00     0.01   0.01   0.00
  11   8    -0.04   0.01  -0.01     0.21  -0.05   0.05     0.07   0.07   0.06
  12   6     0.00  -0.01  -0.01     0.00   0.05   0.06     0.02   0.02   0.08
  13   6     0.03  -0.02   0.00    -0.13   0.11  -0.05     0.02   0.01  -0.01
  14   6     0.00   0.00  -0.01     0.01  -0.01   0.01     0.10   0.03  -0.22
  15   8    -0.01   0.00  -0.01     0.07  -0.02   0.09    -0.05  -0.17   0.22
  16   6     0.00  -0.01   0.00    -0.05  -0.01  -0.02    -0.07  -0.07  -0.06
  17   8    -0.01  -0.04  -0.04    -0.02   0.06   0.00     0.01   0.02  -0.01
  18   6     0.02  -0.01   0.02    -0.05  -0.06  -0.02     0.01  -0.02   0.02
  19   8     0.06   0.00   0.00    -0.07  -0.07  -0.04     0.03  -0.02   0.00
  20   8    -0.05  -0.01   0.06     0.20   0.04  -0.03    -0.03  -0.01   0.03
  21   6    -0.03   0.00  -0.04     0.03   0.01   0.00    -0.02   0.00  -0.02
  22   6     0.02  -0.02  -0.07    -0.06   0.03   0.02    -0.01   0.02  -0.03
  23   6    -0.01  -0.02   0.06     0.02  -0.01  -0.05     0.00  -0.02   0.04
  24   8    -0.04   0.08  -0.07     0.02  -0.01   0.01     0.00   0.04  -0.03
  25   6     0.05   0.01  -0.04    -0.05  -0.02   0.06     0.00   0.01   0.00
  26   6    -0.03   0.01  -0.04     0.07  -0.08   0.10    -0.01   0.00  -0.02
  27   6     0.00  -0.02   0.01     0.00   0.13  -0.10    -0.01   0.03   0.01
  28   6    -0.01   0.00  -0.01     0.03   0.01   0.02     0.00   0.17  -0.25
  29   6     0.00   0.05   0.02     0.00   0.01   0.00     0.00   0.00   0.00
  30   6    -0.03  -0.01   0.02     0.02   0.00   0.00    -0.01   0.00   0.00
  31   6     0.04   0.01  -0.01     0.00   0.01   0.00     0.00   0.00   0.00
  32   6     0.04   0.00  -0.01     0.00   0.00   0.00     0.00  -0.01  -0.01
  33   6     0.04   0.02   0.00    -0.01   0.00   0.00     0.00   0.01   0.00
  34   6     0.02   0.01  -0.01    -0.01   0.01   0.01     0.00   0.01   0.01
  35   6     0.02   0.01  -0.01    -0.01   0.00   0.00     0.00   0.00   0.00
  36   6     0.03  -0.01  -0.01     0.00   0.00   0.00     0.00   0.00   0.00
  37   6     0.01   0.00  -0.02    -0.01   0.00   0.00     0.00   0.00   0.00
  38   6    -0.01  -0.03  -0.01     0.01   0.00   0.00     0.00   0.00   0.00
  39   6    -0.01  -0.03  -0.01     0.01   0.00   0.00     0.00   0.00   0.00
  40   6    -0.02  -0.03  -0.01     0.01   0.01   0.00     0.00   0.00   0.00
  41   6     0.01  -0.02   0.00     0.00   0.01   0.00     0.00   0.00   0.00
  42   6     0.00  -0.02   0.01     0.01   0.01   0.00     0.00   0.00   0.00
  43   6     0.01  -0.02  -0.01    -0.01   0.00   0.01     0.00   0.00   0.00
  44   6     0.01  -0.02   0.00     0.00   0.01   0.01     0.00   0.00   0.00
  45   6    -0.02  -0.01  -0.01     0.00  -0.01   0.00     0.00   0.00   0.01
  46   6    -0.01  -0.01   0.02     0.00   0.00   0.01     0.00   0.00   0.00
  47   6     0.00  -0.01   0.03     0.00   0.00   0.00     0.00   0.00   0.00
  48   6    -0.01  -0.01  -0.01     0.00   0.00  -0.01     0.00   0.00   0.00
  49   6    -0.02   0.02  -0.01     0.00  -0.01   0.01     0.00   0.00   0.00
  50   6     0.01   0.00  -0.02     0.00   0.00  -0.01     0.00   0.00   0.00
  51   6     0.02   0.01   0.01    -0.01   0.00  -0.01     0.00   0.00   0.01
  52   6     0.00   0.01  -0.01    -0.01   0.00   0.01     0.00   0.00   0.00
  53   6     0.14  -0.08  -0.10     0.00  -0.08  -0.06     0.00   0.03   0.02
  54   6    -0.20  -0.02   0.08    -0.05   0.05   0.05     0.02  -0.02  -0.02
  55   1    -0.06   0.05   0.04     0.00  -0.02  -0.01     0.00   0.01   0.01
  56   1     0.04  -0.03   0.01    -0.12   0.17  -0.08     0.02   0.02  -0.01
  57   1     0.02   0.02  -0.01    -0.05  -0.07   0.02     0.16   0.11  -0.23
  58   1     0.00  -0.02  -0.01    -0.05  -0.01  -0.02    -0.16  -0.12  -0.13
  59   1     0.00  -0.02   0.00    -0.05  -0.01  -0.02     0.01  -0.06  -0.07
  60   1     0.01  -0.01   0.00    -0.05  -0.01  -0.02    -0.01  -0.07  -0.09
  61   1     0.05  -0.01  -0.09    -0.08   0.04   0.04    -0.01   0.04  -0.05
  62   1    -0.01  -0.05   0.08     0.03   0.02  -0.07     0.00  -0.03   0.04
  63   1     0.07   0.01  -0.04    -0.07  -0.05   0.12     0.01   0.00   0.03
  64   1     0.03   0.01  -0.02    -0.06  -0.03   0.08    -0.02   0.02   0.01
  65   1     0.06   0.01  -0.04     0.03  -0.05   0.04     0.03  -0.01  -0.02
  66   1     0.00   0.07  -0.17     0.00  -0.23   0.30     0.00   0.03  -0.07
  67   1    -0.18   0.00  -0.04     0.36  -0.05   0.11    -0.08  -0.01  -0.03
  68   1     0.07   0.00  -0.01    -0.06  -0.09   0.07     0.03   0.01  -0.01
  69   1    -0.01  -0.04   0.04     0.01   0.19  -0.22    -0.02   0.00   0.04
  70   1    -0.02  -0.01   0.01     0.04   0.11  -0.03    -0.05   0.05   0.04
  71   1    -0.02  -0.01   0.00     0.07   0.13  -0.07    -0.01   0.08  -0.02
  72   1    -0.01  -0.01   0.00     0.03   0.08   0.00    -0.04   0.23  -0.17
  73   1     0.00   0.02  -0.02     0.01  -0.01   0.02    -0.02   0.31  -0.45
  74   1    -0.03   0.01  -0.01     0.10  -0.01   0.06    -0.06   0.22  -0.09
  75   1     0.04  -0.02  -0.03     0.00   0.00   0.00     0.00  -0.01  -0.01
  76   1     0.05   0.01   0.01     0.00  -0.01   0.00     0.00   0.03   0.02
  77   1     0.01  -0.01  -0.01    -0.01   0.01   0.01     0.00   0.01   0.01
  78   1     0.04  -0.03   0.00     0.00   0.00   0.00     0.00   0.00   0.00
  79   1     0.01   0.00  -0.04    -0.01  -0.01   0.00     0.00   0.00   0.00
  80   1     0.00  -0.03  -0.01    -0.01   0.00   0.00     0.00   0.00   0.00
  81   1    -0.04  -0.03  -0.01     0.01   0.01   0.00     0.00   0.00   0.00
  82   1     0.03  -0.01  -0.01    -0.02   0.01   0.01     0.01   0.00   0.00
  83   1     0.00  -0.02  -0.03    -0.01   0.00   0.01     0.00   0.00   0.00
  84   1     0.02  -0.03   0.01     0.00   0.01   0.00     0.00  -0.01   0.00
  85   1    -0.03   0.00   0.01     0.00  -0.02  -0.01     0.00   0.00   0.00
  86   1    -0.05  -0.01   0.00     0.00  -0.01   0.01     0.00   0.00   0.01
  87   1    -0.03  -0.04  -0.05     0.00  -0.02   0.00     0.00   0.00   0.01
  88   1    -0.01  -0.01   0.03     0.00   0.01   0.02     0.00   0.00   0.00
  89   1    -0.01   0.03   0.05     0.00   0.00   0.01     0.00   0.01   0.00
  90   1    -0.03  -0.04   0.03     0.00  -0.01   0.01     0.00   0.01   0.00
  91   1    -0.01   0.04   0.06     0.01   0.00   0.01     0.01   0.00   0.01
  92   1     0.00  -0.03   0.03     0.00   0.01   0.01     0.00   0.00   0.00
  93   1    -0.01  -0.05   0.05     0.00  -0.01   0.01     0.00  -0.01   0.01
  94   1    -0.01  -0.04  -0.03     0.01   0.00   0.00     0.00   0.00   0.00
  95   1    -0.01  -0.02   0.01     0.01   0.00   0.00     0.00   0.00   0.00
  96   1     0.00  -0.01  -0.01     0.00  -0.01  -0.02     0.00   0.00   0.00
  97   1    -0.06   0.03   0.02     0.00  -0.01   0.00     0.01   0.00   0.00
  98   1    -0.01   0.05  -0.04    -0.01  -0.02   0.00     0.00   0.00   0.00
  99   1    -0.01   0.02  -0.02    -0.02  -0.01   0.02     0.01   0.00  -0.01
 100   1     0.03  -0.01  -0.04     0.00   0.00  -0.01     0.00   0.00   0.01
 101   1    -0.01   0.02  -0.03    -0.02   0.00  -0.01     0.01   0.00   0.01
 102   1     0.01   0.00  -0.01     0.01  -0.01  -0.01    -0.01   0.00   0.01
 103   1    -0.01   0.01   0.02     0.01  -0.01  -0.01    -0.01   0.00   0.01
 104   1     0.02   0.03   0.03    -0.01   0.01  -0.02     0.01   0.00   0.01
 105   1     0.05   0.00   0.01    -0.01   0.00  -0.02     0.00   0.00   0.01
 106   1     0.01   0.01  -0.01     0.00   0.00   0.01     0.00   0.00   0.00
 107   1    -0.04   0.02   0.00     0.00   0.00   0.01     0.00   0.00   0.00
 108   1     0.02   0.04  -0.01    -0.01   0.00   0.01     0.00   0.00   0.00
 109   1     0.20  -0.22  -0.19     0.01  -0.11  -0.08     0.00   0.04   0.03
 110   1     0.33   0.11  -0.02     0.03  -0.04  -0.05    -0.01   0.01   0.02
 111   1     0.19  -0.22  -0.20     0.00  -0.10  -0.07     0.00   0.03   0.03
 112   1    -0.21  -0.02   0.07    -0.13   0.09   0.08     0.04  -0.03  -0.02
 113   1    -0.19  -0.04   0.07    -0.05   0.05   0.05     0.02  -0.02  -0.02
 114   1    -0.21  -0.03   0.10     0.04   0.09   0.07    -0.01  -0.03  -0.02
                    79                     80                     81
                     A                      A                      A
 Frequencies --   385.6768               404.1666               430.4178
 Red. masses --     7.4490                 4.4990                 4.6990
 Frc consts  --     0.6528                 0.4330                 0.5129
 IR Inten    --    32.5952                15.6604                 3.0008
 Atom AN      X      Y      Z        X      Y      Z        X      Y      Z
   1   8     0.00  -0.01   0.03    -0.02  -0.01  -0.03     0.00   0.00   0.00
   2  12     0.04   0.24  -0.10    -0.04   0.05  -0.02     0.05  -0.09  -0.08
   3   8     0.08   0.06   0.02     0.05   0.01  -0.03     0.00   0.01   0.01
   4   6     0.03   0.00  -0.03    -0.01  -0.02   0.01     0.00   0.00   0.00
   5   7     0.02  -0.03  -0.03     0.01   0.00  -0.01    -0.07   0.01   0.01
   6   7     0.02  -0.02   0.00     0.00  -0.01  -0.01    -0.04   0.14  -0.09
   7   8     0.05   0.02   0.04     0.02   0.00  -0.01     0.00   0.00   0.00
   8   6    -0.03  -0.08  -0.04     0.01  -0.01  -0.01    -0.02   0.04   0.06
   9   6    -0.02  -0.06  -0.03     0.01  -0.02  -0.01    -0.04   0.06   0.09
  10   6    -0.03  -0.05  -0.01     0.01  -0.01  -0.01    -0.05   0.08   0.01
  11   8    -0.09   0.05  -0.01     0.00   0.02   0.01     0.00   0.00   0.00
  12   6     0.02  -0.03  -0.01     0.03   0.01  -0.01     0.00   0.00   0.00
  13   6     0.08  -0.06   0.04     0.05   0.01  -0.06     0.01   0.00   0.00
  14   6     0.02   0.02  -0.07     0.00   0.00   0.05     0.00   0.00   0.00
  15   8    -0.07  -0.05   0.03     0.00   0.02   0.00     0.00   0.00   0.00
  16   6     0.01  -0.01   0.00    -0.04  -0.03  -0.01     0.00   0.00   0.00
  17   8     0.05  -0.09   0.12     0.14   0.05   0.10     0.05   0.07  -0.09
  18   6    -0.03   0.13  -0.01     0.00  -0.01   0.12     0.00   0.01   0.00
  19   8    -0.14   0.09   0.00    -0.02   0.02  -0.06    -0.02   0.01   0.00
  20   8     0.00  -0.07  -0.15     0.08  -0.12   0.08     0.01   0.00   0.00
  21   6     0.04  -0.09   0.07    -0.06  -0.12  -0.11    -0.01  -0.02   0.03
  22   6     0.01  -0.10   0.14    -0.14  -0.02  -0.07    -0.04   0.00   0.01
  23   6     0.00   0.07  -0.09    -0.02  -0.04   0.20     0.00   0.00   0.00
  24   8     0.05  -0.24   0.12     0.09   0.02  -0.14     0.02  -0.07   0.06
  25   6    -0.07   0.04   0.03    -0.12   0.06   0.10    -0.05   0.03   0.03
  26   6     0.00   0.06  -0.01    -0.02   0.03  -0.06     0.00   0.00   0.00
  27   6     0.03  -0.06   0.08    -0.04   0.04  -0.04     0.00   0.00   0.00
  28   6    -0.01   0.05  -0.09     0.02  -0.03   0.06     0.00   0.00   0.00
  29   6     0.00   0.00   0.01     0.00   0.00   0.00    -0.03  -0.09  -0.06
  30   6     0.05  -0.01   0.00     0.01   0.00   0.00     0.16   0.00  -0.02
  31   6    -0.01   0.00   0.01     0.00   0.00   0.00     0.03  -0.06  -0.02
  32   6    -0.02   0.00   0.00    -0.01   0.00   0.00     0.03  -0.02  -0.01
  33   6    -0.02   0.00   0.00    -0.01   0.00   0.00     0.06   0.03   0.00
  34   6    -0.01   0.00   0.00    -0.01   0.00   0.00     0.03   0.00  -0.03
  35   6     0.00   0.00   0.01     0.00   0.00   0.00     0.02  -0.04  -0.06
  36   6    -0.01   0.00   0.00    -0.01   0.00   0.00     0.03   0.00   0.05
  37   6     0.00  -0.01   0.01     0.00   0.00   0.01     0.02   0.05  -0.01
  38   6     0.01   0.00   0.01     0.01   0.00   0.01     0.08  -0.04  -0.04
  39   6     0.02   0.00   0.01     0.00   0.01   0.00     0.02  -0.04  -0.06
  40   6     0.01   0.02   0.01     0.00   0.01   0.00    -0.07  -0.06  -0.04
  41   6     0.00   0.02   0.01     0.00   0.01   0.00     0.03  -0.04  -0.02
  42   6     0.03   0.01   0.01     0.01   0.00   0.00     0.10  -0.06   0.01
  43   6    -0.01   0.01   0.01     0.00   0.00   0.01    -0.06  -0.05  -0.01
  44   6     0.00   0.02   0.02     0.00   0.01   0.00     0.01  -0.03   0.13
  45   6     0.01   0.01   0.00     0.00   0.00   0.00     0.01   0.01   0.06
  46   6     0.00   0.00   0.00     0.00   0.00   0.00    -0.02   0.02  -0.03
  47   6     0.00  -0.01  -0.01     0.00   0.00   0.00     0.00   0.05  -0.01
  48   6     0.00   0.01   0.00     0.00   0.00   0.00     0.00  -0.01   0.03
  49   6    -0.03  -0.01   0.01    -0.01  -0.01   0.00    -0.10  -0.02   0.13
  50   6     0.00   0.01  -0.02     0.00   0.00   0.00     0.02   0.03  -0.08
  51   6     0.00   0.01  -0.03     0.00   0.00   0.00    -0.02   0.02  -0.04
  52   6    -0.02   0.00   0.01     0.00   0.00   0.00    -0.04   0.00   0.07
  53   6    -0.02  -0.10  -0.08    -0.01  -0.01  -0.01     0.01   0.07   0.04
  54   6    -0.03   0.07   0.05     0.02   0.01   0.00    -0.06   0.00   0.02
  55   1     0.01  -0.04  -0.04     0.01  -0.02  -0.01    -0.03   0.04   0.11
  56   1     0.06  -0.11   0.06     0.07   0.02  -0.06     0.00   0.00   0.00
  57   1     0.07   0.07  -0.09     0.00   0.01   0.05     0.00   0.01   0.01
  58   1    -0.01  -0.01  -0.02    -0.03  -0.04   0.00     0.00   0.00   0.00
  59   1     0.04   0.00   0.00    -0.06  -0.04  -0.02    -0.01   0.00   0.00
  60   1     0.02   0.00  -0.02    -0.02  -0.03   0.00     0.00   0.00   0.00
  61   1    -0.02  -0.11   0.17    -0.22   0.18  -0.14    -0.06  -0.02   0.04
  62   1    -0.05   0.14  -0.16    -0.09   0.00   0.15     0.00   0.00   0.00
  63   1     0.04   0.11  -0.05     0.09   0.12   0.21     0.01   0.07   0.00
  64   1    -0.07   0.10  -0.01    -0.34   0.19   0.22    -0.09   0.05   0.06
  65   1    -0.26   0.07   0.07    -0.04   0.04   0.08    -0.09   0.07   0.06
  66   1     0.00   0.06   0.10     0.02   0.09  -0.19     0.00   0.00   0.00
  67   1     0.08   0.04  -0.03    -0.21  -0.13  -0.20     0.00   0.01   0.01
  68   1    -0.10   0.08  -0.05     0.15   0.20  -0.11     0.01  -0.01   0.01
  69   1     0.02  -0.07   0.14    -0.05   0.00   0.06     0.00   0.00   0.01
  70   1     0.02  -0.05   0.05    -0.08   0.06  -0.02    -0.01   0.00   0.00
  71   1    -0.02  -0.06   0.05    -0.08   0.10  -0.10    -0.01   0.00  -0.01
  72   1    -0.02   0.04  -0.07     0.02  -0.06   0.05     0.00  -0.01   0.00
  73   1     0.00   0.10  -0.14     0.02  -0.05   0.10     0.00  -0.01   0.01
  74   1    -0.05   0.07  -0.05     0.02  -0.04   0.02     0.01   0.00   0.00
  75   1    -0.02   0.00   0.00    -0.01   0.00   0.00     0.01   0.04   0.03
  76   1    -0.02   0.00   0.00    -0.01  -0.01  -0.01     0.06   0.10   0.05
  77   1     0.00  -0.01  -0.01     0.00   0.00   0.00     0.01   0.05   0.03
  78   1    -0.02   0.01   0.00    -0.01   0.00   0.00     0.04   0.00   0.07
  79   1     0.00  -0.01   0.01     0.00  -0.01   0.01     0.02   0.06  -0.02
  80   1     0.00   0.00   0.00     0.00   0.00   0.00    -0.09  -0.02  -0.02
  81   1     0.01   0.02   0.00    -0.01   0.01   0.01    -0.21  -0.04  -0.01
  82   1    -0.03   0.02   0.02     0.00   0.01   0.00    -0.07   0.02   0.00
  83   1    -0.02   0.00   0.02     0.00   0.00   0.01    -0.08  -0.04  -0.03
  84   1    -0.01   0.03   0.00     0.00   0.01   0.00     0.00  -0.05   0.15
  85   1     0.01   0.01  -0.01     0.01   0.00   0.00     0.02   0.03   0.06
  86   1     0.01   0.01  -0.02     0.00   0.00   0.00     0.01   0.02   0.05
  87   1     0.01   0.01   0.02     0.01   0.00   0.01     0.01   0.01   0.06
  88   1     0.01   0.00   0.00     0.01   0.00   0.00    -0.04  -0.07  -0.08
  89   1     0.01  -0.02  -0.01     0.00  -0.01   0.00    -0.03   0.04  -0.05
  90   1     0.01   0.00   0.00     0.01   0.00   0.00    -0.05   0.10  -0.05
  91   1     0.00  -0.02  -0.02     0.00  -0.01   0.00    -0.01   0.05  -0.01
  92   1     0.00  -0.01  -0.02     0.00   0.00   0.00     0.00   0.04  -0.01
  93   1    -0.01   0.01  -0.02     0.00   0.00  -0.01    -0.01   0.05  -0.01
  94   1     0.01   0.03   0.01     0.00   0.01   0.01    -0.04  -0.08  -0.02
  95   1     0.00   0.01  -0.02     0.00   0.00   0.00    -0.01  -0.02   0.11
  96   1     0.00   0.02  -0.01     0.00   0.00   0.00     0.00  -0.02   0.07
  97   1    -0.05  -0.02  -0.01     0.01  -0.01   0.00    -0.18  -0.04   0.13
  98   1    -0.02  -0.01  -0.02    -0.01  -0.03   0.00    -0.09   0.00   0.00
  99   1    -0.04  -0.02   0.05    -0.02   0.00   0.01    -0.14  -0.03   0.19
 100   1     0.01   0.00  -0.04     0.00   0.00   0.00     0.21   0.00  -0.20
 101   1    -0.04   0.01  -0.03    -0.01   0.00   0.00    -0.18   0.14  -0.17
 102   1     0.02   0.00  -0.03     0.00   0.00  -0.01     0.06   0.04  -0.14
 103   1     0.05   0.00  -0.04     0.02   0.00   0.00     0.04   0.03  -0.05
 104   1    -0.03   0.01  -0.07     0.00  -0.01  -0.01    -0.08   0.07  -0.09
 105   1    -0.01   0.01  -0.04    -0.01  -0.01   0.01     0.04   0.01  -0.04
 106   1    -0.02   0.01   0.01    -0.01   0.00   0.00     0.05   0.05   0.04
 107   1    -0.01   0.00   0.02     0.00   0.00   0.00    -0.10   0.00   0.14
 108   1    -0.02   0.00   0.00     0.00   0.00  -0.01    -0.03   0.04   0.12
 109   1    -0.01  -0.13  -0.10    -0.02   0.00   0.00     0.00   0.04   0.01
 110   1     0.01  -0.07  -0.07    -0.03  -0.03  -0.02     0.01   0.10   0.03
 111   1    -0.01  -0.11  -0.09    -0.02   0.00   0.00     0.01   0.10   0.05
 112   1    -0.15   0.13   0.09     0.00   0.02   0.00    -0.02  -0.02   0.00
 113   1    -0.05   0.08   0.06     0.01   0.01   0.00    -0.03  -0.02   0.01
 114   1     0.10   0.14   0.07     0.03   0.02  -0.01    -0.11  -0.03   0.04
                    82                     83                     84
                     A                      A                      A
 Frequencies --   433.8623               435.5202               439.4874
 Red. masses --     3.6817                 3.8438                 4.1958
 Frc consts  --     0.4083                 0.4296                 0.4775
 IR Inten    --     0.9640                 6.5751                16.7891
 Atom AN      X      Y      Z        X      Y      Z        X      Y      Z
   1   8     0.00   0.00   0.00     0.00   0.00   0.00     0.00   0.00   0.00
   2  12     0.05  -0.01  -0.04    -0.05  -0.04   0.00     0.04  -0.09  -0.06
   3   8     0.00   0.00   0.01     0.00   0.00  -0.01     0.00   0.00   0.01
   4   6     0.00   0.00   0.00     0.00   0.00   0.00     0.00   0.00   0.00
   5   7    -0.07   0.06  -0.09     0.01   0.04  -0.03    -0.01   0.11  -0.11
   6   7     0.05  -0.05   0.13     0.07  -0.01   0.07    -0.05   0.03  -0.07
   7   8     0.00   0.00   0.00     0.00   0.00   0.00     0.00   0.00   0.00
   8   6    -0.04   0.07  -0.04    -0.02   0.00  -0.04    -0.01   0.03  -0.03
   9   6    -0.03   0.04   0.03    -0.02   0.00   0.00     0.01  -0.02   0.04
  10   6     0.00  -0.02   0.08     0.00  -0.02   0.05     0.00   0.01   0.00
  11   8     0.01   0.00   0.00    -0.01   0.00   0.00     0.00   0.00   0.00
  12   6     0.00   0.00   0.00     0.00   0.00   0.00     0.00   0.00   0.00
  13   6     0.00   0.00   0.00     0.00   0.00   0.00     0.00   0.00   0.00
  14   6     0.00   0.00   0.00     0.00   0.00   0.00     0.00   0.00   0.00
  15   8     0.00   0.00   0.00     0.00   0.00   0.00     0.00   0.00   0.00
  16   6    -0.01   0.00   0.00     0.00   0.00   0.00     0.00   0.00   0.00
  17   8     0.03   0.03  -0.04    -0.01   0.00   0.00     0.04   0.05  -0.08
  18   6     0.00   0.00   0.00     0.00   0.00   0.00     0.00   0.00   0.00
  19   8    -0.01   0.00   0.00     0.01   0.00   0.00    -0.01   0.00   0.00
  20   8     0.01   0.00  -0.01     0.00   0.00   0.01     0.00   0.01   0.00
  21   6    -0.01  -0.01   0.02     0.00   0.01   0.00    -0.01  -0.01   0.03
  22   6    -0.02  -0.01   0.01     0.00   0.01  -0.01    -0.03  -0.01   0.01
  23   6     0.01   0.00   0.00    -0.01   0.00   0.01     0.01   0.00   0.00
  24   8     0.01  -0.04   0.03    -0.01   0.01  -0.01     0.02  -0.06   0.06
  25   6    -0.03   0.02   0.02     0.01  -0.01   0.00    -0.04   0.03   0.02
  26   6     0.00   0.01   0.00     0.00  -0.01   0.00     0.01   0.01   0.00
  27   6     0.00   0.00   0.00     0.00   0.00   0.00     0.00   0.00   0.00
  28   6     0.00   0.00   0.00     0.00   0.00   0.00     0.00   0.00   0.00
  29   6    -0.02  -0.13  -0.05     0.01   0.13   0.10     0.02   0.14   0.13
  30   6    -0.06   0.02  -0.01     0.19  -0.01  -0.08    -0.10   0.01   0.05
  31   6     0.02  -0.09  -0.01     0.00   0.07   0.06     0.01   0.07   0.09
  32   6     0.01  -0.01  -0.02    -0.01   0.03   0.01    -0.01   0.04   0.00
  33   6     0.03   0.05  -0.01    -0.01  -0.02  -0.03    -0.02  -0.02  -0.05
  34   6     0.03   0.00  -0.04     0.00   0.02   0.01     0.00   0.03  -0.01
  35   6     0.02  -0.07  -0.03     0.01   0.06   0.07     0.02   0.07   0.09
  36   6    -0.01  -0.04   0.11    -0.01  -0.04  -0.02    -0.03  -0.08   0.02
  37   6     0.06   0.02   0.04     0.03  -0.06   0.01     0.07  -0.09   0.04
  38   6    -0.04   0.02  -0.03     0.10   0.01  -0.07    -0.05  -0.01   0.04
  39   6    -0.01   0.00   0.02     0.03   0.00   0.01    -0.02   0.00  -0.01
  40   6     0.03  -0.03   0.02    -0.03  -0.03   0.03     0.01   0.01  -0.02
  41   6    -0.01  -0.03   0.02     0.03  -0.04   0.00    -0.02   0.02  -0.01
  42   6    -0.05   0.01  -0.02     0.09  -0.02  -0.05    -0.05   0.00   0.03
  43   6     0.01   0.06  -0.06    -0.06   0.11  -0.07     0.03  -0.07   0.05
  44   6    -0.04  -0.02  -0.10    -0.07  -0.01   0.01     0.04   0.00   0.01
  45   6     0.03   0.07   0.11    -0.02   0.01  -0.05    -0.01   0.05  -0.01
  46   6    -0.01  -0.03  -0.07     0.02  -0.06   0.01     0.03  -0.11  -0.02
  47   6    -0.01   0.00  -0.04    -0.01  -0.09   0.00    -0.02  -0.14  -0.02
  48   6     0.00   0.04   0.08     0.00   0.04  -0.02    -0.01   0.07   0.00
  49   6     0.08   0.01  -0.08     0.01  -0.03   0.05    -0.02   0.01  -0.01
  50   6    -0.05   0.01   0.06    -0.07   0.06  -0.01     0.05  -0.03   0.00
  51   6    -0.05   0.00   0.02    -0.16   0.02  -0.04     0.10  -0.01   0.02
  52   6     0.07  -0.01  -0.04     0.08  -0.03   0.03    -0.06   0.02  -0.01
  53   6     0.00   0.03   0.02     0.02  -0.03  -0.03     0.03   0.01  -0.01
  54   6    -0.04  -0.01   0.01    -0.03   0.03   0.03    -0.01  -0.01  -0.01
  55   1    -0.03   0.04   0.03    -0.01   0.02  -0.01     0.03  -0.05   0.08
  56   1     0.00   0.00  -0.01     0.00   0.00   0.00    -0.01   0.01   0.00
  57   1     0.01   0.01   0.01    -0.01   0.00  -0.01    -0.01  -0.01   0.00
  58   1    -0.01   0.00   0.00     0.00   0.00   0.00     0.00   0.00   0.00
  59   1    -0.01   0.00   0.00     0.00   0.00   0.00     0.00   0.00   0.00
  60   1     0.00   0.00   0.00     0.00   0.00   0.00     0.00   0.00   0.00
  61   1    -0.03  -0.01   0.02     0.01   0.01  -0.01    -0.04  -0.02   0.03
  62   1     0.00   0.01  -0.01    -0.01  -0.01   0.01     0.01   0.00   0.00
  63   1     0.01   0.04   0.00    -0.01  -0.02   0.00     0.02   0.06  -0.01
  64   1    -0.05   0.03   0.03     0.02  -0.02  -0.01    -0.08   0.04   0.04
  65   1    -0.06   0.04   0.04     0.02  -0.01  -0.01    -0.08   0.06   0.06
  66   1     0.00   0.01   0.01    -0.01  -0.01  -0.02     0.01   0.01   0.01
  67   1     0.01   0.00   0.00    -0.02   0.00   0.01     0.02   0.01   0.00
  68   1    -0.01   0.01   0.00     0.01  -0.02   0.01     0.00   0.01   0.00
  69   1    -0.01   0.00   0.01     0.00   0.00   0.00     0.00   0.00   0.00
  70   1    -0.01   0.01  -0.01     0.01   0.00   0.00     0.00   0.00   0.00
  71   1    -0.01   0.01  -0.01     0.01   0.00   0.01     0.00   0.00   0.00
  72   1     0.00  -0.01   0.01     0.00   0.01   0.00     0.00   0.00   0.00
  73   1     0.00  -0.01   0.01     0.00   0.01  -0.01     0.00   0.00   0.00
  74   1     0.00   0.00   0.00     0.00   0.00   0.00     0.00   0.00   0.01
  75   1    -0.03   0.07   0.02    -0.02  -0.05  -0.05    -0.04  -0.04  -0.07
  76   1     0.03   0.14   0.04    -0.01  -0.12  -0.10    -0.02  -0.13  -0.14
  77   1     0.03   0.08   0.00     0.02  -0.06  -0.06     0.03  -0.05  -0.09
  78   1     0.00  -0.04   0.12    -0.01  -0.05  -0.03    -0.03  -0.10   0.01
  79   1     0.06   0.04   0.03     0.03  -0.07   0.01     0.06  -0.10   0.04
  80   1     0.03   0.01   0.04    -0.09   0.04   0.07     0.04  -0.02  -0.05
  81   1     0.08  -0.04   0.01    -0.18  -0.02   0.08     0.09   0.01  -0.05
  82   1     0.02  -0.05   0.01    -0.09  -0.05   0.04     0.04   0.03  -0.03
  83   1     0.02   0.05  -0.06    -0.07   0.10  -0.07     0.04  -0.07   0.05
  84   1    -0.03  -0.02  -0.09    -0.08  -0.01   0.02     0.05   0.00   0.01
  85   1     0.07   0.13   0.12    -0.02   0.06   0.00     0.01   0.15   0.06
  86   1     0.05   0.08  -0.02    -0.04   0.02  -0.11    -0.04   0.06  -0.17
  87   1     0.06   0.13   0.19    -0.03   0.02  -0.06    -0.01   0.10   0.02
  88   1    -0.02  -0.15  -0.18     0.04   0.00   0.03     0.07  -0.07  -0.04
  89   1    -0.02  -0.10  -0.14     0.03  -0.09   0.02     0.05  -0.21  -0.04
  90   1    -0.02   0.17  -0.13     0.04  -0.09   0.02     0.07  -0.07  -0.03
  91   1    -0.04  -0.06  -0.09    -0.04  -0.07   0.00    -0.06  -0.14  -0.03
  92   1    -0.02  -0.06  -0.07    -0.01  -0.16  -0.01    -0.03  -0.27  -0.05
  93   1    -0.05   0.11  -0.08    -0.05  -0.07   0.01    -0.11  -0.06  -0.02
  94   1    -0.06   0.02   0.05     0.00   0.13   0.03    -0.01   0.21   0.08
  95   1    -0.05   0.02   0.06    -0.04   0.03  -0.15    -0.08   0.06  -0.21
  96   1     0.00   0.08   0.16     0.00   0.09  -0.01     0.00   0.16   0.05
  97   1     0.17   0.05  -0.06     0.09  -0.03   0.01    -0.07   0.01   0.02
  98   1     0.08   0.01   0.06     0.00  -0.06   0.15    -0.01   0.03  -0.09
  99   1     0.15   0.04  -0.18     0.03  -0.03   0.04    -0.04   0.01   0.00
 100   1    -0.12   0.04   0.14     0.01   0.07  -0.02     0.02  -0.04  -0.01
 101   1     0.12  -0.03   0.13    -0.08   0.10  -0.02     0.03  -0.05  -0.01
 102   1    -0.15   0.04   0.11    -0.14   0.10  -0.01     0.09  -0.06  -0.01
 103   1    -0.15  -0.01   0.04    -0.20  -0.04  -0.02     0.14   0.03   0.01
 104   1     0.03  -0.08   0.10    -0.08  -0.09   0.01     0.04   0.07  -0.02
 105   1    -0.12   0.01   0.03    -0.30   0.04  -0.06     0.20  -0.03   0.03
 106   1     0.11  -0.05  -0.05     0.25  -0.07  -0.01    -0.16   0.05   0.01
 107   1     0.14  -0.02  -0.08     0.20  -0.05   0.00    -0.14   0.03   0.02
 108   1     0.02  -0.06   0.03    -0.04  -0.13   0.23     0.02   0.09  -0.13
 109   1     0.01   0.06   0.07     0.04  -0.03  -0.01     0.04   0.01   0.00
 110   1     0.02   0.01   0.07     0.06  -0.02   0.01     0.05   0.02   0.01
 111   1    -0.01  -0.05   0.00     0.02  -0.09  -0.05     0.02  -0.03  -0.02
 112   1     0.00   0.00  -0.03    -0.05   0.07   0.02     0.01  -0.01  -0.03
 113   1    -0.11  -0.02   0.01    -0.07   0.03   0.03    -0.03  -0.01  -0.01
 114   1    -0.04  -0.01  -0.02     0.03   0.07   0.02    -0.02  -0.02  -0.03
                    85                     86                     87
                     A                      A                      A
 Frequencies --   442.6619               454.5249               455.5295
 Red. masses --     4.4933                 2.6369                 2.6950
 Frc consts  --     0.5187                 0.3210                 0.3295
 IR Inten    --    10.2959                 1.1983                 1.2706
 Atom AN      X      Y      Z        X      Y      Z        X      Y      Z
   1   8     0.00   0.00   0.00     0.01   0.00   0.00     0.00   0.00   0.00
   2  12    -0.04   0.08   0.12    -0.01   0.00   0.01    -0.01  -0.01   0.00
   3   8     0.00  -0.01  -0.01     0.00   0.01  -0.02     0.00   0.00   0.00
   4   6     0.00   0.00   0.00     0.00   0.00   0.00     0.00   0.00   0.00
   5   7    -0.02   0.09  -0.16     0.01   0.00   0.01    -0.01   0.00   0.00
   6   7    -0.04   0.02  -0.10     0.01   0.00  -0.01     0.01   0.03  -0.01
   7   8     0.00   0.00   0.00     0.00   0.00   0.00     0.00   0.00   0.00
   8   6     0.01   0.00  -0.07    -0.01  -0.01   0.00    -0.01   0.00   0.00
   9   6     0.05  -0.07   0.00     0.00  -0.01  -0.01    -0.01   0.01   0.01
  10   6     0.02  -0.04  -0.03     0.00  -0.01  -0.01    -0.01   0.00   0.01
  11   8     0.00   0.00   0.00    -0.01  -0.01   0.00     0.00   0.00   0.00
  12   6     0.00   0.00   0.00     0.00   0.00   0.00     0.00   0.00   0.00
  13   6     0.00   0.00   0.00     0.00   0.00   0.01     0.00   0.00   0.00
  14   6     0.00   0.00   0.00     0.00  -0.01  -0.01     0.00   0.00   0.00
  15   8     0.00   0.00   0.00     0.00   0.00   0.00     0.00   0.00   0.00
  16   6     0.00   0.00   0.00     0.01   0.01   0.00     0.00   0.00   0.00
  17   8    -0.07  -0.08   0.12    -0.01   0.00   0.01     0.00   0.00   0.01
  18   6     0.00  -0.01  -0.01     0.00   0.00   0.00     0.00   0.00   0.00
  19   8     0.02  -0.01   0.00     0.00   0.01   0.00     0.00   0.00   0.00
  20   8    -0.02   0.01   0.01     0.01   0.00   0.01     0.00   0.00   0.00
  21   6     0.02   0.03  -0.04     0.00   0.00   0.00     0.00   0.00   0.00
  22   6     0.05   0.02  -0.01     0.00   0.00   0.00     0.00   0.00   0.00
  23   6    -0.01   0.00   0.00    -0.01  -0.01   0.00     0.00   0.00   0.00
  24   8    -0.03   0.09  -0.08     0.00   0.01  -0.01     0.00   0.00   0.00
  25   6     0.07  -0.04  -0.04     0.00   0.00   0.00     0.00   0.00   0.00
  26   6     0.00  -0.01   0.00    -0.01  -0.01   0.00     0.00   0.00   0.00
  27   6     0.00   0.00   0.00     0.01  -0.01   0.01     0.00   0.00   0.00
  28   6     0.00   0.00   0.00     0.00   0.00  -0.01     0.00   0.00   0.00
  29   6     0.01  -0.09  -0.04     0.00   0.05   0.03     0.00  -0.02  -0.01
  30   6     0.06  -0.02  -0.02     0.04  -0.01  -0.01     0.10  -0.01  -0.03
  31   6    -0.01  -0.07  -0.01     0.01   0.00   0.05     0.00   0.00  -0.02
  32   6    -0.03   0.01  -0.03     0.01   0.00   0.01     0.00   0.00  -0.01
  33   6    -0.03   0.04  -0.02     0.02  -0.01  -0.01     0.00   0.01   0.00
  34   6    -0.02   0.00  -0.03     0.00   0.01   0.00     0.00   0.00   0.00
  35   6    -0.01  -0.07   0.01     0.00   0.05  -0.02     0.00  -0.02   0.00
  36   6    -0.05  -0.04   0.10    -0.04  -0.10   0.10     0.02   0.04  -0.04
  37   6     0.06  -0.02   0.08    -0.10   0.05  -0.10     0.04  -0.02   0.04
  38   6     0.05   0.00   0.01     0.03   0.00   0.01     0.07  -0.02   0.02
  39   6     0.02   0.02  -0.01     0.01   0.00   0.00     0.01   0.00   0.00
  40   6    -0.02   0.03  -0.01    -0.01   0.01   0.01    -0.02   0.01   0.01
  41   6     0.01   0.02  -0.02     0.01   0.00  -0.01     0.02   0.00  -0.02
  42   6     0.05   0.00   0.00     0.02   0.01  -0.02     0.04   0.01  -0.05
  43   6    -0.01  -0.02   0.04    -0.01  -0.04   0.04    -0.02  -0.12   0.09
  44   6     0.03   0.02   0.08    -0.03   0.00  -0.04    -0.10  -0.01  -0.11
  45   6     0.04   0.07   0.09     0.02   0.08   0.08    -0.01  -0.03  -0.03
  46   6     0.00  -0.05  -0.06     0.02  -0.13  -0.06    -0.01   0.05   0.02
  47   6    -0.01  -0.05  -0.05     0.01   0.11   0.05    -0.01  -0.04  -0.02
  48   6     0.00   0.07   0.09     0.00  -0.09  -0.11     0.00   0.03   0.04
  49   6    -0.06  -0.02   0.07     0.03   0.00  -0.02     0.09   0.00  -0.07
  50   6     0.03   0.00  -0.04    -0.04   0.02   0.02    -0.12   0.05   0.04
  51   6     0.02   0.00  -0.02     0.04   0.00  -0.01     0.10  -0.01  -0.02
  52   6    -0.04   0.00   0.03    -0.05   0.00   0.03    -0.12   0.01   0.08
  53   6    -0.03  -0.02  -0.02     0.00  -0.01  -0.01     0.00   0.00   0.00
  54   6     0.02   0.02  -0.01     0.00   0.01   0.00    -0.01   0.01   0.01
  55   1     0.06  -0.10   0.04     0.00  -0.01  -0.01    -0.01   0.01   0.01
  56   1     0.00   0.00   0.01     0.00  -0.01   0.01     0.00   0.00   0.00
  57   1     0.00   0.00   0.00    -0.01  -0.01  -0.01     0.00   0.00   0.00
  58   1     0.00   0.00   0.00     0.01   0.01   0.00     0.00   0.00   0.00
  59   1     0.00   0.00   0.00     0.01   0.01   0.00     0.00   0.00   0.00
  60   1     0.00   0.00   0.00     0.01   0.01   0.00     0.00   0.00   0.00
  61   1     0.07   0.03  -0.05     0.00   0.01  -0.01     0.00   0.00   0.00
  62   1     0.00  -0.01   0.01    -0.01  -0.01   0.00     0.00   0.00   0.00
  63   1    -0.03  -0.10   0.02    -0.01  -0.01   0.01     0.00   0.00   0.00
  64   1     0.13  -0.07  -0.08     0.01  -0.01   0.00     0.00   0.00   0.00
  65   1     0.13  -0.10  -0.09     0.01  -0.01  -0.01     0.00   0.00   0.00
  66   1    -0.01  -0.02  -0.02    -0.01  -0.01   0.00     0.00  -0.01   0.00
  67   1    -0.01  -0.01   0.00     0.00  -0.01   0.00     0.00   0.00   0.01
  68   1     0.01  -0.02   0.00    -0.01  -0.01   0.00     0.00  -0.01   0.00
  69   1     0.00   0.00  -0.01     0.01   0.00  -0.01     0.00   0.00   0.00
  70   1     0.01   0.00   0.00     0.02  -0.01   0.01     0.00   0.00   0.00
  71   1     0.01  -0.01   0.01     0.02  -0.02   0.02     0.00   0.00   0.00
  72   1     0.00   0.00   0.00     0.00   0.01  -0.01     0.00   0.00   0.00
  73   1     0.00   0.00  -0.01     0.00   0.01  -0.01     0.00   0.00   0.00
  74   1    -0.01   0.00   0.00     0.00   0.01   0.01     0.00   0.00   0.00
  75   1    -0.05   0.07   0.00    -0.01  -0.03  -0.01     0.01   0.01   0.00
  76   1    -0.03   0.09   0.02     0.02  -0.04  -0.03     0.00   0.02   0.01
  77   1     0.02   0.07  -0.02    -0.02  -0.03  -0.01     0.01   0.01   0.00
  78   1    -0.04  -0.04   0.10    -0.03  -0.12   0.12     0.02   0.04  -0.04
  79   1     0.05  -0.02   0.10    -0.10   0.06  -0.13     0.04  -0.02   0.04
  80   1    -0.03   0.01  -0.02    -0.02   0.00   0.00    -0.07   0.00   0.01
  81   1    -0.08   0.04   0.01    -0.04   0.01   0.02    -0.10   0.02   0.03
  82   1    -0.02   0.03  -0.01    -0.02   0.00   0.00    -0.04  -0.01   0.00
  83   1    -0.02  -0.02   0.05    -0.01  -0.04   0.05    -0.03  -0.12   0.12
  84   1     0.02   0.02   0.07    -0.04   0.01  -0.05    -0.11   0.01  -0.13
  85   1     0.08   0.12   0.09     0.07   0.20   0.13    -0.03  -0.07  -0.04
  86   1     0.08   0.07  -0.05     0.03   0.10  -0.14    -0.02  -0.04   0.05
  87   1     0.07   0.16   0.21     0.05   0.18   0.20    -0.02  -0.07  -0.08
  88   1     0.02  -0.12  -0.15     0.06  -0.16  -0.15    -0.03   0.05   0.05
  89   1     0.00  -0.16  -0.13     0.03  -0.28  -0.12    -0.02   0.11   0.05
  90   1     0.02   0.13  -0.12     0.06   0.06  -0.11    -0.03  -0.02   0.04
  91   1    -0.03  -0.16  -0.12     0.07   0.21   0.13    -0.03  -0.07  -0.05
  92   1    -0.02  -0.12  -0.09     0.03   0.26   0.11    -0.01  -0.10  -0.04
  93   1    -0.06   0.11  -0.12     0.11  -0.09   0.12    -0.05   0.04  -0.04
  94   1    -0.03   0.12   0.11     0.06  -0.18  -0.14    -0.03   0.06   0.05
  95   1    -0.06   0.06  -0.01     0.11  -0.07   0.06    -0.04   0.03  -0.02
  96   1     0.00   0.13   0.16     0.00  -0.20  -0.24     0.00   0.08   0.10
  97   1    -0.12  -0.05   0.04     0.09   0.01  -0.04     0.24   0.03  -0.09
  98   1    -0.06  -0.02  -0.02     0.03  -0.02   0.06     0.08  -0.03   0.15
  99   1    -0.11  -0.04   0.15     0.06   0.00  -0.06     0.19   0.03  -0.19
 100   1     0.08  -0.03  -0.10    -0.05   0.04   0.05    -0.13   0.11   0.13
 101   1    -0.10   0.03  -0.09     0.02   0.01   0.04     0.06   0.04   0.11
 102   1     0.10  -0.03  -0.08    -0.09   0.04   0.03    -0.27   0.12   0.09
 103   1     0.08  -0.01  -0.03     0.10   0.01  -0.02     0.24   0.03  -0.05
 104   1    -0.03   0.03  -0.07    -0.02   0.04  -0.06    -0.04   0.13  -0.14
 105   1     0.03   0.00  -0.04     0.08  -0.01  -0.01     0.24  -0.02  -0.02
 106   1    -0.05   0.02   0.03    -0.07   0.03   0.03    -0.17   0.09   0.08
 107   1    -0.06   0.00   0.05    -0.10   0.01   0.06    -0.27   0.02   0.18
 108   1    -0.02   0.02   0.01    -0.01   0.04  -0.01    -0.03   0.12  -0.02
 109   1    -0.02   0.01   0.02     0.01  -0.02  -0.02     0.00   0.00   0.00
 110   1    -0.05  -0.06  -0.02     0.02   0.00  -0.01     0.01   0.01   0.01
 111   1    -0.04  -0.04  -0.01     0.01  -0.02  -0.01     0.00  -0.01  -0.01
 112   1    -0.01   0.05  -0.01    -0.02   0.02   0.01    -0.02   0.03   0.00
 113   1    -0.01   0.03  -0.01     0.00   0.01   0.00    -0.02   0.00   0.00
 114   1     0.08   0.05  -0.02     0.03   0.02   0.01     0.00   0.02   0.02
                    88                     89                     90
                     A                      A                      A
 Frequencies --   459.8498               483.0827               513.5760
 Red. masses --     4.3423                 4.4051                 3.5793
 Frc consts  --     0.5410                 0.6057                 0.5562
 IR Inten    --    12.2551                 0.7190                 0.6650
 Atom AN      X      Y      Z        X      Y      Z        X      Y      Z
   1   8    -0.06  -0.03  -0.04    -0.04  -0.02  -0.02    -0.01   0.00   0.00
   2  12    -0.01   0.01   0.00     0.00   0.02   0.01     0.05   0.03   0.01
   3   8     0.03  -0.10   0.19     0.09   0.00   0.04     0.01   0.00   0.01
   4   6     0.00  -0.03   0.01     0.01  -0.02   0.00     0.00   0.00   0.00
   5   7     0.01   0.00   0.01     0.01   0.01   0.00     0.14  -0.05  -0.06
   6   7     0.00   0.00   0.00    -0.01  -0.01  -0.01    -0.06   0.10   0.06
   7   8     0.02  -0.02  -0.01     0.02  -0.01   0.00     0.00   0.00   0.00
   8   6     0.00   0.00   0.00     0.00   0.00   0.00     0.14  -0.02  -0.11
   9   6     0.00   0.00   0.00     0.00  -0.01  -0.01     0.12   0.06   0.00
  10   6     0.00   0.00   0.00     0.00  -0.01  -0.01    -0.03   0.09   0.11
  11   8     0.09   0.08   0.01     0.02   0.09   0.01     0.00   0.01   0.00
  12   6     0.04   0.04  -0.04     0.10   0.00  -0.03     0.01   0.00  -0.01
  13   6     0.05   0.05  -0.13     0.15  -0.04  -0.06     0.01   0.00   0.00
  14   6     0.03   0.06   0.08     0.02   0.07   0.04     0.01   0.01   0.01
  15   8     0.00  -0.01   0.00    -0.03   0.03  -0.01     0.00   0.00   0.00
  16   6    -0.09  -0.05  -0.04    -0.06  -0.03  -0.03    -0.01   0.00   0.00
  17   8     0.00  -0.06   0.01    -0.15   0.14  -0.08     0.02  -0.01   0.00
  18   6     0.06  -0.03   0.01    -0.02   0.02   0.10     0.00   0.01   0.00
  19   8    -0.01  -0.07   0.02     0.00   0.06  -0.02     0.00   0.01   0.00
  20   8    -0.16   0.00  -0.05     0.08  -0.03  -0.01     0.01   0.01  -0.01
  21   6    -0.03   0.01   0.02     0.08   0.01   0.00     0.00   0.01   0.01
  22   6     0.05  -0.03   0.02     0.03   0.17   0.01     0.00  -0.02   0.00
  23   6     0.09   0.07  -0.03    -0.11  -0.10   0.01    -0.01  -0.01  -0.03
  24   8    -0.01  -0.03   0.04     0.01  -0.10   0.03    -0.01   0.02   0.00
  25   6     0.04   0.00  -0.04     0.05  -0.04  -0.03    -0.01   0.00   0.01
  26   6     0.09   0.12  -0.02    -0.16  -0.15   0.00    -0.02  -0.02   0.00
  27   6    -0.12   0.10  -0.12    -0.02   0.00   0.00     0.00   0.00   0.00
  28   6    -0.01  -0.05   0.08    -0.01  -0.02   0.04     0.00   0.00   0.00
  29   6     0.00   0.02   0.01     0.00   0.01   0.00     0.09  -0.03  -0.04
  30   6     0.02   0.00  -0.01    -0.01  -0.01   0.00    -0.03   0.06   0.04
  31   6     0.00   0.01   0.01     0.00   0.00   0.00    -0.03   0.04  -0.02
  32   6     0.00   0.00   0.00     0.00   0.00  -0.01    -0.04   0.04   0.00
  33   6     0.00   0.00   0.00    -0.01   0.00   0.00    -0.09  -0.05  -0.01
  34   6     0.00  -0.01   0.00     0.00  -0.01  -0.01    -0.01   0.00   0.06
  35   6     0.00   0.01   0.00     0.00   0.00   0.00     0.00  -0.01   0.05
  36   6    -0.01  -0.01   0.01     0.00   0.00   0.00    -0.09   0.01  -0.01
  37   6    -0.01   0.01  -0.01     0.00   0.00   0.00    -0.07  -0.02   0.03
  38   6     0.01   0.00   0.00     0.00   0.00   0.01     0.01  -0.01  -0.04
  39   6     0.00   0.00   0.00     0.01   0.00   0.00     0.02  -0.03  -0.03
  40   6     0.00   0.00   0.00     0.01   0.01   0.00    -0.06  -0.06  -0.01
  41   6     0.00   0.00   0.00     0.00   0.01   0.00     0.04  -0.03   0.02
  42   6     0.01   0.00  -0.01    -0.01   0.00   0.00     0.02  -0.01   0.03
  43   6     0.00   0.00   0.01     0.00   0.00   0.01    -0.02  -0.04  -0.05
  44   6    -0.01   0.00   0.00     0.00   0.01   0.00    -0.02  -0.05  -0.01
  45   6     0.00   0.01   0.00     0.00  -0.01   0.00     0.01   0.00   0.00
  46   6     0.00  -0.02  -0.01     0.00   0.00   0.00     0.01  -0.01   0.00
  47   6     0.00   0.01   0.01     0.00   0.00   0.00     0.01   0.00   0.00
  48   6     0.00  -0.01  -0.02     0.00   0.00   0.00     0.01   0.00  -0.02
  49   6     0.00   0.00   0.00     0.01   0.00   0.00     0.01   0.01  -0.01
  50   6    -0.01   0.01   0.00     0.00   0.00   0.00    -0.01   0.01   0.00
  51   6     0.00   0.00   0.00     0.00   0.00   0.00    -0.01   0.01   0.00
  52   6    -0.01   0.00   0.01     0.00   0.00   0.00     0.00   0.00   0.01
  53   6     0.00  -0.01   0.00     0.00   0.00   0.00    -0.07   0.00   0.02
  54   6     0.00   0.00   0.00     0.00   0.00   0.00    -0.08  -0.07  -0.01
  55   1     0.00   0.00   0.00     0.00  -0.01  -0.01     0.23   0.15   0.00
  56   1    -0.02   0.08  -0.19     0.11  -0.06  -0.06     0.00  -0.01   0.00
  57   1     0.05   0.06   0.11     0.06   0.09   0.06     0.01   0.01   0.01
  58   1    -0.09  -0.07  -0.03    -0.06  -0.04  -0.02    -0.01  -0.01   0.00
  59   1    -0.11  -0.07  -0.05    -0.06  -0.04  -0.03    -0.01  -0.01   0.00
  60   1    -0.05  -0.06  -0.02    -0.04  -0.04  -0.02    -0.01   0.00   0.00
  61   1     0.07  -0.06   0.01     0.05   0.12   0.03    -0.01  -0.03   0.01
  62   1     0.15   0.09  -0.02    -0.24  -0.09  -0.04    -0.02  -0.01  -0.03
  63   1     0.04   0.02  -0.09    -0.23  -0.18   0.06     0.03   0.02  -0.01
  64   1     0.07   0.02  -0.08     0.22  -0.17  -0.09    -0.03   0.02   0.02
  65   1    -0.05   0.01  -0.02     0.21  -0.13  -0.10    -0.03   0.02   0.02
  66   1     0.11   0.16  -0.09    -0.16  -0.13   0.09    -0.02  -0.02   0.03
  67   1     0.01   0.11  -0.03    -0.12  -0.15   0.01     0.01   0.00   0.02
  68   1     0.13   0.13  -0.02    -0.26  -0.17  -0.01    -0.05  -0.05   0.01
  69   1    -0.16  -0.03   0.15    -0.05  -0.09   0.22     0.00  -0.01   0.03
  70   1    -0.27   0.17  -0.14    -0.12   0.04   0.00    -0.01   0.00   0.00
  71   1    -0.27   0.22  -0.27    -0.14   0.09  -0.12    -0.01   0.01  -0.01
  72   1    -0.02  -0.14   0.14    -0.02  -0.10   0.08     0.00  -0.01   0.01
  73   1    -0.02  -0.13   0.16    -0.02  -0.08   0.10     0.00  -0.01   0.01
  74   1    -0.03  -0.07  -0.08    -0.03  -0.04  -0.09     0.00   0.00  -0.02
  75   1     0.00  -0.01   0.00     0.00  -0.01  -0.01     0.02   0.05   0.03
  76   1     0.00  -0.01  -0.01    -0.01   0.02   0.01    -0.09  -0.09  -0.04
  77   1     0.00  -0.01  -0.01     0.00  -0.01  -0.01     0.03   0.04   0.03
  78   1     0.00  -0.02   0.01     0.00   0.00   0.00    -0.09   0.02  -0.02
  79   1    -0.01   0.01  -0.02     0.00   0.00   0.01    -0.07  -0.03   0.04
  80   1    -0.01   0.00   0.00     0.00   0.00   0.00     0.04   0.00   0.00
  81   1    -0.01   0.00   0.01     0.00   0.01   0.00    -0.13  -0.05  -0.01
  82   1    -0.01   0.00   0.00     0.00   0.00   0.00     0.07   0.02   0.01
  83   1     0.00   0.00   0.01     0.00   0.00   0.01    -0.03  -0.04  -0.07
  84   1    -0.01   0.00   0.00     0.00   0.01   0.00    -0.02  -0.05  -0.01
  85   1     0.01   0.03   0.01     0.00  -0.01   0.00     0.04  -0.03  -0.08
  86   1     0.00   0.01  -0.02     0.00  -0.01   0.01     0.05  -0.01  -0.01
  87   1     0.00   0.02   0.02     0.00   0.00   0.00     0.04   0.03   0.09
  88   1     0.01  -0.02  -0.01     0.00   0.00   0.00     0.06   0.08   0.02
  89   1     0.01  -0.04  -0.01     0.00   0.00   0.00     0.04  -0.11   0.00
  90   1     0.01   0.00  -0.01     0.00   0.00   0.00     0.06  -0.02   0.01
  91   1     0.01   0.03   0.02     0.00  -0.01  -0.01     0.06  -0.06  -0.02
  92   1     0.00   0.03   0.01     0.00   0.00   0.00     0.02   0.10  -0.01
  93   1     0.01  -0.01   0.02     0.00   0.00  -0.01     0.05   0.00  -0.02
  94   1     0.01  -0.02  -0.02     0.00   0.00   0.01     0.07   0.04   0.04
  95   1     0.01  -0.01   0.01     0.00   0.00   0.00     0.05   0.01  -0.04
  96   1     0.00  -0.03  -0.03     0.00   0.00   0.00     0.01  -0.04  -0.12
  97   1     0.00   0.00  -0.01     0.01   0.00   0.00     0.00   0.04   0.04
  98   1     0.00   0.00   0.01     0.00   0.00   0.01     0.01   0.04   0.01
  99   1     0.01   0.00   0.00     0.00   0.00   0.01     0.04   0.03  -0.08
 100   1     0.00   0.01   0.00    -0.01   0.00   0.00     0.04   0.03   0.01
 101   1    -0.01   0.01   0.00     0.00  -0.01   0.00     0.01   0.04   0.01
 102   1    -0.01   0.01   0.00     0.01  -0.01   0.00    -0.08   0.05   0.01
 103   1     0.01   0.00  -0.01     0.01   0.00   0.00    -0.06   0.05   0.00
 104   1    -0.01   0.00  -0.01     0.00   0.00  -0.01    -0.01   0.03   0.02
 105   1     0.01   0.00  -0.01     0.00   0.00   0.00     0.05   0.00   0.03
 106   1    -0.01   0.00   0.01    -0.01   0.00   0.00     0.08   0.04  -0.01
 107   1    -0.01   0.00   0.01     0.00   0.00   0.00    -0.04   0.00   0.07
 108   1     0.00   0.00   0.00     0.00   0.00  -0.01     0.00   0.03   0.05
 109   1     0.00  -0.01  -0.01     0.01  -0.01  -0.01    -0.10   0.19   0.19
 110   1     0.01   0.00   0.00     0.01   0.00   0.00    -0.24  -0.23  -0.03
 111   1     0.00  -0.01  -0.01     0.01  -0.01  -0.01    -0.13   0.06   0.11
 112   1    -0.01   0.01   0.01    -0.01   0.01   0.01     0.17  -0.14  -0.15
 113   1     0.00   0.01   0.00     0.00   0.00   0.00    -0.17  -0.13  -0.04
 114   1     0.01   0.01   0.00     0.01   0.01   0.00    -0.27  -0.17  -0.06
                    91                     92                     93
                     A                      A                      A
 Frequencies --   520.4699               528.7457               531.5392
 Red. masses --     4.4535                 4.0264                 4.2451
 Frc consts  --     0.7108                 0.6632                 0.7067
 IR Inten    --     9.9418                 0.3895                 0.5014
 Atom AN      X      Y      Z        X      Y      Z        X      Y      Z
   1   8    -0.04  -0.02  -0.01     0.00   0.00   0.00     0.00   0.00   0.00
   2  12     0.00  -0.05   0.00     0.00   0.02  -0.01    -0.01   0.01  -0.01
   3   8     0.02   0.01   0.05     0.00   0.00   0.00     0.00   0.00   0.00
   4   6     0.01  -0.01   0.00     0.00   0.00   0.00     0.00   0.00   0.00
   5   7    -0.03   0.00   0.01    -0.06  -0.04  -0.04    -0.06  -0.06  -0.01
   6   7     0.02  -0.01   0.00     0.08   0.08   0.05     0.08   0.10   0.01
   7   8     0.01  -0.02   0.00     0.00   0.00   0.00     0.00   0.00   0.00
   8   6    -0.03   0.00   0.02     0.01  -0.16   0.14    -0.10   0.07  -0.15
   9   6    -0.02   0.00   0.01    -0.03   0.06   0.07    -0.04   0.06   0.07
  10   6     0.01   0.00  -0.02    -0.03   0.18  -0.13     0.09  -0.02   0.16
  11   8     0.04   0.10  -0.01    -0.01  -0.01   0.00     0.00   0.00   0.00
  12   6     0.07   0.00  -0.04     0.00   0.00   0.01     0.00   0.00   0.00
  13   6     0.07  -0.03  -0.01     0.00   0.00  -0.01     0.01   0.00  -0.01
  14   6     0.04   0.09   0.04     0.00  -0.01   0.00     0.00   0.00   0.00
  15   8    -0.02   0.00  -0.02     0.00   0.00   0.00     0.00   0.00   0.00
  16   6    -0.06  -0.03  -0.03     0.01   0.00   0.00     0.00   0.00   0.00
  17   8     0.13  -0.12   0.05    -0.04  -0.01   0.06    -0.04  -0.01   0.07
  18   6    -0.01   0.05  -0.05     0.00  -0.01   0.01     0.00   0.00   0.01
  19   8    -0.02   0.04   0.02     0.01   0.00   0.00     0.00   0.00   0.00
  20   8     0.08   0.10  -0.02    -0.01  -0.01   0.00     0.00   0.00   0.00
  21   6    -0.02   0.06   0.02     0.01   0.00  -0.01     0.01   0.01  -0.01
  22   6    -0.04  -0.15   0.01     0.01   0.03   0.01     0.01   0.03   0.01
  23   6    -0.05  -0.04  -0.18     0.00   0.00   0.01    -0.01   0.00   0.01
  24   8    -0.05   0.20  -0.04     0.00   0.01  -0.02    -0.01   0.02  -0.02
  25   6    -0.07   0.01   0.05     0.01  -0.01  -0.01     0.01  -0.01  -0.01
  26   6    -0.11  -0.13   0.01     0.00   0.00   0.00     0.00   0.00   0.00
  27   6     0.01  -0.03   0.03     0.00   0.01  -0.01     0.00   0.00   0.00
  28   6     0.01  -0.01   0.03     0.00   0.00   0.00     0.00   0.00   0.00
  29   6    -0.02   0.02   0.02    -0.04  -0.01  -0.03    -0.04  -0.04   0.01
  30   6     0.00   0.00   0.00     0.05   0.05   0.04     0.08   0.07  -0.01
  31   6     0.01   0.00   0.01     0.07   0.02   0.01    -0.04   0.01   0.06
  32   6     0.01  -0.01   0.00     0.06   0.08  -0.03    -0.02  -0.02   0.09
  33   6     0.02   0.00   0.00     0.02  -0.03  -0.08     0.05  -0.06  -0.02
  34   6     0.00   0.00  -0.02    -0.07   0.08  -0.03     0.08   0.02   0.04
  35   6     0.00   0.01  -0.01    -0.06   0.05   0.02     0.05   0.03  -0.02
  36   6     0.02  -0.01   0.00     0.07  -0.04   0.03     0.01   0.01  -0.03
  37   6     0.02   0.00  -0.01     0.00  -0.03   0.02     0.05   0.03  -0.06
  38   6     0.00   0.00   0.00    -0.04  -0.03  -0.04    -0.05   0.08  -0.01
  39   6     0.00   0.00   0.00    -0.06  -0.06   0.00    -0.10   0.10  -0.06
  40   6     0.01   0.00   0.00     0.06  -0.07  -0.02     0.10  -0.05  -0.09
  41   6    -0.01   0.00   0.00    -0.02   0.00   0.09    -0.11  -0.05  -0.04
  42   6    -0.01   0.00   0.00    -0.02   0.01   0.07    -0.05  -0.08   0.02
  43   6     0.00   0.00   0.00    -0.02  -0.06  -0.08     0.02  -0.04   0.01
  44   6     0.00   0.00   0.00     0.00  -0.04  -0.02     0.01  -0.12   0.03
  45   6     0.00   0.01   0.00     0.00   0.01   0.02    -0.01  -0.01  -0.04
  46   6     0.00   0.00   0.00     0.00  -0.04  -0.01     0.00   0.01   0.00
  47   6     0.00   0.00   0.00     0.00  -0.05   0.01     0.00   0.01   0.01
  48   6     0.00   0.00   0.00     0.00   0.01   0.01    -0.01  -0.01  -0.03
  49   6     0.00   0.00   0.00     0.01   0.02  -0.04    -0.02   0.01   0.02
  50   6     0.01   0.00   0.00     0.00   0.00   0.00     0.05  -0.02   0.00
  51   6     0.00   0.00   0.00    -0.01   0.01   0.01     0.05  -0.01   0.03
  52   6     0.00   0.00   0.00     0.02   0.00  -0.01    -0.01   0.01   0.00
  53   6     0.00   0.00  -0.01    -0.07  -0.08  -0.04    -0.06  -0.08  -0.03
  54   6     0.02   0.01   0.00     0.08   0.02  -0.02     0.05   0.03  -0.01
  55   1    -0.04  -0.02   0.02     0.01   0.05   0.11    -0.02   0.06   0.08
  56   1     0.01  -0.08   0.00     0.01   0.01  -0.01     0.01   0.00  -0.01
  57   1     0.07   0.10   0.05    -0.01  -0.01  -0.01     0.00  -0.01   0.00
  58   1    -0.06  -0.04  -0.03     0.01   0.00   0.00     0.00   0.00   0.00
  59   1    -0.06  -0.04  -0.03     0.01   0.00   0.00     0.00   0.00   0.00
  60   1    -0.04  -0.03  -0.02     0.00   0.00   0.00     0.00   0.00   0.00
  61   1    -0.08  -0.16   0.05     0.02   0.05   0.00     0.01   0.05   0.00
  62   1    -0.11  -0.10  -0.15    -0.01   0.01   0.01    -0.01   0.00   0.00
  63   1     0.17   0.14  -0.02    -0.06  -0.05   0.02    -0.06  -0.05   0.02
  64   1    -0.23   0.11   0.13     0.06  -0.03  -0.03     0.06  -0.03  -0.03
  65   1    -0.19   0.11   0.13     0.05  -0.04  -0.04     0.05  -0.04  -0.03
  66   1    -0.13  -0.15   0.18     0.00   0.00  -0.01     0.00   0.00   0.00
  67   1     0.08   0.03   0.16    -0.02  -0.01  -0.01    -0.01  -0.01  -0.01
  68   1    -0.32  -0.32   0.06     0.01   0.01   0.00     0.00   0.00  -0.01
  69   1    -0.01  -0.07   0.13     0.00   0.00   0.00     0.00   0.00   0.01
  70   1    -0.04  -0.01   0.01    -0.01   0.01   0.00    -0.01   0.01   0.00
  71   1    -0.06  -0.01  -0.01    -0.01   0.01  -0.01    -0.01   0.01  -0.01
  72   1    -0.01  -0.10   0.09     0.00   0.01  -0.01     0.00   0.00   0.00
  73   1    -0.01  -0.08   0.09     0.00   0.01  -0.01     0.00   0.00   0.00
  74   1    -0.02  -0.03  -0.12     0.00   0.00   0.01     0.00   0.00   0.01
  75   1    -0.01  -0.01  -0.01     0.04   0.11  -0.01    -0.05  -0.01   0.09
  76   1     0.02   0.01   0.00     0.04  -0.15  -0.06     0.03  -0.08  -0.12
  77   1    -0.01  -0.02  -0.01    -0.08   0.07  -0.02     0.05   0.02   0.07
  78   1     0.02  -0.01   0.00     0.09  -0.07   0.06    -0.01   0.02  -0.06
  79   1     0.02   0.00  -0.01     0.00  -0.06   0.06     0.05   0.04  -0.10
  80   1    -0.02   0.00   0.00    -0.07  -0.03   0.05    -0.11   0.13  -0.02
  81   1     0.02   0.00  -0.01     0.13  -0.06  -0.10     0.26  -0.10  -0.05
  82   1    -0.01   0.00   0.00    -0.03   0.05   0.09    -0.16   0.01  -0.04
  83   1     0.00   0.00   0.00    -0.02  -0.05  -0.12     0.03  -0.05   0.05
  84   1     0.01   0.00   0.00     0.00  -0.02  -0.05     0.03  -0.16   0.06
  85   1    -0.01   0.02   0.02    -0.02   0.07   0.10    -0.03  -0.01  -0.01
  86   1    -0.02   0.01  -0.01    -0.04   0.03  -0.03    -0.03  -0.01  -0.02
  87   1    -0.01   0.00  -0.02    -0.02   0.01  -0.03    -0.03  -0.02  -0.08
  88   1    -0.01  -0.02   0.00    -0.02  -0.10  -0.03    -0.01   0.02   0.03
  89   1    -0.01   0.02   0.00    -0.01   0.00  -0.01    -0.01   0.04   0.01
  90   1    -0.01   0.00   0.00    -0.03   0.00  -0.02     0.00  -0.03   0.02
  91   1    -0.02   0.02   0.01    -0.02  -0.04   0.00    -0.04   0.10   0.04
  92   1     0.00  -0.03   0.01     0.00  -0.08   0.01    -0.01  -0.05   0.02
  93   1    -0.01   0.00   0.01    -0.02  -0.03   0.01    -0.03  -0.02   0.04
  94   1    -0.02  -0.01  -0.01     0.00   0.05   0.03    -0.04  -0.06  -0.07
  95   1    -0.01   0.00   0.00    -0.01   0.01  -0.04    -0.02  -0.02   0.01
  96   1     0.00   0.01   0.02     0.00   0.02   0.02    -0.01   0.00   0.02
  97   1    -0.01   0.00   0.00     0.00   0.05   0.02    -0.10   0.06   0.14
  98   1     0.00   0.00  -0.02     0.02   0.05  -0.03    -0.01   0.08  -0.04
  99   1    -0.01   0.00   0.00     0.04   0.05  -0.10     0.01   0.05  -0.07
 100   1     0.00   0.00   0.00     0.01   0.01   0.02     0.16  -0.01  -0.03
 101   1     0.00  -0.01   0.00     0.04   0.00   0.02     0.03   0.04  -0.02
 102   1     0.01  -0.01   0.00    -0.04   0.02   0.01    -0.02   0.03  -0.01
 103   1    -0.01  -0.01   0.01    -0.10   0.07   0.02     0.02   0.04   0.03
 104   1     0.00   0.00   0.01     0.01   0.03   0.06     0.05   0.02   0.04
 105   1     0.00   0.00   0.00     0.07  -0.01   0.05     0.11  -0.03   0.07
 106   1     0.00   0.00   0.00     0.10   0.04  -0.04    -0.03   0.03   0.00
 107   1     0.01   0.00  -0.01    -0.03   0.00   0.05    -0.05   0.01   0.03
 108   1     0.00   0.00   0.00     0.02   0.03   0.03     0.02   0.04  -0.04
 109   1     0.01  -0.04  -0.04    -0.15  -0.21  -0.23     0.02   0.05   0.14
 110   1     0.03   0.03   0.00    -0.13  -0.01  -0.19    -0.01  -0.15   0.09
 111   1     0.01   0.00  -0.02    -0.03   0.20   0.03    -0.09  -0.32  -0.09
 112   1    -0.01   0.01   0.02     0.07  -0.10   0.10     0.13   0.10  -0.15
 113   1     0.05   0.02   0.00     0.40   0.00  -0.03    -0.21   0.02  -0.02
 114   1     0.04   0.02   0.01    -0.09  -0.09   0.12     0.12   0.07  -0.13
[truncated: 1,621,487 more chars]
