# Supplementary material
Source: publisher figshare collection journal article supplement (https://acs.figshare.com/ndownloader/files/5127205)
Supplement: Supplementary file 1 [file 5127205 › supporting_ja043819b/RRSS_fm-product.mol]

  MacMolPlt                       

114117  0  0  0  0  0  0  0  0  0 v2000
    6.3376    1.3630   -0.1341 O   0  0  0  0  0  0  0  0  0  0  0  0
   -1.5560    0.8099   -0.3255 Mg  0  0  0  0  0  0  0  0  0  0  0  0
    2.0539   -3.0722    0.2001 O   0  0  0  0  0  0  0  0  0  0  0  0
    6.0536    0.0915   -0.4819 C   0  0  0  0  0  0  0  0  0  0  0  0
   -1.1009    2.3875    0.8225 N   0  0  0  0  0  0  0  0  0  0  0  0
   -3.3903    0.7385    0.5079 N   0  0  0  0  0  0  0  0  0  0  0  0
    6.8368   -0.8271   -0.4150 O   0  0  0  0  0  0  0  0  0  0  0  0
   -1.9180    3.0904    1.5993 C   0  0  0  0  0  0  0  0  0  0  0  0
   -3.2738    2.7534    1.8046 C   0  0  0  0  0  0  0  0  0  0  0  0
   -3.9546    1.6070    1.3313 C   0  0  0  0  0  0  0  0  0  0  0  0
    4.1463   -1.3440   -0.9246 O   0  0  0  0  0  0  0  0  0  0  0  0
    4.0348   -1.8082    0.3321 C   0  0  0  0  0  0  0  0  0  0  0  0
    3.4909   -3.2419    0.3496 C   0  0  0  0  0  0  0  0  0  0  0  0
    4.6392    0.0070   -1.0571 C   0  0  0  0  0  0  0  0  0  0  0  0
    4.3168   -1.1744    1.3247 O   0  0  0  0  0  0  0  0  0  0  0  0
    7.6733    1.5799    0.3532 C   0  0  0  0  0  0  0  0  0  0  0  0
   -1.0709    0.6040   -2.1539 O   0  0  0  0  0  0  0  0  0  0  0  0
    1.3353   -4.1289   -0.2352 C   0  0  0  0  0  0  0  0  0  0  0  0
    1.7831   -5.2260   -0.4753 O   0  0  0  0  0  0  0  0  0  0  0  0
   -0.1657   -2.7809   -1.4967 O   0  0  0  0  0  0  0  0  0  0  0  0
   -0.4737   -1.5110   -1.2657 C   0  0  0  0  0  0  0  0  0  0  0  0
   -0.5443   -0.6075   -2.5028 C   0  0  0  0  0  0  0  0  0  0  0  0
   -0.1304   -3.7106   -0.3729 C   0  0  0  0  0  0  0  0  0  0  0  0
   -0.7093   -1.0773   -0.1325 O   0  0  0  0  0  0  0  0  0  0  0  0
    0.8725   -0.4877   -3.1052 C   0  0  0  0  0  0  0  0  0  0  0  0
   -1.0978   -4.8367   -0.6737 C   0  0  0  0  0  0  0  0  0  0  0  0
    3.8249   -3.9545    1.6496 C   0  0  0  0  0  0  0  0  0  0  0  0
    4.6746    0.3169   -2.5519 C   0  0  0  0  0  0  0  0  0  0  0  0
    0.3094    2.6748    0.6519 C   0  0  0  0  0  0  0  0  0  0  0  0
   -3.9266   -0.5328    0.0826 C   0  0  0  0  0  0  0  0  0  0  0  0
    0.7315    3.4495   -0.4860 C   0  0  0  0  0  0  0  0  0  0  0  0
    2.1162    3.5401   -0.7574 C   0  0  0  0  0  0  0  0  0  0  0  0
    3.0688    2.9045    0.0716 C   0  0  0  0  0  0  0  0  0  0  0  0
    2.6439    2.1591    1.1927 C   0  0  0  0  0  0  0  0  0  0  0  0
    1.2635    2.0268    1.5028 C   0  0  0  0  0  0  0  0  0  0  0  0
   -0.2858    4.2285   -1.3618 C   0  0  0  0  0  0  0  0  0  0  0  0
    0.8291    1.2514    2.7734 C   0  0  0  0  0  0  0  0  0  0  0  0
   -3.8231   -1.6831    0.9324 C   0  0  0  0  0  0  0  0  0  0  0  0
   -4.0790   -2.9621    0.3707 C   0  0  0  0  0  0  0  0  0  0  0  0
   -4.4084   -3.1098   -0.9930 C   0  0  0  0  0  0  0  0  0  0  0  0
   -4.5379   -1.9666   -1.8154 C   0  0  0  0  0  0  0  0  0  0  0  0
   -4.3159   -0.6649   -1.3021 C   0  0  0  0  0  0  0  0  0  0  0  0
   -3.4740   -1.5644    2.4389 C   0  0  0  0  0  0  0  0  0  0  0  0
   -4.6174    0.5904   -2.1652 C   0  0  0  0  0  0  0  0  0  0  0  0
   -0.2313    3.7886   -2.8583 C   0  0  0  0  0  0  0  0  0  0  0  0
   -0.0596    5.7731   -1.2307 C   0  0  0  0  0  0  0  0  0  0  0  0
    1.2618   -0.2468    2.7118 C   0  0  0  0  0  0  0  0  0  0  0  0
    1.3934    1.9315    4.0663 C   0  0  0  0  0  0  0  0  0  0  0  0
   -4.0640    0.4952   -3.6182 C   0  0  0  0  0  0  0  0  0  0  0  0
   -6.1612    0.8619   -2.1727 C   0  0  0  0  0  0  0  0  0  0  0  0
   -2.1759   -2.3543    2.8005 C   0  0  0  0  0  0  0  0  0  0  0  0
   -4.6735   -2.0423    3.3259 C   0  0  0  0  0  0  0  0  0  0  0  0
   -1.3809    4.3136    2.3251 C   0  0  0  0  0  0  0  0  0  0  0  0
   -5.3756    1.3926    1.8317 C   0  0  0  0  0  0  0  0  0  0  0  0
   -3.8436    3.4179    2.4453 H   0  0  0  0  0  0  0  0  0  0  0  0
    3.8600   -3.7915   -0.5198 H   0  0  0  0  0  0  0  0  0  0  0  0
    3.9735    0.6970   -0.5291 H   0  0  0  0  0  0  0  0  0  0  0  0
    8.4092    1.2999   -0.4053 H   0  0  0  0  0  0  0  0  0  0  0  0
    7.8483    0.9887    1.2555 H   0  0  0  0  0  0  0  0  0  0  0  0
    7.7349    2.6459    0.5739 H   0  0  0  0  0  0  0  0  0  0  0  0
   -1.1724   -1.1606   -3.2316 H   0  0  0  0  0  0  0  0  0  0  0  0
   -0.4228   -3.1663    0.5262 H   0  0  0  0  0  0  0  0  0  0  0  0
    1.2884   -1.4569   -3.4026 H   0  0  0  0  0  0  0  0  0  0  0  0
    1.5342   -0.0170   -2.3707 H   0  0  0  0  0  0  0  0  0  0  0  0
    0.8129    0.1658   -3.9805 H   0  0  0  0  0  0  0  0  0  0  0  0
   -2.1063   -4.4124   -0.7205 H   0  0  0  0  0  0  0  0  0  0  0  0
   -1.0588   -5.5866    0.1230 H   0  0  0  0  0  0  0  0  0  0  0  0
   -0.8498   -5.3265   -1.6190 H   0  0  0  0  0  0  0  0  0  0  0  0
    4.9113   -4.0374    1.7566 H   0  0  0  0  0  0  0  0  0  0  0  0
    3.3955   -4.9587    1.6445 H   0  0  0  0  0  0  0  0  0  0  0  0
    3.4412   -3.3856    2.5000 H   0  0  0  0  0  0  0  0  0  0  0  0
    3.6740    0.2262   -2.9806 H   0  0  0  0  0  0  0  0  0  0  0  0
    5.3470   -0.3739   -3.0701 H   0  0  0  0  0  0  0  0  0  0  0  0
    5.0288    1.3408   -2.7056 H   0  0  0  0  0  0  0  0  0  0  0  0
    2.4585    4.1472   -1.6060 H   0  0  0  0  0  0  0  0  0  0  0  0
    4.1434    3.0401   -0.1160 H   0  0  0  0  0  0  0  0  0  0  0  0
    3.3936    1.7098    1.8582 H   0  0  0  0  0  0  0  0  0  0  0  0
   -1.3022    4.0008   -0.9787 H   0  0  0  0  0  0  0  0  0  0  0  0
   -0.2783    1.2846    2.8260 H   0  0  0  0  0  0  0  0  0  0  0  0
   -4.0486   -3.8488    1.0179 H   0  0  0  0  0  0  0  0  0  0  0  0
   -4.6299   -4.1063   -1.4002 H   0  0  0  0  0  0  0  0  0  0  0  0
   -4.8631   -2.0862   -2.8574 H   0  0  0  0  0  0  0  0  0  0  0  0
   -3.2840   -0.4968    2.6628 H   0  0  0  0  0  0  0  0  0  0  0  0
   -4.1315    1.4592   -1.6732 H   0  0  0  0  0  0  0  0  0  0  0  0
   -0.9836    4.3474   -3.4370 H   0  0  0  0  0  0  0  0  0  0  0  0
   -0.4481    2.7089   -2.9398 H   0  0  0  0  0  0  0  0  0  0  0  0
    0.7604    3.9881   -3.2916 H   0  0  0  0  0  0  0  0  0  0  0  0
   -0.8350    6.3121   -1.7962 H   0  0  0  0  0  0  0  0  0  0  0  0
    0.9247    6.0582   -1.6329 H   0  0  0  0  0  0  0  0  0  0  0  0
   -0.1112    6.0927   -0.1783 H   0  0  0  0  0  0  0  0  0  0  0  0
    0.8992   -0.7798    3.6044 H   0  0  0  0  0  0  0  0  0  0  0  0
    2.3573   -0.3433    2.6642 H   0  0  0  0  0  0  0  0  0  0  0  0
    0.8341   -0.7313    1.8151 H   0  0  0  0  0  0  0  0  0  0  0  0
    1.0132    1.4099    4.9580 H   0  0  0  0  0  0  0  0  0  0  0  0
    1.0853    2.9870    4.1226 H   0  0  0  0  0  0  0  0  0  0  0  0
    2.4931    1.8878    4.0812 H   0  0  0  0  0  0  0  0  0  0  0  0
   -4.3074    1.4198   -4.1642 H   0  0  0  0  0  0  0  0  0  0  0  0
   -2.9666    0.3876   -3.5896 H   0  0  0  0  0  0  0  0  0  0  0  0
   -4.5014   -0.3538   -4.1640 H   0  0  0  0  0  0  0  0  0  0  0  0
   -6.3754    1.7787   -2.7427 H   0  0  0  0  0  0  0  0  0  0  0  0
   -6.5398    0.9940   -1.1466 H   0  0  0  0  0  0  0  0  0  0  0  0
   -6.7011    0.0235   -2.6402 H   0  0  0  0  0  0  0  0  0  0  0  0
   -1.9546   -2.2491    3.8744 H   0  0  0  0  0  0  0  0  0  0  0  0
   -1.3198   -1.9514    2.2306 H   0  0  0  0  0  0  0  0  0  0  0  0
   -2.2853   -3.4259    2.5720 H   0  0  0  0  0  0  0  0  0  0  0  0
   -4.4414   -1.8792    4.3895 H   0  0  0  0  0  0  0  0  0  0  0  0
   -4.8675   -3.1151    3.1736 H   0  0  0  0  0  0  0  0  0  0  0  0
   -5.5901   -1.4850    3.0784 H   0  0  0  0  0  0  0  0  0  0  0  0
   -0.9300    5.0208    1.6187 H   0  0  0  0  0  0  0  0  0  0  0  0
   -2.1743    4.8331    2.8726 H   0  0  0  0  0  0  0  0  0  0  0  0
   -0.6033    4.0268    3.0437 H   0  0  0  0  0  0  0  0  0  0  0  0
   -5.9521    0.7579    1.1507 H   0  0  0  0  0  0  0  0  0  0  0  0
   -5.3700    0.9121    2.8189 H   0  0  0  0  0  0  0  0  0  0  0  0
   -5.8946    2.3523    1.9397 H   0  0  0  0  0  0  0  0  0  0  0  0
  1  4  1  0  0  0  0
  1 16  1  0  0  0  0
  2  5  2  0  0  0  0
  2  6  2  0  0  0  0
  2 17  2  0  0  0  0
  2 24  1  0  0  0  0
  3 13  1  0  0  0  0
  3 18  1  0  0  0  0
  4  7  2  0  0  0  0
  4 14  1  0  0  0  0
  5  8  1  0  0  0  0
  5 29  1  0  0  0  0
  6 10  1  0  0  0  0
  6 30  1  0  0  0  0
  8  9  1  0  0  0  0
  8 53  1  0  0  0  0
  9 10  1  0  0  0  0
  9 55  1  0  0  0  0
 10 54  1  0  0  0  0
 11 12  1  0  0  0  0
 11 14  1  0  0  0  0
 12 13  1  0  0  0  0
 12 15  2  0  0  0  0
 13 27  1  0  0  0  0
 13 56  1  0  0  0  0
 14 28  1  0  0  0  0
 14 57  1  0  0  0  0
 16 58  1  0  0  0  0
 16 59  1  0  0  0  0
 16 60  1  0  0  0  0
 17 22  1  0  0  0  0
 18 19  2  0  0  0  0
 18 23  1  0  0  0  0
 20 21  1  0  0  0  0
 20 23  1  0  0  0  0
 21 22  1  0  0  0  0
 21 24  2  0  0  0  0
 22 25  1  0  0  0  0
 22 61  1  0  0  0  0
 23 26  1  0  0  0  0
 23 62  1  0  0  0  0
 25 63  1  0  0  0  0
 25 64  1  0  0  0  0
 25 65  1  0  0  0  0
 26 66  1  0  0  0  0
 26 67  1  0  0  0  0
 26 68  1  0  0  0  0
 27 69  1  0  0  0  0
 27 70  1  0  0  0  0
 27 71  1  0  0  0  0
 28 72  1  0  0  0  0
 28 73  1  0  0  0  0
 28 74  1  0  0  0  0
 29 31  1  0  0  0  0
 29 35  1  0  0  0  0
 30 38  1  0  0  0  0
 30 42  1  0  0  0  0
 31 32  1  0  0  0  0
 31 36  1  0  0  0  0
 32 33  1  0  0  0  0
 32 75  1  0  0  0  0
 33 34  1  0  0  0  0
 33 76  1  0  0  0  0
 34 35  1  0  0  0  0
 34 77  1  0  0  0  0
 35 37  1  0  0  0  0
 36 45  1  0  0  0  0
 36 46  1  0  0  0  0
 36 78  1  0  0  0  0
 37 47  1  0  0  0  0
 37 48  1  0  0  0  0
 37 79  1  0  0  0  0
 38 39  1  0  0  0  0
 38 43  1  0  0  0  0
 39 40  1  0  0  0  0
 39 80  1  0  0  0  0
 40 41  1  0  0  0  0
 40 81  1  0  0  0  0
 41 42  1  0  0  0  0
 41 82  1  0  0  0  0
 42 44  1  0  0  0  0
 43 51  1  0  0  0  0
 43 52  1  0  0  0  0
 43 83  1  0  0  0  0
 44 49  1  0  0  0  0
 44 50  1  0  0  0  0
 44 84  1  0  0  0  0
 45 85  1  0  0  0  0
 45 86  1  0  0  0  0
 45 87  1  0  0  0  0
 46 88  1  0  0  0  0
 46 89  1  0  0  0  0
 46 90  1  0  0  0  0
 47 91  1  0  0  0  0
 47 92  1  0  0  0  0
 47 93  1  0  0  0  0
 48 94  1  0  0  0  0
 48 95  1  0  0  0  0
 48 96  1  0  0  0  0
 49 97  1  0  0  0  0
 49 98  1  0  0  0  0
 49 99  1  0  0  0  0
 50100  1  0  0  0  0
 50101  1  0  0  0  0
 50102  1  0  0  0  0
 51103  1  0  0  0  0
 51104  1  0  0  0  0
 51105  1  0  0  0  0
 52106  1  0  0  0  0
 52107  1  0  0  0  0
 52108  1  0  0  0  0
 53109  1  0  0  0  0
 53110  1  0  0  0  0
 53111  1  0  0  0  0
 54112  1  0  0  0  0
 54113  1  0  0  0  0
 54114  1  0  0  0  0
M  END
