# Supplementary material
Source: publisher figshare collection journal article supplement (https://acs.figshare.com/ndownloader/files/5127205)
Supplement: Supplementary file 1 [file 5127205 › supporting_ja043819b/SS-freq.log]

 Entering Gaussian System, Link 0=g03
 Input=SS-gen.gjf
 Output=SS-gen.log
 Initial command:
 /usr/local/g03/l1.exe /home/rzepa/Gau-5252.inp -scrdir=/home/rzepa/
 Entering Link 1 = /usr/local/g03/l1.exe PID=      5253.
  
 Copyright (c) 1988,1990,1992,1993,1995,1998,2003, Gaussian, Inc.
                  All Rights Reserved.
  
 This is the Gaussian(R) 03 program.  It is based on the
 the Gaussian(R) 98 system (copyright 1998, Gaussian, Inc.),
 the Gaussian(R) 94 system (copyright 1995, Gaussian, Inc.),
 the Gaussian 92(TM) system (copyright 1992, Gaussian, Inc.),
 the Gaussian 90(TM) system (copyright 1990, Gaussian, Inc.),
 the Gaussian 88(TM) system (copyright 1988, Gaussian, Inc.),
 the Gaussian 86(TM) system (copyright 1986, Carnegie Mellon
 University), and the Gaussian 82(TM) system (copyright 1983,
 Carnegie Mellon University). Gaussian is a federally registered
 trademark of Gaussian, Inc.
  
 This software contains proprietary and confidential information,
 including trade secrets, belonging to Gaussian, Inc.
  
 This software is provided under written license and may be
 used, copied, transmitted, or stored only in accord with that
 written license.
  
 The following legend is applicable only to US Government
 contracts under DFARS:
  
                    RESTRICTED RIGHTS LEGEND
  
 Use, duplication or disclosure by the US Government is subject
 to restrictions as set forth in subparagraph (c)(1)(ii) of the
 Rights in Technical Data and Computer Software clause at DFARS
 252.227-7013.
  
 Gaussian, Inc.
 Carnegie Office Park, Building 6, Pittsburgh, PA 15106 USA
  
 The following legend is applicable only to US Government
 contracts under FAR:
  
                    RESTRICTED RIGHTS LEGEND
  
 Use, reproduction and disclosure by the US Government is subject
 to restrictions as set forth in subparagraph (c) of the
 Commercial Computer Software - Restricted Rights clause at FAR
 52.227-19.
  
 Gaussian, Inc.
 Carnegie Office Park, Building 6, Pittsburgh, PA 15106 USA
  
  
 ---------------------------------------------------------------
 Warning -- This program may not be used in any manner that
 competes with the business of Gaussian, Inc. or will provide
 assistance to any competitor of Gaussian, Inc.  The licensee
 of this program is prohibited from giving any competitor of
 Gaussian, Inc. access to this program.  By using this program,
 the user acknowledges that Gaussian, Inc. is engaged in the
 business of creating and licensing software in the field of
 computational chemistry and represents and warrants to the
 licensee that it is not a competitor of Gaussian, Inc. and that
 it will not use this program in any manner prohibited above.
 ---------------------------------------------------------------
  

 Cite this work as:
 Gaussian 03, Revision B.04,
 M. J. Frisch, G. W. Trucks, H. B. Schlegel, G. E. Scuseria, 
 M. A. Robb, J. R. Cheeseman, J. A. Montgomery, Jr., T. Vreven, 
 K. N. Kudin, J. C. Burant, J. M. Millam, S. S. Iyengar, J. Tomasi, 
 V. Barone, B. Mennucci, M. Cossi, G. Scalmani, N. Rega, 
 G. A. Petersson, H. Nakatsuji, M. Hada, M. Ehara, K. Toyota, 
 R. Fukuda, J. Hasegawa, M. Ishida, T. Nakajima, Y. Honda, O. Kitao, 
 H. Nakai, M. Klene, X. Li, J. E. Knox, H. P. Hratchian, J. B. Cross, 
 C. Adamo, J. Jaramillo, R. Gomperts, R. E. Stratmann, O. Yazyev, 
 A. J. Austin, R. Cammi, C. Pomelli, J. W. Ochterski, P. Y. Ayala, 
 K. Morokuma, G. A. Voth, P. Salvador, J. J. Dannenberg, 
 V. G. Zakrzewski, S. Dapprich, A. D. Daniels, M. C. Strain, 
 O. Farkas, D. K. Malick, A. D. Rabuck, K. Raghavachari, 
 J. B. Foresman, J. V. Ortiz, Q. Cui, A. G. Baboul, S. Clifford, 
 J. Cioslowski, B. B. Stefanov, G. Liu, A. Liashenko, P. Piskorz, 
 I. Komaromi, R. L. Martin, D. J. Fox, T. Keith, M. A. Al-Laham, 
 C. Y. Peng, A. Nanayakkara, M. Challacombe, P. M. W. Gill, 
 B. Johnson, W. Chen, M. W. Wong, C. Gonzalez, and J. A. Pople, 
 Gaussian, Inc., Pittsburgh PA, 2003.
 
 *********************************************
 Gaussian 03:  x86-Linux-G03RevB.04 2-Jun-2003
                  30-Nov-2004 
 *********************************************
 %mem=400MB
 %nproc=2
 Will use up to    2 processors via shared memory.
 %chk=SS-gen.chk
 ------------------
 #P RB3LYP/Gen freq
 ------------------
 1/10=4,30=1,38=1/1,3;
 2/17=6,18=5,40=1/2;
 3/5=7,11=2,16=1,25=1,30=1,74=-5/1,2,3;
 4/7=1/1;
 5/5=2,38=5/2;
 8/6=4,10=90,11=11/1;
 11/6=1,8=1,9=11,15=111,16=1/1,2,10;
 10/6=1/2;
 6/7=2,8=2,9=2,10=2,18=1,28=1/1;
 7/8=1,10=1,25=1/1,2,3,16;
 1/10=4,30=1/3;
 99//99;
 Leave Link    1 at Tue Nov 30 22:20:05 2004, MaxMem=   52428800 cpu:       0.1
 (Enter /usr/local/g03/l101.exe)
 -----------
 from SS.mol
 -----------
 Symbolic Z-matrix:
 Charge =  0 Multiplicity = 1
 O                    0    -0.25795   1.35414  -0.10571 
 C                    0     1.03797   0.96504  -0.05652 
 O                    0     1.92357   1.7158   -0.37838 
 O                    0     0.25794  -1.35415  -0.10555 
 C                    0    -1.03797  -0.96506  -0.05627 
 C                    0    -1.26453   0.46553   0.43691 
 C                    0     1.26454  -0.46547   0.43685 
 O                    0    -1.9236   -1.71585  -0.378 
 C                    0    -2.62304   1.01236   0.03894 
 C                    0     2.62307  -1.01235   0.03881 
 H                    0    -1.16365   0.46475   1.53314 
 H                    0     1.16382  -0.46458   1.5331 
 H                    0    -2.73933   2.03054   0.41988 
 H                    0    -2.72374   1.0242   -1.0496 
 H                    0    -3.41048   0.37737   0.45119 
 H                    0     3.41051  -0.37723   0.45082 
 H                    0     2.73941  -2.03045   0.41994 
 H                    0     2.7236   -1.02439  -1.04975 
 
                    Isotopes and Nuclear Properties:

  Atom         1           2           3           4           5           6           7           8           9          10
 IAtWgt=          16          12          16          16          12          12          12          16          12          12
 AtmWgt=  15.9949146  12.0000000  15.9949146  15.9949146  12.0000000  12.0000000  12.0000000  15.9949146  12.0000000  12.0000000
 IAtSpn=           0           0           0           0           0           0           0           0           0           0
 AtZEff=   0.0000000   0.0000000   0.0000000   0.0000000   0.0000000   0.0000000   0.0000000   0.0000000   0.0000000   0.0000000
 AtQMom=   0.0000000   0.0000000   0.0000000   0.0000000   0.0000000   0.0000000   0.0000000   0.0000000   0.0000000   0.0000000
 AtGFac=   0.0000000   0.0000000   0.0000000   0.0000000   0.0000000   0.0000000   0.0000000   0.0000000   0.0000000   0.0000000

  Atom        11          12          13          14          15          16          17          18
 IAtWgt=           1           1           1           1           1           1           1           1
 AtmWgt=   1.0078250   1.0078250   1.0078250   1.0078250   1.0078250   1.0078250   1.0078250   1.0078250
 IAtSpn=           1           1           1           1           1           1           1           1
 AtZEff=   0.0000000   0.0000000   0.0000000   0.0000000   0.0000000   0.0000000   0.0000000   0.0000000
 AtQMom=   0.0000000   0.0000000   0.0000000   0.0000000   0.0000000   0.0000000   0.0000000   0.0000000
 AtGFac=   2.7928460   2.7928460   2.7928460   2.7928460   2.7928460   2.7928460   2.7928460   2.7928460
 Leave Link  101 at Tue Nov 30 22:20:06 2004, MaxMem=   52428800 cpu:       0.0
 (Enter /usr/local/g03/l103.exe)

 GradGradGradGradGradGradGradGradGradGradGradGradGradGradGradGradGradGrad
 Berny optimization.
 Initialization pass.
 Trust Radius=3.00D-01 FncErr=1.00D-07 GrdErr=1.00D-07
 Number of steps in this run=   2 maximum allowed number of steps=   2.
 GradGradGradGradGradGradGradGradGradGradGradGradGradGradGradGradGradGrad

 Leave Link  103 at Tue Nov 30 22:20:07 2004, MaxMem=   52428800 cpu:       0.0
 (Enter /usr/local/g03/l202.exe)
                          Input orientation:                          
 ---------------------------------------------------------------------
 Center     Atomic     Atomic              Coordinates (Angstroms)
 Number     Number      Type              X           Y           Z
 ---------------------------------------------------------------------
    1          8             0       -0.257949    1.354140   -0.105705
    2          6             0        1.037967    0.965039   -0.056517
    3          8             0        1.923572    1.715796   -0.378378
    4          8             0        0.257942   -1.354153   -0.105553
    5          6             0       -1.037969   -0.965060   -0.056267
    6          6             0       -1.264533    0.465534    0.436913
    7          6             0        1.264538   -0.465468    0.436849
    8          8             0       -1.923602   -1.715846   -0.377997
    9          6             0       -2.623041    1.012356    0.038936
   10          6             0        2.623065   -1.012352    0.038813
   11          1             0       -1.163651    0.464752    1.533141
   12          1             0        1.163823   -0.464583    1.533104
   13          1             0       -2.739334    2.030539    0.419881
   14          1             0       -2.723743    1.024196   -1.049601
   15          1             0       -3.410476    0.377369    0.451186
   16          1             0        3.410505   -0.377228    0.450816
   17          1             0        2.739408   -2.030447    0.419943
   18          1             0        2.723596   -1.024387   -1.049754
 ---------------------------------------------------------------------
                    Distance matrix (angstroms):
                    1          2          3          4          5
     1  O    0.000000
     2  C    1.353963   0.000000
     3  O    2.228044   1.204793   0.000000
     4  O    2.756989   2.447344   3.503333   0.000000
     5  C    2.447358   2.834571   4.007676   1.353960   0.000000
     6  C    1.448194   2.407173   3.520209   2.433816   1.530084
     7  C    2.433784   1.530064   2.420089   1.448171   2.407135
     8  O    3.503335   4.007666   5.155281   2.228045   1.204798
     9  C    2.394034   3.662558   4.619597   3.731126   2.536078
    10  C    3.731141   2.536080   2.847127   2.394051   3.662574
    11  H    2.072951   2.761236   3.840569   2.831018   2.141583
    12  H    2.831057   2.141625   2.997505   2.072957   2.761243
    13  H    2.625077   3.953510   4.741200   4.551470   3.477782
    14  H    2.660816   3.891038   4.746198   3.929149   2.790284
    15  H    3.347034   4.515724   5.561622   4.094559   2.772799
    16  H    4.094497   2.772726   2.698014   3.347026   4.515706
    17  H    4.551470   3.477766   3.916279   2.625109   3.953531
    18  H    3.929151   2.790284   2.932471   2.660772   3.891004
                    6          7          8          9         10
     6  C    0.000000
     7  C    2.694989   0.000000
     8  O    2.420097   3.520179   0.000000
     9  C    1.517546   4.177987   2.847128   0.000000
    10  C    4.178044   1.517600   4.619613   5.623262   0.000000
    11  H    1.100861   2.821927   2.997497   2.159245   4.330598
    12  H    2.821996   1.100871   3.840594   4.330615   2.159246
    13  H    2.150481   4.718191   3.916303   1.093316   6.177356
    14  H    2.156646   4.509437   2.932424   1.093249   5.824134
    15  H    2.147801   4.750404   2.698127   1.092342   6.205240
    16  H    4.750413   2.147826   5.561613   6.205181   1.092333
    17  H    4.718236   2.150509   4.741239   6.177352   1.093304
    18  H    4.509458   2.156671   4.746138   5.824097   1.093265
                   11         12         13         14         15
    11  H    0.000000
    12  H    2.506153   0.000000
    13  H    2.484716   4.764402   0.000000
    14  H    3.068782   4.898979   1.781108   0.000000
    15  H    2.495292   4.775316   1.784484   1.772667   0.000000
    16  H    4.775277   2.495307   6.604454   6.468713   6.862594
    17  H    4.764358   2.484658   6.819693   6.429341   6.604516
    18  H    4.898936   3.068782   6.429308   5.819811   6.468739
                   16         17         18
    16  H    0.000000
    17  H    1.784505   0.000000
    18  H    1.772673   1.781127   0.000000
 Stoichiometry    C6H8O4
 Framework group  C1[X(C6H8O4)]
 Deg. of freedom    48
 Full point group                 C1      NOp   1
 Largest Abelian subgroup         C1      NOp   1
 Largest concise Abelian subgroup C1      NOp   1
                         Standard orientation:                         
 ---------------------------------------------------------------------
 Center     Atomic     Atomic              Coordinates (Angstroms)
 Number     Number      Type              X           Y           Z
 ---------------------------------------------------------------------
    1          8             0        0.258508   -1.354033   -0.105705
    2          6             0       -1.037568   -0.965468   -0.056517
    3          8             0       -1.922864   -1.716590   -0.378378
    4          8             0       -0.258501    1.354046   -0.105553
    5          6             0        1.037570    0.965488   -0.056267
    6          6             0        1.264725   -0.465012    0.436913
    7          6             0       -1.264731    0.464945    0.436849
    8          8             0        1.922893    1.716641   -0.377997
    9          6             0        2.623459   -1.011272    0.038936
   10          6             0       -2.623483    1.011269    0.038813
   11          1             0        1.163843   -0.464271    1.533141
   12          1             0       -1.164015    0.464103    1.533104
   13          1             0        2.740172   -2.029407    0.419881
   14          1             0        2.724166   -1.023071   -1.049601
   15          1             0        3.410632   -0.375960    0.451186
   16          1             0       -3.410661    0.375819    0.450816
   17          1             0       -2.740247    2.029315    0.419943
   18          1             0       -2.724019    1.023262   -1.049754
 ---------------------------------------------------------------------
 Rotational constants (GHZ):      2.1845948      1.1876971      0.8121801
 Leave Link  202 at Tue Nov 30 22:20:07 2004, MaxMem=   52428800 cpu:       0.1
 (Enter /usr/local/g03/l301.exe)
 General basis read from cards:  (5D, 7F)
 Centers:   1  2  3  4  5  6  7  8  9 10 11 12 13 14 15 16 17 18
 6-31(d)
 ****
 There are   156 symmetry adapted basis functions of A   symmetry.
 Integral buffers will be    262144 words long.
 Raffenetti 2 integral format.
 Two-electron integral symmetry is turned on.
   156 basis functions,   312 primitive gaussians,   166 cartesian basis functions
    38 alpha electrons       38 beta electrons
       nuclear repulsion energy       561.5483334462 Hartrees.
 IExCor= 402 DFT=T Ex=B+HF Corr=LYP ExCW=0 ScaHFX=  0.200000
 ScaDFX=  0.800000  0.720000  1.000000  0.810000
 IRadAn=      0 IRanWt=     -1 IRanGd=            0 ICorTp=0
 NAtoms=   18 NActive=   18 NUniq=   18 SFac= 1.00D+00 NAtFMM=   60 Big=F
 Leave Link  301 at Tue Nov 30 22:20:08 2004, MaxMem=   52428800 cpu:       0.0
 (Enter /usr/local/g03/l302.exe)
 NPDir=0 NMtPBC=     1 NCelOv=     1 NCel=       1 NClECP=     1 NCelD=      1
         NCelK=      1 NCelE2=     1 NClLst=     1 CellRange=     0.0.
 One-electron integrals computed using PRISM.
 NBasis=   156 RedAO= T  NBF=   156
 NBsUse=   156 1.00D-06 NBFU=   156
 Precomputing XC quadrature grid using
 IXCGrd= 2 IRadAn=           0 IRanWt=          -1 IRanGd=           0.
 NRdTot=    1124 NPtTot=      142884 NUsed=      147979 NTot=      147995
 NSgBfM=   166   166   166   166.
 Leave Link  302 at Tue Nov 30 22:20:10 2004, MaxMem=   52428800 cpu:       0.9
 (Enter /usr/local/g03/l303.exe)
 DipDrv:  MaxL=1.
 Leave Link  303 at Tue Nov 30 22:20:11 2004, MaxMem=   52428800 cpu:       0.0
 (Enter /usr/local/g03/l401.exe)
 Harris functional with IExCor=  402 diagonalized for initial guess.
 ExpMin= 1.61D-01 ExpMax= 5.48D+03 ExpMxC= 8.25D+02 IAcc=1 IRadAn=         1 AccDes= 1.00D-06
 HarFok:  IExCor= 402 AccDes= 1.00D-06 IRadAn=         1 IDoV=1
 ScaDFX=  1.000000  1.000000  1.000000  1.000000
 Harris En= -534.480633297007    
 Initial guess orbital symmetries:
       Occupied  (A) (A) (A) (A) (A) (A) (A) (A) (A) (A) (A) (A)
                 (A) (A) (A) (A) (A) (A) (A) (A) (A) (A) (A) (A)
                 (A) (A) (A) (A) (A) (A) (A) (A) (A) (A) (A) (A)
                 (A) (A)
       Virtual   (A) (A) (A) (A) (A) (A) (A) (A) (A) (A) (A) (A)
                 (A) (A) (A) (A) (A) (A) (A) (A) (A) (A) (A) (A)
                 (A) (A) (A) (A) (A) (A) (A) (A) (A) (A) (A) (A)
                 (A) (A) (A) (A) (A) (A) (A) (A) (A) (A) (A) (A)
                 (A) (A) (A) (A) (A) (A) (A) (A) (A) (A) (A) (A)
                 (A) (A) (A) (A) (A) (A) (A) (A) (A) (A) (A) (A)
                 (A) (A) (A) (A) (A) (A) (A) (A) (A) (A) (A) (A)
                 (A) (A) (A) (A) (A) (A) (A) (A) (A) (A) (A) (A)
                 (A) (A) (A) (A) (A) (A) (A) (A) (A) (A) (A) (A)
                 (A) (A) (A) (A) (A) (A) (A) (A) (A) (A)
 The electronic state of the initial guess is 1-A.
 Leave Link  401 at Tue Nov 30 22:20:14 2004, MaxMem=   52428800 cpu:       2.5
 (Enter /usr/local/g03/l502.exe)
 Closed shell SCF:
 Requested convergence on RMS density matrix=1.00D-08 within 128 cycles.
 Requested convergence on MAX density matrix=1.00D-06.
 Requested convergence on             energy=1.00D-06.
 No special actions if energy rises.
 Using DIIS extrapolation, IDIIS=  1040.
 Integral symmetry usage will be decided dynamically.
       147978 words used for storage of precomputed grid.
 IEnd=    256458 IEndB=    256458 NGot=  52428800 MDV=  52216705
 LenX=  52216705
 Fock matrices will be formed incrementally for  20 cycles.
 Integral accuracy reduced to 1.0D-05 until final iterations.

 Cycle   1  Pass 0  IDiag  1:
 Petite list used in FoFDir.
 MinBra= 0 MaxBra= 2 Meth= 1.
 IRaf=       0 NMat=   1 IRICut=       1 DoRegI=T DoRafI=F ISym2E= 1 JSym2E=1.
 E= -534.014519999841    
 DIIS: error= 4.19D-02 at cycle   1 NSaved=   1.
 NSaved= 1 IEnMin= 1 EnMin= -534.014519999841     IErMin= 1 ErrMin= 4.19D-02
 ErrMax= 4.19D-02 EMaxC= 1.00D-01 BMatC= 3.93D-01 BMatP= 3.93D-01
 IDIUse=3 WtCom= 5.81D-01 WtEn= 4.19D-01
 Coeff-Com:  0.100D+01
 Coeff-En:   0.100D+01
 Coeff:      0.100D+01
 Gap=     0.210 Goal=   None    Shift=    0.000
 GapD=    0.210 DampG=1.000 DampE=0.500 DampFc=0.5000 IDamp=-1.
 Damping current iteration by 5.00D-01
 RMSDP=8.88D-03 MaxDP=2.26D-01              OVMax= 3.28D-01

 Cycle   2  Pass 0  IDiag  1:
 RMSU=  4.43D-03    CP:  9.88D-01
 E= -534.067853408705     Delta-E=       -0.053333408864 Rises=F Damp=T
 DIIS: error= 2.36D-02 at cycle   2 NSaved=   2.
 NSaved= 2 IEnMin= 2 EnMin= -534.067853408705     IErMin= 2 ErrMin= 2.36D-02
 ErrMax= 2.36D-02 EMaxC= 1.00D-01 BMatC= 8.74D-02 BMatP= 3.93D-01
 IDIUse=3 WtCom= 7.64D-01 WtEn= 2.36D-01
 Coeff-Com:  0.279D+00 0.721D+00
 Coeff-En:   0.426D+00 0.574D+00
 Coeff:      0.314D+00 0.686D+00
 Gap=     0.256 Goal=   None    Shift=    0.000
 RMSDP=2.90D-03 MaxDP=5.92D-02 DE=-5.33D-02 OVMax= 2.23D-01

 Cycle   3  Pass 0  IDiag  1:
 RMSU=  2.43D-03    CP:  9.82D-01  6.47D-01
 E= -534.295448545038     Delta-E=       -0.227595136333 Rises=F Damp=F
 DIIS: error= 1.71D-02 at cycle   3 NSaved=   3.
 NSaved= 3 IEnMin= 3 EnMin= -534.295448545038     IErMin= 3 ErrMin= 1.71D-02
 ErrMax= 1.71D-02 EMaxC= 1.00D-01 BMatC= 6.25D-02 BMatP= 8.74D-02
 IDIUse=3 WtCom= 8.29D-01 WtEn= 1.71D-01
 Coeff-Com:  0.125D+00 0.448D+00 0.426D+00
 Coeff-En:   0.000D+00 0.000D+00 0.100D+01
 Coeff:      0.104D+00 0.372D+00 0.524D+00
 Gap=     0.270 Goal=   None    Shift=    0.000
 RMSDP=1.92D-03 MaxDP=4.05D-02 DE=-2.28D-01 OVMax= 8.59D-02

 Cycle   4  Pass 0  IDiag  1:
 RMSU=  8.63D-04    CP:  9.88D-01  7.56D-01  3.28D-01
 E= -534.340686698304     Delta-E=       -0.045238153266 Rises=F Damp=F
 DIIS: error= 6.85D-03 at cycle   4 NSaved=   4.
 NSaved= 4 IEnMin= 4 EnMin= -534.340686698304     IErMin= 4 ErrMin= 6.85D-03
 ErrMax= 6.85D-03 EMaxC= 1.00D-01 BMatC= 1.35D-02 BMatP= 6.25D-02
 IDIUse=3 WtCom= 9.31D-01 WtEn= 6.85D-02
 Coeff-Com:  0.447D-01 0.124D+00 0.324D+00 0.506D+00
 Coeff-En:   0.000D+00 0.000D+00 0.188D+00 0.812D+00
 Coeff:      0.416D-01 0.116D+00 0.315D+00 0.527D+00
 Gap=     0.265 Goal=   None    Shift=    0.000
 RMSDP=6.64D-04 MaxDP=1.55D-02 DE=-4.52D-02 OVMax= 2.93D-02

 Cycle   5  Pass 0  IDiag  1:
 RMSU=  2.55D-04    CP:  9.87D-01  6.95D-01  5.03D-01  5.98D-01
 E= -534.350837784108     Delta-E=       -0.010151085805 Rises=F Damp=F
 DIIS: error= 1.38D-03 at cycle   5 NSaved=   5.
 NSaved= 5 IEnMin= 5 EnMin= -534.350837784108     IErMin= 5 ErrMin= 1.38D-03
 ErrMax= 1.38D-03 EMaxC= 1.00D-01 BMatC= 6.58D-04 BMatP= 1.35D-02
 IDIUse=3 WtCom= 9.86D-01 WtEn= 1.38D-02
 Coeff-Com:  0.945D-02 0.174D-01 0.124D+00 0.303D+00 0.546D+00
 Coeff-En:   0.000D+00 0.000D+00 0.000D+00 0.000D+00 0.100D+01
 Coeff:      0.932D-02 0.172D-01 0.122D+00 0.299D+00 0.553D+00
 Gap=     0.262 Goal=   None    Shift=    0.000
 RMSDP=1.45D-04 MaxDP=3.99D-03 DE=-1.02D-02 OVMax= 5.33D-03

 Cycle   6  Pass 0  IDiag  1:
 RMSU=  7.60D-05    CP:  9.87D-01  7.04D-01  4.97D-01  6.63D-01  6.03D-01
 E= -534.351323472335     Delta-E=       -0.000485688226 Rises=F Damp=F
 DIIS: error= 3.00D-04 at cycle   6 NSaved=   6.
 NSaved= 6 IEnMin= 6 EnMin= -534.351323472335     IErMin= 6 ErrMin= 3.00D-04
 ErrMax= 3.00D-04 EMaxC= 1.00D-01 BMatC= 4.23D-05 BMatP= 6.58D-04
 IDIUse=3 WtCom= 9.97D-01 WtEn= 3.00D-03
 Coeff-Com:  0.387D-03-0.367D-02 0.293D-01 0.938D-01 0.281D+00 0.599D+00
 Coeff-En:   0.000D+00 0.000D+00 0.000D+00 0.000D+00 0.000D+00 0.100D+01
 Coeff:      0.386D-03-0.366D-02 0.293D-01 0.935D-01 0.280D+00 0.601D+00
 Gap=     0.262 Goal=   None    Shift=    0.000
 RMSDP=3.75D-05 MaxDP=8.50D-04 DE=-4.86D-04 OVMax= 9.98D-04

 Cycle   7  Pass 0  IDiag  1:
 RMSU=  2.36D-05    CP:  9.87D-01  7.04D-01  4.98D-01  6.60D-01  6.32D-01
                    CP:  6.32D-01
 E= -534.351347517570     Delta-E=       -0.000024045235 Rises=F Damp=F
 DIIS: error= 7.74D-05 at cycle   7 NSaved=   7.
 NSaved= 7 IEnMin= 7 EnMin= -534.351347517570     IErMin= 7 ErrMin= 7.74D-05
 ErrMax= 7.74D-05 EMaxC= 1.00D-01 BMatC= 1.62D-06 BMatP= 4.23D-05
 IDIUse=1 WtCom= 1.00D+00 WtEn= 0.00D+00
 Coeff-Com: -0.204D-03-0.249D-02 0.417D-02 0.160D-01 0.799D-01 0.241D+00
 Coeff-Com:  0.661D+00
 Coeff:     -0.204D-03-0.249D-02 0.417D-02 0.160D-01 0.799D-01 0.241D+00
 Coeff:      0.661D+00
 Gap=     0.262 Goal=   None    Shift=    0.000
 RMSDP=9.09D-06 MaxDP=1.28D-04 DE=-2.40D-05 OVMax= 2.30D-04

 Initial convergence to 1.0D-05 achieved.  Increase integral accuracy.
 Cycle   8  Pass 1  IDiag  1:
 E= -534.351275801106     Delta-E=        0.000071716463 Rises=F Damp=F
 DIIS: error= 2.77D-05 at cycle   1 NSaved=   1.
 NSaved= 1 IEnMin= 1 EnMin= -534.351275801106     IErMin= 1 ErrMin= 2.77D-05
 ErrMax= 2.77D-05 EMaxC= 1.00D-01 BMatC= 1.27D-07 BMatP= 1.27D-07
 IDIUse=1 WtCom= 1.00D+00 WtEn= 0.00D+00
 Coeff-Com:  0.100D+01
 Coeff:      0.100D+01
 Gap=     0.262 Goal=   None    Shift=    0.000
 RMSDP=9.09D-06 MaxDP=1.28D-04 DE= 7.17D-05 OVMax= 1.32D-04

 Cycle   9  Pass 1  IDiag  1:
 RMSU=  7.13D-06    CP:  1.00D+00
 E= -534.351275758035     Delta-E=        0.000000043072 Rises=F Damp=F
 DIIS: error= 3.06D-05 at cycle   2 NSaved=   2.
 NSaved= 2 IEnMin= 1 EnMin= -534.351275801106     IErMin= 1 ErrMin= 2.77D-05
 ErrMax= 3.06D-05 EMaxC= 1.00D-01 BMatC= 2.36D-07 BMatP= 1.27D-07
 IDIUse=1 WtCom= 1.00D+00 WtEn= 0.00D+00
 Coeff-Com:  0.591D+00 0.409D+00
 Coeff:      0.591D+00 0.409D+00
 Gap=     0.262 Goal=   None    Shift=    0.000
 RMSDP=3.09D-06 MaxDP=9.22D-05 DE= 4.31D-08 OVMax= 1.49D-04

 Cycle  10  Pass 1  IDiag  1:
 RMSU=  2.80D-06    CP:  1.00D+00  8.19D-01
 E= -534.351275917156     Delta-E=       -0.000000159121 Rises=F Damp=F
 DIIS: error= 1.34D-05 at cycle   3 NSaved=   3.
 NSaved= 3 IEnMin= 3 EnMin= -534.351275917156     IErMin= 3 ErrMin= 1.34D-05
 ErrMax= 1.34D-05 EMaxC= 1.00D-01 BMatC= 3.24D-08 BMatP= 1.27D-07
 IDIUse=1 WtCom= 1.00D+00 WtEn= 0.00D+00
 Coeff-Com:  0.114D+00 0.269D+00 0.617D+00
 Coeff:      0.114D+00 0.269D+00 0.617D+00
 Gap=     0.262 Goal=   None    Shift=    0.000
 RMSDP=1.15D-06 MaxDP=2.79D-05 DE=-1.59D-07 OVMax= 4.57D-05

 Cycle  11  Pass 1  IDiag  1:
 RMSU=  8.03D-07    CP:  1.00D+00  8.75D-01  7.48D-01
 E= -534.351275939113     Delta-E=       -0.000000021957 Rises=F Damp=F
 DIIS: error= 3.53D-06 at cycle   4 NSaved=   4.
 NSaved= 4 IEnMin= 4 EnMin= -534.351275939113     IErMin= 4 ErrMin= 3.53D-06
 ErrMax= 3.53D-06 EMaxC= 1.00D-01 BMatC= 2.87D-09 BMatP= 3.24D-08
 IDIUse=1 WtCom= 1.00D+00 WtEn= 0.00D+00
 Coeff-Com: -0.116D-01 0.999D-01 0.335D+00 0.577D+00
 Coeff:     -0.116D-01 0.999D-01 0.335D+00 0.577D+00
 Gap=     0.262 Goal=   None    Shift=    0.000
 RMSDP=3.57D-07 MaxDP=7.91D-06 DE=-2.20D-08 OVMax= 1.06D-05

 Cycle  12  Pass 1  IDiag  1:
 RMSU=  1.59D-07    CP:  1.00D+00  8.79D-01  7.79D-01  6.20D-01
 E= -534.351275941688     Delta-E=       -0.000000002575 Rises=F Damp=F
 DIIS: error= 5.54D-07 at cycle   5 NSaved=   5.
 NSaved= 5 IEnMin= 5 EnMin= -534.351275941688     IErMin= 5 ErrMin= 5.54D-07
 ErrMax= 5.54D-07 EMaxC= 1.00D-01 BMatC= 1.46D-10 BMatP= 2.87D-09
 IDIUse=1 WtCom= 1.00D+00 WtEn= 0.00D+00
 Coeff-Com: -0.896D-02 0.432D-01 0.145D+00 0.297D+00 0.524D+00
 Coeff:     -0.896D-02 0.432D-01 0.145D+00 0.297D+00 0.524D+00
 Gap=     0.262 Goal=   None    Shift=    0.000
 RMSDP=7.29D-08 MaxDP=1.42D-06 DE=-2.57D-09 OVMax= 1.62D-06

 Cycle  13  Pass 1  IDiag  1:
 RMSU=  4.49D-08    CP:  1.00D+00  8.83D-01  7.76D-01  6.33D-01  6.86D-01
 E= -534.351275941703     Delta-E=       -0.000000000015 Rises=F Damp=F
 DIIS: error= 1.51D-07 at cycle   6 NSaved=   6.
 NSaved= 6 IEnMin= 6 EnMin= -534.351275941703     IErMin= 6 ErrMin= 1.51D-07
 ErrMax= 1.51D-07 EMaxC= 1.00D-01 BMatC= 1.11D-11 BMatP= 1.46D-10
 IDIUse=1 WtCom= 1.00D+00 WtEn= 0.00D+00
 Coeff-Com: -0.446D-02 0.165D-01 0.525D-01 0.121D+00 0.276D+00 0.539D+00
 Coeff:     -0.446D-02 0.165D-01 0.525D-01 0.121D+00 0.276D+00 0.539D+00
 Gap=     0.262 Goal=   None    Shift=    0.000
 RMSDP=1.82D-08 MaxDP=4.57D-07 DE=-1.53D-11 OVMax= 6.03D-07

 Cycle  14  Pass 1  IDiag  1:
 RMSU=  1.54D-08    CP:  1.00D+00  8.83D-01  7.74D-01  6.35D-01  7.13D-01
                    CP:  8.78D-01
 E= -534.351275941677     Delta-E=        0.000000000026 Rises=F Damp=F
 DIIS: error= 7.24D-08 at cycle   7 NSaved=   7.
 NSaved= 7 IEnMin= 6 EnMin= -534.351275941703     IErMin= 7 ErrMin= 7.24D-08
 ErrMax= 7.24D-08 EMaxC= 1.00D-01 BMatC= 9.88D-13 BMatP= 1.11D-11
 IDIUse=1 WtCom= 1.00D+00 WtEn= 0.00D+00
 Coeff-Com: -0.218D-03 0.209D-03-0.269D-02 0.182D-02 0.255D-01 0.239D+00
 Coeff-Com:  0.736D+00
 Coeff:     -0.218D-03 0.209D-03-0.269D-02 0.182D-02 0.255D-01 0.239D+00
 Coeff:      0.736D+00
 Gap=     0.262 Goal=   None    Shift=    0.000
 RMSDP=6.84D-09 MaxDP=1.10D-07 DE= 2.63D-11 OVMax= 2.05D-07

 SCF Done:  E(RB+HF-LYP) =  -534.351275942     A.U. after   14 cycles
             Convg  =    0.6843D-08             -V/T =  2.0064
             S**2   =   0.0000
 KE= 5.309547385996D+02 PE=-2.373487369070D+03 EE= 7.466330210826D+02
 Leave Link  502 at Tue Nov 30 22:23:37 2004, MaxMem=   52428800 cpu:     200.9
 (Enter /usr/local/g03/l801.exe)
 Range of M.O.s used for correlation:     1   156
 NBasis=   156 NAE=    38 NBE=    38 NFC=     0 NFV=     0
 NROrb=    156 NOA=    38 NOB=    38 NVA=   118 NVB=   118
 Leave Link  801 at Tue Nov 30 22:23:38 2004, MaxMem=   52428800 cpu:       0.0
 (Enter /usr/local/g03/l1101.exe)
 Using compressed storage, NAtomX=    18.
 Will process  19 centers per pass.
 Leave Link 1101 at Tue Nov 30 22:23:39 2004, MaxMem=   52428800 cpu:       0.7
 (Enter /usr/local/g03/l1102.exe)
 Use density number 0.
 Symmetrizing basis deriv contribution to polar:
 IMax=3 JMax=2 DiffMx= 0.00D+00
 Leave Link 1102 at Tue Nov 30 22:23:40 2004, MaxMem=   52428800 cpu:       0.0
 (Enter /usr/local/g03/l1110.exe)
 Forming Gx(P) for the SCF density, NAtomX=    18.
 Integral derivatives from FoFDir, PRISM(SPDF).
 Do as many integral derivatives as possible in FoFDir.
 G2DrvN: MDV=      52428690.
 G2DrvN: will do   19 centers at a time, making    1 passes doing MaxLOS=2.
 Symmetry not used in FoFDir.
 MinBra= 0 MaxBra= 2 Meth= 1.
 IRaf=       0 NMat=   1 IRICut=       1 DoRegI=T DoRafI=F ISym2E= 0 JSym2E=0.
 FoFDir/FoFCou used for L=0 through L=2.
 Leave Link 1110 at Tue Nov 30 22:34:09 2004, MaxMem=   52428800 cpu:     625.0
 (Enter /usr/local/g03/l1002.exe)
 Minotr:  Closed-shell wavefunction.
          Direct CPHF calculation.
          Solving linear equations simultaneously.
          Differentiating once with respect to electric field.
                with respect to dipole field.
          Differentiating once with respect to nuclear coordinates.
          Requested convergence is 1.0D-08 RMS, and 1.0D-07 maximum.
          Secondary convergence is 1.0D-12 RMS, and 1.0D-12 maximum.
          NewPWx=T KeepS1=F KeepF1=F KeepIn=T MapXYZ=F.
          MDV=      52428800 using IRadAn=       2.
 Generate precomputed XC quadrature information.
 Integrals replicated using symmetry in FoFDir.
 MinBra= 0 MaxBra= 2 Meth= 1.
 IRaf=       0 NMat=  57 IRICut=      57 DoRegI=T DoRafI=T ISym2E= 2 JSym2E=2.
          There are  57 degrees of freedom in the 1st order CPHF.
    54 vectors were produced by pass  0.
 AX will form  54 AO Fock derivatives at one time.
    54 vectors were produced by pass  1.
    54 vectors were produced by pass  2.
    54 vectors were produced by pass  3.
    54 vectors were produced by pass  4.
    36 vectors were produced by pass  5.
     5 vectors were produced by pass  6.
     1 vectors were produced by pass  7.
 Inv2:  IOpt= 1 Iter= 1 AM= 1.83D-15 Conv= 1.00D-12.
 Inverted reduced A of dimension  312 with in-core refinement.
 Isotropic polarizability for W=    0.000000       69.85 Bohr**3.
 End of Minotr Frequency-dependent properties file   721 does not exist.
 Leave Link 1002 at Tue Nov 30 22:46:56 2004, MaxMem=   52428800 cpu:     766.3
 (Enter /usr/local/g03/l601.exe)
 Copying SCF densities to generalized density rwf, ISCF=0 IROHF=0.

 **********************************************************************

            Population analysis using the SCF density.

 **********************************************************************

 Orbital symmetries:
       Occupied  (A) (A) (A) (A) (A) (A) (A) (A) (A) (A) (A) (A)
                 (A) (A) (A) (A) (A) (A) (A) (A) (A) (A) (A) (A)
                 (A) (A) (A) (A) (A) (A) (A) (A) (A) (A) (A) (A)
                 (A) (A)
       Virtual   (A) (A) (A) (A) (A) (A) (A) (A) (A) (A) (A) (A)
                 (A) (A) (A) (A) (A) (A) (A) (A) (A) (A) (A) (A)
                 (A) (A) (A) (A) (A) (A) (A) (A) (A) (A) (A) (A)
                 (A) (A) (A) (A) (A) (A) (A) (A) (A) (A) (A) (A)
                 (A) (A) (A) (A) (A) (A) (A) (A) (A) (A) (A) (A)
                 (A) (A) (A) (A) (A) (A) (A) (A) (A) (A) (A) (A)
                 (A) (A) (A) (A) (A) (A) (A) (A) (A) (A) (A) (A)
                 (A) (A) (A) (A) (A) (A) (A) (A) (A) (A) (A) (A)
                 (A) (A) (A) (A) (A) (A) (A) (A) (A) (A) (A) (A)
                 (A) (A) (A) (A) (A) (A) (A) (A) (A) (A)
 The electronic state is 1-A.
 Alpha  occ. eigenvalues --  -19.21174 -19.21174 -19.15310 -19.15309 -10.33444
 Alpha  occ. eigenvalues --  -10.33442 -10.28269 -10.28266 -10.19416 -10.19416
 Alpha  occ. eigenvalues --   -1.13848  -1.10822  -1.04248  -1.04210  -0.81622
 Alpha  occ. eigenvalues --   -0.79905  -0.68542  -0.68473  -0.63993  -0.58478
 Alpha  occ. eigenvalues --   -0.55933  -0.53919  -0.48959  -0.46033  -0.45106
 Alpha  occ. eigenvalues --   -0.44700  -0.43225  -0.42632  -0.42248  -0.41125
 Alpha  occ. eigenvalues --   -0.40801  -0.39168  -0.38573  -0.36289  -0.33156
 Alpha  occ. eigenvalues --   -0.32612  -0.28489  -0.28181
 Alpha virt. eigenvalues --   -0.02017  -0.01697   0.06492   0.09737   0.09808
 Alpha virt. eigenvalues --    0.11737   0.13092   0.14625   0.14802   0.15981
 Alpha virt. eigenvalues --    0.16870   0.17857   0.19600   0.21394   0.21609
 Alpha virt. eigenvalues --    0.25018   0.31436   0.31770   0.35718   0.37177
 Alpha virt. eigenvalues --    0.46368   0.47500   0.48667   0.52391   0.53990
 Alpha virt. eigenvalues --    0.55846   0.56829   0.57686   0.58185   0.60718
 Alpha virt. eigenvalues --    0.62665   0.64831   0.66705   0.68580   0.69907
 Alpha virt. eigenvalues --    0.70712   0.71671   0.77174   0.77887   0.81590
 Alpha virt. eigenvalues --    0.86003   0.86248   0.87612   0.87726   0.88359
 Alpha virt. eigenvalues --    0.89390   0.89426   0.93220   0.94520   0.96272
 Alpha virt. eigenvalues --    0.99925   1.01384   1.01922   1.07410   1.09898
 Alpha virt. eigenvalues --    1.10561   1.10744   1.15669   1.19076   1.24872
 Alpha virt. eigenvalues --    1.32014   1.34152   1.38933   1.40609   1.44202
 Alpha virt. eigenvalues --    1.44218   1.47222   1.50475   1.58280   1.58903
 Alpha virt. eigenvalues --    1.66337   1.67434   1.69650   1.74722   1.75051
 Alpha virt. eigenvalues --    1.77743   1.80328   1.80474   1.81788   1.83320
 Alpha virt. eigenvalues --    1.84364   1.85622   1.90407   1.91609   1.91872
 Alpha virt. eigenvalues --    1.93050   1.97877   1.99711   2.04553   2.05665
 Alpha virt. eigenvalues --    2.08960   2.09497   2.14446   2.14649   2.14838
 Alpha virt. eigenvalues --    2.15315   2.25881   2.26975   2.31784   2.32817
 Alpha virt. eigenvalues --    2.40336   2.41108   2.44543   2.48947   2.55048
 Alpha virt. eigenvalues --    2.61690   2.63374   2.63533   2.64778   2.70805
 Alpha virt. eigenvalues --    2.75313   2.84230   2.87930   2.95020   3.02076
 Alpha virt. eigenvalues --    3.04517   3.17983   3.19435
          Condensed to atoms (all electrons):
              1          2          3          4          5          6
     1  O    8.225808   0.284793  -0.068254   0.003031  -0.017250   0.175522
     2  C    0.284793   4.370135   0.636403  -0.017249  -0.015624  -0.023797
     3  O   -0.068254   0.636403   7.891987   0.001168  -0.000028   0.001841
     4  O    0.003031  -0.017249   0.001168   8.225791   0.284789  -0.099620
     5  C   -0.017250  -0.015624  -0.000028   0.284789   4.370156   0.278665
     6  C    0.175522  -0.023797   0.001841  -0.099620   0.278665   5.081638
     7  C   -0.099624   0.278661  -0.083029   0.175519  -0.023799   0.010764
     8  O    0.001168  -0.000028   0.000000  -0.068254   0.636401  -0.083031
     9  C   -0.042321   0.001576  -0.000081   0.002894  -0.025660   0.371270
    10  C    0.002894  -0.025659   0.003911  -0.042321   0.001576   0.000183
    11  H   -0.035492  -0.004751   0.000066   0.000218  -0.040849   0.353817
    12  H    0.000217  -0.040846   0.001771  -0.035492  -0.004751  -0.000069
    13  H    0.000431  -0.000063  -0.000005  -0.000047   0.004411  -0.026883
    14  H    0.000610  -0.000071  -0.000009   0.000053  -0.005948  -0.032206
    15  H    0.002842  -0.000014   0.000001   0.000065  -0.002710  -0.023885
    16  H    0.000065  -0.002710   0.004317   0.002842  -0.000014   0.000028
    17  H   -0.000047   0.004411   0.000319   0.000431  -0.000063   0.000009
    18  H    0.000053  -0.005948   0.001934   0.000610  -0.000071   0.000007
              7          8          9         10         11         12
     1  O   -0.099624   0.001168  -0.042321   0.002894  -0.035492   0.000217
     2  C    0.278661  -0.000028   0.001576  -0.025659  -0.004751  -0.040846
     3  O   -0.083029   0.000000  -0.000081   0.003911   0.000066   0.001771
     4  O    0.175519  -0.068254   0.002894  -0.042321   0.000218  -0.035492
     5  C   -0.023799   0.636401  -0.025660   0.001576  -0.040849  -0.004751
     6  C    0.010764  -0.083031   0.371270   0.000183   0.353817  -0.000069
     7  C    5.081683   0.001841   0.000183   0.371260  -0.000068   0.353820
     8  O    0.001841   7.891993   0.003914  -0.000081   0.001771   0.000066
     9  C    0.000183   0.003914   5.070320   0.000000  -0.038908  -0.000045
    10  C    0.371260  -0.000081   0.000000   5.070325  -0.000045  -0.038908
    11  H   -0.000068   0.001771  -0.038908  -0.000045   0.586555   0.003071
    12  H    0.353820   0.000066  -0.000045  -0.038908   0.003071   0.586551
    13  H    0.000009   0.000319   0.365845   0.000000  -0.004220  -0.000003
    14  H    0.000007   0.001934   0.379858   0.000001   0.005012   0.000001
    15  H    0.000028   0.004315   0.363157   0.000000  -0.000092   0.000001
    16  H   -0.023887   0.000001   0.000000   0.363159   0.000001  -0.000091
    17  H   -0.026882  -0.000005   0.000000   0.365846  -0.000003  -0.004220
    18  H   -0.032207  -0.000009   0.000001   0.379855   0.000001   0.005011
             13         14         15         16         17         18
     1  O    0.000431   0.000610   0.002842   0.000065  -0.000047   0.000053
     2  C   -0.000063  -0.000071  -0.000014  -0.002710   0.004411  -0.005948
     3  O   -0.000005  -0.000009   0.000001   0.004317   0.000319   0.001934
     4  O   -0.000047   0.000053   0.000065   0.002842   0.000431   0.000610
     5  C    0.004411  -0.005948  -0.002710  -0.000014  -0.000063  -0.000071
     6  C   -0.026883  -0.032206  -0.023885   0.000028   0.000009   0.000007
     7  C    0.000009   0.000007   0.000028  -0.023887  -0.026882  -0.032207
     8  O    0.000319   0.001934   0.004315   0.000001  -0.000005  -0.000009
     9  C    0.365845   0.379858   0.363157   0.000000   0.000000   0.000001
    10  C    0.000000   0.000001   0.000000   0.363159   0.365846   0.379855
    11  H   -0.004220   0.005012  -0.000092   0.000001  -0.000003   0.000001
    12  H   -0.000003   0.000001   0.000001  -0.000091  -0.004220   0.005011
    13  H    0.544193  -0.027341  -0.025440   0.000000   0.000000   0.000000
    14  H   -0.027341   0.521390  -0.022944   0.000000   0.000000   0.000000
    15  H   -0.025440  -0.022944   0.524802   0.000000   0.000000   0.000000
    16  H    0.000000   0.000000   0.000000   0.524794  -0.025438  -0.022945
    17  H    0.000000   0.000000   0.000000  -0.025438   0.544191  -0.027340
    18  H    0.000000   0.000000   0.000000  -0.022945  -0.027340   0.521399
 Mulliken atomic charges:
              1
     1  O   -0.434444
     2  C    0.560782
     3  O   -0.392311
     4  O   -0.434428
     5  C    0.560770
     6  C    0.015747
     7  C    0.015721
     8  O   -0.392314
     9  C   -0.452002
    10  C   -0.451995
    11  H    0.173917
    12  H    0.173918
    13  H    0.168793
    14  H    0.179655
    15  H    0.179876
    16  H    0.179879
    17  H    0.168791
    18  H    0.179648
 Sum of Mulliken charges=   0.00000
 Atomic charges with hydrogens summed into heavy atoms:
              1
     1  O   -0.434444
     2  C    0.560782
     3  O   -0.392311
     4  O   -0.434428
     5  C    0.560770
     6  C    0.189664
     7  C    0.189639
     8  O   -0.392314
     9  C    0.076321
    10  C    0.076322
    11  H    0.000000
    12  H    0.000000
    13  H    0.000000
    14  H    0.000000
    15  H    0.000000
    16  H    0.000000
    17  H    0.000000
    18  H    0.000000
 Sum of Mulliken charges=   0.00000
 APT atomic charges:
              1
     1  O   -0.818993
     2  C    1.057141
     3  O   -0.707048
     4  O   -0.818980
     5  C    1.057129
     6  C    0.431581
     7  C    0.431548
     8  O   -0.707045
     9  C    0.044288
    10  C    0.044308
    11  H   -0.048429
    12  H   -0.048429
    13  H    0.004536
    14  H    0.013457
    15  H    0.023475
    16  H    0.023479
    17  H    0.004535
    18  H    0.013448
 Sum of APT charges=   0.00000
 APT Atomic charges with hydrogens summed into heavy atoms:
              1
     1  O   -0.818993
     2  C    1.057141
     3  O   -0.707048
     4  O   -0.818980
     5  C    1.057129
     6  C    0.383152
     7  C    0.383119
     8  O   -0.707045
     9  C    0.085757
    10  C    0.085769
    11  H    0.000000
    12  H    0.000000
    13  H    0.000000
    14  H    0.000000
    15  H    0.000000
    16  H    0.000000
    17  H    0.000000
    18  H    0.000000
 Sum of APT charges=   0.00000
 Electronic spatial extent (au):  <R**2>=  1407.8145
 Charge=     0.0000 electrons
 Dipole moment (field-independent basis, Debye):
    X=     0.0000    Y=    -0.0002    Z=     2.6382  Tot=     2.6382
 Quadrupole moment (field-independent basis, Debye-Ang):
   XX=   -57.5628   YY=   -67.9656   ZZ=   -54.1365
   XY=   -10.9264   XZ=    -0.0008   YZ=    -0.0012
 Traceless Quadrupole moment (field-independent basis, Debye-Ang):
   XX=     2.3255   YY=    -8.0773   ZZ=     5.7518
   XY=   -10.9264   XZ=    -0.0008   YZ=    -0.0012
 Octapole moment (field-independent basis, Debye-Ang**2):
  XXX=     0.0008  YYY=    -0.0012  ZZZ=    -1.9729  XYY=    -0.0007
  XXY=    -0.0018  XXZ=     6.3259  XZZ=     0.0013  YZZ=     0.0014
  YYZ=     5.8112  XYZ=     4.1955
 Hexadecapole moment (field-independent basis, Debye-Ang**3):
 XXXX= -1101.1546 YYYY=  -569.5571 ZZZZ=   -97.0777 XXXY=   -36.1938
 XXXZ=    -0.0268 YYYX=   -20.0094 YYYZ=    -0.0161 ZZZX=    -0.0234
 ZZZY=    -0.0131 XXYY=  -301.0116 XXZZ=  -196.5628 YYZZ=  -106.1466
 XXYZ=    -0.0080 YYXZ=    -0.0113 ZZXY=     3.8239
 N-N= 5.615483334462D+02 E-N=-2.373487372849D+03  KE= 5.309547385996D+02
  Exact polarizability:  91.526   3.405  65.746   0.002   0.001  52.290
 Approx polarizability: 124.703  16.570  96.398   0.003   0.002  79.566
 No NMR shielding tensors so no spin-rotation constants.
 Leave Link  601 at Tue Nov 30 22:46:57 2004, MaxMem=   52428800 cpu:       0.6
 (Enter /usr/local/g03/l701.exe)
 Compute integral second derivatives.
 ... and contract with generalized density number  0.
 Leave Link  701 at Tue Nov 30 22:46:59 2004, MaxMem=   52428800 cpu:       0.8
 (Enter /usr/local/g03/l702.exe)
 L702 exits ... SP integral derivatives will be done elsewhere.
 Leave Link  702 at Tue Nov 30 22:46:59 2004, MaxMem=   52428800 cpu:       0.0
 (Enter /usr/local/g03/l703.exe)
 Compute integral second derivatives, UseDBF=F.
 Integral derivatives from FoFDir, PRISM(SPDF).
 Symmetry not used in FoFDir.
 MinBra= 0 MaxBra= 2 Meth= 1.
 IRaf=       0 NMat=   1 IRICut=       1 DoRegI=T DoRafI=F ISym2E= 0 JSym2E=0.
 Leave Link  703 at Tue Nov 30 23:01:13 2004, MaxMem=   52428800 cpu:     847.7
 (Enter /usr/local/g03/l716.exe)
 Dipole        =-1.01737138D-05-6.54316900D-05 1.03794070D+00
 Polarizability= 9.15262917D+01 3.40501050D+00 6.57463085D+01
                 2.10040434D-03 1.03713195D-03 5.22896495D+01
 Full mass-weighted force constant matrix:
 Low frequencies ---   -6.3704   -4.4822   -0.0006    0.0008    0.0009    5.6058
 Low frequencies ---   67.2278  129.1721  130.2229
 Diagonal vibrational polarizability:
       20.0882669       7.6242603      42.2557310
 Harmonic frequencies (cm**-1), IR intensities (KM/Mole), Raman scattering
 activities (A**4/AMU), depolarization ratios for plane and unpolarized
 incident light, reduced masses (AMU), force constants (mDyne/A),
 and normal coordinates:
                     1                      2                      3
                     A                      A                      A
 Frequencies --    67.2238               129.1718               130.2223
 Red. masses --     5.0602                 5.0322                 4.7936
 Frc consts  --     0.0135                 0.0495                 0.0479
 IR Inten    --     6.2846                 0.0132                 0.2126
 Atom AN      X      Y      Z        X      Y      Z        X      Y      Z
   1   8    -0.02   0.00  -0.02     0.00  -0.05   0.27     0.02   0.07  -0.27
   2   6    -0.02  -0.02   0.08     0.02   0.02   0.04     0.01   0.00  -0.01
   3   8    -0.04  -0.08   0.26     0.05   0.06  -0.16    -0.02  -0.05   0.17
   4   8     0.02   0.00  -0.02     0.00   0.05   0.26     0.02   0.07   0.27
   5   6     0.02   0.02   0.08    -0.02  -0.02   0.04     0.01   0.00   0.01
   6   6     0.03  -0.03  -0.07     0.06   0.00   0.06    -0.02  -0.02  -0.04
   7   6    -0.03   0.03  -0.07    -0.06   0.00   0.06    -0.03  -0.02   0.04
   8   8     0.04   0.08   0.26    -0.05  -0.06  -0.16    -0.02  -0.05  -0.17
   9   6    -0.02  -0.01  -0.26    -0.01   0.00  -0.18     0.03   0.00   0.14
  10   6     0.02   0.01  -0.26     0.01   0.00  -0.18     0.03   0.00  -0.14
  11   1     0.14  -0.11  -0.06     0.24   0.05   0.08    -0.19  -0.10  -0.06
  12   1    -0.14   0.11  -0.06    -0.24  -0.05   0.08    -0.20  -0.10   0.06
  13   1     0.02  -0.03  -0.34     0.09   0.03  -0.16    -0.09  -0.07   0.00
  14   1    -0.14   0.06  -0.27    -0.25  -0.05  -0.21     0.26   0.18   0.16
  15   1     0.03  -0.04  -0.31     0.07   0.04  -0.39    -0.03  -0.10   0.40
  16   1    -0.03   0.04  -0.31    -0.07  -0.04  -0.38    -0.03  -0.10  -0.41
  17   1    -0.02   0.03  -0.34    -0.08  -0.02  -0.16    -0.09  -0.07   0.00
  18   1     0.14  -0.06  -0.27     0.24   0.05  -0.20     0.26   0.18  -0.16
                     4                      5                      6
                     A                      A                      A
 Frequencies --   211.5435               217.8044               265.8062
 Red. masses --     1.0468                 1.1222                 2.5928
 Frc consts  --     0.0276                 0.0314                 0.1079
 IR Inten    --     0.3443                 0.1243                 4.5354
 Atom AN      X      Y      Z        X      Y      Z        X      Y      Z
   1   8     0.00   0.00   0.01     0.00   0.01  -0.05     0.01   0.06   0.00
   2   6     0.00   0.00   0.01     0.00   0.00   0.00     0.03   0.06   0.03
   3   8     0.00   0.02  -0.01    -0.01   0.01   0.00     0.02   0.08   0.00
   4   8     0.00   0.00   0.01     0.00   0.01   0.05     0.01   0.06   0.00
   5   6     0.00   0.00   0.01     0.00   0.00   0.00     0.03   0.06  -0.03
   6   6     0.00   0.00   0.01     0.00  -0.01  -0.02     0.02   0.04  -0.03
   7   6     0.00   0.00   0.01     0.00  -0.01   0.02     0.02   0.04   0.03
   8   8     0.00  -0.02  -0.01    -0.01   0.01   0.00     0.02   0.08   0.00
   9   6     0.00   0.02  -0.02     0.00  -0.02   0.02    -0.07  -0.21   0.01
  10   6     0.00  -0.02  -0.02     0.00  -0.02  -0.02    -0.07  -0.21  -0.01
  11   1     0.01  -0.02   0.01    -0.03  -0.01  -0.02     0.02   0.09  -0.02
  12   1    -0.01   0.02   0.01    -0.03  -0.01   0.02     0.02   0.09   0.02
  13   1    -0.15  -0.13  -0.36     0.16   0.13   0.36    -0.34  -0.24   0.03
  14   1     0.16   0.40   0.00    -0.14  -0.40   0.01    -0.05  -0.27   0.01
  15   1     0.02  -0.21   0.32    -0.02   0.22  -0.31     0.08  -0.41   0.03
  16   1    -0.02   0.21   0.32    -0.02   0.22   0.31     0.08  -0.41  -0.03
  17   1     0.15   0.13  -0.36     0.17   0.13  -0.36    -0.34  -0.24  -0.03
  18   1    -0.16  -0.40   0.00    -0.14  -0.40  -0.01    -0.05  -0.27  -0.01
                     7                      8                      9
                     A                      A                      A
 Frequencies --   282.9928               338.1583               368.6750
 Red. masses --     3.3231                 5.1479                 6.2307
 Frc consts  --     0.1568                 0.3468                 0.4990
 IR Inten    --     0.0076                12.9792                13.5204
 Atom AN      X      Y      Z        X      Y      Z        X      Y      Z
   1   8     0.02   0.04   0.03    -0.02  -0.13   0.02     0.04   0.26  -0.17
   2   6     0.00  -0.05  -0.02    -0.02  -0.02   0.11     0.00   0.07   0.17
   3   8     0.09  -0.17  -0.02    -0.16   0.20  -0.03     0.09   0.06  -0.06
   4   8    -0.02  -0.04   0.03    -0.02  -0.13  -0.02    -0.04  -0.26  -0.17
   5   6     0.00   0.05  -0.02    -0.02  -0.02  -0.11     0.00  -0.07   0.17
   6   6     0.04   0.05  -0.02     0.06  -0.06  -0.15     0.05  -0.02   0.21
   7   6    -0.04  -0.05  -0.02     0.06  -0.06   0.15    -0.05   0.02   0.21
   8   8    -0.09   0.17  -0.02    -0.16   0.20   0.03    -0.10  -0.06  -0.06
   9   6    -0.05  -0.20   0.02     0.15  -0.02   0.07    -0.02  -0.03  -0.05
  10   6     0.05   0.20   0.02     0.15  -0.02  -0.07     0.02   0.03  -0.05
  11   1     0.04   0.11  -0.01     0.06   0.05  -0.15     0.02  -0.26   0.20
  12   1    -0.04  -0.11  -0.01     0.06   0.05   0.15    -0.02   0.26   0.20
  13   1    -0.33  -0.24   0.00     0.13  -0.01   0.10     0.06  -0.04  -0.11
  14   1    -0.02  -0.22   0.02     0.44   0.00   0.10    -0.32   0.00  -0.08
  15   1     0.10  -0.41   0.07     0.01   0.02   0.29     0.09  -0.04  -0.25
  16   1    -0.10   0.41   0.07     0.01   0.02  -0.29    -0.09   0.04  -0.25
  17   1     0.33   0.24   0.00     0.13  -0.01  -0.10    -0.06   0.04  -0.11
  18   1     0.02   0.22   0.02     0.44   0.00  -0.10     0.32   0.00  -0.08
                    10                     11                     12
                     A                      A                      A
 Frequencies --   413.6496               477.0705               477.7017
 Red. masses --     3.6998                 5.6087                10.6930
 Frc consts  --     0.3730                 0.7521                 1.4377
 IR Inten    --     0.0567                 9.8839                 1.0022
 Atom AN      X      Y      Z        X      Y      Z        X      Y      Z
   1   8     0.01   0.05   0.02     0.06  -0.05   0.00     0.21  -0.23  -0.07
   2   6    -0.03   0.08   0.00     0.05   0.03  -0.22     0.32   0.10   0.00
   3   8     0.02   0.02   0.02    -0.16   0.13   0.12     0.27   0.18   0.10
   4   8    -0.01  -0.05   0.02     0.06  -0.05   0.00    -0.21   0.23  -0.07
   5   6     0.03  -0.08   0.00     0.05   0.03   0.22    -0.32  -0.10   0.00
   6   6     0.16  -0.08  -0.07     0.07  -0.06   0.25    -0.06  -0.14  -0.02
   7   6    -0.16   0.08  -0.07     0.07  -0.06  -0.25     0.06   0.14  -0.02
   8   8    -0.02  -0.02   0.02    -0.16   0.13  -0.12    -0.27  -0.18   0.10
   9   6     0.26  -0.08   0.01     0.02  -0.04  -0.01    -0.03  -0.10  -0.01
  10   6    -0.26   0.08   0.01     0.02  -0.04   0.01     0.03   0.10  -0.01
  11   1     0.24  -0.07  -0.06     0.03  -0.29   0.24    -0.06  -0.19  -0.02
  12   1    -0.24   0.07  -0.06     0.03  -0.29  -0.24     0.06   0.19  -0.02
  13   1     0.27  -0.05   0.09     0.11  -0.08  -0.14    -0.14  -0.10   0.03
  14   1     0.42  -0.12   0.02    -0.28   0.05  -0.04    -0.06  -0.18  -0.01
  15   1     0.17  -0.02   0.10     0.13  -0.08  -0.17     0.03  -0.17  -0.03
  16   1    -0.17   0.02   0.10     0.13  -0.08   0.17    -0.03   0.17  -0.03
  17   1    -0.27   0.05   0.09     0.11  -0.08   0.14     0.14   0.10   0.03
  18   1    -0.42   0.12   0.02    -0.28   0.05   0.04     0.06   0.18  -0.01
                    13                     14                     15
                     A                      A                      A
 Frequencies --   602.3466               643.6108               654.9693
 Red. masses --     4.5185                 4.9725                 7.4195
 Frc consts  --     0.9659                 1.2136                 1.8753
 IR Inten    --     2.2001                14.0554                 6.2606
 Atom AN      X      Y      Z        X      Y      Z        X      Y      Z
   1   8     0.12   0.10   0.03     0.11  -0.17  -0.07    -0.12   0.20   0.12
   2   6     0.08   0.00  -0.09     0.13  -0.05   0.12     0.00   0.28  -0.17
   3   8    -0.10   0.15   0.07     0.07   0.12   0.01     0.17   0.01   0.09
   4   8    -0.12  -0.10   0.03     0.11  -0.17   0.07     0.12  -0.20   0.12
   5   6    -0.08   0.00  -0.09     0.13  -0.05  -0.12     0.00  -0.28  -0.17
   6   6     0.08   0.23  -0.04    -0.08  -0.01   0.01    -0.09  -0.04  -0.11
   7   6    -0.08  -0.23  -0.04    -0.08  -0.01  -0.01     0.09   0.04  -0.11
   8   8     0.10  -0.15   0.07     0.07   0.12  -0.01    -0.17  -0.01   0.09
   9   6     0.00   0.02  -0.01    -0.21   0.08   0.03    -0.12   0.06   0.01
  10   6     0.00  -0.02  -0.01    -0.21   0.08  -0.03     0.12  -0.06   0.01
  11   1     0.10   0.37  -0.03    -0.27   0.13  -0.01    -0.03   0.25  -0.09
  12   1    -0.10  -0.37  -0.03    -0.27   0.13   0.01     0.03  -0.25  -0.09
  13   1    -0.33   0.01   0.07    -0.12   0.05  -0.10     0.01   0.08   0.02
  14   1    -0.05  -0.13  -0.01    -0.37   0.20   0.01     0.04   0.12   0.02
  15   1     0.20  -0.20  -0.06    -0.19   0.09  -0.04    -0.30   0.21   0.13
  16   1    -0.20   0.20  -0.06    -0.19   0.09   0.04     0.30  -0.21   0.13
  17   1     0.33  -0.01   0.07    -0.12   0.05   0.10    -0.01  -0.08   0.02
  18   1     0.05   0.13  -0.01    -0.37   0.20  -0.01    -0.04  -0.12   0.02
                    16                     17                     18
                     A                      A                      A
 Frequencies --   774.6863               802.9261               832.6469
 Red. masses --     4.4443                 2.8529                 2.9775
 Frc consts  --     1.5715                 1.0836                 1.2163
 IR Inten    --     8.0369                 2.7744                 4.7825
 Atom AN      X      Y      Z        X      Y      Z        X      Y      Z
   1   8     0.08   0.07  -0.07    -0.02   0.04   0.01    -0.07   0.10   0.00
   2   6    -0.06  -0.17   0.19     0.02  -0.06   0.20     0.02   0.02   0.13
   3   8    -0.12  -0.04  -0.08     0.03   0.05  -0.04     0.06   0.06   0.00
   4   8     0.08   0.07   0.07     0.02  -0.04   0.01    -0.07   0.10   0.00
   5   6    -0.06  -0.17  -0.19    -0.02   0.06   0.20     0.02   0.02  -0.13
   6   6     0.07   0.09   0.12    -0.03   0.03  -0.16    -0.05  -0.16   0.09
   7   6     0.07   0.09  -0.12     0.03  -0.03  -0.16    -0.05  -0.16  -0.09
   8   8    -0.12  -0.04   0.08    -0.03  -0.05  -0.04     0.06   0.06   0.00
   9   6     0.05   0.02   0.02    -0.05   0.02  -0.03     0.04  -0.08   0.01
  10   6     0.05   0.02  -0.02     0.05  -0.02  -0.03     0.04  -0.08  -0.01
  11   1    -0.05   0.31   0.11     0.17  -0.14  -0.14    -0.13  -0.10   0.08
  12   1    -0.05   0.31  -0.11    -0.17   0.14  -0.14    -0.13  -0.10  -0.08
  13   1    -0.06  -0.05  -0.13    -0.23   0.10   0.24     0.49  -0.10  -0.20
  14   1    -0.28   0.06  -0.02     0.35  -0.18   0.01    -0.08   0.21  -0.01
  15   1     0.29  -0.16  -0.18    -0.19   0.04   0.19    -0.14   0.17  -0.03
  16   1     0.29  -0.16   0.18     0.19  -0.04   0.19    -0.14   0.17   0.03
  17   1    -0.06  -0.05   0.13     0.23  -0.10   0.24     0.49  -0.10   0.20
  18   1    -0.28   0.06   0.02    -0.35   0.18   0.01    -0.08   0.21   0.01
                    19                     20                     21
                     A                      A                      A
 Frequencies --   948.1563               999.9184              1052.1967
 Red. masses --     2.5844                 2.3298                 2.0047
 Frc consts  --     1.3689                 1.3725                 1.3077
 IR Inten    --    32.3898                 2.8612                 7.8423
 Atom AN      X      Y      Z        X      Y      Z        X      Y      Z
   1   8     0.11   0.11   0.05     0.13   0.06   0.03     0.00  -0.04  -0.03
   2   6     0.03  -0.09  -0.01     0.02  -0.06  -0.05    -0.04   0.06  -0.05
   3   8    -0.07   0.00  -0.01    -0.06  -0.01   0.00    -0.01  -0.02   0.01
   4   8     0.11   0.11  -0.05    -0.13  -0.06   0.03     0.00   0.04  -0.03
   5   6     0.03  -0.09   0.01    -0.02   0.06  -0.05     0.04  -0.06  -0.05
   6   6     0.02  -0.07  -0.03     0.00  -0.08   0.01     0.12  -0.03   0.07
   7   6     0.02  -0.07   0.03     0.00   0.08   0.01    -0.12   0.03   0.07
   8   8    -0.07   0.00   0.01     0.06   0.01   0.00     0.01   0.02   0.01
   9   6    -0.11  -0.01  -0.03    -0.08  -0.08  -0.02    -0.08   0.07  -0.02
  10   6    -0.11  -0.01   0.03     0.08   0.08  -0.02     0.08  -0.07  -0.02
  11   1     0.30  -0.11   0.00     0.15  -0.06   0.03     0.38  -0.23   0.09
  12   1     0.30  -0.11   0.00    -0.15   0.06   0.03    -0.38   0.23   0.09
  13   1     0.00   0.07   0.15     0.33  -0.02   0.00    -0.34   0.13   0.22
  14   1     0.24  -0.01   0.01     0.15   0.13   0.00     0.13  -0.14   0.00
  15   1    -0.41   0.19   0.22    -0.43   0.26   0.15    -0.08  -0.04   0.15
  16   1    -0.41   0.19  -0.22     0.43  -0.26   0.15     0.08   0.04   0.15
  17   1     0.00   0.07  -0.15    -0.33   0.02   0.00     0.34  -0.13   0.22
  18   1     0.24  -0.01  -0.01    -0.15  -0.13   0.00    -0.13   0.14   0.00
                    22                     23                     24
                     A                      A                      A
 Frequencies --  1077.2214              1119.2139              1136.6140
 Red. masses --     2.0890                 3.6239                 2.2079
 Frc consts  --     1.4282                 2.6746                 1.6805
 IR Inten    --    36.4952                 7.6249                86.1050
 Atom AN      X      Y      Z        X      Y      Z        X      Y      Z
   1   8    -0.08  -0.03  -0.05    -0.15   0.00  -0.03    -0.06  -0.05  -0.04
   2   6    -0.02   0.02   0.09     0.14  -0.08  -0.07    -0.02   0.03  -0.01
   3   8     0.04   0.02  -0.01     0.03   0.02   0.02     0.00  -0.03  -0.01
   4   8    -0.08  -0.03   0.05     0.15   0.00  -0.03    -0.06  -0.05   0.04
   5   6    -0.02   0.02  -0.09    -0.14   0.08  -0.07    -0.02   0.03   0.01
   6   6     0.08  -0.03   0.11    -0.02   0.13   0.14     0.15   0.10   0.01
   7   6     0.08  -0.03  -0.11     0.02  -0.13   0.14     0.15   0.10  -0.01
   8   8     0.04   0.02   0.01    -0.03  -0.02   0.02     0.00  -0.03   0.01
   9   6    -0.04   0.06  -0.04     0.03  -0.08  -0.09    -0.07  -0.08   0.02
  10   6    -0.04   0.06   0.04    -0.03   0.08  -0.09    -0.07  -0.08  -0.02
  11   1     0.32  -0.32   0.12     0.04  -0.11   0.13     0.20   0.26   0.01
  12   1     0.32  -0.32  -0.12    -0.04   0.11   0.13     0.20   0.26  -0.01
  13   1    -0.30   0.12   0.21     0.21   0.03   0.14     0.34  -0.05  -0.05
  14   1     0.17  -0.17  -0.01     0.46  -0.05  -0.05    -0.03   0.25   0.03
  15   1    -0.01  -0.08   0.14    -0.22   0.09   0.15    -0.32   0.23   0.03
  16   1    -0.01  -0.08  -0.14     0.22  -0.09   0.15    -0.32   0.23  -0.03
  17   1    -0.30   0.12  -0.21    -0.21  -0.03   0.14     0.34  -0.05   0.05
  18   1     0.17  -0.17   0.01    -0.46   0.05  -0.05    -0.03   0.25  -0.03
                    25                     26                     27
                     A                      A                      A
 Frequencies --  1140.1263              1174.6989              1224.4747
 Red. masses --     2.7311                 2.2746                 2.0584
 Frc consts  --     2.0917                 1.8493                 1.8183
 IR Inten    --     5.1301                14.9940                 1.1605
 Atom AN      X      Y      Z        X      Y      Z        X      Y      Z
   1   8    -0.06  -0.06  -0.04    -0.03   0.04   0.03     0.05  -0.06  -0.04
   2   6     0.01   0.01   0.05     0.00   0.00  -0.01    -0.11   0.09   0.06
   3   8     0.04   0.02   0.00    -0.01  -0.01   0.00     0.02   0.00   0.00
   4   8     0.06   0.06  -0.04    -0.03   0.04  -0.03    -0.05   0.06  -0.04
   5   6    -0.01  -0.01   0.05     0.00   0.00   0.01     0.11  -0.09   0.06
   6   6     0.19   0.08  -0.06     0.12  -0.09  -0.11    -0.05   0.05   0.05
   7   6    -0.19  -0.08  -0.06     0.12  -0.09   0.11     0.05  -0.05   0.05
   8   8    -0.04  -0.02   0.00    -0.01  -0.01   0.00    -0.02   0.00   0.00
   9   6    -0.08  -0.06   0.07    -0.04   0.06   0.12     0.00  -0.03  -0.07
  10   6     0.08   0.06   0.08    -0.04   0.06  -0.12     0.00   0.03  -0.07
  11   1     0.13   0.22  -0.07     0.15  -0.22  -0.11     0.01   0.58   0.07
  12   1    -0.13  -0.22  -0.07     0.15  -0.22   0.11    -0.01  -0.58   0.07
  13   1     0.27  -0.08  -0.12    -0.14  -0.05  -0.14     0.08   0.04   0.09
  14   1    -0.26   0.31   0.05    -0.49   0.12   0.07     0.26  -0.04  -0.04
  15   1    -0.22   0.21  -0.06     0.17  -0.03  -0.16    -0.13   0.03   0.10
  16   1     0.22  -0.21  -0.06     0.17  -0.03   0.16     0.13  -0.03   0.10
  17   1    -0.27   0.08  -0.12    -0.14  -0.05   0.14    -0.08  -0.04   0.09
  18   1     0.26  -0.31   0.05    -0.49   0.12  -0.07    -0.26   0.04  -0.04
                    28                     29                     30
                     A                      A                      A
 Frequencies --  1276.6764              1353.6193              1363.6657
 Red. masses --     5.0333                 1.2780                 1.2434
 Frc consts  --     4.8335                 1.3797                 1.3623
 IR Inten    --   620.9269                29.7846                 0.6681
 Atom AN      X      Y      Z        X      Y      Z        X      Y      Z
   1   8     0.20  -0.06  -0.02    -0.01   0.00  -0.02    -0.02   0.01  -0.02
   2   6    -0.25   0.21   0.08     0.00   0.01  -0.03     0.03  -0.03   0.00
   3   8     0.01  -0.03  -0.01     0.01   0.00   0.01     0.00   0.00   0.00
   4   8     0.20  -0.06   0.02    -0.01   0.00   0.02     0.02  -0.01  -0.02
   5   6    -0.25   0.21  -0.08     0.00   0.01   0.03    -0.03   0.03   0.00
   6   6    -0.07  -0.02   0.00    -0.02  -0.09   0.01    -0.07  -0.03   0.00
   7   6    -0.07  -0.02   0.00    -0.02  -0.09  -0.01     0.07   0.03   0.00
   8   8     0.01  -0.03   0.01     0.01   0.00  -0.01     0.00   0.00   0.00
   9   6     0.00  -0.03   0.04     0.01   0.03   0.00     0.01   0.01   0.04
  10   6     0.00  -0.03  -0.04     0.01   0.03   0.00    -0.01  -0.01   0.04
  11   1     0.46  -0.26   0.06     0.31   0.61   0.06     0.63   0.23   0.07
  12   1     0.46  -0.26  -0.06     0.31   0.60  -0.06    -0.63  -0.23   0.07
  13   1     0.15  -0.07  -0.10    -0.05   0.01  -0.01     0.04  -0.04  -0.10
  14   1    -0.07   0.05   0.03    -0.04  -0.09   0.00    -0.08  -0.03   0.03
  15   1     0.01   0.01  -0.06     0.05  -0.06   0.05     0.09  -0.04  -0.05
  16   1     0.01   0.01   0.06     0.05  -0.06  -0.05    -0.10   0.04  -0.05
  17   1     0.15  -0.07   0.10    -0.05   0.01   0.01    -0.04   0.04  -0.10
  18   1    -0.07   0.05  -0.03    -0.04  -0.09   0.00     0.08   0.03   0.03
                    31                     32                     33
                     A                      A                      A
 Frequencies --  1382.9809              1395.1202              1442.1222
 Red. masses --     1.7373                 1.9424                 1.2647
 Frc consts  --     1.9578                 2.2275                 1.5497
 IR Inten    --    27.3638                 0.0063                25.9435
 Atom AN      X      Y      Z        X      Y      Z        X      Y      Z
   1   8     0.03   0.00   0.01    -0.04   0.03  -0.01     0.00   0.00   0.00
   2   6    -0.06   0.07   0.01     0.07  -0.07   0.01     0.00   0.00   0.00
   3   8    -0.01  -0.02  -0.01    -0.01   0.01   0.00     0.01   0.01   0.00
   4   8     0.03   0.00  -0.01     0.04  -0.03  -0.01     0.00   0.00   0.00
   5   6    -0.06   0.07  -0.01    -0.07   0.07   0.01     0.00   0.00   0.00
   6   6     0.11  -0.08   0.01     0.08  -0.14   0.02    -0.02   0.01   0.00
   7   6     0.11  -0.08  -0.01    -0.08   0.14   0.02    -0.02   0.01  -0.01
   8   8    -0.01  -0.02   0.01     0.01  -0.01   0.00     0.01   0.00   0.00
   9   6    -0.02   0.02  -0.05     0.00   0.04  -0.03     0.09  -0.03  -0.02
  10   6    -0.02   0.02   0.05     0.00  -0.04  -0.03     0.10  -0.04   0.02
  11   1    -0.61   0.19  -0.05    -0.25   0.57   0.00     0.04   0.00   0.01
  12   1    -0.61   0.19   0.05     0.25  -0.57   0.00     0.05   0.00  -0.01
  13   1    -0.10   0.07   0.12    -0.14   0.06   0.07    -0.37  -0.04   0.09
  14   1     0.02  -0.05  -0.04    -0.05  -0.12  -0.03    -0.33   0.10  -0.05
  15   1    -0.09  -0.01   0.13    -0.03  -0.06   0.15    -0.26   0.29   0.15
  16   1    -0.09  -0.01  -0.13     0.03   0.06   0.15    -0.29   0.32  -0.16
  17   1    -0.10   0.07  -0.12     0.14  -0.06   0.07    -0.41  -0.04  -0.10
  18   1     0.02  -0.05   0.04     0.05   0.12  -0.03    -0.36   0.11   0.06
                    34                     35                     36
                     A                      A                      A
 Frequencies --  1442.6099              1512.6475              1513.0999
 Red. masses --     1.2642                 1.0469                 1.0485
 Frc consts  --     1.5502                 1.4113                 1.4144
 IR Inten    --     0.6234                 5.9871                10.9152
 Atom AN      X      Y      Z        X      Y      Z        X      Y      Z
   1   8     0.00   0.00   0.00     0.00   0.00   0.00     0.00   0.00   0.00
   2   6     0.00   0.00   0.00    -0.01   0.00   0.00    -0.01   0.00   0.00
   3   8     0.00   0.00   0.00     0.00   0.00   0.00     0.00   0.00   0.00
   4   8     0.00   0.00   0.00     0.00   0.00   0.00     0.00   0.00   0.00
   5   6     0.00   0.01   0.00    -0.01   0.00   0.00     0.01   0.00   0.00
   6   6     0.02  -0.01   0.00     0.01  -0.02   0.01    -0.01   0.02  -0.01
   7   6    -0.02   0.01   0.00     0.01  -0.02  -0.01     0.01  -0.02  -0.01
   8   8     0.00   0.00   0.00     0.00   0.00   0.00     0.00   0.00   0.00
   9   6    -0.10   0.04   0.02    -0.01  -0.01   0.03     0.01   0.01  -0.03
  10   6     0.09  -0.04   0.02    -0.01  -0.01  -0.03    -0.01  -0.01  -0.03
  11   1    -0.06   0.01  -0.01    -0.04   0.05   0.01     0.04  -0.06  -0.01
  12   1     0.05  -0.01  -0.01    -0.04   0.06  -0.01    -0.03   0.06  -0.01
  13   1     0.41   0.05  -0.10    -0.30  -0.11  -0.15     0.30   0.11   0.17
  14   1     0.36  -0.11   0.06     0.34   0.07   0.05    -0.35  -0.06  -0.05
  15   1     0.29  -0.32  -0.16     0.00   0.27  -0.40     0.01  -0.27   0.41
  16   1    -0.26   0.29  -0.14     0.00   0.27   0.42    -0.01   0.27   0.40
  17   1    -0.37  -0.04  -0.09    -0.31  -0.11   0.16    -0.30  -0.11   0.16
  18   1    -0.33   0.10   0.05     0.35   0.07  -0.05     0.34   0.06  -0.05
                    37                     38                     39
                     A                      A                      A
 Frequencies --  1522.0689              1522.6122              1862.0057
 Red. masses --     1.0488                 1.0514                12.5875
 Frc consts  --     1.4315                 1.4361                25.7130
 IR Inten    --     3.7485                 2.1294               563.0627
 Atom AN      X      Y      Z        X      Y      Z        X      Y      Z
   1   8     0.00   0.00   0.00     0.00   0.00   0.00    -0.02  -0.03  -0.01
   2   6     0.00   0.00   0.00     0.01   0.00   0.00     0.41   0.37   0.16
   3   8     0.00   0.00   0.00     0.00   0.00   0.00    -0.27  -0.24  -0.10
   4   8     0.00   0.00   0.00     0.00   0.00   0.00    -0.02  -0.03   0.01
   5   6     0.00   0.00   0.00    -0.01   0.00   0.00     0.41   0.37  -0.16
   6   6    -0.01  -0.02  -0.01    -0.01  -0.02   0.00    -0.05  -0.03   0.02
   7   6    -0.01  -0.02   0.01     0.01   0.02   0.00    -0.05  -0.03  -0.02
   8   8     0.00   0.00   0.00     0.00   0.00   0.00    -0.27  -0.24   0.10
   9   6    -0.01  -0.03  -0.02    -0.01  -0.03  -0.02     0.01   0.00   0.00
  10   6    -0.01  -0.03   0.02     0.01   0.03  -0.02     0.01   0.00   0.00
  11   1     0.03   0.03   0.00     0.04   0.03   0.00     0.10  -0.01   0.02
  12   1     0.03   0.03   0.00    -0.04  -0.03   0.00     0.10  -0.01  -0.02
  13   1    -0.03   0.14   0.43    -0.04   0.14   0.43    -0.09   0.00   0.03
  14   1     0.03   0.48  -0.01     0.03   0.48  -0.01    -0.01   0.04  -0.01
  15   1     0.15  -0.12  -0.15     0.15  -0.12  -0.16     0.00   0.04  -0.02
  16   1     0.15  -0.12   0.16    -0.15   0.12  -0.16     0.00   0.04   0.02
  17   1    -0.03   0.14  -0.43     0.04  -0.14   0.43    -0.09   0.00  -0.03
  18   1     0.03   0.48   0.01    -0.03  -0.48  -0.01    -0.01   0.04   0.01
                    40                     41                     42
                     A                      A                      A
 Frequencies --  1868.7508              3018.5661              3021.1766
 Red. masses --    12.7081                 1.0832                 1.0830
 Frc consts  --    26.1477                 5.8154                 5.8240
 IR Inten    --    31.9206                 2.9622                32.7791
 Atom AN      X      Y      Z        X      Y      Z        X      Y      Z
   1   8    -0.01  -0.01  -0.01     0.00   0.00   0.00     0.00   0.00   0.00
   2   6     0.40   0.39   0.17     0.00   0.00   0.00     0.00   0.00   0.00
   3   8    -0.27  -0.24  -0.10     0.00   0.00   0.00     0.00   0.00   0.00
   4   8     0.01   0.01  -0.01     0.00   0.00   0.00     0.00   0.00   0.00
   5   6    -0.40  -0.38   0.17     0.00   0.00   0.00     0.00   0.00   0.00
   6   6    -0.02   0.03  -0.02     0.01   0.00  -0.06     0.01   0.00  -0.06
   7   6     0.02  -0.03  -0.02     0.01   0.00   0.06    -0.01   0.00  -0.06
   8   8     0.27   0.24  -0.10     0.00   0.00   0.00     0.00   0.00   0.00
   9   6     0.00   0.00   0.00     0.00   0.00   0.00     0.00   0.00   0.00
  10   6     0.00   0.00   0.00     0.00   0.00   0.00     0.00   0.00   0.00
  11   1     0.03   0.09   0.00    -0.07  -0.01   0.69    -0.07  -0.02   0.71
  12   1    -0.03  -0.09   0.00    -0.07  -0.01  -0.71     0.07   0.02   0.69
  13   1     0.08  -0.01  -0.03     0.00   0.02  -0.01     0.00   0.02  -0.01
  14   1     0.00  -0.03   0.01     0.00   0.00  -0.03     0.00   0.00  -0.04
  15   1     0.00  -0.04   0.01    -0.01  -0.01  -0.01    -0.01  -0.01  -0.01
  16   1     0.00   0.04   0.01    -0.01  -0.01   0.01     0.01   0.01  -0.01
  17   1    -0.08   0.01  -0.03     0.00   0.02   0.01     0.00  -0.02  -0.01
  18   1     0.00   0.04   0.01     0.00   0.00   0.04     0.00   0.00  -0.04
                    43                     44                     45
                     A                      A                      A
 Frequencies --  3082.2597              3082.3567              3158.8451
 Red. masses --     1.0348                 1.0348                 1.1047
 Frc consts  --     5.7924                 5.7927                 6.4945
 IR Inten    --    15.3674                 0.4076                 7.7545
 Atom AN      X      Y      Z        X      Y      Z        X      Y      Z
   1   8     0.00   0.00   0.00     0.00   0.00   0.00     0.00   0.00   0.00
   2   6     0.00   0.00   0.00     0.00   0.00   0.00     0.00   0.00   0.00
   3   8     0.00   0.00   0.00     0.00   0.00   0.00     0.00   0.00   0.00
   4   8     0.00   0.00   0.00     0.00   0.00   0.00     0.00   0.00   0.00
   5   6     0.00   0.00   0.00     0.00   0.00   0.00     0.00   0.00   0.00
   6   6     0.00   0.00   0.00     0.00   0.00   0.00     0.00   0.00   0.00
   7   6     0.00   0.00   0.00     0.00   0.00   0.00     0.00   0.00   0.00
   8   8     0.00   0.00   0.00     0.00   0.00   0.00     0.00   0.00   0.00
   9   6     0.03  -0.02  -0.01    -0.03   0.02   0.01     0.00   0.04  -0.05
  10   6     0.03  -0.02   0.01     0.03  -0.02   0.01     0.00   0.04   0.06
  11   1     0.00   0.00   0.00     0.00   0.00   0.00    -0.01   0.00   0.03
  12   1     0.00   0.00   0.00     0.00   0.00   0.00    -0.01   0.00  -0.04
  13   1    -0.04   0.42  -0.16     0.04  -0.40   0.15     0.05  -0.43   0.16
  14   1    -0.03   0.00   0.43     0.03   0.00  -0.41    -0.04   0.01   0.46
  15   1    -0.26  -0.22  -0.14     0.25   0.21   0.13    -0.02  -0.01  -0.02
  16   1    -0.25  -0.21   0.13    -0.26  -0.22   0.14    -0.02  -0.01   0.02
  17   1    -0.04   0.40   0.15    -0.04   0.42   0.16     0.05  -0.50  -0.18
  18   1    -0.03   0.00  -0.41    -0.03   0.00  -0.43    -0.05   0.01  -0.53
                    46                     47                     48
                     A                      A                      A
 Frequencies --  3158.9044              3167.6974              3167.7682
 Red. masses --     1.1047                 1.1033                 1.1033
 Frc consts  --     6.4948                 6.5229                 6.5230
 IR Inten    --    14.4849                 5.9975                 7.6524
 Atom AN      X      Y      Z        X      Y      Z        X      Y      Z
   1   8     0.00   0.00   0.00     0.00   0.00   0.00     0.00   0.00   0.00
   2   6     0.00   0.00   0.00     0.00   0.00   0.00     0.00   0.00   0.00
   3   8     0.00   0.00   0.00     0.00   0.00   0.00     0.00   0.00   0.00
   4   8     0.00   0.00   0.00     0.00   0.00   0.00     0.00   0.00   0.00
   5   6     0.00   0.00   0.00     0.00   0.00   0.00     0.00   0.00   0.00
   6   6     0.00   0.00   0.00     0.00   0.00   0.00     0.00   0.00   0.00
   7   6     0.00   0.00   0.00     0.00   0.00   0.00     0.00   0.00   0.00
   8   8     0.00   0.00   0.00     0.00   0.00   0.00     0.00   0.00   0.00
   9   6     0.00  -0.04   0.06     0.04   0.06   0.05    -0.01  -0.01  -0.01
  10   6     0.00   0.04   0.05    -0.01  -0.01   0.01    -0.04  -0.06   0.05
  11   1     0.01   0.00  -0.04     0.00   0.00  -0.03     0.00   0.00   0.01
  12   1    -0.01   0.00  -0.04     0.00   0.00  -0.01     0.00   0.00  -0.03
  13   1    -0.05   0.50  -0.18     0.04  -0.29   0.12    -0.01   0.06  -0.03
  14   1     0.05  -0.01  -0.53     0.04   0.01  -0.38    -0.01   0.00   0.07
  15   1     0.03   0.01   0.03    -0.61  -0.49  -0.31     0.12   0.10   0.06
  16   1    -0.02  -0.01   0.02     0.12   0.10  -0.06     0.61   0.49  -0.31
  17   1     0.05  -0.43  -0.16    -0.01   0.06   0.02    -0.04   0.30   0.13
  18   1    -0.04   0.01  -0.46    -0.01   0.00  -0.08    -0.04  -0.01  -0.37

 -------------------
 - Thermochemistry -
 -------------------
 Temperature   298.150 Kelvin.  Pressure   1.00000 Atm.
 Atom  1 has atomic number  8 and mass  15.99491
 Atom  2 has atomic number  6 and mass  12.00000
 Atom  3 has atomic number  8 and mass  15.99491
 Atom  4 has atomic number  8 and mass  15.99491
 Atom  5 has atomic number  6 and mass  12.00000
 Atom  6 has atomic number  6 and mass  12.00000
 Atom  7 has atomic number  6 and mass  12.00000
 Atom  8 has atomic number  8 and mass  15.99491
 Atom  9 has atomic number  6 and mass  12.00000
 Atom 10 has atomic number  6 and mass  12.00000
 Atom 11 has atomic number  1 and mass   1.00783
 Atom 12 has atomic number  1 and mass   1.00783
 Atom 13 has atomic number  1 and mass   1.00783
 Atom 14 has atomic number  1 and mass   1.00783
 Atom 15 has atomic number  1 and mass   1.00783
 Atom 16 has atomic number  1 and mass   1.00783
 Atom 17 has atomic number  1 and mass   1.00783
 Atom 18 has atomic number  1 and mass   1.00783
 Molecular mass:   144.04226 amu.
 Principal axes and moments of inertia in atomic units:
                           1         2         3
     EIGENVALUES --   826.121731519.529882222.09489
           X            0.99454  -0.10435  -0.00005
           Y            0.10435   0.99454  -0.00006
           Z            0.00005   0.00006   1.00000
 This molecule is an asymmetric top.
 Rotational symmetry number  1.
 Warning -- assumption of classical behavior for rotation
           may cause significant error
 Rotational temperatures (Kelvin)      0.10484     0.05700     0.03898
 Rotational constants (GHZ):           2.18459     1.18770     0.81218
 Zero-point vibrational energy     370120.9 (Joules/Mol)
                                   88.46102 (Kcal/Mol)
 Warning -- explicit consideration of  13 degrees of freedom as
           vibrations may cause significant error
 Vibrational temperatures:     96.72   185.85   187.36   304.36   313.37
          (Kelvin)            382.44   407.16   486.53   530.44   595.15
                              686.40   687.31   866.64   926.01   942.35
                             1114.60  1155.23  1197.99  1364.18  1438.66
                             1513.87  1549.88  1610.30  1635.33  1640.39
                             1690.13  1761.74  1836.85  1947.55  1962.01
                             1989.80  2007.26  2074.89  2075.59  2176.36
                             2177.01  2189.92  2190.70  2679.01  2688.71
                             4343.04  4346.79  4434.68  4434.82  4544.87
                             4544.95  4557.60  4557.71
 
 Zero-point correction=                           0.140972 (Hartree/Particle)
 Thermal correction to Energy=                    0.150418
 Thermal correction to Enthalpy=                  0.151362
 Thermal correction to Gibbs Free Energy=         0.106344
 Sum of electronic and zero-point Energies=           -534.210304
 Sum of electronic and thermal Energies=              -534.200858
 Sum of electronic and thermal Enthalpies=            -534.199914
 Sum of electronic and thermal Free Energies=         -534.244932
 
                     E (Thermal)             CV                S
                      KCal/Mol        Cal/Mol-Kelvin    Cal/Mol-Kelvin
 Total                   94.389             34.597             94.750
 Electronic               0.000              0.000              0.000
 Translational            0.889              2.981             40.806
 Rotational               0.889              2.981             29.413
 Vibrational             92.611             28.635             24.531
 Vibration  1             0.598              1.970              4.233
 Vibration  2             0.612              1.924              2.958
 Vibration  3             0.612              1.923              2.943
 Vibration  4             0.643              1.823              2.030
 Vibration  5             0.646              1.814              1.977
 Vibration  6             0.672              1.736              1.623
 Vibration  7             0.682              1.705              1.516
 Vibration  8             0.718              1.599              1.221
 Vibration  9             0.741              1.537              1.085
 Vibration 10             0.777              1.441              0.914
 Vibration 11             0.834              1.301              0.718
 Vibration 12             0.834              1.300              0.716
 Vibration 13             0.961              1.027              0.446
                       Q            Log10(Q)             Ln(Q)
 Total Bot       0.121712D-48        -48.914665       -112.630180
 Total V=0       0.846514D+16         15.927634         36.674733
 Vib (Bot)       0.299599D-62        -62.523460       -143.965587
 Vib (Bot)  1    0.306913D+01          0.487016          1.121395
 Vib (Bot)  2    0.157858D+01          0.198266          0.456523
 Vib (Bot)  3    0.156543D+01          0.194634          0.448161
 Vib (Bot)  4    0.938308D+00         -0.027654         -0.063677
 Vib (Bot)  5    0.909004D+00         -0.041434         -0.095406
 Vib (Bot)  6    0.728621D+00         -0.137498         -0.316601
 Vib (Bot)  7    0.678311D+00         -0.168571         -0.388150
 Vib (Bot)  8    0.549745D+00         -0.259839         -0.598301
 Vib (Bot)  9    0.494266D+00         -0.306039         -0.704681
 Vib (Bot) 10    0.426539D+00         -0.370041         -0.852050
 Vib (Bot) 11    0.351450D+00         -0.454137         -1.045689
 Vib (Bot) 12    0.350796D+00         -0.454945         -1.047550
 Vib (Bot) 13    0.247298D+00         -0.606779         -1.397160
 Vib (V=0)       0.208372D+03          2.318840          5.339326
 Vib (V=0)  1    0.360960D+01          0.557459          1.283596
 Vib (V=0)  2    0.215587D+01          0.333622          0.768194
 Vib (V=0)  3    0.214334D+01          0.331092          0.762366
 Vib (V=0)  4    0.156321D+01          0.194018          0.446743
 Vib (V=0)  5    0.153744D+01          0.186799          0.430120
 Vib (V=0)  6    0.138368D+01          0.141035          0.324746
 Vib (V=0)  7    0.134268D+01          0.127972          0.294666
 Vib (V=0)  8    0.124311D+01          0.094511          0.217620
 Vib (V=0)  9    0.120306D+01          0.080289          0.184872
 Vib (V=0) 10    0.115722D+01          0.063415          0.146019
 Vib (V=0) 11    0.111116D+01          0.045777          0.105405
 Vib (V=0) 12    0.111078D+01          0.045630          0.105067
 Vib (V=0) 13    0.105781D+01          0.024409          0.056204
 Electronic      0.100000D+01          0.000000          0.000000
 Translational   0.679501D+08          7.832190         18.034284
 Rotational      0.597867D+06          5.776604         13.301123
 
                                                             from SS.mol
                                                             IR Spectrum
 
   3333 3333                                             11          1111111111  1 1 111111 1                                        
   1111 0000                                             88          5555443333  2 2 111100 0 9    887    666   44  4 33 2222 11     
   6655 8821                                             66          2211449865  7 2 743175 0 4    307    540   77  1 63 8611 32  6  
   8899 2219                                             92          3233325344  7 4 507972 0 8    335    542   87  4 98 3682 09  7  
 
   XXXX XXXX                                             XX          XXXXXX XXX  X X XXXXXX X X    XXX    XXX   XX  X XX  XXX X   X  
                                                          X                      X     X                                             
                                                          X                      X     X                                             
                                                          X                      X                                                   
                                                          X                      X                                                   
                                                          X                      X                                                   
                                                          X                      X                                                   
                                                          X                      X                                                   
                                                          X                      X                                                   
                                                          X                      X                                                   
                                                          X                      X                                                   
                                                          X                      X                                                   
                                                          X                      X                                                   
                                                          X                      X                                                   
                                                          X                      X                                                   
                                                          X                      X                                                   
                                                          X                      X                                                   
                                                          X                      X                                                   
                                                                                 X                                                   
                                                                                 X                                                   
 
 ***** Axes restored to original set *****
 -------------------------------------------------------------------
 Center     Atomic                   Forces (Hartrees/Bohr)
 Number     Number              X              Y              Z
 -------------------------------------------------------------------
    1          8           0.000042357    0.000134170   -0.000100500
    2          6           0.000259657    0.000167161    0.000116917
    3          8          -0.000212594   -0.000193980    0.000017325
    4          8          -0.000049646   -0.000134703   -0.000096997
    5          6          -0.000275421   -0.000162906    0.000099473
    6          6          -0.000176805   -0.000157898   -0.000038916
    7          6           0.000220716    0.000138235   -0.000037637
    8          8           0.000217749    0.000195819    0.000023572
    9          6           0.000009990    0.000028842    0.000013552
   10          6          -0.000041291   -0.000012988    0.000000579
   11          1           0.000031219    0.000001715    0.000007229
   12          1          -0.000036338    0.000004906   -0.000000111
   13          1          -0.000003050   -0.000035220   -0.000013313
   14          1          -0.000000052   -0.000006825    0.000015734
   15          1           0.000019388    0.000009018   -0.000012673
   16          1          -0.000014158   -0.000009103   -0.000009054
   17          1           0.000006765    0.000029321   -0.000011323
   18          1           0.000001512    0.000004435    0.000026142
 -------------------------------------------------------------------
 Cartesian Forces:  Max     0.000275421 RMS     0.000104299
 ------------------------------------------------------------------------
           Internal Coordinate Forces (Hartree/Bohr or radian)
 Cent Atom N1     Length/X     N2     Alpha/Y      N3      Beta/Z       J
 ------------------------------------------------------------------------
   1  O         0.000042(   1)      0.000134(  19)     -0.000101(  37)
   2  C         0.000260(   2)      0.000167(  20)      0.000117(  38)
   3  O        -0.000213(   3)     -0.000194(  21)      0.000017(  39)
   4  O        -0.000050(   4)     -0.000135(  22)     -0.000097(  40)
   5  C        -0.000275(   5)     -0.000163(  23)      0.000099(  41)
   6  C        -0.000177(   6)     -0.000158(  24)     -0.000039(  42)
   7  C         0.000221(   7)      0.000138(  25)     -0.000038(  43)
   8  O         0.000218(   8)      0.000196(  26)      0.000024(  44)
   9  C         0.000010(   9)      0.000029(  27)      0.000014(  45)
  10  C        -0.000041(  10)     -0.000013(  28)      0.000001(  46)
  11  H         0.000031(  11)      0.000002(  29)      0.000007(  47)
  12  H        -0.000036(  12)      0.000005(  30)      0.000000(  48)
  13  H        -0.000003(  13)     -0.000035(  31)     -0.000013(  49)
  14  H         0.000000(  14)     -0.000007(  32)      0.000016(  50)
  15  H         0.000019(  15)      0.000009(  33)     -0.000013(  51)
  16  H        -0.000014(  16)     -0.000009(  34)     -0.000009(  52)
  17  H         0.000007(  17)      0.000029(  35)     -0.000011(  53)
  18  H         0.000002(  18)      0.000004(  36)      0.000026(  54)
 ------------------------------------------------------------------------
 Internal  Forces:  Max     0.000275421 RMS     0.000104299
 Leave Link  716 at Tue Nov 30 23:01:14 2004, MaxMem=   52428800 cpu:       0.0
 (Enter /usr/local/g03/l103.exe)

 GradGradGradGradGradGradGradGradGradGradGradGradGradGradGradGradGradGrad
 Berny optimization.
 Search for a local minimum.
 Step number   1 out of a maximum of   2
 All quantities printed in internal units (Hartrees-Bohrs-Radians)
 Second derivative matrix not updated -- analytic derivatives used.
     Eigenvalues ---    0.00092   0.00165   0.00182   0.00606   0.00610
     Eigenvalues ---    0.00809   0.01253   0.01974   0.02349   0.03451
     Eigenvalues ---    0.04608   0.04716   0.05611   0.06679   0.06968
     Eigenvalues ---    0.07839   0.08989   0.09691   0.10459   0.11253
     Eigenvalues ---    0.11510   0.12314   0.12930   0.13587   0.15687
     Eigenvalues ---    0.18033   0.22851   0.23237   0.25759   0.28035
     Eigenvalues ---    0.30324   0.40625   0.43856   0.50619   0.55640
     Eigenvalues ---    0.63495   0.66942   0.69665   0.76775   0.77422
     Eigenvalues ---    0.79623   0.82651   0.85568   0.86115   0.88482
     Eigenvalues ---    0.88738   1.75918   1.77743
 Angle between quadratic step and forces=  61.36 degrees.
 Linear search not attempted -- first point.
 TrRot= -0.000001  0.000002 -0.000067  0.000000  0.000002  0.000000
 Variable       Old X    -DE/DX   Delta X   Delta X   Delta X     New X
                                 (Linear)    (Quad)   (Total)
    X1       -0.48745   0.00004   0.00000   0.00002   0.00002  -0.48744
    Y1        2.55895   0.00013   0.00000  -0.00002  -0.00002   2.55893
    Z1       -0.19975  -0.00010   0.00000  -0.00070  -0.00077  -0.20052
    X2        1.96147   0.00026   0.00000   0.00027   0.00027   1.96174
    Y2        1.82366   0.00017   0.00000   0.00025   0.00025   1.82391
    Z2       -0.10680   0.00012   0.00000   0.00055   0.00048  -0.10632
    X3        3.63503  -0.00021   0.00000  -0.00002  -0.00002   3.63501
    Y3        3.24238  -0.00019   0.00000  -0.00032  -0.00033   3.24206
    Z3       -0.71503   0.00002   0.00000  -0.00041  -0.00048  -0.71551
    X4        0.48744  -0.00005   0.00000  -0.00003  -0.00003   0.48741
    Y4       -2.55898  -0.00013   0.00000   0.00002   0.00002  -2.55895
    Z4       -0.19947  -0.00010   0.00000  -0.00070  -0.00077  -0.20023
    X5       -1.96148  -0.00028   0.00000  -0.00028  -0.00028  -1.96176
    Y5       -1.82370  -0.00016   0.00000  -0.00023  -0.00022  -1.82392
    Z5       -0.10633   0.00010   0.00000   0.00052   0.00045  -0.10587
    X6       -2.38962  -0.00018   0.00000  -0.00027  -0.00027  -2.38989
    Y6        0.87973  -0.00016   0.00000  -0.00030  -0.00030   0.87943
    Z6        0.82565  -0.00004   0.00000   0.00014   0.00008   0.82572
    X7        2.38963   0.00022   0.00000   0.00034   0.00034   2.38997
    Y7       -0.87961   0.00014   0.00000   0.00029   0.00029  -0.87932
    Z7        0.82553  -0.00004   0.00000   0.00014   0.00007   0.82559
    X8       -3.63508   0.00022   0.00000   0.00000   0.00000  -3.63508
    Y8       -3.24248   0.00020   0.00000   0.00033   0.00033  -3.24215
    Z8       -0.71431   0.00002   0.00000  -0.00034  -0.00040  -0.71471
    X9       -4.95683   0.00001   0.00000  -0.00005  -0.00004  -4.95687
    Y9        1.91308   0.00003   0.00000  -0.00008  -0.00008   1.91300
    Z9        0.07358   0.00001   0.00000   0.00026   0.00020   0.07378
   X10        4.95688  -0.00004   0.00000   0.00001   0.00000   4.95688
   Y10       -1.91307  -0.00001   0.00000   0.00009   0.00009  -1.91298
   Z10        0.07335   0.00000   0.00000   0.00026   0.00018   0.07353
   X11       -2.19898   0.00003   0.00000   0.00068   0.00068  -2.19830
   Y11        0.87825   0.00000   0.00000   0.00043   0.00044   0.87869
   Z11        2.89722   0.00001   0.00000   0.00006   0.00000   2.89722
   X12        2.19931  -0.00004   0.00000  -0.00072  -0.00071   2.19859
   Y12       -0.87794   0.00000   0.00000  -0.00036  -0.00036  -0.87830
   Z12        2.89715   0.00000   0.00000   0.00003  -0.00004   2.89711
   X13       -5.17659   0.00000   0.00000   0.00008   0.00008  -5.17651
   Y13        3.83716  -0.00004   0.00000  -0.00010  -0.00009   3.83707
   Z13        0.79346  -0.00001   0.00000   0.00001  -0.00005   0.79341
   X14       -5.14713   0.00000   0.00000  -0.00013  -0.00013  -5.14726
   Y14        1.93545  -0.00001   0.00000  -0.00040  -0.00040   1.93505
   Z14       -1.98346   0.00002   0.00000   0.00031   0.00025  -1.98321
   X15       -6.44487   0.00002   0.00000  -0.00009  -0.00009  -6.44495
   Y15        0.71312   0.00001   0.00000   0.00012   0.00013   0.71325
   Z15        0.85262  -0.00001   0.00000   0.00034   0.00028   0.85290
   X16        6.44492  -0.00001   0.00000   0.00012   0.00012   6.44504
   Y16       -0.71286  -0.00001   0.00000  -0.00027  -0.00028  -0.71313
   Z16        0.85192  -0.00001   0.00000   0.00050   0.00042   0.85234
   X17        5.17673   0.00001   0.00000  -0.00014  -0.00014   5.17659
   Y17       -3.83699   0.00003   0.00000   0.00003   0.00003  -3.83696
   Z17        0.79358  -0.00001   0.00000  -0.00011  -0.00019   0.79339
   X18        5.14685   0.00000   0.00000   0.00021   0.00021   5.14706
   Y18       -1.93581   0.00000   0.00000   0.00050   0.00050  -1.93531
   Z18       -1.98375   0.00003   0.00000   0.00035   0.00027  -1.98348
         Item               Value     Threshold  Converged?
 Maximum Force            0.000275     0.000450     YES
 RMS     Force            0.000104     0.000300     YES
 Maximum Displacement     0.000769     0.001800     YES
 RMS     Displacement     0.000314     0.001200     YES
 Predicted change in Energy=-4.263601D-07
 Optimization completed.
    -- Stationary point found.
 GradGradGradGradGradGradGradGradGradGradGradGradGradGradGradGradGradGrad

 Leave Link  103 at Tue Nov 30 23:01:14 2004, MaxMem=   52428800 cpu:       0.0
 (Enter /usr/local/g03/l9999.exe)
 1\1\GINC-KETIDE\Freq\RB3LYP\Gen\C6H8O4\RZEPA\30-Nov-2004\0\\#P RB3LYP/
 GEN FREQ\\from SS.mol\\0,1\O,-0.2579488548,1.35413954,-0.1057052823\C,
 1.0379669405,0.9650393387,-0.0565174856\O,1.9235724683,1.715795799,-0.
 3783784217\O,0.2579418933,-1.3541526049,-0.1055534569\C,-1.0379691297,
 -0.9650596577,-0.0562670667\C,-1.2645327556,0.4655340319,0.4369126394\
 C,1.2645384565,-0.4654675509,0.4368492323\O,-1.9236022305,-1.715846371
 ,-0.3779974928\C,-2.6230413692,1.0123558848,0.0389363744\C,2.623065463
 2,-1.0123522579,0.0388131568\H,-1.1636513865,0.4647520678,1.533141282\
 H,1.1638228561,-0.4645833983,1.53310355\H,-2.739333625,2.0305390104,0.
 4198810082\H,-2.7237431376,1.0241960848,-1.0496007983\H,-3.4104760054,
 0.3773690586,0.4511859984\H,3.4105052992,-0.3772279634,0.4508159618\H,
 2.7394080027,-2.0304472158,0.4199428619\H,2.7235961523,-1.0243872814,-
 1.049753738\\Version=x86-Linux-G03RevB.04\State=1-A\HF=-534.3512759\RM
 SD=6.843e-09\RMSF=1.043e-04\Dipole=0.0000102,0.0000654,1.0379407\Dipol
 eDeriv=-1.6438254,-0.1238659,0.2035938,0.200179,-0.5321996,0.0315748,0
 .0247725,0.089625,-0.2809544,1.8798187,0.2511587,-0.2166927,-0.0850088
 ,0.9803575,-0.19886,-0.1473881,-0.2556579,0.3112468,-0.9961369,-0.1909
 092,0.1189226,-0.3657084,-0.7584152,0.1382071,0.2073248,0.1527484,-0.3
 665929,-1.6438108,-0.1239026,-0.2034515,0.2001294,-0.5322195,-0.031571
 4,-0.0246569,-0.0895798,-0.2809097,1.8798189,0.2512177,0.216511,-0.084
 9312,0.9804178,0.1987793,0.1472618,0.2555433,0.3111499,0.72423,0.09872
 61,-0.1139196,0.2787436,0.2138855,-0.1467901,-0.1409451,-0.1351977,0.3
 566274,0.7241763,0.0987844,0.1138767,0.2788262,0.2139018,0.146788,0.14
 08966,0.1352189,0.3565648,-0.9961463,-0.1909419,-0.1188307,-0.3657388,
 -0.7584576,-0.1381187,-0.2072448,-0.1526989,-0.3665308,-0.0189967,-0.0
 248342,-0.0033304,0.0134551,0.0792994,0.0223909,0.0154902,0.0130821,0.
 0725624,-0.0189696,-0.0248496,0.0033419,0.0134315,0.079306,-0.0223979,
 -0.015488,-0.013078,0.0725869,-0.0332324,-0.0099264,-0.0633524,-0.0454
 425,-0.003089,0.0146127,0.0128144,0.031375,-0.1089669,-0.0332171,-0.00
 99281,0.0633387,-0.0454457,-0.0030989,-0.0146143,-0.0128273,-0.0313843
 ,-0.1089705,0.0474332,0.0152309,-0.0136309,0.0576115,-0.0804522,-0.051
 4565,-0.016634,-0.0586196,0.0466283,0.0498614,0.018793,0.0144169,0.016
 9368,0.0691541,-0.0129246,-0.0293063,0.0115881,-0.0786439,-0.0091503,-
 0.0343873,0.0267562,-0.0707981,0.0314539,0.0455506,0.0262613,0.0484759
 ,0.0481206,-0.009141,-0.0343924,-0.0267383,-0.0708071,0.0314323,-0.045
 5339,-0.0262376,-0.0484637,0.0481449,0.047429,0.0152396,0.0136297,0.05
 76216,-0.0804229,0.0514692,0.0166182,0.0586412,0.0465975,0.0498591,0.0
 187872,-0.014441,0.0169458,0.0691465,0.0128949,0.0292881,-0.0116182,-0
 .0786604\Polar=91.5291005,3.3943596,65.7434997,-0.0021008,-0.0010363,5
 2.2896495\PG=C01 [X(C6H8O4)]\NImag=0\\0.50727547,0.00331409,0.27520878
 ,-0.05442967,-0.09685075,0.11020297,-0.22366800,0.05713348,-0.00264857
 ,0.79678089,0.09559503,-0.14097869,0.03064891,0.23606603,0.70761506,-0
 .01992629,0.03371944,-0.06010374,-0.12487762,-0.19201215,0.29961482,-0
 .09982230,-0.03680978,0.02108226,-0.43514106,-0.32106375,0.13757830,0.
 53202325,-0.02346324,0.02833040,-0.00448467,-0.30893802,-0.39407923,0.
 13260048,0.36053483,0.40023844,0.01575694,-0.00369219,0.01391720,0.133
 73547,0.13566166,-0.12789289,-0.16175867,-0.15230431,0.09239579,0.0173
 8768,-0.00153219,0.00215642,-0.02584211,0.00268908,-0.00617472,0.00631
 646,-0.00720277,0.00211787,0.50730774,-0.00153170,0.00940743,0.0018892
 0,-0.02950999,-0.02713520,-0.02030920,-0.00134130,-0.00695881,0.007161
 84,0.00334869,0.27524406,-0.00215808,-0.00189027,0.00087776,0.00407268
 ,0.00007902,0.00400939,-0.00095138,0.00064907,-0.00084190,0.05439774,0
 .09683735,0.11017437,-0.02584178,-0.02950717,-0.00406546,0.02425530,-0
 .01994503,0.00668998,-0.00642008,0.00833432,-0.00269220,-0.22367622,0.
 05713170,0.00266036,0.79680244,0.00268952,-0.02713282,-0.00007533,-0.0
 1994665,0.00408910,-0.00169971,0.00664948,-0.00047372,-0.00027357,0.09
 559607,-0.14098499,-0.03065077,0.23608149,0.70762465,0.00617769,0.0203
 1580,0.00400560,-0.00668918,0.00170160,0.00420989,0.00267440,0.0003568
 0,-0.00133827,0.01993250,-0.03371480,-0.06009909,0.12481171,0.19194305
 ,0.29955594,-0.10295742,-0.02531126,0.02151838,-0.05217940,-0.01855151
 ,0.01091459,0.00589040,0.00476764,-0.00085513,-0.02785156,0.03595507,0
 .01514812,-0.07583343,0.01393203,0.00066366,0.49510936,-0.04011750,-0.
 12843500,0.04069443,-0.01618516,0.01270498,-0.00939707,0.01180953,0.00
 311226,0.00136997,0.00373531,-0.00701855,-0.00565090,0.03987255,-0.150
 04555,-0.03197165,-0.04801827,0.45235156,0.03173688,0.04339540,-0.0804
 5656,0.00963639,-0.00897560,-0.00707792,-0.00600269,0.00145593,0.00568
 401,0.00316710,-0.00513285,0.01662374,0.00534299,-0.02061194,-0.104055
 74,0.04149766,0.00760332,0.54315468,-0.02785564,0.03595656,-0.01514961
 ,-0.07583025,0.01393274,-0.00066947,-0.00077448,-0.02856052,0.01323701
 ,-0.10298040,-0.02533185,-0.02152173,-0.05218450,-0.01855483,-0.010910
 50,0.00566531,0.00655001,-0.00123430,0.49505781,0.00373854,-0.00701954
 ,0.00565616,0.03987736,-0.15006101,0.03198069,-0.01429750,-0.02261566,
 0.01318393,-0.04014266,-0.12845942,-0.04069223,-0.01618701,0.01270667,
 0.00939551,0.00655009,-0.00172371,0.00039211,-0.04797964,0.45238387,-0
 .00316383,0.00513285,0.01662465,-0.00535298,0.02062850,-0.10406608,0.0
 0732813,0.02032078,0.01712177,-0.03173820,-0.04339294,-0.08044615,-0.0
 0963092,0.00897481,-0.00707724,0.00123319,-0.00039183,0.00103904,-0.04
 143880,-0.00760661,0.54314960,0.00631620,-0.00134151,0.00095082,-0.006
 42004,0.00664889,-0.00267468,0.00130025,-0.00341948,0.00125334,-0.0998
 2373,-0.03681290,-0.02106800,-0.43514998,-0.32107377,-0.13751944,-0.00
 077598,-0.01429857,-0.00732584,0.00588989,0.01181033,0.00600082,0.5320
 3511,-0.00720311,-0.00695916,-0.00064732,0.00833471,-0.00047392,-0.000
 35767,-0.00341966,-0.00114442,0.00084703,-0.02346442,0.02833108,0.0044
 8531,-0.30894841,-0.39409699,-0.13254673,-0.02856413,-0.02261935,-0.02
 031554,0.00476734,0.00311201,-0.00145633,0.36054998,0.40025974,-0.0021
 1792,-0.00716112,-0.00084064,0.00269172,0.00027301,-0.00133836,-0.0012
 5308,-0.00084659,0.00085084,-0.01574393,0.00369358,0.01391973,-0.13368
 003,-0.13560947,-0.12784767,-0.01323208,-0.01317707,0.01712709,0.00085
 491,-0.00137053,0.00568373,0.16168512,0.15224265,0.09234180,-0.0412668
 3,0.00264404,-0.00036454,0.00182906,-0.00360483,0.00071229,-0.00221093
 ,0.00024805,0.00012879,0.00278580,-0.00162669,-0.00178675,-0.00425156,
 0.01510800,0.00318770,-0.16648912,0.03943697,-0.03520418,-0.00116584,-
 0.00042490,-0.00021902,-0.00289781,-0.00296610,0.00006082,0.51162954,-
 0.03147577,0.00873873,-0.00373603,0.00154785,-0.00491053,0.00123048,-0
 .00353490,0.00008182,0.00049438,0.00451434,-0.00584815,-0.00272489,0.0
 2983663,-0.01301363,0.00898044,0.05100159,-0.09961311,0.01510708,-0.00
 233969,-0.00119832,-0.00079492,0.00226970,0.00119243,-0.00018051,0.037
 60772,0.59057848,0.02012093,-0.00443057,0.00494053,-0.00055950,0.00259
 159,-0.00066313,0.00219154,0.00016718,-0.00037987,0.00239496,-0.003960
 36,-0.00147696,0.01098980,-0.00331578,0.00470414,-0.04151150,0.0139279
 9,-0.09327838,-0.00077220,-0.00009171,-0.00068036,0.00111959,-0.000621
 71,-0.00116975,-0.02546850,0.00841597,0.58961904,0.00278588,-0.0016260
 6,0.00178657,-0.00425381,0.01510882,-0.00318893,-0.00289831,-0.0029660
 1,-0.00006047,-0.04126625,0.00264408,0.00036934,0.00182891,-0.00360476
 ,-0.00071190,-0.00116570,-0.00042484,0.00021905,-0.16642079,0.03941235
 ,0.03518528,-0.00221066,0.00024810,-0.00012865,-0.00000523,0.00021369,
 0.00006937,0.51156845,0.00451395,-0.00584717,0.00272487,0.02983341,-0.
 01301408,-0.00898077,0.00226977,0.00119215,0.00018014,-0.03147878,0.00
 873946,0.00373883,0.00154736,-0.00491068,-0.00123023,-0.00233941,-0.00
 119797,0.00079506,0.05097950,-0.09961083,-0.01510331,-0.00353516,0.000
 08172,-0.00049415,0.00021370,0.00035360,-0.00004232,0.03765410,0.59062
 020,-0.00239626,0.00396111,-0.00147768,-0.01099229,0.00331651,0.004706
 23,-0.00112001,0.00062198,-0.00116951,-0.02011072,0.00442934,0.0049415
 6,0.00055877,-0.00259031,-0.00066261,0.00077262,0.00009183,-0.00068057
 ,0.04149141,-0.01392220,-0.09327641,-0.00219060,-0.00016727,-0.0003796
 1,-0.00006935,0.00004231,0.00043214,0.02550685,-0.00843846,0.58957986,
 -0.01011729,-0.00760612,0.02988380,0.00595249,-0.00086114,0.00295037,-
 0.00239768,-0.00105436,-0.00049493,0.00004245,-0.00018037,-0.00159242,
 0.00194860,0.00076078,0.00595184,-0.05042453,0.00222111,-0.03109805,-0
 .00047772,-0.00024263,0.00140488,0.00061193,0.00089818,0.00001004,-0.0
 0411329,0.00019524,-0.03192286,-0.00010936,0.00012444,-0.00028444,0.06
 244299,-0.01118446,-0.00362099,0.02762847,0.00580542,-0.00092999,0.001
 94997,-0.00188758,-0.00061976,-0.00074966,0.00280086,-0.00178899,0.003
 46619,-0.00618902,0.00403621,-0.03414861,0.00357211,-0.05119824,-0.019
 52121,-0.00072330,-0.00038207,-0.00093277,-0.00009890,-0.00514937,0.00
 333506,0.00253126,0.00119870,0.01341995,0.00020191,0.00023389,0.000129
 21,0.00328348,0.05713285,0.01206015,0.00722325,-0.01015173,-0.00511712
 ,0.00273298,-0.00096294,0.00181202,-0.00002804,0.00006932,0.00052267,-
 0.00103838,0.00030305,-0.00373965,-0.00226875,-0.01179788,-0.02848083,
 -0.00850722,-0.29393687,0.00003911,-0.00022581,-0.00012664,0.00070750,
 -0.00194743,0.00060401,-0.00238701,-0.00050148,-0.00739133,0.00005249,
 -0.00011965,0.00047304,0.02551579,0.00437161,0.32061805,0.00004268,-0.
 00017993,0.00159251,0.00194718,0.00076102,-0.00595329,0.00061166,0.000
 89790,-0.00001008,-0.01012097,-0.00761038,-0.02988260,0.00595274,-0.00
 086174,-0.00295090,-0.00047783,-0.00024272,-0.00140459,-0.05041479,0.0
 0222256,0.03106066,-0.00239777,-0.00105422,0.00049523,-0.00010927,0.00
 012450,0.00028445,-0.00411082,0.00020095,0.03192145,-0.00052231,0.0004
 6712,0.00061324,0.06243573,0.00280053,-0.00178930,-0.00346615,-0.00618
 518,0.00404185,0.03414488,-0.00009889,-0.00514892,-0.00333422,-0.01118
 831,-0.00362522,-0.02762879,0.00580612,-0.00093057,-0.00195044,-0.0007
 2335,-0.00038216,0.00093285,0.00357456,-0.05119762,0.01949751,-0.00188
 786,-0.00061969,0.00074980,0.00020191,0.00023393,-0.00012923,0.0025309
 2,0.00119690,-0.01342051,0.00046701,0.00017593,-0.00038743,0.00328121,
 0.05713336,-0.00052283,0.00103848,0.00030325,0.00373920,0.00226470,-0.
 01180005,-0.00070754,0.00194788,0.00060428,-0.01205879,-0.00722389,-0.
 01014322,0.00511591,-0.00273296,-0.00096233,-0.00003878,0.00022582,-0.
 00012674,0.02844166,0.00848453,-0.29392918,-0.00181161,0.00002824,0.00
 006924,-0.00005245,0.00011971,0.00047305,0.00238724,0.00049991,-0.0073
 9439,-0.00061324,0.00038742,0.00043727,-0.02547734,-0.00434347,0.32060
 643,0.00314548,-0.00063725,-0.00027772,-0.00077413,0.00041100,-0.00017
 665,0.00036850,-0.00011764,-0.00002038,-0.00176201,0.00224526,0.000908
 40,-0.00576550,-0.00192105,-0.00315449,-0.00580054,0.03212497,0.011436
 21,0.00102451,0.00051766,0.00038591,0.00127349,-0.00002588,0.00041132,
 -0.05157771,0.02292271,0.00907239,-0.00006403,-0.00013092,-0.00001192,
 0.00135146,-0.00080536,0.00028554,-0.00002491,-0.00009287,-0.00003344,
 0.05475611,-0.00077477,0.00116255,0.00014833,0.00024516,-0.00002268,0.
 00017413,0.00005531,0.00012170,-0.00007128,0.00099889,-0.00062034,-0.0
 0033479,0.00033255,0.00052204,0.00115393,0.00007063,-0.01159602,-0.003
 75237,-0.00055731,-0.00013280,-0.00021224,0.00092154,-0.00002421,-0.00
 008553,0.02652750,-0.28478777,-0.08866524,0.00002333,0.00008128,0.0000
 2912,-0.00012623,0.00044492,0.00026889,0.00003330,0.00005487,0.0000361
 8,-0.02973738,0.30734795,0.00051548,-0.00030414,-0.00003415,0.00021754
 ,0.00012085,-0.00009392,-0.00006849,-0.00000473,0.00001744,-0.00035087
 ,0.00082800,0.00031802,-0.00285331,-0.00041170,-0.00012237,-0.00047337
 ,0.01065887,0.00264308,0.00011192,0.00005576,0.00011127,0.00044177,0.0
 0002888,0.00053545,0.00921032,-0.08998830,-0.08557831,0.00000347,0.000
 01896,-0.00003215,0.00083591,0.00042393,0.00063358,-0.00000638,0.00000
 766,-0.00002361,-0.00805235,0.09715344,0.08619460,0.00356441,-0.000106
 36,0.00079387,-0.00076807,0.00046623,-0.00001977,0.00035528,-0.0000067
 6,-0.00001273,-0.00023882,-0.00006432,0.00011321,0.00048151,-0.0020293
 6,-0.00092907,-0.00537488,0.00161158,-0.03365792,0.00009484,0.00004317
 ,-0.00019966,0.00049638,0.00048386,0.00024623,-0.05076680,0.00008091,-
 0.01960911,0.00002681,-0.00004906,0.00010894,-0.00536275,0.00252874,-0
 .00130337,0.00008257,-0.00007679,0.00015829,-0.00052850,-0.00079550,0.
 00356759,0.05453023,-0.00042169,0.00008934,-0.00094592,-0.00044083,0.0
 0009093,-0.00005389,0.00018296,-0.00002479,0.00005086,-0.00071404,0.00
 003795,-0.00006303,0.00132582,0.00120746,0.00186423,0.00035844,-0.0018
 0478,0.01418148,0.00021765,0.00015923,0.00011766,-0.00088830,-0.000125
 44,-0.00103102,0.00120540,-0.05035498,-0.00008886,-0.00004653,-0.00007
 270,-0.00005028,0.00270223,-0.00021313,0.00049316,-0.00009162,-0.00000
 989,-0.00008056,-0.00287718,0.00257644,-0.03116024,-0.00358141,0.04845
 955,0.00012772,-0.00030179,0.00121881,0.00002231,-0.00009516,0.0001764
 7,-0.00009950,-0.00002491,0.00002338,0.00003828,0.00030165,0.00006246,
 -0.00089643,-0.00189462,0.00002640,-0.00097288,0.00138915,-0.00841652,
 0.00013183,-0.00001561,-0.00012309,0.00102816,0.00044042,0.00069379,-0
 .02309528,0.00188274,-0.32067585,0.00000413,-0.00001869,0.00001378,-0.
 00115007,0.00073415,0.00100256,0.00004033,-0.00000401,0.00003675,-0.00
 025087,0.00065285,-0.00896756,0.02618809,-0.00229990,0.34540842,-0.008
 35139,0.00328693,-0.00161198,0.00192185,-0.00185667,0.00030461,-0.0014
 4836,-0.00002805,0.00017904,0.00136346,0.00014188,0.00019509,-0.002525
 97,-0.00184586,-0.00042605,-0.01802771,-0.01828100,0.01299059,-0.00042
 625,-0.00035467,-0.00008702,0.00247724,0.00051623,-0.00015384,-0.19143
 675,-0.11293023,0.07367192,0.00008395,0.00014567,-0.00002577,0.0010830
 2,-0.00022514,-0.00043699,0.00003428,0.00009255,0.00001865,0.00438154,
 0.00278052,-0.00308930,0.00345913,0.00304202,-0.00110623,0.20742623,0.
 00421883,-0.00076288,0.00029967,-0.00000808,0.00111792,-0.00028012,0.0
 0056561,-0.00011146,-0.00002541,-0.00098332,0.00019078,-0.00011805,0.0
 0071178,0.00021678,-0.00030877,0.00740048,0.00718684,-0.00557994,0.000
 23948,0.00025239,0.00006833,0.00035204,-0.00174992,-0.00038389,-0.1170
 6091,-0.14260334,0.06279119,-0.00001790,-0.00005642,-0.00001074,-0.000
 48233,0.00066932,-0.00013828,-0.00004099,-0.00003426,-0.00002820,-0.02
 188821,-0.01510705,0.01257439,0.00146633,-0.00001904,-0.00074821,0.125
 53001,0.15081077,-0.00275856,0.00081198,0.00073627,-0.00017148,-0.0002
 9218,0.00062073,-0.00037879,-0.00008185,-0.00002602,-0.00066459,-0.000
 16235,-0.00014311,0.00145664,0.00095066,0.00075801,-0.00586672,-0.0067
 5870,0.00176606,0.00007301,0.00006669,0.00000338,-0.00114352,-0.000124
 07,-0.00026444,0.07533532,0.06162805,-0.08881364,-0.00001943,-0.000025
 24,-0.00004297,0.00059380,-0.00048547,0.00026326,-0.00004351,0.0000046
 1,-0.00004991,-0.01052273,-0.00648796,0.00438694,0.02455148,0.01906789
 ,-0.01048451,-0.08043923,-0.06811637,0.09127524,0.00136375,0.00014180,
 -0.00019532,-0.00252659,-0.00184633,0.00042658,0.00247774,0.00051630,0
 .00015357,-0.00835147,0.00328666,0.00161258,0.00192161,-0.00185658,-0.
 00030450,-0.00042629,-0.00035470,0.00008710,-0.01802771,-0.01828242,-0
 .01298408,-0.00144826,-0.00002804,-0.00017893,0.00008397,0.00014570,0.
 00002572,-0.19145071,-0.11296824,-0.07363750,0.00003430,0.00009254,-0.
 00001868,0.00108299,-0.00022497,0.00043686,-0.00005619,0.00003815,-0.0
 0000398,-0.00001116,-0.00002641,-0.00000052,0.00005308,-0.00002592,-0.
 00001199,0.20744076,-0.00098339,0.00019084,0.00011816,0.00071194,0.000
 21676,0.00030888,0.00035253,-0.00175041,0.00038411,0.00421968,-0.00076
 314,-0.00029991,-0.00000801,0.00111795,0.00028011,0.00023952,0.0002524
 0,-0.00006838,0.00740111,0.00718951,0.00557717,0.00056571,-0.00011144,
 0.00002538,-0.00001792,-0.00005643,0.00001074,-0.11709962,-0.14265249,
 -0.06277333,-0.00004099,-0.00003426,0.00002820,-0.00048251,0.00066926,
 0.00013836,0.00001561,-0.00000820,-0.00000541,0.00000750,0.00001081,0.
 00000104,-0.00002593,-0.00000305,-0.00000002,0.12556920,0.15086127,0.0
 0066466,0.00016228,-0.00014319,-0.00145656,-0.00095033,0.00075827,0.00
 114313,0.00012430,-0.00026485,0.00275830,-0.00081218,0.00073573,0.0001
 7139,0.00029221,0.00062063,-0.00007304,-0.00006670,0.00000340,0.005867
 73,0.00675988,0.00176456,0.00037876,0.00008186,-0.00002603,0.00001942,
 0.00002524,-0.00004298,-0.07529987,-0.06161007,-0.08876798,0.00004351,
 -0.00000462,-0.00004992,-0.00059385,0.00048536,0.00026303,-0.00000248,
 -0.00000336,0.00000616,-0.00000783,-0.00000098,0.00000105,0.00001200,0
 .00000003,0.00000750,0.08039965,0.06809649,0.09122597,-0.00176200,0.00
 224512,-0.00090851,-0.00576500,-0.00192067,0.00315533,0.00127346,-0.00
 002593,-0.00041133,0.00314530,-0.00063729,0.00027754,-0.00077399,0.000
 41092,0.00017669,0.00102442,0.00051752,-0.00038604,-0.00580268,0.03212
 093,-0.01144087,0.00036841,-0.00011764,0.00002035,-0.00006403,-0.00013
 090,0.00001195,-0.05157755,0.02293573,-0.00908471,-0.00002490,-0.00009
 285,0.00003345,0.00135147,-0.00080533,-0.00028564,0.00004156,-0.000026
 29,-0.00000635,0.00001088,0.00002283,0.00000307,-0.00005619,0.00001560
 ,0.00000248,0.00438443,-0.02188605,0.01052756,0.05475546,0.00099895,-0
 .00062037,0.00033478,0.00033274,0.00052147,-0.00115386,0.00092166,-0.0
 0002426,0.00008554,-0.00077447,0.00116245,-0.00014834,0.00024510,-0.00
 002279,-0.00017416,-0.00055724,-0.00013276,0.00021229,0.00007113,-0.01
 159537,0.00375454,0.00005534,0.00012172,0.00007127,0.00002333,0.000081
 25,-0.00002914,0.02653981,-0.28477626,0.08871150,0.00003330,0.00005486
 ,-0.00003619,-0.00012642,0.00044481,-0.00026887,-0.00002629,-0.0000021
 4,0.00000615,-0.00000940,-0.00001053,-0.00000206,0.00003815,-0.0000081
 9,0.00000336,0.00278348,-0.01510712,0.00649200,-0.02975281,0.30733017,
 0.00035100,-0.00082814,0.00031812,0.00285383,0.00041160,-0.00012288,-0
 .00044181,-0.00002887,0.00053552,-0.00051596,0.00030391,-0.00003414,-0
 .00021745,-0.00012094,-0.00009390,-0.00011195,-0.00005578,0.00011129,0
 .00047536,-0.01065994,0.00264570,0.00006840,0.00000472,0.00001743,-0.0
 0000346,-0.00001896,-0.00003214,-0.00922337,0.09003586,-0.08561271,0.0
 0000638,-0.00000766,-0.00002360,-0.00083586,-0.00042392,0.00063384,0.0
 0000635,-0.00000614,0.00000763,-0.00000040,0.00000237,-0.00000211,0.00
 000399,0.00000540,0.00000616,0.00308963,-0.01256757,0.00438653,0.00806
 462,-0.09720333,0.08623189,-0.00023891,-0.00006438,-0.00011325,0.00048
 168,-0.00202891,0.00092939,0.00049619,0.00048374,-0.00024610,0.0035646
 6,-0.00010655,-0.00079412,-0.00076811,0.00046631,0.00001984,0.00009488
 ,0.00004322,0.00019963,-0.00537132,0.00161842,0.03365648,0.00035533,-0
 .00000677,0.00001271,0.00002679,-0.00004908,-0.00010895,-0.05076079,0.
 00008298,0.01956352,0.00008258,-0.00007682,-0.00015829,-0.00536264,0.0
 0252876,0.00130383,0.00001088,-0.00000940,0.00000040,-0.00005106,0.000
 03065,-0.00001216,-0.00001116,0.00000750,0.00000783,0.00345577,0.00146
 163,-0.02455249,-0.00052904,-0.00079637,-0.00356928,0.05452428,-0.0007
 1383,0.00003786,0.00006318,0.00132583,0.00120726,-0.00186451,-0.000888
 31,-0.00012533,0.00103119,-0.00042195,0.00008959,0.00094619,-0.0004407
 7,0.00009090,0.00005395,0.00021756,0.00015916,-0.00011770,0.00035706,-
 0.00180733,-0.01418121,0.00018292,-0.00002480,-0.00005087,-0.00004652,
 -0.00007267,0.00005030,0.00120862,-0.05036059,0.00004017,-0.00009162,-
 0.00000987,0.00008057,0.00270197,-0.00021328,-0.00049330,0.00002283,-0
 .00001053,-0.00000238,0.00003065,0.00000357,0.00000296,-0.00002640,0.0
 0001080,0.00000098,0.00303979,-0.00002224,-0.01907142,-0.00287289,0.00
 258305,0.03115739,-0.00358495,0.04846445,-0.00003801,-0.00030163,0.000
 06252,0.00089615,0.00189447,0.00002611,-0.00102782,-0.00044042,0.00069
 376,-0.00012810,0.00030205,0.00121877,-0.00002211,0.00009512,0.0001764
 8,-0.00013195,0.00001554,-0.00012309,0.00097265,-0.00139062,-0.0084185
 4,0.00009942,0.00002493,0.00002338,-0.00000412,0.00001871,0.00001379,0
 .02304881,-0.00193076,-0.32065002,-0.00004033,0.00000403,0.00003676,0.
 00115053,-0.00073450,0.00100229,-0.00000308,0.00000207,-0.00000211,0.0
 0001216,-0.00000297,0.00000578,0.00000053,-0.00000105,0.00000105,0.001
 10383,0.00074597,-0.01047789,0.00025040,-0.00065546,-0.00897261,-0.026
 13898,0.00235452,0.34538357\\-0.00004236,-0.00013417,0.00010050,-0.000
 25966,-0.00016716,-0.00011692,0.00021259,0.00019398,-0.00001732,0.0000
 4965,0.00013470,0.00009700,0.00027542,0.00016291,-0.00009947,0.0001768
 0,0.00015790,0.00003892,-0.00022072,-0.00013823,0.00003764,-0.00021775
 ,-0.00019582,-0.00002357,-0.00000999,-0.00002884,-0.00001355,0.0000412
 9,0.00001299,-0.00000058,-0.00003122,-0.00000171,-0.00000723,0.0000363
 4,-0.00000491,0.00000011,0.00000305,0.00003522,0.00001331,0.00000005,0
 .00000682,-0.00001573,-0.00001939,-0.00000902,0.00001267,0.00001416,0.
 00000910,0.00000905,-0.00000677,-0.00002932,0.00001132,-0.00000151,-0.
 00000444,-0.00002614\\\@


 THE LENGTH OF A MEETING IS PROPORTIONAL TO THE
 SQUARE OF THE PARTICIPANTS.
 Job cpu time:  0 days  0 hours 40 minutes 59.3 seconds.
 File lengths (MBytes):  RWF=     52 Int=      0 D2E=      0 Chk=      8 Scr=      1
 Normal termination of Gaussian 03 at Tue Nov 30 23:01:15 2004.
