# Supplementary material
Source: publisher figshare collection journal article supplement (https://acs.figshare.com/ndownloader/files/5127205)
Supplement: Supplementary file 1 [file 5127205 › supporting_ja043819b/SS-solv.log]

 Entering Gaussian System, Link 0=g03
 Input=SS-gen.gjf
 Output=SS-gen.log
 Initial command:
 /usr/local/g03/l1.exe /home/rzepa/Gau-30732.inp -scrdir=/home/rzepa/
 Entering Link 1 = /usr/local/g03/l1.exe PID=     30733.
  
 Copyright (c) 1988,1990,1992,1993,1995,1998,2003, Gaussian, Inc.
                  All Rights Reserved.
  
 This is the Gaussian(R) 03 program.  It is based on the
 the Gaussian(R) 98 system (copyright 1998, Gaussian, Inc.),
 the Gaussian(R) 94 system (copyright 1995, Gaussian, Inc.),
 the Gaussian 92(TM) system (copyright 1992, Gaussian, Inc.),
 the Gaussian 90(TM) system (copyright 1990, Gaussian, Inc.),
 the Gaussian 88(TM) system (copyright 1988, Gaussian, Inc.),
 the Gaussian 86(TM) system (copyright 1986, Carnegie Mellon
 University), and the Gaussian 82(TM) system (copyright 1983,
 Carnegie Mellon University). Gaussian is a federally registered
 trademark of Gaussian, Inc.
  
 This software contains proprietary and confidential information,
 including trade secrets, belonging to Gaussian, Inc.
  
 This software is provided under written license and may be
 used, copied, transmitted, or stored only in accord with that
 written license.
  
 The following legend is applicable only to US Government
 contracts under DFARS:
  
                    RESTRICTED RIGHTS LEGEND
  
 Use, duplication or disclosure by the US Government is subject
 to restrictions as set forth in subparagraph (c)(1)(ii) of the
 Rights in Technical Data and Computer Software clause at DFARS
 252.227-7013.
  
 Gaussian, Inc.
 Carnegie Office Park, Building 6, Pittsburgh, PA 15106 USA
  
 The following legend is applicable only to US Government
 contracts under FAR:
  
                    RESTRICTED RIGHTS LEGEND
  
 Use, reproduction and disclosure by the US Government is subject
 to restrictions as set forth in subparagraph (c) of the
 Commercial Computer Software - Restricted Rights clause at FAR
 52.227-19.
  
 Gaussian, Inc.
 Carnegie Office Park, Building 6, Pittsburgh, PA 15106 USA
  
  
 ---------------------------------------------------------------
 Warning -- This program may not be used in any manner that
 competes with the business of Gaussian, Inc. or will provide
 assistance to any competitor of Gaussian, Inc.  The licensee
 of this program is prohibited from giving any competitor of
 Gaussian, Inc. access to this program.  By using this program,
 the user acknowledges that Gaussian, Inc. is engaged in the
 business of creating and licensing software in the field of
 computational chemistry and represents and warrants to the
 licensee that it is not a competitor of Gaussian, Inc. and that
 it will not use this program in any manner prohibited above.
 ---------------------------------------------------------------
  

 Cite this work as:
 Gaussian 03, Revision B.04,
 M. J. Frisch, G. W. Trucks, H. B. Schlegel, G. E. Scuseria, 
 M. A. Robb, J. R. Cheeseman, J. A. Montgomery, Jr., T. Vreven, 
 K. N. Kudin, J. C. Burant, J. M. Millam, S. S. Iyengar, J. Tomasi, 
 V. Barone, B. Mennucci, M. Cossi, G. Scalmani, N. Rega, 
 G. A. Petersson, H. Nakatsuji, M. Hada, M. Ehara, K. Toyota, 
 R. Fukuda, J. Hasegawa, M. Ishida, T. Nakajima, Y. Honda, O. Kitao, 
 H. Nakai, M. Klene, X. Li, J. E. Knox, H. P. Hratchian, J. B. Cross, 
 C. Adamo, J. Jaramillo, R. Gomperts, R. E. Stratmann, O. Yazyev, 
 A. J. Austin, R. Cammi, C. Pomelli, J. W. Ochterski, P. Y. Ayala, 
 K. Morokuma, G. A. Voth, P. Salvador, J. J. Dannenberg, 
 V. G. Zakrzewski, S. Dapprich, A. D. Daniels, M. C. Strain, 
 O. Farkas, D. K. Malick, A. D. Rabuck, K. Raghavachari, 
 J. B. Foresman, J. V. Ortiz, Q. Cui, A. G. Baboul, S. Clifford, 
 J. Cioslowski, B. B. Stefanov, G. Liu, A. Liashenko, P. Piskorz, 
 I. Komaromi, R. L. Martin, D. J. Fox, T. Keith, M. A. Al-Laham, 
 C. Y. Peng, A. Nanayakkara, M. Challacombe, P. M. W. Gill, 
 B. Johnson, W. Chen, M. W. Wong, C. Gonzalez, and J. A. Pople, 
 Gaussian, Inc., Pittsburgh PA, 2003.
 
 *********************************************
 Gaussian 03:  x86-Linux-G03RevB.04 2-Jun-2003
                  23-Nov-2004 
 *********************************************
 %mem=400MB
 %nproc=2
 Will use up to    2 processors via shared memory.
 %chk=SS-gen.chk
 --------------------------------------
 #P RB3LYP/Gen scrf(IEFPCM,solvent=thf)
 --------------------------------------
 1/38=1/1;
 2/17=6,18=5,40=1/2;
 3/5=7,11=2,16=1,25=1,30=1,70=2201,72=20,74=-5/1,2,3;
 4/7=1/1;
 5/5=2,32=1,38=5,53=20/2;
 6/7=2,8=2,9=2,10=2,28=1/1;
 99/5=1,9=1/99;
 Leave Link    1 at Tue Nov 23 03:03:45 2004, MaxMem=   52428800 cpu:       0.7
 (Enter /usr/local/g03/l101.exe)
 -----------
 from SS.mol
 -----------
 Symbolic Z-matrix:
 Charge =  0 Multiplicity = 1
 O                    0    -0.25795   1.35414  -0.10571 
 C                    0     1.03797   0.96504  -0.05652 
 O                    0     1.92357   1.7158   -0.37838 
 O                    0     0.25794  -1.35415  -0.10555 
 C                    0    -1.03797  -0.96506  -0.05627 
 C                    0    -1.26453   0.46553   0.43691 
 C                    0     1.26454  -0.46547   0.43685 
 O                    0    -1.9236   -1.71585  -0.378 
 C                    0    -2.62304   1.01236   0.03894 
 C                    0     2.62307  -1.01235   0.03881 
 H                    0    -1.16365   0.46475   1.53314 
 H                    0     1.16382  -0.46458   1.5331 
 H                    0    -2.73933   2.03054   0.41988 
 H                    0    -2.72374   1.0242   -1.0496 
 H                    0    -3.41048   0.37737   0.45119 
 H                    0     3.41051  -0.37723   0.45082 
 H                    0     2.73941  -2.03045   0.41994 
 H                    0     2.7236   -1.02439  -1.04975 
 
                    Isotopes and Nuclear Properties:

  Atom         1           2           3           4           5           6           7           8           9          10
 IAtWgt=          16          12          16          16          12          12          12          16          12          12
 AtmWgt=  15.9949146  12.0000000  15.9949146  15.9949146  12.0000000  12.0000000  12.0000000  15.9949146  12.0000000  12.0000000
 IAtSpn=           0           0           0           0           0           0           0           0           0           0
 AtZEff=   0.0000000   0.0000000   0.0000000   0.0000000   0.0000000   0.0000000   0.0000000   0.0000000   0.0000000   0.0000000
 AtQMom=   0.0000000   0.0000000   0.0000000   0.0000000   0.0000000   0.0000000   0.0000000   0.0000000   0.0000000   0.0000000
 AtGFac=   0.0000000   0.0000000   0.0000000   0.0000000   0.0000000   0.0000000   0.0000000   0.0000000   0.0000000   0.0000000

  Atom        11          12          13          14          15          16          17          18
 IAtWgt=           1           1           1           1           1           1           1           1
 AtmWgt=   1.0078250   1.0078250   1.0078250   1.0078250   1.0078250   1.0078250   1.0078250   1.0078250
 IAtSpn=           1           1           1           1           1           1           1           1
 AtZEff=   0.0000000   0.0000000   0.0000000   0.0000000   0.0000000   0.0000000   0.0000000   0.0000000
 AtQMom=   0.0000000   0.0000000   0.0000000   0.0000000   0.0000000   0.0000000   0.0000000   0.0000000
 AtGFac=   2.7928460   2.7928460   2.7928460   2.7928460   2.7928460   2.7928460   2.7928460   2.7928460
 Leave Link  101 at Tue Nov 23 03:03:48 2004, MaxMem=   52428800 cpu:       0.1
 (Enter /usr/local/g03/l202.exe)
                          Input orientation:                          
 ---------------------------------------------------------------------
 Center     Atomic     Atomic              Coordinates (Angstroms)
 Number     Number      Type              X           Y           Z
 ---------------------------------------------------------------------
    1          8             0       -0.257949    1.354140   -0.105705
    2          6             0        1.037967    0.965039   -0.056517
    3          8             0        1.923572    1.715796   -0.378378
    4          8             0        0.257942   -1.354153   -0.105553
    5          6             0       -1.037969   -0.965060   -0.056267
    6          6             0       -1.264533    0.465534    0.436913
    7          6             0        1.264538   -0.465468    0.436849
    8          8             0       -1.923602   -1.715846   -0.377997
    9          6             0       -2.623041    1.012356    0.038936
   10          6             0        2.623065   -1.012352    0.038813
   11          1             0       -1.163651    0.464752    1.533141
   12          1             0        1.163823   -0.464583    1.533104
   13          1             0       -2.739334    2.030539    0.419881
   14          1             0       -2.723743    1.024196   -1.049601
   15          1             0       -3.410476    0.377369    0.451186
   16          1             0        3.410505   -0.377228    0.450816
   17          1             0        2.739408   -2.030447    0.419943
   18          1             0        2.723596   -1.024387   -1.049754
 ---------------------------------------------------------------------
                    Distance matrix (angstroms):
                    1          2          3          4          5
     1  O    0.000000
     2  C    1.353963   0.000000
     3  O    2.228044   1.204793   0.000000
     4  O    2.756989   2.447344   3.503333   0.000000
     5  C    2.447358   2.834571   4.007676   1.353960   0.000000
     6  C    1.448194   2.407173   3.520209   2.433816   1.530084
     7  C    2.433784   1.530064   2.420089   1.448171   2.407135
     8  O    3.503335   4.007666   5.155281   2.228045   1.204798
     9  C    2.394034   3.662558   4.619597   3.731126   2.536078
    10  C    3.731141   2.536080   2.847127   2.394051   3.662574
    11  H    2.072951   2.761236   3.840569   2.831018   2.141583
    12  H    2.831057   2.141625   2.997505   2.072957   2.761243
    13  H    2.625077   3.953510   4.741200   4.551470   3.477782
    14  H    2.660816   3.891038   4.746198   3.929149   2.790284
    15  H    3.347034   4.515724   5.561622   4.094559   2.772799
    16  H    4.094497   2.772726   2.698014   3.347026   4.515706
    17  H    4.551470   3.477766   3.916279   2.625109   3.953531
    18  H    3.929151   2.790284   2.932471   2.660772   3.891004
                    6          7          8          9         10
     6  C    0.000000
     7  C    2.694989   0.000000
     8  O    2.420097   3.520179   0.000000
     9  C    1.517546   4.177987   2.847128   0.000000
    10  C    4.178044   1.517600   4.619613   5.623262   0.000000
    11  H    1.100861   2.821927   2.997497   2.159245   4.330598
    12  H    2.821996   1.100871   3.840594   4.330615   2.159246
    13  H    2.150481   4.718191   3.916303   1.093316   6.177356
    14  H    2.156646   4.509437   2.932424   1.093249   5.824134
    15  H    2.147801   4.750404   2.698127   1.092342   6.205240
    16  H    4.750413   2.147826   5.561613   6.205181   1.092333
    17  H    4.718236   2.150509   4.741239   6.177352   1.093304
    18  H    4.509458   2.156671   4.746138   5.824097   1.093265
                   11         12         13         14         15
    11  H    0.000000
    12  H    2.506153   0.000000
    13  H    2.484716   4.764402   0.000000
    14  H    3.068782   4.898979   1.781108   0.000000
    15  H    2.495292   4.775316   1.784484   1.772667   0.000000
    16  H    4.775277   2.495307   6.604454   6.468713   6.862594
    17  H    4.764358   2.484658   6.819693   6.429341   6.604516
    18  H    4.898936   3.068782   6.429308   5.819811   6.468739
                   16         17         18
    16  H    0.000000
    17  H    1.784505   0.000000
    18  H    1.772673   1.781127   0.000000
 Stoichiometry    C6H8O4
 Framework group  C1[X(C6H8O4)]
 Deg. of freedom    48
 Full point group                 C1      NOp   1
 Largest Abelian subgroup         C1      NOp   1
 Largest concise Abelian subgroup C1      NOp   1
                         Standard orientation:                         
 ---------------------------------------------------------------------
 Center     Atomic     Atomic              Coordinates (Angstroms)
 Number     Number      Type              X           Y           Z
 ---------------------------------------------------------------------
    1          8             0        0.258508   -1.354033   -0.105705
    2          6             0       -1.037568   -0.965468   -0.056517
    3          8             0       -1.922864   -1.716590   -0.378378
    4          8             0       -0.258501    1.354046   -0.105553
    5          6             0        1.037570    0.965488   -0.056267
    6          6             0        1.264725   -0.465012    0.436913
    7          6             0       -1.264731    0.464945    0.436849
    8          8             0        1.922893    1.716641   -0.377997
    9          6             0        2.623459   -1.011272    0.038936
   10          6             0       -2.623483    1.011269    0.038813
   11          1             0        1.163843   -0.464271    1.533141
   12          1             0       -1.164015    0.464103    1.533104
   13          1             0        2.740172   -2.029407    0.419881
   14          1             0        2.724166   -1.023071   -1.049601
   15          1             0        3.410632   -0.375960    0.451186
   16          1             0       -3.410661    0.375819    0.450816
   17          1             0       -2.740247    2.029315    0.419943
   18          1             0       -2.724019    1.023262   -1.049754
 ---------------------------------------------------------------------
 Rotational constants (GHZ):      2.1845948      1.1876971      0.8121801
 Leave Link  202 at Tue Nov 23 03:03:57 2004, MaxMem=   52428800 cpu:       3.0
 (Enter /usr/local/g03/l301.exe)
 General basis read from cards:  (5D, 7F)
 Centers:   1  2  3  4  5  6  7  8  9 10 11 12 13 14 15 16 17 18
 6-31(d)
 ****
 There are   156 symmetry adapted basis functions of A   symmetry.
 Integral buffers will be    262144 words long.
 Raffenetti 2 integral format.
 Two-electron integral symmetry is turned on.
   156 basis functions,   312 primitive gaussians,   166 cartesian basis functions
    38 alpha electrons       38 beta electrons
       nuclear repulsion energy       561.5483334462 Hartrees.
 IExCor= 402 DFT=T Ex=B+HF Corr=LYP ExCW=0 ScaHFX=  0.200000
 ScaDFX=  0.800000  0.720000  1.000000  0.810000
 IRadAn=      0 IRanWt=     -1 IRanGd=            0 ICorTp=0
 NAtoms=   18 NActive=   18 NUniq=   18 SFac= 1.00D+00 NAtFMM=   60 Big=F
 ------------------------------------------------------------------------------
 United Atom Topological Model (UA0  parameters set).
  Nord Group  Hybr  Charge Alpha Radius          Bonded to
    1   O     *     0.00   1.00  1.750   C2   [s]  C6   [s]
    2   C     *     0.00   1.00  1.925   O1   [s]  O3   [d]  C7   [s]
    3   O     *     0.00   1.00  1.750   C2   [d]
    4   O     *     0.00   1.00  1.750   C5   [s]  C7   [s]
    5   C     *     0.00   1.00  1.925   O4   [s]  C6   [s]  O8   [d]
    6   CH    *     0.00   1.00  2.125   O1   [s]  C5   [s]  C9   [s]
    7   CH    *     0.00   1.00  2.125   C2   [s]  O4   [s]  C10  [s]
    8   O     *     0.00   1.00  1.750   C5   [d]
    9   CH3   *     0.00   1.00  2.525   C6   [s]
   10   CH3   *     0.00   1.00  2.525   C7   [s]
 ------------------------------------------------------------------------------
 Polarizable Continuum Model (PCM)
 =================================
 Model                : PCM.
 Atomic radii         : UA0 (Simple United Atom Topological Model).
 Polarization charges : Total charges.
 Charge compensation  : None.
 Solution method      : Matrix inversion.
 Cavity               : GePol (RMin=0.200 OFac=0.890).
                        Default sphere list used, NSphG=   10.
                        Tesserae with average area of 0.200 Ang**2.
 Solvent              : THF, Eps=   7.580000.
 ------------------------------------------------------------------------------
 GePol: Number of tesserae being generated         =    1456
 GePol: Average area of tesserae                   =       0.13 Ang**2
 GePol: Minimum area of tessera                    =   0.10D-02 Ang**2
 GePol: Maximum area of tessera                    =    0.30586 Ang**2
 GePol: Number of small tesserae                   =       9
 GePol: Fraction of small tesserae (<1% of avg)    =       0.62%
 GePol: Total count of vertices                    =    5078
 GePol: Maximum number of vertices in a tessera    =       7
 GePol: Cavity surface area                        =    188.196 Ang**2
 GePol: Cavity volume                              =    197.719 Ang**3
 Leave Link  301 at Tue Nov 23 03:04:04 2004, MaxMem=   52428800 cpu:       0.7
 (Enter /usr/local/g03/l302.exe)
 NPDir=0 NMtPBC=     1 NCelOv=     1 NCel=       1 NClECP=     1 NCelD=      1
         NCelK=      1 NCelE2=     1 NClLst=     1 CellRange=     0.0.
 One-electron integrals computed using PRISM.
 NBasis=   156 RedAO= T  NBF=   156
 NBsUse=   156 1.00D-06 NBFU=   156
 Precomputing XC quadrature grid using
 IXCGrd= 2 IRadAn=           0 IRanWt=          -1 IRanGd=           0.
 NRdTot=    1124 NPtTot=      142884 NUsed=      147979 NTot=      147995
 NSgBfM=   166   166   166   166.
 Leave Link  302 at Tue Nov 23 03:04:26 2004, MaxMem=   52428800 cpu:       9.9
 (Enter /usr/local/g03/l303.exe)
 DipDrv:  MaxL=1.
 Leave Link  303 at Tue Nov 23 03:04:33 2004, MaxMem=   52428800 cpu:       2.3
 (Enter /usr/local/g03/l401.exe)
 Harris functional with IExCor=  402 diagonalized for initial guess.
 ExpMin= 1.61D-01 ExpMax= 5.48D+03 ExpMxC= 8.25D+02 IAcc=1 IRadAn=         1 AccDes= 1.00D-06
 HarFok:  IExCor= 402 AccDes= 1.00D-06 IRadAn=         1 IDoV=1
 ScaDFX=  1.000000  1.000000  1.000000  1.000000
 Harris En= -534.480633297007    
 Initial guess orbital symmetries:
       Occupied  (A) (A) (A) (A) (A) (A) (A) (A) (A) (A) (A) (A)
                 (A) (A) (A) (A) (A) (A) (A) (A) (A) (A) (A) (A)
                 (A) (A) (A) (A) (A) (A) (A) (A) (A) (A) (A) (A)
                 (A) (A)
       Virtual   (A) (A) (A) (A) (A) (A) (A) (A) (A) (A) (A) (A)
                 (A) (A) (A) (A) (A) (A) (A) (A) (A) (A) (A) (A)
                 (A) (A) (A) (A) (A) (A) (A) (A) (A) (A) (A) (A)
                 (A) (A) (A) (A) (A) (A) (A) (A) (A) (A) (A) (A)
                 (A) (A) (A) (A) (A) (A) (A) (A) (A) (A) (A) (A)
                 (A) (A) (A) (A) (A) (A) (A) (A) (A) (A) (A) (A)
                 (A) (A) (A) (A) (A) (A) (A) (A) (A) (A) (A) (A)
                 (A) (A) (A) (A) (A) (A) (A) (A) (A) (A) (A) (A)
                 (A) (A) (A) (A) (A) (A) (A) (A) (A) (A) (A) (A)
                 (A) (A) (A) (A) (A) (A) (A) (A) (A) (A)
 The electronic state of the initial guess is 1-A.
 Leave Link  401 at Tue Nov 23 03:05:01 2004, MaxMem=   52428800 cpu:       9.9
 (Enter /usr/local/g03/l502.exe)
 Warning!  Cutoffs for single-point calculations used.
 Closed shell SCF:
 Requested convergence on RMS density matrix=1.00D-04 within 128 cycles.
 Requested convergence on MAX density matrix=1.00D-02.
 Requested convergence on             energy=5.00D-05.
 No special actions if energy rises.
 Using DIIS extrapolation, IDIIS=  1040.
 Integral symmetry usage will be decided dynamically.
       147978 words used for storage of precomputed grid.
 IEnd=    256458 IEndB=    256458 NGot=  52428800 MDV=  52216705
 LenX=  52216705
 Fock matrices will be formed incrementally for  20 cycles.

 Cycle   1  Pass 1  IDiag  1:
 Petite list used in FoFDir.
 MinBra= 0 MaxBra= 2 Meth= 1.
 IRaf=       0 NMat=   1 IRICut=       1 DoRegI=T DoRafI=F ISym2E= 1 JSym2E=1.
 E= -534.043978370105    
 DIIS: error= 4.35D-02 at cycle   1 NSaved=   1.
 NSaved= 1 IEnMin= 1 EnMin= -534.043978370105     IErMin= 1 ErrMin= 4.35D-02
 ErrMax= 4.35D-02 EMaxC= 1.00D-01 BMatC= 3.78D-01 BMatP= 3.78D-01
 IDIUse=3 WtCom= 5.65D-01 WtEn= 4.35D-01
 Coeff-Com:  0.100D+01
 Coeff-En:   0.100D+01
 Coeff:      0.100D+01
 Gap=     0.214 Goal=   None    Shift=    0.000
 GapD=    0.214 DampG=1.000 DampE=0.500 DampFc=0.5000 IDamp=-1.
 Damping current iteration by 5.00D-01
 RMSDP=7.80D-03 MaxDP=2.09D-01              OVMax= 2.68D-01

 Cycle   2  Pass 1  IDiag  1:
 RMSU=  3.88D-03    CP:  9.87D-01
 E= -534.123449168608     Delta-E=       -0.079470798503 Rises=F Damp=T
 DIIS: error= 1.79D-02 at cycle   2 NSaved=   2.
 NSaved= 2 IEnMin= 2 EnMin= -534.123449168608     IErMin= 2 ErrMin= 1.79D-02
 ErrMax= 1.79D-02 EMaxC= 1.00D-01 BMatC= 5.98D-02 BMatP= 3.78D-01
 IDIUse=3 WtCom= 8.21D-01 WtEn= 1.79D-01
 Coeff-Com:  0.235D+00 0.765D+00
 Coeff-En:   0.367D+00 0.633D+00
 Coeff:      0.259D+00 0.741D+00
 Gap=     0.269 Goal=   None    Shift=    0.000
 RMSDP=2.34D-03 MaxDP=5.31D-02 DE=-7.95D-02 OVMax= 1.99D-01

 Cycle   3  Pass 1  IDiag  1:
 RMSU=  2.06D-03    CP:  9.82D-01  7.14D-01
 E= -534.323072686017     Delta-E=       -0.199623517409 Rises=F Damp=F
 DIIS: error= 1.47D-02 at cycle   3 NSaved=   3.
 NSaved= 3 IEnMin= 3 EnMin= -534.323072686017     IErMin= 3 ErrMin= 1.47D-02
 ErrMax= 1.47D-02 EMaxC= 1.00D-01 BMatC= 4.65D-02 BMatP= 5.98D-02
 IDIUse=3 WtCom= 8.53D-01 WtEn= 1.47D-01
 Coeff-Com:  0.956D-01 0.468D+00 0.437D+00
 Coeff-En:   0.000D+00 0.000D+00 0.100D+01
 Coeff:      0.815D-01 0.399D+00 0.520D+00
 Gap=     0.272 Goal=   None    Shift=    0.000
 RMSDP=1.55D-03 MaxDP=3.61D-02 DE=-2.00D-01 OVMax= 6.82D-02

 Cycle   4  Pass 1  IDiag  1:
 RMSU=  7.25D-04    CP:  9.86D-01  8.08D-01  3.63D-01
 E= -534.357515155226     Delta-E=       -0.034442469209 Rises=F Damp=F
 DIIS: error= 5.36D-03 at cycle   4 NSaved=   4.
 NSaved= 4 IEnMin= 4 EnMin= -534.357515155226     IErMin= 4 ErrMin= 5.36D-03
 ErrMax= 5.36D-03 EMaxC= 1.00D-01 BMatC= 7.95D-03 BMatP= 4.65D-02
 IDIUse=3 WtCom= 9.46D-01 WtEn= 5.36D-02
 Coeff-Com:  0.300D-01 0.132D+00 0.310D+00 0.528D+00
 Coeff-En:   0.000D+00 0.000D+00 0.146D+00 0.854D+00
 Coeff:      0.284D-01 0.125D+00 0.301D+00 0.545D+00
 Gap=     0.265 Goal=   None    Shift=    0.000
 RMSDP=5.03D-04 MaxDP=1.21D-02 DE=-3.44D-02 OVMax= 2.17D-02

 Cycle   5  Pass 1  IDiag  1:
 RMSU=  2.18D-04    CP:  9.86D-01  7.60D-01  5.12D-01  6.20D-01
 E= -534.363416894136     Delta-E=       -0.005901738910 Rises=F Damp=F
 DIIS: error= 1.15D-03 at cycle   5 NSaved=   5.
 NSaved= 5 IEnMin= 5 EnMin= -534.363416894136     IErMin= 5 ErrMin= 1.15D-03
 ErrMax= 1.15D-03 EMaxC= 1.00D-01 BMatC= 4.66D-04 BMatP= 7.95D-03
 IDIUse=3 WtCom= 9.89D-01 WtEn= 1.15D-02
 Coeff-Com:  0.592D-02 0.226D-01 0.116D+00 0.310D+00 0.546D+00
 Coeff-En:   0.000D+00 0.000D+00 0.000D+00 0.000D+00 0.100D+01
 Coeff:      0.586D-02 0.223D-01 0.115D+00 0.306D+00 0.551D+00
 Gap=     0.266 Goal=   None    Shift=    0.000
 RMSDP=1.18D-04 MaxDP=3.35D-03 DE=-5.90D-03 OVMax= 4.30D-03

 Cycle   6  Pass 1  IDiag  1:
 RMSU=  6.29D-05    CP:  9.85D-01  7.68D-01  5.08D-01  6.83D-01  6.22D-01
 E= -534.363759016508     Delta-E=       -0.000342122372 Rises=F Damp=F
 DIIS: error= 2.73D-04 at cycle   6 NSaved=   6.
 NSaved= 6 IEnMin= 6 EnMin= -534.363759016508     IErMin= 6 ErrMin= 2.73D-04
 ErrMax= 2.73D-04 EMaxC= 1.00D-01 BMatC= 3.16D-05 BMatP= 4.66D-04
 IDIUse=3 WtCom= 9.97D-01 WtEn= 2.73D-03
 Coeff-Com: -0.931D-04-0.152D-02 0.292D-01 0.103D+00 0.287D+00 0.583D+00
 Coeff-En:   0.000D+00 0.000D+00 0.000D+00 0.000D+00 0.000D+00 0.100D+01
 Coeff:     -0.929D-04-0.152D-02 0.291D-01 0.103D+00 0.286D+00 0.584D+00
 Gap=     0.266 Goal=   None    Shift=    0.000
 RMSDP=3.17D-05 MaxDP=7.50D-04 DE=-3.42D-04 OVMax= 8.20D-04

 Cycle   7  Pass 1  IDiag  1:
 RMSU=  1.81D-05    CP:  9.85D-01  7.68D-01  5.08D-01  6.81D-01  6.42D-01
                    CP:  5.92D-01
 E= -534.363776276335     Delta-E=       -0.000017259827 Rises=F Damp=F
 DIIS: error= 5.67D-05 at cycle   7 NSaved=   7.
 NSaved= 7 IEnMin= 7 EnMin= -534.363776276335     IErMin= 7 ErrMin= 5.67D-05
 ErrMax= 5.67D-05 EMaxC= 1.00D-01 BMatC= 1.01D-06 BMatP= 3.16D-05
 IDIUse=1 WtCom= 1.00D+00 WtEn= 0.00D+00
 Coeff-Com: -0.295D-03-0.186D-02 0.409D-02 0.182D-01 0.790D-01 0.230D+00
 Coeff-Com:  0.671D+00
 Coeff:     -0.295D-03-0.186D-02 0.409D-02 0.182D-01 0.790D-01 0.230D+00
 Coeff:      0.671D+00
 Gap=     0.266 Goal=   None    Shift=    0.000
 RMSDP=6.68D-06 MaxDP=1.05D-04 DE=-1.73D-05 OVMax= 1.70D-04

 Error on total polarization charges =  0.00638
 SCF Done:  E(RB+HF-LYP) =  -534.363776276     A.U. after    7 cycles
             Convg  =    0.6681D-05             -V/T =  2.0064
             S**2   =   0.0000
 KE= 5.309446346072D+02 PE=-2.373478529247D+03 EE= 7.466217849175D+02
 --------------------------------------------------------------------
 Variational PCM results
 =======================
 <psi(f)|   H    |psi(f)>                     (a.u.) =    -534.349332
 <psi(f)|H+V(f)/2|psi(f)>                     (a.u.) =    -534.363776
 Total free energy in solution:
  with all non electrostatic terms            (a.u.) =    -534.353644
 --------------------------------------------------------------------
 (Polarized solute)-Solvent               (kcal/mol) =      -9.06
 --------------------------------------------------------------------
 Cavitation energy                        (kcal/mol) =      18.64
 Dispersion energy                        (kcal/mol) =     -12.99
 Repulsion energy                         (kcal/mol) =       0.70
 Total non electrostatic                  (kcal/mol) =       6.36
 --------------------------------------------------------------------
 Partition over spheres:
 Sphere  on Atom  Surface  Charge   GEl     GCav    GDR
    1      O1       4.35   0.025   -0.21    0.87   -0.47
    2      C2       2.63  -0.014   -0.09    0.62   -0.34
    3      O3      15.29   0.120   -1.74    2.06   -1.53
    4      O4       4.34   0.025   -0.21    0.87   -0.47
    5      C5       2.87  -0.016   -0.11    0.62   -0.34
    6      C6       4.63  -0.052   -1.21    0.78   -0.62
    7      C7       4.78  -0.053   -1.22    0.78   -0.62
    8      O8      15.29   0.120   -1.74    2.06   -1.53
    9      C9      48.60  -0.078   -0.42    4.99   -3.19
   10      C10     48.60  -0.078   -0.42    4.99   -3.19
 Added spheres:    36.83  -0.004   -1.69    0.00    0.00
 --------------------------------------------------------------------
 Leave Link  502 at Tue Nov 23 03:24:13 2004, MaxMem=   52428800 cpu:     576.6
 (Enter /usr/local/g03/l601.exe)
 Copying SCF densities to generalized density rwf, ISCF=0 IROHF=0.

 **********************************************************************

            Population analysis using the SCF density.

 **********************************************************************

 Orbital symmetries:
       Occupied  (A) (A) (A) (A) (A) (A) (A) (A) (A) (A) (A) (A)
                 (A) (A) (A) (A) (A) (A) (A) (A) (A) (A) (A) (A)
                 (A) (A) (A) (A) (A) (A) (A) (A) (A) (A) (A) (A)
                 (A) (A)
       Virtual   (A) (A) (A) (A) (A) (A) (A) (A) (A) (A) (A) (A)
                 (A) (A) (A) (A) (A) (A) (A) (A) (A) (A) (A) (A)
                 (A) (A) (A) (A) (A) (A) (A) (A) (A) (A) (A) (A)
                 (A) (A) (A) (A) (A) (A) (A) (A) (A) (A) (A) (A)
                 (A) (A) (A) (A) (A) (A) (A) (A) (A) (A) (A) (A)
                 (A) (A) (A) (A) (A) (A) (A) (A) (A) (A) (A) (A)
                 (A) (A) (A) (A) (A) (A) (A) (A) (A) (A) (A) (A)
                 (A) (A) (A) (A) (A) (A) (A) (A) (A) (A) (A) (A)
                 (A) (A) (A) (A) (A) (A) (A) (A) (A) (A) (A) (A)
                 (A) (A) (A) (A) (A) (A) (A) (A) (A) (A)
 The electronic state is 1-A.
 Alpha  occ. eigenvalues --  -19.21084 -19.21083 -19.15600 -19.15599 -10.33630
 Alpha  occ. eigenvalues --  -10.33628 -10.27442 -10.27439 -10.18683 -10.18682
 Alpha  occ. eigenvalues --   -1.13762  -1.10884  -1.04452  -1.04359  -0.81085
 Alpha  occ. eigenvalues --   -0.79294  -0.68007  -0.67903  -0.63734  -0.58181
 Alpha  occ. eigenvalues --   -0.55249  -0.53182  -0.49133  -0.46606  -0.45074
 Alpha  occ. eigenvalues --   -0.44622  -0.42852  -0.42521  -0.41643  -0.40608
 Alpha  occ. eigenvalues --   -0.40125  -0.38718  -0.38004  -0.36081  -0.33235
 Alpha  occ. eigenvalues --   -0.32754  -0.28793  -0.28390
 Alpha virt. eigenvalues --   -0.01829  -0.01655   0.08405   0.10469   0.10652
 Alpha virt. eigenvalues --    0.12667   0.13678   0.15497   0.15645   0.17127
 Alpha virt. eigenvalues --    0.17619   0.19195   0.20260   0.22076   0.22079
 Alpha virt. eigenvalues --    0.25511   0.31293   0.31981   0.35945   0.37189
 Alpha virt. eigenvalues --    0.46953   0.48003   0.49144   0.52948   0.54539
 Alpha virt. eigenvalues --    0.56314   0.57255   0.58144   0.58831   0.60805
 Alpha virt. eigenvalues --    0.62992   0.64947   0.66853   0.69136   0.70346
 Alpha virt. eigenvalues --    0.71115   0.72293   0.77866   0.78183   0.82759
 Alpha virt. eigenvalues --    0.85548   0.86134   0.87932   0.88333   0.89110
 Alpha virt. eigenvalues --    0.89976   0.90691   0.93516   0.95043   0.96536
 Alpha virt. eigenvalues --    0.99859   1.00894   1.01723   1.06966   1.09265
 Alpha virt. eigenvalues --    1.10382   1.10541   1.15561   1.19344   1.25209
 Alpha virt. eigenvalues --    1.32015   1.34312   1.39225   1.41007   1.44367
 Alpha virt. eigenvalues --    1.44503   1.47476   1.50810   1.58576   1.58888
 Alpha virt. eigenvalues --    1.66423   1.67561   1.69650   1.74498   1.75221
 Alpha virt. eigenvalues --    1.78141   1.80217   1.80238   1.81690   1.83552
 Alpha virt. eigenvalues --    1.84417   1.85722   1.90498   1.91867   1.92137
 Alpha virt. eigenvalues --    1.93135   1.98407   2.00255   2.04680   2.05866
 Alpha virt. eigenvalues --    2.09182   2.09861   2.14907   2.15277   2.15320
 Alpha virt. eigenvalues --    2.15645   2.26492   2.27446   2.32218   2.33213
 Alpha virt. eigenvalues --    2.40744   2.41382   2.44894   2.49226   2.55459
 Alpha virt. eigenvalues --    2.61633   2.63328   2.63771   2.65048   2.70976
 Alpha virt. eigenvalues --    2.75588   2.84438   2.87727   2.94519   3.01606
 Alpha virt. eigenvalues --    3.04388   3.17984   3.19394
          Condensed to atoms (all electrons):
              1          2          3          4          5          6
     1  O    8.228064   0.292592  -0.068016   0.002801  -0.017178   0.171603
     2  C    0.292592   4.333798   0.636304  -0.017181  -0.015028  -0.024836
     3  O   -0.068016   0.636304   7.932814   0.001191  -0.000001   0.001730
     4  O    0.002801  -0.017181   0.001191   8.228028   0.292596  -0.096962
     5  C   -0.017178  -0.015028  -0.000001   0.292596   4.333669   0.288452
     6  C    0.171603  -0.024836   0.001730  -0.096962   0.288452   5.080339
     7  C   -0.096974   0.288457  -0.084245   0.171619  -0.024837   0.011701
     8  O    0.001190  -0.000001   0.000000  -0.068013   0.636312  -0.084247
     9  C   -0.041918   0.001630  -0.000083   0.002892  -0.026587   0.367798
    10  C    0.002893  -0.026585   0.003796  -0.041921   0.001631   0.000155
    11  H   -0.032678  -0.004291   0.000062  -0.000034  -0.036868   0.362585
    12  H   -0.000035  -0.036861   0.001520  -0.032671  -0.004294   0.000276
    13  H    0.000510  -0.000045  -0.000005  -0.000047   0.004273  -0.026617
    14  H    0.000575  -0.000054  -0.000009   0.000048  -0.006102  -0.032867
    15  H    0.002791  -0.000017   0.000001   0.000062  -0.002546  -0.023947
    16  H    0.000062  -0.002546   0.004223   0.002790  -0.000017   0.000028
    17  H   -0.000047   0.004273   0.000308   0.000510  -0.000045   0.000009
    18  H    0.000048  -0.006103   0.001944   0.000577  -0.000054   0.000009
              7          8          9         10         11         12
     1  O   -0.096974   0.001190  -0.041918   0.002893  -0.032678  -0.000035
     2  C    0.288457  -0.000001   0.001630  -0.026585  -0.004291  -0.036861
     3  O   -0.084245   0.000000  -0.000083   0.003796   0.000062   0.001520
     4  O    0.171619  -0.068013   0.002892  -0.041921  -0.000034  -0.032671
     5  C   -0.024837   0.636312  -0.026587   0.001631  -0.036868  -0.004294
     6  C    0.011701  -0.084247   0.367798   0.000155   0.362585   0.000276
     7  C    5.080328   0.001730   0.000155   0.367786   0.000273   0.362582
     8  O    0.001730   7.932843   0.003800  -0.000083   0.001520   0.000062
     9  C    0.000155   0.003800   5.079895   0.000000  -0.035254  -0.000039
    10  C    0.367786  -0.000083   0.000000   5.079911  -0.000039  -0.035259
    11  H    0.000273   0.001520  -0.035254  -0.000039   0.518873   0.002614
    12  H    0.362582   0.000062  -0.000039  -0.035259   0.002614   0.518854
    13  H    0.000009   0.000308   0.367684   0.000000  -0.003946  -0.000002
    14  H    0.000009   0.001945   0.378332   0.000001   0.004601   0.000001
    15  H    0.000028   0.004221   0.364252   0.000000  -0.000329   0.000001
    16  H   -0.023950   0.000001   0.000000   0.364254   0.000001  -0.000328
    17  H   -0.026618  -0.000005   0.000000   0.367686  -0.000002  -0.003946
    18  H   -0.032866  -0.000009   0.000001   0.378326   0.000001   0.004601
             13         14         15         16         17         18
     1  O    0.000510   0.000575   0.002791   0.000062  -0.000047   0.000048
     2  C   -0.000045  -0.000054  -0.000017  -0.002546   0.004273  -0.006103
     3  O   -0.000005  -0.000009   0.000001   0.004223   0.000308   0.001944
     4  O   -0.000047   0.000048   0.000062   0.002790   0.000510   0.000577
     5  C    0.004273  -0.006102  -0.002546  -0.000017  -0.000045  -0.000054
     6  C   -0.026617  -0.032867  -0.023947   0.000028   0.000009   0.000009
     7  C    0.000009   0.000009   0.000028  -0.023950  -0.026618  -0.032866
     8  O    0.000308   0.001945   0.004221   0.000001  -0.000005  -0.000009
     9  C    0.367684   0.378332   0.364252   0.000000   0.000000   0.000001
    10  C    0.000000   0.000001   0.000000   0.364254   0.367686   0.378326
    11  H   -0.003946   0.004601  -0.000329   0.000001  -0.000002   0.000001
    12  H   -0.000002   0.000001   0.000001  -0.000328  -0.003946   0.004601
    13  H    0.533113  -0.027370  -0.023868   0.000000   0.000000   0.000000
    14  H   -0.027370   0.526564  -0.023549   0.000000   0.000000   0.000000
    15  H   -0.023868  -0.023549   0.520654   0.000000   0.000000   0.000000
    16  H    0.000000   0.000000   0.000000   0.520649  -0.023867  -0.023549
    17  H    0.000000   0.000000   0.000000  -0.023867   0.533110  -0.027369
    18  H    0.000000   0.000000   0.000000  -0.023549  -0.027369   0.526577
 Mulliken atomic charges:
              1
     1  O   -0.446282
     2  C    0.576494
     3  O   -0.431534
     4  O   -0.446287
     5  C    0.576624
     6  C    0.004791
     7  C    0.004813
     8  O   -0.431574
     9  C   -0.462559
    10  C   -0.462551
    11  H    0.222908
    12  H    0.222923
    13  H    0.176003
    14  H    0.177873
    15  H    0.182245
    16  H    0.182248
    17  H    0.176001
    18  H    0.177864
 Sum of Mulliken charges=   0.00000
 Atomic charges with hydrogens summed into heavy atoms:
              1
     1  O   -0.446282
     2  C    0.576494
     3  O   -0.431534
     4  O   -0.446287
     5  C    0.576624
     6  C    0.227699
     7  C    0.227735
     8  O   -0.431574
     9  C    0.073563
    10  C    0.073562
    11  H    0.000000
    12  H    0.000000
    13  H    0.000000
    14  H    0.000000
    15  H    0.000000
    16  H    0.000000
    17  H    0.000000
    18  H    0.000000
 Sum of Mulliken charges=   0.00000
 Electronic spatial extent (au):  <R**2>=  1408.6514
 Charge=     0.0000 electrons
 Dipole moment (field-independent basis, Debye):
    X=     0.0001    Y=    -0.0001    Z=     3.4173  Tot=     3.4173
 Quadrupole moment (field-independent basis, Debye-Ang):
   XX=   -58.2786   YY=   -69.1577   ZZ=   -53.3542
   XY=   -12.3858   XZ=    -0.0010   YZ=    -0.0011
 Traceless Quadrupole moment (field-independent basis, Debye-Ang):
   XX=     1.9849   YY=    -8.8942   ZZ=     6.9093
   XY=   -12.3858   XZ=    -0.0010   YZ=    -0.0011
 Octapole moment (field-independent basis, Debye-Ang**2):
  XXX=     0.0007  YYY=    -0.0016  ZZZ=     0.4063  XYY=    -0.0012
  XXY=    -0.0027  XXZ=     8.6198  XZZ=     0.0015  YZZ=     0.0017
  YYZ=     7.0988  XYZ=     4.3206
 Hexadecapole moment (field-independent basis, Debye-Ang**3):
 XXXX= -1104.9980 YYYY=  -576.4578 ZZZZ=   -92.9574 XXXY=   -44.4411
 XXXZ=    -0.0272 YYYX=   -27.4845 YYYZ=    -0.0161 ZZZX=    -0.0240
 ZZZY=    -0.0129 XXYY=  -305.3259 XXZZ=  -195.7398 YYZZ=  -106.3240
 XXYZ=    -0.0080 YYXZ=    -0.0118 ZZXY=     2.5940
 N-N= 5.615483334462D+02 E-N=-2.373487552908D+03  KE= 5.309446346072D+02
 No NMR shielding tensors so no spin-rotation constants.
 Leave Link  601 at Tue Nov 23 03:24:54 2004, MaxMem=   52428800 cpu:      19.5
 (Enter /usr/local/g03/l9999.exe)
 1\1\GINC-DEWAR\SP\RB3LYP\Gen\C6H8O4\RZEPA\23-Nov-2004\0\\#P RB3LYP/GEN
  SCRF(IEFPCM,SOLVENT=THF)\\from SS.mol\\0,1\O,0,-0.2579488548,1.354139
 54,-0.1057052823\C,0,1.0379669405,0.9650393387,-0.0565174856\O,0,1.923
 5724683,1.715795799,-0.3783784217\O,0,0.2579418933,-1.3541526049,-0.10
 55534569\C,0,-1.0379691297,-0.9650596577,-0.0562670667\C,0,-1.26453275
 56,0.4655340319,0.4369126394\C,0,1.2645384565,-0.4654675509,0.43684923
 23\O,0,-1.9236022305,-1.715846371,-0.3779974928\C,0,-2.6230413692,1.01
 23558848,0.0389363744\C,0,2.6230654632,-1.0123522579,0.0388131568\H,0,
 -1.1636513865,0.4647520678,1.533141282\H,0,1.1638228561,-0.4645833983,
 1.53310355\H,0,-2.739333625,2.0305390104,0.4198810082\H,0,-2.723743137
 6,1.0241960848,-1.0496007983\H,0,-3.4104760054,0.3773690586,0.45118599
 84\H,0,3.4105052992,-0.3772279634,0.4508159618\H,0,2.7394080027,-2.030
 4472158,0.4199428619\H,0,2.7235961523,-1.0243872814,-1.049753738\\Vers
 ion=x86-Linux-G03RevB.04\State=1-A\HF=-534.3637763\RMSD=6.681e-06\Dipo
 le=-0.0000263,0.0000213,1.3444852\PG=C01 [X(C6H8O4)]\\@


 OPTIMIST - A PESSIMIST WHO LACKS EXPERIENCE
 Job cpu time:  0 days  0 hours 10 minutes 36.6 seconds.
 File lengths (MBytes):  RWF=     77 Int=      0 D2E=      0 Chk=     10 Scr=      1
 Normal termination of Gaussian 03 at Tue Nov 23 03:25:09 2004.
