# Supplementary material
Source: publisher figshare collection journal article supplement (https://acs.figshare.com/ndownloader/files/5127205)
Supplement: Supplementary file 1 [file 5127205 › supporting_ja043819b/SSRR_fm-5-ts1-143.xyz]

114
O	-6.327896	1.444911	-0.539457	-0.02	0.0	0.0
Mg	0.473602	-0.604435	0.070623	-0.03	0.03	-0.16
O	0.667288	1.160763	-1.112432	-0.08	-0.27	-0.26
C	-5.170353	1.770427	-1.157853	-0.02	0.01	0.0
N	-0.485587	-2.358328	0.671348	0.0	0.02	-0.02
N	2.176572	-1.752479	-0.323893	0.01	0.01	0.01
O	-5.108998	2.260833	-2.260504	-0.02	0.01	0.0
C	0.047142	-3.574598	0.797743	0.0	0.02	0.0
C	1.360033	-3.901552	0.42691	0.0	0.01	0.0
C	2.355885	-3.046718	-0.091451	0.0	0.01	0.01
O	-2.819145	1.874388	-0.977997	-0.02	-0.02	-0.03
C	-1.662915	1.253735	-0.773377	-0.02	-0.03	-0.04
C	-0.484582	1.767365	-1.595037	-0.02	-0.15	-0.12
C	-3.988401	1.388852	-0.272504	-0.01	0.01	0.0
O	-1.528531	0.319271	0.006653	-0.03	0.04	0.06
C	-7.521449	1.725344	-1.289363	-0.01	0.0	0.0
O	0.233866	2.790619	0.898865	0.1	-0.02	0.15
C	1.259751	1.912004	0.647593	0.13	0.07	0.34
O	1.242808	0.828577	1.279482	0.03	-0.02	0.06
O	2.881938	3.592642	1.258661	0.07	0.11	0.04
C	1.940023	4.491087	1.583023	0.04	0.09	0.02
C	0.48543	4.169681	1.240963	0.04	0.04	0.03
C	2.588809	2.568905	0.249362	0.07	0.02	0.13
O	2.217479	5.509368	2.173799	0.0	0.1	0.0
C	-0.090884	5.135628	0.204799	0.0	-0.06	-0.04
C	2.728086	3.156755	-1.151427	-0.05	-0.09	0.08
C	-0.732941	1.523701	-3.09464	-0.19	0.0	-0.12
C	-4.055895	1.980461	1.134203	0.0	0.02	-0.01
C	-1.891968	-2.187747	0.976016	0.0	0.01	-0.01
C	3.292463	-0.917113	-0.713476	0.01	0.0	0.01
C	-2.856046	-2.452677	-0.051087	0.0	0.01	-0.01
C	-4.205411	-2.081903	0.1818	0.0	0.0	0.0
C	-4.595632	-1.491338	1.408696	0.0	0.0	0.0
C	-3.640352	-1.272915	2.421966	0.0	0.0	0.0
C	-2.279433	-1.611041	2.227011	0.0	0.0	-0.01
C	-2.429393	-3.112379	-1.391341	0.0	0.01	0.0
C	-1.246688	-1.342008	3.35087	0.0	0.0	-0.01
C	4.243825	-0.474534	0.271441	0.0	0.01	0.01
C	5.236988	0.461758	-0.130249	0.0	0.01	0.01
C	5.311654	0.92169	-1.46243	0.0	0.01	0.01
C	4.399451	0.446583	-2.428293	0.01	0.0	0.0
C	3.370149	-0.466312	-2.075366	0.01	0.0	0.0
C	4.267166	-1.017784	1.727808	0.01	0.0	0.0
C	2.393312	-1.017853	-3.148924	0.01	-0.01	0.0
C	-2.010211	-2.03775	-2.445861	0.0	0.01	-0.01
C	-3.528098	-4.055747	-1.980744	0.0	0.0	0.0
C	-1.178782	0.176361	3.706862	-0.01	0.0	0.0
C	-1.557769	-2.19777	4.624359	0.01	0.0	-0.01
C	2.232712	-0.064097	-4.373367	-0.01	0.0	0.01
C	2.819983	-2.44211	-3.639695	0.02	0.0	0.0
C	4.080025	0.110691	2.791167	0.02	-0.01	0.02
C	5.604515	-1.788242	2.004987	0.01	-0.01	-0.01
C	-0.79455	-4.701549	1.386451	0.0	0.03	0.0
C	3.694495	-3.731512	-0.356059	0.0	0.0	0.01
H	1.657077	-4.934495	0.574036	-0.01	0.01	0.0
H	-0.458215	2.856576	-1.438796	0.07	-0.15	-0.06
H	-3.956188	0.295545	-0.188274	-0.02	0.01	0.01
H	-7.520656	1.173239	-2.233006	-0.01	0.0	0.0
H	-7.596912	2.794457	-1.504469	-0.02	0.0	0.0
H	-8.347626	1.402195	-0.655456	-0.02	0.0	0.0
H	-0.058538	4.318048	2.179798	0.03	0.07	0.02
H	3.380494	1.837187	0.388237	0.1	0.05	0.14
H	0.001142	6.157313	0.584357	-0.04	-0.04	-0.09
H	-1.149035	4.910261	0.040932	0.02	-0.12	-0.03
H	0.433073	5.072428	-0.752669	0.01	-0.09	-0.03
H	3.516866	3.917227	-1.123027	-0.08	-0.05	-0.01
H	1.810984	3.610792	-1.531517	-0.09	-0.18	0.09
H	3.05072	2.359324	-1.819416	-0.05	-0.13	0.12
H	-1.666364	2.000807	-3.411767	-0.17	0.11	-0.03
H	-0.791073	0.4532	-3.308768	-0.3	0.02	-0.19
H	0.097314	1.939444	-3.66942	-0.18	-0.04	-0.15
H	-4.987851	1.672017	1.613105	-0.01	0.05	-0.01
H	-4.017151	3.074219	1.100918	0.02	0.02	-0.01
H	-3.222976	1.598048	1.727334	-0.02	0.0	0.0
H	-4.96794	-2.288487	-0.579775	0.0	0.0	0.0
H	-5.651178	-1.236244	1.578705	0.0	-0.01	0.0
H	-3.958795	-0.846159	3.382469	0.0	-0.01	0.0
H	-1.532947	-3.730157	-1.193908	0.0	0.01	0.0
H	-0.249638	-1.64796	2.971882	0.0	0.01	-0.01
H	5.978139	0.803879	0.603909	0.01	0.0	0.0
H	6.10055	1.628567	-1.755039	0.0	0.01	0.0
H	4.503571	0.771255	-3.470484	0.0	0.0	0.0
H	3.425551	-1.729646	1.841149	0.01	0.0	0.0
H	1.400037	-1.123001	-2.661173	0.02	-0.01	0.01
H	-1.728663	-2.521102	-3.396235	0.01	0.0	0.0
H	-1.131946	-1.478331	-2.074409	-0.01	0.02	-0.01
H	-2.83033	-1.326999	-2.639396	-0.01	0.0	-0.01
H	-3.114153	-4.610508	-2.836424	0.01	0.0	0.0
H	-4.399515	-3.484487	-2.334109	0.0	0.0	0.0
H	-3.865975	-4.781569	-1.225401	0.01	0.0	0.0
H	-0.402697	0.351441	4.469657	0.0	0.01	-0.01
H	-2.142575	0.534219	4.101945	-0.01	-0.01	0.03
H	-0.91959	0.767607	2.810177	-0.05	0.01	0.0
H	-0.782129	-2.02753	5.386573	0.0	0.0	-0.01
H	-1.574969	-3.271219	4.379439	0.01	0.0	-0.01
H	-2.53346	-1.921923	5.053108	0.0	-0.01	-0.01
H	1.388211	-0.400084	-4.994046	0.01	-0.02	0.0
H	3.138206	-0.06409	-5.000508	0.0	0.04	0.02
H	2.0389	0.968485	-4.042216	-0.05	-0.01	0.03
H	2.134611	-2.779732	-4.43255	0.02	0.0	0.0
H	2.777922	-3.171278	-2.815713	0.03	0.0	-0.01
H	3.844158	-2.425472	-4.044589	0.02	0.01	-0.01
H	4.125759	-0.323658	3.801946	0.07	-0.02	0.01
H	3.099037	0.595977	2.662119	0.01	-0.03	0.07
H	4.868057	0.873776	2.704201	0.0	0.01	0.0
H	5.555957	-2.2704	2.993265	0.01	-0.02	-0.01
H	6.458168	-1.093257	2.001055	0.01	-0.01	0.0
H	5.787069	-2.563982	1.246525	0.0	0.0	-0.02
H	-1.676623	-4.916614	0.772679	0.0	0.02	0.0
H	-0.209053	-5.623282	1.470486	0.0	0.03	0.01
H	-1.151575	-4.433957	2.388398	0.0	0.03	0.0
H	4.390878	-3.106642	-0.919606	0.01	0.0	0.01
H	4.171109	-4.00816	0.592393	0.0	-0.01	0.01
H	3.531336	-4.661874	-0.913762	0.0	0.01	0.0
114
O	-6.33222223792125	1.444911	-0.539457	-0.02	0.0	0.0
Mg	0.4671126431181261	-0.597945643118126	0.036013096630005896	-0.03	0.03	-0.16
O	0.649983048315003	1.102358788063135	-1.1686730929762406	-0.08	-0.27	-0.26
C	-5.17467923792125	1.7725901189606246	-1.157853	-0.02	0.01	0.0
N	-0.485587	-2.354001762078751	0.6670217620787506	0.0	0.02	-0.02
N	2.178735118960625	-1.7503158810393753	-0.32172988103937533	0.01	0.01	0.01
O	-5.113324237921249	2.2629961189606247	-2.260504	-0.02	0.01	0.0
C	0.047142	-3.5702717620787507	0.797743	0.0	0.02	0.0
C	1.360033	-3.8993888810393753	0.42691	0.0	0.01	0.0
C	2.355885	-3.044554881039375	-0.08928788103937538	0.0	0.01	0.01
O	-2.823471237921249	1.8700617620787507	-0.9844863568818739	-0.02	-0.02	-0.03
C	-1.6672412379212491	1.2472456431181262	-0.7820294758424985	-0.02	-0.03	-0.04
C	-0.48890823792124927	1.7349182155906306	-1.6209944275274957	-0.02	-0.15	-0.12
C	-3.990564118960625	1.3910151189606246	-0.272504	-0.01	0.01	0.0
O	-1.5350203568818739	0.32792347584249854	0.01963171376374779	-0.03	0.04	0.06
C	-7.523612118960624	1.725344	-1.289363	-0.01	0.0	0.0
O	0.2554971896062463	2.7862927620787508	0.9313117844093695	0.1	-0.02	0.15
C	1.2878715464881203	1.9271458327243725	0.7211390446612375	0.13	0.07	0.34
O	1.2492973568818737	0.8242507620787507	1.2924607137637478	0.03	-0.02	0.06
O	2.8970798327243723	3.616436308566871	1.2673134758424986	0.07	0.11	0.04
C	1.9486754758424987	4.510555070645622	1.5873492379212493	0.04	0.09	0.02
C	0.4940824758424985	4.178333475842498	1.2474523568818738	0.04	0.04	0.03
C	2.6039508327243723	2.573231237921249	0.2774825464881202	0.07	0.02	0.13
O	2.217479	5.530999189606247	2.173799	0.0	0.1	0.0
C	-0.090884	5.122649286236252	0.19614652415750147	0.0	-0.06	-0.04
C	2.7172704051968766	3.1372869293543784	-1.134122048315003	-0.05	-0.09	0.08
C	-0.774040260251868	1.523701	-3.1205974275274957	-0.19	0.0	-0.12
C	-4.055895	1.9847872379212492	1.1320398810393755	0.0	0.02	-0.01
C	-1.891968	-2.185583881039375	0.9738528810393754	0.0	0.01	-0.01
C	3.294626118960625	-0.917113	-0.7113128810393754	0.01	0.0	0.01
C	-2.856046	-2.450513881039375	-0.053250118960624634	0.0	0.01	-0.01
C	-4.205411	-2.081903	0.1818	0.0	0.0	0.0
C	-4.595632	-1.491338	1.408696	0.0	0.0	0.0
C	-3.640352	-1.272915	2.421966	0.0	0.0	0.0
C	-2.279433	-1.611041	2.2248478810393753	0.0	0.0	-0.01
C	-2.429393	-3.110215881039375	-1.391341	0.0	0.01	0.0
C	-1.246688	-1.342008	3.348706881039375	0.0	0.0	-0.01
C	4.243825	-0.47237088103937536	0.27360411896062464	0.0	0.01	0.01
C	5.236988	0.46392111896062466	-0.12808588103937538	0.0	0.01	0.01
C	5.311654	0.9238531189606246	-1.4602668810393753	0.0	0.01	0.01
C	4.401614118960625	0.446583	-2.428293	0.01	0.0	0.0
C	3.372312118960625	-0.466312	-2.075366	0.01	0.0	0.0
C	4.269329118960624	-1.017784	1.727808	0.01	0.0	0.0
C	2.3954751189606247	-1.0200161189606245	-3.148924	0.01	-0.01	0.0
C	-2.010211	-2.035586881039375	-2.4480241189606247	0.0	0.01	-0.01
C	-3.528098	-4.055747	-1.980744	0.0	0.0	0.0
C	-1.1809451189606246	0.176361	3.706862	-0.01	0.0	0.0
C	-1.5556058810393754	-2.19777	4.622195881039375	0.01	0.0	-0.01
C	2.230548881039375	-0.064097	-4.371203881039375	-0.01	0.0	0.01
C	2.8243092379212493	-2.44211	-3.639695	0.02	0.0	0.0
C	4.08435123792125	0.10852788103937537	2.7954932379212494	0.02	-0.01	0.02
C	5.606678118960625	-1.7904051189606247	2.002823881039375	0.01	-0.01	-0.01
C	-0.79455	-4.695059643118126	1.386451	0.0	0.03	0.0
C	3.694495	-3.731512	-0.35389588103937536	0.0	0.0	0.01
H	1.6549138810393753	-4.932331881039375	0.574036	-0.01	0.01	0.0
H	-0.44307316727562757	2.8241292155906303	-1.4517747137637478	0.07	-0.15	-0.06
H	-3.9605142379212492	0.29770811896062466	-0.18611088103937537	-0.02	0.01	0.01
H	-7.522819118960625	1.173239	-2.233006	-0.01	0.0	0.0
H	-7.601238237921249	2.794457	-1.504469	-0.02	0.0	0.0
H	-8.35195223792125	1.402195	-0.655456	-0.02	0.0	0.0
H	-0.052048643118126105	4.333189832724373	2.184124237921249	0.03	0.07	0.02
H	3.4021251896062465	1.8480025948031231	0.41852066544874483	0.1	0.05	0.14
H	-0.0075104758424985275	6.148660524157502	0.5648889293543783	-0.04	-0.04	-0.09
H	-1.1447087620787508	4.884303572472505	0.03444264311812611	0.02	-0.12	-0.03
H	0.43523611896062464	5.052959929354379	-0.7591583568818739	0.01	-0.09	-0.03
H	3.4995610483150026	3.906411405196877	-1.1251901189606246	-0.08	-0.05	-0.01
H	1.7915159293543783	3.5718558587087568	-1.5120489293543784	-0.09	-0.18	0.09
H	3.039904405196877	2.33120345351188	-1.7934585724725043	-0.05	-0.13	0.12
H	-1.7031370223306186	2.024601308566871	-3.4182563568818742	-0.17	0.11	-0.03
H	-0.855966568818739	0.45752623792124925	-3.349867260251868	-0.3	0.02	-0.19
H	0.05837785870875663	1.9307915241575013	-3.70186678440937	-0.18	-0.04	-0.15
H	-4.990014118960625	1.6828325948031233	1.6109418810393754	-0.01	0.05	-0.01
H	-4.0128247620787505	3.078545237921249	1.0987548810393755	0.02	0.02	-0.01
H	-3.2273022379212493	1.598048	1.727334	-0.02	0.0	0.0
H	-4.96794	-2.288487	-0.579775	0.0	0.0	0.0
H	-5.651178	-1.2384071189606245	1.578705	0.0	-0.01	0.0
H	-3.958795	-0.8483221189606246	3.382469	0.0	-0.01	0.0
H	-1.532947	-3.7279938810393753	-1.193908	0.0	0.01	0.0
H	-0.249638	-1.6457968810393755	2.969718881039375	0.0	0.01	-0.01
H	5.9803021189606245	0.803879	0.603909	0.01	0.0	0.0
H	6.10055	1.6307301189606247	-1.755039	0.0	0.01	0.0
H	4.503571	0.771255	-3.470484	0.0	0.0	0.0
H	3.427714118960625	-1.729646	1.841149	0.01	0.0	0.0
H	1.4043632379212492	-1.1251641189606245	-2.659009881039375	0.02	-0.01	0.01
H	-1.7264998810393755	-2.521102	-3.396235	0.01	0.0	0.0
H	-1.1341091189606245	-1.4740047620787509	-2.076572118960625	-0.01	0.02	-0.01
H	-2.832493118960625	-1.326999	-2.641559118960625	-0.01	0.0	-0.01
H	-3.111989881039375	-4.610508	-2.836424	0.01	0.0	0.0
H	-4.399515	-3.484487	-2.334109	0.0	0.0	0.0
H	-3.8638118810393753	-4.781569	-1.225401	0.01	0.0	0.0
H	-0.402697	0.35360411896062466	4.467493881039375	0.0	0.01	-0.01
H	-2.1447381189606247	0.5320558810393754	4.108434356881873	-0.01	-0.01	0.03
H	-0.9304055948031231	0.7697701189606246	2.810177	-0.05	0.01	0.0
H	-0.782129	-2.02753	5.3844098810393755	0.0	0.0	-0.01
H	-1.5728058810393755	-3.271219	4.377275881039375	0.01	0.0	-0.01
H	-2.53346	-1.9240861189606246	5.050944881039375	0.0	-0.01	-0.01
H	1.3903741189606247	-0.40441023792124925	-4.994046	0.01	-0.02	0.0
H	3.138206	-0.055437524157501465	-4.99618176207875	0.0	0.04	0.02
H	2.0280844051968767	0.9663218810393754	-4.035726643118126	-0.05	-0.01	0.03
H	2.1389372379212492	-2.779732	-4.43255	0.02	0.0	0.0
H	2.784411356881874	-3.171278	-2.817876118960625	0.03	0.0	-0.01
H	3.8484842379212494	-2.4233088810393753	-4.046752118960625	0.02	0.01	-0.01
H	4.140900832724373	-0.32798423792124926	3.804109118960625	0.07	-0.02	0.01
H	3.101200118960625	0.5894876431181261	2.6772608327243725	0.01	-0.03	0.07
H	4.868057	0.8759391189606246	2.704201	0.0	0.01	0.0
H	5.558120118960625	-2.274726237921249	2.9911018810393752	0.01	-0.02	-0.01
H	6.4603311189606245	-1.0954201189606245	2.001055	0.01	-0.01	0.0
H	5.787069	-2.563982	1.242198762078751	0.0	0.0	-0.02
H	-1.676623	-4.91228776207875	0.772679	0.0	0.02	0.0
H	-0.209053	-5.616792643118126	1.4726491189606246	0.0	0.03	0.01
H	-1.151575	-4.427467643118127	2.388398	0.0	0.03	0.0
H	4.393041118960625	-3.106642	-0.9174428810393754	0.01	0.0	0.01
H	4.171109	-4.010323118960625	0.5945561189606245	0.0	-0.01	0.01
H	3.531336	-4.659710881039375	-0.913762	0.0	0.01	0.0
114
O	-6.336124993532095	1.444911	-0.539457	-0.02	0.0	0.0
Mg	0.4612585097018581	-0.592091509701858	0.004791051743243013	-0.03	0.03	-0.16
O	0.6343720258716214	1.0496715873167226	-1.21940891591723	-0.08	-0.27	-0.26
C	-5.178581993532095	1.7745414967660473	-1.157853	-0.02	0.01	0.0
N	-0.485587	-2.3500990064679055	0.6631190064679053	0.0	0.02	-0.02
N	2.1806864967660475	-1.7483645032339525	-0.3197785032339527	0.01	0.01	0.01
O	-5.117226993532094	2.2649474967660472	-2.260504	-0.02	0.01	0.0
C	0.047142	-3.5663690064679052	0.797743	0.0	0.02	0.0
C	1.360033	-3.8974375032339528	0.42691	0.0	0.01	0.0
C	2.355885	-3.0426035032339525	-0.08733650323395269	0.0	0.01	0.01
O	-2.8273739935320945	1.8661590064679052	-0.990340490298142	-0.02	-0.02	-0.03
C	-1.6711439935320946	1.2413915097018582	-0.7898349870641892	-0.02	-0.03	-0.04
C	-0.4928109935320946	1.7056475485092903	-1.6444109611925677	-0.02	-0.15	-0.12
C	-3.9925154967660474	1.3929664967660473	-0.272504	-0.01	0.01	0.0
O	-1.540874490298142	0.3357289870641893	0.03133998059628387	-0.03	0.04	0.06
C	-7.525563496766047	1.725344	-1.289363	-0.01	0.0	0.0
O	0.2750109676604731	2.7823900064679052	0.9605824514907098	0.1	-0.02	0.15
C	1.313239457958615	1.940805477362331	0.7874858900456085	0.13	0.07	0.34
O	1.2551514902981418	0.8203480064679054	1.304168980596284	0.03	-0.02	0.06
O	2.910739477362331	3.6379014644265206	1.2751189870641892	0.07	0.11	0.04
C	1.9564809870641893	4.5281174708944265	1.5912519935320948	0.04	0.09	0.02
C	0.5018879870641892	4.186138987064189	1.253306490298142	0.04	0.04	0.03
C	2.617610477362331	2.5771339935320947	0.30285045795861504	0.07	0.02	0.13
O	2.217479	5.550512967660473	2.173799	0.0	0.1	0.0
C	-0.090884	5.1109410194037155	0.18834101293581076	0.0	-0.06	-0.04
C	2.7075135161697634	3.119724529105574	-1.1185110258716215	-0.05	-0.09	0.08
C	-0.8111164385548989	1.523701	-3.144013961192568	-0.19	0.0	-0.12
C	-4.055895	1.9886899935320947	1.1300885032339527	0.0	0.02	-0.01
C	-1.891968	-2.1836325032339525	0.9719015032339526	0.0	0.01	-0.01
C	3.2965774967660475	-0.917113	-0.7093615032339526	0.01	0.0	0.01
C	-2.856046	-2.4485625032339526	-0.05520149676604731	0.0	0.01	-0.01
C	-4.205411	-2.081903	0.1818	0.0	0.0	0.0
C	-4.595632	-1.491338	1.408696	0.0	0.0	0.0
C	-3.640352	-1.272915	2.421966	0.0	0.0	0.0
C	-2.279433	-1.611041	2.2228965032339527	0.0	0.0	-0.01
C	-2.429393	-3.1082645032339524	-1.391341	0.0	0.01	0.0
C	-1.246688	-1.342008	3.3467555032339527	0.0	0.0	-0.01
C	4.243825	-0.4704195032339527	0.2755554967660473	0.0	0.01	0.01
C	5.236988	0.4658724967660473	-0.1261345032339527	0.0	0.01	0.01
C	5.311654	0.9258044967660474	-1.4583155032339525	0.0	0.01	0.01
C	4.403565496766047	0.446583	-2.428293	0.01	0.0	0.0
C	3.3742634967660474	-0.466312	-2.075366	0.01	0.0	0.0
C	4.271280496766047	-1.017784	1.727808	0.01	0.0	0.0
C	2.3974264967660472	-1.0219674967660473	-3.148924	0.01	-0.01	0.0
C	-2.010211	-2.0336355032339526	-2.449975496766047	0.0	0.01	-0.01
C	-3.528098	-4.055747	-1.980744	0.0	0.0	0.0
C	-1.1828964967660474	0.176361	3.706862	-0.01	0.0	0.0
C	-1.5536545032339526	-2.19777	4.620244503233953	0.01	0.0	-0.01
C	2.2285975032339524	-0.064097	-4.369252503233953	-0.01	0.0	0.01
C	2.828211993532095	-2.44211	-3.639695	0.02	0.0	0.0
C	4.088253993532095	0.10657650323395268	2.799395993532095	0.02	-0.01	0.02
C	5.6086294967660475	-1.7923564967660475	2.0008725032339525	0.01	-0.01	-0.01
C	-0.79455	-4.689205509701858	1.386451	0.0	0.03	0.0
C	3.694495	-3.731512	-0.3519445032339527	0.0	0.0	0.01
H	1.6529625032339526	-4.930380503233953	0.574036	-0.01	0.01	0.0
H	-0.4294135226376688	2.7948585485092905	-1.463482980596284	0.07	-0.15	-0.06
H	-3.9644169935320948	0.2996594967660473	-0.1841595032339527	-0.02	0.01	0.01
H	-7.524770496766047	1.173239	-2.233006	-0.01	0.0	0.0
H	-7.605140993532094	2.794457	-1.504469	-0.02	0.0	0.0
H	-8.355854993532095	1.402195	-0.655456	-0.02	0.0	0.0
H	-0.046194509701858066	4.346849477362332	2.1880269935320946	0.03	0.07	0.02
H	3.4216389676604733	1.8577594838302365	0.44583995472466237	0.1	0.05	0.14
H	-0.015315987064189247	6.140855012935811	0.5473265291055742	-0.04	-0.04	-0.09
H	-1.1408060064679053	4.860887038807433	0.02858850970185807	0.02	-0.12	-0.03
H	0.4371874967660473	5.035397529105574	-0.765012490298142	0.01	-0.09	-0.03
H	3.4839500258716214	3.8966545161697637	-1.1271414967660474	-0.08	-0.05	-0.01
H	1.7739535291055741	3.5367310582111484	-1.4944865291055742	-0.09	-0.18	0.09
H	3.0301475161697637	2.3058355420413847	-1.7700420388074323	-0.05	-0.13	0.12
H	-1.7363104450228042	2.0460664644265205	-3.4241104902981423	-0.17	0.11	-0.03
H	-0.9145079029814194	0.4614289935320946	-3.386943438554899	-0.3	0.02	-0.19
H	0.023253058211148384	1.9229860129358107	-3.7311374514907096	-0.18	-0.04	-0.15
H	-4.991965496766047	1.6925894838302367	1.6089905032339527	-0.01	0.05	-0.01
H	-4.008922006467905	3.0824479935320945	1.0968035032339527	0.02	0.02	-0.01
H	-3.231204993532095	1.598048	1.727334	-0.02	0.0	0.0
H	-4.96794	-2.288487	-0.579775	0.0	0.0	0.0
H	-5.651178	-1.2403584967660473	1.578705	0.0	-0.01	0.0
H	-3.958795	-0.8502734967660474	3.382469	0.0	-0.01	0.0
H	-1.532947	-3.726042503233953	-1.193908	0.0	0.01	0.0
H	-0.249638	-1.6438455032339527	2.9677675032339526	0.0	0.01	-0.01
H	5.982253496766047	0.803879	0.603909	0.01	0.0	0.0
H	6.10055	1.6326814967660475	-1.755039	0.0	0.01	0.0
H	4.503571	0.771255	-3.470484	0.0	0.0	0.0
H	3.4296654967660474	-1.729646	1.841149	0.01	0.0	0.0
H	1.4082659935320947	-1.1271154967660473	-2.6570585032339524	0.02	-0.01	0.01
H	-1.7245485032339527	-2.521102	-3.396235	0.01	0.0	0.0
H	-1.1360604967660473	-1.4701020064679053	-2.0785234967660475	-0.01	0.02	-0.01
H	-2.8344444967660474	-1.326999	-2.6435104967660474	-0.01	0.0	-0.01
H	-3.1100385032339526	-4.610508	-2.836424	0.01	0.0	0.0
H	-4.399515	-3.484487	-2.334109	0.0	0.0	0.0
H	-3.861860503233953	-4.781569	-1.225401	0.01	0.0	0.0
H	-0.402697	0.3555554967660473	4.465542503233952	0.0	0.01	-0.01
H	-2.1466894967660473	0.5301045032339526	4.114288490298142	-0.01	-0.01	0.03
H	-0.9401624838302366	0.7717214967660474	2.810177	-0.05	0.01	0.0
H	-0.782129	-2.02753	5.382458503233953	0.0	0.0	-0.01
H	-1.5708545032339527	-3.271219	4.375324503233952	0.01	0.0	-0.01
H	-2.53346	-1.9260374967660474	5.048993503233953	0.0	-0.01	-0.01
H	1.3923254967660474	-0.4083129935320946	-4.994046	0.01	-0.02	0.0
H	3.138206	-0.04763201293581075	-4.992279006467905	0.0	0.04	0.02
H	2.0183275161697636	0.9643705032339527	-4.029872509701858	-0.05	-0.01	0.03
H	2.1428399935320948	-2.779732	-4.43255	0.02	0.0	0.0
H	2.790265490298142	-3.171278	-2.8198274967660475	0.03	0.0	-0.01
H	3.852386993532095	-2.4213575032339527	-4.048703496766048	0.02	0.01	-0.01
H	4.154560477362332	-0.3318869935320946	3.8060604967660474	0.07	-0.02	0.01
H	3.1031514967660474	0.583633509701858	2.690920477362331	0.01	-0.03	0.07
H	4.868057	0.8778904967660474	2.704201	0.0	0.01	0.0
H	5.560071496766048	-2.2786289935320947	2.9891505032339527	0.01	-0.02	-0.01
H	6.462282496766047	-1.0973714967660473	2.001055	0.01	-0.01	0.0
H	5.787069	-2.563982	1.2382960064679054	0.0	0.0	-0.02
H	-1.676623	-4.908385006467905	0.772679	0.0	0.02	0.0
H	-0.209053	-5.610938509701858	1.4746004967660473	0.0	0.03	0.01
H	-1.151575	-4.421613509701858	2.388398	0.0	0.03	0.0
H	4.394992496766047	-3.106642	-0.9154915032339527	0.01	0.0	0.01
H	4.171109	-4.0122744967660475	0.5965074967660473	0.0	-0.01	0.01
H	3.531336	-4.657759503233953	-0.913762	0.0	0.01	0.0
114
O	-6.339222237921249	1.444911	-0.539457	-0.02	0.0	0.0
Mg	0.4566126431181261	-0.5874456431181261	-0.01998690336999409	-0.03	0.03	-0.16
O	0.621983048315003	1.007858788063135	-1.2596730929762405	-0.08	-0.27	-0.26
C	-5.18167923792125	1.7760901189606246	-1.157853	-0.02	0.01	0.0
N	-0.485587	-2.347001762078751	0.6600217620787506	0.0	0.02	-0.02
N	2.182235118960625	-1.7468158810393752	-0.31822988103937533	0.01	0.01	0.01
O	-5.120324237921249	2.2664961189606245	-2.260504	-0.02	0.01	0.0
C	0.047142	-3.5632717620787506	0.797743	0.0	0.02	0.0
C	1.360033	-3.8958888810393755	0.42691	0.0	0.01	0.0
C	2.355885	-3.041054881039375	-0.08578788103937537	0.0	0.01	0.01
O	-2.830471237921249	1.8630617620787506	-0.9949863568818739	-0.02	-0.02	-0.03
C	-1.6742412379212492	1.236745643118126	-0.7960294758424985	-0.02	-0.03	-0.04
C	-0.4959082379212493	1.6824182155906307	-1.6629944275274957	-0.02	-0.15	-0.12
C	-3.9940641189606247	1.3945151189606246	-0.272504	-0.01	0.01	0.0
O	-1.545520356881874	0.34192347584249855	0.04063171376374779	-0.03	0.04	0.06
C	-7.527112118960624	1.725344	-1.289363	-0.01	0.0	0.0
O	0.2904971896062463	2.7792927620787506	0.9838117844093694	0.1	-0.02	0.15
C	1.3333715464881202	1.9516458327243724	0.8401390446612375	0.13	0.07	0.34
O	1.2597973568818739	0.8172507620787507	1.3134607137637477	0.03	-0.02	0.06
O	2.9215798327243725	3.654936308566871	1.2813134758424987	0.07	0.11	0.04
C	1.9626754758424987	4.542055070645622	1.5943492379212494	0.04	0.09	0.02
C	0.5080824758424985	4.192333475842498	1.257952356881874	0.04	0.04	0.03
C	2.6284508327243725	2.5802312379212493	0.3229825464881202	0.07	0.02	0.13
O	2.217479	5.565999189606247	2.173799	0.0	0.1	0.0
C	-0.090884	5.101649286236252	0.1821465241575015	0.0	-0.06	-0.04
C	2.6997704051968765	3.1057869293543785	-1.106122048315003	-0.05	-0.09	0.08
C	-0.8405402602518679	1.523701	-3.1625974275274955	-0.19	0.0	-0.12
C	-4.055895	1.9917872379212493	1.1285398810393754	0.0	0.02	-0.01
C	-1.891968	-2.1820838810393752	0.9703528810393753	0.0	0.01	-0.01
C	3.298126118960625	-0.917113	-0.7078128810393753	0.01	0.0	0.01
C	-2.856046	-2.4470138810393753	-0.05675011896062463	0.0	0.01	-0.01
C	-4.205411	-2.081903	0.1818	0.0	0.0	0.0
C	-4.595632	-1.491338	1.408696	0.0	0.0	0.0
C	-3.640352	-1.272915	2.421966	0.0	0.0	0.0
C	-2.279433	-1.611041	2.2213478810393754	0.0	0.0	-0.01
C	-2.429393	-3.106715881039375	-1.391341	0.0	0.01	0.0
C	-1.246688	-1.342008	3.3452068810393754	0.0	0.0	-0.01
C	4.243825	-0.46887088103937535	0.27710411896062465	0.0	0.01	0.01
C	5.236988	0.46742111896062466	-0.12458588103937537	0.0	0.01	0.01
C	5.311654	0.9273531189606247	-1.4567668810393752	0.0	0.01	0.01
C	4.405114118960625	0.446583	-2.428293	0.01	0.0	0.0
C	3.3758121189606247	-0.466312	-2.075366	0.01	0.0	0.0
C	4.272829118960624	-1.017784	1.727808	0.01	0.0	0.0
C	2.3989751189606245	-1.0235161189606246	-3.148924	0.01	-0.01	0.0
C	-2.010211	-2.0320868810393753	-2.4515241189606245	0.0	0.01	-0.01
C	-3.528098	-4.055747	-1.980744	0.0	0.0	0.0
C	-1.1844451189606247	0.176361	3.706862	-0.01	0.0	0.0
C	-1.5521058810393753	-2.19777	4.6186958810393755	0.01	0.0	-0.01
C	2.227048881039375	-0.064097	-4.367703881039375	-0.01	0.0	0.01
C	2.8313092379212494	-2.44211	-3.639695	0.02	0.0	0.0
C	4.091351237921249	0.10502788103937537	2.8024932379212495	0.02	-0.01	0.02
C	5.610178118960625	-1.7939051189606248	1.9993238810393752	0.01	-0.01	-0.01
C	-0.79455	-4.684559643118126	1.386451	0.0	0.03	0.0
C	3.694495	-3.731512	-0.35039588103937536	0.0	0.0	0.01
H	1.6514138810393753	-4.928831881039375	0.574036	-0.01	0.01	0.0
H	-0.41857316727562754	2.7716292155906306	-1.4727747137637477	0.07	-0.15	-0.06
H	-3.9675142379212494	0.30120811896062466	-0.18261088103937537	-0.02	0.01	0.01
H	-7.526319118960624	1.173239	-2.233006	-0.01	0.0	0.0
H	-7.608238237921249	2.794457	-1.504469	-0.02	0.0	0.0
H	-8.35895223792125	1.402195	-0.655456	-0.02	0.0	0.0
H	-0.0415486431181261	4.357689832724373	2.191124237921249	0.03	0.07	0.02
H	3.4371251896062462	1.865502594803123	0.4675206654487448	0.1	0.05	0.14
H	-0.021510475842498523	6.134660524157502	0.5333889293543783	-0.04	-0.04	-0.09
H	-1.1377087620787507	4.842303572472504	0.02394264311812611	0.02	-0.12	-0.03
H	0.43873611896062464	5.0214599293543785	-0.7696583568818739	0.01	-0.09	-0.03
H	3.4715610483150026	3.8889114051968767	-1.1286901189606247	-0.08	-0.05	-0.01
H	1.7600159293543782	3.5088558587087566	-1.4805489293543783	-0.09	-0.18	0.09
H	3.022404405196877	2.28570345351188	-1.7514585724725042	-0.05	-0.13	0.12
H	-1.7626370223306187	2.063101308566871	-3.428756356881874	-0.17	0.11	-0.03
H	-0.960966568818739	0.46452623792124925	-3.416367260251868	-0.3	0.02	-0.19
H	-0.004622141291243359	1.9167915241575013	-3.7543667844093696	-0.18	-0.04	-0.15
H	-4.993514118960625	1.7003325948031232	1.6074418810393754	-0.01	0.05	-0.01
H	-4.005824762078751	3.085545237921249	1.0952548810393754	0.02	0.02	-0.01
H	-3.2343022379212494	1.598048	1.727334	-0.02	0.0	0.0
H	-4.96794	-2.288487	-0.579775	0.0	0.0	0.0
H	-5.651178	-1.2419071189606246	1.578705	0.0	-0.01	0.0
H	-3.958795	-0.8518221189606247	3.382469	0.0	-0.01	0.0
H	-1.532947	-3.7244938810393755	-1.193908	0.0	0.01	0.0
H	-0.249638	-1.6422968810393754	2.9662188810393753	0.0	0.01	-0.01
H	5.983802118960624	0.803879	0.603909	0.01	0.0	0.0
H	6.10055	1.6342301189606248	-1.755039	0.0	0.01	0.0
H	4.503571	0.771255	-3.470484	0.0	0.0	0.0
H	3.4312141189606247	-1.729646	1.841149	0.01	0.0	0.0
H	1.4113632379212493	-1.1286641189606246	-2.655509881039375	0.02	-0.01	0.01
H	-1.7229998810393754	-2.521102	-3.396235	0.01	0.0	0.0
H	-1.1376091189606246	-1.4670047620787507	-2.080072118960625	-0.01	0.02	-0.01
H	-2.8359931189606247	-1.326999	-2.6450591189606247	-0.01	0.0	-0.01
H	-3.1084898810393753	-4.610508	-2.836424	0.01	0.0	0.0
H	-4.399515	-3.484487	-2.334109	0.0	0.0	0.0
H	-3.8603118810393755	-4.781569	-1.225401	0.01	0.0	0.0
H	-0.402697	0.35710411896062466	4.463993881039375	0.0	0.01	-0.01
H	-2.1482381189606246	0.5285558810393753	4.118934356881874	-0.01	-0.01	0.03
H	-0.9479055948031232	0.7732701189606247	2.810177	-0.05	0.01	0.0
H	-0.782129	-2.02753	5.380909881039376	0.0	0.0	-0.01
H	-1.5693058810393754	-3.271219	4.373775881039375	0.01	0.0	-0.01
H	-2.53346	-1.9275861189606247	5.047444881039375	0.0	-0.01	-0.01
H	1.3938741189606247	-0.41141023792124926	-4.994046	0.01	-0.02	0.0
H	3.138206	-0.041437524157501474	-4.989181762078751	0.0	0.04	0.02
H	2.0105844051968766	0.9628218810393754	-4.025226643118126	-0.05	-0.01	0.03
H	2.1459372379212494	-2.779732	-4.43255	0.02	0.0	0.0
H	2.7949113568818738	-3.171278	-2.821376118960625	0.03	0.0	-0.01
H	3.8554842379212495	-2.4198088810393754	-4.050252118960625	0.02	0.01	-0.01
H	4.165400832724373	-0.33498423792124926	3.8076091189606247	0.07	-0.02	0.01
H	3.1047001189606247	0.5789876431181261	2.7017608327243727	0.01	-0.03	0.07
H	4.868057	0.8794391189606247	2.704201	0.0	0.01	0.0
H	5.561620118960625	-2.2817262379212493	2.9876018810393754	0.01	-0.02	-0.01
H	6.463831118960624	-1.0989201189606246	2.001055	0.01	-0.01	0.0
H	5.787069	-2.563982	1.2351987620787508	0.0	0.0	-0.02
H	-1.676623	-4.905287762078751	0.772679	0.0	0.02	0.0
H	-0.209053	-5.606292643118126	1.4761491189606246	0.0	0.03	0.01
H	-1.151575	-4.416967643118126	2.388398	0.0	0.03	0.0
H	4.3965411189606245	-3.106642	-0.9139428810393754	0.01	0.0	0.01
H	4.171109	-4.013823118960625	0.5980561189606246	0.0	-0.01	0.01
H	3.531336	-4.656210881039375	-0.913762	0.0	0.01	0.0
114
O	-6.341210791228132	1.444911	-0.539457	-0.02	0.0	0.0
Mg	0.4536298131578018	-0.5844628131578017	-0.03589532982505718	-0.03	0.03	-0.16
O	0.6140288350874714	0.981013318420216	-1.285524285965718	-0.08	-0.27	-0.26
C	-5.183667791228133	1.777084395614066	-1.157853	-0.02	0.01	0.0
N	-0.485587	-2.345013208771868	0.6580332087718678	0.0	0.02	-0.02
N	2.1832293956140663	-1.7458216043859338	-0.3172356043859339	0.01	0.01	0.01
O	-5.122312791228132	2.267490395614066	-2.260504	-0.02	0.01	0.0
C	0.047142	-3.5612832087718678	0.797743	0.0	0.02	0.0
C	1.360033	-3.894894604385934	0.42691	0.0	0.01	0.0
C	2.355885	-3.0400606043859337	-0.08479360438593393	0.0	0.01	0.01
O	-2.832459791228132	1.8610732087718678	-0.9979691868421983	-0.02	-0.02	-0.03
C	-1.676229791228132	1.2337628131578018	-0.8000065824562643	-0.02	-0.03	-0.04
C	-0.4978967912281322	1.667504065789009	-1.6749257473687928	-0.02	-0.15	-0.12
C	-3.995058395614066	1.395509395614066	-0.272504	-0.01	0.01	0.0
O	-1.5485031868421983	0.3459005824562643	0.04659737368439644	-0.03	0.04	0.06
C	-7.528106395614065	1.725344	-1.289363	-0.01	0.0	0.0
O	0.3004399561406607	2.777304208771868	0.9987259342109911	0.1	-0.02	0.15
C	1.346297142982859	1.9586057692984626	0.8739444508782466	0.13	0.07	0.34
O	1.2627801868421982	0.8152622087718678	1.3194263736843965	0.03	-0.02	0.06
O	2.9285397692984625	3.665873351754727	1.2852905824562644	0.07	0.11	0.04
C	1.9666525824562644	4.551003560526595	1.5963377912281322	0.04	0.09	0.02
C	0.5120595824562643	4.196310582456264	1.2609351868421983	0.04	0.04	0.03
C	2.6354107692984625	2.582219791228132	0.335908142982859	0.07	0.02	0.13
O	2.217479	5.575941956140661	2.173799	0.0	0.1	0.0
C	-0.090884	5.095683626315603	0.17816941754373572	0.0	-0.06	-0.04
C	2.6947990219296694	3.096838439473405	-1.0981678350874713	-0.05	-0.09	0.08
C	-0.8594315166672554	1.523701	-3.174528747368793	-0.19	0.0	-0.12
C	-4.055895	1.9937757912281322	1.127545604385934	0.0	0.02	-0.01
C	-1.891968	-2.181089604385934	0.9693586043859339	0.0	0.01	-0.01
C	3.2991203956140662	-0.917113	-0.7068186043859339	0.01	0.0	0.01
C	-2.856046	-2.446019604385934	-0.05774439561406607	0.0	0.01	-0.01
C	-4.205411	-2.081903	0.1818	0.0	0.0	0.0
C	-4.595632	-1.491338	1.408696	0.0	0.0	0.0
C	-3.640352	-1.272915	2.421966	0.0	0.0	0.0
C	-2.279433	-1.611041	2.220353604385934	0.0	0.0	-0.01
C	-2.429393	-3.1057216043859337	-1.391341	0.0	0.01	0.0
C	-1.246688	-1.342008	3.344212604385934	0.0	0.0	-0.01
C	4.243825	-0.4678766043859339	0.2780983956140661	0.0	0.01	0.01
C	5.236988	0.4684153956140661	-0.12359160438593393	0.0	0.01	0.01
C	5.311654	0.9283473956140661	-1.4557726043859338	0.0	0.01	0.01
C	4.406108395614066	0.446583	-2.428293	0.01	0.0	0.0
C	3.376806395614066	-0.466312	-2.075366	0.01	0.0	0.0
C	4.273823395614065	-1.017784	1.727808	0.01	0.0	0.0
C	2.399969395614066	-1.024510395614066	-3.148924	0.01	-0.01	0.0
C	-2.010211	-2.031092604385934	-2.452518395614066	0.0	0.01	-0.01
C	-3.528098	-4.055747	-1.980744	0.0	0.0	0.0
C	-1.185439395614066	0.176361	3.706862	-0.01	0.0	0.0
C	-1.5511116043859339	-2.19777	4.6177016043859345	0.01	0.0	-0.01
C	2.2260546043859337	-0.064097	-4.366709604385934	-0.01	0.0	0.01
C	2.8332977912281323	-2.44211	-3.639695	0.02	0.0	0.0
C	4.093339791228132	0.10403360438593393	2.8044817912281323	0.02	-0.01	0.02
C	5.611172395614066	-1.7948993956140662	1.9983296043859338	0.01	-0.01	-0.01
C	-0.79455	-4.681576813157802	1.386451	0.0	0.03	0.0
C	3.694495	-3.731512	-0.34940160438593393	0.0	0.0	0.01
H	1.6504196043859338	-4.927837604385934	0.574036	-0.01	0.01	0.0
H	-0.41161323070153744	2.7567150657890087	-1.4787403736843965	0.07	-0.15	-0.06
H	-3.969502791228132	0.3022023956140661	-0.1816166043859339	-0.02	0.01	0.01
H	-7.527313395614065	1.173239	-2.233006	-0.01	0.0	0.0
H	-7.610226791228132	2.794457	-1.504469	-0.02	0.0	0.0
H	-8.360940791228131	1.402195	-0.655456	-0.02	0.0	0.0
H	-0.038565813157801776	4.364649769298462	2.193112791228132	0.03	0.07	0.02
H	3.447067956140661	1.8704739780703303	0.48144053859692504	0.1	0.05	0.14
H	-0.025487582456264295	6.130683417543736	0.5244404394734054	-0.04	-0.04	-0.09
H	-1.1357202087718679	4.830372252631207	0.020959813157801783	0.02	-0.12	-0.03
H	0.43973039561406607	5.012511439473406	-0.7726411868421983	0.01	-0.09	-0.03
H	3.463606835087471	3.8839400219296696	-1.129684395614066	-0.08	-0.05	-0.01
H	1.7510674394734052	3.4909588789468105	-1.4716004394734052	-0.09	-0.18	0.09
H	3.0174330219296697	2.272777857017141	-1.739527252631207	-0.05	-0.13	0.12
H	-1.7795397254391232	2.074038351754727	-3.4317391868421985	-0.17	0.11	-0.03
H	-0.9907948684219823	0.46651479122813216	-3.435258516667256	-0.3	0.02	-0.19
H	-0.02251912105318933	1.9128144175437356	-3.7692809342109914	-0.18	-0.04	-0.15
H	-4.994508395614066	1.7053039780703305	1.606447604385934	-0.01	0.05	-0.01
H	-4.003836208771868	3.087533791228132	1.094260604385934	0.02	0.02	-0.01
H	-3.2362907912281322	1.598048	1.727334	-0.02	0.0	0.0
H	-4.96794	-2.288487	-0.579775	0.0	0.0	0.0
H	-5.651178	-1.242901395614066	1.578705	0.0	-0.01	0.0
H	-3.958795	-0.8528163956140661	3.382469	0.0	-0.01	0.0
H	-1.532947	-3.723499604385934	-1.193908	0.0	0.01	0.0
H	-0.249638	-1.641302604385934	2.965224604385934	0.0	0.01	-0.01
H	5.984796395614065	0.803879	0.603909	0.01	0.0	0.0
H	6.10055	1.6352243956140662	-1.755039	0.0	0.01	0.0
H	4.503571	0.771255	-3.470484	0.0	0.0	0.0
H	3.432208395614066	-1.729646	1.841149	0.01	0.0	0.0
H	1.4133517912281321	-1.129658395614066	-2.6545156043859337	0.02	-0.01	0.01
H	-1.722005604385934	-2.521102	-3.396235	0.01	0.0	0.0
H	-1.138603395614066	-1.465016208771868	-2.0810663956140663	-0.01	0.02	-0.01
H	-2.836987395614066	-1.326999	-2.646053395614066	-0.01	0.0	-0.01
H	-3.107495604385934	-4.610508	-2.836424	0.01	0.0	0.0
H	-4.399515	-3.484487	-2.334109	0.0	0.0	0.0
H	-3.859317604385934	-4.781569	-1.225401	0.01	0.0	0.0
H	-0.402697	0.3580983956140661	4.462999604385934	0.0	0.01	-0.01
H	-2.149232395614066	0.5275616043859339	4.1219171868421975	-0.01	-0.01	0.03
H	-0.9528769780703303	0.7742643956140661	2.810177	-0.05	0.01	0.0
H	-0.782129	-2.02753	5.379915604385935	0.0	0.0	-0.01
H	-1.568311604385934	-3.271219	4.372781604385934	0.01	0.0	-0.01
H	-2.53346	-1.9285803956140661	5.046450604385934	0.0	-0.01	-0.01
H	1.3948683956140662	-0.41339879122813217	-4.994046	0.01	-0.02	0.0
H	3.138206	-0.0374604175437357	-4.987193208771868	0.0	0.04	0.02
H	2.0056130219296695	0.961827604385934	-4.022243813157802	-0.05	-0.01	0.03
H	2.147925791228132	-2.779732	-4.43255	0.02	0.0	0.0
H	2.797894186842198	-3.171278	-2.822370395614066	0.03	0.0	-0.01
H	3.8574727912281324	-2.418814604385934	-4.051246395614066	0.02	0.01	-0.01
H	4.172360769298463	-0.3369727912281322	3.808603395614066	0.07	-0.02	0.01
H	3.105694395614066	0.5760048131578017	2.7087207692984627	0.01	-0.03	0.07
H	4.868057	0.8804333956140661	2.704201	0.0	0.01	0.0
H	5.562614395614066	-2.283714791228132	2.986607604385934	0.01	-0.02	-0.01
H	6.464825395614065	-1.099914395614066	2.001055	0.01	-0.01	0.0
H	5.787069	-2.563982	1.233210208771868	0.0	0.0	-0.02
H	-1.676623	-4.903299208771868	0.772679	0.0	0.02	0.0
H	-0.209053	-5.603309813157802	1.477143395614066	0.0	0.03	0.01
H	-1.151575	-4.4139848131578026	2.388398	0.0	0.03	0.0
H	4.3975353956140655	-3.106642	-0.912948604385934	0.01	0.0	0.01
H	4.171109	-4.014817395614066	0.599050395614066	0.0	-0.01	0.01
H	3.531336	-4.655216604385934	-0.913762	0.0	0.01	0.0
114
O	-6.341896	1.444911	-0.539457	-0.02	0.0	0.0
Mg	0.452602	-0.5834349999999999	-0.04137699999999998	-0.03	0.03	-0.16
O	0.611288	0.9717629999999999	-1.294432	-0.08	-0.27	-0.26
C	-5.184353000000001	1.7774269999999999	-1.157853	-0.02	0.01	0.0
N	-0.485587	-2.3443280000000004	0.6573479999999999	0.0	0.02	-0.02
N	2.1835720000000003	-1.745479	-0.316893	0.01	0.01	0.01
O	-5.122998	2.267833	-2.260504	-0.02	0.01	0.0
C	0.047142	-3.560598	0.797743	0.0	0.02	0.0
C	1.360033	-3.894552	0.42691	0.0	0.01	0.0
C	2.355885	-3.0397179999999997	-0.084451	0.0	0.01	0.01
O	-2.8331449999999996	1.860388	-0.998997	-0.02	-0.02	-0.03
C	-1.676915	1.2327350000000001	-0.801377	-0.02	-0.03	-0.04
C	-0.498582	1.662365	-1.6790370000000001	-0.02	-0.15	-0.12
C	-3.995401	1.3958519999999999	-0.272504	-0.01	0.01	0.0
O	-1.549531	0.347271	0.048652999999999995	-0.03	0.04	0.06
C	-7.528448999999999	1.725344	-1.289363	-0.01	0.0	0.0
O	0.30386599999999997	2.776619	1.003865	0.1	-0.02	0.15
C	1.350751	1.961004	0.885593	0.13	0.07	0.34
O	1.2638079999999998	0.814577	1.321482	0.03	-0.02	0.06
O	2.930938	3.669642	1.286661	0.07	0.11	0.04
C	1.968023	4.554087	1.597023	0.04	0.09	0.02
C	0.5134299999999999	4.197680999999999	1.261963	0.04	0.04	0.03
C	2.637809	2.582905	0.340362	0.07	0.02	0.13
O	2.217479	5.5793680000000005	2.173799	0.0	0.1	0.0
C	-0.090884	5.093628	0.176799	0.0	-0.06	-0.04
C	2.6930859999999996	3.093755	-1.095427	-0.05	-0.09	0.08
C	-0.865941	1.523701	-3.17864	-0.19	0.0	-0.12
C	-4.055895	1.994461	1.1272030000000002	0.0	0.02	-0.01
C	-1.891968	-2.1807469999999998	0.969016	0.0	0.01	-0.01
C	3.2994630000000003	-0.917113	-0.706476	0.01	0.0	0.01
C	-2.856046	-2.445677	-0.058087	0.0	0.01	-0.01
C	-4.205411	-2.081903	0.1818	0.0	0.0	0.0
C	-4.595632	-1.491338	1.408696	0.0	0.0	0.0
C	-3.640352	-1.272915	2.421966	0.0	0.0	0.0
C	-2.279433	-1.611041	2.220011	0.0	0.0	-0.01
C	-2.429393	-3.1053789999999997	-1.391341	0.0	0.01	0.0
C	-1.246688	-1.342008	3.34387	0.0	0.0	-0.01
C	4.243825	-0.467534	0.278441	0.0	0.01	0.01
C	5.236988	0.468758	-0.123249	0.0	0.01	0.01
C	5.311654	0.92869	-1.45543	0.0	0.01	0.01
C	4.406451	0.446583	-2.428293	0.01	0.0	0.0
C	3.377149	-0.466312	-2.075366	0.01	0.0	0.0
C	4.274165999999999	-1.017784	1.727808	0.01	0.0	0.0
C	2.400312	-1.0248529999999998	-3.148924	0.01	-0.01	0.0
C	-2.010211	-2.03075	-2.452861	0.0	0.01	-0.01
C	-3.528098	-4.055747	-1.980744	0.0	0.0	0.0
C	-1.185782	0.176361	3.706862	-0.01	0.0	0.0
C	-1.550769	-2.19777	4.617359	0.01	0.0	-0.01
C	2.2257119999999997	-0.064097	-4.366367	-0.01	0.0	0.01
C	2.833983	-2.44211	-3.639695	0.02	0.0	0.0
C	4.094025	0.103691	2.805167	0.02	-0.01	0.02
C	5.611515	-1.795242	1.997987	0.01	-0.01	-0.01
C	-0.79455	-4.680549	1.386451	0.0	0.03	0.0
C	3.694495	-3.731512	-0.349059	0.0	0.0	0.01
H	1.650077	-4.927495	0.574036	-0.01	0.01	0.0
H	-0.409215	2.751576	-1.480796	0.07	-0.15	-0.06
H	-3.970188	0.302545	-0.181274	-0.02	0.01	0.01
H	-7.5276559999999995	1.173239	-2.233006	-0.01	0.0	0.0
H	-7.610912	2.794457	-1.504469	-0.02	0.0	0.0
H	-8.361626	1.402195	-0.655456	-0.02	0.0	0.0
H	-0.037538	4.3670480000000005	2.1937979999999997	0.03	0.07	0.02
H	3.450494	1.8721869999999998	0.48623700000000003	0.1	0.05	0.14
H	-0.026857999999999996	6.129313000000001	0.5213570000000001	-0.04	-0.04	-0.09
H	-1.135035	4.826261000000001	0.019932000000000005	0.02	-0.12	-0.03
H	0.440073	5.009428000000001	-0.773669	0.01	-0.09	-0.03
H	3.4608659999999998	3.882227	-1.130027	-0.08	-0.05	-0.01
H	1.747984	3.484792	-1.468517	-0.09	-0.18	0.09
H	3.01572	2.268324	-1.7354159999999998	-0.05	-0.13	0.12
H	-1.785364	2.077807	-3.432767	-0.17	0.11	-0.03
H	-1.001073	0.4672	-3.441768	-0.3	0.02	-0.19
H	-0.028686000000000003	1.911444	-3.77442	-0.18	-0.04	-0.15
H	-4.994851	1.707017	1.6061050000000001	-0.01	0.05	-0.01
H	-4.003151	3.0882189999999996	1.0939180000000002	0.02	0.02	-0.01
H	-3.236976	1.598048	1.727334	-0.02	0.0	0.0
H	-4.96794	-2.288487	-0.579775	0.0	0.0	0.0
H	-5.651178	-1.2432439999999998	1.578705	0.0	-0.01	0.0
H	-3.958795	-0.853159	3.382469	0.0	-0.01	0.0
H	-1.532947	-3.723157	-1.193908	0.0	0.01	0.0
H	-0.249638	-1.6409600000000002	2.964882	0.0	0.01	-0.01
H	5.985138999999999	0.803879	0.603909	0.01	0.0	0.0
H	6.10055	1.635567	-1.755039	0.0	0.01	0.0
H	4.503571	0.771255	-3.470484	0.0	0.0	0.0
H	3.432551	-1.729646	1.841149	0.01	0.0	0.0
H	1.414037	-1.1300009999999998	-2.6541729999999997	0.02	-0.01	0.01
H	-1.7216630000000002	-2.521102	-3.396235	0.01	0.0	0.0
H	-1.1389459999999998	-1.464331	-2.0814090000000003	-0.01	0.02	-0.01
H	-2.83733	-1.326999	-2.646396	-0.01	0.0	-0.01
H	-3.107153	-4.610508	-2.836424	0.01	0.0	0.0
H	-4.399515	-3.484487	-2.334109	0.0	0.0	0.0
H	-3.858975	-4.781569	-1.225401	0.01	0.0	0.0
H	-0.402697	0.358441	4.462657	0.0	0.01	-0.01
H	-2.149575	0.527219	4.122945	-0.01	-0.01	0.03
H	-0.95459	0.774607	2.810177	-0.05	0.01	0.0
H	-0.782129	-2.02753	5.379573000000001	0.0	0.0	-0.01
H	-1.5679690000000002	-3.271219	4.372439	0.01	0.0	-0.01
H	-2.53346	-1.928923	5.046108	0.0	-0.01	-0.01
H	1.395211	-0.414084	-4.994046	0.01	-0.02	0.0
H	3.138206	-0.03609	-4.986508	0.0	0.04	0.02
H	2.0039	0.961485	-4.021216	-0.05	-0.01	0.03
H	2.148611	-2.779732	-4.43255	0.02	0.0	0.0
H	2.7989219999999997	-3.171278	-2.8227130000000002	0.03	0.0	-0.01
H	3.858158	-2.418472	-4.051589	0.02	0.01	-0.01
H	4.174759000000001	-0.337658	3.808946	0.07	-0.02	0.01
H	3.106037	0.574977	2.711119	0.01	-0.03	0.07
H	4.868057	0.880776	2.704201	0.0	0.01	0.0
H	5.562957	-2.2843999999999998	2.986265	0.01	-0.02	-0.01
H	6.465167999999999	-1.1002569999999998	2.001055	0.01	-0.01	0.0
H	5.787069	-2.563982	1.232525	0.0	0.0	-0.02
H	-1.676623	-4.902614	0.772679	0.0	0.02	0.0
H	-0.209053	-5.602282	1.4774859999999999	0.0	0.03	0.01
H	-1.151575	-4.4129570000000005	2.388398	0.0	0.03	0.0
H	4.3978779999999995	-3.106642	-0.912606	0.01	0.0	0.01
H	4.171109	-4.01516	0.599393	0.0	-0.01	0.01
H	3.531336	-4.654874	-0.913762	0.0	0.01	0.0
114
O	-6.341210791228132	1.444911	-0.539457	-0.02	0.0	0.0
Mg	0.4536298131578018	-0.5844628131578017	-0.03589532982505719	-0.03	0.03	-0.16
O	0.6140288350874714	0.9810133184202159	-1.285524285965718	-0.08	-0.27	-0.26
C	-5.183667791228133	1.777084395614066	-1.157853	-0.02	0.01	0.0
N	-0.485587	-2.345013208771868	0.6580332087718678	0.0	0.02	-0.02
N	2.1832293956140663	-1.7458216043859338	-0.3172356043859339	0.01	0.01	0.01
O	-5.122312791228132	2.267490395614066	-2.260504	-0.02	0.01	0.0
C	0.047142	-3.5612832087718678	0.797743	0.0	0.02	0.0
C	1.360033	-3.894894604385934	0.42691	0.0	0.01	0.0
C	2.355885	-3.0400606043859337	-0.08479360438593393	0.0	0.01	0.01
O	-2.832459791228132	1.8610732087718678	-0.9979691868421983	-0.02	-0.02	-0.03
C	-1.676229791228132	1.2337628131578018	-0.8000065824562643	-0.02	-0.03	-0.04
C	-0.4978967912281322	1.667504065789009	-1.6749257473687928	-0.02	-0.15	-0.12
C	-3.995058395614066	1.395509395614066	-0.272504	-0.01	0.01	0.0
O	-1.5485031868421983	0.3459005824562643	0.04659737368439645	-0.03	0.04	0.06
C	-7.528106395614065	1.725344	-1.289363	-0.01	0.0	0.0
O	0.30043995614066077	2.777304208771868	0.9987259342109911	0.1	-0.02	0.15
C	1.346297142982859	1.9586057692984626	0.8739444508782466	0.13	0.07	0.34
O	1.2627801868421982	0.8152622087718678	1.3194263736843965	0.03	-0.02	0.06
O	2.9285397692984625	3.665873351754727	1.2852905824562644	0.07	0.11	0.04
C	1.9666525824562644	4.551003560526595	1.5963377912281322	0.04	0.09	0.02
C	0.5120595824562643	4.196310582456264	1.2609351868421983	0.04	0.04	0.03
C	2.6354107692984625	2.582219791228132	0.335908142982859	0.07	0.02	0.13
O	2.217479	5.575941956140661	2.173799	0.0	0.1	0.0
C	-0.090884	5.095683626315603	0.17816941754373572	0.0	-0.06	-0.04
C	2.6947990219296694	3.096838439473405	-1.0981678350874713	-0.05	-0.09	0.08
C	-0.8594315166672554	1.523701	-3.174528747368793	-0.19	0.0	-0.12
C	-4.055895	1.9937757912281322	1.127545604385934	0.0	0.02	-0.01
C	-1.891968	-2.181089604385934	0.9693586043859339	0.0	0.01	-0.01
C	3.2991203956140662	-0.917113	-0.7068186043859339	0.01	0.0	0.01
C	-2.856046	-2.446019604385934	-0.05774439561406607	0.0	0.01	-0.01
C	-4.205411	-2.081903	0.1818	0.0	0.0	0.0
C	-4.595632	-1.491338	1.408696	0.0	0.0	0.0
C	-3.640352	-1.272915	2.421966	0.0	0.0	0.0
C	-2.279433	-1.611041	2.220353604385934	0.0	0.0	-0.01
C	-2.429393	-3.1057216043859337	-1.391341	0.0	0.01	0.0
C	-1.246688	-1.342008	3.344212604385934	0.0	0.0	-0.01
C	4.243825	-0.4678766043859339	0.2780983956140661	0.0	0.01	0.01
C	5.236988	0.4684153956140661	-0.12359160438593393	0.0	0.01	0.01
C	5.311654	0.9283473956140661	-1.4557726043859338	0.0	0.01	0.01
C	4.406108395614066	0.446583	-2.428293	0.01	0.0	0.0
C	3.376806395614066	-0.466312	-2.075366	0.01	0.0	0.0
C	4.273823395614065	-1.017784	1.727808	0.01	0.0	0.0
C	2.399969395614066	-1.024510395614066	-3.148924	0.01	-0.01	0.0
C	-2.010211	-2.031092604385934	-2.452518395614066	0.0	0.01	-0.01
C	-3.528098	-4.055747	-1.980744	0.0	0.0	0.0
C	-1.185439395614066	0.176361	3.706862	-0.01	0.0	0.0
C	-1.5511116043859339	-2.19777	4.6177016043859345	0.01	0.0	-0.01
C	2.2260546043859337	-0.064097	-4.366709604385934	-0.01	0.0	0.01
C	2.8332977912281323	-2.44211	-3.639695	0.02	0.0	0.0
C	4.093339791228132	0.10403360438593393	2.8044817912281323	0.02	-0.01	0.02
C	5.611172395614066	-1.7948993956140662	1.9983296043859338	0.01	-0.01	-0.01
C	-0.79455	-4.681576813157802	1.386451	0.0	0.03	0.0
C	3.694495	-3.731512	-0.34940160438593393	0.0	0.0	0.01
H	1.6504196043859338	-4.927837604385934	0.574036	-0.01	0.01	0.0
H	-0.41161323070153744	2.7567150657890087	-1.4787403736843965	0.07	-0.15	-0.06
H	-3.969502791228132	0.3022023956140661	-0.1816166043859339	-0.02	0.01	0.01
H	-7.527313395614065	1.173239	-2.233006	-0.01	0.0	0.0
H	-7.610226791228132	2.794457	-1.504469	-0.02	0.0	0.0
H	-8.360940791228131	1.402195	-0.655456	-0.02	0.0	0.0
H	-0.038565813157801776	4.364649769298462	2.193112791228132	0.03	0.07	0.02
H	3.447067956140661	1.8704739780703303	0.48144053859692504	0.1	0.05	0.14
H	-0.0254875824562643	6.130683417543736	0.5244404394734054	-0.04	-0.04	-0.09
H	-1.1357202087718679	4.830372252631207	0.02095981315780178	0.02	-0.12	-0.03
H	0.43973039561406607	5.012511439473406	-0.7726411868421983	0.01	-0.09	-0.03
H	3.463606835087471	3.8839400219296696	-1.129684395614066	-0.08	-0.05	-0.01
H	1.7510674394734052	3.4909588789468105	-1.4716004394734052	-0.09	-0.18	0.09
H	3.0174330219296697	2.272777857017141	-1.739527252631207	-0.05	-0.13	0.12
H	-1.7795397254391232	2.074038351754727	-3.4317391868421985	-0.17	0.11	-0.03
H	-0.9907948684219823	0.46651479122813216	-3.435258516667256	-0.3	0.02	-0.19
H	-0.022519121053189345	1.9128144175437356	-3.7692809342109914	-0.18	-0.04	-0.15
H	-4.994508395614066	1.7053039780703305	1.606447604385934	-0.01	0.05	-0.01
H	-4.003836208771868	3.087533791228132	1.094260604385934	0.02	0.02	-0.01
H	-3.2362907912281322	1.598048	1.727334	-0.02	0.0	0.0
H	-4.96794	-2.288487	-0.579775	0.0	0.0	0.0
H	-5.651178	-1.242901395614066	1.578705	0.0	-0.01	0.0
H	-3.958795	-0.8528163956140661	3.382469	0.0	-0.01	0.0
H	-1.532947	-3.723499604385934	-1.193908	0.0	0.01	0.0
H	-0.249638	-1.641302604385934	2.965224604385934	0.0	0.01	-0.01
H	5.984796395614065	0.803879	0.603909	0.01	0.0	0.0
H	6.10055	1.6352243956140662	-1.755039	0.0	0.01	0.0
H	4.503571	0.771255	-3.470484	0.0	0.0	0.0
H	3.432208395614066	-1.729646	1.841149	0.01	0.0	0.0
H	1.4133517912281321	-1.129658395614066	-2.6545156043859337	0.02	-0.01	0.01
H	-1.722005604385934	-2.521102	-3.396235	0.01	0.0	0.0
H	-1.138603395614066	-1.465016208771868	-2.0810663956140663	-0.01	0.02	-0.01
H	-2.836987395614066	-1.326999	-2.646053395614066	-0.01	0.0	-0.01
H	-3.107495604385934	-4.610508	-2.836424	0.01	0.0	0.0
H	-4.399515	-3.484487	-2.334109	0.0	0.0	0.0
H	-3.859317604385934	-4.781569	-1.225401	0.01	0.0	0.0
H	-0.402697	0.3580983956140661	4.462999604385934	0.0	0.01	-0.01
H	-2.149232395614066	0.5275616043859339	4.1219171868421975	-0.01	-0.01	0.03
H	-0.9528769780703303	0.7742643956140661	2.810177	-0.05	0.01	0.0
H	-0.782129	-2.02753	5.379915604385935	0.0	0.0	-0.01
H	-1.568311604385934	-3.271219	4.372781604385934	0.01	0.0	-0.01
H	-2.53346	-1.9285803956140661	5.046450604385934	0.0	-0.01	-0.01
H	1.3948683956140662	-0.41339879122813217	-4.994046	0.01	-0.02	0.0
H	3.138206	-0.03746041754373569	-4.987193208771868	0.0	0.04	0.02
H	2.0056130219296695	0.961827604385934	-4.022243813157802	-0.05	-0.01	0.03
H	2.147925791228132	-2.779732	-4.43255	0.02	0.0	0.0
H	2.797894186842198	-3.171278	-2.822370395614066	0.03	0.0	-0.01
H	3.8574727912281324	-2.418814604385934	-4.051246395614066	0.02	0.01	-0.01
H	4.172360769298463	-0.3369727912281322	3.808603395614066	0.07	-0.02	0.01
H	3.105694395614066	0.5760048131578017	2.7087207692984627	0.01	-0.03	0.07
H	4.868057	0.8804333956140661	2.704201	0.0	0.01	0.0
H	5.562614395614066	-2.283714791228132	2.986607604385934	0.01	-0.02	-0.01
H	6.464825395614065	-1.099914395614066	2.001055	0.01	-0.01	0.0
H	5.787069	-2.563982	1.233210208771868	0.0	0.0	-0.02
H	-1.676623	-4.903299208771868	0.772679	0.0	0.02	0.0
H	-0.209053	-5.603309813157802	1.477143395614066	0.0	0.03	0.01
H	-1.151575	-4.4139848131578026	2.388398	0.0	0.03	0.0
H	4.3975353956140655	-3.106642	-0.912948604385934	0.01	0.0	0.01
H	4.171109	-4.014817395614066	0.599050395614066	0.0	-0.01	0.01
H	3.531336	-4.655216604385934	-0.913762	0.0	0.01	0.0
114
O	-6.339222237921249	1.444911	-0.539457	-0.02	0.0	0.0
Mg	0.4566126431181261	-0.5874456431181261	-0.01998690336999409	-0.03	0.03	-0.16
O	0.621983048315003	1.007858788063135	-1.2596730929762405	-0.08	-0.27	-0.26
C	-5.18167923792125	1.7760901189606246	-1.157853	-0.02	0.01	0.0
N	-0.485587	-2.347001762078751	0.6600217620787506	0.0	0.02	-0.02
N	2.182235118960625	-1.7468158810393752	-0.31822988103937533	0.01	0.01	0.01
O	-5.120324237921249	2.2664961189606245	-2.260504	-0.02	0.01	0.0
C	0.047142	-3.5632717620787506	0.797743	0.0	0.02	0.0
C	1.360033	-3.8958888810393755	0.42691	0.0	0.01	0.0
C	2.355885	-3.041054881039375	-0.08578788103937537	0.0	0.01	0.01
O	-2.830471237921249	1.8630617620787506	-0.9949863568818739	-0.02	-0.02	-0.03
C	-1.6742412379212492	1.236745643118126	-0.7960294758424985	-0.02	-0.03	-0.04
C	-0.4959082379212493	1.6824182155906307	-1.6629944275274957	-0.02	-0.15	-0.12
C	-3.9940641189606247	1.3945151189606246	-0.272504	-0.01	0.01	0.0
O	-1.545520356881874	0.34192347584249855	0.04063171376374779	-0.03	0.04	0.06
C	-7.527112118960624	1.725344	-1.289363	-0.01	0.0	0.0
O	0.2904971896062463	2.7792927620787506	0.9838117844093694	0.1	-0.02	0.15
C	1.3333715464881202	1.9516458327243724	0.8401390446612375	0.13	0.07	0.34
O	1.2597973568818739	0.8172507620787507	1.3134607137637477	0.03	-0.02	0.06
O	2.9215798327243725	3.654936308566871	1.2813134758424987	0.07	0.11	0.04
C	1.9626754758424987	4.542055070645622	1.5943492379212494	0.04	0.09	0.02
C	0.5080824758424985	4.192333475842498	1.257952356881874	0.04	0.04	0.03
C	2.6284508327243725	2.5802312379212493	0.3229825464881202	0.07	0.02	0.13
O	2.217479	5.565999189606247	2.173799	0.0	0.1	0.0
C	-0.090884	5.101649286236252	0.1821465241575015	0.0	-0.06	-0.04
C	2.6997704051968765	3.1057869293543785	-1.106122048315003	-0.05	-0.09	0.08
C	-0.8405402602518679	1.523701	-3.1625974275274955	-0.19	0.0	-0.12
C	-4.055895	1.9917872379212493	1.1285398810393754	0.0	0.02	-0.01
C	-1.891968	-2.1820838810393752	0.9703528810393753	0.0	0.01	-0.01
C	3.298126118960625	-0.917113	-0.7078128810393753	0.01	0.0	0.01
C	-2.856046	-2.4470138810393753	-0.05675011896062463	0.0	0.01	-0.01
C	-4.205411	-2.081903	0.1818	0.0	0.0	0.0
C	-4.595632	-1.491338	1.408696	0.0	0.0	0.0
C	-3.640352	-1.272915	2.421966	0.0	0.0	0.0
C	-2.279433	-1.611041	2.2213478810393754	0.0	0.0	-0.01
C	-2.429393	-3.106715881039375	-1.391341	0.0	0.01	0.0
C	-1.246688	-1.342008	3.3452068810393754	0.0	0.0	-0.01
C	4.243825	-0.46887088103937535	0.27710411896062465	0.0	0.01	0.01
C	5.236988	0.46742111896062466	-0.12458588103937537	0.0	0.01	0.01
C	5.311654	0.9273531189606247	-1.4567668810393752	0.0	0.01	0.01
C	4.405114118960625	0.446583	-2.428293	0.01	0.0	0.0
C	3.3758121189606247	-0.466312	-2.075366	0.01	0.0	0.0
C	4.272829118960624	-1.017784	1.727808	0.01	0.0	0.0
C	2.3989751189606245	-1.0235161189606246	-3.148924	0.01	-0.01	0.0
C	-2.010211	-2.0320868810393753	-2.4515241189606245	0.0	0.01	-0.01
C	-3.528098	-4.055747	-1.980744	0.0	0.0	0.0
C	-1.1844451189606247	0.176361	3.706862	-0.01	0.0	0.0
C	-1.5521058810393753	-2.19777	4.6186958810393755	0.01	0.0	-0.01
C	2.227048881039375	-0.064097	-4.367703881039375	-0.01	0.0	0.01
C	2.8313092379212494	-2.44211	-3.639695	0.02	0.0	0.0
C	4.091351237921249	0.10502788103937537	2.8024932379212495	0.02	-0.01	0.02
C	5.610178118960625	-1.7939051189606248	1.9993238810393752	0.01	-0.01	-0.01
C	-0.79455	-4.684559643118126	1.386451	0.0	0.03	0.0
C	3.694495	-3.731512	-0.35039588103937536	0.0	0.0	0.01
H	1.6514138810393753	-4.928831881039375	0.574036	-0.01	0.01	0.0
H	-0.41857316727562754	2.7716292155906306	-1.4727747137637477	0.07	-0.15	-0.06
H	-3.9675142379212494	0.30120811896062466	-0.18261088103937537	-0.02	0.01	0.01
H	-7.526319118960624	1.173239	-2.233006	-0.01	0.0	0.0
H	-7.608238237921249	2.794457	-1.504469	-0.02	0.0	0.0
H	-8.35895223792125	1.402195	-0.655456	-0.02	0.0	0.0
H	-0.0415486431181261	4.357689832724373	2.191124237921249	0.03	0.07	0.02
H	3.4371251896062462	1.865502594803123	0.4675206654487448	0.1	0.05	0.14
H	-0.021510475842498523	6.134660524157502	0.5333889293543783	-0.04	-0.04	-0.09
H	-1.1377087620787507	4.842303572472504	0.02394264311812611	0.02	-0.12	-0.03
H	0.43873611896062464	5.0214599293543785	-0.7696583568818739	0.01	-0.09	-0.03
H	3.4715610483150026	3.8889114051968767	-1.1286901189606247	-0.08	-0.05	-0.01
H	1.7600159293543782	3.5088558587087566	-1.4805489293543783	-0.09	-0.18	0.09
H	3.022404405196877	2.28570345351188	-1.7514585724725042	-0.05	-0.13	0.12
H	-1.7626370223306187	2.063101308566871	-3.428756356881874	-0.17	0.11	-0.03
H	-0.960966568818739	0.46452623792124925	-3.416367260251868	-0.3	0.02	-0.19
H	-0.004622141291243359	1.9167915241575013	-3.7543667844093696	-0.18	-0.04	-0.15
H	-4.993514118960625	1.7003325948031232	1.6074418810393754	-0.01	0.05	-0.01
H	-4.005824762078751	3.085545237921249	1.0952548810393754	0.02	0.02	-0.01
H	-3.2343022379212494	1.598048	1.727334	-0.02	0.0	0.0
H	-4.96794	-2.288487	-0.579775	0.0	0.0	0.0
H	-5.651178	-1.2419071189606246	1.578705	0.0	-0.01	0.0
H	-3.958795	-0.8518221189606247	3.382469	0.0	-0.01	0.0
H	-1.532947	-3.7244938810393755	-1.193908	0.0	0.01	0.0
H	-0.249638	-1.6422968810393754	2.9662188810393753	0.0	0.01	-0.01
H	5.983802118960624	0.803879	0.603909	0.01	0.0	0.0
H	6.10055	1.6342301189606248	-1.755039	0.0	0.01	0.0
H	4.503571	0.771255	-3.470484	0.0	0.0	0.0
H	3.4312141189606247	-1.729646	1.841149	0.01	0.0	0.0
H	1.4113632379212493	-1.1286641189606246	-2.655509881039375	0.02	-0.01	0.01
H	-1.7229998810393754	-2.521102	-3.396235	0.01	0.0	0.0
H	-1.1376091189606246	-1.4670047620787507	-2.080072118960625	-0.01	0.02	-0.01
H	-2.8359931189606247	-1.326999	-2.6450591189606247	-0.01	0.0	-0.01
H	-3.1084898810393753	-4.610508	-2.836424	0.01	0.0	0.0
H	-4.399515	-3.484487	-2.334109	0.0	0.0	0.0
H	-3.8603118810393755	-4.781569	-1.225401	0.01	0.0	0.0
H	-0.402697	0.35710411896062466	4.463993881039375	0.0	0.01	-0.01
H	-2.1482381189606246	0.5285558810393753	4.118934356881874	-0.01	-0.01	0.03
H	-0.9479055948031232	0.7732701189606247	2.810177	-0.05	0.01	0.0
H	-0.782129	-2.02753	5.380909881039376	0.0	0.0	-0.01
H	-1.5693058810393754	-3.271219	4.373775881039375	0.01	0.0	-0.01
H	-2.53346	-1.9275861189606247	5.047444881039375	0.0	-0.01	-0.01
H	1.3938741189606247	-0.41141023792124926	-4.994046	0.01	-0.02	0.0
H	3.138206	-0.041437524157501474	-4.989181762078751	0.0	0.04	0.02
H	2.0105844051968766	0.9628218810393754	-4.025226643118126	-0.05	-0.01	0.03
H	2.1459372379212494	-2.779732	-4.43255	0.02	0.0	0.0
H	2.7949113568818738	-3.171278	-2.821376118960625	0.03	0.0	-0.01
H	3.8554842379212495	-2.4198088810393754	-4.050252118960625	0.02	0.01	-0.01
H	4.165400832724373	-0.33498423792124926	3.8076091189606247	0.07	-0.02	0.01
H	3.1047001189606247	0.5789876431181261	2.7017608327243727	0.01	-0.03	0.07
H	4.868057	0.8794391189606247	2.704201	0.0	0.01	0.0
H	5.561620118960625	-2.2817262379212493	2.9876018810393754	0.01	-0.02	-0.01
H	6.463831118960624	-1.0989201189606246	2.001055	0.01	-0.01	0.0
H	5.787069	-2.563982	1.2351987620787508	0.0	0.0	-0.02
H	-1.676623	-4.905287762078751	0.772679	0.0	0.02	0.0
H	-0.209053	-5.606292643118126	1.4761491189606246	0.0	0.03	0.01
H	-1.151575	-4.416967643118126	2.388398	0.0	0.03	0.0
H	4.3965411189606245	-3.106642	-0.9139428810393754	0.01	0.0	0.01
H	4.171109	-4.013823118960625	0.5980561189606246	0.0	-0.01	0.01
H	3.531336	-4.656210881039375	-0.913762	0.0	0.01	0.0
114
O	-6.336124993532095	1.444911	-0.539457	-0.02	0.0	0.0
Mg	0.4612585097018581	-0.592091509701858	0.004791051743242999	-0.03	0.03	-0.16
O	0.6343720258716214	1.0496715873167226	-1.21940891591723	-0.08	-0.27	-0.26
C	-5.178581993532095	1.7745414967660473	-1.157853	-0.02	0.01	0.0
N	-0.485587	-2.3500990064679055	0.6631190064679053	0.0	0.02	-0.02
N	2.1806864967660475	-1.7483645032339525	-0.3197785032339527	0.01	0.01	0.01
O	-5.117226993532094	2.2649474967660472	-2.260504	-0.02	0.01	0.0
C	0.047142	-3.5663690064679052	0.797743	0.0	0.02	0.0
C	1.360033	-3.8974375032339528	0.42691	0.0	0.01	0.0
C	2.355885	-3.0426035032339525	-0.08733650323395269	0.0	0.01	0.01
O	-2.8273739935320945	1.8661590064679052	-0.990340490298142	-0.02	-0.02	-0.03
C	-1.6711439935320946	1.2413915097018582	-0.7898349870641892	-0.02	-0.03	-0.04
C	-0.4928109935320946	1.7056475485092903	-1.6444109611925677	-0.02	-0.15	-0.12
C	-3.9925154967660474	1.3929664967660473	-0.272504	-0.01	0.01	0.0
O	-1.540874490298142	0.3357289870641893	0.03133998059628387	-0.03	0.04	0.06
C	-7.525563496766047	1.725344	-1.289363	-0.01	0.0	0.0
O	0.2750109676604731	2.7823900064679052	0.9605824514907098	0.1	-0.02	0.15
C	1.313239457958615	1.9408054773623313	0.7874858900456086	0.13	0.07	0.34
O	1.2551514902981418	0.8203480064679054	1.304168980596284	0.03	-0.02	0.06
O	2.910739477362331	3.6379014644265206	1.2751189870641892	0.07	0.11	0.04
C	1.9564809870641893	4.5281174708944265	1.5912519935320948	0.04	0.09	0.02
C	0.5018879870641892	4.186138987064189	1.253306490298142	0.04	0.04	0.03
C	2.617610477362331	2.5771339935320947	0.3028504579586151	0.07	0.02	0.13
O	2.217479	5.550512967660473	2.173799	0.0	0.1	0.0
C	-0.090884	5.1109410194037155	0.18834101293581076	0.0	-0.06	-0.04
C	2.7075135161697634	3.119724529105574	-1.1185110258716215	-0.05	-0.09	0.08
C	-0.8111164385548989	1.523701	-3.144013961192568	-0.19	0.0	-0.12
C	-4.055895	1.9886899935320947	1.1300885032339527	0.0	0.02	-0.01
C	-1.891968	-2.1836325032339525	0.9719015032339526	0.0	0.01	-0.01
C	3.2965774967660475	-0.917113	-0.7093615032339526	0.01	0.0	0.01
C	-2.856046	-2.4485625032339526	-0.05520149676604731	0.0	0.01	-0.01
C	-4.205411	-2.081903	0.1818	0.0	0.0	0.0
C	-4.595632	-1.491338	1.408696	0.0	0.0	0.0
C	-3.640352	-1.272915	2.421966	0.0	0.0	0.0
C	-2.279433	-1.611041	2.2228965032339527	0.0	0.0	-0.01
C	-2.429393	-3.1082645032339524	-1.391341	0.0	0.01	0.0
C	-1.246688	-1.342008	3.3467555032339527	0.0	0.0	-0.01
C	4.243825	-0.4704195032339527	0.2755554967660473	0.0	0.01	0.01
C	5.236988	0.4658724967660473	-0.1261345032339527	0.0	0.01	0.01
C	5.311654	0.9258044967660474	-1.4583155032339525	0.0	0.01	0.01
C	4.403565496766047	0.446583	-2.428293	0.01	0.0	0.0
C	3.3742634967660474	-0.466312	-2.075366	0.01	0.0	0.0
C	4.271280496766047	-1.017784	1.727808	0.01	0.0	0.0
C	2.3974264967660472	-1.0219674967660473	-3.148924	0.01	-0.01	0.0
C	-2.010211	-2.0336355032339526	-2.449975496766047	0.0	0.01	-0.01
C	-3.528098	-4.055747	-1.980744	0.0	0.0	0.0
C	-1.1828964967660474	0.176361	3.706862	-0.01	0.0	0.0
C	-1.5536545032339526	-2.19777	4.620244503233953	0.01	0.0	-0.01
C	2.2285975032339524	-0.064097	-4.369252503233953	-0.01	0.0	0.01
C	2.828211993532095	-2.44211	-3.639695	0.02	0.0	0.0
C	4.088253993532095	0.10657650323395268	2.799395993532095	0.02	-0.01	0.02
C	5.6086294967660475	-1.7923564967660475	2.0008725032339525	0.01	-0.01	-0.01
C	-0.79455	-4.689205509701858	1.386451	0.0	0.03	0.0
C	3.694495	-3.731512	-0.3519445032339527	0.0	0.0	0.01
H	1.6529625032339526	-4.930380503233953	0.574036	-0.01	0.01	0.0
H	-0.4294135226376688	2.7948585485092905	-1.463482980596284	0.07	-0.15	-0.06
H	-3.9644169935320948	0.2996594967660473	-0.1841595032339527	-0.02	0.01	0.01
H	-7.524770496766047	1.173239	-2.233006	-0.01	0.0	0.0
H	-7.605140993532094	2.794457	-1.504469	-0.02	0.0	0.0
H	-8.355854993532095	1.402195	-0.655456	-0.02	0.0	0.0
H	-0.046194509701858066	4.346849477362332	2.1880269935320946	0.03	0.07	0.02
H	3.4216389676604733	1.8577594838302365	0.44583995472466237	0.1	0.05	0.14
H	-0.01531598706418925	6.140855012935811	0.5473265291055742	-0.04	-0.04	-0.09
H	-1.1408060064679053	4.860887038807433	0.028588509701858066	0.02	-0.12	-0.03
H	0.4371874967660473	5.035397529105574	-0.765012490298142	0.01	-0.09	-0.03
H	3.4839500258716214	3.8966545161697637	-1.1271414967660474	-0.08	-0.05	-0.01
H	1.7739535291055741	3.5367310582111484	-1.4944865291055742	-0.09	-0.18	0.09
H	3.0301475161697637	2.3058355420413847	-1.7700420388074323	-0.05	-0.13	0.12
H	-1.7363104450228042	2.0460664644265205	-3.4241104902981423	-0.17	0.11	-0.03
H	-0.9145079029814194	0.4614289935320946	-3.386943438554899	-0.3	0.02	-0.19
H	0.02325305821114837	1.9229860129358107	-3.7311374514907096	-0.18	-0.04	-0.15
H	-4.991965496766047	1.6925894838302367	1.6089905032339527	-0.01	0.05	-0.01
H	-4.008922006467905	3.0824479935320945	1.0968035032339527	0.02	0.02	-0.01
H	-3.231204993532095	1.598048	1.727334	-0.02	0.0	0.0
H	-4.96794	-2.288487	-0.579775	0.0	0.0	0.0
H	-5.651178	-1.2403584967660473	1.578705	0.0	-0.01	0.0
H	-3.958795	-0.8502734967660474	3.382469	0.0	-0.01	0.0
H	-1.532947	-3.726042503233953	-1.193908	0.0	0.01	0.0
H	-0.249638	-1.6438455032339527	2.9677675032339526	0.0	0.01	-0.01
H	5.982253496766047	0.803879	0.603909	0.01	0.0	0.0
H	6.10055	1.6326814967660475	-1.755039	0.0	0.01	0.0
H	4.503571	0.771255	-3.470484	0.0	0.0	0.0
H	3.4296654967660474	-1.729646	1.841149	0.01	0.0	0.0
H	1.4082659935320947	-1.1271154967660473	-2.6570585032339524	0.02	-0.01	0.01
H	-1.7245485032339527	-2.521102	-3.396235	0.01	0.0	0.0
H	-1.1360604967660473	-1.4701020064679053	-2.0785234967660475	-0.01	0.02	-0.01
H	-2.8344444967660474	-1.326999	-2.6435104967660474	-0.01	0.0	-0.01
H	-3.1100385032339526	-4.610508	-2.836424	0.01	0.0	0.0
H	-4.399515	-3.484487	-2.334109	0.0	0.0	0.0
H	-3.861860503233953	-4.781569	-1.225401	0.01	0.0	0.0
H	-0.402697	0.3555554967660473	4.465542503233952	0.0	0.01	-0.01
H	-2.1466894967660473	0.5301045032339526	4.114288490298142	-0.01	-0.01	0.03
H	-0.9401624838302366	0.7717214967660474	2.810177	-0.05	0.01	0.0
H	-0.782129	-2.02753	5.382458503233953	0.0	0.0	-0.01
H	-1.5708545032339527	-3.271219	4.375324503233952	0.01	0.0	-0.01
H	-2.53346	-1.9260374967660474	5.048993503233953	0.0	-0.01	-0.01
H	1.3923254967660474	-0.4083129935320946	-4.994046	0.01	-0.02	0.0
H	3.138206	-0.04763201293581074	-4.992279006467905	0.0	0.04	0.02
H	2.0183275161697636	0.9643705032339527	-4.029872509701858	-0.05	-0.01	0.03
H	2.1428399935320948	-2.779732	-4.43255	0.02	0.0	0.0
H	2.790265490298142	-3.171278	-2.8198274967660475	0.03	0.0	-0.01
H	3.852386993532095	-2.4213575032339527	-4.048703496766048	0.02	0.01	-0.01
H	4.154560477362332	-0.3318869935320946	3.8060604967660474	0.07	-0.02	0.01
H	3.1031514967660474	0.583633509701858	2.690920477362331	0.01	-0.03	0.07
H	4.868057	0.8778904967660474	2.704201	0.0	0.01	0.0
H	5.560071496766048	-2.2786289935320947	2.9891505032339527	0.01	-0.02	-0.01
H	6.462282496766047	-1.0973714967660473	2.001055	0.01	-0.01	0.0
H	5.787069	-2.563982	1.2382960064679054	0.0	0.0	-0.02
H	-1.676623	-4.908385006467905	0.772679	0.0	0.02	0.0
H	-0.209053	-5.610938509701858	1.4746004967660473	0.0	0.03	0.01
H	-1.151575	-4.421613509701858	2.388398	0.0	0.03	0.0
H	4.394992496766047	-3.106642	-0.9154915032339527	0.01	0.0	0.01
H	4.171109	-4.0122744967660475	0.5965074967660473	0.0	-0.01	0.01
H	3.531336	-4.657759503233953	-0.913762	0.0	0.01	0.0
114
O	-6.33222223792125	1.444911	-0.539457	-0.02	0.0	0.0
Mg	0.4671126431181261	-0.597945643118126	0.03601309663000589	-0.03	0.03	-0.16
O	0.649983048315003	1.102358788063135	-1.1686730929762406	-0.08	-0.27	-0.26
C	-5.17467923792125	1.7725901189606246	-1.157853	-0.02	0.01	0.0
N	-0.485587	-2.354001762078751	0.6670217620787506	0.0	0.02	-0.02
N	2.178735118960625	-1.7503158810393753	-0.32172988103937533	0.01	0.01	0.01
O	-5.113324237921249	2.2629961189606247	-2.260504	-0.02	0.01	0.0
C	0.047142	-3.5702717620787507	0.797743	0.0	0.02	0.0
C	1.360033	-3.8993888810393753	0.42691	0.0	0.01	0.0
C	2.355885	-3.044554881039375	-0.08928788103937538	0.0	0.01	0.01
O	-2.823471237921249	1.8700617620787507	-0.9844863568818739	-0.02	-0.02	-0.03
C	-1.6672412379212491	1.2472456431181262	-0.7820294758424985	-0.02	-0.03	-0.04
C	-0.48890823792124927	1.7349182155906306	-1.6209944275274957	-0.02	-0.15	-0.12
C	-3.990564118960625	1.3910151189606246	-0.272504	-0.01	0.01	0.0
O	-1.5350203568818739	0.32792347584249854	0.019631713763747793	-0.03	0.04	0.06
C	-7.523612118960624	1.725344	-1.289363	-0.01	0.0	0.0
O	0.25549718960624634	2.7862927620787508	0.9313117844093695	0.1	-0.02	0.15
C	1.2878715464881203	1.9271458327243725	0.7211390446612375	0.13	0.07	0.34
O	1.2492973568818737	0.8242507620787507	1.2924607137637478	0.03	-0.02	0.06
O	2.8970798327243723	3.616436308566871	1.2673134758424986	0.07	0.11	0.04
C	1.9486754758424987	4.510555070645622	1.5873492379212493	0.04	0.09	0.02
C	0.4940824758424985	4.178333475842498	1.2474523568818738	0.04	0.04	0.03
C	2.6039508327243723	2.573231237921249	0.2774825464881202	0.07	0.02	0.13
O	2.217479	5.530999189606247	2.173799	0.0	0.1	0.0
C	-0.090884	5.122649286236252	0.19614652415750147	0.0	-0.06	-0.04
C	2.7172704051968766	3.1372869293543784	-1.134122048315003	-0.05	-0.09	0.08
C	-0.774040260251868	1.523701	-3.1205974275274957	-0.19	0.0	-0.12
C	-4.055895	1.9847872379212492	1.1320398810393755	0.0	0.02	-0.01
C	-1.891968	-2.185583881039375	0.9738528810393754	0.0	0.01	-0.01
C	3.294626118960625	-0.917113	-0.7113128810393754	0.01	0.0	0.01
C	-2.856046	-2.450513881039375	-0.053250118960624634	0.0	0.01	-0.01
C	-4.205411	-2.081903	0.1818	0.0	0.0	0.0
C	-4.595632	-1.491338	1.408696	0.0	0.0	0.0
C	-3.640352	-1.272915	2.421966	0.0	0.0	0.0
C	-2.279433	-1.611041	2.2248478810393753	0.0	0.0	-0.01
C	-2.429393	-3.110215881039375	-1.391341	0.0	0.01	0.0
C	-1.246688	-1.342008	3.348706881039375	0.0	0.0	-0.01
C	4.243825	-0.47237088103937536	0.27360411896062464	0.0	0.01	0.01
C	5.236988	0.46392111896062466	-0.12808588103937538	0.0	0.01	0.01
C	5.311654	0.9238531189606246	-1.4602668810393753	0.0	0.01	0.01
C	4.401614118960625	0.446583	-2.428293	0.01	0.0	0.0
C	3.372312118960625	-0.466312	-2.075366	0.01	0.0	0.0
C	4.269329118960624	-1.017784	1.727808	0.01	0.0	0.0
C	2.3954751189606247	-1.0200161189606245	-3.148924	0.01	-0.01	0.0
C	-2.010211	-2.035586881039375	-2.4480241189606247	0.0	0.01	-0.01
C	-3.528098	-4.055747	-1.980744	0.0	0.0	0.0
C	-1.1809451189606246	0.176361	3.706862	-0.01	0.0	0.0
C	-1.5556058810393754	-2.19777	4.622195881039375	0.01	0.0	-0.01
C	2.230548881039375	-0.064097	-4.371203881039375	-0.01	0.0	0.01
C	2.8243092379212493	-2.44211	-3.639695	0.02	0.0	0.0
C	4.08435123792125	0.10852788103937537	2.7954932379212494	0.02	-0.01	0.02
C	5.606678118960625	-1.7904051189606247	2.002823881039375	0.01	-0.01	-0.01
C	-0.79455	-4.695059643118126	1.386451	0.0	0.03	0.0
C	3.694495	-3.731512	-0.35389588103937536	0.0	0.0	0.01
H	1.6549138810393753	-4.932331881039375	0.574036	-0.01	0.01	0.0
H	-0.44307316727562757	2.8241292155906303	-1.4517747137637478	0.07	-0.15	-0.06
H	-3.9605142379212492	0.29770811896062466	-0.18611088103937537	-0.02	0.01	0.01
H	-7.522819118960625	1.173239	-2.233006	-0.01	0.0	0.0
H	-7.601238237921249	2.794457	-1.504469	-0.02	0.0	0.0
H	-8.35195223792125	1.402195	-0.655456	-0.02	0.0	0.0
H	-0.052048643118126105	4.333189832724373	2.184124237921249	0.03	0.07	0.02
H	3.4021251896062465	1.8480025948031231	0.41852066544874483	0.1	0.05	0.14
H	-0.007510475842498529	6.148660524157502	0.5648889293543783	-0.04	-0.04	-0.09
H	-1.1447087620787508	4.884303572472505	0.03444264311812611	0.02	-0.12	-0.03
H	0.43523611896062464	5.052959929354379	-0.7591583568818739	0.01	-0.09	-0.03
H	3.4995610483150026	3.906411405196877	-1.1251901189606246	-0.08	-0.05	-0.01
H	1.7915159293543783	3.5718558587087568	-1.5120489293543784	-0.09	-0.18	0.09
H	3.039904405196877	2.33120345351188	-1.7934585724725043	-0.05	-0.13	0.12
H	-1.7031370223306188	2.024601308566871	-3.4182563568818742	-0.17	0.11	-0.03
H	-0.855966568818739	0.45752623792124925	-3.349867260251868	-0.3	0.02	-0.19
H	0.05837785870875662	1.9307915241575013	-3.70186678440937	-0.18	-0.04	-0.15
H	-4.990014118960625	1.6828325948031233	1.6109418810393754	-0.01	0.05	-0.01
H	-4.0128247620787505	3.078545237921249	1.0987548810393755	0.02	0.02	-0.01
H	-3.2273022379212493	1.598048	1.727334	-0.02	0.0	0.0
H	-4.96794	-2.288487	-0.579775	0.0	0.0	0.0
H	-5.651178	-1.2384071189606245	1.578705	0.0	-0.01	0.0
H	-3.958795	-0.8483221189606246	3.382469	0.0	-0.01	0.0
H	-1.532947	-3.7279938810393753	-1.193908	0.0	0.01	0.0
H	-0.249638	-1.6457968810393755	2.969718881039375	0.0	0.01	-0.01
H	5.9803021189606245	0.803879	0.603909	0.01	0.0	0.0
H	6.10055	1.6307301189606247	-1.755039	0.0	0.01	0.0
H	4.503571	0.771255	-3.470484	0.0	0.0	0.0
H	3.427714118960625	-1.729646	1.841149	0.01	0.0	0.0
H	1.4043632379212492	-1.1251641189606245	-2.659009881039375	0.02	-0.01	0.01
H	-1.7264998810393755	-2.521102	-3.396235	0.01	0.0	0.0
H	-1.1341091189606245	-1.4740047620787509	-2.076572118960625	-0.01	0.02	-0.01
H	-2.832493118960625	-1.326999	-2.641559118960625	-0.01	0.0	-0.01
H	-3.111989881039375	-4.610508	-2.836424	0.01	0.0	0.0
H	-4.399515	-3.484487	-2.334109	0.0	0.0	0.0
H	-3.8638118810393753	-4.781569	-1.225401	0.01	0.0	0.0
H	-0.402697	0.35360411896062466	4.467493881039375	0.0	0.01	-0.01
H	-2.1447381189606247	0.5320558810393754	4.108434356881873	-0.01	-0.01	0.03
H	-0.9304055948031231	0.7697701189606246	2.810177	-0.05	0.01	0.0
H	-0.782129	-2.02753	5.3844098810393755	0.0	0.0	-0.01
H	-1.5728058810393755	-3.271219	4.377275881039375	0.01	0.0	-0.01
H	-2.53346	-1.9240861189606246	5.050944881039375	0.0	-0.01	-0.01
H	1.3903741189606247	-0.40441023792124925	-4.994046	0.01	-0.02	0.0
H	3.138206	-0.055437524157501465	-4.99618176207875	0.0	0.04	0.02
H	2.0280844051968767	0.9663218810393754	-4.035726643118126	-0.05	-0.01	0.03
H	2.1389372379212492	-2.779732	-4.43255	0.02	0.0	0.0
H	2.784411356881874	-3.171278	-2.817876118960625	0.03	0.0	-0.01
H	3.8484842379212494	-2.4233088810393753	-4.046752118960625	0.02	0.01	-0.01
H	4.140900832724373	-0.32798423792124926	3.804109118960625	0.07	-0.02	0.01
H	3.101200118960625	0.5894876431181261	2.6772608327243725	0.01	-0.03	0.07
H	4.868057	0.8759391189606246	2.704201	0.0	0.01	0.0
H	5.558120118960625	-2.274726237921249	2.9911018810393752	0.01	-0.02	-0.01
H	6.4603311189606245	-1.0954201189606245	2.001055	0.01	-0.01	0.0
H	5.787069	-2.563982	1.242198762078751	0.0	0.0	-0.02
H	-1.676623	-4.91228776207875	0.772679	0.0	0.02	0.0
H	-0.209053	-5.616792643118126	1.4726491189606246	0.0	0.03	0.01
H	-1.151575	-4.427467643118127	2.388398	0.0	0.03	0.0
H	4.393041118960625	-3.106642	-0.9174428810393754	0.01	0.0	0.01
H	4.171109	-4.010323118960625	0.5945561189606245	0.0	-0.01	0.01
H	3.531336	-4.659710881039375	-0.913762	0.0	0.01	0.0
114
O	-6.327896	1.444911	-0.539457	-0.02	0.0	0.0
Mg	0.473602	-0.604435	0.07062299999999999	-0.03	0.03	-0.16
O	0.667288	1.160763	-1.112432	-0.08	-0.27	-0.26
C	-5.170353	1.770427	-1.157853	-0.02	0.01	0.0
N	-0.485587	-2.358328	0.671348	0.0	0.02	-0.02
N	2.176572	-1.752479	-0.323893	0.01	0.01	0.01
O	-5.108998	2.260833	-2.260504	-0.02	0.01	0.0
C	0.047142	-3.574598	0.797743	0.0	0.02	0.0
C	1.360033	-3.901552	0.42691	0.0	0.01	0.0
C	2.355885	-3.046718	-0.091451	0.0	0.01	0.01
O	-2.819145	1.874388	-0.977997	-0.02	-0.02	-0.03
C	-1.662915	1.253735	-0.773377	-0.02	-0.03	-0.04
C	-0.484582	1.767365	-1.595037	-0.02	-0.15	-0.12
C	-3.988401	1.388852	-0.272504	-0.01	0.01	0.0
O	-1.528531	0.319271	0.006653000000000005	-0.03	0.04	0.06
C	-7.521449	1.725344	-1.289363	-0.01	0.0	0.0
O	0.233866	2.790619	0.898865	0.1	-0.02	0.15
C	1.259751	1.912004	0.647593	0.13	0.07	0.34
O	1.242808	0.828577	1.279482	0.03	-0.02	0.06
O	2.881938	3.592642	1.258661	0.07	0.11	0.04
C	1.940023	4.491087	1.583023	0.04	0.09	0.02
C	0.48543	4.169681	1.240963	0.04	0.04	0.03
C	2.588809	2.568905	0.249362	0.07	0.02	0.13
O	2.217479	5.509368	2.173799	0.0	0.1	0.0
C	-0.090884	5.135628	0.204799	0.0	-0.06	-0.04
C	2.728086	3.156755	-1.151427	-0.05	-0.09	0.08
C	-0.732941	1.523701	-3.09464	-0.19	0.0	-0.12
C	-4.055895	1.980461	1.134203	0.0	0.02	-0.01
C	-1.891968	-2.187747	0.976016	0.0	0.01	-0.01
C	3.292463	-0.917113	-0.713476	0.01	0.0	0.01
C	-2.856046	-2.452677	-0.051087	0.0	0.01	-0.01
C	-4.205411	-2.081903	0.1818	0.0	0.0	0.0
C	-4.595632	-1.491338	1.408696	0.0	0.0	0.0
C	-3.640352	-1.272915	2.421966	0.0	0.0	0.0
C	-2.279433	-1.611041	2.227011	0.0	0.0	-0.01
C	-2.429393	-3.112379	-1.391341	0.0	0.01	0.0
C	-1.246688	-1.342008	3.35087	0.0	0.0	-0.01
C	4.243825	-0.474534	0.271441	0.0	0.01	0.01
C	5.236988	0.461758	-0.130249	0.0	0.01	0.01
C	5.311654	0.92169	-1.46243	0.0	0.01	0.01
C	4.399451	0.446583	-2.428293	0.01	0.0	0.0
C	3.370149	-0.466312	-2.075366	0.01	0.0	0.0
C	4.267166	-1.017784	1.727808	0.01	0.0	0.0
C	2.393312	-1.017853	-3.148924	0.01	-0.01	0.0
C	-2.010211	-2.03775	-2.445861	0.0	0.01	-0.01
C	-3.528098	-4.055747	-1.980744	0.0	0.0	0.0
C	-1.178782	0.176361	3.706862	-0.01	0.0	0.0
C	-1.557769	-2.19777	4.624359	0.01	0.0	-0.01
C	2.232712	-0.064097	-4.373367	-0.01	0.0	0.01
C	2.819983	-2.44211	-3.639695	0.02	0.0	0.0
C	4.080025	0.110691	2.791167	0.02	-0.01	0.02
C	5.604515	-1.788242	2.004987	0.01	-0.01	-0.01
C	-0.79455	-4.701549	1.386451	0.0	0.03	0.0
C	3.694495	-3.731512	-0.356059	0.0	0.0	0.01
H	1.657077	-4.934495	0.574036	-0.01	0.01	0.0
H	-0.458215	2.856576	-1.438796	0.07	-0.15	-0.06
H	-3.956188	0.295545	-0.188274	-0.02	0.01	0.01
H	-7.520656	1.173239	-2.233006	-0.01	0.0	0.0
H	-7.596912	2.794457	-1.504469	-0.02	0.0	0.0
H	-8.347626	1.402195	-0.655456	-0.02	0.0	0.0
H	-0.058538	4.318048	2.179798	0.03	0.07	0.02
H	3.380494	1.837187	0.388237	0.1	0.05	0.14
H	0.0011419999999999965	6.157313	0.584357	-0.04	-0.04	-0.09
H	-1.149035	4.910261	0.040932	0.02	-0.12	-0.03
H	0.433073	5.072428	-0.752669	0.01	-0.09	-0.03
H	3.516866	3.917227	-1.123027	-0.08	-0.05	-0.01
H	1.810984	3.610792	-1.531517	-0.09	-0.18	0.09
H	3.05072	2.359324	-1.819416	-0.05	-0.13	0.12
H	-1.666364	2.000807	-3.411767	-0.17	0.11	-0.03
H	-0.791073	0.4532	-3.308768	-0.3	0.02	-0.19
H	0.09731399999999998	1.939444	-3.66942	-0.18	-0.04	-0.15
H	-4.987851	1.672017	1.613105	-0.01	0.05	-0.01
H	-4.017151	3.074219	1.100918	0.02	0.02	-0.01
H	-3.222976	1.598048	1.727334	-0.02	0.0	0.0
H	-4.96794	-2.288487	-0.579775	0.0	0.0	0.0
H	-5.651178	-1.236244	1.578705	0.0	-0.01	0.0
H	-3.958795	-0.846159	3.382469	0.0	-0.01	0.0
H	-1.532947	-3.730157	-1.193908	0.0	0.01	0.0
H	-0.249638	-1.64796	2.971882	0.0	0.01	-0.01
H	5.978139	0.803879	0.603909	0.01	0.0	0.0
H	6.10055	1.628567	-1.755039	0.0	0.01	0.0
H	4.503571	0.771255	-3.470484	0.0	0.0	0.0
H	3.425551	-1.729646	1.841149	0.01	0.0	0.0
H	1.400037	-1.123001	-2.661173	0.02	-0.01	0.01
H	-1.728663	-2.521102	-3.396235	0.01	0.0	0.0
H	-1.131946	-1.478331	-2.074409	-0.01	0.02	-0.01
H	-2.83033	-1.326999	-2.639396	-0.01	0.0	-0.01
H	-3.114153	-4.610508	-2.836424	0.01	0.0	0.0
H	-4.399515	-3.484487	-2.334109	0.0	0.0	0.0
H	-3.865975	-4.781569	-1.225401	0.01	0.0	0.0
H	-0.402697	0.351441	4.469657	0.0	0.01	-0.01
H	-2.142575	0.534219	4.101945	-0.01	-0.01	0.03
H	-0.91959	0.767607	2.810177	-0.05	0.01	0.0
H	-0.782129	-2.02753	5.386573	0.0	0.0	-0.01
H	-1.574969	-3.271219	4.379439	0.01	0.0	-0.01
H	-2.53346	-1.921923	5.053108	0.0	-0.01	-0.01
H	1.388211	-0.400084	-4.994046	0.01	-0.02	0.0
H	3.138206	-0.06409	-5.000508	0.0	0.04	0.02
H	2.0389	0.968485	-4.042216	-0.05	-0.01	0.03
H	2.134611	-2.779732	-4.43255	0.02	0.0	0.0
H	2.777922	-3.171278	-2.815713	0.03	0.0	-0.01
H	3.844158	-2.425472	-4.044589	0.02	0.01	-0.01
H	4.125759	-0.323658	3.801946	0.07	-0.02	0.01
H	3.099037	0.595977	2.662119	0.01	-0.03	0.07
H	4.868057	0.873776	2.704201	0.0	0.01	0.0
H	5.555957	-2.2704	2.993265	0.01	-0.02	-0.01
H	6.458168	-1.093257	2.001055	0.01	-0.01	0.0
H	5.787069	-2.563982	1.246525	0.0	0.0	-0.02
H	-1.676623	-4.916614	0.772679	0.0	0.02	0.0
H	-0.209053	-5.623282	1.470486	0.0	0.03	0.01
H	-1.151575	-4.433957	2.388398	0.0	0.03	0.0
H	4.390878	-3.106642	-0.919606	0.01	0.0	0.01
H	4.171109	-4.00816	0.592393	0.0	-0.01	0.01
H	3.531336	-4.661874	-0.913762	0.0	0.01	0.0
114
O	-6.32356976207875	1.444911	-0.539457	-0.02	0.0	0.0
Mg	0.48009135688187393	-0.6109243568818739	0.10523290336999405	-0.03	0.03	-0.16
O	0.684592951684997	1.219167211936865	-1.0561909070237598	-0.08	-0.27	-0.26
C	-5.166026762078751	1.7682638810393754	-1.157853	-0.02	0.01	0.0
N	-0.485587	-2.3626542379212494	0.6756742379212493	0.0	0.02	-0.02
N	2.1744088810393754	-1.7546421189606245	-0.32605611896062464	0.01	0.01	0.01
O	-5.10467176207875	2.258669881039375	-2.260504	-0.02	0.01	0.0
C	0.047142	-3.578924237921249	0.797743	0.0	0.02	0.0
C	1.360033	-3.903715118960625	0.42691	0.0	0.01	0.0
C	2.355885	-3.0488811189606246	-0.09361411896062463	0.0	0.01	0.01
O	-2.8148187620787506	1.8787142379212491	-0.9715076431181261	-0.02	-0.02	-0.03
C	-1.6585887620787507	1.2602243568818738	-0.7647245241575015	-0.02	-0.03	-0.04
C	-0.48025576207875076	1.7998117844093695	-1.5690795724725044	-0.02	-0.15	-0.12
C	-3.9862378810393753	1.3866888810393754	-0.272504	-0.01	0.01	0.0
O	-1.5220416431181263	0.3106185241575015	-0.006325713763747769	-0.03	0.04	0.06
C	-7.519285881039375	1.725344	-1.289363	-0.01	0.0	0.0
O	0.2122348103937537	2.794945237921249	0.8664182155906306	0.1	-0.02	0.15
C	1.2316304535118798	1.8968621672756276	0.5740469553387626	0.13	0.07	0.34
O	1.2363186431181261	0.8329032379212493	1.2665032862362522	0.03	-0.02	0.06
O	2.8667961672756275	3.5688476914331293	1.2500085241575014	0.07	0.11	0.04
C	1.9313705241575014	4.471618929354379	1.5786967620787509	0.04	0.09	0.02
C	0.47677752415750146	4.161028524157501	1.2344736431181262	0.04	0.04	0.03
C	2.5736671672756275	2.564578762078751	0.22124145351187985	0.07	0.02	0.13
O	2.217479	5.487736810393754	2.173799	0.0	0.1	0.0
C	-0.090884	5.148606713763748	0.21345147584249852	0.0	-0.06	-0.04
C	2.738901594803123	3.1762230706456216	-1.168731951684997	-0.05	-0.09	0.08
C	-0.691841739748132	1.523701	-3.0686825724725044	-0.19	0.0	-0.12
C	-4.055895	1.9761347620787508	1.1363661189606247	0.0	0.02	-0.01
C	-1.891968	-2.1899101189606247	0.9781791189606246	0.0	0.01	-0.01
C	3.2902998810393753	-0.917113	-0.7156391189606246	0.01	0.0	0.01
C	-2.856046	-2.454840118960625	-0.04892388103937537	0.0	0.01	-0.01
C	-4.205411	-2.081903	0.1818	0.0	0.0	0.0
C	-4.595632	-1.491338	1.408696	0.0	0.0	0.0
C	-3.640352	-1.272915	2.421966	0.0	0.0	0.0
C	-2.279433	-1.611041	2.229174118960625	0.0	0.0	-0.01
C	-2.429393	-3.1145421189606246	-1.391341	0.0	0.01	0.0
C	-1.246688	-1.342008	3.353033118960625	0.0	0.0	-0.01
C	4.243825	-0.47669711896062467	0.26927788103937533	0.0	0.01	0.01
C	5.236988	0.45959488103937535	-0.13241211896062463	0.0	0.01	0.01
C	5.311654	0.9195268810393754	-1.4645931189606245	0.0	0.01	0.01
C	4.397287881039375	0.446583	-2.428293	0.01	0.0	0.0
C	3.3679858810393752	-0.466312	-2.075366	0.01	0.0	0.0
C	4.265002881039375	-1.017784	1.727808	0.01	0.0	0.0
C	2.391148881039375	-1.0156898810393753	-3.148924	0.01	-0.01	0.0
C	-2.010211	-2.0399131189606248	-2.443697881039375	0.0	0.01	-0.01
C	-3.528098	-4.055747	-1.980744	0.0	0.0	0.0
C	-1.1766188810393754	0.176361	3.706862	-0.01	0.0	0.0
C	-1.5599321189606246	-2.19777	4.626522118960625	0.01	0.0	-0.01
C	2.2348751189606246	-0.064097	-4.375530118960625	-0.01	0.0	0.01
C	2.815656762078751	-2.44211	-3.639695	0.02	0.0	0.0
C	4.07569876207875	0.11285411896062462	2.786840762078751	0.02	-0.01	0.02
C	5.602351881039375	-1.7860788810393755	2.0071501189606247	0.01	-0.01	-0.01
C	-0.79455	-4.7080383568818736	1.386451	0.0	0.03	0.0
C	3.694495	-3.731512	-0.35822211896062467	0.0	0.0	0.01
H	1.6592401189606245	-4.936658118960625	0.574036	-0.01	0.01	0.0
H	-0.4733568327243724	2.889022784409369	-1.4258172862362521	0.07	-0.15	-0.06
H	-3.951861762078751	0.29338188103937535	-0.19043711896062462	-0.02	0.01	0.01
H	-7.518492881039375	1.173239	-2.233006	-0.01	0.0	0.0
H	-7.59258576207875	2.794457	-1.504469	-0.02	0.0	0.0
H	-8.34329976207875	1.402195	-0.655456	-0.02	0.0	0.0
H	-0.06502735688187389	4.302906167275628	2.1754717620787507	0.03	0.07	0.02
H	3.3588628103937537	1.8263714051968767	0.3579533345512552	0.1	0.05	0.14
H	0.009794475842498514	6.165965475842499	0.6038250706456216	-0.04	-0.04	-0.09
H	-1.1533612379212492	4.936218427527495	0.04742135688187389	0.02	-0.12	-0.03
H	0.43090988103937533	5.091896070645622	-0.7461796431181261	0.01	-0.09	-0.03
H	3.534170951684997	3.9280425948031232	-1.1208638810393754	-0.08	-0.05	-0.01
H	1.8304520706456215	3.6497281412912432	-1.5509850706456216	-0.09	-0.18	0.09
H	3.0615355948031233	2.38744454648812	-1.8453734275274956	-0.05	-0.13	0.12
H	-1.6295909776693813	1.9770126914331292	-3.405277643118126	-0.17	0.11	-0.03
H	-0.7261794311812612	0.44887376207875074	-3.267668739748132	-0.3	0.02	-0.19
H	0.1362501412912433	1.9480964758424986	-3.636973215590631	-0.18	-0.04	-0.15
H	-4.985687881039375	1.6612014051968769	1.6152681189606246	-0.01	0.05	-0.01
H	-4.02147723792125	3.0698927620787506	1.1030811189606247	0.02	0.02	-0.01
H	-3.218649762078751	1.598048	1.727334	-0.02	0.0	0.0
H	-4.96794	-2.288487	-0.579775	0.0	0.0	0.0
H	-5.651178	-1.2340808810393753	1.578705	0.0	-0.01	0.0
H	-3.958795	-0.8439958810393754	3.382469	0.0	-0.01	0.0
H	-1.532947	-3.732320118960625	-1.193908	0.0	0.01	0.0
H	-0.249638	-1.6501231189606247	2.9740451189606247	0.0	0.01	-0.01
H	5.975975881039375	0.803879	0.603909	0.01	0.0	0.0
H	6.10055	1.6264038810393755	-1.755039	0.0	0.01	0.0
H	4.503571	0.771255	-3.470484	0.0	0.0	0.0
H	3.423387881039375	-1.729646	1.841149	0.01	0.0	0.0
H	1.3957107620787508	-1.1208378810393753	-2.6633361189606246	0.02	-0.01	0.01
H	-1.7308261189606247	-2.521102	-3.396235	0.01	0.0	0.0
H	-1.1297828810393753	-1.4826572379212493	-2.0722458810393753	-0.01	0.02	-0.01
H	-2.828166881039375	-1.326999	-2.6372328810393753	-0.01	0.0	-0.01
H	-3.1163161189606248	-4.610508	-2.836424	0.01	0.0	0.0
H	-4.399515	-3.484487	-2.334109	0.0	0.0	0.0
H	-3.868138118960625	-4.781569	-1.225401	0.01	0.0	0.0
H	-0.402697	0.34927788103937535	4.471820118960625	0.0	0.01	-0.01
H	-2.140411881039375	0.5363821189606246	4.095455643118126	-0.01	-0.01	0.03
H	-0.9087744051968769	0.7654438810393754	2.810177	-0.05	0.01	0.0
H	-0.782129	-2.02753	5.388736118960625	0.0	0.0	-0.01
H	-1.5771321189606247	-3.271219	4.3816021189606245	0.01	0.0	-0.01
H	-2.53346	-1.9197598810393754	5.055271118960625	0.0	-0.01	-0.01
H	1.3860478810393755	-0.39575776207875074	-4.994046	0.01	-0.02	0.0
H	3.138206	-0.0727424758424985	-5.00483423792125	0.0	0.04	0.02
H	2.049715594803123	0.9706481189606246	-4.048705356881873	-0.05	-0.01	0.03
H	2.130284762078751	-2.779732	-4.43255	0.02	0.0	0.0
H	2.7714326431181258	-3.171278	-2.8135498810393753	0.03	0.0	-0.01
H	3.839831762078751	-2.427635118960625	-4.042425881039375	0.02	0.01	-0.01
H	4.110617167275628	-0.31933176207875075	3.7997828810393752	0.07	-0.02	0.01
H	3.096873881039375	0.6024663568818739	2.6469771672756277	0.01	-0.03	0.07
H	4.868057	0.8716128810393754	2.704201	0.0	0.01	0.0
H	5.553793881039375	-2.2660737620787508	2.995428118960625	0.01	-0.02	-0.01
H	6.456004881039375	-1.0910938810393753	2.001055	0.01	-0.01	0.0
H	5.787069	-2.563982	1.2508512379212493	0.0	0.0	-0.02
H	-1.676623	-4.92094023792125	0.772679	0.0	0.02	0.0
H	-0.209053	-5.629771356881873	1.4683228810393754	0.0	0.03	0.01
H	-1.151575	-4.440446356881874	2.388398	0.0	0.03	0.0
H	4.388714881039375	-3.106642	-0.9217691189606246	0.01	0.0	0.01
H	4.171109	-4.005996881039375	0.5902298810393753	0.0	-0.01	0.01
H	3.531336	-4.664037118960625	-0.913762	0.0	0.01	0.0
114
O	-6.319667006467905	1.444911	-0.539457	-0.02	0.0	0.0
Mg	0.48594549029814194	-0.6167784902981419	0.13645494825675697	-0.03	0.03	-0.16
O	0.7002039741283785	1.2718544126832774	-1.00545508408277	-0.08	-0.27	-0.26
C	-5.162124006467906	1.7663125032339526	-1.157853	-0.02	0.01	0.0
N	-0.485587	-2.366556993532095	0.6795769935320946	0.0	0.02	-0.02
N	2.172457503233953	-1.7565934967660473	-0.3280074967660473	0.01	0.01	0.01
O	-5.100769006467905	2.2567185032339525	-2.260504	-0.02	0.01	0.0
C	0.047142	-3.5828269935320947	0.797743	0.0	0.02	0.0
C	1.360033	-3.9056664967660475	0.42691	0.0	0.01	0.0
C	2.355885	-3.050832496766047	-0.09556549676604731	0.0	0.01	0.01
O	-2.810916006467905	1.8826169935320947	-0.965653509701858	-0.02	-0.02	-0.03
C	-1.6546860064679052	1.266078490298142	-0.7569190129358108	-0.02	-0.03	-0.04
C	-0.4763530064679054	1.8290824514907098	-1.5456630388074324	-0.02	-0.15	-0.12
C	-3.9842865032339527	1.3847375032339526	-0.272504	-0.01	0.01	0.0
O	-1.5161875097018582	0.30281301293581075	-0.018033980596283864	-0.03	0.04	0.06
C	-7.517334503233952	1.725344	-1.289363	-0.01	0.0	0.0
O	0.19272103233952687	2.7988479935320947	0.8371475485092904	0.1	-0.02	0.15
C	1.206262542041385	1.883202522637669	0.5077001099543914	0.13	0.07	0.34
O	1.230464509701858	0.8368059935320946	1.254795019403716	0.03	-0.02	0.06
O	2.853136522637669	3.5473825355734796	1.2422030129358108	0.07	0.11	0.04
C	1.9235650129358108	4.454056529105575	1.5747940064679053	0.04	0.09	0.02
C	0.4689720129358107	4.15322301293581	1.2286195097018582	0.04	0.04	0.03
C	2.560007522637669	2.5606760064679053	0.19587354204138496	0.07	0.02	0.13
O	2.217479	5.468223032339528	2.173799	0.0	0.1	0.0
C	-0.090884	5.160314980596284	0.22125698706418925	0.0	-0.06	-0.04
C	2.748658483830236	3.1937854708944258	-1.1843429741283784	-0.05	-0.09	0.08
C	-0.654765561445101	1.523701	-3.045266038807432	-0.19	0.0	-0.12
C	-4.055895	1.9722320064679053	1.1383174967660474	0.0	0.02	-0.01
C	-1.891968	-2.1918614967660472	0.9801304967660474	0.0	0.01	-0.01
C	3.288348503233953	-0.917113	-0.7175904967660474	0.01	0.0	0.01
C	-2.856046	-2.4567914967660474	-0.04697250323395269	0.0	0.01	-0.01
C	-4.205411	-2.081903	0.1818	0.0	0.0	0.0
C	-4.595632	-1.491338	1.408696	0.0	0.0	0.0
C	-3.640352	-1.272915	2.421966	0.0	0.0	0.0
C	-2.279433	-1.611041	2.2311254967660474	0.0	0.0	-0.01
C	-2.429393	-3.116493496766047	-1.391341	0.0	0.01	0.0
C	-1.246688	-1.342008	3.3549844967660474	0.0	0.0	-0.01
C	4.243825	-0.4786484967660473	0.2673265032339527	0.0	0.01	0.01
C	5.236988	0.4576435032339527	-0.1343634967660473	0.0	0.01	0.01
C	5.311654	0.9175755032339526	-1.4665444967660473	0.0	0.01	0.01
C	4.395336503233953	0.446583	-2.428293	0.01	0.0	0.0
C	3.3660345032339527	-0.466312	-2.075366	0.01	0.0	0.0
C	4.263051503233952	-1.017784	1.727808	0.01	0.0	0.0
C	2.3891975032339525	-1.0137385032339525	-3.148924	0.01	-0.01	0.0
C	-2.010211	-2.0418644967660473	-2.4417465032339525	0.0	0.01	-0.01
C	-3.528098	-4.055747	-1.980744	0.0	0.0	0.0
C	-1.1746675032339526	0.176361	3.706862	-0.01	0.0	0.0
C	-1.5618834967660473	-2.19777	4.6284734967660475	0.01	0.0	-0.01
C	2.236826496766047	-0.064097	-4.377481496766047	-0.01	0.0	0.01
C	2.8117540064679054	-2.44211	-3.639695	0.02	0.0	0.0
C	4.071796006467905	0.11480549676604732	2.7829380064679055	0.02	-0.01	0.02
C	5.600400503233953	-1.7841275032339527	2.009101496766047	0.01	-0.01	-0.01
C	-0.79455	-4.713892490298142	1.386451	0.0	0.03	0.0
C	3.694495	-3.731512	-0.3601734967660473	0.0	0.0	0.01
H	1.6611914967660473	-4.938609496766047	0.574036	-0.01	0.01	0.0
H	-0.48701647736233117	2.9182934514907095	-1.414109019403716	0.07	-0.15	-0.06
H	-3.9479590064679053	0.2914305032339527	-0.1923884967660473	-0.02	0.01	0.01
H	-7.516541503233952	1.173239	-2.233006	-0.01	0.0	0.0
H	-7.588683006467905	2.794457	-1.504469	-0.02	0.0	0.0
H	-8.339397006467905	1.402195	-0.655456	-0.02	0.0	0.0
H	-0.07088149029814193	4.289246522637669	2.171569006467905	0.03	0.07	0.02
H	3.339349032339527	1.8166145161697633	0.33063404527533763	0.1	0.05	0.14
H	0.017599987064189245	6.17377098706419	0.6213874708944258	-0.04	-0.04	-0.09
H	-1.1572639935320947	4.959634961192568	0.053275490298141936	0.02	-0.12	-0.03
H	0.4289585032339527	5.109458470894426	-0.7403255097018581	0.01	-0.09	-0.03
H	3.5497819741283783	3.9377994838302364	-1.1189125032339526	-0.08	-0.05	-0.01
H	1.8480144708944257	3.6848529417888516	-1.5685474708944258	-0.09	-0.18	0.09
H	3.0712924838302365	2.412812457958615	-1.8687899611925676	-0.05	-0.13	0.12
H	-1.5964175549771957	1.9555475355734795	-3.399423509701858	-0.17	0.11	-0.03
H	-0.6676380970185807	0.4449710064679054	-3.230592561445101	-0.3	0.02	-0.19
H	0.1713749417888516	1.9559019870641892	-3.6077025485092906	-0.18	-0.04	-0.15
H	-4.983736503233953	1.6514445161697635	1.6172194967660474	-0.01	0.05	-0.01
H	-4.025379993532095	3.065990006467905	1.1050324967660474	0.02	0.02	-0.01
H	-3.2147470064679053	1.598048	1.727334	-0.02	0.0	0.0
H	-4.96794	-2.288487	-0.579775	0.0	0.0	0.0
H	-5.651178	-1.2321295032339525	1.578705	0.0	-0.01	0.0
H	-3.958795	-0.8420445032339526	3.382469	0.0	-0.01	0.0
H	-1.532947	-3.7342714967660475	-1.193908	0.0	0.01	0.0
H	-0.249638	-1.6520744967660475	2.9759964967660473	0.0	0.01	-0.01
H	5.974024503233952	0.803879	0.603909	0.01	0.0	0.0
H	6.10055	1.6244525032339527	-1.755039	0.0	0.01	0.0
H	4.503571	0.771255	-3.470484	0.0	0.0	0.0
H	3.4214365032339527	-1.729646	1.841149	0.01	0.0	0.0
H	1.3918080064679053	-1.1188865032339526	-2.665287496766047	0.02	-0.01	0.01
H	-1.7327774967660474	-2.521102	-3.396235	0.01	0.0	0.0
H	-1.1278315032339525	-1.4865599935320948	-2.070294503233953	-0.01	0.02	-0.01
H	-2.8262155032339527	-1.326999	-2.6352815032339527	-0.01	0.0	-0.01
H	-3.1182674967660473	-4.610508	-2.836424	0.01	0.0	0.0
H	-4.399515	-3.484487	-2.334109	0.0	0.0	0.0
H	-3.8700894967660475	-4.781569	-1.225401	0.01	0.0	0.0
H	-0.402697	0.3473265032339527	4.473771496766047	0.0	0.01	-0.01
H	-2.1384605032339525	0.5383334967660474	4.089601509701858	-0.01	-0.01	0.03
H	-0.8990175161697634	0.7634925032339527	2.810177	-0.05	0.01	0.0
H	-0.782129	-2.02753	5.390687496766048	0.0	0.0	-0.01
H	-1.5790834967660474	-3.271219	4.383553496766047	0.01	0.0	-0.01
H	-2.53346	-1.9178085032339527	5.057222496766047	0.0	-0.01	-0.01
H	1.3840965032339527	-0.3918550064679054	-4.994046	0.01	-0.02	0.0
H	3.138206	-0.08054798706418924	-5.008736993532095	0.0	0.04	0.02
H	2.0594724838302363	0.9725994967660474	-4.054559490298142	-0.05	-0.01	0.03
H	2.1263820064679053	-2.779732	-4.43255	0.02	0.0	0.0
H	2.7655785097018577	-3.171278	-2.8115985032339528	0.03	0.0	-0.01
H	3.8359290064679055	-2.4295864967660474	-4.040474503233953	0.02	0.01	-0.01
H	4.096957522637669	-0.3154290064679054	3.7978315032339527	0.07	-0.02	0.01
H	3.0949225032339527	0.608320490298142	2.633317522637669	0.01	-0.03	0.07
H	4.868057	0.8696615032339526	2.704201	0.0	0.01	0.0
H	5.551842503233953	-2.2621710064679053	2.9973794967660474	0.01	-0.02	-0.01
H	6.454053503233952	-1.0891425032339526	2.001055	0.01	-0.01	0.0
H	5.787069	-2.563982	1.2547539935320948	0.0	0.0	-0.02
H	-1.676623	-4.924842993532095	0.772679	0.0	0.02	0.0
H	-0.209053	-5.635625490298142	1.4663715032339526	0.0	0.03	0.01
H	-1.151575	-4.4463004902981424	2.388398	0.0	0.03	0.0
H	4.3867635032339525	-3.106642	-0.9237204967660474	0.01	0.0	0.01
H	4.171109	-4.004045503233953	0.5882785032339526	0.0	-0.01	0.01
H	3.531336	-4.665988496766047	-0.913762	0.0	0.01	0.0
114
O	-6.316569762078751	1.444911	-0.539457	-0.02	0.0	0.0
Mg	0.49059135688187394	-0.6214243568818738	0.1612329033699941	-0.03	0.03	-0.16
O	0.712592951684997	1.313667211936865	-0.9651909070237596	-0.08	-0.27	-0.26
C	-5.159026762078751	1.7647638810393753	-1.157853	-0.02	0.01	0.0
N	-0.485587	-2.3696542379212495	0.6826742379212493	0.0	0.02	-0.02
N	2.1709088810393755	-1.7581421189606246	-0.32955611896062464	0.01	0.01	0.01
O	-5.09767176207875	2.255169881039375	-2.260504	-0.02	0.01	0.0
C	0.047142	-3.5859242379212493	0.797743	0.0	0.02	0.0
C	1.360033	-3.907215118960625	0.42691	0.0	0.01	0.0
C	2.355885	-3.0523811189606245	-0.09711411896062463	0.0	0.01	0.01
O	-2.8078187620787505	1.8857142379212493	-0.9610076431181261	-0.02	-0.02	-0.03
C	-1.6515887620787506	1.270724356881874	-0.7507245241575015	-0.02	-0.03	-0.04
C	-0.47325576207875075	1.8523117844093695	-1.5270795724725044	-0.02	-0.15	-0.12
C	-3.9827378810393754	1.3831888810393753	-0.272504	-0.01	0.01	0.0
O	-1.511541643118126	0.2966185241575015	-0.02732571376374779	-0.03	0.04	0.06
C	-7.515785881039375	1.725344	-1.289363	-0.01	0.0	0.0
O	0.17723481039375366	2.8019452379212493	0.8139182155906306	0.1	-0.02	0.15
C	1.18613045351188	1.8723621672756277	0.4550469553387625	0.13	0.07	0.34
O	1.225818643118126	0.8399032379212493	1.2455032862362523	0.03	-0.02	0.06
O	2.8422961672756273	3.5303476914331293	1.2360085241575014	0.07	0.11	0.04
C	1.9173705241575014	4.440118929354378	1.5716967620787508	0.04	0.09	0.02
C	0.46277752415750145	4.147028524157501	1.223973643118126	0.04	0.04	0.03
C	2.5491671672756273	2.5575787620787507	0.1757414535118798	0.07	0.02	0.13
O	2.217479	5.452736810393754	2.173799	0.0	0.1	0.0
C	-0.090884	5.169606713763748	0.22745147584249853	0.0	-0.06	-0.04
C	2.756401594803123	3.2077230706456215	-1.196731951684997	-0.05	-0.09	0.08
C	-0.625341739748132	1.523701	-3.0266825724725046	-0.19	0.0	-0.12
C	-4.055895	1.9691347620787507	1.1398661189606247	0.0	0.02	-0.01
C	-1.891968	-2.1934101189606245	0.9816791189606247	0.0	0.01	-0.01
C	3.2867998810393755	-0.917113	-0.7191391189606247	0.01	0.0	0.01
C	-2.856046	-2.4583401189606247	-0.04542388103937537	0.0	0.01	-0.01
C	-4.205411	-2.081903	0.1818	0.0	0.0	0.0
C	-4.595632	-1.491338	1.408696	0.0	0.0	0.0
C	-3.640352	-1.272915	2.421966	0.0	0.0	0.0
C	-2.279433	-1.611041	2.2326741189606247	0.0	0.0	-0.01
C	-2.429393	-3.1180421189606244	-1.391341	0.0	0.01	0.0
C	-1.246688	-1.342008	3.3565331189606247	0.0	0.0	-0.01
C	4.243825	-0.48019711896062467	0.26577788103937533	0.0	0.01	0.01
C	5.236988	0.45609488103937534	-0.13591211896062463	0.0	0.01	0.01
C	5.311654	0.9160268810393754	-1.4680931189606246	0.0	0.01	0.01
C	4.393787881039375	0.446583	-2.428293	0.01	0.0	0.0
C	3.3644858810393754	-0.466312	-2.075366	0.01	0.0	0.0
C	4.261502881039375	-1.017784	1.727808	0.01	0.0	0.0
C	2.3876488810393752	-1.0121898810393752	-3.148924	0.01	-0.01	0.0
C	-2.010211	-2.0434131189606246	-2.440197881039375	0.0	0.01	-0.01
C	-3.528098	-4.055747	-1.980744	0.0	0.0	0.0
C	-1.1731188810393753	0.176361	3.706862	-0.01	0.0	0.0
C	-1.5634321189606246	-2.19777	4.630022118960625	0.01	0.0	-0.01
C	2.2383751189606245	-0.064097	-4.379030118960625	-0.01	0.0	0.01
C	2.808656762078751	-2.44211	-3.639695	0.02	0.0	0.0
C	4.068698762078751	0.11635411896062463	2.779840762078751	0.02	-0.01	0.02
C	5.5988518810393755	-1.7825788810393755	2.0106501189606245	0.01	-0.01	-0.01
C	-0.79455	-4.718538356881874	1.386451	0.0	0.03	0.0
C	3.694495	-3.731512	-0.3617221189606247	0.0	0.0	0.01
H	1.6627401189606246	-4.940158118960625	0.574036	-0.01	0.01	0.0
H	-0.4978568327243724	2.9415227844093694	-1.4048172862362522	0.07	-0.15	-0.06
H	-3.9448617620787507	0.28988188103937534	-0.19393711896062463	-0.02	0.01	0.01
H	-7.514992881039375	1.173239	-2.233006	-0.01	0.0	0.0
H	-7.58558576207875	2.794457	-1.504469	-0.02	0.0	0.0
H	-8.33629976207875	1.402195	-0.655456	-0.02	0.0	0.0
H	-0.0755273568818739	4.2784061672756275	2.1684717620787506	0.03	0.07	0.02
H	3.323862810393754	1.8088714051968768	0.3089533345512552	0.1	0.05	0.14
H	0.023794475842498525	6.179965475842499	0.6353250706456217	-0.04	-0.04	-0.09
H	-1.1603612379212493	4.978218427527496	0.0579213568818739	0.02	-0.12	-0.03
H	0.42740988103937533	5.123396070645622	-0.7356796431181262	0.01	-0.09	-0.03
H	3.562170951684997	3.9455425948031233	-1.1173638810393753	-0.08	-0.05	-0.01
H	1.8619520706456216	3.7127281412912434	-1.5824850706456217	-0.09	-0.18	0.09
H	3.0790355948031234	2.43294454648812	-1.8873734275274956	-0.05	-0.13	0.12
H	-1.5700909776693812	1.938512691433129	-3.3947776431181262	-0.17	0.11	-0.03
H	-0.6211794311812611	0.44187376207875073	-3.201168739748132	-0.3	0.02	-0.19
H	0.19925014129124335	1.9620964758424986	-3.5844732155906307	-0.18	-0.04	-0.15
H	-4.982187881039375	1.643701405196877	1.6187681189606247	-0.01	0.05	-0.01
H	-4.0284772379212495	3.0628927620787505	1.1065811189606247	0.02	0.02	-0.01
H	-3.2116497620787507	1.598048	1.727334	-0.02	0.0	0.0
H	-4.96794	-2.288487	-0.579775	0.0	0.0	0.0
H	-5.651178	-1.2305808810393752	1.578705	0.0	-0.01	0.0
H	-3.958795	-0.8404958810393753	3.382469	0.0	-0.01	0.0
H	-1.532947	-3.735820118960625	-1.193908	0.0	0.01	0.0
H	-0.249638	-1.6536231189606247	2.9775451189606246	0.0	0.01	-0.01
H	5.972475881039375	0.803879	0.603909	0.01	0.0	0.0
H	6.10055	1.6229038810393754	-1.755039	0.0	0.01	0.0
H	4.503571	0.771255	-3.470484	0.0	0.0	0.0
H	3.4198878810393754	-1.729646	1.841149	0.01	0.0	0.0
H	1.3887107620787507	-1.1173378810393753	-2.6668361189606244	0.02	-0.01	0.01
H	-1.7343261189606247	-2.521102	-3.396235	0.01	0.0	0.0
H	-1.1262828810393752	-1.4896572379212494	-2.0687458810393755	-0.01	0.02	-0.01
H	-2.8246668810393754	-1.326999	-2.6337328810393754	-0.01	0.0	-0.01
H	-3.1198161189606246	-4.610508	-2.836424	0.01	0.0	0.0
H	-4.399515	-3.484487	-2.334109	0.0	0.0	0.0
H	-3.871638118960625	-4.781569	-1.225401	0.01	0.0	0.0
H	-0.402697	0.34577788103937535	4.475320118960624	0.0	0.01	-0.01
H	-2.1369118810393752	0.5398821189606247	4.084955643118126	-0.01	-0.01	0.03
H	-0.8912744051968768	0.7619438810393754	2.810177	-0.05	0.01	0.0
H	-0.782129	-2.02753	5.392236118960625	0.0	0.0	-0.01
H	-1.5806321189606247	-3.271219	4.385102118960624	0.01	0.0	-0.01
H	-2.53346	-1.9162598810393754	5.058771118960625	0.0	-0.01	-0.01
H	1.3825478810393754	-0.38875776207875073	-4.994046	0.01	-0.02	0.0
H	3.138206	-0.08674247584249851	-5.011834237921249	0.0	0.04	0.02
H	2.0672155948031232	0.9741481189606247	-4.059205356881874	-0.05	-0.01	0.03
H	2.1232847620787507	-2.779732	-4.43255	0.02	0.0	0.0
H	2.760932643118126	-3.171278	-2.8100498810393755	0.03	0.0	-0.01
H	3.832831762078751	-2.4311351189606247	-4.0389258810393756	0.02	0.01	-0.01
H	4.086117167275628	-0.31233176207875074	3.7962828810393754	0.07	-0.02	0.01
H	3.0933738810393754	0.6129663568818738	2.6224771672756275	0.01	-0.03	0.07
H	4.868057	0.8681128810393753	2.704201	0.0	0.01	0.0
H	5.550293881039376	-2.2590737620787507	2.9989281189606247	0.01	-0.02	-0.01
H	6.452504881039375	-1.0875938810393753	2.001055	0.01	-0.01	0.0
H	5.787069	-2.563982	1.2578512379212494	0.0	0.0	-0.02
H	-1.676623	-4.927940237921249	0.772679	0.0	0.02	0.0
H	-0.209053	-5.640271356881874	1.4648228810393753	0.0	0.03	0.01
H	-1.151575	-4.450946356881874	2.388398	0.0	0.03	0.0
H	4.385214881039375	-3.106642	-0.9252691189606247	0.01	0.0	0.01
H	4.171109	-4.0024968810393755	0.5867298810393753	0.0	-0.01	0.01
H	3.531336	-4.667537118960625	-0.913762	0.0	0.01	0.0
114
O	-6.314581208771868	1.444911	-0.539457	-0.02	0.0	0.0
Mg	0.4935741868421982	-0.6244071868421982	0.1771413298250572	-0.03	0.03	-0.16
O	0.7205471649125286	1.340512681579784	-0.9393397140342822	-0.08	-0.27	-0.26
C	-5.157038208771868	1.7637696043859339	-1.157853	-0.02	0.01	0.0
N	-0.485587	-2.3716427912281324	0.6846627912281321	0.0	0.02	-0.02
N	2.169914604385934	-1.759136395614066	-0.3305503956140661	0.01	0.01	0.01
O	-5.0956832087718675	2.254175604385934	-2.260504	-0.02	0.01	0.0
C	0.047142	-3.587912791228132	0.797743	0.0	0.02	0.0
C	1.360033	-3.908209395614066	0.42691	0.0	0.01	0.0
C	2.355885	-3.053375395614066	-0.09810839561406608	0.0	0.01	0.01
O	-2.8058302087718676	1.8877027912281321	-0.9580248131578017	-0.02	-0.02	-0.03
C	-1.6496002087718677	1.2737071868421983	-0.7467474175437356	-0.02	-0.03	-0.04
C	-0.47126720877186784	1.8672259342109911	-1.5151482526312072	-0.02	-0.15	-0.12
C	-3.981743604385934	1.382194604385934	-0.272504	-0.01	0.01	0.0
O	-1.5085588131578018	0.29264141754373574	-0.03329137368439644	-0.03	0.04	0.06
C	-7.514791604385934	1.725344	-1.289363	-0.01	0.0	0.0
O	0.16729204385933927	2.803933791228132	0.799004065789009	0.1	-0.02	0.15
C	1.1732048570171412	1.8654022307015374	0.42124154912175343	0.13	0.07	0.34
O	1.2228358131578017	0.8418917912281322	1.2395376263156035	0.03	-0.02	0.06
O	2.8353362307015373	3.519410648245273	1.2320314175437357	0.07	0.11	0.04
C	1.9133934175437357	4.431170439473406	1.569708208771868	0.04	0.09	0.02
C	0.4588004175437357	4.143051417543735	1.2209908131578018	0.04	0.04	0.03
C	2.5422072307015373	2.555590208771868	0.16281585701714102	0.07	0.02	0.13
O	2.217479	5.442794043859339	2.173799	0.0	0.1	0.0
C	-0.090884	5.175572373684396	0.2314285824562643	0.0	-0.06	-0.04
C	2.76137297807033	3.2166715605265948	-1.2046861649125287	-0.05	-0.09	0.08
C	-0.6064504833327445	1.523701	-3.014751252631207	-0.19	0.0	-0.12
C	-4.055895	1.9671462087718679	1.1408603956140662	0.0	0.02	-0.01
C	-1.891968	-2.194404395614066	0.9826733956140661	0.0	0.01	-0.01
C	3.285805604385934	-0.917113	-0.7201333956140661	0.01	0.0	0.01
C	-2.856046	-2.459334395614066	-0.04442960438593393	0.0	0.01	-0.01
C	-4.205411	-2.081903	0.1818	0.0	0.0	0.0
C	-4.595632	-1.491338	1.408696	0.0	0.0	0.0
C	-3.640352	-1.272915	2.421966	0.0	0.0	0.0
C	-2.279433	-1.611041	2.233668395614066	0.0	0.0	-0.01
C	-2.429393	-3.119036395614066	-1.391341	0.0	0.01	0.0
C	-1.246688	-1.342008	3.357527395614066	0.0	0.0	-0.01
C	4.243825	-0.4811913956140661	0.2647836043859339	0.0	0.01	0.01
C	5.236988	0.4551006043859339	-0.1369063956140661	0.0	0.01	0.01
C	5.311654	0.9150326043859339	-1.469087395614066	0.0	0.01	0.01
C	4.392793604385934	0.446583	-2.428293	0.01	0.0	0.0
C	3.363491604385934	-0.466312	-2.075366	0.01	0.0	0.0
C	4.260508604385934	-1.017784	1.727808	0.01	0.0	0.0
C	2.386654604385934	-1.0111956043859338	-3.148924	0.01	-0.01	0.0
C	-2.010211	-2.044407395614066	-2.4392036043859338	0.0	0.01	-0.01
C	-3.528098	-4.055747	-1.980744	0.0	0.0	0.0
C	-1.172124604385934	0.176361	3.706862	-0.01	0.0	0.0
C	-1.564426395614066	-2.19777	4.631016395614066	0.01	0.0	-0.01
C	2.239369395614066	-0.064097	-4.380024395614066	-0.01	0.0	0.01
C	2.806668208771868	-2.44211	-3.639695	0.02	0.0	0.0
C	4.066710208771868	0.11734839561406607	2.777852208771868	0.02	-0.01	0.02
C	5.5978576043859345	-1.781584604385934	2.011644395614066	0.01	-0.01	-0.01
C	-0.79455	-4.721521186842198	1.386451	0.0	0.03	0.0
C	3.694495	-3.731512	-0.3627163956140661	0.0	0.0	0.01
H	1.663734395614066	-4.941152395614066	0.574036	-0.01	0.01	0.0
H	-0.5048167692984625	2.9564369342109913	-1.3988516263156034	0.07	-0.15	-0.06
H	-3.942873208771868	0.2888876043859339	-0.19493139561406608	-0.02	0.01	0.01
H	-7.513998604385934	1.173239	-2.233006	-0.01	0.0	0.0
H	-7.5835972087718675	2.794457	-1.504469	-0.02	0.0	0.0
H	-8.334311208771869	1.402195	-0.655456	-0.02	0.0	0.0
H	-0.07851018684219822	4.271446230701538	2.1664832087718677	0.03	0.07	0.02
H	3.3139200438593392	1.8039000219296695	0.29503346140307496	0.1	0.05	0.14
H	0.027771582456264297	6.183942582456265	0.6442735605265947	-0.04	-0.04	-0.09
H	-1.1623497912281322	4.990149747368793	0.06090418684219823	0.02	-0.12	-0.03
H	0.4264156043859339	5.132344560526595	-0.7326968131578018	0.01	-0.09	-0.03
H	3.5701251649125285	3.9505139780703304	-1.116369604385934	-0.08	-0.05	-0.01
H	1.8709005605265947	3.7306251210531896	-1.5914335605265948	-0.09	-0.18	0.09
H	3.0840069780703305	2.445870142982859	-1.8993047473687927	-0.05	-0.13	0.12
H	-1.5531882745608767	1.9275756482452733	-3.391794813157802	-0.17	0.11	-0.03
H	-0.5913511315780178	0.4398852087718678	-3.1822774833327445	-0.3	0.02	-0.19
H	0.21714712105318934	1.9660735824562643	-3.569559065789009	-0.18	-0.04	-0.15
H	-4.981193604385934	1.6387300219296697	1.619762395614066	-0.01	0.05	-0.01
H	-4.030465791228132	3.0609042087718676	1.1075753956140661	0.02	0.02	-0.01
H	-3.209661208771868	1.598048	1.727334	-0.02	0.0	0.0
H	-4.96794	-2.288487	-0.579775	0.0	0.0	0.0
H	-5.651178	-1.2295866043859338	1.578705	0.0	-0.01	0.0
H	-3.958795	-0.8395016043859339	3.382469	0.0	-0.01	0.0
H	-1.532947	-3.7368143956140663	-1.193908	0.0	0.01	0.0
H	-0.249638	-1.6546173956140662	2.978539395614066	0.0	0.01	-0.01
H	5.971481604385934	0.803879	0.603909	0.01	0.0	0.0
H	6.10055	1.621909604385934	-1.755039	0.0	0.01	0.0
H	4.503571	0.771255	-3.470484	0.0	0.0	0.0
H	3.418893604385934	-1.729646	1.841149	0.01	0.0	0.0
H	1.3867222087718678	-1.1163436043859338	-2.667830395614066	0.02	-0.01	0.01
H	-1.7353203956140661	-2.521102	-3.396235	0.01	0.0	0.0
H	-1.1252886043859338	-1.4916457912281322	-2.067751604385934	-0.01	0.02	-0.01
H	-2.823672604385934	-1.326999	-2.632738604385934	-0.01	0.0	-0.01
H	-3.120810395614066	-4.610508	-2.836424	0.01	0.0	0.0
H	-4.399515	-3.484487	-2.334109	0.0	0.0	0.0
H	-3.8726323956140662	-4.781569	-1.225401	0.01	0.0	0.0
H	-0.402697	0.3447836043859339	4.476314395614065	0.0	0.01	-0.01
H	-2.135917604385934	0.5408763956140661	4.081972813157802	-0.01	-0.01	0.03
H	-0.8863030219296697	0.760949604385934	2.810177	-0.05	0.01	0.0
H	-0.782129	-2.02753	5.393230395614066	0.0	0.0	-0.01
H	-1.5816263956140661	-3.271219	4.386096395614065	0.01	0.0	-0.01
H	-2.53346	-1.915265604385934	5.059765395614066	0.0	-0.01	-0.01
H	1.381553604385934	-0.3867692087718678	-4.994046	0.01	-0.02	0.0
H	3.138206	-0.0907195824562643	-5.013822791228132	0.0	0.04	0.02
H	2.0721869780703304	0.9751423956140661	-4.062188186842198	-0.05	-0.01	0.03
H	2.121296208771868	-2.779732	-4.43255	0.02	0.0	0.0
H	2.7579498131578015	-3.171278	-2.809055604385934	0.03	0.0	-0.01
H	3.830843208771868	-2.432129395614066	-4.037931604385935	0.02	0.01	-0.01
H	4.079157230701538	-0.31034320877186783	3.795288604385934	0.07	-0.02	0.01
H	3.092379604385934	0.6159491868421982	2.6155172307015375	0.01	-0.03	0.07
H	4.868057	0.8671186043859339	2.704201	0.0	0.01	0.0
H	5.549299604385935	-2.257085208771868	2.999922395614066	0.01	-0.02	-0.01
H	6.451510604385934	-1.0865996043859338	2.001055	0.01	-0.01	0.0
H	5.787069	-2.563982	1.2598397912281323	0.0	0.0	-0.02
H	-1.676623	-4.929928791228132	0.772679	0.0	0.02	0.0
H	-0.209053	-5.6432541868421975	1.4638286043859339	0.0	0.03	0.01
H	-1.151575	-4.453929186842198	2.388398	0.0	0.03	0.0
H	4.384220604385934	-3.106642	-0.9262633956140661	0.01	0.0	0.01
H	4.171109	-4.0015026043859345	0.5857356043859339	0.0	-0.01	0.01
H	3.531336	-4.668531395614066	-0.913762	0.0	0.01	0.0
114
O	-6.313896	1.444911	-0.539457	-0.02	0.0	0.0
Mg	0.49460200000000004	-0.625435	0.18262299999999998	-0.03	0.03	-0.16
O	0.7232879999999999	1.349763	-0.9304320000000001	-0.08	-0.27	-0.26
C	-5.156353	1.763427	-1.157853	-0.02	0.01	0.0
N	-0.485587	-2.372328	0.685348	0.0	0.02	-0.02
N	2.169572	-1.7594789999999998	-0.330893	0.01	0.01	0.01
O	-5.0949979999999995	2.2538329999999998	-2.260504	-0.02	0.01	0.0
C	0.047142	-3.5885979999999997	0.797743	0.0	0.02	0.0
C	1.360033	-3.9085520000000002	0.42691	0.0	0.01	0.0
C	2.355885	-3.053718	-0.09845100000000001	0.0	0.01	0.01
O	-2.805145	1.888388	-0.956997	-0.02	-0.02	-0.03
C	-1.648915	1.274735	-0.745377	-0.02	-0.03	-0.04
C	-0.470582	1.872365	-1.511037	-0.02	-0.15	-0.12
C	-3.981401	1.381852	-0.272504	-0.01	0.01	0.0
O	-1.5075310000000002	0.29127100000000006	-0.035346999999999996	-0.03	0.04	0.06
C	-7.514449	1.725344	-1.289363	-0.01	0.0	0.0
O	0.163866	2.8046189999999998	0.793865	0.1	-0.02	0.15
C	1.168751	1.863004	0.409593	0.13	0.07	0.34
O	1.221808	0.842577	1.237482	0.03	-0.02	0.06
O	2.832938	3.515642	1.230661	0.07	0.11	0.04
C	1.912023	4.4280870000000006	1.569023	0.04	0.09	0.02
C	0.45743	4.141681	1.2199630000000001	0.04	0.04	0.03
C	2.539809	2.554905	0.158362	0.07	0.02	0.13
O	2.217479	5.439368	2.173799	0.0	0.1	0.0
C	-0.090884	5.1776279999999995	0.232799	0.0	-0.06	-0.04
C	2.763086	3.219755	-1.207427	-0.05	-0.09	0.08
C	-0.599941	1.523701	-3.01064	-0.19	0.0	-0.12
C	-4.055895	1.966461	1.141203	0.0	0.02	-0.01
C	-1.891968	-2.194747	0.983016	0.0	0.01	-0.01
C	3.285463	-0.917113	-0.720476	0.01	0.0	0.01
C	-2.856046	-2.459677	-0.044087	0.0	0.01	-0.01
C	-4.205411	-2.081903	0.1818	0.0	0.0	0.0
C	-4.595632	-1.491338	1.408696	0.0	0.0	0.0
C	-3.640352	-1.272915	2.421966	0.0	0.0	0.0
C	-2.279433	-1.611041	2.234011	0.0	0.0	-0.01
C	-2.429393	-3.119379	-1.391341	0.0	0.01	0.0
C	-1.246688	-1.342008	3.35787	0.0	0.0	-0.01
C	4.243825	-0.481534	0.264441	0.0	0.01	0.01
C	5.236988	0.454758	-0.137249	0.0	0.01	0.01
C	5.311654	0.91469	-1.4694299999999998	0.0	0.01	0.01
C	4.392451	0.446583	-2.428293	0.01	0.0	0.0
C	3.363149	-0.466312	-2.075366	0.01	0.0	0.0
C	4.260166	-1.017784	1.727808	0.01	0.0	0.0
C	2.3863119999999998	-1.010853	-3.148924	0.01	-0.01	0.0
C	-2.010211	-2.04475	-2.4388609999999997	0.0	0.01	-0.01
C	-3.528098	-4.055747	-1.980744	0.0	0.0	0.0
C	-1.171782	0.176361	3.706862	-0.01	0.0	0.0
C	-1.5647689999999999	-2.19777	4.631359	0.01	0.0	-0.01
C	2.239712	-0.064097	-4.380367	-0.01	0.0	0.01
C	2.8059830000000003	-2.44211	-3.639695	0.02	0.0	0.0
C	4.066025	0.11769099999999999	2.7771670000000004	0.02	-0.01	0.02
C	5.5975150000000005	-1.7812420000000002	2.011987	0.01	-0.01	-0.01
C	-0.79455	-4.722549	1.386451	0.0	0.03	0.0
C	3.694495	-3.731512	-0.363059	0.0	0.0	0.01
H	1.6640769999999998	-4.941495	0.574036	-0.01	0.01	0.0
H	-0.507215	2.961576	-1.396796	0.07	-0.15	-0.06
H	-3.9421880000000002	0.288545	-0.195274	-0.02	0.01	0.01
H	-7.513656	1.173239	-2.233006	-0.01	0.0	0.0
H	-7.582911999999999	2.794457	-1.504469	-0.02	0.0	0.0
H	-8.333626	1.402195	-0.655456	-0.02	0.0	0.0
H	-0.079538	4.269048	2.165798	0.03	0.07	0.02
H	3.3104940000000003	1.802187	0.29023699999999997	0.1	0.05	0.14
H	0.029141999999999998	6.185313	0.647357	-0.04	-0.04	-0.09
H	-1.163035	4.994261	0.061932	0.02	-0.12	-0.03
H	0.426073	5.135428	-0.731669	0.01	-0.09	-0.03
H	3.572866	3.952227	-1.116027	-0.08	-0.05	-0.01
H	1.8739839999999999	3.736792	-1.594517	-0.09	-0.18	0.09
H	3.0857200000000002	2.450324	-1.903416	-0.05	-0.13	0.12
H	-1.547364	1.923807	-3.3907670000000003	-0.17	0.11	-0.03
H	-0.5810730000000001	0.4392	-3.175768	-0.3	0.02	-0.19
H	0.223314	1.967444	-3.56442	-0.18	-0.04	-0.15
H	-4.980851	1.6370170000000002	1.620105	-0.01	0.05	-0.01
H	-4.031151	3.060219	1.107918	0.02	0.02	-0.01
H	-3.2089760000000003	1.598048	1.727334	-0.02	0.0	0.0
H	-4.96794	-2.288487	-0.579775	0.0	0.0	0.0
H	-5.651178	-1.229244	1.578705	0.0	-0.01	0.0
H	-3.958795	-0.839159	3.382469	0.0	-0.01	0.0
H	-1.532947	-3.7371570000000003	-1.193908	0.0	0.01	0.0
H	-0.249638	-1.65496	2.978882	0.0	0.01	-0.01
H	5.971139	0.803879	0.603909	0.01	0.0	0.0
H	6.10055	1.6215670000000002	-1.755039	0.0	0.01	0.0
H	4.503571	0.771255	-3.470484	0.0	0.0	0.0
H	3.418551	-1.729646	1.841149	0.01	0.0	0.0
H	1.386037	-1.116001	-2.668173	0.02	-0.01	0.01
H	-1.735663	-2.521102	-3.396235	0.01	0.0	0.0
H	-1.124946	-1.492331	-2.067409	-0.01	0.02	-0.01
H	-2.82333	-1.326999	-2.632396	-0.01	0.0	-0.01
H	-3.121153	-4.610508	-2.836424	0.01	0.0	0.0
H	-4.399515	-3.484487	-2.334109	0.0	0.0	0.0
H	-3.8729750000000003	-4.781569	-1.225401	0.01	0.0	0.0
H	-0.402697	0.344441	4.476656999999999	0.0	0.01	-0.01
H	-2.135575	0.541219	4.080945	-0.01	-0.01	0.03
H	-0.88459	0.760607	2.810177	-0.05	0.01	0.0
H	-0.782129	-2.02753	5.393573	0.0	0.0	-0.01
H	-1.581969	-3.271219	4.386438999999999	0.01	0.0	-0.01
H	-2.53346	-1.9149230000000002	5.060108	0.0	-0.01	-0.01
H	1.3812110000000002	-0.386084	-4.994046	0.01	-0.02	0.0
H	3.138206	-0.09208999999999999	-5.014508	0.0	0.04	0.02
H	2.0739	0.975485	-4.063216	-0.05	-0.01	0.03
H	2.1206110000000002	-2.779732	-4.43255	0.02	0.0	0.0
H	2.756922	-3.171278	-2.808713	0.03	0.0	-0.01
H	3.8301580000000004	-2.432472	-4.0375890000000005	0.02	0.01	-0.01
H	4.076759	-0.309658	3.794946	0.07	-0.02	0.01
H	3.092037	0.616977	2.613119	0.01	-0.03	0.07
H	4.868057	0.866776	2.704201	0.0	0.01	0.0
H	5.548957000000001	-2.2564	3.000265	0.01	-0.02	-0.01
H	6.451168	-1.086257	2.001055	0.01	-0.01	0.0
H	5.787069	-2.563982	1.2605250000000001	0.0	0.0	-0.02
H	-1.676623	-4.930614	0.772679	0.0	0.02	0.0
H	-0.209053	-5.644282	1.463486	0.0	0.03	0.01
H	-1.151575	-4.454957	2.388398	0.0	0.03	0.0
H	4.383878	-3.106642	-0.926606	0.01	0.0	0.01
H	4.171109	-4.0011600000000005	0.5853929999999999	0.0	-0.01	0.01
H	3.531336	-4.668874	-0.913762	0.0	0.01	0.0
114
O	-6.314581208771868	1.444911	-0.539457	-0.02	0.0	0.0
Mg	0.4935741868421982	-0.6244071868421982	0.1771413298250572	-0.03	0.03	-0.16
O	0.7205471649125286	1.340512681579784	-0.9393397140342821	-0.08	-0.27	-0.26
C	-5.157038208771868	1.7637696043859339	-1.157853	-0.02	0.01	0.0
N	-0.485587	-2.3716427912281324	0.6846627912281321	0.0	0.02	-0.02
N	2.169914604385934	-1.759136395614066	-0.3305503956140661	0.01	0.01	0.01
O	-5.0956832087718675	2.254175604385934	-2.260504	-0.02	0.01	0.0
C	0.047142	-3.587912791228132	0.797743	0.0	0.02	0.0
C	1.360033	-3.908209395614066	0.42691	0.0	0.01	0.0
C	2.355885	-3.053375395614066	-0.09810839561406608	0.0	0.01	0.01
O	-2.8058302087718676	1.8877027912281321	-0.9580248131578017	-0.02	-0.02	-0.03
C	-1.6496002087718677	1.2737071868421983	-0.7467474175437356	-0.02	-0.03	-0.04
C	-0.47126720877186784	1.8672259342109911	-1.5151482526312072	-0.02	-0.15	-0.12
C	-3.981743604385934	1.382194604385934	-0.272504	-0.01	0.01	0.0
O	-1.5085588131578018	0.29264141754373574	-0.03329137368439645	-0.03	0.04	0.06
C	-7.514791604385934	1.725344	-1.289363	-0.01	0.0	0.0
O	0.16729204385933924	2.803933791228132	0.799004065789009	0.1	-0.02	0.15
C	1.1732048570171412	1.8654022307015374	0.4212415491217534	0.13	0.07	0.34
O	1.2228358131578017	0.8418917912281322	1.2395376263156035	0.03	-0.02	0.06
O	2.8353362307015373	3.519410648245273	1.2320314175437357	0.07	0.11	0.04
C	1.9133934175437357	4.431170439473406	1.569708208771868	0.04	0.09	0.02
C	0.4588004175437357	4.143051417543735	1.2209908131578018	0.04	0.04	0.03
C	2.5422072307015373	2.555590208771868	0.16281585701714102	0.07	0.02	0.13
O	2.217479	5.442794043859339	2.173799	0.0	0.1	0.0
C	-0.090884	5.175572373684396	0.2314285824562643	0.0	-0.06	-0.04
C	2.76137297807033	3.2166715605265948	-1.2046861649125287	-0.05	-0.09	0.08
C	-0.6064504833327445	1.523701	-3.014751252631207	-0.19	0.0	-0.12
C	-4.055895	1.9671462087718679	1.1408603956140662	0.0	0.02	-0.01
C	-1.891968	-2.194404395614066	0.9826733956140661	0.0	0.01	-0.01
C	3.285805604385934	-0.917113	-0.7201333956140661	0.01	0.0	0.01
C	-2.856046	-2.459334395614066	-0.04442960438593393	0.0	0.01	-0.01
C	-4.205411	-2.081903	0.1818	0.0	0.0	0.0
C	-4.595632	-1.491338	1.408696	0.0	0.0	0.0
C	-3.640352	-1.272915	2.421966	0.0	0.0	0.0
C	-2.279433	-1.611041	2.233668395614066	0.0	0.0	-0.01
C	-2.429393	-3.119036395614066	-1.391341	0.0	0.01	0.0
C	-1.246688	-1.342008	3.357527395614066	0.0	0.0	-0.01
C	4.243825	-0.4811913956140661	0.2647836043859339	0.0	0.01	0.01
C	5.236988	0.4551006043859339	-0.1369063956140661	0.0	0.01	0.01
C	5.311654	0.9150326043859339	-1.469087395614066	0.0	0.01	0.01
C	4.392793604385934	0.446583	-2.428293	0.01	0.0	0.0
C	3.363491604385934	-0.466312	-2.075366	0.01	0.0	0.0
C	4.260508604385934	-1.017784	1.727808	0.01	0.0	0.0
C	2.386654604385934	-1.0111956043859338	-3.148924	0.01	-0.01	0.0
C	-2.010211	-2.044407395614066	-2.4392036043859338	0.0	0.01	-0.01
C	-3.528098	-4.055747	-1.980744	0.0	0.0	0.0
C	-1.172124604385934	0.176361	3.706862	-0.01	0.0	0.0
C	-1.564426395614066	-2.19777	4.631016395614066	0.01	0.0	-0.01
C	2.239369395614066	-0.064097	-4.380024395614066	-0.01	0.0	0.01
C	2.806668208771868	-2.44211	-3.639695	0.02	0.0	0.0
C	4.066710208771868	0.11734839561406607	2.777852208771868	0.02	-0.01	0.02
C	5.5978576043859345	-1.781584604385934	2.011644395614066	0.01	-0.01	-0.01
C	-0.79455	-4.721521186842198	1.386451	0.0	0.03	0.0
C	3.694495	-3.731512	-0.3627163956140661	0.0	0.0	0.01
H	1.663734395614066	-4.941152395614066	0.574036	-0.01	0.01	0.0
H	-0.5048167692984625	2.9564369342109913	-1.3988516263156034	0.07	-0.15	-0.06
H	-3.942873208771868	0.2888876043859339	-0.19493139561406608	-0.02	0.01	0.01
H	-7.513998604385934	1.173239	-2.233006	-0.01	0.0	0.0
H	-7.5835972087718675	2.794457	-1.504469	-0.02	0.0	0.0
H	-8.334311208771869	1.402195	-0.655456	-0.02	0.0	0.0
H	-0.07851018684219822	4.271446230701538	2.1664832087718677	0.03	0.07	0.02
H	3.3139200438593392	1.8039000219296695	0.29503346140307496	0.1	0.05	0.14
H	0.0277715824562643	6.183942582456265	0.6442735605265947	-0.04	-0.04	-0.09
H	-1.1623497912281322	4.990149747368793	0.06090418684219823	0.02	-0.12	-0.03
H	0.4264156043859339	5.132344560526595	-0.7326968131578018	0.01	-0.09	-0.03
H	3.5701251649125285	3.9505139780703304	-1.116369604385934	-0.08	-0.05	-0.01
H	1.8709005605265947	3.7306251210531896	-1.5914335605265948	-0.09	-0.18	0.09
H	3.0840069780703305	2.445870142982859	-1.8993047473687927	-0.05	-0.13	0.12
H	-1.5531882745608767	1.9275756482452733	-3.391794813157802	-0.17	0.11	-0.03
H	-0.5913511315780178	0.4398852087718678	-3.1822774833327445	-0.3	0.02	-0.19
H	0.21714712105318934	1.9660735824562643	-3.569559065789009	-0.18	-0.04	-0.15
H	-4.981193604385934	1.6387300219296697	1.619762395614066	-0.01	0.05	-0.01
H	-4.030465791228132	3.0609042087718676	1.1075753956140661	0.02	0.02	-0.01
H	-3.209661208771868	1.598048	1.727334	-0.02	0.0	0.0
H	-4.96794	-2.288487	-0.579775	0.0	0.0	0.0
H	-5.651178	-1.2295866043859338	1.578705	0.0	-0.01	0.0
H	-3.958795	-0.8395016043859339	3.382469	0.0	-0.01	0.0
H	-1.532947	-3.7368143956140663	-1.193908	0.0	0.01	0.0
H	-0.249638	-1.6546173956140662	2.978539395614066	0.0	0.01	-0.01
H	5.971481604385934	0.803879	0.603909	0.01	0.0	0.0
H	6.10055	1.621909604385934	-1.755039	0.0	0.01	0.0
H	4.503571	0.771255	-3.470484	0.0	0.0	0.0
H	3.418893604385934	-1.729646	1.841149	0.01	0.0	0.0
H	1.3867222087718678	-1.1163436043859338	-2.667830395614066	0.02	-0.01	0.01
H	-1.7353203956140661	-2.521102	-3.396235	0.01	0.0	0.0
H	-1.1252886043859338	-1.4916457912281322	-2.067751604385934	-0.01	0.02	-0.01
H	-2.823672604385934	-1.326999	-2.632738604385934	-0.01	0.0	-0.01
H	-3.120810395614066	-4.610508	-2.836424	0.01	0.0	0.0
H	-4.399515	-3.484487	-2.334109	0.0	0.0	0.0
H	-3.8726323956140662	-4.781569	-1.225401	0.01	0.0	0.0
H	-0.402697	0.3447836043859339	4.476314395614065	0.0	0.01	-0.01
H	-2.135917604385934	0.5408763956140661	4.081972813157802	-0.01	-0.01	0.03
H	-0.8863030219296697	0.760949604385934	2.810177	-0.05	0.01	0.0
H	-0.782129	-2.02753	5.393230395614066	0.0	0.0	-0.01
H	-1.5816263956140661	-3.271219	4.386096395614065	0.01	0.0	-0.01
H	-2.53346	-1.915265604385934	5.059765395614066	0.0	-0.01	-0.01
H	1.381553604385934	-0.3867692087718678	-4.994046	0.01	-0.02	0.0
H	3.138206	-0.0907195824562643	-5.013822791228132	0.0	0.04	0.02
H	2.0721869780703304	0.9751423956140661	-4.062188186842198	-0.05	-0.01	0.03
H	2.121296208771868	-2.779732	-4.43255	0.02	0.0	0.0
H	2.7579498131578015	-3.171278	-2.809055604385934	0.03	0.0	-0.01
H	3.830843208771868	-2.432129395614066	-4.037931604385935	0.02	0.01	-0.01
H	4.079157230701538	-0.31034320877186783	3.795288604385934	0.07	-0.02	0.01
H	3.092379604385934	0.6159491868421982	2.6155172307015375	0.01	-0.03	0.07
H	4.868057	0.8671186043859339	2.704201	0.0	0.01	0.0
H	5.549299604385935	-2.257085208771868	2.999922395614066	0.01	-0.02	-0.01
H	6.451510604385934	-1.0865996043859338	2.001055	0.01	-0.01	0.0
H	5.787069	-2.563982	1.2598397912281323	0.0	0.0	-0.02
H	-1.676623	-4.929928791228132	0.772679	0.0	0.02	0.0
H	-0.209053	-5.6432541868421975	1.4638286043859339	0.0	0.03	0.01
H	-1.151575	-4.453929186842198	2.388398	0.0	0.03	0.0
H	4.384220604385934	-3.106642	-0.9262633956140661	0.01	0.0	0.01
H	4.171109	-4.0015026043859345	0.5857356043859339	0.0	-0.01	0.01
H	3.531336	-4.668531395614066	-0.913762	0.0	0.01	0.0
114
O	-6.316569762078751	1.444911	-0.539457	-0.02	0.0	0.0
Mg	0.49059135688187394	-0.6214243568818738	0.16123290336999413	-0.03	0.03	-0.16
O	0.712592951684997	1.313667211936865	-0.9651909070237596	-0.08	-0.27	-0.26
C	-5.159026762078751	1.7647638810393753	-1.157853	-0.02	0.01	0.0
N	-0.485587	-2.3696542379212495	0.6826742379212493	0.0	0.02	-0.02
N	2.1709088810393755	-1.7581421189606246	-0.32955611896062464	0.01	0.01	0.01
O	-5.09767176207875	2.255169881039375	-2.260504	-0.02	0.01	0.0
C	0.047142	-3.5859242379212493	0.797743	0.0	0.02	0.0
C	1.360033	-3.907215118960625	0.42691	0.0	0.01	0.0
C	2.355885	-3.0523811189606245	-0.09711411896062463	0.0	0.01	0.01
O	-2.8078187620787505	1.8857142379212493	-0.9610076431181261	-0.02	-0.02	-0.03
C	-1.6515887620787506	1.270724356881874	-0.7507245241575015	-0.02	-0.03	-0.04
C	-0.47325576207875075	1.8523117844093695	-1.5270795724725044	-0.02	-0.15	-0.12
C	-3.9827378810393754	1.3831888810393753	-0.272504	-0.01	0.01	0.0
O	-1.511541643118126	0.2966185241575015	-0.027325713763747796	-0.03	0.04	0.06
C	-7.515785881039375	1.725344	-1.289363	-0.01	0.0	0.0
O	0.17723481039375366	2.8019452379212493	0.8139182155906306	0.1	-0.02	0.15
C	1.18613045351188	1.8723621672756277	0.4550469553387625	0.13	0.07	0.34
O	1.225818643118126	0.8399032379212493	1.2455032862362523	0.03	-0.02	0.06
O	2.8422961672756273	3.5303476914331293	1.2360085241575014	0.07	0.11	0.04
C	1.9173705241575014	4.440118929354378	1.5716967620787508	0.04	0.09	0.02
C	0.46277752415750145	4.147028524157501	1.223973643118126	0.04	0.04	0.03
C	2.5491671672756273	2.5575787620787507	0.17574145351187978	0.07	0.02	0.13
O	2.217479	5.452736810393754	2.173799	0.0	0.1	0.0
C	-0.090884	5.169606713763748	0.22745147584249853	0.0	-0.06	-0.04
C	2.756401594803123	3.2077230706456215	-1.196731951684997	-0.05	-0.09	0.08
C	-0.6253417397481319	1.523701	-3.0266825724725046	-0.19	0.0	-0.12
C	-4.055895	1.9691347620787507	1.1398661189606247	0.0	0.02	-0.01
C	-1.891968	-2.1934101189606245	0.9816791189606247	0.0	0.01	-0.01
C	3.2867998810393755	-0.917113	-0.7191391189606247	0.01	0.0	0.01
C	-2.856046	-2.4583401189606247	-0.04542388103937537	0.0	0.01	-0.01
C	-4.205411	-2.081903	0.1818	0.0	0.0	0.0
C	-4.595632	-1.491338	1.408696	0.0	0.0	0.0
C	-3.640352	-1.272915	2.421966	0.0	0.0	0.0
C	-2.279433	-1.611041	2.2326741189606247	0.0	0.0	-0.01
C	-2.429393	-3.1180421189606244	-1.391341	0.0	0.01	0.0
C	-1.246688	-1.342008	3.3565331189606247	0.0	0.0	-0.01
C	4.243825	-0.48019711896062467	0.26577788103937533	0.0	0.01	0.01
C	5.236988	0.45609488103937534	-0.13591211896062463	0.0	0.01	0.01
C	5.311654	0.9160268810393754	-1.4680931189606246	0.0	0.01	0.01
C	4.393787881039375	0.446583	-2.428293	0.01	0.0	0.0
C	3.3644858810393754	-0.466312	-2.075366	0.01	0.0	0.0
C	4.261502881039375	-1.017784	1.727808	0.01	0.0	0.0
C	2.3876488810393752	-1.0121898810393752	-3.148924	0.01	-0.01	0.0
[truncated: 300 more rows]
