# Supplementary material
Source: publisher figshare collection journal article supplement (https://acs.figshare.com/ndownloader/files/5127205)
Supplement: Supplementary file 1 [file 5127205 › supporting_ja043819b/SSRR_fm-5-ts1-freq-143.log]

 Entering Gaussian System, Link 0=/homes/rzepa/g98/g98
 Input=SSRR_fm-5-ts.gjf
 Output=SSRR_fm-5-ts.log
 Initial command:
 /homes/rzepa/g98/l1.exe /scratch/Gau-27705.inp -scrdir=/scratch/
 Entering Link 1 = /homes/rzepa/g98/l1.exe PID=     27706.
  
 Copyright (c) 1988,1990,1992,1993,1995,1998 Gaussian, Inc.
                  All Rights Reserved.
  
 This is part of the Gaussian(R) 98 program.  It is based on
 the Gaussian 94(TM) system (copyright 1995 Gaussian, Inc.),
 the Gaussian 92(TM) system (copyright 1992 Gaussian, Inc.),
 the Gaussian 90(TM) system (copyright 1990 Gaussian, Inc.),
 the Gaussian 88(TM) system (copyright 1988 Gaussian, Inc.),
 the Gaussian 86(TM) system (copyright 1986 Carnegie Mellon
 University), and the Gaussian 82(TM) system (copyright 1983
 Carnegie Mellon University). Gaussian is a federally registered
 trademark of Gaussian, Inc.
  
 This software contains proprietary and confidential information,
 including trade secrets, belonging to Gaussian, Inc.
  
 This software is provided under written license and may be
 used, copied, transmitted, or stored only in accord with that
 written license.
  
 The following legend is applicable only to US Government
 contracts under DFARS:
  
                    RESTRICTED RIGHTS LEGEND
  
 Use, duplication or disclosure by the US Government is subject
 to restrictions as set forth in subparagraph (c)(1)(ii) of the
 Rights in Technical Data and Computer Software clause at DFARS
 252.227-7013.
  
 Gaussian, Inc.
 Carnegie Office Park, Building 6, Pittsburgh, PA 15106 USA
  
 The following legend is applicable only to US Government
 contracts under FAR:
  
                    RESTRICTED RIGHTS LEGEND
  
 Use, reproduction and disclosure by the US Government is subject
 to restrictions as set forth in subparagraph (c) of the
 Commercial Computer Software - Restricted Rights clause at FAR
 52.227-19.
  
 Gaussian, Inc.
 Carnegie Office Park, Building 6, Pittsburgh, PA 15106 USA
  
  
 ---------------------------------------------------------------
 Warning -- This program may not be used in any manner that
 competes with the business of Gaussian, Inc. or will provide
 assistance to any competitor of Gaussian, Inc.  The licensee
 of this program is prohibited from giving any competitor of
 Gaussian, Inc. access to this program.  By using this program,
 the user acknowledges that Gaussian, Inc. is engaged in the
 business of creating and licensing software in the field of
 computational chemistry and represents and warrants to the
 licensee that it is not a competitor of Gaussian, Inc. and that
 it will not use this program in any manner prohibited above.
 ---------------------------------------------------------------
  

 Cite this work as:
 Gaussian 98, Revision A.11.3,
 M. J. Frisch, G. W. Trucks, H. B. Schlegel, G. E. Scuseria, 
 M. A. Robb, J. R. Cheeseman, V. G. Zakrzewski, J. A. Montgomery, Jr., 
 R. E. Stratmann, J. C. Burant, S. Dapprich, J. M. Millam, 
 A. D. Daniels, K. N. Kudin, M. C. Strain, O. Farkas, J. Tomasi, 
 V. Barone, M. Cossi, R. Cammi, B. Mennucci, C. Pomelli, C. Adamo, 
 S. Clifford, J. Ochterski, G. A. Petersson, P. Y. Ayala, Q. Cui, 
 K. Morokuma, N. Rega, P. Salvador, J. J. Dannenberg, D. K. Malick, 
 A. D. Rabuck, K. Raghavachari, J. B. Foresman, J. Cioslowski, 
 J. V. Ortiz, A. G. Baboul, B. B. Stefanov, G. Liu, A. Liashenko, 
 P. Piskorz, I. Komaromi, R. Gomperts, R. L. Martin, D. J. Fox, 
 T. Keith, M. A. Al-Laham, C. Y. Peng, A. Nanayakkara, M. Challacombe, 
 P. M. W. Gill, B. Johnson, W. Chen, M. W. Wong, J. L. Andres, 
 C. Gonzalez, M. Head-Gordon, E. S. Replogle, and J. A. Pople, 
 Gaussian, Inc., Pittsburgh PA, 2002.

 ***********************************************
 Gaussian 98:  x86-Linux-G98RevA.11.3 5-Feb-2002
                   23-Mar-2004 
 ***********************************************
 %mem=500MB
 %nproc=2
 Will use up to    2 processors via shared memory.
 %chk=SSRR_fm-5-ts.chk
 %rwf=/scratch/51.rwf,1800MB,/scratch/52.rwf,1800MB,/scratch/53.rwf,1800MB,/scrat
 ch/54.rwf,1800MB,/scratch/55.rwf,1800MB,/scratch/56.rwf,1800MB,/scratch/57.rwf,1
 800MB,/scratch/58.rwf,1800MB,/scratch/59.rwf,1800MB
 -------------------------------------------
 # b3lyp/Gen freq guess=read geom=checkpoint
 -------------------------------------------
 1/10=4,29=2,30=1,38=1/1,3;
 2/40=1/2;
 3/5=7,11=2,25=1,30=1/1,2,3;
 4/5=1/1;
 5/5=2,42=-5/2;
 8/6=4,11=11/1;
 11/6=1,8=1,9=11,15=111,16=11/1,2,10;
 10/6=1/2;
 6/7=2,8=2,9=2,10=2,18=1,28=1/1;
 7/8=1,10=1,25=1/1,2,3,16;
 1/10=4,30=1/3;
 99//99;
 ----------------
 from RRSS_fm.gjf
 ----------------
 Redundant internal coordinates taken from checkpoint file:
 SSRR_fm-5-ts.chk
 Charge =  0 Multiplicity = 1
 O,0,-6.3245965224,1.478322645,-0.4848610542
 Mg,0,0.4707177508,-0.6066318366,0.0710647837
 O,0,0.6621977616,1.1465608188,-1.1300625069
 C,0,-5.1718513185,1.7911910564,-1.1185586307
 N,0,-0.4924037165,-2.3491559948,0.6980113329
 N,0,2.1624625469,-1.7685154694,-0.3311591529
 O,0,-5.1194369787,2.2711996329,-2.226234821
 C,0,0.034384455,-3.5674397699,0.8297963712
 C,0,1.3412346264,-3.9056999342,0.4479316798
 C,0,2.336536707,-3.0616577645,-0.0888428922
 O,0,-2.8182658522,1.8825127476,-0.9648367309
 C,0,-1.6636263301,1.2567374612,-0.7669472933
 C,0,-0.4911564434,1.7557397408,-1.6058286836
 C,0,-3.9827408848,1.4104948673,-0.2424648764
 O,0,-1.5264384107,0.3285854366,0.0200993884
 C,0,-7.5244530664,1.7591821035,-1.2244769259
 O,0,0.260176427,2.797182666,0.8707935123
 C,0,1.2780353278,1.9101189967,0.6165868648
 O,0,1.2614256051,0.8325872661,1.2584873524
 O,0,2.9167056055,3.5863556563,1.1948856872
 C,0,1.9837141734,4.4934014953,1.521095294
 C,0,0.5236326709,4.1777377318,1.1975738311
 C,0,2.6066294159,2.5553079604,0.1981720311
 O,0,2.2735835729,5.5152942689,2.0995462027
 C,0,-0.0580190757,5.1377305437,0.158862487
 C,0,2.7343339004,3.1295789969,-1.2093363038
 C,0,-0.7570857017,1.5000015344,-3.1003996049
 C,0,-4.0315636028,2.01523038,1.1594234898
 C,0,-1.8943828744,-2.1672910716,1.0161458385
 C,0,3.2790634088,-0.9435008371,-0.7402753494
 C,0,-2.871019254,-2.4356678729,0.0018831832
 C,0,-4.2155637865,-2.0546184728,0.2458058677
 C,0,-4.5890297342,-1.4505989858,1.4713655803
 C,0,-3.6216164328,-1.2287984554,2.4723154992
 C,0,-2.2649159667,-1.5769274877,2.265898796
 C,0,-2.462756161,-3.110069585,-1.3367818507
 C,0,-1.2185519623,-1.3039877055,3.3761363321
 C,0,4.2435912605,-0.4977900197,0.2303205401
 C,0,5.2379467077,0.4287791298,-0.1905099099
 C,0,5.3010189744,0.876153602,-1.527557333
 C,0,4.3756575534,0.3978525831,-2.4792224993
 C,0,3.3447816237,-0.5055438346,-2.1069779488
 C,0,4.2793570828,-1.0279472722,1.6912527837
 C,0,2.3531765873,-1.0608582489,-3.1649370825
 C,0,-2.0485368927,-2.0476069619,-2.4054965669
 C,0,-3.5733498201,-4.052058888,-1.9057533312
 C,0,-1.1377578193,0.2171063285,3.7175027077
 C,0,-1.5210167144,-2.1462664935,4.6606421911
 C,0,2.1851072869,-0.1172850567,-4.396247934
 C,0,2.7660333769,-2.4920681327,-3.6472237758
 C,0,4.1104063893,0.1112367544,2.7462065457
 C,0,5.6149884169,-1.8039590804,1.9611236591
 C,0,-0.807636003,-4.6838800184,1.4377446332
 C,0,3.6681110822,-3.7569304354,-0.3615008804
 H,0,1.6336741595,-4.9390505096,0.6012947629
 H,0,-0.4566095481,2.8461423067,-1.459830124
 H,0,-3.9561500911,0.3178208587,-0.1486065185
 H,0,-7.5371088445,1.1985502165,-2.1629950351
 H,0,-7.5958431001,2.826738535,-1.4485158806
 H,0,-8.3456761092,1.4468109788,-0.578839312
 H,0,-0.0093075044,4.3379072479,2.1407845845
 H,0,3.3953812742,1.8200888601,0.3352397552
 H,0,0.0441816558,6.1622377526,0.5280694945
 H,0,-1.1191983604,4.9173103321,0.0083956699
 H,0,0.4552196884,5.0626752031,-0.8035421592
 H,0,3.5278992606,3.885477985,-1.1963265079
 H,0,1.8159216214,3.5857065255,-1.5837173368
 H,0,3.0449970593,2.3241819118,-1.873432045
 H,0,-1.6910019167,1.9798677391,-3.4118600916
 H,0,-0.8239064144,0.4279762526,-3.3041107343
 H,0,0.0694041207,1.9054727232,-3.6878064193
 H,0,-4.9601384673,1.7168000805,1.6510697213
 H,0,-3.9866527138,3.1083865251,1.1157413106
 H,0,-3.1946094265,1.6331643148,1.7470721393
 H,0,-4.9874617282,-2.2634688297,-0.5056460962
 H,0,-5.6411444638,-1.1875756787,1.6503266521
 H,0,-3.9271539043,-0.791428021,3.4322349301
 H,0,-1.5679411212,-3.731458893,-1.1433240133
 H,0,-0.2274813386,-1.619405382,2.9893061057
 H,0,5.9889824399,0.7730396901,0.5325188513
 H,0,6.0909264528,1.5755506902,-1.8350353882
 H,0,4.4704949274,0.712425664,-3.5253888066
 H,0,3.4347765276,-1.7336331814,1.8200914138
 H,0,1.3645967245,-1.1555529421,-2.6656428533
 H,0,-1.7801205548,-2.5412539291,-3.3543772896
 H,0,-1.1630027296,-1.4901819114,-2.0485893216
 H,0,-2.8664337925,-1.3336779019,-2.5967228047
 H,0,-3.1719541047,-4.6170550022,-2.7607143201
 H,0,-4.4450927229,-3.4787495156,-2.2549709985
 H,0,-3.9074076102,-4.7689400068,-1.1402407543
 H,0,-0.3524806727,0.3943836276,4.4703166447
 H,0,-2.095091348,0.5843722428,4.1195957029
 H,0,-0.8847038886,0.7986157291,2.8127343101
 H,0,-0.7362181251,-1.9738319755,5.4129241393
 H,0,-1.547257501,-3.2217675974,4.4257312138
 H,0,-2.4903738005,-1.8606300698,5.0972738793
 H,0,1.3319877893,-0.4537557256,-5.0047589415
 H,0,3.083785426,-0.1284572765,-5.0330194863
 H,0,2.0010367005,0.9194129516,-4.0724828272
 H,0,2.070168147,-2.8326998004,-4.4295810686
 H,0,2.7284885245,-3.2134683006,-2.8162154753
 H,0,3.7858746845,-2.4853155753,-4.0631922593
 H,0,4.1644194484,-0.314200854,3.7603622049
 H,0,3.1310012273,0.6012750573,2.6232418516
 H,0,4.9019986416,0.8687073196,2.6438467549
 H,0,5.5741891892,-2.276834604,2.95422588
 H,0,6.4726829,-1.1142296454,1.9417096408
 H,0,5.784738076,-2.5876365439,1.2078658762
 H,0,-1.6975296118,-4.8991458088,0.8354395375
 H,0,-0.2267809967,-5.6083480887,1.5239195383
 H,0,-1.152257139,-4.4050550039,2.4409707772
 H,0,4.3621081147,-3.1414318756,-0.9381508901
 H,0,4.1532419682,-4.0278553303,0.5842815333
 H,0,3.4934113172,-4.6913036482,-0.9089072236
 Recover connectivity data from disk.

 GradGradGradGradGradGradGradGradGradGradGradGradGradGradGradGradGradGrad
 Berny optimization.
 Initialization pass.
                         ----------------------------
                         !    Initial Parameters    !
                         ! (Angstroms and Degrees)  !
 ------------------------                            -------------------------
 ! Name  Definition              Value          Derivative Info.             !
 -----------------------------------------------------------------------------
 ! R1    R(1,4)                  1.3521         calculate D2E/DX2 analyticall!
 ! R2    R(1,16)                 1.4372         calculate D2E/DX2 analyticall!
 ! R3    R(2,3)                  2.1338         calculate D2E/DX2 analyticall!
 ! R4    R(2,5)                  2.0874         calculate D2E/DX2 analyticall!
 ! R5    R(2,6)                  2.0914         calculate D2E/DX2 analyticall!
 ! R6    R(2,15)                 2.2059         calculate D2E/DX2 analyticall!
 ! R7    R(2,19)                 2.0265         calculate D2E/DX2 analyticall!
 ! R8    R(3,13)                 1.3884         calculate D2E/DX2 analyticall!
 ! R9    R(4,7)                  1.2083         calculate D2E/DX2 analyticall!
 ! R10   R(4,14)                 1.5253         calculate D2E/DX2 analyticall!
 ! R11   R(5,8)                  1.3338         calculate D2E/DX2 analyticall!
 ! R12   R(5,29)                 1.4491         calculate D2E/DX2 analyticall!
 ! R13   R(6,10)                 1.3271         calculate D2E/DX2 analyticall!
 ! R14   R(6,30)                 1.4474         calculate D2E/DX2 analyticall!
 ! R15   R(8,9)                  1.4029         calculate D2E/DX2 analyticall!
 ! R16   R(8,53)                 1.5248         calculate D2E/DX2 analyticall!
 ! R17   R(9,10)                 1.4111         calculate D2E/DX2 analyticall!
 ! R18   R(9,55)                 1.0848         calculate D2E/DX2 analyticall!
 ! R19   R(10,54)                1.5267         calculate D2E/DX2 analyticall!
 ! R20   R(11,12)                1.3281         calculate D2E/DX2 analyticall!
 ! R21   R(11,14)                1.4494         calculate D2E/DX2 analyticall!
 ! R22   R(12,13)                1.5256         calculate D2E/DX2 analyticall!
 ! R23   R(12,15)                1.2246         calculate D2E/DX2 analyticall!
 ! R24   R(13,27)                1.5394         calculate D2E/DX2 analyticall!
 ! R25   R(13,56)                1.1007         calculate D2E/DX2 analyticall!
 ! R26   R(14,28)                1.5275         calculate D2E/DX2 analyticall!
 ! R27   R(14,57)                1.097          calculate D2E/DX2 analyticall!
 ! R28   R(16,58)                1.0933         calculate D2E/DX2 analyticall!
 ! R29   R(16,59)                1.0931         calculate D2E/DX2 analyticall!
 ! R30   R(16,60)                1.0903         calculate D2E/DX2 analyticall!
 ! R31   R(17,18)                1.3739         calculate D2E/DX2 analyticall!
 ! R32   R(17,22)                1.443          calculate D2E/DX2 analyticall!
 ! R33   R(18,19)                1.2543         calculate D2E/DX2 analyticall!
 ! R34   R(18,23)                1.5351         calculate D2E/DX2 analyticall!
 ! R35   R(20,21)                1.3415         calculate D2E/DX2 analyticall!
 ! R36   R(20,23)                1.4672         calculate D2E/DX2 analyticall!
 ! R37   R(21,22)                1.5284         calculate D2E/DX2 analyticall!
 ! R38   R(21,24)                1.2095         calculate D2E/DX2 analyticall!
 ! R39   R(22,25)                1.5293         calculate D2E/DX2 analyticall!
 ! R40   R(22,61)                1.0951         calculate D2E/DX2 analyticall!
 ! R41   R(23,26)                1.5255         calculate D2E/DX2 analyticall!
 ! R42   R(23,62)                1.087          calculate D2E/DX2 analyticall!
 ! R43   R(25,63)                1.0938         calculate D2E/DX2 analyticall!
 ! R44   R(25,64)                1.0942         calculate D2E/DX2 analyticall!
 ! R45   R(25,65)                1.0933         calculate D2E/DX2 analyticall!
 ! R46   R(26,66)                1.096          calculate D2E/DX2 analyticall!
 ! R47   R(26,67)                1.0916         calculate D2E/DX2 analyticall!
 ! R48   R(26,68)                1.0891         calculate D2E/DX2 analyticall!
 ! R49   R(27,69)                1.0952         calculate D2E/DX2 analyticall!
 ! R50   R(27,70)                1.0933         calculate D2E/DX2 analyticall!
 ! R51   R(27,71)                1.092          calculate D2E/DX2 analyticall!
 ! R52   R(28,72)                1.0923         calculate D2E/DX2 analyticall!
 ! R53   R(28,73)                1.0949         calculate D2E/DX2 analyticall!
 ! R54   R(28,74)                1.0917         calculate D2E/DX2 analyticall!
 ! R55   R(29,31)                1.4334         calculate D2E/DX2 analyticall!
 ! R56   R(29,35)                1.431          calculate D2E/DX2 analyticall!
 ! R57   R(30,38)                1.4391         calculate D2E/DX2 analyticall!
 ! R58   R(30,42)                1.4367         calculate D2E/DX2 analyticall!
 ! R59   R(31,32)                1.4186         calculate D2E/DX2 analyticall!
 ! R60   R(31,36)                1.5536         calculate D2E/DX2 analyticall!
 ! R61   R(32,33)                1.4164         calculate D2E/DX2 analyticall!
 ! R62   R(32,75)                1.0973         calculate D2E/DX2 analyticall!
 ! R63   R(33,34)                1.4096         calculate D2E/DX2 analyticall!
 ! R64   R(33,76)                1.0992         calculate D2E/DX2 analyticall!
 ! R65   R(34,35)                1.4158         calculate D2E/DX2 analyticall!
 ! R66   R(34,77)                1.0982         calculate D2E/DX2 analyticall!
 ! R67   R(35,37)                1.5498         calculate D2E/DX2 analyticall!
 ! R68   R(36,45)                1.5629         calculate D2E/DX2 analyticall!
 ! R69   R(36,46)                1.5635         calculate D2E/DX2 analyticall!
 ! R70   R(36,78)                1.1065         calculate D2E/DX2 analyticall!
 ! R71   R(37,47)                1.561          calculate D2E/DX2 analyticall!
 ! R72   R(37,48)                1.5655         calculate D2E/DX2 analyticall!
 ! R73   R(37,79)                1.1097         calculate D2E/DX2 analyticall!
 ! R74   R(38,39)                1.4228         calculate D2E/DX2 analyticall!
 ! R75   R(38,43)                1.5546         calculate D2E/DX2 analyticall!
 ! R76   R(39,40)                1.4113         calculate D2E/DX2 analyticall!
 ! R77   R(39,80)                1.0979         calculate D2E/DX2 analyticall!
 ! R78   R(40,41)                1.4109         calculate D2E/DX2 analyticall!
 ! R79   R(40,81)                1.0989         calculate D2E/DX2 analyticall!
 ! R80   R(41,42)                1.4204         calculate D2E/DX2 analyticall!
 ! R81   R(41,82)                1.0965         calculate D2E/DX2 analyticall!
 ! R82   R(42,44)                1.5527         calculate D2E/DX2 analyticall!
 ! R83   R(43,51)                1.5618         calculate D2E/DX2 analyticall!
 ! R84   R(43,52)                1.5681         calculate D2E/DX2 analyticall!
 ! R85   R(43,83)                1.1081         calculate D2E/DX2 analyticall!
 ! R86   R(44,49)                1.5604         calculate D2E/DX2 analyticall!
 ! R87   R(44,50)                1.5657         calculate D2E/DX2 analyticall!
 ! R88   R(44,84)                1.1116         calculate D2E/DX2 analyticall!
 ! R89   R(45,85)                1.1028         calculate D2E/DX2 analyticall!
 ! R90   R(45,86)                1.1056         calculate D2E/DX2 analyticall!
 ! R91   R(45,87)                1.1024         calculate D2E/DX2 analyticall!
 ! R92   R(46,88)                1.1006         calculate D2E/DX2 analyticall!
 ! R93   R(46,89)                1.1003         calculate D2E/DX2 analyticall!
 ! R94   R(46,90)                1.1007         calculate D2E/DX2 analyticall!
 ! R95   R(47,91)                1.1022         calculate D2E/DX2 analyticall!
 ! R96   R(47,92)                1.1014         calculate D2E/DX2 analyticall!
 ! R97   R(47,93)                1.1049         calculate D2E/DX2 analyticall!
 ! R98   R(48,94)                1.1007         calculate D2E/DX2 analyticall!
 ! R99   R(48,95)                1.1012         calculate D2E/DX2 analyticall!
 ! R100  R(48,96)                1.1009         calculate D2E/DX2 analyticall!
 ! R101  R(49,97)                1.1006         calculate D2E/DX2 analyticall!
 ! R102  R(49,98)                1.1015         calculate D2E/DX2 analyticall!
 ! R103  R(49,99)                1.1016         calculate D2E/DX2 analyticall!
 ! R104  R(50,100)               1.1011         calculate D2E/DX2 analyticall!
 ! R105  R(50,101)               1.1011         calculate D2E/DX2 analyticall!
 ! R106  R(50,102)               1.1014         calculate D2E/DX2 analyticall!
 ! R107  R(51,103)               1.1011         calculate D2E/DX2 analyticall!
 ! R108  R(51,104)               1.102          calculate D2E/DX2 analyticall!
 ! R109  R(51,105)               1.1004         calculate D2E/DX2 analyticall!
 ! R110  R(52,106)               1.1007         calculate D2E/DX2 analyticall!
 ! R111  R(52,107)               1.1008         calculate D2E/DX2 analyticall!
 ! R112  R(52,108)               1.1002         calculate D2E/DX2 analyticall!
 ! R113  R(53,109)               1.0959         calculate D2E/DX2 analyticall!
 ! R114  R(53,110)               1.0952         calculate D2E/DX2 analyticall!
 ! R115  R(53,111)               1.0968         calculate D2E/DX2 analyticall!
 ! R116  R(54,112)               1.0922         calculate D2E/DX2 analyticall!
 ! R117  R(54,113)               1.0969         calculate D2E/DX2 analyticall!
 ! R118  R(54,114)               1.0969         calculate D2E/DX2 analyticall!
 ! A1    A(4,1,16)             115.1721         calculate D2E/DX2 analyticall!
 ! A2    A(3,2,5)              153.6858         calculate D2E/DX2 analyticall!
 ! A3    A(3,2,6)              105.9989         calculate D2E/DX2 analyticall!
 ! A4    A(3,2,15)              73.7335         calculate D2E/DX2 analyticall!
 ! A5    A(3,2,19)              73.2193         calculate D2E/DX2 analyticall!
 ! A6    A(5,2,6)               88.1217         calculate D2E/DX2 analyticall!
 ! A7    A(5,2,15)              86.7391         calculate D2E/DX2 analyticall!
 ! A8    A(5,2,19)             126.6502         calculate D2E/DX2 analyticall!
 ! A9    A(6,2,15)             164.4685         calculate D2E/DX2 analyticall!
 ! A10   A(6,2,19)             101.048          calculate D2E/DX2 analyticall!
 ! A11   A(15,2,19)             93.7672         calculate D2E/DX2 analyticall!
 ! A12   A(2,3,13)             118.6102         calculate D2E/DX2 analyticall!
 ! A13   A(1,4,7)              123.9532         calculate D2E/DX2 analyticall!
 ! A14   A(1,4,14)             109.7365         calculate D2E/DX2 analyticall!
 ! A15   A(7,4,14)             126.2894         calculate D2E/DX2 analyticall!
 ! A16   A(2,5,8)              127.5845         calculate D2E/DX2 analyticall!
 ! A17   A(2,5,29)             114.0529         calculate D2E/DX2 analyticall!
 ! A18   A(8,5,29)             118.3626         calculate D2E/DX2 analyticall!
 ! A19   A(2,6,10)             127.7582         calculate D2E/DX2 analyticall!
 ! A20   A(2,6,30)             111.2077         calculate D2E/DX2 analyticall!
 ! A21   A(10,6,30)            120.3874         calculate D2E/DX2 analyticall!
 ! A22   A(5,8,9)              124.1419         calculate D2E/DX2 analyticall!
 ! A23   A(5,8,53)             119.3444         calculate D2E/DX2 analyticall!
 ! A24   A(9,8,53)             116.5127         calculate D2E/DX2 analyticall!
 ! A25   A(8,9,10)             128.0522         calculate D2E/DX2 analyticall!
 ! A26   A(8,9,55)             116.2515         calculate D2E/DX2 analyticall!
 ! A27   A(10,9,55)            115.6837         calculate D2E/DX2 analyticall!
 ! A28   A(6,10,9)             124.0404         calculate D2E/DX2 analyticall!
 ! A29   A(6,10,54)            121.7047         calculate D2E/DX2 analyticall!
 ! A30   A(9,10,54)            114.2505         calculate D2E/DX2 analyticall!
 ! A31   A(12,11,14)           118.0849         calculate D2E/DX2 analyticall!
 ! A32   A(11,12,13)           115.6008         calculate D2E/DX2 analyticall!
 ! A33   A(11,12,15)           123.3839         calculate D2E/DX2 analyticall!
 ! A34   A(13,12,15)           121.0108         calculate D2E/DX2 analyticall!
 ! A35   A(3,13,12)            107.8476         calculate D2E/DX2 analyticall!
 ! A36   A(3,13,27)            113.7843         calculate D2E/DX2 analyticall!
 ! A37   A(3,13,56)            111.2931         calculate D2E/DX2 analyticall!
 ! A38   A(12,13,27)           110.2887         calculate D2E/DX2 analyticall!
 ! A39   A(12,13,56)           105.9751         calculate D2E/DX2 analyticall!
 ! A40   A(27,13,56)           107.384          calculate D2E/DX2 analyticall!
 ! A41   A(4,14,11)            104.9992         calculate D2E/DX2 analyticall!
 ! A42   A(4,14,28)            113.7915         calculate D2E/DX2 analyticall!
 ! A43   A(4,14,57)            108.4601         calculate D2E/DX2 analyticall!
 ! A44   A(11,14,28)           110.742          calculate D2E/DX2 analyticall!
 ! A45   A(11,14,57)           110.3377         calculate D2E/DX2 analyticall!
 ! A46   A(28,14,57)           108.4559         calculate D2E/DX2 analyticall!
 ! A47   A(2,15,12)            115.9508         calculate D2E/DX2 analyticall!
 ! A48   A(1,16,58)            110.562          calculate D2E/DX2 analyticall!
 ! A49   A(1,16,59)            110.5386         calculate D2E/DX2 analyticall!
 ! A50   A(1,16,60)            105.5501         calculate D2E/DX2 analyticall!
 ! A51   A(58,16,59)           108.9109         calculate D2E/DX2 analyticall!
 ! A52   A(58,16,60)           110.6519         calculate D2E/DX2 analyticall!
 ! A53   A(59,16,60)           110.607          calculate D2E/DX2 analyticall!
 ! A54   A(18,17,22)           121.6263         calculate D2E/DX2 analyticall!
 ! A55   A(17,18,19)           116.7535         calculate D2E/DX2 analyticall!
 ! A56   A(17,18,23)           114.8517         calculate D2E/DX2 analyticall!
 ! A57   A(19,18,23)           120.7966         calculate D2E/DX2 analyticall!
 ! A58   A(2,19,18)            108.3854         calculate D2E/DX2 analyticall!
 ! A59   A(21,20,23)           119.5617         calculate D2E/DX2 analyticall!
 ! A60   A(20,21,22)           118.2464         calculate D2E/DX2 analyticall!
 ! A61   A(20,21,24)           121.3914         calculate D2E/DX2 analyticall!
 ! A62   A(22,21,24)           120.309          calculate D2E/DX2 analyticall!
 ! A63   A(17,22,21)           114.831          calculate D2E/DX2 analyticall!
 ! A64   A(17,22,25)           112.1679         calculate D2E/DX2 analyticall!
 ! A65   A(17,22,61)           104.2485         calculate D2E/DX2 analyticall!
 ! A66   A(21,22,25)           112.1754         calculate D2E/DX2 analyticall!
 ! A67   A(21,22,61)           104.6177         calculate D2E/DX2 analyticall!
 ! A68   A(25,22,61)           107.9435         calculate D2E/DX2 analyticall!
 ! A69   A(18,23,20)           107.0438         calculate D2E/DX2 analyticall!
 ! A70   A(18,23,26)           118.8261         calculate D2E/DX2 analyticall!
 ! A71   A(18,23,62)           108.022          calculate D2E/DX2 analyticall!
 ! A72   A(20,23,26)           110.1546         calculate D2E/DX2 analyticall!
 ! A73   A(20,23,62)           103.6687         calculate D2E/DX2 analyticall!
 ! A74   A(26,23,62)           108.0732         calculate D2E/DX2 analyticall!
 ! A75   A(22,25,63)           108.8544         calculate D2E/DX2 analyticall!
 ! A76   A(22,25,64)           109.6209         calculate D2E/DX2 analyticall!
 ! A77   A(22,25,65)           112.1015         calculate D2E/DX2 analyticall!
 ! A78   A(63,25,64)           109.0087         calculate D2E/DX2 analyticall!
 ! A79   A(63,25,65)           108.5166         calculate D2E/DX2 analyticall!
 ! A80   A(64,25,65)           108.6867         calculate D2E/DX2 analyticall!
 ! A81   A(23,26,66)           108.0159         calculate D2E/DX2 analyticall!
 ! A82   A(23,26,67)           113.7838         calculate D2E/DX2 analyticall!
 ! A83   A(23,26,68)           107.9439         calculate D2E/DX2 analyticall!
 ! A84   A(66,26,67)           108.9679         calculate D2E/DX2 analyticall!
 ! A85   A(66,26,68)           108.1023         calculate D2E/DX2 analyticall!
 ! A86   A(67,26,68)           109.8674         calculate D2E/DX2 analyticall!
 ! A87   A(13,27,69)           110.5249         calculate D2E/DX2 analyticall!
 ! A88   A(13,27,70)           110.7543         calculate D2E/DX2 analyticall!
 ! A89   A(13,27,71)           109.2569         calculate D2E/DX2 analyticall!
 ! A90   A(69,27,70)           108.9373         calculate D2E/DX2 analyticall!
 ! A91   A(69,27,71)           109.2518         calculate D2E/DX2 analyticall!
 ! A92   A(70,27,71)           108.0664         calculate D2E/DX2 analyticall!
 ! A93   A(14,28,72)           109.3962         calculate D2E/DX2 analyticall!
 ! A94   A(14,28,73)           110.9355         calculate D2E/DX2 analyticall!
 ! A95   A(14,28,74)           109.3269         calculate D2E/DX2 analyticall!
 ! A96   A(72,28,73)           109.0021         calculate D2E/DX2 analyticall!
 ! A97   A(72,28,74)           108.2914         calculate D2E/DX2 analyticall!
 ! A98   A(73,28,74)           109.8422         calculate D2E/DX2 analyticall!
 ! A99   A(5,29,31)            118.7089         calculate D2E/DX2 analyticall!
 ! A100  A(5,29,35)            119.6062         calculate D2E/DX2 analyticall!
 ! A101  A(31,29,35)           121.2522         calculate D2E/DX2 analyticall!
 ! A102  A(6,30,38)            120.1964         calculate D2E/DX2 analyticall!
 ! A103  A(6,30,42)            118.5521         calculate D2E/DX2 analyticall!
 ! A104  A(38,30,42)           121.0996         calculate D2E/DX2 analyticall!
 ! A105  A(29,31,32)           118.2821         calculate D2E/DX2 analyticall!
 ! A106  A(29,31,36)           120.7939         calculate D2E/DX2 analyticall!
 ! A107  A(32,31,36)           120.9195         calculate D2E/DX2 analyticall!
 ! A108  A(31,32,33)           120.8779         calculate D2E/DX2 analyticall!
 ! A109  A(31,32,75)           119.8567         calculate D2E/DX2 analyticall!
 ! A110  A(33,32,75)           119.2228         calculate D2E/DX2 analyticall!
 ! A111  A(32,33,34)           120.036          calculate D2E/DX2 analyticall!
 ! A112  A(32,33,76)           119.6893         calculate D2E/DX2 analyticall!
 ! A113  A(34,33,76)           120.2424         calculate D2E/DX2 analyticall!
 ! A114  A(33,34,35)           121.027          calculate D2E/DX2 analyticall!
 ! A115  A(33,34,77)           119.4982         calculate D2E/DX2 analyticall!
 ! A116  A(35,34,77)           119.4698         calculate D2E/DX2 analyticall!
 ! A117  A(29,35,34)           118.4837         calculate D2E/DX2 analyticall!
 ! A118  A(29,35,37)           121.5652         calculate D2E/DX2 analyticall!
 ! A119  A(34,35,37)           119.9486         calculate D2E/DX2 analyticall!
 ! A120  A(31,36,45)           111.332          calculate D2E/DX2 analyticall!
 ! A121  A(31,36,46)           112.8581         calculate D2E/DX2 analyticall!
 ! A122  A(31,36,78)           107.7979         calculate D2E/DX2 analyticall!
 ! A123  A(45,36,46)           110.4262         calculate D2E/DX2 analyticall!
 ! A124  A(45,36,78)           106.6788         calculate D2E/DX2 analyticall!
 ! A125  A(46,36,78)           107.4412         calculate D2E/DX2 analyticall!
 ! A126  A(35,37,47)           111.2969         calculate D2E/DX2 analyticall!
 ! A127  A(35,37,48)           111.2586         calculate D2E/DX2 analyticall!
 ! A128  A(35,37,79)           107.6504         calculate D2E/DX2 analyticall!
 ! A129  A(47,37,48)           110.7829         calculate D2E/DX2 analyticall!
 ! A130  A(47,37,79)           107.8775         calculate D2E/DX2 analyticall!
 ! A131  A(48,37,79)           107.7974         calculate D2E/DX2 analyticall!
 ! A132  A(30,38,39)           118.074          calculate D2E/DX2 analyticall!
 ! A133  A(30,38,43)           122.9303         calculate D2E/DX2 analyticall!
 ! A134  A(39,38,43)           118.9451         calculate D2E/DX2 analyticall!
 ! A135  A(38,39,40)           121.1899         calculate D2E/DX2 analyticall!
 ! A136  A(38,39,80)           119.1763         calculate D2E/DX2 analyticall!
 ! A137  A(40,39,80)           119.6            calculate D2E/DX2 analyticall!
 ! A138  A(39,40,41)           120.1476         calculate D2E/DX2 analyticall!
 ! A139  A(39,40,81)           119.9298         calculate D2E/DX2 analyticall!
 ! A140  A(41,40,81)           119.8975         calculate D2E/DX2 analyticall!
 ! A141  A(40,41,42)           120.9876         calculate D2E/DX2 analyticall!
 ! A142  A(40,41,82)           119.3098         calculate D2E/DX2 analyticall!
 ! A143  A(42,41,82)           119.6878         calculate D2E/DX2 analyticall!
 ! A144  A(30,42,41)           118.4511         calculate D2E/DX2 analyticall!
 ! A145  A(30,42,44)           120.66           calculate D2E/DX2 analyticall!
 ! A146  A(41,42,44)           120.8245         calculate D2E/DX2 analyticall!
 ! A147  A(38,43,51)           112.5538         calculate D2E/DX2 analyticall!
 ! A148  A(38,43,52)           110.4934         calculate D2E/DX2 analyticall!
 ! A149  A(38,43,83)           107.9937         calculate D2E/DX2 analyticall!
 ! A150  A(51,43,52)           109.6853         calculate D2E/DX2 analyticall!
 ! A151  A(51,43,83)           107.6695         calculate D2E/DX2 analyticall!
 ! A152  A(52,43,83)           108.3019         calculate D2E/DX2 analyticall!
 ! A153  A(42,44,49)           112.9665         calculate D2E/DX2 analyticall!
 ! A154  A(42,44,50)           111.6172         calculate D2E/DX2 analyticall!
 ! A155  A(42,44,84)           107.0007         calculate D2E/DX2 analyticall!
 ! A156  A(49,44,50)           109.7612         calculate D2E/DX2 analyticall!
 ! A157  A(49,44,84)           108.0703         calculate D2E/DX2 analyticall!
 ! A158  A(50,44,84)           107.1579         calculate D2E/DX2 analyticall!
 ! A159  A(36,45,85)           110.4009         calculate D2E/DX2 analyticall!
 ! A160  A(36,45,86)           109.5298         calculate D2E/DX2 analyticall!
 ! A161  A(36,45,87)           111.2383         calculate D2E/DX2 analyticall!
 ! A162  A(85,45,86)           107.9699         calculate D2E/DX2 analyticall!
 ! A163  A(85,45,87)           108.7377         calculate D2E/DX2 analyticall!
 ! A164  A(86,45,87)           108.8897         calculate D2E/DX2 analyticall!
 ! A165  A(36,46,88)           109.4463         calculate D2E/DX2 analyticall!
 ! A166  A(36,46,89)           111.3685         calculate D2E/DX2 analyticall!
 ! A167  A(36,46,90)           110.7869         calculate D2E/DX2 analyticall!
 ! A168  A(88,46,89)           108.053          calculate D2E/DX2 analyticall!
 ! A169  A(88,46,90)           108.4577         calculate D2E/DX2 analyticall!
 ! A170  A(89,46,90)           108.6418         calculate D2E/DX2 analyticall!
 ! A171  A(37,47,91)           110.0577         calculate D2E/DX2 analyticall!
 ! A172  A(37,47,92)           111.0865         calculate D2E/DX2 analyticall!
 ! A173  A(37,47,93)           110.2198         calculate D2E/DX2 analyticall!
 ! A174  A(91,47,92)           108.4391         calculate D2E/DX2 analyticall!
 ! A175  A(91,47,93)           108.1482         calculate D2E/DX2 analyticall!
 ! A176  A(92,47,93)           108.8159         calculate D2E/DX2 analyticall!
 ! A177  A(37,48,94)           109.7995         calculate D2E/DX2 analyticall!
 ! A178  A(37,48,95)           110.7961         calculate D2E/DX2 analyticall!
 ! A179  A(37,48,96)           110.8522         calculate D2E/DX2 analyticall!
 ! A180  A(94,48,95)           108.4088         calculate D2E/DX2 analyticall!
 ! A181  A(94,48,96)           108.4272         calculate D2E/DX2 analyticall!
 ! A182  A(95,48,96)           108.4845         calculate D2E/DX2 analyticall!
 ! A183  A(44,49,97)           109.5677         calculate D2E/DX2 analyticall!
 ! A184  A(44,49,98)           111.2346         calculate D2E/DX2 analyticall!
 ! A185  A(44,49,99)           110.804          calculate D2E/DX2 analyticall!
 ! A186  A(97,49,98)           108.0411         calculate D2E/DX2 analyticall!
 ! A187  A(97,49,99)           108.7047         calculate D2E/DX2 analyticall!
 ! A188  A(98,49,99)           108.4089         calculate D2E/DX2 analyticall!
 ! A189  A(44,50,100)          109.5734         calculate D2E/DX2 analyticall!
 ! A190  A(44,50,101)          110.942          calculate D2E/DX2 analyticall!
 ! A191  A(44,50,102)          110.7863         calculate D2E/DX2 analyticall!
 ! A192  A(100,50,101)         108.1812         calculate D2E/DX2 analyticall!
 ! A193  A(100,50,102)         108.586          calculate D2E/DX2 analyticall!
 ! A194  A(101,50,102)         108.7001         calculate D2E/DX2 analyticall!
 ! A195  A(43,51,103)          109.5729         calculate D2E/DX2 analyticall!
 ! A196  A(43,51,104)          110.1886         calculate D2E/DX2 analyticall!
 ! A197  A(43,51,105)          111.1889         calculate D2E/DX2 analyticall!
 ! A198  A(103,51,104)         108.5523         calculate D2E/DX2 analyticall!
 ! A199  A(103,51,105)         108.4426         calculate D2E/DX2 analyticall!
 ! A200  A(104,51,105)         108.8355         calculate D2E/DX2 analyticall!
 ! A201  A(43,52,106)          109.6523         calculate D2E/DX2 analyticall!
 ! A202  A(43,52,107)          110.5204         calculate D2E/DX2 analyticall!
 ! A203  A(43,52,108)          111.4753         calculate D2E/DX2 analyticall!
 ! A204  A(106,52,107)         108.2993         calculate D2E/DX2 analyticall!
 ! A205  A(106,52,108)         108.5083         calculate D2E/DX2 analyticall!
 ! A206  A(107,52,108)         108.3023         calculate D2E/DX2 analyticall!
 ! A207  A(8,53,109)           111.9069         calculate D2E/DX2 analyticall!
 ! A208  A(8,53,110)           110.8879         calculate D2E/DX2 analyticall!
 ! A209  A(8,53,111)           110.6137         calculate D2E/DX2 analyticall!
 ! A210  A(109,53,110)         107.9449         calculate D2E/DX2 analyticall!
 ! A211  A(109,53,111)         107.3075         calculate D2E/DX2 analyticall!
 ! A212  A(110,53,111)         108.0146         calculate D2E/DX2 analyticall!
 ! A213  A(10,54,112)          113.0687         calculate D2E/DX2 analyticall!
 ! A214  A(10,54,113)          110.1348         calculate D2E/DX2 analyticall!
 ! A215  A(10,54,114)          109.7636         calculate D2E/DX2 analyticall!
 ! A216  A(112,54,113)         108.2628         calculate D2E/DX2 analyticall!
 ! A217  A(112,54,114)         108.5263         calculate D2E/DX2 analyticall!
 ! A218  A(113,54,114)         106.8776         calculate D2E/DX2 analyticall!
 ! D1    D(16,1,4,7)            -0.098          calculate D2E/DX2 analyticall!
 ! D2    D(16,1,4,14)         -178.5241         calculate D2E/DX2 analyticall!
 ! D3    D(4,1,16,58)           60.0396         calculate D2E/DX2 analyticall!
 ! D4    D(4,1,16,59)          -60.6367         calculate D2E/DX2 analyticall!
 ! D5    D(4,1,16,60)          179.7345         calculate D2E/DX2 analyticall!
 ! D6    D(5,2,3,13)            28.0918         calculate D2E/DX2 analyticall!
 ! D7    D(6,2,3,13)           148.2814         calculate D2E/DX2 analyticall!
 ! D8    D(15,2,3,13)          -15.5486         calculate D2E/DX2 analyticall!
 ! D9    D(19,2,3,13)         -114.7251         calculate D2E/DX2 analyticall!
 ! D10   D(3,2,5,8)            129.5973         calculate D2E/DX2 analyticall!
 ! D11   D(3,2,5,29)           -50.3944         calculate D2E/DX2 analyticall!
 ! D12   D(6,2,5,8)              5.8333         calculate D2E/DX2 analyticall!
 ! D13   D(6,2,5,29)          -174.1584         calculate D2E/DX2 analyticall!
 ! D14   D(15,2,5,8)           171.1707         calculate D2E/DX2 analyticall!
 ! D15   D(15,2,5,29)           -8.821          calculate D2E/DX2 analyticall!
 ! D16   D(19,2,5,8)           -96.5577         calculate D2E/DX2 analyticall!
 ! D17   D(19,2,5,29)           83.4506         calculate D2E/DX2 analyticall!
 ! D18   D(3,2,6,10)          -162.014          calculate D2E/DX2 analyticall!
 ! D19   D(3,2,6,30)            27.2934         calculate D2E/DX2 analyticall!
 ! D20   D(5,2,6,10)            -4.5568         calculate D2E/DX2 analyticall!
 ! D21   D(5,2,6,30)          -175.2494         calculate D2E/DX2 analyticall!
 ! D22   D(15,2,6,10)          -75.2549         calculate D2E/DX2 analyticall!
 ! D23   D(15,2,6,30)          114.0525         calculate D2E/DX2 analyticall!
 ! D24   D(19,2,6,10)          122.4653         calculate D2E/DX2 analyticall!
 ! D25   D(19,2,6,30)          -48.2273         calculate D2E/DX2 analyticall!
 ! D26   D(3,2,15,12)            9.2877         calculate D2E/DX2 analyticall!
 ! D27   D(5,2,15,12)         -152.8683         calculate D2E/DX2 analyticall!
 ! D28   D(6,2,15,12)          -81.9922         calculate D2E/DX2 analyticall!
 ! D29   D(19,2,15,12)          80.5878         calculate D2E/DX2 analyticall!
 ! D30   D(3,2,19,18)            5.7316         calculate D2E/DX2 analyticall!
 ! D31   D(5,2,19,18)         -154.7609         calculate D2E/DX2 analyticall!
 ! D32   D(6,2,19,18)          109.29           calculate D2E/DX2 analyticall!
 ! D33   D(15,2,19,18)         -66.0251         calculate D2E/DX2 analyticall!
 ! D34   D(2,3,13,12)           18.1649         calculate D2E/DX2 analyticall!
 ! D35   D(2,3,13,27)         -104.5185         calculate D2E/DX2 analyticall!
 ! D36   D(2,3,13,56)          134.0018         calculate D2E/DX2 analyticall!
 ! D37   D(1,4,14,11)         -175.6028         calculate D2E/DX2 analyticall!
 ! D38   D(1,4,14,28)          -54.3491         calculate D2E/DX2 analyticall!
 ! D39   D(1,4,14,57)           66.4426         calculate D2E/DX2 analyticall!
 ! D40   D(7,4,14,11)            6.017          calculate D2E/DX2 analyticall!
 ! D41   D(7,4,14,28)          127.2707         calculate D2E/DX2 analyticall!
 ! D42   D(7,4,14,57)         -111.9376         calculate D2E/DX2 analyticall!
 ! D43   D(2,5,8,9)             -5.7167         calculate D2E/DX2 analyticall!
 ! D44   D(2,5,8,53)           173.9084         calculate D2E/DX2 analyticall!
 ! D45   D(29,5,8,9)           174.2748         calculate D2E/DX2 analyticall!
 ! D46   D(29,5,8,53)           -6.1002         calculate D2E/DX2 analyticall!
 ! D47   D(2,5,29,31)           94.4662         calculate D2E/DX2 analyticall!
 ! D48   D(2,5,29,35)          -78.081          calculate D2E/DX2 analyticall!
 ! D49   D(8,5,29,31)          -85.5264         calculate D2E/DX2 analyticall!
 ! D50   D(8,5,29,35)          101.9264         calculate D2E/DX2 analyticall!
 ! D51   D(2,6,10,9)             3.0673         calculate D2E/DX2 analyticall!
 ! D52   D(2,6,10,54)         -176.1281         calculate D2E/DX2 analyticall!
 ! D53   D(30,6,10,9)          173.0009         calculate D2E/DX2 analyticall!
 ! D54   D(30,6,10,54)          -6.1946         calculate D2E/DX2 analyticall!
 ! D55   D(2,6,30,38)           94.1587         calculate D2E/DX2 analyticall!
 ! D56   D(2,6,30,42)          -81.4111         calculate D2E/DX2 analyticall!
 ! D57   D(10,6,30,38)         -77.317          calculate D2E/DX2 analyticall!
 ! D58   D(10,6,30,42)         107.1131         calculate D2E/DX2 analyticall!
 ! D59   D(5,8,9,10)             2.1179         calculate D2E/DX2 analyticall!
 ! D60   D(5,8,9,55)          -179.2429         calculate D2E/DX2 analyticall!
 ! D61   D(53,8,9,10)         -177.5168         calculate D2E/DX2 analyticall!
 ! D62   D(53,8,9,55)            1.1223         calculate D2E/DX2 analyticall!
 ! D63   D(5,8,53,109)          62.1004         calculate D2E/DX2 analyticall!
 ! D64   D(5,8,53,110)        -177.3087         calculate D2E/DX2 analyticall!
 ! D65   D(5,8,53,111)         -57.4936         calculate D2E/DX2 analyticall!
 ! D66   D(9,8,53,109)        -118.2464         calculate D2E/DX2 analyticall!
 ! D67   D(9,8,53,110)           2.3445         calculate D2E/DX2 analyticall!
 ! D68   D(9,8,53,111)         122.1596         calculate D2E/DX2 analyticall!
 ! D69   D(8,9,10,6)            -0.7            calculate D2E/DX2 analyticall!
 ! D70   D(8,9,10,54)          178.5493         calculate D2E/DX2 analyticall!
 ! D71   D(55,9,10,6)         -179.3457         calculate D2E/DX2 analyticall!
 ! D72   D(55,9,10,54)          -0.0964         calculate D2E/DX2 analyticall!
 ! D73   D(6,10,54,112)        -11.108          calculate D2E/DX2 analyticall!
 ! D74   D(6,10,54,113)        110.1526         calculate D2E/DX2 analyticall!
 ! D75   D(6,10,54,114)       -132.44           calculate D2E/DX2 analyticall!
 ! D76   D(9,10,54,112)        169.6232         calculate D2E/DX2 analyticall!
 ! D77   D(9,10,54,113)        -69.1163         calculate D2E/DX2 analyticall!
 ! D78   D(9,10,54,114)         48.2912         calculate D2E/DX2 analyticall!
 ! D79   D(14,11,12,13)        177.1345         calculate D2E/DX2 analyticall!
 ! D80   D(14,11,12,15)         -2.1            calculate D2E/DX2 analyticall!
 ! D81   D(12,11,14,4)        -152.97           calculate D2E/DX2 analyticall!
 ! D82   D(12,11,14,28)         83.7965         calculate D2E/DX2 analyticall!
 ! D83   D(12,11,14,57)        -36.2957         calculate D2E/DX2 analyticall!
 ! D84   D(11,12,13,3)         170.8658         calculate D2E/DX2 analyticall!
 ! D85   D(11,12,13,27)        -64.3323         calculate D2E/DX2 analyticall!
 ! D86   D(11,12,13,56)         51.591          calculate D2E/DX2 analyticall!
 ! D87   D(15,12,13,3)          -9.88           calculate D2E/DX2 analyticall!
 ! D88   D(15,12,13,27)        114.922          calculate D2E/DX2 analyticall!
 ! D89   D(15,12,13,56)       -129.1548         calculate D2E/DX2 analyticall!
 ! D90   D(11,12,15,2)         176.6493         calculate D2E/DX2 analyticall!
 ! D91   D(13,12,15,2)          -2.5452         calculate D2E/DX2 analyticall!
 ! D92   D(3,13,27,69)         178.4251         calculate D2E/DX2 analyticall!
 ! D93   D(3,13,27,70)          57.5979         calculate D2E/DX2 analyticall!
 ! D94   D(3,13,27,71)         -61.3282         calculate D2E/DX2 analyticall!
 ! D95   D(12,13,27,69)         57.0916         calculate D2E/DX2 analyticall!
 ! D96   D(12,13,27,70)        -63.7355         calculate D2E/DX2 analyticall!
 ! D97   D(12,13,27,71)        177.3384         calculate D2E/DX2 analyticall!
 ! D98   D(56,13,27,69)        -57.9457         calculate D2E/DX2 analyticall!
 ! D99   D(56,13,27,70)       -178.7729         calculate D2E/DX2 analyticall!
 ! D100  D(56,13,27,71)         62.301          calculate D2E/DX2 analyticall!
 ! D101  D(4,14,28,72)          57.0047         calculate D2E/DX2 analyticall!
 ! D102  D(4,14,28,73)         -63.2796         calculate D2E/DX2 analyticall!
 ! D103  D(4,14,28,74)         175.435          calculate D2E/DX2 analyticall!
 ! D104  D(11,14,28,72)        175.0004         calculate D2E/DX2 analyticall!
 ! D105  D(11,14,28,73)         54.7162         calculate D2E/DX2 analyticall!
 ! D106  D(11,14,28,74)        -66.5693         calculate D2E/DX2 analyticall!
 ! D107  D(57,14,28,72)        -63.7893         calculate D2E/DX2 analyticall!
 ! D108  D(57,14,28,73)        175.9265         calculate D2E/DX2 analyticall!
 ! D109  D(57,14,28,74)         54.641          calculate D2E/DX2 analyticall!
 ! D110  D(22,17,18,19)        128.408          calculate D2E/DX2 analyticall!
 ! D111  D(22,17,18,23)        -21.5172         calculate D2E/DX2 analyticall!
 ! D112  D(18,17,22,21)        -12.1608         calculate D2E/DX2 analyticall!
 ! D113  D(18,17,22,25)        117.4537         calculate D2E/DX2 analyticall!
 ! D114  D(18,17,22,61)       -126.0146         calculate D2E/DX2 analyticall!
 ! D115  D(17,18,19,2)          99.23           calculate D2E/DX2 analyticall!
 ! D116  D(23,18,19,2)        -112.7331         calculate D2E/DX2 analyticall!
 ! D117  D(17,18,23,20)         50.9939         calculate D2E/DX2 analyticall!
 ! D118  D(17,18,23,26)        -74.4617         calculate D2E/DX2 analyticall!
 ! D119  D(17,18,23,62)        162.0729         calculate D2E/DX2 analyticall!
 ! D120  D(19,18,23,20)        -97.6105         calculate D2E/DX2 analyticall!
 ! D121  D(19,18,23,26)        136.9339         calculate D2E/DX2 analyticall!
 ! D122  D(19,18,23,62)         13.4685         calculate D2E/DX2 analyticall!
 ! D123  D(23,20,21,22)         19.0452         calculate D2E/DX2 analyticall!
 ! D124  D(23,20,21,24)       -163.5996         calculate D2E/DX2 analyticall!
 ! D125  D(21,20,23,18)        -50.5305         calculate D2E/DX2 analyticall!
 ! D126  D(21,20,23,26)         79.9896         calculate D2E/DX2 analyticall!
 ! D127  D(21,20,23,62)       -164.5835         calculate D2E/DX2 analyticall!
 ! D128  D(20,21,22,17)         14.5796         calculate D2E/DX2 analyticall!
 ! D129  D(20,21,22,25)       -115.0312         calculate D2E/DX2 analyticall!
 ! D130  D(20,21,22,61)        128.2174         calculate D2E/DX2 analyticall!
 ! D131  D(24,21,22,17)       -162.8053         calculate D2E/DX2 analyticall!
 ! D132  D(24,21,22,25)         67.5839         calculate D2E/DX2 analyticall!
 ! D133  D(24,21,22,61)        -49.1675         calculate D2E/DX2 analyticall!
 ! D134  D(17,22,25,63)        171.9326         calculate D2E/DX2 analyticall!
 ! D135  D(17,22,25,64)         52.7801         calculate D2E/DX2 analyticall!
 ! D136  D(17,22,25,65)        -68.0096         calculate D2E/DX2 analyticall!
 ! D137  D(21,22,25,63)        -57.0907         calculate D2E/DX2 analyticall!
 ! D138  D(21,22,25,64)       -176.2432         calculate D2E/DX2 analyticall!
 ! D139  D(21,22,25,65)         62.9671         calculate D2E/DX2 analyticall!
 ! D140  D(61,22,25,63)         57.646          calculate D2E/DX2 analyticall!
 ! D141  D(61,22,25,64)        -61.5065         calculate D2E/DX2 analyticall!
 ! D142  D(61,22,25,65)        177.7039         calculate D2E/DX2 analyticall!
 ! D143  D(18,23,26,66)        156.5189         calculate D2E/DX2 analyticall!
 ! D144  D(18,23,26,67)         35.3977         calculate D2E/DX2 analyticall!
 ! D145  D(18,23,26,68)        -86.817          calculate D2E/DX2 analyticall!
 ! D146  D(20,23,26,66)         32.5754         calculate D2E/DX2 analyticall!
 ! D147  D(20,23,26,67)        -88.5458         calculate D2E/DX2 analyticall!
 ! D148  D(20,23,26,68)        149.2395         calculate D2E/DX2 analyticall!
 ! D149  D(62,23,26,66)        -80.041          calculate D2E/DX2 analyticall!
 ! D150  D(62,23,26,67)        158.8378         calculate D2E/DX2 analyticall!
 ! D151  D(62,23,26,68)         36.6231         calculate D2E/DX2 analyticall!
 ! D152  D(5,29,31,32)        -170.0839         calculate D2E/DX2 analyticall!
 ! D153  D(5,29,31,36)           9.1504         calculate D2E/DX2 analyticall!
 ! D154  D(35,29,31,32)          2.3357         calculate D2E/DX2 analyticall!
 ! D155  D(35,29,31,36)       -178.43           calculate D2E/DX2 analyticall!
 ! D156  D(5,29,35,34)         170.8066         calculate D2E/DX2 analyticall!
 ! D157  D(5,29,35,37)          -8.6181         calculate D2E/DX2 analyticall!
 ! D158  D(31,29,35,34)         -1.5461         calculate D2E/DX2 analyticall!
 ! D159  D(31,29,35,37)        179.0292         calculate D2E/DX2 analyticall!
 ! D160  D(6,30,38,39)        -173.2198         calculate D2E/DX2 analyticall!
 ! D161  D(6,30,38,43)           9.3957         calculate D2E/DX2 analyticall!
 ! D162  D(42,30,38,39)          2.2354         calculate D2E/DX2 analyticall!
 ! D163  D(42,30,38,43)       -175.1491         calculate D2E/DX2 analyticall!
 ! D164  D(6,30,42,41)         174.5953         calculate D2E/DX2 analyticall!
 ! D165  D(6,30,42,44)          -8.2986         calculate D2E/DX2 analyticall!
 ! D166  D(38,30,42,41)         -0.9329         calculate D2E/DX2 analyticall!
 ! D167  D(38,30,42,44)        176.1732         calculate D2E/DX2 analyticall!
 ! D168  D(29,31,32,33)         -1.3321         calculate D2E/DX2 analyticall!
 ! D169  D(29,31,32,75)       -178.939          calculate D2E/DX2 analyticall!
 ! D170  D(36,31,32,33)        179.4346         calculate D2E/DX2 analyticall!
 ! D171  D(36,31,32,75)          1.8277         calculate D2E/DX2 analyticall!
 ! D172  D(29,31,36,45)        -89.2673         calculate D2E/DX2 analyticall!
 ! D173  D(29,31,36,46)        145.8968         calculate D2E/DX2 analyticall!
 ! D174  D(29,31,36,78)         27.4104         calculate D2E/DX2 analyticall!
 ! D175  D(32,31,36,45)         89.9466         calculate D2E/DX2 analyticall!
 ! D176  D(32,31,36,46)        -34.8893         calculate D2E/DX2 analyticall!
 ! D177  D(32,31,36,78)       -153.3756         calculate D2E/DX2 analyticall!
 ! D178  D(31,32,33,34)         -0.4337         calculate D2E/DX2 analyticall!
 ! D179  D(31,32,33,76)       -178.3735         calculate D2E/DX2 analyticall!
 ! D180  D(75,32,33,34)        177.1882         calculate D2E/DX2 analyticall!
 ! D181  D(75,32,33,76)         -0.7516         calculate D2E/DX2 analyticall!
 ! D182  D(32,33,34,35)          1.2648         calculate D2E/DX2 analyticall!
 ! D183  D(32,33,34,77)       -177.9172         calculate D2E/DX2 analyticall!
 ! D184  D(76,33,34,35)        179.1931         calculate D2E/DX2 analyticall!
 ! D185  D(76,33,34,77)          0.0112         calculate D2E/DX2 analyticall!
 ! D186  D(33,34,35,29)         -0.2791         calculate D2E/DX2 analyticall!
 ! D187  D(33,34,35,37)        179.1552         calculate D2E/DX2 analyticall!
 ! D188  D(77,34,35,29)        178.9031         calculate D2E/DX2 analyticall!
 ! D189  D(77,34,35,37)         -1.6626         calculate D2E/DX2 analyticall!
 ! D190  D(29,35,37,47)        119.3799         calculate D2E/DX2 analyticall!
 ! D191  D(29,35,37,48)       -116.5433         calculate D2E/DX2 analyticall!
 ! D192  D(29,35,37,79)          1.3588         calculate D2E/DX2 analyticall!
 ! D193  D(34,35,37,47)        -60.0364         calculate D2E/DX2 analyticall!
 ! D194  D(34,35,37,48)         64.0403         calculate D2E/DX2 analyticall!
 ! D195  D(34,35,37,79)       -178.0576         calculate D2E/DX2 analyticall!
 ! D196  D(31,36,45,85)       -178.9436         calculate D2E/DX2 analyticall!
 ! D197  D(31,36,45,86)         62.294          calculate D2E/DX2 analyticall!
 ! D198  D(31,36,45,87)        -58.1299         calculate D2E/DX2 analyticall!
 ! D199  D(46,36,45,85)        -52.7554         calculate D2E/DX2 analyticall!
 ! D200  D(46,36,45,86)       -171.5178         calculate D2E/DX2 analyticall!
 ! D201  D(46,36,45,87)         68.0583         calculate D2E/DX2 analyticall!
 ! D202  D(78,36,45,85)         63.6976         calculate D2E/DX2 analyticall!
 ! D203  D(78,36,45,86)        -55.0647         calculate D2E/DX2 analyticall!
 ! D204  D(78,36,45,87)       -175.4886         calculate D2E/DX2 analyticall!
 ! D205  D(31,36,46,88)       -171.2285         calculate D2E/DX2 analyticall!
 ! D206  D(31,36,46,89)         69.3622         calculate D2E/DX2 analyticall!
 ! D207  D(31,36,46,90)        -51.68           calculate D2E/DX2 analyticall!
 ! D208  D(45,36,46,88)         63.4436         calculate D2E/DX2 analyticall!
 ! D209  D(45,36,46,89)        -55.9656         calculate D2E/DX2 analyticall!
 ! D210  D(45,36,46,90)       -177.0079         calculate D2E/DX2 analyticall!
 ! D211  D(78,36,46,88)        -52.5343         calculate D2E/DX2 analyticall!
 ! D212  D(78,36,46,89)       -171.9436         calculate D2E/DX2 analyticall!
 ! D213  D(78,36,46,90)         67.0142         calculate D2E/DX2 analyticall!
 ! D214  D(35,37,47,91)       -177.0816         calculate D2E/DX2 analyticall!
 ! D215  D(35,37,47,92)         62.8078         calculate D2E/DX2 analyticall!
 ! D216  D(35,37,47,93)        -57.8827         calculate D2E/DX2 analyticall!
 ! D217  D(48,37,47,91)         58.5728         calculate D2E/DX2 analyticall!
 ! D218  D(48,37,47,92)        -61.5378         calculate D2E/DX2 analyticall!
 ! D219  D(48,37,47,93)        177.7717         calculate D2E/DX2 analyticall!
 ! D220  D(79,37,47,91)        -59.1976         calculate D2E/DX2 analyticall!
 ! D221  D(79,37,47,92)       -179.3082         calculate D2E/DX2 analyticall!
 ! D222  D(79,37,47,93)         60.0013         calculate D2E/DX2 analyticall!
 ! D223  D(35,37,48,94)        177.1004         calculate D2E/DX2 analyticall!
 ! D224  D(35,37,48,95)         57.3808         calculate D2E/DX2 analyticall!
 ! D225  D(35,37,48,96)        -63.1217         calculate D2E/DX2 analyticall!
 ! D226  D(47,37,48,94)        -58.5321         calculate D2E/DX2 analyticall!
 ! D227  D(47,37,48,95)       -178.2517         calculate D2E/DX2 analyticall!
 ! D228  D(47,37,48,96)         61.2457         calculate D2E/DX2 analyticall!
 ! D229  D(79,37,48,94)         59.2872         calculate D2E/DX2 analyticall!
 ! D230  D(79,37,48,95)        -60.4324         calculate D2E/DX2 analyticall!
 ! D231  D(79,37,48,96)        179.065          calculate D2E/DX2 analyticall!
 ! D232  D(30,38,39,40)         -1.5117         calculate D2E/DX2 analyticall!
 ! D233  D(30,38,39,80)       -179.3854         calculate D2E/DX2 analyticall!
 ! D234  D(43,38,39,40)        175.9798         calculate D2E/DX2 analyticall!
 ! D235  D(43,38,39,80)         -1.8939         calculate D2E/DX2 analyticall!
 ! D236  D(30,38,43,51)       -121.1071         calculate D2E/DX2 analyticall!
 ! D237  D(30,38,43,52)        115.8943         calculate D2E/DX2 analyticall!
 ! D238  D(30,38,43,83)         -2.3919         calculate D2E/DX2 analyticall!
 ! D239  D(39,38,43,51)         61.5301         calculate D2E/DX2 analyticall!
 ! D240  D(39,38,43,52)        -61.4685         calculate D2E/DX2 analyticall!
 ! D241  D(39,38,43,83)       -179.7547         calculate D2E/DX2 analyticall!
 ! D242  D(38,39,40,41)         -0.5127         calculate D2E/DX2 analyticall!
 ! D243  D(38,39,40,81)       -178.69           calculate D2E/DX2 analyticall!
 ! D244  D(80,39,40,41)        177.3521         calculate D2E/DX2 analyticall!
 ! D245  D(80,39,40,81)         -0.8252         calculate D2E/DX2 analyticall!
 ! D246  D(39,40,41,42)          1.8879         calculate D2E/DX2 analyticall!
 ! D247  D(39,40,41,82)       -176.7106         calculate D2E/DX2 analyticall!
 ! D248  D(81,40,41,42)       -179.9343         calculate D2E/DX2 analyticall!
 ! D249  D(81,40,41,82)          1.4673         calculate D2E/DX2 analyticall!
 ! D250  D(40,41,42,30)         -1.1532         calculate D2E/DX2 analyticall!
 ! D251  D(40,41,42,44)       -178.2543         calculate D2E/DX2 analyticall!
 ! D252  D(82,41,42,30)        177.44           calculate D2E/DX2 analyticall!
 ! D253  D(82,41,42,44)          0.3389         calculate D2E/DX2 analyticall!
 ! D254  D(30,42,44,49)        157.3874         calculate D2E/DX2 analyticall!
 ! D255  D(30,42,44,50)        -78.3543         calculate D2E/DX2 analyticall!
 ! D256  D(30,42,44,84)         38.581          calculate D2E/DX2 analyticall!
 ! D257  D(41,42,44,49)        -25.5756         calculate D2E/DX2 analyticall!
 ! D258  D(41,42,44,50)         98.6826         calculate D2E/DX2 analyticall!
 ! D259  D(41,42,44,84)       -144.3821         calculate D2E/DX2 analyticall!
 ! D260  D(38,43,51,103)      -178.8039         calculate D2E/DX2 analyticall!
 ! D261  D(38,43,51,104)        61.821          calculate D2E/DX2 analyticall!
 ! D262  D(38,43,51,105)       -58.9407         calculate D2E/DX2 analyticall!
 ! D263  D(52,43,51,103)       -55.3541         calculate D2E/DX2 analyticall!
 ! D264  D(52,43,51,104)      -174.7292         calculate D2E/DX2 analyticall!
 ! D265  D(52,43,51,105)        64.5092         calculate D2E/DX2 analyticall!
 ! D266  D(83,43,51,103)        62.2912         calculate D2E/DX2 analyticall!
 ! D267  D(83,43,51,104)       -57.0839         calculate D2E/DX2 analyticall!
 ! D268  D(83,43,51,105)      -177.8455         calculate D2E/DX2 analyticall!
 ! D269  D(38,43,52,106)      -173.1353         calculate D2E/DX2 analyticall!
 ! D270  D(38,43,52,107)        67.5469         calculate D2E/DX2 analyticall!
 ! D271  D(38,43,52,108)       -52.9554         calculate D2E/DX2 analyticall!
 ! D272  D(51,43,52,106)        62.2124         calculate D2E/DX2 analyticall!
 ! D273  D(51,43,52,107)       -57.1054         calculate D2E/DX2 analyticall!
 ! D274  D(51,43,52,108)      -177.6077         calculate D2E/DX2 analyticall!
 ! D275  D(83,43,52,106)       -55.0376         calculate D2E/DX2 analyticall!
 ! D276  D(83,43,52,107)      -174.3554         calculate D2E/DX2 analyticall!
 ! D277  D(83,43,52,108)        65.1423         calculate D2E/DX2 analyticall!
 ! D278  D(42,44,49,97)       -168.5854         calculate D2E/DX2 analyticall!
 ! D279  D(42,44,49,98)         72.0254         calculate D2E/DX2 analyticall!
 ! D280  D(42,44,49,99)        -48.6426         calculate D2E/DX2 analyticall!
 ! D281  D(50,44,49,97)         66.1464         calculate D2E/DX2 analyticall!
 ! D282  D(50,44,49,98)        -53.2428         calculate D2E/DX2 analyticall!
 ! D283  D(50,44,49,99)       -173.9108         calculate D2E/DX2 analyticall!
 ! D284  D(84,44,49,97)        -50.4016         calculate D2E/DX2 analyticall!
 ! D285  D(84,44,49,98)       -169.7908         calculate D2E/DX2 analyticall!
 ! D286  D(84,44,49,99)         69.5412         calculate D2E/DX2 analyticall!
 ! D287  D(42,44,50,100)      -177.2936         calculate D2E/DX2 analyticall!
 ! D288  D(42,44,50,101)        63.3226         calculate D2E/DX2 analyticall!
 ! D289  D(42,44,50,102)       -57.5054         calculate D2E/DX2 analyticall!
 ! D290  D(49,44,50,100)       -51.2542         calculate D2E/DX2 analyticall!
 ! D291  D(49,44,50,101)      -170.638          calculate D2E/DX2 analyticall!
 ! D292  D(49,44,50,102)        68.534          calculate D2E/DX2 analyticall!
 ! D293  D(84,44,50,100)        65.8664         calculate D2E/DX2 analyticall!
 ! D294  D(84,44,50,101)       -53.5174         calculate D2E/DX2 analyticall!
 ! D295  D(84,44,50,102)      -174.3454         calculate D2E/DX2 analyticall!
 -----------------------------------------------------------------------------
 Trust Radius=3.00D-01 FncErr=1.00D-07 GrdErr=1.00D-07
 Number of steps in this run= 641 maximum allowed number of steps= 684.
 GradGradGradGradGradGradGradGradGradGradGradGradGradGradGradGradGradGrad

 Stoichiometry    C42H60MgN2O9
 Framework group  C1[X(C42H60MgN2O9)]
 Deg. of freedom  336
 Full point group                 C1      NOp   1
 Largest Abelian subgroup         C1      NOp   1
 Largest concise Abelian subgroup C1      NOp   1
                         Standard orientation:                         
 ---------------------------------------------------------------------
 Center     Atomic     Atomic              Coordinates (Angstroms)
 Number     Number      Type              X           Y           Z
 ---------------------------------------------------------------------
    1          8             0       -6.327896    1.444911   -0.539457
    2         12             0        0.473602   -0.604435    0.070623
    3          8             0        0.667288    1.160763   -1.112432
    4          6             0       -5.170353    1.770427   -1.157853
    5          7             0       -0.485587   -2.358328    0.671348
    6          7             0        2.176572   -1.752479   -0.323893
    7          8             0       -5.108998    2.260833   -2.260504
    8          6             0        0.047142   -3.574598    0.797743
    9          6             0        1.360033   -3.901552    0.426910
   10          6             0        2.355885   -3.046718   -0.091451
   11          8             0       -2.819145    1.874388   -0.977997
   12          6             0       -1.662915    1.253735   -0.773377
   13          6             0       -0.484582    1.767365   -1.595037
   14          6             0       -3.988401    1.388852   -0.272504
   15          8             0       -1.528531    0.319271    0.006653
   16          6             0       -7.521449    1.725344   -1.289363
   17          8             0        0.233866    2.790619    0.898865
   18          6             0        1.259751    1.912004    0.647593
   19          8             0        1.242808    0.828577    1.279482
   20          8             0        2.881938    3.592642    1.258661
   21          6             0        1.940023    4.491087    1.583023
   22          6             0        0.485430    4.169681    1.240963
   23          6             0        2.588809    2.568905    0.249362
   24          8             0        2.217479    5.509368    2.173799
   25          6             0       -0.090884    5.135628    0.204799
   26          6             0        2.728086    3.156755   -1.151427
   27          6             0       -0.732941    1.523701   -3.094640
   28          6             0       -4.055895    1.980461    1.134203
   29          6             0       -1.891968   -2.187747    0.976016
   30          6             0        3.292463   -0.917113   -0.713476
   31          6             0       -2.856046   -2.452677   -0.051087
   32          6             0       -4.205411   -2.081903    0.181800
   33          6             0       -4.595632   -1.491338    1.408696
   34          6             0       -3.640352   -1.272915    2.421966
   35          6             0       -2.279433   -1.611041    2.227011
   36          6             0       -2.429393   -3.112379   -1.391341
   37          6             0       -1.246688   -1.342008    3.350870
   38          6             0        4.243825   -0.474534    0.271441
   39          6             0        5.236988    0.461758   -0.130249
   40          6             0        5.311654    0.921690   -1.462430
   41          6             0        4.399451    0.446583   -2.428293
   42          6             0        3.370149   -0.466312   -2.075366
   43          6             0        4.267166   -1.017784    1.727808
   44          6             0        2.393312   -1.017853   -3.148924
   45          6             0       -2.010211   -2.037750   -2.445861
   46          6             0       -3.528098   -4.055747   -1.980744
   47          6             0       -1.178782    0.176361    3.706862
   48          6             0       -1.557769   -2.197770    4.624359
   49          6             0        2.232712   -0.064097   -4.373367
   50          6             0        2.819983   -2.442110   -3.639695
   51          6             0        4.080025    0.110691    2.791167
   52          6             0        5.604515   -1.788242    2.004987
   53          6             0       -0.794550   -4.701549    1.386451
   54          6             0        3.694495   -3.731512   -0.356059
   55          1             0        1.657077   -4.934495    0.574036
   56          1             0       -0.458215    2.856576   -1.438796
   57          1             0       -3.956188    0.295545   -0.188274
   58          1             0       -7.520656    1.173239   -2.233006
   59          1             0       -7.596912    2.794457   -1.504469
   60          1             0       -8.347626    1.402195   -0.655456
   61          1             0       -0.058538    4.318048    2.179798
   62          1             0        3.380494    1.837187    0.388237
   63          1             0        0.001142    6.157313    0.584357
   64          1             0       -1.149035    4.910261    0.040932
   65          1             0        0.433073    5.072428   -0.752669
   66          1             0        3.516866    3.917227   -1.123027
   67          1             0        1.810984    3.610792   -1.531517
   68          1             0        3.050720    2.359324   -1.819416
   69          1             0       -1.666364    2.000807   -3.411767
   70          1             0       -0.791073    0.453200   -3.308768
   71          1             0        0.097314    1.939444   -3.669420
   72          1             0       -4.987851    1.672017    1.613105
   73          1             0       -4.017151    3.074219    1.100918
   74          1             0       -3.222976    1.598048    1.727334
   75          1             0       -4.967940   -2.288487   -0.579775
   76          1             0       -5.651178   -1.236244    1.578705
   77          1             0       -3.958795   -0.846159    3.382469
   78          1             0       -1.532947   -3.730157   -1.193908
   79          1             0       -0.249638   -1.647960    2.971882
   80          1             0        5.978139    0.803879    0.603909
   81          1             0        6.100550    1.628567   -1.755039
   82          1             0        4.503571    0.771255   -3.470484
   83          1             0        3.425551   -1.729646    1.841149
   84          1             0        1.400037   -1.123001   -2.661173
   85          1             0       -1.728663   -2.521102   -3.396235
   86          1             0       -1.131946   -1.478331   -2.074409
   87          1             0       -2.830330   -1.326999   -2.639396
   88          1             0       -3.114153   -4.610508   -2.836424
   89          1             0       -4.399515   -3.484487   -2.334109
   90          1             0       -3.865975   -4.781569   -1.225401
   91          1             0       -0.402697    0.351441    4.469657
   92          1             0       -2.142575    0.534219    4.101945
   93          1             0       -0.919590    0.767607    2.810177
   94          1             0       -0.782129   -2.027530    5.386573
   95          1             0       -1.574969   -3.271219    4.379439
   96          1             0       -2.533460   -1.921923    5.053108
   97          1             0        1.388211   -0.400084   -4.994046
   98          1             0        3.138206   -0.064090   -5.000508
   99          1             0        2.038900    0.968485   -4.042216
  100          1             0        2.134611   -2.779732   -4.432550
  101          1             0        2.777922   -3.171278   -2.815713
  102          1             0        3.844158   -2.425472   -4.044589
  103          1             0        4.125759   -0.323658    3.801946
  104          1             0        3.099037    0.595977    2.662119
  105          1             0        4.868057    0.873776    2.704201
  106          1             0        5.555957   -2.270400    2.993265
  107          1             0        6.458168   -1.093257    2.001055
  108          1             0        5.787069   -2.563982    1.246525
  109          1             0       -1.676623   -4.916614    0.772679
  110          1             0       -0.209053   -5.623282    1.470486
  111          1             0       -1.151575   -4.433957    2.388398
  112          1             0        4.390878   -3.106642   -0.919606
  113          1             0        4.171109   -4.008160    0.592393
  114          1             0        3.531336   -4.661874   -0.913762
 ---------------------------------------------------------------------
 Rotational constants (GHZ):      0.0687257      0.0478449      0.0405294
 Isotopes: O-16,Mg-24,O-16,C-12,N-14,N-14,O-16,C-12,C-12,C-12,O-16,C-12,C-12,C-12
 ,O-16,C-12,O-16,C-12,O-16,O-16,C-12,C-12,C-12,O-16,C-12,C-12,C-12,C-12,C-12,C-12
 ,C-12,C-12,C-12,C-12,C-12,C-12,C-12,C-12,C-12,C-12,C-12,C-12,C-12,C-12,C-12,C-12
 ,C-12,C-12,C-12,C-12,C-12,C-12,C-12,C-12,H-1,H-1,H-1,H-1,H-1,H-1,H-1,H-1,H-1,H-1
 ,H-1,H-1,H-1,H-1,H-1,H-1,H-1,H-1,H-1,H-1,H-1,H-1,H-1,H-1,H-1,H-1,H-1,H-1,H-1,H-1
 ,H-1,H-1,H-1,H-1,H-1,H-1,H-1,H-1,H-1,H-1,H-1,H-1,H-1,H-1,H-1,H-1,H-1,H-1,H-1,H-1
 ,H-1,H-1,H-1,H-1,H-1,H-1,H-1,H-1,H-1,H-1
 General basis read from cards:  (5D, 7F)
 There are   642 symmetry adapted basis functions of A   symmetry.
 Crude estimate of integral set expansion from redundant integrals=1.000.
 Integral buffers will be    262144 words long.
 Raffenetti 2 integral format.
 Two-electron integral symmetry is turned on.
   642 basis functions     1430 primitive gaussians
   205 alpha electrons      205 beta electrons
       nuclear repulsion energy      9038.6013142499 Hartrees.
 One-electron integrals computed using PRISM.
 NBasis=   642 RedAO= T  NBF=   642
 NBsUse=   642 1.00D-04 NBFU=   642
 Initial guess read from the checkpoint file:
 SSRR_fm-5-ts.chk
 Requested convergence on RMS density matrix=1.00D-08 within  64 cycles.
 Requested convergence on MAX density matrix=1.00D-06.
 SCF Done:  E(RB+HF-LYP) =  -2612.18540948     A.U. after    1 cycles
             Convg  =    0.6388D-08             -V/T =  2.0106
             S**2   =   0.0000
 Range of M.O.s used for correlation:     1   642
 NBasis=   642 NAE=   205 NBE=   205 NFC=     0 NFV=     0
 NROrb=    642 NOA=   205 NOB=   205 NVA=   437 NVB=   437
 PrsmSu:  requested number of processors reduced to:   1 ShMem   1 Linda.
 PrsmSu:  requested number of processors reduced to:   1 ShMem   1 Linda.
 G2DrvN: will do   23 atoms at a time, making    5 passes doing MaxLOS=2.
 FoFDir used for L=0 through L=2.
          Differentiating once with respect to electric field.
                with respect to dipole field.
          Differentiating once with respect to nuclear coordinates.
 Integrals replicated using symmetry in FoFDir.
 MinBra= 0 MaxBra= 2 Meth= 1.
 IRaf=       0 NMat=  69 IRICut=      69 DoRegI=T DoRafI=T ISym2E= 2 JSym2E=2.
 Raff turned off since only 53.09% of shell-pairs survive.
          There are 345 degrees of freedom in the 1st order CPHF.
 345 vectors were produced by pass  0.
 AX will form  69 AO Fock derivatives at one time.
 345 vectors were produced by pass  1.
 345 vectors were produced by pass  2.
 342 vectors were produced by pass  3.
 342 vectors were produced by pass  4.
 198 vectors were produced by pass  5.
  36 vectors were produced by pass  6.
   3 vectors were produced by pass  7.
 Inv2:  IOpt= 1 Iter= 1 AM= 8.11D-15 Conv= 1.00D-12.
 Inverted reduced A of dimension1956 with in-core refinement.

 **********************************************************************

            Population analysis using the SCF density.

 **********************************************************************

 Alpha  occ. eigenvalues --  -46.71915 -19.19827 -19.19554 -19.18084 -19.17339
 Alpha  occ. eigenvalues --  -19.14657 -19.13929 -19.12266 -19.10896 -19.09334
 Alpha  occ. eigenvalues --  -14.28412 -14.27925 -10.32716 -10.31602 -10.31390
 Alpha  occ. eigenvalues --  -10.30817 -10.25682 -10.25251 -10.24028 -10.23489
 Alpha  occ. eigenvalues --  -10.22511 -10.20394 -10.20096 -10.18213 -10.17639
 Alpha  occ. eigenvalues --  -10.16138 -10.15820 -10.15818 -10.15783 -10.12296
 Alpha  occ. eigenvalues --  -10.06138 -10.05666 -10.03864 -10.03566 -10.03470
 Alpha  occ. eigenvalues --  -10.03429 -10.02911 -10.02899 -10.02835 -10.02599
 Alpha  occ. eigenvalues --  -10.02586 -10.02558 -10.02375 -10.02354 -10.02201
 Alpha  occ. eigenvalues --  -10.01864 -10.01697 -10.01490 -10.00909 -10.00867
 Alpha  occ. eigenvalues --  -10.00761 -10.00669  -9.99999  -9.99434  -3.02237
 Alpha  occ. eigenvalues --   -1.77037  -1.76821  -1.76641  -1.11948  -1.10638
 Alpha  occ. eigenvalues --   -1.10375  -1.07378  -1.03111  -1.01812  -1.01033
 Alpha  occ. eigenvalues --   -0.99949  -0.95098  -0.89324  -0.88031  -0.81631
 Alpha  occ. eigenvalues --   -0.81035  -0.80250  -0.78733  -0.77170  -0.76931
 Alpha  occ. eigenvalues --   -0.76480  -0.74943  -0.74550  -0.74260  -0.74069
 Alpha  occ. eigenvalues --   -0.72497  -0.72080  -0.68815  -0.68709  -0.68646
 Alpha  occ. eigenvalues --   -0.68149  -0.67640  -0.66796  -0.65940  -0.65744
 Alpha  occ. eigenvalues --   -0.65039  -0.65028  -0.64511  -0.64219  -0.62942
 Alpha  occ. eigenvalues --   -0.62499  -0.59516  -0.59273  -0.58653  -0.57995
 Alpha  occ. eigenvalues --   -0.57105  -0.55504  -0.55359  -0.55089  -0.54943
 Alpha  occ. eigenvalues --   -0.52743  -0.52497  -0.51043  -0.50754  -0.50478
 Alpha  occ. eigenvalues --   -0.50387  -0.49863  -0.49294  -0.48983  -0.48204
 Alpha  occ. eigenvalues --   -0.47834  -0.47175  -0.47130  -0.46286  -0.45509
 Alpha  occ. eigenvalues --   -0.45160  -0.44799  -0.44745  -0.44503  -0.44026
 Alpha  occ. eigenvalues --   -0.43926  -0.43353  -0.43304  -0.42742  -0.42283
 Alpha  occ. eigenvalues --   -0.41894  -0.41454  -0.41274  -0.41062  -0.40926
 Alpha  occ. eigenvalues --   -0.40676  -0.40621  -0.40492  -0.40245  -0.39973
 Alpha  occ. eigenvalues --   -0.39858  -0.39678  -0.39588  -0.39242  -0.39155
 Alpha  occ. eigenvalues --   -0.38893  -0.38792  -0.38518  -0.38381  -0.38097
 Alpha  occ. eigenvalues --   -0.37670  -0.37527  -0.37365  -0.37119  -0.36881
 Alpha  occ. eigenvalues --   -0.36655  -0.36576  -0.36453  -0.36268  -0.36130
 Alpha  occ. eigenvalues --   -0.35852  -0.35599  -0.35277  -0.35200  -0.35028
 Alpha  occ. eigenvalues --   -0.34923  -0.34714  -0.34592  -0.34430  -0.34347
 Alpha  occ. eigenvalues --   -0.33942  -0.33128  -0.32626  -0.32166  -0.31380
 Alpha  occ. eigenvalues --   -0.31300  -0.31228  -0.30889  -0.30862  -0.30632
 Alpha  occ. eigenvalues --   -0.30339  -0.30115  -0.29969  -0.29851  -0.29466
 Alpha  occ. eigenvalues --   -0.29238  -0.28791  -0.28482  -0.28332  -0.28159
 Alpha  occ. eigenvalues --   -0.27887  -0.27651  -0.27623  -0.27370  -0.26213
 Alpha  occ. eigenvalues --   -0.25928  -0.25199  -0.25057  -0.24884  -0.23147
 Alpha  occ. eigenvalues --   -0.19359  -0.19245  -0.18900  -0.18245  -0.15667
 Alpha virt. eigenvalues --    0.00115   0.00737   0.00841   0.00982   0.01251
 Alpha virt. eigenvalues --    0.05869   0.06346   0.06618   0.06859   0.07631
 Alpha virt. eigenvalues --    0.08222   0.09039   0.09966   0.10228   0.10443
 Alpha virt. eigenvalues --    0.11776   0.12036   0.12945   0.13316   0.13982
 Alpha virt. eigenvalues --    0.14422   0.14815   0.15167   0.15349   0.15589
 Alpha virt. eigenvalues --    0.16335   0.16441   0.16619   0.17144   0.17785
 Alpha virt. eigenvalues --    0.17926   0.18065   0.18666   0.19255   0.19517
 Alpha virt. eigenvalues --    0.19982   0.20317   0.20817   0.21144   0.21542
 Alpha virt. eigenvalues --    0.21834   0.22297   0.22628   0.23077   0.23767
 Alpha virt. eigenvalues --    0.24456   0.24731   0.25032   0.25175   0.25403
 Alpha virt. eigenvalues --    0.25931   0.26563   0.27011   0.27714   0.28417
 Alpha virt. eigenvalues --    0.29097   0.29425   0.29780   0.31045   0.31517
 Alpha virt. eigenvalues --    0.32340   0.32661   0.32769   0.33220   0.33591
 Alpha virt. eigenvalues --    0.33754   0.34404   0.34652   0.34994   0.35201
 Alpha virt. eigenvalues --    0.35559   0.36308   0.36971   0.37243   0.37418
 Alpha virt. eigenvalues --    0.38061   0.38431   0.38686   0.38903   0.38974
 Alpha virt. eigenvalues --    0.39577   0.39711   0.40092   0.40514   0.40750
 Alpha virt. eigenvalues --    0.41162   0.41223   0.41809   0.41985   0.42362
 Alpha virt. eigenvalues --    0.42915   0.43662   0.43888   0.44094   0.44613
 Alpha virt. eigenvalues --    0.44840   0.45192   0.45528   0.45831   0.46060
 Alpha virt. eigenvalues --    0.46359   0.46491   0.46704   0.46782   0.47348
 Alpha virt. eigenvalues --    0.47598   0.47731   0.48294   0.48519   0.48710
 Alpha virt. eigenvalues --    0.48878   0.48961   0.49331   0.49361   0.49603
 Alpha virt. eigenvalues --    0.49703   0.49965   0.50212   0.50496   0.50780
 Alpha virt. eigenvalues --    0.50882   0.51130   0.51324   0.51876   0.52171
 Alpha virt. eigenvalues --    0.52867   0.53204   0.53774   0.54255   0.54419
 Alpha virt. eigenvalues --    0.54705   0.55313   0.55486   0.55551   0.56014
 Alpha virt. eigenvalues --    0.56230   0.56688   0.56820   0.57499   0.57655
 Alpha virt. eigenvalues --    0.57826   0.57993   0.58228   0.58426   0.58757
 Alpha virt. eigenvalues --    0.59286   0.59546   0.60380   0.60790   0.61022
 Alpha virt. eigenvalues --    0.61266   0.61775   0.62118   0.62864   0.63424
 Alpha virt. eigenvalues --    0.63905   0.65284   0.65990   0.66543   0.66680
 Alpha virt. eigenvalues --    0.66972   0.67329   0.67540   0.68009   0.68356
 Alpha virt. eigenvalues --    0.69131   0.69527   0.70184   0.70524   0.70751
 Alpha virt. eigenvalues --    0.71356   0.71691   0.71957   0.72090   0.72278
 Alpha virt. eigenvalues --    0.73253   0.73877   0.74219   0.74893   0.75380
 Alpha virt. eigenvalues --    0.75684   0.76482   0.76720   0.77575   0.77988
 Alpha virt. eigenvalues --    0.78165   0.79153   0.79832   0.80143   0.81800
 Alpha virt. eigenvalues --    0.82343   0.82825   0.83389   0.84216   0.84289
 Alpha virt. eigenvalues --    0.84650   0.85761   0.86946   0.87628   0.88181
 Alpha virt. eigenvalues --    0.88636   0.89257   0.89505   0.90286   0.90461
 Alpha virt. eigenvalues --    0.90747   0.91456   0.92839   0.93187   0.93580
 Alpha virt. eigenvalues --    0.93965   0.94568   0.95154   0.96134   0.96441
 Alpha virt. eigenvalues --    0.96885   0.97375   0.97854   0.98702   0.99537
 Alpha virt. eigenvalues --    1.00377   1.02012   1.02963   1.03688   1.04548
 Alpha virt. eigenvalues --    1.05476   1.05995   1.06516   1.07252   1.08239
 Alpha virt. eigenvalues --    1.08433   1.09249   1.10079   1.11176   1.11522
 Alpha virt. eigenvalues --    1.12097   1.13139   1.14043   1.15317   1.15443
 Alpha virt. eigenvalues --    1.17202   1.18415   1.18882   1.19558   1.21474
 Alpha virt. eigenvalues --    1.22263   1.22510   1.24417   1.25362   1.27331
 Alpha virt. eigenvalues --    1.27897   1.29364   1.29680   1.30545   1.32350
 Alpha virt. eigenvalues --    1.33005   1.34399   1.36227   1.37161   1.37320
 Alpha virt. eigenvalues --    1.37962   1.38638   1.39720   1.40939   1.42229
 Alpha virt. eigenvalues --    1.43135   1.43460   1.43794   1.45041   1.46299
 Alpha virt. eigenvalues --    1.46581   1.48464   1.49960   1.50857   1.51939
 Alpha virt. eigenvalues --    1.52527   1.53239   1.54089   1.54530   1.55335
 Alpha virt. eigenvalues --    1.56796   1.59723   1.60860   1.61596   1.62261
 Alpha virt. eigenvalues --    1.62850   1.64247   1.65591   1.66006   1.67348
 Alpha virt. eigenvalues --    1.68499   1.69689   1.71032   1.71641   1.71827
 Alpha virt. eigenvalues --    1.73014   1.74605   1.75442   1.76513   1.76772
 Alpha virt. eigenvalues --    1.77677   1.78142   1.79420   1.79782   1.80103
 Alpha virt. eigenvalues --    1.81078   1.82269   1.82849   1.83305   1.83810
 Alpha virt. eigenvalues --    1.84671   1.85415   1.85574   1.86298   1.86966
 Alpha virt. eigenvalues --    1.87929   1.88133   1.89245   1.89858   1.90132
 Alpha virt. eigenvalues --    1.91034   1.91435   1.92874   1.93195   1.94082
 Alpha virt. eigenvalues --    1.94819   1.95441   1.95695   1.97114   1.97849
 Alpha virt. eigenvalues --    1.98732   1.99260   1.99681   2.00086   2.00377
 Alpha virt. eigenvalues --    2.01055   2.01869   2.02308   2.02821   2.03393
 Alpha virt. eigenvalues --    2.05111   2.05926   2.06135   2.07472   2.08194
 Alpha virt. eigenvalues --    2.08560   2.10142   2.10440   2.11562   2.12537
 Alpha virt. eigenvalues --    2.12877   2.13756   2.14555   2.15320   2.16225
 Alpha virt. eigenvalues --    2.16526   2.18111   2.19354   2.19750   2.20652
 Alpha virt. eigenvalues --    2.21339   2.22195   2.23488   2.23840   2.25165
 Alpha virt. eigenvalues --    2.25737   2.26117   2.27941   2.28702   2.29363
 Alpha virt. eigenvalues --    2.29472   2.30360   2.31402   2.32262   2.33331
 Alpha virt. eigenvalues --    2.34107   2.34573   2.35002   2.35162   2.35974
 Alpha virt. eigenvalues --    2.36510   2.38605   2.39471   2.40669   2.42488
 Alpha virt. eigenvalues --    2.44623   2.45765   2.47378   2.49129   2.49823
 Alpha virt. eigenvalues --    2.51452   2.52672   2.53815   2.56228   2.57624
 Alpha virt. eigenvalues --    2.59499   2.60263   2.61070   2.63745   2.64786
 Alpha virt. eigenvalues --    2.66107   2.66336   2.67590   2.69591   2.69848
 Alpha virt. eigenvalues --    2.71715   2.74002   2.74944   2.75933   2.77266
 Alpha virt. eigenvalues --    2.78728   2.79746   2.84446   2.86715   2.88246
 Alpha virt. eigenvalues --    2.89721   2.90244   2.91734   2.95220   2.96753
 Alpha virt. eigenvalues --    3.01655   3.01929   3.03352   3.04340   3.06027
 Alpha virt. eigenvalues --    3.11891   3.14007   3.17182   3.20789   3.21624
 Alpha virt. eigenvalues --    3.23256   3.26597   3.86006   5.99083   6.15087
 Alpha virt. eigenvalues --    6.33400 103.59104
          Condensed to atoms (all electrons):
 Total atomic charges:
              1
  1  O   -0.451423
  2  Mg   0.867998
  3  O   -0.609093
  4  C    0.561562
  5  N   -0.538918
  6  N   -0.524794
  7  O   -0.425989
  8  C    0.330132
  9  C   -0.235130
 10  C    0.334581
 11  O   -0.443803
 12  C    0.624054
 13  C    0.108690
 14  C    0.043127
 15  O   -0.453883
 16  C   -0.211896
 17  O   -0.474448
 18  C    0.696037
 19  O   -0.541757
 20  O   -0.439801
 21  C    0.541386
 22  C    0.057173
 23  C    0.075054
 24  O   -0.423080
 25  C   -0.473305
 26  C   -0.465201
 27  C   -0.473609
 28  C   -0.476842
 29  C    0.023322
 30  C    0.015645
 31  C   -0.001394
 32  C   -0.075646
 33  C   -0.070255
 34  C   -0.080913
 35  C   -0.002922
 36  C   -0.055550
 37  C   -0.061104
 38  C    0.008772
 39  C   -0.072972
 40  C   -0.068554
 41  C   -0.076862
 42  C    0.008935
 43  C   -0.054289
 44  C   -0.049791
 45  C   -0.217305
 46  C   -0.218718
 47  C   -0.223482
 48  C   -0.216869
 49  C   -0.217705
 50  C   -0.218437
 51  C   -0.221600
 52  C   -0.217750
 53  C   -0.447214
 54  C   -0.451699
 55  H    0.076660
 56  H    0.139328
 57  H    0.142423
 58  H    0.170601
 59  H    0.173221
 60  H    0.163986
 61  H    0.187189
 62  H    0.113078
 63  H    0.179881
 64  H    0.170599
 65  H    0.165243
 66  H    0.149982
 67  H    0.146559
 68  H    0.144558
 69  H    0.167647
 70  H    0.163082
 71  H    0.149780
 72  H    0.164518
 73  H    0.151875
 74  H    0.193993
 75  H    0.084617
 76  H    0.086921
 77  H    0.081619
 78  H    0.095780
 79  H    0.100750
 80  H    0.088819
 81  H    0.088455
 82  H    0.088422
 83  H    0.098682
 84  H    0.099001
 85  H    0.079333
 86  H    0.087966
 87  H    0.077895
 88  H    0.077432
 89  H    0.072348
 90  H    0.075555
 91  H    0.078575
 92  H    0.066915
 93  H    0.107140
 94  H    0.077614
 95  H    0.073264
 96  H    0.070603
 97  H    0.076286
 98  H    0.070621
 99  H    0.088017
100  H    0.076056
101  H    0.089391
102  H    0.071880
103  H    0.072979
104  H    0.109071
105  H    0.070854
106  H    0.076510
107  H    0.072125
108  H    0.075177
109  H    0.127454
110  H    0.123571
111  H    0.128692
112  H    0.125441
113  H    0.132447
114  H    0.129055
 Sum of Mulliken charges=   0.00000
 Atomic charges with hydrogens summed into heavy atoms:
              1
  1  O   -0.451423
  2  Mg   0.867998
  3  O   -0.609093
  4  C    0.561562
  5  N   -0.538918
  6  N   -0.524794
  7  O   -0.425989
  8  C    0.330132
  9  C   -0.158470
 10  C    0.334581
 11  O   -0.443803
 12  C    0.624054
 13  C    0.248018
 14  C    0.185550
 15  O   -0.453883
 16  C    0.295912
 17  O   -0.474448
 18  C    0.696037
 19  O   -0.541757
 20  O   -0.439801
 21  C    0.541386
 22  C    0.244362
 23  C    0.188132
 24  O   -0.423080
 25  C    0.042419
 26  C   -0.024103
 27  C    0.006900
 28  C    0.033545
 29  C    0.023322
 30  C    0.015645
 31  C   -0.001394
 32  C    0.008971
 33  C    0.016666
 34  C    0.000706
 35  C   -0.002922
 36  C    0.040230
 37  C    0.039646
 38  C    0.008772
 39  C    0.015847
 40  C    0.019902
 41  C    0.011560
 42  C    0.008935
 43  C    0.044393
 44  C    0.049210
 45  C    0.027889
 46  C    0.006617
 47  C    0.029149
 48  C    0.004613
 49  C    0.017219
 50  C    0.018889
 51  C    0.031303
 52  C    0.006062
 53  C   -0.067497
 54  C   -0.064756
 55  H    0.000000
 56  H    0.000000
 57  H    0.000000
 58  H    0.000000
 59  H    0.000000
 60  H    0.000000
 61  H    0.000000
 62  H    0.000000
 63  H    0.000000
 64  H    0.000000
 65  H    0.000000
 66  H    0.000000
 67  H    0.000000
 68  H    0.000000
 69  H    0.000000
 70  H    0.000000
 71  H    0.000000
 72  H    0.000000
 73  H    0.000000
 74  H    0.000000
 75  H    0.000000
 76  H    0.000000
 77  H    0.000000
 78  H    0.000000
 79  H    0.000000
 80  H    0.000000
 81  H    0.000000
 82  H    0.000000
 83  H    0.000000
 84  H    0.000000
 85  H    0.000000
 86  H    0.000000
 87  H    0.000000
 88  H    0.000000
 89  H    0.000000
 90  H    0.000000
 91  H    0.000000
 92  H    0.000000
 93  H    0.000000
 94  H    0.000000
 95  H    0.000000
 96  H    0.000000
 97  H    0.000000
 98  H    0.000000
 99  H    0.000000
100  H    0.000000
101  H    0.000000
102  H    0.000000
103  H    0.000000
104  H    0.000000
105  H    0.000000
106  H    0.000000
107  H    0.000000
108  H    0.000000
109  H    0.000000
110  H    0.000000
111  H    0.000000
112  H    0.000000
113  H    0.000000
114  H    0.000000
 Sum of Mulliken charges=   0.00000
 Electronic spatial extent (au):  <R**2>= 30873.7530
 Charge=     0.0000 electrons
 Dipole moment (Debye):
    X=    -3.6756    Y=    -3.8869    Z=    -1.9589  Tot=     5.6970
 Quadrupole moment (Debye-Ang):
   XX=  -274.8656   YY=  -329.4410   ZZ=  -313.0313
   XY=   -10.5019   XZ=   -16.3339   YZ=    -7.0109
 Octapole moment (Debye-Ang**2):
  XXX=  -192.7704  YYY=   -94.2446  ZZZ=     5.1053  XYY=   -98.6584
  XXY=   -21.6089  XXZ=   -24.5554  XZZ=     1.4390  YZZ=   -46.3561
  YYZ=   -64.8014  XYZ=   -69.6631
 Hexadecapole moment (Debye-Ang**3):
 XXXX=-17439.1864 YYYY=-12845.2507 ZZZZ= -7424.0399 XXXY=  -313.1468
 XXXZ=   140.7018 YYYX=  -505.4216 YYYZ=  -373.7108 ZZZX=  -138.7428
 ZZZY=    30.6404 XXYY= -5524.7779 XXZZ= -4568.5323 YYZZ= -3502.6066
 XXYZ=   -52.3035 YYXZ=  -256.8708 ZZXY=    -6.4320
 N-N= 9.038601314250D+03 E-N=-2.417310742688D+04  KE= 2.584685622479D+03
  Exact polarizability: 474.915   7.219 394.033  -7.530  -0.567 369.919
 Approx polarizability: 651.544  17.594 559.016 -10.705  -6.641 593.599
 Full mass-weighted force constant matrix:
 Low frequencies --- -142.8783   -6.5857   -4.9327   -0.0083   -0.0062   -0.0022
 Low frequencies ---    5.3383   14.4683   18.4625
 ******    1 imaginary frequencies (negative Signs) ****** 
 Harmonic frequencies (cm**-1), IR intensities (KM/Mole),
 Raman scattering activities (A**4/AMU), Raman depolarization ratios,
 reduced masses (AMU), force constants (mDyne/A) and normal coordinates:
                     1                      2                      3
                    ?A                     ?A                     ?A
 Frequencies --  -142.8773                14.3614                18.4376
 Red. masses --     8.2660                 5.2522                 4.3381
 Frc consts  --     0.0994                 0.0006                 0.0009
 IR Inten    --    76.7853                 0.0965                 0.2367
 Raman Activ --     0.0000                 0.0000                 0.0000
 Depolar     --     0.0000                 0.0000                 0.0000
 Atom AN      X      Y      Z        X      Y      Z        X      Y      Z
   1   8    -0.02   0.00   0.00     0.01   0.13   0.16     0.00   0.02  -0.01
   2  12    -0.03   0.03  -0.16     0.00  -0.02  -0.01     0.00   0.00   0.01
   3   8    -0.08  -0.27  -0.26     0.00  -0.03  -0.03     0.00   0.00   0.02
   4   6    -0.02   0.01   0.00     0.00   0.09   0.11     0.00   0.03   0.00
   5   7     0.00   0.02  -0.02     0.01  -0.03  -0.01     0.01   0.00   0.02
   6   7     0.01   0.01   0.01     0.02  -0.01   0.01     0.01   0.00   0.03
   7   8    -0.02   0.01   0.00    -0.04   0.10   0.11     0.01   0.05   0.01
   8   6     0.00   0.02   0.00     0.02  -0.02   0.00     0.02   0.01   0.06
   9   6     0.00   0.01   0.00     0.02  -0.01   0.01     0.02   0.02   0.08
  10   6     0.00   0.01   0.01     0.02  -0.01   0.02     0.02   0.01   0.06
  11   8    -0.02  -0.02  -0.03     0.01   0.01   0.01     0.00   0.01   0.02
  12   6    -0.02  -0.03  -0.04     0.00  -0.02  -0.02     0.00   0.01   0.02
  13   6    -0.02  -0.15  -0.12     0.00  -0.03  -0.03     0.00   0.01   0.03
  14   6    -0.01   0.01   0.00     0.02   0.05   0.06    -0.01   0.01   0.00
  15   8    -0.03   0.04   0.06     0.00  -0.02  -0.02     0.00   0.00   0.01
  16   6    -0.01   0.00   0.00    -0.01   0.19   0.22     0.00   0.04  -0.02
  17   8     0.10  -0.02   0.15    -0.03  -0.02  -0.05     0.01   0.00   0.03
  18   6     0.13   0.07   0.34    -0.02  -0.01  -0.04     0.01   0.00   0.03
  19   8     0.03  -0.02   0.06    -0.02   0.00  -0.03     0.01  -0.01   0.02
  20   8     0.07   0.11   0.04    -0.05   0.02  -0.04     0.02  -0.02   0.03
  21   6     0.04   0.09   0.02    -0.06   0.01  -0.06     0.03  -0.02   0.06
  22   6     0.04   0.04   0.03    -0.05  -0.01  -0.07     0.02  -0.01   0.06
  23   6     0.07   0.02   0.13    -0.03   0.00  -0.03     0.01   0.00   0.02
  24   8     0.00   0.10   0.00    -0.07   0.02  -0.07     0.03  -0.04   0.08
  25   6     0.00  -0.06  -0.04    -0.05  -0.03  -0.08     0.02   0.01   0.09
  26   6    -0.05  -0.09   0.08    -0.02  -0.01  -0.04    -0.01   0.01   0.02
  27   6    -0.19   0.00  -0.12    -0.01  -0.06  -0.03     0.00   0.04   0.02
  28   6     0.00   0.02  -0.01     0.10   0.05   0.06    -0.01   0.00   0.01
  29   6     0.00   0.01  -0.01     0.01  -0.03  -0.03     0.00  -0.01  -0.02
  30   6     0.01   0.00   0.01     0.01   0.00   0.02    -0.01   0.00  -0.02
  31   6     0.00   0.01  -0.01     0.02  -0.03  -0.05     0.03  -0.02  -0.04
  32   6     0.00   0.00   0.00     0.02  -0.02  -0.07     0.02  -0.03  -0.08
  33   6     0.00   0.00   0.00     0.00  -0.02  -0.08    -0.02  -0.03  -0.10
  34   6     0.00   0.00   0.00    -0.01  -0.02  -0.06    -0.05  -0.02  -0.07
  35   6     0.00   0.00  -0.01    -0.01  -0.03  -0.04    -0.05  -0.01  -0.03
  36   6     0.00   0.01   0.00     0.04  -0.04  -0.04     0.07  -0.02  -0.03
  37   6     0.00   0.00  -0.01    -0.03  -0.04  -0.02    -0.08   0.01   0.00
  38   6     0.00   0.01   0.01     0.00   0.01   0.03     0.02   0.02  -0.05
  39   6     0.00   0.01   0.01    -0.01   0.02   0.04     0.00   0.02  -0.10
  40   6     0.00   0.01   0.01     0.01   0.01   0.04    -0.05   0.01  -0.11
  41   6     0.01   0.00   0.00     0.03  -0.01   0.03    -0.07  -0.02  -0.07
  42   6     0.01   0.00   0.00     0.03  -0.01   0.02    -0.05  -0.03  -0.03
  43   6     0.01   0.00   0.00    -0.02   0.02   0.04     0.07   0.05  -0.05
  44   6     0.01  -0.01   0.00     0.05  -0.03   0.01    -0.07  -0.06   0.01
  45   6     0.00   0.01  -0.01     0.06  -0.05  -0.04     0.05  -0.02  -0.03
  46   6     0.00   0.00   0.00     0.05  -0.04  -0.05     0.12  -0.07  -0.03
  47   6    -0.01   0.00   0.00    -0.02  -0.04  -0.03    -0.09   0.02  -0.03
  48   6     0.01   0.00  -0.01    -0.06  -0.03  -0.02    -0.12   0.03   0.00
  49   6    -0.01   0.00   0.01     0.04  -0.02   0.01    -0.09  -0.11  -0.02
  50   6     0.02   0.00   0.00     0.08  -0.02   0.01    -0.08  -0.08   0.05
  51   6     0.02  -0.01   0.02    -0.04   0.03   0.03     0.08   0.06  -0.06
  52   6     0.01  -0.01  -0.01    -0.02   0.03   0.06     0.09   0.08  -0.07
  53   6     0.00   0.03   0.00     0.02  -0.02  -0.01     0.01   0.01   0.05
  54   6     0.00   0.00   0.01     0.03   0.00   0.04     0.02   0.01   0.07
  55   1    -0.01   0.01   0.00     0.03  -0.01   0.02     0.03   0.02   0.11
  56   1     0.07  -0.15  -0.06     0.00  -0.03  -0.06     0.01   0.01   0.04
  57   1    -0.02   0.01   0.01    -0.01   0.04   0.05    -0.01   0.01  -0.01
  58   1    -0.01   0.00   0.00    -0.08   0.20   0.22     0.01   0.06  -0.03
  59   1    -0.02   0.00   0.00     0.02   0.19   0.24     0.01   0.05   0.00
  60   1    -0.02   0.00   0.00     0.00   0.21   0.26     0.00   0.03  -0.03
  61   1     0.03   0.07   0.02    -0.06   0.00  -0.07     0.03  -0.03   0.07
  62   1     0.10   0.05   0.14    -0.02   0.01  -0.01     0.01  -0.01   0.00
  63   1    -0.04  -0.04  -0.09    -0.07  -0.02  -0.10     0.02   0.00   0.11
  64   1     0.02  -0.12  -0.03    -0.05  -0.05  -0.09     0.02   0.02   0.09
  65   1     0.01  -0.09  -0.03    -0.04  -0.03  -0.08     0.01   0.03   0.08
  66   1    -0.08  -0.05  -0.01    -0.02  -0.01  -0.04    -0.01   0.02   0.03
  67   1    -0.09  -0.18   0.09    -0.02  -0.02  -0.05    -0.01   0.02   0.04
  68   1    -0.05  -0.13   0.12    -0.01  -0.02  -0.03    -0.01   0.02   0.01
  69   1    -0.17   0.11  -0.03    -0.01  -0.06  -0.03     0.00   0.05   0.03
  70   1    -0.30   0.02  -0.19    -0.02  -0.07  -0.01     0.00   0.04   0.00
  71   1    -0.18  -0.04  -0.15    -0.01  -0.08  -0.04     0.00   0.04   0.03
  72   1    -0.01   0.05  -0.01     0.12   0.06   0.11    -0.02   0.01   0.00
  73   1     0.02   0.02  -0.01     0.12   0.05   0.06     0.00   0.00   0.02
  74   1    -0.02   0.00   0.00     0.13   0.04   0.02    -0.02  -0.02   0.01
  75   1     0.00   0.00   0.00     0.03  -0.02  -0.09     0.04  -0.04  -0.11
  76   1     0.00  -0.01   0.00     0.00  -0.01  -0.10    -0.03  -0.04  -0.13
  77   1     0.00  -0.01   0.00    -0.03  -0.02  -0.07    -0.09  -0.02  -0.08
  78   1     0.00   0.01   0.00     0.04  -0.04  -0.02     0.09   0.01   0.00
  79   1     0.00   0.01  -0.01    -0.03  -0.05   0.00    -0.07   0.00   0.03
  80   1     0.01   0.00   0.00    -0.02   0.03   0.05     0.02   0.04  -0.13
  81   1     0.00   0.01   0.00     0.01   0.01   0.04    -0.06   0.01  -0.15
  82   1     0.00   0.00   0.00     0.04  -0.01   0.03    -0.11  -0.03  -0.08
  83   1     0.01   0.00   0.00    -0.02   0.02   0.03     0.09   0.04  -0.01
  84   1     0.02  -0.01   0.01     0.05  -0.04   0.00    -0.06  -0.05   0.03
  85   1     0.01   0.00   0.00     0.07  -0.05  -0.03     0.09  -0.02  -0.02
  86   1    -0.01   0.02  -0.01     0.05  -0.04  -0.03     0.02   0.02  -0.02
  87   1    -0.01   0.00  -0.01     0.06  -0.05  -0.06     0.03  -0.05  -0.05
  88   1     0.01   0.00   0.00     0.06  -0.05  -0.04     0.15  -0.06  -0.02
  89   1     0.00   0.00   0.00     0.05  -0.04  -0.06     0.10  -0.10  -0.05
  90   1     0.01   0.00   0.00     0.04  -0.04  -0.05     0.13  -0.07  -0.03
  91   1     0.00   0.01  -0.01    -0.04  -0.04  -0.01    -0.11   0.03   0.00
  92   1    -0.01  -0.01   0.03    -0.02  -0.02  -0.05    -0.10   0.03  -0.07
  93   1    -0.05   0.01   0.00     0.01  -0.04  -0.02    -0.05   0.00  -0.03
  94   1     0.00   0.00  -0.01    -0.07  -0.04  -0.01    -0.14   0.04   0.02
  95   1     0.01   0.00  -0.01    -0.08  -0.03  -0.02    -0.12   0.03   0.02
  96   1     0.00  -0.01  -0.01    -0.07  -0.01  -0.04    -0.13   0.05  -0.03
  97   1     0.01  -0.02   0.00     0.05  -0.04   0.00    -0.11  -0.13   0.01
  98   1     0.00   0.04   0.02     0.05  -0.01   0.02    -0.11  -0.14  -0.04
  99   1    -0.05  -0.01   0.03     0.02  -0.03   0.01    -0.09  -0.10  -0.06
 100   1     0.02   0.00   0.00     0.09  -0.03   0.01    -0.09  -0.11   0.08
 101   1     0.03   0.00  -0.01     0.09  -0.02   0.01    -0.07  -0.05   0.08
 102   1     0.02   0.01  -0.01     0.08   0.00   0.02    -0.09  -0.10   0.04
 103   1     0.07  -0.02   0.01    -0.06   0.04   0.03     0.13   0.08  -0.05
 104   1     0.01  -0.03   0.07    -0.04   0.03   0.00     0.07   0.03  -0.03
 105   1     0.00   0.01   0.00    -0.04   0.03   0.03     0.06   0.08  -0.10
 106   1     0.01  -0.02  -0.01    -0.04   0.04   0.07     0.13   0.09  -0.06
 107   1     0.01  -0.01   0.00    -0.03   0.03   0.07     0.08   0.09  -0.11
 108   1     0.00   0.00  -0.02    -0.01   0.02   0.07     0.09   0.07  -0.06
 109   1     0.00   0.02   0.00     0.02  -0.03  -0.02     0.05  -0.03   0.01
 110   1     0.00   0.03   0.01     0.02  -0.02   0.00     0.03   0.03   0.11
 111   1     0.00   0.03   0.00     0.01  -0.02  -0.01    -0.05   0.04   0.03
 112   1     0.01   0.00   0.01     0.04   0.01   0.06     0.01   0.00   0.04
 113   1     0.00  -0.01   0.01     0.01  -0.01   0.05     0.03   0.04   0.07
 114   1     0.00   0.01   0.00     0.05   0.01   0.03     0.02  -0.01   0.10
                     4                      5                      6
                    ?A                     ?A                     ?A
 Frequencies --    25.4940                27.8314                35.3453
 Red. masses --     6.0167                 6.3714                 4.0269
 Frc consts  --     0.0023                 0.0029                 0.0030
 IR Inten    --     1.6582                 0.4719                 0.0860
 Raman Activ --     0.0000                 0.0000                 0.0000
 Depolar     --     0.0000                 0.0000                 0.0000
 Atom AN      X      Y      Z        X      Y      Z        X      Y      Z
   1   8     0.01   0.24   0.03     0.03  -0.14  -0.11    -0.01  -0.03   0.05
   2  12     0.00  -0.02  -0.03     0.00  -0.02  -0.03    -0.01   0.00  -0.02
   3   8     0.02  -0.02  -0.02     0.02  -0.02  -0.02    -0.01   0.01  -0.01
   4   6     0.03   0.00  -0.06     0.02   0.11   0.00    -0.02  -0.02   0.03
   5   7     0.02  -0.01   0.00     0.01  -0.01   0.00     0.01   0.02   0.03
   6   7     0.00  -0.01  -0.03     0.00  -0.02  -0.03    -0.02   0.00  -0.04
   7   8     0.06  -0.23  -0.16     0.00   0.39   0.12    -0.04  -0.04   0.02
   8   6     0.02  -0.01   0.01     0.01  -0.01   0.01     0.01   0.02   0.04
   9   6     0.02  -0.01   0.00     0.01  -0.01   0.00     0.00   0.01   0.00
  10   6     0.01  -0.01  -0.02     0.01  -0.02  -0.01    -0.02   0.00  -0.04
  11   8     0.03   0.01  -0.03     0.03   0.01  -0.04    -0.01   0.00   0.00
  12   6     0.02  -0.01  -0.03     0.02  -0.01  -0.05    -0.01   0.00  -0.01
  13   6     0.02  -0.02  -0.03     0.03  -0.02  -0.04    -0.01   0.01  -0.01
  14   6     0.02   0.03  -0.02     0.02   0.03  -0.04     0.00   0.00   0.01
  15   8     0.00  -0.02  -0.05     0.00  -0.02  -0.06    -0.01  -0.01  -0.03
  16   6     0.03   0.20  -0.01     0.02  -0.03  -0.06    -0.02  -0.05   0.06
  17   8    -0.05  -0.05   0.01    -0.04  -0.05  -0.01     0.01   0.01  -0.01
  18   6    -0.02  -0.02   0.02    -0.02  -0.02   0.01     0.00   0.00  -0.01
  19   8    -0.01  -0.04   0.00    -0.01  -0.03  -0.01    -0.01   0.00  -0.01
  20   8    -0.07   0.00   0.07    -0.06   0.00   0.05     0.02  -0.03   0.01
  21   6    -0.09  -0.04   0.09    -0.09  -0.03   0.06     0.03  -0.03   0.03
  22   6    -0.08  -0.06   0.05    -0.08  -0.05   0.03     0.03   0.00   0.01
  23   6    -0.03   0.01   0.05    -0.03   0.01   0.03     0.01  -0.02   0.00
  24   8    -0.12  -0.05   0.12    -0.12  -0.04   0.10     0.05  -0.04   0.05
  25   6    -0.08  -0.04   0.07    -0.07  -0.04   0.04     0.05   0.03   0.02
  26   6    -0.03   0.03   0.06    -0.02   0.03   0.04     0.01   0.00   0.00
  27   6     0.03  -0.04  -0.03     0.04  -0.04  -0.04    -0.02  -0.01  -0.01
  28   6     0.02   0.06  -0.04     0.04  -0.01  -0.03     0.01   0.01   0.01
  29   6     0.02   0.00   0.02     0.02   0.01   0.02     0.00   0.01   0.01
  30   6     0.00   0.00  -0.03     0.00  -0.01  -0.02    -0.01   0.00  -0.02
  31   6     0.01   0.00   0.03     0.00   0.00   0.04     0.02  -0.04   0.01
  32   6     0.02   0.02   0.04     0.01   0.02   0.04     0.02  -0.05  -0.03
  33   6     0.04   0.05   0.03     0.03   0.05   0.03    -0.01  -0.02  -0.05
  34   6     0.05   0.06   0.02     0.05   0.06   0.02    -0.03   0.03  -0.04
  35   6     0.04   0.03   0.01     0.04   0.04   0.01    -0.02   0.05  -0.01
  36   6    -0.01  -0.03   0.04    -0.02  -0.04   0.05     0.06  -0.07   0.03
  37   6     0.05   0.04   0.00     0.06   0.06  -0.01    -0.05   0.11  -0.01
  38   6    -0.01   0.01  -0.03    -0.01   0.00  -0.01    -0.01  -0.03   0.00
  39   6    -0.03   0.03  -0.02    -0.02   0.02  -0.01     0.01  -0.04   0.03
  40   6    -0.04   0.04  -0.01    -0.03   0.03   0.00     0.03  -0.01   0.04
  41   6    -0.03   0.03  -0.02    -0.02   0.02  -0.01     0.03   0.02   0.02
  42   6    -0.01   0.01  -0.02     0.00   0.00  -0.02     0.01   0.03  -0.01
  43   6     0.01  -0.01  -0.03     0.00  -0.01  -0.02    -0.04  -0.06  -0.01
  44   6     0.00   0.00  -0.03     0.01  -0.02  -0.03     0.01   0.08  -0.04
  45   6    -0.02  -0.06   0.02    -0.03  -0.07   0.01     0.05  -0.10   0.01
  46   6    -0.03  -0.04   0.07    -0.04  -0.05   0.09     0.08  -0.11   0.05
  47   6     0.05   0.04   0.00     0.05   0.06  -0.01    -0.08   0.13  -0.07
  48   6     0.08   0.03   0.00     0.08   0.05   0.00    -0.04   0.16   0.02
  49   6     0.02  -0.02  -0.05     0.04  -0.04  -0.04     0.04   0.12  -0.01
  50   6     0.00  -0.01   0.00     0.01  -0.03   0.00     0.00   0.09  -0.07
  51   6     0.00  -0.02  -0.02    -0.01  -0.02  -0.01    -0.04  -0.08   0.01
  52   6     0.02   0.00  -0.05     0.00   0.00  -0.03    -0.05  -0.09  -0.01
  53   6     0.03   0.00   0.03     0.02   0.00   0.04     0.03   0.03   0.09
  54   6     0.01  -0.01  -0.02     0.01  -0.02   0.00    -0.03  -0.01  -0.09
  55   1     0.02  -0.01   0.00     0.01  -0.01   0.01     0.00   0.01   0.01
  56   1     0.03  -0.02  -0.05     0.03  -0.02  -0.06    -0.01   0.01  -0.02
  57   1     0.02   0.03   0.00    -0.01   0.02  -0.07     0.00   0.00   0.02
  58   1    -0.05  -0.01   0.11     0.09   0.23  -0.21    -0.03  -0.07   0.07
  59   1     0.14   0.16  -0.25    -0.07   0.02   0.24    -0.04  -0.05   0.05
  60   1     0.00   0.43   0.07     0.04  -0.28  -0.17    -0.01  -0.05   0.08
  61   1    -0.10  -0.09   0.05    -0.10  -0.08   0.02     0.03  -0.01   0.01
  62   1    -0.02   0.02   0.04    -0.02   0.02   0.03     0.00  -0.03  -0.01
  63   1    -0.12  -0.05   0.10    -0.11  -0.05   0.06     0.07   0.02   0.04
  64   1    -0.07  -0.07   0.04    -0.06  -0.07   0.00     0.05   0.05   0.02
  65   1    -0.06   0.00   0.08    -0.05   0.00   0.05     0.06   0.03   0.03
  66   1    -0.04   0.05   0.08    -0.03   0.04   0.06     0.01  -0.01   0.01
  67   1    -0.03   0.02   0.06    -0.02   0.01   0.04     0.01   0.00   0.00
  68   1     0.00   0.05   0.05     0.01   0.04   0.04     0.01   0.00   0.00
  69   1     0.02  -0.05  -0.04     0.05  -0.03  -0.06    -0.02   0.00  -0.01
  70   1     0.03  -0.05  -0.01     0.01  -0.05  -0.02    -0.03  -0.01   0.00
  71   1     0.02  -0.05  -0.03     0.05  -0.07  -0.04    -0.02  -0.02  -0.02
  72   1     0.03   0.07  -0.02     0.01   0.05  -0.05     0.02   0.00   0.03
  73   1     0.01   0.06  -0.06     0.13  -0.01   0.00    -0.01   0.01  -0.01
  74   1     0.03   0.08  -0.04     0.00  -0.09  -0.02     0.02   0.04   0.00
  75   1     0.01   0.02   0.05     0.00   0.01   0.06     0.03  -0.08  -0.04
  76   1     0.04   0.07   0.03     0.04   0.07   0.04    -0.02  -0.03  -0.08
  77   1     0.06   0.08   0.01     0.06   0.09   0.01    -0.06   0.06  -0.06
  78   1    -0.02  -0.04   0.04    -0.02  -0.04   0.05     0.07  -0.05   0.07
  79   1     0.05   0.05  -0.01     0.05   0.07  -0.02    -0.03   0.12   0.02
  80   1    -0.03   0.03  -0.02    -0.03   0.02   0.00     0.00  -0.06   0.05
  81   1    -0.05   0.06  -0.01    -0.04   0.04   0.00     0.04  -0.02   0.07
  82   1    -0.04   0.05  -0.01    -0.02   0.03  -0.01     0.05   0.04   0.03
  83   1     0.02  -0.02  -0.03     0.00  -0.02  -0.02    -0.05  -0.05  -0.04
  84   1    -0.01   0.01  -0.04     0.00  -0.01  -0.04     0.01   0.08  -0.05
  85   1    -0.03  -0.08   0.02    -0.05  -0.10   0.02     0.08  -0.12   0.03
  86   1    -0.01  -0.06  -0.01    -0.02  -0.06  -0.02     0.03  -0.06   0.01
  87   1    -0.01  -0.06   0.01    -0.03  -0.07   0.01     0.04  -0.12  -0.03
  88   1    -0.05  -0.06   0.08    -0.05  -0.07   0.09     0.11  -0.13   0.07
  89   1    -0.03  -0.04   0.07    -0.04  -0.06   0.09     0.08  -0.14   0.02
  90   1    -0.03  -0.02   0.09    -0.03  -0.03   0.11     0.09  -0.10   0.06
  91   1     0.06   0.04  -0.02     0.06   0.07  -0.03    -0.10   0.18  -0.07
  92   1     0.05   0.03   0.03     0.05   0.04   0.02    -0.10   0.13  -0.10
  93   1     0.02   0.04   0.00     0.01   0.06  -0.02    -0.08   0.10  -0.09
  94   1     0.08   0.04  -0.01     0.09   0.07  -0.01    -0.06   0.21   0.03
  95   1     0.09   0.03   0.00     0.10   0.05   0.00    -0.02   0.15   0.07
  96   1     0.08   0.02   0.01     0.09   0.04   0.01    -0.06   0.16   0.00
  97   1     0.02  -0.03  -0.05     0.04  -0.05  -0.05     0.04   0.15  -0.03
  98   1     0.02  -0.04  -0.04     0.05  -0.06  -0.03     0.04   0.13   0.00
  99   1     0.02  -0.02  -0.07     0.04  -0.03  -0.07     0.05   0.11   0.02
 100   1     0.01  -0.02  -0.01     0.03  -0.03  -0.01    -0.01   0.12  -0.08
 101   1    -0.02   0.00   0.00    -0.01  -0.02   0.01    -0.01   0.07  -0.09
 102   1     0.00  -0.02   0.01     0.02  -0.04   0.02     0.00   0.09  -0.07
 103   1     0.02  -0.04  -0.02     0.00  -0.03  -0.01    -0.06  -0.10   0.00
 104   1    -0.01  -0.04   0.00    -0.02  -0.03   0.00    -0.03  -0.06   0.00
 105   1    -0.01  -0.01  -0.02    -0.02  -0.01  -0.01    -0.03  -0.09   0.03
 106   1     0.03  -0.01  -0.06     0.01  -0.01  -0.03    -0.07  -0.11  -0.02
 107   1     0.01   0.01  -0.05     0.00   0.01  -0.03    -0.04  -0.10   0.02
 108   1     0.02   0.01  -0.06     0.01   0.01  -0.04    -0.05  -0.07  -0.02
 109   1     0.02  -0.01   0.05     0.01   0.00   0.06     0.03   0.00   0.11
 110   1     0.03   0.00   0.03     0.02   0.00   0.04     0.04   0.04   0.12
 111   1     0.05   0.01   0.04     0.04   0.02   0.04     0.04   0.07   0.09
 112   1     0.01   0.00  -0.02     0.01  -0.01   0.00    -0.03   0.00  -0.08
 113   1     0.01  -0.01  -0.02     0.00  -0.02   0.00    -0.02  -0.04  -0.10
 114   1     0.01   0.00  -0.03     0.01  -0.01  -0.01    -0.06   0.01  -0.11
                     7                      8                      9
                    ?A                     ?A                     ?A
 Frequencies --    38.3660                43.9123                48.4955
 Red. masses --     4.8192                 4.3485                 3.0943
 Frc consts  --     0.0042                 0.0049                 0.0043
 IR Inten    --     0.8258                 0.1681                 0.2464
 Raman Activ --     0.0000                 0.0000                 0.0000
 Depolar     --     0.0000                 0.0000                 0.0000
 Atom AN      X      Y      Z        X      Y      Z        X      Y      Z
   1   8    -0.03   0.10  -0.12    -0.06   0.07  -0.04    -0.01   0.00  -0.02
   2  12     0.00  -0.01   0.04    -0.02   0.00  -0.02     0.00  -0.01  -0.01
   3   8    -0.02  -0.01   0.05    -0.05  -0.01  -0.03    -0.02  -0.01  -0.01
   4   6     0.01   0.07  -0.04    -0.05   0.03  -0.02     0.00   0.01   0.00
   5   7     0.02  -0.02   0.04     0.00  -0.01  -0.03     0.00   0.00   0.02
   6   7     0.00   0.00  -0.01     0.01   0.02   0.02     0.00  -0.02  -0.02
   7   8     0.09   0.10  -0.03    -0.02   0.05  -0.01     0.02   0.00   0.00
   8   6     0.03  -0.02   0.02     0.01   0.00  -0.02     0.00   0.00   0.03
   9   6     0.02  -0.01  -0.01     0.02   0.01   0.00     0.00  -0.01   0.02
  10   6     0.01   0.00  -0.03     0.02   0.02   0.02     0.00  -0.02   0.00
  11   8    -0.01   0.01   0.07    -0.05  -0.03   0.00    -0.01   0.03   0.05
  12   6    -0.02  -0.01   0.06    -0.05  -0.02   0.00    -0.01   0.02   0.04
  13   6    -0.02  -0.01   0.06    -0.05   0.00  -0.01    -0.02   0.00   0.01
  14   6    -0.04   0.00   0.00    -0.06  -0.04  -0.03    -0.01   0.03   0.04
  15   8    -0.02  -0.02   0.04    -0.04  -0.02  -0.01    -0.01   0.02   0.04
  16   6     0.02   0.18  -0.17    -0.05   0.15  -0.04     0.01  -0.04  -0.06
  17   8     0.00  -0.01   0.04     0.01   0.03  -0.04     0.00  -0.03   0.00
  18   6     0.00  -0.01   0.02    -0.01   0.00  -0.03     0.00  -0.02  -0.02
  19   8     0.01   0.00   0.03    -0.03   0.01  -0.02     0.03  -0.02  -0.02
  20   8    -0.01   0.02  -0.03     0.05  -0.06  -0.04     0.00   0.00  -0.05
  21   6     0.00   0.04  -0.08     0.08  -0.06   0.03    -0.01  -0.02   0.00
  22   6    -0.01   0.01  -0.03     0.07   0.01   0.02    -0.01  -0.03   0.03
  23   6    -0.01  -0.01   0.00     0.00  -0.03  -0.05    -0.01   0.00  -0.04
  24   8     0.00   0.09  -0.15     0.11  -0.10   0.10    -0.01  -0.03   0.01
  25   6    -0.05  -0.04  -0.06     0.11   0.07   0.06    -0.05  -0.02   0.06
  26   6    -0.01  -0.03  -0.01    -0.02  -0.01  -0.05    -0.04   0.01  -0.04
  27   6    -0.04  -0.02   0.06    -0.07   0.01  -0.01    -0.06  -0.01   0.02
  28   6    -0.09  -0.05   0.02    -0.06  -0.10   0.00    -0.05   0.05   0.03
  29   6     0.02  -0.03   0.04     0.00  -0.02  -0.01     0.00   0.01   0.02
  30   6     0.00   0.01  -0.01     0.01   0.02   0.02     0.00  -0.02  -0.02
  31   6     0.03  -0.04   0.03    -0.01  -0.03   0.01     0.01   0.02   0.01
  32   6     0.03  -0.03   0.00    -0.01  -0.04   0.03     0.01   0.02   0.00
  33   6     0.01  -0.02  -0.01     0.00  -0.04   0.04     0.01   0.02   0.00
  34   6     0.00  -0.03   0.01     0.02  -0.03   0.02     0.00   0.01   0.00
  35   6     0.00  -0.03   0.03     0.02  -0.01  -0.01     0.00   0.01   0.02
  36   6     0.05  -0.05   0.04    -0.03  -0.03   0.01     0.02   0.02   0.01
  37   6    -0.01  -0.05   0.05     0.04   0.01  -0.03    -0.01   0.00   0.03
  38   6     0.00  -0.01  -0.01     0.00   0.03   0.02    -0.02   0.00  -0.01
  39   6     0.01  -0.02   0.00     0.01   0.02   0.01    -0.02   0.01  -0.01
  40   6     0.01   0.00   0.01     0.02   0.00   0.00    -0.02   0.02  -0.01
  41   6     0.00   0.02   0.00     0.03  -0.01   0.01    -0.01   0.00  -0.01
  42   6    -0.01   0.03   0.00     0.02   0.00   0.01     0.01  -0.02  -0.02
  43   6     0.01  -0.04  -0.02    -0.02   0.07   0.03    -0.02   0.00  -0.01
  44   6    -0.03   0.07   0.00     0.04  -0.03   0.01     0.06  -0.07  -0.04
  45   6     0.03  -0.06   0.02    -0.09  -0.03  -0.02     0.14   0.01   0.05
  46   6     0.06  -0.08   0.05    -0.02  -0.07   0.05    -0.01   0.10  -0.06
  47   6     0.00  -0.05   0.06     0.00   0.01  -0.02     0.02   0.00   0.01
  48   6    -0.04  -0.05   0.04     0.11  -0.01  -0.03    -0.05   0.02   0.03
  49   6    -0.02   0.10   0.02    -0.03   0.00   0.04    -0.05  -0.03   0.01
  50   6    -0.07   0.07  -0.04     0.13   0.01  -0.03     0.22   0.00  -0.11
  51   6     0.02  -0.05   0.00    -0.03   0.09   0.00     0.02   0.01  -0.01
  52   6     0.01  -0.05  -0.03    -0.03   0.07   0.08    -0.04  -0.03  -0.02
  53   6     0.05  -0.03   0.03     0.02  -0.01  -0.02     0.00   0.01   0.05
  54   6     0.00   0.01  -0.08     0.03   0.03   0.05    -0.01  -0.03   0.00
  55   1     0.03  -0.01  -0.03     0.03   0.01   0.01    -0.01   0.00   0.03
  56   1    -0.02  -0.01   0.05    -0.06  -0.01   0.01    -0.01   0.00   0.01
  57   1    -0.06   0.00  -0.03    -0.08  -0.04  -0.07    -0.01   0.03   0.05
  58   1     0.05   0.22  -0.19    -0.07   0.19  -0.06     0.05  -0.05  -0.05
  59   1     0.08   0.19  -0.13     0.01   0.17   0.00    -0.01  -0.04  -0.09
  60   1    -0.03   0.19  -0.23    -0.07   0.18  -0.05    -0.01  -0.04  -0.08
  61   1     0.02   0.05  -0.02     0.07  -0.01   0.03     0.01  -0.06   0.04
  62   1     0.00   0.00   0.01    -0.01  -0.05  -0.08     0.00   0.01  -0.06
  63   1    -0.05  -0.02  -0.10     0.15   0.05   0.09    -0.06  -0.03   0.08
  64   1    -0.05  -0.06  -0.02     0.09   0.12   0.05    -0.05  -0.04   0.07
  65   1    -0.07  -0.07  -0.07     0.10   0.07   0.05    -0.07   0.01   0.05
  66   1     0.00  -0.04  -0.03    -0.02  -0.01  -0.05    -0.05   0.01  -0.06
  67   1    -0.01  -0.02  -0.01    -0.03  -0.01  -0.03    -0.05   0.01  -0.02
  68   1    -0.03  -0.05   0.00    -0.03  -0.01  -0.06    -0.06   0.01  -0.05
  69   1    -0.04  -0.02   0.07    -0.07   0.02   0.01    -0.07  -0.01   0.05
  70   1    -0.04  -0.02   0.07    -0.07   0.02  -0.02    -0.07  -0.01   0.03
  71   1    -0.04  -0.03   0.05    -0.08   0.02  -0.01    -0.08  -0.01   0.00
  72   1    -0.16   0.02  -0.06    -0.11  -0.05  -0.05    -0.06   0.06   0.01
  73   1     0.02  -0.05   0.07     0.02  -0.10   0.05    -0.03   0.05   0.02
  74   1    -0.17  -0.16   0.07    -0.12  -0.20   0.01    -0.06   0.04   0.05
  75   1     0.04  -0.04   0.00    -0.03  -0.06   0.05     0.02   0.03  -0.01
  76   1     0.01  -0.02  -0.02     0.00  -0.05   0.06     0.01   0.03  -0.01
  77   1    -0.01  -0.03   0.01     0.03  -0.03   0.02    -0.01   0.01   0.00
  78   1     0.05  -0.04   0.05    -0.01  -0.01  -0.01    -0.03  -0.05   0.04
  79   1    -0.01  -0.05   0.06     0.04   0.05  -0.06    -0.01  -0.03   0.04
  80   1     0.02  -0.03   0.00     0.01   0.03   0.01    -0.03   0.02   0.00
  81   1     0.02  -0.01   0.01     0.03  -0.01   0.00    -0.03   0.03   0.00
  82   1     0.00   0.03   0.01     0.03  -0.02   0.00     0.00  -0.01  -0.01
  83   1     0.01  -0.03  -0.02    -0.02   0.07   0.04    -0.04   0.02  -0.01
  84   1    -0.03   0.08   0.01     0.05  -0.10   0.02     0.08  -0.21  -0.03
  85   1     0.05  -0.07   0.03    -0.11  -0.03  -0.02     0.16   0.00   0.06
  86   1     0.02  -0.04   0.02    -0.09  -0.01  -0.05     0.15  -0.05   0.10
  87   1     0.02  -0.08   0.01    -0.11  -0.05   0.01     0.19   0.05   0.01
  88   1     0.07  -0.08   0.06    -0.03  -0.07   0.04    -0.01   0.09  -0.05
  89   1     0.05  -0.10   0.04    -0.05  -0.10   0.07     0.05   0.17  -0.10
  90   1     0.07  -0.07   0.06     0.02  -0.08   0.06    -0.10   0.11  -0.09
  91   1    -0.01  -0.06   0.07     0.02   0.03  -0.05     0.01  -0.01   0.02
  92   1    -0.01  -0.04   0.04     0.00  -0.03   0.02     0.02   0.03  -0.02
  93   1     0.02  -0.05   0.06    -0.06   0.03  -0.02     0.05  -0.02   0.00
  94   1    -0.05  -0.07   0.05     0.12   0.02  -0.05    -0.05   0.01   0.04
  95   1    -0.06  -0.05   0.03     0.15  -0.01  -0.04    -0.09   0.02   0.05
  96   1    -0.05  -0.04   0.03     0.10  -0.06  -0.01    -0.05   0.06   0.02
  97   1    -0.04   0.13   0.02    -0.02  -0.03   0.04    -0.04  -0.07   0.01
  98   1    -0.03   0.09   0.01    -0.04   0.07   0.03    -0.06   0.08  -0.01
  99   1     0.01   0.10   0.04    -0.08  -0.02   0.07    -0.13  -0.06   0.07
 100   1    -0.09   0.10  -0.04     0.14  -0.02  -0.02     0.25  -0.05  -0.11
 101   1    -0.08   0.06  -0.05     0.19  -0.01  -0.04     0.33  -0.04  -0.14
 102   1    -0.08   0.06  -0.05     0.12   0.09  -0.05     0.22   0.15  -0.12
 103   1     0.02  -0.06  -0.01    -0.05   0.12   0.01     0.00   0.00  -0.01
 104   1     0.02  -0.04   0.01    -0.02   0.10  -0.02     0.03   0.04  -0.01
 105   1     0.02  -0.05   0.01    -0.02   0.09  -0.01     0.04  -0.02  -0.01
 106   1     0.01  -0.06  -0.04    -0.04   0.10   0.09    -0.04  -0.02  -0.01
 107   1     0.01  -0.05  -0.02    -0.02   0.06   0.07    -0.02  -0.05  -0.04
 108   1     0.00  -0.03  -0.05    -0.02   0.04   0.10    -0.07  -0.04  -0.01
 109   1     0.04  -0.03   0.05     0.04  -0.03  -0.04    -0.03   0.04   0.09
 110   1     0.06  -0.02   0.02     0.03   0.00   0.00    -0.01   0.00   0.01
 111   1     0.07  -0.03   0.04    -0.01  -0.01  -0.03     0.06   0.01   0.07
 112   1    -0.02   0.01  -0.11     0.04   0.04   0.08     0.04   0.00   0.10
 113   1     0.04   0.01  -0.10     0.01   0.02   0.06    -0.07  -0.13   0.00
 114   1    -0.02   0.01  -0.08     0.05   0.04   0.03    -0.01   0.03  -0.09
                    10                     11                     12
                    ?A                     ?A                     ?A
 Frequencies --    51.2168                54.6257                57.0495
 Red. masses --     3.9464                 3.0807                 3.7496
 Frc consts  --     0.0061                 0.0054                 0.0072
 IR Inten    --     0.1557                 0.0442                 0.3363
 Raman Activ --     0.0000                 0.0000                 0.0000
 Depolar     --     0.0000                 0.0000                 0.0000
 Atom AN      X      Y      Z        X      Y      Z        X      Y      Z
   1   8     0.01   0.01   0.01    -0.03   0.01  -0.01     0.00   0.01   0.00
   2  12     0.02   0.00   0.01     0.01   0.00   0.01    -0.02  -0.02   0.00
   3   8     0.01   0.03   0.04    -0.01  -0.01   0.00    -0.03  -0.02   0.00
   4   6     0.02  -0.01   0.03    -0.03  -0.01  -0.02     0.01   0.03   0.03
   5   7    -0.01   0.00  -0.04     0.00   0.00   0.00     0.01  -0.04  -0.03
   6   7     0.01  -0.02   0.02     0.00   0.00   0.01     0.01   0.01   0.02
   7   8     0.05  -0.02   0.02    -0.03   0.03   0.00     0.03  -0.01   0.01
   8   6    -0.03  -0.01  -0.04     0.00   0.00   0.00     0.02  -0.03  -0.03
   9   6    -0.02  -0.02  -0.01     0.00   0.00   0.00     0.02  -0.02  -0.02
  10   6     0.00  -0.02   0.01     0.00   0.00   0.01     0.02   0.00   0.00
  11   8     0.01   0.02   0.08    -0.02  -0.07  -0.05     0.00   0.08   0.09
  12   6     0.02   0.02   0.05    -0.01  -0.03  -0.01    -0.02   0.03   0.05
  13   6     0.01   0.03   0.05    -0.01  -0.02  -0.01    -0.03  -0.01   0.01
  14   6     0.01  -0.01   0.04    -0.02  -0.06  -0.04    -0.01   0.11   0.08
  15   8     0.02  -0.01   0.02     0.00   0.00   0.02    -0.04   0.01   0.03
  16   6     0.03   0.00  -0.02    -0.03   0.09   0.03     0.01  -0.11  -0.08
  17   8     0.01  -0.03   0.06     0.00   0.00  -0.01    -0.01  -0.01  -0.01
  18   6     0.02  -0.01   0.01     0.00   0.00  -0.01    -0.02  -0.02  -0.01
  19   8     0.05  -0.02   0.01     0.01   0.00   0.00    -0.03  -0.02   0.00
  20   8    -0.01   0.04   0.00     0.00   0.00  -0.02     0.00  -0.04  -0.01
  21   6    -0.02   0.04  -0.04     0.00  -0.01  -0.01     0.00  -0.04   0.00
  22   6    -0.02  -0.02   0.02     0.00  -0.01   0.01     0.00  -0.01  -0.02
  23   6     0.01   0.02   0.01     0.00   0.00  -0.02    -0.01  -0.04  -0.01
  24   8    -0.03   0.08  -0.11     0.00  -0.01   0.00     0.01  -0.05   0.02
  25   6    -0.09  -0.05   0.03    -0.02   0.00   0.03     0.03  -0.01  -0.03
  26   6     0.00   0.01   0.01    -0.02   0.00  -0.02    -0.01  -0.04  -0.01
  27   6     0.00   0.05   0.05     0.01  -0.02  -0.01    -0.08  -0.07   0.03
  28   6    -0.03  -0.06   0.06     0.00  -0.10  -0.03    -0.05   0.19   0.05
  29   6    -0.01   0.00  -0.04     0.00   0.00   0.00     0.01  -0.02  -0.03
  30   6     0.01  -0.02   0.02     0.00   0.00   0.01     0.00   0.01   0.02
  31   6    -0.02  -0.02  -0.03     0.00  -0.01   0.00     0.01  -0.02  -0.02
  32   6    -0.02  -0.04  -0.01     0.00  -0.04   0.02     0.02   0.02  -0.03
  33   6    -0.02  -0.04  -0.01     0.00  -0.05   0.03     0.03   0.05  -0.04
  34   6    -0.01  -0.01  -0.03     0.00  -0.03   0.02     0.04   0.05  -0.05
  35   6     0.00   0.03  -0.05     0.01   0.00   0.00     0.03   0.02  -0.04
  36   6    -0.03   0.00  -0.04     0.01   0.01   0.00     0.00  -0.05  -0.01
  37   6     0.02   0.12  -0.09     0.02   0.05  -0.02     0.04   0.03  -0.06
  38   6     0.01  -0.01   0.01     0.01  -0.01   0.01     0.01   0.01   0.02
  39   6    -0.01   0.00   0.01     0.01  -0.01   0.01     0.02  -0.01   0.00
  40   6    -0.02   0.01   0.01     0.00   0.00   0.01     0.02  -0.02   0.00
  41   6    -0.02   0.00   0.01    -0.01   0.01   0.01     0.01  -0.02   0.01
  42   6     0.00  -0.02   0.02    -0.01   0.01   0.01    -0.01   0.00   0.02
  43   6     0.03  -0.03   0.01     0.02  -0.02   0.00     0.01   0.03   0.02
  44   6     0.01  -0.05   0.02    -0.03   0.03   0.02    -0.04   0.03   0.04
  45   6    -0.11   0.02  -0.04     0.19   0.02   0.07     0.08  -0.08   0.00
  46   6    -0.01  -0.05  -0.01    -0.05   0.16  -0.13    -0.05   0.01  -0.03
  47   6    -0.09   0.13  -0.11    -0.03   0.06  -0.05    -0.01   0.02  -0.02
  48   6     0.15   0.11  -0.07     0.09   0.06   0.00     0.11  -0.02  -0.07
  49   6    -0.04  -0.03   0.03     0.02   0.01   0.00    -0.02   0.03   0.03
  50   6     0.08  -0.02  -0.01    -0.11  -0.01   0.06    -0.12   0.01   0.05
  51   6     0.04  -0.04   0.02     0.00  -0.04   0.01    -0.03   0.04   0.00
  52   6     0.03  -0.03  -0.02     0.04   0.00  -0.01     0.02   0.06   0.05
  53   6    -0.05  -0.01  -0.06     0.00   0.01   0.02     0.02  -0.04  -0.03
  54   6     0.00  -0.04   0.04     0.00   0.00   0.00     0.03   0.03   0.01
  55   1    -0.03  -0.02   0.00     0.00   0.00   0.01     0.03  -0.01  -0.03
  56   1     0.01   0.03   0.07    -0.02  -0.02   0.00     0.00  -0.01  -0.03
  57   1     0.02  -0.02   0.01    -0.04  -0.07  -0.07     0.00   0.11   0.14
  58   1     0.04  -0.01  -0.01    -0.07   0.14   0.00     0.09  -0.17  -0.04
  59   1     0.04   0.00  -0.04     0.01   0.11   0.09    -0.04  -0.12  -0.15
  60   1     0.01   0.02  -0.03    -0.03   0.10   0.03     0.00  -0.11  -0.09
  61   1     0.01  -0.02   0.04     0.01  -0.03   0.02    -0.01   0.00  -0.02
  62   1     0.02   0.03   0.02     0.00   0.00  -0.02    -0.02  -0.04  -0.01
  63   1    -0.12  -0.05   0.01    -0.02   0.00   0.04     0.04  -0.01  -0.03
  64   1    -0.09  -0.10   0.07    -0.02   0.00   0.05     0.03   0.00  -0.05
  65   1    -0.13  -0.05   0.01    -0.04   0.01   0.02     0.05  -0.02  -0.02
  66   1     0.01   0.00   0.00    -0.02   0.00  -0.03    -0.01  -0.04  -0.01
  67   1     0.00   0.03   0.02    -0.03   0.00   0.00    -0.01  -0.04  -0.02
  68   1    -0.02   0.00   0.00    -0.04   0.00  -0.02     0.00  -0.04  -0.01
  69   1    -0.01   0.05   0.07     0.01  -0.03  -0.02    -0.07  -0.05   0.03
  70   1     0.01   0.05   0.04     0.02  -0.02  -0.01    -0.12  -0.07   0.07
  71   1    -0.01   0.06   0.05     0.01  -0.02   0.00    -0.08  -0.12  -0.01
  72   1    -0.04  -0.08   0.03    -0.01  -0.08  -0.03    -0.07   0.23   0.04
  73   1    -0.03  -0.05   0.09     0.03  -0.10   0.00    -0.02   0.18  -0.01
  74   1    -0.04  -0.07   0.07    -0.02  -0.14  -0.04    -0.07   0.20   0.09
  75   1    -0.03  -0.05   0.00    -0.01  -0.05   0.03     0.01   0.03  -0.03
  76   1    -0.02  -0.07   0.01    -0.01  -0.08   0.04     0.04   0.08  -0.05
  77   1     0.00   0.00  -0.03     0.01  -0.03   0.02     0.05   0.08  -0.05
  78   1     0.00   0.04  -0.06    -0.07  -0.09   0.02    -0.04  -0.11   0.01
  79   1     0.03   0.19  -0.13     0.03   0.09  -0.04     0.05   0.08  -0.09
  80   1     0.00   0.00   0.01     0.01  -0.01   0.01     0.03  -0.01   0.00
  81   1    -0.03   0.02   0.01    -0.01   0.01   0.01     0.03  -0.04  -0.01
  82   1    -0.02   0.00   0.01    -0.01   0.02   0.02     0.00  -0.02   0.00
  83   1     0.03  -0.03   0.01     0.04  -0.04   0.00     0.02   0.01   0.03
  84   1     0.02  -0.10   0.03    -0.03   0.09   0.02    -0.04   0.08   0.05
  85   1    -0.11   0.04  -0.06     0.21   0.03   0.07     0.10  -0.10   0.01
  86   1    -0.12   0.05  -0.06     0.21  -0.07   0.16     0.09  -0.11   0.03
  87   1    -0.14  -0.01  -0.01     0.26   0.10   0.04     0.11  -0.05  -0.04
  88   1    -0.01  -0.03  -0.02    -0.05   0.16  -0.12    -0.06  -0.02  -0.02
  89   1    -0.04  -0.09   0.02     0.04   0.28  -0.17     0.00   0.06  -0.06
  90   1     0.05  -0.07   0.00    -0.19   0.17  -0.19    -0.11   0.03  -0.04
  91   1    -0.06   0.20  -0.15    -0.02   0.11  -0.07     0.02   0.04  -0.04
  92   1    -0.10   0.05  -0.06    -0.04   0.03  -0.02    -0.01  -0.03   0.03
  93   1    -0.19   0.14  -0.13    -0.08   0.06  -0.06    -0.07   0.06  -0.01
  94   1     0.15   0.20  -0.09     0.09   0.12  -0.02     0.11   0.01  -0.08
  95   1     0.26   0.10  -0.05     0.14   0.06   0.02     0.17  -0.01  -0.10
  96   1     0.13   0.00  -0.05     0.08   0.02   0.01     0.10  -0.09  -0.06
  97   1    -0.04  -0.06   0.04     0.02   0.02   0.00    -0.04   0.05   0.04
  98   1    -0.05   0.01   0.02     0.03  -0.04   0.01    -0.03  -0.01   0.02
  99   1    -0.08  -0.05   0.05     0.06   0.02  -0.03     0.02   0.04   0.03
 100   1     0.09  -0.04   0.00    -0.12   0.02   0.06    -0.15   0.03   0.06
 101   1     0.13  -0.03  -0.01    -0.16   0.01   0.07    -0.14   0.02   0.06
 102   1     0.07   0.04  -0.02    -0.10  -0.08   0.07    -0.12  -0.05   0.03
 103   1     0.04  -0.05   0.02     0.01  -0.04   0.01    -0.02   0.06   0.01
 104   1     0.05  -0.03   0.03     0.00  -0.05   0.01    -0.04   0.02  -0.01
 105   1     0.05  -0.04   0.02    -0.01  -0.02   0.02    -0.04   0.06  -0.01
 106   1     0.04  -0.03  -0.02     0.05  -0.02  -0.01     0.01   0.07   0.06
 107   1     0.03  -0.04  -0.03     0.02   0.01   0.00     0.00   0.07   0.06
 108   1     0.01  -0.03  -0.02     0.05   0.01  -0.01     0.04   0.05   0.07
 109   1     0.00  -0.04  -0.13    -0.02   0.02   0.05     0.02  -0.03  -0.03
 110   1    -0.04   0.01   0.00    -0.01   0.00  -0.01     0.02  -0.04  -0.05
 111   1    -0.13   0.01  -0.10     0.04   0.00   0.03     0.03  -0.05  -0.03
 112   1     0.02  -0.03   0.08    -0.02  -0.02  -0.04    -0.01   0.01  -0.06
 113   1    -0.04  -0.07   0.04     0.03   0.05   0.01     0.07   0.12   0.02
 114   1     0.00  -0.02   0.00     0.00  -0.03   0.05     0.05  -0.02   0.09
                    13                     14                     15
                    ?A                     ?A                     ?A
 Frequencies --    59.9598                69.2224                70.6422
 Red. masses --     3.6877                 3.1461                 3.8896
 Frc consts  --     0.0078                 0.0089                 0.0114
 IR Inten    --     1.5585                 0.4612                 0.2005
 Raman Activ --     0.0000                 0.0000                 0.0000
 Depolar     --     0.0000                 0.0000                 0.0000
 Atom AN      X      Y      Z        X      Y      Z        X      Y      Z
   1   8    -0.01   0.00   0.00     0.00  -0.01   0.00    -0.04   0.00   0.00
   2  12     0.01   0.00  -0.01     0.00   0.00   0.03    -0.01   0.00   0.04
   3   8    -0.01  -0.03  -0.03     0.01  -0.02   0.04    -0.02   0.01   0.06
   4   6    -0.01   0.01  -0.01    -0.01   0.00  -0.01    -0.06   0.02  -0.03
   5   7     0.00   0.00  -0.01     0.01  -0.01   0.01     0.02  -0.01   0.03
   6   7     0.01  -0.01   0.02    -0.01   0.01  -0.02     0.00   0.00  -0.01
   7   8    -0.03   0.01  -0.01    -0.02   0.01  -0.01    -0.10   0.02  -0.02
   8   6     0.00   0.00   0.00     0.01  -0.01  -0.01     0.01  -0.01   0.01
   9   6     0.00  -0.01   0.01     0.01   0.00  -0.02     0.01  -0.01   0.00
  10   6     0.01  -0.01   0.02     0.00   0.01  -0.03     0.00   0.00  -0.01
  11   8    -0.01  -0.01  -0.04     0.00  -0.03  -0.05    -0.04  -0.03  -0.08
  12   6    -0.01  -0.01  -0.02     0.00  -0.01  -0.01    -0.04  -0.01  -0.02
  13   6    -0.01  -0.02  -0.03     0.02  -0.02   0.02    -0.01   0.00   0.02
  14   6    -0.01   0.02  -0.02     0.00   0.01  -0.02    -0.04   0.03  -0.04
  15   8    -0.01   0.02   0.01    -0.01   0.01   0.02    -0.05   0.02   0.01
  16   6    -0.02  -0.02   0.00    -0.01   0.00   0.02    -0.07   0.00   0.04
  17   8     0.02  -0.02  -0.04     0.01  -0.01   0.04    -0.02   0.04   0.02
  18   6     0.03  -0.01  -0.04     0.00  -0.01   0.04    -0.05   0.00   0.03
  19   8     0.07   0.00  -0.04     0.00  -0.01   0.04    -0.08   0.01   0.06
  20   8     0.04   0.02  -0.11     0.02  -0.01   0.01    -0.01  -0.05   0.05
  21   6     0.04  -0.01  -0.04     0.03   0.01  -0.01     0.03   0.01  -0.02
  22   6     0.02  -0.05   0.08     0.01  -0.02   0.07     0.02   0.03   0.00
  23   6     0.00   0.01  -0.10     0.00  -0.02   0.02    -0.03  -0.04   0.04
  24   8     0.06  -0.01  -0.06     0.05   0.04  -0.08     0.06   0.04  -0.09
  25   6    -0.12   0.01   0.22    -0.07  -0.01   0.12     0.02   0.04   0.00
  26   6    -0.10   0.04  -0.10    -0.02  -0.02   0.02    -0.01  -0.03   0.05
  27   6    -0.01  -0.02  -0.03     0.06  -0.01   0.01     0.05   0.02   0.01
  28   6     0.01   0.07  -0.04     0.03   0.05  -0.04     0.00   0.12  -0.08
  29   6     0.00   0.00  -0.01     0.01  -0.01   0.01     0.02   0.00   0.02
  30   6     0.01   0.00   0.03    -0.01   0.01  -0.02     0.00  -0.01  -0.01
  31   6     0.00   0.01  -0.01     0.01  -0.01   0.00     0.02   0.00   0.01
  32   6     0.01   0.03  -0.01     0.01  -0.01   0.00     0.03   0.01  -0.01
  33   6     0.01   0.04  -0.02     0.01   0.00  -0.01     0.02   0.04  -0.02
  34   6     0.01   0.03  -0.01     0.01   0.01  -0.01     0.02   0.04  -0.01
  35   6     0.01   0.00  -0.01     0.01   0.00   0.00     0.01   0.02   0.00
  36   6     0.00   0.00  -0.01     0.02  -0.01   0.01     0.04   0.00   0.01
  37   6     0.00  -0.03   0.00     0.01   0.02   0.00     0.01   0.03   0.01
  38   6     0.01  -0.02   0.03    -0.03   0.03  -0.01     0.00  -0.02  -0.01
  39   6     0.00   0.01   0.05    -0.01   0.00  -0.02    -0.01   0.00   0.00
  40   6    -0.03   0.05   0.06     0.02  -0.03  -0.03    -0.02   0.02   0.00
  41   6    -0.03   0.05   0.05     0.02  -0.02  -0.03    -0.01   0.01   0.00
  42   6    -0.01   0.03   0.04     0.01  -0.01  -0.03     0.00  -0.01  -0.01
  43   6     0.03  -0.05   0.02    -0.09   0.10   0.01     0.05  -0.07  -0.03
  44   6    -0.01   0.04   0.04     0.01  -0.01  -0.03     0.04  -0.05  -0.02
  45   6    -0.07   0.00  -0.03     0.02  -0.01   0.01     0.03   0.01   0.01
  46   6     0.02  -0.05   0.04     0.02  -0.01   0.00     0.05  -0.01   0.01
  47   6     0.06  -0.03  -0.01    -0.04   0.01   0.03    -0.08   0.01   0.10
  48   6    -0.05  -0.01   0.00     0.05  -0.02  -0.02     0.09  -0.07  -0.04
  49   6     0.03   0.02   0.02     0.05  -0.03  -0.05     0.01  -0.05  -0.02
  50   6    -0.05   0.02   0.07    -0.03  -0.03   0.00     0.13  -0.02  -0.03
  51   6     0.00  -0.07   0.04     0.05   0.17  -0.03    -0.04  -0.12   0.01
  52   6     0.06  -0.01   0.00    -0.19  -0.05   0.05     0.11   0.02  -0.07
  53   6    -0.01   0.00  -0.01     0.01  -0.02  -0.02     0.00  -0.02  -0.02
  54   6     0.01  -0.01   0.03    -0.01   0.00  -0.07     0.01   0.01   0.00
  55   1     0.00  -0.01   0.01     0.01   0.00  -0.04     0.01  -0.01  -0.01
  56   1     0.00  -0.02  -0.02     0.02  -0.02   0.02    -0.03   0.00   0.04
  57   1    -0.02   0.03   0.02    -0.01   0.01   0.01    -0.06   0.04   0.02
  58   1    -0.02  -0.02   0.00    -0.02   0.01   0.02    -0.09   0.01   0.04
  59   1    -0.03  -0.02   0.00    -0.01   0.00   0.04    -0.09   0.00   0.06
  60   1    -0.01  -0.03   0.01     0.00  -0.01   0.03    -0.05  -0.02   0.07
  61   1     0.11  -0.15   0.16     0.07  -0.05   0.10     0.04   0.06   0.01
  62   1     0.03   0.03  -0.14     0.00  -0.02   0.01    -0.05  -0.06   0.04
  63   1    -0.13  -0.01   0.30    -0.06  -0.01   0.13     0.06   0.04  -0.02
  64   1    -0.13  -0.02   0.31    -0.07  -0.02   0.18     0.01   0.07   0.04
  65   1    -0.21   0.11   0.17    -0.13   0.01   0.09    -0.01   0.00  -0.01
  66   1    -0.07   0.01  -0.15     0.00  -0.04   0.00     0.01  -0.04   0.06
  67   1    -0.12   0.08   0.00    -0.02   0.00   0.04     0.00  -0.01   0.05
  68   1    -0.18   0.04  -0.14    -0.05  -0.02   0.01    -0.02  -0.02   0.04
  69   1    -0.01   0.00  -0.02     0.08  -0.01  -0.02     0.06   0.00  -0.02
  70   1    -0.03  -0.01  -0.03     0.06  -0.01   0.01     0.08   0.02   0.00
  71   1    -0.01  -0.02  -0.03     0.08  -0.02   0.04     0.07   0.04   0.05
  72   1     0.01   0.11  -0.02     0.03   0.07  -0.02    -0.01   0.19  -0.04
  73   1     0.04   0.07  -0.07     0.03   0.05  -0.08     0.04   0.12  -0.15
  74   1     0.01   0.07  -0.03     0.03   0.07  -0.04     0.00   0.13  -0.06
  75   1     0.01   0.03  -0.02     0.01  -0.01   0.00     0.03   0.01  -0.01
  76   1     0.01   0.05  -0.02     0.01   0.01  -0.01     0.02   0.05  -0.03
  77   1     0.01   0.03  -0.02     0.00   0.02  -0.01     0.01   0.06  -0.02
  78   1     0.02   0.04  -0.02     0.01  -0.01   0.01     0.04   0.01   0.01
  79   1     0.00  -0.07   0.02     0.01   0.06  -0.02     0.03   0.11  -0.02
  80   1     0.00   0.01   0.05    -0.01   0.01  -0.01    -0.01   0.00   0.00
  81   1    -0.04   0.07   0.07     0.03  -0.04  -0.03    -0.04   0.04   0.01
  82   1    -0.04   0.08   0.06     0.03  -0.04  -0.03    -0.01   0.01   0.00
  83   1     0.06  -0.08   0.01    -0.18   0.20   0.04     0.10  -0.14  -0.05
  84   1    -0.02   0.08   0.03     0.00   0.03  -0.04     0.04  -0.10  -0.04
  85   1    -0.07   0.00  -0.03     0.03  -0.01   0.01     0.04   0.01   0.02
  86   1    -0.07   0.04  -0.06     0.02  -0.01   0.02     0.03   0.01   0.02
  87   1    -0.09  -0.02  -0.02     0.03  -0.01   0.01     0.03   0.00   0.01
  88   1     0.01  -0.04   0.03     0.02  -0.01   0.00     0.05   0.00   0.01
  89   1    -0.02  -0.09   0.05     0.02  -0.01   0.00     0.04  -0.02   0.01
  90   1     0.07  -0.05   0.06     0.01  -0.01  -0.01     0.05  -0.01   0.01
  91   1     0.06  -0.06   0.00    -0.03   0.02   0.02    -0.07   0.01   0.08
  92   1     0.07   0.01  -0.03    -0.04  -0.03   0.05    -0.09  -0.07   0.14
  93   1     0.10  -0.05  -0.01    -0.07   0.04   0.04    -0.14   0.08   0.12
  94   1    -0.05  -0.04   0.01     0.04   0.00  -0.02     0.07  -0.05  -0.03
  95   1    -0.11  -0.01   0.01     0.10  -0.02  -0.04     0.18  -0.06  -0.10
  96   1    -0.04   0.05   0.00     0.03  -0.08  -0.01     0.06  -0.18  -0.03
  97   1     0.03   0.03   0.01     0.05  -0.02  -0.06     0.03  -0.08  -0.03
  98   1     0.04   0.00   0.04     0.06  -0.06  -0.04     0.01  -0.02  -0.02
  99   1     0.04   0.03   0.00     0.07  -0.01  -0.08    -0.03  -0.06  -0.02
 100   1    -0.06   0.03   0.06    -0.03  -0.01  -0.01     0.17  -0.05  -0.05
 101   1    -0.09   0.03   0.08    -0.08  -0.02   0.01     0.15  -0.03  -0.04
 102   1    -0.05  -0.02   0.08    -0.03  -0.07   0.02     0.14   0.04   0.00
 103   1     0.00  -0.10   0.03    -0.01   0.20  -0.02     0.01  -0.15   0.00
 104   1    -0.01  -0.09   0.04     0.11   0.29  -0.05    -0.09  -0.21   0.04
 105   1    -0.02  -0.06   0.07     0.15   0.06  -0.06    -0.11  -0.05   0.03
 106   1     0.08  -0.03  -0.01    -0.24   0.02   0.08     0.14  -0.03  -0.09
 107   1     0.04   0.02   0.01    -0.10  -0.15   0.00     0.05   0.09  -0.03
 108   1     0.08   0.01  -0.02    -0.29  -0.12   0.10     0.17   0.08  -0.11
 109   1     0.00   0.00  -0.02     0.02  -0.03  -0.03     0.04  -0.05  -0.07
 110   1    -0.01   0.00  -0.01     0.02  -0.01  -0.01     0.02  -0.01   0.02
 111   1    -0.02   0.00  -0.02     0.00  -0.02  -0.02    -0.06  -0.02  -0.04
 112   1     0.00  -0.02   0.00     0.04   0.06   0.06    -0.02  -0.02  -0.06
 113   1     0.03   0.03   0.04    -0.08  -0.16  -0.09     0.04   0.08   0.01
 114   1     0.02  -0.03   0.07    -0.02   0.09  -0.22     0.01  -0.04   0.07
                    16                     17                     18
                    ?A                     ?A                     ?A
 Frequencies --    73.9766                77.1737                79.2355
 Red. masses --     4.1046                 4.3166                 4.3654
 Frc consts  --     0.0132                 0.0151                 0.0161
 IR Inten    --     1.2984                 0.3271                 0.0225
 Raman Activ --     0.0000                 0.0000                 0.0000
 Depolar     --     0.0000                 0.0000                 0.0000
 Atom AN      X      Y      Z        X      Y      Z        X      Y      Z
   1   8    -0.03   0.00  -0.01    -0.02   0.01   0.00     0.03   0.01  -0.01
   2  12     0.02   0.00   0.06    -0.01  -0.02  -0.07     0.02   0.02   0.01
   3   8    -0.02  -0.05   0.02    -0.02   0.03  -0.05     0.02  -0.01  -0.04
   4   6    -0.03   0.01  -0.02    -0.02   0.01   0.00     0.05   0.00   0.02
   5   7     0.02   0.01   0.03     0.06  -0.01   0.03     0.02   0.00   0.02
   6   7     0.02   0.00   0.03    -0.01  -0.05  -0.01    -0.03  -0.03  -0.02
   7   8    -0.04   0.02  -0.01    -0.03   0.00  -0.01     0.08   0.00   0.02
   8   6     0.00   0.00   0.00     0.03  -0.02   0.04    -0.01  -0.01   0.00
   9   6     0.00   0.00   0.00     0.03  -0.04   0.04    -0.02  -0.03  -0.02
  10   6     0.01   0.00   0.00     0.01  -0.04   0.02    -0.02  -0.03  -0.03
  11   8    -0.03  -0.06  -0.05    -0.02   0.04   0.01     0.03   0.01   0.05
  12   6    -0.02  -0.02   0.03    -0.02   0.02  -0.04     0.03   0.00   0.03
  13   6    -0.02  -0.05   0.01    -0.02   0.07  -0.01     0.01  -0.03  -0.03
  14   6    -0.03   0.01  -0.02    -0.02   0.01  -0.01     0.03   0.00   0.04
  15   8    -0.01   0.06   0.12    -0.02  -0.02  -0.09     0.05   0.02   0.05
  16   6    -0.04   0.02   0.00    -0.02   0.00   0.00     0.06   0.00  -0.05
  17   8    -0.01  -0.04  -0.03    -0.01  -0.03   0.02     0.01   0.08  -0.06
  18   6     0.01  -0.01  -0.02    -0.02  -0.02  -0.02     0.01   0.07  -0.01
  19   8     0.06   0.01   0.01    -0.02  -0.04  -0.05     0.00   0.08  -0.01
  20   8    -0.02   0.04  -0.07    -0.02  -0.03   0.01     0.02   0.07  -0.04
  21   6    -0.06  -0.03   0.03    -0.02  -0.02  -0.01     0.02   0.04   0.02
  22   6    -0.04  -0.03  -0.04    -0.02  -0.03   0.00     0.02   0.07  -0.01
  23   6    -0.01   0.01  -0.05    -0.01  -0.02   0.00     0.00   0.07  -0.04
  24   8    -0.10  -0.09   0.14    -0.01   0.00  -0.04     0.02   0.01   0.08
  25   6     0.02  -0.04  -0.10    -0.03  -0.04   0.00     0.05   0.11   0.00
  26   6    -0.02  -0.03  -0.07     0.02  -0.02   0.01    -0.05   0.07  -0.04
  27   6    -0.01  -0.05   0.01    -0.02   0.20  -0.02    -0.03  -0.08  -0.01
  28   6     0.00   0.09  -0.05    -0.03  -0.03   0.01     0.01  -0.02   0.05
  29   6     0.01   0.01   0.02     0.06   0.01   0.02     0.02   0.00   0.01
  30   6     0.02   0.00   0.02    -0.02  -0.04   0.00    -0.05  -0.02  -0.01
  31   6     0.03   0.02   0.00     0.08   0.04   0.00     0.03  -0.01   0.00
  32   6     0.02   0.01   0.00     0.08   0.03  -0.01     0.03  -0.03  -0.01
  33   6     0.01  -0.01   0.00     0.07   0.01   0.00     0.01  -0.05   0.00
  34   6     0.00   0.00   0.01     0.06   0.01   0.01     0.00  -0.04   0.01
  35   6     0.00   0.01   0.02     0.06   0.01   0.02     0.01  -0.01   0.01
  36   6     0.05   0.08  -0.02     0.11   0.09  -0.02     0.06   0.01   0.00
  37   6     0.00   0.03   0.01     0.06   0.01   0.02     0.01   0.01   0.01
  38   6     0.03  -0.01   0.01    -0.03  -0.04   0.01    -0.08   0.00   0.01
  39   6     0.04  -0.02   0.00    -0.02  -0.04   0.01    -0.10   0.03   0.03
  40   6     0.04  -0.03   0.00    -0.01  -0.05   0.01    -0.11   0.05   0.04
  41   6     0.03  -0.02   0.00    -0.02  -0.04   0.01    -0.07   0.03   0.01
  42   6     0.02  -0.01   0.01    -0.02  -0.03   0.01    -0.04  -0.01  -0.01
  43   6     0.04   0.00   0.01    -0.07  -0.01   0.02    -0.09  -0.04  -0.01
  44   6     0.00   0.01   0.02    -0.05  -0.02   0.02    -0.02  -0.05  -0.02
  45   6    -0.07   0.15   0.00     0.02   0.13  -0.01     0.03   0.02   0.01
  46   6     0.12   0.00  -0.01     0.17   0.02  -0.02     0.09  -0.03  -0.01
  47   6    -0.06   0.03   0.03     0.08   0.01   0.01    -0.08  -0.01   0.07
  48   6     0.04   0.01   0.01     0.07   0.02   0.02     0.09  -0.07  -0.03
  49   6    -0.02   0.04   0.04    -0.08   0.00   0.04     0.03  -0.10  -0.07
  50   6    -0.02   0.02  -0.01    -0.08  -0.02   0.00    -0.03  -0.07   0.05
  51   6     0.13   0.01   0.01    -0.11   0.00   0.00    -0.12  -0.07   0.03
  52   6     0.00  -0.08  -0.02    -0.07   0.00   0.09    -0.09  -0.03  -0.01
  53   6    -0.02  -0.01  -0.06     0.01   0.00   0.04    -0.03  -0.01  -0.02
  54   6    -0.01  -0.02  -0.04     0.02  -0.03   0.02    -0.03  -0.03  -0.05
  55   1    -0.01  -0.01  -0.03     0.03  -0.04   0.05    -0.02  -0.03  -0.03
  56   1    -0.01  -0.05   0.00    -0.02   0.06   0.08     0.01  -0.02  -0.07
  57   1    -0.06   0.01   0.04     0.00   0.01  -0.03     0.03  -0.01   0.03
  58   1    -0.04   0.04  -0.01    -0.03  -0.02   0.01     0.09  -0.01  -0.04
  59   1    -0.03   0.03   0.03    -0.03  -0.01  -0.01     0.07   0.00  -0.06
  60   1    -0.03   0.01   0.00    -0.02   0.00   0.01     0.04   0.01  -0.07
  61   1    -0.10  -0.01  -0.08    -0.01  -0.02   0.00     0.01   0.05  -0.02
  62   1     0.01   0.03  -0.03    -0.02  -0.03   0.01     0.01   0.07  -0.06
  63   1    -0.01  -0.04  -0.11    -0.03  -0.03  -0.01     0.06   0.09   0.03
  64   1     0.04  -0.05  -0.17    -0.03  -0.04   0.01     0.05   0.12  -0.03
  65   1     0.09  -0.05  -0.06    -0.04  -0.04  -0.01     0.07   0.12   0.01
  66   1    -0.05   0.00  -0.09     0.03  -0.03   0.03    -0.07   0.10  -0.06
  67   1    -0.03  -0.07  -0.09     0.03   0.01   0.00    -0.07   0.05  -0.02
  68   1     0.01  -0.04  -0.04     0.01  -0.02   0.01    -0.04   0.08  -0.05
  69   1    -0.02  -0.07   0.01    -0.02   0.23   0.02    -0.04  -0.08  -0.01
  70   1     0.02  -0.05   0.00    -0.03   0.21  -0.12    -0.04  -0.08   0.02
  71   1    -0.02  -0.03   0.01    -0.02   0.24   0.01    -0.05  -0.10  -0.05
  72   1    -0.02   0.17  -0.03    -0.03  -0.04  -0.01     0.00  -0.02   0.02
  73   1     0.05   0.09  -0.12    -0.02  -0.03   0.04     0.02  -0.02   0.06
  74   1    -0.02   0.09  -0.03    -0.03  -0.05   0.00     0.00  -0.04   0.06
  75   1     0.03   0.01  -0.02     0.08   0.05  -0.02     0.03  -0.03  -0.01
  76   1     0.00  -0.02  -0.01     0.07   0.01  -0.01     0.01  -0.07  -0.01
  77   1    -0.01   0.00   0.00     0.05   0.00   0.01    -0.01  -0.05   0.01
  78   1     0.11   0.16  -0.05     0.15   0.15  -0.04     0.08   0.03   0.00
  79   1     0.00   0.07   0.01     0.06   0.00   0.01     0.02   0.08  -0.02
  80   1     0.04  -0.02  -0.01    -0.03  -0.04   0.02    -0.12   0.05   0.04
  81   1     0.04  -0.04  -0.01    -0.01  -0.06   0.01    -0.13   0.09   0.05
  82   1     0.02  -0.03   0.00    -0.02  -0.04   0.01    -0.07   0.05   0.02
  83   1     0.00   0.04   0.03    -0.07  -0.02   0.01    -0.08  -0.05  -0.04
  84   1     0.00   0.01   0.04    -0.04  -0.02   0.04    -0.03  -0.01  -0.05
  85   1    -0.08   0.20  -0.03     0.01   0.17  -0.03     0.05   0.04   0.01
  86   1    -0.09   0.19  -0.01     0.01   0.17  -0.04     0.02   0.04   0.02
  87   1    -0.13   0.10   0.06    -0.02   0.10   0.04     0.02   0.00   0.01
  88   1     0.14   0.06  -0.04     0.19   0.08  -0.04     0.11  -0.01  -0.01
  89   1     0.05  -0.07   0.04     0.12  -0.04   0.02     0.07  -0.06   0.00
  90   1     0.21  -0.06  -0.02     0.24  -0.02  -0.03     0.12  -0.05  -0.01
  91   1    -0.05   0.05   0.02     0.08   0.01   0.00    -0.07   0.01   0.06
  92   1    -0.06   0.00   0.04     0.08   0.02   0.01    -0.09  -0.08   0.10
  93   1    -0.09   0.05   0.03     0.07   0.00   0.00    -0.13   0.05   0.09
  94   1     0.02   0.04   0.01     0.07   0.02   0.02     0.08  -0.04  -0.02
  95   1     0.10   0.01   0.00     0.06   0.02   0.03     0.18  -0.06  -0.07
  96   1     0.02  -0.05   0.00     0.07   0.02   0.03     0.07  -0.18  -0.01
  97   1    -0.04   0.06   0.06    -0.09   0.00   0.05     0.06  -0.14  -0.09
  98   1    -0.04   0.04   0.02    -0.09   0.02   0.02     0.06  -0.12  -0.03
  99   1     0.00   0.04   0.07    -0.08  -0.01   0.06     0.00  -0.09  -0.12
 100   1    -0.04   0.04   0.00    -0.11  -0.01   0.02     0.01  -0.08   0.02
 101   1     0.00   0.01  -0.02    -0.05  -0.02   0.00    -0.10  -0.05   0.07
 102   1    -0.03   0.03  -0.04    -0.09  -0.02  -0.04     0.00  -0.12   0.11
 103   1     0.10   0.01   0.01    -0.13   0.02   0.01    -0.13  -0.11   0.01
 104   1     0.16   0.09   0.01    -0.12  -0.02  -0.03    -0.12  -0.07   0.02
 105   1     0.18  -0.05   0.00    -0.12   0.01   0.01    -0.12  -0.06   0.07
 106   1     0.00  -0.06  -0.01    -0.11   0.01   0.09    -0.10  -0.06  -0.03
 107   1     0.04  -0.13  -0.06    -0.08   0.01   0.11    -0.09  -0.02   0.02
 108   1    -0.07  -0.10  -0.01    -0.03  -0.01   0.10    -0.07  -0.01  -0.03
 109   1     0.06  -0.06  -0.17     0.06  -0.04  -0.02     0.02  -0.04  -0.08
 110   1     0.01   0.01   0.03     0.02   0.02   0.13    -0.02   0.00   0.03
 111   1    -0.15   0.00  -0.11    -0.07   0.04   0.00    -0.10   0.01  -0.05
 112   1     0.02   0.00   0.03     0.00  -0.03  -0.01    -0.02  -0.01  -0.02
 113   1    -0.03  -0.11  -0.05     0.04   0.00   0.01    -0.03  -0.06  -0.05
 114   1    -0.03   0.03  -0.12     0.02  -0.04   0.04    -0.03  -0.01  -0.08
                    19                     20                     21
                    ?A                     ?A                     ?A
 Frequencies --    87.8912                89.3768                91.0047
 Red. masses --     3.2908                 3.2618                 3.2963
 Frc consts  --     0.0150                 0.0154                 0.0161
 IR Inten    --     0.1809                 0.2251                 0.8067
 Raman Activ --     0.0000                 0.0000                 0.0000
 Depolar     --     0.0000                 0.0000                 0.0000
 Atom AN      X      Y      Z        X      Y      Z        X      Y      Z
   1   8     0.01   0.01   0.00    -0.05   0.01  -0.01    -0.05   0.02   0.01
   2  12    -0.01  -0.01  -0.01     0.01   0.00   0.03     0.00   0.01  -0.04
   3   8     0.00  -0.04  -0.01    -0.03   0.01   0.05    -0.04   0.04   0.01
   4   6     0.02   0.01   0.02    -0.04   0.00   0.00    -0.04   0.01   0.01
   5   7    -0.01   0.01   0.03     0.02  -0.02  -0.01    -0.01   0.03  -0.03
   6   7     0.00   0.02  -0.04     0.00   0.00  -0.01     0.01   0.02  -0.03
   7   8     0.05   0.00   0.02    -0.04   0.00   0.00    -0.04  -0.01   0.00
   8   6     0.00   0.02   0.00     0.01  -0.03  -0.07     0.01   0.04   0.04
   9   6     0.00   0.03  -0.02     0.00  -0.03  -0.10     0.02   0.05   0.08
  10   6     0.00   0.03  -0.03     0.00  -0.01  -0.06     0.02   0.03   0.04
  11   8     0.01   0.02   0.05    -0.04  -0.01   0.01    -0.04   0.06   0.05
  12   6     0.01   0.00   0.02    -0.03   0.00   0.03    -0.04   0.04   0.01
  13   6     0.00  -0.04  -0.01    -0.03   0.01   0.05    -0.04   0.05   0.02
  14   6     0.01   0.01   0.04    -0.05   0.01   0.01    -0.04   0.01   0.02
  15   8     0.00   0.00   0.03    -0.03   0.01   0.05    -0.04   0.01  -0.03
  16   6     0.03  -0.01  -0.04    -0.04   0.01  -0.01    -0.04  -0.02  -0.01
  17   8    -0.01  -0.04  -0.02     0.01   0.01   0.07     0.00  -0.02   0.04
  18   6    -0.02  -0.04   0.00     0.00   0.01   0.03     0.00  -0.01  -0.01
  19   8    -0.03  -0.04   0.01     0.02   0.01   0.02     0.02  -0.02  -0.03
  20   8    -0.01  -0.06   0.00     0.01   0.02   0.00     0.00   0.01  -0.03
  21   6     0.00  -0.04  -0.02     0.01   0.02   0.02    -0.01  -0.01   0.00
  22   6    -0.01  -0.05   0.01     0.01   0.02   0.00    -0.01  -0.01  -0.01
  23   6    -0.01  -0.05   0.00     0.00   0.02   0.01    -0.01   0.00  -0.02
  24   8     0.01  -0.03  -0.04     0.01   0.01   0.03    -0.01  -0.02   0.02
  25   6    -0.04  -0.03   0.05     0.05  -0.01  -0.05     0.01  -0.04  -0.04
  26   6    -0.01  -0.05   0.00    -0.01   0.00   0.01    -0.01  -0.01  -0.03
  27   6    -0.01  -0.06   0.00     0.01   0.00   0.04    -0.02   0.04   0.02
  28   6    -0.01   0.01   0.04    -0.05   0.04   0.00    -0.08  -0.05   0.04
  29   6    -0.01   0.00   0.03     0.02  -0.02   0.00     0.00   0.02  -0.02
  30   6     0.01   0.02  -0.04     0.00   0.00   0.00     0.02   0.01  -0.02
  31   6    -0.01   0.02   0.02     0.02  -0.02   0.00    -0.01   0.02  -0.02
  32   6    -0.01  -0.01   0.02     0.02  -0.01   0.00    -0.01   0.02  -0.01
  33   6    -0.03  -0.05   0.03     0.03   0.00   0.00     0.00   0.01  -0.01
  34   6    -0.04  -0.05   0.04     0.03   0.00  -0.01     0.00   0.00  -0.01
  35   6    -0.03  -0.02   0.04     0.03  -0.01   0.00     0.00   0.01  -0.01
  36   6     0.00   0.07   0.00     0.01  -0.01  -0.01    -0.01   0.00  -0.01
  37   6    -0.04   0.02   0.04     0.03  -0.01  -0.01     0.00  -0.01  -0.01
  38   6     0.01   0.01  -0.03    -0.02   0.01   0.01     0.02  -0.01  -0.01
  39   6     0.02  -0.01  -0.02    -0.03   0.03   0.02     0.03  -0.01   0.01
  40   6     0.05  -0.01  -0.02    -0.02   0.02   0.01     0.04   0.01   0.02
  41   6     0.06  -0.01  -0.03     0.00   0.00   0.00     0.05   0.02   0.00
  42   6     0.04   0.01  -0.04     0.01  -0.01   0.00     0.04   0.02  -0.02
  43   6     0.00   0.02  -0.02    -0.02   0.00   0.00     0.01  -0.03  -0.02
  44   6     0.06   0.02  -0.06     0.03  -0.04  -0.01     0.06   0.01  -0.03
  45   6    -0.07   0.13   0.02    -0.01   0.01   0.00    -0.01  -0.02  -0.03
  46   6     0.04   0.04  -0.01     0.02  -0.02  -0.01    -0.02   0.00   0.01
  47   6    -0.09   0.03   0.00     0.16   0.02  -0.14    -0.01  -0.03   0.04
  48   6    -0.03   0.04   0.06    -0.08   0.14   0.06     0.03  -0.07  -0.04
  49   6     0.13   0.00  -0.09     0.08  -0.10  -0.06     0.17  -0.06  -0.10
  50   6     0.01  -0.01  -0.01     0.01  -0.08   0.06    -0.01  -0.05   0.09
  51   6    -0.11   0.01  -0.03    -0.03  -0.01   0.02     0.08  -0.04   0.00
  52   6     0.04   0.11   0.03    -0.02   0.01   0.00    -0.02  -0.10  -0.05
  53   6     0.01   0.00  -0.01     0.01  -0.04  -0.08     0.02   0.06   0.08
  54   6     0.01   0.04   0.00     0.01   0.01  -0.06     0.01   0.00   0.06
  55   1     0.01   0.03  -0.02    -0.01  -0.04  -0.13     0.04   0.06   0.13
  56   1     0.02  -0.03  -0.03    -0.03   0.01   0.05    -0.03   0.05   0.02
  57   1     0.02   0.01   0.03    -0.05   0.01   0.03    -0.02   0.01  -0.02
  58   1     0.06  -0.03  -0.03    -0.04   0.02  -0.01    -0.04  -0.06   0.02
  59   1     0.03  -0.01  -0.06    -0.04   0.01  -0.01    -0.04  -0.03  -0.06
  60   1     0.02   0.00  -0.05    -0.05   0.01  -0.02    -0.05   0.01   0.00
  61   1     0.02  -0.07   0.03    -0.01   0.07  -0.01    -0.02   0.02  -0.02
  62   1    -0.02  -0.06   0.00     0.00   0.02   0.01    -0.01   0.00  -0.02
  63   1    -0.04  -0.04   0.06     0.05   0.01  -0.08     0.00  -0.03  -0.06
  64   1    -0.04  -0.04   0.07     0.05   0.00  -0.06     0.01  -0.04  -0.05
  65   1    -0.07  -0.01   0.03     0.06  -0.05  -0.03     0.02  -0.06  -0.03
  66   1     0.00  -0.06   0.00    -0.02   0.01   0.00    -0.01  -0.01  -0.03
  67   1    -0.01  -0.04   0.01    -0.01  -0.02  -0.01     0.00  -0.02  -0.04
  68   1    -0.02  -0.05  -0.01     0.01  -0.01   0.02     0.00  -0.02  -0.02
  69   1     0.01  -0.05  -0.02     0.02   0.02   0.01     0.02   0.10  -0.02
  70   1    -0.04  -0.07   0.02     0.00   0.00   0.05    -0.08   0.04   0.03
  71   1     0.01  -0.10  -0.01     0.03  -0.01   0.06     0.03  -0.02   0.03
  72   1     0.00  -0.02   0.03    -0.07   0.08  -0.01    -0.09  -0.07   0.00
  73   1    -0.03   0.01   0.05    -0.01   0.04  -0.02    -0.07  -0.05   0.09
  74   1     0.00   0.02   0.04    -0.08   0.02   0.02    -0.10  -0.08   0.05
  75   1    -0.01   0.00   0.01     0.02  -0.01   0.00    -0.01   0.02  -0.01
  76   1    -0.04  -0.07   0.04     0.03   0.01   0.00     0.00   0.01   0.00
  77   1    -0.04  -0.07   0.05     0.04   0.01  -0.01     0.00  -0.01   0.00
  78   1     0.04   0.11  -0.04     0.02   0.00  -0.02    -0.01   0.00   0.00
  79   1    -0.03   0.04   0.05     0.01  -0.13   0.04     0.01   0.02  -0.03
  80   1     0.02  -0.01  -0.01    -0.04   0.04   0.02     0.02  -0.02   0.02
  81   1     0.07  -0.02  -0.01    -0.03   0.03   0.02     0.04   0.01   0.03
  82   1     0.08  -0.02  -0.03     0.01   0.00   0.00     0.06   0.03   0.01
  83   1     0.04  -0.04  -0.04    -0.02  -0.01  -0.01    -0.02   0.01  -0.02
  84   1     0.03   0.08  -0.09     0.01   0.00  -0.03     0.02   0.11  -0.07
  85   1    -0.10   0.18  -0.01    -0.01   0.02  -0.01    -0.01  -0.03  -0.02
  86   1    -0.07   0.13   0.01    -0.01   0.01   0.00     0.00  -0.01  -0.04
  87   1    -0.10   0.12   0.09    -0.02   0.00   0.01     0.00  -0.02  -0.04
  88   1     0.05   0.09  -0.04     0.02   0.00  -0.02    -0.02  -0.02   0.02
  89   1     0.00   0.01   0.02     0.01  -0.03   0.01    -0.01   0.00   0.00
  90   1     0.09   0.00  -0.03     0.04  -0.03  -0.01    -0.02   0.01   0.02
  91   1    -0.10   0.07   0.01     0.16   0.01  -0.13    -0.01  -0.05   0.04
  92   1    -0.10   0.01  -0.02     0.18   0.13  -0.18    -0.02  -0.05   0.07
  93   1    -0.09   0.02  -0.01     0.23  -0.08  -0.18    -0.03   0.01   0.06
  94   1    -0.04   0.09   0.06    -0.06   0.11   0.05     0.03  -0.08  -0.04
  95   1     0.01   0.04   0.08    -0.21   0.12   0.15     0.05  -0.06  -0.08
  96   1    -0.04   0.02   0.04    -0.04   0.30   0.04     0.03  -0.11  -0.03
  97   1     0.16   0.00  -0.12     0.11  -0.14  -0.08     0.23  -0.10  -0.15
  98   1     0.17  -0.03  -0.04     0.11  -0.12  -0.02     0.23  -0.11  -0.03
  99   1     0.13   0.01  -0.12     0.05  -0.09  -0.12     0.15  -0.04  -0.19
 100   1     0.03   0.01  -0.04     0.06  -0.07   0.02     0.01  -0.06   0.08
 101   1    -0.07   0.01   0.00    -0.08  -0.05   0.08    -0.11   0.01   0.14
 102   1     0.03  -0.07   0.04     0.04  -0.13   0.14     0.01  -0.15   0.15
 103   1    -0.07   0.02  -0.03    -0.03  -0.03   0.01     0.05  -0.06  -0.01
 104   1    -0.15  -0.08  -0.04    -0.04  -0.02   0.03     0.11   0.02   0.00
 105   1    -0.18   0.08  -0.04    -0.04  -0.01   0.03     0.12  -0.09   0.02
 106   1     0.03   0.09   0.01    -0.02  -0.01  -0.01    -0.03  -0.11  -0.05
 107   1    -0.01   0.18   0.08    -0.02   0.02   0.02     0.01  -0.14  -0.05
 108   1     0.14   0.14   0.02     0.00   0.03  -0.02    -0.06  -0.10  -0.06
 109   1     0.06  -0.04  -0.06    -0.07   0.06   0.00     0.05   0.00   0.06
 110   1     0.04   0.03   0.04    -0.03  -0.08  -0.21     0.04   0.08   0.16
 111   1    -0.06   0.01  -0.04     0.13  -0.10  -0.02    -0.02   0.11   0.06
 112   1    -0.07  -0.04  -0.18    -0.01   0.00  -0.10     0.10   0.05   0.23
 113   1     0.11   0.26   0.01     0.04   0.06  -0.05    -0.10  -0.19   0.06
 114   1     0.01  -0.08   0.20     0.02  -0.02  -0.01     0.01   0.11  -0.12
                    22                     23                     24
                    ?A                     ?A                     ?A
 Frequencies --    99.4239               107.0457               109.6380
 Red. masses --     3.0319                 4.4049                 4.3909
 Frc consts  --     0.0177                 0.0297                 0.0311
 IR Inten    --     0.2324                 1.9992                 0.3868
 Raman Activ --     0.0000                 0.0000                 0.0000
 Depolar     --     0.0000                 0.0000                 0.0000
 Atom AN      X      Y      Z        X      Y      Z        X      Y      Z
   1   8     0.01   0.01  -0.01     0.01  -0.02  -0.01    -0.02   0.00  -0.01
   2  12    -0.01  -0.02   0.00     0.00  -0.01   0.02     0.01   0.03   0.02
   3   8     0.00  -0.03   0.00     0.02   0.02   0.05     0.00   0.03   0.02
   4   6     0.02   0.01   0.00     0.01  -0.01  -0.02    -0.02   0.00  -0.01
   5   7     0.00  -0.03  -0.02    -0.02  -0.01  -0.01     0.00   0.01  -0.05
   6   7     0.00   0.00   0.00    -0.03  -0.01  -0.04    -0.01   0.00  -0.01
   7   8     0.03   0.01   0.00     0.00   0.01  -0.01    -0.02   0.01   0.00
   8   6     0.02  -0.01   0.05     0.00   0.00   0.04     0.02   0.03   0.05
   9   6     0.04   0.01   0.10     0.01   0.01   0.06     0.02   0.02   0.09
  10   6     0.02   0.01   0.06     0.00   0.00   0.01     0.00   0.01   0.03
  11   8     0.01  -0.01  -0.01     0.01  -0.04  -0.05    -0.02  -0.02  -0.02
  12   6     0.00  -0.03  -0.01     0.02  -0.01   0.01    -0.01   0.01   0.03
  13   6     0.00  -0.04  -0.01     0.03   0.03   0.06    -0.01   0.00   0.01
  14   6     0.01   0.02   0.01     0.01   0.00  -0.02    -0.02   0.02   0.01
  15   8     0.00  -0.02   0.00     0.02   0.02   0.04     0.01   0.05   0.08
  16   6     0.02   0.00  -0.03     0.00   0.02   0.02    -0.02   0.02  -0.01
  17   8    -0.01   0.01  -0.02     0.06  -0.08   0.15    -0.01   0.06  -0.05
  18   6    -0.03  -0.02   0.00     0.07  -0.03   0.01     0.00   0.06   0.00
  19   8    -0.06  -0.01   0.02     0.14  -0.06  -0.02    -0.01   0.07   0.01
  20   8     0.00  -0.08   0.06     0.05   0.06  -0.08    -0.02   0.09   0.01
  21   6     0.03  -0.02  -0.02     0.02   0.00   0.01    -0.04   0.07   0.03
  22   6     0.02   0.01  -0.03     0.03  -0.04   0.00    -0.03   0.04   0.04
  23   6    -0.02  -0.04   0.02     0.03   0.03  -0.05     0.02   0.05   0.04
  24   8     0.05   0.00  -0.06     0.00  -0.03   0.06    -0.06   0.07   0.04
  25   6     0.05   0.02  -0.04     0.05  -0.14  -0.10    -0.06   0.09   0.10
  26   6    -0.02   0.02   0.04    -0.02   0.00  -0.07     0.07   0.00   0.02
  27   6     0.01  -0.04  -0.01     0.08   0.11   0.04    -0.01  -0.04   0.02
  28   6     0.03   0.09  -0.01     0.04   0.09  -0.06    -0.02   0.10  -0.03
  29   6    -0.01  -0.04  -0.01    -0.02  -0.02  -0.01     0.00  -0.01  -0.04
  30   6    -0.02   0.02   0.00    -0.03   0.00  -0.03     0.01  -0.03  -0.02
  31   6    -0.01  -0.02  -0.01    -0.03  -0.03   0.00    -0.01  -0.02  -0.03
  32   6    -0.01  -0.03   0.01    -0.03  -0.03   0.00    -0.02  -0.04   0.00
  33   6     0.00  -0.05   0.02    -0.02  -0.02   0.01     0.00  -0.08   0.02
  34   6     0.01  -0.07   0.02    -0.02  -0.03   0.00     0.01  -0.09   0.01
  35   6     0.00  -0.06   0.00    -0.02  -0.02  -0.01     0.01  -0.06  -0.02
  36   6    -0.02   0.03  -0.03    -0.04  -0.04   0.00    -0.02  -0.01  -0.04
  37   6     0.02  -0.03  -0.02    -0.01  -0.02  -0.02     0.04  -0.06  -0.05
  38   6    -0.02   0.02   0.00    -0.06   0.02  -0.01     0.01  -0.05  -0.02
  39   6    -0.04   0.04   0.01    -0.07   0.03   0.01     0.05  -0.09  -0.03
  40   6    -0.06   0.07   0.02    -0.05   0.04   0.01     0.08  -0.13  -0.04
  41   6    -0.06   0.08   0.02    -0.03   0.03   0.00     0.07  -0.11  -0.04
  42   6    -0.04   0.05   0.01    -0.03   0.02  -0.02     0.03  -0.06  -0.03
  43   6    -0.01  -0.01  -0.01    -0.07   0.02  -0.01    -0.02  -0.04  -0.02
  44   6    -0.02   0.04   0.00    -0.01   0.02  -0.04     0.01  -0.03  -0.03
  45   6    -0.06   0.07   0.00    -0.01  -0.04   0.00    -0.03  -0.01  -0.03
  46   6    -0.01   0.03  -0.05    -0.06  -0.01  -0.01    -0.02  -0.02  -0.04
  47   6     0.05  -0.01  -0.10    -0.03  -0.02  -0.01     0.08  -0.05  -0.09
  48   6     0.02   0.05   0.04     0.03  -0.04  -0.02     0.06  -0.01  -0.01
  49   6    -0.02   0.03  -0.01     0.00   0.03  -0.03    -0.01   0.00   0.00
  50   6     0.01   0.04   0.01     0.00   0.03  -0.05    -0.01  -0.02  -0.07
  51   6     0.04  -0.01   0.00    -0.15   0.00   0.00    -0.07  -0.04  -0.02
  52   6    -0.03  -0.05  -0.05    -0.03   0.10   0.02    -0.01  -0.01   0.03
  53   6     0.03  -0.01   0.06     0.02   0.01   0.09     0.03   0.06   0.14
  54   6     0.02   0.01   0.05     0.01   0.02   0.03     0.00   0.00   0.01
  55   1     0.07   0.03   0.15     0.03   0.02   0.10     0.04   0.03   0.14
  56   1     0.00  -0.03  -0.02     0.02   0.02   0.11    -0.02   0.01  -0.02
  57   1     0.00   0.03   0.06    -0.01   0.01   0.04    -0.03   0.02   0.06
  58   1     0.04  -0.01  -0.03    -0.01   0.09  -0.02    -0.01   0.06  -0.03
  59   1     0.02  -0.01  -0.03    -0.01   0.04   0.09    -0.02   0.03   0.03
  60   1     0.02  -0.01  -0.04     0.01  -0.02   0.01    -0.02  -0.01  -0.03
  61   1     0.02   0.03  -0.04     0.01   0.04  -0.02    -0.02  -0.02   0.06
  62   1    -0.03  -0.05  -0.01     0.06   0.06  -0.06     0.01   0.05   0.09
  63   1     0.08   0.02  -0.05     0.01  -0.10  -0.17    -0.07   0.07   0.14
  64   1     0.04   0.05  -0.04     0.06  -0.17  -0.11    -0.06   0.08   0.10
  65   1     0.05   0.00  -0.04     0.08  -0.19  -0.07    -0.07   0.13   0.09
  66   1    -0.03   0.02   0.07    -0.03   0.01  -0.11     0.09  -0.01   0.02
  67   1    -0.03   0.02   0.06    -0.03  -0.03  -0.07     0.09   0.01  -0.01
  68   1    -0.01   0.04   0.01    -0.02  -0.02  -0.05     0.08  -0.02   0.05
  69   1    -0.01  -0.07  -0.01     0.08   0.11   0.03    -0.02  -0.07   0.01
  70   1     0.04  -0.04  -0.01     0.09   0.12  -0.02     0.00  -0.05   0.05
  71   1    -0.01  -0.02  -0.01     0.09   0.14   0.09    -0.02  -0.05   0.00
  72   1     0.04   0.11   0.02     0.06   0.11  -0.01    -0.01   0.12   0.00
  73   1     0.02   0.09  -0.06     0.01   0.09  -0.13    -0.03   0.10  -0.09
  74   1     0.05   0.13  -0.01     0.06   0.16  -0.05     0.00   0.15  -0.01
  75   1    -0.02  -0.01   0.01    -0.03  -0.03   0.01    -0.03  -0.04   0.01
  76   1     0.00  -0.05   0.04    -0.02  -0.02   0.01     0.00  -0.10   0.04
  77   1     0.01  -0.08   0.03    -0.01  -0.02   0.00     0.01  -0.12   0.02
  78   1    -0.01   0.04  -0.06    -0.05  -0.05   0.01    -0.01  -0.01  -0.04
  79   1     0.01  -0.07  -0.01    -0.01   0.01  -0.03     0.02  -0.09  -0.07
  80   1    -0.04   0.04   0.01    -0.08   0.04   0.02     0.06  -0.11  -0.03
  81   1    -0.08   0.10   0.03    -0.06   0.05   0.02     0.12  -0.17  -0.05
  82   1    -0.08   0.10   0.02    -0.02   0.04   0.00     0.09  -0.13  -0.04
  83   1    -0.03   0.02   0.00    -0.03  -0.03  -0.03     0.00  -0.06  -0.04
  84   1    -0.03   0.03  -0.02    -0.02   0.02  -0.05     0.02  -0.03  -0.01
  85   1    -0.09   0.12  -0.03     0.01  -0.05   0.01    -0.02   0.00  -0.03
  86   1    -0.05   0.06  -0.01    -0.01  -0.04   0.02    -0.04   0.00  -0.03
  87   1    -0.07   0.08   0.06     0.00  -0.04  -0.01    -0.04  -0.02  -0.04
  88   1    -0.02   0.08  -0.08    -0.06  -0.02   0.00    -0.02  -0.01  -0.04
  89   1    -0.03   0.03  -0.02    -0.04   0.01  -0.02    -0.03  -0.02  -0.02
  90   1     0.01   0.00  -0.08    -0.08   0.00  -0.01    -0.01  -0.03  -0.04
  91   1     0.07   0.02  -0.13    -0.02  -0.01  -0.02     0.11  -0.05  -0.12
  92   1     0.06   0.02  -0.11    -0.03  -0.04   0.01     0.10  -0.02  -0.07
  93   1     0.05  -0.06  -0.14    -0.06  -0.01   0.00     0.06  -0.08  -0.12
  94   1     0.03   0.08   0.01     0.04  -0.02  -0.03     0.09  -0.02  -0.05
  95   1    -0.01   0.04   0.10     0.07  -0.04  -0.03     0.01  -0.02   0.02
  96   1     0.03   0.10   0.03     0.03  -0.07  -0.01     0.09   0.03   0.02
  97   1    -0.01   0.02  -0.02     0.00   0.04  -0.04    -0.02   0.03   0.01
  98   1    -0.01   0.03   0.00     0.01   0.04  -0.03    -0.02   0.01  -0.02
  99   1    -0.02   0.03  -0.03     0.00   0.03  -0.03     0.01   0.00   0.03
 100   1     0.01   0.01   0.03     0.00   0.03  -0.05    -0.05  -0.01  -0.04
 101   1     0.03   0.05   0.03     0.01   0.03  -0.05     0.02  -0.03  -0.08
 102   1     0.00   0.06   0.01     0.00   0.04  -0.05    -0.03  -0.02  -0.11
 103   1     0.02  -0.03   0.00    -0.11  -0.01   0.00    -0.06  -0.04  -0.02
 104   1     0.06   0.03   0.01    -0.18  -0.07   0.01    -0.09  -0.08  -0.04
 105   1     0.07  -0.05   0.02    -0.20   0.06   0.01    -0.10  -0.02  -0.02
 106   1    -0.02  -0.05  -0.04    -0.03   0.07   0.01    -0.05  -0.04   0.01
 107   1    -0.01  -0.09  -0.08    -0.07   0.15   0.07    -0.03   0.01   0.09
 108   1    -0.09  -0.07  -0.05     0.05   0.13   0.01     0.05   0.01   0.02
 109   1     0.15  -0.16  -0.07     0.07  -0.08   0.05     0.07  -0.04   0.11
 110   1     0.10   0.05   0.25     0.06   0.05   0.20     0.07   0.09   0.26
 111   1    -0.15   0.06  -0.03    -0.06   0.07   0.04    -0.03   0.15   0.09
 112   1     0.12   0.11   0.29    -0.03  -0.01  -0.05    -0.04  -0.03  -0.07
 113   1    -0.11  -0.27   0.04     0.05   0.12   0.04     0.05   0.07   0.00
 114   1     0.03   0.16  -0.21     0.02  -0.04   0.13    -0.03  -0.04   0.08
                    25                     26                     27
                    ?A                     ?A                     ?A
 Frequencies --   111.8400               116.4858               122.0872
 Red. masses --     1.7581                 2.1901                 1.1728
 Frc consts  --     0.0130                 0.0175                 0.0103
 IR Inten    --     1.4254                 1.1100                 0.7245
 Raman Activ --     0.0000                 0.0000                 0.0000
 Depolar     --     0.0000                 0.0000                 0.0000
 Atom AN      X      Y      Z        X      Y      Z        X      Y      Z
   1   8    -0.01  -0.01   0.01     0.00  -0.02   0.00     0.00  -0.01   0.00
   2  12     0.01   0.00   0.02     0.02   0.00   0.01     0.00   0.00  -0.01
   3   8     0.00  -0.01   0.02     0.01  -0.02   0.02     0.00   0.01  -0.01
   4   6    -0.01  -0.02   0.00     0.00  -0.02   0.00     0.01  -0.03  -0.01
   5   7     0.01   0.00   0.00     0.00   0.01  -0.03     0.00   0.00   0.00
   6   7     0.00  -0.01  -0.01     0.00  -0.01  -0.01     0.00   0.00   0.00
   7   8    -0.01  -0.02   0.00    -0.01  -0.02   0.00     0.01  -0.06  -0.02
   8   6     0.00   0.00   0.02     0.00   0.02   0.01     0.00   0.00  -0.01
   9   6     0.01   0.00   0.04     0.00   0.00   0.02     0.00   0.00  -0.01
  10   6     0.00   0.00   0.02     0.00  -0.01   0.01     0.00   0.00   0.00
  11   8     0.00  -0.02   0.01     0.00  -0.03   0.00     0.00   0.01   0.02
  12   6     0.00  -0.01   0.02     0.01   0.00   0.04     0.00   0.01   0.00
  13   6     0.00  -0.02   0.01     0.00  -0.03   0.01     0.00   0.01   0.00
  14   6    -0.01  -0.04  -0.01     0.00  -0.03  -0.01     0.00   0.00   0.01
  15   8     0.01   0.01   0.04     0.02   0.05   0.09     0.00   0.00   0.00
  16   6    -0.01   0.00   0.02    -0.01   0.02   0.02     0.00   0.05   0.02
  17   8     0.00   0.00   0.01    -0.01  -0.01   0.00     0.00   0.00  -0.01
  18   6     0.00   0.00   0.01    -0.01  -0.02   0.00     0.00   0.00  -0.01
  19   8     0.00   0.00   0.02     0.00  -0.01   0.02     0.00   0.00  -0.01
  20   8     0.00   0.00   0.01     0.00  -0.05   0.03     0.00  -0.01   0.01
  21   6     0.00   0.00   0.00     0.01  -0.02  -0.01     0.00   0.00   0.00
  22   6     0.00   0.00   0.01     0.00  -0.01  -0.01     0.00   0.00   0.00
  23   6     0.00   0.00   0.01    -0.01  -0.02   0.01     0.00   0.00   0.00
  24   8     0.00   0.00   0.00     0.02  -0.01  -0.03     0.00   0.00  -0.01
  25   6     0.00   0.00   0.00     0.01  -0.02  -0.02     0.00   0.00   0.00
  26   6     0.00   0.00   0.01    -0.01   0.00   0.02     0.01   0.01   0.00
  27   6    -0.01  -0.07   0.02    -0.01  -0.10   0.02    -0.02   0.01   0.00
  28   6    -0.01  -0.09   0.02    -0.01  -0.07   0.00    -0.02   0.03   0.00
  29   6     0.01   0.01  -0.01     0.01   0.03  -0.03     0.00   0.00   0.00
  30   6     0.00  -0.01  -0.01     0.00  -0.01  -0.01     0.00   0.00   0.00
  31   6     0.01   0.01  -0.01     0.01   0.05  -0.04     0.00   0.00   0.00
  32   6     0.01   0.04  -0.02     0.01   0.06  -0.04     0.00   0.00   0.00
  33   6     0.02   0.08  -0.03     0.01   0.05  -0.04     0.00   0.00   0.00
  34   6     0.02   0.09  -0.04     0.01   0.04  -0.03     0.00   0.00   0.00
  35   6     0.01   0.05  -0.02     0.01   0.03  -0.03     0.00   0.00   0.00
  36   6     0.00   0.00   0.00     0.01   0.04  -0.03     0.00   0.00   0.00
  37   6     0.01   0.01  -0.01     0.02   0.01  -0.03     0.00   0.00   0.01
  38   6    -0.01   0.00  -0.01    -0.01   0.00  -0.01     0.00   0.00   0.00
  39   6    -0.01   0.00  -0.01    -0.02   0.01   0.00     0.00   0.00   0.00
  40   6     0.00   0.00  -0.01    -0.02   0.02   0.00     0.00   0.00   0.00
  41   6     0.00   0.00  -0.01    -0.02   0.02   0.00     0.00   0.00   0.00
  42   6     0.00   0.00  -0.01    -0.01   0.00  -0.01     0.00   0.00   0.00
  43   6    -0.02   0.00  -0.01    -0.02   0.00   0.00     0.00   0.00   0.00
  44   6     0.00   0.01  -0.02    -0.01   0.01  -0.01     0.00   0.00   0.00
  45   6     0.01  -0.01  -0.01    -0.04   0.04  -0.05     0.01   0.00   0.00
  46   6    -0.01   0.01   0.00     0.03  -0.01   0.00     0.00   0.00   0.00
  47   6     0.07   0.01   0.01     0.02   0.00   0.00     0.00   0.00   0.01
  48   6    -0.04   0.01  -0.03     0.02  -0.01  -0.05    -0.01   0.00   0.00
  49   6     0.01   0.02  -0.01    -0.01   0.02   0.00     0.00  -0.01   0.00
  50   6    -0.01   0.01  -0.03    -0.01   0.01  -0.02     0.00   0.00   0.01
  51   6    -0.04   0.00  -0.01    -0.04   0.01  -0.01     0.01   0.00   0.00
  52   6    -0.01   0.02   0.01    -0.01   0.02   0.01     0.00  -0.01   0.00
  53   6    -0.02  -0.01  -0.04     0.01   0.06   0.10     0.00   0.00  -0.02
  54   6     0.00   0.00   0.01     0.00  -0.01   0.02     0.00   0.00   0.00
  55   1     0.02   0.01   0.06     0.00   0.00   0.04     0.00   0.00  -0.01
  56   1     0.00  -0.02  -0.02     0.01  -0.03  -0.04     0.00   0.01   0.00
  57   1    -0.01  -0.04  -0.04     0.00  -0.03  -0.03     0.02   0.00   0.03
  58   1    -0.02   0.02   0.01     0.00   0.08  -0.02     0.21   0.51  -0.24
  59   1    -0.01   0.01   0.04    -0.02   0.03   0.10    -0.23   0.14   0.53
  60   1    -0.01   0.00   0.01     0.00  -0.04   0.00     0.02  -0.43  -0.20
  61   1     0.00   0.00   0.01     0.00   0.00  -0.01     0.00  -0.01   0.00
  62   1     0.00   0.00   0.01    -0.01  -0.03  -0.01     0.00   0.00   0.00
  63   1     0.00   0.00   0.00     0.02  -0.02  -0.03     0.00   0.00   0.01
  64   1     0.00  -0.01   0.00     0.01  -0.01  -0.01     0.00   0.00   0.00
  65   1     0.00  -0.01   0.00     0.01  -0.03  -0.02     0.00   0.00   0.00
  66   1    -0.01   0.00   0.01    -0.02   0.02   0.04     0.01   0.00   0.01
  67   1     0.00  -0.01   0.01    -0.01   0.00   0.02     0.01   0.01   0.00
  68   1     0.01   0.00   0.01     0.01   0.02   0.01     0.01   0.01   0.00
  69   1    -0.02  -0.09   0.01    -0.02  -0.13   0.02    -0.02   0.01   0.01
  70   1     0.00  -0.08   0.05     0.01  -0.11   0.07    -0.03   0.01   0.00
  71   1    -0.02  -0.09   0.00    -0.03  -0.10   0.00    -0.02   0.00  -0.01
  72   1    -0.05  -0.06  -0.03    -0.03  -0.05  -0.02     0.01  -0.03   0.02
  73   1     0.05  -0.09   0.06     0.02  -0.07   0.03    -0.10   0.03  -0.03
  74   1    -0.06  -0.17   0.02    -0.03  -0.11   0.01     0.02   0.11  -0.01
  75   1     0.01   0.03  -0.01     0.01   0.06  -0.04     0.00   0.00   0.00
  76   1     0.02   0.10  -0.04     0.02   0.06  -0.04     0.00   0.00   0.00
  77   1     0.03   0.12  -0.05     0.02   0.04  -0.03     0.00   0.00   0.00
  78   1    -0.01  -0.01   0.00     0.03   0.07  -0.03     0.00   0.00   0.01
  79   1     0.00  -0.02   0.00     0.01   0.01  -0.04     0.00   0.00   0.01
  80   1    -0.01   0.00   0.00    -0.02   0.02   0.00     0.01   0.00   0.00
  81   1     0.00  -0.01   0.00    -0.03   0.03   0.01     0.00   0.00   0.00
  82   1     0.00   0.00  -0.01    -0.03   0.03   0.00     0.00   0.00   0.00
  83   1    -0.01  -0.01  -0.01    -0.01   0.00  -0.01     0.00   0.00   0.00
  84   1     0.00   0.01  -0.02    -0.01   0.01  -0.01     0.00   0.00   0.00
  85   1     0.01  -0.01   0.00    -0.04   0.04  -0.05     0.01  -0.01   0.01
  86   1     0.01  -0.02   0.00    -0.05   0.06  -0.06     0.01  -0.01   0.00
  87   1     0.02   0.00  -0.01    -0.06   0.01  -0.05     0.01   0.00   0.00
  88   1    -0.02   0.00   0.00     0.03   0.00  -0.01     0.00   0.00   0.01
  89   1    -0.01   0.02  -0.01     0.00  -0.04   0.01     0.00   0.00   0.00
  90   1    -0.03   0.02   0.00     0.08  -0.01   0.01     0.00   0.00   0.01
  91   1     0.07  -0.04   0.02     0.04  -0.02  -0.01    -0.01   0.00   0.01
  92   1     0.08   0.04   0.01     0.03  -0.01   0.02    -0.01   0.00   0.00
  93   1     0.10   0.01   0.03     0.01   0.02   0.01     0.00   0.00   0.01
  94   1    -0.05  -0.04  -0.02     0.04  -0.05  -0.05    -0.01   0.00   0.01
  95   1    -0.08   0.01  -0.05    -0.01  -0.01  -0.07     0.00   0.00   0.00
  96   1    -0.04   0.04  -0.04     0.03   0.00  -0.02    -0.01   0.00   0.00
  97   1     0.00   0.03  -0.02    -0.02   0.03   0.00     0.01  -0.01  -0.01
  98   1     0.01   0.02  -0.01    -0.01   0.02  -0.01     0.01   0.00   0.00
  99   1     0.02   0.02  -0.01     0.00   0.02   0.00     0.00  -0.01  -0.01
 100   1    -0.01   0.01  -0.02    -0.02   0.01  -0.01     0.00  -0.01   0.01
 101   1     0.01   0.01  -0.03     0.01   0.01  -0.02     0.00   0.00   0.02
 102   1    -0.01   0.01  -0.04    -0.02   0.02  -0.04     0.00  -0.01   0.02
 103   1    -0.03   0.00  -0.01    -0.04   0.01  -0.01     0.00   0.00   0.00
 104   1    -0.05  -0.02  -0.01    -0.04  -0.01  -0.02     0.01   0.00   0.00
 105   1    -0.05   0.02  -0.01    -0.05   0.02  -0.01     0.01   0.00   0.00
 106   1    -0.02   0.02   0.01    -0.02   0.03   0.02     0.00  -0.01   0.00
 107   1    -0.02   0.03   0.02    -0.02   0.03   0.01     0.00  -0.01   0.00
 108   1     0.01   0.02   0.01     0.00   0.01   0.02     0.00  -0.01   0.00
 109   1     0.27  -0.31  -0.35    -0.26   0.33   0.40     0.01  -0.02  -0.04
 110   1     0.11   0.11   0.37    -0.13  -0.06  -0.27     0.00   0.00   0.00
 111   1    -0.47   0.13  -0.24     0.44  -0.04   0.28    -0.03   0.00  -0.03
 112   1     0.00   0.00   0.01     0.02  -0.01   0.04     0.01   0.01   0.02
 113   1     0.01   0.01   0.01    -0.01  -0.03   0.02    -0.01  -0.01   0.01
 114   1     0.00  -0.01   0.02     0.00   0.00   0.00     0.01   0.01  -0.01
                    28                     29                     30
                    ?A                     ?A                     ?A
 Frequencies --   132.0598               134.5697               137.5136
 Red. masses --     3.8983                 1.9730                 1.9112
 Frc consts  --     0.0401                 0.0211                 0.0213
 IR Inten    --     0.2846                 0.0750                 0.1313
 Raman Activ --     0.0000                 0.0000                 0.0000
 Depolar     --     0.0000                 0.0000                 0.0000
 Atom AN      X      Y      Z        X      Y      Z        X      Y      Z
   1   8    -0.02  -0.04  -0.03    -0.01   0.00   0.00    -0.03   0.03   0.02
   2  12     0.01   0.01  -0.04     0.01   0.00  -0.02     0.03  -0.01  -0.02
   3   8     0.01   0.05  -0.05     0.00   0.01  -0.02     0.00   0.01  -0.02
   4   6    -0.03  -0.01  -0.02    -0.01   0.00  -0.01    -0.01   0.00   0.04
   5   7     0.00   0.04   0.00     0.00   0.01  -0.02     0.01  -0.01   0.00
   6   7     0.00  -0.01  -0.03     0.01  -0.01   0.02     0.02  -0.02  -0.02
   7   8    -0.03   0.03   0.00    -0.01   0.00   0.00     0.01  -0.02   0.02
   8   6    -0.03   0.02  -0.05     0.00   0.02   0.02     0.01  -0.01   0.00
   9   6    -0.03   0.01  -0.02    -0.02  -0.01  -0.03     0.01  -0.01   0.00
  10   6     0.00   0.00   0.02    -0.02  -0.03  -0.05     0.02  -0.02   0.00
  11   8    -0.02  -0.01  -0.02    -0.01   0.01   0.00    -0.02  -0.09   0.00
  12   6     0.00   0.04   0.03     0.00   0.02   0.01    -0.01  -0.06   0.00
  13   6    -0.02   0.03  -0.02    -0.01   0.01  -0.01    -0.02  -0.01   0.01
  14   6    -0.02   0.00  -0.01    -0.01   0.01   0.00    -0.02  -0.02   0.04
  15   8     0.04   0.10   0.09     0.01   0.03   0.02     0.02  -0.05   0.01
  16   6    -0.03   0.04   0.01    -0.01   0.01   0.01     0.00  -0.02  -0.05
  17   8     0.04  -0.04  -0.04     0.00  -0.02  -0.01     0.01   0.01  -0.02
  18   6     0.05  -0.02  -0.07     0.01  -0.01  -0.02     0.01   0.01  -0.02
  19   8     0.08  -0.03  -0.09     0.02  -0.01  -0.02     0.01   0.01  -0.02
  20   8     0.00  -0.07   0.12     0.00  -0.05   0.05     0.00   0.00   0.03
  21   6     0.00  -0.02   0.00     0.01  -0.02   0.00     0.00   0.01   0.00
  22   6     0.01  -0.05  -0.02     0.01  -0.02  -0.02     0.00   0.01  -0.01
  23   6     0.07   0.01   0.02     0.01   0.00   0.00     0.01   0.02   0.00
  24   8    -0.02   0.01  -0.06     0.01   0.00  -0.03    -0.01   0.02  -0.01
  25   6    -0.01  -0.04   0.00     0.01  -0.01  -0.02     0.00   0.02   0.00
  26   6     0.13   0.12   0.07     0.01   0.06   0.03     0.02   0.05   0.02
  27   6    -0.08  -0.04   0.00    -0.02  -0.01   0.00    -0.01   0.07   0.00
  28   6    -0.05   0.06  -0.03    -0.02   0.01  -0.01     0.05   0.04   0.02
  29   6     0.00   0.03   0.01     0.00   0.01  -0.01     0.00  -0.01   0.00
  30   6     0.00   0.00  -0.02     0.02  -0.01   0.02     0.02  -0.02  -0.01
  31   6     0.00  -0.01   0.02     0.00   0.01  -0.01    -0.01  -0.02   0.01
  32   6    -0.01  -0.05   0.03    -0.01   0.00   0.00    -0.01  -0.03   0.01
  33   6    -0.02  -0.06   0.04    -0.01  -0.02   0.00     0.00   0.01  -0.01
  34   6    -0.01  -0.03   0.03    -0.01  -0.02   0.00     0.01   0.04  -0.02
  35   6    -0.01   0.01   0.02     0.00  -0.01  -0.01     0.00   0.02  -0.01
  36   6     0.02  -0.03   0.04    -0.01   0.00  -0.01    -0.02  -0.01   0.00
  37   6     0.00   0.00   0.02     0.00  -0.01  -0.01    -0.02   0.02   0.00
  38   6     0.01  -0.02  -0.02     0.01   0.00   0.02     0.02  -0.02  -0.01
  39   6     0.01  -0.02  -0.01    -0.01   0.02   0.02     0.01  -0.01   0.00
  40   6     0.00   0.01  -0.01    -0.03   0.04   0.03     0.00   0.01   0.00
  41   6    -0.02   0.04   0.00    -0.03   0.03   0.03     0.00   0.02   0.00
  42   6    -0.01   0.03  -0.01     0.00  -0.01   0.02     0.01   0.00  -0.01
  43   6    -0.01  -0.01  -0.01     0.02   0.02   0.03     0.00   0.00   0.00
  44   6    -0.01   0.02  -0.01     0.01  -0.02   0.02     0.01   0.01  -0.01
  45   6     0.06  -0.04   0.04    -0.01   0.00  -0.01    -0.03   0.02   0.02
  46   6     0.04  -0.04   0.03    -0.01   0.00   0.00    -0.04   0.02  -0.02
  47   6     0.01   0.00   0.03     0.00  -0.01   0.00    -0.03   0.01   0.03
  48   6    -0.01  -0.01   0.01     0.01  -0.02  -0.01    -0.05   0.00  -0.02
  49   6     0.00   0.00  -0.03     0.00  -0.03   0.02     0.02   0.00  -0.01
  50   6     0.00   0.01   0.03     0.02  -0.02   0.02    -0.01   0.00   0.00
  51   6    -0.04   0.00  -0.03     0.07   0.05   0.01    -0.01   0.01  -0.02
  52   6    -0.02   0.00   0.03     0.00  -0.01   0.02     0.00   0.00   0.03
  53   6    -0.07   0.01  -0.12     0.01   0.05   0.10     0.01   0.00   0.02
  54   6     0.01  -0.01   0.12    -0.04  -0.03  -0.13     0.01  -0.03   0.01
  55   1    -0.04   0.00  -0.02    -0.04  -0.02  -0.04     0.00  -0.01   0.01
  56   1    -0.01   0.03  -0.06     0.00   0.01  -0.02    -0.06  -0.01   0.07
  57   1    -0.02   0.00   0.03     0.00   0.01   0.00    -0.08  -0.02   0.08
  58   1    -0.17  -0.08   0.08    -0.03   0.00   0.01     0.10   0.02  -0.07
  59   1     0.11   0.02  -0.12     0.00   0.00   0.00    -0.07  -0.02  -0.02
  60   1    -0.04   0.24   0.11    -0.01   0.02   0.02    -0.02  -0.10  -0.12
  61   1     0.01  -0.08  -0.02     0.00  -0.01  -0.02    -0.01   0.00  -0.01
  62   1     0.06   0.00   0.00     0.00  -0.01  -0.03     0.01   0.02   0.00
  63   1    -0.03  -0.05   0.01     0.01  -0.01  -0.02     0.01   0.02   0.01
  64   1    -0.01  -0.06   0.00     0.01  -0.01  -0.02     0.00   0.03   0.00
  65   1    -0.02  -0.02  -0.01     0.01  -0.01  -0.02     0.00   0.02   0.00
  66   1     0.12   0.13   0.16    -0.01   0.08   0.06     0.00   0.07   0.04
  67   1     0.14   0.13   0.05     0.00   0.05   0.03     0.02   0.03   0.01
  68   1     0.18   0.17   0.03     0.04   0.09   0.00     0.05   0.07   0.01
  69   1    -0.09  -0.05   0.02    -0.02  -0.01   0.00    -0.03   0.05   0.02
  70   1    -0.09  -0.05   0.05    -0.04  -0.01   0.01     0.03   0.08  -0.06
  71   1    -0.10  -0.07  -0.05    -0.03  -0.02  -0.02    -0.03   0.13   0.02
  72   1    -0.02   0.03  -0.01    -0.01  -0.01   0.00    -0.15   0.48  -0.09
  73   1    -0.12   0.06  -0.09    -0.04   0.01  -0.01     0.54   0.02  -0.02
  74   1    -0.02   0.15  -0.02    -0.01   0.04  -0.01    -0.20  -0.31   0.14
  75   1    -0.01  -0.08   0.04    -0.01   0.00   0.00    -0.01  -0.05   0.02
  76   1    -0.02  -0.10   0.05    -0.01  -0.03   0.01     0.00   0.02  -0.01
  77   1    -0.02  -0.05   0.03    -0.01  -0.03   0.01     0.01   0.07  -0.03
  78   1     0.02  -0.02   0.06    -0.01   0.01   0.00    -0.02  -0.02  -0.03
  79   1    -0.01   0.00   0.02     0.00  -0.01  -0.01    -0.01   0.03   0.02
  80   1     0.02  -0.04  -0.02    -0.02   0.04   0.02     0.01   0.00   0.00
  81   1     0.00   0.01   0.00    -0.06   0.07   0.03    -0.01   0.02   0.01
  82   1    -0.03   0.06   0.00    -0.04   0.04   0.03    -0.01   0.03   0.00
  83   1    -0.01  -0.01  -0.02     0.00   0.04   0.05     0.00   0.00   0.00
  84   1    -0.01   0.03  -0.01     0.01  -0.03   0.02     0.01   0.02  -0.01
  85   1     0.12  -0.06   0.06     0.00   0.00  -0.01    -0.06   0.05   0.00
  86   1     0.03  -0.02   0.07    -0.01   0.01  -0.01    -0.02   0.00   0.01
  87   1     0.06  -0.06  -0.02    -0.01  -0.01  -0.02    -0.03   0.03   0.06
  88   1     0.06  -0.05   0.05    -0.01   0.00   0.00    -0.05   0.03  -0.03
  89   1     0.04  -0.06   0.01    -0.01   0.00  -0.01    -0.03   0.04   0.00
  90   1     0.04  -0.04   0.03    -0.01   0.00   0.00    -0.05   0.01  -0.03
  91   1    -0.01  -0.02   0.05     0.00  -0.02   0.00    -0.05   0.00   0.06
  92   1     0.00   0.01   0.01     0.00  -0.02   0.00    -0.04   0.00   0.02
  93   1     0.04   0.00   0.04     0.00  -0.01   0.00    -0.01   0.03   0.05
  94   1     0.00  -0.03   0.01     0.01  -0.02  -0.01    -0.07  -0.02   0.01
  95   1    -0.02  -0.01   0.00     0.01  -0.02  -0.01    -0.05   0.00  -0.04
  96   1     0.00   0.00   0.02     0.01  -0.02   0.00    -0.06  -0.01  -0.04
  97   1     0.01  -0.03  -0.03     0.01  -0.04   0.02     0.04  -0.01  -0.03
  98   1     0.01   0.00  -0.01     0.01  -0.02   0.02     0.03   0.01   0.00
  99   1    -0.03   0.00  -0.05    -0.01  -0.03   0.02     0.00   0.00  -0.02
 100   1    -0.02  -0.03   0.06     0.09   0.02  -0.05    -0.03   0.00   0.01
 101   1     0.03   0.04   0.06    -0.07  -0.04   0.00    -0.02   0.00   0.01
 102   1    -0.02   0.01   0.00     0.06  -0.03   0.11    -0.02  -0.02  -0.01
 103   1    -0.06   0.01  -0.02     0.05   0.07   0.02    -0.03   0.03  -0.02
 104   1    -0.04  -0.01  -0.05     0.10   0.10   0.00     0.00   0.02  -0.05
 105   1    -0.05   0.01  -0.02     0.11   0.01   0.00     0.00   0.01  -0.02
 106   1    -0.04   0.02   0.04     0.00   0.00   0.03    -0.02   0.02   0.04
 107   1    -0.02   0.00   0.04     0.02  -0.03   0.01     0.00  -0.01   0.01
 108   1     0.00  -0.01   0.05    -0.02  -0.02   0.03     0.00  -0.03   0.05
 109   1    -0.05   0.04  -0.16     0.11  -0.12   0.02    -0.02   0.03   0.05
 110   1    -0.08   0.00  -0.14     0.07   0.11   0.31     0.00  -0.01  -0.03
 111   1    -0.10  -0.03  -0.12    -0.13   0.18   0.01     0.07  -0.01   0.04
 112   1     0.10   0.03   0.26    -0.21  -0.17  -0.49     0.02  -0.04   0.00
 113   1    -0.11  -0.11   0.15     0.20   0.31  -0.15     0.01  -0.02   0.01
 114   1     0.06   0.05   0.01    -0.11  -0.23   0.21     0.01  -0.04   0.02
                    31                     32                     33
                    ?A                     ?A                     ?A
 Frequencies --   143.6546               146.5405               148.7786
 Red. masses --     2.8954                 3.1068                 3.3666
 Frc consts  --     0.0352                 0.0393                 0.0439
 IR Inten    --     1.0022                 3.8358                 0.2996
 Raman Activ --     0.0000                 0.0000                 0.0000
 Depolar     --     0.0000                 0.0000                 0.0000
 Atom AN      X      Y      Z        X      Y      Z        X      Y      Z
   1   8    -0.02   0.12   0.04    -0.01   0.13   0.05     0.02  -0.01   0.00
   2  12     0.01   0.00   0.00    -0.05   0.02   0.03    -0.06   0.02   0.02
   3   8     0.00   0.02   0.03     0.01  -0.01   0.00     0.00  -0.04  -0.02
   4   6    -0.02   0.07   0.01    -0.02   0.07  -0.01     0.03  -0.02   0.02
   5   7    -0.02   0.03   0.01    -0.01  -0.01   0.01    -0.04   0.02  -0.01
   6   7    -0.01  -0.03  -0.01    -0.03   0.06   0.03    -0.06   0.06   0.01
   7   8    -0.03   0.00  -0.02    -0.04   0.00  -0.04     0.06  -0.01   0.03
   8   6    -0.06   0.01   0.00     0.02   0.00   0.00    -0.05   0.02   0.00
   9   6    -0.06  -0.02   0.02     0.03   0.03  -0.02    -0.05   0.04   0.00
  10   6    -0.03  -0.03   0.03     0.00   0.06  -0.02    -0.05   0.06   0.01
  11   8    -0.01   0.03  -0.02     0.00   0.03  -0.03     0.01  -0.05  -0.02
  12   6    -0.02   0.01  -0.03     0.00   0.03  -0.01     0.02  -0.01   0.01
  13   6     0.00  -0.01  -0.01     0.01   0.00  -0.02     0.01   0.00   0.01
  14   6    -0.01   0.04  -0.02    -0.01   0.03  -0.04     0.02  -0.03   0.02
  15   8    -0.03  -0.02  -0.05    -0.02   0.04   0.00     0.03   0.04   0.07
  16   6    -0.02  -0.09  -0.03    -0.02  -0.11  -0.01     0.05   0.01  -0.03
  17   8     0.00   0.00   0.06     0.04  -0.03  -0.04    -0.02  -0.01  -0.05
  18   6     0.00   0.01   0.02     0.06  -0.02  -0.03    -0.02  -0.02   0.01
  19   8     0.01   0.00   0.01     0.07  -0.02  -0.03    -0.04   0.00   0.03
  20   8     0.01   0.01   0.00     0.02   0.00   0.02    -0.02  -0.03  -0.02
  21   6     0.01   0.01   0.01     0.00  -0.02   0.00    -0.02  -0.03  -0.02
  22   6     0.01   0.01   0.02     0.01  -0.04  -0.01    -0.02  -0.02  -0.02
  23   6    -0.01   0.02   0.00     0.06   0.00   0.01    -0.01  -0.04   0.00
  24   8     0.02   0.01   0.01    -0.02   0.00  -0.01    -0.02  -0.04  -0.01
  25   6     0.01  -0.01  -0.01    -0.01  -0.04   0.01    -0.01   0.00   0.00
  26   6    -0.03   0.02   0.00     0.11   0.01   0.02    -0.01  -0.06  -0.01
  27   6     0.05  -0.09  -0.01     0.01  -0.06  -0.01     0.00   0.13   0.00
  28   6     0.03  -0.03   0.01     0.04  -0.09   0.01     0.07  -0.01   0.02
  29   6    -0.01   0.03   0.00    -0.01  -0.02   0.01    -0.04   0.02  -0.01
  30   6     0.00  -0.04  -0.01    -0.04   0.06   0.02    -0.05   0.05   0.01
  31   6     0.00   0.02   0.00    -0.01  -0.01   0.00    -0.04  -0.04   0.01
  32   6    -0.01  -0.01   0.00     0.00   0.01  -0.01    -0.04  -0.07   0.02
  33   6    -0.01  -0.05   0.02     0.00   0.01  -0.01    -0.03  -0.01   0.00
  34   6    -0.02  -0.06   0.03    -0.01  -0.01   0.00    -0.01   0.06  -0.02
  35   6    -0.01  -0.02   0.02    -0.01  -0.02   0.01    -0.02   0.06  -0.02
  36   6     0.04   0.01   0.01     0.00   0.00   0.00     0.02  -0.03   0.03
  37   6     0.02  -0.03  -0.01    -0.01  -0.01   0.00     0.03   0.00  -0.05
  38   6     0.00  -0.03  -0.01    -0.03   0.05   0.02    -0.02   0.02   0.00
  39   6    -0.02  -0.01   0.00     0.00   0.01   0.00     0.01  -0.02   0.00
  40   6    -0.02   0.01   0.01     0.01  -0.02  -0.01     0.02  -0.02   0.00
  41   6    -0.02   0.01   0.01     0.00  -0.02  -0.01     0.00   0.00   0.00
  42   6    -0.01  -0.01   0.00    -0.03   0.02   0.01    -0.03   0.04   0.01
  43   6     0.01   0.01   0.00    -0.03   0.00   0.00    -0.01   0.00   0.00
  44   6     0.00   0.03  -0.03    -0.02  -0.02   0.04     0.00   0.02  -0.01
  45   6     0.06  -0.02   0.00    -0.01   0.02   0.01     0.05   0.00   0.06
  46   6     0.08  -0.03   0.01     0.00   0.00  -0.01     0.09  -0.06  -0.04
  47   6     0.06  -0.02  -0.03    -0.02   0.00  -0.01     0.14  -0.01   0.00
  48   6     0.06   0.00   0.02     0.02   0.00   0.01     0.04  -0.02  -0.07
  49   6     0.05   0.06  -0.01    -0.07  -0.05   0.02     0.02  -0.01  -0.03
  50   6     0.00   0.04  -0.06     0.03  -0.01   0.05     0.05   0.02   0.04
  51   6     0.05   0.05  -0.04    -0.04  -0.05   0.06     0.04  -0.01   0.02
  52   6     0.02   0.01   0.01    -0.02   0.00  -0.03    -0.01  -0.02  -0.05
  53   6    -0.11   0.02  -0.04     0.06  -0.02   0.02    -0.04   0.02   0.00
  54   6    -0.03  -0.05   0.10     0.00   0.09  -0.08    -0.04   0.08   0.04
  55   1    -0.08  -0.02   0.02     0.05   0.04  -0.03    -0.03   0.04   0.00
  56   1    -0.01   0.00  -0.06     0.03   0.00  -0.05     0.02  -0.01   0.09
  57   1    -0.03   0.03  -0.06    -0.03   0.02  -0.11     0.00  -0.03   0.04
  58   1     0.17  -0.03  -0.06     0.16  -0.06  -0.04     0.07   0.01  -0.03
  59   1    -0.24  -0.09   0.03    -0.26  -0.11   0.03     0.07   0.01  -0.03
  60   1     0.00  -0.30  -0.11     0.01  -0.32  -0.08     0.02   0.02  -0.06
  61   1     0.01   0.04   0.01     0.01  -0.07   0.00    -0.01  -0.03  -0.02
  62   1    -0.01   0.02  -0.01     0.06   0.00   0.03    -0.02  -0.04   0.01
  63   1     0.01   0.00  -0.04    -0.04  -0.04   0.03     0.00   0.00   0.02
  64   1     0.01  -0.01  -0.01    -0.01  -0.07   0.01    -0.02   0.02   0.00
  65   1     0.02  -0.03  -0.01    -0.01  -0.01   0.01    -0.02   0.02  -0.01
  66   1    -0.05   0.04  -0.01     0.14  -0.03   0.04     0.02  -0.09  -0.03
  67   1    -0.05  -0.01   0.00     0.13   0.05   0.01     0.00  -0.02   0.01
  68   1    -0.01   0.02   0.00     0.08   0.00   0.01    -0.06  -0.08  -0.01
  69   1     0.05  -0.14  -0.06     0.00  -0.08  -0.02     0.02   0.20   0.04
  70   1     0.09  -0.11   0.05     0.02  -0.07   0.03    -0.05   0.15  -0.10
  71   1     0.06  -0.10  -0.01     0.00  -0.07  -0.03     0.02   0.15   0.03
  72   1    -0.04   0.09  -0.03    -0.06   0.07  -0.07     0.05   0.06   0.03
  73   1     0.20  -0.03   0.07     0.27  -0.09   0.11     0.14  -0.01  -0.01
  74   1    -0.05  -0.19   0.02    -0.08  -0.32   0.02     0.05  -0.05   0.01
  75   1    -0.01  -0.01   0.00     0.00   0.02  -0.01    -0.05  -0.12   0.05
  76   1    -0.02  -0.08   0.03     0.00   0.02  -0.01    -0.03  -0.02   0.01
  77   1    -0.03  -0.10   0.05    -0.01  -0.02   0.00    -0.01   0.10  -0.04
  78   1     0.04   0.03   0.05     0.00   0.00   0.00     0.03   0.00   0.06
  79   1     0.00  -0.04  -0.04    -0.01   0.00  -0.01     0.00  -0.04  -0.10
  80   1    -0.02  -0.01   0.00     0.02   0.00  -0.01     0.02  -0.04  -0.01
  81   1    -0.04   0.03   0.01     0.04  -0.06  -0.03     0.04  -0.05  -0.01
  82   1    -0.03   0.03   0.01     0.01  -0.05  -0.02     0.01  -0.01   0.00
  83   1     0.01   0.02   0.04    -0.02  -0.01  -0.03    -0.02   0.02   0.01
  84   1    -0.01   0.02  -0.06    -0.01  -0.05   0.05    -0.01   0.01  -0.03
  85   1     0.10  -0.04   0.02    -0.01   0.03   0.01     0.16   0.02   0.08
  86   1     0.04   0.00   0.01    -0.01   0.01   0.02    -0.01   0.04   0.14
  87   1     0.06  -0.03  -0.06    -0.02   0.01   0.02     0.03  -0.04   0.00
  88   1     0.10  -0.03   0.02     0.00   0.02  -0.02     0.14   0.00  -0.06
  89   1     0.06  -0.06  -0.01     0.00   0.00   0.00     0.06  -0.10  -0.03
  90   1     0.09  -0.03   0.01     0.01  -0.01  -0.02     0.13  -0.12  -0.08
  91   1     0.10  -0.02  -0.07    -0.01   0.01  -0.03     0.20  -0.09  -0.04
  92   1     0.08   0.00   0.01    -0.02  -0.01   0.00     0.19   0.04   0.06
  93   1     0.02  -0.04  -0.05    -0.05  -0.01  -0.02     0.13   0.00   0.00
  94   1     0.10  -0.01  -0.02     0.02   0.03   0.00     0.12  -0.15  -0.12
  95   1     0.03  -0.01   0.03     0.04   0.00   0.02    -0.10  -0.01  -0.12
  96   1     0.09   0.02   0.07     0.01  -0.02   0.01     0.10   0.06   0.02
  97   1     0.04   0.11  -0.03    -0.09  -0.07   0.06     0.05  -0.04  -0.05
  98   1     0.05   0.04  -0.01    -0.09  -0.05  -0.01     0.04   0.00   0.00
  99   1     0.08   0.06   0.01    -0.07  -0.05   0.01    -0.02  -0.01  -0.06
 100   1    -0.02   0.04  -0.05     0.07  -0.03   0.02     0.11   0.01  -0.02
 101   1     0.03   0.02  -0.07     0.01  -0.02   0.05    -0.02   0.02   0.04
 102   1    -0.01   0.05  -0.09     0.05   0.01   0.10     0.08   0.02   0.12
 103   1     0.06   0.09  -0.02    -0.02  -0.10   0.04     0.06  -0.02   0.01
 104   1     0.06   0.07  -0.04    -0.06  -0.08   0.10     0.05   0.01   0.05
 105   1     0.06   0.03  -0.08    -0.07  -0.02   0.09     0.06  -0.02   0.00
 106   1     0.03   0.05   0.03    -0.03  -0.08  -0.07    -0.03  -0.12  -0.09
 107   1     0.02   0.01  -0.03    -0.03   0.02   0.04    -0.02  -0.02   0.04
 108   1     0.00  -0.02   0.04     0.01   0.07  -0.09     0.01   0.05  -0.11
 109   1    -0.11   0.08  -0.06     0.07  -0.06   0.02    -0.06   0.03   0.02
 110   1    -0.14   0.00  -0.07     0.10   0.01   0.04    -0.05   0.02  -0.02
 111   1    -0.11   0.00  -0.04     0.05  -0.01   0.01    -0.02   0.02   0.01
 112   1    -0.07  -0.14  -0.04     0.02   0.16   0.02    -0.10   0.02  -0.10
 113   1     0.01   0.13   0.13    -0.02  -0.03  -0.10     0.02   0.24   0.05
 114   1    -0.04  -0.15   0.27     0.01   0.16  -0.19    -0.04  -0.02   0.19
                    34                     35                     36
                    ?A                     ?A                     ?A
 Frequencies --   152.5927               155.2299               159.1453
 Red. masses --     2.6041                 2.5549                 3.4168
 Frc consts  --     0.0357                 0.0363                 0.0510
 IR Inten    --     1.1466                 0.6005                 1.0809
 Raman Activ --     0.0000                 0.0000                 0.0000
 Depolar     --     0.0000                 0.0000                 0.0000
 Atom AN      X      Y      Z        X      Y      Z        X      Y      Z
   1   8     0.01   0.04   0.01     0.01   0.00   0.00     0.01   0.04   0.01
   2  12     0.04   0.01  -0.01     0.00   0.00   0.02     0.04   0.03  -0.04
   3   8     0.00  -0.02  -0.01     0.00  -0.03   0.00     0.00   0.05   0.02
   4   6     0.01   0.02   0.00     0.00   0.00   0.00     0.01   0.02   0.00
   5   7     0.00   0.05  -0.03     0.01  -0.01   0.01     0.02   0.06  -0.04
   6   7     0.03   0.00   0.01    -0.01   0.01  -0.02     0.04   0.02  -0.02
   7   8     0.01   0.00   0.00     0.00   0.00   0.00     0.01   0.01   0.00
   8   6    -0.01   0.04  -0.02     0.02  -0.01   0.00     0.03   0.06  -0.04
   9   6    -0.02   0.01  -0.03     0.03   0.01   0.02     0.02   0.04  -0.05
  10   6     0.00  -0.01  -0.03     0.02   0.02   0.02     0.04   0.03  -0.02
  11   8     0.00  -0.03  -0.03     0.00  -0.03  -0.02     0.00   0.00  -0.03
  12   6     0.01   0.02   0.02     0.01  -0.01   0.02     0.01   0.02  -0.01
  13   6     0.01   0.01   0.01     0.01  -0.01   0.02     0.00   0.01  -0.01
  14   6     0.01   0.00  -0.01     0.00  -0.01  -0.01     0.01   0.01  -0.01
  15   8     0.03   0.08   0.09     0.01   0.03   0.06     0.01   0.03   0.00
  16   6     0.01  -0.03  -0.02     0.00  -0.01   0.00     0.02  -0.03  -0.02
  17   8    -0.03   0.00  -0.01    -0.01   0.01  -0.04    -0.04  -0.01   0.12
  18   6    -0.04  -0.01   0.01     0.00   0.00   0.00    -0.05   0.00   0.03
  19   8    -0.05   0.00   0.03    -0.01   0.01   0.02    -0.04  -0.01   0.02
  20   8    -0.02  -0.05  -0.01    -0.01  -0.01   0.00    -0.02  -0.02  -0.02
  21   6    -0.01  -0.03  -0.01    -0.01  -0.01  -0.01     0.00  -0.01   0.00
  22   6    -0.02  -0.01  -0.01    -0.01   0.00  -0.02    -0.01   0.01   0.03
  23   6    -0.04  -0.04  -0.01     0.00  -0.01   0.00    -0.07  -0.01  -0.02
  24   8     0.01  -0.03  -0.02    -0.02  -0.01   0.00     0.04  -0.02   0.00
  25   6    -0.01   0.00  -0.01     0.00   0.02  -0.01     0.00  -0.03  -0.02
  26   6    -0.04  -0.04  -0.01    -0.02   0.00   0.00    -0.12   0.01  -0.02
  27   6     0.00   0.09   0.01    -0.01   0.08   0.01     0.02  -0.07   0.00
  28   6     0.05  -0.01   0.00     0.02  -0.03   0.00     0.05   0.00  -0.01
  29   6     0.01   0.05  -0.02     0.01  -0.01   0.00     0.02   0.04  -0.02
  30   6     0.04  -0.01   0.00    -0.01   0.01  -0.02     0.04   0.02  -0.01
  31   6     0.01   0.05  -0.02     0.03   0.07  -0.03     0.00  -0.02   0.01
  32   6     0.00   0.02   0.00     0.03   0.12  -0.05    -0.01  -0.09   0.04
  33   6    -0.01  -0.04   0.02     0.02   0.04  -0.01     0.00  -0.07   0.04
  34   6    -0.01  -0.07   0.03     0.00  -0.06   0.03     0.02  -0.01   0.00
  35   6     0.00  -0.01   0.01     0.00  -0.06   0.03     0.03   0.04  -0.02
  36   6     0.00   0.00   0.00     0.00   0.02  -0.01    -0.01  -0.01   0.00
  37   6     0.00  -0.01   0.01    -0.01  -0.02   0.03     0.00   0.03   0.00
  38   6     0.01   0.02   0.01     0.01  -0.03  -0.02     0.06  -0.03  -0.02
  39   6    -0.01   0.05   0.02     0.03  -0.05  -0.02     0.07  -0.04  -0.03
  40   6     0.00   0.02   0.01     0.00  -0.01  -0.01     0.03  -0.01  -0.02
  41   6     0.04  -0.02   0.00    -0.03   0.04   0.00     0.00   0.03  -0.02
  42   6     0.04  -0.03   0.00    -0.03   0.04  -0.01     0.00   0.03  -0.01
  43   6     0.01   0.02   0.01    -0.02  -0.03  -0.02    -0.01  -0.04  -0.02
  44   6     0.02  -0.02   0.02    -0.01   0.02  -0.01    -0.02  -0.01   0.04
  45   6     0.04  -0.08  -0.06     0.02  -0.07  -0.09    -0.02   0.01   0.02
  46   6    -0.02  -0.01   0.06    -0.05   0.02   0.07    -0.02   0.00  -0.01
  47   6     0.00  -0.01  -0.02    -0.06   0.00  -0.04     0.00   0.02   0.05
  48   6     0.00   0.01   0.03     0.03   0.03   0.07    -0.07   0.00  -0.03
  49   6     0.00  -0.01   0.03    -0.01  -0.01  -0.04    -0.12  -0.05   0.03
  50   6    -0.05  -0.03   0.00     0.03   0.02   0.03     0.01  -0.01   0.07
  51   6    -0.05  -0.01   0.02     0.02  -0.01  -0.03    -0.05  -0.05  -0.02
  52   6     0.04   0.06  -0.01    -0.06  -0.08   0.03    -0.06  -0.10   0.08
  53   6    -0.03   0.06  -0.01     0.01  -0.03  -0.05     0.03   0.07  -0.02
  54   6    -0.03  -0.06  -0.07     0.04   0.05   0.07     0.05   0.03   0.03
  55   1    -0.05   0.00  -0.03     0.04   0.01   0.02     0.01   0.04  -0.03
  56   1     0.03   0.01   0.06     0.02  -0.01   0.06    -0.02   0.02  -0.06
  57   1    -0.01   0.00  -0.02    -0.01  -0.01  -0.02     0.01   0.00  -0.01
  58   1     0.08  -0.02  -0.03     0.01  -0.01   0.00     0.08  -0.03  -0.02
  59   1    -0.05  -0.03  -0.02    -0.01  -0.01   0.00    -0.04  -0.03  -0.03
  60   1     0.01  -0.09  -0.05     0.01  -0.02   0.00     0.02  -0.07  -0.05
  61   1    -0.01   0.00  -0.01    -0.01  -0.01  -0.02     0.00   0.08   0.02
  62   1    -0.05  -0.04  -0.01     0.00   0.00  -0.01    -0.06  -0.01  -0.05
  63   1     0.02   0.00   0.00    -0.01   0.01   0.01     0.02  -0.01  -0.08
  64   1    -0.01   0.02   0.00     0.00   0.02  -0.02    -0.01  -0.02   0.00
  65   1    -0.02  -0.01  -0.01     0.00   0.04  -0.01    -0.01  -0.10  -0.03
  66   1    -0.04  -0.04  -0.01    -0.02   0.00  -0.01    -0.18   0.08  -0.02
  67   1    -0.04  -0.04  -0.01    -0.03   0.00   0.02    -0.15  -0.08  -0.03
  68   1    -0.04  -0.04  -0.01    -0.03   0.00  -0.01    -0.04   0.03  -0.02
  69   1     0.03   0.16   0.03     0.01   0.14   0.04    -0.02  -0.18  -0.02
  70   1    -0.07   0.11  -0.05    -0.06   0.09  -0.05     0.13  -0.09   0.05
  71   1     0.02   0.07   0.03     0.00   0.07   0.03    -0.02  -0.02  -0.03
  72   1     0.02   0.06  -0.01    -0.01   0.03  -0.02     0.09  -0.05   0.04
  73   1     0.14  -0.01   0.01     0.09  -0.03   0.01    -0.01   0.00  -0.01
  74   1     0.01  -0.09   0.00    -0.02  -0.09   0.01     0.10   0.05  -0.05
  75   1     0.00   0.03   0.00     0.05   0.18  -0.08    -0.02  -0.14   0.07
  76   1    -0.01  -0.07   0.04     0.02   0.06  -0.02    -0.01  -0.12   0.06
  77   1    -0.02  -0.12   0.05    -0.01  -0.11   0.05     0.02   0.00   0.00
  78   1    -0.01  -0.01   0.04    -0.02   0.00   0.01    -0.01  -0.02  -0.02
  79   1     0.00  -0.02   0.01     0.00  -0.01   0.03     0.01   0.02   0.03
  80   1    -0.04   0.09   0.02     0.05  -0.09  -0.03     0.10  -0.07  -0.04
  81   1    -0.01   0.04   0.01     0.01  -0.01  -0.01     0.04  -0.02  -0.03
  82   1     0.05  -0.04  -0.01    -0.05   0.07   0.00    -0.03   0.06  -0.01
  83   1     0.05  -0.03  -0.01    -0.05   0.01  -0.02    -0.04  -0.01  -0.08
  84   1     0.03   0.01   0.04    -0.02   0.01  -0.03     0.01  -0.05   0.09
  85   1     0.09  -0.15  -0.01     0.02  -0.15  -0.05    -0.03   0.03   0.01
  86   1     0.03  -0.04  -0.06     0.04  -0.05  -0.13    -0.01   0.00   0.03
  87   1     0.05  -0.10  -0.15     0.04  -0.07  -0.15    -0.02   0.01   0.04
  88   1    -0.02  -0.09   0.11    -0.08  -0.09   0.13    -0.02   0.01  -0.01
  89   1     0.01  -0.01   0.00    -0.02   0.04   0.02    -0.01   0.01  -0.01
  90   1    -0.05   0.06   0.11    -0.09   0.11   0.14    -0.03   0.00  -0.02
  91   1     0.00   0.00  -0.02    -0.05   0.07  -0.07    -0.06  -0.02   0.12
  92   1     0.00   0.00  -0.02    -0.06  -0.03  -0.04    -0.02   0.03  -0.03
  93   1     0.01  -0.02  -0.02    -0.11  -0.03  -0.08     0.10   0.03   0.09
  94   1     0.01   0.02   0.02     0.00   0.14   0.07    -0.09  -0.07   0.00
  95   1    -0.01   0.01   0.05     0.12   0.01   0.14    -0.13   0.01  -0.07
  96   1     0.01   0.03   0.03     0.00  -0.02   0.03    -0.07   0.04  -0.05
  97   1    -0.01   0.01   0.04     0.01  -0.05  -0.05    -0.15  -0.09   0.09
  98   1    -0.01  -0.01   0.01     0.00   0.00  -0.02    -0.16  -0.05  -0.03
  99   1     0.02  -0.01   0.04    -0.05  -0.01  -0.06    -0.13  -0.05   0.01
 100   1    -0.11  -0.01   0.04     0.08  -0.01   0.00    -0.01  -0.06   0.11
 101   1    -0.02  -0.03   0.00     0.01   0.03   0.04     0.08   0.01   0.09
 102   1    -0.07  -0.06  -0.07     0.05   0.03   0.07     0.00   0.02   0.02
 103   1    -0.04  -0.02   0.02    -0.03   0.00  -0.03    -0.15  -0.07  -0.03
 104   1    -0.08  -0.06   0.02     0.05   0.05  -0.06    -0.01   0.00  -0.10
 105   1    -0.10   0.04   0.04     0.06  -0.05  -0.02     0.00  -0.09   0.05
 106   1     0.12   0.17   0.05    -0.17  -0.18  -0.03    -0.21  -0.19   0.02
 107   1     0.04   0.07  -0.14    -0.05  -0.09   0.20    -0.05  -0.11   0.26
 108   1    -0.01  -0.02   0.06     0.02   0.00  -0.03     0.03  -0.03   0.03
 109   1     0.04  -0.02  -0.08     0.02  -0.01  -0.08     0.05   0.03  -0.03
 110   1    -0.01   0.09   0.13     0.01  -0.03  -0.07     0.05   0.08   0.03
 111   1    -0.14   0.13  -0.07    -0.01  -0.07  -0.05     0.01   0.10  -0.04
 112   1     0.09   0.04   0.19    -0.05  -0.04  -0.15     0.03   0.00  -0.04
 113   1    -0.16  -0.37  -0.10     0.15   0.32   0.09     0.07   0.14   0.05
 114   1    -0.05   0.12  -0.36     0.06  -0.10   0.32     0.07  -0.02   0.12
                    37                     38                     39
                    ?A                     ?A                     ?A
 Frequencies --   164.0971               167.4651               177.0325
 Red. masses --     3.0863                 2.4394                 2.0283
 Frc consts  --     0.0490                 0.0403                 0.0375
 IR Inten    --     1.2724                 0.5534                 0.1577
 Raman Activ --     0.0000                 0.0000                 0.0000
 Depolar     --     0.0000                 0.0000                 0.0000
 Atom AN      X      Y      Z        X      Y      Z        X      Y      Z
   1   8     0.01   0.10   0.03     0.00   0.02   0.00     0.05  -0.07  -0.03
   2  12     0.01  -0.03   0.03     0.02   0.00  -0.01     0.01   0.00  -0.01
   3   8     0.00  -0.05  -0.01     0.00   0.00  -0.01     0.02  -0.01   0.01
   4   6     0.00   0.06  -0.03     0.00   0.01  -0.01     0.02  -0.01  -0.05
   5   7     0.01  -0.05   0.00     0.02   0.00  -0.01     0.00   0.01  -0.02
   6   7     0.02  -0.05  -0.01     0.02  -0.01  -0.01     0.01  -0.01  -0.01
   7   8    -0.03   0.03  -0.04    -0.01   0.01  -0.01    -0.02  -0.01  -0.05
   8   6     0.02  -0.05   0.01     0.02   0.00  -0.01     0.00   0.01  -0.01
   9   6     0.02  -0.04   0.01     0.02   0.00   0.01     0.00  -0.01  -0.02
  10   6     0.02  -0.05   0.01     0.03  -0.01   0.02     0.00  -0.01  -0.01
  11   8     0.01   0.05  -0.03     0.00   0.01  -0.01     0.03   0.09   0.03
  12   6     0.01   0.06   0.03     0.01   0.02   0.01     0.02   0.06   0.01
  13   6     0.03   0.01   0.02     0.00   0.01   0.00     0.03   0.02   0.01
  14   6     0.01   0.03  -0.05     0.00   0.01  -0.01     0.02   0.04  -0.03
  15   8     0.00   0.10   0.09     0.01   0.04   0.03     0.00   0.04  -0.01
  16   6    -0.01  -0.08   0.01    -0.01  -0.01   0.00    -0.01   0.02   0.10
  17   8     0.00   0.02  -0.06    -0.01   0.00  -0.02     0.00   0.01  -0.02
  18   6     0.01   0.01   0.01    -0.01   0.00  -0.01    -0.01  -0.01   0.02
  19   8    -0.01   0.02   0.02    -0.01   0.00   0.00    -0.03   0.00   0.03
  20   8    -0.01   0.01   0.00    -0.01  -0.02   0.01     0.01   0.03  -0.04
  21   6    -0.01   0.01  -0.01     0.00  -0.01   0.00    -0.01   0.00  -0.01
  22   6    -0.01   0.01  -0.03     0.00  -0.01   0.00     0.00   0.00   0.00
  23   6     0.00   0.00   0.00    -0.01  -0.01   0.00     0.00  -0.03   0.02
  24   8    -0.02   0.01   0.01     0.01  -0.01  -0.02    -0.01  -0.01   0.01
  25   6     0.00   0.04  -0.01     0.01   0.01   0.01    -0.01   0.01   0.00
  26   6    -0.02   0.00   0.00     0.02  -0.01   0.00     0.03  -0.10  -0.01
  27   6    -0.01   0.09   0.01    -0.01   0.02   0.00     0.01  -0.02   0.02
  28   6    -0.01  -0.07  -0.01     0.00  -0.01  -0.01    -0.05   0.01  -0.02
  29   6     0.01  -0.04   0.00     0.02   0.00  -0.01     0.01   0.00  -0.01
  30   6     0.01  -0.04  -0.01     0.01  -0.01  -0.01     0.00   0.00   0.00
  31   6    -0.01  -0.08   0.03     0.01  -0.02   0.01     0.00  -0.02   0.01
  32   6    -0.01  -0.07   0.03     0.01  -0.04   0.02     0.00  -0.04   0.02
  33   6     0.01  -0.01   0.00     0.01  -0.03   0.01     0.00  -0.04   0.02
  34   6     0.02   0.04  -0.02     0.02   0.00   0.00     0.00  -0.02   0.01
  35   6     0.01   0.01  -0.02     0.02   0.01  -0.01     0.01   0.00   0.00
  36   6    -0.03  -0.05   0.01    -0.01  -0.01   0.00     0.00  -0.01   0.00
  37   6     0.00   0.02   0.00     0.00   0.01   0.01     0.00   0.00   0.00
  38   6     0.03  -0.06  -0.02    -0.05   0.07   0.02     0.01  -0.01  -0.01
  39   6     0.01  -0.04  -0.01    -0.08   0.11   0.04    -0.01   0.01   0.00
  40   6    -0.03   0.02   0.01    -0.02   0.03   0.01    -0.03   0.03   0.01
  41   6    -0.04   0.04   0.01     0.06  -0.07  -0.02    -0.03   0.04   0.01
  42   6    -0.01   0.01   0.00     0.06  -0.07  -0.02    -0.01   0.02   0.00
  43   6     0.02  -0.02   0.00    -0.04   0.03   0.00     0.00   0.00   0.00
  44   6     0.00   0.02  -0.02     0.03  -0.03  -0.02    -0.01   0.01   0.00
  45   6    -0.04   0.02   0.07    -0.02   0.00   0.01    -0.01   0.00   0.02
  46   6    -0.04  -0.01  -0.04    -0.03   0.01   0.00     0.00  -0.01  -0.01
  47   6    -0.01   0.01   0.02    -0.02   0.01   0.02     0.00   0.00   0.00
  48   6    -0.04   0.00  -0.02    -0.04   0.01  -0.01    -0.02   0.00   0.00
  49   6     0.04   0.02  -0.03     0.01   0.03   0.03    -0.02   0.00   0.00
  50   6     0.01   0.02  -0.01    -0.08  -0.04  -0.09     0.01   0.01   0.01
  51   6     0.00   0.03  -0.07     0.05  -0.03   0.09     0.00   0.01  -0.02
  52   6     0.02   0.00   0.06    -0.06  -0.03  -0.10    -0.01  -0.01   0.01
  53   6     0.03  -0.06   0.02     0.01  -0.01  -0.02     0.00   0.02   0.00
  54   6     0.02  -0.05   0.01     0.05   0.01   0.09     0.01  -0.01   0.01
  55   1     0.03  -0.04   0.02     0.02   0.00   0.03    -0.01  -0.01  -0.01
  56   1     0.08   0.00   0.05     0.02   0.01   0.00     0.07   0.02  -0.02
  57   1     0.01   0.02  -0.11     0.00   0.01  -0.02     0.04   0.04  -0.04
  58   1     0.09  -0.08   0.01     0.01  -0.02   0.00    -0.15   0.04   0.09
  59   1    -0.17  -0.09  -0.01    -0.04  -0.02   0.00     0.04   0.03   0.13
  60   1     0.02  -0.19  -0.01     0.00  -0.04   0.00     0.03   0.07   0.19
  61   1    -0.02  -0.01  -0.03     0.00  -0.01   0.00     0.00  -0.01   0.00
  62   1     0.02   0.01   0.00    -0.02  -0.02   0.01     0.00  -0.03   0.05
  63   1    -0.02   0.03   0.04     0.02   0.01   0.02    -0.02   0.00   0.02
  64   1     0.01   0.04  -0.04     0.00   0.03   0.01     0.00   0.00  -0.01
  65   1     0.02   0.09   0.00     0.00   0.02   0.01     0.01   0.03   0.01
  66   1     0.00  -0.02  -0.02     0.03  -0.02   0.02     0.16  -0.23  -0.06
  67   1    -0.02   0.03   0.03     0.03   0.00  -0.01     0.08   0.05   0.03
  68   1    -0.06   0.00  -0.01     0.03  -0.01   0.01    -0.13  -0.17   0.00
  69   1     0.05   0.23   0.03     0.01   0.06   0.01     0.05   0.04   0.00
  70   1    -0.15   0.11  -0.03    -0.06   0.02   0.00    -0.07  -0.02   0.05
  71   1     0.04   0.01   0.03     0.00  -0.02   0.00     0.04  -0.10   0.00
  72   1     0.13  -0.36   0.05     0.01  -0.04   0.00    -0.27   0.36  -0.21
  73   1    -0.31  -0.06   0.06    -0.03  -0.01   0.01     0.37   0.00   0.01
  74   1     0.15   0.11  -0.12     0.01   0.01  -0.02    -0.31  -0.32   0.13
  75   1    -0.01  -0.10   0.05     0.00  -0.06   0.03    -0.01  -0.05   0.03
  76   1     0.01   0.00   0.00     0.01  -0.04   0.02     0.00  -0.05   0.02
  77   1     0.04   0.09  -0.04     0.02   0.01   0.00     0.00  -0.03   0.01
  78   1    -0.03  -0.06  -0.03    -0.01  -0.02  -0.02     0.00  -0.01  -0.01
  79   1     0.01   0.02   0.02     0.01   0.02   0.03     0.00  -0.01   0.01
  80   1     0.02  -0.05  -0.01    -0.14   0.18   0.06     0.00   0.01   0.00
  81   1    -0.05   0.05   0.02    -0.03   0.05   0.02    -0.04   0.05   0.01
  82   1    -0.07   0.09   0.03     0.11  -0.11  -0.03    -0.05   0.06   0.01
  83   1     0.02  -0.02   0.02    -0.07   0.06   0.00     0.00   0.00   0.00
  84   1    -0.01   0.03  -0.05     0.04  -0.01   0.02    -0.01   0.00   0.00
  85   1    -0.03   0.09   0.04    -0.03   0.01   0.00     0.00   0.02   0.01
  86   1    -0.06   0.02   0.11    -0.01  -0.01   0.01    -0.01   0.01   0.03
  87   1    -0.06   0.01   0.11    -0.02   0.01   0.03    -0.01   0.00   0.02
  88   1    -0.05   0.05  -0.08    -0.04   0.00  -0.01     0.00   0.01  -0.02
  89   1    -0.04   0.01   0.01    -0.02   0.02   0.00     0.00   0.00   0.00
  90   1    -0.03  -0.06  -0.08    -0.04   0.01  -0.01     0.00  -0.02  -0.02
  91   1    -0.04   0.00   0.05    -0.06   0.01   0.07     0.00   0.00   0.00
  92   1    -0.02   0.01  -0.02    -0.04   0.01  -0.03     0.00   0.00   0.00
  93   1     0.03   0.02   0.04     0.03   0.02   0.04     0.00   0.00   0.00
  94   1    -0.07  -0.02   0.00    -0.06   0.00   0.02    -0.02   0.00   0.01
  95   1    -0.05   0.01  -0.04    -0.04   0.01  -0.02    -0.03   0.00   0.01
  96   1    -0.06   0.01  -0.05    -0.05   0.01  -0.03    -0.02   0.02   0.00
  97   1     0.06   0.01  -0.06    -0.02   0.08   0.04    -0.03   0.00   0.01
  98   1     0.06   0.02   0.00    -0.01   0.03   0.00    -0.03  -0.01  -0.01
  99   1     0.03   0.02  -0.04     0.05   0.02   0.09    -0.01   0.00  -0.01
 100   1     0.02   0.02  -0.03    -0.22  -0.02   0.02     0.02   0.00   0.01
 101   1    -0.01   0.02  -0.01     0.05  -0.04  -0.09     0.02   0.02   0.02
 102   1     0.02   0.01   0.01    -0.15  -0.06  -0.27     0.01   0.02   0.02
 103   1    -0.02   0.09  -0.04     0.06  -0.10   0.05    -0.01   0.02  -0.01
 104   1     0.00   0.03  -0.11     0.08   0.04   0.15     0.00   0.01  -0.03
 105   1     0.00   0.03  -0.09     0.10  -0.07   0.12     0.01   0.00  -0.02
 106   1     0.03   0.13   0.13    -0.10  -0.27  -0.22    -0.02   0.01   0.02
 107   1     0.03  -0.01  -0.04    -0.07  -0.02   0.11     0.00  -0.02   0.01
 108   1    -0.01  -0.10   0.16     0.00   0.15  -0.28    -0.01  -0.02   0.03
 109   1     0.01  -0.04   0.05     0.00   0.02  -0.01     0.00   0.00   0.00
 110   1     0.03  -0.06  -0.02     0.00  -0.02  -0.06     0.00   0.02   0.03
 111   1     0.07  -0.07   0.03     0.03  -0.03  -0.01    -0.01   0.04   0.00
 112   1     0.03  -0.05   0.03    -0.02  -0.07  -0.09     0.01  -0.03   0.00
 113   1     0.01  -0.07   0.01     0.12   0.24   0.12     0.00   0.01   0.02
 114   1     0.02  -0.04  -0.01     0.07  -0.12   0.29     0.01  -0.03   0.04
                    40                     41                     42
                    ?A                     ?A                     ?A
 Frequencies --   180.1490               190.2046               196.7556
 Red. masses --     2.5389                 3.4850                 2.4823
 Frc consts  --     0.0485                 0.0743                 0.0566
 IR Inten    --     2.0897                 4.0302                 1.4714
 Raman Activ --     0.0000                 0.0000                 0.0000
 Depolar     --     0.0000                 0.0000                 0.0000
 Atom AN      X      Y      Z        X      Y      Z        X      Y      Z
   1   8     0.05  -0.04  -0.02    -0.01   0.00   0.00     0.00  -0.01   0.00
   2  12    -0.04  -0.01   0.00    -0.04   0.00  -0.05    -0.01   0.02   0.02
   3   8     0.01   0.03  -0.03    -0.01   0.14  -0.03     0.00  -0.02   0.00
   4   6     0.03  -0.01  -0.04     0.00  -0.01   0.02     0.00   0.00   0.00
   5   7    -0.02  -0.04   0.02     0.02  -0.04  -0.01     0.05   0.02   0.00
   6   7    -0.02   0.01   0.01    -0.04  -0.03  -0.01    -0.04   0.00   0.04
   7   8     0.01  -0.01  -0.04     0.02  -0.01   0.02     0.00   0.00   0.00
   8   6     0.00  -0.03   0.01     0.01  -0.04  -0.01     0.02   0.01   0.03
   9   6     0.01   0.00   0.01     0.00  -0.05  -0.03     0.04   0.00   0.11
  10   6    -0.01   0.01   0.01    -0.01  -0.02  -0.01     0.00   0.00   0.06
  11   8     0.02   0.04  -0.01    -0.02  -0.05  -0.06     0.00   0.02   0.00
  12   6     0.02   0.05   0.01     0.01   0.05   0.00     0.00   0.01  -0.01
  13   6     0.01   0.03  -0.02    -0.03   0.07  -0.04     0.01   0.00  -0.01
  14   6     0.03   0.01  -0.03     0.01  -0.03   0.00     0.00   0.01   0.01
  15   8     0.02   0.07   0.03     0.07   0.11   0.06    -0.01   0.01  -0.02
  16   6     0.01   0.01   0.06     0.02   0.01  -0.05     0.00   0.01   0.00
  17   8    -0.02   0.00   0.07    -0.04   0.01   0.12     0.00  -0.01  -0.01
  18   6    -0.02   0.01   0.00    -0.06   0.01  -0.02     0.01   0.00   0.00
  19   8     0.00   0.00  -0.03    -0.06  -0.02  -0.07     0.02   0.01   0.02
  20   8    -0.02  -0.04   0.04    -0.01   0.03  -0.05     0.00  -0.02   0.01
  21   6     0.00   0.00   0.01     0.00   0.02   0.01     0.00  -0.01   0.00
  22   6     0.00   0.02   0.01    -0.01   0.03   0.05     0.00  -0.01  -0.01
  23   6    -0.05   0.04  -0.03    -0.03  -0.01   0.00     0.00   0.00  -0.01
  24   8     0.03   0.01  -0.02     0.03   0.00   0.02     0.00  -0.01  -0.01
  25   6     0.01   0.00  -0.02    -0.01  -0.01   0.01    -0.01  -0.02  -0.01
  26   6    -0.14   0.14  -0.01     0.09  -0.09  -0.01    -0.03   0.03   0.00
  27   6    -0.04   0.01  -0.01    -0.07  -0.05  -0.02     0.01   0.00  -0.01
  28   6     0.01  -0.02  -0.02     0.10  -0.01  -0.01    -0.01   0.01   0.01
  29   6    -0.02  -0.04   0.02     0.02  -0.02   0.00     0.05   0.03  -0.03
  30   6    -0.01   0.00   0.01    -0.05  -0.01   0.02    -0.06   0.00   0.02
  31   6    -0.02  -0.03   0.01     0.02  -0.01   0.00     0.05   0.01  -0.02
  32   6    -0.01   0.01  -0.01     0.02   0.02   0.00     0.04  -0.07   0.02
  33   6    -0.01   0.03  -0.02     0.03   0.02   0.00     0.03  -0.10   0.03
  34   6    -0.01   0.01   0.00     0.03   0.00   0.00     0.04  -0.03   0.00
  35   6    -0.02  -0.03   0.01     0.03  -0.02   0.00     0.06   0.04  -0.03
  36   6    -0.01  -0.02   0.01     0.00  -0.01  -0.01     0.01   0.01  -0.04
  37   6    -0.01  -0.02   0.00     0.01   0.00   0.02     0.03   0.04   0.00
  38   6     0.00   0.00   0.01    -0.04  -0.02   0.02    -0.05  -0.01   0.02
  39   6     0.02  -0.03   0.00    -0.04  -0.03   0.02    -0.02  -0.05   0.00
  40   6     0.04  -0.06  -0.01    -0.02  -0.03   0.02    -0.01  -0.07  -0.01
  41   6     0.04  -0.06  -0.01    -0.02  -0.02   0.02    -0.03  -0.04   0.01
  42   6     0.01  -0.03   0.00    -0.04   0.01   0.02    -0.06   0.00   0.02
  43   6     0.01   0.00   0.01     0.01   0.00   0.02    -0.01   0.00   0.02
  44   6     0.01  -0.01  -0.01    -0.01   0.01  -0.01    -0.03   0.01  -0.02
  45   6    -0.01   0.01   0.05    -0.01   0.00   0.00    -0.02  -0.02  -0.08
  46   6     0.01  -0.02  -0.02    -0.01   0.00   0.00    -0.05   0.04   0.01
  47   6    -0.01  -0.01  -0.03    -0.04   0.00   0.00     0.00   0.04   0.05
  48   6     0.02   0.00   0.02    -0.02   0.01   0.03    -0.05   0.01  -0.04
  49   6     0.03   0.01   0.01     0.03   0.02  -0.01     0.03   0.02  -0.01
  50   6    -0.01  -0.01  -0.03     0.03   0.02   0.02     0.03   0.02  -0.02
  51   6     0.02  -0.01   0.01     0.07   0.03   0.00     0.01   0.01   0.02
  52   6     0.02   0.01  -0.01     0.03   0.01  -0.04     0.01   0.02  -0.03
  53   6     0.02  -0.05   0.00     0.02  -0.04   0.03    -0.05   0.01  -0.06
  54   6     0.00   0.03   0.00     0.01   0.02   0.03    -0.01   0.03  -0.06
  55   1     0.02   0.00   0.00     0.02  -0.04  -0.02     0.04   0.00   0.11
  56   1     0.02   0.04  -0.04    -0.08   0.08  -0.11     0.02   0.00  -0.01
  57   1     0.04   0.01  -0.05     0.00  -0.03   0.00     0.01   0.01   0.01
  58   1    -0.07   0.02   0.06     0.07   0.01  -0.05     0.00   0.01   0.00
  59   1     0.03   0.01   0.08     0.04   0.01  -0.06     0.01   0.01   0.00
  60   1     0.04   0.03   0.11    -0.01   0.02  -0.09     0.00   0.01   0.00
  61   1    -0.01   0.05   0.00     0.01   0.08   0.05     0.00  -0.01  -0.01
  62   1    -0.04   0.03  -0.11    -0.07  -0.04   0.07     0.00   0.00  -0.03
  63   1     0.02   0.00  -0.04     0.07   0.01  -0.07    -0.02  -0.02   0.00
  64   1     0.01   0.00  -0.02    -0.03   0.04   0.09     0.00  -0.03  -0.01
  65   1     0.01  -0.03  -0.01    -0.07  -0.12  -0.01     0.00   0.00   0.00
  66   1    -0.37   0.38   0.06     0.28  -0.29  -0.03    -0.09   0.09   0.02
  67   1    -0.25  -0.14  -0.07     0.20   0.13  -0.01    -0.06  -0.05  -0.01
  68   1     0.14   0.24  -0.01    -0.11  -0.18   0.00     0.05   0.06   0.00
  69   1    -0.02   0.07   0.00    -0.14  -0.18  -0.01     0.06   0.08  -0.03
  70   1    -0.13   0.01   0.02     0.03  -0.08   0.06    -0.08   0.01   0.00
  71   1    -0.03  -0.06  -0.04    -0.14  -0.01  -0.09     0.06  -0.08   0.01
  72   1    -0.11   0.18  -0.12     0.12   0.01   0.05    -0.03   0.06  -0.02
  73   1     0.26  -0.03   0.01     0.12  -0.02  -0.03     0.05   0.01   0.00
  74   1    -0.14  -0.23   0.05     0.13  -0.02  -0.05    -0.04  -0.02   0.03
  75   1    -0.01   0.03  -0.01     0.02   0.03  -0.01     0.03  -0.11   0.04
  76   1     0.00   0.07  -0.03     0.03   0.03   0.00     0.02  -0.18   0.06
  77   1    -0.01   0.02  -0.01     0.04   0.00   0.00     0.04  -0.05   0.01
  78   1     0.00  -0.01   0.01     0.00  -0.01  -0.02     0.00  -0.01  -0.07
  79   1    -0.01  -0.02  -0.01     0.02   0.01   0.05     0.04   0.05   0.04
  80   1     0.02  -0.04   0.00    -0.04  -0.04   0.02     0.00  -0.07  -0.01
  81   1     0.07  -0.10  -0.02     0.00  -0.05   0.03     0.02  -0.11  -0.02
  82   1     0.06  -0.09  -0.01    -0.01  -0.02   0.03    -0.02  -0.06   0.00
  83   1     0.02  -0.01   0.02     0.01   0.00   0.08     0.00  -0.01   0.05
  84   1     0.01   0.00  -0.01    -0.04   0.01  -0.05    -0.05  -0.01  -0.07
  85   1     0.03   0.04   0.04    -0.02   0.02  -0.01    -0.12  -0.05  -0.09
  86   1    -0.03   0.02   0.08    -0.01   0.00   0.00     0.04  -0.06  -0.15
  87   1    -0.02   0.00   0.04    -0.02   0.01   0.02     0.00   0.01  -0.03
  88   1     0.01   0.03  -0.05    -0.03   0.01  -0.01    -0.07  -0.06   0.06
  89   1    -0.01  -0.02   0.02    -0.02   0.01   0.02     0.00   0.08  -0.05
  90   1     0.04  -0.06  -0.05     0.00   0.00   0.00    -0.12   0.12   0.06
  91   1     0.04   0.01  -0.09    -0.08   0.03   0.04    -0.14  -0.01   0.21
  92   1     0.01  -0.02   0.03    -0.07  -0.01  -0.05    -0.06   0.05  -0.12
  93   1    -0.08  -0.02  -0.06     0.00  -0.01   0.01     0.19   0.05   0.12
  94   1     0.02   0.05   0.02    -0.09   0.11   0.08    -0.06  -0.08  -0.01
  95   1     0.06  -0.01   0.05     0.09   0.00   0.06    -0.13   0.02  -0.09
  96   1     0.01  -0.02   0.02    -0.08  -0.05  -0.06    -0.04   0.06  -0.04
  97   1     0.03   0.03   0.00     0.08   0.00  -0.06     0.04   0.06  -0.04
  98   1     0.04   0.01   0.01     0.07   0.04   0.04     0.05   0.00   0.01
  99   1     0.05   0.01   0.02    -0.01   0.01  -0.02     0.06   0.03  -0.01
 100   1    -0.01   0.01  -0.03     0.12   0.04  -0.07     0.21   0.10  -0.21
 101   1    -0.02  -0.02  -0.04    -0.08   0.01   0.00    -0.20  -0.03  -0.08
 102   1    -0.01  -0.02  -0.03     0.08   0.02   0.15     0.13   0.01   0.23
 103   1     0.03  -0.01   0.01     0.14   0.07   0.01     0.13   0.03   0.02
 104   1     0.01  -0.01   0.02     0.06   0.02   0.04    -0.03  -0.05   0.09
 105   1     0.01   0.00   0.00     0.06   0.04  -0.08    -0.04   0.06  -0.06
 106   1     0.05   0.01  -0.01     0.13   0.10   0.00     0.06   0.04  -0.02
 107   1     0.02   0.01  -0.03     0.03   0.01  -0.19     0.00   0.04  -0.08
 108   1     0.01   0.00  -0.01    -0.04  -0.05   0.01    -0.01   0.01  -0.02
 109   1     0.02  -0.06   0.01     0.03  -0.07   0.03    -0.08   0.14  -0.06
 110   1     0.04  -0.05  -0.03     0.04  -0.02   0.06    -0.12  -0.04  -0.16
 111   1     0.03  -0.08   0.01     0.01  -0.01   0.01    -0.01  -0.06  -0.02
 112   1     0.00   0.05   0.03     0.01   0.03   0.04    -0.06   0.05  -0.10
 113   1    -0.01  -0.01  -0.01     0.00   0.03   0.04     0.07   0.00  -0.11
 114   1     0.00   0.05  -0.05     0.05   0.01   0.03    -0.04   0.05  -0.08
                    43                     44                     45
                    ?A                     ?A                     ?A
 Frequencies --   205.8404               213.0942               214.6683
 Red. masses --     2.7217                 1.1368                 1.3613
 Frc consts  --     0.0679                 0.0304                 0.0370
 IR Inten    --     3.1070                 0.1939                 0.9466
 Raman Activ --     0.0000                 0.0000                 0.0000
 Depolar     --     0.0000                 0.0000                 0.0000
 Atom AN      X      Y      Z        X      Y      Z        X      Y      Z
   1   8     0.01   0.00   0.00    -0.01   0.00   0.00     0.01   0.02   0.00
   2  12     0.02   0.00   0.02     0.01   0.01   0.00     0.04  -0.02  -0.01
   3   8     0.00   0.04  -0.03     0.00   0.00   0.00     0.01   0.01   0.00
   4   6     0.00   0.00   0.00     0.00   0.00   0.00     0.01   0.01  -0.02
   5   7    -0.01   0.00   0.06     0.00   0.01  -0.01     0.00  -0.01   0.00
   6   7     0.04   0.02   0.04     0.01   0.00   0.01     0.02  -0.03   0.01
   7   8     0.00   0.00   0.00     0.00   0.00   0.01     0.00   0.01  -0.02
   8   6     0.02   0.02   0.08     0.00   0.01   0.01    -0.01  -0.01   0.01
   9   6     0.07   0.06   0.19     0.00   0.01   0.03    -0.01  -0.02   0.00
  10   6     0.04   0.02   0.08     0.00   0.00   0.02     0.00  -0.03   0.00
  11   8     0.00  -0.01  -0.02     0.00   0.00   0.00     0.01  -0.01   0.00
  12   6     0.01   0.01  -0.01     0.00   0.00   0.00     0.01  -0.01   0.01
  13   6    -0.02   0.03  -0.02     0.00   0.00   0.00     0.00   0.00   0.01
  14   6     0.01   0.00  -0.01     0.00   0.00   0.01     0.00   0.00  -0.02
  15   8     0.02   0.01  -0.01     0.00   0.00   0.00     0.01  -0.02   0.00
  16   6     0.01   0.00   0.00     0.00   0.00   0.00    -0.01  -0.02   0.02
  17   8    -0.01   0.00   0.05     0.00   0.00  -0.01    -0.01   0.00   0.01
  18   6    -0.02   0.01  -0.01     0.00   0.00   0.00    -0.01   0.00   0.00
  19   8    -0.02   0.00  -0.03     0.00   0.00   0.01    -0.01   0.00  -0.01
  20   8     0.00   0.00  -0.01     0.00  -0.01   0.00    -0.01   0.00  -0.01
  21   6     0.00   0.00   0.00     0.00   0.00   0.00     0.00   0.00   0.00
  22   6     0.00   0.01   0.02     0.00   0.00   0.00     0.00   0.01   0.01
  23   6    -0.01  -0.01   0.00     0.00   0.00   0.00    -0.01   0.00   0.00
  24   8     0.02  -0.01   0.01     0.00  -0.01   0.00     0.00   0.00   0.00
  25   6    -0.02  -0.02   0.00     0.00   0.00   0.00     0.00   0.01   0.00
  26   6     0.05  -0.03   0.00     0.00   0.00   0.00     0.00   0.00   0.00
  27   6    -0.07  -0.01  -0.01     0.02   0.00  -0.01    -0.04   0.00   0.02
  28   6     0.03   0.00  -0.01    -0.01   0.00   0.01    -0.01   0.00  -0.02
  29   6    -0.03  -0.01   0.01     0.00   0.01  -0.01    -0.01   0.00   0.00
  30   6     0.05  -0.01  -0.01     0.00   0.00   0.00     0.01  -0.01   0.00
  31   6    -0.02  -0.01   0.01    -0.01  -0.01   0.00    -0.01   0.00   0.00
  32   6    -0.02   0.00   0.00    -0.01  -0.02   0.01    -0.01   0.01   0.00
  33   6    -0.03   0.01  -0.01     0.01   0.01   0.01    -0.01   0.01   0.00
  34   6    -0.04   0.01   0.00     0.02   0.01   0.00    -0.01   0.00   0.00
  35   6    -0.04   0.00   0.01     0.01   0.00   0.00    -0.01   0.00   0.00
  36   6    -0.01  -0.01   0.01     0.00  -0.01   0.00     0.00   0.00   0.00
  37   6    -0.02  -0.01  -0.02     0.01  -0.02   0.00     0.00   0.00   0.00
  38   6     0.05   0.00  -0.02     0.00   0.01   0.00     0.01   0.02  -0.01
  39   6     0.01   0.05  -0.01     0.00   0.00   0.00     0.02   0.00  -0.01
  40   6    -0.02   0.07   0.00     0.00   0.00  -0.01     0.03  -0.01  -0.02
  41   6     0.01   0.03  -0.01     0.00   0.00   0.00     0.00   0.01   0.00
  42   6     0.04  -0.01  -0.02     0.00   0.00   0.00     0.00   0.01   0.01
  43   6     0.01  -0.01  -0.02     0.00   0.00   0.00    -0.01   0.03  -0.01
  44   6     0.02  -0.02   0.00     0.00   0.00   0.00     0.00   0.02   0.01
  45   6     0.00   0.00   0.02     0.00   0.00   0.01     0.00   0.00   0.01
  46   6    -0.01   0.00   0.00     0.00  -0.01  -0.01     0.00   0.00   0.00
  47   6     0.02  -0.01  -0.03     0.03  -0.01  -0.01    -0.01   0.00   0.00
  48   6     0.03  -0.01  -0.01    -0.04   0.00   0.00     0.01   0.00   0.00
  49   6     0.00  -0.02   0.00     0.00   0.00   0.00     0.00   0.02   0.01
  50   6    -0.01  -0.02  -0.02     0.00   0.00   0.00     0.02   0.02   0.05
  51   6    -0.04  -0.02  -0.02    -0.01   0.00   0.00    -0.01   0.03  -0.01
  52   6    -0.01  -0.03   0.04     0.00   0.00   0.00    -0.02   0.01  -0.03
  53   6    -0.02  -0.05  -0.11    -0.03   0.02  -0.02    -0.02   0.00   0.01
  54   6    -0.02  -0.03  -0.11    -0.01  -0.01  -0.02    -0.01  -0.06  -0.02
  55   1     0.06   0.06   0.18     0.00   0.01   0.04    -0.02  -0.02   0.00
  56   1    -0.02   0.03  -0.04     0.00   0.00   0.00    -0.01   0.00   0.01
  57   1     0.00   0.00  -0.01     0.00   0.00   0.01    -0.01   0.00  -0.01
  58   1     0.01   0.00   0.00     0.00   0.00  -0.01    -0.01  -0.02   0.03
  59   1     0.00   0.00   0.00     0.00   0.00   0.00    -0.04  -0.02   0.01
  60   1     0.01   0.00   0.00    -0.01   0.00  -0.01     0.01  -0.03   0.04
  61   1     0.01   0.03   0.02     0.00   0.00   0.00     0.00   0.01   0.01
  62   1    -0.03  -0.02   0.02     0.00   0.00   0.00    -0.01   0.00   0.00
  63   1     0.03  -0.01  -0.06    -0.01   0.00   0.00     0.02   0.01  -0.01
  64   1    -0.03   0.00   0.06     0.00  -0.01   0.00     0.00   0.03   0.01
  65   1    -0.06  -0.09  -0.02    -0.01   0.00   0.00    -0.01  -0.01   0.00
  66   1     0.15  -0.14   0.00     0.00   0.00   0.00     0.01  -0.01   0.00
  67   1     0.11   0.11   0.01     0.00   0.00   0.00     0.01   0.01  -0.01
  68   1    -0.07  -0.07  -0.01     0.00   0.00   0.00     0.00  -0.01   0.00
  69   1    -0.07   0.02   0.02     0.01  -0.02  -0.01    -0.05   0.02   0.04
  70   1    -0.12  -0.01   0.03     0.04   0.00  -0.01    -0.07   0.00   0.02
  71   1    -0.08  -0.05  -0.05     0.01   0.03   0.00    -0.05  -0.01  -0.01
  72   1     0.03   0.02   0.00    -0.01  -0.01   0.00     0.00  -0.02  -0.01
  73   1     0.04   0.00  -0.02    -0.02   0.00   0.01    -0.04   0.01  -0.02
  74   1     0.03  -0.01  -0.02     0.00   0.01   0.01     0.00   0.03  -0.02
  75   1    -0.02   0.00  -0.01    -0.01  -0.03   0.03     0.00   0.01   0.00
  76   1    -0.03   0.02  -0.02     0.01   0.02   0.01    -0.01   0.02  -0.01
  77   1    -0.04   0.02  -0.01     0.03   0.03   0.00    -0.01   0.00   0.00
  78   1    -0.01   0.00   0.02     0.00  -0.01   0.00     0.00   0.00   0.01
  79   1    -0.03  -0.01  -0.05     0.01  -0.03   0.02    -0.01   0.00  -0.01
  80   1     0.00   0.07   0.00     0.00   0.01  -0.01     0.02   0.00  -0.02
  81   1    -0.06   0.11   0.00     0.00   0.00  -0.01     0.04  -0.03  -0.03
  82   1    -0.01   0.04  -0.01     0.00   0.00   0.00    -0.01   0.01   0.00
  83   1     0.00  -0.01  -0.06     0.00   0.00  -0.01    -0.01   0.04  -0.02
  84   1     0.03  -0.01   0.02     0.00   0.00   0.00    -0.01   0.02   0.01
  85   1     0.02   0.01   0.03     0.04   0.00   0.02     0.01   0.01   0.01
  86   1    -0.01   0.01   0.05    -0.02   0.01   0.04    -0.01   0.01   0.02
  87   1     0.00  -0.01   0.01    -0.01  -0.02  -0.01     0.00   0.00   0.01
  88   1     0.00   0.00   0.00     0.00   0.03  -0.04     0.00   0.01  -0.01
  89   1     0.00   0.00  -0.01    -0.02  -0.02   0.03     0.00  -0.01   0.01
  90   1    -0.01  -0.01  -0.01     0.03  -0.05  -0.03     0.02  -0.02  -0.01
  91   1     0.09   0.00  -0.10     0.15   0.00  -0.14    -0.01   0.00   0.00
  92   1     0.05   0.00   0.06     0.09  -0.03   0.14    -0.01   0.00  -0.01
  93   1    -0.06  -0.01  -0.05    -0.12  -0.01  -0.05    -0.01  -0.01  -0.01
  94   1     0.13  -0.11  -0.09    -0.34   0.38   0.22     0.05  -0.05  -0.03
  95   1    -0.10   0.00  -0.04     0.47  -0.04   0.11    -0.05   0.00  -0.01
  96   1     0.10   0.08   0.10    -0.28  -0.35  -0.32     0.04   0.04   0.05
  97   1     0.00  -0.03   0.01    -0.01   0.01   0.01     0.00   0.02   0.01
  98   1    -0.01   0.00  -0.01     0.00   0.00   0.00     0.01   0.02   0.02
  99   1    -0.02  -0.02   0.01     0.01   0.00   0.00     0.00   0.02   0.01
 100   1    -0.01   0.02  -0.04     0.04   0.02  -0.04     0.14   0.06  -0.08
 101   1    -0.06  -0.04  -0.04    -0.05  -0.01  -0.01    -0.15   0.00   0.03
 102   1    -0.01  -0.06   0.00     0.03  -0.01   0.06     0.09  -0.01   0.22
 103   1    -0.22  -0.06  -0.02     0.00   0.00   0.00     0.26   0.08   0.00
 104   1     0.02   0.06  -0.14    -0.02  -0.01   0.01    -0.12  -0.14   0.15
 105   1     0.03  -0.09   0.12    -0.02   0.01   0.00    -0.16   0.17  -0.19
 106   1    -0.05   0.01   0.06    -0.02  -0.04  -0.02    -0.18  -0.35  -0.21
 107   1     0.01  -0.06   0.02    -0.01   0.00   0.04    -0.06   0.06   0.39
 108   1    -0.02  -0.07   0.07     0.02   0.03  -0.03     0.17   0.29  -0.28
 109   1    -0.06   0.14  -0.12    -0.04   0.07  -0.01    -0.02   0.00   0.00
 110   1    -0.08  -0.11  -0.33    -0.05   0.00  -0.06    -0.03   0.00   0.01
 111   1     0.03  -0.24  -0.04     0.00   0.00   0.00    -0.02   0.01   0.00
 112   1    -0.11  -0.07  -0.26    -0.02  -0.01  -0.03     0.02  -0.04   0.05
 113   1     0.14  -0.01  -0.19     0.01  -0.02  -0.03    -0.04  -0.15  -0.03
 114   1    -0.15  -0.04  -0.05    -0.04   0.00  -0.02    -0.03  -0.01  -0.10
                    46                     47                     48
                    ?A                     ?A                     ?A
 Frequencies --   217.8925               223.8026               226.6034
 Red. masses --     1.3827                 1.9065                 1.3311
 Frc consts  --     0.0387                 0.0563                 0.0403
 IR Inten    --     0.0378                 1.3327                 2.6369
 Raman Activ --     0.0000                 0.0000                 0.0000
 Depolar     --     0.0000                 0.0000                 0.0000
 Atom AN      X      Y      Z        X      Y      Z        X      Y      Z
   1   8    -0.01   0.00   0.00    -0.05  -0.05   0.00     0.03   0.02   0.00
   2  12     0.00   0.00  -0.03    -0.03   0.01   0.01    -0.01   0.01   0.03
   3   8     0.01   0.00  -0.02    -0.02  -0.01   0.00     0.00   0.01  -0.01
   4   6    -0.01   0.00   0.01    -0.03  -0.04   0.05     0.02   0.01  -0.02
   5   7     0.00  -0.01   0.00     0.00  -0.01   0.00     0.01   0.01   0.02
   6   7     0.00   0.00   0.00     0.00   0.00   0.02    -0.02   0.01   0.00
   7   8    -0.01   0.00   0.00    -0.02  -0.04   0.05     0.01   0.02  -0.02
   8   6     0.01   0.00   0.01     0.01  -0.01   0.00     0.00   0.00   0.01
   9   6     0.02   0.00   0.03     0.01   0.00   0.01     0.00   0.01   0.00
  10   6     0.01   0.00   0.01     0.00   0.00   0.00    -0.01   0.01  -0.01
  11   8     0.00   0.02   0.03    -0.03   0.04  -0.02     0.01  -0.01   0.00
  12   6     0.00   0.01  -0.01    -0.02   0.05  -0.03     0.01  -0.01   0.01
  13   6     0.01  -0.01  -0.03     0.01   0.02  -0.04    -0.01   0.00   0.01
  14   6    -0.01   0.01   0.02     0.00   0.00   0.04     0.01   0.00  -0.02
  15   8     0.02   0.05   0.04    -0.02   0.08  -0.01     0.00  -0.02   0.00
  16   6    -0.01   0.00   0.01     0.01   0.05  -0.08     0.00  -0.02   0.03
  17   8     0.00   0.00  -0.01     0.01   0.00  -0.01     0.00   0.00   0.01
  18   6     0.00   0.00   0.01     0.01   0.00   0.00     0.00   0.00   0.00
  19   8    -0.01  -0.01  -0.01     0.01   0.00   0.00     0.00   0.01   0.00
  20   8     0.00   0.00   0.00     0.00   0.00   0.00     0.00  -0.01   0.00
  21   6     0.00   0.00   0.00     0.00   0.00   0.00     0.00   0.00   0.00
  22   6     0.00   0.00   0.00     0.00   0.00  -0.01     0.00   0.00   0.00
  23   6     0.00  -0.01   0.00     0.01   0.00   0.00     0.00   0.00   0.00
  24   8     0.00   0.00   0.00     0.00   0.00   0.00     0.01  -0.01   0.01
  25   6     0.00   0.00   0.00     0.00  -0.01  -0.01    -0.02  -0.01  -0.01
  26   6    -0.02  -0.01   0.00    -0.01   0.01   0.00     0.00   0.01   0.00
  27   6     0.10   0.02  -0.05     0.09  -0.01  -0.04    -0.06   0.01   0.01
  28   6    -0.06   0.00   0.02     0.05  -0.01   0.05    -0.01   0.00  -0.02
  29   6     0.00  -0.01   0.00     0.00  -0.01   0.00     0.01   0.01   0.00
  30   6     0.00   0.00   0.00     0.01  -0.01   0.01    -0.01   0.00   0.00
  31   6    -0.01   0.00   0.00     0.00   0.00   0.00     0.02   0.00   0.00
  32   6    -0.01   0.01   0.00     0.00   0.01   0.00     0.01  -0.03  -0.01
  33   6     0.00   0.01   0.00     0.00   0.00   0.00     0.00  -0.03  -0.01
  34   6     0.00   0.00   0.00     0.00   0.00   0.00    -0.01   0.00  -0.01
  35   6     0.00   0.00   0.00     0.00   0.00   0.00     0.00   0.01   0.00
  36   6    -0.01  -0.01   0.01     0.00  -0.01   0.00     0.01   0.00  -0.01
  37   6     0.00   0.00   0.00     0.00   0.00   0.00     0.00   0.01   0.00
  38   6     0.00   0.00   0.00     0.02  -0.02   0.00    -0.01  -0.02   0.01
  39   6     0.00   0.00   0.00     0.01  -0.01   0.00     0.00  -0.03   0.02
  40   6     0.00   0.00   0.00    -0.03   0.03   0.01     0.00   0.00   0.03
  41   6     0.00   0.00   0.00    -0.03   0.02   0.02     0.00   0.02   0.02
  42   6     0.00   0.00   0.00     0.00  -0.01   0.01     0.00   0.01   0.00
  43   6     0.00   0.00   0.00     0.02  -0.01   0.01     0.00  -0.01   0.01
  44   6     0.00   0.00   0.00     0.01  -0.02   0.00     0.01   0.00  -0.01
  45   6     0.00  -0.01   0.01     0.00   0.00   0.01    -0.01   0.01  -0.02
  46   6    -0.01  -0.01   0.01     0.00   0.00   0.00    -0.01   0.01   0.01
  47   6    -0.01   0.00  -0.01    -0.01   0.00  -0.01     0.03   0.00   0.01
  48   6     0.00   0.00   0.00     0.00   0.00   0.00     0.00   0.00  -0.01
  49   6     0.01   0.00   0.00     0.01  -0.02   0.00     0.02  -0.03  -0.03
  50   6    -0.01   0.00   0.00    -0.01  -0.01  -0.04    -0.01  -0.01   0.00
  51   6     0.00   0.01   0.00     0.02   0.02  -0.02     0.02   0.02  -0.01
  52   6     0.00   0.00   0.00     0.01  -0.02   0.05     0.01  -0.01   0.01
  53   6     0.00  -0.02  -0.02     0.01  -0.02   0.00     0.00   0.00   0.00
  54   6     0.00   0.00  -0.02     0.00   0.00  -0.03    -0.02   0.02  -0.02
  55   1     0.02   0.00   0.03     0.01   0.00   0.00     0.00   0.01   0.00
  56   1    -0.01  -0.01  -0.01     0.04   0.02  -0.06    -0.02   0.00   0.01
  57   1     0.00   0.01   0.01     0.03   0.00   0.03    -0.01   0.00  -0.02
  58   1    -0.02   0.00   0.00     0.04   0.07  -0.09    -0.02  -0.03   0.04
  59   1    -0.01   0.00   0.01     0.11   0.06  -0.06    -0.03  -0.02   0.03
  60   1    -0.01   0.00   0.01    -0.06   0.10  -0.14     0.03  -0.04   0.06
  61   1     0.00  -0.01   0.00     0.00   0.00  -0.01     0.01   0.01   0.00
  62   1     0.00   0.00   0.00     0.01   0.00  -0.01     0.00   0.00  -0.01
  63   1    -0.02   0.00   0.01    -0.05  -0.01   0.01     0.02   0.00  -0.04
  64   1     0.00  -0.01  -0.01     0.01  -0.04  -0.04    -0.03   0.01   0.04
  65   1     0.01   0.02   0.00     0.02   0.03   0.00    -0.06  -0.05  -0.03
  66   1    -0.03   0.01  -0.01     0.03  -0.03  -0.01     0.03  -0.02   0.00
  67   1    -0.03  -0.03   0.00     0.00   0.05   0.04     0.01   0.04   0.02
  68   1     0.00  -0.01   0.00    -0.06   0.00  -0.01    -0.03   0.00  -0.01
  69   1    -0.13  -0.40  -0.01     0.21   0.15  -0.16    -0.13  -0.10   0.08
  70   1     0.63   0.01  -0.14    -0.09  -0.01   0.00     0.05   0.00   0.00
  71   1    -0.11   0.47  -0.03     0.22  -0.20   0.02    -0.14   0.12  -0.03
  72   1    -0.09  -0.01  -0.03     0.04   0.03   0.06     0.00   0.00  -0.02
  73   1    -0.06   0.00   0.04     0.10  -0.01   0.06    -0.01   0.00  -0.02
  74   1    -0.09  -0.02   0.06     0.04  -0.06   0.03     0.00   0.01  -0.01
  75   1    -0.01   0.01   0.00     0.00   0.01   0.00     0.02  -0.05  -0.01
  76   1     0.00   0.01   0.00     0.00   0.01   0.00    -0.01  -0.05  -0.02
  77   1     0.00  -0.01   0.01     0.00   0.00   0.00    -0.02   0.01  -0.02
  78   1    -0.01  -0.01   0.02     0.00  -0.01   0.00     0.01   0.00  -0.02
  79   1     0.00   0.00   0.00     0.00   0.00   0.00     0.00   0.00  -0.01
  80   1     0.00   0.00   0.00     0.03  -0.02  -0.01     0.01  -0.05   0.02
  81   1     0.00   0.00   0.00    -0.05   0.05   0.02     0.00   0.00   0.04
  82   1     0.00   0.00   0.00    -0.05   0.05   0.02     0.00   0.04   0.03
  83   1     0.00   0.00   0.01     0.02   0.00   0.01     0.00  -0.01   0.03
  84   1     0.00   0.00  -0.01     0.01  -0.02   0.00     0.01   0.01  -0.01
  85   1     0.11  -0.01   0.05     0.03   0.00   0.02    -0.14   0.01  -0.06
  86   1    -0.06   0.05   0.07    -0.02   0.02   0.03     0.06  -0.06  -0.09
  87   1    -0.02  -0.06  -0.06    -0.01  -0.02  -0.01     0.01   0.06   0.08
  88   1    -0.01   0.00   0.00    -0.01   0.02  -0.02     0.03  -0.13   0.12
  89   1    -0.01  -0.01   0.02    -0.01   0.00   0.02     0.07   0.04  -0.15
  90   1     0.00  -0.01   0.00     0.01  -0.02  -0.01    -0.14   0.14   0.07
  91   1    -0.02   0.01   0.00    -0.01   0.01  -0.01     0.10  -0.01  -0.06
  92   1    -0.02   0.00  -0.02    -0.01  -0.01  -0.01     0.07   0.00   0.11
  93   1    -0.01   0.00  -0.01    -0.01   0.00  -0.01    -0.05   0.02   0.00
  94   1     0.05  -0.06  -0.03     0.02  -0.02  -0.01    -0.04   0.04   0.02
  95   1    -0.08   0.01  -0.01    -0.03   0.00   0.00     0.05   0.00   0.00
  96   1     0.04   0.06   0.05     0.02   0.02   0.02    -0.03  -0.04  -0.04
  97   1     0.06  -0.04  -0.05    -0.04   0.04   0.04     0.11  -0.13  -0.10
  98   1     0.04   0.06   0.05    -0.02  -0.08  -0.04     0.07   0.06   0.05
  99   1    -0.08  -0.01   0.00     0.10   0.00   0.00    -0.13  -0.05  -0.05
 100   1     0.01   0.01  -0.02    -0.16  -0.07   0.11    -0.24  -0.14   0.25
 101   1    -0.03  -0.01  -0.01     0.21   0.01  -0.02     0.32   0.06   0.07
 102   1     0.00  -0.01   0.02    -0.10   0.04  -0.27    -0.15   0.05  -0.34
 103   1     0.07   0.02   0.00     0.24   0.09   0.00     0.26   0.09   0.00
 104   1    -0.02  -0.03   0.04    -0.08  -0.14   0.10    -0.08  -0.13   0.13
 105   1    -0.03   0.04  -0.04    -0.12   0.14  -0.20    -0.11   0.13  -0.20
 106   1    -0.01  -0.03  -0.02    -0.12  -0.21  -0.05     0.01  -0.01   0.00
 107   1     0.00   0.00   0.03    -0.01   0.01   0.31     0.00   0.00   0.01
 108   1     0.01   0.02  -0.02     0.15   0.13  -0.07     0.01   0.00   0.00
 109   1     0.00   0.01  -0.03     0.01  -0.02  -0.01    -0.01   0.02   0.00
 110   1     0.00  -0.02  -0.05     0.02  -0.01  -0.01    -0.01   0.00  -0.02
 111   1     0.01  -0.05  -0.01     0.01  -0.02   0.00     0.00  -0.01   0.01
 112   1    -0.01   0.00  -0.03     0.01   0.03   0.01    -0.02   0.02  -0.04
 113   1     0.03  -0.01  -0.04    -0.01  -0.07  -0.05     0.00   0.02  -0.03
 114   1    -0.01   0.00  -0.03    -0.01   0.04  -0.10    -0.02   0.01  -0.02
                    49                     50                     51
                    ?A                     ?A                     ?A
 Frequencies --   229.8109               235.8551               236.9483
 Red. masses --     1.1967                 1.3485                 1.2977
 Frc consts  --     0.0372                 0.0442                 0.0429
 IR Inten    --     0.1762                 2.0452                 2.4772
 Raman Activ --     0.0000                 0.0000                 0.0000
 Depolar     --     0.0000                 0.0000                 0.0000
 Atom AN      X      Y      Z        X      Y      Z        X      Y      Z
   1   8    -0.01   0.00   0.00    -0.01   0.00   0.00     0.00  -0.01   0.00
   2  12     0.01   0.00   0.00     0.02   0.00  -0.04    -0.02  -0.02  -0.01
   3   8     0.00   0.00  -0.01     0.01   0.01   0.01     0.00   0.01   0.01
   4   6    -0.01  -0.01   0.01    -0.01   0.00   0.00     0.00   0.00   0.00
   5   7     0.01   0.00   0.02     0.00   0.01   0.00    -0.01  -0.01   0.01
   6   7     0.01  -0.01   0.00     0.00   0.00  -0.04     0.00   0.00   0.00
   7   8    -0.01  -0.01   0.01    -0.01   0.00   0.00     0.00   0.00   0.00
   8   6     0.00   0.00   0.00     0.01   0.02   0.00    -0.01  -0.01   0.01
   9   6     0.00  -0.01  -0.03     0.02   0.02   0.03    -0.01   0.00   0.01
  10   6     0.00  -0.01  -0.01     0.02   0.01   0.00    -0.01   0.00   0.00
  11   8    -0.01   0.01   0.00     0.00  -0.01   0.00     0.00   0.00  -0.01
  12   6     0.00   0.01  -0.01     0.00   0.00   0.01     0.00   0.01   0.00
  13   6     0.01   0.00  -0.02     0.00   0.01   0.01     0.00   0.01   0.01
  14   6     0.00   0.00   0.01     0.00  -0.01   0.00     0.00   0.00   0.00
  15   8     0.01   0.03   0.01     0.01   0.00   0.00    -0.01   0.01   0.01
  16   6     0.00   0.01  -0.01     0.00   0.00  -0.01     0.00   0.00  -0.01
  17   8     0.00   0.00   0.00     0.00  -0.01  -0.01     0.00  -0.01   0.00
  18   6     0.00   0.00   0.00     0.00  -0.01   0.00     0.00  -0.01   0.00
  19   8     0.00   0.00   0.00     0.00  -0.02  -0.01     0.00  -0.02  -0.02
  20   8     0.00   0.00   0.00     0.00   0.01  -0.01     0.00   0.02  -0.01
  21   6     0.00   0.00   0.00    -0.01   0.00   0.01    -0.01   0.00   0.01
  22   6     0.00   0.00   0.00     0.00  -0.02   0.02     0.00  -0.02   0.03
  23   6     0.00   0.00   0.00     0.00   0.00   0.01     0.00   0.00   0.01
  24   8     0.00   0.00   0.00    -0.02   0.02  -0.03    -0.02   0.03  -0.03
  25   6     0.00   0.00   0.00     0.06   0.02   0.02     0.07   0.02   0.02
  26   6     0.00   0.00   0.00    -0.02  -0.02  -0.01    -0.02  -0.03   0.00
  27   6     0.03   0.00  -0.02     0.00  -0.01   0.02    -0.01  -0.01   0.01
  28   6    -0.01   0.00   0.01     0.01   0.00   0.00     0.02   0.00   0.00
  29   6     0.01   0.00   0.01     0.00   0.00   0.00    -0.01   0.00   0.00
  30   6     0.00   0.00   0.00     0.00   0.00  -0.01     0.01   0.00   0.00
  31   6     0.02  -0.01   0.00    -0.01   0.00   0.00     0.00   0.00   0.00
  32   6     0.01  -0.03  -0.02    -0.01   0.01   0.00     0.00   0.00  -0.01
  33   6    -0.01  -0.02  -0.03    -0.01   0.01   0.00    -0.01   0.00  -0.01
  34   6    -0.02   0.00  -0.02    -0.01   0.00   0.00    -0.01   0.00  -0.01
  35   6    -0.02   0.01   0.00    -0.01   0.00   0.00    -0.01   0.00   0.00
  36   6     0.01   0.00   0.00     0.00   0.00   0.01     0.01   0.01   0.01
  37   6    -0.02   0.00   0.00    -0.01   0.00   0.00     0.00   0.00  -0.01
  38   6     0.00   0.00   0.00    -0.02   0.00   0.00     0.01   0.01  -0.01
  39   6     0.00   0.01  -0.01    -0.02   0.00   0.02     0.01   0.01   0.00
  40   6     0.00   0.00  -0.01     0.01   0.00   0.02     0.01   0.01   0.00
  41   6     0.00  -0.01  -0.01     0.03   0.00   0.00     0.01   0.01   0.00
  42   6     0.00   0.00   0.00     0.02   0.01  -0.01     0.01   0.01   0.00
  43   6     0.00   0.00   0.00    -0.02  -0.01   0.00     0.00   0.01  -0.01
  44   6    -0.01   0.00   0.00     0.00   0.00   0.01     0.01   0.01   0.01
  45   6    -0.02   0.02   0.00     0.00   0.00   0.01    -0.01   0.02   0.02
  46   6    -0.01   0.01   0.02     0.00   0.00   0.00     0.02  -0.01   0.02
  47   6     0.02  -0.01   0.02    -0.01   0.00   0.00     0.02   0.00  -0.03
  48   6     0.00   0.01   0.01    -0.01   0.00   0.01     0.02  -0.02  -0.02
  49   6     0.00   0.01   0.01    -0.04  -0.01   0.01     0.00   0.00   0.00
  50   6     0.00   0.00   0.00     0.01   0.00   0.03     0.00   0.00   0.02
  51   6     0.00   0.00   0.00     0.00   0.00  -0.01    -0.01   0.00  -0.01
  52   6     0.00   0.00   0.00    -0.03  -0.03  -0.03     0.00   0.01   0.00
  53   6     0.01   0.00   0.01     0.01   0.00  -0.03    -0.01  -0.02   0.00
  54   6     0.01  -0.01   0.02     0.02   0.00   0.00    -0.02  -0.02  -0.01
  55   1    -0.01  -0.01  -0.03     0.02   0.02   0.04     0.00   0.00   0.01
  56   1     0.01   0.00  -0.02     0.00   0.01   0.00     0.00   0.01   0.00
  57   1     0.00   0.00   0.01    -0.01  -0.01   0.00     0.00   0.00  -0.01
  58   1     0.01   0.01  -0.02     0.01   0.00  -0.01     0.00   0.01  -0.01
  59   1     0.01   0.01  -0.01     0.00   0.00  -0.01     0.01   0.01   0.00
  60   1    -0.01   0.01  -0.03    -0.01   0.00  -0.02     0.00   0.01  -0.01
  61   1     0.00   0.00   0.00    -0.02  -0.03   0.01    -0.03  -0.03   0.01
  62   1     0.00   0.00   0.00     0.01   0.00   0.02     0.01   0.01   0.02
  63   1     0.00   0.00   0.00    -0.11  -0.01   0.15    -0.16  -0.01   0.18
  64   1     0.00   0.00   0.00     0.11  -0.07  -0.18     0.14  -0.11  -0.23
  65   1     0.00   0.00   0.00     0.22   0.19   0.10     0.29   0.23   0.13
  66   1     0.00   0.00   0.00    -0.08   0.04  -0.01    -0.06   0.02  -0.02
  67   1     0.00   0.00   0.00    -0.05  -0.11  -0.03    -0.04  -0.10  -0.03
  68   1     0.00   0.00   0.00     0.05  -0.02   0.02     0.04  -0.03   0.02
  69   1     0.05   0.01  -0.04     0.04   0.04   0.00    -0.03  -0.05   0.02
  70   1     0.03   0.00  -0.02    -0.06  -0.01   0.04     0.04  -0.01   0.02
  71   1     0.05  -0.01   0.00     0.04  -0.08   0.02    -0.03   0.03   0.00
  72   1    -0.01  -0.01   0.01     0.02  -0.01   0.01     0.02   0.01   0.01
  73   1    -0.02   0.00   0.01     0.00   0.00  -0.01     0.04   0.00   0.00
  74   1    -0.01   0.00   0.01     0.02   0.02  -0.01     0.02  -0.02  -0.01
  75   1     0.03  -0.05  -0.03    -0.01   0.01   0.00     0.00  -0.01  -0.01
  76   1    -0.02  -0.03  -0.05     0.00   0.02   0.00    -0.01   0.00  -0.01
  77   1    -0.04   0.02  -0.03     0.00   0.00   0.00    -0.01   0.00  -0.01
  78   1     0.02   0.00  -0.02    -0.01   0.00   0.01     0.02   0.02   0.02
  79   1    -0.03  -0.01  -0.02    -0.01   0.00   0.00     0.00   0.00  -0.02
  80   1    -0.01   0.01  -0.01    -0.03   0.00   0.03     0.01   0.01   0.00
  81   1     0.00  -0.01  -0.02     0.02   0.00   0.04     0.01   0.01   0.00
  82   1     0.00  -0.02  -0.01     0.04   0.01   0.00     0.01   0.01   0.00
  83   1     0.00   0.00  -0.01    -0.03   0.00   0.02     0.00   0.01  -0.02
  84   1    -0.01   0.00   0.00     0.02   0.00   0.03     0.01   0.01   0.01
  85   1    -0.18   0.05  -0.06     0.02   0.00   0.01    -0.11   0.05  -0.02
  86   1     0.07  -0.07  -0.08     0.00   0.00   0.02     0.06  -0.05  -0.03
  87   1     0.01   0.09   0.15     0.01   0.00   0.00     0.02   0.08   0.12
  88   1     0.05  -0.22   0.20    -0.02   0.06  -0.05     0.10  -0.22   0.20
  89   1     0.12   0.06  -0.24    -0.03  -0.01   0.07     0.13   0.01  -0.24
  90   1    -0.23   0.21   0.11     0.05  -0.05  -0.02    -0.19   0.18   0.11
  91   1     0.29   0.01  -0.26     0.09   0.02  -0.11    -0.17  -0.03   0.17
  92   1     0.15  -0.08   0.39     0.04  -0.04   0.14    -0.06   0.08  -0.28
  93   1    -0.34   0.04  -0.06    -0.15   0.01  -0.03     0.29  -0.05   0.02
  94   1     0.04  -0.05  -0.03     0.02  -0.04  -0.02    -0.04   0.07   0.02
  95   1    -0.09   0.01   0.00    -0.06   0.00   0.00     0.15  -0.02  -0.01
  96   1     0.03   0.07   0.06     0.02   0.05   0.04    -0.03  -0.12  -0.07
  97   1    -0.04   0.05   0.04    -0.08   0.01   0.06     0.01  -0.02   0.00
  98   1    -0.02  -0.02  -0.02    -0.07  -0.03  -0.04     0.00   0.01   0.01
  99   1     0.05   0.02   0.02     0.00   0.00   0.01    -0.02   0.00   0.00
 100   1     0.10   0.06  -0.10     0.03   0.00   0.01    -0.02  -0.02   0.05
 101   1    -0.13  -0.02  -0.03    -0.03   0.01   0.03     0.04   0.02   0.03
 102   1     0.06  -0.02   0.14     0.02  -0.01   0.07    -0.01   0.01  -0.01
 103   1    -0.09  -0.02   0.00     0.34   0.07   0.01    -0.12  -0.02  -0.01
 104   1     0.03   0.05  -0.05    -0.14  -0.22   0.21     0.03   0.07  -0.08
 105   1     0.05  -0.05   0.07    -0.20   0.18  -0.24     0.05  -0.05   0.07
 106   1    -0.01  -0.02  -0.01     0.09   0.17   0.07    -0.02  -0.04  -0.03
 107   1     0.00   0.01   0.02     0.01  -0.08  -0.30    -0.01   0.02   0.06
 108   1     0.01   0.02  -0.02    -0.18  -0.19   0.10     0.04   0.05  -0.04
 109   1     0.01  -0.02   0.01     0.01   0.03  -0.04    -0.02   0.00   0.01
 110   1     0.02   0.00   0.02     0.01   0.00  -0.06    -0.01  -0.02  -0.01
 111   1     0.01   0.01   0.01     0.01  -0.03  -0.02     0.00  -0.03   0.01
 112   1     0.03   0.00   0.05    -0.02  -0.04  -0.08    -0.02  -0.03  -0.02
 113   1    -0.02  -0.02   0.04     0.06   0.08   0.00    -0.02  -0.03  -0.02
 114   1     0.03   0.00   0.01     0.00  -0.05   0.08    -0.04  -0.02  -0.01
                    52                     53                     54
                    ?A                     ?A                     ?A
 Frequencies --   240.0832               244.2609               248.6348
 Red. masses --     1.2944                 2.0838                 1.7706
 Frc consts  --     0.0440                 0.0733                 0.0645
 IR Inten    --     1.6176                 0.6834                 3.9587
 Raman Activ --     0.0000                 0.0000                 0.0000
 Depolar     --     0.0000                 0.0000                 0.0000
 Atom AN      X      Y      Z        X      Y      Z        X      Y      Z
   1   8     0.01   0.00   0.00    -0.02  -0.01   0.00     0.00   0.03   0.01
   2  12    -0.01   0.00   0.01     0.02  -0.02   0.00    -0.02  -0.04  -0.03
   3   8     0.00   0.02   0.00     0.00  -0.01  -0.01     0.01   0.00   0.00
   4   6     0.00   0.00  -0.01    -0.01  -0.01   0.01     0.00   0.01  -0.01
   5   7     0.01   0.00   0.00     0.01  -0.01   0.02    -0.02  -0.03  -0.01
   6   7    -0.01   0.00   0.02     0.01  -0.03  -0.01     0.00  -0.01   0.00
   7   8     0.01   0.00   0.00    -0.02  -0.01   0.01     0.01   0.02   0.00
   8   6     0.00  -0.01   0.00    -0.01  -0.02   0.03     0.01  -0.02   0.01
   9   6     0.00  -0.01   0.00    -0.01  -0.02   0.04     0.02   0.00   0.01
  10   6     0.00   0.00   0.00    -0.01  -0.03   0.00     0.01   0.00   0.00
  11   8     0.00   0.00  -0.01     0.00   0.02   0.00     0.01  -0.03   0.02
  12   6     0.00   0.00   0.00     0.00   0.02  -0.01     0.02  -0.02   0.01
  13   6    -0.01   0.01   0.01     0.01   0.00  -0.02     0.01  -0.01   0.00
  14   6     0.00   0.00  -0.01     0.00   0.01   0.01    -0.01  -0.01   0.00
  15   8    -0.01  -0.01  -0.01     0.01   0.04   0.01     0.04  -0.01   0.01
  16   6     0.00   0.00   0.00     0.00   0.01  -0.02    -0.01  -0.02   0.02
  17   8     0.00  -0.01   0.00     0.00   0.00   0.00    -0.01  -0.01   0.01
  18   6     0.00  -0.01   0.00     0.00   0.00   0.00    -0.01  -0.01  -0.01
  19   8     0.00  -0.01  -0.01    -0.01   0.00   0.00     0.00  -0.02  -0.03
  20   8     0.00   0.01   0.00     0.00   0.00   0.00     0.00   0.03  -0.01
  21   6    -0.01   0.00   0.01     0.00   0.00   0.00    -0.01   0.01   0.01
  22   6     0.00  -0.01   0.02     0.00   0.00   0.00    -0.01  -0.01   0.02
  23   6     0.00   0.00   0.00     0.00   0.00   0.00    -0.01   0.01   0.00
  24   8    -0.01   0.02  -0.03     0.00   0.00   0.01    -0.03   0.03  -0.02
  25   6     0.05   0.01   0.02    -0.01   0.00   0.00     0.06   0.04   0.03
  26   6    -0.01  -0.02   0.00     0.01   0.00   0.00     0.00  -0.01  -0.01
  27   6    -0.04   0.00   0.01     0.05   0.00  -0.03     0.04  -0.01  -0.01
  28   6     0.02   0.00  -0.01    -0.01   0.00   0.01    -0.06   0.02  -0.01
  29   6     0.01   0.01   0.00     0.01  -0.01   0.00    -0.02   0.01   0.00
  30   6    -0.01   0.00   0.01    -0.01   0.01  -0.01    -0.01   0.00   0.00
  31   6     0.01   0.01  -0.01     0.02  -0.02   0.00    -0.03   0.05   0.00
  32   6     0.01  -0.01   0.01     0.02  -0.02  -0.01    -0.04   0.02   0.03
  33   6     0.01  -0.02   0.02     0.02   0.00  -0.02    -0.03  -0.03   0.06
  34   6     0.01  -0.01   0.01     0.01   0.00  -0.01     0.00   0.00   0.02
  35   6     0.01   0.01   0.00     0.01  -0.01   0.00     0.00   0.03  -0.01
  36   6     0.00   0.01  -0.02     0.00  -0.02  -0.01     0.00   0.05   0.01
  37   6     0.00   0.02   0.01     0.00   0.00   0.01     0.00   0.03  -0.02
  38   6     0.00   0.00   0.00    -0.03   0.04  -0.01    -0.01   0.00   0.01
  39   6     0.00  -0.01   0.00     0.02   0.00  -0.01     0.00  -0.01   0.01
  40   6    -0.01  -0.01   0.00     0.08  -0.04  -0.01     0.00  -0.01   0.01
  41   6    -0.02   0.00   0.01     0.03   0.01   0.00    -0.01   0.00   0.01
  42   6    -0.02   0.00   0.01    -0.01   0.07   0.01    -0.01   0.01   0.01
  43   6     0.01   0.00   0.01    -0.04   0.04  -0.02     0.00   0.00   0.01
  44   6    -0.01   0.00  -0.01    -0.01   0.06   0.03    -0.01   0.00   0.00
  45   6     0.01  -0.02  -0.05    -0.01  -0.01  -0.01     0.01   0.01  -0.03
  46   6    -0.01   0.01  -0.02    -0.02   0.00  -0.02     0.03   0.01   0.01
  47   6     0.00   0.01   0.04    -0.01   0.00   0.01     0.01   0.02   0.01
  48   6    -0.03   0.02   0.01     0.01   0.01   0.02    -0.04   0.00  -0.05
  49   6     0.03   0.00  -0.02    -0.03  -0.01  -0.02     0.00  -0.01  -0.01
  50   6     0.00   0.00  -0.01     0.05   0.06   0.12     0.01   0.01   0.00
  51   6     0.01   0.00   0.01    -0.04   0.01   0.01     0.01   0.00   0.01
  52   6     0.02   0.02   0.02    -0.02   0.04  -0.10     0.01   0.01   0.00
  53   6    -0.01   0.00   0.01    -0.05  -0.01   0.00     0.04  -0.05   0.00
  54   6     0.00   0.01  -0.02    -0.05  -0.09  -0.02     0.01   0.01  -0.03
  55   1     0.00  -0.01  -0.01    -0.02  -0.02   0.03     0.03   0.00   0.02
  56   1    -0.01   0.01   0.00     0.02   0.00  -0.02     0.00  -0.01   0.00
  57   1     0.00   0.00  -0.01     0.01   0.01   0.01    -0.02  -0.01   0.02
  58   1     0.00   0.00   0.00     0.01   0.02  -0.02     0.00  -0.03   0.02
  59   1     0.00   0.00   0.00     0.02   0.01  -0.02    -0.05  -0.02   0.01
  60   1     0.01   0.00   0.01    -0.02   0.02  -0.04     0.01  -0.03   0.03
  61   1    -0.02  -0.02   0.01     0.01   0.01   0.01    -0.01  -0.01   0.02
  62   1     0.00   0.00   0.01     0.00   0.00   0.00     0.00   0.01   0.02
  63   1    -0.19  -0.02   0.16     0.09   0.01  -0.05     0.33   0.04  -0.04
  64   1     0.12  -0.14  -0.23    -0.03   0.07   0.09     0.00   0.26   0.15
  65   1     0.26   0.22   0.12    -0.08  -0.08  -0.03    -0.05  -0.14  -0.02
  66   1    -0.02  -0.01  -0.01    -0.04   0.05   0.01    -0.04   0.03   0.00
  67   1    -0.01  -0.04  -0.01    -0.01  -0.06  -0.04    -0.01  -0.07  -0.04
  68   1     0.00  -0.02   0.01     0.07   0.01   0.01     0.06  -0.01   0.02
  69   1    -0.08  -0.06   0.05     0.09   0.07  -0.07     0.12   0.11  -0.06
  70   1     0.01  -0.01   0.02    -0.02   0.01  -0.03    -0.11  -0.01   0.01
  71   1    -0.09   0.04  -0.02     0.10  -0.06   0.01     0.13  -0.15   0.03
  72   1     0.03   0.00   0.01    -0.02  -0.01   0.00    -0.07   0.01  -0.04
  73   1     0.02   0.00  -0.02    -0.02   0.00   0.02    -0.07   0.02  -0.03
  74   1     0.03   0.01  -0.02    -0.02  -0.01   0.02    -0.07   0.04   0.03
  75   1     0.00  -0.01   0.02     0.02  -0.01  -0.01    -0.04   0.01   0.04
  76   1     0.00  -0.05   0.03     0.02   0.01  -0.03    -0.03  -0.07   0.09
  77   1     0.01  -0.01   0.01     0.00   0.01  -0.02     0.01  -0.01   0.03
  78   1    -0.01   0.00  -0.02     0.00  -0.04  -0.04     0.00   0.08   0.05
  79   1     0.01   0.02   0.02     0.01   0.00   0.02     0.00   0.02  -0.02
  80   1     0.01  -0.02  -0.01     0.02  -0.02   0.01     0.00  -0.02   0.00
  81   1    -0.01  -0.01  -0.01     0.13  -0.11  -0.02     0.00  -0.02   0.01
  82   1    -0.02   0.00   0.01     0.04   0.00  -0.01    -0.01   0.00   0.01
  83   1     0.02   0.00   0.01    -0.03   0.03  -0.03     0.01   0.00   0.02
  84   1    -0.02   0.00  -0.03     0.00   0.05   0.04    -0.01  -0.01   0.00
  85   1     0.08  -0.06  -0.01    -0.08   0.00  -0.04     0.31  -0.06   0.09
  86   1    -0.04   0.04  -0.03     0.03  -0.05  -0.04    -0.17   0.22   0.08
  87   1    -0.02  -0.07  -0.14     0.00   0.02   0.05    -0.08  -0.17  -0.30
  88   1    -0.09   0.18  -0.16    -0.08   0.09  -0.09     0.11  -0.12   0.14
  89   1    -0.10   0.00   0.19    -0.06   0.02   0.09     0.09  -0.01  -0.16
  90   1     0.15  -0.13  -0.08     0.04  -0.07  -0.05    -0.08   0.13   0.08
  91   1     0.16   0.02  -0.13     0.01   0.00   0.00     0.06   0.01  -0.04
  92   1     0.07  -0.06   0.28     0.00  -0.02   0.03     0.04   0.01   0.07
  93   1    -0.23   0.06   0.01    -0.03   0.00   0.01    -0.04   0.04   0.00
  94   1     0.00  -0.04  -0.01     0.03  -0.01   0.00    -0.08  -0.02  -0.01
  95   1    -0.11   0.02   0.00    -0.03   0.01   0.03    -0.02   0.00  -0.08
  96   1     0.00   0.09   0.03     0.03   0.04   0.04    -0.06  -0.02  -0.09
  97   1     0.09  -0.05  -0.08    -0.04  -0.03   0.02    -0.05   0.02   0.03
  98   1     0.07   0.05   0.05    -0.04  -0.05  -0.03    -0.03  -0.07  -0.04
  99   1    -0.06  -0.02  -0.03    -0.01   0.01  -0.07     0.07   0.01  -0.02
 100   1    -0.06  -0.03   0.05    -0.11  -0.16   0.34    -0.04  -0.04   0.07
 101   1     0.09   0.02   0.00     0.38   0.17   0.23     0.12   0.02   0.02
 102   1    -0.04   0.03  -0.10    -0.05   0.15  -0.15    -0.03   0.05  -0.09
 103   1    -0.18  -0.03   0.00    -0.19  -0.05   0.00    -0.03   0.00   0.01
 104   1     0.09   0.14  -0.11     0.03   0.11  -0.07     0.03   0.04  -0.02
 105   1     0.12  -0.10   0.13     0.05  -0.07   0.14     0.04  -0.02   0.03
 106   1    -0.03  -0.09  -0.04     0.06   0.05  -0.09     0.01  -0.02  -0.01
 107   1    -0.01   0.06   0.16    -0.02   0.04  -0.18     0.00   0.02   0.04
 108   1     0.11   0.12  -0.06    -0.09   0.04  -0.11     0.03   0.03  -0.02
 109   1    -0.01   0.00   0.00    -0.05   0.03  -0.01     0.04  -0.07   0.01
 110   1    -0.01   0.00   0.02    -0.07  -0.03  -0.02     0.06  -0.04  -0.02
 111   1    -0.01   0.01   0.00    -0.04  -0.03   0.01     0.04  -0.08   0.01
 112   1     0.00   0.03   0.02    -0.06  -0.17  -0.13     0.00   0.03  -0.03
 113   1    -0.01  -0.04  -0.03     0.01  -0.02  -0.03     0.04   0.01  -0.04
 114   1     0.00   0.03  -0.07    -0.11  -0.14   0.08     0.02   0.02  -0.04
                    55                     56                     57
                    ?A                     ?A                     ?A
 Frequencies --   249.6779               251.4081               258.5537
 Red. masses --     2.4091                 1.5876                 2.5441
 Frc consts  --     0.0885                 0.0591                 0.1002
 IR Inten    --     4.4794                 1.5261                 9.4643
 Raman Activ --     0.0000                 0.0000                 0.0000
 Depolar     --     0.0000                 0.0000                 0.0000
 Atom AN      X      Y      Z        X      Y      Z        X      Y      Z
   1   8     0.00  -0.06  -0.02     0.01  -0.02  -0.01    -0.01  -0.03  -0.01
   2  12    -0.02  -0.03   0.10    -0.02   0.01  -0.03     0.08   0.02  -0.04
   3   8    -0.04  -0.04   0.01    -0.01  -0.01   0.02    -0.01   0.00   0.03
   4   6     0.00  -0.01   0.01     0.00   0.00   0.00    -0.01  -0.01   0.00
   5   7     0.00  -0.03   0.02     0.01   0.02   0.00     0.01   0.03  -0.06
   6   7     0.02  -0.01  -0.01     0.00   0.00   0.00     0.01  -0.04   0.00
   7   8    -0.01  -0.03   0.00     0.00  -0.01   0.00    -0.02  -0.02   0.00
   8   6     0.00  -0.03   0.00     0.00   0.01   0.00     0.03   0.04  -0.03
   9   6    -0.01  -0.02  -0.02     0.00   0.01   0.01     0.04   0.00   0.02
  10   6     0.00  -0.02  -0.01     0.00   0.01   0.00     0.04  -0.03   0.01
  11   8    -0.02   0.08  -0.03     0.00   0.02  -0.01    -0.01   0.03  -0.02
  12   6    -0.04   0.04  -0.02    -0.01   0.02   0.01    -0.02   0.01   0.01
  13   6    -0.02   0.00   0.00    -0.01   0.01   0.02    -0.01   0.01   0.04
  14   6     0.02   0.03  -0.01     0.01   0.01  -0.01     0.01   0.02  -0.01
  15   8    -0.10   0.02  -0.03    -0.04   0.01   0.01    -0.05  -0.02  -0.03
  16   6     0.03   0.03  -0.03     0.01   0.01   0.00     0.01   0.02  -0.02
  17   8     0.01   0.00   0.00    -0.01  -0.03  -0.03     0.00   0.00  -0.03
  18   6     0.01   0.00  -0.01     0.01  -0.02   0.00     0.01   0.00   0.01
  19   8     0.02   0.01   0.01     0.03  -0.02  -0.01     0.02   0.01   0.04
  20   8     0.00   0.00   0.01     0.00   0.03  -0.01     0.01  -0.01   0.01
  21   6     0.00   0.01   0.00    -0.03  -0.01   0.01     0.00  -0.01  -0.01
  22   6     0.00   0.00   0.00    -0.01  -0.04   0.02     0.00   0.00  -0.02
  23   6     0.01   0.01   0.00     0.01   0.00   0.01     0.01  -0.01   0.00
  24   8     0.00   0.01   0.00    -0.07   0.03  -0.04    -0.01  -0.01   0.00
  25   6     0.00   0.00   0.00     0.09   0.04   0.04    -0.01   0.00  -0.01
  26   6     0.02   0.01   0.00     0.00  -0.04  -0.01    -0.01   0.00   0.00
  27   6    -0.07   0.01   0.00    -0.01   0.00   0.03    -0.04  -0.01   0.05
  28   6     0.12  -0.02   0.02     0.05  -0.01   0.00     0.08  -0.01   0.00
  29   6     0.00   0.00   0.00     0.01   0.00   0.00     0.01   0.00  -0.02
  30   6     0.03  -0.01  -0.02     0.00   0.00   0.00    -0.03   0.00   0.01
  31   6     0.00   0.02  -0.01     0.01  -0.02   0.00    -0.02  -0.01   0.02
  32   6    -0.01  -0.01   0.01     0.01  -0.01  -0.01    -0.01   0.02   0.02
  33   6    -0.01  -0.05   0.03     0.01   0.00  -0.02     0.01   0.06   0.01
  34   6     0.00  -0.01   0.01     0.00   0.00  -0.01     0.03   0.00   0.00
  35   6     0.00   0.02   0.00     0.00  -0.01   0.00     0.01  -0.04  -0.01
  36   6     0.00   0.02  -0.02     0.00  -0.02   0.00    -0.02  -0.01   0.04
  37   6     0.00   0.03   0.00     0.00  -0.01   0.01     0.00  -0.04  -0.01
  38   6     0.01   0.01  -0.02     0.01  -0.01   0.00    -0.04   0.00   0.02
  39   6     0.00   0.03   0.00    -0.01   0.01   0.00    -0.01  -0.04   0.00
  40   6     0.02   0.03  -0.01    -0.02   0.02   0.01     0.00  -0.07   0.00
  41   6     0.04   0.01  -0.01    -0.01   0.01   0.00    -0.04  -0.01   0.01
  42   6     0.04   0.00  -0.01     0.00  -0.01   0.00    -0.06   0.01   0.01
  43   6    -0.01   0.00  -0.03     0.01  -0.01   0.00    -0.02   0.02   0.04
  44   6     0.02   0.01   0.01     0.00  -0.01  -0.01    -0.03   0.01  -0.02
  45   6    -0.01  -0.01  -0.06     0.00  -0.01   0.01    -0.01   0.04   0.11
  46   6     0.00   0.02  -0.02    -0.01   0.00   0.00     0.01  -0.03   0.01
  47   6     0.03   0.02   0.04    -0.01  -0.01   0.01    -0.07  -0.02  -0.07
  48   6    -0.01   0.01  -0.02     0.01   0.00   0.02    -0.02  -0.02   0.00
  49   6    -0.01   0.02   0.02     0.00   0.00   0.00     0.01  -0.01  -0.05
  50   6     0.00   0.00   0.04    -0.01  -0.01  -0.01     0.00   0.02  -0.01
  51   6    -0.03   0.00  -0.03     0.01   0.00  -0.01     0.02   0.00   0.07
  52   6    -0.03  -0.02  -0.04     0.01   0.00   0.03     0.01   0.04   0.00
  53   6     0.03  -0.04   0.03    -0.02   0.03  -0.01    -0.01   0.07  -0.04
  54   6     0.00  -0.05   0.04    -0.01   0.01  -0.01     0.05  -0.01  -0.03
  55   1     0.00  -0.01  -0.02    -0.01   0.01   0.01     0.00  -0.01   0.04
  56   1     0.01   0.00  -0.01     0.00   0.00   0.03     0.01   0.01   0.03
  57   1     0.05   0.03  -0.04     0.01   0.01  -0.02     0.02   0.01  -0.02
  58   1     0.00   0.06  -0.04     0.00   0.02  -0.01     0.00   0.03  -0.03
  59   1     0.10   0.04   0.00     0.03   0.01   0.00     0.05   0.02  -0.01
  60   1     0.00   0.07  -0.04     0.00   0.02  -0.01    -0.01   0.04  -0.04
  61   1     0.01   0.00   0.00    -0.02  -0.06   0.01     0.01  -0.01  -0.02
  62   1     0.01   0.01   0.00     0.02   0.01   0.03     0.01   0.00   0.00
  63   1     0.08   0.00  -0.04     0.52   0.04  -0.06     0.02   0.00  -0.01
  64   1    -0.03   0.05   0.07    -0.01   0.40   0.24    -0.02   0.02   0.03
  65   1    -0.06  -0.07  -0.02    -0.09  -0.23  -0.04    -0.05  -0.01  -0.02
  66   1    -0.02   0.06   0.02    -0.13   0.09  -0.01    -0.02   0.00  -0.01
  67   1     0.01  -0.04  -0.03    -0.06  -0.20  -0.08    -0.02  -0.01   0.02
  68   1     0.09   0.03   0.02     0.15  -0.02   0.05    -0.02   0.00   0.00
  69   1    -0.17  -0.14   0.08    -0.06  -0.08   0.05    -0.06  -0.03   0.08
  70   1     0.10   0.00  -0.03     0.08  -0.01   0.03    -0.03  -0.01   0.07
  71   1    -0.18   0.17  -0.05    -0.06   0.07   0.01    -0.07   0.00   0.01
  72   1     0.13   0.01   0.07     0.06  -0.01   0.03     0.12  -0.02   0.06
  73   1     0.17  -0.02   0.06     0.06  -0.01   0.02     0.08  -0.01   0.02
  74   1     0.13  -0.09  -0.05     0.06  -0.03  -0.03     0.12  -0.02  -0.06
  75   1    -0.01  -0.02   0.02     0.02  -0.01  -0.01    -0.02   0.03   0.02
  76   1    -0.02  -0.08   0.04     0.01   0.01  -0.03     0.02   0.11   0.01
  77   1     0.00  -0.01   0.01    -0.01   0.00  -0.01     0.05   0.00   0.01
  78   1     0.00   0.03  -0.01     0.00  -0.03  -0.02    -0.01   0.00   0.05
  79   1     0.00   0.02   0.00     0.00   0.00   0.01     0.01  -0.02   0.01
  80   1    -0.02   0.05   0.01    -0.01   0.01   0.00     0.01  -0.06  -0.01
  81   1     0.02   0.03   0.00    -0.03   0.04   0.01     0.04  -0.11  -0.02
  82   1     0.04   0.00  -0.01    -0.01   0.01   0.00    -0.04  -0.01   0.01
  83   1    -0.02   0.01  -0.05     0.01  -0.01   0.00    -0.01   0.01   0.06
  84   1     0.03   0.03   0.03     0.00   0.00   0.00    -0.05   0.00  -0.06
  85   1     0.28  -0.08   0.06    -0.21   0.02  -0.07     0.23   0.09   0.15
  86   1    -0.21   0.23   0.05     0.14  -0.16  -0.08    -0.17   0.18   0.27
  87   1    -0.13  -0.21  -0.32     0.08   0.13   0.18    -0.09  -0.09  -0.03
  88   1     0.03  -0.06   0.05    -0.06   0.08  -0.08     0.11  -0.19   0.16
  89   1     0.05   0.03  -0.12    -0.06  -0.01   0.12     0.11  -0.02  -0.22
  90   1    -0.08   0.09   0.01     0.08  -0.08  -0.03    -0.16   0.11   0.06
  91   1     0.05  -0.02   0.03     0.00   0.00  -0.01    -0.03   0.07  -0.13
  92   1     0.04   0.02   0.07     0.00  -0.01   0.02    -0.07  -0.08  -0.02
  93   1     0.02   0.05   0.05    -0.02   0.00   0.00    -0.18  -0.04  -0.11
  94   1    -0.04   0.02   0.01     0.02   0.00   0.00     0.02  -0.09  -0.03
  95   1     0.02   0.01  -0.03    -0.01   0.00   0.03    -0.12  -0.02  -0.01
  96   1    -0.03  -0.02  -0.05     0.02   0.02   0.03     0.02   0.06   0.04
  97   1     0.03  -0.03  -0.01     0.02  -0.02  -0.02     0.12  -0.11  -0.15
  98   1     0.01   0.09   0.04     0.01   0.03   0.02     0.09   0.08   0.06
  99   1    -0.09   0.00   0.04    -0.04  -0.01   0.00    -0.14  -0.03  -0.08
 100   1     0.06   0.02  -0.02     0.01   0.02  -0.04    -0.03  -0.03   0.04
 101   1    -0.11   0.00   0.04    -0.05  -0.02  -0.02     0.10   0.04   0.01
 102   1     0.04  -0.05   0.14     0.00  -0.03   0.02    -0.02   0.07  -0.08
 103   1     0.04   0.02  -0.03    -0.01   0.01   0.00    -0.03  -0.05   0.05
 104   1    -0.07  -0.07   0.00     0.01   0.01  -0.02     0.06   0.07   0.07
 105   1    -0.09   0.06  -0.08     0.02  -0.01   0.00     0.08  -0.06   0.12
 106   1     0.00   0.05   0.00    -0.02  -0.03   0.01     0.04   0.02  -0.01
 107   1     0.00  -0.05  -0.12     0.00   0.01   0.09    -0.01   0.07  -0.01
 108   1    -0.09  -0.07   0.01     0.05   0.03   0.01     0.02   0.06  -0.02
 109   1     0.03  -0.07   0.04    -0.02   0.04  -0.02    -0.01   0.10  -0.05
 110   1     0.05  -0.02   0.04    -0.04   0.01  -0.01    -0.04   0.05  -0.03
 111   1     0.03  -0.03   0.03    -0.03   0.03  -0.01    -0.01   0.08  -0.04
 112   1     0.02  -0.10   0.01     0.00   0.02   0.01     0.02   0.01  -0.05
 113   1    -0.03   0.00   0.07    -0.01  -0.02  -0.01     0.08  -0.02  -0.05
 114   1    -0.01  -0.09   0.10    -0.01   0.02  -0.03     0.04  -0.01  -0.04
                    58                     59                     60
                    ?A                     ?A                     ?A
 Frequencies --   260.7705               267.7935               271.8105
 Red. masses --     2.2394                 3.3619                 1.5880
 Frc consts  --     0.0897                 0.1420                 0.0691
 IR Inten    --     0.5369                 5.3533                 5.8081
 Raman Activ --     0.0000                 0.0000                 0.0000
 Depolar     --     0.0000                 0.0000                 0.0000
 Atom AN      X      Y      Z        X      Y      Z        X      Y      Z
   1   8     0.00  -0.01   0.00    -0.01   0.01   0.01    -0.02   0.01   0.01
   2  12     0.00  -0.02   0.02     0.08   0.01   0.13     0.02   0.02   0.05
   3   8    -0.01  -0.02   0.01     0.00  -0.02  -0.06     0.02   0.03  -0.03
   4   6     0.00   0.00   0.00     0.00   0.00   0.01    -0.01   0.00   0.01
   5   7     0.00  -0.02   0.00     0.02   0.03   0.04     0.01   0.00   0.01
   6   7     0.00  -0.02  -0.01     0.03   0.00   0.07     0.00   0.00   0.02
   7   8    -0.01  -0.01   0.00    -0.01   0.00   0.01    -0.02   0.00   0.01
   8   6     0.01  -0.02   0.00     0.01   0.01  -0.01     0.00   0.00   0.00
   9   6     0.02  -0.01   0.00    -0.01  -0.01  -0.06     0.00  -0.01  -0.02
  10   6     0.02  -0.02  -0.01     0.02  -0.01   0.00     0.00  -0.01   0.00
  11   8     0.00   0.02  -0.01     0.00   0.01   0.01     0.00  -0.01   0.00
  12   6    -0.01   0.01   0.00     0.01   0.00  -0.05     0.02   0.01  -0.01
  13   6     0.00   0.00   0.00     0.00  -0.01  -0.08     0.01   0.02  -0.03
  14   6     0.00   0.01   0.00     0.00   0.00   0.01     0.00  -0.01   0.00
  15   8    -0.02   0.01   0.00     0.05   0.01  -0.04     0.05   0.00  -0.03
  16   6     0.00   0.01  -0.01     0.00   0.00  -0.01    -0.01   0.00  -0.01
  17   8     0.01   0.01   0.00    -0.05  -0.04   0.07     0.00   0.01  -0.02
  18   6     0.00   0.00   0.00    -0.03   0.01   0.00     0.00   0.01   0.00
  19   8     0.00   0.00   0.00     0.05   0.01   0.01    -0.04   0.01   0.02
  20   8     0.00   0.00   0.01    -0.03  -0.02   0.00     0.01   0.01  -0.02
  21   6     0.01   0.01   0.00    -0.04  -0.04   0.03     0.01   0.00   0.00
  22   6     0.00   0.02  -0.01    -0.03  -0.04   0.06     0.01   0.00   0.02
  23   6     0.00   0.00   0.00    -0.04   0.01  -0.02     0.02  -0.03   0.02
  24   8     0.01   0.00   0.02    -0.04   0.02  -0.07     0.02  -0.01   0.01
  25   6    -0.03   0.00  -0.01     0.13   0.03   0.04    -0.05  -0.04   0.02
  26   6     0.00   0.02   0.00     0.00   0.01  -0.01     0.06  -0.09  -0.02
  27   6    -0.01   0.01   0.00    -0.03   0.02  -0.09    -0.02   0.00  -0.02
  28   6     0.03   0.00   0.00    -0.05   0.00   0.01    -0.02   0.01   0.00
  29   6     0.00   0.02  -0.01     0.01   0.01   0.01     0.01   0.00   0.00
  30   6     0.00  -0.01   0.00     0.00   0.02   0.02    -0.01   0.00   0.00
  31   6    -0.01   0.06   0.01     0.02  -0.01   0.01     0.01   0.00   0.00
  32   6    -0.02   0.05   0.02     0.02   0.00  -0.02     0.01   0.00   0.00
  33   6    -0.04  -0.04   0.06    -0.01   0.00  -0.03     0.00   0.00  -0.01
  34   6    -0.02  -0.04   0.04    -0.03  -0.01  -0.01    -0.01   0.00   0.00
  35   6    -0.01   0.02  -0.03    -0.03   0.00   0.00     0.00   0.00   0.00
  36   6     0.01   0.05   0.04     0.00  -0.01   0.01     0.00   0.00   0.01
  37   6    -0.01   0.02  -0.07    -0.02  -0.01  -0.02     0.00  -0.01  -0.01
  38   6    -0.01   0.00   0.00     0.02   0.04   0.00     0.01   0.00   0.00
  39   6     0.00  -0.01   0.01     0.03   0.01  -0.06    -0.02   0.02   0.00
  40   6     0.01  -0.02   0.01     0.00  -0.03  -0.07    -0.03   0.03   0.00
  41   6     0.01   0.00   0.00    -0.05  -0.01  -0.03    -0.03   0.01   0.00
  42   6     0.00   0.00   0.00    -0.05   0.00   0.01    -0.02   0.00   0.00
  43   6    -0.01   0.00   0.00     0.00   0.02   0.01     0.01  -0.01   0.00
  44   6     0.00   0.01   0.00    -0.03   0.01  -0.02    -0.01   0.01  -0.01
  45   6     0.08   0.03   0.04     0.00   0.01   0.03     0.00   0.01   0.02
  46   6     0.02   0.01   0.13    -0.03   0.02   0.04    -0.01   0.01   0.02
  47   6     0.00   0.02  -0.09     0.01  -0.01  -0.05     0.00   0.00  -0.03
  48   6    -0.08  -0.05  -0.15     0.02  -0.03  -0.03     0.00  -0.02  -0.02
  49   6     0.00   0.00   0.00     0.04   0.01  -0.04     0.01   0.00  -0.02
  50   6     0.00   0.00   0.02     0.00   0.03  -0.03     0.00   0.01   0.00
  51   6     0.00   0.01   0.00    -0.01  -0.05   0.09     0.01   0.00  -0.01
  52   6     0.00   0.01  -0.02    -0.03  -0.02   0.03     0.00  -0.01   0.03
  53   6     0.04  -0.04   0.01     0.01   0.03   0.02     0.00   0.00   0.01
  54   6     0.02  -0.02   0.00     0.02  -0.01   0.03     0.00   0.00   0.01
  55   1     0.02  -0.01   0.00    -0.04  -0.02  -0.09    -0.01  -0.01  -0.03
  56   1     0.01   0.00   0.01     0.01  -0.01  -0.07     0.00   0.02  -0.04
  57   1     0.01   0.01  -0.01     0.01   0.00   0.01     0.00  -0.01   0.01
  58   1     0.00   0.01  -0.01     0.01   0.00   0.00     0.01   0.00  -0.01
  59   1     0.02   0.01   0.00     0.00   0.00  -0.01    -0.01   0.00  -0.02
  60   1     0.00   0.02  -0.01    -0.01   0.00  -0.02    -0.02   0.00  -0.02
  61   1     0.01   0.02  -0.01    -0.06  -0.02   0.04     0.02  -0.02   0.03
  62   1     0.00   0.01  -0.01    -0.06  -0.01  -0.03     0.00  -0.03   0.08
  63   1    -0.06   0.00  -0.02     0.24   0.00   0.07    -0.10  -0.03  -0.02
  64   1    -0.02  -0.04   0.00     0.12   0.17  -0.06    -0.03  -0.11   0.03
  65   1    -0.03   0.01  -0.02     0.20  -0.01   0.08    -0.05  -0.06   0.01
  66   1     0.02  -0.01   0.00     0.17  -0.17  -0.03    -0.29   0.27   0.07
  67   1     0.01   0.05   0.02     0.09   0.23   0.05    -0.07  -0.55  -0.26
  68   1    -0.04   0.01  -0.01    -0.21  -0.04  -0.05     0.55  -0.02   0.14
  69   1    -0.03  -0.03   0.02    -0.02   0.06  -0.06    -0.02   0.03   0.00
  70   1     0.03   0.01  -0.01    -0.06   0.03  -0.12    -0.06   0.00  -0.01
  71   1    -0.03   0.05   0.00    -0.03   0.02  -0.10    -0.03  -0.03  -0.05
  72   1     0.02   0.02   0.01    -0.08   0.01  -0.04    -0.03   0.01  -0.02
  73   1     0.05   0.00   0.01    -0.05   0.00   0.01    -0.03   0.01  -0.02
  74   1     0.02  -0.02  -0.01    -0.09   0.00   0.05    -0.04   0.02   0.02
  75   1    -0.02   0.07   0.01     0.03   0.00  -0.04     0.01   0.00  -0.01
  76   1    -0.04  -0.09   0.09    -0.02  -0.01  -0.06     0.00   0.00  -0.01
  77   1     0.00  -0.09   0.06    -0.05  -0.02  -0.01    -0.01  -0.01   0.00
  78   1     0.00   0.05   0.08     0.00  -0.02  -0.01     0.00   0.00   0.00
  79   1    -0.01   0.01  -0.07    -0.03  -0.02  -0.04    -0.01  -0.01  -0.01
  80   1    -0.01  -0.02   0.01     0.06   0.01  -0.09    -0.02   0.04   0.00
  81   1     0.02  -0.03   0.01     0.01  -0.06  -0.12    -0.05   0.04  -0.01
  82   1     0.01   0.00   0.01    -0.08  -0.03  -0.03    -0.02   0.00   0.00
  83   1    -0.01   0.00   0.01    -0.01   0.03  -0.03     0.01   0.00  -0.01
  84   1     0.00   0.01   0.00    -0.05   0.01  -0.06    -0.02   0.01  -0.02
  85   1    -0.20   0.04  -0.05     0.04   0.03   0.03     0.04   0.02   0.03
  86   1     0.28  -0.22  -0.06    -0.04   0.04   0.07    -0.03   0.04   0.05
  87   1     0.22   0.24   0.24    -0.02  -0.02   0.02    -0.02  -0.02  -0.01
  88   1    -0.07   0.10   0.02    -0.10   0.06  -0.02    -0.03   0.01   0.01
  89   1    -0.10  -0.06   0.32    -0.06   0.03   0.12    -0.01   0.01   0.04
  90   1     0.22  -0.08   0.14     0.02  -0.02   0.03     0.00   0.01   0.02
  91   1     0.06   0.06  -0.16    -0.03  -0.01   0.00    -0.01   0.01  -0.03
  92   1     0.02   0.02  -0.03     0.00   0.04  -0.12     0.00   0.01  -0.04
  93   1    -0.08   0.00  -0.13     0.09  -0.04  -0.05     0.01  -0.02  -0.04
  94   1    -0.13  -0.14  -0.08     0.01  -0.01  -0.02     0.00  -0.02  -0.01
  95   1    -0.08  -0.03  -0.25     0.06  -0.03  -0.04     0.00  -0.01  -0.03
  96   1    -0.11  -0.08  -0.19     0.00  -0.08  -0.02     0.00  -0.02  -0.02
  97   1     0.02  -0.02  -0.02     0.11  -0.03  -0.11     0.04  -0.02  -0.04
  98   1     0.01   0.03   0.02     0.10   0.03   0.04     0.03   0.02   0.02
  99   1    -0.04   0.00   0.00    -0.02   0.00  -0.07    -0.02   0.00  -0.02
 100   1     0.00  -0.01   0.02     0.00   0.01  -0.02     0.00  -0.01   0.01
 101   1     0.01   0.01   0.03     0.05   0.02  -0.04     0.03   0.01   0.00
 102   1     0.00   0.00   0.02     0.00   0.07  -0.05     0.00   0.03  -0.02
 103   1    -0.03   0.01   0.00     0.12  -0.11   0.05     0.02   0.01   0.00
 104   1     0.02   0.04  -0.02    -0.07  -0.13   0.21     0.00  -0.02  -0.01
 105   1     0.02  -0.01   0.01    -0.09   0.03   0.07     0.00   0.01  -0.02
 106   1     0.02   0.00  -0.03    -0.03   0.09   0.09    -0.03  -0.01   0.03
 107   1    -0.01   0.02  -0.03     0.01  -0.08  -0.08     0.01  -0.02   0.04
 108   1     0.00   0.03  -0.04    -0.12  -0.12   0.12     0.02  -0.02   0.03
 109   1     0.05  -0.07   0.01     0.02  -0.01   0.03     0.01  -0.01   0.01
 110   1     0.07  -0.02   0.00     0.02   0.04   0.06     0.01   0.01   0.02
 111   1     0.04  -0.05   0.01     0.01   0.06   0.01     0.00   0.01   0.01
 112   1     0.02  -0.02  -0.01     0.03  -0.03   0.02     0.01   0.00   0.02
 113   1     0.02  -0.01   0.00     0.01   0.03   0.05     0.00   0.00   0.01
 114   1     0.02  -0.02   0.00     0.04  -0.04   0.07     0.02   0.00   0.01
                    61                     62                     63
                    ?A                     ?A                     ?A
 Frequencies --   276.4433               278.0509               286.0581
 Red. masses --     2.9115                 3.2322                 3.4644
 Frc consts  --     0.1311                 0.1472                 0.1670
 IR Inten    --     4.1838                 7.8954                 1.6961
 Raman Activ --     0.0000                 0.0000                 0.0000
 Depolar     --     0.0000                 0.0000                 0.0000
 Atom AN      X      Y      Z        X      Y      Z        X      Y      Z
   1   8     0.02   0.01   0.00     0.02   0.01   0.01    -0.08   0.01   0.03
   2  12    -0.06   0.00   0.02     0.00   0.05   0.10     0.02   0.02   0.05
   3   8    -0.02  -0.01   0.00    -0.02  -0.03  -0.02     0.09   0.06  -0.04
   4   6     0.02   0.00  -0.01     0.02   0.00   0.00    -0.06  -0.02   0.03
   5   7    -0.01  -0.04  -0.10     0.03   0.03  -0.02    -0.01  -0.03  -0.02
   6   7     0.02   0.04   0.09    -0.05   0.00  -0.06    -0.01   0.02   0.01
   7   8     0.03   0.01   0.00     0.03   0.01   0.00    -0.11   0.00   0.04
   8   6    -0.03  -0.03  -0.03     0.01   0.02  -0.01    -0.01  -0.02   0.00
   9   6    -0.02  -0.01   0.01     0.01   0.01   0.01    -0.01   0.00   0.00
  10   6    -0.02   0.02   0.04    -0.02   0.01  -0.02    -0.02   0.02   0.00
  11   8     0.00  -0.01   0.00     0.00  -0.01   0.00     0.03  -0.01   0.01
  12   6    -0.01  -0.02   0.00    -0.01  -0.03  -0.03     0.08   0.05  -0.01
  13   6    -0.02  -0.01  -0.01    -0.02  -0.03  -0.05     0.08   0.07  -0.01
  14   6     0.00  -0.01   0.00     0.00   0.00   0.01     0.00  -0.02  -0.01
  15   8    -0.02   0.00   0.02    -0.01  -0.01  -0.01     0.14   0.00  -0.09
  16   6     0.01  -0.01   0.02     0.01  -0.01   0.02    -0.03   0.02  -0.07
  17   8     0.00   0.00   0.02    -0.03  -0.02   0.05     0.03  -0.02  -0.06
  18   6    -0.01   0.00  -0.01    -0.02   0.02  -0.01     0.04  -0.02   0.04
  19   8     0.00   0.00  -0.02     0.03   0.02   0.01     0.01  -0.01   0.06
  20   8     0.00   0.01  -0.01    -0.02  -0.02   0.00     0.04   0.01   0.02
  21   6     0.00   0.00   0.00    -0.02  -0.02   0.02     0.01  -0.01  -0.01
  22   6     0.00   0.00   0.02    -0.02  -0.02   0.04     0.02  -0.03  -0.04
  23   6     0.00   0.01  -0.01    -0.02   0.01  -0.02     0.03  -0.02   0.05
  24   8     0.01   0.01   0.00    -0.01   0.01  -0.04    -0.05   0.00   0.00
  25   6     0.01  -0.01   0.01     0.05  -0.01   0.02     0.02  -0.01  -0.01
  26   6     0.04   0.01  -0.01     0.04   0.02  -0.02    -0.15  -0.03   0.03
  27   6     0.01   0.01  -0.01     0.00   0.02  -0.06    -0.06  -0.02   0.02
  28   6    -0.02  -0.01   0.00    -0.05   0.00   0.01    -0.02   0.02  -0.03
  29   6     0.02  -0.02  -0.05     0.03   0.00  -0.02    -0.01  -0.01  -0.01
  30   6     0.02   0.02   0.03    -0.02  -0.03  -0.03     0.00   0.00   0.00
  31   6    -0.03   0.00  -0.01     0.02  -0.02   0.01    -0.02   0.01  -0.01
  32   6    -0.01   0.03   0.06     0.03   0.00   0.01    -0.02   0.02   0.03
  33   6     0.07   0.04   0.08     0.05   0.03   0.00     0.01   0.01   0.04
  34   6     0.12   0.00   0.04     0.05   0.00   0.00     0.03   0.01   0.02
  35   6     0.09  -0.04  -0.02     0.04  -0.03  -0.01     0.02  -0.01   0.00
  36   6    -0.01   0.00   0.00     0.00  -0.02   0.01    -0.01   0.01  -0.01
  37   6     0.05  -0.02   0.00     0.02  -0.03  -0.01     0.01   0.00   0.00
  38   6     0.06   0.05  -0.02    -0.04  -0.07  -0.01     0.00  -0.01  -0.01
  39   6     0.04   0.06  -0.06    -0.05  -0.03   0.08     0.01  -0.01   0.00
  40   6    -0.01   0.04  -0.07     0.00   0.01   0.10     0.01   0.01   0.01
  41   6    -0.02   0.00  -0.03     0.06   0.00   0.05     0.02   0.00   0.01
  42   6    -0.01  -0.01   0.02     0.05  -0.01  -0.01     0.03  -0.02   0.00
  43   6     0.02   0.01  -0.03    -0.02  -0.05  -0.03    -0.02   0.00  -0.03
  44   6     0.00   0.00   0.01     0.03  -0.01   0.02     0.02  -0.02   0.02
  45   6     0.02   0.00   0.01    -0.01   0.02   0.06     0.00  -0.01  -0.03
  46   6     0.06  -0.05  -0.04    -0.02   0.00   0.02     0.03  -0.02  -0.05
  47   6    -0.10   0.00  -0.01    -0.06  -0.02  -0.07    -0.02   0.00   0.00
  48   6    -0.07   0.01   0.00    -0.03  -0.03  -0.02    -0.01   0.00   0.00
  49   6     0.06   0.02   0.02    -0.04   0.00   0.05     0.01   0.02   0.06
  50   6     0.01   0.01   0.00     0.00  -0.03   0.05    -0.01  -0.03   0.01
  51   6    -0.05  -0.03   0.00    -0.01   0.07  -0.16    -0.04   0.02  -0.06
  52   6    -0.04  -0.06   0.01     0.03   0.02  -0.07    -0.01   0.00  -0.06
  53   6    -0.06   0.01   0.02    -0.04   0.07  -0.01     0.01  -0.04   0.02
  54   6    -0.05  -0.02   0.01     0.00   0.05   0.00    -0.02   0.02   0.01
  55   1     0.00  -0.01   0.01     0.01   0.01   0.04     0.01   0.01   0.00
  56   1    -0.03  -0.01   0.01    -0.02  -0.03  -0.03     0.09   0.08  -0.07
  57   1     0.00  -0.01   0.00     0.00   0.00   0.01     0.01  -0.02   0.00
  58   1     0.00  -0.01   0.02     0.01  -0.01   0.02     0.05   0.02  -0.07
  59   1    -0.01  -0.01   0.02     0.00  -0.01   0.02     0.00   0.02  -0.09
  60   1     0.03  -0.02   0.04     0.02  -0.02   0.03    -0.08   0.03  -0.13
  61   1     0.00   0.00   0.01    -0.03  -0.01   0.03     0.02  -0.04  -0.04
  62   1    -0.01   0.00   0.00    -0.04  -0.01  -0.02     0.07   0.01   0.00
  63   1    -0.02  -0.01   0.01     0.06  -0.01   0.03     0.13  -0.01  -0.03
  64   1     0.01  -0.02  -0.02     0.06   0.02  -0.05    -0.01   0.08   0.07
  65   1     0.03   0.00   0.02     0.12  -0.01   0.06    -0.06  -0.05  -0.05
  66   1     0.02   0.03   0.03     0.09  -0.04   0.02    -0.07  -0.11  -0.12
  67   1     0.04  -0.01  -0.05     0.09   0.08  -0.04    -0.18   0.06   0.21
  68   1     0.09   0.02   0.00     0.02   0.00  -0.01    -0.37  -0.07  -0.03
  69   1     0.01   0.01  -0.03     0.02   0.07  -0.06    -0.10  -0.05   0.10
  70   1     0.02   0.01  -0.03    -0.04   0.03  -0.11    -0.08  -0.04   0.11
  71   1     0.02   0.03   0.01     0.02   0.01  -0.03    -0.13  -0.06  -0.11
  72   1    -0.02  -0.01  -0.01    -0.07  -0.01  -0.04    -0.04   0.05  -0.03
  73   1    -0.02   0.00   0.00    -0.05   0.00   0.01    -0.02   0.02  -0.07
  74   1    -0.02   0.00   0.01    -0.07   0.00   0.05    -0.04   0.04   0.01
  75   1    -0.05   0.05   0.09     0.02   0.00   0.02    -0.04   0.02   0.04
  76   1     0.09   0.08   0.14     0.05   0.06   0.00     0.02   0.02   0.06
  77   1     0.17   0.00   0.06     0.06   0.00   0.00     0.05   0.01   0.03
  78   1     0.00   0.02   0.03     0.00  -0.02  -0.01    -0.01   0.02   0.02
  79   1     0.09   0.01   0.08     0.03  -0.02   0.02     0.02   0.00   0.02
  80   1     0.05   0.08  -0.08    -0.09  -0.05   0.12     0.01  -0.03   0.01
  81   1    -0.03   0.05  -0.11    -0.01   0.05   0.16     0.00   0.02   0.02
  82   1    -0.05  -0.03  -0.04     0.11   0.01   0.05     0.02   0.01   0.02
  83   1     0.00   0.03  -0.10     0.00  -0.06   0.03    -0.01   0.00  -0.03
  84   1    -0.01   0.00  -0.01     0.06   0.00   0.07     0.03  -0.01   0.03
  85   1    -0.11   0.01  -0.04     0.11   0.06   0.07    -0.07  -0.03  -0.04
  86   1     0.12  -0.12  -0.04    -0.09   0.09   0.14     0.05  -0.06  -0.07
  87   1     0.09   0.10   0.11    -0.05  -0.05   0.01     0.03   0.03   0.01
  88   1     0.17  -0.14   0.07    -0.02  -0.05   0.05     0.10  -0.04   0.00
  89   1     0.10  -0.09  -0.21     0.01   0.02  -0.02     0.05  -0.04  -0.12
  90   1    -0.04   0.02  -0.01    -0.06   0.03   0.04     0.00  -0.01  -0.05
  91   1    -0.05   0.11  -0.10    -0.06   0.08  -0.09    -0.03   0.03   0.00
  92   1    -0.11  -0.14   0.08    -0.08  -0.06  -0.07    -0.03  -0.03   0.00
  93   1    -0.28   0.03  -0.05    -0.12  -0.04  -0.10    -0.05   0.00   0.00
  94   1    -0.06  -0.11   0.01    -0.01  -0.10  -0.02    -0.02  -0.02   0.01
  95   1    -0.24   0.02  -0.01    -0.11  -0.02  -0.04    -0.05   0.00   0.01
  96   1    -0.04   0.16  -0.02    -0.01   0.03  -0.01    -0.01   0.04   0.00
  97   1     0.06   0.07   0.00    -0.11   0.05   0.12     0.16  -0.10  -0.08
  98   1     0.08   0.00   0.04    -0.10  -0.02  -0.04     0.09   0.24   0.18
  99   1     0.09   0.03   0.04     0.04   0.00   0.09    -0.23  -0.04   0.11
 100   1    -0.02  -0.02   0.04     0.00  -0.02   0.04    -0.01   0.01  -0.01
 101   1     0.08   0.01   0.01    -0.04  -0.01   0.06    -0.07  -0.03   0.00
 102   1    -0.01   0.03  -0.06     0.01  -0.07   0.07     0.00  -0.07   0.04
 103   1     0.04  -0.05  -0.01    -0.16   0.19  -0.10    -0.10   0.05  -0.05
 104   1    -0.11  -0.14   0.05     0.06   0.16  -0.33    -0.02   0.04  -0.12
 105   1    -0.14   0.06  -0.01     0.08  -0.03  -0.18    -0.01   0.00  -0.04
 106   1    -0.07   0.03   0.05     0.06  -0.09  -0.12     0.02  -0.01  -0.07
 107   1     0.03  -0.13  -0.06    -0.03   0.09   0.02    -0.01   0.01  -0.08
 108   1    -0.11  -0.14   0.07     0.11   0.12  -0.15    -0.03   0.02  -0.08
 109   1    -0.06   0.00   0.03    -0.04   0.10  -0.02     0.01  -0.06   0.03
 110   1    -0.08   0.00   0.08    -0.09   0.04   0.01     0.03  -0.02   0.02
 111   1    -0.06   0.07   0.00    -0.05   0.09  -0.02     0.01  -0.04   0.02
 112   1    -0.06  -0.06  -0.06     0.01   0.08   0.05    -0.02   0.03   0.02
 113   1    -0.01   0.02   0.00    -0.03   0.02   0.00    -0.03   0.03   0.02
 114   1    -0.10  -0.05   0.07     0.04   0.07  -0.05    -0.01   0.02   0.01
                    64                     65                     66
                    ?A                     ?A                     ?A
 Frequencies --   288.8601               294.3484               306.6103
 Red. masses --     2.8128                 2.3368                 1.3785
 Frc consts  --     0.1383                 0.1193                 0.0764
 IR Inten    --    10.1320                 1.6853                 0.6874
 Raman Activ --     0.0000                 0.0000                 0.0000
 Depolar     --     0.0000                 0.0000                 0.0000
 Atom AN      X      Y      Z        X      Y      Z        X      Y      Z
   1   8     0.01   0.01   0.00     0.01  -0.01   0.00     0.00   0.00  -0.01
   2  12    -0.06   0.03  -0.07     0.02  -0.01  -0.03     0.02   0.01   0.02
   3   8     0.00   0.04   0.02    -0.01  -0.03   0.01     0.00   0.02  -0.02
   4   6     0.01   0.00  -0.01     0.00   0.00   0.00     0.00   0.00  -0.01
   5   7     0.04   0.01   0.07    -0.01   0.02  -0.02     0.00   0.01  -0.01
   6   7    -0.01   0.03   0.06     0.02  -0.02   0.06     0.00  -0.01   0.03
   7   8     0.02   0.01   0.00     0.01   0.00   0.00     0.00   0.00  -0.01
   8   6    -0.01  -0.01   0.02     0.03   0.03  -0.03     0.01   0.01  -0.02
   9   6    -0.03  -0.02  -0.02     0.03   0.00  -0.01     0.02  -0.01  -0.01
  10   6    -0.04   0.02   0.01     0.05  -0.01   0.01     0.02  -0.01   0.01
  11   8     0.00  -0.02   0.00     0.00   0.00   0.00     0.00   0.00   0.01
  12   6     0.00   0.00   0.02    -0.01  -0.01   0.00     0.00   0.00   0.00
  13   6    -0.01   0.03   0.04     0.00  -0.03   0.01    -0.02   0.02   0.00
  14   6     0.00  -0.02   0.00     0.00   0.01   0.00     0.00   0.00   0.00
  15   8    -0.01  -0.02   0.00    -0.02   0.00   0.02     0.01  -0.01  -0.01
  16   6    -0.01  -0.01   0.01     0.00   0.00   0.00    -0.01   0.00   0.01
  17   8     0.02   0.00  -0.04    -0.01   0.00   0.02     0.01   0.00  -0.02
  18   6     0.02  -0.01   0.01    -0.01   0.00  -0.01     0.01   0.00   0.01
  19   8     0.00  -0.02  -0.01    -0.01   0.00  -0.01     0.01   0.00   0.01
  20   8     0.02   0.01   0.01    -0.01   0.00  -0.01     0.01   0.00   0.01
  21   6     0.01   0.00  -0.01     0.00   0.00   0.00     0.00   0.00   0.00
  22   6     0.01  -0.01  -0.03    -0.01   0.00   0.02     0.01  -0.01  -0.01
  23   6     0.02   0.00   0.02    -0.01   0.01  -0.01     0.01  -0.01   0.01
  24   8    -0.02   0.00   0.01     0.01   0.00   0.00    -0.01   0.00   0.00
  25   6    -0.01   0.00  -0.01     0.00   0.00   0.01     0.00  -0.01   0.00
  26   6    -0.06  -0.01   0.02     0.04   0.01  -0.01    -0.03  -0.02   0.01
  27   6     0.01  -0.02   0.05     0.04   0.00   0.00    -0.05   0.02   0.00
  28   6     0.01   0.00  -0.01     0.00   0.00   0.01     0.02   0.00   0.00
  29   6     0.05  -0.01   0.02    -0.02   0.01   0.00    -0.01   0.01   0.00
  30   6     0.00   0.01   0.02    -0.02  -0.01   0.03    -0.02  -0.01   0.02
  31   6     0.08  -0.03   0.02    -0.03   0.01   0.00    -0.02   0.01   0.00
  32   6     0.08  -0.04  -0.03    -0.03   0.01  -0.01    -0.02   0.01   0.00
  33   6     0.03  -0.03  -0.06    -0.04   0.00  -0.01    -0.02   0.00   0.00
  34   6     0.00  -0.02  -0.04    -0.05   0.00   0.00    -0.02  -0.01   0.00
  35   6     0.01  -0.01   0.00    -0.03   0.01   0.01    -0.01   0.01   0.00
  36   6     0.04  -0.01   0.01    -0.02   0.00   0.00    -0.01   0.00   0.00
  37   6     0.00  -0.01  -0.02    -0.02   0.01   0.01    -0.01   0.01   0.00
  38   6     0.03   0.02  -0.02     0.00   0.00  -0.01    -0.01  -0.01   0.00
  39   6     0.02   0.03  -0.04    -0.01  -0.01  -0.01    -0.01  -0.01  -0.01
  40   6    -0.01   0.03  -0.04    -0.04  -0.02  -0.02    -0.03  -0.01  -0.01
  41   6    -0.02  -0.01  -0.01    -0.06  -0.03   0.02    -0.03  -0.02   0.00
  42   6     0.00  -0.02   0.02    -0.04  -0.03   0.04    -0.02  -0.02   0.02
  43   6     0.01   0.01  -0.03    -0.02  -0.02  -0.04    -0.01  -0.01  -0.01
  44   6     0.01  -0.02   0.03    -0.02  -0.03   0.04     0.00  -0.01   0.01
  45   6    -0.02   0.05   0.05     0.01  -0.01   0.00     0.00   0.00   0.00
  46   6    -0.08   0.07   0.11     0.01  -0.01  -0.01     0.01  -0.01  -0.01
  47   6    -0.01   0.00  -0.08     0.03   0.00   0.05     0.01   0.00   0.02
  48   6    -0.01  -0.05  -0.05     0.03   0.02   0.03     0.01   0.01   0.01
  49   6     0.07   0.03   0.07     0.09   0.06   0.12     0.07   0.01   0.01
  50   6     0.01  -0.02   0.02     0.01  -0.02   0.03     0.04   0.00   0.02
  51   6    -0.05   0.00  -0.04    -0.06   0.03  -0.10    -0.02   0.01  -0.03
  52   6    -0.02  -0.03  -0.03    -0.02  -0.03  -0.09    -0.01  -0.01  -0.03
  53   6    -0.04   0.01   0.02     0.05   0.03  -0.02     0.02   0.01  -0.01
  54   6    -0.05   0.01   0.02     0.07   0.03  -0.02     0.03   0.01  -0.01
  55   1    -0.02  -0.02  -0.06     0.00  -0.01  -0.02     0.00  -0.01  -0.01
  56   1    -0.02   0.03   0.03     0.01  -0.03   0.02    -0.03   0.02   0.00
  57   1    -0.01  -0.02   0.00     0.00   0.01   0.00    -0.01   0.00   0.00
  58   1    -0.01  -0.01   0.02     0.00   0.00   0.00    -0.03   0.00   0.00
  59   1    -0.03  -0.01   0.01     0.01   0.00   0.01    -0.02   0.00   0.01
  60   1     0.01  -0.02   0.03     0.01   0.00   0.01     0.00   0.00   0.02
  61   1     0.01  -0.01  -0.03    -0.01   0.01   0.01     0.01  -0.02  -0.01
  62   1     0.04   0.01   0.00    -0.02   0.00   0.00     0.02   0.00   0.01
  63   1     0.01   0.00  -0.01    -0.01   0.00   0.00     0.01  -0.01   0.00
  64   1    -0.01   0.01   0.02     0.01  -0.01  -0.01     0.00   0.00   0.01
  65   1    -0.04   0.00  -0.03     0.02   0.00   0.02    -0.01  -0.01  -0.01
  66   1    -0.02  -0.04  -0.05     0.02   0.04   0.04    -0.03  -0.02  -0.03
  67   1    -0.07   0.04   0.10     0.05  -0.01  -0.06    -0.04  -0.02   0.04
  68   1    -0.15  -0.02  -0.02     0.11   0.02   0.01    -0.06  -0.03   0.01
  69   1     0.01  -0.03   0.01     0.10   0.09  -0.04    -0.14  -0.12   0.06
  70   1     0.01  -0.03   0.09    -0.05   0.00  -0.01     0.10   0.01   0.00
  71   1     0.02  -0.05   0.05     0.11  -0.08   0.05    -0.14   0.15  -0.04
  72   1     0.02   0.01   0.01     0.00  -0.01   0.01     0.04   0.00   0.03
  73   1     0.01   0.00  -0.03     0.00   0.00   0.02     0.03   0.00   0.01
  74   1     0.03   0.02  -0.02     0.00  -0.01   0.00     0.04   0.00  -0.02
  75   1     0.11  -0.05  -0.05    -0.02   0.01  -0.02    -0.02   0.02  -0.01
  76   1     0.03  -0.04  -0.10    -0.05  -0.01  -0.01    -0.02   0.00   0.01
  77   1    -0.03  -0.01  -0.05    -0.06  -0.01   0.00    -0.02  -0.02   0.01
  78   1     0.04  -0.04  -0.06    -0.02   0.01   0.02    -0.01   0.00   0.02
  79   1     0.00  -0.01  -0.02    -0.03   0.00  -0.02    -0.01   0.00  -0.01
  80   1     0.03   0.04  -0.05     0.00  -0.01  -0.03     0.00  -0.01  -0.02
  81   1    -0.03   0.04  -0.07    -0.05  -0.02  -0.05    -0.03  -0.01  -0.02
  82   1    -0.04  -0.03  -0.02    -0.07  -0.05   0.01    -0.04  -0.03   0.00
  83   1     0.00   0.02  -0.07    -0.02  -0.01  -0.04    -0.01  -0.01   0.00
  84   1     0.00  -0.02   0.01    -0.04  -0.04   0.00    -0.01  -0.01  -0.02
  85   1     0.28   0.09   0.12    -0.05  -0.01  -0.01    -0.03  -0.01  -0.01
  86   1    -0.23   0.27   0.21     0.05  -0.06  -0.02     0.03  -0.04  -0.01
  87   1    -0.16  -0.16  -0.12     0.04   0.04   0.04     0.03   0.03   0.02
  88   1    -0.23   0.06   0.05     0.03   0.01  -0.02     0.03  -0.01  -0.01
  89   1    -0.08   0.14   0.23    -0.01  -0.03  -0.01     0.00  -0.03  -0.02
  90   1    -0.03   0.09   0.15     0.02  -0.03  -0.02     0.01  -0.02  -0.02
  91   1     0.02   0.05  -0.11     0.02  -0.07   0.08     0.01  -0.03   0.03
  92   1     0.00   0.01  -0.06     0.04   0.04   0.03     0.01   0.01   0.02
  93   1    -0.04  -0.05  -0.12     0.09   0.02   0.08     0.03   0.01   0.03
  94   1    -0.01  -0.10  -0.04     0.03   0.09   0.01     0.01   0.03   0.00
  95   1    -0.03  -0.03  -0.11     0.08   0.01   0.06     0.03   0.01   0.02
  96   1    -0.01  -0.05  -0.04     0.02  -0.01   0.04     0.01   0.00   0.01
  97   1     0.06   0.11   0.04     0.33  -0.03  -0.15    -0.23   0.33   0.23
  98   1     0.08   0.02   0.08     0.26   0.33   0.36    -0.09  -0.40  -0.22
  99   1     0.12   0.03   0.12    -0.20  -0.03   0.21     0.56   0.11   0.00
 100   1    -0.02  -0.04   0.06    -0.03  -0.06   0.08    -0.01  -0.07   0.09
 101   1     0.07  -0.01   0.03     0.10  -0.01   0.04     0.15   0.03   0.05
 102   1    -0.01   0.00  -0.04    -0.02   0.02  -0.04     0.00   0.06  -0.07
 103   1    -0.06   0.00  -0.04    -0.13   0.09  -0.07    -0.05   0.03  -0.02
 104   1    -0.06  -0.05  -0.07    -0.05   0.02  -0.19    -0.01   0.01  -0.07
 105   1    -0.08   0.03  -0.03    -0.05   0.02  -0.10    -0.01   0.00  -0.03
 106   1    -0.03  -0.01  -0.02     0.03  -0.04  -0.09     0.01  -0.01  -0.03
 107   1     0.01  -0.07  -0.06    -0.01  -0.05  -0.14    -0.01  -0.01  -0.04
 108   1    -0.07  -0.06  -0.01    -0.08  -0.03  -0.10    -0.02   0.00  -0.03
 109   1    -0.04   0.02   0.01     0.05   0.01  -0.02     0.02   0.00   0.00
 110   1    -0.06  -0.01   0.03     0.06   0.04  -0.02     0.03   0.02   0.00
 111   1    -0.05   0.02   0.01     0.05   0.03  -0.02     0.03   0.01  -0.01
 112   1    -0.04  -0.01   0.01     0.03   0.06  -0.05     0.01   0.03  -0.02
 113   1    -0.05   0.03   0.02     0.11   0.05  -0.04     0.06   0.02  -0.02
 114   1    -0.05   0.00   0.04     0.09   0.02  -0.01     0.05   0.01  -0.01
                    67                     68                     69
                    ?A                     ?A                     ?A
 Frequencies --   314.7018               319.5199               324.7469
 Red. masses --     4.6129                 3.3174                 3.9715
 Frc consts  --     0.2692                 0.1995                 0.2468
 IR Inten    --     4.5496                 3.9929                 7.6597
 Raman Activ --     0.0000                 0.0000                 0.0000
 Depolar     --     0.0000                 0.0000                 0.0000
 Atom AN      X      Y      Z        X      Y      Z        X      Y      Z
   1   8     0.08   0.04   0.02    -0.01  -0.01  -0.02    -0.03  -0.01  -0.07
   2  12    -0.08   0.08   0.06     0.05   0.05  -0.06     0.05   0.14  -0.06
   3   8    -0.09   0.11   0.03     0.00  -0.02   0.00     0.00   0.02   0.00
   4   6     0.08  -0.02   0.01    -0.01   0.01  -0.01    -0.01   0.02  -0.03
   5   7     0.00   0.05   0.00     0.01   0.04   0.11     0.00  -0.01  -0.01
   6   7     0.04  -0.04  -0.01    -0.02   0.01  -0.01    -0.03   0.04   0.00
   7   8     0.18   0.02   0.04     0.00   0.00  -0.01     0.06   0.00  -0.04
   8   6     0.05   0.06  -0.02     0.00   0.02   0.04    -0.02  -0.01   0.01
   9   6     0.03   0.02  -0.01    -0.02   0.02  -0.03    -0.03   0.03   0.01
  10   6     0.06  -0.03  -0.01    -0.02   0.01  -0.02    -0.06   0.03   0.01
  11   8    -0.08  -0.06  -0.07     0.00   0.02   0.01    -0.01  -0.01   0.03
  12   6    -0.07   0.02  -0.06     0.00   0.01   0.02    -0.01  -0.01   0.00
  13   6    -0.09   0.06  -0.04     0.00   0.00   0.01    -0.02   0.01   0.00
  14   6    -0.01  -0.07   0.01     0.00   0.01   0.00    -0.03   0.02   0.03
  15   8    -0.06   0.05  -0.02     0.00   0.01   0.02     0.03  -0.02  -0.01
  16   6     0.05  -0.04   0.07    -0.02   0.00   0.00    -0.10  -0.01   0.03
  17   8     0.04   0.00  -0.07    -0.02   0.00   0.01    -0.04  -0.01   0.00
  18   6     0.04  -0.01   0.00    -0.01   0.02   0.02     0.00   0.03   0.05
  19   8     0.04  -0.01  -0.01     0.02   0.03   0.04     0.04   0.07   0.10
  20   8     0.04   0.00   0.05    -0.01  -0.02  -0.01     0.00  -0.03  -0.02
  21   6     0.02   0.00   0.00    -0.01  -0.02  -0.01    -0.01  -0.05  -0.01
  22   6     0.03  -0.02  -0.03    -0.02  -0.01   0.01    -0.02  -0.04   0.02
  23   6     0.04  -0.02   0.06    -0.01   0.00  -0.02    -0.01   0.00  -0.03
  24   8    -0.03   0.01   0.01     0.00  -0.02  -0.02    -0.02  -0.04  -0.04
  25   6    -0.01  -0.02  -0.01     0.01   0.00   0.01     0.02  -0.02   0.01
  26   6    -0.10  -0.07   0.03     0.04   0.01  -0.02     0.04   0.02  -0.02
  27   6     0.01  -0.01  -0.05     0.01   0.00   0.02     0.02   0.00  -0.01
  28   6    -0.09   0.00  -0.02     0.04  -0.01   0.01     0.06   0.00   0.05
  29   6    -0.01   0.01   0.00    -0.01   0.00   0.05     0.01  -0.01  -0.01
  30   6     0.02  -0.03  -0.01    -0.01   0.00   0.00     0.00   0.00   0.00
  31   6    -0.01   0.01   0.00     0.01   0.00   0.03     0.00  -0.01  -0.01
  32   6    -0.02  -0.01   0.02    -0.01  -0.10   0.12     0.03   0.11  -0.06
  33   6    -0.01   0.02   0.01     0.00   0.04   0.06     0.02  -0.01  -0.01
  34   6    -0.01   0.04   0.00     0.02   0.16   0.02     0.00  -0.12   0.04
  35   6    -0.01   0.00   0.01    -0.02   0.00   0.04     0.02   0.00  -0.01
  36   6    -0.01   0.01   0.00     0.02   0.04  -0.01    -0.02  -0.05   0.00
  37   6    -0.01  -0.02   0.01    -0.02  -0.05   0.02     0.03   0.05  -0.02
  38   6    -0.01   0.00   0.01    -0.01  -0.01   0.00     0.00  -0.01   0.00
  39   6     0.03  -0.05   0.00    -0.02   0.00  -0.01    -0.01  -0.01   0.00
  40   6     0.01  -0.02   0.01    -0.03  -0.01  -0.01    -0.01   0.00   0.01
  41   6    -0.03   0.03   0.02    -0.02  -0.02  -0.01     0.00   0.00   0.00
  42   6     0.00  -0.01   0.00    -0.02  -0.01   0.01     0.00   0.00   0.00
  43   6    -0.03   0.03   0.02     0.00  -0.01   0.00     0.00   0.00   0.00
  44   6    -0.01  -0.01   0.00    -0.01  -0.01   0.01     0.00   0.00   0.00
  45   6     0.00  -0.01  -0.03    -0.02  -0.06  -0.15    -0.02   0.00   0.06
  46   6     0.01   0.00  -0.02     0.05   0.05  -0.06    -0.01  -0.04  -0.04
  47   6    -0.01  -0.01  -0.02    -0.06  -0.02  -0.15     0.04   0.04   0.07
  48   6     0.01  -0.01   0.02     0.00  -0.09   0.00    -0.03   0.04  -0.05
  49   6    -0.01   0.00   0.00     0.03   0.02   0.03     0.00   0.01   0.01
  50   6    -0.01  -0.01  -0.02     0.01   0.00   0.02     0.00   0.00   0.00
  51   6    -0.01   0.01   0.04     0.00   0.00  -0.01     0.00   0.01  -0.01
  52   6    -0.01   0.04  -0.04     0.01   0.00   0.01     0.01   0.01   0.01
  53   6     0.12   0.01  -0.04     0.07  -0.05   0.00     0.12  -0.13   0.00
  54   6     0.01  -0.17   0.03    -0.03  -0.01   0.02    -0.12  -0.08   0.04
  55   1    -0.01   0.01   0.01    -0.03   0.01  -0.06     0.00   0.04   0.00
  56   1    -0.15   0.06  -0.07     0.02  -0.01   0.01    -0.03   0.01   0.00
  57   1     0.00  -0.06   0.04    -0.01   0.01   0.00    -0.05   0.02   0.03
  58   1     0.05  -0.06   0.08    -0.04   0.00   0.00    -0.19  -0.01   0.03
  59   1    -0.02  -0.05   0.05    -0.02   0.00   0.01    -0.14  -0.01   0.06
  60   1     0.09  -0.07   0.10    -0.01   0.00   0.02    -0.03  -0.03   0.12
  61   1     0.03  -0.04  -0.03    -0.02   0.00   0.01    -0.02  -0.03   0.02
  62   1     0.06   0.00   0.05    -0.03  -0.02  -0.02    -0.03  -0.03  -0.04
  63   1     0.00  -0.02  -0.02     0.00   0.00   0.02     0.02  -0.03   0.02
  64   1    -0.01  -0.03   0.04     0.01   0.01  -0.02     0.03  -0.01  -0.04
  65   1    -0.05  -0.02  -0.03     0.03   0.01   0.02     0.07  -0.03   0.03
  66   1    -0.12  -0.05  -0.11     0.05   0.01   0.03     0.05   0.00   0.03
  67   1    -0.16  -0.13   0.12     0.06   0.03  -0.05     0.07   0.04  -0.05
  68   1    -0.16  -0.10   0.04     0.07   0.02  -0.01     0.06   0.02  -0.02
  69   1     0.07   0.03  -0.16     0.00  -0.04   0.01     0.04   0.02  -0.04
  70   1    -0.05  -0.02   0.00     0.05   0.00   0.01     0.00   0.00   0.00
  71   1     0.08  -0.11   0.00     0.00   0.03   0.02     0.05  -0.03   0.02
  72   1    -0.15   0.05  -0.10     0.06  -0.02   0.05     0.11  -0.03   0.13
  73   1    -0.08   0.00  -0.08     0.03   0.00   0.03     0.05   0.00   0.08
  74   1    -0.16   0.03   0.08     0.06  -0.01  -0.03     0.12  -0.01  -0.04
  75   1    -0.02  -0.03   0.03    -0.04  -0.20   0.18     0.05   0.21  -0.10
  76   1    -0.01   0.03   0.01     0.00   0.04   0.05     0.02   0.00   0.00
  77   1     0.00   0.06  -0.01     0.06   0.27  -0.02    -0.02  -0.22   0.07
  78   1    -0.01   0.02   0.01     0.03   0.05  -0.01    -0.02  -0.05   0.00
  79   1    -0.02  -0.02   0.00    -0.03  -0.05   0.00     0.03   0.06   0.00
  80   1     0.04  -0.07  -0.01    -0.02   0.01  -0.01    -0.01   0.00   0.01
  81   1     0.01  -0.03   0.01    -0.03  -0.01  -0.02    -0.02   0.01   0.01
  82   1    -0.06   0.08   0.03    -0.01  -0.04  -0.01     0.00   0.00   0.00
  83   1    -0.02   0.02   0.02     0.01  -0.01   0.00     0.01  -0.01   0.01
  84   1    -0.01  -0.01   0.00    -0.02  -0.01  -0.01     0.00  -0.01   0.00
  85   1    -0.04  -0.04  -0.02    -0.14  -0.21  -0.11     0.01   0.07   0.03
  86   1     0.03  -0.04  -0.06     0.05  -0.05  -0.32    -0.05   0.00   0.12
  87   1     0.02   0.01  -0.02     0.00  -0.05  -0.17    -0.04  -0.01   0.09
  88   1     0.03   0.01  -0.02     0.09   0.09  -0.07     0.02  -0.04  -0.02
  89   1     0.01  -0.01  -0.03     0.06   0.06  -0.08     0.01  -0.03  -0.08
  90   1     0.01  -0.01  -0.03     0.01   0.01  -0.11    -0.05  -0.04  -0.06
  91   1    -0.02   0.01  -0.01    -0.07   0.13  -0.18     0.05  -0.03   0.07
  92   1    -0.02   0.00  -0.05    -0.07   0.01  -0.21     0.05   0.02   0.11
  93   1     0.01  -0.03  -0.03    -0.08  -0.15  -0.24     0.04   0.10   0.11
  94   1     0.02   0.00   0.00     0.02  -0.14  -0.01    -0.07   0.01   0.00
  95   1     0.02  -0.01   0.02    -0.01  -0.08  -0.06    -0.03   0.04  -0.07
  96   1     0.02  -0.02   0.03     0.01  -0.11   0.04    -0.05   0.05  -0.09
  97   1     0.07  -0.07  -0.06     0.01   0.08   0.02     0.02  -0.01  -0.02
  98   1     0.04   0.09   0.07     0.03   0.00   0.03     0.01   0.04   0.03
  99   1    -0.12  -0.03   0.01     0.08   0.02   0.06    -0.04  -0.01   0.02
 100   1     0.01   0.03  -0.06     0.01  -0.04   0.05     0.01   0.00  -0.01
 101   1    -0.07  -0.03  -0.05     0.05   0.01   0.04    -0.02   0.00   0.00
 102   1     0.00  -0.02   0.02     0.01   0.02   0.00     0.00  -0.01   0.02
 103   1    -0.03  -0.02   0.03     0.00   0.01  -0.01    -0.02   0.01   0.00
 104   1     0.00   0.04   0.05     0.01   0.00  -0.02     0.00   0.01  -0.02
 105   1     0.01   0.00   0.07     0.01  -0.01  -0.02     0.00   0.00  -0.01
 106   1     0.04   0.00  -0.06    -0.01  -0.01   0.01     0.00  -0.01  -0.01
 107   1    -0.03   0.05  -0.06     0.00   0.01   0.03     0.00   0.03   0.04
 108   1    -0.03   0.07  -0.08     0.03   0.01   0.01     0.03   0.04  -0.01
 109   1     0.12  -0.03  -0.04     0.08  -0.08  -0.01     0.12  -0.22   0.02
 110   1     0.17   0.04  -0.08     0.13  -0.01  -0.06     0.25  -0.05  -0.08
 111   1     0.11  -0.05  -0.03     0.06  -0.13   0.02     0.12  -0.24   0.03
 112   1     0.09  -0.28  -0.01     0.00  -0.03   0.03    -0.04  -0.18   0.03
 113   1    -0.03  -0.16   0.05    -0.07  -0.02   0.03    -0.17  -0.09   0.06
 114   1    -0.09  -0.18   0.09    -0.04  -0.01   0.02    -0.22  -0.08   0.08
                    70                     71                     72
                    ?A                     ?A                     ?A
 Frequencies --   325.9273               328.5099               335.9570
 Red. masses --     3.3039                 3.2041                 3.4419
 Frc consts  --     0.2068                 0.2037                 0.2289
 IR Inten    --     3.2719                 7.2307                 7.5997
 Raman Activ --     0.0000                 0.0000                 0.0000
 Depolar     --     0.0000                 0.0000                 0.0000
 Atom AN      X      Y      Z        X      Y      Z        X      Y      Z
   1   8    -0.04  -0.02  -0.10     0.04   0.00   0.10     0.03   0.00   0.03
   2  12     0.03  -0.04   0.03    -0.01   0.03  -0.05     0.07  -0.03  -0.02
   3   8     0.00   0.02  -0.03     0.01  -0.04   0.02    -0.03   0.02   0.01
   4   6    -0.02   0.04  -0.04     0.01  -0.03   0.04     0.02  -0.01   0.01
   5   7     0.00   0.00   0.01     0.00   0.01  -0.01     0.03   0.02   0.14
   6   7     0.03   0.02   0.07     0.02   0.03   0.06     0.00   0.00  -0.01
   7   8     0.05  -0.01  -0.06    -0.10   0.00   0.05     0.00   0.00   0.01
   8   6    -0.01  -0.01   0.00     0.00   0.01  -0.01     0.00   0.00   0.05
   9   6    -0.01  -0.01  -0.02    -0.01   0.02  -0.01    -0.02  -0.02  -0.03
  10   6     0.01   0.01   0.02    -0.01   0.02   0.02    -0.02   0.00  -0.02
  11   8     0.00   0.00   0.05     0.02   0.01  -0.04    -0.02   0.00  -0.04
  12   6     0.00  -0.02   0.01     0.01   0.01   0.01    -0.03  -0.01  -0.01
  13   6    -0.01  -0.01  -0.02     0.02  -0.01   0.04    -0.03   0.00   0.00
  14   6    -0.03   0.05   0.04     0.04  -0.03  -0.05     0.01   0.00  -0.01
  15   8     0.03   0.00   0.03    -0.04  -0.01  -0.01    -0.04   0.02   0.02
  16   6    -0.13  -0.01   0.04     0.14   0.02  -0.05     0.06   0.00   0.00
  17   8     0.01   0.00   0.00    -0.03   0.00   0.02     0.02   0.01  -0.01
  18   6    -0.01  -0.01  -0.03    -0.02   0.01   0.02     0.00  -0.01  -0.02
  19   8    -0.03  -0.02  -0.05    -0.01   0.03   0.04     0.01  -0.03  -0.05
  20   8     0.01   0.02   0.00    -0.01   0.00  -0.04    -0.01   0.00   0.03
  21   6     0.01   0.02   0.01    -0.01  -0.02  -0.01     0.00   0.02   0.00
  22   6     0.01   0.00   0.01    -0.02  -0.01   0.02     0.01   0.01  -0.01
  23   6     0.01  -0.01   0.02    -0.01   0.00  -0.04     0.01  -0.01   0.02
  24   8     0.00   0.02   0.01     0.00  -0.02  -0.02     0.01   0.01   0.01
  25   6     0.00  -0.01   0.00     0.01  -0.01   0.01    -0.02   0.02   0.00
  26   6    -0.01  -0.03   0.01     0.08   0.04  -0.02    -0.03  -0.04   0.01
  27   6     0.03   0.00  -0.03    -0.03   0.00   0.05     0.01   0.00  -0.01
  28   6     0.09  -0.01   0.07    -0.08   0.00  -0.07    -0.03   0.00  -0.01
  29   6     0.00   0.00   0.01     0.00   0.00   0.00     0.01   0.00   0.06
  30   6     0.02   0.02   0.03     0.01   0.01   0.03     0.00   0.01   0.00
  31   6     0.00   0.00   0.00     0.01   0.00   0.00     0.02  -0.03   0.03
  32   6     0.00  -0.02   0.02     0.01   0.00  -0.01     0.06   0.14  -0.01
  33   6     0.00   0.00   0.01     0.01   0.00  -0.01     0.02   0.03   0.04
  34   6     0.01   0.03   0.00     0.00  -0.01   0.00    -0.03  -0.11   0.10
  35   6     0.00   0.00   0.00     0.00   0.00   0.00    -0.01   0.01   0.04
  36   6     0.01   0.01   0.00     0.01   0.00   0.00    -0.02  -0.08   0.02
  37   6     0.00  -0.01   0.00     0.00   0.00   0.00     0.01   0.06   0.00
  38   6     0.02   0.02   0.02     0.01   0.01   0.02     0.00   0.01   0.00
  39   6     0.12  -0.09   0.02     0.09  -0.08   0.01     0.02  -0.01  -0.01
  40   6     0.04   0.01   0.06     0.02   0.00   0.04     0.00   0.01   0.00
  41   6    -0.05   0.12   0.08    -0.06   0.09   0.07    -0.01   0.02   0.00
  42   6     0.01   0.01   0.02     0.00   0.00   0.02     0.00   0.00   0.00
  43   6    -0.03   0.04   0.01    -0.03   0.03   0.01     0.00   0.01   0.00
  44   6     0.03  -0.04   0.00     0.02  -0.03   0.00     0.01  -0.01   0.01
  45   6     0.00   0.00  -0.02     0.00   0.01   0.00    -0.09  -0.08   0.01
  46   6     0.00   0.01   0.00     0.00   0.01   0.01     0.02  -0.03  -0.17
  47   6    -0.01  -0.01  -0.02     0.00   0.00   0.00     0.04   0.07  -0.03
  48   6     0.00  -0.01   0.00     0.00   0.00   0.00    -0.04  -0.05  -0.10
  49   6    -0.02  -0.07  -0.02     0.01  -0.05  -0.02     0.01   0.00   0.02
  50   6    -0.05  -0.03  -0.12    -0.03  -0.03  -0.09     0.00  -0.01  -0.01
  51   6    -0.05   0.04   0.01    -0.05   0.03   0.01     0.00   0.00   0.01
  52   6    -0.03   0.01  -0.12    -0.02   0.01  -0.10    -0.01   0.00  -0.01
  53   6    -0.04   0.02   0.02     0.05  -0.03   0.00    -0.07   0.02   0.02
  54   6     0.01   0.03   0.02    -0.04  -0.04   0.03     0.03   0.08  -0.01
  55   1    -0.01  -0.01  -0.05    -0.01   0.02  -0.03    -0.02  -0.03  -0.06
  56   1    -0.04  -0.01  -0.02     0.06  -0.01   0.04    -0.05   0.00   0.00
  57   1    -0.06   0.04   0.03     0.07  -0.03  -0.04     0.02   0.00  -0.01
  58   1    -0.25   0.00   0.03     0.27   0.02  -0.05     0.09   0.00   0.00
  59   1    -0.17  -0.01   0.07     0.20   0.02  -0.08     0.08   0.00  -0.01
  60   1    -0.05  -0.03   0.13     0.04   0.05  -0.17     0.04   0.01  -0.03
  61   1     0.01   0.00   0.01    -0.02   0.00   0.02     0.00   0.01  -0.01
  62   1     0.01   0.00   0.04    -0.03  -0.01  -0.02     0.01   0.00   0.03
  63   1     0.00   0.00  -0.02     0.01  -0.01   0.01    -0.02   0.01   0.00
  64   1     0.00  -0.02   0.01     0.02   0.00  -0.03    -0.02   0.01   0.01
  65   1    -0.01  -0.03   0.00     0.05  -0.01   0.03    -0.03   0.03  -0.01
  66   1    -0.05   0.02  -0.01     0.05   0.07   0.08    -0.04  -0.02  -0.04
  67   1    -0.04  -0.10   0.00     0.10   0.03  -0.10    -0.05  -0.08   0.02
  68   1     0.03  -0.03   0.03     0.17   0.07  -0.01    -0.03  -0.06   0.03
  69   1     0.06   0.05  -0.07    -0.09  -0.08   0.12     0.02   0.01  -0.04
  70   1    -0.01   0.01  -0.05     0.05   0.00   0.04     0.00   0.00  -0.01
  71   1     0.07  -0.02   0.01    -0.10   0.08   0.00     0.03  -0.01   0.02
  72   1     0.16  -0.06   0.18    -0.14   0.04  -0.17    -0.06   0.00  -0.06
  73   1     0.07   0.00   0.13    -0.06   0.00  -0.12    -0.03   0.00  -0.01
  74   1     0.18  -0.02  -0.06    -0.15   0.01   0.04    -0.06   0.00   0.02
  75   1     0.00  -0.04   0.03     0.01   0.00  -0.01     0.08   0.25  -0.06
  76   1     0.00   0.00   0.01     0.01   0.00  -0.01     0.02   0.05   0.00
  77   1     0.01   0.05  -0.01     0.00  -0.01   0.00    -0.05  -0.21   0.14
  78   1     0.01   0.01  -0.01     0.01   0.00  -0.01    -0.02  -0.09   0.01
  79   1     0.00  -0.01   0.00     0.01   0.00   0.00     0.00   0.06  -0.01
  80   1     0.18  -0.19   0.01     0.15  -0.16   0.00     0.03  -0.03  -0.01
  81   1     0.04   0.01   0.05     0.02   0.00   0.04     0.00   0.01   0.00
  82   1    -0.10   0.22   0.10    -0.10   0.17   0.08    -0.02   0.03   0.01
  83   1    -0.04   0.04   0.00    -0.03   0.03   0.01    -0.01   0.01  -0.01
  84   1     0.04  -0.05   0.02     0.02  -0.04   0.00     0.01  -0.01   0.01
  85   1    -0.01  -0.02  -0.01     0.02   0.01   0.01    -0.16  -0.07  -0.02
  86   1     0.01   0.00  -0.04    -0.01   0.02   0.01    -0.08  -0.05  -0.06
  87   1     0.00   0.00  -0.02    -0.01  -0.01   0.00    -0.13  -0.10   0.07
  88   1     0.00   0.01   0.00    -0.02   0.00   0.01     0.15   0.05  -0.16
  89   1     0.00   0.01   0.01     0.00   0.01   0.02     0.09   0.03  -0.26
  90   1     0.01   0.01   0.00     0.00   0.01   0.02    -0.13  -0.10  -0.30
  91   1    -0.01   0.02  -0.03     0.00   0.00   0.01     0.07   0.08  -0.07
  92   1    -0.02  -0.01  -0.02     0.00   0.00   0.00     0.06   0.11  -0.02
  93   1    -0.03  -0.02  -0.04     0.01   0.01   0.01     0.03   0.03  -0.07
  94   1     0.01  -0.02   0.00    -0.01   0.00   0.00    -0.09  -0.16  -0.03
  95   1    -0.01  -0.01   0.00     0.00   0.00   0.00    -0.04  -0.02  -0.24
  96   1     0.00  -0.01   0.01     0.00   0.01  -0.01    -0.07  -0.10  -0.12
  97   1    -0.04  -0.11   0.02    -0.09   0.02   0.08     0.01   0.01   0.01
  98   1    -0.04  -0.09  -0.05    -0.05  -0.19  -0.11     0.01   0.01   0.02
  99   1    -0.03  -0.06  -0.07     0.16  -0.01  -0.05     0.01   0.00   0.03
 100   1    -0.06   0.14  -0.19    -0.04   0.09  -0.13    -0.01   0.00   0.00
 101   1    -0.15  -0.13  -0.22    -0.09  -0.10  -0.16     0.00  -0.02  -0.01
 102   1    -0.04  -0.08  -0.09    -0.03  -0.05  -0.08    -0.01  -0.02  -0.02
 103   1    -0.09   0.03   0.01    -0.09   0.04   0.01     0.00  -0.01   0.00
 104   1    -0.05   0.03  -0.02    -0.04   0.03  -0.03     0.00   0.00   0.01
 105   1    -0.05   0.04   0.04    -0.04   0.03   0.03     0.00   0.00   0.01
 106   1     0.08  -0.02  -0.13     0.07  -0.03  -0.11     0.00   0.01  -0.01
 107   1    -0.01  -0.01  -0.21    -0.01   0.00  -0.15     0.00  -0.01  -0.03
 108   1    -0.14   0.03  -0.17    -0.10   0.05  -0.15    -0.02  -0.01   0.00
 109   1    -0.04   0.02   0.02     0.05  -0.08   0.01    -0.06   0.07  -0.01
 110   1    -0.06   0.01   0.05     0.11   0.00  -0.02    -0.12  -0.01   0.02
 111   1    -0.03   0.06   0.01     0.06  -0.06   0.01    -0.09   0.03   0.01
 112   1    -0.01   0.05   0.01    -0.01  -0.10   0.01    -0.01   0.15   0.03
 113   1     0.02   0.04   0.01    -0.06  -0.04   0.04     0.02   0.09  -0.01
 114   1     0.03   0.03   0.01    -0.10  -0.05   0.06     0.11   0.09  -0.04
                    73                     74                     75
                    ?A                     ?A                     ?A
 Frequencies --   341.6381               347.5934               353.7217
 Red. masses --     6.0727                 3.3354                 4.7130
 Frc consts  --     0.4176                 0.2374                 0.3474
 IR Inten    --    17.7035                 3.1256                 5.3358
 Raman Activ --     0.0000                 0.0000                 0.0000
 Depolar     --     0.0000                 0.0000                 0.0000
 Atom AN      X      Y      Z        X      Y      Z        X      Y      Z
   1   8     0.06   0.00   0.03     0.00   0.00   0.00     0.00  -0.01   0.00
   2  12     0.28   0.00  -0.06    -0.01   0.01  -0.02     0.01   0.01   0.03
   3   8    -0.09   0.06   0.04     0.00   0.00   0.00     0.00  -0.02  -0.02
   4   6     0.05  -0.01   0.01     0.00   0.00   0.00    -0.01   0.01  -0.01
   5   7    -0.03  -0.11  -0.05     0.01   0.02   0.02    -0.01   0.02  -0.03
   6   7    -0.03   0.04   0.04     0.05   0.02   0.17    -0.01   0.03   0.01
   7   8     0.08   0.00   0.02    -0.01   0.00   0.00    -0.06   0.00  -0.02
   8   6    -0.09  -0.12   0.02     0.01   0.02  -0.02     0.00   0.03  -0.01
   9   6    -0.05  -0.05   0.02    -0.01  -0.01  -0.04    -0.01   0.04   0.00
  10   6    -0.09   0.02   0.04     0.03  -0.01   0.05    -0.02   0.04   0.00
  11   8    -0.07   0.02  -0.07     0.00   0.00   0.00     0.03   0.01   0.03
  12   6    -0.08   0.02  -0.04     0.00   0.00   0.01     0.02  -0.02   0.01
  13   6    -0.09   0.02  -0.02     0.00   0.00   0.01     0.01  -0.02   0.00
  14   6     0.00  -0.01  -0.01     0.00   0.00   0.00     0.01   0.02  -0.01
  15   8    -0.09   0.06   0.00    -0.01   0.00   0.01     0.02  -0.03   0.00
  16   6     0.08  -0.01   0.03     0.01   0.00   0.00     0.01   0.01  -0.01
  17   8     0.01   0.00  -0.04     0.01   0.00  -0.01     0.07   0.00   0.12
  18   6     0.02   0.01   0.01     0.01   0.00   0.00     0.06  -0.02  -0.03
  19   8     0.08   0.03   0.03     0.00  -0.01  -0.02     0.18  -0.06  -0.11
  20   8     0.01  -0.03   0.04     0.01   0.00   0.02    -0.15  -0.11   0.11
  21   6     0.00  -0.01   0.00     0.01   0.00   0.00    -0.06   0.04  -0.03
  22   6     0.00  -0.01  -0.02     0.01  -0.01  -0.01    -0.05   0.12  -0.10
  23   6     0.02  -0.01   0.02     0.00   0.01   0.01     0.00  -0.03   0.00
  24   8    -0.01  -0.01  -0.01    -0.01   0.01   0.00     0.05  -0.03   0.03
  25   6    -0.01   0.00   0.00     0.00  -0.01   0.00    -0.10   0.24  -0.02
  26   6    -0.03  -0.06   0.01    -0.03   0.00   0.00    -0.02  -0.16  -0.05
  27   6    -0.01   0.00  -0.04     0.01  -0.01   0.02     0.01   0.00   0.00
  28   6    -0.04   0.00  -0.01     0.00   0.00  -0.01     0.01   0.00   0.00
  29   6    -0.02  -0.02  -0.03     0.00   0.00   0.01     0.00   0.01  -0.01
  30   6     0.00   0.02   0.01    -0.01   0.03   0.06    -0.01   0.01   0.01
  31   6    -0.03   0.03  -0.02     0.01   0.00   0.01     0.00  -0.01  -0.01
  32   6    -0.04  -0.06   0.01     0.01   0.01   0.00     0.01  -0.01  -0.01
  33   6    -0.02  -0.03  -0.01     0.00   0.01   0.00     0.02   0.00  -0.01
  34   6     0.01   0.05  -0.05    -0.01   0.00   0.01     0.02   0.00  -0.01
  35   6     0.00   0.00  -0.03    -0.01   0.00   0.01     0.02  -0.01  -0.01
  36   6     0.00   0.05  -0.02     0.00  -0.01   0.01     0.01   0.00  -0.01
  37   6     0.00  -0.03   0.00    -0.01   0.01   0.00     0.01  -0.01   0.00
  38   6     0.01   0.01   0.00     0.02   0.02   0.03     0.00  -0.01   0.00
  39   6     0.01   0.03   0.01    -0.06   0.12   0.09     0.00  -0.01   0.00
  40   6     0.01   0.02   0.01     0.02  -0.02   0.05    -0.02   0.00   0.01
  41   6     0.03   0.00   0.01     0.09  -0.13   0.03    -0.02   0.00   0.01
  42   6     0.01   0.01   0.00    -0.04   0.02   0.04    -0.02   0.00   0.00
  43   6     0.01  -0.01  -0.02     0.04  -0.05  -0.01     0.00   0.00   0.00
  44   6     0.01   0.01   0.00    -0.06   0.07  -0.02    -0.01  -0.01   0.00
  45   6     0.05   0.04  -0.01    -0.01  -0.01  -0.01     0.01   0.01   0.01
  46   6     0.00   0.01   0.09     0.01   0.00  -0.02    -0.01   0.00   0.02
  47   6    -0.02  -0.04   0.04     0.00   0.01  -0.01    -0.01  -0.01   0.01
  48   6     0.02   0.04   0.05     0.00  -0.01  -0.01     0.00   0.01   0.01
  49   6    -0.02  -0.02  -0.02    -0.07  -0.08  -0.16     0.01   0.00   0.01
  50   6    -0.01   0.01  -0.01    -0.01   0.11  -0.06     0.00   0.00  -0.01
  51   6    -0.02   0.00  -0.04    -0.05   0.03  -0.13    -0.01   0.01  -0.01
  52   6     0.00  -0.02  -0.01     0.03  -0.08  -0.02     0.00   0.01   0.00
  53   6    -0.07  -0.15   0.08     0.03   0.01   0.00     0.06  -0.01  -0.02
  54   6    -0.04   0.18  -0.02     0.01  -0.04   0.02    -0.06  -0.03   0.02
  55   1     0.03  -0.03   0.01    -0.04  -0.03  -0.09    -0.01   0.05   0.00
  56   1    -0.11   0.03  -0.04     0.00   0.00   0.01     0.01  -0.02   0.02
  57   1     0.02  -0.01   0.00     0.00   0.00   0.00     0.00   0.01  -0.01
  58   1     0.09  -0.01   0.03     0.01   0.00   0.00     0.02   0.01  -0.02
  59   1     0.07  -0.01   0.02     0.01   0.00   0.00     0.03   0.01  -0.01
  60   1     0.07  -0.01   0.02     0.00   0.00  -0.01     0.00   0.02  -0.03
  61   1     0.00  -0.02  -0.01     0.01  -0.01  -0.01    -0.07   0.13  -0.11
  62   1     0.01  -0.01   0.03     0.01   0.01  -0.01     0.02   0.00   0.04
  63   1    -0.01   0.00   0.00     0.01  -0.01   0.00    -0.05   0.16   0.19
  64   1    -0.01  -0.01   0.01     0.00  -0.01   0.01    -0.12   0.32   0.01
  65   1    -0.02   0.01  -0.01    -0.01  -0.01  -0.01    -0.14   0.42  -0.06
  66   1    -0.04  -0.05  -0.07     0.01  -0.03  -0.03    -0.07  -0.10  -0.16
  67   1    -0.06  -0.10   0.02    -0.02   0.05   0.05    -0.06  -0.28  -0.11
  68   1    -0.06  -0.09   0.03    -0.10  -0.01  -0.01     0.03  -0.23   0.07
  69   1     0.02   0.01  -0.11     0.02  -0.01   0.00     0.02   0.00  -0.01
  70   1    -0.02  -0.01  -0.02     0.01  -0.01   0.02     0.02   0.00   0.00
  71   1     0.04  -0.03   0.00     0.02  -0.01   0.02     0.02  -0.01   0.02
  72   1    -0.07   0.00  -0.06     0.00   0.00   0.00     0.02  -0.01   0.01
  73   1    -0.05   0.00  -0.02     0.00   0.00  -0.01     0.01   0.00   0.02
  74   1    -0.08   0.00   0.03     0.00   0.00   0.00     0.02  -0.01  -0.02
  75   1    -0.06  -0.11   0.03     0.01   0.01   0.00     0.00  -0.02   0.00
  76   1    -0.02  -0.05   0.02     0.00   0.01  -0.01     0.02   0.00   0.00
  77   1     0.03   0.11  -0.07    -0.01  -0.01   0.01     0.02   0.00  -0.01
  78   1     0.00   0.06   0.00     0.00  -0.01   0.00     0.01   0.00  -0.01
  79   1     0.00  -0.03   0.00    -0.01   0.00   0.00     0.02   0.00   0.01
  80   1     0.00   0.03   0.02    -0.12   0.20   0.12     0.00  -0.02   0.00
  81   1     0.01   0.03   0.01     0.04  -0.05   0.02    -0.03   0.01   0.01
  82   1     0.04  -0.02   0.00     0.17  -0.23   0.01    -0.02   0.01   0.01
  83   1     0.01  -0.01  -0.03     0.04  -0.05  -0.02     0.00  -0.01   0.01
  84   1     0.01   0.00   0.01    -0.07   0.07  -0.04    -0.01  -0.01   0.00
  85   1     0.05   0.03  -0.01    -0.03  -0.02  -0.01     0.02   0.03   0.00
  86   1     0.07  -0.01   0.02    -0.01  -0.01  -0.03     0.00   0.01   0.03
  87   1     0.10   0.09  -0.03    -0.02  -0.02   0.00     0.01   0.01   0.01
  88   1    -0.06  -0.04   0.09     0.02   0.02  -0.02    -0.03  -0.02   0.02
  89   1    -0.05  -0.04   0.13     0.02   0.01  -0.03    -0.01   0.00   0.03
  90   1     0.08   0.05   0.16    -0.01  -0.01  -0.04     0.00   0.01   0.03
  91   1    -0.04  -0.06   0.06     0.01   0.02  -0.02    -0.01   0.00   0.01
  92   1    -0.03  -0.06   0.03     0.01   0.02  -0.02    -0.02  -0.03   0.02
  93   1     0.00   0.00   0.07     0.01  -0.01  -0.02    -0.03   0.01   0.02
  94   1     0.04   0.11   0.02     0.00  -0.03   0.00     0.00   0.01   0.01
  95   1     0.02   0.02   0.14     0.00  -0.01  -0.03    -0.01   0.01   0.02
  96   1     0.03   0.07   0.06     0.00  -0.03   0.00     0.00   0.03   0.00
  97   1    -0.01  -0.07  -0.01    -0.02  -0.26  -0.12     0.01   0.02   0.00
  98   1    -0.02   0.00  -0.01    -0.05  -0.15  -0.13     0.02  -0.01   0.02
  99   1    -0.06  -0.02  -0.04    -0.14  -0.03  -0.36     0.02   0.00   0.01
 100   1    -0.02   0.02  -0.01     0.04   0.14  -0.12     0.00   0.00  -0.01
 101   1     0.00   0.00  -0.02    -0.01   0.05  -0.11     0.00  -0.01  -0.02
 102   1    -0.01   0.00  -0.02     0.00   0.18  -0.02     0.00   0.01  -0.01
 103   1    -0.03   0.03  -0.03    -0.13   0.17  -0.07    -0.02   0.02   0.00
 104   1    -0.02  -0.02  -0.07    -0.06  -0.03  -0.28     0.00   0.01  -0.02
 105   1    -0.03   0.01  -0.04    -0.08   0.06  -0.16     0.00   0.00  -0.01
 106   1    -0.01   0.00   0.00     0.01  -0.11  -0.03     0.01  -0.01  -0.01
 107   1     0.01  -0.04  -0.02     0.06  -0.11   0.00     0.00   0.01   0.00
 108   1    -0.02  -0.04   0.01     0.00  -0.07  -0.04     0.01   0.02  -0.02
 109   1    -0.08  -0.19   0.10     0.03  -0.03   0.01     0.06  -0.06   0.00
 110   1    -0.04  -0.13   0.09     0.05   0.03   0.02     0.12   0.02  -0.05
 111   1    -0.05  -0.13   0.08     0.03   0.03  -0.01     0.07  -0.06   0.00
 112   1    -0.14   0.32   0.02     0.01  -0.07  -0.01    -0.02  -0.10   0.01
 113   1     0.02   0.17  -0.05     0.03  -0.04   0.01    -0.09  -0.04   0.03
 114   1     0.08   0.20  -0.09    -0.04  -0.05   0.04    -0.12  -0.04   0.05
                    76                     77                     78
                    ?A                     ?A                     ?A
 Frequencies --   362.8695               383.5184               392.6728
 Red. masses --     4.6507                 5.8775                 4.6654
 Frc consts  --     0.3608                 0.5094                 0.4238
 IR Inten    --    21.4860                20.3892                 6.6637
 Raman Activ --     0.0000                 0.0000                 0.0000
 Depolar     --     0.0000                 0.0000                 0.0000
 Atom AN      X      Y      Z        X      Y      Z        X      Y      Z
   1   8    -0.05   0.04  -0.02     0.08  -0.04   0.01     0.06  -0.03   0.00
   2  12    -0.09   0.04  -0.04    -0.11   0.18  -0.03     0.01   0.00   0.04
   3   8    -0.01  -0.04   0.03    -0.02   0.11  -0.01    -0.02   0.11  -0.03
   4   6     0.00  -0.04   0.02     0.00   0.06  -0.05     0.01   0.05  -0.03
   5   7     0.02  -0.05   0.03     0.02  -0.06   0.01     0.00   0.00   0.00
   6   7     0.03  -0.06   0.03     0.02  -0.07   0.01     0.00   0.00   0.00
   7   8     0.15   0.01   0.06    -0.20   0.00  -0.10    -0.09   0.00  -0.06
   8   6     0.01  -0.07   0.01     0.02  -0.08   0.01     0.00   0.00   0.00
   9   6     0.02  -0.10  -0.01     0.03  -0.11   0.00     0.00   0.00   0.00
  10   6     0.05  -0.07   0.01     0.05  -0.09   0.00     0.00   0.00   0.00
  11   8    -0.04  -0.02  -0.04     0.05  -0.02   0.08     0.00  -0.03   0.02
  12   6     0.01   0.10  -0.03     0.00  -0.09   0.03    -0.02  -0.07   0.00
  13   6     0.06   0.07   0.01    -0.08  -0.02  -0.02    -0.07   0.00  -0.03
  14   6    -0.01  -0.08   0.01    -0.01   0.08   0.00    -0.01   0.07   0.01
  15   8     0.04   0.05  -0.09     0.04  -0.07   0.07     0.00  -0.02   0.05
  16   6    -0.10  -0.02   0.02     0.12   0.02  -0.02     0.08   0.01   0.00
  17   8    -0.01  -0.02   0.08    -0.03   0.02  -0.05    -0.01  -0.06   0.13
  18   6     0.04   0.01   0.10     0.02   0.07   0.01    -0.02  -0.02   0.08
  19   8     0.10   0.04   0.14     0.10   0.09   0.03    -0.07  -0.06   0.03
  20   8    -0.03  -0.05  -0.04    -0.03  -0.06   0.07     0.16   0.04  -0.11
  21   6    -0.03  -0.04  -0.07    -0.02  -0.03   0.04     0.05  -0.07  -0.15
  22   6    -0.04   0.02  -0.07    -0.03  -0.01   0.05     0.06  -0.02  -0.16
  23   6     0.00  -0.02  -0.05     0.00   0.02  -0.01     0.04  -0.06   0.03
  24   8    -0.02  -0.08  -0.02     0.02   0.00  -0.03    -0.17  -0.10   0.00
  25   6    -0.04   0.13   0.00     0.01  -0.06   0.00    -0.03   0.14   0.01
  26   6     0.08   0.03  -0.03    -0.03  -0.07  -0.05     0.04   0.08   0.09
  27   6    -0.02  -0.02   0.04     0.03   0.00  -0.04     0.01  -0.01  -0.05
  28   6    -0.02   0.01  -0.03     0.03   0.00   0.04     0.00   0.00   0.05
  29   6     0.00  -0.02   0.02     0.00  -0.05   0.02     0.00   0.00   0.00
  30   6     0.03  -0.03   0.00     0.03  -0.05  -0.01     0.00   0.00   0.00
  31   6    -0.01   0.02   0.01    -0.02   0.01   0.01     0.00   0.00   0.00
  32   6    -0.02   0.02   0.00    -0.03   0.00   0.02     0.00  -0.01   0.00
  33   6    -0.04   0.00   0.01    -0.05  -0.01   0.02     0.00   0.00   0.00
  34   6    -0.03   0.01   0.01    -0.03   0.02   0.00     0.00   0.00   0.00
  35   6    -0.03   0.01   0.00    -0.03   0.00   0.00     0.00   0.00   0.00
  36   6    -0.01   0.01   0.01    -0.01   0.03   0.01     0.00   0.00   0.00
  37   6    -0.02   0.01   0.00    -0.02   0.01  -0.01     0.00   0.00   0.00
  38   6     0.02   0.01  -0.01     0.02   0.01  -0.02     0.00   0.00   0.00
  39   6     0.03   0.01   0.00     0.03   0.01  -0.02    -0.01   0.01   0.00
  40   6     0.04   0.02   0.00     0.04   0.03  -0.01     0.00   0.00   0.00
  41   6     0.02   0.03   0.01     0.02   0.03   0.00     0.01  -0.01   0.00
  42   6     0.03   0.01   0.00     0.04   0.00   0.00     0.00   0.00   0.00
  43   6    -0.01   0.02  -0.02    -0.01   0.03  -0.02     0.00   0.00   0.00
  44   6     0.02   0.02   0.00     0.02   0.02   0.00     0.00   0.00   0.00
  45   6    -0.01  -0.01   0.00     0.01   0.00  -0.02     0.00   0.00   0.00
  46   6     0.01   0.00  -0.02     0.01   0.00   0.01     0.00   0.00   0.00
  47   6     0.01   0.01   0.00     0.01   0.00   0.01     0.00   0.00   0.00
  48   6     0.01  -0.01   0.00     0.00   0.01  -0.01     0.00   0.00   0.00
  49   6    -0.02  -0.01  -0.03    -0.03   0.00  -0.02     0.00   0.00   0.00
  50   6    -0.01   0.01   0.00     0.00   0.01   0.01     0.00   0.00   0.00
  51   6    -0.02   0.00   0.00    -0.01  -0.01   0.02     0.00   0.00   0.00
  52   6    -0.02   0.00  -0.02    -0.02   0.01  -0.01     0.00   0.00   0.00
  53   6    -0.11   0.02   0.04    -0.10  -0.01   0.04     0.00   0.01   0.00
  54   6     0.12   0.04  -0.03     0.12   0.01  -0.03     0.00   0.00   0.00
  55   1     0.01  -0.11  -0.01     0.02  -0.12   0.01     0.00   0.00   0.00
  56   1     0.15   0.07  -0.02    -0.21  -0.02   0.00    -0.19   0.01  -0.02
  57   1     0.02  -0.07   0.02    -0.09   0.07  -0.01    -0.07   0.06   0.01
  58   1    -0.12  -0.05   0.04     0.14   0.05  -0.04     0.08   0.03  -0.01
  59   1    -0.17  -0.03   0.01     0.20   0.03  -0.01     0.13   0.02   0.01
  60   1    -0.05  -0.06   0.07     0.08   0.06  -0.06     0.06   0.03  -0.02
  61   1    -0.01   0.07  -0.06    -0.05  -0.03   0.05     0.17   0.08  -0.11
  62   1    -0.01  -0.03  -0.05    -0.02   0.00  -0.01     0.01  -0.10   0.01
  63   1    -0.01   0.07   0.16    -0.01  -0.03  -0.09    -0.05   0.03   0.30
  64   1    -0.05   0.19  -0.02     0.02  -0.09  -0.03    -0.04   0.16   0.04
  65   1    -0.04   0.27  -0.02     0.06  -0.15   0.03    -0.11   0.45  -0.05
  66   1     0.04   0.07   0.10     0.01  -0.11  -0.17    -0.05   0.16   0.24
  67   1     0.10   0.02  -0.09    -0.03  -0.08  -0.06     0.00   0.04   0.14
  68   1     0.19   0.08  -0.03    -0.10  -0.16   0.02     0.14   0.21  -0.02
  69   1    -0.08  -0.12   0.08     0.10   0.08  -0.15     0.06   0.04  -0.14
  70   1     0.05  -0.04   0.13    -0.01   0.01  -0.08    -0.02   0.00  -0.06
  71   1    -0.10   0.00  -0.06     0.13  -0.04   0.08     0.09  -0.05   0.03
  72   1    -0.04   0.08  -0.03     0.07  -0.07   0.07     0.02  -0.07   0.05
  73   1     0.01   0.01  -0.13     0.02   0.00   0.15    -0.01   0.00   0.15
  74   1    -0.04   0.05   0.02     0.07  -0.05  -0.04     0.02  -0.04   0.00
  75   1    -0.01   0.03  -0.01    -0.03  -0.01   0.01     0.00  -0.01   0.01
  76   1    -0.04  -0.01   0.01    -0.05  -0.03   0.03     0.00   0.00   0.00
  77   1    -0.03   0.01   0.01    -0.01   0.05  -0.01     0.00   0.01   0.00
  78   1    -0.01   0.02   0.03    -0.01   0.04   0.02     0.00   0.00   0.00
  79   1    -0.03   0.00  -0.02    -0.03   0.00  -0.03     0.00   0.00   0.00
  80   1     0.02   0.01   0.01     0.02   0.01   0.00    -0.01   0.01   0.01
  81   1     0.03   0.03   0.00     0.03   0.04  -0.01     0.00   0.00   0.00
  82   1    -0.01   0.04   0.01    -0.02   0.06   0.01     0.02  -0.02   0.00
  83   1    -0.01   0.03  -0.04    -0.01   0.03  -0.04     0.00   0.00   0.00
  84   1     0.03   0.02   0.01     0.03   0.03   0.02     0.00   0.00   0.00
  85   1    -0.02  -0.03   0.00     0.01  -0.05   0.00     0.00   0.00   0.00
  86   1     0.00  -0.01  -0.02     0.03  -0.01  -0.04     0.01   0.00  -0.01
  87   1     0.00   0.00  -0.02     0.03   0.01  -0.06     0.01   0.00  -0.01
  88   1     0.04   0.02  -0.01     0.03   0.01   0.01     0.00   0.00   0.00
  89   1     0.01  -0.01  -0.03     0.00  -0.02  -0.01     0.00   0.00   0.00
  90   1     0.01  -0.02  -0.04     0.03   0.00   0.01     0.00   0.00   0.01
  91   1     0.02  -0.02   0.00     0.01  -0.04   0.02    -0.01   0.00   0.01
  92   1     0.02   0.04  -0.01     0.02   0.03   0.01     0.00   0.00  -0.01
  93   1     0.04  -0.01   0.00     0.04   0.01   0.02     0.01   0.00   0.00
  94   1     0.01   0.00  -0.01     0.01   0.02  -0.02     0.00   0.01   0.00
  95   1     0.03  -0.01  -0.02     0.02   0.01  -0.01     0.00   0.00   0.00
  96   1     0.01  -0.03   0.01     0.01  -0.01   0.01     0.00   0.01  -0.01
  97   1    -0.03  -0.05   0.01     0.00  -0.07  -0.01     0.01  -0.01  -0.01
  98   1    -0.04  -0.02  -0.05    -0.03   0.04  -0.02     0.00   0.02   0.01
  99   1    -0.03  -0.01  -0.06    -0.09  -0.01  -0.04    -0.02   0.00   0.00
 100   1    -0.01   0.03  -0.01    -0.01   0.03   0.00     0.00   0.00   0.00
 101   1    -0.02   0.01  -0.01    -0.03   0.02   0.01     0.00   0.00   0.00
 102   1    -0.01  -0.01   0.00     0.00  -0.01   0.01     0.00   0.01   0.00
 103   1    -0.02  -0.02  -0.01     0.01  -0.05   0.00    -0.01   0.00   0.00
 104   1    -0.03  -0.01   0.00    -0.02  -0.01   0.05     0.01   0.01  -0.01
 105   1    -0.03   0.01   0.02    -0.02   0.01   0.04     0.01   0.00   0.00
 106   1    -0.01   0.02  -0.02    -0.02   0.03  -0.01     0.00   0.00   0.00
 107   1    -0.01  -0.02  -0.05    -0.01  -0.01  -0.03     0.00   0.00   0.00
 108   1    -0.05  -0.02  -0.01    -0.04  -0.01   0.00     0.00   0.00   0.00
 109   1    -0.11   0.09   0.02    -0.10   0.06   0.02     0.00   0.01   0.00
 110   1    -0.22  -0.05   0.11    -0.20  -0.07   0.10     0.00   0.01   0.00
 111   1    -0.12   0.11   0.01    -0.10   0.08   0.01     0.00   0.01   0.00
 112   1     0.04   0.15  -0.02     0.05   0.10  -0.02     0.00  -0.01   0.00
 113   1     0.17   0.05  -0.06     0.17   0.02  -0.05     0.00   0.00   0.00
 114   1     0.22   0.05  -0.08     0.21   0.01  -0.07     0.00   0.00   0.00
                    79                     80                     81
                    ?A                     ?A                     ?A
 Frequencies --   428.6139               433.0346               437.8726
 Red. masses --     5.9649                 3.4358                 3.7790
 Frc consts  --     0.6456                 0.3796                 0.4269
 IR Inten    --    28.8200                 3.8736                 3.7462
 Raman Activ --     0.0000                 0.0000                 0.0000
 Depolar     --     0.0000                 0.0000                 0.0000
 Atom AN      X      Y      Z        X      Y      Z        X      Y      Z
   1   8    -0.05   0.04   0.03    -0.01   0.01   0.00    -0.02   0.04   0.02
   2  12     0.03   0.18   0.05     0.01   0.03   0.01     0.02  -0.01   0.02
   3   8     0.07  -0.04  -0.17     0.03   0.01  -0.04    -0.07   0.01  -0.02
   4   6    -0.01  -0.08   0.02     0.00  -0.01   0.01     0.00  -0.06  -0.02
   5   7     0.06   0.02   0.12    -0.05  -0.03  -0.14    -0.06  -0.04  -0.12
   6   7     0.00  -0.02   0.01     0.03   0.03   0.15    -0.02  -0.02  -0.12
   7   8     0.05   0.01   0.07     0.02   0.00   0.02     0.00   0.03   0.03
   8   6     0.01  -0.02   0.06    -0.04  -0.02  -0.09    -0.01  -0.01  -0.04
   9   6    -0.01  -0.05  -0.02    -0.01  -0.01   0.00     0.02   0.02   0.05
  10   6    -0.01  -0.03  -0.02     0.02   0.01   0.09     0.00   0.00  -0.02
  11   8     0.03   0.09   0.09     0.01   0.02   0.00     0.02   0.08   0.14
  12   6    -0.01   0.01   0.09     0.00   0.00   0.01     0.00   0.01   0.05
  13   6     0.01  -0.02   0.06     0.01  -0.01   0.01    -0.06   0.00  -0.02
  14   6     0.02  -0.12  -0.06     0.01  -0.01  -0.01     0.01  -0.12  -0.05
  15   8    -0.15  -0.05   0.05    -0.04  -0.01   0.02     0.01  -0.01   0.02
  16   6    -0.06  -0.01  -0.01    -0.02   0.00   0.00    -0.02   0.00  -0.01
  17   8     0.04  -0.01   0.07     0.01   0.00   0.02    -0.03   0.01   0.00
  18   6    -0.01   0.03  -0.05     0.00   0.01  -0.01    -0.01   0.04   0.01
  19   8    -0.15  -0.03  -0.16    -0.03   0.00  -0.03     0.03   0.03   0.01
  20   8     0.04  -0.02   0.02     0.01  -0.01   0.01     0.04  -0.01   0.02
  21   6     0.01  -0.02  -0.01     0.00  -0.01   0.00     0.02  -0.02  -0.01
  22   6     0.03   0.00  -0.01     0.01   0.00   0.00     0.01   0.00  -0.01
  23   6     0.02  -0.01  -0.01     0.01   0.00   0.00     0.00   0.01   0.00
  24   8    -0.09   0.00   0.00    -0.02   0.00   0.00    -0.03  -0.01  -0.01
  25   6     0.01   0.00   0.02     0.00   0.00   0.00     0.00   0.00   0.00
  26   6    -0.01  -0.01  -0.02     0.00   0.00  -0.01     0.00  -0.01   0.00
  27   6     0.08  -0.01   0.07     0.02   0.00   0.01     0.02   0.00  -0.04
  28   6     0.05  -0.01  -0.15     0.00   0.00  -0.02     0.06  -0.01  -0.14
  29   6     0.01   0.01  -0.03    -0.01  -0.02   0.03    -0.02  -0.06   0.04
  30   6     0.02  -0.04  -0.01     0.02  -0.04  -0.03    -0.02   0.04   0.01
  31   6    -0.01   0.03  -0.04     0.00  -0.03   0.05    -0.01  -0.05   0.05
  32   6    -0.01   0.02   0.02     0.00  -0.02  -0.01    -0.01  -0.01  -0.01
  33   6    -0.02   0.00   0.04     0.00   0.01  -0.04     0.00   0.02  -0.03
  34   6     0.00   0.02   0.00    -0.02  -0.03  -0.01    -0.01  -0.03   0.00
  35   6    -0.01   0.00  -0.04     0.00  -0.02   0.04     0.00  -0.04   0.04
  36   6    -0.07   0.01  -0.06     0.08   0.00   0.08     0.08   0.01   0.07
  37   6     0.00  -0.03  -0.06    -0.02   0.04   0.05     0.00   0.04   0.03
  38   6     0.01  -0.01  -0.01     0.01  -0.04  -0.03    -0.01   0.03   0.01
  39   6     0.01  -0.01  -0.01     0.02  -0.05   0.01    -0.02   0.03  -0.01
  40   6     0.00   0.01   0.00    -0.03   0.02   0.04     0.02  -0.01  -0.02
  41   6     0.01   0.00   0.00     0.01  -0.01   0.01     0.00   0.02  -0.01
  42   6     0.02  -0.02  -0.01     0.02  -0.06  -0.06    -0.02   0.05   0.04
  43   6     0.00   0.02   0.00    -0.05   0.00  -0.01     0.02  -0.01   0.00
  44   6     0.01   0.02  -0.01     0.04   0.01  -0.13    -0.02  -0.01   0.10
  45   6     0.04   0.04   0.00    -0.05  -0.05  -0.01    -0.03  -0.04  -0.02
  46   6    -0.04  -0.08  -0.02     0.06   0.10   0.02     0.05   0.10   0.03
  47   6    -0.02  -0.06   0.02     0.02   0.06  -0.01     0.02   0.05   0.01
  48   6     0.01   0.05  -0.01    -0.01  -0.04   0.01    -0.01  -0.02  -0.01
  49   6    -0.02   0.01  -0.02    -0.07   0.12  -0.08     0.05  -0.09   0.07
  50   6     0.00   0.01   0.02     0.02  -0.07   0.07    -0.02   0.04  -0.05
  51   6     0.01   0.00   0.03     0.03  -0.02   0.02    -0.01   0.00  -0.02
  52   6    -0.01   0.00  -0.01    -0.03   0.05  -0.01     0.02  -0.02   0.01
  53   6    -0.01  -0.04   0.02     0.01   0.00   0.00    -0.02   0.02  -0.01
  54   6     0.02   0.02   0.00     0.00   0.02  -0.01     0.00  -0.02   0.00
  55   1    -0.01  -0.06  -0.05    -0.01  -0.01   0.00     0.04   0.04   0.10
  56   1     0.02  -0.02   0.08     0.00  -0.01   0.01    -0.07   0.01  -0.04
  57   1     0.13  -0.12  -0.09     0.03  -0.01  -0.01     0.09  -0.11  -0.09
  58   1    -0.02  -0.03   0.00    -0.01   0.00   0.00     0.02  -0.02   0.00
  59   1    -0.09  -0.01  -0.03    -0.02   0.00   0.00    -0.05  -0.01  -0.03
  60   1    -0.06  -0.02  -0.02    -0.02   0.00   0.00    -0.02  -0.02  -0.02
  61   1     0.05   0.01   0.00     0.01   0.01   0.00     0.04   0.01   0.00
  62   1     0.00  -0.03  -0.03     0.00  -0.01  -0.01    -0.03  -0.02   0.00
  63   1     0.00  -0.01   0.05     0.00   0.00   0.01    -0.02   0.00   0.01
  64   1     0.01  -0.01   0.04     0.00   0.00   0.01     0.00  -0.03   0.01
  65   1    -0.02   0.04   0.00     0.00   0.01   0.00    -0.01   0.02   0.00
  66   1    -0.01  -0.01  -0.06    -0.01   0.00  -0.02     0.00  -0.01  -0.03
  67   1    -0.03  -0.01   0.00    -0.01  -0.01   0.00     0.00  -0.02  -0.02
  68   1    -0.04  -0.02  -0.02    -0.01  -0.01   0.00     0.00  -0.03   0.02
  69   1     0.12  -0.02  -0.06     0.03   0.01  -0.01     0.05   0.00  -0.13
  70   1     0.13  -0.02   0.09     0.01   0.00   0.01     0.06   0.00  -0.06
  71   1     0.16  -0.03   0.18     0.04  -0.02   0.03     0.08   0.02   0.05
  72   1     0.05   0.15  -0.05     0.00   0.01  -0.02     0.08   0.15   0.01
  73   1     0.11  -0.01  -0.36     0.01   0.00  -0.04     0.14  -0.02  -0.35
  74   1     0.06   0.07  -0.12     0.00   0.01  -0.01     0.10   0.07  -0.15
  75   1    -0.03   0.00   0.04     0.02   0.01  -0.04     0.01   0.04  -0.04
  76   1    -0.02  -0.03   0.05     0.01   0.07  -0.06     0.02   0.11  -0.07
  77   1     0.04   0.02   0.01    -0.04  -0.01  -0.02    -0.02   0.01  -0.02
  78   1    -0.07   0.02  -0.04     0.07   0.00   0.07     0.08   0.01   0.06
  79   1     0.00  -0.03  -0.06    -0.01   0.04   0.04     0.00   0.04   0.03
  80   1     0.00   0.00   0.00     0.00  -0.04   0.03     0.00   0.02  -0.01
  81   1    -0.01   0.03   0.00    -0.08   0.08   0.06     0.07  -0.06  -0.04
  82   1    -0.02   0.02   0.00     0.00   0.05   0.02     0.01  -0.02  -0.02
  83   1     0.00   0.02   0.00    -0.05   0.00   0.00     0.02  -0.01  -0.01
  84   1     0.02   0.02   0.00     0.03   0.03  -0.13    -0.02  -0.03   0.10
  85   1     0.11   0.09   0.00    -0.13  -0.13   0.01    -0.12  -0.12   0.00
  86   1     0.04  -0.05   0.13    -0.04   0.04  -0.17    -0.02   0.04  -0.17
  87   1     0.11   0.12  -0.03    -0.12  -0.13   0.01    -0.09  -0.11   0.00
  88   1     0.00  -0.13   0.03     0.03   0.16  -0.03     0.01   0.13  -0.01
  89   1    -0.09  -0.18  -0.05     0.11   0.21   0.05     0.10   0.19   0.07
  90   1     0.03  -0.05   0.05    -0.02   0.06  -0.06    -0.01   0.07  -0.03
  91   1    -0.05  -0.10   0.05     0.05   0.08  -0.04     0.04   0.04  -0.01
  92   1    -0.04  -0.11   0.02     0.05   0.13  -0.01     0.04   0.10   0.01
  93   1    -0.01   0.02   0.07     0.03  -0.01  -0.05     0.03   0.02  -0.01
  94   1     0.01   0.12  -0.03    -0.01  -0.11   0.02    -0.02  -0.08   0.01
  95   1     0.00   0.03   0.09     0.00  -0.02  -0.10    -0.01   0.00  -0.10
  96   1     0.01   0.10  -0.03    -0.01  -0.10   0.03    -0.02  -0.05  -0.01
  97   1    -0.01  -0.02  -0.01    -0.11   0.15  -0.04     0.09  -0.11   0.03
  98   1    -0.02   0.05  -0.02    -0.13   0.26  -0.16     0.10  -0.18   0.14
  99   1    -0.06   0.01  -0.02    -0.10   0.06   0.07     0.07  -0.05  -0.03
 100   1     0.01  -0.01   0.02     0.03  -0.24   0.14    -0.02   0.18  -0.10
 101   1    -0.01   0.03   0.04    -0.01   0.13   0.24     0.00  -0.10  -0.18
 102   1     0.01  -0.01   0.02     0.04  -0.19   0.09    -0.03   0.13  -0.07
 103   1     0.01  -0.02   0.02     0.07  -0.06   0.00    -0.02   0.02  -0.01
 104   1     0.00   0.00   0.05     0.04   0.03   0.10    -0.01  -0.01  -0.05
 105   1     0.01   0.01   0.04     0.05  -0.05   0.00    -0.01   0.01  -0.02
 106   1     0.00   0.00  -0.01     0.00   0.06   0.00    -0.01  -0.01   0.01
 107   1     0.00  -0.01  -0.01    -0.07   0.09  -0.01     0.03  -0.03   0.02
 108   1    -0.02   0.00  -0.01     0.01   0.05   0.00     0.01  -0.03   0.02
 109   1     0.00  -0.02   0.00    -0.02  -0.09   0.07    -0.03   0.03   0.00
 110   1    -0.01  -0.04   0.00     0.05   0.03   0.06    -0.04   0.01   0.01
 111   1    -0.03  -0.07   0.02     0.06   0.08   0.00    -0.01   0.05  -0.01
 112   1     0.01   0.07   0.03    -0.05   0.04  -0.05     0.01  -0.05  -0.01
 113   1     0.01   0.04   0.01     0.08  -0.02  -0.07    -0.01  -0.02   0.00
 114   1     0.10   0.02  -0.02    -0.05   0.04  -0.04    -0.02  -0.03   0.02
                    82                     83                     84
                    ?A                     ?A                     ?A
 Frequencies --   440.9415               448.4868               450.3748
 Red. masses --     4.6558                 3.1424                 2.7458
 Frc consts  --     0.5333                 0.3724                 0.3281
 IR Inten    --    26.7869                 1.4396                 1.0596
 Raman Activ --     0.0000                 0.0000                 0.0000
 Depolar     --     0.0000                 0.0000                 0.0000
 Atom AN      X      Y      Z        X      Y      Z        X      Y      Z
   1   8     0.02   0.03   0.01     0.00   0.01   0.00     0.00   0.00   0.00
   2  12    -0.01  -0.12  -0.03    -0.02  -0.01   0.01     0.00   0.02   0.01
   3   8    -0.16   0.00   0.06    -0.04  -0.01   0.03     0.00  -0.01  -0.01
   4   6     0.00  -0.04  -0.04     0.00  -0.01  -0.01     0.00   0.00   0.00
   5   7     0.03   0.03   0.10     0.00   0.01  -0.02     0.01  -0.02  -0.06
   6   7     0.03   0.04   0.12    -0.01  -0.01  -0.07    -0.01  -0.01   0.00
   7   8    -0.04   0.03  -0.01    -0.01   0.01   0.00     0.00   0.00   0.00
   8   6     0.01   0.02   0.02    -0.01   0.01   0.00    -0.01  -0.02  -0.02
   9   6    -0.01   0.02  -0.05    -0.02   0.01   0.02     0.00  -0.02   0.02
  10   6     0.01   0.02   0.02    -0.03   0.01  -0.01     0.00  -0.01   0.01
  11   8     0.00   0.05   0.17     0.01   0.01   0.04     0.00   0.00   0.01
  12   6    -0.01   0.02   0.03     0.00   0.00   0.00     0.00   0.00   0.00
  13   6    -0.10   0.03  -0.03    -0.01  -0.01  -0.01     0.00   0.00   0.01
  14   6    -0.01  -0.12  -0.04     0.00  -0.02  -0.01     0.00   0.00   0.00
  15   8     0.11   0.00  -0.01     0.03   0.00   0.00     0.00  -0.01   0.00
  16   6     0.02   0.00   0.00     0.00   0.00   0.00     0.00   0.00   0.00
  17   8    -0.07   0.00  -0.05    -0.01   0.00   0.00     0.01   0.00   0.01
  18   6    -0.02   0.01   0.04    -0.01   0.00   0.00     0.00   0.00  -0.01
  19   8     0.10   0.02   0.04     0.02   0.00   0.01    -0.02   0.00  -0.01
  20   8     0.03   0.02  -0.01     0.01   0.01   0.00     0.00   0.00   0.00
  21   6     0.01  -0.01  -0.01     0.01   0.00   0.00     0.00   0.00   0.00
  22   6    -0.01  -0.01  -0.01     0.00   0.00   0.00     0.01   0.00   0.00
  23   6    -0.02   0.01   0.03     0.00   0.00   0.01     0.00   0.00  -0.01
  24   8     0.03  -0.01   0.00     0.00   0.00   0.00    -0.01   0.00   0.00
  25   6    -0.01   0.00  -0.01     0.00   0.00   0.00     0.00   0.00   0.00
  26   6     0.01   0.01   0.04     0.00   0.00   0.01     0.00   0.00  -0.01
  27   6     0.02   0.00  -0.06     0.00   0.00  -0.02     0.00   0.00   0.01
  28   6     0.07   0.00  -0.12     0.01   0.00  -0.02     0.00   0.00   0.00
  29   6     0.00   0.03  -0.02     0.01   0.05  -0.02     0.02   0.07  -0.02
  30   6    -0.01   0.02  -0.01     0.09  -0.11  -0.01    -0.01   0.01   0.00
  31   6     0.01   0.02  -0.04     0.01   0.03  -0.01     0.01   0.05  -0.04
  32   6     0.01   0.02   0.00     0.01   0.00  -0.01     0.00   0.00  -0.03
  33   6     0.02  -0.01   0.02     0.01  -0.01  -0.01     0.00  -0.04  -0.02
  34   6     0.01   0.02   0.01     0.01   0.00  -0.01     0.01   0.02  -0.03
  35   6     0.01   0.02  -0.01     0.01   0.03   0.00     0.03   0.06   0.03
  36   6    -0.06  -0.01  -0.07     0.00  -0.01   0.01    -0.07  -0.01  -0.06
  37   6     0.01  -0.02  -0.01     0.00   0.00   0.03    -0.06   0.05   0.18
  38   6    -0.01  -0.01  -0.01     0.06  -0.08   0.04    -0.01   0.01  -0.01
  39   6     0.01  -0.02   0.03     0.00  -0.04  -0.03     0.00   0.01   0.00
  40   6    -0.01   0.00   0.04    -0.07   0.00  -0.02     0.02   0.01   0.00
  41   6     0.00  -0.01   0.02    -0.02  -0.05  -0.04     0.01   0.01   0.00
  42   6    -0.01  -0.02  -0.04     0.04  -0.08  -0.01     0.00   0.01   0.01
  43   6    -0.04  -0.02  -0.03     0.08   0.07   0.14    -0.02  -0.01  -0.03
  44   6     0.02  -0.01  -0.09    -0.02   0.04  -0.02     0.00   0.00   0.03
  45   6     0.04   0.04   0.01    -0.01  -0.01   0.02     0.03   0.04   0.01
  46   6    -0.05  -0.08  -0.02    -0.01  -0.01  -0.01    -0.05  -0.09  -0.03
  47   6    -0.01  -0.03   0.00     0.00   0.01  -0.02     0.04   0.13  -0.05
  48   6     0.00   0.01   0.00     0.00  -0.03   0.03     0.01  -0.15   0.11
  49   6    -0.04   0.08  -0.04    -0.02   0.03  -0.06     0.01  -0.02   0.02
  50   6     0.01  -0.07   0.03     0.02   0.05   0.04    -0.01   0.01  -0.01
  51   6     0.03  -0.03  -0.02    -0.11   0.12   0.11     0.02  -0.03  -0.02
  52   6    -0.02   0.04   0.01     0.05  -0.10  -0.06    -0.01   0.02   0.01
  53   6     0.02   0.03   0.00     0.02  -0.02   0.00     0.01  -0.03   0.01
  54   6    -0.01  -0.01   0.01    -0.01   0.07  -0.01     0.00   0.00   0.00
  55   1    -0.03   0.00  -0.11     0.00   0.02   0.04     0.02  -0.01   0.04
  56   1    -0.09   0.03  -0.06    -0.01  -0.01  -0.02     0.01   0.00   0.01
  57   1     0.03  -0.12  -0.07     0.01  -0.02  -0.01    -0.01   0.00   0.00
  58   1     0.06  -0.02   0.01     0.01   0.00   0.00     0.00   0.00   0.00
  59   1     0.00  -0.01  -0.02     0.00   0.00  -0.01     0.00   0.00   0.00
  60   1     0.02  -0.02  -0.01     0.00   0.00   0.00     0.00   0.00   0.00
  61   1     0.00   0.00   0.00     0.01   0.01   0.00     0.00   0.00   0.00
  62   1    -0.04  -0.01   0.04    -0.01  -0.01   0.01     0.01   0.00  -0.01
  63   1    -0.02   0.00  -0.02    -0.01   0.00   0.00     0.00   0.00   0.00
  64   1     0.00  -0.01  -0.02     0.00   0.00   0.00     0.00   0.00   0.01
  65   1     0.00   0.00  -0.01     0.00   0.00   0.00     0.00   0.00   0.00
  66   1     0.00   0.01   0.07    -0.01   0.01   0.02     0.00   0.00  -0.01
  67   1     0.01   0.00   0.02     0.00   0.00   0.01     0.00   0.00   0.00
  68   1     0.03   0.02   0.04     0.01   0.01   0.01     0.00   0.00  -0.01
  69   1     0.06   0.00  -0.18     0.00   0.02  -0.02     0.00  -0.01   0.00
  70   1     0.05   0.00  -0.06    -0.01   0.01  -0.04     0.01   0.00   0.01
  71   1     0.09   0.00   0.03     0.00   0.01  -0.01     0.01   0.00   0.01
  72   1     0.11   0.16   0.07     0.02   0.03   0.01     0.01   0.01   0.01
  73   1     0.15  -0.01  -0.33     0.03   0.00  -0.06     0.01   0.00  -0.01
  74   1     0.14   0.07  -0.17     0.03   0.01  -0.03     0.01   0.00  -0.01
  75   1     0.00   0.00   0.02     0.00  -0.03   0.00     0.00  -0.05  -0.02
  76   1     0.01  -0.04   0.03     0.00  -0.05   0.01    -0.01  -0.12   0.02
  77   1     0.02   0.01   0.02    -0.01  -0.03   0.00    -0.03  -0.01  -0.02
  78   1    -0.06  -0.02  -0.07    -0.01  -0.02   0.01    -0.08  -0.02  -0.06
  79   1     0.01  -0.02  -0.01     0.00   0.00   0.04    -0.04   0.05   0.21
  80   1     0.01  -0.04   0.03    -0.03   0.06  -0.04     0.00   0.00   0.00
  81   1    -0.02   0.01   0.04    -0.16   0.11   0.00     0.03  -0.01  -0.01
  82   1     0.03   0.01   0.02    -0.08   0.01  -0.03     0.01   0.00   0.00
  83   1    -0.04  -0.02  -0.02     0.08   0.07   0.17    -0.02  -0.01  -0.04
  84   1     0.01  -0.01  -0.10    -0.02   0.07  -0.02     0.01   0.00   0.04
  85   1     0.10   0.11  -0.01    -0.01   0.02   0.01     0.11   0.11   0.00
  86   1     0.03  -0.03   0.13    -0.02   0.00   0.03     0.02  -0.04   0.16
  87   1     0.09   0.10   0.00    -0.02  -0.01   0.04     0.09   0.10   0.00
  88   1    -0.03  -0.13   0.02     0.00   0.01  -0.02    -0.01  -0.12   0.00
  89   1    -0.09  -0.16  -0.04     0.00   0.00  -0.01    -0.11  -0.19  -0.07
  90   1     0.01  -0.05   0.04    -0.01  -0.02  -0.03     0.01  -0.08   0.01
  91   1    -0.02  -0.02   0.01     0.01   0.06  -0.04     0.12   0.27  -0.17
  92   1    -0.02  -0.05   0.00     0.00   0.04  -0.02     0.10   0.32  -0.07
  93   1    -0.02  -0.01   0.01    -0.01  -0.03  -0.05     0.02  -0.11  -0.22
  94   1     0.00   0.04   0.00     0.01  -0.04   0.02     0.06  -0.28   0.09
  95   1     0.00   0.00   0.04     0.01  -0.02   0.00     0.06  -0.10  -0.13
  96   1     0.01   0.03  -0.01     0.01  -0.05   0.05     0.02  -0.32   0.24
  97   1    -0.07   0.13  -0.03    -0.01  -0.02  -0.05     0.02  -0.04   0.02
  98   1    -0.08   0.18  -0.09    -0.02   0.04  -0.06     0.02  -0.05   0.03
  99   1    -0.05   0.04   0.09    -0.06   0.03  -0.09     0.01  -0.02  -0.01
 100   1     0.01  -0.17   0.08     0.05  -0.04   0.05    -0.01   0.05  -0.02
 101   1    -0.01   0.05   0.14     0.04   0.10   0.09     0.00  -0.03  -0.05
 102   1     0.02  -0.15   0.04     0.03   0.07   0.07    -0.01   0.03  -0.02
 103   1     0.07  -0.04  -0.03    -0.24   0.16   0.14     0.05  -0.04  -0.03
 104   1     0.05   0.02   0.03    -0.15  -0.01  -0.07     0.03   0.00   0.03
 105   1     0.06  -0.07  -0.06    -0.19   0.22   0.22     0.04  -0.04  -0.03
 106   1    -0.02   0.08   0.02     0.14  -0.27  -0.14    -0.03   0.06   0.03
 107   1    -0.07   0.10   0.01     0.17  -0.24  -0.11    -0.03   0.05   0.02
 108   1     0.05   0.03   0.04    -0.20  -0.01  -0.22     0.03   0.00   0.04
 109   1     0.02   0.03  -0.01     0.03  -0.05   0.00     0.00  -0.06   0.03
 110   1     0.02   0.03   0.00     0.06   0.00  -0.03     0.03  -0.02   0.02
 111   1     0.01   0.03  -0.01     0.02  -0.06   0.01     0.02  -0.02   0.01
 112   1     0.01  -0.04   0.00    -0.05   0.12   0.01    -0.02   0.01  -0.01
 113   1    -0.02  -0.03   0.00    -0.01   0.08  -0.01     0.01   0.00  -0.01
 114   1    -0.05  -0.01   0.01     0.04   0.07  -0.02    -0.01   0.00  -0.01
                    85                     86                     87
                    ?A                     ?A                     ?A
 Frequencies --   453.1591               457.9830               462.2789
 Red. masses --     3.7519                 5.8787                 5.1242
 Frc consts  --     0.4539                 0.7265                 0.6452
 IR Inten    --     1.5553                25.0860                 5.7431
 Raman Activ --     0.0000                 0.0000                 0.0000
 Depolar     --     0.0000                 0.0000                 0.0000
 Atom AN      X      Y      Z        X      Y      Z        X      Y      Z
   1   8     0.01   0.00   0.00    -0.02   0.00   0.01     0.04   0.00   0.00
   2  12    -0.01   0.04   0.02     0.02   0.11   0.01     0.04   0.04   0.03
   3   8    -0.04  -0.04   0.01     0.05   0.03  -0.01    -0.07   0.00  -0.07
   4   6     0.00   0.00  -0.01    -0.01  -0.02   0.01     0.01   0.01  -0.03
   5   7     0.06   0.01  -0.04    -0.03   0.00  -0.01     0.00  -0.03  -0.02
   6   7    -0.01  -0.02   0.02     0.00  -0.01   0.01    -0.02  -0.01  -0.04
   7   8    -0.02   0.01  -0.01     0.01   0.00   0.02    -0.03   0.02  -0.03
   8   6    -0.01  -0.03   0.00    -0.01   0.01  -0.01     0.01  -0.02   0.00
   9   6    -0.01  -0.04   0.02    -0.01   0.00   0.01     0.02  -0.01   0.00
  10   6    -0.02  -0.02   0.01     0.00  -0.01   0.01     0.02   0.00  -0.01
  11   8    -0.01   0.00   0.04     0.03   0.03   0.01    -0.05  -0.02   0.05
  12   6    -0.01   0.00   0.01     0.00  -0.02   0.00    -0.03   0.03   0.02
  13   6    -0.02   0.00   0.00     0.01  -0.03  -0.02    -0.07   0.07   0.00
  14   6    -0.01  -0.02   0.00     0.02  -0.01  -0.01    -0.04  -0.03   0.01
  15   8     0.03  -0.01  -0.01    -0.05  -0.01   0.03     0.04   0.01  -0.02
  16   6     0.02   0.00   0.00    -0.03   0.00  -0.01     0.05   0.00   0.01
  17   8     0.01  -0.02  -0.02    -0.09  -0.08  -0.09     0.22  -0.01  -0.02
  18   6    -0.01  -0.05  -0.01    -0.03  -0.09   0.01     0.10  -0.12   0.02
  19   8    -0.01  -0.06  -0.02     0.09  -0.13  -0.03    -0.13  -0.08   0.10
  20   8    -0.03   0.04  -0.05    -0.08   0.14  -0.18    -0.18   0.01  -0.08
  21   6    -0.01   0.03   0.00    -0.04   0.06  -0.01    -0.10   0.06   0.02
  22   6    -0.01   0.00   0.00    -0.10  -0.02  -0.01    -0.04   0.00   0.04
  23   6    -0.01  -0.02   0.02    -0.04  -0.04   0.13     0.05  -0.08  -0.06
  24   8     0.06   0.01   0.01     0.25  -0.03   0.02     0.05   0.02   0.01
  25   6     0.00   0.01  -0.01    -0.01   0.04  -0.04     0.02   0.00   0.00
  26   6     0.00   0.02   0.06    -0.02   0.03   0.23     0.03   0.07  -0.01
  27   6     0.00   0.00   0.00    -0.02   0.01  -0.03     0.03  -0.02   0.01
  28   6     0.01   0.00  -0.01     0.00  -0.01  -0.02     0.02   0.00  -0.01
  29   6     0.07   0.18  -0.07    -0.03  -0.09   0.04     0.00  -0.04   0.01
  30   6     0.00  -0.02   0.00     0.04  -0.06  -0.01    -0.07   0.09   0.02
  31   6     0.03   0.14   0.00    -0.02  -0.07   0.01    -0.01  -0.01   0.01
  32   6     0.00   0.04  -0.03    -0.01  -0.03   0.02    -0.01   0.00   0.00
  33   6    -0.05  -0.06   0.00     0.02   0.04   0.00    -0.01   0.01   0.00
  34   6    -0.01   0.03  -0.06     0.00  -0.02   0.03    -0.01  -0.01   0.00
  35   6     0.02   0.11  -0.07    -0.01  -0.07   0.04    -0.01  -0.02   0.01
  36   6     0.02  -0.05   0.14     0.00   0.03  -0.05     0.00   0.01   0.00
  37   6    -0.01  -0.07  -0.03     0.00   0.04   0.01    -0.01   0.01   0.01
  38   6     0.00   0.00  -0.03     0.02  -0.03  -0.02    -0.03   0.06   0.04
  39   6     0.00   0.01  -0.01     0.00  -0.01  -0.01    -0.01   0.03   0.02
  40   6     0.02   0.01   0.00    -0.01   0.01  -0.01     0.02  -0.02   0.00
  41   6     0.01   0.01   0.01     0.01  -0.02   0.00    -0.01   0.02   0.00
  42   6     0.02   0.00   0.01     0.03  -0.03   0.01    -0.04   0.05  -0.01
  43   6    -0.03  -0.01  -0.05    -0.03   0.00  -0.02     0.08   0.01   0.04
  44   6     0.00   0.01   0.04    -0.02   0.02   0.04     0.03  -0.04  -0.08
  45   6    -0.10  -0.10   0.10     0.04   0.04  -0.05     0.01   0.00  -0.01
  46   6     0.05   0.07  -0.03    -0.01  -0.01   0.02     0.00   0.01   0.01
  47   6    -0.04  -0.09  -0.03     0.02   0.05   0.02     0.01   0.02   0.00
  48   6     0.02   0.01   0.04    -0.01   0.00  -0.02     0.00  -0.01   0.00
  49   6     0.01  -0.03   0.02     0.01  -0.03   0.00    -0.03   0.06  -0.01
  50   6    -0.01   0.03  -0.01     0.00   0.05   0.00     0.00  -0.10  -0.01
  51   6     0.03  -0.03  -0.02     0.01  -0.01   0.00    -0.04   0.04   0.00
  52   6    -0.03   0.04   0.01    -0.03   0.03  -0.01     0.06  -0.08   0.02
  53   6     0.02  -0.07   0.01     0.00   0.01   0.00    -0.02   0.01   0.01
  54   6    -0.01   0.02   0.00     0.01   0.02  -0.01     0.01  -0.04   0.00
  55   1     0.01  -0.04   0.02    -0.02  -0.01   0.01     0.03  -0.01   0.01
  56   1     0.01   0.00   0.01    -0.03  -0.03  -0.02    -0.05   0.07   0.00
  57   1    -0.02  -0.02  -0.01     0.05  -0.01  -0.02    -0.07  -0.03   0.01
  58   1     0.02   0.00   0.00    -0.02   0.00   0.00     0.06   0.00   0.01
  59   1     0.02   0.00   0.00    -0.03   0.00  -0.01     0.05   0.00   0.01
  60   1     0.02   0.00   0.00    -0.03   0.00  -0.01     0.05   0.00   0.01
  61   1    -0.04  -0.03  -0.01    -0.16  -0.07  -0.04    -0.14  -0.09  -0.01
  62   1     0.01   0.00   0.04    -0.02  -0.01   0.20     0.18   0.07  -0.04
  63   1     0.03   0.00   0.00     0.08   0.02   0.00     0.12   0.00  -0.02
  64   1     0.00   0.04  -0.02    -0.02   0.16  -0.11     0.01   0.10  -0.02
  65   1     0.01   0.00   0.00     0.05   0.02  -0.01     0.05  -0.07   0.03
  66   1    -0.01   0.03   0.12    -0.07   0.07   0.39     0.03   0.06   0.11
  67   1     0.00   0.04   0.08    -0.04   0.07   0.30     0.02   0.14   0.08
  68   1     0.02   0.07   0.01     0.02   0.17   0.09     0.01   0.17  -0.14
  69   1     0.00  -0.01  -0.01    -0.01   0.05   0.02     0.06  -0.07  -0.16
  70   1     0.02   0.00   0.00    -0.05   0.02  -0.09     0.10  -0.04   0.11
  71   1     0.01   0.01   0.02    -0.02   0.02  -0.03     0.09  -0.06   0.07
  72   1     0.03   0.03   0.04    -0.01   0.01  -0.04     0.06   0.05   0.09
  73   1     0.03   0.00  -0.05     0.00  -0.01  -0.04     0.05   0.00  -0.06
  74   1     0.03   0.01  -0.03    -0.01   0.00  -0.01     0.07   0.01  -0.06
  75   1     0.02  -0.11   0.00    -0.01   0.05   0.00     0.00   0.02  -0.01
  76   1    -0.08  -0.24   0.08     0.03   0.15  -0.05     0.00   0.04  -0.01
  77   1    -0.03  -0.10   0.00     0.01   0.05   0.00     0.00   0.02  -0.01
  78   1     0.01  -0.04   0.19     0.01   0.03  -0.08     0.00   0.01   0.00
  79   1    -0.02  -0.09  -0.03     0.00   0.05   0.01    -0.01   0.02   0.01
  80   1    -0.01   0.00   0.01    -0.03   0.02   0.00     0.04  -0.03  -0.01
  81   1     0.03   0.01   0.00    -0.04   0.04   0.00     0.10  -0.11  -0.03
  82   1     0.00   0.01   0.00    -0.03   0.00   0.00     0.06  -0.04  -0.01
  83   1    -0.03   0.00  -0.06    -0.03   0.01  -0.02     0.09   0.00   0.05
  84   1     0.01   0.01   0.05    -0.01   0.03   0.05     0.03  -0.06  -0.10
  85   1    -0.19  -0.10   0.08     0.07   0.02  -0.04     0.00  -0.02   0.00
  86   1    -0.11   0.00  -0.03     0.05   0.00  -0.02     0.01   0.00  -0.02
  87   1    -0.19  -0.18   0.18     0.08   0.07  -0.09     0.01   0.01  -0.02
  88   1     0.12   0.22  -0.10    -0.05  -0.08   0.05     0.00   0.00   0.01
  89   1     0.12   0.17  -0.03    -0.04  -0.05   0.02     0.00   0.00   0.00
  90   1    -0.07  -0.07  -0.22     0.03   0.04   0.10     0.01   0.01   0.01
  91   1    -0.06  -0.05  -0.02     0.03   0.01   0.02     0.02   0.00   0.00
  92   1    -0.07  -0.15  -0.04     0.04   0.08   0.02     0.02   0.05   0.01
  93   1    -0.07  -0.08  -0.03     0.05   0.05   0.02     0.03   0.01   0.00
  94   1     0.05   0.13  -0.01    -0.03  -0.06   0.00     0.00  -0.02   0.00
  95   1     0.04  -0.02   0.17    -0.02   0.01  -0.09     0.00   0.00  -0.03
  96   1     0.04   0.05   0.06    -0.02  -0.03  -0.03     0.00  -0.02   0.01
  97   1     0.03  -0.06   0.02     0.03  -0.08   0.00    -0.06   0.13   0.00
  98   1     0.02  -0.06   0.03     0.03  -0.08   0.03    -0.06   0.16  -0.07
  99   1     0.01  -0.02  -0.04     0.00  -0.01  -0.08    -0.02   0.01   0.13
 100   1    -0.01   0.08  -0.03     0.02   0.07  -0.02    -0.04  -0.13   0.04
 101   1     0.00  -0.02  -0.05     0.02   0.02  -0.03    -0.05  -0.02   0.06
 102   1    -0.01   0.05  -0.01     0.00   0.11   0.01     0.00  -0.21  -0.02
 103   1     0.07  -0.07  -0.04     0.02  -0.03  -0.01    -0.13   0.10   0.03
 104   1     0.04   0.01   0.05     0.02   0.02   0.04    -0.06  -0.04  -0.13
 105   1     0.05  -0.06  -0.04     0.03  -0.03   0.00    -0.09   0.10   0.05
 106   1    -0.05   0.08   0.03    -0.01   0.04  -0.01     0.02  -0.11   0.00
 107   1    -0.06   0.08   0.02    -0.05   0.06  -0.02     0.14  -0.17   0.03
 108   1     0.04   0.02   0.05     0.00   0.03  -0.01    -0.03  -0.08  -0.01
 109   1     0.02  -0.12   0.02    -0.01   0.00   0.01    -0.03   0.04   0.00
 110   1     0.07  -0.04  -0.01     0.00   0.01   0.00    -0.06  -0.02   0.03
 111   1     0.02  -0.10   0.02     0.01   0.01   0.00    -0.02   0.04   0.00
 112   1    -0.04   0.06   0.01    -0.01   0.05   0.00     0.03  -0.08  -0.02
 113   1     0.01   0.02  -0.01     0.03   0.02  -0.01     0.00  -0.04   0.01
 114   1     0.02   0.02  -0.02     0.04   0.03  -0.02    -0.02  -0.06   0.03
                    88                     89                     90
                    ?A                     ?A                     ?A
 Frequencies --   463.6098               481.1597               483.9510
 Red. masses --     3.9746                 7.4094                 6.0630
 Frc consts  --     0.5033                 1.0107                 0.8366
 IR Inten    --     1.0828                53.3197                79.9082
 Raman Activ --     0.0000                 0.0000                 0.0000
 Depolar     --     0.0000                 0.0000                 0.0000
 Atom AN      X      Y      Z        X      Y      Z        X      Y      Z
   1   8     0.03   0.00   0.00    -0.07   0.01   0.02    -0.05   0.01   0.00
   2  12     0.00  -0.04   0.00    -0.04  -0.13  -0.04     0.01   0.14  -0.05
   3   8    -0.05   0.00  -0.03     0.20   0.29  -0.01    -0.08  -0.05   0.35
   4   6     0.01   0.01  -0.02    -0.01  -0.04   0.04    -0.01  -0.02   0.02
   5   7    -0.03   0.03   0.02     0.02   0.00   0.02     0.01   0.01   0.00
   6   7     0.04   0.01   0.04     0.01   0.02   0.01    -0.01  -0.02   0.02
   7   8    -0.02   0.01  -0.02     0.05  -0.01   0.07     0.00   0.00   0.03
   8   6    -0.03   0.04  -0.01     0.02   0.00   0.01     0.00   0.00   0.00
   9   6    -0.03   0.03   0.00     0.01   0.01  -0.01    -0.01  -0.03   0.00
  10   6    -0.02   0.01   0.02     0.00   0.02  -0.01     0.00  -0.03   0.02
  11   8    -0.04  -0.02   0.02     0.10   0.10   0.02     0.09   0.06   0.03
  12   6    -0.01   0.02   0.01     0.00  -0.13  -0.01     0.04  -0.06  -0.07
  13   6    -0.04   0.05   0.00    -0.01  -0.10  -0.08     0.02  -0.14  -0.09
  14   6    -0.03  -0.02   0.01     0.07   0.00  -0.05     0.06   0.00  -0.02
  15   8     0.04   0.01  -0.02    -0.21  -0.04   0.15     0.10   0.03   0.01
  16   6     0.04   0.00   0.01    -0.08   0.00  -0.02    -0.06   0.00  -0.02
  17   8     0.13   0.02   0.01     0.11   0.02   0.00     0.11   0.02   0.05
  18   6     0.06  -0.04   0.01     0.10  -0.02   0.07    -0.03  -0.11  -0.12
  19   8    -0.09   0.00   0.07     0.02   0.05   0.19    -0.09  -0.08  -0.01
  20   8    -0.07  -0.03   0.00    -0.09  -0.03  -0.02    -0.01  -0.01   0.02
  21   6    -0.04   0.02   0.01    -0.08  -0.02   0.00     0.03   0.06   0.00
  22   6     0.00   0.01   0.03    -0.05   0.00   0.03     0.09   0.02  -0.02
  23   6     0.04  -0.03  -0.07     0.06  -0.03  -0.04     0.01  -0.04  -0.04
  24   8    -0.04   0.02   0.00     0.02  -0.03  -0.02    -0.09   0.07   0.05
  25   6     0.01  -0.01   0.01     0.00   0.01   0.00     0.01   0.00   0.02
  26   6     0.02   0.03  -0.06     0.01   0.01  -0.04     0.00   0.02  -0.03
  27   6     0.01  -0.01   0.01    -0.05   0.01  -0.16    -0.10   0.02  -0.16
  28   6     0.01   0.00   0.00     0.00  -0.01  -0.07     0.00   0.00  -0.03
  29   6    -0.03  -0.03   0.01     0.02   0.07  -0.02     0.00  -0.03   0.01
  30   6     0.10  -0.13  -0.03     0.00   0.01   0.00    -0.02  -0.01   0.01
  31   6     0.00  -0.05   0.00     0.02   0.07  -0.02     0.00  -0.03   0.01
  32   6     0.01  -0.02   0.01     0.01   0.02  -0.02     0.00  -0.02   0.02
  33   6     0.03   0.03   0.00    -0.01  -0.05   0.01     0.00   0.02   0.00
  34   6     0.01  -0.02   0.03     0.01   0.03  -0.02    -0.01  -0.01   0.01
  35   6     0.00  -0.03   0.02     0.01   0.06  -0.02    -0.02  -0.03   0.01
  36   6     0.02   0.00  -0.03    -0.02  -0.02   0.02    -0.01   0.01  -0.02
  37   6     0.02   0.01  -0.01     0.00  -0.02   0.00    -0.01   0.01  -0.01
  38   6     0.05  -0.10  -0.04     0.01  -0.01   0.00     0.00   0.02  -0.01
  39   6     0.00  -0.04  -0.02     0.00  -0.01   0.00     0.01   0.01   0.00
  40   6    -0.06   0.03   0.00    -0.02   0.01   0.01     0.02   0.01   0.00
  41   6     0.01  -0.06  -0.02     0.00  -0.02   0.00     0.00   0.01   0.01
  42   6     0.06  -0.09   0.00     0.00  -0.01   0.00     0.00   0.00   0.01
  43   6    -0.11  -0.01  -0.04    -0.01  -0.01   0.00     0.00   0.00  -0.02
  44   6    -0.06   0.06   0.10    -0.01   0.00   0.00     0.02   0.00  -0.01
  45   6     0.02   0.02  -0.02    -0.02  -0.02   0.04     0.01   0.01  -0.02
  46   6    -0.01   0.00   0.01    -0.01  -0.01  -0.02     0.00  -0.01   0.00
  47   6     0.00   0.00   0.01    -0.01  -0.03  -0.02     0.01   0.01   0.01
  48   6    -0.01   0.01  -0.02     0.01  -0.01   0.02     0.00   0.01  -0.02
  49   6     0.03  -0.07   0.01     0.00   0.00   0.00     0.00   0.00  -0.01
  50   6     0.00   0.14   0.02     0.00   0.00   0.00     0.00  -0.01   0.00
  51   6     0.05  -0.04   0.01     0.00   0.00   0.00     0.01  -0.01  -0.01
  52   6    -0.08   0.10  -0.03     0.00   0.01   0.00    -0.01   0.01   0.01
  53   6     0.03   0.01  -0.01     0.01   0.01  -0.01     0.00  -0.01   0.00
  54   6    -0.01   0.06  -0.01    -0.01  -0.01   0.00     0.01   0.00   0.00
  55   1    -0.05   0.03  -0.01     0.01   0.01  -0.03    -0.02  -0.03   0.00
  56   1    -0.02   0.05   0.00    -0.30  -0.08  -0.11     0.02  -0.14  -0.12
  57   1    -0.05  -0.02   0.01     0.16   0.01  -0.08     0.12   0.00  -0.03
  58   1     0.04   0.00   0.01    -0.07  -0.01  -0.01    -0.06   0.00  -0.01
  59   1     0.04   0.00   0.01    -0.09   0.00  -0.02    -0.07   0.00  -0.02
  60   1     0.03   0.00   0.01    -0.09   0.00  -0.02    -0.05   0.00  -0.01
  61   1    -0.03  -0.02   0.01    -0.10  -0.02   0.01     0.10   0.02  -0.02
  62   1     0.10   0.03  -0.08     0.13   0.04  -0.04     0.05   0.01  -0.03
  63   1     0.04   0.00  -0.02     0.05   0.01  -0.02    -0.01   0.00   0.03
  64   1     0.01   0.01   0.01     0.00   0.06  -0.04     0.01  -0.04   0.09
  65   1     0.02  -0.05   0.02     0.04  -0.04   0.03    -0.05   0.05  -0.02
  66   1     0.03   0.03  -0.03     0.01   0.01  -0.05     0.00   0.01  -0.02
  67   1     0.02   0.05  -0.04    -0.02   0.01   0.02     0.00   0.03  -0.01
  68   1     0.02   0.06  -0.09    -0.03   0.03  -0.09     0.01   0.03  -0.05
  69   1     0.02  -0.05  -0.09    -0.01   0.18  -0.03    -0.15   0.17   0.19
  70   1     0.06  -0.02   0.07    -0.19   0.06  -0.37    -0.25   0.08  -0.42
  71   1     0.04  -0.03   0.03    -0.03   0.04  -0.12    -0.23   0.14  -0.27
  72   1     0.03   0.02   0.06    -0.03  -0.01  -0.14    -0.03  -0.01  -0.09
  73   1     0.02   0.00  -0.02    -0.01  -0.01  -0.10    -0.01   0.00  -0.04
  74   1     0.04   0.01  -0.03    -0.04   0.01  -0.01    -0.03   0.01   0.02
  75   1     0.00   0.02   0.01     0.01  -0.04   0.00     0.00   0.00   0.01
  76   1     0.04   0.09  -0.03    -0.03  -0.14   0.05     0.00   0.07  -0.03
  77   1     0.01   0.01   0.01     0.00  -0.01  -0.01     0.00   0.01   0.01
  78   1     0.02   0.00  -0.05    -0.03  -0.02   0.04     0.00   0.01  -0.03
  79   1     0.02   0.01  -0.01     0.00  -0.03   0.01    -0.01   0.01  -0.02
  80   1    -0.06   0.05   0.00     0.00   0.00   0.00     0.01   0.00   0.00
  81   1    -0.17   0.17   0.04    -0.04   0.03   0.01     0.03   0.00  -0.01
  82   1    -0.06   0.02   0.00     0.01  -0.02   0.00     0.00  -0.01   0.01
  83   1    -0.12   0.01  -0.04    -0.01  -0.01   0.00    -0.01   0.01  -0.03
  84   1    -0.04   0.09   0.13    -0.01   0.00   0.00     0.02  -0.01  -0.01
  85   1     0.02   0.03  -0.03    -0.01   0.01   0.02     0.03   0.00  -0.01
  86   1     0.01   0.01  -0.01    -0.02  -0.01   0.05     0.02   0.00  -0.01
  87   1     0.02   0.02  -0.02    -0.03  -0.02   0.05     0.03   0.02  -0.04
  88   1    -0.05  -0.04   0.02     0.03   0.02  -0.02    -0.01  -0.03   0.01
  89   1    -0.01   0.00   0.03     0.00  -0.02  -0.03    -0.02  -0.02   0.00
  90   1     0.01   0.03   0.05    -0.02  -0.05  -0.05     0.01   0.01   0.03
  91   1    -0.01  -0.01   0.02    -0.01   0.01  -0.03     0.01  -0.03   0.01
  92   1    -0.01  -0.02   0.01    -0.02  -0.04  -0.03     0.01   0.01   0.02
  93   1     0.00   0.03   0.03    -0.03  -0.04  -0.03     0.02   0.02   0.02
  94   1    -0.03   0.00   0.00     0.02   0.02   0.00     0.00   0.01  -0.01
  95   1    -0.03   0.02  -0.02     0.01  -0.02   0.06     0.00   0.01  -0.02
  96   1    -0.01   0.04  -0.06     0.01   0.00   0.04     0.00   0.01  -0.02
  97   1     0.09  -0.17  -0.02     0.00   0.00  -0.01    -0.02   0.00   0.01
  98   1     0.09  -0.19   0.10     0.00  -0.01   0.00    -0.02   0.00  -0.03
  99   1     0.00  -0.01  -0.18     0.01   0.00   0.00     0.01   0.01  -0.01
 100   1     0.07   0.16  -0.04     0.01  -0.01   0.00    -0.01  -0.01   0.01
 101   1     0.07   0.05  -0.07     0.01   0.00   0.00    -0.01   0.00   0.01
 102   1     0.01   0.30   0.04     0.00   0.02   0.01     0.00  -0.04  -0.01
 103   1     0.15  -0.11  -0.03     0.00   0.01   0.00     0.03  -0.04  -0.02
 104   1     0.07   0.06   0.17     0.00   0.01   0.00     0.01  -0.01   0.02
 105   1     0.11  -0.11  -0.04     0.00  -0.01  -0.01     0.01  -0.02   0.00
 106   1     0.00   0.13  -0.02     0.01   0.00   0.00    -0.03   0.03   0.01
 107   1    -0.18   0.22  -0.06    -0.01   0.02  -0.01    -0.01   0.01   0.01
 108   1     0.02   0.12  -0.02     0.00   0.01  -0.01     0.01  -0.01   0.03
 109   1     0.02  -0.03   0.01     0.01   0.03  -0.02     0.00  -0.03   0.01
 110   1     0.08   0.04  -0.03    -0.01   0.00  -0.01     0.01  -0.01   0.00
 111   1     0.03  -0.02   0.00    -0.01   0.00  -0.01     0.00  -0.03   0.01
 112   1    -0.04   0.12   0.02     0.01  -0.03   0.00    -0.02   0.03  -0.01
 113   1     0.01   0.05  -0.02    -0.03  -0.01   0.01     0.04   0.00  -0.02
 114   1     0.03   0.08  -0.05    -0.04  -0.01   0.01     0.03   0.01  -0.02
                    91                     92                     93
                    ?A                     ?A                     ?A
 Frequencies --   508.9800               531.3687               534.1529
 Red. masses --     3.3869                 4.8475                 3.7569
 Frc consts  --     0.5170                 0.8064                 0.6315
 IR Inten    --     1.5190                 7.0154                 0.1055
 Raman Activ --     0.0000                 0.0000                 0.0000
 Depolar     --     0.0000                 0.0000                 0.0000
 Atom AN      X      Y      Z        X      Y      Z        X      Y      Z
   1   8     0.00   0.00   0.00     0.00   0.00   0.00     0.00   0.00   0.00
   2  12     0.04   0.02  -0.01    -0.02   0.06   0.00     0.00  -0.02   0.00
   3   8    -0.02  -0.02   0.01     0.00  -0.01   0.01     0.00   0.00   0.00
   4   6     0.00   0.00   0.00     0.00   0.00   0.00     0.00   0.00   0.00
   5   7     0.09  -0.11   0.00    -0.10  -0.04   0.05     0.02   0.01  -0.03
   6   7     0.00   0.13   0.01     0.18   0.07  -0.07    -0.03  -0.02   0.04
   7   8     0.00   0.00   0.00     0.00   0.00   0.00     0.00   0.00   0.00
   8   6     0.12  -0.10   0.00    -0.07  -0.02   0.05     0.10   0.07   0.22
   9   6     0.13   0.00  -0.05    -0.03   0.14  -0.03     0.00  -0.03   0.00
  10   6     0.02   0.13  -0.04     0.07   0.08  -0.06    -0.10  -0.07  -0.20
  11   8     0.00   0.00  -0.01     0.01   0.00   0.00     0.00   0.00   0.00
  12   6     0.00   0.01   0.00     0.00   0.00   0.00     0.00   0.00   0.00
  13   6     0.00   0.00   0.00     0.00  -0.01   0.00     0.00   0.00   0.00
  14   6     0.00   0.01   0.00     0.00   0.00   0.00     0.00   0.00   0.00
  15   8     0.01   0.01   0.00     0.00   0.00   0.00     0.00   0.00   0.00
  16   6     0.00   0.00   0.00     0.00   0.00   0.00     0.00   0.00   0.00
  17   8     0.00   0.00   0.00     0.01   0.00   0.00     0.00   0.00   0.00
  18   6    -0.01  -0.01  -0.01     0.00  -0.01  -0.01     0.00   0.00   0.00
  19   8    -0.01  -0.01  -0.02    -0.01  -0.01  -0.01     0.00   0.00   0.00
  20   8     0.00   0.00   0.00     0.00   0.00   0.00     0.00   0.00   0.00
  21   6     0.00   0.00   0.00     0.00   0.01   0.00     0.00   0.00   0.00
  22   6     0.00   0.00   0.00     0.01   0.00   0.00     0.00   0.00   0.00
  23   6     0.00  -0.01   0.00    -0.01   0.00   0.00     0.00   0.00   0.00
  24   8     0.00   0.00   0.00     0.00   0.00   0.00     0.00   0.00   0.00
  25   6     0.00   0.00   0.00     0.00   0.00   0.00     0.00   0.00   0.00
  26   6     0.00   0.00   0.01     0.00   0.00   0.00     0.00   0.00   0.00
  27   6     0.00   0.00   0.00     0.00   0.00   0.00     0.00   0.00   0.00
  28   6     0.00   0.00   0.00     0.00   0.00   0.00     0.00   0.00   0.00
  29   6     0.06  -0.09   0.02    -0.06  -0.03   0.01     0.00  -0.03  -0.03
  30   6     0.01   0.06  -0.01     0.18  -0.03  -0.07     0.00  -0.03   0.03
  31   6    -0.01   0.05   0.03    -0.03   0.02  -0.04    -0.08   0.02   0.01
  32   6    -0.02   0.04   0.01    -0.02   0.03  -0.08    -0.11  -0.04  -0.05
  33   6    -0.08  -0.04   0.02     0.04  -0.09   0.00    -0.02   0.02  -0.06
  34   6    -0.02   0.03  -0.06     0.06   0.04  -0.04     0.05  -0.07  -0.10
  35   6    -0.01  -0.01  -0.03     0.05   0.03   0.01     0.06  -0.07  -0.01
  36   6    -0.06   0.04   0.04     0.03  -0.02   0.01    -0.04   0.05   0.06
  37   6    -0.06   0.01   0.00     0.08  -0.01   0.03     0.04   0.02   0.04
  38   6     0.02  -0.06   0.02     0.06   0.01   0.05     0.06   0.04  -0.02
  39   6     0.00  -0.07  -0.01    -0.01   0.09   0.13     0.08   0.04   0.03
  40   6    -0.10   0.03   0.02     0.01  -0.15   0.04     0.02   0.02   0.03
  41   6     0.02  -0.05  -0.05    -0.08   0.01   0.03    -0.02  -0.05   0.09
  42   6     0.02  -0.03  -0.03    -0.11   0.02  -0.05    -0.03  -0.05   0.04
  43   6    -0.04  -0.03   0.04    -0.05  -0.05   0.03     0.01   0.04  -0.06
  44   6    -0.04   0.00   0.02    -0.16  -0.07  -0.04    -0.02   0.00  -0.04
  45   6    -0.01  -0.02   0.01    -0.01  -0.01   0.02    -0.01  -0.02   0.01
  46   6     0.01   0.00  -0.01     0.00   0.01   0.01     0.02   0.04   0.02
  47   6     0.01   0.01   0.00    -0.01   0.00  -0.01     0.02   0.05   0.01
  48   6     0.01  -0.01   0.01     0.00  -0.02   0.02     0.00  -0.02   0.01
  49   6     0.01  -0.01   0.01     0.01   0.02   0.00    -0.02   0.03  -0.04
  50   6     0.00   0.04   0.01     0.01  -0.05  -0.01     0.00  -0.01   0.01
  51   6     0.00   0.01   0.02     0.01   0.00  -0.02     0.01  -0.02  -0.02
  52   6    -0.01   0.02  -0.01    -0.01   0.02  -0.01    -0.02   0.02  -0.01
  53   6    -0.07   0.07   0.00    -0.11  -0.08   0.06     0.03   0.03  -0.03
  54   6    -0.07  -0.05   0.03     0.08  -0.01  -0.02    -0.04   0.03   0.01
  55   1     0.23   0.02  -0.09     0.01   0.14  -0.04     0.00  -0.03   0.04
  56   1     0.02   0.00   0.00     0.01  -0.01   0.00     0.00   0.00   0.00
  57   1     0.00   0.00   0.00     0.00   0.00   0.00    -0.01   0.00   0.00
  58   1     0.00   0.00   0.00     0.00   0.00   0.00     0.00   0.00   0.00
  59   1     0.00   0.00   0.00     0.00   0.00   0.00     0.00   0.00   0.00
  60   1     0.00   0.00   0.00     0.00   0.00   0.00     0.00   0.00   0.00
  61   1     0.00   0.00   0.00     0.01  -0.01   0.00     0.00   0.00   0.00
  62   1     0.00  -0.01   0.00     0.00   0.00   0.00     0.00   0.00   0.00
  63   1     0.00   0.00   0.00     0.00   0.00   0.01     0.00   0.00   0.00
  64   1     0.00   0.00   0.00     0.00   0.00   0.01     0.00   0.00   0.00
  65   1     0.00   0.00   0.00     0.00   0.01   0.00     0.00   0.00   0.00
  66   1    -0.01   0.01   0.01     0.00  -0.01   0.01     0.00   0.00   0.00
  67   1     0.00   0.00   0.01     0.00   0.01   0.00     0.00   0.00  -0.01
  68   1     0.00   0.01   0.00     0.00   0.00   0.00     0.00   0.00   0.00
  69   1    -0.01   0.00   0.01    -0.01   0.00   0.02     0.00   0.00  -0.01
  70   1     0.00   0.00   0.00    -0.01   0.00  -0.02     0.00   0.00   0.00
  71   1    -0.01   0.01   0.00    -0.01   0.01  -0.01     0.00   0.00   0.00
  72   1    -0.01   0.00  -0.01     0.00   0.00  -0.01     0.00   0.00   0.01
  73   1     0.00   0.00   0.01     0.00   0.00   0.00     0.00   0.00   0.00
  74   1    -0.01   0.00   0.01     0.00   0.00   0.00     0.00   0.00   0.00
  75   1     0.02   0.04  -0.04    -0.04   0.06  -0.07    -0.10  -0.06  -0.05
  76   1    -0.09  -0.09   0.06     0.03  -0.18   0.08     0.02   0.12   0.02
  77   1     0.04   0.08  -0.06     0.01   0.05  -0.06     0.06  -0.03  -0.11
  78   1    -0.06   0.05   0.07     0.02  -0.02   0.03    -0.04   0.07   0.11
  79   1    -0.06   0.01   0.00     0.09  -0.01   0.06     0.07   0.05   0.09
  80   1     0.02  -0.05  -0.04    -0.05   0.21   0.11     0.07   0.04   0.05
  81   1    -0.18   0.13   0.07     0.06  -0.24  -0.03    -0.03   0.04  -0.05
  82   1     0.05  -0.04  -0.05    -0.02   0.11   0.07    -0.04  -0.05   0.09
  83   1    -0.04  -0.03   0.07    -0.05  -0.04   0.01     0.00   0.05  -0.11
  84   1    -0.03   0.02   0.04    -0.18  -0.10  -0.08    -0.04   0.00  -0.07
  85   1    -0.02  -0.09   0.04    -0.03   0.03   0.00    -0.04  -0.11   0.05
  86   1     0.02  -0.05  -0.01    -0.02   0.01   0.01     0.02  -0.03  -0.04
  87   1     0.03   0.01  -0.05    -0.04  -0.04   0.07     0.02   0.00  -0.04
  88   1     0.10   0.05   0.01    -0.03   0.02  -0.01     0.08   0.08   0.02
  89   1    -0.01  -0.06  -0.05     0.02   0.06   0.03     0.01   0.01   0.00
  90   1     0.02  -0.04  -0.05    -0.02   0.01   0.00     0.03   0.00  -0.02
  91   1     0.04  -0.05  -0.01    -0.03   0.12  -0.01     0.03   0.07   0.00
  92   1     0.04   0.07   0.02    -0.05  -0.07  -0.04     0.02   0.06   0.02
  93   1     0.04  -0.01   0.00    -0.06  -0.01  -0.04     0.01   0.03   0.00
  94   1     0.04   0.01  -0.03    -0.04  -0.06   0.07    -0.02  -0.08   0.05
  95   1     0.04  -0.01   0.00    -0.04  -0.01   0.01    -0.02   0.00  -0.05
  96   1     0.02  -0.05   0.07    -0.02   0.02  -0.04    -0.01  -0.02   0.00
  97   1     0.04  -0.01  -0.03     0.04   0.21  -0.14    -0.03   0.03  -0.03
  98   1     0.04  -0.05   0.06     0.09  -0.04   0.12    -0.03   0.04  -0.05
  99   1     0.02   0.00  -0.03     0.13   0.02   0.08    -0.02   0.02  -0.02
 100   1     0.04   0.02  -0.02     0.10  -0.18  -0.03     0.02  -0.07   0.01
 101   1     0.03   0.01  -0.01     0.09  -0.04   0.01     0.01   0.03   0.04
 102   1     0.01   0.11   0.03     0.03   0.10   0.04     0.01  -0.01   0.02
 103   1     0.01   0.05   0.03     0.03   0.07   0.01     0.03  -0.08  -0.04
 104   1     0.01   0.04   0.02     0.03   0.04  -0.02     0.00  -0.02   0.03
 105   1     0.02  -0.02  -0.03     0.04  -0.05  -0.10     0.00   0.00   0.02
 106   1     0.08  -0.02  -0.03     0.08   0.01  -0.01    -0.08   0.05   0.01
 107   1    -0.05   0.07  -0.04    -0.07   0.09  -0.05     0.00   0.00   0.01
 108   1     0.00   0.06  -0.06     0.02   0.04  -0.03    -0.01  -0.01   0.03
 109   1    -0.07   0.26  -0.05    -0.10  -0.05   0.04     0.14   0.26  -0.25
 110   1    -0.30  -0.07   0.12    -0.12  -0.09   0.05    -0.04  -0.03  -0.22
 111   1    -0.08   0.25  -0.05    -0.12  -0.09   0.06    -0.14  -0.25  -0.01
 112   1     0.12  -0.28   0.01     0.12  -0.05  -0.01     0.06   0.07   0.17
 113   1    -0.19  -0.09   0.09     0.04  -0.01   0.00    -0.28   0.17   0.18
 114   1    -0.26  -0.07   0.12     0.06  -0.01  -0.01     0.23  -0.04   0.06
                    94                     95                     96
                    ?A                     ?A                     ?A
 Frequencies --   548.7917               550.4850               560.1240
 Red. masses --     5.3094                 4.9453                 4.4190
 Frc consts  --     0.9421                 0.8829                 0.8169
 IR Inten    --     9.8970                 3.3375                 0.5373
 Raman Activ --     0.0000                 0.0000                 0.0000
 Depolar     --     0.0000                 0.0000                 0.0000
 Atom AN      X      Y      Z        X      Y      Z        X      Y      Z
   1   8     0.04   0.01  -0.01     0.03   0.01   0.00     0.01   0.00   0.00
   2  12    -0.01   0.00   0.00     0.02   0.03  -0.01     0.02   0.01   0.00
   3   8     0.11   0.03  -0.05     0.08   0.01  -0.02     0.02  -0.01   0.01
   4   6     0.00  -0.01  -0.04     0.00  -0.01  -0.03     0.00   0.00  -0.01
   5   7     0.08  -0.01  -0.06    -0.08   0.02   0.09    -0.09  -0.03  -0.06
   6   7     0.01   0.02  -0.04    -0.01  -0.02   0.07    -0.08  -0.03  -0.08
   7   8    -0.02   0.02  -0.03    -0.02   0.01  -0.02    -0.01   0.01  -0.01
   8   6     0.03  -0.04  -0.03    -0.03   0.05   0.03     0.00   0.02  -0.02
   9   6     0.03  -0.03   0.02    -0.03   0.03  -0.03     0.02   0.02   0.04
  10   6    -0.04   0.03   0.00     0.05  -0.03   0.02    -0.01  -0.03  -0.05
  11   8    -0.07  -0.02   0.06    -0.05  -0.01   0.04    -0.02   0.00   0.01
  12   6    -0.03   0.02   0.01    -0.03   0.02   0.00    -0.01   0.01   0.00
  13   6     0.04   0.00  -0.03     0.03   0.00  -0.02     0.02  -0.01  -0.01
  14   6    -0.07  -0.07   0.03    -0.05  -0.05   0.02    -0.02  -0.02   0.01
  15   8    -0.08   0.02   0.00    -0.05   0.02   0.00    -0.01   0.01  -0.01
  16   6     0.04   0.00   0.01     0.03   0.00   0.01     0.01   0.00   0.00
  17   8    -0.07  -0.11  -0.03    -0.05  -0.08  -0.02     0.00   0.00   0.01
  18   6    -0.07  -0.12   0.00    -0.05  -0.09  -0.01     0.00   0.00  -0.01
  19   8     0.01  -0.08   0.13     0.01  -0.06   0.08     0.00   0.00  -0.01
  20   8     0.01   0.02   0.09     0.01   0.01   0.06     0.00   0.00   0.00
  21   6     0.09   0.11   0.03     0.06   0.08   0.02     0.00   0.00   0.00
  22   6     0.09  -0.05  -0.10     0.06  -0.04  -0.07     0.00   0.00   0.00
  23   6    -0.11   0.07  -0.05    -0.08   0.05  -0.03     0.01   0.00   0.00
  24   8     0.03   0.12   0.08     0.03   0.08   0.06     0.00   0.00   0.00
  25   6     0.00   0.01   0.00     0.00   0.01   0.00     0.00   0.00   0.00
  26   6     0.02   0.01  -0.12     0.02   0.01  -0.08     0.00   0.00   0.00
  27   6     0.00   0.00  -0.04     0.00   0.00  -0.03     0.00   0.00  -0.01
  28   6     0.01   0.00   0.02     0.01   0.00   0.01     0.00   0.00   0.01
  29   6     0.07   0.04  -0.02    -0.08  -0.08   0.04    -0.06  -0.09   0.06
  30   6     0.08  -0.06  -0.03    -0.09   0.07   0.03    -0.08   0.03   0.05
  31   6     0.05  -0.02   0.03    -0.07   0.03  -0.03     0.05  -0.03  -0.04
  32   6     0.05  -0.02   0.09    -0.07   0.04  -0.12     0.10   0.13  -0.02
  33   6    -0.03   0.09   0.02     0.02  -0.12  -0.02     0.02  -0.14   0.10
  34   6    -0.06  -0.02   0.06     0.08   0.03  -0.09    -0.02   0.15   0.06
  35   6    -0.06  -0.01  -0.02     0.08   0.00   0.03    -0.04   0.08   0.01
  36   6    -0.01   0.00  -0.02    -0.01   0.01   0.03     0.08  -0.08  -0.05
  37   6    -0.11   0.01  -0.03     0.14  -0.01   0.04    -0.03  -0.02  -0.01
  38   6     0.05   0.01  -0.01    -0.06  -0.02   0.02     0.08   0.02  -0.06
  39   6     0.02   0.07   0.06    -0.04  -0.09  -0.09     0.15  -0.01   0.03
  40   6     0.05  -0.06   0.03    -0.05   0.06  -0.04    -0.03   0.11   0.08
  41   6    -0.04   0.01   0.06     0.04   0.01  -0.09     0.04  -0.14   0.12
  42   6    -0.05  -0.01   0.00     0.07   0.02   0.01    -0.05  -0.06   0.04
  43   6     0.01   0.02  -0.03    -0.01  -0.03   0.04     0.04   0.09  -0.09
  44   6    -0.07  -0.03  -0.02     0.11   0.04   0.03    -0.06  -0.01  -0.03
  45   6     0.01   0.01  -0.02    -0.02  -0.02   0.02     0.00   0.01   0.00
  46   6    -0.01  -0.02  -0.01     0.01   0.02   0.01    -0.01  -0.02  -0.01
  47   6     0.00  -0.01   0.00     0.00   0.01  -0.01    -0.02  -0.04  -0.02
  48   6     0.00   0.01  -0.02     0.00  -0.02   0.02     0.00   0.00   0.01
  49   6     0.00   0.01  -0.01     0.00  -0.01   0.01    -0.02   0.01  -0.03
  50   6     0.00  -0.02   0.00    -0.01   0.03   0.00     0.00   0.00   0.01
  51   6     0.00  -0.01  -0.01    -0.01   0.01   0.01     0.00  -0.01   0.00
  52   6    -0.01   0.01   0.00     0.01  -0.01   0.00    -0.03   0.03  -0.01
  53   6     0.01   0.00   0.00     0.00   0.01   0.00     0.01   0.04  -0.02
  54   6    -0.07   0.04   0.01     0.08  -0.04  -0.01     0.02  -0.02  -0.01
  55   1     0.09  -0.01   0.04    -0.10   0.00  -0.07     0.01   0.02   0.09
  56   1     0.06   0.00  -0.05     0.06   0.00  -0.04     0.04  -0.01  -0.01
  57   1    -0.08  -0.07   0.04    -0.07  -0.05   0.02    -0.02  -0.02   0.01
  58   1     0.05  -0.01   0.01     0.03   0.00   0.01     0.01   0.00   0.00
  59   1     0.03  -0.01   0.01     0.03   0.00   0.01     0.01   0.00   0.00
  60   1     0.05  -0.01   0.01     0.04  -0.01   0.01     0.01   0.00   0.00
  61   1     0.09  -0.06  -0.10     0.06  -0.04  -0.07     0.00   0.00   0.00
  62   1    -0.08   0.10  -0.07    -0.05   0.07  -0.05     0.00   0.00   0.01
  63   1     0.01  -0.04   0.15     0.01  -0.03   0.11     0.00   0.00   0.00
  64   1    -0.02   0.02   0.09    -0.01   0.02   0.06     0.00   0.00   0.00
  65   1    -0.10   0.17  -0.06    -0.07   0.13  -0.04     0.00   0.00   0.00
  66   1     0.10  -0.07  -0.09     0.07  -0.04  -0.06    -0.01   0.01   0.00
  67   1     0.13   0.05  -0.32     0.09   0.03  -0.22    -0.01   0.00   0.01
  68   1     0.07  -0.09   0.02     0.05  -0.06   0.01    -0.01   0.00   0.00
  69   1    -0.02   0.02   0.03    -0.01   0.02   0.03    -0.01   0.01   0.02
  70   1    -0.03   0.01  -0.06    -0.03   0.01  -0.06    -0.01   0.00  -0.02
  71   1    -0.03   0.01  -0.08    -0.03   0.01  -0.07    -0.02   0.01  -0.03
  72   1     0.05   0.08   0.15     0.04   0.06   0.11     0.01   0.02   0.04
  73   1     0.06   0.00  -0.08     0.05   0.00  -0.06     0.02   0.00  -0.02
  74   1     0.07   0.03  -0.05     0.05   0.02  -0.04     0.01   0.00  -0.01
  75   1     0.06  -0.06   0.09    -0.08   0.10  -0.14     0.08   0.25  -0.03
  76   1    -0.03   0.14  -0.08     0.03  -0.18   0.10    -0.03  -0.34   0.09
  77   1    -0.01  -0.07   0.10     0.02   0.11  -0.14    -0.02   0.21   0.04
  78   1     0.00  -0.01  -0.05    -0.01   0.02   0.08     0.08  -0.09  -0.08
  79   1    -0.12   0.00  -0.06     0.15   0.00   0.07    -0.04  -0.04  -0.04
  80   1    -0.03   0.12   0.09     0.02  -0.16  -0.12     0.16  -0.08   0.05
  81   1     0.06  -0.10  -0.04    -0.06   0.11   0.05    -0.17   0.22  -0.01
  82   1    -0.05   0.08   0.08     0.04  -0.06  -0.11     0.08  -0.20   0.10
  83   1     0.00   0.03  -0.05     0.00  -0.04   0.07     0.03   0.10  -0.13
  84   1    -0.08  -0.04  -0.04     0.12   0.06   0.06    -0.08  -0.01  -0.06
  85   1     0.03   0.01  -0.01    -0.04  -0.03   0.02     0.01   0.13  -0.06
  86   1     0.01   0.00   0.00    -0.01  -0.01   0.00    -0.04   0.05   0.03
  87   1     0.03   0.02  -0.03    -0.02  -0.03   0.03    -0.07  -0.04   0.11
  88   1     0.00  -0.03   0.00     0.01   0.05   0.00    -0.13  -0.07  -0.03
  89   1    -0.02  -0.04  -0.02     0.01   0.03   0.02     0.03   0.08   0.05
  90   1     0.01  -0.01   0.01     0.00   0.00  -0.01    -0.05   0.03   0.02
  91   1     0.04  -0.13   0.00    -0.04   0.17   0.00    -0.03  -0.02  -0.01
  92   1     0.05   0.09   0.04    -0.06  -0.11  -0.05    -0.02  -0.04  -0.03
  93   1     0.07   0.00   0.03    -0.07   0.00  -0.03    -0.02  -0.05  -0.02
  94   1     0.06   0.07  -0.09    -0.08  -0.10   0.11     0.02   0.05  -0.02
  95   1     0.05   0.01   0.00    -0.07  -0.01  -0.01     0.02  -0.01   0.06
  96   1     0.02  -0.04   0.07    -0.03   0.06  -0.10     0.01   0.00   0.03
  97   1     0.01   0.08  -0.06    -0.01  -0.12   0.09    -0.01   0.04  -0.05
  98   1     0.03  -0.02   0.04    -0.04   0.02  -0.06     0.00   0.00  -0.01
  99   1     0.05   0.01   0.03    -0.06  -0.01  -0.04     0.00   0.02  -0.03
 100   1     0.04  -0.09  -0.01    -0.07   0.12   0.02     0.05  -0.08   0.00
 101   1     0.04  -0.01   0.01    -0.06   0.02  -0.01     0.04   0.03   0.03
 102   1     0.01   0.04   0.02    -0.02  -0.06  -0.03     0.01   0.05   0.03
 103   1     0.01  -0.04  -0.02    -0.02   0.06   0.03     0.02  -0.15  -0.06
 104   1    -0.01  -0.02   0.01     0.00   0.02  -0.03    -0.02  -0.04   0.07
 105   1    -0.01   0.01   0.01     0.00  -0.01  -0.03    -0.03   0.04   0.12
 106   1    -0.03   0.02   0.00     0.05  -0.03   0.00    -0.13   0.06   0.00
 107   1     0.00   0.00   0.01     0.00   0.00  -0.01     0.03  -0.05   0.03
 108   1     0.00   0.00   0.01     0.01   0.00  -0.01    -0.04  -0.02   0.03
 109   1     0.00   0.01   0.01     0.01   0.00  -0.01     0.01   0.06  -0.02
 110   1    -0.02  -0.02   0.03     0.02   0.02  -0.02    -0.01   0.03  -0.03
 111   1     0.02   0.05  -0.01    -0.02  -0.04   0.01     0.02   0.04  -0.02
 112   1    -0.06   0.02   0.01     0.06  -0.03  -0.02     0.04  -0.03   0.01
 113   1    -0.08   0.03   0.01     0.11  -0.05  -0.03    -0.02   0.00   0.02
 114   1    -0.09   0.04   0.02     0.07  -0.04  -0.02     0.05  -0.04   0.01
                    97                     98                     99
                    ?A                     ?A                     ?A
 Frequencies --   561.1948               567.8112               573.1920
 Red. masses --     4.6766                 4.0271                 3.7579
 Frc consts  --     0.8678                 0.7650                 0.7274
 IR Inten    --     3.3776                 0.5405                 0.1969
 Raman Activ --     0.0000                 0.0000                 0.0000
 Depolar     --     0.0000                 0.0000                 0.0000
 Atom AN      X      Y      Z        X      Y      Z        X      Y      Z
   1   8     0.07   0.03  -0.02    -0.01   0.00   0.00     0.00   0.00   0.00
   2  12     0.00   0.00  -0.01     0.00   0.01   0.00     0.00   0.00   0.00
   3   8     0.16  -0.02   0.11    -0.01   0.00  -0.01     0.00   0.00   0.00
   4   6     0.01  -0.02  -0.08     0.00   0.00   0.01     0.00   0.00   0.00
   5   7     0.01   0.00   0.00    -0.04  -0.02  -0.07    -0.04  -0.03  -0.12
   6   7     0.01   0.01   0.01     0.04   0.04   0.02     0.04   0.02   0.13
   7   8    -0.06   0.04  -0.06     0.00   0.00   0.01     0.00   0.00   0.00
   8   6     0.00  -0.01   0.01    -0.03  -0.01   0.12     0.06   0.04   0.12
   9   6     0.00   0.00  -0.01    -0.01   0.06  -0.01     0.01  -0.01   0.01
  10   6     0.01   0.01  -0.01     0.05   0.00  -0.13    -0.06  -0.03  -0.13
  11   8    -0.14  -0.05   0.11     0.01   0.00   0.00     0.00   0.00   0.00
  12   6    -0.04   0.07  -0.02     0.00  -0.01   0.00     0.00   0.00   0.00
  13   6     0.17  -0.06  -0.05    -0.01   0.00   0.01     0.00   0.00   0.00
  14   6    -0.14  -0.15   0.08     0.01   0.01  -0.01     0.00   0.00   0.00
  15   8    -0.10   0.06  -0.03     0.00  -0.01   0.00     0.00   0.00   0.00
  16   6     0.08  -0.01   0.03    -0.01   0.00   0.00     0.00   0.00   0.00
  17   8     0.03   0.06   0.05    -0.01  -0.02   0.00     0.01   0.00   0.00
  18   6     0.04   0.07  -0.03    -0.01  -0.01   0.00     0.00   0.00   0.00
  19   8    -0.02   0.06  -0.08     0.00  -0.01   0.01     0.00   0.00   0.00
  20   8     0.01  -0.01  -0.03     0.00   0.01   0.01     0.00   0.00   0.00
  21   6    -0.05  -0.07  -0.01     0.01   0.01   0.01     0.00   0.00   0.00
  22   6    -0.07   0.02   0.06     0.00  -0.01  -0.01     0.00   0.00   0.00
  23   6     0.09  -0.01   0.04     0.00   0.01   0.00     0.00   0.00   0.00
  24   8    -0.01  -0.08  -0.05     0.01   0.01   0.01     0.00   0.00   0.00
  25   6    -0.01   0.01  -0.01     0.00   0.00   0.00     0.00   0.00   0.00
  26   6    -0.02  -0.02   0.05     0.00   0.00  -0.01     0.00   0.00   0.00
  27   6    -0.01   0.00  -0.07     0.00   0.00   0.01     0.00   0.00   0.00
  28   6     0.01   0.01   0.06     0.00   0.00  -0.01     0.00   0.00   0.00
  29   6     0.01   0.02  -0.01     0.00   0.16  -0.08    -0.02  -0.06   0.00
  30   6     0.00   0.01   0.00    -0.06   0.15   0.04     0.06  -0.05   0.01
  31   6     0.00   0.00   0.00     0.02  -0.03  -0.03     0.04  -0.04  -0.03
  32   6    -0.01  -0.01   0.01     0.01  -0.08   0.07     0.07   0.09   0.02
  33   6     0.00   0.04  -0.01     0.04   0.14  -0.01     0.00  -0.06   0.09
  34   6     0.00  -0.02   0.01    -0.03  -0.07   0.09    -0.02   0.09   0.06
  35   6     0.00  -0.01   0.00    -0.03   0.03  -0.01    -0.05   0.04  -0.02
  36   6     0.00   0.00   0.00     0.07  -0.05  -0.04     0.08  -0.07  -0.05
  37   6    -0.01   0.00   0.00    -0.05   0.00   0.00    -0.09   0.00  -0.01
  38   6    -0.01   0.00   0.01     0.01  -0.01   0.03    -0.06   0.01   0.06
  39   6    -0.01   0.00   0.00     0.06  -0.09  -0.02    -0.11   0.03  -0.04
  40   6    -0.01  -0.01  -0.01    -0.11   0.08   0.02     0.03  -0.08  -0.08
  41   6     0.00   0.00  -0.02     0.06  -0.08  -0.06    -0.06   0.10  -0.07
  42   6     0.00   0.01  -0.01     0.00   0.01  -0.01     0.06   0.01   0.01
  43   6    -0.01  -0.01   0.01    -0.04  -0.04   0.04    -0.04  -0.08   0.06
  44   6     0.00   0.00   0.00    -0.01   0.00   0.00     0.11   0.04   0.01
  45   6     0.00   0.00   0.00     0.01   0.01  -0.01     0.01   0.01   0.00
  46   6     0.00   0.00   0.00     0.00   0.00   0.01     0.00   0.00   0.00
  47   6     0.00   0.01   0.00     0.00   0.01   0.00    -0.01  -0.01  -0.01
  48   6     0.00   0.00   0.00     0.00   0.00   0.00     0.00   0.00   0.02
  49   6     0.00   0.00   0.00     0.00   0.00  -0.01     0.00   0.00   0.00
  50   6     0.00   0.00   0.00     0.00   0.01   0.00     0.00   0.01   0.00
  51   6     0.00   0.00   0.00     0.00   0.01   0.00     0.00  -0.01  -0.02
  52   6     0.00   0.00   0.00    -0.01   0.01  -0.01     0.01  -0.01   0.01
  53   6    -0.01  -0.02   0.01    -0.09  -0.12   0.06     0.02   0.03  -0.02
  54   6     0.01   0.00   0.00     0.13  -0.07  -0.02    -0.03   0.02   0.01
  55   1     0.01   0.01  -0.01     0.01   0.06   0.00     0.02   0.00   0.04
  56   1     0.26  -0.05  -0.12    -0.03   0.00   0.01     0.00   0.00   0.00
  57   1    -0.17  -0.15   0.10     0.01   0.01  -0.01     0.00   0.00   0.00
  58   1     0.08  -0.01   0.03     0.00   0.00   0.00     0.00   0.00   0.00
  59   1     0.05  -0.01   0.01     0.00   0.00   0.00     0.00   0.00   0.00
  60   1     0.10  -0.02   0.04    -0.01   0.00   0.00     0.00   0.00   0.00
  61   1    -0.07   0.05   0.06     0.00  -0.01  -0.02     0.01   0.00   0.00
  62   1     0.07  -0.03   0.05     0.00   0.02  -0.01     0.00   0.00   0.00
  63   1     0.00   0.03  -0.09     0.01  -0.01   0.02     0.00   0.00   0.00
  64   1     0.00   0.01  -0.06    -0.01   0.01   0.00     0.00   0.00   0.00
  65   1     0.05  -0.09   0.03    -0.01   0.02  -0.01     0.00   0.00   0.00
  66   1    -0.07   0.04  -0.03     0.01   0.00  -0.02     0.00   0.00   0.01
  67   1    -0.09  -0.06   0.18     0.01   0.01  -0.03     0.00  -0.01   0.00
  68   1    -0.07   0.01   0.00     0.00  -0.01   0.00     0.01   0.00   0.00
[truncated: 1,639,607 more chars]
