# Supplementary material
Source: publisher figshare collection journal article supplement (https://acs.figshare.com/ndownloader/files/5127205)
Supplement: Supplementary file 1 [file 5127205 › supporting_ja043819b/SSRR_fm-5-ts1.mol]

  MacMolPlt                       

114118  0  0  0  0  0  0  0  0  0 v2000
   -6.3279    1.4449   -0.5395 O   0  0  0  0  0  0  0  0  0  0  0  0
    0.4736   -0.6044    0.0706 Mg  0  0  0  0  0  0  0  0  0  0  0  0
    0.6673    1.1608   -1.1124 O   0  0  0  0  0  0  0  0  0  0  0  0
   -5.1704    1.7704   -1.1579 C   0  0  0  0  0  0  0  0  0  0  0  0
   -0.4856   -2.3583    0.6713 N   0  0  0  0  0  0  0  0  0  0  0  0
    2.1766   -1.7525   -0.3239 N   0  0  0  0  0  0  0  0  0  0  0  0
   -5.1090    2.2608   -2.2605 O   0  0  0  0  0  0  0  0  0  0  0  0
    0.0471   -3.5746    0.7977 C   0  0  0  0  0  0  0  0  0  0  0  0
    1.3600   -3.9016    0.4269 C   0  0  0  0  0  0  0  0  0  0  0  0
    2.3559   -3.0467   -0.0915 C   0  0  0  0  0  0  0  0  0  0  0  0
   -2.8191    1.8744   -0.9780 O   0  0  0  0  0  0  0  0  0  0  0  0
   -1.6629    1.2537   -0.7734 C   0  0  0  0  0  0  0  0  0  0  0  0
   -0.4846    1.7674   -1.5950 C   0  0  0  0  0  0  0  0  0  0  0  0
   -3.9884    1.3889   -0.2725 C   0  0  0  0  0  0  0  0  0  0  0  0
   -1.5285    0.3193    0.0067 O   0  0  0  0  0  0  0  0  0  0  0  0
   -7.5214    1.7253   -1.2894 C   0  0  0  0  0  0  0  0  0  0  0  0
    0.2339    2.7906    0.8989 O   0  0  0  0  0  0  0  0  0  0  0  0
    1.2598    1.9120    0.6476 C   0  0  0  0  0  0  0  0  0  0  0  0
    1.2428    0.8286    1.2795 O   0  0  0  0  0  0  0  0  0  0  0  0
    2.8819    3.5926    1.2587 O   0  0  0  0  0  0  0  0  0  0  0  0
    1.9400    4.4911    1.5830 C   0  0  0  0  0  0  0  0  0  0  0  0
    0.4854    4.1697    1.2410 C   0  0  0  0  0  0  0  0  0  0  0  0
    2.5888    2.5689    0.2494 C   0  0  0  0  0  0  0  0  0  0  0  0
    2.2175    5.5094    2.1738 O   0  0  0  0  0  0  0  0  0  0  0  0
   -0.0909    5.1356    0.2048 C   0  0  0  0  0  0  0  0  0  0  0  0
    2.7281    3.1568   -1.1514 C   0  0  0  0  0  0  0  0  0  0  0  0
   -0.7329    1.5237   -3.0946 C   0  0  0  0  0  0  0  0  0  0  0  0
   -4.0559    1.9805    1.1342 C   0  0  0  0  0  0  0  0  0  0  0  0
   -1.8920   -2.1877    0.9760 C   0  0  0  0  0  0  0  0  0  0  0  0
    3.2925   -0.9171   -0.7135 C   0  0  0  0  0  0  0  0  0  0  0  0
   -2.8560   -2.4527   -0.0511 C   0  0  0  0  0  0  0  0  0  0  0  0
   -4.2054   -2.0819    0.1818 C   0  0  0  0  0  0  0  0  0  0  0  0
   -4.5956   -1.4913    1.4087 C   0  0  0  0  0  0  0  0  0  0  0  0
   -3.6404   -1.2729    2.4220 C   0  0  0  0  0  0  0  0  0  0  0  0
   -2.2794   -1.6110    2.2270 C   0  0  0  0  0  0  0  0  0  0  0  0
   -2.4294   -3.1124   -1.3913 C   0  0  0  0  0  0  0  0  0  0  0  0
   -1.2467   -1.3420    3.3509 C   0  0  0  0  0  0  0  0  0  0  0  0
    4.2438   -0.4745    0.2714 C   0  0  0  0  0  0  0  0  0  0  0  0
    5.2370    0.4618   -0.1302 C   0  0  0  0  0  0  0  0  0  0  0  0
    5.3117    0.9217   -1.4624 C   0  0  0  0  0  0  0  0  0  0  0  0
    4.3995    0.4466   -2.4283 C   0  0  0  0  0  0  0  0  0  0  0  0
    3.3701   -0.4663   -2.0754 C   0  0  0  0  0  0  0  0  0  0  0  0
    4.2672   -1.0178    1.7278 C   0  0  0  0  0  0  0  0  0  0  0  0
    2.3933   -1.0179   -3.1489 C   0  0  0  0  0  0  0  0  0  0  0  0
   -2.0102   -2.0378   -2.4459 C   0  0  0  0  0  0  0  0  0  0  0  0
   -3.5281   -4.0557   -1.9807 C   0  0  0  0  0  0  0  0  0  0  0  0
   -1.1788    0.1764    3.7069 C   0  0  0  0  0  0  0  0  0  0  0  0
   -1.5578   -2.1978    4.6244 C   0  0  0  0  0  0  0  0  0  0  0  0
    2.2327   -0.0641   -4.3734 C   0  0  0  0  0  0  0  0  0  0  0  0
    2.8200   -2.4421   -3.6397 C   0  0  0  0  0  0  0  0  0  0  0  0
    4.0800    0.1107    2.7912 C   0  0  0  0  0  0  0  0  0  0  0  0
    5.6045   -1.7882    2.0050 C   0  0  0  0  0  0  0  0  0  0  0  0
   -0.7946   -4.7015    1.3865 C   0  0  0  0  0  0  0  0  0  0  0  0
    3.6945   -3.7315   -0.3561 C   0  0  0  0  0  0  0  0  0  0  0  0
    1.6571   -4.9345    0.5740 H   0  0  0  0  0  0  0  0  0  0  0  0
   -0.4582    2.8566   -1.4388 H   0  0  0  0  0  0  0  0  0  0  0  0
   -3.9562    0.2955   -0.1883 H   0  0  0  0  0  0  0  0  0  0  0  0
   -7.5207    1.1732   -2.2330 H   0  0  0  0  0  0  0  0  0  0  0  0
   -7.5969    2.7945   -1.5045 H   0  0  0  0  0  0  0  0  0  0  0  0
   -8.3476    1.4022   -0.6555 H   0  0  0  0  0  0  0  0  0  0  0  0
   -0.0585    4.3180    2.1798 H   0  0  0  0  0  0  0  0  0  0  0  0
    3.3805    1.8372    0.3882 H   0  0  0  0  0  0  0  0  0  0  0  0
    0.0011    6.1573    0.5844 H   0  0  0  0  0  0  0  0  0  0  0  0
   -1.1490    4.9103    0.0409 H   0  0  0  0  0  0  0  0  0  0  0  0
    0.4331    5.0724   -0.7527 H   0  0  0  0  0  0  0  0  0  0  0  0
    3.5169    3.9172   -1.1230 H   0  0  0  0  0  0  0  0  0  0  0  0
    1.8110    3.6108   -1.5315 H   0  0  0  0  0  0  0  0  0  0  0  0
    3.0507    2.3593   -1.8194 H   0  0  0  0  0  0  0  0  0  0  0  0
   -1.6664    2.0008   -3.4118 H   0  0  0  0  0  0  0  0  0  0  0  0
   -0.7911    0.4532   -3.3088 H   0  0  0  0  0  0  0  0  0  0  0  0
    0.0973    1.9394   -3.6694 H   0  0  0  0  0  0  0  0  0  0  0  0
   -4.9879    1.6720    1.6131 H   0  0  0  0  0  0  0  0  0  0  0  0
   -4.0172    3.0742    1.1009 H   0  0  0  0  0  0  0  0  0  0  0  0
   -3.2230    1.5980    1.7273 H   0  0  0  0  0  0  0  0  0  0  0  0
   -4.9679   -2.2885   -0.5798 H   0  0  0  0  0  0  0  0  0  0  0  0
   -5.6512   -1.2362    1.5787 H   0  0  0  0  0  0  0  0  0  0  0  0
   -3.9588   -0.8462    3.3825 H   0  0  0  0  0  0  0  0  0  0  0  0
   -1.5329   -3.7302   -1.1939 H   0  0  0  0  0  0  0  0  0  0  0  0
   -0.2496   -1.6480    2.9719 H   0  0  0  0  0  0  0  0  0  0  0  0
    5.9781    0.8039    0.6039 H   0  0  0  0  0  0  0  0  0  0  0  0
    6.1006    1.6286   -1.7550 H   0  0  0  0  0  0  0  0  0  0  0  0
    4.5036    0.7713   -3.4705 H   0  0  0  0  0  0  0  0  0  0  0  0
    3.4256   -1.7296    1.8411 H   0  0  0  0  0  0  0  0  0  0  0  0
    1.4000   -1.1230   -2.6612 H   0  0  0  0  0  0  0  0  0  0  0  0
   -1.7287   -2.5211   -3.3962 H   0  0  0  0  0  0  0  0  0  0  0  0
   -1.1319   -1.4783   -2.0744 H   0  0  0  0  0  0  0  0  0  0  0  0
   -2.8303   -1.3270   -2.6394 H   0  0  0  0  0  0  0  0  0  0  0  0
   -3.1142   -4.6105   -2.8364 H   0  0  0  0  0  0  0  0  0  0  0  0
   -4.3995   -3.4845   -2.3341 H   0  0  0  0  0  0  0  0  0  0  0  0
   -3.8660   -4.7816   -1.2254 H   0  0  0  0  0  0  0  0  0  0  0  0
   -0.4027    0.3514    4.4697 H   0  0  0  0  0  0  0  0  0  0  0  0
   -2.1426    0.5342    4.1019 H   0  0  0  0  0  0  0  0  0  0  0  0
   -0.9196    0.7676    2.8102 H   0  0  0  0  0  0  0  0  0  0  0  0
   -0.7821   -2.0275    5.3866 H   0  0  0  0  0  0  0  0  0  0  0  0
   -1.5750   -3.2712    4.3794 H   0  0  0  0  0  0  0  0  0  0  0  0
   -2.5335   -1.9219    5.0531 H   0  0  0  0  0  0  0  0  0  0  0  0
    1.3882   -0.4001   -4.9940 H   0  0  0  0  0  0  0  0  0  0  0  0
    3.1382   -0.0641   -5.0005 H   0  0  0  0  0  0  0  0  0  0  0  0
    2.0389    0.9685   -4.0422 H   0  0  0  0  0  0  0  0  0  0  0  0
    2.1346   -2.7797   -4.4325 H   0  0  0  0  0  0  0  0  0  0  0  0
    2.7779   -3.1713   -2.8157 H   0  0  0  0  0  0  0  0  0  0  0  0
    3.8442   -2.4255   -4.0446 H   0  0  0  0  0  0  0  0  0  0  0  0
    4.1258   -0.3237    3.8019 H   0  0  0  0  0  0  0  0  0  0  0  0
    3.0990    0.5960    2.6621 H   0  0  0  0  0  0  0  0  0  0  0  0
    4.8681    0.8738    2.7042 H   0  0  0  0  0  0  0  0  0  0  0  0
    5.5560   -2.2704    2.9933 H   0  0  0  0  0  0  0  0  0  0  0  0
    6.4582   -1.0933    2.0011 H   0  0  0  0  0  0  0  0  0  0  0  0
    5.7871   -2.5640    1.2465 H   0  0  0  0  0  0  0  0  0  0  0  0
   -1.6766   -4.9166    0.7727 H   0  0  0  0  0  0  0  0  0  0  0  0
   -0.2091   -5.6233    1.4705 H   0  0  0  0  0  0  0  0  0  0  0  0
   -1.1516   -4.4340    2.3884 H   0  0  0  0  0  0  0  0  0  0  0  0
    4.3909   -3.1066   -0.9196 H   0  0  0  0  0  0  0  0  0  0  0  0
    4.1711   -4.0082    0.5924 H   0  0  0  0  0  0  0  0  0  0  0  0
    3.5313   -4.6619   -0.9138 H   0  0  0  0  0  0  0  0  0  0  0  0
  1  4  1  0  0  0  0
  1 16  1  0  0  0  0
  2  3  1  0  0  0  0
  2  5  1  0  0  0  0
  2  6  1  0  0  0  0
  2 15  1  0  0  0  0
  2 19  2  0  0  0  0
  3 13  1  0  0  0  0
  4  7  2  0  0  0  0
  4 14  1  0  0  0  0
  5  8  1  0  0  0  0
  5 29  1  0  0  0  0
  6 10  1  0  0  0  0
  6 30  1  0  0  0  0
  8  9  1  0  0  0  0
  8 53  1  0  0  0  0
  9 10  1  0  0  0  0
  9 55  1  0  0  0  0
 10 54  1  0  0  0  0
 11 12  1  0  0  0  0
 11 14  1  0  0  0  0
 12 13  1  0  0  0  0
 12 15  2  0  0  0  0
 13 27  1  0  0  0  0
 13 56  1  0  0  0  0
 14 28  1  0  0  0  0
 14 57  1  0  0  0  0
 16 58  1  0  0  0  0
 16 59  1  0  0  0  0
 16 60  1  0  0  0  0
 17 18  1  0  0  0  0
 17 22  1  0  0  0  0
 18 19  2  0  0  0  0
 18 23  1  0  0  0  0
 20 21  1  0  0  0  0
 20 23  1  0  0  0  0
 21 22  1  0  0  0  0
 21 24  2  0  0  0  0
 22 25  1  0  0  0  0
 22 61  1  0  0  0  0
 23 26  1  0  0  0  0
 23 62  1  0  0  0  0
 25 63  1  0  0  0  0
 25 64  1  0  0  0  0
 25 65  1  0  0  0  0
 26 66  1  0  0  0  0
 26 67  1  0  0  0  0
 26 68  1  0  0  0  0
 27 69  1  0  0  0  0
 27 70  1  0  0  0  0
 27 71  1  0  0  0  0
 28 72  1  0  0  0  0
 28 73  1  0  0  0  0
 28 74  1  0  0  0  0
 29 31  1  0  0  0  0
 29 35  1  0  0  0  0
 30 38  1  0  0  0  0
 30 42  1  0  0  0  0
 31 32  1  0  0  0  0
 31 36  1  0  0  0  0
 32 33  1  0  0  0  0
 32 75  1  0  0  0  0
 33 34  1  0  0  0  0
 33 76  1  0  0  0  0
 34 35  1  0  0  0  0
 34 77  1  0  0  0  0
 35 37  1  0  0  0  0
 36 45  1  0  0  0  0
 36 46  1  0  0  0  0
 36 78  1  0  0  0  0
 37 47  1  0  0  0  0
 37 48  1  0  0  0  0
 37 79  1  0  0  0  0
 38 39  1  0  0  0  0
 38 43  1  0  0  0  0
 39 40  1  0  0  0  0
 39 80  1  0  0  0  0
 40 41  1  0  0  0  0
 40 81  1  0  0  0  0
 41 42  1  0  0  0  0
 41 82  1  0  0  0  0
 42 44  1  0  0  0  0
 43 51  1  0  0  0  0
 43 52  1  0  0  0  0
 43 83  1  0  0  0  0
 44 49  1  0  0  0  0
 44 50  1  0  0  0  0
 44 84  1  0  0  0  0
 45 85  1  0  0  0  0
 45 86  1  0  0  0  0
 45 87  1  0  0  0  0
 46 88  1  0  0  0  0
 46 89  1  0  0  0  0
 46 90  1  0  0  0  0
 47 91  1  0  0  0  0
 47 92  1  0  0  0  0
 47 93  1  0  0  0  0
 48 94  1  0  0  0  0
 48 95  1  0  0  0  0
 48 96  1  0  0  0  0
 49 97  1  0  0  0  0
 49 98  1  0  0  0  0
 49 99  1  0  0  0  0
 50100  1  0  0  0  0
 50101  1  0  0  0  0
 50102  1  0  0  0  0
 51103  1  0  0  0  0
 51104  1  0  0  0  0
 51105  1  0  0  0  0
 52106  1  0  0  0  0
 52107  1  0  0  0  0
 52108  1  0  0  0  0
 53109  1  0  0  0  0
 53110  1  0  0  0  0
 53111  1  0  0  0  0
 54112  1  0  0  0  0
 54113  1  0  0  0  0
 54114  1  0  0  0  0
M  END
