# Supplementary material
Source: publisher figshare collection journal article supplement (https://acs.figshare.com/ndownloader/files/5127205)
Supplement: Supplementary file 1 [file 5127205 › supporting_ja043819b/SSRR_fm-5-ts1.xml]

<cml:molecule xmlns:cml="http://www.xml-cml.org/schema/cml2/core"
>
<cml:metadataList title="generated automatically from Openbabel">
<cml:metadata name="dc:creator" content="OpenBabel version 1-100.1"/>
<cml:metadata name="dc:description" content="Conversion of legacy filetype to CML"/>
<cml:metadata name="dc:identifier" content="Unknown"/>
<cml:metadata name="dc:content"/>
<cml:metadata name="dc:rights" content="unknown"/>
<cml:metadata name="dc:type" content="chemistry"/>
<cml:metadata name="dc:contributor" content="unknown"/>
<cml:metadata name="dc:creator" content="Openbabel V1-100.1"/>
<cml:metadata name="dc:date" content="Sun Oct 10 09:47:30 BST 2004"/>
<cml:metadata name="cmlm:structure" content="yes"/>
</cml:metadataList>
<cml:atomArray atomID="a1 a2 a3 a4 a5 a6 a7 a8 a9 a10 a11 a12 a13 a14 a15 a16 a17 a18 a19 a20 a21 a22 a23 a24 a25 a26 a27 a28 a29 a30 a31 a32 a33 a34 a35 a36 a37 a38 a39 a40 a41 a42 a43 a44 a45 a46 a47 a48 a49 a50 a51 a52 a53 a54 a55 a56 a57 a58 a59 a60 a61 a62 a63 a64 a65 a66 a67 a68 a69 a70 a71 a72 a73 a74 a75 a76 a77 a78 a79 a80 a81 a82 a83 a84 a85 a86 a87 a88 a89 a90 a91 a92 a93 a94 a95 a96 a97 a98 a99 a100 a101 a102 a103 a104 a105 a106 a107 a108 a109 a110 a111 a112 a113 a114" elementType="O Mg O C N N O C C C O C C C O C O C O O C C C O C C C C C C C C C C C C C C C C C C C C C C C C C C C C C C H H H H H H H H H H H H H H H H H H H H H H H H H H H H H H H H H H H H H H H H H H H H H H H H H H H H H H H H H H H H" formalCharge="0 0 0 0 0 0 0 0 0 0 0 0 0 0 0 0 0 0 0 0 0 0 0 0 0 0 0 0 0 0 0 0 0 0 0 0 0 0 0 0 0 0 0 0 0 0 0 0 0 0 0 0 0 0 0 0 0 0 0 0 0 0 0 0 0 0 0 0 0 0 0 0 0 0 0 0 0 0 0 0 0 0 0 0 0 0 0 0 0 0 0 0 0 0 0 0 0 0 0 0 0 0 0 0 0 0 0 0 0 0 0 0 0 0" x3="-6.327900 0.473600 0.667300 -5.170400 -0.485600 2.176600 -5.109000 0.047100 1.360000 2.355900 -2.819100 -1.662900 -0.484600 -3.988400 -1.528500 -7.521400 0.233900 1.259800 1.242800 2.881900 1.940000 0.485400 2.588800 2.217500 -0.090900 2.728100 -0.732900 -4.055900 -1.892000 3.292500 -2.856000 -4.205400 -4.595600 -3.640400 -2.279400 -2.429400 -1.246700 4.243800 5.237000 5.311700 4.399500 3.370100 4.267200 2.393300 -2.010200 -3.528100 -1.178800 -1.557800 2.232700 2.820000 4.080000 5.604500 -0.794600 3.694500 1.657100 -0.458200 -3.956200 -7.520700 -7.596900 -8.347600 -0.058500 3.380500 0.001100 -1.149000 0.433100 3.516900 1.811000 3.050700 -1.666400 -0.791100 0.097300 -4.987900 -4.017200 -3.223000 -4.967900 -5.651200 -3.958800 -1.532900 -0.249600 5.978100 6.100600 4.503600 3.425600 1.400000 -1.728700 -1.131900 -2.830300 -3.114200 -4.399500 -3.866000 -0.402700 -2.142600 -0.919600 -0.782100 -1.575000 -2.533500 1.388200 3.138200 2.038900 2.134600 2.777900 3.844200 4.125800 3.099000 4.868100 5.556000 6.458200 5.787100 -1.676600 -0.209100 -1.151600 4.390900 4.171100 3.531300" y3="1.444900 -0.604400 1.160800 1.770400 -2.358300 -1.752500 2.260800 -3.574600 -3.901600 -3.046700 1.874400 1.253700 1.767400 1.388900 0.319300 1.725300 2.790600 1.912000 0.828600 3.592600 4.491100 4.169700 2.568900 5.509400 5.135600 3.156800 1.523700 1.980500 -2.187700 -0.917100 -2.452700 -2.081900 -1.491300 -1.272900 -1.611000 -3.112400 -1.342000 -0.474500 0.461800 0.921700 0.446600 -0.466300 -1.017800 -1.017900 -2.037800 -4.055700 0.176400 -2.197800 -0.064100 -2.442100 0.110700 -1.788200 -4.701500 -3.731500 -4.934500 2.856600 0.295500 1.173200 2.794500 1.402200 4.318000 1.837200 6.157300 4.910300 5.072400 3.917200 3.610800 2.359300 2.000800 0.453200 1.939400 1.672000 3.074200 1.598000 -2.288500 -1.236200 -0.846200 -3.730200 -1.648000 0.803900 1.628600 0.771300 -1.729600 -1.123000 -2.521100 -1.478300 -1.327000 -4.610500 -3.484500 -4.781600 0.351400 0.534200 0.767600 -2.027500 -3.271200 -1.921900 -0.400100 -0.064100 0.968500 -2.779700 -3.171300 -2.425500 -0.323700 0.596000 0.873800 -2.270400 -1.093300 -2.564000 -4.916600 -5.623300 -4.434000 -3.106600 -4.008200 -4.661900" z3="-0.539500 0.070600 -1.112400 -1.157900 0.671300 -0.323900 -2.260500 0.797700 0.426900 -0.091500 -0.978000 -0.773400 -1.595000 -0.272500 0.006700 -1.289400 0.898900 0.647600 1.279500 1.258700 1.583000 1.241000 0.249400 2.173800 0.204800 -1.151400 -3.094600 1.134200 0.976000 -0.713500 -0.051100 0.181800 1.408700 2.422000 2.227000 -1.391300 3.350900 0.271400 -0.130200 -1.462400 -2.428300 -2.075400 1.727800 -3.148900 -2.445900 -1.980700 3.706900 4.624400 -4.373400 -3.639700 2.791200 2.005000 1.386500 -0.356100 0.574000 -1.438800 -0.188300 -2.233000 -1.504500 -0.655500 2.179800 0.388200 0.584400 0.040900 -0.752700 -1.123000 -1.531500 -1.819400 -3.411800 -3.308800 -3.669400 1.613100 1.100900 1.727300 -0.579800 1.578700 3.382500 -1.193900 2.971900 0.603900 -1.755000 -3.470500 1.841100 -2.661200 -3.396200 -2.074400 -2.639400 -2.836400 -2.334100 -1.225400 4.469700 4.101900 2.810200 5.386600 4.379400 5.053100 -4.994000 -5.000500 -4.042200 -4.432500 -2.815700 -4.044600 3.801900 2.662100 2.704200 2.993300 2.001100 1.246500 0.772700 1.470500 2.388400 -0.919600 0.592400 -0.913800"/>
<cml:bondArray atomRef1="a1 a1 a2 a2 a2 a2 a2 a3 a4 a4 a5 a5 a6 a6 a8 a8 a9 a9 a10 a11 a11 a12 a12 a13 a13 a14 a14 a16 a16 a16 a17 a17 a18 a18 a20 a20 a21 a21 a22 a22 a23 a23 a25 a25 a25 a26 a26 a26 a27 a27 a27 a28 a28 a28 a29 a29 a30 a30 a31 a31 a32 a32 a33 a33 a34 a34 a35 a36 a36 a36 a37 a37 a37 a38 a38 a39 a39 a40 a40 a41 a41 a42 a43 a43 a43 a44 a44 a44 a45 a45 a45 a46 a46 a46 a47 a47 a47 a48 a48 a48 a49 a49 a49 a50 a50 a50 a51 a51 a51 a52 a52 a52 a53 a53 a53 a54 a54 a54" atomRef2="a4 a16 a3 a5 a6 a15 a19 a13 a7 a14 a8 a29 a10 a30 a9 a53 a10 a55 a54 a12 a14 a13 a15 a27 a56 a28 a57 a58 a59 a60 a18 a22 a19 a23 a21 a23 a22 a24 a25 a61 a26 a62 a63 a64 a65 a66 a67 a68 a69 a70 a71 a72 a73 a74 a31 a35 a38 a42 a32 a36 a33 a75 a34 a76 a35 a77 a37 a45 a46 a78 a47 a48 a79 a39 a43 a40 a80 a41 a81 a42 a82 a44 a51 a52 a83 a49 a50 a84 a85 a86 a87 a88 a89 a90 a91 a92 a93 a94 a95 a96 a97 a98 a99 a100 a101 a102 a103 a104 a105 a106 a107 a108 a109 a110 a111 a112 a113 a114" order="1 1 1 1 1 1 2 1 2 1 1 1 1 1 1 1 1 1 1 1 1 1 2 1 1 1 1 1 1 1 1 1 2 1 1 1 1 2 1 1 1 1 1 1 1 1 1 1 1 1 1 1 1 1 1 1 1 1 1 1 1 1 1 1 1 1 1 1 1 1 1 1 1 1 1 1 1 1 1 1 1 1 1 1 1 1 1 1 1 1 1 1 1 1 1 1 1 1 1 1 1 1 1 1 1 1 1 1 1 1 1 1 1 1 1 1 1 1"/>
</cml:molecule>
