# Supplementary material
Source: publisher figshare collection journal article supplement (https://acs.figshare.com/ndownloader/files/5127205)
Supplement: Supplementary file 1 [file 5127205 › supporting_ja043819b/SSRR_fm-5-ts2-44.xyz]

114
O	5.649207	0.333254	-1.16246	0.0294	-0.0294	0.0147
Mg	-0.290775	-0.063629	0.004974	0.0294	-0.1323	0.0147
O	0.848608	-0.682681	3.164911	-0.0588	0.1764	-0.1029
C	4.954079	0.020982	-0.057192	0.0294	-0.0147	0.0294
N	-0.655181	-1.315754	-1.581088	-0.0147	-0.0441	-0.0294
N	0.028382	1.505101	-1.295376	-0.0441	-0.0588	0.0588
O	4.867728	0.718237	0.927074	0.0294	0.0147	0.0
C	-0.216888	-1.098204	-2.811659	-0.0147	-0.0147	-0.0294
C	0.471772	0.079955	-3.198354	-0.0147	0.0	0.0147
C	0.507454	1.31803	-2.522181	-0.0294	-0.0147	0.0441
O	3.593418	-1.663657	1.006058	0.0147	0.0147	0.0441
C	2.417249	-1.077371	1.257929	0.0147	0.0441	-0.0147
C	2.07694	-1.272369	2.73904	-0.0882	0.0735	-0.0441
C	4.348264	-1.379702	-0.195878	0.0441	-0.0147	0.0588
O	1.789692	-0.433417	0.437375	0.0735	0.0441	-0.0735
C	6.323947	1.6072	-1.137499	0.0147	-0.0147	-0.0147
O	-0.918769	0.74539	1.647909	0.1176	-0.0147	0.0882
C	-0.334951	-1.091239	2.610138	-0.0882	0.2793	-0.1617
O	-0.357742	-1.793765	1.599937	-0.0441	0.2352	-0.1764
O	-2.746841	-0.722411	3.067725	-0.0735	0.1029	-0.0294
C	-3.116651	0.539754	2.665114	0.0294	0.1176	-0.0441
C	-2.089532	1.42682	1.946807	0.147	0.0735	0.0882
C	-1.469729	-1.019884	3.637257	-0.0588	0.0147	-0.1176
O	-4.276886	0.854052	2.793506	0.0441	0.2058	-0.1323
C	-1.870744	2.747074	2.71345	0.2352	0.0147	0.1617
C	-1.18406	-0.175722	4.877455	-0.0735	-0.1911	0.0294
C	2.192471	-2.721276	3.227744	-0.2205	0.0735	-0.0294
C	3.634297	-1.644163	-1.521168	0.0735	-0.0735	0.0441
C	-1.420353	-2.483822	-1.182157	0.0	-0.0441	-0.0441
C	-0.220988	2.849293	-0.801642	-0.0294	-0.0588	0.0588
C	-2.793944	-2.276661	-0.813129	0.0	-0.0588	-0.0294
C	-3.496099	-3.339565	-0.197702	0.0147	-0.0588	-0.0147
C	-2.872976	-4.578667	0.046217	0.0294	-0.0441	0.0
C	-1.544846	-4.785543	-0.359181	0.0294	-0.0441	-0.0147
C	-0.794548	-3.754844	-0.976604	0.0147	-0.0294	-0.0294
C	-3.524063	-0.955611	-1.17826	0.0	-0.0588	-0.0147
C	0.66372	-4.055739	-1.408303	0.0147	-0.0294	-0.0294
C	0.689091	3.469024	0.113533	-0.0147	-0.0294	0.0294
C	0.329004	4.709179	0.702471	0.0	-0.0147	0.0147
C	-0.892485	5.33841	0.390747	-0.0147	-0.0294	0.0294
C	-1.767107	4.737217	-0.534455	-0.0294	-0.0441	0.0588
C	-1.460271	3.497869	-1.141034	-0.0441	-0.0588	0.0735
C	2.059382	2.847264	0.475074	0.0	0.0	0.0
C	-2.463699	2.90042	-2.163627	-0.0441	-0.0588	0.0882
C	-4.814739	-0.708672	-0.338044	0.0	-0.0588	0.0
C	-3.867767	-0.934615	-2.705777	-0.0147	-0.0441	0.0
C	1.54645	-4.444378	-0.179901	0.0147	-0.0147	-0.0294
C	0.718172	-5.189242	-2.489017	0.0147	-0.0294	-0.0294
C	-3.901053	2.794897	-1.560429	-0.0441	-0.0588	0.1029
C	-2.511908	3.746708	-3.481676	-0.0588	-0.0735	0.0882
C	2.146987	2.521203	1.998032	0.0588	0.0294	0.0
C	3.236969	3.784325	0.042992	-0.0147	0.0	-0.0441
C	-0.448173	-2.112004	-3.927727	0.0	0.0	-0.0441
C	1.120711	2.492795	-3.274989	-0.0441	0.0	0.0735
H	0.861708	0.082036	-4.211391	-0.0147	0.0294	0.0147
H	2.833116	-0.664535	3.248905	-0.0588	0.0147	0.0
H	5.184692	-2.081509	-0.106199	0.0441	-0.0147	0.1029
H	5.600837	2.412768	-0.998056	0.0147	-0.0294	-0.0294
H	6.81896	1.690918	-2.104807	0.0147	-0.0441	-0.0147
H	7.055653	1.632139	-0.325625	0.0147	0.0	-0.0147
H	-2.627552	1.7068	1.025257	0.2646	0.1911	0.0588
H	-1.590968	-2.065404	3.954386	-0.0147	-0.0441	-0.3087
H	-2.836244	3.179707	2.998309	0.2646	0.0735	0.147
H	-1.332628	3.459496	2.085119	0.3087	-0.0147	0.2058
H	-1.279831	2.582143	3.620843	0.1911	-0.0882	0.1764
H	-2.080007	-0.157663	5.505616	-0.0588	-0.3381	0.0441
H	-0.909826	0.846909	4.613597	-0.1176	-0.1176	0.2205
H	-0.360753	-0.607504	5.452554	-0.0441	-0.2499	-0.0588
H	3.186763	-3.119364	3.014079	-0.2499	-0.0147	0.0
H	1.444173	-3.353337	2.746223	-0.2646	0.1323	-0.0588
H	2.031784	-2.738078	4.309698	-0.2646	0.0882	-0.0441
H	3.183704	-2.637529	-1.493332	0.0735	-0.0735	0.0735
H	4.382771	-1.622953	-2.318415	0.1029	-0.1029	0.0735
H	2.858102	-0.910721	-1.742939	0.0882	-0.0735	0.0
H	-4.547526	-3.204042	0.081955	0.0147	-0.0588	0.0
H	-3.434549	-5.388749	0.530748	0.0441	-0.0441	0.0
H	-1.076711	-5.765298	-0.197986	0.0294	-0.0294	-0.0147
H	-2.82424	-0.109506	-0.99314	0.0	-0.0588	-0.0147
H	1.084435	-3.13344	-1.852307	0.0	-0.0147	-0.0294
H	1.022323	5.190667	1.404575	0.0147	0.0	-0.0147
H	-1.15147	6.300778	0.852913	0.0	-0.0147	0.0147
H	-2.706871	5.242125	-0.792143	-0.0294	-0.0441	0.0735
H	2.157253	1.898442	-0.087252	0.0	-0.0147	0.0147
H	-2.121534	1.87806	-2.422918	-0.0588	-0.0735	0.1029
H	-5.203681	0.298004	-0.54574	0.0	-0.0588	0.0147
H	-4.612914	-0.787844	0.742145	0.0147	-0.0588	0.0
H	-5.599294	-1.435406	-0.598856	0.0	-0.0588	0.0147
H	-4.394873	-0.002868	-2.960395	-0.0147	-0.0441	0.0
H	-4.515467	-1.787073	-2.965147	-0.0294	-0.0294	0.0
H	-2.951964	-0.992658	-3.316914	-0.0294	-0.0441	-0.0147
H	2.589343	-4.633248	-0.488065	0.0147	-0.0294	-0.0441
H	1.164709	-5.35356	0.309978	0.0147	0.0	-0.0147
H	1.538188	-3.624765	0.558468	0.0441	0.0	-0.0441
H	1.754244	-5.332142	-2.833078	0.0147	-0.0147	-0.0294
H	0.09345	-4.937176	-3.359131	0.0147	-0.0294	-0.0294
H	0.358093	-6.140818	-2.069301	0.0294	-0.0294	-0.0294
H	-4.574909	2.301364	-2.277785	-0.0588	-0.0588	0.1176
H	-3.894296	2.205626	-0.626775	-0.0441	-0.0441	0.1176
H	-4.309938	3.790139	-1.33035	-0.0441	-0.0441	0.1029
H	-3.214911	3.287425	-4.193467	-0.0735	-0.0735	0.1029
H	-1.522571	3.798185	-3.959855	-0.0588	-0.1029	0.0735
H	-2.850873	4.772803	-3.270927	-0.0441	-0.0735	0.0735
H	3.105528	2.024891	2.220254	0.0735	0.0441	-0.0147
H	1.314336	1.85553	2.286196	0.0882	0.0147	0.0441
H	2.081164	3.438213	2.603404	0.0588	0.0441	-0.0147
H	4.195219	3.328471	0.347638	0.0	0.0147	-0.0735
H	3.163847	4.769294	0.530127	-0.0147	0.0147	-0.0588
H	3.2391	3.937457	-1.048484	-0.0588	0.0	-0.0441
H	-1.183838	-2.869938	-3.646106	0.0	0.0	-0.0588
H	-0.799857	-1.603384	-4.833204	0.0147	0.0147	-0.0441
H	0.488234	-2.622556	-4.18649	0.0147	0.0	-0.0441
H	1.957271	2.91228	-2.702168	-0.0294	-0.0147	0.0882
H	1.496952	2.183659	-4.256054	-0.0441	0.0294	0.0588
H	0.397393	3.300089	-3.427399	-0.0294	0.0147	0.1176
114
O	5.661505876376123	0.32095512362387707	-1.1563105618119387	0.0294	-0.0294	0.0147
Mg	-0.2784761236238771	-0.11897394369255308	0.011123438188061455	0.0294	-0.1323	0.0147
O	0.8240102472477542	-0.6088877417432625	3.12186493268357	-0.0588	0.1764	-0.1029
C	4.966377876376123	0.014832561811938547	-0.044893123623877096	0.0294	-0.0147	0.0294
N	-0.6613304381880615	-1.3342023145641844	-1.593386876376123	-0.0147	-0.0441	-0.0294
N	0.009933685435815642	1.4805032472477542	-1.2707782472477542	-0.0441	-0.0588	0.0588
O	4.880026876376123	0.7243864381880615	0.927074	0.0294	0.0147	0.0
C	-0.22303743818806146	-1.1043534381880613	-2.823957876376123	-0.0147	-0.0147	-0.0294
C	0.46562256181193856	0.079955	-3.1922045618119386	-0.0147	0.0	0.0147
C	0.49515512362387704	1.3118805618119387	-2.5037326854358155	-0.0294	-0.0147	0.0441
O	3.5995674381880614	-1.6575075618119386	1.0245063145641842	0.0147	0.0147	0.0441
C	2.4233984381880616	-1.0589226854358158	1.2517795618119387	0.0147	0.0441	-0.0147
C	2.0400433708716315	-1.2416218090596929	2.720591685435816	-0.0882	0.0735	-0.0441
C	4.366712314564185	-1.3858514381880613	-0.17128024724775417	0.0441	-0.0147	0.0588
O	1.8204391909403073	-0.41496868543581567	0.40662780905969276	0.0735	0.0441	-0.0735
C	6.330096438188062	1.6010505618119386	-1.1436484381880614	0.0147	-0.0147	-0.0147
O	-0.8695734944955084	0.7392405618119385	1.6848056291283688	0.1176	-0.0147	0.0882
C	-0.3718476291283687	-0.9743996744268324	2.542494179931324	-0.0882	0.2793	-0.1617
O	-0.3761903145641844	-1.6953739889910169	1.5261437417432626	-0.0441	0.2352	-0.1764
O	-2.7775881909403073	-0.6793649326835698	3.055426123623877	-0.0735	0.1029	-0.0294
C	-3.1043521236238774	0.5889495055044915	2.6466656854358157	0.0294	0.1176	-0.0441
C	-2.0280376181193858	1.4575671909403072	1.9837036291283687	0.147	0.0735	0.0882
C	-1.494326752752246	-1.0137345618119387	3.5880614944955083	-0.0588	0.0147	-0.1176
O	-4.2584376854358155	0.9401441346328604	2.7381610563074466	0.0441	0.2058	-0.1323
C	-1.7723529889910168	2.7532234381880616	2.781093820068676	0.2352	0.0147	0.1617
C	-1.214807190940307	-0.2556646964447989	4.8897538763761235	-0.0735	-0.1911	0.0294
C	2.100229427179078	-2.6905288090596926	3.2154451236238772	-0.2205	0.0735	-0.0294
C	3.6650441909403075	-1.6749101909403072	-1.5027196854358158	0.0735	-0.0735	0.0441
C	-1.420353	-2.5022703145641843	-1.2006053145641842	0.0	-0.0441	-0.0441
C	-0.2332868763761229	2.824695247247754	-0.7770442472477541	-0.0294	-0.0588	0.0588
C	-2.793944	-2.3012587527522457	-0.8254278763761229	0.0	-0.0588	-0.0294
C	-3.4899495618119385	-3.3641627527522457	-0.20385143818806145	0.0147	-0.0588	-0.0147
C	-2.8606771236238773	-4.597115314564185	0.046217	0.0294	-0.0441	0.0
C	-1.532547123623877	-4.803991314564184	-0.36533043818806143	0.0294	-0.0441	-0.0147
C	-0.7883985618119386	-3.7671428763761226	-0.988902876376123	0.0147	-0.0294	-0.0294
C	-3.524063	-0.9802087527522458	-1.1844094381880614	0.0	-0.0588	-0.0147
C	0.6698694381880614	-4.068037876376123	-1.420601876376123	0.0147	-0.0294	-0.0294
C	0.6829415618119385	3.4567251236238774	0.1258318763761229	-0.0147	-0.0294	0.0294
C	0.329004	4.703029561811938	0.7086204381880614	0.0	-0.0147	0.0147
C	-0.8986344381880614	5.3261111236238765	0.40304587637612294	-0.0147	-0.0294	0.0294
C	-1.779405876376123	4.7187686854358155	-0.5098572472477542	-0.0294	-0.0441	0.0588
C	-1.4787193145641844	3.4732712472477543	-1.110286809059693	-0.0441	-0.0588	0.0735
C	2.059382	2.847264	0.475074	0.0	0.0	0.0
C	-2.4821473145641844	2.875822247247754	-2.1267303708716314	-0.0441	-0.0588	0.0882
C	-4.814739	-0.7332697527522458	-0.338044	0.0	-0.0588	0.0
C	-3.8739164381880618	-0.9530633145641844	-2.705777	-0.0147	-0.0441	0.0
C	1.5525994381880615	-4.450527438188062	-0.1921998763761229	0.0147	-0.0147	-0.0294
C	0.7243214381880615	-5.201540876376123	-2.5013158763761227	0.0147	-0.0294	-0.0294
C	-3.9195013145641844	2.7702992472477543	-1.51738293268357	-0.0441	-0.0588	0.1029
C	-2.536505752752246	3.7159608090596925	-3.4447793708716317	-0.0588	-0.0735	0.0882
C	2.171584752752246	2.5335018763761226	1.998032	0.0588	0.0294	0.0
C	3.2308195618119386	3.784325	0.024543685435815643	-0.0147	0.0	-0.0441
C	-0.448173	-2.112004	-3.9461753145641842	0.0	0.0	-0.0441
C	1.1022626854358157	2.492795	-3.2442418090596927	-0.0441	0.0	0.0735
H	0.8555585618119386	0.09433487637612291	-4.205241561811938	-0.0147	0.0294	0.0147
H	2.808518247247754	-0.6583855618119385	3.248905	-0.0588	0.0147	0.0
H	5.203140314564185	-2.0876584381880616	-0.06315293268356982	0.0441	-0.0147	0.1029
H	5.606986438188062	2.400469123623877	-1.010354876376123	0.0147	-0.0294	-0.0294
H	6.825109438188061	1.6724696854358156	-2.1109564381880617	0.0147	-0.0441	-0.0147
H	7.061802438188062	1.632139	-0.33177443818806146	0.0147	0.0	-0.0147
H	-2.516862112614894	1.786742696444799	1.049854752752246	0.2646	0.1911	0.0588
H	-1.5971174381880613	-2.0838523145641843	3.8252477980507096	-0.0147	-0.0441	-0.3087
H	-2.725554112614894	3.2104541909403075	3.0598033818806143	0.2646	0.0735	0.147
H	-1.2034897980507093	3.4533465618119386	2.1712111346328604	0.3087	-0.0147	0.2058
H	-1.199888303555201	2.5452463708716313	3.6946362582567374	0.1911	-0.0882	0.1764
H	-2.104604752752246	-0.2991000783254134	5.524064314564185	-0.0588	-0.3381	0.0441
H	-0.9590215055044916	0.7977134944955084	4.705838572820922	-0.1176	-0.1176	0.2205
H	-0.3792013145641844	-0.7120444491970448	5.427956247247755	-0.0441	-0.2499	-0.0588
H	3.0822225508029555	-3.1255134381880616	3.014079	-0.2499	-0.0147	0.0
H	1.3334831126148938	-3.2979920563074465	2.7216252472477542	-0.2646	0.1323	-0.0588
H	1.921094112614894	-2.7011813708716312	4.291249685435815	-0.2646	0.0882	-0.0441
H	3.2144511909403075	-2.668276190940307	-1.462584809059693	0.0735	-0.0735	0.0735
H	4.42581706731643	-1.6659990673164302	-2.2876678090596925	0.1029	-0.1029	0.0735
H	2.8949986291283687	-0.9414681909403073	-1.742939	0.0882	-0.0735	0.0
H	-4.541376561811939	-3.2286397527522457	0.081955	0.0147	-0.0588	0.0
H	-3.416100685435816	-5.4071973145641845	0.530748	0.0441	-0.0441	0.0
H	-1.064412123623877	-5.777596876376123	-0.20413543818806146	0.0294	-0.0294	-0.0147
H	-2.82424	-0.13410375275224581	-0.9992894381880615	0.0	-0.0588	-0.0147
H	1.084435	-3.1395894381880614	-1.8646058763761229	0.0	-0.0147	-0.0294
H	1.0284724381880614	5.190667	1.3984255618119386	0.0147	0.0	-0.0147
H	-1.15147	6.294628561811939	0.8590624381880615	0.0	-0.0147	0.0147
H	-2.7191698763761227	5.223676685435815	-0.7613958090596927	-0.0294	-0.0441	0.0735
H	2.157253	1.8922925618119386	-0.08110256181193855	0.0	-0.0147	0.0147
H	-2.146131752752246	1.8473128090596929	-2.37987193268357	-0.0588	-0.0735	0.1029
H	-5.203681	0.2734062472477542	-0.5395905618119385	0.0	-0.0588	0.0147
H	-4.606764561811938	-0.8124417527522458	0.742145	0.0147	-0.0588	0.0
H	-5.599294	-1.4600037527522458	-0.5927065618119386	0.0	-0.0588	0.0147
H	-4.401022438188061	-0.02131631456418436	-2.960395	-0.0147	-0.0441	0.0
H	-4.527765876376123	-1.7993718763761228	-2.965147	-0.0294	-0.0294	0.0
H	-2.9642628763761225	-1.0111063145641843	-3.3230634381880617	-0.0294	-0.0441	-0.0147
H	2.5954924381880615	-4.645546876376123	-0.5065133145641844	0.0147	-0.0294	-0.0441
H	1.1708584381880613	-5.35356	0.3038285618119385	0.0147	0.0	-0.0147
H	1.5566363145641844	-3.624765	0.5400196854358156	0.0441	0.0	-0.0441
H	1.7603934381880613	-5.338291438188062	-2.8453768763761227	0.0147	-0.0147	-0.0294
H	0.09959943818806145	-4.949474876376123	-3.371429876376123	0.0147	-0.0294	-0.0294
H	0.3703918763761229	-6.1531168763761235	-2.0815998763761225	0.0294	-0.0294	-0.0294
H	-4.599506752752245	2.276766247247754	-2.2285894944955085	-0.0588	-0.0588	0.1176
H	-3.9127443145641845	2.187177685435816	-0.5775794944955084	-0.0441	-0.0441	0.1176
H	-4.3283863145641845	3.7716906854358156	-1.2873039326835698	-0.0441	-0.0441	0.1029
H	-3.2456581909403073	3.2566778090596924	-4.15042093268357	-0.0735	-0.0735	0.1029
H	-1.5471687527522457	3.75513893268357	-3.9291078090596927	-0.0588	-0.1029	0.0735
H	-2.8693213145641843	4.742055809059693	-3.2401798090596925	-0.0441	-0.0735	0.0735
H	3.1362751909403075	2.0433393145641845	2.2141045618119386	0.0735	0.0441	-0.0147
H	1.3512326291283687	1.8616794381880613	2.304644314564184	0.0882	0.0147	0.0441
H	2.1057617527522456	3.4566613145641845	2.5972545618119383	0.0588	0.0441	-0.0147
H	4.195219	3.3346204381880615	0.31689080905969275	0.0	0.0147	-0.0735
H	3.1576975618119385	4.775443438188062	0.5055292472477542	-0.0147	0.0147	-0.0588
H	3.2145022472477542	3.937457	-1.0669323145641842	-0.0588	0.0	-0.0441
H	-1.183838	-2.869938	-3.670703752752246	0.0	0.0	-0.0588
H	-0.7937075618119386	-1.5972345618119386	-4.851652314564185	0.0147	0.0147	-0.0441
H	0.49438343818806146	-2.622556	-4.204938314564185	0.0147	0.0	-0.0441
H	1.944972123623877	2.9061305618119384	-2.6652713708716314	-0.0294	-0.0147	0.0882
H	1.4785036854358158	2.1959578763761227	-4.231456247247754	-0.0441	0.0294	0.0588
H	0.38509412362387707	3.3062384381880614	-3.378203494495508	-0.0294	0.0147	0.1176
114
O	5.67260085304124	0.3098601469587596	-1.15076307347938	0.0294	-0.0294	0.0147
Mg	-0.2673811469587596	-0.16890133868558194	0.016670926520620216	0.0294	-0.1323	0.0147
O	0.8018202939175192	-0.5423178817525574	3.0830325143556587	-0.0588	0.1764	-0.1029
C	4.977472853041241	0.009285073479379785	-0.03379814695875957	0.0294	-0.0147	0.0294
N	-0.6668779265206203	-1.3508447795618608	-1.6044818530412406	-0.0147	-0.0441	-0.0294
N	-0.006708779561860643	1.4583132939175192	-1.2485882939175192	-0.0441	-0.0588	0.0588
O	4.89112185304124	0.7299339265206203	0.927074	0.0294	0.0147	0.0
C	-0.2285849265206202	-1.1099009265206201	-2.8350528530412404	-0.0147	-0.0147	-0.0294
C	0.4600750734793798	0.079955	-3.1866570734793798	-0.0147	0.0	0.0147
C	0.48406014695875954	1.3063330734793799	-2.487090220438139	-0.0294	-0.0147	0.0441
O	3.60511492652062	-1.6519600734793798	1.0411487795618606	0.0147	0.0147	0.0441
C	2.4289459265206204	-1.0422802204381394	1.24623207347938	0.0147	0.0441	-0.0147
C	2.0067584408762786	-1.213884367396899	2.7039492204381395	-0.0882	0.0735	-0.0441
C	4.383354779561861	-1.3913989265206201	-0.14909029391751913	0.0441	-0.0147	0.0588
O	1.848176632603101	-0.39832622043813937	0.37889036739689896	0.0735	0.0441	-0.0735
C	6.33564392652062	1.5955030734793798	-1.1491959265206202	0.0147	-0.0147	-0.0147
O	-0.8251935878350383	0.7336930734793797	1.7180905591237214	0.1176	-0.0147	0.0882
C	-0.40513255912372126	-0.868997396108216	2.4814718082731777	-0.0882	0.2793	-0.1617
O	-0.39283277956186063	-1.6066141756700767	1.4595738817525574	-0.0441	0.2352	-0.1764
O	-2.805325632603101	-0.6405325143556585	3.0443311469587595	-0.0735	0.1029	-0.0294
C	-3.0932571469587598	0.6333294121649616	2.6300232204381393	0.0294	0.1176	-0.0441
C	-1.972562734793798	1.485304632603101	2.016988559123721	0.147	0.0735	0.0882
C	-1.516516706082481	-1.0081870734793799	3.5436815878350383	-0.0588	0.0147	-0.1176
O	-4.2417952204381395	1.017808971288683	2.6882336613144178	0.0441	0.2058	-0.1323
C	-1.6835931756700766	2.7587709265206204	2.8421161917268223	0.2352	0.0147	0.1617
C	-1.2425446326031009	-0.3277820447680628	4.900848853041241	-0.0735	-0.1911	0.0294
C	2.017017102190697	-2.662791367396899	3.2043501469587596	-0.2205	0.0735	-0.0294
C	3.692781632603101	-1.702647632603101	-1.4860772204381394	0.0735	-0.0735	0.0441
C	-1.420353	-2.5189127795618607	-1.2172477795618606	0.0	-0.0441	-0.0441
C	-0.2443818530412404	2.802505293917519	-0.7548542939175191	-0.0294	-0.0588	0.0588
C	-2.793944	-2.323448706082481	-0.8365228530412404	0.0	-0.0588	-0.0294
C	-3.4844020734793797	-3.386352706082481	-0.2093989265206202	0.0147	-0.0588	-0.0147
C	-2.8495821469587597	-4.613757779561861	0.046217	0.0294	-0.0441	0.0
C	-1.5214521469587594	-4.82063377956186	-0.3708779265206202	0.0294	-0.0441	-0.0147
C	-0.7828510734793798	-3.77823785304124	-0.9999978530412404	0.0147	-0.0294	-0.0294
C	-3.524063	-1.0023987060824808	-1.1899569265206202	0.0	-0.0588	-0.0147
C	0.6754169265206202	-4.079132853041241	-1.4316968530412406	0.0147	-0.0294	-0.0294
C	0.6773940734793797	3.44563014695876	0.13692685304124042	-0.0147	-0.0294	0.0294
C	0.329004	4.69748207347938	0.7141679265206202	0.0	-0.0147	0.0147
C	-0.9041819265206202	5.315016146958759	0.41414085304124043	-0.0147	-0.0294	0.0294
C	-1.7905008530412405	4.7021262204381395	-0.4876672939175192	-0.0294	-0.0441	0.0588
C	-1.4953617795618608	3.451081293917519	-1.082549367396899	-0.0441	-0.0588	0.0735
C	2.059382	2.847264	0.475074	0.0	0.0	0.0
C	-2.4987897795618608	2.853632293917519	-2.0934454408762786	-0.0441	-0.0588	0.0882
C	-4.814739	-0.7554597060824808	-0.338044	0.0	-0.0588	0.0
C	-3.8794639265206206	-0.9697057795618607	-2.705777	-0.0147	-0.0441	0.0
C	1.5581469265206203	-4.45607492652062	-0.20329485304124043	0.0147	-0.0147	-0.0294
C	0.7298689265206203	-5.212635853041241	-2.5124108530412403	0.0147	-0.0294	-0.0294
C	-3.936143779561861	2.748109293917519	-1.4785505143556585	-0.0441	-0.0588	0.1029
C	-2.558695706082481	3.688223367396899	-3.411494440876279	-0.0588	-0.0735	0.0882
C	2.1937747060824813	2.54459685304124	1.998032	0.0588	0.0294	0.0
C	3.22527207347938	3.784325	0.007901220438139359	-0.0147	0.0	-0.0441
C	-0.448173	-2.112004	-3.9628177795618607	0.0	0.0	-0.0441
C	1.0856202204381393	2.492795	-3.216504367396899	-0.0441	0.0	0.0735
H	0.8500110734793798	0.10542985304124043	-4.19969407347938	-0.0147	0.0294	0.0147
H	2.786328293917519	-0.6528380734793797	3.248905	-0.0588	0.0147	0.0
H	5.219782779561861	-2.0932059265206204	-0.02432051435565849	0.0441	-0.0147	0.1029
H	5.61253392652062	2.3893741469587595	-1.0214498530412406	0.0147	-0.0294	-0.0294
H	6.83065692652062	1.6558272204381392	-2.1165039265206205	0.0147	-0.0441	-0.0147
H	7.06734992652062	1.632139	-0.3373219265206202	0.0147	0.0	-0.0147
H	-2.4170073226288364	1.858860044768063	1.072044706082481	0.2646	0.1911	0.0588
H	-1.60266492652062	-2.1004947795618607	3.7087505430669756	-0.0147	-0.0441	-0.3087
H	-2.6256993226288365	3.238191632603101	3.115278265206202	0.2646	0.0735	0.147
H	-1.0869925430669753	3.4477990734793798	2.248875971288683	0.3087	-0.0147	0.2058
H	-1.127770955231937	2.5119614408762785	3.7612061182474426	0.1911	-0.0882	0.1764
H	-2.1267947060824812	-0.42669230997426494	5.5407067795618605	-0.0588	-0.3381	0.0441
H	-1.0034014121649617	0.7533335878350383	4.789050897809304	-0.1176	-0.1176	0.2205
H	-0.3958437795618606	-0.8063517508505437	5.4057662939175195	-0.0441	-0.2499	-0.0588
H	2.9879152491494563	-3.1310609265206204	3.014079	-0.2499	-0.0147	0.0
H	1.233628322628836	-3.2480646613144177	2.699435293917519	-0.2646	0.1323	-0.0588
H	1.8212393226288361	-2.6678964408762784	4.274607220438139	-0.2646	0.0882	-0.0441
H	3.242188632603101	-2.696013632603101	-1.434847367396899	0.0735	-0.0735	0.0735
H	4.464649485644341	-1.7048314856443416	-2.259930367396899	0.1029	-0.1029	0.0735
H	2.9282835591237215	-0.9692056326031011	-1.742939	0.0882	-0.0735	0.0
H	-4.5358290734793805	-3.250829706082481	0.081955	0.0147	-0.0588	0.0
H	-3.3994582204381394	-5.4238397795618605	0.530748	0.0441	-0.0441	0.0
H	-1.0533171469587594	-5.78869185304124	-0.2096829265206202	0.0294	-0.0294	-0.0147
H	-2.82424	-0.15629370608248086	-1.0048369265206203	0.0	-0.0588	-0.0147
H	1.084435	-3.14513692652062	-1.8757008530412405	0.0	-0.0147	-0.0294
H	1.0340199265206202	5.190667	1.3928780734793798	0.0147	0.0	-0.0147
H	-1.15147	6.28908107347938	0.8646099265206203	0.0	-0.0147	0.0147
H	-2.7302648530412403	5.207034220438139	-0.7336583673968989	-0.0294	-0.0441	0.0735
H	2.157253	1.8867450734793798	-0.07555507347937979	0.0	-0.0147	0.0147
H	-2.168321706082481	1.819575367396899	-2.341039514355659	-0.0588	-0.0735	0.1029
H	-5.203681	0.25121629391751915	-0.5340430734793797	0.0	-0.0588	0.0147
H	-4.60121707347938	-0.8346317060824808	0.742145	0.0147	-0.0588	0.0
H	-5.599294	-1.4821937060824808	-0.5871590734793798	0.0	-0.0588	0.0147
H	-4.4065699265206195	-0.037958779561860646	-2.960395	-0.0147	-0.0441	0.0
H	-4.538860853041241	-1.8104668530412404	-2.965147	-0.0294	-0.0294	0.0
H	-2.97535785304124	-1.0277487795618607	-3.3286109265206205	-0.0294	-0.0441	-0.0147
H	2.6010399265206203	-4.656641853041241	-0.5231557795618607	0.0147	-0.0294	-0.0441
H	1.1764059265206201	-5.35356	0.29828107347937977	0.0147	0.0	-0.0147
H	1.5732787795618608	-3.624765	0.5233772204381393	0.0441	0.0	-0.0441
H	1.76594092652062	-5.34383892652062	-2.8564718530412403	0.0147	-0.0147	-0.0294
H	0.10514692652062022	-4.960569853041241	-3.3825248530412404	0.0147	-0.0294	-0.0294
H	0.3814868530412404	-6.164211853041241	-2.09269485304124	0.0294	-0.0294	-0.0294
H	-4.6216967060824805	2.254576293917519	-2.1842095878350385	-0.0588	-0.0588	0.1176
H	-3.929386779561861	2.1705352204381394	-0.5331995878350383	-0.0441	-0.0441	0.1176
H	-4.3450287795618605	3.7550482204381392	-1.2484715143556584	-0.0441	-0.0441	0.1029
H	-3.273395632603101	3.228940367396899	-4.111588514355659	-0.0735	-0.0735	0.1029
H	-1.5693587060824807	3.716306514355659	-3.901370367396899	-0.0588	-0.1029	0.0735
H	-2.8859637795618607	4.714318367396898	-3.212442367396899	-0.0441	-0.0735	0.0735
H	3.164012632603101	2.059981779561861	2.20855707347938	0.0735	0.0441	-0.0147
H	1.3845175591237213	1.86722692652062	2.3212867795618606	0.0882	0.0147	0.0441
H	2.127951706082481	3.473303779561861	2.5917070734793795	0.0588	0.0441	-0.0147
H	4.195219	3.3401679265206203	0.2891533673968989	0.0	0.0147	-0.0735
H	3.1521500734793797	4.78099092652062	0.4833392939175192	-0.0147	0.0147	-0.0588
H	3.192312293917519	3.937457	-1.0835747795618607	-0.0588	0.0	-0.0441
H	-1.183838	-2.869938	-3.692893706082481	0.0	0.0	-0.0588
H	-0.7881600734793798	-1.5916870734793798	-4.868294779561861	0.0147	0.0147	-0.0441
H	0.4999309265206202	-2.622556	-4.221580779561861	0.0147	0.0	-0.0441
H	1.9338771469587595	2.9005830734793796	-2.6319864408762785	-0.0294	-0.0147	0.0882
H	1.4618612204381394	2.2070528530412403	-4.209266293917519	-0.0441	0.0294	0.0588
H	0.3739991469587596	3.31178592652062	-3.333823587835038	-0.0294	0.0147	0.1176
114
O	5.681405876376123	0.3010551236238771	-1.1463605618119386	0.0294	-0.0294	0.0147
Mg	-0.2585761236238771	-0.20852394369255312	0.021073438188061455	0.0294	-0.1323	0.0147
O	0.7842102472477542	-0.48948774174326254	3.0522149326835697	-0.0588	0.1764	-0.1029
C	4.986277876376123	0.004882561811938545	-0.024993123623877088	0.0294	-0.0147	0.0294
N	-0.6712804381880615	-1.3640523145641845	-1.613286876376123	-0.0147	-0.0441	-0.0294
N	-0.01991631456418436	1.4407032472477541	-1.2309782472477542	-0.0441	-0.0588	0.0588
O	4.899926876376123	0.7343364381880615	0.927074	0.0294	0.0147	0.0
C	-0.23298743818806145	-1.1143034381880614	-2.843857876376123	-0.0147	-0.0147	-0.0294
C	0.45567256181193855	0.079955	-3.1822545618119387	-0.0147	0.0	0.0147
C	0.47525512362387706	1.3019305618119386	-2.4738826854358154	-0.0294	-0.0147	0.0441
O	3.6095174381880613	-1.6475575618119385	1.0543563145641843	0.0147	0.0147	0.0441
C	2.4333484381880615	-1.0290726854358156	1.2418295618119386	0.0147	0.0441	-0.0147
C	1.9803433708716314	-1.191871809059693	2.6907416854358157	-0.0882	0.0735	-0.0441
C	4.396562314564185	-1.3958014381880615	-0.13148024724775417	0.0441	-0.0147	0.0588
O	1.8701891909403074	-0.3851186854358156	0.35687780905969274	0.0735	0.0441	-0.0735
C	6.340046438188062	1.5911005618119385	-1.1535984381880615	0.0147	-0.0147	-0.0147
O	-0.7899734944955084	0.7292905618119385	1.7445056291283687	0.1176	-0.0147	0.0882
C	-0.43154762912836875	-0.7853496744268325	2.4330441799313243	-0.0882	0.2793	-0.1617
O	-0.4060403145641844	-1.5361739889910169	1.4067437417432624	-0.0441	0.2352	-0.1764
O	-2.8273381909403072	-0.6097149326835698	3.035526123623877	-0.0735	0.1029	-0.0294
C	-3.084452123623877	0.6685495055044917	2.6168156854358156	0.0294	0.1176	-0.0441
C	-1.9285376181193856	1.5073171909403071	2.0434036291283686	0.147	0.0735	0.0882
C	-1.534126752752246	-1.0037845618119385	3.508461494495508	-0.0588	0.0147	-0.1176
O	-4.228587685435816	1.0794441346328605	2.6486110563074465	0.0441	0.2058	-0.1323
C	-1.6131529889910166	2.7631734381880615	2.8905438200686757	0.2352	0.0147	0.1617
C	-1.264557190940307	-0.3850146964447989	4.909653876376123	-0.0735	-0.1911	0.0294
C	1.9509794271790781	-2.6407788090596926	3.195545123623877	-0.2205	0.0735	-0.0294
C	3.7147941909403075	-1.7246601909403072	-1.4728696854358156	0.0735	-0.0735	0.0441
C	-1.420353	-2.5321203145641844	-1.2304553145641843	0.0	-0.0441	-0.0441
C	-0.2531868763761229	2.784895247247754	-0.7372442472477542	-0.0294	-0.0588	0.0588
C	-2.793944	-2.3410587527522457	-0.8453278763761229	0.0	-0.0588	-0.0294
C	-3.4799995618119386	-3.403962752752246	-0.21380143818806144	0.0147	-0.0588	-0.0147
C	-2.840777123623877	-4.626965314564185	0.046217	0.0294	-0.0441	0.0
C	-1.512647123623877	-4.833841314564184	-0.37528043818806145	0.0294	-0.0441	-0.0147
C	-0.7784485618119386	-3.787042876376123	-1.008802876376123	0.0147	-0.0294	-0.0294
C	-3.524063	-1.020008752752246	-1.1943594381880616	0.0	-0.0588	-0.0147
C	0.6798194381880615	-4.087937876376123	-1.440501876376123	0.0147	-0.0294	-0.0294
C	0.6729915618119385	3.436825123623877	0.1457318763761229	-0.0147	-0.0294	0.0294
C	0.329004	4.693079561811938	0.7185704381880614	0.0	-0.0147	0.0147
C	-0.9085844381880614	5.306211123623877	0.4229458763761229	-0.0147	-0.0294	0.0294
C	-1.799305876376123	4.688918685435816	-0.4700572472477542	-0.0294	-0.0441	0.0588
C	-1.5085693145641845	3.433471247247754	-1.060536809059693	-0.0441	-0.0588	0.0735
C	2.059382	2.847264	0.475074	0.0	0.0	0.0
C	-2.5119973145641845	2.836022247247754	-2.067030370871631	-0.0441	-0.0588	0.0882
C	-4.814739	-0.7730697527522458	-0.338044	0.0	-0.0588	0.0
C	-3.8838664381880617	-0.9829133145641843	-2.705777	-0.0147	-0.0441	0.0
C	1.5625494381880616	-4.460477438188062	-0.21209987637612293	0.0147	-0.0147	-0.0294
C	0.7342714381880615	-5.221440876376123	-2.521215876376123	0.0147	-0.0294	-0.0294
C	-3.9493513145641845	2.7304992472477543	-1.44773293268357	-0.0441	-0.0588	0.1029
C	-2.576305752752246	3.6662108090596925	-3.3850793708716314	-0.0588	-0.0735	0.0882
C	2.211384752752246	2.553401876376123	1.998032	0.0588	0.0294	0.0
C	3.2208695618119387	3.784325	-0.005306314564184358	-0.0147	0.0	-0.0441
C	-0.448173	-2.112004	-3.9760253145641844	0.0	0.0	-0.0441
C	1.0724126854358156	2.492795	-3.1944918090596928	-0.0441	0.0	0.0735
H	0.8456085618119386	0.11423487637612291	-4.195291561811938	-0.0147	0.0294	0.0147
H	2.768718247247754	-0.6484355618119385	3.248905	-0.0588	0.0147	0.0
H	5.2329903145641845	-2.0976084381880615	0.006497067316430197	0.0441	-0.0147	0.1029
H	5.616936438188062	2.380569123623877	-1.030254876376123	0.0147	-0.0294	-0.0294
H	6.835059438188061	1.6426196854358155	-2.1209064381880616	0.0147	-0.0441	-0.0147
H	7.071752438188062	1.632139	-0.3417244381880615	0.0147	0.0	-0.0147
H	-2.337762112614894	1.916092696444799	1.089654752752246	0.2646	0.1911	0.0588
H	-1.6070674381880614	-2.1137023145641844	3.6162977980507094	-0.0147	-0.0441	-0.3087
H	-2.546454112614894	3.2602041909403074	3.1593033818806147	0.2646	0.0735	0.147
H	-0.9945397980507094	3.4433965618119386	2.3105111346328604	0.3087	-0.0147	0.2058
H	-1.070538303555201	2.485546370871631	3.814036258256737	0.1911	-0.0882	0.1764
H	-2.144404752752246	-0.5279500783254134	5.553914314564184	-0.0588	-0.3381	0.0441
H	-1.0386215055044916	0.7181134944955083	4.8550885728209225	-0.1176	-0.1176	0.2205
H	-0.40905131456418437	-0.8811944491970448	5.388156247247754	-0.0441	-0.2499	-0.0588
H	2.9130725508029554	-3.1354634381880615	3.014079	-0.2499	-0.0147	0.0
H	1.1543831126148938	-3.2084420563074465	2.681825247247754	-0.2646	0.1323	-0.0588
H	1.741994112614894	-2.641481370871631	4.261399685435816	-0.2646	0.0882	-0.0441
H	3.2642011909403075	-2.718026190940307	-1.4128348090596927	0.0735	-0.0735	0.0735
H	4.49546706731643	-1.7356490673164302	-2.2379178090596925	0.1029	-0.1029	0.0735
H	2.954698629128369	-0.9912181909403073	-1.742939	0.0882	-0.0735	0.0
H	-4.531426561811939	-3.2684397527522457	0.081955	0.0147	-0.0588	0.0
H	-3.3862506854358156	-5.437047314564184	0.530748	0.0441	-0.0441	0.0
H	-1.044512123623877	-5.7974968763761225	-0.21408543818806144	0.0294	-0.0294	-0.0147
H	-2.82424	-0.17390375275224584	-1.0092394381880614	0.0	-0.0588	-0.0147
H	1.084435	-3.1495394381880613	-1.8845058763761229	0.0	-0.0147	-0.0294
H	1.0384224381880616	5.190667	1.3884755618119384	0.0147	0.0	-0.0147
H	-1.15147	6.284678561811939	0.8690124381880615	0.0	-0.0147	0.0147
H	-2.739069876376123	5.193826685435815	-0.7116458090596928	-0.0294	-0.0441	0.0735
H	2.157253	1.8823425618119385	-0.07115256181193855	0.0	-0.0147	0.0147
H	-2.185931752752246	1.7975628090596927	-2.31022193268357	-0.0588	-0.0735	0.1029
H	-5.203681	0.23360624724775417	-0.5296405618119385	0.0	-0.0588	0.0147
H	-4.5968145618119385	-0.8522417527522458	0.742145	0.0147	-0.0588	0.0
H	-5.599294	-1.4998037527522459	-0.5827565618119386	0.0	-0.0588	0.0147
H	-4.410972438188061	-0.05116631456418436	-2.960395	-0.0147	-0.0441	0.0
H	-4.547665876376123	-1.8192718763761229	-2.965147	-0.0294	-0.0294	0.0
H	-2.9841628763761228	-1.0409563145641845	-3.3330134381880616	-0.0294	-0.0441	-0.0147
H	2.6054424381880614	-4.665446876376123	-0.5363633145641844	0.0147	-0.0294	-0.0441
H	1.1808084381880615	-5.35356	0.2938785618119385	0.0147	0.0	-0.0147
H	1.5864863145641845	-3.624765	0.5101696854358156	0.0441	0.0	-0.0441
H	1.7703434381880614	-5.348241438188062	-2.865276876376123	0.0147	-0.0147	-0.0294
H	0.10954943818806145	-4.969374876376123	-3.391329876376123	0.0147	-0.0294	-0.0294
H	0.3902918763761229	-6.173016876376123	-2.101499876376123	0.0294	-0.0294	-0.0294
H	-4.639306752752246	2.236966247247754	-2.1489894944955084	-0.0588	-0.0588	0.1176
H	-3.9425943145641846	2.1573276854358157	-0.4979794944955083	-0.0441	-0.0441	0.1176
H	-4.358236314564184	3.7418406854358155	-1.2176539326835698	-0.0441	-0.0441	0.1029
H	-3.2954081909403072	3.2069278090596924	-4.08077093268357	-0.0735	-0.0735	0.1029
H	-1.5869687527522458	3.68548893268357	-3.8793578090596927	-0.0588	-0.1029	0.0735
H	-2.8991713145641844	4.692305809059692	-3.1904298090596925	-0.0441	-0.0735	0.0735
H	3.1860251909403074	2.0731893145641846	2.2041545618119387	0.0735	0.0441	-0.0147
H	1.4109326291283686	1.8716294381880614	2.3344943145641843	0.0882	0.0147	0.0441
H	2.1455617527522457	3.4865113145641846	2.5873045618119384	0.0588	0.0441	-0.0147
H	4.195219	3.3445704381880614	0.26714080905969273	0.0	0.0147	-0.0735
H	3.1477475618119386	4.785393438188062	0.4657292472477542	-0.0147	0.0147	-0.0588
H	3.174702247247754	3.937457	-1.0967823145641844	-0.0588	0.0	-0.0441
H	-1.183838	-2.869938	-3.710503752752246	0.0	0.0	-0.0588
H	-0.7837575618119386	-1.5872845618119384	-4.881502314564185	0.0147	0.0147	-0.0441
H	0.5043334381880614	-2.622556	-4.2347883145641845	0.0147	0.0	-0.0441
H	1.925072123623877	2.8961805618119385	-2.605571370871631	-0.0294	-0.0147	0.0882
H	1.4486536854358156	2.215857876376123	-4.191656247247754	-0.0441	0.0294	0.0588
H	0.3651941236238771	3.3161884381880613	-3.298603494495508	-0.0294	0.0147	0.1176
114
O	5.687059049348547	0.29540195065145286	-1.1435339753257265	0.0294	-0.0294	0.0147
Mg	-0.25292295065145287	-0.23396322206846198	0.023900024674273556	0.0294	-0.1323	0.0147
O	0.7729039013029058	-0.4555687039087173	3.0324288272800852	-0.0588	0.1764	-0.1029
C	4.991931049348548	0.002055975325726444	-0.019339950651452886	0.0294	-0.0147	0.0294
N	-0.6741070246742735	-1.3725320740228208	-1.618940049348547	-0.0147	-0.0441	-0.0294
N	-0.028396074022820666	1.4293969013029058	-1.2196719013029058	-0.0441	-0.0588	0.0588
O	4.905580049348547	0.7371630246742735	0.927074	0.0294	0.0147	0.0
C	-0.23581402467427356	-1.1171300246742735	-2.849511049348547	-0.0147	-0.0147	-0.0294
C	0.45284597532572646	0.079955	-3.1794279753257264	-0.0147	0.0	0.0147
C	0.4696019506514528	1.2991039753257265	-2.465402925977179	-0.0294	-0.0147	0.0441
O	3.6123440246742735	-1.6447309753257264	1.0628360740228207	0.0147	0.0147	0.0441
C	2.4361750246742737	-1.0205929259771793	1.2390029753257266	0.0147	0.0441	-0.0147
C	1.9633838519543587	-1.1777388766286323	2.6822619259771794	-0.0882	0.0735	-0.0441
C	4.405042074022821	-1.3986280246742735	-0.12017390130290577	0.0441	-0.0147	0.0588
O	1.8843221233713678	-0.37663892597717935	0.34274487662863223	0.0735	0.0441	-0.0735
C	6.342873024674274	1.5882739753257265	-1.1564250246742735	0.0147	-0.0147	-0.0147
O	-0.7673608026058115	0.7264639753257265	1.7614651480456414	0.1176	-0.0147	0.0882
C	-0.44850714804564135	-0.7316445311888025	2.4019517285829908	-0.0882	0.2793	-0.1617
O	-0.41452007402282065	-1.4909486052116232	1.3728247039087174	-0.0441	0.2352	-0.1764
O	-2.8414711233713676	-0.5899288272800851	3.029872950651453	-0.0735	0.1029	-0.0294
C	-3.078798950651453	0.6911621973941884	2.6083359259771792	0.0294	0.1176	-0.0441
C	-1.9002717532572646	1.5214501233713678	2.0603631480456412	0.147	0.0735	0.0882
C	-1.5454330986970943	-1.0009579753257265	3.4858488026058114	-0.0588	0.0147	-0.1176
O	-4.22010792597718	1.1190163454398299	2.623171777931538	0.0441	0.2058	-0.1323
C	-1.567927605211623	2.7660000246742737	2.921636271417009	0.2352	0.0147	0.1617
C	-1.2786901233713677	-0.42176032076555625	4.915307049348548	-0.0735	-0.1911	0.0294
C	1.9085806298858965	-2.6266458766286322	3.189891950651453	-0.2205	0.0735	-0.0294
C	3.728927123371368	-1.7387931233713678	-1.4643899259771793	0.0735	-0.0735	0.0441
C	-1.420353	-2.5406000740228207	-1.2389350740228207	0.0	-0.0441	-0.0441
C	-0.2588400493485471	2.773588901302906	-0.7259379013029057	-0.0294	-0.0588	0.0588
C	-2.793944	-2.352365098697094	-0.8509810493485471	0.0	-0.0588	-0.0294
C	-3.4771729753257263	-3.415269098697094	-0.21662802467427356	0.0147	-0.0588	-0.0147
C	-2.835123950651453	-4.635445074022821	0.046217	0.0294	-0.0441	0.0
C	-1.506993950651453	-4.84232107402282	-0.37810702467427354	0.0294	-0.0441	-0.0147
C	-0.7756219753257265	-3.792696049348547	-1.014456049348547	0.0147	-0.0294	-0.0294
C	-3.524063	-1.0313150986970943	-1.1971860246742736	0.0	-0.0588	-0.0147
C	0.6826460246742735	-4.0935910493485475	-1.446155049348547	0.0147	-0.0294	-0.0294
C	0.6701649753257265	3.431171950651453	0.1513850493485471	-0.0147	-0.0294	0.0294
C	0.329004	4.690252975325726	0.7213970246742735	0.0	-0.0147	0.0147
C	-0.9114110246742735	5.300557950651452	0.42859904934854715	-0.0147	-0.0294	0.0294
C	-1.804959049348547	4.68043892597718	-0.4587509013029058	-0.0294	-0.0441	0.0588
C	-1.5170490740228209	3.422164901302906	-1.0464038766286323	-0.0441	-0.0588	0.0735
C	2.059382	2.847264	0.475074	0.0	0.0	0.0
C	-2.520477074022821	2.824715901302906	-2.0500708519543585	-0.0441	-0.0588	0.0882
C	-4.814739	-0.7843760986970942	-0.338044	0.0	-0.0588	0.0
C	-3.886693024674274	-0.9913930740228206	-2.705777	-0.0147	-0.0441	0.0
C	1.5653760246742736	-4.463304024674274	-0.2177530493485471	0.0147	-0.0147	-0.0294
C	0.7370980246742735	-5.227094049348548	-2.526869049348547	0.0147	-0.0294	-0.0294
C	-3.957831074022821	2.719192901302906	-1.4279468272800853	-0.0441	-0.0588	0.1029
C	-2.587612098697094	3.652077876628632	-3.3681198519543587	-0.0588	-0.0735	0.0882
C	2.2226910986970942	2.559055049348547	1.998032	0.0588	0.0294	0.0
C	3.2180429753257265	3.784325	-0.013786074022820664	-0.0147	0.0	-0.0441
C	-0.448173	-2.112004	-3.9845050740228207	0.0	0.0	-0.0441
C	1.0639329259771793	2.492795	-3.1803588766286324	-0.0441	0.0	0.0735
H	0.8427819753257265	0.1198880493485471	-4.192464975325726	-0.0147	0.0294	0.0147
H	2.757411901302906	-0.6456089753257265	3.248905	-0.0588	0.0147	0.0
H	5.24147007402282	-2.100435024674274	0.026283172719914913	0.0441	-0.0147	0.1029
H	5.619763024674274	2.374915950651453	-1.035908049348547	0.0147	-0.0294	-0.0294
H	6.837886024674273	1.6341399259771792	-2.123733024674274	0.0147	-0.0441	-0.0147
H	7.074579024674274	1.632139	-0.34455102467427356	0.0147	0.0	-0.0147
H	-2.286883555863076	1.9528383207655564	1.1009610986970944	0.2646	0.1911	0.0588
H	-1.6098940246742734	-2.1221820740228208	3.556939481840255	-0.0147	-0.0441	-0.3087
H	-2.495575555863076	3.274337123371368	3.1875692467427355	0.2646	0.0735	0.147
H	-0.9351814818402553	3.4405699753257264	2.35008334543983	0.3087	-0.0147	0.2058
H	-1.0337926792344436	2.4685868519543583	3.8479552960912824	0.1911	-0.0882	0.1764
H	-2.155711098697094	-0.5929615675082918	5.56239407402282	-0.0588	-0.3381	0.0441
H	-1.0612341973941886	0.6955008026058116	4.897487370114104	-0.1176	-0.1176	0.2205
H	-0.41753107402282064	-0.9292464194626505	5.376849901302906	-0.0441	-0.2499	-0.0588
H	2.8650205805373496	-3.1382900246742738	3.014079	-0.2499	-0.0147	0.0
H	1.103504555863076	-3.183002777931538	2.670518901302906	-0.2646	0.1323	-0.0588
H	1.691115555863076	-2.6245218519543583	4.25291992597718	-0.2646	0.0882	-0.0441
H	3.278334123371368	-2.7321591233713676	-1.3987018766286323	0.0735	-0.0735	0.0735
H	4.515253172719915	-1.7554351727199151	-2.223784876628632	0.1029	-0.1029	0.0735
H	2.9716581480456417	-1.005351123371368	-1.742939	0.0882	-0.0735	0.0
H	-4.528599975325727	-3.279746098697094	0.081955	0.0147	-0.0588	0.0
H	-3.3777709259771793	-5.44552707402282	0.530748	0.0441	-0.0441	0.0
H	-1.038858950651453	-5.803150049348547	-0.21691202467427356	0.0294	-0.0294	-0.0147
H	-2.82424	-0.18521009869709423	-1.0120660246742736	0.0	-0.0588	-0.0147
H	1.084435	-3.1523660246742735	-1.890159049348547	0.0	-0.0147	-0.0294
H	1.0412490246742736	5.190667	1.3856489753257264	0.0147	0.0	-0.0147
H	-1.15147	6.2818519753257265	0.8718390246742735	0.0	-0.0147	0.0147
H	-2.744723049348547	5.185346925977179	-0.6975128766286323	-0.0294	-0.0441	0.0735
H	2.157253	1.8795159753257265	-0.06832597532572644	0.0	-0.0147	0.0147
H	-2.197238098697094	1.7834298766286323	-2.2904358272800853	-0.0588	-0.0735	0.1029
H	-5.203681	0.22229990130290578	-0.5268139753257265	0.0	-0.0588	0.0147
H	-4.593987975325726	-0.8635480986970943	0.742145	0.0147	-0.0588	0.0
H	-5.599294	-1.5111100986970942	-0.5799299753257265	0.0	-0.0588	0.0147
H	-4.413799024674273	-0.05964607402282067	-2.960395	-0.0147	-0.0441	0.0
H	-4.553319049348548	-1.824925049348547	-2.965147	-0.0294	-0.0294	0.0
H	-2.989816049348547	-1.0494360740228208	-3.335840024674274	-0.0294	-0.0441	-0.0147
H	2.6082690246742737	-4.6711000493485475	-0.5448430740228207	0.0147	-0.0294	-0.0441
H	1.1836350246742735	-5.35356	0.2910519753257264	0.0147	0.0	-0.0147
H	1.5949660740228209	-3.624765	0.5016899259771793	0.0441	0.0	-0.0441
H	1.7731700246742734	-5.351068024674274	-2.870930049348547	0.0147	-0.0147	-0.0294
H	0.11237602467427356	-4.9750280493485475	-3.396983049348547	0.0147	-0.0294	-0.0294
H	0.39594504934854713	-6.178670049348548	-2.107153049348547	0.0294	-0.0294	-0.0294
H	-4.650613098697094	2.225659901302906	-2.1263768026058116	-0.0588	-0.0588	0.1176
H	-3.951074074022821	2.1488479259771793	-0.47536680260581154	-0.0441	-0.0441	0.1176
H	-4.36671607402282	3.733360925977179	-1.197867827280085	-0.0441	-0.0441	0.1029
H	-3.3095411233713676	3.192794876628632	-4.060984827280085	-0.0735	-0.0735	0.1029
H	-1.5982750986970942	3.6657028272800853	-3.8652248766286323	-0.0588	-0.1029	0.0735
H	-2.9076510740228207	4.678172876628632	-3.176296876628632	-0.0441	-0.0735	0.0735
H	3.200158123371368	2.081669074022821	2.2013279753257264	0.0735	0.0441	-0.0147
H	1.4278921480456412	1.8744560246742734	2.3429740740228207	0.0882	0.0147	0.0441
H	2.156868098697094	3.494991074022821	2.584477975325726	0.0588	0.0441	-0.0147
H	4.195219	3.3473970246742737	0.2530078766286322	0.0	0.0147	-0.0735
H	3.1449209753257263	4.788220024674274	0.4544229013029058	-0.0147	0.0147	-0.0588
H	3.163395901302906	3.937457	-1.1052620740228207	-0.0588	0.0	-0.0441
H	-1.183838	-2.869938	-3.721810098697094	0.0	0.0	-0.0588
H	-0.7809309753257265	-1.5844579753257264	-4.889982074022821	0.0147	0.0147	-0.0441
H	0.5071600246742736	-2.622556	-4.24326807402282	0.0147	0.0	-0.0441
H	1.919418950651453	2.8933539753257262	-2.5886118519543584	-0.0294	-0.0147	0.0882
H	1.4401739259771793	2.221511049348547	-4.180349901302906	-0.0441	0.0294	0.0588
H	0.35954095065145286	3.3190150246742736	-3.2759908026058113	-0.0294	0.0147	0.1176
114
O	5.689006999999999	0.293454	-1.14256	0.0294	-0.0294	0.0147
Mg	-0.250975	-0.24272899999999997	0.024874	0.0294	-0.1323	0.0147
O	0.769008	-0.44388099999999997	3.025611	-0.0588	0.1764	-0.1029
C	4.993879	0.0010819999999999996	-0.017391999999999998	0.0294	-0.0147	0.0294
N	-0.675081	-1.3754540000000002	-1.620888	-0.0147	-0.0441	-0.0294
N	-0.031318	1.4255010000000001	-1.215776	-0.0441	-0.0588	0.0588
O	4.907527999999999	0.738137	0.927074	0.0294	0.0147	0.0
C	-0.236788	-1.118104	-2.851459	-0.0147	-0.0147	-0.0294
C	0.45187200000000005	0.079955	-3.1784540000000003	-0.0147	0.0	0.0147
C	0.46765399999999996	1.29813	-2.462481	-0.0294	-0.0147	0.0441
O	3.6133179999999996	-1.643757	1.065758	0.0147	0.0147	0.0441
C	2.437149	-1.017671	1.238029	0.0147	0.0441	-0.0147
C	1.95754	-1.1728690000000002	2.6793400000000003	-0.0882	0.0735	-0.0441
C	4.407964000000001	-1.399602	-0.11627799999999999	0.0441	-0.0147	0.0588
O	1.889192	-0.373717	0.33787500000000004	0.0735	0.0441	-0.0735
C	6.343847	1.5873	-1.157399	0.0147	-0.0147	-0.0147
O	-0.7595689999999999	0.72549	1.767309	0.1176	-0.0147	0.0882
C	-0.454351	-0.7131390000000001	2.391238	-0.0882	0.2793	-0.1617
O	-0.417442	-1.475365	1.361137	-0.0441	0.2352	-0.1764
O	-2.846341	-0.583111	3.0279249999999998	-0.0735	0.1029	-0.0294
C	-3.076851	0.698954	2.605414	0.0294	0.1176	-0.0441
C	-1.890532	1.52632	2.066207	0.147	0.0735	0.0882
C	-1.5493290000000002	-0.999984	3.4780569999999997	-0.0588	0.0147	-0.1176
O	-4.217186	1.132652	2.614406	0.0441	0.2058	-0.1323
C	-1.552344	2.766974	2.93235	0.2352	0.0147	0.1617
C	-1.2835599999999998	-0.434422	4.917255	-0.0735	-0.1911	0.0294
C	1.8939709999999998	-2.621776	3.187944	-0.2205	0.0735	-0.0294
C	3.733797	-1.743663	-1.461468	0.0735	-0.0735	0.0441
C	-1.420353	-2.543522	-1.241857	0.0	-0.0441	-0.0441
C	-0.260788	2.7696929999999997	-0.722042	-0.0294	-0.0588	0.0588
C	-2.793944	-2.356261	-0.852929	0.0	-0.0588	-0.0294
C	-3.4761990000000003	-3.419165	-0.217602	0.0147	-0.0588	-0.0147
C	-2.833176	-4.638367000000001	0.046217	0.0294	-0.0441	0.0
C	-1.5050459999999999	-4.845243	-0.379081	0.0294	-0.0441	-0.0147
C	-0.774648	-3.794644	-1.016404	0.0147	-0.0294	-0.0294
C	-3.524063	-1.0352109999999999	-1.1981600000000001	0.0	-0.0588	-0.0147
C	0.68362	-4.095539	-1.4481030000000001	0.0147	-0.0294	-0.0294
C	0.669191	3.429224	0.153333	-0.0147	-0.0294	0.0294
C	0.329004	4.689279	0.722371	0.0	-0.0147	0.0147
C	-0.912385	5.29861	0.430547	-0.0147	-0.0294	0.0294
C	-1.806907	4.677517	-0.454855	-0.0294	-0.0441	0.0588
C	-1.5199710000000002	3.418269	-1.0415340000000002	-0.0441	-0.0588	0.0735
C	2.059382	2.847264	0.475074	0.0	0.0	0.0
C	-2.523399	2.82082	-2.044227	-0.0441	-0.0588	0.0882
C	-4.814739	-0.788272	-0.338044	0.0	-0.0588	0.0
C	-3.887667	-0.994315	-2.705777	-0.0147	-0.0441	0.0
C	1.5663500000000001	-4.464278	-0.219701	0.0147	-0.0147	-0.0294
C	0.7380720000000001	-5.229042	-2.528817	0.0147	-0.0294	-0.0294
C	-3.960753	2.715297	-1.421129	-0.0441	-0.0588	0.1029
C	-2.591508	3.647208	-3.362276	-0.0588	-0.0735	0.0882
C	2.2265870000000003	2.561003	1.998032	0.0588	0.0294	0.0
C	3.2170690000000004	3.784325	-0.016707999999999994	-0.0147	0.0	-0.0441
C	-0.448173	-2.112004	-3.987427	0.0	0.0	-0.0441
C	1.061011	2.492795	-3.1754890000000002	-0.0441	0.0	0.0735
H	0.841808	0.121836	-4.191491	-0.0147	0.0294	0.0147
H	2.753516	-0.644635	3.248905	-0.0588	0.0147	0.0
H	5.244392	-2.101409	0.033101000000000005	0.0441	-0.0147	0.1029
H	5.620737	2.3729679999999997	-1.0378560000000001	0.0147	-0.0294	-0.0294
H	6.8388599999999995	1.6312179999999998	-2.124707	0.0147	-0.0441	-0.0147
H	7.075553	1.632139	-0.34552499999999997	0.0147	0.0	-0.0147
H	-2.269352	1.9655	1.104857	0.2646	0.1911	0.0588
H	-1.610868	-2.125104	3.536486	-0.0147	-0.0441	-0.3087
H	-2.478044	3.279207	3.1973089999999997	0.2646	0.0735	0.147
H	-0.914728	3.4395960000000003	2.363719	0.3087	-0.0147	0.2058
H	-1.021131	2.4627429999999997	3.8596429999999997	0.1911	-0.0882	0.1764
H	-2.1596070000000003	-0.615363	5.565316	-0.0588	-0.3381	0.0441
H	-1.069026	0.687709	4.912097	-0.1176	-0.1176	0.2205
H	-0.42045299999999997	-0.9458040000000001	5.372954	-0.0441	-0.2499	-0.0588
H	2.8484629999999997	-3.139264	3.014079	-0.2499	-0.0147	0.0
H	1.085973	-3.1742369999999998	2.666623	-0.2646	0.1323	-0.0588
H	1.673584	-2.6186779999999996	4.249998	-0.2646	0.0882	-0.0441
H	3.283204	-2.7370289999999997	-1.3938320000000002	0.0735	-0.0735	0.0735
H	4.522071	-1.762253	-2.218915	0.1029	-0.1029	0.0735
H	2.9775020000000003	-1.010221	-1.742939	0.0882	-0.0735	0.0
H	-4.527626000000001	-3.283642	0.081955	0.0147	-0.0588	0.0
H	-3.374849	-5.448449	0.530748	0.0441	-0.0441	0.0
H	-1.036911	-5.805097999999999	-0.217886	0.0294	-0.0294	-0.0147
H	-2.82424	-0.189106	-1.01304	0.0	-0.0588	-0.0147
H	1.084435	-3.1533399999999996	-1.892107	0.0	-0.0147	-0.0294
H	1.0422230000000001	5.190667	1.3846749999999999	0.0147	0.0	-0.0147
H	-1.15147	6.280878	0.8728130000000001	0.0	-0.0147	0.0147
H	-2.746671	5.182424999999999	-0.692643	-0.0294	-0.0441	0.0735
H	2.157253	1.878542	-0.067352	0.0	-0.0147	0.0147
H	-2.201134	1.7785600000000001	-2.283618	-0.0588	-0.0735	0.1029
H	-5.203681	0.218404	-0.52584	0.0	-0.0588	0.0147
H	-4.593014	-0.867444	0.742145	0.0147	-0.0588	0.0
H	-5.599294	-1.515006	-0.578956	0.0	-0.0588	0.0147
H	-4.414772999999999	-0.062568	-2.960395	-0.0147	-0.0441	0.0
H	-4.555267	-1.826873	-2.965147	-0.0294	-0.0294	0.0
H	-2.991764	-1.0523580000000001	-3.336814	-0.0294	-0.0441	-0.0147
H	2.6092429999999998	-4.673048	-0.5477650000000001	0.0147	-0.0294	-0.0441
H	1.184609	-5.35356	0.29007799999999995	0.0147	0.0	-0.0147
H	1.5978880000000002	-3.624765	0.498768	0.0441	0.0	-0.0441
H	1.774144	-5.352042	-2.872878	0.0147	-0.0147	-0.0294
H	0.11335	-4.976976	-3.398931	0.0147	-0.0294	-0.0294
H	0.397893	-6.180618	-2.109101	0.0294	-0.0294	-0.0294
H	-4.654509	2.221764	-2.1185850000000004	-0.0588	-0.0588	0.1176
H	-3.953996	2.1459260000000002	-0.46757499999999996	-0.0441	-0.0441	0.1176
H	-4.369638	3.730439	-1.19105	-0.0441	-0.0441	0.1029
H	-3.3144109999999998	3.187925	-4.054167	-0.0735	-0.0735	0.1029
H	-1.6021709999999998	3.658885	-3.860355	-0.0588	-0.1029	0.0735
H	-2.910573	4.673303	-3.171427	-0.0441	-0.0735	0.0735
H	3.205028	2.084591	2.2003540000000004	0.0735	0.0441	-0.0147
H	1.433736	1.87543	2.3458959999999998	0.0882	0.0147	0.0441
H	2.160764	3.497913	2.583504	0.0588	0.0441	-0.0147
H	4.195219	3.3483709999999998	0.248138	0.0	0.0147	-0.0735
H	3.1439470000000003	4.789194	0.450527	-0.0147	0.0147	-0.0588
H	3.1595	3.937457	-1.108184	-0.0588	0.0	-0.0441
H	-1.183838	-2.869938	-3.725706	0.0	0.0	-0.0588
H	-0.779957	-1.583484	-4.892904000000001	0.0147	0.0147	-0.0441
H	0.508134	-2.622556	-4.24619	0.0147	0.0	-0.0441
H	1.917471	2.89238	-2.5827679999999997	-0.0294	-0.0147	0.0882
H	1.437252	2.223459	-4.176454	-0.0441	0.0294	0.0588
H	0.357593	3.3199889999999996	-3.268199	-0.0294	0.0147	0.1176
114
O	5.687059049348547	0.29540195065145286	-1.1435339753257265	0.0294	-0.0294	0.0147
Mg	-0.25292295065145287	-0.23396322206846204	0.02390002467427356	0.0294	-0.1323	0.0147
O	0.7729039013029058	-0.4555687039087173	3.0324288272800852	-0.0588	0.1764	-0.1029
C	4.991931049348548	0.0020559753257264404	-0.01933995065145288	0.0294	-0.0147	0.0294
N	-0.6741070246742735	-1.3725320740228208	-1.618940049348547	-0.0147	-0.0441	-0.0294
N	-0.028396074022820673	1.4293969013029058	-1.2196719013029058	-0.0441	-0.0588	0.0588
O	4.905580049348547	0.7371630246742735	0.927074	0.0294	0.0147	0.0
C	-0.23581402467427356	-1.1171300246742735	-2.849511049348547	-0.0147	-0.0147	-0.0294
C	0.45284597532572646	0.079955	-3.1794279753257264	-0.0147	0.0	0.0147
C	0.4696019506514528	1.2991039753257265	-2.465402925977179	-0.0294	-0.0147	0.0441
O	3.6123440246742735	-1.6447309753257264	1.0628360740228207	0.0147	0.0147	0.0441
C	2.4361750246742737	-1.0205929259771793	1.2390029753257266	0.0147	0.0441	-0.0147
C	1.9633838519543587	-1.1777388766286323	2.6822619259771794	-0.0882	0.0735	-0.0441
C	4.405042074022821	-1.3986280246742735	-0.12017390130290576	0.0441	-0.0147	0.0588
O	1.8843221233713678	-0.3766389259771793	0.34274487662863223	0.0735	0.0441	-0.0735
C	6.342873024674274	1.5882739753257265	-1.1564250246742735	0.0147	-0.0147	-0.0147
O	-0.7673608026058114	0.7264639753257265	1.7614651480456414	0.1176	-0.0147	0.0882
C	-0.44850714804564135	-0.7316445311888025	2.4019517285829908	-0.0882	0.2793	-0.1617
O	-0.41452007402282065	-1.490948605211623	1.3728247039087171	-0.0441	0.2352	-0.1764
O	-2.8414711233713676	-0.5899288272800851	3.029872950651453	-0.0735	0.1029	-0.0294
C	-3.078798950651453	0.6911621973941884	2.6083359259771792	0.0294	0.1176	-0.0441
C	-1.9002717532572646	1.5214501233713678	2.0603631480456412	0.147	0.0735	0.0882
C	-1.5454330986970943	-1.0009579753257265	3.4858488026058114	-0.0588	0.0147	-0.1176
O	-4.22010792597718	1.1190163454398299	2.623171777931538	0.0441	0.2058	-0.1323
C	-1.567927605211623	2.7660000246742737	2.921636271417009	0.2352	0.0147	0.1617
C	-1.2786901233713677	-0.42176032076555625	4.915307049348548	-0.0735	-0.1911	0.0294
C	1.9085806298858965	-2.6266458766286322	3.189891950651453	-0.2205	0.0735	-0.0294
C	3.728927123371368	-1.7387931233713678	-1.4643899259771793	0.0735	-0.0735	0.0441
C	-1.420353	-2.5406000740228207	-1.2389350740228207	0.0	-0.0441	-0.0441
C	-0.2588400493485471	2.773588901302906	-0.7259379013029057	-0.0294	-0.0588	0.0588
C	-2.793944	-2.352365098697094	-0.8509810493485471	0.0	-0.0588	-0.0294
C	-3.4771729753257263	-3.415269098697094	-0.21662802467427356	0.0147	-0.0588	-0.0147
C	-2.835123950651453	-4.635445074022821	0.046217	0.0294	-0.0441	0.0
C	-1.506993950651453	-4.84232107402282	-0.37810702467427354	0.0294	-0.0441	-0.0147
C	-0.7756219753257265	-3.792696049348547	-1.014456049348547	0.0147	-0.0294	-0.0294
C	-3.524063	-1.0313150986970943	-1.1971860246742736	0.0	-0.0588	-0.0147
C	0.6826460246742735	-4.0935910493485475	-1.446155049348547	0.0147	-0.0294	-0.0294
C	0.6701649753257265	3.431171950651453	0.15138504934854713	-0.0147	-0.0294	0.0294
C	0.329004	4.690252975325726	0.7213970246742735	0.0	-0.0147	0.0147
C	-0.9114110246742735	5.300557950651452	0.42859904934854715	-0.0147	-0.0294	0.0294
C	-1.804959049348547	4.68043892597718	-0.45875090130290574	-0.0294	-0.0441	0.0588
C	-1.5170490740228209	3.422164901302906	-1.0464038766286323	-0.0441	-0.0588	0.0735
C	2.059382	2.847264	0.475074	0.0	0.0	0.0
C	-2.520477074022821	2.824715901302906	-2.0500708519543585	-0.0441	-0.0588	0.0882
C	-4.814739	-0.7843760986970942	-0.338044	0.0	-0.0588	0.0
C	-3.886693024674274	-0.9913930740228206	-2.705777	-0.0147	-0.0441	0.0
C	1.5653760246742736	-4.463304024674274	-0.2177530493485471	0.0147	-0.0147	-0.0294
C	0.7370980246742735	-5.227094049348548	-2.526869049348547	0.0147	-0.0294	-0.0294
C	-3.957831074022821	2.719192901302906	-1.4279468272800853	-0.0441	-0.0588	0.1029
C	-2.587612098697094	3.652077876628632	-3.3681198519543587	-0.0588	-0.0735	0.0882
C	2.2226910986970942	2.559055049348547	1.998032	0.0588	0.0294	0.0
C	3.2180429753257265	3.784325	-0.013786074022820671	-0.0147	0.0	-0.0441
C	-0.448173	-2.112004	-3.9845050740228207	0.0	0.0	-0.0441
C	1.0639329259771793	2.492795	-3.1803588766286324	-0.0441	0.0	0.0735
H	0.8427819753257265	0.11988804934854712	-4.192464975325726	-0.0147	0.0294	0.0147
H	2.757411901302906	-0.6456089753257265	3.248905	-0.0588	0.0147	0.0
H	5.24147007402282	-2.100435024674274	0.026283172719914913	0.0441	-0.0147	0.1029
H	5.619763024674274	2.374915950651453	-1.035908049348547	0.0147	-0.0294	-0.0294
H	6.837886024674273	1.6341399259771792	-2.123733024674274	0.0147	-0.0441	-0.0147
H	7.074579024674274	1.632139	-0.34455102467427356	0.0147	0.0	-0.0147
H	-2.286883555863076	1.9528383207655564	1.1009610986970944	0.2646	0.1911	0.0588
H	-1.6098940246742734	-2.1221820740228208	3.556939481840255	-0.0147	-0.0441	-0.3087
H	-2.495575555863076	3.274337123371368	3.1875692467427355	0.2646	0.0735	0.147
H	-0.9351814818402553	3.4405699753257264	2.35008334543983	0.3087	-0.0147	0.2058
H	-1.0337926792344436	2.4685868519543583	3.8479552960912824	0.1911	-0.0882	0.1764
H	-2.155711098697094	-0.5929615675082919	5.56239407402282	-0.0588	-0.3381	0.0441
H	-1.0612341973941886	0.6955008026058116	4.897487370114104	-0.1176	-0.1176	0.2205
H	-0.41753107402282064	-0.9292464194626506	5.376849901302906	-0.0441	-0.2499	-0.0588
H	2.8650205805373496	-3.1382900246742738	3.014079	-0.2499	-0.0147	0.0
H	1.1035045558630758	-3.183002777931538	2.670518901302906	-0.2646	0.1323	-0.0588
H	1.691115555863076	-2.6245218519543583	4.25291992597718	-0.2646	0.0882	-0.0441
H	3.278334123371368	-2.7321591233713676	-1.3987018766286323	0.0735	-0.0735	0.0735
H	4.515253172719915	-1.7554351727199151	-2.223784876628632	0.1029	-0.1029	0.0735
H	2.9716581480456417	-1.005351123371368	-1.742939	0.0882	-0.0735	0.0
H	-4.528599975325727	-3.279746098697094	0.081955	0.0147	-0.0588	0.0
H	-3.3777709259771793	-5.44552707402282	0.530748	0.0441	-0.0441	0.0
H	-1.038858950651453	-5.803150049348547	-0.21691202467427356	0.0294	-0.0294	-0.0147
H	-2.82424	-0.18521009869709426	-1.0120660246742736	0.0	-0.0588	-0.0147
H	1.084435	-3.1523660246742735	-1.890159049348547	0.0	-0.0147	-0.0294
H	1.0412490246742736	5.190667	1.3856489753257264	0.0147	0.0	-0.0147
H	-1.15147	6.2818519753257265	0.8718390246742735	0.0	-0.0147	0.0147
H	-2.744723049348547	5.185346925977179	-0.6975128766286323	-0.0294	-0.0441	0.0735
H	2.157253	1.8795159753257265	-0.06832597532572643	0.0	-0.0147	0.0147
H	-2.197238098697094	1.7834298766286323	-2.2904358272800853	-0.0588	-0.0735	0.1029
H	-5.203681	0.22229990130290575	-0.5268139753257265	0.0	-0.0588	0.0147
H	-4.593987975325726	-0.8635480986970943	0.742145	0.0147	-0.0588	0.0
H	-5.599294	-1.5111100986970942	-0.5799299753257265	0.0	-0.0588	0.0147
H	-4.413799024674273	-0.059646074022820676	-2.960395	-0.0147	-0.0441	0.0
H	-4.553319049348548	-1.824925049348547	-2.965147	-0.0294	-0.0294	0.0
H	-2.989816049348547	-1.0494360740228208	-3.335840024674274	-0.0294	-0.0441	-0.0147
H	2.6082690246742737	-4.6711000493485475	-0.5448430740228207	0.0147	-0.0294	-0.0441
H	1.1836350246742735	-5.35356	0.2910519753257264	0.0147	0.0	-0.0147
H	1.5949660740228209	-3.624765	0.5016899259771793	0.0441	0.0	-0.0441
H	1.7731700246742734	-5.351068024674274	-2.870930049348547	0.0147	-0.0147	-0.0294
H	0.11237602467427357	-4.9750280493485475	-3.396983049348547	0.0147	-0.0294	-0.0294
H	0.39594504934854713	-6.178670049348548	-2.107153049348547	0.0294	-0.0294	-0.0294
H	-4.650613098697094	2.225659901302906	-2.1263768026058116	-0.0588	-0.0588	0.1176
H	-3.951074074022821	2.1488479259771793	-0.4753668026058115	-0.0441	-0.0441	0.1176
H	-4.36671607402282	3.733360925977179	-1.197867827280085	-0.0441	-0.0441	0.1029
H	-3.3095411233713676	3.192794876628632	-4.060984827280085	-0.0735	-0.0735	0.1029
H	-1.5982750986970942	3.6657028272800853	-3.8652248766286323	-0.0588	-0.1029	0.0735
H	-2.9076510740228207	4.678172876628632	-3.176296876628632	-0.0441	-0.0735	0.0735
H	3.200158123371368	2.081669074022821	2.2013279753257264	0.0735	0.0441	-0.0147
H	1.4278921480456412	1.8744560246742734	2.3429740740228207	0.0882	0.0147	0.0441
H	2.156868098697094	3.494991074022821	2.584477975325726	0.0588	0.0441	-0.0147
H	4.195219	3.3473970246742737	0.2530078766286322	0.0	0.0147	-0.0735
H	3.1449209753257263	4.788220024674274	0.45442290130290575	-0.0147	0.0147	-0.0588
H	3.163395901302906	3.937457	-1.1052620740228207	-0.0588	0.0	-0.0441
H	-1.183838	-2.869938	-3.721810098697094	0.0	0.0	-0.0588
H	-0.7809309753257265	-1.5844579753257264	-4.889982074022821	0.0147	0.0147	-0.0441
H	0.5071600246742736	-2.622556	-4.24326807402282	0.0147	0.0	-0.0441
H	1.919418950651453	2.8933539753257262	-2.5886118519543584	-0.0294	-0.0147	0.0882
H	1.4401739259771793	2.221511049348547	-4.180349901302906	-0.0441	0.0294	0.0588
H	0.35954095065145286	3.3190150246742736	-3.2759908026058113	-0.0294	0.0147	0.1176
114
O	5.681405876376123	0.3010551236238771	-1.1463605618119386	0.0294	-0.0294	0.0147
Mg	-0.2585761236238771	-0.20852394369255312	0.021073438188061455	0.0294	-0.1323	0.0147
O	0.7842102472477542	-0.48948774174326254	3.0522149326835697	-0.0588	0.1764	-0.1029
C	4.986277876376123	0.004882561811938545	-0.024993123623877088	0.0294	-0.0147	0.0294
N	-0.6712804381880615	-1.3640523145641845	-1.613286876376123	-0.0147	-0.0441	-0.0294
N	-0.01991631456418436	1.4407032472477541	-1.2309782472477542	-0.0441	-0.0588	0.0588
O	4.899926876376123	0.7343364381880615	0.927074	0.0294	0.0147	0.0
C	-0.23298743818806145	-1.1143034381880614	-2.843857876376123	-0.0147	-0.0147	-0.0294
C	0.45567256181193855	0.079955	-3.1822545618119387	-0.0147	0.0	0.0147
C	0.47525512362387706	1.3019305618119386	-2.4738826854358154	-0.0294	-0.0147	0.0441
O	3.6095174381880613	-1.6475575618119385	1.0543563145641843	0.0147	0.0147	0.0441
C	2.4333484381880615	-1.0290726854358156	1.2418295618119386	0.0147	0.0441	-0.0147
C	1.9803433708716314	-1.191871809059693	2.6907416854358157	-0.0882	0.0735	-0.0441
C	4.396562314564185	-1.3958014381880615	-0.13148024724775417	0.0441	-0.0147	0.0588
O	1.8701891909403074	-0.3851186854358156	0.35687780905969274	0.0735	0.0441	-0.0735
C	6.340046438188062	1.5911005618119385	-1.1535984381880615	0.0147	-0.0147	-0.0147
O	-0.7899734944955084	0.7292905618119385	1.7445056291283687	0.1176	-0.0147	0.0882
C	-0.43154762912836875	-0.7853496744268325	2.4330441799313243	-0.0882	0.2793	-0.1617
O	-0.4060403145641844	-1.5361739889910169	1.4067437417432624	-0.0441	0.2352	-0.1764
O	-2.8273381909403072	-0.6097149326835698	3.035526123623877	-0.0735	0.1029	-0.0294
C	-3.084452123623877	0.6685495055044917	2.6168156854358156	0.0294	0.1176	-0.0441
C	-1.9285376181193856	1.5073171909403071	2.0434036291283686	0.147	0.0735	0.0882
C	-1.534126752752246	-1.0037845618119385	3.508461494495508	-0.0588	0.0147	-0.1176
O	-4.228587685435816	1.0794441346328605	2.6486110563074465	0.0441	0.2058	-0.1323
C	-1.6131529889910166	2.7631734381880615	2.8905438200686757	0.2352	0.0147	0.1617
C	-1.264557190940307	-0.3850146964447989	4.909653876376123	-0.0735	-0.1911	0.0294
C	1.9509794271790781	-2.6407788090596926	3.195545123623877	-0.2205	0.0735	-0.0294
C	3.7147941909403075	-1.7246601909403072	-1.4728696854358156	0.0735	-0.0735	0.0441
C	-1.420353	-2.5321203145641844	-1.2304553145641843	0.0	-0.0441	-0.0441
C	-0.2531868763761229	2.784895247247754	-0.7372442472477542	-0.0294	-0.0588	0.0588
C	-2.793944	-2.3410587527522457	-0.8453278763761229	0.0	-0.0588	-0.0294
C	-3.4799995618119386	-3.403962752752246	-0.21380143818806144	0.0147	-0.0588	-0.0147
C	-2.840777123623877	-4.626965314564185	0.046217	0.0294	-0.0441	0.0
C	-1.512647123623877	-4.833841314564184	-0.37528043818806145	0.0294	-0.0441	-0.0147
C	-0.7784485618119386	-3.787042876376123	-1.008802876376123	0.0147	-0.0294	-0.0294
C	-3.524063	-1.020008752752246	-1.1943594381880616	0.0	-0.0588	-0.0147
C	0.6798194381880615	-4.087937876376123	-1.440501876376123	0.0147	-0.0294	-0.0294
C	0.6729915618119385	3.436825123623877	0.1457318763761229	-0.0147	-0.0294	0.0294
C	0.329004	4.693079561811938	0.7185704381880614	0.0	-0.0147	0.0147
C	-0.9085844381880614	5.306211123623877	0.4229458763761229	-0.0147	-0.0294	0.0294
C	-1.799305876376123	4.688918685435816	-0.4700572472477542	-0.0294	-0.0441	0.0588
C	-1.5085693145641845	3.433471247247754	-1.060536809059693	-0.0441	-0.0588	0.0735
C	2.059382	2.847264	0.475074	0.0	0.0	0.0
C	-2.5119973145641845	2.836022247247754	-2.067030370871631	-0.0441	-0.0588	0.0882
C	-4.814739	-0.7730697527522458	-0.338044	0.0	-0.0588	0.0
C	-3.8838664381880617	-0.9829133145641843	-2.705777	-0.0147	-0.0441	0.0
C	1.5625494381880616	-4.460477438188062	-0.21209987637612293	0.0147	-0.0147	-0.0294
C	0.7342714381880615	-5.221440876376123	-2.521215876376123	0.0147	-0.0294	-0.0294
C	-3.9493513145641845	2.7304992472477543	-1.44773293268357	-0.0441	-0.0588	0.1029
C	-2.576305752752246	3.6662108090596925	-3.3850793708716314	-0.0588	-0.0735	0.0882
C	2.211384752752246	2.553401876376123	1.998032	0.0588	0.0294	0.0
C	3.2208695618119387	3.784325	-0.005306314564184358	-0.0147	0.0	-0.0441
C	-0.448173	-2.112004	-3.9760253145641844	0.0	0.0	-0.0441
C	1.0724126854358156	2.492795	-3.1944918090596928	-0.0441	0.0	0.0735
H	0.8456085618119386	0.11423487637612291	-4.195291561811938	-0.0147	0.0294	0.0147
H	2.768718247247754	-0.6484355618119385	3.248905	-0.0588	0.0147	0.0
H	5.2329903145641845	-2.0976084381880615	0.006497067316430197	0.0441	-0.0147	0.1029
H	5.616936438188062	2.380569123623877	-1.030254876376123	0.0147	-0.0294	-0.0294
H	6.835059438188061	1.6426196854358155	-2.1209064381880616	0.0147	-0.0441	-0.0147
H	7.071752438188062	1.632139	-0.3417244381880615	0.0147	0.0	-0.0147
H	-2.337762112614894	1.916092696444799	1.089654752752246	0.2646	0.1911	0.0588
H	-1.6070674381880614	-2.1137023145641844	3.6162977980507094	-0.0147	-0.0441	-0.3087
H	-2.546454112614894	3.2602041909403074	3.1593033818806147	0.2646	0.0735	0.147
H	-0.9945397980507094	3.4433965618119386	2.3105111346328604	0.3087	-0.0147	0.2058
H	-1.070538303555201	2.485546370871631	3.814036258256737	0.1911	-0.0882	0.1764
H	-2.144404752752246	-0.5279500783254134	5.553914314564184	-0.0588	-0.3381	0.0441
H	-1.0386215055044916	0.7181134944955083	4.8550885728209225	-0.1176	-0.1176	0.2205
H	-0.40905131456418437	-0.8811944491970448	5.388156247247754	-0.0441	-0.2499	-0.0588
H	2.9130725508029554	-3.1354634381880615	3.014079	-0.2499	-0.0147	0.0
H	1.1543831126148938	-3.2084420563074465	2.681825247247754	-0.2646	0.1323	-0.0588
H	1.741994112614894	-2.641481370871631	4.261399685435816	-0.2646	0.0882	-0.0441
H	3.2642011909403075	-2.718026190940307	-1.4128348090596927	0.0735	-0.0735	0.0735
H	4.49546706731643	-1.7356490673164302	-2.2379178090596925	0.1029	-0.1029	0.0735
H	2.954698629128369	-0.9912181909403073	-1.742939	0.0882	-0.0735	0.0
H	-4.531426561811939	-3.2684397527522457	0.081955	0.0147	-0.0588	0.0
H	-3.3862506854358156	-5.437047314564184	0.530748	0.0441	-0.0441	0.0
H	-1.044512123623877	-5.7974968763761225	-0.21408543818806144	0.0294	-0.0294	-0.0147
H	-2.82424	-0.17390375275224584	-1.0092394381880614	0.0	-0.0588	-0.0147
H	1.084435	-3.1495394381880613	-1.8845058763761229	0.0	-0.0147	-0.0294
H	1.0384224381880616	5.190667	1.3884755618119384	0.0147	0.0	-0.0147
H	-1.15147	6.284678561811939	0.8690124381880615	0.0	-0.0147	0.0147
H	-2.739069876376123	5.193826685435815	-0.7116458090596928	-0.0294	-0.0441	0.0735
H	2.157253	1.8823425618119385	-0.07115256181193855	0.0	-0.0147	0.0147
H	-2.185931752752246	1.7975628090596927	-2.31022193268357	-0.0588	-0.0735	0.1029
H	-5.203681	0.23360624724775417	-0.5296405618119385	0.0	-0.0588	0.0147
H	-4.5968145618119385	-0.8522417527522458	0.742145	0.0147	-0.0588	0.0
H	-5.599294	-1.4998037527522459	-0.5827565618119386	0.0	-0.0588	0.0147
H	-4.410972438188061	-0.05116631456418436	-2.960395	-0.0147	-0.0441	0.0
H	-4.547665876376123	-1.8192718763761229	-2.965147	-0.0294	-0.0294	0.0
H	-2.9841628763761228	-1.0409563145641845	-3.3330134381880616	-0.0294	-0.0441	-0.0147
H	2.6054424381880614	-4.665446876376123	-0.5363633145641844	0.0147	-0.0294	-0.0441
H	1.1808084381880615	-5.35356	0.2938785618119385	0.0147	0.0	-0.0147
H	1.5864863145641845	-3.624765	0.5101696854358156	0.0441	0.0	-0.0441
H	1.7703434381880614	-5.348241438188062	-2.865276876376123	0.0147	-0.0147	-0.0294
H	0.10954943818806145	-4.969374876376123	-3.391329876376123	0.0147	-0.0294	-0.0294
H	0.3902918763761229	-6.173016876376123	-2.101499876376123	0.0294	-0.0294	-0.0294
H	-4.639306752752246	2.236966247247754	-2.1489894944955084	-0.0588	-0.0588	0.1176
H	-3.9425943145641846	2.1573276854358157	-0.4979794944955083	-0.0441	-0.0441	0.1176
H	-4.358236314564184	3.7418406854358155	-1.2176539326835698	-0.0441	-0.0441	0.1029
H	-3.2954081909403072	3.2069278090596924	-4.08077093268357	-0.0735	-0.0735	0.1029
H	-1.5869687527522458	3.68548893268357	-3.8793578090596927	-0.0588	-0.1029	0.0735
H	-2.8991713145641844	4.692305809059692	-3.1904298090596925	-0.0441	-0.0735	0.0735
H	3.1860251909403074	2.0731893145641846	2.2041545618119387	0.0735	0.0441	-0.0147
H	1.4109326291283686	1.8716294381880614	2.3344943145641843	0.0882	0.0147	0.0441
H	2.1455617527522457	3.4865113145641846	2.5873045618119384	0.0588	0.0441	-0.0147
H	4.195219	3.3445704381880614	0.26714080905969273	0.0	0.0147	-0.0735
H	3.1477475618119386	4.785393438188062	0.4657292472477542	-0.0147	0.0147	-0.0588
H	3.174702247247754	3.937457	-1.0967823145641844	-0.0588	0.0	-0.0441
H	-1.183838	-2.869938	-3.710503752752246	0.0	0.0	-0.0588
H	-0.7837575618119386	-1.5872845618119384	-4.881502314564185	0.0147	0.0147	-0.0441
H	0.5043334381880614	-2.622556	-4.2347883145641845	0.0147	0.0	-0.0441
H	1.925072123623877	2.8961805618119385	-2.605571370871631	-0.0294	-0.0147	0.0882
H	1.4486536854358156	2.215857876376123	-4.191656247247754	-0.0441	0.0294	0.0588
H	0.3651941236238771	3.3161884381880613	-3.298603494495508	-0.0294	0.0147	0.1176
114
O	5.67260085304124	0.3098601469587596	-1.15076307347938	0.0294	-0.0294	0.0147
Mg	-0.2673811469587596	-0.16890133868558194	0.016670926520620216	0.0294	-0.1323	0.0147
O	0.8018202939175192	-0.5423178817525574	3.0830325143556587	-0.0588	0.1764	-0.1029
C	4.977472853041241	0.009285073479379784	-0.033798146958759566	0.0294	-0.0147	0.0294
N	-0.6668779265206203	-1.3508447795618608	-1.6044818530412406	-0.0147	-0.0441	-0.0294
N	-0.00670877956186065	1.4583132939175192	-1.2485882939175192	-0.0441	-0.0588	0.0588
O	4.89112185304124	0.7299339265206203	0.927074	0.0294	0.0147	0.0
C	-0.2285849265206202	-1.1099009265206201	-2.8350528530412404	-0.0147	-0.0147	-0.0294
C	0.4600750734793798	0.079955	-3.1866570734793798	-0.0147	0.0	0.0147
C	0.48406014695875954	1.3063330734793799	-2.487090220438139	-0.0294	-0.0147	0.0441
O	3.60511492652062	-1.6519600734793798	1.0411487795618606	0.0147	0.0147	0.0441
C	2.4289459265206204	-1.0422802204381394	1.24623207347938	0.0147	0.0441	-0.0147
C	2.0067584408762786	-1.213884367396899	2.7039492204381395	-0.0882	0.0735	-0.0441
C	4.383354779561861	-1.3913989265206201	-0.14909029391751913	0.0441	-0.0147	0.0588
O	1.848176632603101	-0.39832622043813937	0.3788903673968989	0.0735	0.0441	-0.0735
C	6.33564392652062	1.5955030734793798	-1.1491959265206202	0.0147	-0.0147	-0.0147
O	-0.8251935878350383	0.7336930734793797	1.7180905591237214	0.1176	-0.0147	0.0882
C	-0.4051325591237213	-0.8689973961082159	2.4814718082731777	-0.0882	0.2793	-0.1617
O	-0.39283277956186063	-1.6066141756700767	1.4595738817525574	-0.0441	0.2352	-0.1764
O	-2.805325632603101	-0.6405325143556585	3.0443311469587595	-0.0735	0.1029	-0.0294
C	-3.0932571469587598	0.6333294121649617	2.6300232204381393	0.0294	0.1176	-0.0441
C	-1.972562734793798	1.485304632603101	2.016988559123721	0.147	0.0735	0.0882
C	-1.516516706082481	-1.0081870734793799	3.5436815878350383	-0.0588	0.0147	-0.1176
O	-4.2417952204381395	1.017808971288683	2.6882336613144178	0.0441	0.2058	-0.1323
C	-1.6835931756700764	2.7587709265206204	2.8421161917268223	0.2352	0.0147	0.1617
C	-1.2425446326031009	-0.32778204476806283	4.900848853041241	-0.0735	-0.1911	0.0294
C	2.0170171021906964	-2.662791367396899	3.2043501469587596	-0.2205	0.0735	-0.0294
C	3.692781632603101	-1.702647632603101	-1.4860772204381394	0.0735	-0.0735	0.0441
C	-1.420353	-2.5189127795618607	-1.2172477795618606	0.0	-0.0441	-0.0441
C	-0.24438185304124044	2.802505293917519	-0.7548542939175191	-0.0294	-0.0588	0.0588
C	-2.793944	-2.323448706082481	-0.8365228530412404	0.0	-0.0588	-0.0294
C	-3.4844020734793797	-3.386352706082481	-0.2093989265206202	0.0147	-0.0588	-0.0147
C	-2.8495821469587597	-4.613757779561861	0.046217	0.0294	-0.0441	0.0
C	-1.5214521469587594	-4.82063377956186	-0.3708779265206202	0.0294	-0.0441	-0.0147
C	-0.7828510734793798	-3.77823785304124	-0.9999978530412404	0.0147	-0.0294	-0.0294
C	-3.524063	-1.0023987060824808	-1.1899569265206202	0.0	-0.0588	-0.0147
C	0.6754169265206202	-4.079132853041241	-1.4316968530412406	0.0147	-0.0294	-0.0294
C	0.6773940734793797	3.44563014695876	0.13692685304124042	-0.0147	-0.0294	0.0294
C	0.329004	4.69748207347938	0.7141679265206202	0.0	-0.0147	0.0147
C	-0.9041819265206202	5.315016146958759	0.41414085304124043	-0.0147	-0.0294	0.0294
C	-1.7905008530412405	4.7021262204381395	-0.4876672939175192	-0.0294	-0.0441	0.0588
C	-1.4953617795618608	3.451081293917519	-1.082549367396899	-0.0441	-0.0588	0.0735
C	2.059382	2.847264	0.475074	0.0	0.0	0.0
C	-2.4987897795618608	2.853632293917519	-2.0934454408762786	-0.0441	-0.0588	0.0882
C	-4.814739	-0.7554597060824808	-0.338044	0.0	-0.0588	0.0
C	-3.8794639265206206	-0.9697057795618607	-2.705777	-0.0147	-0.0441	0.0
C	1.5581469265206203	-4.45607492652062	-0.20329485304124045	0.0147	-0.0147	-0.0294
C	0.7298689265206203	-5.212635853041241	-2.5124108530412403	0.0147	-0.0294	-0.0294
C	-3.936143779561861	2.748109293917519	-1.4785505143556585	-0.0441	-0.0588	0.1029
C	-2.558695706082481	3.688223367396899	-3.411494440876279	-0.0588	-0.0735	0.0882
C	2.1937747060824813	2.54459685304124	1.998032	0.0588	0.0294	0.0
C	3.22527207347938	3.784325	0.007901220438139352	-0.0147	0.0	-0.0441
C	-0.448173	-2.112004	-3.9628177795618607	0.0	0.0	-0.0441
C	1.0856202204381393	2.492795	-3.216504367396899	-0.0441	0.0	0.0735
H	0.8500110734793798	0.10542985304124043	-4.19969407347938	-0.0147	0.0294	0.0147
H	2.786328293917519	-0.6528380734793797	3.248905	-0.0588	0.0147	0.0
H	5.219782779561861	-2.0932059265206204	-0.024320514355658476	0.0441	-0.0147	0.1029
H	5.61253392652062	2.3893741469587595	-1.0214498530412406	0.0147	-0.0294	-0.0294
H	6.83065692652062	1.6558272204381392	-2.1165039265206205	0.0147	-0.0441	-0.0147
H	7.06734992652062	1.632139	-0.3373219265206202	0.0147	0.0	-0.0147
H	-2.4170073226288364	1.858860044768063	1.072044706082481	0.2646	0.1911	0.0588
H	-1.60266492652062	-2.1004947795618607	3.7087505430669756	-0.0147	-0.0441	-0.3087
H	-2.6256993226288365	3.238191632603101	3.115278265206202	0.2646	0.0735	0.147
H	-1.0869925430669753	3.4477990734793798	2.248875971288683	0.3087	-0.0147	0.2058
H	-1.127770955231937	2.5119614408762785	3.7612061182474426	0.1911	-0.0882	0.1764
H	-2.1267947060824812	-0.426692309974265	5.5407067795618605	-0.0588	-0.3381	0.0441
H	-1.0034014121649617	0.7533335878350382	4.789050897809304	-0.1176	-0.1176	0.2205
H	-0.3958437795618606	-0.8063517508505438	5.4057662939175195	-0.0441	-0.2499	-0.0588
H	2.9879152491494563	-3.1310609265206204	3.014079	-0.2499	-0.0147	0.0
H	1.233628322628836	-3.2480646613144177	2.699435293917519	-0.2646	0.1323	-0.0588
H	1.8212393226288361	-2.6678964408762784	4.274607220438139	-0.2646	0.0882	-0.0441
H	3.242188632603101	-2.696013632603101	-1.434847367396899	0.0735	-0.0735	0.0735
H	4.464649485644341	-1.7048314856443416	-2.259930367396899	0.1029	-0.1029	0.0735
H	2.9282835591237215	-0.9692056326031011	-1.742939	0.0882	-0.0735	0.0
H	-4.5358290734793805	-3.250829706082481	0.081955	0.0147	-0.0588	0.0
H	-3.3994582204381394	-5.4238397795618605	0.530748	0.0441	-0.0441	0.0
H	-1.0533171469587594	-5.78869185304124	-0.2096829265206202	0.0294	-0.0294	-0.0147
H	-2.82424	-0.1562937060824809	-1.0048369265206203	0.0	-0.0588	-0.0147
H	1.084435	-3.14513692652062	-1.8757008530412405	0.0	-0.0147	-0.0294
H	1.0340199265206202	5.190667	1.3928780734793798	0.0147	0.0	-0.0147
H	-1.15147	6.28908107347938	0.8646099265206203	0.0	-0.0147	0.0147
H	-2.7302648530412403	5.207034220438139	-0.7336583673968989	-0.0294	-0.0441	0.0735
H	2.157253	1.8867450734793798	-0.07555507347937979	0.0	-0.0147	0.0147
H	-2.168321706082481	1.819575367396899	-2.341039514355659	-0.0588	-0.0735	0.1029
H	-5.203681	0.2512162939175191	-0.5340430734793797	0.0	-0.0588	0.0147
H	-4.60121707347938	-0.8346317060824808	0.742145	0.0147	-0.0588	0.0
H	-5.599294	-1.4821937060824808	-0.5871590734793798	0.0	-0.0588	0.0147
H	-4.4065699265206195	-0.03795877956186065	-2.960395	-0.0147	-0.0441	0.0
H	-4.538860853041241	-1.8104668530412404	-2.965147	-0.0294	-0.0294	0.0
H	-2.97535785304124	-1.0277487795618607	-3.3286109265206205	-0.0294	-0.0441	-0.0147
H	2.6010399265206203	-4.656641853041241	-0.5231557795618607	0.0147	-0.0294	-0.0441
H	1.1764059265206201	-5.35356	0.29828107347937977	0.0147	0.0	-0.0147
H	1.5732787795618608	-3.624765	0.5233772204381393	0.0441	0.0	-0.0441
H	1.76594092652062	-5.34383892652062	-2.8564718530412403	0.0147	-0.0147	-0.0294
H	0.10514692652062022	-4.960569853041241	-3.3825248530412404	0.0147	-0.0294	-0.0294
H	0.3814868530412404	-6.164211853041241	-2.09269485304124	0.0294	-0.0294	-0.0294
H	-4.6216967060824805	2.254576293917519	-2.1842095878350385	-0.0588	-0.0588	0.1176
H	-3.929386779561861	2.1705352204381394	-0.5331995878350382	-0.0441	-0.0441	0.1176
H	-4.3450287795618605	3.7550482204381392	-1.2484715143556584	-0.0441	-0.0441	0.1029
H	-3.273395632603101	3.228940367396899	-4.111588514355659	-0.0735	-0.0735	0.1029
H	-1.5693587060824807	3.716306514355659	-3.901370367396899	-0.0588	-0.1029	0.0735
H	-2.8859637795618607	4.714318367396898	-3.212442367396899	-0.0441	-0.0735	0.0735
H	3.164012632603101	2.059981779561861	2.20855707347938	0.0735	0.0441	-0.0147
H	1.3845175591237213	1.86722692652062	2.3212867795618606	0.0882	0.0147	0.0441
H	2.127951706082481	3.473303779561861	2.5917070734793795	0.0588	0.0441	-0.0147
H	4.195219	3.3401679265206203	0.2891533673968989	0.0	0.0147	-0.0735
H	3.1521500734793797	4.78099092652062	0.4833392939175192	-0.0147	0.0147	-0.0588
H	3.192312293917519	3.937457	-1.0835747795618607	-0.0588	0.0	-0.0441
H	-1.183838	-2.869938	-3.692893706082481	0.0	0.0	-0.0588
H	-0.7881600734793798	-1.5916870734793798	-4.868294779561861	0.0147	0.0147	-0.0441
H	0.4999309265206202	-2.622556	-4.221580779561861	0.0147	0.0	-0.0441
H	1.9338771469587595	2.9005830734793796	-2.6319864408762785	-0.0294	-0.0147	0.0882
H	1.4618612204381394	2.2070528530412403	-4.209266293917519	-0.0441	0.0294	0.0588
H	0.3739991469587596	3.31178592652062	-3.333823587835038	-0.0294	0.0147	0.1176
114
O	5.661505876376123	0.32095512362387707	-1.1563105618119387	0.0294	-0.0294	0.0147
Mg	-0.2784761236238771	-0.1189739436925531	0.011123438188061455	0.0294	-0.1323	0.0147
O	0.8240102472477542	-0.6088877417432625	3.12186493268357	-0.0588	0.1764	-0.1029
C	4.966377876376123	0.014832561811938545	-0.04489312362387709	0.0294	-0.0147	0.0294
N	-0.6613304381880615	-1.3342023145641844	-1.593386876376123	-0.0147	-0.0441	-0.0294
N	0.009933685435815635	1.4805032472477542	-1.2707782472477542	-0.0441	-0.0588	0.0588
O	4.880026876376123	0.7243864381880615	0.927074	0.0294	0.0147	0.0
C	-0.22303743818806146	-1.1043534381880613	-2.823957876376123	-0.0147	-0.0147	-0.0294
C	0.46562256181193856	0.079955	-3.1922045618119386	-0.0147	0.0	0.0147
C	0.49515512362387704	1.3118805618119387	-2.5037326854358155	-0.0294	-0.0147	0.0441
O	3.5995674381880614	-1.6575075618119386	1.0245063145641842	0.0147	0.0147	0.0441
C	2.4233984381880616	-1.0589226854358158	1.2517795618119387	0.0147	0.0441	-0.0147
C	2.0400433708716315	-1.2416218090596929	2.720591685435816	-0.0882	0.0735	-0.0441
C	4.366712314564185	-1.3858514381880613	-0.17128024724775417	0.0441	-0.0147	0.0588
O	1.8204391909403073	-0.4149686854358156	0.40662780905969276	0.0735	0.0441	-0.0735
C	6.330096438188062	1.6010505618119386	-1.1436484381880614	0.0147	-0.0147	-0.0147
O	-0.8695734944955082	0.7392405618119385	1.6848056291283688	0.1176	-0.0147	0.0882
C	-0.3718476291283687	-0.9743996744268324	2.542494179931324	-0.0882	0.2793	-0.1617
O	-0.3761903145641844	-1.6953739889910167	1.5261437417432624	-0.0441	0.2352	-0.1764
O	-2.7775881909403073	-0.6793649326835698	3.055426123623877	-0.0735	0.1029	-0.0294
C	-3.1043521236238774	0.5889495055044915	2.6466656854358157	0.0294	0.1176	-0.0441
C	-2.0280376181193858	1.4575671909403072	1.9837036291283687	0.147	0.0735	0.0882
C	-1.494326752752246	-1.0137345618119387	3.5880614944955083	-0.0588	0.0147	-0.1176
O	-4.2584376854358155	0.9401441346328604	2.7381610563074466	0.0441	0.2058	-0.1323
C	-1.7723529889910168	2.7532234381880616	2.781093820068676	0.2352	0.0147	0.1617
C	-1.214807190940307	-0.25566469644479894	4.8897538763761235	-0.0735	-0.1911	0.0294
C	2.100229427179078	-2.6905288090596926	3.2154451236238772	-0.2205	0.0735	-0.0294
C	3.6650441909403075	-1.6749101909403072	-1.5027196854358158	0.0735	-0.0735	0.0441
C	-1.420353	-2.5022703145641843	-1.2006053145641842	0.0	-0.0441	-0.0441
C	-0.2332868763761229	2.824695247247754	-0.7770442472477541	-0.0294	-0.0588	0.0588
C	-2.793944	-2.3012587527522457	-0.8254278763761229	0.0	-0.0588	-0.0294
C	-3.4899495618119385	-3.3641627527522457	-0.20385143818806145	0.0147	-0.0588	-0.0147
C	-2.8606771236238773	-4.597115314564185	0.046217	0.0294	-0.0441	0.0
C	-1.532547123623877	-4.803991314564184	-0.36533043818806143	0.0294	-0.0441	-0.0147
C	-0.7883985618119386	-3.7671428763761226	-0.988902876376123	0.0147	-0.0294	-0.0294
C	-3.524063	-0.9802087527522458	-1.1844094381880614	0.0	-0.0588	-0.0147
C	0.6698694381880614	-4.068037876376123	-1.420601876376123	0.0147	-0.0294	-0.0294
C	0.6829415618119385	3.4567251236238774	0.12583187637612292	-0.0147	-0.0294	0.0294
C	0.329004	4.703029561811938	0.7086204381880614	0.0	-0.0147	0.0147
C	-0.8986344381880614	5.3261111236238765	0.40304587637612294	-0.0147	-0.0294	0.0294
C	-1.779405876376123	4.7187686854358155	-0.5098572472477542	-0.0294	-0.0441	0.0588
C	-1.4787193145641844	3.4732712472477543	-1.110286809059693	-0.0441	-0.0588	0.0735
C	2.059382	2.847264	0.475074	0.0	0.0	0.0
C	-2.4821473145641844	2.875822247247754	-2.1267303708716314	-0.0441	-0.0588	0.0882
C	-4.814739	-0.7332697527522458	-0.338044	0.0	-0.0588	0.0
C	-3.8739164381880618	-0.9530633145641844	-2.705777	-0.0147	-0.0441	0.0
C	1.5525994381880615	-4.450527438188062	-0.1921998763761229	0.0147	-0.0147	-0.0294
C	0.7243214381880615	-5.201540876376123	-2.5013158763761227	0.0147	-0.0294	-0.0294
C	-3.9195013145641844	2.7702992472477543	-1.51738293268357	-0.0441	-0.0588	0.1029
C	-2.536505752752246	3.7159608090596925	-3.4447793708716317	-0.0588	-0.0735	0.0882
C	2.171584752752246	2.5335018763761226	1.998032	0.0588	0.0294	0.0
C	3.2308195618119386	3.784325	0.024543685435815636	-0.0147	0.0	-0.0441
C	-0.448173	-2.112004	-3.9461753145641842	0.0	0.0	-0.0441
C	1.1022626854358157	2.492795	-3.2442418090596927	-0.0441	0.0	0.0735
H	0.8555585618119386	0.09433487637612291	-4.205241561811938	-0.0147	0.0294	0.0147
H	2.808518247247754	-0.6583855618119385	3.248905	-0.0588	0.0147	0.0
H	5.203140314564185	-2.0876584381880616	-0.0631529326835698	0.0441	-0.0147	0.1029
H	5.606986438188062	2.400469123623877	-1.010354876376123	0.0147	-0.0294	-0.0294
H	6.825109438188061	1.6724696854358156	-2.1109564381880617	0.0147	-0.0441	-0.0147
H	7.061802438188062	1.632139	-0.33177443818806146	0.0147	0.0	-0.0147
H	-2.516862112614894	1.786742696444799	1.049854752752246	0.2646	0.1911	0.0588
H	-1.5971174381880613	-2.0838523145641843	3.8252477980507096	-0.0147	-0.0441	-0.3087
H	-2.725554112614894	3.2104541909403075	3.0598033818806143	0.2646	0.0735	0.147
H	-1.2034897980507093	3.4533465618119386	2.1712111346328604	0.3087	-0.0147	0.2058
H	-1.199888303555201	2.5452463708716313	3.6946362582567374	0.1911	-0.0882	0.1764
H	-2.104604752752246	-0.2991000783254135	5.524064314564185	-0.0588	-0.3381	0.0441
H	-0.9590215055044917	0.7977134944955084	4.705838572820922	-0.1176	-0.1176	0.2205
H	-0.3792013145641844	-0.7120444491970448	5.427956247247755	-0.0441	-0.2499	-0.0588
H	3.082222550802955	-3.1255134381880616	3.014079	-0.2499	-0.0147	0.0
H	1.3334831126148938	-3.2979920563074465	2.7216252472477542	-0.2646	0.1323	-0.0588
H	1.921094112614894	-2.7011813708716312	4.291249685435815	-0.2646	0.0882	-0.0441
H	3.2144511909403075	-2.668276190940307	-1.462584809059693	0.0735	-0.0735	0.0735
H	4.42581706731643	-1.6659990673164302	-2.2876678090596925	0.1029	-0.1029	0.0735
H	2.8949986291283687	-0.9414681909403073	-1.742939	0.0882	-0.0735	0.0
H	-4.541376561811939	-3.2286397527522457	0.081955	0.0147	-0.0588	0.0
H	-3.416100685435816	-5.4071973145641845	0.530748	0.0441	-0.0441	0.0
H	-1.064412123623877	-5.777596876376123	-0.20413543818806146	0.0294	-0.0294	-0.0147
H	-2.82424	-0.13410375275224584	-0.9992894381880615	0.0	-0.0588	-0.0147
H	1.084435	-3.1395894381880614	-1.8646058763761229	0.0	-0.0147	-0.0294
H	1.0284724381880614	5.190667	1.3984255618119386	0.0147	0.0	-0.0147
H	-1.15147	6.294628561811939	0.8590624381880615	0.0	-0.0147	0.0147
H	-2.7191698763761227	5.223676685435815	-0.7613958090596927	-0.0294	-0.0441	0.0735
H	2.157253	1.8922925618119386	-0.08110256181193853	0.0	-0.0147	0.0147
H	-2.146131752752246	1.8473128090596929	-2.37987193268357	-0.0588	-0.0735	0.1029
H	-5.203681	0.2734062472477542	-0.5395905618119385	0.0	-0.0588	0.0147
H	-4.606764561811938	-0.8124417527522458	0.742145	0.0147	-0.0588	0.0
H	-5.599294	-1.4600037527522458	-0.5927065618119386	0.0	-0.0588	0.0147
H	-4.401022438188061	-0.021316314564184365	-2.960395	-0.0147	-0.0441	0.0
H	-4.527765876376123	-1.7993718763761228	-2.965147	-0.0294	-0.0294	0.0
H	-2.9642628763761225	-1.0111063145641843	-3.3230634381880617	-0.0294	-0.0441	-0.0147
H	2.5954924381880615	-4.645546876376123	-0.5065133145641844	0.0147	-0.0294	-0.0441
H	1.1708584381880613	-5.35356	0.3038285618119385	0.0147	0.0	-0.0147
H	1.5566363145641844	-3.624765	0.5400196854358156	0.0441	0.0	-0.0441
H	1.7603934381880613	-5.338291438188062	-2.8453768763761227	0.0147	-0.0147	-0.0294
H	0.09959943818806147	-4.949474876376123	-3.371429876376123	0.0147	-0.0294	-0.0294
H	0.3703918763761229	-6.1531168763761235	-2.0815998763761225	0.0294	-0.0294	-0.0294
H	-4.599506752752245	2.276766247247754	-2.2285894944955085	-0.0588	-0.0588	0.1176
H	-3.9127443145641845	2.187177685435816	-0.5775794944955084	-0.0441	-0.0441	0.1176
H	-4.3283863145641845	3.7716906854358156	-1.2873039326835698	-0.0441	-0.0441	0.1029
H	-3.2456581909403073	3.2566778090596924	-4.15042093268357	-0.0735	-0.0735	0.1029
H	-1.5471687527522457	3.75513893268357	-3.9291078090596927	-0.0588	-0.1029	0.0735
H	-2.8693213145641843	4.742055809059693	-3.2401798090596925	-0.0441	-0.0735	0.0735
H	3.1362751909403075	2.0433393145641845	2.2141045618119386	0.0735	0.0441	-0.0147
H	1.3512326291283687	1.8616794381880613	2.304644314564184	0.0882	0.0147	0.0441
H	2.1057617527522456	3.4566613145641845	2.5972545618119383	0.0588	0.0441	-0.0147
H	4.195219	3.3346204381880615	0.31689080905969275	0.0	0.0147	-0.0735
H	3.1576975618119385	4.775443438188062	0.5055292472477542	-0.0147	0.0147	-0.0588
H	3.2145022472477542	3.937457	-1.0669323145641842	-0.0588	0.0	-0.0441
H	-1.183838	-2.869938	-3.670703752752246	0.0	0.0	-0.0588
H	-0.7937075618119386	-1.5972345618119386	-4.851652314564185	0.0147	0.0147	-0.0441
H	0.49438343818806146	-2.622556	-4.204938314564185	0.0147	0.0	-0.0441
H	1.944972123623877	2.9061305618119384	-2.6652713708716314	-0.0294	-0.0147	0.0882
H	1.4785036854358158	2.1959578763761227	-4.231456247247754	-0.0441	0.0294	0.0588
H	0.38509412362387707	3.3062384381880614	-3.378203494495508	-0.0294	0.0147	0.1176
114
O	5.649207	0.333254	-1.16246	0.0294	-0.0294	0.0147
Mg	-0.290775	-0.06362900000000003	0.004974000000000003	0.0294	-0.1323	0.0147
O	0.848608	-0.682681	3.164911	-0.0588	0.1764	-0.1029
C	4.954079	0.020981999999999997	-0.05719199999999999	0.0294	-0.0147	0.0294
N	-0.655181	-1.315754	-1.581088	-0.0147	-0.0441	-0.0294
N	0.028381999999999994	1.505101	-1.295376	-0.0441	-0.0588	0.0588
O	4.867728	0.718237	0.927074	0.0294	0.0147	0.0
C	-0.216888	-1.098204	-2.811659	-0.0147	-0.0147	-0.0294
C	0.471772	0.079955	-3.198354	-0.0147	0.0	0.0147
C	0.507454	1.31803	-2.522181	-0.0294	-0.0147	0.0441
O	3.593418	-1.663657	1.006058	0.0147	0.0147	0.0441
C	2.417249	-1.077371	1.257929	0.0147	0.0441	-0.0147
C	2.07694	-1.272369	2.73904	-0.0882	0.0735	-0.0441
C	4.348264	-1.379702	-0.195878	0.0441	-0.0147	0.0588
O	1.789692	-0.433417	0.437375	0.0735	0.0441	-0.0735
C	6.323947	1.6072	-1.137499	0.0147	-0.0147	-0.0147
O	-0.918769	0.74539	1.647909	0.1176	-0.0147	0.0882
C	-0.334951	-1.091239	2.610138	-0.0882	0.2793	-0.1617
O	-0.357742	-1.793765	1.599937	-0.0441	0.2352	-0.1764
O	-2.746841	-0.722411	3.067725	-0.0735	0.1029	-0.0294
C	-3.116651	0.539754	2.665114	0.0294	0.1176	-0.0441
C	-2.089532	1.42682	1.946807	0.147	0.0735	0.0882
C	-1.469729	-1.019884	3.637257	-0.0588	0.0147	-0.1176
O	-4.276886	0.854052	2.793506	0.0441	0.2058	-0.1323
C	-1.870744	2.747074	2.71345	0.2352	0.0147	0.1617
C	-1.18406	-0.17572200000000002	4.877455	-0.0735	-0.1911	0.0294
C	2.192471	-2.721276	3.227744	-0.2205	0.0735	-0.0294
C	3.634297	-1.644163	-1.521168	0.0735	-0.0735	0.0441
C	-1.420353	-2.483822	-1.182157	0.0	-0.0441	-0.0441
C	-0.220988	2.849293	-0.801642	-0.0294	-0.0588	0.0588
C	-2.793944	-2.276661	-0.813129	0.0	-0.0588	-0.0294
C	-3.496099	-3.339565	-0.197702	0.0147	-0.0588	-0.0147
C	-2.872976	-4.578667	0.046217	0.0294	-0.0441	0.0
C	-1.544846	-4.785543	-0.359181	0.0294	-0.0441	-0.0147
C	-0.794548	-3.754844	-0.976604	0.0147	-0.0294	-0.0294
C	-3.524063	-0.955611	-1.17826	0.0	-0.0588	-0.0147
C	0.66372	-4.055739	-1.408303	0.0147	-0.0294	-0.0294
C	0.689091	3.469024	0.113533	-0.0147	-0.0294	0.0294
C	0.329004	4.709179	0.702471	0.0	-0.0147	0.0147
C	-0.892485	5.33841	0.390747	-0.0147	-0.0294	0.0294
C	-1.767107	4.737217	-0.534455	-0.0294	-0.0441	0.0588
C	-1.460271	3.497869	-1.141034	-0.0441	-0.0588	0.0735
C	2.059382	2.847264	0.475074	0.0	0.0	0.0
C	-2.463699	2.90042	-2.163627	-0.0441	-0.0588	0.0882
C	-4.814739	-0.708672	-0.338044	0.0	-0.0588	0.0
C	-3.867767	-0.934615	-2.705777	-0.0147	-0.0441	0.0
C	1.54645	-4.444378	-0.179901	0.0147	-0.0147	-0.0294
C	0.718172	-5.189242	-2.489017	0.0147	-0.0294	-0.0294
C	-3.901053	2.794897	-1.560429	-0.0441	-0.0588	0.1029
C	-2.511908	3.746708	-3.481676	-0.0588	-0.0735	0.0882
C	2.146987	2.521203	1.998032	0.0588	0.0294	0.0
C	3.236969	3.784325	0.042991999999999995	-0.0147	0.0	-0.0441
C	-0.448173	-2.112004	-3.927727	0.0	0.0	-0.0441
C	1.120711	2.492795	-3.274989	-0.0441	0.0	0.0735
H	0.861708	0.082036	-4.211391	-0.0147	0.0294	0.0147
H	2.833116	-0.664535	3.248905	-0.0588	0.0147	0.0
H	5.184692	-2.081509	-0.10619899999999999	0.0441	-0.0147	0.1029
H	5.600837	2.412768	-0.998056	0.0147	-0.0294	-0.0294
H	6.81896	1.690918	-2.104807	0.0147	-0.0441	-0.0147
H	7.055653	1.632139	-0.325625	0.0147	0.0	-0.0147
H	-2.627552	1.7068	1.025257	0.2646	0.1911	0.0588
H	-1.590968	-2.065404	3.954386	-0.0147	-0.0441	-0.3087
H	-2.836244	3.179707	2.998309	0.2646	0.0735	0.147
H	-1.332628	3.459496	2.085119	0.3087	-0.0147	0.2058
H	-1.279831	2.582143	3.620843	0.1911	-0.0882	0.1764
H	-2.080007	-0.15766300000000005	5.505616	-0.0588	-0.3381	0.0441
H	-0.909826	0.846909	4.613597	-0.1176	-0.1176	0.2205
H	-0.360753	-0.607504	5.452554	-0.0441	-0.2499	-0.0588
H	3.186763	-3.119364	3.014079	-0.2499	-0.0147	0.0
H	1.444173	-3.353337	2.746223	-0.2646	0.1323	-0.0588
H	2.031784	-2.738078	4.309698	-0.2646	0.0882	-0.0441
H	3.183704	-2.637529	-1.493332	0.0735	-0.0735	0.0735
H	4.382771	-1.622953	-2.318415	0.1029	-0.1029	0.0735
H	2.858102	-0.910721	-1.742939	0.0882	-0.0735	0.0
H	-4.547526	-3.204042	0.081955	0.0147	-0.0588	0.0
H	-3.434549	-5.388749	0.530748	0.0441	-0.0441	0.0
H	-1.076711	-5.765298	-0.197986	0.0294	-0.0294	-0.0147
H	-2.82424	-0.10950600000000002	-0.99314	0.0	-0.0588	-0.0147
H	1.084435	-3.13344	-1.852307	0.0	-0.0147	-0.0294
H	1.022323	5.190667	1.404575	0.0147	0.0	-0.0147
H	-1.15147	6.300778	0.852913	0.0	-0.0147	0.0147
H	-2.706871	5.242125	-0.792143	-0.0294	-0.0441	0.0735
H	2.157253	1.898442	-0.087252	0.0	-0.0147	0.0147
H	-2.121534	1.87806	-2.422918	-0.0588	-0.0735	0.1029
H	-5.203681	0.298004	-0.54574	0.0	-0.0588	0.0147
H	-4.612914	-0.787844	0.742145	0.0147	-0.0588	0.0
H	-5.599294	-1.435406	-0.598856	0.0	-0.0588	0.0147
H	-4.394873	-0.0028680000000000073	-2.960395	-0.0147	-0.0441	0.0
H	-4.515467	-1.787073	-2.965147	-0.0294	-0.0294	0.0
H	-2.951964	-0.992658	-3.316914	-0.0294	-0.0441	-0.0147
H	2.589343	-4.633248	-0.488065	0.0147	-0.0294	-0.0441
H	1.164709	-5.35356	0.309978	0.0147	0.0	-0.0147
H	1.538188	-3.624765	0.558468	0.0441	0.0	-0.0441
H	1.754244	-5.332142	-2.833078	0.0147	-0.0147	-0.0294
H	0.09345	-4.937176	-3.359131	0.0147	-0.0294	-0.0294
H	0.358093	-6.140818	-2.069301	0.0294	-0.0294	-0.0294
H	-4.574909	2.301364	-2.277785	-0.0588	-0.0588	0.1176
H	-3.894296	2.205626	-0.626775	-0.0441	-0.0441	0.1176
H	-4.309938	3.790139	-1.33035	-0.0441	-0.0441	0.1029
H	-3.214911	3.287425	-4.193467	-0.0735	-0.0735	0.1029
H	-1.522571	3.798185	-3.959855	-0.0588	-0.1029	0.0735
H	-2.850873	4.772803	-3.270927	-0.0441	-0.0735	0.0735
H	3.105528	2.024891	2.220254	0.0735	0.0441	-0.0147
H	1.314336	1.85553	2.286196	0.0882	0.0147	0.0441
H	2.081164	3.438213	2.603404	0.0588	0.0441	-0.0147
H	4.195219	3.328471	0.347638	0.0	0.0147	-0.0735
H	3.163847	4.769294	0.530127	-0.0147	0.0147	-0.0588
H	3.2391	3.937457	-1.048484	-0.0588	0.0	-0.0441
H	-1.183838	-2.869938	-3.646106	0.0	0.0	-0.0588
H	-0.799857	-1.603384	-4.833204	0.0147	0.0147	-0.0441
H	0.488234	-2.622556	-4.18649	0.0147	0.0	-0.0441
H	1.957271	2.91228	-2.702168	-0.0294	-0.0147	0.0882
H	1.496952	2.183659	-4.256054	-0.0441	0.0294	0.0588
H	0.397393	3.300089	-3.427399	-0.0294	0.0147	0.1176
114
O	5.6369081236238765	0.34555287637612286	-1.1686094381880614	0.0294	-0.0294	0.0147
Mg	-0.3030738763761229	-0.008284056307447017	-0.0011754381880614432	0.0294	-0.1323	0.0147
O	0.8732057527522458	-0.7564742582567373	3.20795706731643	-0.0588	0.1764	-0.1029
C	4.941780123623877	0.027131438188061442	-0.06949087637612289	0.0294	-0.0147	0.0294
N	-0.6490315618119386	-1.2973056854358158	-1.5687891236238771	-0.0147	-0.0441	-0.0294
N	0.04683031456418433	1.5296987527522459	-1.319973752752246	-0.0441	-0.0588	0.0588
O	4.8554291236238765	0.7120875618119386	0.927074	0.0294	0.0147	0.0
C	-0.21073856181193856	-1.0920545618119386	-2.7993601236238774	-0.0147	-0.0147	-0.0294
C	0.4779214381880615	0.079955	-3.2045034381880617	-0.0147	0.0	0.0147
C	0.5197528763761229	1.3241794381880614	-2.540629314564184	-0.0294	-0.0147	0.0441
O	3.587268561811938	-1.6698064381880613	0.9876096854358156	0.0147	0.0147	0.0441
C	2.4110995618119384	-1.0958193145641844	1.2640784381880614	0.0147	0.0441	-0.0147
C	2.1138366291283686	-1.3031161909403073	2.7574883145641844	-0.0882	0.0735	-0.0441
C	4.329815685435816	-1.3735525618119386	-0.22047575275224576	0.0441	-0.0147	0.0588
O	1.7589448090596929	-0.45186531456418433	0.4681221909403072	0.0735	0.0441	-0.0735
C	6.317797561811939	1.6133494381880613	-1.1313495618119387	0.0147	-0.0147	-0.0147
O	-0.9679645055044915	0.7515394381880615	1.6110123708716315	0.1176	-0.0147	0.0882
C	-0.29805437087163134	-1.2080783255731675	2.677781820068676	-0.0882	0.2793	-0.1617
O	-0.3392936854358157	-1.8921560110089832	1.6737302582567373	-0.0441	0.2352	-0.1764
O	-2.7160938090596924	-0.7654570673164302	3.0800238763761225	-0.0735	0.1029	-0.0294
C	-3.1289498763761228	0.4905584944955084	2.6835623145641843	0.0294	0.1176	-0.0441
C	-2.1510263818806146	1.3960728090596928	1.9099103708716314	0.147	0.0735	0.0882
C	-1.4451312472477542	-1.0260334381880614	3.6864525055044917	-0.0588	0.0147	-0.1176
O	-4.295334314564185	0.7679598653671398	2.8488509436925527	0.0441	0.2058	-0.1323
C	-1.9691350110089831	2.7409245618119384	2.645806179931324	0.2352	0.0147	0.1617
C	-1.1533128090596927	-0.09577930355520121	4.865156123623877	-0.0735	-0.1911	0.0294
C	2.2847125728209217	-2.7520231909403075	3.2400428763761226	-0.2205	0.0735	-0.0294
C	3.6035498090596927	-1.6134158090596928	-1.5396163145641844	0.0735	-0.0735	0.0441
C	-1.420353	-2.4653736854358157	-1.1637086854358156	0.0	-0.0441	-0.0441
C	-0.2086891236238771	2.8738907527522457	-0.8262397527522457	-0.0294	-0.0588	0.0588
C	-2.793944	-2.252063247247754	-0.8008301236238771	0.0	-0.0588	-0.0294
C	-3.5022484381880616	-3.314967247247754	-0.19155256181193855	0.0147	-0.0588	-0.0147
C	-2.8852748763761227	-4.5602186854358155	0.046217	0.0294	-0.0441	0.0
C	-1.5571448763761229	-4.767094685435815	-0.3530315618119385	0.0294	-0.0441	-0.0147
C	-0.8006974381880615	-3.742545123623877	-0.9643051236238771	0.0147	-0.0294	-0.0294
C	-3.524063	-0.9310132472477542	-1.1721105618119387	0.0	-0.0588	-0.0147
C	0.6575705618119385	-4.043440123623877	-1.3960041236238772	0.0147	-0.0294	-0.0294
C	0.6952404381880615	3.481322876376123	0.10123412362387711	-0.0147	-0.0294	0.0294
C	0.329004	4.715328438188061	0.6963215618119385	0.0	-0.0147	0.0147
C	-0.8863355618119385	5.350708876376123	0.37844812362387714	-0.0147	-0.0294	0.0294
C	-1.754808123623877	4.755665314564185	-0.5590527527522458	-0.0294	-0.0441	0.0588
C	-1.4418226854358158	3.522466752752246	-1.1717811909403073	-0.0441	-0.0588	0.0735
C	2.059382	2.847264	0.475074	0.0	0.0	0.0
C	-2.445250685435816	2.925017752752246	-2.2005236291283685	-0.0441	-0.0588	0.0882
C	-4.814739	-0.6840742472477542	-0.338044	0.0	-0.0588	0.0
C	-3.8616175618119386	-0.9161666854358157	-2.705777	-0.0147	-0.0441	0.0
C	1.5403005618119388	-4.438228561811939	-0.1676021236238771	0.0147	-0.0147	-0.0294
C	0.7120225618119386	-5.176943123623877	-2.4767181236238773	0.0147	-0.0294	-0.0294
C	-3.882604685435816	2.819494752752246	-1.6034750673164302	-0.0441	-0.0588	0.1029
C	-2.487310247247754	3.7774551909403074	-3.5185726291283688	-0.0588	-0.0735	0.0882
C	2.1223892472477544	2.508904123623877	1.998032	0.0588	0.0294	0.0
C	3.243118438188062	3.784325	0.061440314564184334	-0.0147	0.0	-0.0441
C	-0.448173	-2.112004	-3.9092786854358157	0.0	0.0	-0.0441
C	1.1391593145641843	2.492795	-3.3057361909403076	-0.0441	0.0	0.0735
H	0.8678574381880615	0.06973712362387711	-4.2175404381880615	-0.0147	0.0294	0.0147
H	2.857713752752246	-0.6706844381880614	3.248905	-0.0588	0.0147	0.0
H	5.166243685435815	-2.0753595618119385	-0.1492450673164301	0.0441	-0.0147	0.1029
H	5.594687561811939	2.4250668763761225	-0.9857571236238771	0.0147	-0.0294	-0.0294
H	6.812810561811938	1.7093663145641842	-2.0986575618119385	0.0147	-0.0441	-0.0147
H	7.049503561811939	1.632139	-0.31947556181193854	0.0147	0.0	-0.0147
H	-2.738241887385106	1.6268573035552014	1.0006592472477542	0.2646	0.1911	0.0588
H	-1.5848185618119386	-2.0469556854358157	4.08352420194929	-0.0147	-0.0441	-0.3087
H	-2.9469338873851063	3.1489598090596926	2.9368146181193855	0.2646	0.0735	0.147
H	-1.4617662019492903	3.4656454381880617	1.99902686536714	0.3087	-0.0147	0.2058
H	-1.3597736964447986	2.6190396291283684	3.5470497417432627	0.1911	-0.0882	0.1764
H	-2.0554092472477543	-0.01622592167458678	5.487167685435815	-0.0588	-0.3381	0.0441
H	-0.8606304944955084	0.8961045055044916	4.521355427179079	-0.1176	-0.1176	0.2205
H	-0.34230468543581566	-0.5029635508029555	5.4771517527522455	-0.0441	-0.2499	-0.0588
H	3.2913034491970445	-3.1132145618119385	3.014079	-0.2499	-0.0147	0.0
H	1.5548628873851058	-3.4086819436925526	2.770820752752246	-0.2646	0.1323	-0.0588
H	2.142473887385106	-2.7749746291283683	4.328146314564185	-0.2646	0.0882	-0.0441
H	3.1529568090596927	-2.6067818090596924	-1.5240791909403073	0.0735	-0.0735	0.0735
H	4.33972493268357	-1.57990693268357	-2.3491621909403073	0.1029	-0.1029	0.0735
H	2.8212053708716316	-0.8799738090596928	-1.742939	0.0882	-0.0735	0.0
H	-4.553675438188062	-3.179444247247754	0.081955	0.0147	-0.0588	0.0
H	-3.4529973145641844	-5.370300685435815	0.530748	0.0441	-0.0441	0.0
H	-1.089009876376123	-5.752999123623876	-0.19183656181193856	0.0294	-0.0294	-0.0147
H	-2.82424	-0.08490824724775423	-0.9869905618119386	0.0	-0.0588	-0.0147
H	1.084435	-3.127290561811938	-1.840008123623877	0.0	-0.0147	-0.0294
H	1.0161735618119387	5.190667	1.4107244381880613	0.0147	0.0	-0.0147
H	-1.15147	6.306927438188062	0.8467635618119386	0.0	-0.0147	0.0147
H	-2.6945721236238773	5.260573314564184	-0.8228901909403072	-0.0294	-0.0441	0.0735
H	2.157253	1.9045914381880613	-0.09340143818806144	0.0	-0.0147	0.0147
H	-2.096936247247754	1.9088071909403073	-2.4659640673164303	-0.0588	-0.0735	0.1029
H	-5.203681	0.3226017527522458	-0.5518894381880615	0.0	-0.0588	0.0147
H	-4.6190634381880615	-0.7632462472477543	0.742145	0.0147	-0.0588	0.0
H	-5.599294	-1.410808247247754	-0.6050054381880615	0.0	-0.0588	0.0147
H	-4.388723561811938	0.015580314564184329	-2.960395	-0.0147	-0.0441	0.0
H	-4.503168123623877	-1.774774123623877	-2.965147	-0.0294	-0.0294	0.0
H	-2.939665123623877	-0.9742096854358158	-3.3107645618119386	-0.0294	-0.0441	-0.0147
H	2.5831935618119384	-4.620949123623877	-0.4696166854358157	0.0147	-0.0294	-0.0441
H	1.1585595618119386	-5.35356	0.31612743818806144	0.0147	0.0	-0.0147
H	1.5197396854358158	-3.624765	0.5769163145641842	0.0441	0.0	-0.0441
H	1.7480945618119386	-5.325992561811939	-2.8207791236238773	0.0147	-0.0147	-0.0294
H	0.08730056181193856	-4.924877123623877	-3.3468321236238774	0.0147	-0.0294	-0.0294
H	0.3457941236238771	-6.128519123623877	-2.057002123623877	0.0294	-0.0294	-0.0294
H	-4.5503112472477545	2.325961752752246	-2.326980505504492	-0.0588	-0.0588	0.1176
H	-3.875847685435816	2.2240743145641844	-0.6759705055044916	-0.0441	-0.0441	0.1176
H	-4.291489685435815	3.808587314564184	-1.37339606731643	-0.0441	-0.0441	0.1029
H	-3.1841638090596924	3.3181721909403072	-4.23651306731643	-0.0735	-0.0735	0.1029
H	-1.497973247247754	3.8412310673164303	-3.9906021909403075	-0.0588	-0.1029	0.0735
H	-2.8324246854358157	4.803550190940307	-3.3016741909403073	-0.0441	-0.0735	0.0735
H	3.0747808090596926	2.006442685435816	2.2264034381880617	0.0735	0.0441	-0.0147
H	1.2774393708716314	1.8493805618119386	2.2677476854358156	0.0882	0.0147	0.0441
H	2.056566247247754	3.419764685435816	2.6095534381880614	0.0588	0.0441	-0.0147
H	4.195219	3.3223215618119384	0.3783851909403072	0.0	0.0147	-0.0735
H	3.1699964381880616	4.763144561811939	0.5547247527522458	-0.0147	0.0147	-0.0588
H	3.263697752752246	3.937457	-1.0300356854358157	-0.0588	0.0	-0.0441
H	-1.183838	-2.869938	-3.621508247247754	0.0	0.0	-0.0588
H	-0.8060064381880615	-1.6095334381880613	-4.814755685435816	0.0147	0.0147	-0.0441
H	0.48208456181193854	-2.622556	-4.168041685435815	0.0147	0.0	-0.0441
H	1.969569876376123	2.9184294381880616	-2.7390646291283685	-0.0294	-0.0147	0.0882
H	1.5154003145641843	2.1713601236238773	-4.280651752752245	-0.0441	0.0294	0.0588
H	0.40969187637612287	3.2939395618119383	-3.4765945055044916	-0.0294	0.0147	0.1176
114
O	5.625813146958759	0.3566478530412404	-1.1741569265206202	0.0294	-0.0294	0.0147
Mg	-0.3141688530412404	0.0416433386855819	-0.006722926520620212	0.0294	-0.1323	0.0147
O	0.8953957060824809	-0.8230441182474425	3.2467894856443413	-0.0588	0.1764	-0.1029
C	4.930685146958759	0.03267892652062021	-0.08058585304124043	0.0294	-0.0147	0.0294
N	-0.6434840734793797	-1.2806632204381394	-1.5576941469587595	-0.0147	-0.0441	-0.0294
N	0.06347277956186063	1.5518887060824809	-1.342163706082481	-0.0441	-0.0588	0.0588
O	4.844334146958759	0.7065400734793797	0.927074	0.0294	0.0147	0.0
C	-0.2051910734793798	-1.0865070734793798	-2.78826514695876	-0.0147	-0.0147	-0.0294
C	0.48346892652062023	0.079955	-3.2100509265206205	-0.0147	0.0	0.0147
C	0.5308478530412404	1.3297269265206202	-2.5572717795618605	-0.0294	-0.0147	0.0441
O	3.5817210734793794	-1.67535392652062	0.9709672204381392	0.0147	0.0147	0.0441
C	2.4055520734793796	-1.1124617795618608	1.2696259265206202	0.0147	0.0441	-0.0147
C	2.1471215591237214	-1.330853632603101	2.774130779561861	-0.0882	0.0735	-0.0441
C	4.31317322043814	-1.3680050734793798	-0.24266570608248084	0.0441	-0.0147	0.0588
O	1.731207367396899	-0.4685077795618606	0.49585963260310106	0.0735	0.0441	-0.0735
C	6.3122500734793805	1.6188969265206201	-1.1258020734793799	0.0147	-0.0147	-0.0147
O	-1.0123444121649616	0.7570869265206203	1.5777274408762787	0.1176	-0.0147	0.0882
C	-0.26476944087627874	-1.3134806038917841	2.7388041917268224	-0.0882	0.2793	-0.1617
O	-0.3226512204381394	-1.9809158243299234	1.7403001182474425	-0.0441	0.2352	-0.1764
O	-2.688356367396899	-0.8042894856443416	3.09111885304124	-0.0735	0.1029	-0.0294
C	-3.1400448530412404	0.4461785878350383	2.7002047795618607	0.0294	0.1176	-0.0441
C	-2.206501265206202	1.368335367396899	1.8766254408762786	0.147	0.0735	0.0882
C	-1.4229412939175192	-1.0315809265206202	3.7308324121649616	-0.0588	0.0147	-0.1176
O	-4.311976779561861	0.690295028711317	2.898778338685582	0.0441	0.2058	-0.1323
C	-2.0578948243299235	2.7353770734793796	2.5847838082731776	0.2352	0.0147	0.1617
C	-1.125575367396899	-0.02366195523193723	4.85406114695876	-0.0735	-0.1911	0.0294
C	2.367924897809303	-2.779760632603101	3.2511378530412403	-0.2205	0.0735	-0.0294
C	3.575812367396899	-1.585678367396899	-1.5562587795618608	0.0735	-0.0735	0.0441
C	-1.420353	-2.4487312204381393	-1.1470662204381392	0.0	-0.0441	-0.0441
C	-0.19759414695875957	2.896080706082481	-0.8484297060824808	-0.0294	-0.0588	0.0588
C	-2.793944	-2.2298732939175188	-0.7897351469587596	0.0	-0.0588	-0.0294
C	-3.5077959265206204	-3.292777293917519	-0.18600507347937978	0.0147	-0.0588	-0.0147
C	-2.8963698530412403	-4.54357622043814	0.046217	0.0294	-0.0441	0.0
C	-1.5682398530412405	-4.750452220438139	-0.34748407347937976	0.0294	-0.0441	-0.0147
C	-0.8062449265206203	-3.7314501469587595	-0.9532101469587596	0.0147	-0.0294	-0.0294
C	-3.524063	-0.9088232939175191	-1.16656307347938	0.0	-0.0588	-0.0147
C	0.6520230734793797	-4.032345146958759	-1.3849091469587596	0.0147	-0.0294	-0.0294
C	0.7007879265206203	3.4924178530412404	0.09013914695875958	-0.0147	-0.0294	0.0294
C	0.329004	4.72087592652062	0.6907740734793797	0.0	-0.0147	0.0147
C	-0.8807880734793797	5.36180385304124	0.3673531469587596	-0.0147	-0.0294	0.0294
C	-1.7437131469587595	4.772307779561861	-0.5812427060824809	-0.0294	-0.0441	0.0588
C	-1.4251802204381394	3.544656706082481	-1.199518632603101	-0.0441	-0.0588	0.0735
C	2.059382	2.847264	0.475074	0.0	0.0	0.0
C	-2.4286082204381394	2.947207706082481	-2.2338085591237213	-0.0441	-0.0588	0.0882
C	-4.814739	-0.6618842939175191	-0.338044	0.0	-0.0588	0.0
C	-3.85607007347938	-0.8995242204381393	-2.705777	-0.0147	-0.0441	0.0
C	1.53475307347938	-4.4326810734793805	-0.15650714695875959	0.0147	-0.0147	-0.0294
C	0.7064750734793798	-5.165848146958759	-2.4656231469587597	0.0147	-0.0294	-0.0294
C	-3.8659622204381394	2.8416847060824812	-1.6423074856443416	-0.0441	-0.0588	0.1029
C	-2.465120293917519	3.805192632603101	-3.5518575591237216	-0.0588	-0.0735	0.0882
C	2.100199293917519	2.4978091469587596	1.998032	0.0588	0.0294	0.0
C	3.2486659265206206	3.784325	0.07808277956186063	-0.0147	0.0	-0.0441
C	-0.448173	-2.112004	-3.8926362204381393	0.0	0.0	-0.0441
C	1.1558017795618607	2.492795	-3.333473632603101	-0.0441	0.0	0.0735
H	0.8734049265206203	0.05864214695875958	-4.22308792652062	-0.0147	0.0294	0.0147
H	2.879903706082481	-0.6762319265206203	3.248905	-0.0588	0.0147	0.0
H	5.149601220438139	-2.0698120734793797	-0.1880774856443415	0.0441	-0.0147	0.1029
H	5.58914007347938	2.43616185304124	-0.9746621469587596	0.0147	-0.0294	-0.0294
H	6.80726307347938	1.7260087795618606	-2.0931100734793797	0.0147	-0.0441	-0.0147
H	7.0439560734793805	1.632139	-0.3139280734793798	0.0147	0.0	-0.0147
H	-2.838096677371164	1.5547399552319374	0.9784692939175192	0.2646	0.1911	0.0588
H	-1.5792710734793798	-2.0303132204381393	4.200021456933024	-0.0147	-0.0441	-0.3087
H	-3.046788677371164	3.121222367396899	2.881339734793798	0.2646	0.0735	0.147
H	-1.5782634569330243	3.4711929265206205	1.9213620287113171	0.3087	-0.0147	0.2058
H	-1.4318910447680626	2.6523245591237212	3.480479881752557	0.1911	-0.0882	0.1764
H	-2.033219293917519	0.11136630997426489	5.470525220438139	-0.0588	-0.3381	0.0441
H	-0.8162505878350383	0.9404844121649617	4.438143102190697	-0.1176	-0.1176	0.2205
H	-0.32566222043813936	-0.4086562491494564	5.499341706082481	-0.0441	-0.2499	-0.0588
H	3.3856107508505437	-3.1076670734793796	3.014079	-0.2499	-0.0147	0.0
H	1.6547176773711638	-3.458609338685582	2.793010706082481	-0.2646	0.1323	-0.0588
H	2.2423286773711637	-2.808259559123721	4.344788779561861	-0.2646	0.0882	-0.0441
H	3.125219367396899	-2.579044367396899	-1.551816632603101	0.0735	-0.0735	0.0735
H	4.300892514355659	-1.5410745143556586	-2.376899632603101	0.1029	-0.1029	0.0735
H	2.7879204408762788	-0.8522363673968989	-1.742939	0.0882	-0.0735	0.0
H	-4.55922292652062	-3.1572542939175188	0.081955	0.0147	-0.0588	0.0
H	-3.4696397795618608	-5.353658220438139	0.530748	0.0441	-0.0441	0.0
H	-1.1001048530412405	-5.741904146958759	-0.18628907347937979	0.0294	-0.0294	-0.0147
H	-2.82424	-0.06271829391751915	-0.9814430734793798	0.0	-0.0588	-0.0147
H	1.084435	-3.1217430734793794	-1.8289131469587594	0.0	-0.0147	-0.0294
H	1.01062607347938	5.190667	1.41627192652062	0.0147	0.0	-0.0147
H	-1.15147	6.31247492652062	0.8412160734793798	0.0	-0.0147	0.0147
H	-2.6834771469587597	5.27721577956186	-0.8506276326031011	-0.0294	-0.0441	0.0735
H	2.157253	1.9101389265206201	-0.0989489265206202	0.0	-0.0147	0.0147
H	-2.074746293917519	1.936544632603101	-2.5047964856443414	-0.0588	-0.0735	0.1029
H	-5.203681	0.34479170608248083	-0.5574369265206203	0.0	-0.0588	0.0147
H	-4.62461092652062	-0.7410562939175191	0.742145	0.0147	-0.0588	0.0
H	-5.599294	-1.3886182939175191	-0.6105529265206203	0.0	-0.0588	0.0147
H	-4.38317607347938	0.032222779561860634	-2.960395	-0.0147	-0.0441	0.0
H	-4.492073146958759	-1.7636791469587594	-2.965147	-0.0294	-0.0294	0.0
H	-2.9285701469587595	-0.9575672204381394	-3.3052170734793798	-0.0294	-0.0441	-0.0147
H	2.5776460734793796	-4.609854146958759	-0.4529742204381394	0.0147	-0.0294	-0.0441
H	1.1530120734793798	-5.35356	0.3216749265206202	0.0147	0.0	-0.0147
H	1.5030972204381394	-3.624765	0.5935587795618606	0.0441	0.0	-0.0441
H	1.7425470734793798	-5.32044507347938	-2.8096841469587597	0.0147	-0.0147	-0.0294
H	0.0817530734793798	-4.913782146958759	-3.33573714695876	0.0147	-0.0294	-0.0294
H	0.3346991469587596	-6.11742414695876	-2.0459071469587595	0.0294	-0.0294	-0.0294
H	-4.528121293917519	2.348151706082481	-2.371360412164962	-0.0588	-0.0588	0.1176
H	-3.8592052204381395	2.2407167795618608	-0.7203504121649617	-0.0441	-0.0441	0.1176
H	-4.274847220438139	3.8252297795618606	-1.4122284856443414	-0.0441	-0.0441	0.1029
H	-3.156426367396899	3.345909632603101	-4.275345485644341	-0.0735	-0.0735	0.1029
H	-1.475783293917519	3.8800634856443414	-4.018339632603102	-0.0588	-0.1029	0.0735
H	-2.8157822204381393	4.831287632603101	-3.329411632603101	-0.0441	-0.0735	0.0735
H	3.047043367396899	1.9898002204381395	2.2319509265206205	0.0735	0.0441	-0.0147
H	1.2441544408762786	1.8438330734793797	2.251105220438139	0.0882	0.0147	0.0441
H	2.0343762939175187	3.4031222204381395	2.61510092652062	0.0588	0.0441	-0.0147
H	4.195219	3.3167740734793796	0.40612263260310105	0.0	0.0147	-0.0735
H	3.1755439265206205	4.75759707347938	0.5769147060824809	-0.0147	0.0147	-0.0588
H	3.285887706082481	3.937457	-1.0133932204381393	-0.0588	0.0	-0.0441
H	-1.183838	-2.869938	-3.599318293917519	0.0	0.0	-0.0588
H	-0.8115539265206203	-1.61508092652062	-4.79811322043814	0.0147	0.0147	-0.0441
H	0.4765370734793798	-2.622556	-4.151399220438139	0.0147	0.0	-0.0441
H	1.9806648530412405	2.9239769265206204	-2.7723495591237213	-0.0294	-0.0147	0.0882
H	1.5320427795618607	2.1602651469587597	-4.30284170608248	-0.0441	0.0294	0.0588
H	0.4207868530412404	3.2883920734793795	-3.5209744121649615	-0.0294	0.0147	0.1176
114
O	5.617008123623877	0.3654528763761229	-1.1785594381880615	0.0294	-0.0294	0.0147
Mg	-0.3229738763761229	0.08126594369255306	-0.011125438188061453	0.0294	-0.1323	0.0147
O	0.9130057527522458	-0.8758742582567374	3.2776070673164304	-0.0588	0.1764	-0.1029
C	4.921880123623877	0.03708143818806145	-0.0893908763761229	0.0294	-0.0147	0.0294
N	-0.6390815618119385	-1.2674556854358157	-1.548889123623877	-0.0147	-0.0441	-0.0294
N	0.07668031456418435	1.569498752752246	-1.359773752752246	-0.0441	-0.0588	0.0588
O	4.835529123623877	0.7021375618119385	0.927074	0.0294	0.0147	0.0
C	-0.20078856181193855	-1.0821045618119385	-2.779460123623877	-0.0147	-0.0147	-0.0294
C	0.4878714381880615	0.079955	-3.2144534381880616	-0.0147	0.0	0.0147
C	0.5396528763761229	1.3341294381880615	-2.570479314564184	-0.0294	-0.0147	0.0441
O	3.5773185618119383	-1.6797564381880614	0.9577596854358156	0.0147	0.0147	0.0441
C	2.4011495618119385	-1.1256693145641845	1.2740284381880616	0.0147	0.0441	-0.0147
C	2.173536629128369	-1.3528661909403072	2.7873383145641846	-0.0882	0.0735	-0.0441
C	4.299965685435816	-1.3636025618119385	-0.2602757527522458	0.0441	-0.0147	0.0588
O	1.7091948090596927	-0.48171531456418437	0.5178721909403072	0.0735	0.0441	-0.0735
C	6.307847561811939	1.6232994381880614	-1.1213995618119386	0.0147	-0.0147	-0.0147
O	-1.0475645055044915	0.7614894381880615	1.5513123708716314	0.1176	-0.0147	0.0882
C	-0.2383543708716313	-1.3971283255731677	2.787231820068676	-0.0882	0.2793	-0.1617
O	-0.30944368543581563	-2.0513560110089832	1.7931302582567374	-0.0441	0.2352	-0.1764
O	-2.6663438090596925	-0.8351070673164303	3.0999238763761228	-0.0735	0.1029	-0.0294
C	-3.148849876376123	0.41095849449550836	2.7134123145641844	0.0294	0.1176	-0.0441
C	-2.250526381880615	1.3463228090596928	1.8502103708716313	0.147	0.0735	0.0882
C	-1.4053312472477542	-1.0359834381880615	3.7660525055044918	-0.0588	0.0147	-0.1176
O	-4.325184314564185	0.6286598653671397	2.938400943692553	0.0441	0.2058	-0.1323
C	-2.1283350110089834	2.7309745618119385	2.536356179931324	0.2352	0.0147	0.1617
C	-1.1035628090596927	0.0335706964447989	4.845256123623877	-0.0735	-0.1911	0.0294
C	2.4339625728209215	-2.8017731909403074	3.259942876376123	-0.2205	0.0735	-0.0294
C	3.5537998090596927	-1.5636658090596929	-1.5694663145641845	0.0735	-0.0735	0.0441
C	-1.420353	-2.4355236854358155	-1.1338586854358155	0.0	-0.0441	-0.0441
C	-0.1887891236238771	2.9136907527522458	-0.8660397527522458	-0.0294	-0.0588	0.0588
C	-2.793944	-2.212263247247754	-0.780930123623877	0.0	-0.0588	-0.0294
C	-3.5121984381880615	-3.275167247247754	-0.18160256181193854	0.0147	-0.0588	-0.0147
C	-2.905174876376123	-4.530368685435816	0.046217	0.0294	-0.0441	0.0
C	-1.577044876376123	-4.737244685435815	-0.3430815618119385	0.0294	-0.0441	-0.0147
C	-0.8106474381880615	-3.722645123623877	-0.9444051236238771	0.0147	-0.0294	-0.0294
C	-3.524063	-0.8912132472477542	-1.1621605618119386	0.0	-0.0588	-0.0147
C	0.6476205618119385	-4.023540123623877	-1.3761041236238771	0.0147	-0.0294	-0.0294
C	0.7051904381880615	3.501222876376123	0.0813341236238771	-0.0147	-0.0294	0.0294
C	0.329004	4.725278438188061	0.6863715618119385	0.0	-0.0147	0.0147
C	-0.8763855618119385	5.370608876376123	0.3585481236238771	-0.0147	-0.0294	0.0294
C	-1.734908123623877	4.785515314564185	-0.5988527527522458	-0.0294	-0.0441	0.0588
C	-1.4119726854358157	3.562266752752246	-1.2215311909403073	-0.0441	-0.0588	0.0735
C	2.059382	2.847264	0.475074	0.0	0.0	0.0
C	-2.4154006854358157	2.964817752752246	-2.260223629128369	-0.0441	-0.0588	0.0882
C	-4.814739	-0.6442742472477542	-0.338044	0.0	-0.0588	0.0
C	-3.8516675618119387	-0.8863166854358157	-2.705777	-0.0147	-0.0441	0.0
C	1.5303505618119386	-4.428278561811939	-0.1477021236238771	0.0147	-0.0147	-0.0294
C	0.7020725618119386	-5.157043123623877	-2.456818123623877	0.0147	-0.0294	-0.0294
C	-3.8527546854358157	2.859294752752246	-1.6731250673164302	-0.0441	-0.0588	0.1029
C	-2.447510247247754	3.8272051909403073	-3.578272629128369	-0.0588	-0.0735	0.0882
C	2.0825892472477543	2.489004123623877	1.998032	0.0588	0.0294	0.0
C	3.2530684381880617	3.784325	0.09129031456418435	-0.0147	0.0	-0.0441
C	-0.448173	-2.112004	-3.8794286854358155	0.0	0.0	-0.0441
C	1.1690093145641844	2.492795	-3.3554861909403075	-0.0441	0.0	0.0735
H	0.8778074381880615	0.04983712362387709	-4.227490438188061	-0.0147	0.0294	0.0147
H	2.897513752752246	-0.6806344381880615	3.248905	-0.0588	0.0147	0.0
H	5.136393685435816	-2.0654095618119386	-0.21889506731643016	0.0441	-0.0147	0.1029
H	5.584737561811939	2.4449668763761228	-0.9658571236238771	0.0147	-0.0294	-0.0294
H	6.802860561811938	1.7392163145641844	-2.0887075618119386	0.0147	-0.0441	-0.0147
H	7.039553561811939	1.632139	-0.3095255618119385	0.0147	0.0	-0.0147
H	-2.9173418873851062	1.4975073035552011	0.9608592472477543	0.2646	0.1911	0.0588
H	-1.5748685618119385	-2.0171056854358156	4.2924742019492905	-0.0147	-0.0441	-0.3087
H	-3.1260338873851063	3.0992098090596927	2.837314618119385	0.2646	0.0735	0.147
H	-1.6707162019492905	3.4755954381880616	1.85972686536714	0.3087	-0.0147	0.2058
H	-1.489123696444799	2.6787396291283687	3.4276497417432625	0.1911	-0.0882	0.1764
H	-2.0156092472477543	0.2126240783254134	5.457317685435815	-0.0588	-0.3381	0.0441
H	-0.7810304944955084	0.9757045055044916	4.372105427179078	-0.1176	-0.1176	0.2205
H	-0.3124546854358156	-0.33381355080295533	5.516951752752246	-0.0441	-0.2499	-0.0588
H	3.4604534491970447	-3.1032645618119385	3.014079	-0.2499	-0.0147	0.0
H	1.733962887385106	-3.498231943692553	2.810620752752246	-0.2646	0.1323	-0.0588
H	2.321573887385106	-2.8346746291283687	4.3579963145641845	-0.2646	0.0882	-0.0441
H	3.1032068090596927	-2.5570318090596924	-1.5738291909403075	0.0735	-0.0735	0.0735
H	4.27007493268357	-1.51025693268357	-2.3989121909403073	0.1029	-0.1029	0.0735
H	2.7615053708716313	-0.8302238090596927	-1.742939	0.0882	-0.0735	0.0
H	-4.563625438188062	-3.139644247247754	0.081955	0.0147	-0.0588	0.0
H	-3.4828473145641845	-5.340450685435815	0.530748	0.0441	-0.0441	0.0
H	-1.108909876376123	-5.733099123623877	-0.18188656181193855	0.0294	-0.0294	-0.0147
H	-2.82424	-0.045108247247754196	-0.9770405618119385	0.0	-0.0588	-0.0147
H	1.084435	-3.1173405618119383	-1.820108123623877	0.0	-0.0147	-0.0294
H	1.0062235618119386	5.190667	1.4206744381880614	0.0147	0.0	-0.0147
H	-1.15147	6.316877438188062	0.8368135618119386	0.0	-0.0147	0.0147
H	-2.674672123623877	5.290423314564184	-0.8726401909403073	-0.0294	-0.0441	0.0735
H	2.157253	1.9145414381880614	-0.10335143818806145	0.0	-0.0147	0.0147
H	-2.057136247247754	1.9585571909403074	-2.5356140673164305	-0.0588	-0.0735	0.1029
H	-5.203681	0.3624017527522458	-0.5618394381880615	0.0	-0.0588	0.0147
H	-4.629013438188061	-0.7234462472477542	0.742145	0.0147	-0.0588	0.0
H	-5.599294	-1.371008247247754	-0.6149554381880615	0.0	-0.0588	0.0147
H	-4.378773561811938	0.04543031456418435	-2.960395	-0.0147	-0.0441	0.0
H	-4.483268123623877	-1.754874123623877	-2.965147	-0.0294	-0.0294	0.0
H	-2.919765123623877	-0.9443596854358157	-3.3008145618119387	-0.0294	-0.0441	-0.0147
H	2.5732435618119385	-4.601049123623877	-0.43976668543581565	0.0147	-0.0294	-0.0441
H	1.1486095618119385	-5.35356	0.32607743818806145	0.0147	0.0	-0.0147
H	1.4898896854358157	-3.624765	0.6067663145641843	0.0441	0.0	-0.0441
H	1.7381445618119384	-5.316042561811939	-2.800879123623877	0.0147	-0.0147	-0.0294
H	0.07735056181193856	-4.904977123623877	-3.326932123623877	0.0147	-0.0294	-0.0294
H	0.3258941236238771	-6.108619123623877	-2.037102123623877	0.0294	-0.0294	-0.0294
H	-4.510511247247754	2.365761752752246	-2.406580505504492	-0.0588	-0.0588	0.1176
H	-3.8459976854358158	2.2539243145641845	-0.7555705055044916	-0.0441	-0.0441	0.1176
H	-4.261639685435815	3.8384373145641844	-1.44304606731643	-0.0441	-0.0441	0.1029
H	-3.1344138090596925	3.367922190940307	-4.30616306731643	-0.0735	-0.0735	0.1029
H	-1.458173247247754	3.9108810673164305	-4.0403521909403075	-0.0588	-0.1029	0.0735
H	-2.8025746854358156	4.853300190940307	-3.3514241909403073	-0.0441	-0.0735	0.0735
H	3.0250308090596927	1.9765926854358158	2.2363534381880616	0.0735	0.0441	-0.0147
H	1.2177393708716313	1.8394305618119384	2.2378976854358155	0.0882	0.0147	0.0441
H	2.016766247247754	3.3899146854358158	2.6195034381880613	0.0588	0.0441	-0.0147
H	4.195219	3.3123715618119385	0.4281351909403073	0.0	0.0147	-0.0735
H	3.1799464381880616	4.753194561811939	0.5945247527522458	-0.0147	0.0147	-0.0588
H	3.303497752752246	3.937457	-1.0001856854358155	-0.0588	0.0	-0.0441
H	-1.183838	-2.869938	-3.581708247247754	0.0	0.0	-0.0588
H	-0.8159564381880615	-1.6194834381880614	-4.784905685435816	0.0147	0.0147	-0.0441
H	0.4721345618119385	-2.622556	-4.138191685435816	0.0147	0.0	-0.0441
H	1.989469876376123	2.9283794381880615	-2.7987646291283688	-0.0294	-0.0147	0.0882
H	1.5452503145641845	2.151460123623877	-4.320451752752246	-0.0441	0.0294	0.0588
H	0.4295918763761229	3.2839895618119384	-3.5561945055044917	-0.0294	0.0147	0.1176
114
O	5.611354950651452	0.37110604934854713	-1.1813860246742736	0.0294	-0.0294	0.0147
Mg	-0.32862704934854714	0.10670522206846199	-0.013952024674273557	0.0294	-0.1323	0.0147
O	0.9243120986970943	-0.9097932960912827	3.297393172719915	-0.0588	0.1764	-0.1029
C	4.916226950651453	0.039908024674273554	-0.09504404934854711	0.0294	-0.0147	0.0294
N	-0.6362549753257265	-1.2589759259771793	-1.543235950651453	-0.0147	-0.0441	-0.0294
N	0.08516007402282066	1.5808050986970943	-1.3710800986970944	-0.0441	-0.0588	0.0588
O	4.829875950651452	0.6993109753257265	0.927074	0.0294	0.0147	0.0
C	-0.19796197532572643	-1.0792779753257264	-2.773806950651453	-0.0147	-0.0147	-0.0294
C	0.4906980246742736	0.079955	-3.217280024674274	-0.0147	0.0	0.0147
C	0.5453060493485471	1.3369560246742735	-2.5789590740228205	-0.0294	-0.0147	0.0441
O	3.574491975325726	-1.6825830246742735	0.9492799259771793	0.0147	0.0147	0.0441
C	2.3983229753257262	-1.1341490740228208	1.2768550246742736	0.0147	0.0441	-0.0147
C	2.1904961480456415	-1.3669991233713679	2.795818074022821	-0.0882	0.0735	-0.0441
C	4.29148592597718	-1.3607759753257265	-0.2715820986970942	0.0441	-0.0147	0.0588
O	1.6950618766286323	-0.49019507402282064	0.5320051233713678	0.0735	0.0441	-0.0735
C	6.305020975325727	1.6261260246742735	-1.1185729753257265	0.0147	-0.0147	-0.0147
O	-1.0701771973941885	0.7643160246742735	1.5343528519543588	0.1176	-0.0147	0.0882
C	-0.22139485195435865	-1.4508334688111977	2.8183242714170094	-0.0882	0.2793	-0.1617
O	-0.30096392597717936	-2.096581394788377	1.8270492960912825	-0.0441	0.2352	-0.1764
O	-2.652210876628632	-0.8548931727199149	3.105577049348547	-0.0735	0.1029	-0.0294
C	-3.154503049348547	0.38834580260581153	2.7218920740228207	0.0294	0.1176	-0.0441
C	-2.2787922467427357	1.3321898766286322	1.8332508519543587	0.147	0.0735	0.0882
C	-1.3940249013029058	-1.0388100246742735	3.7886651973941885	-0.0588	0.0147	-0.1176
O	-4.3336640740228205	0.5890876545601702	2.9638402220684616	0.0441	0.2058	-0.1323
C	-2.173560394788377	2.7281479753257263	2.5052637285829906	0.2352	0.0147	0.1617
C	-1.089429876628632	0.07031632076555624	4.839602950651453	-0.0735	-0.1911	0.0294
C	2.476361370114103	-2.815906123371368	3.265596049348547	-0.2205	0.0735	-0.0294
C	3.5396668766286323	-1.5495328766286323	-1.5779460740228208	0.0735	-0.0735	0.0441
C	-1.420353	-2.427043925977179	-1.1253789259771791	0.0	-0.0441	-0.0441
C	-0.18313595065145288	2.924997098697094	-0.8773460986970942	-0.0294	-0.0588	0.0588
C	-2.793944	-2.2009569013029058	-0.7752769506514529	0.0	-0.0588	-0.0294
C	-3.515025024674274	-3.263860901302906	-0.17877597532572642	0.0147	-0.0588	-0.0147
C	-2.910828049348547	-4.52188892597718	0.046217	0.0294	-0.0441	0.0
C	-1.582698049348547	-4.728764925977179	-0.3402549753257264	0.0294	-0.0441	-0.0147
C	-0.8134740246742735	-3.716991950651453	-0.9387519506514529	0.0147	-0.0294	-0.0294
C	-3.524063	-0.8799069013029057	-1.1593339753257266	0.0	-0.0588	-0.0147
C	0.6447939753257265	-4.0178869506514525	-1.370450950651453	0.0147	-0.0294	-0.0294
C	0.7080170246742735	3.506876049348547	0.07568095065145289	-0.0147	-0.0294	0.0294
C	0.329004	4.7281050246742735	0.6835449753257264	0.0	-0.0147	0.0147
C	-0.8735589753257265	5.376262049348547	0.3528949506514529	-0.0147	-0.0294	0.0294
C	-1.729254950651453	4.7939950740228205	-0.6101590986970943	-0.0294	-0.0441	0.0588
C	-1.4034929259771793	3.573573098697094	-1.2356641233713679	-0.0441	-0.0588	0.0735
C	2.059382	2.847264	0.475074	0.0	0.0	0.0
C	-2.4069209259771793	2.976124098697094	-2.2771831480456415	-0.0441	-0.0588	0.0882
C	-4.814739	-0.6329679013029057	-0.338044	0.0	-0.0588	0.0
C	-3.8488409753257264	-0.8778369259771793	-2.705777	-0.0147	-0.0441	0.0
C	1.5275239753257266	-4.425451975325727	-0.1420489506514529	0.0147	-0.0147	-0.0294
C	0.6992459753257265	-5.151389950651453	-2.451164950651453	0.0147	-0.0294	-0.0294
C	-3.8442749259771793	2.8706010986970942	-1.6929111727199149	-0.0441	-0.0588	0.1029
C	-2.436203901302906	3.8413381233713677	-3.5952321480456417	-0.0588	-0.0735	0.0882
C	2.071282901302906	2.483350950651453	1.998032	0.0588	0.0294	0.0
C	3.255895024674274	3.784325	0.09977007402282068	-0.0147	0.0	-0.0441
C	-0.448173	-2.112004	-3.870948925977179	0.0	0.0	-0.0441
C	1.1774890740228208	2.492795	-3.369619123371368	-0.0441	0.0	0.0735
H	0.8806340246742735	0.044183950651452884	-4.230317024674274	-0.0147	0.0294	0.0147
H	2.908820098697094	-0.6834610246742735	3.248905	-0.0588	0.0147	0.0
H	5.12791392597718	-2.0625829753257263	-0.2386811727199149	0.0441	-0.0147	0.1029
H	5.5819109753257266	2.450620049348547	-0.9602039506514529	0.0147	-0.0294	-0.0294
H	6.800033975325726	1.7476960740228207	-2.0858809753257264	0.0147	-0.0441	-0.0147
H	7.036726975325727	1.632139	-0.30669897532572643	0.0147	0.0	-0.0147
H	-2.968220444136924	1.4607616792344438	0.9495529013029058	0.2646	0.1911	0.0588
H	-1.5720419753257264	-2.0086259259771793	4.351832518159744	-0.0147	-0.0441	-0.3087
H	-3.1769124441369243	3.0850768766286323	2.8090487532572643	0.2646	0.0735	0.147
H	-1.7300745181597446	3.478422024674274	1.8201546545601703	0.3087	-0.0147	0.2058
H	-1.5258693207655563	2.6956991480456414	3.3937307039087172	0.1911	-0.0882	0.1764
H	-2.004302901302906	0.2776355675082918	5.4488379259771795	-0.0588	-0.3381	0.0441
H	-0.7584178026058116	0.9983171973941884	4.329706629885897	-0.1176	-0.1176	0.2205
H	-0.30397492597717934	-0.28576158053734957	5.528258098697094	-0.0441	-0.2499	-0.0588
H	3.5085054194626504	-3.1004379753257263	3.014079	-0.2499	-0.0147	0.0
H	1.7848414441369238	-3.5236712220684616	2.821927098697094	-0.2646	0.1323	-0.0588
H	2.372452444136924	-2.8516341480456413	4.36647607402282	-0.2646	0.0882	-0.0441
H	3.0890738766286323	-2.542898876628632	-1.5879621233713679	0.0735	-0.0735	0.0735
H	4.250288827280085	-1.490470827280085	-2.4130451233713677	0.1029	-0.1029	0.0735
H	2.7445458519543586	-0.8160908766286322	-1.742939	0.0882	-0.0735	0.0
H	-4.566452024674274	-3.128337901302906	0.081955	0.0147	-0.0588	0.0
H	-3.491327074022821	-5.3319709259771795	0.530748	0.0441	-0.0441	0.0
H	-1.114563049348547	-5.727445950651452	-0.17905997532572643	0.0294	-0.0294	-0.0147
H	-2.82424	-0.03380190130290578	-0.9742139753257265	0.0	-0.0588	-0.0147
H	1.084435	-3.114513975325726	-1.814454950651453	0.0	-0.0147	-0.0294
H	1.0033969753257266	5.190667	1.4235010246742734	0.0147	0.0	-0.0147
H	-1.15147	6.319704024674274	0.8339869753257265	0.0	-0.0147	0.0147
H	-2.669018950651453	5.29890307402282	-0.8867731233713678	-0.0294	-0.0441	0.0735
H	2.157253	1.9173680246742735	-0.10617802467427355	0.0	-0.0147	0.0147
H	-2.045829901302906	1.9726901233713678	-2.555400172719915	-0.0588	-0.0735	0.1029
H	-5.203681	0.3737080986970942	-0.5646660246742735	0.0	-0.0588	0.0147
H	-4.631840024674274	-0.7121399013029057	0.742145	0.0147	-0.0588	0.0
H	-5.599294	-1.3597019013029057	-0.6177820246742736	0.0	-0.0588	0.0147
H	-4.375946975325726	0.053910074022820664	-2.960395	-0.0147	-0.0441	0.0
H	-4.477614950651453	-1.7492209506514529	-2.965147	-0.0294	-0.0294	0.0
H	-2.914111950651453	-0.9358799259771794	-3.2979879753257264	-0.0294	-0.0441	-0.0147
H	2.570416975325726	-4.595395950651453	-0.4312869259771794	0.0147	-0.0294	-0.0441
H	1.1457829753257265	-5.35356	0.32890402467427354	0.0147	0.0	-0.0147
H	1.4814099259771794	-3.624765	0.6152460740228206	0.0441	0.0	-0.0441
H	1.7353179753257264	-5.313215975325726	-2.795225950651453	0.0147	-0.0147	-0.0294
H	0.07452397532572645	-4.8993239506514525	-3.321278950651453	0.0147	-0.0294	-0.0294
H	0.32024095065145286	-6.102965950651453	-2.031448950651453	0.0294	-0.0294	-0.0294
H	-4.499204901302906	2.377068098697094	-2.4291931973941887	-0.0588	-0.0588	0.1176
H	-3.8375179259771794	2.262404074022821	-0.7781831973941884	-0.0441	-0.0441	0.1176
H	-4.2531599259771795	3.8469170740228207	-1.462832172719915	-0.0441	-0.0441	0.1029
H	-3.120280876628632	3.3820551233713676	-4.325949172719915	-0.0735	-0.0735	0.1029
H	-1.4468669013029056	3.930667172719915	-4.054485123371368	-0.0588	-0.1029	0.0735
H	-2.7940949259771792	4.8674331233713675	-3.3655571233713677	-0.0441	-0.0735	0.0735
H	3.0108978766286323	1.9681129259771795	2.239180024674274	0.0735	0.0441	-0.0147
H	1.2007798519543587	1.8366039753257264	2.229417925977179	0.0882	0.0147	0.0441
H	2.0054599013029057	3.3814349259771794	2.6223300246742736	0.0588	0.0441	-0.0147
H	4.195219	3.3095449753257262	0.4422681233713678	0.0	0.0147	-0.0735
H	3.182773024674274	4.750367975325727	0.6058310986970943	-0.0147	0.0147	-0.0588
H	3.314804098697094	3.937457	-0.9917059259771793	-0.0588	0.0	-0.0441
H	-1.183838	-2.869938	-3.570401901302906	0.0	0.0	-0.0588
H	-0.8187830246742736	-1.6223100246742734	-4.77642592597718	0.0147	0.0147	-0.0441
H	0.46930797532572643	-2.622556	-4.12971192597718	0.0147	0.0	-0.0441
H	1.995123049348547	2.9312060246742737	-2.8157241480456414	-0.0294	-0.0147	0.0882
H	1.5537300740228208	2.145806950651453	-4.331758098697094	-0.0441	0.0294	0.0588
H	0.43524504934854713	3.281162975325726	-3.5788071973941884	-0.0294	0.0147	0.1176
114
O	5.609407	0.373054	-1.18236	0.0294	-0.0294	0.0147
Mg	-0.330575	0.11547099999999998	-0.014926000000000002	0.0294	-0.1323	0.0147
O	0.928208	-0.921481	3.304211	-0.0588	0.1764	-0.1029
C	4.9142790000000005	0.040882	-0.096992	0.0294	-0.0147	0.0294
N	-0.635281	-1.256054	-1.541288	-0.0147	-0.0441	-0.0294
N	0.088082	1.584701	-1.3749760000000002	-0.0441	-0.0588	0.0588
O	4.827928	0.698337	0.927074	0.0294	0.0147	0.0
C	-0.196988	-1.078304	-2.771859	-0.0147	-0.0147	-0.0294
C	0.491672	0.079955	-3.218254	-0.0147	0.0	0.0147
C	0.5472539999999999	1.33793	-2.5818809999999996	-0.0294	-0.0147	0.0441
O	3.573518	-1.683557	0.9463579999999999	0.0147	0.0147	0.0441
C	2.397349	-1.1370710000000002	1.277829	0.0147	0.0441	-0.0147
C	2.19634	-1.371869	2.79874	-0.0882	0.0735	-0.0441
C	4.288564	-1.359802	-0.275478	0.0441	-0.0147	0.0588
O	1.6901920000000001	-0.49311699999999997	0.536875	0.0735	0.0441	-0.0735
C	6.304047000000001	1.6271	-1.117599	0.0147	-0.0147	-0.0147
O	-1.077969	0.76529	1.5285090000000001	0.1176	-0.0147	0.0882
C	-0.215551	-1.4693390000000002	2.829038	-0.0882	0.2793	-0.1617
O	-0.29804200000000003	-2.112165	1.8387369999999998	-0.0441	0.2352	-0.1764
O	-2.647341	-0.861711	3.107525	-0.0735	0.1029	-0.0294
C	-3.156451	0.38055399999999995	2.724814	0.0294	0.1176	-0.0441
C	-2.288532	1.32732	1.827407	0.147	0.0735	0.0882
C	-1.390129	-1.039784	3.796457	-0.0588	0.0147	-0.1176
O	-4.3365860000000005	0.5754520000000001	2.972606	0.0441	0.2058	-0.1323
C	-2.1891439999999998	2.727174	2.49455	0.2352	0.0147	0.1617
C	-1.08456	0.082978	4.837655000000001	-0.0735	-0.1911	0.0294
C	2.490971	-2.820776	3.267544	-0.2205	0.0735	-0.0294
C	3.534797	-1.5446630000000001	-1.5808680000000002	0.0735	-0.0735	0.0441
C	-1.420353	-2.424122	-1.1224569999999998	0.0	-0.0441	-0.0441
C	-0.181188	2.928893	-0.881242	-0.0294	-0.0588	0.0588
C	-2.793944	-2.1970609999999997	-0.7733289999999999	0.0	-0.0588	-0.0294
C	-3.515999	-3.259965	-0.177802	0.0147	-0.0588	-0.0147
C	-2.912776	-4.518967	0.046217	0.0294	-0.0441	0.0
C	-1.584646	-4.725842999999999	-0.33928099999999994	0.0294	-0.0441	-0.0147
C	-0.8144480000000001	-3.715044	-0.936804	0.0147	-0.0294	-0.0294
C	-3.524063	-0.876011	-1.15836	0.0	-0.0588	-0.0147
C	0.64382	-4.015939	-1.368503	0.0147	-0.0294	-0.0294
C	0.708991	3.508824	0.07373299999999999	-0.0147	-0.0294	0.0294
C	0.329004	4.729079	0.6825709999999999	0.0	-0.0147	0.0147
C	-0.8725849999999999	5.378209999999999	0.350947	-0.0147	-0.0294	0.0294
C	-1.727307	4.7969170000000005	-0.614055	-0.0294	-0.0441	0.0588
C	-1.400571	3.5774690000000002	-1.240534	-0.0441	-0.0588	0.0735
C	2.059382	2.847264	0.475074	0.0	0.0	0.0
C	-2.403999	2.98002	-2.283027	-0.0441	-0.0588	0.0882
C	-4.814739	-0.629072	-0.338044	0.0	-0.0588	0.0
C	-3.8478670000000004	-0.874915	-2.705777	-0.0147	-0.0441	0.0
C	1.52655	-4.424478000000001	-0.140101	0.0147	-0.0147	-0.0294
C	0.698272	-5.1494420000000005	-2.449217	0.0147	-0.0294	-0.0294
C	-3.8413530000000002	2.8744970000000003	-1.699729	-0.0441	-0.0588	0.1029
C	-2.432308	3.846208	-3.6010760000000004	-0.0588	-0.0735	0.0882
C	2.067387	2.481403	1.998032	0.0588	0.0294	0.0
C	3.256869	3.784325	0.102692	-0.0147	0.0	-0.0441
C	-0.448173	-2.112004	-3.868027	0.0	0.0	-0.0441
C	1.180411	2.492795	-3.374489	-0.0441	0.0	0.0735
H	0.8816080000000001	0.042235999999999996	-4.231291	-0.0147	0.0294	0.0147
H	2.912716	-0.684435	3.248905	-0.0588	0.0147	0.0
H	5.124992	-2.0616090000000002	-0.24549900000000002	0.0441	-0.0147	0.1029
H	5.5809370000000005	2.452568	-0.958256	0.0147	-0.0294	-0.0294
H	6.79906	1.750618	-2.0849070000000003	0.0147	-0.0441	-0.0147
H	7.035753000000001	1.632139	-0.305725	0.0147	0.0	-0.0147
H	-2.985752	1.4481000000000002	0.9456570000000001	0.2646	0.1911	0.0588
H	-1.571068	-2.005704	4.372286	-0.0147	-0.0441	-0.3087
H	-3.1944440000000003	3.080207	2.799309	0.2646	0.0735	0.147
H	-1.7505279999999999	3.479396	1.8065190000000002	0.3087	-0.0147	0.2058
H	-1.5385309999999999	2.701543	3.382043	0.1911	-0.0882	0.1764
H	-2.000407	0.300037	5.4459159999999995	-0.0588	-0.3381	0.0441
H	-0.750626	1.006109	4.315097000000001	-0.1176	-0.1176	0.2205
H	-0.301053	-0.269204	5.532154	-0.0441	-0.2499	-0.0588
H	3.5250630000000003	-3.099464	3.014079	-0.2499	-0.0147	0.0
H	1.8023729999999998	-3.532437	2.825823	-0.2646	0.1323	-0.0588
H	2.389984	-2.857478	4.369398	-0.2646	0.0882	-0.0441
H	3.084204	-2.538029	-1.592832	0.0735	-0.0735	0.0735
H	4.2434709999999995	-1.483653	-2.417915	0.1029	-0.1029	0.0735
H	2.738702	-0.811221	-1.742939	0.0882	-0.0735	0.0
H	-4.567426	-3.1244419999999997	0.081955	0.0147	-0.0588	0.0
H	-3.494249	-5.3290489999999995	0.530748	0.0441	-0.0441	0.0
H	-1.116511	-5.725498	-0.178086	0.0294	-0.0294	-0.0147
H	-2.82424	-0.029906000000000002	-0.97324	0.0	-0.0588	-0.0147
H	1.084435	-3.11354	-1.8125069999999999	0.0	-0.0147	-0.0294
H	1.002423	5.190667	1.424475	0.0147	0.0	-0.0147
H	-1.15147	6.320678	0.833013	0.0	-0.0147	0.0147
H	-2.667071	5.301825	-0.8916430000000001	-0.0294	-0.0441	0.0735
H	2.157253	1.918342	-0.107152	0.0	-0.0147	0.0147
H	-2.041934	1.97756	-2.562218	-0.0588	-0.0735	0.1029
H	-5.203681	0.377604	-0.56564	0.0	-0.0588	0.0147
H	-4.632814	-0.708244	0.742145	0.0147	-0.0588	0.0
H	-5.599294	-1.3558059999999998	-0.6187560000000001	0.0	-0.0588	0.0147
H	-4.374973	0.056831999999999994	-2.960395	-0.0147	-0.0441	0.0
H	-4.4756670000000005	-1.7472729999999999	-2.965147	-0.0294	-0.0294	0.0
H	-2.9121639999999998	-0.9329580000000001	-3.2970140000000003	-0.0294	-0.0441	-0.0147
H	2.569443	-4.593448	-0.42836500000000005	0.0147	-0.0294	-0.0441
H	1.144809	-5.35356	0.329878	0.0147	0.0	-0.0147
H	1.478488	-3.624765	0.6181679999999999	0.0441	0.0	-0.0441
H	1.7343439999999999	-5.312242	-2.793278	0.0147	-0.0147	-0.0294
H	0.07355	-4.897376	-3.319331	0.0147	-0.0294	-0.0294
H	0.318293	-6.101018000000001	-2.0295009999999998	0.0294	-0.0294	-0.0294
H	-4.495309	2.380964	-2.436985	-0.0588	-0.0588	0.1176
H	-3.8345960000000003	2.265326	-0.785975	-0.0441	-0.0441	0.1176
H	-4.2502379999999995	3.849839	-1.46965	-0.0441	-0.0441	0.1029
H	-3.115411	3.3869249999999997	-4.3327670000000005	-0.0735	-0.0735	0.1029
H	-1.442971	3.937485	-4.059355	-0.0588	-0.1029	0.0735
H	-2.791173	4.872303	-3.370427	-0.0441	-0.0735	0.0735
H	3.006028	1.9651910000000001	2.240154	0.0735	0.0441	-0.0147
H	1.194936	1.8356299999999999	2.226496	0.0882	0.0147	0.0441
H	2.0015639999999997	3.3785130000000003	2.6233039999999996	0.0588	0.0441	-0.0147
H	4.195219	3.308571	0.44713800000000004	0.0	0.0147	-0.0735
H	3.183747	4.749394000000001	0.609727	-0.0147	0.0147	-0.0588
H	3.3187	3.937457	-0.988784	-0.0588	0.0	-0.0441
H	-1.183838	-2.869938	-3.566506	0.0	0.0	-0.0588
H	-0.8197570000000001	-1.623284	-4.773504	0.0147	0.0147	-0.0441
H	0.46833400000000003	-2.622556	-4.12679	0.0147	0.0	-0.0441
H	1.997071	2.93218	-2.821568	-0.0294	-0.0147	0.0882
H	1.5566520000000001	2.143859	-4.335654	-0.0441	0.0294	0.0588
H	0.437193	3.280189	-3.5865989999999996	-0.0294	0.0147	0.1176
114
O	5.611354950651452	0.37110604934854713	-1.1813860246742736	0.0294	-0.0294	0.0147
Mg	-0.32862704934854714	0.10670522206846202	-0.013952024674273561	0.0294	-0.1323	0.0147
O	0.9243120986970943	-0.9097932960912827	3.297393172719915	-0.0588	0.1764	-0.1029
C	4.916226950651453	0.03990802467427356	-0.09504404934854713	0.0294	-0.0147	0.0294
N	-0.6362549753257265	-1.2589759259771793	-1.543235950651453	-0.0147	-0.0441	-0.0294
N	0.08516007402282068	1.5808050986970943	-1.3710800986970944	-0.0441	-0.0588	0.0588
O	4.829875950651452	0.6993109753257265	0.927074	0.0294	0.0147	0.0
C	-0.19796197532572643	-1.0792779753257264	-2.773806950651453	-0.0147	-0.0147	-0.0294
C	0.4906980246742736	0.079955	-3.217280024674274	-0.0147	0.0	0.0147
C	0.5453060493485471	1.3369560246742735	-2.5789590740228205	-0.0294	-0.0147	0.0441
O	3.574491975325726	-1.6825830246742735	0.9492799259771793	0.0147	0.0147	0.0441
C	2.3983229753257262	-1.1341490740228208	1.2768550246742736	0.0147	0.0441	-0.0147
C	2.1904961480456415	-1.3669991233713679	2.795818074022821	-0.0882	0.0735	-0.0441
C	4.29148592597718	-1.3607759753257265	-0.27158209869709427	0.0441	-0.0147	0.0588
O	1.6950618766286323	-0.4901950740228207	0.5320051233713678	0.0735	0.0441	-0.0735
C	6.305020975325727	1.6261260246742735	-1.1185729753257265	0.0147	-0.0147	-0.0147
O	-1.0701771973941885	0.7643160246742735	1.5343528519543588	0.1176	-0.0147	0.0882
C	-0.22139485195435865	-1.4508334688111977	2.8183242714170094	-0.0882	0.2793	-0.1617
O	-0.30096392597717936	-2.096581394788377	1.8270492960912827	-0.0441	0.2352	-0.1764
O	-2.652210876628632	-0.8548931727199149	3.105577049348547	-0.0735	0.1029	-0.0294
C	-3.154503049348547	0.3883458026058115	2.7218920740228207	0.0294	0.1176	-0.0441
C	-2.2787922467427357	1.3321898766286322	1.8332508519543587	0.147	0.0735	0.0882
C	-1.3940249013029058	-1.0388100246742735	3.7886651973941885	-0.0588	0.0147	-0.1176
O	-4.3336640740228205	0.5890876545601702	2.9638402220684616	0.0441	0.2058	-0.1323
C	-2.173560394788377	2.7281479753257263	2.5052637285829906	0.2352	0.0147	0.1617
C	-1.089429876628632	0.07031632076555627	4.839602950651453	-0.0735	-0.1911	0.0294
C	2.476361370114103	-2.815906123371368	3.265596049348547	-0.2205	0.0735	-0.0294
C	3.5396668766286323	-1.5495328766286323	-1.5779460740228208	0.0735	-0.0735	0.0441
C	-1.420353	-2.427043925977179	-1.1253789259771791	0.0	-0.0441	-0.0441
C	-0.18313595065145288	2.924997098697094	-0.8773460986970942	-0.0294	-0.0588	0.0588
C	-2.793944	-2.2009569013029058	-0.7752769506514529	0.0	-0.0588	-0.0294
C	-3.515025024674274	-3.263860901302906	-0.17877597532572642	0.0147	-0.0588	-0.0147
C	-2.910828049348547	-4.52188892597718	0.046217	0.0294	-0.0441	0.0
C	-1.582698049348547	-4.728764925977179	-0.3402549753257264	0.0294	-0.0441	-0.0147
C	-0.8134740246742735	-3.716991950651453	-0.9387519506514529	0.0147	-0.0294	-0.0294
C	-3.524063	-0.8799069013029057	-1.1593339753257266	0.0	-0.0588	-0.0147
C	0.6447939753257265	-4.0178869506514525	-1.370450950651453	0.0147	-0.0294	-0.0294
C	0.7080170246742735	3.506876049348547	0.07568095065145287	-0.0147	-0.0294	0.0294
C	0.329004	4.7281050246742735	0.6835449753257264	0.0	-0.0147	0.0147
C	-0.8735589753257265	5.376262049348547	0.3528949506514529	-0.0147	-0.0294	0.0294
C	-1.729254950651453	4.7939950740228205	-0.6101590986970943	-0.0294	-0.0441	0.0588
C	-1.4034929259771793	3.573573098697094	-1.2356641233713679	-0.0441	-0.0588	0.0735
C	2.059382	2.847264	0.475074	0.0	0.0	0.0
C	-2.4069209259771793	2.976124098697094	-2.2771831480456415	-0.0441	-0.0588	0.0882
C	-4.814739	-0.6329679013029057	-0.338044	0.0	-0.0588	0.0
C	-3.8488409753257264	-0.8778369259771793	-2.705777	-0.0147	-0.0441	0.0
C	1.5275239753257266	-4.425451975325727	-0.1420489506514529	0.0147	-0.0147	-0.0294
C	0.6992459753257265	-5.151389950651453	-2.451164950651453	0.0147	-0.0294	-0.0294
C	-3.8442749259771793	2.8706010986970942	-1.6929111727199149	-0.0441	-0.0588	0.1029
C	-2.436203901302906	3.8413381233713677	-3.5952321480456417	-0.0588	-0.0735	0.0882
C	2.071282901302906	2.483350950651453	1.998032	0.0588	0.0294	0.0
C	3.255895024674274	3.784325	0.09977007402282068	-0.0147	0.0	-0.0441
C	-0.448173	-2.112004	-3.870948925977179	0.0	0.0	-0.0441
C	1.1774890740228208	2.492795	-3.369619123371368	-0.0441	0.0	0.0735
H	0.8806340246742735	0.04418395065145288	-4.230317024674274	-0.0147	0.0294	0.0147
H	2.908820098697094	-0.6834610246742735	3.248905	-0.0588	0.0147	0.0
H	5.12791392597718	-2.0625829753257263	-0.2386811727199149	0.0441	-0.0147	0.1029
H	5.5819109753257266	2.450620049348547	-0.9602039506514529	0.0147	-0.0294	-0.0294
H	6.800033975325726	1.7476960740228207	-2.0858809753257264	0.0147	-0.0441	-0.0147
H	7.036726975325727	1.632139	-0.30669897532572643	0.0147	0.0	-0.0147
H	-2.968220444136924	1.4607616792344438	0.9495529013029058	0.2646	0.1911	0.0588
H	-1.5720419753257264	-2.0086259259771793	4.351832518159744	-0.0147	-0.0441	-0.3087
H	-3.1769124441369243	3.0850768766286323	2.8090487532572643	0.2646	0.0735	0.147
H	-1.7300745181597446	3.478422024674274	1.8201546545601703	0.3087	-0.0147	0.2058
H	-1.5258693207655563	2.6956991480456414	3.3937307039087172	0.1911	-0.0882	0.1764
H	-2.004302901302906	0.2776355675082919	5.4488379259771795	-0.0588	-0.3381	0.0441
H	-0.7584178026058115	0.9983171973941884	4.329706629885897	-0.1176	-0.1176	0.2205
H	-0.30397492597717934	-0.2857615805373495	5.528258098697094	-0.0441	-0.2499	-0.0588
H	3.5085054194626504	-3.1004379753257263	3.014079	-0.2499	-0.0147	0.0
H	1.784841444136924	-3.5236712220684616	2.821927098697094	-0.2646	0.1323	-0.0588
H	2.372452444136924	-2.8516341480456413	4.36647607402282	-0.2646	0.0882	-0.0441
H	3.0890738766286323	-2.542898876628632	-1.5879621233713679	0.0735	-0.0735	0.0735
H	4.250288827280085	-1.490470827280085	-2.4130451233713677	0.1029	-0.1029	0.0735
H	2.7445458519543586	-0.8160908766286322	-1.742939	0.0882	-0.0735	0.0
H	-4.566452024674274	-3.128337901302906	0.081955	0.0147	-0.0588	0.0
H	-3.491327074022821	-5.3319709259771795	0.530748	0.0441	-0.0441	0.0
H	-1.114563049348547	-5.727445950651452	-0.17905997532572643	0.0294	-0.0294	-0.0147
H	-2.82424	-0.033801901302905765	-0.9742139753257265	0.0	-0.0588	-0.0147
H	1.084435	-3.114513975325726	-1.814454950651453	0.0	-0.0147	-0.0294
H	1.0033969753257266	5.190667	1.4235010246742734	0.0147	0.0	-0.0147
H	-1.15147	6.319704024674274	0.8339869753257265	0.0	-0.0147	0.0147
H	-2.669018950651453	5.29890307402282	-0.8867731233713678	-0.0294	-0.0441	0.0735
H	2.157253	1.9173680246742735	-0.10617802467427356	0.0	-0.0147	0.0147
H	-2.045829901302906	1.9726901233713678	-2.555400172719915	-0.0588	-0.0735	0.1029
H	-5.203681	0.3737080986970942	-0.5646660246742735	0.0	-0.0588	0.0147
H	-4.631840024674274	-0.7121399013029057	0.742145	0.0147	-0.0588	0.0
H	-5.599294	-1.3597019013029057	-0.6177820246742736	0.0	-0.0588	0.0147
H	-4.375946975325726	0.05391007402282067	-2.960395	-0.0147	-0.0441	0.0
H	-4.477614950651453	-1.7492209506514529	-2.965147	-0.0294	-0.0294	0.0
H	-2.914111950651453	-0.9358799259771794	-3.2979879753257264	-0.0294	-0.0441	-0.0147
H	2.570416975325726	-4.595395950651453	-0.4312869259771793	0.0147	-0.0294	-0.0441
H	1.1457829753257265	-5.35356	0.32890402467427354	0.0147	0.0	-0.0147
H	1.4814099259771794	-3.624765	0.6152460740228206	0.0441	0.0	-0.0441
H	1.7353179753257264	-5.313215975325726	-2.795225950651453	0.0147	-0.0147	-0.0294
H	0.07452397532572644	-4.8993239506514525	-3.321278950651453	0.0147	-0.0294	-0.0294
H	0.32024095065145286	-6.102965950651453	-2.031448950651453	0.0294	-0.0294	-0.0294
H	-4.499204901302906	2.377068098697094	-2.4291931973941887	-0.0588	-0.0588	0.1176
H	-3.8375179259771794	2.262404074022821	-0.7781831973941884	-0.0441	-0.0441	0.1176
H	-4.2531599259771795	3.8469170740228207	-1.462832172719915	-0.0441	-0.0441	0.1029
H	-3.120280876628632	3.3820551233713676	-4.325949172719915	-0.0735	-0.0735	0.1029
H	-1.4468669013029056	3.930667172719915	-4.054485123371368	-0.0588	-0.1029	0.0735
H	-2.7940949259771792	4.8674331233713675	-3.3655571233713677	-0.0441	-0.0735	0.0735
H	3.0108978766286323	1.9681129259771795	2.239180024674274	0.0735	0.0441	-0.0147
H	1.2007798519543587	1.8366039753257264	2.229417925977179	0.0882	0.0147	0.0441
H	2.0054599013029057	3.3814349259771794	2.6223300246742736	0.0588	0.0441	-0.0147
H	4.195219	3.3095449753257262	0.4422681233713678	0.0	0.0147	-0.0735
H	3.182773024674274	4.750367975325727	0.6058310986970943	-0.0147	0.0147	-0.0588
H	3.314804098697094	3.937457	-0.9917059259771793	-0.0588	0.0	-0.0441
H	-1.183838	-2.869938	-3.570401901302906	0.0	0.0	-0.0588
H	-0.8187830246742736	-1.6223100246742734	-4.77642592597718	0.0147	0.0147	-0.0441
H	0.46930797532572643	-2.622556	-4.12971192597718	0.0147	0.0	-0.0441
H	1.995123049348547	2.9312060246742737	-2.8157241480456414	-0.0294	-0.0147	0.0882
H	1.5537300740228208	2.145806950651453	-4.331758098697094	-0.0441	0.0294	0.0588
H	0.43524504934854713	3.281162975325726	-3.5788071973941884	-0.0294	0.0147	0.1176
114
O	5.617008123623877	0.3654528763761229	-1.1785594381880615	0.0294	-0.0294	0.0147
Mg	-0.3229738763761229	0.08126594369255309	-0.011125438188061457	0.0294	-0.1323	0.0147
O	0.9130057527522458	-0.8758742582567375	3.2776070673164304	-0.0588	0.1764	-0.1029
C	4.921880123623877	0.03708143818806146	-0.08939087637612292	0.0294	-0.0147	0.0294
N	-0.6390815618119385	-1.2674556854358157	-1.548889123623877	-0.0147	-0.0441	-0.0294
N	0.07668031456418437	1.569498752752246	-1.359773752752246	-0.0441	-0.0588	0.0588
O	4.835529123623877	0.7021375618119385	0.927074	0.0294	0.0147	0.0
C	-0.20078856181193855	-1.0821045618119385	-2.779460123623877	-0.0147	-0.0147	-0.0294
C	0.4878714381880615	0.079955	-3.2144534381880616	-0.0147	0.0	0.0147
C	0.5396528763761229	1.3341294381880615	-2.570479314564184	-0.0294	-0.0147	0.0441
O	3.5773185618119383	-1.6797564381880614	0.9577596854358156	0.0147	0.0147	0.0441
C	2.4011495618119385	-1.1256693145641845	1.2740284381880616	0.0147	0.0441	-0.0147
C	2.173536629128369	-1.3528661909403075	2.7873383145641846	-0.0882	0.0735	-0.0441
C	4.299965685435816	-1.3636025618119385	-0.2602757527522458	0.0441	-0.0147	0.0588
O	1.7091948090596927	-0.48171531456418437	0.5178721909403073	0.0735	0.0441	-0.0735
C	6.307847561811939	1.6232994381880614	-1.1213995618119386	0.0147	-0.0147	-0.0147
O	-1.0475645055044915	0.7614894381880615	1.5513123708716314	0.1176	-0.0147	0.0882
C	-0.23835437087163125	-1.3971283255731677	2.7872318200686763	-0.0882	0.2793	-0.1617
O	-0.30944368543581563	-2.0513560110089832	1.7931302582567374	-0.0441	0.2352	-0.1764
O	-2.6663438090596925	-0.8351070673164303	3.0999238763761228	-0.0735	0.1029	-0.0294
C	-3.148849876376123	0.4109584944955083	2.7134123145641844	0.0294	0.1176	-0.0441
C	-2.250526381880615	1.3463228090596926	1.8502103708716313	0.147	0.0735	0.0882
C	-1.4053312472477542	-1.0359834381880615	3.7660525055044918	-0.0588	0.0147	-0.1176
O	-4.325184314564185	0.6286598653671396	2.938400943692553	0.0441	0.2058	-0.1323
C	-2.1283350110089834	2.7309745618119385	2.5363561799313237	0.2352	0.0147	0.1617
C	-1.1035628090596925	0.03357069644479896	4.845256123623877	-0.0735	-0.1911	0.0294
C	2.4339625728209215	-2.8017731909403074	3.259942876376123	-0.2205	0.0735	-0.0294
C	3.5537998090596927	-1.5636658090596927	-1.5694663145641845	0.0735	-0.0735	0.0441
C	-1.420353	-2.4355236854358155	-1.1338586854358155	0.0	-0.0441	-0.0441
C	-0.18878912362387706	2.9136907527522458	-0.8660397527522458	-0.0294	-0.0588	0.0588
C	-2.793944	-2.212263247247754	-0.780930123623877	0.0	-0.0588	-0.0294
C	-3.5121984381880615	-3.275167247247754	-0.18160256181193854	0.0147	-0.0588	-0.0147
C	-2.905174876376123	-4.530368685435816	0.046217	0.0294	-0.0441	0.0
C	-1.577044876376123	-4.737244685435815	-0.3430815618119385	0.0294	-0.0441	-0.0147
C	-0.8106474381880615	-3.722645123623877	-0.9444051236238771	0.0147	-0.0294	-0.0294
C	-3.524063	-0.8912132472477542	-1.1621605618119386	0.0	-0.0588	-0.0147
C	0.6476205618119385	-4.023540123623877	-1.3761041236238771	0.0147	-0.0294	-0.0294
C	0.7051904381880615	3.501222876376123	0.08133412362387708	-0.0147	-0.0294	0.0294
C	0.329004	4.725278438188061	0.6863715618119385	0.0	-0.0147	0.0147
C	-0.8763855618119385	5.370608876376123	0.3585481236238771	-0.0147	-0.0294	0.0294
C	-1.734908123623877	4.785515314564185	-0.5988527527522458	-0.0294	-0.0441	0.0588
C	-1.4119726854358157	3.562266752752246	-1.2215311909403075	-0.0441	-0.0588	0.0735
C	2.059382	2.847264	0.475074	0.0	0.0	0.0
C	-2.4154006854358157	2.964817752752246	-2.260223629128369	-0.0441	-0.0588	0.0882
[truncated: 300 more rows]
