# Supplementary material
Source: publisher figshare collection journal article supplement (https://acs.figshare.com/ndownloader/files/5127205)
Supplement: Supplementary file 1 [file 5127205 › supporting_ja043819b/SSRR_fm-5-ts2-freq-44.log]

 Entering Gaussian System, Link 0=g03
 Input=SSRR_fm-5-oco-freq.gjf
 Output=SSRR_fm-5-oco-freq.log
 Initial command:
 /usr/local/g03/l1.exe /home/rzepa/Gau-15868.inp -scrdir=/home/rzepa/
 Entering Link 1 = /usr/local/g03/l1.exe PID=     15869.
  
 Copyright (c) 1988,1990,1992,1993,1995,1998,2003, Gaussian, Inc.
                  All Rights Reserved.
  
 This is the Gaussian(R) 03 program.  It is based on the
 the Gaussian(R) 98 system (copyright 1998, Gaussian, Inc.),
 the Gaussian(R) 94 system (copyright 1995, Gaussian, Inc.),
 the Gaussian 92(TM) system (copyright 1992, Gaussian, Inc.),
 the Gaussian 90(TM) system (copyright 1990, Gaussian, Inc.),
 the Gaussian 88(TM) system (copyright 1988, Gaussian, Inc.),
 the Gaussian 86(TM) system (copyright 1986, Carnegie Mellon
 University), and the Gaussian 82(TM) system (copyright 1983,
 Carnegie Mellon University). Gaussian is a federally registered
 trademark of Gaussian, Inc.
  
 This software contains proprietary and confidential information,
 including trade secrets, belonging to Gaussian, Inc.
  
 This software is provided under written license and may be
 used, copied, transmitted, or stored only in accord with that
 written license.
  
 The following legend is applicable only to US Government
 contracts under DFARS:
  
                    RESTRICTED RIGHTS LEGEND
  
 Use, duplication or disclosure by the US Government is subject
 to restrictions as set forth in subparagraph (c)(1)(ii) of the
 Rights in Technical Data and Computer Software clause at DFARS
 252.227-7013.
  
 Gaussian, Inc.
 Carnegie Office Park, Building 6, Pittsburgh, PA 15106 USA
  
 The following legend is applicable only to US Government
 contracts under FAR:
  
                    RESTRICTED RIGHTS LEGEND
  
 Use, reproduction and disclosure by the US Government is subject
 to restrictions as set forth in subparagraph (c) of the
 Commercial Computer Software - Restricted Rights clause at FAR
 52.227-19.
  
 Gaussian, Inc.
 Carnegie Office Park, Building 6, Pittsburgh, PA 15106 USA
  
  
 ---------------------------------------------------------------
 Warning -- This program may not be used in any manner that
 competes with the business of Gaussian, Inc. or will provide
 assistance to any competitor of Gaussian, Inc.  The licensee
 of this program is prohibited from giving any competitor of
 Gaussian, Inc. access to this program.  By using this program,
 the user acknowledges that Gaussian, Inc. is engaged in the
 business of creating and licensing software in the field of
 computational chemistry and represents and warrants to the
 licensee that it is not a competitor of Gaussian, Inc. and that
 it will not use this program in any manner prohibited above.
 ---------------------------------------------------------------
  

 Cite this work as:
 Gaussian 03, Revision B.04,
 M. J. Frisch, G. W. Trucks, H. B. Schlegel, G. E. Scuseria, 
 M. A. Robb, J. R. Cheeseman, J. A. Montgomery, Jr., T. Vreven, 
 K. N. Kudin, J. C. Burant, J. M. Millam, S. S. Iyengar, J. Tomasi, 
 V. Barone, B. Mennucci, M. Cossi, G. Scalmani, N. Rega, 
 G. A. Petersson, H. Nakatsuji, M. Hada, M. Ehara, K. Toyota, 
 R. Fukuda, J. Hasegawa, M. Ishida, T. Nakajima, Y. Honda, O. Kitao, 
 H. Nakai, M. Klene, X. Li, J. E. Knox, H. P. Hratchian, J. B. Cross, 
 C. Adamo, J. Jaramillo, R. Gomperts, R. E. Stratmann, O. Yazyev, 
 A. J. Austin, R. Cammi, C. Pomelli, J. W. Ochterski, P. Y. Ayala, 
 K. Morokuma, G. A. Voth, P. Salvador, J. J. Dannenberg, 
 V. G. Zakrzewski, S. Dapprich, A. D. Daniels, M. C. Strain, 
 O. Farkas, D. K. Malick, A. D. Rabuck, K. Raghavachari, 
 J. B. Foresman, J. V. Ortiz, Q. Cui, A. G. Baboul, S. Clifford, 
 J. Cioslowski, B. B. Stefanov, G. Liu, A. Liashenko, P. Piskorz, 
 I. Komaromi, R. L. Martin, D. J. Fox, T. Keith, M. A. Al-Laham, 
 C. Y. Peng, A. Nanayakkara, M. Challacombe, P. M. W. Gill, 
 B. Johnson, W. Chen, M. W. Wong, C. Gonzalez, and J. A. Pople, 
 Gaussian, Inc., Pittsburgh PA, 2003.
 
 *********************************************
 Gaussian 03:  x86-Linux-G03RevB.04 2-Jun-2003
                  18-Jul-2004 
 *********************************************
 %nproc=2
 Will use up to    2 processors via shared memory.
 %chk=ssrr_fm-oco.chk
 %mem=500MB
 %rwf=ts1.rwf,1800MB,ts2.rwf,1800MB,ts3.rwf,1800MB,ts4.rwf,1800MB,ts5.rwf,1800MB
 --------------------------------------------
 # rb3lyp gen geom=checkpoint guess=read freq
 --------------------------------------------
 1/10=4,29=2,30=1,38=1/1,3;
 2/40=1/2;
 3/5=7,11=2,16=1,25=1,30=1,74=-5/1,2,3;
 4/5=1,7=1/1;
 5/5=2,38=6/2;
 8/6=4,10=90,11=11,27=1179648000/1;
 11/6=1,8=1,9=11,15=111,16=1/1,2,10;
 10/6=1/2;
 6/7=2,8=2,9=2,10=2,18=1,28=1/1;
 7/8=1,10=1,25=1/1,2,3,16;
 1/10=4,30=1/3;
 99//99;
 --------------------------------
 from RRSS_fm-/scratch/oco5-5.gjf
 --------------------------------
 Redundant internal coordinates taken from checkpoint file:
 ssrr_fm-oco.chk
 Charge =  0 Multiplicity = 1
 O,0,5.6492068113,0.3332535409,-1.1624599418
 Mg,0,-0.2907752675,-0.0636289113,0.0049741956
 O,0,0.8486080086,-0.6826808576,3.1649114816
 C,0,4.9540794705,0.0209820972,-0.0571921281
 N,0,-0.6551809458,-1.3157544602,-1.5810883289
 N,0,0.0283824355,1.5051010937,-1.295376173
 O,0,4.8677279678,0.7182370665,0.9270739977
 C,0,-0.2168877965,-1.0982044539,-2.8116594387
 C,0,0.4717721753,0.0799549646,-3.1983535036
 C,0,0.5074538314,1.3180303887,-2.5221809933
 O,0,3.5934179534,-1.6636568868,1.0060580736
 C,0,2.4172492171,-1.0773708243,1.2579291243
 C,0,2.0769401964,-1.2723688182,2.7390398037
 C,0,4.3482644383,-1.3797019921,-0.1958780881
 O,0,1.7896921446,-0.4334171992,0.4373752629
 C,0,6.3239466519,1.6072003953,-1.1374985761
 O,0,-0.9187685519,0.7453904976,1.6479094386
 C,0,-0.3349508074,-1.0912387628,2.6101383036
 O,0,-0.3577423486,-1.7937654283,1.5999366871
 O,0,-2.7468407724,-0.7224112272,3.0677245503
 C,0,-3.1166513141,0.5397538908,2.6651140967
 C,0,-2.0895320333,1.4268204629,1.9468073721
 C,0,-1.46972875,-1.0198839916,3.6372570593
 O,0,-4.2768861844,0.8540517747,2.7935057629
 C,0,-1.8707444199,2.747073929,2.7134502669
 C,0,-1.184059745,-0.1757216463,4.8774550965
 C,0,2.1924714007,-2.721276484,3.2277438066
 C,0,3.6342969766,-1.6441627451,-1.5211683423
 C,0,-1.4203534808,-2.4838218244,-1.1821566729
 C,0,-0.2209884299,2.8492930756,-0.8016424843
 C,0,-2.7939437893,-2.2766614402,-0.8131293209
 C,0,-3.4960988625,-3.3395654346,-0.1977023947
 C,0,-2.8729760806,-4.5786665456,0.0462169456
 C,0,-1.5448464488,-4.7855431896,-0.3591805625
 C,0,-0.7945475249,-3.7548441368,-0.9766035163
 C,0,-3.5240630754,-0.9556111187,-1.1782602905
 C,0,0.6637204893,-4.0557388239,-1.4083027726
 C,0,0.6890913354,3.4690239689,0.1135331302
 C,0,0.3290040828,4.7091785649,0.7024709372
 C,0,-0.892484543,5.3384097548,0.3907467359
 C,0,-1.7671066883,4.7372172913,-0.5344553114
 C,0,-1.4602707881,3.4978688007,-1.1410342963
 C,0,2.0593822743,2.8472641912,0.4750743209
 C,0,-2.4636991929,2.9004202673,-2.1636273581
 C,0,-4.814739059,-0.7086718611,-0.3380437054
 C,0,-3.8677674793,-0.9346151905,-2.7057772545
 C,0,1.5464501739,-4.4443776747,-0.1799013399
 C,0,0.7181716617,-5.1892423413,-2.4890167606
 C,0,-3.9010531675,2.794897112,-1.5604288172
 C,0,-2.5119075421,3.7467081537,-3.4816755006
 C,0,2.1469869648,2.5212030067,1.9980323573
 C,0,3.2369687332,3.7843249381,0.0429915717
 C,0,-0.4481729974,-2.1120043464,-3.9277273243
 C,0,1.1207112727,2.4927948772,-3.2749886804
 H,0,0.8617083312,0.0820361593,-4.2113906758
 H,0,2.8331158375,-0.6645349618,3.2489052672
 H,0,5.1846920155,-2.0815091955,-0.1061985177
 H,0,5.6008372744,2.412767729,-0.9980558011
 H,0,6.8189597404,1.6909183262,-2.1048065609
 H,0,7.0556526353,1.6321392341,-0.3256245406
 H,0,-2.6275520904,1.7068004221,1.0252574887
 H,0,-1.5909677289,-2.0654039488,3.9543856619
 H,0,-2.8362444133,3.1797066655,2.9983093184
 H,0,-1.3326280757,3.459496172,2.0851185655
 H,0,-1.2798307209,2.5821430948,3.6208427108
 H,0,-2.0800067804,-0.15766269,5.505615828
 H,0,-0.909826456,0.8469087499,4.6135967355
 H,0,-0.3607531141,-0.6075040577,5.4525541637
 H,0,3.1867630819,-3.1193636766,3.0140787205
 H,0,1.4441726077,-3.3533372446,2.7462231801
 H,0,2.0317844181,-2.7380776559,4.3096977461
 H,0,3.1837038041,-2.6375291786,-1.4933321267
 H,0,4.3827708345,-1.6229526323,-2.3184145258
 H,0,2.8581023562,-0.9107206212,-1.7429385793
 H,0,-4.5475260341,-3.2040416357,0.0819554514
 H,0,-3.4345489571,-5.3887485895,0.5307482313
 H,0,-1.0767109238,-5.7652977879,-0.1979862791
 H,0,-2.8242398768,-0.1095056142,-0.9931395774
 H,0,1.0844345074,-3.1334397793,-1.852306594
 H,0,1.0223230134,5.1906665994,1.4045749875
 H,0,-1.1514701098,6.3007776878,0.8529127801
 H,0,-2.7068705821,5.2421248633,-0.7921431867
 H,0,2.1572534423,1.8984418848,-0.0872519672
 H,0,-2.1215344612,1.8780597979,-2.4229180424
 H,0,-5.2036813955,0.2980040549,-0.5457401213
 H,0,-4.6129140566,-0.7878442006,0.7421448581
 H,0,-5.5992942237,-1.4354061563,-0.5988558464
 H,0,-4.3948727471,-0.0028677955,-2.9603949952
 H,0,-4.5154666786,-1.7870733958,-2.9651472378
 H,0,-2.9519641948,-0.9926576459,-3.3169136363
 H,0,2.5893425963,-4.6332476228,-0.4880654468
 H,0,1.1647094192,-5.3535598066,0.3099776896
 H,0,1.538188168,-3.6247650611,0.5584680002
 H,0,1.7542443306,-5.332142445,-2.8330777297
 H,0,0.093450099,-4.937176282,-3.3591309933
 H,0,0.3580928296,-6.1408183393,-2.0693013537
 H,0,-4.5749094571,2.3013641588,-2.2777847608
 H,0,-3.8942955038,2.2056264637,-0.6267752584
 H,0,-4.3099381432,3.7901388125,-1.3303504136
 H,0,-3.2149109622,3.2874253266,-4.1934674793
 H,0,-1.5225711733,3.7981851366,-3.9598551822
 H,0,-2.8508733567,4.7728025962,-3.2709272465
 H,0,3.1055279041,2.024890843,2.2202536396
 H,0,1.314335797,1.8555302828,2.2861958756
 H,0,2.0811642569,3.4382130529,2.603404031
 H,0,4.1952192098,3.3284713282,0.3476382601
 H,0,3.1638466559,4.7692935486,0.53012744
 H,0,3.2391002353,3.9374571495,-1.0484842063
 H,0,-1.1838380334,-2.8699381877,-3.6461057837
 H,0,-0.7998570742,-1.6033843111,-4.8332043803
 H,0,0.4882341853,-2.6225561959,-4.1864904159
 H,0,1.9572712428,2.9122795874,-2.7021683692
 H,0,1.4969522621,2.1836592948,-4.2560541079
 H,0,0.3973928055,3.3000890397,-3.4273989999
 Recover connectivity data from disk.

 GradGradGradGradGradGradGradGradGradGradGradGradGradGradGradGradGradGrad
 Berny optimization.
 Initialization pass.
                           ----------------------------
                           !    Initial Parameters    !
                           ! (Angstroms and Degrees)  !
 --------------------------                            --------------------------
 ! Name  Definition              Value          Derivative Info.                !
 --------------------------------------------------------------------------------
 ! R1    R(1,4)                  1.3425         calculate D2E/DX2 analytically  !
 ! R2    R(1,16)                 1.4418         calculate D2E/DX2 analytically  !
 ! R3    R(2,5)                  2.0533         calculate D2E/DX2 analytically  !
 ! R4    R(2,6)                  2.0624         calculate D2E/DX2 analytically  !
 ! R5    R(2,15)                 2.1569         calculate D2E/DX2 analytically  !
 ! R6    R(2,17)                 1.936          calculate D2E/DX2 analytically  !
 ! R7    R(3,13)                 1.4275         calculate D2E/DX2 analytically  !
 ! R8    R(3,18)                 1.3695         calculate D2E/DX2 analytically  !
 ! R9    R(4,7)                  1.2093         calculate D2E/DX2 analytically  !
 ! R10   R(4,14)                 1.5324         calculate D2E/DX2 analytically  !
 ! R11   R(5,8)                  1.3243         calculate D2E/DX2 analytically  !
 ! R12   R(5,29)                 1.4522         calculate D2E/DX2 analytically  !
 ! R13   R(6,10)                 1.3302         calculate D2E/DX2 analytically  !
 ! R14   R(6,30)                 1.4536         calculate D2E/DX2 analytically  !
 ! R15   R(8,9)                  1.4184         calculate D2E/DX2 analytically  !
 ! R16   R(8,53)                 1.5254         calculate D2E/DX2 analytically  !
 ! R17   R(9,10)                 1.4111         calculate D2E/DX2 analytically  !
 ! R18   R(9,55)                 1.0855         calculate D2E/DX2 analytically  !
 ! R19   R(10,54)                1.5241         calculate D2E/DX2 analytically  !
 ! R20   R(11,12)                1.3381         calculate D2E/DX2 analytically  !
 ! R21   R(11,14)                1.4474         calculate D2E/DX2 analytically  !
 ! R22   R(12,13)                1.5322         calculate D2E/DX2 analytically  !
 ! R23   R(12,15)                1.2173         calculate D2E/DX2 analytically  !
 ! R24   R(13,27)                1.5335         calculate D2E/DX2 analytically  !
 ! R25   R(13,56)                1.096          calculate D2E/DX2 analytically  !
 ! R26   R(14,28)                1.5284         calculate D2E/DX2 analytically  !
 ! R27   R(14,57)                1.0955         calculate D2E/DX2 analytically  !
 ! R28   R(16,58)                1.0915         calculate D2E/DX2 analytically  !
 ! R29   R(16,59)                1.0898         calculate D2E/DX2 analytically  !
 ! R30   R(16,60)                1.0932         calculate D2E/DX2 analytically  !
 ! R31   R(17,22)                1.3872         calculate D2E/DX2 analytically  !
 ! R32   R(18,19)                1.2307         calculate D2E/DX2 analytically  !
 ! R33   R(18,23)                1.5322         calculate D2E/DX2 analytically  !
 ! R34   R(20,21)                1.3755         calculate D2E/DX2 analytically  !
 ! R35   R(20,23)                1.4296         calculate D2E/DX2 analytically  !
 ! R36   R(21,22)                1.5355         calculate D2E/DX2 analytically  !
 ! R37   R(21,24)                1.2089         calculate D2E/DX2 analytically  !
 ! R38   R(22,25)                1.5423         calculate D2E/DX2 analytically  !
 ! R39   R(22,61)                1.1032         calculate D2E/DX2 analytically  !
 ! R40   R(23,26)                1.5272         calculate D2E/DX2 analytically  !
 ! R41   R(23,62)                1.0993         calculate D2E/DX2 analytically  !
 ! R42   R(25,63)                1.0957         calculate D2E/DX2 analytically  !
 ! R43   R(25,64)                1.0917         calculate D2E/DX2 analytically  !
 ! R44   R(25,65)                1.0953         calculate D2E/DX2 analytically  !
 ! R45   R(26,66)                1.0944         calculate D2E/DX2 analytically  !
 ! R46   R(26,67)                1.0911         calculate D2E/DX2 analytically  !
 ! R47   R(26,68)                1.0932         calculate D2E/DX2 analytically  !
 ! R48   R(27,69)                1.0921         calculate D2E/DX2 analytically  !
 ! R49   R(27,70)                1.0915         calculate D2E/DX2 analytically  !
 ! R50   R(27,71)                1.094          calculate D2E/DX2 analytically  !
 ! R51   R(28,72)                1.0911         calculate D2E/DX2 analytically  !
 ! R52   R(28,73)                1.0937         calculate D2E/DX2 analytically  !
 ! R53   R(28,74)                1.0907         calculate D2E/DX2 analytically  !
 ! R54   R(29,31)                1.4373         calculate D2E/DX2 analytically  !
 ! R55   R(29,35)                1.4316         calculate D2E/DX2 analytically  !
 ! R56   R(30,38)                1.4317         calculate D2E/DX2 analytically  !
 ! R57   R(30,42)                1.4393         calculate D2E/DX2 analytically  !
 ! R58   R(31,32)                1.4148         calculate D2E/DX2 analytically  !
 ! R59   R(31,36)                1.5529         calculate D2E/DX2 analytically  !
 ! R60   R(32,33)                1.4082         calculate D2E/DX2 analytically  !
 ! R61   R(32,75)                1.0964         calculate D2E/DX2 analytically  !
 ! R62   R(33,34)                1.4039         calculate D2E/DX2 analytically  !
 ! R63   R(33,76)                1.0983         calculate D2E/DX2 analytically  !
 ! R64   R(34,35)                1.4165         calculate D2E/DX2 analytically  !
 ! R65   R(34,77)                1.0977         calculate D2E/DX2 analytically  !
 ! R66   R(35,37)                1.5503         calculate D2E/DX2 analytically  !
 ! R67   R(36,45)                1.5597         calculate D2E/DX2 analytically  !
 ! R68   R(36,46)                1.5658         calculate D2E/DX2 analytically  !
 ! R69   R(36,78)                1.1135         calculate D2E/DX2 analytically  !
 ! R70   R(37,47)                1.5618         calculate D2E/DX2 analytically  !
 ! R71   R(37,48)                1.5671         calculate D2E/DX2 analytically  !
 ! R72   R(37,79)                1.1067         calculate D2E/DX2 analytically  !
 ! R73   R(38,39)                1.4193         calculate D2E/DX2 analytically  !
 ! R74   R(38,43)                1.5476         calculate D2E/DX2 analytically  !
 ! R75   R(39,40)                1.4089         calculate D2E/DX2 analytically  !
 ! R76   R(39,80)                1.0979         calculate D2E/DX2 analytically  !
 ! R77   R(40,41)                1.408          calculate D2E/DX2 analytically  !
 ! R78   R(40,81)                1.0986         calculate D2E/DX2 analytically  !
 ! R79   R(41,42)                1.4135         calculate D2E/DX2 analytically  !
 ! R80   R(41,82)                1.0975         calculate D2E/DX2 analytically  !
 ! R81   R(42,44)                1.5523         calculate D2E/DX2 analytically  !
 ! R82   R(43,51)                1.5599         calculate D2E/DX2 analytically  !
 ! R83   R(43,52)                1.5657         calculate D2E/DX2 analytically  !
 ! R84   R(43,83)                1.1073         calculate D2E/DX2 analytically  !
 ! R85   R(44,49)                1.5624         calculate D2E/DX2 analytically  !
 ! R86   R(44,50)                1.5671         calculate D2E/DX2 analytically  !
 ! R87   R(44,84)                1.1088         calculate D2E/DX2 analytically  !
 ! R88   R(45,85)                1.099          calculate D2E/DX2 analytically  !
 ! R89   R(45,86)                1.1017         calculate D2E/DX2 analytically  !
 ! R90   R(45,87)                1.1008         calculate D2E/DX2 analytically  !
 ! R91   R(46,88)                1.1004         calculate D2E/DX2 analytically  !
 ! R92   R(46,89)                1.1016         calculate D2E/DX2 analytically  !
 ! R93   R(46,90)                1.1025         calculate D2E/DX2 analytically  !
 ! R94   R(47,91)                1.1037         calculate D2E/DX2 analytically  !
 ! R95   R(47,92)                1.1011         calculate D2E/DX2 analytically  !
 ! R96   R(47,93)                1.1032         calculate D2E/DX2 analytically  !
 ! R97   R(48,94)                1.101          calculate D2E/DX2 analytically  !
 ! R98   R(48,95)                1.1004         calculate D2E/DX2 analytically  !
 ! R99   R(48,96)                1.1006         calculate D2E/DX2 analytically  !
 ! R100  R(49,97)                1.101          calculate D2E/DX2 analytically  !
 ! R101  R(49,98)                1.1041         calculate D2E/DX2 analytically  !
 ! R102  R(49,99)                1.1003         calculate D2E/DX2 analytically  !
 ! R103  R(50,100)               1.1008         calculate D2E/DX2 analytically  !
 ! R104  R(50,101)               1.1            calculate D2E/DX2 analytically  !
 ! R105  R(50,102)               1.101          calculate D2E/DX2 analytically  !
 ! R106  R(51,103)               1.102          calculate D2E/DX2 analytically  !
 ! R107  R(51,104)               1.1043         calculate D2E/DX2 analytically  !
 ! R108  R(51,105)               1.1008         calculate D2E/DX2 analytically  !
 ! R109  R(52,106)               1.104          calculate D2E/DX2 analytically  !
 ! R110  R(52,107)               1.1013         calculate D2E/DX2 analytically  !
 ! R111  R(52,108)               1.1022         calculate D2E/DX2 analytically  !
 ! R112  R(53,109)               1.0932         calculate D2E/DX2 analytically  !
 ! R113  R(53,110)               1.0965         calculate D2E/DX2 analytically  !
 ! R114  R(53,111)               1.0975         calculate D2E/DX2 analytically  !
 ! R115  R(54,112)               1.0972         calculate D2E/DX2 analytically  !
 ! R116  R(54,113)               1.0953         calculate D2E/DX2 analytically  !
 ! R117  R(54,114)               1.0946         calculate D2E/DX2 analytically  !
 ! A1    A(4,1,16)             115.6949         calculate D2E/DX2 analytically  !
 ! A2    A(5,2,6)               90.2451         calculate D2E/DX2 analytically  !
 ! A3    A(5,2,15)             102.7965         calculate D2E/DX2 analytically  !
 ! A4    A(5,2,17)             148.5128         calculate D2E/DX2 analytically  !
 ! A5    A(6,2,15)              96.1734         calculate D2E/DX2 analytically  !
 ! A6    A(6,2,17)             105.5094         calculate D2E/DX2 analytically  !
 ! A7    A(15,2,17)            102.3804         calculate D2E/DX2 analytically  !
 ! A8    A(13,3,18)            119.9699         calculate D2E/DX2 analytically  !
 ! A9    A(1,4,7)              124.9557         calculate D2E/DX2 analytically  !
 ! A10   A(1,4,14)             110.0479         calculate D2E/DX2 analytically  !
 ! A11   A(7,4,14)             124.9221         calculate D2E/DX2 analytically  !
 ! A12   A(2,5,8)              123.9767         calculate D2E/DX2 analytically  !
 ! A13   A(2,5,29)             111.8262         calculate D2E/DX2 analytically  !
 ! A14   A(8,5,29)             124.1785         calculate D2E/DX2 analytically  !
 ! A15   A(2,6,10)             122.0208         calculate D2E/DX2 analytically  !
 ! A16   A(2,6,30)             117.5603         calculate D2E/DX2 analytically  !
 ! A17   A(10,6,30)            120.3376         calculate D2E/DX2 analytically  !
 ! A18   A(5,8,9)              123.3999         calculate D2E/DX2 analytically  !
 ! A19   A(5,8,53)             121.3666         calculate D2E/DX2 analytically  !
 ! A20   A(9,8,53)             115.2259         calculate D2E/DX2 analytically  !
 ! A21   A(8,9,10)             127.6185         calculate D2E/DX2 analytically  !
 ! A22   A(8,9,55)             115.4951         calculate D2E/DX2 analytically  !
 ! A23   A(10,9,55)            115.8755         calculate D2E/DX2 analytically  !
 ! A24   A(6,10,9)             123.7922         calculate D2E/DX2 analytically  !
 ! A25   A(6,10,54)            119.4749         calculate D2E/DX2 analytically  !
 ! A26   A(9,10,54)            116.7282         calculate D2E/DX2 analytically  !
 ! A27   A(12,11,14)           121.9204         calculate D2E/DX2 analytically  !
 ! A28   A(11,12,13)           108.7491         calculate D2E/DX2 analytically  !
 ! A29   A(11,12,15)           123.9204         calculate D2E/DX2 analytically  !
 ! A30   A(13,12,15)           127.1885         calculate D2E/DX2 analytically  !
 ! A31   A(3,13,12)            115.2726         calculate D2E/DX2 analytically  !
 ! A32   A(3,13,27)            111.1034         calculate D2E/DX2 analytically  !
 ! A33   A(3,13,56)            103.0491         calculate D2E/DX2 analytically  !
 ! A34   A(12,13,27)           114.3049         calculate D2E/DX2 analytically  !
 ! A35   A(12,13,56)           103.0545         calculate D2E/DX2 analytically  !
 ! A36   A(27,13,56)           108.8912         calculate D2E/DX2 analytically  !
 ! A37   A(4,14,11)            108.0797         calculate D2E/DX2 analytically  !
 ! A38   A(4,14,28)            114.9173         calculate D2E/DX2 analytically  !
 ! A39   A(4,14,57)            106.0399         calculate D2E/DX2 analytically  !
 ! A40   A(11,14,28)           116.2618         calculate D2E/DX2 analytically  !
 ! A41   A(11,14,57)           101.8012         calculate D2E/DX2 analytically  !
 ! A42   A(28,14,57)           108.4685         calculate D2E/DX2 analytically  !
 ! A43   A(2,15,12)            136.3115         calculate D2E/DX2 analytically  !
 ! A44   A(1,16,58)            110.1392         calculate D2E/DX2 analytically  !
 ! A45   A(1,16,59)            105.371          calculate D2E/DX2 analytically  !
 ! A46   A(1,16,60)            110.2571         calculate D2E/DX2 analytically  !
 ! A47   A(58,16,59)           110.9543         calculate D2E/DX2 analytically  !
 ! A48   A(58,16,60)           109.3728         calculate D2E/DX2 analytically  !
 ! A49   A(59,16,60)           110.6947         calculate D2E/DX2 analytically  !
 ! A50   A(2,17,22)            131.4435         calculate D2E/DX2 analytically  !
 ! A51   A(3,18,19)            121.2535         calculate D2E/DX2 analytically  !
 ! A52   A(3,18,23)            110.7693         calculate D2E/DX2 analytically  !
 ! A53   A(19,18,23)           124.2712         calculate D2E/DX2 analytically  !
 ! A54   A(21,20,23)           123.2107         calculate D2E/DX2 analytically  !
 ! A55   A(20,21,22)           119.1563         calculate D2E/DX2 analytically  !
 ! A56   A(20,21,24)           117.7442         calculate D2E/DX2 analytically  !
 ! A57   A(22,21,24)           122.7839         calculate D2E/DX2 analytically  !
 ! A58   A(17,22,21)           112.4297         calculate D2E/DX2 analytically  !
 ! A59   A(17,22,25)           114.0717         calculate D2E/DX2 analytically  !
 ! A60   A(17,22,61)           110.8709         calculate D2E/DX2 analytically  !
 ! A61   A(21,22,25)           110.9091         calculate D2E/DX2 analytically  !
 ! A62   A(21,22,61)           102.1902         calculate D2E/DX2 analytically  !
 ! A63   A(25,22,61)           105.4951         calculate D2E/DX2 analytically  !
 ! A64   A(18,23,20)           113.8427         calculate D2E/DX2 analytically  !
 ! A65   A(18,23,26)           115.5674         calculate D2E/DX2 analytically  !
 ! A66   A(18,23,62)           103.3427         calculate D2E/DX2 analytically  !
 ! A67   A(20,23,26)           112.0611         calculate D2E/DX2 analytically  !
 ! A68   A(20,23,62)           102.3748         calculate D2E/DX2 analytically  !
 ! A69   A(26,23,62)           108.1848         calculate D2E/DX2 analytically  !
 ! A70   A(22,25,63)           110.0132         calculate D2E/DX2 analytically  !
 ! A71   A(22,25,64)           110.0258         calculate D2E/DX2 analytically  !
 ! A72   A(22,25,65)           111.0648         calculate D2E/DX2 analytically  !
 ! A73   A(63,25,64)           109.0443         calculate D2E/DX2 analytically  !
 ! A74   A(63,25,65)           108.6308         calculate D2E/DX2 analytically  !
 ! A75   A(64,25,65)           108.0068         calculate D2E/DX2 analytically  !
 ! A76   A(23,26,66)           108.7906         calculate D2E/DX2 analytically  !
 ! A77   A(23,26,67)           111.6345         calculate D2E/DX2 analytically  !
 ! A78   A(23,26,68)           110.4734         calculate D2E/DX2 analytically  !
 ! A79   A(66,26,67)           109.2139         calculate D2E/DX2 analytically  !
 ! A80   A(66,26,68)           108.7317         calculate D2E/DX2 analytically  !
 ! A81   A(67,26,68)           107.9457         calculate D2E/DX2 analytically  !
 ! A82   A(13,27,69)           110.527          calculate D2E/DX2 analytically  !
 ! A83   A(13,27,70)           110.7879         calculate D2E/DX2 analytically  !
 ! A84   A(13,27,71)           108.5809         calculate D2E/DX2 analytically  !
 ! A85   A(69,27,70)           109.0733         calculate D2E/DX2 analytically  !
 ! A86   A(69,27,71)           108.7613         calculate D2E/DX2 analytically  !
 ! A87   A(70,27,71)           109.0704         calculate D2E/DX2 analytically  !
 ! A88   A(14,28,72)           109.166          calculate D2E/DX2 analytically  !
 ! A89   A(14,28,73)           108.0002         calculate D2E/DX2 analytically  !
 ! A90   A(14,28,74)           113.1031         calculate D2E/DX2 analytically  !
 ! A91   A(72,28,73)           108.5932         calculate D2E/DX2 analytically  !
 ! A92   A(72,28,74)           108.8751         calculate D2E/DX2 analytically  !
 ! A93   A(73,28,74)           109.0112         calculate D2E/DX2 analytically  !
 ! A94   A(5,29,31)            117.2668         calculate D2E/DX2 analytically  !
 ! A95   A(5,29,35)            121.5493         calculate D2E/DX2 analytically  !
 ! A96   A(31,29,35)           120.5886         calculate D2E/DX2 analytically  !
 ! A97   A(6,30,38)            120.5545         calculate D2E/DX2 analytically  !
 ! A98   A(6,30,42)            118.9686         calculate D2E/DX2 analytically  !
 ! A99   A(38,30,42)           120.1974         calculate D2E/DX2 analytically  !
 ! A100  A(29,31,32)           118.5359         calculate D2E/DX2 analytically  !
 ! A101  A(29,31,36)           120.7677         calculate D2E/DX2 analytically  !
 ! A102  A(32,31,36)           120.5345         calculate D2E/DX2 analytically  !
 ! A103  A(31,32,33)           121.1178         calculate D2E/DX2 analytically  !
 ! A104  A(31,32,75)           119.6067         calculate D2E/DX2 analytically  !
 ! A105  A(33,32,75)           119.2695         calculate D2E/DX2 analytically  !
 ! A106  A(32,33,34)           119.8827         calculate D2E/DX2 analytically  !
 ! A107  A(32,33,76)           119.9427         calculate D2E/DX2 analytically  !
 ! A108  A(34,33,76)           120.1576         calculate D2E/DX2 analytically  !
 ! A109  A(33,34,35)           121.3134         calculate D2E/DX2 analytically  !
 ! A110  A(33,34,77)           119.5073         calculate D2E/DX2 analytically  !
 ! A111  A(35,34,77)           119.1792         calculate D2E/DX2 analytically  !
 ! A112  A(29,35,34)           118.4941         calculate D2E/DX2 analytically  !
 ! A113  A(29,35,37)           122.9245         calculate D2E/DX2 analytically  !
 ! A114  A(34,35,37)           118.58           calculate D2E/DX2 analytically  !
 ! A115  A(31,36,45)           113.3955         calculate D2E/DX2 analytically  !
 ! A116  A(31,36,46)           110.1193         calculate D2E/DX2 analytically  !
 ! A117  A(31,36,78)           108.1689         calculate D2E/DX2 analytically  !
 ! A118  A(45,36,46)           109.9832         calculate D2E/DX2 analytically  !
 ! A119  A(45,36,78)           108.0717         calculate D2E/DX2 analytically  !
 ! A120  A(46,36,78)           106.8545         calculate D2E/DX2 analytically  !
 ! A121  A(35,37,47)           111.157          calculate D2E/DX2 analytically  !
 ! A122  A(35,37,48)           111.4142         calculate D2E/DX2 analytically  !
 ! A123  A(35,37,79)           107.9119         calculate D2E/DX2 analytically  !
 ! A124  A(47,37,48)           110.0468         calculate D2E/DX2 analytically  !
 ! A125  A(47,37,79)           107.9429         calculate D2E/DX2 analytically  !
 ! A126  A(48,37,79)           108.2349         calculate D2E/DX2 analytically  !
 ! A127  A(30,38,39)           118.8278         calculate D2E/DX2 analytically  !
 ! A128  A(30,38,43)           122.565          calculate D2E/DX2 analytically  !
 ! A129  A(39,38,43)           118.6036         calculate D2E/DX2 analytically  !
 ! A130  A(38,39,40)           121.2224         calculate D2E/DX2 analytically  !
 ! A131  A(38,39,80)           119.2299         calculate D2E/DX2 analytically  !
 ! A132  A(40,39,80)           119.5437         calculate D2E/DX2 analytically  !
 ! A133  A(39,40,41)           119.5533         calculate D2E/DX2 analytically  !
 ! A134  A(39,40,81)           120.168          calculate D2E/DX2 analytically  !
 ! A135  A(41,40,81)           120.269          calculate D2E/DX2 analytically  !
 ! A136  A(40,41,42)           121.434          calculate D2E/DX2 analytically  !
 ! A137  A(40,41,82)           119.3251         calculate D2E/DX2 analytically  !
 ! A138  A(42,41,82)           119.2408         calculate D2E/DX2 analytically  !
 ! A139  A(30,42,41)           118.7376         calculate D2E/DX2 analytically  !
 ! A140  A(30,42,44)           122.581          calculate D2E/DX2 analytically  !
 ! A141  A(41,42,44)           118.6747         calculate D2E/DX2 analytically  !
 ! A142  A(38,43,51)           111.2098         calculate D2E/DX2 analytically  !
 ! A143  A(38,43,52)           111.1632         calculate D2E/DX2 analytically  !
 ! A144  A(38,43,83)           107.6916         calculate D2E/DX2 analytically  !
 ! A145  A(51,43,52)           110.6269         calculate D2E/DX2 analytically  !
 ! A146  A(51,43,83)           108.1638         calculate D2E/DX2 analytically  !
 ! A147  A(52,43,83)           107.8313         calculate D2E/DX2 analytically  !
 ! A148  A(42,44,49)           111.4915         calculate D2E/DX2 analytically  !
 ! A149  A(42,44,50)           111.4762         calculate D2E/DX2 analytically  !
 ! A150  A(42,44,84)           108.0258         calculate D2E/DX2 analytically  !
 ! A151  A(49,44,50)           109.4448         calculate D2E/DX2 analytically  !
 ! A152  A(49,44,84)           108.1736         calculate D2E/DX2 analytically  !
 ! A153  A(50,44,84)           108.1035         calculate D2E/DX2 analytically  !
 ! A154  A(36,45,85)           109.6376         calculate D2E/DX2 analytically  !
 ! A155  A(36,45,86)           111.4194         calculate D2E/DX2 analytically  !
 ! A156  A(36,45,87)           110.9543         calculate D2E/DX2 analytically  !
 ! A157  A(85,45,86)           108.418          calculate D2E/DX2 analytically  !
 ! A158  A(85,45,87)           107.9221         calculate D2E/DX2 analytically  !
 ! A159  A(86,45,87)           108.3865         calculate D2E/DX2 analytically  !
 ! A160  A(36,46,88)           110.0126         calculate D2E/DX2 analytically  !
 ! A161  A(36,46,89)           110.3879         calculate D2E/DX2 analytically  !
 ! A162  A(36,46,90)           110.9594         calculate D2E/DX2 analytically  !
 ! A163  A(88,46,89)           108.6102         calculate D2E/DX2 analytically  !
 ! A164  A(88,46,90)           108.3134         calculate D2E/DX2 analytically  !
 ! A165  A(89,46,90)           108.4903         calculate D2E/DX2 analytically  !
 ! A166  A(37,47,91)           110.9173         calculate D2E/DX2 analytically  !
 ! A167  A(37,47,92)           111.0671         calculate D2E/DX2 analytically  !
 ! A168  A(37,47,93)           109.7136         calculate D2E/DX2 analytically  !
 ! A169  A(91,47,92)           108.0901         calculate D2E/DX2 analytically  !
 ! A170  A(91,47,93)           108.728          calculate D2E/DX2 analytically  !
 ! A171  A(92,47,93)           108.2461         calculate D2E/DX2 analytically  !
 ! A172  A(37,48,94)           110.0038         calculate D2E/DX2 analytically  !
 ! A173  A(37,48,95)           111.0935         calculate D2E/DX2 analytically  !
 ! A174  A(37,48,96)           110.5498         calculate D2E/DX2 analytically  !
 ! A175  A(94,48,95)           108.4733         calculate D2E/DX2 analytically  !
 ! A176  A(94,48,96)           108.3501         calculate D2E/DX2 analytically  !
 ! A177  A(95,48,96)           108.2916         calculate D2E/DX2 analytically  !
 ! A178  A(44,49,97)           109.9858         calculate D2E/DX2 analytically  !
 ! A179  A(44,49,98)           110.9101         calculate D2E/DX2 analytically  !
 ! A180  A(44,49,99)           111.1938         calculate D2E/DX2 analytically  !
 ! A181  A(97,49,98)           108.3892         calculate D2E/DX2 analytically  !
 ! A182  A(97,49,99)           108.3159         calculate D2E/DX2 analytically  !
 ! A183  A(98,49,99)           107.9515         calculate D2E/DX2 analytically  !
 ! A184  A(44,50,100)          109.7657         calculate D2E/DX2 analytically  !
 ! A185  A(44,50,101)          111.2978         calculate D2E/DX2 analytically  !
 ! A186  A(44,50,102)          110.5959         calculate D2E/DX2 analytically  !
 ! A187  A(100,50,101)         108.2281         calculate D2E/DX2 analytically  !
 ! A188  A(100,50,102)         108.4208         calculate D2E/DX2 analytically  !
 ! A189  A(101,50,102)         108.4505         calculate D2E/DX2 analytically  !
 ! A190  A(43,51,103)          109.8674         calculate D2E/DX2 analytically  !
 ! A191  A(43,51,104)          109.7805         calculate D2E/DX2 analytically  !
 ! A192  A(43,51,105)          111.065          calculate D2E/DX2 analytically  !
 ! A193  A(103,51,104)         109.3739         calculate D2E/DX2 analytically  !
 ! A194  A(103,51,105)         108.4385         calculate D2E/DX2 analytically  !
 ! A195  A(104,51,105)         108.2747         calculate D2E/DX2 analytically  !
 ! A196  A(43,52,106)          109.2405         calculate D2E/DX2 analytically  !
 ! A197  A(43,52,107)          111.3012         calculate D2E/DX2 analytically  !
 ! A198  A(43,52,108)          110.9709         calculate D2E/DX2 analytically  !
 ! A199  A(106,52,107)         107.7502         calculate D2E/DX2 analytically  !
 ! A200  A(106,52,108)         109.2054         calculate D2E/DX2 analytically  !
 ! A201  A(107,52,108)         108.2951         calculate D2E/DX2 analytically  !
 ! A202  A(8,53,109)           111.9842         calculate D2E/DX2 analytically  !
 ! A203  A(8,53,110)           110.1538         calculate D2E/DX2 analytically  !
 ! A204  A(8,53,111)           110.6289         calculate D2E/DX2 analytically  !
 ! A205  A(109,53,110)         108.5733         calculate D2E/DX2 analytically  !
 ! A206  A(109,53,111)         108.2038         calculate D2E/DX2 analytically  !
 ! A207  A(110,53,111)         107.1425         calculate D2E/DX2 analytically  !
 ! A208  A(10,54,112)          110.0963         calculate D2E/DX2 analytically  !
 ! A209  A(10,54,113)          111.2908         calculate D2E/DX2 analytically  !
 ! A210  A(10,54,114)          111.7997         calculate D2E/DX2 analytically  !
 ! A211  A(112,54,113)         108.2778         calculate D2E/DX2 analytically  !
 ! A212  A(112,54,114)         107.1302         calculate D2E/DX2 analytically  !
 ! A213  A(113,54,114)         108.0858         calculate D2E/DX2 analytically  !
 ! D1    D(16,1,4,7)            -0.3276         calculate D2E/DX2 analytically  !
 ! D2    D(16,1,4,14)         -177.3165         calculate D2E/DX2 analytically  !
 ! D3    D(4,1,16,58)          -59.7794         calculate D2E/DX2 analytically  !
 ! D4    D(4,1,16,59)         -179.5056         calculate D2E/DX2 analytically  !
 ! D5    D(4,1,16,60)           61.0146         calculate D2E/DX2 analytically  !
 ! D6    D(6,2,5,8)             22.8057         calculate D2E/DX2 analytically  !
 ! D7    D(6,2,5,29)          -158.7036         calculate D2E/DX2 analytically  !
 ! D8    D(15,2,5,8)           -73.5816         calculate D2E/DX2 analytically  !
 ! D9    D(15,2,5,29)          104.909          calculate D2E/DX2 analytically  !
 ! D10   D(17,2,5,8)           144.0667         calculate D2E/DX2 analytically  !
 ! D11   D(17,2,5,29)          -37.4426         calculate D2E/DX2 analytically  !
 ! D12   D(5,2,6,10)           -29.6989         calculate D2E/DX2 analytically  !
 ! D13   D(5,2,6,30)           153.5719         calculate D2E/DX2 analytically  !
 ! D14   D(15,2,6,10)           73.2009         calculate D2E/DX2 analytically  !
 ! D15   D(15,2,6,30)         -103.5283         calculate D2E/DX2 analytically  !
 ! D16   D(17,2,6,10)          177.9044         calculate D2E/DX2 analytically  !
 ! D17   D(17,2,6,30)            1.1752         calculate D2E/DX2 analytically  !
 ! D18   D(5,2,15,12)         -101.0779         calculate D2E/DX2 analytically  !
 ! D19   D(6,2,15,12)          167.2615         calculate D2E/DX2 analytically  !
 ! D20   D(17,2,15,12)          59.8578         calculate D2E/DX2 analytically  !
 ! D21   D(5,2,17,22)          -50.6549         calculate D2E/DX2 analytically  !
 ! D22   D(6,2,17,22)           66.8332         calculate D2E/DX2 analytically  !
 ! D23   D(15,2,17,22)         166.9219         calculate D2E/DX2 analytically  !
 ! D24   D(18,3,13,12)          61.4043         calculate D2E/DX2 analytically  !
 ! D25   D(18,3,13,27)         -70.6691         calculate D2E/DX2 analytically  !
 ! D26   D(18,3,13,56)         172.8629         calculate D2E/DX2 analytically  !
 ! D27   D(13,3,18,19)         -12.1719         calculate D2E/DX2 analytically  !
 ! D28   D(13,3,18,23)         146.9998         calculate D2E/DX2 analytically  !
 ! D29   D(1,4,14,11)         -179.1188         calculate D2E/DX2 analytically  !
 ! D30   D(1,4,14,28)          -47.4453         calculate D2E/DX2 analytically  !
 ! D31   D(1,4,14,57)           72.3567         calculate D2E/DX2 analytically  !
 ! D32   D(7,4,14,11)            3.8911         calculate D2E/DX2 analytically  !
 ! D33   D(7,4,14,28)          135.5646         calculate D2E/DX2 analytically  !
 ! D34   D(7,4,14,57)         -104.6334         calculate D2E/DX2 analytically  !
 ! D35   D(2,5,8,9)             -4.9448         calculate D2E/DX2 analytically  !
 ! D36   D(2,5,8,53)           176.1115         calculate D2E/DX2 analytically  !
 ! D37   D(29,5,8,9)           176.7488         calculate D2E/DX2 analytically  !
 ! D38   D(29,5,8,53)           -2.1948         calculate D2E/DX2 analytically  !
 ! D39   D(2,5,29,31)           69.651          calculate D2E/DX2 analytically  !
 ! D40   D(2,5,29,35)         -101.5494         calculate D2E/DX2 analytically  !
 ! D41   D(8,5,29,31)         -111.862          calculate D2E/DX2 analytically  !
 ! D42   D(8,5,29,35)           76.9377         calculate D2E/DX2 analytically  !
 ! D43   D(2,6,10,9)            19.5398         calculate D2E/DX2 analytically  !
 ! D44   D(2,6,10,54)         -161.28           calculate D2E/DX2 analytically  !
 ! D45   D(30,6,10,9)         -163.82           calculate D2E/DX2 analytically  !
 ! D46   D(30,6,10,54)          15.3601         calculate D2E/DX2 analytically  !
 ! D47   D(2,6,30,38)           73.985          calculate D2E/DX2 analytically  !
 ! D48   D(2,6,30,42)          -99.9548         calculate D2E/DX2 analytically  !
 ! D49   D(10,6,30,38)        -102.8019         calculate D2E/DX2 analytically  !
 ! D50   D(10,6,30,42)          83.2583         calculate D2E/DX2 analytically  !
 ! D51   D(5,8,9,10)           -18.0389         calculate D2E/DX2 analytically  !
 ! D52   D(5,8,9,55)           174.0309         calculate D2E/DX2 analytically  !
 ! D53   D(53,8,9,10)          160.9641         calculate D2E/DX2 analytically  !
 ! D54   D(53,8,9,55)           -6.9661         calculate D2E/DX2 analytically  !
 ! D55   D(5,8,53,109)          13.1901         calculate D2E/DX2 analytically  !
 ! D56   D(5,8,53,110)         134.125          calculate D2E/DX2 analytically  !
 ! D57   D(5,8,53,111)        -107.6038         calculate D2E/DX2 analytically  !
 ! D58   D(9,8,53,109)        -165.835          calculate D2E/DX2 analytically  !
 ! D59   D(9,8,53,110)         -44.9002         calculate D2E/DX2 analytically  !
 ! D60   D(9,8,53,111)          73.3711         calculate D2E/DX2 analytically  !
 ! D61   D(8,9,10,6)             9.6472         calculate D2E/DX2 analytically  !
 ! D62   D(8,9,10,54)         -169.5537         calculate D2E/DX2 analytically  !
 ! D63   D(55,9,10,6)          177.5382         calculate D2E/DX2 analytically  !
 ! D64   D(55,9,10,54)          -1.6627         calculate D2E/DX2 analytically  !
 ! D65   D(6,10,54,112)         58.2914         calculate D2E/DX2 analytically  !
 ! D66   D(6,10,54,113)        178.3576         calculate D2E/DX2 analytically  !
 ! D67   D(6,10,54,114)        -60.6643         calculate D2E/DX2 analytically  !
 ! D68   D(9,10,54,112)       -122.4715         calculate D2E/DX2 analytically  !
 ! D69   D(9,10,54,113)         -2.4052         calculate D2E/DX2 analytically  !
 ! D70   D(9,10,54,114)        118.5728         calculate D2E/DX2 analytically  !
 ! D71   D(14,11,12,13)       -164.2507         calculate D2E/DX2 analytically  !
 ! D72   D(14,11,12,15)         11.6871         calculate D2E/DX2 analytically  !
 ! D73   D(12,11,14,4)          73.1329         calculate D2E/DX2 analytically  !
 ! D74   D(12,11,14,28)        -57.8079         calculate D2E/DX2 analytically  !
 ! D75   D(12,11,14,57)       -175.4508         calculate D2E/DX2 analytically  !
 ! D76   D(11,12,13,3)         179.2593         calculate D2E/DX2 analytically  !
 ! D77   D(11,12,13,27)        -50.1917         calculate D2E/DX2 analytically  !
 ! D78   D(11,12,13,56)         67.8038         calculate D2E/DX2 analytically  !
 ! D79   D(15,12,13,3)           3.4908         calculate D2E/DX2 analytically  !
 ! D80   D(15,12,13,27)        134.0399         calculate D2E/DX2 analytically  !
 ! D81   D(15,12,13,56)       -107.9646         calculate D2E/DX2 analytically  !
 ! D82   D(11,12,15,2)         147.1826         calculate D2E/DX2 analytically  !
 ! D83   D(13,12,15,2)         -37.6476         calculate D2E/DX2 analytically  !
 ! D84   D(3,13,27,69)        -172.4128         calculate D2E/DX2 analytically  !
 ! D85   D(3,13,27,70)          66.5652         calculate D2E/DX2 analytically  !
 ! D86   D(3,13,27,71)         -53.1914         calculate D2E/DX2 analytically  !
 ! D87   D(12,13,27,69)         55.023          calculate D2E/DX2 analytically  !
 ! D88   D(12,13,27,70)        -65.9991         calculate D2E/DX2 analytically  !
 ! D89   D(12,13,27,71)        174.2443         calculate D2E/DX2 analytically  !
 ! D90   D(56,13,27,69)        -59.591          calculate D2E/DX2 analytically  !
 ! D91   D(56,13,27,70)        179.387          calculate D2E/DX2 analytically  !
 ! D92   D(56,13,27,71)         59.6304         calculate D2E/DX2 analytically  !
 ! D93   D(4,14,28,72)        -176.226          calculate D2E/DX2 analytically  !
 ! D94   D(4,14,28,73)          65.8784         calculate D2E/DX2 analytically  !
 ! D95   D(4,14,28,74)         -54.8517         calculate D2E/DX2 analytically  !
 ! D96   D(11,14,28,72)        -48.5794         calculate D2E/DX2 analytically  !
 ! D97   D(11,14,28,73)       -166.4751         calculate D2E/DX2 analytically  !
 ! D98   D(11,14,28,74)         72.7949         calculate D2E/DX2 analytically  !
 ! D99   D(57,14,28,72)         65.326          calculate D2E/DX2 analytically  !
 ! D100  D(57,14,28,73)        -52.5697         calculate D2E/DX2 analytically  !
 ! D101  D(57,14,28,74)       -173.2998         calculate D2E/DX2 analytically  !
 ! D102  D(2,17,22,21)          99.9736         calculate D2E/DX2 analytically  !
 ! D103  D(2,17,22,25)        -132.634          calculate D2E/DX2 analytically  !
 ! D104  D(2,17,22,61)         -13.7212         calculate D2E/DX2 analytically  !
 ! D105  D(3,18,23,20)         148.3459         calculate D2E/DX2 analytically  !
 ! D106  D(3,18,23,26)          16.5369         calculate D2E/DX2 analytically  !
 ! D107  D(3,18,23,62)        -101.4344         calculate D2E/DX2 analytically  !
 ! D108  D(19,18,23,20)        -53.236          calculate D2E/DX2 analytically  !
 ! D109  D(19,18,23,26)        174.955          calculate D2E/DX2 analytically  !
 ! D110  D(19,18,23,62)         56.9837         calculate D2E/DX2 analytically  !
 ! D111  D(23,20,21,22)         40.2298         calculate D2E/DX2 analytically  !
 ! D112  D(23,20,21,24)       -146.0395         calculate D2E/DX2 analytically  !
 ! D113  D(21,20,23,18)        -76.7218         calculate D2E/DX2 analytically  !
 ! D114  D(21,20,23,26)         56.7677         calculate D2E/DX2 analytically  !
 ! D115  D(21,20,23,62)        172.468          calculate D2E/DX2 analytically  !
 ! D116  D(20,21,22,17)          7.4103         calculate D2E/DX2 analytically  !
 ! D117  D(20,21,22,25)       -121.6448         calculate D2E/DX2 analytically  !
 ! D118  D(20,21,22,61)        126.3235         calculate D2E/DX2 analytically  !
 ! D119  D(24,21,22,17)       -165.9884         calculate D2E/DX2 analytically  !
 ! D120  D(24,21,22,25)         64.9564         calculate D2E/DX2 analytically  !
 ! D121  D(24,21,22,61)        -47.0752         calculate D2E/DX2 analytically  !
 ! D122  D(17,22,25,63)       -174.5915         calculate D2E/DX2 analytically  !
 ! D123  D(17,22,25,64)         65.2514         calculate D2E/DX2 analytically  !
 ! D124  D(17,22,25,65)        -54.2844         calculate D2E/DX2 analytically  !
 ! D125  D(21,22,25,63)        -46.4198         calculate D2E/DX2 analytically  !
 ! D126  D(21,22,25,64)       -166.5768         calculate D2E/DX2 analytically  !
 ! D127  D(21,22,25,65)         73.8874         calculate D2E/DX2 analytically  !
 ! D128  D(61,22,25,63)         63.4866         calculate D2E/DX2 analytically  !
 ! D129  D(61,22,25,64)        -56.6705         calculate D2E/DX2 analytically  !
 ! D130  D(61,22,25,65)       -176.2063         calculate D2E/DX2 analytically  !
 ! D131  D(18,23,26,66)        177.0193         calculate D2E/DX2 analytically  !
 ! D132  D(18,23,26,67)         56.4276         calculate D2E/DX2 analytically  !
 ! D133  D(18,23,26,68)        -63.6979         calculate D2E/DX2 analytically  !
 ! D134  D(20,23,26,66)         44.3788         calculate D2E/DX2 analytically  !
 ! D135  D(20,23,26,67)        -76.2129         calculate D2E/DX2 analytically  !
 ! D136  D(20,23,26,68)        163.6616         calculate D2E/DX2 analytically  !
 ! D137  D(62,23,26,66)        -67.7394         calculate D2E/DX2 analytically  !
 ! D138  D(62,23,26,67)        171.6689         calculate D2E/DX2 analytically  !
 ! D139  D(62,23,26,68)         51.5434         calculate D2E/DX2 analytically  !
 ! D140  D(5,29,31,32)        -168.9503         calculate D2E/DX2 analytically  !
 ! D141  D(5,29,31,36)          15.6511         calculate D2E/DX2 analytically  !
 ! D142  D(35,29,31,32)          2.3392         calculate D2E/DX2 analytically  !
 ! D143  D(35,29,31,36)       -173.0594         calculate D2E/DX2 analytically  !
 ! D144  D(5,29,35,34)         168.7028         calculate D2E/DX2 analytically  !
 ! D145  D(5,29,35,37)         -11.7265         calculate D2E/DX2 analytically  !
 ! D146  D(31,29,35,34)         -2.2086         calculate D2E/DX2 analytically  !
 ! D147  D(31,29,35,37)        177.3622         calculate D2E/DX2 analytically  !
 ! D148  D(6,30,38,39)        -172.1594         calculate D2E/DX2 analytically  !
 ! D149  D(6,30,38,43)           8.5368         calculate D2E/DX2 analytically  !
 ! D150  D(42,30,38,39)          1.7059         calculate D2E/DX2 analytically  !
 ! D151  D(42,30,38,43)       -177.5979         calculate D2E/DX2 analytically  !
 ! D152  D(6,30,42,41)         172.7226         calculate D2E/DX2 analytically  !
 ! D153  D(6,30,42,44)          -8.2336         calculate D2E/DX2 analytically  !
 ! D154  D(38,30,42,41)         -1.2394         calculate D2E/DX2 analytically  !
 ! D155  D(38,30,42,44)        177.8044         calculate D2E/DX2 analytically  !
 ! D156  D(29,31,32,33)         -0.291          calculate D2E/DX2 analytically  !
 ! D157  D(29,31,32,75)       -179.3932         calculate D2E/DX2 analytically  !
 ! D158  D(36,31,32,33)        175.1187         calculate D2E/DX2 analytically  !
 ! D159  D(36,31,32,75)         -3.9835         calculate D2E/DX2 analytically  !
 ! D160  D(29,31,36,45)       -161.7207         calculate D2E/DX2 analytically  !
 ! D161  D(29,31,36,46)         74.5653         calculate D2E/DX2 analytically  !
 ! D162  D(29,31,36,78)        -41.8715         calculate D2E/DX2 analytically  !
 ! D163  D(32,31,36,45)         22.9728         calculate D2E/DX2 analytically  !
 ! D164  D(32,31,36,46)       -100.7412         calculate D2E/DX2 analytically  !
 ! D165  D(32,31,36,78)        142.822          calculate D2E/DX2 analytically  !
 ! D166  D(31,32,33,34)         -1.8635         calculate D2E/DX2 analytically  !
 ! D167  D(31,32,33,76)        179.6318         calculate D2E/DX2 analytically  !
 ! D168  D(75,32,33,34)        177.2416         calculate D2E/DX2 analytically  !
 ! D169  D(75,32,33,76)         -1.2631         calculate D2E/DX2 analytically  !
 ! D170  D(32,33,34,35)          2.0037         calculate D2E/DX2 analytically  !
 ! D171  D(32,33,34,77)       -177.8437         calculate D2E/DX2 analytically  !
 ! D172  D(76,33,34,35)       -179.4948         calculate D2E/DX2 analytically  !
 ! D173  D(76,33,34,77)          0.6578         calculate D2E/DX2 analytically  !
 ! D174  D(33,34,35,29)          0.0253         calculate D2E/DX2 analytically  !
 ! D175  D(33,34,35,37)       -179.5644         calculate D2E/DX2 analytically  !
 ! D176  D(77,34,35,29)        179.8732         calculate D2E/DX2 analytically  !
 ! D177  D(77,34,35,37)          0.2835         calculate D2E/DX2 analytically  !
 ! D178  D(29,35,37,47)        119.4408         calculate D2E/DX2 analytically  !
 ! D179  D(29,35,37,48)       -117.4252         calculate D2E/DX2 analytically  !
 ! D180  D(29,35,37,79)          1.2602         calculate D2E/DX2 analytically  !
 ! D181  D(34,35,37,47)        -60.9888         calculate D2E/DX2 analytically  !
 ! D182  D(34,35,37,48)         62.1452         calculate D2E/DX2 analytically  !
 ! D183  D(34,35,37,79)       -179.1694         calculate D2E/DX2 analytically  !
 ! D184  D(31,36,45,85)        172.2951         calculate D2E/DX2 analytically  !
 ! D185  D(31,36,45,86)         52.2737         calculate D2E/DX2 analytically  !
 ! D186  D(31,36,45,87)        -68.5933         calculate D2E/DX2 analytically  !
 ! D187  D(46,36,45,85)        -63.9166         calculate D2E/DX2 analytically  !
 ! D188  D(46,36,45,86)        176.062          calculate D2E/DX2 analytically  !
 ! D189  D(46,36,45,87)         55.1949         calculate D2E/DX2 analytically  !
 ! D190  D(78,36,45,85)         52.3906         calculate D2E/DX2 analytically  !
 ! D191  D(78,36,45,86)        -67.6308         calculate D2E/DX2 analytically  !
 ! D192  D(78,36,45,87)        171.5021         calculate D2E/DX2 analytically  !
 ! D193  D(31,36,46,88)        179.3764         calculate D2E/DX2 analytically  !
 ! D194  D(31,36,46,89)         59.5285         calculate D2E/DX2 analytically  !
 ! D195  D(31,36,46,90)        -60.7813         calculate D2E/DX2 analytically  !
 ! D196  D(45,36,46,88)         53.7016         calculate D2E/DX2 analytically  !
 ! D197  D(45,36,46,89)        -66.1462         calculate D2E/DX2 analytically  !
 ! D198  D(45,36,46,90)        173.5439         calculate D2E/DX2 analytically  !
 ! D199  D(78,36,46,88)        -63.3674         calculate D2E/DX2 analytically  !
 ! D200  D(78,36,46,89)        176.7848         calculate D2E/DX2 analytically  !
 ! D201  D(78,36,46,90)         56.475          calculate D2E/DX2 analytically  !
 ! D202  D(35,37,47,91)       -178.5886         calculate D2E/DX2 analytically  !
 ! D203  D(35,37,47,92)         61.1823         calculate D2E/DX2 analytically  !
 ! D204  D(35,37,47,93)        -58.4507         calculate D2E/DX2 analytically  !
 ! D205  D(48,37,47,91)         57.4962         calculate D2E/DX2 analytically  !
 ! D206  D(48,37,47,92)        -62.7329         calculate D2E/DX2 analytically  !
 ! D207  D(48,37,47,93)        177.6341         calculate D2E/DX2 analytically  !
 ! D208  D(79,37,47,91)        -60.4267         calculate D2E/DX2 analytically  !
 ! D209  D(79,37,47,92)        179.3441         calculate D2E/DX2 analytically  !
 ! D210  D(79,37,47,93)         59.7111         calculate D2E/DX2 analytically  !
 ! D211  D(35,37,48,94)        175.8053         calculate D2E/DX2 analytically  !
 ! D212  D(35,37,48,95)         55.6828         calculate D2E/DX2 analytically  !
 ! D213  D(35,37,48,96)        -64.5727         calculate D2E/DX2 analytically  !
 ! D214  D(47,37,48,94)        -60.4289         calculate D2E/DX2 analytically  !
 ! D215  D(47,37,48,95)        179.4485         calculate D2E/DX2 analytically  !
 ! D216  D(47,37,48,96)         59.193          calculate D2E/DX2 analytically  !
 ! D217  D(79,37,48,94)         57.3134         calculate D2E/DX2 analytically  !
 ! D218  D(79,37,48,95)        -62.8091         calculate D2E/DX2 analytically  !
 ! D219  D(79,37,48,96)        176.9353         calculate D2E/DX2 analytically  !
 ! D220  D(30,38,39,40)         -0.6807         calculate D2E/DX2 analytically  !
 ! D221  D(30,38,39,80)       -179.9504         calculate D2E/DX2 analytically  !
 ! D222  D(43,38,39,40)        178.6509         calculate D2E/DX2 analytically  !
 ! D223  D(43,38,39,80)         -0.6187         calculate D2E/DX2 analytically  !
 ! D224  D(30,38,43,51)       -118.4706         calculate D2E/DX2 analytically  !
 ! D225  D(30,38,43,52)        117.7881         calculate D2E/DX2 analytically  !
 ! D226  D(30,38,43,83)         -0.1262         calculate D2E/DX2 analytically  !
 ! D227  D(39,38,43,51)         62.2241         calculate D2E/DX2 analytically  !
 ! D228  D(39,38,43,52)        -61.5172         calculate D2E/DX2 analytically  !
 ! D229  D(39,38,43,83)       -179.4315         calculate D2E/DX2 analytically  !
 ! D230  D(38,39,40,41)         -0.8124         calculate D2E/DX2 analytically  !
 ! D231  D(38,39,40,81)       -179.6878         calculate D2E/DX2 analytically  !
 ! D232  D(80,39,40,41)        178.455          calculate D2E/DX2 analytically  !
 ! D233  D(80,39,40,81)         -0.4204         calculate D2E/DX2 analytically  !
 ! D234  D(39,40,41,42)          1.3028         calculate D2E/DX2 analytically  !
 ! D235  D(39,40,41,82)       -178.5847         calculate D2E/DX2 analytically  !
 ! D236  D(81,40,41,42)       -179.8229         calculate D2E/DX2 analytically  !
 ! D237  D(81,40,41,82)          0.2896         calculate D2E/DX2 analytically  !
 ! D238  D(40,41,42,30)         -0.2777         calculate D2E/DX2 analytically  !
 ! D239  D(40,41,42,44)       -179.3593         calculate D2E/DX2 analytically  !
 ! D240  D(82,41,42,30)        179.61           calculate D2E/DX2 analytically  !
 ! D241  D(82,41,42,44)          0.5283         calculate D2E/DX2 analytically  !
 ! D242  D(30,42,44,49)        127.1392         calculate D2E/DX2 analytically  !
 ! D243  D(30,42,44,50)       -110.2197         calculate D2E/DX2 analytically  !
 ! D244  D(30,42,44,84)          8.4124         calculate D2E/DX2 analytically  !
 ! D245  D(41,42,44,49)        -53.8165         calculate D2E/DX2 analytically  !
 ! D246  D(41,42,44,50)         68.8247         calculate D2E/DX2 analytically  !
 ! D247  D(41,42,44,84)       -172.5433         calculate D2E/DX2 analytically  !
 ! D248  D(38,43,51,103)       176.6037         calculate D2E/DX2 analytically  !
 ! D249  D(38,43,51,104)        56.2857         calculate D2E/DX2 analytically  !
 ! D250  D(38,43,51,105)       -63.4249         calculate D2E/DX2 analytically  !
 ! D251  D(52,43,51,103)       -59.3503         calculate D2E/DX2 analytically  !
 ! D252  D(52,43,51,104)      -179.6683         calculate D2E/DX2 analytically  !
 ! D253  D(52,43,51,105)        60.6211         calculate D2E/DX2 analytically  !
 ! D254  D(83,43,51,103)        58.5442         calculate D2E/DX2 analytically  !
 ! D255  D(83,43,51,104)       -61.7738         calculate D2E/DX2 analytically  !
 ! D256  D(83,43,51,105)       178.5156         calculate D2E/DX2 analytically  !
 ! D257  D(38,43,52,106)       177.9793         calculate D2E/DX2 analytically  !
 ! D258  D(38,43,52,107)        59.1195         calculate D2E/DX2 analytically  !
 ! D259  D(38,43,52,108)       -61.5625         calculate D2E/DX2 analytically  !
 ! D260  D(51,43,52,106)        53.9066         calculate D2E/DX2 analytically  !
 ! D261  D(51,43,52,107)       -64.9532         calculate D2E/DX2 analytically  !
 ! D262  D(51,43,52,108)       174.3648         calculate D2E/DX2 analytically  !
 ! D263  D(83,43,52,106)       -64.191          calculate D2E/DX2 analytically  !
 ! D264  D(83,43,52,107)       176.9491         calculate D2E/DX2 analytically  !
 ! D265  D(83,43,52,108)        56.2671         calculate D2E/DX2 analytically  !
 ! D266  D(42,44,49,97)       -175.8616         calculate D2E/DX2 analytically  !
 ! D267  D(42,44,49,98)        -55.9737         calculate D2E/DX2 analytically  !
 ! D268  D(42,44,49,99)         64.1601         calculate D2E/DX2 analytically  !
 ! D269  D(50,44,49,97)         60.3398         calculate D2E/DX2 analytically  !
 ! D270  D(50,44,49,98)       -179.7724         calculate D2E/DX2 analytically  !
 ! D271  D(50,44,49,99)        -59.6386         calculate D2E/DX2 analytically  !
 ! D272  D(84,44,49,97)        -57.2231         calculate D2E/DX2 analytically  !
 ! D273  D(84,44,49,98)         62.6647         calculate D2E/DX2 analytically  !
 ! D274  D(84,44,49,99)       -177.2015         calculate D2E/DX2 analytically  !
 ! D275  D(42,44,50,100)       178.833          calculate D2E/DX2 analytically  !
 ! D276  D(42,44,50,101)        59.0422         calculate D2E/DX2 analytically  !
 ! D277  D(42,44,50,102)       -61.5801         calculate D2E/DX2 analytically  !
 ! D278  D(49,44,50,100)       -57.3594         calculate D2E/DX2 analytically  !
 ! D279  D(49,44,50,101)      -177.1502         calculate D2E/DX2 analytically  !
 ! D280  D(49,44,50,102)        62.2275         calculate D2E/DX2 analytically  !
 ! D281  D(84,44,50,100)        60.2474         calculate D2E/DX2 analytically  !
 ! D282  D(84,44,50,101)       -59.5434         calculate D2E/DX2 analytically  !
 ! D283  D(84,44,50,102)       179.8344         calculate D2E/DX2 analytically  !
 --------------------------------------------------------------------------------
 Trust Radius=3.00D-01 FncErr=1.00D-07 GrdErr=1.00D-07
 Number of steps in this run=   2 maximum allowed number of steps=   2.
 GradGradGradGradGradGradGradGradGradGradGradGradGradGradGradGradGradGrad

 Stoichiometry    C42H60MgN2O9
 Framework group  C1[X(C42H60MgN2O9)]
 Deg. of freedom   336
 Full point group                 C1      NOp   1
 Largest Abelian subgroup         C1      NOp   1
 Largest concise Abelian subgroup C1      NOp   1
                         Standard orientation:                         
 ---------------------------------------------------------------------
 Center     Atomic     Atomic              Coordinates (Angstroms)
 Number     Number      Type              X           Y           Z
 ---------------------------------------------------------------------
    1          8             0        5.649207    0.333254   -1.162460
    2         12             0       -0.290775   -0.063629    0.004974
    3          8             0        0.848608   -0.682681    3.164911
    4          6             0        4.954079    0.020982   -0.057192
    5          7             0       -0.655181   -1.315754   -1.581088
    6          7             0        0.028382    1.505101   -1.295376
    7          8             0        4.867728    0.718237    0.927074
    8          6             0       -0.216888   -1.098204   -2.811659
    9          6             0        0.471772    0.079955   -3.198354
   10          6             0        0.507454    1.318030   -2.522181
   11          8             0        3.593418   -1.663657    1.006058
   12          6             0        2.417249   -1.077371    1.257929
   13          6             0        2.076940   -1.272369    2.739040
   14          6             0        4.348264   -1.379702   -0.195878
   15          8             0        1.789692   -0.433417    0.437375
   16          6             0        6.323947    1.607200   -1.137499
   17          8             0       -0.918769    0.745390    1.647909
   18          6             0       -0.334951   -1.091239    2.610138
   19          8             0       -0.357742   -1.793765    1.599937
   20          8             0       -2.746841   -0.722411    3.067725
   21          6             0       -3.116651    0.539754    2.665114
   22          6             0       -2.089532    1.426820    1.946807
   23          6             0       -1.469729   -1.019884    3.637257
   24          8             0       -4.276886    0.854052    2.793506
   25          6             0       -1.870744    2.747074    2.713450
   26          6             0       -1.184060   -0.175722    4.877455
   27          6             0        2.192471   -2.721276    3.227744
   28          6             0        3.634297   -1.644163   -1.521168
   29          6             0       -1.420353   -2.483822   -1.182157
   30          6             0       -0.220988    2.849293   -0.801642
   31          6             0       -2.793944   -2.276661   -0.813129
   32          6             0       -3.496099   -3.339565   -0.197702
   33          6             0       -2.872976   -4.578667    0.046217
   34          6             0       -1.544846   -4.785543   -0.359181
   35          6             0       -0.794548   -3.754844   -0.976604
   36          6             0       -3.524063   -0.955611   -1.178260
   37          6             0        0.663720   -4.055739   -1.408303
   38          6             0        0.689091    3.469024    0.113533
   39          6             0        0.329004    4.709179    0.702471
   40          6             0       -0.892485    5.338410    0.390747
   41          6             0       -1.767107    4.737217   -0.534455
   42          6             0       -1.460271    3.497869   -1.141034
   43          6             0        2.059382    2.847264    0.475074
   44          6             0       -2.463699    2.900420   -2.163627
   45          6             0       -4.814739   -0.708672   -0.338044
   46          6             0       -3.867767   -0.934615   -2.705777
   47          6             0        1.546450   -4.444378   -0.179901
   48          6             0        0.718172   -5.189242   -2.489017
   49          6             0       -3.901053    2.794897   -1.560429
   50          6             0       -2.511908    3.746708   -3.481676
   51          6             0        2.146987    2.521203    1.998032
   52          6             0        3.236969    3.784325    0.042992
   53          6             0       -0.448173   -2.112004   -3.927727
   54          6             0        1.120711    2.492795   -3.274989
   55          1             0        0.861708    0.082036   -4.211391
   56          1             0        2.833116   -0.664535    3.248905
   57          1             0        5.184692   -2.081509   -0.106199
   58          1             0        5.600837    2.412768   -0.998056
   59          1             0        6.818960    1.690918   -2.104807
   60          1             0        7.055653    1.632139   -0.325625
   61          1             0       -2.627552    1.706800    1.025257
   62          1             0       -1.590968   -2.065404    3.954386
   63          1             0       -2.836244    3.179707    2.998309
   64          1             0       -1.332628    3.459496    2.085119
   65          1             0       -1.279831    2.582143    3.620843
   66          1             0       -2.080007   -0.157663    5.505616
   67          1             0       -0.909826    0.846909    4.613597
   68          1             0       -0.360753   -0.607504    5.452554
   69          1             0        3.186763   -3.119364    3.014079
   70          1             0        1.444173   -3.353337    2.746223
   71          1             0        2.031784   -2.738078    4.309698
   72          1             0        3.183704   -2.637529   -1.493332
   73          1             0        4.382771   -1.622953   -2.318415
   74          1             0        2.858102   -0.910721   -1.742939
   75          1             0       -4.547526   -3.204042    0.081955
   76          1             0       -3.434549   -5.388749    0.530748
   77          1             0       -1.076711   -5.765298   -0.197986
   78          1             0       -2.824240   -0.109506   -0.993140
   79          1             0        1.084435   -3.133440   -1.852307
   80          1             0        1.022323    5.190667    1.404575
   81          1             0       -1.151470    6.300778    0.852913
   82          1             0       -2.706871    5.242125   -0.792143
   83          1             0        2.157253    1.898442   -0.087252
   84          1             0       -2.121534    1.878060   -2.422918
   85          1             0       -5.203681    0.298004   -0.545740
   86          1             0       -4.612914   -0.787844    0.742145
   87          1             0       -5.599294   -1.435406   -0.598856
   88          1             0       -4.394873   -0.002868   -2.960395
   89          1             0       -4.515467   -1.787073   -2.965147
   90          1             0       -2.951964   -0.992658   -3.316914
   91          1             0        2.589343   -4.633248   -0.488065
   92          1             0        1.164709   -5.353560    0.309978
   93          1             0        1.538188   -3.624765    0.558468
   94          1             0        1.754244   -5.332142   -2.833078
   95          1             0        0.093450   -4.937176   -3.359131
   96          1             0        0.358093   -6.140818   -2.069301
   97          1             0       -4.574909    2.301364   -2.277785
   98          1             0       -3.894296    2.205626   -0.626775
   99          1             0       -4.309938    3.790139   -1.330350
  100          1             0       -3.214911    3.287425   -4.193467
  101          1             0       -1.522571    3.798185   -3.959855
  102          1             0       -2.850873    4.772803   -3.270927
  103          1             0        3.105528    2.024891    2.220254
  104          1             0        1.314336    1.855530    2.286196
  105          1             0        2.081164    3.438213    2.603404
  106          1             0        4.195219    3.328471    0.347638
  107          1             0        3.163847    4.769294    0.530127
  108          1             0        3.239100    3.937457   -1.048484
  109          1             0       -1.183838   -2.869938   -3.646106
  110          1             0       -0.799857   -1.603384   -4.833204
  111          1             0        0.488234   -2.622556   -4.186490
  112          1             0        1.957271    2.912280   -2.702168
  113          1             0        1.496952    2.183659   -4.256054
  114          1             0        0.397393    3.300089   -3.427399
 ---------------------------------------------------------------------
 Rotational constants (GHZ):      0.0607062      0.0577421      0.0478490
 General basis read from cards:  (5D, 7F)
 There are   642 symmetry adapted basis functions of A   symmetry.
 Integral buffers will be    262144 words long.
 Raffenetti 2 integral format.
 Two-electron integral symmetry is turned on.
   642 basis functions,  1430 primitive gaussians,   674 cartesian basis functions
   205 alpha electrons      205 beta electrons
       nuclear repulsion energy      9205.5001087026 Hartrees.
 NAtoms=  114 NActive=  114 NUniq=  114 SFac= 1.00D+00 NAtFMM=   60 Big=T
 One-electron integrals computed using PRISM.
 NBasis=   642 RedAO= T  NBF=   642
 NBsUse=   642 1.00D-06 NBFU=   642
 Initial guess read from the checkpoint file:
 ssrr_fm-oco.chk
 Initial guess orbital symmetries:
       Occupied  (A) (A) (A) (A) (A) (A) (A) (A) (A) (A) (A) (A)
                 (A) (A) (A) (A) (A) (A) (A) (A) (A) (A) (A) (A)
                 (A) (A) (A) (A) (A) (A) (A) (A) (A) (A) (A) (A)
                 (A) (A) (A) (A) (A) (A) (A) (A) (A) (A) (A) (A)
                 (A) (A) (A) (A) (A) (A) (A) (A) (A) (A) (A) (A)
                 (A) (A) (A) (A) (A) (A) (A) (A) (A) (A) (A) (A)
                 (A) (A) (A) (A) (A) (A) (A) (A) (A) (A) (A) (A)
                 (A) (A) (A) (A) (A) (A) (A) (A) (A) (A) (A) (A)
                 (A) (A) (A) (A) (A) (A) (A) (A) (A) (A) (A) (A)
                 (A) (A) (A) (A) (A) (A) (A) (A) (A) (A) (A) (A)
                 (A) (A) (A) (A) (A) (A) (A) (A) (A) (A) (A) (A)
                 (A) (A) (A) (A) (A) (A) (A) (A) (A) (A) (A) (A)
                 (A) (A) (A) (A) (A) (A) (A) (A) (A) (A) (A) (A)
                 (A) (A) (A) (A) (A) (A) (A) (A) (A) (A) (A) (A)
                 (A) (A) (A) (A) (A) (A) (A) (A) (A) (A) (A) (A)
                 (A) (A) (A) (A) (A) (A) (A) (A) (A) (A) (A) (A)
                 (A) (A) (A) (A) (A) (A) (A) (A) (A) (A) (A) (A)
                 (A)
       Virtual   (A) (A) (A) (A) (A) (A) (A) (A) (A) (A) (A) (A)
                 (A) (A) (A) (A) (A) (A) (A) (A) (A) (A) (A) (A)
                 (A) (A) (A) (A) (A) (A) (A) (A) (A) (A) (A) (A)
                 (A) (A) (A) (A) (A) (A) (A) (A) (A) (A) (A) (A)
                 (A) (A) (A) (A) (A) (A) (A) (A) (A) (A) (A) (A)
                 (A) (A) (A) (A) (A) (A) (A) (A) (A) (A) (A) (A)
                 (A) (A) (A) (A) (A) (A) (A) (A) (A) (A) (A) (A)
                 (A) (A) (A) (A) (A) (A) (A) (A) (A) (A) (A) (A)
                 (A) (A) (A) (A) (A) (A) (A) (A) (A) (A) (A) (A)
                 (A) (A) (A) (A) (A) (A) (A) (A) (A) (A) (A) (A)
                 (A) (A) (A) (A) (A) (A) (A) (A) (A) (A) (A) (A)
                 (A) (A) (A) (A) (A) (A) (A) (A) (A) (A) (A) (A)
                 (A) (A) (A) (A) (A) (A) (A) (A) (A) (A) (A) (A)
                 (A) (A) (A) (A) (A) (A) (A) (A) (A) (A) (A) (A)
                 (A) (A) (A) (A) (A) (A) (A) (A) (A) (A) (A) (A)
                 (A) (A) (A) (A) (A) (A) (A) (A) (A) (A) (A) (A)
                 (A) (A) (A) (A) (A) (A) (A) (A) (A) (A) (A) (A)
                 (A) (A) (A) (A) (A) (A) (A) (A) (A) (A) (A) (A)
                 (A) (A) (A) (A) (A) (A) (A) (A) (A) (A) (A) (A)
                 (A) (A) (A) (A) (A) (A) (A) (A) (A) (A) (A) (A)
                 (A) (A) (A) (A) (A) (A) (A) (A) (A) (A) (A) (A)
                 (A) (A) (A) (A) (A) (A) (A) (A) (A) (A) (A) (A)
                 (A) (A) (A) (A) (A) (A) (A) (A) (A) (A) (A) (A)
                 (A) (A) (A) (A) (A) (A) (A) (A) (A) (A) (A) (A)
                 (A) (A) (A) (A) (A) (A) (A) (A) (A) (A) (A) (A)
                 (A) (A) (A) (A) (A) (A) (A) (A) (A) (A) (A) (A)
                 (A) (A) (A) (A) (A) (A) (A) (A) (A) (A) (A) (A)
                 (A) (A) (A) (A) (A) (A) (A) (A) (A) (A) (A) (A)
                 (A) (A) (A) (A) (A) (A) (A) (A) (A) (A) (A) (A)
                 (A) (A) (A) (A) (A) (A) (A) (A) (A) (A) (A) (A)
                 (A) (A) (A) (A) (A) (A) (A) (A) (A) (A) (A) (A)
                 (A) (A) (A) (A) (A) (A) (A) (A) (A) (A) (A) (A)
                 (A) (A) (A) (A) (A) (A) (A) (A) (A) (A) (A) (A)
                 (A) (A) (A) (A) (A) (A) (A) (A) (A) (A) (A) (A)
                 (A) (A) (A) (A) (A) (A) (A) (A) (A) (A) (A) (A)
                 (A) (A) (A) (A) (A) (A) (A) (A) (A) (A) (A) (A)
                 (A) (A) (A) (A) (A)
 Requested convergence on RMS density matrix=1.00D-08 within 128 cycles.
 Requested convergence on MAX density matrix=1.00D-06.
 Requested convergence on             energy=1.00D-06.
 No special actions if energy rises.
 SCF Done:  E(RB+HF-LYP) =  -2612.16180053     A.U. after    1 cycles
             Convg  =    0.5494D-08             -V/T =  2.0106
             S**2   =   0.0000
 Range of M.O.s used for correlation:     1   642
 NBasis=   642 NAE=   205 NBE=   205 NFC=     0 NFV=     0
 NROrb=    642 NOA=   205 NOB=   205 NVA=   437 NVB=   437
 PrsmSu:  requested number of processors reduced to:   1 ShMem   1 Linda.
 PrsmSu:  requested number of processors reduced to:   1 ShMem   1 Linda.
 Symmetrizing basis deriv contribution to polar:
 IMax=3 JMax=2 DiffMx= 0.00D+00
 G2DrvN: will do   29 centers at a time, making    4 passes doing MaxLOS=2.
 Calling FoFCou, ICntrl=  3107 FMM=T I1Cent=   0.
 Number of processors reduced from  2 to  1 for far-field.
 Calling FoFCou, ICntrl=  3107 FMM=T I1Cent=   0.
 Number of processors reduced from  2 to  1 for far-field.
 Calling FoFCou, ICntrl=  3107 FMM=T I1Cent=   0.
 Number of processors reduced from  2 to  1 for far-field.
 Calling FoFCou, ICntrl=  3107 FMM=T I1Cent=   0.
 Number of processors reduced from  2 to  1 for far-field.
 FoFDir/FoFCou used for L=0 through L=2.
          Differentiating once with respect to electric field.
                with respect to dipole field.
          Differentiating once with respect to nuclear coordinates.
 FoFCou: FMM=T IPFlag=           0 FMFlag=      100000 FMFlg1=        8193
 NFxFlg=           0 DoJE=F BraDBF=F KetDBF=F FulRan=T.
 Symmetry not used in FoFCou.
 FMM levels:  10  Number of levels for PrismC:   9
 Number of processors reduced from  2 to  1 for far-field.
 PrismC:  NFx=      2048 NFxT=         4 NFxU=         4.
 PrismC:  NFx=      2048 NFxT=         4 NFxU=         4.
 Number of processors reduced from  2 to  1 for far-field.
 PrismC:  NFx=      2048 NFxT=         4 NFxU=         4.
 PrismC:  NFx=      2048 NFxT=         4 NFxU=         4.
 Number of processors reduced from  2 to  1 for far-field.
 PrismC:  NFx=      2048 NFxT=         4 NFxU=         4.
 PrismC:  NFx=      2048 NFxT=         4 NFxU=         4.
 Number of processors reduced from  2 to  1 for far-field.
 PrismC:  NFx=      2048 NFxT=         4 NFxU=         4.
 PrismC:  NFx=      2048 NFxT=         4 NFxU=         4.
          There are 345 degrees of freedom in the 1st order CPHF.
   345 vectors were produced by pass  0.
 AX will form  87 AO Fock derivatives at one time.
 Number of processors reduced from  2 to  1 for far-field.
 PrismC:  NFx=      2048 NFxT=         4 NFxU=         4.
 PrismC:  NFx=      2048 NFxT=         4 NFxU=         4.
 Number of processors reduced from  2 to  1 for far-field.
 PrismC:  NFx=      2048 NFxT=         4 NFxU=         4.
 PrismC:  NFx=      2048 NFxT=         4 NFxU=         4.
 Number of processors reduced from  2 to  1 for far-field.
 PrismC:  NFx=      2048 NFxT=         4 NFxU=         4.
 PrismC:  NFx=      2048 NFxT=         4 NFxU=         4.
 Number of processors reduced from  2 to  1 for far-field.
 PrismC:  NFx=      2048 NFxT=         4 NFxU=         4.
 PrismC:  NFx=      2048 NFxT=         4 NFxU=         4.
   345 vectors were produced by pass  1.
 Number of processors reduced from  2 to  1 for far-field.
 PrismC:  NFx=      2048 NFxT=         4 NFxU=         4.
 PrismC:  NFx=      2048 NFxT=         4 NFxU=         4.
 Number of processors reduced from  2 to  1 for far-field.
 PrismC:  NFx=      2048 NFxT=         4 NFxU=         4.
 PrismC:  NFx=      2048 NFxT=         4 NFxU=         4.
 Number of processors reduced from  2 to  1 for far-field.
 PrismC:  NFx=      2048 NFxT=         4 NFxU=         4.
 PrismC:  NFx=      2048 NFxT=         4 NFxU=         4.
 Number of processors reduced from  2 to  1 for far-field.
 PrismC:  NFx=      2048 NFxT=         4 NFxU=         4.
 PrismC:  NFx=      2048 NFxT=         4 NFxU=         4.
   342 vectors were produced by pass  2.
 Number of processors reduced from  2 to  1 for far-field.
 PrismC:  NFx=      2048 NFxT=         4 NFxU=         4.
 PrismC:  NFx=      2048 NFxT=         4 NFxU=         4.
 Number of processors reduced from  2 to  1 for far-field.
 PrismC:  NFx=      2048 NFxT=         4 NFxU=         4.
 PrismC:  NFx=      2048 NFxT=         4 NFxU=         4.
 Number of processors reduced from  2 to  1 for far-field.
 PrismC:  NFx=      2048 NFxT=         4 NFxU=         4.
 PrismC:  NFx=      2048 NFxT=         4 NFxU=         4.
 Number of processors reduced from  2 to  1 for far-field.
 PrismC:  NFx=      2048 NFxT=         4 NFxU=         4.
 PrismC:  NFx=      2048 NFxT=         4 NFxU=         4.
   342 vectors were produced by pass  3.
 Number of processors reduced from  2 to  1 for far-field.
 PrismC:  NFx=      2048 NFxT=         4 NFxU=         4.
 PrismC:  NFx=      2048 NFxT=         4 NFxU=         4.
 Number of processors reduced from  2 to  1 for far-field.
 PrismC:  NFx=      2048 NFxT=         4 NFxU=         4.
 PrismC:  NFx=      2048 NFxT=         4 NFxU=         4.
 Number of processors reduced from  2 to  1 for far-field.
 PrismC:  NFx=      2048 NFxT=         4 NFxU=         4.
 PrismC:  NFx=      2048 NFxT=         4 NFxU=         4.
 Number of processors reduced from  2 to  1 for far-field.
 PrismC:  NFx=      2048 NFxT=         4 NFxU=         3.
 PrismC:  NFx=      2048 NFxT=         4 NFxU=         4.
   342 vectors were produced by pass  4.
 Number of processors reduced from  2 to  1 for far-field.
 PrismC:  NFx=      2048 NFxT=         4 NFxU=         4.
 PrismC:  NFx=      2048 NFxT=         4 NFxU=         4.
 Number of processors reduced from  2 to  1 for far-field.
 PrismC:  NFx=      2048 NFxT=         4 NFxU=         3.
 PrismC:  NFx=      2048 NFxT=         4 NFxU=         3.
 Number of processors reduced from  2 to  1 for far-field.
 PrismC:  NFx=      2048 NFxT=         4 NFxU=         3.
 PrismC:  NFx=      2048 NFxT=         4 NFxU=         3.
 Number of processors reduced from  2 to  1 for far-field.
 PrismC:  NFx=      2048 NFxT=         4 NFxU=         2.
 PrismC:  NFx=      2048 NFxT=         4 NFxU=         2.
   208 vectors were produced by pass  5.
 Number of processors reduced from  2 to  1 for far-field.
 PrismC:  NFx=      2048 NFxT=         4 NFxU=         4.
 PrismC:  NFx=      2048 NFxT=         4 NFxU=         4.
 Number of processors reduced from  2 to  1 for far-field.
 PrismC:  NFx=      2048 NFxT=         4 NFxU=         2.
 PrismC:  NFx=      2048 NFxT=         4 NFxU=         2.
 Number of processors reduced from  2 to  1 for far-field.
 PrismC:  NFx=      2048 NFxT=         4 NFxU=         1.
 PrismC:  NFx=      2048 NFxT=         4 NFxU=         1.
    64 vectors were produced by pass  6.
 Number of processors reduced from  2 to  1 for far-field.
 PrismC:  NFx=      2048 NFxT=         4 NFxU=         3.
 PrismC:  NFx=      2048 NFxT=         4 NFxU=         3.
     3 vectors were produced by pass  7.
 Number of processors reduced from  2 to  1 for far-field.
 PrismC:  NFx=      2048 NFxT=         4 NFxU=         2.
 PrismC:  NFx=      2048 NFxT=         4 NFxU=         1.
 Inv2:  IOpt= 1 Iter= 1 AM= 1.33D-14 Conv= 1.00D-12.
 Inverted reduced A of dimension 1991 with in-core refinement.
 Number of processors reduced from  2 to  1 for far-field.
 PrismC:  NFx=      2048 NFxT=         4 NFxU=         4.
 PrismC:  NFx=      2048 NFxT=         4 NFxU=         4.
 Number of processors reduced from  2 to  1 for far-field.
 PrismC:  NFx=      2048 NFxT=         4 NFxU=         4.
 PrismC:  NFx=      2048 NFxT=         4 NFxU=         4.
 Number of processors reduced from  2 to  1 for far-field.
 PrismC:  NFx=      2048 NFxT=         4 NFxU=         4.
 PrismC:  NFx=      2048 NFxT=         4 NFxU=         4.
 Number of processors reduced from  2 to  1 for far-field.
 PrismC:  NFx=      2048 NFxT=         4 NFxU=         4.
 PrismC:  NFx=      2048 NFxT=         4 NFxU=         4.
 Isotropic polarizability for W=    0.000000      406.54 Bohr**3.
 End of Minotr Frequency-dependent properties file   721 does not exist.

 **********************************************************************

            Population analysis using the SCF density.

 **********************************************************************

 Orbital symmetries:
       Occupied  (A) (A) (A) (A) (A) (A) (A) (A) (A) (A) (A) (A)
                 (A) (A) (A) (A) (A) (A) (A) (A) (A) (A) (A) (A)
                 (A) (A) (A) (A) (A) (A) (A) (A) (A) (A) (A) (A)
                 (A) (A) (A) (A) (A) (A) (A) (A) (A) (A) (A) (A)
                 (A) (A) (A) (A) (A) (A) (A) (A) (A) (A) (A) (A)
                 (A) (A) (A) (A) (A) (A) (A) (A) (A) (A) (A) (A)
                 (A) (A) (A) (A) (A) (A) (A) (A) (A) (A) (A) (A)
                 (A) (A) (A) (A) (A) (A) (A) (A) (A) (A) (A) (A)
                 (A) (A) (A) (A) (A) (A) (A) (A) (A) (A) (A) (A)
                 (A) (A) (A) (A) (A) (A) (A) (A) (A) (A) (A) (A)
                 (A) (A) (A) (A) (A) (A) (A) (A) (A) (A) (A) (A)
                 (A) (A) (A) (A) (A) (A) (A) (A) (A) (A) (A) (A)
                 (A) (A) (A) (A) (A) (A) (A) (A) (A) (A) (A) (A)
                 (A) (A) (A) (A) (A) (A) (A) (A) (A) (A) (A) (A)
                 (A) (A) (A) (A) (A) (A) (A) (A) (A) (A) (A) (A)
                 (A) (A) (A) (A) (A) (A) (A) (A) (A) (A) (A) (A)
                 (A) (A) (A) (A) (A) (A) (A) (A) (A) (A) (A) (A)
                 (A)
       Virtual   (A) (A) (A) (A) (A) (A) (A) (A) (A) (A) (A) (A)
                 (A) (A) (A) (A) (A) (A) (A) (A) (A) (A) (A) (A)
                 (A) (A) (A) (A) (A) (A) (A) (A) (A) (A) (A) (A)
                 (A) (A) (A) (A) (A) (A) (A) (A) (A) (A) (A) (A)
                 (A) (A) (A) (A) (A) (A) (A) (A) (A) (A) (A) (A)
                 (A) (A) (A) (A) (A) (A) (A) (A) (A) (A) (A) (A)
                 (A) (A) (A) (A) (A) (A) (A) (A) (A) (A) (A) (A)
                 (A) (A) (A) (A) (A) (A) (A) (A) (A) (A) (A) (A)
                 (A) (A) (A) (A) (A) (A) (A) (A) (A) (A) (A) (A)
                 (A) (A) (A) (A) (A) (A) (A) (A) (A) (A) (A) (A)
                 (A) (A) (A) (A) (A) (A) (A) (A) (A) (A) (A) (A)
                 (A) (A) (A) (A) (A) (A) (A) (A) (A) (A) (A) (A)
                 (A) (A) (A) (A) (A) (A) (A) (A) (A) (A) (A) (A)
                 (A) (A) (A) (A) (A) (A) (A) (A) (A) (A) (A) (A)
                 (A) (A) (A) (A) (A) (A) (A) (A) (A) (A) (A) (A)
                 (A) (A) (A) (A) (A) (A) (A) (A) (A) (A) (A) (A)
                 (A) (A) (A) (A) (A) (A) (A) (A) (A) (A) (A) (A)
                 (A) (A) (A) (A) (A) (A) (A) (A) (A) (A) (A) (A)
                 (A) (A) (A) (A) (A) (A) (A) (A) (A) (A) (A) (A)
                 (A) (A) (A) (A) (A) (A) (A) (A) (A) (A) (A) (A)
                 (A) (A) (A) (A) (A) (A) (A) (A) (A) (A) (A) (A)
                 (A) (A) (A) (A) (A) (A) (A) (A) (A) (A) (A) (A)
                 (A) (A) (A) (A) (A) (A) (A) (A) (A) (A) (A) (A)
                 (A) (A) (A) (A) (A) (A) (A) (A) (A) (A) (A) (A)
                 (A) (A) (A) (A) (A) (A) (A) (A) (A) (A) (A) (A)
                 (A) (A) (A) (A) (A) (A) (A) (A) (A) (A) (A) (A)
                 (A) (A) (A) (A) (A) (A) (A) (A) (A) (A) (A) (A)
                 (A) (A) (A) (A) (A) (A) (A) (A) (A) (A) (A) (A)
                 (A) (A) (A) (A) (A) (A) (A) (A) (A) (A) (A) (A)
                 (A) (A) (A) (A) (A) (A) (A) (A) (A) (A) (A) (A)
                 (A) (A) (A) (A) (A) (A) (A) (A) (A) (A) (A) (A)
                 (A) (A) (A) (A) (A) (A) (A) (A) (A) (A) (A) (A)
                 (A) (A) (A) (A) (A) (A) (A) (A) (A) (A) (A) (A)
                 (A) (A) (A) (A) (A) (A) (A) (A) (A) (A) (A) (A)
                 (A) (A) (A) (A) (A) (A) (A) (A) (A) (A) (A) (A)
                 (A) (A) (A) (A) (A) (A) (A) (A) (A) (A) (A) (A)
                 (A) (A) (A) (A) (A)
 The electronic state is 1-A.
 Alpha  occ. eigenvalues --  -46.70861 -19.21591 -19.20930 -19.18300 -19.16963
 Alpha  occ. eigenvalues --  -19.15497 -19.15177 -19.11904 -19.09846 -19.06138
 Alpha  occ. eigenvalues --  -14.28161 -14.26981 -10.34894 -10.33220 -10.31945
 Alpha  occ. eigenvalues --  -10.27972 -10.27389 -10.27076 -10.24734 -10.24167
 Alpha  occ. eigenvalues --  -10.20287 -10.20012 -10.19779 -10.18709 -10.18293
 Alpha  occ. eigenvalues --  -10.16282 -10.15739 -10.15459 -10.12948 -10.12229
 Alpha  occ. eigenvalues --  -10.04905 -10.04829 -10.03509 -10.02585 -10.02407
 Alpha  occ. eigenvalues --  -10.02155 -10.01794 -10.01656 -10.01623 -10.01604
 Alpha  occ. eigenvalues --  -10.01470 -10.01211 -10.01075 -10.00831 -10.00804
 Alpha  occ. eigenvalues --  -10.00538 -10.00397 -10.00365 -10.00297 -10.00284
 Alpha  occ. eigenvalues --  -10.00093 -10.00093  -9.99126  -9.98918  -3.01315
 Alpha  occ. eigenvalues --   -1.76133  -1.75882  -1.75723  -1.13814  -1.12117
 Alpha  occ. eigenvalues --   -1.09749  -1.06220  -1.05049  -1.03451  -1.00732
 Alpha  occ. eigenvalues --   -0.98401  -0.92650  -0.88712  -0.87186  -0.82781
 Alpha  occ. eigenvalues --   -0.80578  -0.79969  -0.79428  -0.76647  -0.76159
 Alpha  occ. eigenvalues --   -0.76104  -0.74112  -0.74004  -0.73839  -0.73608
 Alpha  occ. eigenvalues --   -0.71592  -0.70736  -0.69722  -0.68154  -0.67894
 Alpha  occ. eigenvalues --   -0.67636  -0.67486  -0.67289  -0.65619  -0.65387
 Alpha  occ. eigenvalues --   -0.65311  -0.64366  -0.64104  -0.63831  -0.63001
 Alpha  occ. eigenvalues --   -0.60323  -0.58856  -0.58687  -0.58330  -0.57901
 Alpha  occ. eigenvalues --   -0.56435  -0.55818  -0.55311  -0.54908  -0.54383
 Alpha  occ. eigenvalues --   -0.52994  -0.51907  -0.51784  -0.50615  -0.49898
 Alpha  occ. eigenvalues --   -0.49690  -0.49387  -0.49162  -0.49035  -0.48665
 Alpha  occ. eigenvalues --   -0.48246  -0.47141  -0.46691  -0.46469  -0.46089
 Alpha  occ. eigenvalues --   -0.45343  -0.44990  -0.44284  -0.43892  -0.43737
 Alpha  occ. eigenvalues --   -0.43355  -0.43185  -0.42997  -0.42838  -0.41982
 Alpha  occ. eigenvalues --   -0.41283  -0.41213  -0.40886  -0.40876  -0.40616
 Alpha  occ. eigenvalues --   -0.40469  -0.40118  -0.39958  -0.39637  -0.39464
 Alpha  occ. eigenvalues --   -0.39405  -0.39273  -0.39031  -0.38811  -0.38693
 Alpha  occ. eigenvalues --   -0.38499  -0.38431  -0.38223  -0.38104  -0.38031
 Alpha  occ. eigenvalues --   -0.37658  -0.37413  -0.37252  -0.36862  -0.36823
 Alpha  occ. eigenvalues --   -0.36346  -0.36114  -0.36012  -0.35903  -0.35589
 Alpha  occ. eigenvalues --   -0.35071  -0.34991  -0.34799  -0.34719  -0.34338
 Alpha  occ. eigenvalues --   -0.34081  -0.33906  -0.33815  -0.33598  -0.33496
 Alpha  occ. eigenvalues --   -0.33231  -0.32764  -0.32145  -0.31949  -0.31736
 Alpha  occ. eigenvalues --   -0.31294  -0.30999  -0.30838  -0.30475  -0.30403
 Alpha  occ. eigenvalues --   -0.30116  -0.29822  -0.29464  -0.29285  -0.29176
 Alpha  occ. eigenvalues --   -0.29040  -0.28687  -0.28291  -0.27867  -0.27627
 Alpha  occ. eigenvalues --   -0.27405  -0.27277  -0.26663  -0.26536  -0.26136
 Alpha  occ. eigenvalues --   -0.25399  -0.25006  -0.23646  -0.21910  -0.20186
 Alpha  occ. eigenvalues --   -0.17899  -0.17783  -0.17736  -0.17237  -0.15102
 Alpha virt. eigenvalues --   -0.02483  -0.00871   0.01223   0.01398   0.03244
 Alpha virt. eigenvalues --    0.07590   0.07883   0.07942   0.08066   0.08183
 Alpha virt. eigenvalues --    0.08501   0.08987   0.09947   0.10393   0.10928
 Alpha virt. eigenvalues --    0.11232   0.12305   0.12520   0.12830   0.13507
 Alpha virt. eigenvalues --    0.13758   0.14151   0.14699   0.15572   0.15688
 Alpha virt. eigenvalues --    0.16144   0.16432   0.16528   0.16875   0.17179
 Alpha virt. eigenvalues --    0.18083   0.18156   0.19003   0.19894   0.19974
 Alpha virt. eigenvalues --    0.20961   0.21512   0.22059   0.22358   0.22654
 Alpha virt. eigenvalues --    0.22878   0.23427   0.23760   0.23853   0.24247
 Alpha virt. eigenvalues --    0.24685   0.25037   0.25434   0.25775   0.25969
 Alpha virt. eigenvalues --    0.26783   0.27314   0.27751   0.28049   0.28300
 Alpha virt. eigenvalues --    0.28733   0.29948   0.30184   0.30402   0.30854
 Alpha virt. eigenvalues --    0.31810   0.32432   0.32918   0.33295   0.33854
 Alpha virt. eigenvalues --    0.34612   0.34694   0.35005   0.35424   0.35954
 Alpha virt. eigenvalues --    0.36326   0.36802   0.37374   0.37944   0.38127
 Alpha virt. eigenvalues --    0.38386   0.38568   0.39098   0.39355   0.39442
 Alpha virt. eigenvalues --    0.39508   0.40157   0.41147   0.41191   0.41318
 Alpha virt. eigenvalues --    0.41708   0.41980   0.42198   0.42710   0.43251
 Alpha virt. eigenvalues --    0.43362   0.43647   0.44094   0.44253   0.44728
 Alpha virt. eigenvalues --    0.45050   0.45469   0.45629   0.45852   0.46165
 Alpha virt. eigenvalues --    0.46370   0.46775   0.47233   0.47532   0.47689
 Alpha virt. eigenvalues --    0.48032   0.48261   0.48419   0.48708   0.48814
 Alpha virt. eigenvalues --    0.49067   0.49393   0.49512   0.49867   0.50010
 Alpha virt. eigenvalues --    0.50570   0.50809   0.51293   0.51470   0.51595
 Alpha virt. eigenvalues --    0.51785   0.52202   0.52440   0.52811   0.52994
 Alpha virt. eigenvalues --    0.53459   0.53847   0.54438   0.54616   0.55353
 Alpha virt. eigenvalues --    0.55500   0.55703   0.55910   0.56405   0.56631
 Alpha virt. eigenvalues --    0.57242   0.57511   0.57782   0.58091   0.58385
 Alpha virt. eigenvalues --    0.58665   0.59055   0.59208   0.59373   0.59918
 Alpha virt. eigenvalues --    0.60034   0.60533   0.60729   0.61124   0.61753
 Alpha virt. eigenvalues --    0.62049   0.62709   0.63136   0.63883   0.64251
 Alpha virt. eigenvalues --    0.64582   0.65463   0.65869   0.66884   0.67181
 Alpha virt. eigenvalues --    0.67884   0.68443   0.68546   0.69178   0.69810
 Alpha virt. eigenvalues --    0.70338   0.70462   0.70764   0.71525   0.72402
 Alpha virt. eigenvalues --    0.72542   0.73381   0.73427   0.73886   0.74542
 Alpha virt. eigenvalues --    0.75112   0.75652   0.76081   0.76444   0.76898
 Alpha virt. eigenvalues --    0.77353   0.78131   0.78167   0.78589   0.78937
 Alpha virt. eigenvalues --    0.79683   0.80053   0.81375   0.81834   0.83092
 Alpha virt. eigenvalues --    0.83342   0.83725   0.83904   0.84333   0.85285
 Alpha virt. eigenvalues --    0.85765   0.86261   0.86500   0.87505   0.88537
 Alpha virt. eigenvalues --    0.89315   0.89548   0.89730   0.90323   0.90742
 Alpha virt. eigenvalues --    0.91603   0.92095   0.92474   0.92715   0.93445
 Alpha virt. eigenvalues --    0.93950   0.94893   0.95149   0.95643   0.96690
 Alpha virt. eigenvalues --    0.97301   0.97853   0.99332   0.99823   1.00237
 Alpha virt. eigenvalues --    1.00976   1.02104   1.02565   1.03186   1.03992
 Alpha virt. eigenvalues --    1.05061   1.06939   1.07128   1.08769   1.09680
 Alpha virt. eigenvalues --    1.10403   1.10901   1.11484   1.12232   1.13551
 Alpha virt. eigenvalues --    1.13900   1.14769   1.15242   1.15733   1.17137
 Alpha virt. eigenvalues --    1.17336   1.18414   1.19599   1.20545   1.21243
 Alpha virt. eigenvalues --    1.23320   1.24341   1.25001   1.26709   1.27405
 Alpha virt. eigenvalues --    1.27863   1.28695   1.30371   1.31064   1.32226
 Alpha virt. eigenvalues --    1.33800   1.34263   1.35569   1.36420   1.37272
 Alpha virt. eigenvalues --    1.38605   1.39421   1.39625   1.40485   1.41399
 Alpha virt. eigenvalues --    1.42356   1.43015   1.45018   1.46377   1.47088
 Alpha virt. eigenvalues --    1.47377   1.48958   1.49354   1.50193   1.50567
 Alpha virt. eigenvalues --    1.52044   1.52645   1.54806   1.56392   1.56930
 Alpha virt. eigenvalues --    1.58746   1.59659   1.60530   1.61632   1.61882
 Alpha virt. eigenvalues --    1.64115   1.64387   1.65833   1.66287   1.68755
 Alpha virt. eigenvalues --    1.69349   1.70127   1.70376   1.71338   1.72086
 Alpha virt. eigenvalues --    1.73101   1.73299   1.74750   1.75160   1.76150
 Alpha virt. eigenvalues --    1.76444   1.77645   1.78483   1.79635   1.80442
 Alpha virt. eigenvalues --    1.81013   1.81717   1.82163   1.82893   1.84180
 Alpha virt. eigenvalues --    1.84749   1.85186   1.85528   1.87181   1.87474
 Alpha virt. eigenvalues --    1.88498   1.88840   1.89834   1.90308   1.90839
 Alpha virt. eigenvalues --    1.91610   1.92201   1.92522   1.93685   1.93920
 Alpha virt. eigenvalues --    1.95645   1.96426   1.96707   1.96950   1.97808
 Alpha virt. eigenvalues --    1.98480   1.99185   1.99579   2.00304   2.00699
 Alpha virt. eigenvalues --    2.01376   2.02457   2.03483   2.03571   2.04570
 Alpha virt. eigenvalues --    2.04887   2.05929   2.06270   2.08341   2.08753
 Alpha virt. eigenvalues --    2.09325   2.09804   2.10457   2.12837   2.13679
 Alpha virt. eigenvalues --    2.13840   2.14722   2.15446   2.15738   2.16545
 Alpha virt. eigenvalues --    2.17178   2.17826   2.18398   2.19041   2.19526
 Alpha virt. eigenvalues --    2.21513   2.22114   2.22669   2.23650   2.24926
 Alpha virt. eigenvalues --    2.25885   2.26621   2.27091   2.28593   2.29293
 Alpha virt. eigenvalues --    2.29619   2.31127   2.31672   2.32086   2.32946
 Alpha virt. eigenvalues --    2.33853   2.34443   2.35101   2.35932   2.36966
 Alpha virt. eigenvalues --    2.38101   2.39536   2.39925   2.40225   2.42038
 Alpha virt. eigenvalues --    2.42898   2.44595   2.45810   2.46795   2.48456
 Alpha virt. eigenvalues --    2.49945   2.52157   2.53512   2.55939   2.58316
 Alpha virt. eigenvalues --    2.59165   2.59655   2.60640   2.62491   2.62649
 Alpha virt. eigenvalues --    2.64858   2.65383   2.66643   2.67599   2.68812
 Alpha virt. eigenvalues --    2.71469   2.74602   2.74887   2.75459   2.78176
 Alpha virt. eigenvalues --    2.78375   2.81267   2.82559   2.86935   2.87881
 Alpha virt. eigenvalues --    2.89058   2.92556   2.94099   2.95186   2.98141
 Alpha virt. eigenvalues --    3.01980   3.03907   3.05960   3.06317   3.10028
 Alpha virt. eigenvalues --    3.11698   3.14828   3.15401   3.19517   3.21100
 Alpha virt. eigenvalues --    3.22238   3.25116   3.74960   6.09672   6.13207
 Alpha virt. eigenvalues --    6.31739 103.48884
          Condensed to atoms (all electrons):
 Mulliken atomic charges:
              1
     1  O   -0.443885
     2  Mg   0.876841
     3  O   -0.453017
     4  C    0.589192
     5  N   -0.537182
     6  N   -0.539709
     7  O   -0.434957
     8  C    0.325667
     9  C   -0.258849
    10  C    0.342414
    11  O   -0.454447
    12  C    0.636323
    13  C    0.056539
    14  C    0.042841
    15  O   -0.443591
    16  C   -0.217694
    17  O   -0.683742
    18  C    0.678844
    19  O   -0.478904
    20  O   -0.446876
    21  C    0.525116
    22  C    0.112436
    23  C    0.070837
    24  O   -0.422340
    25  C   -0.476328
    26  C   -0.478405
    27  C   -0.480468
    28  C   -0.499082
    29  C    0.011005
    30  C    0.016218
    31  C   -0.006536
    32  C   -0.075577
    33  C   -0.074514
    34  C   -0.078469
    35  C    0.000180
    36  C   -0.056796
    37  C   -0.051460
    38  C   -0.001881
    39  C   -0.073618
    40  C   -0.071227
    41  C   -0.080879
    42  C   -0.005336
    43  C   -0.060716
    44  C   -0.055274
    45  C   -0.223704
    46  C   -0.218115
    47  C   -0.214120
    48  C   -0.217866
    49  C   -0.215280
    50  C   -0.215929
    51  C   -0.230129
    52  C   -0.217903
    53  C   -0.449572
    54  C   -0.450227
    55  H    0.074348
    56  H    0.197651
    57  H    0.184490
    58  H    0.167438
    59  H    0.170652
    60  H    0.172541
    61  H    0.136380
    62  H    0.160432
    63  H    0.144497
    64  H    0.126813
    65  H    0.136060
    66  H    0.164743
    67  H    0.189716
    68  H    0.149296
    69  H    0.171416
    70  H    0.191822
    71  H    0.165060
    72  H    0.154856
    73  H    0.166260
    74  H    0.258070
    75  H    0.087334
    76  H    0.081271
    77  H    0.075470
    78  H    0.090143
    79  H    0.091823
    80  H    0.081124
    81  H    0.083868
    82  H    0.079365
    83  H    0.099146
    84  H    0.103519
    85  H    0.078075
    86  H    0.098647
    87  H    0.069517
    88  H    0.074431
    89  H    0.071808
    90  H    0.086394
    91  H    0.072143
    92  H    0.077413
    93  H    0.092969
    94  H    0.072389
    95  H    0.078549
    96  H    0.073707
    97  H    0.072982
    98  H    0.091160
    99  H    0.073359
   100  H    0.075167
   101  H    0.073375
   102  H    0.071650
   103  H    0.079658
   104  H    0.111807
   105  H    0.067818
   106  H    0.084038
   107  H    0.073920
   108  H    0.071097
   109  H    0.127547
   110  H    0.129108
   111  H    0.129374
   112  H    0.126677
   113  H    0.122114
   114  H    0.127653
 Sum of Mulliken charges=   0.00000
 Atomic charges with hydrogens summed into heavy atoms:
              1
     1  O   -0.443885
     2  Mg   0.876841
     3  O   -0.453017
     4  C    0.589192
     5  N   -0.537182
     6  N   -0.539709
     7  O   -0.434957
     8  C    0.325667
     9  C   -0.184502
    10  C    0.342414
    11  O   -0.454447
    12  C    0.636323
    13  C    0.254190
    14  C    0.227331
    15  O   -0.443591
    16  C    0.292938
    17  O   -0.683742
    18  C    0.678844
    19  O   -0.478904
    20  O   -0.446876
    21  C    0.525116
    22  C    0.248815
    23  C    0.231270
    24  O   -0.422340
    25  C   -0.068957
    26  C    0.025349
    27  C    0.047830
    28  C    0.080105
    29  C    0.011005
    30  C    0.016218
    31  C   -0.006536
    32  C    0.011757
    33  C    0.006757
    34  C   -0.002999
    35  C    0.000180
    36  C    0.033346
    37  C    0.040363
    38  C   -0.001881
    39  C    0.007505
    40  C    0.012641
    41  C   -0.001514
    42  C   -0.005336
    43  C    0.038430
    44  C    0.048245
    45  C    0.022534
    46  C    0.014518
    47  C    0.028405
    48  C    0.006779
    49  C    0.022221
    50  C    0.004263
    51  C    0.029153
    52  C    0.011153
    53  C   -0.063543
    54  C   -0.073783
    55  H    0.000000
    56  H    0.000000
    57  H    0.000000
    58  H    0.000000
    59  H    0.000000
    60  H    0.000000
    61  H    0.000000
    62  H    0.000000
    63  H    0.000000
    64  H    0.000000
    65  H    0.000000
    66  H    0.000000
    67  H    0.000000
    68  H    0.000000
    69  H    0.000000
    70  H    0.000000
    71  H    0.000000
    72  H    0.000000
    73  H    0.000000
    74  H    0.000000
    75  H    0.000000
    76  H    0.000000
    77  H    0.000000
    78  H    0.000000
    79  H    0.000000
    80  H    0.000000
    81  H    0.000000
    82  H    0.000000
    83  H    0.000000
    84  H    0.000000
    85  H    0.000000
    86  H    0.000000
    87  H    0.000000
    88  H    0.000000
    89  H    0.000000
    90  H    0.000000
    91  H    0.000000
    92  H    0.000000
    93  H    0.000000
    94  H    0.000000
    95  H    0.000000
    96  H    0.000000
    97  H    0.000000
    98  H    0.000000
    99  H    0.000000
   100  H    0.000000
   101  H    0.000000
   102  H    0.000000
   103  H    0.000000
   104  H    0.000000
   105  H    0.000000
   106  H    0.000000
   107  H    0.000000
   108  H    0.000000
   109  H    0.000000
   110  H    0.000000
   111  H    0.000000
   112  H    0.000000
   113  H    0.000000
   114  H    0.000000
 Sum of Mulliken charges=   0.00000
 APT atomic charges:
              1
     1  O   -0.812571
     2  Mg   1.246971
     3  O   -0.870237
     4  C    0.986001
     5  N   -0.874573
     6  N   -0.919127
     7  O   -0.649101
     8  C    0.884144
     9  C   -0.877828
    10  C    0.866951
    11  O   -0.891722
    12  C    1.159865
    13  C    0.441571
    14  C    0.458604
    15  O   -0.791794
    16  C    0.477192
    17  O   -1.023392
    18  C    1.369760
    19  O   -0.838357
    20  O   -0.764179
    21  C    0.976038
    22  C    0.457956
    23  C    0.434625
    24  O   -0.718617
    25  C    0.010386
    26  C   -0.007681
    27  C   -0.004428
    28  C   -0.024568
    29  C    0.285154
    30  C    0.321419
    31  C   -0.067469
    32  C   -0.109149
    33  C   -0.039392
    34  C   -0.098243
    35  C   -0.057020
    36  C    0.207818
    37  C    0.176144
    38  C   -0.038969
    39  C   -0.137521
    40  C   -0.073493
    41  C   -0.099896
    42  C   -0.061017
    43  C    0.181742
    44  C    0.178484
    45  C   -0.043293
    46  C   -0.044472
    47  C   -0.014774
    48  C   -0.054431
    49  C   -0.023340
    50  C   -0.047084
    51  C   -0.015749
    52  C   -0.038947
    53  C   -0.227841
    54  C   -0.196075
    55  H   -0.015201
    56  H    0.000537
    57  H   -0.027924
    58  H    0.006452
    59  H   -0.005136
    60  H   -0.019944
    61  H   -0.072054
    62  H   -0.052279
    63  H   -0.019327
    64  H    0.037824
    65  H   -0.025033
    66  H   -0.006540
    67  H    0.024951
    68  H    0.001201
    69  H    0.017423
    70  H    0.038099
    71  H   -0.006907
    72  H    0.027151
    73  H    0.009141
    74  H    0.057124
    75  H    0.075030
    76  H    0.067299
    77  H    0.056384
    78  H   -0.098814
    79  H   -0.043923
    80  H    0.064950
    81  H    0.071737
    82  H    0.058753
    83  H   -0.046151
    84  H   -0.051042
    85  H    0.016208
    86  H    0.016914
    87  H    0.002503
    88  H    0.005226
    89  H    0.005388
    90  H   -0.001803
    91  H   -0.018127
    92  H    0.015521
    93  H   -0.036945
    94  H    0.000382
    95  H    0.010006
    96  H    0.011553
    97  H    0.000235
    98  H   -0.019132
    99  H    0.008603
   100  H    0.002497
   101  H    0.003826
   102  H    0.008120
   103  H    0.000149
   104  H    0.005315
   105  H    0.003086
   106  H   -0.025070
   107  H    0.001905
   108  H    0.005825
   109  H    0.051110
   110  H    0.048503
   111  H    0.048989
   112  H    0.040265
   113  H    0.046104
   114  H    0.054588
 Sum of APT charges=   0.00000
 APT Atomic charges with hydrogens summed into heavy atoms:
              1
     1  O   -0.812571
     2  Mg   1.246971
     3  O   -0.870237
     4  C    0.986001
     5  N   -0.874573
     6  N   -0.919127
     7  O   -0.649101
     8  C    0.884144
     9  C   -0.893029
    10  C    0.866951
    11  O   -0.891722
    12  C    1.159865
    13  C    0.442108
    14  C    0.430680
    15  O   -0.791794
    16  C    0.458564
    17  O   -1.023392
    18  C    1.369760
    19  O   -0.838357
    20  O   -0.764179
    21  C    0.976038
    22  C    0.385901
    23  C    0.382346
    24  O   -0.718617
    25  C    0.003849
    26  C    0.011932
    27  C    0.044186
    28  C    0.068848
    29  C    0.285154
    30  C    0.321419
    31  C   -0.067469
    32  C   -0.034119
    33  C    0.027906
    34  C   -0.041858
    35  C   -0.057020
    36  C    0.109004
    37  C    0.132220
    38  C   -0.038969
    39  C   -0.072571
    40  C   -0.001755
    41  C   -0.041143
    42  C   -0.061017
    43  C    0.135590
    44  C    0.127442
    45  C   -0.007669
    46  C   -0.035661
    47  C   -0.054324
    48  C   -0.032490
    49  C   -0.033634
    50  C   -0.032640
    51  C   -0.007199
    52  C   -0.056287
    53  C   -0.079239
    54  C   -0.055118
    55  H    0.000000
    56  H    0.000000
    57  H    0.000000
    58  H    0.000000
    59  H    0.000000
    60  H    0.000000
    61  H    0.000000
    62  H    0.000000
    63  H    0.000000
    64  H    0.000000
    65  H    0.000000
    66  H    0.000000
    67  H    0.000000
    68  H    0.000000
    69  H    0.000000
    70  H    0.000000
    71  H    0.000000
    72  H    0.000000
    73  H    0.000000
    74  H    0.000000
    75  H    0.000000
    76  H    0.000000
    77  H    0.000000
    78  H    0.000000
    79  H    0.000000
    80  H    0.000000
    81  H    0.000000
    82  H    0.000000
    83  H    0.000000
    84  H    0.000000
    85  H    0.000000
    86  H    0.000000
    87  H    0.000000
    88  H    0.000000
    89  H    0.000000
    90  H    0.000000
    91  H    0.000000
    92  H    0.000000
    93  H    0.000000
    94  H    0.000000
    95  H    0.000000
    96  H    0.000000
    97  H    0.000000
    98  H    0.000000
    99  H    0.000000
   100  H    0.000000
   101  H    0.000000
   102  H    0.000000
   103  H    0.000000
   104  H    0.000000
   105  H    0.000000
   106  H    0.000000
   107  H    0.000000
   108  H    0.000000
   109  H    0.000000
   110  H    0.000000
   111  H    0.000000
   112  H    0.000000
   113  H    0.000000
   114  H    0.000000
 Sum of APT charges=   0.00000
 Electronic spatial extent (au):  <R**2>= 28248.4328
 Charge=     0.0000 electrons
 Dipole moment (field-independent basis, Debye):
    X=     7.8944    Y=    -2.0407    Z=    -3.3014  Tot=     8.7969
 Quadrupole moment (field-independent basis, Debye-Ang):
   XX=  -301.3512   YY=  -288.9067   ZZ=  -310.8486
   XY=     0.5042   XZ=    13.0136   YZ=    -7.6907
 Traceless Quadrupole moment (field-independent basis, Debye-Ang):
   XX=    -0.9824   YY=    11.4622   ZZ=   -10.4798
   XY=     0.5042   XZ=    13.0136   YZ=    -7.6907
 Octapole moment (field-independent basis, Debye-Ang**2):
  XXX=   263.6374  YYY=    -8.9639  ZZZ=    50.3627  XYY=    22.0970
  XXY=    -8.3444  XXZ=  -121.3832  XZZ=    52.9644  YZZ=   -31.0995
  YYZ=     1.8887  XYZ=     0.9188
 Hexadecapole moment (field-independent basis, Debye-Ang**3):
 XXXX=-13216.1515 YYYY=-12839.2494 ZZZZ= -8686.6711 XXXY=   295.3488
 XXXZ=   134.0593 YYYX=   -20.3523 YYYZ=     9.9562 ZZZX=    87.5549
 ZZZY=  -127.9442 XXYY= -4312.7450 XXZZ= -3980.5808 YYZZ= -3697.1772
 XXYZ=  -176.3864 YYXZ=     9.7931 ZZXY=     9.8348
 N-N= 9.205500108703D+03 E-N=-2.450864189566D+04  KE= 2.584805263811D+03
  Exact polarizability: 411.435  -5.009 447.065 -16.700   0.946 361.120
 Approx polarizability: 597.184 -18.271 662.879 -15.890  12.009 531.570
 Full mass-weighted force constant matrix:
 Low frequencies ---  -44.1637   -6.4890   -5.1888   -0.0008   -0.0008   -0.0006
 Low frequencies ---    4.6325   15.0879   26.8750
 ******    1 imaginary frequencies (negative Signs) ****** 
 Diagonal vibrational polarizability:
      218.7779244     254.6098753      85.3463355
 Harmonic frequencies (cm**-1), IR intensities (KM/Mole), Raman scattering
 activities (A**4/AMU), depolarization ratios for plane and unpolarized
 incident light, reduced masses (AMU), force constants (mDyne/A),
 and normal coordinates:
                     1                      2                      3
                     A                      A                      A
 Frequencies --   -44.1301                14.9153                26.8161
 Red. masses --     5.7501                 4.5729                 4.3714
 Frc consts  --     0.0066                 0.0006                 0.0019
 IR Inten    --     3.9475                 1.0958                 1.3992
 Atom AN      X      Y      Z        X      Y      Z        X      Y      Z
   1   8     0.02  -0.02   0.01     0.09   0.00   0.12     0.15  -0.08   0.08
   2  12     0.02  -0.09   0.01    -0.02   0.02  -0.01     0.00   0.01  -0.01
   3   8    -0.04   0.12  -0.07    -0.02  -0.06   0.01     0.02   0.05  -0.01
   4   6     0.02  -0.01   0.02     0.02  -0.01   0.07     0.07  -0.05   0.03
   5   7    -0.01  -0.03  -0.02     0.00   0.00  -0.01    -0.03   0.01   0.00
   6   7    -0.03  -0.04   0.04    -0.01   0.00  -0.03    -0.03   0.01  -0.02
   7   8     0.02   0.01   0.00    -0.01  -0.03   0.08     0.04  -0.04   0.03
   8   6    -0.01  -0.01  -0.02    -0.02   0.01  -0.02    -0.04   0.00   0.00
   9   6    -0.01   0.00   0.01    -0.03   0.01  -0.03    -0.05   0.01  -0.02
  10   6    -0.02  -0.01   0.03    -0.02   0.01  -0.03    -0.05   0.01  -0.02
  11   8     0.01   0.01   0.03    -0.03  -0.02  -0.02     0.00  -0.01  -0.01
  12   6     0.01   0.03  -0.01    -0.03  -0.03   0.00     0.01   0.02  -0.01
  13   6    -0.06   0.05  -0.03    -0.03  -0.07  -0.01     0.03   0.06   0.00
  14   6     0.03  -0.01   0.04    -0.02   0.02   0.00     0.02  -0.02   0.00
  15   8     0.05   0.03  -0.05    -0.04  -0.01   0.02     0.01   0.01  -0.02
  16   6     0.01  -0.01  -0.01     0.13  -0.02   0.18     0.20  -0.10   0.12
  17   8     0.08  -0.01   0.06    -0.01   0.02  -0.02     0.00   0.00   0.00
  18   6    -0.06   0.19  -0.11    -0.02  -0.04   0.02     0.03   0.02   0.00
  19   8    -0.03   0.16  -0.12    -0.05  -0.03   0.01     0.04   0.01   0.01
  20   8    -0.05   0.07  -0.02    -0.02   0.05   0.00     0.02  -0.02   0.00
  21   6     0.02   0.08  -0.03     0.01   0.07   0.02     0.00  -0.04  -0.02
  22   6     0.10   0.05   0.06     0.01   0.04   0.00    -0.02  -0.02  -0.01
  23   6    -0.04   0.01  -0.08    -0.03   0.02   0.01     0.03   0.01   0.00
  24   8     0.03   0.14  -0.09     0.02   0.09   0.06    -0.01  -0.07  -0.03
  25   6     0.16   0.01   0.11     0.05   0.04  -0.01    -0.04  -0.01  -0.01
  26   6    -0.05  -0.13   0.02     0.00   0.03  -0.01     0.02   0.02   0.00
  27   6    -0.15   0.05  -0.02    -0.05  -0.09  -0.06     0.07   0.09   0.06
  28   6     0.05  -0.05   0.03    -0.02   0.11  -0.02     0.02   0.04  -0.02
  29   6     0.00  -0.03  -0.03     0.02  -0.01   0.00    -0.03   0.00   0.00
  30   6    -0.02  -0.04   0.04    -0.01   0.01  -0.03    -0.02   0.01   0.00
  31   6     0.00  -0.04  -0.02     0.03  -0.02   0.05    -0.04  -0.01  -0.04
  32   6     0.01  -0.04  -0.01     0.06  -0.03   0.06    -0.05  -0.03  -0.08
  33   6     0.02  -0.03   0.00     0.08  -0.03   0.04    -0.05  -0.03  -0.08
  34   6     0.02  -0.03  -0.01     0.07  -0.01  -0.01    -0.03  -0.01  -0.04
  35   6     0.01  -0.02  -0.02     0.04  -0.01  -0.03    -0.02   0.01   0.00
  36   6     0.00  -0.04  -0.01     0.01  -0.02   0.08    -0.04  -0.01  -0.04
  37   6     0.01  -0.02  -0.02     0.03   0.00  -0.08     0.00   0.03   0.06
  38   6    -0.01  -0.02   0.02     0.00   0.01  -0.04     0.00   0.00  -0.02
  39   6     0.00  -0.01   0.01     0.01   0.02  -0.06     0.01  -0.01   0.00
  40   6    -0.01  -0.02   0.02     0.01   0.02  -0.06     0.00  -0.01   0.04
  41   6    -0.02  -0.03   0.04     0.00   0.01  -0.04    -0.02   0.00   0.05
  42   6    -0.03  -0.04   0.05    -0.01   0.00  -0.03    -0.03   0.01   0.03
  43   6     0.00   0.00   0.00    -0.01   0.00  -0.03     0.01  -0.01  -0.06
  44   6    -0.03  -0.04   0.06    -0.02  -0.01  -0.01    -0.05   0.02   0.04
  45   6     0.00  -0.04   0.00     0.04  -0.04   0.12    -0.04  -0.02  -0.04
  46   6    -0.01  -0.03   0.00    -0.04  -0.01   0.09    -0.02   0.00  -0.04
  47   6     0.01  -0.01  -0.02     0.08  -0.01  -0.12    -0.04   0.06   0.10
  48   6     0.01  -0.02  -0.02    -0.02   0.01  -0.10     0.07   0.03   0.06
  49   6    -0.03  -0.04   0.07    -0.01  -0.01   0.01    -0.04   0.01   0.07
  50   6    -0.04  -0.05   0.06    -0.04  -0.02  -0.02    -0.08   0.05   0.06
  51   6     0.04   0.02   0.00    -0.02   0.01  -0.03     0.05   0.01  -0.06
  52   6    -0.01   0.00  -0.03     0.00  -0.01  -0.03     0.00  -0.02  -0.11
  53   6     0.00   0.00  -0.03    -0.05   0.01  -0.02    -0.02  -0.01   0.01
  54   6    -0.03   0.00   0.05    -0.03   0.01  -0.04    -0.08   0.01  -0.04
  55   1    -0.01   0.02   0.01    -0.05   0.01  -0.04    -0.06   0.00  -0.02
  56   1    -0.04   0.01   0.00    -0.02  -0.10   0.01     0.02   0.10  -0.04
  57   1     0.03  -0.01   0.07    -0.04  -0.01  -0.03    -0.01  -0.06  -0.01
  58   1     0.01  -0.02  -0.02     0.14  -0.01   0.15     0.22  -0.07   0.08
  59   1     0.01  -0.03  -0.01     0.19  -0.02   0.22     0.25  -0.11   0.14
  60   1     0.01   0.00  -0.01     0.08  -0.06   0.23     0.15  -0.13   0.16
  61   1     0.18   0.13   0.04    -0.01   0.05   0.01    -0.02  -0.03  -0.01
  62   1    -0.01  -0.03  -0.21    -0.06   0.03   0.03     0.05   0.01   0.01
  63   1     0.18   0.05   0.10     0.06   0.06   0.01    -0.05  -0.04  -0.01
  64   1     0.21  -0.01   0.14     0.04   0.03  -0.03    -0.06   0.00  -0.02
  65   1     0.13  -0.06   0.12     0.07   0.03  -0.03    -0.04   0.00  -0.01
  66   1    -0.04  -0.23   0.03     0.00   0.07  -0.01     0.02   0.01   0.00
  67   1    -0.08  -0.08   0.15     0.03   0.02  -0.03     0.00   0.02  -0.01
  68   1    -0.03  -0.17  -0.04    -0.02   0.02   0.00     0.03   0.04   0.00
  69   1    -0.17  -0.01   0.00    -0.06  -0.10  -0.07     0.08   0.10   0.06
  70   1    -0.18   0.09  -0.04    -0.06  -0.06  -0.08     0.08   0.05   0.09
  71   1    -0.18   0.06  -0.03    -0.05  -0.13  -0.06     0.08   0.13   0.06
  72   1     0.05  -0.05   0.05    -0.05   0.12  -0.08    -0.02   0.05  -0.04
  73   1     0.07  -0.07   0.05    -0.01   0.13  -0.01     0.03   0.03  -0.01
  74   1     0.06  -0.05   0.00     0.00   0.14   0.01     0.05   0.07  -0.01
  75   1     0.01  -0.04   0.00     0.07  -0.04   0.10    -0.06  -0.04  -0.11
  76   1     0.03  -0.03   0.00     0.10  -0.03   0.05    -0.06  -0.04  -0.11
  77   1     0.02  -0.02  -0.01     0.08  -0.01  -0.03    -0.03  -0.01  -0.03
  78   1     0.00  -0.04  -0.01     0.01  -0.02   0.06    -0.04  -0.01  -0.02
  79   1     0.00  -0.01  -0.02     0.01   0.01  -0.09     0.00   0.04   0.07
  80   1     0.01   0.00  -0.01     0.01   0.03  -0.07     0.03  -0.02  -0.01
  81   1     0.00  -0.01   0.01     0.01   0.03  -0.07     0.01  -0.01   0.06
  82   1    -0.02  -0.03   0.05     0.00   0.01  -0.04    -0.03   0.00   0.08
  83   1     0.00  -0.01   0.01    -0.02   0.00  -0.03    -0.02  -0.01  -0.06
  84   1    -0.04  -0.05   0.07    -0.02  -0.01   0.00    -0.05   0.03   0.01
  85   1     0.00  -0.04   0.01     0.03  -0.03   0.16    -0.04  -0.02  -0.04
  86   1     0.01  -0.04   0.00     0.07  -0.07   0.11    -0.05  -0.02  -0.04
  87   1     0.00  -0.04   0.01     0.03  -0.03   0.13    -0.04  -0.02  -0.05
  88   1    -0.01  -0.03   0.00    -0.05  -0.02   0.11    -0.02   0.00  -0.04
  89   1    -0.02  -0.02   0.00    -0.04  -0.02   0.10    -0.02   0.00  -0.05
  90   1    -0.02  -0.03  -0.01    -0.05   0.00   0.06    -0.02   0.00  -0.03
  91   1     0.01  -0.02  -0.03     0.06  -0.02  -0.17    -0.02   0.11   0.15
  92   1     0.01   0.00  -0.01     0.09  -0.01  -0.11    -0.03   0.03   0.06
  93   1     0.03   0.00  -0.03     0.12  -0.02  -0.12    -0.13   0.05   0.10
  94   1     0.01  -0.01  -0.02    -0.03   0.02  -0.14     0.08   0.05   0.11
  95   1     0.01  -0.02  -0.02    -0.05   0.02  -0.07     0.10   0.01   0.04
  96   1     0.02  -0.02  -0.02     0.01   0.01  -0.09     0.07   0.02   0.05
  97   1    -0.04  -0.04   0.08    -0.02  -0.01   0.02    -0.05   0.02   0.07
  98   1    -0.03  -0.03   0.08     0.00  -0.01   0.01    -0.02  -0.02   0.05
  99   1    -0.03  -0.03   0.07    -0.01  -0.01   0.01    -0.04   0.00   0.10
 100   1    -0.05  -0.05   0.07    -0.05  -0.03   0.00    -0.09   0.06   0.06
 101   1    -0.04  -0.07   0.05    -0.05  -0.03  -0.03    -0.09   0.07   0.04
 102   1    -0.03  -0.05   0.05    -0.04  -0.02  -0.03    -0.09   0.05   0.09
 103   1     0.05   0.03  -0.01    -0.03   0.00  -0.02     0.06   0.00  -0.08
 104   1     0.06   0.01   0.03    -0.03   0.02  -0.04     0.06   0.01  -0.03
 105   1     0.04   0.03  -0.01    -0.02   0.01  -0.04     0.08   0.01  -0.06
 106   1     0.00   0.01  -0.05    -0.01  -0.02  -0.03     0.01  -0.03  -0.15
 107   1    -0.01   0.01  -0.04     0.01  -0.01  -0.04     0.03  -0.02  -0.10
 108   1    -0.04   0.00  -0.03     0.01  -0.02  -0.03    -0.04  -0.01  -0.10
 109   1     0.00   0.00  -0.04    -0.04   0.00   0.00    -0.03   0.00   0.01
 110   1     0.01   0.01  -0.03    -0.08   0.02   0.00    -0.01  -0.02   0.00
 111   1     0.01   0.00  -0.03    -0.06   0.02  -0.06    -0.02  -0.02   0.04
 112   1    -0.02  -0.01   0.06    -0.03   0.01  -0.04    -0.08   0.03  -0.06
 113   1    -0.03   0.02   0.04    -0.04   0.01  -0.04    -0.10   0.01  -0.05
 114   1    -0.02   0.01   0.08    -0.03   0.00  -0.03    -0.10   0.00  -0.03
                     4                      5                      6
                     A                      A                      A
 Frequencies --    29.1186                37.1811                40.8505
 Red. masses --     4.4827                 2.9683                 4.3560
 Frc consts  --     0.0022                 0.0024                 0.0043
 IR Inten    --     0.1588                 0.1996                 0.3554
 Atom AN      X      Y      Z        X      Y      Z        X      Y      Z
   1   8     0.05  -0.01   0.01    -0.02   0.00  -0.01    -0.06  -0.05  -0.05
   2  12    -0.01  -0.02  -0.01    -0.01   0.00  -0.01     0.00   0.02   0.02
   3   8     0.00   0.02  -0.03    -0.02   0.01   0.00    -0.01  -0.03   0.03
   4   6     0.03  -0.01   0.00     0.00   0.01   0.00    -0.02  -0.03  -0.02
   5   7     0.01   0.01  -0.03     0.00  -0.01   0.00     0.05  -0.01   0.02
   6   7    -0.01  -0.01  -0.01    -0.01   0.00  -0.02    -0.02   0.02   0.01
   7   8     0.03  -0.01   0.00     0.02   0.02   0.00     0.02  -0.02  -0.03
   8   6     0.01   0.00  -0.03    -0.01  -0.01   0.00     0.04   0.00   0.02
   9   6     0.00   0.01  -0.02    -0.03  -0.01  -0.02     0.01   0.02   0.02
  10   6    -0.01   0.01  -0.01    -0.03  -0.01  -0.02    -0.02   0.02   0.01
  11   8     0.00   0.01  -0.02     0.00   0.02   0.02    -0.01  -0.02   0.02
  12   6     0.00   0.01  -0.02    -0.01   0.01   0.01    -0.01  -0.02   0.03
  13   6    -0.01   0.00  -0.03    -0.01   0.02   0.01    -0.02  -0.05   0.02
  14   6     0.00   0.01  -0.02     0.00   0.01   0.02    -0.02  -0.04   0.01
  15   8     0.00   0.01  -0.03    -0.01   0.00   0.00    -0.01  -0.01   0.03
  16   6     0.07  -0.02   0.03    -0.02   0.00  -0.03    -0.06  -0.05  -0.10
  17   8    -0.01  -0.01   0.00    -0.02  -0.02  -0.01     0.01   0.06   0.00
  18   6    -0.01   0.02  -0.03    -0.02  -0.01   0.00    -0.02   0.00   0.04
  19   8     0.00   0.02  -0.03     0.00  -0.01   0.00    -0.05   0.01   0.04
  20   8    -0.01  -0.04  -0.01    -0.02   0.00  -0.01    -0.01   0.05   0.00
  21   6    -0.02  -0.05  -0.04    -0.01   0.01   0.02    -0.03   0.02  -0.07
  22   6    -0.03  -0.03  -0.01     0.00   0.00   0.01    -0.02   0.03  -0.05
  23   6     0.00  -0.02  -0.02    -0.03  -0.02  -0.01    -0.02   0.08   0.03
  24   8    -0.04  -0.08  -0.08     0.00   0.03   0.04    -0.04  -0.01  -0.14
  25   6    -0.06  -0.04   0.00     0.04  -0.01   0.03    -0.08   0.05  -0.06
  26   6    -0.01  -0.02  -0.02    -0.03  -0.06   0.01    -0.01   0.15  -0.03
  27   6    -0.03   0.00  -0.04     0.00   0.02   0.02    -0.06  -0.07  -0.02
  28   6    -0.01   0.04  -0.02     0.00   0.00   0.02    -0.03  -0.06   0.02
  29   6     0.01   0.02   0.01     0.01  -0.02   0.01     0.05  -0.02   0.01
  30   6    -0.01  -0.01   0.01     0.01   0.01  -0.02    -0.01   0.02   0.02
  31   6     0.02   0.05   0.05     0.01  -0.03   0.01     0.05  -0.03   0.01
  32   6     0.05   0.10   0.17     0.02  -0.03   0.01     0.05  -0.04  -0.01
  33   6     0.06   0.13   0.25     0.02  -0.03   0.01     0.05  -0.04  -0.03
  34   6     0.04   0.09   0.19     0.03  -0.02   0.01     0.05  -0.03  -0.02
  35   6     0.01   0.04   0.07     0.02  -0.01   0.01     0.05  -0.02  -0.01
  36   6     0.01   0.02  -0.04     0.00  -0.03   0.00     0.05  -0.02   0.02
  37   6    -0.02  -0.01  -0.01     0.02   0.00   0.01     0.05  -0.03  -0.01
  38   6    -0.01  -0.02   0.02     0.00  -0.02   0.01     0.02   0.01  -0.01
  39   6    -0.01  -0.03   0.04     0.01  -0.03   0.03     0.04   0.01   0.00
  40   6    -0.01  -0.03   0.05     0.03   0.00   0.01     0.03   0.02   0.04
  41   6    -0.01  -0.02   0.04     0.04   0.04  -0.02     0.00   0.02   0.07
  42   6    -0.01   0.00   0.02     0.04   0.05  -0.05    -0.02   0.02   0.05
  43   6     0.00  -0.02   0.00    -0.01  -0.04   0.01     0.02   0.00  -0.03
  44   6    -0.01   0.02   0.00     0.05   0.11  -0.09    -0.05   0.04   0.07
  45   6    -0.04   0.03  -0.12     0.02  -0.02   0.03     0.01  -0.07  -0.03
  46   6     0.07  -0.05  -0.06    -0.03  -0.06   0.01     0.12   0.04   0.01
  47   6     0.06  -0.02  -0.06     0.02   0.00   0.02     0.05  -0.05  -0.02
  48   6    -0.12  -0.03   0.01     0.03  -0.01   0.02     0.04  -0.02  -0.03
  49   6    -0.01   0.00  -0.01     0.07  -0.04  -0.06    -0.03   0.02   0.11
  50   6     0.00   0.05   0.02    -0.04   0.27   0.02    -0.09   0.06   0.09
  51   6     0.02  -0.03  -0.01    -0.01  -0.04   0.01     0.04   0.00  -0.03
  52   6    -0.01  -0.02  -0.02     0.00  -0.05   0.01     0.02  -0.02  -0.05
  53   6     0.03   0.00  -0.02    -0.01  -0.02   0.00     0.07  -0.01   0.02
  54   6    -0.02   0.02   0.00    -0.08   0.00  -0.05    -0.07   0.04  -0.01
  55   1     0.00   0.02  -0.02    -0.04  -0.01  -0.02     0.00   0.02   0.01
  56   1     0.00  -0.01  -0.02    -0.02   0.03   0.01    -0.01  -0.09   0.04
  57   1    -0.01  -0.01  -0.03     0.00   0.01   0.02    -0.02  -0.03   0.02
  58   1     0.08  -0.01   0.03    -0.02   0.01  -0.04    -0.05  -0.04  -0.09
  59   1     0.08  -0.02   0.04    -0.03  -0.01  -0.04    -0.09  -0.07  -0.12
  60   1     0.06  -0.04   0.04    -0.01   0.01  -0.04    -0.03  -0.03  -0.12
  61   1    -0.01  -0.04  -0.02     0.00   0.03   0.02     0.01   0.01  -0.07
  62   1     0.03  -0.02  -0.03    -0.03  -0.03  -0.04    -0.03   0.10   0.09
  63   1    -0.07  -0.05  -0.02     0.05   0.01   0.05    -0.10   0.03  -0.10
  64   1    -0.06  -0.02   0.01     0.05  -0.02   0.03    -0.08   0.06  -0.05
  65   1    -0.07  -0.03   0.01     0.05  -0.04   0.02    -0.11   0.09  -0.03
  66   1     0.00  -0.04  -0.01    -0.04  -0.08   0.01    -0.02   0.22  -0.04
  67   1    -0.02  -0.01  -0.01    -0.03  -0.05   0.04     0.02   0.13  -0.10
  68   1     0.00  -0.01  -0.02    -0.03  -0.07   0.00    -0.03   0.17   0.01
  69   1    -0.04  -0.02  -0.04     0.01   0.03   0.03    -0.08  -0.09  -0.03
  70   1    -0.04   0.01  -0.05     0.01   0.01   0.02    -0.08  -0.04  -0.03
  71   1    -0.04  -0.01  -0.04    -0.01   0.03   0.02    -0.06  -0.09  -0.02
  72   1    -0.03   0.05  -0.03     0.00   0.00   0.03    -0.02  -0.07   0.04
  73   1     0.00   0.03  -0.02     0.00  -0.01   0.02    -0.04  -0.06   0.02
  74   1     0.01   0.06  -0.02     0.00  -0.01   0.01    -0.04  -0.07   0.02
  75   1     0.06   0.12   0.20     0.01  -0.04   0.01     0.05  -0.04  -0.02
  76   1     0.09   0.17   0.34     0.03  -0.03   0.01     0.05  -0.05  -0.04
  77   1     0.04   0.10   0.24     0.03  -0.01   0.02     0.05  -0.04  -0.04
  78   1    -0.02   0.05  -0.05     0.00  -0.03  -0.03     0.03  -0.02   0.09
  79   1    -0.02  -0.03  -0.05     0.02   0.00   0.01     0.05  -0.02  -0.01
  80   1    -0.01  -0.04   0.04     0.01  -0.05   0.05     0.06   0.01  -0.01
  81   1    -0.01  -0.04   0.07     0.04   0.00   0.03     0.05   0.02   0.05
  82   1    -0.01  -0.01   0.05     0.06   0.06  -0.04     0.00   0.03   0.10
  83   1    -0.01  -0.02  -0.01    -0.02  -0.04   0.01     0.00   0.00  -0.03
  84   1    -0.01   0.03  -0.02     0.09   0.16  -0.22    -0.05   0.04   0.04
  85   1    -0.06   0.00  -0.21     0.02  -0.02   0.03     0.00  -0.07  -0.01
  86   1    -0.09   0.12  -0.10     0.04  -0.01   0.02    -0.04  -0.11  -0.02
  87   1     0.00  -0.01  -0.10     0.01  -0.02   0.05     0.03  -0.08  -0.09
  88   1     0.06  -0.07  -0.12    -0.03  -0.06   0.00     0.11   0.04   0.03
  89   1     0.09  -0.07  -0.05    -0.05  -0.06   0.04     0.16   0.04  -0.06
  90   1     0.10  -0.06  -0.02    -0.05  -0.08  -0.01     0.15   0.10   0.05
  91   1     0.02  -0.07  -0.14     0.02   0.01   0.02     0.05  -0.08  -0.03
  92   1     0.06   0.01  -0.01     0.03   0.00   0.02     0.04  -0.04  -0.02
  93   1     0.15   0.00  -0.08     0.02   0.01   0.02     0.09  -0.05  -0.02
  94   1    -0.15  -0.07  -0.05     0.03   0.00   0.02     0.04  -0.01  -0.04
  95   1    -0.17  -0.03   0.05     0.03  -0.01   0.02     0.03  -0.01  -0.02
  96   1    -0.13  -0.01   0.05     0.04  -0.01   0.02     0.04  -0.02  -0.03
  97   1     0.00   0.01  -0.02     0.07   0.03  -0.10    -0.05   0.05   0.11
  98   1    -0.01  -0.01  -0.01     0.13  -0.17  -0.14    -0.01  -0.02   0.08
  99   1    -0.02   0.00   0.00     0.04  -0.09   0.10    -0.02   0.01   0.16
 100   1     0.00   0.07   0.01     0.00   0.29  -0.04    -0.10   0.07   0.10
 101   1     0.00   0.07   0.03    -0.05   0.43   0.02    -0.10   0.09   0.07
 102   1    -0.01   0.05   0.05    -0.14   0.21   0.15    -0.10   0.05   0.12
 103   1     0.02  -0.03  -0.02    -0.01  -0.05   0.01     0.03  -0.02  -0.05
 104   1     0.02  -0.02   0.01    -0.01  -0.03   0.02     0.03   0.01  -0.02
 105   1     0.03  -0.03   0.00     0.00  -0.04   0.01     0.06   0.00  -0.03
 106   1     0.00  -0.02  -0.04     0.00  -0.05   0.02     0.02  -0.02  -0.06
 107   1     0.00  -0.02   0.00     0.00  -0.04   0.00     0.03  -0.01  -0.06
 108   1    -0.03  -0.01  -0.01     0.01  -0.07   0.01     0.01  -0.02  -0.05
 109   1     0.04  -0.01  -0.01    -0.01  -0.02   0.01     0.07  -0.01   0.01
 110   1     0.01  -0.02  -0.02     0.00  -0.03   0.00     0.08  -0.01   0.01
 111   1     0.03   0.01  -0.02     0.00  -0.03   0.01     0.07   0.00   0.04
 112   1    -0.01   0.01   0.00    -0.19   0.16   0.00    -0.10   0.09   0.00
 113   1    -0.02   0.03   0.00     0.07  -0.04   0.02    -0.03   0.03   0.01
 114   1    -0.02   0.02   0.02    -0.16  -0.11  -0.21    -0.11   0.00  -0.04
                     7                      8                      9
                     A                      A                      A
 Frequencies --    43.4123                45.8649                49.5765
 Red. masses --     4.6254                 4.8172                 5.8477
 Frc consts  --     0.0051                 0.0060                 0.0085
 IR Inten    --     0.4390                 0.0269                 0.5537
 Atom AN      X      Y      Z        X      Y      Z        X      Y      Z
   1   8     0.02   0.00   0.04    -0.04   0.00   0.04     0.04  -0.12  -0.01
   2  12     0.01  -0.02   0.03     0.03   0.01  -0.01    -0.03   0.00  -0.02
   3   8     0.06   0.06  -0.06     0.03  -0.08   0.03    -0.02   0.12  -0.06
   4   6    -0.02  -0.04   0.00    -0.05  -0.04   0.02    -0.03  -0.08  -0.04
   5   7    -0.02   0.00   0.01     0.04   0.00   0.00     0.07  -0.01  -0.02
   6   7     0.00   0.00   0.04    -0.04   0.03  -0.01    -0.04   0.01  -0.01
   7   8    -0.09  -0.06   0.01    -0.09  -0.07   0.04    -0.08  -0.04  -0.07
   8   6    -0.01   0.01   0.02     0.05   0.01   0.00     0.09   0.00  -0.01
   9   6     0.00   0.00   0.04     0.01   0.02   0.00     0.06   0.02   0.01
  10   6     0.00   0.00   0.04    -0.03   0.03  -0.01     0.01   0.02   0.01
  11   8     0.00  -0.09  -0.07    -0.02  -0.10  -0.03    -0.06  -0.04  -0.04
  12   6     0.02  -0.05  -0.06     0.01  -0.06   0.00    -0.04   0.02  -0.05
  13   6     0.02  -0.03  -0.06     0.03  -0.06   0.01    -0.03   0.09  -0.04
  14   6     0.02  -0.05  -0.05    -0.01  -0.06  -0.01    -0.04  -0.07  -0.03
  15   8     0.03  -0.03  -0.06     0.02  -0.02   0.02    -0.02   0.01  -0.06
  16   6    -0.03   0.02   0.09    -0.08   0.01   0.08     0.04  -0.12  -0.01
  17   8     0.04   0.03   0.05     0.07  -0.01   0.00    -0.09  -0.04  -0.01
  18   6     0.02   0.10  -0.02     0.04  -0.07   0.02    -0.03   0.06  -0.02
  19   8    -0.03   0.08  -0.01     0.03  -0.05   0.01    -0.02   0.03  -0.01
  20   8     0.05   0.04   0.12     0.04   0.02  -0.02    -0.03  -0.02   0.09
  21   6     0.02  -0.01   0.01     0.07   0.04   0.00    -0.04  -0.02   0.12
  22   6     0.00  -0.01   0.00     0.10   0.03   0.03    -0.08  -0.03   0.04
  23   6     0.09   0.09   0.06     0.02  -0.04  -0.01     0.01  -0.01   0.02
  24   8     0.00  -0.05  -0.05     0.08   0.06  -0.01    -0.03   0.00   0.21
  25   6    -0.07   0.03  -0.04     0.16  -0.01   0.06    -0.04  -0.02   0.00
  26   6     0.14   0.14   0.01     0.02  -0.07   0.02     0.02  -0.03   0.04
  27   6    -0.07  -0.03  -0.05     0.06  -0.06   0.02    -0.03   0.11   0.03
  28   6     0.06  -0.05  -0.07     0.00  -0.05  -0.02    -0.01  -0.08  -0.04
  29   6    -0.02  -0.01   0.00     0.03   0.01   0.00     0.07  -0.01  -0.02
  30   6    -0.01   0.00   0.03    -0.05   0.03  -0.02    -0.04   0.01   0.00
  31   6    -0.02  -0.03  -0.01     0.02   0.04  -0.03     0.08   0.02   0.01
  32   6    -0.01  -0.04  -0.02     0.00   0.06  -0.02     0.06   0.03   0.00
  33   6     0.00  -0.03  -0.01    -0.02   0.05   0.01     0.04   0.01  -0.02
  34   6     0.01  -0.01   0.00    -0.02   0.03   0.03     0.03  -0.01  -0.03
  35   6     0.00   0.00   0.00     0.00   0.01   0.03     0.05  -0.02  -0.03
  36   6    -0.04  -0.04  -0.03     0.04   0.04  -0.07     0.11   0.05   0.05
  37   6     0.00   0.01   0.00     0.00  -0.02   0.05     0.05  -0.04  -0.02
  38   6    -0.03   0.01   0.05    -0.06   0.04  -0.02    -0.05   0.00   0.00
  39   6    -0.04   0.02   0.02    -0.05   0.05  -0.04    -0.05   0.00   0.01
  40   6    -0.02   0.02  -0.03    -0.05   0.05  -0.06    -0.04   0.01   0.01
  41   6     0.00   0.02  -0.05    -0.05   0.04  -0.05    -0.04   0.02  -0.01
  42   6     0.01   0.01  -0.03    -0.05   0.03  -0.03    -0.04   0.02  -0.01
  43   6    -0.04   0.01   0.08    -0.06   0.04  -0.01    -0.05   0.00   0.00
  44   6     0.04   0.02  -0.05    -0.06   0.01  -0.01    -0.03   0.03  -0.02
  45   6    -0.03  -0.03  -0.02     0.03   0.07  -0.10     0.12   0.05   0.06
  46   6    -0.06  -0.09  -0.03     0.07   0.00  -0.08     0.11   0.10   0.05
  47   6     0.00   0.00  -0.01    -0.02  -0.03   0.06     0.02  -0.05   0.00
  48   6     0.00   0.03  -0.02     0.00  -0.03   0.06     0.05  -0.04  -0.01
  49   6     0.04  -0.05  -0.06    -0.05  -0.01   0.04    -0.04   0.07  -0.05
  50   6     0.01   0.07  -0.02    -0.12   0.02   0.00     0.02   0.01  -0.04
  51   6    -0.05   0.03   0.09    -0.06   0.05  -0.01    -0.04   0.00   0.00
  52   6    -0.03  -0.01   0.08    -0.06   0.03  -0.02    -0.04  -0.01  -0.01
  53   6    -0.02   0.02   0.01     0.09  -0.01   0.01     0.14  -0.01  -0.01
  54   6     0.00   0.00   0.05    -0.09   0.05  -0.03     0.02   0.03   0.03
  55   1     0.01   0.01   0.04     0.02   0.03   0.00     0.09   0.03   0.02
  56   1     0.06  -0.08  -0.07     0.03  -0.05  -0.01    -0.02   0.11  -0.07
  57   1     0.04  -0.03  -0.04     0.01  -0.04  -0.02    -0.05  -0.08   0.00
  58   1    -0.06  -0.01   0.08    -0.10  -0.01   0.07     0.03  -0.11  -0.03
  59   1     0.01   0.06   0.11    -0.05   0.04   0.10     0.05  -0.13   0.00
  60   1    -0.06   0.03   0.11    -0.10   0.02   0.10     0.02  -0.11   0.00
  61   1     0.02  -0.07  -0.02     0.11   0.08   0.04    -0.13  -0.07   0.06
  62   1     0.14   0.10   0.10    -0.03  -0.04  -0.03     0.05  -0.02  -0.01
  63   1    -0.10   0.03  -0.14     0.18   0.03   0.08    -0.03  -0.02   0.04
  64   1    -0.03   0.01  -0.03     0.19  -0.02   0.08    -0.07  -0.03  -0.03
  65   1    -0.14   0.09   0.01     0.15  -0.05   0.06     0.00  -0.01  -0.02
  66   1     0.17   0.16   0.05     0.01  -0.05   0.00     0.05  -0.10   0.08
  67   1     0.13   0.13  -0.05     0.06  -0.07   0.04    -0.04  -0.01   0.06
  68   1     0.18   0.17  -0.02     0.00  -0.11   0.02     0.07  -0.01  -0.01
  69   1    -0.11  -0.11  -0.08     0.06  -0.05   0.00    -0.03   0.10   0.06
  70   1    -0.13   0.02  -0.02     0.06  -0.07   0.04    -0.03   0.09   0.05
  71   1    -0.04  -0.01  -0.05     0.08  -0.05   0.02    -0.04   0.16   0.03
  72   1     0.10  -0.07  -0.10     0.04  -0.07  -0.05     0.00  -0.08  -0.04
  73   1     0.07   0.01  -0.05     0.01  -0.01  -0.02     0.00  -0.07  -0.02
  74   1     0.03  -0.07  -0.06    -0.02  -0.07  -0.01    -0.01  -0.09  -0.05
  75   1    -0.02  -0.05  -0.03     0.00   0.08  -0.04     0.07   0.05   0.02
  76   1     0.01  -0.04  -0.02    -0.04   0.07   0.02     0.02   0.02  -0.02
  77   1     0.02  -0.01   0.00    -0.04   0.02   0.06     0.01  -0.02  -0.04
  78   1    -0.04  -0.04  -0.06     0.04   0.03  -0.08     0.12   0.03   0.07
  79   1     0.00   0.02   0.01     0.02  -0.03   0.05     0.06  -0.05  -0.01
  80   1    -0.06   0.02   0.04    -0.05   0.06  -0.05    -0.05  -0.01   0.02
  81   1    -0.03   0.03  -0.05    -0.05   0.06  -0.07    -0.04   0.00   0.01
  82   1     0.02   0.03  -0.09    -0.05   0.03  -0.06    -0.03   0.02  -0.01
  83   1    -0.03   0.00   0.10    -0.06   0.03   0.00    -0.05   0.00   0.00
  84   1     0.07   0.04  -0.09    -0.06   0.02  -0.02    -0.04   0.02   0.00
  85   1    -0.04  -0.04  -0.04     0.02   0.05  -0.16     0.14   0.07   0.11
  86   1    -0.01   0.00  -0.02     0.01   0.12  -0.10     0.12   0.00   0.06
  87   1    -0.03  -0.05   0.02     0.04   0.05  -0.08     0.10   0.08   0.04
  88   1    -0.06  -0.09  -0.04     0.09   0.00  -0.12     0.12   0.12   0.08
  89   1    -0.07  -0.09   0.01     0.06   0.01  -0.07     0.10   0.12   0.02
  90   1    -0.07  -0.11  -0.04     0.08  -0.03  -0.06     0.11   0.11   0.05
  91   1     0.00   0.01  -0.02    -0.01  -0.03   0.08     0.03  -0.05   0.01
  92   1     0.01  -0.01  -0.02    -0.03  -0.03   0.05     0.01  -0.05  -0.01
  93   1     0.01  -0.01   0.00    -0.03  -0.03   0.07     0.02  -0.05   0.00
  94   1     0.00   0.04  -0.03     0.00  -0.05   0.08     0.05  -0.06   0.00
  95   1     0.00   0.04  -0.01     0.02  -0.02   0.04     0.06  -0.04  -0.02
  96   1     0.01   0.02  -0.03    -0.03  -0.02   0.06     0.03  -0.04  -0.02
  97   1     0.05  -0.04  -0.08    -0.06  -0.03   0.06    -0.04   0.06  -0.05
  98   1     0.06  -0.09  -0.08    -0.01   0.01   0.04    -0.07   0.10  -0.03
  99   1     0.02  -0.07  -0.01    -0.06  -0.01   0.04    -0.03   0.08  -0.09
 100   1     0.05   0.06  -0.05    -0.13   0.01   0.02     0.01   0.02  -0.04
 101   1     0.02   0.14   0.00    -0.13   0.04  -0.03     0.03  -0.03  -0.02
 102   1    -0.04   0.04   0.01    -0.13   0.01   0.01     0.05   0.03  -0.06
 103   1    -0.05   0.04   0.10    -0.06   0.07   0.00    -0.04   0.00   0.00
 104   1    -0.05   0.03   0.09    -0.05   0.04  -0.01    -0.04   0.00   0.01
 105   1    -0.06   0.04   0.07    -0.08   0.05  -0.02    -0.04   0.00   0.00
 106   1    -0.04   0.00   0.10    -0.06   0.04   0.01    -0.04  -0.03  -0.05
 107   1    -0.03   0.00   0.06    -0.06   0.04  -0.03    -0.01  -0.02   0.02
 108   1    -0.01  -0.03   0.08    -0.04   0.01  -0.02    -0.07   0.02   0.00
 109   1     0.00   0.01   0.00     0.07   0.00   0.00     0.12  -0.01  -0.04
 110   1    -0.04   0.03   0.02     0.12  -0.03  -0.01     0.17  -0.02  -0.03
 111   1    -0.01   0.04  -0.02     0.09  -0.02   0.06     0.15  -0.01   0.03
 112   1    -0.06   0.07   0.09    -0.15   0.14  -0.01     0.03   0.00   0.04
 113   1     0.08  -0.02   0.08    -0.03   0.04   0.00     0.01   0.05   0.02
 114   1    -0.03  -0.04  -0.04    -0.15  -0.02  -0.09     0.03   0.04   0.06
                    10                     11                     12
                     A                      A                      A
 Frequencies --    54.4302                60.0018                61.4956
 Red. masses --     4.3681                 4.1558                 5.1174
 Frc consts  --     0.0076                 0.0088                 0.0114
 IR Inten    --     0.9431                 0.3885                 0.9855
 Atom AN      X      Y      Z        X      Y      Z        X      Y      Z
   1   8     0.01  -0.02   0.03     0.03   0.10   0.00     0.14  -0.08   0.00
   2  12     0.06   0.00   0.01    -0.02  -0.04   0.02     0.02  -0.03   0.02
   3   8     0.02   0.01   0.00     0.01  -0.01  -0.02     0.01  -0.02   0.03
   4   6     0.01  -0.03   0.03     0.03   0.08  -0.01     0.08   0.04   0.00
   5   7    -0.01   0.00   0.03     0.01  -0.05   0.02     0.01   0.00  -0.01
   6   7     0.00   0.01   0.00    -0.04  -0.03   0.01    -0.03   0.00   0.02
   7   8    -0.02  -0.01   0.02     0.04   0.06   0.01     0.01   0.16  -0.09
   8   6    -0.04   0.00   0.02     0.04  -0.06   0.03     0.00   0.02  -0.01
   9   6    -0.03  -0.01   0.01     0.03  -0.05   0.03     0.00   0.02   0.01
  10   6    -0.02   0.00   0.00    -0.01  -0.04   0.02    -0.02   0.01   0.02
  11   8     0.03  -0.04   0.03     0.02   0.07  -0.04     0.10   0.09   0.13
  12   6     0.04   0.00   0.02     0.00   0.02  -0.03     0.05   0.01   0.07
  13   6     0.03   0.02   0.01     0.00  -0.03  -0.03     0.00  -0.04   0.05
  14   6     0.04  -0.04   0.04     0.00   0.10  -0.05     0.10   0.03   0.11
  15   8     0.07   0.02   0.01    -0.02   0.02  -0.01     0.03  -0.05   0.04
  16   6    -0.02   0.00   0.02     0.07   0.08   0.04     0.10  -0.05  -0.12
  17   8     0.06   0.00   0.02     0.02   0.00   0.03     0.01  -0.04   0.02
  18   6     0.03   0.01  -0.04     0.00   0.02  -0.01     0.00  -0.02   0.04
  19   8     0.07   0.02  -0.05    -0.03   0.03  -0.02    -0.01  -0.03   0.05
  20   8     0.02  -0.06  -0.09     0.01   0.02   0.04     0.01  -0.01   0.07
  21   6     0.01  -0.06  -0.08     0.01   0.00   0.01     0.01  -0.02   0.05
  22   6     0.02  -0.04  -0.03     0.02   0.00   0.02     0.00  -0.04   0.01
  23   6     0.01  -0.04  -0.06     0.02   0.02   0.02     0.01   0.00   0.06
  24   8     0.00  -0.07  -0.10     0.00   0.00  -0.03     0.01  -0.01   0.05
  25   6    -0.05  -0.02  -0.04     0.01   0.00   0.02     0.00  -0.02  -0.03
  26   6    -0.04  -0.06  -0.04     0.05   0.01   0.01     0.03   0.02   0.04
  27   6     0.02   0.02   0.03    -0.03  -0.05  -0.09    -0.07  -0.08  -0.03
  28   6     0.07  -0.09   0.04    -0.04   0.15  -0.04     0.09  -0.07   0.13
  29   6    -0.01   0.01   0.04    -0.01  -0.04   0.01    -0.01   0.01  -0.02
  30   6    -0.01   0.01  -0.01    -0.02  -0.02   0.00    -0.04   0.00   0.00
  31   6     0.00   0.02   0.08    -0.01   0.00   0.00    -0.01   0.02  -0.04
  32   6     0.00   0.01   0.07    -0.04   0.00  -0.03    -0.02   0.03  -0.04
  33   6    -0.01  -0.01   0.01    -0.08  -0.02  -0.05    -0.03   0.03  -0.03
  34   6    -0.02  -0.01  -0.02    -0.08  -0.05  -0.03    -0.03   0.01  -0.02
  35   6    -0.02   0.00  -0.01    -0.05  -0.06  -0.01    -0.02   0.00  -0.02
  36   6     0.01   0.05   0.15     0.04   0.03   0.04     0.00   0.02  -0.06
  37   6    -0.03   0.00  -0.02    -0.05  -0.09   0.01    -0.03  -0.02  -0.05
  38   6    -0.03   0.02   0.00    -0.01  -0.03   0.00    -0.04   0.01   0.01
  39   6    -0.04   0.02   0.00     0.00  -0.03   0.00    -0.03   0.02  -0.03
  40   6    -0.03   0.02  -0.03     0.01  -0.01  -0.01    -0.02   0.04  -0.06
  41   6    -0.01   0.02  -0.05     0.01   0.01  -0.02    -0.01   0.03  -0.06
  42   6     0.00   0.02  -0.04     0.00   0.00  -0.01    -0.02   0.01  -0.03
  43   6    -0.03   0.03   0.01    -0.02  -0.04   0.01    -0.05   0.00   0.02
  44   6     0.01   0.02  -0.05    -0.01   0.02  -0.02    -0.03   0.00  -0.02
  45   6    -0.04  -0.03   0.11     0.00   0.01  -0.02     0.02   0.06  -0.04
  46   6     0.08   0.18   0.14     0.14   0.14   0.02    -0.03  -0.03  -0.05
  47   6    -0.03  -0.03  -0.03    -0.05  -0.03   0.03    -0.01  -0.05  -0.08
  48   6    -0.04   0.01  -0.04    -0.05  -0.14   0.06    -0.08  -0.01  -0.07
  49   6     0.01   0.01  -0.06    -0.01   0.03  -0.01    -0.02   0.00   0.00
  50   6     0.00   0.04  -0.04    -0.01   0.05  -0.01    -0.05   0.00  -0.02
  51   6    -0.01   0.06   0.02    -0.02  -0.03   0.01    -0.04   0.04   0.03
  52   6    -0.04   0.03  -0.02    -0.02  -0.04   0.00    -0.04  -0.04  -0.03
  53   6    -0.08   0.01   0.02     0.07  -0.07   0.03    -0.01   0.03  -0.02
  54   6    -0.04  -0.01  -0.02    -0.01  -0.05   0.02    -0.06   0.03   0.02
  55   1    -0.05  -0.01   0.00     0.05  -0.05   0.04     0.00   0.03   0.00
  56   1     0.02   0.02   0.02     0.01  -0.07  -0.01     0.00  -0.10   0.11
  57   1     0.06  -0.02   0.07    -0.01   0.08  -0.09     0.10   0.04   0.15
  58   1    -0.05  -0.02   0.01     0.08   0.10   0.04     0.07  -0.06  -0.19
  59   1    -0.02   0.00   0.03     0.09   0.09   0.06     0.10  -0.13  -0.12
  60   1    -0.03   0.03   0.03     0.05   0.05   0.06     0.10   0.05  -0.12
  61   1     0.06  -0.06  -0.06     0.03   0.00   0.01    -0.01  -0.08   0.00
  62   1     0.03  -0.05  -0.09     0.03   0.02   0.02     0.02   0.00   0.08
  63   1    -0.08  -0.04  -0.11     0.01   0.01   0.00    -0.01   0.00  -0.07
  64   1    -0.02  -0.03  -0.01     0.03  -0.01   0.03     0.03  -0.04  -0.04
  65   1    -0.11  -0.01   0.01    -0.01   0.01   0.04    -0.03   0.01  -0.01
  66   1    -0.06  -0.09  -0.07     0.06   0.02   0.03     0.04   0.04   0.05
  67   1    -0.06  -0.05  -0.02     0.05   0.01   0.01     0.03   0.02   0.01
  68   1    -0.05  -0.05  -0.03     0.05   0.01   0.00     0.04   0.03   0.03
  69   1     0.03   0.03   0.06    -0.05  -0.07  -0.13    -0.07  -0.09   0.00
  70   1     0.05   0.01   0.01    -0.06  -0.01  -0.09    -0.06  -0.03  -0.09
  71   1    -0.01   0.03   0.02     0.00  -0.09  -0.08    -0.11  -0.13  -0.03
  72   1     0.09  -0.10   0.05    -0.09   0.17  -0.05     0.07  -0.06   0.21
  73   1     0.08  -0.08   0.04    -0.05   0.13  -0.05     0.09  -0.14   0.12
  74   1     0.05  -0.11   0.02    -0.01   0.19  -0.02     0.10  -0.07   0.07
  75   1     0.01   0.02   0.10    -0.04   0.03  -0.03    -0.03   0.04  -0.05
  76   1    -0.01  -0.01   0.00    -0.11  -0.02  -0.07    -0.04   0.03  -0.03
  77   1    -0.03  -0.02  -0.06    -0.11  -0.06  -0.04    -0.05   0.00  -0.03
  78   1    -0.01   0.04   0.26     0.05   0.01   0.13     0.02   0.02  -0.10
  79   1    -0.02   0.00  -0.01    -0.04  -0.11  -0.03    -0.02  -0.02  -0.05
  80   1    -0.06   0.02   0.01     0.00  -0.04   0.00    -0.03   0.03  -0.03
  81   1    -0.04   0.02  -0.04     0.03   0.00  -0.01    -0.01   0.05  -0.09
  82   1     0.00   0.02  -0.07     0.02   0.02  -0.03     0.00   0.04  -0.09
  83   1    -0.03   0.02   0.03    -0.02  -0.04   0.01    -0.07  -0.02   0.05
  84   1     0.01   0.03  -0.07    -0.02   0.02  -0.04    -0.03   0.00  -0.02
  85   1    -0.02  -0.01   0.19     0.02   0.03   0.00     0.02   0.06  -0.07
  86   1    -0.10  -0.14   0.11    -0.06  -0.04  -0.01     0.04   0.10  -0.04
  87   1    -0.03   0.00  -0.01     0.01   0.03  -0.10     0.01   0.06   0.00
  88   1     0.03   0.17   0.21     0.15   0.16   0.05    -0.01  -0.02  -0.08
  89   1     0.14   0.17   0.03     0.16   0.16  -0.08    -0.06  -0.02  -0.01
  90   1     0.11   0.30   0.18     0.18   0.19   0.08    -0.05  -0.07  -0.07
  91   1    -0.03  -0.04  -0.04    -0.05  -0.05   0.04    -0.03  -0.12  -0.11
  92   1    -0.03  -0.03  -0.04    -0.06   0.00   0.08    -0.04  -0.03  -0.05
  93   1    -0.02  -0.04  -0.02    -0.05   0.01  -0.02     0.07  -0.04  -0.09
  94   1    -0.05   0.02  -0.05    -0.05  -0.16   0.07    -0.10  -0.02  -0.10
  95   1    -0.05   0.03  -0.03    -0.04  -0.17   0.04    -0.10   0.02  -0.05
  96   1    -0.04   0.01  -0.05    -0.06  -0.12   0.10    -0.09   0.00  -0.07
  97   1     0.00   0.03  -0.07    -0.02   0.05  -0.02    -0.03  -0.01   0.02
  98   1     0.01  -0.02  -0.07    -0.01   0.01  -0.03     0.00   0.02   0.01
  99   1     0.01   0.00  -0.03     0.01   0.03   0.01    -0.02   0.01  -0.01
 100   1     0.01   0.04  -0.05     0.00   0.06  -0.02    -0.06  -0.01  -0.01
 101   1     0.00   0.07  -0.04     0.00   0.06   0.00    -0.06   0.00  -0.04
 102   1    -0.02   0.03  -0.03    -0.01   0.04   0.01    -0.06  -0.01  -0.02
 103   1    -0.01   0.08   0.02    -0.02  -0.04   0.01    -0.03   0.05   0.03
 104   1     0.00   0.06   0.04    -0.02  -0.02   0.01    -0.03   0.04   0.05
 105   1    -0.02   0.07   0.00    -0.01  -0.03   0.00    -0.04   0.06   0.00
 106   1    -0.03   0.04  -0.02    -0.02  -0.04   0.01    -0.04  -0.07  -0.07
 107   1    -0.04   0.04  -0.04    -0.02  -0.04  -0.01     0.01  -0.03  -0.02
 108   1    -0.05   0.00  -0.02    -0.01  -0.06   0.00    -0.08  -0.03  -0.03
 109   1    -0.09   0.03   0.03     0.06  -0.07   0.01    -0.01   0.03  -0.02
 110   1    -0.09   0.02   0.03     0.10  -0.08   0.01    -0.02   0.05  -0.01
 111   1    -0.10  -0.01   0.00     0.08  -0.08   0.07    -0.02   0.03  -0.03
 112   1    -0.05   0.02  -0.03    -0.06   0.01   0.05    -0.10   0.09   0.04
 113   1    -0.02  -0.02  -0.01     0.06  -0.07   0.05     0.00   0.03   0.04
 114   1    -0.05  -0.02  -0.05    -0.04  -0.08  -0.05    -0.09  -0.01  -0.03
                    13                     14                     15
                     A                      A                      A
 Frequencies --    64.9032                68.9058                75.0722
 Red. masses --     4.4056                 4.7079                 3.6990
 Frc consts  --     0.0109                 0.0132                 0.0123
 IR Inten    --     1.0104                 2.2704                 0.8443
 Atom AN      X      Y      Z        X      Y      Z        X      Y      Z
   1   8    -0.07   0.10   0.03    -0.11   0.07   0.02    -0.03  -0.01   0.01
   2  12     0.01  -0.04  -0.03     0.02   0.01   0.00     0.01  -0.02   0.00
   3   8     0.00   0.06  -0.05     0.02   0.04   0.01     0.01   0.07   0.04
   4   6     0.01   0.02   0.06     0.01  -0.01   0.07    -0.03  -0.01   0.00
   5   7     0.00  -0.01  -0.04     0.03  -0.01   0.00     0.01  -0.02   0.00
   6   7    -0.03  -0.02  -0.02     0.02   0.00  -0.02     0.02  -0.01   0.02
   7   8     0.06  -0.03   0.11     0.12  -0.09   0.14    -0.01  -0.02   0.01
   8   6    -0.02   0.00  -0.05     0.01  -0.01   0.00     0.01   0.00   0.00
   9   6    -0.05   0.01  -0.05     0.01  -0.01  -0.02     0.01   0.00   0.02
  10   6    -0.05   0.00  -0.03     0.01  -0.01  -0.03     0.01  -0.01   0.02
  11   8     0.03  -0.01   0.03     0.00  -0.03   0.04    -0.04   0.01   0.00
  12   6     0.01  -0.02  -0.01     0.02   0.00   0.03    -0.01   0.06   0.03
  13   6    -0.01   0.03  -0.01    -0.01  -0.01   0.02     0.03   0.12   0.04
  14   6     0.06   0.00   0.05     0.01  -0.01   0.05    -0.06   0.01  -0.02
  15   8     0.02  -0.05  -0.05     0.04   0.04   0.04    -0.01   0.06   0.03
  16   6    -0.10   0.12   0.05    -0.08   0.05   0.05     0.00  -0.02   0.03
  17   8    -0.02  -0.05  -0.03    -0.02   0.00   0.01     0.00  -0.02   0.00
  18   6    -0.01   0.03  -0.03     0.01   0.04   0.01     0.02   0.03   0.03
  19   8     0.00  -0.01  -0.01     0.01   0.03   0.02     0.06   0.00   0.05
  20   8     0.00  -0.02   0.03     0.01  -0.01   0.07     0.01   0.00   0.01
  21   6    -0.01  -0.02   0.02     0.00  -0.03   0.06     0.01  -0.01  -0.01
  22   6    -0.03  -0.05  -0.04    -0.03  -0.02   0.03     0.01  -0.01   0.00
  23   6     0.02   0.01   0.00     0.03   0.01   0.04     0.01   0.01   0.02
  24   8     0.00  -0.01   0.06     0.00  -0.03   0.08     0.00  -0.02  -0.03
  25   6    -0.03  -0.01  -0.11    -0.03  -0.01   0.02     0.02   0.00  -0.01
  26   6     0.03   0.03  -0.01     0.04   0.02   0.04    -0.02   0.01   0.03
  27   6    -0.02   0.05   0.03    -0.07  -0.02   0.00     0.11   0.14   0.09
  28   6     0.11  -0.05   0.03     0.02  -0.02   0.05    -0.10   0.06  -0.01
  29   6     0.00   0.00  -0.03     0.01   0.00   0.00     0.00  -0.02  -0.01
  30   6     0.00  -0.02  -0.01     0.01  -0.01  -0.03     0.02   0.00   0.01
  31   6     0.01   0.02  -0.01     0.01   0.02  -0.02     0.00  -0.02  -0.01
  32   6     0.01   0.03   0.01    -0.02   0.02  -0.04     0.00  -0.01  -0.01
  33   6     0.01   0.03   0.02    -0.03   0.01  -0.04    -0.01  -0.02  -0.01
  34   6     0.00   0.02   0.02    -0.03  -0.01  -0.04    -0.02  -0.03  -0.03
  35   6     0.00   0.01  -0.01    -0.01  -0.01  -0.02    -0.02  -0.03  -0.03
  36   6     0.02   0.03   0.00     0.02   0.02  -0.03     0.00  -0.02  -0.03
  37   6     0.01   0.01   0.00    -0.03  -0.04  -0.04    -0.04  -0.07  -0.08
  38   6     0.03  -0.04  -0.03     0.01   0.01  -0.04     0.02   0.01   0.00
  39   6     0.08  -0.01  -0.05    -0.02  -0.02   0.01     0.03   0.03  -0.03
  40   6     0.10   0.03  -0.05    -0.06  -0.06   0.06     0.04   0.04  -0.06
  41   6     0.07   0.04  -0.03    -0.05  -0.06   0.05     0.04   0.02  -0.05
  42   6     0.01   0.01   0.00    -0.01  -0.03   0.00     0.03   0.00  -0.01
  43   6     0.00  -0.08  -0.01     0.05   0.06  -0.10     0.01   0.01   0.04
  44   6    -0.05   0.01   0.06     0.01   0.00  -0.04     0.01  -0.02   0.02
  45   6     0.03   0.04   0.01     0.04   0.05  -0.01    -0.01  -0.02  -0.05
  46   6     0.00   0.05   0.00    -0.01  -0.02  -0.03     0.02  -0.04  -0.03
  47   6     0.00   0.01   0.01    -0.01  -0.08  -0.06     0.00  -0.12  -0.13
  48   6     0.01   0.00   0.01    -0.08  -0.03  -0.06    -0.12  -0.04  -0.11
  49   6    -0.03   0.08   0.12     0.00  -0.05  -0.07     0.04  -0.06   0.07
  50   6    -0.08  -0.05   0.03     0.02   0.07   0.00    -0.06  -0.02   0.02
  51   6    -0.06  -0.12  -0.01     0.14   0.06  -0.11    -0.02   0.02   0.04
  52   6     0.04  -0.10   0.06    -0.02   0.11  -0.16     0.03  -0.01   0.06
  53   6    -0.03  -0.01  -0.04    -0.01  -0.01   0.00     0.00   0.02  -0.01
  54   6    -0.07   0.01  -0.03    -0.01  -0.01  -0.05    -0.01   0.00   0.01
  55   1    -0.07   0.03  -0.06     0.00  -0.02  -0.02     0.01   0.00   0.02
  56   1     0.00   0.04  -0.03     0.01  -0.05   0.05     0.01   0.18   0.00
  57   1     0.08   0.03   0.09     0.01  -0.01   0.05    -0.08  -0.02  -0.05
  58   1    -0.12   0.10   0.06    -0.06   0.06   0.11     0.02  -0.01   0.05
  59   1    -0.11   0.14   0.05    -0.13   0.09   0.03    -0.01  -0.01   0.02
  60   1    -0.10   0.12   0.05    -0.05   0.01   0.01     0.01  -0.06   0.02
  61   1    -0.05  -0.11  -0.05    -0.05  -0.04   0.04     0.01  -0.01  -0.01
  62   1     0.05   0.01   0.01     0.07   0.01   0.04     0.02   0.01   0.01
  63   1    -0.03   0.00  -0.13    -0.04  -0.04   0.06     0.02   0.01  -0.02
  64   1    -0.02  -0.04  -0.13    -0.08   0.01   0.00     0.03  -0.01  -0.02
  65   1    -0.04   0.03  -0.09     0.01   0.00  -0.01     0.01   0.00  -0.01
  66   1     0.05   0.01   0.01     0.06   0.00   0.05    -0.02  -0.01   0.02
  67   1    -0.01   0.03  -0.03     0.01   0.03   0.03    -0.04   0.02   0.04
  68   1     0.06   0.06  -0.03     0.07   0.04   0.02    -0.01   0.02   0.03
  69   1    -0.02   0.03   0.06    -0.08  -0.05   0.02     0.15   0.21   0.15
  70   1    -0.02   0.04   0.04    -0.08   0.01  -0.04     0.18   0.07   0.07
  71   1    -0.03   0.08   0.03    -0.11  -0.04  -0.01     0.06   0.16   0.09
  72   1     0.15  -0.06   0.04     0.02  -0.02   0.05    -0.15   0.08  -0.01
  73   1     0.14  -0.04   0.05     0.02  -0.02   0.05    -0.12   0.03  -0.02
  74   1     0.10  -0.08  -0.01     0.02  -0.02   0.04    -0.07   0.10   0.01
  75   1     0.01   0.04   0.02    -0.02   0.03  -0.05     0.00  -0.01   0.00
  76   1     0.01   0.04   0.04    -0.05   0.01  -0.06    -0.02  -0.01  -0.01
  77   1     0.00   0.02   0.03    -0.05  -0.02  -0.05    -0.03  -0.04  -0.05
  78   1     0.03   0.02  -0.01     0.03   0.01  -0.07     0.00  -0.02  -0.02
  79   1     0.01   0.01   0.01    -0.01  -0.05  -0.04    -0.03  -0.07  -0.08
  80   1     0.09  -0.03  -0.05    -0.02  -0.02   0.01     0.03   0.04  -0.03
  81   1     0.14   0.05  -0.07    -0.09  -0.09   0.10     0.05   0.05  -0.08
  82   1     0.08   0.07  -0.03    -0.07  -0.08   0.08     0.05   0.03  -0.07
  83   1    -0.01  -0.07  -0.03     0.06   0.06  -0.11     0.02   0.00   0.05
  84   1    -0.09  -0.01   0.08     0.03   0.02  -0.08     0.03  -0.01   0.01
  85   1     0.05   0.05   0.03     0.04   0.05  -0.03    -0.02  -0.03  -0.08
  86   1     0.04   0.02   0.01     0.06   0.07  -0.01    -0.03   0.01  -0.05
  87   1     0.02   0.05   0.01     0.03   0.05   0.02     0.00  -0.04  -0.05
  88   1     0.01   0.06   0.02     0.00  -0.02  -0.04     0.02  -0.04  -0.05
  89   1    -0.01   0.06   0.00    -0.04  -0.02   0.01     0.03  -0.04  -0.04
  90   1    -0.01   0.04  -0.01    -0.03  -0.06  -0.05     0.03  -0.04  -0.02
  91   1     0.00   0.02   0.02    -0.03  -0.12  -0.09    -0.02  -0.13  -0.17
  92   1     0.00   0.01   0.01    -0.04  -0.06  -0.05     0.00  -0.13  -0.15
  93   1    -0.02   0.01   0.02     0.04  -0.08  -0.06     0.04  -0.15  -0.09
  94   1     0.02   0.00   0.02    -0.09  -0.05  -0.08    -0.13  -0.07  -0.16
  95   1     0.02   0.00   0.00    -0.09  -0.01  -0.04    -0.14   0.00  -0.08
  96   1     0.01   0.01   0.01    -0.09  -0.03  -0.06    -0.13  -0.04  -0.12
  97   1    -0.07   0.07   0.16     0.03  -0.05  -0.09     0.02  -0.06   0.09
  98   1    -0.01   0.11   0.14     0.00  -0.06  -0.08     0.08  -0.08   0.06
  99   1     0.02   0.10   0.10    -0.03  -0.06  -0.06     0.03  -0.07   0.11
 100   1    -0.14  -0.04   0.09     0.05   0.09  -0.04    -0.06  -0.05   0.04
 101   1    -0.11  -0.12  -0.03     0.03   0.11   0.03    -0.08   0.02  -0.01
 102   1    -0.02  -0.02   0.00    -0.01   0.05   0.05    -0.09  -0.04   0.03
 103   1    -0.08  -0.15   0.01     0.16   0.08  -0.16    -0.03   0.02   0.07
 104   1    -0.09  -0.10  -0.05     0.17   0.04  -0.06    -0.03   0.03   0.03
 105   1    -0.05  -0.13   0.01     0.15   0.06  -0.10    -0.04   0.03   0.03
 106   1     0.01  -0.11   0.15     0.02   0.18  -0.16     0.02  -0.01   0.08
 107   1     0.02  -0.09   0.03    -0.06   0.12  -0.19     0.03   0.00   0.05
 108   1     0.13  -0.13   0.05    -0.05   0.08  -0.16     0.05  -0.01   0.06
 109   1    -0.06   0.02  -0.05    -0.02   0.00   0.01     0.01   0.00  -0.02
 110   1     0.00  -0.01  -0.06    -0.02   0.00   0.00    -0.03   0.03   0.00
 111   1    -0.04  -0.04  -0.01    -0.02  -0.02  -0.01     0.00   0.03  -0.05
 112   1    -0.07   0.02  -0.03     0.01  -0.01  -0.07    -0.11   0.12   0.07
 113   1    -0.07   0.03  -0.03    -0.03  -0.01  -0.06     0.12  -0.03   0.07
 114   1    -0.08   0.00  -0.02    -0.01  -0.01  -0.03    -0.07  -0.08  -0.12
                    16                     17                     18
                     A                      A                      A
 Frequencies --    77.3698                79.7028                83.0909
 Red. masses --     4.6113                 4.0492                 3.1295
 Frc consts  --     0.0163                 0.0152                 0.0127
 IR Inten    --     1.2507                 0.8053                 1.8090
 Atom AN      X      Y      Z        X      Y      Z        X      Y      Z
   1   8    -0.01   0.00  -0.03    -0.05  -0.01  -0.06    -0.02  -0.03  -0.04
   2  12     0.02   0.01   0.04     0.01  -0.01   0.01    -0.01   0.01   0.00
   3   8    -0.01  -0.04  -0.02     0.02   0.00   0.03    -0.01   0.01  -0.01
   4   6     0.02  -0.02  -0.01     0.07  -0.05   0.01     0.05  -0.04   0.00
   5   7     0.01  -0.01   0.05     0.02  -0.01   0.01    -0.02   0.04  -0.01
   6   7     0.00   0.02   0.05    -0.06   0.01   0.01     0.03   0.00   0.00
   7   8     0.07  -0.04   0.01     0.23  -0.11   0.06     0.15  -0.07   0.03
   8   6     0.03   0.00   0.05    -0.02   0.01  -0.01     0.01   0.02   0.00
   9   6     0.02   0.00   0.06    -0.06   0.03  -0.01     0.04   0.00   0.01
  10   6     0.01   0.01   0.05    -0.06   0.02   0.00     0.04   0.00   0.00
  11   8     0.00  -0.01  -0.03     0.01   0.00   0.01     0.00   0.00   0.00
  12   6     0.02   0.01  -0.01     0.02   0.01   0.02    -0.01   0.00   0.00
  13   6    -0.01  -0.04  -0.02     0.02   0.01   0.02    -0.02  -0.02   0.00
  14   6    -0.01   0.00  -0.03    -0.01  -0.01  -0.01     0.00  -0.01   0.00
  15   8     0.05   0.08   0.02     0.02   0.03   0.03     0.00   0.00   0.00
  16   6     0.02  -0.02  -0.01     0.02  -0.05  -0.06     0.02  -0.05  -0.05
  17   8     0.00   0.03   0.04     0.04   0.01   0.02    -0.02  -0.02   0.01
  18   6     0.00   0.01  -0.07     0.02   0.01   0.01    -0.02   0.01   0.00
  19   8     0.02   0.06  -0.11     0.03   0.02   0.01    -0.03   0.00   0.00
  20   8    -0.01  -0.08  -0.11     0.02   0.02  -0.01    -0.01   0.00   0.06
  21   6    -0.02  -0.04   0.02     0.02   0.01  -0.03    -0.01  -0.01   0.04
  22   6    -0.05  -0.03  -0.01     0.03   0.01  -0.01    -0.01  -0.01   0.03
  23   6    -0.02  -0.06  -0.09     0.01   0.02   0.00     0.00  -0.01   0.03
  24   8     0.00  -0.02   0.13     0.01   0.01  -0.07    -0.01  -0.01   0.03
  25   6    -0.13   0.03  -0.09     0.01   0.01   0.01     0.01  -0.02   0.03
  26   6    -0.07  -0.07  -0.07     0.00   0.02   0.00     0.02  -0.03   0.04
  27   6    -0.05  -0.07  -0.07     0.03   0.01   0.02    -0.05  -0.03  -0.02
  28   6    -0.03   0.03  -0.02    -0.06   0.05   0.00    -0.02   0.02   0.00
  29   6     0.00  -0.02   0.03     0.02  -0.01   0.00    -0.02   0.04  -0.01
  30   6     0.01   0.04   0.02    -0.06   0.00   0.02     0.01   0.00  -0.02
  31   6     0.00  -0.02   0.00     0.02  -0.01  -0.01    -0.02   0.02   0.01
  32   6    -0.02  -0.02  -0.02     0.01  -0.01  -0.02     0.00   0.02   0.02
  33   6    -0.02  -0.02   0.00     0.01  -0.01  -0.01     0.01   0.02   0.00
  34   6    -0.01  -0.02   0.03     0.01  -0.01   0.00     0.01   0.03  -0.01
  35   6     0.00  -0.02   0.04     0.02  -0.01   0.00     0.00   0.04  -0.01
  36   6     0.00  -0.03  -0.03     0.02  -0.01  -0.02    -0.03   0.02   0.02
  37   6     0.00  -0.03   0.04     0.02  -0.01   0.00     0.00   0.07   0.00
  38   6     0.02   0.06   0.00    -0.07  -0.02   0.04     0.00   0.02  -0.02
  39   6     0.03   0.08  -0.04    -0.06  -0.01   0.03    -0.02   0.02  -0.03
  40   6     0.05   0.09  -0.07    -0.04   0.02   0.00    -0.02   0.01  -0.06
  41   6     0.04   0.08  -0.05    -0.03   0.03  -0.03     0.00  -0.01  -0.07
  42   6     0.02   0.05   0.00    -0.04   0.03  -0.01     0.01  -0.02  -0.05
  43   6     0.02   0.06   0.01    -0.08  -0.04   0.04     0.00   0.02   0.00
  44   6     0.00   0.02   0.04    -0.03   0.04  -0.04     0.01  -0.06  -0.02
  45   6     0.05   0.03   0.03     0.05   0.03   0.02    -0.09  -0.05  -0.04
  46   6    -0.08  -0.10  -0.01    -0.03  -0.04  -0.01     0.07   0.09   0.00
  47   6     0.00  -0.02   0.04     0.02  -0.01   0.00    -0.01   0.09   0.02
  48   6    -0.02  -0.05   0.06     0.02  -0.01   0.00     0.05   0.07   0.01
  49   6     0.01   0.02   0.08    -0.06   0.11  -0.09     0.04  -0.13   0.03
  50   6    -0.05  -0.02   0.02     0.06  -0.01  -0.07    -0.08  -0.05  -0.01
  51   6     0.02   0.09   0.01    -0.08  -0.07   0.04    -0.04  -0.03  -0.01
  52   6     0.02   0.04  -0.01    -0.06  -0.06   0.06     0.01   0.03   0.06
  53   6     0.06   0.00   0.05    -0.02   0.01   0.00     0.01   0.02   0.00
  54   6    -0.01   0.01   0.04    -0.03   0.03   0.03     0.01   0.01  -0.01
  55   1     0.04   0.00   0.07    -0.07   0.05  -0.01     0.06  -0.01   0.01
  56   1    -0.01  -0.08   0.02     0.02   0.01   0.02    -0.01  -0.04   0.01
  57   1    -0.02  -0.02  -0.05    -0.05  -0.06  -0.05    -0.03  -0.04  -0.01
  58   1     0.05  -0.01   0.05     0.09  -0.03   0.13     0.07  -0.03   0.09
  59   1    -0.02   0.00  -0.03    -0.14   0.01  -0.14    -0.10  -0.01  -0.11
  60   1     0.06  -0.06  -0.04     0.16  -0.16  -0.18     0.13  -0.12  -0.15
  61   1    -0.05  -0.12  -0.04     0.06   0.02  -0.02    -0.02  -0.01   0.04
  62   1     0.01  -0.07  -0.11     0.01   0.02   0.01     0.01  -0.02   0.01
  63   1    -0.16   0.01  -0.16     0.01   0.02  -0.05     0.02   0.00   0.05
  64   1    -0.12   0.01  -0.10     0.06   0.00   0.03     0.01  -0.02   0.02
  65   1    -0.17   0.10  -0.05    -0.04   0.00   0.04     0.03  -0.02   0.02
  66   1    -0.08  -0.11  -0.09     0.00   0.04  -0.01     0.03  -0.05   0.05
  67   1    -0.12  -0.05  -0.07     0.02   0.02   0.00     0.00  -0.02   0.05
  68   1    -0.06  -0.03  -0.07    -0.01   0.01   0.02     0.04  -0.03   0.01
  69   1    -0.07  -0.09  -0.09     0.04   0.02   0.02    -0.07  -0.05  -0.03
  70   1    -0.07  -0.03  -0.09     0.04   0.00   0.02    -0.08   0.00  -0.02
  71   1    -0.05  -0.10  -0.07     0.03   0.00   0.02    -0.04  -0.03  -0.02
  72   1    -0.05   0.04  -0.03    -0.14   0.09   0.01    -0.05   0.03   0.00
  73   1    -0.04   0.03  -0.03    -0.08   0.00  -0.01    -0.02   0.00   0.00
  74   1    -0.02   0.04   0.00    -0.01   0.11   0.02     0.00   0.04   0.01
  75   1    -0.02  -0.02  -0.04     0.01  -0.01  -0.03     0.00   0.01   0.03
  76   1    -0.03  -0.02   0.00     0.01  -0.01  -0.02     0.03   0.02   0.01
  77   1    -0.01  -0.02   0.04     0.01  -0.01   0.00     0.02   0.04  -0.01
  78   1     0.02  -0.03  -0.11     0.04  -0.01  -0.06    -0.06   0.03   0.11
  79   1     0.00  -0.04   0.02     0.01  -0.01   0.00    -0.01   0.08   0.01
  80   1     0.04   0.09  -0.06    -0.07  -0.02   0.04    -0.04   0.03  -0.03
  81   1     0.06   0.11  -0.11    -0.03   0.02  -0.01    -0.03   0.01  -0.08
  82   1     0.05   0.09  -0.08    -0.01   0.05  -0.05    -0.01  -0.02  -0.09
  83   1     0.01   0.04   0.03    -0.10  -0.03   0.03     0.02   0.04  -0.03
  84   1     0.00   0.01   0.05    -0.06   0.02   0.01     0.05  -0.04  -0.05
  85   1     0.07   0.04   0.03     0.07   0.03   0.03    -0.12  -0.06  -0.06
  86   1     0.10   0.04   0.02     0.08   0.02   0.01    -0.14  -0.04  -0.03
  87   1     0.01   0.05   0.09     0.03   0.04   0.05    -0.04  -0.08  -0.10
  88   1    -0.04  -0.09  -0.04    -0.02  -0.04  -0.01     0.03   0.07   0.02
  89   1    -0.14  -0.08   0.08    -0.07  -0.03   0.04     0.13   0.06  -0.09
  90   1    -0.12  -0.19  -0.05    -0.06  -0.09  -0.04     0.11   0.18   0.06
  91   1    -0.01  -0.05   0.03     0.02   0.00   0.00     0.00   0.12   0.04
  92   1    -0.01   0.01   0.07     0.03  -0.01   0.00     0.01   0.08   0.01
  93   1     0.03   0.01   0.01     0.02  -0.01   0.00    -0.04   0.09   0.01
  94   1    -0.02  -0.07   0.06     0.01  -0.01   0.00     0.06   0.09   0.02
  95   1    -0.02  -0.06   0.06     0.01  -0.01   0.00     0.06   0.05   0.00
  96   1    -0.02  -0.04   0.08     0.01  -0.01   0.00     0.06   0.06   0.00
  97   1     0.00   0.01   0.11    -0.04   0.09  -0.10     0.03  -0.13   0.04
  98   1     0.04   0.04   0.09    -0.11   0.16  -0.06     0.10  -0.17   0.00
  99   1     0.02   0.03   0.07    -0.04   0.14  -0.17     0.02  -0.15   0.08
 100   1    -0.06  -0.04   0.05     0.05   0.01  -0.07    -0.06  -0.10   0.00
 101   1    -0.06  -0.02  -0.01     0.08  -0.10  -0.05    -0.09   0.04  -0.03
 102   1    -0.05  -0.02   0.00     0.13   0.02  -0.12    -0.16  -0.08   0.00
 103   1     0.02   0.08   0.02    -0.09  -0.09   0.02    -0.04  -0.03  -0.01
 104   1     0.01   0.10   0.03    -0.09  -0.05   0.03    -0.04  -0.04  -0.05
 105   1     0.03   0.10   0.00    -0.06  -0.07   0.05    -0.05  -0.05   0.02
 106   1     0.02   0.03  -0.01    -0.07  -0.10   0.02     0.00   0.01   0.04
 107   1     0.04   0.05  -0.02    -0.03  -0.08   0.10     0.01   0.01   0.11
 108   1     0.02   0.02  -0.01    -0.08  -0.02   0.06     0.02   0.09   0.07
 109   1     0.06  -0.01   0.03    -0.03   0.02  -0.01     0.03   0.00   0.01
 110   1     0.07  -0.01   0.04    -0.01   0.01  -0.01    -0.03   0.02   0.01
 111   1     0.07   0.00   0.07    -0.03   0.00   0.01     0.01   0.05  -0.04
 112   1    -0.09   0.11   0.08     0.12  -0.16  -0.04    -0.17   0.21   0.09
 113   1     0.09  -0.02   0.09    -0.22   0.09  -0.06     0.23  -0.05   0.09
 114   1    -0.05  -0.05  -0.07     0.06   0.15   0.25    -0.10  -0.13  -0.25
                    19                     20                     21
                     A                      A                      A
 Frequencies --    86.4597                96.1792               100.0265
 Red. masses --     3.5145                 4.0089                 3.2934
 Frc consts  --     0.0155                 0.0218                 0.0194
 IR Inten    --     0.8468                 0.3737                 0.7617
 Atom AN      X      Y      Z        X      Y      Z        X      Y      Z
   1   8    -0.05   0.01   0.00    -0.01   0.02   0.00     0.02  -0.03   0.01
   2  12     0.02  -0.02   0.01    -0.04  -0.01   0.00     0.05   0.01  -0.01
   3   8    -0.01   0.02   0.01    -0.01  -0.01  -0.01    -0.01   0.03  -0.01
   4   6    -0.05   0.01   0.00     0.01   0.01   0.01    -0.02   0.00  -0.01
   5   7     0.01   0.00   0.00    -0.05  -0.01   0.01     0.03  -0.01   0.01
   6   7     0.01   0.00   0.01    -0.08   0.02   0.02     0.03   0.02  -0.01
   7   8    -0.04   0.01   0.00     0.03  -0.01   0.02    -0.05   0.03  -0.03
   8   6    -0.04   0.02  -0.02     0.02  -0.01   0.04    -0.02   0.00  -0.01
   9   6    -0.07   0.02  -0.03     0.07  -0.02   0.08    -0.05   0.01  -0.03
  10   6    -0.04   0.01  -0.01     0.03  -0.01   0.07    -0.02   0.01  -0.03
  11   8    -0.03   0.00   0.00     0.00   0.01   0.00    -0.01   0.01   0.00
  12   6    -0.02   0.00   0.02    -0.02  -0.01  -0.02    -0.01   0.01   0.01
  13   6    -0.03  -0.02   0.02    -0.01   0.01  -0.02    -0.03  -0.01   0.00
  14   6    -0.06   0.02  -0.02     0.02   0.00   0.01    -0.03   0.01   0.00
  15   8    -0.02   0.02   0.03    -0.03  -0.04  -0.04     0.01   0.03   0.01
  16   6    -0.03  -0.01   0.00     0.00   0.02   0.01     0.02  -0.03   0.01
  17   8     0.02  -0.07   0.05     0.01  -0.05   0.02     0.02  -0.05   0.01
  18   6    -0.02   0.02   0.01    -0.02  -0.03   0.01    -0.01   0.02   0.00
  19   8    -0.02  -0.01   0.03    -0.02  -0.05   0.03    -0.01  -0.01   0.02
  20   8    -0.02  -0.03   0.09    -0.01   0.00   0.05    -0.01  -0.01   0.06
  21   6    -0.01  -0.06   0.02     0.00  -0.02   0.00     0.00  -0.04  -0.03
  22   6     0.01  -0.07   0.03     0.02  -0.03   0.01     0.01  -0.05  -0.01
  23   6     0.00  -0.04   0.05    -0.01  -0.03   0.03     0.01  -0.01   0.03
  24   8    -0.02  -0.06  -0.04    -0.01  -0.02  -0.05    -0.02  -0.05  -0.11
  25   6     0.01  -0.06   0.01     0.05  -0.03   0.01     0.02  -0.05  -0.01
  26   6     0.01  -0.08   0.07     0.02  -0.06   0.04     0.02  -0.03   0.04
  27   6    -0.07  -0.03   0.00     0.03   0.02   0.01    -0.08  -0.02  -0.02
  28   6    -0.09   0.06  -0.01     0.06  -0.04   0.00    -0.04   0.02   0.00
  29   6     0.01   0.00   0.00    -0.04  -0.02   0.01     0.02  -0.01   0.01
  30   6     0.02   0.00   0.01    -0.04   0.04   0.00     0.03   0.03  -0.02
  31   6     0.01  -0.01  -0.01    -0.03  -0.04   0.03     0.02   0.00  -0.01
  32   6     0.01  -0.01  -0.02    -0.01  -0.05   0.04     0.00   0.00  -0.02
  33   6     0.03  -0.01   0.00     0.01  -0.04   0.03    -0.01   0.00  -0.02
  34   6     0.03   0.00   0.01     0.01  -0.02   0.01     0.00  -0.01   0.01
  35   6     0.03   0.01   0.01    -0.01  -0.01   0.00     0.01  -0.01   0.02
  36   6     0.01  -0.01  -0.01    -0.06  -0.05   0.02     0.03   0.01   0.00
  37   6     0.03   0.03   0.02    -0.01   0.01  -0.01     0.01  -0.03   0.02
  38   6     0.02   0.00   0.01     0.00   0.05  -0.06     0.03   0.04  -0.04
  39   6     0.03   0.02  -0.01     0.04   0.06  -0.07     0.01   0.03  -0.02
  40   6     0.06   0.05  -0.06     0.04   0.08  -0.04     0.00   0.01   0.00
  41   6     0.07   0.06  -0.07     0.01   0.08  -0.01     0.01   0.01   0.00
  42   6     0.04   0.03  -0.03    -0.03   0.06   0.01     0.02   0.02  -0.01
  43   6     0.01  -0.01   0.02     0.01   0.04  -0.10     0.05   0.07  -0.05
  44   6     0.03   0.02  -0.01    -0.04   0.08   0.00     0.01   0.01   0.00
  45   6    -0.01  -0.02  -0.04    -0.09  -0.07  -0.02     0.07   0.04   0.06
  46   6     0.05   0.02  -0.02    -0.01  -0.05   0.01    -0.04  -0.01   0.02
  47   6     0.04   0.04   0.02    -0.01  -0.02  -0.03     0.01  -0.01   0.03
  48   6     0.06   0.03   0.02     0.00   0.05  -0.05    -0.01  -0.06   0.05
  49   6     0.03   0.06   0.00    -0.06   0.15  -0.03     0.02   0.01   0.02
  50   6     0.04  -0.03  -0.05     0.05   0.06  -0.01    -0.01   0.00   0.00
  51   6     0.08   0.13   0.04     0.01  -0.05  -0.12    -0.04  -0.11  -0.08
  52   6     0.01  -0.07  -0.13     0.00   0.07  -0.05     0.02   0.18   0.15
  53   6    -0.06   0.01  -0.01     0.07   0.01   0.02    -0.05  -0.01   0.01
  54   6    -0.04   0.01  -0.01     0.11  -0.03   0.10    -0.03   0.01  -0.05
  55   1    -0.10   0.04  -0.04     0.14  -0.03   0.11    -0.08   0.01  -0.04
  56   1    -0.01  -0.05   0.03    -0.01   0.04  -0.04    -0.01  -0.04   0.02
  57   1    -0.06   0.01  -0.05     0.03   0.01   0.05    -0.03   0.00  -0.02
  58   1    -0.02   0.01  -0.06     0.00   0.02   0.02     0.03  -0.03   0.05
  59   1     0.03  -0.04   0.02     0.00   0.02   0.01    -0.01  -0.01  -0.01
  60   1    -0.07   0.00   0.04     0.00   0.01   0.01     0.05  -0.04  -0.02
  61   1     0.02  -0.08   0.02     0.03  -0.02   0.01     0.03  -0.05  -0.02
  62   1     0.02  -0.05   0.01    -0.02  -0.04   0.01     0.02  -0.02   0.01
  63   1     0.02  -0.03  -0.03     0.06   0.01  -0.01     0.02  -0.03  -0.03
  64   1     0.06  -0.08   0.02     0.08  -0.05   0.01     0.04  -0.06   0.00
  65   1    -0.02  -0.06   0.04     0.03  -0.05   0.02     0.00  -0.05   0.00
  66   1     0.03  -0.13   0.10     0.03  -0.07   0.06     0.03  -0.06   0.06
  67   1    -0.03  -0.06   0.11     0.01  -0.05   0.06     0.00  -0.02   0.06
  68   1     0.04  -0.08   0.03     0.02  -0.08   0.02     0.04  -0.03   0.01
  69   1    -0.09  -0.06  -0.02     0.04   0.04   0.01    -0.10  -0.06  -0.03
  70   1    -0.11   0.01   0.01     0.04   0.00   0.02    -0.11   0.02  -0.03
  71   1    -0.05  -0.03   0.00     0.04   0.04   0.01    -0.07  -0.03  -0.02
  72   1    -0.10   0.07  -0.03     0.09  -0.05   0.01    -0.06   0.03   0.01
  73   1    -0.10   0.06  -0.02     0.08  -0.03   0.02    -0.05   0.00   0.00
  74   1    -0.08   0.08   0.02     0.05  -0.06  -0.03    -0.03   0.03   0.01
  75   1     0.01  -0.02  -0.03    -0.01  -0.06   0.06     0.00   0.01  -0.04
  76   1     0.03  -0.01  -0.01     0.03  -0.05   0.04    -0.02   0.00  -0.03
  77   1     0.04   0.01   0.02     0.02  -0.02   0.00    -0.01  -0.01   0.01
  78   1     0.00  -0.01   0.02    -0.08  -0.03   0.04     0.05   0.00  -0.04
  79   1     0.01   0.04   0.01    -0.02   0.03   0.02     0.01  -0.05   0.00
  80   1     0.03   0.01  -0.01     0.07   0.06  -0.09     0.01   0.03  -0.02
  81   1     0.08   0.07  -0.09     0.07   0.09  -0.05    -0.01   0.00   0.01
  82   1     0.09   0.08  -0.11     0.02   0.10  -0.01     0.00   0.00   0.01
  83   1    -0.03  -0.06   0.10     0.01   0.07  -0.15     0.13   0.14  -0.16
  84   1     0.01   0.00   0.02    -0.07   0.06   0.03     0.01   0.01   0.01
  85   1    -0.01  -0.02  -0.04    -0.10  -0.08  -0.05     0.10   0.06   0.09
  86   1    -0.04  -0.03  -0.04    -0.12  -0.05  -0.02     0.10   0.00   0.05
  87   1     0.00  -0.02  -0.07    -0.06  -0.10  -0.04     0.03   0.07   0.07
  88   1     0.04   0.02  -0.01     0.00  -0.05  -0.01    -0.03  -0.01   0.03
  89   1     0.07   0.02  -0.06     0.00  -0.05  -0.01    -0.08   0.00   0.07
  90   1     0.06   0.06   0.00     0.01  -0.05   0.04    -0.07  -0.05  -0.03
  91   1     0.04   0.06   0.02     0.00   0.01  -0.04     0.00  -0.05   0.02
  92   1     0.05   0.04   0.02     0.01  -0.04  -0.06    -0.01   0.01   0.06
  93   1     0.02   0.04   0.02    -0.02  -0.05   0.01     0.04   0.01   0.00
  94   1     0.06   0.05   0.02     0.00   0.07  -0.05    -0.01  -0.08   0.04
  95   1     0.05   0.02   0.01     0.00   0.07  -0.04    -0.02  -0.07   0.05
  96   1     0.07   0.02   0.01     0.00   0.03  -0.08    -0.02  -0.05   0.08
  97   1     0.02   0.06   0.02    -0.06   0.18  -0.05     0.01  -0.01   0.04
  98   1     0.03   0.09   0.01    -0.11   0.15  -0.03     0.03   0.03   0.03
  99   1     0.06   0.08  -0.02    -0.02   0.17  -0.05     0.01   0.01   0.00
 100   1     0.01  -0.04  -0.01     0.06   0.08  -0.04    -0.02   0.00   0.02
 101   1     0.03  -0.10  -0.07     0.07   0.01   0.03    -0.02  -0.01  -0.02
 102   1     0.09  -0.01  -0.09     0.08   0.08  -0.05     0.00   0.01   0.00
 103   1     0.09   0.14   0.04     0.01  -0.05  -0.14    -0.03  -0.10  -0.08
 104   1     0.10   0.15   0.14     0.01  -0.07  -0.16    -0.03  -0.18  -0.21
 105   1     0.12   0.18  -0.03    -0.01  -0.08  -0.07    -0.11  -0.19   0.02
 106   1     0.01  -0.03  -0.09     0.01   0.05  -0.09     0.04   0.15   0.07
 107   1     0.03   0.00  -0.26     0.01   0.03   0.02    -0.01   0.09   0.34
 108   1    -0.01  -0.21  -0.15     0.00   0.14  -0.04     0.03   0.40   0.18
 109   1    -0.07   0.03   0.00     0.15  -0.07   0.02    -0.11   0.05   0.00
 110   1    -0.05   0.01  -0.01    -0.02   0.01   0.06     0.02  -0.01  -0.02
 111   1    -0.07  -0.01  -0.01     0.11   0.11  -0.05    -0.07  -0.08   0.06
 112   1     0.08  -0.12  -0.10     0.04  -0.01   0.18     0.01  -0.02  -0.08
 113   1    -0.21   0.06  -0.09     0.22  -0.07   0.15    -0.08   0.01  -0.07
 114   1     0.02   0.10   0.17     0.12  -0.04  -0.01    -0.01   0.03   0.00
                    22                     23                     24
                     A                      A                      A
 Frequencies --   100.6325               113.0397               114.5877
 Red. masses --     2.9566                 3.3555                 3.9220
 Frc consts  --     0.0176                 0.0253                 0.0303
 IR Inten    --     0.9303                 1.3923                 2.2043
 Atom AN      X      Y      Z        X      Y      Z        X      Y      Z
   1   8     0.02  -0.01   0.00     0.00  -0.01   0.01    -0.01  -0.03   0.02
   2  12     0.00   0.04   0.01     0.00   0.06   0.03     0.03  -0.09   0.03
   3   8     0.01   0.00   0.00     0.03   0.00   0.04     0.02   0.00   0.04
   4   6     0.01   0.00   0.00    -0.03   0.01   0.00    -0.04  -0.01   0.00
   5   7    -0.01  -0.01   0.04     0.02   0.02   0.04     0.00  -0.02  -0.03
   6   7     0.01   0.02  -0.01    -0.02  -0.01  -0.05    -0.05  -0.05   0.03
   7   8    -0.01   0.01  -0.01    -0.06   0.02  -0.01    -0.08   0.02  -0.02
   8   6    -0.06   0.00   0.02     0.02  -0.01   0.03    -0.03   0.00  -0.03
   9   6    -0.09   0.00  -0.01     0.05  -0.04   0.01     0.00  -0.01   0.00
  10   6    -0.05   0.01  -0.02     0.03  -0.03  -0.03    -0.01  -0.03   0.04
  11   8     0.01   0.00   0.00    -0.01  -0.01   0.00     0.00  -0.02   0.02
  12   6     0.01   0.01  -0.01     0.01   0.03   0.02     0.02   0.00   0.06
  13   6     0.01   0.00  -0.01     0.02  -0.01   0.02     0.01  -0.02   0.05
  14   6     0.02  -0.01   0.01    -0.01   0.00   0.00    -0.05   0.00   0.00
  15   8     0.02   0.02   0.00     0.03   0.07   0.05     0.03   0.04   0.07
  16   6     0.01   0.00   0.00    -0.01   0.00   0.01    -0.03  -0.02   0.00
  17   8    -0.03   0.04   0.00     0.01   0.08   0.04     0.07  -0.04   0.04
  18   6     0.01   0.00  -0.01     0.03   0.04   0.01     0.02   0.04  -0.01
  19   8     0.01   0.03  -0.02     0.03   0.10  -0.03     0.05   0.04  -0.01
  20   8     0.01   0.00  -0.02     0.03  -0.02  -0.01     0.02  -0.02  -0.04
  21   6     0.00   0.03   0.05     0.00  -0.02   0.01     0.04   0.00   0.02
  22   6    -0.02   0.04   0.03    -0.01   0.04   0.06     0.04  -0.04  -0.03
  23   6     0.00   0.00  -0.02     0.02  -0.01   0.00     0.02   0.01  -0.01
  24   8     0.01   0.04   0.13    -0.02  -0.08  -0.03     0.07   0.06   0.12
  25   6    -0.01   0.03   0.03    -0.05   0.01   0.12    -0.02   0.02  -0.13
  26   6     0.00  -0.02  -0.01    -0.01  -0.05   0.04    -0.02   0.04  -0.03
  27   6    -0.01  -0.01  -0.03    -0.02  -0.03  -0.03    -0.02  -0.02   0.03
  28   6     0.04  -0.04   0.00    -0.02  -0.01   0.00    -0.11   0.06   0.02
  29   6     0.00  -0.02   0.04     0.02   0.03   0.04    -0.01  -0.01  -0.03
  30   6     0.01   0.02   0.00    -0.01   0.00  -0.05    -0.04  -0.05   0.02
  31   6    -0.01  -0.04  -0.01     0.01   0.02   0.00     0.00   0.00  -0.02
  32   6    -0.01  -0.05  -0.03     0.00   0.00  -0.03     0.01   0.01   0.01
  33   6     0.00  -0.04  -0.01     0.00   0.00  -0.04     0.02   0.01   0.02
  34   6     0.01  -0.02   0.03     0.01   0.01  -0.01     0.01   0.01   0.00
  35   6     0.01  -0.01   0.05     0.02   0.03   0.03     0.00   0.00  -0.02
  36   6    -0.01  -0.04  -0.03     0.01   0.01  -0.01     0.01   0.01  -0.02
  37   6     0.01  -0.01   0.02     0.02   0.04   0.01     0.01   0.03  -0.02
  38   6     0.01   0.02  -0.01     0.00  -0.04  -0.04    -0.01  -0.02  -0.03
  39   6     0.01   0.02   0.00     0.01  -0.05  -0.01     0.01  -0.01  -0.04
  40   6     0.01   0.02   0.00     0.02  -0.03   0.01     0.00  -0.02  -0.01
  41   6     0.01   0.02   0.00     0.01   0.00  -0.01    -0.03  -0.04   0.03
  42   6     0.01   0.02   0.00    -0.01   0.01  -0.04    -0.04  -0.04   0.03
  43   6     0.01   0.02   0.00    -0.02  -0.08  -0.04     0.01  -0.01  -0.05
  44   6     0.01   0.01   0.00    -0.03   0.01  -0.01    -0.02   0.00  -0.01
  45   6    -0.09  -0.09  -0.13     0.03   0.04   0.00    -0.01   0.00  -0.05
  46   6     0.13   0.01  -0.06    -0.01  -0.03  -0.01     0.05   0.04  -0.03
  47   6     0.04  -0.07  -0.02     0.03  -0.02  -0.02     0.01   0.10   0.00
  48   6    -0.03   0.02  -0.02     0.01   0.09  -0.04     0.06   0.01   0.01
  49   6     0.01   0.02  -0.02    -0.03   0.07   0.01    -0.05   0.01  -0.06
  50   6     0.04   0.00  -0.01    -0.02  -0.05  -0.05     0.03   0.07   0.03
  51   6    -0.03  -0.04  -0.01    -0.05  -0.11  -0.05    -0.01  -0.08  -0.07
  52   6     0.02   0.04   0.07     0.02  -0.11  -0.01    -0.01   0.03   0.01
  53   6    -0.08  -0.02   0.04    -0.03  -0.01   0.04    -0.10   0.04  -0.06
  54   6    -0.03  -0.01  -0.04     0.02  -0.04  -0.05     0.03  -0.02   0.09
  55   1    -0.13  -0.01  -0.03     0.06  -0.07   0.01     0.01   0.02   0.00
  56   1     0.01  -0.01   0.00     0.03  -0.04   0.04     0.02  -0.04   0.07
  57   1     0.03   0.00   0.03    -0.01   0.01   0.00    -0.05  -0.01  -0.06
  58   1     0.00  -0.01   0.02    -0.03   0.00  -0.11    -0.05  -0.02  -0.08
  59   1    -0.01   0.01   0.00     0.09  -0.05   0.06     0.04  -0.06   0.03
  60   1     0.02   0.00  -0.01    -0.10   0.05   0.09    -0.08   0.03   0.05
  61   1    -0.05   0.04   0.04    -0.01   0.07   0.07     0.06  -0.14  -0.08
  62   1     0.00  -0.01  -0.03     0.04  -0.02  -0.03     0.04   0.01   0.00
  63   1     0.00   0.02   0.08    -0.06  -0.03   0.17    -0.04   0.03  -0.24
  64   1    -0.04   0.05   0.01    -0.10   0.06   0.13     0.03  -0.02  -0.14
  65   1     0.04   0.03   0.00    -0.01   0.00   0.10    -0.09   0.09  -0.07
  66   1     0.00  -0.03  -0.01    -0.02  -0.09   0.03    -0.03   0.04  -0.04
  67   1    -0.01  -0.01   0.00    -0.04  -0.03   0.08    -0.05   0.04  -0.06
  68   1     0.00  -0.02  -0.01    -0.01  -0.05   0.03    -0.02   0.09  -0.01
  69   1    -0.01  -0.01  -0.03    -0.04  -0.05  -0.04    -0.02  -0.04   0.03
  70   1    -0.01   0.00  -0.04    -0.04   0.01  -0.04    -0.03   0.00   0.02
  71   1    -0.01  -0.02  -0.03    -0.02  -0.06  -0.03    -0.02  -0.03   0.03
  72   1     0.07  -0.05   0.01     0.02  -0.02   0.00    -0.15   0.08   0.01
  73   1     0.04  -0.02   0.01    -0.03   0.03   0.00    -0.13   0.05  -0.01
  74   1     0.02  -0.06   0.00    -0.05  -0.03   0.02    -0.09   0.09   0.06
  75   1    -0.03  -0.07  -0.07    -0.01  -0.01  -0.06     0.01   0.01   0.02
  76   1     0.00  -0.05  -0.03    -0.01  -0.01  -0.06     0.03   0.02   0.04
  77   1     0.02  -0.02   0.04     0.01   0.01  -0.01     0.02   0.01   0.01
  78   1    -0.04  -0.04   0.07     0.02   0.01  -0.05     0.01   0.00   0.01
  79   1     0.01   0.00   0.04     0.02   0.06   0.04    -0.02   0.04  -0.04
  80   1     0.01   0.02   0.00     0.02  -0.07   0.00     0.04   0.00  -0.07
  81   1     0.01   0.02   0.00     0.03  -0.04   0.03     0.01  -0.02  -0.01
  82   1     0.01   0.02   0.00     0.01   0.01   0.01    -0.03  -0.04   0.04
  83   1     0.03   0.04  -0.04    -0.04  -0.07  -0.06     0.03   0.01  -0.10
  84   1     0.01   0.01   0.01    -0.06  -0.01   0.03    -0.03   0.01  -0.04
  85   1    -0.11  -0.11  -0.19     0.04   0.05  -0.01    -0.03  -0.01  -0.08
  86   1    -0.16  -0.06  -0.11     0.04   0.06   0.00    -0.03   0.02  -0.05
  87   1    -0.03  -0.13  -0.18     0.01   0.05   0.02     0.01  -0.02  -0.06
  88   1     0.09  -0.01  -0.05     0.01  -0.02  -0.03     0.05   0.04  -0.02
  89   1     0.21  -0.01  -0.17    -0.04  -0.02   0.03     0.07   0.04  -0.07
  90   1     0.19   0.11   0.02    -0.03  -0.07  -0.02     0.07   0.07   0.00
  91   1     0.02  -0.10  -0.06     0.02  -0.04  -0.05     0.03   0.15   0.02
  92   1     0.02  -0.06  -0.02     0.02  -0.03  -0.04     0.05   0.08   0.01
  93   1     0.10  -0.08   0.00     0.08  -0.04   0.00    -0.05   0.11  -0.01
  94   1    -0.05   0.03  -0.06     0.00   0.12  -0.08     0.07   0.03   0.04
  95   1    -0.07   0.04   0.02    -0.02   0.11  -0.02     0.08  -0.01  -0.02
  96   1    -0.01   0.00  -0.03     0.03   0.06  -0.08     0.06   0.01   0.01
  97   1     0.01   0.04  -0.03    -0.05   0.04   0.04    -0.03   0.04  -0.10
  98   1    -0.01   0.00  -0.03    -0.04   0.13   0.04    -0.08  -0.03  -0.08
  99   1     0.02   0.02   0.00    -0.01   0.09  -0.05    -0.04   0.01  -0.04
 100   1     0.03   0.00  -0.01    -0.05  -0.05  -0.01     0.07   0.11  -0.03
 101   1     0.04  -0.03  -0.01    -0.03  -0.10  -0.07     0.06   0.10   0.08
 102   1     0.06   0.01  -0.03     0.02  -0.02  -0.08     0.02   0.06   0.07
 103   1    -0.04  -0.05   0.00    -0.08  -0.16  -0.05     0.00  -0.08  -0.08
 104   1    -0.04  -0.05  -0.06    -0.09  -0.06  -0.07     0.00  -0.10  -0.11
 105   1    -0.05  -0.06   0.02     0.00  -0.11  -0.04    -0.03  -0.11  -0.03
 106   1     0.01   0.02   0.05    -0.01  -0.13   0.03     0.00   0.02  -0.03
 107   1     0.01   0.01   0.13     0.03  -0.10  -0.03    -0.02   0.00   0.08
 108   1     0.03   0.11   0.08     0.07  -0.13  -0.01    -0.01   0.11   0.02
 109   1    -0.11   0.01   0.05     0.03  -0.06   0.09    -0.01  -0.02  -0.01
 110   1    -0.06  -0.03   0.03    -0.15  -0.01   0.09    -0.24   0.07   0.01
 111   1    -0.10  -0.05   0.06    -0.03   0.05  -0.06    -0.09   0.13  -0.20
 112   1     0.17  -0.23  -0.18    -0.15   0.16   0.06    -0.06   0.04   0.19
 113   1    -0.30   0.04  -0.16     0.26  -0.12   0.07     0.17  -0.02   0.15
 114   1     0.08   0.13   0.22    -0.07  -0.16  -0.30     0.01  -0.06  -0.02
                    25                     26                     27
                     A                      A                      A
 Frequencies --   120.9013               127.0436               130.2296
 Red. masses --     2.5431                 1.9768                 1.7037
 Frc consts  --     0.0219                 0.0188                 0.0170
 IR Inten    --     0.1676                 0.1666                 0.1131
 Atom AN      X      Y      Z        X      Y      Z        X      Y      Z
   1   8     0.00  -0.03   0.02    -0.01   0.02  -0.01     0.01   0.01   0.00
   2  12     0.00   0.03  -0.01     0.01  -0.01   0.01     0.00   0.00   0.01
   3   8     0.02   0.01   0.02     0.00   0.00   0.00    -0.01  -0.01  -0.01
   4   6     0.00  -0.02   0.02    -0.01   0.02  -0.01     0.01   0.00   0.00
   5   7    -0.02   0.02  -0.01     0.00   0.01   0.01     0.02  -0.02   0.02
   6   7     0.01   0.02  -0.02     0.00  -0.01   0.00     0.01   0.00   0.01
   7   8    -0.02  -0.01   0.01    -0.01   0.02  -0.01     0.01   0.00   0.00
   8   6     0.03   0.00   0.00     0.03  -0.01   0.02    -0.02  -0.01   0.01
   9   6     0.02   0.00   0.00     0.02  -0.01   0.01    -0.02  -0.01   0.01
  10   6     0.00   0.01  -0.03    -0.01   0.00  -0.01    -0.01  -0.01   0.00
  11   8     0.00  -0.01   0.02     0.00   0.01   0.00     0.00   0.00  -0.01
  12   6     0.01   0.02   0.02     0.00   0.00   0.00    -0.01  -0.01  -0.02
  13   6     0.01   0.00   0.02    -0.01  -0.01   0.00    -0.01   0.00  -0.02
  14   6     0.00  -0.02   0.02    -0.01   0.02  -0.01     0.01   0.00   0.00
  15   8     0.02   0.03   0.03     0.00   0.00   0.01    -0.01  -0.02  -0.03
  16   6    -0.04  -0.01  -0.01     0.02   0.00   0.01     0.01   0.01   0.00
  17   8    -0.01   0.02  -0.02     0.02   0.00   0.02    -0.02   0.01   0.00
  18   6     0.02   0.01   0.01     0.00   0.01  -0.01    -0.02  -0.02   0.00
  19   8     0.03   0.03   0.00     0.00   0.01  -0.01    -0.02  -0.01   0.00
  20   8     0.02  -0.01   0.00     0.00  -0.01   0.00    -0.02   0.01   0.00
  21   6     0.01  -0.01   0.01     0.00  -0.01   0.00    -0.01   0.01   0.00
  22   6    -0.01   0.01   0.01     0.01  -0.01   0.00    -0.01   0.01   0.00
  23   6     0.02   0.00   0.00     0.00   0.00   0.00    -0.02   0.00   0.00
  24   8     0.00  -0.03   0.01     0.01   0.00   0.00    -0.01   0.01  -0.01
  25   6     0.00   0.00   0.03    -0.02   0.00  -0.02    -0.01   0.00   0.02
  26   6     0.01  -0.01   0.01    -0.01  -0.01   0.00     0.00   0.01  -0.01
  27   6    -0.02  -0.01  -0.01    -0.02  -0.01   0.00     0.02   0.01   0.00
  28   6     0.00  -0.02   0.03    -0.02   0.02   0.00     0.03  -0.02  -0.01
  29   6    -0.02   0.01  -0.02    -0.01   0.01   0.01     0.01  -0.02   0.02
  30   6     0.01   0.02  -0.02     0.00  -0.01   0.00     0.01   0.00   0.01
  31   6    -0.01   0.01   0.03     0.00   0.03   0.05     0.02   0.00   0.03
  32   6     0.01   0.00   0.05     0.01   0.04   0.07     0.01   0.01   0.04
  33   6     0.01  -0.01  -0.01    -0.01   0.01   0.01     0.00  -0.01   0.00
  34   6    -0.01  -0.01  -0.08    -0.04  -0.01  -0.05    -0.02  -0.03  -0.03
  35   6    -0.03   0.00  -0.08    -0.03   0.00  -0.03    -0.01  -0.03  -0.02
  36   6    -0.03  -0.01   0.02     0.00   0.02   0.02     0.04   0.00   0.00
  37   6    -0.03  -0.01  -0.09    -0.01   0.02   0.01     0.00  -0.02  -0.01
  38   6     0.01   0.01  -0.01     0.01  -0.01  -0.01     0.00  -0.01   0.03
  39   6     0.01   0.01  -0.01     0.01   0.00  -0.02    -0.02  -0.01   0.04
  40   6     0.01   0.01   0.00     0.01   0.00  -0.02     0.00   0.00   0.02
  41   6     0.00   0.01   0.01     0.01  -0.01  -0.01     0.02   0.01  -0.01
  42   6     0.00   0.01   0.00     0.00  -0.01   0.00     0.02   0.01  -0.01
  43   6     0.00  -0.01   0.00     0.00  -0.01  -0.01     0.01   0.02   0.02
  44   6     0.00   0.01   0.00     0.01  -0.01  -0.01     0.01   0.01   0.00
  45   6    -0.06  -0.03  -0.01    -0.01   0.04   0.00     0.04   0.05  -0.03
  46   6    -0.01  -0.06   0.01     0.01  -0.05   0.02     0.06  -0.05  -0.01
  47   6    -0.01   0.18  -0.05    -0.08  -0.08   0.03    -0.02   0.01   0.01
  48   6    -0.01  -0.14   0.05     0.07   0.10  -0.08     0.04  -0.03   0.00
  49   6     0.00   0.01   0.01     0.02  -0.06   0.00     0.01   0.04   0.02
  50   6    -0.01   0.01   0.00    -0.02   0.02   0.01     0.00  -0.03  -0.02
  51   6    -0.04   0.00   0.01    -0.01  -0.04  -0.02     0.04   0.02   0.02
  52   6     0.02  -0.03   0.02     0.01  -0.01   0.01    -0.02   0.05   0.00
  53   6     0.08  -0.02   0.00     0.09  -0.02   0.02    -0.10   0.04  -0.02
  54   6    -0.01   0.01  -0.04    -0.04   0.01  -0.02    -0.03  -0.01  -0.02
  55   1     0.03  -0.01   0.00     0.02  -0.01   0.01    -0.04  -0.01   0.00
  56   1     0.02  -0.02   0.04     0.00  -0.02   0.01    -0.01   0.02  -0.03
  57   1     0.00  -0.02   0.02    -0.01   0.02  -0.02     0.01   0.00   0.01
  58   1    -0.07  -0.03  -0.06     0.04   0.02   0.00     0.02   0.00   0.06
  59   1    -0.01  -0.02   0.01     0.03  -0.01   0.01    -0.04   0.04  -0.02
  60   1    -0.07   0.05   0.02     0.01  -0.02   0.01     0.05  -0.02  -0.03
  61   1    -0.02   0.03   0.03     0.02  -0.03  -0.02    -0.01   0.02   0.01
  62   1     0.03   0.00   0.00     0.01  -0.01  -0.01    -0.03   0.01   0.01
  63   1     0.01  -0.02   0.08    -0.03   0.01  -0.07    -0.01   0.01   0.02
  64   1    -0.03   0.02   0.02     0.01  -0.01  -0.02     0.00   0.01   0.02
  65   1     0.04  -0.01   0.00    -0.05   0.02   0.00    -0.01  -0.01   0.02
  66   1     0.01  -0.02   0.01     0.00  -0.02   0.00    -0.01   0.03  -0.01
  67   1     0.00   0.00   0.02    -0.02   0.00   0.00     0.02   0.00  -0.02
  68   1     0.02   0.00   0.01     0.00   0.00   0.00    -0.01   0.00   0.00
  69   1    -0.01  -0.01   0.03    -0.04  -0.03  -0.03     0.03   0.03   0.00
  70   1     0.01   0.00  -0.06    -0.05   0.01   0.02     0.03  -0.01   0.01
  71   1    -0.07  -0.03  -0.02     0.01  -0.01   0.00     0.02   0.02   0.00
  72   1    -0.01  -0.01   0.03    -0.03   0.02   0.01     0.04  -0.02  -0.01
  73   1    -0.01  -0.02   0.02    -0.03   0.01  -0.01     0.04  -0.01   0.00
  74   1     0.00  -0.01   0.03    -0.02   0.02   0.00     0.02  -0.02  -0.02
  75   1     0.03   0.01   0.10     0.02   0.06   0.12     0.02   0.03   0.06
  76   1     0.03  -0.01   0.00    -0.02   0.02   0.01    -0.01   0.00   0.00
  77   1    -0.02  -0.02  -0.12    -0.05  -0.03  -0.09    -0.04  -0.04  -0.06
  78   1    -0.06   0.01   0.01     0.00   0.03  -0.01     0.05   0.00  -0.02
  79   1    -0.06  -0.05  -0.21     0.01   0.05   0.10    -0.01  -0.02  -0.02
  80   1     0.02   0.01  -0.01     0.01   0.00  -0.02    -0.03  -0.02   0.06
  81   1     0.01   0.01   0.00     0.01   0.00  -0.03    -0.01  -0.01   0.02
  82   1     0.00   0.01   0.02     0.01   0.00  -0.02     0.02   0.02  -0.03
  83   1    -0.01  -0.01   0.01     0.00   0.00  -0.03     0.02   0.02   0.01
  84   1    -0.01   0.01   0.00     0.03   0.00  -0.04    -0.01  -0.01   0.03
  85   1    -0.09  -0.05  -0.05    -0.02   0.02  -0.06     0.04   0.04  -0.08
  86   1    -0.07   0.01   0.00    -0.01   0.10   0.01     0.02   0.10  -0.02
  87   1    -0.03  -0.07   0.00     0.01   0.01   0.03     0.04   0.04  -0.01
  88   1    -0.01  -0.07  -0.02     0.04  -0.06  -0.04     0.11  -0.03  -0.06
  89   1     0.00  -0.07   0.03     0.00  -0.05   0.06     0.03  -0.03   0.02
  90   1     0.00  -0.07   0.03     0.02  -0.11   0.03     0.07  -0.12   0.01
  91   1    -0.01   0.14  -0.03    -0.05   0.01   0.09     0.00   0.05   0.05
  92   1     0.00   0.25   0.08    -0.07  -0.15  -0.10     0.00   0.00   0.00
  93   1    -0.01   0.29  -0.17    -0.19  -0.16   0.12    -0.08   0.02   0.01
  94   1    -0.01  -0.17   0.06     0.09   0.12   0.00     0.07  -0.06   0.08
  95   1    -0.02  -0.26   0.02     0.15   0.18  -0.12     0.12  -0.01  -0.05
  96   1     0.01  -0.10   0.17     0.02   0.08  -0.19    -0.02  -0.02  -0.02
  97   1    -0.01   0.02   0.01     0.02  -0.06   0.00     0.00   0.01   0.04
  98   1     0.00   0.01   0.01     0.04  -0.08  -0.01     0.01   0.08   0.04
  99   1     0.00   0.01   0.02     0.00  -0.08   0.03     0.02   0.05  -0.02
 100   1    -0.02   0.02   0.01    -0.02   0.02   0.01    -0.02  -0.04   0.01
 101   1    -0.01  -0.01  -0.01    -0.03   0.04   0.00    -0.01  -0.06  -0.04
 102   1     0.02   0.02   0.00    -0.03   0.01   0.04     0.02  -0.02  -0.04
 103   1    -0.05  -0.02   0.02    -0.01  -0.05  -0.02     0.05   0.04   0.00
 104   1    -0.05   0.02  -0.01    -0.01  -0.04  -0.04     0.06  -0.01   0.03
 105   1    -0.03   0.00   0.00    -0.01  -0.05   0.00     0.03   0.01   0.02
 106   1     0.00  -0.04   0.05     0.00  -0.02  -0.01     0.00   0.07  -0.02
 107   1     0.02  -0.02   0.00     0.01  -0.02   0.04    -0.04   0.04   0.02
 108   1     0.05  -0.05   0.02     0.00   0.02   0.01    -0.05   0.07   0.01
 109   1     0.24  -0.16   0.05     0.21  -0.13   0.05     0.20  -0.20   0.12
 110   1    -0.10  -0.05   0.05    -0.05  -0.05   0.05    -0.53   0.04   0.15
 111   1     0.15   0.16  -0.12     0.14   0.12  -0.07    -0.03   0.34  -0.37
 112   1     0.14  -0.14  -0.15     0.18  -0.21  -0.18    -0.13   0.11   0.04
 113   1    -0.21   0.05  -0.13    -0.36   0.09  -0.16     0.09  -0.05   0.04
 114   1     0.06   0.11   0.17     0.05   0.15   0.31    -0.09  -0.09  -0.15
                    28                     29                     30
                     A                      A                      A
 Frequencies --   133.7124               136.7157               140.6553
 Red. masses --     3.3068                 2.2548                 1.9138
 Frc consts  --     0.0348                 0.0248                 0.0223
 IR Inten    --     2.5655                 0.8134                 1.4206
 Atom AN      X      Y      Z        X      Y      Z        X      Y      Z
   1   8    -0.01   0.00  -0.01     0.02  -0.02   0.01    -0.10   0.06  -0.04
   2  12     0.08   0.05  -0.05     0.02   0.00  -0.03    -0.01  -0.01   0.00
   3   8     0.00   0.07  -0.04     0.01   0.03  -0.01     0.01   0.00   0.02
   4   6     0.00   0.00   0.00     0.00  -0.01   0.01    -0.07   0.05  -0.03
   5   7     0.01  -0.01   0.02    -0.03   0.00  -0.01     0.00   0.00  -0.01
   6   7     0.02   0.04  -0.05     0.02   0.01  -0.01    -0.01  -0.01  -0.01
   7   8     0.02   0.00   0.00    -0.01   0.01   0.00    -0.04   0.03  -0.01
   8   6     0.01  -0.01   0.02     0.00  -0.01  -0.01    -0.01   0.00  -0.01
   9   6     0.04  -0.03   0.01    -0.02   0.00  -0.02    -0.01   0.00  -0.01
  10   6     0.04  -0.01  -0.03    -0.02   0.01  -0.03     0.00   0.00   0.00
  11   8     0.00   0.00   0.00     0.01   0.00   0.01    -0.01   0.01   0.00
  12   6     0.01   0.01   0.00     0.01   0.00   0.02     0.00   0.02   0.01
  13   6    -0.02   0.00  -0.01     0.00  -0.01   0.01     0.00   0.00   0.01
  14   6    -0.01   0.01  -0.01    -0.01   0.00   0.00    -0.02   0.02   0.00
  15   8     0.02   0.03   0.00     0.01   0.00   0.02     0.00   0.03   0.02
  16   6     0.02  -0.01  -0.01    -0.02   0.00  -0.01     0.13  -0.06   0.07
  17   8    -0.01  -0.06  -0.06     0.00  -0.02  -0.03     0.01   0.00   0.00
  18   6     0.00   0.00  -0.01     0.01   0.01  -0.01     0.01   0.01   0.01
  19   8     0.03  -0.06   0.03     0.02  -0.01   0.00     0.02   0.01   0.01
  20   8     0.00   0.01   0.02     0.01   0.00  -0.01     0.01  -0.01  -0.01
  21   6     0.01   0.00  -0.02     0.01   0.00   0.00     0.01  -0.01   0.00
  22   6     0.01  -0.04  -0.06     0.01  -0.01  -0.02     0.01   0.00   0.00
  23   6     0.01  -0.01   0.00     0.01   0.01  -0.01     0.01   0.00   0.00
  24   8     0.02   0.03   0.00     0.03   0.03   0.04     0.01  -0.01   0.01
  25   6     0.06  -0.04  -0.08     0.02  -0.01  -0.03     0.00   0.00   0.00
  26   6     0.02  -0.03   0.01     0.01   0.03  -0.02    -0.01   0.01   0.00
  27   6    -0.11  -0.01  -0.03    -0.05  -0.01   0.01     0.00  -0.01  -0.02
  28   6    -0.03   0.03   0.00    -0.04   0.04   0.01     0.02  -0.10   0.01
  29   6     0.00   0.00   0.03    -0.02   0.00  -0.01     0.00   0.00  -0.01
  30   6     0.01   0.03  -0.04     0.02   0.01   0.00     0.00  -0.01   0.00
  31   6     0.00  -0.01   0.01    -0.01  -0.01   0.03     0.00   0.00   0.01
  32   6    -0.01  -0.02  -0.01     0.01   0.00   0.06     0.01   0.01   0.02
  33   6    -0.02  -0.02  -0.01     0.01  -0.01   0.02     0.01   0.00   0.01
  34   6    -0.01  -0.01   0.02    -0.01  -0.02  -0.04     0.00   0.00  -0.02
  35   6     0.00   0.00   0.04    -0.02  -0.01  -0.03     0.00   0.00  -0.02
  36   6     0.00  -0.01   0.01    -0.03  -0.02   0.02     0.00   0.00   0.00
  37   6     0.00   0.00   0.04    -0.01   0.00  -0.01     0.00   0.00  -0.02
  38   6     0.01   0.04  -0.04     0.00  -0.02   0.04     0.00  -0.01   0.00
  39   6     0.01   0.04  -0.03    -0.02  -0.04   0.07     0.00  -0.01   0.00
  40   6    -0.04  -0.01   0.05    -0.01  -0.02   0.05     0.01  -0.01   0.00
  41   6    -0.07  -0.04   0.10     0.02   0.01   0.01     0.00   0.00   0.00
  42   6    -0.04  -0.01   0.04     0.02   0.02  -0.01     0.00   0.00   0.00
  43   6    -0.02   0.01   0.04     0.01   0.01   0.03     0.00  -0.01   0.00
  44   6    -0.04   0.01   0.04     0.01   0.02   0.00     0.00   0.00   0.00
  45   6    -0.01  -0.01   0.00    -0.06  -0.04  -0.02    -0.01   0.00  -0.01
  46   6     0.01  -0.02   0.01     0.00  -0.05   0.01     0.00  -0.01   0.00
  47   6     0.00  -0.05   0.02    -0.05  -0.02   0.01    -0.01   0.02   0.00
  48   6    -0.01   0.03   0.00     0.03   0.03  -0.04     0.01  -0.01   0.00
  49   6    -0.06   0.03   0.00    -0.01   0.11   0.00    -0.01   0.02   0.00
  50   6     0.01   0.04   0.05     0.03  -0.06  -0.05     0.00   0.00   0.00
  51   6    -0.11   0.11   0.06     0.04   0.00   0.02     0.00   0.01   0.01
  52   6     0.05  -0.09   0.03    -0.02   0.05   0.02     0.00  -0.01   0.00
  53   6    -0.04   0.00   0.02     0.08  -0.05   0.01    -0.01  -0.01  -0.01
  54   6     0.08  -0.05  -0.06    -0.07   0.01  -0.06     0.01   0.00   0.00
  55   1     0.05  -0.07   0.01    -0.02   0.00  -0.01    -0.01   0.00  -0.01
  56   1     0.00  -0.05   0.01     0.01  -0.03   0.02     0.01  -0.01   0.02
  57   1    -0.02   0.00  -0.02    -0.02  -0.01  -0.02     0.03   0.08   0.04
  58   1     0.04   0.00   0.08    -0.04  -0.02  -0.02     0.32   0.04   0.51
  59   1    -0.06   0.02  -0.05    -0.03   0.00  -0.01    -0.15   0.10  -0.06
  60   1     0.08  -0.06  -0.07    -0.02   0.04  -0.02     0.39  -0.41  -0.15
  61   1     0.00  -0.05  -0.05     0.00  -0.02  -0.02     0.01  -0.01   0.00
  62   1     0.01  -0.01  -0.02     0.02   0.01   0.00     0.01   0.00   0.01
  63   1     0.08  -0.03  -0.03     0.03  -0.01  -0.02     0.00   0.00   0.00
  64   1     0.03  -0.04  -0.10     0.03  -0.02  -0.03     0.00   0.00   0.00
  65   1     0.11  -0.05  -0.11     0.02  -0.01  -0.03     0.00   0.00   0.00
  66   1     0.03  -0.06   0.03     0.01   0.04  -0.02    -0.01   0.01  -0.01
  67   1    -0.02  -0.01   0.02     0.02   0.02  -0.03    -0.01   0.01   0.00
  68   1     0.04  -0.02  -0.02     0.01   0.03  -0.01    -0.01   0.02   0.01
  69   1    -0.13  -0.07  -0.03    -0.06  -0.04   0.01     0.00  -0.01  -0.03
  70   1    -0.15   0.04  -0.03    -0.07   0.01   0.00     0.00   0.00  -0.03
  71   1    -0.10  -0.01  -0.02    -0.05  -0.01   0.00     0.00  -0.03  -0.02
  72   1    -0.06   0.04   0.00    -0.09   0.06   0.02     0.17  -0.17   0.03
  73   1    -0.03   0.00  -0.01    -0.05   0.00   0.00     0.02  -0.01   0.01
  74   1     0.00   0.05  -0.01    -0.01   0.08   0.02    -0.08  -0.21   0.00
  75   1    -0.02  -0.02  -0.03     0.02   0.00   0.10     0.02   0.01   0.04
  76   1    -0.02  -0.02  -0.03     0.02  -0.01   0.03     0.01   0.00   0.01
  77   1    -0.01  -0.01   0.02    -0.01  -0.02  -0.06     0.00   0.00  -0.03
  78   1    -0.01  -0.01   0.01    -0.06   0.00   0.02    -0.01   0.00   0.00
  79   1     0.01   0.01   0.06     0.00   0.02   0.03     0.00   0.00  -0.02
  80   1     0.02   0.05  -0.05    -0.04  -0.06   0.11     0.01  -0.01   0.00
  81   1    -0.05  -0.03   0.08    -0.02  -0.03   0.08     0.01   0.00   0.00
  82   1    -0.11  -0.08   0.17     0.03   0.02   0.00     0.01   0.00   0.00
  83   1    -0.05  -0.03   0.11     0.03   0.01   0.02     0.00  -0.01   0.01
  84   1    -0.05   0.01   0.02    -0.04  -0.01   0.06    -0.01   0.00   0.00
  85   1    -0.02  -0.01  -0.01    -0.08  -0.05  -0.06    -0.02  -0.01  -0.02
  86   1    -0.02  -0.01   0.00    -0.09   0.00  -0.02    -0.01   0.01  -0.01
  87   1    -0.01  -0.02  -0.01    -0.04  -0.06  -0.03     0.00  -0.01   0.00
  88   1     0.02  -0.01  -0.01    -0.02  -0.07  -0.02    -0.02  -0.02  -0.01
  89   1     0.00  -0.01   0.00     0.04  -0.08   0.00     0.02  -0.02   0.00
  90   1     0.01  -0.03   0.01     0.02  -0.02   0.03     0.00   0.00   0.00
  91   1    -0.01  -0.05   0.02    -0.03   0.03   0.05    -0.01   0.00   0.01
  92   1    -0.01  -0.06   0.00    -0.04  -0.05  -0.05    -0.02   0.04   0.02
  93   1     0.01  -0.07   0.05    -0.11  -0.05   0.04    -0.01   0.04  -0.02
  94   1     0.00   0.02   0.02     0.04   0.06  -0.02     0.02   0.00   0.00
  95   1     0.02   0.07   0.00     0.04   0.03  -0.04     0.01  -0.03   0.00
  96   1    -0.03   0.03  -0.03     0.05   0.01  -0.06     0.03  -0.01   0.01
  97   1    -0.04   0.03  -0.01    -0.01   0.08   0.02    -0.01   0.02   0.00
  98   1    -0.09   0.04   0.01    -0.04   0.18   0.04    -0.01   0.02   0.00
  99   1    -0.06   0.03  -0.02     0.02   0.14  -0.08     0.00   0.02   0.00
 100   1     0.02   0.07   0.02    -0.01  -0.06   0.00    -0.01   0.01   0.00
 101   1     0.02   0.05   0.09     0.02  -0.15  -0.08     0.00  -0.01   0.00
 102   1     0.01   0.04   0.07     0.11  -0.02  -0.10     0.02   0.01   0.00
 103   1    -0.14   0.08   0.14     0.06   0.02   0.00     0.00   0.01   0.01
 104   1    -0.15   0.16   0.07     0.07  -0.02   0.04     0.00   0.01   0.01
 105   1    -0.10   0.15   0.00     0.03  -0.01   0.03     0.00   0.02   0.00
 106   1     0.00  -0.10   0.16     0.00   0.07  -0.01     0.00  -0.01   0.00
 107   1     0.06  -0.03  -0.09    -0.05   0.04   0.03     0.00  -0.01  -0.01
 108   1     0.15  -0.22   0.01    -0.05   0.06   0.02     0.00  -0.02   0.00
 109   1     0.12  -0.12   0.10    -0.06   0.06  -0.06    -0.08   0.05  -0.04
 110   1    -0.28   0.00   0.11     0.31  -0.07  -0.08     0.09   0.00  -0.04
 111   1    -0.01   0.16  -0.18     0.06  -0.18   0.22    -0.03  -0.08   0.07
 112   1     0.06  -0.02  -0.05    -0.26   0.25   0.03    -0.02   0.02   0.02
 113   1     0.12  -0.09  -0.03     0.17  -0.06   0.05     0.04  -0.01   0.02
 114   1     0.09  -0.05  -0.13    -0.19  -0.14  -0.33     0.00  -0.02  -0.04
                    31                     32                     33
                     A                      A                      A
 Frequencies --   141.3372               148.1144               151.4564
 Red. masses --     2.6239                 2.4732                 1.6770
 Frc consts  --     0.0309                 0.0320                 0.0227
 IR Inten    --     2.1004                 1.1265                 0.3803
 Atom AN      X      Y      Z        X      Y      Z        X      Y      Z
   1   8    -0.03   0.02  -0.01     0.02  -0.03   0.03    -0.07   0.04  -0.05
   2  12     0.05   0.01   0.01    -0.04  -0.03  -0.03     0.01   0.00  -0.02
   3   8    -0.01   0.02  -0.01     0.02   0.01   0.00     0.01   0.02   0.00
   4   6    -0.02   0.01  -0.01     0.00  -0.01   0.02    -0.02   0.02  -0.02
   5   7    -0.01   0.02   0.03    -0.02  -0.02  -0.05     0.01   0.00  -0.01
   6   7     0.02   0.00   0.00    -0.01  -0.02  -0.01     0.00   0.02   0.00
   7   8    -0.02   0.00  -0.01    -0.03   0.01   0.00     0.04  -0.01   0.00
   8   6     0.05  -0.01   0.04     0.01  -0.02  -0.03     0.00   0.02  -0.01
   9   6     0.06  -0.02   0.03     0.02  -0.01  -0.01     0.00   0.02   0.00
  10   6     0.01   0.00  -0.01     0.01  -0.02   0.00     0.01   0.02   0.01
  11   8    -0.01   0.00  -0.01     0.01  -0.01   0.02     0.00   0.02   0.00
  12   6    -0.01  -0.01  -0.01     0.01   0.00   0.02     0.00   0.02   0.01
  13   6    -0.01   0.02   0.00     0.01  -0.02   0.02     0.00   0.00   0.00
  14   6    -0.01   0.01  -0.01     0.00   0.00   0.01    -0.01   0.01   0.00
  15   8    -0.01  -0.02  -0.02     0.01   0.00   0.03     0.01   0.03   0.01
  16   6     0.02  -0.01   0.02    -0.03   0.00  -0.01     0.06  -0.03   0.04
  17   8     0.04  -0.03   0.03    -0.05   0.01  -0.06    -0.02  -0.02  -0.03
  18   6    -0.01   0.00   0.00     0.03   0.02  -0.01     0.01   0.00   0.00
  19   8     0.00  -0.03   0.02     0.03   0.02  -0.01     0.03  -0.02   0.02
  20   8    -0.01   0.01   0.00     0.03  -0.03  -0.05     0.01  -0.01  -0.03
  21   6     0.02   0.01  -0.01     0.00  -0.02   0.00     0.00  -0.01   0.00
  22   6     0.03  -0.03  -0.03    -0.01   0.02   0.03     0.00   0.00   0.00
  23   6    -0.02  -0.01   0.00     0.03   0.03  -0.02     0.01   0.01  -0.01
  24   8     0.03   0.06   0.02    -0.01  -0.06   0.01     0.00  -0.01   0.01
  25   6    -0.01   0.00  -0.07     0.06  -0.03   0.09     0.05  -0.02   0.02
  26   6    -0.02  -0.01   0.00     0.01   0.09  -0.05    -0.01   0.05  -0.03
  27   6    -0.01   0.02   0.01    -0.04  -0.02   0.01    -0.04  -0.01  -0.02
  28   6     0.00  -0.01  -0.01    -0.03   0.03   0.02    -0.01  -0.06   0.01
  29   6    -0.01   0.02   0.03    -0.02  -0.02  -0.04     0.00   0.00  -0.01
  30   6     0.00  -0.01   0.00     0.00  -0.01  -0.01    -0.01   0.01   0.01
  31   6    -0.03  -0.01  -0.03    -0.02  -0.03  -0.05     0.00  -0.01   0.00
  32   6    -0.04  -0.04  -0.09    -0.01  -0.02  -0.03     0.00   0.00   0.00
  33   6    -0.01  -0.01  -0.03     0.00   0.00   0.03     0.00   0.00   0.01
  34   6     0.02   0.03   0.06     0.02   0.01   0.07     0.00   0.00   0.01
  35   6     0.01   0.04   0.06     0.00   0.00   0.02     0.00   0.00   0.00
  36   6    -0.03   0.00   0.00    -0.02  -0.01  -0.01    -0.01  -0.01   0.00
  37   6     0.00   0.04   0.01     0.00   0.00   0.03     0.00  -0.02   0.02
  38   6    -0.02  -0.04   0.04    -0.01  -0.02   0.01    -0.01   0.00   0.02
  39   6    -0.03  -0.05   0.07    -0.01  -0.02   0.01    -0.02   0.00   0.03
  40   6    -0.01  -0.02   0.03     0.02   0.01  -0.02    -0.01   0.01   0.00
  41   6     0.02   0.01  -0.02     0.03   0.02  -0.04     0.00   0.02  -0.02
  42   6     0.02   0.01  -0.02     0.01   0.01  -0.02     0.00   0.02  -0.01
  43   6    -0.01  -0.03   0.01     0.00   0.01   0.01    -0.01  -0.01   0.01
  44   6     0.01   0.00  -0.01    -0.01   0.02   0.00     0.01   0.00   0.00
  45   6    -0.02  -0.02   0.02     0.00  -0.03   0.03    -0.01  -0.03   0.00
  46   6    -0.03   0.05   0.00    -0.04   0.07   0.00    -0.01   0.00   0.00
  47   6     0.08   0.04  -0.06    -0.01  -0.05   0.02    -0.02  -0.03   0.03
  48   6    -0.08   0.03   0.01     0.01   0.03   0.00     0.00  -0.02   0.02
  49   6     0.02   0.01   0.02     0.01   0.04   0.05     0.01  -0.02   0.01
  50   6    -0.02  -0.03  -0.03    -0.04   0.03   0.00    -0.01  -0.02  -0.01
  51   6     0.05  -0.06  -0.01     0.02   0.02   0.01     0.01  -0.03   0.00
  52   6    -0.05   0.02  -0.02    -0.04   0.05   0.00    -0.02  -0.01   0.00
  53   6     0.09  -0.02   0.04     0.03   0.00  -0.06    -0.01   0.04  -0.02
  54   6    -0.06   0.01  -0.05     0.04  -0.02   0.01     0.02   0.02   0.02
  55   1     0.07  -0.04   0.04     0.04  -0.01   0.00     0.00   0.02   0.00
  56   1    -0.01   0.02  -0.01     0.03  -0.04   0.03     0.01  -0.03   0.02
  57   1     0.00   0.02  -0.01    -0.01  -0.01  -0.01     0.01   0.03   0.01
  58   1     0.06   0.01   0.07    -0.02  -0.04   0.22     0.08   0.07  -0.41
  59   1     0.01   0.01   0.01    -0.25   0.11  -0.12     0.48  -0.24   0.24
  60   1     0.04  -0.07   0.01     0.16  -0.04  -0.18    -0.30   0.04   0.36
  61   1     0.05  -0.08  -0.06    -0.04   0.09   0.07    -0.01   0.02   0.02
  62   1    -0.02  -0.01   0.00     0.06   0.04   0.03     0.02   0.02   0.02
  63   1    -0.02   0.04  -0.19     0.09  -0.07   0.26     0.06  -0.02   0.08
  64   1     0.08  -0.05  -0.05    -0.05   0.03   0.05     0.01  -0.01   0.00
  65   1    -0.11   0.02   0.00     0.20  -0.06  -0.01     0.10  -0.04  -0.02
  66   1    -0.02  -0.01   0.00    -0.01   0.13  -0.08    -0.02   0.08  -0.04
  67   1    -0.03   0.00   0.00     0.03   0.07  -0.09     0.01   0.04  -0.05
  68   1    -0.02   0.00   0.00    -0.02   0.10  -0.01    -0.02   0.06   0.00
  69   1     0.00   0.02   0.03    -0.06  -0.06   0.00    -0.05  -0.04  -0.03
  70   1     0.00   0.01   0.01    -0.07   0.01   0.01    -0.06   0.02  -0.03
  71   1    -0.02   0.03   0.01    -0.03  -0.03   0.01    -0.04  -0.02  -0.02
  72   1     0.02  -0.02  -0.02    -0.08   0.06   0.03     0.05  -0.08   0.03
  73   1     0.00   0.01  -0.01    -0.05   0.00   0.01    -0.01  -0.03   0.00
  74   1    -0.02  -0.02  -0.02     0.00   0.07   0.03    -0.05  -0.10   0.00
  75   1    -0.06  -0.07  -0.15    -0.02  -0.03  -0.05     0.01   0.00   0.01
  76   1    -0.02  -0.03  -0.06     0.01   0.02   0.06     0.00   0.00   0.02
  77   1     0.04   0.05   0.10     0.03   0.03   0.12     0.00   0.00   0.01
  78   1    -0.02  -0.01   0.02    -0.01  -0.02   0.02    -0.02   0.00   0.01
  79   1    -0.03   0.03  -0.03     0.01   0.01   0.06     0.02  -0.02   0.02
  80   1    -0.05  -0.08   0.11    -0.01  -0.03   0.02    -0.03  -0.01   0.04
  81   1    -0.02  -0.03   0.04     0.03   0.01  -0.03    -0.01   0.01   0.00
  82   1     0.04   0.03  -0.05     0.05   0.04  -0.07     0.01   0.03  -0.03
  83   1     0.00  -0.01  -0.02     0.03   0.01   0.01    -0.03   0.00  -0.01
  84   1     0.00  -0.01   0.00    -0.03   0.02  -0.02     0.02   0.00   0.01
  85   1    -0.01   0.00   0.07     0.02  -0.01   0.10    -0.02  -0.03   0.02
  86   1    -0.01  -0.08   0.02     0.02  -0.10   0.02    -0.02  -0.05   0.00
  87   1    -0.04   0.01  -0.01    -0.02   0.00   0.00    -0.01  -0.03  -0.01
  88   1     0.01   0.09   0.02     0.00   0.11   0.05    -0.03  -0.01   0.02
  89   1    -0.08   0.09  -0.02    -0.09   0.12  -0.03     0.01  -0.01  -0.01
  90   1    -0.04   0.02   0.00    -0.06   0.05  -0.02    -0.01   0.03   0.00
  91   1     0.05  -0.03  -0.15     0.00  -0.02   0.03    -0.02  -0.05   0.05
  92   1     0.08   0.08   0.01     0.00  -0.08  -0.02    -0.05  -0.02   0.03
  93   1     0.20   0.06  -0.08    -0.02  -0.09   0.06    -0.02  -0.03   0.03
  94   1    -0.11   0.05  -0.09     0.02  -0.01   0.04     0.01  -0.07   0.06
  95   1    -0.17   0.01   0.07     0.06   0.09  -0.03     0.05   0.01  -0.01
  96   1    -0.02   0.03   0.06    -0.06   0.03  -0.05    -0.06  -0.01   0.00
  97   1     0.00   0.00   0.04    -0.03   0.07   0.06     0.01  -0.02   0.01
  98   1     0.03   0.02   0.02     0.03   0.01   0.03     0.03  -0.02   0.00
  99   1     0.03   0.01   0.01     0.04   0.04   0.10     0.01  -0.02   0.02
 100   1    -0.06  -0.04   0.01    -0.10   0.07   0.04     0.00  -0.05  -0.01
 101   1    -0.04  -0.06  -0.07    -0.06  -0.02  -0.05    -0.01   0.00  -0.01
 102   1     0.00  -0.02  -0.05     0.02   0.05   0.02    -0.04  -0.02  -0.03
 103   1     0.07  -0.05  -0.06     0.04   0.06   0.01     0.02  -0.03  -0.02
 104   1     0.08  -0.08   0.01     0.05  -0.01   0.02     0.02  -0.03   0.00
 105   1     0.06  -0.08   0.02    -0.02   0.02   0.01     0.02  -0.04   0.01
 106   1    -0.02   0.02  -0.09    -0.01   0.09   0.00    -0.01  -0.06  -0.11
 107   1    -0.05  -0.01   0.03    -0.07   0.05   0.01     0.04  -0.05   0.08
 108   1    -0.11   0.06  -0.01    -0.05   0.06   0.01    -0.09   0.08   0.01
 109   1     0.33  -0.22   0.13     0.19  -0.13  -0.01     0.02   0.01  -0.01
 110   1    -0.21  -0.06   0.14    -0.17   0.00   0.02    -0.06   0.05   0.00
 111   1     0.17   0.23  -0.16     0.08   0.17  -0.21    -0.01   0.07  -0.07
 112   1     0.00  -0.01  -0.12     0.11  -0.12  -0.02     0.02   0.01   0.04
 113   1    -0.16   0.02  -0.09    -0.05   0.01  -0.03     0.04   0.02   0.03
 114   1    -0.07   0.02   0.04     0.09   0.04   0.11     0.03   0.02   0.01
                    34                     35                     36
                     A                      A                      A
 Frequencies --   155.6497               159.6152               162.9540
 Red. masses --     2.5498                 3.4352                 2.6176
 Frc consts  --     0.0364                 0.0516                 0.0410
 IR Inten    --     0.7479                 3.1490                 0.3771
 Atom AN      X      Y      Z        X      Y      Z        X      Y      Z
   1   8     0.02  -0.01   0.01    -0.02   0.00   0.00     0.02   0.00   0.03
   2  12     0.03   0.03  -0.01    -0.01   0.02  -0.03     0.04   0.05   0.00
   3   8     0.00   0.03  -0.01    -0.02  -0.09   0.01     0.01   0.03  -0.02
   4   6     0.01  -0.01   0.00    -0.01   0.00   0.01     0.00   0.01   0.01
   5   7     0.01   0.00   0.03     0.00  -0.01  -0.04     0.03   0.03   0.01
   6   7    -0.02   0.00  -0.03     0.01   0.01  -0.04    -0.01   0.05   0.00
   7   8     0.00  -0.01   0.00     0.00   0.01   0.01    -0.05   0.02   0.00
   8   6    -0.01  -0.02   0.02     0.00   0.00  -0.04     0.00   0.06   0.01
   9   6     0.03  -0.04   0.01     0.02  -0.01  -0.03     0.01   0.06   0.01
  10   6     0.05  -0.04   0.00     0.03   0.00  -0.04     0.02   0.06   0.01
  11   8    -0.01   0.00  -0.01     0.00   0.00   0.02     0.01  -0.01   0.01
  12   6    -0.01   0.01  -0.01     0.02   0.03   0.03     0.00  -0.03   0.00
  13   6    -0.01   0.01  -0.01     0.01  -0.02   0.02     0.00   0.00   0.00
  14   6     0.00   0.00   0.00    -0.01   0.00   0.02     0.00   0.01   0.00
  15   8     0.00   0.01  -0.01     0.03   0.08   0.06     0.00  -0.05  -0.02
  16   6    -0.02   0.01  -0.01     0.01  -0.02   0.00    -0.02   0.02  -0.01
  17   8     0.01  -0.02   0.00     0.00   0.04  -0.01     0.01   0.01   0.00
  18   6     0.00  -0.01   0.00    -0.02  -0.02  -0.04     0.01   0.01  -0.01
  19   8     0.01  -0.03   0.02    -0.04   0.05  -0.09     0.01  -0.01   0.00
  20   8    -0.01   0.00  -0.02    -0.01   0.08   0.12     0.01   0.00  -0.01
  21   6     0.01   0.00  -0.01     0.00   0.04   0.00     0.01   0.00   0.00
  22   6     0.01  -0.01  -0.01    -0.02   0.01  -0.04     0.00   0.00   0.00
  23   6    -0.01   0.00   0.00     0.02  -0.02   0.00     0.01   0.00  -0.01
  24   8     0.01   0.02   0.01    -0.01   0.05  -0.02     0.01   0.01   0.02
  25   6     0.01  -0.01  -0.01    -0.09   0.04  -0.07    -0.01   0.01   0.00
  26   6    -0.02   0.02  -0.01     0.15  -0.12   0.04     0.00  -0.02   0.00
  27   6    -0.03   0.01  -0.01     0.10  -0.01   0.01    -0.04   0.00   0.03
  28   6     0.01   0.01  -0.01    -0.03  -0.02   0.04    -0.02   0.05   0.00
  29   6     0.01   0.01   0.03     0.00  -0.01  -0.04     0.02   0.02   0.00
  30   6    -0.01   0.00  -0.03     0.01   0.00  -0.03    -0.01   0.04   0.00
  31   6     0.01   0.02   0.04     0.00  -0.02  -0.04     0.02   0.01   0.01
  32   6     0.01   0.01   0.03     0.01  -0.01   0.00     0.02   0.01   0.00
  33   6     0.00   0.00  -0.02     0.02   0.01   0.04     0.01   0.00  -0.01
  34   6    -0.01  -0.01  -0.04     0.02   0.01   0.03     0.00   0.00  -0.02
  35   6     0.00   0.00  -0.01     0.00  -0.01  -0.01     0.01   0.01  -0.01
  36   6     0.02   0.01   0.00    -0.03  -0.02  -0.01    -0.02  -0.01   0.01
  37   6     0.00   0.02  -0.02     0.01  -0.03   0.01     0.01  -0.05   0.02
  38   6    -0.04  -0.03   0.03    -0.01  -0.02   0.01    -0.01   0.01   0.01
  39   6    -0.05  -0.05   0.06    -0.03  -0.03   0.04    -0.01   0.00   0.04
  40   6    -0.01   0.00   0.01    -0.01  -0.02   0.02     0.00   0.01   0.02
  41   6     0.02   0.04  -0.05     0.01   0.01  -0.01     0.00   0.04   0.00
  42   6     0.01   0.03  -0.04     0.01   0.01  -0.02     0.00   0.04  -0.01
  43   6    -0.03  -0.02   0.01    -0.01   0.00   0.02    -0.02  -0.04  -0.04
  44   6    -0.03   0.03   0.00    -0.02   0.02   0.00     0.02   0.00  -0.01
  45   6     0.01   0.04  -0.03    -0.02  -0.06   0.01    -0.04  -0.07   0.00
  46   6     0.03  -0.05  -0.01    -0.04   0.03   0.00    -0.01  -0.03   0.01
  47   6     0.01   0.05  -0.02    -0.04  -0.06   0.04    -0.04  -0.07   0.05
  48   6     0.02   0.01  -0.01     0.01  -0.02   0.01    -0.03  -0.08   0.05
  49   6     0.02   0.00   0.10     0.00   0.03   0.05     0.03  -0.06  -0.01
  50   6    -0.11   0.03   0.01    -0.05   0.01   0.00    -0.01  -0.05  -0.04
  51   6     0.03  -0.02   0.01     0.00   0.02   0.02     0.02  -0.10  -0.06
  52   6    -0.08   0.03  -0.02    -0.03   0.02   0.01    -0.01  -0.08  -0.07
  53   6    -0.08  -0.02   0.03    -0.01   0.01  -0.05    -0.04   0.10  -0.01
  54   6     0.16  -0.08   0.02     0.07  -0.02  -0.03     0.04   0.07   0.04
  55   1     0.05  -0.07   0.02     0.04  -0.02  -0.03     0.01   0.06   0.01
  56   1     0.00   0.00  -0.01    -0.03   0.02   0.03     0.01  -0.01  -0.01
  57   1    -0.01  -0.01   0.00     0.00   0.01   0.02     0.00   0.00  -0.03
  58   1    -0.04  -0.01   0.00     0.02   0.00  -0.09    -0.02  -0.02   0.25
  59   1    -0.04   0.02  -0.02     0.09  -0.07   0.04    -0.26   0.14  -0.12
  60   1    -0.01   0.04  -0.02    -0.06   0.00   0.06     0.18  -0.04  -0.18
  61   1     0.02  -0.02  -0.01    -0.02  -0.03  -0.06     0.00   0.00  -0.01
  62   1    -0.01   0.01   0.01    -0.02  -0.04  -0.06     0.01  -0.01  -0.02
  63   1     0.00   0.01  -0.06    -0.12   0.10  -0.28    -0.02   0.01  -0.03
  64   1     0.05  -0.03   0.00     0.07  -0.03   0.00     0.01   0.00   0.01
  65   1    -0.04  -0.01   0.02    -0.29   0.04   0.07    -0.04   0.01   0.02
  66   1    -0.03   0.04  -0.02     0.19  -0.10   0.09     0.00  -0.03   0.00
  67   1    -0.01   0.01  -0.02     0.22  -0.13   0.08    -0.01  -0.01   0.01
  68   1    -0.03   0.02   0.01     0.16  -0.22  -0.04     0.01  -0.02  -0.01
  69   1    -0.03   0.00  -0.01     0.13   0.06   0.04    -0.06  -0.03   0.02
  70   1    -0.03   0.02  -0.02     0.16  -0.07  -0.02    -0.07   0.02   0.05
  71   1    -0.04   0.01  -0.01     0.05  -0.04   0.00    -0.03   0.03   0.03
  72   1     0.00   0.02  -0.02    -0.02  -0.02   0.07    -0.10   0.08   0.01
  73   1     0.01   0.01   0.00    -0.05  -0.03   0.02    -0.02  -0.02   0.00
  74   1     0.02   0.02  -0.01    -0.04  -0.03   0.05     0.03   0.10   0.00
  75   1     0.01   0.02   0.04     0.01  -0.01   0.01     0.02   0.01   0.01
  76   1    -0.01  -0.01  -0.03     0.04   0.02   0.08     0.01   0.00  -0.01
  77   1    -0.02  -0.03  -0.08     0.03   0.02   0.06     0.00   0.00  -0.03
  78   1     0.02   0.01  -0.03    -0.04  -0.01   0.02    -0.05   0.01   0.02
  79   1    -0.02   0.02  -0.02     0.04  -0.03   0.03     0.05  -0.08   0.00
  80   1    -0.07  -0.09   0.11    -0.04  -0.06   0.07    -0.02  -0.02   0.06
  81   1    -0.01  -0.01   0.01    -0.02  -0.03   0.04     0.00   0.00   0.04
  82   1     0.05   0.06  -0.09     0.01   0.01  -0.01     0.01   0.05  -0.01
  83   1    -0.02  -0.01   0.01     0.01   0.00   0.03    -0.08  -0.03  -0.08
  84   1    -0.03   0.03  -0.03    -0.03   0.01   0.00     0.06   0.00   0.02
  85   1     0.01   0.03  -0.09    -0.03  -0.06   0.05    -0.07  -0.08   0.02
  86   1     0.00   0.10  -0.02    -0.02  -0.10   0.01    -0.05  -0.09   0.00
  87   1     0.02   0.02   0.00    -0.02  -0.06  -0.01    -0.01  -0.09  -0.02
  88   1     0.01  -0.07  -0.04    -0.06   0.03   0.04    -0.13  -0.09   0.02
  89   1     0.06  -0.07   0.02    -0.02   0.03  -0.04     0.10  -0.11  -0.01
  90   1     0.04  -0.04   0.00    -0.04   0.08  -0.01     0.00   0.10   0.02
  91   1     0.01   0.05  -0.02    -0.03  -0.05   0.08    -0.04  -0.08   0.09
  92   1     0.02   0.05   0.00    -0.06  -0.08   0.00    -0.08  -0.07   0.03
  93   1     0.01   0.06  -0.04    -0.08  -0.08   0.06    -0.06  -0.08   0.06
  94   1     0.01   0.09  -0.07     0.03  -0.11   0.10    -0.02  -0.23   0.15
  95   1    -0.05  -0.04   0.02     0.12   0.04  -0.05     0.09  -0.01  -0.02
  96   1     0.12  -0.01   0.02    -0.11   0.00  -0.04    -0.20  -0.02   0.03
  97   1    -0.03   0.00   0.15    -0.03   0.05   0.07     0.04  -0.08  -0.02
  98   1     0.09  -0.01   0.09     0.02   0.02   0.04     0.05  -0.07  -0.02
  99   1     0.02  -0.01   0.15     0.02   0.03   0.08    -0.01  -0.08   0.00
 100   1    -0.18   0.06   0.06    -0.11   0.05   0.04     0.08  -0.16  -0.05
 101   1    -0.14  -0.01  -0.06    -0.07  -0.04  -0.05     0.01   0.04   0.01
 102   1    -0.05   0.05   0.04     0.02   0.03   0.02    -0.13  -0.08  -0.09
 103   1     0.05   0.01  -0.03     0.01   0.02   0.02     0.01  -0.16  -0.12
 104   1     0.06  -0.04   0.04     0.01   0.02   0.03     0.00  -0.07  -0.05
 105   1     0.03  -0.02   0.01     0.01   0.02   0.01     0.10  -0.12  -0.02
 106   1    -0.05   0.05  -0.10    -0.01   0.03  -0.03    -0.02  -0.08  -0.04
 107   1    -0.08   0.01   0.01    -0.03   0.01   0.03     0.00  -0.06  -0.11
 108   1    -0.15   0.06  -0.02    -0.06   0.05   0.01     0.00  -0.13  -0.08
 109   1    -0.28   0.15  -0.02     0.04  -0.02  -0.04    -0.04   0.10  -0.02
 110   1     0.15   0.01  -0.04    -0.07   0.02  -0.02    -0.05   0.13   0.01
 111   1    -0.16  -0.25   0.18     0.01   0.06  -0.11    -0.05   0.09  -0.05
 112   1     0.28  -0.26  -0.01     0.10  -0.07  -0.03     0.03   0.06   0.07
 113   1     0.04  -0.07  -0.03     0.05  -0.02  -0.04     0.07   0.07   0.04
 114   1     0.28   0.04   0.14     0.11   0.01  -0.01     0.05   0.07   0.02
                    37                     38                     39
                     A                      A                      A
 Frequencies --   171.9442               172.5128               180.2049
 Red. masses --     3.9758                 3.8717                 4.3596
 Frc consts  --     0.0693                 0.0679                 0.0834
 IR Inten    --     1.1845                 2.4567                 9.4438
 Atom AN      X      Y      Z        X      Y      Z        X      Y      Z
   1   8     0.09  -0.03   0.03     0.04  -0.03   0.03     0.01  -0.03   0.03
   2  12    -0.04  -0.01  -0.01     0.02  -0.01   0.00    -0.01   0.03   0.00
   3   8     0.04   0.01   0.11    -0.05  -0.04  -0.04    -0.05  -0.05   0.02
   4   6     0.05  -0.03   0.00     0.00  -0.02   0.02     0.00   0.00   0.03
   5   7     0.00  -0.01  -0.03     0.01   0.00   0.03    -0.01   0.02  -0.02
   6   7    -0.02  -0.01  -0.01    -0.02   0.00   0.03     0.01   0.02  -0.04
   7   8     0.01  -0.04   0.00    -0.03   0.00   0.00     0.02   0.01   0.03
   8   6     0.00   0.00  -0.03     0.01   0.00   0.03     0.00   0.00  -0.02
   9   6    -0.01   0.01  -0.02     0.00   0.01   0.03     0.00   0.00  -0.03
  10   6    -0.01   0.00   0.00    -0.02   0.01   0.03     0.01   0.00  -0.04
  11   8    -0.07   0.03  -0.06    -0.04   0.01  -0.02    -0.08   0.04   0.00
  12   6    -0.03   0.10  -0.03     0.01   0.10   0.01    -0.08   0.04  -0.03
  13   6     0.01   0.02  -0.02    -0.02   0.02  -0.01    -0.05   0.03  -0.03
  14   6     0.02  -0.02  -0.02     0.00  -0.01   0.01    -0.02   0.01   0.04
  15   8    -0.01   0.16   0.00     0.07   0.23   0.07    -0.07   0.04  -0.04
  16   6    -0.06   0.05  -0.01    -0.04   0.01  -0.01    -0.02  -0.02  -0.03
  17   8     0.01  -0.01  -0.01    -0.07  -0.10  -0.03     0.16  -0.04   0.18
  18   6     0.04   0.01   0.11    -0.04  -0.06  -0.06    -0.06   0.01  -0.02
  19   8     0.06   0.00   0.12    -0.01  -0.06  -0.06    -0.08   0.01  -0.03
  20   8     0.01   0.02   0.00    -0.05   0.02   0.04    -0.02  -0.10  -0.01
  21   6     0.01   0.02  -0.02    -0.04   0.00   0.00     0.05  -0.07   0.05
  22   6     0.00   0.00  -0.05    -0.02  -0.03   0.00     0.11  -0.08   0.11
  23   6    -0.02   0.01   0.06    -0.01   0.00  -0.03    -0.02  -0.01   0.02
  24   8     0.02   0.02  -0.01    -0.04   0.01  -0.02     0.07   0.00   0.04
  25   6     0.00   0.02  -0.08     0.09  -0.05   0.01     0.00  -0.03   0.06
  26   6    -0.14  -0.04   0.13     0.12   0.08  -0.11    -0.04   0.15  -0.08
  27   6     0.00  -0.03  -0.17     0.04   0.01  -0.07     0.05   0.03  -0.04
  28   6     0.10  -0.05  -0.05     0.02  -0.02   0.00     0.04  -0.01   0.01
  29   6     0.00  -0.01  -0.03     0.00   0.01   0.03     0.00   0.00  -0.02
  30   6     0.00  -0.02   0.01    -0.02  -0.01   0.03     0.02   0.03  -0.05
  31   6     0.00   0.00  -0.02     0.00   0.01   0.02     0.00   0.00  -0.02
  32   6     0.00   0.01   0.00    -0.01   0.00   0.00     0.01   0.00   0.00
  33   6     0.00   0.01   0.02    -0.02   0.00  -0.02     0.02   0.01   0.01
  34   6     0.00   0.00   0.01    -0.02   0.00   0.00     0.02   0.01   0.00
  35   6     0.00  -0.01  -0.01    -0.01   0.00   0.02     0.01   0.01  -0.02
  36   6    -0.02   0.00  -0.01     0.00   0.01   0.01    -0.01  -0.01  -0.01
  37   6     0.00  -0.02   0.01     0.00   0.02   0.02     0.01  -0.02   0.00
  38   6     0.00  -0.03   0.02     0.00  -0.01   0.02     0.02   0.03  -0.04
  39   6     0.00  -0.03   0.02     0.01   0.00   0.00    -0.01   0.00   0.00
  40   6     0.01  -0.01   0.00     0.02   0.01  -0.01    -0.03  -0.03   0.04
  41   6     0.01   0.00  -0.01     0.01   0.01   0.00    -0.02  -0.01   0.02
  42   6     0.00  -0.01   0.00    -0.01   0.00   0.02     0.01   0.02  -0.03
  43   6     0.00  -0.02   0.01     0.00  -0.03  -0.02     0.01   0.02  -0.01
  44   6     0.01  -0.01   0.00     0.02  -0.01   0.00     0.00   0.02  -0.02
  45   6    -0.01  -0.03   0.01     0.00   0.02   0.00    -0.01  -0.03   0.00
  46   6    -0.03   0.02   0.00     0.01  -0.02   0.01    -0.02   0.01  -0.01
  47   6    -0.04  -0.04   0.03     0.01   0.02   0.00    -0.02  -0.04   0.02
  48   6     0.02  -0.01   0.01     0.00   0.04   0.00     0.00  -0.04   0.01
  49   6     0.01  -0.01   0.00     0.01  -0.04  -0.03     0.01   0.02   0.01
  50   6     0.00  -0.01   0.00     0.03  -0.03  -0.01    -0.01   0.00  -0.02
  51   6     0.03  -0.01   0.01     0.02  -0.06  -0.03    -0.05   0.04   0.00
  52   6    -0.02   0.01   0.00     0.00  -0.05  -0.04     0.05  -0.02   0.02
  53   6     0.01   0.01  -0.04     0.00   0.01   0.03     0.00  -0.01  -0.02
  54   6    -0.01   0.02   0.02    -0.05   0.02   0.04     0.04  -0.02  -0.06
  55   1    -0.01   0.02  -0.02     0.00   0.01   0.03     0.00  -0.01  -0.03
  56   1     0.05  -0.04  -0.01    -0.06   0.04   0.03    -0.06   0.07  -0.06
  57   1    -0.01  -0.04   0.06    -0.01  -0.02   0.04    -0.03   0.00   0.09
  58   1    -0.14  -0.04   0.06    -0.08  -0.04   0.11    -0.03  -0.02  -0.08
  59   1    -0.14   0.12  -0.04    -0.17   0.08  -0.06    -0.01  -0.06  -0.04
  60   1     0.00   0.13  -0.06     0.06   0.03  -0.10    -0.02   0.04  -0.03
  61   1     0.00  -0.04  -0.06    -0.02   0.02   0.02     0.17  -0.13   0.06
  62   1    -0.03   0.00   0.02    -0.04   0.03   0.04     0.04   0.01   0.12
  63   1     0.00   0.02  -0.10     0.13   0.03   0.01    -0.04  -0.02  -0.12
  64   1     0.00   0.00  -0.09     0.16  -0.10   0.02     0.09  -0.08   0.08
  65   1    -0.01   0.03  -0.08     0.07  -0.10   0.02    -0.14   0.05   0.16
  66   1    -0.15  -0.22   0.12     0.12   0.33  -0.13    -0.07   0.32  -0.14
  67   1    -0.30   0.02   0.20     0.34   0.00  -0.22     0.06   0.09  -0.23
  68   1    -0.08   0.04   0.10     0.03  -0.02  -0.05    -0.10   0.18   0.04
  69   1    -0.03  -0.05  -0.31     0.10   0.11   0.03     0.06   0.08  -0.08
  70   1    -0.07   0.05  -0.16     0.16  -0.04  -0.18     0.06   0.00   0.00
  71   1     0.11  -0.14  -0.16    -0.08  -0.05  -0.09     0.10   0.03  -0.03
  72   1     0.21  -0.10  -0.11     0.09  -0.05  -0.02     0.03  -0.01   0.01
  73   1     0.13   0.05  -0.02     0.02   0.05   0.00     0.07  -0.03   0.04
  74   1     0.04  -0.12  -0.06    -0.03  -0.07   0.03     0.05  -0.01  -0.04
  75   1     0.00   0.01   0.01    -0.01   0.01   0.00     0.02   0.00   0.00
  76   1     0.01   0.02   0.04    -0.03  -0.01  -0.04     0.04   0.01   0.04
  77   1     0.00   0.01   0.02    -0.02  -0.01  -0.02     0.03   0.02   0.01
  78   1    -0.02   0.00   0.00     0.01   0.01   0.00    -0.02   0.00   0.00
  79   1     0.03  -0.02   0.03    -0.02   0.03   0.03     0.04  -0.04   0.00
  80   1     0.00  -0.04   0.03     0.02   0.00  -0.01    -0.01  -0.01   0.01
  81   1     0.02  -0.01   0.00     0.03   0.02  -0.02    -0.06  -0.05   0.09
  82   1     0.02   0.01  -0.02     0.02   0.03  -0.01    -0.04  -0.03   0.05
  83   1     0.01  -0.01   0.01    -0.03  -0.02  -0.03     0.01   0.01   0.01
  84   1     0.00  -0.01   0.00     0.04  -0.01   0.02     0.00   0.01  -0.01
  85   1    -0.02  -0.03   0.03     0.00   0.02  -0.02    -0.01  -0.03   0.02
  86   1    -0.01  -0.06   0.00    -0.01   0.04   0.00    -0.01  -0.06   0.00
  87   1    -0.01  -0.02  -0.01     0.00   0.02   0.01    -0.01  -0.03  -0.02
  88   1    -0.05   0.02   0.02     0.01  -0.03  -0.01    -0.06   0.00   0.01
  89   1    -0.01   0.01  -0.02     0.02  -0.03   0.02     0.01  -0.01  -0.02
  90   1    -0.03   0.05  -0.01     0.02  -0.03   0.02    -0.02   0.06  -0.01
  91   1    -0.03  -0.05   0.06    -0.01  -0.04  -0.02    -0.01  -0.03   0.04
  92   1    -0.07  -0.04   0.02    -0.02   0.06   0.05    -0.03  -0.05  -0.01
  93   1    -0.04  -0.04   0.03     0.08   0.05  -0.03    -0.05  -0.06   0.03
  94   1     0.04  -0.07   0.09    -0.01   0.11  -0.06     0.02  -0.14   0.11
  95   1     0.11   0.04  -0.05    -0.06   0.01   0.04     0.11   0.02  -0.05
  96   1    -0.08   0.01  -0.04     0.08   0.01   0.01    -0.13   0.00  -0.02
  97   1     0.00   0.01  -0.01     0.03  -0.04  -0.05     0.01  -0.04   0.05
  98   1     0.00  -0.02  -0.01     0.00  -0.05  -0.04     0.04   0.07   0.05
  99   1     0.01  -0.01   0.02    -0.01  -0.05  -0.03    -0.01   0.02  -0.04
 100   1     0.01  -0.01   0.00     0.13  -0.11  -0.06    -0.10   0.05   0.03
 101   1     0.00   0.00   0.00     0.06   0.08   0.07    -0.04  -0.10  -0.09
 102   1     0.00  -0.01   0.00    -0.10  -0.06  -0.04     0.09   0.03  -0.02
 103   1     0.03  -0.02  -0.01     0.02  -0.09  -0.06    -0.07   0.02   0.04
 104   1     0.03  -0.01   0.03     0.01  -0.05  -0.02    -0.08   0.07  -0.02
 105   1     0.05  -0.01   0.01     0.06  -0.07  -0.01    -0.04   0.05  -0.02
 106   1    -0.01   0.05   0.04     0.00  -0.04   0.00     0.02  -0.02   0.11
 107   1    -0.05   0.02  -0.03     0.00  -0.03  -0.08     0.03   0.01  -0.04
 108   1     0.00  -0.03   0.00     0.02  -0.10  -0.04     0.13  -0.08   0.01
 109   1     0.05  -0.02  -0.04    -0.01   0.02   0.03     0.03  -0.03   0.00
 110   1    -0.03   0.01  -0.02     0.01   0.01   0.03    -0.03  -0.02  -0.01
 111   1     0.03   0.06  -0.07    -0.01   0.00   0.04     0.02   0.02  -0.03
 112   1    -0.02   0.02   0.04    -0.06   0.04   0.04     0.04  -0.03  -0.06
 113   1     0.01   0.03   0.02    -0.04   0.04   0.04     0.03  -0.04  -0.05
 114   1    -0.01   0.01   0.01    -0.07   0.01   0.04     0.05  -0.01  -0.07
                    40                     41                     42
                     A                      A                      A
 Frequencies --   186.4676               199.6376               203.0462
 Red. masses --     1.8740                 1.5624                 1.8886
 Frc consts  --     0.0384                 0.0367                 0.0459
 IR Inten    --     0.6806                 0.5296                 0.5271
 Atom AN      X      Y      Z        X      Y      Z        X      Y      Z
   1   8     0.01   0.01  -0.02     0.01   0.01  -0.01     0.00   0.01  -0.01
   2  12     0.05  -0.02   0.04     0.05   0.00   0.02     0.03  -0.01   0.00
   3   8    -0.01  -0.01  -0.01    -0.01  -0.01   0.00     0.00  -0.01   0.01
   4   6     0.01   0.00  -0.02     0.01   0.00  -0.01     0.00   0.00  -0.01
   5   7     0.04   0.01   0.02     0.02  -0.01   0.01    -0.02  -0.03   0.02
   6   7     0.04  -0.03   0.02     0.01   0.00  -0.01     0.02   0.03   0.02
   7   8     0.00  -0.01  -0.02     0.01   0.00  -0.01    -0.01   0.00  -0.01
   8   6     0.05   0.01   0.02     0.03  -0.02   0.02     0.00   0.00   0.03
   9   6     0.09  -0.02   0.03     0.07  -0.04   0.03     0.02   0.00   0.05
  10   6     0.04  -0.01   0.01     0.02  -0.02   0.00     0.01   0.01   0.03
  11   8     0.02  -0.01  -0.02     0.01  -0.01  -0.01     0.01  -0.01   0.00
  12   6     0.02  -0.01   0.00     0.01  -0.01   0.00     0.02   0.00   0.01
  13   6     0.00   0.00   0.00     0.00  -0.01   0.00     0.00  -0.01   0.00
  14   6     0.01   0.00  -0.03     0.01   0.00  -0.02     0.01   0.00  -0.01
  15   8     0.03   0.01   0.01     0.02   0.00   0.01     0.03   0.01   0.01
  16   6     0.01   0.02   0.01     0.01   0.01   0.00     0.00   0.01   0.01
  17   8    -0.03  -0.01   0.00     0.00  -0.01   0.01    -0.01  -0.01  -0.01
  18   6    -0.02   0.00   0.00    -0.02   0.01   0.00    -0.01   0.01   0.00
  19   8    -0.02   0.00   0.00    -0.03   0.02   0.00    -0.01   0.01   0.00
  20   8    -0.03   0.01   0.01    -0.02   0.00   0.01    -0.02   0.01   0.02
  21   6    -0.03   0.01   0.01    -0.02   0.00   0.01    -0.01   0.00   0.00
  22   6    -0.02   0.00   0.01     0.00  -0.01   0.01    -0.01  -0.01  -0.01
  23   6    -0.02   0.01   0.00    -0.02   0.01   0.01    -0.01   0.01   0.01
  24   8    -0.03   0.01   0.00    -0.01   0.01   0.00    -0.01   0.01  -0.01
  25   6     0.01  -0.01   0.02     0.00  -0.01   0.01     0.01  -0.01  -0.01
  26   6    -0.03   0.02   0.00    -0.04   0.02   0.01    -0.03   0.01   0.01
  27   6     0.02   0.00   0.01     0.02   0.00   0.02     0.02  -0.01   0.01
  28   6     0.00   0.00  -0.03     0.01   0.00  -0.02     0.00   0.00  -0.01
  29   6     0.02   0.02   0.00     0.00   0.00  -0.02    -0.03  -0.04  -0.02
  30   6     0.00  -0.04   0.00     0.00   0.00  -0.01     0.01   0.04  -0.01
  31   6     0.02   0.03   0.00     0.00   0.00  -0.03    -0.03  -0.05  -0.03
  32   6     0.02   0.02   0.00     0.01   0.01   0.00    -0.01  -0.04   0.02
  33   6     0.01   0.02  -0.01     0.02   0.02   0.03     0.01  -0.02   0.07
  34   6     0.00   0.01  -0.02     0.01   0.01   0.01     0.00  -0.02   0.04
  35   6     0.01   0.02  -0.01     0.00  -0.01  -0.02    -0.02  -0.04  -0.02
  36   6    -0.02   0.00   0.00    -0.01   0.00  -0.02     0.01  -0.03  -0.02
  37   6     0.01  -0.01   0.00     0.00  -0.01  -0.02    -0.02  -0.01  -0.03
  38   6     0.00  -0.02  -0.01    -0.01  -0.01   0.00     0.00   0.05  -0.01
  39   6     0.00  -0.01  -0.03     0.00  -0.01   0.00    -0.02   0.02   0.03
  40   6     0.00  -0.02  -0.04     0.02   0.01   0.00    -0.04  -0.01   0.06
  41   6     0.00  -0.04  -0.02     0.01   0.01   0.00    -0.02   0.01   0.02
  42   6     0.00  -0.04  -0.01    -0.01   0.01   0.01     0.01   0.04  -0.02
  43   6     0.01   0.00   0.00     0.00   0.00   0.01    -0.01   0.01  -0.03
  44   6    -0.02   0.00  -0.02    -0.02   0.01   0.02     0.03   0.01  -0.02
  45   6    -0.04  -0.05   0.00     0.00  -0.02  -0.01     0.02   0.01  -0.01
  46   6    -0.04  -0.02   0.00    -0.04   0.03  -0.02     0.01   0.06  -0.02
  47   6    -0.01  -0.01   0.01    -0.01   0.01  -0.01    -0.02   0.04  -0.02
  48   6    -0.01  -0.02   0.01     0.01  -0.01  -0.01     0.02  -0.01  -0.03
  49   6    -0.02   0.04  -0.01    -0.03   0.06   0.00     0.04  -0.02   0.01
  50   6    -0.01   0.05   0.01     0.00  -0.01   0.00    -0.02  -0.02  -0.04
  51   6     0.00   0.01   0.00    -0.01   0.01   0.01    -0.03  -0.03  -0.04
  52   6     0.00   0.01   0.01    -0.02   0.02   0.01     0.03  -0.04  -0.02
  53   6    -0.04   0.05   0.00    -0.04   0.01   0.00    -0.01   0.04   0.00
  54   6    -0.06   0.03  -0.01    -0.03  -0.03  -0.06    -0.02   0.00  -0.01
  55   1     0.07  -0.01   0.02     0.07  -0.05   0.03     0.03  -0.01   0.05
  56   1    -0.01   0.01   0.00    -0.01   0.00   0.00     0.00   0.00   0.01
  57   1     0.01   0.00  -0.03     0.01   0.00  -0.02     0.01   0.00  -0.01
  58   1     0.00   0.01   0.01     0.01   0.01   0.00     0.01   0.01   0.02
  59   1     0.02   0.03   0.02     0.02   0.02   0.01    -0.01   0.02   0.00
  60   1     0.00   0.01   0.02     0.00   0.00   0.01     0.01  -0.01   0.00
  61   1    -0.02   0.01   0.01     0.00  -0.01   0.01    -0.01  -0.01  -0.01
  62   1    -0.02   0.01   0.01    -0.01   0.01   0.02     0.00   0.01   0.01
  63   1     0.03  -0.02   0.09     0.01  -0.04   0.08     0.02  -0.06   0.10
  64   1    -0.04   0.01  -0.01    -0.05   0.01  -0.01    -0.09   0.03  -0.05
  65   1     0.08  -0.01  -0.03     0.06   0.00  -0.02     0.12   0.00  -0.09
  66   1    -0.02   0.01   0.00    -0.03  -0.02   0.02    -0.01  -0.07   0.04
  67   1    -0.05   0.02  -0.01    -0.09   0.04   0.00    -0.12   0.04   0.02
  68   1    -0.02   0.04   0.00    -0.01   0.07   0.00     0.03   0.07  -0.02
  69   1     0.03   0.02   0.03     0.03   0.01   0.02     0.03   0.01   0.01
  70   1     0.03  -0.02   0.01     0.03  -0.02   0.03     0.03  -0.02   0.00
  71   1     0.00   0.01   0.01     0.03   0.01   0.02     0.01  -0.01   0.00
  72   1     0.02   0.00  -0.04     0.01   0.00  -0.03     0.01   0.00  -0.01
  73   1     0.00   0.02  -0.03     0.01   0.02  -0.02     0.00   0.00  -0.01
  74   1    -0.01   0.00  -0.01     0.00   0.00  -0.01     0.00   0.00   0.00
  75   1     0.02   0.02   0.00     0.01   0.01   0.01    -0.01  -0.04   0.03
  76   1     0.00   0.02  -0.02     0.03   0.03   0.07     0.04   0.00   0.13
  77   1     0.00   0.01  -0.03     0.01   0.01   0.02     0.02  -0.01   0.07
  78   1    -0.06   0.03   0.00    -0.01   0.00  -0.02     0.05  -0.07   0.01
  79   1     0.03  -0.02  -0.01     0.00  -0.01  -0.03    -0.05   0.00  -0.03
  80   1     0.01   0.00  -0.04     0.01  -0.02   0.01    -0.03   0.02   0.05
  81   1     0.00  -0.01  -0.05     0.03   0.01  -0.01    -0.08  -0.03   0.10
  82   1     0.00  -0.04  -0.03     0.02   0.02   0.00    -0.03   0.00   0.03
  83   1     0.02   0.00   0.01     0.01   0.00   0.01    -0.05   0.01  -0.04
  84   1    -0.06  -0.01  -0.05    -0.03   0.00   0.04     0.05   0.02  -0.01
  85   1    -0.05  -0.05   0.03    -0.01  -0.02   0.01     0.05   0.02  -0.02
  86   1    -0.05  -0.08   0.00     0.01  -0.03  -0.01     0.03   0.02  -0.01
  87   1    -0.02  -0.05  -0.03    -0.01  -0.02  -0.01     0.01   0.03   0.00
  88   1    -0.23  -0.12   0.03    -0.07   0.02   0.02     0.33   0.23  -0.03
  89   1     0.14  -0.15  -0.02    -0.02   0.01  -0.03    -0.28   0.27   0.00
  90   1    -0.03   0.18   0.00    -0.05   0.07  -0.04    -0.02  -0.27  -0.03
  91   1    -0.01  -0.03   0.03     0.01   0.10   0.02     0.02   0.20   0.02
  92   1    -0.03   0.00   0.01     0.04  -0.04  -0.06     0.09  -0.04  -0.09
  93   1    -0.02  -0.01   0.01    -0.10  -0.02   0.02    -0.16   0.00   0.03
  94   1    -0.01  -0.09   0.06     0.03  -0.08   0.07     0.04   0.00   0.02
  95   1     0.04   0.02  -0.02     0.10   0.02  -0.07     0.06   0.00  -0.05
  96   1    -0.09   0.01   0.00    -0.08   0.01  -0.04     0.00  -0.01  -0.05
  97   1    -0.03   0.03   0.01    -0.05   0.14  -0.03     0.05  -0.08   0.04
  98   1    -0.04   0.08   0.01    -0.07   0.00  -0.03     0.09   0.01   0.03
  99   1    -0.01   0.06  -0.05     0.03   0.07   0.06     0.01  -0.03  -0.02
 100   1    -0.33   0.32   0.15     0.35  -0.29  -0.18    -0.19   0.07   0.07
 101   1    -0.09  -0.29  -0.20     0.10   0.37   0.25    -0.08  -0.18  -0.18
 102   1     0.40   0.16   0.12    -0.45  -0.14  -0.09     0.16   0.04  -0.03
 103   1     0.01   0.03   0.02     0.00   0.03   0.02    -0.06  -0.10  -0.05
 104   1     0.01  -0.01   0.00     0.01  -0.01   0.01    -0.07   0.03  -0.05
 105   1    -0.02   0.01   0.00    -0.03   0.01   0.01     0.04  -0.03  -0.01
 106   1     0.00   0.02   0.02    -0.01   0.02  -0.01     0.01  -0.05   0.04
 107   1    -0.02   0.01   0.00    -0.02   0.01   0.02     0.04  -0.01  -0.08
 108   1     0.01   0.00   0.01    -0.03   0.03   0.01     0.08  -0.10  -0.03
 109   1    -0.11   0.11   0.00    -0.11   0.07  -0.01    -0.10   0.10  -0.07
 110   1    -0.01   0.09   0.02     0.02   0.05   0.01     0.10   0.08  -0.02
 111   1    -0.09  -0.03  -0.02    -0.08  -0.07   0.01    -0.04  -0.05   0.06
 112   1    -0.03   0.05  -0.06     0.03  -0.03  -0.14     0.01   0.00  -0.05
 113   1    -0.13   0.07  -0.04    -0.14  -0.02  -0.10    -0.07   0.00  -0.02
 114   1    -0.10   0.01   0.08    -0.04  -0.02   0.02    -0.02   0.01   0.03
                    43                     44                     45
                     A                      A                      A
 Frequencies --   207.2110               211.0912               212.2921
 Red. masses --     1.6390                 2.1380                 1.6559
 Frc consts  --     0.0415                 0.0561                 0.0440
 IR Inten    --     0.9791                 2.2700                 4.7577
 Atom AN      X      Y      Z        X      Y      Z        X      Y      Z
   1   8     0.00   0.00  -0.01    -0.06  -0.02   0.05    -0.01  -0.01   0.01
   2  12     0.02  -0.02  -0.01     0.00   0.00  -0.01    -0.03  -0.02  -0.01
   3   8    -0.01  -0.05   0.01     0.00  -0.02   0.01     0.01   0.01   0.01
   4   6     0.00  -0.01  -0.01    -0.03   0.04   0.08     0.00   0.00   0.01
   5   7     0.00   0.01  -0.01     0.00  -0.01   0.01     0.01  -0.04   0.00
   6   7    -0.01   0.01  -0.01     0.00   0.00   0.00     0.01   0.01   0.01
   7   8     0.00  -0.01  -0.01    -0.02   0.06   0.07     0.00   0.00   0.01
   8   6    -0.01   0.01  -0.02     0.01  -0.01   0.01     0.03  -0.02   0.01
   9   6    -0.04   0.02  -0.03     0.01  -0.01   0.01     0.07  -0.03   0.05
  10   6    -0.01   0.01  -0.01     0.00   0.00   0.01     0.02  -0.01   0.02
  11   8     0.02   0.00   0.01    -0.06  -0.06  -0.03    -0.01   0.03   0.02
  12   6     0.02  -0.01   0.01    -0.04  -0.03  -0.01    -0.02   0.02  -0.01
  13   6     0.01  -0.01   0.00    -0.01  -0.02  -0.01     0.00   0.01  -0.01
  14   6     0.00  -0.01   0.00     0.00   0.03   0.04    -0.01   0.00   0.02
  15   8     0.02  -0.01   0.00    -0.01   0.04   0.01    -0.03  -0.02  -0.02
  16   6     0.00   0.01   0.02     0.03  -0.07  -0.12    -0.01  -0.01   0.01
  17   8     0.01  -0.02   0.00     0.00   0.00  -0.02     0.01   0.01  -0.02
  18   6    -0.03   0.03  -0.02     0.01   0.01  -0.01     0.02   0.00   0.00
  19   8    -0.05   0.06  -0.04     0.01   0.03  -0.03     0.02   0.00   0.00
  20   8    -0.03  -0.01   0.04     0.01   0.00   0.01     0.02   0.00  -0.01
  21   6     0.00  -0.01   0.01     0.01   0.00   0.00     0.02   0.00  -0.01
  22   6     0.01  -0.03  -0.01     0.00   0.00  -0.02     0.01   0.01  -0.01
  23   6    -0.01   0.01   0.02     0.01   0.00  -0.01     0.02   0.00   0.00
  24   8     0.00   0.01  -0.01     0.00  -0.01  -0.01     0.02  -0.01   0.00
  25   6     0.03  -0.01  -0.04     0.02   0.00  -0.03    -0.01   0.01   0.00
  26   6    -0.05   0.03   0.01     0.02  -0.01   0.00     0.02  -0.01   0.00
  27   6     0.07  -0.01  -0.01     0.01  -0.01   0.04     0.00   0.00  -0.04
  28   6    -0.03  -0.01   0.01     0.11   0.08  -0.03    -0.02  -0.01   0.02
  29   6     0.01   0.01   0.01     0.00   0.00   0.01    -0.01  -0.03  -0.02
  30   6     0.00   0.01  -0.01     0.00   0.00   0.01     0.01   0.02   0.00
  31   6     0.01   0.01   0.02     0.00   0.00   0.01     0.00  -0.02  -0.02
  32   6     0.00   0.01   0.00    -0.01   0.00  -0.01    -0.01   0.00   0.01
  33   6    -0.02  -0.01  -0.03    -0.01   0.00  -0.01    -0.02   0.00   0.03
  34   6    -0.01   0.00  -0.01    -0.01   0.00   0.01    -0.02  -0.02   0.03
  35   6     0.00   0.01   0.02    -0.01  -0.01   0.01    -0.02  -0.04   0.00
  36   6     0.00   0.00   0.02     0.01   0.00   0.00     0.01  -0.01  -0.02
  37   6     0.00   0.01   0.02    -0.01   0.00  -0.01    -0.02   0.00   0.01
  38   6     0.00   0.00   0.00     0.00   0.00   0.01     0.01   0.03  -0.01
  39   6     0.00   0.00   0.01     0.00   0.01   0.00     0.00   0.01   0.02
  40   6    -0.01   0.00   0.02     0.00   0.01   0.00    -0.02   0.00   0.04
  41   6     0.00   0.01   0.00     0.00   0.00   0.01     0.00   0.02   0.02
  42   6     0.01   0.02  -0.01     0.00   0.00   0.01     0.01   0.03  -0.01
  43   6     0.00   0.00   0.00    -0.01  -0.01   0.01     0.00   0.01  -0.01
  44   6     0.00   0.01  -0.01     0.01   0.00   0.00     0.02   0.02  -0.01
  45   6    -0.01   0.00   0.01     0.01   0.01   0.01     0.03   0.01   0.01
  46   6     0.02  -0.03   0.02     0.01  -0.02   0.00     0.00  -0.01  -0.02
  47   6     0.00  -0.02   0.02     0.01   0.02  -0.02    -0.01   0.02   0.01
  48   6    -0.01   0.02   0.01    -0.03  -0.01   0.00     0.04   0.02  -0.01
  49   6     0.01   0.00   0.01     0.00  -0.01   0.00     0.02   0.00   0.00
  50   6    -0.02  -0.01  -0.02     0.01   0.00   0.00    -0.01  -0.01  -0.02
  51   6     0.00   0.00   0.00     0.01  -0.01   0.01    -0.02   0.00  -0.01
  52   6     0.00   0.00   0.00    -0.01  -0.01   0.00     0.02  -0.01   0.00
  53   6     0.03  -0.01  -0.01     0.00   0.00   0.00    -0.03   0.05  -0.04
  54   6     0.04   0.00   0.02    -0.01   0.00   0.00    -0.05   0.00  -0.02
  55   1    -0.03   0.02  -0.02     0.01  -0.01   0.01     0.07  -0.02   0.05
  56   1    -0.02   0.01   0.00     0.01   0.00  -0.05     0.01   0.00   0.00
  57   1     0.00  -0.01  -0.02     0.02   0.06   0.06    -0.02  -0.01   0.02
  58   1    -0.01   0.00   0.03     0.09   0.00  -0.19    -0.01  -0.01   0.01
  59   1     0.00   0.03   0.02     0.00  -0.22  -0.15    -0.01  -0.01   0.01
  60   1    -0.01   0.00   0.02     0.06  -0.03  -0.15    -0.01  -0.01   0.01
  61   1    -0.01  -0.06  -0.01    -0.02  -0.02  -0.01     0.00   0.01  -0.01
  62   1     0.03   0.01   0.02     0.02   0.00  -0.01     0.01   0.00  -0.01
  63   1     0.06  -0.16   0.28     0.04  -0.06   0.12    -0.02   0.02  -0.05
  64   1    -0.27   0.10  -0.17    -0.11   0.05  -0.09     0.03  -0.01   0.02
  65   1     0.35   0.03  -0.25     0.17   0.01  -0.13    -0.06   0.00   0.03
  66   1     0.02  -0.20   0.12     0.05  -0.09   0.05     0.01   0.02  -0.01
  67   1    -0.32   0.10   0.02    -0.07   0.02   0.00     0.07  -0.02   0.01
  68   1     0.12   0.21  -0.10     0.08   0.04  -0.06     0.00  -0.05   0.02
  69   1     0.12   0.06   0.04    -0.06  -0.08  -0.16     0.00   0.01  -0.05
  70   1     0.15  -0.06  -0.06    -0.14   0.03   0.22     0.00   0.01  -0.06
  71   1     0.01  -0.04  -0.02     0.24   0.05   0.07    -0.01  -0.03  -0.04
  72   1    -0.07   0.01   0.04     0.17   0.04  -0.14    -0.07   0.01   0.07
  73   1    -0.04  -0.05   0.00     0.16   0.20   0.02    -0.02  -0.09   0.02
  74   1     0.00   0.02   0.01     0.07   0.04  -0.02     0.01   0.01  -0.01
  75   1     0.00   0.01   0.00    -0.01   0.00  -0.02    -0.01   0.02   0.01
  76   1    -0.03  -0.02  -0.06    -0.02   0.00  -0.01    -0.03   0.02   0.06
  77   1    -0.02  -0.01  -0.02    -0.01   0.00   0.01    -0.03  -0.02   0.04
  78   1    -0.01   0.01   0.01     0.01   0.00   0.00     0.02  -0.01  -0.03
  79   1     0.00   0.01   0.03    -0.02   0.00  -0.02    -0.05   0.02   0.02
  80   1    -0.01  -0.02   0.03     0.00   0.01   0.00    -0.01   0.01   0.03
  81   1    -0.01  -0.01   0.04     0.00   0.01   0.00    -0.03  -0.02   0.07
  82   1     0.00   0.01   0.01     0.00   0.00   0.01    -0.01   0.01   0.03
  83   1    -0.01   0.00   0.00    -0.02   0.00   0.01    -0.01   0.01  -0.01
  84   1     0.01   0.01   0.00     0.01   0.00   0.00     0.03   0.02   0.01
  85   1     0.00   0.00   0.01     0.03   0.02   0.02     0.09   0.04   0.09
  86   1    -0.02  -0.01   0.01     0.01  -0.01   0.00     0.05  -0.08   0.00
  87   1     0.00   0.00   0.00     0.00   0.03   0.00    -0.01   0.07  -0.02
  88   1    -0.08  -0.10   0.00    -0.12  -0.09   0.01    -0.32  -0.17   0.05
  89   1     0.12  -0.11   0.01     0.14  -0.11  -0.02     0.29  -0.21  -0.09
  90   1     0.03   0.07   0.03     0.03   0.13   0.01     0.03   0.36  -0.02
  91   1    -0.03  -0.14  -0.01     0.05   0.21  -0.01    -0.02  -0.01   0.01
  92   1    -0.08   0.05   0.08     0.14  -0.09  -0.12    -0.02   0.04   0.04
  93   1     0.11   0.02  -0.03    -0.13  -0.05   0.06     0.01   0.04  -0.02
  94   1    -0.04   0.12  -0.11    -0.03  -0.05   0.02     0.00   0.27  -0.22
  95   1    -0.13  -0.04   0.08    -0.01   0.01  -0.01    -0.19  -0.11   0.11
  96   1     0.13  -0.02   0.04    -0.07   0.01   0.00     0.34  -0.07   0.04
  97   1     0.02  -0.04   0.03     0.02  -0.05   0.01     0.04  -0.09   0.04
  98   1     0.03   0.03   0.03     0.01   0.02   0.02     0.04   0.08   0.05
  99   1    -0.01   0.00  -0.01    -0.02  -0.01  -0.04    -0.02   0.00  -0.08
 100   1     0.01  -0.04  -0.02    -0.02   0.02   0.02     0.00  -0.05  -0.01
 101   1    -0.02   0.03  -0.01     0.00  -0.03  -0.02    -0.02   0.01  -0.03
 102   1    -0.06  -0.02  -0.03     0.04   0.01   0.01    -0.04  -0.02  -0.05
 103   1     0.01   0.01   0.00     0.02   0.02   0.00    -0.03  -0.04  -0.01
 104   1     0.01  -0.01   0.00     0.02  -0.03   0.01    -0.04   0.03  -0.02
 105   1    -0.01   0.00   0.00    -0.02  -0.01   0.01     0.02   0.00  -0.01
 106   1     0.00   0.01   0.02     0.00  -0.11  -0.19     0.01   0.00   0.05
 107   1    -0.01   0.01  -0.02     0.11  -0.08   0.15     0.01   0.01  -0.05
 108   1     0.01  -0.02  -0.01    -0.14   0.14   0.02     0.06  -0.05  -0.01
 109   1     0.09  -0.07   0.01    -0.01   0.01   0.00    -0.05   0.06  -0.06
 110   1    -0.03  -0.04   0.00     0.00   0.01   0.01    -0.03   0.11   0.00
 111   1     0.06   0.06  -0.03    -0.01  -0.01   0.00    -0.06   0.02  -0.09
 112   1     0.03  -0.02   0.06    -0.01   0.01  -0.01     0.00   0.01  -0.09
 113   1     0.08   0.00   0.03    -0.01  -0.01   0.00    -0.14   0.01  -0.06
 114   1     0.07   0.02  -0.01    -0.02  -0.01  -0.01    -0.07  -0.01   0.05
                    46                     47                     48
                     A                      A                      A
 Frequencies --   215.5361               219.1341               225.5837
 Red. masses --     1.8954                 1.3299                 1.4208
 Frc consts  --     0.0519                 0.0376                 0.0426
 IR Inten    --     0.3561                 0.3136                 1.1487
 Atom AN      X      Y      Z        X      Y      Z        X      Y      Z
   1   8     0.04   0.02  -0.04    -0.01  -0.01   0.00     0.01  -0.01   0.00
   2  12     0.00  -0.02   0.00    -0.01   0.01   0.01     0.00  -0.01  -0.01
   3   8     0.01   0.00   0.01     0.00   0.01  -0.02     0.00  -0.02   0.02
   4   6     0.02   0.00  -0.05    -0.01  -0.01   0.00     0.00  -0.01  -0.01
   5   7    -0.01  -0.01  -0.01    -0.01   0.00   0.02    -0.01   0.01   0.00
   6   7    -0.02   0.01   0.00    -0.02   0.00   0.01     0.00   0.00   0.00
   7   8     0.02  -0.01  -0.04    -0.01  -0.01   0.00     0.01  -0.01  -0.01
   8   6    -0.03  -0.01  -0.02    -0.01  -0.01   0.02     0.01   0.00   0.01
   9   6    -0.07   0.01  -0.03    -0.02  -0.01   0.01     0.02   0.00   0.01
  10   6    -0.03   0.00  -0.01    -0.02  -0.01   0.01     0.01   0.00   0.00
  11   8     0.03  -0.03  -0.02     0.00   0.02   0.02     0.00   0.05   0.03
  12   6     0.04  -0.03   0.02     0.00   0.02   0.00    -0.02   0.02  -0.01
  13   6     0.01  -0.03   0.03     0.00   0.02  -0.01     0.00   0.01  -0.01
  14   6     0.02  -0.01  -0.04    -0.01  -0.01   0.01    -0.01  -0.01   0.01
  15   8     0.04   0.02   0.06    -0.01  -0.01  -0.02    -0.02  -0.01  -0.03
  16   6     0.01   0.04   0.02    -0.01  -0.01   0.01    -0.02   0.01   0.05
  17   8    -0.03  -0.04   0.01     0.01   0.02   0.00    -0.01  -0.01  -0.02
  18   6    -0.01   0.02   0.01     0.00  -0.02   0.00     0.00   0.00  -0.01
  19   8     0.00   0.01   0.01     0.00  -0.03   0.01     0.01   0.02  -0.03
  20   8    -0.03   0.01   0.00     0.01   0.00   0.00     0.00   0.00   0.01
  21   6    -0.03   0.01   0.00     0.01   0.00   0.00     0.00   0.00   0.00
  22   6    -0.02  -0.01   0.01     0.01   0.01  -0.01     0.00  -0.01  -0.01
  23   6    -0.02   0.02   0.00     0.01  -0.01   0.00     0.01   0.00  -0.01
  24   8    -0.03   0.02   0.00     0.01  -0.01  -0.01     0.00   0.00   0.00
  25   6     0.00  -0.02   0.02     0.00   0.01  -0.02     0.02  -0.01  -0.02
  26   6    -0.03   0.02   0.00     0.02  -0.01   0.00     0.03   0.00  -0.01
  27   6    -0.01  -0.01   0.09     0.00   0.00  -0.05     0.03   0.01  -0.03
  28   6     0.02  -0.01  -0.04    -0.02  -0.01   0.02    -0.06  -0.05   0.05
  29   6     0.00  -0.01   0.00    -0.01   0.00   0.01     0.00   0.01   0.01
  30   6     0.00   0.02  -0.01     0.00   0.00   0.01     0.00  -0.01   0.00
  31   6     0.00   0.00  -0.01    -0.01  -0.01  -0.01     0.00   0.00   0.02
  32   6    -0.01   0.00  -0.02    -0.01  -0.01  -0.02     0.00  -0.01  -0.01
  33   6    -0.01   0.01   0.00     0.00   0.01   0.01     0.00  -0.02  -0.03
  34   6    -0.01   0.00   0.01     0.01   0.01   0.02     0.01   0.00   0.00
  35   6    -0.01  -0.01   0.00     0.00   0.00   0.00     0.01   0.01   0.01
  36   6     0.01   0.00  -0.01     0.01   0.00  -0.02     0.01   0.00   0.02
  37   6    -0.01   0.00  -0.02     0.00   0.01  -0.02     0.00   0.02   0.00
  38   6     0.01   0.02  -0.02     0.00   0.00   0.01     0.00  -0.01   0.00
  39   6    -0.01   0.00   0.02     0.00   0.01   0.00     0.00   0.00   0.00
  40   6    -0.02  -0.01   0.04     0.00   0.01   0.00     0.00   0.00  -0.01
  41   6     0.00   0.01   0.01     0.00   0.01   0.00     0.00   0.00   0.00
  42   6     0.01   0.03  -0.01     0.00   0.00   0.01     0.00  -0.01   0.00
  43   6     0.01   0.02  -0.02     0.00   0.00   0.00     0.00   0.00   0.00
  44   6     0.01   0.01  -0.01     0.01   0.00   0.00     0.00   0.00   0.00
  45   6     0.02   0.01   0.01     0.03   0.03   0.01     0.00   0.01   0.00
  46   6     0.01  -0.01  -0.01     0.00   0.01  -0.02     0.03  -0.03   0.01
  47   6     0.01   0.02  -0.03     0.02   0.04  -0.03     0.02   0.03  -0.01
  48   6    -0.02   0.00  -0.01     0.01   0.01  -0.02    -0.04   0.01   0.01
  49   6     0.02  -0.01   0.01     0.01  -0.02   0.00    -0.01   0.00   0.00
  50   6    -0.02  -0.01  -0.02     0.01   0.00   0.00     0.00   0.00   0.00
  51   6    -0.02   0.01  -0.02     0.01  -0.01   0.00     0.01   0.00   0.00
  52   6     0.03   0.00   0.00    -0.01   0.00   0.00    -0.01   0.01   0.00
  53   6     0.04  -0.05   0.00     0.01  -0.04   0.04    -0.01   0.01   0.00
  54   6     0.04  -0.02   0.02     0.00  -0.02   0.01    -0.01   0.01   0.00
  55   1    -0.06   0.01  -0.02    -0.02  -0.02   0.01     0.02  -0.01   0.01
  56   1     0.01  -0.02   0.03    -0.01   0.00   0.01     0.00   0.02  -0.02
  57   1     0.03   0.00  -0.05    -0.01  -0.01   0.01    -0.02  -0.02   0.02
  58   1    -0.01   0.02   0.04    -0.01  -0.01   0.02    -0.04  -0.01   0.07
  59   1     0.03   0.08   0.03    -0.01   0.00   0.02    -0.01   0.05   0.06
  60   1    -0.01   0.02   0.04    -0.01  -0.02   0.01    -0.03   0.00   0.06
  61   1     0.00   0.01   0.01     0.00   0.00  -0.01    -0.01  -0.01  -0.01
  62   1    -0.02   0.02   0.00     0.00  -0.01   0.00     0.01   0.00  -0.01
  63   1     0.00   0.07  -0.13     0.00  -0.05   0.09     0.03  -0.02   0.03
  64   1     0.15  -0.08   0.08    -0.10   0.06  -0.05    -0.02   0.00  -0.04
  65   1    -0.15  -0.04   0.12     0.11   0.03  -0.08     0.07  -0.01  -0.05
  66   1    -0.07   0.08  -0.04     0.04  -0.06   0.03     0.03   0.02  -0.01
  67   1     0.05  -0.01   0.01    -0.04   0.00   0.00     0.05  -0.01  -0.02
  68   1    -0.09  -0.03   0.05     0.06   0.02  -0.04     0.02  -0.02  -0.02
  69   1    -0.07  -0.09  -0.03     0.08   0.09   0.15    -0.12  -0.13  -0.46
  70   1    -0.13   0.02   0.22     0.15  -0.04  -0.24    -0.27   0.12   0.29
  71   1     0.13   0.05   0.11    -0.24  -0.05  -0.09     0.49   0.03   0.04
  72   1     0.14  -0.07  -0.10    -0.09   0.02   0.07    -0.16   0.00   0.16
  73   1     0.00   0.14  -0.05    -0.03  -0.09   0.02    -0.07  -0.21   0.03
  74   1    -0.07  -0.09   0.03     0.02   0.03   0.00     0.02   0.01  -0.01
  75   1    -0.01   0.01  -0.03    -0.02  -0.02  -0.04    -0.01  -0.02  -0.03
  76   1    -0.02   0.01   0.01     0.01   0.01   0.03     0.00  -0.03  -0.05
  77   1    -0.01   0.00   0.03     0.02   0.02   0.05     0.02   0.01   0.00
  78   1     0.01   0.00  -0.02     0.02  -0.01  -0.02     0.01   0.00   0.01
  79   1    -0.03   0.01  -0.02    -0.01   0.02  -0.03    -0.01   0.01  -0.02
  80   1    -0.01   0.00   0.02     0.00   0.01   0.00     0.00  -0.01   0.00
  81   1    -0.03  -0.03   0.07     0.01   0.01   0.00     0.01   0.00  -0.01
  82   1    -0.01   0.01   0.02     0.00   0.01   0.00     0.00   0.00  -0.01
  83   1     0.00   0.01  -0.02    -0.01   0.00   0.00     0.01   0.00   0.00
  84   1     0.03   0.02   0.00     0.02   0.00   0.00    -0.01   0.00   0.00
  85   1     0.07   0.04   0.08     0.07   0.05   0.04     0.00   0.01  -0.02
  86   1     0.03  -0.07   0.01     0.04  -0.01   0.00     0.00   0.04   0.01
  87   1    -0.01   0.06  -0.02     0.00   0.07   0.00     0.01   0.00   0.02
  88   1    -0.26  -0.15   0.04    -0.19  -0.09   0.03     0.05  -0.02  -0.02
  89   1     0.26  -0.19  -0.06     0.18  -0.11  -0.06     0.01  -0.02   0.03
  90   1     0.03   0.29   0.00     0.02   0.23  -0.01     0.04  -0.06   0.03
  91   1     0.05   0.21  -0.02     0.04   0.14  -0.02     0.04   0.13  -0.01
  92   1     0.14  -0.09  -0.13     0.09  -0.01  -0.06     0.10  -0.03  -0.07
  93   1    -0.13  -0.05   0.05    -0.06   0.01   0.00    -0.05  -0.02   0.04
  94   1    -0.01  -0.05   0.03     0.07  -0.25   0.27    -0.03  -0.11   0.09
  95   1     0.03   0.02  -0.04     0.32   0.18  -0.19     0.05   0.08  -0.04
  96   1    -0.08   0.02  -0.02    -0.35   0.10  -0.13    -0.18   0.05  -0.01
  97   1     0.04  -0.09   0.05     0.03  -0.08   0.02    -0.01   0.01   0.00
  98   1     0.06   0.05   0.05     0.02   0.03   0.03    -0.01   0.01   0.00
  99   1    -0.02  -0.02  -0.05    -0.03  -0.02  -0.06     0.00   0.01  -0.01
 100   1    -0.02  -0.03   0.00    -0.02   0.02   0.02     0.01   0.00   0.00
 101   1    -0.02  -0.01  -0.04     0.00  -0.03  -0.02     0.00   0.02   0.01
 102   1    -0.02  -0.01  -0.03     0.04   0.01   0.01    -0.02   0.00   0.00
 103   1    -0.05  -0.03  -0.01     0.01   0.00  -0.01     0.01   0.00   0.00
 104   1    -0.05   0.05  -0.03     0.01  -0.01   0.01     0.01  -0.01   0.00
 105   1     0.01   0.01  -0.02     0.01  -0.01   0.01     0.00  -0.01   0.01
 106   1     0.01   0.03   0.11     0.00  -0.01  -0.02     0.00   0.06   0.07
 107   1    -0.02   0.04  -0.09     0.00  -0.01   0.01    -0.06   0.04  -0.07
 108   1     0.11  -0.09  -0.01    -0.02   0.01   0.00     0.04  -0.06  -0.01
 109   1     0.12  -0.11   0.03     0.00  -0.03   0.04    -0.05   0.05  -0.01
 110   1    -0.01  -0.10   0.00     0.03  -0.06   0.02     0.04   0.03  -0.01
 111   1     0.09   0.04   0.00     0.01  -0.04   0.07    -0.02  -0.03   0.02
 112   1     0.02  -0.05   0.07    -0.01  -0.02   0.02     0.00   0.01  -0.02
 113   1     0.08  -0.04   0.04     0.01  -0.03   0.02    -0.03   0.02  -0.01
 114   1     0.08   0.01  -0.02     0.00  -0.02  -0.01    -0.02   0.00   0.02
                    49                     50                     51
                     A                      A                      A
 Frequencies --   228.6635               229.9134               237.2665
 Red. masses --     2.2466                 2.0108                 2.3791
 Frc consts  --     0.0692                 0.0626                 0.0789
 IR Inten    --     2.2914                 1.0039                 6.9275
 Atom AN      X      Y      Z        X      Y      Z        X      Y      Z
   1   8    -0.05   0.00   0.01     0.02   0.01  -0.01    -0.05  -0.01   0.01
   2  12     0.07   0.00   0.00     0.04   0.07   0.00     0.04  -0.02   0.05
   3   8     0.02  -0.02   0.05    -0.02   0.01  -0.03     0.00   0.01  -0.01
   4   6    -0.02   0.00   0.03     0.01  -0.01  -0.02    -0.02   0.01   0.03
   5   7     0.00   0.00   0.00     0.01   0.00   0.02     0.03   0.01   0.02
   6   7     0.02   0.01  -0.01     0.00   0.01  -0.01    -0.05  -0.03   0.02
   7   8    -0.04   0.00   0.02     0.00  -0.01  -0.02    -0.02   0.02   0.02
   8   6    -0.01   0.00   0.00    -0.01   0.00   0.01    -0.01   0.00   0.01
   9   6    -0.03   0.01  -0.02    -0.04   0.01  -0.02    -0.05   0.01  -0.01
  10   6     0.00   0.01  -0.02    -0.02   0.01  -0.02    -0.04  -0.01   0.02
  11   8     0.02  -0.02   0.01     0.00   0.02   0.01    -0.01  -0.01   0.00
  12   6     0.02  -0.01  -0.02     0.00   0.02   0.00     0.00   0.01  -0.02
  13   6     0.02   0.00  -0.02    -0.01   0.01  -0.01     0.00   0.02  -0.03
  14   6     0.01  -0.01   0.01     0.00  -0.01   0.00     0.01   0.00   0.02
  15   8     0.05  -0.04  -0.07     0.01   0.03   0.00     0.04   0.01  -0.04
  16   6     0.00  -0.03  -0.01    -0.01   0.03   0.03     0.02  -0.05  -0.03
  17   8    -0.06  -0.04  -0.02     0.03   0.03   0.02    -0.01   0.01   0.01
  18   6     0.00   0.05   0.02    -0.02  -0.04   0.00     0.01  -0.03   0.01
  19   8     0.03   0.07   0.00    -0.03  -0.05   0.01     0.03  -0.05   0.03
  20   8    -0.03   0.01   0.01     0.00  -0.01   0.01     0.00   0.03  -0.01
  21   6    -0.05   0.00   0.01     0.01   0.00   0.01    -0.01   0.02  -0.01
  22   6    -0.04  -0.01   0.01     0.01   0.01   0.02    -0.01   0.02  -0.01
  23   6    -0.02   0.03   0.01    -0.01  -0.02   0.00    -0.01  -0.01   0.00
  24   8    -0.05   0.00   0.02     0.01   0.00  -0.01    -0.01   0.03   0.00
  25   6     0.02  -0.03   0.03    -0.02   0.02   0.01    -0.04   0.01   0.01
  26   6    -0.06   0.03   0.03     0.01   0.00  -0.01     0.03  -0.02   0.00
  27   6     0.08  -0.02  -0.10    -0.02   0.02   0.02     0.00   0.01  -0.04
  28   6     0.00   0.03   0.01    -0.02  -0.03   0.02     0.02   0.02   0.01
  29   6     0.00   0.00   0.00     0.00  -0.01  -0.02     0.02   0.02   0.01
  30   6     0.00   0.01   0.00    -0.01  -0.01   0.02     0.00  -0.02  -0.01
  31   6     0.00   0.00  -0.01     0.00   0.00  -0.05     0.01   0.03  -0.02
  32   6     0.00   0.00   0.00     0.01   0.02   0.00     0.02   0.03   0.00
  33   6     0.00   0.00   0.01     0.01   0.03   0.05     0.01   0.03   0.01
  34   6     0.00   0.00   0.01     0.00   0.00   0.01     0.00   0.01  -0.02
  35   6     0.00   0.00   0.00    -0.01  -0.02  -0.03     0.01   0.00  -0.02
  36   6     0.00   0.00   0.00    -0.01   0.00  -0.04    -0.02   0.02  -0.02
  37   6    -0.01   0.00   0.00    -0.01  -0.03  -0.03     0.01  -0.01  -0.02
  38   6    -0.01   0.02   0.01    -0.02  -0.01   0.03     0.02  -0.01  -0.04
  39   6    -0.01   0.03   0.00     0.01   0.02  -0.02     0.00  -0.04   0.01
  40   6     0.00   0.03  -0.02     0.03   0.04  -0.05    -0.01  -0.06   0.05
  41   6    -0.01   0.01   0.00     0.00   0.01  -0.01     0.01  -0.01  -0.01
  42   6    -0.01   0.00   0.02    -0.02  -0.02   0.03     0.01   0.01  -0.05
  43   6    -0.02   0.00   0.00    -0.02  -0.02   0.02     0.04   0.01  -0.02
  44   6     0.00  -0.01   0.02     0.00  -0.02   0.03    -0.01   0.02  -0.04
  45   6     0.01   0.00   0.00     0.01  -0.02   0.00    -0.03  -0.03  -0.01
  46   6     0.00   0.00   0.00    -0.05   0.05  -0.03    -0.06   0.04  -0.01
  47   6    -0.01   0.00   0.00    -0.02  -0.01  -0.01     0.01  -0.02  -0.01
  48   6     0.01   0.00  -0.01     0.05  -0.04  -0.02     0.04  -0.03   0.00
  49   6     0.00  -0.02   0.01    -0.02  -0.04  -0.01     0.01   0.03   0.00
  50   6     0.04   0.01   0.03     0.05   0.01   0.05    -0.07  -0.01  -0.07
  51   6    -0.01  -0.01   0.00     0.03  -0.03   0.02    -0.01   0.04  -0.01
  52   6    -0.02  -0.02  -0.03    -0.05  -0.01  -0.01     0.06   0.02   0.03
  53   6     0.02  -0.02   0.01     0.01  -0.03   0.04     0.00  -0.05   0.05
  54   6     0.03  -0.02  -0.03     0.02  -0.01  -0.02     0.00   0.02   0.11
  55   1    -0.03   0.00  -0.02    -0.04   0.00  -0.02    -0.06   0.03  -0.02
  56   1     0.02   0.00  -0.02    -0.02   0.02   0.00     0.00   0.01  -0.03
  57   1     0.01   0.00   0.00     0.00  -0.01   0.00     0.01   0.01   0.02
  58   1     0.04   0.01  -0.01    -0.03   0.00   0.07     0.06   0.00  -0.08
  59   1    -0.01  -0.06  -0.02    -0.03   0.08   0.03     0.06  -0.12  -0.01
  60   1     0.02  -0.06  -0.03     0.00   0.02   0.02     0.00  -0.06   0.00
  61   1    -0.02   0.03   0.01     0.01  -0.01   0.01     0.00   0.02  -0.02
  62   1     0.00   0.03   0.01    -0.01  -0.01   0.02    -0.04   0.00  -0.01
  63   1     0.03   0.13  -0.20    -0.03  -0.07   0.13    -0.04  -0.09   0.14
  64   1     0.27  -0.15   0.12    -0.15   0.08  -0.03    -0.17   0.09  -0.02
  65   1    -0.22  -0.09   0.18     0.10   0.05  -0.06     0.08   0.01  -0.07
  66   1    -0.12   0.10  -0.05     0.04  -0.04   0.03     0.01   0.07  -0.03
  67   1     0.04   0.01   0.05    -0.05   0.01  -0.03     0.13  -0.05  -0.01
  68   1    -0.15  -0.02   0.11     0.06   0.04  -0.05    -0.03  -0.09   0.02
  69   1     0.11   0.05  -0.11    -0.08  -0.05  -0.12    -0.03  -0.01  -0.13
  70   1     0.12  -0.04  -0.15    -0.14   0.06   0.14    -0.05   0.03   0.01
  71   1     0.07  -0.10  -0.10     0.14   0.05   0.04     0.09   0.00  -0.03
  72   1    -0.29   0.17   0.12    -0.06  -0.01   0.07    -0.19   0.12   0.08
  73   1     0.04  -0.29   0.04    -0.03  -0.10   0.00     0.06  -0.21   0.04
  74   1     0.21   0.21  -0.12     0.01  -0.01  -0.01     0.18   0.16  -0.11
  75   1     0.00   0.00  -0.01     0.01   0.03   0.02     0.02   0.04   0.01
  76   1     0.00   0.01   0.02     0.02   0.06   0.11     0.01   0.04   0.02
  77   1     0.00   0.00   0.01    -0.01   0.00   0.02    -0.01   0.00  -0.03
  78   1     0.01   0.00   0.00     0.00  -0.01  -0.03    -0.04   0.03  -0.02
  79   1    -0.01   0.01   0.00    -0.02  -0.02  -0.03     0.02  -0.02  -0.02
  80   1     0.00   0.04  -0.02     0.02   0.03  -0.03    -0.01  -0.06   0.02
  81   1     0.00   0.04  -0.04     0.05   0.07  -0.11    -0.03  -0.09   0.10
  82   1    -0.01   0.00   0.00     0.00   0.01  -0.02     0.02   0.00   0.00
  83   1    -0.05   0.00  -0.01    -0.03  -0.02   0.01     0.08   0.01  -0.01
  84   1     0.01  -0.01   0.02     0.01  -0.02   0.02    -0.02   0.02  -0.05
  85   1     0.02   0.00   0.03     0.02  -0.01   0.05    -0.06  -0.04  -0.01
  86   1     0.01  -0.03   0.00     0.04  -0.07  -0.01    -0.04  -0.03  -0.01
  87   1     0.00   0.01  -0.01     0.00   0.00  -0.02    -0.01  -0.05  -0.03
  88   1    -0.03  -0.01   0.01    -0.11   0.04   0.04    -0.05   0.05   0.02
  89   1     0.02  -0.01  -0.01    -0.01   0.03  -0.06    -0.09   0.06   0.00
  90   1     0.00   0.04  -0.01    -0.06   0.14  -0.06    -0.08   0.03  -0.04
  91   1     0.00   0.04   0.01     0.03   0.18   0.04     0.02   0.04   0.00
  92   1     0.01  -0.02  -0.02     0.09  -0.13  -0.14     0.04  -0.06  -0.06
  93   1    -0.05  -0.01   0.01    -0.21  -0.09   0.08    -0.05  -0.06   0.03
  94   1     0.01   0.04  -0.02     0.02   0.18  -0.19     0.04   0.04  -0.04
  95   1    -0.01  -0.02   0.00    -0.15  -0.19   0.08    -0.02  -0.09   0.02
  96   1     0.05  -0.01   0.00     0.33  -0.11   0.06     0.13  -0.05   0.03
  97   1     0.01  -0.01  -0.01     0.00  -0.02  -0.05    -0.04   0.11  -0.01
  98   1    -0.01  -0.03   0.00    -0.04  -0.07  -0.03     0.02  -0.04  -0.04
  99   1    -0.01  -0.02   0.01    -0.02  -0.05   0.01     0.06   0.03   0.09
 100   1     0.01   0.06   0.03     0.00   0.10   0.04    -0.04  -0.09  -0.04
 101   1     0.04  -0.04   0.03     0.05  -0.08   0.03    -0.08   0.05  -0.08
 102   1     0.10   0.02   0.05     0.16   0.04   0.08    -0.15  -0.03  -0.10
 103   1     0.00   0.00  -0.01     0.05  -0.02  -0.02    -0.02   0.04   0.04
 104   1     0.00  -0.02   0.00     0.05  -0.05   0.04    -0.03   0.05  -0.03
 105   1    -0.01  -0.02   0.00     0.04  -0.04   0.02    -0.03   0.05  -0.03
 106   1    -0.01  -0.10  -0.17    -0.03  -0.05  -0.14     0.04   0.12   0.25
 107   1     0.08  -0.07   0.08     0.02  -0.05   0.08    -0.08   0.09  -0.13
 108   1    -0.12   0.09  -0.01    -0.15   0.08   0.00     0.23  -0.14   0.01
 109   1     0.05  -0.05   0.02     0.08  -0.08   0.08     0.06  -0.08   0.10
 110   1     0.00  -0.05   0.00    -0.07  -0.08   0.05    -0.07  -0.10   0.05
 111   1     0.04   0.01   0.02     0.04   0.03   0.00     0.02   0.00   0.03
 112   1     0.01   0.00  -0.01    -0.02   0.02   0.03     0.00  -0.05   0.16
 113   1     0.08  -0.05   0.00     0.10  -0.04   0.02     0.02   0.07   0.10
 114   1     0.04  -0.02  -0.10     0.03  -0.02  -0.10     0.03   0.05   0.15
                    52                     53                     54
                     A                      A                      A
 Frequencies --   241.7178               249.9917               253.0798
 Red. masses --     1.5019                 1.5455                 1.3847
 Frc consts  --     0.0517                 0.0569                 0.0523
 IR Inten    --     0.0517                 4.4106                 3.8648
 Atom AN      X      Y      Z        X      Y      Z        X      Y      Z
   1   8    -0.01   0.00  -0.01     0.00   0.01   0.00    -0.01  -0.01   0.00
   2  12     0.01   0.01  -0.01     0.05   0.00   0.01     0.05   0.00   0.00
   3   8    -0.01   0.00   0.00    -0.01   0.01   0.00    -0.01  -0.01   0.01
   4   6     0.00   0.00   0.00     0.00   0.00  -0.01     0.00   0.01   0.01
   5   7     0.01   0.00  -0.01    -0.02  -0.01  -0.02    -0.01  -0.01   0.00
   6   7     0.01  -0.01  -0.02     0.00   0.00  -0.01     0.03   0.01   0.01
   7   8     0.00   0.00  -0.01    -0.01  -0.01   0.00     0.01   0.01   0.00
   8   6     0.00   0.02  -0.02    -0.01   0.01  -0.01    -0.01   0.01   0.00
   9   6     0.01   0.03  -0.02    -0.01   0.01  -0.01    -0.02   0.01   0.00
  10   6     0.01   0.02  -0.02     0.00   0.01  -0.01     0.00   0.01   0.00
  11   8     0.00   0.00   0.00     0.00  -0.01  -0.01    -0.02   0.00   0.00
  12   6     0.00   0.01   0.00     0.01   0.01   0.00    -0.02   0.00   0.00
  13   6    -0.01   0.00   0.00     0.00   0.01   0.00    -0.01   0.00   0.00
  14   6     0.00   0.00   0.00     0.01   0.00  -0.01    -0.01   0.01   0.00
  15   8     0.00   0.01   0.00     0.03   0.02   0.00    -0.01  -0.01  -0.01
  16   6     0.00   0.00   0.01     0.00   0.02   0.00     0.01  -0.02  -0.01
  17   8     0.02   0.02   0.00     0.02   0.03   0.01     0.01   0.02  -0.02
  18   6     0.00   0.00   0.01    -0.01  -0.02   0.02    -0.01   0.00   0.00
  19   8    -0.01  -0.01   0.01    -0.02  -0.02   0.03    -0.01   0.02   0.00
  20   8     0.00   0.00   0.00    -0.01   0.01   0.01     0.00   0.00   0.00
  21   6     0.01   0.00   0.00     0.00   0.00  -0.01     0.01  -0.01  -0.01
  22   6     0.01   0.00   0.00     0.00   0.00  -0.01     0.00   0.00  -0.01
  23   6     0.00   0.00   0.01    -0.02  -0.01   0.02     0.00   0.00   0.01
  24   8     0.01   0.00   0.00     0.01   0.03   0.01     0.01   0.00   0.00
  25   6    -0.02   0.00   0.02    -0.07  -0.01   0.04    -0.02  -0.01   0.01
  26   6    -0.01   0.00   0.01     0.00  -0.02   0.02     0.00   0.00   0.01
  27   6    -0.01  -0.01  -0.02    -0.01   0.01   0.01     0.00   0.00   0.01
  28   6     0.01  -0.01   0.00     0.01   0.00  -0.02     0.02   0.01  -0.01
  29   6     0.00   0.00   0.01    -0.02  -0.02  -0.02    -0.01  -0.02  -0.01
  30   6     0.00  -0.02  -0.01     0.00  -0.01  -0.01     0.00   0.00   0.01
  31   6     0.01  -0.01   0.02    -0.02  -0.03   0.00    -0.01  -0.02  -0.01
  32   6    -0.01  -0.03  -0.02    -0.01  -0.03   0.00    -0.01  -0.02   0.00
  33   6    -0.02  -0.03  -0.02     0.00  -0.02   0.02    -0.01  -0.01   0.02
  34   6    -0.01  -0.01   0.03     0.00  -0.01   0.02    -0.01  -0.01   0.01
  35   6    -0.01   0.00   0.03    -0.02  -0.01   0.00    -0.02  -0.01   0.00
  36   6     0.02  -0.02   0.03     0.01  -0.02   0.00     0.01  -0.01  -0.01
  37   6    -0.02   0.01   0.02    -0.02   0.01   0.00    -0.01   0.00   0.00
  38   6     0.01  -0.03  -0.01     0.01  -0.01  -0.01    -0.02   0.01   0.02
  39   6     0.00  -0.02  -0.01     0.02   0.00  -0.02    -0.03   0.01   0.01
  40   6     0.01  -0.02  -0.02     0.01  -0.01  -0.01    -0.02   0.01  -0.03
  41   6     0.01  -0.02  -0.02     0.00  -0.01   0.00     0.00   0.00  -0.03
  42   6     0.00  -0.02  -0.01     0.00  -0.01  -0.01     0.00  -0.02   0.01
  43   6     0.01  -0.01   0.00     0.01  -0.01   0.00    -0.01   0.01   0.00
  44   6    -0.02  -0.01  -0.01    -0.01   0.00  -0.01     0.00  -0.02   0.02
  45   6     0.02  -0.01   0.02     0.03   0.00   0.01     0.03   0.02   0.01
  46   6     0.06  -0.05   0.02     0.04  -0.02   0.00     0.01  -0.01  -0.01
  47   6    -0.01   0.03   0.01    -0.03   0.03   0.01    -0.02   0.02   0.00
  48   6    -0.07   0.01   0.02    -0.02   0.03  -0.02     0.00   0.02  -0.02
  49   6    -0.02   0.02  -0.01    -0.01   0.01  -0.01     0.00   0.01   0.03
  50   6    -0.02   0.01   0.00    -0.03   0.01  -0.01     0.05   0.00   0.03
  51   6     0.01   0.00   0.01     0.02   0.02   0.01    -0.01  -0.04  -0.01
  52   6     0.01   0.01   0.02     0.01  -0.02   0.01    -0.02   0.02  -0.01
  53   6     0.02   0.05  -0.04     0.03   0.03  -0.04     0.02   0.01  -0.01
  54   6     0.01   0.04   0.01     0.01   0.01   0.01     0.01   0.00  -0.02
  55   1     0.00   0.03  -0.02    -0.01   0.01  -0.01    -0.02   0.01   0.00
  56   1    -0.01  -0.01   0.01    -0.01   0.01   0.00    -0.01   0.01  -0.01
  57   1     0.00   0.00   0.01     0.00  -0.01  -0.01    -0.01   0.01   0.01
  58   1     0.01   0.00   0.00    -0.01   0.01   0.03     0.02  -0.01  -0.05
  59   1     0.02   0.00   0.01    -0.03   0.03  -0.01     0.04  -0.05   0.00
  60   1    -0.01  -0.01   0.02     0.02   0.01  -0.02    -0.01  -0.01   0.01
  61   1     0.01   0.00   0.00     0.01  -0.01  -0.01     0.00   0.00  -0.01
  62   1     0.00   0.00   0.01    -0.04  -0.01   0.01     0.00   0.00   0.00
  63   1    -0.03  -0.02   0.01    -0.09  -0.16   0.18    -0.02  -0.07   0.09
  64   1    -0.03   0.01   0.03    -0.24   0.10   0.02    -0.10   0.04   0.00
  65   1    -0.03   0.00   0.02     0.07   0.00  -0.05     0.05  -0.02  -0.04
  66   1    -0.02   0.03  -0.01    -0.08   0.22  -0.11    -0.03   0.08  -0.04
  67   1     0.03  -0.01   0.01     0.28  -0.09   0.02     0.11  -0.03   0.01
  68   1    -0.03  -0.02   0.03    -0.19  -0.19   0.16    -0.07  -0.07   0.06
  69   1     0.06   0.07   0.17    -0.05  -0.03  -0.06     0.00   0.00   0.00
  70   1     0.13  -0.05  -0.17    -0.07   0.04   0.08    -0.01   0.00   0.02
  71   1    -0.23  -0.04  -0.05     0.07   0.04   0.03     0.01   0.01   0.01
  72   1    -0.04   0.02   0.02    -0.06   0.04   0.00     0.07  -0.02  -0.05
  73   1     0.03  -0.07   0.01     0.03  -0.07   0.00     0.02   0.08   0.00
  74   1     0.05   0.02  -0.04     0.06   0.05  -0.05    -0.02  -0.02   0.01
  75   1    -0.02  -0.03  -0.05    -0.01  -0.03   0.01    -0.01  -0.01   0.01
  76   1    -0.03  -0.04  -0.04     0.01  -0.02   0.04     0.00  -0.01   0.03
  77   1     0.01   0.00   0.04     0.01   0.00   0.03    -0.01  -0.01   0.02
  78   1     0.02  -0.02   0.03     0.03  -0.04   0.01     0.03  -0.03  -0.01
  79   1    -0.04   0.01   0.01    -0.03   0.02   0.01    -0.02   0.01   0.01
  80   1     0.00  -0.02  -0.01     0.02   0.00  -0.03    -0.05   0.01   0.03
  81   1     0.02  -0.01  -0.03     0.01  -0.01  -0.01    -0.02   0.03  -0.06
  82   1     0.01  -0.01  -0.02     0.00  -0.01   0.01     0.01   0.00  -0.07
  83   1     0.04  -0.01   0.01     0.01  -0.02   0.01    -0.02   0.02  -0.02
  84   1    -0.04  -0.01  -0.02    -0.01   0.00  -0.02    -0.03  -0.03   0.01
  85   1     0.03   0.00   0.03     0.09   0.04   0.08     0.01   0.00  -0.03
  86   1     0.01  -0.03   0.02     0.02  -0.08   0.01     0.07   0.08   0.01
  87   1     0.01   0.00   0.00    -0.02   0.07  -0.03     0.03   0.00   0.07
  88   1     0.09  -0.05  -0.03     0.04  -0.02  -0.01    -0.08  -0.05   0.02
  89   1     0.04  -0.05   0.03     0.06  -0.03  -0.02     0.10  -0.06  -0.04
  90   1     0.07  -0.10   0.05     0.06  -0.01   0.02     0.03   0.11   0.00
  91   1     0.09   0.46   0.08    -0.08  -0.18   0.00    -0.04  -0.10  -0.01
  92   1     0.25  -0.21  -0.23    -0.17   0.16   0.16    -0.09   0.10   0.09
  93   1    -0.38  -0.13   0.19     0.13   0.13  -0.10     0.08   0.08  -0.06
  94   1    -0.11   0.06  -0.10    -0.01  -0.01   0.02     0.01   0.00   0.02
  95   1    -0.19  -0.03   0.09     0.03   0.09  -0.04     0.04   0.05  -0.03
  96   1     0.02  -0.01   0.07    -0.08   0.04  -0.06    -0.04   0.02  -0.05
  97   1    -0.04   0.07  -0.03     0.02  -0.12   0.04    -0.11   0.35  -0.10
  98   1    -0.05  -0.01  -0.03     0.00   0.13   0.06    -0.05  -0.29  -0.16
  99   1     0.01   0.03   0.02    -0.07   0.02  -0.16     0.17   0.00   0.37
 100   1     0.01  -0.01  -0.02    -0.01  -0.02  -0.02     0.03   0.05   0.01
 101   1    -0.01   0.05   0.02    -0.03   0.06   0.00     0.06  -0.05   0.04
 102   1    -0.06  -0.01   0.01    -0.09  -0.01   0.00     0.11   0.01   0.04
 103   1     0.03   0.03   0.01     0.04   0.07   0.02    -0.05  -0.13  -0.05
 104   1     0.03  -0.01   0.01     0.04  -0.01   0.03    -0.06   0.02  -0.03
 105   1    -0.01   0.01   0.00    -0.02   0.03  -0.01     0.07  -0.06   0.02
 106   1     0.01   0.06   0.08     0.02  -0.14  -0.18    -0.03   0.17   0.22
 107   1    -0.05   0.03  -0.03     0.15  -0.10   0.19    -0.18   0.12  -0.25
 108   1     0.05  -0.04   0.01    -0.11   0.17   0.04     0.13  -0.22  -0.05
 109   1     0.00   0.05  -0.08     0.02   0.02  -0.09     0.03  -0.01  -0.03
 110   1     0.05   0.07  -0.04     0.07   0.04  -0.05     0.03   0.01  -0.01
 111   1     0.02   0.04  -0.03     0.04   0.03  -0.01     0.04   0.03   0.01
 112   1     0.01   0.03   0.03     0.02  -0.01   0.02     0.00   0.02  -0.01
 113   1     0.02   0.07   0.00     0.02   0.02   0.01     0.03  -0.01   0.00
 114   1     0.01   0.04   0.03     0.02   0.02   0.01     0.01   0.00  -0.04
                    55                     56                     57
                     A                      A                      A
 Frequencies --   254.7190               256.7586               261.4689
 Red. masses --     1.5541                 1.2484                 1.9591
 Frc consts  --     0.0594                 0.0485                 0.0789
 IR Inten    --     0.2855                 1.5199                 5.8252
 Atom AN      X      Y      Z        X      Y      Z        X      Y      Z
   1   8     0.03  -0.01   0.01     0.01   0.01   0.00     0.01  -0.01   0.03
   2  12     0.03  -0.03   0.00    -0.03  -0.02   0.01     0.05   0.02   0.02
   3   8     0.00  -0.01   0.05     0.00   0.01  -0.01     0.01   0.01  -0.01
   4   6     0.01   0.00  -0.01     0.01  -0.01   0.00    -0.01   0.01   0.02
   5   7     0.02   0.00   0.01     0.00   0.00   0.00    -0.01   0.01   0.02
   6   7     0.00   0.01   0.01     0.00   0.00   0.01     0.04   0.00   0.01
   7   8     0.02  -0.01   0.00    -0.01  -0.02   0.00     0.00   0.00   0.03
   8   6     0.00  -0.01   0.00     0.00   0.00   0.00    -0.02   0.02   0.02
   9   6     0.00   0.00   0.00     0.00   0.00   0.00    -0.03   0.03  -0.01
  10   6     0.00   0.00   0.00     0.00   0.00   0.01     0.01   0.02   0.00
  11   8    -0.01   0.03   0.01     0.01   0.01   0.00     0.00   0.02   0.02
  12   6    -0.03   0.00   0.00     0.01   0.01   0.00    -0.01   0.00   0.00
  13   6     0.00   0.01   0.01     0.00   0.01   0.00     0.00   0.01  -0.01
  14   6    -0.02   0.00   0.00     0.01  -0.01  -0.01    -0.02   0.01   0.01
  15   8    -0.06  -0.05  -0.02     0.01   0.01   0.00    -0.03  -0.05  -0.03
  16   6    -0.02   0.02   0.01    -0.01   0.02   0.01    -0.01   0.00  -0.02
  17   8     0.00  -0.01  -0.02     0.00   0.00   0.01    -0.02  -0.01  -0.01
  18   6     0.00   0.04   0.00     0.00  -0.01   0.00     0.01   0.01  -0.01
  19   8     0.02   0.07  -0.02    -0.01  -0.02   0.01     0.02   0.00  -0.01
  20   8     0.00   0.00   0.01     0.00   0.00   0.00     0.00   0.00   0.00
  21   6     0.00  -0.01  -0.01     0.00   0.00   0.00    -0.01   0.00   0.00
  22   6    -0.01  -0.02  -0.03     0.00   0.00   0.00    -0.01   0.01   0.01
  23   6     0.00   0.00   0.00     0.00   0.00   0.00     0.00   0.01  -0.01
  24   8     0.00   0.01   0.01     0.00   0.00  -0.01    -0.02  -0.01   0.00
  25   6    -0.01  -0.03  -0.03    -0.01   0.00   0.00     0.02   0.00   0.01
  26   6     0.02  -0.02   0.02     0.00   0.00   0.00     0.01   0.01  -0.02
  27   6     0.01  -0.01  -0.03     0.00   0.00  -0.01     0.03   0.00  -0.05
  28   6    -0.02  -0.02   0.00    -0.02  -0.01   0.01    -0.05  -0.01   0.03
  29   6     0.02   0.01   0.01     0.00   0.00   0.00    -0.01  -0.01   0.00
  30   6     0.00   0.01   0.00     0.01   0.01  -0.01     0.01  -0.01   0.00
  31   6     0.01   0.03   0.01     0.00   0.00   0.01    -0.01  -0.02  -0.01
  32   6     0.01   0.03   0.00     0.00   0.00   0.00    -0.01  -0.02   0.00
  33   6     0.00   0.02  -0.02    -0.01   0.00  -0.01     0.01   0.00   0.03
  34   6     0.00   0.01  -0.01     0.00   0.00   0.00     0.00   0.00   0.01
  35   6     0.01   0.01   0.00     0.00   0.00   0.01    -0.01  -0.01  -0.01
  36   6    -0.01   0.02   0.00     0.00   0.00   0.00     0.01  -0.02  -0.01
  37   6     0.01  -0.01   0.00     0.00   0.00   0.01    -0.01   0.00  -0.01
  38   6     0.00   0.02   0.00     0.01   0.02  -0.02     0.01   0.00   0.00
  39   6     0.00   0.02   0.00     0.00   0.01   0.00    -0.02   0.00  -0.01
  40   6    -0.01   0.01   0.01    -0.02  -0.02   0.03    -0.03  -0.03  -0.03
  41   6     0.00   0.01   0.01    -0.01  -0.02   0.02    -0.02  -0.04  -0.03
  42   6     0.00   0.01   0.00     0.01   0.00  -0.02     0.00  -0.04  -0.03
  43   6    -0.01   0.00   0.00     0.00   0.01  -0.02     0.03   0.01   0.01
  44   6     0.01   0.01   0.00     0.01   0.00  -0.02    -0.04  -0.01  -0.03
  45   6    -0.03  -0.01  -0.01     0.01   0.01   0.00     0.02   0.00   0.00
  46   6    -0.03   0.01   0.01     0.00  -0.01   0.00     0.01   0.00  -0.02
  47   6     0.03  -0.02  -0.01     0.01   0.00   0.00    -0.03   0.01   0.00
  48   6     0.02  -0.02   0.01    -0.01   0.00   0.01     0.01   0.00  -0.02
  49   6     0.01  -0.01   0.01     0.03   0.03   0.03    -0.05   0.05  -0.03
  50   6     0.01   0.00   0.00     0.00  -0.02  -0.04    -0.07   0.02  -0.01
  51   6    -0.01   0.00   0.00    -0.02   0.04  -0.01     0.09   0.00   0.01
  52   6    -0.01  -0.01  -0.01     0.03  -0.03  -0.01     0.07  -0.03   0.04
  53   6    -0.01  -0.02   0.02     0.00   0.00  -0.01     0.02   0.00   0.04
  54   6     0.00  -0.01   0.00    -0.01   0.00   0.01     0.03   0.03   0.03
  55   1     0.00   0.00   0.00     0.00   0.01   0.00    -0.04   0.01  -0.01
  56   1     0.00   0.00   0.01     0.00   0.00   0.01     0.01   0.01  -0.01
  57   1    -0.03   0.00   0.00     0.00  -0.01  -0.01    -0.01   0.02  -0.01
  58   1    -0.04  -0.01   0.03    -0.02   0.01   0.06    -0.02  -0.01  -0.02
  59   1    -0.03   0.04   0.00    -0.05   0.06  -0.01    -0.04  -0.02  -0.04
  60   1     0.00   0.04   0.00     0.02   0.02  -0.02     0.02   0.03  -0.04
  61   1    -0.01  -0.04  -0.04     0.01   0.00   0.00    -0.01   0.03   0.01
  62   1     0.00   0.00  -0.03    -0.01   0.00   0.00     0.01   0.01  -0.01
  63   1     0.01  -0.12   0.16    -0.01   0.01  -0.02     0.03   0.07  -0.08
  64   1    -0.17   0.05  -0.08     0.01   0.00   0.01     0.12  -0.05   0.04
  65   1     0.17  -0.04  -0.14    -0.03   0.01   0.02    -0.07  -0.02   0.07
  66   1    -0.09   0.27  -0.15     0.01  -0.04   0.02     0.06  -0.12   0.06
  67   1     0.38  -0.11   0.03    -0.05   0.01  -0.01    -0.15   0.05  -0.02
  68   1    -0.23  -0.25   0.20     0.03   0.03  -0.03     0.12   0.10  -0.11
  69   1     0.04   0.04   0.04    -0.01  -0.01  -0.03     0.02   0.01  -0.13
  70   1     0.07  -0.02  -0.11    -0.02   0.01   0.00     0.01   0.01  -0.04
  71   1    -0.08  -0.05  -0.04     0.02   0.00   0.00     0.10  -0.04  -0.05
  72   1     0.20  -0.12  -0.09    -0.03  -0.01   0.03     0.25  -0.15  -0.08
  73   1    -0.06   0.23  -0.02    -0.03  -0.04   0.00    -0.13   0.34  -0.03
  74   1    -0.19  -0.16   0.11    -0.01  -0.01   0.01    -0.29  -0.20   0.21
  75   1     0.01   0.03   0.00     0.00   0.00   0.00    -0.01  -0.02   0.00
  76   1    -0.01   0.02  -0.03    -0.01  -0.01  -0.02     0.02   0.00   0.06
  77   1    -0.01   0.00  -0.03     0.00   0.00   0.00     0.01   0.00   0.02
  78   1    -0.03   0.03   0.00     0.00   0.00   0.00     0.02  -0.03  -0.01
  79   1     0.02  -0.01   0.00     0.00   0.00   0.00    -0.01   0.00  -0.01
  80   1     0.00   0.02   0.00     0.00   0.01   0.00    -0.04   0.03  -0.01
  81   1    -0.01   0.01   0.01    -0.05  -0.04   0.06    -0.06  -0.03  -0.04
  82   1    -0.01   0.00   0.02    -0.01  -0.02   0.03    -0.02  -0.05  -0.04
  83   1    -0.03   0.00   0.00    -0.02   0.00   0.00     0.01   0.01   0.01
  84   1     0.02   0.01   0.01    -0.01   0.00  -0.01    -0.08  -0.02  -0.06
  85   1    -0.06  -0.02  -0.03    -0.06  -0.03  -0.09     0.08   0.03   0.08
  86   1    -0.04   0.01  -0.01     0.03   0.13   0.01     0.03  -0.09   0.00
  87   1     0.00  -0.04  -0.01     0.04  -0.06   0.09    -0.02   0.06  -0.04
  88   1    -0.01   0.02   0.01    -0.06  -0.04   0.02    -0.01   0.00   0.00
  89   1    -0.06   0.03   0.03     0.05  -0.04   0.00     0.03  -0.01  -0.03
  90   1    -0.04  -0.02  -0.01     0.00   0.06   0.00     0.01   0.03  -0.01
  91   1     0.06   0.14   0.00     0.02   0.04  -0.01    -0.03  -0.02   0.02
  92   1     0.13  -0.12  -0.12     0.04  -0.02  -0.02    -0.06   0.03   0.02
  93   1    -0.09  -0.10   0.07    -0.01  -0.01   0.02    -0.03   0.03  -0.02
  94   1     0.01   0.00  -0.01    -0.01  -0.01   0.01     0.01   0.02  -0.02
  95   1    -0.01  -0.06   0.02     0.00   0.01   0.01     0.00  -0.01  -0.01
  96   1     0.05  -0.03   0.04    -0.02   0.01   0.00     0.03  -0.01  -0.02
  97   1     0.02  -0.02   0.01    -0.10   0.38  -0.10    -0.06   0.06  -0.02
  98   1     0.02   0.00   0.01     0.00  -0.30  -0.18    -0.08   0.08  -0.01
  99   1     0.00  -0.01   0.00     0.20   0.01   0.40    -0.01   0.07  -0.06
 100   1     0.00   0.00   0.01    -0.03  -0.03  -0.01    -0.04  -0.01  -0.03
 101   1     0.00  -0.02  -0.01    -0.01  -0.07  -0.06    -0.07   0.11   0.00
 102   1     0.02   0.00  -0.01     0.03  -0.01  -0.06    -0.15  -0.01   0.02
 103   1     0.00   0.01   0.00    -0.03   0.04   0.02     0.03  -0.15  -0.08
 104   1     0.00  -0.01   0.00    -0.03   0.05   0.00     0.01   0.13   0.09
 105   1    -0.02   0.00   0.00    -0.03   0.05  -0.03     0.29   0.02   0.01
 106   1     0.00  -0.06  -0.10     0.02  -0.23  -0.29     0.04  -0.10   0.01
 107   1     0.06  -0.04   0.06     0.24  -0.15   0.26     0.13  -0.06   0.11
 108   1    -0.07   0.06   0.00    -0.15   0.24   0.03     0.07   0.05   0.05
 109   1     0.00  -0.03   0.06     0.00   0.00  -0.02     0.04  -0.02   0.05
 110   1    -0.04  -0.04   0.02     0.01   0.01  -0.01     0.00  -0.03   0.03
 111   1    -0.02  -0.02   0.01     0.01   0.01  -0.01     0.04   0.03   0.05
 112   1     0.00  -0.01   0.00    -0.01   0.01   0.01     0.03   0.00   0.05
 113   1     0.01  -0.02   0.00    -0.01   0.01   0.01     0.03   0.05   0.02
 114   1     0.01  -0.01  -0.01    -0.02   0.00   0.01     0.04   0.05   0.05
                    58                     59                     60
                     A                      A                      A
 Frequencies --   264.8261               268.3090               272.5128
 Red. masses --     1.4747                 2.4869                 2.7356
 Frc consts  --     0.0609                 0.1055                 0.1197
 IR Inten    --     2.5755                 3.7324                 3.4995
 Atom AN      X      Y      Z        X      Y      Z        X      Y      Z
   1   8     0.00   0.01  -0.01     0.01   0.01  -0.02     0.01   0.01  -0.01
   2  12    -0.03  -0.02  -0.01    -0.02   0.07  -0.03    -0.06  -0.01   0.05
   3   8    -0.01  -0.01   0.01     0.00  -0.02   0.04     0.01   0.00   0.04
   4   6     0.00   0.00  -0.01     0.01   0.00  -0.02     0.01   0.00  -0.01
   5   7    -0.01   0.00  -0.01    -0.03   0.02   0.03    -0.04   0.06   0.01
   6   7     0.04   0.00   0.02    -0.05   0.02  -0.03     0.05  -0.01   0.02
   7   8    -0.01   0.00  -0.02     0.01   0.01  -0.02     0.01   0.00  -0.01
   8   6     0.00  -0.01  -0.01     0.00   0.02   0.04    -0.01   0.02   0.02
   9   6     0.00  -0.01   0.00     0.02   0.00   0.03    -0.01   0.00  -0.01
  10   6     0.01  -0.01   0.01     0.00   0.02  -0.01     0.01  -0.01   0.01
  11   8    -0.01  -0.01  -0.01    -0.02  -0.01  -0.01    -0.02   0.00  -0.02
  12   6    -0.01   0.00   0.00    -0.02  -0.02   0.00    -0.03  -0.01   0.00
  13   6    -0.01  -0.01   0.01     0.00  -0.02   0.02     0.00  -0.01   0.02
  14   6     0.01   0.00   0.00     0.00   0.00  -0.01     0.00   0.00  -0.01
  15   8     0.00   0.03   0.02    -0.03  -0.01   0.02    -0.04  -0.01   0.01
  16   6     0.00   0.01   0.02     0.00   0.02   0.02     0.00   0.02   0.01
  17   8     0.01   0.01  -0.01    -0.01  -0.03   0.00    -0.02  -0.05   0.06
  18   6     0.00   0.00   0.00     0.00   0.04  -0.01     0.02   0.01   0.00
  19   8    -0.01   0.01   0.00     0.01   0.08  -0.04     0.09   0.01  -0.01
  20   8     0.01  -0.01   0.00     0.00  -0.01   0.01    -0.01   0.02   0.00
  21   6     0.01  -0.01   0.00     0.00  -0.02   0.01    -0.03   0.02   0.01
  22   6     0.01   0.00  -0.01     0.00  -0.02  -0.01    -0.01   0.00   0.02
  23   6     0.00   0.00   0.01     0.01   0.00   0.00     0.00  -0.01  -0.03
  24   8     0.01  -0.01   0.00    -0.01  -0.03   0.00    -0.03   0.00  -0.02
  25   6     0.01   0.00  -0.02     0.07  -0.01  -0.06     0.04   0.03  -0.07
  26   6     0.00   0.00   0.01    -0.01   0.00   0.01     0.04  -0.02  -0.03
  27   6    -0.02   0.00   0.04    -0.01  -0.02   0.05    -0.02  -0.01   0.02
  28   6     0.04   0.00  -0.02     0.03   0.00  -0.02     0.03  -0.01  -0.02
  29   6     0.00   0.00   0.00    -0.01  -0.01   0.00     0.01   0.04  -0.01
  30   6     0.01   0.01   0.01    -0.02   0.01   0.00     0.02  -0.01   0.00
  31   6     0.00   0.01   0.01    -0.02  -0.03  -0.02     0.01  -0.02  -0.02
  32   6     0.00   0.01   0.00     0.00  -0.03   0.00     0.03  -0.03  -0.02
  33   6    -0.01   0.00  -0.02     0.02  -0.01   0.03     0.08   0.00   0.01
  34   6     0.00   0.00  -0.01     0.02   0.00   0.01     0.07   0.04  -0.02
  35   6     0.01   0.00   0.01     0.00   0.00  -0.02     0.02   0.05  -0.04
  36   6    -0.01   0.01   0.01     0.01  -0.01  -0.02     0.03  -0.02  -0.03
  37   6     0.01  -0.01   0.01     0.00  -0.01  -0.02     0.00   0.02  -0.03
  38   6     0.00   0.03   0.02     0.02  -0.04   0.00    -0.01   0.02   0.00
  39   6    -0.04   0.03   0.00     0.04  -0.03  -0.01    -0.03   0.01   0.00
  40   6    -0.04   0.01  -0.03     0.04  -0.01   0.01    -0.04  -0.02   0.00
  41   6    -0.02  -0.01  -0.03     0.00   0.01   0.03    -0.01  -0.04  -0.02
  42   6     0.00  -0.02  -0.01    -0.04   0.01   0.00     0.02  -0.02  -0.01
  43   6     0.00   0.02   0.01     0.04  -0.02   0.03    -0.02   0.01  -0.01
  44   6    -0.02  -0.01   0.00    -0.04   0.01  -0.02     0.02  -0.01   0.00
  45   6    -0.03   0.02  -0.01     0.04   0.04   0.01     0.06  -0.03   0.01
  46   6    -0.02   0.01   0.01     0.00   0.03  -0.02     0.04  -0.02  -0.03
  47   6     0.04  -0.02  -0.01    -0.03  -0.01   0.00    -0.13   0.01   0.05
  48   6     0.02  -0.01   0.01     0.01  -0.02  -0.01    -0.08   0.00  -0.01
  49   6    -0.02   0.03   0.00    -0.07  -0.04  -0.09     0.04   0.05   0.06
  50   6    -0.02   0.02   0.01    -0.08  -0.03  -0.05     0.03   0.02   0.01
  51   6     0.07  -0.02   0.00     0.09   0.02   0.04    -0.04  -0.01  -0.02
  52   6     0.04  -0.02   0.03     0.04   0.00   0.06    -0.02  -0.01  -0.03
  53   6     0.00  -0.01  -0.01    -0.02   0.01   0.06    -0.02  -0.03   0.07
  54   6     0.00  -0.02  -0.02     0.00   0.03   0.02     0.00  -0.01  -0.01
  55   1    -0.01   0.00   0.00     0.04  -0.02   0.04    -0.02   0.00  -0.01
  56   1    -0.01  -0.01   0.01     0.01  -0.02   0.00     0.02  -0.02   0.01
  57   1     0.00  -0.01   0.02     0.00   0.00   0.01    -0.01   0.00   0.02
  58   1     0.00   0.01   0.04    -0.01   0.01   0.03    -0.01   0.01   0.03
  59   1     0.00   0.03   0.02     0.01   0.04   0.02    -0.01   0.04   0.01
  60   1     0.00  -0.01   0.02    -0.01   0.01   0.02     0.00   0.01   0.01
  61   1     0.00  -0.01  -0.01    -0.01  -0.04  -0.01     0.01  -0.04  -0.01
  62   1     0.00   0.00   0.01     0.03   0.00  -0.01    -0.01  -0.01  -0.04
  63   1     0.02  -0.01   0.03     0.10   0.07  -0.06     0.07   0.02   0.04
  64   1    -0.02   0.01  -0.04     0.11  -0.07  -0.09    -0.05   0.02  -0.15
  65   1     0.05   0.00  -0.04     0.07  -0.03  -0.07     0.17   0.07  -0.14
  66   1    -0.03   0.05  -0.03    -0.07   0.10  -0.07     0.04   0.03  -0.03
  67   1     0.07  -0.02   0.01     0.11  -0.03   0.02     0.08  -0.03  -0.04
  68   1    -0.05  -0.04   0.05    -0.11  -0.07   0.09     0.02  -0.05  -0.03
  69   1    -0.01   0.00   0.09     0.01  -0.01   0.13    -0.01  -0.01   0.09
  70   1     0.00  -0.01   0.02     0.03  -0.04   0.03     0.01  -0.02  -0.02
  71   1    -0.07   0.03   0.03    -0.08   0.01   0.04    -0.09   0.00   0.01
  72   1    -0.16   0.09   0.05    -0.09   0.05   0.02    -0.10   0.05   0.04
  73   1     0.09  -0.23   0.02     0.07  -0.15   0.01     0.07  -0.17   0.01
  74   1     0.19   0.12  -0.14     0.12   0.07  -0.11     0.13   0.07  -0.12
  75   1     0.00   0.01   0.01     0.00  -0.05   0.01     0.03  -0.05  -0.02
  76   1    -0.01   0.00  -0.03     0.05  -0.01   0.06     0.11  -0.01   0.03
  77   1    -0.01   0.00  -0.01     0.03   0.00   0.02     0.10   0.05  -0.03
  78   1    -0.02   0.02   0.01     0.04  -0.04  -0.02     0.04  -0.03  -0.03
  79   1     0.01  -0.01   0.00     0.00  -0.01  -0.02     0.05   0.00  -0.03
  80   1    -0.06   0.05   0.02     0.05  -0.03  -0.02    -0.04   0.02   0.01
  81   1    -0.07   0.01  -0.04     0.07  -0.01   0.01    -0.08  -0.03   0.00
  82   1    -0.02  -0.03  -0.05     0.00   0.03   0.07    -0.02  -0.06  -0.03
  83   1    -0.04   0.02   0.00     0.07  -0.03   0.04    -0.04   0.01  -0.01
  84   1    -0.03  -0.01  -0.02    -0.02   0.01  -0.02    -0.02  -0.02  -0.02
  85   1    -0.06  -0.01  -0.09    -0.04  -0.02  -0.14     0.19   0.07   0.24
  86   1    -0.03   0.11   0.00     0.10   0.22   0.01     0.06  -0.29  -0.01
  87   1     0.00  -0.03   0.04     0.06  -0.05   0.17    -0.03   0.13  -0.14
  88   1    -0.03   0.00   0.01    -0.07   0.01   0.03     0.07  -0.01  -0.05
  89   1    -0.01   0.00   0.01     0.07   0.00  -0.07     0.03  -0.01  -0.04
  90   1    -0.02   0.02   0.01     0.01   0.14  -0.02     0.05  -0.05  -0.02
  91   1     0.04   0.00  -0.04    -0.04  -0.08   0.02    -0.10  -0.04   0.18
  92   1     0.07  -0.04  -0.04    -0.09   0.04   0.04    -0.23   0.04   0.04
  93   1     0.05  -0.05   0.01     0.01   0.03  -0.03    -0.19   0.03   0.03
  94   1     0.03  -0.02   0.03     0.02   0.01  -0.02    -0.12   0.01  -0.13
  95   1     0.03  -0.02   0.00     0.01  -0.03  -0.01    -0.19  -0.03   0.05
  96   1     0.02  -0.01   0.02     0.04  -0.02  -0.01    -0.02   0.01   0.05
  97   1    -0.02  -0.01   0.02    -0.05   0.11  -0.20    -0.02   0.08   0.10
  98   1    -0.04   0.08   0.03    -0.13  -0.20  -0.19     0.07   0.06   0.06
  99   1    -0.02   0.04  -0.07    -0.04  -0.06   0.06     0.10   0.07   0.08
 100   1     0.00   0.01  -0.01    -0.15  -0.03   0.02     0.08   0.01  -0.03
 101   1    -0.01   0.06   0.03    -0.11  -0.10  -0.13     0.05   0.07   0.06
 102   1    -0.05   0.00   0.04    -0.02  -0.01  -0.07    -0.02   0.00   0.03
 103   1    -0.09  -0.41  -0.15     0.20   0.21   0.04    -0.05  -0.03  -0.01
 104   1    -0.14   0.30   0.13     0.23  -0.15   0.06    -0.06   0.00  -0.04
 105   1     0.55   0.00   0.02    -0.09   0.01   0.02    -0.03  -0.02   0.00
 106   1     0.01  -0.07   0.02     0.03   0.01   0.10    -0.01  -0.04  -0.09
 107   1     0.08  -0.03   0.07     0.01  -0.01   0.06     0.03  -0.02  -0.01
 108   1     0.04   0.02   0.04     0.09   0.00   0.06    -0.06   0.01  -0.03
 109   1     0.00  -0.01   0.00    -0.02   0.02   0.07     0.02  -0.05   0.13
 110   1    -0.01  -0.01  -0.01    -0.03   0.00   0.06    -0.08  -0.09   0.06
 111   1     0.00  -0.01  -0.01    -0.02   0.00   0.05    -0.01  -0.01   0.05
 112   1     0.02  -0.01  -0.04     0.00   0.02   0.03     0.00   0.00  -0.02
 113   1    -0.02  -0.03  -0.02     0.00   0.05   0.01    -0.02  -0.01  -0.01
 114   1     0.01  -0.01  -0.01     0.00   0.04   0.03    -0.01  -0.01  -0.01
                    61                     62                     63
                     A                      A                      A
 Frequencies --   274.0173               277.1545               281.0252
 Red. masses --     1.7581                 1.9095                 3.7052
 Frc consts  --     0.0778                 0.0864                 0.1724
 IR Inten    --     0.3125                 1.3413                 0.9790
 Atom AN      X      Y      Z        X      Y      Z        X      Y      Z
   1   8    -0.01   0.00   0.00    -0.01   0.00   0.01     0.02   0.00  -0.02
   2  12    -0.02  -0.01   0.01     0.01  -0.01   0.00     0.09   0.00   0.01
   3   8     0.01   0.01  -0.01     0.01   0.01  -0.02     0.01  -0.01   0.09
   4   6     0.00   0.00   0.01    -0.01   0.00   0.01     0.01   0.00  -0.02
   5   7    -0.08   0.03  -0.01    -0.01   0.01  -0.02     0.01  -0.02  -0.02
   6   7     0.06   0.00   0.02    -0.07   0.00  -0.01    -0.02   0.00  -0.01
   7   8    -0.01   0.00   0.01    -0.01   0.00   0.01     0.03   0.00  -0.03
   8   6    -0.03   0.02   0.00     0.01  -0.03  -0.02     0.00  -0.01  -0.02
   9   6     0.00   0.01   0.01     0.03  -0.04   0.00     0.00   0.00  -0.01
  10   6     0.03   0.01   0.00    -0.03  -0.03   0.00    -0.01   0.00  -0.01
  11   8     0.02  -0.01   0.00     0.02  -0.01   0.01    -0.07   0.04  -0.02
  12   6     0.02   0.01   0.00     0.02   0.00   0.00    -0.08  -0.01   0.02
  13   6     0.01   0.01   0.00     0.01   0.00  -0.01    -0.01  -0.02   0.04
  14   6     0.01   0.00   0.00     0.00   0.00   0.00    -0.03   0.01  -0.01
  15   8     0.03   0.01  -0.01     0.03  -0.01  -0.02    -0.12  -0.05   0.01
  16   6     0.00  -0.01  -0.01     0.00  -0.01  -0.01    -0.01   0.02   0.03
  17   8     0.00  -0.02   0.03     0.00  -0.01   0.00    -0.02  -0.05   0.05
  18   6     0.01  -0.01   0.00     0.00   0.00   0.00     0.04   0.02  -0.02
  19   8     0.02  -0.03   0.01     0.00  -0.02   0.02     0.21  -0.02  -0.01
  20   8    -0.01   0.01   0.00    -0.01   0.01   0.00    -0.06   0.04   0.03
  21   6    -0.01   0.01   0.00    -0.01   0.00   0.00    -0.05   0.03   0.00
  22   6     0.00   0.00   0.01     0.00   0.00   0.00    -0.01  -0.01   0.04
  23   6    -0.01   0.00  -0.01    -0.01   0.00   0.00    -0.01   0.01  -0.07
  24   8    -0.01   0.02  -0.02    -0.01   0.02   0.00    -0.04   0.09  -0.01
  25   6    -0.02   0.01   0.00    -0.03  -0.01   0.02    -0.10  -0.02   0.10
  26   6    -0.01   0.00  -0.01    -0.01   0.00   0.00     0.08   0.01  -0.10
  27   6     0.00   0.00  -0.02     0.02   0.00  -0.03    -0.02  -0.03   0.02
  28   6    -0.01   0.01   0.01    -0.03   0.01   0.02     0.06  -0.02  -0.05
  29   6    -0.03   0.00  -0.01     0.00   0.02  -0.02    -0.01  -0.02   0.00
  30   6     0.02  -0.01   0.00    -0.03   0.01   0.00    -0.01   0.00  -0.01
  31   6    -0.04  -0.03   0.00     0.00  -0.01  -0.01    -0.01   0.00   0.01
  32   6    -0.01  -0.06   0.00     0.03  -0.03  -0.02    -0.02   0.00   0.00
  33   6     0.04  -0.04   0.00     0.06  -0.02  -0.02    -0.03  -0.01   0.00
  34   6     0.04   0.00   0.00     0.06   0.02  -0.02    -0.03  -0.01   0.02
  35   6     0.02   0.01  -0.01     0.02   0.04  -0.02    -0.01  -0.02   0.02
  36   6    -0.02   0.00   0.02     0.01   0.00   0.00    -0.01   0.00   0.01
  37   6     0.02  -0.01   0.00     0.01   0.03  -0.01     0.00  -0.01   0.01
  38   6     0.00   0.01   0.01     0.00  -0.01  -0.01     0.00  -0.01  -0.01
  39   6    -0.02   0.01   0.00     0.03  -0.01   0.01     0.02   0.00  -0.01
  40   6    -0.03  -0.01  -0.02     0.05   0.03   0.02     0.03   0.01   0.00
  41   6    -0.01  -0.03  -0.02     0.02   0.05   0.03     0.01   0.02   0.01
  42   6     0.02  -0.03  -0.01    -0.02   0.04   0.02    -0.01   0.01   0.01
  43   6    -0.01   0.00   0.00     0.00   0.00   0.00     0.00   0.00   0.00
  44   6     0.00  -0.01   0.00     0.00   0.02   0.01     0.00   0.00   0.00
  45   6    -0.01   0.10   0.00     0.03   0.00   0.02    -0.02   0.01   0.00
  46   6     0.00   0.04   0.01     0.02   0.02   0.00    -0.01   0.01   0.01
  47   6     0.01  -0.05   0.00    -0.08   0.01   0.05     0.04   0.00  -0.01
  48   6     0.02  -0.04   0.03    -0.09   0.02   0.00     0.03   0.00   0.01
  49   6     0.01   0.04   0.02    -0.01  -0.06  -0.03    -0.01  -0.02  -0.02
  50   6     0.00   0.03   0.02     0.01  -0.02  -0.01     0.00  -0.01   0.00
  51   6    -0.02  -0.03  -0.01     0.00   0.03   0.01     0.00   0.02   0.00
  52   6     0.00  -0.02  -0.03    -0.02   0.04   0.03    -0.01   0.01   0.01
  53   6     0.02   0.02  -0.01    -0.02  -0.03  -0.01     0.03   0.03  -0.07
  54   6     0.01   0.01  -0.02    -0.02  -0.04  -0.01     0.01  -0.01  -0.02
  55   1     0.00   0.00   0.01     0.06  -0.03   0.02     0.00   0.00   0.00
  56   1     0.01   0.00   0.01     0.00   0.00   0.00     0.02  -0.04   0.02
  57   1     0.01   0.00  -0.02     0.01   0.01  -0.02    -0.05   0.00   0.05
  58   1     0.01   0.00  -0.01     0.01   0.00  -0.03    -0.04  -0.01   0.05
  59   1     0.00  -0.02  -0.01     0.01  -0.04  -0.02    -0.01   0.07   0.03
  60   1     0.00  -0.01  -0.01     0.00   0.00  -0.01    -0.02   0.02   0.03
  61   1     0.01  -0.01   0.00     0.01   0.01   0.00     0.05   0.02   0.01
  62   1    -0.02   0.00  -0.01    -0.01   0.00   0.00    -0.02   0.01  -0.07
  63   1    -0.03  -0.03   0.04    -0.04  -0.05   0.05    -0.14  -0.14   0.11
  64   1    -0.08   0.04  -0.01    -0.06   0.02   0.03    -0.17   0.06   0.12
  65   1     0.02   0.03  -0.02    -0.01  -0.01   0.01    -0.08   0.00   0.09
  66   1    -0.01   0.02  -0.02    -0.02   0.01  -0.01     0.23  -0.20   0.12
  67   1     0.02  -0.01  -0.01     0.00   0.00   0.00    -0.20   0.07  -0.13
  68   1    -0.02  -0.01   0.00    -0.02   0.00   0.01     0.32   0.17  -0.32
  69   1     0.00   0.00  -0.05     0.02   0.01  -0.05     0.01  -0.01   0.09
  70   1    -0.01   0.02  -0.02     0.01   0.00  -0.03     0.03  -0.04  -0.04
  71   1     0.02  -0.02  -0.02     0.04  -0.02  -0.03    -0.09  -0.05   0.01
  72   1     0.02  -0.01  -0.01     0.06  -0.03  -0.02    -0.03   0.02  -0.02
  73   1    -0.03   0.06  -0.01    -0.06   0.12  -0.01     0.13  -0.14   0.02
  74   1    -0.04  -0.01   0.04    -0.09  -0.04   0.08     0.14   0.03  -0.17
  75   1    -0.01  -0.09   0.01     0.03  -0.06  -0.01    -0.01   0.01   0.00
  76   1     0.07  -0.06   0.00     0.08  -0.03  -0.01    -0.04   0.00  -0.01
  77   1     0.07   0.02   0.01     0.09   0.04  -0.02    -0.03  -0.02   0.02
  78   1     0.01  -0.03   0.02     0.02  -0.01   0.00    -0.01   0.00   0.02
  79   1     0.05  -0.02  -0.01     0.05   0.01  -0.01    -0.03   0.00   0.02
  80   1    -0.03   0.02   0.00     0.05  -0.03   0.00     0.04  -0.01  -0.02
  81   1    -0.04  -0.01  -0.03     0.08   0.03   0.03     0.05   0.02  -0.01
  82   1    -0.01  -0.04  -0.04     0.02   0.07   0.04     0.01   0.03   0.02
  83   1    -0.02   0.00  -0.01     0.02   0.00   0.01     0.01  -0.01   0.00
  84   1    -0.02  -0.01  -0.02     0.04   0.03   0.04     0.01   0.01   0.01
  85   1    -0.14  -0.02  -0.34    -0.12  -0.09  -0.18    -0.07  -0.03  -0.10
  86   1     0.05   0.50   0.02     0.11   0.26   0.02    -0.01   0.12   0.01
  87   1     0.07  -0.09   0.29     0.11  -0.15   0.23     0.02  -0.05   0.07
  88   1    -0.11  -0.01   0.06     0.00   0.01   0.01    -0.02   0.00   0.02
  89   1     0.10  -0.02  -0.06     0.04   0.01  -0.03     0.00   0.00   0.01
  90   1     0.02   0.19   0.02     0.02   0.05   0.00    -0.01   0.03   0.01
  91   1     0.02  -0.02   0.00    -0.06   0.01   0.14     0.02  -0.02  -0.06
  92   1     0.02  -0.09  -0.06    -0.13   0.01   0.01     0.05   0.01   0.02
  93   1    -0.01  -0.10   0.05    -0.16   0.01   0.05     0.09   0.01  -0.03
  94   1     0.01  -0.01  -0.01    -0.13  -0.01  -0.10     0.04   0.00   0.04
  95   1    -0.03  -0.10   0.05    -0.17   0.02   0.06     0.06   0.01  -0.01
  96   1     0.08  -0.04   0.08    -0.07   0.03   0.04     0.01   0.00  -0.02
  97   1     0.02  -0.09   0.10     0.05  -0.09  -0.06     0.01  -0.04  -0.03
  98   1     0.02   0.19   0.12    -0.01  -0.06  -0.03    -0.02  -0.03  -0.02
  99   1    -0.02   0.06  -0.14    -0.07  -0.08  -0.04    -0.04  -0.03  -0.02
 100   1     0.04   0.01  -0.02    -0.04  -0.01   0.03    -0.02   0.00   0.01
 101   1     0.01   0.10   0.05     0.00  -0.10  -0.04     0.00  -0.04  -0.01
 102   1    -0.06   0.00   0.05     0.07   0.00  -0.04     0.03   0.00  -0.01
 103   1     0.06   0.15   0.03    -0.14  -0.27  -0.05    -0.02  -0.02   0.01
 104   1     0.09  -0.19  -0.08    -0.19   0.30   0.10    -0.03   0.07   0.03
 105   1    -0.23  -0.06   0.02     0.35   0.07  -0.02     0.05   0.04  -0.02
 106   1     0.00   0.00   0.00    -0.01   0.06   0.03     0.00  -0.01  -0.04
 107   1     0.00   0.01  -0.07    -0.06   0.03   0.04     0.01  -0.02   0.06
 108   1     0.00  -0.07  -0.03    -0.01   0.06   0.03    -0.04   0.06   0.01
 109   1     0.04   0.00  -0.02    -0.01  -0.03   0.01     0.01   0.02  -0.12
 110   1     0.01   0.02  -0.01    -0.04  -0.03   0.00     0.07   0.07  -0.06
 111   1     0.04   0.06   0.00    -0.03  -0.04  -0.04     0.03   0.03  -0.04
 112   1     0.02   0.01  -0.04    -0.02  -0.04  -0.01     0.01  -0.02  -0.01
 113   1    -0.02   0.00  -0.02    -0.02  -0.05   0.00     0.02  -0.03  -0.01
 114   1     0.00   0.00   0.00    -0.02  -0.04  -0.01     0.02  -0.01  -0.04
                    64                     65                     66
                     A                      A                      A
 Frequencies --   283.5971               291.6187               297.1012
 Red. masses --     3.3489                 2.3062                 2.4531
 Frc consts  --     0.1587                 0.1156                 0.1276
 IR Inten    --    38.1012                 2.5702                 4.8612
 Atom AN      X      Y      Z        X      Y      Z        X      Y      Z
   1   8     0.03   0.00   0.00     0.00   0.00   0.00     0.00   0.00   0.00
   2  12     0.14  -0.04   0.01     0.00  -0.05   0.00    -0.01   0.02   0.04
   3   8    -0.03  -0.04   0.01     0.00   0.00   0.00     0.00   0.00   0.00
   4   6     0.01   0.01  -0.01     0.00   0.00   0.00     0.00   0.00   0.00
   5   7     0.01   0.00   0.01     0.06  -0.03  -0.01     0.11  -0.06   0.03
   6   7     0.01  -0.03   0.02     0.01   0.02   0.03     0.02   0.00  -0.01
   7   8     0.03   0.00   0.00    -0.01   0.00   0.00     0.00   0.00   0.00
   8   6    -0.01   0.00   0.01     0.01  -0.04  -0.02     0.02   0.00   0.00
   9   6    -0.02   0.01  -0.01    -0.02  -0.02   0.00    -0.05   0.03  -0.03
  10   6    -0.01   0.00   0.01    -0.02  -0.03   0.02    -0.01   0.01  -0.02
  11   8    -0.08   0.05  -0.02    -0.01   0.01   0.00     0.01   0.00   0.01
  12   6    -0.07   0.01   0.00    -0.01   0.01   0.00     0.00   0.00  -0.01
  13   6    -0.04  -0.01   0.00     0.00   0.00   0.00     0.00   0.01   0.00
  14   6    -0.03   0.02  -0.01     0.00   0.00   0.00     0.00   0.00   0.00
  15   8    -0.09   0.02   0.03    -0.01   0.01   0.01     0.00  -0.02  -0.02
  16   6    -0.01   0.03   0.01     0.00   0.00   0.00     0.00   0.00   0.00
  17   8    -0.01   0.08  -0.13     0.01   0.02  -0.03    -0.02  -0.01   0.07
  18   6    -0.02  -0.01   0.01     0.00  -0.01   0.00     0.00  -0.01   0.00
  19   8    -0.09   0.04  -0.03    -0.01  -0.01   0.01     0.02   0.00  -0.01
  20   8     0.06  -0.03  -0.03     0.01   0.00  -0.01     0.00   0.00  -0.01
  21   6     0.04  -0.02  -0.02     0.01   0.00  -0.02    -0.02   0.02   0.05
  22   6     0.00   0.03  -0.05     0.00   0.00  -0.02    -0.01   0.03   0.05
  23   6     0.02   0.01   0.02     0.00   0.01   0.00    -0.01  -0.03   0.00
  24   8     0.04  -0.08   0.03     0.02   0.02   0.01    -0.05  -0.06  -0.02
  25   6     0.04  -0.01   0.02    -0.04  -0.02   0.04     0.07   0.10  -0.08
  26   6     0.02   0.01   0.02     0.01   0.00   0.00     0.00  -0.02  -0.01
  27   6    -0.03   0.01   0.05    -0.01   0.00   0.00    -0.01   0.01   0.00
  28   6     0.02  -0.05  -0.02     0.01   0.00   0.00     0.00   0.01   0.00
  29   6     0.00   0.00   0.00     0.03   0.01   0.00     0.04  -0.03   0.01
  30   6     0.01  -0.02   0.00     0.00   0.04   0.02     0.01   0.00  -0.01
  31   6    -0.01  -0.01  -0.01     0.04   0.03  -0.01     0.04   0.00  -0.02
  32   6     0.01  -0.03   0.00     0.04   0.03   0.00     0.01   0.03   0.00
  33   6     0.04  -0.02   0.01     0.02   0.02  -0.02    -0.05   0.01   0.02
  34   6     0.03   0.00   0.00     0.01   0.00  -0.03    -0.06  -0.04   0.02
  35   6     0.00   0.01  -0.01     0.01   0.01   0.00    -0.03  -0.06   0.03
  36   6    -0.01  -0.01   0.00     0.01   0.01  -0.01     0.02  -0.01  -0.01
  37   6    -0.01   0.01  -0.01     0.00   0.02   0.01    -0.04  -0.01   0.02
  38   6     0.00  -0.01  -0.02    -0.01   0.06   0.04     0.00  -0.01   0.00
  39   6     0.01  -0.02   0.00    -0.06   0.07   0.02     0.00  -0.01   0.00
  40   6     0.00  -0.03   0.02    -0.06   0.05  -0.01     0.00  -0.02   0.01
  41   6     0.02  -0.02   0.00    -0.04   0.03  -0.02     0.00  -0.02   0.00
  42   6     0.02  -0.01  -0.01    -0.01   0.02   0.00     0.01  -0.01  -0.01
  43   6    -0.01   0.00  -0.03     0.01   0.03   0.02     0.00  -0.01   0.00
  44   6     0.02   0.00  -0.01    -0.01   0.01   0.01     0.00   0.00  -0.01
  45   6     0.00   0.02   0.00     0.02  -0.06   0.01     0.02  -0.10   0.02
  46   6    -0.01   0.03   0.00    -0.02   0.01  -0.01    -0.03   0.03   0.00
  47   6    -0.04   0.01   0.01    -0.04   0.04   0.03     0.00   0.07   0.01
  48   6    -0.03   0.01  -0.01    -0.08   0.04  -0.01    -0.03   0.05  -0.04
  49   6     0.04   0.02   0.04    -0.03   0.00  -0.02     0.01   0.02   0.01
  50   6     0.01   0.01   0.00    -0.02   0.00   0.00     0.00   0.01   0.00
  51   6    -0.08   0.03  -0.02     0.10  -0.05   0.00    -0.02   0.00   0.01
  52   6    -0.02   0.01  -0.04     0.09  -0.07   0.03    -0.03   0.01  -0.01
  53   6     0.00  -0.04   0.04    -0.01  -0.05  -0.02     0.04   0.03  -0.04
  54   6    -0.01   0.04   0.08     0.01  -0.08  -0.03     0.03   0.00  -0.02
  55   1    -0.03   0.01  -0.01    -0.03   0.01   0.00    -0.08   0.03  -0.04
  56   1    -0.04   0.01  -0.02     0.00   0.00   0.00     0.00   0.01  -0.01
  57   1    -0.05   0.01   0.05    -0.01   0.00   0.01     0.00   0.00   0.00
  58   1    -0.04   0.00   0.02     0.00   0.00   0.01     0.00   0.00   0.00
  59   1    -0.02   0.06   0.01    -0.01   0.01   0.00     0.00   0.00   0.00
  60   1     0.00   0.05   0.00     0.00   0.00   0.00     0.00  -0.01   0.00
  61   1    -0.06   0.08   0.00     0.01   0.03  -0.01    -0.02  -0.03   0.04
  62   1     0.04   0.01   0.04     0.00   0.01   0.01    -0.03  -0.03  -0.01
  63   1     0.05   0.12  -0.15    -0.07  -0.06   0.02     0.11   0.16  -0.05
  64   1     0.23  -0.08   0.10    -0.04   0.02   0.08     0.05   0.02  -0.18
  65   1    -0.14  -0.08   0.12    -0.07  -0.04   0.06     0.14   0.17  -0.11
  66   1     0.06  -0.11   0.09     0.04  -0.05   0.04    -0.03   0.06  -0.05
  67   1    -0.11   0.04   0.04    -0.05   0.02   0.00     0.08  -0.05  -0.04
  68   1     0.11   0.08  -0.05     0.06   0.04  -0.04    -0.06  -0.06   0.04
  69   1    -0.01   0.02   0.12     0.00   0.00   0.01    -0.02   0.00  -0.01
  70   1     0.01  -0.03   0.04     0.00   0.00   0.00    -0.02   0.02   0.00
  71   1    -0.09   0.05   0.04    -0.02   0.00   0.00     0.00   0.01   0.00
  72   1    -0.05  -0.01   0.05    -0.02   0.01   0.01     0.02   0.00  -0.02
  73   1     0.07  -0.18   0.02     0.02  -0.04   0.01     0.00   0.04   0.00
  74   1     0.09  -0.02  -0.15     0.03   0.01  -0.03    -0.01   0.00   0.02
  75   1     0.01  -0.05   0.00     0.04   0.03   0.01     0.01   0.06  -0.01
  76   1     0.05  -0.02   0.02     0.00   0.02  -0.04    -0.09   0.04   0.02
  77   1     0.05   0.00  -0.01     0.00   0.00  -0.04    -0.08  -0.06   0.02
  78   1     0.01  -0.02   0.01    -0.01   0.03  -0.02    -0.02   0.02   0.00
  79   1     0.01   0.00  -0.01     0.01   0.02   0.01    -0.09   0.02   0.03
  80   1     0.01  -0.02  -0.01    -0.08   0.09   0.03     0.00  -0.02   0.01
  81   1    -0.01  -0.04   0.04    -0.09   0.05  -0.03    -0.01  -0.03   0.02
  82   1     0.02  -0.02   0.00    -0.04   0.01  -0.05    -0.01  -0.03   0.02
  83   1     0.00  -0.01  -0.02    -0.06   0.04  -0.01     0.00  -0.01   0.01
  84   1     0.01   0.00  -0.01    -0.01   0.01   0.01    -0.01   0.00  -0.01
  85   1    -0.11  -0.07  -0.19    -0.10  -0.12  -0.05    -0.24  -0.25  -0.22
  86   1     0.05   0.26   0.01     0.06   0.04   0.01     0.12   0.23   0.02
  87   1     0.07  -0.12   0.19     0.09  -0.17   0.09     0.17  -0.35   0.27
  88   1    -0.05   0.02   0.04     0.00   0.02   0.00    -0.03   0.04   0.04
  89   1     0.02   0.02  -0.04    -0.04   0.03   0.01    -0.05   0.04   0.00
  90   1    -0.01   0.10   0.00    -0.03  -0.02  -0.03    -0.05   0.04  -0.03
  91   1    -0.03   0.00   0.06    -0.02   0.04   0.09    -0.01   0.06   0.00
  92   1    -0.07   0.02   0.01    -0.05   0.04   0.03     0.01   0.11   0.09
  93   1    -0.07   0.02   0.00    -0.08   0.05   0.02     0.01   0.13  -0.06
  94   1    -0.04   0.00  -0.04    -0.10  -0.01  -0.06    -0.03   0.04  -0.02
  95   1    -0.05   0.01   0.00    -0.10   0.09   0.02     0.00   0.13  -0.04
  96   1    -0.03   0.01   0.00    -0.11   0.05  -0.02    -0.08   0.04  -0.11
  97   1     0.05  -0.12   0.13    -0.01   0.01  -0.04     0.02  -0.09   0.07
  98   1     0.09   0.17   0.13    -0.06   0.00  -0.02     0.02   0.12   0.08
  99   1     0.00   0.04  -0.12    -0.04   0.00  -0.03    -0.03   0.03  -0.11
 100   1     0.05  -0.01  -0.02    -0.04   0.01   0.02     0.02   0.00  -0.01
 101   1     0.02   0.07   0.02    -0.03  -0.01  -0.01     0.00   0.04   0.01
 102   1    -0.04   0.00   0.01    -0.01   0.01   0.00    -0.03   0.00   0.01
 103   1    -0.10   0.02   0.05     0.27   0.26  -0.04    -0.04  -0.04   0.01
 104   1    -0.11   0.05  -0.06     0.33  -0.36  -0.06    -0.04   0.04   0.01
 105   1    -0.11   0.04  -0.04    -0.23  -0.13   0.07     0.02   0.00   0.00
 106   1     0.00  -0.03  -0.14     0.03  -0.13   0.13    -0.01   0.03  -0.03
 107   1     0.03  -0.03   0.04     0.14  -0.03  -0.05    -0.04   0.01  -0.01
 108   1    -0.10   0.09  -0.03     0.18  -0.14   0.01    -0.05   0.01  -0.01
 109   1     0.04  -0.05   0.08     0.00  -0.05   0.01     0.03   0.02  -0.09
 110   1    -0.04  -0.08   0.03    -0.04  -0.06  -0.01     0.07   0.06  -0.03
 111   1     0.02  -0.01   0.04    -0.01  -0.05  -0.04     0.05   0.05  -0.02
 112   1    -0.03   0.02   0.12     0.03  -0.08  -0.06     0.03  -0.01  -0.01
 113   1     0.02   0.09   0.07    -0.01  -0.13  -0.02     0.05  -0.03  -0.01
 114   1    -0.02   0.03   0.10     0.03  -0.06  -0.06     0.06   0.02  -0.06
                    67                     68                     69
                     A                      A                      A
 Frequencies --   304.8307               313.0593               316.6570
 Red. masses --     3.4883                 3.1886                 3.8424
 Frc consts  --     0.1910                 0.1841                 0.2270
 IR Inten    --    27.1830                 3.0071                 5.3879
 Atom AN      X      Y      Z        X      Y      Z        X      Y      Z
   1   8     0.00   0.00   0.01    -0.10  -0.06  -0.09    -0.02  -0.02  -0.03
   2  12     0.11  -0.07   0.10    -0.01  -0.03   0.00     0.08   0.14  -0.04
   3   8    -0.02  -0.01   0.00    -0.03   0.00   0.02    -0.02  -0.02   0.03
   4   6     0.00   0.00   0.00     0.00  -0.08  -0.04     0.00  -0.02  -0.01
   5   7    -0.07   0.03  -0.04    -0.01   0.00   0.01    -0.01  -0.02  -0.05
   6   7     0.00   0.00   0.02     0.03   0.00   0.01    -0.14  -0.02  -0.03
   7   8     0.00   0.00   0.01    -0.02  -0.01  -0.10     0.00   0.01  -0.03
   8   6    -0.04   0.00  -0.04    -0.01   0.02   0.01     0.02  -0.07  -0.04
   9   6    -0.02  -0.01   0.01    -0.01   0.01   0.00     0.05  -0.06   0.01
  10   6    -0.01  -0.03   0.02     0.02   0.01   0.00    -0.07  -0.06   0.01
  11   8    -0.02   0.02   0.00     0.04   0.05   0.08     0.01   0.01   0.03
  12   6    -0.01   0.01  -0.01     0.03   0.06   0.06     0.00   0.00   0.00
  13   6    -0.02   0.01  -0.01     0.01   0.06   0.06    -0.02   0.01   0.01
  14   6    -0.01   0.01   0.00     0.04  -0.06   0.05     0.00  -0.01   0.02
  15   8     0.00   0.01  -0.02    -0.02  -0.04   0.03     0.03  -0.02  -0.04
  16   6     0.00   0.00  -0.01    -0.08  -0.08   0.12    -0.03  -0.02   0.04
  17   8    -0.04   0.03   0.03     0.01   0.02  -0.03    -0.01   0.02   0.02
  18   6    -0.01  -0.05   0.03    -0.02  -0.01   0.00    -0.01  -0.02   0.00
  19   8    -0.02  -0.02   0.01    -0.03   0.00  -0.01     0.03   0.01  -0.01
  20   8     0.04   0.00  -0.04     0.00  -0.02   0.00    -0.01  -0.01   0.02
  21   6    -0.01   0.02   0.04     0.01  -0.01  -0.01    -0.01   0.00   0.04
  22   6    -0.01   0.08   0.05     0.01   0.00  -0.01     0.00   0.02   0.04
  23   6    -0.01  -0.03   0.01     0.00  -0.01   0.00    -0.01  -0.02   0.01
  24   8    -0.04  -0.11   0.00     0.02   0.00   0.00    -0.03  -0.04  -0.01
  25   6     0.07   0.13  -0.05     0.00  -0.01   0.01     0.04   0.06  -0.04
  26   6     0.02  -0.02   0.00     0.03   0.00  -0.02    -0.01   0.00  -0.01
  27   6    -0.02   0.02   0.00     0.00   0.03  -0.07    -0.02   0.01   0.00
  28   6     0.00  -0.01  -0.01     0.14   0.17  -0.05     0.02   0.05   0.00
  29   6    -0.03   0.02  -0.03     0.00   0.00   0.00    -0.01  -0.01  -0.02
  30   6    -0.01   0.02   0.01     0.01   0.00   0.00    -0.04  -0.01  -0.01
  31   6    -0.02   0.01   0.01     0.00  -0.01  -0.01    -0.01  -0.01   0.01
  32   6    -0.01  -0.01   0.00     0.01   0.00   0.03     0.01  -0.02   0.02
  33   6     0.02   0.00  -0.02     0.01  -0.01   0.01     0.02  -0.02  -0.01
  34   6     0.03   0.03  -0.02     0.00  -0.01  -0.03     0.02  -0.01  -0.02
  35   6     0.02   0.04  -0.02     0.00   0.00   0.00     0.01   0.01   0.00
  36   6    -0.01   0.01   0.02     0.00  -0.01  -0.02    -0.01   0.00   0.01
  37   6     0.03   0.01   0.00     0.00   0.00   0.01     0.01   0.01   0.02
  38   6     0.00   0.01   0.02     0.00   0.00   0.00    -0.02  -0.01  -0.02
  39   6     0.03   0.03   0.00     0.03   0.01  -0.01    -0.08  -0.02  -0.01
  40   6     0.02   0.03   0.04     0.02   0.00   0.01    -0.09  -0.02  -0.02
  41   6    -0.01   0.02   0.06     0.00  -0.01   0.03    -0.05   0.01  -0.06
  42   6    -0.01   0.03   0.01     0.00   0.00   0.00    -0.01   0.00  -0.01
  43   6    -0.01   0.00   0.02    -0.01  -0.01   0.01     0.01   0.01  -0.02
  44   6    -0.01   0.03  -0.01     0.00   0.01  -0.01     0.02  -0.01   0.00
  45   6    -0.03   0.06  -0.01     0.01   0.00   0.00    -0.03   0.05  -0.02
  46   6     0.02  -0.03   0.02    -0.01   0.02  -0.02    -0.01   0.00   0.01
  47   6     0.02  -0.05   0.00    -0.01  -0.01   0.02     0.01  -0.01   0.01
  48   6     0.02  -0.03   0.04    -0.03   0.01   0.01    -0.02   0.01   0.02
  49   6    -0.03  -0.02  -0.06    -0.01   0.01  -0.02     0.07   0.00   0.11
  50   6    -0.06  -0.02  -0.04    -0.03  -0.01  -0.02     0.12   0.02   0.03
  51   6     0.03  -0.02   0.02    -0.01   0.00   0.01     0.08   0.03  -0.02
  52   6    -0.02   0.00   0.00    -0.03   0.01  -0.02     0.09  -0.04   0.06
  53   6     0.05   0.04  -0.11     0.00   0.00   0.03    -0.01  -0.02  -0.10
  54   6     0.03  -0.11  -0.09     0.02   0.01  -0.01    -0.08  -0.01   0.10
  55   1    -0.01   0.00   0.01    -0.02   0.00   0.00     0.10  -0.03   0.03
  56   1    -0.02   0.02  -0.01    -0.03   0.05   0.12    -0.02   0.01   0.01
  57   1    -0.02   0.01   0.01    -0.01  -0.11   0.07    -0.01  -0.03   0.01
  58   1     0.00   0.00  -0.02    -0.08  -0.09   0.19    -0.03  -0.03   0.07
  59   1     0.00  -0.01  -0.01    -0.02   0.06   0.16    -0.01   0.04   0.05
  60   1     0.00   0.01   0.00    -0.14  -0.21   0.17    -0.04  -0.05   0.05
  61   1    -0.04   0.04   0.05    -0.01   0.01   0.00    -0.03  -0.01   0.05
  62   1    -0.04  -0.02   0.02     0.00  -0.01   0.01    -0.02  -0.02   0.01
  63   1     0.10   0.22  -0.07     0.00   0.00  -0.02     0.06   0.12  -0.05
  64   1     0.09   0.05  -0.13     0.03  -0.01   0.03     0.06   0.00  -0.10
  65   1     0.08   0.18  -0.05    -0.03  -0.02   0.03     0.06   0.11  -0.04
  66   1     0.03   0.01   0.01     0.07  -0.02   0.03    -0.02   0.04  -0.03
  67   1     0.04  -0.03  -0.03    -0.01   0.01  -0.04     0.02  -0.02  -0.04
  68   1     0.02  -0.03   0.00     0.08   0.03  -0.06    -0.03   0.00   0.02
  69   1    -0.02   0.01   0.02    -0.03   0.01  -0.19    -0.02   0.00   0.00
  70   1    -0.02   0.02   0.00    -0.06   0.10  -0.08    -0.02   0.01   0.00
  71   1    -0.04   0.03   0.00     0.08  -0.08  -0.06    -0.02   0.01   0.00
  72   1     0.02  -0.02  -0.01     0.15   0.15  -0.35     0.07   0.03  -0.11
  73   1     0.01   0.00   0.00     0.24   0.39   0.05     0.03   0.17   0.01
  74   1    -0.01  -0.02  -0.02     0.16   0.21   0.04    -0.01   0.04   0.05
  75   1    -0.01  -0.02   0.01     0.02   0.01   0.06     0.02  -0.02   0.05
  76   1     0.04  -0.02  -0.04     0.01  -0.01   0.01     0.03  -0.03  -0.01
  77   1     0.05   0.04  -0.01    -0.01  -0.02  -0.06     0.03   0.00  -0.03
  78   1     0.01   0.00   0.02     0.01  -0.01  -0.02     0.00  -0.02   0.01
  79   1     0.06  -0.01  -0.01     0.02   0.00   0.02     0.03   0.00   0.02
  80   1     0.05   0.03  -0.02     0.04   0.02  -0.03    -0.11  -0.02   0.01
  81   1     0.03   0.03   0.04     0.02   0.00   0.00    -0.09  -0.03   0.01
  82   1    -0.02   0.01   0.10    -0.01  -0.02   0.05    -0.04   0.00  -0.10
  83   1    -0.02   0.00   0.01    -0.01  -0.01   0.01     0.01   0.01  -0.02
  84   1     0.02   0.03   0.01     0.00   0.01  -0.01     0.01  -0.02   0.01
  85   1     0.13   0.15   0.13     0.02   0.00   0.01     0.06   0.09   0.00
  86   1    -0.10  -0.14  -0.01     0.02  -0.02  -0.01    -0.08  -0.01  -0.02
  87   1    -0.11   0.21  -0.17     0.00   0.01  -0.01    -0.07   0.12  -0.09
  88   1     0.01  -0.04  -0.03    -0.02   0.02   0.01    -0.03   0.00   0.02
  89   1     0.04  -0.04   0.03    -0.01   0.02  -0.03     0.00   0.00   0.00
  90   1     0.03  -0.03   0.04    -0.01   0.04  -0.03    -0.01   0.03   0.01
  91   1     0.02  -0.03  -0.01     0.00   0.00   0.02     0.01  -0.01   0.00
  92   1     0.03  -0.09  -0.07    -0.01  -0.01   0.01     0.01  -0.02   0.00
  93   1     0.02  -0.10   0.05    -0.01  -0.01   0.02     0.02  -0.03   0.03
  94   1     0.01  -0.02   0.01    -0.04  -0.01  -0.02    -0.03  -0.02   0.00
  95   1    -0.02  -0.08   0.05    -0.04   0.02   0.02    -0.03   0.02   0.03
  96   1     0.05  -0.02   0.10    -0.03   0.01   0.01    -0.03   0.02   0.03
  97   1    -0.01   0.09  -0.15     0.00   0.02  -0.04     0.00  -0.05   0.21
  98   1    -0.07  -0.15  -0.14    -0.02  -0.01  -0.03     0.19   0.04   0.14
  99   1    -0.02  -0.05   0.07     0.00   0.01  -0.01     0.08   0.00   0.11
 100   1    -0.12  -0.05   0.03    -0.05  -0.02   0.01     0.19   0.06  -0.06
 101   1    -0.09  -0.08  -0.11    -0.05   0.00  -0.05     0.17   0.01   0.13
 102   1    -0.03  -0.01  -0.08    -0.04  -0.01  -0.02     0.14   0.02   0.03
 103   1     0.06   0.03   0.00    -0.03  -0.02   0.01     0.13   0.11  -0.06
 104   1     0.07  -0.07   0.02    -0.03   0.01   0.00     0.14  -0.03   0.04
 105   1    -0.02  -0.04   0.04     0.00   0.00   0.01     0.03   0.04  -0.03
 106   1    -0.01   0.04   0.04    -0.01   0.01  -0.06     0.03  -0.14   0.10
 107   1    -0.05   0.02  -0.04    -0.02   0.00   0.00     0.14  -0.07   0.12
 108   1    -0.01  -0.05   0.00    -0.08   0.02  -0.01     0.17   0.02   0.07
 109   1     0.04   0.00  -0.21     0.02  -0.01   0.05    -0.04   0.00  -0.15
 110   1     0.11   0.09  -0.10    -0.02  -0.02   0.03     0.03   0.05  -0.08
 111   1     0.08   0.08  -0.06     0.01   0.02   0.03    -0.02  -0.05  -0.12
 112   1     0.07  -0.11  -0.15     0.02   0.01  -0.02    -0.12  -0.03   0.16
 113   1    -0.02  -0.23  -0.07     0.01   0.00  -0.01    -0.05   0.08   0.08
 114   1     0.07  -0.08  -0.15     0.02   0.01  -0.01    -0.11  -0.03   0.15
                    70                     71                     72
                     A                      A                      A
 Frequencies --   321.1135               328.4562               334.5726
 Red. masses --     2.9518                 3.3633                 5.1087
 Frc consts  --     0.1793                 0.2138                 0.3369
 IR Inten    --     1.1729                 4.7697                25.6088
 Atom AN      X      Y      Z        X      Y      Z        X      Y      Z
   1   8     0.01   0.01   0.01     0.00   0.01   0.00     0.01   0.03   0.03
   2  12    -0.01   0.02  -0.01     0.00  -0.04   0.05     0.03   0.04   0.01
   3   8     0.01   0.00   0.00     0.00   0.02  -0.02     0.05   0.12  -0.13
   4   6     0.00   0.01   0.01     0.00  -0.01   0.00    -0.01   0.00   0.01
   5   7    -0.01  -0.02   0.02    -0.02   0.02   0.03     0.02  -0.01   0.00
   6   7     0.01   0.00   0.01    -0.03   0.01  -0.02    -0.05   0.00  -0.02
   7   8     0.00   0.00   0.01    -0.03  -0.04   0.01    -0.07  -0.10   0.07
   8   6    -0.02   0.01   0.02    -0.01   0.04   0.03     0.01  -0.01   0.00
   9   6    -0.03   0.01   0.02    -0.01   0.02   0.01     0.00   0.00   0.00
  10   6     0.00   0.01   0.00    -0.01   0.03  -0.02    -0.03   0.00  -0.01
  11   8     0.00  -0.01  -0.01     0.01   0.02   0.00     0.02   0.04  -0.03
  12   6    -0.01  -0.01  -0.01     0.01   0.01   0.03     0.05   0.02   0.13
  13   6     0.00  -0.01  -0.01     0.02   0.01   0.02     0.08   0.03   0.09
  14   6    -0.01   0.01  -0.01     0.01  -0.01  -0.01     0.01   0.00  -0.05
  15   8     0.01   0.01  -0.01    -0.04  -0.02   0.04    -0.18  -0.08   0.24
  16   6     0.01   0.01  -0.02     0.01   0.00  -0.01     0.05   0.01  -0.08
  17   8     0.00   0.00   0.00    -0.01   0.00   0.01     0.00  -0.03   0.05
  18   6     0.01   0.01   0.00     0.00   0.01  -0.01    -0.01   0.08  -0.07
  19   8     0.01   0.01   0.00    -0.03   0.00   0.00    -0.12  -0.03   0.01
  20   8     0.00   0.00   0.01     0.01   0.00  -0.02     0.01   0.01  -0.05
  21   6     0.00   0.00  -0.01     0.00   0.00  -0.01    -0.03   0.00  -0.01
  22   6     0.00  -0.01  -0.01    -0.01   0.00  -0.01    -0.01  -0.01   0.01
  23   6     0.00   0.01   0.00     0.00   0.00  -0.01     0.02   0.04  -0.05
  24   8     0.00   0.01   0.00    -0.01  -0.01   0.00    -0.03   0.00   0.01
  25   6    -0.01  -0.02   0.01     0.02   0.00  -0.02     0.00  -0.01  -0.01
  26   6    -0.01   0.00   0.01     0.01  -0.01   0.00     0.00  -0.03   0.00
  27   6     0.00  -0.01   0.01     0.01   0.00  -0.02     0.10  -0.04  -0.10
  28   6    -0.03  -0.03   0.01     0.02   0.00  -0.02     0.06  -0.05  -0.07
  29   6     0.00  -0.03   0.01    -0.01   0.00   0.00     0.01   0.00   0.01
  30   6     0.00  -0.01   0.00    -0.02   0.00  -0.01    -0.01   0.00  -0.01
  31   6    -0.01  -0.04  -0.01    -0.01  -0.01  -0.01     0.00   0.00   0.01
  32   6     0.08   0.00   0.18     0.00   0.00   0.03     0.00  -0.01  -0.01
  33   6     0.04  -0.06   0.00     0.00   0.00   0.01     0.01  -0.01   0.00
  34   6    -0.02  -0.10  -0.17    -0.01  -0.01  -0.03     0.01  -0.01   0.01
  35   6     0.01  -0.02   0.02     0.00   0.00   0.00     0.00  -0.01   0.00
  36   6     0.00  -0.03  -0.07     0.00   0.00  -0.02     0.00   0.00   0.01
  37   6     0.03   0.03   0.08     0.00   0.00   0.01     0.00   0.00   0.00
  38   6     0.01  -0.01   0.00     0.00  -0.02  -0.03    -0.01  -0.01   0.00
  39   6     0.02   0.00  -0.02    -0.08  -0.13   0.15     0.01   0.03  -0.07
  40   6     0.01  -0.01  -0.01     0.01  -0.02   0.01    -0.02   0.00  -0.02
  41   6     0.00  -0.03   0.02     0.09   0.10  -0.15    -0.05  -0.03   0.04
  42   6     0.00  -0.01   0.00    -0.02   0.00   0.01    -0.01   0.01  -0.01
  43   6     0.00  -0.01   0.01     0.04   0.03  -0.08    -0.01  -0.02   0.02
  44   6     0.00   0.00  -0.01    -0.05  -0.04   0.06     0.02   0.01  -0.02
  45   6     0.03   0.04  -0.06     0.02   0.00   0.00    -0.02   0.03  -0.02
  46   6    -0.09   0.10  -0.06     0.00   0.01  -0.02    -0.02   0.00   0.02
  47   6     0.09   0.01   0.04     0.02  -0.01   0.00    -0.01   0.01   0.01
  48   6    -0.12   0.06   0.06     0.00   0.00   0.02     0.00   0.00  -0.01
  49   6     0.01   0.00  -0.01    -0.10  -0.07  -0.03     0.06   0.01   0.05
  50   6    -0.02   0.00  -0.01     0.05   0.00   0.10     0.03   0.01  -0.03
  51   6    -0.01  -0.01   0.01    -0.05   0.09  -0.07     0.05  -0.03   0.02
  52   6    -0.03   0.01  -0.01     0.12  -0.01   0.02    -0.03   0.01   0.03
  53   6     0.03   0.04  -0.01     0.02   0.06   0.02     0.01   0.02  -0.03
  54   6     0.01  -0.01  -0.01     0.02  -0.01  -0.07     0.00  -0.01   0.00
  55   1    -0.03   0.00   0.02    -0.02  -0.01   0.01     0.00   0.00   0.00
  56   1     0.01  -0.02  -0.02     0.00   0.01   0.05     0.05  -0.01   0.18
  57   1     0.00   0.02  -0.01     0.00  -0.02   0.00     0.01   0.00  -0.01
  58   1     0.01   0.01  -0.03     0.01   0.01  -0.01     0.09   0.05  -0.15
  59   1     0.00  -0.01  -0.02    -0.01  -0.01  -0.02     0.04  -0.10  -0.10
  60   1     0.02   0.03  -0.02     0.02   0.00  -0.02     0.08   0.05  -0.10
  61   1     0.01   0.00  -0.01     0.00  -0.01  -0.02     0.03  -0.03  -0.01
  62   1     0.01   0.01   0.00     0.00   0.00  -0.01     0.04   0.03  -0.09
  63   1    -0.01  -0.02   0.00     0.04   0.01   0.03     0.01   0.00   0.01
  64   1     0.00  -0.01   0.02     0.00   0.00  -0.05    -0.01  -0.01  -0.03
  65   1    -0.01  -0.03   0.01     0.08  -0.01  -0.06     0.03   0.00  -0.03
  66   1    -0.01   0.00   0.00     0.02  -0.01   0.01    -0.03  -0.01  -0.04
  67   1    -0.01   0.01   0.01     0.03  -0.01   0.01     0.07  -0.03   0.08
  68   1    -0.01   0.00   0.01     0.01  -0.03  -0.01    -0.06  -0.11   0.01
  69   1     0.02   0.00   0.05     0.01   0.00  -0.06     0.09   0.03  -0.29
  70   1     0.03  -0.03  -0.01     0.00   0.02  -0.03     0.07   0.03  -0.13
  71   1    -0.04   0.01   0.00     0.03  -0.04  -0.02     0.23  -0.24  -0.08
  72   1    -0.04  -0.02   0.07    -0.01   0.01  -0.02    -0.07   0.01   0.01
  73   1    -0.05  -0.08   0.00     0.04  -0.03   0.00     0.11  -0.22  -0.02
  74   1    -0.02  -0.03  -0.01     0.05   0.02  -0.04     0.15   0.03  -0.19
  75   1     0.12   0.04   0.34     0.01   0.01   0.05     0.00  -0.02  -0.02
  76   1     0.05  -0.07  -0.01     0.01   0.00   0.01     0.01  -0.01   0.00
  77   1    -0.05  -0.14  -0.32    -0.02  -0.01  -0.05     0.02   0.00   0.02
  78   1     0.04  -0.06  -0.08     0.01  -0.01  -0.02     0.00   0.00   0.01
  79   1     0.02   0.03   0.08     0.01   0.00   0.01     0.00   0.00   0.00
  80   1     0.03   0.01  -0.04    -0.15  -0.22   0.28     0.03   0.06  -0.11
  81   1     0.02  -0.01  -0.01     0.02  -0.03   0.03    -0.01   0.00  -0.01
  82   1    -0.01  -0.03   0.03     0.17   0.20  -0.27    -0.08  -0.06   0.08
  83   1     0.01  -0.01   0.01     0.06   0.02  -0.06     0.00  -0.01   0.02
  84   1     0.00   0.00  -0.02    -0.04  -0.04   0.07     0.01   0.01  -0.02
  85   1     0.16   0.11   0.04     0.03   0.01   0.04     0.00   0.03  -0.04
  86   1     0.00  -0.10  -0.07     0.03  -0.03   0.00    -0.06   0.03  -0.01
  87   1    -0.06   0.16  -0.16     0.00   0.02   0.00    -0.03   0.04  -0.04
  88   1    -0.15   0.11   0.11     0.00   0.02   0.00    -0.03   0.00   0.03
  89   1    -0.08   0.11  -0.12     0.00   0.02  -0.03    -0.01   0.00   0.02
  90   1    -0.13   0.22  -0.15     0.00   0.02  -0.02    -0.02   0.01   0.00
  91   1     0.08   0.07  -0.01     0.01   0.01  -0.02     0.00   0.02   0.03
  92   1     0.15  -0.03   0.02     0.03  -0.02  -0.01     0.00   0.00   0.01
  93   1     0.08  -0.02   0.08     0.02  -0.02   0.02    -0.04   0.01   0.00
  94   1    -0.16  -0.06  -0.02    -0.01  -0.01   0.01    -0.01   0.00  -0.01
  95   1    -0.15   0.16   0.11    -0.01  -0.01   0.02    -0.01   0.00   0.00
  96   1    -0.21   0.09   0.06     0.00   0.00   0.03     0.00   0.00  -0.01
  97   1     0.00   0.01   0.00    -0.02  -0.10  -0.09     0.00   0.00   0.11
  98   1     0.01   0.01   0.00    -0.16  -0.06  -0.03     0.13   0.02   0.06
  99   1     0.02   0.01   0.00    -0.15  -0.08  -0.08     0.06   0.01   0.07
 100   1    -0.02  -0.01   0.00     0.07   0.09   0.03     0.04  -0.01  -0.04
 101   1    -0.02   0.01  -0.02     0.09  -0.04   0.17     0.03   0.01  -0.01
 102   1    -0.03   0.00   0.00     0.12   0.01   0.13     0.02   0.01  -0.05
 103   1    -0.02  -0.03   0.01    -0.07   0.11   0.04     0.07  -0.01  -0.04
 104   1    -0.03   0.02   0.01    -0.07   0.10  -0.09     0.08  -0.04   0.07
 105   1     0.02   0.00   0.01    -0.11   0.12  -0.13     0.07  -0.03   0.03
 106   1    -0.01   0.05  -0.02     0.06  -0.13   0.01    -0.02   0.07   0.09
 107   1    -0.05   0.02  -0.02     0.19  -0.06   0.13    -0.10   0.03  -0.03
 108   1    -0.04   0.00  -0.01     0.17   0.10   0.03     0.01  -0.04   0.02
 109   1     0.05   0.00  -0.06     0.02   0.05  -0.03     0.00   0.02  -0.07
 110   1     0.03   0.06   0.00     0.05   0.08   0.02     0.04   0.05  -0.02
 111   1     0.06   0.09  -0.01     0.04   0.08   0.03     0.01   0.02  -0.03
 112   1     0.01  -0.01  -0.01     0.03   0.00  -0.09    -0.01  -0.02   0.02
 113   1     0.00  -0.03   0.00     0.01  -0.08  -0.05     0.01  -0.01   0.01
 114   1     0.02   0.00  -0.02     0.05   0.00  -0.12     0.01   0.00  -0.01
                    73                     74                     75
                     A                      A                      A
 Frequencies --   339.6437               344.3211               347.6511
 Red. masses --     3.3106                 3.4606                 5.3525
 Frc consts  --     0.2250                 0.2417                 0.3811
 IR Inten    --     4.7806                12.9271                 7.4734
 Atom AN      X      Y      Z        X      Y      Z        X      Y      Z
   1   8    -0.01  -0.02  -0.01     0.01   0.02   0.01    -0.02  -0.08  -0.03
   2  12    -0.04  -0.07   0.03     0.00   0.09  -0.05     0.03   0.08   0.00
   3   8     0.00  -0.01   0.00    -0.01   0.00   0.01     0.07   0.09  -0.13
   4   6     0.00   0.00   0.00     0.00  -0.01   0.00     0.01   0.02   0.01
   5   7     0.13  -0.05   0.07     0.07  -0.06  -0.04    -0.01  -0.01  -0.01
   6   7    -0.05   0.01  -0.04     0.12  -0.01   0.06     0.04  -0.01   0.06
   7   8     0.03   0.04  -0.02    -0.03  -0.04   0.02     0.15   0.21  -0.10
   8   6     0.04   0.03   0.05     0.02  -0.07  -0.06    -0.02  -0.03  -0.01
   9   6    -0.04   0.04  -0.01    -0.02  -0.03  -0.03    -0.03  -0.02   0.01
  10   6    -0.03   0.05  -0.03     0.03  -0.05   0.03    -0.01  -0.04   0.04
  11   8    -0.01  -0.02   0.00     0.02   0.02   0.00    -0.09  -0.10  -0.04
  12   6    -0.02  -0.01  -0.02     0.02   0.01   0.02    -0.07  -0.08  -0.02
  13   6    -0.01  -0.02  -0.02     0.01   0.02   0.02    -0.01  -0.09  -0.06
  14   6     0.00   0.00   0.02     0.00  -0.01  -0.02     0.00   0.02   0.08
  15   8     0.01   0.01  -0.03    -0.01  -0.02   0.01    -0.05   0.04   0.06
  16   6    -0.02  -0.01   0.03     0.02   0.01  -0.03    -0.10  -0.04   0.15
  17   8     0.00  -0.01  -0.01     0.01   0.01   0.02    -0.01  -0.05   0.05
  18   6     0.00   0.00   0.01     0.00  -0.01  -0.01     0.01   0.09  -0.05
  19   8     0.00   0.00   0.01     0.02   0.00  -0.01    -0.05  -0.04   0.04
  20   8     0.01   0.00  -0.02    -0.02  -0.01   0.03     0.05   0.04  -0.07
  21   6     0.00   0.00  -0.02     0.00   0.00   0.03    -0.02   0.01  -0.02
  22   6     0.00  -0.01  -0.02     0.01   0.00   0.03    -0.02   0.00   0.00
  23   6     0.00   0.01   0.00    -0.01  -0.02   0.00     0.04   0.08  -0.03
  24   8     0.01   0.01   0.01     0.00   0.00  -0.01    -0.02  -0.01   0.02
  25   6    -0.01  -0.03   0.01     0.01   0.03  -0.02    -0.01  -0.01   0.00
  26   6     0.01   0.00   0.01    -0.02   0.00  -0.02    -0.02  -0.01   0.05
  27   6     0.00   0.00   0.01    -0.01   0.01  -0.01     0.12  -0.08  -0.02
  28   6     0.00   0.01   0.02     0.01   0.00  -0.02    -0.01   0.01   0.10
  29   6     0.05  -0.01   0.05     0.02  -0.02   0.01     0.00   0.00   0.00
  30   6    -0.02   0.00  -0.02     0.05   0.01   0.03     0.02   0.00   0.02
  31   6     0.02   0.00   0.04     0.02   0.00   0.02     0.00   0.01   0.00
  32   6     0.03  -0.06  -0.06     0.02  -0.04  -0.03     0.00   0.01  -0.01
  33   6     0.05  -0.05   0.01     0.03  -0.04  -0.01     0.00   0.01  -0.01
  34   6     0.07  -0.03   0.07     0.04  -0.02   0.04     0.00   0.01   0.00
  35   6     0.02  -0.03   0.01     0.02  -0.02   0.01     0.00   0.01   0.00
  36   6    -0.02   0.02   0.05    -0.01   0.01   0.04     0.00   0.01   0.00
  37   6     0.00  -0.03  -0.04     0.00  -0.01  -0.01     0.00   0.01   0.00
  38   6    -0.01  -0.02  -0.02     0.02   0.04   0.04     0.01   0.01   0.01
  39   6     0.00  -0.02  -0.03     0.00   0.01   0.10     0.00   0.00   0.04
  40   6    -0.01  -0.01  -0.01     0.03   0.02   0.02     0.01  -0.01   0.01
  41   6    -0.02  -0.01   0.00     0.07   0.02  -0.02     0.03   0.00  -0.02
  42   6    -0.01   0.00  -0.01     0.02  -0.02   0.02     0.01  -0.02   0.00
  43   6     0.00  -0.02   0.00     0.01   0.04   0.00     0.01   0.01  -0.01
  44   6     0.00   0.00  -0.01    -0.01  -0.02   0.03     0.00  -0.02   0.00
  45   6    -0.11   0.14  -0.10    -0.07   0.09  -0.07     0.00  -0.01   0.01
  46   6    -0.09   0.02   0.07    -0.06   0.01   0.05     0.00   0.00   0.00
  47   6    -0.08   0.05   0.03    -0.04   0.03   0.03     0.00   0.00   0.00
  48   6    -0.01  -0.01  -0.07    -0.03   0.01  -0.04     0.00   0.00   0.01
  49   6     0.02  -0.02   0.04    -0.07   0.00  -0.10    -0.02   0.01  -0.03
  50   6     0.03   0.00   0.00    -0.08  -0.02   0.03    -0.03   0.00   0.01
  51   6     0.04   0.01   0.00    -0.09  -0.02  -0.01    -0.04   0.00  -0.01
  52   6     0.00  -0.01   0.03     0.01   0.01  -0.07     0.01  -0.01  -0.03
  53   6     0.04   0.08   0.02    -0.02  -0.09  -0.06     0.02   0.00  -0.06
  54   6     0.04   0.00  -0.08    -0.02   0.01   0.09    -0.03  -0.06   0.03
  55   1    -0.08   0.02  -0.02    -0.03   0.03  -0.04    -0.03   0.01   0.02
  56   1     0.00  -0.01  -0.05     0.00   0.01   0.04     0.04  -0.09  -0.12
  57   1     0.01   0.00   0.02     0.00  -0.01  -0.02     0.02   0.04   0.08
  58   1    -0.03  -0.02   0.05     0.03   0.03  -0.04    -0.17  -0.12   0.25
  59   1    -0.01   0.02   0.04     0.01  -0.02  -0.04    -0.08   0.14   0.18
  60   1    -0.03  -0.03   0.04     0.03   0.02  -0.04    -0.15  -0.10   0.18
  61   1     0.01   0.01  -0.02    -0.01  -0.02   0.03     0.04  -0.01  -0.04
  62   1     0.00   0.01   0.00     0.00  -0.02   0.00     0.06   0.06  -0.07
  63   1    -0.01  -0.03   0.01     0.02   0.04  -0.01     0.00  -0.04   0.04
  64   1     0.00  -0.01   0.03     0.00   0.01  -0.05    -0.04   0.01  -0.01
  65   1    -0.02  -0.05   0.01     0.04   0.07  -0.02     0.03  -0.03  -0.03
  66   1     0.03  -0.02   0.03    -0.03   0.03  -0.04    -0.07  -0.04  -0.02
  67   1     0.00   0.01   0.02     0.00  -0.01  -0.04     0.05   0.00   0.18
  68   1     0.03   0.00  -0.02    -0.03   0.01   0.02    -0.09  -0.11   0.08
  69   1     0.01   0.00   0.03    -0.02  -0.01  -0.03     0.17   0.06  -0.06
  70   1     0.01  -0.03   0.03    -0.03   0.04  -0.02     0.19  -0.19   0.03
  71   1     0.00   0.03   0.01     0.00  -0.02  -0.01     0.19  -0.07  -0.01
  72   1     0.01   0.00   0.01     0.00   0.00  -0.03    -0.02   0.02   0.14
  73   1    -0.02   0.04   0.01     0.02  -0.01  -0.01    -0.05  -0.01   0.06
  74   1    -0.02   0.00   0.05     0.01   0.00  -0.03    -0.02   0.01   0.13
  75   1     0.00  -0.10  -0.14     0.01  -0.05  -0.06     0.00   0.01  -0.01
  76   1     0.04  -0.05  -0.01     0.02  -0.04  -0.03     0.00   0.01  -0.01
  77   1     0.09  -0.02   0.10     0.06  -0.01   0.06     0.00   0.01   0.00
  78   1    -0.01   0.02   0.05     0.00   0.01   0.04     0.00   0.01   0.00
  79   1     0.00  -0.03  -0.04     0.00  -0.01  -0.01     0.01   0.00  -0.01
  80   1     0.01  -0.01  -0.05    -0.03  -0.01   0.14    -0.01  -0.01   0.05
  81   1     0.01  -0.01  -0.01     0.00   0.03   0.00    -0.01  -0.01   0.00
  82   1    -0.03  -0.01   0.02     0.09   0.04  -0.07     0.04   0.01  -0.05
  83   1     0.01  -0.02   0.01    -0.02   0.04  -0.01    -0.01   0.01  -0.01
  84   1     0.00   0.00  -0.01    -0.01  -0.02   0.02    -0.01  -0.02   0.00
  85   1     0.08   0.20  -0.14     0.07   0.15  -0.08    -0.02  -0.02   0.01
  86   1    -0.33   0.08  -0.06    -0.23   0.02  -0.04     0.02  -0.01   0.00
  87   1    -0.16   0.26  -0.28    -0.12   0.20  -0.22     0.02  -0.03   0.01
  88   1    -0.15   0.01   0.13    -0.09   0.00   0.09     0.01  -0.01  -0.01
  89   1    -0.08   0.01   0.12    -0.06   0.00   0.09     0.00  -0.01   0.01
  90   1    -0.13   0.06  -0.01    -0.09   0.03   0.00     0.01  -0.01   0.00
  91   1    -0.05   0.02   0.15    -0.02   0.02   0.09     0.00  -0.02  -0.01
  92   1    -0.12   0.10   0.09    -0.05   0.06   0.06    -0.01   0.01   0.00
  93   1    -0.15   0.12  -0.05    -0.08   0.07  -0.02     0.02   0.00  -0.01
  94   1    -0.02   0.01  -0.10    -0.04   0.00  -0.07     0.00   0.00   0.01
  95   1    -0.04   0.03  -0.05    -0.04   0.06  -0.02     0.00  -0.01   0.01
  96   1     0.00  -0.03  -0.10    -0.05   0.01  -0.07     0.00   0.00   0.02
  97   1    -0.01  -0.02   0.07     0.00   0.08  -0.23     0.00   0.03  -0.06
  98   1     0.08  -0.02   0.03    -0.22  -0.05  -0.14    -0.08   0.01  -0.03
  99   1     0.02  -0.02   0.07    -0.05   0.01  -0.11    -0.01   0.02  -0.06
 100   1     0.05   0.02  -0.03    -0.13  -0.03   0.09    -0.05   0.00   0.03
 101   1     0.05  -0.01   0.03    -0.12   0.01  -0.04    -0.05   0.02  -0.01
 102   1     0.05   0.01  -0.01    -0.09  -0.03   0.07    -0.04  -0.01   0.04
 103   1     0.05   0.03  -0.02    -0.12  -0.06   0.05    -0.06  -0.01   0.03
 104   1     0.05   0.01   0.05    -0.14   0.00  -0.13    -0.06   0.01  -0.06
 105   1     0.05   0.03  -0.02    -0.12  -0.04   0.03    -0.07   0.00  -0.01
 106   1     0.00  -0.01   0.05     0.02   0.00  -0.13     0.01  -0.06  -0.11
 107   1    -0.02  -0.02   0.06     0.06   0.03  -0.10     0.08  -0.03   0.02
 108   1     0.03   0.02   0.04    -0.06  -0.02  -0.08    -0.05   0.04  -0.03
 109   1     0.03   0.08  -0.03    -0.01  -0.08  -0.01     0.02  -0.02  -0.13
 110   1     0.06   0.13   0.03    -0.05  -0.11  -0.05     0.06   0.04  -0.06
 111   1     0.04   0.08   0.01    -0.03  -0.10  -0.08     0.04   0.03  -0.04
 112   1     0.05  -0.02  -0.08    -0.05   0.02   0.12    -0.02  -0.05   0.02
 113   1     0.06  -0.10  -0.04    -0.01   0.11   0.06    -0.04  -0.06   0.03
 114   1     0.10   0.03  -0.16    -0.07  -0.02   0.16    -0.03  -0.06   0.04
                    76                     77                     78
                     A                      A                      A
 Frequencies --   355.1557               379.0843               391.6427
 Red. masses --     3.8195                 4.8729                 4.9865
 Frc consts  --     0.2839                 0.4126                 0.4506
 IR Inten    --     1.9704                 6.6674                 7.7339
 Atom AN      X      Y      Z        X      Y      Z        X      Y      Z
   1   8     0.00   0.02   0.00     0.01  -0.01   0.01    -0.05   0.01  -0.03
   2  12    -0.03   0.13   0.02     0.01  -0.05  -0.05     0.02  -0.01  -0.04
   3   8    -0.01  -0.03   0.04    -0.01   0.05  -0.07     0.06  -0.04  -0.09
   4   6     0.00  -0.01   0.00    -0.01   0.02   0.01     0.03  -0.07  -0.01
   5   7    -0.01   0.01   0.05    -0.01   0.00   0.04     0.00   0.00   0.01
   6   7    -0.02  -0.03   0.10    -0.02   0.00   0.03    -0.01   0.00   0.01
   7   8    -0.03  -0.04   0.01     0.04   0.05  -0.01    -0.13  -0.14   0.02
   8   6    -0.06   0.00   0.05    -0.02   0.02   0.05    -0.01   0.01   0.02
   9   6    -0.10  -0.01   0.08    -0.03   0.01   0.05    -0.01   0.01   0.02
  10   6    -0.07  -0.06   0.09    -0.02   0.01   0.03    -0.01   0.00   0.01
  11   8     0.02   0.02   0.01    -0.02  -0.06  -0.03     0.04   0.24   0.05
  12   6     0.01   0.02   0.00     0.01  -0.02   0.03    -0.07   0.03  -0.09
  13   6     0.01   0.02   0.01     0.01   0.02   0.02    -0.03  -0.14  -0.11
  14   6     0.01  -0.01  -0.01    -0.02   0.01   0.00     0.07  -0.03   0.04
  15   8     0.01  -0.01  -0.02    -0.04  -0.04   0.07    -0.07   0.10  -0.04
  16   6     0.02   0.01  -0.02    -0.01   0.00   0.02     0.01  -0.03  -0.02
  17   8     0.01   0.02  -0.04     0.02   0.12  -0.15    -0.03  -0.08   0.01
  18   6     0.00  -0.02   0.02     0.02  -0.04  -0.08     0.04   0.03  -0.08
  19   8    -0.01   0.05  -0.02     0.12  -0.06  -0.07     0.05  -0.05  -0.04
  20   8    -0.01  -0.02   0.01    -0.09  -0.04   0.25     0.06   0.07   0.04
  21   6     0.00  -0.03  -0.06     0.06  -0.03   0.11     0.02   0.03   0.03
  22   6    -0.02  -0.05  -0.08     0.03   0.02   0.07     0.01   0.01   0.03
  23   6     0.00   0.00   0.01     0.02  -0.09  -0.01     0.08   0.06  -0.02
  24   8     0.03   0.05   0.01     0.05   0.02  -0.07     0.00  -0.02  -0.01
  25   6     0.03  -0.12   0.00    -0.01   0.09   0.01    -0.05   0.04   0.02
  26   6     0.02   0.02   0.00    -0.17   0.02  -0.06    -0.10   0.02   0.06
  27   6    -0.03   0.02   0.01     0.02  -0.01  -0.05     0.03  -0.09   0.12
  28   6     0.00   0.01  -0.01     0.00  -0.02  -0.01     0.04   0.06   0.07
  29   6     0.02   0.02   0.03     0.00   0.01   0.02     0.00   0.00   0.01
  30   6     0.00  -0.03   0.04    -0.01  -0.01   0.02     0.00  -0.01   0.01
  31   6     0.02   0.04   0.00     0.01   0.02   0.00     0.00   0.01   0.00
  32   6     0.00   0.03  -0.04     0.00   0.01  -0.01     0.00   0.01  -0.01
  33   6     0.02   0.05  -0.01     0.01   0.02  -0.01     0.00   0.01   0.00
  34   6     0.02   0.04   0.01     0.01   0.02   0.00     0.00   0.01   0.00
  35   6     0.02   0.02  -0.01     0.01   0.01   0.00     0.01   0.00  -0.01
  36   6     0.01   0.03  -0.01     0.00   0.01  -0.01     0.00   0.01   0.00
  37   6     0.02   0.00  -0.03     0.01   0.01  -0.01     0.01  -0.01  -0.01
  38   6     0.02  -0.02   0.00     0.00  -0.01   0.00     0.00  -0.01   0.01
  39   6     0.02  -0.01  -0.01     0.00  -0.02   0.00     0.00  -0.01   0.00
  40   6     0.00  -0.05  -0.01     0.00  -0.02   0.00     0.00  -0.01  -0.01
  41   6     0.01  -0.05  -0.01     0.00  -0.01  -0.01     0.00  -0.01  -0.01
  42   6     0.02  -0.04  -0.01     0.00  -0.01   0.00     0.00  -0.01   0.00
  43   6     0.02  -0.01   0.00     0.01  -0.01  -0.01     0.01   0.00   0.00
  44   6     0.01  -0.02  -0.02     0.00   0.00  -0.01     0.00  -0.01  -0.01
  45   6     0.01  -0.04   0.01     0.00  -0.02   0.00     0.00  -0.01   0.00
  46   6     0.00  -0.01   0.00     0.00   0.00  -0.01     0.00   0.00   0.00
  47   6    -0.03  -0.01   0.00    -0.01   0.00   0.00     0.00   0.00   0.00
  48   6     0.01  -0.03  -0.01     0.00  -0.01   0.00     0.00  -0.01  -0.01
  49   6     0.02   0.03   0.00     0.00   0.00   0.00     0.00   0.01   0.00
  50   6    -0.03   0.01  -0.01     0.00   0.00  -0.01    -0.01   0.00   0.00
  51   6    -0.04   0.00   0.00    -0.01   0.01  -0.01    -0.01   0.00   0.00
  52   6     0.00   0.02  -0.02     0.01   0.00   0.00     0.00   0.01  -0.01
  53   6     0.08   0.13  -0.09     0.02   0.05   0.03     0.01   0.02   0.02
  54   6    -0.04  -0.18  -0.01     0.00  -0.05  -0.03     0.00  -0.02  -0.01
  55   1    -0.12   0.02   0.08    -0.05   0.01   0.04    -0.01   0.00   0.02
  56   1     0.00   0.02   0.02    -0.01   0.01   0.05     0.02  -0.15  -0.17
  57   1     0.00  -0.02  -0.01     0.01   0.04  -0.01    -0.01  -0.11   0.10
  58   1     0.03   0.02  -0.04    -0.03  -0.02   0.03     0.05   0.01  -0.03
  59   1     0.01  -0.02  -0.03    -0.01   0.02   0.02     0.02  -0.05  -0.01
  60   1     0.03   0.01  -0.03    -0.02   0.01   0.02     0.00  -0.07  -0.01
  61   1    -0.01  -0.02  -0.08    -0.13   0.00   0.16     0.03   0.01   0.03
  62   1     0.00   0.01   0.03     0.10  -0.10  -0.03     0.09   0.05  -0.05
  63   1     0.06  -0.06   0.02    -0.04   0.10  -0.12    -0.09  -0.04  -0.01
  64   1     0.10  -0.13   0.06     0.02   0.03  -0.04    -0.10   0.09   0.02
  65   1     0.00  -0.25  -0.02    -0.07   0.21   0.07    -0.06   0.11   0.04
  66   1     0.05  -0.02   0.04    -0.34   0.11  -0.30    -0.24  -0.04  -0.14
  67   1    -0.03   0.02  -0.01    -0.13  -0.02  -0.16    -0.09   0.04   0.16
  68   1     0.07   0.04  -0.05    -0.31   0.13   0.24    -0.22   0.01   0.22
  69   1    -0.05  -0.02   0.03     0.01   0.02  -0.13     0.06  -0.07   0.26
  70   1    -0.05   0.05   0.00     0.01   0.02  -0.06     0.07  -0.25   0.25
  71   1    -0.06   0.03   0.01     0.08  -0.09  -0.04     0.00   0.15   0.13
  72   1     0.00   0.01  -0.03    -0.02  -0.01   0.04     0.04   0.06  -0.04
  73   1     0.01   0.02  -0.01     0.00  -0.07   0.00     0.01   0.17   0.05
  74   1     0.01   0.01   0.00     0.01  -0.02  -0.05     0.03   0.09   0.18
  75   1    -0.01   0.01  -0.08     0.00   0.00  -0.03     0.00   0.00  -0.02
  76   1     0.01   0.05  -0.02     0.01   0.02  -0.01     0.00   0.01   0.00
  77   1     0.01   0.04   0.03     0.01   0.01   0.00     0.00   0.01   0.01
  78   1    -0.02   0.05  -0.01    -0.01   0.02  -0.01     0.00   0.01   0.00
  79   1     0.04  -0.02  -0.04     0.02   0.00  -0.02     0.01  -0.01  -0.01
  80   1     0.02   0.01  -0.03     0.00  -0.01  -0.01     0.00   0.00  -0.01
  81   1    -0.01  -0.06  -0.01     0.00  -0.02   0.00     0.00  -0.01  -0.02
  82   1     0.02  -0.04  -0.02     0.01   0.00  -0.01     0.01  -0.01  -0.01
  83   1     0.04  -0.01   0.00     0.01  -0.01  -0.01     0.02   0.00   0.00
  84   1    -0.02  -0.03  -0.05    -0.01   0.00  -0.02     0.00  -0.01  -0.01
  85   1    -0.07  -0.07   0.01    -0.01  -0.01   0.04    -0.01   0.00   0.01
  86   1     0.04  -0.02   0.01     0.01  -0.04   0.00    -0.01  -0.02   0.00
  87   1     0.06  -0.10   0.03     0.01  -0.02  -0.01     0.00  -0.01  -0.01
  88   1     0.00  -0.01  -0.03     0.00   0.00  -0.02     0.00  -0.01  -0.01
  89   1     0.00  -0.01   0.03     0.00   0.00   0.00     0.00  -0.01   0.01
  90   1     0.00  -0.03  -0.01     0.00  -0.01  -0.01     0.00  -0.01   0.00
  91   1    -0.01  -0.01   0.05    -0.01  -0.01   0.02     0.00  -0.02   0.01
  92   1    -0.05  -0.01  -0.02    -0.03   0.00  -0.01    -0.02   0.01   0.01
  93   1    -0.06  -0.01   0.00    -0.02   0.00   0.00     0.00   0.00   0.00
  94   1     0.01  -0.01  -0.03     0.00  -0.01   0.00     0.00  -0.01  -0.02
  95   1    -0.01  -0.06   0.00    -0.01  -0.02   0.00    -0.01   0.00   0.00
  96   1     0.05  -0.03   0.02     0.01   0.00   0.02     0.00  -0.01  -0.01
  97   1    -0.01   0.02   0.03    -0.01   0.00   0.02     0.00   0.01   0.00
  98   1     0.00   0.07   0.02     0.02   0.01   0.01     0.00   0.01   0.00
  99   1     0.05   0.05  -0.04     0.01   0.01   0.00     0.02   0.01  -0.01
 100   1    -0.04   0.01   0.00     0.00   0.01  -0.01    -0.01   0.00   0.00
 101   1    -0.04   0.05  -0.03     0.00   0.01  -0.01    -0.01   0.01  -0.01
 102   1    -0.05  -0.01   0.03     0.00   0.00  -0.01    -0.01   0.00   0.01
 103   1    -0.07  -0.04   0.05    -0.01   0.01   0.01    -0.02  -0.01   0.02
 104   1    -0.08   0.04  -0.04    -0.01   0.02  -0.01    -0.02   0.00  -0.01
 105   1    -0.03   0.01  -0.01    -0.01   0.02  -0.02    -0.01  -0.01   0.01
 106   1     0.02   0.04  -0.06     0.01   0.00   0.00     0.01   0.01  -0.01
 107   1    -0.01   0.02  -0.02     0.00  -0.01   0.02     0.00   0.01  -0.02
 108   1    -0.04   0.02  -0.02     0.01   0.02   0.01     0.00  -0.01  -0.01
 109   1     0.06   0.06  -0.33     0.02   0.03  -0.01     0.01   0.01   0.00
 110   1     0.21   0.27  -0.06     0.04   0.07   0.03     0.01   0.02   0.02
 111   1     0.14   0.20  -0.03     0.04   0.08   0.05     0.01   0.03   0.02
 112   1     0.01  -0.18  -0.08     0.03  -0.05  -0.06     0.01  -0.02  -0.02
 113   1    -0.08  -0.32   0.02    -0.02  -0.13  -0.01    -0.01  -0.05   0.00
 114   1     0.02  -0.15  -0.09     0.03  -0.03  -0.07     0.01  -0.01  -0.03
                    79                     80                     81
                     A                      A                      A
 Frequencies --   410.2816               413.2189               426.3951
 Red. masses --     4.9360                 5.0876                 3.3560
 Frc consts  --     0.4895                 0.5118                 0.3595
 IR Inten    --    19.1364                18.4501                 3.6510
 Atom AN      X      Y      Z        X      Y      Z        X      Y      Z
   1   8    -0.01   0.10  -0.07    -0.02  -0.12   0.07     0.00   0.00   0.00
   2  12     0.00  -0.01   0.11    -0.03   0.02   0.14    -0.01   0.01   0.03
   3   8     0.00   0.05  -0.02     0.05  -0.01  -0.08     0.01  -0.02   0.00
   4   6     0.10  -0.06  -0.02    -0.08   0.04   0.03     0.00   0.00   0.00
   5   7     0.02   0.00  -0.02     0.02   0.01  -0.02     0.19  -0.08   0.05
   6   7     0.01  -0.01  -0.02     0.02  -0.01  -0.02    -0.02   0.00  -0.01
   7   8    -0.08  -0.05  -0.05     0.05   0.04   0.05     0.00   0.01   0.00
   8   6     0.02  -0.01  -0.03     0.02  -0.01  -0.04     0.08  -0.03   0.01
   9   6     0.02  -0.01  -0.05     0.02  -0.01  -0.06    -0.03   0.01  -0.04
  10   6     0.01  -0.01  -0.03     0.02  -0.01  -0.03    -0.05   0.01  -0.03
  11   8    -0.06  -0.08  -0.02     0.08   0.16   0.01     0.00  -0.01  -0.01
  12   6    -0.07  -0.04  -0.05     0.05   0.03  -0.01     0.01   0.01   0.00
  13   6    -0.03  -0.02  -0.05     0.05  -0.04  -0.02     0.03   0.03   0.00
  14   6     0.14  -0.11   0.08    -0.09   0.11  -0.07     0.01   0.00   0.00
  15   8    -0.09   0.04   0.03     0.03   0.00  -0.02    -0.03  -0.01   0.01
  16   6     0.08   0.08  -0.04    -0.10  -0.11   0.05     0.00   0.00   0.00
  17   8     0.10   0.19   0.00     0.08   0.15   0.04    -0.04  -0.06   0.00
  18   6     0.01   0.01   0.01     0.05  -0.04  -0.03     0.01  -0.03   0.00
  19   8     0.07  -0.01   0.03     0.04  -0.04  -0.03    -0.01   0.02  -0.04
  20   8    -0.08  -0.03   0.06    -0.04   0.03   0.09     0.03   0.01   0.01
  21   6    -0.06  -0.04  -0.03    -0.06  -0.01  -0.04     0.03   0.01   0.00
  22   6    -0.05  -0.03  -0.07    -0.06  -0.04  -0.09     0.00   0.00   0.00
  23   6    -0.03   0.00  -0.02     0.02   0.02  -0.02     0.02  -0.02   0.01
  24   8    -0.04   0.01   0.04    -0.05   0.01   0.04     0.03   0.02  -0.02
  25   6     0.08  -0.10  -0.04     0.06  -0.14  -0.03    -0.02   0.00   0.01
  26   6     0.00   0.00  -0.03    -0.06   0.02   0.00    -0.02   0.01   0.01
  27   6     0.02   0.00  -0.02    -0.01  -0.03   0.05    -0.02   0.03  -0.01
  28   6     0.00   0.06   0.18     0.01  -0.04  -0.13     0.00   0.00   0.01
  29   6     0.00   0.00  -0.02     0.00   0.00  -0.03    -0.03   0.02  -0.03
  30   6     0.01   0.01  -0.02     0.02   0.01  -0.04     0.01   0.00   0.00
  31   6    -0.01  -0.02  -0.01    -0.01  -0.02  -0.01    -0.07   0.00  -0.06
  32   6     0.00  -0.02   0.01     0.00  -0.01   0.00     0.01  -0.03  -0.01
  33   6    -0.01  -0.02   0.01    -0.01  -0.02   0.01     0.05   0.00   0.04
  34   6    -0.01  -0.01   0.00    -0.01  -0.01   0.00     0.01  -0.02  -0.06
  35   6    -0.02   0.00   0.00    -0.02  -0.01  -0.01    -0.04   0.02  -0.04
  36   6    -0.01  -0.02   0.00    -0.01  -0.02   0.01    -0.17  -0.02  -0.01
  37   6    -0.01   0.01   0.01    -0.01   0.00   0.01    -0.02   0.07   0.01
  38   6    -0.01   0.01  -0.01    -0.01   0.02  -0.01     0.01   0.01   0.01
  39   6    -0.01   0.01   0.00    -0.01   0.02   0.00     0.00   0.01   0.00
  40   6     0.00   0.02   0.01     0.00   0.02   0.01    -0.01   0.00   0.00
  41   6     0.00   0.02   0.01     0.00   0.02   0.01     0.00   0.00   0.00
  42   6     0.00   0.02   0.00     0.01   0.02   0.00     0.01   0.00   0.00
  43   6    -0.01   0.01   0.01    -0.02   0.00   0.00     0.01   0.01   0.02
  44   6     0.00   0.01   0.01     0.00   0.01   0.02     0.01  -0.01   0.01
  45   6     0.00   0.01   0.01    -0.01   0.01   0.00    -0.09   0.08   0.15
  46   6     0.01   0.00   0.00     0.01   0.00   0.01     0.08  -0.02  -0.08
  47   6     0.00   0.00  -0.01     0.01   0.00   0.00     0.00  -0.03  -0.04
  48   6     0.00   0.01   0.01     0.00   0.01   0.00     0.00   0.02   0.08
  49   6     0.00  -0.01   0.00    -0.01  -0.01   0.00     0.00   0.01  -0.01
  50   6     0.00   0.00   0.00     0.01   0.00   0.01    -0.01   0.00   0.01
  51   6     0.01  -0.01   0.00     0.01   0.00   0.00    -0.01  -0.01   0.02
  52   6    -0.01   0.00   0.01    -0.02  -0.01   0.01     0.01   0.01  -0.02
  53   6    -0.01  -0.03  -0.03    -0.01  -0.03  -0.04     0.00   0.01  -0.01
  54   6     0.01   0.03   0.00     0.00   0.03   0.01     0.01   0.00   0.00
  55   1     0.02   0.00  -0.05     0.00   0.00  -0.06    -0.08   0.03  -0.05
  56   1     0.00  -0.01  -0.11     0.04  -0.06   0.00     0.02   0.03   0.00
  57   1     0.08  -0.19   0.13    -0.04   0.16  -0.09     0.01   0.00   0.00
  58   1     0.14   0.13  -0.05    -0.15  -0.16   0.07     0.00   0.00   0.01
  59   1     0.11   0.04  -0.03    -0.11  -0.06   0.05     0.00   0.00   0.00
  60   1     0.07   0.00  -0.03    -0.10  -0.06   0.05     0.00  -0.01   0.00
  61   1    -0.05  -0.05  -0.07    -0.02  -0.05  -0.12     0.00   0.01   0.00
  62   1     0.00  -0.01  -0.02     0.03   0.02  -0.03     0.00  -0.01   0.02
  63   1     0.18   0.08   0.04     0.17   0.04   0.07    -0.03  -0.03   0.00
  64   1     0.20  -0.19  -0.02     0.19  -0.20   0.01    -0.03   0.02   0.02
  65   1     0.10  -0.27  -0.08     0.09  -0.35  -0.09    -0.02   0.00   0.01
  66   1     0.02   0.02  -0.01    -0.13  -0.02  -0.09    -0.05   0.00  -0.04
  67   1     0.02  -0.01  -0.05    -0.08   0.03   0.03    -0.05   0.01  -0.01
  68   1     0.01  -0.01  -0.06    -0.10   0.05   0.08    -0.03   0.05   0.05
  69   1     0.04   0.05  -0.03    -0.02  -0.09   0.11    -0.04  -0.03   0.01
  70   1     0.05  -0.06   0.01    -0.02  -0.04   0.09    -0.05   0.07  -0.03
  71   1     0.04   0.01  -0.02    -0.03   0.06   0.05    -0.05   0.03  -0.01
  72   1    -0.08   0.10   0.12     0.08  -0.07  -0.06    -0.01   0.00   0.02
  73   1    -0.16   0.13   0.04     0.12  -0.11  -0.02    -0.02   0.00   0.00
  74   1     0.01   0.15   0.43    -0.01  -0.12  -0.32     0.00   0.00   0.03
  75   1     0.00  -0.01   0.02     0.00   0.00   0.01     0.02  -0.05   0.03
  76   1     0.00  -0.02   0.02    -0.01  -0.01   0.03     0.09   0.02   0.13
  77   1     0.00  -0.01  -0.01     0.00  -0.01   0.01     0.04  -0.01  -0.07
  78   1     0.00  -0.03   0.00     0.00  -0.02   0.01    -0.16  -0.02   0.00
  79   1    -0.02   0.01   0.01    -0.02   0.00   0.02    -0.01   0.07   0.02
  80   1     0.00   0.00   0.01     0.00   0.00   0.01    -0.01   0.01   0.00
  81   1    -0.01   0.02   0.02    -0.01   0.01   0.03    -0.01   0.00   0.00
  82   1    -0.01   0.00   0.02    -0.01   0.00   0.03     0.00  -0.01  -0.01
  83   1    -0.02   0.01   0.00    -0.04   0.00   0.00     0.01   0.01   0.02
  84   1     0.01   0.01   0.02     0.01   0.01   0.03     0.01  -0.01   0.00
  85   1     0.01   0.02   0.00     0.01   0.02  -0.02    -0.02   0.12   0.23
  86   1     0.01   0.03   0.01    -0.01   0.03   0.01     0.10   0.06   0.11
  87   1    -0.02   0.02   0.04    -0.02   0.02   0.02    -0.22   0.16   0.30
  88   1     0.02   0.01   0.00     0.01   0.00   0.01     0.20   0.00  -0.25
  89   1     0.01   0.01  -0.03     0.01   0.00  -0.01     0.13  -0.01  -0.25
  90   1     0.02   0.01   0.02     0.02   0.00   0.02     0.25  -0.07   0.18
  91   1    -0.01  -0.01  -0.04     0.00   0.00  -0.02    -0.03  -0.06  -0.12
  92   1     0.01   0.00  -0.01     0.03  -0.01   0.01    -0.02  -0.06  -0.11
  93   1     0.03  -0.01   0.00     0.02   0.00   0.00     0.09  -0.10   0.03
  94   1     0.01   0.01   0.03     0.00   0.01   0.01     0.01   0.00   0.12
  95   1     0.01   0.00   0.00     0.00   0.01   0.00     0.02  -0.06   0.05
  96   1     0.00   0.01   0.02     0.00   0.00  -0.01     0.00   0.06   0.16
  97   1     0.01  -0.01  -0.02     0.01  -0.01  -0.02     0.01   0.03  -0.03
  98   1    -0.01  -0.02  -0.01    -0.02  -0.02  -0.01    -0.03  -0.01  -0.02
  99   1    -0.02  -0.02   0.00    -0.03  -0.02   0.00     0.02   0.01  -0.01
 100   1     0.00  -0.01   0.01     0.01  -0.01   0.01    -0.02   0.00   0.02
 101   1     0.00  -0.01   0.00     0.01  -0.02   0.01    -0.02   0.01   0.00
 102   1     0.01   0.00  -0.01     0.01   0.00   0.00    -0.02  -0.01   0.03
 103   1     0.03   0.01  -0.02     0.04   0.03  -0.03    -0.02  -0.04   0.02
 104   1     0.03  -0.03   0.00     0.04  -0.03   0.02    -0.02  -0.01  -0.02
 105   1    -0.01  -0.02   0.02     0.00  -0.01   0.00    -0.01  -0.03   0.04
 106   1    -0.01   0.00   0.02    -0.02  -0.02   0.02     0.02   0.00  -0.05
 107   1    -0.02   0.01  -0.01    -0.01  -0.02   0.02     0.03   0.02  -0.03
 108   1     0.00  -0.03   0.00     0.00   0.00   0.01    -0.03  -0.01  -0.02
 109   1    -0.01  -0.02  -0.01    -0.01  -0.03  -0.02    -0.03   0.03  -0.02
 110   1    -0.02  -0.04  -0.03    -0.02  -0.04  -0.04     0.00   0.06   0.02
 111   1    -0.02  -0.04  -0.04    -0.02  -0.05  -0.05    -0.04  -0.04  -0.06
 112   1    -0.01   0.02   0.03    -0.01   0.03   0.04     0.00  -0.05   0.06
 113   1     0.02   0.07   0.00     0.02   0.09   0.00     0.06  -0.01   0.02
 114   1    -0.01   0.02   0.03    -0.02   0.02   0.04     0.06   0.03  -0.03
                    82                     83                     84
                     A                      A                      A
 Frequencies --   430.2621               440.1581               441.6373
 Red. masses --     4.9320                 3.5701                 3.4217
 Frc consts  --     0.5379                 0.4075                 0.3932
 IR Inten    --    24.8514                 2.6669                 7.0205
 Atom AN      X      Y      Z        X      Y      Z        X      Y      Z
   1   8    -0.02   0.01  -0.01     0.00   0.00   0.00     0.00   0.00   0.00
   2  12     0.00   0.05   0.14    -0.01  -0.04   0.01    -0.02   0.01  -0.01
   3   8     0.02  -0.08  -0.03     0.00   0.02  -0.01     0.01   0.04   0.00
   4   6     0.03   0.00   0.02     0.00   0.00   0.00    -0.01   0.00   0.00
   5   7    -0.05   0.04  -0.03     0.01   0.01   0.02     0.05  -0.03   0.01
   6   7     0.07  -0.01   0.00    -0.05   0.02  -0.04     0.19  -0.01   0.09
   7   8     0.00   0.03  -0.01     0.00  -0.01   0.00    -0.01  -0.02   0.01
   8   6    -0.03  -0.01  -0.04     0.00  -0.03   0.00    -0.03  -0.02  -0.01
   9   6     0.02  -0.02  -0.04     0.01  -0.03  -0.01    -0.05   0.00  -0.01
  10   6     0.04  -0.03  -0.01    -0.02  -0.02  -0.02     0.07  -0.03   0.05
  11   8    -0.03  -0.06  -0.06     0.01   0.02   0.01     0.01   0.03   0.02
  12   6     0.02   0.03  -0.01     0.00  -0.01   0.00    -0.01  -0.01  -0.01
  13   6     0.09   0.09  -0.01    -0.01  -0.02   0.00    -0.03  -0.04  -0.01
  14   6     0.06  -0.03   0.02    -0.01   0.01   0.00    -0.01   0.01   0.00
  15   8    -0.09  -0.02   0.04     0.01   0.01   0.00     0.02   0.02  -0.01
  16   6     0.00   0.00   0.01    -0.01   0.00   0.00     0.00  -0.01  -0.01
  17   8    -0.13  -0.14   0.02    -0.01  -0.01  -0.02    -0.02   0.01  -0.04
  18   6     0.05  -0.13  -0.01    -0.01   0.02   0.01    -0.01   0.04   0.02
  19   8    -0.02   0.04  -0.13     0.00   0.01   0.01    -0.01   0.02   0.04
  20   8     0.11   0.06   0.05    -0.01  -0.03  -0.01    -0.03  -0.06  -0.02
  21   6     0.07   0.03  -0.03     0.01  -0.01   0.01     0.01  -0.02   0.01
  22   6    -0.01   0.00  -0.04     0.01   0.00   0.02     0.00  -0.01   0.03
  23   6     0.08  -0.06   0.04    -0.01  -0.01   0.00    -0.02  -0.02   0.01
  24   8     0.08   0.05  -0.05     0.02   0.01  -0.02     0.03   0.03  -0.03
  25   6    -0.04  -0.03   0.02     0.00   0.02   0.01     0.00   0.02  -0.01
  26   6    -0.08   0.03   0.02     0.01  -0.01  -0.01     0.03  -0.01  -0.01
  27   6    -0.08   0.10  -0.03     0.01  -0.02   0.01     0.03  -0.04   0.02
  28   6    -0.01   0.01   0.06     0.00   0.00  -0.01     0.01   0.00  -0.01
  29   6     0.01   0.00   0.01     0.02   0.06   0.15     0.01   0.02   0.05
  30   6     0.01   0.01  -0.05     0.09   0.08  -0.13    -0.02   0.00  -0.03
  31   6     0.02  -0.02   0.02     0.01   0.01   0.10    -0.01   0.02   0.02
  32   6     0.00  -0.01   0.01     0.01  -0.04   0.04     0.01  -0.01   0.01
  33   6    -0.03  -0.02   0.00     0.00  -0.06  -0.02     0.02  -0.01   0.00
  34   6    -0.02   0.00   0.02     0.02   0.00   0.03     0.02  -0.01   0.00
  35   6     0.00  -0.01   0.02    -0.01   0.05   0.08     0.00   0.02   0.02
  36   6     0.07  -0.01   0.01     0.03  -0.02  -0.05    -0.04   0.00  -0.02
  37   6    -0.01  -0.02   0.00    -0.07   0.08  -0.05    -0.02   0.03  -0.02
  38   6    -0.02   0.01  -0.03     0.07   0.05  -0.06    -0.05   0.00  -0.03
  39   6     0.00   0.01  -0.01     0.00   0.01  -0.03     0.03  -0.01   0.01
  40   6     0.01   0.02   0.02    -0.03  -0.03   0.02     0.05   0.01   0.03
  41   6     0.01   0.02   0.01     0.00   0.01  -0.04     0.03   0.01   0.03
  42   6     0.00   0.03  -0.02     0.05   0.05  -0.07    -0.03   0.01  -0.02
  43   6    -0.04  -0.02  -0.02     0.03   0.00   0.08    -0.10  -0.07  -0.09
  44   6    -0.03   0.03   0.01    -0.02  -0.03   0.04    -0.08   0.05  -0.02
  45   6     0.04  -0.02  -0.06     0.06  -0.03  -0.04    -0.01   0.01   0.03
  46   6    -0.03   0.01   0.03    -0.04   0.05  -0.05     0.01   0.01  -0.04
  47   6     0.00   0.01   0.00    -0.10  -0.02  -0.10    -0.03  -0.01  -0.03
  48   6     0.01   0.00  -0.01     0.05  -0.01   0.06     0.01   0.00   0.02
  49   6    -0.03  -0.03   0.02    -0.06  -0.02  -0.02    -0.05  -0.05   0.06
  50   6     0.03   0.00  -0.01     0.02  -0.01   0.07     0.05   0.02  -0.07
  51   6     0.03   0.02  -0.02     0.01  -0.06   0.09     0.04   0.08  -0.10
  52   6    -0.03  -0.02   0.04    -0.02   0.01  -0.04    -0.08  -0.05   0.10
  53   6     0.00  -0.03  -0.05     0.02   0.02  -0.06     0.01  -0.01  -0.04
  54   6    -0.01   0.02   0.02    -0.03   0.02   0.06    -0.01  -0.01   0.03
  55   1     0.02  -0.01  -0.04     0.00  -0.03  -0.01    -0.10   0.03  -0.02
  56   1     0.06   0.12   0.01     0.00  -0.02  -0.01     0.00  -0.06  -0.03
  57   1     0.05  -0.03   0.03    -0.01   0.01   0.00    -0.01   0.01   0.00
  58   1     0.01   0.01   0.01    -0.01  -0.01   0.00     0.00   0.00  -0.02
  59   1     0.01  -0.01   0.01    -0.01   0.00   0.00     0.01  -0.02   0.00
  60   1    -0.01  -0.03   0.01     0.00   0.00   0.00     0.00   0.00   0.00
  61   1     0.01   0.04  -0.04    -0.02   0.00   0.03    -0.04  -0.01   0.05
  62   1     0.00  -0.04   0.08     0.00  -0.02   0.00     0.01  -0.02   0.00
  63   1    -0.07  -0.09   0.02    -0.02   0.01  -0.03    -0.01   0.02  -0.04
  64   1    -0.05   0.03   0.08    -0.01   0.01  -0.01    -0.01   0.00  -0.03
  65   1    -0.06  -0.06   0.03    -0.02   0.05   0.02    -0.01   0.07   0.01
  66   1    -0.19  -0.01  -0.13     0.03   0.02   0.01     0.07   0.03   0.05
  67   1    -0.18   0.04  -0.04     0.02  -0.01  -0.03     0.07  -0.03  -0.04
  68   1    -0.13   0.18   0.20     0.02  -0.01  -0.02     0.05  -0.04  -0.06
  69   1    -0.14  -0.10   0.03     0.02   0.01   0.00     0.05   0.03   0.01
  70   1    -0.17   0.26  -0.09     0.03  -0.05   0.03     0.07  -0.11   0.05
  71   1    -0.18   0.12  -0.05     0.03  -0.01   0.01     0.06  -0.03   0.02
  72   1    -0.04   0.02   0.10     0.01   0.00  -0.02     0.01   0.00  -0.02
  73   1    -0.09   0.00  -0.01     0.02   0.01   0.00     0.02   0.01   0.01
  74   1    -0.01   0.03   0.15     0.00   0.00  -0.02     0.01   0.00  -0.03
  75   1    -0.01   0.01  -0.01    -0.03  -0.09  -0.05     0.00  -0.04  -0.02
  76   1    -0.04  -0.03  -0.03    -0.03  -0.12  -0.14     0.01  -0.03  -0.04
  77   1    -0.02   0.00   0.01     0.02  -0.01  -0.07     0.02  -0.01  -0.04
  78   1     0.07  -0.02   0.00     0.04  -0.02  -0.08    -0.04   0.01  -0.03
  79   1    -0.03  -0.01   0.00    -0.08   0.07  -0.06    -0.02   0.03  -0.02
  80   1     0.01  -0.02   0.01    -0.06  -0.02   0.06     0.06  -0.05   0.01
  81   1     0.01   0.01   0.03    -0.10  -0.10   0.13     0.05   0.01   0.03
  82   1    -0.01   0.01   0.04    -0.05  -0.05   0.04     0.03   0.04   0.06
  83   1    -0.05  -0.02  -0.02     0.03  -0.01   0.10    -0.12  -0.06  -0.10
  84   1    -0.02   0.03   0.02    -0.02  -0.03   0.06    -0.07   0.05  -0.02
  85   1     0.03  -0.03  -0.10     0.04  -0.03   0.01    -0.01   0.02   0.07
  86   1    -0.05  -0.02  -0.05     0.09  -0.07  -0.05     0.06  -0.01   0.01
  87   1     0.07  -0.04  -0.13     0.07  -0.04  -0.04    -0.04   0.02   0.07
  88   1    -0.08   0.01   0.12    -0.05   0.07   0.07     0.03   0.03  -0.06
  89   1    -0.05   0.01   0.08    -0.06   0.07  -0.08     0.01   0.02  -0.09
  90   1    -0.10   0.04  -0.07    -0.08   0.10  -0.12     0.04   0.01   0.00
  91   1     0.00   0.02   0.01    -0.12  -0.09  -0.11    -0.04  -0.04  -0.04
  92   1     0.01   0.01   0.02    -0.18  -0.04  -0.19    -0.07  -0.01  -0.07
  93   1    -0.02   0.02  -0.01    -0.04  -0.10  -0.02    -0.01  -0.04   0.00
  94   1     0.01   0.02   0.00     0.10   0.02   0.20     0.03   0.00   0.06
  95   1     0.02   0.01  -0.02     0.12  -0.19  -0.04     0.04  -0.06  -0.01
  96   1     0.01  -0.01  -0.04     0.09   0.01   0.16     0.03   0.01   0.06
  97   1    -0.01  -0.06   0.02    -0.01   0.01  -0.08    -0.06  -0.12   0.11
  98   1     0.01  -0.04   0.01    -0.14  -0.04  -0.03     0.09  -0.06   0.05
  99   1    -0.08  -0.05   0.04    -0.06  -0.01  -0.03    -0.14  -0.09   0.11
 100   1     0.05   0.01  -0.04     0.03   0.04   0.02     0.11   0.02  -0.13
 101   1     0.05  -0.04   0.04     0.04   0.00   0.11     0.11  -0.07   0.05
 102   1     0.05   0.02  -0.05     0.04  -0.01   0.11     0.10   0.06  -0.16
 103   1     0.06   0.07  -0.07     0.01  -0.09   0.05     0.11   0.19  -0.15
 104   1     0.07   0.01   0.07     0.01  -0.09   0.03     0.13   0.06   0.12
 105   1     0.05   0.05  -0.06     0.02  -0.11   0.17     0.06   0.17  -0.23
 106   1    -0.05  -0.02   0.09     0.03   0.07  -0.14    -0.13  -0.04   0.26
 107   1    -0.07  -0.03   0.06    -0.01   0.04  -0.09    -0.20  -0.09   0.18
 108   1     0.03   0.01   0.04    -0.17  -0.04  -0.05     0.13   0.05   0.12
 109   1     0.01  -0.05  -0.06    -0.01   0.02  -0.15     0.03  -0.04  -0.07
 110   1     0.01  -0.04  -0.06     0.07   0.10  -0.04     0.03  -0.01  -0.05
 111   1     0.02  -0.01  -0.02     0.02   0.02  -0.06     0.04   0.02  -0.01
 112   1    -0.03   0.04   0.03    -0.05  -0.02   0.12    -0.02   0.05   0.00
 113   1    -0.01   0.10   0.00     0.01   0.10   0.04    -0.04   0.03   0.01
 114   1    -0.06  -0.01   0.08    -0.03   0.02   0.10    -0.07  -0.05   0.07
                    85                     86                     87
                     A                      A                      A
 Frequencies --   444.6717               449.6919               456.7157
 Red. masses --     3.6604                 6.2799                 2.9278
 Frc consts  --     0.4264                 0.7482                 0.3598
 IR Inten    --     3.2479                34.7985                 0.8013
 Atom AN      X      Y      Z        X      Y      Z        X      Y      Z
   1   8     0.00   0.00   0.00     0.02   0.03  -0.01     0.00   0.01   0.00
   2  12     0.00   0.01  -0.01     0.00  -0.04  -0.12     0.00  -0.01   0.00
   3   8     0.00  -0.01   0.00    -0.09  -0.13   0.04    -0.02  -0.01   0.00
   4   6     0.00   0.00   0.00     0.01   0.00  -0.01     0.00   0.00   0.00
   5   7     0.04   0.02  -0.01     0.03  -0.04   0.02    -0.04   0.04   0.00
   6   7    -0.02  -0.04  -0.02     0.07   0.02   0.05    -0.02  -0.01  -0.03
   7   8     0.00   0.00   0.00     0.01   0.01  -0.01     0.00   0.00   0.00
   8   6     0.03   0.00  -0.03    -0.01  -0.01   0.02    -0.01  -0.01  -0.01
   9   6     0.03   0.01  -0.04    -0.04   0.01   0.04     0.01  -0.02  -0.02
  10   6     0.01   0.02  -0.03     0.02   0.00   0.04     0.01  -0.02  -0.02
  11   8     0.00   0.00   0.00    -0.03  -0.08   0.01    -0.01  -0.01   0.01
  12   6     0.00   0.00   0.00     0.01   0.02   0.04     0.00   0.00   0.01
  13   6     0.01   0.00   0.00    -0.02   0.08   0.05    -0.01   0.01   0.01
  14   6     0.00   0.00   0.00    -0.02  -0.02   0.01    -0.01   0.00   0.00
  15   8     0.00   0.00   0.00     0.02  -0.03  -0.01     0.01   0.00   0.00
  16   6     0.00   0.00   0.00     0.03   0.04  -0.02     0.01   0.01   0.00
  17   8     0.00   0.00   0.01     0.15   0.03   0.10     0.01  -0.01   0.01
  18   6     0.00  -0.01   0.00    -0.02  -0.01  -0.12    -0.01   0.00  -0.01
  19   8     0.00   0.00  -0.01     0.05  -0.14  -0.06     0.00  -0.01  -0.01
  20   8     0.00   0.01   0.00     0.08   0.20   0.04     0.01   0.02   0.01
  21   6     0.00   0.00   0.00    -0.07   0.07  -0.03     0.00   0.01   0.00
  22   6     0.00   0.00   0.00     0.03   0.02  -0.06     0.00   0.00  -0.01
  23   6     0.00   0.00   0.00     0.06   0.15  -0.08     0.01   0.01   0.00
  24   8    -0.01   0.00   0.00    -0.13  -0.18   0.14     0.00  -0.02   0.01
  25   6     0.00   0.00   0.00     0.01  -0.04   0.01     0.00   0.00   0.00
  26   6     0.00   0.00   0.00    -0.06   0.03   0.06    -0.01   0.00   0.00
  27   6    -0.01   0.01   0.00    -0.05   0.07  -0.04     0.00   0.00   0.00
  28   6     0.00   0.00   0.00    -0.01   0.00  -0.01     0.00   0.00   0.00
  29   6     0.01   0.05   0.08     0.00   0.01   0.04     0.03   0.03   0.13
  30   6    -0.09  -0.11   0.16     0.01   0.03  -0.03     0.01  -0.01  -0.01
  31   6     0.01  -0.01   0.07     0.00   0.02   0.03    -0.01   0.04   0.08
  32   6     0.01  -0.04   0.04     0.01   0.00   0.00     0.00   0.01   0.05
  33   6    -0.01  -0.07   0.00     0.02  -0.01  -0.01    -0.01  -0.02  -0.04
  34   6     0.00  -0.01   0.03     0.02   0.00   0.01     0.01   0.00   0.03
  35   6    -0.03   0.04   0.06     0.00   0.02   0.02     0.06   0.01   0.09
  36   6     0.04  -0.03  -0.03     0.00   0.01  -0.02    -0.11  -0.01  -0.07
  37   6    -0.09   0.09  -0.03    -0.02   0.06  -0.02     0.04  -0.13  -0.01
  38   6    -0.07  -0.05   0.10     0.01   0.01  -0.03    -0.02   0.00   0.00
  39   6    -0.04   0.00   0.04     0.03  -0.01  -0.01    -0.02   0.01   0.00
  40   6     0.02   0.06  -0.03     0.02  -0.03   0.01    -0.01   0.03   0.00
  41   6    -0.02  -0.01   0.05     0.01   0.00  -0.01     0.00   0.01   0.01
  42   6    -0.04  -0.05   0.12    -0.01   0.01  -0.04     0.02   0.00   0.02
  43   6     0.00   0.04  -0.06    -0.02  -0.04  -0.02    -0.04  -0.01  -0.03
  44   6     0.08   0.02  -0.02    -0.05   0.01  -0.01     0.07  -0.03   0.03
  45   6     0.05  -0.03  -0.04     0.01  -0.01   0.00    -0.03   0.02   0.08
  46   6    -0.03   0.03  -0.02    -0.01   0.01  -0.02     0.01   0.03  -0.12
  47   6    -0.09  -0.02  -0.10    -0.05  -0.01  -0.05     0.02   0.04   0.07
  48   6     0.04   0.01   0.08     0.01   0.01   0.05     0.02  -0.06  -0.14
  49   6     0.11   0.05  -0.03    -0.05  -0.03   0.03     0.06   0.04  -0.05
  50   6    -0.06  -0.01  -0.04     0.03   0.01  -0.02    -0.04  -0.02   0.06
  51   6    -0.03   0.04  -0.07     0.01   0.02  -0.02     0.01   0.02  -0.04
  52   6     0.07   0.00   0.01    -0.04  -0.01   0.03    -0.03  -0.02   0.03
  53   6     0.00  -0.01  -0.03     0.01   0.01   0.01     0.01   0.01  -0.04
  54   6     0.04   0.01  -0.06    -0.01  -0.01   0.02     0.00   0.01   0.01
  55   1     0.04   0.00  -0.04    -0.05   0.02   0.03     0.02  -0.03  -0.02
  56   1     0.00   0.01   0.00    -0.08   0.13   0.09    -0.02   0.01   0.01
  57   1     0.00   0.00   0.00    -0.02  -0.02   0.00    -0.01   0.00   0.00
  58   1    -0.01  -0.01   0.01     0.04   0.05  -0.03     0.01   0.01  -0.01
  59   1    -0.01   0.00   0.00     0.03   0.02  -0.02     0.01   0.00   0.00
  60   1     0.00  -0.01   0.00     0.03   0.04  -0.02     0.01   0.01   0.00
  61   1     0.01   0.00  -0.01     0.17   0.01  -0.14     0.02   0.01  -0.01
  62   1     0.00   0.00   0.00     0.02   0.15  -0.08     0.00   0.01   0.00
  63   1     0.01  -0.01   0.02     0.01  -0.06   0.07    -0.01  -0.01   0.01
  64   1    -0.01   0.00   0.00     0.01   0.02   0.08    -0.01   0.01   0.01
  65   1     0.02  -0.01  -0.02     0.01  -0.15  -0.01     0.00  -0.01   0.00
  66   1    -0.01   0.00  -0.01    -0.16  -0.16  -0.08    -0.02  -0.01  -0.01
  67   1    -0.01   0.00   0.00    -0.12   0.10   0.28    -0.02   0.01   0.02
  68   1    -0.01   0.00   0.01    -0.12  -0.01   0.12    -0.01   0.01   0.02
  69   1    -0.01  -0.01   0.01    -0.08   0.01  -0.07     0.00   0.01  -0.02
  70   1    -0.01   0.02   0.00    -0.10   0.18  -0.09     0.00   0.01   0.00
  71   1    -0.01   0.01   0.00    -0.07   0.00  -0.04     0.01  -0.01   0.00
  72   1     0.01   0.00   0.00    -0.01   0.00  -0.04     0.00   0.00  -0.01
  73   1     0.00   0.01   0.00     0.01   0.01   0.01     0.01   0.00   0.00
  74   1     0.00   0.00   0.00     0.01   0.01  -0.01     0.00   0.00  -0.01
  75   1    -0.01  -0.06  -0.02     0.00  -0.03  -0.02    -0.03  -0.04  -0.03
  76   1    -0.04  -0.11  -0.09     0.01  -0.02  -0.05    -0.06  -0.07  -0.17
  77   1     0.02  -0.01  -0.04     0.03   0.00  -0.01    -0.03  -0.04  -0.06
  78   1     0.05  -0.04  -0.04    -0.01   0.02  -0.03    -0.13   0.01  -0.09
  79   1    -0.11   0.09  -0.03    -0.02   0.05  -0.02     0.05  -0.14  -0.04
  80   1     0.03   0.05  -0.06     0.02  -0.02   0.01    -0.01   0.00   0.00
  81   1     0.10   0.16  -0.19     0.00  -0.05   0.04     0.00   0.03  -0.01
  82   1     0.04   0.04  -0.07     0.01   0.00   0.03    -0.01  -0.01   0.00
  83   1    -0.01   0.05  -0.08    -0.03  -0.04  -0.01    -0.05  -0.01  -0.04
  84   1     0.09   0.02  -0.03    -0.06   0.01  -0.02     0.09  -0.03   0.05
  85   1     0.04  -0.04  -0.05    -0.01  -0.01   0.03    -0.01   0.05   0.18
  86   1     0.04  -0.03  -0.04     0.03  -0.03   0.00     0.16  -0.02   0.04
  87   1     0.07  -0.04  -0.06     0.02  -0.01   0.00    -0.11   0.06   0.21
  88   1    -0.05   0.05   0.10     0.00   0.01  -0.02     0.09   0.08  -0.14
  89   1    -0.06   0.05  -0.03    -0.01   0.01  -0.02     0.02   0.07  -0.28
  90   1    -0.08   0.08  -0.09    -0.01   0.01  -0.03     0.10   0.05   0.00
  91   1    -0.12  -0.09  -0.16    -0.06  -0.05  -0.05     0.07   0.10   0.19
  92   1    -0.15  -0.05  -0.20    -0.10  -0.02  -0.11     0.07   0.08   0.18
  93   1     0.00  -0.11  -0.01    -0.01  -0.06   0.01    -0.13   0.15  -0.06
  94   1     0.09   0.04   0.22     0.03   0.00   0.10     0.01   0.00  -0.18
  95   1     0.11  -0.17  -0.03     0.03  -0.08   0.00     0.01   0.07  -0.09
  96   1     0.08   0.04   0.18     0.02   0.03   0.12     0.02  -0.13  -0.28
  97   1     0.07   0.05   0.00    -0.05  -0.06   0.06     0.07   0.10  -0.10
  98   1     0.10   0.09   0.00     0.02  -0.03   0.03    -0.07   0.04  -0.05
  99   1     0.15   0.07  -0.05    -0.08  -0.05   0.06     0.12   0.07  -0.09
 100   1    -0.12  -0.09   0.08     0.08   0.04  -0.08    -0.09  -0.03   0.12
 101   1    -0.13   0.04  -0.18     0.08  -0.03   0.06    -0.09   0.05  -0.04
 102   1    -0.11  -0.02  -0.04     0.06   0.03  -0.05    -0.07  -0.05   0.13
 103   1    -0.05   0.03  -0.02     0.04   0.06  -0.03     0.03   0.06  -0.06
 104   1    -0.06   0.07  -0.09     0.04   0.02   0.05     0.04   0.02   0.03
 105   1    -0.04   0.06  -0.10     0.02   0.05  -0.06     0.02   0.05  -0.07
 106   1     0.00  -0.09   0.07    -0.04   0.02   0.06    -0.05  -0.02   0.08
 107   1     0.12   0.00   0.02    -0.10  -0.03   0.05    -0.06  -0.03   0.05
 108   1     0.17   0.02   0.01     0.00   0.02   0.04     0.05   0.01   0.04
 109   1    -0.02   0.01   0.00     0.01   0.00  -0.01    -0.01   0.00  -0.09
 110   1     0.00  -0.01  -0.03     0.02   0.02   0.01     0.04   0.04  -0.03
 111   1    -0.02  -0.04  -0.03     0.02   0.02   0.02     0.02   0.02  -0.03
 112   1     0.04   0.01  -0.07    -0.01   0.01  -0.01    -0.01   0.01   0.03
 113   1     0.04  -0.03  -0.05    -0.03  -0.02   0.01     0.01   0.06   0.00
 114   1     0.05   0.01  -0.09    -0.03  -0.02   0.02    -0.02   0.00   0.04
                    88                     89                     90
                     A                      A                      A
 Frequencies --   458.9942               469.6032               507.2356
 Red. masses --     2.6631                 4.8226                 3.4170
 Frc consts  --     0.3306                 0.6266                 0.5180
 IR Inten    --     0.9148                35.7305                 0.3373
 Atom AN      X      Y      Z        X      Y      Z        X      Y      Z
   1   8     0.00   0.00   0.00    -0.06  -0.05   0.02     0.00   0.00   0.00
   2  12     0.00   0.00   0.00     0.05  -0.05  -0.12     0.01   0.03   0.00
   3   8    -0.01   0.01   0.00     0.15  -0.10   0.04     0.00   0.03  -0.02
   4   6     0.00   0.00   0.00     0.02   0.00   0.05     0.00   0.00   0.00
   5   7     0.01  -0.02   0.02    -0.01  -0.03   0.00     0.03   0.03  -0.12
   6   7    -0.02   0.01  -0.01     0.00   0.03   0.02    -0.06   0.06   0.12
   7   8     0.00   0.00   0.00     0.00   0.05   0.02     0.00   0.00   0.00
   8   6     0.00   0.00   0.02    -0.01   0.00   0.02     0.06   0.05  -0.11
   9   6    -0.01   0.00   0.01    -0.01   0.01   0.05     0.04   0.12   0.05
  10   6    -0.02   0.00   0.00    -0.01   0.02   0.03    -0.02   0.08   0.13
  11   8     0.00   0.00   0.01     0.04   0.04  -0.13     0.00   0.00   0.01
  12   6     0.00   0.00   0.00     0.07   0.06  -0.07    -0.01  -0.01   0.00
  13   6    -0.01   0.00   0.00     0.20   0.04  -0.06    -0.01  -0.01   0.00
  14   6    -0.01   0.00   0.00     0.12   0.01  -0.03     0.00   0.00   0.00
  15   8     0.01   0.00   0.00    -0.11   0.02   0.04     0.00   0.00   0.01
  16   6     0.01   0.00  -0.01    -0.06  -0.08   0.03     0.00   0.00   0.00
  17   8     0.00  -0.01   0.00     0.06   0.04   0.02    -0.01   0.00   0.03
  18   6    -0.01   0.01   0.00     0.07  -0.01   0.05     0.00  -0.03   0.03
  19   8     0.01   0.00   0.00    -0.10   0.02   0.04     0.00   0.03  -0.01
  20   8     0.00   0.00   0.00    -0.10  -0.04  -0.02     0.02   0.02   0.01
  21   6     0.01   0.00   0.00    -0.09   0.00   0.04     0.01   0.01  -0.02
  22   6     0.00   0.00   0.00     0.01  -0.03   0.06    -0.01   0.01  -0.03
  23   6     0.00   0.00   0.00    -0.04  -0.01  -0.02    -0.01  -0.05   0.03
  24   8     0.00   0.00   0.00    -0.10   0.04   0.00     0.00  -0.01   0.01
  25   6     0.00   0.01   0.00     0.01   0.02  -0.01     0.00  -0.01   0.00
  26   6     0.00   0.00   0.00     0.01  -0.03  -0.05    -0.01   0.00  -0.02
  27   6     0.00  -0.01   0.00    -0.07   0.07   0.01     0.01  -0.01   0.00
  28   6     0.00   0.00   0.00    -0.01   0.00   0.07     0.00   0.00   0.00
  29   6    -0.02  -0.02  -0.06    -0.01  -0.01   0.02     0.02   0.02  -0.05
  30   6     0.03   0.03  -0.05     0.00   0.02   0.00    -0.03   0.04   0.06
  31   6     0.00  -0.01  -0.04     0.00   0.02   0.02     0.03   0.00   0.02
  32   6     0.00   0.00  -0.03     0.01   0.01   0.01     0.05  -0.01   0.05
  33   6     0.01   0.02   0.02     0.01   0.01  -0.02    -0.04  -0.08  -0.04
  34   6    -0.01   0.01  -0.02     0.02   0.00   0.01     0.00  -0.02   0.06
  35   6    -0.02   0.00  -0.05     0.01   0.00   0.01    -0.02   0.00   0.06
  36   6     0.04   0.01   0.03    -0.01   0.02  -0.01    -0.03  -0.04  -0.01
  37   6    -0.01   0.05   0.01     0.01   0.00  -0.01    -0.06  -0.02   0.01
  38   6    -0.01   0.02  -0.05     0.01   0.00  -0.01     0.05   0.01  -0.02
  39   6     0.00   0.01  -0.02     0.01  -0.01   0.00     0.06   0.00  -0.04
  40   6    -0.02   0.00   0.02     0.00  -0.02   0.00    -0.02  -0.11   0.03
  41   6     0.01   0.01  -0.01     0.00  -0.01  -0.01     0.01   0.00  -0.07
  42   6     0.06   0.02  -0.01     0.00   0.00  -0.01    -0.01   0.00  -0.05
  43   6    -0.08  -0.07  -0.06    -0.01  -0.02  -0.01     0.02  -0.07  -0.01
  44   6     0.12  -0.09   0.06     0.01  -0.02   0.00    -0.01  -0.06  -0.03
  45   6     0.01  -0.01  -0.03     0.00   0.00   0.01    -0.01   0.02   0.01
  46   6     0.00  -0.02   0.06     0.00   0.00  -0.02     0.00   0.01  -0.03
  47   6     0.00  -0.01  -0.02    -0.01   0.00   0.00    -0.02   0.01  -0.02
  48   6    -0.01   0.03   0.05     0.00  -0.01  -0.01     0.01   0.00  -0.01
  49   6     0.08   0.06  -0.09     0.00   0.01  -0.01    -0.01   0.00   0.00
  50   6    -0.05  -0.04   0.14     0.00   0.00   0.01     0.01   0.00   0.02
  51   6     0.03   0.05  -0.07     0.01   0.01  -0.01     0.00   0.00   0.01
  52   6    -0.10  -0.04   0.08    -0.02  -0.01   0.01    -0.03   0.00   0.01
  53   6     0.00   0.01   0.02     0.00   0.01   0.02    -0.04  -0.08   0.02
  54   6    -0.01  -0.01   0.01     0.00   0.00   0.00     0.01  -0.04  -0.06
  55   1    -0.02   0.00   0.01     0.00   0.00   0.05     0.11   0.22   0.07
  56   1    -0.01   0.00   0.00     0.21   0.04  -0.07     0.00  -0.02  -0.01
  57   1    -0.01   0.00   0.00     0.14   0.02  -0.03    -0.01   0.00   0.00
  58   1     0.01   0.01  -0.01    -0.05  -0.08   0.05     0.00   0.00   0.00
  59   1     0.01  -0.01   0.00    -0.04  -0.06   0.04     0.00   0.00   0.00
  60   1     0.00   0.01   0.00    -0.07  -0.10   0.05     0.00   0.00   0.00
  61   1     0.00   0.00   0.00     0.00  -0.05   0.06     0.01   0.02  -0.04
  62   1     0.00   0.00   0.00    -0.05  -0.01  -0.04    -0.05  -0.04   0.03
  63   1    -0.01   0.00  -0.01     0.03   0.05  -0.02     0.02   0.01   0.02
  64   1    -0.01   0.01   0.00     0.01  -0.03  -0.07     0.02   0.00   0.03
  65   1    -0.01   0.01   0.01     0.04   0.08  -0.01     0.00  -0.06   0.00
  66   1     0.00   0.00   0.00     0.07   0.02   0.03     0.00   0.04  -0.01
  67   1     0.00   0.00   0.01     0.06  -0.05  -0.07    -0.03  -0.02  -0.10
  68   1     0.00   0.00   0.00     0.04  -0.08  -0.11     0.01   0.06   0.01
  69   1     0.01   0.01  -0.01    -0.16  -0.25   0.22     0.02   0.02  -0.01
  70   1     0.01  -0.02   0.00    -0.19   0.26  -0.03     0.02  -0.04   0.01
  71   1     0.01  -0.01   0.00    -0.28   0.24  -0.01     0.03  -0.02   0.01
  72   1     0.00   0.00  -0.01    -0.02   0.01   0.21     0.01   0.00  -0.01
  73   1     0.01   0.00   0.00    -0.18  -0.04  -0.09     0.01   0.01   0.01
  74   1     0.00   0.00  -0.01    -0.06  -0.01   0.21     0.00   0.00  -0.01
  75   1     0.01   0.02   0.01     0.00  -0.01   0.00     0.06   0.03   0.05
  76   1     0.03   0.05   0.09     0.00  -0.01  -0.06    -0.10  -0.10  -0.14
  77   1     0.01   0.02   0.03     0.01   0.00   0.00     0.03  -0.01   0.04
  78   1     0.05   0.00   0.04    -0.02   0.03  -0.02    -0.04  -0.02  -0.02
  79   1    -0.01   0.05   0.02     0.01   0.00  -0.02    -0.08  -0.01   0.01
  80   1    -0.02  -0.02   0.01     0.00  -0.01   0.01     0.03   0.05  -0.05
  81   1    -0.05  -0.04   0.07    -0.01  -0.03   0.02    -0.07  -0.16   0.11
  82   1    -0.02  -0.03   0.01     0.00   0.00   0.00     0.03   0.04  -0.05
  83   1    -0.11  -0.07  -0.07    -0.01  -0.02  -0.01     0.03  -0.07   0.00
  84   1     0.13  -0.08   0.08     0.00  -0.02   0.00    -0.02  -0.06  -0.03
  85   1     0.00  -0.03  -0.07    -0.02  -0.01   0.04     0.04   0.04   0.01
  86   1    -0.07   0.01  -0.01     0.03  -0.02   0.00     0.02   0.03   0.01
  87   1     0.05  -0.03  -0.08     0.00  -0.01   0.02    -0.07   0.06   0.05
  88   1    -0.04  -0.04   0.05     0.01   0.00  -0.04     0.03   0.04   0.00
  89   1     0.00  -0.04   0.13     0.00   0.00  -0.02    -0.01   0.04  -0.10
  90   1    -0.04  -0.03   0.01     0.01   0.00  -0.01     0.02   0.03   0.00
  91   1    -0.02  -0.04  -0.07     0.00  -0.01   0.02    -0.03   0.02  -0.06
  92   1    -0.02  -0.03  -0.07    -0.03   0.00  -0.02     0.02   0.01   0.01
  93   1     0.06  -0.06   0.03    -0.03   0.00   0.00    -0.01   0.02  -0.03
  94   1    -0.01  -0.01   0.06     0.00  -0.01   0.00     0.04   0.06   0.05
  95   1    -0.02  -0.02   0.05     0.00  -0.02  -0.01     0.06  -0.01  -0.04
  96   1    -0.02   0.06   0.11     0.00   0.00   0.01     0.03  -0.03  -0.05
  97   1     0.11   0.18  -0.19    -0.01   0.03  -0.01    -0.05   0.02   0.03
  98   1    -0.17   0.07  -0.08    -0.02   0.01   0.00    -0.02   0.03   0.02
  99   1     0.21   0.13  -0.17     0.03   0.02  -0.02     0.06   0.03  -0.02
 100   1    -0.14  -0.02   0.21    -0.01   0.01   0.01     0.01   0.07  -0.03
 101   1    -0.13   0.09  -0.02    -0.01   0.02   0.01     0.02   0.03   0.05
 102   1    -0.11  -0.09   0.30    -0.01  -0.01   0.05     0.02  -0.01   0.11
 103   1     0.09   0.15  -0.11     0.01   0.03   0.00     0.00   0.02   0.06
 104   1     0.11   0.04   0.12     0.01   0.01   0.02     0.00   0.03   0.04
 105   1     0.05   0.12  -0.18     0.01   0.03  -0.04    -0.01   0.05  -0.06
 106   1    -0.11   0.00   0.18    -0.01   0.01   0.02     0.01   0.08   0.00
 107   1    -0.22  -0.08   0.14    -0.05  -0.02   0.03    -0.12  -0.02   0.04
 108   1     0.04   0.04   0.09     0.00   0.02   0.02    -0.05   0.03   0.02
 109   1     0.00   0.01   0.01     0.00   0.00   0.02    -0.03   0.01   0.29
 110   1     0.00   0.02   0.02     0.00   0.00   0.01    -0.16  -0.26  -0.04
 111   1     0.00   0.02   0.02     0.01   0.01   0.03    -0.10  -0.18   0.00
 112   1     0.00  -0.03   0.02     0.01   0.00  -0.02     0.11   0.01  -0.24
 113   1    -0.01   0.00   0.01    -0.01  -0.03   0.01    -0.10  -0.30  -0.02
 114   1     0.01   0.00   0.02     0.01   0.00  -0.01     0.08  -0.01  -0.21
                    91                     92                     93
                     A                      A                      A
 Frequencies --   516.0804               528.0107               532.9234
 Red. masses --     4.1880                 4.6607                 3.7160
 Frc consts  --     0.6572                 0.7656                 0.6218
 IR Inten    --    16.5819                15.3050                 1.2360
 Atom AN      X      Y      Z        X      Y      Z        X      Y      Z
   1   8     0.00   0.00   0.00     0.00   0.00   0.00     0.00   0.00   0.00
   2  12    -0.01   0.03   0.06     0.00  -0.01  -0.07     0.00   0.01  -0.01
   3   8    -0.03  -0.12   0.04     0.03   0.03   0.03     0.01   0.00   0.01
   4   6     0.00   0.00   0.00     0.00   0.00   0.00     0.00   0.00   0.00
   5   7     0.03   0.08  -0.03     0.07   0.15   0.00     0.04  -0.01   0.01
   6   7    -0.02  -0.03   0.03     0.00  -0.10   0.02    -0.02  -0.07  -0.01
   7   8     0.00   0.01   0.00     0.00   0.00   0.00     0.00   0.00   0.00
   8   6     0.04   0.04  -0.05     0.08   0.06  -0.02    -0.20   0.12  -0.05
   9   6     0.03   0.04  -0.05     0.02   0.02  -0.12    -0.01   0.00  -0.03
  10   6    -0.01  -0.01   0.03    -0.02  -0.07   0.00     0.23  -0.08   0.08
  11   8    -0.01  -0.02   0.00     0.00   0.01  -0.01     0.00   0.00   0.00
  12   6     0.01   0.02   0.00     0.00   0.01  -0.01     0.00   0.00   0.00
  13   6     0.02   0.03   0.01     0.02  -0.01   0.01     0.00   0.00   0.00
  14   6     0.00  -0.01   0.00     0.00   0.00   0.00     0.00   0.00   0.00
  15   8     0.00  -0.01  -0.01     0.00   0.01  -0.01     0.00   0.00   0.00
  16   6     0.00   0.00   0.00     0.00   0.00   0.00     0.00   0.00   0.00
  17   8    -0.01   0.03  -0.09     0.03  -0.03  -0.01     0.00  -0.01   0.00
  18   6     0.00   0.08  -0.12     0.00   0.02   0.04     0.00   0.00   0.00
  19   8     0.02  -0.12  -0.01    -0.06   0.03   0.05    -0.01   0.00   0.01
  20   8    -0.04  -0.11  -0.07     0.00   0.07   0.05     0.00   0.01   0.01
  21   6     0.00  -0.07   0.07     0.01   0.03  -0.01     0.00   0.00   0.00
  22   6    -0.02  -0.06   0.13     0.04   0.02  -0.04     0.00   0.00   0.00
  23   6     0.06   0.20  -0.07    -0.02  -0.07  -0.03     0.00  -0.01  -0.01
  24   8     0.02   0.09  -0.06    -0.02  -0.07   0.04     0.00  -0.01   0.00
  25   6    -0.01   0.01  -0.02     0.00   0.01   0.01     0.00   0.00   0.00
  26   6     0.04   0.04   0.13    -0.03  -0.04  -0.11     0.00  -0.01  -0.02
  27   6    -0.02   0.04  -0.01     0.01  -0.02   0.01     0.00   0.00   0.00
  28   6     0.00   0.00   0.00     0.00   0.00   0.01     0.00   0.00   0.00
  29   6     0.04   0.05   0.00     0.08   0.12   0.08     0.03  -0.02  -0.01
  30   6    -0.01  -0.02   0.02     0.00  -0.06   0.02    -0.04  -0.05  -0.01
  31   6     0.01  -0.04  -0.01     0.00  -0.10  -0.03     0.04   0.04  -0.03
  32   6     0.00  -0.03   0.00    -0.07  -0.06  -0.04     0.08   0.01  -0.04
  33   6    -0.03  -0.03   0.04    -0.04   0.01   0.15     0.03  -0.01   0.01
  34   6    -0.04   0.01  -0.01    -0.10   0.05  -0.10     0.01  -0.09   0.01
  35   6    -0.02   0.02   0.01    -0.02   0.06  -0.02    -0.03  -0.05   0.02
  36   6    -0.01  -0.06   0.01     0.01  -0.14   0.03    -0.02   0.04   0.00
  37   6    -0.03  -0.03   0.02    -0.02  -0.04   0.03    -0.05   0.01   0.02
  38   6     0.01   0.01  -0.02    -0.02   0.04  -0.02     0.00  -0.06  -0.06
  39   6     0.01   0.02  -0.03     0.02   0.06  -0.03    -0.06  -0.05  -0.11
  40   6    -0.02  -0.01   0.04    -0.03   0.01   0.08    -0.07   0.01   0.02
  41   6     0.02   0.02  -0.02     0.07   0.02  -0.02    -0.07   0.10  -0.02
  42   6     0.01   0.01  -0.01     0.04   0.00  -0.01    -0.01   0.08   0.04
  43   6    -0.01   0.00   0.01    -0.04   0.04   0.01     0.04   0.00   0.03
  44   6     0.00   0.00   0.01    -0.01   0.03   0.02     0.04   0.06   0.06
  45   6     0.00   0.01  -0.01     0.02   0.01  -0.03    -0.03   0.02   0.02
  46   6     0.00   0.00   0.01     0.00   0.00   0.05     0.01   0.00  -0.01
  47   6     0.01   0.00   0.00     0.03   0.00   0.02    -0.02   0.00  -0.02
  48   6     0.00   0.00  -0.01     0.01  -0.01  -0.02    -0.01   0.01   0.02
  49   6    -0.01   0.00  -0.01    -0.03  -0.02   0.00     0.03   0.01  -0.02
  50   6     0.00   0.00   0.01     0.00   0.00   0.00     0.00  -0.02   0.03
  51   6     0.00   0.00   0.01     0.01   0.00   0.00     0.01  -0.03   0.04
  52   6    -0.01   0.00   0.00    -0.02  -0.01   0.01     0.03   0.01  -0.02
  53   6     0.00   0.00   0.01     0.02   0.07   0.04     0.01   0.02   0.03
  54   6    -0.01  -0.05  -0.01    -0.04  -0.11   0.03    -0.01  -0.03   0.00
  55   1     0.01   0.09  -0.05    -0.06   0.08  -0.15    -0.01  -0.02  -0.03
  56   1    -0.02   0.07   0.03     0.04  -0.03  -0.01     0.01   0.00   0.00
  57   1     0.00  -0.01   0.00     0.01   0.00   0.00     0.00   0.00   0.00
  58   1     0.00   0.01   0.00     0.00   0.00   0.00     0.00   0.00   0.00
  59   1     0.00   0.00   0.00     0.00   0.00   0.00     0.00   0.00   0.00
  60   1     0.00   0.00   0.00     0.00   0.00   0.00     0.00   0.00   0.00
  61   1    -0.13  -0.11   0.18     0.08   0.05  -0.06     0.01   0.00   0.00
  62   1     0.23   0.20  -0.03    -0.06  -0.09  -0.10     0.00  -0.01  -0.02
  63   1    -0.01   0.04  -0.09    -0.03  -0.06   0.01     0.00  -0.01   0.00
  64   1    -0.02  -0.07  -0.13    -0.02   0.07   0.06    -0.01   0.01   0.00
  65   1     0.00   0.16   0.00    -0.03   0.00   0.03     0.00   0.00   0.00
  66   1     0.01  -0.15   0.09    -0.02   0.03  -0.11     0.00   0.00  -0.02
  67   1     0.11   0.12   0.51    -0.05  -0.08  -0.26    -0.01  -0.01  -0.03
  68   1    -0.03  -0.22   0.04     0.00   0.05  -0.07     0.00   0.01  -0.01
  69   1    -0.05  -0.04   0.02     0.01  -0.02   0.02     0.00  -0.01   0.00
  70   1    -0.07   0.11  -0.03     0.01  -0.02   0.01     0.00   0.00   0.00
  71   1    -0.07   0.05  -0.02     0.00  -0.01   0.01     0.00   0.00   0.00
  72   1     0.00   0.00  -0.01     0.00   0.00   0.01     0.00   0.00  -0.01
  73   1    -0.01   0.00  -0.01    -0.01   0.00   0.00     0.00   0.00   0.00
  74   1     0.00   0.00   0.01     0.00   0.00   0.02     0.00   0.00   0.00
  75   1    -0.01   0.01  -0.03    -0.09  -0.01  -0.14     0.08   0.01  -0.04
  76   1    -0.02  -0.03   0.06     0.06   0.01   0.27    -0.03   0.04   0.04
  77   1    -0.02   0.01  -0.05    -0.10   0.04  -0.22     0.02  -0.08   0.01
  78   1     0.01  -0.08   0.02     0.05  -0.18   0.06    -0.05   0.06   0.00
  79   1    -0.03  -0.03   0.02     0.01  -0.05   0.02    -0.08   0.03   0.03
  80   1     0.02   0.02  -0.03     0.05   0.04  -0.05    -0.04  -0.06  -0.12
  81   1    -0.05  -0.05   0.09    -0.10  -0.04   0.14     0.00  -0.01   0.12
  82   1     0.02   0.02  -0.03     0.07   0.00  -0.06    -0.06   0.09  -0.07
  83   1    -0.01   0.00   0.01    -0.07   0.04   0.01     0.09  -0.01   0.05
  84   1     0.00   0.00   0.02    -0.02   0.03   0.02     0.09   0.07   0.11
  85   1     0.07   0.03  -0.05     0.15   0.03  -0.14    -0.04   0.02   0.05
  86   1    -0.02   0.05   0.00    -0.04   0.09  -0.01    -0.02   0.01   0.02
  87   1    -0.04   0.05   0.02    -0.06   0.08   0.00    -0.03   0.02   0.02
  88   1     0.01   0.02   0.06     0.01   0.03   0.18     0.01  -0.02  -0.08
  89   1    -0.01   0.02  -0.04    -0.02   0.04  -0.04     0.02  -0.02   0.00
  90   1     0.01   0.03   0.02    -0.01   0.06   0.03     0.03  -0.03   0.02
  91   1     0.00   0.03  -0.04     0.03   0.05  -0.03    -0.03   0.00  -0.07
  92   1     0.06   0.00   0.04     0.11   0.00   0.07     0.00   0.00  -0.02
  93   1     0.02   0.02  -0.02     0.04   0.03  -0.01     0.02  -0.01  -0.01
  94   1     0.02   0.04   0.01     0.01   0.04  -0.02     0.01   0.03   0.06
  95   1     0.02   0.02  -0.02     0.01   0.04  -0.01     0.01  -0.01   0.00
  96   1     0.02  -0.03  -0.06     0.02  -0.05  -0.09     0.00   0.01   0.02
  97   1     0.00   0.00  -0.02     0.02  -0.04  -0.03     0.10   0.02  -0.09
  98   1    -0.02  -0.01  -0.01    -0.03  -0.04  -0.01    -0.02  -0.03  -0.04
  99   1    -0.02  -0.01   0.00    -0.09  -0.04   0.01    -0.02  -0.01  -0.01
 100   1     0.00   0.00   0.01     0.01  -0.02   0.00    -0.03  -0.08   0.10
 101   1     0.00  -0.01   0.01     0.01  -0.03   0.02    -0.03  -0.04  -0.02
 102   1     0.00   0.00   0.01     0.01   0.01  -0.05    -0.01  -0.01  -0.03
 103   1     0.01   0.00  -0.01     0.03   0.00  -0.08    -0.01  -0.05   0.04
 104   1     0.01  -0.01   0.02     0.04  -0.03   0.01    -0.01  -0.02   0.00
 105   1     0.01  -0.01   0.02     0.03  -0.03   0.04     0.01  -0.05   0.08
 106   1    -0.01   0.00   0.00    -0.04  -0.05   0.03     0.05   0.02  -0.06
 107   1    -0.01   0.00   0.00     0.02   0.00  -0.01     0.05   0.02  -0.03
 108   1    -0.02  -0.01   0.00     0.00  -0.03   0.01    -0.03  -0.01  -0.02
 109   1     0.00   0.03   0.09     0.01   0.10   0.07     0.15  -0.11   0.02
 110   1    -0.04  -0.05  -0.01     0.00   0.07   0.05     0.07  -0.19  -0.11
 111   1    -0.02  -0.03   0.00    -0.01   0.03   0.00     0.18   0.20   0.28
 112   1     0.01  -0.04  -0.05    -0.04  -0.12   0.03     0.01   0.23  -0.22
 113   1    -0.04  -0.12   0.00    -0.03  -0.12   0.04    -0.19   0.05  -0.09
[truncated: 1,591,349 more chars]
