# Supplementary material
Source: publisher figshare collection journal article supplement (https://acs.figshare.com/ndownloader/files/5127205)
Supplement: Supplementary file 1 [file 5127205 › supporting_ja043819b/SSRR_fm-5-ts2.mol]

  MacMolPlt                       

114118  0  0  0  0  0  0  0  0  0 v2000
    5.6492    0.3333   -1.1625 O   0  0  0  0  0  0  0  0  0  0  0  0
   -0.2908   -0.0636    0.0050 Mg  0  0  0  0  0  0  0  0  0  0  0  0
    0.8486   -0.6827    3.1649 O   0  0  0  0  0  0  0  0  0  0  0  0
    4.9541    0.0210   -0.0572 C   0  0  0  0  0  0  0  0  0  0  0  0
   -0.6552   -1.3158   -1.5811 N   0  0  0  0  0  0  0  0  0  0  0  0
    0.0284    1.5051   -1.2954 N   0  0  0  0  0  0  0  0  0  0  0  0
    4.8677    0.7182    0.9271 O   0  0  0  0  0  0  0  0  0  0  0  0
   -0.2169   -1.0982   -2.8117 C   0  0  0  0  0  0  0  0  0  0  0  0
    0.4718    0.0800   -3.1984 C   0  0  0  0  0  0  0  0  0  0  0  0
    0.5075    1.3180   -2.5222 C   0  0  0  0  0  0  0  0  0  0  0  0
    3.5934   -1.6637    1.0061 O   0  0  0  0  0  0  0  0  0  0  0  0
    2.4172   -1.0774    1.2579 C   0  0  0  0  0  0  0  0  0  0  0  0
    2.0769   -1.2724    2.7390 C   0  0  0  0  0  0  0  0  0  0  0  0
    4.3483   -1.3797   -0.1959 C   0  0  0  0  0  0  0  0  0  0  0  0
    1.7897   -0.4334    0.4374 O   0  0  0  0  0  0  0  0  0  0  0  0
    6.3239    1.6072   -1.1375 C   0  0  0  0  0  0  0  0  0  0  0  0
   -0.9188    0.7454    1.6479 O   0  0  0  0  0  0  0  0  0  0  0  0
   -0.3350   -1.0912    2.6101 C   0  0  0  0  0  0  0  0  0  0  0  0
   -0.3577   -1.7938    1.5999 O   0  0  0  0  0  0  0  0  0  0  0  0
   -2.7468   -0.7224    3.0677 O   0  0  0  0  0  0  0  0  0  0  0  0
   -3.1167    0.5398    2.6651 C   0  0  0  0  0  0  0  0  0  0  0  0
   -2.0895    1.4268    1.9468 C   0  0  0  0  0  0  0  0  0  0  0  0
   -1.4697   -1.0199    3.6373 C   0  0  0  0  0  0  0  0  0  0  0  0
   -4.2769    0.8541    2.7935 O   0  0  0  0  0  0  0  0  0  0  0  0
   -1.8707    2.7471    2.7134 C   0  0  0  0  0  0  0  0  0  0  0  0
   -1.1841   -0.1757    4.8775 C   0  0  0  0  0  0  0  0  0  0  0  0
    2.1925   -2.7213    3.2277 C   0  0  0  0  0  0  0  0  0  0  0  0
    3.6343   -1.6442   -1.5212 C   0  0  0  0  0  0  0  0  0  0  0  0
   -1.4204   -2.4838   -1.1822 C   0  0  0  0  0  0  0  0  0  0  0  0
   -0.2210    2.8493   -0.8016 C   0  0  0  0  0  0  0  0  0  0  0  0
   -2.7939   -2.2767   -0.8131 C   0  0  0  0  0  0  0  0  0  0  0  0
   -3.4961   -3.3396   -0.1977 C   0  0  0  0  0  0  0  0  0  0  0  0
   -2.8730   -4.5787    0.0462 C   0  0  0  0  0  0  0  0  0  0  0  0
   -1.5448   -4.7855   -0.3592 C   0  0  0  0  0  0  0  0  0  0  0  0
   -0.7945   -3.7548   -0.9766 C   0  0  0  0  0  0  0  0  0  0  0  0
   -3.5241   -0.9556   -1.1783 C   0  0  0  0  0  0  0  0  0  0  0  0
    0.6637   -4.0557   -1.4083 C   0  0  0  0  0  0  0  0  0  0  0  0
    0.6891    3.4690    0.1135 C   0  0  0  0  0  0  0  0  0  0  0  0
    0.3290    4.7092    0.7025 C   0  0  0  0  0  0  0  0  0  0  0  0
   -0.8925    5.3384    0.3907 C   0  0  0  0  0  0  0  0  0  0  0  0
   -1.7671    4.7372   -0.5345 C   0  0  0  0  0  0  0  0  0  0  0  0
   -1.4603    3.4979   -1.1410 C   0  0  0  0  0  0  0  0  0  0  0  0
    2.0594    2.8473    0.4751 C   0  0  0  0  0  0  0  0  0  0  0  0
   -2.4637    2.9004   -2.1636 C   0  0  0  0  0  0  0  0  0  0  0  0
   -4.8147   -0.7087   -0.3380 C   0  0  0  0  0  0  0  0  0  0  0  0
   -3.8678   -0.9346   -2.7058 C   0  0  0  0  0  0  0  0  0  0  0  0
    1.5465   -4.4444   -0.1799 C   0  0  0  0  0  0  0  0  0  0  0  0
    0.7182   -5.1892   -2.4890 C   0  0  0  0  0  0  0  0  0  0  0  0
   -3.9011    2.7949   -1.5604 C   0  0  0  0  0  0  0  0  0  0  0  0
   -2.5119    3.7467   -3.4817 C   0  0  0  0  0  0  0  0  0  0  0  0
    2.1470    2.5212    1.9980 C   0  0  0  0  0  0  0  0  0  0  0  0
    3.2370    3.7843    0.0430 C   0  0  0  0  0  0  0  0  0  0  0  0
   -0.4482   -2.1120   -3.9277 C   0  0  0  0  0  0  0  0  0  0  0  0
    1.1207    2.4928   -3.2750 C   0  0  0  0  0  0  0  0  0  0  0  0
    0.8617    0.0820   -4.2114 H   0  0  0  0  0  0  0  0  0  0  0  0
    2.8331   -0.6645    3.2489 H   0  0  0  0  0  0  0  0  0  0  0  0
    5.1847   -2.0815   -0.1062 H   0  0  0  0  0  0  0  0  0  0  0  0
    5.6008    2.4128   -0.9981 H   0  0  0  0  0  0  0  0  0  0  0  0
    6.8190    1.6909   -2.1048 H   0  0  0  0  0  0  0  0  0  0  0  0
    7.0557    1.6321   -0.3256 H   0  0  0  0  0  0  0  0  0  0  0  0
   -2.6276    1.7068    1.0253 H   0  0  0  0  0  0  0  0  0  0  0  0
   -1.5910   -2.0654    3.9544 H   0  0  0  0  0  0  0  0  0  0  0  0
   -2.8362    3.1797    2.9983 H   0  0  0  0  0  0  0  0  0  0  0  0
   -1.3326    3.4595    2.0851 H   0  0  0  0  0  0  0  0  0  0  0  0
   -1.2798    2.5821    3.6208 H   0  0  0  0  0  0  0  0  0  0  0  0
   -2.0800   -0.1577    5.5056 H   0  0  0  0  0  0  0  0  0  0  0  0
   -0.9098    0.8469    4.6136 H   0  0  0  0  0  0  0  0  0  0  0  0
   -0.3608   -0.6075    5.4526 H   0  0  0  0  0  0  0  0  0  0  0  0
    3.1868   -3.1194    3.0141 H   0  0  0  0  0  0  0  0  0  0  0  0
    1.4442   -3.3533    2.7462 H   0  0  0  0  0  0  0  0  0  0  0  0
    2.0318   -2.7381    4.3097 H   0  0  0  0  0  0  0  0  0  0  0  0
    3.1837   -2.6375   -1.4933 H   0  0  0  0  0  0  0  0  0  0  0  0
    4.3828   -1.6230   -2.3184 H   0  0  0  0  0  0  0  0  0  0  0  0
    2.8581   -0.9107   -1.7429 H   0  0  0  0  0  0  0  0  0  0  0  0
   -4.5475   -3.2040    0.0820 H   0  0  0  0  0  0  0  0  0  0  0  0
   -3.4345   -5.3887    0.5307 H   0  0  0  0  0  0  0  0  0  0  0  0
   -1.0767   -5.7653   -0.1980 H   0  0  0  0  0  0  0  0  0  0  0  0
   -2.8242   -0.1095   -0.9931 H   0  0  0  0  0  0  0  0  0  0  0  0
    1.0844   -3.1334   -1.8523 H   0  0  0  0  0  0  0  0  0  0  0  0
    1.0223    5.1907    1.4046 H   0  0  0  0  0  0  0  0  0  0  0  0
   -1.1515    6.3008    0.8529 H   0  0  0  0  0  0  0  0  0  0  0  0
   -2.7069    5.2421   -0.7921 H   0  0  0  0  0  0  0  0  0  0  0  0
    2.1573    1.8984   -0.0873 H   0  0  0  0  0  0  0  0  0  0  0  0
   -2.1215    1.8781   -2.4229 H   0  0  0  0  0  0  0  0  0  0  0  0
   -5.2037    0.2980   -0.5457 H   0  0  0  0  0  0  0  0  0  0  0  0
   -4.6129   -0.7878    0.7421 H   0  0  0  0  0  0  0  0  0  0  0  0
   -5.5993   -1.4354   -0.5989 H   0  0  0  0  0  0  0  0  0  0  0  0
   -4.3949   -0.0029   -2.9604 H   0  0  0  0  0  0  0  0  0  0  0  0
   -4.5155   -1.7871   -2.9651 H   0  0  0  0  0  0  0  0  0  0  0  0
   -2.9520   -0.9927   -3.3169 H   0  0  0  0  0  0  0  0  0  0  0  0
    2.5893   -4.6332   -0.4881 H   0  0  0  0  0  0  0  0  0  0  0  0
    1.1647   -5.3536    0.3100 H   0  0  0  0  0  0  0  0  0  0  0  0
    1.5382   -3.6248    0.5585 H   0  0  0  0  0  0  0  0  0  0  0  0
    1.7542   -5.3321   -2.8331 H   0  0  0  0  0  0  0  0  0  0  0  0
    0.0935   -4.9372   -3.3591 H   0  0  0  0  0  0  0  0  0  0  0  0
    0.3581   -6.1408   -2.0693 H   0  0  0  0  0  0  0  0  0  0  0  0
   -4.5749    2.3014   -2.2778 H   0  0  0  0  0  0  0  0  0  0  0  0
   -3.8943    2.2056   -0.6268 H   0  0  0  0  0  0  0  0  0  0  0  0
   -4.3099    3.7901   -1.3304 H   0  0  0  0  0  0  0  0  0  0  0  0
   -3.2149    3.2874   -4.1935 H   0  0  0  0  0  0  0  0  0  0  0  0
   -1.5226    3.7982   -3.9599 H   0  0  0  0  0  0  0  0  0  0  0  0
   -2.8509    4.7728   -3.2709 H   0  0  0  0  0  0  0  0  0  0  0  0
    3.1055    2.0249    2.2203 H   0  0  0  0  0  0  0  0  0  0  0  0
    1.3143    1.8555    2.2862 H   0  0  0  0  0  0  0  0  0  0  0  0
    2.0812    3.4382    2.6034 H   0  0  0  0  0  0  0  0  0  0  0  0
    4.1952    3.3285    0.3476 H   0  0  0  0  0  0  0  0  0  0  0  0
    3.1638    4.7693    0.5301 H   0  0  0  0  0  0  0  0  0  0  0  0
    3.2391    3.9375   -1.0485 H   0  0  0  0  0  0  0  0  0  0  0  0
   -1.1838   -2.8699   -3.6461 H   0  0  0  0  0  0  0  0  0  0  0  0
   -0.7999   -1.6034   -4.8332 H   0  0  0  0  0  0  0  0  0  0  0  0
    0.4882   -2.6226   -4.1865 H   0  0  0  0  0  0  0  0  0  0  0  0
    1.9573    2.9123   -2.7022 H   0  0  0  0  0  0  0  0  0  0  0  0
    1.4970    2.1837   -4.2561 H   0  0  0  0  0  0  0  0  0  0  0  0
    0.3974    3.3001   -3.4274 H   0  0  0  0  0  0  0  0  0  0  0  0
  1  4  1  0  0  0  0
  1 16  1  0  0  0  0
  2  5  1  0  0  0  0
  2  6  1  0  0  0  0
  2 15  1  0  0  0  0
  2 17  2  0  0  0  0
  2 19  1  0  0  0  0
  3 13  1  0  0  0  0
  3 18  1  0  0  0  0
  4  7  2  0  0  0  0
  4 14  1  0  0  0  0
  5  8  1  0  0  0  0
  5 29  1  0  0  0  0
  6 10  1  0  0  0  0
  6 30  1  0  0  0  0
  8  9  1  0  0  0  0
  8 53  1  0  0  0  0
  9 10  1  0  0  0  0
  9 55  1  0  0  0  0
 10 54  1  0  0  0  0
 11 12  1  0  0  0  0
 11 14  1  0  0  0  0
 12 13  1  0  0  0  0
 12 15  2  0  0  0  0
 13 27  1  0  0  0  0
 13 56  1  0  0  0  0
 14 28  1  0  0  0  0
 14 57  1  0  0  0  0
 16 58  1  0  0  0  0
 16 59  1  0  0  0  0
 16 60  1  0  0  0  0
 17 22  1  0  0  0  0
 18 19  2  0  0  0  0
 18 23  1  0  0  0  0
 20 21  1  0  0  0  0
 20 23  1  0  0  0  0
 21 22  1  0  0  0  0
 21 24  2  0  0  0  0
 22 25  1  0  0  0  0
 22 61  1  0  0  0  0
 23 26  1  0  0  0  0
 23 62  1  0  0  0  0
 25 63  1  0  0  0  0
 25 64  1  0  0  0  0
 25 65  1  0  0  0  0
 26 66  1  0  0  0  0
 26 67  1  0  0  0  0
 26 68  1  0  0  0  0
 27 69  1  0  0  0  0
 27 70  1  0  0  0  0
 27 71  1  0  0  0  0
 28 72  1  0  0  0  0
 28 73  1  0  0  0  0
 28 74  1  0  0  0  0
 29 31  1  0  0  0  0
 29 35  1  0  0  0  0
 30 38  1  0  0  0  0
 30 42  1  0  0  0  0
 31 32  1  0  0  0  0
 31 36  1  0  0  0  0
 32 33  1  0  0  0  0
 32 75  1  0  0  0  0
 33 34  1  0  0  0  0
 33 76  1  0  0  0  0
 34 35  1  0  0  0  0
 34 77  1  0  0  0  0
 35 37  1  0  0  0  0
 36 45  1  0  0  0  0
 36 46  1  0  0  0  0
 36 78  1  0  0  0  0
 37 47  1  0  0  0  0
 37 48  1  0  0  0  0
 37 79  1  0  0  0  0
 38 39  1  0  0  0  0
 38 43  1  0  0  0  0
 39 40  1  0  0  0  0
 39 80  1  0  0  0  0
 40 41  1  0  0  0  0
 40 81  1  0  0  0  0
 41 42  1  0  0  0  0
 41 82  1  0  0  0  0
 42 44  1  0  0  0  0
 43 51  1  0  0  0  0
 43 52  1  0  0  0  0
 43 83  1  0  0  0  0
 44 49  1  0  0  0  0
 44 50  1  0  0  0  0
 44 84  1  0  0  0  0
 45 85  1  0  0  0  0
 45 86  1  0  0  0  0
 45 87  1  0  0  0  0
 46 88  1  0  0  0  0
 46 89  1  0  0  0  0
 46 90  1  0  0  0  0
 47 91  1  0  0  0  0
 47 92  1  0  0  0  0
 47 93  1  0  0  0  0
 48 94  1  0  0  0  0
 48 95  1  0  0  0  0
 48 96  1  0  0  0  0
 49 97  1  0  0  0  0
 49 98  1  0  0  0  0
 49 99  1  0  0  0  0
 50100  1  0  0  0  0
 50101  1  0  0  0  0
 50102  1  0  0  0  0
 51103  1  0  0  0  0
 51104  1  0  0  0  0
 51105  1  0  0  0  0
 52106  1  0  0  0  0
 52107  1  0  0  0  0
 52108  1  0  0  0  0
 53109  1  0  0  0  0
 53110  1  0  0  0  0
 53111  1  0  0  0  0
 54112  1  0  0  0  0
 54113  1  0  0  0  0
 54114  1  0  0  0  0
M  END
