# Supplementary material
Source: publisher figshare collection journal article supplement (https://acs.figshare.com/ndownloader/files/5127205)
Supplement: Supplementary file 1 [file 5127205 › supporting_ja043819b/SSSS_fm-5-ts1-134.xyz]

114
O	6.388792	1.305743	0.130296	-0.01	0.0	0.0
Mg	-0.521654	-0.558916	0.077935	-0.02	-0.09	-0.13
O	-0.594984	1.415659	0.896391	-0.07	0.22	-0.27
C	5.261138	1.873689	0.616433	-0.01	-0.01	0.0
N	0.441779	-2.41988	0.033345	0.0	-0.03	-0.01
N	-2.244056	-1.541592	0.739596	0.0	-0.01	0.02
O	5.249645	2.713393	1.484571	-0.02	-0.01	0.0
C	-0.080767	-3.607747	0.346247	0.0	-0.03	0.01
C	-1.369725	-3.791482	0.870122	0.0	-0.02	0.01
C	-2.394477	-2.832652	1.008537	0.0	-0.01	0.01
O	2.908185	1.925465	0.545681	-0.02	0.02	-0.05
C	1.723034	1.332166	0.483801	-0.02	0.03	-0.05
C	0.602654	2.015092	1.265384	-0.01	0.13	-0.15
C	4.042993	1.267764	-0.074711	-0.01	-0.01	-0.01
O	1.515606	0.2948	-0.133224	-0.02	-0.04	0.06
C	7.61257	1.783121	0.713078	-0.01	0.0	0.0
O	-0.188492	2.576185	-1.428099	0.06	0.02	0.11
C	-1.210033	1.834683	-0.895916	0.12	-0.03	0.36
O	-1.310323	0.659652	-1.340171	0.03	0.0	0.13
O	-2.158222	3.901773	0.085171	-0.01	0.05	0.04
C	-1.154414	4.650041	-0.386505	0.0	0.04	0.02
C	-0.169873	4.016553	-1.365143	0.01	0.01	0.05
C	-2.462942	2.605769	-0.499319	0.04	0.01	0.08
O	-1.009098	5.799319	-0.035671	0.0	0.05	0.0
C	-0.324415	4.598799	-2.772792	0.0	-0.03	0.03
C	-3.434454	2.759177	-1.674685	0.16	-0.06	-0.02
C	0.857947	1.928936	2.780966	-0.17	-0.01	-0.14
C	4.042873	1.445602	-1.59692	0.01	-0.02	-0.01
C	1.805913	-2.37698	-0.462011	0.0	-0.02	0.0
C	-3.415087	-0.692099	0.66402	0.0	-0.01	0.01
C	2.902963	-2.394278	0.462195	0.0	-0.01	0.0
C	4.212478	-2.157938	-0.037069	0.0	0.0	0.0
C	4.435627	-1.921598	-1.413332	0.0	0.0	0.0
C	3.351772	-1.936981	-2.314887	0.0	0.0	0.0
C	2.028087	-2.164298	-1.861915	0.0	-0.01	0.0
C	2.702139	-2.647495	1.981314	0.0	0.0	0.0
C	0.862607	-2.190227	-2.884245	0.0	-0.01	0.0
C	-4.245417	-0.732694	-0.50743	0.0	-0.01	0.01
C	-5.329173	0.18098	-0.59694	0.01	-0.01	0.01
C	-5.577655	1.118531	0.425492	0.0	-0.01	0.01
C	-4.761476	1.144103	1.57742	-0.01	-0.02	0.01
C	-3.674927	0.238278	1.727626	0.0	-0.01	0.01
C	-4.023187	-1.752054	-1.658185	0.01	0.0	0.0
C	-2.836785	0.216979	3.033429	0.01	0.0	0.0
C	3.005674	-1.360937	2.813088	-0.01	0.0	0.0
C	3.580177	-3.837598	2.496587	0.0	0.0	0.0
C	0.780692	-0.861499	-3.698402	-0.01	0.0	0.01
C	0.983682	-3.424543	-3.84013	0.0	0.0	-0.01
C	-2.673953	1.630926	3.67183	-0.01	0.0	0.0
C	-3.447598	-0.779475	4.076447	0.03	0.0	0.01
C	-3.660876	-1.037213	-2.999248	0.03	0.01	0.02
C	-5.280182	-2.66629	-1.856465	0.01	0.0	-0.01
C	0.73164	-4.873688	0.102074	0.0	-0.03	0.01
C	-3.7398	-3.406407	1.445908	0.0	-0.01	0.01
H	-1.645021	-4.811573	1.115747	0.0	-0.02	0.01
H	0.629844	3.082506	0.999054	0.07	0.13	-0.1
H	4.013465	0.191734	0.135818	-0.02	0.0	0.0
H	7.625932	1.591795	1.789413	-0.01	0.0	0.0
H	7.725117	2.857143	0.543197	-0.01	0.0	0.01
H	8.409175	1.230123	0.214523	-0.01	0.0	0.0
H	0.823252	4.281618	-0.990043	0.0	0.09	0.03
H	-2.976759	2.075767	0.297761	-0.06	0.09	0.07
H	-0.194949	5.683988	-2.731154	-0.02	-0.03	-0.01
H	-1.309317	4.377101	-3.193282	0.0	-0.07	0.03
H	0.437664	4.170056	-3.430059	0.01	-0.05	0.04
H	-4.139518	3.563392	-1.440963	0.19	0.01	-0.19
H	-3.997577	1.830345	-1.759256	0.1	-0.04	0.04
H	-2.938397	2.985988	-2.623173	0.26	-0.23	0.0
H	1.825689	2.371119	3.040002	-0.16	-0.09	-0.04
H	0.83985	0.887126	3.11543	-0.26	-0.03	-0.21
H	0.06254	2.464811	3.302551	-0.17	0.02	-0.16
H	3.408286	0.679101	-2.043363	-0.02	0.01	-0.01
H	5.057163	1.310773	-1.981405	0.0	-0.06	0.0
H	3.693002	2.446667	-1.867373	0.05	0.0	-0.02
H	5.068473	-2.197522	0.649224	0.0	0.01	0.0
H	5.458367	-1.758602	-1.781401	0.0	0.01	0.0
H	3.539399	-1.798341	-3.387901	0.0	0.01	0.0
H	1.638436	-2.907228	2.146943	0.0	-0.01	0.0
H	-0.08331	-2.302295	-2.314582	0.0	-0.02	0.0
H	-5.998376	0.13925	-1.46632	0.02	0.0	0.0
H	-6.422596	1.81581	0.338614	0.0	-0.01	0.0
H	-4.984823	1.859533	2.379026	-0.01	-0.02	0.02
H	-3.168145	-2.400982	-1.382826	0.01	-0.01	0.01
H	-1.827364	-0.158592	2.766131	0.01	0.0	-0.01
H	2.820677	-1.545011	3.883006	0.0	0.0	0.0
H	2.349094	-0.534847	2.486532	-0.02	0.0	0.0
H	4.051437	-1.041075	2.686955	-0.01	0.01	-0.01
H	3.339104	-4.046232	3.550139	0.0	0.0	0.0
H	4.651119	-3.593392	2.429561	0.0	0.0	0.0
H	3.395902	-4.75098	1.910837	0.01	0.0	0.0
H	-0.091463	-0.887616	-4.371555	0.0	-0.01	0.0
H	1.685732	-0.710417	-4.306287	0.0	0.02	0.02
H	0.665456	-2.5E-4	-3.016177	-0.04	-0.01	0.01
H	0.125572	-3.44802	-4.529139	0.0	0.0	-0.01
H	0.994043	-4.363751	-3.264987	0.01	0.0	-0.01
H	1.908057	-3.36938	-4.435743	0.0	0.01	-0.01
H	-1.943634	1.577869	4.494451	0.01	0.02	-0.02
H	-3.625206	1.998349	4.087774	-0.01	-0.02	0.02
H	-2.316064	2.355635	2.922459	-0.05	0.02	-0.01
H	-2.844031	-0.766768	4.99711	0.03	0.01	0.01
H	-3.453739	-1.807955	3.682645	0.03	0.0	0.01
H	-4.480725	-0.493932	4.330149	0.02	-0.01	0.01
H	-3.477195	-1.787075	-3.785179	0.06	0.02	0.02
H	-2.752589	-0.42435	-2.86879	0.01	0.03	0.05
H	-4.481647	-0.381822	-3.329912	0.02	0.0	0.0
H	-5.057689	-3.446002	-2.600857	0.01	0.01	-0.02
H	-6.137439	-2.07821	-2.218168	0.01	0.01	-0.01
H	-5.569299	-3.155903	-0.914319	0.0	-0.01	-0.02
H	1.646605	-4.897807	0.701499	0.0	-0.02	0.01
H	0.144905	-5.765614	0.345737	0.0	-0.03	0.02
H	1.02905	-4.940866	-0.951761	0.0	-0.03	0.01
H	-4.456229	-2.639435	1.747994	0.01	-0.01	0.02
H	-4.187374	-3.987883	0.630178	-0.01	0.01	0.0
H	-3.591681	-4.096568	2.285654	0.0	-0.03	0.0
114
O	6.386628881039375	1.305743	0.130296	-0.01	0.0	0.0
Mg	-0.5259802379212493	-0.5783840706456217	0.04981445351187979	-0.02	-0.09	-0.13
O	-0.6101258327243724	1.4632476171337419	0.837986788063135	-0.07	0.22	-0.27
C	5.258974881039375	1.8715258810393753	0.616433	-0.01	-0.01	0.0
N	0.441779	-2.426369356881874	0.03118188103937537	0.0	-0.03	-0.01
N	-2.244056	-1.5437551189606247	0.7439222379212493	0.0	-0.01	0.02
O	5.2453187620787505	2.711229881039375	1.484571	-0.02	-0.01	0.0
C	-0.080767	-3.614236356881874	0.3484101189606247	0.0	-0.03	0.01
C	-1.369725	-3.795808237921249	0.8722851189606246	0.0	-0.02	0.01
C	-2.394477	-2.8348151189606248	1.0107001189606246	0.0	-0.01	0.01
O	2.903858762078751	1.9297912379212492	0.5348654051968769	-0.02	0.02	-0.05
C	1.7187077620787508	1.3386553568818738	0.4729854051968768	-0.02	0.03	-0.05
C	0.6004908810393754	2.04321254648812	1.2329372155906306	-0.01	0.13	-0.15
C	4.040829881039375	1.2656008810393753	-0.07687411896062463	-0.01	-0.01	-0.01
O	1.5112797620787508	0.2861475241575015	-0.12024528623625222	-0.02	-0.04	0.06
C	7.610406881039375	1.783121	0.713078	-0.01	0.0	0.0
O	-0.1755132862362522	2.5805112379212494	-1.404304691433129	0.06	0.02	0.11
C	-1.1840755724725043	1.8281936431181263	-0.8180437174175132	0.12	-0.03	0.36
O	-1.303833643118126	0.659652	-1.3120504535118798	0.03	0.0	0.13
O	-2.1603851189606247	3.912588594803123	0.09382347584249852	-0.01	0.05	0.04
C	-1.154414	4.658693475842498	-0.38217876207875073	0.0	0.04	0.02
C	-0.16770988103937537	4.018716118960625	-1.3543274051968768	0.01	0.01	0.05
C	-2.4542895241575016	2.607932118960625	-0.48201404831500294	0.04	0.01	0.08
O	-1.009098	5.810134594803123	-0.035671	0.0	0.05	0.0
C	-0.324415	4.592309643118126	-2.766302643118126	0.0	-0.03	0.03
C	-3.399844096630006	2.7461982862362526	-1.6790112379212492	0.16	-0.06	-0.02
C	0.8211739776693813	1.9267728810393754	2.750682334551255	-0.17	-0.01	-0.14
C	4.045036118960625	1.4412757620787509	-1.5990831189606245	0.01	-0.02	-0.01
C	1.805913	-2.3813062379212493	-0.462011	0.0	-0.02	0.0
C	-3.415087	-0.6942621189606246	0.6661831189606247	0.0	-0.01	0.01
C	2.902963	-2.3964411189606247	0.462195	0.0	-0.01	0.0
C	4.212478	-2.157938	-0.037069	0.0	0.0	0.0
C	4.435627	-1.921598	-1.413332	0.0	0.0	0.0
C	3.351772	-1.936981	-2.314887	0.0	0.0	0.0
C	2.028087	-2.166461118960625	-1.861915	0.0	-0.01	0.0
C	2.702139	-2.647495	1.981314	0.0	0.0	0.0
C	0.862607	-2.192390118960625	-2.884245	0.0	-0.01	0.0
C	-4.245417	-0.7348571189606246	-0.5052668810393754	0.0	-0.01	0.01
C	-5.327009881039375	0.17881688103937537	-0.5947768810393754	0.01	-0.01	0.01
C	-5.577655	1.1163678810393753	0.42765511896062464	0.0	-0.01	0.01
C	-4.763639118960625	1.139776762078751	1.5795831189606246	-0.01	-0.02	0.01
C	-3.674927	0.23611488103937536	1.7297891189606247	0.0	-0.01	0.01
C	-4.021023881039375	-1.752054	-1.658185	0.01	0.0	0.0
C	-2.834621881039375	0.216979	3.033429	0.01	0.0	0.0
C	3.003510881039375	-1.360937	2.813088	-0.01	0.0	0.0
C	3.580177	-3.837598	2.496587	0.0	0.0	0.0
C	0.7785288810393755	-0.861499	-3.6962388810393754	-0.01	0.0	0.01
C	0.983682	-3.424543	-3.8422931189606246	0.0	0.0	-0.01
C	-2.676116118960625	1.630926	3.67183	-0.01	0.0	0.0
C	-3.441108643118126	-0.779475	4.078610118960625	0.03	0.0	0.01
C	-3.654386643118126	-1.0350498810393753	-2.994921762078751	0.03	0.01	0.02
C	-5.278018881039375	-2.66629	-1.8586281189606246	0.01	0.0	-0.01
C	0.73164	-4.880177356881873	0.10423711896062463	0.0	-0.03	0.01
C	-3.7398	-3.408570118960625	1.4480711189606246	0.0	-0.01	0.01
H	-1.645021	-4.81589923792125	1.1179101189606246	0.0	-0.02	0.01
H	0.6449858327243724	3.11062654648812	0.9774228103937537	0.07	0.13	-0.1
H	4.00913876207875	0.191734	0.135818	-0.02	0.0	0.0
H	7.623768881039375	1.591795	1.789413	-0.01	0.0	0.0
H	7.722953881039375	2.857143	0.5453601189606246	-0.01	0.0	0.01
H	8.407011881039375	1.230123	0.214523	-0.01	0.0	0.0
H	0.823252	4.3010860706456215	-0.9835536431181261	0.0	0.09	0.03
H	-2.9897377137637475	2.0952350706456215	0.3129028327243724	-0.06	0.09	0.07
H	-0.19927523792124927	5.677498643118127	-2.733317118960625	-0.02	-0.03	-0.01
H	-1.309317	4.361959167275627	-3.186792643118126	0.0	-0.07	0.03
H	0.43982711896062465	4.1592404051968765	-3.4214065241575016	0.01	-0.05	0.04
H	-4.098418739748132	3.5655551189606247	-1.482062260251868	0.19	0.01	-0.19
H	-3.9759458103937537	1.8216925241575015	-1.7506035241575013	0.1	-0.04	0.04
H	-2.8821559070237597	2.9362362639056334	-2.623173	0.26	-0.23	0.0
H	1.7910790966300059	2.3516509293543786	3.0313495241575015	-0.16	-0.09	-0.04
H	0.7836089070237595	0.8806366431181261	3.0700045018268827	-0.26	-0.03	-0.21
H	0.025766977669381255	2.4691372379212493	3.2679410966300058	-0.17	0.02	-0.16
H	3.4039597620787507	0.6812641189606246	-2.0455261189606246	-0.02	0.01	-0.01
H	5.057163	1.2977942862362521	-1.981405	0.0	-0.06	0.0
H	3.703817594803123	2.446667	-1.8716992379212491	0.05	0.0	-0.02
H	5.068473	-2.1953588810393754	0.649224	0.0	0.01	0.0
H	5.458367	-1.7564388810393754	-1.781401	0.0	0.01	0.0
H	3.539399	-1.7961778810393754	-3.387901	0.0	0.01	0.0
H	1.638436	-2.9093911189606247	2.146943	0.0	-0.01	0.0
H	-0.08331	-2.306621237921249	-2.314582	0.0	-0.02	0.0
H	-5.994049762078751	0.13925	-1.46632	0.02	0.0	0.0
H	-6.422596	1.8136468810393753	0.338614	0.0	-0.01	0.0
H	-4.986986118960624	1.855206762078751	2.3833522379212493	-0.01	-0.02	0.02
H	-3.165981881039375	-2.4031451189606248	-1.3806628810393755	0.01	-0.01	0.01
H	-1.8252008810393754	-0.158592	2.7639678810393753	0.01	0.0	-0.01
H	2.820677	-1.545011	3.883006	0.0	0.0	0.0
H	2.344767762078751	-0.534847	2.486532	-0.02	0.0	0.0
H	4.049273881039375	-1.0389118810393754	2.6847918810393754	-0.01	0.01	-0.01
H	3.339104	-4.046232	3.550139	0.0	0.0	0.0
H	4.651119	-3.593392	2.429561	0.0	0.0	0.0
H	3.398065118960625	-4.75098	1.910837	0.01	0.0	0.0
H	-0.091463	-0.8897791189606246	-4.371555	0.0	-0.01	0.0
H	1.685732	-0.7060907620787507	-4.3019607620787506	0.0	0.02	0.02
H	0.6568035241575015	-0.0024131189606246316	-3.014013881039375	-0.04	-0.01	0.01
H	0.125572	-3.44802	-4.531302118960625	0.0	0.0	-0.01
H	0.9962061189606246	-4.363751	-3.267150118960625	0.01	0.0	-0.01
H	1.908057	-3.367216881039375	-4.437906118960625	0.0	0.01	-0.01
H	-1.9414708810393755	1.5821952379212492	4.49012476207875	0.01	0.02	-0.02
H	-3.6273691189606247	1.9940227620787507	4.092100237921249	-0.01	-0.02	0.02
H	-2.326879594803123	2.359961237921249	2.920295881039375	-0.05	0.02	-0.01
H	-2.837541643118126	-0.7646048810393754	4.999273118960625	0.03	0.01	0.01
H	-3.447249643118126	-1.807955	3.6848081189606248	0.03	0.0	0.01
H	-4.47639876207875	-0.49609511896062464	4.332312118960624	0.02	-0.01	0.01
H	-3.4642162862362524	-1.7827487620787508	-3.7808527620787507	0.06	0.02	0.02
H	-2.750425881039375	-0.4178606431181261	-2.857974405196877	0.01	0.03	0.05
H	-4.47732076207875	-0.381822	-3.329912	0.02	0.0	0.0
H	-5.055525881039375	-3.443838881039375	-2.605183237921249	0.01	0.01	-0.02
H	-6.135275881039375	-2.076046881039375	-2.2203311189606247	0.01	0.01	-0.01
H	-5.569299	-3.1580661189606247	-0.9186452379212493	0.0	-0.01	-0.02
H	1.646605	-4.90213323792125	0.7036621189606246	0.0	-0.02	0.01
H	0.144905	-5.772103356881874	0.35006323792124927	0.0	-0.03	0.02
H	1.02905	-4.947355356881873	-0.9495978810393754	0.0	-0.03	0.01
H	-4.454065881039376	-2.641598118960625	1.7523202379212492	0.01	-0.01	0.02
H	-4.189537118960625	-3.9857198810393752	0.630178	-0.01	0.01	0.0
H	-3.591681	-4.103057356881874	2.285654	0.0	-0.03	0.0
114
O	6.384677503233952	1.305743	0.130296	-0.01	0.0	0.0
Mg	-0.5298829935320946	-0.5959464708944258	0.024446542041384946	-0.02	-0.09	-0.13
O	-0.6237854773623311	1.5061779288530408	0.7852995873167226	-0.07	0.22	-0.27
C	5.2570235032339525	1.8695745032339526	0.616433	-0.01	-0.01	0.0
N	0.441779	-2.432223490298142	0.02923050323395269	0.0	-0.03	-0.01
N	-2.244056	-1.5457064967660474	0.7478249935320946	0.0	-0.01	0.02
O	5.241416006467905	2.7092785032339526	1.484571	-0.02	-0.01	0.0
C	-0.080767	-3.620090490298142	0.35036149676604733	0.0	-0.03	0.01
C	-1.369725	-3.7997109935320945	0.8742364967660473	0.0	-0.02	0.01
C	-2.394477	-2.8367664967660473	1.0126514967660474	0.0	-0.01	0.01
O	2.8999560064679053	1.9336939935320947	0.5251085161697634	-0.02	0.02	-0.05
C	1.7148050064679052	1.3445094902981418	0.4632285161697634	-0.02	0.03	-0.05
C	0.5985395032339527	2.0685804579586153	1.2036665485092903	-0.01	0.13	-0.15
C	4.038878503233953	1.2636495032339525	-0.07882549676604732	-0.01	-0.01	-0.01
O	1.5073770064679053	0.27834201293581073	-0.10853701940371614	-0.02	-0.04	0.06
C	7.6084555032339525	1.783121	0.713078	-0.01	0.0	0.0
O	-0.1638050194037161	2.584413993532095	-1.3828395355734795	0.06	0.02	0.11
C	-1.1606590388074323	1.8223395097018582	-0.7477941164222968	0.12	-0.03	0.36
O	-1.297979509701858	0.659652	-1.286682542041385	0.03	0.0	0.13
O	-2.1623364967660472	3.9223454838302363	0.10162898706418924	-0.01	0.05	0.04
C	-1.154414	4.666498987064189	-0.3782760064679054	0.0	0.04	0.02
C	-0.1657585032339527	4.020667496766047	-1.3445705161697634	0.01	0.01	0.05
C	-2.4464840129358105	2.6098834967660474	-0.4664030258716215	0.04	0.01	0.08
O	-1.009098	5.8198914838302365	-0.035671	0.0	0.05	0.0
C	-0.324415	4.586455509701858	-2.760448509701858	0.0	-0.03	0.03
C	-3.3686220517432433	2.7344900194037165	-1.6829139935320947	0.16	-0.06	-0.02
C	0.7880005549771957	1.9248215032339526	2.7233630452753372	-0.17	-0.01	-0.14
C	4.0469874967660475	1.4373730064679053	-1.6010344967660473	0.01	-0.02	-0.01
C	1.805913	-2.385208993532095	-0.462011	0.0	-0.02	0.0
C	-3.415087	-0.6962134967660474	0.6681344967660474	0.0	-0.01	0.01
C	2.902963	-2.3983924967660473	0.462195	0.0	-0.01	0.0
C	4.212478	-2.157938	-0.037069	0.0	0.0	0.0
C	4.435627	-1.921598	-1.413332	0.0	0.0	0.0
C	3.351772	-1.936981	-2.314887	0.0	0.0	0.0
C	2.028087	-2.1684124967660474	-1.861915	0.0	-0.01	0.0
C	2.702139	-2.647495	1.981314	0.0	0.0	0.0
C	0.862607	-2.1943414967660475	-2.884245	0.0	-0.01	0.0
C	-4.245417	-0.7368084967660473	-0.5033155032339527	0.0	-0.01	0.01
C	-5.325058503233953	0.1768655032339527	-0.5928255032339527	0.01	-0.01	0.01
C	-5.577655	1.1144165032339526	0.4296064967660473	0.0	-0.01	0.01
C	-4.765590496766047	1.1358740064679054	1.5815344967660474	-0.01	-0.02	0.01
C	-3.674927	0.23416350323395269	1.7317404967660475	0.0	-0.01	0.01
C	-4.019072503233953	-1.752054	-1.658185	0.01	0.0	0.0
C	-2.8326705032339525	0.216979	3.033429	0.01	0.0	0.0
C	3.0015595032339526	-1.360937	2.813088	-0.01	0.0	0.0
C	3.580177	-3.837598	2.496587	0.0	0.0	0.0
C	0.7765775032339527	-0.861499	-3.694287503233953	-0.01	0.0	0.01
C	0.983682	-3.424543	-3.844244496766047	0.0	0.0	-0.01
C	-2.6780674967660474	1.630926	3.67183	-0.01	0.0	0.0
C	-3.435254509701858	-0.779475	4.080561496766047	0.03	0.0	0.01
C	-3.648532509701858	-1.0330985032339526	-2.9910190064679054	0.03	0.01	0.02
C	-5.276067503233953	-2.66629	-1.8605794967660474	0.01	0.0	-0.01
C	0.73164	-4.886031490298142	0.10618849676604732	0.0	-0.03	0.01
C	-3.7398	-3.4105214967660475	1.4500224967660473	0.0	-0.01	0.01
H	-1.645021	-4.819801993532095	1.1198614967660474	0.0	-0.02	0.01
H	0.6586454773623311	3.135994457958615	0.9579090323395268	0.07	0.13	-0.1
H	4.005236006467905	0.191734	0.135818	-0.02	0.0	0.0
H	7.621817503233952	1.591795	1.789413	-0.01	0.0	0.0
H	7.721002503233953	2.857143	0.5473114967660474	-0.01	0.0	0.01
H	8.405060503233953	1.230123	0.214523	-0.01	0.0	0.0
H	0.823252	4.318648470894426	-0.977699509701858	0.0	0.09	0.03
H	-3.0014459805962836	2.1127974708944257	0.3265624773623312	-0.06	0.09	0.07
H	-0.20317799353209465	5.671644509701858	-2.7352684967660474	-0.02	-0.03	-0.01
H	-1.309317	4.348299522637668	-3.180938509701858	0.0	-0.07	0.03
H	0.4417784967660473	4.149483516169763	-3.4136010129358105	0.01	-0.05	0.04
H	-4.061342561445101	3.5675064967660473	-1.519138438554899	0.19	0.01	-0.19
H	-3.956432032339527	1.813887012935811	-1.7427980129358107	0.1	-0.04	0.04
H	-2.83142008408277	2.8913545743809115	-2.623173	0.26	-0.23	0.0
H	1.7598570517432428	2.3340885291055744	3.0235440129358104	-0.16	-0.09	-0.04
H	0.7328730840827699	0.874782509701858	3.0290255679130063	-0.26	-0.03	-0.21
H	-0.007406445022804312	2.473039993532095	3.236719051743243	-0.17	0.02	-0.16
H	3.400057006467905	0.6832154967660473	-2.047477496766047	-0.02	0.01	-0.01
H	5.057163	1.286086019403716	-1.981405	0.0	-0.06	0.0
H	3.7135744838302363	2.446667	-1.8756019935320947	0.05	0.0	-0.02
H	5.068473	-2.193407503233953	0.649224	0.0	0.01	0.0
H	5.458367	-1.7544875032339526	-1.781401	0.0	0.01	0.0
H	3.539399	-1.7942265032339526	-3.387901	0.0	0.01	0.0
H	1.638436	-2.9113424967660473	2.146943	0.0	-0.01	0.0
H	-0.08331	-2.3105239935320947	-2.314582	0.0	-0.02	0.0
H	-5.990147006467906	0.13925	-1.46632	0.02	0.0	0.0
H	-6.422596	1.8116955032339526	0.338614	0.0	-0.01	0.0
H	-4.988937496766047	1.8513040064679054	2.387254993532095	-0.01	-0.02	0.02
H	-3.1640305032339526	-2.4050964967660473	-1.3787115032339528	0.01	-0.01	0.01
H	-1.8232495032339526	-0.158592	2.7620165032339528	0.01	0.0	-0.01
H	2.820677	-1.545011	3.883006	0.0	0.0	0.0
H	2.3408650064679053	-0.534847	2.486532	-0.02	0.0	0.0
H	4.047322503233953	-1.0369605032339526	2.682840503233953	-0.01	0.01	-0.01
H	3.339104	-4.046232	3.550139	0.0	0.0	0.0
H	4.651119	-3.593392	2.429561	0.0	0.0	0.0
H	3.4000164967660473	-4.75098	1.910837	0.01	0.0	0.0
H	-0.091463	-0.8917304967660473	-4.371555	0.0	-0.01	0.0
H	1.685732	-0.7021880064679054	-4.2980580064679055	0.0	0.02	0.02
H	0.6489980129358108	-0.004364496766047312	-3.0120625032339525	-0.04	-0.01	0.01
H	0.125572	-3.44802	-4.533253496766047	0.0	0.0	-0.01
H	0.9981574967660474	-4.363751	-3.2691014967660474	0.01	0.0	-0.01
H	1.908057	-3.3652655032339527	-4.439857496766048	0.0	0.01	-0.01
H	-1.9395195032339527	1.5860979935320947	4.486222006467905	0.01	0.02	-0.02
H	-3.6293204967660473	1.9901200064679052	4.096002993532094	-0.01	-0.02	0.02
H	-2.3366364838302363	2.3638639935320946	2.9183445032339526	-0.05	0.02	-0.01
H	-2.831687509701858	-0.7626535032339526	5.0012244967660475	0.03	0.01	0.01
H	-3.441395509701858	-1.807955	3.6867594967660473	0.03	0.0	0.01
H	-4.472496006467905	-0.4980464967660473	4.334263496766047	0.02	-0.01	0.01
H	-3.4525080194037163	-1.7788460064679052	-3.776950006467905	0.06	0.02	0.02
H	-2.7484745032339526	-0.4120065097018581	-2.848217516169764	0.01	0.03	0.05
H	-4.473418006467905	-0.381822	-3.329912	0.02	0.0	0.0
H	-5.0535745032339525	-3.4418875032339526	-2.6090859935320947	0.01	0.01	-0.02
H	-6.133324503233952	-2.0740955032339525	-2.2222824967660473	0.01	0.01	-0.01
H	-5.569299	-3.1600174967660473	-0.9225479935320946	0.0	-0.01	-0.02
H	1.646605	-4.906035993532095	0.7056134967660473	0.0	-0.02	0.01
H	0.144905	-5.777957490298142	0.3539659935320946	0.0	-0.03	0.02
H	1.02905	-4.953209490298142	-0.9476465032339526	0.0	-0.03	0.01
H	-4.452114503233953	-2.6435494967660476	1.7562229935320948	0.01	-0.01	0.02
H	-4.1914884967660475	-3.9837685032339527	0.630178	-0.01	0.01	0.0
H	-3.591681	-4.1089114902981425	2.285654	0.0	-0.03	0.0
114
O	6.383128881039375	1.305743	0.130296	-0.01	0.0	0.0
Mg	-0.5329802379212493	-0.6098840706456217	0.004314453511879798	-0.02	-0.09	-0.13
O	-0.6346258327243723	1.5402476171337418	0.7434867880631351	-0.07	0.22	-0.27
C	5.255474881039375	1.8680258810393753	0.616433	-0.01	-0.01	0.0
N	0.441779	-2.436869356881874	0.02768188103937537	0.0	-0.03	-0.01
N	-2.244056	-1.5472551189606247	0.7509222379212493	0.0	-0.01	0.02
O	5.238318762078751	2.7077298810393753	1.484571	-0.02	-0.01	0.0
C	-0.080767	-3.624736356881874	0.3519101189606247	0.0	-0.03	0.01
C	-1.369725	-3.802808237921249	0.8757851189606246	0.0	-0.02	0.01
C	-2.394477	-2.8383151189606246	1.0142001189606247	0.0	-0.01	0.01
O	2.8968587620787507	1.9367912379212493	0.5173654051968768	-0.02	0.02	-0.05
C	1.7117077620787506	1.349155356881874	0.4554854051968768	-0.02	0.03	-0.05
C	0.5969908810393754	2.08871254648812	1.1804372155906306	-0.01	0.13	-0.15
C	4.037329881039375	1.2621008810393752	-0.08037411896062463	-0.01	-0.01	-0.01
O	1.5042797620787507	0.2721475241575015	-0.09924528623625223	-0.02	-0.04	0.06
C	7.606906881039375	1.783121	0.713078	-0.01	0.0	0.0
O	-0.1545132862362522	2.5875112379212495	-1.365804691433129	0.06	0.02	0.11
C	-1.1420755724725042	1.817693643118126	-0.6920437174175134	0.12	-0.03	0.36
O	-1.293333643118126	0.659652	-1.26655045351188	0.03	0.0	0.13
O	-2.1638851189606245	3.9300885948031232	0.10782347584249852	-0.01	0.05	0.04
C	-1.154414	4.6726934758424985	-0.3751787620787507	0.0	0.04	0.02
C	-0.16420988103937537	4.022216118960625	-1.336827405196877	0.01	0.01	0.05
C	-2.4402895241575013	2.6114321189606247	-0.45401404831500297	0.04	0.01	0.08
O	-1.009098	5.827634594803123	-0.035671	0.0	0.05	0.0
C	-0.324415	4.581809643118126	-2.755802643118126	0.0	-0.03	0.03
C	-3.343844096630006	2.7251982862362523	-1.6860112379212493	0.16	-0.06	-0.02
C	0.7616739776693813	1.9232728810393753	2.701682334551255	-0.17	-0.01	-0.14
C	4.048536118960625	1.4342757620787507	-1.6025831189606246	0.01	-0.02	-0.01
C	1.805913	-2.3883062379212494	-0.462011	0.0	-0.02	0.0
C	-3.415087	-0.6977621189606247	0.6696831189606247	0.0	-0.01	0.01
C	2.902963	-2.3999411189606246	0.462195	0.0	-0.01	0.0
C	4.212478	-2.157938	-0.037069	0.0	0.0	0.0
C	4.435627	-1.921598	-1.413332	0.0	0.0	0.0
C	3.351772	-1.936981	-2.314887	0.0	0.0	0.0
C	2.028087	-2.1699611189606247	-1.861915	0.0	-0.01	0.0
C	2.702139	-2.647495	1.981314	0.0	0.0	0.0
C	0.862607	-2.195890118960625	-2.884245	0.0	-0.01	0.0
C	-4.245417	-0.7383571189606246	-0.5017668810393754	0.0	-0.01	0.01
C	-5.323509881039375	0.17531688103937537	-0.5912768810393754	0.01	-0.01	0.01
C	-5.577655	1.1128678810393753	0.43115511896062464	0.0	-0.01	0.01
C	-4.767139118960625	1.1327767620787508	1.5830831189606247	-0.01	-0.02	0.01
C	-3.674927	0.23261488103937536	1.7332891189606248	0.0	-0.01	0.01
C	-4.017523881039375	-1.752054	-1.658185	0.01	0.0	0.0
C	-2.8311218810393752	0.216979	3.033429	0.01	0.0	0.0
C	3.0000108810393753	-1.360937	2.813088	-0.01	0.0	0.0
C	3.580177	-3.837598	2.496587	0.0	0.0	0.0
C	0.7750288810393754	-0.861499	-3.6927388810393755	-0.01	0.0	0.01
C	0.983682	-3.424543	-3.8457931189606245	0.0	0.0	-0.01
C	-2.6796161189606247	1.630926	3.67183	-0.01	0.0	0.0
C	-3.430608643118126	-0.779475	4.082110118960625	0.03	0.0	0.01
C	-3.643886643118126	-1.0315498810393753	-2.987921762078751	0.03	0.01	0.02
C	-5.274518881039375	-2.66629	-1.8621281189606247	0.01	0.0	-0.01
C	0.73164	-4.8906773568818735	0.10773711896062463	0.0	-0.03	0.01
C	-3.7398	-3.412070118960625	1.4515711189606246	0.0	-0.01	0.01
H	-1.645021	-4.822899237921249	1.1214101189606247	0.0	-0.02	0.01
H	0.6694858327243723	3.15612654648812	0.9424228103937536	0.07	0.13	-0.1
H	4.002138762078751	0.191734	0.135818	-0.02	0.0	0.0
H	7.620268881039375	1.591795	1.789413	-0.01	0.0	0.0
H	7.719453881039375	2.857143	0.5488601189606247	-0.01	0.0	0.01
H	8.403511881039375	1.230123	0.214523	-0.01	0.0	0.0
H	0.823252	4.332586070645622	-0.9730536431181261	0.0	0.09	0.03
H	-3.010737713763748	2.1267350706456214	0.33740283272437244	-0.06	0.09	0.07
H	-0.20627523792124927	5.666998643118126	-2.7368171189606247	-0.02	-0.03	-0.01
H	-1.309317	4.337459167275627	-3.176292643118126	0.0	-0.07	0.03
H	0.44332711896062466	4.1417404051968765	-3.4074065241575013	0.01	-0.05	0.04
H	-4.031918739748132	3.5690551189606246	-1.548562260251868	0.19	0.01	-0.19
H	-3.940945810393754	1.8076925241575015	-1.7366035241575013	0.1	-0.04	0.04
H	-2.79115590702376	2.855736263905633	-2.623173	0.26	-0.23	0.0
H	1.7350790966300058	2.3201509293543787	3.0173495241575012	-0.16	-0.09	-0.04
H	0.6926089070237595	0.8701366431181261	2.9965045018268825	-0.26	-0.03	-0.21
H	-0.03373302233061874	2.4761372379212494	3.2119410966300057	-0.17	0.02	-0.16
H	3.3969597620787506	0.6847641189606246	-2.0490261189606245	-0.02	0.01	-0.01
H	5.057163	1.2767942862362522	-1.981405	0.0	-0.06	0.0
H	3.721317594803123	2.446667	-1.8786992379212493	0.05	0.0	-0.02
H	5.068473	-2.1918588810393755	0.649224	0.0	0.01	0.0
H	5.458367	-1.7529388810393753	-1.781401	0.0	0.01	0.0
H	3.539399	-1.7926778810393753	-3.387901	0.0	0.01	0.0
H	1.638436	-2.9128911189606246	2.146943	0.0	-0.01	0.0
H	-0.08331	-2.3136212379212493	-2.314582	0.0	-0.02	0.0
H	-5.987049762078751	0.13925	-1.46632	0.02	0.0	0.0
H	-6.422596	1.8101468810393753	0.338614	0.0	-0.01	0.0
H	-4.990486118960624	1.8482067620787508	2.3903522379212494	-0.01	-0.02	0.02
H	-3.1624818810393753	-2.4066451189606246	-1.3771628810393755	0.01	-0.01	0.01
H	-1.8217008810393753	-0.158592	2.7604678810393755	0.01	0.0	-0.01
H	2.820677	-1.545011	3.883006	0.0	0.0	0.0
H	2.3377677620787507	-0.534847	2.486532	-0.02	0.0	0.0
H	4.045773881039375	-1.0354118810393753	2.6812918810393755	-0.01	0.01	-0.01
H	3.339104	-4.046232	3.550139	0.0	0.0	0.0
H	4.651119	-3.593392	2.429561	0.0	0.0	0.0
H	3.4015651189606246	-4.75098	1.910837	0.01	0.0	0.0
H	-0.091463	-0.8932791189606246	-4.371555	0.0	-0.01	0.0
H	1.685732	-0.6990907620787506	-4.294960762078751	0.0	0.02	0.02
H	0.6428035241575015	-0.005913118960624631	-3.0105138810393752	-0.04	-0.01	0.01
H	0.125572	-3.44802	-4.5348021189606245	0.0	0.0	-0.01
H	0.9997061189606247	-4.363751	-3.2706501189606247	0.01	0.0	-0.01
H	1.908057	-3.3637168810393754	-4.441406118960625	0.0	0.01	-0.01
H	-1.9379708810393754	1.5891952379212493	4.48312476207875	0.01	0.02	-0.02
H	-3.6308691189606246	1.9870227620787506	4.099100237921249	-0.01	-0.02	0.02
H	-2.344379594803123	2.3669612379212492	2.9167958810393753	-0.05	0.02	-0.01
H	-2.8270416431181262	-0.7611048810393753	5.002773118960625	0.03	0.01	0.01
H	-3.436749643118126	-1.807955	3.6883081189606246	0.03	0.0	0.01
H	-4.46939876207875	-0.49959511896062464	4.335812118960624	0.02	-0.01	0.01
H	-3.443216286236252	-1.7757487620787507	-3.7738527620787505	0.06	0.02	0.02
H	-2.7469258810393753	-0.4073606431181261	-2.840474405196877	0.01	0.03	0.05
H	-4.47032076207875	-0.381822	-3.329912	0.02	0.0	0.0
H	-5.052025881039375	-3.4403388810393754	-2.6121832379212493	0.01	0.01	-0.02
H	-6.131775881039375	-2.0725468810393752	-2.2238311189606246	0.01	0.01	-0.01
H	-5.569299	-3.1615661189606246	-0.9256452379212493	0.0	-0.01	-0.02
H	1.646605	-4.90913323792125	0.7071621189606246	0.0	-0.02	0.01
H	0.144905	-5.782603356881874	0.3570632379212493	0.0	-0.03	0.02
H	1.02905	-4.957855356881874	-0.9460978810393753	0.0	-0.03	0.01
H	-4.450565881039376	-2.645098118960625	1.7593202379212494	0.01	-0.01	0.02
H	-4.193037118960625	-3.9822198810393754	0.630178	-0.01	0.01	0.0
H	-3.591681	-4.113557356881874	2.285654	0.0	-0.03	0.0
114
O	6.382134604385934	1.305743	0.130296	-0.01	0.0	0.0
Mg	-0.5349687912281321	-0.6188325605265946	-0.008611142982858963	-0.02	-0.09	-0.13
O	-0.6415857692984624	1.5621217035094537	0.7166413184202161	-0.07	0.22	-0.27
C	5.254480604385934	1.8670316043859339	0.616433	-0.01	-0.01	0.0
N	0.441779	-2.4398521868421983	0.026687604385933927	0.0	-0.03	-0.01
N	-2.244056	-1.5482493956140662	0.7529107912281322	0.0	-0.01	0.02
O	5.236330208771868	2.706735604385934	1.484571	-0.02	-0.01	0.0
C	-0.080767	-3.627719186842198	0.3529043956140661	0.0	-0.03	0.01
C	-1.369725	-3.804796791228132	0.876779395614066	0.0	-0.02	0.01
C	-2.394477	-2.839309395614066	1.015194395614066	0.0	-0.01	0.01
O	2.894870208771868	1.9387797912281322	0.5123940219296697	-0.02	0.02	-0.05
C	1.7097192087718678	1.3521381868421982	0.4505140219296696	-0.02	0.03	-0.05
C	0.5959966043859339	2.1016381429828592	1.165523065789009	-0.01	0.13	-0.15
C	4.036335604385934	1.2611066043859338	-0.08136839561406607	-0.01	-0.01	-0.01
O	1.5022912087718678	0.2681704175437357	-0.09327962631560358	-0.02	-0.04	0.06
C	7.605912604385934	1.783121	0.713078	-0.01	0.0	0.0
O	-0.14854762631560356	2.5894997912281323	-1.3548676482452733	0.06	0.02	0.11
C	-1.130144252631207	1.8147108131578018	-0.6562497578936214	0.12	-0.03	0.36
O	-1.2903508131578016	0.659652	-1.253624857017141	0.03	0.0	0.13
O	-2.164879395614066	3.9350599780703304	0.11180058245626429	-0.01	0.05	0.04
C	-1.154414	4.676670582456264	-0.3731902087718678	0.0	0.04	0.02
C	-0.1632156043859339	4.023210395614066	-1.3318560219296696	0.01	0.01	0.05
C	-2.4363124175437356	2.612426395614066	-0.44605983508747143	0.04	0.01	0.08
O	-1.009098	5.83260597807033	-0.035671	0.0	0.05	0.0
C	-0.324415	4.578826813157802	-2.7528198131578017	0.0	-0.03	0.03
C	-3.3279356701749427	2.7192326263156037	-1.6879997912281322	0.16	-0.06	-0.02
C	0.7447712745608768	1.922278604385934	2.6877624614030746	-0.17	-0.01	-0.14
C	4.049530395614066	1.4322872087718679	-1.603577395614066	0.01	-0.02	-0.01
C	1.805913	-2.3902947912281323	-0.462011	0.0	-0.02	0.0
C	-3.415087	-0.6987563956140661	0.6706773956140661	0.0	-0.01	0.01
C	2.902963	-2.400935395614066	0.462195	0.0	-0.01	0.0
C	4.212478	-2.157938	-0.037069	0.0	0.0	0.0
C	4.435627	-1.921598	-1.413332	0.0	0.0	0.0
C	3.351772	-1.936981	-2.314887	0.0	0.0	0.0
C	2.028087	-2.170955395614066	-1.861915	0.0	-0.01	0.0
C	2.702139	-2.647495	1.981314	0.0	0.0	0.0
C	0.862607	-2.1968843956140662	-2.884245	0.0	-0.01	0.0
C	-4.245417	-0.739351395614066	-0.500772604385934	0.0	-0.01	0.01
C	-5.322515604385934	0.17432260438593392	-0.5902826043859339	0.01	-0.01	0.01
C	-5.577655	1.1118736043859339	0.43214939561406607	0.0	-0.01	0.01
C	-4.768133395614066	1.130788208771868	1.5840773956140661	-0.01	-0.02	0.01
C	-3.674927	0.2316206043859339	1.7342833956140662	0.0	-0.01	0.01
C	-4.016529604385934	-1.752054	-1.658185	0.01	0.0	0.0
C	-2.830127604385934	0.216979	3.033429	0.01	0.0	0.0
C	2.999016604385934	-1.360937	2.813088	-0.01	0.0	0.0
C	3.580177	-3.837598	2.496587	0.0	0.0	0.0
C	0.774034604385934	-0.861499	-3.691744604385934	-0.01	0.0	0.01
C	0.983682	-3.424543	-3.846787395614066	0.0	0.0	-0.01
C	-2.680610395614066	1.630926	3.67183	-0.01	0.0	0.0
C	-3.427625813157802	-0.779475	4.083104395614066	0.03	0.0	0.01
C	-3.6409038131578018	-1.0305556043859339	-2.985933208771868	0.03	0.01	0.02
C	-5.273524604385934	-2.66629	-1.8631223956140661	0.01	0.0	-0.01
C	0.73164	-4.893660186842197	0.10873139561406607	0.0	-0.03	0.01
C	-3.7398	-3.4130643956140663	1.452565395614066	0.0	-0.01	0.01
H	-1.645021	-4.824887791228132	1.1224043956140661	0.0	-0.02	0.01
H	0.6764457692984625	3.169052142982859	0.9324800438593392	0.07	0.13	-0.1
H	4.000150208771868	0.191734	0.135818	-0.02	0.0	0.0
H	7.619274604385934	1.591795	1.789413	-0.01	0.0	0.0
H	7.718459604385934	2.857143	0.5498543956140661	-0.01	0.0	0.01
H	8.402517604385933	1.230123	0.214523	-0.01	0.0	0.0
H	0.823252	4.341534560526594	-0.9700708131578017	0.0	0.09	0.03
H	-3.0167033736843964	2.1356835605265947	0.34436276929846255	-0.06	0.09	0.07
H	-0.20826379122813216	5.6640158131578024	-2.737811395614066	-0.02	-0.03	-0.01
H	-1.309317	4.3304992307015375	-3.1733098131578017	0.0	-0.07	0.03
H	0.4443213956140661	4.13676902192967	-3.4034294175437356	0.01	-0.05	0.04
H	-4.013027483332745	3.570049395614066	-1.5674535166672554	0.19	0.01	-0.19
H	-3.9310030438593393	1.8037154175437358	-1.7326264175437356	0.1	-0.04	0.04
H	-2.7653047140342824	2.8328679008764803	-2.623173	0.26	-0.23	0.0
H	1.7191706701749427	2.3112024394734054	3.0133724175437355	-0.16	-0.09	-0.04
H	0.6667577140342821	0.8671538131578017	2.9756246921046126	-0.26	-0.03	-0.21
H	-0.05063572543912327	2.4781257912281323	3.1960326701749424	-0.17	0.02	-0.16
H	3.3949712087718678	0.685758395614066	-2.050020395614066	-0.02	0.01	-0.01
H	5.057163	1.2708286263156034	-1.981405	0.0	-0.06	0.0
H	3.7262889780703303	2.446667	-1.8806877912281321	0.05	0.0	-0.02
H	5.068473	-2.190864604385934	0.649224	0.0	0.01	0.0
H	5.458367	-1.751944604385934	-1.781401	0.0	0.01	0.0
H	3.539399	-1.7916836043859339	-3.387901	0.0	0.01	0.0
H	1.638436	-2.913885395614066	2.146943	0.0	-0.01	0.0
H	-0.08331	-2.315609791228132	-2.314582	0.0	-0.02	0.0
H	-5.985061208771868	0.13925	-1.46632	0.02	0.0	0.0
H	-6.422596	1.8091526043859338	0.338614	0.0	-0.01	0.0
H	-4.991480395614065	1.846218208771868	2.3923407912281323	-0.01	-0.02	0.02
H	-3.161487604385934	-2.407639395614066	-1.376168604385934	0.01	-0.01	0.01
H	-1.820706604385934	-0.158592	2.759473604385934	0.01	0.0	-0.01
H	2.820677	-1.545011	3.883006	0.0	0.0	0.0
H	2.335779208771868	-0.534847	2.486532	-0.02	0.0	0.0
H	4.044779604385934	-1.0344176043859339	2.680297604385934	-0.01	0.01	-0.01
H	3.339104	-4.046232	3.550139	0.0	0.0	0.0
H	4.651119	-3.593392	2.429561	0.0	0.0	0.0
H	3.402559395614066	-4.75098	1.910837	0.01	0.0	0.0
H	-0.091463	-0.894273395614066	-4.371555	0.0	-0.01	0.0
H	1.685732	-0.6971022087718678	-4.292972208771868	0.0	0.02	0.02
H	0.6388264175437357	-0.006907395614066074	-3.009519604385934	-0.04	-0.01	0.01
H	0.125572	-3.44802	-4.5357963956140654	0.0	0.0	-0.01
H	1.000700395614066	-4.363751	-3.271644395614066	0.01	0.0	-0.01
H	1.908057	-3.362722604385934	-4.442400395614066	0.0	0.01	-0.01
H	-1.936976604385934	1.5911837912281321	4.481136208771868	0.01	0.02	-0.02
H	-3.631863395614066	1.9850342087718678	4.101088791228132	-0.01	-0.02	0.02
H	-2.3493509780703303	2.368949791228132	2.915801604385934	-0.05	0.02	-0.01
H	-2.824058813157802	-0.7601106043859339	5.003767395614066	0.03	0.01	0.01
H	-3.433766813157802	-1.807955	3.689302395614066	0.03	0.0	0.01
H	-4.4674102087718675	-0.500589395614066	4.336806395614065	0.02	-0.01	0.01
H	-3.4372506263156035	-1.7737602087718678	-3.7718642087718677	0.06	0.02	0.02
H	-2.745931604385934	-0.4043778131578018	-2.8355030219296697	0.01	0.03	0.05
H	-4.4683322087718675	-0.381822	-3.329912	0.02	0.0	0.0
H	-5.051031604385934	-3.439344604385934	-2.614171791228132	0.01	0.01	-0.02
H	-6.130781604385934	-2.071552604385934	-2.224825395614066	0.01	0.01	-0.01
H	-5.569299	-3.162560395614066	-0.9276337912281322	0.0	-0.01	-0.02
H	1.646605	-4.911121791228132	0.7081563956140661	0.0	-0.02	0.01
H	0.144905	-5.785586186842198	0.3590517912281322	0.0	-0.03	0.02
H	1.02905	-4.960838186842198	-0.9451036043859339	0.0	-0.03	0.01
H	-4.449571604385935	-2.6460923956140663	1.7613087912281322	0.01	-0.01	0.02
H	-4.194031395614066	-3.981225604385934	0.630178	-0.01	0.01	0.0
H	-3.591681	-4.116540186842198	2.285654	0.0	-0.03	0.0
114
O	6.381792	1.305743	0.130296	-0.01	0.0	0.0
Mg	-0.535654	-0.6219159999999999	-0.013064999999999993	-0.02	-0.09	-0.13
O	-0.643984	1.569659	0.7073910000000001	-0.07	0.22	-0.27
C	5.254138	1.866689	0.616433	-0.01	-0.01	0.0
N	0.441779	-2.44088	0.026345	0.0	-0.03	-0.01
N	-2.244056	-1.548592	0.753596	0.0	-0.01	0.02
O	5.235645	2.706393	1.484571	-0.02	-0.01	0.0
C	-0.080767	-3.6287469999999997	0.35324700000000003	0.0	-0.03	0.01
C	-1.369725	-3.8054819999999996	0.877122	0.0	-0.02	0.01
C	-2.394477	-2.839652	1.015537	0.0	-0.01	0.01
O	2.8941850000000002	1.939465	0.5106809999999999	-0.02	0.02	-0.05
C	1.709034	1.3531659999999999	0.448801	-0.02	0.03	-0.05
C	0.595654	2.1060920000000003	1.160384	-0.01	0.13	-0.15
C	4.035993	1.260764	-0.081711	-0.01	-0.01	-0.01
O	1.501606	0.26680000000000004	-0.09122400000000001	-0.02	-0.04	0.06
C	7.60557	1.783121	0.713078	-0.01	0.0	0.0
O	-0.146492	2.590185	-1.351099	0.06	0.02	0.11
C	-1.1260329999999998	1.8136830000000002	-0.643916	0.12	-0.03	0.36
O	-1.289323	0.659652	-1.249171	0.03	0.0	0.13
O	-2.165222	3.936773	0.113171	-0.01	0.05	0.04
C	-1.154414	4.6780409999999994	-0.372505	0.0	0.04	0.02
C	-0.162873	4.023553	-1.330143	0.01	0.01	0.05
C	-2.434942	2.612769	-0.443319	0.04	0.01	0.08
O	-1.009098	5.834319	-0.035671	0.0	0.05	0.0
C	-0.324415	4.577799	-2.751792	0.0	-0.03	0.03
C	-3.322454	2.7171770000000004	-1.688685	0.16	-0.06	-0.02
C	0.738947	1.921936	2.682966	-0.17	-0.01	-0.14
C	4.049873	1.431602	-1.6039199999999998	0.01	-0.02	-0.01
C	1.805913	-2.39098	-0.462011	0.0	-0.02	0.0
C	-3.415087	-0.699099	0.6710200000000001	0.0	-0.01	0.01
C	2.902963	-2.401278	0.462195	0.0	-0.01	0.0
C	4.212478	-2.157938	-0.037069	0.0	0.0	0.0
C	4.435627	-1.921598	-1.413332	0.0	0.0	0.0
C	3.351772	-1.936981	-2.314887	0.0	0.0	0.0
C	2.028087	-2.171298	-1.861915	0.0	-0.01	0.0
C	2.702139	-2.647495	1.981314	0.0	0.0	0.0
C	0.862607	-2.1972270000000003	-2.884245	0.0	-0.01	0.0
C	-4.245417	-0.739694	-0.50043	0.0	-0.01	0.01
C	-5.322173	0.17398	-0.58994	0.01	-0.01	0.01
C	-5.577655	1.111531	0.432492	0.0	-0.01	0.01
C	-4.768476	1.130103	1.58442	-0.01	-0.02	0.01
C	-3.674927	0.23127799999999998	1.734626	0.0	-0.01	0.01
C	-4.016187	-1.752054	-1.658185	0.01	0.0	0.0
C	-2.8297849999999998	0.216979	3.033429	0.01	0.0	0.0
C	2.998674	-1.360937	2.813088	-0.01	0.0	0.0
C	3.580177	-3.837598	2.496587	0.0	0.0	0.0
C	0.773692	-0.861499	-3.691402	-0.01	0.0	0.01
C	0.983682	-3.424543	-3.84713	0.0	0.0	-0.01
C	-2.680953	1.630926	3.67183	-0.01	0.0	0.0
C	-3.4265980000000003	-0.779475	4.083447	0.03	0.0	0.01
C	-3.639876	-1.030213	-2.9852480000000003	0.03	0.01	0.02
C	-5.273182	-2.66629	-1.863465	0.01	0.0	-0.01
C	0.73164	-4.8946879999999995	0.109074	0.0	-0.03	0.01
C	-3.7398	-3.4134070000000003	1.4529079999999999	0.0	-0.01	0.01
H	-1.645021	-4.825573	1.122747	0.0	-0.02	0.01
H	0.678844	3.173506	0.929054	0.07	0.13	-0.1
H	3.9994650000000003	0.191734	0.135818	-0.02	0.0	0.0
H	7.618932	1.591795	1.789413	-0.01	0.0	0.0
H	7.718117	2.857143	0.550197	-0.01	0.0	0.01
H	8.402175	1.230123	0.214523	-0.01	0.0	0.0
H	0.823252	4.344618	-0.969043	0.0	0.09	0.03
H	-3.0187589999999997	2.138767	0.346761	-0.06	0.09	0.07
H	-0.208949	5.662988	-2.738154	-0.02	-0.03	-0.01
H	-1.309317	4.328100999999999	-3.172282	0.0	-0.07	0.03
H	0.444664	4.135056	-3.402059	0.01	-0.05	0.04
H	-4.006518	3.570392	-1.573963	0.19	0.01	-0.19
H	-3.9275770000000003	1.802345	-1.731256	0.1	-0.04	0.04
H	-2.756397	2.824988	-2.623173	0.26	-0.23	0.0
H	1.713689	2.308119	3.012002	-0.16	-0.09	-0.04
H	0.65785	0.866126	2.96843	-0.26	-0.03	-0.21
H	-0.056459999999999996	2.478811	3.1905509999999997	-0.17	0.02	-0.16
H	3.394286	0.686101	-2.050363	-0.02	0.01	-0.01
H	5.057163	1.268773	-1.981405	0.0	-0.06	0.0
H	3.728002	2.446667	-1.881373	0.05	0.0	-0.02
H	5.068473	-2.190522	0.649224	0.0	0.01	0.0
H	5.458367	-1.751602	-1.781401	0.0	0.01	0.0
H	3.539399	-1.791341	-3.387901	0.0	0.01	0.0
H	1.638436	-2.914228	2.146943	0.0	-0.01	0.0
H	-0.08331	-2.3162949999999998	-2.314582	0.0	-0.02	0.0
H	-5.984376	0.13925	-1.46632	0.02	0.0	0.0
H	-6.422596	1.80881	0.338614	0.0	-0.01	0.0
H	-4.991822999999999	1.845533	2.393026	-0.01	-0.02	0.02
H	-3.161145	-2.407982	-1.3758260000000002	0.01	-0.01	0.01
H	-1.820364	-0.158592	2.759131	0.01	0.0	-0.01
H	2.820677	-1.545011	3.883006	0.0	0.0	0.0
H	2.3350940000000002	-0.534847	2.486532	-0.02	0.0	0.0
H	4.044437	-1.034075	2.679955	-0.01	0.01	-0.01
H	3.339104	-4.046232	3.550139	0.0	0.0	0.0
H	4.651119	-3.593392	2.429561	0.0	0.0	0.0
H	3.402902	-4.75098	1.910837	0.01	0.0	0.0
H	-0.091463	-0.894616	-4.371555	0.0	-0.01	0.0
H	1.685732	-0.696417	-4.292287	0.0	0.02	0.02
H	0.637456	-0.0072499999999999995	-3.0091769999999998	-0.04	-0.01	0.01
H	0.125572	-3.44802	-4.5361389999999995	0.0	0.0	-0.01
H	1.001043	-4.363751	-3.271987	0.01	0.0	-0.01
H	1.908057	-3.36238	-4.442743	0.0	0.01	-0.01
H	-1.9366340000000002	1.591869	4.4804509999999995	0.01	0.02	-0.02
H	-3.632206	1.984349	4.101774	-0.01	-0.02	0.02
H	-2.351064	2.3696349999999997	2.915459	-0.05	0.02	-0.01
H	-2.8230310000000003	-0.759768	5.00411	0.03	0.01	0.01
H	-3.432739	-1.807955	3.689645	0.03	0.0	0.01
H	-4.466724999999999	-0.5009319999999999	4.337148999999999	0.02	-0.01	0.01
H	-3.435195	-1.773075	-3.771179	0.06	0.02	0.02
H	-2.745589	-0.40335	-2.83379	0.01	0.03	0.05
H	-4.4676469999999995	-0.381822	-3.329912	0.02	0.0	0.0
H	-5.050689	-3.439002	-2.6148569999999998	0.01	0.01	-0.02
H	-6.130439	-2.0712099999999998	-2.225168	0.01	0.01	-0.01
H	-5.569299	-3.162903	-0.928319	0.0	-0.01	-0.02
H	1.646605	-4.9118070000000005	0.708499	0.0	-0.02	0.01
H	0.144905	-5.786614	0.35973700000000003	0.0	-0.03	0.02
H	1.02905	-4.961866	-0.944761	0.0	-0.03	0.01
H	-4.449229000000001	-2.6464350000000003	1.761994	0.01	-0.01	0.02
H	-4.194374	-3.980883	0.630178	-0.01	0.01	0.0
H	-3.591681	-4.117568	2.285654	0.0	-0.03	0.0
114
O	6.382134604385934	1.305743	0.130296	-0.01	0.0	0.0
Mg	-0.5349687912281321	-0.6188325605265946	-0.008611142982858977	-0.02	-0.09	-0.13
O	-0.6415857692984624	1.5621217035094537	0.7166413184202161	-0.07	0.22	-0.27
C	5.254480604385934	1.8670316043859339	0.616433	-0.01	-0.01	0.0
N	0.441779	-2.4398521868421983	0.026687604385933924	0.0	-0.03	-0.01
N	-2.244056	-1.5482493956140662	0.7529107912281322	0.0	-0.01	0.02
O	5.236330208771868	2.706735604385934	1.484571	-0.02	-0.01	0.0
C	-0.080767	-3.627719186842198	0.3529043956140661	0.0	-0.03	0.01
C	-1.369725	-3.804796791228132	0.876779395614066	0.0	-0.02	0.01
C	-2.394477	-2.839309395614066	1.015194395614066	0.0	-0.01	0.01
O	2.894870208771868	1.9387797912281322	0.5123940219296697	-0.02	0.02	-0.05
C	1.7097192087718678	1.3521381868421982	0.4505140219296696	-0.02	0.03	-0.05
C	0.5959966043859339	2.1016381429828592	1.165523065789009	-0.01	0.13	-0.15
C	4.036335604385934	1.2611066043859338	-0.08136839561406607	-0.01	-0.01	-0.01
O	1.5022912087718678	0.2681704175437357	-0.09327962631560356	-0.02	-0.04	0.06
C	7.605912604385934	1.783121	0.713078	-0.01	0.0	0.0
O	-0.14854762631560353	2.5894997912281323	-1.3548676482452733	0.06	0.02	0.11
C	-1.130144252631207	1.8147108131578018	-0.6562497578936214	0.12	-0.03	0.36
O	-1.2903508131578016	0.659652	-1.253624857017141	0.03	0.0	0.13
O	-2.164879395614066	3.9350599780703304	0.1118005824562643	-0.01	0.05	0.04
C	-1.154414	4.676670582456264	-0.3731902087718678	0.0	0.04	0.02
C	-0.1632156043859339	4.023210395614066	-1.3318560219296696	0.01	0.01	0.05
C	-2.4363124175437356	2.612426395614066	-0.44605983508747143	0.04	0.01	0.08
O	-1.009098	5.83260597807033	-0.035671	0.0	0.05	0.0
C	-0.324415	4.578826813157802	-2.7528198131578017	0.0	-0.03	0.03
C	-3.3279356701749427	2.7192326263156037	-1.6879997912281322	0.16	-0.06	-0.02
C	0.7447712745608768	1.922278604385934	2.6877624614030746	-0.17	-0.01	-0.14
C	4.049530395614066	1.4322872087718679	-1.603577395614066	0.01	-0.02	-0.01
C	1.805913	-2.3902947912281323	-0.462011	0.0	-0.02	0.0
C	-3.415087	-0.6987563956140661	0.6706773956140661	0.0	-0.01	0.01
C	2.902963	-2.400935395614066	0.462195	0.0	-0.01	0.0
C	4.212478	-2.157938	-0.037069	0.0	0.0	0.0
C	4.435627	-1.921598	-1.413332	0.0	0.0	0.0
C	3.351772	-1.936981	-2.314887	0.0	0.0	0.0
C	2.028087	-2.170955395614066	-1.861915	0.0	-0.01	0.0
C	2.702139	-2.647495	1.981314	0.0	0.0	0.0
C	0.862607	-2.1968843956140662	-2.884245	0.0	-0.01	0.0
C	-4.245417	-0.739351395614066	-0.500772604385934	0.0	-0.01	0.01
C	-5.322515604385934	0.17432260438593392	-0.5902826043859339	0.01	-0.01	0.01
C	-5.577655	1.1118736043859339	0.43214939561406607	0.0	-0.01	0.01
C	-4.768133395614066	1.130788208771868	1.5840773956140661	-0.01	-0.02	0.01
C	-3.674927	0.2316206043859339	1.7342833956140662	0.0	-0.01	0.01
C	-4.016529604385934	-1.752054	-1.658185	0.01	0.0	0.0
C	-2.830127604385934	0.216979	3.033429	0.01	0.0	0.0
C	2.999016604385934	-1.360937	2.813088	-0.01	0.0	0.0
C	3.580177	-3.837598	2.496587	0.0	0.0	0.0
C	0.774034604385934	-0.861499	-3.691744604385934	-0.01	0.0	0.01
C	0.983682	-3.424543	-3.846787395614066	0.0	0.0	-0.01
C	-2.680610395614066	1.630926	3.67183	-0.01	0.0	0.0
C	-3.427625813157802	-0.779475	4.083104395614066	0.03	0.0	0.01
C	-3.6409038131578018	-1.0305556043859339	-2.985933208771868	0.03	0.01	0.02
C	-5.273524604385934	-2.66629	-1.8631223956140661	0.01	0.0	-0.01
C	0.73164	-4.893660186842197	0.10873139561406607	0.0	-0.03	0.01
C	-3.7398	-3.4130643956140663	1.452565395614066	0.0	-0.01	0.01
H	-1.645021	-4.824887791228132	1.1224043956140661	0.0	-0.02	0.01
H	0.6764457692984625	3.169052142982859	0.9324800438593392	0.07	0.13	-0.1
H	4.000150208771868	0.191734	0.135818	-0.02	0.0	0.0
H	7.619274604385934	1.591795	1.789413	-0.01	0.0	0.0
H	7.718459604385934	2.857143	0.5498543956140661	-0.01	0.0	0.01
H	8.402517604385933	1.230123	0.214523	-0.01	0.0	0.0
H	0.823252	4.341534560526594	-0.9700708131578017	0.0	0.09	0.03
H	-3.0167033736843964	2.1356835605265947	0.34436276929846255	-0.06	0.09	0.07
H	-0.20826379122813216	5.6640158131578024	-2.737811395614066	-0.02	-0.03	-0.01
H	-1.309317	4.3304992307015375	-3.1733098131578017	0.0	-0.07	0.03
H	0.4443213956140661	4.13676902192967	-3.4034294175437356	0.01	-0.05	0.04
H	-4.013027483332745	3.570049395614066	-1.5674535166672554	0.19	0.01	-0.19
H	-3.9310030438593393	1.8037154175437358	-1.7326264175437356	0.1	-0.04	0.04
H	-2.7653047140342824	2.8328679008764803	-2.623173	0.26	-0.23	0.0
H	1.7191706701749427	2.3112024394734054	3.0133724175437355	-0.16	-0.09	-0.04
H	0.666757714034282	0.8671538131578017	2.9756246921046126	-0.26	-0.03	-0.21
H	-0.050635725439123286	2.4781257912281323	3.1960326701749424	-0.17	0.02	-0.16
H	3.3949712087718678	0.685758395614066	-2.050020395614066	-0.02	0.01	-0.01
H	5.057163	1.2708286263156034	-1.981405	0.0	-0.06	0.0
H	3.7262889780703303	2.446667	-1.8806877912281321	0.05	0.0	-0.02
H	5.068473	-2.190864604385934	0.649224	0.0	0.01	0.0
H	5.458367	-1.751944604385934	-1.781401	0.0	0.01	0.0
H	3.539399	-1.7916836043859339	-3.387901	0.0	0.01	0.0
H	1.638436	-2.913885395614066	2.146943	0.0	-0.01	0.0
H	-0.08331	-2.315609791228132	-2.314582	0.0	-0.02	0.0
H	-5.985061208771868	0.13925	-1.46632	0.02	0.0	0.0
H	-6.422596	1.8091526043859338	0.338614	0.0	-0.01	0.0
H	-4.991480395614065	1.846218208771868	2.3923407912281323	-0.01	-0.02	0.02
H	-3.161487604385934	-2.407639395614066	-1.376168604385934	0.01	-0.01	0.01
H	-1.820706604385934	-0.158592	2.759473604385934	0.01	0.0	-0.01
H	2.820677	-1.545011	3.883006	0.0	0.0	0.0
H	2.335779208771868	-0.534847	2.486532	-0.02	0.0	0.0
H	4.044779604385934	-1.0344176043859339	2.680297604385934	-0.01	0.01	-0.01
H	3.339104	-4.046232	3.550139	0.0	0.0	0.0
H	4.651119	-3.593392	2.429561	0.0	0.0	0.0
H	3.402559395614066	-4.75098	1.910837	0.01	0.0	0.0
H	-0.091463	-0.894273395614066	-4.371555	0.0	-0.01	0.0
H	1.685732	-0.6971022087718678	-4.292972208771868	0.0	0.02	0.02
H	0.6388264175437357	-0.006907395614066075	-3.009519604385934	-0.04	-0.01	0.01
H	0.125572	-3.44802	-4.5357963956140654	0.0	0.0	-0.01
H	1.000700395614066	-4.363751	-3.271644395614066	0.01	0.0	-0.01
H	1.908057	-3.362722604385934	-4.442400395614066	0.0	0.01	-0.01
H	-1.936976604385934	1.5911837912281321	4.481136208771868	0.01	0.02	-0.02
H	-3.631863395614066	1.9850342087718678	4.101088791228132	-0.01	-0.02	0.02
H	-2.3493509780703303	2.368949791228132	2.915801604385934	-0.05	0.02	-0.01
H	-2.824058813157802	-0.7601106043859339	5.003767395614066	0.03	0.01	0.01
H	-3.433766813157802	-1.807955	3.689302395614066	0.03	0.0	0.01
H	-4.4674102087718675	-0.500589395614066	4.336806395614065	0.02	-0.01	0.01
H	-3.4372506263156035	-1.7737602087718678	-3.7718642087718677	0.06	0.02	0.02
H	-2.745931604385934	-0.4043778131578018	-2.8355030219296697	0.01	0.03	0.05
H	-4.4683322087718675	-0.381822	-3.329912	0.02	0.0	0.0
H	-5.051031604385934	-3.439344604385934	-2.614171791228132	0.01	0.01	-0.02
H	-6.130781604385934	-2.071552604385934	-2.224825395614066	0.01	0.01	-0.01
H	-5.569299	-3.162560395614066	-0.9276337912281322	0.0	-0.01	-0.02
H	1.646605	-4.911121791228132	0.7081563956140661	0.0	-0.02	0.01
H	0.144905	-5.785586186842198	0.3590517912281322	0.0	-0.03	0.02
H	1.02905	-4.960838186842198	-0.9451036043859339	0.0	-0.03	0.01
H	-4.449571604385935	-2.6460923956140663	1.7613087912281322	0.01	-0.01	0.02
H	-4.194031395614066	-3.981225604385934	0.630178	-0.01	0.01	0.0
H	-3.591681	-4.116540186842198	2.285654	0.0	-0.03	0.0
114
O	6.383128881039375	1.305743	0.130296	-0.01	0.0	0.0
Mg	-0.5329802379212493	-0.6098840706456217	0.004314453511879798	-0.02	-0.09	-0.13
O	-0.6346258327243723	1.5402476171337418	0.7434867880631351	-0.07	0.22	-0.27
C	5.255474881039375	1.8680258810393753	0.616433	-0.01	-0.01	0.0
N	0.441779	-2.436869356881874	0.02768188103937537	0.0	-0.03	-0.01
N	-2.244056	-1.5472551189606247	0.7509222379212493	0.0	-0.01	0.02
O	5.238318762078751	2.7077298810393753	1.484571	-0.02	-0.01	0.0
C	-0.080767	-3.624736356881874	0.3519101189606247	0.0	-0.03	0.01
C	-1.369725	-3.802808237921249	0.8757851189606246	0.0	-0.02	0.01
C	-2.394477	-2.8383151189606246	1.0142001189606247	0.0	-0.01	0.01
O	2.8968587620787507	1.9367912379212493	0.5173654051968768	-0.02	0.02	-0.05
C	1.7117077620787506	1.349155356881874	0.4554854051968768	-0.02	0.03	-0.05
C	0.5969908810393754	2.08871254648812	1.1804372155906306	-0.01	0.13	-0.15
C	4.037329881039375	1.2621008810393752	-0.08037411896062463	-0.01	-0.01	-0.01
O	1.5042797620787507	0.2721475241575015	-0.09924528623625223	-0.02	-0.04	0.06
C	7.606906881039375	1.783121	0.713078	-0.01	0.0	0.0
O	-0.1545132862362522	2.5875112379212495	-1.365804691433129	0.06	0.02	0.11
C	-1.1420755724725042	1.817693643118126	-0.6920437174175134	0.12	-0.03	0.36
O	-1.293333643118126	0.659652	-1.26655045351188	0.03	0.0	0.13
O	-2.1638851189606245	3.9300885948031232	0.10782347584249852	-0.01	0.05	0.04
C	-1.154414	4.6726934758424985	-0.3751787620787507	0.0	0.04	0.02
C	-0.16420988103937537	4.022216118960625	-1.336827405196877	0.01	0.01	0.05
C	-2.4402895241575013	2.6114321189606247	-0.45401404831500297	0.04	0.01	0.08
O	-1.009098	5.827634594803123	-0.035671	0.0	0.05	0.0
C	-0.324415	4.581809643118126	-2.755802643118126	0.0	-0.03	0.03
C	-3.343844096630006	2.7251982862362523	-1.6860112379212493	0.16	-0.06	-0.02
C	0.7616739776693813	1.9232728810393753	2.701682334551255	-0.17	-0.01	-0.14
C	4.048536118960625	1.4342757620787507	-1.6025831189606246	0.01	-0.02	-0.01
C	1.805913	-2.3883062379212494	-0.462011	0.0	-0.02	0.0
C	-3.415087	-0.6977621189606247	0.6696831189606247	0.0	-0.01	0.01
C	2.902963	-2.3999411189606246	0.462195	0.0	-0.01	0.0
C	4.212478	-2.157938	-0.037069	0.0	0.0	0.0
C	4.435627	-1.921598	-1.413332	0.0	0.0	0.0
C	3.351772	-1.936981	-2.314887	0.0	0.0	0.0
C	2.028087	-2.1699611189606247	-1.861915	0.0	-0.01	0.0
C	2.702139	-2.647495	1.981314	0.0	0.0	0.0
C	0.862607	-2.195890118960625	-2.884245	0.0	-0.01	0.0
C	-4.245417	-0.7383571189606246	-0.5017668810393754	0.0	-0.01	0.01
C	-5.323509881039375	0.17531688103937537	-0.5912768810393754	0.01	-0.01	0.01
C	-5.577655	1.1128678810393753	0.43115511896062464	0.0	-0.01	0.01
C	-4.767139118960625	1.1327767620787508	1.5830831189606247	-0.01	-0.02	0.01
C	-3.674927	0.23261488103937536	1.7332891189606248	0.0	-0.01	0.01
C	-4.017523881039375	-1.752054	-1.658185	0.01	0.0	0.0
C	-2.8311218810393752	0.216979	3.033429	0.01	0.0	0.0
C	3.0000108810393753	-1.360937	2.813088	-0.01	0.0	0.0
C	3.580177	-3.837598	2.496587	0.0	0.0	0.0
C	0.7750288810393754	-0.861499	-3.6927388810393755	-0.01	0.0	0.01
C	0.983682	-3.424543	-3.8457931189606245	0.0	0.0	-0.01
C	-2.6796161189606247	1.630926	3.67183	-0.01	0.0	0.0
C	-3.430608643118126	-0.779475	4.082110118960625	0.03	0.0	0.01
C	-3.643886643118126	-1.0315498810393753	-2.987921762078751	0.03	0.01	0.02
C	-5.274518881039375	-2.66629	-1.8621281189606247	0.01	0.0	-0.01
C	0.73164	-4.8906773568818735	0.10773711896062463	0.0	-0.03	0.01
C	-3.7398	-3.412070118960625	1.4515711189606246	0.0	-0.01	0.01
H	-1.645021	-4.822899237921249	1.1214101189606247	0.0	-0.02	0.01
H	0.6694858327243723	3.15612654648812	0.9424228103937536	0.07	0.13	-0.1
H	4.002138762078751	0.191734	0.135818	-0.02	0.0	0.0
H	7.620268881039375	1.591795	1.789413	-0.01	0.0	0.0
H	7.719453881039375	2.857143	0.5488601189606247	-0.01	0.0	0.01
H	8.403511881039375	1.230123	0.214523	-0.01	0.0	0.0
H	0.823252	4.332586070645622	-0.9730536431181261	0.0	0.09	0.03
H	-3.010737713763748	2.1267350706456214	0.33740283272437244	-0.06	0.09	0.07
H	-0.20627523792124927	5.666998643118126	-2.7368171189606247	-0.02	-0.03	-0.01
H	-1.309317	4.337459167275627	-3.176292643118126	0.0	-0.07	0.03
H	0.44332711896062466	4.1417404051968765	-3.4074065241575013	0.01	-0.05	0.04
H	-4.031918739748132	3.5690551189606246	-1.548562260251868	0.19	0.01	-0.19
H	-3.940945810393754	1.8076925241575015	-1.7366035241575013	0.1	-0.04	0.04
H	-2.79115590702376	2.855736263905633	-2.623173	0.26	-0.23	0.0
H	1.7350790966300058	2.3201509293543787	3.0173495241575012	-0.16	-0.09	-0.04
H	0.6926089070237595	0.8701366431181261	2.9965045018268825	-0.26	-0.03	-0.21
H	-0.03373302233061874	2.4761372379212494	3.2119410966300057	-0.17	0.02	-0.16
H	3.3969597620787506	0.6847641189606246	-2.0490261189606245	-0.02	0.01	-0.01
H	5.057163	1.2767942862362522	-1.981405	0.0	-0.06	0.0
H	3.721317594803123	2.446667	-1.8786992379212493	0.05	0.0	-0.02
H	5.068473	-2.1918588810393755	0.649224	0.0	0.01	0.0
H	5.458367	-1.7529388810393753	-1.781401	0.0	0.01	0.0
H	3.539399	-1.7926778810393753	-3.387901	0.0	0.01	0.0
H	1.638436	-2.9128911189606246	2.146943	0.0	-0.01	0.0
H	-0.08331	-2.3136212379212493	-2.314582	0.0	-0.02	0.0
H	-5.987049762078751	0.13925	-1.46632	0.02	0.0	0.0
H	-6.422596	1.8101468810393753	0.338614	0.0	-0.01	0.0
H	-4.990486118960624	1.8482067620787508	2.3903522379212494	-0.01	-0.02	0.02
H	-3.1624818810393753	-2.4066451189606246	-1.3771628810393755	0.01	-0.01	0.01
H	-1.8217008810393753	-0.158592	2.7604678810393755	0.01	0.0	-0.01
H	2.820677	-1.545011	3.883006	0.0	0.0	0.0
H	2.3377677620787507	-0.534847	2.486532	-0.02	0.0	0.0
H	4.045773881039375	-1.0354118810393753	2.6812918810393755	-0.01	0.01	-0.01
H	3.339104	-4.046232	3.550139	0.0	0.0	0.0
H	4.651119	-3.593392	2.429561	0.0	0.0	0.0
H	3.4015651189606246	-4.75098	1.910837	0.01	0.0	0.0
H	-0.091463	-0.8932791189606246	-4.371555	0.0	-0.01	0.0
H	1.685732	-0.6990907620787506	-4.294960762078751	0.0	0.02	0.02
H	0.6428035241575015	-0.005913118960624631	-3.0105138810393752	-0.04	-0.01	0.01
H	0.125572	-3.44802	-4.5348021189606245	0.0	0.0	-0.01
H	0.9997061189606247	-4.363751	-3.2706501189606247	0.01	0.0	-0.01
H	1.908057	-3.3637168810393754	-4.441406118960625	0.0	0.01	-0.01
H	-1.9379708810393754	1.5891952379212493	4.48312476207875	0.01	0.02	-0.02
H	-3.6308691189606246	1.9870227620787506	4.099100237921249	-0.01	-0.02	0.02
H	-2.344379594803123	2.3669612379212492	2.9167958810393753	-0.05	0.02	-0.01
H	-2.8270416431181262	-0.7611048810393753	5.002773118960625	0.03	0.01	0.01
H	-3.436749643118126	-1.807955	3.6883081189606246	0.03	0.0	0.01
H	-4.46939876207875	-0.49959511896062464	4.335812118960624	0.02	-0.01	0.01
H	-3.443216286236252	-1.7757487620787507	-3.7738527620787505	0.06	0.02	0.02
H	-2.7469258810393753	-0.4073606431181261	-2.840474405196877	0.01	0.03	0.05
H	-4.47032076207875	-0.381822	-3.329912	0.02	0.0	0.0
H	-5.052025881039375	-3.4403388810393754	-2.6121832379212493	0.01	0.01	-0.02
H	-6.131775881039375	-2.0725468810393752	-2.2238311189606246	0.01	0.01	-0.01
H	-5.569299	-3.1615661189606246	-0.9256452379212493	0.0	-0.01	-0.02
H	1.646605	-4.90913323792125	0.7071621189606246	0.0	-0.02	0.01
H	0.144905	-5.782603356881874	0.3570632379212493	0.0	-0.03	0.02
H	1.02905	-4.957855356881874	-0.9460978810393753	0.0	-0.03	0.01
H	-4.450565881039376	-2.645098118960625	1.7593202379212494	0.01	-0.01	0.02
H	-4.193037118960625	-3.9822198810393754	0.630178	-0.01	0.01	0.0
H	-3.591681	-4.113557356881874	2.285654	0.0	-0.03	0.0
114
O	6.384677503233952	1.305743	0.130296	-0.01	0.0	0.0
Mg	-0.5298829935320946	-0.5959464708944258	0.02444654204138494	-0.02	-0.09	-0.13
O	-0.6237854773623311	1.5061779288530408	0.7852995873167226	-0.07	0.22	-0.27
C	5.2570235032339525	1.8695745032339526	0.616433	-0.01	-0.01	0.0
N	0.441779	-2.432223490298142	0.02923050323395269	0.0	-0.03	-0.01
N	-2.244056	-1.5457064967660474	0.7478249935320946	0.0	-0.01	0.02
O	5.241416006467905	2.7092785032339526	1.484571	-0.02	-0.01	0.0
C	-0.080767	-3.620090490298142	0.35036149676604733	0.0	-0.03	0.01
C	-1.369725	-3.7997109935320945	0.8742364967660473	0.0	-0.02	0.01
C	-2.394477	-2.8367664967660473	1.0126514967660474	0.0	-0.01	0.01
O	2.8999560064679053	1.9336939935320947	0.5251085161697634	-0.02	0.02	-0.05
C	1.7148050064679052	1.3445094902981418	0.4632285161697634	-0.02	0.03	-0.05
C	0.5985395032339527	2.0685804579586153	1.2036665485092903	-0.01	0.13	-0.15
C	4.038878503233953	1.2636495032339525	-0.07882549676604732	-0.01	-0.01	-0.01
O	1.5073770064679053	0.27834201293581073	-0.10853701940371613	-0.02	-0.04	0.06
C	7.6084555032339525	1.783121	0.713078	-0.01	0.0	0.0
O	-0.1638050194037161	2.584413993532095	-1.3828395355734795	0.06	0.02	0.11
C	-1.1606590388074323	1.8223395097018582	-0.7477941164222968	0.12	-0.03	0.36
O	-1.297979509701858	0.659652	-1.286682542041385	0.03	0.0	0.13
O	-2.1623364967660472	3.9223454838302363	0.10162898706418924	-0.01	0.05	0.04
C	-1.154414	4.666498987064189	-0.3782760064679054	0.0	0.04	0.02
C	-0.1657585032339527	4.020667496766047	-1.3445705161697634	0.01	0.01	0.05
C	-2.4464840129358105	2.6098834967660474	-0.4664030258716215	0.04	0.01	0.08
O	-1.009098	5.8198914838302365	-0.035671	0.0	0.05	0.0
C	-0.324415	4.586455509701858	-2.760448509701858	0.0	-0.03	0.03
C	-3.3686220517432433	2.7344900194037165	-1.6829139935320947	0.16	-0.06	-0.02
C	0.7880005549771957	1.9248215032339526	2.7233630452753372	-0.17	-0.01	-0.14
C	4.0469874967660475	1.4373730064679053	-1.6010344967660473	0.01	-0.02	-0.01
C	1.805913	-2.385208993532095	-0.462011	0.0	-0.02	0.0
C	-3.415087	-0.6962134967660474	0.6681344967660474	0.0	-0.01	0.01
C	2.902963	-2.3983924967660473	0.462195	0.0	-0.01	0.0
C	4.212478	-2.157938	-0.037069	0.0	0.0	0.0
C	4.435627	-1.921598	-1.413332	0.0	0.0	0.0
C	3.351772	-1.936981	-2.314887	0.0	0.0	0.0
C	2.028087	-2.1684124967660474	-1.861915	0.0	-0.01	0.0
C	2.702139	-2.647495	1.981314	0.0	0.0	0.0
C	0.862607	-2.1943414967660475	-2.884245	0.0	-0.01	0.0
C	-4.245417	-0.7368084967660473	-0.5033155032339527	0.0	-0.01	0.01
C	-5.325058503233953	0.1768655032339527	-0.5928255032339527	0.01	-0.01	0.01
C	-5.577655	1.1144165032339526	0.4296064967660473	0.0	-0.01	0.01
C	-4.765590496766047	1.1358740064679054	1.5815344967660474	-0.01	-0.02	0.01
C	-3.674927	0.23416350323395269	1.7317404967660475	0.0	-0.01	0.01
C	-4.019072503233953	-1.752054	-1.658185	0.01	0.0	0.0
C	-2.8326705032339525	0.216979	3.033429	0.01	0.0	0.0
C	3.0015595032339526	-1.360937	2.813088	-0.01	0.0	0.0
C	3.580177	-3.837598	2.496587	0.0	0.0	0.0
C	0.7765775032339527	-0.861499	-3.694287503233953	-0.01	0.0	0.01
C	0.983682	-3.424543	-3.844244496766047	0.0	0.0	-0.01
C	-2.6780674967660474	1.630926	3.67183	-0.01	0.0	0.0
C	-3.435254509701858	-0.779475	4.080561496766047	0.03	0.0	0.01
C	-3.648532509701858	-1.0330985032339526	-2.9910190064679054	0.03	0.01	0.02
C	-5.276067503233953	-2.66629	-1.8605794967660474	0.01	0.0	-0.01
C	0.73164	-4.886031490298142	0.10618849676604732	0.0	-0.03	0.01
C	-3.7398	-3.4105214967660475	1.4500224967660473	0.0	-0.01	0.01
H	-1.645021	-4.819801993532095	1.1198614967660474	0.0	-0.02	0.01
H	0.6586454773623311	3.135994457958615	0.9579090323395268	0.07	0.13	-0.1
H	4.005236006467905	0.191734	0.135818	-0.02	0.0	0.0
H	7.621817503233952	1.591795	1.789413	-0.01	0.0	0.0
H	7.721002503233953	2.857143	0.5473114967660474	-0.01	0.0	0.01
H	8.405060503233953	1.230123	0.214523	-0.01	0.0	0.0
H	0.823252	4.318648470894426	-0.977699509701858	0.0	0.09	0.03
H	-3.0014459805962836	2.1127974708944257	0.3265624773623312	-0.06	0.09	0.07
H	-0.20317799353209465	5.671644509701858	-2.7352684967660474	-0.02	-0.03	-0.01
H	-1.309317	4.348299522637668	-3.180938509701858	0.0	-0.07	0.03
H	0.4417784967660473	4.149483516169763	-3.4136010129358105	0.01	-0.05	0.04
H	-4.061342561445101	3.5675064967660473	-1.519138438554899	0.19	0.01	-0.19
H	-3.956432032339527	1.813887012935811	-1.7427980129358107	0.1	-0.04	0.04
H	-2.83142008408277	2.8913545743809115	-2.623173	0.26	-0.23	0.0
H	1.7598570517432428	2.3340885291055744	3.0235440129358104	-0.16	-0.09	-0.04
H	0.7328730840827699	0.874782509701858	3.0290255679130063	-0.26	-0.03	-0.21
H	-0.0074064450228043255	2.473039993532095	3.236719051743243	-0.17	0.02	-0.16
H	3.400057006467905	0.6832154967660473	-2.047477496766047	-0.02	0.01	-0.01
H	5.057163	1.286086019403716	-1.981405	0.0	-0.06	0.0
H	3.7135744838302363	2.446667	-1.8756019935320947	0.05	0.0	-0.02
H	5.068473	-2.193407503233953	0.649224	0.0	0.01	0.0
H	5.458367	-1.7544875032339526	-1.781401	0.0	0.01	0.0
H	3.539399	-1.7942265032339526	-3.387901	0.0	0.01	0.0
H	1.638436	-2.9113424967660473	2.146943	0.0	-0.01	0.0
H	-0.08331	-2.3105239935320947	-2.314582	0.0	-0.02	0.0
H	-5.990147006467906	0.13925	-1.46632	0.02	0.0	0.0
H	-6.422596	1.8116955032339526	0.338614	0.0	-0.01	0.0
H	-4.988937496766047	1.8513040064679054	2.387254993532095	-0.01	-0.02	0.02
H	-3.1640305032339526	-2.4050964967660473	-1.3787115032339528	0.01	-0.01	0.01
H	-1.8232495032339526	-0.158592	2.7620165032339528	0.01	0.0	-0.01
H	2.820677	-1.545011	3.883006	0.0	0.0	0.0
H	2.3408650064679053	-0.534847	2.486532	-0.02	0.0	0.0
H	4.047322503233953	-1.0369605032339526	2.682840503233953	-0.01	0.01	-0.01
H	3.339104	-4.046232	3.550139	0.0	0.0	0.0
H	4.651119	-3.593392	2.429561	0.0	0.0	0.0
H	3.4000164967660473	-4.75098	1.910837	0.01	0.0	0.0
H	-0.091463	-0.8917304967660473	-4.371555	0.0	-0.01	0.0
H	1.685732	-0.7021880064679054	-4.2980580064679055	0.0	0.02	0.02
H	0.6489980129358108	-0.004364496766047313	-3.0120625032339525	-0.04	-0.01	0.01
H	0.125572	-3.44802	-4.533253496766047	0.0	0.0	-0.01
H	0.9981574967660474	-4.363751	-3.2691014967660474	0.01	0.0	-0.01
H	1.908057	-3.3652655032339527	-4.439857496766048	0.0	0.01	-0.01
H	-1.9395195032339527	1.5860979935320947	4.486222006467905	0.01	0.02	-0.02
H	-3.6293204967660473	1.9901200064679052	4.096002993532094	-0.01	-0.02	0.02
H	-2.3366364838302363	2.3638639935320946	2.9183445032339526	-0.05	0.02	-0.01
H	-2.831687509701858	-0.7626535032339526	5.0012244967660475	0.03	0.01	0.01
H	-3.441395509701858	-1.807955	3.6867594967660473	0.03	0.0	0.01
H	-4.472496006467905	-0.4980464967660473	4.334263496766047	0.02	-0.01	0.01
H	-3.4525080194037163	-1.7788460064679052	-3.776950006467905	0.06	0.02	0.02
H	-2.7484745032339526	-0.4120065097018581	-2.848217516169764	0.01	0.03	0.05
H	-4.473418006467905	-0.381822	-3.329912	0.02	0.0	0.0
H	-5.0535745032339525	-3.4418875032339526	-2.6090859935320947	0.01	0.01	-0.02
H	-6.133324503233952	-2.0740955032339525	-2.2222824967660473	0.01	0.01	-0.01
H	-5.569299	-3.1600174967660473	-0.9225479935320946	0.0	-0.01	-0.02
H	1.646605	-4.906035993532095	0.7056134967660473	0.0	-0.02	0.01
H	0.144905	-5.777957490298142	0.3539659935320946	0.0	-0.03	0.02
H	1.02905	-4.953209490298142	-0.9476465032339526	0.0	-0.03	0.01
H	-4.452114503233953	-2.6435494967660476	1.7562229935320948	0.01	-0.01	0.02
H	-4.1914884967660475	-3.9837685032339527	0.630178	-0.01	0.01	0.0
H	-3.591681	-4.1089114902981425	2.285654	0.0	-0.03	0.0
114
O	6.386628881039375	1.305743	0.130296	-0.01	0.0	0.0
Mg	-0.5259802379212493	-0.5783840706456217	0.04981445351187978	-0.02	-0.09	-0.13
O	-0.6101258327243724	1.4632476171337419	0.837986788063135	-0.07	0.22	-0.27
C	5.258974881039375	1.8715258810393753	0.616433	-0.01	-0.01	0.0
N	0.441779	-2.426369356881874	0.031181881039375366	0.0	-0.03	-0.01
N	-2.244056	-1.5437551189606247	0.7439222379212493	0.0	-0.01	0.02
O	5.2453187620787505	2.711229881039375	1.484571	-0.02	-0.01	0.0
C	-0.080767	-3.614236356881874	0.3484101189606247	0.0	-0.03	0.01
C	-1.369725	-3.795808237921249	0.8722851189606246	0.0	-0.02	0.01
C	-2.394477	-2.8348151189606248	1.0107001189606246	0.0	-0.01	0.01
O	2.903858762078751	1.9297912379212492	0.5348654051968769	-0.02	0.02	-0.05
C	1.7187077620787508	1.3386553568818738	0.4729854051968768	-0.02	0.03	-0.05
C	0.6004908810393754	2.04321254648812	1.2329372155906306	-0.01	0.13	-0.15
C	4.040829881039375	1.2656008810393753	-0.07687411896062463	-0.01	-0.01	-0.01
O	1.5112797620787508	0.2861475241575015	-0.12024528623625222	-0.02	-0.04	0.06
C	7.610406881039375	1.783121	0.713078	-0.01	0.0	0.0
O	-0.1755132862362522	2.5805112379212494	-1.404304691433129	0.06	0.02	0.11
C	-1.1840755724725043	1.8281936431181263	-0.8180437174175132	0.12	-0.03	0.36
O	-1.303833643118126	0.659652	-1.3120504535118798	0.03	0.0	0.13
O	-2.1603851189606247	3.912588594803123	0.09382347584249853	-0.01	0.05	0.04
C	-1.154414	4.658693475842498	-0.38217876207875073	0.0	0.04	0.02
C	-0.16770988103937537	4.018716118960625	-1.3543274051968768	0.01	0.01	0.05
C	-2.4542895241575016	2.607932118960625	-0.48201404831500294	0.04	0.01	0.08
O	-1.009098	5.810134594803123	-0.035671	0.0	0.05	0.0
C	-0.324415	4.592309643118126	-2.766302643118126	0.0	-0.03	0.03
C	-3.399844096630006	2.7461982862362526	-1.6790112379212492	0.16	-0.06	-0.02
C	0.8211739776693813	1.9267728810393754	2.750682334551255	-0.17	-0.01	-0.14
C	4.045036118960625	1.4412757620787509	-1.5990831189606245	0.01	-0.02	-0.01
C	1.805913	-2.3813062379212493	-0.462011	0.0	-0.02	0.0
C	-3.415087	-0.6942621189606246	0.6661831189606247	0.0	-0.01	0.01
C	2.902963	-2.3964411189606247	0.462195	0.0	-0.01	0.0
C	4.212478	-2.157938	-0.037069	0.0	0.0	0.0
C	4.435627	-1.921598	-1.413332	0.0	0.0	0.0
C	3.351772	-1.936981	-2.314887	0.0	0.0	0.0
C	2.028087	-2.166461118960625	-1.861915	0.0	-0.01	0.0
C	2.702139	-2.647495	1.981314	0.0	0.0	0.0
C	0.862607	-2.192390118960625	-2.884245	0.0	-0.01	0.0
C	-4.245417	-0.7348571189606246	-0.5052668810393754	0.0	-0.01	0.01
C	-5.327009881039375	0.17881688103937537	-0.5947768810393754	0.01	-0.01	0.01
C	-5.577655	1.1163678810393753	0.42765511896062464	0.0	-0.01	0.01
C	-4.763639118960625	1.139776762078751	1.5795831189606246	-0.01	-0.02	0.01
C	-3.674927	0.23611488103937536	1.7297891189606247	0.0	-0.01	0.01
C	-4.021023881039375	-1.752054	-1.658185	0.01	0.0	0.0
C	-2.834621881039375	0.216979	3.033429	0.01	0.0	0.0
C	3.003510881039375	-1.360937	2.813088	-0.01	0.0	0.0
C	3.580177	-3.837598	2.496587	0.0	0.0	0.0
C	0.7785288810393755	-0.861499	-3.6962388810393754	-0.01	0.0	0.01
C	0.983682	-3.424543	-3.8422931189606246	0.0	0.0	-0.01
C	-2.676116118960625	1.630926	3.67183	-0.01	0.0	0.0
C	-3.441108643118126	-0.779475	4.078610118960625	0.03	0.0	0.01
C	-3.654386643118126	-1.0350498810393753	-2.994921762078751	0.03	0.01	0.02
C	-5.278018881039375	-2.66629	-1.8586281189606246	0.01	0.0	-0.01
C	0.73164	-4.880177356881873	0.10423711896062463	0.0	-0.03	0.01
C	-3.7398	-3.408570118960625	1.4480711189606246	0.0	-0.01	0.01
H	-1.645021	-4.81589923792125	1.1179101189606246	0.0	-0.02	0.01
H	0.6449858327243724	3.11062654648812	0.9774228103937537	0.07	0.13	-0.1
H	4.00913876207875	0.191734	0.135818	-0.02	0.0	0.0
H	7.623768881039375	1.591795	1.789413	-0.01	0.0	0.0
H	7.722953881039375	2.857143	0.5453601189606246	-0.01	0.0	0.01
H	8.407011881039375	1.230123	0.214523	-0.01	0.0	0.0
H	0.823252	4.3010860706456215	-0.9835536431181261	0.0	0.09	0.03
H	-2.9897377137637475	2.0952350706456215	0.3129028327243724	-0.06	0.09	0.07
H	-0.19927523792124927	5.677498643118127	-2.733317118960625	-0.02	-0.03	-0.01
H	-1.309317	4.361959167275627	-3.186792643118126	0.0	-0.07	0.03
H	0.43982711896062465	4.1592404051968765	-3.4214065241575016	0.01	-0.05	0.04
H	-4.098418739748132	3.5655551189606247	-1.482062260251868	0.19	0.01	-0.19
H	-3.9759458103937537	1.8216925241575015	-1.7506035241575013	0.1	-0.04	0.04
H	-2.8821559070237597	2.9362362639056334	-2.623173	0.26	-0.23	0.0
H	1.7910790966300059	2.3516509293543786	3.0313495241575015	-0.16	-0.09	-0.04
H	0.7836089070237595	0.8806366431181261	3.0700045018268827	-0.26	-0.03	-0.21
H	0.02576697766938125	2.4691372379212493	3.2679410966300058	-0.17	0.02	-0.16
H	3.4039597620787507	0.6812641189606246	-2.0455261189606246	-0.02	0.01	-0.01
H	5.057163	1.2977942862362521	-1.981405	0.0	-0.06	0.0
H	3.703817594803123	2.446667	-1.8716992379212491	0.05	0.0	-0.02
H	5.068473	-2.1953588810393754	0.649224	0.0	0.01	0.0
H	5.458367	-1.7564388810393754	-1.781401	0.0	0.01	0.0
H	3.539399	-1.7961778810393754	-3.387901	0.0	0.01	0.0
H	1.638436	-2.9093911189606247	2.146943	0.0	-0.01	0.0
H	-0.08331	-2.306621237921249	-2.314582	0.0	-0.02	0.0
H	-5.994049762078751	0.13925	-1.46632	0.02	0.0	0.0
H	-6.422596	1.8136468810393753	0.338614	0.0	-0.01	0.0
H	-4.986986118960624	1.855206762078751	2.3833522379212493	-0.01	-0.02	0.02
H	-3.165981881039375	-2.4031451189606248	-1.3806628810393755	0.01	-0.01	0.01
H	-1.8252008810393754	-0.158592	2.7639678810393753	0.01	0.0	-0.01
H	2.820677	-1.545011	3.883006	0.0	0.0	0.0
H	2.344767762078751	-0.534847	2.486532	-0.02	0.0	0.0
H	4.049273881039375	-1.0389118810393754	2.6847918810393754	-0.01	0.01	-0.01
H	3.339104	-4.046232	3.550139	0.0	0.0	0.0
H	4.651119	-3.593392	2.429561	0.0	0.0	0.0
H	3.398065118960625	-4.75098	1.910837	0.01	0.0	0.0
H	-0.091463	-0.8897791189606246	-4.371555	0.0	-0.01	0.0
H	1.685732	-0.7060907620787507	-4.3019607620787506	0.0	0.02	0.02
H	0.6568035241575015	-0.0024131189606246325	-3.014013881039375	-0.04	-0.01	0.01
H	0.125572	-3.44802	-4.531302118960625	0.0	0.0	-0.01
H	0.9962061189606246	-4.363751	-3.267150118960625	0.01	0.0	-0.01
H	1.908057	-3.367216881039375	-4.437906118960625	0.0	0.01	-0.01
H	-1.9414708810393755	1.5821952379212492	4.49012476207875	0.01	0.02	-0.02
H	-3.6273691189606247	1.9940227620787507	4.092100237921249	-0.01	-0.02	0.02
H	-2.326879594803123	2.359961237921249	2.920295881039375	-0.05	0.02	-0.01
H	-2.837541643118126	-0.7646048810393754	4.999273118960625	0.03	0.01	0.01
H	-3.447249643118126	-1.807955	3.6848081189606248	0.03	0.0	0.01
H	-4.47639876207875	-0.49609511896062464	4.332312118960624	0.02	-0.01	0.01
H	-3.4642162862362524	-1.7827487620787508	-3.7808527620787507	0.06	0.02	0.02
H	-2.750425881039375	-0.4178606431181261	-2.857974405196877	0.01	0.03	0.05
H	-4.47732076207875	-0.381822	-3.329912	0.02	0.0	0.0
H	-5.055525881039375	-3.443838881039375	-2.605183237921249	0.01	0.01	-0.02
H	-6.135275881039375	-2.076046881039375	-2.2203311189606247	0.01	0.01	-0.01
H	-5.569299	-3.1580661189606247	-0.9186452379212493	0.0	-0.01	-0.02
H	1.646605	-4.90213323792125	0.7036621189606246	0.0	-0.02	0.01
H	0.144905	-5.772103356881874	0.35006323792124927	0.0	-0.03	0.02
H	1.02905	-4.947355356881873	-0.9495978810393754	0.0	-0.03	0.01
H	-4.454065881039376	-2.641598118960625	1.7523202379212492	0.01	-0.01	0.02
H	-4.189537118960625	-3.9857198810393752	0.630178	-0.01	0.01	0.0
H	-3.591681	-4.103057356881874	2.285654	0.0	-0.03	0.0
114
O	6.388792	1.305743	0.130296	-0.01	0.0	0.0
Mg	-0.521654	-0.558916	0.07793499999999999	-0.02	-0.09	-0.13
O	-0.594984	1.415659	0.896391	-0.07	0.22	-0.27
C	5.261138	1.873689	0.616433	-0.01	-0.01	0.0
N	0.441779	-2.41988	0.033345	0.0	-0.03	-0.01
N	-2.244056	-1.541592	0.739596	0.0	-0.01	0.02
O	5.249645	2.713393	1.484571	-0.02	-0.01	0.0
C	-0.080767	-3.607747	0.346247	0.0	-0.03	0.01
C	-1.369725	-3.791482	0.870122	0.0	-0.02	0.01
C	-2.394477	-2.832652	1.008537	0.0	-0.01	0.01
O	2.908185	1.925465	0.545681	-0.02	0.02	-0.05
C	1.723034	1.332166	0.483801	-0.02	0.03	-0.05
C	0.602654	2.015092	1.265384	-0.01	0.13	-0.15
C	4.042993	1.267764	-0.074711	-0.01	-0.01	-0.01
O	1.515606	0.2948	-0.133224	-0.02	-0.04	0.06
C	7.61257	1.783121	0.713078	-0.01	0.0	0.0
O	-0.188492	2.576185	-1.428099	0.06	0.02	0.11
C	-1.210033	1.834683	-0.895916	0.12	-0.03	0.36
O	-1.310323	0.659652	-1.340171	0.03	0.0	0.13
O	-2.158222	3.901773	0.085171	-0.01	0.05	0.04
C	-1.154414	4.650041	-0.386505	0.0	0.04	0.02
C	-0.169873	4.016553	-1.365143	0.01	0.01	0.05
C	-2.462942	2.605769	-0.499319	0.04	0.01	0.08
O	-1.009098	5.799319	-0.035671	0.0	0.05	0.0
C	-0.324415	4.598799	-2.772792	0.0	-0.03	0.03
C	-3.434454	2.759177	-1.674685	0.16	-0.06	-0.02
C	0.857947	1.928936	2.780966	-0.17	-0.01	-0.14
C	4.042873	1.445602	-1.59692	0.01	-0.02	-0.01
C	1.805913	-2.37698	-0.462011	0.0	-0.02	0.0
C	-3.415087	-0.692099	0.66402	0.0	-0.01	0.01
C	2.902963	-2.394278	0.462195	0.0	-0.01	0.0
C	4.212478	-2.157938	-0.037069	0.0	0.0	0.0
C	4.435627	-1.921598	-1.413332	0.0	0.0	0.0
C	3.351772	-1.936981	-2.314887	0.0	0.0	0.0
C	2.028087	-2.164298	-1.861915	0.0	-0.01	0.0
C	2.702139	-2.647495	1.981314	0.0	0.0	0.0
C	0.862607	-2.190227	-2.884245	0.0	-0.01	0.0
C	-4.245417	-0.732694	-0.50743	0.0	-0.01	0.01
C	-5.329173	0.18098	-0.59694	0.01	-0.01	0.01
C	-5.577655	1.118531	0.425492	0.0	-0.01	0.01
C	-4.761476	1.144103	1.57742	-0.01	-0.02	0.01
C	-3.674927	0.238278	1.727626	0.0	-0.01	0.01
C	-4.023187	-1.752054	-1.658185	0.01	0.0	0.0
C	-2.836785	0.216979	3.033429	0.01	0.0	0.0
C	3.005674	-1.360937	2.813088	-0.01	0.0	0.0
C	3.580177	-3.837598	2.496587	0.0	0.0	0.0
C	0.780692	-0.861499	-3.698402	-0.01	0.0	0.01
C	0.983682	-3.424543	-3.84013	0.0	0.0	-0.01
C	-2.673953	1.630926	3.67183	-0.01	0.0	0.0
C	-3.447598	-0.779475	4.076447	0.03	0.0	0.01
C	-3.660876	-1.037213	-2.999248	0.03	0.01	0.02
C	-5.280182	-2.66629	-1.856465	0.01	0.0	-0.01
C	0.73164	-4.873688	0.102074	0.0	-0.03	0.01
C	-3.7398	-3.406407	1.445908	0.0	-0.01	0.01
H	-1.645021	-4.811573	1.115747	0.0	-0.02	0.01
H	0.629844	3.082506	0.999054	0.07	0.13	-0.1
H	4.013465	0.191734	0.135818	-0.02	0.0	0.0
H	7.625932	1.591795	1.789413	-0.01	0.0	0.0
H	7.725117	2.857143	0.543197	-0.01	0.0	0.01
H	8.409175	1.230123	0.214523	-0.01	0.0	0.0
H	0.823252	4.281618	-0.990043	0.0	0.09	0.03
H	-2.976759	2.075767	0.297761	-0.06	0.09	0.07
H	-0.194949	5.683988	-2.731154	-0.02	-0.03	-0.01
H	-1.309317	4.377101	-3.193282	0.0	-0.07	0.03
H	0.437664	4.170056	-3.430059	0.01	-0.05	0.04
H	-4.139518	3.563392	-1.440963	0.19	0.01	-0.19
H	-3.997577	1.830345	-1.759256	0.1	-0.04	0.04
H	-2.938397	2.985988	-2.623173	0.26	-0.23	0.0
H	1.825689	2.371119	3.040002	-0.16	-0.09	-0.04
H	0.83985	0.887126	3.11543	-0.26	-0.03	-0.21
H	0.06253999999999998	2.464811	3.302551	-0.17	0.02	-0.16
H	3.408286	0.679101	-2.043363	-0.02	0.01	-0.01
H	5.057163	1.310773	-1.981405	0.0	-0.06	0.0
H	3.693002	2.446667	-1.867373	0.05	0.0	-0.02
H	5.068473	-2.197522	0.649224	0.0	0.01	0.0
H	5.458367	-1.758602	-1.781401	0.0	0.01	0.0
H	3.539399	-1.798341	-3.387901	0.0	0.01	0.0
H	1.638436	-2.907228	2.146943	0.0	-0.01	0.0
H	-0.08331	-2.302295	-2.314582	0.0	-0.02	0.0
H	-5.998376	0.13925	-1.46632	0.02	0.0	0.0
H	-6.422596	1.81581	0.338614	0.0	-0.01	0.0
H	-4.984823	1.859533	2.379026	-0.01	-0.02	0.02
H	-3.168145	-2.400982	-1.382826	0.01	-0.01	0.01
H	-1.827364	-0.158592	2.766131	0.01	0.0	-0.01
H	2.820677	-1.545011	3.883006	0.0	0.0	0.0
H	2.349094	-0.534847	2.486532	-0.02	0.0	0.0
H	4.051437	-1.041075	2.686955	-0.01	0.01	-0.01
H	3.339104	-4.046232	3.550139	0.0	0.0	0.0
H	4.651119	-3.593392	2.429561	0.0	0.0	0.0
H	3.395902	-4.75098	1.910837	0.01	0.0	0.0
H	-0.091463	-0.887616	-4.371555	0.0	-0.01	0.0
H	1.685732	-0.710417	-4.306287	0.0	0.02	0.02
H	0.665456	-2.5000000000000087E-4	-3.016177	-0.04	-0.01	0.01
H	0.125572	-3.44802	-4.529139	0.0	0.0	-0.01
H	0.994043	-4.363751	-3.264987	0.01	0.0	-0.01
H	1.908057	-3.36938	-4.435743	0.0	0.01	-0.01
H	-1.943634	1.577869	4.494451	0.01	0.02	-0.02
H	-3.625206	1.998349	4.087774	-0.01	-0.02	0.02
H	-2.316064	2.355635	2.922459	-0.05	0.02	-0.01
H	-2.844031	-0.766768	4.99711	0.03	0.01	0.01
H	-3.453739	-1.807955	3.682645	0.03	0.0	0.01
H	-4.480725	-0.493932	4.330149	0.02	-0.01	0.01
H	-3.477195	-1.787075	-3.785179	0.06	0.02	0.02
H	-2.752589	-0.42435	-2.86879	0.01	0.03	0.05
H	-4.481647	-0.381822	-3.329912	0.02	0.0	0.0
H	-5.057689	-3.446002	-2.600857	0.01	0.01	-0.02
H	-6.137439	-2.07821	-2.218168	0.01	0.01	-0.01
H	-5.569299	-3.155903	-0.914319	0.0	-0.01	-0.02
H	1.646605	-4.897807	0.701499	0.0	-0.02	0.01
H	0.144905	-5.765614	0.345737	0.0	-0.03	0.02
H	1.02905	-4.940866	-0.951761	0.0	-0.03	0.01
H	-4.456229	-2.639435	1.747994	0.01	-0.01	0.02
H	-4.187374	-3.987883	0.630178	-0.01	0.01	0.0
H	-3.591681	-4.096568	2.285654	0.0	-0.03	0.0
114
O	6.390955118960624	1.305743	0.130296	-0.01	0.0	0.0
Mg	-0.5173277620787506	-0.5394479293543784	0.10605554648812017	-0.02	-0.09	-0.13
O	-0.5798421672756275	1.3680703828662582	0.954795211936865	-0.07	0.22	-0.27
C	5.263301118960625	1.8758521189606245	0.616433	-0.01	-0.01	0.0
N	0.441779	-2.413390643118126	0.03550811896062463	0.0	-0.03	-0.01
N	-2.244056	-1.5394288810393755	0.7352697620787507	0.0	-0.01	0.02
O	5.25397123792125	2.7155561189606248	1.484571	-0.02	-0.01	0.0
C	-0.080767	-3.601257643118126	0.34408388103937537	0.0	-0.03	0.01
C	-1.369725	-3.7871557620787506	0.8679588810393754	0.0	-0.02	0.01
C	-2.394477	-2.830488881039375	1.0063738810393754	0.0	-0.01	0.01
O	2.912511237921249	1.9211387620787508	0.5564965948031231	-0.02	0.02	-0.05
C	1.7273602379212492	1.3256766431181262	0.49461659480312314	-0.02	0.03	-0.05
C	0.6048171189606246	1.9869714535118799	1.2978307844093695	-0.01	0.13	-0.15
C	4.045156118960625	1.2699271189606245	-0.07254788103937537	-0.01	-0.01	-0.01
O	1.5199322379212492	0.3034524758424985	-0.14620271376374777	-0.02	-0.04	0.06
C	7.614733118960625	1.783121	0.713078	-0.01	0.0	0.0
O	-0.20147071376374776	2.571858762078751	-1.4518933085668708	0.06	0.02	0.11
C	-1.2359904275274955	1.8411723568818739	-0.9737882825824866	0.12	-0.03	0.36
O	-1.3168123568818737	0.659652	-1.3682915464881202	0.03	0.0	0.13
O	-2.156058881039375	3.8909574051968767	0.07651852415750149	-0.01	0.05	0.04
C	-1.154414	4.6413885241575015	-0.39083123792124924	0.0	0.04	0.02
C	-0.17203611896062462	4.014389881039375	-1.3759585948031232	0.01	0.01	0.05
C	-2.4715944758424984	2.603605881039375	-0.5166239516849971	0.04	0.01	0.08
O	-1.009098	5.7885034051968765	-0.035671	0.0	0.05	0.0
C	-0.324415	4.605288356881873	-2.779281356881874	0.0	-0.03	0.03
C	-3.469063903369994	2.772155713763748	-1.6703587620787508	0.16	-0.06	-0.02
C	0.8947200223306186	1.9310991189606246	2.8112496654487447	-0.17	-0.01	-0.14
C	4.040709881039375	1.4499282379212493	-1.5947568810393753	0.01	-0.02	-0.01
C	1.805913	-2.372653762078751	-0.462011	0.0	-0.02	0.0
C	-3.415087	-0.6899358810393754	0.6618568810393755	0.0	-0.01	0.01
C	2.902963	-2.392114881039375	0.462195	0.0	-0.01	0.0
C	4.212478	-2.157938	-0.037069	0.0	0.0	0.0
C	4.435627	-1.921598	-1.413332	0.0	0.0	0.0
C	3.351772	-1.936981	-2.314887	0.0	0.0	0.0
C	2.028087	-2.1621348810393752	-1.861915	0.0	-0.01	0.0
C	2.702139	-2.647495	1.981314	0.0	0.0	0.0
C	0.862607	-2.1880638810393753	-2.884245	0.0	-0.01	0.0
C	-4.245417	-0.7305308810393754	-0.5095931189606246	0.0	-0.01	0.01
C	-5.331336118960625	0.18314311896062463	-0.5991031189606246	0.01	-0.01	0.01
C	-5.577655	1.1206941189606245	0.4233288810393753	0.0	-0.01	0.01
C	-4.759312881039375	1.1484292379212493	1.5752568810393754	-0.01	-0.02	0.01
C	-3.674927	0.24044111896062462	1.7254628810393755	0.0	-0.01	0.01
C	-4.025350118960625	-1.752054	-1.658185	0.01	0.0	0.0
C	-2.8389481189606247	0.216979	3.033429	0.01	0.0	0.0
C	3.007837118960625	-1.360937	2.813088	-0.01	0.0	0.0
C	3.580177	-3.837598	2.496587	0.0	0.0	0.0
C	0.7828551189606247	-0.861499	-3.700565118960625	-0.01	0.0	0.01
C	0.983682	-3.424543	-3.837966881039375	0.0	0.0	-0.01
C	-2.671789881039375	1.630926	3.67183	-0.01	0.0	0.0
C	-3.454087356881874	-0.779475	4.074283881039375	0.03	0.0	0.01
C	-3.667365356881874	-1.0393761189606245	-3.0035742379212493	0.03	0.01	0.02
C	-5.282345118960625	-2.66629	-1.8543018810393754	0.01	0.0	-0.01
C	0.73164	-4.867198643118126	0.09991088103937537	0.0	-0.03	0.01
C	-3.7398	-3.4042438810393754	1.4437448810393754	0.0	-0.01	0.01
H	-1.645021	-4.8072467620787505	1.1135838810393754	0.0	-0.02	0.01
H	0.6147021672756275	3.05438545351188	1.0206851896062463	0.07	0.13	-0.1
H	4.01779123792125	0.191734	0.135818	-0.02	0.0	0.0
H	7.6280951189606245	1.591795	1.789413	-0.01	0.0	0.0
H	7.727280118960625	2.857143	0.5410338810393754	-0.01	0.0	0.01
H	8.411338118960623	1.230123	0.214523	-0.01	0.0	0.0
H	0.823252	4.262149929354378	-0.9965323568818739	0.0	0.09	0.03
H	-2.9637802862362523	2.0562989293543783	0.2826191672756276	-0.06	0.09	0.07
H	-0.19062276207875076	5.690477356881874	-2.7289908810393753	-0.02	-0.03	-0.01
H	-1.309317	4.392242832724372	-3.199771356881874	0.0	-0.07	0.03
H	0.43550088103937534	4.180871594803123	-3.4387114758424984	0.01	-0.05	0.04
H	-4.180617260251868	3.561228881039375	-1.3998637397481322	0.19	0.01	-0.19
H	-4.019208189606246	1.8389974758424987	-1.7679084758424986	0.1	-0.04	0.04
H	-2.9946380929762406	3.0357397360943663	-2.623173	0.26	-0.23	0.0
H	1.860298903369994	2.390587070645622	3.0486544758424983	-0.16	-0.09	-0.04
H	0.8960910929762403	0.8936153568818739	3.160855498173117	-0.26	-0.03	-0.21
H	0.09931302233061867	2.460484762078751	3.337160903369994	-0.17	0.02	-0.16
H	3.412612237921249	0.6769378810393754	-2.041199881039375	-0.02	0.01	-0.01
H	5.057163	1.3237517137637478	-1.981405	0.0	-0.06	0.0
H	3.6821864051968767	2.446667	-1.8630467620787508	0.05	0.0	-0.02
H	5.068473	-2.199685118960625	0.649224	0.0	0.01	0.0
H	5.458367	-1.7607651189606246	-1.781401	0.0	0.01	0.0
H	3.539399	-1.8005041189606246	-3.387901	0.0	0.01	0.0
H	1.638436	-2.905064881039375	2.146943	0.0	-0.01	0.0
H	-0.08331	-2.297968762078751	-2.314582	0.0	-0.02	0.0
H	-6.00270223792125	0.13925	-1.46632	0.02	0.0	0.0
H	-6.422596	1.8179731189606245	0.338614	0.0	-0.01	0.0
H	-4.982659881039375	1.8638592379212493	2.374699762078751	-0.01	-0.02	0.02
H	-3.170308118960625	-2.398818881039375	-1.3849891189606247	0.01	-0.01	0.01
H	-1.8295271189606246	-0.158592	2.768294118960625	0.01	0.0	-0.01
H	2.820677	-1.545011	3.883006	0.0	0.0	0.0
H	2.353420237921249	-0.534847	2.486532	-0.02	0.0	0.0
H	4.053600118960625	-1.0432381189606246	2.689118118960625	-0.01	0.01	-0.01
H	3.339104	-4.046232	3.550139	0.0	0.0	0.0
H	4.651119	-3.593392	2.429561	0.0	0.0	0.0
H	3.393738881039375	-4.75098	1.910837	0.01	0.0	0.0
H	-0.091463	-0.8854528810393754	-4.371555	0.0	-0.01	0.0
H	1.685732	-0.7147432379212493	-4.31061323792125	0.0	0.02	0.02
H	0.6741084758424986	0.0019131189606246283	-3.0183401189606247	-0.04	-0.01	0.01
H	0.125572	-3.44802	-4.526975881039375	0.0	0.0	-0.01
H	0.9918798810393754	-4.363751	-3.2628238810393753	0.01	0.0	-0.01
H	1.908057	-3.371543118960625	-4.433579881039376	0.0	0.01	-0.01
H	-1.9457971189606247	1.5735427620787508	4.498777237921249	0.01	0.02	-0.02
H	-3.623042881039375	2.0026752379212494	4.08344776207875	-0.01	-0.02	0.02
H	-2.3052484051968767	2.3513087620787507	2.9246221189606247	-0.05	0.02	-0.01
H	-2.850520356881874	-0.7689311189606246	4.994946881039375	0.03	0.01	0.01
H	-3.460228356881874	-1.807955	3.680481881039375	0.03	0.0	0.01
H	-4.485051237921249	-0.4917688810393753	4.327985881039375	0.02	-0.01	0.01
H	-3.4901737137637476	-1.7914012379212492	-3.789505237921249	0.06	0.02	0.02
H	-2.7547521189606248	-0.4308393568818739	-2.8796055948031234	0.01	0.03	0.05
H	-4.485973237921249	-0.381822	-3.329912	0.02	0.0	0.0
H	-5.059852118960625	-3.448165118960625	-2.5965307620787508	0.01	0.01	-0.02
H	-6.1396021189606245	-2.0803731189606247	-2.216004881039375	0.01	0.01	-0.01
H	-5.569299	-3.153739881039375	-0.9099927620787507	0.0	-0.01	-0.02
H	1.646605	-4.893480762078751	0.6993358810393754	0.0	-0.02	0.01
H	0.144905	-5.759124643118127	0.34141076207875076	0.0	-0.03	0.02
H	1.02905	-4.934376643118126	-0.9539241189606246	0.0	-0.03	0.01
H	-4.458392118960625	-2.6372718810393754	1.7436677620787508	0.01	-0.01	0.02
H	-4.185210881039375	-3.990046118960625	0.630178	-0.01	0.01	0.0
H	-3.591681	-4.090078643118127	2.285654	0.0	-0.03	0.0
114
O	6.392906496766047	1.305743	0.130296	-0.01	0.0	0.0
Mg	-0.5134250064679053	-0.5218855291055742	0.13142345795861504	-0.02	-0.09	-0.13
O	-0.5661825226376688	1.3251400711469592	1.0074824126832775	-0.07	0.22	-0.27
C	5.265252496766047	1.8778034967660473	0.616433	-0.01	-0.01	0.0
N	0.441779	-2.407536509701858	0.03745949676604731	0.0	-0.03	-0.01
N	-2.244056	-1.5374775032339527	0.7313670064679054	0.0	-0.01	0.02
O	5.257873993532095	2.7175074967660473	1.484571	-0.02	-0.01	0.0
C	-0.080767	-3.5954035097018577	0.3421325032339527	0.0	-0.03	0.01
C	-1.369725	-3.783253006467905	0.8660075032339526	0.0	-0.02	0.01
C	-2.394477	-2.8285375032339526	1.0044225032339527	0.0	-0.01	0.01
O	2.9164139935320947	1.9172360064679053	0.5662534838302365	-0.02	0.02	-0.05
C	1.7312629935320947	1.319822509701858	0.5043734838302365	-0.02	0.03	-0.05
C	0.6067684967660474	1.961603542041385	1.3271014514907098	-0.01	0.13	-0.15
C	4.047107496766047	1.2718784967660473	-0.0705965032339527	-0.01	-0.01	-0.01
O	1.5238349935320947	0.3112579870641893	-0.15791098059628386	-0.02	-0.04	0.06
C	7.616684496766047	1.783121	0.713078	-0.01	0.0	0.0
O	-0.21317898059628385	2.5679560064679054	-1.4733584644265205	0.06	0.02	0.11
C	-1.2594069611925676	1.847026490298142	-1.0440378835777033	0.12	-0.03	0.36
O	-1.3226664902981418	0.659652	-1.393659457958615	0.03	0.0	0.13
O	-2.1541075032339525	3.8812005161697636	0.06871301293581075	-0.01	0.05	0.04
C	-1.154414	4.63358301293581	-0.3947339935320946	0.0	0.04	0.02
C	-0.1739874967660473	4.012438503233953	-1.3857154838302366	0.01	0.01	0.05
C	-2.4793999870641894	2.6016545032339526	-0.5322349741283785	0.04	0.01	0.08
O	-1.009098	5.778746516169763	-0.035671	0.0	0.05	0.0
C	-0.324415	4.611142490298142	-2.785135490298142	0.0	-0.03	0.03
C	-3.500285948256757	2.783863980596284	-1.6664560064679053	0.16	-0.06	-0.02
C	0.9278934450228044	1.9330504967660473	2.838568954724662	-0.17	-0.01	-0.14
C	4.038758503233953	1.4538309935320948	-1.5928055032339525	0.01	-0.02	-0.01
C	1.805913	-2.3687510064679054	-0.462011	0.0	-0.02	0.0
C	-3.415087	-0.6879845032339527	0.6599055032339527	0.0	-0.01	0.01
C	2.902963	-2.3901635032339525	0.462195	0.0	-0.01	0.0
C	4.212478	-2.157938	-0.037069	0.0	0.0	0.0
C	4.435627	-1.921598	-1.413332	0.0	0.0	0.0
C	3.351772	-1.936981	-2.314887	0.0	0.0	0.0
C	2.028087	-2.1601835032339527	-1.861915	0.0	-0.01	0.0
C	2.702139	-2.647495	1.981314	0.0	0.0	0.0
C	0.862607	-2.186112503233953	-2.884245	0.0	-0.01	0.0
C	-4.245417	-0.7285795032339526	-0.5115444967660474	0.0	-0.01	0.01
C	-5.333287496766047	0.1850944967660473	-0.6010544967660474	0.01	-0.01	0.01
C	-5.577655	1.1226454967660473	0.4213775032339527	0.0	-0.01	0.01
C	-4.757361503233953	1.1523319935320948	1.5733055032339527	-0.01	-0.02	0.01
C	-3.674927	0.2423924967660473	1.7235115032339527	0.0	-0.01	0.01
C	-4.027301496766047	-1.752054	-1.658185	0.01	0.0	0.0
C	-2.8408994967660472	0.216979	3.033429	0.01	0.0	0.0
C	3.0097884967660473	-1.360937	2.813088	-0.01	0.0	0.0
C	3.580177	-3.837598	2.496587	0.0	0.0	0.0
C	0.7848064967660474	-0.861499	-3.7025164967660475	-0.01	0.0	0.01
C	0.983682	-3.424543	-3.8360155032339525	0.0	0.0	-0.01
C	-2.6698385032339527	1.630926	3.67183	-0.01	0.0	0.0
C	-3.4599414902981422	-0.779475	4.072332503233953	0.03	0.0	0.01
C	-3.673219490298142	-1.0413274967660473	-3.007476993532095	0.03	0.01	0.02
C	-5.284296496766047	-2.66629	-1.8523505032339527	0.01	0.0	-0.01
C	0.73164	-4.8613445097018575	0.0979595032339527	0.0	-0.03	0.01
C	-3.7398	-3.402292503233953	1.4417935032339526	0.0	-0.01	0.01
H	-1.645021	-4.803344006467905	1.1116325032339527	0.0	-0.02	0.01
H	0.6010425226376688	3.0290175420413847	1.040198967660473	0.07	0.13	-0.1
H	4.021693993532095	0.191734	0.135818	-0.02	0.0	0.0
H	7.630046496766047	1.591795	1.789413	-0.01	0.0	0.0
H	7.729231496766047	2.857143	0.5390825032339527	-0.01	0.0	0.01
H	8.413289496766046	1.230123	0.214523	-0.01	0.0	0.0
H	0.823252	4.244587529105575	-1.0023864902981419	0.0	0.09	0.03
H	-2.952072019403716	2.038736529105574	0.2689595226376688	-0.06	0.09	0.07
H	-0.18672000646790538	5.696331490298142	-2.7270395032339527	-0.02	-0.03	-0.01
H	-1.309317	4.405902477362331	-3.205625490298142	0.0	-0.07	0.03
H	0.4335495032339527	4.190628483830237	-3.4465169870641894	0.01	-0.05	0.04
H	-4.217693438554899	3.5592775032339525	-1.362787561445101	0.19	0.01	-0.19
H	-4.038721967660473	1.8468029870641893	-1.7757139870641891	0.1	-0.04	0.04
H	-3.04537391591723	3.080621425619088	-2.623173	0.26	-0.23	0.0
H	1.891520948256757	2.408149470894426	3.0564599870641893	-0.16	-0.09	-0.04
H	0.9468269159172301	0.8994694902981419	3.2018344320869936	-0.26	-0.03	-0.21
H	0.1324864450228043	2.4565820064679054	3.3683829482567567	-0.17	0.02	-0.16
H	3.4165149935320946	0.6749865032339526	-2.0392485032339525	-0.02	0.01	-0.01
H	5.057163	1.335459980596284	-1.981405	0.0	-0.06	0.0
H	3.6724295161697635	2.446667	-1.8591440064679052	0.05	0.0	-0.02
H	5.068473	-2.2016364967660476	0.649224	0.0	0.01	0.0
H	5.458367	-1.7627164967660474	-1.781401	0.0	0.01	0.0
H	3.539399	-1.8024554967660473	-3.387901	0.0	0.01	0.0
H	1.638436	-2.9031135032339526	2.146943	0.0	-0.01	0.0
H	-0.08331	-2.2940660064679053	-2.314582	0.0	-0.02	0.0
H	-6.006604993532095	0.13925	-1.46632	0.02	0.0	0.0
H	-6.422596	1.8199244967660473	0.338614	0.0	-0.01	0.0
H	-4.980708503233952	1.8677619935320948	2.3707970064679054	-0.01	-0.02	0.02
H	-3.1722594967660473	-2.3968675032339526	-1.3869404967660475	0.01	-0.01	0.01
H	-1.8314784967660473	-0.158592	2.7702454967660475	0.01	0.0	-0.01
H	2.820677	-1.545011	3.883006	0.0	0.0	0.0
H	2.3573229935320947	-0.534847	2.486532	-0.02	0.0	0.0
H	4.055551496766047	-1.0451894967660473	2.6910694967660476	-0.01	0.01	-0.01
H	3.339104	-4.046232	3.550139	0.0	0.0	0.0
H	4.651119	-3.593392	2.429561	0.0	0.0	0.0
H	3.3917875032339526	-4.75098	1.910837	0.01	0.0	0.0
H	-0.091463	-0.8835015032339526	-4.371555	0.0	-0.01	0.0
H	1.685732	-0.7186459935320946	-4.314515993532095	0.0	0.02	0.02
H	0.6819139870641893	0.003864496766047311	-3.0202914967660472	-0.04	-0.01	0.01
H	0.125572	-3.44802	-4.5250245032339524	0.0	0.0	-0.01
H	0.9899285032339527	-4.363751	-3.2608725032339527	0.01	0.0	-0.01
H	1.908057	-3.3734944967660474	-4.431628503233953	0.0	0.01	-0.01
H	-1.9477484967660474	1.5696400064679052	4.5026799935320945	0.01	0.02	-0.02
H	-3.6210915032339526	2.0065779935320944	4.079545006467905	-0.01	-0.02	0.02
H	-2.2954915161697635	2.347406006467905	2.9265734967660473	-0.05	0.02	-0.01
H	-2.8563744902981423	-0.7708824967660474	4.992995503233953	0.03	0.01	0.01
H	-3.466082490298142	-1.807955	3.6785305032339526	0.03	0.0	0.01
H	-4.488953993532094	-0.4898175032339527	4.326034503233952	0.02	-0.01	0.01
H	-3.5018819805962837	-1.7953039935320947	-3.7934079935320946	0.06	0.02	0.02
H	-2.7567034967660473	-0.4366934902981419	-2.8893624838302365	0.01	0.03	0.05
H	-4.489875993532094	-0.381822	-3.329912	0.02	0.0	0.0
H	-5.061803496766047	-3.4501164967660474	-2.5926280064679053	0.01	0.01	-0.02
H	-6.141553496766047	-2.0823244967660473	-2.2140535032339526	0.01	0.01	-0.01
H	-5.569299	-3.1517885032339525	-0.9060900064679054	0.0	-0.01	-0.02
H	1.646605	-4.8895780064679055	0.6973845032339526	0.0	-0.02	0.01
H	0.144905	-5.753270509701858	0.3375080064679054	0.0	-0.03	0.02
H	1.02905	-4.928522509701858	-0.9558754967660473	0.0	-0.03	0.01
H	-4.460343496766048	-2.635320503233953	1.7397650064679053	0.01	-0.01	0.02
H	-4.183259503233953	-3.9919974967660474	0.630178	-0.01	0.01	0.0
H	-3.591681	-4.084224509701858	2.285654	0.0	-0.03	0.0
114
O	6.394455118960624	1.305743	0.130296	-0.01	0.0	0.0
Mg	-0.5103277620787506	-0.5079479293543783	0.1515555464881202	-0.02	-0.09	-0.13
O	-0.5553421672756276	1.2910703828662582	1.049295211936865	-0.07	0.22	-0.27
C	5.2668011189606245	1.8793521189606246	0.616433	-0.01	-0.01	0.0
N	0.441779	-2.402890643118126	0.03900811896062463	0.0	-0.03	-0.01
N	-2.244056	-1.5359288810393754	0.7282697620787507	0.0	-0.01	0.02
O	5.260971237921249	2.7190561189606246	1.484571	-0.02	-0.01	0.0
C	-0.080767	-3.590757643118126	0.34058388103937537	0.0	-0.03	0.01
C	-1.369725	-3.7801557620787505	0.8644588810393753	0.0	-0.02	0.01
C	-2.394477	-2.8269888810393753	1.0028738810393754	0.0	-0.01	0.01
O	2.9195112379212493	1.9141387620787507	0.5739965948031232	-0.02	0.02	-0.05
C	1.7343602379212493	1.315176643118126	0.5121165948031231	-0.02	0.03	-0.05
C	0.6083171189606247	1.94147145351188	1.3503307844093695	-0.01	0.13	-0.15
C	4.048656118960625	1.2734271189606245	-0.06904788103937537	-0.01	-0.01	-0.01
O	1.5269322379212493	0.3174524758424985	-0.1672027137637478	-0.02	-0.04	0.06
C	7.6182331189606245	1.783121	0.713078	-0.01	0.0	0.0
O	-0.22247071376374777	2.564858762078751	-1.490393308566871	0.06	0.02	0.11
C	-1.2779904275274956	1.851672356881874	-1.0997882825824867	0.12	-0.03	0.36
O	-1.3273123568818739	0.659652	-1.41379154648812	0.03	0.0	0.13
O	-2.152558881039375	3.8734574051968766	0.06251852415750148	-0.01	0.05	0.04
C	-1.154414	4.627388524157501	-0.39783123792124925	0.0	0.04	0.02
C	-0.17553611896062463	4.010889881039375	-1.393458594803123	0.01	0.01	0.05
C	-2.4855944758424986	2.6001058810393753	-0.5446239516849971	0.04	0.01	0.08
O	-1.009098	5.771003405196876	-0.035671	0.0	0.05	0.0
C	-0.324415	4.615788356881874	-2.789781356881874	0.0	-0.03	0.03
C	-3.525063903369994	2.793155713763748	-1.6633587620787507	0.16	-0.06	-0.02
C	0.9542200223306188	1.9345991189606246	2.8602496654487446	-0.17	-0.01	-0.14
C	4.0372098810393755	1.4569282379212494	-1.5912568810393752	0.01	-0.02	-0.01
C	1.805913	-2.3656537620787508	-0.462011	0.0	-0.02	0.0
C	-3.415087	-0.6864358810393754	0.6583568810393754	0.0	-0.01	0.01
C	2.902963	-2.3886148810393752	0.462195	0.0	-0.01	0.0
C	4.212478	-2.157938	-0.037069	0.0	0.0	0.0
C	4.435627	-1.921598	-1.413332	0.0	0.0	0.0
C	3.351772	-1.936981	-2.314887	0.0	0.0	0.0
C	2.028087	-2.1586348810393754	-1.861915	0.0	-0.01	0.0
C	2.702139	-2.647495	1.981314	0.0	0.0	0.0
C	0.862607	-2.1845638810393755	-2.884245	0.0	-0.01	0.0
C	-4.245417	-0.7270308810393753	-0.5130931189606247	0.0	-0.01	0.01
C	-5.334836118960625	0.18664311896062463	-0.6026031189606247	0.01	-0.01	0.01
C	-5.577655	1.1241941189606246	0.4198288810393753	0.0	-0.01	0.01
C	-4.755812881039375	1.1554292379212494	1.5717568810393754	-0.01	-0.02	0.01
C	-3.674927	0.24394111896062462	1.7219628810393754	0.0	-0.01	0.01
C	-4.028850118960625	-1.752054	-1.658185	0.01	0.0	0.0
C	-2.8424481189606245	0.216979	3.033429	0.01	0.0	0.0
C	3.0113371189606246	-1.360937	2.813088	-0.01	0.0	0.0
C	3.580177	-3.837598	2.496587	0.0	0.0	0.0
C	0.7863551189606247	-0.861499	-3.704065118960625	-0.01	0.0	0.01
C	0.983682	-3.424543	-3.834466881039375	0.0	0.0	-0.01
C	-2.6682898810393754	1.630926	3.67183	-0.01	0.0	0.0
C	-3.464587356881874	-0.779475	4.070783881039375	0.03	0.0	0.01
C	-3.677865356881874	-1.0428761189606246	-3.0105742379212495	0.03	0.01	0.02
C	-5.285845118960625	-2.66629	-1.8508018810393754	0.01	0.0	-0.01
C	0.73164	-4.856698643118126	0.09641088103937537	0.0	-0.03	0.01
C	-3.7398	-3.4007438810393755	1.4402448810393753	0.0	-0.01	0.01
H	-1.645021	-4.800246762078751	1.1100838810393754	0.0	-0.02	0.01
H	0.5902021672756276	3.00888545351188	1.0556851896062462	0.07	0.13	-0.1
H	4.024791237921249	0.191734	0.135818	-0.02	0.0	0.0
H	7.631595118960624	1.591795	1.789413	-0.01	0.0	0.0
H	7.730780118960625	2.857143	0.5375338810393754	-0.01	0.0	0.01
H	8.414838118960624	1.230123	0.214523	-0.01	0.0	0.0
H	0.823252	4.230649929354378	-1.007032356881874	0.0	0.09	0.03
H	-2.942780286236252	2.0247989293543784	0.25811916727562756	-0.06	0.09	0.07
H	-0.18362276207875075	5.700977356881874	-2.7254908810393754	-0.02	-0.03	-0.01
H	-1.309317	4.416742832724372	-3.210271356881874	0.0	-0.07	0.03
H	0.43200088103937534	4.198371594803123	-3.4527114758424986	0.01	-0.05	0.04
H	-4.247117260251867	3.5577288810393752	-1.333363739748132	0.19	0.01	-0.19
H	-4.054208189606246	1.8529974758424987	-1.7819084758424986	0.1	-0.04	0.04
H	-3.0856380929762404	3.1162397360943666	-2.623173	0.26	-0.23	0.0
H	1.916298903369994	2.4220870706456217	3.0626544758424985	-0.16	-0.09	-0.04
H	0.9870910929762404	0.9041153568818738	3.2343554981731173	-0.26	-0.03	-0.21
H	0.15881302233061872	2.4534847620787508	3.393160903369994	-0.17	0.02	-0.16
H	3.4196122379212492	0.6734378810393753	-2.037699881039375	-0.02	0.01	-0.01
H	5.057163	1.3447517137637477	-1.981405	0.0	-0.06	0.0
H	3.6646864051968766	2.446667	-1.8560467620787506	0.05	0.0	-0.02
H	5.068473	-2.203185118960625	0.649224	0.0	0.01	0.0
H	5.458367	-1.7642651189606247	-1.781401	0.0	0.01	0.0
H	3.539399	-1.8040041189606246	-3.387901	0.0	0.01	0.0
H	1.638436	-2.9015648810393753	2.146943	0.0	-0.01	0.0
H	-0.08331	-2.2909687620787507	-2.314582	0.0	-0.02	0.0
H	-6.00970223792125	0.13925	-1.46632	0.02	0.0	0.0
H	-6.422596	1.8214731189606246	0.338614	0.0	-0.01	0.0
H	-4.979159881039375	1.8708592379212494	2.3676997620787508	-0.01	-0.02	0.02
H	-3.1738081189606246	-2.3953188810393753	-1.3884891189606248	0.01	-0.01	0.01
H	-1.8330271189606246	-0.158592	2.7717941189606248	0.01	0.0	-0.01
H	2.820677	-1.545011	3.883006	0.0	0.0	0.0
H	2.3604202379212493	-0.534847	2.486532	-0.02	0.0	0.0
H	4.057100118960625	-1.0467381189606246	2.692618118960625	-0.01	0.01	-0.01
H	3.339104	-4.046232	3.550139	0.0	0.0	0.0
H	4.651119	-3.593392	2.429561	0.0	0.0	0.0
H	3.3902388810393753	-4.75098	1.910837	0.01	0.0	0.0
H	-0.091463	-0.8819528810393753	-4.371555	0.0	-0.01	0.0
H	1.685732	-0.7217432379212493	-4.3176132379212495	0.0	0.02	0.02
H	0.6881084758424986	0.005413118960624631	-3.0218401189606245	-0.04	-0.01	0.01
H	0.125572	-3.44802	-4.523475881039375	0.0	0.0	-0.01
H	0.9883798810393754	-4.363751	-3.2593238810393754	0.01	0.0	-0.01
H	1.908057	-3.3750431189606247	-4.430079881039376	0.0	0.01	-0.01
H	-1.9492971189606247	1.5665427620787507	4.505777237921249	0.01	0.02	-0.02
H	-3.6195428810393753	2.009675237921249	4.07644776207875	-0.01	-0.02	0.02
H	-2.2877484051968766	2.3443087620787506	2.9281221189606246	-0.05	0.02	-0.01
H	-2.861020356881874	-0.7724311189606247	4.9914468810393755	0.03	0.01	0.01
H	-3.470728356881874	-1.807955	3.6769818810393753	0.03	0.0	0.01
H	-4.492051237921249	-0.4882688810393753	4.324485881039375	0.02	-0.01	0.01
H	-3.511173713763748	-1.7984012379212493	-3.796505237921249	0.06	0.02	0.02
H	-2.7582521189606246	-0.4413393568818739	-2.8971055948031235	0.01	0.03	0.05
H	-4.492973237921249	-0.381822	-3.329912	0.02	0.0	0.0
H	-5.0633521189606245	-3.4516651189606247	-2.5895307620787507	0.01	0.01	-0.02
H	-6.143102118960624	-2.0838731189606245	-2.2125048810393753	0.01	0.01	-0.01
H	-5.569299	-3.1502398810393752	-0.9029927620787507	0.0	-0.01	-0.02
H	1.646605	-4.886480762078751	0.6958358810393753	0.0	-0.02	0.01
H	0.144905	-5.748624643118126	0.33441076207875076	0.0	-0.03	0.02
H	1.02905	-4.923876643118126	-0.9574241189606246	0.0	-0.03	0.01
H	-4.461892118960625	-2.6337718810393755	1.7366677620787507	0.01	-0.01	0.02
H	-4.1817108810393755	-3.9935461189606247	0.630178	-0.01	0.01	0.0
H	-3.591681	-4.0795786431181265	2.285654	0.0	-0.03	0.0
114
O	6.395449395614065	1.305743	0.130296	-0.01	0.0	0.0
Mg	-0.5083392087718678	-0.4989994394734053	0.16448114298285899	-0.02	-0.09	-0.13
O	-0.5483822307015375	1.2691962964905463	1.076140681579784	-0.07	0.22	-0.27
C	5.2677953956140655	1.880346395614066	0.616433	-0.01	-0.01	0.0
N	0.441779	-2.3999078131578018	0.04000239561406607	0.0	-0.03	-0.01
N	-2.244056	-1.534934604385934	0.7262812087718679	0.0	-0.01	0.02
O	5.262959791228132	2.720050395614066	1.484571	-0.02	-0.01	0.0
C	-0.080767	-3.5877748131578016	0.33958960438593394	0.0	-0.03	0.01
C	-1.369725	-3.7781672087718676	0.8634646043859339	0.0	-0.02	0.01
C	-2.394477	-2.825994604385934	1.001879604385934	0.0	-0.01	0.01
O	2.921499791228132	1.9121502087718678	0.5789679780703303	-0.02	0.02	-0.05
C	1.7363487912281321	1.3121938131578017	0.5170879780703304	-0.02	0.03	-0.05
C	0.6093113956140661	1.9285458570171412	1.3652449342109911	-0.01	0.13	-0.15
C	4.049650395614066	1.274421395614066	-0.06805360438593393	-0.01	-0.01	-0.01
O	1.5289207912281322	0.3214295824562643	-0.17316837368439644	-0.02	-0.04	0.06
C	7.6192273956140655	1.783121	0.713078	-0.01	0.0	0.0
O	-0.22843637368439643	2.562870208771868	-1.5013303517547267	0.06	0.02	0.11
C	-1.2899217473687927	1.8546551868421983	-1.1355822421063788	0.12	-0.03	0.36
O	-1.3302951868421982	0.659652	-1.426717142982859	0.03	0.0	0.13
O	-2.1515646043859338	3.8684860219296695	0.0585414175437357	-0.01	0.05	0.04
C	-1.154414	4.6234114175437355	-0.39981979122813216	0.0	0.04	0.02
C	-0.17653039561406608	4.009895604385934	-1.3984299780703304	0.01	0.01	0.05
C	-2.4895715824562643	2.599111604385934	-0.5525781649125286	0.04	0.01	0.08
O	-1.009098	5.76603202192967	-0.035671	0.0	0.05	0.0
C	-0.324415	4.6187711868421975	-2.792764186842198	0.0	-0.03	0.03
C	-3.5409723298250575	2.7991213736843967	-1.6613702087718678	0.16	-0.06	-0.02
C	0.9711227254391233	1.935593395614066	2.874169538596925	-0.17	-0.01	-0.14
C	4.0362156043859345	1.4589167912281322	-1.5902626043859338	0.01	-0.02	-0.01
C	1.805913	-2.363665208771868	-0.462011	0.0	-0.02	0.0
C	-3.415087	-0.6854416043859339	0.657362604385934	0.0	-0.01	0.01
C	2.902963	-2.387620604385934	0.462195	0.0	-0.01	0.0
C	4.212478	-2.157938	-0.037069	0.0	0.0	0.0
C	4.435627	-1.921598	-1.413332	0.0	0.0	0.0
C	3.351772	-1.936981	-2.314887	0.0	0.0	0.0
C	2.028087	-2.157640604385934	-1.861915	0.0	-0.01	0.0
C	2.702139	-2.647495	1.981314	0.0	0.0	0.0
C	0.862607	-2.183569604385934	-2.884245	0.0	-0.01	0.0
C	-4.245417	-0.7260366043859339	-0.5140873956140661	0.0	-0.01	0.01
C	-5.335830395614066	0.1876373956140661	-0.6035973956140661	0.01	-0.01	0.01
C	-5.577655	1.125188395614066	0.4188346043859339	0.0	-0.01	0.01
C	-4.754818604385934	1.1574177912281323	1.570762604385934	-0.01	-0.02	0.01
C	-3.674927	0.24493539561406608	1.720968604385934	0.0	-0.01	0.01
C	-4.029844395614066	-1.752054	-1.658185	0.01	0.0	0.0
C	-2.843442395614066	0.216979	3.033429	0.01	0.0	0.0
C	3.012331395614066	-1.360937	2.813088	-0.01	0.0	0.0
C	3.580177	-3.837598	2.496587	0.0	0.0	0.0
C	0.7873493956140661	-0.861499	-3.7050593956140663	-0.01	0.0	0.01
C	0.983682	-3.424543	-3.8334726043859337	0.0	0.0	-0.01
C	-2.667295604385934	1.630926	3.67183	-0.01	0.0	0.0
C	-3.4675701868421984	-0.779475	4.069789604385934	0.03	0.0	0.01
C	-3.6808481868421983	-1.043870395614066	-3.0125627912281323	0.03	0.01	0.02
C	-5.286839395614066	-2.66629	-1.849807604385934	0.01	0.0	-0.01
C	0.73164	-4.853715813157802	0.09541660438593393	0.0	-0.03	0.01
C	-3.7398	-3.399749604385934	1.4392506043859339	0.0	-0.01	0.01
H	-1.645021	-4.798258208771868	1.109089604385934	0.0	-0.02	0.01
H	0.5832422307015375	2.995959857017141	1.0656279561406607	0.07	0.13	-0.1
H	4.026779791228132	0.191734	0.135818	-0.02	0.0	0.0
H	7.632589395614065	1.591795	1.789413	-0.01	0.0	0.0
H	7.731774395614066	2.857143	0.536539604385934	-0.01	0.0	0.01
H	8.415832395614066	1.230123	0.214523	-0.01	0.0	0.0
H	0.823252	4.221701439473406	-1.0100151868421983	0.0	0.09	0.03
H	-2.9368146263156034	2.015850439473405	0.25115923070153745	-0.06	0.09	0.07
H	-0.18163420877186787	5.703960186842198	-2.724496604385934	-0.02	-0.03	-0.01
H	-1.309317	4.423702769298462	-3.213254186842198	0.0	-0.07	0.03
H	0.4310066043859339	4.20334297807033	-3.4566885824562643	0.01	-0.05	0.04
H	-4.266008516667255	3.556734604385934	-1.3144724833327446	0.19	0.01	-0.19
H	-4.064150956140661	1.8569745824562645	-1.7858855824562643	0.1	-0.04	0.04
H	-3.111489285965718	3.1391080991235194	-2.623173	0.26	-0.23	0.0
H	1.932207329825057	2.431035560526595	3.066631582456264	-0.16	-0.09	-0.04
H	1.012942285965718	0.9070981868421982	3.2552353078953873	-0.26	-0.03	-0.21
H	0.17571572543912328	2.451496208771868	3.409069329825057	-0.17	0.02	-0.16
H	3.421600791228132	0.6724436043859339	-2.0367056043859337	-0.02	0.01	-0.01
H	5.057163	1.3507173736843965	-1.981405	0.0	-0.06	0.0
H	3.6597150219296695	2.446667	-1.8540582087718678	0.05	0.0	-0.02
H	5.068473	-2.2041793956140663	0.649224	0.0	0.01	0.0
H	5.458367	-1.765259395614066	-1.781401	0.0	0.01	0.0
H	3.539399	-1.804998395614066	-3.387901	0.0	0.01	0.0
H	1.638436	-2.900570604385934	2.146943	0.0	-0.01	0.0
H	-0.08331	-2.288980208771868	-2.314582	0.0	-0.02	0.0
H	-6.0116907912281325	0.13925	-1.46632	0.02	0.0	0.0
H	-6.422596	1.822467395614066	0.338614	0.0	-0.01	0.0
H	-4.978165604385934	1.8728477912281323	2.365711208771868	-0.01	-0.02	0.02
H	-3.174802395614066	-2.394324604385934	-1.3894833956140662	0.01	-0.01	0.01
H	-1.834021395614066	-0.158592	2.772788395614066	0.01	0.0	-0.01
H	2.820677	-1.545011	3.883006	0.0	0.0	0.0
H	2.362408791228132	-0.534847	2.486532	-0.02	0.0	0.0
H	4.058094395614066	-1.047732395614066	2.6936123956140663	-0.01	0.01	-0.01
H	3.339104	-4.046232	3.550139	0.0	0.0	0.0
H	4.651119	-3.593392	2.429561	0.0	0.0	0.0
H	3.389244604385934	-4.75098	1.910837	0.01	0.0	0.0
H	-0.091463	-0.8809586043859339	-4.371555	0.0	-0.01	0.0
H	1.685732	-0.7237317912281321	-4.319601791228132	0.0	0.02	0.02
H	0.6920855824562644	0.006407395614066074	-3.022834395614066	-0.04	-0.01	0.01
H	0.125572	-3.44802	-4.522481604385934	0.0	0.0	-0.01
H	0.9873856043859339	-4.363751	-3.258329604385934	0.01	0.0	-0.01
H	1.908057	-3.376037395614066	-4.429085604385935	0.0	0.01	-0.01
H	-1.9502913956140662	1.5645542087718678	4.507765791228132	0.01	0.02	-0.02
H	-3.618548604385934	2.011663791228132	4.074459208771867	-0.01	-0.02	0.02
H	-2.2827770219296695	2.3423202087718678	2.929116395614066	-0.05	0.02	-0.01
H	-2.8640031868421985	-0.7734253956140661	4.9904526043859345	0.03	0.01	0.01
H	-3.4737111868421984	-1.807955	3.675987604385934	0.03	0.0	0.01
H	-4.494039791228132	-0.4872746043859339	4.323491604385934	0.02	-0.01	0.01
H	-3.5171393736843966	-1.8003897912281321	-3.798493791228132	0.06	0.02	0.02
H	-2.759246395614066	-0.4443221868421982	-2.9020769780703306	0.01	0.03	0.05
H	-4.494961791228132	-0.381822	-3.329912	0.02	0.0	0.0
H	-5.0643463956140655	-3.452659395614066	-2.587542208771868	0.01	0.01	-0.02
H	-6.144096395614065	-2.084867395614066	-2.211510604385934	0.01	0.01	-0.01
H	-5.569299	-3.149245604385934	-0.9010042087718678	0.0	-0.01	-0.02
H	1.646605	-4.884492208771868	0.6948416043859339	0.0	-0.02	0.01
H	0.144905	-5.745641813157802	0.33242220877186784	0.0	-0.03	0.02
H	1.02905	-4.920893813157802	-0.958418395614066	0.0	-0.03	0.01
H	-4.462886395614066	-2.632777604385934	1.7346792087718679	0.01	-0.01	0.02
H	-4.1807166043859345	-3.994540395614066	0.630178	-0.01	0.01	0.0
H	-3.591681	-4.076595813157803	2.285654	0.0	-0.03	0.0
114
O	6.395791999999999	1.305743	0.130296	-0.01	0.0	0.0
Mg	-0.5076539999999999	-0.49591599999999997	0.168935	-0.02	-0.09	-0.13
O	-0.5459839999999999	1.261659	1.085391	-0.07	0.22	-0.27
C	5.2681379999999995	1.8806889999999998	0.616433	-0.01	-0.01	0.0
N	0.441779	-2.39888	0.040345	0.0	-0.03	-0.01
N	-2.244056	-1.5345920000000002	0.725596	0.0	-0.01	0.02
O	5.263645	2.720393	1.484571	-0.02	-0.01	0.0
C	-0.080767	-3.586747	0.339247	0.0	-0.03	0.01
C	-1.369725	-3.777482	0.863122	0.0	-0.02	0.01
C	-2.394477	-2.825652	1.0015370000000001	0.0	-0.01	0.01
O	2.922185	1.911465	0.580681	-0.02	0.02	-0.05
C	1.737034	1.311166	0.518801	-0.02	0.03	-0.05
C	0.609654	1.9240920000000001	1.370384	-0.01	0.13	-0.15
C	4.049993	1.2747639999999998	-0.067711	-0.01	-0.01	-0.01
O	1.529606	0.3228	-0.175224	-0.02	-0.04	0.06
C	7.6195699999999995	1.783121	0.713078	-0.01	0.0	0.0
O	-0.23049199999999997	2.5621850000000004	-1.505099	0.06	0.02	0.11
C	-1.294033	1.855683	-1.147916	0.12	-0.03	0.36
O	-1.3313229999999998	0.659652	-1.431171	0.03	0.0	0.13
O	-2.1512219999999997	3.866773	0.057171	-0.01	0.05	0.04
C	-1.154414	4.622041	-0.400505	0.0	0.04	0.02
C	-0.176873	4.009553	-1.400143	0.01	0.01	0.05
C	-2.490942	2.598769	-0.555319	0.04	0.01	0.08
O	-1.009098	5.7643189999999995	-0.035671	0.0	0.05	0.0
C	-0.324415	4.6197989999999995	-2.793792	0.0	-0.03	0.03
C	-3.546454	2.801177	-1.660685	0.16	-0.06	-0.02
C	0.976947	1.9359359999999999	2.8789659999999997	-0.17	-0.01	-0.14
C	4.0358730000000005	1.459602	-1.58992	0.01	-0.02	-0.01
C	1.805913	-2.3629800000000003	-0.462011	0.0	-0.02	0.0
C	-3.415087	-0.685099	0.65702	0.0	-0.01	0.01
C	2.902963	-2.387278	0.462195	0.0	-0.01	0.0
C	4.212478	-2.157938	-0.037069	0.0	0.0	0.0
C	4.435627	-1.921598	-1.413332	0.0	0.0	0.0
C	3.351772	-1.936981	-2.314887	0.0	0.0	0.0
C	2.028087	-2.157298	-1.861915	0.0	-0.01	0.0
C	2.702139	-2.647495	1.981314	0.0	0.0	0.0
C	0.862607	-2.183227	-2.884245	0.0	-0.01	0.0
C	-4.245417	-0.725694	-0.51443	0.0	-0.01	0.01
C	-5.336173	0.18798	-0.60394	0.01	-0.01	0.01
C	-5.577655	1.1255309999999998	0.418492	0.0	-0.01	0.01
C	-4.754476	1.158103	1.5704200000000001	-0.01	-0.02	0.01
C	-3.674927	0.245278	1.7206260000000002	0.0	-0.01	0.01
C	-4.030187	-1.752054	-1.658185	0.01	0.0	0.0
C	-2.843785	0.216979	3.033429	0.01	0.0	0.0
C	3.012674	-1.360937	2.813088	-0.01	0.0	0.0
C	3.580177	-3.837598	2.496587	0.0	0.0	0.0
C	0.7876920000000001	-0.861499	-3.7054020000000003	-0.01	0.0	0.01
C	0.983682	-3.424543	-3.8331299999999997	0.0	0.0	-0.01
C	-2.666953	1.630926	3.67183	-0.01	0.0	0.0
C	-3.468598	-0.779475	4.069447	0.03	0.0	0.01
C	-3.681876	-1.0442129999999998	-3.013248	0.03	0.01	0.02
C	-5.287182	-2.66629	-1.8494650000000001	0.01	0.0	-0.01
C	0.73164	-4.852688	0.09507399999999999	0.0	-0.03	0.01
C	-3.7398	-3.399407	1.438908	0.0	-0.01	0.01
H	-1.645021	-4.797573	1.1087470000000001	0.0	-0.02	0.01
H	0.5808439999999999	2.9915059999999998	1.069054	0.07	0.13	-0.1
H	4.027465	0.191734	0.135818	-0.02	0.0	0.0
H	7.632931999999999	1.591795	1.789413	-0.01	0.0	0.0
H	7.732117	2.857143	0.536197	-0.01	0.0	0.01
H	8.416174999999999	1.230123	0.214523	-0.01	0.0	0.0
H	0.823252	4.218618	-1.011043	0.0	0.09	0.03
H	-2.934759	2.0127669999999998	0.248761	-0.06	0.09	0.07
H	-0.18094900000000003	5.704988	-2.724154	-0.02	-0.03	-0.01
H	-1.309317	4.426101	-3.214282	0.0	-0.07	0.03
H	0.430664	4.205056	-3.458059	0.01	-0.05	0.04
H	-4.272518	3.5563919999999998	-1.307963	0.19	0.01	-0.19
H	-4.067577	1.8583450000000001	-1.787256	0.1	-0.04	0.04
H	-3.120397	3.146988	-2.623173	0.26	-0.23	0.0
H	1.9376889999999998	2.4341190000000004	3.068002	-0.16	-0.09	-0.04
H	1.02185	0.908126	3.2624299999999997	-0.26	-0.03	-0.21
H	0.18153999999999998	2.4508110000000003	3.414551	-0.17	0.02	-0.16
H	3.4222859999999997	0.672101	-2.0363629999999997	-0.02	0.01	-0.01
H	5.057163	1.352773	-1.981405	0.0	-0.06	0.0
H	3.6580019999999998	2.446667	-1.853373	0.05	0.0	-0.02
H	5.068473	-2.2045220000000003	0.649224	0.0	0.01	0.0
H	5.458367	-1.765602	-1.781401	0.0	0.01	0.0
H	3.539399	-1.8053409999999999	-3.387901	0.0	0.01	0.0
H	1.638436	-2.900228	2.146943	0.0	-0.01	0.0
H	-0.08331	-2.288295	-2.314582	0.0	-0.02	0.0
H	-6.012376000000001	0.13925	-1.46632	0.02	0.0	0.0
H	-6.422596	1.8228099999999998	0.338614	0.0	-0.01	0.0
H	-4.977823	1.8735330000000001	2.3650260000000003	-0.01	-0.02	0.02
H	-3.175145	-2.393982	-1.389826	0.01	-0.01	0.01
H	-1.8343639999999999	-0.158592	2.7731310000000002	0.01	0.0	-0.01
H	2.820677	-1.545011	3.883006	0.0	0.0	0.0
H	2.363094	-0.534847	2.486532	-0.02	0.0	0.0
H	4.058437	-1.0480749999999999	2.6939550000000003	-0.01	0.01	-0.01
H	3.339104	-4.046232	3.550139	0.0	0.0	0.0
H	4.651119	-3.593392	2.429561	0.0	0.0	0.0
H	3.388902	-4.75098	1.910837	0.01	0.0	0.0
H	-0.091463	-0.880616	-4.371555	0.0	-0.01	0.0
H	1.685732	-0.724417	-4.320287	0.0	0.02	0.02
H	0.6934560000000001	0.006749999999999999	-3.023177	-0.04	-0.01	0.01
H	0.125572	-3.44802	-4.522139	0.0	0.0	-0.01
H	0.987043	-4.363751	-3.257987	0.01	0.0	-0.01
H	1.908057	-3.37638	-4.428743000000001	0.0	0.01	-0.01
H	-1.950634	1.563869	4.508451	0.01	0.02	-0.02
H	-3.618206	2.012349	4.073773999999999	-0.01	-0.02	0.02
H	-2.2810639999999998	2.341635	2.929459	-0.05	0.02	-0.01
H	-2.865031	-0.773768	4.9901100000000005	0.03	0.01	0.01
H	-3.474739	-1.807955	3.675645	0.03	0.0	0.01
H	-4.494725	-0.486932	4.323149	0.02	-0.01	0.01
H	-3.519195	-1.801075	-3.7991789999999996	0.06	0.02	0.02
H	-2.759589	-0.44535	-2.9037900000000003	0.01	0.03	0.05
H	-4.495647	-0.381822	-3.329912	0.02	0.0	0.0
H	-5.0646889999999996	-3.453002	-2.586857	0.01	0.01	-0.02
H	-6.144438999999999	-2.08521	-2.211168	0.01	0.01	-0.01
H	-5.569299	-3.148903	-0.900319	0.0	-0.01	-0.02
H	1.646605	-4.883807	0.694499	0.0	-0.02	0.01
H	0.144905	-5.744614	0.331737	0.0	-0.03	0.02
H	1.02905	-4.919866	-0.958761	0.0	-0.03	0.01
H	-4.463229	-2.632435	1.733994	0.01	-0.01	0.02
H	-4.1803740000000005	-3.994883	0.630178	-0.01	0.01	0.0
H	-3.591681	-4.0755680000000005	2.285654	0.0	-0.03	0.0
114
O	6.395449395614065	1.305743	0.130296	-0.01	0.0	0.0
Mg	-0.5083392087718678	-0.4989994394734053	0.16448114298285899	-0.02	-0.09	-0.13
O	-0.5483822307015375	1.2691962964905463	1.076140681579784	-0.07	0.22	-0.27
C	5.2677953956140655	1.880346395614066	0.616433	-0.01	-0.01	0.0
N	0.441779	-2.3999078131578018	0.04000239561406607	0.0	-0.03	-0.01
N	-2.244056	-1.534934604385934	0.7262812087718679	0.0	-0.01	0.02
O	5.262959791228132	2.720050395614066	1.484571	-0.02	-0.01	0.0
C	-0.080767	-3.5877748131578016	0.33958960438593394	0.0	-0.03	0.01
C	-1.369725	-3.7781672087718676	0.8634646043859339	0.0	-0.02	0.01
C	-2.394477	-2.825994604385934	1.001879604385934	0.0	-0.01	0.01
O	2.921499791228132	1.9121502087718678	0.5789679780703303	-0.02	0.02	-0.05
C	1.7363487912281321	1.3121938131578017	0.5170879780703304	-0.02	0.03	-0.05
C	0.6093113956140661	1.9285458570171412	1.3652449342109911	-0.01	0.13	-0.15
C	4.049650395614066	1.274421395614066	-0.06805360438593393	-0.01	-0.01	-0.01
O	1.5289207912281322	0.3214295824562643	-0.17316837368439647	-0.02	-0.04	0.06
C	7.6192273956140655	1.783121	0.713078	-0.01	0.0	0.0
O	-0.22843637368439645	2.562870208771868	-1.5013303517547267	0.06	0.02	0.11
C	-1.2899217473687927	1.8546551868421983	-1.1355822421063788	0.12	-0.03	0.36
O	-1.3302951868421982	0.659652	-1.426717142982859	0.03	0.0	0.13
O	-2.1515646043859338	3.8684860219296695	0.058541417543735694	-0.01	0.05	0.04
C	-1.154414	4.6234114175437355	-0.39981979122813216	0.0	0.04	0.02
C	-0.17653039561406608	4.009895604385934	-1.3984299780703304	0.01	0.01	0.05
C	-2.4895715824562643	2.599111604385934	-0.5525781649125286	0.04	0.01	0.08
O	-1.009098	5.76603202192967	-0.035671	0.0	0.05	0.0
C	-0.324415	4.6187711868421975	-2.792764186842198	0.0	-0.03	0.03
C	-3.5409723298250575	2.7991213736843967	-1.6613702087718678	0.16	-0.06	-0.02
C	0.9711227254391233	1.935593395614066	2.874169538596925	-0.17	-0.01	-0.14
C	4.0362156043859345	1.4589167912281322	-1.5902626043859338	0.01	-0.02	-0.01
C	1.805913	-2.363665208771868	-0.462011	0.0	-0.02	0.0
C	-3.415087	-0.6854416043859339	0.657362604385934	0.0	-0.01	0.01
C	2.902963	-2.387620604385934	0.462195	0.0	-0.01	0.0
C	4.212478	-2.157938	-0.037069	0.0	0.0	0.0
C	4.435627	-1.921598	-1.413332	0.0	0.0	0.0
C	3.351772	-1.936981	-2.314887	0.0	0.0	0.0
C	2.028087	-2.157640604385934	-1.861915	0.0	-0.01	0.0
C	2.702139	-2.647495	1.981314	0.0	0.0	0.0
C	0.862607	-2.183569604385934	-2.884245	0.0	-0.01	0.0
C	-4.245417	-0.7260366043859339	-0.5140873956140661	0.0	-0.01	0.01
C	-5.335830395614066	0.1876373956140661	-0.6035973956140661	0.01	-0.01	0.01
C	-5.577655	1.125188395614066	0.4188346043859339	0.0	-0.01	0.01
C	-4.754818604385934	1.1574177912281323	1.570762604385934	-0.01	-0.02	0.01
C	-3.674927	0.24493539561406608	1.720968604385934	0.0	-0.01	0.01
C	-4.029844395614066	-1.752054	-1.658185	0.01	0.0	0.0
C	-2.843442395614066	0.216979	3.033429	0.01	0.0	0.0
C	3.012331395614066	-1.360937	2.813088	-0.01	0.0	0.0
C	3.580177	-3.837598	2.496587	0.0	0.0	0.0
C	0.7873493956140661	-0.861499	-3.7050593956140663	-0.01	0.0	0.01
C	0.983682	-3.424543	-3.8334726043859337	0.0	0.0	-0.01
C	-2.667295604385934	1.630926	3.67183	-0.01	0.0	0.0
C	-3.4675701868421984	-0.779475	4.069789604385934	0.03	0.0	0.01
C	-3.6808481868421983	-1.043870395614066	-3.0125627912281323	0.03	0.01	0.02
C	-5.286839395614066	-2.66629	-1.849807604385934	0.01	0.0	-0.01
C	0.73164	-4.853715813157802	0.09541660438593393	0.0	-0.03	0.01
C	-3.7398	-3.399749604385934	1.4392506043859339	0.0	-0.01	0.01
H	-1.645021	-4.798258208771868	1.109089604385934	0.0	-0.02	0.01
H	0.5832422307015375	2.995959857017141	1.0656279561406607	0.07	0.13	-0.1
H	4.026779791228132	0.191734	0.135818	-0.02	0.0	0.0
H	7.632589395614065	1.591795	1.789413	-0.01	0.0	0.0
H	7.731774395614066	2.857143	0.536539604385934	-0.01	0.0	0.01
H	8.415832395614066	1.230123	0.214523	-0.01	0.0	0.0
H	0.823252	4.221701439473406	-1.0100151868421983	0.0	0.09	0.03
H	-2.9368146263156034	2.015850439473405	0.25115923070153745	-0.06	0.09	0.07
H	-0.18163420877186787	5.703960186842198	-2.724496604385934	-0.02	-0.03	-0.01
H	-1.309317	4.423702769298462	-3.213254186842198	0.0	-0.07	0.03
H	0.4310066043859339	4.20334297807033	-3.4566885824562643	0.01	-0.05	0.04
H	-4.266008516667255	3.556734604385934	-1.3144724833327446	0.19	0.01	-0.19
H	-4.064150956140661	1.8569745824562645	-1.7858855824562643	0.1	-0.04	0.04
H	-3.111489285965718	3.1391080991235194	-2.623173	0.26	-0.23	0.0
H	1.932207329825057	2.431035560526595	3.066631582456264	-0.16	-0.09	-0.04
H	1.012942285965718	0.9070981868421982	3.2552353078953873	-0.26	-0.03	-0.21
H	0.17571572543912328	2.451496208771868	3.409069329825057	-0.17	0.02	-0.16
H	3.421600791228132	0.6724436043859339	-2.0367056043859337	-0.02	0.01	-0.01
H	5.057163	1.3507173736843965	-1.981405	0.0	-0.06	0.0
H	3.6597150219296695	2.446667	-1.8540582087718678	0.05	0.0	-0.02
H	5.068473	-2.2041793956140663	0.649224	0.0	0.01	0.0
H	5.458367	-1.765259395614066	-1.781401	0.0	0.01	0.0
H	3.539399	-1.804998395614066	-3.387901	0.0	0.01	0.0
H	1.638436	-2.900570604385934	2.146943	0.0	-0.01	0.0
H	-0.08331	-2.288980208771868	-2.314582	0.0	-0.02	0.0
H	-6.0116907912281325	0.13925	-1.46632	0.02	0.0	0.0
H	-6.422596	1.822467395614066	0.338614	0.0	-0.01	0.0
H	-4.978165604385934	1.8728477912281323	2.365711208771868	-0.01	-0.02	0.02
H	-3.174802395614066	-2.394324604385934	-1.3894833956140662	0.01	-0.01	0.01
H	-1.834021395614066	-0.158592	2.772788395614066	0.01	0.0	-0.01
H	2.820677	-1.545011	3.883006	0.0	0.0	0.0
H	2.362408791228132	-0.534847	2.486532	-0.02	0.0	0.0
H	4.058094395614066	-1.047732395614066	2.6936123956140663	-0.01	0.01	-0.01
H	3.339104	-4.046232	3.550139	0.0	0.0	0.0
H	4.651119	-3.593392	2.429561	0.0	0.0	0.0
H	3.389244604385934	-4.75098	1.910837	0.01	0.0	0.0
H	-0.091463	-0.8809586043859339	-4.371555	0.0	-0.01	0.0
H	1.685732	-0.7237317912281321	-4.319601791228132	0.0	0.02	0.02
H	0.6920855824562644	0.006407395614066075	-3.022834395614066	-0.04	-0.01	0.01
H	0.125572	-3.44802	-4.522481604385934	0.0	0.0	-0.01
H	0.9873856043859339	-4.363751	-3.258329604385934	0.01	0.0	-0.01
H	1.908057	-3.376037395614066	-4.429085604385935	0.0	0.01	-0.01
H	-1.9502913956140662	1.5645542087718678	4.507765791228132	0.01	0.02	-0.02
H	-3.618548604385934	2.011663791228132	4.074459208771867	-0.01	-0.02	0.02
H	-2.2827770219296695	2.3423202087718678	2.929116395614066	-0.05	0.02	-0.01
H	-2.8640031868421985	-0.7734253956140661	4.9904526043859345	0.03	0.01	0.01
H	-3.4737111868421984	-1.807955	3.675987604385934	0.03	0.0	0.01
H	-4.494039791228132	-0.4872746043859339	4.323491604385934	0.02	-0.01	0.01
H	-3.5171393736843966	-1.8003897912281321	-3.798493791228132	0.06	0.02	0.02
H	-2.759246395614066	-0.4443221868421982	-2.9020769780703306	0.01	0.03	0.05
H	-4.494961791228132	-0.381822	-3.329912	0.02	0.0	0.0
H	-5.0643463956140655	-3.452659395614066	-2.587542208771868	0.01	0.01	-0.02
H	-6.144096395614065	-2.084867395614066	-2.211510604385934	0.01	0.01	-0.01
H	-5.569299	-3.149245604385934	-0.9010042087718678	0.0	-0.01	-0.02
H	1.646605	-4.884492208771868	0.6948416043859339	0.0	-0.02	0.01
H	0.144905	-5.745641813157802	0.33242220877186784	0.0	-0.03	0.02
H	1.02905	-4.920893813157802	-0.958418395614066	0.0	-0.03	0.01
H	-4.462886395614066	-2.632777604385934	1.7346792087718679	0.01	-0.01	0.02
H	-4.1807166043859345	-3.994540395614066	0.630178	-0.01	0.01	0.0
H	-3.591681	-4.076595813157803	2.285654	0.0	-0.03	0.0
114
O	6.394455118960624	1.305743	0.130296	-0.01	0.0	0.0
Mg	-0.5103277620787506	-0.5079479293543783	0.15155554648812022	-0.02	-0.09	-0.13
O	-0.5553421672756276	1.2910703828662582	1.0492952119368653	-0.07	0.22	-0.27
C	5.2668011189606245	1.8793521189606246	0.616433	-0.01	-0.01	0.0
N	0.441779	-2.402890643118126	0.03900811896062463	0.0	-0.03	-0.01
N	-2.244056	-1.5359288810393754	0.7282697620787507	0.0	-0.01	0.02
O	5.260971237921249	2.7190561189606246	1.484571	-0.02	-0.01	0.0
C	-0.080767	-3.590757643118126	0.34058388103937537	0.0	-0.03	0.01
C	-1.369725	-3.7801557620787505	0.8644588810393753	0.0	-0.02	0.01
C	-2.394477	-2.8269888810393753	1.0028738810393754	0.0	-0.01	0.01
O	2.9195112379212493	1.9141387620787507	0.5739965948031232	-0.02	0.02	-0.05
C	1.7343602379212493	1.315176643118126	0.5121165948031231	-0.02	0.03	-0.05
C	0.6083171189606247	1.94147145351188	1.3503307844093695	-0.01	0.13	-0.15
C	4.048656118960625	1.2734271189606245	-0.06904788103937537	-0.01	-0.01	-0.01
O	1.5269322379212493	0.3174524758424985	-0.1672027137637478	-0.02	-0.04	0.06
C	7.6182331189606245	1.783121	0.713078	-0.01	0.0	0.0
O	-0.22247071376374777	2.564858762078751	-1.490393308566871	0.06	0.02	0.11
C	-1.2779904275274956	1.851672356881874	-1.0997882825824867	0.12	-0.03	0.36
O	-1.3273123568818739	0.659652	-1.4137915464881203	0.03	0.0	0.13
O	-2.152558881039375	3.8734574051968766	0.06251852415750146	-0.01	0.05	0.04
C	-1.154414	4.627388524157501	-0.39783123792124925	0.0	0.04	0.02
C	-0.17553611896062463	4.010889881039375	-1.393458594803123	0.01	0.01	0.05
C	-2.4855944758424986	2.6001058810393753	-0.5446239516849971	0.04	0.01	0.08
O	-1.009098	5.771003405196876	-0.035671	0.0	0.05	0.0
C	-0.324415	4.615788356881874	-2.789781356881874	0.0	-0.03	0.03
C	-3.525063903369994	2.793155713763748	-1.6633587620787507	0.16	-0.06	-0.02
C	0.9542200223306188	1.9345991189606246	2.8602496654487446	-0.17	-0.01	-0.14
C	4.0372098810393755	1.4569282379212494	-1.5912568810393752	0.01	-0.02	-0.01
C	1.805913	-2.3656537620787508	-0.462011	0.0	-0.02	0.0
C	-3.415087	-0.6864358810393754	0.6583568810393754	0.0	-0.01	0.01
C	2.902963	-2.3886148810393752	0.462195	0.0	-0.01	0.0
C	4.212478	-2.157938	-0.037069	0.0	0.0	0.0
C	4.435627	-1.921598	-1.413332	0.0	0.0	0.0
C	3.351772	-1.936981	-2.314887	0.0	0.0	0.0
C	2.028087	-2.1586348810393754	-1.861915	0.0	-0.01	0.0
C	2.702139	-2.647495	1.981314	0.0	0.0	0.0
C	0.862607	-2.1845638810393755	-2.884245	0.0	-0.01	0.0
C	-4.245417	-0.7270308810393753	-0.5130931189606247	0.0	-0.01	0.01
C	-5.334836118960625	0.18664311896062463	-0.6026031189606247	0.01	-0.01	0.01
C	-5.577655	1.1241941189606246	0.4198288810393753	0.0	-0.01	0.01
C	-4.755812881039375	1.1554292379212494	1.5717568810393754	-0.01	-0.02	0.01
C	-3.674927	0.24394111896062462	1.7219628810393754	0.0	-0.01	0.01
C	-4.028850118960625	-1.752054	-1.658185	0.01	0.0	0.0
C	-2.8424481189606245	0.216979	3.033429	0.01	0.0	0.0
[truncated: 300 more rows]
