# Supplementary material
Source: publisher figshare collection journal article supplement (https://acs.figshare.com/ndownloader/files/5127205)
Supplement: Supplementary file 1 [file 5127205 › supporting_ja043819b/SSSS_fm-5-ts1-freq-134.log]

 Entering Gaussian System, Link 0=g03
 Input=SSSS_fm-5-ts1.gjf
 Output=SSSS_fm-5-ts1.log
 Initial command:
 /usr/local/g03/l1.exe /home/rzepa/Gau-9739.inp -scrdir=/home/rzepa/
 Entering Link 1 = /usr/local/g03/l1.exe PID=      9740.
  
 Copyright (c) 1988,1990,1992,1993,1995,1998,2003, Gaussian, Inc.
                  All Rights Reserved.
  
 This is the Gaussian(R) 03 program.  It is based on the
 the Gaussian(R) 98 system (copyright 1998, Gaussian, Inc.),
 the Gaussian(R) 94 system (copyright 1995, Gaussian, Inc.),
 the Gaussian 92(TM) system (copyright 1992, Gaussian, Inc.),
 the Gaussian 90(TM) system (copyright 1990, Gaussian, Inc.),
 the Gaussian 88(TM) system (copyright 1988, Gaussian, Inc.),
 the Gaussian 86(TM) system (copyright 1986, Carnegie Mellon
 University), and the Gaussian 82(TM) system (copyright 1983,
 Carnegie Mellon University). Gaussian is a federally registered
 trademark of Gaussian, Inc.
  
 This software contains proprietary and confidential information,
 including trade secrets, belonging to Gaussian, Inc.
  
 This software is provided under written license and may be
 used, copied, transmitted, or stored only in accord with that
 written license.
  
 The following legend is applicable only to US Government
 contracts under DFARS:
  
                    RESTRICTED RIGHTS LEGEND
  
 Use, duplication or disclosure by the US Government is subject
 to restrictions as set forth in subparagraph (c)(1)(ii) of the
 Rights in Technical Data and Computer Software clause at DFARS
 252.227-7013.
  
 Gaussian, Inc.
 Carnegie Office Park, Building 6, Pittsburgh, PA 15106 USA
  
 The following legend is applicable only to US Government
 contracts under FAR:
  
                    RESTRICTED RIGHTS LEGEND
  
 Use, reproduction and disclosure by the US Government is subject
 to restrictions as set forth in subparagraph (c) of the
 Commercial Computer Software - Restricted Rights clause at FAR
 52.227-19.
  
 Gaussian, Inc.
 Carnegie Office Park, Building 6, Pittsburgh, PA 15106 USA
  
  
 ---------------------------------------------------------------
 Warning -- This program may not be used in any manner that
 competes with the business of Gaussian, Inc. or will provide
 assistance to any competitor of Gaussian, Inc.  The licensee
 of this program is prohibited from giving any competitor of
 Gaussian, Inc. access to this program.  By using this program,
 the user acknowledges that Gaussian, Inc. is engaged in the
 business of creating and licensing software in the field of
 computational chemistry and represents and warrants to the
 licensee that it is not a competitor of Gaussian, Inc. and that
 it will not use this program in any manner prohibited above.
 ---------------------------------------------------------------
  

 Cite this work as:
 Gaussian 03, Revision B.04,
 M. J. Frisch, G. W. Trucks, H. B. Schlegel, G. E. Scuseria, 
 M. A. Robb, J. R. Cheeseman, J. A. Montgomery, Jr., T. Vreven, 
 K. N. Kudin, J. C. Burant, J. M. Millam, S. S. Iyengar, J. Tomasi, 
 V. Barone, B. Mennucci, M. Cossi, G. Scalmani, N. Rega, 
 G. A. Petersson, H. Nakatsuji, M. Hada, M. Ehara, K. Toyota, 
 R. Fukuda, J. Hasegawa, M. Ishida, T. Nakajima, Y. Honda, O. Kitao, 
 H. Nakai, M. Klene, X. Li, J. E. Knox, H. P. Hratchian, J. B. Cross, 
 C. Adamo, J. Jaramillo, R. Gomperts, R. E. Stratmann, O. Yazyev, 
 A. J. Austin, R. Cammi, C. Pomelli, J. W. Ochterski, P. Y. Ayala, 
 K. Morokuma, G. A. Voth, P. Salvador, J. J. Dannenberg, 
 V. G. Zakrzewski, S. Dapprich, A. D. Daniels, M. C. Strain, 
 O. Farkas, D. K. Malick, A. D. Rabuck, K. Raghavachari, 
 J. B. Foresman, J. V. Ortiz, Q. Cui, A. G. Baboul, S. Clifford, 
 J. Cioslowski, B. B. Stefanov, G. Liu, A. Liashenko, P. Piskorz, 
 I. Komaromi, R. L. Martin, D. J. Fox, T. Keith, M. A. Al-Laham, 
 C. Y. Peng, A. Nanayakkara, M. Challacombe, P. M. W. Gill, 
 B. Johnson, W. Chen, M. W. Wong, C. Gonzalez, and J. A. Pople, 
 Gaussian, Inc., Pittsburgh PA, 2003.
 
 *********************************************
 Gaussian 03:  x86-Linux-G03RevB.04 2-Jun-2003
                  18-Jul-2004 
 *********************************************
 %mem=500MB
 %nproc=2
 Will use up to    2 processors via shared memory.
 %chk=SSSS_fm-5-scan187.chk
 %rwf=1871.rwf,1800MB,1872.rwf,1800MB,1873.rwf,1800MB,1874.rwf,1800MB,1875.rwf,18
 00MB
 -------------------------------------------
 # b3lyp/Gen freq geom=checkpoint guess=read
 -------------------------------------------
 1/10=4,29=2,30=1,38=1/1,3;
 2/40=1/2;
 3/5=7,11=2,16=1,25=1,30=1,74=-5/1,2,3;
 4/5=1/1;
 5/5=2,38=6/2;
 8/6=4,10=90,11=11,27=1179648000/1;
 11/6=1,8=1,9=11,15=111,16=1/1,2,10;
 10/6=1/2;
 6/7=2,8=2,9=2,10=2,18=1,28=1/1;
 7/8=1,10=1,25=1/1,2,3,16;
 1/10=4,30=1/3;
 99//99;
 ----------------
 from SSSS_fm.gjf
 ----------------
 Redundant internal coordinates taken from checkpoint file:
 SSSS_fm-5-scan187.chk
 Charge =  0 Multiplicity = 1
 O,0,6.3887922969,1.3057427212,0.1302958571
 Mg,0,-0.5216544235,-0.5589157049,0.077934992
 O,0,-0.5949838984,1.4156589754,0.8963908993
 C,0,5.2611382373,1.8736887626,0.6164329731
 N,0,0.4417785328,-2.419879612,0.0333454895
 N,0,-2.2440559248,-1.5415923658,0.7395960045
 O,0,5.2496446967,2.7133929088,1.4845707749
 C,0,-0.0807668542,-3.6077474517,0.3462474841
 C,0,-1.3697245281,-3.7914816872,0.870121987
 C,0,-2.3944771768,-2.8326524468,1.0085374581
 O,0,2.9081848153,1.9254645914,0.5456814297
 C,0,1.7230343684,1.3321655624,0.4838014273
 C,0,0.6026543679,2.0150918411,1.2653836648
 C,0,4.042993079,1.2677638672,-0.0747108116
 O,0,1.5156055872,0.294799646,-0.1332243616
 C,0,7.6125700954,1.7831211274,0.7130776147
 O,0,-0.188491725,2.5761849389,-1.4280992915
 C,0,-1.2100328617,1.834682822,-0.8959160141
 O,0,-1.3103226608,0.6596522284,-1.3401705427
 O,0,-2.1582219522,3.9017726863,0.085171323
 C,0,-1.1544140172,4.6500406409,-0.3865053026
 C,0,-0.1698727707,4.0165530797,-1.3651425438
 C,0,-2.4629416984,2.6057690842,-0.4993185074
 O,0,-1.0090982516,5.799319453,-0.0356708677
 C,0,-0.3244149686,4.5987994679,-2.7727920681
 C,0,-3.4344539752,2.7591774022,-1.6746847995
 C,0,0.8579467533,1.9289359957,2.780966008
 C,0,4.0428731579,1.4456020817,-1.5969201296
 C,0,1.8059128314,-2.3769799283,-0.4620109093
 C,0,-3.4150871883,-0.6920986088,0.6640202625
 C,0,2.9029629207,-2.394278008,0.4621946834
 C,0,4.2124780543,-2.1579383539,-0.0370687374
 C,0,4.435627093,-1.9215978483,-1.4133324799
 C,0,3.3517722322,-1.9369812257,-2.3148869186
 C,0,2.0280869083,-2.1642978778,-1.8619150396
 C,0,2.7021392075,-2.6474949422,1.9813137122
 C,0,0.8626071492,-2.190227065,-2.8842445006
 C,0,-4.2454171552,-0.7326941163,-0.5074304624
 C,0,-5.3291732629,0.180980106,-0.5969403776
 C,0,-5.5776548856,1.118530616,0.4254916038
 C,0,-4.7614760021,1.1441027182,1.5774204927
 C,0,-3.674927278,0.2382782718,1.7276262444
 C,0,-4.0231866403,-1.7520539005,-1.6581849903
 C,0,-2.8367848123,0.2169789621,3.0334291159
 C,0,3.0056744201,-1.3609371521,2.8130880701
 C,0,3.5801771772,-3.8375980309,2.496586655
 C,0,0.7806919746,-0.861499104,-3.698402142
 C,0,0.9836819326,-3.4245429191,-3.8401303764
 C,0,-2.6739529061,1.6309264136,3.6718300913
 C,0,-3.4475982648,-0.7794752358,4.0764465327
 C,0,-3.6608761223,-1.0372131711,-2.9992482026
 C,0,-5.2801820869,-2.6662902162,-1.8564645914
 C,0,0.7316395366,-4.8736882021,0.1020736966
 C,0,-3.7398004689,-3.4064070633,1.4459084281
 H,0,-1.6450209043,-4.81157309,1.1157467247
 H,0,0.6298436657,3.0825063,0.9990543746
 H,0,4.0134652221,0.1917339524,0.1358176231
 H,0,7.6259319736,1.5917953897,1.7894133211
 H,0,7.7251168391,2.8571428051,0.543197277
 H,0,8.4091752895,1.2301225037,0.214522587
 H,0,0.823251704,4.2816179908,-0.9900434191
 H,0,-2.9767592687,2.0757668034,0.2977608656
 H,0,-0.1949488207,5.683987528,-2.7311543076
 H,0,-1.3093172275,4.3771013334,-3.1932815769
 H,0,0.4376638811,4.170055721,-3.4300594233
 H,0,-4.1395184552,3.5633918639,-1.4409630581
 H,0,-3.9975772833,1.830344727,-1.7592557371
 H,0,-2.9383971908,2.9859879792,-2.6231733066
 H,0,1.8256887573,2.3711185,3.0400015898
 H,0,0.8398499447,0.8871257143,3.1154304567
 H,0,0.0625404163,2.4648105889,3.302551318
 H,0,3.4082859946,0.6791007632,-2.0433628537
 H,0,5.057162561,1.310773073,-1.9814049928
 H,0,3.6930020355,2.4466670588,-1.8673732852
 H,0,5.0684732008,-2.1975222639,0.6492242116
 H,0,5.4583665401,-1.7586021978,-1.7814007656
 H,0,3.5393987509,-1.7983412695,-3.3879014571
 H,0,1.6384361697,-2.9072278345,2.146942764
 H,0,-0.0833103795,-2.3022952959,-2.314582285
 H,0,-5.9983759307,0.1392496835,-1.4663197113
 H,0,-6.4225957548,1.8158103007,0.3386142877
 H,0,-4.9848232352,1.8595328296,2.3790256516
 H,0,-3.1681452812,-2.400981834,-1.3828256978
 H,0,-1.8273635822,-0.1585918339,2.7661309344
 H,0,2.8206767208,-1.5450109439,3.8830056459
 H,0,2.349093722,-0.5348467678,2.4865323662
 H,0,4.0514372191,-1.0410751569,2.6869554916
 H,0,3.3391041487,-4.0462319541,3.5501394361
 H,0,4.6511185176,-3.5933922809,2.4295608054
 H,0,3.395902371,-4.7509804089,1.9108370997
 H,0,-0.0914630604,-0.8876161641,-4.371554557
 H,0,1.6857322736,-0.7104168157,-4.3062873523
 H,0,0.6654557095,-0.0002498563,-3.0161767584
 H,0,0.1255719089,-3.4480204935,-4.5291392376
 H,0,0.9940427633,-4.3637508023,-3.2649873218
 H,0,1.9080567446,-3.369380312,-4.4357433261
 H,0,-1.9436337784,1.5778691409,4.4944507949
 H,0,-3.6252063337,1.998349116,4.0877735127
 H,0,-2.3160644922,2.3556353186,2.9224585318
 H,0,-2.8440307568,-0.7667678902,4.997110334
 H,0,-3.4537386786,-1.8079546391,3.6826449005
 H,0,-4.4807248397,-0.4939315345,4.3301486192
 H,0,-3.4771947227,-1.7870748327,-3.7851793865
 H,0,-2.7525892917,-0.4243504592,-2.8687898883
 H,0,-4.4816465546,-0.3818218162,-3.3299120476
 H,0,-5.0576889354,-3.4460021694,-2.600856926
 H,0,-6.1374386553,-2.0782099363,-2.2181676098
 H,0,-5.5692986261,-3.1559033036,-0.9143185846
 H,0,1.6466049584,-4.8978067379,0.7014994359
 H,0,0.1449048908,-5.7656135956,0.3457373854
 H,0,1.029050456,-4.940865789,-0.9517607525
 H,0,-4.456228913,-2.6394345636,1.7479936152
 H,0,-4.1873735963,-3.9878827457,0.6301775246
 H,0,-3.5916806746,-4.0965678941,2.2856542069
 Recover connectivity data from disk.

 GradGradGradGradGradGradGradGradGradGradGradGradGradGradGradGradGradGrad
 Berny optimization.
 Initialization pass.
                           ----------------------------
                           !    Initial Parameters    !
                           ! (Angstroms and Degrees)  !
 --------------------------                            --------------------------
 ! Name  Definition              Value          Derivative Info.                !
 --------------------------------------------------------------------------------
 ! R1    R(1,4)                  1.353          calculate D2E/DX2 analytically  !
 ! R2    R(1,16)                 1.4371         calculate D2E/DX2 analytically  !
 ! R3    R(2,3)                  2.1387         calculate D2E/DX2 analytically  !
 ! R4    R(2,5)                  2.096          calculate D2E/DX2 analytically  !
 ! R5    R(2,6)                  2.0905         calculate D2E/DX2 analytically  !
 ! R6    R(2,15)                 2.219          calculate D2E/DX2 analytically  !
 ! R7    R(2,19)                 2.0293         calculate D2E/DX2 analytically  !
 ! R8    R(3,13)                 1.3892         calculate D2E/DX2 analytically  !
 ! R9    R(4,7)                  1.2078         calculate D2E/DX2 analytically  !
 ! R10   R(4,14)                 1.526          calculate D2E/DX2 analytically  !
 ! R11   R(5,8)                  1.3349         calculate D2E/DX2 analytically  !
 ! R12   R(5,29)                 1.4519         calculate D2E/DX2 analytically  !
 ! R13   R(6,10)                 1.3273         calculate D2E/DX2 analytically  !
 ! R14   R(6,30)                 1.4487         calculate D2E/DX2 analytically  !
 ! R15   R(8,9)                  1.4034         calculate D2E/DX2 analytically  !
 ! R16   R(8,53)                 1.5239         calculate D2E/DX2 analytically  !
 ! R17   R(9,10)                 1.4102         calculate D2E/DX2 analytically  !
 ! R18   R(9,55)                 1.0848         calculate D2E/DX2 analytically  !
 ! R19   R(10,54)                1.5266         calculate D2E/DX2 analytically  !
 ! R20   R(11,12)                1.3268         calculate D2E/DX2 analytically  !
 ! R21   R(11,14)                1.4509         calculate D2E/DX2 analytically  !
 ! R22   R(12,13)                1.5273         calculate D2E/DX2 analytically  !
 ! R23   R(12,15)                1.2247         calculate D2E/DX2 analytically  !
 ! R24   R(13,27)                1.5393         calculate D2E/DX2 analytically  !
 ! R25   R(13,56)                1.1005         calculate D2E/DX2 analytically  !
 ! R26   R(14,28)                1.5326         calculate D2E/DX2 analytically  !
 ! R27   R(14,57)                1.0968         calculate D2E/DX2 analytically  !
 ! R28   R(16,58)                1.0933         calculate D2E/DX2 analytically  !
 ! R29   R(16,59)                1.0932         calculate D2E/DX2 analytically  !
 ! R30   R(16,60)                1.0904         calculate D2E/DX2 analytically  !
 ! R31   R(17,18)                1.3699         calculate D2E/DX2 analytically  !
 ! R32   R(17,22)                1.4419         calculate D2E/DX2 analytically  !
 ! R33   R(18,19)                1.2602         calculate D2E/DX2 analytically  !
 ! R34   R(18,23)                1.5237         calculate D2E/DX2 analytically  !
 ! R35   R(20,21)                1.3379         calculate D2E/DX2 analytically  !
 ! R36   R(20,23)                1.454          calculate D2E/DX2 analytically  !
 ! R37   R(21,22)                1.5259         calculate D2E/DX2 analytically  !
 ! R38   R(21,24)                1.2104         calculate D2E/DX2 analytically  !
 ! R39   R(22,25)                1.5311         calculate D2E/DX2 analytically  !
 ! R40   R(22,61)                1.0942         calculate D2E/DX2 analytically  !
 ! R41   R(23,26)                1.5326         calculate D2E/DX2 analytically  !
 ! R42   R(23,62)                1.0864         calculate D2E/DX2 analytically  !
 ! R43   R(25,63)                1.0937         calculate D2E/DX2 analytically  !
 ! R44   R(25,64)                1.0936         calculate D2E/DX2 analytically  !
 ! R45   R(25,65)                1.0939         calculate D2E/DX2 analytically  !
 ! R46   R(26,66)                1.0948         calculate D2E/DX2 analytically  !
 ! R47   R(26,67)                1.0895         calculate D2E/DX2 analytically  !
 ! R48   R(26,68)                1.0941         calculate D2E/DX2 analytically  !
 ! R49   R(27,69)                1.0951         calculate D2E/DX2 analytically  !
 ! R50   R(27,70)                1.0943         calculate D2E/DX2 analytically  !
 ! R51   R(27,71)                1.0917         calculate D2E/DX2 analytically  !
 ! R52   R(28,72)                1.0907         calculate D2E/DX2 analytically  !
 ! R53   R(28,73)                1.0931         calculate D2E/DX2 analytically  !
 ! R54   R(28,74)                1.0944         calculate D2E/DX2 analytically  !
 ! R55   R(29,31)                1.4346         calculate D2E/DX2 analytically  !
 ! R56   R(29,35)                1.4333         calculate D2E/DX2 analytically  !
 ! R57   R(30,38)                1.4365         calculate D2E/DX2 analytically  !
 ! R58   R(30,42)                1.4368         calculate D2E/DX2 analytically  !
 ! R59   R(31,32)                1.4212         calculate D2E/DX2 analytically  !
 ! R60   R(31,36)                1.5531         calculate D2E/DX2 analytically  !
 ! R61   R(32,33)                1.4141         calculate D2E/DX2 analytically  !
 ! R62   R(32,75)                1.0979         calculate D2E/DX2 analytically  !
 ! R63   R(33,34)                1.4099         calculate D2E/DX2 analytically  !
 ! R64   R(33,76)                1.0991         calculate D2E/DX2 analytically  !
 ! R65   R(34,35)                1.4174         calculate D2E/DX2 analytically  !
 ! R66   R(34,77)                1.0981         calculate D2E/DX2 analytically  !
 ! R67   R(35,37)                1.5505         calculate D2E/DX2 analytically  !
 ! R68   R(36,45)                1.5618         calculate D2E/DX2 analytically  !
 ! R69   R(36,46)                1.5661         calculate D2E/DX2 analytically  !
 ! R70   R(36,78)                1.1074         calculate D2E/DX2 analytically  !
 ! R71   R(37,47)                1.5605         calculate D2E/DX2 analytically  !
 ! R72   R(37,48)                1.5659         calculate D2E/DX2 analytically  !
 ! R73   R(37,79)                1.1099         calculate D2E/DX2 analytically  !
 ! R74   R(38,39)                1.4203         calculate D2E/DX2 analytically  !
 ! R75   R(38,43)                1.5533         calculate D2E/DX2 analytically  !
 ! R76   R(39,40)                1.4093         calculate D2E/DX2 analytically  !
 ! R77   R(39,80)                1.0979         calculate D2E/DX2 analytically  !
 ! R78   R(40,41)                1.412          calculate D2E/DX2 analytically  !
 ! R79   R(40,81)                1.0989         calculate D2E/DX2 analytically  !
 ! R80   R(41,42)                1.4226         calculate D2E/DX2 analytically  !
 ! R81   R(41,82)                1.0974         calculate D2E/DX2 analytically  !
 ! R82   R(42,44)                1.5518         calculate D2E/DX2 analytically  !
 ! R83   R(43,51)                1.5623         calculate D2E/DX2 analytically  !
 ! R84   R(43,52)                1.5669         calculate D2E/DX2 analytically  !
 ! R85   R(43,83)                1.1082         calculate D2E/DX2 analytically  !
 ! R86   R(44,49)                1.5599         calculate D2E/DX2 analytically  !
 ! R87   R(44,50)                1.5665         calculate D2E/DX2 analytically  !
 ! R88   R(44,84)                1.1097         calculate D2E/DX2 analytically  !
 ! R89   R(45,85)                1.1013         calculate D2E/DX2 analytically  !
 ! R90   R(45,86)                1.1046         calculate D2E/DX2 analytically  !
 ! R91   R(45,87)                1.1008         calculate D2E/DX2 analytically  !
 ! R92   R(46,88)                1.1007         calculate D2E/DX2 analytically  !
 ! R93   R(46,89)                1.1005         calculate D2E/DX2 analytically  !
 ! R94   R(46,90)                1.1006         calculate D2E/DX2 analytically  !
 ! R95   R(47,91)                1.102          calculate D2E/DX2 analytically  !
 ! R96   R(47,92)                1.1007         calculate D2E/DX2 analytically  !
 ! R97   R(47,93)                1.1047         calculate D2E/DX2 analytically  !
 ! R98   R(48,94)                1.1007         calculate D2E/DX2 analytically  !
 ! R99   R(48,95)                1.1014         calculate D2E/DX2 analytically  !
 ! R100  R(48,96)                1.101          calculate D2E/DX2 analytically  !
 ! R101  R(49,97)                1.1013         calculate D2E/DX2 analytically  !
 ! R102  R(49,98)                1.1013         calculate D2E/DX2 analytically  !
 ! R103  R(49,99)                1.1022         calculate D2E/DX2 analytically  !
 ! R104  R(50,100)               1.1009         calculate D2E/DX2 analytically  !
 ! R105  R(50,101)               1.1013         calculate D2E/DX2 analytically  !
 ! R106  R(50,102)               1.1015         calculate D2E/DX2 analytically  !
 ! R107  R(51,103)               1.1017         calculate D2E/DX2 analytically  !
 ! R108  R(51,104)               1.1035         calculate D2E/DX2 analytically  !
 ! R109  R(51,105)               1.1012         calculate D2E/DX2 analytically  !
 ! R110  R(52,106)               1.1007         calculate D2E/DX2 analytically  !
 ! R111  R(52,107)               1.1007         calculate D2E/DX2 analytically  !
 ! R112  R(52,108)               1.1004         calculate D2E/DX2 analytically  !
 ! R113  R(53,109)               1.0941         calculate D2E/DX2 analytically  !
 ! R114  R(53,110)               1.0951         calculate D2E/DX2 analytically  !
 ! R115  R(53,111)               1.0971         calculate D2E/DX2 analytically  !
 ! R116  R(54,112)               1.0921         calculate D2E/DX2 analytically  !
 ! R117  R(54,113)               1.0972         calculate D2E/DX2 analytically  !
 ! R118  R(54,114)               1.097          calculate D2E/DX2 analytically  !
 ! A1    A(4,1,16)             115.1259         calculate D2E/DX2 analytically  !
 ! A2    A(3,2,5)              147.5223         calculate D2E/DX2 analytically  !
 ! A3    A(3,2,6)              106.536          calculate D2E/DX2 analytically  !
 ! A4    A(3,2,15)              73.3031         calculate D2E/DX2 analytically  !
 ! A5    A(3,2,19)              72.5243         calculate D2E/DX2 analytically  !
 ! A6    A(5,2,6)               88.1716         calculate D2E/DX2 analytically  !
 ! A7    A(5,2,15)              85.271          calculate D2E/DX2 analytically  !
 ! A8    A(5,2,19)             134.1806         calculate D2E/DX2 analytically  !
 ! A9    A(6,2,15)             165.3357         calculate D2E/DX2 analytically  !
 ! A10   A(6,2,19)             100.5589         calculate D2E/DX2 analytically  !
 ! A11   A(15,2,19)             93.3989         calculate D2E/DX2 analytically  !
 ! A12   A(2,3,13)             118.0648         calculate D2E/DX2 analytically  !
 ! A13   A(1,4,7)              123.9191         calculate D2E/DX2 analytically  !
 ! A14   A(1,4,14)             109.6277         calculate D2E/DX2 analytically  !
 ! A15   A(7,4,14)             126.4395         calculate D2E/DX2 analytically  !
 ! A16   A(2,5,8)              127.2387         calculate D2E/DX2 analytically  !
 ! A17   A(2,5,29)             114.3857         calculate D2E/DX2 analytically  !
 ! A18   A(8,5,29)             118.2968         calculate D2E/DX2 analytically  !
 ! A19   A(2,6,10)             127.9325         calculate D2E/DX2 analytically  !
 ! A20   A(2,6,30)             111.9537         calculate D2E/DX2 analytically  !
 ! A21   A(10,6,30)            119.2969         calculate D2E/DX2 analytically  !
 ! A22   A(5,8,9)              124.2989         calculate D2E/DX2 analytically  !
 ! A23   A(5,8,53)             119.5367         calculate D2E/DX2 analytically  !
 ! A24   A(9,8,53)             116.1475         calculate D2E/DX2 analytically  !
 ! A25   A(8,9,10)             127.9541         calculate D2E/DX2 analytically  !
 ! A26   A(8,9,55)             116.1499         calculate D2E/DX2 analytically  !
 ! A27   A(10,9,55)            115.6422         calculate D2E/DX2 analytically  !
 ! A28   A(6,10,9)             123.9945         calculate D2E/DX2 analytically  !
 ! A29   A(6,10,54)            121.5676         calculate D2E/DX2 analytically  !
 ! A30   A(9,10,54)            114.392          calculate D2E/DX2 analytically  !
 ! A31   A(12,11,14)           118.423          calculate D2E/DX2 analytically  !
 ! A32   A(11,12,13)           115.5595         calculate D2E/DX2 analytically  !
 ! A33   A(11,12,15)           123.611          calculate D2E/DX2 analytically  !
 ! A34   A(13,12,15)           120.8202         calculate D2E/DX2 analytically  !
 ! A35   A(3,13,12)            107.6716         calculate D2E/DX2 analytically  !
 ! A36   A(3,13,27)            112.3551         calculate D2E/DX2 analytically  !
 ! A37   A(3,13,56)            112.0587         calculate D2E/DX2 analytically  !
 ! A38   A(12,13,27)           110.9263         calculate D2E/DX2 analytically  !
 ! A39   A(12,13,56)           106.9627         calculate D2E/DX2 analytically  !
 ! A40   A(27,13,56)           106.7662         calculate D2E/DX2 analytically  !
 ! A41   A(4,14,11)            104.5183         calculate D2E/DX2 analytically  !
 ! A42   A(4,14,28)            113.8183         calculate D2E/DX2 analytically  !
 ! A43   A(4,14,57)            108.9106         calculate D2E/DX2 analytically  !
 ! A44   A(11,14,28)           111.8407         calculate D2E/DX2 analytically  !
 ! A45   A(11,14,57)           109.9725         calculate D2E/DX2 analytically  !
 ! A46   A(28,14,57)           107.7271         calculate D2E/DX2 analytically  !
 ! A47   A(2,15,12)            115.6863         calculate D2E/DX2 analytically  !
 ! A48   A(1,16,58)            110.5804         calculate D2E/DX2 analytically  !
 ! A49   A(1,16,59)            110.5497         calculate D2E/DX2 analytically  !
 ! A50   A(1,16,60)            105.5599         calculate D2E/DX2 analytically  !
 ! A51   A(58,16,59)           108.8847         calculate D2E/DX2 analytically  !
 ! A52   A(58,16,60)           110.6376         calculate D2E/DX2 analytically  !
 ! A53   A(59,16,60)           110.6097         calculate D2E/DX2 analytically  !
 ! A54   A(18,17,22)           122.235          calculate D2E/DX2 analytically  !
 ! A55   A(17,18,19)           115.2834         calculate D2E/DX2 analytically  !
 ! A56   A(17,18,23)           116.1281         calculate D2E/DX2 analytically  !
 ! A57   A(19,18,23)           119.8796         calculate D2E/DX2 analytically  !
 ! A58   A(2,19,18)            106.417          calculate D2E/DX2 analytically  !
 ! A59   A(21,20,23)           120.9324         calculate D2E/DX2 analytically  !
 ! A60   A(20,21,22)           118.5557         calculate D2E/DX2 analytically  !
 ! A61   A(20,21,24)           121.2606         calculate D2E/DX2 analytically  !
 ! A62   A(22,21,24)           120.1742         calculate D2E/DX2 analytically  !
 ! A63   A(17,22,21)           115.7471         calculate D2E/DX2 analytically  !
 ! A64   A(17,22,25)           109.7813         calculate D2E/DX2 analytically  !
 ! A65   A(17,22,61)           105.586          calculate D2E/DX2 analytically  !
 ! A66   A(21,22,25)           111.508          calculate D2E/DX2 analytically  !
 ! A67   A(21,22,61)           105.3784         calculate D2E/DX2 analytically  !
 ! A68   A(25,22,61)           108.3399         calculate D2E/DX2 analytically  !
 ! A69   A(18,23,20)           112.543          calculate D2E/DX2 analytically  !
 ! A70   A(18,23,26)           111.8565         calculate D2E/DX2 analytically  !
 ! A71   A(18,23,62)           109.4504         calculate D2E/DX2 analytically  !
 ! A72   A(20,23,26)           110.6047         calculate D2E/DX2 analytically  !
 ! A73   A(20,23,62)           103.8292         calculate D2E/DX2 analytically  !
 ! A74   A(26,23,62)           108.1619         calculate D2E/DX2 analytically  !
 ! A75   A(22,25,63)           109.2913         calculate D2E/DX2 analytically  !
 ! A76   A(22,25,64)           111.549          calculate D2E/DX2 analytically  !
 ! A77   A(22,25,65)           109.453          calculate D2E/DX2 analytically  !
 ! A78   A(63,25,64)           108.8078         calculate D2E/DX2 analytically  !
 ! A79   A(63,25,65)           109.2268         calculate D2E/DX2 analytically  !
 ! A80   A(64,25,65)           108.4777         calculate D2E/DX2 analytically  !
 ! A81   A(23,26,66)           108.5454         calculate D2E/DX2 analytically  !
 ! A82   A(23,26,67)           107.568          calculate D2E/DX2 analytically  !
 ! A83   A(23,26,68)           113.4641         calculate D2E/DX2 analytically  !
 ! A84   A(66,26,67)           108.0573         calculate D2E/DX2 analytically  !
 ! A85   A(66,26,68)           108.9523         calculate D2E/DX2 analytically  !
 ! A86   A(67,26,68)           110.1068         calculate D2E/DX2 analytically  !
 ! A87   A(13,27,69)           110.9075         calculate D2E/DX2 analytically  !
 ! A88   A(13,27,70)           110.5764         calculate D2E/DX2 analytically  !
 ! A89   A(13,27,71)           108.7888         calculate D2E/DX2 analytically  !
 ! A90   A(69,27,70)           109.0707         calculate D2E/DX2 analytically  !
 ! A91   A(69,27,71)           109.4296         calculate D2E/DX2 analytically  !
 ! A92   A(70,27,71)           108.0123         calculate D2E/DX2 analytically  !
 ! A93   A(14,28,72)           108.9693         calculate D2E/DX2 analytically  !
 ! A94   A(14,28,73)           109.5718         calculate D2E/DX2 analytically  !
 ! A95   A(14,28,74)           110.5869         calculate D2E/DX2 analytically  !
 ! A96   A(72,28,73)           108.0131         calculate D2E/DX2 analytically  !
 ! A97   A(72,28,74)           110.8357         calculate D2E/DX2 analytically  !
 ! A98   A(73,28,74)           108.8178         calculate D2E/DX2 analytically  !
 ! A99   A(5,29,31)            119.8899         calculate D2E/DX2 analytically  !
 ! A100  A(5,29,35)            118.8977         calculate D2E/DX2 analytically  !
 ! A101  A(31,29,35)           120.8294         calculate D2E/DX2 analytically  !
 ! A102  A(6,30,38)            119.5531         calculate D2E/DX2 analytically  !
 ! A103  A(6,30,42)            119.1619         calculate D2E/DX2 analytically  !
 ! A104  A(38,30,42)           121.162          calculate D2E/DX2 analytically  !
 ! A105  A(29,31,32)           118.4433         calculate D2E/DX2 analytically  !
 ! A106  A(29,31,36)           122.2235         calculate D2E/DX2 analytically  !
 ! A107  A(32,31,36)           119.3304         calculate D2E/DX2 analytically  !
 ! A108  A(31,32,33)           121.0018         calculate D2E/DX2 analytically  !
 ! A109  A(31,32,75)           119.5253         calculate D2E/DX2 analytically  !
 ! A110  A(33,32,75)           119.4308         calculate D2E/DX2 analytically  !
 ! A111  A(32,33,34)           119.947          calculate D2E/DX2 analytically  !
 ! A112  A(32,33,76)           119.8369         calculate D2E/DX2 analytically  !
 ! A113  A(34,33,76)           120.1866         calculate D2E/DX2 analytically  !
 ! A114  A(33,34,35)           121.019          calculate D2E/DX2 analytically  !
 ! A115  A(33,34,77)           119.4801         calculate D2E/DX2 analytically  !
 ! A116  A(35,34,77)           119.4791         calculate D2E/DX2 analytically  !
 ! A117  A(29,35,34)           118.7309         calculate D2E/DX2 analytically  !
 ! A118  A(29,35,37)           121.6671         calculate D2E/DX2 analytically  !
 ! A119  A(34,35,37)           119.5997         calculate D2E/DX2 analytically  !
 ! A120  A(31,36,45)           111.1912         calculate D2E/DX2 analytically  !
 ! A121  A(31,36,46)           111.9134         calculate D2E/DX2 analytically  !
 ! A122  A(31,36,78)           107.9827         calculate D2E/DX2 analytically  !
 ! A123  A(45,36,46)           109.9863         calculate D2E/DX2 analytically  !
 ! A124  A(45,36,78)           107.4715         calculate D2E/DX2 analytically  !
 ! A125  A(46,36,78)           108.1241         calculate D2E/DX2 analytically  !
 ! A126  A(35,37,47)           111.6675         calculate D2E/DX2 analytically  !
 ! A127  A(35,37,48)           110.9503         calculate D2E/DX2 analytically  !
 ! A128  A(35,37,79)           107.6915         calculate D2E/DX2 analytically  !
 ! A129  A(47,37,48)           110.9016         calculate D2E/DX2 analytically  !
 ! A130  A(47,37,79)           108.0007         calculate D2E/DX2 analytically  !
 ! A131  A(48,37,79)           107.4354         calculate D2E/DX2 analytically  !
 ! A132  A(30,38,39)           118.3124         calculate D2E/DX2 analytically  !
 ! A133  A(30,38,43)           122.685          calculate D2E/DX2 analytically  !
 ! A134  A(39,38,43)           118.9887         calculate D2E/DX2 analytically  !
 ! A135  A(38,39,40)           121.1155         calculate D2E/DX2 analytically  !
 ! A136  A(38,39,80)           119.3761         calculate D2E/DX2 analytically  !
 ! A137  A(40,39,80)           119.4919         calculate D2E/DX2 analytically  !
 ! A138  A(39,40,41)           120.1323         calculate D2E/DX2 analytically  !
 ! A139  A(39,40,81)           120.0212         calculate D2E/DX2 analytically  !
 ! A140  A(41,40,81)           119.8303         calculate D2E/DX2 analytically  !
 ! A141  A(40,41,42)           121.0716         calculate D2E/DX2 analytically  !
 ! A142  A(40,41,82)           119.3459         calculate D2E/DX2 analytically  !
 ! A143  A(42,41,82)           119.5672         calculate D2E/DX2 analytically  !
 ! A144  A(30,42,41)           118.1832         calculate D2E/DX2 analytically  !
 ! A145  A(30,42,44)           121.0879         calculate D2E/DX2 analytically  !
 ! A146  A(41,42,44)           120.6724         calculate D2E/DX2 analytically  !
 ! A147  A(38,43,51)           111.6445         calculate D2E/DX2 analytically  !
 ! A148  A(38,43,52)           111.2157         calculate D2E/DX2 analytically  !
 ! A149  A(38,43,83)           108.0954         calculate D2E/DX2 analytically  !
 ! A150  A(51,43,52)           110.1447         calculate D2E/DX2 analytically  !
 ! A151  A(51,43,83)           107.5959         calculate D2E/DX2 analytically  !
 ! A152  A(52,43,83)           107.9839         calculate D2E/DX2 analytically  !
 ! A153  A(42,44,49)           112.8499         calculate D2E/DX2 analytically  !
 ! A154  A(42,44,50)           111.0026         calculate D2E/DX2 analytically  !
 ! A155  A(42,44,84)           107.0532         calculate D2E/DX2 analytically  !
 ! A156  A(49,44,50)           110.1691         calculate D2E/DX2 analytically  !
 ! A157  A(49,44,84)           108.0834         calculate D2E/DX2 analytically  !
 ! A158  A(50,44,84)           107.4446         calculate D2E/DX2 analytically  !
 ! A159  A(36,45,85)           110.3082         calculate D2E/DX2 analytically  !
 ! A160  A(36,45,86)           110.0655         calculate D2E/DX2 analytically  !
 ! A161  A(36,45,87)           111.2821         calculate D2E/DX2 analytically  !
 ! A162  A(85,45,86)           108.2015         calculate D2E/DX2 analytically  !
 ! A163  A(85,45,87)           108.6303         calculate D2E/DX2 analytically  !
 ! A164  A(86,45,87)           108.2697         calculate D2E/DX2 analytically  !
 ! A165  A(36,46,88)           109.6425         calculate D2E/DX2 analytically  !
 ! A166  A(36,46,89)           110.9115         calculate D2E/DX2 analytically  !
 ! A167  A(36,46,90)           111.2023         calculate D2E/DX2 analytically  !
 ! A168  A(88,46,89)           108.2697         calculate D2E/DX2 analytically  !
 ! A169  A(88,46,90)           108.3866         calculate D2E/DX2 analytically  !
 ! A170  A(89,46,90)           108.3417         calculate D2E/DX2 analytically  !
 ! A171  A(37,47,91)           109.8803         calculate D2E/DX2 analytically  !
 ! A172  A(37,47,92)           111.2149         calculate D2E/DX2 analytically  !
 ! A173  A(37,47,93)           110.3097         calculate D2E/DX2 analytically  !
 ! A174  A(91,47,92)           108.4604         calculate D2E/DX2 analytically  !
 ! A175  A(91,47,93)           108.2483         calculate D2E/DX2 analytically  !
 ! A176  A(92,47,93)           108.6523         calculate D2E/DX2 analytically  !
 ! A177  A(37,48,94)           109.7945         calculate D2E/DX2 analytically  !
 ! A178  A(37,48,95)           110.7414         calculate D2E/DX2 analytically  !
 ! A179  A(37,48,96)           110.8336         calculate D2E/DX2 analytically  !
 ! A180  A(94,48,95)           108.4224         calculate D2E/DX2 analytically  !
 ! A181  A(94,48,96)           108.4786         calculate D2E/DX2 analytically  !
 ! A182  A(95,48,96)           108.5009         calculate D2E/DX2 analytically  !
 ! A183  A(44,49,97)           109.3444         calculate D2E/DX2 analytically  !
 ! A184  A(44,49,98)           111.519          calculate D2E/DX2 analytically  !
 ! A185  A(44,49,99)           110.5873         calculate D2E/DX2 analytically  !
 ! A186  A(97,49,98)           107.8633         calculate D2E/DX2 analytically  !
 ! A187  A(97,49,99)           108.9167         calculate D2E/DX2 analytically  !
 ! A188  A(98,49,99)           108.5348         calculate D2E/DX2 analytically  !
 ! A189  A(44,50,100)          109.6145         calculate D2E/DX2 analytically  !
 ! A190  A(44,50,101)          110.9853         calculate D2E/DX2 analytically  !
 ! A191  A(44,50,102)          110.7436         calculate D2E/DX2 analytically  !
 ! A192  A(100,50,101)         108.2315         calculate D2E/DX2 analytically  !
 ! A193  A(100,50,102)         108.5785         calculate D2E/DX2 analytically  !
 ! A194  A(101,50,102)         108.616          calculate D2E/DX2 analytically  !
 ! A195  A(43,51,103)          109.8525         calculate D2E/DX2 analytically  !
 ! A196  A(43,51,104)          110.0927         calculate D2E/DX2 analytically  !
 ! A197  A(43,51,105)          110.9309         calculate D2E/DX2 analytically  !
 ! A198  A(103,51,104)         108.974          calculate D2E/DX2 analytically  !
 ! A199  A(103,51,105)         108.3707         calculate D2E/DX2 analytically  !
 ! A200  A(104,51,105)         108.5706         calculate D2E/DX2 analytically  !
 ! A201  A(43,52,106)          109.6779         calculate D2E/DX2 analytically  !
 ! A202  A(43,52,107)          110.7712         calculate D2E/DX2 analytically  !
 ! A203  A(43,52,108)          111.2248         calculate D2E/DX2 analytically  !
 ! A204  A(106,52,107)         108.2799         calculate D2E/DX2 analytically  !
 ! A205  A(106,52,108)         108.4779         calculate D2E/DX2 analytically  !
 ! A206  A(107,52,108)         108.3268         calculate D2E/DX2 analytically  !
 ! A207  A(8,53,109)           112.1081         calculate D2E/DX2 analytically  !
 ! A208  A(8,53,110)           110.8138         calculate D2E/DX2 analytically  !
 ! A209  A(8,53,111)           110.4454         calculate D2E/DX2 analytically  !
 ! A210  A(109,53,110)         107.9515         calculate D2E/DX2 analytically  !
 ! A211  A(109,53,111)         107.3509         calculate D2E/DX2 analytically  !
 ! A212  A(110,53,111)         108.0065         calculate D2E/DX2 analytically  !
 ! A213  A(10,54,112)          113.1667         calculate D2E/DX2 analytically  !
 ! A214  A(10,54,113)          110.2227         calculate D2E/DX2 analytically  !
 ! A215  A(10,54,114)          109.681          calculate D2E/DX2 analytically  !
 ! A216  A(112,54,113)         108.0728         calculate D2E/DX2 analytically  !
 ! A217  A(112,54,114)         108.5816         calculate D2E/DX2 analytically  !
 ! A218  A(113,54,114)         106.9044         calculate D2E/DX2 analytically  !
 ! D1    D(16,1,4,7)            -0.6647         calculate D2E/DX2 analytically  !
 ! D2    D(16,1,4,14)         -179.3943         calculate D2E/DX2 analytically  !
 ! D3    D(4,1,16,58)           60.3463         calculate D2E/DX2 analytically  !
 ! D4    D(4,1,16,59)          -60.3164         calculate D2E/DX2 analytically  !
 ! D5    D(4,1,16,60)         -179.9602         calculate D2E/DX2 analytically  !
 ! D6    D(5,2,3,13)            31.4093         calculate D2E/DX2 analytically  !
 ! D7    D(6,2,3,13)           145.2662         calculate D2E/DX2 analytically  !
 ! D8    D(15,2,3,13)          -19.4275         calculate D2E/DX2 analytically  !
 ! D9    D(19,2,3,13)         -118.5954         calculate D2E/DX2 analytically  !
 ! D10   D(3,2,5,8)            119.1038         calculate D2E/DX2 analytically  !
 ! D11   D(3,2,5,29)           -64.2063         calculate D2E/DX2 analytically  !
 ! D12   D(6,2,5,8)              0.4078         calculate D2E/DX2 analytically  !
 ! D13   D(6,2,5,29)           177.0977         calculate D2E/DX2 analytically  !
 ! D14   D(15,2,5,8)           167.2798         calculate D2E/DX2 analytically  !
 ! D15   D(15,2,5,29)          -16.0302         calculate D2E/DX2 analytically  !
 ! D16   D(19,2,5,8)          -102.5733         calculate D2E/DX2 analytically  !
 ! D17   D(19,2,5,29)           74.1166         calculate D2E/DX2 analytically  !
 ! D18   D(3,2,6,10)          -148.0586         calculate D2E/DX2 analytically  !
 ! D19   D(3,2,6,30)            42.4992         calculate D2E/DX2 analytically  !
 ! D20   D(5,2,6,10)             2.5126         calculate D2E/DX2 analytically  !
 ! D21   D(5,2,6,30)          -166.9296         calculate D2E/DX2 analytically  !
 ! D22   D(15,2,6,10)          -60.8837         calculate D2E/DX2 analytically  !
 ! D23   D(15,2,6,30)          129.674          calculate D2E/DX2 analytically  !
 ! D24   D(19,2,6,10)          137.208          calculate D2E/DX2 analytically  !
 ! D25   D(19,2,6,30)          -32.2342         calculate D2E/DX2 analytically  !
 ! D26   D(3,2,15,12)           11.9468         calculate D2E/DX2 analytically  !
 ! D27   D(5,2,15,12)         -143.3598         calculate D2E/DX2 analytically  !
 ! D28   D(6,2,15,12)          -79.6292         calculate D2E/DX2 analytically  !
 ! D29   D(19,2,15,12)          82.5634         calculate D2E/DX2 analytically  !
 ! D30   D(3,2,19,18)            6.9944         calculate D2E/DX2 analytically  !
 ! D31   D(5,2,19,18)         -151.0229         calculate D2E/DX2 analytically  !
 ! D32   D(6,2,19,18)          111.167          calculate D2E/DX2 analytically  !
 ! D33   D(15,2,19,18)         -64.316          calculate D2E/DX2 analytically  !
 ! D34   D(2,3,13,12)           22.5233         calculate D2E/DX2 analytically  !
 ! D35   D(2,3,13,27)          -99.9116         calculate D2E/DX2 analytically  !
 ! D36   D(2,3,13,56)          139.877          calculate D2E/DX2 analytically  !
 ! D37   D(1,4,14,11)          178.6949         calculate D2E/DX2 analytically  !
 ! D38   D(1,4,14,28)          -59.0026         calculate D2E/DX2 analytically  !
 ! D39   D(1,4,14,57)           61.1993         calculate D2E/DX2 analytically  !
 ! D40   D(7,4,14,11)            0.0053         calculate D2E/DX2 analytically  !
 ! D41   D(7,4,14,28)          122.3078         calculate D2E/DX2 analytically  !
 ! D42   D(7,4,14,57)         -117.4904         calculate D2E/DX2 analytically  !
 ! D43   D(2,5,8,9)             -5.3107         calculate D2E/DX2 analytically  !
 ! D44   D(2,5,8,53)           173.1369         calculate D2E/DX2 analytically  !
 ! D45   D(29,5,8,9)           178.1134         calculate D2E/DX2 analytically  !
 ! D46   D(29,5,8,53)           -3.4391         calculate D2E/DX2 analytically  !
 ! D47   D(2,5,29,31)          100.4153         calculate D2E/DX2 analytically  !
 ! D48   D(2,5,29,35)          -72.5404         calculate D2E/DX2 analytically  !
 ! D49   D(8,5,29,31)          -82.5772         calculate D2E/DX2 analytically  !
 ! D50   D(8,5,29,35)          104.467          calculate D2E/DX2 analytically  !
 ! D51   D(2,6,10,9)            -0.7053         calculate D2E/DX2 analytically  !
 ! D52   D(2,6,10,54)         -178.0992         calculate D2E/DX2 analytically  !
 ! D53   D(30,6,10,9)          168.058          calculate D2E/DX2 analytically  !
 ! D54   D(30,6,10,54)          -9.3359         calculate D2E/DX2 analytically  !
 ! D55   D(2,6,30,38)           93.3417         calculate D2E/DX2 analytically  !
 ! D56   D(2,6,30,42)          -82.6755         calculate D2E/DX2 analytically  !
 ! D57   D(10,6,30,38)         -77.1196         calculate D2E/DX2 analytically  !
 ! D58   D(10,6,30,42)         106.8631         calculate D2E/DX2 analytically  !
 ! D59   D(5,8,9,10)             8.5518         calculate D2E/DX2 analytically  !
 ! D60   D(5,8,9,55)          -177.5342         calculate D2E/DX2 analytically  !
 ! D61   D(53,8,9,10)         -169.9435         calculate D2E/DX2 analytically  !
 ! D62   D(53,8,9,55)            3.9704         calculate D2E/DX2 analytically  !
 ! D63   D(5,8,53,109)          63.0872         calculate D2E/DX2 analytically  !
 ! D64   D(5,8,53,110)        -176.2276         calculate D2E/DX2 analytically  !
 ! D65   D(5,8,53,111)         -56.5806         calculate D2E/DX2 analytically  !
 ! D66   D(9,8,53,109)        -118.3415         calculate D2E/DX2 analytically  !
 ! D67   D(9,8,53,110)           2.3437         calculate D2E/DX2 analytically  !
 ! D68   D(9,8,53,111)         121.9907         calculate D2E/DX2 analytically  !
 ! D69   D(8,9,10,6)            -5.3164         calculate D2E/DX2 analytically  !
 ! D70   D(8,9,10,54)          172.2456         calculate D2E/DX2 analytically  !
 ! D71   D(55,9,10,6)         -179.2566         calculate D2E/DX2 analytically  !
 ! D72   D(55,9,10,54)          -1.6946         calculate D2E/DX2 analytically  !
 ! D73   D(6,10,54,112)        -14.4196         calculate D2E/DX2 analytically  !
 ! D74   D(6,10,54,113)        106.7274         calculate D2E/DX2 analytically  !
 ! D75   D(6,10,54,114)       -135.8298         calculate D2E/DX2 analytically  !
 ! D76   D(9,10,54,112)        167.9528         calculate D2E/DX2 analytically  !
 ! D77   D(9,10,54,113)        -70.9003         calculate D2E/DX2 analytically  !
 ! D78   D(9,10,54,114)         46.5425         calculate D2E/DX2 analytically  !
 ! D79   D(14,11,12,13)        174.6235         calculate D2E/DX2 analytically  !
 ! D80   D(14,11,12,15)         -4.2748         calculate D2E/DX2 analytically  !
 ! D81   D(12,11,14,4)        -158.546          calculate D2E/DX2 analytically  !
 ! D82   D(12,11,14,28)         77.8668         calculate D2E/DX2 analytically  !
 ! D83   D(12,11,14,57)        -41.7819         calculate D2E/DX2 analytically  !
 ! D84   D(11,12,13,3)         169.237          calculate D2E/DX2 analytically  !
 ! D85   D(11,12,13,27)        -67.4509         calculate D2E/DX2 analytically  !
 ! D86   D(11,12,13,56)         48.6224         calculate D2E/DX2 analytically  !
 ! D87   D(15,12,13,3)         -11.8315         calculate D2E/DX2 analytically  !
 ! D88   D(15,12,13,27)        111.4806         calculate D2E/DX2 analytically  !
 ! D89   D(15,12,13,56)       -132.446          calculate D2E/DX2 analytically  !
 ! D90   D(11,12,15,2)         175.0834         calculate D2E/DX2 analytically  !
 ! D91   D(13,12,15,2)          -3.7593         calculate D2E/DX2 analytically  !
 ! D92   D(3,13,27,69)         177.6595         calculate D2E/DX2 analytically  !
 ! D93   D(3,13,27,70)          56.5277         calculate D2E/DX2 analytically  !
 ! D94   D(3,13,27,71)         -61.9359         calculate D2E/DX2 analytically  !
 ! D95   D(12,13,27,69)         57.0844         calculate D2E/DX2 analytically  !
 ! D96   D(12,13,27,70)        -64.0474         calculate D2E/DX2 analytically  !
 ! D97   D(12,13,27,71)        177.489          calculate D2E/DX2 analytically  !
 ! D98   D(56,13,27,69)        -59.1103         calculate D2E/DX2 analytically  !
 ! D99   D(56,13,27,70)        179.7579         calculate D2E/DX2 analytically  !
 ! D100  D(56,13,27,71)         61.2943         calculate D2E/DX2 analytically  !
 ! D101  D(4,14,28,72)         157.2134         calculate D2E/DX2 analytically  !
 ! D102  D(4,14,28,73)          39.2277         calculate D2E/DX2 analytically  !
 ! D103  D(4,14,28,74)         -80.7216         calculate D2E/DX2 analytically  !
 ! D104  D(11,14,28,72)        -84.6132         calculate D2E/DX2 analytically  !
 ! D105  D(11,14,28,73)        157.4012         calculate D2E/DX2 analytically  !
 ! D106  D(11,14,28,74)         37.4519         calculate D2E/DX2 analytically  !
 ! D107  D(57,14,28,72)         36.3472         calculate D2E/DX2 analytically  !
 ! D108  D(57,14,28,73)        -81.6384         calculate D2E/DX2 analytically  !
 ! D109  D(57,14,28,74)        158.4123         calculate D2E/DX2 analytically  !
 ! D110  D(22,17,18,19)        160.296          calculate D2E/DX2 analytically  !
 ! D111  D(22,17,18,23)         12.5863         calculate D2E/DX2 analytically  !
 ! D112  D(18,17,22,21)         14.5989         calculate D2E/DX2 analytically  !
 ! D113  D(18,17,22,25)       -112.7035         calculate D2E/DX2 analytically  !
 ! D114  D(18,17,22,61)        130.7149         calculate D2E/DX2 analytically  !
 ! D115  D(17,18,19,2)         102.3831         calculate D2E/DX2 analytically  !
 ! D116  D(23,18,19,2)        -111.2001         calculate D2E/DX2 analytically  !
 ! D117  D(17,18,23,20)        -38.2253         calculate D2E/DX2 analytically  !
 ! D118  D(17,18,23,26)         87.0175         calculate D2E/DX2 analytically  !
 ! D119  D(17,18,23,62)       -153.1264         calculate D2E/DX2 analytically  !
 ! D120  D(19,18,23,20)        175.6293         calculate D2E/DX2 analytically  !
 ! D121  D(19,18,23,26)        -59.1279         calculate D2E/DX2 analytically  !
 ! D122  D(19,18,23,62)         60.7281         calculate D2E/DX2 analytically  !
 ! D123  D(23,20,21,22)        -11.4813         calculate D2E/DX2 analytically  !
 ! D124  D(23,20,21,24)        169.6332         calculate D2E/DX2 analytically  !
 ! D125  D(21,20,23,18)         38.1816         calculate D2E/DX2 analytically  !
 ! D126  D(21,20,23,26)        -87.741          calculate D2E/DX2 analytically  !
 ! D127  D(21,20,23,62)        156.4421         calculate D2E/DX2 analytically  !
 ! D128  D(20,21,22,17)        -15.9631         calculate D2E/DX2 analytically  !
 ! D129  D(20,21,22,25)        110.4718         calculate D2E/DX2 analytically  !
 ! D130  D(20,21,22,61)       -132.1961         calculate D2E/DX2 analytically  !
 ! D131  D(24,21,22,17)        162.9349         calculate D2E/DX2 analytically  !
 ! D132  D(24,21,22,25)        -70.6302         calculate D2E/DX2 analytically  !
 ! D133  D(24,21,22,61)         46.7019         calculate D2E/DX2 analytically  !
 ! D134  D(17,22,25,63)       -173.5839         calculate D2E/DX2 analytically  !
 ! D135  D(17,22,25,64)         66.0538         calculate D2E/DX2 analytically  !
 ! D136  D(17,22,25,65)        -54.0031         calculate D2E/DX2 analytically  !
 ! D137  D(21,22,25,63)         56.7792         calculate D2E/DX2 analytically  !
 ! D138  D(21,22,25,64)        -63.5832         calculate D2E/DX2 analytically  !
 ! D139  D(21,22,25,65)        176.3599         calculate D2E/DX2 analytically  !
 ! D140  D(61,22,25,63)        -58.7471         calculate D2E/DX2 analytically  !
 ! D141  D(61,22,25,64)       -179.1094         calculate D2E/DX2 analytically  !
 ! D142  D(61,22,25,65)         60.8337         calculate D2E/DX2 analytically  !
 ! D143  D(18,23,26,66)       -162.3488         calculate D2E/DX2 analytically  !
 ! D144  D(18,23,26,67)         80.9619         calculate D2E/DX2 analytically  !
 ! D145  D(18,23,26,68)        -41.0789         calculate D2E/DX2 analytically  !
 ! D146  D(20,23,26,66)        -36.0422         calculate D2E/DX2 analytically  !
 ! D147  D(20,23,26,67)       -152.7316         calculate D2E/DX2 analytically  !
 ! D148  D(20,23,26,68)         85.2276         calculate D2E/DX2 analytically  !
 ! D149  D(62,23,26,66)         77.0422         calculate D2E/DX2 analytically  !
 ! D150  D(62,23,26,67)        -39.6471         calculate D2E/DX2 analytically  !
 ! D151  D(62,23,26,68)       -161.6879         calculate D2E/DX2 analytically  !
 ! D152  D(5,29,31,32)        -171.067          calculate D2E/DX2 analytically  !
 ! D153  D(5,29,31,36)           8.3184         calculate D2E/DX2 analytically  !
 ! D154  D(35,29,31,32)          1.7503         calculate D2E/DX2 analytically  !
 ! D155  D(35,29,31,36)       -178.8643         calculate D2E/DX2 analytically  !
 ! D156  D(5,29,35,34)         171.3149         calculate D2E/DX2 analytically  !
 ! D157  D(5,29,35,37)          -9.2461         calculate D2E/DX2 analytically  !
 ! D158  D(31,29,35,34)         -1.5725         calculate D2E/DX2 analytically  !
 ! D159  D(31,29,35,37)        177.8665         calculate D2E/DX2 analytically  !
 ! D160  D(6,30,38,39)        -175.3977         calculate D2E/DX2 analytically  !
 ! D161  D(6,30,38,43)           5.9705         calculate D2E/DX2 analytically  !
 ! D162  D(42,30,38,39)          0.5378         calculate D2E/DX2 analytically  !
 ! D163  D(42,30,38,43)       -178.094          calculate D2E/DX2 analytically  !
 ! D164  D(6,30,42,41)         174.5017         calculate D2E/DX2 analytically  !
 ! D165  D(6,30,42,44)          -8.2157         calculate D2E/DX2 analytically  !
 ! D166  D(38,30,42,41)         -1.4494         calculate D2E/DX2 analytically  !
 ! D167  D(38,30,42,44)        175.8332         calculate D2E/DX2 analytically  !
 ! D168  D(29,31,32,33)         -0.51           calculate D2E/DX2 analytically  !
 ! D169  D(29,31,32,75)       -178.1368         calculate D2E/DX2 analytically  !
 ! D170  D(36,31,32,33)       -179.9136         calculate D2E/DX2 analytically  !
 ! D171  D(36,31,32,75)          2.4595         calculate D2E/DX2 analytically  !
 ! D172  D(29,31,36,45)       -111.4971         calculate D2E/DX2 analytically  !
 ! D173  D(29,31,36,46)        125.061          calculate D2E/DX2 analytically  !
 ! D174  D(29,31,36,78)          6.1733         calculate D2E/DX2 analytically  !
 ! D175  D(32,31,36,45)         67.8831         calculate D2E/DX2 analytically  !
 ! D176  D(32,31,36,46)        -55.5589         calculate D2E/DX2 analytically  !
 ! D177  D(32,31,36,78)       -174.4465         calculate D2E/DX2 analytically  !
 ! D178  D(31,32,33,34)         -0.894          calculate D2E/DX2 analytically  !
 ! D179  D(31,32,33,76)       -178.9225         calculate D2E/DX2 analytically  !
 ! D180  D(75,32,33,34)        176.7351         calculate D2E/DX2 analytically  !
 ! D181  D(75,32,33,76)         -1.2934         calculate D2E/DX2 analytically  !
 ! D182  D(32,33,34,35)          1.0849         calculate D2E/DX2 analytically  !
 ! D183  D(32,33,34,77)       -177.2083         calculate D2E/DX2 analytically  !
 ! D184  D(76,33,34,35)        179.1064         calculate D2E/DX2 analytically  !
 ! D185  D(76,33,34,77)          0.8132         calculate D2E/DX2 analytically  !
 ! D186  D(33,34,35,29)          0.1398         calculate D2E/DX2 analytically  !
 ! D187  D(33,34,35,37)       -179.311          calculate D2E/DX2 analytically  !
 ! D188  D(77,34,35,29)        178.433          calculate D2E/DX2 analytically  !
 ! D189  D(77,34,35,37)         -1.0179         calculate D2E/DX2 analytically  !
 ! D190  D(29,35,37,47)        123.2739         calculate D2E/DX2 analytically  !
 ! D191  D(29,35,37,48)       -112.4505         calculate D2E/DX2 analytically  !
 ! D192  D(29,35,37,79)          4.8653         calculate D2E/DX2 analytically  !
 ! D193  D(34,35,37,47)        -57.2918         calculate D2E/DX2 analytically  !
 ! D194  D(34,35,37,48)         66.9838         calculate D2E/DX2 analytically  !
 ! D195  D(34,35,37,79)       -175.7005         calculate D2E/DX2 analytically  !
 ! D196  D(31,36,45,85)        177.7746         calculate D2E/DX2 analytically  !
 ! D197  D(31,36,45,86)         58.4497         calculate D2E/DX2 analytically  !
 ! D198  D(31,36,45,87)        -61.5804         calculate D2E/DX2 analytically  !
 ! D199  D(46,36,45,85)        -57.6891         calculate D2E/DX2 analytically  !
 ! D200  D(46,36,45,86)       -177.014          calculate D2E/DX2 analytically  !
 ! D201  D(46,36,45,87)         62.9559         calculate D2E/DX2 analytically  !
 ! D202  D(78,36,45,85)         59.7946         calculate D2E/DX2 analytically  !
 ! D203  D(78,36,45,86)        -59.5303         calculate D2E/DX2 analytically  !
 ! D204  D(78,36,45,87)       -179.5604         calculate D2E/DX2 analytically  !
 ! D205  D(31,36,46,88)       -174.6478         calculate D2E/DX2 analytically  !
 ! D206  D(31,36,46,89)         65.8336         calculate D2E/DX2 analytically  !
 ! D207  D(31,36,46,90)        -54.8005         calculate D2E/DX2 analytically  !
 ! D208  D(45,36,46,88)         61.2336         calculate D2E/DX2 analytically  !
 ! D209  D(45,36,46,89)        -58.285          calculate D2E/DX2 analytically  !
 ! D210  D(45,36,46,90)       -178.919          calculate D2E/DX2 analytically  !
 ! D211  D(78,36,46,88)        -55.8438         calculate D2E/DX2 analytically  !
 ! D212  D(78,36,46,89)       -175.3624         calculate D2E/DX2 analytically  !
 ! D213  D(78,36,46,90)         64.0035         calculate D2E/DX2 analytically  !
 ! D214  D(35,37,47,91)       -176.6377         calculate D2E/DX2 analytically  !
 ! D215  D(35,37,47,92)         63.259          calculate D2E/DX2 analytically  !
 ! D216  D(35,37,47,93)        -57.3704         calculate D2E/DX2 analytically  !
 ! D217  D(48,37,47,91)         59.0593         calculate D2E/DX2 analytically  !
 ! D218  D(48,37,47,92)        -61.044          calculate D2E/DX2 analytically  !
 ! D219  D(48,37,47,93)        178.3267         calculate D2E/DX2 analytically  !
 ! D220  D(79,37,47,91)        -58.4138         calculate D2E/DX2 analytically  !
 ! D221  D(79,37,47,92)       -178.5171         calculate D2E/DX2 analytically  !
 ! D222  D(79,37,47,93)         60.8535         calculate D2E/DX2 analytically  !
 ! D223  D(35,37,48,94)        177.6261         calculate D2E/DX2 analytically  !
 ! D224  D(35,37,48,95)         57.9273         calculate D2E/DX2 analytically  !
 ! D225  D(35,37,48,96)        -62.5472         calculate D2E/DX2 analytically  !
 ! D226  D(47,37,48,94)        -57.6641         calculate D2E/DX2 analytically  !
 ! D227  D(47,37,48,95)       -177.3628         calculate D2E/DX2 analytically  !
 ! D228  D(47,37,48,96)         62.1626         calculate D2E/DX2 analytically  !
 ! D229  D(79,37,48,94)         60.1539         calculate D2E/DX2 analytically  !
 ! D230  D(79,37,48,95)        -59.5449         calculate D2E/DX2 analytically  !
 ! D231  D(79,37,48,96)        179.9806         calculate D2E/DX2 analytically  !
 ! D232  D(30,38,39,40)          0.8749         calculate D2E/DX2 analytically  !
 ! D233  D(30,38,39,80)       -177.6398         calculate D2E/DX2 analytically  !
 ! D234  D(43,38,39,40)        179.5584         calculate D2E/DX2 analytically  !
 ! D235  D(43,38,39,80)          1.0437         calculate D2E/DX2 analytically  !
 ! D236  D(30,38,43,51)       -116.8941         calculate D2E/DX2 analytically  !
 ! D237  D(30,38,43,52)        119.636          calculate D2E/DX2 analytically  !
 ! D238  D(30,38,43,83)          1.2587         calculate D2E/DX2 analytically  !
 ! D239  D(39,38,43,51)         64.483          calculate D2E/DX2 analytically  !
 ! D240  D(39,38,43,52)        -58.9869         calculate D2E/DX2 analytically  !
 ! D241  D(39,38,43,83)       -177.3642         calculate D2E/DX2 analytically  !
 ! D242  D(38,39,40,41)         -1.3437         calculate D2E/DX2 analytically  !
 ! D243  D(38,39,40,81)       -179.8758         calculate D2E/DX2 analytically  !
 ! D244  D(80,39,40,41)        177.1693         calculate D2E/DX2 analytically  !
 ! D245  D(80,39,40,81)         -1.3628         calculate D2E/DX2 analytically  !
 ! D246  D(39,40,41,42)          0.3821         calculate D2E/DX2 analytically  !
 ! D247  D(39,40,41,82)       -178.1877         calculate D2E/DX2 analytically  !
 ! D248  D(81,40,41,42)        178.917          calculate D2E/DX2 analytically  !
 ! D249  D(81,40,41,82)          0.3472         calculate D2E/DX2 analytically  !
 ! D250  D(40,41,42,30)          0.9886         calculate D2E/DX2 analytically  !
 ! D251  D(40,41,42,44)       -176.3058         calculate D2E/DX2 analytically  !
 ! D252  D(82,41,42,30)        179.5553         calculate D2E/DX2 analytically  !
 ! D253  D(82,41,42,44)          2.2609         calculate D2E/DX2 analytically  !
 ! D254  D(30,42,44,49)        148.173          calculate D2E/DX2 analytically  !
 ! D255  D(30,42,44,50)        -87.5941         calculate D2E/DX2 analytically  !
 ! D256  D(30,42,44,84)         29.3841         calculate D2E/DX2 analytically  !
 ! D257  D(41,42,44,49)        -34.6118         calculate D2E/DX2 analytically  !
 ! D258  D(41,42,44,50)         89.6211         calculate D2E/DX2 analytically  !
 ! D259  D(41,42,44,84)       -153.4008         calculate D2E/DX2 analytically  !
 ! D260  D(38,43,51,103)       178.1307         calculate D2E/DX2 analytically  !
 ! D261  D(38,43,51,104)        58.12           calculate D2E/DX2 analytically  !
 ! D262  D(38,43,51,105)       -62.0776         calculate D2E/DX2 analytically  !
 ! D263  D(52,43,51,103)       -57.7948         calculate D2E/DX2 analytically  !
 ! D264  D(52,43,51,104)      -177.8055         calculate D2E/DX2 analytically  !
 ! D265  D(52,43,51,105)        61.9969         calculate D2E/DX2 analytically  !
 ! D266  D(83,43,51,103)        59.6793         calculate D2E/DX2 analytically  !
 ! D267  D(83,43,51,104)       -60.3314         calculate D2E/DX2 analytically  !
 ! D268  D(83,43,51,105)       179.471          calculate D2E/DX2 analytically  !
 ! D269  D(38,43,52,106)      -173.9889         calculate D2E/DX2 analytically  !
 ! D270  D(38,43,52,107)        66.545          calculate D2E/DX2 analytically  !
 ! D271  D(38,43,52,108)       -53.9904         calculate D2E/DX2 analytically  !
 ! D272  D(51,43,52,106)        61.689          calculate D2E/DX2 analytically  !
 ! D273  D(51,43,52,107)       -57.7771         calculate D2E/DX2 analytically  !
 ! D274  D(51,43,52,108)      -178.3125         calculate D2E/DX2 analytically  !
 ! D275  D(83,43,52,106)       -55.5445         calculate D2E/DX2 analytically  !
 ! D276  D(83,43,52,107)      -175.0105         calculate D2E/DX2 analytically  !
 ! D277  D(83,43,52,108)        64.4541         calculate D2E/DX2 analytically  !
 ! D278  D(42,44,49,97)       -170.9777         calculate D2E/DX2 analytically  !
 ! D279  D(42,44,49,98)         69.8209         calculate D2E/DX2 analytically  !
 ! D280  D(42,44,49,99)        -51.0506         calculate D2E/DX2 analytically  !
 ! D281  D(50,44,49,97)         64.3332         calculate D2E/DX2 analytically  !
 ! D282  D(50,44,49,98)        -54.8682         calculate D2E/DX2 analytically  !
 ! D283  D(50,44,49,99)       -175.7396         calculate D2E/DX2 analytically  !
 ! D284  D(84,44,49,97)        -52.7898         calculate D2E/DX2 analytically  !
 ! D285  D(84,44,49,98)       -171.9912         calculate D2E/DX2 analytically  !
 ! D286  D(84,44,49,99)         67.1373         calculate D2E/DX2 analytically  !
 ! D287  D(42,44,50,100)      -179.2648         calculate D2E/DX2 analytically  !
 ! D288  D(42,44,50,101)        61.2356         calculate D2E/DX2 analytically  !
 ! D289  D(42,44,50,102)       -59.4865         calculate D2E/DX2 analytically  !
 ! D290  D(49,44,50,100)       -53.5222         calculate D2E/DX2 analytically  !
 ! D291  D(49,44,50,101)      -173.0218         calculate D2E/DX2 analytically  !
 ! D292  D(49,44,50,102)        66.2562         calculate D2E/DX2 analytically  !
 ! D293  D(84,44,50,100)        63.997          calculate D2E/DX2 analytically  !
 ! D294  D(84,44,50,101)       -55.5026         calculate D2E/DX2 analytically  !
 ! D295  D(84,44,50,102)      -176.2246         calculate D2E/DX2 analytically  !
 --------------------------------------------------------------------------------
 Trust Radius=3.00D-01 FncErr=1.00D-07 GrdErr=1.00D-07
 Number of steps in this run=   2 maximum allowed number of steps=   2.
 GradGradGradGradGradGradGradGradGradGradGradGradGradGradGradGradGradGrad

 Stoichiometry    C42H60MgN2O9
 Framework group  C1[X(C42H60MgN2O9)]
 Deg. of freedom   336
 Full point group                 C1      NOp   1
 Largest Abelian subgroup         C1      NOp   1
 Largest concise Abelian subgroup C1      NOp   1
                         Standard orientation:                         
 ---------------------------------------------------------------------
 Center     Atomic     Atomic              Coordinates (Angstroms)
 Number     Number      Type              X           Y           Z
 ---------------------------------------------------------------------
    1          8             0        6.388792    1.305743    0.130296
    2         12             0       -0.521654   -0.558916    0.077935
    3          8             0       -0.594984    1.415659    0.896391
    4          6             0        5.261138    1.873689    0.616433
    5          7             0        0.441779   -2.419880    0.033345
    6          7             0       -2.244056   -1.541592    0.739596
    7          8             0        5.249645    2.713393    1.484571
    8          6             0       -0.080767   -3.607747    0.346247
    9          6             0       -1.369725   -3.791482    0.870122
   10          6             0       -2.394477   -2.832652    1.008537
   11          8             0        2.908185    1.925465    0.545681
   12          6             0        1.723034    1.332166    0.483801
   13          6             0        0.602654    2.015092    1.265384
   14          6             0        4.042993    1.267764   -0.074711
   15          8             0        1.515606    0.294800   -0.133224
   16          6             0        7.612570    1.783121    0.713078
   17          8             0       -0.188492    2.576185   -1.428099
   18          6             0       -1.210033    1.834683   -0.895916
   19          8             0       -1.310323    0.659652   -1.340171
   20          8             0       -2.158222    3.901773    0.085171
   21          6             0       -1.154414    4.650041   -0.386505
   22          6             0       -0.169873    4.016553   -1.365143
   23          6             0       -2.462942    2.605769   -0.499319
   24          8             0       -1.009098    5.799319   -0.035671
   25          6             0       -0.324415    4.598799   -2.772792
   26          6             0       -3.434454    2.759177   -1.674685
   27          6             0        0.857947    1.928936    2.780966
   28          6             0        4.042873    1.445602   -1.596920
   29          6             0        1.805913   -2.376980   -0.462011
   30          6             0       -3.415087   -0.692099    0.664020
   31          6             0        2.902963   -2.394278    0.462195
   32          6             0        4.212478   -2.157938   -0.037069
   33          6             0        4.435627   -1.921598   -1.413332
   34          6             0        3.351772   -1.936981   -2.314887
   35          6             0        2.028087   -2.164298   -1.861915
   36          6             0        2.702139   -2.647495    1.981314
   37          6             0        0.862607   -2.190227   -2.884245
   38          6             0       -4.245417   -0.732694   -0.507430
   39          6             0       -5.329173    0.180980   -0.596940
   40          6             0       -5.577655    1.118531    0.425492
   41          6             0       -4.761476    1.144103    1.577420
   42          6             0       -3.674927    0.238278    1.727626
   43          6             0       -4.023187   -1.752054   -1.658185
   44          6             0       -2.836785    0.216979    3.033429
   45          6             0        3.005674   -1.360937    2.813088
   46          6             0        3.580177   -3.837598    2.496587
   47          6             0        0.780692   -0.861499   -3.698402
   48          6             0        0.983682   -3.424543   -3.840130
   49          6             0       -2.673953    1.630926    3.671830
   50          6             0       -3.447598   -0.779475    4.076447
   51          6             0       -3.660876   -1.037213   -2.999248
   52          6             0       -5.280182   -2.666290   -1.856465
   53          6             0        0.731640   -4.873688    0.102074
   54          6             0       -3.739800   -3.406407    1.445908
   55          1             0       -1.645021   -4.811573    1.115747
   56          1             0        0.629844    3.082506    0.999054
   57          1             0        4.013465    0.191734    0.135818
   58          1             0        7.625932    1.591795    1.789413
   59          1             0        7.725117    2.857143    0.543197
   60          1             0        8.409175    1.230123    0.214523
   61          1             0        0.823252    4.281618   -0.990043
   62          1             0       -2.976759    2.075767    0.297761
   63          1             0       -0.194949    5.683988   -2.731154
   64          1             0       -1.309317    4.377101   -3.193282
   65          1             0        0.437664    4.170056   -3.430059
   66          1             0       -4.139518    3.563392   -1.440963
   67          1             0       -3.997577    1.830345   -1.759256
   68          1             0       -2.938397    2.985988   -2.623173
   69          1             0        1.825689    2.371119    3.040002
   70          1             0        0.839850    0.887126    3.115430
   71          1             0        0.062540    2.464811    3.302551
   72          1             0        3.408286    0.679101   -2.043363
   73          1             0        5.057163    1.310773   -1.981405
   74          1             0        3.693002    2.446667   -1.867373
   75          1             0        5.068473   -2.197522    0.649224
   76          1             0        5.458367   -1.758602   -1.781401
   77          1             0        3.539399   -1.798341   -3.387901
   78          1             0        1.638436   -2.907228    2.146943
   79          1             0       -0.083310   -2.302295   -2.314582
   80          1             0       -5.998376    0.139250   -1.466320
   81          1             0       -6.422596    1.815810    0.338614
   82          1             0       -4.984823    1.859533    2.379026
   83          1             0       -3.168145   -2.400982   -1.382826
   84          1             0       -1.827364   -0.158592    2.766131
   85          1             0        2.820677   -1.545011    3.883006
   86          1             0        2.349094   -0.534847    2.486532
   87          1             0        4.051437   -1.041075    2.686955
   88          1             0        3.339104   -4.046232    3.550139
   89          1             0        4.651119   -3.593392    2.429561
   90          1             0        3.395902   -4.750980    1.910837
   91          1             0       -0.091463   -0.887616   -4.371555
   92          1             0        1.685732   -0.710417   -4.306287
   93          1             0        0.665456   -0.000250   -3.016177
   94          1             0        0.125572   -3.448020   -4.529139
   95          1             0        0.994043   -4.363751   -3.264987
   96          1             0        1.908057   -3.369380   -4.435743
   97          1             0       -1.943634    1.577869    4.494451
   98          1             0       -3.625206    1.998349    4.087774
   99          1             0       -2.316064    2.355635    2.922459
  100          1             0       -2.844031   -0.766768    4.997110
  101          1             0       -3.453739   -1.807955    3.682645
  102          1             0       -4.480725   -0.493932    4.330149
  103          1             0       -3.477195   -1.787075   -3.785179
  104          1             0       -2.752589   -0.424350   -2.868790
  105          1             0       -4.481647   -0.381822   -3.329912
  106          1             0       -5.057689   -3.446002   -2.600857
  107          1             0       -6.137439   -2.078210   -2.218168
  108          1             0       -5.569299   -3.155903   -0.914319
  109          1             0        1.646605   -4.897807    0.701499
  110          1             0        0.144905   -5.765614    0.345737
  111          1             0        1.029050   -4.940866   -0.951761
  112          1             0       -4.456229   -2.639435    1.747994
  113          1             0       -4.187374   -3.987883    0.630178
  114          1             0       -3.591681   -4.096568    2.285654
 ---------------------------------------------------------------------
 Rotational constants (GHZ):      0.0696200      0.0484780      0.0395925
 General basis read from cards:  (5D, 7F)
 There are   642 symmetry adapted basis functions of A   symmetry.
 Integral buffers will be    262144 words long.
 Raffenetti 2 integral format.
 Two-electron integral symmetry is turned on.
   642 basis functions,  1430 primitive gaussians,   674 cartesian basis functions
   205 alpha electrons      205 beta electrons
       nuclear repulsion energy      9035.4608491155 Hartrees.
 NAtoms=  114 NActive=  114 NUniq=  114 SFac= 1.00D+00 NAtFMM=   60 Big=T
 One-electron integrals computed using PRISM.
 NBasis=   642 RedAO= T  NBF=   642
 NBsUse=   642 1.00D-06 NBFU=   642
 Initial guess read from the checkpoint file:
 SSSS_fm-5-scan187.chk
 Initial guess orbital symmetries:
       Occupied  (A) (A) (A) (A) (A) (A) (A) (A) (A) (A) (A) (A)
                 (A) (A) (A) (A) (A) (A) (A) (A) (A) (A) (A) (A)
                 (A) (A) (A) (A) (A) (A) (A) (A) (A) (A) (A) (A)
                 (A) (A) (A) (A) (A) (A) (A) (A) (A) (A) (A) (A)
                 (A) (A) (A) (A) (A) (A) (A) (A) (A) (A) (A) (A)
                 (A) (A) (A) (A) (A) (A) (A) (A) (A) (A) (A) (A)
                 (A) (A) (A) (A) (A) (A) (A) (A) (A) (A) (A) (A)
                 (A) (A) (A) (A) (A) (A) (A) (A) (A) (A) (A) (A)
                 (A) (A) (A) (A) (A) (A) (A) (A) (A) (A) (A) (A)
                 (A) (A) (A) (A) (A) (A) (A) (A) (A) (A) (A) (A)
                 (A) (A) (A) (A) (A) (A) (A) (A) (A) (A) (A) (A)
                 (A) (A) (A) (A) (A) (A) (A) (A) (A) (A) (A) (A)
                 (A) (A) (A) (A) (A) (A) (A) (A) (A) (A) (A) (A)
                 (A) (A) (A) (A) (A) (A) (A) (A) (A) (A) (A) (A)
                 (A) (A) (A) (A) (A) (A) (A) (A) (A) (A) (A) (A)
                 (A) (A) (A) (A) (A) (A) (A) (A) (A) (A) (A) (A)
                 (A) (A) (A) (A) (A) (A) (A) (A) (A) (A) (A) (A)
                 (A)
       Virtual   (A) (A) (A) (A) (A) (A) (A) (A) (A) (A) (A) (A)
                 (A) (A) (A) (A) (A) (A) (A) (A) (A) (A) (A) (A)
                 (A) (A) (A) (A) (A) (A) (A) (A) (A) (A) (A) (A)
                 (A) (A) (A) (A) (A) (A) (A) (A) (A) (A) (A) (A)
                 (A) (A) (A) (A) (A) (A) (A) (A) (A) (A) (A) (A)
                 (A) (A) (A) (A) (A) (A) (A) (A) (A) (A) (A) (A)
                 (A) (A) (A) (A) (A) (A) (A) (A) (A) (A) (A) (A)
                 (A) (A) (A) (A) (A) (A) (A) (A) (A) (A) (A) (A)
                 (A) (A) (A) (A) (A) (A) (A) (A) (A) (A) (A) (A)
                 (A) (A) (A) (A) (A) (A) (A) (A) (A) (A) (A) (A)
                 (A) (A) (A) (A) (A) (A) (A) (A) (A) (A) (A) (A)
                 (A) (A) (A) (A) (A) (A) (A) (A) (A) (A) (A) (A)
                 (A) (A) (A) (A) (A) (A) (A) (A) (A) (A) (A) (A)
                 (A) (A) (A) (A) (A) (A) (A) (A) (A) (A) (A) (A)
                 (A) (A) (A) (A) (A) (A) (A) (A) (A) (A) (A) (A)
                 (A) (A) (A) (A) (A) (A) (A) (A) (A) (A) (A) (A)
                 (A) (A) (A) (A) (A) (A) (A) (A) (A) (A) (A) (A)
                 (A) (A) (A) (A) (A) (A) (A) (A) (A) (A) (A) (A)
                 (A) (A) (A) (A) (A) (A) (A) (A) (A) (A) (A) (A)
                 (A) (A) (A) (A) (A) (A) (A) (A) (A) (A) (A) (A)
                 (A) (A) (A) (A) (A) (A) (A) (A) (A) (A) (A) (A)
                 (A) (A) (A) (A) (A) (A) (A) (A) (A) (A) (A) (A)
                 (A) (A) (A) (A) (A) (A) (A) (A) (A) (A) (A) (A)
                 (A) (A) (A) (A) (A) (A) (A) (A) (A) (A) (A) (A)
                 (A) (A) (A) (A) (A) (A) (A) (A) (A) (A) (A) (A)
                 (A) (A) (A) (A) (A) (A) (A) (A) (A) (A) (A) (A)
                 (A) (A) (A) (A) (A) (A) (A) (A) (A) (A) (A) (A)
                 (A) (A) (A) (A) (A) (A) (A) (A) (A) (A) (A) (A)
                 (A) (A) (A) (A) (A) (A) (A) (A) (A) (A) (A) (A)
                 (A) (A) (A) (A) (A) (A) (A) (A) (A) (A) (A) (A)
                 (A) (A) (A) (A) (A) (A) (A) (A) (A) (A) (A) (A)
                 (A) (A) (A) (A) (A) (A) (A) (A) (A) (A) (A) (A)
                 (A) (A) (A) (A) (A) (A) (A) (A) (A) (A) (A) (A)
                 (A) (A) (A) (A) (A) (A) (A) (A) (A) (A) (A) (A)
                 (A) (A) (A) (A) (A) (A) (A) (A) (A) (A) (A) (A)
                 (A) (A) (A) (A) (A) (A) (A) (A) (A) (A) (A) (A)
                 (A) (A) (A) (A) (A)
 Requested convergence on RMS density matrix=1.00D-08 within 128 cycles.
 Requested convergence on MAX density matrix=1.00D-06.
 Requested convergence on             energy=1.00D-06.
 No special actions if energy rises.
 SCF Done:  E(RB+HF-LYP) =  -2612.19292909     A.U. after    1 cycles
             Convg  =    0.5230D-08             -V/T =  2.0106
             S**2   =   0.0000
 Range of M.O.s used for correlation:     1   642
 NBasis=   642 NAE=   205 NBE=   205 NFC=     0 NFV=     0
 NROrb=    642 NOA=   205 NOB=   205 NVA=   437 NVB=   437
 PrsmSu:  requested number of processors reduced to:   1 ShMem   1 Linda.
 PrsmSu:  requested number of processors reduced to:   1 ShMem   1 Linda.
 Symmetrizing basis deriv contribution to polar:
 IMax=3 JMax=2 DiffMx= 0.00D+00
 G2DrvN: will do   29 centers at a time, making    4 passes doing MaxLOS=2.
 Calling FoFCou, ICntrl=  3107 FMM=T I1Cent=   0.
 Number of processors reduced from  2 to  1 for far-field.
 Calling FoFCou, ICntrl=  3107 FMM=T I1Cent=   0.
 Number of processors reduced from  2 to  1 for far-field.
 Calling FoFCou, ICntrl=  3107 FMM=T I1Cent=   0.
 Number of processors reduced from  2 to  1 for far-field.
 Calling FoFCou, ICntrl=  3107 FMM=T I1Cent=   0.
 Number of processors reduced from  2 to  1 for far-field.
 FoFDir/FoFCou used for L=0 through L=2.
          Differentiating once with respect to electric field.
                with respect to dipole field.
          Differentiating once with respect to nuclear coordinates.
 FoFCou: FMM=T IPFlag=           0 FMFlag=      100000 FMFlg1=        8193
 NFxFlg=           0 DoJE=F BraDBF=F KetDBF=F FulRan=T.
 Symmetry not used in FoFCou.
 FMM levels:  10  Number of levels for PrismC:   9
 Number of processors reduced from  2 to  1 for far-field.
 PrismC:  NFx=      2048 NFxT=         6 NFxU=         6.
 PrismC:  NFx=      2048 NFxT=         6 NFxU=         6.
 Number of processors reduced from  2 to  1 for far-field.
 PrismC:  NFx=      2048 NFxT=         6 NFxU=         6.
 PrismC:  NFx=      2048 NFxT=         6 NFxU=         6.
 Number of processors reduced from  2 to  1 for far-field.
 PrismC:  NFx=      2048 NFxT=         6 NFxU=         6.
 PrismC:  NFx=      2048 NFxT=         6 NFxU=         6.
 Number of processors reduced from  2 to  1 for far-field.
 PrismC:  NFx=      2048 NFxT=         6 NFxU=         6.
 PrismC:  NFx=      2048 NFxT=         6 NFxU=         6.
          There are 345 degrees of freedom in the 1st order CPHF.
   345 vectors were produced by pass  0.
 AX will form  87 AO Fock derivatives at one time.
 Number of processors reduced from  2 to  1 for far-field.
 PrismC:  NFx=      2048 NFxT=         6 NFxU=         6.
 PrismC:  NFx=      2048 NFxT=         6 NFxU=         6.
 Number of processors reduced from  2 to  1 for far-field.
 PrismC:  NFx=      2048 NFxT=         6 NFxU=         6.
 PrismC:  NFx=      2048 NFxT=         6 NFxU=         6.
 Number of processors reduced from  2 to  1 for far-field.
 PrismC:  NFx=      2048 NFxT=         6 NFxU=         6.
 PrismC:  NFx=      2048 NFxT=         6 NFxU=         6.
 Number of processors reduced from  2 to  1 for far-field.
 PrismC:  NFx=      2048 NFxT=         6 NFxU=         6.
 PrismC:  NFx=      2048 NFxT=         6 NFxU=         6.
   345 vectors were produced by pass  1.
 Number of processors reduced from  2 to  1 for far-field.
 PrismC:  NFx=      2048 NFxT=         6 NFxU=         6.
 PrismC:  NFx=      2048 NFxT=         6 NFxU=         6.
 Number of processors reduced from  2 to  1 for far-field.
 PrismC:  NFx=      2048 NFxT=         6 NFxU=         6.
 PrismC:  NFx=      2048 NFxT=         6 NFxU=         6.
 Number of processors reduced from  2 to  1 for far-field.
 PrismC:  NFx=      2048 NFxT=         6 NFxU=         6.
 PrismC:  NFx=      2048 NFxT=         6 NFxU=         6.
 Number of processors reduced from  2 to  1 for far-field.
 PrismC:  NFx=      2048 NFxT=         6 NFxU=         6.
 PrismC:  NFx=      2048 NFxT=         6 NFxU=         6.
   342 vectors were produced by pass  2.
 Number of processors reduced from  2 to  1 for far-field.
 PrismC:  NFx=      2048 NFxT=         6 NFxU=         6.
 PrismC:  NFx=      2048 NFxT=         6 NFxU=         6.
 Number of processors reduced from  2 to  1 for far-field.
 PrismC:  NFx=      2048 NFxT=         6 NFxU=         6.
 PrismC:  NFx=      2048 NFxT=         6 NFxU=         6.
 Number of processors reduced from  2 to  1 for far-field.
 PrismC:  NFx=      2048 NFxT=         6 NFxU=         6.
 PrismC:  NFx=      2048 NFxT=         6 NFxU=         6.
 Number of processors reduced from  2 to  1 for far-field.
 PrismC:  NFx=      2048 NFxT=         6 NFxU=         6.
 PrismC:  NFx=      2048 NFxT=         6 NFxU=         6.
   342 vectors were produced by pass  3.
 Number of processors reduced from  2 to  1 for far-field.
 PrismC:  NFx=      2048 NFxT=         6 NFxU=         6.
 PrismC:  NFx=      2048 NFxT=         6 NFxU=         6.
 Number of processors reduced from  2 to  1 for far-field.
 PrismC:  NFx=      2048 NFxT=         6 NFxU=         5.
 PrismC:  NFx=      2048 NFxT=         6 NFxU=         6.
 Number of processors reduced from  2 to  1 for far-field.
 PrismC:  NFx=      2048 NFxT=         6 NFxU=         5.
 PrismC:  NFx=      2048 NFxT=         6 NFxU=         5.
 Number of processors reduced from  2 to  1 for far-field.
 PrismC:  NFx=      2048 NFxT=         6 NFxU=         4.
 PrismC:  NFx=      2048 NFxT=         6 NFxU=         4.
   342 vectors were produced by pass  4.
 Number of processors reduced from  2 to  1 for far-field.
 PrismC:  NFx=      2048 NFxT=         6 NFxU=         6.
 PrismC:  NFx=      2048 NFxT=         6 NFxU=         6.
 Number of processors reduced from  2 to  1 for far-field.
 PrismC:  NFx=      2048 NFxT=         6 NFxU=         4.
 PrismC:  NFx=      2048 NFxT=         6 NFxU=         4.
 Number of processors reduced from  2 to  1 for far-field.
 PrismC:  NFx=      2048 NFxT=         6 NFxU=         3.
 PrismC:  NFx=      2048 NFxT=         6 NFxU=         4.
 Number of processors reduced from  2 to  1 for far-field.
 PrismC:  NFx=      2048 NFxT=         6 NFxU=         2.
 PrismC:  NFx=      2048 NFxT=         6 NFxU=         2.
   205 vectors were produced by pass  5.
 Number of processors reduced from  2 to  1 for far-field.
 PrismC:  NFx=      2048 NFxT=         6 NFxU=         5.
 PrismC:  NFx=      2048 NFxT=         6 NFxU=         5.
 Number of processors reduced from  2 to  1 for far-field.
 PrismC:  NFx=      2048 NFxT=         6 NFxU=         2.
 PrismC:  NFx=      2048 NFxT=         6 NFxU=         2.
 Number of processors reduced from  2 to  1 for far-field.
 PrismC:  NFx=      2048 NFxT=         6 NFxU=         2.
 PrismC:  NFx=      2048 NFxT=         6 NFxU=         2.
    63 vectors were produced by pass  6.
 Number of processors reduced from  2 to  1 for far-field.
 PrismC:  NFx=      2048 NFxT=         6 NFxU=         3.
 PrismC:  NFx=      2048 NFxT=         6 NFxU=         3.
     3 vectors were produced by pass  7.
 Number of processors reduced from  2 to  1 for far-field.
 PrismC:  NFx=      2048 NFxT=         6 NFxU=         3.
 PrismC:  NFx=      2048 NFxT=         6 NFxU=         2.
 Inv2:  IOpt= 1 Iter= 1 AM= 9.20D-15 Conv= 1.00D-12.
 Inverted reduced A of dimension 1987 with in-core refinement.
 Number of processors reduced from  2 to  1 for far-field.
 PrismC:  NFx=      2048 NFxT=         6 NFxU=         6.
 PrismC:  NFx=      2048 NFxT=         6 NFxU=         6.
 Number of processors reduced from  2 to  1 for far-field.
 PrismC:  NFx=      2048 NFxT=         6 NFxU=         6.
 PrismC:  NFx=      2048 NFxT=         6 NFxU=         6.
 Number of processors reduced from  2 to  1 for far-field.
 PrismC:  NFx=      2048 NFxT=         6 NFxU=         6.
 PrismC:  NFx=      2048 NFxT=         6 NFxU=         6.
 Number of processors reduced from  2 to  1 for far-field.
 PrismC:  NFx=      2048 NFxT=         6 NFxU=         6.
 PrismC:  NFx=      2048 NFxT=         6 NFxU=         6.
 Isotropic polarizability for W=    0.000000      412.64 Bohr**3.
 End of Minotr Frequency-dependent properties file   721 does not exist.

 **********************************************************************

            Population analysis using the SCF density.

 **********************************************************************

 Orbital symmetries:
       Occupied  (A) (A) (A) (A) (A) (A) (A) (A) (A) (A) (A) (A)
                 (A) (A) (A) (A) (A) (A) (A) (A) (A) (A) (A) (A)
                 (A) (A) (A) (A) (A) (A) (A) (A) (A) (A) (A) (A)
                 (A) (A) (A) (A) (A) (A) (A) (A) (A) (A) (A) (A)
                 (A) (A) (A) (A) (A) (A) (A) (A) (A) (A) (A) (A)
                 (A) (A) (A) (A) (A) (A) (A) (A) (A) (A) (A) (A)
                 (A) (A) (A) (A) (A) (A) (A) (A) (A) (A) (A) (A)
                 (A) (A) (A) (A) (A) (A) (A) (A) (A) (A) (A) (A)
                 (A) (A) (A) (A) (A) (A) (A) (A) (A) (A) (A) (A)
                 (A) (A) (A) (A) (A) (A) (A) (A) (A) (A) (A) (A)
                 (A) (A) (A) (A) (A) (A) (A) (A) (A) (A) (A) (A)
                 (A) (A) (A) (A) (A) (A) (A) (A) (A) (A) (A) (A)
                 (A) (A) (A) (A) (A) (A) (A) (A) (A) (A) (A) (A)
                 (A) (A) (A) (A) (A) (A) (A) (A) (A) (A) (A) (A)
                 (A) (A) (A) (A) (A) (A) (A) (A) (A) (A) (A) (A)
                 (A) (A) (A) (A) (A) (A) (A) (A) (A) (A) (A) (A)
                 (A) (A) (A) (A) (A) (A) (A) (A) (A) (A) (A) (A)
                 (A)
       Virtual   (A) (A) (A) (A) (A) (A) (A) (A) (A) (A) (A) (A)
                 (A) (A) (A) (A) (A) (A) (A) (A) (A) (A) (A) (A)
                 (A) (A) (A) (A) (A) (A) (A) (A) (A) (A) (A) (A)
                 (A) (A) (A) (A) (A) (A) (A) (A) (A) (A) (A) (A)
                 (A) (A) (A) (A) (A) (A) (A) (A) (A) (A) (A) (A)
                 (A) (A) (A) (A) (A) (A) (A) (A) (A) (A) (A) (A)
                 (A) (A) (A) (A) (A) (A) (A) (A) (A) (A) (A) (A)
                 (A) (A) (A) (A) (A) (A) (A) (A) (A) (A) (A) (A)
                 (A) (A) (A) (A) (A) (A) (A) (A) (A) (A) (A) (A)
                 (A) (A) (A) (A) (A) (A) (A) (A) (A) (A) (A) (A)
                 (A) (A) (A) (A) (A) (A) (A) (A) (A) (A) (A) (A)
                 (A) (A) (A) (A) (A) (A) (A) (A) (A) (A) (A) (A)
                 (A) (A) (A) (A) (A) (A) (A) (A) (A) (A) (A) (A)
                 (A) (A) (A) (A) (A) (A) (A) (A) (A) (A) (A) (A)
                 (A) (A) (A) (A) (A) (A) (A) (A) (A) (A) (A) (A)
                 (A) (A) (A) (A) (A) (A) (A) (A) (A) (A) (A) (A)
                 (A) (A) (A) (A) (A) (A) (A) (A) (A) (A) (A) (A)
                 (A) (A) (A) (A) (A) (A) (A) (A) (A) (A) (A) (A)
                 (A) (A) (A) (A) (A) (A) (A) (A) (A) (A) (A) (A)
                 (A) (A) (A) (A) (A) (A) (A) (A) (A) (A) (A) (A)
                 (A) (A) (A) (A) (A) (A) (A) (A) (A) (A) (A) (A)
                 (A) (A) (A) (A) (A) (A) (A) (A) (A) (A) (A) (A)
                 (A) (A) (A) (A) (A) (A) (A) (A) (A) (A) (A) (A)
                 (A) (A) (A) (A) (A) (A) (A) (A) (A) (A) (A) (A)
                 (A) (A) (A) (A) (A) (A) (A) (A) (A) (A) (A) (A)
                 (A) (A) (A) (A) (A) (A) (A) (A) (A) (A) (A) (A)
                 (A) (A) (A) (A) (A) (A) (A) (A) (A) (A) (A) (A)
                 (A) (A) (A) (A) (A) (A) (A) (A) (A) (A) (A) (A)
                 (A) (A) (A) (A) (A) (A) (A) (A) (A) (A) (A) (A)
                 (A) (A) (A) (A) (A) (A) (A) (A) (A) (A) (A) (A)
                 (A) (A) (A) (A) (A) (A) (A) (A) (A) (A) (A) (A)
                 (A) (A) (A) (A) (A) (A) (A) (A) (A) (A) (A) (A)
                 (A) (A) (A) (A) (A) (A) (A) (A) (A) (A) (A) (A)
                 (A) (A) (A) (A) (A) (A) (A) (A) (A) (A) (A) (A)
                 (A) (A) (A) (A) (A) (A) (A) (A) (A) (A) (A) (A)
                 (A) (A) (A) (A) (A) (A) (A) (A) (A) (A) (A) (A)
                 (A) (A) (A) (A) (A)
 The electronic state is 1-A.
 Alpha  occ. eigenvalues --  -46.72061 -19.19797 -19.19388 -19.17894 -19.17578
 Alpha  occ. eigenvalues --  -19.14651 -19.13763 -19.12005 -19.10355 -19.09589
 Alpha  occ. eigenvalues --  -14.28396 -14.28199 -10.32466 -10.31443 -10.31441
 Alpha  occ. eigenvalues --  -10.30643 -10.25417 -10.25236 -10.23890 -10.23261
 Alpha  occ. eigenvalues --  -10.22829 -10.20409 -10.20226 -10.18027 -10.17228
 Alpha  occ. eigenvalues --  -10.16195 -10.16182 -10.15850 -10.15812 -10.12403
 Alpha  occ. eigenvalues --  -10.06006 -10.05962 -10.03795 -10.03414 -10.03249
 Alpha  occ. eigenvalues --  -10.03166 -10.03121 -10.03039 -10.03028 -10.02959
 Alpha  occ. eigenvalues --  -10.02741 -10.02561 -10.02429 -10.02297 -10.02058
 Alpha  occ. eigenvalues --  -10.02009 -10.01607 -10.01505 -10.01006 -10.00870
 Alpha  occ. eigenvalues --  -10.00681 -10.00162 -10.00095  -9.99885  -3.02367
 Alpha  occ. eigenvalues --   -1.77162  -1.76946  -1.76780  -1.11884  -1.10507
 Alpha  occ. eigenvalues --   -1.10271  -1.07478  -1.03072  -1.01677  -1.00868
 Alpha  occ. eigenvalues --   -0.99614  -0.95443  -0.89380  -0.88080  -0.81692
 Alpha  occ. eigenvalues --   -0.81101  -0.80088  -0.78615  -0.77293  -0.76801
 Alpha  occ. eigenvalues --   -0.76643  -0.75010  -0.74612  -0.74211  -0.74115
 Alpha  occ. eigenvalues --   -0.72389  -0.72120  -0.68860  -0.68743  -0.68612
 Alpha  occ. eigenvalues --   -0.68227  -0.67573  -0.66660  -0.66022  -0.65627
 Alpha  occ. eigenvalues --   -0.64977  -0.64674  -0.64564  -0.64505  -0.62951
 Alpha  occ. eigenvalues --   -0.62627  -0.59647  -0.59233  -0.58673  -0.57957
 Alpha  occ. eigenvalues --   -0.57146  -0.55552  -0.55500  -0.55065  -0.54996
 Alpha  occ. eigenvalues --   -0.52819  -0.52414  -0.51730  -0.50759  -0.50547
 Alpha  occ. eigenvalues --   -0.50246  -0.49912  -0.49267  -0.48276  -0.48154
 Alpha  occ. eigenvalues --   -0.47942  -0.47148  -0.46967  -0.46526  -0.45595
 Alpha  occ. eigenvalues --   -0.45087  -0.45007  -0.44553  -0.44203  -0.44049
 Alpha  occ. eigenvalues --   -0.43950  -0.43135  -0.42785  -0.42495  -0.42331
 Alpha  occ. eigenvalues --   -0.41802  -0.41450  -0.41315  -0.41046  -0.40999
 Alpha  occ. eigenvalues --   -0.40592  -0.40442  -0.40197  -0.40146  -0.39865
 Alpha  occ. eigenvalues --   -0.39825  -0.39618  -0.39414  -0.39179  -0.38970
 Alpha  occ. eigenvalues --   -0.38927  -0.38872  -0.38713  -0.38309  -0.38022
 Alpha  occ. eigenvalues --   -0.38002  -0.37667  -0.37219  -0.37026  -0.36889
 Alpha  occ. eigenvalues --   -0.36668  -0.36455  -0.36396  -0.36312  -0.35760
 Alpha  occ. eigenvalues --   -0.35713  -0.35525  -0.35446  -0.35257  -0.35107
 Alpha  occ. eigenvalues --   -0.35074  -0.34818  -0.34698  -0.34557  -0.34423
 Alpha  occ. eigenvalues --   -0.33955  -0.33054  -0.32752  -0.32152  -0.31354
 Alpha  occ. eigenvalues --   -0.31243  -0.31173  -0.30854  -0.30793  -0.30613
 Alpha  occ. eigenvalues --   -0.30440  -0.30138  -0.29991  -0.29531  -0.29319
 Alpha  occ. eigenvalues --   -0.29227  -0.28988  -0.28641  -0.28485  -0.28091
 Alpha  occ. eigenvalues --   -0.27811  -0.27703  -0.27471  -0.27388  -0.26416
 Alpha  occ. eigenvalues --   -0.25496  -0.25435  -0.25139  -0.24740  -0.23283
 Alpha  occ. eigenvalues --   -0.19397  -0.19307  -0.18924  -0.18441  -0.15776
 Alpha virt. eigenvalues --   -0.00143   0.00773   0.00867   0.01369   0.03281
 Alpha virt. eigenvalues --    0.05533   0.06298   0.06375   0.06690   0.07045
 Alpha virt. eigenvalues --    0.07558   0.09263   0.09957   0.10381   0.10575
 Alpha virt. eigenvalues --    0.11807   0.12262   0.13054   0.13282   0.13843
 Alpha virt. eigenvalues --    0.14018   0.15054   0.15241   0.15794   0.15941
 Alpha virt. eigenvalues --    0.16021   0.16515   0.16899   0.17189   0.17770
 Alpha virt. eigenvalues --    0.18058   0.18361   0.18877   0.19685   0.19775
 Alpha virt. eigenvalues --    0.20274   0.20928   0.21060   0.21389   0.21707
 Alpha virt. eigenvalues --    0.21834   0.22456   0.22738   0.23244   0.23329
 Alpha virt. eigenvalues --    0.23809   0.24065   0.24615   0.25182   0.25236
 Alpha virt. eigenvalues --    0.25427   0.26513   0.27311   0.27434   0.28597
 Alpha virt. eigenvalues --    0.28983   0.29454   0.29745   0.30942   0.31339
 Alpha virt. eigenvalues --    0.31884   0.32220   0.32785   0.33077   0.33662
 Alpha virt. eigenvalues --    0.33686   0.34082   0.34740   0.34819   0.34992
 Alpha virt. eigenvalues --    0.35504   0.36339   0.36723   0.37404   0.37749
 Alpha virt. eigenvalues --    0.38101   0.38414   0.38593   0.38788   0.39346
 Alpha virt. eigenvalues --    0.39596   0.39816   0.39966   0.40379   0.40629
 Alpha virt. eigenvalues --    0.40996   0.41282   0.41535   0.41833   0.42158
 Alpha virt. eigenvalues --    0.42622   0.42972   0.44018   0.44683   0.44738
 Alpha virt. eigenvalues --    0.44828   0.45179   0.45374   0.45746   0.46015
 Alpha virt. eigenvalues --    0.46233   0.46341   0.46484   0.46976   0.47125
 Alpha virt. eigenvalues --    0.47478   0.47848   0.48249   0.48451   0.48599
 Alpha virt. eigenvalues --    0.48920   0.49019   0.49074   0.49330   0.49410
 Alpha virt. eigenvalues --    0.49646   0.49922   0.50549   0.50739   0.50941
 Alpha virt. eigenvalues --    0.51152   0.51239   0.51263   0.51921   0.52811
 Alpha virt. eigenvalues --    0.53122   0.53537   0.53833   0.54222   0.54529
 Alpha virt. eigenvalues --    0.54775   0.55291   0.55353   0.56024   0.56068
 Alpha virt. eigenvalues --    0.56359   0.56615   0.56955   0.57143   0.57432
 Alpha virt. eigenvalues --    0.57682   0.57959   0.58434   0.58545   0.58882
 Alpha virt. eigenvalues --    0.59206   0.59577   0.59954   0.60430   0.60950
 Alpha virt. eigenvalues --    0.61111   0.61281   0.61772   0.62107   0.63200
 Alpha virt. eigenvalues --    0.63530   0.64306   0.65055   0.65521   0.66059
 Alpha virt. eigenvalues --    0.66310   0.66934   0.67166   0.67468   0.68156
 Alpha virt. eigenvalues --    0.69117   0.69449   0.70232   0.70789   0.70823
 Alpha virt. eigenvalues --    0.71515   0.71700   0.72169   0.72504   0.72862
 Alpha virt. eigenvalues --    0.72864   0.73397   0.73972   0.74878   0.75240
 Alpha virt. eigenvalues --    0.75760   0.75855   0.76746   0.77255   0.77594
 Alpha virt. eigenvalues --    0.78483   0.79112   0.80438   0.81216   0.81403
 Alpha virt. eigenvalues --    0.82308   0.83107   0.83464   0.84201   0.84346
 Alpha virt. eigenvalues --    0.85935   0.86760   0.86907   0.87370   0.88051
 Alpha virt. eigenvalues --    0.88373   0.89026   0.90001   0.90290   0.90853
 Alpha virt. eigenvalues --    0.90939   0.91637   0.92060   0.92768   0.93412
 Alpha virt. eigenvalues --    0.93695   0.93812   0.95226   0.95573   0.96905
 Alpha virt. eigenvalues --    0.97114   0.97789   0.98635   0.99753   1.00262
 Alpha virt. eigenvalues --    1.00750   1.01321   1.02135   1.02803   1.04290
 Alpha virt. eigenvalues --    1.04609   1.04921   1.06282   1.07071   1.08225
 Alpha virt. eigenvalues --    1.08983   1.09642   1.10087   1.10654   1.11393
 Alpha virt. eigenvalues --    1.11572   1.12080   1.13256   1.14497   1.15087
 Alpha virt. eigenvalues --    1.16210   1.18007   1.19094   1.20262   1.20321
 Alpha virt. eigenvalues --    1.21698   1.22719   1.23911   1.24834   1.25491
 Alpha virt. eigenvalues --    1.27648   1.29446   1.29822   1.31472   1.32795
 Alpha virt. eigenvalues --    1.33270   1.33971   1.34777   1.35854   1.36384
 Alpha virt. eigenvalues --    1.37049   1.37560   1.38398   1.39951   1.41156
 Alpha virt. eigenvalues --    1.42058   1.42893   1.43898   1.44475   1.46369
 Alpha virt. eigenvalues --    1.47595   1.48633   1.49469   1.50529   1.51213
 Alpha virt. eigenvalues --    1.51661   1.52504   1.53541   1.54278   1.56240
 Alpha virt. eigenvalues --    1.56806   1.58374   1.59651   1.61043   1.61786
 Alpha virt. eigenvalues --    1.63307   1.63892   1.66067   1.66727   1.68002
 Alpha virt. eigenvalues --    1.68335   1.69710   1.71022   1.72331   1.72747
 Alpha virt. eigenvalues --    1.73930   1.74704   1.75005   1.75971   1.76970
 Alpha virt. eigenvalues --    1.77742   1.78497   1.79336   1.79969   1.80152
 Alpha virt. eigenvalues --    1.81452   1.82291   1.82763   1.83499   1.84063
 Alpha virt. eigenvalues --    1.84553   1.85478   1.85881   1.87023   1.87467
 Alpha virt. eigenvalues --    1.88315   1.88944   1.89092   1.90107   1.90889
 Alpha virt. eigenvalues --    1.91220   1.91279   1.92113   1.93215   1.94299
 Alpha virt. eigenvalues --    1.94936   1.95172   1.95562   1.96222   1.96705
 Alpha virt. eigenvalues --    1.97652   1.99270   1.99330   2.00443   2.00470
 Alpha virt. eigenvalues --    2.01333   2.02358   2.02421   2.02932   2.04652
 Alpha virt. eigenvalues --    2.06054   2.06612   2.06986   2.08064   2.08589
 Alpha virt. eigenvalues --    2.09464   2.09947   2.10268   2.10753   2.13300
 Alpha virt. eigenvalues --    2.13828   2.14624   2.15001   2.15129   2.15487
 Alpha virt. eigenvalues --    2.16158   2.16965   2.18305   2.19757   2.20763
 Alpha virt. eigenvalues --    2.21327   2.22512   2.23888   2.24257   2.24620
 Alpha virt. eigenvalues --    2.25709   2.25968   2.27973   2.28560   2.29297
 Alpha virt. eigenvalues --    2.29649   2.31319   2.32202   2.32663   2.32910
 Alpha virt. eigenvalues --    2.33407   2.34641   2.35088   2.35642   2.35816
 Alpha virt. eigenvalues --    2.36636   2.37238   2.39390   2.42396   2.42951
 Alpha virt. eigenvalues --    2.43617   2.44770   2.47162   2.47670   2.49500
 Alpha virt. eigenvalues --    2.49896   2.50288   2.53333   2.55745   2.58385
 Alpha virt. eigenvalues --    2.59659   2.60167   2.62598   2.63654   2.65968
 Alpha virt. eigenvalues --    2.66405   2.67104   2.69239   2.69743   2.70632
 Alpha virt. eigenvalues --    2.72274   2.73010   2.74396   2.76051   2.76919
 Alpha virt. eigenvalues --    2.79255   2.79592   2.81809   2.85661   2.87946
 Alpha virt. eigenvalues --    2.88354   2.90383   2.94376   2.95531   2.99595
 Alpha virt. eigenvalues --    3.01263   3.01694   3.02862   3.04381   3.06315
 Alpha virt. eigenvalues --    3.12114   3.13388   3.20741   3.22366   3.23792
 Alpha virt. eigenvalues --    3.25355   3.26230   3.85165   5.96984   6.14168
 Alpha virt. eigenvalues --    6.33138 103.58612
          Condensed to atoms (all electrons):
 Mulliken atomic charges:
              1
     1  O   -0.452833
     2  Mg   0.860050
     3  O   -0.608917
     4  C    0.551545
     5  N   -0.539781
     6  N   -0.527172
     7  O   -0.422146
     8  C    0.334446
     9  C   -0.235647
    10  C    0.338058
    11  O   -0.443389
    12  C    0.616464
    13  C    0.101532
    14  C    0.061672
    15  O   -0.450361
    16  C   -0.211915
    17  O   -0.459886
    18  C    0.708939
    19  O   -0.565881
    20  O   -0.434246
    21  C    0.548049
    22  C    0.036772
    23  C    0.080136
    24  O   -0.428410
    25  C   -0.465273
    26  C   -0.479662
    27  C   -0.479450
    28  C   -0.482514
    29  C    0.024809
    30  C    0.016727
    31  C    0.005827
    32  C   -0.075085
    33  C   -0.068299
    34  C   -0.080014
    35  C   -0.001955
    36  C   -0.053683
    37  C   -0.062631
    38  C    0.005454
    39  C   -0.077302
    40  C   -0.070083
    41  C   -0.073225
    42  C    0.007845
    43  C   -0.054757
    44  C   -0.051926
    45  C   -0.214451
    46  C   -0.216863
    47  C   -0.224305
    48  C   -0.216583
    49  C   -0.218408
    50  C   -0.217938
    51  C   -0.221108
    52  C   -0.217418
    53  C   -0.446913
    54  C   -0.452428
    55  H    0.077006
    56  H    0.139848
    57  H    0.133564
    58  H    0.170917
    59  H    0.173389
    60  H    0.163195
    61  H    0.182867
    62  H    0.125380
    63  H    0.177662
    64  H    0.164512
    65  H    0.169395
    66  H    0.159153
    67  H    0.141148
    68  H    0.149077
    69  H    0.168287
    70  H    0.166818
    71  H    0.164263
    72  H    0.176757
    73  H    0.163891
    74  H    0.158068
    75  H    0.084814
    76  H    0.087597
    77  H    0.083485
    78  H    0.100342
    79  H    0.099252
    80  H    0.085530
    81  H    0.087715
    82  H    0.090426
    83  H    0.099449
    84  H    0.102657
    85  H    0.078859
    86  H    0.088501
    87  H    0.074175
    88  H    0.078138
    89  H    0.072411
    90  H    0.074377
    91  H    0.077779
    92  H    0.067431
    93  H    0.108049
    94  H    0.077320
    95  H    0.074571
    96  H    0.071226
    97  H    0.075603
    98  H    0.069724
    99  H    0.097067
   100  H    0.076750
   101  H    0.083491
   102  H    0.071561
   103  H    0.071923
   104  H    0.112392
   105  H    0.069203
   106  H    0.076170
   107  H    0.071404
   108  H    0.074714
   109  H    0.126666
   110  H    0.123537
   111  H    0.128503
   112  H    0.126090
   113  H    0.131348
   114  H    0.129088
 Sum of Mulliken charges=   0.00000
 Atomic charges with hydrogens summed into heavy atoms:
              1
     1  O   -0.452833
     2  Mg   0.860050
     3  O   -0.608917
     4  C    0.551545
     5  N   -0.539781
     6  N   -0.527172
     7  O   -0.422146
     8  C    0.334446
     9  C   -0.158641
    10  C    0.338058
    11  O   -0.443389
    12  C    0.616464
    13  C    0.241380
    14  C    0.195236
    15  O   -0.450361
    16  C    0.295586
    17  O   -0.459886
    18  C    0.708939
    19  O   -0.565881
    20  O   -0.434246
    21  C    0.548049
    22  C    0.219639
    23  C    0.205516
    24  O   -0.428410
    25  C    0.046295
    26  C   -0.030285
    27  C    0.019918
    28  C    0.016203
    29  C    0.024809
    30  C    0.016727
    31  C    0.005827
    32  C    0.009729
    33  C    0.019298
    34  C    0.003471
    35  C   -0.001955
    36  C    0.046660
    37  C    0.036621
    38  C    0.005454
    39  C    0.008228
    40  C    0.017631
    41  C    0.017201
    42  C    0.007845
    43  C    0.044692
    44  C    0.050731
    45  C    0.027084
    46  C    0.008062
    47  C    0.028954
    48  C    0.006534
    49  C    0.023986
    50  C    0.013863
    51  C    0.032411
    52  C    0.004869
    53  C   -0.068205
    54  C   -0.065902
    55  H    0.000000
    56  H    0.000000
    57  H    0.000000
    58  H    0.000000
    59  H    0.000000
    60  H    0.000000
    61  H    0.000000
    62  H    0.000000
    63  H    0.000000
    64  H    0.000000
    65  H    0.000000
    66  H    0.000000
    67  H    0.000000
    68  H    0.000000
    69  H    0.000000
    70  H    0.000000
    71  H    0.000000
    72  H    0.000000
    73  H    0.000000
    74  H    0.000000
    75  H    0.000000
    76  H    0.000000
    77  H    0.000000
    78  H    0.000000
    79  H    0.000000
    80  H    0.000000
    81  H    0.000000
    82  H    0.000000
    83  H    0.000000
    84  H    0.000000
    85  H    0.000000
    86  H    0.000000
    87  H    0.000000
    88  H    0.000000
    89  H    0.000000
    90  H    0.000000
    91  H    0.000000
    92  H    0.000000
    93  H    0.000000
    94  H    0.000000
    95  H    0.000000
    96  H    0.000000
    97  H    0.000000
    98  H    0.000000
    99  H    0.000000
   100  H    0.000000
   101  H    0.000000
   102  H    0.000000
   103  H    0.000000
   104  H    0.000000
   105  H    0.000000
   106  H    0.000000
   107  H    0.000000
   108  H    0.000000
   109  H    0.000000
   110  H    0.000000
   111  H    0.000000
   112  H    0.000000
   113  H    0.000000
   114  H    0.000000
 Sum of Mulliken charges=   0.00000
 APT atomic charges:
              1
     1  O   -0.875621
     2  Mg   1.240418
     3  O   -0.980684
     4  C    1.089817
     5  N   -0.944507
     6  N   -0.912730
     7  O   -0.665994
     8  C    0.931172
     9  C   -0.899454
    10  C    0.950341
    11  O   -0.845229
    12  C    1.024328
    13  C    0.414336
    14  C    0.337648
    15  O   -0.723349
    16  C    0.525153
    17  O   -0.850827
    18  C    1.517433
    19  O   -1.000785
    20  O   -0.764843
    21  C    1.027130
    22  C    0.411648
    23  C    0.329941
    24  O   -0.733162
    25  C    0.022583
    26  C   -0.023351
    27  C    0.013102
    28  C   -0.021425
    29  C    0.309974
    30  C    0.295866
    31  C   -0.038299
    32  C   -0.179486
    33  C   -0.080041
    34  C   -0.147806
    35  C   -0.015192
    36  C    0.167455
    37  C    0.177579
    38  C   -0.036094
    39  C   -0.157398
    40  C   -0.061298
    41  C   -0.168216
    42  C   -0.031224
    43  C    0.175857
    44  C    0.187728
    45  C    0.005322
    46  C   -0.049910
    47  C    0.001613
    48  C   -0.049521
    49  C   -0.041193
    50  C   -0.041801
    51  C   -0.022239
    52  C   -0.046549
    53  C   -0.205411
    54  C   -0.235930
    55  H   -0.020519
    56  H   -0.063144
    57  H    0.064272
    58  H   -0.025399
    59  H   -0.024523
    60  H   -0.011935
    61  H   -0.025159
    62  H    0.072360
    63  H    0.009520
    64  H    0.002325
    65  H    0.003570
    66  H   -0.006610
    67  H    0.075873
    68  H   -0.011536
    69  H   -0.009169
    70  H   -0.004597
    71  H    0.012618
    72  H    0.055004
    73  H    0.023406
    74  H   -0.001968
    75  H    0.073304
    76  H    0.073213
    77  H    0.067961
    78  H   -0.033635
    79  H   -0.062632
    80  H    0.074352
    81  H    0.075795
    82  H    0.077671
    83  H   -0.048403
    84  H   -0.062005
    85  H    0.005741
    86  H   -0.045551
    87  H    0.002170
    88  H    0.006066
    89  H    0.009203
    90  H    0.007749
    91  H   -0.002912
    92  H    0.000066
    93  H   -0.008173
    94  H    0.004039
    95  H    0.003990
    96  H    0.007120
    97  H    0.005849
    98  H    0.000685
    99  H    0.006932
   100  H    0.001966
   101  H    0.003636
   102  H    0.003798
   103  H   -0.001503
   104  H    0.015905
   105  H    0.003760
   106  H    0.003652
   107  H    0.008285
   108  H    0.006552
   109  H    0.051244
   110  H    0.046198
   111  H    0.050676
   112  H    0.043713
   113  H    0.053942
   114  H    0.048317
 Sum of APT charges=   0.00000
 APT Atomic charges with hydrogens summed into heavy atoms:
              1
     1  O   -0.875621
     2  Mg   1.240418
     3  O   -0.980684
     4  C    1.089817
     5  N   -0.944507
     6  N   -0.912730
     7  O   -0.665994
     8  C    0.931172
     9  C   -0.919973
    10  C    0.950341
    11  O   -0.845229
    12  C    1.024328
    13  C    0.351192
    14  C    0.401920
    15  O   -0.723349
    16  C    0.463297
    17  O   -0.850827
    18  C    1.517433
    19  O   -1.000785
    20  O   -0.764843
    21  C    1.027130
    22  C    0.386489
    23  C    0.402301
    24  O   -0.733162
    25  C    0.037999
    26  C    0.034376
    27  C    0.011955
    28  C    0.055017
    29  C    0.309974
    30  C    0.295866
    31  C   -0.038299
    32  C   -0.106183
    33  C   -0.006828
    34  C   -0.079845
    35  C   -0.015192
    36  C    0.133820
    37  C    0.114947
    38  C   -0.036094
    39  C   -0.083045
    40  C    0.014497
    41  C   -0.090545
    42  C   -0.031224
    43  C    0.127453
    44  C    0.125723
    45  C   -0.032318
    46  C   -0.026892
    47  C   -0.009407
    48  C   -0.034372
    49  C   -0.027726
    50  C   -0.032401
    51  C   -0.004077
    52  C   -0.028061
    53  C   -0.057293
    54  C   -0.089958
    55  H    0.000000
    56  H    0.000000
    57  H    0.000000
    58  H    0.000000
    59  H    0.000000
    60  H    0.000000
    61  H    0.000000
    62  H    0.000000
    63  H    0.000000
    64  H    0.000000
    65  H    0.000000
    66  H    0.000000
    67  H    0.000000
    68  H    0.000000
    69  H    0.000000
    70  H    0.000000
    71  H    0.000000
    72  H    0.000000
    73  H    0.000000
    74  H    0.000000
    75  H    0.000000
    76  H    0.000000
    77  H    0.000000
    78  H    0.000000
    79  H    0.000000
    80  H    0.000000
    81  H    0.000000
    82  H    0.000000
    83  H    0.000000
    84  H    0.000000
    85  H    0.000000
    86  H    0.000000
    87  H    0.000000
    88  H    0.000000
    89  H    0.000000
    90  H    0.000000
    91  H    0.000000
    92  H    0.000000
    93  H    0.000000
    94  H    0.000000
    95  H    0.000000
    96  H    0.000000
    97  H    0.000000
    98  H    0.000000
    99  H    0.000000
   100  H    0.000000
   101  H    0.000000
   102  H    0.000000
   103  H    0.000000
   104  H    0.000000
   105  H    0.000000
   106  H    0.000000
   107  H    0.000000
   108  H    0.000000
   109  H    0.000000
   110  H    0.000000
   111  H    0.000000
   112  H    0.000000
   113  H    0.000000
   114  H    0.000000
 Sum of APT charges=   0.00000
 Electronic spatial extent (au):  <R**2>= 30982.3790
 Charge=     0.0000 electrons
 Dipole moment (field-independent basis, Debye):
    X=     2.1132    Y=    -4.9470    Z=    -1.7256  Tot=     5.6495
 Quadrupole moment (field-independent basis, Debye-Ang):
   XX=  -267.2064   YY=  -339.8200   ZZ=  -303.9268
   XY=    -1.5185   XZ=    -4.0391   YZ=   -10.1472
 Traceless Quadrupole moment (field-independent basis, Debye-Ang):
   XX=    36.4446   YY=   -36.1689   ZZ=    -0.2757
   XY=    -1.5185   XZ=    -4.0391   YZ=   -10.1472
 Octapole moment (field-independent basis, Debye-Ang**2):
  XXX=   174.8286  YYY=  -176.9571  ZZZ=    -2.3068  XYY=    36.6214
  XXY=     8.2397  XXZ=    -7.9126  XZZ=    -0.6541  YZZ=     8.8356
  YYZ=   -64.4751  XYZ=   -23.4806
 Hexadecapole moment (field-independent basis, Debye-Ang**3):
 XXXX=-17690.1610 YYYY=-13773.1790 ZZZZ= -6845.5961 XXXY=   138.2390
 XXXZ=    99.4277 YYYX=   236.6189 YYYZ=  -267.3096 ZZZX=   -47.0322
 ZZZY=    56.6429 XXYY= -5504.1291 XXZZ= -4459.5483 YYZZ= -3171.2230
 XXYZ=   -70.0075 YYXZ=   -28.0524 ZZXY=   -85.9290
 N-N= 9.035460849116D+03 E-N=-2.416687829021D+04  KE= 2.584688743748D+03
  Exact polarizability: 478.496  -7.875 397.072  -3.580   1.842 362.361
 Approx polarizability: 653.508 -17.753 571.552  -4.936  27.308 574.485
 Full mass-weighted force constant matrix:
 Low frequencies --- -134.4299   -5.5261   -3.6268   -0.0010   -0.0006    0.0000
 Low frequencies ---    5.1717   11.9714   19.5134
 ******    1 imaginary frequencies (negative Signs) ****** 
 Diagonal vibrational polarizability:
      152.2045514     196.4398056     222.1467349
 Harmonic frequencies (cm**-1), IR intensities (KM/Mole), Raman scattering
 activities (A**4/AMU), depolarization ratios for plane and unpolarized
 incident light, reduced masses (AMU), force constants (mDyne/A),
 and normal coordinates:
                     1                      2                      3
                     A                      A                      A
 Frequencies --  -134.4294                11.6187                19.3832
 Red. masses --     7.4064                 4.6132                 4.1872
 Frc consts  --     0.0789                 0.0004                 0.0009
 IR Inten    --   100.9373                 0.0850                 0.1220
 Atom AN      X      Y      Z        X      Y      Z        X      Y      Z
   1   8    -0.01   0.00   0.00     0.01  -0.04   0.11     0.00   0.02  -0.06
   2  12    -0.02  -0.09  -0.13     0.01   0.01   0.00     0.00   0.00   0.00
   3   8    -0.07   0.22  -0.27     0.00   0.02  -0.02     0.00   0.00   0.00
   4   6    -0.01  -0.01   0.00     0.00  -0.05   0.10     0.00   0.02  -0.05
   5   7     0.00  -0.03  -0.01     0.00   0.00  -0.03    -0.01  -0.01  -0.02
   6   7     0.00  -0.01   0.02     0.02   0.00   0.02    -0.01  -0.01  -0.02
   7   8    -0.02  -0.01   0.00    -0.02  -0.10   0.15     0.01   0.04  -0.07
   8   6     0.00  -0.03   0.01     0.01   0.00  -0.03    -0.01  -0.01  -0.05
   9   6     0.00  -0.02   0.01     0.02   0.00  -0.01    -0.02  -0.02  -0.08
  10   6     0.00  -0.01   0.01     0.02   0.00   0.01    -0.02  -0.02  -0.06
  11   8    -0.02   0.02  -0.05     0.01   0.01   0.00     0.00   0.00  -0.02
  12   6    -0.02   0.03  -0.05     0.00   0.02  -0.01     0.00   0.00  -0.01
  13   6    -0.01   0.13  -0.15     0.00   0.04  -0.04     0.00   0.01  -0.01
  14   6    -0.01  -0.01  -0.01     0.02  -0.01   0.04    -0.01   0.00  -0.02
  15   8    -0.02  -0.04   0.06     0.01   0.01   0.00     0.00  -0.01   0.00
  16   6    -0.01   0.00   0.00     0.00  -0.08   0.18     0.00   0.05  -0.09
  17   8     0.06   0.02   0.11    -0.02  -0.01  -0.05    -0.01  -0.01  -0.01
  18   6     0.12  -0.03   0.36    -0.02  -0.01  -0.03    -0.01   0.00   0.00
  19   8     0.03   0.00   0.13    -0.01  -0.02  -0.01    -0.01  -0.01   0.00
  20   8    -0.01   0.05   0.04    -0.02   0.00  -0.06     0.00   0.00  -0.01
  21   6     0.00   0.04   0.02    -0.03   0.00  -0.09    -0.01   0.00  -0.03
  22   6     0.01   0.01   0.05    -0.04  -0.01  -0.08    -0.01  -0.01  -0.03
  23   6     0.04   0.01   0.08    -0.02  -0.01  -0.03     0.00   0.00   0.00
  24   8     0.00   0.05   0.00    -0.04   0.01  -0.12    -0.01   0.01  -0.05
  25   6     0.00  -0.03   0.03    -0.05  -0.05  -0.10    -0.02  -0.02  -0.04
  26   6     0.16  -0.06  -0.02    -0.03  -0.04  -0.02    -0.01   0.00   0.01
  27   6    -0.17  -0.01  -0.14     0.00   0.10  -0.04     0.00   0.04  -0.01
  28   6     0.01  -0.02  -0.01     0.08   0.01   0.04    -0.03  -0.01  -0.02
  29   6     0.00  -0.02   0.00     0.00   0.01  -0.04     0.01  -0.01   0.03
  30   6     0.00  -0.01   0.01     0.01   0.00   0.03     0.00   0.00   0.01
  31   6     0.00  -0.01   0.00     0.00  -0.01  -0.04    -0.02  -0.01   0.06
  32   6     0.00   0.00   0.00     0.00   0.00  -0.03     0.00  -0.01   0.11
  33   6     0.00   0.00   0.00     0.00   0.03  -0.03     0.04  -0.02   0.12
  34   6     0.00   0.00   0.00     0.00   0.05  -0.03     0.08  -0.02   0.08
  35   6     0.00  -0.01   0.00     0.00   0.04  -0.03     0.06  -0.01   0.03
  36   6     0.00   0.00   0.00    -0.01  -0.05  -0.04    -0.08  -0.01   0.06
  37   6     0.00  -0.01   0.00     0.00   0.06  -0.03     0.09   0.00  -0.01
  38   6     0.00  -0.01   0.01    -0.01  -0.01   0.05    -0.03   0.02   0.03
  39   6     0.01  -0.01   0.01    -0.01  -0.01   0.06    -0.02   0.04   0.06
  40   6     0.00  -0.01   0.01     0.01   0.00   0.06     0.02   0.03   0.08
  41   6    -0.01  -0.02   0.01     0.03   0.01   0.04     0.04   0.01   0.06
  42   6     0.00  -0.01   0.01     0.04   0.01   0.03     0.03  -0.01   0.03
  43   6     0.01   0.00   0.00    -0.03  -0.02   0.05    -0.07   0.03   0.01
  44   6     0.01   0.00   0.00     0.06   0.02   0.01     0.06  -0.05   0.01
  45   6    -0.01   0.00   0.00    -0.14  -0.04  -0.02    -0.09  -0.01   0.07
  46   6     0.00   0.00   0.00     0.08   0.01  -0.04    -0.11  -0.02   0.08
  47   6    -0.01   0.00   0.01     0.02   0.06  -0.03     0.10   0.03   0.04
  48   6     0.00   0.00  -0.01    -0.02   0.06  -0.04     0.14   0.03  -0.04
  49   6    -0.01   0.00   0.00     0.04   0.02   0.02     0.04  -0.07   0.06
  50   6     0.03   0.00   0.01     0.10   0.00   0.02     0.10  -0.10  -0.02
  51   6     0.03   0.01   0.02    -0.04  -0.03   0.04    -0.05   0.05   0.02
  52   6     0.01   0.00  -0.01    -0.04  -0.01   0.07    -0.10   0.08   0.00
  53   6     0.00  -0.03   0.01     0.01   0.00  -0.04    -0.01  -0.01  -0.06
  54   6     0.00  -0.01   0.01     0.03   0.00   0.03    -0.02  -0.02  -0.07
  55   1     0.00  -0.02   0.01     0.02   0.00  -0.01    -0.03  -0.03  -0.11
  56   1     0.07   0.13  -0.10    -0.01   0.03  -0.08     0.00   0.00  -0.03
  57   1    -0.02   0.00   0.00    -0.02  -0.01   0.02     0.01   0.00  -0.01
  58   1    -0.01   0.00   0.00    -0.04  -0.15   0.17     0.02   0.07  -0.09
  59   1    -0.01   0.00   0.01     0.02  -0.08   0.24    -0.01   0.04  -0.11
  60   1    -0.01   0.00   0.00     0.01  -0.07   0.17     0.00   0.04  -0.09
  61   1     0.00   0.09   0.03    -0.04   0.01  -0.10    -0.01   0.00  -0.04
  62   1    -0.06   0.09   0.07     0.00   0.00  -0.01     0.00   0.01   0.01
  63   1    -0.02  -0.03  -0.01    -0.07  -0.04  -0.12    -0.02  -0.02  -0.05
  64   1     0.00  -0.07   0.03    -0.05  -0.07  -0.08    -0.02  -0.03  -0.03
  65   1     0.01  -0.05   0.04    -0.05  -0.05  -0.09    -0.02  -0.03  -0.03
  66   1     0.19   0.01  -0.19    -0.04  -0.04  -0.02    -0.01  -0.01   0.01
  67   1     0.10  -0.04   0.04    -0.02  -0.04   0.00    -0.01  -0.01   0.01
  68   1     0.26  -0.23   0.00    -0.04  -0.04  -0.03    -0.02   0.00   0.00
  69   1    -0.16  -0.09  -0.04     0.00   0.11  -0.06     0.00   0.05  -0.03
  70   1    -0.26  -0.03  -0.21     0.01   0.11   0.00     0.00   0.05   0.01
  71   1    -0.17   0.02  -0.16     0.00   0.11  -0.05     0.00   0.05  -0.02
  72   1    -0.02   0.01  -0.01     0.05   0.05   0.01    -0.06   0.00  -0.01
  73   1     0.00  -0.06   0.00     0.08  -0.03   0.08    -0.04  -0.05  -0.04
  74   1     0.05   0.00  -0.02     0.14   0.04   0.05     0.00  -0.01  -0.03
  75   1     0.00   0.01   0.00     0.00  -0.02  -0.03    -0.03  -0.01   0.14
  76   1     0.00   0.01   0.00     0.00   0.03  -0.02     0.06  -0.02   0.15
  77   1     0.00   0.01   0.00     0.00   0.07  -0.02     0.11  -0.02   0.08
  78   1     0.00  -0.01   0.00     0.01  -0.14  -0.07    -0.09   0.00   0.02
  79   1     0.00  -0.02   0.00     0.00   0.07  -0.03     0.08  -0.03  -0.04
  80   1     0.02   0.00   0.00    -0.03  -0.01   0.08    -0.04   0.06   0.08
  81   1     0.00  -0.01   0.00     0.01   0.00   0.07     0.03   0.04   0.10
  82   1    -0.01  -0.02   0.02     0.05   0.02   0.04     0.07   0.00   0.07
  83   1     0.01  -0.01   0.01    -0.03  -0.02   0.04    -0.08   0.00  -0.01
  84   1     0.01   0.00  -0.01     0.06   0.04  -0.01     0.06  -0.02  -0.02
  85   1     0.00   0.00   0.00    -0.13  -0.07  -0.03    -0.14  -0.01   0.06
  86   1    -0.02   0.00   0.00    -0.23  -0.11  -0.01    -0.07  -0.01   0.04
  87   1    -0.01   0.01  -0.01    -0.18   0.08  -0.02    -0.08  -0.03   0.11
  88   1     0.00   0.00   0.00     0.06  -0.04  -0.06    -0.15  -0.02   0.08
  89   1     0.00   0.00   0.00     0.06   0.10   0.00    -0.11  -0.04   0.11
  90   1     0.01   0.00   0.00     0.17   0.01  -0.07    -0.11  -0.02   0.08
  91   1     0.00  -0.01   0.00     0.01   0.08  -0.02     0.13   0.03   0.00
  92   1     0.00   0.02   0.02     0.01   0.05  -0.03     0.12   0.06   0.08
  93   1    -0.04  -0.01   0.01     0.03   0.06  -0.03     0.06   0.00   0.06
  94   1     0.00   0.00  -0.01    -0.02   0.08  -0.04     0.16   0.04  -0.07
  95   1     0.01   0.00  -0.01    -0.03   0.06  -0.04     0.14   0.02  -0.07
  96   1     0.00   0.01  -0.01    -0.02   0.05  -0.03     0.16   0.07  -0.02
  97   1     0.01   0.02  -0.02     0.06   0.03   0.00     0.07  -0.09   0.04
  98   1    -0.01  -0.02   0.02     0.04  -0.01   0.05     0.05  -0.11   0.10
  99   1    -0.05   0.02  -0.01     0.01   0.03   0.02     0.01  -0.03   0.08
 100   1     0.03   0.01   0.01     0.12   0.01   0.01     0.12  -0.12  -0.03
 101   1     0.03   0.00   0.01     0.12   0.00   0.01     0.12  -0.09  -0.06
 102   1     0.02  -0.01   0.01     0.10  -0.03   0.04     0.10  -0.13   0.01
 103   1     0.06   0.02   0.02    -0.06  -0.03   0.04    -0.09   0.05   0.00
 104   1     0.01   0.03   0.05    -0.04  -0.03   0.03    -0.03   0.01   0.02
 105   1     0.02   0.00   0.00    -0.04  -0.02   0.05    -0.03   0.08   0.04
 106   1     0.01   0.01  -0.02    -0.06  -0.02   0.08    -0.12   0.08  -0.01
 107   1     0.01   0.01  -0.01    -0.04   0.00   0.08    -0.08   0.11   0.01
 108   1     0.00  -0.01  -0.02    -0.03   0.00   0.08    -0.11   0.08   0.00
 109   1     0.00  -0.02   0.01     0.00  -0.01  -0.03    -0.01  -0.01  -0.06
 110   1     0.00  -0.03   0.02     0.00   0.00  -0.07    -0.01  -0.01  -0.08
 111   1     0.00  -0.03   0.01     0.03   0.02  -0.04     0.00   0.00  -0.06
 112   1     0.01  -0.01   0.02     0.03   0.00   0.05    -0.01  -0.03  -0.03
 113   1    -0.01   0.01   0.00     0.01   0.00   0.04    -0.04   0.02  -0.10
 114   1     0.00  -0.03   0.00     0.04   0.00   0.03    -0.03  -0.06  -0.11
                     4                      5                      6
                     A                      A                      A
 Frequencies --    26.1892                26.5408                29.6398
 Red. masses --     4.6285                 6.4935                 3.7498
 Frc consts  --     0.0019                 0.0027                 0.0019
 IR Inten    --     0.0328                 2.3156                 0.3750
 Atom AN      X      Y      Z        X      Y      Z        X      Y      Z
   1   8    -0.02   0.11  -0.03    -0.01  -0.21   0.23    -0.01   0.06   0.09
   2  12     0.00  -0.02   0.04     0.00   0.00   0.00    -0.01  -0.01  -0.01
   3   8    -0.02  -0.02   0.04     0.00   0.00   0.00    -0.02  -0.02  -0.01
   4   6    -0.02   0.08  -0.01     0.01   0.07  -0.03    -0.03   0.04   0.06
   5   7    -0.02  -0.03   0.00     0.00   0.00  -0.01     0.00   0.00   0.00
   6   7     0.00  -0.02   0.03     0.00   0.00   0.00    -0.01  -0.01  -0.01
   7   8    -0.03   0.10  -0.03     0.04   0.36  -0.31    -0.07   0.04   0.06
   8   6    -0.02  -0.03  -0.01     0.00   0.00  -0.01     0.00   0.00  -0.01
   9   6    -0.02  -0.02   0.00     0.01   0.00  -0.01    -0.01  -0.01  -0.02
  10   6    -0.01  -0.02   0.01     0.01   0.00   0.00    -0.01  -0.01  -0.02
  11   8    -0.02   0.01   0.05     0.01  -0.01   0.03    -0.02   0.02  -0.01
  12   6    -0.01  -0.01   0.07     0.00   0.00   0.01    -0.02   0.00  -0.02
  13   6    -0.02  -0.01   0.05     0.00   0.01   0.00    -0.02  -0.02   0.00
  14   6    -0.02   0.04   0.03     0.01  -0.01   0.04     0.00   0.02   0.02
  15   8     0.00  -0.02   0.09     0.01   0.00   0.01     0.00   0.00  -0.02
  16   6    -0.02   0.16  -0.07     0.00  -0.12   0.13    -0.03   0.08   0.13
  17   8     0.06  -0.06   0.03     0.00   0.01   0.01     0.01  -0.03  -0.01
  18   6     0.03  -0.03   0.01     0.00   0.00   0.01     0.00  -0.01  -0.01
  19   8     0.02  -0.03   0.03     0.00   0.00   0.00    -0.01  -0.01  -0.01
  20   8     0.05   0.01  -0.06    -0.01   0.00   0.01     0.02   0.01  -0.03
  21   6     0.06  -0.01  -0.06    -0.02   0.01   0.00     0.03  -0.01  -0.03
  22   6     0.09  -0.06  -0.01    -0.01   0.01   0.00     0.04  -0.03  -0.01
  23   6     0.04   0.00  -0.03     0.00   0.00   0.00     0.01   0.01  -0.02
  24   8     0.06   0.00  -0.11    -0.03   0.01  -0.01     0.04   0.00  -0.04
  25   6     0.15  -0.09  -0.03    -0.01   0.01   0.00     0.06  -0.03  -0.02
  26   6     0.06  -0.01  -0.05     0.00  -0.01   0.00     0.02   0.01  -0.02
  27   6    -0.04  -0.02   0.06    -0.01   0.02   0.00    -0.01  -0.07   0.00
  28   6    -0.06   0.03   0.03     0.00  -0.07   0.03     0.04   0.00   0.02
  29   6    -0.02  -0.01  -0.01     0.00   0.00  -0.02     0.00   0.00  -0.01
  30   6     0.01   0.00   0.02     0.00   0.00   0.00     0.00   0.00   0.01
  31   6    -0.02  -0.04  -0.02     0.00  -0.01  -0.02     0.00   0.04  -0.02
  32   6    -0.02   0.00  -0.02     0.00  -0.02  -0.02     0.00   0.04  -0.04
  33   6    -0.04   0.05  -0.02     0.00  -0.03  -0.02    -0.02   0.00  -0.05
  34   6    -0.04   0.06  -0.01     0.00  -0.02  -0.02    -0.02  -0.03  -0.03
  35   6    -0.04   0.04  -0.01     0.00   0.00  -0.02    -0.02  -0.04  -0.02
  36   6     0.00  -0.10  -0.03     0.00  -0.02  -0.02     0.03   0.09  -0.01
  37   6    -0.05   0.06   0.00    -0.01   0.02  -0.01    -0.02  -0.09  -0.01
  38   6     0.02   0.01   0.01     0.00   0.00   0.01    -0.02   0.03   0.02
  39   6     0.04   0.03  -0.01     0.00  -0.01   0.01     0.00   0.05   0.03
  40   6     0.05   0.04  -0.03     0.00  -0.01   0.01     0.03   0.05   0.04
  41   6     0.03   0.03  -0.01     0.00  -0.01   0.01     0.04   0.02   0.03
  42   6     0.01   0.01   0.01     0.00   0.00   0.01     0.03   0.00   0.02
  43   6     0.01  -0.01   0.02     0.00   0.00   0.00    -0.05   0.03   0.01
  44   6    -0.01  -0.01   0.02     0.01   0.00   0.00     0.04  -0.03   0.01
  45   6    -0.11  -0.10   0.01    -0.02  -0.01  -0.02     0.19   0.07  -0.03
  46   6     0.08  -0.06  -0.07     0.02  -0.01  -0.02    -0.07   0.01  -0.02
  47   6    -0.03   0.05  -0.01     0.01   0.02  -0.01    -0.08  -0.10  -0.02
  48   6    -0.08   0.05   0.01    -0.03   0.02  -0.01     0.01  -0.09   0.00
  49   6    -0.02  -0.02   0.04    -0.01   0.00   0.01     0.03  -0.05   0.05
  50   6    -0.05  -0.02   0.00     0.03  -0.01   0.00     0.05  -0.07  -0.01
  51   6     0.02  -0.03   0.01     0.00   0.00   0.01    -0.06   0.02   0.01
  52   6     0.00   0.01   0.03     0.00   0.00   0.00    -0.08   0.05   0.03
  53   6    -0.02  -0.03  -0.02     0.00   0.00  -0.02     0.00   0.00  -0.01
  54   6    -0.02  -0.02   0.01     0.01   0.00   0.00    -0.01  -0.02  -0.03
  55   1    -0.02  -0.03  -0.01     0.01   0.00  -0.01    -0.01  -0.01  -0.03
  56   1    -0.03  -0.01   0.06     0.00   0.00  -0.01    -0.02  -0.01   0.03
  57   1     0.01   0.04   0.04     0.03   0.00   0.08     0.00   0.03   0.03
  58   1     0.02   0.19  -0.07    -0.07   0.24   0.20    -0.07   0.08   0.13
  59   1    -0.06   0.16  -0.10     0.10  -0.18  -0.22    -0.04   0.08   0.14
  60   1    -0.01   0.17  -0.08    -0.02  -0.35   0.36    -0.01   0.09   0.16
  61   1     0.08  -0.07   0.02    -0.02   0.02   0.00     0.04  -0.04   0.00
  62   1     0.01   0.03  -0.03     0.00   0.00   0.00     0.00   0.02  -0.02
  63   1     0.17  -0.09  -0.06    -0.02   0.01   0.00     0.08  -0.03  -0.02
  64   1     0.16  -0.09  -0.06    -0.01   0.00   0.00     0.07  -0.02  -0.03
  65   1     0.17  -0.12   0.01    -0.01   0.01   0.00     0.07  -0.05  -0.01
  66   1     0.06   0.00  -0.08    -0.01  -0.01   0.00     0.02   0.01  -0.03
  67   1     0.06  -0.01  -0.05     0.00  -0.01   0.00     0.01   0.01  -0.03
  68   1     0.09  -0.02  -0.05     0.00  -0.01   0.00     0.02   0.01  -0.02
  69   1    -0.04  -0.01   0.06    -0.02   0.03   0.01    -0.01  -0.08   0.01
  70   1    -0.03  -0.02   0.05     0.00   0.02   0.01    -0.01  -0.08  -0.04
  71   1    -0.04  -0.02   0.05    -0.03   0.01  -0.01    -0.01  -0.09   0.02
  72   1    -0.02  -0.02   0.05     0.15  -0.20   0.05     0.11  -0.06   0.01
  73   1    -0.06   0.09   0.01     0.03   0.09   0.05     0.06   0.08   0.06
  74   1    -0.13   0.00   0.03    -0.17  -0.14  -0.01    -0.04  -0.03  -0.01
  75   1    -0.02  -0.01  -0.03     0.01  -0.03  -0.02     0.01   0.06  -0.04
  76   1    -0.04   0.07  -0.02     0.00  -0.04  -0.02    -0.02   0.00  -0.06
  77   1    -0.05   0.09  -0.01     0.00  -0.02  -0.02    -0.03  -0.05  -0.04
  78   1     0.02  -0.19  -0.04     0.01  -0.03  -0.02     0.00   0.20   0.03
  79   1    -0.05   0.08   0.01    -0.01   0.03  -0.01    -0.02  -0.11   0.00
  80   1     0.05   0.04  -0.02     0.00  -0.01   0.01    -0.01   0.07   0.04
  81   1     0.07   0.06  -0.04     0.00  -0.01   0.01     0.05   0.07   0.05
  82   1     0.04   0.04  -0.02     0.00  -0.01   0.01     0.07   0.02   0.04
  83   1     0.00  -0.02   0.03     0.00   0.00   0.00    -0.06   0.01   0.00
  84   1    -0.01  -0.02   0.04     0.01   0.01   0.00     0.04  -0.02  -0.01
  85   1    -0.09  -0.16   0.01    -0.01  -0.02  -0.02     0.19   0.10  -0.03
  86   1    -0.19  -0.16   0.04    -0.04  -0.03  -0.01     0.30   0.15  -0.03
  87   1    -0.14   0.00   0.01    -0.03   0.01  -0.02     0.23  -0.07  -0.05
  88   1     0.08  -0.12  -0.08     0.01  -0.01  -0.02    -0.04   0.07   0.00
  89   1     0.06   0.02  -0.04     0.02   0.01  -0.01    -0.05  -0.09  -0.08
  90   1     0.15  -0.05  -0.11     0.04  -0.01  -0.02    -0.19   0.01   0.02
  91   1    -0.04   0.07   0.01     0.01   0.03  -0.01    -0.08  -0.14  -0.02
  92   1    -0.04   0.03  -0.02     0.01   0.01  -0.01    -0.08  -0.07  -0.02
  93   1     0.00   0.06  -0.01     0.02   0.02  -0.01    -0.11  -0.09  -0.03
  94   1    -0.08   0.06   0.01    -0.03   0.03  -0.01     0.01  -0.13   0.01
  95   1    -0.10   0.05   0.02    -0.04   0.02  -0.01     0.06  -0.09   0.01
  96   1    -0.08   0.02   0.01    -0.03   0.01  -0.02     0.00  -0.06  -0.01
  97   1    -0.03  -0.04   0.05     0.00   0.00   0.00     0.04  -0.07   0.05
  98   1    -0.02  -0.02   0.03    -0.01  -0.01   0.02     0.03  -0.07   0.08
  99   1     0.00  -0.02   0.06    -0.02   0.01   0.01     0.02  -0.03   0.07
 100   1    -0.06  -0.04   0.01     0.03  -0.01   0.00     0.06  -0.09  -0.02
 101   1    -0.05  -0.01  -0.01     0.04  -0.01   0.00     0.06  -0.06  -0.05
 102   1    -0.05  -0.01  -0.01     0.02  -0.03   0.00     0.05  -0.08   0.00
 103   1     0.02  -0.04   0.02     0.00   0.00   0.00    -0.08   0.02   0.00
 104   1     0.03  -0.04   0.01     0.00   0.00   0.01    -0.04   0.00   0.00
 105   1     0.03  -0.03   0.00     0.00   0.00   0.01    -0.05   0.04   0.02
 106   1    -0.02   0.00   0.03     0.00   0.00   0.00    -0.11   0.05   0.02
 107   1     0.00   0.01   0.02     0.00   0.00   0.00    -0.07   0.07   0.04
 108   1    -0.01   0.02   0.03     0.00   0.00   0.00    -0.07   0.06   0.03
 109   1    -0.04  -0.04   0.00     0.00   0.00  -0.02     0.02   0.02  -0.04
 110   1    -0.03  -0.03  -0.05     0.00   0.00  -0.02     0.02   0.00   0.03
 111   1     0.00  -0.01  -0.01     0.00   0.01  -0.02    -0.03  -0.02  -0.02
 112   1    -0.03  -0.02  -0.04     0.01   0.00   0.01    -0.02  -0.02  -0.04
 113   1     0.01  -0.06   0.02     0.00   0.01   0.00     0.00  -0.02  -0.04
 114   1    -0.02   0.02   0.04     0.01  -0.01  -0.01    -0.02  -0.01  -0.03
                     7                      8                      9
                     A                      A                      A
 Frequencies --    37.6879                38.9535                44.7574
 Red. masses --     3.4770                 3.8771                 5.7958
 Frc consts  --     0.0029                 0.0035                 0.0068
 IR Inten    --     0.1000                 0.0284                 0.6485
 Atom AN      X      Y      Z        X      Y      Z        X      Y      Z
   1   8    -0.01  -0.05  -0.03     0.05   0.11   0.03    -0.06  -0.06   0.00
   2  12     0.00   0.00   0.02     0.01   0.00  -0.03    -0.02  -0.01  -0.01
   3   8     0.00   0.01   0.02     0.02  -0.01  -0.04    -0.04   0.00  -0.03
   4   6     0.01  -0.03  -0.01     0.02   0.05   0.02    -0.04  -0.01  -0.03
   5   7     0.02   0.00   0.05    -0.01  -0.02  -0.01     0.00   0.01   0.00
   6   7    -0.01  -0.01  -0.04     0.00   0.01  -0.02    -0.01  -0.02   0.00
   7   8     0.03  -0.03  -0.01    -0.03   0.06   0.02    -0.02   0.00  -0.03
   8   6     0.02   0.00   0.05    -0.02  -0.01   0.01     0.02   0.00   0.01
   9   6     0.00  -0.01   0.01    -0.02   0.01   0.01     0.01  -0.01   0.00
  10   6    -0.01  -0.01  -0.04    -0.01   0.02   0.00     0.00  -0.02   0.00
  11   8     0.00   0.01   0.01     0.03  -0.02   0.00    -0.05   0.04  -0.05
  12   6     0.00   0.01   0.01     0.03  -0.02  -0.02    -0.04   0.02  -0.03
  13   6     0.00   0.02   0.01     0.02   0.00  -0.04    -0.04   0.01  -0.02
  14   6    -0.01   0.00  -0.01     0.05  -0.01   0.03    -0.05   0.04  -0.05
  15   8    -0.01   0.01   0.01     0.03  -0.01  -0.03    -0.03   0.02  -0.02
  16   6     0.01  -0.09  -0.03     0.02   0.19   0.03    -0.05  -0.12   0.03
  17   8     0.00   0.01   0.01    -0.01   0.01  -0.03     0.00  -0.06  -0.06
  18   6     0.00   0.01   0.01     0.00   0.00  -0.02    -0.02  -0.02  -0.04
  19   8     0.01   0.01   0.01     0.01   0.00  -0.03    -0.05  -0.03  -0.02
  20   8     0.00   0.01   0.00     0.00  -0.03   0.03     0.04   0.00  -0.04
  21   6    -0.02   0.02  -0.02     0.02  -0.03   0.07     0.15  -0.07   0.08
  22   6    -0.01   0.01  -0.01    -0.02   0.01   0.01     0.07  -0.07   0.00
  23   6     0.00   0.01   0.01     0.00  -0.02   0.00     0.00   0.01  -0.05
  24   8    -0.04   0.03  -0.05     0.05  -0.05   0.15     0.28  -0.13   0.22
  25   6     0.01  -0.01  -0.01    -0.09   0.06   0.04     0.02   0.01   0.04
  26   6     0.00   0.01   0.01    -0.01   0.01   0.02     0.01   0.04  -0.05
  27   6     0.00   0.05   0.01     0.01   0.05  -0.04    -0.05   0.00  -0.02
  28   6    -0.02   0.03   0.00     0.05  -0.06   0.02    -0.03   0.10  -0.04
  29   6     0.01   0.01   0.04    -0.01  -0.03  -0.01     0.00   0.03   0.01
  30   6     0.00  -0.01  -0.03     0.00   0.02  -0.02    -0.01  -0.02   0.00
  31   6     0.03   0.01   0.01    -0.01  -0.04  -0.01     0.00   0.04   0.01
  32   6     0.01   0.02  -0.02    -0.01  -0.03  -0.01     0.00   0.06   0.02
  33   6    -0.02   0.02  -0.02    -0.01  -0.03  -0.01     0.00   0.08   0.02
  34   6    -0.04   0.01   0.00    -0.01  -0.04  -0.01     0.00   0.07   0.02
  35   6    -0.02   0.00   0.03    -0.01  -0.04  -0.01     0.01   0.04   0.01
  36   6     0.06   0.01   0.02    -0.01  -0.06  -0.01    -0.01   0.04   0.01
  37   6    -0.05  -0.02   0.05    -0.01  -0.07  -0.01     0.01   0.04   0.01
  38   6     0.00   0.02  -0.03    -0.02   0.01  -0.01    -0.01  -0.02   0.00
  39   6     0.00   0.03   0.00    -0.02   0.00   0.01     0.01   0.00  -0.01
  40   6     0.01   0.01   0.02    -0.02   0.00   0.01     0.03   0.03  -0.02
  41   6     0.01  -0.02   0.01    -0.01   0.00   0.00     0.03   0.02  -0.02
  42   6     0.01  -0.03  -0.01     0.01   0.01  -0.01     0.01   0.00  -0.01
  43   6    -0.01   0.05  -0.05    -0.02   0.02  -0.01    -0.04  -0.05   0.03
  44   6     0.01  -0.07  -0.01     0.03   0.03  -0.03     0.01   0.00  -0.01
  45   6    -0.05   0.05   0.00    -0.16  -0.04   0.00    -0.07   0.06   0.01
  46   6     0.16   0.09   0.02     0.08   0.01   0.00     0.04   0.08   0.03
  47   6    -0.05  -0.06   0.00    -0.02  -0.09  -0.04     0.01   0.03   0.00
  48   6    -0.08  -0.07   0.11     0.00  -0.09   0.02     0.02   0.03   0.01
  49   6    -0.01  -0.09   0.05     0.02   0.04  -0.04    -0.01  -0.01   0.01
  50   6     0.04  -0.13  -0.05     0.08   0.02  -0.01     0.04  -0.03  -0.03
  51   6     0.01   0.08  -0.03    -0.02   0.03  -0.01    -0.05  -0.09   0.00
  52   6    -0.02   0.08  -0.09    -0.03   0.03  -0.02    -0.06  -0.04   0.07
  53   6     0.05   0.01   0.11    -0.02  -0.02   0.05     0.04   0.01   0.03
  54   6    -0.03  -0.02  -0.11    -0.02   0.04   0.00     0.01  -0.03   0.01
  55   1     0.00  -0.01   0.01    -0.03   0.01   0.03     0.03  -0.01   0.00
  56   1     0.00   0.01  -0.01     0.03  -0.01  -0.07    -0.05   0.01  -0.01
  57   1    -0.02   0.00  -0.02     0.07   0.00   0.06    -0.07   0.03  -0.09
  58   1     0.01  -0.09  -0.03     0.03   0.20   0.03    -0.08  -0.12   0.03
  59   1     0.03  -0.09  -0.03    -0.04   0.19   0.02     0.01  -0.13   0.03
  60   1    -0.01  -0.10  -0.04     0.05   0.23   0.04    -0.06  -0.17   0.05
  61   1    -0.01   0.02   0.00     0.00   0.01  -0.03     0.11  -0.13  -0.04
  62   1     0.00   0.01   0.01     0.01  -0.03   0.00    -0.02   0.03  -0.05
  63   1     0.00  -0.01  -0.03    -0.08   0.06   0.07     0.10   0.00   0.08
  64   1     0.01  -0.02  -0.02    -0.11   0.08   0.08    -0.03   0.11   0.09
  65   1     0.02  -0.01   0.00    -0.12   0.08  -0.02    -0.06  -0.01  -0.03
  66   1    -0.01   0.00   0.01     0.00   0.02   0.03     0.05   0.08  -0.08
  67   1     0.01   0.00   0.00    -0.03   0.02   0.02    -0.03   0.06  -0.03
  68   1     0.00   0.02   0.01    -0.02   0.00   0.01     0.02  -0.02  -0.06
  69   1     0.00   0.05   0.00     0.01   0.05  -0.05    -0.05  -0.01  -0.02
  70   1    -0.01   0.06   0.03     0.00   0.06   0.00    -0.06   0.00  -0.03
  71   1     0.00   0.06   0.00     0.01   0.07  -0.06    -0.04   0.01  -0.02
  72   1    -0.07   0.07  -0.01     0.18  -0.17   0.03    -0.18   0.24  -0.07
  73   1    -0.03  -0.02  -0.02     0.08   0.09   0.04    -0.06  -0.09  -0.05
  74   1     0.03   0.05   0.02    -0.10  -0.12  -0.02     0.16   0.18   0.00
  75   1     0.03   0.03  -0.04    -0.01  -0.03  -0.01    -0.01   0.08   0.03
  76   1    -0.03   0.03  -0.04    -0.01  -0.03  -0.01     0.00   0.10   0.03
  77   1    -0.06   0.01   0.00    -0.01  -0.06  -0.01     0.00   0.09   0.02
  78   1     0.08  -0.08   0.02     0.01  -0.17  -0.03     0.00  -0.01   0.01
  79   1    -0.04   0.01   0.08    -0.01  -0.06  -0.01     0.01   0.04   0.00
  80   1     0.00   0.06   0.00    -0.03   0.00   0.02     0.01   0.00  -0.01
  81   1     0.01   0.02   0.03    -0.03  -0.01   0.03     0.05   0.04  -0.03
  82   1     0.02  -0.03   0.03     0.00   0.00   0.01     0.05   0.04  -0.03
  83   1    -0.02   0.03  -0.06    -0.03   0.01  -0.02    -0.05  -0.05   0.03
  84   1     0.02  -0.04  -0.03     0.04   0.05  -0.05     0.02   0.02  -0.02
  85   1    -0.01   0.04   0.01    -0.15  -0.06   0.00    -0.08   0.06   0.01
  86   1    -0.15  -0.03   0.01    -0.26  -0.12  -0.01    -0.11   0.02  -0.01
  87   1    -0.09   0.15  -0.02    -0.20   0.08   0.01    -0.09   0.10   0.02
  88   1     0.17   0.06   0.02     0.06  -0.03  -0.01     0.03   0.07   0.03
  89   1     0.14   0.18   0.03     0.06   0.11   0.04     0.03   0.12   0.04
  90   1     0.24   0.08   0.01     0.19   0.01  -0.03     0.09   0.07   0.03
  91   1    -0.07  -0.07   0.03    -0.02  -0.12  -0.04     0.01   0.03   0.00
  92   1    -0.06  -0.09  -0.03    -0.02  -0.10  -0.04     0.01   0.03   0.00
  93   1    -0.02  -0.03  -0.03    -0.03  -0.08  -0.06     0.01   0.04   0.00
  94   1    -0.09  -0.08   0.12     0.00  -0.12   0.02     0.02   0.03   0.01
  95   1    -0.09  -0.04   0.15     0.00  -0.08   0.05     0.01   0.04   0.02
  96   1    -0.09  -0.11   0.09     0.00  -0.10   0.02     0.02   0.03   0.02
  97   1     0.00  -0.12   0.04     0.04   0.05  -0.05    -0.01  -0.01   0.01
  98   1    -0.01  -0.13   0.07     0.02   0.02  -0.02    -0.02  -0.04   0.02
  99   1    -0.02  -0.06   0.08    -0.01   0.04  -0.05    -0.03   0.01   0.02
 100   1     0.04  -0.15  -0.05     0.10   0.04  -0.02     0.04  -0.04  -0.03
 101   1     0.06  -0.11  -0.09     0.10   0.02   0.00     0.05  -0.03  -0.05
 102   1     0.03  -0.16  -0.04     0.08  -0.01   0.00     0.03  -0.06  -0.02
 103   1     0.00   0.10  -0.05    -0.03   0.03  -0.02    -0.07  -0.11   0.02
 104   1     0.02   0.06  -0.01    -0.01   0.02   0.00    -0.05  -0.09  -0.03
 105   1     0.03   0.10  -0.02    -0.01   0.04   0.00    -0.05  -0.09   0.00
 106   1    -0.03   0.09  -0.11    -0.03   0.03  -0.03    -0.09  -0.06   0.09
 107   1    -0.01   0.10  -0.09    -0.02   0.03  -0.03    -0.06  -0.03   0.08
 108   1    -0.04   0.06  -0.11    -0.04   0.03  -0.03    -0.04  -0.01   0.09
 109   1     0.00   0.02   0.18    -0.04  -0.02   0.08     0.02   0.02   0.05
 110   1     0.04   0.00   0.08    -0.04  -0.01   0.03     0.04   0.01   0.01
 111   1     0.12   0.00   0.13     0.02  -0.03   0.06     0.07   0.02   0.04
 112   1    -0.02  -0.03  -0.07     0.01   0.04   0.05    -0.02  -0.04  -0.06
 113   1    -0.02   0.04  -0.16    -0.06   0.09  -0.03     0.05  -0.10   0.03
 114   1    -0.06  -0.08  -0.15    -0.02  -0.01  -0.04     0.01   0.02   0.05
                    10                     11                     12
                     A                      A                      A
 Frequencies --    45.6871                50.2230                55.0630
 Red. masses --     3.2512                 3.8344                 3.1706
 Frc consts  --     0.0040                 0.0057                 0.0057
 IR Inten    --     0.0989                 0.3477                 0.4798
 Atom AN      X      Y      Z        X      Y      Z        X      Y      Z
   1   8    -0.02  -0.04  -0.01     0.02   0.02   0.03     0.01  -0.01   0.00
   2  12     0.01   0.01   0.01    -0.01  -0.01   0.00     0.00   0.00   0.02
   3   8    -0.01   0.00   0.03     0.02  -0.01   0.00     0.01   0.00   0.03
   4   6    -0.01  -0.01  -0.01     0.01   0.01   0.00     0.02   0.01   0.01
   5   7    -0.01  -0.01  -0.04     0.00   0.00   0.00    -0.01   0.00   0.01
   6   7     0.01   0.01   0.02    -0.01  -0.01  -0.01    -0.01   0.00  -0.01
   7   8     0.02   0.00  -0.01    -0.01   0.02   0.00     0.04   0.01   0.01
   8   6    -0.01  -0.01  -0.03     0.00   0.00   0.00    -0.01   0.00   0.00
   9   6     0.00   0.00  -0.01     0.00  -0.01  -0.01    -0.01   0.00   0.00
  10   6     0.01   0.01   0.01     0.00  -0.01  -0.01    -0.01   0.00   0.00
  11   8    -0.01   0.02   0.01     0.01   0.00  -0.03     0.01   0.01   0.04
  12   6    -0.01   0.01   0.03     0.01   0.00  -0.04     0.01   0.01   0.04
  13   6    -0.01   0.01   0.03     0.02   0.00  -0.03     0.01   0.00   0.03
  14   6    -0.02   0.03  -0.01     0.02   0.00  -0.02     0.01   0.02   0.02
  15   8     0.00   0.00   0.04     0.01   0.01  -0.04     0.01   0.01   0.03
  16   6    -0.01  -0.07  -0.01     0.01   0.04   0.05     0.02  -0.01  -0.02
  17   8     0.01   0.01   0.02    -0.02  -0.04  -0.01     0.01  -0.02   0.02
  18   6     0.00   0.01   0.00    -0.02   0.00   0.04     0.00   0.01   0.03
  19   8     0.02   0.01   0.01    -0.08   0.00   0.04    -0.03   0.00   0.04
  20   8    -0.01   0.01   0.00     0.10   0.04   0.07     0.06   0.03   0.03
  21   6    -0.02   0.02   0.00     0.08   0.01  -0.03     0.06   0.01  -0.02
  22   6     0.01   0.02   0.03     0.01  -0.04  -0.07     0.01  -0.02  -0.04
  23   6     0.00   0.01   0.00     0.02   0.05   0.09     0.02   0.03   0.06
  24   8    -0.03   0.02  -0.01     0.13   0.02  -0.07     0.08   0.02  -0.04
  25   6     0.04   0.01   0.02    -0.07  -0.09  -0.09    -0.05  -0.07  -0.05
  26   6     0.01   0.01  -0.01    -0.03   0.07   0.14    -0.02   0.02   0.09
  27   6    -0.01   0.03   0.03     0.04   0.04  -0.03     0.00   0.01   0.03
  28   6    -0.03   0.06   0.00     0.05  -0.01  -0.02    -0.01   0.04   0.02
  29   6    -0.01  -0.01  -0.03     0.00   0.00   0.00    -0.01   0.00   0.00
  30   6     0.01   0.01   0.02    -0.02  -0.01   0.00    -0.02  -0.01  -0.02
  31   6    -0.02   0.02  -0.02     0.00   0.00   0.00    -0.01   0.01   0.00
  32   6    -0.02   0.05  -0.01     0.00   0.00   0.00    -0.01   0.03  -0.01
  33   6    -0.01   0.07   0.00     0.00   0.00   0.00    -0.02   0.04  -0.01
  34   6     0.00   0.02  -0.02     0.00  -0.01   0.00    -0.02   0.03   0.00
  35   6     0.01  -0.04  -0.03     0.00  -0.01   0.00    -0.02   0.00   0.00
  36   6    -0.03  -0.01  -0.03     0.00   0.01   0.00     0.00   0.01   0.00
  37   6     0.03  -0.15  -0.06     0.00  -0.01   0.00    -0.02  -0.02   0.00
  38   6     0.03   0.01   0.01     0.00   0.01  -0.01    -0.03  -0.05  -0.01
  39   6     0.03   0.01   0.00    -0.02  -0.01   0.00    -0.05  -0.07  -0.01
  40   6     0.02   0.02   0.00    -0.04  -0.03   0.02    -0.06  -0.06  -0.02
  41   6     0.01   0.01   0.00    -0.04  -0.04   0.02    -0.04  -0.02  -0.03
  42   6     0.01   0.01   0.01    -0.03  -0.04   0.01    -0.02   0.01  -0.03
  43   6     0.03   0.01   0.01     0.02   0.04  -0.04    -0.02  -0.05  -0.01
  44   6    -0.01   0.00   0.03    -0.07  -0.07   0.03     0.03   0.07  -0.06
  45   6    -0.11   0.00   0.00    -0.04   0.02  -0.01     0.04  -0.01   0.01
  46   6     0.02   0.03  -0.03     0.02   0.03   0.02    -0.03  -0.02  -0.02
  47   6    -0.12  -0.14  -0.02    -0.02   0.01   0.04    -0.08  -0.01   0.04
  48   6     0.21  -0.11  -0.09     0.03   0.02  -0.03     0.04   0.01  -0.03
  49   6     0.00   0.01   0.02     0.03  -0.07   0.00    -0.08   0.08  -0.05
  50   6    -0.05   0.03   0.03    -0.19   0.01   0.04     0.18  -0.01  -0.05
  51   6     0.02   0.00   0.01    -0.06   0.08  -0.04     0.06  -0.05   0.02
  52   6     0.04   0.00   0.02     0.07  -0.03  -0.02    -0.04  -0.01  -0.07
  53   6    -0.02  -0.01  -0.04     0.01   0.00   0.00    -0.02   0.00  -0.02
  54   6     0.01   0.01   0.03     0.00  -0.02   0.00    -0.02   0.01  -0.03
  55   1     0.00   0.00   0.00     0.01  -0.01  -0.01    -0.01   0.00   0.00
  56   1    -0.01   0.01   0.02     0.01   0.00  -0.05     0.00   0.00   0.02
  57   1    -0.03   0.02  -0.03     0.02   0.00  -0.01     0.01   0.01   0.01
  58   1    -0.01  -0.07  -0.01    -0.01   0.04   0.05     0.03  -0.01  -0.02
  59   1     0.02  -0.08  -0.01     0.00   0.03   0.04     0.03  -0.02  -0.03
  60   1    -0.03  -0.10  -0.01     0.02   0.04   0.07     0.01  -0.02  -0.03
  61   1     0.00   0.01   0.05     0.04  -0.04  -0.15     0.03  -0.01  -0.09
  62   1     0.00   0.00   0.00     0.03   0.06   0.11     0.04   0.04   0.08
  63   1     0.03   0.01   0.02    -0.05  -0.09  -0.14    -0.05  -0.07  -0.10
  64   1     0.05   0.01   0.00    -0.10  -0.09  -0.02    -0.07  -0.09   0.00
  65   1     0.06   0.02   0.04    -0.12  -0.13  -0.12    -0.08  -0.09  -0.07
  66   1    -0.01  -0.01   0.00     0.02   0.11   0.16     0.03   0.07   0.08
  67   1     0.03   0.00  -0.03    -0.08   0.10   0.18    -0.08   0.05   0.16
  68   1     0.01   0.04   0.00    -0.08   0.03   0.11    -0.05  -0.05   0.06
  69   1     0.00   0.03   0.02     0.05   0.04  -0.05    -0.02   0.04   0.04
  70   1    -0.01   0.04   0.04     0.04   0.04  -0.01     0.03   0.01   0.04
  71   1     0.00   0.04   0.02     0.06   0.05  -0.03    -0.02  -0.01   0.02
  72   1    -0.09   0.12  -0.01     0.06  -0.01  -0.02    -0.03   0.06   0.02
  73   1    -0.04   0.00  -0.02     0.05  -0.01   0.00    -0.02   0.03   0.01
  74   1     0.03   0.09   0.03     0.05  -0.01  -0.03     0.00   0.05   0.04
  75   1    -0.02   0.08   0.00     0.00   0.00   0.00    -0.01   0.03  -0.01
  76   1    -0.01   0.11   0.01     0.00  -0.01   0.00    -0.02   0.05  -0.01
  77   1     0.01   0.01  -0.02     0.00  -0.01   0.00    -0.03   0.03   0.00
  78   1    -0.02  -0.06  -0.05     0.00  -0.01   0.00    -0.01   0.03   0.01
  79   1     0.03  -0.28  -0.08     0.01  -0.04   0.00    -0.01  -0.08   0.00
  80   1     0.04   0.01  -0.01    -0.01   0.00   0.00    -0.06  -0.10   0.00
  81   1     0.02   0.02  -0.01    -0.05  -0.04   0.03    -0.08  -0.09  -0.02
  82   1     0.00   0.01   0.00    -0.05  -0.06   0.04    -0.05  -0.01  -0.04
  83   1     0.04   0.02   0.01     0.07   0.08  -0.07    -0.05  -0.08   0.02
  84   1    -0.02  -0.02   0.04    -0.09  -0.17   0.07     0.06   0.18  -0.10
  85   1    -0.11  -0.03  -0.01    -0.04   0.03  -0.01     0.05  -0.02   0.01
  86   1    -0.16  -0.04   0.00    -0.06   0.00  -0.02     0.06   0.01   0.03
  87   1    -0.13   0.06   0.01    -0.05   0.05   0.00     0.05  -0.04   0.00
  88   1     0.01   0.00  -0.04     0.02   0.03   0.02    -0.01  -0.02  -0.02
  89   1     0.01   0.08  -0.01     0.02   0.05   0.03    -0.02  -0.05  -0.04
  90   1     0.07   0.03  -0.05     0.04   0.02   0.02    -0.06  -0.01  -0.02
  91   1    -0.08  -0.24  -0.06    -0.02   0.01   0.03    -0.08  -0.03   0.03
  92   1    -0.11   0.00   0.02    -0.03   0.05   0.04    -0.08   0.05   0.04
  93   1    -0.26  -0.17   0.00    -0.05  -0.01   0.06    -0.12  -0.03   0.06
  94   1     0.21  -0.22  -0.09     0.03   0.02  -0.03     0.03  -0.02  -0.03
  95   1     0.34  -0.12  -0.11     0.06   0.01  -0.05     0.09  -0.01  -0.06
  96   1     0.20   0.03  -0.08     0.03   0.06  -0.03     0.03   0.07  -0.04
  97   1    -0.01   0.00   0.03     0.01  -0.10   0.01    -0.06   0.13  -0.07
  98   1     0.00   0.02   0.00     0.05   0.02  -0.04    -0.10  -0.01  -0.03
  99   1     0.02  -0.01   0.02     0.11  -0.12  -0.02    -0.16   0.12  -0.05
 100   1    -0.06   0.02   0.03    -0.20  -0.04   0.05     0.20   0.07  -0.06
 101   1    -0.07   0.02   0.03    -0.30   0.01   0.05     0.30  -0.01  -0.04
 102   1    -0.05   0.05   0.01    -0.16   0.13   0.02     0.15  -0.14  -0.02
 103   1     0.03   0.00   0.01    -0.04   0.11  -0.05     0.07  -0.04   0.02
 104   1     0.02   0.01   0.00    -0.09   0.13  -0.05     0.08  -0.08   0.06
 105   1     0.02  -0.01   0.00    -0.10   0.04   0.00     0.10  -0.02  -0.01
 106   1     0.04   0.00   0.02     0.09   0.00  -0.05    -0.02  -0.02  -0.06
 107   1     0.03  -0.01   0.02     0.02  -0.07   0.03     0.00   0.01  -0.13
 108   1     0.05   0.00   0.02     0.14  -0.08  -0.02    -0.11   0.00  -0.09
 109   1     0.01   0.00  -0.08     0.01   0.01   0.00     0.01   0.01  -0.06
 110   1     0.00  -0.01   0.00     0.02   0.00   0.01    -0.01   0.00   0.01
 111   1    -0.06  -0.02  -0.05     0.01   0.00   0.00    -0.06  -0.01  -0.03
 112   1     0.00   0.01  -0.01    -0.04  -0.03  -0.09     0.04   0.00   0.15
 113   1     0.02  -0.03   0.05     0.05  -0.12   0.04    -0.11   0.19  -0.11
 114   1     0.02   0.05   0.06     0.01   0.06   0.07    -0.02  -0.16  -0.17
                    13                     14                     15
                     A                      A                      A
 Frequencies --    57.7971                63.0288                68.2868
 Red. masses --     3.1455                 2.7642                 4.2239
 Frc consts  --     0.0062                 0.0065                 0.0116
 IR Inten    --     0.7547                 0.2518                 1.8996
 Atom AN      X      Y      Z        X      Y      Z        X      Y      Z
   1   8     0.01   0.01   0.02    -0.02   0.00   0.00     0.01   0.00  -0.01
   2  12     0.02  -0.02   0.01     0.00   0.00  -0.01     0.02   0.01   0.08
   3   8     0.02  -0.02  -0.01    -0.02  -0.01  -0.01     0.01   0.05   0.03
   4   6     0.00   0.04  -0.02    -0.02   0.00   0.00     0.01   0.01   0.00
   5   7     0.00  -0.02   0.03    -0.01  -0.01   0.00    -0.02   0.00  -0.01
   6   7     0.00   0.00  -0.01     0.01   0.01   0.01     0.02   0.00   0.05
   7   8    -0.01   0.04  -0.03    -0.02   0.00   0.00     0.02   0.00   0.01
   8   6    -0.02  -0.02   0.01    -0.01   0.00   0.01    -0.02  -0.01  -0.04
   9   6    -0.03  -0.01   0.00    -0.01   0.01   0.02    -0.01  -0.02  -0.03
  10   6    -0.02   0.01  -0.01     0.00   0.02   0.03     0.00  -0.01   0.00
  11   8     0.00   0.06  -0.09    -0.02   0.00   0.00     0.01   0.05  -0.01
  12   6     0.02   0.02  -0.04    -0.02   0.00   0.00     0.01   0.03   0.04
  13   6     0.02   0.00  -0.02    -0.02  -0.01   0.00     0.01   0.07   0.00
  14   6     0.01   0.07  -0.07    -0.02   0.01   0.00     0.00   0.01   0.02
  15   8     0.03  -0.01  -0.01    -0.01   0.00   0.01     0.02  -0.01   0.12
  16   6    -0.01  -0.03   0.08    -0.02  -0.01   0.00     0.01  -0.01  -0.02
  17   8     0.00  -0.01  -0.01    -0.01  -0.01  -0.02     0.01  -0.02  -0.02
  18   6     0.01  -0.02   0.00    -0.01  -0.01  -0.02     0.02  -0.02  -0.01
  19   8     0.03  -0.03   0.00    -0.01  -0.01  -0.02     0.06  -0.04   0.03
  20   8    -0.01  -0.04   0.01     0.00  -0.01  -0.01    -0.03  -0.03  -0.06
  21   6    -0.02  -0.02   0.00     0.00  -0.01  -0.01     0.01  -0.05   0.01
  22   6    -0.02  -0.01   0.00     0.00  -0.01  -0.02    -0.03  -0.01  -0.05
  23   6     0.00  -0.04   0.00    -0.01  -0.01  -0.02     0.00  -0.04  -0.05
  24   8    -0.04  -0.02   0.01     0.01  -0.02   0.00     0.07  -0.08   0.09
  25   6    -0.03  -0.01   0.00    -0.01  -0.01  -0.01    -0.16  -0.03  -0.05
  26   6     0.00  -0.04   0.00    -0.01   0.01  -0.01     0.02  -0.08  -0.07
  27   6     0.06  -0.03  -0.03    -0.03  -0.02   0.00     0.01   0.15   0.01
  28   6     0.06   0.13  -0.06    -0.03   0.02   0.00     0.01  -0.03   0.01
  29   6     0.00  -0.02   0.03    -0.01  -0.01   0.00    -0.03   0.00  -0.02
  30   6     0.00   0.01  -0.01     0.02   0.02   0.00     0.02   0.00   0.03
  31   6     0.00  -0.01   0.03    -0.01  -0.01   0.01    -0.03   0.02  -0.02
  32   6    -0.01   0.04   0.03    -0.01   0.00   0.01    -0.03   0.01  -0.02
  33   6    -0.02   0.10   0.04    -0.01   0.01   0.02    -0.03  -0.02  -0.02
  34   6    -0.02   0.08   0.04    -0.01   0.01   0.01    -0.03  -0.02  -0.02
  35   6    -0.01   0.02   0.03    -0.01   0.00   0.01    -0.03   0.00  -0.02
  36   6     0.01  -0.07   0.02    -0.01  -0.02   0.01    -0.05   0.06  -0.01
  37   6    -0.01   0.00   0.03     0.00   0.00   0.00    -0.03   0.00  -0.02
  38   6    -0.01   0.01   0.00     0.04   0.04  -0.01     0.04   0.01   0.02
  39   6    -0.02   0.00   0.01     0.02   0.01   0.00     0.04   0.00   0.01
  40   6    -0.02   0.00   0.02    -0.01  -0.02   0.02     0.02   0.00   0.01
  41   6    -0.01  -0.01   0.01    -0.01  -0.01   0.02     0.01  -0.01   0.02
  42   6     0.00   0.00   0.00     0.01   0.01   0.01     0.01  -0.01   0.03
  43   6    -0.01   0.02  -0.01     0.10   0.08  -0.04     0.07   0.03   0.00
  44   6     0.00   0.00   0.00     0.03   0.03  -0.01    -0.02  -0.03   0.05
  45   6     0.06  -0.12   0.07     0.01  -0.04   0.02     0.03   0.05  -0.03
  46   6     0.00  -0.11  -0.05    -0.04  -0.05  -0.01    -0.11   0.02   0.01
  47   6    -0.01  -0.02   0.00     0.01  -0.01  -0.01    -0.01  -0.01  -0.04
  48   6     0.00  -0.02   0.06    -0.01  -0.01   0.02    -0.07  -0.02   0.00
  49   6     0.06   0.01  -0.04    -0.05   0.02   0.03    -0.01  -0.03   0.06
  50   6    -0.04   0.05   0.03     0.15  -0.06  -0.02    -0.06  -0.02   0.03
  51   6     0.01   0.04   0.00    -0.07   0.16  -0.05     0.14   0.05   0.03
  52   6    -0.03   0.05  -0.05     0.20  -0.06   0.01     0.07   0.05  -0.08
  53   6    -0.03  -0.03   0.01    -0.02  -0.01   0.01    -0.03  -0.01  -0.09
  54   6    -0.03   0.02  -0.02     0.01   0.03   0.06    -0.02  -0.01  -0.04
  55   1    -0.04   0.00   0.00    -0.01   0.01   0.03    -0.02  -0.02  -0.05
  56   1     0.00   0.00   0.00    -0.02   0.00   0.01     0.01   0.06  -0.05
  57   1     0.00   0.06  -0.11    -0.02   0.01  -0.01    -0.02   0.02   0.04
  58   1    -0.06  -0.03   0.08    -0.02  -0.01   0.00     0.02  -0.02  -0.02
  59   1     0.03  -0.03   0.09    -0.02  -0.01   0.00     0.02  -0.01  -0.01
  60   1     0.00  -0.04   0.11    -0.02  -0.01   0.00     0.01  -0.01  -0.03
  61   1    -0.02   0.00  -0.01     0.00  -0.02  -0.02    -0.01   0.02  -0.13
  62   1     0.01  -0.05   0.00    -0.01  -0.01  -0.01     0.00  -0.03  -0.05
  63   1    -0.05  -0.01   0.00     0.00  -0.01  -0.01    -0.17  -0.03  -0.07
  64   1    -0.03  -0.02   0.00    -0.01   0.00  -0.01    -0.19  -0.05   0.03
  65   1    -0.03   0.01  -0.01    -0.01  -0.01  -0.02    -0.20  -0.03  -0.11
  66   1     0.00  -0.05   0.00    -0.02   0.00   0.01     0.04  -0.05  -0.13
  67   1     0.01  -0.04   0.00    -0.01   0.01  -0.02     0.00  -0.07  -0.02
  68   1     0.00  -0.04   0.00    -0.02   0.03  -0.01     0.04  -0.16  -0.08
  69   1     0.06  -0.02  -0.04    -0.04  -0.01   0.02     0.00   0.19  -0.02
  70   1     0.09  -0.04  -0.05    -0.02  -0.03  -0.01     0.04   0.16   0.05
  71   1     0.06  -0.06   0.00    -0.05  -0.04   0.00     0.00   0.15  -0.02
  72   1    -0.17   0.33  -0.09    -0.06   0.05   0.00     0.02  -0.06   0.03
  73   1     0.02  -0.16  -0.06    -0.03  -0.02  -0.01     0.01  -0.02   0.02
  74   1     0.35   0.24  -0.02     0.01   0.04   0.01    -0.02  -0.05  -0.02
  75   1    -0.01   0.05   0.03    -0.01   0.00   0.02    -0.03   0.01  -0.02
  76   1    -0.03   0.14   0.04    -0.01   0.02   0.02    -0.03  -0.03  -0.02
  77   1    -0.03   0.12   0.04     0.00   0.02   0.01    -0.02  -0.03  -0.02
  78   1     0.01  -0.06   0.02    -0.02   0.00   0.00    -0.06   0.12  -0.01
  79   1    -0.01   0.02   0.03    -0.01   0.01   0.00    -0.03   0.04  -0.01
  80   1    -0.02   0.01   0.02     0.02   0.01   0.00     0.04   0.00   0.01
  81   1    -0.02  -0.01   0.03    -0.03  -0.04   0.03     0.02  -0.01   0.01
  82   1    -0.01  -0.01   0.02    -0.02  -0.02   0.02     0.00  -0.01   0.02
  83   1    -0.03   0.00  -0.01     0.19   0.18  -0.10     0.05   0.01   0.02
  84   1    -0.01  -0.05   0.01     0.06   0.11  -0.04    -0.02  -0.05   0.07
  85   1     0.05  -0.16   0.06     0.01  -0.05   0.02     0.03   0.07  -0.03
  86   1     0.08  -0.08   0.10     0.03  -0.02   0.03     0.06   0.08  -0.03
  87   1     0.07  -0.15   0.08     0.02  -0.06   0.03     0.04   0.00  -0.05
  88   1     0.02  -0.15  -0.06    -0.03  -0.05  -0.01    -0.12   0.06   0.02
  89   1     0.01  -0.13  -0.07    -0.03  -0.07  -0.01    -0.10  -0.05  -0.01
  90   1    -0.03  -0.09  -0.09    -0.06  -0.04  -0.02    -0.18   0.01   0.04
  91   1    -0.02  -0.03   0.01     0.01  -0.01  -0.01    -0.01   0.00  -0.03
  92   1    -0.02  -0.04  -0.02     0.01  -0.02  -0.01    -0.01  -0.04  -0.05
  93   1     0.00   0.00  -0.03     0.01   0.00  -0.02     0.02   0.00  -0.05
  94   1     0.00  -0.04   0.06    -0.01  -0.01   0.02    -0.07  -0.01   0.01
  95   1    -0.01  -0.01   0.09    -0.02  -0.01   0.03    -0.10  -0.01   0.02
  96   1     0.00  -0.04   0.07    -0.01  -0.03   0.02    -0.07  -0.05   0.00
  97   1     0.06   0.01  -0.04    -0.03   0.04   0.02    -0.02  -0.05   0.07
  98   1     0.07   0.06  -0.05    -0.07  -0.06   0.06    -0.01  -0.02   0.05
  99   1     0.08  -0.02  -0.06    -0.12   0.07   0.05     0.01  -0.04   0.07
 100   1    -0.03   0.05   0.02     0.17  -0.03  -0.04    -0.09  -0.04   0.05
 101   1    -0.08   0.04   0.05     0.23  -0.04  -0.05    -0.07  -0.02   0.03
 102   1    -0.02   0.11   0.02     0.13  -0.15   0.01    -0.06   0.00   0.01
 103   1     0.01   0.05  -0.01    -0.03   0.19  -0.08     0.15   0.06   0.02
 104   1     0.03   0.02   0.02    -0.13   0.26  -0.10     0.15   0.02   0.07
 105   1     0.03   0.06   0.00    -0.17   0.06   0.01     0.16   0.07   0.01
 106   1    -0.03   0.05  -0.05     0.24   0.00  -0.04     0.10   0.06  -0.08
 107   1    -0.01   0.07  -0.06     0.10  -0.15   0.09     0.10   0.07  -0.11
 108   1    -0.05   0.04  -0.06     0.32  -0.14   0.00     0.01   0.04  -0.10
 109   1    -0.04  -0.04   0.02    -0.02  -0.02   0.00     0.00  -0.01  -0.13
 110   1    -0.05  -0.02   0.00    -0.03   0.00   0.01    -0.01  -0.01  -0.07
 111   1    -0.03  -0.02   0.01    -0.03  -0.01   0.00    -0.08   0.01  -0.10
 112   1     0.01   0.03   0.07    -0.04   0.04  -0.09     0.01  -0.01   0.04
 113   1    -0.08   0.12  -0.06     0.08  -0.13   0.14    -0.04   0.08  -0.08
 114   1    -0.04  -0.06  -0.08     0.01   0.17   0.18    -0.03  -0.08  -0.10
                    16                     17                     18
                     A                      A                      A
 Frequencies --    71.8622                72.4745                77.3557
 Red. masses --     3.6798                 3.4309                 3.2481
 Frc consts  --     0.0112                 0.0106                 0.0115
 IR Inten    --     1.0807                 1.1583                 0.4340
 Atom AN      X      Y      Z        X      Y      Z        X      Y      Z
   1   8    -0.01   0.03   0.01    -0.03   0.01   0.01     0.02   0.01   0.00
   2  12    -0.01  -0.01   0.01     0.00   0.01   0.03    -0.01   0.03   0.02
   3   8     0.01  -0.03   0.04    -0.02   0.02   0.02     0.02   0.05   0.00
   4   6    -0.03   0.01  -0.03    -0.05  -0.01  -0.02     0.01   0.00  -0.01
   5   7    -0.04  -0.02  -0.03     0.01   0.00   0.04    -0.01   0.01   0.02
   6   7     0.01  -0.03   0.02     0.01   0.00   0.01     0.00  -0.01   0.01
   7   8    -0.07   0.00  -0.02    -0.09  -0.02  -0.01    -0.01   0.00  -0.01
   8   6    -0.02  -0.03  -0.02     0.01   0.00   0.04    -0.01   0.00   0.00
   9   6    -0.01  -0.03   0.01     0.01   0.00   0.04    -0.01  -0.01  -0.01
  10   6     0.00  -0.03   0.02     0.00   0.00   0.02     0.00  -0.01  -0.01
  11   8    -0.02   0.03  -0.10    -0.04   0.01  -0.09     0.01   0.03  -0.06
  12   6    -0.01   0.00  -0.05    -0.03   0.00  -0.03     0.01   0.03  -0.02
  13   6     0.02  -0.02   0.00    -0.01   0.02  -0.01     0.02   0.05  -0.02
  14   6    -0.01   0.02  -0.07    -0.03  -0.03  -0.04     0.02   0.00  -0.02
  15   8    -0.01  -0.01  -0.03    -0.04  -0.03   0.02     0.00   0.01   0.01
  16   6    -0.04   0.01   0.08    -0.06   0.02   0.05     0.01   0.01   0.03
  17   8     0.00   0.00   0.02    -0.03   0.00  -0.02    -0.02   0.06  -0.01
  18   6     0.00   0.00   0.01    -0.03   0.01  -0.02    -0.01   0.05   0.00
  19   8    -0.01   0.01   0.02    -0.02   0.00   0.01    -0.01   0.05   0.01
  20   8     0.03   0.00   0.06    -0.04   0.01  -0.03     0.01   0.05   0.03
  21   6     0.00   0.01   0.01    -0.01   0.00   0.00    -0.01   0.05   0.01
  22   6     0.04   0.00   0.05    -0.01   0.00   0.01    -0.03   0.06  -0.02
  23   6     0.01   0.01   0.05    -0.03   0.01  -0.03     0.00   0.05   0.02
  24   8    -0.04   0.03  -0.05     0.01  -0.01   0.03    -0.01   0.06   0.00
  25   6     0.14   0.02   0.05     0.02   0.02   0.01    -0.06   0.06  -0.01
  26   6     0.00   0.04   0.06    -0.02   0.01  -0.04    -0.01   0.07   0.03
  27   6     0.07   0.00  -0.01     0.04   0.02  -0.02     0.05   0.07  -0.03
  28   6     0.04   0.02  -0.07     0.01  -0.09  -0.05     0.04  -0.03  -0.03
  29   6    -0.04  -0.01  -0.02     0.01  -0.02   0.02    -0.01   0.00   0.02
  30   6     0.02  -0.03   0.01     0.01   0.00   0.00     0.01  -0.01  -0.01
  31   6    -0.05   0.00  -0.01     0.02  -0.03   0.01    -0.01  -0.01   0.02
  32   6    -0.05   0.00   0.01     0.02  -0.04  -0.01    -0.01  -0.01   0.01
  33   6    -0.03  -0.02   0.01     0.00  -0.06  -0.02    -0.02  -0.01   0.01
  34   6    -0.02  -0.01   0.00    -0.01  -0.06   0.00    -0.02  -0.01   0.02
  35   6    -0.03  -0.01  -0.02     0.00  -0.04   0.02    -0.02   0.00   0.02
  36   6    -0.09   0.05   0.00     0.05  -0.03   0.01    -0.01  -0.05   0.01
  37   6    -0.03   0.02  -0.02    -0.01  -0.01   0.03    -0.02  -0.02   0.03
  38   6     0.03  -0.03   0.00     0.03   0.01  -0.01     0.03  -0.01  -0.02
  39   6     0.04  -0.03  -0.01     0.03   0.02  -0.01     0.05   0.01  -0.05
  40   6     0.02  -0.03  -0.01     0.03   0.01  -0.01     0.06   0.03  -0.07
  41   6     0.02  -0.03   0.00     0.02   0.01   0.00     0.04   0.03  -0.05
  42   6     0.02  -0.02   0.01     0.02   0.00   0.00     0.01   0.01  -0.02
  43   6     0.06  -0.02   0.00     0.04   0.02  -0.02     0.01  -0.07   0.03
  44   6     0.04   0.00   0.00     0.02   0.00   0.00    -0.01  -0.03  -0.01
  45   6    -0.13   0.09  -0.05     0.03  -0.03   0.01     0.02  -0.08   0.05
  46   6    -0.10   0.08   0.08     0.08  -0.02   0.00    -0.03  -0.08  -0.03
  47   6     0.04   0.00  -0.06    -0.11   0.08   0.19    -0.03  -0.03   0.01
  48   6    -0.09  -0.01   0.01     0.07   0.11  -0.12    -0.03  -0.04   0.05
  49   6     0.03   0.01  -0.02     0.02   0.00   0.00    -0.06  -0.06   0.07
  50   6     0.08   0.00   0.02     0.03   0.00   0.00     0.00  -0.11  -0.08
  51   6     0.11  -0.02   0.02     0.08   0.03   0.00     0.02  -0.14  -0.01
  52   6     0.06  -0.01  -0.05     0.03   0.05  -0.06     0.00  -0.07   0.09
  53   6    -0.01  -0.02  -0.02     0.00  -0.01   0.04    -0.01   0.00  -0.04
  54   6     0.00  -0.01   0.02    -0.01   0.01  -0.01     0.00  -0.03  -0.01
  55   1     0.00  -0.04   0.01     0.01   0.00   0.05    -0.01  -0.02  -0.03
  56   1     0.00  -0.02   0.00    -0.01   0.01  -0.02     0.02   0.04  -0.04
  57   1    -0.02   0.02  -0.07    -0.05  -0.02   0.00     0.00   0.01   0.00
  58   1    -0.09  -0.01   0.08    -0.09   0.01   0.05    -0.01   0.00   0.03
  59   1    -0.03   0.02   0.12    -0.07   0.03   0.07     0.00   0.02   0.04
  60   1    -0.01   0.03   0.11    -0.03   0.04   0.07     0.02   0.02   0.03
  61   1     0.02  -0.04   0.12    -0.01  -0.03   0.02    -0.02   0.06  -0.04
  62   1     0.02   0.00   0.04    -0.04   0.01  -0.03     0.00   0.05   0.01
  63   1     0.15   0.02   0.08     0.04   0.02   0.03    -0.06   0.06  -0.01
  64   1     0.17   0.04  -0.02     0.02   0.05   0.00    -0.07   0.06   0.01
  65   1     0.18   0.02   0.10     0.02   0.02   0.02    -0.08   0.07  -0.03
  66   1    -0.04  -0.01   0.13    -0.05  -0.02  -0.03    -0.02   0.05   0.06
  67   1     0.05   0.02  -0.01     0.01  -0.01  -0.08     0.01   0.06   0.00
  68   1    -0.02   0.15   0.08    -0.01   0.05  -0.03    -0.02   0.11   0.03
  69   1     0.08   0.00  -0.05     0.04   0.03  -0.05     0.04   0.11  -0.04
  70   1     0.06   0.01   0.02     0.05   0.03  -0.01     0.08   0.08  -0.01
  71   1     0.09   0.03   0.01     0.05   0.02   0.00     0.03   0.06  -0.02
  72   1    -0.04   0.08  -0.08     0.01  -0.10  -0.03     0.02  -0.02  -0.02
  73   1     0.03  -0.10  -0.05     0.01  -0.13  -0.01     0.04  -0.08  -0.01
  74   1     0.15   0.05  -0.08     0.03  -0.10  -0.10     0.08  -0.02  -0.05
  75   1    -0.05   0.01   0.02     0.03  -0.04  -0.02    -0.01  -0.02   0.01
  76   1    -0.03  -0.02   0.02     0.00  -0.07  -0.03    -0.02  -0.01   0.01
  77   1    -0.01  -0.01   0.00    -0.02  -0.07  -0.01    -0.02  -0.02   0.01
  78   1    -0.09   0.05  -0.02     0.06  -0.06   0.03    -0.01  -0.03   0.01
  79   1    -0.03   0.08  -0.02     0.00  -0.15   0.03    -0.02  -0.01   0.04
  80   1     0.05  -0.02  -0.02     0.04   0.03  -0.02     0.06   0.01  -0.06
  81   1     0.02  -0.03  -0.01     0.03   0.02  -0.01     0.08   0.05  -0.10
  82   1     0.01  -0.02  -0.01     0.02   0.01   0.00     0.04   0.04  -0.06
  83   1     0.04  -0.04   0.02     0.02   0.00   0.00     0.01  -0.06   0.05
  84   1     0.04   0.02  -0.02     0.02   0.01  -0.01     0.01   0.01  -0.01
  85   1    -0.18   0.14  -0.05     0.06  -0.03   0.01     0.03  -0.11   0.05
  86   1    -0.11   0.07  -0.12     0.00  -0.05   0.02     0.03  -0.06   0.08
  87   1    -0.12   0.08  -0.01     0.02   0.00  -0.02     0.03  -0.09   0.06
  88   1    -0.12   0.13   0.08     0.10  -0.03   0.00    -0.03  -0.11  -0.04
  89   1    -0.10   0.08   0.09     0.08   0.01  -0.01    -0.02  -0.10  -0.03
  90   1    -0.08   0.05   0.11     0.10  -0.02  -0.01    -0.05  -0.06  -0.06
  91   1     0.03   0.03  -0.05    -0.11   0.10   0.19    -0.04  -0.05   0.01
  92   1     0.04  -0.06  -0.07    -0.12   0.21   0.21    -0.04  -0.04   0.00
  93   1     0.09   0.03  -0.08    -0.16  -0.01   0.29    -0.04  -0.02  -0.01
  94   1    -0.09   0.02   0.01     0.05   0.13  -0.10    -0.04  -0.05   0.06
  95   1    -0.15   0.00   0.04     0.16   0.04  -0.23    -0.02  -0.03   0.06
  96   1    -0.08  -0.09   0.02     0.04   0.26  -0.14    -0.04  -0.04   0.04
  97   1     0.04   0.02  -0.03     0.02   0.00   0.00    -0.07  -0.09   0.08
  98   1     0.03   0.00  -0.02     0.02   0.00   0.00    -0.08  -0.11   0.07
  99   1     0.01   0.00  -0.03     0.01   0.00   0.00    -0.06  -0.01   0.12
 100   1     0.10   0.03   0.01     0.03   0.01   0.00    -0.01  -0.16  -0.07
 101   1     0.11  -0.01   0.03     0.05   0.00   0.01     0.04  -0.09  -0.15
 102   1     0.08  -0.03   0.03     0.03  -0.02   0.00    -0.01  -0.16  -0.08
 103   1     0.13  -0.02   0.02     0.08   0.03   0.00     0.03  -0.18   0.03
 104   1     0.11  -0.03   0.05     0.09   0.01   0.02     0.02  -0.13  -0.03
 105   1     0.13  -0.01  -0.01     0.10   0.04  -0.01     0.03  -0.15  -0.05
 106   1     0.08  -0.01  -0.04     0.04   0.05  -0.06    -0.01  -0.10   0.12
 107   1     0.08   0.00  -0.08     0.05   0.06  -0.08     0.00  -0.08   0.07
 108   1     0.01  -0.01  -0.06    -0.01   0.04  -0.07     0.02  -0.02   0.11
 109   1    -0.01  -0.02  -0.01     0.04   0.01  -0.02     0.01   0.00  -0.06
 110   1     0.00  -0.02  -0.04     0.02   0.00   0.09     0.00   0.00  -0.03
 111   1     0.01  -0.01  -0.02    -0.07  -0.03   0.02    -0.04   0.01  -0.04
 112   1     0.04  -0.01   0.13     0.03   0.01   0.08    -0.10  -0.02  -0.26
 113   1    -0.07   0.09  -0.02    -0.05   0.11  -0.07     0.14  -0.27   0.09
 114   1     0.00  -0.11  -0.05    -0.02  -0.08  -0.09    -0.02   0.19   0.17
                    19                     20                     21
                     A                      A                      A
 Frequencies --    78.7869                87.9612                93.9732
 Red. masses --     3.6816                 4.1331                 3.7638
 Frc consts  --     0.0135                 0.0188                 0.0196
 IR Inten    --     0.2205                 0.1969                 0.6600
 Atom AN      X      Y      Z        X      Y      Z        X      Y      Z
   1   8     0.08   0.01   0.01    -0.01   0.01  -0.02    -0.04  -0.01   0.01
   2  12     0.01  -0.02   0.01     0.01   0.03   0.08     0.00  -0.01   0.00
   3   8     0.05  -0.01  -0.02     0.01   0.06   0.06    -0.02   0.00   0.03
   4   6     0.08   0.01   0.01    -0.02   0.00  -0.02    -0.03   0.00   0.01
   5   7    -0.03  -0.02   0.02     0.02   0.03   0.01    -0.01  -0.02   0.02
   6   7    -0.02  -0.01  -0.02    -0.02   0.00  -0.02     0.02  -0.05  -0.05
   7   8     0.09   0.02   0.00    -0.02  -0.02   0.00    -0.02   0.00   0.01
   8   6    -0.03  -0.02   0.02     0.01   0.02  -0.05     0.00  -0.04  -0.02
   9   6    -0.03  -0.01   0.01     0.00   0.00  -0.08     0.00  -0.06  -0.05
  10   6    -0.03  -0.01  -0.01    -0.01  -0.01  -0.06     0.00  -0.05  -0.04
  11   8     0.07   0.00   0.01    -0.01   0.07  -0.07    -0.03  -0.01   0.05
  12   6     0.07   0.00   0.00     0.00   0.05   0.02    -0.03  -0.01   0.04
  13   6     0.05   0.01  -0.02     0.01   0.08   0.01    -0.02  -0.01   0.03
  14   6     0.07   0.02   0.01    -0.02   0.00  -0.02    -0.04   0.00   0.03
  15   8     0.07   0.00   0.00    -0.01  -0.01   0.11    -0.03  -0.01   0.04
  16   6     0.08   0.02  -0.02    -0.02  -0.02   0.03    -0.03  -0.01  -0.02
  17   8     0.02  -0.01  -0.01     0.00  -0.02   0.02     0.02   0.03   0.05
  18   6     0.03  -0.03   0.00    -0.01   0.00   0.03     0.01   0.03   0.01
  19   8     0.04  -0.03   0.00     0.00  -0.01   0.06     0.01   0.03   0.01
  20   8    -0.02  -0.05  -0.01    -0.03   0.03  -0.04    -0.01   0.03   0.01
  21   6    -0.03  -0.03   0.01     0.01   0.00   0.01    -0.01   0.03   0.01
  22   6     0.01  -0.01   0.03     0.05  -0.02   0.06    -0.03   0.03  -0.01
  23   6     0.02  -0.06  -0.01    -0.01   0.01   0.01     0.00   0.03   0.00
  24   8    -0.06  -0.03   0.01     0.02   0.00   0.01     0.00   0.03   0.02
  25   6     0.07   0.02   0.04     0.16   0.01   0.06    -0.11  -0.02  -0.02
  26   6     0.04  -0.07  -0.03     0.00  -0.05  -0.01     0.01   0.02  -0.01
  27   6     0.03   0.05  -0.02     0.06   0.14   0.01     0.00   0.01   0.03
  28   6     0.08   0.05   0.02     0.01  -0.10  -0.03    -0.06   0.01   0.03
  29   6    -0.04  -0.01   0.01     0.02   0.02   0.01    -0.01  -0.01   0.02
  30   6    -0.02  -0.01  -0.02    -0.03  -0.01  -0.01     0.04  -0.03  -0.04
  31   6    -0.03   0.01   0.01     0.03   0.01   0.00    -0.01   0.01   0.02
  32   6    -0.04   0.02   0.00     0.03   0.00  -0.01    -0.01   0.01   0.01
  33   6    -0.05   0.03   0.00     0.03  -0.03  -0.01    -0.02   0.01   0.01
  34   6    -0.06   0.02   0.00     0.03  -0.04  -0.01    -0.03   0.01   0.01
  35   6    -0.05   0.00   0.01     0.02   0.00   0.00    -0.02   0.00   0.02
  36   6    -0.04   0.05   0.01     0.03  -0.01   0.00    -0.01   0.01   0.02
  37   6    -0.06   0.01   0.02     0.02  -0.02   0.01    -0.04  -0.01   0.04
  38   6    -0.02  -0.01  -0.02    -0.06  -0.03   0.01     0.02  -0.02  -0.03
  39   6    -0.02   0.00  -0.01    -0.08  -0.06   0.03     0.04   0.01  -0.02
  40   6    -0.02   0.00  -0.01    -0.08  -0.06   0.03     0.08   0.02  -0.02
  41   6    -0.01  -0.01  -0.01    -0.05  -0.03   0.00     0.10   0.01  -0.03
  42   6    -0.01  -0.01  -0.02    -0.03   0.00  -0.02     0.08  -0.01  -0.04
  43   6    -0.03  -0.01  -0.02    -0.05  -0.01  -0.02     0.00  -0.01  -0.04
  44   6     0.00  -0.02  -0.03    -0.01   0.03  -0.03     0.11  -0.01  -0.06
  45   6    -0.02   0.08  -0.02     0.03  -0.02   0.03     0.00   0.01   0.02
  46   6    -0.05   0.06   0.05     0.04  -0.02  -0.03    -0.03   0.01   0.03
  47   6    -0.13   0.06   0.11     0.04  -0.04  -0.03    -0.06   0.00   0.04
  48   6    -0.01   0.09  -0.08    -0.01  -0.05   0.05    -0.05   0.00   0.03
  49   6     0.00  -0.03  -0.01     0.01   0.04  -0.07     0.24   0.01  -0.15
  50   6     0.01  -0.04  -0.04     0.01   0.04  -0.01     0.05   0.10   0.01
  51   6    -0.11   0.00  -0.04    -0.15   0.05  -0.01    -0.06   0.00  -0.05
  52   6     0.00  -0.06   0.04    -0.01  -0.07   0.01     0.02  -0.04   0.01
  53   6    -0.03  -0.01   0.01     0.01   0.02  -0.09     0.02  -0.02  -0.04
  54   6    -0.03  -0.01   0.00     0.00  -0.03  -0.06     0.01  -0.04  -0.01
  55   1    -0.04  -0.01   0.01     0.00  -0.01  -0.12    -0.01  -0.06  -0.06
  56   1     0.05   0.00  -0.05     0.00   0.07  -0.03    -0.02  -0.01   0.03
  57   1     0.07   0.01  -0.01    -0.04   0.01   0.04    -0.03  -0.01   0.02
  58   1     0.10   0.04  -0.01    -0.05  -0.07   0.02    -0.02   0.01  -0.01
  59   1     0.08   0.02  -0.04    -0.01  -0.02   0.07    -0.03  -0.01  -0.03
  60   1     0.08   0.01  -0.02    -0.02  -0.01   0.02    -0.04  -0.02  -0.02
  61   1     0.00  -0.02   0.08     0.04  -0.06   0.12    -0.02   0.08  -0.06
  62   1     0.01  -0.06  -0.02    -0.01   0.02   0.02    -0.01   0.03  -0.01
  63   1     0.06   0.02   0.08     0.19   0.01   0.09    -0.14  -0.01  -0.07
  64   1     0.09   0.02   0.00     0.17   0.05   0.00    -0.12  -0.06   0.03
  65   1     0.10   0.04   0.06     0.18   0.00   0.10    -0.13  -0.02  -0.04
  66   1     0.02  -0.09  -0.05     0.00  -0.03  -0.05     0.03   0.05  -0.04
  67   1     0.06  -0.08  -0.06    -0.01  -0.05   0.03    -0.01   0.03   0.01
  68   1     0.06  -0.05  -0.02     0.01  -0.09  -0.01     0.02  -0.02  -0.02
  69   1     0.03   0.06  -0.02     0.05   0.19  -0.04     0.03  -0.03   0.00
  70   1     0.03   0.06   0.02     0.11   0.16   0.05    -0.03   0.01   0.05
  71   1     0.02   0.06  -0.04     0.06   0.13   0.01     0.04   0.04   0.05
  72   1    -0.01   0.12   0.01     0.09  -0.18   0.00    -0.04  -0.02   0.03
  73   1     0.06  -0.06   0.01     0.03  -0.04   0.00    -0.06   0.06   0.01
  74   1     0.19   0.09   0.04    -0.07  -0.14  -0.11    -0.11  -0.01   0.04
  75   1    -0.03   0.03  -0.01     0.03   0.00  -0.01    -0.01   0.02   0.01
  76   1    -0.06   0.03  -0.01     0.03  -0.05  -0.02    -0.03   0.02   0.01
  77   1    -0.07   0.04   0.00     0.03  -0.07  -0.01    -0.03   0.01   0.01
  78   1    -0.04   0.07   0.02     0.04  -0.02  -0.01    -0.02   0.02   0.02
  79   1    -0.05  -0.08   0.02     0.02   0.02   0.02    -0.03  -0.01   0.05
  80   1    -0.03   0.00  -0.01    -0.10  -0.08   0.04     0.03   0.02  -0.01
  81   1    -0.02   0.00  -0.01    -0.10  -0.08   0.04     0.09   0.03  -0.01
  82   1     0.00   0.00  -0.01    -0.05  -0.03   0.00     0.13   0.02  -0.03
  83   1     0.01   0.03  -0.05     0.00   0.04  -0.06     0.03   0.00  -0.06
  84   1     0.00  -0.01  -0.04    -0.01   0.02  -0.04     0.07  -0.11  -0.07
  85   1    -0.03   0.11  -0.02     0.06  -0.06   0.02    -0.01   0.02   0.02
  86   1    -0.02   0.07  -0.05     0.01  -0.03   0.06     0.00   0.02   0.01
  87   1    -0.02   0.06  -0.03     0.02   0.00   0.01     0.00   0.00   0.02
  88   1    -0.04   0.11   0.06     0.04  -0.05  -0.04    -0.03   0.02   0.03
  89   1    -0.04   0.04   0.03     0.04  -0.01  -0.03    -0.03  -0.01   0.02
  90   1    -0.07   0.04   0.09     0.04   0.00  -0.06    -0.04   0.00   0.04
  91   1    -0.14   0.07   0.13     0.04  -0.05  -0.03    -0.07   0.00   0.06
  92   1    -0.15   0.14   0.11     0.04  -0.07  -0.03    -0.07   0.00   0.03
  93   1    -0.16   0.01   0.17     0.04  -0.02  -0.06    -0.05  -0.01   0.05
  94   1    -0.02   0.09  -0.06    -0.01  -0.06   0.06    -0.07   0.00   0.05
  95   1     0.05   0.04  -0.15    -0.03  -0.03   0.08    -0.04   0.00   0.02
  96   1    -0.03   0.18  -0.09    -0.01  -0.09   0.04    -0.06   0.00   0.01
  97   1     0.00  -0.04  -0.02     0.01   0.05  -0.07     0.25   0.00  -0.16
  98   1     0.00  -0.04   0.00     0.01   0.05  -0.07     0.28   0.12  -0.16
  99   1    -0.01  -0.02   0.00     0.01   0.02  -0.08     0.29  -0.06  -0.20
 100   1     0.02  -0.06  -0.05     0.04   0.03  -0.03     0.10   0.06  -0.03
 101   1     0.00  -0.03  -0.07    -0.03   0.04  -0.01    -0.11   0.09   0.04
 102   1     0.02  -0.04  -0.02     0.02   0.07   0.02     0.10   0.24   0.06
 103   1    -0.11   0.01  -0.04    -0.14   0.08  -0.04    -0.06   0.00  -0.05
 104   1    -0.13   0.04  -0.07    -0.17   0.09  -0.03    -0.07   0.02  -0.07
 105   1    -0.16  -0.04  -0.01    -0.19   0.01   0.04    -0.08  -0.02  -0.02
 106   1    -0.01  -0.05   0.03     0.01  -0.04  -0.01     0.00  -0.02  -0.01
 107   1    -0.05  -0.09   0.09    -0.06  -0.11   0.06    -0.01  -0.06   0.06
 108   1     0.07  -0.08   0.06     0.06  -0.11   0.01     0.07  -0.06   0.01
 109   1     0.00   0.01  -0.04     0.01   0.01  -0.09     0.02  -0.02  -0.03
 110   1    -0.01  -0.01   0.07     0.01   0.02  -0.11     0.03  -0.03  -0.05
 111   1    -0.09  -0.04   0.00     0.01   0.05  -0.09     0.03  -0.01  -0.04
 112   1    -0.09   0.00  -0.17    -0.02  -0.04  -0.10    -0.01  -0.02  -0.09
 113   1     0.06  -0.17   0.08     0.03  -0.08  -0.04     0.03  -0.13   0.05
 114   1    -0.04   0.14   0.13     0.02   0.01  -0.03     0.01   0.05   0.06
                    22                     23                     24
                     A                      A                      A
 Frequencies --    95.0605               100.5866               107.1957
 Red. masses --     3.0960                 1.5228                 3.9263
 Frc consts  --     0.0165                 0.0091                 0.0266
 IR Inten    --     1.3360                 4.7691                 0.7812
 Atom AN      X      Y      Z        X      Y      Z        X      Y      Z
   1   8     0.02  -0.01   0.00     0.01  -0.03   0.04    -0.01  -0.01   0.00
   2  12    -0.03   0.01  -0.03    -0.01   0.01  -0.01     0.01  -0.04   0.00
   3   8    -0.01   0.03  -0.06    -0.01   0.02  -0.01    -0.01  -0.01  -0.04
   4   6     0.04   0.00   0.02     0.00  -0.03   0.03     0.00   0.00   0.02
   5   7    -0.01   0.02   0.02     0.00   0.00  -0.01     0.02  -0.02   0.01
   6   7     0.01  -0.03   0.01     0.00  -0.01   0.00     0.00  -0.01   0.02
   7   8     0.06   0.00   0.02     0.00   0.01  -0.01     0.02   0.00   0.01
   8   6     0.00   0.00   0.01     0.01   0.00   0.00     0.00  -0.02  -0.03
   9   6     0.01  -0.02   0.02     0.01   0.00   0.00    -0.01  -0.02  -0.05
  10   6     0.01  -0.02   0.02     0.01  -0.01   0.00    -0.01  -0.01  -0.03
  11   8     0.02  -0.02   0.05     0.00  -0.03   0.03    -0.01   0.01   0.03
  12   6     0.01   0.02  -0.03    -0.01  -0.01   0.02    -0.01   0.00   0.01
  13   6     0.00   0.02  -0.05    -0.01   0.01  -0.01    -0.03   0.03  -0.05
  14   6     0.02   0.00   0.03     0.00  -0.04   0.04    -0.01   0.00   0.03
  15   8     0.00   0.05  -0.08    -0.02  -0.01   0.02     0.02  -0.02   0.05
  16   6     0.04  -0.02  -0.04     0.01   0.08  -0.05     0.00  -0.01  -0.04
  17   8    -0.07   0.00  -0.09    -0.03   0.01  -0.03    -0.08  -0.07  -0.06
  18   6    -0.05   0.01  -0.02    -0.02   0.02  -0.01    -0.04  -0.08   0.01
  19   8    -0.07   0.01  -0.01    -0.03   0.01   0.00    -0.06  -0.08   0.02
  20   8    -0.03   0.04  -0.05    -0.01   0.03  -0.02     0.05  -0.12   0.14
  21   6     0.01   0.00  -0.02     0.00   0.01  -0.01    -0.03  -0.08   0.02
  22   6     0.02  -0.01   0.00     0.00   0.01   0.00    -0.04  -0.08   0.00
  23   6    -0.04   0.03  -0.02    -0.02   0.02  -0.01    -0.02  -0.06   0.06
  24   8     0.04   0.00  -0.01     0.02   0.01   0.00    -0.06  -0.06  -0.03
  25   6     0.12   0.08   0.02     0.03   0.03   0.01     0.04  -0.01   0.03
  26   6    -0.03   0.02  -0.02    -0.03   0.02   0.00    -0.03   0.08   0.10
  27   6    -0.02   0.03  -0.05    -0.02   0.04   0.00    -0.07   0.13  -0.04
  28   6     0.00   0.00   0.03     0.02  -0.01   0.05    -0.02   0.00   0.03
  29   6    -0.02   0.03   0.02     0.00   0.00  -0.01     0.02  -0.01   0.00
  30   6     0.00  -0.03   0.01     0.00  -0.01   0.00     0.01   0.01   0.01
  31   6    -0.02   0.03   0.03     0.00  -0.01  -0.01     0.02   0.01   0.00
  32   6    -0.02   0.04   0.03     0.00  -0.03  -0.01     0.02   0.02   0.00
  33   6    -0.02   0.05   0.03     0.00  -0.02  -0.01     0.01   0.02  -0.01
  34   6    -0.02   0.04   0.02     0.00   0.00  -0.01     0.01   0.01   0.00
  35   6    -0.02   0.03   0.02     0.00   0.00  -0.01     0.01   0.00   0.00
  36   6    -0.02  -0.02   0.02     0.01   0.00  -0.01     0.03   0.02   0.00
  37   6    -0.03   0.00   0.03     0.00  -0.01  -0.01     0.01   0.00   0.01
  38   6     0.01  -0.03   0.01     0.00  -0.01   0.00     0.04   0.04  -0.02
  39   6     0.01  -0.03   0.02     0.00  -0.01   0.01     0.07   0.08  -0.05
  40   6     0.00  -0.04   0.03     0.00  -0.01   0.01     0.06   0.08  -0.05
  41   6     0.00  -0.05   0.03     0.00  -0.01   0.01     0.03   0.05  -0.03
  42   6     0.01  -0.05   0.02     0.00  -0.01   0.00     0.01   0.02   0.00
  43   6     0.03  -0.01   0.00     0.00   0.00   0.00     0.01   0.03  -0.01
  44   6     0.01  -0.05   0.02     0.00  -0.01   0.00     0.00   0.05   0.00
  45   6     0.00  -0.05   0.07     0.03   0.00  -0.02     0.06   0.01   0.00
  46   6    -0.05  -0.05  -0.03     0.00  -0.01   0.00     0.03   0.00  -0.01
  47   6    -0.07  -0.01   0.02     0.01  -0.01  -0.02     0.02   0.00   0.01
  48   6    -0.01  -0.01   0.05     0.00  -0.02   0.00    -0.01   0.00   0.01
  49   6     0.06  -0.04  -0.02     0.02  -0.01  -0.01    -0.02   0.07  -0.02
  50   6     0.00   0.00   0.05     0.00   0.00   0.01     0.01   0.06   0.01
  51   6     0.06   0.01   0.01     0.00   0.00   0.00     0.01  -0.01  -0.03
  52   6     0.03   0.00  -0.05     0.00   0.00  -0.01    -0.02   0.06   0.03
  53   6     0.01   0.02  -0.04     0.01   0.00   0.00    -0.01  -0.02  -0.04
  54   6     0.01  -0.02   0.02     0.01   0.00   0.01    -0.01  -0.02  -0.03
  55   1     0.02  -0.02   0.01     0.01   0.00   0.01    -0.02  -0.02  -0.08
  56   1     0.01   0.02  -0.05     0.01   0.01  -0.02    -0.05   0.01  -0.11
  57   1     0.04   0.00   0.03    -0.01  -0.05   0.02    -0.01   0.01   0.04
  58   1     0.07  -0.02  -0.04     0.05   0.20  -0.03     0.03   0.00  -0.03
  59   1     0.05  -0.02  -0.05    -0.04   0.06  -0.18     0.01  -0.02  -0.05
  60   1     0.02  -0.03  -0.06     0.01   0.05  -0.02    -0.01  -0.02  -0.05
  61   1     0.01  -0.08   0.06     0.00  -0.02   0.01    -0.04  -0.12   0.04
  62   1    -0.04   0.04  -0.01    -0.02   0.03   0.00    -0.03  -0.09   0.03
  63   1     0.19   0.06   0.09     0.06   0.03   0.03     0.05  -0.01   0.09
  64   1     0.12   0.16  -0.03     0.03   0.06  -0.01     0.05   0.03  -0.04
  65   1     0.12   0.06   0.04     0.03   0.02   0.01     0.06   0.01   0.04
  66   1    -0.07  -0.01  -0.01    -0.04   0.01   0.01    -0.16  -0.10   0.31
  67   1     0.00   0.00  -0.06    -0.01   0.01  -0.01     0.13   0.01  -0.16
  68   1    -0.03   0.07  -0.01    -0.03   0.04   0.00    -0.05   0.43   0.17
  69   1    -0.02   0.02  -0.04    -0.02   0.04  -0.01    -0.10   0.20  -0.05
  70   1    -0.04   0.03  -0.05    -0.02   0.04   0.01    -0.01   0.15   0.02
  71   1    -0.02   0.04  -0.06    -0.02   0.05  -0.01    -0.11   0.12  -0.09
  72   1     0.25  -0.21   0.03    -0.37   0.32   0.04     0.00  -0.03   0.03
  73   1     0.04   0.34   0.03    -0.05  -0.51   0.03    -0.02   0.03   0.02
  74   1    -0.32  -0.11   0.03     0.52   0.18   0.09    -0.06  -0.02   0.03
  75   1    -0.02   0.03   0.02     0.01  -0.04  -0.02     0.02   0.04  -0.01
  76   1    -0.03   0.05   0.03     0.00  -0.02  -0.01     0.01   0.03  -0.01
  77   1    -0.02   0.03   0.02    -0.01   0.02   0.00     0.00   0.01   0.00
  78   1    -0.03   0.00   0.01     0.00   0.01   0.00     0.03   0.03   0.01
  79   1    -0.02  -0.02   0.04     0.00   0.00  -0.01     0.01   0.01   0.01
  80   1     0.01  -0.02   0.02     0.00  -0.01   0.01     0.11   0.11  -0.07
  81   1     0.00  -0.05   0.04     0.00  -0.01   0.01     0.09   0.10  -0.08
  82   1     0.00  -0.06   0.04     0.00  -0.02   0.01     0.03   0.05  -0.03
  83   1     0.02  -0.02   0.00     0.00   0.00   0.00     0.00   0.01  -0.01
  84   1     0.00  -0.09   0.02     0.00  -0.02   0.00     0.01   0.06   0.01
  85   1    -0.01  -0.09   0.06     0.05   0.00  -0.01     0.12   0.00   0.01
  86   1     0.02  -0.02   0.10     0.02   0.00   0.00     0.04   0.01   0.05
  87   1     0.01  -0.07   0.09     0.02   0.00  -0.04     0.06   0.02  -0.04
  88   1    -0.05  -0.08  -0.03     0.00   0.00   0.00     0.05   0.01  -0.01
  89   1    -0.04  -0.07  -0.02     0.00  -0.02  -0.01     0.03  -0.01  -0.04
  90   1    -0.07  -0.03  -0.06    -0.02  -0.01   0.00     0.00   0.01  -0.01
  91   1    -0.08  -0.05   0.02     0.01  -0.02  -0.02     0.01   0.01   0.01
  92   1    -0.08   0.00   0.01     0.01  -0.02  -0.02     0.02  -0.01   0.00
  93   1    -0.09   0.00   0.00     0.01  -0.01  -0.02     0.03   0.01   0.00
  94   1    -0.02  -0.04   0.06     0.00  -0.02   0.00    -0.01   0.01   0.01
  95   1     0.03   0.00   0.06    -0.01  -0.01   0.01    -0.02   0.00   0.01
  96   1    -0.02   0.01   0.03     0.00  -0.03   0.00    -0.01  -0.01   0.01
  97   1     0.07  -0.04  -0.02     0.02  -0.01  -0.01    -0.01   0.10  -0.04
  98   1     0.08   0.00  -0.01     0.02   0.00  -0.01    -0.02   0.05  -0.01
  99   1     0.07  -0.06  -0.04     0.02  -0.02  -0.02    -0.06   0.07  -0.04
 100   1     0.00   0.01   0.05     0.00   0.01   0.01     0.02   0.07   0.01
 101   1    -0.03  -0.01   0.08    -0.01   0.00   0.02     0.01   0.06   0.02
 102   1     0.00   0.03   0.05     0.00   0.02   0.01     0.01   0.06   0.02
 103   1     0.07   0.02   0.01     0.00   0.01   0.00    -0.02  -0.03  -0.01
 104   1     0.05   0.01   0.04     0.00   0.00   0.00     0.02  -0.02  -0.05
 105   1     0.06   0.01   0.01     0.00   0.00   0.00     0.02   0.00  -0.03
 106   1     0.05   0.01  -0.05     0.01   0.00  -0.01    -0.05   0.03   0.04
 107   1     0.05   0.00  -0.07     0.00   0.00  -0.01     0.00   0.07   0.03
 108   1     0.00  -0.02  -0.07     0.00  -0.01  -0.01    -0.02   0.09   0.04
 109   1     0.05   0.03  -0.11     0.00  -0.01   0.02    -0.01  -0.03  -0.03
 110   1     0.04   0.01   0.00     0.00   0.00  -0.01    -0.01  -0.02  -0.07
 111   1    -0.06   0.02  -0.06     0.03   0.01   0.01     0.01   0.00  -0.04
 112   1     0.07  -0.02   0.18     0.03  -0.01   0.06    -0.02  -0.01  -0.06
 113   1    -0.07   0.13  -0.05    -0.02   0.04  -0.01     0.01  -0.04  -0.03
 114   1     0.02  -0.16  -0.10     0.01  -0.05  -0.03    -0.01   0.01  -0.02
                    25                     26                     27
                     A                      A                      A
 Frequencies --   110.3249               119.9685               125.9618
 Red. masses --     3.7992                 1.3322                 3.2867
 Frc consts  --     0.0272                 0.0113                 0.0307
 IR Inten    --     0.2623                 0.9635                 1.1572
 Atom AN      X      Y      Z        X      Y      Z        X      Y      Z
   1   8    -0.02   0.01  -0.02    -0.01   0.00   0.00    -0.02   0.04  -0.03
   2  12     0.01   0.00  -0.01     0.01   0.00   0.00     0.03   0.00  -0.04
   3   8     0.00   0.01   0.02     0.00   0.00   0.00     0.00   0.01  -0.06
   4   6    -0.01   0.02   0.00     0.00   0.00   0.00     0.00   0.05  -0.01
   5   7    -0.02  -0.03  -0.05     0.01   0.01   0.02     0.01  -0.03   0.00
   6   7     0.00  -0.01  -0.05     0.00   0.00  -0.02     0.03   0.01  -0.01
   7   8     0.00   0.01   0.01     0.00   0.00   0.00     0.01   0.04  -0.01
   8   6     0.02  -0.01   0.10     0.01   0.01   0.02    -0.01  -0.03  -0.04
   9   6     0.04   0.02   0.17     0.02   0.01   0.05    -0.02  -0.02  -0.06
  10   6     0.02   0.01   0.08     0.02   0.01   0.03     0.01   0.01  -0.03
  11   8    -0.01   0.04   0.00     0.00   0.01   0.00    -0.01   0.04   0.02
  12   6     0.00   0.02   0.04     0.00   0.00   0.00     0.01   0.01   0.05
  13   6    -0.01   0.04   0.00    -0.01   0.00   0.00    -0.02   0.01   0.00
  14   6    -0.02   0.03   0.00    -0.01   0.01   0.00    -0.01   0.06   0.00
  15   8     0.02  -0.03   0.11     0.00   0.00   0.00     0.04  -0.03   0.09
  16   6    -0.01  -0.03   0.01    -0.01   0.00   0.00    -0.01  -0.06   0.05
  17   8     0.00   0.01  -0.01     0.01   0.00   0.00     0.01   0.05  -0.08
  18   6     0.00   0.01  -0.01     0.01   0.00  -0.01     0.03   0.03  -0.08
  19   8     0.02   0.01  -0.01     0.01   0.00  -0.01     0.06   0.03  -0.08
  20   8     0.02   0.00   0.02     0.02  -0.01   0.01     0.06   0.00   0.01
  21   6     0.01   0.01   0.00     0.00   0.00   0.00     0.03   0.02  -0.02
  22   6     0.01   0.01   0.00     0.00   0.00   0.00     0.02   0.05  -0.04
  23   6     0.01   0.00   0.01     0.01   0.00   0.00     0.04   0.01  -0.02
  24   8     0.00   0.01   0.00    -0.01   0.00   0.00     0.01   0.03  -0.02
  25   6     0.02   0.02   0.01    -0.01   0.00   0.00     0.02   0.11  -0.02
  26   6     0.00   0.03   0.02     0.01   0.01   0.00    -0.03   0.04   0.04
  27   6     0.00   0.14   0.00    -0.02   0.00   0.00    -0.10  -0.01   0.01
  28   6    -0.03   0.00   0.00    -0.01   0.01   0.00    -0.05   0.08   0.00
  29   6    -0.02  -0.03  -0.05     0.01   0.00   0.01     0.01  -0.05   0.01
  30   6     0.00  -0.02  -0.05     0.00   0.00  -0.01     0.02   0.00   0.00
  31   6    -0.03  -0.03  -0.03     0.01   0.01   0.01     0.01  -0.03   0.01
  32   6    -0.02  -0.01  -0.01     0.01   0.01   0.00     0.01  -0.04   0.00
  33   6    -0.01   0.01   0.00     0.01  -0.01   0.00     0.00  -0.06  -0.01
  34   6     0.00   0.03  -0.02     0.01  -0.03   0.00     0.00  -0.08   0.00
  35   6     0.00   0.01  -0.04     0.01  -0.02   0.00     0.01  -0.07   0.01
  36   6    -0.03  -0.02  -0.03     0.01   0.00   0.00     0.01  -0.01   0.01
  37   6     0.02   0.02  -0.07     0.00  -0.01   0.01    -0.02  -0.04   0.03
  38   6    -0.01   0.00  -0.04     0.00   0.00  -0.01     0.00  -0.02   0.02
  39   6     0.00   0.01  -0.02     0.00   0.01  -0.01    -0.02  -0.04   0.04
  40   6     0.01  -0.01  -0.01     0.00   0.00  -0.01    -0.03  -0.06   0.04
  41   6     0.01  -0.03   0.00     0.00  -0.01   0.00    -0.01  -0.04   0.03
  42   6     0.00  -0.04  -0.02     0.00  -0.01  -0.01     0.01  -0.01   0.01
  43   6    -0.04  -0.01  -0.04    -0.02   0.00  -0.01     0.00  -0.02   0.02
  44   6     0.01  -0.07  -0.03    -0.01  -0.02   0.00    -0.01  -0.01   0.03
  45   6     0.05  -0.03  -0.03    -0.02   0.00   0.01     0.01   0.01  -0.01
  46   6    -0.09  -0.06  -0.03     0.02   0.01   0.00     0.01   0.00   0.04
  47   6     0.06   0.02  -0.08     0.02  -0.01   0.01    -0.02   0.00   0.09
  48   6     0.05   0.02  -0.06    -0.04  -0.01   0.01    -0.07   0.00  -0.02
  49   6     0.06  -0.08  -0.04    -0.01  -0.02  -0.01    -0.01  -0.01   0.02
  50   6     0.00  -0.05  -0.01    -0.01  -0.01   0.00    -0.04   0.01   0.03
  51   6    -0.05  -0.01  -0.05    -0.03   0.00  -0.02    -0.02  -0.01   0.02
  52   6    -0.06   0.01  -0.01    -0.02   0.01   0.00     0.01  -0.03   0.03
  53   6     0.02  -0.02   0.20    -0.03   0.00  -0.09    -0.01  -0.04  -0.03
  54   6     0.01   0.04   0.09     0.02   0.01   0.03     0.00   0.03  -0.02
  55   1     0.06   0.04   0.27     0.03   0.02   0.06    -0.04  -0.02  -0.08
  56   1    -0.02   0.03  -0.06    -0.01   0.00   0.00    -0.01   0.01   0.01
  57   1    -0.02   0.03   0.02    -0.01   0.01   0.00     0.00   0.05  -0.01
  58   1    -0.02  -0.09   0.00     0.00  -0.02   0.00     0.04  -0.36  -0.01
  59   1     0.00  -0.03   0.06     0.00   0.00   0.01    -0.06  -0.01   0.34
  60   1    -0.02  -0.02  -0.02    -0.01   0.00  -0.01    -0.01   0.10  -0.14
  61   1     0.01   0.00   0.01     0.00   0.01  -0.01     0.02   0.03  -0.03
  62   1     0.02  -0.01   0.00     0.01  -0.01  -0.01     0.08  -0.02  -0.01
  63   1     0.02   0.02   0.02    -0.02   0.00   0.00     0.02   0.11   0.03
  64   1     0.02   0.03   0.00    -0.01  -0.01   0.00     0.02   0.12  -0.02
  65   1     0.03   0.03   0.01     0.00   0.01   0.00     0.02   0.14  -0.04
  66   1    -0.02   0.01   0.06     0.02   0.02   0.00    -0.03   0.01   0.12
  67   1     0.01   0.02  -0.01     0.00   0.02   0.00    -0.01   0.03   0.03
  68   1    -0.02   0.07   0.03     0.01   0.01   0.00    -0.08   0.10   0.03
  69   1    -0.02   0.20  -0.04    -0.02   0.00   0.01    -0.11  -0.01   0.07
  70   1     0.06   0.15   0.06    -0.02   0.00   0.00    -0.11  -0.01  -0.01
  71   1    -0.02   0.13  -0.02    -0.02   0.00   0.00    -0.12  -0.02  -0.02
  72   1     0.06  -0.08   0.01    -0.05   0.05   0.00    -0.11   0.12   0.01
  73   1    -0.02   0.12   0.00    -0.02  -0.05   0.00    -0.07   0.03  -0.03
  74   1    -0.16  -0.05  -0.01     0.05   0.03   0.01    -0.01   0.10   0.03
  75   1    -0.03  -0.01   0.00     0.01   0.02   0.00     0.01  -0.02   0.00
  76   1     0.00   0.02   0.01     0.01  -0.02   0.00     0.00  -0.06  -0.01
  77   1     0.02   0.04  -0.01     0.01  -0.04   0.00     0.00  -0.09  -0.01
  78   1    -0.05   0.04  -0.02     0.01  -0.02   0.00     0.01  -0.01   0.01
  79   1     0.01   0.03  -0.09     0.00   0.01   0.02     0.00  -0.04   0.05
  80   1    -0.01   0.03  -0.02     0.00   0.01  -0.01    -0.03  -0.06   0.05
  81   1     0.01   0.00   0.01     0.00   0.01   0.00    -0.05  -0.08   0.06
  82   1     0.01  -0.05   0.01     0.00  -0.02   0.00    -0.02  -0.05   0.04
  83   1    -0.04  -0.01  -0.05    -0.02   0.00  -0.02     0.01  -0.01   0.01
  84   1     0.00  -0.10  -0.04    -0.01  -0.02   0.00    -0.01  -0.02   0.05
  85   1     0.08  -0.03  -0.03    -0.03  -0.01   0.01     0.03   0.02   0.00
  86   1     0.07   0.00   0.00    -0.04  -0.01   0.01    -0.01  -0.01  -0.01
  87   1     0.06  -0.08  -0.07    -0.03   0.03   0.02     0.00   0.02  -0.03
  88   1    -0.11  -0.05  -0.03     0.05   0.03   0.01     0.00   0.02   0.04
  89   1    -0.08  -0.10  -0.02     0.02   0.00  -0.03     0.01   0.00   0.03
  90   1    -0.12  -0.05  -0.03     0.00   0.00   0.02     0.01  -0.01   0.05
  91   1     0.08   0.02  -0.11     0.01   0.02   0.02    -0.05   0.05   0.12
  92   1     0.08   0.01  -0.05     0.02  -0.03   0.00    -0.04   0.00   0.05
  93   1     0.04   0.02  -0.08     0.05   0.00   0.01     0.04  -0.03   0.12
  94   1     0.08   0.03  -0.10    -0.05   0.01   0.02    -0.09   0.05   0.00
  95   1     0.01   0.02  -0.06    -0.04  -0.01   0.01    -0.08  -0.02  -0.06
  96   1     0.07   0.01  -0.02    -0.05  -0.03  -0.01    -0.09   0.00  -0.05
  97   1     0.07  -0.09  -0.05     0.00  -0.01  -0.01    -0.02   0.00   0.02
  98   1     0.08  -0.05  -0.02     0.00  -0.02   0.00    -0.02  -0.01   0.01
  99   1     0.07  -0.09  -0.04    -0.01  -0.01  -0.01    -0.02  -0.01   0.02
 100   1    -0.02  -0.02  -0.01    -0.02   0.02   0.01    -0.07   0.03   0.05
 101   1     0.01  -0.06   0.02     0.02  -0.02   0.02    -0.02   0.00   0.05
 102   1    -0.01  -0.04  -0.04    -0.02  -0.03  -0.02    -0.05   0.01  -0.02
 103   1    -0.08  -0.02  -0.05    -0.04   0.00  -0.02    -0.03  -0.01   0.01
 104   1    -0.04  -0.03  -0.07    -0.02   0.00  -0.03    -0.02  -0.01   0.00
 105   1    -0.05   0.00  -0.03    -0.03   0.01  -0.01    -0.03  -0.02   0.03
 106   1    -0.09   0.01  -0.02    -0.04   0.01   0.00     0.02  -0.05   0.05
 107   1    -0.06   0.02   0.01    -0.02   0.02   0.01     0.01  -0.04   0.00
 108   1    -0.04   0.01  -0.01    -0.02   0.01   0.01    -0.01   0.00   0.04
 109   1     0.01   0.02   0.21     0.26   0.16  -0.53    -0.12  -0.12   0.13
 110   1     0.02   0.00   0.26     0.13   0.02   0.34    -0.08  -0.04  -0.20
 111   1     0.03  -0.09   0.21    -0.53  -0.17  -0.22     0.17   0.04   0.02
 112   1     0.06   0.04   0.19     0.05   0.01   0.12     0.06   0.04   0.11
 113   1    -0.05   0.14   0.05    -0.03   0.09   0.00    -0.07   0.14  -0.05
 114   1     0.01  -0.06   0.01     0.03  -0.06  -0.03     0.02  -0.06  -0.10
                    28                     29                     30
                     A                      A                      A
 Frequencies --   130.2920               132.2725               134.9612
 Red. masses --     1.7620                 1.3454                 2.5593
 Frc consts  --     0.0176                 0.0139                 0.0275
 IR Inten    --     1.1109                 0.2745                 1.9346
 Atom AN      X      Y      Z        X      Y      Z        X      Y      Z
   1   8     0.00   0.01   0.00    -0.02   0.00  -0.01     0.01   0.03  -0.01
   2  12     0.02   0.00  -0.02     0.01   0.00  -0.01     0.01  -0.01  -0.01
   3   8     0.00   0.00   0.00     0.00   0.00  -0.01     0.00  -0.02   0.03
   4   6     0.00   0.02   0.00    -0.02  -0.02   0.01     0.01   0.02   0.00
   5   7     0.00  -0.01   0.00     0.00  -0.01   0.00     0.01  -0.02   0.00
   6   7     0.00   0.02  -0.02     0.01   0.01  -0.01     0.01   0.00   0.00
   7   8     0.01   0.02   0.00    -0.02  -0.05   0.04     0.01   0.00   0.02
   8   6    -0.01   0.00   0.01    -0.01   0.00   0.00     0.00  -0.01  -0.01
   9   6    -0.02   0.02   0.00    -0.01   0.00  -0.01     0.00  -0.01  -0.01
  10   6    -0.01   0.03  -0.02     0.00   0.01  -0.01     0.01   0.00   0.00
  11   8     0.00   0.00   0.03    -0.01   0.01  -0.01     0.01  -0.03   0.05
  12   6     0.00   0.00   0.01    -0.01   0.00   0.00     0.00  -0.01  -0.01
  13   6    -0.01   0.00   0.00    -0.01   0.00  -0.01     0.01   0.00  -0.01
  14   6     0.00   0.02   0.00    -0.02   0.00  -0.01     0.01   0.04  -0.03
  15   8     0.00   0.01  -0.02     0.00  -0.01   0.02     0.00   0.03  -0.07
  16   6     0.00  -0.02   0.01    -0.02   0.02  -0.03     0.01   0.00   0.02
  17   8    -0.03  -0.02   0.00     0.02   0.01  -0.02    -0.02  -0.01   0.05
  18   6    -0.03   0.00   0.02     0.02   0.00  -0.03    -0.03   0.01   0.04
  19   8    -0.04   0.00   0.02     0.04   0.00  -0.03    -0.06   0.01   0.04
  20   8    -0.03   0.02  -0.03     0.03  -0.02   0.01    -0.05   0.05  -0.03
  21   6     0.00   0.00   0.00     0.01   0.00   0.00    -0.01   0.02   0.01
  22   6     0.00  -0.02   0.01     0.01   0.01  -0.01    -0.01  -0.01   0.03
  23   6    -0.03   0.00   0.01     0.02  -0.01   0.00    -0.03   0.03   0.00
  24   8     0.02  -0.01   0.00     0.00   0.00  -0.01     0.01   0.01   0.02
  25   6     0.03  -0.02   0.01     0.01   0.03   0.00     0.00  -0.04   0.01
  26   6    -0.04  -0.03   0.01     0.00   0.00   0.02     0.01   0.00  -0.05
  27   6     0.00   0.03   0.00    -0.01   0.01   0.00     0.03   0.10  -0.01
  28   6    -0.02   0.07   0.01    -0.01   0.01  -0.01    -0.03   0.19  -0.01
  29   6     0.00  -0.02   0.00     0.00  -0.01   0.00     0.01  -0.04   0.00
  30   6     0.01   0.03  -0.01     0.01   0.01   0.00     0.01   0.00   0.00
  31   6     0.01  -0.02  -0.01     0.00   0.00   0.00     0.01  -0.04   0.00
  32   6     0.01  -0.02  -0.01     0.00   0.01   0.00     0.02  -0.05  -0.01
  33   6     0.01  -0.03  -0.01     0.00   0.01   0.00     0.02  -0.07  -0.01
  34   6     0.01  -0.04  -0.01     0.00   0.00   0.00     0.02  -0.08  -0.01
  35   6     0.01  -0.03  -0.01     0.00  -0.01   0.00     0.02  -0.06  -0.01
  36   6     0.01  -0.01   0.00     0.00   0.00   0.00     0.01  -0.02   0.00
  37   6     0.01  -0.01  -0.01     0.00   0.00   0.01     0.01  -0.03   0.00
  38   6    -0.01   0.01   0.00    -0.01   0.00   0.01     0.02   0.01  -0.01
  39   6    -0.03  -0.01   0.02    -0.02  -0.02   0.02     0.03   0.02  -0.02
  40   6    -0.04  -0.03   0.03    -0.03  -0.03   0.02     0.03   0.02  -0.03
  41   6    -0.02  -0.01   0.02    -0.01  -0.02   0.02     0.01   0.01  -0.01
  42   6     0.00   0.02  -0.01     0.00   0.00   0.00     0.00   0.00   0.00
  43   6     0.01   0.00   0.01     0.00  -0.01   0.01     0.01   0.00  -0.01
  44   6     0.02   0.00  -0.02     0.00   0.00   0.00    -0.01   0.01   0.01
  45   6     0.01   0.00  -0.02     0.00   0.00   0.01     0.02  -0.01  -0.02
  46   6     0.01   0.00   0.00     0.01   0.00   0.00     0.00  -0.02   0.02
  47   6     0.04   0.00   0.00     0.00   0.00   0.01     0.03  -0.01   0.03
  48   6    -0.01   0.00  -0.02    -0.01   0.01   0.00    -0.04  -0.01  -0.02
  49   6     0.06  -0.01  -0.01     0.01  -0.01   0.00    -0.04   0.01   0.01
  50   6     0.01   0.00  -0.03    -0.01   0.00   0.00    -0.01   0.00   0.01
  51   6     0.11  -0.02   0.02     0.03  -0.01   0.01    -0.05   0.00  -0.02
  52   6    -0.01   0.04  -0.04     0.00   0.00  -0.01     0.01  -0.01   0.03
  53   6    -0.03  -0.01   0.02    -0.01  -0.01   0.00    -0.01  -0.02  -0.01
  54   6    -0.01   0.03   0.01     0.00   0.02   0.00     0.00   0.01  -0.01
  55   1    -0.03   0.02   0.00    -0.02   0.00  -0.01     0.00  -0.01  -0.01
  56   1    -0.01   0.00  -0.01    -0.01   0.00  -0.01     0.00  -0.01  -0.07
  57   1     0.01   0.02  -0.02    -0.03   0.00  -0.01     0.04   0.02  -0.11
  58   1     0.04  -0.14  -0.01    -0.22   0.52   0.06    -0.13   0.21   0.06
  59   1    -0.04   0.01   0.13     0.22  -0.08  -0.51     0.15  -0.05  -0.18
  60   1     0.00   0.06  -0.08    -0.05  -0.36   0.35    -0.01  -0.19   0.21
  61   1     0.00  -0.04   0.03     0.01   0.01  -0.01    -0.01  -0.01   0.03
  62   1    -0.02   0.02   0.03     0.04  -0.02   0.00    -0.06   0.05   0.00
  63   1     0.05  -0.02   0.01     0.00   0.03   0.01     0.02  -0.04  -0.02
  64   1     0.03   0.00   0.00     0.01   0.02  -0.01     0.00  -0.03   0.02
  65   1     0.03  -0.04   0.02     0.02   0.05  -0.01    -0.01  -0.08   0.03
  66   1    -0.05  -0.04   0.01     0.00   0.00   0.05     0.05   0.05  -0.14
  67   1    -0.02  -0.04   0.03    -0.01   0.00   0.03    -0.03   0.02   0.01
  68   1    -0.04  -0.03   0.01    -0.03   0.02   0.01     0.06  -0.11  -0.05
  69   1     0.00   0.03  -0.01    -0.01   0.01   0.00     0.02   0.17  -0.06
  70   1     0.00   0.03   0.01    -0.01   0.01   0.00     0.10   0.12   0.06
  71   1     0.00   0.03  -0.01    -0.02   0.01  -0.01     0.02   0.09  -0.03
  72   1    -0.04   0.09  -0.01     0.04  -0.03  -0.02     0.00   0.19  -0.07
  73   1    -0.03   0.08  -0.01     0.00   0.08   0.00    -0.03   0.30  -0.05
  74   1    -0.03   0.08   0.05    -0.07  -0.01  -0.01    -0.11   0.19   0.09
  75   1     0.00  -0.01   0.00     0.00   0.02   0.00     0.01  -0.05  -0.01
  76   1     0.01  -0.03  -0.01     0.00   0.02   0.00     0.02  -0.08  -0.01
  77   1     0.01  -0.04  -0.01     0.00   0.00   0.00     0.02  -0.09  -0.01
  78   1     0.01  -0.01   0.00     0.00   0.00   0.01     0.01  -0.01   0.00
  79   1     0.01   0.00  -0.01     0.00   0.00   0.01     0.01  -0.02   0.01
  80   1    -0.04  -0.02   0.03    -0.03  -0.03   0.03     0.04   0.02  -0.03
  81   1    -0.06  -0.05   0.05    -0.04  -0.04   0.04     0.04   0.04  -0.04
  82   1    -0.03  -0.02   0.03    -0.02  -0.02   0.02     0.01   0.01  -0.02
  83   1    -0.03  -0.03   0.05    -0.01  -0.01   0.02     0.03   0.02  -0.02
  84   1     0.01  -0.02  -0.04     0.00  -0.01   0.00     0.00   0.02   0.02
  85   1     0.03   0.01  -0.01     0.01   0.00   0.01     0.04   0.01  -0.02
  86   1     0.00  -0.01  -0.01     0.00   0.00   0.01     0.00  -0.02  -0.02
  87   1     0.01   0.01  -0.04     0.00   0.01   0.00     0.01   0.00  -0.05
  88   1     0.03   0.01   0.01     0.01   0.00   0.00    -0.01   0.00   0.02
  89   1     0.01  -0.01  -0.02     0.01   0.00  -0.01     0.00  -0.04   0.01
  90   1     0.00  -0.01   0.02     0.00   0.00   0.00    -0.02  -0.03   0.03
  91   1     0.04   0.03   0.01    -0.01   0.01   0.02     0.02   0.03   0.05
  92   1     0.04  -0.02   0.00    -0.01   0.00   0.01     0.03  -0.02   0.02
  93   1     0.07   0.00   0.01     0.01   0.00   0.02     0.07  -0.02   0.06
  94   1    -0.01   0.03  -0.03    -0.01   0.01   0.00    -0.04   0.03  -0.02
  95   1    -0.04  -0.01  -0.03    -0.01   0.00  -0.01    -0.07  -0.03  -0.04
  96   1    -0.01  -0.02  -0.01    -0.01   0.01   0.00    -0.04  -0.03  -0.03
  97   1     0.06  -0.03  -0.01     0.01  -0.01   0.00    -0.04   0.02   0.01
  98   1     0.06   0.01  -0.01     0.01   0.00   0.00    -0.04  -0.01   0.02
  99   1     0.07  -0.02  -0.01     0.01  -0.01   0.00    -0.05   0.02   0.02
 100   1     0.07  -0.09  -0.07     0.00  -0.02  -0.01    -0.05   0.06   0.03
 101   1    -0.09   0.02  -0.08    -0.03   0.00  -0.01     0.07  -0.01   0.04
 102   1     0.05   0.06   0.05     0.00   0.02   0.01    -0.04  -0.05  -0.05
 103   1     0.11  -0.04   0.04     0.03  -0.01   0.02    -0.06  -0.01  -0.02
 104   1     0.12  -0.06   0.06     0.03  -0.02   0.03    -0.06   0.02  -0.06
 105   1     0.15   0.01  -0.03     0.04   0.00   0.00    -0.07  -0.02   0.00
 106   1    -0.02   0.06  -0.05     0.00   0.01  -0.01     0.01  -0.04   0.06
 107   1     0.00   0.07  -0.03     0.00   0.01  -0.01     0.01  -0.03   0.01
 108   1    -0.03   0.02  -0.05    -0.01   0.00  -0.01     0.01   0.02   0.05
 109   1     0.03   0.03  -0.08    -0.01  -0.01  -0.01    -0.06  -0.07   0.06
 110   1     0.00   0.00   0.13    -0.01  -0.01   0.01    -0.05  -0.02  -0.09
 111   1    -0.14  -0.08  -0.01    -0.02  -0.02   0.00     0.07   0.02   0.01
 112   1    -0.15   0.05  -0.38    -0.03   0.03  -0.09     0.08   0.00   0.21
 113   1     0.19  -0.36   0.18     0.04  -0.08   0.05    -0.11   0.22  -0.10
 114   1    -0.03   0.38   0.31    -0.01   0.11   0.08     0.01  -0.18  -0.17
                    31                     32                     33
                     A                      A                      A
 Frequencies --   138.1576               142.6793               147.3583
 Red. masses --     3.2488                 2.6206                 2.7960
 Frc consts  --     0.0365                 0.0314                 0.0358
 IR Inten    --     1.5369                 0.1410                 1.4249
 Atom AN      X      Y      Z        X      Y      Z        X      Y      Z
   1   8    -0.02  -0.04   0.03    -0.02   0.00   0.00    -0.02  -0.03   0.02
   2  12    -0.02  -0.01  -0.03     0.02   0.02  -0.01     0.07   0.01  -0.04
   3   8     0.00  -0.06   0.02    -0.01  -0.02   0.02     0.00   0.00   0.00
   4   6    -0.04  -0.05  -0.01     0.00   0.01   0.02    -0.02  -0.03   0.00
   5   7     0.00   0.00   0.01     0.02   0.03   0.00     0.03   0.00   0.00
   6   7    -0.01   0.00   0.00     0.01   0.02  -0.05     0.06   0.06  -0.04
   7   8    -0.07  -0.01  -0.04     0.02   0.01   0.02    -0.04  -0.01  -0.02
   8   6    -0.01   0.00  -0.02     0.00   0.03  -0.04     0.02   0.01   0.00
   9   6    -0.01   0.00  -0.02     0.02   0.03   0.00     0.01   0.04  -0.01
  10   6     0.00   0.00   0.01     0.03   0.04   0.03     0.03   0.06  -0.03
  11   8    -0.01  -0.11   0.04    -0.01   0.06  -0.02    -0.01  -0.03   0.00
  12   6    -0.02  -0.06  -0.02    -0.01   0.05  -0.01    -0.01  -0.01  -0.01
  13   6    -0.01  -0.02  -0.04    -0.02   0.01   0.01     0.00   0.00  -0.01
  14   6    -0.02  -0.06  -0.01    -0.01   0.02   0.03    -0.02  -0.03  -0.01
  15   8    -0.05  -0.01  -0.09     0.01   0.06  -0.02    -0.02   0.00  -0.01
  16   6    -0.05   0.04   0.02     0.01  -0.02  -0.03    -0.03   0.03   0.00
  17   8     0.08   0.02   0.04     0.01  -0.02   0.04     0.03  -0.01   0.05
  18   6     0.05   0.00  -0.04    -0.01  -0.02   0.01     0.01   0.00   0.02
  19   8     0.07   0.01  -0.07    -0.01  -0.01   0.00     0.01   0.01   0.00
  20   8     0.07  -0.05   0.04     0.00  -0.02   0.02    -0.03   0.02  -0.04
  21   6     0.02   0.00   0.01     0.00  -0.02   0.01     0.00  -0.01   0.00
  22   6     0.03   0.02   0.01     0.00  -0.03   0.01     0.02  -0.01   0.02
  23   6     0.06  -0.02  -0.02    -0.01  -0.01   0.00     0.00  -0.01   0.02
  24   8    -0.03   0.01   0.00    -0.01  -0.02   0.00     0.03  -0.01   0.02
  25   6     0.02   0.00   0.01     0.00  -0.06   0.00     0.02  -0.06   0.00
  26   6     0.07   0.02  -0.03     0.02   0.01  -0.02    -0.06  -0.08   0.07
  27   6     0.03   0.20  -0.04     0.00  -0.02   0.01     0.01   0.03  -0.01
  28   6    -0.06   0.01  -0.01     0.03  -0.06   0.02    -0.02  -0.02  -0.01
  29   6     0.00   0.01   0.02     0.01   0.03   0.00     0.03   0.00   0.00
  30   6    -0.01   0.00   0.01     0.01   0.01  -0.04     0.05   0.05  -0.03
  31   6     0.00   0.02   0.01     0.01   0.04   0.01     0.03  -0.05  -0.01
  32   6     0.00   0.02   0.01     0.01   0.02   0.00     0.03  -0.05  -0.01
  33   6     0.00   0.04   0.01     0.01  -0.03  -0.01     0.01   0.03   0.00
  34   6    -0.01   0.04   0.01     0.01  -0.06  -0.01     0.00   0.09   0.01
  35   6     0.00   0.02   0.02     0.01  -0.02   0.00     0.01   0.06   0.00
  36   6     0.02   0.02   0.01    -0.01   0.01   0.00    -0.01  -0.02  -0.01
  37   6     0.00   0.01   0.02    -0.01  -0.02   0.02    -0.01   0.03   0.03
  38   6    -0.01   0.00   0.01     0.02   0.04  -0.05     0.04   0.03  -0.02
  39   6    -0.02  -0.01   0.01     0.02   0.04  -0.04     0.00  -0.01   0.01
  40   6    -0.03  -0.02   0.02    -0.02  -0.01   0.00    -0.02  -0.03   0.02
  41   6    -0.02  -0.02   0.02    -0.04  -0.06   0.02    -0.01  -0.02   0.01
  42   6    -0.02  -0.01   0.01    -0.02  -0.04   0.00     0.03   0.02  -0.01
  43   6     0.00   0.00   0.01    -0.01   0.02  -0.04     0.02   0.00   0.00
  44   6    -0.01  -0.01   0.01    -0.01  -0.05  -0.01     0.01   0.00   0.00
  45   6     0.05   0.01   0.02    -0.03  -0.01   0.05    -0.02   0.00  -0.05
  46   6     0.02   0.00  -0.02    -0.02   0.00  -0.02    -0.06  -0.02   0.07
  47   6    -0.02   0.01   0.01    -0.04  -0.01   0.05    -0.10   0.00   0.00
  48   6     0.02   0.01   0.02    -0.05  -0.01   0.00     0.00   0.00   0.07
  49   6    -0.02   0.00   0.01     0.00  -0.04  -0.03     0.00  -0.01   0.03
  50   6     0.00  -0.01   0.02     0.03  -0.03   0.02    -0.03  -0.01  -0.03
  51   6     0.03   0.01   0.02     0.02  -0.04  -0.06    -0.01  -0.05  -0.04
  52   6     0.00   0.01  -0.02    -0.05   0.07   0.01     0.01   0.00   0.07
  53   6    -0.01   0.00  -0.04     0.00   0.03  -0.08     0.00  -0.01   0.00
  54   6     0.01   0.00   0.06     0.06   0.07   0.15     0.01   0.10  -0.06
  55   1    -0.01  -0.01  -0.03     0.02   0.03   0.01    -0.01   0.05  -0.01
  56   1    -0.02  -0.05  -0.17    -0.05   0.02   0.04     0.00   0.00  -0.02
  57   1     0.01  -0.07  -0.06    -0.04   0.03   0.07    -0.01  -0.03  -0.01
  58   1     0.05  -0.13  -0.01     0.02   0.00  -0.03     0.01   0.00  -0.01
  59   1    -0.21   0.09   0.19     0.02  -0.02  -0.05    -0.09   0.04   0.02
  60   1     0.00   0.23  -0.12    -0.02  -0.04  -0.04    -0.01   0.08  -0.04
  61   1     0.03   0.05   0.01     0.00  -0.01   0.01     0.01   0.01   0.02
  62   1     0.05  -0.04  -0.03    -0.02  -0.01  -0.01     0.04  -0.01   0.05
  63   1    -0.02   0.01   0.00    -0.01  -0.06  -0.03    -0.02  -0.05  -0.04
  64   1     0.03  -0.04   0.01     0.01  -0.08   0.00     0.03  -0.12  -0.01
  65   1     0.04   0.03   0.01     0.01  -0.07   0.02     0.04  -0.06   0.03
  66   1     0.22   0.19  -0.13     0.07   0.07  -0.07    -0.25  -0.29   0.22
  67   1    -0.10   0.11   0.10    -0.04   0.04   0.01     0.16  -0.19  -0.08
  68   1     0.10  -0.21  -0.07     0.05  -0.08  -0.03    -0.14   0.21   0.09
  69   1     0.00   0.31  -0.13    -0.01   0.01   0.01     0.00   0.05  -0.02
  70   1     0.11   0.24   0.11     0.03  -0.02  -0.01     0.03   0.03   0.01
  71   1     0.00   0.22  -0.10    -0.01  -0.05   0.03     0.00   0.02  -0.01
  72   1    -0.06   0.03  -0.03    -0.03  -0.02   0.04     0.01  -0.05  -0.01
  73   1    -0.07   0.05  -0.04     0.02  -0.17   0.05    -0.02   0.03  -0.01
  74   1    -0.08   0.02   0.06     0.13  -0.04  -0.04    -0.07  -0.03   0.00
  75   1     0.00   0.02   0.00     0.01   0.04   0.00     0.03  -0.09  -0.02
  76   1    -0.01   0.05   0.01     0.01  -0.05  -0.01     0.01   0.04   0.00
  77   1    -0.01   0.06   0.01     0.02  -0.09  -0.01     0.00   0.14   0.01
  78   1     0.02   0.03   0.03    -0.01   0.01  -0.03    -0.02   0.00  -0.03
  79   1     0.00   0.00   0.01     0.00  -0.03   0.05     0.01   0.00   0.06
  80   1    -0.03  -0.02   0.02     0.03   0.06  -0.05    -0.01  -0.02   0.02
  81   1    -0.03  -0.03   0.03    -0.02  -0.02   0.01    -0.05  -0.07   0.05
  82   1    -0.03  -0.02   0.02    -0.07  -0.10   0.05    -0.04  -0.05   0.03
  83   1    -0.01  -0.01   0.02    -0.04  -0.01  -0.02     0.02   0.01   0.00
  84   1    -0.01   0.01   0.01    -0.01  -0.04  -0.03     0.01   0.00   0.02
  85   1     0.14  -0.03   0.03    -0.09  -0.04   0.03    -0.09   0.06  -0.05
  86   1     0.01   0.00   0.10    -0.01   0.01   0.04     0.01   0.00  -0.12
  87   1     0.04   0.03  -0.05    -0.02  -0.02   0.10    -0.01  -0.03   0.00
  88   1     0.03  -0.01  -0.02    -0.07  -0.06  -0.05    -0.08   0.05   0.08
  89   1     0.02  -0.01  -0.03    -0.02   0.02   0.04    -0.05  -0.07   0.06
  90   1    -0.01   0.01  -0.03     0.02   0.03  -0.08    -0.10  -0.06   0.13
  91   1    -0.02  -0.01   0.02    -0.06   0.00   0.07    -0.12  -0.06   0.03
  92   1    -0.02   0.01   0.01    -0.05   0.00   0.02    -0.13   0.03  -0.03
  93   1    -0.03   0.01   0.01    -0.02  -0.02   0.06    -0.12   0.01  -0.02
  94   1     0.02  -0.01   0.02    -0.07   0.00   0.04    -0.04  -0.08   0.12
  95   1     0.04   0.01   0.02    -0.03  -0.02  -0.01     0.10   0.02   0.10
  96   1     0.02   0.03   0.02    -0.07   0.00  -0.03    -0.04   0.04   0.01
  97   1    -0.01   0.01   0.00     0.02  -0.03  -0.04    -0.02  -0.03   0.04
  98   1    -0.02  -0.02   0.03     0.01  -0.04  -0.02    -0.01  -0.01   0.01
  99   1    -0.05   0.00   0.01    -0.01  -0.05  -0.04     0.02   0.00   0.04
 100   1     0.00   0.01   0.02     0.02   0.04   0.02    -0.09   0.01   0.00
 101   1     0.02  -0.01   0.03     0.08  -0.05   0.07     0.01  -0.01  -0.03
 102   1     0.00  -0.02   0.02     0.01  -0.07   0.01    -0.05  -0.03  -0.09
 103   1     0.03   0.01   0.02    -0.03  -0.07  -0.04    -0.04  -0.09  -0.01
 104   1     0.03  -0.01   0.04     0.05  -0.09  -0.09    -0.01  -0.05  -0.09
 105   1     0.04   0.02   0.01     0.05   0.00  -0.07    -0.02  -0.06  -0.05
 106   1     0.00   0.02  -0.03    -0.11   0.04   0.02     0.01  -0.09   0.16
 107   1     0.00   0.01   0.00    -0.04   0.10   0.02     0.03  -0.02  -0.03
 108   1     0.00  -0.02  -0.03    -0.05   0.10   0.03    -0.04   0.12   0.11
 109   1    -0.04  -0.03   0.00    -0.17  -0.13   0.17     0.02   0.00  -0.04
 110   1    -0.03  -0.01  -0.10    -0.12   0.02  -0.39    -0.01   0.00   0.04
 111   1     0.03   0.04  -0.03     0.28   0.20   0.00    -0.05  -0.03  -0.02
 112   1     0.00   0.01   0.01     0.09   0.09   0.17     0.06   0.10   0.02
 113   1     0.01  -0.06   0.10    -0.01   0.04   0.21    -0.03   0.20  -0.11
 114   1     0.03   0.07   0.10     0.11   0.11   0.18    -0.01   0.01  -0.13
                    34                     35                     36
                     A                      A                      A
 Frequencies --   148.8681               150.6703               151.2708
 Red. masses --     3.1007                 1.9573                 2.8362
 Frc consts  --     0.0405                 0.0262                 0.0382
 IR Inten    --     0.1220                 0.4176                 0.8418
 Atom AN      X      Y      Z        X      Y      Z        X      Y      Z
   1   8     0.04   0.03  -0.02     0.00   0.02  -0.01     0.00   0.03  -0.02
   2  12    -0.02  -0.02   0.02     0.02   0.01   0.01    -0.02   0.01   0.01
   3   8     0.01   0.03   0.00     0.00   0.00   0.00     0.00   0.00  -0.01
   4   6     0.02   0.00  -0.03     0.00   0.01   0.00     0.00   0.02  -0.01
   5   7     0.01  -0.03   0.01     0.02   0.00   0.00     0.03   0.05  -0.01
   6   7    -0.02  -0.04  -0.01     0.01   0.01   0.00     0.00  -0.02   0.02
   7   8    -0.01  -0.01  -0.02     0.00   0.00   0.00     0.00   0.01   0.00
   8   6    -0.01  -0.03  -0.03     0.02   0.01   0.01     0.07   0.04   0.02
   9   6     0.00  -0.03  -0.01     0.01   0.01   0.00     0.08   0.00   0.03
  10   6     0.01  -0.03   0.04     0.01   0.01  -0.02     0.05  -0.03   0.01
  11   8     0.02  -0.05   0.00     0.00   0.01   0.00     0.00   0.00   0.02
  12   6     0.02  -0.05   0.03     0.00   0.01   0.01     0.00   0.02  -0.01
  13   6     0.03  -0.01   0.01     0.00   0.00   0.01    -0.01   0.01   0.00
  14   6     0.03  -0.02  -0.04     0.00   0.01   0.00    -0.01   0.01   0.00
  15   8     0.01  -0.08   0.07     0.01   0.00   0.03    -0.01   0.04  -0.04
  16   6     0.01   0.00   0.06     0.00  -0.01   0.01    -0.01  -0.01   0.02
  17   8    -0.03   0.02  -0.03    -0.05  -0.02  -0.04     0.03   0.00   0.00
  18   6    -0.01   0.02   0.00    -0.03  -0.02   0.00     0.03  -0.01  -0.01
  19   8    -0.01   0.01   0.03    -0.03  -0.02   0.02     0.04  -0.01  -0.02
  20   8    -0.03   0.05  -0.05     0.03  -0.03   0.05     0.02  -0.03   0.01
  21   6     0.00   0.02  -0.02    -0.01  -0.01   0.00     0.01  -0.01   0.00
  22   6    -0.01   0.02  -0.02    -0.02  -0.02   0.00     0.01   0.00   0.00
  23   6    -0.01   0.02   0.00    -0.01   0.01  -0.01     0.02  -0.02   0.00
  24   8     0.03   0.02   0.00    -0.03   0.00  -0.03    -0.01  -0.01   0.00
  25   6    -0.02   0.04  -0.01     0.00   0.03   0.01     0.00  -0.01  -0.01
  26   6    -0.02  -0.01   0.00     0.05   0.08  -0.07     0.00  -0.02   0.02
  27   6     0.00  -0.02   0.01     0.00  -0.02   0.01    -0.02   0.02   0.00
  28   6    -0.01   0.02  -0.03    -0.01   0.00   0.00    -0.03   0.05   0.00
  29   6     0.01  -0.02   0.01     0.01   0.00   0.00     0.02   0.04  -0.01
  30   6    -0.02  -0.03   0.00     0.01   0.01   0.00    -0.01  -0.03   0.02
  31   6     0.02  -0.06   0.00     0.02  -0.06  -0.01     0.02  -0.01  -0.01
  32   6     0.02  -0.05   0.00     0.02  -0.08  -0.02     0.03  -0.08  -0.02
  33   6     0.01   0.03   0.01     0.01  -0.02  -0.01     0.02  -0.08  -0.02
  34   6     0.00   0.09   0.02     0.00   0.06   0.00     0.02  -0.03  -0.02
  35   6     0.00   0.05   0.02     0.00   0.05   0.00     0.01   0.02  -0.02
  36   6     0.03  -0.02   0.01     0.00  -0.03  -0.01    -0.04  -0.03  -0.02
  37   6     0.01   0.03   0.02     0.00   0.02   0.01    -0.02   0.00   0.02
  38   6    -0.01   0.00  -0.02     0.02   0.02  -0.01    -0.03  -0.03   0.03
  39   6     0.01   0.02  -0.03     0.01   0.01   0.00    -0.01  -0.02   0.02
  40   6     0.01   0.02  -0.03    -0.02  -0.02   0.02     0.02   0.02  -0.01
  41   6    -0.01  -0.02  -0.01    -0.03  -0.03   0.02     0.03   0.03  -0.02
  42   6    -0.03  -0.04   0.00     0.00   0.00   0.01     0.01   0.01  -0.01
  43   6    -0.03   0.01  -0.03     0.01   0.01   0.00    -0.04   0.00   0.00
  44   6    -0.02  -0.01   0.00     0.00   0.00   0.00    -0.01   0.04   0.00
  45   6     0.03   0.04  -0.07    -0.01   0.00  -0.06    -0.06  -0.04   0.01
  46   6     0.05   0.02   0.08    -0.03  -0.02   0.07    -0.11  -0.06   0.02
  47   6    -0.02   0.00  -0.02    -0.06   0.00  -0.02    -0.09  -0.01   0.02
  48   6     0.05   0.00   0.06     0.03   0.00   0.04    -0.03  -0.01   0.02
  49   6    -0.06   0.00  -0.02     0.00   0.01  -0.01    -0.05   0.04   0.00
  50   6     0.01  -0.01   0.03     0.01   0.01   0.01    -0.02   0.03  -0.01
  51   6     0.00   0.04  -0.01     0.01  -0.02  -0.02    -0.01   0.08   0.04
  52   6    -0.07   0.07  -0.05     0.00   0.02   0.03    -0.05   0.04  -0.07
  53   6    -0.03  -0.03  -0.10     0.01   0.00   0.01     0.11   0.06   0.03
  54   6     0.04  -0.01   0.17     0.00   0.00  -0.05     0.07  -0.10  -0.01
  55   1     0.00  -0.03  -0.01     0.01   0.01  -0.01     0.12   0.00   0.04
  56   1     0.07  -0.01   0.00    -0.01   0.01   0.02    -0.01   0.01  -0.01
  57   1     0.05  -0.03  -0.06     0.00   0.01   0.01     0.00   0.01  -0.02
  58   1    -0.08   0.03   0.06    -0.03   0.00   0.01    -0.06   0.01   0.03
  59   1     0.05   0.00   0.05     0.03  -0.02   0.00     0.04  -0.02   0.01
  60   1     0.03  -0.03   0.13     0.00  -0.04   0.03    -0.01  -0.05   0.07
  61   1    -0.01   0.01  -0.02    -0.01  -0.05   0.01     0.01   0.02  -0.01
  62   1    -0.01   0.03   0.01    -0.06   0.01  -0.04     0.04  -0.04   0.00
  63   1     0.01   0.04   0.00     0.06   0.02   0.05    -0.03   0.00  -0.01
  64   1    -0.03   0.07   0.00    -0.01   0.10   0.01     0.01  -0.04  -0.01
  65   1    -0.03   0.03  -0.03    -0.02   0.02  -0.01     0.02   0.02   0.00
  66   1    -0.13  -0.12   0.06     0.34   0.39  -0.29    -0.07  -0.11   0.10
  67   1     0.09  -0.07  -0.08    -0.26   0.24   0.16     0.09  -0.06  -0.06
  68   1    -0.04   0.14   0.03     0.15  -0.35  -0.12    -0.03   0.12   0.04
  69   1     0.01  -0.06   0.03     0.00  -0.02   0.02    -0.04   0.05   0.01
  70   1    -0.05  -0.02   0.01     0.01  -0.03  -0.01     0.01   0.02   0.00
  71   1     0.01   0.01   0.00    -0.01  -0.03   0.02    -0.04   0.00  -0.01
  72   1     0.04  -0.02  -0.04    -0.01  -0.01   0.01    -0.10   0.11  -0.01
  73   1    -0.01   0.12  -0.06    -0.01  -0.01   0.00    -0.04  -0.03  -0.02
  74   1    -0.10   0.00   0.00    -0.01   0.00   0.00     0.05   0.08   0.03
  75   1     0.02  -0.09  -0.01     0.03  -0.12  -0.02     0.03  -0.12  -0.03
  76   1     0.00   0.05   0.01     0.01  -0.02  -0.01     0.03  -0.13  -0.03
  77   1    -0.01   0.15   0.03     0.00   0.10   0.01     0.02  -0.04  -0.02
  78   1     0.03  -0.02   0.03    -0.01  -0.02  -0.02    -0.05   0.00  -0.07
  79   1     0.01   0.02   0.02     0.00   0.01   0.02     0.01  -0.03   0.05
  80   1     0.04   0.05  -0.05     0.00   0.00   0.00    -0.01  -0.02   0.02
  81   1     0.03   0.04  -0.04    -0.04  -0.04   0.03     0.03   0.04  -0.03
  82   1    -0.01  -0.02  -0.01    -0.04  -0.05   0.04     0.06   0.06  -0.04
  83   1    -0.06  -0.03  -0.04     0.01   0.01   0.01    -0.05  -0.03  -0.02
  84   1    -0.01   0.01   0.00     0.00   0.00   0.00     0.00   0.05   0.02
  85   1     0.07   0.11  -0.06    -0.06   0.06  -0.06    -0.14  -0.05   0.00
  86   1     0.01   0.01  -0.11     0.01  -0.01  -0.14    -0.01  -0.02  -0.03
  87   1     0.02   0.05  -0.13     0.00  -0.02  -0.04    -0.04  -0.08   0.09
  88   1     0.10   0.13   0.11    -0.03   0.06   0.08    -0.21  -0.09  -0.01
  89   1     0.05   0.00  -0.01    -0.03  -0.06   0.04    -0.10  -0.08   0.13
  90   1    -0.01  -0.03   0.18    -0.06  -0.06   0.13    -0.07  -0.04  -0.02
  91   1    -0.01  -0.05  -0.03    -0.05  -0.06  -0.02    -0.11  -0.05   0.04
  92   1    -0.02   0.01  -0.02    -0.06   0.02  -0.02    -0.12   0.03  -0.01
  93   1    -0.05   0.01  -0.05    -0.10   0.01  -0.04    -0.11  -0.01   0.02
  94   1     0.05  -0.06   0.06     0.00  -0.07   0.07    -0.09  -0.06   0.09
  95   1     0.08   0.02   0.09     0.10   0.02   0.07     0.07   0.00   0.03
  96   1     0.05   0.01   0.06     0.00   0.03   0.01    -0.08   0.04  -0.06
  97   1    -0.05   0.04  -0.03     0.00   0.02  -0.01    -0.05   0.07   0.00
  98   1    -0.06  -0.02  -0.02     0.01   0.01  -0.01    -0.06   0.02  -0.01
  99   1    -0.09   0.00  -0.04     0.00   0.00  -0.02    -0.07   0.05  -0.01
 100   1    -0.01   0.07   0.04     0.04  -0.02  -0.01    -0.02   0.01  -0.01
 101   1     0.09  -0.03   0.07    -0.03   0.01   0.00    -0.03   0.04  -0.03
 102   1    -0.01  -0.06  -0.01     0.03   0.03   0.05    -0.01   0.04  -0.01
 103   1    -0.02   0.06  -0.04    -0.03  -0.04  -0.01    -0.01   0.13   0.00
 104   1     0.02   0.00   0.01     0.03  -0.05  -0.04     0.00   0.06   0.10
 105   1     0.02   0.07   0.00     0.02   0.00  -0.01     0.01   0.11   0.08
 106   1    -0.14   0.15  -0.16     0.00  -0.03   0.08    -0.10   0.15  -0.20
 107   1    -0.08   0.13   0.08     0.02   0.01  -0.01    -0.07   0.09   0.07
 108   1    -0.01  -0.04  -0.09    -0.02   0.07   0.05     0.01  -0.11  -0.13
 109   1    -0.06  -0.11  -0.05     0.05   0.03  -0.05     0.12   0.09   0.02
 110   1    -0.07  -0.04  -0.21     0.03   0.01   0.07     0.14   0.04   0.04
 111   1     0.03   0.05  -0.09    -0.05  -0.03  -0.01     0.11   0.06   0.03
 112   1     0.04   0.01   0.11    -0.02   0.00  -0.10    -0.03  -0.13  -0.17
 113   1     0.01  -0.13   0.27     0.05  -0.03  -0.05     0.19  -0.26   0.04
 114   1     0.10   0.09   0.25    -0.02   0.03  -0.03     0.08   0.04   0.11
                    37                     38                     39
                     A                      A                      A
 Frequencies --   160.2270               160.7152               164.9135
 Red. masses --     2.8695                 3.5818                 2.9302
 Frc consts  --     0.0434                 0.0545                 0.0470
 IR Inten    --     2.1844                 0.6313                 1.4337
 Atom AN      X      Y      Z        X      Y      Z        X      Y      Z
   1   8     0.04   0.11  -0.10     0.06   0.06  -0.07     0.00  -0.08   0.07
   2  12    -0.04   0.03   0.02     0.03  -0.01  -0.03    -0.02   0.02   0.05
   3   8     0.00   0.03  -0.02     0.02  -0.02   0.00     0.01   0.06   0.00
   4   6     0.02   0.04  -0.06     0.03   0.00  -0.06    -0.01  -0.05   0.01
   5   7    -0.02   0.06   0.02     0.01  -0.03  -0.04    -0.01   0.03   0.01
   6   7    -0.03   0.02   0.01     0.04   0.00  -0.01    -0.02  -0.01   0.02
   7   8     0.00   0.01  -0.03    -0.01  -0.02  -0.05    -0.03  -0.03  -0.01
   8   6    -0.02   0.06   0.01     0.04  -0.02   0.00     0.01   0.03   0.01
   9   6    -0.02   0.04   0.02     0.03  -0.01  -0.02     0.01   0.01   0.00
  10   6    -0.03   0.02   0.01     0.03   0.00  -0.03    -0.01  -0.01  -0.01
  11   8     0.03  -0.06   0.07     0.03  -0.10   0.03     0.01  -0.02  -0.02
  12   6     0.01  -0.01   0.02     0.03  -0.09   0.04     0.00  -0.01   0.01
  13   6     0.01   0.01   0.00     0.03  -0.04   0.01     0.03   0.02   0.01
  14   6     0.01  -0.02   0.00     0.03  -0.06  -0.02     0.00  -0.01  -0.04
  15   8    -0.02   0.02  -0.03     0.01  -0.09   0.05    -0.02  -0.02   0.03
  16   6     0.00  -0.05   0.13     0.01  -0.01   0.11    -0.01   0.07  -0.03
  17   8     0.02  -0.01  -0.01    -0.03   0.00   0.00     0.01   0.01  -0.04
  18   6     0.02  -0.01   0.01    -0.03   0.01   0.01     0.03   0.00   0.00
  19   8     0.02  -0.01   0.00    -0.04   0.01   0.01     0.04   0.00   0.02
  20   8     0.01  -0.03   0.01    -0.04   0.04  -0.03     0.01   0.00  -0.01
  21   6     0.00  -0.02   0.00    -0.01   0.02   0.00     0.01   0.00  -0.01
  22   6     0.00  -0.01  -0.01    -0.01   0.00   0.01     0.00   0.01  -0.03
  23   6     0.02  -0.03   0.01    -0.03   0.02   0.00     0.02  -0.01   0.00
  24   8    -0.01  -0.02   0.00     0.01   0.01   0.00     0.01   0.00  -0.01
  25   6     0.00  -0.02  -0.01     0.00   0.00   0.00    -0.02   0.03  -0.02
  26   6     0.02  -0.03   0.01    -0.01   0.00  -0.02     0.03  -0.02   0.00
  27   6    -0.03   0.00   0.01    -0.02   0.01   0.02     0.01  -0.03   0.01
  28   6    -0.09  -0.04   0.01    -0.04  -0.08  -0.02     0.01   0.13  -0.03
  29   6    -0.02   0.05   0.01     0.02   0.00  -0.02    -0.01   0.02   0.00
  30   6    -0.03   0.01   0.00     0.04   0.01   0.00    -0.02  -0.01   0.01
  31   6    -0.01   0.01   0.00     0.00   0.09   0.00    -0.01   0.01   0.00
  32   6    -0.01  -0.05  -0.01    -0.01   0.14   0.02     0.00  -0.02  -0.01
  33   6    -0.01  -0.06  -0.01     0.00   0.09   0.00     0.00  -0.05  -0.01
  34   6    -0.02  -0.01   0.00     0.01   0.00  -0.01     0.00  -0.04  -0.01
  35   6    -0.02   0.04   0.01     0.02  -0.03  -0.02    -0.01  -0.01   0.00
  36   6     0.01   0.01   0.00    -0.03   0.05  -0.01    -0.01   0.00   0.00
  37   6     0.00   0.02  -0.01    -0.01  -0.02   0.00     0.00  -0.01  -0.01
  38   6    -0.01   0.02  -0.01     0.05   0.03  -0.01     0.03   0.05  -0.03
  39   6     0.00   0.03  -0.02     0.04   0.01  -0.01     0.04   0.06  -0.05
  40   6    -0.01   0.02   0.00    -0.01  -0.03   0.02    -0.03  -0.02   0.01
  41   6    -0.03   0.00   0.01    -0.02  -0.05   0.03    -0.09  -0.08   0.05
  42   6    -0.03  -0.01   0.01     0.01  -0.01   0.01    -0.07  -0.06   0.04
  43   6     0.02   0.00   0.01     0.01   0.02  -0.01     0.02   0.03  -0.02
  44   6     0.01  -0.04  -0.02    -0.01   0.03   0.02    -0.03  -0.02   0.01
  45   6     0.02   0.00   0.00    -0.03  -0.01   0.09    -0.01  -0.01   0.02
  46   6     0.02   0.01  -0.02    -0.06   0.01  -0.06    -0.01   0.00  -0.02
  47   6     0.00   0.00  -0.04    -0.01   0.00   0.03     0.01   0.00   0.00
  48   6     0.06   0.01   0.02    -0.08   0.00  -0.03     0.00   0.00  -0.02
  49   6     0.08  -0.05  -0.02    -0.07   0.05  -0.01    -0.01   0.01  -0.06
  50   6     0.04  -0.03   0.01     0.00   0.03   0.03     0.07   0.00   0.10
  51   6     0.02  -0.05  -0.01    -0.01  -0.01  -0.04     0.00  -0.05  -0.06
  52   6     0.05  -0.04   0.02    -0.03   0.07   0.05    -0.01   0.04   0.07
  53   6    -0.02   0.07  -0.03     0.06  -0.02   0.07     0.03   0.04   0.02
  54   6    -0.03   0.01  -0.02     0.03  -0.01  -0.05    -0.01  -0.05  -0.06
  55   1     0.00   0.03   0.00     0.02  -0.01  -0.01     0.02   0.00  -0.01
  56   1     0.04   0.01   0.00     0.06  -0.05  -0.03     0.06   0.02   0.03
  57   1     0.06  -0.02   0.01     0.07  -0.06  -0.01    -0.01  -0.02  -0.12
  58   1    -0.25  -0.03   0.13    -0.17   0.00   0.11     0.11   0.07  -0.03
  59   1     0.20  -0.07   0.12     0.11  -0.02   0.11    -0.17   0.09  -0.03
  60   1     0.01  -0.18   0.29     0.04  -0.07   0.23     0.02   0.18  -0.10
  61   1     0.00   0.00  -0.01    -0.01  -0.01   0.01     0.00   0.02  -0.04
  62   1     0.02  -0.04   0.00    -0.04   0.04   0.01     0.02  -0.01   0.00
  63   1    -0.03  -0.01  -0.01     0.03   0.00   0.00    -0.02   0.03  -0.01
  64   1     0.01  -0.04  -0.02    -0.01   0.03   0.01    -0.02   0.03  -0.02
  65   1     0.02   0.00   0.00    -0.02  -0.03   0.00    -0.02   0.05  -0.04
  66   1    -0.06  -0.11   0.07     0.03   0.06  -0.09    -0.08  -0.13   0.06
  67   1     0.10  -0.07  -0.07    -0.06   0.03   0.04     0.15  -0.08  -0.11
  68   1     0.01   0.10   0.04     0.01  -0.10  -0.03     0.02   0.15   0.03
  69   1    -0.01  -0.06   0.03    -0.01  -0.02   0.03     0.04  -0.11   0.03
  70   1    -0.10   0.01   0.01    -0.08   0.03   0.06    -0.06  -0.04  -0.01
  71   1    -0.01   0.05  -0.01    -0.01   0.07  -0.03     0.05   0.01   0.02
  72   1    -0.26   0.07   0.06    -0.12  -0.03   0.02     0.11   0.09  -0.11
  73   1    -0.14  -0.23  -0.07    -0.07  -0.17  -0.07     0.04   0.30  -0.04
  74   1     0.07   0.02   0.02     0.04  -0.05  -0.02    -0.11   0.11   0.05
  75   1     0.00  -0.09  -0.02    -0.01   0.19   0.03     0.00  -0.03  -0.01
  76   1     0.00  -0.11  -0.02     0.00   0.13   0.01     0.00  -0.07  -0.01
  77   1    -0.02  -0.02   0.00     0.02  -0.02  -0.02     0.00  -0.07  -0.01
  78   1     0.01   0.00   0.02    -0.04   0.06  -0.04    -0.01   0.00  -0.01
  79   1    -0.02   0.01  -0.03     0.01  -0.01   0.03     0.00   0.00  -0.01
  80   1     0.01   0.05  -0.03     0.05   0.02  -0.02     0.09   0.11  -0.09
  81   1     0.00   0.02  -0.01    -0.03  -0.05   0.04    -0.04  -0.02   0.01
  82   1    -0.03  -0.01   0.02    -0.06  -0.08   0.05    -0.14  -0.14   0.09
  83   1     0.03   0.03   0.04     0.00   0.00  -0.03     0.02   0.03   0.00
  84   1    -0.02  -0.07  -0.06     0.00   0.05   0.05    -0.04  -0.02  -0.03
  85   1     0.10  -0.02   0.01    -0.04  -0.10   0.07    -0.01  -0.03   0.02
  86   1    -0.03  -0.01   0.07    -0.02   0.02   0.16    -0.02  -0.01   0.04
  87   1     0.00   0.04  -0.06    -0.03  -0.01   0.13    -0.02   0.00   0.02
  88   1     0.02  -0.03  -0.03    -0.14  -0.10  -0.10    -0.05  -0.05  -0.03
  89   1     0.02   0.03   0.00    -0.06   0.03   0.04    -0.01   0.02   0.04
  90   1     0.05   0.02  -0.05    -0.01   0.06  -0.17     0.03   0.02  -0.06
  91   1     0.04  -0.05  -0.10    -0.06   0.05   0.09     0.02   0.00  -0.02
  92   1     0.03   0.03   0.02    -0.04  -0.02  -0.03     0.02   0.00   0.02
  93   1    -0.09   0.01  -0.06     0.08  -0.01   0.06    -0.01  -0.01   0.00
  94   1     0.07  -0.04   0.00    -0.11   0.05   0.00     0.01   0.01  -0.02
  95   1     0.08   0.02   0.03    -0.10  -0.02  -0.05     0.00   0.00  -0.02
  96   1     0.07   0.03   0.03    -0.10  -0.03  -0.06     0.01   0.00  -0.01
  97   1     0.10  -0.08  -0.04    -0.07   0.10   0.00     0.01   0.05  -0.08
  98   1     0.11   0.00   0.00    -0.09   0.02  -0.02     0.00   0.03  -0.05
  99   1     0.10  -0.06  -0.03    -0.09   0.05  -0.02    -0.03  -0.03  -0.11
 100   1     0.11  -0.08  -0.04    -0.01   0.05   0.04     0.22  -0.04   0.00
 101   1    -0.06  -0.02  -0.01     0.01   0.03   0.05    -0.06   0.01   0.08
 102   1     0.07   0.03   0.10    -0.01   0.02   0.02     0.13   0.06   0.26
 103   1     0.08  -0.08   0.03    -0.09  -0.03  -0.04    -0.03  -0.09  -0.02
 104   1    -0.01   0.00  -0.02     0.03  -0.06  -0.09     0.01  -0.06  -0.12
 105   1     0.00  -0.10  -0.07     0.02   0.04   0.00     0.00  -0.05  -0.08
 106   1     0.10  -0.10   0.10    -0.08   0.02   0.08    -0.03  -0.05   0.16
 107   1     0.05  -0.09  -0.07    -0.01   0.09   0.04     0.02   0.03   0.01
 108   1     0.01   0.03   0.05    -0.03   0.13   0.08    -0.03   0.16   0.13
 109   1    -0.04   0.03  -0.01     0.10   0.06   0.02     0.04   0.07   0.01
 110   1    -0.03   0.06  -0.08     0.11  -0.02   0.19     0.05   0.03   0.04
 111   1     0.00   0.11  -0.02     0.01  -0.11   0.06     0.02   0.03   0.02
 112   1    -0.01   0.00   0.06     0.00  -0.01  -0.13    -0.05  -0.06  -0.11
 113   1    -0.06   0.10  -0.06     0.08  -0.09  -0.02     0.05  -0.09  -0.06
 114   1    -0.04  -0.07  -0.08     0.02   0.06   0.01    -0.02  -0.02  -0.03
                    40                     41                     42
                     A                      A                      A
 Frequencies --   167.4528               185.7390               195.2128
 Red. masses --     3.4420                 4.0585                 2.0708
 Frc consts  --     0.0569                 0.0825                 0.0465
 IR Inten    --     2.6492                 4.9622                 0.5255
 Atom AN      X      Y      Z        X      Y      Z        X      Y      Z
   1   8    -0.02   0.06  -0.04    -0.02   0.01  -0.01    -0.01   0.01  -0.01
   2  12    -0.03  -0.02  -0.04     0.06   0.00   0.05     0.00  -0.02   0.00
   3   8    -0.01  -0.07   0.01     0.01   0.10   0.03     0.00   0.01   0.01
   4   6     0.01   0.06   0.02    -0.02  -0.01   0.00    -0.01   0.01   0.01
   5   7    -0.02  -0.04   0.00    -0.01  -0.04   0.03     0.04  -0.02  -0.02
   6   7    -0.01  -0.04   0.01     0.05  -0.02   0.01    -0.04   0.02   0.01
   7   8     0.05   0.04   0.04    -0.03   0.00   0.00     0.00   0.01   0.01
   8   6    -0.01  -0.04   0.00    -0.01  -0.05   0.02     0.01   0.00   0.00
   9   6    -0.03  -0.06  -0.05    -0.01  -0.04   0.03     0.01   0.03   0.02
  10   6    -0.03  -0.05  -0.03     0.01  -0.01   0.01     0.00   0.02   0.01
  11   8    -0.02   0.07  -0.01     0.01  -0.02   0.08    -0.01  -0.01   0.02
  12   6    -0.02   0.05  -0.04    -0.02   0.07  -0.03    -0.01   0.00  -0.01
  13   6    -0.04  -0.01  -0.02     0.03   0.07   0.03     0.01   0.00   0.00
  14   6    -0.01   0.04   0.05    -0.03  -0.02   0.03    -0.01  -0.01   0.02
  15   8     0.01   0.06  -0.07    -0.07   0.15  -0.14    -0.01   0.00  -0.01
  16   6     0.02  -0.07  -0.02    -0.04   0.00   0.02    -0.01  -0.01   0.00
  17   8     0.06   0.03   0.08    -0.04   0.00  -0.10    -0.01   0.01  -0.02
  18   6     0.01   0.03  -0.03     0.04  -0.01   0.04     0.01   0.00   0.01
  19   8     0.02   0.04  -0.06     0.06  -0.04   0.08     0.01   0.00   0.02
  20   8    -0.01   0.04  -0.04     0.03  -0.01   0.01     0.01   0.00   0.00
  21   6     0.01   0.04   0.00     0.02  -0.01  -0.02     0.01   0.00  -0.01
  22   6     0.02   0.04   0.01     0.00   0.00  -0.04     0.00   0.01  -0.01
  23   6     0.01   0.03  -0.03     0.04  -0.03   0.04     0.01   0.00   0.00
  24   8     0.02   0.03   0.03     0.01   0.00  -0.04     0.01   0.01  -0.01
  25   6     0.00  -0.04  -0.02    -0.01   0.11   0.00    -0.01   0.03   0.00
  26   6    -0.01   0.01  -0.01     0.05  -0.08   0.03     0.03  -0.01  -0.01
  27   6     0.01   0.05  -0.02     0.08  -0.03   0.02     0.05   0.00  -0.01
  28   6     0.03  -0.09   0.04    -0.10  -0.05   0.03    -0.03  -0.03   0.02
  29   6    -0.02  -0.02   0.01    -0.02  -0.03   0.01     0.05  -0.04  -0.02
  30   6    -0.01  -0.03   0.03     0.06  -0.01  -0.02    -0.06   0.00   0.01
  31   6    -0.01  -0.05   0.00    -0.02  -0.01   0.00     0.05  -0.02  -0.02
  32   6    -0.01  -0.04   0.00    -0.02   0.03   0.00     0.04   0.06   0.00
  33   6    -0.02   0.00   0.01    -0.03   0.03   0.00     0.04   0.09   0.00
  34   6    -0.02   0.02   0.01    -0.03   0.00   0.01     0.05   0.03  -0.01
  35   6    -0.02   0.01   0.01    -0.03  -0.03   0.00     0.05  -0.04  -0.02
  36   6     0.02  -0.04   0.01     0.00  -0.01   0.00     0.01  -0.02  -0.03
  37   6     0.00   0.01  -0.01    -0.01  -0.01  -0.02     0.02  -0.03   0.01
  38   6     0.03   0.02   0.00     0.06  -0.01  -0.01    -0.05   0.01   0.01
  39   6     0.05   0.03  -0.02     0.04  -0.04   0.00    -0.03   0.04  -0.02
  40   6     0.00  -0.02   0.02     0.01  -0.06   0.00    -0.01   0.06  -0.03
  41   6    -0.05  -0.07   0.05     0.02  -0.04  -0.01    -0.04   0.03  -0.01
  42   6    -0.04  -0.06   0.05     0.05  -0.01  -0.02    -0.07   0.00   0.01
  43   6     0.02   0.02   0.00     0.00  -0.01  -0.03    -0.02   0.00   0.02
  44   6    -0.03   0.00   0.04     0.01   0.02   0.00    -0.03  -0.02  -0.01
  45   6     0.03   0.00  -0.05     0.00   0.00  -0.02    -0.04  -0.01  -0.03
  46   6     0.04  -0.01   0.03     0.01   0.00  -0.01    -0.02  -0.02   0.02
  47   6     0.01   0.01  -0.02     0.05   0.00  -0.01     0.00  -0.01   0.05
  48   6     0.03   0.01   0.00     0.01   0.00  -0.04    -0.06  -0.02  -0.02
  49   6    -0.07   0.05  -0.03    -0.05   0.03   0.00     0.02  -0.02  -0.01
  50   6     0.04   0.03   0.12    -0.03   0.01  -0.03     0.04  -0.02   0.02
  51   6     0.00  -0.01  -0.02    -0.06   0.02  -0.04     0.01   0.00   0.03
  52   6    -0.01   0.04   0.04    -0.06   0.06   0.02     0.02  -0.04  -0.01
  53   6     0.01  -0.04   0.05    -0.03  -0.05   0.00    -0.03  -0.03   0.00
  54   6    -0.03  -0.06  -0.04    -0.01   0.02  -0.02     0.01  -0.02   0.00
  55   1    -0.03  -0.06  -0.06    -0.03  -0.03   0.03     0.01   0.03   0.02
  56   1    -0.11  -0.01  -0.03     0.05   0.08   0.09     0.01   0.00   0.00
  57   1    -0.01   0.06   0.13    -0.02  -0.02   0.05     0.00   0.00   0.04
  58   1    -0.02  -0.07  -0.02    -0.07   0.00   0.02    -0.01  -0.02   0.00
  59   1     0.15  -0.09  -0.03    -0.03   0.00   0.03     0.01  -0.02   0.00
  60   1    -0.03  -0.16  -0.01    -0.03   0.00   0.04    -0.02  -0.03   0.00
  61   1     0.02   0.07  -0.01     0.01  -0.03  -0.04     0.00   0.00  -0.02
  62   1     0.01   0.02  -0.02     0.05  -0.02   0.05     0.00   0.00   0.00
  63   1    -0.05  -0.03  -0.07     0.07   0.10   0.09     0.02   0.03   0.02
  64   1     0.01  -0.10  -0.01    -0.05   0.23   0.03    -0.03   0.08   0.01
  65   1     0.02  -0.03   0.01    -0.08   0.10  -0.07    -0.04   0.02  -0.03
  66   1    -0.09  -0.08   0.05     0.01  -0.11   0.00    -0.02  -0.06   0.01
  67   1     0.09  -0.04  -0.09     0.09  -0.10   0.03     0.08  -0.03  -0.07
  68   1    -0.04   0.14   0.00     0.06  -0.07   0.04     0.04   0.06   0.01
  69   1    -0.05   0.19  -0.06     0.10  -0.06   0.01     0.04   0.04  -0.04
  70   1     0.17   0.06   0.00     0.08  -0.05  -0.04     0.11   0.00  -0.01
  71   1    -0.06  -0.05  -0.02     0.11  -0.04   0.09     0.05  -0.03   0.02
  72   1    -0.02  -0.08   0.09    -0.17  -0.01   0.07    -0.04  -0.03   0.04
  73   1     0.03  -0.22   0.08    -0.13  -0.11  -0.01    -0.03  -0.05   0.01
  74   1     0.13  -0.08  -0.06    -0.05  -0.03   0.04    -0.02  -0.03   0.01
  75   1    -0.01  -0.05   0.00    -0.02   0.05   0.00     0.04   0.10   0.00
  76   1    -0.02   0.01   0.01    -0.04   0.06   0.00     0.03   0.17   0.01
  77   1    -0.02   0.05   0.02    -0.04   0.00   0.01     0.05   0.05  -0.01
  78   1     0.02  -0.03   0.04     0.00  -0.02   0.01     0.00  -0.02  -0.06
  79   1    -0.02   0.01  -0.03    -0.03   0.00  -0.05     0.05  -0.03   0.06
  80   1     0.09   0.07  -0.05     0.04  -0.05   0.00    -0.01   0.06  -0.03
  81   1     0.00  -0.02   0.02    -0.02  -0.09   0.02     0.02   0.09  -0.05
  82   1    -0.09  -0.11   0.07     0.00  -0.06   0.00    -0.04   0.04  -0.01
  83   1     0.01   0.00  -0.01    -0.01  -0.04  -0.08    -0.01   0.03   0.05
  84   1    -0.02   0.03   0.04     0.03   0.04   0.05    -0.05  -0.02  -0.06
  85   1     0.04   0.05  -0.04    -0.08   0.04  -0.02    -0.28   0.07  -0.06
  86   1     0.04  -0.01  -0.09     0.06   0.02  -0.09     0.12   0.04  -0.22
  87   1     0.03  -0.02  -0.07     0.02  -0.05   0.04     0.02  -0.12   0.18
  88   1     0.11   0.08   0.06     0.11   0.07   0.03     0.09   0.14   0.08
  89   1     0.03  -0.04  -0.07     0.02  -0.04  -0.13    -0.01  -0.11  -0.14
  90   1    -0.03  -0.06   0.12    -0.07  -0.03   0.07    -0.17  -0.08   0.17
  91   1     0.03  -0.01  -0.04     0.08   0.02  -0.05    -0.10   0.06   0.17
  92   1     0.02   0.01   0.01     0.08  -0.01   0.03    -0.07  -0.06  -0.07
  93   1    -0.02   0.01  -0.03     0.03  -0.01  -0.01     0.16  -0.02   0.09
  94   1     0.06   0.00  -0.03     0.08   0.08  -0.13    -0.11   0.01   0.05
  95   1     0.02   0.01   0.01    -0.11  -0.01  -0.07    -0.03  -0.03  -0.03
  96   1     0.05   0.01   0.04     0.07  -0.04   0.05    -0.10  -0.02  -0.08
  97   1    -0.05   0.12  -0.05    -0.08   0.05   0.03     0.03  -0.05  -0.02
  98   1    -0.08   0.02  -0.03    -0.07   0.01  -0.04     0.03   0.00   0.01
  99   1    -0.12   0.02  -0.08    -0.03   0.03   0.01     0.03  -0.03  -0.01
 100   1     0.13   0.04   0.06    -0.14   0.10   0.05     0.22  -0.17  -0.09
 101   1    -0.02   0.03   0.13     0.10   0.00   0.01    -0.17   0.01  -0.05
 102   1     0.07   0.06   0.21    -0.08  -0.06  -0.16     0.12   0.09   0.25
 103   1    -0.04  -0.03  -0.02    -0.19   0.04  -0.09     0.14  -0.01   0.06
 104   1     0.02  -0.03  -0.06     0.01  -0.07  -0.09    -0.05   0.08   0.08
 105   1     0.01   0.00  -0.02    -0.03   0.10   0.07    -0.02  -0.09  -0.05
 106   1    -0.05   0.01   0.06    -0.15   0.07  -0.03     0.07  -0.03   0.00
 107   1     0.00   0.06   0.04    -0.06   0.11   0.11     0.01  -0.07  -0.04
 108   1     0.00   0.08   0.07    -0.01   0.03   0.02     0.01  -0.05  -0.02
 109   1     0.08   0.06  -0.05    -0.06  -0.10   0.04    -0.05  -0.07   0.04
 110   1     0.07  -0.04   0.20    -0.06  -0.05  -0.07    -0.07  -0.01  -0.04
 111   1    -0.10  -0.13   0.02     0.02  -0.01   0.01     0.02  -0.02   0.02
 112   1    -0.06  -0.06  -0.12    -0.03   0.04  -0.11     0.00  -0.05   0.05
 113   1     0.02  -0.14  -0.01     0.03  -0.04  -0.01     0.01   0.02  -0.03
 114   1    -0.03   0.01   0.02    -0.05   0.07   0.03     0.02  -0.07  -0.04
                    43                     44                     45
                     A                      A                      A
 Frequencies --   203.0883               207.7123               211.7503
 Red. masses --     1.9323                 1.3490                 1.7083
 Frc consts  --     0.0470                 0.0343                 0.0451
 IR Inten    --     3.3506                 1.4919                 4.5054
 Atom AN      X      Y      Z        X      Y      Z        X      Y      Z
   1   8     0.01   0.00   0.00    -0.01   0.01   0.00     0.02  -0.01   0.00
   2  12     0.00   0.02   0.01     0.01  -0.02   0.00     0.04   0.02   0.01
   3   8    -0.01  -0.01  -0.02     0.00  -0.02   0.00    -0.01   0.05   0.00
   4   6     0.01   0.00  -0.01    -0.01   0.01   0.01     0.01  -0.02  -0.01
   5   7     0.00   0.02   0.03     0.01  -0.02   0.01     0.00  -0.01   0.00
   6   7     0.02   0.00   0.04     0.00   0.00   0.02     0.02   0.02   0.00
   7   8     0.01   0.00  -0.01     0.00   0.01   0.01     0.00  -0.01  -0.02
   8   6     0.02   0.02   0.05     0.00  -0.02   0.02    -0.01   0.00  -0.01
   9   6     0.06   0.02   0.14     0.02   0.01   0.07    -0.02   0.00  -0.03
  10   6     0.03   0.01   0.06     0.01   0.00   0.04     0.00   0.02  -0.02
  11   8     0.00  -0.01  -0.01    -0.01   0.01   0.00     0.01  -0.01   0.01
  12   6     0.00  -0.02   0.00     0.00   0.00  -0.01     0.00   0.02   0.00
  13   6    -0.01  -0.01  -0.02     0.00  -0.01   0.00     0.00   0.03   0.01
  14   6     0.01  -0.01  -0.01     0.00   0.01   0.01     0.01  -0.01  -0.01
  15   8     0.01  -0.02   0.01     0.00   0.00  -0.02    -0.02   0.03  -0.01
  16   6     0.01   0.00   0.01     0.00  -0.02  -0.01     0.00   0.02   0.02
  17   8     0.02   0.00   0.04     0.00   0.01   0.00     0.01   0.00   0.02
  18   6    -0.01   0.01  -0.02     0.00   0.00   0.00    -0.01   0.01  -0.01
  19   8    -0.01   0.01  -0.03     0.00   0.00   0.00    -0.01   0.00   0.01
  20   8    -0.01   0.00   0.00     0.00   0.01  -0.01     0.00  -0.02   0.03
  21   6    -0.01   0.00   0.01     0.01   0.01   0.00    -0.02  -0.01   0.01
  22   6     0.00   0.00   0.01     0.00   0.01   0.00    -0.02   0.00  -0.01
  23   6    -0.01   0.01  -0.02     0.00   0.00   0.01    -0.02   0.02  -0.04
  24   8    -0.01   0.00   0.02     0.01   0.01  -0.01    -0.01  -0.02   0.03
  25   6     0.01  -0.05  -0.01    -0.01   0.02   0.01     0.01  -0.06  -0.04
  26   6    -0.03   0.05  -0.01     0.00  -0.02   0.01     0.03   0.11  -0.06
  27   6    -0.05   0.00  -0.01     0.00   0.00   0.00     0.00  -0.01   0.01
  28   6     0.02   0.00  -0.01     0.01  -0.01   0.01    -0.01   0.00  -0.01
  29   6    -0.01   0.00   0.01     0.01  -0.02   0.00     0.00  -0.01   0.00
  30   6     0.02   0.00   0.00     0.00   0.00   0.00     0.01   0.00   0.00
  31   6    -0.01  -0.01   0.00     0.01  -0.01  -0.01     0.01  -0.01   0.00
  32   6    -0.01   0.02   0.00     0.01   0.00   0.00     0.00   0.00   0.00
  33   6    -0.02   0.02   0.00     0.01   0.01   0.00     0.00   0.02   0.00
  34   6    -0.02   0.00   0.00     0.01   0.02   0.01    -0.01   0.01   0.00
  35   6    -0.02  -0.02   0.00     0.01   0.00   0.00     0.00  -0.01   0.00
  36   6     0.00  -0.01   0.01     0.00   0.01  -0.01     0.00   0.00   0.00
  37   6    -0.01  -0.02  -0.01     0.01   0.00   0.01     0.00  -0.01   0.00
  38   6     0.03  -0.01   0.00     0.01   0.00   0.00     0.00  -0.03   0.01
  39   6     0.01  -0.03   0.00     0.01  -0.01  -0.01     0.01  -0.02   0.00
  40   6    -0.01  -0.04   0.01     0.00   0.00  -0.02     0.00  -0.02  -0.01
  41   6     0.00  -0.01   0.00    -0.01   0.01  -0.01    -0.02  -0.03   0.01
  42   6     0.02   0.01  -0.01    -0.01   0.00   0.00     0.00  -0.01   0.01
  43   6     0.01   0.00  -0.01     0.00   0.00   0.00    -0.02  -0.04   0.01
  44   6     0.01   0.01  -0.01    -0.01   0.00   0.00    -0.01  -0.01   0.02
  45   6    -0.02   0.00   0.00     0.02   0.02  -0.03     0.01   0.00  -0.02
  46   6     0.01   0.00   0.00    -0.03   0.00   0.01    -0.01  -0.01   0.01
  47   6     0.02  -0.01   0.00     0.00   0.00   0.01     0.00   0.00   0.01
  48   6     0.01   0.00  -0.02     0.00   0.00   0.01     0.01   0.00   0.00
  49   6     0.00   0.01   0.00    -0.01   0.00   0.01    -0.01  -0.01   0.01
  50   6    -0.01   0.01  -0.03     0.01   0.00   0.00     0.01   0.00   0.03
  51   6    -0.02   0.02  -0.01    -0.01   0.01   0.00    -0.01  -0.02   0.02
  52   6    -0.02   0.03   0.01    -0.01   0.01   0.00    -0.02  -0.03  -0.02
  53   6    -0.03   0.01  -0.09    -0.05  -0.04  -0.05    -0.01  -0.01   0.03
  54   6     0.00  -0.03  -0.08    -0.01  -0.01  -0.03    -0.01   0.05  -0.02
  55   1     0.05   0.02   0.13     0.01   0.01   0.07    -0.04   0.01  -0.04
  56   1     0.00  -0.01  -0.03    -0.01  -0.01  -0.01     0.02   0.03   0.03
  57   1     0.01  -0.01  -0.01     0.00   0.01   0.02     0.00  -0.01  -0.01
  58   1     0.00   0.00   0.01     0.01  -0.02  -0.01    -0.01   0.02   0.02
  59   1     0.01   0.00   0.01     0.02  -0.02  -0.01    -0.02   0.02   0.02
  60   1     0.01   0.01   0.01    -0.02  -0.03  -0.02     0.02   0.04   0.04
  61   1    -0.01   0.02   0.02     0.01   0.00   0.00    -0.03   0.02   0.00
  62   1    -0.01   0.00  -0.03     0.01   0.01   0.02    -0.06  -0.01  -0.08
  63   1    -0.07  -0.03  -0.04     0.04   0.02   0.02    -0.14  -0.04  -0.06
  64   1     0.05  -0.14  -0.04    -0.03   0.07   0.03     0.08  -0.21  -0.11
  65   1     0.08  -0.01   0.04    -0.04   0.00  -0.02     0.13   0.03   0.04
  66   1    -0.01   0.06   0.02     0.00  -0.02   0.00    -0.02   0.04   0.01
  67   1    -0.05   0.06  -0.01     0.00  -0.02   0.03     0.07   0.09  -0.20
  68   1    -0.04   0.05  -0.01    -0.01  -0.04   0.00     0.05   0.25  -0.01
  69   1    -0.05  -0.01   0.01     0.01  -0.01  -0.01     0.02  -0.07   0.02
  70   1    -0.07   0.01  -0.01    -0.01   0.01   0.01    -0.06  -0.02  -0.02
  71   1    -0.06   0.02  -0.04     0.01   0.02  -0.01     0.02   0.01   0.02
  72   1     0.03   0.00  -0.01     0.01  -0.02   0.01     0.00  -0.01  -0.01
  73   1     0.02   0.01   0.00     0.01  -0.02   0.02    -0.01   0.01  -0.02
  74   1     0.01   0.00  -0.01     0.01  -0.02  -0.01    -0.02   0.00   0.00
  75   1    -0.01   0.03   0.00     0.01  -0.01   0.00     0.01   0.00  -0.01
  76   1    -0.02   0.04   0.00     0.01   0.02   0.00    -0.01   0.03   0.00
  77   1    -0.02  -0.01   0.00     0.00   0.04   0.01    -0.01   0.03   0.00
  78   1     0.00  -0.02   0.02     0.00   0.03  -0.02     0.00   0.00  -0.01
  79   1    -0.02  -0.01  -0.02     0.01   0.00   0.01     0.00  -0.01   0.00
  80   1     0.01  -0.05   0.01     0.01  -0.01  -0.01     0.02  -0.02  -0.01
  81   1    -0.03  -0.06   0.01     0.00   0.00  -0.02     0.01  -0.02  -0.02
  82   1    -0.01  -0.02   0.00    -0.01   0.01  -0.02    -0.04  -0.04   0.01
  83   1     0.00  -0.02  -0.03     0.00   0.00  -0.01    -0.02  -0.05   0.00
  84   1     0.01   0.01   0.00    -0.01   0.01  -0.01    -0.01  -0.01   0.01
  85   1    -0.03   0.01   0.00     0.19   0.00  -0.01     0.03   0.01  -0.01
  86   1    -0.01  -0.01  -0.02    -0.09  -0.02   0.07    -0.01  -0.01  -0.01
  87   1    -0.01   0.00   0.01    -0.02   0.10  -0.18     0.00   0.01  -0.04
  88   1     0.23   0.20   0.09    -0.36  -0.29  -0.13    -0.11  -0.08  -0.03
  89   1     0.02  -0.12  -0.29    -0.03   0.16   0.44    -0.01   0.03   0.13
  90   1    -0.22  -0.08   0.20     0.30   0.12  -0.29     0.08   0.02  -0.06
  91   1     0.01   0.02   0.01    -0.02   0.01   0.03    -0.04   0.03   0.07
  92   1     0.02  -0.03  -0.01    -0.01  -0.01  -0.02    -0.03  -0.03  -0.04
  93   1     0.05  -0.01   0.01     0.03   0.00   0.01     0.07   0.00   0.02
  94   1     0.09   0.09  -0.13    -0.01  -0.02   0.03     0.09   0.08  -0.11
  95   1    -0.15  -0.02  -0.05     0.03   0.00   0.02    -0.15  -0.01  -0.02
  96   1     0.09  -0.07   0.10    -0.01   0.01  -0.01     0.08  -0.08   0.11
  97   1    -0.01   0.01   0.02    -0.02  -0.01   0.02    -0.02  -0.01   0.02
  98   1     0.00   0.01  -0.02    -0.01   0.01  -0.01    -0.01   0.00   0.00
  99   1     0.02   0.01   0.01     0.01   0.00   0.01     0.01  -0.01   0.02
 100   1     0.08  -0.14  -0.08     0.14  -0.15  -0.08     0.07  -0.04   0.00
 101   1    -0.17   0.04  -0.11    -0.18   0.03  -0.08    -0.06   0.00   0.02
 102   1     0.05   0.11   0.09     0.08   0.11   0.16     0.04   0.04   0.10
 103   1    -0.14   0.03  -0.05    -0.05   0.02  -0.02     0.08   0.00   0.03
 104   1     0.03  -0.06  -0.05     0.00  -0.01  -0.02    -0.06   0.05   0.07
 105   1     0.01   0.10   0.07    -0.01   0.03   0.03    -0.05  -0.08  -0.02
 106   1    -0.05   0.01   0.02    -0.02   0.00   0.00    -0.13   0.21  -0.31
 107   1     0.00   0.05  -0.01     0.00   0.02   0.00    -0.12   0.05   0.33
 108   1    -0.04   0.06   0.02    -0.02   0.02   0.00     0.18  -0.34  -0.12
 109   1    -0.10  -0.16   0.01    -0.06  -0.12  -0.04     0.00   0.01   0.00
 110   1    -0.11   0.00  -0.32    -0.10  -0.03  -0.12    -0.01   0.00   0.08
 111   1     0.09   0.19  -0.07    -0.04   0.02  -0.05    -0.04  -0.06   0.02
 112   1    -0.06  -0.06  -0.16    -0.03  -0.02  -0.05     0.01   0.07   0.00
 113   1     0.12  -0.05  -0.13     0.04   0.00  -0.07    -0.03   0.07  -0.02
 114   1    -0.07  -0.03  -0.06    -0.04  -0.03  -0.04    -0.02   0.04  -0.03
                    46                     47                     48
                     A                      A                      A
 Frequencies --   214.0854               216.3228               221.6796
 Red. masses --     1.1242                 1.5369                 1.3479
 Frc consts  --     0.0304                 0.0424                 0.0390
 IR Inten    --     0.1940                 0.7000                 0.5681
 Atom AN      X      Y      Z        X      Y      Z        X      Y      Z
   1   8     0.00   0.00   0.00     0.00   0.01  -0.01     0.01  -0.01   0.00
   2  12     0.01   0.00   0.00    -0.02   0.00   0.04     0.01   0.01  -0.01
   3   8     0.00   0.00   0.00    -0.02   0.05   0.00     0.00   0.03   0.01
   4   6     0.00   0.00   0.00     0.01   0.01   0.01     0.01  -0.01  -0.01
   5   7    -0.01  -0.01  -0.01     0.01  -0.01   0.00    -0.01   0.00  -0.03
   6   7     0.01   0.01   0.01    -0.02  -0.01   0.01     0.00   0.00  -0.01
   7   8     0.00   0.00   0.00     0.01   0.01   0.00     0.00  -0.01  -0.01
   8   6    -0.01  -0.01   0.00     0.00  -0.01   0.00     0.00  -0.01  -0.02
   9   6    -0.01   0.00   0.01     0.00  -0.01   0.02    -0.01  -0.01  -0.05
  10   6     0.00   0.01   0.01    -0.01  -0.01   0.01     0.01   0.00  -0.02
  11   8     0.00   0.00   0.00     0.00  -0.02   0.01     0.01   0.01   0.00
  12   6     0.00   0.00   0.00    -0.01   0.00  -0.01     0.00   0.03   0.01
  13   6     0.00   0.00   0.01     0.00   0.02  -0.01     0.00   0.02   0.02
  14   6     0.00   0.00   0.00     0.01   0.00   0.01     0.00   0.00  -0.01
  15   8     0.00   0.01  -0.01    -0.03   0.00  -0.01    -0.01   0.04  -0.02
  16   6     0.00   0.01   0.00     0.01  -0.01   0.00     0.00   0.02   0.01
  17   8     0.00   0.00   0.00     0.01   0.01   0.01     0.00   0.00  -0.01
  18   6     0.00   0.00   0.00     0.00   0.01  -0.01     0.00   0.00   0.00
  19   8     0.00   0.00   0.00     0.01   0.00   0.01     0.00   0.00   0.01
  20   8     0.00   0.00   0.00     0.00  -0.02   0.02     0.00  -0.01   0.01
  21   6     0.00   0.00   0.00    -0.01   0.00   0.00     0.00  -0.01   0.00
  22   6     0.00   0.00   0.00    -0.01   0.01  -0.01     0.00   0.00   0.00
  23   6     0.00   0.00   0.00    -0.01   0.01  -0.03     0.00  -0.01   0.00
  24   8     0.00   0.00   0.00     0.00  -0.01   0.03     0.00  -0.01   0.00
  25   6     0.00   0.00   0.00     0.01  -0.03  -0.03     0.01  -0.01  -0.01
  26   6     0.00   0.01   0.00     0.02   0.09  -0.05    -0.01   0.00   0.01
  27   6    -0.01   0.00   0.01     0.03  -0.01  -0.01    -0.03   0.00   0.03
  28   6     0.00   0.00   0.00     0.01   0.01   0.01     0.00  -0.01  -0.01
  29   6    -0.01   0.00  -0.01     0.01  -0.02  -0.01     0.00   0.00  -0.01
  30   6     0.01   0.00   0.00    -0.01  -0.01   0.00     0.00  -0.01   0.00
  31   6    -0.01   0.01   0.00     0.01  -0.01  -0.01    -0.02  -0.01   0.00
  32   6    -0.01   0.01   0.02     0.01   0.01   0.00    -0.01   0.00   0.02
  33   6     0.01  -0.01   0.02     0.01   0.03   0.01     0.00   0.01   0.02
  34   6     0.02  -0.02   0.01     0.02   0.01   0.00     0.01   0.01   0.01
  35   6     0.01   0.00  -0.01     0.02  -0.01  -0.01     0.01  -0.01  -0.01
  36   6     0.00   0.01   0.01     0.00   0.00  -0.01    -0.01  -0.01   0.01
  37   6     0.01   0.01  -0.01     0.01  -0.01   0.00     0.00  -0.01   0.00
  38   6     0.01  -0.01   0.00    -0.01   0.00   0.01     0.00  -0.01   0.00
  39   6     0.01  -0.01   0.00    -0.02  -0.01   0.02    -0.01  -0.02   0.00
  40   6     0.01  -0.01  -0.01    -0.03  -0.03   0.03     0.01   0.01  -0.02
  41   6     0.00  -0.01   0.00    -0.02  -0.02   0.02     0.01   0.02  -0.03
  42   6     0.00   0.00   0.00     0.00   0.00  -0.01     0.00   0.00   0.00
  43   6     0.00  -0.01   0.00     0.00   0.01   0.01     0.00   0.00  -0.01
  44   6     0.00   0.00   0.01     0.01   0.00  -0.02    -0.01   0.00   0.00
  45   6     0.00   0.00   0.01     0.01   0.01  -0.03     0.01   0.00  -0.02
  46   6     0.01   0.01  -0.02    -0.01   0.00   0.00    -0.01  -0.02   0.00
  47   6     0.02   0.01  -0.02     0.02   0.00   0.01    -0.02  -0.01   0.01
  48   6    -0.03   0.01   0.00    -0.02   0.00  -0.01    -0.01  -0.01  -0.01
  49   6    -0.01   0.00   0.01     0.02   0.01  -0.02    -0.02  -0.01   0.02
  50   6     0.01   0.00   0.01    -0.02  -0.01  -0.04     0.01   0.00   0.01
  51   6    -0.01   0.00   0.00     0.00   0.02   0.02    -0.02   0.03   0.01
  52   6    -0.01   0.00  -0.01     0.01   0.00   0.01     0.00  -0.01  -0.02
  53   6    -0.02  -0.01   0.00    -0.02  -0.02   0.00     0.03   0.00   0.03
  54   6    -0.01   0.02  -0.01     0.00  -0.03   0.01     0.02   0.01   0.05
  55   1    -0.01   0.00   0.01     0.01  -0.01   0.02     0.00  -0.01  -0.04
  56   1     0.00   0.00   0.01     0.03   0.02   0.00     0.01   0.02   0.04
  57   1     0.00   0.00  -0.01     0.02   0.00   0.01    -0.01   0.00  -0.01
  58   1     0.00   0.01   0.00     0.01  -0.02   0.00    -0.01   0.02   0.01
  59   1    -0.01   0.01   0.00     0.04  -0.01   0.00    -0.02   0.02   0.01
  60   1     0.00   0.01   0.00     0.00  -0.03  -0.01     0.02   0.03   0.02
  61   1     0.00   0.00   0.00    -0.02   0.03  -0.01    -0.01   0.00   0.00
  62   1    -0.01   0.00   0.00    -0.04   0.00  -0.06     0.01  -0.01   0.00
  63   1     0.00   0.00   0.00    -0.16  -0.01  -0.04    -0.07   0.00   0.00
  64   1     0.00  -0.01   0.00     0.08  -0.19  -0.12     0.04  -0.08  -0.04
  65   1     0.00   0.00   0.00     0.13   0.08   0.04     0.06   0.04   0.02
  66   1     0.00   0.01   0.00    -0.04   0.02   0.03     0.01   0.01   0.00
  67   1     0.00   0.01  -0.01     0.07   0.06  -0.18    -0.03   0.01   0.03
  68   1     0.00   0.01   0.00     0.03   0.24  -0.01    -0.01  -0.03   0.00
  69   1     0.00  -0.02   0.01     0.07  -0.08  -0.03     0.01  -0.09   0.05
  70   1    -0.03   0.00   0.01    -0.03  -0.02  -0.03    -0.13   0.00   0.02
  71   1     0.00   0.02   0.00     0.08   0.03   0.01     0.01   0.07   0.02
  72   1     0.00   0.00   0.00     0.01   0.00   0.01     0.01  -0.02  -0.01
  73   1     0.00   0.00   0.00     0.01   0.01   0.01     0.01  -0.01  -0.01
  74   1     0.00   0.00   0.00     0.00   0.00   0.02     0.00  -0.01  -0.02
  75   1    -0.02   0.02   0.03     0.00   0.02   0.01    -0.02   0.00   0.03
  76   1     0.01  -0.02   0.03     0.01   0.06   0.01     0.00   0.02   0.04
  77   1     0.03  -0.03   0.01     0.02   0.02   0.00     0.02   0.01   0.01
  78   1     0.00   0.00   0.02     0.00   0.00  -0.01    -0.01  -0.01   0.02
  79   1     0.01   0.03   0.01     0.02   0.00   0.02     0.01  -0.01   0.01
  80   1     0.02  -0.02  -0.01    -0.02  -0.01   0.02    -0.01  -0.03   0.00
  81   1     0.01  -0.01  -0.02    -0.05  -0.04   0.05     0.02   0.02  -0.04
  82   1    -0.01  -0.01  -0.01    -0.01  -0.02   0.02     0.02   0.04  -0.04
  83   1     0.00  -0.02  -0.02     0.00   0.02   0.01     0.00   0.00  -0.02
  84   1     0.00   0.00   0.01     0.01   0.00  -0.01    -0.01   0.00   0.00
  85   1     0.08  -0.02   0.02     0.01   0.02  -0.02     0.30  -0.06   0.02
  86   1    -0.05  -0.01   0.06     0.01   0.00  -0.04    -0.20  -0.09   0.17
  87   1    -0.02   0.04  -0.05     0.01   0.00  -0.04    -0.07   0.16  -0.28
  88   1     0.11   0.07   0.01    -0.09  -0.07  -0.03     0.07   0.05   0.03
  89   1     0.01  -0.03  -0.14    -0.01   0.03   0.11    -0.01  -0.06  -0.10
  90   1    -0.07  -0.02   0.04     0.08   0.02  -0.06    -0.09  -0.04   0.07
  91   1     0.12  -0.06  -0.15     0.01   0.01   0.02    -0.09   0.04   0.11
  92   1     0.10   0.07   0.11     0.01  -0.01   0.00    -0.08  -0.05  -0.09
  93   1    -0.15   0.00  -0.04     0.04  -0.01   0.02     0.11   0.00   0.02
  94   1    -0.29  -0.24   0.33    -0.13  -0.09   0.13     0.00   0.03  -0.02
  95   1     0.44   0.03   0.03     0.16   0.00  -0.01    -0.05  -0.01  -0.01
  96   1    -0.27   0.23  -0.36    -0.13   0.08  -0.16     0.00  -0.03   0.01
  97   1    -0.02   0.00   0.02     0.03   0.01  -0.03    -0.04  -0.02   0.04
  98   1    -0.01   0.00   0.00     0.03   0.02  -0.02    -0.03  -0.01   0.00
  99   1     0.01   0.00   0.02     0.02   0.00  -0.03     0.00   0.00   0.04
 100   1     0.08  -0.08  -0.03    -0.19   0.16   0.07     0.16  -0.16  -0.08
 101   1    -0.10   0.02  -0.02     0.23  -0.04   0.03    -0.21   0.03  -0.06
 102   1     0.05   0.07   0.10    -0.11  -0.16  -0.26     0.09   0.14   0.21
 103   1    -0.02   0.00  -0.01    -0.10   0.04  -0.02    -0.19   0.06  -0.06
 104   1    -0.01   0.00   0.00     0.06  -0.06   0.00     0.08  -0.10  -0.03
 105   1    -0.01   0.00   0.01     0.05   0.11   0.08     0.05   0.17   0.13
 106   1    -0.07   0.09  -0.11     0.10  -0.17   0.22     0.09  -0.15   0.16
 107   1    -0.04   0.04   0.13     0.08  -0.06  -0.25     0.07  -0.05  -0.25
 108   1     0.07  -0.11  -0.04    -0.15   0.21   0.07    -0.15   0.18   0.03
 109   1    -0.03  -0.03   0.03    -0.02  -0.04   0.00     0.04   0.06   0.01
 110   1    -0.04  -0.01  -0.02    -0.03  -0.01  -0.01     0.06   0.00   0.09
 111   1     0.00  -0.01   0.01    -0.01  -0.02   0.00     0.02  -0.05   0.03
 112   1    -0.01   0.02  -0.01    -0.03  -0.03  -0.05     0.05   0.02   0.09
 113   1    -0.01   0.03  -0.03     0.04  -0.09   0.02    -0.03   0.02   0.07
 114   1    -0.03   0.00  -0.02    -0.01   0.02   0.05     0.06   0.01   0.04
                    49                     50                     51
                     A                      A                      A
 Frequencies --   222.3429               228.5969               231.9492
 Red. masses --     1.2319                 1.2658                 2.6531
 Frc consts  --     0.0359                 0.0390                 0.0841
 IR Inten    --     0.0252                 3.6447                 4.1992
 Atom AN      X      Y      Z        X      Y      Z        X      Y      Z
   1   8    -0.01   0.01   0.00     0.00   0.00   0.00    -0.07   0.06   0.00
   2  12    -0.01   0.00   0.01     0.01   0.00   0.00    -0.03   0.00   0.00
   3   8     0.00  -0.01   0.01     0.00  -0.02   0.01    -0.01   0.03   0.00
   4   6     0.00   0.01   0.01     0.00   0.00   0.00    -0.04   0.07   0.06
   5   7     0.00   0.01  -0.01     0.00   0.00   0.00    -0.01   0.02  -0.02
   6   7    -0.01   0.00   0.00     0.01   0.01   0.00     0.02   0.02   0.02
   7   8     0.00   0.01   0.01     0.00   0.00   0.00    -0.03   0.08   0.05
   8   6     0.01   0.01   0.01     0.00   0.00   0.00     0.01   0.01  -0.02
   9   6     0.02   0.01   0.02     0.00   0.00   0.00     0.00   0.00  -0.04
  10   6     0.00   0.00   0.00     0.00   0.01   0.00     0.01   0.01  -0.01
  11   8    -0.01   0.00  -0.01     0.00   0.00  -0.01    -0.04  -0.06   0.00
  12   6     0.00  -0.01   0.00     0.00   0.00   0.00    -0.03  -0.08  -0.03
  13   6     0.00  -0.01   0.01    -0.01  -0.01   0.00     0.02  -0.02  -0.04
  14   6     0.00   0.01   0.00     0.00   0.00  -0.01     0.00   0.01   0.05
  15   8    -0.01   0.00  -0.02     0.00   0.00   0.00    -0.02  -0.11   0.02
  16   6     0.00  -0.01  -0.01     0.00   0.00   0.00     0.01  -0.09  -0.07
  17   8     0.00   0.00   0.00     0.00  -0.01   0.03     0.00   0.00  -0.01
  18   6     0.00   0.00   0.00     0.00  -0.01   0.01     0.01   0.00   0.01
  19   8     0.00   0.00   0.00    -0.01   0.00   0.00     0.01   0.00   0.01
  20   8     0.00   0.00   0.00     0.01   0.00   0.01     0.01  -0.01   0.01
  21   6     0.01   0.00   0.00     0.01   0.00   0.01     0.00  -0.01   0.00
  22   6     0.01   0.00   0.00     0.00   0.00   0.01     0.00   0.00  -0.01
  23   6     0.01   0.00   0.01     0.00   0.01  -0.02     0.00   0.00   0.00
  24   8     0.00   0.00  -0.01    -0.01   0.01  -0.02     0.00  -0.01   0.00
  25   6    -0.01   0.01   0.01    -0.03   0.00   0.01     0.00   0.01   0.00
  26   6     0.01  -0.02   0.00     0.06   0.05  -0.06     0.02   0.00  -0.01
  27   6    -0.02   0.00   0.01    -0.01   0.01   0.01     0.15  -0.02  -0.06
  28   6     0.02  -0.01   0.00     0.01   0.00  -0.01     0.03   0.03   0.06
  29   6     0.00   0.00  -0.01     0.00   0.00   0.00    -0.01   0.02   0.00
  30   6    -0.01   0.00   0.00     0.01   0.00   0.00     0.02   0.02   0.00
  31   6    -0.01  -0.01   0.00     0.00   0.01   0.00    -0.01   0.01   0.01
  32   6    -0.01   0.00   0.02     0.00   0.00   0.00    -0.01  -0.01   0.01
  33   6     0.01   0.02   0.03     0.00  -0.01   0.00     0.00  -0.02   0.01
  34   6     0.02   0.01   0.01     0.00   0.00   0.00     0.00  -0.01   0.00
  35   6     0.02  -0.01  -0.01     0.00   0.01   0.00     0.00   0.01   0.00
  36   6    -0.01  -0.01   0.00     0.00   0.00   0.00    -0.01   0.01   0.01
  37   6     0.01  -0.01   0.00     0.00   0.01   0.00    -0.01   0.01   0.00
  38   6    -0.01   0.02   0.00    -0.01  -0.02   0.01     0.03   0.00   0.00
  39   6     0.00   0.03   0.00    -0.01  -0.02   0.01     0.01  -0.03  -0.01
  40   6    -0.01   0.01   0.02    -0.01  -0.02   0.01    -0.03  -0.04  -0.02
  41   6    -0.01  -0.01   0.02    -0.01  -0.02   0.01    -0.03   0.00  -0.02
  42   6    -0.01   0.00   0.00     0.00   0.00   0.00     0.00   0.03  -0.01
  43   6     0.00   0.01   0.01    -0.01  -0.01   0.01     0.02   0.00   0.00
  44   6     0.00   0.00   0.00     0.00   0.00   0.00     0.00   0.02  -0.01
  45   6     0.00   0.00  -0.04     0.00   0.00   0.01     0.00   0.00   0.03
  46   6    -0.02  -0.02   0.00     0.00   0.00  -0.01     0.00   0.01   0.00
  47   6    -0.01  -0.01   0.01    -0.01   0.00   0.00    -0.03   0.00  -0.01
  48   6    -0.02  -0.01  -0.01     0.01   0.00   0.01     0.00   0.00   0.00
  49   6     0.02   0.01  -0.02     0.00   0.00   0.00     0.00   0.00   0.04
  50   6     0.00   0.00  -0.01     0.00   0.00  -0.01     0.00  -0.01  -0.04
  51   6     0.02  -0.02  -0.01    -0.01   0.02   0.03     0.00   0.00  -0.01
  52   6     0.01   0.00   0.02     0.00  -0.02  -0.02    -0.01   0.02   0.03
  53   6     0.01   0.02  -0.01     0.00   0.00   0.00     0.04   0.03   0.01
  54   6     0.00  -0.02  -0.04     0.00   0.02   0.00     0.02   0.02   0.03
  55   1     0.02   0.01   0.03    -0.01   0.01   0.00     0.00   0.00  -0.04
  56   1     0.01  -0.01   0.00    -0.01  -0.01   0.00     0.07  -0.03  -0.06
  57   1     0.00   0.01   0.01     0.00   0.00  -0.01     0.05   0.00   0.04
  58   1     0.01  -0.01  -0.01     0.00   0.00   0.00     0.06  -0.12  -0.08
  59   1     0.01  -0.01  -0.01     0.00   0.00   0.00     0.14  -0.10  -0.06
  60   1    -0.01  -0.02  -0.02     0.00   0.00   0.00    -0.08  -0.18  -0.13
  61   1     0.01  -0.01   0.00     0.01  -0.01  -0.02     0.00   0.00  -0.01
  62   1     0.01   0.00   0.01    -0.05   0.01  -0.05     0.00   0.00  -0.01
  63   1     0.08   0.00   0.01     0.42  -0.06  -0.05    -0.06   0.02   0.02
  64   1    -0.05   0.10   0.05    -0.21   0.41   0.20     0.02  -0.03  -0.03
  65   1    -0.07  -0.05  -0.03    -0.33  -0.35  -0.11     0.03   0.06   0.00
  66   1     0.00  -0.03  -0.01    -0.08  -0.09   0.01    -0.01  -0.03   0.00
  67   1     0.02  -0.03   0.01     0.20  -0.01  -0.25     0.05  -0.01  -0.05
  68   1     0.01  -0.02   0.00     0.10   0.28   0.01     0.03   0.05   0.01
  69   1     0.03  -0.10   0.01    -0.02   0.02   0.01     0.26  -0.20  -0.19
  70   1    -0.14   0.01   0.03     0.00   0.01   0.02    -0.01  -0.01  -0.04
  71   1     0.04   0.10   0.00    -0.02   0.00  -0.01     0.31   0.14   0.02
  72   1     0.03  -0.02   0.00     0.02   0.00  -0.01     0.03   0.04   0.03
  73   1     0.03  -0.02   0.02     0.02   0.00   0.00     0.03   0.03   0.07
  74   1     0.03  -0.01  -0.02     0.02   0.00  -0.01     0.04   0.04   0.07
  75   1    -0.01   0.01   0.03     0.00   0.00   0.00    -0.01  -0.02   0.01
  76   1     0.01   0.05   0.04     0.00  -0.02  -0.01     0.00  -0.04   0.01
  77   1     0.03   0.02   0.01     0.00  -0.01   0.00     0.01  -0.01   0.00
  78   1    -0.01  -0.01   0.01     0.00   0.00   0.00    -0.01   0.00   0.02
  79   1     0.02  -0.02   0.02     0.00   0.00   0.00    -0.01   0.00   0.00
  80   1     0.00   0.04   0.00    -0.01  -0.03   0.01     0.02  -0.05  -0.02
  81   1    -0.01   0.01   0.03    -0.02  -0.03   0.01    -0.05  -0.07  -0.02
  82   1    -0.01  -0.02   0.03    -0.02  -0.02   0.01    -0.05  -0.01  -0.02
  83   1     0.00   0.02   0.02    -0.01  -0.02   0.00     0.01  -0.02  -0.02
  84   1     0.00  -0.01  -0.01     0.00   0.00   0.00     0.00   0.03  -0.01
  85   1     0.35  -0.06   0.01     0.01  -0.01   0.01     0.10  -0.05   0.04
  86   1    -0.25  -0.11   0.18    -0.02   0.00   0.03    -0.07  -0.02   0.11
  87   1    -0.09   0.20  -0.34    -0.01   0.01   0.00    -0.03   0.05  -0.05
  88   1     0.06   0.06   0.03     0.02   0.02   0.00     0.07   0.06   0.02
  89   1    -0.01  -0.08  -0.10     0.00  -0.02  -0.04     0.00  -0.01  -0.08
  90   1    -0.12  -0.05   0.07    -0.03  -0.01   0.01    -0.05  -0.01   0.05
  91   1    -0.11   0.05   0.14     0.01  -0.01  -0.02     0.00  -0.04  -0.04
  92   1    -0.09  -0.07  -0.11     0.01   0.02   0.02    -0.01   0.04   0.02
  93   1     0.15   0.00   0.03    -0.04   0.00  -0.01    -0.09   0.00  -0.02
  94   1    -0.03   0.01   0.00     0.02   0.01  -0.02     0.04   0.05  -0.05
  95   1    -0.02  -0.01  -0.02    -0.02   0.00   0.01    -0.09   0.00   0.01
  96   1    -0.02  -0.01  -0.03     0.02  -0.01   0.03     0.04  -0.05   0.07
  97   1     0.04   0.02  -0.05    -0.01  -0.01   0.01    -0.08  -0.05   0.11
  98   1     0.03   0.01   0.00     0.00   0.00   0.00    -0.02   0.04  -0.04
  99   1     0.00   0.00  -0.04     0.01   0.00   0.01     0.11   0.00   0.09
 100   1    -0.14   0.15   0.08     0.00  -0.02  -0.01     0.08  -0.15  -0.09
 101   1     0.20  -0.03   0.06    -0.02   0.00  -0.02    -0.12   0.02  -0.13
 102   1    -0.08  -0.13  -0.18     0.00   0.01   0.00     0.05   0.05   0.07
 103   1     0.19  -0.05   0.06    -0.10   0.05  -0.02    -0.15   0.02  -0.05
 104   1    -0.07   0.11   0.03     0.04  -0.06   0.02     0.08  -0.11  -0.05
 105   1    -0.04  -0.16  -0.12     0.03   0.10   0.10     0.05   0.11   0.09
 106   1    -0.05   0.10  -0.10     0.04  -0.06   0.04    -0.09   0.10  -0.08
 107   1    -0.04   0.03   0.17     0.02  -0.03  -0.10    -0.04   0.07   0.18
 108   1     0.11  -0.11  -0.02    -0.06   0.03  -0.01     0.09  -0.07   0.00
 109   1    -0.01  -0.01   0.01     0.00   0.00   0.00     0.05   0.09   0.00
 110   1     0.00   0.01  -0.04     0.00   0.00   0.00     0.08   0.02   0.06
 111   1     0.02   0.04   0.00     0.00   0.00   0.00     0.03   0.00   0.01
 112   1    -0.02  -0.04  -0.05     0.00   0.03  -0.02     0.06   0.03   0.11
 113   1     0.04  -0.03  -0.05     0.00   0.00   0.01    -0.05   0.10   0.01
 114   1    -0.01  -0.02  -0.03    -0.01   0.04   0.02     0.04  -0.04  -0.03
                    52                     53                     54
                     A                      A                      A
 Frequencies --   235.0560               241.5867               244.0214
 Red. masses --     1.1715                 1.9802                 1.8149
 Frc consts  --     0.0381                 0.0681                 0.0637
 IR Inten    --     0.5926                 4.0997                 0.8359
 Atom AN      X      Y      Z        X      Y      Z        X      Y      Z
   1   8     0.00   0.00   0.00    -0.02  -0.02   0.01     0.02   0.00  -0.01
   2  12    -0.02   0.01   0.00     0.03  -0.02  -0.07    -0.03   0.02   0.03
   3   8     0.00   0.00  -0.01     0.03  -0.03   0.00    -0.02   0.06   0.00
   4   6     0.00   0.00   0.00    -0.01  -0.01   0.00     0.02   0.00   0.00
   5   7    -0.02   0.01  -0.01    -0.02  -0.01  -0.02    -0.01   0.00   0.00
   6   7     0.00   0.00   0.02     0.01  -0.01  -0.03     0.00  -0.02  -0.01
   7   8     0.00   0.00   0.00    -0.01  -0.01   0.00     0.02   0.00  -0.01
   8   6    -0.02   0.02   0.00     0.01  -0.01   0.01     0.01  -0.01  -0.01
   9   6    -0.02   0.00   0.00     0.03  -0.01   0.04     0.01  -0.03  -0.02
  10   6    -0.02   0.00   0.01     0.02   0.00   0.01     0.01  -0.03   0.00
  11   8     0.00   0.00   0.00     0.01   0.03   0.02     0.00  -0.01   0.00
  12   6     0.00   0.00   0.00     0.02   0.01   0.01    -0.01   0.01  -0.01
  13   6     0.00   0.00  -0.01     0.02  -0.01   0.00     0.00   0.04  -0.01
  14   6     0.00   0.00   0.00    -0.02   0.01   0.01     0.01  -0.01   0.00
  15   8     0.00  -0.01   0.01     0.06  -0.01   0.03    -0.04   0.01   0.01
  16   6     0.00   0.00   0.00    -0.02   0.01   0.00     0.01   0.01   0.01
  17   8     0.01   0.00   0.01    -0.03   0.00  -0.02     0.02   0.00   0.02
  18   6     0.00   0.00   0.00    -0.01   0.00   0.02     0.01   0.00  -0.02
  19   8     0.00   0.00  -0.01    -0.03   0.00   0.02     0.03   0.00  -0.02
  20   8     0.00   0.00   0.00     0.00   0.01   0.01     0.00  -0.03   0.00
  21   6     0.00   0.00   0.00    -0.01   0.00   0.00    -0.01  -0.01   0.01
  22   6     0.01   0.00   0.01    -0.02   0.00  -0.02     0.01   0.00   0.01
  23   6     0.00   0.00   0.00     0.00   0.01   0.01    -0.01  -0.01  -0.02
  24   8     0.00   0.00   0.00     0.02   0.00   0.00    -0.03  -0.01   0.02
  25   6     0.00   0.00   0.01    -0.01   0.01  -0.02     0.02  -0.04  -0.01
  26   6    -0.01  -0.01   0.01     0.07   0.02  -0.05    -0.05   0.03   0.02
  27   6    -0.01   0.00  -0.01     0.09  -0.02  -0.01     0.01  -0.01  -0.02
  28   6     0.00   0.01   0.00    -0.07   0.00   0.01     0.00   0.01   0.00
  29   6    -0.01   0.01   0.00    -0.02   0.01   0.00    -0.02  -0.01   0.00
  30   6     0.01   0.00   0.01     0.01   0.00  -0.01     0.01   0.00  -0.01
  31   6    -0.01   0.00   0.00    -0.04   0.01   0.02    -0.02  -0.03   0.01
  32   6     0.00  -0.02   0.00    -0.03  -0.02   0.03    -0.02  -0.01   0.01
  33   6     0.01  -0.02   0.01    -0.02  -0.05   0.03    -0.02   0.03   0.02
  34   6     0.01   0.00   0.00    -0.01  -0.01   0.01    -0.02   0.01   0.01
  35   6     0.01   0.01   0.00    -0.02   0.02   0.00    -0.01  -0.02   0.00
  36   6     0.00   0.00   0.00    -0.01   0.02   0.03     0.01  -0.02   0.02
  37   6     0.01   0.00   0.00    -0.01   0.02  -0.02    -0.01  -0.02  -0.02
  38   6     0.02  -0.01   0.00    -0.02   0.00   0.01     0.01   0.03  -0.01
  39   6     0.02  -0.02  -0.01    -0.01   0.00   0.02    -0.01   0.00   0.01
  40   6     0.01  -0.02  -0.01    -0.01   0.00   0.03    -0.03  -0.03   0.03
  41   6     0.00   0.00  -0.01     0.01  -0.01   0.02     0.01   0.00   0.00
  42   6     0.00   0.00   0.00     0.02   0.00   0.00     0.03   0.02  -0.02
  43   6     0.01  -0.01  -0.01    -0.02   0.00   0.01     0.01   0.03  -0.02
  44   6     0.00   0.00   0.00     0.00   0.01   0.00     0.02   0.03  -0.01
  45   6     0.01   0.00   0.01     0.01   0.00   0.05     0.03  -0.01  -0.01
  46   6     0.02   0.01  -0.01     0.03   0.03   0.00     0.03   0.00   0.04
  47   6    -0.01  -0.01  -0.02    -0.03   0.00  -0.05     0.02  -0.02  -0.01
  48   6     0.03   0.01  -0.01     0.02   0.02  -0.01    -0.02   0.00  -0.05
  49   6     0.02   0.00   0.00    -0.04   0.02   0.01    -0.02   0.01   0.03
  50   6     0.00   0.00   0.00    -0.01   0.01  -0.01    -0.02   0.01  -0.05
  51   6    -0.01   0.00  -0.01    -0.01   0.01   0.01     0.01  -0.02  -0.05
  52   6     0.00   0.00   0.01    -0.01   0.00  -0.02    -0.01   0.05   0.02
  53   6    -0.02   0.02   0.01     0.01   0.00  -0.04     0.05   0.01   0.00
  54   6    -0.03   0.01   0.00     0.02  -0.01  -0.02     0.03  -0.03   0.05
  55   1    -0.01   0.00  -0.01     0.02   0.00   0.06     0.02  -0.03  -0.01
  56   1     0.00   0.00  -0.01    -0.01  -0.01   0.01     0.01   0.04   0.01
  57   1     0.00   0.00   0.00    -0.02   0.01   0.02     0.01  -0.01   0.00
  58   1     0.00   0.00   0.00    -0.01   0.02   0.00     0.00   0.00   0.01
  59   1     0.00   0.00   0.00    -0.05   0.01  -0.01     0.02   0.01   0.02
  60   1     0.00   0.00   0.01    -0.01   0.03   0.00     0.02   0.01   0.02
  61   1     0.01   0.00   0.01    -0.02   0.00  -0.02     0.01   0.01   0.01
  62   1     0.01   0.00   0.01    -0.04   0.02  -0.02     0.02  -0.03  -0.02
  63   1     0.05  -0.01   0.00    -0.14   0.03   0.02     0.26  -0.07  -0.09
  64   1    -0.02   0.04   0.04     0.04  -0.09  -0.08    -0.06   0.14   0.08
  65   1    -0.04  -0.05  -0.01     0.08   0.13   0.02    -0.12  -0.26  -0.03
  66   1     0.00   0.00   0.01    -0.02  -0.06  -0.05     0.01   0.07   0.05
  67   1    -0.03  -0.01   0.04     0.15  -0.02  -0.16    -0.12   0.06   0.07
  68   1    -0.02  -0.04   0.00     0.12   0.13   0.01    -0.09  -0.02  -0.01
  69   1    -0.03   0.04   0.00     0.04   0.12  -0.05     0.02  -0.03  -0.01
  70   1     0.04   0.00  -0.02     0.27  -0.03  -0.03     0.00  -0.02  -0.05
  71   1    -0.03  -0.04  -0.01     0.04  -0.15   0.04     0.02  -0.02   0.01
  72   1     0.00   0.01   0.00    -0.10   0.01   0.04     0.01   0.00   0.00
  73   1     0.00   0.01   0.00    -0.09  -0.03  -0.03     0.00   0.03   0.00
  74   1     0.00   0.01   0.01    -0.06   0.00   0.02    -0.02   0.01   0.02
  75   1    -0.01  -0.03   0.01    -0.04  -0.03   0.03    -0.02  -0.01   0.01
  76   1     0.01  -0.03   0.01    -0.01  -0.09   0.03    -0.03   0.06   0.03
  77   1     0.01   0.01   0.00     0.01  -0.02   0.02    -0.01   0.03   0.02
  78   1     0.01   0.00   0.01     0.00   0.00   0.06     0.01  -0.03   0.04
  79   1     0.02  -0.01   0.00    -0.01   0.01  -0.02    -0.01  -0.01  -0.03
  80   1     0.02  -0.02  -0.01    -0.02   0.01   0.02    -0.03  -0.01   0.02
  81   1     0.00  -0.02  -0.02    -0.01  -0.01   0.04    -0.06  -0.06   0.06
  82   1    -0.01   0.00  -0.01     0.01  -0.02   0.02     0.02   0.00   0.00
  83   1     0.01  -0.02  -0.02    -0.02   0.01   0.01     0.00   0.03  -0.01
  84   1     0.00  -0.01   0.00     0.02   0.03   0.02     0.02   0.04   0.01
  85   1    -0.11   0.03  -0.01     0.09  -0.04   0.05    -0.03   0.04  -0.01
  86   1     0.10   0.04  -0.07    -0.02   0.00   0.12     0.10   0.02  -0.07
  87   1     0.04  -0.08   0.11     0.00   0.03  -0.01     0.05  -0.08   0.03
  88   1     0.02  -0.01  -0.02     0.08   0.03   0.01    -0.04  -0.04   0.02
  89   1     0.02   0.04   0.01     0.02   0.06  -0.04     0.02   0.06   0.13
  90   1     0.05   0.02  -0.03     0.03   0.03   0.01     0.12   0.00   0.00
  91   1    -0.28   0.16   0.32    -0.17   0.05   0.11    -0.01   0.02   0.02
  92   1    -0.21  -0.24  -0.38    -0.14  -0.12  -0.24     0.00  -0.06  -0.05
  93   1     0.45   0.05  -0.01     0.18   0.04  -0.08     0.08  -0.01  -0.01
  94   1    -0.04  -0.08   0.08     0.00  -0.02   0.01    -0.07  -0.01   0.01
  95   1     0.19   0.01  -0.01     0.08   0.02  -0.01     0.04  -0.02  -0.08
  96   1    -0.04   0.10  -0.10     0.00   0.06  -0.04    -0.07   0.05  -0.11
  97   1     0.01  -0.01   0.01    -0.06   0.03   0.03    -0.06  -0.01   0.07
  98   1     0.02   0.01   0.00    -0.05   0.00  -0.02    -0.04   0.00  -0.01
  99   1     0.03  -0.01   0.00    -0.02   0.02   0.02     0.02   0.04   0.07
 100   1    -0.02   0.02   0.01     0.02  -0.05  -0.02     0.06  -0.15  -0.10
 101   1     0.03  -0.01   0.01    -0.07   0.02  -0.04    -0.19   0.05  -0.15
 102   1    -0.01  -0.02  -0.02     0.01   0.05   0.03     0.04   0.13   0.06
 103   1    -0.21   0.01  -0.07     0.27   0.00   0.08     0.32  -0.07   0.07
 104   1     0.10  -0.15  -0.06    -0.16   0.22   0.09    -0.17   0.23   0.01
 105   1     0.07   0.15   0.11    -0.12  -0.21  -0.14    -0.12  -0.28  -0.24
 106   1    -0.05   0.06  -0.06     0.06  -0.09   0.09    -0.03   0.01   0.05
 107   1    -0.02   0.03   0.11     0.04  -0.03  -0.18     0.01   0.06   0.00
 108   1     0.06  -0.06  -0.01    -0.11   0.10   0.00    -0.02   0.10   0.04
 109   1    -0.02   0.03   0.01     0.01  -0.03  -0.03     0.05   0.05  -0.01
 110   1    -0.01   0.02   0.02     0.01  -0.01  -0.08     0.08  -0.01   0.02
 111   1    -0.02   0.01   0.01     0.03   0.05  -0.04     0.04   0.00  -0.01
 112   1    -0.02   0.02   0.00     0.00  -0.01  -0.05     0.06  -0.03   0.14
 113   1    -0.03   0.02  -0.01     0.06  -0.03  -0.02    -0.04   0.04   0.04
 114   1    -0.04   0.01   0.00     0.00   0.01   0.00     0.07  -0.09  -0.01
                    55                     56                     57
                     A                      A                      A
 Frequencies --   244.3959               249.3865               253.8190
 Red. masses --     2.2206                 2.2631                 2.6404
 Frc consts  --     0.0781                 0.0829                 0.1002
 IR Inten    --     1.1549                 2.0155                 2.1164
 Atom AN      X      Y      Z        X      Y      Z        X      Y      Z
   1   8     0.00   0.03  -0.02    -0.02   0.02   0.00    -0.01   0.02  -0.01
   2  12     0.01  -0.02   0.04     0.03   0.03  -0.01    -0.02   0.04   0.04
   3   8    -0.02   0.00   0.04    -0.01   0.06  -0.01    -0.01  -0.03   0.01
   4   6     0.00   0.02   0.01    -0.01   0.02   0.02    -0.01   0.01   0.00
   5   7     0.01  -0.04   0.02     0.00   0.01   0.02     0.00   0.06   0.02
   6   7     0.01  -0.01  -0.02     0.02   0.01  -0.03     0.02   0.01  -0.02
   7   8    -0.01   0.03   0.00    -0.02   0.02   0.01    -0.01   0.02   0.00
   8   6     0.00  -0.04   0.01     0.00   0.01   0.02     0.00   0.05   0.00
   9   6    -0.01  -0.02   0.01     0.00   0.02   0.03     0.00   0.02  -0.01
  10   6     0.00  -0.01   0.00     0.01   0.02  -0.02     0.00   0.02  -0.02
  11   8    -0.02  -0.04  -0.03    -0.01  -0.03   0.01    -0.01  -0.04  -0.02
  12   6    -0.03  -0.03   0.00    -0.01  -0.02  -0.01    -0.01  -0.04   0.00
  13   6    -0.02  -0.02   0.04     0.02   0.02  -0.03    -0.01  -0.03   0.00
  14   6     0.02   0.00  -0.01     0.00  -0.01   0.02     0.01  -0.01   0.00
  15   8    -0.07   0.01  -0.04    -0.01  -0.03   0.02    -0.03  -0.03  -0.01
  16   6     0.02  -0.04  -0.03     0.00  -0.03  -0.02     0.01  -0.03  -0.02
  17   8     0.00   0.00  -0.01     0.01   0.01   0.01     0.01  -0.03   0.00
  18   6     0.00   0.00   0.00     0.00   0.01  -0.01     0.00  -0.01   0.02
  19   8     0.01  -0.01   0.03     0.02   0.01  -0.02    -0.04  -0.01   0.02
  20   8     0.01   0.01   0.00     0.00  -0.02   0.00     0.01   0.01   0.01
  21   6     0.01   0.00   0.00    -0.01  -0.01   0.00     0.03  -0.01   0.00
  22   6     0.00   0.00  -0.01     0.00   0.00   0.00     0.01  -0.03   0.02
  23   6     0.01   0.01   0.00    -0.01  -0.01   0.00     0.02   0.01   0.01
  24   8     0.01   0.01  -0.02    -0.02  -0.01   0.02     0.02   0.01  -0.06
  25   6    -0.02   0.04   0.01     0.03  -0.05  -0.02    -0.06   0.06   0.06
  26   6     0.02   0.01  -0.01    -0.06   0.00   0.04     0.07  -0.03  -0.03
  27   6    -0.09   0.04   0.05     0.06  -0.02  -0.04    -0.06   0.01   0.01
  28   6     0.12   0.02  -0.01     0.00   0.01   0.02     0.07   0.00   0.00
  29   6     0.01   0.00   0.00     0.00   0.00   0.01    -0.01   0.01   0.01
  30   6     0.02   0.00  -0.02     0.01  -0.02  -0.01     0.02   0.01  -0.02
  31   6     0.02   0.04  -0.01     0.00   0.00   0.00     0.00  -0.04   0.01
  32   6     0.03   0.00  -0.03     0.00   0.00  -0.01    -0.01   0.00   0.01
  33   6     0.02  -0.06  -0.05    -0.01   0.00  -0.01    -0.03   0.08   0.02
  34   6     0.00  -0.01  -0.02    -0.01   0.00   0.00    -0.03   0.03   0.01
  35   6     0.00   0.03   0.01    -0.01   0.00   0.00    -0.02  -0.04  -0.01
  36   6     0.00   0.04  -0.02     0.00   0.00   0.00     0.02  -0.05   0.02
  37   6     0.01   0.04   0.02     0.00   0.00  -0.01    -0.01  -0.04  -0.03
  38   6     0.00   0.00  -0.01    -0.02  -0.03   0.00     0.00  -0.01  -0.01
  39   6    -0.01  -0.01   0.02     0.01   0.00   0.00     0.00  -0.02   0.02
  40   6     0.00  -0.02   0.03     0.08   0.05  -0.02     0.02  -0.01   0.02
  41   6     0.02  -0.01   0.01     0.06   0.00   0.00     0.03  -0.01   0.01
  42   6     0.03   0.00  -0.01     0.00  -0.06   0.03     0.03  -0.01   0.00
  43   6    -0.01   0.00  -0.01    -0.04  -0.03  -0.02    -0.01  -0.02  -0.02
  44   6     0.01   0.01   0.00    -0.02  -0.04   0.05     0.02  -0.01   0.02
  45   6    -0.03   0.01   0.04     0.00   0.00   0.01     0.03  -0.03  -0.02
  46   6    -0.02   0.01  -0.06     0.00   0.00   0.01     0.02  -0.02   0.10
  47   6    -0.01   0.02  -0.01     0.01  -0.01  -0.01     0.03  -0.04  -0.03
  48   6     0.06   0.01   0.05     0.00   0.01  -0.02    -0.06   0.00  -0.10
  49   6    -0.02   0.01   0.02    -0.06   0.00   0.00    -0.01   0.00   0.03
  50   6    -0.01   0.02   0.00     0.03   0.02   0.14     0.00   0.02   0.04
  51   6    -0.01  -0.01  -0.02    -0.04  -0.01  -0.01    -0.02  -0.03  -0.03
  52   6    -0.01   0.01  -0.02    -0.02  -0.05  -0.09     0.00  -0.03  -0.06
  53   6    -0.03  -0.06   0.02    -0.02   0.01  -0.01     0.05   0.09  -0.02
  54   6    -0.01   0.02   0.02    -0.02   0.06  -0.05    -0.01   0.06   0.00
  55   1    -0.02  -0.01   0.01    -0.01   0.02   0.02     0.01   0.02  -0.02
  56   1     0.01  -0.02   0.00     0.06   0.02  -0.02    -0.01  -0.03  -0.02
  57   1     0.03  -0.01  -0.03     0.02  -0.01   0.01     0.02  -0.01  -0.01
  58   1     0.03  -0.05  -0.03     0.02  -0.04  -0.02     0.01  -0.04  -0.02
  59   1     0.08  -0.04  -0.01     0.04  -0.03  -0.02     0.05  -0.03  -0.01
  60   1    -0.01  -0.07  -0.04    -0.03  -0.05  -0.04    -0.01  -0.05  -0.03
  61   1     0.00   0.00  -0.01     0.00   0.01   0.02     0.02  -0.03   0.00
  62   1     0.00   0.01  -0.01     0.02  -0.02   0.01    -0.01   0.02   0.01
  63   1    -0.14   0.05   0.07     0.20  -0.06  -0.10    -0.27   0.08   0.17
  64   1     0.02  -0.05  -0.02    -0.01   0.08   0.03    -0.02  -0.09   0.03
  65   1     0.04   0.16   0.01    -0.05  -0.21  -0.01     0.02   0.27   0.02
  66   1    -0.01  -0.02  -0.01     0.04   0.09   0.03    -0.03  -0.11  -0.05
  67   1     0.05  -0.01  -0.05    -0.15   0.05   0.14     0.17  -0.09  -0.10
  68   1     0.03   0.05   0.00    -0.09  -0.12  -0.01     0.10   0.05   0.01
  69   1    -0.03  -0.11   0.08     0.15  -0.20  -0.08    -0.17   0.22   0.06
  70   1    -0.29   0.06   0.11    -0.13  -0.02  -0.04     0.15   0.01   0.02
  71   1    -0.02   0.21  -0.02     0.18   0.13   0.00    -0.21  -0.16  -0.04
  72   1     0.16   0.01  -0.07     0.00   0.02   0.01     0.11  -0.01  -0.04
  73   1     0.15   0.04   0.07    -0.01   0.02   0.01     0.09   0.02   0.05
  74   1     0.13   0.02  -0.03    -0.01   0.01   0.04     0.07  -0.01  -0.02
  75   1     0.03  -0.01  -0.04     0.01   0.00  -0.01    -0.01  -0.01   0.00
  76   1     0.02  -0.12  -0.07    -0.01   0.01  -0.01    -0.04   0.15   0.03
  77   1    -0.02  -0.03  -0.03    -0.02   0.00   0.00    -0.02   0.04   0.01
  78   1     0.00   0.04  -0.05     0.00   0.00   0.00     0.02  -0.04   0.04
  79   1     0.00   0.03   0.01    -0.01   0.00  -0.01    -0.02  -0.03  -0.05
  80   1    -0.03  -0.01   0.03    -0.01   0.02   0.01    -0.02  -0.01   0.03
  81   1    -0.01  -0.03   0.05     0.13   0.11  -0.04     0.02  -0.01   0.03
  82   1     0.03  -0.01   0.01     0.07   0.02  -0.01     0.03  -0.01   0.02
  83   1    -0.01   0.00  -0.01    -0.03  -0.03  -0.02    -0.01  -0.02  -0.02
  84   1     0.02   0.02   0.03     0.00  -0.02   0.07     0.02  -0.01   0.04
  85   1    -0.14  -0.02   0.02    -0.02  -0.01   0.01     0.02   0.01  -0.01
  86   1     0.04   0.05   0.01     0.00   0.00   0.01     0.06  -0.02  -0.05
  87   1     0.00  -0.03   0.16     0.00  -0.01   0.03     0.04  -0.06  -0.02
  88   1     0.05   0.04  -0.04    -0.01   0.00   0.01    -0.08  -0.02   0.07
  89   1    -0.02  -0.06  -0.15     0.00   0.00   0.02     0.02   0.03   0.21
  90   1    -0.12   0.01  -0.03     0.00   0.00   0.01     0.12  -0.03   0.08
  91   1    -0.10   0.06   0.11    -0.01   0.01   0.01     0.06  -0.02  -0.06
  92   1    -0.08  -0.06  -0.13     0.00  -0.04  -0.04     0.06  -0.05   0.00
  93   1     0.14   0.05  -0.02     0.05   0.01  -0.02     0.03  -0.03  -0.03
  94   1     0.08  -0.05   0.04    -0.01  -0.01   0.00    -0.10   0.04  -0.04
  95   1     0.10   0.04   0.09     0.04   0.00  -0.03    -0.01  -0.04  -0.16
  96   1     0.07   0.04   0.07    -0.01   0.04  -0.04    -0.10   0.04  -0.16
  97   1    -0.03   0.02   0.02    -0.01   0.07  -0.04     0.03   0.02  -0.01
  98   1    -0.04  -0.02   0.02    -0.06  -0.05   0.04     0.00  -0.05   0.08
  99   1    -0.04   0.03   0.03    -0.13   0.00  -0.04    -0.08   0.03   0.02
 100   1     0.04  -0.07  -0.03     0.01   0.17   0.15     0.01   0.02   0.03
 101   1    -0.12   0.03  -0.04     0.12  -0.03   0.24    -0.04   0.02   0.06
 102   1     0.03   0.10   0.06     0.00  -0.04   0.09     0.01   0.06   0.04
 103   1     0.23  -0.04   0.05     0.04   0.00   0.00    -0.04  -0.04  -0.02
 104   1    -0.15   0.19   0.03    -0.09   0.06   0.02    -0.01  -0.03  -0.05
 105   1    -0.12  -0.22  -0.17    -0.08  -0.08  -0.03    -0.02  -0.03  -0.03
 106   1     0.02  -0.05   0.05     0.10  -0.13   0.02     0.04  -0.04  -0.04
 107   1     0.02  -0.01  -0.12     0.04  -0.09  -0.29     0.01  -0.04  -0.11
 108   1    -0.08   0.08  -0.01    -0.16   0.04  -0.09    -0.05  -0.02  -0.07
 109   1    -0.04  -0.09   0.02    -0.03  -0.03   0.00     0.05   0.12  -0.02
 110   1    -0.06  -0.04   0.02    -0.04   0.01  -0.06     0.09   0.06  -0.03
 111   1    -0.03  -0.08   0.02    -0.01   0.05  -0.01     0.05   0.12  -0.02
 112   1     0.01   0.04   0.01    -0.06   0.08  -0.23     0.00   0.09  -0.05
 113   1    -0.03   0.02   0.03     0.07  -0.08   0.00    -0.01   0.02   0.03
 114   1    -0.02   0.03   0.03    -0.08   0.19   0.07    -0.03   0.11   0.04
                    58                     59                     60
                     A                      A                      A
 Frequencies --   258.5366               264.6673               266.6970
 Red. masses --     2.7704                 2.9578                 3.1313
 Frc consts  --     0.1091                 0.1221                 0.1312
 IR Inten    --     5.1153                 0.8131                 1.0571
 Atom AN      X      Y      Z        X      Y      Z        X      Y      Z
   1   8    -0.01   0.01  -0.01    -0.01  -0.03   0.02    -0.03   0.01   0.00
   2  12     0.06  -0.02  -0.03     0.03   0.00   0.07     0.00   0.00   0.03
   3   8     0.00   0.00   0.02     0.02  -0.05  -0.05     0.03  -0.05  -0.01
   4   6    -0.01   0.00   0.00    -0.01   0.00   0.00    -0.03   0.01   0.01
   5   7     0.02  -0.03   0.02     0.03   0.02   0.10     0.01   0.02   0.05
   6   7     0.00   0.02  -0.01     0.00   0.00   0.03     0.00  -0.01  -0.01
   7   8    -0.01   0.00   0.00     0.00  -0.01   0.01    -0.04   0.01   0.01
   8   6     0.02  -0.04   0.00     0.00   0.00   0.02     0.00   0.01   0.01
   9   6     0.02   0.00   0.00    -0.02  -0.02  -0.06    -0.01   0.00  -0.02
  10   6     0.03   0.02  -0.01    -0.01  -0.01  -0.01    -0.01   0.00  -0.01
  11   8     0.00   0.00  -0.01     0.01   0.04   0.02     0.00  -0.02   0.00
  12   6     0.00   0.00   0.01     0.04   0.00  -0.03     0.01  -0.04   0.00
  13   6     0.00   0.00   0.03     0.01  -0.02  -0.06     0.01  -0.04   0.01
  14   6     0.00   0.00  -0.01    -0.01   0.02   0.01     0.00   0.00   0.00
  15   8    -0.01   0.03  -0.03     0.11  -0.01  -0.02     0.02  -0.02  -0.02
  16   6     0.00  -0.01  -0.01    -0.02   0.02   0.00    -0.01  -0.02  -0.03
  17   8    -0.02   0.01  -0.01     0.02  -0.01   0.03    -0.09   0.07  -0.05
  18   6     0.00   0.00   0.00    -0.01  -0.01  -0.01     0.00   0.01   0.04
  19   8     0.02   0.00   0.01    -0.02  -0.01   0.00     0.02   0.02   0.03
  20   8    -0.01   0.00   0.00    -0.01   0.03  -0.02     0.01   0.00   0.05
  21   6    -0.01   0.01  -0.01     0.02   0.01   0.01    -0.05   0.05  -0.02
  22   6    -0.01   0.01  -0.01     0.02  -0.01   0.04    -0.08   0.08  -0.09
  23   6    -0.01   0.00   0.00    -0.01   0.02  -0.02     0.00  -0.01   0.06
  24   8     0.00   0.00   0.02     0.01   0.02  -0.04     0.00   0.00   0.14
  25   6     0.02  -0.01  -0.02    -0.04   0.01   0.06     0.12  -0.04  -0.17
  26   6    -0.01   0.00   0.01    -0.02   0.03  -0.01     0.07  -0.06   0.01
  27   6    -0.05   0.03   0.04     0.00  -0.01  -0.07    -0.04  -0.01   0.02
  28   6     0.04  -0.01  -0.01    -0.10  -0.02   0.01     0.03  -0.01   0.00
  29   6     0.01  -0.02   0.01     0.01   0.00   0.04     0.00   0.01   0.02
  30   6    -0.03   0.01   0.01     0.00   0.00   0.01     0.01   0.00  -0.01
  31   6     0.01  -0.01   0.03     0.06   0.01  -0.02     0.02   0.00  -0.01
  32   6     0.00  -0.03  -0.01     0.03   0.03  -0.08     0.01   0.02  -0.04
  33   6    -0.03  -0.01  -0.02    -0.04   0.03  -0.10    -0.02   0.03  -0.05
  34   6    -0.04   0.02  -0.01    -0.08  -0.01  -0.04    -0.04   0.00  -0.02
  35   6    -0.04   0.00  -0.01    -0.05  -0.02   0.03    -0.03  -0.01   0.02
  36   6     0.03   0.00   0.06     0.02   0.00  -0.02     0.01  -0.01  -0.01
  37   6    -0.03   0.01  -0.06    -0.02  -0.01   0.01    -0.01  -0.01   0.01
  38   6    -0.03   0.02   0.02     0.01  -0.01   0.00     0.00   0.00   0.00
  39   6    -0.01   0.03  -0.02     0.01  -0.02  -0.01     0.00   0.00   0.01
  40   6    -0.02   0.04  -0.03    -0.01  -0.02  -0.02     0.00   0.00   0.01
  41   6    -0.05   0.01  -0.01    -0.02   0.00  -0.01     0.01   0.00   0.00
  42   6    -0.05   0.00   0.00    -0.01   0.01   0.00     0.02   0.00  -0.01
  43   6     0.00   0.01   0.04     0.00   0.00   0.00     0.00   0.00   0.00
  44   6    -0.03  -0.01  -0.03    -0.01   0.00   0.00     0.01   0.00  -0.01
  45   6     0.04  -0.04   0.14    -0.04  -0.01   0.02    -0.03   0.00  -0.01
  46   6     0.03   0.02   0.14    -0.07  -0.04   0.05    -0.04  -0.02   0.02
  47   6    -0.03  -0.03  -0.13     0.10   0.00   0.01     0.06   0.00   0.02
  48   6    -0.03   0.04  -0.11     0.07   0.01   0.00     0.03   0.00   0.00
  49   6     0.02  -0.01  -0.06     0.01   0.00   0.01     0.00   0.00   0.00
  50   6     0.00  -0.03  -0.02     0.00  -0.01  -0.01    -0.01   0.01  -0.02
  51   6     0.03   0.04   0.07    -0.01   0.02   0.00     0.00  -0.01  -0.01
  52   6     0.01  -0.01   0.06    -0.02   0.02   0.00     0.00  -0.01   0.00
  53   6     0.01  -0.04  -0.02     0.03   0.02   0.02     0.02   0.03   0.00
  54   6     0.05  -0.02  -0.02    -0.01   0.01   0.04    -0.01   0.01   0.02
  55   1    -0.01   0.00  -0.01    -0.03  -0.02  -0.09    -0.01  -0.01  -0.03
  56   1     0.02  -0.01   0.01    -0.01  -0.03  -0.07     0.00  -0.05  -0.01
  57   1     0.00   0.00  -0.01    -0.03   0.02   0.03     0.01   0.00   0.00
  58   1     0.00  -0.01  -0.01    -0.01   0.03   0.01     0.01  -0.03  -0.03
  59   1     0.01  -0.01  -0.01    -0.06   0.02  -0.01     0.01  -0.03  -0.02
  60   1    -0.01  -0.02  -0.01    -0.01   0.04   0.00    -0.04  -0.04  -0.04
  61   1    -0.01   0.00   0.00     0.03  -0.01   0.02    -0.10   0.07  -0.05
  62   1     0.00   0.00   0.01    -0.01   0.03  -0.02    -0.01   0.01   0.06
  63   1     0.04  -0.01  -0.04    -0.12   0.02   0.10     0.29  -0.06  -0.31
  64   1     0.02   0.01  -0.03    -0.04  -0.04   0.08     0.14   0.05  -0.28
  65   1     0.02  -0.03   0.00    -0.03   0.10   0.02     0.14  -0.25  -0.01
  66   1     0.01   0.02   0.00    -0.02   0.02   0.02     0.04  -0.06  -0.08
  67   1    -0.03   0.02   0.02    -0.02   0.03  -0.02     0.10  -0.07   0.01
  68   1    -0.01  -0.02   0.00    -0.03   0.05  -0.01     0.14  -0.09   0.04
  69   1     0.06  -0.19   0.04     0.10  -0.21  -0.09    -0.15   0.20   0.07
  70   1    -0.32   0.06   0.10    -0.22   0.00  -0.05     0.17  -0.01   0.02
  71   1     0.08   0.26  -0.01     0.12   0.17  -0.07    -0.19  -0.18  -0.04
  72   1     0.06  -0.01  -0.03    -0.16  -0.01   0.08     0.04  -0.01  -0.01
  73   1     0.06   0.00   0.03    -0.14  -0.07  -0.06     0.04  -0.02   0.03
  74   1     0.04  -0.01  -0.03    -0.09  -0.02   0.01     0.04  -0.01  -0.02
  75   1     0.02  -0.04  -0.04     0.07   0.03  -0.13     0.03   0.02  -0.06
  76   1    -0.04  -0.01  -0.03    -0.06   0.05  -0.16    -0.04   0.04  -0.07
  77   1    -0.04   0.04  -0.01    -0.14  -0.01  -0.05    -0.07  -0.01  -0.02
  78   1     0.03   0.00   0.06     0.01   0.02  -0.08     0.00   0.00  -0.04
  79   1    -0.05   0.01  -0.08    -0.06   0.00  -0.05    -0.03   0.00  -0.02
  80   1     0.01   0.04  -0.04     0.02  -0.03  -0.02    -0.01   0.00   0.01
  81   1     0.00   0.06  -0.05    -0.02  -0.03  -0.03     0.00  -0.01   0.02
  82   1    -0.05   0.01   0.00    -0.03   0.00  -0.02     0.02   0.00   0.01
  83   1     0.00   0.02   0.06     0.00  -0.01  -0.01     0.00   0.00   0.00
  84   1    -0.04  -0.02  -0.07    -0.01   0.00  -0.01     0.01   0.00   0.00
  85   1    -0.02  -0.12   0.11     0.04  -0.08   0.02     0.05  -0.03   0.00
  86   1     0.10   0.02   0.18    -0.15  -0.07   0.10    -0.10  -0.05   0.04
  87   1     0.07  -0.09   0.21    -0.08   0.10  -0.03    -0.06   0.07  -0.07
  88   1    -0.03   0.06   0.13    -0.12   0.04   0.05    -0.06   0.01   0.02
  89   1     0.03   0.05   0.19    -0.05  -0.12   0.06    -0.03  -0.06   0.03
  90   1     0.09  -0.01   0.16    -0.13  -0.05   0.10    -0.07  -0.03   0.04
  91   1    -0.04  -0.08  -0.11     0.06   0.12   0.05     0.04   0.08   0.04
  92   1    -0.04  -0.09  -0.16     0.09  -0.13  -0.04     0.06  -0.06   0.00
  93   1    -0.01   0.03  -0.19     0.25   0.02   0.01     0.14   0.00   0.03
  94   1    -0.05   0.08  -0.10     0.02  -0.12   0.06     0.01  -0.07   0.04
  95   1    -0.01   0.01  -0.17     0.25   0.01   0.00     0.13   0.00   0.00
  96   1    -0.05   0.10  -0.13     0.02   0.14  -0.06     0.01   0.07  -0.03
  97   1     0.05  -0.01  -0.08    -0.04  -0.03   0.05     0.06   0.01  -0.05
  98   1     0.04   0.02  -0.03     0.00   0.03  -0.05     0.02  -0.05   0.08
  99   1     0.01  -0.04  -0.09     0.08  -0.02   0.03    -0.09   0.03  -0.01
 100   1    -0.01   0.00  -0.02     0.02  -0.03  -0.02     0.00  -0.04  -0.03
 101   1     0.06  -0.03  -0.02     0.00   0.00  -0.03    -0.07   0.02  -0.04
 102   1    -0.01  -0.08  -0.04     0.01  -0.02   0.01     0.01   0.06   0.00
 103   1    -0.05   0.07   0.02     0.09   0.02   0.02    -0.03  -0.01  -0.01
 104   1     0.09  -0.05   0.10    -0.07   0.10   0.03     0.02  -0.03  -0.02
 105   1     0.09   0.13   0.12    -0.06  -0.07  -0.04     0.02   0.02   0.00
 106   1     0.00   0.02   0.02    -0.02  -0.01   0.04     0.00   0.00  -0.01
 107   1    -0.02  -0.02   0.12     0.01   0.04  -0.04    -0.01  -0.01   0.02
 108   1     0.08  -0.05   0.06    -0.05   0.07   0.02     0.02  -0.02   0.00
 109   1     0.01  -0.06  -0.01     0.03   0.05   0.02     0.02   0.04   0.00
 110   1     0.00  -0.04  -0.04     0.05   0.01   0.03     0.04   0.02  -0.01
 111   1     0.02  -0.02  -0.02     0.03   0.02   0.02     0.02   0.04   0.00
 112   1     0.03  -0.04   0.03     0.02   0.02   0.08     0.02   0.02   0.05
 113   1     0.05   0.01  -0.04    -0.06   0.02   0.06    -0.05   0.03   0.03
 114   1     0.07  -0.05  -0.05     0.02   0.00   0.03     0.00   0.00   0.00
                    61                     62                     63
                     A                      A                      A
 Frequencies --   271.2615               271.9246               275.6832
 Red. masses --     1.7669                 1.9098                 2.9458
 Frc consts  --     0.0766                 0.0832                 0.1319
 IR Inten    --     6.1349                 0.7566                 5.9144
 Atom AN      X      Y      Z        X      Y      Z        X      Y      Z
   1   8     0.00   0.02  -0.01    -0.01   0.00   0.00    -0.01  -0.02   0.02
   2  12     0.04   0.01   0.08     0.01   0.02   0.01     0.00  -0.01   0.13
   3   8    -0.02   0.02  -0.02     0.01  -0.04  -0.01     0.02  -0.05  -0.04
   4   6     0.00   0.00   0.01    -0.01   0.00   0.00    -0.01   0.00   0.00
   5   7     0.01  -0.02   0.00    -0.02   0.02  -0.03     0.01  -0.01  -0.05
   6   7     0.02   0.02   0.02     0.03   0.02   0.07    -0.02  -0.01   0.04
   7   8     0.00   0.01   0.00    -0.02   0.00   0.00     0.00  -0.01   0.02
   8   6     0.01  -0.02  -0.01    -0.02   0.02  -0.02    -0.01   0.00  -0.02
   9   6     0.00   0.00  -0.02    -0.02   0.01  -0.02    -0.02   0.01  -0.01
  10   6     0.01   0.01   0.00    -0.01   0.01   0.02    -0.03  -0.01   0.02
  11   8    -0.01  -0.04   0.01     0.00   0.01   0.00     0.01   0.03   0.01
  12   6    -0.02  -0.01  -0.03     0.01  -0.01   0.01     0.03   0.00  -0.03
  13   6    -0.01   0.01  -0.03     0.00  -0.02   0.00     0.01  -0.03  -0.05
  14   6     0.01  -0.02   0.01     0.00   0.00  -0.01    -0.01   0.02   0.00
  15   8    -0.03  -0.02  -0.01     0.03   0.00  -0.02     0.08   0.00  -0.05
  16   6     0.01  -0.01   0.00    -0.01  -0.01  -0.01    -0.02   0.01   0.00
  17   8     0.02   0.00   0.01    -0.02   0.01  -0.01    -0.01   0.02   0.01
  18   6     0.00  -0.01   0.00     0.00   0.00   0.00     0.00   0.00   0.00
  19   8     0.03  -0.01   0.01    -0.01   0.01  -0.01     0.01  -0.01   0.02
  20   8    -0.01   0.01  -0.02     0.00   0.00   0.01     0.00   0.02   0.00
  21   6     0.01   0.00   0.00    -0.01   0.01   0.00    -0.01   0.03   0.00
  22   6     0.01   0.00   0.01    -0.01   0.01  -0.01    -0.01   0.03  -0.01
  23   6    -0.01   0.00  -0.02     0.00   0.00   0.02     0.00   0.01   0.00
  24   8     0.00   0.00  -0.01     0.00   0.00   0.02     0.00   0.02   0.03
  25   6     0.00   0.01   0.02     0.02   0.00  -0.02     0.02   0.00  -0.02
  26   6    -0.05   0.03   0.02     0.02  -0.03   0.00     0.01   0.01   0.00
  27   6     0.00  -0.05  -0.05    -0.05   0.03   0.01    -0.04  -0.01  -0.05
  28   6     0.02   0.02   0.01     0.01  -0.01  -0.01    -0.08  -0.02   0.00
  29   6     0.01   0.00  -0.01    -0.01   0.00  -0.01     0.03  -0.01  -0.03
  30   6     0.00   0.00   0.01     0.02  -0.01   0.03     0.00   0.00   0.00
  31   6     0.00   0.02   0.00    -0.02  -0.02   0.00     0.01   0.00   0.00
  32   6     0.01   0.01   0.00    -0.01  -0.01   0.03     0.03  -0.02   0.04
  33   6     0.01  -0.02  -0.01     0.01   0.01   0.04     0.07  -0.03   0.04
  34   6     0.01  -0.01  -0.01     0.03   0.01   0.02     0.08   0.01   0.01
  35   6     0.01   0.01  -0.01     0.02   0.00  -0.01     0.06   0.02  -0.04
  36   6    -0.01   0.02   0.00     0.00  -0.01   0.00     0.01   0.01   0.01
  37   6     0.00   0.02  -0.01     0.01  -0.01   0.00     0.03   0.02  -0.03
  38   6     0.01  -0.01   0.01     0.04  -0.05   0.02     0.01   0.00  -0.02
  39   6     0.01  -0.01  -0.02     0.05  -0.05  -0.04     0.00  -0.02   0.01
  40   6     0.01   0.01  -0.04     0.01  -0.03  -0.08    -0.01  -0.02   0.02
  41   6    -0.02   0.00  -0.02    -0.03  -0.02  -0.04     0.01   0.01   0.01
  42   6    -0.03  -0.01   0.00    -0.02   0.00   0.01     0.02   0.02   0.00
  43   6     0.00  -0.01   0.02     0.01  -0.03   0.01     0.00   0.00  -0.04
  44   6    -0.02  -0.02  -0.02    -0.01  -0.01   0.00     0.01   0.02   0.01
  45   6    -0.02   0.00   0.04     0.02   0.00  -0.03     0.02  -0.01   0.05
  46   6    -0.02   0.02   0.00     0.03   0.00  -0.02     0.02   0.02   0.01
  47   6    -0.03   0.00  -0.03    -0.02   0.00   0.01    -0.11  -0.01  -0.07
  48   6     0.00   0.02   0.00    -0.03  -0.01  -0.01    -0.06   0.02  -0.04
  49   6     0.02  -0.02  -0.04     0.04  -0.01  -0.02     0.02   0.00   0.07
  50   6     0.00  -0.02   0.00     0.03  -0.03   0.00    -0.01   0.03   0.01
  51   6     0.00   0.04   0.04    -0.04   0.07   0.05    -0.03  -0.06  -0.09
  52   6    -0.02   0.02   0.03    -0.05   0.05   0.02     0.00   0.00  -0.07
  53   6    -0.01  -0.04   0.02     0.00   0.04   0.01    -0.04  -0.02   0.02
  54   6     0.01   0.03   0.00    -0.02   0.03   0.00    -0.03  -0.01   0.02
  55   1    -0.02   0.00  -0.02    -0.01   0.00  -0.04     0.00   0.01   0.00
  56   1    -0.02   0.02   0.00     0.00  -0.03  -0.03    -0.01  -0.03  -0.07
  57   1     0.02  -0.02  -0.01     0.00   0.00   0.00    -0.01   0.02   0.02
  58   1     0.01  -0.02  -0.01     0.00   0.00  -0.01     0.00   0.02   0.00
  59   1     0.04  -0.01   0.00    -0.01  -0.01  -0.01    -0.04   0.01  -0.01
  60   1     0.00  -0.03  -0.01    -0.01  -0.01  -0.01    -0.01   0.02  -0.01
  61   1     0.01   0.00   0.01    -0.01   0.01  -0.01    -0.01   0.03  -0.01
  62   1     0.00   0.00  -0.01     0.00   0.01   0.02    -0.01   0.02   0.01
  63   1     0.00   0.00   0.02     0.02   0.00  -0.03     0.03   0.00  -0.05
  64   1    -0.01   0.01   0.04     0.02  -0.01  -0.04     0.02   0.00  -0.04
  65   1    -0.02   0.01   0.00     0.03  -0.02   0.00     0.03  -0.03   0.01
  66   1     0.01   0.07   0.05     0.01  -0.03  -0.04     0.00   0.00   0.00
  67   1    -0.11   0.06   0.06     0.03  -0.04   0.02     0.02   0.00  -0.01
  68   1    -0.09  -0.01  -0.01     0.04  -0.06   0.01     0.01   0.02   0.00
  69   1    -0.20   0.34   0.02    -0.02  -0.05   0.02     0.02  -0.14  -0.03
  70   1     0.44  -0.08  -0.14    -0.16   0.04   0.06    -0.21   0.00  -0.03
  71   1    -0.25  -0.44  -0.02    -0.01   0.12  -0.04     0.02   0.13  -0.09
  72   1     0.02   0.02  -0.01     0.01  -0.01  -0.01    -0.13   0.00   0.06
  73   1     0.02   0.03   0.02     0.01  -0.02   0.01    -0.10  -0.07  -0.05
  74   1     0.01   0.02   0.04     0.02  -0.01  -0.02    -0.05  -0.01  -0.01
  75   1     0.01   0.01   0.00    -0.02  -0.02   0.05     0.01  -0.02   0.06
  76   1     0.01  -0.05  -0.01     0.02   0.02   0.06     0.08  -0.04   0.07
  77   1     0.01  -0.01  -0.01     0.05   0.01   0.02     0.12   0.03   0.02
  78   1    -0.01   0.02  -0.01     0.00  -0.02   0.02     0.01   0.01   0.02
  79   1     0.00   0.02   0.00     0.02  -0.01   0.02     0.06   0.02   0.03
  80   1     0.03  -0.02  -0.03     0.08  -0.08  -0.06    -0.02  -0.02   0.02
  81   1     0.02   0.02  -0.06     0.02  -0.04  -0.12    -0.03  -0.05   0.03
  82   1    -0.03   0.00  -0.03    -0.07  -0.01  -0.06     0.02   0.02   0.00
  83   1     0.00  -0.01   0.00     0.00  -0.06  -0.04     0.00  -0.01  -0.05
  84   1    -0.03  -0.04  -0.04    -0.02  -0.02  -0.03     0.01   0.01   0.02
  85   1     0.15  -0.08   0.05    -0.08   0.07  -0.04     0.00  -0.04   0.04
  86   1    -0.14  -0.05   0.17     0.11   0.04  -0.12     0.04   0.02   0.07
  87   1    -0.07   0.12  -0.08     0.06  -0.09   0.04     0.03  -0.03   0.07
  88   1     0.02   0.05   0.02     0.03  -0.04  -0.03     0.04   0.04   0.02
  89   1    -0.01  -0.01  -0.05     0.02   0.04  -0.01     0.02   0.03  -0.01
  90   1    -0.06   0.01   0.03     0.06   0.01  -0.05     0.02   0.01   0.03
  91   1    -0.05  -0.03  -0.01    -0.01  -0.03   0.00    -0.11  -0.15  -0.07
  92   1    -0.05   0.00  -0.06    -0.02   0.04   0.02    -0.13   0.07  -0.09
  93   1    -0.03   0.02  -0.05    -0.06  -0.02   0.02    -0.22   0.00  -0.11
  94   1     0.01   0.03  -0.02    -0.02   0.03  -0.01    -0.03   0.16  -0.09
  95   1    -0.02   0.01  -0.01    -0.07  -0.01  -0.01    -0.22   0.01  -0.07
  96   1     0.01   0.00   0.01    -0.02  -0.05   0.00    -0.03  -0.08   0.00
  97   1     0.09  -0.01  -0.10    -0.17  -0.08   0.16     0.24   0.01  -0.12
  98   1     0.06  -0.02   0.03     0.00   0.16  -0.28     0.09  -0.15   0.34
  99   1    -0.05  -0.03  -0.08     0.33  -0.12   0.02    -0.24   0.11   0.05
 100   1     0.00   0.01   0.00     0.00   0.03   0.02    -0.01   0.03   0.01
 101   1     0.03  -0.03   0.01     0.13  -0.04   0.02    -0.03   0.03   0.02
 102   1     0.00  -0.05   0.00    -0.01  -0.12  -0.03     0.00   0.06   0.00
 103   1     0.10   0.07   0.03     0.21   0.13   0.05    -0.07  -0.11  -0.05
 104   1    -0.06   0.12   0.10    -0.20   0.29   0.14    -0.01  -0.07  -0.16
 105   1    -0.05  -0.02   0.02    -0.17  -0.13  -0.01    -0.03  -0.07  -0.09
 106   1    -0.03  -0.02   0.06    -0.07  -0.04   0.11     0.01   0.01  -0.07
 107   1     0.00   0.03   0.00     0.03   0.10  -0.10     0.01   0.01  -0.08
 108   1    -0.04   0.06   0.04    -0.16   0.18   0.05    -0.03  -0.01  -0.08
 109   1    -0.01  -0.03   0.02     0.01   0.08   0.00    -0.04  -0.02   0.03
 110   1    -0.02  -0.02   0.04     0.03   0.03   0.04    -0.06   0.00   0.06
 111   1    -0.01  -0.07   0.02     0.00   0.01   0.01    -0.04  -0.07   0.03
 112   1     0.02   0.03  -0.01    -0.03   0.05  -0.06    -0.03   0.00   0.01
 113   1     0.01   0.02   0.01     0.00  -0.01   0.02    -0.03  -0.02   0.03
 114   1     0.01   0.04   0.01    -0.05   0.08   0.04    -0.03   0.00   0.03
                    64                     65                     66
                     A                      A                      A
 Frequencies --   277.9873               285.8788               296.4450
 Red. masses --     1.5953                 2.1994                 3.2046
 Frc consts  --     0.0726                 0.1059                 0.1659
 IR Inten    --     4.6906                 7.5186                 3.7693
 Atom AN      X      Y      Z        X      Y      Z        X      Y      Z
   1   8     0.02   0.00  -0.01    -0.02   0.00   0.01    -0.01   0.01  -0.01
   2  12    -0.04  -0.02  -0.02     0.05   0.01   0.10     0.08  -0.01  -0.01
   3   8    -0.02   0.01   0.01     0.01  -0.02  -0.03     0.01   0.00  -0.01
   4   6     0.01  -0.01  -0.01    -0.01   0.01   0.01    -0.01   0.00   0.00
   5   7     0.02   0.00   0.01    -0.01  -0.01   0.00    -0.01  -0.04   0.00
   6   7    -0.02  -0.01   0.01     0.00   0.00  -0.08     0.01   0.06   0.06
   7   8     0.03  -0.01  -0.01    -0.03   0.01   0.01    -0.03   0.01  -0.01
   8   6     0.00   0.01   0.01     0.02  -0.02   0.00     0.04  -0.05  -0.01
   9   6    -0.01   0.01   0.01     0.02  -0.01   0.01     0.04   0.00  -0.02
  10   6    -0.02  -0.01   0.01     0.02   0.00  -0.03     0.06   0.03   0.00
  11   8     0.00   0.01   0.00     0.01  -0.01   0.01     0.01  -0.02   0.01
  12   6    -0.01   0.01   0.00     0.02  -0.02  -0.02     0.01   0.00   0.01
  13   6    -0.02   0.01   0.01     0.01  -0.01  -0.04     0.00   0.00   0.01
  14   6     0.00   0.00   0.00     0.00   0.00   0.00     0.00  -0.01   0.00
  15   8    -0.03   0.01   0.02     0.04  -0.01  -0.04     0.00   0.01  -0.01
  16   6     0.01   0.01   0.02     0.00  -0.01  -0.02    -0.01  -0.01  -0.01
  17   8     0.00   0.01   0.00     0.00   0.00   0.01     0.00   0.00   0.00
  18   6     0.00   0.00   0.00     0.00  -0.01   0.00     0.00   0.00   0.00
  19   8     0.00   0.00  -0.01     0.01  -0.01   0.02     0.01  -0.01   0.01
  20   8     0.01  -0.01   0.00     0.00   0.01  -0.01     0.00   0.01  -0.01
  21   6     0.00   0.00   0.00     0.00   0.01   0.00     0.00   0.00   0.00
  22   6     0.00   0.01  -0.01     0.00   0.01   0.01     0.00   0.00   0.00
  23   6     0.00   0.00   0.00     0.00   0.01   0.00     0.00   0.00  -0.01
  24   8     0.00   0.00   0.01     0.00   0.01   0.01     0.00   0.00   0.00
  25   6     0.01   0.00  -0.01     0.00   0.00   0.00     0.00   0.00   0.00
  26   6     0.00   0.00   0.00    -0.01   0.01   0.01    -0.01   0.02   0.00
  27   6     0.01  -0.01   0.01    -0.05   0.00  -0.04    -0.03   0.00   0.01
  28   6     0.01   0.00   0.00    -0.02   0.00   0.00     0.03   0.00   0.00
  29   6     0.03   0.00   0.00    -0.02   0.00   0.00    -0.04  -0.01   0.01
  30   6    -0.01   0.00   0.01    -0.01   0.00  -0.03    -0.04   0.03   0.03
  31   6     0.04   0.01   0.00    -0.04  -0.01   0.01    -0.05  -0.01   0.01
  32   6     0.04   0.01  -0.03    -0.03  -0.01   0.04    -0.06  -0.01   0.02
  33   6     0.02   0.00  -0.04    -0.01  -0.01   0.05    -0.06  -0.01   0.02
  34   6     0.01   0.00  -0.03     0.00   0.00   0.03    -0.05  -0.01   0.02
  35   6     0.02   0.01  -0.01    -0.01   0.00   0.00    -0.05  -0.01   0.02
  36   6     0.02   0.01   0.00    -0.02   0.00   0.00    -0.03   0.00   0.01
  37   6     0.01   0.01  -0.01     0.00   0.00   0.00    -0.03   0.00   0.01
  38   6     0.00   0.00  -0.01    -0.05   0.04  -0.01    -0.01   0.01  -0.01
  39   6     0.00   0.00   0.00    -0.03   0.06   0.03    -0.02   0.00  -0.04
  40   6     0.00  -0.01   0.01     0.01   0.05   0.05    -0.07   0.01  -0.05
  41   6     0.01   0.01   0.00     0.03   0.00   0.04    -0.09   0.05  -0.02
  42   6     0.01   0.01   0.01     0.02  -0.02  -0.01    -0.07   0.07   0.02
  43   6     0.00   0.00  -0.03    -0.03   0.02   0.01    -0.02   0.00  -0.03
  44   6     0.01   0.02   0.03     0.00  -0.01   0.00    -0.03   0.06   0.02
  45   6    -0.01  -0.02   0.06     0.01   0.02  -0.04     0.01   0.01  -0.03
  46   6    -0.02   0.00   0.06     0.02   0.00  -0.06     0.01   0.00  -0.04
  47   6    -0.02  -0.01  -0.03    -0.01   0.00  -0.01     0.04   0.01   0.03
  48   6    -0.01   0.01  -0.02     0.00   0.00   0.00     0.03  -0.01   0.02
  49   6     0.02   0.01   0.05    -0.06   0.01  -0.06     0.13  -0.02   0.15
  50   6     0.03   0.01   0.03     0.00  -0.02   0.00     0.04   0.04   0.05
  51   6    -0.02  -0.04  -0.05     0.03  -0.02   0.01    -0.04  -0.06  -0.08
  52   6     0.00  -0.01  -0.05     0.03  -0.05   0.00    -0.01   0.00  -0.10
  53   6    -0.04  -0.02   0.01     0.03  -0.01  -0.01     0.06  -0.04  -0.01
  54   6    -0.03  -0.01   0.00     0.04   0.00   0.00     0.11  -0.07  -0.01
  55   1     0.00   0.01   0.00     0.01   0.00   0.03     0.00   0.01  -0.03
  56   1    -0.03   0.01   0.02     0.01  -0.02  -0.06     0.01   0.00   0.01
  57   1     0.00   0.00   0.00     0.01   0.00   0.00     0.00  -0.01  -0.01
  58   1    -0.01   0.02   0.02     0.02  -0.02  -0.02    -0.01  -0.02  -0.01
  59   1    -0.01   0.02   0.02     0.01  -0.02  -0.02     0.01  -0.01  -0.01
  60   1     0.02   0.02   0.03    -0.02  -0.03  -0.03    -0.02  -0.02  -0.02
  61   1     0.00   0.01  -0.01     0.00   0.01   0.00     0.00   0.00   0.00
  62   1     0.01   0.00   0.00    -0.01   0.02   0.00    -0.01   0.00  -0.01
  63   1     0.02   0.00  -0.02     0.00   0.00   0.00     0.00   0.00   0.00
  64   1     0.01   0.01  -0.02     0.00   0.00   0.00     0.00   0.00   0.00
  65   1     0.01  -0.01  -0.01     0.00   0.00   0.01     0.00   0.00   0.00
  66   1     0.00   0.00   0.00     0.00   0.02   0.01     0.00   0.02   0.02
  67   1     0.00   0.00   0.01    -0.02   0.02   0.01    -0.02   0.03  -0.01
  68   1     0.00  -0.01   0.00    -0.02   0.01   0.00    -0.01   0.03   0.00
  69   1    -0.03   0.10   0.00    -0.07   0.00   0.01    -0.06   0.06   0.05
  70   1     0.14  -0.01  -0.02    -0.07   0.00  -0.04     0.03   0.00   0.01
  71   1    -0.03  -0.11   0.04    -0.08   0.00  -0.08    -0.08  -0.05  -0.01
  72   1     0.01   0.00  -0.01    -0.03   0.00   0.01     0.05   0.00  -0.02
  73   1     0.01   0.01   0.00    -0.02  -0.02  -0.01     0.04   0.02   0.03
  74   1     0.00   0.00   0.00    -0.01   0.00   0.00     0.03   0.00   0.00
  75   1     0.05   0.02  -0.04    -0.04  -0.02   0.05    -0.05  -0.01   0.01
  76   1     0.02  -0.01  -0.05     0.00  -0.02   0.06    -0.06  -0.02   0.02
  77   1     0.00   0.00  -0.03     0.02   0.00   0.03    -0.05  -0.01   0.02
  78   1     0.02   0.01  -0.03    -0.02  -0.01   0.03    -0.02  -0.01   0.05
  79   1     0.01   0.01   0.00     0.00   0.00   0.00    -0.05   0.00  -0.02
  80   1    -0.01   0.00   0.01    -0.06   0.09   0.04     0.00  -0.01  -0.05
  81   1    -0.01  -0.02   0.02     0.02   0.08   0.09    -0.08   0.00  -0.09
  82   1     0.00   0.01   0.00     0.04  -0.02   0.06    -0.11   0.07  -0.04
  83   1     0.00   0.00  -0.02    -0.02   0.05   0.06    -0.02   0.00  -0.03
  84   1     0.02   0.03   0.04     0.02   0.01   0.03    -0.06   0.03  -0.05
  85   1     0.09  -0.12   0.06    -0.05   0.09  -0.04    -0.03   0.07  -0.02
  86   1    -0.11  -0.05   0.18     0.07   0.04  -0.12     0.06   0.03  -0.08
  87   1    -0.05   0.08   0.00     0.03  -0.05  -0.01     0.03  -0.04  -0.02
  88   1    -0.04   0.07   0.07     0.05  -0.06  -0.07     0.04  -0.05  -0.05
  89   1    -0.01  -0.04   0.07     0.01   0.03  -0.09     0.00   0.04  -0.06
  90   1    -0.05  -0.02   0.12     0.02   0.03  -0.11     0.03   0.02  -0.08
  91   1    -0.01  -0.05  -0.04    -0.03   0.00   0.01     0.03   0.08   0.03
  92   1    -0.02   0.01  -0.03    -0.02  -0.01  -0.03     0.04  -0.04   0.02
  93   1    -0.06   0.01  -0.05     0.01   0.00  -0.01     0.10   0.01   0.04
  94   1    -0.01   0.05  -0.03     0.00   0.00   0.00     0.03  -0.08   0.03
  95   1    -0.05   0.00  -0.04     0.00   0.00   0.00     0.10   0.00   0.04
  96   1     0.00   0.00  -0.01     0.00   0.00   0.00     0.03   0.04   0.02
  97   1    -0.33  -0.10   0.35    -0.40   0.00   0.24     0.15  -0.21   0.13
  98   1    -0.08   0.22  -0.35    -0.17   0.19  -0.47     0.18   0.05   0.23
  99   1     0.46  -0.09   0.16     0.33  -0.11   0.00     0.19   0.03   0.23
 100   1    -0.01   0.07   0.05     0.02  -0.04  -0.01    -0.01   0.20   0.09
 101   1     0.11   0.00   0.05    -0.02  -0.01  -0.02     0.22   0.01   0.13
 102   1     0.00  -0.05  -0.01     0.01   0.00   0.02    -0.01  -0.10  -0.02
 103   1    -0.07  -0.07  -0.04    -0.07  -0.05   0.01    -0.11  -0.12  -0.05
 104   1     0.01  -0.06  -0.11     0.12  -0.14   0.00    -0.01  -0.09  -0.17
 105   1    -0.01  -0.03  -0.05     0.12   0.09   0.02    -0.04  -0.05  -0.08
 106   1     0.02   0.01  -0.06     0.08   0.00  -0.04     0.04   0.02  -0.10
 107   1     0.01  -0.01  -0.06    -0.02  -0.10   0.05     0.01   0.00  -0.14
 108   1    -0.01  -0.02  -0.06     0.09  -0.12  -0.01    -0.06  -0.03  -0.12
 109   1    -0.04  -0.05   0.01     0.03  -0.01  -0.01     0.06  -0.02  -0.02
 110   1    -0.07   0.00   0.00     0.04  -0.02  -0.01     0.08  -0.05   0.00
 111   1    -0.03  -0.02   0.01     0.03   0.00  -0.01     0.06  -0.05  -0.01
 112   1    -0.04  -0.01  -0.02     0.05  -0.01   0.04     0.04  -0.14  -0.01
 113   1    -0.01  -0.03   0.01     0.01   0.02   0.00     0.16  -0.11  -0.02
 114   1    -0.03   0.00   0.02     0.06  -0.02  -0.02     0.17  -0.06  -0.02
                    67                     68                     69
                     A                      A                      A
 Frequencies --   308.7641               317.2641               323.6455
 Red. masses --     5.4700                 3.8217                 3.3968
 Frc consts  --     0.3072                 0.2266                 0.2096
 IR Inten    --     2.8601                 6.0747                 1.9857
 Atom AN      X      Y      Z        X      Y      Z        X      Y      Z
   1   8     0.11  -0.04   0.00     0.00  -0.01  -0.02    -0.03  -0.01  -0.10
   2  12    -0.06  -0.04   0.08     0.06  -0.12  -0.06     0.07  -0.05   0.00
   3   8    -0.13  -0.09   0.05    -0.02  -0.02   0.02    -0.02  -0.03   0.00
   4   6     0.10  -0.01  -0.01     0.00  -0.01  -0.01    -0.01  -0.05  -0.02
   5   7     0.01  -0.04   0.02     0.05   0.04   0.16    -0.02   0.01  -0.04
   6   7     0.04   0.05  -0.04    -0.03  -0.04  -0.02     0.01   0.00   0.10
   7   8     0.24  -0.02   0.00     0.02  -0.01  -0.02     0.06  -0.01  -0.06
   8   6     0.06  -0.05   0.00     0.00   0.03   0.07    -0.02   0.01  -0.02
   9   6     0.05  -0.01   0.01    -0.03  -0.02  -0.01    -0.02  -0.01  -0.01
  10   6     0.08   0.04  -0.03    -0.06  -0.03  -0.01    -0.02   0.00   0.05
  11   8    -0.10   0.03  -0.07    -0.01   0.00   0.01    -0.01   0.01   0.04
  12   6    -0.12   0.00  -0.06    -0.01  -0.01   0.01    -0.02   0.02   0.00
  13   6    -0.14  -0.03  -0.05    -0.01  -0.01   0.02    -0.04   0.00  -0.02
  14   6    -0.01   0.04   0.02    -0.01  -0.01   0.01    -0.03  -0.03   0.05
  15   8    -0.12  -0.05   0.03     0.00  -0.01   0.01     0.02   0.01   0.01
  16   6     0.05   0.09   0.09    -0.02   0.01   0.01    -0.11   0.03   0.04
  17   8    -0.04   0.03   0.02    -0.01   0.00   0.00    -0.01   0.01   0.01
  18   6    -0.03  -0.02   0.01     0.01  -0.02   0.03     0.00  -0.02   0.01
  19   8     0.01  -0.01  -0.03     0.08  -0.04   0.05     0.05  -0.02   0.01
  20   8     0.05   0.00   0.03    -0.02   0.01  -0.05    -0.01   0.01  -0.03
  21   6     0.01   0.04  -0.01    -0.01   0.00  -0.02     0.00   0.01  -0.01
  22   6    -0.02   0.04  -0.04    -0.01   0.01  -0.02     0.00   0.01  -0.01
  23   6     0.01  -0.01   0.05    -0.02   0.00  -0.03    -0.01  -0.01   0.00
  24   8     0.03   0.03   0.02     0.01  -0.01   0.01     0.01   0.01   0.01
  25   6     0.02   0.05  -0.04     0.00   0.03  -0.01     0.01   0.02  -0.01
  26   6     0.05  -0.08   0.01    -0.06   0.08   0.01    -0.03   0.02   0.02
  27   6     0.02  -0.01  -0.09     0.02   0.01   0.02     0.03  -0.01  -0.03
  28   6    -0.08   0.01   0.02     0.04   0.01   0.01     0.11   0.03   0.06
  29   6    -0.01  -0.01   0.01     0.02   0.03   0.06    -0.01   0.00  -0.02
  30   6     0.01   0.03  -0.02    -0.01   0.00  -0.01     0.01   0.00   0.04
  31   6    -0.02   0.00   0.01     0.04   0.02   0.02    -0.01   0.00  -0.01
  32   6    -0.02   0.00   0.02     0.05   0.03   0.06    -0.01  -0.03  -0.01
  33   6    -0.03  -0.02   0.02     0.03   0.00   0.06     0.00   0.00  -0.01
  34   6    -0.02  -0.02   0.02     0.02  -0.03   0.07     0.00   0.03  -0.01
  35   6    -0.03   0.00   0.01     0.00   0.01   0.04     0.01   0.00  -0.01
  36   6    -0.02  -0.01   0.01     0.01  -0.01  -0.01    -0.01   0.00   0.00
  37   6    -0.02   0.01   0.00     0.00   0.01   0.00     0.01  -0.01   0.00
  38   6    -0.01   0.01   0.00     0.00   0.00  -0.01     0.01   0.00   0.02
  39   6    -0.01   0.00  -0.02    -0.02  -0.02  -0.01     0.10   0.10  -0.01
  40   6    -0.01   0.02  -0.03    -0.02  -0.02  -0.02     0.03   0.03   0.05
  41   6    -0.03   0.01  -0.02     0.00   0.01  -0.03    -0.06  -0.06   0.10
  42   6    -0.02   0.01   0.00     0.00   0.01  -0.01     0.00   0.00   0.02
  43   6    -0.01  -0.01   0.01     0.01   0.01  -0.01    -0.03  -0.03   0.02
  44   6    -0.02   0.00   0.00     0.00   0.01   0.00     0.02   0.03  -0.01
  45   6     0.00   0.01  -0.03    -0.04   0.06  -0.11     0.01  -0.01   0.02
  46   6     0.00  -0.01  -0.03    -0.03  -0.07  -0.10     0.00   0.02   0.01
  47   6     0.00   0.00  -0.01    -0.04  -0.06  -0.11     0.02   0.01   0.04
  48   6     0.02   0.01   0.00    -0.04   0.07  -0.09     0.00  -0.03   0.01
  49   6     0.01  -0.01   0.01     0.01  -0.01   0.05     0.00   0.05  -0.05
  50   6     0.01   0.00   0.02     0.01   0.02   0.03    -0.04  -0.03  -0.11
  51   6     0.00   0.02   0.03     0.02   0.01   0.00    -0.06  -0.04   0.01
  52   6    -0.01  -0.02   0.00     0.00   0.01   0.04     0.00  -0.05  -0.11
  53   6     0.09  -0.04  -0.03     0.06   0.09  -0.02     0.04   0.06  -0.01
  54   6     0.06   0.12  -0.05    -0.08   0.01   0.02    -0.04   0.02   0.03
  55   1     0.00   0.01   0.02    -0.01  -0.04  -0.05     0.00  -0.02  -0.03
  56   1    -0.23  -0.03  -0.06    -0.02  -0.02   0.01    -0.07   0.00  -0.01
  57   1    -0.02   0.04   0.03    -0.01  -0.01   0.00    -0.06  -0.04   0.04
  58   1    -0.02   0.11   0.09    -0.06   0.01   0.01    -0.23   0.02   0.03
  59   1    -0.05   0.09   0.08    -0.04   0.01   0.02    -0.14   0.04   0.07
  60   1     0.13   0.15   0.15     0.00   0.02   0.04    -0.03   0.07   0.12
  61   1    -0.02   0.02  -0.04    -0.01   0.01  -0.01     0.00   0.01  -0.01
  62   1    -0.01   0.03   0.06    -0.03   0.01  -0.02    -0.01   0.01   0.02
  63   1     0.01   0.05  -0.01     0.01   0.03   0.02     0.00   0.02   0.01
  64   1     0.04   0.05  -0.10     0.01   0.05  -0.03     0.01   0.03  -0.02
  65   1     0.06   0.08  -0.02     0.01   0.05  -0.02     0.01   0.03  -0.01
  66   1    -0.01  -0.12  -0.07     0.01   0.12   0.09     0.02   0.06   0.03
  67   1     0.11  -0.12   0.02    -0.12   0.12  -0.01    -0.09   0.05   0.06
  68   1     0.09  -0.11   0.02    -0.09   0.10   0.00    -0.05  -0.03   0.00
  69   1     0.12  -0.17  -0.23     0.03   0.01  -0.02     0.06  -0.06  -0.08
  70   1    -0.11  -0.01  -0.07     0.04   0.01   0.04    -0.01  -0.01  -0.03
  71   1     0.18   0.13   0.02     0.04   0.02   0.03     0.09   0.03   0.02
  72   1    -0.10   0.00   0.07     0.06   0.01  -0.02     0.19   0.03  -0.05
  73   1    -0.11   0.02  -0.06     0.05   0.02   0.05     0.15   0.10   0.17
  74   1    -0.12   0.00   0.03     0.04   0.01   0.01     0.09   0.03   0.08
  75   1    -0.03   0.01   0.02     0.04   0.04   0.07    -0.01  -0.05  -0.02
  76   1    -0.03  -0.03   0.02     0.03  -0.01   0.04     0.00   0.01   0.00
  77   1    -0.02  -0.03   0.02     0.03  -0.07   0.06     0.00   0.05  -0.01
  78   1    -0.01  -0.01   0.03     0.01   0.00  -0.02    -0.01   0.00   0.00
  79   1    -0.03   0.01  -0.01    -0.01   0.00   0.00     0.01  -0.01   0.00
  80   1    -0.01  -0.01  -0.02    -0.03  -0.04  -0.01     0.15   0.18  -0.05
  81   1     0.00   0.03  -0.05    -0.03  -0.03  -0.01     0.04   0.04   0.03
  82   1    -0.04   0.00  -0.01     0.01   0.03  -0.04    -0.11  -0.14   0.16
  83   1    -0.01   0.00   0.02     0.01   0.01  -0.01    -0.03  -0.03   0.02
  84   1    -0.03   0.00  -0.01     0.00   0.01   0.00     0.02   0.04  -0.01
  85   1    -0.01   0.05  -0.02    -0.08   0.19  -0.09     0.02  -0.05   0.02
  86   1     0.02   0.01  -0.06    -0.07  -0.01  -0.24     0.01   0.00   0.06
  87   1     0.01  -0.01  -0.03    -0.06   0.10  -0.11     0.01  -0.02   0.02
  88   1     0.02  -0.04  -0.03    -0.01  -0.15  -0.11     0.01   0.04   0.02
  89   1     0.00   0.01  -0.04    -0.02  -0.14  -0.12     0.00   0.03   0.01
  90   1     0.01   0.01  -0.05    -0.11  -0.01  -0.17     0.02   0.00   0.03
  91   1    -0.01   0.01   0.00    -0.04  -0.18  -0.10     0.02   0.05   0.04
  92   1    -0.01  -0.04  -0.03    -0.05  -0.10  -0.13     0.02   0.03   0.05
  93   1     0.04   0.01  -0.02    -0.08   0.02  -0.21     0.02  -0.02   0.08
  94   1     0.02  -0.02   0.00    -0.04   0.18  -0.09    -0.01  -0.04   0.02
  95   1     0.04   0.01   0.00    -0.07   0.00  -0.19     0.00  -0.01   0.03
  96   1     0.02   0.04   0.01    -0.04   0.10  -0.09     0.00  -0.05   0.01
  97   1     0.04  -0.03  -0.02     0.02  -0.06   0.05     0.02   0.10  -0.07
  98   1     0.03  -0.01   0.05     0.02  -0.03   0.08     0.00   0.05  -0.05
  99   1    -0.01   0.00   0.01     0.01   0.02   0.09    -0.03   0.02  -0.10
 100   1     0.03   0.04   0.02     0.02   0.07   0.03    -0.06  -0.18  -0.09
 101   1     0.05  -0.01   0.05     0.02   0.01   0.07    -0.09   0.02  -0.24
 102   1     0.01  -0.03   0.03     0.01   0.02   0.03    -0.03  -0.01  -0.11
 103   1     0.01   0.04   0.01     0.03   0.02   0.00    -0.11  -0.06   0.01
 104   1     0.00   0.01   0.06     0.01   0.01   0.02    -0.05  -0.05  -0.04
 105   1     0.01   0.03   0.04     0.02   0.01  -0.01    -0.07  -0.04   0.03
 106   1     0.01  -0.01   0.00    -0.03   0.00   0.04     0.11  -0.01  -0.12
 107   1    -0.01  -0.03   0.00    -0.01   0.01   0.07     0.03  -0.06  -0.20
 108   1     0.00  -0.03   0.00     0.04   0.02   0.05    -0.11  -0.11  -0.17
 109   1     0.09  -0.03  -0.04     0.06   0.10  -0.03     0.04   0.13  -0.01
 110   1     0.11  -0.06  -0.05     0.12   0.03  -0.08     0.11   0.02   0.00
 111   1     0.08   0.00  -0.03     0.05   0.20  -0.03     0.05   0.07  -0.01
 112   1     0.09   0.18  -0.12    -0.03   0.05   0.03    -0.03   0.04   0.01
 113   1     0.05   0.10  -0.03    -0.13   0.02   0.04    -0.04   0.04   0.02
 114   1    -0.01   0.16   0.00    -0.09   0.02   0.03    -0.08   0.01   0.03
                    70                     71                     72
                     A                      A                      A
 Frequencies --   326.2261               326.8501               332.2414
 Red. masses --     3.4576                 3.5761                 3.3251
 Frc consts  --     0.2168                 0.2251                 0.2162
 IR Inten    --     6.8872                 5.6172                 1.0422
 Atom AN      X      Y      Z        X      Y      Z        X      Y      Z
   1   8     0.06   0.01   0.13     0.00   0.00  -0.01    -0.02  -0.01  -0.03
   2  12     0.00  -0.04  -0.04    -0.02   0.11  -0.02    -0.02   0.00   0.01
   3   8     0.00   0.02   0.03     0.01   0.02  -0.02     0.01   0.01  -0.01
   4   6     0.03   0.06   0.03     0.00  -0.01   0.00    -0.01  -0.01  -0.01
   5   7     0.00  -0.01   0.00     0.05   0.00   0.13    -0.02  -0.01  -0.04
   6   7     0.01   0.01   0.06     0.03   0.02   0.04     0.00   0.00   0.00
   7   8    -0.05   0.01   0.08    -0.01   0.00  -0.01     0.01   0.00  -0.02
   8   6     0.00  -0.01   0.00     0.02  -0.01   0.02     0.00  -0.01  -0.01
   9   6    -0.01  -0.01   0.00    -0.01   0.00  -0.07     0.01   0.00   0.01
  10   6     0.00   0.00   0.03     0.03   0.01  -0.02     0.01   0.00   0.00
  11   8    -0.01  -0.02  -0.07     0.00  -0.01   0.01     0.01  -0.01   0.03
  12   6     0.00  -0.03   0.00     0.00   0.01   0.01     0.01  -0.01   0.01
  13   6     0.02  -0.02   0.04     0.00   0.02  -0.01     0.01   0.00   0.00
  14   6     0.04   0.05  -0.07     0.00  -0.01   0.01    -0.01   0.00   0.01
  15   8    -0.05  -0.01  -0.03    -0.02   0.00   0.04     0.02   0.00  -0.01
  16   6     0.16  -0.03  -0.04    -0.01   0.00   0.00    -0.06   0.01   0.01
  17   8     0.00   0.00  -0.01     0.00   0.00  -0.01     0.01   0.00   0.00
  18   6     0.01   0.00   0.01    -0.02   0.03  -0.04     0.00   0.00   0.00
  19   8     0.04  -0.01   0.02    -0.10   0.05  -0.09     0.00   0.00   0.01
  20   8    -0.02   0.00  -0.03     0.02  -0.01   0.05     0.00   0.00   0.00
  21   6     0.00  -0.01  -0.01     0.01   0.00   0.02     0.00   0.00   0.00
  22   6     0.00   0.00   0.00     0.01  -0.01   0.02     0.00   0.00   0.00
  23   6    -0.01  -0.01  -0.01     0.02   0.00   0.03     0.00   0.00   0.00
  24   8     0.00  -0.01   0.00     0.00   0.01  -0.01     0.00   0.00   0.00
  25   6     0.00   0.01   0.00     0.00  -0.04   0.02     0.00   0.00   0.00
  26   6    -0.04   0.03   0.02     0.05  -0.09  -0.01     0.00   0.01   0.00
  27   6    -0.03   0.02   0.05     0.02  -0.01  -0.01     0.00   0.01   0.00
  28   6    -0.14  -0.04  -0.09     0.02   0.01   0.01     0.04   0.01   0.02
  29   6     0.00   0.00   0.00     0.02   0.00   0.06    -0.01  -0.01  -0.02
  30   6     0.01   0.00   0.03     0.01  -0.01   0.03     0.00   0.00   0.00
  31   6     0.00   0.00   0.00     0.04   0.01   0.02    -0.01  -0.01   0.00
  32   6     0.00   0.05   0.01     0.04   0.04   0.04    -0.05   0.24   0.03
  33   6     0.00   0.00   0.00     0.01  -0.01   0.03    -0.01   0.01  -0.01
  34   6     0.00  -0.04  -0.01     0.00  -0.04   0.05     0.03  -0.23  -0.05
  35   6     0.00   0.00   0.00    -0.02   0.00   0.04     0.00   0.00  -0.01
  36   6     0.01  -0.02   0.00     0.02   0.00   0.00     0.02  -0.09  -0.01
  37   6     0.00   0.02   0.00    -0.01   0.02   0.01    -0.01   0.09   0.00
  38   6     0.01   0.00   0.02     0.01  -0.01   0.02     0.00   0.00   0.00
  39   6     0.08   0.08  -0.02     0.07   0.05  -0.01    -0.01  -0.01   0.00
  40   6     0.02   0.02   0.02     0.02   0.01   0.02     0.00   0.00   0.00
  41   6    -0.06  -0.05   0.07    -0.04  -0.04   0.06     0.01   0.01  -0.01
  42   6    -0.01   0.01   0.02     0.00   0.00   0.02     0.00   0.00   0.00
  43   6    -0.03  -0.03   0.02    -0.01  -0.02   0.01     0.00   0.00   0.00
  44   6     0.01   0.03  -0.01     0.01   0.02  -0.01     0.00  -0.01   0.00
  45   6     0.00  -0.01  -0.02    -0.04   0.05  -0.07     0.03  -0.06  -0.08
  46   6     0.00  -0.02   0.02    -0.02  -0.05  -0.06     0.02  -0.05   0.13
  47   6    -0.02   0.01  -0.02    -0.03  -0.04  -0.10    -0.08   0.06  -0.06
  48   6     0.01   0.01   0.01    -0.01   0.07  -0.06     0.06   0.04   0.09
  49   6     0.02   0.03  -0.02     0.01   0.03  -0.03     0.00   0.00   0.00
  50   6    -0.02  -0.01  -0.08    -0.02  -0.02  -0.07     0.00   0.00   0.01
  51   6    -0.05  -0.03   0.02    -0.03  -0.02   0.01     0.00   0.00   0.00
  52   6    -0.01  -0.05  -0.08     0.00  -0.02  -0.07     0.00   0.00   0.01
  53   6     0.05   0.03  -0.02    -0.09  -0.09   0.05     0.01   0.00  -0.01
  54   6    -0.03   0.05   0.01     0.07  -0.06   0.02     0.00   0.02  -0.01
  55   1    -0.01  -0.02  -0.02    -0.05   0.00  -0.11     0.01   0.00   0.03
  56   1     0.06  -0.02   0.03     0.00   0.03   0.01     0.03  -0.01  -0.01
  57   1     0.09   0.05  -0.05     0.00  -0.01   0.00    -0.02   0.00   0.00
  58   1     0.32  -0.01  -0.03    -0.02  -0.01   0.00    -0.09   0.01   0.01
  59   1     0.19  -0.04  -0.08     0.00   0.00   0.01    -0.07   0.01   0.02
  60   1     0.06  -0.08  -0.14     0.00   0.00   0.01    -0.02   0.03   0.04
  61   1     0.00   0.00   0.00     0.01  -0.01   0.02     0.00   0.00   0.00
  62   1     0.01  -0.01   0.00     0.03  -0.01   0.03     0.00   0.00  -0.01
  63   1     0.01   0.01   0.00    -0.02  -0.04  -0.02     0.00   0.00   0.00
  64   1     0.00   0.01   0.00    -0.01  -0.07   0.04     0.00   0.00   0.01
  65   1     0.00   0.01  -0.01    -0.01  -0.06   0.02     0.00  -0.01   0.00
  66   1     0.03   0.08   0.05    -0.02  -0.13  -0.10     0.00   0.01   0.01
  67   1    -0.11   0.07   0.05     0.12  -0.14   0.03    -0.01   0.01   0.00
  68   1    -0.06  -0.01   0.00     0.09  -0.13   0.00    -0.01   0.01   0.00
  69   1    -0.07   0.09   0.09     0.03  -0.03  -0.02     0.01  -0.01   0.00
  70   1     0.02   0.03   0.08     0.01  -0.02  -0.04    -0.03   0.01   0.01
  71   1    -0.09  -0.02   0.00     0.03  -0.01   0.01     0.01   0.04  -0.01
  72   1    -0.25  -0.04   0.07     0.03   0.02  -0.02     0.05   0.03  -0.03
  73   1    -0.21  -0.13  -0.23     0.02   0.03   0.02     0.06   0.00   0.06
  74   1    -0.13  -0.05  -0.12     0.02   0.02   0.03     0.08   0.02   0.01
  75   1    -0.01   0.08   0.01     0.04   0.07   0.04    -0.06   0.42   0.06
  76   1     0.00   0.00   0.00     0.00  -0.02   0.00    -0.01   0.02   0.01
  77   1     0.01  -0.08  -0.01     0.00  -0.08   0.04     0.05  -0.42  -0.07
  78   1     0.01  -0.02   0.00     0.01   0.01  -0.02     0.02  -0.10   0.00
  79   1     0.00   0.02   0.00    -0.02   0.02   0.00    -0.01   0.10   0.00
  80   1     0.13   0.14  -0.06     0.11   0.10  -0.04    -0.02  -0.02   0.01
  81   1     0.02   0.02   0.01     0.03   0.02   0.00     0.00   0.00   0.00
  82   1    -0.11  -0.12   0.12    -0.07  -0.09   0.09     0.01   0.02  -0.01
  83   1    -0.03  -0.03   0.02    -0.01  -0.03   0.01     0.00   0.01   0.00
  84   1     0.01   0.03  -0.02     0.01   0.03  -0.01     0.00  -0.01   0.00
  85   1    -0.01   0.02  -0.02    -0.06   0.14  -0.05     0.04   0.03  -0.07
  86   1     0.01  -0.01  -0.05    -0.07  -0.01  -0.16     0.05  -0.06  -0.15
  87   1     0.01  -0.02  -0.02    -0.05   0.09  -0.07     0.04  -0.09  -0.12
  88   1    -0.02  -0.01   0.02    -0.01  -0.11  -0.07    -0.08   0.02   0.12
  89   1     0.00  -0.02   0.04    -0.01  -0.11  -0.08     0.02   0.00   0.23
  90   1     0.02  -0.03   0.03    -0.09   0.00  -0.12     0.13  -0.10   0.17
  91   1    -0.02  -0.01  -0.01    -0.03  -0.15  -0.10    -0.11  -0.01  -0.02
  92   1    -0.02   0.00  -0.03    -0.04  -0.10  -0.12    -0.11   0.06  -0.12
  93   1    -0.01   0.02  -0.03    -0.05   0.04  -0.20    -0.08   0.10  -0.11
  94   1     0.02   0.00   0.01    -0.01   0.14  -0.07     0.11  -0.07   0.04
  95   1     0.02   0.02   0.02    -0.02   0.02  -0.14     0.09   0.10   0.18
  96   1     0.02   0.02   0.02    -0.01   0.12  -0.05     0.10   0.04   0.14
  97   1     0.03   0.04  -0.02     0.02   0.06  -0.04     0.00   0.00   0.00
  98   1     0.03   0.04  -0.01     0.01   0.03  -0.02     0.00   0.00  -0.01
  99   1     0.02   0.02  -0.03    -0.01   0.02  -0.05     0.00  -0.01   0.00
 100   1    -0.05  -0.11  -0.06    -0.04  -0.12  -0.06     0.01   0.01   0.01
 101   1    -0.05   0.02  -0.16    -0.05   0.01  -0.16     0.01  -0.01   0.02
 102   1    -0.02   0.00  -0.09    -0.02  -0.01  -0.07     0.00  -0.01   0.01
 103   1    -0.07  -0.02   0.01    -0.05  -0.01   0.01     0.00   0.00   0.00
 104   1    -0.05  -0.02   0.00    -0.04  -0.01  -0.01     0.01   0.00   0.00
 105   1    -0.06  -0.02   0.05    -0.05  -0.02   0.03     0.01   0.00  -0.01
 106   1     0.08  -0.02  -0.09     0.06  -0.01  -0.06     0.00   0.00   0.00
 107   1     0.02  -0.05  -0.15     0.03  -0.01  -0.13     0.00   0.00   0.01
 108   1    -0.09  -0.09  -0.13    -0.08  -0.03  -0.10     0.01   0.00   0.01
 109   1     0.05   0.07  -0.02    -0.09  -0.17   0.05     0.01   0.01  -0.01
 110   1     0.10   0.00  -0.03    -0.18  -0.02   0.09     0.02  -0.01  -0.01
 111   1     0.05   0.06  -0.02    -0.10  -0.17   0.05     0.02   0.00  -0.01
 112   1     0.00   0.08  -0.02     0.05  -0.12   0.10     0.00   0.03  -0.03
 113   1    -0.03   0.05   0.01     0.06  -0.05   0.03     0.01   0.01  -0.01
 114   1    -0.08   0.05   0.02     0.17  -0.09  -0.01    -0.02   0.02   0.00
                    73                     74                     75
                     A                      A                      A
 Frequencies --   337.7561               343.6201               360.5896
 Red. masses --     4.8874                 3.5588                 4.3505
 Frc consts  --     0.3285                 0.2476                 0.3333
 IR Inten    --    23.8947                 6.7941                20.5571
 Atom AN      X      Y      Z        X      Y      Z        X      Y      Z
   1   8     0.06   0.01   0.03    -0.01   0.00   0.00    -0.06  -0.04  -0.01
   2  12     0.23   0.03  -0.04    -0.08  -0.04  -0.01    -0.10  -0.01  -0.02
   3   8    -0.07  -0.04   0.04     0.03   0.01  -0.01     0.01   0.04   0.02
   4   6     0.04   0.01   0.01    -0.01   0.00   0.00     0.00   0.04   0.01
   5   7    -0.01   0.07  -0.02     0.02  -0.04   0.03     0.02   0.06   0.00
   6   7    -0.01   0.01   0.08     0.03   0.05   0.14     0.03   0.07  -0.01
   7   8     0.04   0.00   0.01    -0.01   0.00   0.00     0.16   0.01   0.05
   8   6    -0.07   0.09  -0.02     0.04  -0.06  -0.01     0.01   0.07  -0.03
   9   6    -0.05   0.05  -0.04     0.01  -0.03  -0.03     0.02   0.09  -0.06
  10   6    -0.06   0.01   0.03     0.05   0.02   0.04     0.05   0.07  -0.04
  11   8    -0.05  -0.03  -0.05     0.02   0.01   0.01    -0.04   0.01  -0.04
  12   6    -0.06  -0.01  -0.03     0.02   0.00   0.02     0.01  -0.11   0.00
  13   6    -0.07   0.00  -0.02     0.03   0.00   0.02     0.06  -0.07   0.03
  14   6     0.01   0.00  -0.01     0.00   0.01   0.00    -0.01   0.08   0.00
  15   8    -0.08  -0.04   0.02     0.02   0.02   0.00     0.04  -0.06  -0.08
  16   6     0.08   0.00   0.01    -0.02   0.00   0.00    -0.12   0.04   0.02
  17   8    -0.02   0.01   0.03     0.02   0.00  -0.01     0.02  -0.01   0.00
  18   6    -0.03  -0.01   0.01     0.01   0.01   0.00     0.05  -0.01   0.07
  19   8     0.01  -0.01   0.01    -0.02   0.00   0.00     0.09  -0.03   0.10
  20   8     0.03  -0.01   0.02     0.00   0.00   0.00    -0.05   0.00  -0.05
  21   6     0.01   0.02  -0.01     0.00   0.00   0.00    -0.02  -0.04  -0.03
  22   6    -0.01   0.01  -0.02     0.00   0.00   0.00    -0.01  -0.01  -0.03
  23   6    -0.01   0.00   0.00     0.01   0.01  -0.02    -0.01  -0.02  -0.01
  24   8     0.02   0.01   0.00    -0.02   0.00   0.01     0.01  -0.05  -0.01
  25   6     0.01   0.03  -0.02     0.00   0.00   0.00     0.00   0.04  -0.02
  26   6     0.02  -0.01  -0.02     0.00   0.03  -0.01    -0.04   0.08   0.02
  27   6     0.00  -0.01  -0.04     0.01   0.01   0.03    -0.01   0.03   0.06
  28   6    -0.04   0.00  -0.01     0.01   0.00  -0.01    -0.02  -0.02  -0.02
  29   6    -0.01   0.01   0.00     0.01  -0.01   0.02     0.00   0.02   0.01
  30   6    -0.01  -0.01   0.03    -0.01   0.01   0.06     0.03   0.02  -0.01
  31   6    -0.01  -0.01   0.00     0.01   0.00   0.01    -0.01  -0.01   0.01
  32   6    -0.02   0.03   0.00     0.01  -0.01   0.01    -0.02  -0.02   0.01
  33   6    -0.01   0.01   0.00     0.00  -0.01   0.01    -0.03   0.00   0.01
  34   6     0.00  -0.03  -0.01    -0.01   0.01   0.02    -0.03   0.01   0.01
  35   6    -0.01   0.00  -0.01    -0.01   0.00   0.01    -0.03   0.00   0.01
  36   6     0.00  -0.02   0.00     0.00   0.01   0.00    -0.01   0.00   0.02
  37   6    -0.01   0.01   0.00    -0.01   0.00   0.01    -0.02  -0.01   0.00
  38   6     0.01  -0.01   0.02     0.01   0.00   0.04     0.03  -0.02   0.00
  39   6    -0.05  -0.08   0.08    -0.07  -0.08   0.12     0.03  -0.02   0.00
  40   6     0.01   0.00   0.03    -0.01   0.03   0.03     0.04  -0.02   0.00
  41   6     0.08   0.08  -0.02     0.05   0.13  -0.02     0.03  -0.02   0.02
  42   6    -0.01  -0.01   0.02    -0.05   0.01   0.04     0.03  -0.01   0.01
  43   6     0.04   0.03  -0.03     0.04   0.04  -0.01     0.00  -0.03  -0.01
  44   6    -0.02  -0.04   0.01    -0.06  -0.06   0.01     0.02  -0.02   0.01
  45   6     0.01  -0.02  -0.01    -0.01   0.02  -0.01     0.00   0.01   0.00
  46   6     0.01   0.00   0.03    -0.01  -0.01  -0.03     0.01   0.00  -0.01
  47   6     0.00   0.01   0.01     0.00  -0.02  -0.01     0.01  -0.01   0.00
  48   6     0.01   0.00   0.02     0.00   0.01  -0.02     0.00   0.00  -0.01
  49   6    -0.04   0.00  -0.10    -0.03   0.00  -0.16    -0.01   0.00  -0.03
  50   6    -0.01  -0.05   0.01    -0.01  -0.11   0.01    -0.01  -0.01   0.00
  51   6    -0.01  -0.04  -0.09    -0.03  -0.08  -0.10    -0.02   0.00   0.00
  52   6     0.02   0.06  -0.01     0.03   0.07  -0.04    -0.01  -0.01  -0.02
  53   6    -0.10   0.09   0.04     0.09  -0.04  -0.02    -0.14  -0.02   0.06
  54   6     0.01  -0.18   0.05     0.00   0.11  -0.02     0.14  -0.06  -0.01
  55   1    -0.01   0.04  -0.08    -0.04  -0.02  -0.06     0.00   0.10  -0.07
  56   1    -0.10  -0.01  -0.03     0.04   0.00   0.03     0.16  -0.09  -0.01
  57   1     0.03   0.00  -0.01     0.00   0.01   0.00     0.03   0.08   0.02
  58   1     0.11   0.00   0.01    -0.02   0.00   0.00    -0.15   0.07   0.03
  59   1     0.09   0.00   0.00    -0.02   0.00  -0.01    -0.20   0.05   0.01
  60   1     0.06  -0.01  -0.01    -0.02   0.00   0.00    -0.05   0.09   0.06
  61   1    -0.01   0.01  -0.03     0.00   0.01   0.00    -0.02   0.01  -0.01
  62   1    -0.04   0.02   0.00     0.00   0.00  -0.03    -0.01  -0.02  -0.01
  63   1     0.00   0.03   0.02     0.00   0.00  -0.01     0.03   0.03   0.04
  64   1     0.02   0.05  -0.05     0.00   0.00   0.00     0.00   0.09  -0.04
  65   1     0.02   0.06  -0.01    -0.01  -0.01   0.00     0.00   0.05  -0.03
  66   1    -0.03  -0.06  -0.04    -0.01   0.01   0.02     0.06   0.14   0.11
  67   1     0.08  -0.05  -0.05     0.02   0.02  -0.05    -0.14   0.14   0.00
  68   1     0.04   0.03   0.00     0.00   0.08  -0.01    -0.07   0.10   0.02
  69   1     0.03  -0.05  -0.08     0.00   0.03   0.03    -0.07   0.14   0.08
  70   1    -0.04  -0.01  -0.04     0.03   0.01   0.04     0.06   0.05   0.15
  71   1     0.04   0.02   0.00     0.00   0.00   0.02    -0.09   0.00  -0.05
  72   1    -0.07   0.00   0.02     0.01  -0.01   0.00    -0.04  -0.05   0.05
  73   1    -0.06   0.00  -0.06     0.01  -0.01   0.01    -0.02  -0.09  -0.01
  74   1    -0.06   0.00   0.01     0.01  -0.01  -0.02     0.01  -0.04  -0.10
  75   1    -0.02   0.04   0.00     0.01  -0.02   0.00    -0.01  -0.04   0.00
  76   1    -0.01   0.02   0.01     0.00  -0.02  -0.01    -0.04   0.01   0.01
  77   1     0.00  -0.06  -0.01    -0.02   0.02   0.02    -0.03   0.01   0.01
  78   1     0.00  -0.02   0.01     0.00   0.01   0.00    -0.01  -0.01   0.03
  79   1    -0.01   0.01   0.00    -0.01  -0.01   0.00    -0.03  -0.01  -0.01
  80   1    -0.10  -0.12   0.12    -0.13  -0.15   0.16     0.02  -0.02   0.01
  81   1     0.01   0.00   0.03     0.00   0.03   0.00     0.05  -0.02   0.00
  82   1     0.14   0.15  -0.07     0.13   0.22  -0.08     0.00  -0.03   0.02
  83   1     0.04   0.02  -0.03     0.04   0.04  -0.01     0.00  -0.04  -0.03
  84   1    -0.02  -0.04   0.01    -0.08  -0.07  -0.02     0.03  -0.02   0.03
  85   1     0.01   0.00  -0.01    -0.02   0.03  -0.01    -0.01   0.04   0.00
  86   1     0.02  -0.01  -0.02    -0.02   0.00  -0.03     0.02   0.01  -0.03
  87   1     0.02  -0.03  -0.01    -0.02   0.03  -0.01     0.01  -0.01   0.00
  88   1    -0.01   0.01   0.03     0.01  -0.04  -0.03     0.02  -0.03  -0.01
  89   1     0.01   0.02   0.05    -0.01  -0.03  -0.04     0.00   0.01  -0.02
  90   1     0.04  -0.01   0.04    -0.03   0.01  -0.05     0.01   0.01  -0.03
  91   1    -0.01   0.03   0.01     0.01  -0.03  -0.02     0.02   0.02  -0.01
  92   1    -0.01   0.02   0.00     0.01  -0.04  -0.01     0.03  -0.04   0.01
  93   1     0.01   0.01   0.01     0.01   0.00  -0.03     0.04   0.00   0.00
  94   1     0.02  -0.03   0.01    -0.01   0.03  -0.02     0.01  -0.01  -0.01
  95   1     0.02   0.01   0.04     0.00   0.00  -0.04     0.02  -0.01  -0.02
  96   1     0.01  -0.01   0.02    -0.01   0.03  -0.02     0.01   0.03   0.00
  97   1    -0.03   0.10  -0.10     0.01   0.13  -0.19    -0.02   0.05  -0.02
  98   1    -0.04   0.03  -0.14     0.00   0.08  -0.18    -0.03  -0.01  -0.05
  99   1    -0.05  -0.08  -0.18    -0.05  -0.14  -0.30    -0.03  -0.02  -0.05
 100   1     0.01  -0.07   0.00     0.03  -0.14  -0.02    -0.02  -0.03   0.01
 101   1    -0.01  -0.05  -0.01     0.02  -0.09  -0.05    -0.03  -0.01   0.00
 102   1    -0.01  -0.07   0.03    -0.01  -0.17   0.06     0.00   0.01  -0.01
 103   1    -0.04  -0.11  -0.03    -0.12  -0.18  -0.02     0.00   0.02  -0.01
 104   1     0.00  -0.03  -0.18     0.00  -0.08  -0.26    -0.03   0.03   0.01
 105   1    -0.02  -0.07  -0.11    -0.05  -0.10  -0.12    -0.04  -0.02   0.02
 106   1    -0.02   0.05  -0.01     0.03   0.10  -0.07    -0.02  -0.02  -0.01
 107   1     0.03   0.09   0.00     0.05   0.10  -0.03     0.01   0.01  -0.04
 108   1     0.01   0.07   0.00     0.00   0.03  -0.07    -0.04   0.01  -0.02
 109   1    -0.11   0.10   0.06     0.09   0.01  -0.03    -0.14  -0.11   0.07
 110   1    -0.12   0.11   0.09     0.13  -0.07  -0.01    -0.27   0.08   0.13
 111   1    -0.09   0.02   0.05     0.09  -0.02  -0.02    -0.14  -0.16   0.06
 112   1    -0.09  -0.31   0.16     0.04   0.17  -0.10     0.05  -0.17   0.07
 113   1     0.06  -0.17   0.02     0.02   0.11  -0.02     0.17  -0.08  -0.02
 114   1     0.17  -0.24  -0.03    -0.10   0.14   0.02     0.27  -0.09  -0.06
                    76                     77                     78
                     A                      A                      A
 Frequencies --   374.8206               390.6875               402.6678
 Red. masses --     5.2642                 5.3157                 8.5853
 Frc consts  --     0.4357                 0.4781                 0.8202
 IR Inten    --     7.3166                14.2587                12.4336
 Atom AN      X      Y      Z        X      Y      Z        X      Y      Z
   1   8    -0.09  -0.05   0.00    -0.01   0.00   0.00     0.00   0.00   0.00
   2  12     0.12   0.09  -0.02     0.02   0.07  -0.01     0.00   0.18  -0.02
   3   8     0.03   0.13  -0.01     0.00   0.01   0.01    -0.03   0.00   0.04
   4   6     0.00   0.07   0.03     0.00   0.01   0.00     0.00   0.00   0.00
   5   7    -0.02  -0.04   0.00    -0.01  -0.02   0.00    -0.02  -0.04   0.00
   6   7    -0.02  -0.06   0.02     0.00  -0.02   0.00     0.00  -0.04   0.02
   7   8     0.23   0.03   0.09     0.01   0.00   0.01     0.00   0.00   0.00
   8   6    -0.02  -0.05   0.02     0.00  -0.02   0.01     0.00  -0.05   0.01
   9   6    -0.03  -0.08   0.04     0.00  -0.03   0.01    -0.01  -0.07   0.03
  10   6    -0.05  -0.06   0.03    -0.01  -0.02   0.01    -0.01  -0.05   0.02
  11   8    -0.05  -0.04  -0.07     0.00   0.00   0.00     0.00   0.00   0.01
  12   6    -0.01  -0.11  -0.02     0.01  -0.01   0.00     0.01  -0.01  -0.01
  13   6     0.09  -0.03   0.02     0.01   0.00   0.00     0.00  -0.01  -0.01
  14   6     0.00   0.09  -0.01     0.00   0.01   0.00     0.00   0.00   0.00
  15   8    -0.04  -0.08  -0.07     0.03  -0.01  -0.01     0.04  -0.01  -0.01
  16   6    -0.15   0.05   0.02    -0.01   0.00   0.00    -0.01   0.00   0.00
  17   8     0.01   0.00  -0.08     0.19  -0.01   0.23    -0.03   0.02   0.11
  18   6     0.00   0.05  -0.07    -0.02   0.04   0.06     0.01   0.02   0.06
  19   8    -0.07   0.05  -0.01    -0.20   0.05   0.09     0.26   0.07  -0.15
  20   8     0.01  -0.01   0.04     0.07  -0.12   0.00    -0.23   0.05   0.14
  21   6     0.01   0.00   0.05    -0.01  -0.08  -0.10    -0.15  -0.12  -0.04
  22   6     0.04  -0.01   0.05     0.00   0.03  -0.16    -0.20  -0.07  -0.01
  23   6     0.03   0.02  -0.01    -0.02  -0.01  -0.04    -0.10  -0.04   0.11
  24   8    -0.04   0.02   0.00    -0.03  -0.12   0.02     0.31  -0.14  -0.21
  25   6    -0.01  -0.08   0.04     0.04   0.22  -0.14     0.02   0.05   0.01
  26   6     0.03  -0.05  -0.02    -0.08  -0.04  -0.02     0.04   0.04   0.02
  27   6    -0.03   0.01   0.05     0.00   0.00   0.00    -0.01  -0.01  -0.02
  28   6    -0.04  -0.02  -0.03     0.00   0.00  -0.01     0.00   0.00   0.00
  29   6     0.00  -0.04  -0.01     0.00  -0.01   0.00     0.00  -0.02   0.00
  30   6    -0.02  -0.03   0.01    -0.01  -0.02   0.01    -0.01  -0.03   0.01
  31   6     0.02   0.00  -0.01     0.01   0.00   0.00     0.01   0.00  -0.01
  32   6     0.02  -0.01  -0.01     0.01   0.00   0.00     0.02   0.00  -0.01
  33   6     0.03  -0.01  -0.01     0.01   0.00   0.00     0.03   0.00  -0.01
  34   6     0.02   0.02   0.00     0.01   0.00   0.00     0.02   0.01   0.00
  35   6     0.02  -0.01   0.00     0.01   0.00   0.00     0.02   0.00   0.01
  36   6     0.01   0.02  -0.01     0.01   0.01   0.00     0.01   0.01  -0.01
  37   6     0.02   0.01   0.00     0.01   0.00   0.00     0.01   0.01   0.01
  38   6    -0.02   0.01   0.01    -0.01   0.00   0.01    -0.01   0.01   0.01
  39   6    -0.02   0.02   0.00     0.00   0.02  -0.01    -0.03   0.00   0.02
  40   6    -0.04   0.02   0.00    -0.01   0.01   0.00    -0.02   0.02   0.00
  41   6    -0.02   0.01  -0.01    -0.01  -0.01   0.00     0.00   0.03  -0.01
  42   6    -0.03   0.00   0.00    -0.01  -0.01   0.00    -0.02   0.00   0.00
  43   6     0.00   0.02   0.00     0.00   0.01   0.00     0.00   0.02  -0.01
  44   6    -0.01   0.01  -0.01     0.00   0.01   0.00    -0.01   0.01   0.00
  45   6     0.00   0.00   0.02     0.00   0.00   0.00     0.00   0.00   0.01
  46   6    -0.01   0.01  -0.01     0.00   0.00   0.00    -0.01   0.00   0.00
  47   6    -0.01   0.00  -0.01     0.00   0.00  -0.01    -0.01  -0.01   0.00
  48   6     0.00   0.01   0.01     0.00   0.00   0.00     0.00   0.01   0.00
  49   6     0.02   0.00   0.02     0.01   0.00   0.01     0.01   0.01   0.00
  50   6     0.01   0.01   0.00     0.00   0.01  -0.01     0.00   0.00  -0.01
  51   6     0.01  -0.01  -0.01     0.00   0.00   0.00     0.00  -0.01  -0.02
  52   6     0.01   0.00   0.01     0.01   0.00   0.00     0.01   0.00   0.00
  53   6     0.09   0.02  -0.04     0.02  -0.01  -0.01     0.05  -0.04  -0.02
  54   6    -0.11   0.01   0.02    -0.03   0.01   0.00    -0.05   0.01   0.01
  55   1    -0.01  -0.09   0.04     0.00  -0.03   0.02    -0.01  -0.07   0.03
  56   1     0.26  -0.03   0.00     0.01  -0.01  -0.02    -0.01  -0.01  -0.03
  57   1     0.08   0.08   0.01     0.01   0.01   0.00     0.01   0.00   0.00
  58   1    -0.19   0.08   0.03    -0.01   0.00   0.00    -0.01   0.00   0.00
  59   1    -0.25   0.05   0.01    -0.02   0.00   0.00    -0.01   0.00   0.00
  60   1    -0.09   0.11   0.07    -0.01   0.00   0.00     0.00   0.00   0.00
  61   1     0.04  -0.03   0.05    -0.04   0.17  -0.17    -0.27   0.06   0.09
  62   1     0.06  -0.02  -0.02    -0.01  -0.04  -0.06    -0.11  -0.08   0.07
  63   1    -0.04  -0.08  -0.08     0.17   0.20   0.17     0.18   0.02   0.18
  64   1    -0.02  -0.16   0.10     0.03   0.47  -0.25     0.06   0.25  -0.20
  65   1    -0.04  -0.14   0.04     0.04   0.34  -0.21     0.08   0.03   0.10
  66   1    -0.03  -0.09  -0.06    -0.06  -0.03   0.00     0.08   0.10  -0.05
  67   1     0.09  -0.09   0.01    -0.09  -0.04   0.06    -0.03   0.09  -0.09
  68   1     0.02  -0.05  -0.02    -0.14  -0.07  -0.06     0.19   0.03   0.10
  69   1    -0.11   0.14   0.16    -0.01   0.00   0.01    -0.02   0.00  -0.01
  70   1     0.05   0.02   0.08     0.00   0.00   0.00    -0.01  -0.01  -0.02
  71   1    -0.16  -0.06  -0.08    -0.01  -0.01  -0.02    -0.02  -0.01  -0.03
  72   1    -0.08  -0.05   0.08    -0.01  -0.01   0.00     0.00   0.00   0.00
  73   1    -0.06  -0.11  -0.05     0.00  -0.02  -0.01     0.00  -0.01   0.00
  74   1    -0.02  -0.04  -0.11     0.01   0.00  -0.02     0.01   0.00  -0.01
  75   1     0.02  -0.02  -0.01     0.01   0.00   0.00     0.01   0.01   0.00
  76   1     0.03  -0.02  -0.01     0.01   0.00  -0.01     0.03  -0.01  -0.01
  77   1     0.01   0.05   0.00     0.00   0.01   0.00     0.00   0.01   0.00
  78   1     0.00   0.02  -0.03     0.00   0.01  -0.01     0.01   0.01  -0.02
  79   1     0.03   0.01   0.02     0.01   0.00   0.01     0.02   0.01   0.02
  80   1    -0.01   0.02  -0.01     0.02   0.03  -0.02    -0.03  -0.01   0.02
  81   1    -0.03   0.02   0.00     0.00   0.02  -0.01    -0.02   0.02   0.00
  82   1     0.00   0.02  -0.01    -0.01  -0.01   0.00     0.03   0.05  -0.03
  83   1     0.00   0.04   0.02     0.00   0.01   0.01     0.00   0.03   0.00
  84   1    -0.02   0.01  -0.03     0.00   0.01  -0.01    -0.02   0.01  -0.01
  85   1    -0.02  -0.03   0.01    -0.01  -0.01   0.00    -0.01  -0.02   0.00
  86   1    -0.01   0.01   0.04    -0.01   0.00   0.01    -0.01   0.00   0.02
  87   1    -0.01   0.02   0.04     0.00   0.01   0.01    -0.01   0.02   0.02
  88   1    -0.01   0.01  -0.01    -0.01   0.00   0.00    -0.02   0.01   0.00
  89   1    -0.01  -0.01  -0.02     0.00  -0.01   0.00     0.00  -0.02   0.00
  90   1    -0.03   0.01  -0.01    -0.01   0.00   0.00    -0.02   0.00   0.00
  91   1    -0.01  -0.03   0.00     0.00  -0.02  -0.01    -0.01  -0.04   0.00
  92   1    -0.02   0.02  -0.01     0.00   0.00  -0.01    -0.01   0.00  -0.01
  93   1    -0.03   0.01  -0.01    -0.01   0.01  -0.02    -0.03   0.00  -0.02
  94   1     0.00   0.01   0.01     0.00   0.01   0.00    -0.01   0.03   0.01
  95   1    -0.01   0.01   0.01     0.00   0.00   0.00    -0.01   0.01  -0.01
  96   1     0.00  -0.01   0.00     0.00   0.00   0.00     0.00   0.01   0.00
  97   1     0.00  -0.05   0.03     0.00  -0.02   0.02     0.01  -0.02   0.00
  98   1     0.02   0.02   0.02     0.01   0.01   0.02     0.02   0.03   0.01
  99   1     0.05   0.01   0.04     0.02   0.01   0.03     0.03   0.00   0.01
 100   1     0.01   0.03  -0.01     0.00   0.00  -0.01     0.01   0.00  -0.01
 101   1     0.02   0.01   0.00     0.00   0.01  -0.02     0.02   0.00  -0.02
 102   1     0.00   0.00   0.00     0.00   0.00  -0.01     0.00  -0.02   0.00
 103   1    -0.01  -0.03   0.01     0.00  -0.01   0.01    -0.01  -0.04   0.00
 104   1     0.02  -0.02  -0.02     0.01   0.00  -0.01     0.02  -0.03  -0.04
 105   1     0.02   0.01  -0.03     0.01   0.00   0.00     0.01   0.00  -0.04
 106   1     0.02   0.01   0.00     0.01   0.01   0.00     0.01   0.01   0.00
 107   1     0.00  -0.01   0.02     0.00   0.00   0.01    -0.01  -0.01   0.01
 108   1     0.03  -0.01   0.01     0.01   0.00   0.00     0.02   0.00   0.01
 109   1     0.10   0.09  -0.04     0.03  -0.01  -0.01     0.05  -0.02  -0.02
 110   1     0.20  -0.06  -0.09     0.04  -0.03  -0.02     0.08  -0.07  -0.03
 111   1     0.10   0.12  -0.04     0.02   0.01  -0.01     0.05  -0.01  -0.02
 112   1    -0.06   0.07  -0.02    -0.01   0.04  -0.02    -0.01   0.07  -0.03
 113   1    -0.13   0.02   0.02    -0.04   0.02   0.01    -0.07   0.02   0.01
 114   1    -0.19   0.02   0.05    -0.06   0.02   0.02    -0.12   0.03   0.03
                    79                     80                     81
                     A                      A                      A
 Frequencies --   424.0175               432.2875               436.2596
 Red. masses --     6.6433                 4.7011                 3.2465
 Frc consts  --     0.7037                 0.5176                 0.3641
 IR Inten    --    20.2027                 7.6099                 0.3735
 Atom AN      X      Y      Z        X      Y      Z        X      Y      Z
   1   8     0.00  -0.01   0.01    -0.08  -0.04   0.05    -0.01  -0.01   0.01
   2  12    -0.05   0.04  -0.05     0.02  -0.09   0.05     0.00  -0.01   0.01
   3   8    -0.12   0.11   0.10     0.00  -0.03  -0.08     0.00  -0.01  -0.02
   4   6    -0.01   0.01  -0.02    -0.01   0.11  -0.03     0.00   0.02  -0.01
   5   7    -0.01   0.00  -0.01     0.02   0.01   0.06    -0.04  -0.02  -0.12
   6   7     0.00  -0.01  -0.01    -0.01   0.00  -0.02     0.02   0.04   0.16
   7   8    -0.03  -0.01   0.00     0.06   0.00   0.09     0.01   0.00   0.02
   8   6     0.00  -0.01   0.00     0.01   0.01   0.03    -0.03  -0.01  -0.09
   9   6     0.00  -0.01   0.01     0.00   0.01  -0.01    -0.01   0.01   0.00
  10   6     0.01  -0.01   0.00     0.00   0.01  -0.02     0.02   0.03   0.09
  11   8     0.03   0.00   0.07     0.08  -0.11   0.18     0.02  -0.02   0.04
  12   6     0.04  -0.03   0.00     0.01   0.04   0.08     0.00   0.01   0.01
  13   6    -0.01  -0.01  -0.01    -0.04   0.05  -0.01    -0.01   0.01   0.00
  14   6     0.01   0.04  -0.03     0.04   0.12  -0.14     0.01   0.02  -0.03
  15   8     0.17  -0.03  -0.05    -0.08   0.07   0.07    -0.02   0.01   0.02
  16   6     0.00   0.00  -0.01    -0.08   0.00  -0.02    -0.02   0.00   0.00
  17   8    -0.20   0.07   0.11     0.00   0.01   0.05     0.00   0.00   0.01
  18   6    -0.14  -0.01   0.04    -0.02  -0.02  -0.02    -0.01  -0.01   0.00
  19   8     0.17  -0.04   0.04    -0.03   0.00  -0.09     0.00   0.00  -0.02
  20   8     0.24  -0.11   0.08     0.00   0.01   0.04     0.00   0.00   0.00
  21   6     0.13   0.05   0.01    -0.02   0.01   0.00     0.00   0.00   0.00
  22   6     0.04   0.04   0.04    -0.04   0.00   0.00    -0.01   0.00   0.00
  23   6    -0.15   0.01  -0.09    -0.02   0.00   0.00     0.00   0.00   0.00
  24   8     0.04   0.08  -0.04     0.05   0.01  -0.02     0.00   0.00   0.00
  25   6     0.00  -0.01   0.03     0.01   0.02   0.00     0.00   0.00   0.00
  26   6    -0.17  -0.11  -0.16    -0.01  -0.02  -0.01     0.00   0.00   0.00
  27   6    -0.02  -0.01  -0.02     0.05  -0.01  -0.03     0.01   0.00  -0.01
  28   6     0.02  -0.02  -0.05     0.07  -0.06  -0.21     0.01  -0.01  -0.04
  29   6     0.00  -0.01   0.00    -0.01   0.05  -0.01     0.01  -0.01   0.02
  30   6     0.00   0.00   0.01     0.00   0.01   0.00     0.02   0.02  -0.04
  31   6     0.01  -0.01   0.00    -0.02   0.02  -0.01     0.01   0.01   0.03
  32   6     0.00   0.00   0.00    -0.01   0.00   0.02     0.00   0.01  -0.02
  33   6     0.00   0.00   0.00     0.00  -0.01   0.02    -0.01  -0.01  -0.03
  34   6     0.00   0.00   0.00     0.00   0.02   0.01    -0.02   0.01  -0.01
  35   6     0.00  -0.01   0.01    -0.01   0.03  -0.02     0.00   0.00   0.03
  36   6     0.01   0.01   0.00    -0.04  -0.02  -0.03     0.06   0.01   0.06
  37   6     0.00   0.00   0.02     0.01  -0.01  -0.05    -0.02  -0.01   0.08
  38   6     0.00   0.00   0.00     0.00   0.00   0.00     0.01   0.02  -0.04
  39   6     0.00   0.00   0.00     0.00  -0.01   0.00     0.01   0.04   0.01
  40   6     0.00   0.01  -0.01     0.01   0.00  -0.01    -0.02   0.00   0.04
  41   6     0.00   0.00   0.00     0.00   0.00   0.00     0.01   0.01   0.01
  42   6     0.00   0.00   0.01     0.00   0.00   0.01     0.02   0.02  -0.07
  43   6     0.00   0.00   0.00     0.01   0.00   0.00    -0.05   0.00  -0.04
  44   6     0.00   0.01   0.01     0.00   0.00   0.02     0.05  -0.07  -0.12
  45   6     0.00   0.01   0.01     0.01  -0.04  -0.02    -0.02   0.07   0.01
  46   6     0.00   0.00  -0.01     0.00   0.03   0.01     0.01  -0.08   0.00
  47   6     0.00  -0.01   0.00     0.00   0.03   0.01     0.02  -0.07   0.00
  48   6     0.00   0.02   0.00    -0.01  -0.05  -0.02     0.00   0.07   0.01
  49   6     0.01   0.02   0.00     0.00   0.01   0.00    -0.07  -0.14  -0.02
  50   6     0.00  -0.01   0.00     0.00  -0.01   0.00     0.03   0.10   0.01
  51   6     0.00   0.00  -0.01     0.00   0.00   0.00     0.03   0.03   0.00
  52   6     0.00   0.00   0.00     0.00   0.00   0.00    -0.03  -0.05   0.01
  53   6     0.01  -0.01   0.00    -0.02   0.00   0.01     0.02   0.01   0.00
  54   6     0.00   0.01   0.00     0.01   0.00   0.00     0.00  -0.02  -0.01
  55   1     0.01  -0.01   0.01     0.00   0.01  -0.02    -0.01   0.01  -0.02
  56   1     0.07  -0.02  -0.03    -0.10   0.05   0.00    -0.03   0.01   0.00
  57   1     0.02   0.03  -0.04     0.21   0.10  -0.18     0.04   0.02  -0.03
  58   1     0.01   0.00  -0.01    -0.03   0.04  -0.01    -0.01   0.01   0.00
  59   1    -0.02   0.00  -0.01    -0.14   0.00  -0.05    -0.02   0.00  -0.01
  60   1     0.00   0.00  -0.01    -0.08   0.03  -0.04    -0.02   0.00  -0.01
  61   1     0.10  -0.09  -0.03    -0.05   0.03   0.01    -0.01   0.00   0.00
  62   1    -0.26   0.11  -0.09    -0.03   0.01   0.00    -0.01   0.01   0.00
  63   1    -0.10   0.00  -0.01     0.03   0.01   0.02     0.00   0.00   0.01
  64   1     0.00  -0.12   0.08     0.02   0.05  -0.05     0.00   0.01  -0.01
  65   1     0.01   0.03   0.02     0.02   0.01   0.02     0.00   0.01   0.00
  66   1    -0.34  -0.24  -0.24    -0.03  -0.03  -0.05    -0.01  -0.01   0.00
  67   1     0.00  -0.23  -0.06     0.01  -0.03   0.00     0.00  -0.01   0.00
  68   1    -0.21  -0.12  -0.19     0.00  -0.04  -0.01     0.00  -0.01   0.00
  69   1    -0.04   0.04   0.01     0.10  -0.07  -0.13     0.03  -0.02  -0.03
  70   1     0.02  -0.01  -0.01     0.06  -0.03  -0.09     0.01  -0.01  -0.02
  71   1    -0.06  -0.05  -0.04     0.14  -0.01   0.11     0.04   0.00   0.03
  72   1     0.03  -0.03  -0.03     0.07  -0.13  -0.10     0.02  -0.02  -0.02
  73   1     0.03  -0.07   0.00     0.10  -0.24  -0.07     0.02  -0.04  -0.01
  74   1     0.06  -0.03  -0.13     0.18  -0.09  -0.49     0.03  -0.02  -0.09
  75   1     0.01   0.01  -0.01    -0.01  -0.04   0.02     0.02   0.01  -0.04
  76   1     0.00   0.01  -0.01     0.01  -0.06   0.02    -0.01  -0.03  -0.04
  77   1    -0.01   0.01   0.00     0.03  -0.02   0.01    -0.05   0.01  -0.02
  78   1     0.01   0.01   0.00    -0.03  -0.02  -0.02     0.06   0.00   0.06
  79   1     0.00   0.00   0.02     0.00  -0.02  -0.05    -0.01  -0.01   0.07
  80   1     0.00   0.00   0.00     0.00  -0.01   0.00    -0.01   0.05   0.02
  81   1     0.01   0.01  -0.01     0.01   0.00  -0.01    -0.06  -0.04   0.08
  82   1    -0.01   0.00   0.00     0.00   0.00   0.00     0.02  -0.02   0.05
  83   1     0.00   0.00   0.00     0.00  -0.01   0.00    -0.05   0.00  -0.02
  84   1    -0.01   0.01   0.01     0.00   0.01   0.02     0.04  -0.07  -0.12
  85   1    -0.01   0.01   0.00     0.04  -0.05  -0.02    -0.06   0.13   0.02
  86   1    -0.01   0.00   0.00     0.04  -0.01   0.01    -0.08  -0.02  -0.08
  87   1    -0.01   0.02   0.01     0.02  -0.09  -0.05    -0.04   0.15   0.04
  88   1     0.00  -0.01  -0.01     0.01   0.08   0.02    -0.01  -0.14  -0.01
  89   1     0.00  -0.02  -0.01    -0.01   0.09   0.01     0.03  -0.17   0.01
  90   1    -0.01   0.00  -0.02     0.05  -0.01   0.06    -0.07  -0.02  -0.06
  91   1     0.01  -0.03  -0.01    -0.01   0.10   0.03     0.05  -0.12  -0.03
  92   1     0.00  -0.02   0.00    -0.01   0.07   0.01     0.04  -0.15   0.02
  93   1    -0.01   0.00  -0.02     0.02  -0.02   0.09     0.01   0.00  -0.09
  94   1     0.01   0.02   0.00    -0.02  -0.08   0.00     0.02   0.13  -0.01
  95   1     0.00   0.01  -0.01    -0.02  -0.03   0.03     0.01   0.01  -0.10
  96   1     0.00   0.03   0.01    -0.02  -0.10  -0.04     0.01   0.15   0.02
  97   1     0.02   0.01  -0.01     0.02   0.03  -0.01    -0.17  -0.17   0.06
  98   1     0.02   0.03   0.01     0.01   0.02   0.01    -0.15  -0.28  -0.07
  99   1     0.02   0.00  -0.01    -0.01   0.00  -0.02    -0.07  -0.01   0.11
 100   1     0.00  -0.03   0.00     0.00  -0.04   0.00     0.04   0.28   0.00
 101   1     0.01   0.00  -0.03     0.00   0.00  -0.02    -0.04   0.01   0.24
 102   1     0.00  -0.02   0.00    -0.01  -0.02   0.01     0.05   0.23  -0.03
 103   1    -0.01   0.00   0.00     0.00   0.00   0.00     0.08   0.07  -0.02
 104   1     0.00   0.00  -0.01     0.00   0.00   0.00     0.03   0.01   0.10
 105   1    -0.01   0.00  -0.01     0.00   0.00   0.01     0.07   0.07  -0.03
 106   1     0.00   0.00   0.00     0.00   0.00   0.00    -0.02  -0.07   0.03
 107   1     0.00   0.00   0.00     0.01   0.01   0.00    -0.08  -0.11   0.02
 108   1     0.00   0.00   0.00    -0.01   0.00   0.00     0.02  -0.04   0.04
 109   1     0.01  -0.01   0.00    -0.01  -0.04   0.00     0.00   0.12   0.03
 110   1     0.00  -0.01   0.00    -0.05   0.01   0.00     0.07  -0.01   0.06
 111   1     0.00  -0.01   0.00    -0.03   0.01   0.00     0.06  -0.06   0.02
 112   1     0.01   0.02  -0.01     0.02   0.00   0.02    -0.05  -0.05  -0.05
 113   1    -0.01   0.01   0.00    -0.01   0.00   0.02     0.10  -0.01  -0.07
 114   1    -0.02   0.01   0.00     0.04   0.00   0.00    -0.04  -0.04  -0.02
                    82                     83                     84
                     A                      A                      A
 Frequencies --   441.9533               444.1798               449.9069
 Red. masses --     3.6043                 5.2164                 2.9845
 Frc consts  --     0.4148                 0.6064                 0.3559
 IR Inten    --    12.3337                42.7979                 0.7861
 Atom AN      X      Y      Z        X      Y      Z        X      Y      Z
   1   8     0.02   0.01  -0.01     0.01  -0.01   0.01     0.00   0.00   0.00
   2  12    -0.01  -0.06   0.00     0.00   0.21  -0.07    -0.02   0.03   0.00
   3   8     0.01   0.04   0.00    -0.05  -0.07   0.01    -0.01  -0.01   0.01
   4   6     0.00  -0.02   0.01     0.00   0.01  -0.02     0.00   0.01   0.00
   5   7     0.07   0.01   0.17    -0.01   0.01   0.10    -0.01  -0.01   0.00
   6   7     0.02   0.04   0.13     0.02  -0.02   0.08     0.00  -0.03  -0.07
   7   8    -0.01   0.00  -0.02     0.00  -0.01   0.01     0.00   0.00   0.00
   8   6     0.03   0.00   0.05     0.03  -0.04   0.03    -0.01  -0.01   0.02
   9   6    -0.02   0.00  -0.06     0.00  -0.07  -0.02    -0.01  -0.02   0.02
  10   6     0.00   0.01   0.01     0.03  -0.04   0.02    -0.02  -0.02  -0.02
  11   8    -0.02   0.03  -0.05    -0.01  -0.01   0.05     0.00   0.00   0.02
  12   6     0.00  -0.01  -0.01    -0.01  -0.01   0.02     0.00   0.00   0.00
  13   6     0.02  -0.01   0.02    -0.05  -0.03   0.00    -0.01   0.00  -0.01
  14   6    -0.01  -0.03   0.03     0.00   0.03  -0.03     0.00   0.01  -0.01
  15   8     0.02  -0.01  -0.02     0.02  -0.01   0.02     0.01   0.00   0.00
  16   6     0.02   0.00   0.00     0.01   0.00   0.00     0.00   0.00   0.00
  17   8     0.02   0.01   0.01    -0.07  -0.03  -0.02    -0.01  -0.01   0.00
  18   6    -0.01   0.03  -0.03     0.01  -0.07   0.10     0.00  -0.01   0.02
  19   8    -0.02   0.03  -0.02     0.06  -0.07   0.05     0.01  -0.01   0.01
  20   8     0.00  -0.01   0.07     0.02   0.01  -0.18     0.00   0.00  -0.03
  21   6    -0.01  -0.01   0.01     0.06   0.03  -0.04     0.01   0.00  -0.01
  22   6    -0.02   0.00   0.01     0.07  -0.01  -0.01     0.01   0.00   0.00
  23   6    -0.02   0.02  -0.02     0.03  -0.05   0.05     0.01  -0.01   0.01
  24   8     0.04  -0.01  -0.03    -0.10   0.01   0.08    -0.02   0.00   0.01
  25   6     0.01   0.00   0.00    -0.02   0.00   0.00     0.00   0.00   0.00
  26   6    -0.03  -0.03  -0.04     0.06   0.08   0.07     0.01   0.01   0.02
  27   6     0.00   0.01   0.03     0.01   0.00  -0.02     0.00   0.00  -0.01
  28   6    -0.02   0.01   0.05     0.02  -0.01  -0.05     0.01   0.00  -0.01
  29   6     0.00  -0.01  -0.02    -0.03   0.07   0.01    -0.01  -0.01   0.00
  30   6     0.02   0.03  -0.02    -0.04  -0.07   0.03     0.08   0.08  -0.03
  31   6    -0.01  -0.02  -0.04    -0.01   0.04  -0.04     0.00   0.00  -0.01
  32   6     0.01  -0.02   0.03     0.01   0.01   0.00     0.00   0.00  -0.01
  33   6     0.00   0.01   0.04     0.04  -0.01   0.01     0.01   0.00  -0.01
  34   6     0.01  -0.02   0.03     0.03   0.02   0.02     0.01   0.00   0.00
  35   6    -0.02  -0.02  -0.04     0.01   0.04   0.00     0.01   0.00   0.01
  36   6    -0.08   0.00  -0.06    -0.06  -0.02  -0.08    -0.01   0.00  -0.02
  37   6     0.01   0.02  -0.11     0.02  -0.02  -0.01     0.00   0.00   0.03
  38   6     0.02   0.02  -0.02    -0.03  -0.02   0.01     0.05   0.09   0.02
  39   6     0.02   0.03   0.01    -0.01   0.01   0.03     0.00   0.02  -0.03
  40   6    -0.02   0.00   0.03    -0.01   0.03   0.02    -0.06  -0.01  -0.02
  41   6     0.00   0.02   0.01    -0.01   0.01   0.01    -0.01   0.02  -0.05
  42   6     0.01   0.03  -0.05    -0.03  -0.03  -0.01     0.03   0.06  -0.05
  43   6    -0.02  -0.01  -0.01    -0.02   0.03  -0.04     0.08   0.00   0.18
  44   6     0.04  -0.06  -0.10     0.01   0.00  -0.06     0.00  -0.05  -0.05
  45   6     0.02  -0.08  -0.01     0.02  -0.09  -0.04     0.00  -0.02   0.00
  46   6    -0.02   0.10  -0.02    -0.01   0.08   0.01    -0.01   0.02   0.00
  47   6    -0.03   0.10  -0.01     0.01  -0.01   0.02     0.00  -0.03   0.00
  48   6     0.00  -0.08  -0.01    -0.01  -0.02  -0.02     0.00   0.03   0.01
  49   6    -0.06  -0.12  -0.02    -0.02  -0.04   0.02    -0.04  -0.08  -0.04
  50   6     0.02   0.08   0.01     0.01   0.06  -0.03     0.02   0.02   0.04
  51   6     0.01   0.01   0.01     0.03   0.01  -0.05    -0.12  -0.09   0.13
  52   6    -0.02  -0.03   0.00    -0.01  -0.02   0.02     0.08   0.10  -0.07
  53   6     0.01   0.00   0.01     0.00  -0.09   0.01     0.01   0.00  -0.01
  54   6     0.01  -0.01   0.01    -0.02   0.04   0.00    -0.01  -0.05   0.01
  55   1    -0.05  -0.01  -0.14    -0.02  -0.07  -0.07     0.00  -0.02   0.05
  56   1     0.07   0.00   0.02    -0.12  -0.04  -0.03    -0.02   0.00  -0.01
  57   1    -0.05  -0.02   0.04     0.02   0.03  -0.04     0.01   0.01  -0.01
  58   1     0.01  -0.01   0.00     0.02   0.01   0.00     0.00   0.00   0.00
  59   1     0.03   0.00   0.01     0.00   0.00  -0.01    -0.01   0.00   0.00
  60   1     0.02  -0.01   0.01     0.01   0.01   0.00     0.00   0.00   0.00
  61   1    -0.03   0.03   0.02     0.11  -0.09  -0.06     0.01  -0.01  -0.01
  62   1    -0.01  -0.01  -0.04    -0.01   0.04   0.09     0.00   0.01   0.02
  63   1     0.03   0.00  -0.01    -0.09   0.01   0.01    -0.01   0.00   0.01
  64   1     0.01   0.01  -0.01    -0.03  -0.05   0.06     0.00   0.00   0.00
  65   1     0.01  -0.03   0.02    -0.03   0.07  -0.07     0.00   0.02  -0.01
  66   1    -0.08  -0.06  -0.07     0.16   0.14   0.17     0.03   0.02   0.03
  67   1     0.01  -0.07   0.02    -0.04   0.15  -0.05     0.00   0.02   0.00
  68   1    -0.05  -0.06  -0.05     0.10   0.15   0.11     0.02   0.02   0.02
  69   1    -0.01   0.03   0.05     0.05  -0.02  -0.13     0.01  -0.01  -0.02
  70   1     0.00   0.02   0.06     0.02   0.01   0.01    -0.01  -0.01  -0.02
  71   1    -0.02   0.01   0.00     0.08   0.04   0.03     0.01   0.00   0.00
  72   1    -0.02   0.03   0.03     0.03  -0.03  -0.04     0.01  -0.01  -0.01
  73   1    -0.02   0.05   0.01     0.04  -0.06   0.01     0.01  -0.02   0.00
  74   1    -0.04   0.02   0.11     0.06  -0.02  -0.12     0.01  -0.01  -0.03
  75   1    -0.01   0.00   0.06    -0.01  -0.04   0.03     0.00   0.00   0.00
  76   1     0.00   0.06   0.05     0.05  -0.08   0.00     0.01   0.00  -0.01
  77   1     0.05   0.00   0.03     0.03  -0.04   0.02     0.00   0.01   0.00
  78   1    -0.08   0.00  -0.06    -0.06  -0.02  -0.11    -0.01   0.00  -0.03
  79   1     0.00   0.02  -0.11     0.03  -0.03   0.00     0.01   0.00   0.04
  80   1     0.00   0.03   0.02     0.01   0.05   0.01    -0.01  -0.07  -0.01
  81   1    -0.06  -0.04   0.05     0.01   0.05   0.00    -0.14  -0.09   0.03
  82   1     0.00  -0.01   0.04     0.04   0.02   0.01    -0.05  -0.02  -0.02
  83   1    -0.03  -0.01   0.00    -0.02   0.03  -0.03     0.07   0.01   0.20
  84   1     0.03  -0.07  -0.11     0.00   0.00  -0.08    -0.01  -0.07  -0.05
  85   1     0.08  -0.16  -0.02     0.07  -0.15  -0.05     0.01  -0.05  -0.01
  86   1     0.09   0.03   0.11     0.08  -0.01   0.05     0.02   0.00   0.03
  87   1     0.05  -0.18  -0.05     0.04  -0.18  -0.07     0.01  -0.04  -0.01
  88   1     0.02   0.16   0.00    -0.02   0.19   0.03     0.00   0.05   0.00
  89   1    -0.04   0.21  -0.04    -0.03   0.17   0.02    -0.01   0.05   0.00
  90   1     0.08   0.03   0.06     0.09  -0.01   0.12     0.02   0.01   0.02
  91   1    -0.07   0.17   0.03     0.00   0.02   0.02     0.01  -0.06  -0.01
  92   1    -0.06   0.20  -0.03     0.00   0.02   0.02     0.01  -0.05   0.00
  93   1    -0.02   0.01   0.10     0.01  -0.03   0.05     0.00   0.00  -0.03
  94   1    -0.01  -0.19   0.01    -0.03   0.01   0.00     0.01   0.06   0.00
  95   1     0.00   0.00   0.14    -0.04  -0.03  -0.02     0.00   0.00  -0.03
  96   1     0.00  -0.19  -0.02    -0.03  -0.06  -0.04     0.00   0.05   0.01
  97   1    -0.14  -0.14   0.04    -0.06  -0.11   0.05    -0.06  -0.06  -0.02
  98   1    -0.13  -0.23  -0.07    -0.04  -0.09   0.00    -0.07  -0.14  -0.05
  99   1    -0.06  -0.02   0.08     0.01   0.03   0.10    -0.06  -0.05  -0.01
 100   1     0.03   0.23   0.00     0.00   0.11  -0.03     0.05   0.13   0.01
 101   1    -0.04   0.01   0.20    -0.01   0.03   0.04     0.00  -0.03   0.16
 102   1     0.04   0.18  -0.02     0.02   0.10  -0.05     0.03   0.05   0.05
 103   1     0.03   0.03   0.00     0.05   0.00  -0.02    -0.24  -0.13   0.15
 104   1     0.01   0.00   0.06     0.05  -0.02  -0.01    -0.14  -0.01  -0.10
 105   1     0.02   0.03   0.01     0.08   0.04  -0.10    -0.24  -0.18   0.26
 106   1     0.00  -0.03   0.00    -0.02  -0.05   0.05     0.16   0.23  -0.18
 107   1    -0.03  -0.05  -0.01    -0.05  -0.06   0.04     0.20   0.23  -0.15
 108   1     0.00  -0.03   0.00     0.06   0.02   0.06    -0.15  -0.06  -0.22
 109   1     0.02  -0.03  -0.01     0.00  -0.14   0.00     0.01   0.00  -0.01
 110   1     0.00   0.00  -0.01    -0.05  -0.05   0.01     0.03  -0.01  -0.03
 111   1    -0.02   0.02   0.00    -0.02  -0.11   0.01     0.00   0.04  -0.01
 112   1     0.01  -0.02   0.03     0.04   0.11  -0.05    -0.02  -0.07   0.04
 113   1     0.01  -0.01   0.01    -0.04   0.05   0.01    -0.02  -0.06   0.02
 114   1     0.04  -0.01   0.00    -0.10   0.06   0.03     0.03  -0.05   0.01
                    85                     86                     87
                     A                      A                      A
 Frequencies --   452.0282               457.4671               463.6655
 Red. masses --     2.6283                 4.2734                 3.6179
 Frc consts  --     0.3164                 0.5269                 0.4583
 IR Inten    --     3.1048                 8.1121                 2.0605
 Atom AN      X      Y      Z        X      Y      Z        X      Y      Z
   1   8     0.00   0.00   0.00    -0.02   0.01  -0.01    -0.01   0.00   0.00
   2  12     0.00  -0.04   0.01     0.02  -0.05   0.00    -0.02   0.03  -0.01
   3   8     0.01   0.01  -0.01     0.09  -0.02  -0.02     0.03  -0.02  -0.01
   4   6     0.00   0.00   0.00     0.00  -0.01   0.03     0.00   0.00   0.01
   5   7    -0.01   0.00  -0.01    -0.05   0.02  -0.03    -0.03  -0.02   0.02
   6   7     0.00   0.01   0.00    -0.01  -0.02  -0.02     0.04   0.00   0.04
   7   8     0.00   0.00   0.00     0.02   0.02   0.00     0.01   0.01   0.00
   8   6    -0.01   0.00  -0.01     0.02  -0.02  -0.02    -0.02  -0.04   0.01
   9   6     0.00   0.01   0.00     0.03  -0.02   0.00    -0.03  -0.04   0.01
  10   6     0.00   0.01   0.01     0.02  -0.02   0.00    -0.02  -0.01   0.02
  11   8     0.00   0.00  -0.01     0.01  -0.01  -0.09     0.01   0.00  -0.02
  12   6     0.00   0.00   0.00     0.01   0.00  -0.02     0.01   0.00   0.00
  13   6     0.01   0.01   0.00     0.07   0.01   0.00     0.02   0.00   0.00
  14   6     0.00  -0.01   0.01     0.02  -0.05   0.03     0.01  -0.01   0.01
  15   8    -0.01   0.00   0.00    -0.05  -0.01   0.01    -0.02   0.00   0.01
  16   6     0.00   0.00   0.00    -0.03   0.00   0.00    -0.01   0.00   0.00
  17   8     0.01   0.00   0.00    -0.02   0.02   0.04    -0.02   0.00   0.02
  18   6     0.00   0.01  -0.02    -0.02   0.00  -0.01    -0.01  -0.01   0.02
  19   8    -0.01   0.01  -0.01     0.01   0.00   0.00     0.01  -0.01   0.00
  20   8     0.00   0.00   0.03     0.02  -0.01   0.04     0.02  -0.01  -0.02
  21   6    -0.01   0.00   0.01     0.00   0.01   0.01     0.01   0.00  -0.01
  22   6    -0.01   0.00   0.00    -0.02   0.01   0.01     0.01   0.00   0.00
  23   6     0.00   0.01  -0.01    -0.03   0.01  -0.03    -0.01  -0.01   0.00
  24   8     0.02   0.00  -0.01     0.04   0.01  -0.02    -0.01   0.00   0.01
  25   6     0.00   0.00   0.00     0.00   0.00   0.00     0.00   0.00   0.00
  26   6    -0.01  -0.01  -0.01    -0.05  -0.02  -0.04     0.00   0.00   0.00
  27   6     0.00   0.00   0.01    -0.02   0.00   0.01     0.00   0.00   0.00
  28   6     0.00   0.00   0.01    -0.03   0.02   0.06    -0.01   0.01   0.01
  29   6    -0.01   0.02   0.01    -0.04   0.25   0.03    -0.03   0.06   0.01
  30   6     0.00   0.01   0.00    -0.03  -0.05   0.03     0.13   0.14  -0.08
  31   6    -0.01   0.01  -0.04    -0.03   0.17   0.02     0.00   0.06  -0.01
  32   6     0.00   0.01  -0.01    -0.01   0.08   0.01     0.01   0.03   0.00
  33   6     0.02   0.00  -0.01     0.02  -0.08  -0.02     0.03  -0.03  -0.01
  34   6     0.01   0.00   0.01     0.01   0.07   0.01     0.01   0.03   0.01
  35   6     0.02   0.01   0.04    -0.01   0.17   0.02     0.00   0.05   0.01
  36   6    -0.11  -0.02  -0.10     0.04  -0.07   0.00     0.02  -0.02  -0.02
  37   6    -0.02  -0.02   0.16     0.02  -0.07  -0.02     0.03  -0.02  -0.03
  38   6     0.00  -0.01  -0.01    -0.02  -0.01   0.03     0.08   0.10  -0.08
  39   6     0.00   0.00   0.00    -0.01   0.00   0.01     0.02   0.04  -0.04
  40   6     0.01   0.00   0.00     0.00   0.02  -0.01    -0.07  -0.04   0.02
  41   6     0.00   0.00   0.01    -0.01  -0.01   0.00     0.02   0.06  -0.04
  42   6     0.00   0.00   0.01    -0.02  -0.03   0.00     0.07   0.11  -0.04
  43   6    -0.01   0.00  -0.02     0.04   0.01   0.04    -0.11  -0.02  -0.04
  44   6     0.00   0.01   0.02     0.02   0.00  -0.04    -0.08  -0.01   0.10
  45   6     0.03  -0.12  -0.05     0.00  -0.03  -0.07     0.00  -0.02  -0.02
  46   6    -0.02   0.13  -0.01     0.03  -0.07   0.07     0.01  -0.02   0.02
  47   6     0.04  -0.15   0.02     0.04  -0.04   0.06     0.00   0.01   0.01
  48   6     0.01   0.13   0.02    -0.04  -0.07  -0.07    -0.02  -0.04  -0.03
  49   6     0.01   0.02   0.00    -0.01  -0.03   0.01     0.03   0.05  -0.03
  50   6     0.00  -0.01   0.00     0.01   0.04  -0.03    -0.01  -0.12   0.10
  51   6     0.01   0.01  -0.01    -0.02  -0.02   0.01     0.03   0.04   0.02
  52   6    -0.01  -0.02   0.01     0.04   0.05   0.00    -0.08  -0.12  -0.02
  53   6     0.00   0.01   0.00    -0.04  -0.08   0.02     0.02  -0.02  -0.01
  54   6     0.01   0.00   0.00     0.00   0.04  -0.01    -0.01  -0.07   0.02
  55   1     0.00   0.01   0.01     0.02  -0.02   0.01    -0.04  -0.04   0.01
  56   1     0.02   0.01   0.00     0.07   0.01   0.00     0.00   0.00   0.00
  57   1     0.00  -0.01   0.01     0.01  -0.05   0.05     0.01  -0.01   0.01
  58   1     0.00   0.00   0.00    -0.04  -0.01   0.00    -0.01   0.00   0.00
  59   1     0.00   0.00   0.00    -0.02   0.00   0.01    -0.01   0.00   0.00
  60   1     0.00   0.00   0.00    -0.02   0.00   0.01    -0.01   0.00   0.00
  61   1    -0.02   0.02   0.01    -0.02   0.01   0.01     0.01  -0.02  -0.01
  62   1     0.00  -0.01  -0.02    -0.05   0.01  -0.03    -0.02   0.02   0.01
  63   1     0.02   0.00   0.00     0.01   0.00   0.00    -0.01   0.01   0.01
  64   1     0.01   0.01  -0.01     0.01   0.00  -0.01     0.00   0.00   0.00
  65   1     0.01  -0.01   0.01     0.01  -0.01   0.02     0.00   0.02  -0.01
  66   1    -0.03  -0.03  -0.03    -0.08  -0.04  -0.06     0.00   0.00   0.01
  67   1     0.01  -0.03   0.01    -0.01  -0.04  -0.01    -0.01   0.00  -0.01
  68   1    -0.03  -0.03  -0.02    -0.06  -0.03  -0.05     0.00   0.01   0.00
  69   1    -0.01   0.00   0.02    -0.03  -0.01   0.10    -0.01   0.00   0.03
  70   1    -0.01   0.00   0.00    -0.06   0.00  -0.01    -0.02   0.00   0.00
  71   1    -0.01   0.00  -0.01    -0.06   0.00  -0.05    -0.01   0.00  -0.02
  72   1    -0.01   0.01   0.01    -0.07   0.05   0.05    -0.02   0.01   0.01
  73   1    -0.01   0.01   0.00    -0.07   0.07  -0.04    -0.02   0.02  -0.01
  74   1    -0.01   0.00   0.03    -0.08   0.04   0.18    -0.02   0.01   0.05
  75   1    -0.01   0.00   0.00    -0.01  -0.09  -0.01     0.00  -0.02   0.01
  76   1     0.02  -0.01  -0.01     0.06  -0.35  -0.05     0.04  -0.13  -0.02
  77   1    -0.01  -0.02   0.00     0.02  -0.10  -0.01     0.01  -0.02   0.01
  78   1    -0.11  -0.02  -0.13     0.04  -0.09  -0.01     0.02  -0.02  -0.03
  79   1     0.00  -0.02   0.19     0.02  -0.09  -0.03     0.03  -0.03  -0.03
  80   1     0.00   0.00   0.00     0.02   0.02  -0.01    -0.06  -0.07   0.03
  81   1     0.01   0.00   0.00     0.03   0.05  -0.03    -0.21  -0.19   0.12
  82   1     0.00   0.00   0.00     0.02   0.01  -0.01    -0.07  -0.02   0.01
  83   1    -0.01  -0.01  -0.03     0.04   0.03   0.04    -0.12  -0.04  -0.03
  84   1     0.00   0.01   0.02     0.01   0.01  -0.06    -0.07  -0.03   0.14
  85   1     0.11  -0.21  -0.05    -0.01   0.08  -0.06    -0.01   0.00  -0.02
  86   1     0.12   0.01   0.10    -0.01  -0.08  -0.18    -0.01  -0.03  -0.04
  87   1     0.06  -0.27  -0.11     0.00  -0.03  -0.10     0.00  -0.01  -0.02
  88   1     0.01   0.24   0.02    -0.04   0.02   0.08    -0.03   0.03   0.02
  89   1    -0.06   0.29  -0.03     0.04  -0.11   0.13     0.01  -0.04   0.05
  90   1     0.13   0.02   0.11     0.03  -0.11   0.14     0.01  -0.04   0.06
  91   1     0.10  -0.25  -0.05     0.04   0.07   0.06    -0.01   0.03   0.03
  92   1     0.09  -0.31   0.05     0.05  -0.02   0.08    -0.01   0.05   0.01
  93   1     0.03  -0.01  -0.16     0.09  -0.09   0.14     0.01  -0.03   0.06
  94   1     0.04   0.27  -0.01    -0.08   0.03  -0.02    -0.04  -0.01   0.00
  95   1     0.02   0.01  -0.18    -0.09  -0.09  -0.11    -0.04  -0.03  -0.02
  96   1     0.02   0.30   0.06    -0.07  -0.11  -0.12    -0.03  -0.08  -0.06
  97   1     0.02   0.03  -0.01    -0.04  -0.07   0.04     0.12   0.14  -0.11
  98   1     0.01   0.03   0.01    -0.03  -0.07   0.00     0.09   0.18   0.01
  99   1     0.00   0.00  -0.02     0.01   0.02   0.07    -0.01  -0.09  -0.19
 100   1    -0.01  -0.03   0.00    -0.01   0.07  -0.02     0.07  -0.14   0.05
 101   1     0.00   0.00  -0.02    -0.02   0.03   0.02     0.08  -0.09   0.01
 102   1    -0.01  -0.02   0.01     0.01   0.08  -0.05    -0.02  -0.25   0.21
 103   1     0.03   0.03  -0.02    -0.07  -0.06   0.03     0.13   0.11  -0.02
 104   1     0.01   0.01   0.03    -0.02  -0.01  -0.08     0.02   0.01   0.21
 105   1     0.03   0.02  -0.02    -0.05  -0.05   0.03     0.09   0.10  -0.02
 106   1    -0.02  -0.03   0.02     0.03   0.07  -0.02     0.02  -0.12   0.00
 107   1    -0.03  -0.03   0.01     0.07   0.09  -0.01    -0.16  -0.24  -0.03
 108   1     0.01   0.00   0.02    -0.01   0.03  -0.03     0.00  -0.14   0.00
 109   1     0.00   0.02   0.01    -0.05  -0.13   0.03     0.02   0.01  -0.01
 110   1     0.00   0.00   0.01    -0.12  -0.02   0.05     0.06  -0.05  -0.02
 111   1     0.00   0.00   0.00    -0.04  -0.14   0.02     0.03   0.02  -0.01
 112   1    -0.01  -0.01   0.00     0.04   0.09  -0.06    -0.04  -0.12   0.08
 113   1     0.02   0.00  -0.01     0.00   0.04  -0.01    -0.01  -0.05   0.01
 114   1     0.01  -0.01  -0.01    -0.06   0.06   0.01     0.04  -0.11  -0.01
                    88                     89                     90
                     A                      A                      A
 Frequencies --   467.1933               491.4933               497.4512
 Red. masses --     6.9380                 4.7811                 6.9658
 Frc consts  --     0.8922                 0.6805                 1.0156
 IR Inten    --     3.8561               100.1425                42.0483
 Atom AN      X      Y      Z        X      Y      Z        X      Y      Z
   1   8    -0.08   0.02  -0.01    -0.05   0.00   0.00    -0.02   0.00   0.01
   2  12    -0.04   0.04  -0.01    -0.02  -0.05  -0.06    -0.03   0.10  -0.06
   3   8     0.25  -0.11  -0.06    -0.02   0.02   0.35     0.11  -0.24  -0.03
   4   6    -0.01   0.02   0.06    -0.01   0.03   0.02     0.00   0.02   0.01
   5   7     0.03   0.00   0.01     0.01   0.00   0.01     0.01   0.03   0.01
   6   7    -0.01   0.01   0.00    -0.01   0.01   0.02     0.01  -0.03   0.02
   7   8     0.06   0.05   0.04     0.01   0.02   0.03     0.02   0.01   0.02
   8   6     0.01   0.02   0.01     0.01   0.00   0.01     0.03   0.02   0.01
   9   6     0.00   0.02  -0.01     0.00   0.01  -0.01     0.02  -0.02  -0.01
  10   6    -0.01   0.01  -0.01     0.00   0.01   0.01     0.01  -0.04   0.00
  11   8     0.08  -0.05  -0.14     0.09  -0.06   0.01     0.03  -0.04   0.01
  12   6     0.04   0.07  -0.03     0.04   0.07  -0.09    -0.02   0.06  -0.01
  13   6     0.14   0.09   0.00     0.02   0.13  -0.11    -0.05   0.00  -0.04
  14   6     0.07  -0.09   0.03     0.07  -0.03  -0.01     0.02  -0.01  -0.02
  15   8    -0.21   0.07   0.08     0.06  -0.02   0.04    -0.12   0.04   0.08
  16   6    -0.10  -0.01  -0.01    -0.07  -0.01  -0.01    -0.02   0.00   0.00
  17   8    -0.14   0.02   0.16     0.03  -0.03  -0.01     0.09   0.01  -0.16
  18   6    -0.08  -0.11   0.07    -0.02   0.03  -0.10     0.12   0.10   0.01
  19   8     0.06  -0.07  -0.10    -0.01   0.01   0.03     0.08   0.01   0.32
  20   8     0.09  -0.03  -0.10    -0.03   0.02  -0.02    -0.03  -0.01   0.16
  21   6     0.06   0.05  -0.05    -0.01  -0.01   0.01    -0.04  -0.02   0.07
  22   6     0.00   0.01   0.00     0.00  -0.01  -0.01     0.00   0.02   0.03
  23   6    -0.08  -0.07   0.02     0.05   0.00   0.04     0.02   0.09  -0.14
  24   8     0.01   0.04   0.01    -0.02  -0.01   0.01     0.04   0.00  -0.04
  25   6    -0.01   0.03   0.00     0.00   0.00  -0.01     0.01  -0.04   0.02
  26   6    -0.02   0.03  -0.02     0.07   0.00   0.04    -0.15  -0.03  -0.12
  27   6    -0.01  -0.01   0.02    -0.11  -0.04  -0.18    -0.02  -0.01  -0.09
  28   6    -0.05   0.02   0.06    -0.01   0.00  -0.02     0.00   0.00  -0.03
  29   6     0.02  -0.12  -0.02     0.01   0.01   0.00     0.00  -0.01   0.00
  30   6    -0.01  -0.01   0.01    -0.01   0.00   0.01     0.00  -0.03   0.01
  31   6     0.01  -0.09  -0.01     0.00   0.01   0.00     0.00  -0.04   0.00
  32   6     0.01  -0.04   0.00     0.00   0.01   0.01     0.00  -0.03   0.00
  33   6    -0.02   0.06   0.01     0.00   0.00   0.01    -0.01   0.04   0.01
  34   6     0.00  -0.05  -0.01    -0.01   0.00   0.01     0.00  -0.03  -0.01
  35   6     0.01  -0.10  -0.01    -0.01   0.01   0.00     0.00  -0.04  -0.01
  36   6    -0.02   0.03   0.00    -0.01   0.00   0.00    -0.01   0.01   0.01
  37   6    -0.01   0.04   0.01    -0.01   0.00  -0.01     0.00   0.01   0.00
  38   6    -0.01  -0.02   0.01     0.00  -0.01   0.00     0.01   0.02   0.00
  39   6     0.00  -0.01   0.00     0.01   0.00   0.00     0.01   0.02  -0.01
  40   6     0.02   0.00  -0.01     0.00  -0.01   0.01    -0.03   0.00   0.01
  41   6     0.00  -0.01   0.01     0.00   0.01   0.01     0.00   0.01  -0.01
  42   6     0.00  -0.01   0.01     0.00   0.01   0.00     0.00   0.00  -0.01
  43   6     0.01   0.00   0.00     0.00  -0.01  -0.01    -0.01   0.01   0.01
  44   6     0.01   0.00   0.00     0.01   0.00  -0.01    -0.02   0.00   0.00
  45   6     0.00   0.01   0.04     0.00  -0.01  -0.01     0.00   0.01   0.02
  46   6    -0.02   0.04  -0.04     0.00   0.01   0.00     0.00   0.01  -0.01
  47   6    -0.02   0.02  -0.03     0.00   0.01   0.00    -0.01   0.01  -0.01
  48   6     0.02   0.03   0.04     0.00  -0.01   0.00     0.01   0.01   0.01
  49   6     0.00   0.00   0.00     0.00  -0.01  -0.01     0.00   0.00   0.00
  50   6     0.00   0.01  -0.01     0.00   0.01   0.00     0.00   0.00   0.00
  51   6     0.00   0.00  -0.01     0.01   0.01  -0.01    -0.01  -0.01   0.00
  52   6     0.00   0.01   0.01    -0.01  -0.01   0.00     0.00  -0.01   0.00
  53   6     0.01   0.03  -0.01     0.00   0.00   0.00    -0.01  -0.02   0.00
  54   6     0.00   0.00   0.00     0.00   0.00   0.00    -0.01   0.02   0.00
  55   1     0.00   0.02  -0.01     0.00   0.01  -0.02     0.04  -0.03  -0.03
  56   1     0.02   0.10   0.03    -0.04   0.12  -0.15    -0.26   0.00  -0.06
  57   1     0.09  -0.09   0.04     0.13  -0.04  -0.03     0.05  -0.02  -0.03
  58   1    -0.11  -0.01  -0.01    -0.07   0.00  -0.01    -0.01   0.00   0.00
  59   1    -0.09  -0.01   0.00    -0.07  -0.01  -0.01    -0.02   0.00   0.00
  60   1    -0.09  -0.01   0.00    -0.06   0.00  -0.01    -0.02   0.00  -0.01
  61   1     0.04  -0.06  -0.06     0.00  -0.02  -0.01    -0.03   0.06   0.08
  62   1    -0.17   0.08   0.06     0.10  -0.04   0.04     0.03  -0.03  -0.21
  63   1    -0.05   0.03   0.07     0.01   0.00   0.03     0.03  -0.04  -0.11
  64   1     0.00   0.02  -0.01     0.00   0.03  -0.02     0.00  -0.08   0.05
  65   1     0.02   0.11  -0.02     0.00   0.02  -0.02    -0.01  -0.14   0.07
  66   1     0.01   0.05   0.00     0.09   0.02   0.02    -0.22  -0.12  -0.05
  67   1    -0.06   0.06  -0.12     0.06   0.02   0.02    -0.06  -0.11   0.09
  68   1     0.05   0.08   0.03     0.11   0.00   0.06    -0.36  -0.06  -0.23
  69   1    -0.04  -0.07   0.23    -0.17  -0.15   0.22     0.01  -0.08  -0.09
  70   1    -0.12  -0.04  -0.09    -0.29  -0.12  -0.45    -0.08  -0.03  -0.15
  71   1    -0.08  -0.03  -0.05    -0.26  -0.17  -0.27     0.02   0.00  -0.05
  72   1    -0.12   0.06   0.08    -0.05   0.01   0.02     0.00   0.00  -0.02
  73   1    -0.11   0.11  -0.14    -0.05   0.00  -0.11     0.00  -0.01  -0.04
  74   1    -0.14   0.04   0.26    -0.03   0.01   0.04     0.00   0.00  -0.02
  75   1     0.01   0.04   0.00     0.01   0.00   0.01     0.00  -0.01  -0.01
  76   1    -0.04   0.23   0.03    -0.01  -0.01   0.00    -0.02   0.12   0.02
  77   1    -0.01   0.03   0.00     0.00  -0.02   0.01     0.00  -0.02   0.00
  78   1    -0.03   0.05   0.01    -0.01  -0.01  -0.01    -0.01   0.02   0.01
  79   1    -0.01   0.05   0.01    -0.01  -0.01  -0.02     0.00   0.02   0.00
  80   1     0.00   0.00   0.00     0.01   0.01   0.00     0.02   0.01  -0.01
  81   1     0.03   0.02  -0.02    -0.01  -0.02   0.01    -0.05  -0.03   0.03
  82   1     0.00   0.00   0.00     0.00   0.01   0.00     0.01   0.01  -0.01
  83   1     0.01   0.00  -0.01     0.00  -0.01  -0.02    -0.01   0.01   0.01
  84   1     0.01   0.00   0.00     0.01   0.00  -0.01    -0.02   0.00   0.00
  85   1     0.01  -0.04   0.03     0.01  -0.01  -0.01     0.00  -0.01   0.01
  86   1     0.01   0.04   0.09     0.01   0.00   0.00     0.00   0.01   0.03
  87   1     0.01   0.01   0.05     0.00  -0.02  -0.02     0.00   0.01   0.02
  88   1     0.03  -0.01  -0.04     0.00   0.01   0.00     0.01  -0.01  -0.01
  89   1    -0.02   0.06  -0.07     0.00   0.02   0.00    -0.01   0.02  -0.02
  90   1    -0.01   0.06  -0.07     0.01   0.00   0.01    -0.01   0.02  -0.03
  91   1    -0.02  -0.03  -0.03     0.00   0.02  -0.01     0.00  -0.01  -0.01
  92   1    -0.03   0.02  -0.05     0.00   0.01   0.01    -0.01   0.01  -0.01
  93   1    -0.05   0.05  -0.07     0.00   0.00   0.01    -0.01   0.02  -0.02
  94   1     0.05  -0.03   0.01     0.00  -0.02   0.00     0.01  -0.01   0.00
  95   1     0.05   0.05   0.07     0.00   0.00   0.01     0.02   0.02   0.03
  96   1     0.04   0.06   0.07     0.00  -0.01   0.00     0.01   0.01   0.02
  97   1    -0.01   0.00   0.01    -0.01  -0.01   0.00     0.01  -0.02   0.00
  98   1    -0.01  -0.02   0.00     0.00  -0.01  -0.02     0.01   0.02   0.01
  99   1     0.00   0.01   0.02     0.01  -0.01  -0.01     0.01   0.00   0.01
 100   1    -0.01   0.00   0.00     0.00   0.01   0.00     0.02   0.01  -0.01
 101   1    -0.01   0.01  -0.01     0.00   0.00   0.01     0.02   0.00   0.00
 102   1     0.00   0.02  -0.02     0.00   0.01  -0.01     0.00  -0.02   0.02
 103   1     0.00   0.00  -0.01     0.02   0.02  -0.01    -0.01  -0.02   0.01
 104   1     0.00   0.00  -0.01     0.00   0.01   0.01     0.00  -0.01   0.00
 105   1     0.00   0.00   0.00     0.01   0.01  -0.01     0.00   0.00  -0.02
 106   1    -0.02   0.00   0.01    -0.02  -0.02   0.01     0.02   0.00  -0.01
 107   1     0.01   0.02   0.01    -0.01  -0.01   0.01    -0.01  -0.03  -0.01
 108   1     0.00   0.02   0.01     0.00   0.00   0.01     0.00  -0.02  -0.01
 109   1     0.02   0.03  -0.02     0.00  -0.01  -0.01    -0.01  -0.08   0.00
 110   1     0.03   0.02  -0.02    -0.01   0.00   0.00    -0.07   0.02   0.01
 111   1     0.01   0.06  -0.01     0.00   0.00   0.00    -0.03  -0.05   0.00
 112   1     0.00   0.00   0.01     0.00   0.00  -0.01     0.04   0.07  -0.03
 113   1    -0.01  -0.01   0.01     0.01   0.01  -0.01    -0.04   0.03   0.01
 114   1     0.02   0.01   0.00    -0.01   0.00   0.00    -0.06   0.03   0.02
                    91                     92                     93
                     A                      A                      A
 Frequencies --   510.2462               525.8725               532.7217
 Red. masses --     3.4411                 7.2895                 4.6459
 Frc consts  --     0.5279                 1.1877                 0.7768
 IR Inten    --     1.8900                13.7319                 6.3043
 Atom AN      X      Y      Z        X      Y      Z        X      Y      Z
   1   8     0.00   0.00   0.00     0.00   0.00   0.00     0.00   0.00   0.00
   2  12     0.03  -0.02   0.00     0.03  -0.05   0.05    -0.01  -0.05   0.02
   3   8    -0.02   0.04   0.00     0.03  -0.07  -0.01     0.00   0.00   0.01
   4   6     0.00   0.00   0.00     0.00   0.00   0.00     0.00   0.00   0.00
   5   7     0.10   0.10  -0.05     0.06  -0.01  -0.03    -0.10   0.04   0.04
   6   7     0.00  -0.11   0.06    -0.04   0.01   0.01     0.14  -0.05  -0.01
   7   8     0.00   0.00   0.00     0.00   0.00   0.00     0.00   0.00   0.00
   8   6     0.13   0.10  -0.03     0.05   0.01   0.00    -0.02   0.02   0.15
   9   6     0.12  -0.01  -0.05     0.03   0.05  -0.01    -0.03  -0.12   0.00
  10   6     0.01  -0.13  -0.01    -0.04   0.00  -0.02     0.03  -0.08  -0.12
  11   8     0.00   0.00  -0.01     0.00  -0.01   0.02     0.01   0.00   0.00
  12   6     0.00  -0.01   0.00    -0.01   0.02  -0.01     0.00   0.00   0.00
  13   6     0.00   0.00   0.01    -0.02  -0.01  -0.01     0.00   0.00   0.00
  14   6     0.00   0.00   0.00     0.00   0.01   0.00     0.00   0.00   0.00
  15   8     0.01  -0.01  -0.01    -0.02   0.01   0.01     0.00   0.00   0.00
  16   6     0.00   0.00   0.00     0.00   0.00   0.00     0.00   0.00   0.00
  17   8     0.00  -0.01   0.02    -0.10   0.18  -0.06    -0.01   0.02  -0.01
  18   6    -0.01  -0.02  -0.01    -0.05   0.21   0.14    -0.01   0.02   0.01
  19   8    -0.02  -0.02  -0.04     0.03   0.30   0.01    -0.01   0.03  -0.01
  20   8     0.00   0.01  -0.01     0.00  -0.10  -0.09     0.00  -0.01  -0.01
  21   6    -0.01   0.02   0.00     0.11  -0.23  -0.06     0.01  -0.02   0.00
  22   6    -0.02   0.00   0.00     0.23   0.04   0.02     0.02   0.00   0.00
  23   6     0.01  -0.01   0.01    -0.12  -0.01   0.12    -0.01   0.00   0.01
  24   8     0.00   0.01   0.01    -0.08  -0.23  -0.08    -0.01  -0.02  -0.01
  25   6     0.00   0.01   0.00    -0.01  -0.04   0.01     0.00   0.00   0.00
  26   6     0.01   0.00   0.01     0.02   0.02   0.01     0.01   0.00   0.00
  27   6     0.00   0.00   0.02    -0.01   0.00  -0.03     0.00   0.00   0.00
  28   6     0.00   0.00   0.00     0.00   0.00  -0.01     0.00   0.00   0.00
  29   6     0.06   0.07  -0.03     0.04   0.00  -0.02    -0.08   0.05   0.00
  30   6     0.01  -0.05   0.02    -0.02   0.02   0.00     0.13   0.02  -0.02
  31   6    -0.02  -0.04   0.04     0.00   0.01   0.03    -0.07  -0.04  -0.02
  32   6    -0.04  -0.05   0.01    -0.01   0.02   0.02    -0.09  -0.05  -0.09
  33   6    -0.08   0.05   0.02    -0.03  -0.03   0.01     0.03   0.09  -0.06
  34   6    -0.02  -0.04  -0.06    -0.02   0.02  -0.02     0.08  -0.04  -0.09
  35   6     0.00  -0.01  -0.04    -0.01   0.02  -0.02     0.09  -0.01   0.00
  36   6    -0.05  -0.01   0.07    -0.03  -0.01   0.03     0.03   0.01   0.03
  37   6    -0.06   0.00   0.02    -0.03  -0.01   0.01     0.12   0.01   0.04
  38   6     0.02   0.06  -0.01     0.01   0.00  -0.01     0.05  -0.02   0.05
  39   6     0.01   0.06  -0.03     0.01  -0.01  -0.01     0.02  -0.04   0.14
  40   6    -0.09  -0.03   0.02     0.01  -0.02   0.01     0.01   0.12  -0.01
  41   6     0.03   0.04  -0.06     0.01   0.02   0.01    -0.09   0.03   0.05
  42   6     0.02   0.02  -0.04     0.01   0.02   0.01    -0.09   0.00  -0.03
  43   6    -0.04   0.03   0.02     0.01  -0.02   0.00    -0.03   0.02  -0.02
  44   6    -0.04   0.01   0.01     0.02  -0.01   0.00    -0.12   0.03  -0.08
  45   6     0.00   0.02   0.01     0.00   0.00  -0.01     0.00   0.03   0.03
  46   6     0.01   0.00  -0.01     0.00   0.00   0.00     0.01  -0.03   0.01
  47   6     0.01  -0.01   0.01     0.01  -0.01   0.01     0.00  -0.03   0.01
  48   6     0.01   0.02   0.02     0.00   0.00   0.00     0.00   0.04   0.02
  49   6     0.01   0.01   0.00    -0.01   0.00  -0.01     0.00  -0.03   0.00
  50   6     0.00  -0.02   0.02     0.00   0.00   0.00     0.01   0.03  -0.03
  51   6     0.00   0.00   0.02    -0.01   0.00   0.00     0.02   0.00  -0.03
  52   6    -0.01  -0.02  -0.01     0.00   0.00   0.00    -0.01  -0.02   0.00
  53   6    -0.06  -0.06   0.03     0.02  -0.02  -0.01    -0.08   0.06   0.03
  54   6    -0.07   0.06   0.01    -0.05  -0.01   0.01     0.08   0.00  -0.01
  55   1     0.23  -0.04  -0.07     0.05   0.05   0.01    -0.03  -0.12  -0.02
  56   1     0.04   0.00   0.01    -0.08  -0.01  -0.02     0.00   0.01   0.00
  57   1     0.00   0.00   0.00     0.00   0.00  -0.01     0.01  -0.01   0.00
  58   1     0.00   0.00   0.00     0.00   0.00   0.00     0.00   0.00   0.00
  59   1     0.00   0.00   0.00     0.00   0.00   0.00     0.00   0.00   0.00
  60   1     0.00   0.00   0.00     0.00   0.00   0.00     0.00   0.00   0.00
  61   1    -0.02   0.00  -0.01     0.25   0.02   0.01     0.02   0.00   0.00
  62   1     0.01   0.00   0.02    -0.14  -0.02   0.11    -0.01   0.00   0.02
  63   1     0.01   0.00   0.02    -0.15  -0.01  -0.19    -0.01   0.00  -0.02
  64   1     0.01   0.03  -0.03    -0.08  -0.25   0.29    -0.01  -0.02   0.03
  65   1     0.01   0.02   0.00    -0.13  -0.07  -0.10    -0.01  -0.01  -0.01
  66   1     0.02   0.00   0.01     0.03   0.06  -0.09     0.00   0.01  -0.02
  67   1     0.01   0.00   0.01     0.01   0.05  -0.15     0.01   0.01  -0.02
  68   1     0.02   0.00   0.02     0.21   0.04   0.12     0.03   0.01   0.02
  69   1     0.00   0.01   0.01     0.00  -0.02  -0.03    -0.01   0.00   0.01
  70   1     0.02   0.00   0.03    -0.02   0.00  -0.04    -0.01   0.00  -0.01
  71   1     0.00   0.00   0.01     0.00   0.01  -0.03    -0.01  -0.01   0.00
  72   1     0.00   0.00   0.00     0.01  -0.01  -0.01     0.00   0.00   0.00
  73   1     0.00   0.00   0.00     0.01  -0.01   0.01     0.00   0.00  -0.01
  74   1     0.00   0.00   0.01     0.01   0.00  -0.02     0.00   0.00   0.00
  75   1     0.00  -0.05  -0.03     0.00   0.03   0.00    -0.11  -0.08  -0.07
  76   1    -0.08   0.13   0.06    -0.03  -0.07   0.01     0.06   0.17   0.06
  77   1     0.03  -0.06  -0.06     0.01   0.02  -0.01     0.02  -0.07  -0.10
  78   1    -0.05  -0.01   0.09    -0.03  -0.02   0.03     0.03   0.01   0.08
  79   1    -0.05   0.00   0.03    -0.03  -0.01   0.01     0.15   0.02   0.09
  80   1     0.03   0.03  -0.04     0.00   0.00   0.00     0.00  -0.12   0.15
  81   1    -0.17  -0.11   0.10     0.00  -0.04   0.01     0.04   0.15  -0.12
  82   1     0.06   0.04  -0.05     0.00   0.03  -0.01    -0.06  -0.03   0.11
  83   1    -0.05   0.04   0.04     0.01  -0.02  -0.01    -0.03   0.00  -0.05
  84   1    -0.04   0.00   0.02     0.02  -0.01   0.01    -0.13   0.03  -0.13
  85   1     0.03   0.09   0.03     0.02   0.05   0.01    -0.04   0.02   0.03
  86   1     0.03   0.03  -0.01     0.02   0.01  -0.03    -0.03   0.01   0.02
  87   1     0.01  -0.03  -0.04     0.01  -0.03  -0.05    -0.01   0.08   0.07
  88   1     0.08  -0.08  -0.01     0.04  -0.03   0.00    -0.02  -0.05   0.00
  89   1    -0.01   0.06  -0.06    -0.01   0.03  -0.02     0.02  -0.07   0.03
  90   1     0.02   0.03  -0.06     0.02   0.00  -0.01    -0.03   0.00  -0.02
  91   1     0.04   0.02  -0.03     0.02   0.03  -0.01    -0.03  -0.16   0.05
  92   1     0.05  -0.08   0.04     0.03  -0.06   0.02    -0.05   0.04  -0.05
  93   1     0.04   0.01  -0.02     0.04   0.00   0.00    -0.07  -0.01  -0.03
  94   1     0.05  -0.01  -0.03     0.02  -0.01  -0.02    -0.04   0.14   0.07
  95   1     0.05   0.01   0.00     0.02  -0.01  -0.02    -0.05   0.02  -0.01
[truncated: 1,594,215 more chars]
