# Supplementary material
Source: publisher figshare collection journal article supplement (https://acs.figshare.com/ndownloader/files/5127205)
Supplement: Supplementary file 1 [file 5127205 › supporting_ja043819b/SSSS_fm-5-ts1.mol]

  MacMolPlt                       

114118  0  0  0  0  0  0  0  0  0 v2000
    6.3888    1.3057    0.1303 O   0  0  0  0  0  0  0  0  0  0  0  0
   -0.5217   -0.5589    0.0779 Mg  0  0  0  0  0  0  0  0  0  0  0  0
   -0.5950    1.4157    0.8964 O   0  0  0  0  0  0  0  0  0  0  0  0
    5.2611    1.8737    0.6164 C   0  0  0  0  0  0  0  0  0  0  0  0
    0.4418   -2.4199    0.0333 N   0  0  0  0  0  0  0  0  0  0  0  0
   -2.2441   -1.5416    0.7396 N   0  0  0  0  0  0  0  0  0  0  0  0
    5.2496    2.7134    1.4846 O   0  0  0  0  0  0  0  0  0  0  0  0
   -0.0808   -3.6077    0.3462 C   0  0  0  0  0  0  0  0  0  0  0  0
   -1.3697   -3.7915    0.8701 C   0  0  0  0  0  0  0  0  0  0  0  0
   -2.3945   -2.8327    1.0085 C   0  0  0  0  0  0  0  0  0  0  0  0
    2.9082    1.9255    0.5457 O   0  0  0  0  0  0  0  0  0  0  0  0
    1.7230    1.3322    0.4838 C   0  0  0  0  0  0  0  0  0  0  0  0
    0.6027    2.0151    1.2654 C   0  0  0  0  0  0  0  0  0  0  0  0
    4.0430    1.2678   -0.0747 C   0  0  0  0  0  0  0  0  0  0  0  0
    1.5156    0.2948   -0.1332 O   0  0  0  0  0  0  0  0  0  0  0  0
    7.6126    1.7831    0.7131 C   0  0  0  0  0  0  0  0  0  0  0  0
   -0.1885    2.5762   -1.4281 O   0  0  0  0  0  0  0  0  0  0  0  0
   -1.2100    1.8347   -0.8959 C   0  0  0  0  0  0  0  0  0  0  0  0
   -1.3103    0.6597   -1.3402 O   0  0  0  0  0  0  0  0  0  0  0  0
   -2.1582    3.9018    0.0852 O   0  0  0  0  0  0  0  0  0  0  0  0
   -1.1544    4.6500   -0.3865 C   0  0  0  0  0  0  0  0  0  0  0  0
   -0.1699    4.0166   -1.3651 C   0  0  0  0  0  0  0  0  0  0  0  0
   -2.4629    2.6058   -0.4993 C   0  0  0  0  0  0  0  0  0  0  0  0
   -1.0091    5.7993   -0.0357 O   0  0  0  0  0  0  0  0  0  0  0  0
   -0.3244    4.5988   -2.7728 C   0  0  0  0  0  0  0  0  0  0  0  0
   -3.4345    2.7592   -1.6747 C   0  0  0  0  0  0  0  0  0  0  0  0
    0.8579    1.9289    2.7810 C   0  0  0  0  0  0  0  0  0  0  0  0
    4.0429    1.4456   -1.5969 C   0  0  0  0  0  0  0  0  0  0  0  0
    1.8059   -2.3770   -0.4620 C   0  0  0  0  0  0  0  0  0  0  0  0
   -3.4151   -0.6921    0.6640 C   0  0  0  0  0  0  0  0  0  0  0  0
    2.9030   -2.3943    0.4622 C   0  0  0  0  0  0  0  0  0  0  0  0
    4.2125   -2.1579   -0.0371 C   0  0  0  0  0  0  0  0  0  0  0  0
    4.4356   -1.9216   -1.4133 C   0  0  0  0  0  0  0  0  0  0  0  0
    3.3518   -1.9370   -2.3149 C   0  0  0  0  0  0  0  0  0  0  0  0
    2.0281   -2.1643   -1.8619 C   0  0  0  0  0  0  0  0  0  0  0  0
    2.7021   -2.6475    1.9813 C   0  0  0  0  0  0  0  0  0  0  0  0
    0.8626   -2.1902   -2.8842 C   0  0  0  0  0  0  0  0  0  0  0  0
   -4.2454   -0.7327   -0.5074 C   0  0  0  0  0  0  0  0  0  0  0  0
   -5.3292    0.1810   -0.5969 C   0  0  0  0  0  0  0  0  0  0  0  0
   -5.5777    1.1185    0.4255 C   0  0  0  0  0  0  0  0  0  0  0  0
   -4.7615    1.1441    1.5774 C   0  0  0  0  0  0  0  0  0  0  0  0
   -3.6749    0.2383    1.7276 C   0  0  0  0  0  0  0  0  0  0  0  0
   -4.0232   -1.7521   -1.6582 C   0  0  0  0  0  0  0  0  0  0  0  0
   -2.8368    0.2170    3.0334 C   0  0  0  0  0  0  0  0  0  0  0  0
    3.0057   -1.3609    2.8131 C   0  0  0  0  0  0  0  0  0  0  0  0
    3.5802   -3.8376    2.4966 C   0  0  0  0  0  0  0  0  0  0  0  0
    0.7807   -0.8615   -3.6984 C   0  0  0  0  0  0  0  0  0  0  0  0
    0.9837   -3.4245   -3.8401 C   0  0  0  0  0  0  0  0  0  0  0  0
   -2.6740    1.6309    3.6718 C   0  0  0  0  0  0  0  0  0  0  0  0
   -3.4476   -0.7795    4.0764 C   0  0  0  0  0  0  0  0  0  0  0  0
   -3.6609   -1.0372   -2.9992 C   0  0  0  0  0  0  0  0  0  0  0  0
   -5.2802   -2.6663   -1.8565 C   0  0  0  0  0  0  0  0  0  0  0  0
    0.7316   -4.8737    0.1021 C   0  0  0  0  0  0  0  0  0  0  0  0
   -3.7398   -3.4064    1.4459 C   0  0  0  0  0  0  0  0  0  0  0  0
   -1.6450   -4.8116    1.1157 H   0  0  0  0  0  0  0  0  0  0  0  0
    0.6298    3.0825    0.9991 H   0  0  0  0  0  0  0  0  0  0  0  0
    4.0135    0.1917    0.1358 H   0  0  0  0  0  0  0  0  0  0  0  0
    7.6259    1.5918    1.7894 H   0  0  0  0  0  0  0  0  0  0  0  0
    7.7251    2.8571    0.5432 H   0  0  0  0  0  0  0  0  0  0  0  0
    8.4092    1.2301    0.2145 H   0  0  0  0  0  0  0  0  0  0  0  0
    0.8233    4.2816   -0.9900 H   0  0  0  0  0  0  0  0  0  0  0  0
   -2.9768    2.0758    0.2978 H   0  0  0  0  0  0  0  0  0  0  0  0
   -0.1949    5.6840   -2.7312 H   0  0  0  0  0  0  0  0  0  0  0  0
   -1.3093    4.3771   -3.1933 H   0  0  0  0  0  0  0  0  0  0  0  0
    0.4377    4.1701   -3.4301 H   0  0  0  0  0  0  0  0  0  0  0  0
   -4.1395    3.5634   -1.4410 H   0  0  0  0  0  0  0  0  0  0  0  0
   -3.9976    1.8303   -1.7593 H   0  0  0  0  0  0  0  0  0  0  0  0
   -2.9384    2.9860   -2.6232 H   0  0  0  0  0  0  0  0  0  0  0  0
    1.8257    2.3711    3.0400 H   0  0  0  0  0  0  0  0  0  0  0  0
    0.8399    0.8871    3.1154 H   0  0  0  0  0  0  0  0  0  0  0  0
    0.0625    2.4648    3.3026 H   0  0  0  0  0  0  0  0  0  0  0  0
    3.4083    0.6791   -2.0434 H   0  0  0  0  0  0  0  0  0  0  0  0
    5.0572    1.3108   -1.9814 H   0  0  0  0  0  0  0  0  0  0  0  0
    3.6930    2.4467   -1.8674 H   0  0  0  0  0  0  0  0  0  0  0  0
    5.0685   -2.1975    0.6492 H   0  0  0  0  0  0  0  0  0  0  0  0
    5.4584   -1.7586   -1.7814 H   0  0  0  0  0  0  0  0  0  0  0  0
    3.5394   -1.7983   -3.3879 H   0  0  0  0  0  0  0  0  0  0  0  0
    1.6384   -2.9072    2.1469 H   0  0  0  0  0  0  0  0  0  0  0  0
   -0.0833   -2.3023   -2.3146 H   0  0  0  0  0  0  0  0  0  0  0  0
   -5.9984    0.1392   -1.4663 H   0  0  0  0  0  0  0  0  0  0  0  0
   -6.4226    1.8158    0.3386 H   0  0  0  0  0  0  0  0  0  0  0  0
   -4.9848    1.8595    2.3790 H   0  0  0  0  0  0  0  0  0  0  0  0
   -3.1681   -2.4010   -1.3828 H   0  0  0  0  0  0  0  0  0  0  0  0
   -1.8274   -0.1586    2.7661 H   0  0  0  0  0  0  0  0  0  0  0  0
    2.8207   -1.5450    3.8830 H   0  0  0  0  0  0  0  0  0  0  0  0
    2.3491   -0.5348    2.4865 H   0  0  0  0  0  0  0  0  0  0  0  0
    4.0514   -1.0411    2.6870 H   0  0  0  0  0  0  0  0  0  0  0  0
    3.3391   -4.0462    3.5501 H   0  0  0  0  0  0  0  0  0  0  0  0
    4.6511   -3.5934    2.4296 H   0  0  0  0  0  0  0  0  0  0  0  0
    3.3959   -4.7510    1.9108 H   0  0  0  0  0  0  0  0  0  0  0  0
   -0.0915   -0.8876   -4.3716 H   0  0  0  0  0  0  0  0  0  0  0  0
    1.6857   -0.7104   -4.3063 H   0  0  0  0  0  0  0  0  0  0  0  0
    0.6655   -0.0003   -3.0162 H   0  0  0  0  0  0  0  0  0  0  0  0
    0.1256   -3.4480   -4.5291 H   0  0  0  0  0  0  0  0  0  0  0  0
    0.9940   -4.3638   -3.2650 H   0  0  0  0  0  0  0  0  0  0  0  0
    1.9081   -3.3694   -4.4357 H   0  0  0  0  0  0  0  0  0  0  0  0
   -1.9436    1.5779    4.4945 H   0  0  0  0  0  0  0  0  0  0  0  0
   -3.6252    1.9983    4.0878 H   0  0  0  0  0  0  0  0  0  0  0  0
   -2.3161    2.3556    2.9225 H   0  0  0  0  0  0  0  0  0  0  0  0
   -2.8440   -0.7668    4.9971 H   0  0  0  0  0  0  0  0  0  0  0  0
   -3.4537   -1.8080    3.6826 H   0  0  0  0  0  0  0  0  0  0  0  0
   -4.4807   -0.4939    4.3301 H   0  0  0  0  0  0  0  0  0  0  0  0
   -3.4772   -1.7871   -3.7852 H   0  0  0  0  0  0  0  0  0  0  0  0
   -2.7526   -0.4243   -2.8688 H   0  0  0  0  0  0  0  0  0  0  0  0
   -4.4816   -0.3818   -3.3299 H   0  0  0  0  0  0  0  0  0  0  0  0
   -5.0577   -3.4460   -2.6009 H   0  0  0  0  0  0  0  0  0  0  0  0
   -6.1374   -2.0782   -2.2182 H   0  0  0  0  0  0  0  0  0  0  0  0
   -5.5693   -3.1559   -0.9143 H   0  0  0  0  0  0  0  0  0  0  0  0
    1.6466   -4.8978    0.7015 H   0  0  0  0  0  0  0  0  0  0  0  0
    0.1449   -5.7656    0.3457 H   0  0  0  0  0  0  0  0  0  0  0  0
    1.0290   -4.9409   -0.9518 H   0  0  0  0  0  0  0  0  0  0  0  0
   -4.4562   -2.6394    1.7480 H   0  0  0  0  0  0  0  0  0  0  0  0
   -4.1874   -3.9879    0.6302 H   0  0  0  0  0  0  0  0  0  0  0  0
   -3.5917   -4.0966    2.2857 H   0  0  0  0  0  0  0  0  0  0  0  0
  1  4  1  0  0  0  0
  1 16  1  0  0  0  0
  2  3  1  0  0  0  0
  2  5  1  0  0  0  0
  2  6  1  0  0  0  0
  2 15  1  0  0  0  0
  2 19  2  0  0  0  0
  3 13  1  0  0  0  0
  4  7  2  0  0  0  0
  4 14  1  0  0  0  0
  5  8  1  0  0  0  0
  5 29  1  0  0  0  0
  6 10  1  0  0  0  0
  6 30  1  0  0  0  0
  8  9  1  0  0  0  0
  8 53  1  0  0  0  0
  9 10  1  0  0  0  0
  9 55  1  0  0  0  0
 10 54  1  0  0  0  0
 11 12  1  0  0  0  0
 11 14  1  0  0  0  0
 12 13  1  0  0  0  0
 12 15  2  0  0  0  0
 13 27  1  0  0  0  0
 13 56  1  0  0  0  0
 14 28  1  0  0  0  0
 14 57  1  0  0  0  0
 16 58  1  0  0  0  0
 16 59  1  0  0  0  0
 16 60  1  0  0  0  0
 17 18  1  0  0  0  0
 17 22  1  0  0  0  0
 18 19  2  0  0  0  0
 18 23  1  0  0  0  0
 20 21  1  0  0  0  0
 20 23  1  0  0  0  0
 21 22  1  0  0  0  0
 21 24  2  0  0  0  0
 22 25  1  0  0  0  0
 22 61  1  0  0  0  0
 23 26  1  0  0  0  0
 23 62  1  0  0  0  0
 25 63  1  0  0  0  0
 25 64  1  0  0  0  0
 25 65  1  0  0  0  0
 26 66  1  0  0  0  0
 26 67  1  0  0  0  0
 26 68  1  0  0  0  0
 27 69  1  0  0  0  0
 27 70  1  0  0  0  0
 27 71  1  0  0  0  0
 28 72  1  0  0  0  0
 28 73  1  0  0  0  0
 28 74  1  0  0  0  0
 29 31  1  0  0  0  0
 29 35  1  0  0  0  0
 30 38  1  0  0  0  0
 30 42  1  0  0  0  0
 31 32  1  0  0  0  0
 31 36  1  0  0  0  0
 32 33  1  0  0  0  0
 32 75  1  0  0  0  0
 33 34  1  0  0  0  0
 33 76  1  0  0  0  0
 34 35  1  0  0  0  0
 34 77  1  0  0  0  0
 35 37  1  0  0  0  0
 36 45  1  0  0  0  0
 36 46  1  0  0  0  0
 36 78  1  0  0  0  0
 37 47  1  0  0  0  0
 37 48  1  0  0  0  0
 37 79  1  0  0  0  0
 38 39  1  0  0  0  0
 38 43  1  0  0  0  0
 39 40  1  0  0  0  0
 39 80  1  0  0  0  0
 40 41  1  0  0  0  0
 40 81  1  0  0  0  0
 41 42  1  0  0  0  0
 41 82  1  0  0  0  0
 42 44  1  0  0  0  0
 43 51  1  0  0  0  0
 43 52  1  0  0  0  0
 43 83  1  0  0  0  0
 44 49  1  0  0  0  0
 44 50  1  0  0  0  0
 44 84  1  0  0  0  0
 45 85  1  0  0  0  0
 45 86  1  0  0  0  0
 45 87  1  0  0  0  0
 46 88  1  0  0  0  0
 46 89  1  0  0  0  0
 46 90  1  0  0  0  0
 47 91  1  0  0  0  0
 47 92  1  0  0  0  0
 47 93  1  0  0  0  0
 48 94  1  0  0  0  0
 48 95  1  0  0  0  0
 48 96  1  0  0  0  0
 49 97  1  0  0  0  0
 49 98  1  0  0  0  0
 49 99  1  0  0  0  0
 50100  1  0  0  0  0
 50101  1  0  0  0  0
 50102  1  0  0  0  0
 51103  1  0  0  0  0
 51104  1  0  0  0  0
 51105  1  0  0  0  0
 52106  1  0  0  0  0
 52107  1  0  0  0  0
 52108  1  0  0  0  0
 53109  1  0  0  0  0
 53110  1  0  0  0  0
 53111  1  0  0  0  0
 54112  1  0  0  0  0
 54113  1  0  0  0  0
 54114  1  0  0  0  0
M  END
