# Supplementary material
Source: publisher figshare collection journal article supplement (https://acs.figshare.com/ndownloader/files/5127205)
Supplement: Supplementary file 1 [file 5127205 › supporting_ja043819b/SSSS_fm-5-ts2-50.xyz]

114
O	4.993018	-2.497779	-1.222763	-0.0147	0.0	0.0
Mg	-0.260945	0.195957	0.044133	0.0441	0.1176	-0.0441
O	0.101523	-1.542928	3.075676	0.0147	-0.0882	0.0441
C	4.184379	-2.55833	-0.152854	-0.0294	0.0147	-0.0147
N	-1.132399	-0.466683	-1.690986	0.0294	0.0147	0.0147
N	0.978039	1.449569	-1.022754	0.0441	0.0441	-0.0588
O	4.429284	-2.078418	0.929941	-0.0441	0.0147	-0.0147
C	-0.560796	-0.386502	-2.882174	0.0294	0.0147	0.0
C	0.686031	0.251548	-3.107528	0.0147	0.0147	-0.0294
C	1.348744	1.175124	-2.270927	0.0294	0.0294	-0.0588
O	2.090356	-3.412113	0.687182	-0.0294	0.0	-0.0441
C	1.390502	-2.339718	1.079647	-0.0588	-0.0294	-0.0147
C	0.935295	-2.564955	2.527216	0.0294	-0.0588	0.0147
C	2.940868	-3.390211	-0.482358	-0.0294	0.0294	-0.0441
O	1.241682	-1.339426	0.403257	-0.1323	-0.0294	0.0
C	6.237123	-1.795128	-1.029958	-0.0147	0.0	0.0294
O	-0.468628	0.861512	1.809878	-0.0441	0.0588	-0.1029
C	-1.062585	-1.204635	2.440774	-0.0735	-0.2205	0.147
O	-1.355651	-1.633377	1.332832	-0.147	-0.2646	0.2058
O	-2.89629	0.382871	2.990116	0.0294	-0.0882	0.1029
C	-2.410145	1.663582	2.857693	-0.0147	-0.0588	0.0147
C	-0.884913	1.78931	2.752174	-0.0294	0.0	-0.0588
C	-2.053621	-0.660396	3.473219	0.0735	-0.0147	0.1617
O	-3.21065	2.562032	2.757316	-0.0735	-0.1176	0.0
C	-0.466589	3.232675	2.480936	-0.1176	0.0441	-0.0294
C	-2.992236	-1.800039	3.876704	0.0882	0.0588	0.4557
C	0.337399	-3.951414	2.793263	0.1029	-0.0882	0.0441
C	2.260687	-3.03827	-1.804801	-0.0147	0.0588	-0.0294
C	-2.433069	-1.061094	-1.435569	0.0294	0.0147	0.0
C	1.475044	2.647868	-0.366205	0.0441	0.0294	-0.0441
C	-3.484162	-0.176199	-1.009449	0.0147	0.0147	-0.0294
C	-4.66878	-0.741572	-0.481089	-0.0147	0.0294	-0.0882
C	-4.830802	-2.1383	-0.38918	-0.0294	0.0294	-0.1176
C	-3.827157	-2.99244	-0.874362	-0.0147	0.0147	-0.0735
C	-2.616559	-2.480838	-1.402453	0.0147	0.0147	-0.0147
C	-3.367343	1.356689	-1.232545	0.0294	0.0147	-0.0147
C	-1.552405	-3.481109	-1.922735	0.0147	0.0	0.0147
C	2.485378	2.552244	0.644812	0.0	0.0147	-0.0147
C	2.830419	3.717213	1.379526	-0.0147	0.0147	0.0147
C	2.216153	4.956317	1.111862	0.0	0.0147	0.0
C	1.250336	5.048148	0.093599	0.0294	0.0294	-0.0294
C	0.858567	3.913599	-0.655811	0.0441	0.0441	-0.0441
C	3.24177	1.234534	0.939494	-0.0147	0.0147	0.0
C	-0.222191	4.089317	-1.755847	0.0588	0.0441	-0.0588
C	-4.384528	2.1899	-0.394029	0.0294	0.0147	-0.0294
C	-3.533982	1.692991	-2.752951	0.0441	0.0294	-0.0147
C	-1.081008	-4.450914	-0.792867	-0.0294	0.0	0.0147
C	-2.09177	-4.302396	-3.143662	0.0441	0.0147	0.0
C	-1.553055	4.642916	-1.152274	0.0441	0.0147	-0.0735
C	0.270614	5.036793	-2.902278	0.0735	0.0735	-0.0441
C	3.005481	0.751196	2.403607	-0.0588	0.0	-0.0147
C	4.772742	1.391885	0.650247	-0.0147	-0.0147	0.0294
C	-1.228624	-0.9655	-4.12512	0.0147	0.0	0.0147
C	2.537889	1.911219	-2.876836	0.0294	0.0147	-0.0735
H	1.081837	0.158228	-4.114178	0.0	0.0	-0.0294
H	1.866059	-2.462559	3.097232	0.0441	-0.0147	-0.0294
H	3.278741	-4.431239	-0.532795	-0.0294	0.0294	-0.0588
H	6.044264	-0.760965	-0.739978	0.0	0.0	0.0294
H	6.747007	-1.841803	-1.992068	0.0147	0.0	0.0294
H	6.831962	-2.28463	-0.254128	-0.0294	0.0	0.0294
H	-0.467061	1.519629	3.745135	0.0441	0.0	-0.0882
H	-1.483583	-0.312643	4.340056	0.1764	0.0882	0.0441
H	-0.853895	3.886682	3.270821	-0.0882	0.0	0.0147
H	-0.85905	3.585627	1.526818	-0.2058	0.0441	0.0147
H	0.620159	3.316646	2.443623	-0.1176	0.0882	-0.1029
H	-3.700665	-1.441978	4.628881	0.1911	0.1911	0.48510000000000003
H	-2.427489	-2.640427	4.294139	0.1323	0.1029	0.5145
H	-3.545346	-2.140497	2.99622	-0.0147	-0.0735	0.5733
H	1.044398	-4.73516	2.513671	0.1323	-0.0441	0.0294
H	-0.586855	-4.089598	2.228829	0.0882	-0.1323	0.0735
H	0.120048	-4.037362	3.861881	0.1323	-0.0882	0.0441
H	1.346534	-3.625976	-1.904366	-0.0147	0.0588	-0.0588
H	2.939983	-3.309574	-2.618024	-0.0147	0.0882	-0.0294
H	2.011238	-1.979996	-1.890908	-0.0294	0.0588	-0.0147
H	-5.482975	-0.084411	-0.153506	-0.0147	0.0294	-0.1176
H	-5.756968	-2.556211	0.028099	-0.0588	0.0294	-0.1617
H	-3.9798	-4.079055	-0.842429	-0.0294	0.0294	-0.1029
H	-2.340008	1.67301	-0.942993	0.0294	0.0147	-0.0147
H	-0.673607	-2.898517	-2.258531	0.0294	0.0	0.0294
H	3.605488	3.652958	2.154692	-0.0441	0.0	0.0294
H	2.501268	5.848423	1.68605	-0.0147	0.0	0.0147
H	0.788638	6.01968	-0.124746	0.0294	0.0294	-0.0294
H	2.845709	0.460644	0.254219	-0.0147	0.0147	-0.0147
H	-0.432941	3.094562	-2.197145	0.0735	0.0441	-0.0882
H	-4.177518	3.261057	-0.528756	0.0294	0.0147	-0.0147
H	-4.309593	1.95647	0.679666	0.0147	0.0147	-0.0294
H	-5.416316	1.999747	-0.726923	0.0294	0.0294	-0.0441
H	-3.476207	2.781447	-2.903446	0.0441	0.0294	-0.0147
H	-4.510082	1.339096	-3.120934	0.0441	0.0294	-0.0294
H	-2.740422	1.218422	-3.352923	0.0441	0.0294	-0.0147
H	-0.291093	-5.12795	-1.160875	0.0	0.0147	0.0441
H	-1.916155	-5.066893	-0.42513	-0.0294	-0.0147	-0.0294
H	-0.682858	-3.866497	0.053366	-0.0735	-0.0147	0.0441
H	-1.297207	-4.952917	-3.540855	0.0588	0.0147	0.0147
H	-2.432421	-3.636	-3.950332	0.0588	0.0147	-0.0147
H	-2.93826	-4.936348	-2.838545	0.0441	0.0147	-0.0294
H	-2.322157	4.718018	-1.936936	0.0588	0.0294	-0.0882
H	-1.930089	3.973655	-0.359189	0.0441	-0.0147	-0.1029
H	-1.40417	5.641766	-0.715139	0.0294	0.0	-0.0441
H	-0.496654	5.099938	-3.689124	0.0882	0.0735	-0.0588
H	1.200881	4.664317	-3.356646	0.0882	0.0882	-0.0294
H	0.455468	6.050817	-2.515895	0.0441	0.0735	-0.0147
H	3.520658	-0.20958	2.567673	-0.0735	0.0	0.0
H	1.92343	0.617601	2.582182	-0.0588	0.0147	-0.0441
H	3.391723	1.481488	3.131336	-0.0588	0.0	0.0
H	5.289433	0.450616	0.904102	-0.0294	-0.0147	0.0294
H	5.215596	2.195211	1.259694	-0.0147	-0.0147	0.0294
H	4.948235	1.628675	-0.41256	0.0147	-0.0147	0.0294
H	-2.271314	-1.236644	-3.940397	0.0147	0.0	0.0147
H	-1.197192	-0.236895	-4.94406	0.0147	-0.0147	0.0
H	-0.695823	-1.861385	-4.468517	0.0147	-0.0147	0.0294
H	2.308388	2.967506	-3.052629	0.0147	0.0147	-0.1029
H	3.400966	1.872847	-2.201613	0.0294	0.0441	-0.0882
H	2.827758	1.467578	-3.835537	0.0147	0.0	-0.0735
114
O	4.986868561811939	-2.497779	-1.222763	-0.0147	0.0	0.0
Mg	-0.24249668543581562	0.24515250550449164	0.02568468543581564	0.0441	0.1176	-0.0441
O	0.10767243818806145	-1.5798246291283689	3.0941243145641844	0.0147	-0.0882	0.0441
C	4.172080123623877	-2.5521805618119386	-0.15900343818806145	-0.0294	0.0147	-0.0147
N	-1.120100123623877	-0.46053356181193855	-1.6848365618119387	0.0294	0.0147	0.0147
N	0.9964873145641844	1.4680173145641844	-1.0473517527522458	0.0441	0.0441	-0.0588
O	4.410835685435815	-2.0722685618119385	0.9237915618119386	-0.0441	0.0147	-0.0147
C	-0.548497123623877	-0.38035256181193855	-2.882174	0.0294	0.0147	0.0
C	0.6921804381880614	0.25769743818806146	-3.1198268763761225	0.0147	0.0147	-0.0294
C	1.3610428763761229	1.187422876376123	-2.2955247527522458	0.0294	0.0294	-0.0588
O	2.078057123623877	-3.412113	0.6687336854358156	-0.0294	0.0	-0.0441
C	1.365904247247754	-2.3520168763761227	1.0734975618119387	-0.0588	-0.0294	-0.0147
C	0.9475938763761229	-2.5895527527522457	2.5333654381880617	0.0294	-0.0588	0.0147
C	2.9285691236238773	-3.377912123623877	-0.5008063145641843	-0.0294	0.0294	-0.0441
O	1.186337056307447	-1.351724876376123	0.403257	-0.1323	-0.0294	0.0
C	6.230973561811939	-1.795128	-1.017659123623877	-0.0147	0.0	0.0294
O	-0.4870763145641843	0.8861097527522458	1.76683193268357	-0.0441	0.0588	-0.1029
C	-1.093332190940307	-1.2968765728209217	2.5022683818806146	-0.0735	-0.2205	0.147
O	-1.4171453818806146	-1.7440668873851062	1.4189241346328605	-0.147	-0.2646	0.2058
O	-2.8839911236238773	0.3459743708716313	3.03316206731643	0.0294	-0.0882	0.1029
C	-2.4162944381880616	1.638984247247754	2.8638424381880614	-0.0147	-0.0588	0.0147
C	-0.8972118763761229	1.78931	2.7275762472477543	-0.0294	0.0	-0.0588
C	-2.0228738090596927	-0.6665454381880614	3.540862820068676	0.0735	-0.0147	0.1617
O	-3.241397190940307	2.512836494495508	2.757316	-0.0735	-0.1176	0.0
C	-0.5157845055044916	3.2511233145641842	2.468637123623877	-0.1176	0.0441	-0.0294
C	-2.9553393708716316	-1.775441247247754	4.067336583829905	0.0882	0.0588	0.4557
C	0.3804450673164302	-3.9883106291283688	2.8117113145641843	0.1029	-0.0882	0.0441
C	2.2545375618119383	-3.013672247247754	-1.817099876376123	-0.0147	0.0588	-0.0294
C	-2.4207701236238774	-1.0549445618119386	-1.435569	0.0294	0.0147	0.0
C	1.4934923145641843	2.6601668763761226	-0.3846533145641844	0.0441	0.0294	-0.0441
C	-3.4780125618119384	-0.17004956181193853	-1.021747876376123	0.0147	0.0147	-0.0294
C	-4.6749294381880615	-0.7292731236238771	-0.5179856291283687	-0.0147	0.0294	-0.0882
C	-4.843100876376123	-2.1260011236238774	-0.43837550550449167	-0.0294	0.0294	-0.1176
C	-3.8333064381880617	-2.9862905618119386	-0.9051091909403073	-0.0147	0.0147	-0.0735
C	-2.6104095618119385	-2.4746885618119383	-1.4086024381880613	0.0147	0.0147	-0.0147
C	-3.3550441236238773	1.3628384381880614	-1.2386944381880614	0.0294	0.0147	-0.0147
C	-1.5462555618119387	-3.481109	-1.9165855618119387	0.0147	0.0	0.0147
C	2.485378	2.5583934381880615	0.6386625618119386	0.0	0.0147	-0.0147
C	2.8242695618119384	3.7233624381880617	1.3856754381880614	-0.0147	0.0147	0.0147
C	2.216153	4.962466438188062	1.111862	0.0	0.0147	0.0
C	1.2626348763761228	5.0604468763761234	0.08130012362387709	0.0294	0.0294	-0.0294
C	0.8770153145641844	3.9320473145641843	-0.6742593145641844	0.0441	0.0441	-0.0441
C	3.2356205618119382	1.2406834381880614	0.939494	-0.0147	0.0147	0.0
C	-0.19759324724775418	4.107765314564185	-1.7804447527522458	0.0588	0.0441	-0.0588
C	-4.372229123623877	2.1960494381880618	-0.40632787637612294	0.0294	0.0147	-0.0294
C	-3.5155336854358157	1.7052898763761228	-2.7591004381880615	0.0441	0.0294	-0.0147
C	-1.093306876376123	-4.450914	-0.7867175618119385	-0.0294	0.0	0.0147
C	-2.0733216854358156	-4.296246561811938	-3.143662	0.0441	0.0147	0.0
C	-1.5346066854358158	4.649065438188061	-1.1830211909403072	0.0441	0.0147	-0.0735
C	0.3013611909403073	5.067540190940307	-2.920726314564184	0.0735	0.0735	-0.0441
C	2.980883247247754	0.751196	2.3974575618119385	-0.0588	0.0	-0.0147
C	4.7665925618119385	1.3857355618119387	0.6625458763761229	-0.0147	-0.0147	0.0294
C	-1.2224745618119386	-0.9655	-4.118970561811938	0.0147	0.0	0.0147
C	2.5501878763761225	1.9173684381880614	-2.9075831909403074	0.0294	0.0147	-0.0735
H	1.081837	0.158228	-4.126476876376123	0.0	0.0	-0.0294
H	1.8845073145641842	-2.4687084381880617	3.0849331236238773	0.0441	-0.0147	-0.0294
H	3.2664421236238774	-4.418940123623877	-0.5573927527522459	-0.0294	0.0294	-0.0588
H	6.044264	-0.760965	-0.7276791236238771	0.0	0.0	0.0294
H	6.7531564381880615	-1.841803	-1.979769123623877	0.0147	0.0	0.0294
H	6.819663123623877	-2.28463	-0.24182912362387712	-0.0294	0.0	0.0294
H	-0.4486126854358157	1.519629	3.7082383708716313	0.0441	0.0	-0.0882
H	-1.4097897417432628	-0.2757463708716313	4.358504314564184	0.1764	0.0882	0.0441
H	-0.8907916291283686	3.886682	3.2769704381880618	-0.0882	0.0	0.0147
H	-0.9451421346328603	3.6040753145641844	1.5329674381880614	-0.2058	0.0441	0.0147
H	0.5709634944955084	3.3535426291283685	2.40057693268357	-0.1176	0.0882	-0.1029
H	-3.620722303555201	-1.362035303555201	4.831812460206028	0.1911	0.1911	0.48510000000000003
H	-2.3721440563074467	-2.5973809326835697	4.509369336582151	0.1323	0.1029	0.5145
H	-3.5514954381880615	-2.1712441909403073	3.236048089334397	-0.0147	-0.0735	0.5733
H	1.099742943692553	-4.753608314564184	2.5259698763761227	0.1323	-0.0441	0.0294
H	-0.5499583708716314	-4.144942943692553	2.2595761909403076	0.0882	-0.1323	0.0735
H	0.1753929436925531	-4.0742586291283684	3.880329314564184	0.1323	-0.0882	0.0441
H	1.3403845618119385	-3.6013782472477542	-1.9289637527522459	-0.0147	0.0588	-0.0588
H	2.933833561811938	-3.2726773708716315	-2.630322876376123	-0.0147	0.0882	-0.0294
H	1.9989391236238772	-1.9553982472477542	-1.8970574381880614	-0.0294	0.0588	-0.0147
H	-5.489124438188061	-0.07211212362387709	-0.20270150550449162	-0.0147	0.0294	-0.1176
H	-5.781565752752245	-2.543912123623877	-0.03954482006867599	-0.0588	0.0294	-0.1617
H	-3.9920988763761227	-4.066756123623877	-0.8854750673164302	-0.0294	0.0294	-0.1029
H	-2.3277091236238774	1.6791594381880615	-0.9491424381880614	0.0294	0.0147	-0.0147
H	-0.661308123623877	-2.898517	-2.2462321236238774	0.0294	0.0	0.0294
H	3.5870396854358155	3.652958	2.1669908763761225	-0.0441	0.0	0.0294
H	2.4951185618119385	5.848423	1.6921994381880614	-0.0147	0.0	0.0147
H	0.8009368763761229	6.031978876376123	-0.1370448763761229	0.0294	0.0294	-0.0294
H	2.8395595618119382	0.46679343818806146	0.2480695618119385	-0.0147	0.0147	-0.0147
H	-0.40219380905969276	3.113010314564184	-2.2340416291283685	0.0735	0.0441	-0.0882
H	-4.165219123623877	3.2672064381880617	-0.5349054381880615	0.0294	0.0147	-0.0147
H	-4.303443561811938	1.9626194381880613	0.6673671236238771	0.0147	0.0147	-0.0294
H	-5.404017123623877	2.012045876376123	-0.7453713145641844	0.0294	0.0294	-0.0441
H	-3.4577586854358158	2.7937458763761227	-2.9095954381880618	0.0441	0.0294	-0.0147
H	-4.491633685435815	1.351394876376123	-3.133232876376123	0.0441	0.0294	-0.0294
H	-2.721973685435816	1.2307208763761228	-3.3590724381880617	0.0441	0.0294	-0.0147
H	-0.291093	-5.121800561811939	-1.1424266854358158	0.0	0.0147	0.0441
H	-1.928453876376123	-5.073042438188062	-0.43742887637612293	-0.0294	-0.0147	-0.0294
H	-0.7136051909403073	-3.8726464381880614	0.07181431456418436	-0.0735	-0.0147	0.0441
H	-1.2726092472477541	-4.946767561811939	-3.5347055618119385	0.0588	0.0147	0.0147
H	-2.4078232472477543	-3.6298505618119385	-3.9564814381880615	0.0588	0.0147	-0.0147
H	-2.919811685435816	-4.930198561811938	-2.8508438763761226	0.0441	0.0147	-0.0294
H	-2.297559247247754	4.730316876376123	-1.9738326291283688	0.0588	0.0294	-0.0882
H	-1.9116406854358157	3.9675055618119384	-0.40223506731643016	0.0441	-0.0147	-0.1029
H	-1.391871123623877	5.641766	-0.7335873145641844	0.0294	0.0	-0.0441
H	-0.45975737087163127	5.130685190940307	-3.713721752752246	0.0882	0.0735	-0.0588
H	1.2377776291283689	4.701213629128368	-3.3689448763761227	0.0882	0.0882	-0.0294
H	0.47391631456418437	6.081564190940307	-2.5220444381880616	0.0441	0.0735	-0.0147
H	3.4899108090596926	-0.20958	2.567673	-0.0735	0.0	0.0
H	1.8988322472477541	0.6237504381880614	2.5637336854358157	-0.0588	0.0147	-0.0441
H	3.367125247247754	1.481488	3.131336	-0.0588	0.0	0.0
H	5.277134123623877	0.44446656181193855	0.9164008763761229	-0.0294	-0.0147	0.0294
H	5.209446561811938	2.1890615618119385	1.271992876376123	-0.0147	-0.0147	0.0294
H	4.954384438188062	1.6225255618119387	-0.40026112362387706	0.0147	-0.0147	0.0294
H	-2.2651645618119383	-1.236644	-3.9342475618119384	0.0147	0.0	0.0147
H	-1.1910425618119387	-0.24304443818806146	-4.94406	0.0147	-0.0147	0.0
H	-0.6896735618119385	-1.8675344381880614	-4.456218123623877	0.0147	-0.0147	0.0294
H	2.3145374381880615	2.9736554381880618	-3.09567506731643	0.0147	0.0147	-0.1029
H	3.4132648763761226	1.8912953145641842	-2.2385096291283686	0.0294	0.0441	-0.0882
H	2.833907438188062	1.467578	-3.8662841909403074	0.0147	0.0	-0.0735
114
O	4.98132107347938	-2.497779	-1.222763	-0.0147	0.0	0.0
Mg	-0.22585422043813935	0.2895324121649617	0.009042220438139355	0.0441	0.1176	-0.0441
O	0.11321992652062021	-1.6131095591237214	3.1107667795618608	0.0147	-0.0882	0.0441
C	4.160985146958759	-2.54663307347938	-0.1645509265206202	-0.0294	0.0147	-0.0147
N	-1.1090051469587594	-0.4549860734793798	-1.67928907347938	0.0294	0.0147	0.0147
N	1.0131297795618606	1.4846597795618608	-1.0695417060824808	0.0441	0.0441	-0.0588
O	4.394193220438139	-2.0667210734793797	0.9182440734793798	-0.0441	0.0147	-0.0147
C	-0.5374021469587595	-0.3748050734793798	-2.882174	0.0294	0.0147	0.0
C	0.6977279265206202	0.2632449265206202	-3.13092185304124	0.0147	0.0147	-0.0294
C	1.3721378530412405	1.1985178530412406	-2.317714706082481	0.0294	0.0294	-0.0588
O	2.0669621469587596	-3.412113	0.6520912204381393	-0.0294	0.0	-0.0441
C	1.343714293917519	-2.3631118530412403	1.0679500734793799	-0.0588	-0.0294	-0.0147
C	0.9586888530412404	-2.611742706082481	2.5389129265206205	0.0294	-0.0588	0.0147
C	2.9174741469587597	-3.3668171469587596	-0.5174487795618606	-0.0294	0.0294	-0.0441
O	1.1364096613144181	-1.3628198530412405	0.403257	-0.1323	-0.0294	0.0
C	6.2254260734793805	-1.795128	-1.0065641469587594	-0.0147	0.0	0.0294
O	-0.5037187795618606	0.9082997060824808	1.7279995143556586	-0.0441	0.0588	-0.1029
C	-1.1210696326031009	-1.380088897809303	2.557743265206202	-0.0735	-0.2205	0.147
O	-1.4726202652062022	-1.843921677371164	1.496588971288683	-0.147	-0.2646	0.2058
O	-2.8728961469587597	0.3126894408762787	3.0719944856443413	0.0294	-0.0882	0.1029
C	-2.4218419265206204	1.616794293917519	2.86938992652062	-0.0147	-0.0588	0.0147
C	-0.9083068530412404	1.78931	2.705386293917519	-0.0294	0.0	-0.0588
C	-1.9951363673968991	-0.6720929265206202	3.601885191726822	0.0735	-0.0147	0.1617
O	-3.2691346326031008	2.468456587835038	2.757316	-0.0735	-0.1176	0.0
C	-0.5601644121649617	3.2677657795618607	2.4575421469587595	-0.1176	0.0441	-0.0294
C	-2.9220544408762787	-1.753251293917519	4.239308722139227	0.0882	0.0588	0.4557
C	0.41927748564434153	-4.021595559123721	2.8283537795618607	0.1029	-0.0882	0.0441
C	2.2489900734793795	-2.9914822939175187	-1.8281948530412406	-0.0147	0.0588	-0.0294
C	-2.40967514695876	-1.0493970734793798	-1.435569	0.0294	0.0147	0.0
C	1.5101347795618607	2.67126185304124	-0.40129577956186063	0.0441	0.0294	-0.0441
C	-3.4724650734793796	-0.16450207347937978	-1.0328428530412406	0.0147	0.0147	-0.0294
C	-4.68047692652062	-0.7181781469587596	-0.5512705591237212	-0.0147	0.0294	-0.0882
C	-4.854195853041241	-2.11490614695876	-0.48275541216496176	-0.0294	0.0294	-0.1176
C	-3.8388539265206205	-2.98074307347938	-0.9328466326031011	-0.0147	0.0147	-0.0735
C	-2.6048620734793797	-2.4691410734793795	-1.41414992652062	0.0147	0.0147	-0.0147
C	-3.3439491469587597	1.3683859265206202	-1.2442419265206202	0.0294	0.0147	-0.0147
C	-1.5407080734793799	-3.481109	-1.91103807347938	0.0147	0.0	0.0147
C	2.485378	2.5639409265206203	0.6331150734793798	0.0	0.0147	-0.0147
C	2.8187220734793796	3.7289099265206205	1.3912229265206202	-0.0147	0.0147	0.0147
C	2.216153	4.96801392652062	1.111862	0.0	0.0147	0.0
C	1.2737298530412404	5.071541853041241	0.07020514695875957	0.0294	0.0294	-0.0294
C	0.8936577795618607	3.9486897795618607	-0.6909017795618607	0.0441	0.0441	-0.0441
C	3.2300730734793794	1.2462309265206202	0.939494	-0.0147	0.0147	0.0
C	-0.17540329391751913	4.124407779561861	-1.8026347060824808	0.0588	0.0441	-0.0588
C	-4.36113414695876	2.2015969265206206	-0.41742285304124044	0.0294	0.0147	-0.0294
C	-3.4988912204381393	1.7163848530412404	-2.7646479265206203	0.0441	0.0294	-0.0147
C	-1.1044018530412405	-4.450914	-0.7811700734793797	-0.0294	0.0	0.0147
C	-2.056679220438139	-4.29069907347938	-3.143662	0.0441	0.0147	0.0
C	-1.5179642204381394	4.6546129265206195	-1.210758632603101	0.0441	0.0147	-0.0735
C	0.3290986326031011	5.095277632603102	-2.9373687795618606	0.0735	0.0735	-0.0441
C	2.958693293917519	0.751196	2.3919100734793797	-0.0588	0.0	-0.0147
C	4.76104507347938	1.3801880734793799	0.6736408530412404	-0.0147	-0.0147	0.0294
C	-1.2169270734793798	-0.9655	-4.11342307347938	0.0147	0.0	0.0147
C	2.56128285304124	1.9229159265206202	-2.935320632603101	0.0294	0.0147	-0.0735
H	1.081837	0.158228	-4.137571853041241	0.0	0.0	-0.0294
H	1.9011497795618606	-2.4742559265206205	3.0738381469587597	0.0441	-0.0147	-0.0294
H	3.25534714695876	-4.407845146958759	-0.5795827060824809	-0.0294	0.0294	-0.0588
H	6.044264	-0.760965	-0.7165841469587596	0.0	0.0	0.0294
H	6.75870392652062	-1.841803	-1.9686741469587594	0.0147	0.0	0.0294
H	6.808568146958759	-2.28463	-0.2307341469587596	-0.0294	0.0	0.0294
H	-0.4319702204381394	1.519629	3.6749534408762785	0.0441	0.0	-0.0882
H	-1.3432198817525576	-0.24246144087627872	4.37514677956186	0.1764	0.0882	0.0441
H	-0.9240765591237212	3.886682	3.2825179265206206	-0.0882	0.0	0.0147
H	-1.022806971288683	3.620717779561861	1.5385149265206202	-0.2058	0.0441	0.0147
H	0.5265835878350383	3.3868275591237214	2.361744514355659	-0.1176	0.0882	-0.1029
H	-3.548604955231937	-1.289917955231937	5.014879575180467	0.1911	0.1911	0.48510000000000003
H	-2.322216661314418	-2.5585485143556586	4.703531428221708	0.1323	0.1029	0.5145
H	-3.5570429265206203	-2.198981632603101	3.4524001343041886	-0.0147	-0.0735	0.5733
H	1.1496703386855818	-4.77025077956186	2.5370648530412403	0.1323	-0.0441	0.0294
H	-0.5166734408762788	-4.194870338685582	2.287313632603101	0.0882	-0.1323	0.0735
H	0.22532033868558193	-4.107543559123721	3.8969717795618606	0.1323	-0.0882	0.0441
H	1.3348370734793797	-3.579188293917519	-1.9511537060824808	-0.0147	0.0588	-0.0588
H	2.9282860734793794	-3.2393924408762786	-2.6414178530412404	-0.0147	0.0882	-0.0294
H	1.9878441469587596	-1.9332082939175192	-1.9026049265206202	-0.0294	0.0588	-0.0147
H	-5.49467192652062	-0.061017146958759566	-0.2470814121649617	-0.0147	0.0294	-0.1176
H	-5.80375570608248	-2.5328171469587595	-0.10056719172682237	-0.0588	0.0294	-0.1617
H	-4.003193853041241	-4.05566114695876	-0.9243074856443415	-0.0294	0.0294	-0.1029
H	-2.31661414695876	1.6847069265206203	-0.9546899265206202	0.0294	0.0147	-0.0147
H	-0.6502131469587595	-2.898517	-2.2351371469587598	0.0294	0.0	0.0294
H	3.570397220438139	3.652958	2.17808585304124	-0.0441	0.0	0.0294
H	2.4895710734793797	5.848423	1.6977469265206202	-0.0147	0.0	0.0147
H	0.8120318530412404	6.043073853041241	-0.14813985304124042	0.0294	0.0294	-0.0294
H	2.8340120734793794	0.4723409265206202	0.24252207347937976	-0.0147	0.0147	-0.0147
H	-0.3744563673968989	3.1296527795618605	-2.2673265591237213	0.0735	0.0441	-0.0882
H	-4.154124146958759	3.2727539265206205	-0.5404529265206203	0.0294	0.0147	-0.0147
H	-4.29789607347938	1.96816692652062	0.6562721469587596	0.0147	0.0147	-0.0294
H	-5.392922146958759	2.0231408530412405	-0.7620137795618607	0.0294	0.0294	-0.0441
H	-3.4411162204381394	2.8048408530412403	-2.9151429265206206	0.0441	0.0294	-0.0147
H	-4.474991220438139	1.3624898530412406	-3.1443278530412404	0.0441	0.0294	-0.0294
H	-2.7053312204381395	1.2418158530412404	-3.3646199265206205	0.0441	0.0294	-0.0147
H	-0.291093	-5.11625307347938	-1.1257842204381394	0.0	0.0147	0.0441
H	-1.9395488530412406	-5.07858992652062	-0.44852385304124043	-0.0294	-0.0147	-0.0294
H	-0.7413426326031011	-3.8781939265206202	0.08845677956186064	-0.0735	-0.0147	0.0441
H	-1.2504192939175192	-4.94122007347938	-3.5291580734793797	0.0588	0.0147	0.0147
H	-2.385633293917519	-3.6243030734793797	-3.9620289265206203	0.0588	0.0147	-0.0147
H	-2.9031692204381394	-4.92465107347938	-2.86193885304124	0.0441	0.0147	-0.0294
H	-2.2753692939175187	4.741411853041241	-2.007117559123721	0.0588	0.0294	-0.0882
H	-1.8949982204381393	3.9619580734793796	-0.4410674856443415	0.0441	-0.0147	-0.1029
H	-1.3807761469587594	5.641766	-0.7502297795618607	0.0294	0.0	-0.0441
H	-0.42647244087627867	5.158422632603101	-3.735911706082481	0.0882	0.0735	-0.0588
H	1.2710625591237215	4.734498559123721	-3.3800398530412403	0.0882	0.0882	-0.0294
H	0.4905587795618606	6.109301632603102	-2.5275919265206204	0.0441	0.0735	-0.0147
H	3.462173367396899	-0.20958	2.567673	-0.0735	0.0	0.0
H	1.8766422939175191	0.6292979265206202	2.5470912204381393	-0.0588	0.0147	-0.0441
H	3.3449352939175188	1.481488	3.131336	-0.0588	0.0	0.0
H	5.266039146958759	0.4389190734793798	0.9274958530412404	-0.0294	-0.0147	0.0294
H	5.20389907347938	2.1835140734793796	1.2830878530412406	-0.0147	-0.0147	0.0294
H	4.95993192652062	1.61697807347938	-0.38916614695875956	0.0147	-0.0147	0.0294
H	-2.2596170734793795	-1.236644	-3.9287000734793796	0.0147	0.0	0.0147
H	-1.1854950734793799	-0.2485919265206202	-4.94406	0.0147	-0.0147	0.0
H	-0.6841260734793797	-1.8730819265206202	-4.4451231469587595	0.0147	-0.0147	0.0294
H	2.3200849265206203	2.9792029265206206	-3.1345074856443413	0.0147	0.0147	-0.1029
H	3.4243598530412402	1.9079377795618606	-2.2717945591237214	0.0294	0.0441	-0.0882
H	2.8394549265206206	1.467578	-3.894021632603101	0.0147	0.0	-0.0735
114
O	4.976918561811939	-2.497779	-1.222763	-0.0147	0.0	0.0
Mg	-0.2126466854358156	0.32475250550449164	-0.004165314564184362	0.0441	0.1176	-0.0441
O	0.11762243818806145	-1.6395246291283687	3.1239743145641845	0.0147	-0.0882	0.0441
C	4.152180123623877	-2.5422305618119387	-0.16895343818806144	-0.0294	0.0147	-0.0147
N	-1.100200123623877	-0.45058356181193854	-1.6748865618119386	0.0294	0.0147	0.0147
N	1.0263373145641843	1.4978673145641845	-1.0871517527522458	0.0441	0.0441	-0.0588
O	4.380985685435816	-2.0623185618119386	0.9138415618119385	-0.0441	0.0147	-0.0147
C	-0.528597123623877	-0.37040256181193854	-2.882174	0.0294	0.0147	0.0
C	0.7021304381880614	0.26764743818806147	-3.139726876376123	0.0147	0.0147	-0.0294
C	1.380942876376123	1.207322876376123	-2.335324752752246	0.0294	0.0294	-0.0588
O	2.058157123623877	-3.412113	0.6388836854358156	-0.0294	0.0	-0.0441
C	1.326104247247754	-2.371916876376123	1.0635475618119385	-0.0588	-0.0294	-0.0147
C	0.9674938763761229	-2.629352752752246	2.5433154381880616	0.0294	-0.0588	0.0147
C	2.908669123623877	-3.358012123623877	-0.5306563145641844	-0.0294	0.0294	-0.0441
O	1.0967870563074469	-1.371624876376123	0.403257	-0.1323	-0.0294	0.0
C	6.221023561811939	-1.795128	-0.997759123623877	-0.0147	0.0	0.0294
O	-0.5169263145641844	0.9259097527522457	1.69718193268357	-0.0441	0.0588	-0.1029
C	-1.1430821909403073	-1.4461265728209218	2.601768381880615	-0.0735	-0.2205	0.147
O	-1.5166453818806145	-1.9231668873851062	1.5582241346328605	-0.147	-0.2646	0.2058
O	-2.864091123623877	0.2862743708716313	3.1028120673164303	0.0294	-0.0882	0.1029
C	-2.4262444381880615	1.599184247247754	2.8737924381880613	-0.0147	-0.0588	0.0147
C	-0.9171118763761229	1.78931	2.687776247247754	-0.0294	0.0	-0.0588
C	-1.9731238090596928	-0.6764954381880615	3.6503128200686756	0.0735	-0.0147	0.1617
O	-3.291147190940307	2.433236494495508	2.757316	-0.0735	-0.1176	0.0
C	-0.5953845055044916	3.2809733145641844	2.448737123623877	-0.1176	0.0441	-0.0294
C	-2.8956393708716313	-1.735641247247754	4.375786583829905	0.0882	0.0588	0.4557
C	0.45009506731643023	-4.048010629128369	2.8415613145641845	0.1029	-0.0882	0.0441
C	2.2445875618119384	-2.973872247247754	-1.836999876376123	-0.0147	0.0588	-0.0294
C	-2.400870123623877	-1.0449945618119385	-1.435569	0.0294	0.0147	0.0
C	1.5233423145641845	2.680066876376123	-0.4145033145641844	0.0441	0.0294	-0.0441
C	-3.4680625618119385	-0.16009956181193855	-1.041647876376123	0.0147	0.0147	-0.0294
C	-4.684879438188061	-0.709373123623877	-0.5776856291283687	-0.0147	0.0294	-0.0882
C	-4.863000876376123	-2.106101123623877	-0.5179755055044917	-0.0294	0.0294	-0.1176
C	-3.8432564381880616	-2.9763405618119387	-0.9548591909403072	-0.0147	0.0147	-0.0735
C	-2.6004595618119386	-2.4647385618119384	-1.4185524381880614	0.0147	0.0147	-0.0147
C	-3.335144123623877	1.3727884381880615	-1.2486444381880615	0.0294	0.0147	-0.0147
C	-1.5363055618119386	-3.481109	-1.9066355618119386	0.0147	0.0	0.0147
C	2.485378	2.5683434381880614	0.6287125618119386	0.0	0.0147	-0.0147
C	2.8143195618119385	3.7333124381880616	1.3956254381880615	-0.0147	0.0147	0.0147
C	2.216153	4.972416438188062	1.111862	0.0	0.0147	0.0
C	1.2825348763761228	5.080346876376123	0.06140012362387709	0.0294	0.0294	-0.0294
C	0.9068653145641843	3.9618973145641845	-0.7041093145641844	0.0441	0.0441	-0.0441
C	3.2256705618119383	1.2506334381880615	0.939494	-0.0147	0.0147	0.0
C	-0.15779324724775418	4.137615314564185	-1.8202447527522458	0.0588	0.0441	-0.0588
C	-4.3523291236238775	2.2059994381880617	-0.4262278763761229	0.0294	0.0147	-0.0294
C	-3.4856836854358155	1.7251898763761229	-2.7690504381880614	0.0441	0.0294	-0.0147
C	-1.113206876376123	-4.450914	-0.7767675618119385	-0.0294	0.0	0.0147
C	-2.0434716854358155	-4.286296561811938	-3.143662	0.0441	0.0147	0.0
C	-1.5047566854358156	4.659015438188061	-1.2327711909403072	0.0441	0.0147	-0.0735
C	0.3511111909403073	5.117290190940308	-2.9505763145641843	0.0735	0.0735	-0.0441
C	2.941083247247754	0.751196	2.3875075618119386	-0.0588	0.0	-0.0147
C	4.756642561811939	1.3757855618119386	0.682445876376123	-0.0147	-0.0147	0.0294
C	-1.2125245618119385	-0.9655	-4.109020561811938	0.0147	0.0	0.0147
C	2.570087876376123	1.9273184381880615	-2.9573331909403073	0.0294	0.0147	-0.0735
H	1.081837	0.158228	-4.146376876376123	0.0	0.0	-0.0294
H	1.9143573145641843	-2.4786584381880616	3.065033123623877	0.0441	-0.0147	-0.0294
H	3.246542123623877	-4.399040123623877	-0.5971927527522458	-0.0294	0.0294	-0.0588
H	6.044264	-0.760965	-0.7077791236238771	0.0	0.0	0.0294
H	6.7631064381880615	-1.841803	-1.959869123623877	0.0147	0.0	0.0294
H	6.799763123623877	-2.28463	-0.22192912362387712	-0.0294	0.0	0.0294
H	-0.41876268543581563	1.519629	3.648538370871631	0.0441	0.0	-0.0882
H	-1.2903897417432626	-0.21604637087163128	4.388354314564184	0.1764	0.0882	0.0441
H	-0.9504916291283687	3.886682	3.2869204381880617	-0.0882	0.0	0.0147
H	-1.0844421346328603	3.6339253145641845	1.5429174381880615	-0.2058	0.0441	0.0147
H	0.49136349449550837	3.413242629128369	2.3309269326835698	-0.1176	0.0882	-0.1029
H	-3.491372303555201	-1.232685303555201	5.160162460206028	0.1911	0.1911	0.48510000000000003
H	-2.2825940563074467	-2.5277309326835695	4.857619336582151	0.1323	0.1029	0.5145
H	-3.5614454381880614	-2.2209941909403073	3.624098089334397	-0.0147	-0.0735	0.5733
H	1.189292943692553	-4.783458314564184	2.545869876376123	0.1323	-0.0441	0.0294
H	-0.49025837087163127	-4.234492943692553	2.3093261909403076	0.0882	-0.1323	0.0735
H	0.2649429436925531	-4.133958629128369	3.9101793145641843	0.1323	-0.0882	0.0441
H	1.3304345618119384	-3.561578247247754	-1.968763752752246	-0.0147	0.0588	-0.0588
H	2.9238835618119383	-3.212977370871631	-2.650222876376123	-0.0147	0.0882	-0.0294
H	1.9790391236238771	-1.9155982472477542	-1.9070074381880615	-0.0294	0.0588	-0.0147
H	-5.499074438188061	-0.05221212362387709	-0.2823015055044916	-0.0147	0.0294	-0.1176
H	-5.8213657527522455	-2.524012123623877	-0.14899482006867598	-0.0588	0.0294	-0.1617
H	-4.011998876376123	-4.046856123623877	-0.9551250673164302	-0.0294	0.0294	-0.1029
H	-2.307809123623877	1.6891094381880616	-0.9590924381880614	0.0294	0.0147	-0.0147
H	-0.641408123623877	-2.898517	-2.226332123623877	0.0294	0.0	0.0294
H	3.5571896854358154	3.652958	2.186890876376123	-0.0441	0.0	0.0294
H	2.4851685618119386	5.848423	1.7021494381880615	-0.0147	0.0	0.0147
H	0.8208368763761229	6.051878876376123	-0.15694487637612292	0.0294	0.0294	-0.0294
H	2.8296095618119383	0.4767434381880615	0.23811956181193852	-0.0147	0.0147	-0.0147
H	-0.35244380905969275	3.1428603145641842	-2.2937416291283688	0.0735	0.0441	-0.0882
H	-4.145319123623877	3.2771564381880616	-0.5448554381880615	0.0294	0.0147	-0.0147
H	-4.293493561811938	1.9725694381880614	0.647467123623877	0.0147	0.0147	-0.0294
H	-5.384117123623877	2.0319458763761227	-0.7752213145641843	0.0294	0.0294	-0.0441
H	-3.4279086854358156	2.813645876376123	-2.9195454381880617	0.0441	0.0294	-0.0147
H	-4.461783685435815	1.371294876376123	-3.153132876376123	0.0441	0.0294	-0.0294
H	-2.6921236854358157	1.2506208763761228	-3.3690224381880616	0.0441	0.0294	-0.0147
H	-0.291093	-5.111850561811939	-1.1125766854358157	0.0	0.0147	0.0441
H	-1.948353876376123	-5.082992438188062	-0.4573288763761229	-0.0294	-0.0147	-0.0294
H	-0.7633551909403072	-3.8825964381880613	0.10166431456418436	-0.0735	-0.0147	0.0441
H	-1.232809247247754	-4.936817561811939	-3.5247555618119386	0.0588	0.0147	0.0147
H	-2.3680232472477543	-3.6199005618119386	-3.9664314381880614	0.0588	0.0147	-0.0147
H	-2.8899616854358157	-4.920248561811938	-2.870743876376123	0.0441	0.0147	-0.0294
H	-2.257759247247754	4.750216876376123	-2.0335326291283686	0.0588	0.0294	-0.0882
H	-1.8817906854358155	3.9575555618119385	-0.4718850673164302	0.0441	-0.0147	-0.1029
H	-1.371971123623877	5.641766	-0.7634373145641843	0.0294	0.0	-0.0441
H	-0.4000573708716313	5.180435190940307	-3.753521752752246	0.0882	0.0735	-0.0588
H	1.2974776291283687	4.7609136291283685	-3.388844876376123	0.0882	0.0882	-0.0294
H	0.5037663145641843	6.131314190940308	-2.5319944381880615	0.0441	0.0735	-0.0147
H	3.4401608090596927	-0.20958	2.567673	-0.0735	0.0	0.0
H	1.859032247247754	0.6337004381880614	2.5338836854358155	-0.0588	0.0147	-0.0441
H	3.327325247247754	1.481488	3.131336	-0.0588	0.0	0.0
H	5.257234123623877	0.43451656181193854	0.9363008763761229	-0.0294	-0.0147	0.0294
H	5.199496561811938	2.1791115618119385	1.291892876376123	-0.0147	-0.0147	0.0294
H	4.964334438188062	1.6125755618119386	-0.3803611236238771	0.0147	-0.0147	0.0294
H	-2.2552145618119384	-1.236644	-3.9242975618119385	0.0147	0.0	0.0147
H	-1.1810925618119386	-0.25299443818806144	-4.94406	0.0147	-0.0147	0.0
H	-0.6797235618119385	-1.8774844381880615	-4.436318123623877	0.0147	-0.0147	0.0294
H	2.3244874381880614	2.9836054381880617	-3.1653250673164304	0.0147	0.0147	-0.1029
H	3.433164876376123	1.9211453145641844	-2.298209629128369	0.0294	0.0441	-0.0882
H	2.8438574381880617	1.467578	-3.9160341909403074	0.0147	0.0	-0.0735
114
O	4.9740919753257264	-2.497779	-1.222763	-0.0147	0.0	0.0
Mg	-0.2041669259771793	0.3473651973941885	-0.012645074022820668	0.0441	0.1176	-0.0441
O	0.12044902467427356	-1.6564841480456414	3.132454074022821	0.0147	-0.0882	0.0441
C	4.146526950651452	-2.5394039753257265	-0.17178002467427356	-0.0294	0.0147	-0.0147
N	-1.094546950651453	-0.44775697532572645	-1.6720599753257266	0.0294	0.0147	0.0147
N	1.0348170740228206	1.5063470740228209	-1.0984580986970942	0.0441	0.0441	-0.0588
O	4.37250592597718	-2.0594919753257264	0.9110149753257265	-0.0441	0.0147	-0.0147
C	-0.5229439506514528	-0.36757597532572645	-2.882174	0.0294	0.0147	0.0
C	0.7049570246742735	0.27047402467427356	-3.145380049348547	0.0147	0.0147	-0.0294
C	1.386596049348547	1.212976049348547	-2.346631098697094	0.0294	0.0294	-0.0588
O	2.052503950651453	-3.412113	0.6304039259771793	-0.0294	0.0	-0.0441
C	1.3147979013029056	-2.377570049348547	1.0607209753257265	-0.0588	-0.0294	-0.0147
C	0.9731470493485471	-2.640659098697094	2.546142024674274	0.0294	-0.0588	0.0147
C	2.903015950651453	-3.352358950651453	-0.5391360740228207	-0.0294	0.0294	-0.0441
O	1.071347777931538	-1.377278049348547	0.403257	-0.1323	-0.0294	0.0
C	6.218196975325727	-1.795128	-0.9921059506514528	-0.0147	0.0	0.0294
O	-0.5254060740228207	0.9372160986970942	1.677395827280085	-0.0441	0.0588	-0.1029
C	-1.1572151233713677	-1.4885253701141032	2.630034246742736	-0.0735	-0.2205	0.147
O	-1.5449112467427355	-1.974045444136924	1.5977963454398298	-0.147	-0.2646	0.2058
O	-2.858437950651453	0.26931485195435867	3.122598172719915	0.0294	-0.0882	0.1029
C	-2.4290710246742737	1.5878779013029056	2.8766190246742736	-0.0147	-0.0588	0.0147
C	-0.9227650493485471	1.78931	2.676469901302906	-0.0294	0.0	-0.0588
C	-1.9589908766286324	-0.6793220246742735	3.681405271417009	0.0735	-0.0147	0.1617
O	-3.3052801233713676	2.4106238026058113	2.757316	-0.0735	-0.1176	0.0
C	-0.6179971973941885	3.2894530740228207	2.443083950651453	-0.1176	0.0441	-0.0294
C	-2.8786798519543586	-1.7243349013029057	4.463410764902481	0.0882	0.0588	0.4557
C	0.4698811727199149	-4.064970148045641	2.850041074022821	0.1029	-0.0882	0.0441
C	2.241760975325726	-2.9625659013029058	-1.8426530493485471	-0.0147	0.0588	-0.0294
C	-2.395216950651453	-1.0421679753257265	-1.435569	0.0294	0.0147	0.0
C	1.5318220740228208	2.685720049348547	-0.42298307402282065	0.0441	0.0294	-0.0441
C	-3.4652359753257262	-0.15727297532572643	-1.047301049348547	0.0147	0.0147	-0.0294
C	-4.687706024674274	-0.7037199506514529	-0.5946451480456413	-0.0147	0.0294	-0.0882
C	-4.868654049348548	-2.100447950651453	-0.5405881973941885	-0.0294	0.0294	-0.1176
C	-3.846083024674274	-2.9735139753257265	-0.9689921233713678	-0.0147	0.0147	-0.0735
C	-2.5976329753257263	-2.461911975325726	-1.4213790246742735	0.0147	0.0147	-0.0147
C	-3.329490950651453	1.3756150246742735	-1.2514710246742735	0.0294	0.0147	-0.0147
C	-1.5334789753257265	-3.481109	-1.9038089753257266	0.0147	0.0	0.0147
C	2.485378	2.5711700246742737	0.6258859753257265	0.0	0.0147	-0.0147
C	2.8114929753257263	3.736139024674274	1.3984520246742735	-0.0147	0.0147	0.0147
C	2.216153	4.975243024674274	1.111862	0.0	0.0147	0.0
C	1.288188049348547	5.086000049348548	0.05574695065145289	0.0294	0.0294	-0.0294
C	0.9153450740228206	3.970377074022821	-0.7125890740228207	0.0441	0.0441	-0.0441
C	3.222843975325726	1.2534600246742735	0.939494	-0.0147	0.0147	0.0
C	-0.14648690130290576	4.146095074022821	-1.8315510986970942	0.0588	0.0441	-0.0588
C	-4.346675950651453	2.208826024674274	-0.43188104934854715	0.0294	0.0147	-0.0294
C	-3.477203925977179	1.730843049348547	-2.7718770246742737	0.0441	0.0294	-0.0147
C	-1.118860049348547	-4.450914	-0.7739409753257265	-0.0294	0.0	0.0147
C	-2.034991925977179	-4.283469975325726	-3.143662	0.0441	0.0147	0.0
C	-1.4962769259771793	4.661842024674273	-1.2469041233713678	0.0441	0.0147	-0.0735
C	0.3652441233713678	5.131423123371368	-2.9590560740228207	0.0735	0.0735	-0.0441
C	2.929776901302906	0.751196	2.3846809753257263	-0.0588	0.0	-0.0147
C	4.753815975325726	1.3729589753257265	0.6880990493485472	-0.0147	-0.0147	0.0294
C	-1.2096979753257264	-0.9655	-4.106193975325726	0.0147	0.0	0.0147
C	2.575741049348547	1.9301450246742735	-2.9714661233713677	0.0294	0.0147	-0.0735
H	1.081837	0.158228	-4.152030049348547	0.0	0.0	-0.0294
H	1.9228370740228207	-2.481485024674274	3.059379950651453	0.0441	-0.0147	-0.0294
H	3.240888950651453	-4.393386950651452	-0.6084990986970943	-0.0294	0.0294	-0.0588
H	6.044264	-0.760965	-0.7021259506514529	0.0	0.0	0.0294
H	6.765933024674274	-1.841803	-1.954215950651453	0.0147	0.0	0.0294
H	6.794109950651452	-2.28463	-0.21627595065145291	-0.0294	0.0	0.0294
H	-0.41028292597717936	1.519629	3.6315788519543584	0.0441	0.0	-0.0882
H	-1.2564707039087175	-0.19908685195435866	4.39683407402282	0.1764	0.0882	0.0441
H	-0.9674511480456413	3.886682	3.289747024674274	-0.0882	0.0	0.0147
H	-1.12401434543983	3.642405074022821	1.5457440246742735	-0.2058	0.0441	0.0147
H	0.4687508026058116	3.4302021480456415	2.3111408272800853	-0.1176	0.0882	-0.1029
H	-3.4546266792344436	-1.1959396792344437	5.253439814251027	0.1911	0.1911	0.48510000000000003
H	-2.257154777931538	-2.507944827280085	4.956549863599575	0.1323	0.1029	0.5145
H	-3.5642720246742736	-2.2351271233713677	3.7343349622966686	-0.0147	-0.0735	0.5733
H	1.214732222068462	-4.79193807402282	2.551523049348547	0.1323	-0.0441	0.0294
H	-0.47329885195435867	-4.2599322220684614	2.323459123371368	0.0882	-0.1323	0.0735
H	0.290382222068462	-4.150918148045641	3.9186590740228207	0.1323	-0.0882	0.0441
H	1.3276079753257264	-3.550271901302906	-1.9800700986970943	-0.0147	0.0588	-0.0588
H	2.921056975325726	-3.1960178519543585	-2.655876049348547	-0.0147	0.0882	-0.0294
H	1.973385950651453	-1.9042919013029058	-1.9098340246742735	-0.0294	0.0588	-0.0147
H	-5.501901024674273	-0.046558950651452886	-0.30491419739418846	-0.0147	0.0294	-0.1176
H	-5.832672098697094	-2.5183589506514528	-0.18008727141700914	-0.0588	0.0294	-0.1617
H	-4.0176520493485475	-4.041202950651453	-0.9749111727199149	-0.0294	0.0294	-0.1029
H	-2.302155950651453	1.6919360246742736	-0.9619190246742735	0.0294	0.0147	-0.0147
H	-0.6357549506514528	-2.898517	-2.220678950651453	0.0294	0.0	0.0294
H	3.548709925977179	3.652958	2.192544049348547	-0.0441	0.0	0.0294
H	2.4823419753257263	5.848423	1.7049760246742736	-0.0147	0.0	0.0147
H	0.8264900493485471	6.057532049348548	-0.1625980493485471	0.0294	0.0294	-0.0294
H	2.826782975325726	0.47957002467427357	0.2352929753257264	-0.0147	0.0147	-0.0147
H	-0.33831087662863224	3.1513400740228206	-2.3107011480456414	0.0735	0.0441	-0.0882
H	-4.139665950651453	3.279983024674274	-0.5476820246742735	0.0294	0.0147	-0.0147
H	-4.290666975325726	1.9753960246742734	0.6418139506514529	0.0147	0.0147	-0.0294
H	-5.378463950651453	2.037599049348547	-0.7837010740228206	0.0294	0.0294	-0.0441
H	-3.4194289259771793	2.819299049348547	-2.922372024674274	0.0441	0.0294	-0.0147
H	-4.453303925977179	1.376948049348547	-3.158786049348547	0.0441	0.0294	-0.0294
H	-2.6836439259771794	1.256274049348547	-3.371849024674274	0.0441	0.0294	-0.0147
H	-0.291093	-5.1090239753257265	-1.1040969259771793	0.0	0.0147	0.0441
H	-1.954007049348547	-5.085819024674274	-0.46298204934854714	-0.0294	-0.0147	-0.0294
H	-0.7774881233713677	-3.8854230246742736	0.11014407402282067	-0.0735	-0.0147	0.0441
H	-1.2215029013029057	-4.9339909753257265	-3.5219289753257264	0.0588	0.0147	0.0147
H	-2.356716901302906	-3.6170739753257264	-3.9692580246742737	0.0588	0.0147	-0.0147
H	-2.8814819259771793	-4.917421975325726	-2.876397049348547	0.0441	0.0147	-0.0294
H	-2.2464529013029058	4.755870049348547	-2.0504921480456413	0.0588	0.0294	-0.0882
H	-1.8733109259771792	3.954728975325726	-0.4916711727199149	0.0441	-0.0147	-0.1029
H	-1.366317950651453	5.641766	-0.7719170740228206	0.0294	0.0	-0.0441
H	-0.38309785195435864	5.194568123371368	-3.764828098697094	0.0882	0.0735	-0.0588
H	1.3144371480456414	4.777873148045641	-3.394498049348547	0.0882	0.0882	-0.0294
H	0.5122460740228206	6.145447123371368	-2.5348210246742737	0.0441	0.0735	-0.0147
H	3.4260278766286323	-0.20958	2.567673	-0.0735	0.0	0.0
H	1.8477259013029057	0.6365270246742735	2.525403925977179	-0.0588	0.0147	-0.0441
H	3.3160189013029058	1.481488	3.131336	-0.0588	0.0	0.0
H	5.251580950651452	0.43168997532572645	0.9419540493485471	-0.0294	-0.0147	0.0294
H	5.196669975325726	2.1762849753257263	1.2975460493485471	-0.0147	-0.0147	0.0294
H	4.967161024674274	1.6097489753257266	-0.37470795065145285	0.0147	-0.0147	0.0294
H	-2.252387975325726	-1.236644	-3.921470975325726	0.0147	0.0	0.0147
H	-1.1782659753257265	-0.25582102467427353	-4.94406	0.0147	-0.0147	0.0
H	-0.6768969753257265	-1.8803110246742736	-4.430664950651453	0.0147	-0.0147	0.0294
H	2.3273140246742736	2.986432024674274	-3.185111172719915	0.0147	0.0147	-0.1029
H	3.438818049348547	1.9296250740228207	-2.3151691480456416	0.0294	0.0441	-0.0882
H	2.846684024674274	1.467578	-3.9301671233713678	0.0147	0.0	-0.0735
114
O	4.973118	-2.497779	-1.222763	-0.0147	0.0	0.0
Mg	-0.20124499999999998	0.355157	-0.015566999999999998	0.0441	0.1176	-0.0441
O	0.121423	-1.662328	3.135376	0.0147	-0.0882	0.0441
C	4.144579	-2.5384300000000004	-0.172754	-0.0294	0.0147	-0.0147
N	-1.0925989999999999	-0.44678300000000004	-1.671086	0.0294	0.0147	0.0147
N	1.037739	1.5092690000000002	-1.102354	0.0441	0.0441	-0.0588
O	4.369584	-2.0585180000000003	0.910041	-0.0441	0.0147	-0.0147
C	-0.520996	-0.366602	-2.882174	0.0294	0.0147	0.0
C	0.705931	0.271448	-3.147328	0.0147	0.0147	-0.0294
C	1.388544	1.2149240000000001	-2.350527	0.0294	0.0294	-0.0588
O	2.050556	-3.412113	0.627482	-0.0294	0.0	-0.0441
C	1.310902	-2.379518	1.059747	-0.0588	-0.0294	-0.0147
C	0.975095	-2.644555	2.547116	0.0294	-0.0588	0.0147
C	2.901068	-3.350411	-0.542058	-0.0294	0.0294	-0.0441
O	1.062582	-1.379226	0.403257	-0.1323	-0.0294	0.0
C	6.217223000000001	-1.795128	-0.9901579999999999	-0.0147	0.0	0.0294
O	-0.528328	0.941112	1.6705780000000001	-0.0441	0.0588	-0.1029
C	-1.1620849999999998	-1.5031349999999999	2.639774	-0.0735	-0.2205	0.147
O	-1.554651	-1.991577	1.611432	-0.147	-0.2646	0.2058
O	-2.85649	0.263471	3.129416	0.0294	-0.0882	0.1029
C	-2.430045	1.5839819999999998	2.8775929999999996	-0.0147	-0.0588	0.0147
C	-0.9247129999999999	1.78931	2.672574	-0.0294	0.0	-0.0588
C	-1.9541210000000002	-0.680296	3.692119	0.0735	-0.0147	0.1617
O	-3.3101499999999997	2.402832	2.757316	-0.0735	-0.1176	0.0
C	-0.6257889999999999	3.292375	2.4411359999999998	-0.1176	0.0441	-0.0294
C	-2.872836	-1.7204389999999998	4.493604	0.0882	0.0588	0.4557
C	0.476699	-4.070814	2.852963	0.1029	-0.0882	0.0441
C	2.240787	-2.9586699999999997	-1.8446010000000002	-0.0147	0.0588	-0.0294
C	-2.393269	-1.041194	-1.435569	0.0294	0.0147	0.0
C	1.534744	2.687668	-0.425905	0.0441	0.0294	-0.0441
C	-3.464262	-0.156299	-1.049249	0.0147	0.0147	-0.0294
C	-4.68868	-0.7017720000000001	-0.6004889999999999	-0.0147	0.0294	-0.0882
C	-4.870602	-2.0985	-0.5483800000000001	-0.0294	0.0294	-0.1176
C	-3.847057	-2.9725400000000004	-0.973862	-0.0147	0.0147	-0.0735
C	-2.5966590000000003	-2.460938	-1.422353	0.0147	0.0147	-0.0147
C	-3.327543	1.376589	-1.252445	0.0294	0.0147	-0.0147
C	-1.532505	-3.481109	-1.902835	0.0147	0.0	0.0147
C	2.485378	2.5721439999999998	0.624912	0.0	0.0147	-0.0147
C	2.810519	3.737113	1.399426	-0.0147	0.0147	0.0147
C	2.216153	4.976217	1.111862	0.0	0.0147	0.0
C	1.290136	5.087948	0.053799	0.0294	0.0294	-0.0294
C	0.9182669999999999	3.973299	-0.715511	0.0441	0.0441	-0.0441
C	3.22187	1.254434	0.939494	-0.0147	0.0147	0.0
C	-0.142591	4.149017000000001	-1.8354469999999998	0.0588	0.0441	-0.0588
C	-4.344728000000001	2.2098	-0.433829	0.0294	0.0147	-0.0294
C	-3.474282	1.732791	-2.7728509999999997	0.0441	0.0294	-0.0147
C	-1.120808	-4.450914	-0.772967	-0.0294	0.0	0.0147
C	-2.03207	-4.282496	-3.143662	0.0441	0.0147	0.0
C	-1.493355	4.662815999999999	-1.251774	0.0441	0.0147	-0.0735
C	0.37011400000000005	5.136293	-2.9619779999999998	0.0735	0.0735	-0.0441
C	2.925881	0.751196	2.3837070000000002	-0.0588	0.0	-0.0147
C	4.752842	1.371985	0.6900470000000001	-0.0147	-0.0147	0.0294
C	-1.208724	-0.9655	-4.10522	0.0147	0.0	0.0147
C	2.577689	1.931119	-2.976336	0.0294	0.0147	-0.0735
H	1.081837	0.158228	-4.1539779999999995	0.0	0.0	-0.0294
H	1.925759	-2.482459	3.057432	0.0441	-0.0147	-0.0294
H	3.238941	-4.391439	-0.612395	-0.0294	0.0294	-0.0588
H	6.044264	-0.760965	-0.700178	0.0	0.0	0.0294
H	6.766907	-1.841803	-1.952268	0.0147	0.0	0.0294
H	6.792162	-2.28463	-0.21432800000000002	-0.0294	0.0	0.0294
H	-0.40736100000000003	1.519629	3.6257349999999997	0.0441	0.0	-0.0882
H	-1.2447830000000002	-0.193243	4.399756	0.1764	0.0882	0.0441
H	-0.9732949999999999	3.886682	3.290721	-0.0882	0.0	0.0147
H	-1.13765	3.645327	1.546718	-0.2058	0.0441	0.0147
H	0.460959	3.436046	2.304323	-0.1176	0.0882	-0.1029
H	-3.4419649999999997	-1.183278	5.285581	0.1911	0.1911	0.48510000000000003
H	-2.248389	-2.501127	4.990639000000001	0.1323	0.1029	0.5145
H	-3.5652459999999997	-2.239997	3.77232	-0.0147	-0.0735	0.5733
H	1.223498	-4.79486	2.553471	0.1323	-0.0441	0.0294
H	-0.467455	-4.268698	2.328329	0.0882	-0.1323	0.0735
H	0.29914799999999997	-4.156762	3.9215809999999998	0.1323	-0.0882	0.0441
H	1.3266339999999999	-3.546376	-1.9839660000000001	-0.0147	0.0588	-0.0588
H	2.920083	-3.190174	-2.657824	-0.0147	0.0882	-0.0294
H	1.971438	-1.9003960000000002	-1.910808	-0.0294	0.0588	-0.0147
H	-5.5028749999999995	-0.044611	-0.31270600000000004	-0.0147	0.0294	-0.1176
H	-5.836568	-2.5164109999999997	-0.190801	-0.0588	0.0294	-0.1617
H	-4.0196	-4.039255000000001	-0.981729	-0.0294	0.0294	-0.1029
H	-2.300208	1.6929100000000001	-0.962893	0.0294	0.0147	-0.0147
H	-0.633807	-2.898517	-2.218731	0.0294	0.0	0.0294
H	3.545788	3.652958	2.194492	-0.0441	0.0	0.0294
H	2.4813680000000002	5.848423	1.70595	-0.0147	0.0	0.0147
H	0.828438	6.05948	-0.164546	0.0294	0.0294	-0.0294
H	2.825809	0.48054399999999997	0.23431899999999997	-0.0147	0.0147	-0.0147
H	-0.333441	3.1542619999999997	-2.316545	0.0735	0.0441	-0.0882
H	-4.1377180000000005	3.280957	-0.548656	0.0294	0.0147	-0.0147
H	-4.289693	1.97637	0.639866	0.0147	0.0147	-0.0294
H	-5.3765160000000005	2.0395469999999998	-0.786623	0.0294	0.0294	-0.0441
H	-3.416507	2.821247	-2.923346	0.0441	0.0294	-0.0147
H	-4.450381999999999	1.3788960000000001	-3.160734	0.0441	0.0294	-0.0294
H	-2.6807220000000003	1.258222	-3.372823	0.0441	0.0294	-0.0147
H	-0.291093	-5.10805	-1.101175	0.0	0.0147	0.0441
H	-1.955955	-5.086793	-0.46493	-0.0294	-0.0147	-0.0294
H	-0.782358	-3.8863969999999997	0.113066	-0.0735	-0.0147	0.0441
H	-1.217607	-4.933017	-3.5209550000000003	0.0588	0.0147	0.0147
H	-2.352821	-3.6161000000000003	-3.9702319999999998	0.0588	0.0147	-0.0147
H	-2.8785600000000002	-4.916448	-2.878345	0.0441	0.0147	-0.0294
H	-2.2425569999999997	4.757817999999999	-2.056336	0.0588	0.0294	-0.0882
H	-1.8703889999999999	3.953755	-0.49848899999999996	0.0441	-0.0147	-0.1029
H	-1.3643699999999999	5.641766	-0.7748389999999999	0.0294	0.0	-0.0441
H	-0.377254	5.199438	-3.768724	0.0882	0.0735	-0.0588
H	1.320281	4.783716999999999	-3.396446	0.0882	0.0882	-0.0294
H	0.515168	6.150317	-2.535795	0.0441	0.0735	-0.0147
H	3.421158	-0.20958	2.567673	-0.0735	0.0	0.0
H	1.84383	0.637501	2.522482	-0.0588	0.0147	-0.0441
H	3.3121229999999997	1.481488	3.131336	-0.0588	0.0	0.0
H	5.249633	0.430716	0.943902	-0.0294	-0.0147	0.0294
H	5.195696	2.175311	1.2994940000000001	-0.0147	-0.0147	0.0294
H	4.968135	1.608775	-0.37276	0.0147	-0.0147	0.0294
H	-2.251414	-1.236644	-3.920497	0.0147	0.0	0.0147
H	-1.177292	-0.256795	-4.94406	0.0147	-0.0147	0.0
H	-0.6759229999999999	-1.881285	-4.428717000000001	0.0147	-0.0147	0.0294
H	2.3282879999999997	2.987406	-3.191929	0.0147	0.0147	-0.1029
H	3.440766	1.932547	-2.321013	0.0294	0.0441	-0.0882
H	2.847658	1.467578	-3.935037	0.0147	0.0	-0.0735
114
O	4.9740919753257264	-2.497779	-1.222763	-0.0147	0.0	0.0
Mg	-0.2041669259771793	0.3473651973941885	-0.012645074022820675	0.0441	0.1176	-0.0441
O	0.12044902467427357	-1.6564841480456414	3.132454074022821	0.0147	-0.0882	0.0441
C	4.146526950651452	-2.5394039753257265	-0.17178002467427356	-0.0294	0.0147	-0.0147
N	-1.094546950651453	-0.44775697532572645	-1.6720599753257266	0.0294	0.0147	0.0147
N	1.0348170740228206	1.5063470740228209	-1.0984580986970942	0.0441	0.0441	-0.0588
O	4.37250592597718	-2.0594919753257264	0.9110149753257265	-0.0441	0.0147	-0.0147
C	-0.5229439506514528	-0.36757597532572645	-2.882174	0.0294	0.0147	0.0
C	0.7049570246742735	0.27047402467427356	-3.145380049348547	0.0147	0.0147	-0.0294
C	1.386596049348547	1.212976049348547	-2.346631098697094	0.0294	0.0294	-0.0588
O	2.052503950651453	-3.412113	0.6304039259771793	-0.0294	0.0	-0.0441
C	1.3147979013029056	-2.377570049348547	1.0607209753257265	-0.0588	-0.0294	-0.0147
C	0.9731470493485471	-2.640659098697094	2.546142024674274	0.0294	-0.0588	0.0147
C	2.903015950651453	-3.352358950651453	-0.5391360740228207	-0.0294	0.0294	-0.0441
O	1.071347777931538	-1.377278049348547	0.403257	-0.1323	-0.0294	0.0
C	6.218196975325727	-1.795128	-0.9921059506514528	-0.0147	0.0	0.0294
O	-0.5254060740228207	0.9372160986970942	1.677395827280085	-0.0441	0.0588	-0.1029
C	-1.1572151233713677	-1.4885253701141032	2.630034246742736	-0.0735	-0.2205	0.147
O	-1.5449112467427355	-1.9740454441369242	1.5977963454398298	-0.147	-0.2646	0.2058
O	-2.858437950651453	0.26931485195435867	3.122598172719915	0.0294	-0.0882	0.1029
C	-2.4290710246742737	1.5878779013029056	2.8766190246742736	-0.0147	-0.0588	0.0147
C	-0.9227650493485471	1.78931	2.676469901302906	-0.0294	0.0	-0.0588
C	-1.9589908766286324	-0.6793220246742735	3.681405271417009	0.0735	-0.0147	0.1617
O	-3.3052801233713676	2.4106238026058113	2.757316	-0.0735	-0.1176	0.0
C	-0.6179971973941885	3.2894530740228207	2.443083950651453	-0.1176	0.0441	-0.0294
C	-2.8786798519543586	-1.7243349013029057	4.463410764902481	0.0882	0.0588	0.4557
C	0.4698811727199149	-4.064970148045641	2.850041074022821	0.1029	-0.0882	0.0441
C	2.241760975325726	-2.9625659013029058	-1.8426530493485471	-0.0147	0.0588	-0.0294
C	-2.395216950651453	-1.0421679753257265	-1.435569	0.0294	0.0147	0.0
C	1.5318220740228208	2.685720049348547	-0.42298307402282065	0.0441	0.0294	-0.0441
C	-3.4652359753257262	-0.15727297532572643	-1.047301049348547	0.0147	0.0147	-0.0294
C	-4.687706024674274	-0.7037199506514529	-0.5946451480456414	-0.0147	0.0294	-0.0882
C	-4.868654049348548	-2.100447950651453	-0.5405881973941885	-0.0294	0.0294	-0.1176
C	-3.846083024674274	-2.9735139753257265	-0.9689921233713678	-0.0147	0.0147	-0.0735
C	-2.5976329753257263	-2.461911975325726	-1.4213790246742735	0.0147	0.0147	-0.0147
C	-3.329490950651453	1.3756150246742735	-1.2514710246742735	0.0294	0.0147	-0.0147
C	-1.5334789753257265	-3.481109	-1.9038089753257266	0.0147	0.0	0.0147
C	2.485378	2.5711700246742737	0.6258859753257265	0.0	0.0147	-0.0147
C	2.8114929753257263	3.736139024674274	1.3984520246742735	-0.0147	0.0147	0.0147
C	2.216153	4.975243024674274	1.111862	0.0	0.0147	0.0
C	1.288188049348547	5.086000049348548	0.05574695065145288	0.0294	0.0294	-0.0294
C	0.9153450740228206	3.970377074022821	-0.7125890740228207	0.0441	0.0441	-0.0441
C	3.222843975325726	1.2534600246742735	0.939494	-0.0147	0.0147	0.0
C	-0.14648690130290576	4.146095074022821	-1.8315510986970942	0.0588	0.0441	-0.0588
C	-4.346675950651453	2.208826024674274	-0.43188104934854715	0.0294	0.0147	-0.0294
C	-3.477203925977179	1.730843049348547	-2.7718770246742737	0.0441	0.0294	-0.0147
C	-1.118860049348547	-4.450914	-0.7739409753257265	-0.0294	0.0	0.0147
C	-2.034991925977179	-4.283469975325726	-3.143662	0.0441	0.0147	0.0
C	-1.4962769259771793	4.661842024674273	-1.2469041233713678	0.0441	0.0147	-0.0735
C	0.3652441233713678	5.131423123371368	-2.9590560740228207	0.0735	0.0735	-0.0441
C	2.929776901302906	0.751196	2.3846809753257263	-0.0588	0.0	-0.0147
C	4.753815975325726	1.3729589753257265	0.6880990493485472	-0.0147	-0.0147	0.0294
C	-1.2096979753257264	-0.9655	-4.106193975325726	0.0147	0.0	0.0147
C	2.575741049348547	1.9301450246742735	-2.9714661233713677	0.0294	0.0147	-0.0735
H	1.081837	0.158228	-4.152030049348547	0.0	0.0	-0.0294
H	1.9228370740228207	-2.481485024674274	3.059379950651453	0.0441	-0.0147	-0.0294
H	3.240888950651453	-4.393386950651452	-0.6084990986970943	-0.0294	0.0294	-0.0588
H	6.044264	-0.760965	-0.7021259506514529	0.0	0.0	0.0294
H	6.765933024674274	-1.841803	-1.954215950651453	0.0147	0.0	0.0294
H	6.794109950651452	-2.28463	-0.2162759506514529	-0.0294	0.0	0.0294
H	-0.4102829259771793	1.519629	3.6315788519543584	0.0441	0.0	-0.0882
H	-1.2564707039087173	-0.19908685195435866	4.39683407402282	0.1764	0.0882	0.0441
H	-0.9674511480456414	3.886682	3.289747024674274	-0.0882	0.0	0.0147
H	-1.12401434543983	3.642405074022821	1.5457440246742735	-0.2058	0.0441	0.0147
H	0.46875080260581153	3.4302021480456415	2.3111408272800853	-0.1176	0.0882	-0.1029
H	-3.4546266792344436	-1.1959396792344437	5.253439814251028	0.1911	0.1911	0.48510000000000003
H	-2.257154777931538	-2.507944827280085	4.956549863599575	0.1323	0.1029	0.5145
H	-3.5642720246742736	-2.2351271233713677	3.734334962296669	-0.0147	-0.0735	0.5733
H	1.214732222068462	-4.79193807402282	2.551523049348547	0.1323	-0.0441	0.0294
H	-0.47329885195435867	-4.2599322220684614	2.323459123371368	0.0882	-0.1323	0.0735
H	0.29038222206846204	-4.150918148045641	3.9186590740228207	0.1323	-0.0882	0.0441
H	1.3276079753257264	-3.550271901302906	-1.9800700986970943	-0.0147	0.0588	-0.0588
H	2.921056975325726	-3.1960178519543585	-2.655876049348547	-0.0147	0.0882	-0.0294
H	1.973385950651453	-1.9042919013029058	-1.9098340246742735	-0.0294	0.0588	-0.0147
H	-5.501901024674273	-0.04655895065145288	-0.30491419739418846	-0.0147	0.0294	-0.1176
H	-5.832672098697094	-2.5183589506514528	-0.18008727141700914	-0.0588	0.0294	-0.1617
H	-4.0176520493485475	-4.041202950651453	-0.9749111727199149	-0.0294	0.0294	-0.1029
H	-2.302155950651453	1.6919360246742736	-0.9619190246742735	0.0294	0.0147	-0.0147
H	-0.6357549506514528	-2.898517	-2.220678950651453	0.0294	0.0	0.0294
H	3.548709925977179	3.652958	2.192544049348547	-0.0441	0.0	0.0294
H	2.4823419753257263	5.848423	1.7049760246742736	-0.0147	0.0	0.0147
H	0.8264900493485471	6.057532049348548	-0.1625980493485471	0.0294	0.0294	-0.0294
H	2.826782975325726	0.47957002467427357	0.2352929753257264	-0.0147	0.0147	-0.0147
H	-0.33831087662863224	3.1513400740228206	-2.3107011480456414	0.0735	0.0441	-0.0882
H	-4.139665950651453	3.279983024674274	-0.5476820246742735	0.0294	0.0147	-0.0147
H	-4.290666975325726	1.9753960246742734	0.6418139506514529	0.0147	0.0147	-0.0294
H	-5.378463950651453	2.037599049348547	-0.7837010740228206	0.0294	0.0294	-0.0441
H	-3.4194289259771793	2.819299049348547	-2.922372024674274	0.0441	0.0294	-0.0147
H	-4.453303925977179	1.376948049348547	-3.158786049348547	0.0441	0.0294	-0.0294
H	-2.6836439259771794	1.256274049348547	-3.371849024674274	0.0441	0.0294	-0.0147
H	-0.291093	-5.1090239753257265	-1.1040969259771793	0.0	0.0147	0.0441
H	-1.954007049348547	-5.085819024674274	-0.46298204934854714	-0.0294	-0.0147	-0.0294
H	-0.7774881233713677	-3.8854230246742736	0.11014407402282067	-0.0735	-0.0147	0.0441
H	-1.2215029013029057	-4.9339909753257265	-3.5219289753257264	0.0588	0.0147	0.0147
H	-2.356716901302906	-3.6170739753257264	-3.9692580246742737	0.0588	0.0147	-0.0147
H	-2.8814819259771793	-4.917421975325726	-2.876397049348547	0.0441	0.0147	-0.0294
H	-2.2464529013029058	4.755870049348547	-2.0504921480456413	0.0588	0.0294	-0.0882
H	-1.8733109259771792	3.954728975325726	-0.4916711727199149	0.0441	-0.0147	-0.1029
H	-1.366317950651453	5.641766	-0.7719170740228206	0.0294	0.0	-0.0441
H	-0.38309785195435864	5.194568123371368	-3.764828098697094	0.0882	0.0735	-0.0588
H	1.3144371480456414	4.777873148045641	-3.394498049348547	0.0882	0.0882	-0.0294
H	0.5122460740228206	6.145447123371368	-2.5348210246742737	0.0441	0.0735	-0.0147
H	3.4260278766286323	-0.20958	2.567673	-0.0735	0.0	0.0
H	1.8477259013029057	0.6365270246742735	2.525403925977179	-0.0588	0.0147	-0.0441
H	3.3160189013029058	1.481488	3.131336	-0.0588	0.0	0.0
H	5.251580950651452	0.43168997532572645	0.9419540493485471	-0.0294	-0.0147	0.0294
H	5.196669975325726	2.1762849753257263	1.2975460493485471	-0.0147	-0.0147	0.0294
H	4.967161024674274	1.6097489753257266	-0.37470795065145285	0.0147	-0.0147	0.0294
H	-2.252387975325726	-1.236644	-3.921470975325726	0.0147	0.0	0.0147
H	-1.1782659753257265	-0.25582102467427353	-4.94406	0.0147	-0.0147	0.0
H	-0.6768969753257265	-1.8803110246742736	-4.430664950651453	0.0147	-0.0147	0.0294
H	2.3273140246742736	2.986432024674274	-3.185111172719915	0.0147	0.0147	-0.1029
H	3.438818049348547	1.9296250740228207	-2.3151691480456416	0.0294	0.0441	-0.0882
H	2.846684024674274	1.467578	-3.9301671233713678	0.0147	0.0	-0.0735
114
O	4.976918561811939	-2.497779	-1.222763	-0.0147	0.0	0.0
Mg	-0.2126466854358156	0.32475250550449164	-0.004165314564184362	0.0441	0.1176	-0.0441
O	0.11762243818806145	-1.6395246291283687	3.1239743145641845	0.0147	-0.0882	0.0441
C	4.152180123623877	-2.5422305618119387	-0.16895343818806144	-0.0294	0.0147	-0.0147
N	-1.100200123623877	-0.45058356181193854	-1.6748865618119386	0.0294	0.0147	0.0147
N	1.0263373145641843	1.4978673145641845	-1.0871517527522458	0.0441	0.0441	-0.0588
O	4.380985685435816	-2.0623185618119386	0.9138415618119385	-0.0441	0.0147	-0.0147
C	-0.528597123623877	-0.37040256181193854	-2.882174	0.0294	0.0147	0.0
C	0.7021304381880614	0.26764743818806147	-3.139726876376123	0.0147	0.0147	-0.0294
C	1.380942876376123	1.207322876376123	-2.335324752752246	0.0294	0.0294	-0.0588
O	2.058157123623877	-3.412113	0.6388836854358156	-0.0294	0.0	-0.0441
C	1.326104247247754	-2.371916876376123	1.0635475618119385	-0.0588	-0.0294	-0.0147
C	0.9674938763761229	-2.629352752752246	2.5433154381880616	0.0294	-0.0588	0.0147
C	2.908669123623877	-3.358012123623877	-0.5306563145641844	-0.0294	0.0294	-0.0441
O	1.0967870563074469	-1.371624876376123	0.403257	-0.1323	-0.0294	0.0
C	6.221023561811939	-1.795128	-0.997759123623877	-0.0147	0.0	0.0294
O	-0.5169263145641844	0.9259097527522457	1.69718193268357	-0.0441	0.0588	-0.1029
C	-1.1430821909403073	-1.4461265728209218	2.601768381880615	-0.0735	-0.2205	0.147
O	-1.5166453818806145	-1.9231668873851062	1.5582241346328605	-0.147	-0.2646	0.2058
O	-2.864091123623877	0.2862743708716313	3.1028120673164303	0.0294	-0.0882	0.1029
C	-2.4262444381880615	1.599184247247754	2.8737924381880613	-0.0147	-0.0588	0.0147
C	-0.9171118763761229	1.78931	2.687776247247754	-0.0294	0.0	-0.0588
C	-1.9731238090596928	-0.6764954381880615	3.6503128200686756	0.0735	-0.0147	0.1617
O	-3.291147190940307	2.433236494495508	2.757316	-0.0735	-0.1176	0.0
C	-0.5953845055044916	3.2809733145641844	2.448737123623877	-0.1176	0.0441	-0.0294
C	-2.8956393708716313	-1.735641247247754	4.375786583829905	0.0882	0.0588	0.4557
C	0.45009506731643023	-4.048010629128369	2.8415613145641845	0.1029	-0.0882	0.0441
C	2.2445875618119384	-2.973872247247754	-1.836999876376123	-0.0147	0.0588	-0.0294
C	-2.400870123623877	-1.0449945618119385	-1.435569	0.0294	0.0147	0.0
C	1.5233423145641845	2.680066876376123	-0.4145033145641844	0.0441	0.0294	-0.0441
C	-3.4680625618119385	-0.16009956181193855	-1.041647876376123	0.0147	0.0147	-0.0294
C	-4.684879438188061	-0.709373123623877	-0.5776856291283687	-0.0147	0.0294	-0.0882
C	-4.863000876376123	-2.106101123623877	-0.5179755055044917	-0.0294	0.0294	-0.1176
C	-3.8432564381880616	-2.9763405618119387	-0.9548591909403072	-0.0147	0.0147	-0.0735
C	-2.6004595618119386	-2.4647385618119384	-1.4185524381880614	0.0147	0.0147	-0.0147
C	-3.335144123623877	1.3727884381880615	-1.2486444381880615	0.0294	0.0147	-0.0147
C	-1.5363055618119386	-3.481109	-1.9066355618119386	0.0147	0.0	0.0147
C	2.485378	2.5683434381880614	0.6287125618119386	0.0	0.0147	-0.0147
C	2.8143195618119385	3.7333124381880616	1.3956254381880615	-0.0147	0.0147	0.0147
C	2.216153	4.972416438188062	1.111862	0.0	0.0147	0.0
C	1.2825348763761228	5.080346876376123	0.06140012362387709	0.0294	0.0294	-0.0294
C	0.9068653145641843	3.9618973145641845	-0.7041093145641844	0.0441	0.0441	-0.0441
C	3.2256705618119383	1.2506334381880615	0.939494	-0.0147	0.0147	0.0
C	-0.15779324724775418	4.137615314564185	-1.8202447527522458	0.0588	0.0441	-0.0588
C	-4.3523291236238775	2.2059994381880617	-0.4262278763761229	0.0294	0.0147	-0.0294
C	-3.4856836854358155	1.7251898763761229	-2.7690504381880614	0.0441	0.0294	-0.0147
C	-1.113206876376123	-4.450914	-0.7767675618119385	-0.0294	0.0	0.0147
C	-2.0434716854358155	-4.286296561811938	-3.143662	0.0441	0.0147	0.0
C	-1.5047566854358156	4.659015438188061	-1.2327711909403072	0.0441	0.0147	-0.0735
C	0.3511111909403073	5.117290190940308	-2.9505763145641843	0.0735	0.0735	-0.0441
C	2.941083247247754	0.751196	2.3875075618119386	-0.0588	0.0	-0.0147
C	4.756642561811939	1.3757855618119386	0.682445876376123	-0.0147	-0.0147	0.0294
C	-1.2125245618119385	-0.9655	-4.109020561811938	0.0147	0.0	0.0147
C	2.570087876376123	1.9273184381880615	-2.9573331909403073	0.0294	0.0147	-0.0735
H	1.081837	0.158228	-4.146376876376123	0.0	0.0	-0.0294
H	1.9143573145641843	-2.4786584381880616	3.065033123623877	0.0441	-0.0147	-0.0294
H	3.246542123623877	-4.399040123623877	-0.5971927527522458	-0.0294	0.0294	-0.0588
H	6.044264	-0.760965	-0.7077791236238771	0.0	0.0	0.0294
H	6.7631064381880615	-1.841803	-1.959869123623877	0.0147	0.0	0.0294
H	6.799763123623877	-2.28463	-0.22192912362387712	-0.0294	0.0	0.0294
H	-0.41876268543581563	1.519629	3.648538370871631	0.0441	0.0	-0.0882
H	-1.2903897417432626	-0.21604637087163128	4.388354314564184	0.1764	0.0882	0.0441
H	-0.9504916291283687	3.886682	3.2869204381880617	-0.0882	0.0	0.0147
H	-1.0844421346328603	3.6339253145641845	1.5429174381880615	-0.2058	0.0441	0.0147
H	0.49136349449550837	3.413242629128369	2.3309269326835698	-0.1176	0.0882	-0.1029
H	-3.491372303555201	-1.232685303555201	5.160162460206028	0.1911	0.1911	0.48510000000000003
H	-2.2825940563074467	-2.5277309326835695	4.857619336582151	0.1323	0.1029	0.5145
H	-3.5614454381880614	-2.2209941909403073	3.624098089334397	-0.0147	-0.0735	0.5733
H	1.189292943692553	-4.783458314564184	2.545869876376123	0.1323	-0.0441	0.0294
H	-0.49025837087163127	-4.234492943692553	2.3093261909403076	0.0882	-0.1323	0.0735
H	0.2649429436925531	-4.133958629128369	3.9101793145641843	0.1323	-0.0882	0.0441
H	1.3304345618119384	-3.561578247247754	-1.968763752752246	-0.0147	0.0588	-0.0588
H	2.9238835618119383	-3.212977370871631	-2.650222876376123	-0.0147	0.0882	-0.0294
H	1.9790391236238771	-1.9155982472477542	-1.9070074381880615	-0.0294	0.0588	-0.0147
H	-5.499074438188061	-0.05221212362387709	-0.2823015055044916	-0.0147	0.0294	-0.1176
H	-5.8213657527522455	-2.524012123623877	-0.14899482006867598	-0.0588	0.0294	-0.1617
H	-4.011998876376123	-4.046856123623877	-0.9551250673164302	-0.0294	0.0294	-0.1029
H	-2.307809123623877	1.6891094381880616	-0.9590924381880614	0.0294	0.0147	-0.0147
H	-0.641408123623877	-2.898517	-2.226332123623877	0.0294	0.0	0.0294
H	3.5571896854358154	3.652958	2.186890876376123	-0.0441	0.0	0.0294
H	2.4851685618119386	5.848423	1.7021494381880615	-0.0147	0.0	0.0147
H	0.8208368763761229	6.051878876376123	-0.15694487637612292	0.0294	0.0294	-0.0294
H	2.8296095618119383	0.4767434381880615	0.23811956181193852	-0.0147	0.0147	-0.0147
H	-0.35244380905969275	3.1428603145641842	-2.2937416291283688	0.0735	0.0441	-0.0882
H	-4.145319123623877	3.2771564381880616	-0.5448554381880615	0.0294	0.0147	-0.0147
H	-4.293493561811938	1.9725694381880614	0.647467123623877	0.0147	0.0147	-0.0294
H	-5.384117123623877	2.0319458763761227	-0.7752213145641843	0.0294	0.0294	-0.0441
H	-3.4279086854358156	2.813645876376123	-2.9195454381880617	0.0441	0.0294	-0.0147
H	-4.461783685435815	1.371294876376123	-3.153132876376123	0.0441	0.0294	-0.0294
H	-2.6921236854358157	1.2506208763761228	-3.3690224381880616	0.0441	0.0294	-0.0147
H	-0.291093	-5.111850561811939	-1.1125766854358157	0.0	0.0147	0.0441
H	-1.948353876376123	-5.082992438188062	-0.4573288763761229	-0.0294	-0.0147	-0.0294
H	-0.7633551909403072	-3.8825964381880613	0.10166431456418436	-0.0735	-0.0147	0.0441
H	-1.232809247247754	-4.936817561811939	-3.5247555618119386	0.0588	0.0147	0.0147
H	-2.3680232472477543	-3.6199005618119386	-3.9664314381880614	0.0588	0.0147	-0.0147
H	-2.8899616854358157	-4.920248561811938	-2.870743876376123	0.0441	0.0147	-0.0294
H	-2.257759247247754	4.750216876376123	-2.0335326291283686	0.0588	0.0294	-0.0882
H	-1.8817906854358155	3.9575555618119385	-0.4718850673164302	0.0441	-0.0147	-0.1029
H	-1.371971123623877	5.641766	-0.7634373145641843	0.0294	0.0	-0.0441
H	-0.4000573708716313	5.180435190940307	-3.753521752752246	0.0882	0.0735	-0.0588
H	1.2974776291283687	4.7609136291283685	-3.388844876376123	0.0882	0.0882	-0.0294
H	0.5037663145641843	6.131314190940308	-2.5319944381880615	0.0441	0.0735	-0.0147
H	3.4401608090596927	-0.20958	2.567673	-0.0735	0.0	0.0
H	1.859032247247754	0.6337004381880614	2.5338836854358155	-0.0588	0.0147	-0.0441
H	3.327325247247754	1.481488	3.131336	-0.0588	0.0	0.0
H	5.257234123623877	0.43451656181193854	0.9363008763761229	-0.0294	-0.0147	0.0294
H	5.199496561811938	2.1791115618119385	1.291892876376123	-0.0147	-0.0147	0.0294
H	4.964334438188062	1.6125755618119386	-0.3803611236238771	0.0147	-0.0147	0.0294
H	-2.2552145618119384	-1.236644	-3.9242975618119385	0.0147	0.0	0.0147
H	-1.1810925618119386	-0.25299443818806144	-4.94406	0.0147	-0.0147	0.0
H	-0.6797235618119385	-1.8774844381880615	-4.436318123623877	0.0147	-0.0147	0.0294
H	2.3244874381880614	2.9836054381880617	-3.1653250673164304	0.0147	0.0147	-0.1029
H	3.433164876376123	1.9211453145641844	-2.298209629128369	0.0294	0.0441	-0.0882
H	2.8438574381880617	1.467578	-3.9160341909403074	0.0147	0.0	-0.0735
114
O	4.98132107347938	-2.497779	-1.222763	-0.0147	0.0	0.0
Mg	-0.22585422043813932	0.2895324121649617	0.009042220438139348	0.0441	0.1176	-0.0441
O	0.11321992652062021	-1.6131095591237214	3.1107667795618608	0.0147	-0.0882	0.0441
C	4.160985146958759	-2.54663307347938	-0.1645509265206202	-0.0294	0.0147	-0.0147
N	-1.1090051469587594	-0.4549860734793798	-1.67928907347938	0.0294	0.0147	0.0147
N	1.0131297795618606	1.4846597795618608	-1.0695417060824808	0.0441	0.0441	-0.0588
O	4.394193220438139	-2.0667210734793797	0.9182440734793798	-0.0441	0.0147	-0.0147
C	-0.5374021469587595	-0.3748050734793798	-2.882174	0.0294	0.0147	0.0
C	0.6977279265206202	0.2632449265206202	-3.13092185304124	0.0147	0.0147	-0.0294
C	1.3721378530412405	1.1985178530412406	-2.317714706082481	0.0294	0.0294	-0.0588
O	2.0669621469587596	-3.412113	0.6520912204381393	-0.0294	0.0	-0.0441
C	1.343714293917519	-2.3631118530412403	1.0679500734793799	-0.0588	-0.0294	-0.0147
C	0.9586888530412404	-2.611742706082481	2.5389129265206205	0.0294	-0.0588	0.0147
C	2.9174741469587597	-3.3668171469587596	-0.5174487795618606	-0.0294	0.0294	-0.0441
O	1.136409661314418	-1.3628198530412405	0.403257	-0.1323	-0.0294	0.0
C	6.2254260734793805	-1.795128	-1.0065641469587594	-0.0147	0.0	0.0294
O	-0.5037187795618606	0.9082997060824808	1.7279995143556586	-0.0441	0.0588	-0.1029
C	-1.1210696326031009	-1.380088897809303	2.557743265206202	-0.0735	-0.2205	0.147
O	-1.4726202652062022	-1.843921677371164	1.496588971288683	-0.147	-0.2646	0.2058
O	-2.8728961469587597	0.3126894408762787	3.0719944856443417	0.0294	-0.0882	0.1029
C	-2.4218419265206204	1.616794293917519	2.86938992652062	-0.0147	-0.0588	0.0147
C	-0.9083068530412404	1.78931	2.705386293917519	-0.0294	0.0	-0.0588
C	-1.9951363673968991	-0.6720929265206202	3.601885191726822	0.0735	-0.0147	0.1617
O	-3.2691346326031008	2.468456587835038	2.757316	-0.0735	-0.1176	0.0
C	-0.5601644121649617	3.2677657795618607	2.4575421469587595	-0.1176	0.0441	-0.0294
C	-2.9220544408762787	-1.753251293917519	4.239308722139227	0.0882	0.0588	0.4557
C	0.41927748564434153	-4.021595559123721	2.8283537795618607	0.1029	-0.0882	0.0441
C	2.2489900734793795	-2.9914822939175187	-1.8281948530412406	-0.0147	0.0588	-0.0294
C	-2.40967514695876	-1.0493970734793798	-1.435569	0.0294	0.0147	0.0
C	1.5101347795618607	2.67126185304124	-0.40129577956186063	0.0441	0.0294	-0.0441
C	-3.4724650734793796	-0.16450207347937978	-1.0328428530412406	0.0147	0.0147	-0.0294
C	-4.68047692652062	-0.7181781469587596	-0.5512705591237212	-0.0147	0.0294	-0.0882
C	-4.854195853041241	-2.11490614695876	-0.48275541216496176	-0.0294	0.0294	-0.1176
C	-3.8388539265206205	-2.98074307347938	-0.9328466326031011	-0.0147	0.0147	-0.0735
C	-2.6048620734793797	-2.4691410734793795	-1.41414992652062	0.0147	0.0147	-0.0147
C	-3.3439491469587597	1.3683859265206202	-1.2442419265206202	0.0294	0.0147	-0.0147
C	-1.5407080734793799	-3.481109	-1.91103807347938	0.0147	0.0	0.0147
C	2.485378	2.5639409265206203	0.6331150734793798	0.0	0.0147	-0.0147
C	2.8187220734793796	3.7289099265206205	1.3912229265206202	-0.0147	0.0147	0.0147
C	2.216153	4.96801392652062	1.111862	0.0	0.0147	0.0
C	1.2737298530412404	5.071541853041241	0.07020514695875957	0.0294	0.0294	-0.0294
C	0.8936577795618607	3.9486897795618607	-0.6909017795618607	0.0441	0.0441	-0.0441
C	3.2300730734793794	1.2462309265206202	0.939494	-0.0147	0.0147	0.0
C	-0.17540329391751913	4.124407779561861	-1.8026347060824808	0.0588	0.0441	-0.0588
C	-4.36113414695876	2.2015969265206206	-0.41742285304124044	0.0294	0.0147	-0.0294
C	-3.4988912204381393	1.7163848530412404	-2.7646479265206203	0.0441	0.0294	-0.0147
C	-1.1044018530412405	-4.450914	-0.7811700734793797	-0.0294	0.0	0.0147
C	-2.056679220438139	-4.29069907347938	-3.143662	0.0441	0.0147	0.0
C	-1.5179642204381394	4.6546129265206195	-1.210758632603101	0.0441	0.0147	-0.0735
C	0.3290986326031011	5.095277632603102	-2.9373687795618606	0.0735	0.0735	-0.0441
C	2.958693293917519	0.751196	2.3919100734793797	-0.0588	0.0	-0.0147
C	4.76104507347938	1.3801880734793799	0.6736408530412404	-0.0147	-0.0147	0.0294
C	-1.2169270734793798	-0.9655	-4.11342307347938	0.0147	0.0	0.0147
C	2.56128285304124	1.9229159265206202	-2.935320632603101	0.0294	0.0147	-0.0735
H	1.081837	0.158228	-4.137571853041241	0.0	0.0	-0.0294
H	1.9011497795618606	-2.4742559265206205	3.0738381469587597	0.0441	-0.0147	-0.0294
H	3.25534714695876	-4.407845146958759	-0.5795827060824809	-0.0294	0.0294	-0.0588
H	6.044264	-0.760965	-0.7165841469587596	0.0	0.0	0.0294
H	6.75870392652062	-1.841803	-1.9686741469587594	0.0147	0.0	0.0294
H	6.808568146958759	-2.28463	-0.2307341469587596	-0.0294	0.0	0.0294
H	-0.4319702204381394	1.519629	3.6749534408762785	0.0441	0.0	-0.0882
H	-1.3432198817525576	-0.2424614408762787	4.37514677956186	0.1764	0.0882	0.0441
H	-0.9240765591237212	3.886682	3.2825179265206206	-0.0882	0.0	0.0147
H	-1.022806971288683	3.620717779561861	1.5385149265206202	-0.2058	0.0441	0.0147
H	0.5265835878350382	3.3868275591237214	2.3617445143556584	-0.1176	0.0882	-0.1029
H	-3.548604955231937	-1.289917955231937	5.014879575180467	0.1911	0.1911	0.48510000000000003
H	-2.322216661314418	-2.5585485143556586	4.703531428221708	0.1323	0.1029	0.5145
H	-3.5570429265206203	-2.198981632603101	3.4524001343041886	-0.0147	-0.0735	0.5733
H	1.1496703386855818	-4.77025077956186	2.5370648530412403	0.1323	-0.0441	0.0294
H	-0.5166734408762788	-4.194870338685582	2.287313632603101	0.0882	-0.1323	0.0735
H	0.22532033868558193	-4.107543559123721	3.8969717795618606	0.1323	-0.0882	0.0441
H	1.3348370734793797	-3.579188293917519	-1.9511537060824808	-0.0147	0.0588	-0.0588
H	2.9282860734793794	-3.2393924408762786	-2.6414178530412404	-0.0147	0.0882	-0.0294
H	1.9878441469587596	-1.9332082939175192	-1.9026049265206202	-0.0294	0.0588	-0.0147
H	-5.49467192652062	-0.061017146958759566	-0.24708141216496174	-0.0147	0.0294	-0.1176
H	-5.80375570608248	-2.5328171469587595	-0.1005671917268224	-0.0588	0.0294	-0.1617
H	-4.003193853041241	-4.05566114695876	-0.9243074856443415	-0.0294	0.0294	-0.1029
H	-2.31661414695876	1.6847069265206203	-0.9546899265206202	0.0294	0.0147	-0.0147
H	-0.6502131469587595	-2.898517	-2.2351371469587598	0.0294	0.0	0.0294
H	3.570397220438139	3.652958	2.17808585304124	-0.0441	0.0	0.0294
H	2.4895710734793797	5.848423	1.6977469265206202	-0.0147	0.0	0.0147
H	0.8120318530412404	6.043073853041241	-0.14813985304124044	0.0294	0.0294	-0.0294
H	2.8340120734793794	0.4723409265206202	0.24252207347937976	-0.0147	0.0147	-0.0147
H	-0.3744563673968989	3.1296527795618605	-2.2673265591237213	0.0735	0.0441	-0.0882
H	-4.154124146958759	3.2727539265206205	-0.5404529265206203	0.0294	0.0147	-0.0147
H	-4.29789607347938	1.96816692652062	0.6562721469587596	0.0147	0.0147	-0.0294
H	-5.392922146958759	2.0231408530412405	-0.7620137795618607	0.0294	0.0294	-0.0441
H	-3.4411162204381394	2.8048408530412403	-2.9151429265206206	0.0441	0.0294	-0.0147
H	-4.474991220438139	1.3624898530412406	-3.1443278530412404	0.0441	0.0294	-0.0294
H	-2.7053312204381395	1.2418158530412404	-3.3646199265206205	0.0441	0.0294	-0.0147
H	-0.291093	-5.11625307347938	-1.1257842204381394	0.0	0.0147	0.0441
H	-1.9395488530412406	-5.07858992652062	-0.44852385304124043	-0.0294	-0.0147	-0.0294
H	-0.7413426326031011	-3.8781939265206202	0.08845677956186065	-0.0735	-0.0147	0.0441
H	-1.2504192939175192	-4.94122007347938	-3.5291580734793797	0.0588	0.0147	0.0147
H	-2.385633293917519	-3.6243030734793797	-3.9620289265206203	0.0588	0.0147	-0.0147
H	-2.9031692204381394	-4.92465107347938	-2.86193885304124	0.0441	0.0147	-0.0294
H	-2.2753692939175187	4.741411853041241	-2.007117559123721	0.0588	0.0294	-0.0882
H	-1.8949982204381393	3.9619580734793796	-0.4410674856443415	0.0441	-0.0147	-0.1029
H	-1.3807761469587594	5.641766	-0.7502297795618607	0.0294	0.0	-0.0441
H	-0.42647244087627867	5.158422632603101	-3.735911706082481	0.0882	0.0735	-0.0588
H	1.2710625591237215	4.734498559123721	-3.3800398530412403	0.0882	0.0882	-0.0294
H	0.4905587795618606	6.109301632603102	-2.5275919265206204	0.0441	0.0735	-0.0147
H	3.462173367396899	-0.20958	2.567673	-0.0735	0.0	0.0
H	1.8766422939175191	0.6292979265206202	2.5470912204381393	-0.0588	0.0147	-0.0441
H	3.3449352939175188	1.481488	3.131336	-0.0588	0.0	0.0
H	5.266039146958759	0.4389190734793798	0.9274958530412404	-0.0294	-0.0147	0.0294
H	5.20389907347938	2.1835140734793796	1.2830878530412406	-0.0147	-0.0147	0.0294
H	4.95993192652062	1.61697807347938	-0.38916614695875956	0.0147	-0.0147	0.0294
H	-2.2596170734793795	-1.236644	-3.9287000734793796	0.0147	0.0	0.0147
H	-1.1854950734793799	-0.2485919265206202	-4.94406	0.0147	-0.0147	0.0
H	-0.6841260734793797	-1.8730819265206202	-4.4451231469587595	0.0147	-0.0147	0.0294
H	2.3200849265206203	2.9792029265206206	-3.134507485644342	0.0147	0.0147	-0.1029
H	3.4243598530412402	1.9079377795618606	-2.2717945591237214	0.0294	0.0441	-0.0882
H	2.8394549265206206	1.467578	-3.894021632603101	0.0147	0.0	-0.0735
114
O	4.986868561811939	-2.497779	-1.222763	-0.0147	0.0	0.0
Mg	-0.24249668543581562	0.24515250550449164	0.025684685435815632	0.0441	0.1176	-0.0441
O	0.10767243818806146	-1.5798246291283689	3.0941243145641844	0.0147	-0.0882	0.0441
C	4.172080123623877	-2.5521805618119386	-0.15900343818806145	-0.0294	0.0147	-0.0147
N	-1.120100123623877	-0.46053356181193855	-1.6848365618119387	0.0294	0.0147	0.0147
N	0.9964873145641844	1.4680173145641844	-1.0473517527522458	0.0441	0.0441	-0.0588
O	4.410835685435815	-2.0722685618119385	0.9237915618119386	-0.0441	0.0147	-0.0147
C	-0.548497123623877	-0.38035256181193855	-2.882174	0.0294	0.0147	0.0
C	0.6921804381880614	0.25769743818806146	-3.1198268763761225	0.0147	0.0147	-0.0294
C	1.3610428763761229	1.187422876376123	-2.2955247527522458	0.0294	0.0294	-0.0588
O	2.078057123623877	-3.412113	0.6687336854358156	-0.0294	0.0	-0.0441
C	1.365904247247754	-2.3520168763761227	1.0734975618119387	-0.0588	-0.0294	-0.0147
C	0.9475938763761229	-2.5895527527522457	2.5333654381880617	0.0294	-0.0588	0.0147
C	2.9285691236238773	-3.377912123623877	-0.5008063145641843	-0.0294	0.0294	-0.0441
O	1.186337056307447	-1.351724876376123	0.403257	-0.1323	-0.0294	0.0
C	6.230973561811939	-1.795128	-1.017659123623877	-0.0147	0.0	0.0294
O	-0.4870763145641844	0.8861097527522458	1.76683193268357	-0.0441	0.0588	-0.1029
C	-1.093332190940307	-1.2968765728209217	2.5022683818806146	-0.0735	-0.2205	0.147
O	-1.4171453818806146	-1.7440668873851062	1.4189241346328605	-0.147	-0.2646	0.2058
O	-2.8839911236238773	0.3459743708716313	3.03316206731643	0.0294	-0.0882	0.1029
C	-2.4162944381880616	1.638984247247754	2.8638424381880614	-0.0147	-0.0588	0.0147
C	-0.8972118763761229	1.78931	2.7275762472477543	-0.0294	0.0	-0.0588
C	-2.0228738090596927	-0.6665454381880614	3.540862820068676	0.0735	-0.0147	0.1617
O	-3.241397190940307	2.512836494495508	2.757316	-0.0735	-0.1176	0.0
C	-0.5157845055044916	3.2511233145641842	2.468637123623877	-0.1176	0.0441	-0.0294
C	-2.9553393708716316	-1.775441247247754	4.067336583829905	0.0882	0.0588	0.4557
C	0.3804450673164302	-3.9883106291283688	2.8117113145641843	0.1029	-0.0882	0.0441
C	2.2545375618119383	-3.013672247247754	-1.817099876376123	-0.0147	0.0588	-0.0294
C	-2.4207701236238774	-1.0549445618119386	-1.435569	0.0294	0.0147	0.0
C	1.4934923145641843	2.6601668763761226	-0.3846533145641844	0.0441	0.0294	-0.0441
C	-3.4780125618119384	-0.17004956181193853	-1.021747876376123	0.0147	0.0147	-0.0294
C	-4.6749294381880615	-0.7292731236238771	-0.5179856291283688	-0.0147	0.0294	-0.0882
C	-4.843100876376123	-2.1260011236238774	-0.43837550550449167	-0.0294	0.0294	-0.1176
C	-3.8333064381880617	-2.9862905618119386	-0.9051091909403073	-0.0147	0.0147	-0.0735
C	-2.6104095618119385	-2.4746885618119383	-1.4086024381880613	0.0147	0.0147	-0.0147
C	-3.3550441236238773	1.3628384381880614	-1.2386944381880614	0.0294	0.0147	-0.0147
C	-1.5462555618119387	-3.481109	-1.9165855618119387	0.0147	0.0	0.0147
C	2.485378	2.5583934381880615	0.6386625618119386	0.0	0.0147	-0.0147
C	2.8242695618119384	3.7233624381880617	1.3856754381880614	-0.0147	0.0147	0.0147
C	2.216153	4.962466438188062	1.111862	0.0	0.0147	0.0
C	1.2626348763761228	5.0604468763761234	0.08130012362387709	0.0294	0.0294	-0.0294
C	0.8770153145641844	3.9320473145641843	-0.6742593145641844	0.0441	0.0441	-0.0441
C	3.2356205618119382	1.2406834381880614	0.939494	-0.0147	0.0147	0.0
C	-0.19759324724775418	4.107765314564185	-1.7804447527522458	0.0588	0.0441	-0.0588
C	-4.372229123623877	2.1960494381880618	-0.40632787637612294	0.0294	0.0147	-0.0294
C	-3.5155336854358157	1.7052898763761228	-2.7591004381880615	0.0441	0.0294	-0.0147
C	-1.093306876376123	-4.450914	-0.7867175618119385	-0.0294	0.0	0.0147
C	-2.0733216854358156	-4.296246561811938	-3.143662	0.0441	0.0147	0.0
C	-1.5346066854358158	4.649065438188061	-1.1830211909403072	0.0441	0.0147	-0.0735
C	0.3013611909403073	5.067540190940307	-2.920726314564184	0.0735	0.0735	-0.0441
C	2.980883247247754	0.751196	2.3974575618119385	-0.0588	0.0	-0.0147
C	4.7665925618119385	1.3857355618119387	0.6625458763761229	-0.0147	-0.0147	0.0294
C	-1.2224745618119386	-0.9655	-4.118970561811938	0.0147	0.0	0.0147
C	2.5501878763761225	1.9173684381880614	-2.9075831909403074	0.0294	0.0147	-0.0735
H	1.081837	0.158228	-4.126476876376123	0.0	0.0	-0.0294
H	1.8845073145641842	-2.4687084381880617	3.0849331236238773	0.0441	-0.0147	-0.0294
H	3.2664421236238774	-4.418940123623877	-0.5573927527522459	-0.0294	0.0294	-0.0588
H	6.044264	-0.760965	-0.7276791236238771	0.0	0.0	0.0294
H	6.7531564381880615	-1.841803	-1.979769123623877	0.0147	0.0	0.0294
H	6.819663123623877	-2.28463	-0.2418291236238771	-0.0294	0.0	0.0294
H	-0.4486126854358156	1.519629	3.7082383708716313	0.0441	0.0	-0.0882
H	-1.4097897417432625	-0.2757463708716313	4.358504314564184	0.1764	0.0882	0.0441
H	-0.8907916291283687	3.886682	3.2769704381880618	-0.0882	0.0	0.0147
H	-0.9451421346328603	3.6040753145641844	1.5329674381880614	-0.2058	0.0441	0.0147
H	0.5709634944955084	3.3535426291283685	2.40057693268357	-0.1176	0.0882	-0.1029
H	-3.6207223035552007	-1.362035303555201	4.831812460206028	0.1911	0.1911	0.48510000000000003
H	-2.3721440563074467	-2.5973809326835697	4.509369336582151	0.1323	0.1029	0.5145
H	-3.5514954381880615	-2.1712441909403073	3.236048089334397	-0.0147	-0.0735	0.5733
H	1.099742943692553	-4.753608314564184	2.5259698763761227	0.1323	-0.0441	0.0294
H	-0.5499583708716312	-4.144942943692553	2.2595761909403076	0.0882	-0.1323	0.0735
H	0.1753929436925531	-4.0742586291283684	3.880329314564184	0.1323	-0.0882	0.0441
H	1.3403845618119385	-3.6013782472477542	-1.9289637527522459	-0.0147	0.0588	-0.0588
H	2.933833561811938	-3.2726773708716315	-2.630322876376123	-0.0147	0.0882	-0.0294
H	1.9989391236238772	-1.9553982472477542	-1.8970574381880614	-0.0294	0.0588	-0.0147
H	-5.489124438188061	-0.07211212362387709	-0.20270150550449165	-0.0147	0.0294	-0.1176
H	-5.781565752752245	-2.543912123623877	-0.03954482006867602	-0.0588	0.0294	-0.1617
H	-3.9920988763761227	-4.066756123623877	-0.8854750673164302	-0.0294	0.0294	-0.1029
H	-2.3277091236238774	1.6791594381880615	-0.9491424381880614	0.0294	0.0147	-0.0147
H	-0.661308123623877	-2.898517	-2.2462321236238774	0.0294	0.0	0.0294
H	3.5870396854358155	3.652958	2.1669908763761225	-0.0441	0.0	0.0294
H	2.4951185618119385	5.848423	1.6921994381880614	-0.0147	0.0	0.0147
H	0.8009368763761229	6.031978876376123	-0.1370448763761229	0.0294	0.0294	-0.0294
H	2.8395595618119382	0.46679343818806146	0.2480695618119385	-0.0147	0.0147	-0.0147
H	-0.40219380905969276	3.113010314564184	-2.2340416291283685	0.0735	0.0441	-0.0882
H	-4.165219123623877	3.2672064381880617	-0.5349054381880615	0.0294	0.0147	-0.0147
H	-4.303443561811938	1.9626194381880613	0.6673671236238771	0.0147	0.0147	-0.0294
H	-5.404017123623877	2.012045876376123	-0.7453713145641844	0.0294	0.0294	-0.0441
H	-3.4577586854358158	2.7937458763761227	-2.9095954381880618	0.0441	0.0294	-0.0147
H	-4.491633685435815	1.351394876376123	-3.133232876376123	0.0441	0.0294	-0.0294
H	-2.721973685435816	1.2307208763761228	-3.3590724381880617	0.0441	0.0294	-0.0147
H	-0.291093	-5.121800561811939	-1.1424266854358158	0.0	0.0147	0.0441
H	-1.928453876376123	-5.073042438188062	-0.43742887637612293	-0.0294	-0.0147	-0.0294
H	-0.7136051909403073	-3.8726464381880614	0.07181431456418436	-0.0735	-0.0147	0.0441
H	-1.2726092472477541	-4.946767561811939	-3.5347055618119385	0.0588	0.0147	0.0147
H	-2.4078232472477543	-3.6298505618119385	-3.9564814381880615	0.0588	0.0147	-0.0147
H	-2.919811685435816	-4.930198561811938	-2.8508438763761226	0.0441	0.0147	-0.0294
H	-2.297559247247754	4.730316876376123	-1.9738326291283688	0.0588	0.0294	-0.0882
H	-1.9116406854358157	3.9675055618119384	-0.40223506731643016	0.0441	-0.0147	-0.1029
H	-1.391871123623877	5.641766	-0.7335873145641844	0.0294	0.0	-0.0441
H	-0.45975737087163127	5.130685190940307	-3.713721752752246	0.0882	0.0735	-0.0588
H	1.2377776291283689	4.701213629128368	-3.3689448763761227	0.0882	0.0882	-0.0294
H	0.47391631456418437	6.081564190940307	-2.5220444381880616	0.0441	0.0735	-0.0147
H	3.4899108090596926	-0.20958	2.567673	-0.0735	0.0	0.0
H	1.8988322472477541	0.6237504381880614	2.5637336854358157	-0.0588	0.0147	-0.0441
H	3.367125247247754	1.481488	3.131336	-0.0588	0.0	0.0
H	5.277134123623877	0.44446656181193855	0.9164008763761229	-0.0294	-0.0147	0.0294
H	5.209446561811938	2.1890615618119385	1.271992876376123	-0.0147	-0.0147	0.0294
H	4.954384438188062	1.6225255618119387	-0.40026112362387706	0.0147	-0.0147	0.0294
H	-2.2651645618119383	-1.236644	-3.9342475618119384	0.0147	0.0	0.0147
H	-1.1910425618119387	-0.24304443818806146	-4.94406	0.0147	-0.0147	0.0
H	-0.6896735618119385	-1.8675344381880614	-4.456218123623877	0.0147	-0.0147	0.0294
H	2.3145374381880615	2.9736554381880618	-3.09567506731643	0.0147	0.0147	-0.1029
H	3.4132648763761226	1.8912953145641842	-2.2385096291283686	0.0294	0.0441	-0.0882
H	2.833907438188062	1.467578	-3.8662841909403074	0.0147	0.0	-0.0735
114
O	4.993018	-2.497779	-1.222763	-0.0147	0.0	0.0
Mg	-0.260945	0.19595700000000002	0.04413299999999999	0.0441	0.1176	-0.0441
O	0.101523	-1.542928	3.075676	0.0147	-0.0882	0.0441
C	4.184379	-2.55833	-0.152854	-0.0294	0.0147	-0.0147
N	-1.132399	-0.466683	-1.690986	0.0294	0.0147	0.0147
N	0.978039	1.449569	-1.022754	0.0441	0.0441	-0.0588
O	4.429284	-2.078418	0.929941	-0.0441	0.0147	-0.0147
C	-0.560796	-0.386502	-2.882174	0.0294	0.0147	0.0
C	0.686031	0.251548	-3.107528	0.0147	0.0147	-0.0294
C	1.348744	1.175124	-2.270927	0.0294	0.0294	-0.0588
O	2.090356	-3.412113	0.687182	-0.0294	0.0	-0.0441
C	1.390502	-2.339718	1.079647	-0.0588	-0.0294	-0.0147
C	0.935295	-2.564955	2.527216	0.0294	-0.0588	0.0147
C	2.940868	-3.390211	-0.482358	-0.0294	0.0294	-0.0441
O	1.241682	-1.339426	0.403257	-0.1323	-0.0294	0.0
C	6.237123	-1.795128	-1.029958	-0.0147	0.0	0.0294
O	-0.468628	0.861512	1.809878	-0.0441	0.0588	-0.1029
C	-1.062585	-1.204635	2.440774	-0.0735	-0.2205	0.147
O	-1.355651	-1.633377	1.332832	-0.147	-0.2646	0.2058
O	-2.89629	0.382871	2.990116	0.0294	-0.0882	0.1029
C	-2.410145	1.663582	2.857693	-0.0147	-0.0588	0.0147
C	-0.884913	1.78931	2.752174	-0.0294	0.0	-0.0588
C	-2.053621	-0.660396	3.473219	0.0735	-0.0147	0.1617
O	-3.21065	2.562032	2.757316	-0.0735	-0.1176	0.0
C	-0.466589	3.232675	2.480936	-0.1176	0.0441	-0.0294
C	-2.992236	-1.800039	3.876704	0.0882	0.0588	0.4557
C	0.337399	-3.951414	2.793263	0.1029	-0.0882	0.0441
C	2.260687	-3.03827	-1.804801	-0.0147	0.0588	-0.0294
C	-2.433069	-1.061094	-1.435569	0.0294	0.0147	0.0
C	1.475044	2.647868	-0.366205	0.0441	0.0294	-0.0441
C	-3.484162	-0.176199	-1.009449	0.0147	0.0147	-0.0294
C	-4.66878	-0.741572	-0.481089	-0.0147	0.0294	-0.0882
C	-4.830802	-2.1383	-0.38918	-0.0294	0.0294	-0.1176
C	-3.827157	-2.99244	-0.874362	-0.0147	0.0147	-0.0735
C	-2.616559	-2.480838	-1.402453	0.0147	0.0147	-0.0147
C	-3.367343	1.356689	-1.232545	0.0294	0.0147	-0.0147
C	-1.552405	-3.481109	-1.922735	0.0147	0.0	0.0147
C	2.485378	2.552244	0.644812	0.0	0.0147	-0.0147
C	2.830419	3.717213	1.379526	-0.0147	0.0147	0.0147
C	2.216153	4.956317	1.111862	0.0	0.0147	0.0
C	1.250336	5.048148	0.093599	0.0294	0.0294	-0.0294
C	0.858567	3.913599	-0.655811	0.0441	0.0441	-0.0441
C	3.24177	1.234534	0.939494	-0.0147	0.0147	0.0
C	-0.222191	4.089317	-1.755847	0.0588	0.0441	-0.0588
C	-4.384528	2.1899	-0.394029	0.0294	0.0147	-0.0294
C	-3.533982	1.692991	-2.752951	0.0441	0.0294	-0.0147
C	-1.081008	-4.450914	-0.792867	-0.0294	0.0	0.0147
C	-2.09177	-4.302396	-3.143662	0.0441	0.0147	0.0
C	-1.553055	4.642916	-1.152274	0.0441	0.0147	-0.0735
C	0.270614	5.036793	-2.902278	0.0735	0.0735	-0.0441
C	3.005481	0.751196	2.403607	-0.0588	0.0	-0.0147
C	4.772742	1.391885	0.650247	-0.0147	-0.0147	0.0294
C	-1.228624	-0.9655	-4.12512	0.0147	0.0	0.0147
C	2.537889	1.911219	-2.876836	0.0294	0.0147	-0.0735
H	1.081837	0.158228	-4.114178	0.0	0.0	-0.0294
H	1.866059	-2.462559	3.097232	0.0441	-0.0147	-0.0294
H	3.278741	-4.431239	-0.532795	-0.0294	0.0294	-0.0588
H	6.044264	-0.760965	-0.739978	0.0	0.0	0.0294
H	6.747007	-1.841803	-1.992068	0.0147	0.0	0.0294
H	6.831962	-2.28463	-0.254128	-0.0294	0.0	0.0294
H	-0.467061	1.519629	3.745135	0.0441	0.0	-0.0882
H	-1.483583	-0.312643	4.340056	0.1764	0.0882	0.0441
H	-0.853895	3.886682	3.270821	-0.0882	0.0	0.0147
H	-0.85905	3.585627	1.526818	-0.2058	0.0441	0.0147
H	0.620159	3.316646	2.443623	-0.1176	0.0882	-0.1029
H	-3.700665	-1.441978	4.628881	0.1911	0.1911	0.48510000000000003
H	-2.427489	-2.640427	4.294139	0.1323	0.1029	0.5145
H	-3.545346	-2.140497	2.99622	-0.0147	-0.0735	0.5733
H	1.044398	-4.73516	2.513671	0.1323	-0.0441	0.0294
H	-0.586855	-4.089598	2.228829	0.0882	-0.1323	0.0735
H	0.12004800000000003	-4.037362	3.861881	0.1323	-0.0882	0.0441
H	1.346534	-3.625976	-1.904366	-0.0147	0.0588	-0.0588
H	2.939983	-3.309574	-2.618024	-0.0147	0.0882	-0.0294
H	2.011238	-1.979996	-1.890908	-0.0294	0.0588	-0.0147
H	-5.482975	-0.084411	-0.15350600000000003	-0.0147	0.0294	-0.1176
H	-5.756968	-2.556211	0.02809899999999997	-0.0588	0.0294	-0.1617
H	-3.9798	-4.079055	-0.842429	-0.0294	0.0294	-0.1029
H	-2.340008	1.67301	-0.942993	0.0294	0.0147	-0.0147
H	-0.673607	-2.898517	-2.258531	0.0294	0.0	0.0294
H	3.605488	3.652958	2.154692	-0.0441	0.0	0.0294
H	2.501268	5.848423	1.68605	-0.0147	0.0	0.0147
H	0.788638	6.01968	-0.124746	0.0294	0.0294	-0.0294
H	2.845709	0.460644	0.254219	-0.0147	0.0147	-0.0147
H	-0.432941	3.094562	-2.197145	0.0735	0.0441	-0.0882
H	-4.177518	3.261057	-0.528756	0.0294	0.0147	-0.0147
H	-4.309593	1.95647	0.679666	0.0147	0.0147	-0.0294
H	-5.416316	1.999747	-0.726923	0.0294	0.0294	-0.0441
H	-3.476207	2.781447	-2.903446	0.0441	0.0294	-0.0147
H	-4.510082	1.339096	-3.120934	0.0441	0.0294	-0.0294
H	-2.740422	1.218422	-3.352923	0.0441	0.0294	-0.0147
H	-0.291093	-5.12795	-1.160875	0.0	0.0147	0.0441
H	-1.916155	-5.066893	-0.42513	-0.0294	-0.0147	-0.0294
H	-0.682858	-3.866497	0.053366000000000004	-0.0735	-0.0147	0.0441
H	-1.297207	-4.952917	-3.540855	0.0588	0.0147	0.0147
H	-2.432421	-3.636	-3.950332	0.0588	0.0147	-0.0147
H	-2.93826	-4.936348	-2.838545	0.0441	0.0147	-0.0294
H	-2.322157	4.718018	-1.936936	0.0588	0.0294	-0.0882
H	-1.930089	3.973655	-0.359189	0.0441	-0.0147	-0.1029
H	-1.40417	5.641766	-0.715139	0.0294	0.0	-0.0441
H	-0.496654	5.099938	-3.689124	0.0882	0.0735	-0.0588
H	1.200881	4.664317	-3.356646	0.0882	0.0882	-0.0294
H	0.455468	6.050817	-2.515895	0.0441	0.0735	-0.0147
H	3.520658	-0.20958	2.567673	-0.0735	0.0	0.0
H	1.92343	0.617601	2.582182	-0.0588	0.0147	-0.0441
H	3.391723	1.481488	3.131336	-0.0588	0.0	0.0
H	5.289433	0.450616	0.904102	-0.0294	-0.0147	0.0294
H	5.215596	2.195211	1.259694	-0.0147	-0.0147	0.0294
H	4.948235	1.628675	-0.41256	0.0147	-0.0147	0.0294
H	-2.271314	-1.236644	-3.940397	0.0147	0.0	0.0147
H	-1.197192	-0.236895	-4.94406	0.0147	-0.0147	0.0
H	-0.695823	-1.861385	-4.468517	0.0147	-0.0147	0.0294
H	2.308388	2.967506	-3.052629	0.0147	0.0147	-0.1029
H	3.400966	1.872847	-2.201613	0.0294	0.0441	-0.0882
H	2.827758	1.467578	-3.835537	0.0147	0.0	-0.0735
114
O	4.999167438188062	-2.497779	-1.222763	-0.0147	0.0	0.0
Mg	-0.2793933145641843	0.14676149449550846	0.06258131456418432	0.0441	0.1176	-0.0441
O	0.09537356181193855	-1.5060313708716315	3.057227685435816	0.0147	-0.0882	0.0441
C	4.196677876376123	-2.564479438188062	-0.14670456181193856	-0.0294	0.0147	-0.0147
N	-1.1446978763761229	-0.4728324381880615	-1.6971354381880615	0.0294	0.0147	0.0147
N	0.9595906854358157	1.4311206854358158	-0.9981562472477542	0.0441	0.0441	-0.0588
O	4.447732314564185	-2.0845674381880617	0.9360904381880615	-0.0441	0.0147	-0.0147
C	-0.5730948763761229	-0.3926514381880615	-2.882174	0.0294	0.0147	0.0
C	0.6798815618119385	0.24539856181193856	-3.095229123623877	0.0147	0.0147	-0.0294
C	1.336445123623877	1.1628251236238771	-2.246329247247754	0.0294	0.0294	-0.0588
O	2.1026548763761226	-3.412113	0.7056303145641842	-0.0294	0.0	-0.0441
C	1.4150997527522458	-2.3274191236238773	1.0857964381880614	-0.0588	-0.0294	-0.0147
C	0.9229961236238771	-2.540357247247754	2.5210665618119386	0.0294	-0.0588	0.0147
C	2.9531668763761227	-3.4025098763761226	-0.4639096854358157	-0.0294	0.0294	-0.0441
O	1.297026943692553	-1.327127123623877	0.403257	-0.1323	-0.0294	0.0
C	6.243272438188062	-1.795128	-1.0422568763761229	-0.0147	0.0	0.0294
O	-0.45017968543581566	0.8369142472477542	1.8529240673164302	-0.0441	0.0588	-0.1029
C	-1.0318378090596927	-1.1123934271790783	2.379279618119386	-0.0735	-0.2205	0.147
O	-1.2941566181193855	-1.5226871126148942	1.2467398653671398	-0.147	-0.2646	0.2058
O	-2.9085888763761227	0.4197676291283687	2.94706993268357	0.0294	-0.0882	0.1029
C	-2.4039955618119384	1.6881797527522457	2.8515435618119382	-0.0147	-0.0588	0.0147
C	-0.872614123623877	1.78931	2.776771752752246	-0.0294	0.0	-0.0588
C	-2.0843681909403076	-0.6542465618119385	3.405575179931324	0.0735	-0.0147	0.1617
O	-3.1799028090596924	2.6112275055044916	2.757316	-0.0735	-0.1176	0.0
C	-0.41739349449550844	3.2142266854358157	2.4932348763761225	-0.1176	0.0441	-0.0294
C	-3.0291326291283687	-1.8246367527522458	3.6860714161700954	0.0882	0.0588	0.4557
C	0.2943529326835699	-3.9145173708716317	2.7748146854358158	0.1029	-0.0882	0.0441
C	2.2668364381880615	-3.0628677527522457	-1.7925021236238772	-0.0147	0.0588	-0.0294
C	-2.445367876376123	-1.0672434381880613	-1.435569	0.0294	0.0147	0.0
C	1.4565956854358157	2.635569123623877	-0.34775668543581567	0.0441	0.0294	-0.0441
C	-3.4903114381880616	-0.18234843818806143	-0.9971501236238771	0.0147	0.0147	-0.0294
C	-4.662630561811938	-0.7538708763761229	-0.4441923708716313	-0.0147	0.0294	-0.0882
C	-4.818503123623877	-2.150598876376123	-0.3399844944955085	-0.0294	0.0294	-0.1176
C	-3.8210075618119386	-2.998589438188062	-0.8436148090596928	-0.0147	0.0147	-0.0735
C	-2.6227084381880617	-2.4869874381880615	-1.3963035618119386	0.0147	0.0147	-0.0147
C	-3.3796418763761227	1.3505395618119387	-1.2263955618119387	0.0294	0.0147	-0.0147
C	-1.5585544381880614	-3.481109	-1.9288844381880614	0.0147	0.0	0.0147
C	2.485378	2.5460945618119384	0.6509614381880615	0.0	0.0147	-0.0147
C	2.8365684381880616	3.7110635618119385	1.3733765618119387	-0.0147	0.0147	0.0147
C	2.216153	4.950167561811939	1.111862	0.0	0.0147	0.0
C	1.238037123623877	5.035849123623877	0.10589787637612288	0.0294	0.0294	-0.0294
C	0.8401186854358157	3.8951506854358158	-0.6373626854358158	0.0441	0.0441	-0.0441
C	3.2479194381880614	1.2283845618119387	0.939494	-0.0147	0.0147	0.0
C	-0.24678875275224577	4.070868685435816	-1.731249247247754	0.0588	0.0441	-0.0588
C	-4.396826876376124	2.1837505618119386	-0.38173012362387715	0.0294	0.0147	-0.0294
C	-3.5524303145641842	1.680692123623877	-2.7468015618119384	0.0441	0.0294	-0.0147
C	-1.068709123623877	-4.450914	-0.7990164381880615	-0.0294	0.0	0.0147
C	-2.110218314564184	-4.3085454381880615	-3.143662	0.0441	0.0147	0.0
C	-1.5715033145641844	4.636766561811938	-1.1215268090596928	0.0441	0.0147	-0.0735
C	0.2398668090596928	5.006045809059693	-2.8838296854358156	0.0735	0.0735	-0.0441
C	3.030078752752246	0.751196	2.4097564381880616	-0.0588	0.0	-0.0147
C	4.778891438188062	1.3980344381880614	0.6379481236238771	-0.0147	-0.0147	0.0294
C	-1.2347734381880613	-0.9655	-4.1312694381880615	0.0147	0.0	0.0147
C	2.525590123623877	1.9050695618119386	-2.8460888090596925	0.0294	0.0147	-0.0735
H	1.081837	0.158228	-4.101879123623877	0.0	0.0	-0.0294
H	1.8476106854358156	-2.4564095618119386	3.1095308763761227	0.0441	-0.0147	-0.0294
H	3.291039876376123	-4.443537876376123	-0.5081972472477543	-0.0294	0.0294	-0.0588
H	6.044264	-0.760965	-0.752276876376123	0.0	0.0	0.0294
H	6.740857561811938	-1.841803	-2.004366876376123	0.0147	0.0	0.0294
H	6.844260876376123	-2.28463	-0.2664268763761229	-0.0294	0.0	0.0294
H	-0.48550931456418434	1.519629	3.7820316291283684	0.0441	0.0	-0.0882
H	-1.5573762582567374	-0.34953962912836867	4.321607685435815	0.1764	0.0882	0.0441
H	-0.8169983708716313	3.886682	3.2646715618119386	-0.0882	0.0	0.0147
H	-0.7729578653671397	3.567178685435816	1.5206685618119387	-0.2058	0.0441	0.0147
H	0.6693545055044916	3.2797493708716314	2.4866690673164302	-0.1176	0.0882	-0.1029
H	-3.7806076964447985	-1.5219206964447987	4.425949539793972	0.1911	0.1911	0.48510000000000003
H	-2.482833943692553	-2.68347306731643	4.07890866341785	0.1323	0.1029	0.5145
H	-3.5391965618119383	-2.1097498090596924	2.7563919106656036	-0.0147	-0.0735	0.5733
H	0.989053056307447	-4.716711685435815	2.5013721236238773	0.1323	-0.0441	0.0294
H	-0.6237516291283687	-4.034253056307446	2.1980818090596927	0.0882	-0.1323	0.0735
H	0.06470305630744702	-4.000465370871631	3.8434326854358156	0.1323	-0.0882	0.0441
H	1.3526834381880612	-3.650573752752246	-1.8797682472477542	-0.0147	0.0588	-0.0588
H	2.9461324381880614	-3.3464706291283686	-2.6057251236238774	-0.0147	0.0882	-0.0294
H	2.023536876376123	-2.0045937527522457	-1.8847585618119387	-0.0294	0.0588	-0.0147
H	-5.476825561811938	-0.09670987637612288	-0.10431049449550846	-0.0147	0.0294	-0.1176
H	-5.732370247247754	-2.5685098763761225	0.09574282006867588	-0.0588	0.0294	-0.1617
H	-3.9675011236238773	-4.0913538763761235	-0.7993829326835699	-0.0294	0.0294	-0.1029
H	-2.352306876376123	1.6668605618119388	-0.9368435618119385	0.0294	0.0147	-0.0147
H	-0.6859058763761229	-2.898517	-2.2708298763761228	0.0294	0.0	0.0294
H	3.623936314564184	3.652958	2.142393123623877	-0.0441	0.0	0.0294
H	2.5074174381880616	5.848423	1.6799005618119387	-0.0147	0.0	0.0147
H	0.776339123623877	6.007381123623877	-0.11244712362387711	0.0294	0.0294	-0.0294
H	2.8518584381880614	0.45449456181193854	0.26036843818806144	-0.0147	0.0147	-0.0147
H	-0.4636881909403072	3.0761136854358155	-2.1602483708716314	0.0735	0.0441	-0.0882
H	-4.189816876376123	3.2549075618119385	-0.5226065618119385	0.0294	0.0147	-0.0147
H	-4.315742438188061	1.9503205618119386	0.6919648763761229	0.0147	0.0147	-0.0294
H	-5.428614876376123	1.987448123623877	-0.7084746854358157	0.0294	0.0294	-0.0441
H	-3.4946553145641843	2.7691481236238773	-2.8972965618119386	0.0441	0.0294	-0.0147
H	-4.528530314564184	1.3267971236238771	-3.1086351236238774	0.0441	0.0294	-0.0294
H	-2.7588703145641844	1.206123123623877	-3.3467735618119385	0.0441	0.0294	-0.0147
H	-0.291093	-5.134099438188062	-1.1793233145641844	0.0	0.0147	0.0441
H	-1.9038561236238771	-5.060743561811939	-0.41283112362387714	-0.0294	-0.0147	-0.0294
H	-0.6521108090596928	-3.8603475618119383	0.034917685435815665	-0.0735	-0.0147	0.0441
H	-1.3218047527522458	-4.959066438188062	-3.5470044381880617	0.0588	0.0147	0.0147
H	-2.457018752752246	-3.6421494381880617	-3.9441825618119384	0.0588	0.0147	-0.0147
H	-2.9567083145641844	-4.942497438188061	-2.826246123623877	0.0441	0.0147	-0.0294
H	-2.3467547527522457	4.705719123623877	-1.9000393708716314	0.0588	0.0294	-0.0882
H	-1.9485373145641842	3.9798044381880615	-0.31614293268356986	0.0441	-0.0147	-0.1029
H	-1.4164688763761228	5.641766	-0.6966906854358157	0.0294	0.0	-0.0441
H	-0.5335506291283686	5.069190809059693	-3.664526247247754	0.0882	0.0735	-0.0588
H	1.1639843708716315	4.627420370871631	-3.3443471236238773	0.0882	0.0882	-0.0294
H	0.43701968543581565	6.020069809059693	-2.5097455618119384	0.0441	0.0735	-0.0147
H	3.5514051909403075	-0.20958	2.567673	-0.0735	0.0	0.0
H	1.9480277527522458	0.6114515618119385	2.6006303145641843	-0.0588	0.0147	-0.0441
H	3.4163207527522457	1.481488	3.131336	-0.0588	0.0	0.0
H	5.301731876376123	0.4567654381880615	0.891803123623877	-0.0294	-0.0147	0.0294
H	5.221745438188061	2.2013604381880616	1.2473951236238772	-0.0147	-0.0147	0.0294
H	4.942085561811939	1.6348244381880614	-0.42485887637612285	0.0147	-0.0147	0.0294
H	-2.2774634381880614	-1.236644	-3.9465464381880615	0.0147	0.0	0.0147
H	-1.2033414381880614	-0.23074556181193856	-4.94406	0.0147	-0.0147	0.0
H	-0.7019724381880614	-1.8552355618119387	-4.480815876376123	0.0147	-0.0147	0.0294
H	2.3022385618119383	2.9613565618119386	-3.00958293268357	0.0147	0.0147	-0.1029
H	3.3886671236238772	1.8543986854358157	-2.1647163708716315	0.0294	0.0441	-0.0882
H	2.8216085618119386	1.467578	-3.8047898090596926	0.0147	0.0	-0.0735
114
O	5.00471492652062	-2.497779	-1.222763	-0.0147	0.0	0.0
Mg	-0.2960357795618606	0.1023815878350383	0.07922377956186064	0.0441	0.1176	-0.0441
O	0.08982607347937979	-1.4727464408762787	3.0405852204381394	0.0147	-0.0882	0.0441
C	4.207772853041241	-2.5700269265206206	-0.14115707347937978	-0.0294	0.0147	-0.0147
N	-1.1557928530412405	-0.4783799265206202	-1.7026829265206203	0.0294	0.0147	0.0147
N	0.9429482204381393	1.4144782204381394	-0.9759662939175191	0.0441	0.0441	-0.0588
O	4.464374779561861	-2.0901149265206205	0.9416379265206203	-0.0441	0.0147	-0.0147
C	-0.5841898530412404	-0.3981989265206202	-2.882174	0.0294	0.0147	0.0
C	0.6743340734793797	0.23985107347937978	-3.0841341469587595	0.0147	0.0147	-0.0294
C	1.3253501469587594	1.1517301469587595	-2.224139293917519	0.0294	0.0294	-0.0588
O	2.11374985304124	-3.412113	0.7222727795618606	-0.0294	0.0	-0.0441
C	1.4372897060824807	-2.3163241469587597	1.0913439265206202	-0.0588	-0.0294	-0.0147
C	0.9119011469587596	-2.518167293917519	2.5155190734793798	0.0294	-0.0588	0.0147
C	2.9642618530412403	-3.41360485304124	-0.4472672204381394	-0.0294	0.0294	-0.0441
O	1.3469543386855818	-1.3160321469587595	0.403257	-0.1323	-0.0294	0.0
C	6.24881992652062	-1.795128	-1.0533518530412405	-0.0147	0.0	0.0294
O	-0.43353722043813936	0.8147242939175191	1.8917564856443416	-0.0441	0.0588	-0.1029
C	-1.004100367396899	-1.0291811021906967	2.3238047347937982	-0.0735	-0.2205	0.147
O	-1.2386817347937977	-1.4228323226288362	1.169075028711317	-0.147	-0.2646	0.2058
O	-2.9196838530412403	0.4530525591237213	2.9082375143556587	0.0294	-0.0882	0.1029
C	-2.3984480734793796	1.7103697060824807	2.8459960734793794	-0.0147	-0.0588	0.0147
C	-0.8615191469587595	1.78931	2.798961706082481	-0.0294	0.0	-0.0588
C	-2.112105632603101	-0.6486990734793797	3.3445528082731775	0.0735	-0.0147	0.1617
O	-3.152165367396899	2.6556074121649615	2.757316	-0.0735	-0.1176	0.0
C	-0.3730135878350383	3.1975842204381393	2.50432985304124	-0.1176	0.0441	-0.0294
C	-3.0624175591237215	-1.8468267060824808	3.5140992778607734	0.0882	0.0588	0.4557
C	0.2555205143556585	-3.881232440876279	2.7581722204381394	0.1029	-0.0882	0.0441
C	2.2723839265206203	-3.085057706082481	-1.7814071469587596	-0.0147	0.0588	-0.0294
C	-2.4564628530412405	-1.0727909265206201	-1.435569	0.0294	0.0147	0.0
C	1.4399532204381393	2.6244741469587596	-0.3311142204381394	0.0441	0.0294	-0.0441
C	-3.4958589265206204	-0.1878959265206202	-0.9860551469587596	0.0147	0.0147	-0.0294
C	-4.65708307347938	-0.7649658530412404	-0.41090744087627873	-0.0147	0.0294	-0.0882
C	-4.8074081469587595	-2.1616938530412404	-0.29560458783503835	-0.0294	0.0294	-0.1176
C	-3.8154600734793798	-3.0041369265206206	-0.8158773673968989	-0.0147	0.0147	-0.0735
C	-2.6282559265206205	-2.4925349265206203	-1.3907560734793798	0.0147	0.0147	-0.0147
C	-3.3907368530412403	1.3449920734793799	-1.2208480734793798	0.0294	0.0147	-0.0147
C	-1.5641019265206202	-3.481109	-1.9344319265206202	0.0147	0.0	0.0147
C	2.485378	2.5405470734793796	0.6565089265206203	0.0	0.0147	-0.0147
C	2.8421159265206204	3.7055160734793797	1.3678290734793799	-0.0147	0.0147	0.0147
C	2.216153	4.94462007347938	1.111862	0.0	0.0147	0.0
C	1.2269421469587594	5.0247541469587595	0.11699285304124042	0.0294	0.0294	-0.0294
C	0.8234762204381393	3.8785082204381394	-0.6207202204381393	0.0441	0.0441	-0.0441
C	3.25346692652062	1.2228370734793799	0.939494	-0.0147	0.0147	0.0
C	-0.26897870608248087	4.05422622043814	-1.709059293917519	0.0588	0.0441	-0.0588
C	-4.407921853041241	2.17820307347938	-0.3706351469587596	0.0294	0.0147	-0.0294
C	-3.5690727795618606	1.6695971469587594	-2.7412540734793795	0.0441	0.0294	-0.0147
C	-1.0576141469587594	-4.450914	-0.8045639265206203	-0.0294	0.0	0.0147
C	-2.1268607795618606	-4.31409292652062	-3.143662	0.0441	0.0147	0.0
C	-1.5881457795618608	4.63121907347938	-1.093789367396899	0.0441	0.0147	-0.0735
C	0.21212936739689897	4.978308367396899	-2.8671872204381392	0.0735	0.0735	-0.0441
C	3.052268706082481	0.751196	2.4153039265206204	-0.0588	0.0	-0.0147
C	4.78443892652062	1.4035819265206202	0.6268531469587596	-0.0147	-0.0147	0.0294
C	-1.24032092652062	-0.9655	-4.13681692652062	0.0147	0.0	0.0147
C	2.5144951469587595	1.8995220734793798	-2.818351367396899	0.0294	0.0147	-0.0735
H	1.081837	0.158228	-4.090784146958759	0.0	0.0	-0.0294
H	1.8309682204381392	-2.45086207347938	3.1206258530412403	0.0441	-0.0147	-0.0294
H	3.3021348530412404	-4.4546328530412405	-0.4860072939175192	-0.0294	0.0294	-0.0588
H	6.044264	-0.760965	-0.7633718530412404	0.0	0.0	0.0294
H	6.73531007347938	-1.841803	-2.0154618530412405	0.0147	0.0	0.0294
H	6.855355853041241	-2.28463	-0.27752185304124044	-0.0294	0.0	0.0294
H	-0.5021517795618606	1.519629	3.8153165591237213	0.0441	0.0	-0.0882
H	-1.6239461182474426	-0.38282455912372126	4.304965220438139	0.1764	0.0882	0.0441
H	-0.7837134408762787	3.886682	3.25912407347938	-0.0882	0.0	0.0147
H	-0.695293028711317	3.5505362204381394	1.5151210734793799	-0.2058	0.0441	0.0147
H	0.7137344121649617	3.2464644408762786	2.5255014856443414	-0.1176	0.0882	-0.1029
H	-3.8527250447680625	-1.5940380447680627	4.242882424819533	0.1911	0.1911	0.48510000000000003
H	-2.532761338685582	-2.722305485644341	3.884746571778293	0.1323	0.1029	0.5145
H	-3.5336490734793795	-2.082012367396899	2.5400398656958116	-0.0147	-0.0735	0.5733
H	0.939125661314418	-4.700069220438139	2.4902771469587597	0.1323	-0.0441	0.0294
H	-0.6570365591237213	-3.9843256613144176	2.170344367396899	0.0882	-0.1323	0.0735
H	0.014775661314418098	-3.9671804408762785	3.826790220438139	0.1323	-0.0882	0.0441
H	1.35823092652062	-3.672763706082481	-1.8575782939175192	-0.0147	0.0588	-0.0588
H	2.95167992652062	-3.3797555591237214	-2.59463014695876	-0.0147	0.0882	-0.0294
H	2.0346318530412404	-2.026783706082481	-1.8792110734793799	-0.0294	0.0588	-0.0147
H	-5.47127807347938	-0.10780485304124042	-0.05993058783503831	-0.0147	0.0294	-0.1176
H	-5.710180293917519	-2.57960485304124	0.15676519172682235	-0.0588	0.0294	-0.1617
H	-3.9564061469587597	-4.102448853041241	-0.7605505143556585	-0.0294	0.0294	-0.1029
H	-2.3634018530412404	1.66131307347938	-0.9312960734793797	0.0294	0.0147	-0.0147
H	-0.6970008530412404	-2.898517	-2.2819248530412404	0.0294	0.0	0.0294
H	3.6405787795618605	3.652958	2.1312981469587595	-0.0441	0.0	0.0294
H	2.5129649265206204	5.848423	1.67435307347938	-0.0147	0.0	0.0147
H	0.7652441469587595	5.996286146958759	-0.10135214695875958	0.0294	0.0294	-0.0294
H	2.85740592652062	0.4489470734793798	0.2659159265206202	-0.0147	0.0147	-0.0147
H	-0.49142563260310107	3.059471220438139	-2.1269634408762785	0.0735	0.0441	-0.0882
H	-4.200911853041241	3.2493600734793797	-0.5170590734793797	0.0294	0.0147	-0.0147
H	-4.3212899265206195	1.9447730734793798	0.7030598530412404	0.0147	0.0147	-0.0294
H	-5.439709853041241	1.9763531469587594	-0.6918322204381393	0.0294	0.0294	-0.0441
H	-3.5112977795618607	2.7580531469587597	-2.89174907347938	0.0441	0.0294	-0.0147
H	-4.54517277956186	1.3157021469587595	-3.09754014695876	0.0441	0.0294	-0.0294
H	-2.775512779561861	1.1950281469587594	-3.3412260734793797	0.0441	0.0294	-0.0147
H	-0.291093	-5.13964692652062	-1.1959657795618608	0.0	0.0147	0.0441
H	-1.8927611469587595	-5.05519607347938	-0.4017361469587596	-0.0294	-0.0147	-0.0294
H	-0.6243733673968989	-3.8548000734793795	0.01827522043813936	-0.0735	-0.0147	0.0441
H	-1.3439947060824808	-4.96461392652062	-3.5525519265206205	0.0588	0.0147	0.0147
H	-2.4792087060824812	-3.6476969265206205	-3.9386350734793796	0.0588	0.0147	-0.0147
H	-2.973350779561861	-4.94804492652062	-2.8151511469587596	0.0441	0.0147	-0.0294
H	-2.368944706082481	4.694624146958759	-1.8667544408762786	0.0588	0.0294	-0.0882
H	-1.9651797795618606	3.9853519265206203	-0.27731051435565846	0.0441	-0.0147	-0.1029
H	-1.4275638530412404	5.641766	-0.6800482204381393	0.0294	0.0	-0.0441
H	-0.5668355591237213	5.041453367396898	-3.642336293917519	0.0882	0.0735	-0.0588
H	1.1306994408762787	4.594135440876278	-3.3332521469587597	0.0882	0.0882	-0.0294
H	0.42037722043813935	5.992332367396899	-2.5041980734793796	0.0441	0.0735	-0.0147
H	3.579142632603101	-0.20958	2.567673	-0.0735	0.0	0.0
H	1.9702177060824808	0.6059040734793797	2.6172727795618607	-0.0588	0.0147	-0.0441
H	3.438510706082481	1.481488	3.131336	-0.0588	0.0	0.0
H	5.312826853041241	0.4623129265206202	0.8807081469587595	-0.0294	-0.0147	0.0294
H	5.22729292652062	2.2069079265206204	1.2363001469587596	-0.0147	-0.0147	0.0294
H	4.9365380734793805	1.6403719265206202	-0.4359538530412404	0.0147	-0.0147	0.0294
H	-2.28301092652062	-1.236644	-3.9520939265206203	0.0147	0.0	0.0147
H	-1.2088889265206202	-0.22519807347937978	-4.94406	0.0147	-0.0147	0.0
H	-0.7075199265206202	-1.84968807347938	-4.491910853041241	0.0147	-0.0147	0.0294
H	2.2966910734793795	2.95580907347938	-2.9707505143556587	0.0147	0.0147	-0.1029
H	3.3775721469587596	1.8377562204381392	-2.1314314408762787	0.0294	0.0441	-0.0882
H	2.81606107347938	1.467578	-3.777052367396899	0.0147	0.0	-0.0735
114
O	5.009117438188062	-2.497779	-1.222763	-0.0147	0.0	0.0
Mg	-0.30924331456418436	0.06716149449550837	0.09243131456418435	0.0441	0.1176	-0.0441
O	0.08542356181193855	-1.4463313708716314	3.0273776854358156	0.0147	-0.0882	0.0441
C	4.216577876376123	-2.5744294381880617	-0.13675456181193854	-0.0294	0.0147	-0.0147
N	-1.1645978763761229	-0.4827824381880615	-1.7070854381880616	0.0294	0.0147	0.0147
N	0.9297406854358157	1.4012706854358157	-0.9583562472477541	0.0441	0.0441	-0.0588
O	4.477582314564184	-2.0945174381880616	0.9460404381880615	-0.0441	0.0147	-0.0147
C	-0.5929948763761229	-0.4026014381880615	-2.882174	0.0294	0.0147	0.0
C	0.6699315618119385	0.23544856181193854	-3.075329123623877	0.0147	0.0147	-0.0294
C	1.316545123623877	1.142925123623877	-2.206529247247754	0.0294	0.0294	-0.0588
O	2.122554876376123	-3.412113	0.7354803145641843	-0.0294	0.0	-0.0441
C	1.4548997527522458	-2.307519123623877	1.0957464381880615	-0.0588	-0.0294	-0.0147
C	0.903096123623877	-2.500557247247754	2.5111165618119387	0.0294	-0.0588	0.0147
C	2.973066876376123	-3.422409876376123	-0.43405968543581563	-0.0294	0.0294	-0.0441
O	1.386576943692553	-1.307227123623877	0.403257	-0.1323	-0.0294	0.0
C	6.253222438188062	-1.795128	-1.0621568763761229	-0.0147	0.0	0.0294
O	-0.4203296854358156	0.7971142472477541	1.9225740673164302	-0.0441	0.0588	-0.1029
C	-0.9820878090596926	-0.9631434271790782	2.2797796181193855	-0.0735	-0.2205	0.147
O	-1.1946566181193854	-1.343587112614894	1.1074398653671396	-0.147	-0.2646	0.2058
O	-2.928488876376123	0.4794676291283687	2.8774199326835697	0.0294	-0.0882	0.1029
C	-2.3940455618119385	1.7279797527522458	2.8415935618119383	-0.0147	-0.0588	0.0147
C	-0.852714123623877	1.78931	2.816571752752246	-0.0294	0.0	-0.0588
C	-2.1341181909403075	-0.6442965618119385	3.296125179931324	0.0735	-0.0147	0.1617
O	-3.1301528090596924	2.6908275055044917	2.757316	-0.0735	-0.1176	0.0
C	-0.33779349449550833	3.1843766854358155	2.5131348763761228	-0.1176	0.0441	-0.0294
C	-3.088832629128369	-1.8644367527522459	3.3776214161700953	0.0882	0.0588	0.4557
C	0.22470293268356983	-3.8548173708716313	2.7449646854358156	0.1029	-0.0882	0.0441
C	2.2767864381880614	-3.1026677527522457	-1.7726021236238771	-0.0147	0.0588	-0.0294
C	-2.465267876376123	-1.0771934381880615	-1.435569	0.0294	0.0147	0.0
C	1.4267456854358156	2.615669123623877	-0.31790668543581563	0.0441	0.0294	-0.0441
C	-3.5002614381880615	-0.19229843818806144	-0.9772501236238771	0.0147	0.0147	-0.0294
C	-4.6526805618119385	-0.773770876376123	-0.3844923708716313	-0.0147	0.0294	-0.0882
C	-4.798603123623877	-2.170498876376123	-0.2603844944955084	-0.0294	0.0294	-0.1176
C	-3.8110575618119387	-3.0085394381880617	-0.7938648090596927	-0.0147	0.0147	-0.0735
C	-2.6326584381880616	-2.4969374381880614	-1.3863535618119385	0.0147	0.0147	-0.0147
C	-3.399541876376123	1.3405895618119386	-1.2164455618119385	0.0294	0.0147	-0.0147
C	-1.5685044381880615	-3.481109	-1.9388344381880616	0.0147	0.0	0.0147
C	2.485378	2.5361445618119385	0.6609114381880615	0.0	0.0147	-0.0147
C	2.8465184381880615	3.7011135618119386	1.3634265618119386	-0.0147	0.0147	0.0147
C	2.216153	4.940217561811939	1.111862	0.0	0.0147	0.0
C	1.218137123623877	5.015949123623877	0.1257978763761229	0.0294	0.0294	-0.0294
C	0.8102686854358156	3.8653006854358156	-0.6075126854358157	0.0441	0.0441	-0.0441
C	3.2578694381880613	1.2184345618119385	0.939494	-0.0147	0.0147	0.0
C	-0.2865887527522458	4.041018685435816	-1.691449247247754	0.0588	0.0441	-0.0588
C	-4.416726876376123	2.1738005618119387	-0.3618301236238771	0.0294	0.0147	-0.0294
C	-3.5822803145641844	1.660792123623877	-2.7368515618119384	0.0441	0.0294	-0.0147
C	-1.048809123623877	-4.450914	-0.8089664381880615	-0.0294	0.0	0.0147
C	-2.1400683145641843	-4.318495438188061	-3.143662	0.0441	0.0147	0.0
C	-1.6013533145641845	4.626816561811938	-1.0717768090596929	0.0441	0.0147	-0.0735
C	0.19011680905969275	4.956295809059693	-2.8539796854358155	0.0735	0.0735	-0.0441
C	3.069878752752246	0.751196	2.4197064381880615	-0.0588	0.0	-0.0147
C	4.7888414381880615	1.4079844381880615	0.6180481236238771	-0.0147	-0.0147	0.0294
C	-1.2447234381880614	-0.9655	-4.141219438188061	0.0147	0.0	0.0147
C	2.505690123623877	1.8951195618119385	-2.7963388090596926	0.0294	0.0147	-0.0735
H	1.081837	0.158228	-4.081979123623877	0.0	0.0	-0.0294
H	1.8177606854358155	-2.4464595618119387	3.129430876376123	0.0441	-0.0147	-0.0294
H	3.310939876376123	-4.463437876376123	-0.4683972472477542	-0.0294	0.0294	-0.0588
H	6.044264	-0.760965	-0.772176876376123	0.0	0.0	0.0294
H	6.7309075618119385	-1.841803	-2.0242668763761227	0.0147	0.0	0.0294
H	6.864160876376123	-2.28463	-0.2863268763761229	-0.0294	0.0	0.0294
H	-0.5153593145641844	1.519629	3.8417316291283687	0.0441	0.0	-0.0882
H	-1.6767762582567376	-0.4092396291283687	4.291757685435815	0.1764	0.0882	0.0441
H	-0.7572983708716312	3.886682	3.2547215618119387	-0.0882	0.0	0.0147
H	-0.6336578653671396	3.5373286854358157	1.5107185618119385	-0.2058	0.0441	0.0147
H	0.7489545055044916	3.220049370871631	2.5563190673164304	-0.1176	0.0882	-0.1029
H	-3.9099576964447986	-1.651270696444799	4.097599539793972	0.1911	0.1911	0.48510000000000003
H	-2.572383943692553	-2.75312306731643	3.7306586634178496	0.1323	0.1029	0.5145
H	-3.5292465618119384	-2.0599998090596925	2.3683419106656034	-0.0147	-0.0735	0.5733
H	0.8995030563074469	-4.686861685435815	2.481472123623877	0.1323	-0.0441	0.0294
H	-0.6834516291283688	-3.9447030563074463	2.148331809059693	0.0882	-0.1323	0.0735
H	-0.024846943692553067	-3.940765370871631	3.8135826854358155	0.1323	-0.0882	0.0441
H	1.3626334381880614	-3.690373752752246	-1.839968247247754	-0.0147	0.0588	-0.0588
H	2.9560824381880613	-3.406170629128369	-2.585825123623877	-0.0147	0.0882	-0.0294
H	2.043436876376123	-2.0443937527522458	-1.8748085618119386	-0.0294	0.0588	-0.0147
H	-5.466875561811938	-0.11660987637612291	-0.024710494495508384	-0.0147	0.0294	-0.1176
H	-5.692570247247754	-2.5884098763761227	0.20519282006867595	-0.0588	0.0294	-0.1617
H	-3.947601123623877	-4.111253876376123	-0.7297329326835698	-0.0294	0.0294	-0.1029
H	-2.372206876376123	1.6569105618119386	-0.9268935618119385	0.0294	0.0147	-0.0147
H	-0.7058058763761229	-2.898517	-2.290729876376123	0.0294	0.0	0.0294
H	3.6537863145641842	3.652958	2.122493123623877	-0.0441	0.0	0.0294
H	2.5173674381880615	5.848423	1.6699505618119386	-0.0147	0.0	0.0147
H	0.756439123623877	5.987481123623877	-0.0925471236238771	0.0294	0.0294	-0.0294
H	2.8618084381880613	0.4445445618119385	0.27031843818806145	-0.0147	0.0147	-0.0147
H	-0.5134381909403073	3.0462636854358154	-2.100548370871631	0.0735	0.0441	-0.0882
H	-4.209716876376123	3.2449575618119386	-0.5126565618119385	0.0294	0.0147	-0.0147
H	-4.325692438188061	1.9403705618119385	0.711864876376123	0.0147	0.0147	-0.0294
H	-5.448514876376123	1.967548123623877	-0.6786246854358157	0.0294	0.0294	-0.0441
H	-3.5245053145641845	2.749248123623877	-2.8873465618119387	0.0441	0.0294	-0.0147
H	-4.558380314564184	1.306897123623877	-3.088735123623877	0.0441	0.0294	-0.0294
H	-2.7887203145641846	1.186223123623877	-3.3368235618119386	0.0441	0.0294	-0.0147
H	-0.291093	-5.144049438188062	-1.2091733145641845	0.0	0.0147	0.0441
H	-1.883956123623877	-5.050793561811939	-0.3929311236238771	-0.0294	-0.0147	-0.0294
H	-0.6023608090596927	-3.8503975618119384	0.005067685435815643	-0.0735	-0.0147	0.0441
H	-1.361604752752246	-4.969016438188062	-3.5569544381880616	0.0588	0.0147	0.0147
H	-2.496818752752246	-3.6520994381880616	-3.9342325618119385	0.0588	0.0147	-0.0147
H	-2.9865583145641845	-4.952447438188061	-2.806346123623877	0.0441	0.0147	-0.0294
H	-2.3865547527522457	4.685819123623877	-1.8403393708716314	0.0588	0.0294	-0.0882
H	-1.9783873145641844	3.9897544381880614	-0.2464929326835698	0.0441	-0.0147	-0.1029
H	-1.4363688763761229	5.641766	-0.6668406854358156	0.0294	0.0	-0.0441
H	-0.5932506291283687	5.0194408090596925	-3.624726247247754	0.0882	0.0735	-0.0588
H	1.1042843708716314	4.567720370871631	-3.324447123623877	0.0882	0.0882	-0.0294
H	0.4071696854358156	5.970319809059693	-2.4997955618119385	0.0441	0.0735	-0.0147
H	3.6011551909403074	-0.20958	2.567673	-0.0735	0.0	0.0
H	1.9878277527522459	0.6015015618119385	2.6304803145641844	-0.0588	0.0147	-0.0441
H	3.4561207527522457	1.481488	3.131336	-0.0588	0.0	0.0
H	5.321631876376123	0.4667154381880615	0.871903123623877	-0.0294	-0.0147	0.0294
H	5.231695438188061	2.2113104381880615	1.2274951236238771	-0.0147	-0.0147	0.0294
H	4.932135561811939	1.6447744381880616	-0.4447588763761229	0.0147	-0.0147	0.0294
H	-2.2874134381880613	-1.236644	-3.9564964381880614	0.0147	0.0	0.0147
H	-1.2132914381880615	-0.22079556181193855	-4.94406	0.0147	-0.0147	0.0
H	-0.7119224381880614	-1.8452855618119386	-4.500715876376123	0.0147	-0.0147	0.0294
H	2.2922885618119384	2.9514065618119387	-2.9399329326835697	0.0147	0.0147	-0.1029
H	3.368767123623877	1.8245486854358155	-2.105016370871631	0.0294	0.0441	-0.0882
H	2.8116585618119387	1.467578	-3.7550398090596926	0.0147	0.0	-0.0735
114
O	5.011944024674274	-2.497779	-1.222763	-0.0147	0.0	0.0
Mg	-0.31772307402282063	0.04454880260581154	0.10091107402282067	0.0441	0.1176	-0.0441
O	0.08259697532572645	-1.4293718519543588	3.0188979259771793	0.0147	-0.0882	0.0441
C	4.222231049348547	-2.577256024674274	-0.13392797532572642	-0.0294	0.0147	-0.0147
N	-1.170251049348547	-0.4856090246742736	-1.7099120246742736	0.0294	0.0147	0.0147
N	0.9212609259771793	1.3927909259771794	-0.9470499013029057	0.0441	0.0441	-0.0588
O	4.48606207402282	-2.097344024674274	0.9488670246742735	-0.0441	0.0147	-0.0147
C	-0.5986480493485471	-0.4054280246742736	-2.882174	0.0294	0.0147	0.0
C	0.6671049753257264	0.23262197532572643	-3.069675950651453	0.0147	0.0147	-0.0294
C	1.310891950651453	1.137271950651453	-2.195222901302906	0.0294	0.0294	-0.0588
O	2.128208049348547	-3.412113	0.7439600740228206	-0.0294	0.0	-0.0441
C	1.4662060986970942	-2.301865950651453	1.0985730246742735	-0.0588	-0.0294	-0.0147
C	0.8974429506514529	-2.489250901302906	2.5082899753257264	0.0294	-0.0588	0.0147
C	2.978720049348547	-3.428063049348547	-0.42557992597717936	-0.0294	0.0294	-0.0441
O	1.412016222068462	-1.301573950651453	0.403257	-0.1323	-0.0294	0.0
C	6.256049024674274	-1.795128	-1.067810049348547	-0.0147	0.0	0.0294
O	-0.41184992597717934	0.7858079013029057	1.9423601727199151	-0.0441	0.0588	-0.1029
C	-0.9679548766286321	-0.9207446298858966	2.2515137532572647	-0.0735	-0.2205	0.147
O	-1.1663907532572644	-1.2927085558630762	1.0678676545601702	-0.147	-0.2646	0.2058
O	-2.934142049348547	0.49642714804564136	2.857633827280085	0.0294	-0.0882	0.1029
C	-2.3912189753257262	1.7392860986970942	2.838766975325726	-0.0147	-0.0588	0.0147
C	-0.8470609506514528	1.78931	2.827878098697094	-0.0294	0.0	-0.0588
C	-2.148251123371368	-0.6414699753257265	3.2650327285829905	0.0735	-0.0147	0.1617
O	-3.116019876628632	2.7134401973941884	2.757316	-0.0735	-0.1176	0.0
C	-0.3151808026058115	3.175896925977179	2.518788049348547	-0.1176	0.0441	-0.0294
C	-3.1057921480456416	-1.8757430986970942	3.2899972350975197	0.0882	0.0588	0.4557
C	0.2049168272800851	-3.8378578519543587	2.7364849259771793	0.1029	-0.0882	0.0441
C	2.2796130246742736	-3.113974098697094	-1.766948950651453	-0.0147	0.0588	-0.0294
C	-2.470921049348547	-1.0800200246742735	-1.435569	0.0294	0.0147	0.0
C	1.4182659259771793	2.610015950651453	-0.30942692597717936	0.0441	0.0294	-0.0441
C	-3.5030880246742737	-0.19512502467427356	-0.9715969506514529	0.0147	0.0147	-0.0294
C	-4.649853975325726	-0.7794240493485471	-0.36753285195435864	-0.0147	0.0294	-0.0882
C	-4.792949950651453	-2.176152049348547	-0.23777180260581157	-0.0294	0.0294	-0.1176
C	-3.8082309753257264	-3.011366024674274	-0.7797318766286322	-0.0147	0.0147	-0.0735
C	-2.635485024674274	-2.4997640246742736	-1.3835269753257264	0.0147	0.0147	-0.0147
C	-3.405195049348547	1.3377629753257265	-1.2136189753257265	0.0294	0.0147	-0.0147
C	-1.5713310246742735	-3.481109	-1.9416610246742736	0.0147	0.0	0.0147
C	2.485378	2.5333179753257262	0.6637380246742736	0.0	0.0147	-0.0147
C	2.8493450246742738	3.6982869753257264	1.3605999753257265	-0.0147	0.0147	0.0147
C	2.216153	4.937390975325727	1.111862	0.0	0.0147	0.0
C	1.2124839506514529	5.010295950651453	0.13145104934854712	0.0294	0.0294	-0.0294
C	0.8017889259771793	3.8568209259771793	-0.5990329259771794	0.0441	0.0441	-0.0441
C	3.2606960246742736	1.2156079753257265	0.939494	-0.0147	0.0147	0.0
C	-0.29789509869709424	4.03253892597718	-1.6801429013029057	0.0588	0.0441	-0.0588
C	-4.422380049348548	2.1709739753257264	-0.3561769506514529	0.0294	0.0147	-0.0294
C	-3.5907600740228207	1.655138950651453	-2.734024975325726	0.0441	0.0294	-0.0147
C	-1.043155950651453	-4.450914	-0.8117930246742735	-0.0294	0.0	0.0147
C	-2.1485480740228207	-4.321322024674274	-3.143662	0.0441	0.0147	0.0
C	-1.6098330740228208	4.623989975325726	-1.0576438766286322	0.0441	0.0147	-0.0735
C	0.17598387662863224	4.9421628766286325	-2.845499925977179	0.0735	0.0735	-0.0441
C	3.081185098697094	0.751196	2.422533024674274	-0.0588	0.0	-0.0147
C	4.791668024674274	1.4108110246742736	0.6123949506514529	-0.0147	-0.0147	0.0294
C	-1.2475500246742735	-0.9655	-4.144046024674274	0.0147	0.0	0.0147
C	2.500036950651453	1.8922929753257265	-2.782205876628632	0.0294	0.0147	-0.0735
H	1.081837	0.158228	-4.076325950651452	0.0	0.0	-0.0294
H	1.8092809259771792	-2.4436329753257264	3.135084049348547	0.0441	-0.0147	-0.0294
H	3.316593049348547	-4.469091049348547	-0.4570909013029058	-0.0294	0.0294	-0.0588
H	6.044264	-0.760965	-0.7778300493485472	0.0	0.0	0.0294
H	6.728080975325726	-1.841803	-2.029920049348547	0.0147	0.0	0.0294
H	6.869814049348547	-2.28463	-0.29198004934854715	-0.0294	0.0	0.0294
H	-0.5238390740228207	1.519629	3.8586911480456414	0.0441	0.0	-0.0882
H	-1.7106952960912827	-0.42619914804564135	4.283277925977179	0.1764	0.0882	0.0441
H	-0.7403388519543587	3.886682	3.2518949753257265	-0.0882	0.0	0.0147
H	-0.5940856545601702	3.5288489259771794	1.5078919753257265	-0.2058	0.0441	0.0147
H	0.7715671973941884	3.2030898519543585	2.576105172719915	-0.1176	0.0882	-0.1029
H	-3.946703320765556	-1.6880163207655563	4.004322185748973	0.1911	0.1911	0.48510000000000003
H	-2.597823222068462	-2.7729091727199147	3.631728136400426	0.1323	0.1029	0.5145
H	-3.526419975325726	-2.045866876628632	2.2581050377033316	-0.0147	-0.0735	0.5733
H	0.8740637779315379	-4.678381925977179	2.475818950651453	0.1323	-0.0441	0.0294
H	-0.7004111480456413	-3.919263777931538	2.1341988766286324	0.0882	-0.1323	0.0735
H	-0.05028622206846199	-3.9238058519543584	3.805102925977179	0.1323	-0.0882	0.0441
H	1.3654600246742734	-3.701680098697094	-1.8286619013029057	-0.0147	0.0588	-0.0588
H	2.9589090246742735	-3.4231301480456415	-2.580171950651453	-0.0147	0.0882	-0.0294
H	2.049090049348547	-2.0557000986970944	-1.8719819753257265	-0.0294	0.0588	-0.0147
H	-5.464048975325726	-0.12226304934854712	-0.0020978026058115495	-0.0147	0.0294	-0.1176
H	-5.681263901302906	-2.594063049348547	0.2362852714170091	-0.0588	0.0294	-0.1617
H	-3.941947950651453	-4.116907049348548	-0.7099468272800851	-0.0294	0.0294	-0.1029
H	-2.377860049348547	1.6540839753257266	-0.9240669753257265	0.0294	0.0147	-0.0147
H	-0.7114590493485471	-2.898517	-2.296383049348547	0.0294	0.0	0.0294
H	3.6622660740228206	3.652958	2.116839950651453	-0.0441	0.0	0.0294
H	2.520194024674274	5.848423	1.6671239753257265	-0.0147	0.0	0.0147
H	0.7507859506514528	5.981827950651453	-0.08689395065145289	0.0294	0.0294	-0.0294
H	2.8646350246742736	0.44171797532572643	0.27314502467427354	-0.0147	0.0147	-0.0147
H	-0.5275711233713678	3.037783925977179	-2.0835888519543584	0.0735	0.0441	-0.0882
H	-4.2153700493485475	3.2421309753257264	-0.5098299753257265	0.0294	0.0147	-0.0147
H	-4.328519024674273	1.9375439753257264	0.7175180493485471	0.0147	0.0147	-0.0294
H	-5.454168049348548	1.961894950651453	-0.6701449259771793	0.0294	0.0294	-0.0441
H	-3.532985074022821	2.743594950651453	-2.8845199753257265	0.0441	0.0294	-0.0147
H	-4.56686007402282	1.301243950651453	-3.083081950651453	0.0441	0.0294	-0.0294
H	-2.797200074022821	1.1805699506514529	-3.3339969753257264	0.0441	0.0294	-0.0147
H	-0.291093	-5.146876024674274	-1.2176530740228209	0.0	0.0147	0.0441
H	-1.878302950651453	-5.047966975325727	-0.3872779506514529	-0.0294	-0.0147	-0.0294
H	-0.5882278766286322	-3.847570975325726	-0.00341207402282067	-0.0735	-0.0147	0.0441
H	-1.3729110986970943	-4.971843024674274	-3.559781024674274	0.0588	0.0147	0.0147
H	-2.508125098697094	-3.654926024674274	-3.931405975325726	0.0588	0.0147	-0.0147
H	-2.995038074022821	-4.9552740246742735	-2.800692950651453	0.0441	0.0147	-0.0294
H	-2.397861098697094	4.680165950651452	-1.8233798519543587	0.0588	0.0294	-0.0882
H	-1.9868670740228207	3.9925810246742737	-0.22670682728008507	0.0441	-0.0147	-0.1029
H	-1.442022049348547	5.641766	-0.6583609259771793	0.0294	0.0	-0.0441
H	-0.6102101480456413	5.005307876628632	-3.613419901302906	0.0882	0.0735	-0.0588
H	1.0873248519543588	4.550760851954358	-3.318793950651453	0.0882	0.0882	-0.0294
H	0.39868992597717934	5.9561868766286326	-2.4969689753257263	0.0441	0.0735	-0.0147
H	3.615288123371368	-0.20958	2.567673	-0.0735	0.0	0.0
H	1.9991340986970942	0.5986749753257264	2.6389600740228207	-0.0588	0.0147	-0.0441
H	3.467427098697094	1.481488	3.131336	-0.0588	0.0	0.0
H	5.327285049348547	0.4695420246742736	0.8662499506514528	-0.0294	-0.0147	0.0294
H	5.234522024674273	2.2141370246742738	1.221841950651453	-0.0147	-0.0147	0.0294
H	4.929308975325727	1.6476010246742736	-0.4504120493485471	0.0147	-0.0147	0.0294
H	-2.2902400246742736	-1.236644	-3.9593230246742737	0.0147	0.0	0.0147
H	-1.2161180246742735	-0.21796897532572643	-4.94406	0.0147	-0.0147	0.0
H	-0.7147490246742735	-1.8424589753257266	-4.506369049348548	0.0147	-0.0147	0.0294
H	2.289461975325726	2.9485799753257265	-2.9201468272800852	0.0147	0.0147	-0.1029
H	3.363113950651453	1.8160689259771792	-2.0880568519543585	0.0294	0.0441	-0.0882
H	2.8088319753257265	1.467578	-3.740906876628632	0.0147	0.0	-0.0735
114
O	5.012918	-2.497779	-1.222763	-0.0147	0.0	0.0
Mg	-0.32064499999999996	0.036756999999999984	0.103833	0.0441	0.1176	-0.0441
O	0.081623	-1.4235280000000001	3.015976	0.0147	-0.0882	0.0441
C	4.2241789999999995	-2.57823	-0.132954	-0.0294	0.0147	-0.0147
N	-1.172199	-0.486583	-1.7108860000000001	0.0294	0.0147	0.0147
N	0.918339	1.389869	-0.9431539999999999	0.0441	0.0441	-0.0588
O	4.488984	-2.098318	0.949841	-0.0441	0.0147	-0.0147
C	-0.6005959999999999	-0.40640200000000004	-2.882174	0.0294	0.0147	0.0
C	0.6661309999999999	0.231648	-3.067728	0.0147	0.0147	-0.0294
C	1.3089439999999999	1.135324	-2.191327	0.0294	0.0294	-0.0588
O	2.130156	-3.412113	0.7468819999999999	-0.0294	0.0	-0.0441
C	1.4701019999999998	-2.299918	1.099547	-0.0588	-0.0294	-0.0147
C	0.8954949999999999	-2.4853549999999998	2.5073160000000003	0.0294	-0.0588	0.0147
C	2.980668	-3.430011	-0.42265800000000003	-0.0294	0.0294	-0.0441
O	1.420782	-1.299626	0.403257	-0.1323	-0.0294	0.0
C	6.257023	-1.795128	-1.069758	-0.0147	0.0	0.0294
O	-0.408928	0.7819119999999999	1.949178	-0.0441	0.0588	-0.1029
C	-0.9630849999999999	-0.9061349999999999	2.2417740000000004	-0.0735	-0.2205	0.147
O	-1.1566509999999999	-1.2751770000000002	1.054232	-0.147	-0.2646	0.2058
O	-2.93609	0.502271	2.850816	0.0294	-0.0882	0.1029
C	-2.390245	1.743182	2.837793	-0.0147	-0.0588	0.0147
C	-0.845113	1.78931	2.8317740000000002	-0.0294	0.0	-0.0588
C	-2.153121	-0.640496	3.2543189999999997	0.0735	-0.0147	0.1617
O	-3.11115	2.7212319999999997	2.757316	-0.0735	-0.1176	0.0
C	-0.30738899999999997	3.172975	2.520736	-0.1176	0.0441	-0.0294
C	-3.1116360000000003	-1.879639	3.259804	0.0882	0.0588	0.4557
C	0.198099	-3.832014	2.733563	0.1029	-0.0882	0.0441
C	2.2805869999999997	-3.11787	-1.765001	-0.0147	0.0588	-0.0294
C	-2.472869	-1.080994	-1.435569	0.0294	0.0147	0.0
C	1.415344	2.608068	-0.306505	0.0441	0.0294	-0.0441
C	-3.504062	-0.196099	-0.969649	0.0147	0.0147	-0.0294
C	-4.64888	-0.781372	-0.361689	-0.0147	0.0294	-0.0882
C	-4.791002000000001	-2.1781	-0.22998000000000002	-0.0294	0.0294	-0.1176
C	-3.8072570000000003	-3.01234	-0.7748619999999999	-0.0147	0.0147	-0.0735
C	-2.636459	-2.5007379999999997	-1.382553	0.0147	0.0147	-0.0147
C	-3.407143	1.336789	-1.212645	0.0294	0.0147	-0.0147
C	-1.572305	-3.481109	-1.9426350000000001	0.0147	0.0	0.0147
C	2.485378	2.532344	0.6647120000000001	0.0	0.0147	-0.0147
C	2.850319	3.6973130000000003	1.359626	-0.0147	0.0147	0.0147
C	2.216153	4.9364170000000005	1.111862	0.0	0.0147	0.0
C	1.2105359999999998	5.008348000000001	0.133399	0.0294	0.0294	-0.0294
C	0.798867	3.853899	-0.5961110000000001	0.0441	0.0441	-0.0441
C	3.2616699999999996	1.214634	0.939494	-0.0147	0.0147	0.0
C	-0.30179100000000003	4.029617	-1.676247	0.0588	0.0441	-0.0588
C	-4.424328	2.1700000000000004	-0.354229	0.0294	0.0147	-0.0294
C	-3.593682	1.6531909999999999	-2.733051	0.0441	0.0294	-0.0147
C	-1.041208	-4.450914	-0.812767	-0.0294	0.0	0.0147
C	-2.1514699999999998	-4.322296	-3.143662	0.0441	0.0147	0.0
C	-1.6127550000000002	4.623016	-1.052774	0.0441	0.0147	-0.0735
C	0.17111400000000002	4.937293	-2.842578	0.0735	0.0735	-0.0441
C	3.085081	0.751196	2.423507	-0.0588	0.0	-0.0147
C	4.792642	1.411785	0.610447	-0.0147	-0.0147	0.0294
C	-1.248524	-0.9655	-4.14502	0.0147	0.0	0.0147
C	2.498089	1.891319	-2.777336	0.0294	0.0147	-0.0735
H	1.081837	0.158228	-4.074378	0.0	0.0	-0.0294
H	1.8063589999999998	-2.4426590000000004	3.137032	0.0441	-0.0147	-0.0294
H	3.318541	-4.471038999999999	-0.453195	-0.0294	0.0294	-0.0588
H	6.044264	-0.760965	-0.7797780000000001	0.0	0.0	0.0294
H	6.727107	-1.841803	-2.031868	0.0147	0.0	0.0294
H	6.8717619999999995	-2.28463	-0.293928	-0.0294	0.0	0.0294
H	-0.526761	1.519629	3.864535	0.0441	0.0	-0.0882
H	-1.722383	-0.432043	4.280355999999999	0.1764	0.0882	0.0441
H	-0.734495	3.886682	3.2509210000000004	-0.0882	0.0	0.0147
H	-0.5804499999999999	3.5259270000000003	1.506918	-0.2058	0.0441	0.0147
H	0.779359	3.197246	2.582923	-0.1176	0.0882	-0.1029
H	-3.959365	-1.700678	3.972181	0.1911	0.1911	0.48510000000000003
H	-2.606589	-2.779727	3.5976390000000005	0.1323	0.1029	0.5145
H	-3.525446	-2.040997	2.22012	-0.0147	-0.0735	0.5733
H	0.8652979999999999	-4.675459999999999	2.473871	0.1323	-0.0441	0.0294
H	-0.706255	-3.9104979999999996	2.1293290000000002	0.0882	-0.1323	0.0735
H	-0.05905199999999998	-3.9179619999999997	3.802181	0.1323	-0.0882	0.0441
H	1.366434	-3.705576	-1.8247659999999999	-0.0147	0.0588	-0.0588
H	2.9598829999999996	-3.428974	-2.578224	-0.0147	0.0882	-0.0294
H	2.051038	-2.059596	-1.871008	-0.0294	0.0588	-0.0147
H	-5.463075	-0.124211	0.005694000000000005	-0.0147	0.0294	-0.1176
H	-5.6773679999999995	-2.596011	0.24699900000000002	-0.0588	0.0294	-0.1617
H	-3.94	-4.118855	-0.703129	-0.0294	0.0294	-0.1029
H	-2.379808	1.65311	-0.9230929999999999	0.0294	0.0147	-0.0147
H	-0.7134069999999999	-2.898517	-2.298331	0.0294	0.0	0.0294
H	3.6651879999999997	3.652958	2.1148919999999998	-0.0441	0.0	0.0294
H	2.521168	5.848423	1.66615	-0.0147	0.0	0.0147
H	0.7488379999999999	5.9798800000000005	-0.084946	0.0294	0.0294	-0.0294
H	2.8656089999999996	0.440744	0.274119	-0.0147	0.0147	-0.0147
H	-0.532441	3.034862	-2.0777449999999997	0.0735	0.0441	-0.0882
H	-4.217318	3.2411570000000003	-0.508856	0.0294	0.0147	-0.0147
H	-4.329492999999999	1.93657	0.7194659999999999	0.0147	0.0147	-0.0294
H	-5.456116	1.9599469999999999	-0.667223	0.0294	0.0294	-0.0441
H	-3.535907	2.741647	-2.8835460000000004	0.0441	0.0294	-0.0147
H	-4.569782	1.299296	-3.081134	0.0441	0.0294	-0.0294
H	-2.800122	1.1786219999999998	-3.3330230000000003	0.0441	0.0294	-0.0147
H	-0.291093	-5.14785	-1.2205750000000002	0.0	0.0147	0.0441
H	-1.876355	-5.0469930000000005	-0.38533	-0.0294	-0.0147	-0.0294
H	-0.5833579999999999	-3.846597	-0.006333999999999999	-0.0735	-0.0147	0.0441
H	-1.376807	-4.972817	-3.560755	0.0588	0.0147	0.0147
H	-2.5120210000000003	-3.6559	-3.930432	0.0588	0.0147	-0.0147
H	-2.99796	-4.9562479999999995	-2.798745	0.0441	0.0147	-0.0294
H	-2.401757	4.678218	-1.817536	0.0588	0.0294	-0.0882
H	-1.989789	3.9935549999999997	-0.21988899999999997	0.0441	-0.0147	-0.1029
H	-1.44397	5.641766	-0.655439	0.0294	0.0	-0.0441
H	-0.616054	5.000438	-3.609524	0.0882	0.0735	-0.0588
H	1.0814810000000001	4.544917	-3.316846	0.0882	0.0882	-0.0294
H	0.395768	5.951317	-2.495995	0.0441	0.0735	-0.0147
H	3.620158	-0.20958	2.567673	-0.0735	0.0	0.0
H	2.00303	0.5977009999999999	2.641882	-0.0588	0.0147	-0.0441
H	3.471323	1.481488	3.131336	-0.0588	0.0	0.0
H	5.329232999999999	0.47051600000000005	0.8643019999999999	-0.0294	-0.0147	0.0294
H	5.2354959999999995	2.215111	1.219894	-0.0147	-0.0147	0.0294
H	4.928335000000001	1.6485750000000001	-0.45236	0.0147	-0.0147	0.0294
H	-2.2912139999999996	-1.236644	-3.9602969999999997	0.0147	0.0	0.0147
H	-1.217092	-0.216995	-4.94406	0.0147	-0.0147	0.0
H	-0.715723	-1.841485	-4.508317	0.0147	-0.0147	0.0294
H	2.288488	2.9476060000000004	-2.913329	0.0147	0.0147	-0.1029
H	3.361166	1.8131469999999998	-2.082213	0.0294	0.0441	-0.0882
H	2.8078580000000004	1.467578	-3.736037	0.0147	0.0	-0.0735
114
O	5.011944024674274	-2.497779	-1.222763	-0.0147	0.0	0.0
Mg	-0.31772307402282063	0.04454880260581151	0.10091107402282068	0.0441	0.1176	-0.0441
O	0.08259697532572643	-1.4293718519543588	3.0188979259771793	0.0147	-0.0882	0.0441
C	4.222231049348547	-2.577256024674274	-0.13392797532572642	-0.0294	0.0147	-0.0147
N	-1.170251049348547	-0.4856090246742736	-1.7099120246742736	0.0294	0.0147	0.0147
N	0.9212609259771793	1.3927909259771794	-0.9470499013029057	0.0441	0.0441	-0.0588
O	4.48606207402282	-2.097344024674274	0.9488670246742735	-0.0441	0.0147	-0.0147
C	-0.5986480493485471	-0.4054280246742736	-2.882174	0.0294	0.0147	0.0
C	0.6671049753257264	0.23262197532572643	-3.069675950651453	0.0147	0.0147	-0.0294
C	1.310891950651453	1.137271950651453	-2.195222901302906	0.0294	0.0294	-0.0588
O	2.128208049348547	-3.412113	0.7439600740228206	-0.0294	0.0	-0.0441
C	1.4662060986970942	-2.301865950651453	1.0985730246742735	-0.0588	-0.0294	-0.0147
C	0.8974429506514529	-2.489250901302906	2.5082899753257264	0.0294	-0.0588	0.0147
C	2.978720049348547	-3.428063049348547	-0.4255799259771793	-0.0294	0.0294	-0.0441
O	1.412016222068462	-1.301573950651453	0.403257	-0.1323	-0.0294	0.0
C	6.256049024674274	-1.795128	-1.067810049348547	-0.0147	0.0	0.0294
O	-0.4118499259771793	0.7858079013029057	1.9423601727199151	-0.0441	0.0588	-0.1029
C	-0.9679548766286321	-0.9207446298858966	2.2515137532572647	-0.0735	-0.2205	0.147
O	-1.1663907532572644	-1.292708555863076	1.0678676545601702	-0.147	-0.2646	0.2058
O	-2.934142049348547	0.49642714804564136	2.857633827280085	0.0294	-0.0882	0.1029
C	-2.3912189753257262	1.7392860986970942	2.838766975325726	-0.0147	-0.0588	0.0147
C	-0.8470609506514528	1.78931	2.827878098697094	-0.0294	0.0	-0.0588
C	-2.148251123371368	-0.6414699753257265	3.2650327285829905	0.0735	-0.0147	0.1617
O	-3.116019876628632	2.7134401973941884	2.757316	-0.0735	-0.1176	0.0
C	-0.3151808026058115	3.175896925977179	2.518788049348547	-0.1176	0.0441	-0.0294
C	-3.1057921480456416	-1.8757430986970942	3.2899972350975197	0.0882	0.0588	0.4557
C	0.2049168272800851	-3.8378578519543587	2.7364849259771793	0.1029	-0.0882	0.0441
C	2.2796130246742736	-3.113974098697094	-1.766948950651453	-0.0147	0.0588	-0.0294
C	-2.470921049348547	-1.0800200246742735	-1.435569	0.0294	0.0147	0.0
C	1.4182659259771793	2.610015950651453	-0.30942692597717936	0.0441	0.0294	-0.0441
C	-3.5030880246742737	-0.19512502467427356	-0.9715969506514529	0.0147	0.0147	-0.0294
C	-4.649853975325726	-0.7794240493485471	-0.36753285195435864	-0.0147	0.0294	-0.0882
C	-4.792949950651453	-2.176152049348547	-0.23777180260581154	-0.0294	0.0294	-0.1176
C	-3.8082309753257264	-3.011366024674274	-0.7797318766286322	-0.0147	0.0147	-0.0735
C	-2.635485024674274	-2.4997640246742736	-1.3835269753257264	0.0147	0.0147	-0.0147
C	-3.405195049348547	1.3377629753257265	-1.2136189753257265	0.0294	0.0147	-0.0147
C	-1.5713310246742735	-3.481109	-1.9416610246742736	0.0147	0.0	0.0147
C	2.485378	2.5333179753257262	0.6637380246742736	0.0	0.0147	-0.0147
C	2.8493450246742738	3.6982869753257264	1.3605999753257265	-0.0147	0.0147	0.0147
C	2.216153	4.937390975325727	1.111862	0.0	0.0147	0.0
C	1.2124839506514529	5.010295950651453	0.13145104934854712	0.0294	0.0294	-0.0294
C	0.8017889259771793	3.8568209259771793	-0.5990329259771794	0.0441	0.0441	-0.0441
C	3.2606960246742736	1.2156079753257265	0.939494	-0.0147	0.0147	0.0
C	-0.29789509869709424	4.03253892597718	-1.6801429013029057	0.0588	0.0441	-0.0588
C	-4.422380049348548	2.1709739753257264	-0.3561769506514529	0.0294	0.0147	-0.0294
C	-3.5907600740228207	1.655138950651453	-2.734024975325726	0.0441	0.0294	-0.0147
C	-1.043155950651453	-4.450914	-0.8117930246742735	-0.0294	0.0	0.0147
C	-2.1485480740228207	-4.321322024674274	-3.143662	0.0441	0.0147	0.0
C	-1.6098330740228208	4.623989975325726	-1.0576438766286322	0.0441	0.0147	-0.0735
C	0.17598387662863224	4.9421628766286325	-2.845499925977179	0.0735	0.0735	-0.0441
C	3.081185098697094	0.751196	2.422533024674274	-0.0588	0.0	-0.0147
C	4.791668024674274	1.4108110246742736	0.6123949506514529	-0.0147	-0.0147	0.0294
C	-1.2475500246742735	-0.9655	-4.144046024674274	0.0147	0.0	0.0147
C	2.500036950651453	1.8922929753257265	-2.782205876628632	0.0294	0.0147	-0.0735
H	1.081837	0.158228	-4.076325950651452	0.0	0.0	-0.0294
H	1.8092809259771792	-2.4436329753257264	3.135084049348547	0.0441	-0.0147	-0.0294
H	3.316593049348547	-4.469091049348547	-0.45709090130290575	-0.0294	0.0294	-0.0588
H	6.044264	-0.760965	-0.7778300493485472	0.0	0.0	0.0294
H	6.728080975325726	-1.841803	-2.029920049348547	0.0147	0.0	0.0294
H	6.869814049348547	-2.28463	-0.29198004934854715	-0.0294	0.0	0.0294
H	-0.5238390740228207	1.519629	3.8586911480456414	0.0441	0.0	-0.0882
H	-1.710695296091283	-0.42619914804564135	4.283277925977179	0.1764	0.0882	0.0441
H	-0.7403388519543586	3.886682	3.2518949753257265	-0.0882	0.0	0.0147
H	-0.5940856545601702	3.5288489259771794	1.5078919753257265	-0.2058	0.0441	0.0147
H	0.7715671973941884	3.2030898519543585	2.576105172719915	-0.1176	0.0882	-0.1029
H	-3.946703320765556	-1.6880163207655563	4.004322185748972	0.1911	0.1911	0.48510000000000003
H	-2.597823222068462	-2.7729091727199147	3.631728136400426	0.1323	0.1029	0.5145
H	-3.526419975325726	-2.045866876628632	2.258105037703331	-0.0147	-0.0735	0.5733
H	0.8740637779315379	-4.678381925977179	2.475818950651453	0.1323	-0.0441	0.0294
H	-0.7004111480456414	-3.919263777931538	2.1341988766286324	0.0882	-0.1323	0.0735
H	-0.05028622206846202	-3.9238058519543584	3.805102925977179	0.1323	-0.0882	0.0441
H	1.3654600246742734	-3.701680098697094	-1.8286619013029057	-0.0147	0.0588	-0.0588
H	2.9589090246742735	-3.4231301480456415	-2.580171950651453	-0.0147	0.0882	-0.0294
H	2.049090049348547	-2.0557000986970944	-1.8719819753257265	-0.0294	0.0588	-0.0147
H	-5.464048975325726	-0.12226304934854712	-0.0020978026058115218	-0.0147	0.0294	-0.1176
H	-5.681263901302906	-2.594063049348547	0.23628527141700917	-0.0588	0.0294	-0.1617
H	-3.941947950651453	-4.116907049348548	-0.7099468272800851	-0.0294	0.0294	-0.1029
H	-2.377860049348547	1.6540839753257266	-0.9240669753257265	0.0294	0.0147	-0.0147
H	-0.7114590493485471	-2.898517	-2.296383049348547	0.0294	0.0	0.0294
H	3.6622660740228206	3.652958	2.116839950651453	-0.0441	0.0	0.0294
H	2.520194024674274	5.848423	1.6671239753257265	-0.0147	0.0	0.0147
H	0.7507859506514528	5.981827950651453	-0.08689395065145288	0.0294	0.0294	-0.0294
H	2.8646350246742736	0.44171797532572643	0.27314502467427354	-0.0147	0.0147	-0.0147
H	-0.5275711233713678	3.037783925977179	-2.0835888519543584	0.0735	0.0441	-0.0882
H	-4.2153700493485475	3.2421309753257264	-0.5098299753257265	0.0294	0.0147	-0.0147
H	-4.328519024674273	1.9375439753257264	0.7175180493485471	0.0147	0.0147	-0.0294
H	-5.454168049348548	1.961894950651453	-0.6701449259771793	0.0294	0.0294	-0.0441
H	-3.532985074022821	2.743594950651453	-2.8845199753257265	0.0441	0.0294	-0.0147
H	-4.56686007402282	1.301243950651453	-3.083081950651453	0.0441	0.0294	-0.0294
H	-2.797200074022821	1.1805699506514529	-3.3339969753257264	0.0441	0.0294	-0.0147
H	-0.291093	-5.146876024674274	-1.2176530740228209	0.0	0.0147	0.0441
H	-1.878302950651453	-5.047966975325727	-0.3872779506514529	-0.0294	-0.0147	-0.0294
H	-0.5882278766286322	-3.847570975325726	-0.003412074022820677	-0.0735	-0.0147	0.0441
H	-1.3729110986970943	-4.971843024674274	-3.559781024674274	0.0588	0.0147	0.0147
H	-2.508125098697094	-3.654926024674274	-3.931405975325726	0.0588	0.0147	-0.0147
H	-2.995038074022821	-4.9552740246742735	-2.800692950651453	0.0441	0.0147	-0.0294
H	-2.397861098697094	4.680165950651452	-1.8233798519543587	0.0588	0.0294	-0.0882
H	-1.9868670740228207	3.9925810246742737	-0.22670682728008507	0.0441	-0.0147	-0.1029
H	-1.442022049348547	5.641766	-0.6583609259771793	0.0294	0.0	-0.0441
H	-0.6102101480456413	5.005307876628632	-3.613419901302906	0.0882	0.0735	-0.0588
H	1.0873248519543588	4.550760851954358	-3.318793950651453	0.0882	0.0882	-0.0294
H	0.39868992597717934	5.9561868766286326	-2.4969689753257263	0.0441	0.0735	-0.0147
H	3.615288123371368	-0.20958	2.567673	-0.0735	0.0	0.0
H	1.9991340986970942	0.5986749753257264	2.6389600740228207	-0.0588	0.0147	-0.0441
H	3.467427098697094	1.481488	3.131336	-0.0588	0.0	0.0
H	5.327285049348547	0.4695420246742736	0.8662499506514528	-0.0294	-0.0147	0.0294
H	5.234522024674273	2.2141370246742738	1.221841950651453	-0.0147	-0.0147	0.0294
H	4.929308975325727	1.6476010246742736	-0.4504120493485471	0.0147	-0.0147	0.0294
H	-2.2902400246742736	-1.236644	-3.9593230246742737	0.0147	0.0	0.0147
H	-1.2161180246742735	-0.21796897532572643	-4.94406	0.0147	-0.0147	0.0
H	-0.7147490246742735	-1.8424589753257266	-4.506369049348548	0.0147	-0.0147	0.0294
H	2.289461975325726	2.9485799753257265	-2.9201468272800852	0.0147	0.0147	-0.1029
H	3.363113950651453	1.8160689259771792	-2.0880568519543585	0.0294	0.0441	-0.0882
H	2.8088319753257265	1.467578	-3.740906876628632	0.0147	0.0	-0.0735
114
O	5.009117438188062	-2.497779	-1.222763	-0.0147	0.0	0.0
Mg	-0.30924331456418436	0.06716149449550834	0.09243131456418437	0.0441	0.1176	-0.0441
O	0.08542356181193855	-1.4463313708716314	3.0273776854358156	0.0147	-0.0882	0.0441
C	4.216577876376123	-2.5744294381880617	-0.13675456181193854	-0.0294	0.0147	-0.0147
N	-1.1645978763761229	-0.4827824381880615	-1.7070854381880616	0.0294	0.0147	0.0147
N	0.9297406854358157	1.4012706854358157	-0.9583562472477541	0.0441	0.0441	-0.0588
O	4.477582314564184	-2.0945174381880616	0.9460404381880615	-0.0441	0.0147	-0.0147
C	-0.5929948763761229	-0.4026014381880615	-2.882174	0.0294	0.0147	0.0
C	0.6699315618119385	0.23544856181193854	-3.075329123623877	0.0147	0.0147	-0.0294
C	1.316545123623877	1.142925123623877	-2.206529247247754	0.0294	0.0294	-0.0588
O	2.122554876376123	-3.412113	0.7354803145641843	-0.0294	0.0	-0.0441
C	1.4548997527522458	-2.307519123623877	1.0957464381880615	-0.0588	-0.0294	-0.0147
C	0.903096123623877	-2.500557247247754	2.5111165618119387	0.0294	-0.0588	0.0147
C	2.973066876376123	-3.422409876376123	-0.43405968543581563	-0.0294	0.0294	-0.0441
O	1.386576943692553	-1.307227123623877	0.403257	-0.1323	-0.0294	0.0
C	6.253222438188062	-1.795128	-1.0621568763761229	-0.0147	0.0	0.0294
O	-0.4203296854358156	0.7971142472477541	1.9225740673164302	-0.0441	0.0588	-0.1029
C	-0.9820878090596926	-0.9631434271790781	2.2797796181193855	-0.0735	-0.2205	0.147
O	-1.1946566181193854	-1.343587112614894	1.1074398653671396	-0.147	-0.2646	0.2058
O	-2.928488876376123	0.47946762912836877	2.8774199326835697	0.0294	-0.0882	0.1029
C	-2.3940455618119385	1.7279797527522458	2.8415935618119383	-0.0147	-0.0588	0.0147
C	-0.852714123623877	1.78931	2.816571752752246	-0.0294	0.0	-0.0588
C	-2.1341181909403075	-0.6442965618119385	3.296125179931324	0.0735	-0.0147	0.1617
O	-3.1301528090596924	2.6908275055044917	2.757316	-0.0735	-0.1176	0.0
C	-0.33779349449550833	3.1843766854358155	2.5131348763761228	-0.1176	0.0441	-0.0294
C	-3.088832629128369	-1.8644367527522459	3.377621416170095	0.0882	0.0588	0.4557
C	0.22470293268356978	-3.8548173708716313	2.7449646854358156	0.1029	-0.0882	0.0441
C	2.2767864381880614	-3.1026677527522457	-1.7726021236238771	-0.0147	0.0588	-0.0294
C	-2.465267876376123	-1.0771934381880615	-1.435569	0.0294	0.0147	0.0
C	1.4267456854358156	2.615669123623877	-0.31790668543581563	0.0441	0.0294	-0.0441
C	-3.5002614381880615	-0.19229843818806144	-0.9772501236238771	0.0147	0.0147	-0.0294
C	-4.6526805618119385	-0.773770876376123	-0.38449237087163124	-0.0147	0.0294	-0.0882
C	-4.798603123623877	-2.170498876376123	-0.2603844944955084	-0.0294	0.0294	-0.1176
C	-3.8110575618119387	-3.0085394381880617	-0.7938648090596927	-0.0147	0.0147	-0.0735
C	-2.6326584381880616	-2.4969374381880614	-1.3863535618119385	0.0147	0.0147	-0.0147
C	-3.399541876376123	1.3405895618119386	-1.2164455618119385	0.0294	0.0147	-0.0147
C	-1.5685044381880615	-3.481109	-1.9388344381880616	0.0147	0.0	0.0147
C	2.485378	2.5361445618119385	0.6609114381880615	0.0	0.0147	-0.0147
C	2.8465184381880615	3.7011135618119386	1.3634265618119386	-0.0147	0.0147	0.0147
C	2.216153	4.940217561811939	1.111862	0.0	0.0147	0.0
C	1.218137123623877	5.015949123623877	0.1257978763761229	0.0294	0.0294	-0.0294
C	0.8102686854358156	3.8653006854358156	-0.6075126854358157	0.0441	0.0441	-0.0441
C	3.2578694381880613	1.2184345618119385	0.939494	-0.0147	0.0147	0.0
C	-0.2865887527522458	4.041018685435816	-1.691449247247754	0.0588	0.0441	-0.0588
[truncated: 300 more rows]
