# Supplementary material
Source: publisher figshare collection journal article supplement (https://acs.figshare.com/ndownloader/files/5127205)
Supplement: Supplementary file 1 [file 5127205 › supporting_ja043819b/SSSS_fm-5-ts2-freq-50.log]

 Entering Gaussian System, Link 0=g03
 Input=SSSS_fm-5-oco.gjf
 Output=SSSS_fm-5-oco.log
 Initial command:
 /usr/local/g03/l1.exe /home/rzepa/Gau-1163.inp -scrdir=/home/rzepa/
 Entering Link 1 = /usr/local/g03/l1.exe PID=      1164.
  
 Copyright (c) 1988,1990,1992,1993,1995,1998,2003, Gaussian, Inc.
                  All Rights Reserved.
  
 This is the Gaussian(R) 03 program.  It is based on the
 the Gaussian(R) 98 system (copyright 1998, Gaussian, Inc.),
 the Gaussian(R) 94 system (copyright 1995, Gaussian, Inc.),
 the Gaussian 92(TM) system (copyright 1992, Gaussian, Inc.),
 the Gaussian 90(TM) system (copyright 1990, Gaussian, Inc.),
 the Gaussian 88(TM) system (copyright 1988, Gaussian, Inc.),
 the Gaussian 86(TM) system (copyright 1986, Carnegie Mellon
 University), and the Gaussian 82(TM) system (copyright 1983,
 Carnegie Mellon University). Gaussian is a federally registered
 trademark of Gaussian, Inc.
  
 This software contains proprietary and confidential information,
 including trade secrets, belonging to Gaussian, Inc.
  
 This software is provided under written license and may be
 used, copied, transmitted, or stored only in accord with that
 written license.
  
 The following legend is applicable only to US Government
 contracts under DFARS:
  
                    RESTRICTED RIGHTS LEGEND
  
 Use, duplication or disclosure by the US Government is subject
 to restrictions as set forth in subparagraph (c)(1)(ii) of the
 Rights in Technical Data and Computer Software clause at DFARS
 252.227-7013.
  
 Gaussian, Inc.
 Carnegie Office Park, Building 6, Pittsburgh, PA 15106 USA
  
 The following legend is applicable only to US Government
 contracts under FAR:
  
                    RESTRICTED RIGHTS LEGEND
  
 Use, reproduction and disclosure by the US Government is subject
 to restrictions as set forth in subparagraph (c) of the
 Commercial Computer Software - Restricted Rights clause at FAR
 52.227-19.
  
 Gaussian, Inc.
 Carnegie Office Park, Building 6, Pittsburgh, PA 15106 USA
  
  
 ---------------------------------------------------------------
 Warning -- This program may not be used in any manner that
 competes with the business of Gaussian, Inc. or will provide
 assistance to any competitor of Gaussian, Inc.  The licensee
 of this program is prohibited from giving any competitor of
 Gaussian, Inc. access to this program.  By using this program,
 the user acknowledges that Gaussian, Inc. is engaged in the
 business of creating and licensing software in the field of
 computational chemistry and represents and warrants to the
 licensee that it is not a competitor of Gaussian, Inc. and that
 it will not use this program in any manner prohibited above.
 ---------------------------------------------------------------
  

 Cite this work as:
 Gaussian 03, Revision B.04,
 M. J. Frisch, G. W. Trucks, H. B. Schlegel, G. E. Scuseria, 
 M. A. Robb, J. R. Cheeseman, J. A. Montgomery, Jr., T. Vreven, 
 K. N. Kudin, J. C. Burant, J. M. Millam, S. S. Iyengar, J. Tomasi, 
 V. Barone, B. Mennucci, M. Cossi, G. Scalmani, N. Rega, 
 G. A. Petersson, H. Nakatsuji, M. Hada, M. Ehara, K. Toyota, 
 R. Fukuda, J. Hasegawa, M. Ishida, T. Nakajima, Y. Honda, O. Kitao, 
 H. Nakai, M. Klene, X. Li, J. E. Knox, H. P. Hratchian, J. B. Cross, 
 C. Adamo, J. Jaramillo, R. Gomperts, R. E. Stratmann, O. Yazyev, 
 A. J. Austin, R. Cammi, C. Pomelli, J. W. Ochterski, P. Y. Ayala, 
 K. Morokuma, G. A. Voth, P. Salvador, J. J. Dannenberg, 
 V. G. Zakrzewski, S. Dapprich, A. D. Daniels, M. C. Strain, 
 O. Farkas, D. K. Malick, A. D. Rabuck, K. Raghavachari, 
 J. B. Foresman, J. V. Ortiz, Q. Cui, A. G. Baboul, S. Clifford, 
 J. Cioslowski, B. B. Stefanov, G. Liu, A. Liashenko, P. Piskorz, 
 I. Komaromi, R. L. Martin, D. J. Fox, T. Keith, M. A. Al-Laham, 
 C. Y. Peng, A. Nanayakkara, M. Challacombe, P. M. W. Gill, 
 B. Johnson, W. Chen, M. W. Wong, C. Gonzalez, and J. A. Pople, 
 Gaussian, Inc., Pittsburgh PA, 2003.
 
 *********************************************
 Gaussian 03:  x86-Linux-G03RevB.04 2-Jun-2003
                  26-Jul-2004 
 *********************************************
 %mem=500MB
 %nproc=2
 Will use up to    2 processors via shared memory.
 %chk=SSSS_fm-5-oco.chk
 %rwf=oco1.rwf,1800MB,oco2.rwf,1800MB,oco3.rwf,1800MB,oco4.rwf,1800MB,oco5.rwf,18
 00MB
 ---------------------------
 # freq b3lyp gen guess=read
 ---------------------------
 1/10=4,30=1,38=1/1,3;
 2/17=6,18=5,40=1/2;
 3/5=7,11=2,16=1,25=1,30=1,74=-5/1,2,3;
 4/5=1/1;
 5/5=2,38=6/2;
 8/6=4,10=90,11=11,27=1179648000/1;
 11/6=1,8=1,9=11,15=111,16=1/1,2,10;
 10/6=1/2;
 6/7=2,8=2,9=2,10=2,18=1,28=1/1;
 7/8=1,10=1,25=1/1,2,3,16;
 1/10=4,30=1/3;
 99//99;
 --------------------
 from SSSS_fm-oco.gjf
 --------------------
 Symbolic Z-matrix:
 Charge =  0 Multiplicity = 1
 O                    0    -0.08214   0.0661   -5.71429 
 Mg                   0    -0.04244   0.03938   0.32417 
 O                    0     3.43841   0.06661  -0.15365 
 C                    0     0.91869   0.03856  -4.81995 
 N                    0    -1.2869   -1.58867   0.42375 
 N                    0    -1.57781   1.2049   -0.4032 
 O                    0     1.6715    0.95745  -4.59266 
 C                    0    -2.40064  -1.71136  -0.28096 
 C                    0    -2.90908  -0.68716  -1.12058 
 C                    0    -2.58154   0.68564  -1.10574 
 O                    0     2.0896   -1.33149  -3.21637 
 C                    0     1.97888  -0.69495  -2.04316 
 C                    0     3.38449  -0.52582  -1.45236 
 C                    0     1.01584  -1.35225  -4.18502 
 O                    0     0.93196  -0.26102  -1.60055 
 C                    0    -0.24448   1.30344  -6.43632 
 O                    0     1.24855   1.14581   1.16864 
 C                    0     2.74143  -0.49955   0.879 
 O                    0     1.94431  -1.41266   0.71149 
 O                    0     2.56422   0.03415   3.30144 
 C                    0     1.86838   1.21437   3.43179 
 C                    0     1.68929   2.0276    2.14343 
 C                    0     3.4439   -0.16449   2.19754 
 O                    0     1.39508   1.47246   4.51228 
 C                    0     0.79821   3.24537   2.37768 
 C                    0     4.3286   -1.35363   2.5794 
 C                    0     4.24907  -1.79079  -1.5061 
 C                    0    -0.31242  -1.93799  -3.70752 
 C                    0    -0.76986  -2.59403   1.33602 
 C                    0    -1.53032   2.63713  -0.15731 
 C                    0    -0.76065  -2.26375   2.7361 
 C                    0    -0.0141   -3.08163   3.61693 
 C                    0     0.69077  -4.20659   3.1445 
 C                    0     0.61588  -4.55987   1.78736 
 C                    0    -0.10707  -3.77058   0.85971 
 C                    0    -1.6426   -1.10751   3.28239 
 C                    0    -0.14974  -4.22067  -0.62328 
 C                    0    -0.60103   3.46263  -0.86938 
 C                    0    -0.46585   4.82435  -0.49062 
 C                    0    -1.24365   5.37268   0.54798 
 C                    0    -2.17859   4.56351   1.21822 
 C                    0    -2.33955   3.19633   0.89075 
 C                    0     0.23316   2.93468  -2.06132 
 C                    0    -3.3828    2.36281   1.68186 
 C                    0    -1.24157  -0.63815   4.71448 
 C                    0    -3.15101  -1.52819   3.26647 
 C                    0     1.28392  -4.29242  -1.23875 
 C                    0    -0.86936  -5.60427  -0.7779 
 C                    0    -3.06236   2.36763   3.21133 
 C                    0    -4.8396    2.88961   1.44713 
 C                    0     1.76394   3.01935  -1.77386 
 C                    0    -0.1247    3.70296  -3.37814 
 C                    0    -3.24503  -2.97996  -0.21902 
 C                    0    -3.47338   1.60735  -1.92921 
 H                    0    -3.7772   -0.9588   -1.71328 
 H                    0     3.83229   0.23988  -2.09649 
 H                    0     1.42597  -2.00974  -4.95958 
 H                    0    -0.43965   2.12186  -5.74144 
 H                    0    -1.09552   1.14206  -7.09776 
 H                    0     0.6566    1.52533  -7.01442 
 H                    0     2.69077   2.41709   1.86303 
 H                    0     4.05567   0.72867   2.03849 
 H                    0     1.22326   3.86977   3.1721 
 H                    0    -0.20588   2.9482    2.68171 
 H                    0     0.70702   3.83537   1.46496 
 H                    0     4.85718  -1.13252   3.51084 
 H                    0     5.06471  -1.55916   1.79496 
 H                    0     3.70106  -2.23811   2.72426 
 H                    0     4.33278  -2.15605  -2.5317 
 H                    0     3.82202  -2.57875  -0.88266 
 H                    0     5.24885  -1.54484  -1.13661 
 H                    0    -0.12373  -2.88585  -3.20063 
 H                    0    -0.93362  -2.13046  -4.58698 
 H                    0    -0.85421  -1.27696  -3.02997 
 H                    0     0.00335  -2.84867   4.68815 
 H                    0     1.26751  -4.82572   3.84493 
 H                    0     1.1293   -5.46382   1.43476 
 H                    0    -1.54282  -0.23867   2.59357 
 H                    0    -0.7256   -3.46559  -1.19134 
 H                    0     0.24263   5.46449  -1.03285 
 H                    0    -1.13017   6.43038   0.82227 
 H                    0    -2.79641   4.99999   2.01351 
 H                    0    -0.0302    1.86965  -2.2087 
 H                    0    -3.33308   1.31491   1.32393 
 H                    0    -1.84126   0.24041   4.99176 
 H                    0    -0.17734  -0.35915   4.76465 
 H                    0    -1.43606  -1.42864   5.45533 
 H                    0    -3.76968  -0.71656   3.67784 
 H                    0    -3.30537  -2.43151   3.8777 
 H                    0    -3.49313  -1.73728   2.23975 
 H                    0     1.23952  -4.56872  -2.3062 
 H                    0     1.90239  -5.03909  -0.71711 
 H                    0     1.77551  -3.30963  -1.14581 
 H                    0    -0.95176  -5.86923  -1.8434 
 H                    0    -1.88131  -5.57519  -0.34669 
 H                    0    -0.29881  -6.39511  -0.26743 
 H                    0    -3.78427   1.7351    3.75134 
 H                    0    -2.04777   1.97458   3.39881 
 H                    0    -3.11646   3.38635   3.62395 
 H                    0    -5.55819   2.24789   1.97969 
 H                    0    -5.0991    2.88468   0.37792 
 H                    0    -4.94658   3.91796   1.82496 
 H                    0     2.32734   2.59639  -2.62186 
 H                    0     2.00362   2.44887  -0.85862 
 H                    0     2.08486   4.06248  -1.62896 
 H                    0     0.51048   3.33116  -4.20016 
 H                    0     0.05677   4.78417  -3.27364 
 H                    0    -1.18538   3.55521  -3.64186 
 H                    0    -2.93957  -3.6349    0.6011 
 H                    0    -4.30259  -2.72279  -0.08507 
 H                    0    -3.16546  -3.54359  -1.15731 
 H                    0    -4.09504   2.24147  -1.28831 
 H                    0    -2.8676    2.27192  -2.55665 
 H                    0    -4.14116   1.03092  -2.57863 
 

 GradGradGradGradGradGradGradGradGradGradGradGradGradGradGradGradGradGrad
 Berny optimization.
 Initialization pass.
 Trust Radius=3.00D-01 FncErr=1.00D-07 GrdErr=1.00D-07
 Number of steps in this run=   2 maximum allowed number of steps=   2.
 GradGradGradGradGradGradGradGradGradGradGradGradGradGradGradGradGradGrad

 Stoichiometry    C42H60MgN2O9
 Framework group  C1[X(C42H60MgN2O9)]
 Deg. of freedom   336
 Full point group                 C1      NOp   1
 Largest Abelian subgroup         C1      NOp   1
 Largest concise Abelian subgroup C1      NOp   1
                         Standard orientation:                         
 ---------------------------------------------------------------------
 Center     Atomic     Atomic              Coordinates (Angstroms)
 Number     Number      Type              X           Y           Z
 ---------------------------------------------------------------------
    1          8             0        4.993018   -2.497779   -1.222763
    2         12             0       -0.260945    0.195957    0.044133
    3          8             0        0.101523   -1.542928    3.075676
    4          6             0        4.184379   -2.558330   -0.152854
    5          7             0       -1.132399   -0.466683   -1.690986
    6          7             0        0.978039    1.449569   -1.022754
    7          8             0        4.429284   -2.078418    0.929941
    8          6             0       -0.560796   -0.386502   -2.882174
    9          6             0        0.686031    0.251548   -3.107528
   10          6             0        1.348744    1.175124   -2.270927
   11          8             0        2.090356   -3.412113    0.687182
   12          6             0        1.390502   -2.339718    1.079647
   13          6             0        0.935295   -2.564955    2.527216
   14          6             0        2.940868   -3.390211   -0.482358
   15          8             0        1.241682   -1.339426    0.403257
   16          6             0        6.237123   -1.795128   -1.029958
   17          8             0       -0.468628    0.861512    1.809878
   18          6             0       -1.062585   -1.204635    2.440774
   19          8             0       -1.355651   -1.633377    1.332832
   20          8             0       -2.896290    0.382871    2.990116
   21          6             0       -2.410145    1.663582    2.857693
   22          6             0       -0.884913    1.789310    2.752174
   23          6             0       -2.053621   -0.660396    3.473219
   24          8             0       -3.210650    2.562032    2.757316
   25          6             0       -0.466589    3.232675    2.480936
   26          6             0       -2.992236   -1.800039    3.876704
   27          6             0        0.337399   -3.951414    2.793263
   28          6             0        2.260687   -3.038270   -1.804801
   29          6             0       -2.433069   -1.061094   -1.435569
   30          6             0        1.475044    2.647868   -0.366205
   31          6             0       -3.484162   -0.176199   -1.009449
   32          6             0       -4.668780   -0.741572   -0.481089
   33          6             0       -4.830802   -2.138300   -0.389180
   34          6             0       -3.827157   -2.992440   -0.874362
   35          6             0       -2.616559   -2.480838   -1.402453
   36          6             0       -3.367343    1.356689   -1.232545
   37          6             0       -1.552405   -3.481109   -1.922735
   38          6             0        2.485378    2.552244    0.644812
   39          6             0        2.830419    3.717213    1.379526
   40          6             0        2.216153    4.956317    1.111862
   41          6             0        1.250336    5.048148    0.093599
   42          6             0        0.858567    3.913599   -0.655811
   43          6             0        3.241770    1.234534    0.939494
   44          6             0       -0.222191    4.089317   -1.755847
   45          6             0       -4.384528    2.189900   -0.394029
   46          6             0       -3.533982    1.692991   -2.752951
   47          6             0       -1.081008   -4.450914   -0.792867
   48          6             0       -2.091770   -4.302396   -3.143662
   49          6             0       -1.553055    4.642916   -1.152274
   50          6             0        0.270614    5.036793   -2.902278
   51          6             0        3.005481    0.751196    2.403607
   52          6             0        4.772742    1.391885    0.650247
   53          6             0       -1.228624   -0.965500   -4.125120
   54          6             0        2.537889    1.911219   -2.876836
   55          1             0        1.081837    0.158228   -4.114178
   56          1             0        1.866059   -2.462559    3.097232
   57          1             0        3.278741   -4.431239   -0.532795
   58          1             0        6.044264   -0.760965   -0.739978
   59          1             0        6.747007   -1.841803   -1.992068
   60          1             0        6.831962   -2.284630   -0.254128
   61          1             0       -0.467061    1.519629    3.745135
   62          1             0       -1.483583   -0.312643    4.340056
   63          1             0       -0.853895    3.886682    3.270821
   64          1             0       -0.859050    3.585627    1.526818
   65          1             0        0.620159    3.316646    2.443623
   66          1             0       -3.700665   -1.441978    4.628881
   67          1             0       -2.427489   -2.640427    4.294139
   68          1             0       -3.545346   -2.140497    2.996220
   69          1             0        1.044398   -4.735160    2.513671
   70          1             0       -0.586855   -4.089598    2.228829
   71          1             0        0.120048   -4.037362    3.861881
   72          1             0        1.346534   -3.625976   -1.904366
   73          1             0        2.939983   -3.309574   -2.618024
   74          1             0        2.011238   -1.979996   -1.890908
   75          1             0       -5.482975   -0.084411   -0.153506
   76          1             0       -5.756968   -2.556211    0.028099
   77          1             0       -3.979800   -4.079055   -0.842429
   78          1             0       -2.340008    1.673010   -0.942993
   79          1             0       -0.673607   -2.898517   -2.258531
   80          1             0        3.605488    3.652958    2.154692
   81          1             0        2.501268    5.848423    1.686050
   82          1             0        0.788638    6.019680   -0.124746
   83          1             0        2.845709    0.460644    0.254219
   84          1             0       -0.432941    3.094562   -2.197145
   85          1             0       -4.177518    3.261057   -0.528756
   86          1             0       -4.309593    1.956470    0.679666
   87          1             0       -5.416316    1.999747   -0.726923
   88          1             0       -3.476207    2.781447   -2.903446
   89          1             0       -4.510082    1.339096   -3.120934
   90          1             0       -2.740422    1.218422   -3.352923
   91          1             0       -0.291093   -5.127950   -1.160875
   92          1             0       -1.916155   -5.066893   -0.425130
   93          1             0       -0.682858   -3.866497    0.053366
   94          1             0       -1.297207   -4.952917   -3.540855
   95          1             0       -2.432421   -3.636000   -3.950332
   96          1             0       -2.938260   -4.936348   -2.838545
   97          1             0       -2.322157    4.718018   -1.936936
   98          1             0       -1.930089    3.973655   -0.359189
   99          1             0       -1.404170    5.641766   -0.715139
  100          1             0       -0.496654    5.099938   -3.689124
  101          1             0        1.200881    4.664317   -3.356646
  102          1             0        0.455468    6.050817   -2.515895
  103          1             0        3.520658   -0.209580    2.567673
  104          1             0        1.923430    0.617601    2.582182
  105          1             0        3.391723    1.481488    3.131336
  106          1             0        5.289433    0.450616    0.904102
  107          1             0        5.215596    2.195211    1.259694
  108          1             0        4.948235    1.628675   -0.412560
  109          1             0       -2.271314   -1.236644   -3.940397
  110          1             0       -1.197192   -0.236895   -4.944060
  111          1             0       -0.695823   -1.861385   -4.468517
  112          1             0        2.308388    2.967506   -3.052629
  113          1             0        3.400966    1.872847   -2.201613
  114          1             0        2.827758    1.467578   -3.835537
 ---------------------------------------------------------------------
 Rotational constants (GHZ):      0.0606665      0.0587074      0.0473701
 General basis read from cards:  (5D, 7F)
 There are   642 symmetry adapted basis functions of A   symmetry.
 Integral buffers will be    262144 words long.
 Raffenetti 2 integral format.
 Two-electron integral symmetry is turned on.
   642 basis functions,  1430 primitive gaussians,   674 cartesian basis functions
   205 alpha electrons      205 beta electrons
       nuclear repulsion energy      9207.3335480415 Hartrees.
 NAtoms=  114 NActive=  114 NUniq=  114 SFac= 1.00D+00 NAtFMM=   60 Big=T
 One-electron integrals computed using PRISM.
 NBasis=   642 RedAO= T  NBF=   642
 NBsUse=   642 1.00D-06 NBFU=   642
 Initial guess read from the checkpoint file:
 SSSS_fm-5-oco.chk
 Initial guess orbital symmetries:
       Occupied  (A) (A) (A) (A) (A) (A) (A) (A) (A) (A) (A) (A)
                 (A) (A) (A) (A) (A) (A) (A) (A) (A) (A) (A) (A)
                 (A) (A) (A) (A) (A) (A) (A) (A) (A) (A) (A) (A)
                 (A) (A) (A) (A) (A) (A) (A) (A) (A) (A) (A) (A)
                 (A) (A) (A) (A) (A) (A) (A) (A) (A) (A) (A) (A)
                 (A) (A) (A) (A) (A) (A) (A) (A) (A) (A) (A) (A)
                 (A) (A) (A) (A) (A) (A) (A) (A) (A) (A) (A) (A)
                 (A) (A) (A) (A) (A) (A) (A) (A) (A) (A) (A) (A)
                 (A) (A) (A) (A) (A) (A) (A) (A) (A) (A) (A) (A)
                 (A) (A) (A) (A) (A) (A) (A) (A) (A) (A) (A) (A)
                 (A) (A) (A) (A) (A) (A) (A) (A) (A) (A) (A) (A)
                 (A) (A) (A) (A) (A) (A) (A) (A) (A) (A) (A) (A)
                 (A) (A) (A) (A) (A) (A) (A) (A) (A) (A) (A) (A)
                 (A) (A) (A) (A) (A) (A) (A) (A) (A) (A) (A) (A)
                 (A) (A) (A) (A) (A) (A) (A) (A) (A) (A) (A) (A)
                 (A) (A) (A) (A) (A) (A) (A) (A) (A) (A) (A) (A)
                 (A) (A) (A) (A) (A) (A) (A) (A) (A) (A) (A) (A)
                 (A)
       Virtual   (A) (A) (A) (A) (A) (A) (A) (A) (A) (A) (A) (A)
                 (A) (A) (A) (A) (A) (A) (A) (A) (A) (A) (A) (A)
                 (A) (A) (A) (A) (A) (A) (A) (A) (A) (A) (A) (A)
                 (A) (A) (A) (A) (A) (A) (A) (A) (A) (A) (A) (A)
                 (A) (A) (A) (A) (A) (A) (A) (A) (A) (A) (A) (A)
                 (A) (A) (A) (A) (A) (A) (A) (A) (A) (A) (A) (A)
                 (A) (A) (A) (A) (A) (A) (A) (A) (A) (A) (A) (A)
                 (A) (A) (A) (A) (A) (A) (A) (A) (A) (A) (A) (A)
                 (A) (A) (A) (A) (A) (A) (A) (A) (A) (A) (A) (A)
                 (A) (A) (A) (A) (A) (A) (A) (A) (A) (A) (A) (A)
                 (A) (A) (A) (A) (A) (A) (A) (A) (A) (A) (A) (A)
                 (A) (A) (A) (A) (A) (A) (A) (A) (A) (A) (A) (A)
                 (A) (A) (A) (A) (A) (A) (A) (A) (A) (A) (A) (A)
                 (A) (A) (A) (A) (A) (A) (A) (A) (A) (A) (A) (A)
                 (A) (A) (A) (A) (A) (A) (A) (A) (A) (A) (A) (A)
                 (A) (A) (A) (A) (A) (A) (A) (A) (A) (A) (A) (A)
                 (A) (A) (A) (A) (A) (A) (A) (A) (A) (A) (A) (A)
                 (A) (A) (A) (A) (A) (A) (A) (A) (A) (A) (A) (A)
                 (A) (A) (A) (A) (A) (A) (A) (A) (A) (A) (A) (A)
                 (A) (A) (A) (A) (A) (A) (A) (A) (A) (A) (A) (A)
                 (A) (A) (A) (A) (A) (A) (A) (A) (A) (A) (A) (A)
                 (A) (A) (A) (A) (A) (A) (A) (A) (A) (A) (A) (A)
                 (A) (A) (A) (A) (A) (A) (A) (A) (A) (A) (A) (A)
                 (A) (A) (A) (A) (A) (A) (A) (A) (A) (A) (A) (A)
                 (A) (A) (A) (A) (A) (A) (A) (A) (A) (A) (A) (A)
                 (A) (A) (A) (A) (A) (A) (A) (A) (A) (A) (A) (A)
                 (A) (A) (A) (A) (A) (A) (A) (A) (A) (A) (A) (A)
                 (A) (A) (A) (A) (A) (A) (A) (A) (A) (A) (A) (A)
                 (A) (A) (A) (A) (A) (A) (A) (A) (A) (A) (A) (A)
                 (A) (A) (A) (A) (A) (A) (A) (A) (A) (A) (A) (A)
                 (A) (A) (A) (A) (A) (A) (A) (A) (A) (A) (A) (A)
                 (A) (A) (A) (A) (A) (A) (A) (A) (A) (A) (A) (A)
                 (A) (A) (A) (A) (A) (A) (A) (A) (A) (A) (A) (A)
                 (A) (A) (A) (A) (A) (A) (A) (A) (A) (A) (A) (A)
                 (A) (A) (A) (A) (A) (A) (A) (A) (A) (A) (A) (A)
                 (A) (A) (A) (A) (A) (A) (A) (A) (A) (A) (A) (A)
                 (A) (A) (A) (A) (A)
 Requested convergence on RMS density matrix=1.00D-08 within 128 cycles.
 Requested convergence on MAX density matrix=1.00D-06.
 Requested convergence on             energy=1.00D-06.
 No special actions if energy rises.
 SCF Done:  E(RB+HF-LYP) =  -2612.16815126     A.U. after    1 cycles
             Convg  =    0.5577D-08             -V/T =  2.0106
             S**2   =   0.0000
 Range of M.O.s used for correlation:     1   642
 NBasis=   642 NAE=   205 NBE=   205 NFC=     0 NFV=     0
 NROrb=    642 NOA=   205 NOB=   205 NVA=   437 NVB=   437
 PrsmSu:  requested number of processors reduced to:   1 ShMem   1 Linda.
 PrsmSu:  requested number of processors reduced to:   1 ShMem   1 Linda.
 Symmetrizing basis deriv contribution to polar:
 IMax=3 JMax=2 DiffMx= 0.00D+00
 G2DrvN: will do   29 centers at a time, making    4 passes doing MaxLOS=2.
 Calling FoFCou, ICntrl=  3107 FMM=T I1Cent=   0.
 Number of processors reduced from  2 to  1 for far-field.
 Calling FoFCou, ICntrl=  3107 FMM=T I1Cent=   0.
 Number of processors reduced from  2 to  1 for far-field.
 Calling FoFCou, ICntrl=  3107 FMM=T I1Cent=   0.
 Number of processors reduced from  2 to  1 for far-field.
 Calling FoFCou, ICntrl=  3107 FMM=T I1Cent=   0.
 Number of processors reduced from  2 to  1 for far-field.
 FoFDir/FoFCou used for L=0 through L=2.
          Differentiating once with respect to electric field.
                with respect to dipole field.
          Differentiating once with respect to nuclear coordinates.
 FoFCou: FMM=T IPFlag=           0 FMFlag=      100000 FMFlg1=        8193
 NFxFlg=           0 DoJE=F BraDBF=F KetDBF=F FulRan=T.
 Symmetry not used in FoFCou.
 FMM levels:  10  Number of levels for PrismC:   9
 Number of processors reduced from  2 to  1 for far-field.
 PrismC:  NFx=      2048 NFxT=         4 NFxU=         4.
 PrismC:  NFx=      2048 NFxT=         4 NFxU=         4.
 Number of processors reduced from  2 to  1 for far-field.
 PrismC:  NFx=      2048 NFxT=         4 NFxU=         4.
 PrismC:  NFx=      2048 NFxT=         4 NFxU=         4.
 Number of processors reduced from  2 to  1 for far-field.
 PrismC:  NFx=      2048 NFxT=         4 NFxU=         4.
 PrismC:  NFx=      2048 NFxT=         4 NFxU=         4.
 Number of processors reduced from  2 to  1 for far-field.
 PrismC:  NFx=      2048 NFxT=         4 NFxU=         4.
 PrismC:  NFx=      2048 NFxT=         4 NFxU=         4.
          There are 345 degrees of freedom in the 1st order CPHF.
   345 vectors were produced by pass  0.
 AX will form  87 AO Fock derivatives at one time.
 Number of processors reduced from  2 to  1 for far-field.
 PrismC:  NFx=      2048 NFxT=         4 NFxU=         4.
 PrismC:  NFx=      2048 NFxT=         4 NFxU=         4.
 Number of processors reduced from  2 to  1 for far-field.
 PrismC:  NFx=      2048 NFxT=         4 NFxU=         4.
 PrismC:  NFx=      2048 NFxT=         4 NFxU=         4.
 Number of processors reduced from  2 to  1 for far-field.
 PrismC:  NFx=      2048 NFxT=         4 NFxU=         4.
 PrismC:  NFx=      2048 NFxT=         4 NFxU=         4.
 Number of processors reduced from  2 to  1 for far-field.
 PrismC:  NFx=      2048 NFxT=         4 NFxU=         4.
 PrismC:  NFx=      2048 NFxT=         4 NFxU=         4.
   345 vectors were produced by pass  1.
 Number of processors reduced from  2 to  1 for far-field.
 PrismC:  NFx=      2048 NFxT=         4 NFxU=         4.
 PrismC:  NFx=      2048 NFxT=         4 NFxU=         4.
 Number of processors reduced from  2 to  1 for far-field.
 PrismC:  NFx=      2048 NFxT=         4 NFxU=         4.
 PrismC:  NFx=      2048 NFxT=         4 NFxU=         4.
 Number of processors reduced from  2 to  1 for far-field.
 PrismC:  NFx=      2048 NFxT=         4 NFxU=         4.
 PrismC:  NFx=      2048 NFxT=         4 NFxU=         4.
 Number of processors reduced from  2 to  1 for far-field.
 PrismC:  NFx=      2048 NFxT=         4 NFxU=         4.
 PrismC:  NFx=      2048 NFxT=         4 NFxU=         4.
   342 vectors were produced by pass  2.
 Number of processors reduced from  2 to  1 for far-field.
 PrismC:  NFx=      2048 NFxT=         4 NFxU=         4.
 PrismC:  NFx=      2048 NFxT=         4 NFxU=         4.
 Number of processors reduced from  2 to  1 for far-field.
 PrismC:  NFx=      2048 NFxT=         4 NFxU=         4.
 PrismC:  NFx=      2048 NFxT=         4 NFxU=         4.
 Number of processors reduced from  2 to  1 for far-field.
 PrismC:  NFx=      2048 NFxT=         4 NFxU=         4.
 PrismC:  NFx=      2048 NFxT=         4 NFxU=         4.
 Number of processors reduced from  2 to  1 for far-field.
 PrismC:  NFx=      2048 NFxT=         4 NFxU=         4.
 PrismC:  NFx=      2048 NFxT=         4 NFxU=         4.
   342 vectors were produced by pass  3.
 Number of processors reduced from  2 to  1 for far-field.
 PrismC:  NFx=      2048 NFxT=         4 NFxU=         4.
 PrismC:  NFx=      2048 NFxT=         4 NFxU=         4.
 Number of processors reduced from  2 to  1 for far-field.
 PrismC:  NFx=      2048 NFxT=         4 NFxU=         4.
 PrismC:  NFx=      2048 NFxT=         4 NFxU=         4.
 Number of processors reduced from  2 to  1 for far-field.
 PrismC:  NFx=      2048 NFxT=         4 NFxU=         4.
 PrismC:  NFx=      2048 NFxT=         4 NFxU=         4.
 Number of processors reduced from  2 to  1 for far-field.
 PrismC:  NFx=      2048 NFxT=         4 NFxU=         3.
 PrismC:  NFx=      2048 NFxT=         4 NFxU=         4.
   342 vectors were produced by pass  4.
 Number of processors reduced from  2 to  1 for far-field.
 PrismC:  NFx=      2048 NFxT=         4 NFxU=         4.
 PrismC:  NFx=      2048 NFxT=         4 NFxU=         4.
 Number of processors reduced from  2 to  1 for far-field.
 PrismC:  NFx=      2048 NFxT=         4 NFxU=         3.
 PrismC:  NFx=      2048 NFxT=         4 NFxU=         3.
 Number of processors reduced from  2 to  1 for far-field.
 PrismC:  NFx=      2048 NFxT=         4 NFxU=         3.
 PrismC:  NFx=      2048 NFxT=         4 NFxU=         3.
 Number of processors reduced from  2 to  1 for far-field.
 PrismC:  NFx=      2048 NFxT=         4 NFxU=         2.
 PrismC:  NFx=      2048 NFxT=         4 NFxU=         2.
   212 vectors were produced by pass  5.
 Number of processors reduced from  2 to  1 for far-field.
 PrismC:  NFx=      2048 NFxT=         4 NFxU=         4.
 PrismC:  NFx=      2048 NFxT=         4 NFxU=         4.
 Number of processors reduced from  2 to  1 for far-field.
 PrismC:  NFx=      2048 NFxT=         4 NFxU=         1.
 PrismC:  NFx=      2048 NFxT=         4 NFxU=         1.
 Number of processors reduced from  2 to  1 for far-field.
 PrismC:  NFx=      2048 NFxT=         4 NFxU=         0.
 PrismC:  NFx=      2048 NFxT=         4 NFxU=         0.
    57 vectors were produced by pass  6.
 Number of processors reduced from  2 to  1 for far-field.
 PrismC:  NFx=      2048 NFxT=         4 NFxU=         3.
 PrismC:  NFx=      2048 NFxT=         4 NFxU=         3.
     3 vectors were produced by pass  7.
 Number of processors reduced from  2 to  1 for far-field.
 PrismC:  NFx=      2048 NFxT=         4 NFxU=         1.
 PrismC:  NFx=      2048 NFxT=         4 NFxU=         1.
 Inv2:  IOpt= 1 Iter= 1 AM= 8.57D-15 Conv= 1.00D-12.
 Inverted reduced A of dimension 1988 with in-core refinement.
 Number of processors reduced from  2 to  1 for far-field.
 PrismC:  NFx=      2048 NFxT=         4 NFxU=         4.
 PrismC:  NFx=      2048 NFxT=         4 NFxU=         4.
 Number of processors reduced from  2 to  1 for far-field.
 PrismC:  NFx=      2048 NFxT=         4 NFxU=         4.
 PrismC:  NFx=      2048 NFxT=         4 NFxU=         4.
 Number of processors reduced from  2 to  1 for far-field.
 PrismC:  NFx=      2048 NFxT=         4 NFxU=         4.
 PrismC:  NFx=      2048 NFxT=         4 NFxU=         4.
 Number of processors reduced from  2 to  1 for far-field.
 PrismC:  NFx=      2048 NFxT=         4 NFxU=         4.
 PrismC:  NFx=      2048 NFxT=         4 NFxU=         4.
 Isotropic polarizability for W=    0.000000      407.29 Bohr**3.
 End of Minotr Frequency-dependent properties file   721 does not exist.

 **********************************************************************

            Population analysis using the SCF density.

 **********************************************************************

 Orbital symmetries:
       Occupied  (A) (A) (A) (A) (A) (A) (A) (A) (A) (A) (A) (A)
                 (A) (A) (A) (A) (A) (A) (A) (A) (A) (A) (A) (A)
                 (A) (A) (A) (A) (A) (A) (A) (A) (A) (A) (A) (A)
                 (A) (A) (A) (A) (A) (A) (A) (A) (A) (A) (A) (A)
                 (A) (A) (A) (A) (A) (A) (A) (A) (A) (A) (A) (A)
                 (A) (A) (A) (A) (A) (A) (A) (A) (A) (A) (A) (A)
                 (A) (A) (A) (A) (A) (A) (A) (A) (A) (A) (A) (A)
                 (A) (A) (A) (A) (A) (A) (A) (A) (A) (A) (A) (A)
                 (A) (A) (A) (A) (A) (A) (A) (A) (A) (A) (A) (A)
                 (A) (A) (A) (A) (A) (A) (A) (A) (A) (A) (A) (A)
                 (A) (A) (A) (A) (A) (A) (A) (A) (A) (A) (A) (A)
                 (A) (A) (A) (A) (A) (A) (A) (A) (A) (A) (A) (A)
                 (A) (A) (A) (A) (A) (A) (A) (A) (A) (A) (A) (A)
                 (A) (A) (A) (A) (A) (A) (A) (A) (A) (A) (A) (A)
                 (A) (A) (A) (A) (A) (A) (A) (A) (A) (A) (A) (A)
                 (A) (A) (A) (A) (A) (A) (A) (A) (A) (A) (A) (A)
                 (A) (A) (A) (A) (A) (A) (A) (A) (A) (A) (A) (A)
                 (A)
       Virtual   (A) (A) (A) (A) (A) (A) (A) (A) (A) (A) (A) (A)
                 (A) (A) (A) (A) (A) (A) (A) (A) (A) (A) (A) (A)
                 (A) (A) (A) (A) (A) (A) (A) (A) (A) (A) (A) (A)
                 (A) (A) (A) (A) (A) (A) (A) (A) (A) (A) (A) (A)
                 (A) (A) (A) (A) (A) (A) (A) (A) (A) (A) (A) (A)
                 (A) (A) (A) (A) (A) (A) (A) (A) (A) (A) (A) (A)
                 (A) (A) (A) (A) (A) (A) (A) (A) (A) (A) (A) (A)
                 (A) (A) (A) (A) (A) (A) (A) (A) (A) (A) (A) (A)
                 (A) (A) (A) (A) (A) (A) (A) (A) (A) (A) (A) (A)
                 (A) (A) (A) (A) (A) (A) (A) (A) (A) (A) (A) (A)
                 (A) (A) (A) (A) (A) (A) (A) (A) (A) (A) (A) (A)
                 (A) (A) (A) (A) (A) (A) (A) (A) (A) (A) (A) (A)
                 (A) (A) (A) (A) (A) (A) (A) (A) (A) (A) (A) (A)
                 (A) (A) (A) (A) (A) (A) (A) (A) (A) (A) (A) (A)
                 (A) (A) (A) (A) (A) (A) (A) (A) (A) (A) (A) (A)
                 (A) (A) (A) (A) (A) (A) (A) (A) (A) (A) (A) (A)
                 (A) (A) (A) (A) (A) (A) (A) (A) (A) (A) (A) (A)
                 (A) (A) (A) (A) (A) (A) (A) (A) (A) (A) (A) (A)
                 (A) (A) (A) (A) (A) (A) (A) (A) (A) (A) (A) (A)
                 (A) (A) (A) (A) (A) (A) (A) (A) (A) (A) (A) (A)
                 (A) (A) (A) (A) (A) (A) (A) (A) (A) (A) (A) (A)
                 (A) (A) (A) (A) (A) (A) (A) (A) (A) (A) (A) (A)
                 (A) (A) (A) (A) (A) (A) (A) (A) (A) (A) (A) (A)
                 (A) (A) (A) (A) (A) (A) (A) (A) (A) (A) (A) (A)
                 (A) (A) (A) (A) (A) (A) (A) (A) (A) (A) (A) (A)
                 (A) (A) (A) (A) (A) (A) (A) (A) (A) (A) (A) (A)
                 (A) (A) (A) (A) (A) (A) (A) (A) (A) (A) (A) (A)
                 (A) (A) (A) (A) (A) (A) (A) (A) (A) (A) (A) (A)
                 (A) (A) (A) (A) (A) (A) (A) (A) (A) (A) (A) (A)
                 (A) (A) (A) (A) (A) (A) (A) (A) (A) (A) (A) (A)
                 (A) (A) (A) (A) (A) (A) (A) (A) (A) (A) (A) (A)
                 (A) (A) (A) (A) (A) (A) (A) (A) (A) (A) (A) (A)
                 (A) (A) (A) (A) (A) (A) (A) (A) (A) (A) (A) (A)
                 (A) (A) (A) (A) (A) (A) (A) (A) (A) (A) (A) (A)
                 (A) (A) (A) (A) (A) (A) (A) (A) (A) (A) (A) (A)
                 (A) (A) (A) (A) (A) (A) (A) (A) (A) (A) (A) (A)
                 (A) (A) (A) (A) (A)
 The electronic state is 1-A.
 Alpha  occ. eigenvalues --  -46.71109 -19.21357 -19.20796 -19.18427 -19.16697
 Alpha  occ. eigenvalues --  -19.15529 -19.15367 -19.12132 -19.10063 -19.06073
 Alpha  occ. eigenvalues --  -14.28162 -14.27005 -10.34724 -10.33085 -10.31553
 Alpha  occ. eigenvalues --  -10.27785 -10.27293 -10.26967 -10.24612 -10.23990
 Alpha  occ. eigenvalues --  -10.20264 -10.20176 -10.19745 -10.18629 -10.18098
 Alpha  occ. eigenvalues --  -10.16954 -10.15712 -10.15393 -10.12205 -10.11979
 Alpha  occ. eigenvalues --  -10.04856 -10.04695 -10.03404 -10.02300 -10.02270
 Alpha  occ. eigenvalues --  -10.02142 -10.01726 -10.01682 -10.01539 -10.01405
 Alpha  occ. eigenvalues --  -10.01383 -10.01122 -10.00853 -10.00750 -10.00742
 Alpha  occ. eigenvalues --  -10.00494 -10.00331 -10.00319 -10.00259 -10.00174
 Alpha  occ. eigenvalues --   -9.99842  -9.99830  -9.99110  -9.98578  -3.01527
 Alpha  occ. eigenvalues --   -1.76323  -1.76105  -1.75952  -1.13582  -1.11958
 Alpha  occ. eigenvalues --   -1.09767  -1.06566  -1.04812  -1.03311  -1.00965
 Alpha  occ. eigenvalues --   -0.98695  -0.92751  -0.88674  -0.87164  -0.82646
 Alpha  occ. eigenvalues --   -0.80487  -0.79883  -0.79361  -0.76584  -0.76465
 Alpha  occ. eigenvalues --   -0.76082  -0.74028  -0.73907  -0.73655  -0.73532
 Alpha  occ. eigenvalues --   -0.71535  -0.70368  -0.69551  -0.68193  -0.68026
 Alpha  occ. eigenvalues --   -0.67523  -0.67401  -0.67203  -0.65476  -0.65272
 Alpha  occ. eigenvalues --   -0.64426  -0.64208  -0.64145  -0.63449  -0.62357
 Alpha  occ. eigenvalues --   -0.60735  -0.58563  -0.58469  -0.58271  -0.57812
 Alpha  occ. eigenvalues --   -0.56323  -0.55645  -0.55147  -0.54747  -0.54282
 Alpha  occ. eigenvalues --   -0.52723  -0.51838  -0.51745  -0.51162  -0.49997
 Alpha  occ. eigenvalues --   -0.49626  -0.49475  -0.49300  -0.49044  -0.48467
 Alpha  occ. eigenvalues --   -0.48117  -0.47561  -0.46476  -0.46402  -0.46038
 Alpha  occ. eigenvalues --   -0.45617  -0.44843  -0.44178  -0.43803  -0.43649
 Alpha  occ. eigenvalues --   -0.43265  -0.43085  -0.42805  -0.42502  -0.41834
 Alpha  occ. eigenvalues --   -0.41226  -0.41159  -0.40810  -0.40594  -0.40386
 Alpha  occ. eigenvalues --   -0.40234  -0.40010  -0.39859  -0.39454  -0.39412
 Alpha  occ. eigenvalues --   -0.39299  -0.39198  -0.39020  -0.38888  -0.38715
 Alpha  occ. eigenvalues --   -0.38536  -0.38479  -0.38080  -0.37941  -0.37804
 Alpha  occ. eigenvalues --   -0.37376  -0.37292  -0.36944  -0.36669  -0.36383
 Alpha  occ. eigenvalues --   -0.36310  -0.36028  -0.35873  -0.35813  -0.35624
 Alpha  occ. eigenvalues --   -0.35246  -0.35171  -0.34822  -0.34720  -0.34492
 Alpha  occ. eigenvalues --   -0.34456  -0.33779  -0.33654  -0.33488  -0.33282
 Alpha  occ. eigenvalues --   -0.32709  -0.32505  -0.32058  -0.31882  -0.31498
 Alpha  occ. eigenvalues --   -0.31377  -0.30911  -0.30664  -0.30354  -0.30262
 Alpha  occ. eigenvalues --   -0.29965  -0.29871  -0.29394  -0.29241  -0.29101
 Alpha  occ. eigenvalues --   -0.28924  -0.28643  -0.28258  -0.27800  -0.27523
 Alpha  occ. eigenvalues --   -0.27228  -0.27147  -0.26545  -0.26407  -0.25994
 Alpha  occ. eigenvalues --   -0.25609  -0.25286  -0.23724  -0.21545  -0.20110
 Alpha  occ. eigenvalues --   -0.17794  -0.17740  -0.17623  -0.17319  -0.14995
 Alpha virt. eigenvalues --   -0.02245  -0.00733   0.01248   0.01593   0.03674
 Alpha virt. eigenvalues --    0.07690   0.07965   0.08026   0.08084   0.08275
 Alpha virt. eigenvalues --    0.08626   0.08924   0.10418   0.10551   0.11026
 Alpha virt. eigenvalues --    0.11227   0.11840   0.12388   0.12849   0.13521
 Alpha virt. eigenvalues --    0.13911   0.14241   0.15415   0.15659   0.15803
 Alpha virt. eigenvalues --    0.16320   0.16570   0.16899   0.17009   0.17238
 Alpha virt. eigenvalues --    0.18121   0.18434   0.19143   0.19853   0.20227
 Alpha virt. eigenvalues --    0.20812   0.21446   0.21754   0.22357   0.22670
 Alpha virt. eigenvalues --    0.22909   0.23092   0.23145   0.23804   0.24128
 Alpha virt. eigenvalues --    0.24468   0.25169   0.25424   0.25750   0.25991
 Alpha virt. eigenvalues --    0.26211   0.26966   0.27408   0.28121   0.28508
 Alpha virt. eigenvalues --    0.28990   0.29767   0.30063   0.30731   0.31287
 Alpha virt. eigenvalues --    0.31640   0.32167   0.32675   0.32934   0.33741
 Alpha virt. eigenvalues --    0.34071   0.35039   0.35386   0.35745   0.35970
 Alpha virt. eigenvalues --    0.36593   0.36681   0.37429   0.38189   0.38283
 Alpha virt. eigenvalues --    0.38429   0.38789   0.38990   0.39285   0.39448
 Alpha virt. eigenvalues --    0.39690   0.39967   0.40399   0.41044   0.41370
 Alpha virt. eigenvalues --    0.41748   0.41845   0.42228   0.42627   0.43082
 Alpha virt. eigenvalues --    0.43268   0.43724   0.43976   0.44536   0.44962
 Alpha virt. eigenvalues --    0.45189   0.45601   0.45900   0.46274   0.46355
 Alpha virt. eigenvalues --    0.46753   0.46911   0.47334   0.47874   0.48099
 Alpha virt. eigenvalues --    0.48175   0.48347   0.48564   0.48707   0.48972
 Alpha virt. eigenvalues --    0.49293   0.49479   0.49572   0.50266   0.50570
 Alpha virt. eigenvalues --    0.50670   0.51036   0.51517   0.51565   0.51714
 Alpha virt. eigenvalues --    0.51778   0.52408   0.52567   0.52973   0.53478
 Alpha virt. eigenvalues --    0.53825   0.54045   0.54342   0.54543   0.55272
 Alpha virt. eigenvalues --    0.55672   0.55879   0.56186   0.56498   0.56838
 Alpha virt. eigenvalues --    0.57029   0.57237   0.57952   0.58177   0.58209
 Alpha virt. eigenvalues --    0.58516   0.58847   0.59199   0.59267   0.59930
 Alpha virt. eigenvalues --    0.60006   0.60428   0.60871   0.61570   0.61726
 Alpha virt. eigenvalues --    0.62047   0.62840   0.63049   0.63600   0.64446
 Alpha virt. eigenvalues --    0.64872   0.65029   0.66283   0.66832   0.67132
 Alpha virt. eigenvalues --    0.67388   0.67757   0.68477   0.69007   0.69309
 Alpha virt. eigenvalues --    0.69991   0.70236   0.70719   0.71578   0.72383
 Alpha virt. eigenvalues --    0.72744   0.73422   0.73647   0.73684   0.74583
 Alpha virt. eigenvalues --    0.74956   0.75416   0.76079   0.76624   0.77006
 Alpha virt. eigenvalues --    0.77566   0.77931   0.78260   0.78451   0.78619
 Alpha virt. eigenvalues --    0.79675   0.80188   0.80695   0.81930   0.82930
 Alpha virt. eigenvalues --    0.83207   0.83417   0.84299   0.85485   0.85976
 Alpha virt. eigenvalues --    0.86048   0.86277   0.86966   0.87253   0.88451
 Alpha virt. eigenvalues --    0.88788   0.89319   0.89601   0.90419   0.91338
 Alpha virt. eigenvalues --    0.91814   0.92202   0.92425   0.93476   0.93617
 Alpha virt. eigenvalues --    0.94672   0.94904   0.95853   0.96349   0.96769
 Alpha virt. eigenvalues --    0.97447   0.97998   0.98889   1.00134   1.00696
 Alpha virt. eigenvalues --    1.01101   1.01555   1.02169   1.02291   1.03542
 Alpha virt. eigenvalues --    1.04130   1.04822   1.06285   1.08322   1.08799
 Alpha virt. eigenvalues --    1.09349   1.10094   1.11159   1.11953   1.12925
 Alpha virt. eigenvalues --    1.13339   1.14543   1.14560   1.15500   1.16380
 Alpha virt. eigenvalues --    1.17170   1.17970   1.19437   1.21195   1.23054
 Alpha virt. eigenvalues --    1.23402   1.25016   1.25560   1.26115   1.26696
 Alpha virt. eigenvalues --    1.27513   1.28707   1.30293   1.32413   1.32661
 Alpha virt. eigenvalues --    1.33786   1.34913   1.36012   1.36740   1.37103
 Alpha virt. eigenvalues --    1.38055   1.39403   1.39826   1.41066   1.41227
 Alpha virt. eigenvalues --    1.42387   1.44071   1.44411   1.45535   1.47601
 Alpha virt. eigenvalues --    1.48030   1.48152   1.50133   1.50490   1.51313
 Alpha virt. eigenvalues --    1.52223   1.53392   1.53986   1.55440   1.57326
 Alpha virt. eigenvalues --    1.58019   1.58717   1.60429   1.61166   1.62218
 Alpha virt. eigenvalues --    1.64079   1.64845   1.65275   1.68632   1.69236
 Alpha virt. eigenvalues --    1.69411   1.70224   1.70804   1.71849   1.72501
 Alpha virt. eigenvalues --    1.72927   1.73741   1.74503   1.75161   1.75741
 Alpha virt. eigenvalues --    1.77349   1.77740   1.78981   1.79149   1.80514
 Alpha virt. eigenvalues --    1.81524   1.82149   1.82355   1.82913   1.83358
 Alpha virt. eigenvalues --    1.83894   1.84915   1.85384   1.86123   1.88202
 Alpha virt. eigenvalues --    1.88446   1.89184   1.89759   1.90300   1.90725
 Alpha virt. eigenvalues --    1.91498   1.92467   1.92546   1.93822   1.94104
 Alpha virt. eigenvalues --    1.94875   1.95880   1.96394   1.97071   1.97486
 Alpha virt. eigenvalues --    1.98787   1.99582   2.00311   2.00597   2.01020
 Alpha virt. eigenvalues --    2.01591   2.02471   2.02772   2.03833   2.04807
 Alpha virt. eigenvalues --    2.05142   2.05209   2.07056   2.08429   2.09489
 Alpha virt. eigenvalues --    2.09570   2.10386   2.10995   2.12550   2.13007
 Alpha virt. eigenvalues --    2.14324   2.14588   2.14970   2.15371   2.16117
 Alpha virt. eigenvalues --    2.16841   2.17699   2.18959   2.19704   2.20509
 Alpha virt. eigenvalues --    2.21308   2.22534   2.22826   2.23718   2.24632
 Alpha virt. eigenvalues --    2.26660   2.26846   2.27038   2.28313   2.28865
 Alpha virt. eigenvalues --    2.29335   2.30081   2.30664   2.31773   2.32516
 Alpha virt. eigenvalues --    2.33555   2.34573   2.35117   2.35825   2.36334
 Alpha virt. eigenvalues --    2.37921   2.38766   2.39866   2.40140   2.42064
 Alpha virt. eigenvalues --    2.42798   2.43423   2.45212   2.46578   2.48461
 Alpha virt. eigenvalues --    2.51525   2.52134   2.54748   2.56206   2.57646
 Alpha virt. eigenvalues --    2.59251   2.59820   2.60223   2.62940   2.64817
 Alpha virt. eigenvalues --    2.65453   2.65698   2.68080   2.69110   2.69650
 Alpha virt. eigenvalues --    2.73597   2.74405   2.74745   2.76073   2.78020
 Alpha virt. eigenvalues --    2.78707   2.79830   2.82317   2.87285   2.87652
 Alpha virt. eigenvalues --    2.88602   2.92258   2.94892   2.96513   2.99724
 Alpha virt. eigenvalues --    3.01854   3.02130   3.05580   3.06137   3.10963
 Alpha virt. eigenvalues --    3.11625   3.15151   3.16756   3.19941   3.22294
 Alpha virt. eigenvalues --    3.23847   3.25234   3.68124   6.07618   6.12805
 Alpha virt. eigenvalues --    6.32675 103.43890
          Condensed to atoms (all electrons):
 Mulliken atomic charges:
              1
     1  O   -0.443847
     2  Mg   0.890844
     3  O   -0.454386
     4  C    0.589641
     5  N   -0.535134
     6  N   -0.541697
     7  O   -0.435951
     8  C    0.325805
     9  C   -0.260212
    10  C    0.341006
    11  O   -0.455545
    12  C    0.635999
    13  C    0.053135
    14  C    0.043811
    15  O   -0.438879
    16  C   -0.218181
    17  O   -0.683546
    18  C    0.664254
    19  O   -0.471273
    20  O   -0.444356
    21  C    0.559694
    22  C    0.111359
    23  C    0.072860
    24  O   -0.425849
    25  C   -0.466815
    26  C   -0.476805
    27  C   -0.473567
    28  C   -0.499235
    29  C    0.011168
    30  C    0.014985
    31  C   -0.006709
    32  C   -0.074389
    33  C   -0.075173
    34  C   -0.078083
    35  C    0.001946
    36  C   -0.057450
    37  C   -0.051038
    38  C   -0.002072
    39  C   -0.075178
    40  C   -0.071865
    41  C   -0.080015
    42  C   -0.003232
    43  C   -0.061175
    44  C   -0.055226
    45  C   -0.224609
    46  C   -0.218399
    47  C   -0.214883
    48  C   -0.217732
    49  C   -0.215446
    50  C   -0.215725
    51  C   -0.228574
    52  C   -0.218292
    53  C   -0.450043
    54  C   -0.450546
    55  H    0.074579
    56  H    0.197284
    57  H    0.183513
    58  H    0.168098
    59  H    0.170123
    60  H    0.171661
    61  H    0.103717
    62  H    0.158899
    63  H    0.127090
    64  H    0.148025
    65  H    0.119869
    66  H    0.167045
    67  H    0.145642
    68  H    0.191452
    69  H    0.171296
    70  H    0.182367
    71  H    0.164947
    72  H    0.154226
    73  H    0.164859
    74  H    0.258575
    75  H    0.088812
    76  H    0.080842
    77  H    0.075324
    78  H    0.091654
    79  H    0.091254
    80  H    0.080401
    81  H    0.082816
    82  H    0.079107
    83  H    0.100641
    84  H    0.102423
    85  H    0.076558
    86  H    0.105187
    87  H    0.067134
    88  H    0.073970
    89  H    0.070991
    90  H    0.085705
    91  H    0.071560
    92  H    0.076270
    93  H    0.095051
    94  H    0.072351
    95  H    0.078253
    96  H    0.073623
    97  H    0.072659
    98  H    0.095771
    99  H    0.073719
   100  H    0.075214
   101  H    0.071683
   102  H    0.071793
   103  H    0.078474
   104  H    0.110585
   105  H    0.068119
   106  H    0.086339
   107  H    0.073765
   108  H    0.070939
   109  H    0.127546
   110  H    0.129357
   111  H    0.129259
   112  H    0.128129
   113  H    0.125969
   114  H    0.122109
 Sum of Mulliken charges=   0.00000
 Atomic charges with hydrogens summed into heavy atoms:
              1
     1  O   -0.443847
     2  Mg   0.890844
     3  O   -0.454386
     4  C    0.589641
     5  N   -0.535134
     6  N   -0.541697
     7  O   -0.435951
     8  C    0.325805
     9  C   -0.185633
    10  C    0.341006
    11  O   -0.455545
    12  C    0.635999
    13  C    0.250419
    14  C    0.227324
    15  O   -0.438879
    16  C    0.291701
    17  O   -0.683546
    18  C    0.664254
    19  O   -0.471273
    20  O   -0.444356
    21  C    0.559694
    22  C    0.215076
    23  C    0.231759
    24  O   -0.425849
    25  C   -0.071830
    26  C    0.027334
    27  C    0.045043
    28  C    0.078426
    29  C    0.011168
    30  C    0.014985
    31  C   -0.006709
    32  C    0.014423
    33  C    0.005669
    34  C   -0.002760
    35  C    0.001946
    36  C    0.034205
    37  C    0.040216
    38  C   -0.002072
    39  C    0.005223
    40  C    0.010952
    41  C   -0.000908
    42  C   -0.003232
    43  C    0.039466
    44  C    0.047197
    45  C    0.024270
    46  C    0.012267
    47  C    0.027998
    48  C    0.006495
    49  C    0.026703
    50  C    0.002965
    51  C    0.028604
    52  C    0.012750
    53  C   -0.063880
    54  C   -0.074338
    55  H    0.000000
    56  H    0.000000
    57  H    0.000000
    58  H    0.000000
    59  H    0.000000
    60  H    0.000000
    61  H    0.000000
    62  H    0.000000
    63  H    0.000000
    64  H    0.000000
    65  H    0.000000
    66  H    0.000000
    67  H    0.000000
    68  H    0.000000
    69  H    0.000000
    70  H    0.000000
    71  H    0.000000
    72  H    0.000000
    73  H    0.000000
    74  H    0.000000
    75  H    0.000000
    76  H    0.000000
    77  H    0.000000
    78  H    0.000000
    79  H    0.000000
    80  H    0.000000
    81  H    0.000000
    82  H    0.000000
    83  H    0.000000
    84  H    0.000000
    85  H    0.000000
    86  H    0.000000
    87  H    0.000000
    88  H    0.000000
    89  H    0.000000
    90  H    0.000000
    91  H    0.000000
    92  H    0.000000
    93  H    0.000000
    94  H    0.000000
    95  H    0.000000
    96  H    0.000000
    97  H    0.000000
    98  H    0.000000
    99  H    0.000000
   100  H    0.000000
   101  H    0.000000
   102  H    0.000000
   103  H    0.000000
   104  H    0.000000
   105  H    0.000000
   106  H    0.000000
   107  H    0.000000
   108  H    0.000000
   109  H    0.000000
   110  H    0.000000
   111  H    0.000000
   112  H    0.000000
   113  H    0.000000
   114  H    0.000000
 Sum of Mulliken charges=   0.00000
 APT atomic charges:
              1
     1  O   -0.810245
     2  Mg   1.260657
     3  O   -0.864308
     4  C    0.983594
     5  N   -0.873924
     6  N   -0.910686
     7  O   -0.648196
     8  C    0.892729
     9  C   -0.884739
    10  C    0.863324
    11  O   -0.886715
    12  C    1.162826
    13  C    0.432867
    14  C    0.457604
    15  O   -0.792919
    16  C    0.475977
    17  O   -1.055461
    18  C    1.332330
    19  O   -0.801413
    20  O   -0.778636
    21  C    0.982854
    22  C    0.501267
    23  C    0.376449
    24  O   -0.713199
    25  C    0.022078
    26  C    0.032248
    27  C   -0.002904
    28  C   -0.025397
    29  C    0.279219
    30  C    0.305245
    31  C   -0.067054
    32  C   -0.111313
    33  C   -0.050169
    34  C   -0.096442
    35  C   -0.056273
    36  C    0.204189
    37  C    0.175685
    38  C   -0.033026
    39  C   -0.146570
    40  C   -0.056002
    41  C   -0.112036
    42  C   -0.058670
    43  C    0.182000
    44  C    0.177802
    45  C   -0.048700
    46  C   -0.041344
    47  C   -0.018645
    48  C   -0.054432
    49  C   -0.031613
    50  C   -0.046685
    51  C   -0.010200
    52  C   -0.052435
    53  C   -0.227437
    54  C   -0.198057
    55  H   -0.014694
    56  H    0.001071
    57  H   -0.029184
    58  H    0.007430
    59  H   -0.005245
    60  H   -0.020604
    61  H   -0.098653
    62  H   -0.030970
    63  H   -0.044617
    64  H    0.017665
    65  H    0.033517
    66  H   -0.009655
    67  H   -0.007719
    68  H    0.025183
    69  H    0.016662
    70  H    0.034390
    71  H   -0.005699
    72  H    0.026086
    73  H    0.007944
    74  H    0.059977
    75  H    0.076957
    76  H    0.067234
    77  H    0.056353
    78  H   -0.095304
    79  H   -0.044008
    80  H    0.064046
    81  H    0.069288
    82  H    0.058570
    83  H   -0.044231
    84  H   -0.049613
    85  H    0.014105
    86  H    0.034053
    87  H    0.000418
    88  H    0.004366
    89  H    0.004557
    90  H   -0.003019
    91  H   -0.017556
    92  H    0.015053
    93  H   -0.031790
    94  H    0.000154
    95  H    0.009447
    96  H    0.011196
    97  H    0.001786
    98  H   -0.014864
    99  H    0.013136
   100  H    0.002388
   101  H    0.002932
   102  H    0.008735
   103  H   -0.003205
   104  H    0.000416
   105  H    0.002815
   106  H   -0.012114
   107  H    0.001872
   108  H    0.004719
   109  H    0.051382
   110  H    0.048468
   111  H    0.049036
   112  H    0.056989
   113  H    0.041556
   114  H    0.045686
 Sum of APT charges=   0.00000
 APT Atomic charges with hydrogens summed into heavy atoms:
              1
     1  O   -0.810245
     2  Mg   1.260657
     3  O   -0.864308
     4  C    0.983594
     5  N   -0.873924
     6  N   -0.910686
     7  O   -0.648196
     8  C    0.892729
     9  C   -0.899432
    10  C    0.863324
    11  O   -0.886715
    12  C    1.162826
    13  C    0.433938
    14  C    0.428420
    15  O   -0.792919
    16  C    0.457558
    17  O   -1.055461
    18  C    1.332330
    19  O   -0.801413
    20  O   -0.778636
    21  C    0.982854
    22  C    0.402614
    23  C    0.345479
    24  O   -0.713199
    25  C    0.028643
    26  C    0.040057
    27  C    0.042449
    28  C    0.068610
    29  C    0.279219
    30  C    0.305245
    31  C   -0.067054
    32  C   -0.034355
    33  C    0.017065
    34  C   -0.040089
    35  C   -0.056273
    36  C    0.108886
    37  C    0.131677
    38  C   -0.033026
    39  C   -0.082523
    40  C    0.013286
    41  C   -0.053465
    42  C   -0.058670
    43  C    0.137769
    44  C    0.128189
    45  C   -0.000123
    46  C   -0.035440
    47  C   -0.052937
    48  C   -0.033634
    49  C   -0.031555
    50  C   -0.032631
    51  C   -0.010174
    52  C   -0.057959
    53  C   -0.078550
    54  C   -0.053825
    55  H    0.000000
    56  H    0.000000
    57  H    0.000000
    58  H    0.000000
    59  H    0.000000
    60  H    0.000000
    61  H    0.000000
    62  H    0.000000
    63  H    0.000000
    64  H    0.000000
    65  H    0.000000
    66  H    0.000000
    67  H    0.000000
    68  H    0.000000
    69  H    0.000000
    70  H    0.000000
    71  H    0.000000
    72  H    0.000000
    73  H    0.000000
    74  H    0.000000
    75  H    0.000000
    76  H    0.000000
    77  H    0.000000
    78  H    0.000000
    79  H    0.000000
    80  H    0.000000
    81  H    0.000000
    82  H    0.000000
    83  H    0.000000
    84  H    0.000000
    85  H    0.000000
    86  H    0.000000
    87  H    0.000000
    88  H    0.000000
    89  H    0.000000
    90  H    0.000000
    91  H    0.000000
    92  H    0.000000
    93  H    0.000000
    94  H    0.000000
    95  H    0.000000
    96  H    0.000000
    97  H    0.000000
    98  H    0.000000
    99  H    0.000000
   100  H    0.000000
   101  H    0.000000
   102  H    0.000000
   103  H    0.000000
   104  H    0.000000
   105  H    0.000000
   106  H    0.000000
   107  H    0.000000
   108  H    0.000000
   109  H    0.000000
   110  H    0.000000
   111  H    0.000000
   112  H    0.000000
   113  H    0.000000
   114  H    0.000000
 Sum of APT charges=   0.00000
 Electronic spatial extent (au):  <R**2>= 28224.7933
 Charge=     0.0000 electrons
 Dipole moment (field-independent basis, Debye):
    X=     5.4621    Y=    -5.4956    Z=    -3.0794  Tot=     8.3378
 Quadrupole moment (field-independent basis, Debye-Ang):
   XX=  -296.4835   YY=  -291.5189   ZZ=  -309.0463
   XY=     6.7224   XZ=     5.5443   YZ=    -9.6477
 Traceless Quadrupole moment (field-independent basis, Debye-Ang):
   XX=     2.5328   YY=     7.4973   ZZ=   -10.0301
   XY=     6.7224   XZ=     5.5443   YZ=    -9.6477
 Octapole moment (field-independent basis, Debye-Ang**2):
  XXX=   168.1191  YYY=   -59.4882  ZZZ=    47.8206  XYY=    54.9286
  XXY=   -80.2588  XXZ=   -71.6379  XZZ=    17.1143  YZZ=   -49.0314
  YYZ=   -21.4950  XYZ=    54.8643
 Hexadecapole moment (field-independent basis, Debye-Ang**3):
 XXXX=-12924.5179 YYYY=-13121.3790 ZZZZ= -8358.3140 XXXY=  -115.5070
 XXXZ=   -87.5205 YYYX=   -20.2952 YYYZ=   -64.5252 ZZZX=   -29.9637
 ZZZY=  -104.1705 XXYY= -4529.9163 XXZZ= -3827.2079 YYZZ= -3686.3104
 XXYZ=   -30.2464 YYXZ=   122.3483 ZZXY=    75.2278
 N-N= 9.207333548042D+03 E-N=-2.451263666954D+04  KE= 2.584817494074D+03
  Exact polarizability: 420.923  19.799 439.130 -11.892  15.486 361.809
 Approx polarizability: 598.524  23.881 650.800   0.064  33.619 547.503
 Full mass-weighted force constant matrix:
 Low frequencies ---  -49.6447   -5.7054   -0.0005    0.0006    0.0009    3.2608
 Low frequencies ---    6.0058   16.9769   19.7377
 ******    1 imaginary frequencies (negative Signs) ****** 
 Diagonal vibrational polarizability:
      134.9261564     187.3776916      89.7099090
 Harmonic frequencies (cm**-1), IR intensities (KM/Mole), Raman scattering
 activities (A**4/AMU), depolarization ratios for plane and unpolarized
 incident light, reduced masses (AMU), force constants (mDyne/A),
 and normal coordinates:
                     1                      2                      3
                     A                      A                      A
 Frequencies --   -49.6302                16.9374                19.1215
 Red. masses --     5.2773                 4.6328                 4.7543
 Frc consts  --     0.0077                 0.0008                 0.0010
 IR Inten    --     1.5556                 0.1871                 0.4191
 Atom AN      X      Y      Z        X      Y      Z        X      Y      Z
   1   8    -0.01   0.00   0.00    -0.05   0.08  -0.07     0.08  -0.09   0.11
   2  12     0.03   0.08  -0.03     0.01   0.00  -0.01     0.01   0.04  -0.04
   3   8     0.01  -0.06   0.03     0.00  -0.01   0.00    -0.04  -0.02   0.00
   4   6    -0.02   0.01  -0.01    -0.01   0.04  -0.04     0.01  -0.04   0.06
   5   7     0.02   0.01   0.01     0.02   0.00  -0.01     0.01   0.02  -0.03
   6   7     0.03   0.03  -0.04     0.02   0.00  -0.01     0.00   0.03  -0.05
   7   8    -0.03   0.01  -0.01     0.01   0.03  -0.04    -0.03  -0.03   0.07
   8   6     0.02   0.01   0.00     0.02  -0.01  -0.01    -0.01   0.03  -0.04
   9   6     0.01   0.01  -0.02     0.02  -0.02   0.00    -0.02   0.04  -0.05
  10   6     0.02   0.02  -0.04     0.02  -0.01   0.00    -0.01   0.04  -0.06
  11   8    -0.02   0.00  -0.03     0.02   0.01   0.00    -0.04   0.01  -0.03
  12   6    -0.04  -0.02  -0.01     0.01   0.01   0.01    -0.03   0.01  -0.01
  13   6     0.02  -0.04   0.01     0.03   0.02   0.01    -0.02   0.00  -0.01
  14   6    -0.02   0.02  -0.03     0.00   0.01  -0.01    -0.01   0.02  -0.01
  15   8    -0.09  -0.02   0.00     0.01   0.00   0.00    -0.04   0.02   0.00
  16   6    -0.01   0.00   0.02    -0.06   0.10  -0.10     0.10  -0.14   0.17
  17   8    -0.03   0.04  -0.07    -0.04  -0.02  -0.02    -0.03   0.01  -0.05
  18   6    -0.05  -0.15   0.10    -0.01  -0.05  -0.01    -0.05  -0.06   0.00
  19   8    -0.10  -0.18   0.14     0.02  -0.06  -0.01    -0.04  -0.07   0.01
  20   8     0.02  -0.06   0.07    -0.04  -0.06  -0.04    -0.02   0.00  -0.02
  21   6    -0.01  -0.04   0.01    -0.05  -0.06  -0.01     0.00  -0.01   0.00
  22   6    -0.02   0.00  -0.04    -0.05  -0.03  -0.02     0.00  -0.02  -0.02
  23   6     0.05  -0.01   0.11    -0.04  -0.06  -0.03    -0.05  -0.02  -0.02
  24   8    -0.05  -0.08   0.00    -0.06  -0.06   0.00     0.01   0.01   0.03
  25   6    -0.08   0.03  -0.02    -0.08  -0.02  -0.02     0.01  -0.01   0.02
  26   6     0.06   0.04   0.31    -0.05  -0.08  -0.09    -0.09   0.00  -0.05
  27   6     0.07  -0.06   0.03     0.08   0.00   0.03     0.00  -0.01  -0.01
  28   6    -0.01   0.04  -0.02    -0.03  -0.02   0.00     0.04   0.10  -0.01
  29   6     0.02   0.01   0.00     0.02   0.02   0.02     0.03   0.00   0.02
  30   6     0.03   0.02  -0.03     0.01   0.00   0.00     0.00   0.02  -0.04
  31   6     0.01   0.01  -0.02     0.04   0.05   0.04     0.04   0.00   0.07
  32   6    -0.01   0.02  -0.06     0.06   0.07   0.12     0.08  -0.01   0.15
  33   6    -0.02   0.02  -0.08     0.06   0.08   0.17     0.10  -0.02   0.17
  34   6    -0.01   0.01  -0.05     0.02   0.05   0.14     0.08  -0.01   0.11
  35   6     0.01   0.01  -0.01     0.00   0.02   0.07     0.04   0.00   0.03
  36   6     0.02   0.01  -0.01     0.04   0.04  -0.03     0.01  -0.01   0.04
  37   6     0.01   0.00   0.01    -0.04   0.00   0.04     0.02   0.01  -0.04
  38   6     0.00   0.01  -0.01    -0.02  -0.01   0.03     0.00   0.01  -0.04
  39   6    -0.01   0.01   0.01    -0.04  -0.02   0.05     0.00   0.00  -0.03
  40   6     0.00   0.01   0.00    -0.03  -0.01   0.04     0.01   0.01  -0.02
  41   6     0.02   0.02  -0.02     0.00  -0.01   0.00     0.00   0.02  -0.01
  42   6     0.03   0.03  -0.03     0.03   0.00  -0.02     0.00   0.02  -0.02
  43   6    -0.01   0.01   0.00    -0.02  -0.01   0.04    -0.01   0.00  -0.05
  44   6     0.04   0.03  -0.04     0.07   0.01  -0.05    -0.01   0.03  -0.02
  45   6     0.02   0.01  -0.02     0.05   0.08  -0.06     0.01  -0.01   0.04
  46   6     0.03   0.02  -0.01     0.03  -0.03  -0.04    -0.03  -0.03   0.03
  47   6    -0.02   0.00   0.01    -0.02  -0.01   0.02     0.06  -0.03  -0.09
  48   6     0.03   0.01   0.00    -0.10   0.01   0.06    -0.04   0.04  -0.04
  49   6     0.03   0.01  -0.05     0.05   0.02  -0.10    -0.01   0.00   0.00
  50   6     0.05   0.05  -0.03     0.12   0.01  -0.03    -0.02   0.06   0.00
  51   6    -0.04   0.00  -0.01    -0.04  -0.02   0.03    -0.01   0.00  -0.05
  52   6    -0.01  -0.01   0.02    -0.02   0.00   0.06    -0.01  -0.01  -0.05
  53   6     0.01   0.00   0.01     0.02  -0.03   0.00    -0.03   0.03  -0.03
  54   6     0.02   0.01  -0.05     0.03  -0.03   0.00    -0.03   0.05  -0.07
  55   1     0.00   0.00  -0.02     0.03  -0.03   0.00    -0.04   0.05  -0.06
  56   1     0.03  -0.01  -0.02     0.03   0.06   0.00    -0.02   0.01  -0.01
  57   1    -0.02   0.02  -0.04     0.02   0.02   0.00    -0.05   0.01  -0.04
  58   1     0.00   0.00   0.02    -0.08   0.09  -0.07     0.12  -0.13   0.14
  59   1     0.01   0.00   0.02    -0.10   0.14  -0.12     0.16  -0.18   0.21
  60   1    -0.02   0.00   0.02    -0.02   0.10  -0.14     0.03  -0.15   0.22
  61   1     0.03   0.00  -0.06    -0.05  -0.03  -0.01     0.01  -0.05  -0.03
  62   1     0.12   0.06   0.03    -0.07  -0.07  -0.01    -0.05  -0.04  -0.01
  63   1    -0.06   0.00   0.01    -0.09  -0.03  -0.02     0.04  -0.03   0.04
  64   1    -0.14   0.03   0.01    -0.10  -0.04  -0.02    -0.02   0.02   0.04
  65   1    -0.08   0.06  -0.07    -0.08   0.00  -0.02     0.01  -0.03  -0.01
  66   1     0.13   0.13   0.33    -0.07  -0.10  -0.10    -0.09   0.00  -0.06
  67   1     0.09   0.07   0.35    -0.06  -0.09  -0.10    -0.12  -0.03  -0.05
  68   1    -0.01  -0.05   0.39    -0.02  -0.05  -0.12    -0.08   0.03  -0.07
  69   1     0.09  -0.03   0.02     0.10   0.02   0.05     0.01   0.00  -0.01
  70   1     0.06  -0.09   0.05     0.08  -0.04   0.03     0.00  -0.03  -0.02
  71   1     0.09  -0.06   0.03     0.07   0.01   0.04     0.00  -0.02  -0.01
  72   1    -0.01   0.04  -0.04    -0.03  -0.03   0.03     0.02   0.14  -0.07
  73   1    -0.01   0.06  -0.02    -0.05  -0.03  -0.01     0.06   0.11   0.00
  74   1    -0.02   0.04  -0.01    -0.04  -0.03  -0.02     0.08   0.11   0.02
  75   1    -0.01   0.02  -0.08     0.08   0.09   0.13     0.09  -0.02   0.19
  76   1    -0.04   0.02  -0.11     0.07   0.10   0.23     0.13  -0.02   0.23
  77   1    -0.02   0.02  -0.07     0.01   0.05   0.18     0.09  -0.01   0.12
  78   1     0.02   0.01  -0.01     0.05   0.05  -0.05     0.01   0.02   0.01
  79   1     0.02   0.00   0.02    -0.03  -0.02   0.01     0.00   0.02  -0.06
  80   1    -0.03   0.00   0.02    -0.07  -0.02   0.07     0.01  -0.01  -0.03
  81   1    -0.01   0.00   0.01    -0.05  -0.02   0.05     0.01   0.00  -0.01
  82   1     0.02   0.02  -0.02     0.01   0.00  -0.01     0.00   0.02   0.00
  83   1    -0.01   0.01  -0.01     0.00  -0.01   0.02    -0.02   0.01  -0.05
  84   1     0.05   0.03  -0.06     0.07   0.02  -0.07     0.00   0.04  -0.04
  85   1     0.02   0.01  -0.01     0.04   0.07  -0.12    -0.02  -0.01   0.01
  86   1     0.01   0.01  -0.02     0.06   0.14  -0.05     0.04   0.02   0.04
  87   1     0.02   0.02  -0.03     0.05   0.05  -0.03     0.00  -0.04   0.07
  88   1     0.03   0.02  -0.01     0.03  -0.03  -0.09    -0.06  -0.04   0.02
  89   1     0.03   0.02  -0.02     0.03  -0.04  -0.02    -0.04  -0.06   0.06
  90   1     0.03   0.02  -0.01     0.02  -0.05  -0.03    -0.04  -0.03   0.02
  91   1     0.00   0.01   0.03    -0.04  -0.03  -0.01     0.05  -0.01  -0.15
  92   1    -0.02  -0.01  -0.02    -0.02   0.00   0.04     0.08  -0.04  -0.08
  93   1    -0.05  -0.01   0.03     0.01  -0.03   0.02     0.10  -0.06  -0.08
  94   1     0.04   0.01   0.01    -0.13  -0.01   0.03    -0.07   0.04  -0.08
  95   1     0.04   0.01  -0.01    -0.10   0.02   0.06    -0.07   0.06  -0.01
  96   1     0.03   0.01  -0.02    -0.11   0.04   0.08    -0.04   0.05  -0.01
  97   1     0.04   0.02  -0.06     0.07   0.01  -0.12    -0.02   0.01   0.01
  98   1     0.03  -0.01  -0.07     0.03   0.03  -0.10     0.01  -0.01   0.00
  99   1     0.02   0.00  -0.03     0.04   0.03  -0.11    -0.02   0.00   0.02
 100   1     0.06   0.05  -0.04     0.15   0.02  -0.06    -0.03   0.06   0.00
 101   1     0.06   0.06  -0.02     0.13   0.01   0.00    -0.02   0.08  -0.01
 102   1     0.03   0.05  -0.01     0.11   0.01  -0.02    -0.03   0.06   0.02
 103   1    -0.05   0.00   0.00    -0.05  -0.02   0.03    -0.02   0.00  -0.05
 104   1    -0.04   0.01  -0.03    -0.05  -0.02   0.01    -0.01   0.01  -0.05
 105   1    -0.04   0.00   0.00    -0.05  -0.03   0.04     0.00   0.00  -0.05
 106   1    -0.02  -0.01   0.02    -0.01   0.00   0.06    -0.01  -0.01  -0.05
 107   1    -0.01  -0.01   0.02    -0.03   0.00   0.08     0.00  -0.01  -0.05
 108   1     0.01  -0.01   0.02     0.00   0.01   0.07    -0.01  -0.02  -0.05
 109   1     0.01   0.00   0.01     0.02  -0.01   0.00    -0.02   0.01  -0.01
 110   1     0.01  -0.01   0.00     0.04  -0.04  -0.01    -0.05   0.03  -0.02
 111   1     0.01  -0.01   0.02     0.01  -0.04   0.02    -0.03   0.03  -0.04
 112   1     0.01   0.01  -0.07     0.04  -0.03  -0.01    -0.04   0.05  -0.06
 113   1     0.02   0.03  -0.06     0.02  -0.02   0.01    -0.02   0.05  -0.08
 114   1     0.01   0.00  -0.05     0.04  -0.04   0.01    -0.04   0.06  -0.07
                     4                      5                      6
                     A                      A                      A
 Frequencies --    31.2876                38.0476                42.4417
 Red. masses --     4.0606                 4.8426                 4.0343
 Frc consts  --     0.0023                 0.0041                 0.0043
 IR Inten    --     0.5799                 0.6887                 0.1497
 Atom AN      X      Y      Z        X      Y      Z        X      Y      Z
   1   8     0.02  -0.10  -0.01     0.11  -0.07   0.06    -0.02  -0.01  -0.04
   2  12     0.01   0.01  -0.01    -0.03  -0.03   0.02    -0.02   0.01  -0.01
   3   8     0.01   0.03   0.02     0.08   0.02  -0.04     0.00   0.07  -0.01
   4   6     0.02  -0.05  -0.01     0.04  -0.04   0.01     0.01   0.00  -0.02
   5   7     0.00   0.00   0.00    -0.05   0.03   0.00    -0.01  -0.01   0.00
   6   7    -0.01   0.03  -0.01    -0.02  -0.02   0.02     0.00   0.00  -0.01
   7   8     0.03  -0.03  -0.02    -0.01  -0.03   0.02     0.05  -0.01  -0.02
   8   6     0.00   0.00   0.00    -0.04   0.02   0.01    -0.03   0.00   0.00
   9   6    -0.02   0.03  -0.01    -0.03  -0.01   0.01    -0.04   0.02  -0.02
  10   6    -0.03   0.04  -0.02    -0.02  -0.02   0.02    -0.03   0.02  -0.02
  11   8     0.01   0.01   0.02     0.01  -0.01  -0.07     0.01   0.04   0.03
  12   6     0.02   0.02   0.02     0.04   0.00  -0.05     0.00   0.04   0.01
  13   6     0.05   0.05   0.03     0.05   0.01  -0.05    -0.01   0.06   0.01
  14   6    -0.01  -0.02   0.01     0.03   0.00  -0.05     0.00   0.01   0.02
  15   8     0.01   0.01   0.00     0.05   0.01  -0.04    -0.01   0.02  -0.01
  16   6     0.04  -0.13  -0.02     0.11  -0.10   0.13    -0.01  -0.01  -0.08
  17   8     0.00  -0.01  -0.01     0.00  -0.01   0.04    -0.05   0.03  -0.01
  18   6     0.01  -0.02   0.00     0.08   0.06  -0.03    -0.01   0.05  -0.01
  19   8     0.03  -0.04   0.00     0.07   0.09  -0.04    -0.01   0.04   0.00
  20   8    -0.02  -0.03  -0.05     0.02  -0.05   0.04    -0.03   0.04   0.01
  21   6    -0.02  -0.03  -0.04    -0.03  -0.03   0.02    -0.03   0.04   0.02
  22   6    -0.02  -0.02   0.00    -0.04   0.02   0.00    -0.03   0.04  -0.01
  23   6    -0.02  -0.02  -0.02     0.08  -0.01   0.01    -0.02   0.04   0.00
  24   8    -0.02  -0.03  -0.08    -0.07  -0.06   0.03    -0.03   0.04   0.06
  25   6    -0.01  -0.02   0.03    -0.10   0.02  -0.07    -0.05   0.04  -0.03
  26   6    -0.03  -0.03  -0.05     0.15  -0.07   0.03    -0.01   0.03  -0.01
  27   6     0.13   0.03   0.10     0.04   0.02  -0.04    -0.01   0.06   0.02
  28   6    -0.01   0.00   0.02     0.07   0.06  -0.05    -0.01   0.00   0.02
  29   6    -0.01   0.01   0.00    -0.05   0.03   0.00     0.00  -0.04   0.00
  30   6    -0.01   0.02   0.00    -0.02  -0.02   0.01     0.02  -0.01   0.00
  31   6    -0.01   0.02  -0.05    -0.05   0.03  -0.01    -0.02  -0.06   0.01
  32   6    -0.03   0.04  -0.07    -0.05   0.03  -0.01    -0.01  -0.08   0.00
  33   6    -0.04   0.04  -0.04    -0.05   0.03   0.00     0.01  -0.09  -0.02
  34   6    -0.03   0.03   0.01    -0.04   0.03   0.01     0.03  -0.07  -0.02
  35   6    -0.01   0.01   0.03    -0.04   0.03   0.01     0.02  -0.04  -0.01
  36   6     0.00   0.02  -0.07    -0.05   0.03  -0.02    -0.03  -0.06   0.03
  37   6     0.00   0.00   0.09    -0.03   0.04   0.02     0.04  -0.02  -0.01
  38   6     0.00  -0.01  -0.01    -0.04  -0.01   0.03    -0.01  -0.04   0.02
  39   6     0.00  -0.02   0.02    -0.05  -0.01   0.03     0.00  -0.06   0.05
  40   6     0.00  -0.02   0.06    -0.04  -0.01   0.01     0.03  -0.05   0.05
  41   6    -0.02   0.00   0.07    -0.02  -0.01  -0.01     0.07  -0.01   0.02
  42   6    -0.02   0.02   0.04     0.00  -0.01  -0.02     0.06   0.01  -0.01
  43   6     0.01  -0.01  -0.06    -0.03  -0.01   0.04    -0.02  -0.06   0.01
  44   6    -0.03   0.05   0.06     0.04  -0.01  -0.06     0.11   0.06  -0.05
  45   6    -0.01   0.04  -0.10    -0.03   0.04   0.00    -0.02  -0.08   0.07
  46   6     0.02   0.00  -0.08    -0.10   0.01  -0.02    -0.06  -0.03   0.04
  47   6    -0.03   0.03   0.13    -0.02   0.06   0.04     0.05  -0.01   0.00
  48   6     0.04  -0.04   0.09    -0.02   0.02   0.03     0.07  -0.03  -0.01
  49   6    -0.03   0.01   0.09     0.02   0.01  -0.12     0.06  -0.04  -0.07
  50   6    -0.05   0.10   0.09     0.10  -0.02  -0.04     0.14   0.18   0.06
  51   6     0.06  -0.04  -0.06    -0.01  -0.01   0.04    -0.02  -0.08   0.00
  52   6     0.00   0.00  -0.10    -0.04   0.00   0.02    -0.02  -0.07   0.00
  53   6     0.01  -0.04   0.01    -0.05   0.03   0.00    -0.03   0.00   0.00
  54   6    -0.05   0.07  -0.04     0.00  -0.05   0.04    -0.05   0.03  -0.04
  55   1    -0.02   0.03  -0.01    -0.02  -0.01   0.02    -0.05   0.03  -0.02
  56   1     0.06   0.12   0.01     0.06  -0.01  -0.06    -0.01   0.06   0.01
  57   1    -0.04  -0.02   0.01     0.01  -0.01  -0.08    -0.02   0.01   0.03
  58   1     0.06  -0.11  -0.05     0.12  -0.10   0.12     0.01  -0.01  -0.08
  59   1     0.04  -0.16  -0.02     0.17  -0.11   0.16    -0.04  -0.02  -0.10
  60   1     0.03  -0.12  -0.01     0.06  -0.11   0.16     0.01  -0.02  -0.10
  61   1    -0.04  -0.04   0.00    -0.02   0.08   0.01    -0.01   0.05  -0.02
  62   1    -0.05  -0.02  -0.01     0.09   0.01   0.00    -0.02   0.03   0.00
  63   1    -0.01  -0.03   0.04    -0.14   0.05  -0.11    -0.04   0.04  -0.03
  64   1     0.01   0.00   0.04    -0.11  -0.05  -0.09    -0.07   0.03  -0.03
  65   1     0.00  -0.03   0.05    -0.10   0.07  -0.06    -0.05   0.05  -0.05
  66   1    -0.05  -0.04  -0.07     0.15  -0.11   0.05    -0.01   0.01  -0.01
  67   1    -0.03  -0.03  -0.04     0.21  -0.04   0.00     0.00   0.03  -0.02
  68   1     0.00  -0.03  -0.07     0.15  -0.09   0.04     0.00   0.03  -0.02
  69   1     0.17   0.06   0.13     0.01   0.00  -0.06    -0.02   0.06   0.03
  70   1     0.13  -0.04   0.11     0.02   0.04  -0.01    -0.01   0.06   0.02
  71   1     0.14   0.07   0.10     0.07   0.02  -0.03    -0.02   0.07   0.02
  72   1    -0.03   0.03   0.03     0.05   0.09  -0.09    -0.02   0.00   0.04
  73   1    -0.03  -0.03   0.01     0.08   0.07  -0.05    -0.02  -0.02   0.02
  74   1     0.02   0.01   0.01     0.09   0.07  -0.02    -0.01   0.00   0.00
  75   1    -0.04   0.05  -0.10    -0.06   0.03  -0.02    -0.02  -0.10   0.00
  76   1    -0.05   0.05  -0.06    -0.05   0.03   0.00     0.01  -0.11  -0.03
  77   1    -0.03   0.03   0.03    -0.04   0.03   0.02     0.04  -0.07  -0.03
  78   1    -0.01   0.02  -0.06    -0.04   0.03  -0.06    -0.03  -0.06   0.02
  79   1     0.01  -0.01   0.10    -0.03   0.04   0.02     0.03   0.00   0.00
  80   1     0.01  -0.04   0.01    -0.07  -0.01   0.05    -0.02  -0.09   0.06
  81   1     0.00  -0.03   0.08    -0.05  -0.01   0.02     0.03  -0.06   0.08
  82   1    -0.02   0.01   0.10     0.00  -0.01  -0.03     0.10   0.00   0.02
  83   1     0.00   0.00  -0.06    -0.03  -0.01   0.04    -0.03  -0.04   0.00
  84   1    -0.02   0.06   0.02     0.05  -0.01  -0.06     0.17   0.09  -0.15
  85   1    -0.01   0.03  -0.12    -0.03   0.04  -0.02    -0.01  -0.07   0.10
  86   1    -0.02   0.06  -0.10     0.00   0.05   0.00    -0.01  -0.11   0.06
  87   1    -0.01   0.03  -0.11    -0.04   0.04   0.03    -0.02  -0.06   0.08
  88   1     0.03  -0.01  -0.09    -0.09   0.01  -0.04    -0.07  -0.03   0.06
  89   1     0.03   0.00  -0.09    -0.11   0.02   0.01    -0.07  -0.02   0.06
  90   1     0.03  -0.02  -0.06    -0.12   0.00  -0.04    -0.08  -0.02   0.02
  91   1     0.00   0.04   0.18     0.00   0.08   0.05     0.06  -0.01   0.00
  92   1    -0.04   0.02   0.10     0.00   0.04   0.03     0.06  -0.02   0.00
  93   1    -0.09   0.05   0.14    -0.04   0.08   0.03     0.05  -0.01  -0.01
  94   1     0.05  -0.05   0.14    -0.01   0.02   0.04     0.08  -0.01  -0.01
  95   1     0.06  -0.06   0.07    -0.02   0.01   0.03     0.05  -0.04  -0.01
  96   1     0.03  -0.03   0.09    -0.01   0.02   0.04     0.08  -0.05  -0.02
  97   1    -0.04   0.03   0.10     0.05   0.00  -0.15     0.10   0.01  -0.10
  98   1    -0.02  -0.02   0.07    -0.02   0.02  -0.13     0.05  -0.14  -0.15
  99   1    -0.04   0.00   0.12     0.01   0.01  -0.12     0.01  -0.08   0.05
 100   1    -0.05   0.11   0.09     0.13  -0.02  -0.08     0.20   0.19   0.01
 101   1    -0.04   0.13   0.08     0.11  -0.03   0.00     0.21   0.28   0.11
 102   1    -0.06   0.09   0.13     0.08  -0.02  -0.04     0.04   0.17   0.15
 103   1     0.06  -0.04  -0.10    -0.01   0.00   0.04    -0.04  -0.09  -0.02
 104   1     0.06  -0.04  -0.03    -0.01  -0.01   0.05    -0.03  -0.06   0.01
 105   1     0.08  -0.05  -0.06    -0.01   0.00   0.04    -0.01  -0.10   0.01
 106   1     0.01  -0.01  -0.15    -0.03   0.00   0.00    -0.03  -0.08  -0.01
 107   1     0.02  -0.02  -0.09    -0.03  -0.01   0.03    -0.01  -0.08   0.01
 108   1    -0.03   0.03  -0.10    -0.05   0.01   0.02    -0.03  -0.06   0.00
 109   1     0.00  -0.02   0.01    -0.05   0.03   0.01    -0.02  -0.02   0.01
 110   1     0.04  -0.08  -0.02    -0.06   0.04   0.01    -0.04   0.00   0.00
 111   1     0.00  -0.06   0.06    -0.05   0.04  -0.01    -0.02   0.00  -0.01
 112   1    -0.09   0.06  -0.04     0.03  -0.04   0.04    -0.10   0.01  -0.11
 113   1    -0.04   0.10  -0.05    -0.01  -0.07   0.04    -0.06   0.11  -0.02
 114   1    -0.05   0.07  -0.04     0.00  -0.05   0.04    -0.02  -0.01  -0.01
                     7                      8                      9
                     A                      A                      A
 Frequencies --    46.4175                50.4480                54.1378
 Red. masses --     4.1618                 4.7354                 4.5560
 Frc consts  --     0.0053                 0.0071                 0.0079
 IR Inten    --     0.7857                 0.1322                 0.3128
 Atom AN      X      Y      Z        X      Y      Z        X      Y      Z
   1   8     0.02   0.02   0.03    -0.03  -0.11  -0.01     0.07  -0.04  -0.04
   2  12     0.02   0.01  -0.01     0.00   0.00   0.01    -0.03   0.00   0.01
   3   8    -0.02   0.00   0.01     0.03   0.04  -0.02    -0.03   0.00   0.02
   4   6     0.01   0.02   0.02    -0.06  -0.06  -0.03     0.11   0.02   0.00
   5   7    -0.02   0.01   0.01     0.05  -0.05   0.01    -0.01   0.00   0.00
   6   7     0.01   0.00  -0.03    -0.04   0.04   0.01    -0.02  -0.02  -0.01
   7   8     0.01   0.02   0.02    -0.09  -0.01  -0.04     0.17   0.04  -0.02
   8   6    -0.03   0.00   0.01     0.06  -0.05   0.01    -0.01  -0.01  -0.01
   9   6    -0.02  -0.02  -0.01     0.04  -0.01   0.02     0.00  -0.02   0.00
  10   6     0.00  -0.02  -0.03     0.00   0.02   0.02     0.00  -0.03   0.00
  11   8     0.01   0.02   0.02    -0.07  -0.03  -0.04     0.12   0.08   0.10
  12   6     0.01   0.02   0.02    -0.01   0.00  -0.03     0.03   0.03   0.06
  13   6     0.04   0.04   0.03     0.01   0.02  -0.02    -0.03   0.00   0.03
  14   6     0.01   0.02   0.02    -0.06  -0.06  -0.03     0.07   0.05   0.06
  15   8     0.01   0.01   0.01     0.03   0.01  -0.02    -0.01   0.02   0.04
  16   6     0.02   0.01   0.03    -0.03  -0.10   0.00     0.10  -0.07  -0.11
  17   8    -0.03  -0.03  -0.02    -0.02   0.01   0.02    -0.03   0.00   0.00
  18   6    -0.02  -0.05  -0.01     0.03   0.05  -0.01    -0.03   0.00   0.02
  19   8     0.01  -0.08  -0.01     0.03   0.05  -0.02    -0.03   0.00   0.02
  20   8    -0.02  -0.03  -0.02    -0.01   0.00   0.03    -0.04  -0.01  -0.01
  21   6     0.01  -0.03   0.06    -0.03   0.00   0.04    -0.05   0.00  -0.03
  22   6     0.01  -0.05   0.01    -0.03   0.02   0.00    -0.05   0.01  -0.01
  23   6    -0.06  -0.06  -0.04     0.02   0.01   0.00    -0.02   0.01   0.02
  24   8     0.02   0.00   0.15    -0.04   0.00   0.08    -0.06  -0.02  -0.05
  25   6     0.01  -0.05   0.02    -0.06   0.02  -0.03    -0.06   0.01  -0.03
  26   6    -0.10  -0.06  -0.13     0.05  -0.02  -0.01    -0.01   0.02   0.06
  27   6     0.12   0.01   0.08    -0.02   0.04   0.01    -0.07   0.00  -0.05
  28   6     0.01   0.01   0.02    -0.04  -0.07  -0.04     0.03   0.07   0.09
  29   6    -0.02   0.01   0.01     0.05  -0.04   0.00    -0.01   0.01   0.00
  30   6     0.02   0.00  -0.04    -0.05   0.05   0.00    -0.02  -0.02   0.00
  31   6    -0.02   0.01   0.01     0.07  -0.03   0.03     0.00   0.01   0.02
  32   6    -0.05   0.01  -0.05     0.06  -0.01   0.02     0.00   0.02   0.03
  33   6    -0.07   0.00  -0.11     0.02  -0.01  -0.02    -0.01   0.02   0.00
  34   6    -0.06   0.01  -0.10     0.00  -0.02  -0.03    -0.02   0.01  -0.02
  35   6    -0.03   0.01  -0.03     0.01  -0.04  -0.02    -0.02   0.01  -0.03
  36   6     0.01   0.02   0.10     0.12  -0.02   0.09     0.03   0.02   0.06
  37   6    -0.01   0.02   0.02     0.00  -0.06  -0.02    -0.04   0.01  -0.06
  38   6     0.01   0.01  -0.03    -0.05   0.05   0.01    -0.01  -0.03  -0.01
  39   6     0.01   0.02  -0.04    -0.05   0.04   0.01    -0.02  -0.04   0.01
  40   6     0.01   0.01  -0.05    -0.05   0.04   0.02    -0.03  -0.04   0.03
  41   6     0.01   0.00  -0.05    -0.05   0.05   0.01    -0.03  -0.03   0.03
  42   6     0.01   0.00  -0.05    -0.04   0.05   0.00    -0.03  -0.03   0.02
  43   6     0.01   0.01  -0.01    -0.04   0.05  -0.01     0.02  -0.02  -0.05
  44   6     0.01  -0.01  -0.05    -0.02   0.06  -0.01    -0.03  -0.02   0.02
  45   6     0.02  -0.01   0.14     0.07  -0.03   0.04    -0.03   0.00   0.01
  46   6     0.02   0.10   0.11     0.24   0.04   0.09     0.13   0.06   0.06
  47   6    -0.05   0.04   0.05    -0.02  -0.06  -0.01     0.00   0.01  -0.08
  48   6     0.06  -0.01   0.01    -0.02  -0.05  -0.02    -0.08   0.01  -0.04
  49   6     0.03   0.03  -0.06    -0.02   0.11  -0.04    -0.01   0.06  -0.01
  50   6     0.03  -0.05  -0.08     0.01   0.03  -0.02     0.02  -0.09  -0.02
  51   6    -0.01   0.02  -0.01    -0.01   0.04  -0.01     0.06  -0.06  -0.05
  52   6     0.01   0.01   0.01    -0.04   0.05  -0.04     0.01   0.01  -0.08
  53   6    -0.06   0.02   0.01     0.08  -0.07   0.01    -0.03   0.02  -0.01
  54   6     0.01  -0.05  -0.04    -0.01   0.04   0.03     0.02  -0.05   0.02
  55   1    -0.04  -0.03  -0.01     0.06  -0.01   0.03     0.00  -0.03   0.00
  56   1     0.04   0.11   0.02     0.02   0.01  -0.04    -0.06  -0.04   0.09
  57   1     0.02   0.02   0.03    -0.06  -0.06  -0.01     0.04   0.04   0.05
  58   1     0.02   0.02   0.02    -0.04  -0.10  -0.02     0.14  -0.06  -0.12
  59   1     0.03   0.01   0.04    -0.02  -0.11   0.01     0.05  -0.10  -0.13
  60   1     0.01   0.02   0.04    -0.04  -0.08   0.02     0.13  -0.07  -0.13
  61   1     0.03  -0.07  -0.01    -0.01   0.05   0.00    -0.06   0.03  -0.01
  62   1    -0.09  -0.11   0.00     0.02   0.00   0.00    -0.02   0.04   0.00
  63   1     0.05  -0.05   0.05    -0.08   0.03  -0.05    -0.09   0.02  -0.05
  64   1    -0.02  -0.03   0.04    -0.06  -0.01  -0.04    -0.04  -0.01  -0.04
  65   1     0.01  -0.06  -0.02    -0.06   0.05  -0.03    -0.06   0.02   0.00
  66   1    -0.13  -0.08  -0.15     0.05  -0.05   0.00     0.00   0.03   0.06
  67   1    -0.14  -0.10  -0.15     0.08  -0.02  -0.03     0.01   0.04   0.09
  68   1    -0.07  -0.01  -0.18     0.06  -0.02  -0.01    -0.02  -0.02   0.08
  69   1     0.17   0.04   0.12    -0.04   0.02   0.00    -0.07   0.00  -0.04
  70   1     0.14  -0.07   0.07    -0.03   0.05   0.02    -0.04   0.04  -0.10
  71   1     0.11   0.04   0.08     0.00   0.06   0.01    -0.13  -0.04  -0.06
  72   1     0.01   0.01   0.03    -0.03  -0.08  -0.05    -0.02   0.13   0.14
  73   1     0.01   0.00   0.02    -0.03  -0.06  -0.03    -0.03   0.01   0.06
  74   1     0.02   0.01   0.01    -0.05  -0.07  -0.04     0.08   0.08   0.08
  75   1    -0.05   0.00  -0.05     0.08   0.00   0.04     0.01   0.02   0.04
  76   1    -0.09   0.00  -0.17     0.01   0.01  -0.02    -0.01   0.02   0.00
  77   1    -0.07   0.01  -0.13    -0.02  -0.02  -0.05    -0.03   0.01  -0.04
  78   1     0.01  -0.02   0.12     0.10  -0.04   0.18     0.01   0.01   0.14
  79   1     0.00   0.02   0.05     0.01  -0.07  -0.02    -0.05   0.01  -0.09
  80   1     0.00   0.02  -0.03    -0.05   0.04   0.01    -0.01  -0.04   0.01
  81   1     0.00   0.02  -0.05    -0.06   0.04   0.02    -0.04  -0.05   0.04
  82   1     0.01   0.00  -0.06    -0.04   0.05   0.01    -0.04  -0.03   0.05
  83   1     0.02   0.01  -0.01    -0.05   0.05   0.00     0.01  -0.02  -0.06
  84   1    -0.01  -0.02  -0.02    -0.04   0.06   0.00    -0.07  -0.03   0.06
  85   1     0.06   0.00   0.22     0.10  -0.03   0.10    -0.02   0.01   0.04
  86   1     0.00  -0.09   0.12    -0.01  -0.07   0.04    -0.11  -0.02   0.01
  87   1     0.02   0.05   0.11     0.10   0.00  -0.04    -0.01   0.01  -0.07
  88   1     0.04   0.11   0.17     0.25   0.05   0.14     0.12   0.06   0.10
  89   1     0.02   0.13   0.09     0.27   0.06   0.00     0.16   0.05  -0.02
  90   1     0.02   0.12   0.09     0.29   0.06   0.13     0.18   0.09   0.10
  91   1    -0.01   0.05   0.10    -0.03  -0.08  -0.01    -0.04  -0.01  -0.11
  92   1    -0.05   0.02   0.01    -0.04  -0.05  -0.01     0.01   0.03  -0.02
  93   1    -0.11   0.06   0.07    -0.02  -0.06  -0.01     0.06   0.01  -0.10
  94   1     0.08   0.00   0.05    -0.03  -0.07  -0.01    -0.10   0.01  -0.07
  95   1     0.08  -0.02  -0.02     0.00  -0.05  -0.02    -0.11   0.02  -0.03
  96   1     0.05  -0.02  -0.02    -0.03  -0.04  -0.02    -0.08   0.01  -0.02
  97   1     0.02   0.02  -0.05     0.00   0.12  -0.05     0.01   0.07  -0.02
  98   1     0.02   0.06  -0.03    -0.05   0.13  -0.04    -0.04   0.11   0.01
  99   1     0.05   0.04  -0.09     0.00   0.11  -0.05     0.03   0.07  -0.05
 100   1     0.02  -0.05  -0.07     0.03   0.05  -0.03     0.01  -0.07  -0.01
 101   1     0.01  -0.09  -0.08     0.01   0.01   0.00    -0.01  -0.15  -0.02
 102   1     0.06  -0.05  -0.10     0.04   0.03  -0.02     0.08  -0.08  -0.05
 103   1    -0.01   0.03   0.00     0.00   0.05  -0.02     0.07  -0.06  -0.09
 104   1    -0.02   0.02  -0.03     0.00   0.03   0.01     0.06  -0.07  -0.03
 105   1    -0.03   0.03  -0.01     0.00   0.04  -0.01     0.07  -0.07  -0.05
 106   1     0.01   0.01   0.02    -0.04   0.04  -0.09     0.03   0.00  -0.15
 107   1     0.00   0.02   0.01    -0.03   0.03  -0.03     0.01  -0.02  -0.06
 108   1     0.03   0.00   0.01    -0.07   0.08  -0.04    -0.02   0.06  -0.08
 109   1    -0.06   0.03   0.03     0.08  -0.05  -0.01    -0.03   0.02   0.00
 110   1    -0.06   0.03   0.02     0.11  -0.09  -0.01    -0.04   0.04   0.01
 111   1    -0.07   0.02   0.00     0.08  -0.09   0.04    -0.04   0.02  -0.04
 112   1     0.04  -0.04  -0.02    -0.02   0.04   0.03     0.07  -0.03   0.08
 113   1     0.02  -0.08  -0.05    -0.01   0.05   0.04     0.03  -0.13   0.00
 114   1    -0.01  -0.05  -0.05     0.01   0.04   0.03    -0.01  -0.02  -0.01
                    10                     11                     12
                     A                      A                      A
 Frequencies --    58.6921                61.2917                64.0067
 Red. masses --     4.5164                 4.4588                 4.4113
 Frc consts  --     0.0092                 0.0099                 0.0106
 IR Inten    --     1.0123                 0.1262                 0.9359
 Atom AN      X      Y      Z        X      Y      Z        X      Y      Z
   1   8     0.00  -0.11  -0.04     0.03   0.12   0.00     0.04   0.01   0.03
   2  12    -0.03   0.02  -0.02    -0.06   0.01  -0.02     0.00  -0.03   0.00
   3   8     0.01   0.09  -0.01    -0.01   0.02  -0.04    -0.01  -0.02   0.00
   4   6    -0.01  -0.03  -0.04     0.02   0.06  -0.01     0.06   0.01   0.04
   5   7     0.02   0.03  -0.05     0.00  -0.05  -0.02     0.02  -0.03  -0.02
   6   7     0.01  -0.01   0.00    -0.03  -0.02  -0.01    -0.04   0.01  -0.01
   7   8     0.00   0.04  -0.07     0.02  -0.02   0.02     0.06   0.04   0.03
   8   6     0.04   0.02  -0.03     0.01  -0.06  -0.02     0.02  -0.02  -0.02
   9   6     0.06   0.00  -0.01     0.00  -0.03  -0.01     0.01   0.00  -0.02
  10   6     0.05  -0.02   0.01    -0.01  -0.03   0.00    -0.03   0.02  -0.01
  11   8    -0.01   0.04   0.02    -0.01   0.07  -0.08     0.07  -0.01   0.07
  12   6    -0.01   0.04  -0.01    -0.02   0.05  -0.06     0.02  -0.03   0.03
  13   6     0.02   0.09   0.01     0.00   0.04  -0.05    -0.04  -0.05   0.01
  14   6    -0.03  -0.01   0.00     0.00   0.11  -0.08     0.07  -0.02   0.07
  15   8    -0.04   0.02  -0.04    -0.05   0.05  -0.04     0.01  -0.04   0.02
  16   6     0.00  -0.11  -0.09     0.05   0.06   0.07     0.03   0.03   0.00
  17   8    -0.09   0.02  -0.04    -0.04   0.02  -0.02    -0.03  -0.05   0.01
  18   6    -0.02   0.03   0.01    -0.02   0.02  -0.01    -0.01   0.00   0.00
  19   8    -0.04  -0.01   0.03    -0.04   0.03  -0.01    -0.02   0.01   0.00
  20   8    -0.03   0.02   0.08     0.00   0.03   0.04     0.01   0.00   0.09
  21   6    -0.02   0.02   0.09     0.01   0.03   0.04     0.03  -0.01   0.10
  22   6    -0.02   0.00   0.01     0.01   0.01   0.01     0.03  -0.04   0.03
  23   6    -0.02   0.01   0.04     0.00   0.02   0.01     0.01  -0.03   0.03
  24   8    -0.01   0.03   0.16     0.02   0.04   0.06     0.04   0.01   0.19
  25   6    -0.01   0.00   0.03     0.03   0.00   0.04     0.03  -0.04   0.01
  26   6    -0.01  -0.01   0.02     0.00   0.02   0.00     0.01  -0.04   0.01
  27   6     0.05   0.09   0.07     0.03   0.03  -0.04    -0.12  -0.03  -0.06
  28   6    -0.03  -0.03   0.00     0.02   0.20  -0.07     0.05  -0.06   0.06
  29   6     0.03   0.02  -0.04     0.00  -0.04  -0.02     0.01  -0.01  -0.03
  30   6     0.00  -0.02   0.02    -0.01  -0.03   0.00    -0.04   0.02  -0.02
  31   6     0.02   0.01  -0.04     0.02  -0.02  -0.02     0.03   0.02  -0.05
  32   6     0.04   0.00  -0.01     0.01   0.01  -0.01     0.01   0.06  -0.05
  33   6     0.05   0.00   0.01    -0.02   0.01   0.00    -0.02   0.06  -0.03
  34   6     0.06   0.01   0.00    -0.03  -0.01   0.01    -0.04   0.03  -0.01
  35   6     0.04   0.02  -0.02    -0.02  -0.03   0.00    -0.02   0.00  -0.01
  36   6    -0.01   0.01  -0.07     0.06  -0.02  -0.01     0.05   0.01  -0.09
  37   6     0.05   0.02  -0.02    -0.03  -0.06   0.03    -0.04  -0.03  -0.01
  38   6     0.00  -0.01   0.01     0.00  -0.05  -0.01    -0.03   0.01  -0.02
  39   6    -0.01  -0.01   0.01     0.03  -0.06  -0.01    -0.02   0.01  -0.02
  40   6    -0.03  -0.01   0.01     0.05  -0.05   0.00    -0.01   0.02  -0.02
  41   6    -0.04  -0.02   0.02     0.04  -0.03   0.01    -0.01   0.02  -0.02
  42   6    -0.03  -0.03   0.03     0.01  -0.02   0.02    -0.01   0.03  -0.03
  43   6     0.01  -0.01   0.01    -0.03  -0.07   0.00    -0.03   0.01  -0.03
  44   6    -0.05  -0.06   0.04    -0.02  -0.01   0.05     0.00   0.05  -0.03
  45   6     0.06   0.01   0.00     0.06   0.00  -0.03     0.15   0.06  -0.02
  46   6    -0.14  -0.03  -0.07     0.11   0.00  -0.01    -0.07  -0.03  -0.09
  47   6     0.04   0.01  -0.03    -0.01   0.00   0.07    -0.04  -0.01   0.00
  48   6     0.06   0.04  -0.04    -0.04  -0.12   0.08    -0.08  -0.04   0.02
  49   6    -0.03   0.00   0.04     0.01   0.03   0.08    -0.01   0.01  -0.02
  50   6    -0.06  -0.14  -0.03    -0.03  -0.03   0.02     0.00   0.11   0.01
  51   6    -0.02  -0.02   0.00    -0.08  -0.07  -0.01    -0.01   0.02  -0.03
  52   6     0.01  -0.01   0.04    -0.02  -0.09   0.05    -0.04   0.01  -0.06
  53   6     0.06   0.02  -0.05     0.04  -0.11  -0.01     0.03  -0.04  -0.02
  54   6     0.09  -0.04   0.06     0.00  -0.04   0.01    -0.06   0.07  -0.02
  55   1     0.08  -0.01   0.00     0.02  -0.04   0.00     0.01   0.01  -0.01
  56   1     0.03   0.13  -0.02     0.01   0.05  -0.07    -0.06  -0.12   0.05
  57   1    -0.05  -0.02   0.03    -0.03   0.11  -0.13     0.09  -0.01   0.09
  58   1     0.01  -0.10  -0.09     0.09   0.05   0.09     0.02   0.04  -0.03
  59   1    -0.02  -0.12  -0.10     0.08   0.07   0.08     0.03   0.01   0.00
  60   1     0.02  -0.10  -0.09     0.01   0.01   0.07     0.05   0.07   0.01
  61   1     0.03  -0.04  -0.02     0.03  -0.03  -0.01     0.07  -0.05   0.01
  62   1    -0.01  -0.01   0.04     0.01   0.00   0.01     0.02  -0.06   0.04
  63   1     0.03  -0.02   0.07     0.07  -0.01   0.06     0.06  -0.04   0.02
  64   1    -0.05   0.03   0.06     0.01   0.04   0.06    -0.01  -0.04   0.02
  65   1    -0.01  -0.01  -0.01     0.03  -0.02   0.01     0.03  -0.05  -0.03
  66   1     0.00  -0.03   0.03     0.01   0.01   0.02     0.02  -0.05   0.03
  67   1     0.00  -0.01  -0.01     0.00   0.01  -0.02     0.01  -0.05  -0.02
  68   1    -0.01   0.01   0.01    -0.02   0.03   0.00    -0.01  -0.01   0.01
  69   1     0.07   0.09   0.09     0.03   0.04  -0.08    -0.16  -0.06  -0.08
  70   1     0.05   0.05   0.08     0.01   0.02   0.00    -0.12   0.04  -0.09
  71   1     0.06   0.12   0.07     0.07   0.01  -0.03    -0.15  -0.07  -0.07
  72   1    -0.03  -0.03   0.01     0.00   0.24  -0.10     0.04  -0.07   0.10
  73   1    -0.03  -0.05   0.00     0.02   0.21  -0.07     0.03  -0.09   0.06
  74   1    -0.02  -0.03  -0.02     0.06   0.21  -0.03     0.05  -0.07   0.03
  75   1     0.03   0.00   0.00     0.02   0.03  -0.02     0.02   0.08  -0.07
  76   1     0.07  -0.01   0.03    -0.02   0.03   0.00    -0.03   0.09  -0.03
  77   1     0.07   0.01   0.01    -0.04  -0.01   0.03    -0.06   0.04   0.00
  78   1     0.01   0.02  -0.17     0.05  -0.04   0.02     0.09  -0.01  -0.19
  79   1     0.05   0.03  -0.01    -0.04  -0.07  -0.01    -0.04  -0.05  -0.03
  80   1    -0.01   0.01   0.01     0.03  -0.08  -0.01    -0.02   0.00  -0.03
  81   1    -0.03  -0.01   0.01     0.07  -0.05  -0.01    -0.01   0.01  -0.02
  82   1    -0.05  -0.03   0.02     0.05  -0.02   0.02     0.00   0.03  -0.02
  83   1     0.02   0.00  -0.01    -0.02  -0.06  -0.01    -0.05   0.01  -0.02
  84   1    -0.08  -0.09   0.10    -0.05  -0.01   0.06     0.02   0.07  -0.08
  85   1     0.03   0.01  -0.04     0.07   0.00  -0.03     0.15   0.05  -0.07
  86   1     0.16   0.04   0.00     0.04   0.00  -0.03     0.24   0.08  -0.02
  87   1     0.03   0.00   0.10     0.06   0.01  -0.04     0.11   0.07   0.09
  88   1    -0.14  -0.04  -0.11     0.14   0.00   0.00    -0.03  -0.03  -0.13
  89   1    -0.19  -0.03   0.03     0.11   0.03  -0.04    -0.12   0.01   0.01
  90   1    -0.21  -0.07  -0.12     0.11  -0.02   0.01    -0.15  -0.09  -0.14
  91   1     0.04   0.02  -0.03     0.01   0.01   0.10    -0.07  -0.05  -0.01
  92   1     0.03   0.00  -0.05     0.01   0.00   0.10    -0.05   0.02   0.05
  93   1     0.02   0.00  -0.01    -0.02   0.05   0.05     0.01   0.00  -0.03
  94   1     0.07   0.04  -0.04    -0.05  -0.14   0.11    -0.10  -0.07   0.02
  95   1     0.07   0.04  -0.04    -0.04  -0.15   0.05    -0.08  -0.05   0.01
  96   1     0.06   0.03  -0.05    -0.05  -0.09   0.12    -0.09  -0.01   0.04
  97   1    -0.04  -0.05   0.05    -0.01   0.04   0.10    -0.02   0.00  -0.02
  98   1    -0.02   0.06   0.09     0.02   0.04   0.09     0.01  -0.01  -0.03
  99   1     0.00   0.02  -0.04     0.05   0.02   0.07    -0.04   0.00  -0.01
 100   1    -0.09  -0.14   0.01    -0.06  -0.01   0.05     0.01   0.12   0.00
 101   1    -0.09  -0.21  -0.05    -0.07  -0.07  -0.01     0.02   0.16   0.02
 102   1     0.01  -0.13  -0.08     0.02  -0.04   0.01    -0.04   0.10   0.05
 103   1    -0.01  -0.02   0.00    -0.10  -0.08   0.00    -0.01   0.02  -0.03
 104   1    -0.03  -0.04  -0.03    -0.08  -0.04  -0.03    -0.01   0.01  -0.01
 105   1    -0.05  -0.03   0.02    -0.08  -0.08   0.01     0.00   0.02  -0.03
 106   1     0.00  -0.03  -0.02    -0.04  -0.09   0.09    -0.03   0.01  -0.05
 107   1     0.01  -0.05   0.10    -0.03  -0.08   0.05    -0.03   0.02  -0.08
 108   1     0.03   0.06   0.06     0.02  -0.12   0.05    -0.06  -0.01  -0.07
 109   1     0.06   0.01  -0.06     0.03  -0.08  -0.03     0.03  -0.03  -0.03
 110   1     0.06   0.04  -0.04     0.08  -0.15  -0.05     0.05  -0.06  -0.04
 111   1     0.07   0.03  -0.05     0.03  -0.14   0.05     0.03  -0.06   0.01
 112   1     0.15  -0.02   0.13     0.03  -0.02   0.05    -0.13   0.05  -0.09
 113   1     0.09  -0.14   0.06     0.00  -0.08   0.00    -0.07   0.17  -0.01
 114   1     0.07   0.00   0.03    -0.02  -0.01  -0.01    -0.02   0.04   0.00
                    13                     14                     15
                     A                      A                      A
 Frequencies --    70.0472                72.3817                78.9591
 Red. masses --     4.0831                 5.2300                 3.7836
 Frc consts  --     0.0118                 0.0161                 0.0139
 IR Inten    --     0.5901                 2.4006                 0.3594
 Atom AN      X      Y      Z        X      Y      Z        X      Y      Z
   1   8    -0.01  -0.01  -0.03    -0.09   0.17   0.05     0.00   0.01  -0.01
   2  12     0.01   0.03   0.04     0.01  -0.01  -0.02     0.00   0.01  -0.01
   3   8    -0.05  -0.06   0.02     0.04   0.07   0.00    -0.04  -0.05  -0.04
   4   6    -0.03   0.02  -0.04    -0.04  -0.01   0.08     0.01  -0.02   0.00
   5   7     0.01  -0.01   0.04     0.01   0.00  -0.03     0.00   0.04  -0.01
   6   7     0.03   0.01   0.03     0.01  -0.02  -0.04    -0.02   0.02  -0.02
   7   8    -0.03   0.03  -0.04    -0.01  -0.17   0.14     0.02  -0.03   0.00
   8   6     0.02  -0.03   0.05     0.00   0.00  -0.03     0.00   0.02  -0.02
   9   6     0.03  -0.03   0.05     0.00   0.00  -0.04     0.00   0.02  -0.02
  10   6     0.03  -0.02   0.04     0.01  -0.02  -0.04     0.00   0.01  -0.02
  11   8    -0.04   0.03  -0.05    -0.07  -0.03   0.00     0.01  -0.03  -0.01
  12   6    -0.03   0.02   0.00    -0.01   0.01   0.00    -0.03  -0.05  -0.03
  13   6    -0.05  -0.05  -0.01     0.01   0.05   0.02    -0.07  -0.07  -0.05
  14   6    -0.05   0.07  -0.06    -0.03  -0.02   0.02     0.03  -0.04   0.00
  15   8    -0.01   0.06   0.05     0.03   0.01   0.00    -0.03  -0.05  -0.04
  16   6     0.01  -0.06  -0.02    -0.08   0.13   0.11    -0.01   0.02  -0.02
  17   8     0.02   0.01   0.05    -0.04   0.00  -0.02     0.00   0.00   0.00
  18   6    -0.03  -0.03   0.01     0.02   0.05   0.00    -0.03  -0.01  -0.02
  19   8    -0.03   0.01  -0.01     0.02   0.02   0.01    -0.05   0.02  -0.03
  20   8    -0.01   0.00  -0.01    -0.01  -0.01   0.04    -0.01   0.00   0.00
  21   6     0.00   0.00   0.03    -0.03  -0.01   0.03    -0.01   0.00   0.00
  22   6     0.00   0.00   0.04    -0.03   0.00  -0.01    -0.01   0.00  -0.01
  23   6    -0.04  -0.01   0.00     0.02   0.01   0.02    -0.01   0.00  -0.01
  24   8     0.01   0.01   0.04    -0.03  -0.01   0.05    -0.01   0.01   0.02
  25   6     0.00   0.00   0.05    -0.05   0.00  -0.03    -0.01   0.00  -0.02
  26   6    -0.07   0.00  -0.03     0.06  -0.02   0.03    -0.02   0.01   0.01
  27   6    -0.06  -0.05  -0.07     0.00   0.06   0.06    -0.12  -0.05  -0.07
  28   6    -0.06   0.15  -0.04     0.01  -0.03   0.01     0.04  -0.08  -0.02
  29   6     0.00  -0.02   0.02     0.01   0.01  -0.02     0.01   0.03   0.00
  30   6     0.02   0.01   0.01     0.01  -0.03  -0.02    -0.02   0.01  -0.01
  31   6    -0.01  -0.02  -0.01     0.02   0.01  -0.01     0.00   0.02   0.01
  32   6    -0.02  -0.02  -0.03     0.02   0.01   0.00     0.02   0.00   0.02
  33   6    -0.02  -0.02  -0.03     0.02   0.01   0.00     0.04   0.00   0.03
  34   6    -0.01  -0.02  -0.01     0.01   0.01  -0.01     0.06   0.01   0.04
  35   6     0.00  -0.02   0.02     0.01   0.01  -0.02     0.05   0.03   0.04
  36   6    -0.02  -0.03  -0.03     0.02   0.01  -0.01    -0.01   0.02   0.02
  37   6     0.00  -0.02   0.03     0.00   0.01  -0.03     0.10   0.05   0.10
  38   6     0.03   0.03   0.01     0.02  -0.04  -0.03    -0.02  -0.01  -0.02
  39   6     0.00   0.04   0.02    -0.02  -0.06   0.02    -0.02  -0.02   0.00
  40   6    -0.04   0.02   0.04    -0.06  -0.07   0.07    -0.02  -0.01   0.02
  41   6    -0.03   0.01   0.03    -0.06  -0.06   0.07    -0.02   0.00   0.02
  42   6     0.01   0.00   0.01    -0.03  -0.04   0.03    -0.02   0.01   0.01
  43   6     0.09   0.06  -0.03     0.09  -0.02  -0.11    -0.02  -0.02  -0.04
  44   6     0.05  -0.01  -0.03    -0.01  -0.02   0.02    -0.02   0.02   0.01
  45   6     0.02  -0.01   0.00     0.03   0.01   0.01    -0.02   0.00   0.03
  46   6    -0.08  -0.06  -0.03     0.00   0.01  -0.01     0.00   0.05   0.03
  47   6     0.01  -0.01   0.04    -0.01  -0.01  -0.04     0.10   0.12   0.16
  48   6     0.00  -0.04   0.04     0.00   0.03  -0.04     0.18  -0.03   0.12
  49   6     0.02  -0.02  -0.09    -0.01   0.01  -0.01     0.00   0.12  -0.02
  50   6     0.10  -0.01  -0.01     0.03  -0.03   0.03     0.02  -0.05  -0.03
  51   6     0.17   0.03  -0.03     0.15  -0.10  -0.13    -0.02  -0.04  -0.05
  52   6     0.07   0.13  -0.09     0.08   0.09  -0.13    -0.02  -0.02  -0.04
  53   6     0.04  -0.04   0.05    -0.02   0.02  -0.03    -0.01   0.00   0.00
  54   6     0.04  -0.05   0.03     0.01  -0.02  -0.04     0.02  -0.01   0.00
  55   1     0.04  -0.06   0.05    -0.01   0.00  -0.05     0.00   0.01  -0.02
  56   1    -0.06  -0.07   0.00     0.03   0.05  -0.01    -0.07  -0.11  -0.03
  57   1    -0.08   0.06  -0.11    -0.01  -0.01   0.04     0.04  -0.04   0.02
  58   1     0.04  -0.05  -0.02    -0.06   0.12   0.17    -0.02   0.02  -0.02
  59   1     0.02  -0.07  -0.01    -0.07   0.18   0.11    -0.01   0.03  -0.03
  60   1    -0.02  -0.08  -0.01    -0.10   0.07   0.08     0.00   0.03  -0.03
  61   1    -0.01   0.00   0.05    -0.01   0.01  -0.02    -0.01   0.01  -0.01
  62   1    -0.05  -0.03   0.01     0.02   0.02   0.01     0.00  -0.01  -0.02
  63   1     0.00   0.00   0.04    -0.06   0.01  -0.04    -0.03   0.01  -0.03
  64   1     0.01   0.00   0.04    -0.04  -0.02  -0.04     0.00  -0.01  -0.02
  65   1     0.00   0.00   0.06    -0.05   0.02  -0.02    -0.01   0.01   0.00
  66   1    -0.08   0.01  -0.04     0.06  -0.05   0.04    -0.01   0.02   0.01
  67   1    -0.10  -0.02  -0.03     0.09   0.00   0.02    -0.02   0.00   0.00
  68   1    -0.06   0.03  -0.05     0.06  -0.04   0.04    -0.03   0.01   0.01
  69   1    -0.07  -0.05  -0.12    -0.01   0.04   0.08    -0.16  -0.07  -0.13
  70   1    -0.06  -0.02  -0.07    -0.01   0.06   0.07    -0.14   0.01  -0.04
  71   1    -0.05  -0.10  -0.08     0.01   0.09   0.07    -0.08  -0.08  -0.07
  72   1    -0.07   0.17  -0.06     0.02  -0.05  -0.02     0.07  -0.12  -0.03
  73   1    -0.06   0.17  -0.05     0.03  -0.02   0.02     0.07  -0.05   0.00
  74   1    -0.03   0.16   0.02    -0.01  -0.04   0.00     0.00  -0.09  -0.03
  75   1    -0.03  -0.02  -0.05     0.02   0.01   0.01     0.01  -0.01   0.02
  76   1    -0.03  -0.02  -0.05     0.02   0.01   0.00     0.05  -0.01   0.04
  77   1    -0.01  -0.02  -0.01     0.01   0.01  -0.01     0.08   0.01   0.07
  78   1    -0.01  -0.02  -0.08     0.02   0.01  -0.02    -0.01   0.03   0.04
  79   1     0.00  -0.03   0.02     0.01   0.01  -0.02     0.09   0.07   0.11
  80   1     0.00   0.05   0.02    -0.01  -0.07   0.01    -0.01  -0.03   0.00
  81   1    -0.08   0.02   0.06    -0.09  -0.09   0.11    -0.01  -0.02   0.03
  82   1    -0.05   0.00   0.03    -0.08  -0.06   0.11    -0.02   0.01   0.04
  83   1     0.10   0.05  -0.03     0.12  -0.01  -0.14    -0.03   0.00  -0.05
  84   1     0.08  -0.01  -0.04    -0.02  -0.02   0.02    -0.07   0.02   0.05
  85   1     0.01  -0.02  -0.02     0.03   0.01   0.00    -0.02   0.01   0.05
  86   1     0.06   0.00   0.00     0.04   0.01   0.01    -0.02  -0.01   0.03
  87   1     0.00  -0.01   0.04     0.02   0.01   0.02    -0.01   0.01   0.02
  88   1    -0.08  -0.06  -0.06    -0.01   0.01   0.00     0.00   0.05   0.05
  89   1    -0.10  -0.06   0.02    -0.01   0.01   0.01     0.01   0.05   0.02
  90   1    -0.12  -0.08  -0.05    -0.01   0.01  -0.02     0.01   0.06   0.03
  91   1     0.01  -0.01   0.05    -0.01  -0.01  -0.05     0.13   0.12   0.22
  92   1     0.01   0.00   0.05    -0.01  -0.02  -0.06     0.11   0.10   0.16
  93   1     0.01   0.01   0.03    -0.02  -0.03  -0.02     0.05   0.17   0.14
  94   1     0.01  -0.05   0.05     0.00   0.03  -0.05     0.23  -0.01   0.18
  95   1     0.00  -0.06   0.03     0.00   0.04  -0.03     0.18  -0.08   0.08
  96   1     0.01  -0.04   0.05     0.00   0.03  -0.05     0.20  -0.06   0.12
  97   1     0.04  -0.06  -0.12     0.00   0.01  -0.02     0.01   0.11  -0.02
  98   1     0.00  -0.01  -0.09    -0.04   0.03  -0.01    -0.03   0.17   0.01
  99   1    -0.02  -0.01  -0.11    -0.01   0.01  -0.02     0.05   0.13  -0.07
 100   1     0.14  -0.02  -0.05     0.04   0.00   0.02     0.01  -0.02  -0.02
 101   1     0.13   0.00   0.04     0.02  -0.05   0.04    -0.01  -0.13  -0.04
 102   1     0.06   0.00   0.00     0.05  -0.04   0.03     0.10  -0.05  -0.07
 103   1     0.21   0.05  -0.06     0.19  -0.09  -0.19    -0.03  -0.05  -0.07
 104   1     0.18  -0.02   0.00     0.16  -0.15  -0.11    -0.02  -0.03  -0.04
 105   1     0.16   0.04  -0.03     0.14  -0.12  -0.11    -0.01  -0.06  -0.03
 106   1     0.12   0.14  -0.15     0.15   0.13  -0.10    -0.02  -0.02  -0.04
 107   1     0.07   0.12  -0.08     0.03   0.13  -0.16    -0.02  -0.02  -0.03
 108   1     0.02   0.18  -0.09     0.05   0.07  -0.14    -0.02  -0.01  -0.03
 109   1     0.05  -0.06   0.04    -0.02   0.02  -0.02    -0.01   0.01   0.01
 110   1     0.04  -0.05   0.04    -0.03   0.03  -0.02    -0.01  -0.01  -0.02
 111   1     0.06  -0.04   0.05    -0.03   0.02  -0.05    -0.01   0.00   0.01
 112   1     0.06  -0.05   0.02     0.04   0.00   0.02     0.08   0.02   0.09
 113   1     0.04  -0.06   0.03     0.03  -0.07  -0.06     0.03  -0.11  -0.02
 114   1     0.04  -0.06   0.03    -0.02   0.02  -0.06    -0.03   0.05  -0.04
                    16                     17                     18
                     A                      A                      A
 Frequencies --    82.1293                87.4419                94.6700
 Red. masses --     5.4931                 3.4303                 4.4956
 Frc consts  --     0.0218                 0.0155                 0.0237
 IR Inten    --     2.9637                 0.0282                 1.2775
 Atom AN      X      Y      Z        X      Y      Z        X      Y      Z
   1   8     0.09  -0.05   0.07     0.00   0.02   0.01    -0.03   0.00   0.02
   2  12    -0.02   0.00  -0.03    -0.03  -0.02   0.00    -0.01  -0.04   0.02
   3   8     0.00   0.03  -0.04     0.00  -0.01   0.03     0.01   0.02   0.04
   4   6    -0.03   0.12  -0.01    -0.01   0.02   0.01    -0.06   0.06   0.00
   5   7    -0.03   0.00  -0.01    -0.01  -0.02  -0.01     0.01   0.00  -0.01
   6   7     0.02  -0.03  -0.01    -0.08   0.04   0.01    -0.02  -0.01   0.02
   7   8    -0.18   0.34  -0.07    -0.02   0.03   0.01    -0.09   0.12  -0.02
   8   6    -0.01  -0.02  -0.01    -0.01   0.00  -0.01    -0.02   0.03  -0.02
   9   6     0.00  -0.04   0.00    -0.02   0.02   0.01    -0.03   0.04  -0.02
  10   6     0.01  -0.04  -0.01    -0.04   0.02   0.02    -0.02   0.01   0.01
  11   8     0.02   0.00  -0.01     0.00   0.01   0.01    -0.03   0.01   0.01
  12   6    -0.02   0.00  -0.05     0.00   0.00   0.01    -0.01   0.02   0.04
  13   6     0.00   0.03  -0.04     0.03   0.02   0.02    -0.02   0.01   0.04
  14   6     0.05  -0.01   0.02     0.00   0.01   0.01    -0.05   0.05   0.01
  15   8    -0.06  -0.04  -0.10    -0.02  -0.01  -0.01     0.01   0.03   0.06
  16   6     0.03   0.06   0.09     0.00   0.02   0.02    -0.04   0.01   0.00
  17   8    -0.02   0.00  -0.03     0.04  -0.05   0.02    -0.04  -0.09   0.07
  18   6    -0.02   0.01  -0.02     0.01  -0.01   0.02     0.02   0.04   0.02
  19   8    -0.05  -0.01   0.00     0.00  -0.03   0.02     0.02   0.02   0.02
  20   8    -0.01   0.01   0.02     0.02   0.02  -0.01    -0.05  -0.05   0.09
  21   6     0.01   0.01  -0.01     0.05   0.00  -0.03    -0.06  -0.06   0.03
  22   6     0.01  -0.01  -0.01     0.05  -0.03   0.01    -0.05  -0.05   0.02
  23   6     0.00   0.01   0.00     0.01   0.01   0.01    -0.01  -0.05   0.05
  24   8     0.02   0.01  -0.03     0.07   0.02  -0.08    -0.06  -0.06   0.01
  25   6     0.03  -0.01   0.02     0.09  -0.04   0.00    -0.05  -0.06  -0.06
  26   6     0.00   0.01   0.01    -0.01   0.03   0.02     0.03  -0.10  -0.01
  27   6     0.00   0.03  -0.01     0.08   0.00   0.05    -0.06   0.02   0.01
  28   6     0.06  -0.16  -0.03     0.00   0.00   0.01    -0.06   0.07   0.02
  29   6    -0.02   0.00   0.00    -0.01  -0.03  -0.01     0.01   0.00  -0.01
  30   6     0.02  -0.03   0.00    -0.05   0.03   0.02     0.01  -0.01   0.00
  31   6    -0.02   0.00   0.01    -0.01  -0.03  -0.01     0.00   0.00  -0.02
  32   6    -0.01   0.01   0.03    -0.01  -0.03   0.00     0.01  -0.01  -0.02
  33   6    -0.01   0.00   0.03     0.00  -0.03   0.00     0.03  -0.01   0.00
  34   6    -0.02   0.01   0.01     0.00  -0.03   0.00     0.04  -0.01   0.01
  35   6    -0.02   0.00   0.00    -0.01  -0.03  -0.01     0.03   0.00   0.01
  36   6    -0.01   0.01   0.03    -0.02  -0.03  -0.03     0.00   0.00  -0.03
  37   6    -0.03   0.00   0.01    -0.01  -0.03  -0.02     0.05   0.02   0.00
  38   6     0.02  -0.04   0.00    -0.04   0.00   0.00     0.03  -0.02  -0.02
  39   6     0.00  -0.05   0.03     0.00  -0.01   0.00     0.09  -0.01  -0.06
  40   6    -0.02  -0.05   0.06     0.01   0.00   0.04     0.14   0.00  -0.09
  41   6    -0.02  -0.04   0.06    -0.01   0.03   0.05     0.12   0.01  -0.08
  42   6     0.01  -0.03   0.03    -0.03   0.04   0.04     0.06   0.00  -0.03
  43   6     0.06  -0.02  -0.03    -0.05  -0.01  -0.02     0.01  -0.03  -0.01
  44   6     0.02  -0.01   0.02     0.00   0.09   0.02     0.02   0.01   0.01
  45   6    -0.04   0.00   0.00     0.01  -0.02   0.00    -0.02   0.00  -0.07
  46   6     0.04   0.02   0.03    -0.08  -0.05  -0.03     0.06   0.00  -0.04
  47   6    -0.03   0.00   0.01    -0.02  -0.05  -0.04     0.06   0.02  -0.01
  48   6    -0.03   0.00   0.01    -0.01   0.00  -0.04     0.07   0.02  -0.01
  49   6     0.01  -0.05   0.01     0.03   0.24  -0.06     0.05   0.04   0.05
  50   6     0.04   0.03   0.06     0.12  -0.02  -0.02    -0.01  -0.02  -0.03
  51   6     0.07  -0.05  -0.04    -0.03  -0.01  -0.02     0.08   0.05   0.03
  52   6     0.05   0.05  -0.03    -0.06  -0.03  -0.05    -0.01  -0.09  -0.12
  53   6    -0.01  -0.03  -0.01     0.00   0.00  -0.01    -0.04   0.05  -0.02
  54   6     0.01  -0.05  -0.02     0.02  -0.03   0.07    -0.02   0.02   0.02
  55   1     0.00  -0.05   0.00     0.00   0.02   0.02    -0.03   0.07  -0.02
  56   1     0.00   0.04  -0.06     0.04   0.05   0.00    -0.02  -0.03   0.04
  57   1     0.14   0.01   0.10     0.01   0.01   0.01    -0.04   0.05  -0.02
  58   1    -0.06   0.11  -0.15    -0.01   0.03  -0.03    -0.04   0.05  -0.13
  59   1     0.16  -0.11   0.16     0.02  -0.01   0.03     0.02  -0.11   0.04
  60   1    -0.04   0.26   0.27    -0.02   0.05   0.05    -0.08   0.09   0.09
  61   1     0.01  -0.04  -0.02     0.03  -0.03   0.01    -0.05   0.00   0.04
  62   1     0.01   0.01   0.00     0.01   0.01   0.01    -0.03  -0.06   0.07
  63   1     0.04  -0.03   0.04     0.06  -0.02  -0.03    -0.05  -0.02  -0.09
  64   1     0.04   0.01   0.03     0.15  -0.05  -0.03    -0.07  -0.11  -0.07
  65   1     0.03  -0.03   0.02     0.09  -0.06   0.05    -0.05  -0.06  -0.07
  66   1     0.01   0.01   0.03    -0.01   0.04   0.01     0.01  -0.17  -0.01
  67   1     0.00   0.01   0.01    -0.02   0.02   0.03     0.06  -0.09  -0.05
  68   1    -0.01   0.02   0.02    -0.01   0.02   0.02     0.06  -0.09  -0.04
  69   1    -0.01   0.03  -0.02     0.11   0.02   0.07    -0.10   0.00  -0.02
  70   1    -0.01   0.03   0.01     0.09  -0.05   0.05    -0.08   0.07   0.03
  71   1     0.02   0.05  -0.01     0.08   0.02   0.05    -0.05   0.00   0.01
  72   1     0.13  -0.26  -0.02     0.00   0.00   0.01    -0.05   0.07   0.00
  73   1     0.12  -0.12   0.01     0.00   0.00   0.01    -0.06   0.10   0.01
  74   1    -0.05  -0.18  -0.08    -0.01   0.00   0.00    -0.06   0.07   0.04
  75   1    -0.01   0.01   0.04    -0.01  -0.03  -0.01     0.00  -0.02  -0.03
  76   1    -0.01   0.01   0.04     0.00  -0.03   0.00     0.03  -0.02   0.01
  77   1    -0.02   0.01   0.02     0.00  -0.03   0.00     0.05  -0.01   0.03
  78   1    -0.02   0.00   0.06    -0.01  -0.02  -0.07    -0.01   0.00   0.00
  79   1    -0.02  -0.01   0.01    -0.01  -0.02  -0.01     0.03   0.04   0.01
  80   1     0.00  -0.06   0.03     0.01  -0.03  -0.01     0.10  -0.02  -0.07
  81   1    -0.04  -0.06   0.09     0.03  -0.01   0.04     0.19   0.01  -0.13
  82   1    -0.03  -0.05   0.08     0.01   0.04   0.07     0.16   0.02  -0.10
  83   1     0.08  -0.02  -0.04    -0.08  -0.01  -0.01    -0.06  -0.05   0.05
  84   1     0.05   0.00  -0.02    -0.08   0.08   0.07    -0.02   0.01   0.03
  85   1    -0.04   0.00   0.01     0.02  -0.02  -0.01    -0.03   0.00  -0.08
  86   1    -0.06   0.00   0.01     0.05  -0.02   0.00    -0.05   0.02  -0.06
  87   1    -0.03   0.00  -0.03     0.00  -0.01   0.04    -0.01  -0.01  -0.09
  88   1     0.04   0.02   0.04    -0.07  -0.05  -0.04     0.05   0.00  -0.03
  89   1     0.05   0.02  -0.01    -0.11  -0.03   0.02     0.07  -0.01  -0.08
  90   1     0.06   0.03   0.05    -0.12  -0.07  -0.06     0.08   0.01  -0.01
  91   1    -0.04  -0.01   0.01    -0.01  -0.04  -0.06     0.07   0.03  -0.01
  92   1    -0.03   0.00   0.01    -0.02  -0.07  -0.07     0.07   0.00  -0.01
  93   1    -0.02   0.00   0.00    -0.02  -0.08  -0.02     0.05   0.01   0.00
  94   1    -0.04  -0.01   0.01    -0.02   0.00  -0.05     0.08   0.05  -0.01
  95   1    -0.03   0.00   0.01    -0.01   0.02  -0.03     0.06   0.02   0.00
  96   1    -0.03   0.00   0.01    -0.02   0.00  -0.06     0.08   0.00  -0.02
  97   1     0.02  -0.04   0.00     0.06   0.23  -0.08     0.04   0.09   0.07
  98   1     0.01  -0.08  -0.01    -0.04   0.34  -0.01     0.04   0.04   0.05
  99   1    -0.01  -0.06   0.04     0.10   0.27  -0.14     0.10   0.03   0.07
 100   1     0.07   0.04   0.04     0.13   0.05  -0.03    -0.05  -0.01   0.01
 101   1     0.07   0.06   0.08     0.07  -0.16  -0.01    -0.05  -0.05  -0.07
 102   1     0.01   0.02   0.10     0.26  -0.03  -0.06     0.03  -0.02  -0.05
 103   1     0.12  -0.02  -0.04    -0.04  -0.02  -0.03     0.07   0.04   0.05
 104   1     0.08  -0.10  -0.05    -0.02   0.00   0.01     0.09   0.07   0.09
 105   1     0.03  -0.04  -0.03     0.00  -0.02  -0.02     0.13   0.07  -0.03
 106   1     0.10   0.07  -0.03    -0.06  -0.04  -0.04    -0.01  -0.07  -0.04
 107   1     0.02   0.07  -0.03    -0.03  -0.03  -0.08     0.05  -0.03  -0.24
 108   1     0.04   0.06  -0.03    -0.07  -0.06  -0.06    -0.07  -0.21  -0.15
 109   1    -0.01  -0.01  -0.01     0.00  -0.01  -0.02    -0.03   0.04  -0.01
 110   1     0.01  -0.03  -0.01     0.00   0.01  -0.01    -0.05   0.07   0.00
 111   1    -0.02  -0.04   0.01     0.01   0.01  -0.02    -0.03   0.06  -0.04
 112   1    -0.01  -0.06  -0.06     0.13   0.02   0.22    -0.01   0.03   0.04
 113   1     0.00  -0.01  -0.01     0.03  -0.22   0.04    -0.02   0.00   0.01
 114   1     0.03  -0.08   0.00    -0.06   0.06   0.00    -0.03   0.04   0.01
                    19                     20                     21
                     A                      A                      A
 Frequencies --    97.7155               103.2644               105.4032
 Red. masses --     4.6062                 4.0912                 2.8262
 Frc consts  --     0.0259                 0.0257                 0.0185
 IR Inten    --     1.1904                 1.9874                 1.3121
 Atom AN      X      Y      Z        X      Y      Z        X      Y      Z
   1   8    -0.02  -0.02  -0.01     0.00   0.03  -0.02     0.00  -0.04   0.00
   2  12    -0.01  -0.05  -0.01    -0.04   0.02  -0.01     0.05  -0.02  -0.02
   3   8     0.01   0.01   0.04     0.01   0.05  -0.03     0.03   0.04   0.00
   4   6    -0.03   0.01  -0.01     0.04  -0.03   0.01    -0.01  -0.01   0.00
   5   7     0.02   0.01  -0.04    -0.04   0.03   0.00     0.00  -0.02   0.01
   6   7     0.00  -0.05  -0.02    -0.03   0.03   0.02     0.03   0.01  -0.01
   7   8    -0.02   0.02  -0.02     0.08  -0.10   0.03    -0.01   0.02  -0.01
   8   6    -0.02   0.03  -0.06     0.01  -0.02   0.03    -0.04   0.03  -0.01
   9   6    -0.03   0.04  -0.07     0.03  -0.06   0.06    -0.05   0.06  -0.03
  10   6    -0.02   0.00  -0.04     0.01  -0.03   0.05    -0.02   0.04  -0.03
  11   8    -0.02   0.01   0.01     0.00   0.02  -0.01    -0.01   0.00   0.01
  12   6    -0.01   0.00   0.03    -0.02   0.02  -0.05     0.01   0.01   0.01
  13   6     0.00   0.01   0.04    -0.01   0.04  -0.04    -0.02   0.01   0.00
  14   6    -0.04   0.04  -0.01     0.02  -0.02   0.00    -0.01   0.00   0.00
  15   8    -0.02   0.01   0.03    -0.05  -0.01  -0.08     0.03   0.01   0.01
  16   6    -0.02  -0.03  -0.02     0.02  -0.01  -0.01    -0.01  -0.03   0.00
  17   8     0.04  -0.07   0.03    -0.05  -0.06   0.02    -0.03  -0.05  -0.01
  18   6     0.02   0.03   0.03    -0.03   0.02   0.01     0.01   0.03   0.00
  19   8     0.00   0.01   0.04    -0.06  -0.01   0.03     0.00  -0.02   0.02
  20   8     0.02   0.03   0.08    -0.02   0.00   0.14    -0.01  -0.01   0.04
  21   6     0.07   0.00   0.01     0.01  -0.02   0.05     0.00  -0.02  -0.01
  22   6     0.07  -0.06   0.04     0.01  -0.07   0.06     0.00  -0.03  -0.01
  23   6     0.01   0.01   0.05    -0.02  -0.04   0.06     0.00  -0.01   0.02
  24   8     0.11   0.03  -0.06     0.03  -0.01  -0.04     0.00  -0.01  -0.04
  25   6     0.13  -0.08   0.06     0.07  -0.08   0.08     0.02  -0.05  -0.04
  26   6     0.00   0.01   0.01    -0.02  -0.06  -0.01     0.02  -0.03  -0.01
  27   6     0.00   0.01   0.04    -0.01   0.05  -0.01    -0.08   0.03  -0.02
  28   6    -0.05   0.10   0.01     0.05  -0.06  -0.02    -0.02   0.01   0.01
  29   6     0.02   0.02  -0.03    -0.04   0.02   0.00     0.00  -0.02   0.01
  30   6    -0.04  -0.05   0.00    -0.01   0.03  -0.01     0.03   0.01  -0.01
  31   6     0.03   0.02  -0.02    -0.05   0.00   0.01     0.00  -0.02  -0.01
  32   6     0.03   0.02  -0.01    -0.03  -0.02   0.02    -0.01  -0.02  -0.03
  33   6     0.03   0.02   0.00    -0.01  -0.02   0.03    -0.01  -0.01  -0.02
  34   6     0.03   0.02  -0.01     0.00   0.00   0.02    -0.01  -0.02   0.01
  35   6     0.02   0.02  -0.02    -0.01   0.01   0.01     0.00  -0.02   0.02
  36   6     0.04   0.02   0.00    -0.06   0.00   0.00     0.00  -0.02  -0.01
  37   6     0.04   0.03  -0.01     0.00   0.03   0.01    -0.01  -0.03   0.01
  38   6    -0.07  -0.03   0.03     0.02   0.04  -0.03     0.04   0.02  -0.02
  39   6    -0.10  -0.03   0.04     0.03   0.05  -0.05     0.03   0.02   0.00
  40   6    -0.14  -0.04   0.04     0.03   0.05  -0.05     0.01   0.02   0.01
  41   6    -0.11  -0.06   0.02     0.02   0.04  -0.03     0.01   0.01   0.01
  42   6    -0.05  -0.06  -0.02     0.01   0.03  -0.02     0.02   0.01   0.01
  43   6    -0.05  -0.02   0.04     0.02   0.04  -0.03     0.07   0.04  -0.01
  44   6     0.01  -0.06  -0.08     0.02   0.03  -0.04     0.01   0.01   0.01
  45   6     0.01   0.02  -0.03    -0.15  -0.01  -0.09     0.01  -0.02  -0.01
  46   6     0.11   0.05   0.00     0.08   0.00  -0.01     0.00  -0.01  -0.01
  47   6     0.06   0.07   0.02    -0.02  -0.01  -0.02     0.03   0.00   0.01
  48   6     0.06  -0.01   0.01     0.03   0.07  -0.04    -0.06  -0.06   0.05
  49   6    -0.04  -0.12  -0.13     0.00  -0.01  -0.05     0.02   0.05   0.01
  50   6     0.04   0.01  -0.01     0.04   0.07   0.00     0.02  -0.01  -0.01
  51   6    -0.02  -0.01   0.04    -0.02   0.01  -0.05    -0.08  -0.05  -0.07
  52   6    -0.06   0.00   0.01     0.02   0.05   0.01     0.09   0.11   0.18
  53   6    -0.06   0.07  -0.05     0.05  -0.04   0.01    -0.06   0.04   0.00
  54   6    -0.04   0.04  -0.03     0.03  -0.06   0.05    -0.02   0.03  -0.04
  55   1    -0.04   0.07  -0.08     0.07  -0.09   0.08    -0.09   0.09  -0.05
  56   1     0.01   0.00   0.03     0.00   0.04  -0.06    -0.02  -0.04   0.01
  57   1    -0.06   0.03  -0.05     0.02  -0.02   0.04    -0.02   0.00   0.00
  58   1    -0.02  -0.02  -0.02     0.05  -0.03   0.09    -0.01  -0.04   0.06
  59   1    -0.03  -0.03  -0.02    -0.02   0.07  -0.03    -0.03   0.03  -0.02
  60   1    -0.02  -0.02  -0.02     0.05  -0.09  -0.08     0.02  -0.06  -0.04
  61   1     0.06  -0.09   0.04     0.02  -0.11   0.04     0.00  -0.03  -0.02
  62   1     0.01  -0.02   0.06    -0.01  -0.09   0.08     0.00  -0.02   0.02
  63   1     0.15  -0.07   0.07     0.14  -0.08   0.12     0.02  -0.03  -0.06
  64   1     0.16  -0.04   0.06     0.04  -0.03   0.11     0.03  -0.06  -0.05
  65   1     0.13  -0.12   0.07     0.07  -0.13   0.03     0.02  -0.06  -0.03
  66   1     0.00  -0.01   0.01    -0.02  -0.11   0.02     0.01  -0.06   0.00
  67   1    -0.01  -0.01  -0.01    -0.02  -0.09  -0.06     0.04  -0.03  -0.02
  68   1     0.01   0.03   0.00    -0.02   0.00  -0.03     0.03  -0.02  -0.02
  69   1    -0.01   0.01   0.03    -0.03   0.04  -0.04    -0.12   0.00  -0.04
  70   1    -0.01   0.02   0.06    -0.04   0.06   0.02    -0.09   0.09  -0.01
  71   1     0.02   0.01   0.05     0.03   0.05  -0.01    -0.08   0.02  -0.02
  72   1    -0.08   0.15   0.01     0.06  -0.07  -0.02    -0.04   0.04   0.02
  73   1    -0.07   0.10   0.00     0.07  -0.07   0.00    -0.04   0.00   0.00
  74   1    -0.01   0.12   0.04     0.04  -0.06  -0.05     0.01   0.02   0.01
  75   1     0.04   0.02   0.00    -0.04  -0.03   0.03    -0.02  -0.01  -0.05
  76   1     0.03   0.03   0.01     0.00  -0.03   0.04    -0.02  -0.01  -0.03
  77   1     0.03   0.02   0.00     0.02  -0.01   0.03    -0.01  -0.02   0.02
  78   1     0.03   0.01   0.05    -0.09   0.03   0.10     0.00  -0.03  -0.01
  79   1     0.02   0.04  -0.02     0.01   0.04   0.05    -0.03  -0.04  -0.04
  80   1    -0.12  -0.02   0.05     0.05   0.06  -0.06     0.02   0.03   0.00
  81   1    -0.18  -0.04   0.06     0.04   0.05  -0.06    -0.01   0.02   0.02
  82   1    -0.13  -0.07   0.01     0.02   0.04  -0.04    -0.01   0.01   0.02
  83   1    -0.05  -0.03   0.05     0.04   0.05  -0.06     0.17   0.06  -0.10
  84   1     0.07  -0.05  -0.13     0.06   0.04  -0.06    -0.01   0.01   0.03
  85   1     0.01   0.02  -0.03    -0.18  -0.01  -0.12     0.02  -0.02   0.00
  86   1    -0.01   0.02  -0.03    -0.21   0.03  -0.08     0.00  -0.03  -0.01
  87   1     0.02   0.01  -0.06    -0.12  -0.06  -0.16     0.01   0.00  -0.02
  88   1     0.09   0.05   0.02     0.06   0.00  -0.01     0.00  -0.01   0.00
  89   1     0.14   0.02  -0.06     0.14  -0.04  -0.11     0.00  -0.02  -0.01
  90   1     0.16   0.09   0.03     0.17   0.03   0.07     0.00   0.00  -0.01
  91   1     0.08   0.08   0.04    -0.01   0.01  -0.02     0.00  -0.03  -0.01
  92   1     0.07   0.05   0.02    -0.03  -0.03  -0.06     0.04   0.02   0.07
  93   1     0.03   0.10   0.01    -0.05  -0.04   0.02     0.08   0.01  -0.03
  94   1     0.07   0.00   0.03     0.05   0.09  -0.04    -0.08  -0.08   0.03
  95   1     0.05  -0.03  -0.01     0.04   0.09  -0.02    -0.08  -0.08   0.04
  96   1     0.07  -0.02   0.02     0.04   0.05  -0.07    -0.06  -0.05   0.09
  97   1    -0.02  -0.17  -0.15     0.01  -0.01  -0.06     0.02   0.05   0.01
  98   1    -0.02  -0.12  -0.13     0.00  -0.04  -0.07     0.01   0.07   0.02
  99   1    -0.10  -0.10  -0.15    -0.03  -0.02  -0.02     0.04   0.05   0.00
 100   1     0.10  -0.02  -0.07     0.07   0.05  -0.04     0.00   0.01   0.01
 101   1     0.10   0.08   0.05     0.07   0.11   0.04    -0.01  -0.05  -0.03
 102   1    -0.05   0.01   0.03    -0.02   0.07   0.02     0.07  -0.02  -0.02
 103   1     0.01   0.01   0.05    -0.01   0.02  -0.04    -0.07  -0.05  -0.06
 104   1    -0.01  -0.03   0.06    -0.02  -0.02  -0.08    -0.09  -0.09  -0.18
 105   1    -0.03   0.01   0.03    -0.06   0.01  -0.03    -0.17  -0.08   0.01
 106   1    -0.04   0.01   0.00     0.01   0.03  -0.02     0.09   0.08   0.08
 107   1    -0.06   0.01   0.00     0.01   0.02   0.07     0.01   0.02   0.36
 108   1    -0.08   0.00   0.00     0.05   0.10   0.03     0.21   0.29   0.24
 109   1    -0.06   0.07  -0.03     0.05  -0.05  -0.01    -0.06   0.05   0.02
 110   1    -0.07   0.08  -0.04     0.06  -0.04   0.01    -0.06   0.03   0.00
 111   1    -0.08   0.07  -0.08     0.07  -0.03   0.03    -0.08   0.03   0.00
 112   1    -0.07   0.03  -0.05    -0.01  -0.09  -0.10     0.07   0.08   0.17
 113   1    -0.04   0.08  -0.02    -0.01   0.06   0.11     0.04  -0.17  -0.12
 114   1    -0.01   0.04  -0.02     0.11  -0.16   0.12    -0.15   0.16  -0.14
                    22                     23                     24
                     A                      A                      A
 Frequencies --   112.8188               116.8545               120.8852
 Red. masses --     3.2303                 2.7710                 3.6260
 Frc consts  --     0.0242                 0.0223                 0.0312
 IR Inten    --     1.6365                 1.6865                 0.6894
 Atom AN      X      Y      Z        X      Y      Z        X      Y      Z
   1   8    -0.02   0.00   0.00     0.00  -0.01   0.00    -0.02  -0.01   0.01
   2  12    -0.03  -0.03  -0.03     0.01   0.05  -0.01     0.05   0.06   0.02
   3   8     0.00   0.02   0.00     0.01   0.01  -0.02     0.04   0.00   0.04
   4   6    -0.01  -0.01   0.01     0.00  -0.03   0.01    -0.03   0.02   0.00
   5   7    -0.01   0.02  -0.05    -0.01   0.01   0.01     0.01   0.03   0.04
   6   7    -0.01   0.01   0.01     0.03   0.01  -0.01     0.00   0.02  -0.06
   7   8    -0.01  -0.02   0.01     0.00  -0.04   0.01    -0.05   0.05  -0.01
   8   6     0.04  -0.01  -0.03    -0.02   0.02   0.00     0.03  -0.05   0.04
   9   6     0.06  -0.03   0.02    -0.03   0.03  -0.02     0.05  -0.10   0.02
  10   6     0.03  -0.02   0.03     0.00   0.02  -0.02     0.04  -0.05  -0.03
  11   8    -0.01   0.00   0.01     0.00  -0.01   0.00    -0.02   0.00   0.01
  12   6    -0.01   0.01   0.00     0.01   0.00  -0.01     0.03   0.02   0.04
  13   6     0.00   0.02   0.01     0.01   0.01  -0.01     0.01  -0.01   0.03
  14   6    -0.02   0.00   0.01     0.01  -0.04   0.01    -0.02   0.01   0.01
  15   8    -0.02   0.00  -0.01     0.01   0.00  -0.02     0.06   0.05   0.08
  16   6    -0.02   0.00   0.00    -0.01   0.02   0.00    -0.02   0.00   0.01
  17   8    -0.01  -0.07   0.00    -0.01   0.07  -0.03     0.03   0.06   0.01
  18   6     0.00   0.01   0.00    -0.01  -0.02   0.00     0.05   0.00   0.02
  19   8    -0.01  -0.01   0.01    -0.01  -0.01   0.00     0.07   0.03   0.01
  20   8    -0.02  -0.02   0.01     0.01   0.00   0.01     0.02  -0.02   0.01
  21   6    -0.01  -0.03  -0.05     0.01   0.00   0.04     0.01  -0.02   0.01
  22   6    -0.01  -0.04  -0.02     0.01   0.01   0.03     0.01   0.01   0.05
  23   6    -0.01  -0.01   0.01     0.00  -0.01   0.00     0.02  -0.02   0.01
  24   8    -0.01  -0.03  -0.11     0.00   0.00   0.05    -0.01  -0.04  -0.03
  25   6     0.01  -0.05  -0.05     0.00   0.03   0.12    -0.01   0.03   0.12
  26   6     0.02  -0.02   0.03    -0.01  -0.01  -0.02     0.03  -0.05  -0.05
  27   6     0.02   0.02   0.02     0.01   0.01  -0.01    -0.06   0.00  -0.03
  28   6    -0.01   0.00   0.01     0.02  -0.07  -0.01    -0.04   0.01   0.02
  29   6    -0.01   0.02  -0.05     0.00  -0.01   0.00     0.01   0.03   0.03
  30   6    -0.01   0.01   0.01     0.02   0.01   0.00     0.00   0.02  -0.06
  31   6     0.01   0.02   0.02    -0.02  -0.02  -0.03     0.00   0.01   0.02
  32   6     0.03   0.01   0.04    -0.03  -0.02  -0.05    -0.01   0.00  -0.01
  33   6     0.02   0.01   0.00    -0.01  -0.03  -0.02     0.00   0.00  -0.04
  34   6    -0.01   0.02  -0.06     0.01  -0.02   0.00     0.01   0.01  -0.04
  35   6    -0.02   0.02  -0.08     0.01  -0.01   0.00     0.02   0.02  -0.01
  36   6    -0.01   0.02   0.05    -0.02  -0.01  -0.03    -0.02   0.01   0.00
  37   6    -0.02   0.01  -0.07    -0.02  -0.01  -0.04     0.01   0.03  -0.03
  38   6     0.01   0.01  -0.01     0.00   0.00   0.02     0.00  -0.01  -0.06
  39   6     0.02   0.02  -0.02    -0.01   0.01   0.03    -0.01  -0.03  -0.02
  40   6     0.02   0.02  -0.02    -0.01   0.01   0.02    -0.03  -0.03   0.02
  41   6     0.01   0.01  -0.01     0.00   0.00   0.01    -0.03  -0.01   0.02
  42   6     0.00   0.01   0.00     0.02   0.00   0.00    -0.02   0.02  -0.02
  43   6     0.01   0.02   0.00    -0.01   0.01   0.04    -0.05  -0.04  -0.07
  44   6     0.00   0.01   0.01     0.02   0.00   0.00    -0.03   0.03  -0.01
  45   6     0.02   0.00   0.11    -0.07  -0.02  -0.07    -0.03   0.01  -0.01
  46   6    -0.10   0.04   0.06     0.05  -0.01  -0.03    -0.04  -0.02   0.00
  47   6     0.09   0.16   0.01     0.12   0.06  -0.04     0.06   0.05  -0.04
  48   6    -0.10  -0.14   0.06    -0.14  -0.09   0.06    -0.01   0.02  -0.01
  49   6    -0.01  -0.02   0.02     0.02   0.02   0.00    -0.02   0.05   0.00
  50   6    -0.01   0.05   0.03     0.03  -0.04  -0.02    -0.01   0.02  -0.01
  51   6     0.02   0.03   0.00     0.06   0.08   0.08    -0.14  -0.08  -0.10
  52   6     0.01   0.01  -0.01    -0.02  -0.03  -0.05    -0.03  -0.08   0.02
  53   6     0.09  -0.03  -0.04    -0.04   0.03   0.01     0.01  -0.05   0.05
  54   6     0.04  -0.01   0.05     0.01   0.00  -0.03     0.03  -0.07  -0.06
  55   1     0.10  -0.05   0.04    -0.05   0.04  -0.03     0.06  -0.16   0.02
  56   1     0.01   0.03   0.00     0.01   0.02  -0.01     0.00  -0.07   0.05
  57   1    -0.02  -0.01   0.01     0.01  -0.04   0.04    -0.02   0.01   0.00
  58   1    -0.02   0.00   0.01    -0.03   0.01   0.01    -0.03   0.02  -0.08
  59   1    -0.03   0.01   0.00    -0.02   0.03   0.00     0.02  -0.09   0.04
  60   1    -0.01  -0.01  -0.01     0.00   0.03   0.00    -0.06   0.06   0.08
  61   1    -0.02  -0.02  -0.02     0.02  -0.05   0.01     0.00  -0.03   0.05
  62   1     0.00   0.01   0.00     0.00  -0.03   0.01     0.00  -0.03   0.03
  63   1     0.00  -0.03  -0.08     0.05  -0.03   0.19     0.02  -0.01   0.17
  64   1     0.04  -0.07  -0.07    -0.05   0.10   0.17    -0.04   0.08   0.15
  65   1     0.01  -0.06  -0.03     0.00   0.02   0.07    -0.01   0.03   0.08
  66   1     0.02  -0.02   0.03    -0.01  -0.02  -0.01     0.01  -0.08  -0.06
  67   1     0.04   0.00   0.04    -0.02  -0.02  -0.03     0.04  -0.05  -0.06
  68   1     0.02  -0.04   0.04    -0.01   0.01  -0.02     0.06  -0.03  -0.07
  69   1     0.03   0.02   0.05     0.03   0.01   0.02    -0.08  -0.02  -0.04
  70   1     0.03  -0.01   0.01     0.03   0.00  -0.03    -0.05   0.06  -0.06
  71   1     0.00   0.04   0.02    -0.02   0.03  -0.01    -0.09  -0.02  -0.04
  72   1    -0.03   0.02   0.01     0.04  -0.10  -0.01    -0.02  -0.01   0.01
  73   1    -0.02  -0.01   0.01     0.04  -0.07   0.01    -0.03   0.04   0.01
  74   1     0.01   0.01   0.00     0.00  -0.08  -0.03    -0.06   0.01   0.03
  75   1     0.04   0.00   0.09    -0.04  -0.03  -0.07    -0.02  -0.01  -0.02
  76   1     0.03   0.00   0.02    -0.01  -0.03  -0.03    -0.01  -0.01  -0.07
  77   1    -0.01   0.02  -0.08     0.03  -0.02   0.01     0.01   0.01  -0.06
  78   1     0.00   0.02  -0.01    -0.04  -0.01   0.03    -0.03   0.03  -0.01
  79   1    -0.06  -0.01  -0.20    -0.06  -0.02  -0.17     0.00   0.04  -0.06
  80   1     0.03   0.02  -0.03    -0.02   0.00   0.04    -0.01  -0.05  -0.02
  81   1     0.03   0.02  -0.03    -0.02   0.01   0.02    -0.04  -0.05   0.05
  82   1     0.01   0.01  -0.01     0.00   0.00   0.01    -0.04   0.00   0.06
  83   1     0.00   0.01   0.01    -0.06  -0.02   0.10    -0.03   0.00  -0.12
  84   1     0.02   0.02  -0.02     0.01  -0.01   0.02    -0.04   0.03   0.00
  85   1     0.02   0.00   0.15    -0.07  -0.02  -0.07    -0.05   0.01  -0.03
  86   1     0.05  -0.04   0.10    -0.10  -0.01  -0.06    -0.02   0.03  -0.01
  87   1     0.01   0.01   0.13    -0.05  -0.04  -0.10    -0.03  -0.01   0.00
  88   1    -0.08   0.04   0.07     0.02  -0.01  -0.02    -0.05  -0.02  -0.03
  89   1    -0.13   0.07   0.12     0.08  -0.03  -0.09    -0.04  -0.03   0.01
  90   1    -0.15   0.02   0.00     0.09   0.02   0.01    -0.04  -0.03   0.00
  91   1     0.07   0.12   0.04     0.05   0.01  -0.10     0.02   0.02  -0.07
  92   1     0.12   0.19   0.15     0.15   0.11   0.13     0.07   0.07   0.02
  93   1     0.13   0.27  -0.09     0.25   0.11  -0.13     0.12   0.05  -0.08
  94   1    -0.12  -0.19   0.10    -0.18  -0.11   0.02    -0.01   0.04  -0.04
  95   1    -0.14  -0.23   0.00    -0.22  -0.14   0.06    -0.06   0.01   0.00
  96   1    -0.08  -0.10   0.19    -0.11  -0.08   0.19     0.02   0.00   0.02
  97   1    -0.01   0.00   0.02     0.02   0.00   0.00    -0.03   0.04   0.01
  98   1     0.00  -0.04   0.00     0.03   0.04   0.01    -0.01   0.07   0.02
  99   1    -0.02  -0.03   0.04     0.03   0.03  -0.03    -0.01   0.06  -0.02
 100   1     0.00   0.04   0.02     0.01  -0.02  -0.01    -0.02   0.04  -0.01
 101   1     0.01   0.08   0.04     0.00  -0.08  -0.04    -0.02   0.00  -0.01
 102   1    -0.04   0.05   0.05     0.07  -0.04  -0.04     0.01   0.02  -0.01
 103   1     0.03   0.04   0.02     0.06   0.08   0.10    -0.23  -0.13  -0.13
 104   1     0.02   0.02   0.01     0.06   0.09   0.13    -0.15   0.02  -0.14
 105   1     0.01   0.04   0.00     0.09   0.11   0.03    -0.08  -0.14  -0.06
 106   1     0.01   0.01   0.00    -0.02  -0.01   0.01    -0.07  -0.10   0.03
 107   1     0.01   0.02  -0.03     0.01   0.02  -0.15    -0.03  -0.10   0.06
 108   1     0.00  -0.01  -0.02    -0.08  -0.14  -0.08     0.04  -0.07   0.03
 109   1     0.09  -0.07  -0.06    -0.03   0.00   0.03     0.05  -0.16   0.08
 110   1     0.07  -0.01  -0.03    -0.08   0.05   0.02    -0.10   0.00   0.09
 111   1     0.13   0.00  -0.05    -0.04   0.05  -0.03     0.08   0.02  -0.04
 112   1    -0.03  -0.05  -0.11     0.09   0.04   0.14    -0.04  -0.12  -0.29
 113   1    -0.02   0.14   0.12     0.06  -0.17  -0.09    -0.02   0.13   0.01
 114   1     0.15  -0.11   0.13    -0.10   0.10  -0.11     0.14  -0.23   0.04
                    25                     26                     27
                     A                      A                      A
 Frequencies --   120.9280               131.4558               132.3535
 Red. masses --     3.7565                 3.6478                 1.4054
 Frc consts  --     0.0324                 0.0371                 0.0145
 IR Inten    --     1.1269                 6.3270                 0.9542
 Atom AN      X      Y      Z        X      Y      Z        X      Y      Z
   1   8    -0.01  -0.02   0.01     0.00   0.00   0.00     0.01   0.00  -0.01
   2  12    -0.04  -0.04   0.02    -0.07   0.01   0.05     0.01  -0.01   0.01
   3   8    -0.04  -0.09   0.03    -0.05  -0.05   0.01     0.00   0.01  -0.01
   4   6    -0.02   0.00   0.00     0.00   0.00   0.00     0.00   0.00  -0.01
   5   7    -0.02   0.01  -0.02     0.01  -0.02   0.00     0.00  -0.01   0.01
   6   7    -0.05  -0.01   0.03    -0.04  -0.01   0.03     0.01  -0.01   0.01
   7   8    -0.03   0.02  -0.01     0.00   0.00   0.00     0.01  -0.01   0.00
   8   6    -0.01   0.01  -0.01    -0.01   0.01  -0.01    -0.01   0.01   0.01
   9   6     0.01  -0.02   0.02    -0.03   0.03   0.00     0.00   0.00   0.01
  10   6    -0.01  -0.02   0.04    -0.04   0.02   0.02     0.00   0.00   0.01
  11   8     0.00  -0.03   0.01     0.00   0.00   0.00     0.00   0.00  -0.01
  12   6     0.01  -0.03   0.03    -0.01   0.00  -0.01    -0.01   0.00  -0.01
  13   6     0.02  -0.04   0.03     0.01   0.00   0.00     0.00   0.01  -0.01
  14   6    -0.01  -0.01   0.00     0.01  -0.02   0.01     0.00   0.00  -0.01
  15   8     0.00  -0.02   0.04    -0.02   0.00  -0.01    -0.01   0.00  -0.02
  16   6    -0.02   0.01   0.00     0.00   0.00   0.01     0.01   0.00   0.00
  17   8     0.02  -0.01   0.02     0.02   0.08   0.05     0.00  -0.01   0.00
  18   6     0.00  -0.03   0.00    -0.02   0.00   0.01    -0.01   0.00   0.00
  19   8     0.02   0.01  -0.03    -0.01   0.09  -0.03    -0.02  -0.01   0.01
  20   8     0.03   0.02  -0.05    -0.02  -0.01   0.02    -0.01   0.01   0.00
  21   6     0.02   0.03   0.04    -0.03  -0.01   0.00     0.00   0.01   0.00
  22   6     0.02   0.04  -0.02    -0.02   0.02   0.09     0.00   0.00   0.00
  23   6     0.01   0.02  -0.02    -0.01  -0.01   0.02    -0.01   0.00   0.00
  24   8     0.02   0.05   0.19    -0.04  -0.03  -0.10     0.00   0.01  -0.01
  25   6    -0.01   0.03  -0.11    -0.02   0.04   0.18     0.00  -0.01  -0.01
  26   6    -0.02   0.05   0.02    -0.01  -0.01   0.02    -0.02   0.01   0.00
  27   6     0.12  -0.08   0.05     0.08  -0.03   0.01     0.01   0.01   0.00
  28   6    -0.02   0.01   0.01     0.01  -0.06   0.00     0.01  -0.01  -0.02
  29   6    -0.02   0.01  -0.03     0.01  -0.02   0.00     0.00  -0.01   0.01
  30   6    -0.03   0.00   0.01    -0.03  -0.01   0.02     0.00   0.00   0.01
  31   6    -0.03   0.00  -0.03     0.04   0.00   0.02     0.00  -0.01  -0.02
  32   6    -0.01  -0.01  -0.01     0.04   0.01   0.03    -0.01  -0.01  -0.03
  33   6     0.02  -0.01   0.02     0.01   0.01   0.00     0.00   0.00  -0.01
  34   6     0.02  -0.01   0.02    -0.01   0.00  -0.04     0.01  -0.01   0.02
  35   6     0.00   0.01  -0.02     0.00  -0.01  -0.03     0.01  -0.01   0.02
  36   6    -0.03   0.00  -0.03     0.06  -0.01   0.00     0.01  -0.01  -0.01
  37   6     0.01   0.03  -0.04     0.00  -0.01  -0.02     0.01  -0.01   0.01
  38   6     0.00   0.00  -0.02    -0.03  -0.01   0.02    -0.01  -0.01   0.03
  39   6     0.03   0.00  -0.04    -0.01  -0.01   0.00    -0.02  -0.01   0.03
  40   6     0.03   0.01  -0.03     0.05   0.01  -0.06     0.00   0.00   0.01
  41   6     0.00   0.00  -0.01     0.08   0.01  -0.09     0.01   0.00   0.00
  42   6    -0.02   0.00   0.01     0.03   0.00  -0.05     0.01   0.00   0.00
  43   6     0.02   0.00  -0.05     0.00  -0.01  -0.03     0.01   0.00   0.02
  44   6    -0.01   0.02   0.00     0.03  -0.01  -0.05     0.00   0.00   0.01
  45   6    -0.09  -0.01  -0.10     0.11   0.02   0.02     0.02   0.00   0.00
  46   6     0.09   0.01  -0.04     0.00  -0.03   0.00     0.00   0.01  -0.01
  47   6     0.09   0.08  -0.03     0.00   0.02   0.00     0.03  -0.02  -0.01
  48   6    -0.04  -0.02   0.01     0.03  -0.04  -0.02    -0.02   0.00   0.01
  49   6    -0.03   0.00  -0.01     0.04  -0.04  -0.01     0.03   0.07   0.01
  50   6     0.01   0.05   0.04    -0.02  -0.01  -0.06     0.00  -0.06  -0.04
  51   6    -0.04  -0.07  -0.09     0.00  -0.12  -0.07     0.02  -0.02   0.01
  52   6     0.03   0.06   0.04     0.00   0.09   0.01     0.00   0.03   0.01
  53   6    -0.01   0.05  -0.03    -0.03   0.05  -0.01    -0.03   0.04   0.01
  54   6     0.01  -0.03   0.07    -0.05   0.04   0.05    -0.05   0.03  -0.04
  55   1     0.03  -0.02   0.03    -0.03   0.07  -0.01    -0.01   0.00   0.01
  56   1     0.02   0.02   0.03     0.00   0.05  -0.01     0.00   0.02  -0.02
  57   1    -0.01  -0.01  -0.02     0.02  -0.01   0.04     0.00   0.00   0.00
  58   1    -0.04   0.01  -0.02     0.00   0.00   0.01     0.01  -0.01   0.03
  59   1    -0.01  -0.01   0.01     0.01   0.00   0.01     0.00   0.02   0.00
  60   1    -0.02   0.04   0.02     0.00   0.01   0.01     0.01  -0.03  -0.01
  61   1     0.04   0.10  -0.01    -0.05  -0.03   0.09     0.00   0.00   0.00
  62   1     0.02   0.03  -0.04    -0.01  -0.01   0.01    -0.01   0.00   0.00
  63   1    -0.06   0.07  -0.16     0.03  -0.02   0.26    -0.01   0.00  -0.02
  64   1     0.00  -0.04  -0.14    -0.08   0.12   0.23     0.02  -0.01  -0.02
  65   1    -0.02   0.06  -0.08    -0.02   0.03   0.12     0.00  -0.01   0.00
  66   1     0.00   0.10   0.02     0.00  -0.02   0.03    -0.02   0.02   0.00
  67   1    -0.03   0.05   0.05     0.00  -0.01   0.02    -0.03   0.01   0.00
  68   1    -0.04   0.04   0.04    -0.02  -0.02   0.03    -0.02   0.01   0.00
  69   1     0.20  -0.03   0.11     0.14   0.01   0.05     0.01   0.01   0.00
  70   1     0.16  -0.18   0.01     0.11  -0.10  -0.01     0.01   0.00   0.01
  71   1     0.07  -0.06   0.04     0.06  -0.02   0.01     0.02   0.01   0.00
  72   1    -0.02   0.01   0.00     0.04  -0.10  -0.01     0.02  -0.02  -0.02
  73   1    -0.02   0.04   0.00     0.04  -0.04   0.01     0.02   0.00  -0.01
  74   1    -0.02   0.01   0.03    -0.03  -0.07  -0.01     0.00  -0.01  -0.02
  75   1    -0.02  -0.02  -0.01     0.05   0.02   0.05    -0.02   0.00  -0.06
  76   1     0.03  -0.02   0.05     0.01   0.02   0.00    -0.01   0.00  -0.01
  77   1     0.04  -0.01   0.04    -0.03   0.00  -0.06     0.02  -0.01   0.04
  78   1    -0.05   0.01   0.04     0.08  -0.02  -0.05     0.01  -0.02  -0.02
  79   1    -0.03   0.04  -0.10     0.00   0.00  -0.03     0.00   0.00  -0.01
  80   1     0.05   0.01  -0.06    -0.02  -0.01   0.01    -0.03  -0.01   0.04
  81   1     0.05   0.01  -0.04     0.07   0.02  -0.09     0.00   0.00   0.01
  82   1     0.01   0.01  -0.01     0.13   0.03  -0.15     0.03   0.00  -0.01
  83   1     0.07   0.03  -0.11     0.05   0.02  -0.09     0.01   0.00   0.01
  84   1     0.00   0.03  -0.02     0.03  -0.01  -0.04    -0.05  -0.02   0.06
  85   1    -0.12   0.00  -0.12     0.12   0.02   0.00     0.04   0.00   0.01
  86   1    -0.12   0.03  -0.09     0.14   0.04   0.02     0.02  -0.02   0.00
  87   1    -0.07  -0.05  -0.14     0.09   0.04   0.06     0.02   0.02   0.00
  88   1     0.07   0.01  -0.03     0.02  -0.04  -0.02     0.02   0.01   0.00
  89   1     0.13  -0.01  -0.13    -0.02  -0.02   0.05     0.00   0.02  -0.01
  90   1     0.15   0.04   0.02    -0.04  -0.06  -0.03    -0.01   0.00  -0.02
  91   1     0.09   0.08  -0.05     0.02   0.02   0.02     0.02  -0.02  -0.04
  92   1     0.13   0.07   0.03     0.01   0.01   0.00     0.04  -0.01   0.01
  93   1     0.12   0.12  -0.07    -0.01   0.04  -0.01     0.06  -0.03  -0.02
  94   1    -0.04  -0.02   0.00     0.03  -0.05   0.02    -0.03   0.00  -0.01
  95   1    -0.08  -0.05   0.01     0.05  -0.05  -0.04    -0.03   0.01   0.02
  96   1    -0.01  -0.03   0.07     0.02  -0.02  -0.03    -0.01   0.00   0.02
  97   1     0.00   0.04  -0.03     0.00  -0.06   0.02     0.02   0.07   0.02
  98   1    -0.06  -0.04  -0.06     0.09  -0.04   0.01     0.01   0.11   0.04
  99   1    -0.03  -0.02   0.04     0.03  -0.03  -0.03     0.07   0.08  -0.03
 100   1     0.04   0.04   0.01    -0.04  -0.02  -0.04     0.00  -0.11  -0.04
 101   1     0.04   0.08   0.07    -0.03   0.00  -0.10     0.00  -0.07  -0.01
 102   1    -0.03   0.05   0.06    -0.01   0.00  -0.07    -0.01  -0.04  -0.09
 103   1    -0.04  -0.08  -0.11     0.04  -0.11  -0.13     0.05  -0.01   0.00
 104   1    -0.05  -0.09  -0.14     0.01  -0.16  -0.09     0.03  -0.05   0.01
 105   1    -0.07  -0.11  -0.04    -0.03  -0.15  -0.02     0.00  -0.02   0.02
 106   1     0.03   0.04  -0.03     0.04   0.07  -0.11     0.02   0.04  -0.01
 107   1    -0.01   0.00   0.15    -0.04   0.02   0.13    -0.01   0.03   0.02
 108   1     0.08   0.17   0.07     0.01   0.24   0.04    -0.01   0.05   0.01
 109   1     0.02  -0.03  -0.02     0.00  -0.06   0.02    -0.01  -0.01   0.03
 110   1    -0.07   0.10   0.02    -0.15   0.13   0.05    -0.09   0.08   0.04
 111   1     0.04   0.10  -0.10     0.04   0.14  -0.12    -0.01   0.08  -0.06
 112   1    -0.01  -0.04  -0.01    -0.02   0.07   0.16    -0.27  -0.09  -0.51
 113   1    -0.03   0.04   0.12    -0.02  -0.04   0.02    -0.16   0.52   0.13
 114   1     0.08  -0.08   0.12    -0.09   0.13   0.00     0.23  -0.28   0.19
                    28                     29                     30
                     A                      A                      A
 Frequencies --   136.1494               138.5350               143.8728
 Red. masses --     1.7929                 2.7490                 2.8903
 Frc consts  --     0.0196                 0.0311                 0.0352
 IR Inten    --     0.5993                 0.3668                 1.2988
 Atom AN      X      Y      Z        X      Y      Z        X      Y      Z
   1   8     0.00   0.02  -0.01     0.01  -0.03   0.01    -0.05   0.14  -0.05
   2  12     0.02  -0.01   0.01     0.01   0.00  -0.02     0.03   0.01   0.03
   3   8     0.00   0.02  -0.01     0.01   0.01  -0.01    -0.01  -0.01   0.03
   4   6     0.00   0.01  -0.01     0.01  -0.02   0.01    -0.03   0.08  -0.03
   5   7     0.02  -0.04   0.03    -0.02   0.01  -0.01     0.01   0.02   0.03
   6   7    -0.01   0.01   0.00     0.02   0.00  -0.01     0.02   0.00   0.01
   7   8     0.01  -0.01   0.00     0.00   0.00   0.00     0.01   0.02  -0.01
   8   6    -0.01   0.00   0.02    -0.01  -0.01   0.00     0.01  -0.01   0.03
   9   6     0.01  -0.04   0.02    -0.01   0.01  -0.01     0.00   0.01   0.01
  10   6     0.01  -0.03   0.01    -0.01   0.02  -0.02    -0.01   0.02  -0.01
  11   8     0.00   0.01  -0.01     0.01  -0.01   0.01     0.00   0.03  -0.01
  12   6     0.00   0.01  -0.02     0.01  -0.01   0.01     0.00   0.03  -0.01
  13   6     0.00   0.01  -0.01     0.00  -0.01   0.00     0.00   0.01  -0.01
  14   6     0.01   0.00  -0.01     0.00  -0.01   0.01     0.00   0.03  -0.01
  15   8     0.00   0.01  -0.02     0.00  -0.01   0.01     0.00   0.03  -0.01
  16   6     0.02  -0.01   0.00    -0.02   0.03  -0.01     0.09  -0.13   0.06
  17   8    -0.01  -0.01   0.00    -0.01   0.01  -0.02     0.02  -0.06   0.06
  18   6    -0.01   0.00   0.00     0.01   0.00  -0.01    -0.01   0.00   0.02
  19   8    -0.02  -0.02   0.01     0.00  -0.01  -0.01    -0.01   0.00   0.03
  20   8    -0.01   0.00   0.00     0.01   0.00   0.01     0.00   0.02   0.02
  21   6    -0.01   0.00  -0.01     0.01   0.00   0.02     0.01   0.01   0.00
  22   6    -0.01   0.00  -0.01     0.01   0.00  -0.01     0.00   0.00   0.00
  23   6    -0.01   0.00   0.00     0.01   0.00   0.00    -0.02   0.00   0.02
  24   8    -0.01   0.00  -0.01     0.01   0.01   0.04     0.01   0.02   0.01
  25   6     0.00  -0.01  -0.03     0.00   0.01   0.00    -0.01  -0.01  -0.10
  26   6    -0.02   0.01   0.00     0.01   0.00  -0.01    -0.05   0.02  -0.01
  27   6    -0.01   0.02  -0.01    -0.02   0.00   0.00     0.03   0.00  -0.03
  28   6     0.01  -0.02  -0.02     0.00   0.04   0.02    -0.02  -0.13  -0.04
  29   6     0.01  -0.02   0.02    -0.02   0.00   0.00     0.01   0.02   0.03
  30   6     0.00   0.01  -0.01     0.02   0.00   0.00     0.01   0.00   0.01
  31   6     0.02  -0.01   0.01     0.01   0.00   0.09     0.01   0.01   0.04
  32   6     0.01   0.01   0.00     0.04   0.00   0.15     0.01   0.01   0.02
  33   6    -0.01   0.01  -0.01     0.00  -0.01   0.03    -0.01   0.00  -0.03
  34   6    -0.02   0.00   0.00    -0.06   0.00  -0.12    -0.01   0.01  -0.05
  35   6     0.00  -0.02   0.01    -0.05   0.01  -0.10     0.00   0.02  -0.01
  36   6     0.04  -0.01  -0.01    -0.02  -0.01   0.02     0.00   0.01   0.01
  37   6     0.00  -0.01   0.01    -0.03   0.01  -0.05     0.00   0.02  -0.03
  38   6     0.01   0.01  -0.02     0.01   0.00   0.02    -0.01  -0.01   0.01
  39   6     0.02   0.01  -0.02     0.00  -0.01   0.03    -0.01  -0.01   0.02
  40   6    -0.01   0.01   0.00     0.00   0.00   0.02    -0.01  -0.01   0.01
  41   6    -0.03   0.00   0.02     0.01   0.00   0.01     0.00   0.00   0.00
  42   6    -0.02   0.01   0.01     0.01   0.00   0.01     0.01   0.00   0.00
  43   6    -0.01   0.01  -0.01     0.02   0.00   0.03    -0.02  -0.02   0.00
  44   6    -0.01   0.01   0.01     0.01   0.00   0.02     0.00  -0.02  -0.01
  45   6     0.07   0.02  -0.01    -0.07   0.03  -0.08    -0.01   0.02  -0.02
  46   6     0.02  -0.04  -0.01     0.01  -0.13  -0.01     0.00  -0.04   0.00
  47   6     0.00  -0.01   0.02    -0.08   0.08   0.03     0.03   0.04  -0.02
  48   6     0.02  -0.02   0.01     0.07  -0.06  -0.05    -0.02   0.00  -0.01
  49   6    -0.03  -0.02   0.01     0.03   0.06   0.01     0.00  -0.03  -0.02
  50   6     0.00   0.05   0.05     0.01  -0.04  -0.02    -0.02  -0.04  -0.03
  51   6    -0.02   0.05   0.00     0.03   0.02   0.03    -0.01  -0.04   0.00
  52   6     0.00  -0.03  -0.01     0.02   0.02   0.02    -0.02  -0.03  -0.01
  53   6    -0.08   0.12   0.00     0.02  -0.03  -0.01     0.03  -0.05   0.05
  54   6     0.04  -0.08   0.02    -0.05   0.05  -0.06    -0.05   0.07  -0.03
  55   1     0.00  -0.04   0.02    -0.02   0.00  -0.01    -0.01   0.01   0.00
  56   1     0.00   0.01  -0.02     0.00  -0.02   0.01     0.01   0.02  -0.01
  57   1     0.01   0.00   0.00    -0.01  -0.01  -0.02     0.08   0.05   0.07
  58   1     0.04  -0.01   0.03    -0.06   0.02  -0.02     0.30  -0.15   0.25
  59   1     0.01   0.00   0.00    -0.03   0.04  -0.02     0.07  -0.07   0.05
  60   1     0.01  -0.04  -0.01     0.02   0.06  -0.02     0.00  -0.39  -0.03
  61   1    -0.01   0.01  -0.01     0.02  -0.01  -0.02     0.00   0.07   0.02
  62   1    -0.01   0.01   0.00     0.02  -0.01  -0.01    -0.03  -0.01   0.03
  63   1    -0.01   0.01  -0.04     0.01   0.00   0.00    -0.06   0.04  -0.17
  64   1     0.01  -0.02  -0.04     0.00   0.01   0.00     0.03  -0.10  -0.15
  65   1     0.00  -0.01  -0.01     0.00   0.01  -0.01    -0.01   0.01  -0.05
  66   1    -0.02   0.02   0.00     0.02  -0.01   0.01    -0.05   0.02  -0.02
  67   1    -0.02   0.01   0.01     0.02  -0.01  -0.02    -0.07   0.00  -0.01
  68   1    -0.02   0.01   0.00     0.00   0.01   0.00    -0.04   0.04  -0.02
  69   1    -0.02   0.01  -0.02    -0.02  -0.01   0.02     0.05   0.02  -0.03
  70   1    -0.02   0.02   0.00    -0.01   0.00  -0.01     0.04  -0.02  -0.03
  71   1     0.01   0.01  -0.01    -0.03   0.01   0.00     0.03  -0.02  -0.03
  72   1     0.02  -0.04  -0.02    -0.04   0.09   0.03     0.08  -0.29  -0.04
  73   1     0.02  -0.02  -0.01    -0.04   0.00   0.00     0.05  -0.05  -0.01
  74   1    -0.01  -0.03  -0.03     0.05   0.05   0.02    -0.19  -0.18  -0.08
  75   1     0.01   0.02   0.00     0.08   0.00   0.25     0.01   0.00   0.02
  76   1    -0.02   0.02  -0.02     0.01  -0.01   0.05    -0.01   0.00  -0.05
  77   1    -0.03   0.00  -0.01    -0.10   0.01  -0.20    -0.02   0.01  -0.09
  78   1     0.05  -0.03  -0.03    -0.03   0.05   0.02     0.00   0.03   0.00
  79   1     0.00  -0.01   0.01    -0.02   0.01  -0.02     0.00   0.02  -0.05
  80   1     0.03   0.02  -0.04    -0.01  -0.01   0.03    -0.02  -0.01   0.03
  81   1    -0.01   0.01   0.01    -0.01  -0.01   0.03    -0.01  -0.01   0.02
  82   1    -0.05   0.00   0.04     0.01   0.00   0.01     0.01   0.00   0.00
  83   1    -0.02   0.00   0.01     0.02  -0.01   0.04    -0.03  -0.01  -0.01
  84   1     0.01   0.02  -0.02    -0.03  -0.01   0.05     0.01  -0.03   0.01
  85   1     0.07   0.01  -0.04    -0.13   0.02  -0.21    -0.04   0.02  -0.06
  86   1     0.08   0.04  -0.01    -0.05   0.16  -0.05    -0.01   0.07  -0.01
  87   1     0.06   0.02   0.01    -0.05  -0.07  -0.05    -0.01  -0.01  -0.01
  88   1     0.04  -0.04  -0.03    -0.03  -0.14  -0.10    -0.03  -0.05  -0.04
  89   1     0.01  -0.03   0.01     0.03  -0.20  -0.01     0.00  -0.08   0.01
  90   1     0.01  -0.06  -0.02     0.04  -0.15   0.05     0.01  -0.05   0.02
  91   1     0.01   0.00   0.03    -0.01   0.11   0.14     0.00   0.01  -0.04
  92   1     0.00  -0.01   0.01    -0.09   0.05  -0.03     0.03   0.07   0.03
  93   1    -0.01   0.00   0.02    -0.21   0.14   0.05     0.08   0.05  -0.06
  94   1     0.01  -0.05   0.05     0.11  -0.09   0.07    -0.01   0.02  -0.03
  95   1     0.07  -0.02  -0.02     0.16  -0.11  -0.12    -0.06  -0.01   0.00
  96   1    -0.02   0.01  -0.01     0.04  -0.04  -0.09     0.01  -0.02   0.02
  97   1    -0.02  -0.02   0.00     0.02   0.05   0.01     0.00  -0.04  -0.02
  98   1    -0.02  -0.04  -0.01     0.01   0.10   0.04     0.00  -0.02  -0.01
  99   1    -0.05  -0.03   0.03     0.06   0.07  -0.03    -0.01  -0.02  -0.03
 100   1     0.01   0.07   0.03     0.00  -0.04  -0.01    -0.03  -0.07  -0.02
 101   1     0.01   0.06   0.05     0.00  -0.08  -0.03    -0.02  -0.02  -0.03
 102   1    -0.01   0.04   0.08     0.05  -0.04  -0.05    -0.04  -0.02  -0.05
 103   1    -0.04   0.04   0.03     0.05   0.03   0.05    -0.03  -0.05  -0.03
 104   1    -0.02   0.07   0.01     0.03   0.00   0.04    -0.01  -0.02   0.01
 105   1     0.00   0.05  -0.01     0.01   0.03   0.03     0.01  -0.06   0.01
 106   1    -0.02  -0.03   0.03     0.03   0.03   0.04    -0.03  -0.05  -0.04
 107   1     0.01  -0.02  -0.05     0.01   0.03   0.01     0.00  -0.06   0.02
 108   1     0.00  -0.08  -0.02     0.01   0.00   0.02    -0.02   0.00   0.00
 109   1     0.04  -0.26   0.12     0.09  -0.25   0.03     0.03  -0.06   0.05
 110   1    -0.47   0.36   0.19    -0.18   0.06   0.06     0.01  -0.06   0.03
 111   1     0.15   0.39  -0.35     0.18   0.12  -0.13     0.04  -0.04   0.06
 112   1     0.09  -0.06   0.04    -0.11   0.03  -0.11    -0.03   0.09   0.12
 113   1     0.04  -0.13   0.02    -0.04   0.13  -0.06     0.01  -0.03  -0.10
 114   1     0.02  -0.07   0.01    -0.04   0.02  -0.04    -0.14   0.17  -0.10
                    31                     32                     33
                     A                      A                      A
 Frequencies --   147.2056               150.4355               155.4327
 Red. masses --     2.4297                 2.6315                 1.9563
 Frc consts  --     0.0310                 0.0351                 0.0278
 IR Inten    --     3.9506                 0.5333                 1.0197
 Atom AN      X      Y      Z        X      Y      Z        X      Y      Z
   1   8     0.04  -0.07   0.02    -0.03   0.05  -0.01     0.02  -0.06   0.02
   2  12     0.04   0.00   0.03    -0.01  -0.01  -0.04    -0.01   0.00   0.01
   3   8     0.02   0.02   0.00     0.04   0.02   0.00    -0.03  -0.02   0.01
   4   6     0.03  -0.05   0.01    -0.02   0.04   0.00     0.01  -0.02   0.01
   5   7     0.01   0.01   0.04    -0.02   0.00  -0.03    -0.01   0.00   0.01
   6   7     0.01   0.01   0.01    -0.01   0.00  -0.02    -0.01  -0.02  -0.03
   7   8     0.00  -0.03   0.00    -0.01   0.03   0.00    -0.02   0.02   0.00
   8   6     0.03  -0.02   0.05     0.01  -0.02  -0.02    -0.02  -0.04   0.00
   9   6     0.03  -0.02   0.04     0.02  -0.03   0.00    -0.02  -0.06  -0.01
  10   6     0.00   0.01   0.01     0.01  -0.02   0.00    -0.02  -0.04  -0.03
  11   8    -0.01  -0.01  -0.02     0.01  -0.01   0.02    -0.01   0.01  -0.01
  12   6    -0.02  -0.01  -0.03     0.00  -0.02   0.02    -0.01   0.01  -0.01
  13   6     0.00   0.01  -0.01     0.00  -0.02   0.02     0.00   0.00   0.00
  14   6     0.01  -0.02  -0.01    -0.01   0.02   0.00     0.00  -0.01   0.00
  15   8    -0.03  -0.03  -0.05    -0.01  -0.02   0.02     0.00   0.01   0.00
  16   6    -0.05   0.10  -0.03     0.02  -0.06   0.02    -0.02   0.03  -0.02
  17   8     0.01  -0.04   0.04     0.01   0.01  -0.06     0.01  -0.02   0.04
  18   6    -0.01   0.01   0.02     0.03  -0.01   0.00    -0.01   0.01   0.00
  19   8    -0.02  -0.02   0.04     0.03  -0.05   0.02    -0.01   0.04  -0.01
  20   8     0.00   0.02   0.03     0.03  -0.01  -0.03    -0.01   0.01   0.03
  21   6     0.01   0.01   0.00     0.03  -0.01  -0.01    -0.01   0.00   0.00
  22   6     0.01   0.01  -0.01     0.03  -0.01  -0.03    -0.01   0.00   0.01
  23   6    -0.01   0.00   0.02     0.03   0.00  -0.02    -0.01   0.00   0.01
  24   8     0.02   0.02  -0.02     0.03   0.00   0.02     0.00   0.00  -0.02
  25   6    -0.01   0.00  -0.09     0.01   0.01   0.01    -0.01  -0.01  -0.02
  26   6    -0.05   0.01  -0.04     0.03  -0.01  -0.02    -0.01   0.00   0.01
  27   6     0.01   0.02   0.02    -0.06   0.01   0.01     0.05  -0.01   0.00
  28   6     0.05   0.06  -0.02    -0.04   0.02   0.02     0.03   0.01  -0.01
  29   6     0.01   0.01   0.04    -0.02   0.00  -0.02    -0.01   0.00   0.01
  30   6     0.00   0.01   0.01    -0.01   0.00   0.00     0.00  -0.02  -0.03
  31   6     0.00   0.01   0.01    -0.03   0.00  -0.03     0.00   0.01   0.01
  32   6    -0.02   0.01  -0.03    -0.02  -0.01  -0.02    -0.01   0.01   0.00
  33   6    -0.02   0.01  -0.03     0.00  -0.01   0.02     0.00   0.00  -0.01
  34   6     0.00   0.01   0.00     0.01  -0.01   0.04     0.00   0.00  -0.01
  35   6     0.01   0.01   0.03     0.00   0.00   0.01     0.00   0.00   0.00
  36   6     0.00   0.01   0.01    -0.03   0.00  -0.01     0.02   0.00  -0.01
  37   6     0.00   0.02   0.00     0.00   0.00   0.01     0.02   0.03  -0.02
  38   6    -0.03  -0.01   0.03    -0.07  -0.02   0.06    -0.01  -0.02  -0.01
  39   6    -0.04  -0.01   0.04    -0.09  -0.03   0.08    -0.02  -0.02   0.00
  40   6    -0.01   0.00   0.01    -0.01   0.00   0.00    -0.02  -0.02   0.00
  41   6     0.03   0.01  -0.03     0.07   0.02  -0.07     0.00  -0.02  -0.01
  42   6     0.02   0.01  -0.02     0.05   0.02  -0.05     0.01  -0.01  -0.02
  43   6    -0.03  -0.02   0.00    -0.04   0.00   0.03     0.01   0.00   0.02
  44   6     0.01  -0.01  -0.01     0.01   0.03  -0.02    -0.01   0.03   0.00
  45   6    -0.01   0.01   0.01    -0.04  -0.02   0.01     0.05   0.03   0.00
  46   6    -0.01   0.00   0.01     0.00   0.05   0.00     0.01  -0.01  -0.01
  47   6     0.04   0.01  -0.03    -0.02  -0.01   0.01     0.06   0.03  -0.04
  48   6    -0.04   0.03   0.00     0.01   0.01   0.01     0.03   0.04  -0.03
  49   6     0.01  -0.04   0.01     0.05   0.01   0.08     0.02   0.04   0.05
  50   6    -0.05  -0.02  -0.04    -0.05   0.05  -0.03    -0.01   0.06   0.02
  51   6     0.00  -0.08  -0.02     0.04  -0.05   0.03     0.02   0.05   0.04
  52   6    -0.04   0.01  -0.03    -0.06   0.10  -0.02     0.01   0.04   0.03
  53   6     0.05  -0.04   0.05     0.03  -0.01  -0.03    -0.03  -0.07   0.02
  54   6    -0.02   0.05   0.00     0.04  -0.05   0.01    -0.02  -0.06  -0.05
  55   1     0.02  -0.04   0.03     0.04  -0.06   0.01    -0.02  -0.07  -0.01
  56   1     0.02   0.02  -0.04     0.00  -0.06   0.02     0.00   0.03  -0.01
  57   1    -0.04  -0.03  -0.04     0.01   0.03  -0.01    -0.02  -0.02   0.01
  58   1    -0.19   0.15  -0.29     0.11  -0.10   0.22    -0.07  -0.09   0.35
  59   1     0.04  -0.07   0.02    -0.05   0.08  -0.02    -0.22   0.39  -0.14
  60   1    -0.06   0.35   0.13     0.05  -0.23  -0.11     0.21  -0.16  -0.31
  61   1     0.01   0.06   0.01     0.05  -0.03  -0.04    -0.01   0.02   0.02
  62   1    -0.03  -0.03   0.04     0.01   0.01  -0.01    -0.01  -0.01   0.01
  63   1    -0.05   0.04  -0.14     0.03  -0.03   0.05    -0.02   0.02  -0.05
  64   1     0.01  -0.07  -0.12    -0.03   0.04   0.04     0.00  -0.04  -0.04
  65   1    -0.01   0.02  -0.06     0.01   0.01  -0.02    -0.01   0.00  -0.01
  66   1    -0.06   0.00  -0.05     0.02  -0.01  -0.03    -0.01   0.00   0.02
  67   1    -0.09  -0.02  -0.06     0.03   0.00  -0.01    -0.02   0.00   0.00
  68   1    -0.03   0.06  -0.07     0.04  -0.01  -0.03    -0.02   0.01   0.01
  69   1    -0.01   0.01   0.00    -0.11  -0.02  -0.02     0.08   0.01   0.02
  70   1    -0.01   0.02   0.05    -0.08   0.07   0.03     0.06  -0.06  -0.02
  71   1     0.04   0.03   0.02    -0.04   0.00   0.01     0.03  -0.01  -0.01
  72   1     0.00   0.14  -0.04    -0.04   0.01   0.04     0.03   0.01  -0.04
  73   1     0.04   0.02  -0.01    -0.06   0.02   0.00     0.05   0.01   0.01
  74   1     0.13   0.08   0.00    -0.05   0.01   0.02     0.03   0.01   0.00
  75   1    -0.03   0.00  -0.06    -0.02  -0.01  -0.03    -0.01   0.01  -0.01
  76   1    -0.03   0.00  -0.07     0.01  -0.01   0.04    -0.01   0.00  -0.02
  77   1     0.00   0.01  -0.01     0.03  -0.01   0.07    -0.01   0.00  -0.01
  78   1     0.00   0.01   0.01    -0.04   0.00   0.02     0.03  -0.01  -0.03
  79   1    -0.01   0.02  -0.02     0.00   0.00   0.02     0.00   0.06  -0.02
  80   1    -0.06  -0.02   0.07    -0.14  -0.05   0.13    -0.04  -0.03   0.01
  81   1    -0.01   0.00   0.01     0.00   0.00   0.00    -0.02  -0.02   0.02
  82   1     0.05   0.02  -0.04     0.13   0.04  -0.11     0.00  -0.02   0.00
  83   1    -0.03   0.01  -0.02    -0.02  -0.01   0.03     0.04  -0.03   0.04
  84   1     0.02  -0.02   0.00    -0.01   0.04  -0.02    -0.04   0.04  -0.02
  85   1     0.00   0.01   0.01    -0.03  -0.02   0.05     0.06   0.03  -0.03
  86   1    -0.01   0.01   0.01    -0.06  -0.06   0.00     0.07   0.06   0.00
  87   1    -0.01   0.01   0.00    -0.04   0.00  -0.02     0.04   0.04   0.03
  88   1     0.01  -0.01  -0.01     0.04   0.05   0.04     0.05  -0.02  -0.02
  89   1    -0.02   0.01   0.02    -0.01   0.10  -0.02    -0.02   0.03   0.02
  90   1    -0.02  -0.03   0.01    -0.02   0.04   0.00    -0.03  -0.05  -0.02
  91   1     0.03   0.01  -0.07    -0.01  -0.01   0.02     0.07   0.05  -0.07
  92   1     0.06   0.00  -0.01    -0.02  -0.02  -0.01     0.09   0.01  -0.03
  93   1     0.07  -0.01  -0.04    -0.03  -0.02   0.02     0.08   0.03  -0.05
  94   1    -0.05   0.04  -0.03     0.00  -0.02   0.03     0.07   0.12  -0.09
  95   1    -0.07   0.04   0.02     0.05   0.01  -0.01    -0.06   0.04   0.01
  96   1    -0.02   0.03   0.03    -0.02   0.04  -0.01     0.10  -0.05  -0.01
  97   1     0.00  -0.04   0.01     0.01   0.07   0.12     0.00   0.09   0.08
  98   1     0.02  -0.05   0.00     0.08  -0.03   0.06     0.02   0.03   0.04
  99   1     0.00  -0.04   0.01     0.08  -0.01   0.13     0.05   0.03   0.08
 100   1    -0.08  -0.04  -0.01    -0.14   0.13   0.06    -0.06   0.17   0.08
 101   1    -0.06  -0.01  -0.07    -0.13   0.00  -0.15    -0.08   0.00  -0.06
 102   1    -0.05  -0.01  -0.06     0.06   0.02  -0.02     0.11   0.02   0.07
 103   1     0.02  -0.08  -0.07     0.13  -0.01  -0.01     0.05   0.07   0.08
 104   1     0.01  -0.10  -0.01     0.06  -0.15   0.05     0.03   0.02   0.04
 105   1     0.01  -0.10   0.00     0.00  -0.04   0.03    -0.01   0.09   0.01
 106   1    -0.02   0.00  -0.08     0.01   0.11  -0.13     0.05   0.09   0.12
 107   1    -0.03  -0.01  -0.01    -0.08   0.07   0.03    -0.03   0.11  -0.03
 108   1    -0.06   0.06  -0.02    -0.12   0.21  -0.01     0.02  -0.04   0.01
 109   1     0.11  -0.25   0.10     0.10  -0.23   0.01    -0.05   0.00   0.02
 110   1    -0.14   0.04   0.12    -0.18   0.10   0.05     0.01  -0.11  -0.01
 111   1     0.19   0.09  -0.06     0.19   0.15  -0.18    -0.08  -0.11   0.07
 112   1     0.02   0.09   0.20     0.09  -0.02   0.08     0.01  -0.05   0.00
 113   1     0.04  -0.11  -0.10     0.04  -0.13   0.00     0.01  -0.12  -0.09
 114   1    -0.14   0.19  -0.11     0.00  -0.01  -0.01    -0.07  -0.04  -0.08
                    34                     35                     36
                     A                      A                      A
 Frequencies --   156.6034               161.6838               163.6156
 Red. masses --     1.9274                 2.2924                 2.9484
 Frc consts  --     0.0278                 0.0353                 0.0465
 IR Inten    --     0.4058                 1.0094                 0.3646
 Atom AN      X      Y      Z        X      Y      Z        X      Y      Z
   1   8     0.00   0.00   0.01     0.02  -0.01   0.02    -0.01   0.01  -0.01
   2  12    -0.02  -0.01   0.00    -0.01   0.02   0.01     0.00   0.04  -0.02
   3   8    -0.03  -0.02  -0.01     0.03  -0.01   0.01    -0.06  -0.08   0.03
   4   6     0.00   0.01   0.01     0.00   0.01   0.01     0.00   0.00   0.00
   5   7    -0.01   0.01  -0.02     0.01   0.00   0.00     0.00   0.00  -0.03
   6   7     0.02  -0.02   0.00     0.00   0.01   0.01     0.03   0.01  -0.05
   7   8    -0.01   0.02   0.00    -0.02   0.04   0.00     0.03  -0.03   0.01
   8   6     0.03  -0.03   0.00     0.01   0.03  -0.01     0.00   0.01  -0.04
   9   6     0.02  -0.01   0.00     0.01   0.03   0.00     0.01   0.00  -0.04
  10   6    -0.01   0.02  -0.02     0.01   0.02   0.01     0.03  -0.01  -0.05
  11   8     0.00   0.00   0.01     0.02  -0.03   0.00     0.00   0.01   0.01
  12   6     0.00   0.00   0.01    -0.02  -0.05   0.00     0.00   0.01   0.01
  13   6    -0.01   0.00   0.00     0.01  -0.03   0.01    -0.01  -0.02   0.00
  14   6     0.00   0.00   0.01     0.01   0.00   0.00     0.00   0.00   0.01
  15   8     0.00   0.00   0.01    -0.07  -0.07  -0.02     0.01   0.03   0.03
  16   6     0.00  -0.01   0.00     0.01   0.01   0.00     0.00  -0.02   0.00
  17   8    -0.01   0.00   0.00     0.03   0.06  -0.02     0.03   0.00   0.03
  18   6    -0.01   0.01  -0.02     0.02  -0.01   0.04    -0.02   0.02   0.01
  19   8     0.00   0.04  -0.04     0.00   0.01   0.04    -0.02   0.10  -0.03
  20   8    -0.02  -0.01   0.00     0.04   0.02   0.09     0.01   0.03   0.16
  21   6    -0.01   0.00   0.00     0.03   0.01   0.01     0.02   0.01   0.03
  22   6    -0.01  -0.01   0.01     0.02   0.06  -0.01     0.02   0.03   0.00
  23   6     0.00   0.00  -0.01     0.02  -0.02   0.04     0.00  -0.02   0.06
  24   8    -0.01   0.00   0.00     0.00  -0.02  -0.05     0.02   0.00  -0.05
  25   6     0.01  -0.01   0.03    -0.05   0.08  -0.05    -0.04   0.03  -0.08
  26   6     0.03  -0.01   0.03    -0.04  -0.04  -0.12    -0.02  -0.04  -0.04
  27   6     0.03  -0.02   0.01    -0.01  -0.02   0.04     0.09  -0.07  -0.02
  28   6    -0.01   0.00   0.01     0.01   0.03   0.01    -0.01  -0.04   0.01
  29   6    -0.01   0.01  -0.02     0.01   0.00  -0.01     0.00   0.00  -0.04
  30   6     0.01  -0.01   0.00     0.00   0.01   0.01     0.03   0.00  -0.04
  31   6    -0.02   0.00  -0.04     0.01   0.00  -0.01     0.00  -0.01  -0.03
  32   6    -0.02   0.00  -0.04     0.01   0.00  -0.01     0.01  -0.01  -0.01
  33   6     0.01   0.00   0.02     0.00   0.00  -0.01     0.02  -0.01   0.02
  34   6     0.03   0.00   0.06     0.00   0.00  -0.01     0.02  -0.01   0.01
  35   6     0.01   0.01   0.02     0.00   0.00  -0.01     0.01  -0.01  -0.02
  36   6    -0.03   0.01   0.00     0.00   0.00   0.00    -0.02   0.00  -0.01
  37   6     0.00   0.00   0.01    -0.01  -0.02   0.00    -0.01  -0.03   0.00
  38   6     0.03   0.00  -0.02     0.01   0.00  -0.01     0.00   0.00   0.00
  39   6     0.04   0.00  -0.03     0.03   0.00  -0.02    -0.04  -0.01   0.03
  40   6     0.00  -0.01   0.00     0.01   0.00   0.00    -0.04  -0.01   0.04
  41   6    -0.03  -0.02   0.02    -0.01   0.00   0.02    -0.01   0.00   0.01
  42   6    -0.01  -0.02   0.02    -0.02   0.00   0.02     0.02   0.01  -0.02
  43   6     0.03   0.00   0.00     0.00  -0.01  -0.03     0.01   0.01   0.02
  44   6     0.00  -0.02   0.00    -0.01  -0.01   0.01     0.00   0.02   0.00
  45   6    -0.03  -0.02   0.03    -0.01  -0.02   0.01    -0.03  -0.04   0.01
  46   6    -0.01   0.08   0.01    -0.01   0.01   0.00    -0.01   0.04   0.00
  47   6    -0.01  -0.03  -0.01    -0.04  -0.02   0.02    -0.07  -0.04   0.02
  48   6    -0.02   0.03   0.00    -0.03  -0.03   0.01    -0.01  -0.03   0.00
  49   6     0.00   0.02  -0.04    -0.03  -0.02  -0.03     0.02   0.03   0.05
  50   6     0.04  -0.03   0.00     0.01  -0.03   0.01    -0.03   0.03   0.00
  51   6    -0.01   0.03   0.00    -0.01  -0.02  -0.03     0.01   0.04   0.03
  52   6     0.04  -0.03   0.02     0.00  -0.03  -0.03     0.01   0.02   0.03
  53   6     0.08  -0.06  -0.02     0.01   0.05  -0.01    -0.01   0.02  -0.04
  54   6    -0.07   0.09  -0.05     0.02   0.02   0.03     0.05  -0.05  -0.06
  55   1     0.02  -0.01   0.00     0.01   0.04   0.00     0.00  -0.01  -0.04
  56   1    -0.01   0.02   0.01     0.02  -0.04  -0.01    -0.01   0.02   0.01
  57   1     0.00   0.00   0.01     0.02   0.00  -0.03     0.00   0.00   0.03
  58   1     0.01  -0.04   0.12     0.00  -0.10   0.39     0.02   0.08  -0.33
  59   1    -0.06   0.10  -0.04    -0.18   0.37  -0.12     0.16  -0.32   0.10
  60   1     0.06  -0.09  -0.10     0.20  -0.22  -0.29    -0.16   0.17   0.24
  61   1    -0.02  -0.02   0.01     0.05   0.08  -0.02     0.03   0.07   0.01
  62   1     0.01   0.01  -0.02     0.00  -0.10   0.09     0.03  -0.10   0.07
  63   1     0.02  -0.02   0.05    -0.08   0.07  -0.05    -0.07   0.06  -0.12
  64   1     0.02   0.01   0.04    -0.09   0.03  -0.05    -0.05  -0.05  -0.10
  65   1     0.01  -0.03   0.03    -0.06   0.13  -0.06    -0.04   0.07  -0.08
  66   1     0.04  -0.01   0.05    -0.06  -0.10  -0.11     0.00  -0.10   0.01
  67   1     0.06   0.01   0.03    -0.09  -0.11  -0.19    -0.04  -0.10  -0.14
  68   1     0.01  -0.03   0.06     0.00   0.09  -0.19    -0.05   0.08  -0.07
  69   1     0.06   0.00   0.03    -0.05  -0.03   0.00     0.16  -0.01   0.02
  70   1     0.04  -0.05  -0.01    -0.05   0.01   0.09     0.13  -0.15  -0.07
  71   1     0.01  -0.01   0.01     0.04  -0.02   0.05     0.04  -0.08  -0.03
  72   1    -0.01   0.01   0.02    -0.02   0.07   0.01     0.00  -0.06   0.03
  73   1    -0.01   0.00   0.01    -0.01   0.02   0.00    -0.01  -0.03   0.01
  74   1     0.00   0.01   0.01     0.04   0.04   0.02    -0.03  -0.04   0.00
  75   1    -0.03   0.00  -0.07     0.01   0.00  -0.01     0.01  -0.01   0.00
  76   1     0.01   0.00   0.03     0.00   0.00  -0.01     0.04  -0.01   0.05
  77   1     0.05   0.00   0.10     0.00   0.00  -0.02     0.03  -0.01   0.03
  78   1    -0.03   0.00   0.02    -0.01   0.01   0.00    -0.02   0.00   0.00
  79   1     0.01  -0.01   0.02     0.00  -0.04  -0.01     0.01  -0.06   0.01
  80   1     0.06   0.01  -0.05     0.04   0.01  -0.03    -0.07  -0.02   0.06
  81   1     0.00  -0.01   0.00     0.02   0.00  -0.01    -0.07  -0.02   0.06
  82   1    -0.05  -0.03   0.04    -0.02   0.00   0.03    -0.02  -0.01   0.01
  83   1     0.03  -0.01   0.00    -0.01   0.00  -0.03     0.02   0.00   0.04
  84   1    -0.01  -0.02   0.01     0.01  -0.02   0.02    -0.02   0.03   0.00
  85   1    -0.02  -0.02   0.10    -0.02  -0.02   0.02    -0.03  -0.03   0.05
  86   1    -0.06  -0.09   0.02    -0.02  -0.03   0.00    -0.04  -0.07   0.00
  87   1    -0.03   0.01   0.00    -0.01  -0.03   0.00    -0.02  -0.03  -0.01
  88   1     0.05   0.08   0.05    -0.04   0.01   0.01    -0.02   0.04   0.03
  89   1    -0.04   0.15   0.00     0.00  -0.02   0.00    -0.01   0.05  -0.01
  90   1    -0.04   0.05  -0.01     0.01   0.03   0.00    -0.01   0.06  -0.01
  91   1    -0.02  -0.03  -0.02    -0.03  -0.02   0.04    -0.05  -0.05   0.06
  92   1    -0.02  -0.04  -0.03    -0.05  -0.02   0.00    -0.09  -0.03  -0.02
  93   1    -0.01  -0.06   0.01    -0.06  -0.02   0.02    -0.10  -0.04   0.04
  94   1    -0.05  -0.02   0.02    -0.06  -0.08   0.04    -0.04  -0.11   0.06
  95   1     0.04   0.04  -0.01     0.02  -0.03  -0.01     0.08  -0.03  -0.04
  96   1    -0.06   0.07  -0.01    -0.07   0.03   0.01    -0.08   0.04  -0.02
  97   1     0.02   0.01  -0.06     0.00  -0.01  -0.05     0.00   0.07   0.07
  98   1    -0.03   0.04  -0.03    -0.05  -0.02  -0.04     0.02   0.00   0.03
  99   1     0.00   0.03  -0.07    -0.04  -0.02  -0.02     0.05   0.01   0.09
 100   1     0.07  -0.05  -0.03     0.05  -0.09  -0.04    -0.09   0.12   0.07
 101   1     0.06  -0.03   0.04     0.05   0.01   0.08    -0.10  -0.03  -0.09
 102   1     0.02  -0.03  -0.01    -0.07   0.00  -0.01     0.08   0.00   0.02
 103   1    -0.03   0.02   0.03    -0.04  -0.04  -0.05     0.01   0.05   0.05
 104   1    -0.01   0.06  -0.01    -0.01   0.01  -0.03     0.01   0.04   0.04
 105   1     0.00   0.04  -0.01     0.01  -0.04  -0.02     0.01   0.06   0.02
 106   1     0.02  -0.02   0.09     0.00  -0.01   0.06     0.01   0.00  -0.02
 107   1     0.03   0.00  -0.01     0.00   0.02  -0.09     0.01  -0.01   0.07
 108   1     0.06  -0.10   0.01     0.01  -0.12  -0.04     0.01   0.07   0.04
 109   1     0.19  -0.45   0.05     0.00   0.07  -0.02     0.00   0.00  -0.03
 110   1    -0.27   0.09   0.10     0.04   0.05  -0.01    -0.04   0.04  -0.02
 111   1     0.37   0.19  -0.23    -0.01   0.03  -0.01     0.00   0.04  -0.06
 112   1    -0.10   0.10   0.07     0.01   0.01  -0.01     0.06  -0.05  -0.10
 113   1    -0.01   0.05  -0.12     0.00   0.06   0.06     0.04  -0.03  -0.04
 114   1    -0.13   0.19  -0.11     0.06   0.00   0.05     0.05  -0.09  -0.04
                    37                     38                     39
                     A                      A                      A
 Frequencies --   167.6988               175.0024               186.2347
 Red. masses --     2.7405                 4.7167                 5.0747
 Frc consts  --     0.0454                 0.0851                 0.1037
 IR Inten    --     3.9127                 3.2530                 9.5575
 Atom AN      X      Y      Z        X      Y      Z        X      Y      Z
   1   8     0.03  -0.06   0.04     0.04  -0.08   0.02     0.04   0.01  -0.03
   2  12     0.05   0.02   0.00    -0.11   0.05  -0.02     0.09  -0.13   0.01
   3   8    -0.05  -0.02  -0.01     0.05   0.00   0.10    -0.01   0.01  -0.05
   4   6     0.01  -0.02   0.02     0.01  -0.05   0.00     0.00  -0.01  -0.05
   5   7     0.03   0.01   0.01    -0.03   0.00  -0.05     0.03  -0.05   0.02
   6   7     0.02   0.04  -0.01    -0.05  -0.01   0.01     0.00  -0.05   0.03
   7   8    -0.02   0.03   0.01    -0.01  -0.04   0.00    -0.03  -0.01  -0.05
   8   6     0.02   0.04   0.00    -0.02   0.00  -0.04     0.04  -0.03   0.03
   9   6     0.03   0.03   0.00    -0.03   0.03  -0.02     0.06  -0.07   0.04
  10   6     0.04   0.02  -0.01    -0.04   0.01   0.01     0.01  -0.03   0.04
  11   8    -0.03   0.03  -0.01    -0.05   0.09  -0.04     0.02  -0.04  -0.03
  12   6     0.01   0.05   0.00     0.04   0.14   0.01     0.11  -0.02   0.03
  13   6    -0.01   0.02  -0.02     0.03   0.03   0.00     0.01  -0.01   0.00
  14   6     0.00  -0.01   0.01    -0.01  -0.02   0.00     0.01  -0.02  -0.06
  15   8     0.07   0.07   0.02     0.08   0.18   0.07     0.21   0.05   0.10
  16   6    -0.02   0.05  -0.01    -0.04   0.06   0.00     0.02   0.02   0.05
  17   8     0.00  -0.07   0.05     0.02   0.01  -0.01    -0.15   0.06  -0.14
  18   6    -0.03   0.02  -0.03     0.04  -0.06   0.10    -0.05  -0.03  -0.02
  19   8    -0.01   0.03  -0.04     0.07  -0.10   0.12    -0.05  -0.05  -0.01
  20   8    -0.04   0.00  -0.02     0.05  -0.01  -0.02    -0.01   0.06   0.16
  21   6    -0.01  -0.01   0.01     0.03   0.00   0.00    -0.01   0.05   0.01
  22   6    -0.01  -0.04   0.02     0.03   0.02  -0.02    -0.02   0.02  -0.05
  23   6    -0.02   0.01  -0.02     0.00  -0.02   0.04    -0.02   0.00   0.03
  24   8     0.01   0.02   0.03     0.02  -0.02  -0.01    -0.01   0.04  -0.07
  25   6     0.03  -0.06  -0.01    -0.01   0.03  -0.05     0.01   0.03   0.02
  26   6     0.02   0.02   0.08    -0.09   0.02  -0.03    -0.08   0.04   0.00
  27   6     0.04   0.00  -0.05    -0.03   0.02  -0.18     0.03  -0.02  -0.02
  28   6     0.03  -0.01   0.00     0.05  -0.11  -0.04    -0.02   0.00  -0.04
  29   6     0.02   0.00   0.00    -0.02  -0.01  -0.04     0.00   0.00   0.01
  30   6     0.02   0.03  -0.01    -0.03  -0.03   0.02    -0.05  -0.03   0.03
  31   6     0.02  -0.01   0.00    -0.02   0.00  -0.03     0.01   0.01   0.00
  32   6     0.02  -0.01   0.01    -0.01   0.01   0.00     0.01   0.01   0.01
  33   6     0.01  -0.01   0.00     0.00   0.01   0.02     0.00   0.01   0.01
  34   6     0.01   0.00  -0.01    -0.01   0.00   0.02    -0.01   0.01   0.00
  35   6     0.01   0.00   0.00    -0.02  -0.01  -0.01    -0.01   0.01   0.01
  36   6    -0.02   0.00   0.01     0.00   0.00  -0.01    -0.02   0.02   0.01
  37   6    -0.01  -0.04   0.02     0.00  -0.01   0.01     0.00   0.02   0.01
  38   6    -0.01   0.01   0.01    -0.01  -0.03   0.01    -0.03  -0.02   0.02
  39   6    -0.03  -0.01   0.04     0.01  -0.02  -0.01     0.00  -0.01  -0.02
  40   6    -0.01   0.00   0.03     0.03  -0.02  -0.02     0.02   0.00  -0.05
  41   6     0.03   0.02  -0.01     0.01  -0.02   0.00     0.00  -0.02  -0.03
  42   6     0.03   0.03  -0.02    -0.02  -0.02   0.02    -0.03  -0.03   0.01
  43   6    -0.04  -0.02  -0.03     0.01  -0.02   0.02    -0.02  -0.01   0.00
  44   6     0.02   0.00  -0.02    -0.01  -0.02   0.01    -0.02   0.01   0.00
  45   6    -0.07  -0.04  -0.01     0.02   0.00   0.01    -0.05  -0.01   0.00
  46   6    -0.02  -0.01   0.00     0.01   0.05   0.00    -0.03   0.02   0.01
  47   6    -0.08  -0.04   0.04    -0.02   0.00   0.02     0.00   0.02   0.01
  48   6    -0.04  -0.04   0.03     0.04  -0.02  -0.01     0.02   0.02   0.00
  49   6     0.01  -0.04   0.00    -0.02  -0.02  -0.02    -0.01   0.04  -0.02
  50   6    -0.04  -0.02  -0.05     0.02  -0.03   0.02     0.03   0.03   0.03
  51   6    -0.03  -0.06  -0.04     0.03  -0.01   0.02     0.01  -0.03   0.00
  52   6    -0.04  -0.04  -0.06     0.01   0.02   0.03    -0.03   0.02  -0.03
  53   6     0.00   0.07   0.00     0.02  -0.03  -0.05     0.00   0.05   0.01
  54   6     0.06   0.00   0.01    -0.03   0.02   0.04    -0.04   0.06   0.03
  55   1     0.02   0.03   0.00    -0.01   0.05  -0.02     0.06  -0.05   0.04
  56   1    -0.02   0.04   0.00     0.03  -0.07   0.02    -0.03   0.01   0.07
  57   1    -0.02  -0.01   0.03    -0.04  -0.04   0.09     0.01  -0.02  -0.08
  58   1    -0.09  -0.05   0.27    -0.15   0.04   0.00    -0.01   0.00   0.11
  59   1    -0.19   0.34  -0.11    -0.05   0.12  -0.01     0.05   0.09   0.06
  60   1     0.18  -0.08  -0.24     0.03   0.13  -0.01     0.00  -0.01   0.04
  61   1    -0.03  -0.03   0.03     0.05   0.04  -0.02     0.04  -0.06  -0.10
  62   1     0.01   0.04  -0.05    -0.05  -0.03   0.08     0.05  -0.08   0.02
  63   1     0.03  -0.03  -0.03    -0.03   0.03  -0.06     0.13  -0.03   0.13
  64   1     0.07  -0.07  -0.03    -0.03  -0.01  -0.05    -0.09   0.13   0.10
  65   1     0.04  -0.09   0.02    -0.02   0.06  -0.05     0.01  -0.02  -0.08
  66   1     0.05   0.05   0.09    -0.14   0.06  -0.11     0.01   0.04   0.09
  67   1     0.06   0.06   0.10    -0.17  -0.01   0.03    -0.13  -0.05  -0.11
  68   1    -0.02  -0.05   0.13    -0.01   0.04  -0.09    -0.17   0.17   0.01
  69   1     0.09   0.03  -0.01    -0.06   0.02  -0.26     0.13   0.00   0.18
  70   1     0.07  -0.04  -0.09    -0.02   0.13  -0.22     0.15  -0.12  -0.19
  71   1    -0.01  -0.01  -0.06    -0.07  -0.10  -0.20    -0.18   0.05  -0.06
  72   1     0.02   0.00  -0.01     0.13  -0.24  -0.11     0.01  -0.04  -0.06
  73   1     0.04  -0.03   0.01     0.14  -0.01   0.00    -0.01   0.06  -0.05
  74   1     0.05  -0.01  -0.02    -0.08  -0.14  -0.05    -0.07  -0.01   0.01
  75   1     0.02  -0.01   0.02     0.00   0.01   0.00     0.01   0.01   0.01
  76   1     0.02  -0.01   0.00     0.01   0.01   0.05    -0.01   0.02   0.01
  77   1     0.01   0.00  -0.02     0.00   0.00   0.04    -0.02   0.01   0.00
  78   1    -0.04   0.03   0.02     0.00  -0.01  -0.01    -0.03   0.03   0.01
  79   1     0.01  -0.08   0.01     0.00   0.00   0.03    -0.01   0.03   0.02
  80   1    -0.06  -0.02   0.07     0.02  -0.02  -0.03     0.01   0.00  -0.03
  81   1    -0.03  -0.01   0.05     0.06  -0.01  -0.04     0.05   0.01  -0.09
  82   1     0.04   0.03  -0.01     0.02  -0.01  -0.01     0.02  -0.02  -0.05
  83   1    -0.06   0.01  -0.05     0.03  -0.03   0.02    -0.01  -0.01   0.00
  84   1     0.04  -0.02   0.01     0.00  -0.02   0.01    -0.04   0.02  -0.03
  85   1    -0.08  -0.03   0.01     0.02   0.00   0.02    -0.06  -0.01   0.02
  86   1    -0.09  -0.05  -0.01     0.03  -0.02   0.01    -0.06  -0.02   0.00
  87   1    -0.05  -0.05  -0.04     0.01   0.02   0.02    -0.04  -0.02  -0.02
  88   1    -0.13   0.00   0.01     0.09   0.05   0.02    -0.11   0.02   0.02
  89   1     0.03  -0.11  -0.02    -0.02   0.13   0.00    -0.01  -0.04   0.00
  90   1     0.04   0.07   0.02    -0.03   0.00  -0.02     0.00   0.08   0.01
  91   1    -0.08  -0.06   0.08    -0.03  -0.01   0.03    -0.01   0.01   0.01
  92   1    -0.11  -0.02   0.02    -0.03   0.02   0.02     0.00   0.04   0.04
  93   1    -0.10  -0.04   0.05    -0.01   0.01   0.01     0.02   0.04   0.00
  94   1    -0.09  -0.14   0.09     0.06  -0.03   0.04     0.03   0.06  -0.02
  95   1     0.07  -0.03  -0.02     0.08  -0.03  -0.03    -0.01   0.03   0.02
  96   1    -0.12   0.07   0.02     0.02  -0.01  -0.03     0.04  -0.01   0.00
  97   1    -0.01  -0.08   0.02     0.01   0.01  -0.04     0.00   0.08  -0.03
  98   1     0.05  -0.05   0.02    -0.05  -0.03  -0.04    -0.04   0.05  -0.03
  99   1    -0.01  -0.03  -0.01    -0.01  -0.03   0.01     0.02   0.04  -0.01
 100   1    -0.07  -0.07  -0.03     0.08  -0.11  -0.05     0.01   0.16   0.07
 101   1    -0.04   0.00  -0.07     0.08   0.03   0.11    -0.02  -0.04  -0.03
 102   1    -0.06   0.00  -0.09    -0.09   0.00   0.00     0.15  -0.02   0.09
 103   1    -0.09  -0.11  -0.11     0.04  -0.01   0.02     0.02  -0.02  -0.02
 104   1    -0.03   0.01  -0.01     0.03  -0.03   0.03     0.01  -0.04   0.02
 105   1     0.06  -0.13  -0.02     0.02  -0.01   0.01     0.01  -0.03   0.00
 106   1    -0.04  -0.02   0.02     0.04   0.04   0.06     0.00   0.04  -0.01
 107   1    -0.03   0.01  -0.13    -0.02   0.05   0.01    -0.03   0.05  -0.06
 108   1    -0.05  -0.13  -0.08     0.02   0.00   0.02    -0.05   0.00  -0.04
 109   1    -0.01   0.13  -0.01     0.05  -0.15  -0.04    -0.03   0.17  -0.02
 110   1     0.05   0.07  -0.01    -0.07   0.00  -0.03     0.11   0.05   0.01
 111   1    -0.04   0.04   0.01     0.12   0.04  -0.09    -0.10  -0.02   0.02
 112   1     0.08   0.00  -0.03    -0.04   0.01   0.02    -0.09   0.07   0.15
 113   1     0.04   0.01   0.04    -0.05   0.04   0.07     0.00   0.02  -0.02
 114   1     0.09  -0.03   0.03     0.01   0.01   0.06    -0.09   0.17  -0.03
                    40                     41                     42
                     A                      A                      A
 Frequencies --   188.6541               199.9964               206.5714
 Red. masses --     1.9654                 1.4514                 2.2378
 Frc consts  --     0.0412                 0.0342                 0.0563
 IR Inten    --     1.9413                 0.0508                 0.7713
 Atom AN      X      Y      Z        X      Y      Z        X      Y      Z
   1   8     0.02   0.00  -0.01     0.00   0.00   0.00     0.02   0.00  -0.02
   2  12     0.00  -0.02   0.04     0.02  -0.01   0.01     0.03  -0.03   0.03
   3   8     0.03   0.01   0.03     0.00   0.00   0.01     0.02   0.01   0.02
   4   6     0.01  -0.01  -0.01     0.00   0.00   0.00     0.01  -0.01  -0.03
   5   7     0.04   0.01   0.00     0.03   0.00   0.00    -0.02  -0.03   0.01
   6   7     0.01  -0.04   0.00    -0.01  -0.02  -0.03     0.03   0.00   0.01
   7   8     0.01  -0.01  -0.01     0.01   0.00   0.00     0.00  -0.01  -0.03
   8   6     0.03   0.00  -0.01     0.01  -0.02  -0.01     0.00  -0.02   0.02
   9   6     0.04  -0.02  -0.01     0.02  -0.04  -0.02     0.03  -0.06   0.04
  10   6     0.02  -0.02   0.00     0.01  -0.03  -0.02     0.01  -0.02   0.01
  11   8     0.00   0.01  -0.02    -0.01   0.00  -0.01     0.02  -0.01  -0.01
  12   6    -0.02   0.00  -0.02    -0.01   0.00  -0.01     0.01  -0.01   0.00
  13   6     0.00   0.01   0.00     0.00   0.00   0.00     0.01   0.00   0.01
  14   6     0.00   0.00  -0.02     0.00   0.00   0.00     0.00  -0.01  -0.02
  15   8    -0.04  -0.01  -0.03    -0.01   0.00  -0.01     0.00  -0.02   0.00
  16   6     0.01   0.01   0.00     0.00   0.00  -0.01     0.01   0.02   0.03
  17   8     0.03  -0.01   0.06     0.01   0.00   0.02     0.01  -0.01   0.04
  18   6     0.02   0.00   0.04     0.00   0.01   0.01     0.01   0.01   0.04
  19   8     0.01  -0.01   0.05     0.00   0.01   0.01     0.01   0.01   0.04
  20   8     0.00  -0.01  -0.06    -0.01   0.00  -0.01    -0.01   0.00  -0.02
  21   6    -0.02   0.00   0.00    -0.01   0.00   0.00    -0.02   0.00   0.00
  22   6    -0.01   0.00   0.03     0.00   0.00   0.02    -0.01   0.00   0.02
  23   6    -0.02   0.01   0.01    -0.01   0.00   0.00    -0.02   0.01   0.02
  24   8    -0.02   0.00   0.03    -0.01   0.00   0.01    -0.02   0.00   0.01
  25   6    -0.01   0.00   0.03    -0.01   0.00   0.02    -0.01   0.00   0.03
  26   6    -0.04   0.02   0.00    -0.01   0.01   0.01    -0.05   0.03   0.01
  27   6    -0.02   0.02   0.01     0.00   0.01   0.01    -0.02   0.01   0.02
  28   6     0.02  -0.01  -0.03     0.01   0.00  -0.01    -0.01  -0.01  -0.02
  29   6     0.04   0.01   0.00     0.03   0.01   0.00    -0.04  -0.02  -0.05
  30   6    -0.01  -0.04  -0.01    -0.02  -0.02  -0.01     0.03   0.02  -0.01
  31   6     0.03   0.01   0.00     0.03   0.01   0.00    -0.05  -0.02  -0.06
  32   6     0.03   0.01  -0.01     0.03   0.01   0.00    -0.01  -0.02   0.02
  33   6     0.03   0.01  -0.02     0.02   0.01  -0.01     0.03  -0.02   0.09
  34   6     0.02   0.01  -0.03     0.02   0.01  -0.02     0.00  -0.02   0.03
  35   6     0.03   0.01  -0.01     0.02   0.01  -0.01    -0.04  -0.02  -0.06
  36   6    -0.02   0.02   0.00    -0.01   0.02   0.00    -0.01  -0.01  -0.04
  37   6     0.00  -0.02   0.00     0.01  -0.01  -0.01    -0.02  -0.01  -0.05
  38   6     0.00  -0.02  -0.02    -0.03  -0.02   0.00     0.03   0.03  -0.01
  39   6     0.00  -0.01  -0.04    -0.01  -0.02  -0.01    -0.01   0.02   0.03
  40   6    -0.01  -0.02  -0.04     0.03  -0.01  -0.03    -0.04   0.01   0.05
  41   6    -0.02  -0.04  -0.03     0.02  -0.01  -0.02     0.00   0.02   0.01
  42   6    -0.02  -0.04  -0.02    -0.02  -0.01   0.01     0.03   0.02  -0.02
  43   6     0.01  -0.01   0.00    -0.01  -0.01   0.02     0.01   0.02  -0.02
  44   6    -0.02   0.01  -0.03    -0.03   0.02   0.02     0.02   0.01  -0.01
  45   6    -0.06  -0.03   0.00    -0.03  -0.01   0.00     0.02   0.00  -0.02
  46   6    -0.04   0.01   0.00    -0.03   0.02   0.00     0.01   0.09  -0.03
  47   6    -0.04  -0.02   0.02    -0.02  -0.01   0.00    -0.01   0.04  -0.01
  48   6    -0.03  -0.02   0.01    -0.01  -0.01   0.00     0.03  -0.05  -0.04
  49   6     0.00   0.03  -0.01    -0.01   0.06   0.02     0.03   0.01   0.02
  50   6     0.02   0.05   0.02     0.00   0.01   0.02    -0.02   0.00  -0.04
  51   6     0.01   0.02   0.01     0.01   0.01   0.03    -0.03   0.01  -0.03
  52   6     0.02   0.01   0.03    -0.02   0.04   0.02     0.02  -0.02  -0.01
  53   6    -0.01   0.04   0.00    -0.03   0.01   0.00    -0.01   0.05   0.00
  54   6    -0.02   0.04   0.00     0.00  -0.02  -0.03    -0.04   0.01  -0.04
  55   1     0.03  -0.01  -0.02     0.02  -0.05  -0.02     0.02  -0.06   0.04
  56   1     0.02  -0.01  -0.02     0.00   0.01  -0.01     0.01  -0.01   0.00
  57   1     0.00   0.00  -0.01     0.00   0.00   0.00     0.00  -0.01  -0.02
  58   1     0.00   0.01  -0.02     0.01   0.00  -0.02    -0.01   0.01   0.04
  59   1     0.03  -0.01   0.01     0.01  -0.02   0.00     0.05   0.03   0.05
  60   1     0.00   0.03   0.03     0.00   0.01   0.00    -0.01   0.01   0.04
  61   1    -0.04   0.02   0.05    -0.02   0.00   0.02    -0.03   0.01   0.03
  62   1    -0.05   0.04   0.02    -0.02   0.01   0.00    -0.04   0.02   0.03
  63   1    -0.03   0.01   0.02    -0.01   0.00   0.02    -0.03   0.00   0.01
  64   1     0.01   0.00   0.02     0.00   0.00   0.02     0.02   0.00   0.01
  65   1    -0.01   0.00   0.05     0.00   0.00   0.02    -0.01   0.00   0.05
  66   1    -0.08   0.06  -0.05    -0.02   0.02  -0.01    -0.07   0.07  -0.03
  67   1    -0.06   0.04   0.08    -0.01   0.01   0.03    -0.08   0.03   0.07
  68   1     0.01  -0.01  -0.01     0.00  -0.01   0.01    -0.01   0.01   0.00
  69   1    -0.09   0.00  -0.10    -0.03   0.00  -0.03    -0.06  -0.01  -0.05
  70   1    -0.09   0.09   0.10    -0.03   0.02   0.06    -0.06   0.06   0.09
  71   1     0.09  -0.01   0.03     0.05   0.00   0.02     0.06   0.00   0.04
  72   1     0.03  -0.01  -0.04     0.01   0.01  -0.02    -0.01   0.00  -0.01
  73   1     0.03   0.00  -0.02     0.02   0.00   0.00    -0.01  -0.02  -0.02
  74   1     0.01  -0.01  -0.03     0.02   0.00  -0.01     0.00  -0.01  -0.02
  75   1     0.03   0.00   0.00     0.03   0.01   0.00     0.00  -0.02   0.05
  76   1     0.02   0.01  -0.03     0.02   0.01  -0.01     0.07  -0.02   0.18
  77   1     0.02   0.01  -0.04     0.02   0.01  -0.03     0.01  -0.02   0.06
  78   1    -0.03   0.06   0.00    -0.02   0.05  -0.01     0.00  -0.06  -0.03
  79   1     0.02  -0.05  -0.01     0.02  -0.03  -0.01    -0.03   0.01  -0.05
  80   1     0.01   0.00  -0.05    -0.01  -0.03  -0.02    -0.03   0.01   0.04
  81   1    -0.01  -0.01  -0.05     0.07  -0.01  -0.06    -0.08   0.00   0.08
  82   1    -0.03  -0.04  -0.03     0.04   0.00  -0.03    -0.01   0.01   0.02
  83   1     0.03  -0.03   0.01     0.01  -0.03   0.03     0.00   0.03  -0.03
  84   1    -0.05   0.03  -0.07    -0.04   0.02   0.02     0.02   0.00   0.01
  85   1    -0.08  -0.02   0.03    -0.06  -0.01   0.01     0.03  -0.01  -0.01
  86   1    -0.09  -0.05  -0.01    -0.04  -0.02   0.00     0.04  -0.01  -0.02
  87   1    -0.05  -0.04  -0.04    -0.03  -0.03  -0.02     0.01   0.01   0.01
  88   1    -0.19   0.02   0.01    -0.14   0.02   0.01     0.31   0.08   0.02
  89   1     0.02  -0.13  -0.02     0.01  -0.08  -0.02    -0.11   0.38   0.00
  90   1     0.05   0.14   0.01     0.03   0.11   0.00    -0.15  -0.11  -0.09
  91   1    -0.04  -0.04   0.04    -0.02  -0.02   0.02     0.11   0.14   0.06
  92   1    -0.06   0.00   0.00    -0.03  -0.01  -0.01     0.03  -0.07  -0.10
  93   1    -0.05  -0.03   0.03    -0.03  -0.02   0.01    -0.17   0.09   0.03
  94   1    -0.08  -0.12   0.07    -0.04  -0.07   0.04     0.03  -0.12   0.07
  95   1     0.07  -0.02  -0.03     0.05  -0.01  -0.02     0.14  -0.08  -0.11
  96   1    -0.11   0.08   0.01    -0.06   0.05   0.00    -0.03   0.01  -0.08
  97   1    -0.01   0.03   0.00     0.01   0.15   0.00     0.02   0.04   0.03
  98   1     0.00   0.05   0.01    -0.07   0.05  -0.03     0.04  -0.02   0.01
  99   1     0.02   0.04  -0.03     0.04   0.03   0.07     0.05  -0.01   0.05
 100   1    -0.14   0.42   0.20     0.21  -0.36  -0.21    -0.01  -0.10  -0.06
 101   1    -0.20  -0.16  -0.25     0.26   0.26   0.36     0.02   0.05   0.00
 102   1     0.42  -0.07   0.15    -0.46   0.13  -0.07    -0.12   0.03  -0.09
 103   1     0.04   0.04   0.04     0.10   0.06   0.06    -0.14  -0.06  -0.06
 104   1     0.01  -0.02   0.00     0.02  -0.08   0.02    -0.04   0.14  -0.02
 105   1    -0.03   0.05   0.00    -0.06   0.06   0.01     0.08  -0.06  -0.02
 106   1     0.03   0.02   0.05     0.01   0.04  -0.06     0.00   0.00   0.11
 107   1     0.00   0.02   0.02    -0.03   0.01   0.07     0.01   0.04  -0.09
 108   1     0.03   0.00   0.03    -0.03   0.12   0.03     0.04  -0.15  -0.03
 109   1    -0.02   0.10   0.00    -0.04   0.05   0.02    -0.05   0.18  -0.06
 110   1     0.03   0.04   0.00    -0.01   0.01   0.01     0.13   0.03  -0.01
 111   1    -0.06   0.01  -0.01    -0.07  -0.02  -0.01    -0.11  -0.03   0.04
 112   1    -0.07   0.03   0.01     0.02   0.00   0.05    -0.05   0.02   0.05
 113   1    -0.01   0.08   0.00     0.03  -0.10  -0.08     0.02  -0.04  -0.12
 114   1     0.00   0.06   0.00    -0.06   0.04  -0.08    -0.12   0.07  -0.10
                    43                     44                     45
                     A                      A                      A
 Frequencies --   209.1745               213.0004               218.1357
 Red. masses --     2.3303                 2.5479                 1.4825
 Frc consts  --     0.0601                 0.0681                 0.0416
 IR Inten    --     4.2871                 0.6340                 3.5510
 Atom AN      X      Y      Z        X      Y      Z        X      Y      Z
   1   8    -0.05   0.01   0.04     0.06   0.00  -0.04    -0.01   0.01   0.01
   2  12     0.01  -0.01  -0.01    -0.02   0.01   0.00     0.05   0.01   0.02
   3   8    -0.01  -0.02   0.00     0.01  -0.01   0.01     0.01   0.02  -0.02
   4   6    -0.01   0.04   0.08     0.03  -0.01  -0.06     0.00   0.01   0.01
   5   7    -0.01  -0.02   0.00    -0.01   0.03  -0.02     0.00   0.04   0.02
   6   7     0.01   0.00   0.01    -0.02   0.02  -0.01     0.00   0.00  -0.01
   7   8     0.01   0.05   0.07     0.02  -0.02  -0.06    -0.01   0.01   0.01
   8   6     0.00  -0.01   0.01    -0.03   0.03  -0.03    -0.02   0.03   0.00
   9   6     0.01  -0.03   0.02    -0.07   0.09  -0.06    -0.04   0.06  -0.03
  10   6     0.01  -0.01   0.01    -0.03   0.03  -0.02    -0.01   0.02  -0.02
  11   8    -0.09  -0.02  -0.06     0.02  -0.05  -0.03     0.00  -0.02   0.00
  12   6    -0.04  -0.01  -0.01     0.02  -0.06   0.03     0.01  -0.01  -0.01
  13   6    -0.02  -0.02   0.00     0.00  -0.05   0.04     0.00   0.01  -0.01
  14   6     0.02   0.02   0.03     0.02  -0.02  -0.05     0.00   0.00   0.00
  15   8     0.03   0.04   0.05     0.05  -0.01   0.09     0.02  -0.01  -0.02
  16   6     0.00  -0.05  -0.14     0.04   0.03   0.03     0.00  -0.01  -0.01
  17   8    -0.02   0.01  -0.03    -0.06  -0.02   0.02     0.01   0.00   0.02
  18   6     0.00  -0.01  -0.01     0.00   0.01   0.01    -0.01   0.00   0.00
  19   8     0.01  -0.01  -0.01     0.01   0.01   0.01    -0.01  -0.01   0.00
  20   8     0.00   0.00   0.01    -0.02   0.03   0.01     0.00   0.00   0.00
  21   6     0.00   0.00   0.00    -0.04   0.03   0.00     0.00   0.00   0.00
  22   6     0.00   0.00  -0.02    -0.04   0.00   0.01     0.00   0.00   0.01
  23   6     0.01   0.00  -0.01    -0.01   0.02   0.00    -0.01   0.00   0.00
  24   8     0.00   0.00  -0.01    -0.04   0.03  -0.01     0.00   0.00   0.00
  25   6     0.01   0.00   0.00     0.03  -0.02   0.01    -0.01   0.00   0.01
  26   6     0.02  -0.01  -0.01    -0.03   0.04   0.00    -0.02   0.01   0.01
  27   6    -0.01  -0.01   0.06    -0.03  -0.02   0.13    -0.01   0.01  -0.01
  28   6     0.16   0.01  -0.04     0.02  -0.02  -0.05     0.01   0.01   0.00
  29   6    -0.02  -0.01  -0.01     0.01   0.01   0.01     0.01   0.01   0.01
  30   6     0.00   0.00   0.01     0.01   0.00  -0.01    -0.02  -0.01   0.01
  31   6    -0.01   0.00  -0.01     0.01   0.01   0.02     0.00   0.00   0.00
  32   6    -0.01   0.00   0.01     0.01   0.00   0.00     0.00  -0.01   0.00
  33   6    -0.01   0.00   0.02     0.00   0.00  -0.03     0.02  -0.02   0.00
  34   6    -0.01   0.00   0.00     0.01   0.01  -0.02     0.03   0.00  -0.02
  35   6    -0.02  -0.01  -0.01     0.02   0.01   0.00     0.02   0.01  -0.01
  36   6     0.00   0.00   0.00     0.00   0.01   0.01    -0.01   0.00   0.00
  37   6    -0.01   0.00  -0.01     0.01   0.00   0.00     0.01  -0.01  -0.01
  38   6     0.00   0.01   0.01     0.00   0.00  -0.01    -0.02  -0.01   0.01
  39   6     0.01   0.01   0.00    -0.01  -0.01   0.01     0.01   0.00  -0.02
  40   6     0.00   0.01   0.00    -0.01  -0.01   0.02     0.02   0.00  -0.04
  41   6    -0.01   0.00   0.01     0.01   0.00   0.00    -0.01  -0.01  -0.01
  42   6     0.00   0.00   0.01     0.01   0.01  -0.01    -0.03  -0.02   0.01
  43   6    -0.01   0.00   0.01     0.01   0.00  -0.01    -0.01  -0.01   0.01
  44   6     0.00  -0.01   0.00     0.01   0.00  -0.01    -0.02  -0.01   0.00
  45   6     0.01   0.00   0.00    -0.01   0.01   0.00    -0.01   0.02  -0.02
  46   6     0.00   0.01   0.00     0.00  -0.01   0.01     0.01   0.03   0.01
  47   6     0.01   0.01  -0.01     0.00  -0.02  -0.02    -0.01  -0.01   0.00
  48   6    -0.02  -0.01   0.00    -0.03   0.01   0.01    -0.01  -0.01   0.00
  49   6     0.00  -0.01  -0.01     0.01  -0.01   0.01    -0.03  -0.01  -0.01
  50   6     0.01  -0.01   0.01    -0.01   0.00  -0.01     0.02   0.00   0.03
  51   6     0.00   0.00   0.00     0.00   0.01   0.00     0.01  -0.02   0.01
  52   6    -0.01  -0.02  -0.01     0.01   0.01   0.01    -0.02   0.01  -0.01
  53   6     0.00   0.02   0.00     0.01  -0.08   0.00    -0.01  -0.05   0.04
  54   6    -0.02   0.01  -0.01     0.05  -0.05   0.03     0.03  -0.03   0.01
  55   1     0.01  -0.03   0.02    -0.06   0.08  -0.05    -0.05   0.05  -0.03
  56   1     0.00  -0.01  -0.04     0.00  -0.03   0.03     0.00   0.01   0.00
  57   1     0.06   0.03   0.06     0.03  -0.01  -0.06     0.01   0.00  -0.01
  58   1     0.10  -0.02  -0.19    -0.01   0.02   0.04     0.02  -0.01   0.00
  59   1    -0.11  -0.14  -0.20     0.09   0.06   0.06    -0.02   0.00  -0.02
  60   1     0.07  -0.04  -0.18     0.01   0.04   0.06     0.01  -0.02  -0.03
  61   1     0.01  -0.01  -0.03    -0.06  -0.01   0.02    -0.01   0.01   0.02
  62   1     0.02  -0.01  -0.01    -0.01   0.02   0.01     0.00   0.00   0.00
  63   1     0.03  -0.01   0.02     0.04   0.00   0.01    -0.01   0.00   0.01
  64   1    -0.01   0.02   0.01     0.06   0.00   0.01    -0.02  -0.01   0.01
  65   1     0.01   0.00  -0.02     0.03  -0.07   0.03    -0.01   0.01   0.00
  66   1     0.04  -0.03   0.03    -0.01   0.05   0.01    -0.02   0.03   0.00
  67   1     0.04  -0.02  -0.05    -0.04   0.02  -0.01    -0.04   0.01   0.03
  68   1    -0.01   0.02   0.00    -0.04   0.06   0.01    -0.02   0.01   0.01
  69   1    -0.10  -0.03  -0.13    -0.18  -0.06  -0.13     0.07   0.01   0.17
  70   1    -0.14   0.05   0.25    -0.21   0.10   0.39     0.10  -0.07  -0.16
  71   1     0.22  -0.06   0.10     0.28  -0.07   0.19    -0.19   0.09  -0.04
  72   1     0.25  -0.10  -0.22     0.14  -0.19  -0.16    -0.01   0.05   0.01
  73   1     0.31   0.16   0.04     0.12   0.20  -0.04     0.00  -0.03   0.00
  74   1     0.04  -0.01  -0.01    -0.18  -0.05   0.05     0.06   0.02  -0.01
  75   1     0.00   0.00   0.01     0.00   0.00   0.00     0.00  -0.03   0.01
  76   1     0.00   0.00   0.03    -0.01   0.00  -0.06     0.03  -0.03  -0.01
  77   1    -0.01   0.00   0.01     0.01   0.01  -0.04     0.04   0.00  -0.03
  78   1     0.00  -0.01   0.00     0.00   0.02   0.01    -0.01   0.00   0.01
  79   1    -0.01   0.00  -0.02     0.01  -0.02  -0.01     0.03  -0.03  -0.02
  80   1     0.01   0.01   0.00    -0.02  -0.01   0.01     0.02   0.01  -0.04
  81   1     0.00   0.01  -0.01    -0.02  -0.01   0.03     0.05   0.01  -0.07
  82   1    -0.01   0.00   0.01     0.01   0.01   0.00    -0.01  -0.01  -0.02
  83   1    -0.02   0.01   0.00     0.01   0.00   0.00    -0.01  -0.01   0.01
  84   1     0.00  -0.01   0.00     0.01   0.00   0.00    -0.02   0.00  -0.01
  85   1     0.01   0.00  -0.01    -0.01   0.01  -0.01    -0.07   0.02  -0.11
  86   1     0.01   0.01   0.00    -0.01   0.02   0.00     0.04   0.10   0.00
  87   1     0.00   0.01   0.01     0.00   0.00   0.00    -0.02  -0.06   0.03
  88   1     0.06   0.01   0.00     0.02  -0.02  -0.01     0.41   0.00  -0.02
  89   1    -0.02   0.06   0.00    -0.01   0.00   0.03    -0.15   0.39   0.09
  90   1    -0.02  -0.03  -0.01    -0.02  -0.04   0.01    -0.22  -0.28  -0.05
  91   1     0.12   0.13   0.02     0.01   0.00  -0.03     0.00  -0.01   0.01
  92   1     0.05  -0.10  -0.10     0.00  -0.04  -0.05    -0.02  -0.01  -0.03
  93   1    -0.13   0.02   0.05    -0.02  -0.05   0.01    -0.04  -0.01   0.01
  94   1    -0.03  -0.05   0.02    -0.06  -0.03   0.01    -0.08  -0.18   0.13
  95   1     0.02  -0.01  -0.02    -0.01   0.01   0.00     0.18  -0.02  -0.09
  96   1    -0.05   0.03   0.00    -0.06   0.05   0.02    -0.15   0.15  -0.03
  97   1     0.00  -0.02  -0.01     0.00  -0.02   0.03     0.00   0.05  -0.03
  98   1     0.00   0.00   0.00     0.03  -0.02   0.02    -0.07  -0.03  -0.05
  99   1    -0.01   0.00  -0.02     0.01  -0.01   0.02    -0.02  -0.03   0.04
 100   1    -0.01   0.05   0.04     0.00  -0.05  -0.03     0.02   0.07   0.04
 101   1    -0.03  -0.05  -0.04     0.02   0.03   0.01     0.00  -0.04   0.02
 102   1     0.08  -0.03   0.02    -0.06   0.02  -0.03     0.08  -0.03   0.07
 103   1     0.01   0.01   0.01    -0.04  -0.01  -0.01     0.07   0.02   0.02
 104   1     0.00  -0.02   0.00     0.00   0.06   0.01     0.02  -0.09   0.01
 105   1    -0.01   0.01   0.00     0.04   0.00  -0.01    -0.05   0.02   0.01
 106   1    -0.06  -0.10  -0.23     0.03   0.04   0.10    -0.02  -0.03  -0.11
 107   1     0.05  -0.17   0.15    -0.02   0.08  -0.06     0.00  -0.07   0.07
 108   1    -0.03   0.20   0.03     0.03  -0.09  -0.01    -0.04   0.12   0.02
 109   1    -0.02   0.08  -0.02     0.06  -0.22   0.03     0.00  -0.08   0.05
 110   1     0.05   0.02   0.00    -0.11  -0.10  -0.02    -0.04  -0.08   0.00
 111   1    -0.05  -0.01   0.01     0.14  -0.01   0.01     0.03  -0.04   0.08
 112   1    -0.04   0.01   0.01     0.11  -0.05  -0.08     0.06  -0.03  -0.07
 113   1     0.00   0.02  -0.04    -0.01  -0.04   0.10    -0.01   0.00   0.06
 114   1    -0.04   0.03  -0.03     0.11  -0.13   0.08     0.08  -0.09   0.05
                    46                     47                     48
                     A                      A                      A
 Frequencies --   223.4333               229.0601               229.6340
 Red. masses --     1.3262                 1.6607                 1.5180
 Frc consts  --     0.0390                 0.0513                 0.0472
 IR Inten    --     0.5649                 9.1758                 2.2919
 Atom AN      X      Y      Z        X      Y      Z        X      Y      Z
   1   8     0.01  -0.01   0.00     0.02  -0.01  -0.01     0.02  -0.02  -0.01
   2  12     0.01  -0.01  -0.01    -0.06   0.03  -0.01    -0.02   0.04  -0.01
   3   8    -0.03  -0.02   0.01     0.01   0.01   0.00    -0.02   0.00  -0.02
   4   6     0.00  -0.01   0.00     0.01   0.00  -0.01     0.00  -0.01  -0.02
   5   7     0.01   0.00  -0.01     0.01   0.00  -0.01    -0.01   0.01   0.02
   6   7     0.01  -0.01   0.00     0.01  -0.01   0.00     0.00   0.00   0.01
   7   8     0.00  -0.01   0.00     0.02  -0.01  -0.01     0.01  -0.02  -0.02
   8   6     0.02   0.01   0.00     0.02   0.00   0.00     0.00  -0.01   0.03
   9   6     0.03  -0.01   0.00     0.05  -0.04   0.02     0.01  -0.04   0.03
  10   6     0.02   0.00   0.00     0.02  -0.02   0.01     0.00  -0.01   0.01
  11   8     0.01   0.03   0.01    -0.01   0.00  -0.01     0.02   0.03   0.02
  12   6    -0.01   0.02   0.00    -0.02  -0.01   0.02     0.00   0.02   0.01
  13   6    -0.01   0.01  -0.01    -0.01  -0.02   0.02    -0.01   0.00   0.00
  14   6    -0.01   0.01   0.01     0.00   0.01  -0.01    -0.01   0.00   0.00
  15   8     0.00   0.02  -0.01    -0.06   0.00   0.04    -0.02   0.02   0.03
  16   6    -0.01   0.01   0.02     0.01   0.01  -0.01    -0.01   0.02   0.03
  17   8     0.01   0.01  -0.02    -0.02  -0.01   0.00     0.00   0.00  -0.02
  18   6    -0.01  -0.01  -0.01     0.02   0.01  -0.01    -0.01  -0.01  -0.04
  19   8     0.00   0.02  -0.02     0.00  -0.02   0.01    -0.02  -0.02  -0.03
  20   8     0.00   0.00   0.00     0.00   0.00  -0.01     0.00   0.00   0.00
  21   6     0.01  -0.01   0.00     0.00   0.01   0.00     0.01   0.00   0.00
  22   6     0.01  -0.01  -0.01     0.00   0.00   0.00     0.01   0.00  -0.01
  23   6     0.00  -0.01  -0.01     0.02   0.01  -0.01     0.01  -0.01  -0.02
  24   8     0.02   0.00   0.00     0.00   0.01   0.00     0.02   0.00  -0.01
  25   6    -0.01   0.00   0.00     0.03  -0.01  -0.01     0.01   0.00  -0.03
  26   6     0.01  -0.01   0.01     0.05  -0.02  -0.03     0.05  -0.03  -0.01
  27   6     0.02   0.00   0.00    -0.03  -0.01   0.03     0.00   0.00   0.01
  28   6    -0.04  -0.01   0.02     0.02   0.01  -0.02    -0.05  -0.02   0.02
  29   6     0.00   0.00   0.01     0.01   0.00   0.01    -0.01   0.01   0.01
  30   6    -0.01  -0.01   0.00     0.00  -0.01  -0.01    -0.01   0.00   0.01
  31   6     0.00  -0.01   0.02     0.01   0.00   0.03    -0.01   0.00   0.01
  32   6     0.00  -0.01   0.01     0.00  -0.01   0.01    -0.02  -0.01  -0.02
  33   6    -0.01  -0.01  -0.02    -0.01  -0.01  -0.04     0.00  -0.01  -0.01
  34   6    -0.01  -0.01  -0.02     0.00   0.00  -0.02     0.02   0.00   0.01
  35   6     0.00   0.00   0.01     0.02   0.00   0.02     0.01   0.01   0.00
  36   6    -0.01  -0.01   0.02     0.00  -0.01   0.02     0.01  -0.01   0.00
  37   6     0.00   0.00   0.02     0.01   0.00   0.03     0.01   0.02  -0.01
  38   6    -0.01  -0.01   0.00     0.01  -0.01  -0.01    -0.01  -0.01   0.01
  39   6     0.00   0.00  -0.01    -0.01  -0.01   0.00     0.01   0.00   0.00
  40   6     0.00   0.00  -0.02    -0.02  -0.02   0.01     0.02   0.00  -0.01
  41   6     0.00  -0.01  -0.01     0.00  -0.01  -0.01     0.00   0.00   0.00
  42   6    -0.01  -0.01   0.00     0.01   0.00  -0.02    -0.01   0.00   0.01
  43   6     0.00  -0.01   0.00     0.01   0.00  -0.01    -0.01  -0.01   0.01
  44   6    -0.01   0.00   0.00     0.00   0.01  -0.02    -0.01  -0.01   0.01
  45   6    -0.02   0.01  -0.01    -0.02   0.01  -0.01     0.04   0.02   0.01
  46   6     0.01  -0.02   0.02     0.01  -0.04   0.02     0.02  -0.02   0.00
  47   6    -0.01  -0.01   0.02    -0.01  -0.02   0.02     0.04   0.02  -0.02
  48   6    -0.02   0.02   0.02    -0.02   0.02   0.03    -0.02   0.02   0.00
  49   6    -0.01   0.02   0.00     0.02   0.02   0.01    -0.02  -0.01  -0.01
  50   6     0.01   0.00   0.01    -0.02   0.02  -0.02     0.01  -0.01   0.01
  51   6     0.00  -0.01   0.00     0.00   0.01   0.00     0.00  -0.02   0.01
  52   6    -0.01   0.01   0.00     0.02   0.00   0.01    -0.01   0.01   0.00
  53   6     0.01   0.05  -0.02     0.01   0.07  -0.03    -0.02   0.01   0.03
  54   6     0.01   0.03   0.00    -0.01   0.04   0.00    -0.03   0.01  -0.01
  55   1     0.02  -0.01   0.00     0.05  -0.04   0.02     0.01  -0.05   0.03
  56   1     0.00   0.03  -0.02    -0.01  -0.03   0.03    -0.01   0.01   0.01
  57   1    -0.02   0.00   0.02     0.00   0.01  -0.01    -0.02   0.00   0.01
  58   1    -0.03   0.00   0.02    -0.01   0.01  -0.03    -0.04   0.01   0.05
  59   1     0.01   0.02   0.03     0.02  -0.01  -0.01     0.02   0.05   0.05
  60   1    -0.01   0.02   0.02     0.01   0.03   0.00    -0.01   0.02   0.04
  61   1     0.02  -0.01  -0.02    -0.01   0.00   0.00     0.03   0.00  -0.02
  62   1     0.01  -0.01  -0.01     0.01   0.02  -0.01     0.03  -0.01  -0.04
  63   1     0.01  -0.01   0.02     0.03   0.01  -0.03     0.02   0.01  -0.03
  64   1    -0.04   0.01   0.02     0.06  -0.02  -0.02     0.00  -0.01  -0.03
  65   1    -0.01   0.01  -0.03     0.03  -0.04   0.01     0.01  -0.01  -0.03
  66   1     0.04  -0.03   0.05     0.01  -0.04  -0.05     0.09  -0.08   0.06
  67   1     0.03  -0.02  -0.03     0.07   0.01  -0.01     0.09  -0.04  -0.09
  68   1    -0.02   0.00   0.02     0.08  -0.05  -0.04    -0.01   0.00   0.01
  69   1    -0.12   0.00  -0.35     0.10  -0.01   0.33    -0.05   0.00  -0.12
  70   1    -0.17   0.14   0.27     0.14  -0.14  -0.20    -0.07   0.05   0.11
  71   1     0.36  -0.15   0.05    -0.31   0.12  -0.02     0.13  -0.05   0.03
  72   1    -0.07   0.02   0.08     0.17  -0.20  -0.18    -0.02  -0.07   0.03
  73   1    -0.08  -0.08   0.00     0.16   0.26   0.01    -0.05   0.04   0.00
  74   1     0.01  -0.01  -0.02    -0.20  -0.04   0.08    -0.12  -0.03   0.04
  75   1     0.00  -0.02   0.02     0.00  -0.01   0.00    -0.03  -0.02  -0.04
  76   1    -0.02  -0.02  -0.05    -0.03  -0.02  -0.07     0.00  -0.03  -0.01
  77   1    -0.01  -0.01  -0.04     0.00   0.00  -0.03     0.04  -0.01   0.03
  78   1    -0.01   0.00   0.03    -0.01   0.01   0.02     0.02  -0.02   0.00
  79   1     0.00   0.00   0.02     0.02  -0.02   0.03     0.01   0.01  -0.02
  80   1     0.00   0.00  -0.01    -0.02  -0.01   0.01     0.01   0.00  -0.01
  81   1     0.02   0.00  -0.04    -0.04  -0.02   0.03     0.04   0.01  -0.03
  82   1     0.00  -0.01  -0.02     0.00  -0.01   0.00     0.01   0.00   0.00
  83   1     0.00  -0.01   0.00     0.02  -0.01   0.00     0.00  -0.01   0.01
  84   1    -0.02   0.00  -0.01    -0.01   0.01  -0.02     0.00  -0.01   0.01
  85   1    -0.08   0.01  -0.10    -0.06   0.01  -0.08     0.05   0.01  -0.01
  86   1     0.02   0.09   0.00     0.01   0.08   0.01     0.05   0.03   0.01
  87   1    -0.02  -0.07   0.03    -0.02  -0.05   0.02     0.03   0.03   0.03
  88   1     0.32  -0.05  -0.03     0.21  -0.05  -0.03    -0.04  -0.02  -0.01
  89   1    -0.12   0.25   0.09    -0.08   0.14   0.08     0.05  -0.09  -0.02
  90   1    -0.17  -0.28  -0.01    -0.12  -0.22   0.01     0.06   0.02   0.02
  91   1    -0.09  -0.09  -0.02    -0.09  -0.09  -0.01     0.12   0.11   0.01
  92   1    -0.04   0.07   0.09    -0.04   0.06   0.09     0.08  -0.08  -0.09
  93   1     0.10  -0.03  -0.02     0.09  -0.03  -0.02    -0.07   0.03   0.03
  94   1     0.02   0.13  -0.10    -0.05   0.01   0.01    -0.17  -0.33   0.27
  95   1    -0.17   0.03   0.10    -0.02   0.04   0.04     0.41   0.02  -0.18
  96   1     0.09  -0.10   0.06    -0.03   0.04   0.03    -0.32   0.38  -0.09
  97   1     0.01   0.08  -0.02     0.02   0.07   0.01    -0.01  -0.04  -0.02
  98   1    -0.05  -0.01  -0.04     0.00   0.01  -0.01    -0.01   0.01   0.00
  99   1     0.02  -0.01   0.04     0.05   0.01   0.04    -0.03   0.01  -0.04
 100   1     0.02   0.02   0.00    -0.01  -0.04  -0.04     0.00   0.03   0.03
 101   1     0.01   0.00   0.02     0.01   0.06   0.00    -0.01  -0.03  -0.01
 102   1     0.01   0.00   0.03    -0.09   0.03  -0.04     0.05  -0.02   0.03
 103   1     0.02   0.00   0.00     0.01   0.02   0.02     0.04   0.00   0.00
 104   1     0.00  -0.03   0.00     0.00   0.00  -0.02     0.01  -0.06   0.00
 105   1    -0.01  -0.01   0.01    -0.02   0.02  -0.01    -0.02  -0.01   0.01
 106   1     0.01   0.03   0.03     0.03   0.03   0.11     0.01   0.03   0.03
 107   1    -0.02   0.04  -0.03    -0.01   0.06  -0.05    -0.02   0.04  -0.03
 108   1    -0.01  -0.03  -0.01     0.04  -0.09  -0.01    -0.02  -0.02  -0.01
 109   1     0.00   0.08  -0.04    -0.02   0.15  -0.05    -0.04   0.09   0.02
 110   1     0.06   0.06  -0.01     0.08   0.09  -0.01     0.05  -0.01   0.01
 111   1    -0.02   0.03  -0.03    -0.06   0.03  -0.03    -0.08  -0.04   0.05
 112   1    -0.01   0.03   0.03    -0.05   0.04   0.07    -0.05   0.01   0.02
 113   1     0.02   0.02  -0.01     0.02   0.02  -0.04     0.00   0.01  -0.05
 114   1     0.00   0.05  -0.01    -0.04   0.10  -0.04    -0.06   0.03  -0.03
                    49                     50                     51
                     A                      A                      A
 Frequencies --   233.4205               236.5607               242.1497
 Red. masses --     2.4544                 2.5466                 2.4605
 Frc consts  --     0.0788                 0.0840                 0.0850
 IR Inten    --     5.0893                12.0008                 0.5663
 Atom AN      X      Y      Z        X      Y      Z        X      Y      Z
   1   8     0.05  -0.01  -0.01    -0.02   0.00   0.00    -0.03   0.00   0.02
   2  12     0.00   0.09   0.00     0.00  -0.03   0.01    -0.03   0.01   0.03
   3   8    -0.01   0.03  -0.06    -0.02   0.04  -0.07     0.01  -0.01  -0.03
   4   6     0.02  -0.01  -0.03     0.00   0.01   0.01    -0.01   0.01   0.03
   5   7     0.01  -0.01   0.02     0.00   0.00   0.00     0.02   0.00   0.04
   6   7     0.01   0.01  -0.01    -0.03  -0.01   0.01    -0.04   0.00   0.03
   7   8     0.01  -0.02  -0.03     0.01   0.02   0.01     0.00   0.01   0.03
   8   6     0.00  -0.01   0.02     0.00   0.01  -0.01    -0.01  -0.02   0.03
   9   6     0.01  -0.02   0.01    -0.01   0.02  -0.01    -0.02  -0.02   0.02
  10   6     0.01   0.00  -0.01    -0.02   0.00   0.02    -0.04  -0.01   0.03
  11   8     0.01   0.01   0.00    -0.02   0.00  -0.01    -0.01   0.00   0.00
  12   6     0.00   0.00   0.02     0.01   0.01  -0.01    -0.01   0.00  -0.01
  13   6    -0.02   0.01   0.01    -0.02   0.04  -0.01     0.01   0.00  -0.02
  14   6     0.00   0.00  -0.02     0.00   0.01   0.01     0.00   0.01   0.02
  15   8     0.00   0.02   0.06     0.06   0.03   0.01    -0.01   0.00  -0.01
  16   6     0.01   0.05   0.03     0.00  -0.04  -0.03    -0.01  -0.03  -0.03
  17   8     0.07  -0.01   0.04     0.11   0.02   0.00    -0.06   0.01  -0.01
  18   6    -0.03  -0.01  -0.04    -0.05  -0.03  -0.03     0.01  -0.02  -0.04
  19   8    -0.06  -0.01  -0.04    -0.06   0.01  -0.04     0.01  -0.08  -0.02
  20   8     0.00  -0.02  -0.01     0.02  -0.04  -0.01     0.01   0.02   0.01
  21   6     0.03  -0.03   0.01     0.07  -0.06   0.01    -0.01   0.03   0.00
  22   6     0.03  -0.01   0.02     0.07  -0.02   0.01    -0.01   0.02   0.00
  23   6     0.00  -0.02  -0.02    -0.02  -0.05   0.00     0.03   0.01  -0.04
  24   8     0.04  -0.02   0.00     0.09  -0.04   0.00    -0.01   0.02  -0.01
  25   6    -0.02   0.00  -0.03    -0.09   0.03  -0.01     0.05   0.00  -0.02
  26   6     0.02  -0.03   0.01    -0.05  -0.01   0.05     0.06  -0.01  -0.03
  27   6    -0.05   0.04   0.09    -0.05   0.07   0.06     0.03  -0.02  -0.03
  28   6    -0.03  -0.01   0.00     0.03   0.01   0.00     0.00   0.01   0.02
  29   6     0.00  -0.01  -0.02     0.00   0.00   0.00     0.03   0.01   0.01
  30   6     0.00   0.01   0.01    -0.01  -0.02   0.00    -0.01   0.00   0.01
  31   6     0.00   0.00  -0.04     0.00   0.00   0.01     0.03   0.03  -0.01
  32   6     0.02   0.01   0.02     0.00   0.00   0.00     0.05   0.03   0.02
  33   6     0.03   0.01   0.05    -0.01   0.00  -0.01     0.05   0.03   0.00
  34   6    -0.01   0.00   0.00     0.00   0.00   0.00     0.02   0.02  -0.05
  35   6    -0.02  -0.01  -0.03     0.00   0.00   0.01     0.03   0.00  -0.03
  36   6     0.00   0.01  -0.04     0.00   0.00   0.01    -0.01   0.05  -0.03
  37   6    -0.01  -0.03  -0.02     0.00   0.01   0.01     0.03  -0.04  -0.02
  38   6    -0.01   0.00   0.02     0.01  -0.01  -0.02     0.01   0.00  -0.01
  39   6     0.03   0.01  -0.01    -0.03  -0.02   0.01    -0.01  -0.01   0.01
  40   6     0.05   0.02  -0.03    -0.04  -0.02   0.01    -0.02  -0.01   0.03
  41   6     0.00   0.01   0.01     0.00  -0.01  -0.03     0.01   0.00   0.00
  42   6    -0.02   0.00   0.03     0.00  -0.01  -0.03     0.01   0.01  -0.01
  43   6    -0.03  -0.01   0.02     0.04   0.00  -0.01     0.02   0.01  -0.01
  44   6    -0.02  -0.02   0.02    -0.01   0.01  -0.02     0.02   0.00  -0.01
  45   6     0.00  -0.02  -0.01     0.00   0.00   0.00    -0.04   0.02  -0.03
  46   6    -0.01   0.07  -0.02     0.00  -0.01   0.00    -0.04   0.11  -0.01
  47   6    -0.03  -0.02  -0.01     0.01   0.00   0.00     0.00  -0.06  -0.03
  48   6     0.03  -0.06  -0.02    -0.01   0.01   0.01     0.05  -0.08  -0.01
  49   6    -0.04  -0.02  -0.03     0.01   0.03   0.01     0.02  -0.01   0.00
  50   6     0.02  -0.02   0.04    -0.03   0.02  -0.02    -0.01   0.00  -0.03
  51   6     0.01  -0.04   0.02     0.01   0.00  -0.01     0.00   0.01  -0.01
  52   6    -0.04   0.00  -0.01     0.05   0.00   0.04     0.03   0.01   0.01
  53   6    -0.03   0.01   0.03     0.01  -0.02   0.00    -0.09  -0.04   0.09
  54   6    -0.01   0.00  -0.04     0.00   0.01   0.07    -0.04  -0.01   0.05
  55   1     0.00  -0.03   0.01    -0.01   0.03  -0.01    -0.02  -0.01   0.02
  56   1    -0.03   0.02   0.03    -0.02   0.06  -0.01     0.01   0.00  -0.02
  57   1    -0.01   0.00  -0.02     0.01   0.01   0.01     0.01   0.01   0.02
  58   1    -0.05   0.02   0.08     0.04  -0.01  -0.11     0.02  -0.01  -0.08
  59   1     0.02   0.12   0.04     0.01  -0.13  -0.02    -0.02  -0.10  -0.03
  60   1     0.03   0.04   0.02    -0.03  -0.01   0.01    -0.02  -0.01  -0.01
  61   1     0.03   0.03   0.03     0.11   0.02   0.00    -0.01   0.01  -0.01
  62   1     0.02  -0.02  -0.04     0.02  -0.06  -0.02     0.06   0.00  -0.05
  63   1    -0.08   0.02  -0.08    -0.08  -0.02   0.04     0.05   0.03  -0.04
  64   1    -0.02  -0.07  -0.06    -0.26  -0.01   0.04     0.10   0.00  -0.04
  65   1    -0.03   0.05  -0.01    -0.11   0.15  -0.13     0.05  -0.04   0.02
  66   1     0.06  -0.04   0.07     0.01   0.04   0.08     0.17  -0.09   0.11
  67   1     0.04  -0.04  -0.04    -0.08  -0.04   0.03     0.10  -0.07  -0.21
  68   1    -0.04  -0.01   0.04    -0.12   0.02   0.08    -0.07   0.10   0.00
  69   1    -0.06   0.00   0.17    -0.07   0.03   0.12     0.00   0.00  -0.14
  70   1    -0.04   0.02   0.08    -0.05   0.06   0.06    -0.03   0.02   0.05
  71   1    -0.07   0.13   0.09    -0.06   0.15   0.06     0.13  -0.08  -0.01
  72   1     0.09  -0.18  -0.09     0.04   0.00  -0.04    -0.03   0.05   0.05
  73   1     0.05   0.21  -0.01     0.06   0.03   0.01    -0.03  -0.04   0.02
  74   1    -0.23  -0.05   0.09     0.01   0.01   0.01     0.04   0.02   0.01
  75   1     0.03   0.01   0.04    -0.01   0.00   0.00     0.06   0.02   0.04
  76   1     0.05   0.02   0.11    -0.01   0.00  -0.02     0.06   0.03   0.02
  77   1    -0.02   0.00   0.00     0.00   0.00   0.00    -0.01   0.02  -0.07
  78   1     0.00   0.01  -0.03     0.00   0.00   0.01    -0.02   0.08  -0.03
  79   1    -0.01  -0.03  -0.01     0.00   0.01   0.00     0.04  -0.06  -0.02
  80   1     0.04   0.01  -0.03    -0.05  -0.02   0.02    -0.02  -0.01   0.02
  81   1     0.09   0.03  -0.07    -0.06  -0.03   0.03    -0.04  -0.01   0.05
  82   1     0.00   0.01   0.01     0.01  -0.01  -0.04     0.01   0.01   0.00
  83   1    -0.04   0.00   0.02     0.06  -0.01  -0.01     0.03   0.00  -0.01
  84   1     0.00  -0.02   0.02    -0.03   0.02  -0.03     0.02   0.00  -0.01
  85   1    -0.01  -0.01   0.02    -0.03   0.00  -0.03    -0.10   0.02  -0.06
  86   1     0.01  -0.04  -0.01     0.02   0.03   0.01    -0.02   0.05  -0.02
  87   1     0.00  -0.01  -0.01    -0.01  -0.02   0.03    -0.04  -0.04  -0.01
  88   1    -0.05   0.08   0.03    -0.06  -0.01   0.00    -0.01   0.12   0.04
  89   1     0.00   0.06  -0.05     0.03  -0.07  -0.01    -0.07   0.17   0.00
  90   1     0.01   0.13  -0.05     0.04   0.03   0.02    -0.08   0.11  -0.07
  91   1    -0.07  -0.06  -0.01     0.03   0.02  -0.01    -0.20  -0.24  -0.11
  92   1    -0.05   0.03   0.02     0.02  -0.02  -0.02    -0.08   0.13   0.13
  93   1     0.02  -0.02  -0.03     0.00   0.00   0.01     0.24  -0.10  -0.11
  94   1     0.15   0.17  -0.17    -0.03  -0.04   0.04     0.07  -0.09   0.04
  95   1    -0.24  -0.09   0.07     0.05   0.02  -0.02     0.07  -0.12  -0.05
  96   1     0.24  -0.31   0.04    -0.05   0.07  -0.01     0.05  -0.08  -0.01
  97   1    -0.02  -0.07  -0.06     0.03   0.15   0.01     0.01  -0.01   0.01
  98   1    -0.05   0.00  -0.02    -0.03  -0.02  -0.06     0.03  -0.02   0.00
  99   1    -0.08   0.00  -0.06     0.06  -0.02   0.10     0.02  -0.02   0.01
 100   1     0.00   0.08   0.07    -0.01  -0.03  -0.04    -0.03  -0.01  -0.01
 101   1    -0.03  -0.09  -0.01     0.00   0.07   0.00    -0.02   0.01  -0.04
 102   1     0.13  -0.05   0.07    -0.09   0.04  -0.03    -0.02   0.01  -0.04
 103   1     0.06  -0.01  -0.01    -0.15  -0.09  -0.06    -0.07  -0.03  -0.02
 104   1     0.02  -0.09   0.03    -0.01   0.18   0.02    -0.01   0.08  -0.01
 105   1    -0.01  -0.03   0.02     0.16  -0.08  -0.01     0.05  -0.03   0.00
 106   1    -0.05  -0.04  -0.16     0.09   0.11   0.36     0.06   0.08   0.20
 107   1     0.00  -0.10   0.10    -0.04   0.22  -0.18    -0.03   0.15  -0.13
 108   1    -0.06   0.16   0.02     0.11  -0.32  -0.02     0.05  -0.18  -0.03
 109   1    -0.02   0.01   0.05     0.02  -0.04  -0.01    -0.07  -0.04   0.17
 110   1    -0.05   0.03   0.04     0.00  -0.02  -0.01    -0.15  -0.05   0.07
 111   1    -0.04   0.02  -0.01     0.04   0.00   0.01    -0.11  -0.04   0.06
 112   1    -0.02   0.00  -0.04     0.01   0.01   0.07    -0.05  -0.01   0.05
 113   1     0.01   0.01  -0.06    -0.03   0.01   0.11    -0.05   0.00   0.06
 114   1    -0.03  -0.01  -0.04     0.04   0.02   0.08    -0.02   0.00   0.05
                    52                     53                     54
                     A                      A                      A
 Frequencies --   245.7996               247.1972               250.3107
 Red. masses --     2.0339                 1.2221                 1.5265
 Frc consts  --     0.0724                 0.0440                 0.0564
 IR Inten    --     8.9131                 2.0412                15.7898
 Atom AN      X      Y      Z        X      Y      Z        X      Y      Z
   1   8    -0.01   0.02   0.00     0.01   0.00   0.01    -0.01   0.02  -0.01
   2  12    -0.07   0.06   0.00    -0.03  -0.03   0.00    -0.06   0.07   0.00
   3   8     0.02   0.02  -0.04     0.00   0.01   0.00     0.02   0.01  -0.02
   4   6    -0.01   0.00   0.00     0.00   0.00   0.00     0.00   0.00   0.00
   5   7    -0.01   0.01  -0.01    -0.01   0.00  -0.02     0.01   0.01   0.00
   6   7    -0.03   0.02  -0.01     0.01  -0.01   0.01     0.01  -0.02   0.00
   7   8    -0.03   0.01   0.00    -0.02   0.00   0.00    -0.01   0.02   0.00
   8   6     0.01  -0.01   0.00    -0.01  -0.01  -0.02     0.01   0.00   0.00
   9   6     0.02  -0.03   0.02     0.00  -0.02   0.00     0.02  -0.02   0.00
  10   6    -0.01  -0.01   0.01     0.00  -0.02   0.00     0.01  -0.01  -0.01
  11   8     0.02  -0.05  -0.01     0.01  -0.01   0.00     0.00  -0.03   0.00
  12   6     0.05  -0.02  -0.01     0.01   0.00   0.00     0.02  -0.01  -0.01
  13   6     0.02   0.00  -0.01     0.01   0.01   0.00     0.01  -0.01  -0.01
  14   6     0.02  -0.02  -0.01     0.00   0.00  -0.01     0.01  -0.02   0.00
  15   8     0.09  -0.01   0.01     0.01  -0.01   0.00     0.04   0.00   0.00
  16   6     0.00   0.00   0.00     0.00   0.02   0.00     0.00  -0.01   0.00
  17   8     0.00  -0.01   0.04     0.01   0.00  -0.01    -0.02  -0.02   0.03
  18   6     0.00  -0.02  -0.01     0.00   0.00   0.01     0.01  -0.01  -0.01
  19   8    -0.01  -0.02  -0.02    -0.01   0.02   0.00     0.00  -0.04   0.00
  20   8     0.01   0.00   0.01     0.00  -0.01   0.00     0.00   0.01   0.01
  21   6     0.00   0.00   0.01     0.01  -0.01   0.00    -0.01   0.01   0.01
  22   6     0.00   0.00   0.03     0.01  -0.01   0.00    -0.01   0.01   0.02
  23   6     0.00  -0.02   0.00    -0.01  -0.01   0.01     0.01   0.00  -0.01
  24   8     0.00  -0.01  -0.01     0.01  -0.01   0.00    -0.02   0.01  -0.01
  25   6    -0.01   0.00  -0.01    -0.01   0.00   0.00     0.03  -0.01  -0.01
  26   6    -0.06   0.04   0.03    -0.03   0.01   0.01     0.00   0.01   0.00
  27   6    -0.01   0.02   0.02     0.00   0.01   0.01    -0.01   0.00   0.00
  28   6     0.00   0.02   0.01    -0.01   0.01   0.00     0.01   0.00   0.01
  29   6     0.00   0.00   0.00    -0.01   0.00  -0.01     0.01   0.00   0.00
  30   6     0.00   0.01  -0.02     0.01   0.00   0.00     0.00  -0.01   0.00
  31   6     0.00   0.00   0.00     0.00   0.00   0.01     0.01   0.00   0.01
  32   6    -0.01  -0.01   0.00     0.00   0.00   0.01     0.00   0.00  -0.01
  33   6     0.00  -0.01  -0.01     0.00   0.00  -0.01     0.00   0.00  -0.02
  34   6     0.01   0.00   0.00     0.00   0.00  -0.01     0.01   0.00   0.00
  35   6     0.01   0.00   0.00     0.01   0.00   0.00     0.01   0.00   0.01
  36   6     0.00   0.00   0.01     0.00   0.00   0.01     0.00   0.00   0.01
  37   6     0.01   0.00   0.01     0.01   0.00   0.01     0.00   0.00   0.00
  38   6     0.02  -0.02  -0.03     0.01   0.03   0.01    -0.01   0.00   0.01
  39   6     0.01  -0.04  -0.01     0.00   0.03   0.01    -0.01   0.01   0.00
  40   6    -0.01  -0.04   0.05    -0.01   0.02   0.01     0.00   0.01  -0.03
  41   6     0.00  -0.01   0.04    -0.01   0.00   0.00    -0.01  -0.01  -0.03
  42   6     0.02   0.02  -0.02     0.01   0.00   0.00    -0.02  -0.02   0.00
  43   6     0.02  -0.02  -0.02    -0.01   0.02   0.00     0.00   0.00   0.02
  44   6     0.02   0.02  -0.02     0.01  -0.01   0.01    -0.02  -0.01   0.00
  45   6     0.00   0.00   0.00     0.00   0.01   0.00     0.00   0.00   0.00
  46   6     0.01  -0.01   0.00     0.00  -0.01   0.00     0.00  -0.02   0.00
  47   6     0.00   0.00   0.01     0.00  -0.01   0.01     0.00   0.00   0.00
  48   6     0.00   0.01   0.01     0.02   0.01   0.00    -0.03   0.00   0.02
  49   6     0.01   0.00  -0.02     0.02   0.00   0.02    -0.01   0.02   0.00
  50   6    -0.05   0.01  -0.06     0.02  -0.01   0.01     0.01   0.01   0.02
  51   6     0.01   0.05   0.01     0.01   0.01   0.00     0.03  -0.03   0.02
  52   6     0.02  -0.05   0.01    -0.01  -0.02  -0.01     0.00   0.01   0.02
  53   6     0.00   0.04  -0.02     0.00  -0.01  -0.02    -0.01   0.02  -0.01
  54   6    -0.02   0.02   0.02    -0.02  -0.02  -0.03    -0.01   0.01  -0.02
  55   1     0.03  -0.03   0.02     0.00  -0.01   0.00     0.01  -0.01  -0.01
  56   1     0.01   0.00   0.00     0.01   0.01   0.00     0.00  -0.02   0.00
  57   1     0.02  -0.02  -0.03     0.00   0.00  -0.02     0.02  -0.02   0.00
  58   1     0.03  -0.01   0.04    -0.01   0.00   0.04     0.02  -0.01   0.01
  59   1    -0.02   0.02  -0.01    -0.02   0.06  -0.01     0.01  -0.02   0.01
  60   1     0.01  -0.04  -0.03     0.03   0.00  -0.03    -0.02  -0.03   0.01
  61   1     0.01   0.02   0.03     0.01   0.00   0.00    -0.03   0.01   0.03
  62   1     0.02  -0.03  -0.01    -0.01  -0.01   0.01     0.02   0.00  -0.01
  63   1    -0.03   0.03  -0.05    -0.01  -0.01   0.00     0.00   0.03  -0.06
  64   1     0.01  -0.05  -0.04    -0.02   0.00   0.00     0.11  -0.04  -0.05
  65   1    -0.01   0.01   0.00    -0.01   0.01  -0.01     0.04  -0.04   0.05
  66   1     0.01   0.09   0.07    -0.04   0.04  -0.02     0.05   0.00   0.05
  67   1    -0.12  -0.02  -0.03    -0.05   0.01   0.05    -0.01  -0.02  -0.07
  68   1    -0.14   0.11   0.05    -0.01  -0.01   0.01    -0.05   0.07   0.01
  69   1    -0.06  -0.01  -0.02    -0.02   0.00  -0.01    -0.01  -0.01   0.04
  70   1    -0.05   0.06   0.07    -0.02   0.03   0.03     0.00  -0.01  -0.01
  71   1     0.04   0.03   0.03     0.03   0.01   0.02    -0.03   0.02   0.00
  72   1    -0.12   0.19   0.12     0.01  -0.01  -0.02    -0.11   0.18   0.12
  73   1    -0.12  -0.17  -0.02     0.00   0.05  -0.01    -0.09  -0.21  -0.01
  74   1     0.19   0.06  -0.04    -0.03   0.01   0.02     0.21   0.04  -0.07
  75   1    -0.01  -0.01   0.00     0.00   0.00   0.02     0.00  -0.01  -0.02
  76   1     0.00  -0.01  -0.02     0.00  -0.01  -0.02     0.00  -0.01  -0.03
  77   1     0.01   0.00   0.00     0.00   0.00  -0.02     0.02   0.00   0.00
  78   1     0.00   0.00   0.00     0.00   0.00   0.00     0.00   0.01   0.00
  79   1     0.01   0.00   0.00     0.02  -0.01   0.02     0.00   0.00  -0.01
  80   1     0.02  -0.05  -0.01     0.00   0.03   0.01    -0.02   0.02   0.00
  81   1    -0.03  -0.07   0.09    -0.03   0.03   0.01     0.01   0.02  -0.06
  82   1     0.00   0.00   0.07    -0.02   0.00   0.00     0.00  -0.01  -0.05
  83   1     0.02  -0.04   0.01    -0.03   0.04   0.00     0.00   0.01   0.02
  84   1     0.03   0.01  -0.01     0.00   0.00   0.01    -0.03   0.00  -0.02
  85   1     0.01   0.00  -0.01    -0.01   0.01  -0.03    -0.01   0.00  -0.02
  86   1     0.01   0.02   0.00     0.02   0.04   0.01     0.02   0.01   0.01
  87   1     0.00   0.00   0.01     0.00  -0.01   0.02     0.00  -0.02   0.02
  88   1     0.04  -0.02  -0.01    -0.03   0.00   0.00     0.02  -0.02  -0.01
  89   1     0.00   0.01   0.01     0.02  -0.04   0.00    -0.01   0.00   0.01
  90   1    -0.01  -0.04   0.01     0.02   0.02   0.01    -0.01  -0.04   0.00
  91   1    -0.06  -0.06  -0.02    -0.24  -0.24  -0.10     0.17   0.15   0.07
  92   1    -0.02   0.06   0.07    -0.08   0.23   0.24     0.05  -0.17  -0.17
  93   1     0.08  -0.01  -0.03     0.33  -0.04  -0.13    -0.22   0.01   0.10
  94   1    -0.02  -0.02   0.02    -0.02  -0.09   0.09    -0.01   0.06  -0.06
  95   1     0.03   0.02   0.00     0.17   0.02  -0.06    -0.13   0.00   0.06
  96   1    -0.02   0.04   0.00    -0.08   0.13  -0.05     0.04  -0.06   0.06
  97   1    -0.01  -0.08  -0.01     0.02   0.04   0.03     0.00   0.07  -0.01
  98   1     0.06   0.03   0.03     0.01  -0.03   0.00    -0.04   0.01  -0.02
  99   1    -0.02   0.03  -0.08     0.04  -0.02   0.06     0.02   0.00   0.03
 100   1    -0.09  -0.04  -0.03     0.03  -0.01   0.00     0.03   0.02   0.00
 101   1    -0.05   0.04  -0.09     0.02  -0.01   0.02     0.02   0.02   0.04
 102   1    -0.08   0.03  -0.09     0.02  -0.01   0.01     0.00   0.00   0.05
 103   1     0.28   0.22   0.17    -0.23  -0.13  -0.10    -0.27  -0.22  -0.15
 104   1     0.03  -0.26  -0.09    -0.01   0.28   0.10     0.01   0.32   0.16
 105   1    -0.29   0.24  -0.03     0.27  -0.12   0.00     0.40  -0.23   0.02
 106   1    -0.04  -0.13  -0.17    -0.07  -0.12  -0.25     0.01   0.01   0.00
 107   1     0.07  -0.20   0.17     0.07  -0.20   0.18    -0.01   0.00   0.04
 108   1     0.04   0.14   0.05    -0.02   0.23   0.04     0.00   0.04   0.03
 109   1    -0.01   0.08  -0.04    -0.01   0.00  -0.03    -0.01   0.03   0.00
 110   1     0.05   0.05   0.00     0.01  -0.01  -0.02     0.00   0.03   0.00
 111   1    -0.03   0.02  -0.03     0.00  -0.01  -0.02    -0.02   0.01  -0.02
 112   1    -0.05   0.02   0.04    -0.02  -0.02  -0.02    -0.02   0.01   0.00
 113   1    -0.02   0.03   0.01     0.00  -0.02  -0.05     0.01   0.01  -0.03
 114   1    -0.02   0.05   0.01    -0.05  -0.02  -0.04    -0.02   0.03  -0.03
                    55                     56                     57
                     A                      A                      A
 Frequencies --   256.0221               258.7740               261.1276
 Red. masses --     1.6048                 1.6652                 1.7325
 Frc consts  --     0.0620                 0.0657                 0.0696
 IR Inten    --     1.4325                 5.7277                 4.9601
 Atom AN      X      Y      Z        X      Y      Z        X      Y      Z
   1   8    -0.02   0.01  -0.01     0.00   0.00   0.00     0.00   0.00  -0.01
   2  12     0.00   0.04  -0.02    -0.04   0.02   0.00    -0.03  -0.02  -0.02
   3   8     0.01  -0.01   0.01     0.01   0.00   0.00    -0.02  -0.01   0.01
   4   6     0.00   0.01   0.01     0.00   0.00   0.00     0.00   0.00  -0.01
   5   7    -0.02   0.01  -0.01     0.00   0.01   0.00     0.03  -0.03  -0.01
   6   7     0.01   0.02  -0.01     0.02  -0.01   0.01    -0.04   0.03   0.00
   7   8     0.01   0.02   0.00     0.00   0.00   0.00     0.00   0.00  -0.02
   8   6     0.00   0.00   0.00     0.00   0.00   0.00     0.00  -0.04  -0.02
   9   6     0.01  -0.02   0.01     0.00   0.00   0.01     0.01  -0.04   0.00
  10   6     0.01   0.00  -0.01     0.00   0.00   0.01    -0.03  -0.01   0.01
  11   8    -0.02  -0.03  -0.02     0.00  -0.01   0.00     0.00   0.00   0.00
  12   6     0.00  -0.02   0.00     0.01   0.00   0.00     0.00   0.00   0.00
  13   6     0.00  -0.01   0.00     0.00   0.00   0.00    -0.01   0.00   0.00
  14   6     0.01  -0.01   0.00     0.00  -0.01   0.00     0.00  -0.01   0.00
  15   8     0.04  -0.01   0.01     0.02   0.00   0.00     0.01   0.01   0.01
  16   6     0.00  -0.04  -0.02     0.00   0.00   0.00     0.00   0.00   0.01
  17   8     0.00  -0.01   0.01    -0.03  -0.02   0.01     0.00   0.01  -0.04
  18   6     0.01   0.01   0.01     0.01   0.00   0.00    -0.01   0.01   0.01
  19   8     0.01   0.02   0.01     0.01   0.00  -0.01    -0.02   0.04   0.00
  20   8     0.00   0.00   0.01     0.00   0.00  -0.01     0.00  -0.01   0.01
  21   6    -0.01   0.00   0.00     0.01   0.00   0.01     0.02  -0.01   0.00
  22   6    -0.01   0.00   0.00     0.01  -0.01   0.01     0.02  -0.01  -0.02
  23   6     0.00   0.00   0.01     0.00   0.00   0.00    -0.01  -0.01   0.02
  24   8    -0.01  -0.01   0.00     0.02   0.01  -0.02     0.03   0.00   0.00
  25   6     0.01  -0.01   0.00    -0.02  -0.01  -0.02    -0.02   0.00  -0.02
  26   6    -0.02   0.01   0.01    -0.01   0.01   0.01     0.00  -0.03   0.00
  27   6    -0.01   0.00   0.03     0.00   0.00   0.00    -0.01   0.00   0.02
  28   6     0.06   0.01  -0.02     0.00   0.00   0.00     0.01  -0.01  -0.01
  29   6    -0.02   0.00  -0.02     0.01   0.00   0.00     0.03   0.00   0.02
  30   6    -0.01   0.01   0.01     0.01   0.00   0.00     0.00   0.02   0.00
  31   6    -0.02  -0.01  -0.01     0.01   0.00   0.00     0.04   0.02   0.02
  32   6    -0.01  -0.01   0.00     0.01   0.00   0.00     0.03   0.02   0.00
  33   6     0.00  -0.01   0.01     0.01   0.00  -0.01     0.01   0.02  -0.04
  34   6     0.00  -0.01   0.01     0.01   0.00  -0.01     0.01   0.01  -0.02
  35   6    -0.01   0.00  -0.01     0.01   0.00   0.00     0.03   0.00   0.01
  36   6     0.00  -0.01   0.00     0.00   0.01   0.00     0.00   0.04   0.02
  37   6     0.00   0.00   0.00     0.01  -0.01   0.00     0.02  -0.01   0.01
  38   6    -0.02   0.00   0.02     0.00   0.03   0.00     0.00   0.00   0.00
  39   6     0.01   0.00   0.01    -0.01   0.03   0.00     0.02  -0.01   0.01
  40   6     0.06   0.02  -0.02    -0.03   0.03   0.00     0.04   0.00   0.04
  41   6     0.03   0.02   0.00    -0.02   0.00  -0.01     0.04   0.03   0.04
  42   6    -0.01   0.01   0.03     0.01  -0.02   0.01     0.02   0.04   0.03
  43   6    -0.02   0.00   0.02    -0.02   0.03  -0.02     0.00   0.01   0.00
  44   6    -0.01  -0.01   0.03     0.02  -0.04   0.02     0.02   0.01   0.02
  45   6     0.02   0.00   0.01     0.01   0.01   0.00    -0.05   0.01  -0.02
  46   6     0.02  -0.01   0.00    -0.01   0.01   0.00    -0.02   0.03   0.02
  47   6    -0.02   0.01   0.01     0.00  -0.02   0.00     0.03  -0.04  -0.02
  48   6     0.01   0.01  -0.01    -0.01  -0.01   0.01    -0.01  -0.01   0.02
  49   6    -0.04  -0.02  -0.02     0.06  -0.03   0.08    -0.01  -0.04  -0.02
  50   6     0.03  -0.02   0.04     0.09  -0.06   0.02    -0.01  -0.02  -0.01
  51   6    -0.03  -0.04   0.00    -0.08   0.02  -0.04     0.00   0.03   0.01
  52   6    -0.03   0.07   0.00    -0.03   0.02  -0.06     0.00   0.02   0.00
  53   6     0.01   0.02  -0.02    -0.01   0.00   0.01    -0.05  -0.01  -0.01
  54   6    -0.01  -0.01  -0.06    -0.02   0.01  -0.02    -0.04  -0.02   0.00
  55   1     0.01  -0.04   0.01     0.00   0.00   0.00     0.02  -0.03   0.01
  56   1     0.01  -0.01  -0.01     0.00  -0.01   0.00    -0.01   0.00   0.00
  57   1     0.02   0.00   0.00     0.00  -0.01   0.00     0.00  -0.01   0.00
  58   1     0.05  -0.01  -0.08     0.00   0.00   0.00     0.00   0.00   0.02
  59   1     0.03  -0.11  -0.01     0.00   0.00   0.01     0.02   0.01   0.02
  60   1    -0.04  -0.02   0.02    -0.01  -0.01   0.01    -0.01  -0.01   0.02
  61   1    -0.02   0.00   0.01     0.03   0.00   0.00     0.05  -0.02  -0.04
  62   1    -0.01   0.00   0.02     0.00   0.00  -0.01    -0.03  -0.01   0.03
  63   1    -0.03   0.01  -0.03     0.10  -0.03   0.06     0.03  -0.02   0.02
  64   1     0.06  -0.03  -0.03    -0.18   0.01   0.06    -0.10   0.02   0.02
  65   1     0.01  -0.01   0.05    -0.02  -0.01  -0.16    -0.02   0.02  -0.08
  66   1    -0.08   0.06  -0.07    -0.06   0.06  -0.06    -0.25   0.08  -0.28
  67   1    -0.05   0.04   0.10    -0.03   0.05   0.09    -0.02   0.14   0.36
  68   1     0.04  -0.04  -0.01     0.04  -0.05   0.00     0.28  -0.30  -0.07
  69   1    -0.01  -0.02   0.06    -0.01  -0.01   0.00     0.00   0.00   0.03
  70   1    -0.01  -0.01   0.04     0.00   0.00   0.00     0.00  -0.01   0.01
  71   1    -0.01   0.03   0.04    -0.01   0.00   0.00    -0.01   0.01   0.01
  72   1    -0.03   0.14   0.02    -0.03   0.04   0.03    -0.04   0.06   0.03
  73   1     0.01  -0.13  -0.01    -0.02  -0.04   0.00    -0.03  -0.09  -0.01
  74   1     0.20   0.04  -0.08     0.05   0.01  -0.01     0.09   0.01  -0.05
  75   1    -0.01  -0.01   0.01     0.00   0.00   0.00     0.03   0.02   0.00
  76   1     0.01  -0.02   0.03     0.00   0.00  -0.02    -0.01   0.03  -0.08
  77   1     0.01  -0.01   0.01     0.01   0.00  -0.01    -0.01   0.01  -0.04
  78   1     0.01  -0.03   0.00     0.00   0.01  -0.01    -0.02   0.08   0.02
  79   1     0.00   0.00   0.01     0.01  -0.01   0.00     0.02  -0.02   0.00
  80   1     0.01  -0.01   0.01    -0.01   0.04   0.01     0.02  -0.04   0.01
  81   1     0.10   0.02  -0.06    -0.05   0.03   0.00     0.05  -0.01   0.06
  82   1     0.04   0.02  -0.01    -0.03  -0.01  -0.02     0.04   0.03   0.06
  83   1     0.00   0.00   0.00    -0.04   0.05  -0.04     0.00   0.00   0.00
  84   1     0.01  -0.02   0.04     0.00  -0.03   0.02     0.06  -0.01   0.05
  85   1     0.05   0.00   0.02    -0.07   0.01  -0.11    -0.14   0.02  -0.10
  86   1     0.02  -0.02   0.00     0.10   0.11   0.02    -0.02   0.10   0.00
  87   1     0.02   0.03   0.01    -0.01  -0.08   0.09    -0.04  -0.09   0.01
  88   1     0.01  -0.01   0.00    -0.09   0.02   0.02     0.06   0.02   0.00
  89   1     0.03  -0.02  -0.02     0.03  -0.06  -0.02    -0.07   0.10   0.06
  90   1     0.03   0.00   0.01     0.04   0.08   0.01    -0.09  -0.04  -0.01
  91   1    -0.21  -0.18  -0.05     0.05   0.04   0.01     0.14   0.08   0.00
  92   1    -0.08   0.22   0.21     0.02  -0.07  -0.07     0.07  -0.18  -0.15
  93   1     0.24   0.01  -0.11    -0.07  -0.02   0.04    -0.11  -0.07   0.07
  94   1     0.00  -0.02   0.03    -0.01   0.01  -0.02    -0.02  -0.02   0.01
  95   1     0.08   0.02  -0.03    -0.05  -0.01   0.02    -0.02  -0.02   0.02
  96   1    -0.03   0.05  -0.04     0.02  -0.03   0.03     0.00  -0.01   0.04
  97   1    -0.04  -0.16  -0.03     0.11   0.34   0.06    -0.04  -0.25  -0.02
  98   1     0.01   0.04   0.06    -0.08  -0.25  -0.17     0.07   0.05   0.09
  99   1    -0.10   0.03  -0.13     0.17  -0.21   0.43    -0.11   0.05  -0.19
 100   1     0.03   0.03   0.04     0.11  -0.02   0.00    -0.04  -0.02   0.02
 101   1     0.01  -0.07   0.03     0.07  -0.13   0.05    -0.04  -0.05  -0.05
 102   1     0.09  -0.04   0.05     0.15  -0.08   0.03     0.03  -0.02  -0.03
 103   1     0.00  -0.02  -0.01     0.03   0.10   0.04    -0.07  -0.01   0.00
 104   1    -0.03  -0.09  -0.03    -0.08  -0.11  -0.15    -0.01   0.10   0.03
 105   1    -0.08  -0.04   0.03    -0.25   0.09  -0.02     0.07   0.00  -0.01
 106   1     0.08   0.20   0.28    -0.02   0.03  -0.03     0.01   0.02  -0.03
 107   1    -0.12   0.31  -0.25    -0.02   0.05  -0.11    -0.01   0.01   0.03
 108   1    -0.05  -0.24  -0.07    -0.07  -0.03  -0.08    -0.01   0.06   0.01
 109   1     0.00   0.04  -0.05    -0.01   0.00   0.02    -0.05   0.02   0.03
 110   1     0.05   0.03  -0.02    -0.02   0.01   0.01    -0.05   0.00   0.00
 111   1     0.00   0.01  -0.02    -0.01   0.00   0.00    -0.09  -0.02  -0.04
 112   1    -0.01  -0.01  -0.05    -0.04   0.01  -0.01    -0.04  -0.02   0.00
 113   1     0.02  -0.02  -0.09     0.00   0.02  -0.04    -0.03  -0.01  -0.01
 114   1    -0.05  -0.02  -0.07    -0.04   0.02  -0.02    -0.04  -0.01  -0.01
                    58                     59                     60
                     A                      A                      A
 Frequencies --   264.5259               269.6341               271.8243
 Red. masses --     1.6753                 1.8827                 1.5317
 Frc consts  --     0.0691                 0.0806                 0.0667
 IR Inten    --     3.3269                 4.1652                 0.7953
 Atom AN      X      Y      Z        X      Y      Z        X      Y      Z
   1   8     0.01   0.00   0.00    -0.03  -0.01   0.03    -0.01   0.00   0.01
   2  12     0.01   0.04   0.00    -0.02   0.02  -0.01    -0.01   0.01   0.01
   3   8    -0.01  -0.01   0.00     0.03   0.02  -0.03     0.00   0.01  -0.05
   4   6     0.00   0.00   0.00    -0.01   0.01   0.04     0.00   0.00   0.01
   5   7    -0.02   0.02   0.03    -0.01   0.02   0.00     0.02  -0.02   0.01
   6   7     0.02  -0.01   0.01     0.02   0.00   0.00     0.00  -0.01   0.00
   7   8     0.00   0.01   0.00    -0.02   0.00   0.04    -0.01   0.00   0.02
   8   6     0.00   0.02   0.03     0.00   0.01   0.00     0.01   0.00   0.00
   9   6     0.00   0.02   0.01     0.01  -0.01   0.01     0.00   0.01  -0.01
  10   6     0.02   0.01   0.01     0.01  -0.01   0.00     0.00   0.00   0.00
  11   8    -0.01  -0.01  -0.01     0.04  -0.05   0.03     0.01  -0.01   0.00
  12   6     0.00  -0.01   0.00     0.05  -0.02  -0.02     0.02   0.00  -0.01
  13   6    -0.01  -0.01   0.00     0.04   0.02  -0.03     0.01   0.01  -0.02
  14   6     0.01   0.00   0.00     0.00   0.00   0.02     0.00   0.00   0.01
  15   8     0.01   0.01   0.02     0.05  -0.05  -0.07     0.03   0.01   0.00
  16   6     0.01   0.01   0.00    -0.01  -0.03  -0.04     0.00  -0.01  -0.01
  17   8    -0.04   0.00  -0.01    -0.03  -0.02   0.01     0.03   0.04  -0.01
  18   6    -0.01   0.01  -0.01     0.01   0.00  -0.01    -0.02  -0.02  -0.01
  19   8    -0.02  -0.01   0.01     0.01   0.02  -0.01    -0.06  -0.01   0.00
  20   8    -0.01   0.02   0.01     0.01   0.00   0.01     0.01  -0.01   0.02
  21   6     0.00   0.01   0.00     0.00   0.00   0.01     0.00   0.00   0.00
  22   6     0.00   0.00   0.00    -0.01  -0.01   0.01     0.00   0.02  -0.01
  23   6     0.00   0.01   0.00     0.00  -0.01   0.01     0.00  -0.02   0.01
  24   8     0.02   0.03  -0.02    -0.01  -0.01  -0.01    -0.02  -0.02   0.02
  25   6     0.01  -0.01  -0.02     0.00  -0.01  -0.01     0.06   0.01   0.00
  26   6     0.04  -0.03  -0.02    -0.06   0.05   0.02     0.01  -0.04  -0.01
  27   6     0.01  -0.02   0.01     0.04   0.01  -0.08     0.01   0.01  -0.01
  28   6     0.01  -0.01  -0.01    -0.07   0.06   0.07    -0.02   0.01   0.02
  29   6    -0.02   0.00   0.00     0.00   0.00   0.00     0.01  -0.01   0.01
  30   6     0.00  -0.01   0.00     0.01   0.00   0.00     0.00  -0.02   0.00
  31   6    -0.03  -0.01  -0.02    -0.01   0.00   0.00     0.02   0.00   0.00
  32   6    -0.02  -0.01   0.00    -0.01  -0.01   0.00     0.01   0.02   0.01
  33   6     0.00  -0.02   0.03     0.00  -0.01   0.00     0.00   0.02   0.01
  34   6     0.00  -0.01   0.01     0.01   0.00   0.00    -0.02   0.01   0.00
  35   6    -0.01   0.00  -0.02     0.01   0.00   0.00    -0.01   0.00   0.00
  36   6     0.00  -0.01  -0.02     0.00   0.00   0.00     0.01  -0.01  -0.01
  37   6    -0.01   0.00  -0.02     0.00  -0.01   0.00    -0.01   0.01   0.00
  38   6     0.01  -0.01   0.00     0.00   0.00   0.02    -0.01   0.00  -0.01
  39   6    -0.01   0.00  -0.01     0.00   0.01   0.01    -0.01   0.00  -0.01
  40   6    -0.04  -0.01  -0.02     0.01   0.01  -0.01    -0.01  -0.01   0.00
  41   6    -0.03  -0.02  -0.03     0.00   0.01  -0.01    -0.01  -0.02  -0.01
  42   6    -0.02  -0.02  -0.03    -0.01   0.00   0.00     0.00  -0.02  -0.01
  43   6     0.02  -0.02   0.01     0.00   0.00   0.01    -0.01   0.00  -0.01
  44   6    -0.03   0.01  -0.03    -0.01   0.00   0.00     0.01  -0.01  -0.01
  45   6     0.03   0.01   0.01     0.01   0.02   0.00    -0.02  -0.05  -0.01
  46   6     0.01   0.01  -0.01     0.01   0.01   0.00    -0.01  -0.03  -0.01
  47   6    -0.02   0.01   0.00    -0.01  -0.02   0.00     0.00   0.03   0.01
  48   6     0.02  -0.02  -0.02    -0.01  -0.02   0.01     0.00   0.03  -0.01
  49   6    -0.01   0.05  -0.02    -0.02   0.02  -0.02     0.03  -0.01   0.04
  50   6    -0.04   0.04  -0.02    -0.01   0.01   0.01     0.03  -0.01   0.00
  51   6     0.06  -0.04   0.01     0.01  -0.03   0.01    -0.04   0.03  -0.01
  52   6     0.03  -0.06   0.03     0.00   0.00   0.01    -0.01   0.02  -0.02
  53   6     0.00   0.00   0.05     0.00   0.01   0.00     0.00   0.00   0.01
  54   6     0.02   0.02   0.04     0.00  -0.01  -0.03     0.00   0.01   0.02
  55   1    -0.02   0.01   0.01     0.01  -0.02   0.01    -0.01   0.03  -0.01
  56   1    -0.01   0.00   0.00     0.03   0.01  -0.02     0.00   0.02  -0.01
  57   1     0.01   0.00   0.00     0.03   0.01  -0.05     0.01   0.00  -0.01
  58   1     0.01   0.00   0.01     0.01  -0.01  -0.07     0.01   0.00  -0.02
  59   1     0.00   0.02   0.00    -0.05  -0.07  -0.05    -0.01  -0.02  -0.02
  60   1     0.01   0.00  -0.01     0.01  -0.01  -0.04     0.01   0.00  -0.01
  61   1     0.02  -0.01  -0.01     0.00  -0.01   0.01    -0.02   0.02   0.00
  62   1    -0.01   0.01   0.00     0.01  -0.02   0.01     0.01  -0.03   0.01
  63   1     0.12  -0.02   0.05     0.03  -0.01   0.01    -0.19   0.09  -0.18
  64   1    -0.11   0.02   0.04    -0.04  -0.01   0.01     0.38  -0.07  -0.17
  65   1     0.00  -0.03  -0.14     0.00  -0.02  -0.05     0.07   0.01   0.30
  66   1    -0.24   0.04  -0.32    -0.14   0.16  -0.11    -0.14   0.01  -0.18
  67   1     0.06   0.17   0.36    -0.14   0.08   0.19     0.00   0.06   0.20
  68   1     0.36  -0.34  -0.10     0.02  -0.04   0.00     0.18  -0.19  -0.06
  69   1     0.01  -0.01  -0.03     0.01   0.02  -0.20    -0.01   0.01  -0.06
  70   1    -0.01  -0.02   0.06     0.00   0.07  -0.02    -0.02   0.03   0.04
  71   1     0.06  -0.04   0.02     0.12  -0.08  -0.07     0.07  -0.01   0.00
  72   1    -0.05   0.07   0.05     0.14  -0.24  -0.10     0.01  -0.04   0.02
  73   1    -0.03  -0.11  -0.01     0.06   0.47   0.04    -0.02   0.07   0.01
  74   1     0.10   0.01  -0.05    -0.41  -0.01   0.29    -0.08   0.00   0.06
  75   1    -0.02  -0.02   0.00    -0.01  -0.01   0.00     0.02   0.03   0.00
  76   1     0.02  -0.02   0.06     0.01  -0.02   0.00    -0.01   0.03   0.01
  77   1     0.01  -0.01   0.02     0.02   0.00   0.00    -0.03   0.01  -0.01
  78   1     0.01  -0.04  -0.02     0.00   0.00   0.00     0.00   0.01  -0.01
  79   1    -0.01   0.00  -0.01     0.01  -0.02   0.00    -0.01   0.02   0.00
  80   1    -0.02   0.03   0.00    -0.01   0.02   0.01     0.00   0.00  -0.02
  81   1    -0.05   0.00  -0.03     0.01   0.02  -0.03    -0.02  -0.01   0.00
  82   1    -0.03  -0.02  -0.03     0.00   0.00  -0.02    -0.01  -0.02  -0.02
  83   1     0.01  -0.02   0.02     0.00   0.01   0.01     0.00   0.00  -0.01
  84   1    -0.05   0.02  -0.05    -0.01   0.01   0.00     0.00  -0.01  -0.01
  85   1     0.04   0.01  -0.02    -0.04   0.02  -0.08     0.14  -0.04   0.26
  86   1     0.08   0.03   0.01     0.08   0.10   0.01    -0.23  -0.28  -0.04
  87   1     0.02   0.01   0.05     0.00  -0.04   0.07     0.02   0.15  -0.23
  88   1    -0.06   0.02   0.02    -0.02   0.01   0.01     0.08  -0.04  -0.04
  89   1     0.05  -0.05  -0.05     0.02  -0.02  -0.01    -0.06   0.05   0.04
  90   1     0.07   0.08   0.00     0.03   0.03   0.01    -0.08  -0.11  -0.03
  91   1    -0.10  -0.07  -0.02     0.04   0.03   0.01     0.01   0.03   0.02
  92   1    -0.04   0.10   0.08     0.01  -0.07  -0.07     0.01   0.04   0.02
  93   1     0.08   0.02  -0.05    -0.07  -0.03   0.03     0.00   0.05  -0.01
  94   1     0.03  -0.01   0.00     0.00   0.00  -0.01    -0.01   0.01   0.00
  95   1     0.02  -0.03  -0.03    -0.05  -0.03   0.02     0.03   0.04  -0.02
  96   1     0.02  -0.03  -0.03     0.02  -0.05   0.03    -0.02   0.04  -0.03
  97   1     0.02   0.18  -0.04    -0.03  -0.07  -0.02     0.02   0.07   0.06
  98   1    -0.09   0.01  -0.10     0.00   0.07   0.04     0.03  -0.06   0.00
  99   1     0.05   0.00   0.07    -0.04   0.06  -0.10     0.08  -0.05   0.11
 100   1    -0.04   0.02  -0.02    -0.01   0.02   0.01     0.05  -0.01  -0.01
 101   1    -0.02   0.08  -0.01    -0.01   0.03   0.01     0.04  -0.01   0.03
 102   1    -0.08   0.04   0.00    -0.02   0.01   0.02     0.02  -0.01   0.01
 103   1     0.10  -0.03  -0.01     0.02  -0.04  -0.03    -0.05   0.02   0.02
 104   1     0.07  -0.09   0.04     0.02  -0.04   0.01    -0.04   0.04  -0.04
 105   1     0.05  -0.04   0.02     0.02  -0.05   0.02    -0.05   0.04  -0.02
 106   1    -0.01  -0.08   0.02     0.02   0.03   0.09     0.01   0.03  -0.03
 107   1     0.05  -0.09   0.05    -0.01   0.06  -0.06    -0.02   0.03  -0.02
 108   1     0.06  -0.05   0.04     0.01  -0.10  -0.01    -0.03   0.03  -0.02
 109   1     0.01  -0.02   0.06     0.00   0.01   0.00     0.00   0.00   0.02
 110   1    -0.01  -0.01   0.04     0.00   0.01   0.00    -0.01  -0.01   0.01
 111   1     0.02   0.00   0.06     0.00   0.01   0.00    -0.01  -0.01   0.01
 112   1     0.02   0.02   0.04     0.00   0.00  -0.01     0.00   0.01   0.02
 113   1     0.01   0.02   0.06     0.02  -0.01  -0.05    -0.01   0.02   0.04
 114   1     0.05   0.03   0.04    -0.02   0.00  -0.04     0.02   0.02   0.03
                    61                     62                     63
                     A                      A                      A
 Frequencies --   274.4059               275.8407               282.1823
 Red. masses --     1.3576                 2.8008                 2.0078
 Frc consts  --     0.0602                 0.1256                 0.0942
 IR Inten    --    11.5368                 4.3901                 5.8001
 Atom AN      X      Y      Z        X      Y      Z        X      Y      Z
   1   8     0.00   0.00   0.00     0.01  -0.01   0.01    -0.01   0.00   0.00
   2  12     0.02  -0.03   0.00     0.02  -0.02   0.02     0.05   0.04  -0.01
   3   8    -0.01   0.00  -0.01     0.00   0.01  -0.02     0.01   0.00   0.00
   4   6     0.00   0.00   0.00     0.00   0.00   0.01     0.00   0.00   0.01
   5   7    -0.02   0.03  -0.01    -0.01   0.06   0.00     0.02  -0.07   0.00
   6   7     0.01  -0.01   0.00    -0.06   0.02  -0.01    -0.06   0.05  -0.04
   7   8     0.00   0.00   0.00     0.01  -0.01   0.01     0.00   0.00   0.01
   8   6    -0.01   0.01   0.00     0.00   0.00   0.01     0.01  -0.02   0.00
   9   6     0.00   0.00   0.00     0.01  -0.03   0.00     0.01   0.00   0.00
  10   6     0.00   0.00   0.00    -0.03  -0.01   0.00    -0.01   0.03  -0.02
  11   8     0.00   0.01   0.00     0.00   0.00   0.00     0.01  -0.01   0.01
  12   6     0.00   0.01   0.00    -0.01   0.00  -0.01     0.00  -0.01   0.00
  13   6     0.00   0.00   0.00     0.00   0.00  -0.01     0.00   0.00   0.00
  14   6     0.00   0.00   0.00     0.00   0.01   0.00     0.00   0.00   0.00
  15   8     0.01   0.01   0.01    -0.01   0.00   0.00     0.00  -0.02  -0.02
  16   6     0.00   0.00   0.00     0.00   0.00  -0.01     0.00  -0.01  -0.01
  17   8     0.03   0.04  -0.03    -0.02   0.00   0.00     0.00  -0.01   0.03
  18   6    -0.01  -0.01   0.01     0.00  -0.01  -0.01     0.00   0.01   0.00
  19   8    -0.03   0.01   0.00    -0.01  -0.03   0.00    -0.01  -0.01   0.01
  20   8     0.01  -0.01   0.01     0.00   0.01   0.00    -0.01   0.01   0.00
  21   6    -0.01   0.00  -0.01     0.00   0.01   0.00    -0.02   0.01   0.00
  22   6     0.00   0.02  -0.02     0.00   0.01   0.00    -0.02   0.00   0.01
  23   6     0.00  -0.01   0.01     0.00   0.00  -0.01     0.00   0.02   0.00
  24   8    -0.04  -0.03   0.02     0.01   0.01  -0.02    -0.02   0.02   0.00
  25   6     0.05   0.01   0.02    -0.01   0.01  -0.01     0.00  -0.01   0.02
  26   6     0.00  -0.02   0.00     0.02  -0.01  -0.01     0.01   0.01  -0.01
  27   6    -0.01   0.01   0.01     0.00  -0.01  -0.01     0.02  -0.01  -0.01
  28   6     0.00  -0.01   0.00    -0.02   0.00   0.01    -0.01   0.01   0.01
  29   6    -0.02   0.01  -0.01     0.02   0.03  -0.02    -0.01  -0.03   0.00
  30   6     0.00   0.00   0.00    -0.02   0.00  -0.01    -0.03   0.01  -0.01
  31   6    -0.03   0.00   0.00    -0.02  -0.02  -0.04     0.01   0.00  -0.01
  32   6    -0.02  -0.03  -0.01     0.01  -0.07  -0.03     0.00   0.02   0.00
  33   6     0.00  -0.03  -0.01     0.08  -0.08   0.01    -0.04   0.03   0.02
  34   6     0.02  -0.02   0.00     0.11  -0.02  -0.02    -0.06   0.00   0.02
  35   6     0.01   0.00   0.00     0.06   0.05  -0.05    -0.05  -0.02   0.02
  36   6    -0.01   0.01   0.01     0.01  -0.04  -0.03     0.00   0.00   0.00
  37   6     0.01  -0.01   0.00     0.02   0.04  -0.03    -0.02   0.00   0.01
  38   6     0.00   0.00   0.00    -0.01  -0.02  -0.03    -0.02  -0.04  -0.03
  39   6     0.00   0.00   0.00     0.01  -0.05   0.00     0.02  -0.07  -0.01
  40   6     0.00   0.00   0.00     0.03  -0.04   0.04     0.05  -0.05   0.02
  41   6     0.00   0.00   0.00     0.03   0.00   0.04     0.03   0.00   0.04
  42   6     0.00   0.00  -0.01     0.01   0.02   0.02    -0.01   0.03   0.02
  43   6     0.00   0.00   0.00     0.00   0.00  -0.02     0.00  -0.03   0.00
  44   6     0.00   0.00  -0.01     0.02   0.00   0.01    -0.01   0.01   0.00
  45   6     0.02   0.06   0.01     0.06  -0.04   0.02    -0.01  -0.03   0.01
  46   6     0.01   0.03   0.01     0.04  -0.02  -0.03    -0.01   0.02   0.00
  47   6    -0.01  -0.03   0.00    -0.13   0.11   0.09     0.04   0.01  -0.01
  48   6     0.00  -0.02   0.01    -0.09   0.09  -0.01     0.03   0.02  -0.01
  49   6     0.01   0.00   0.00     0.00  -0.03   0.00    -0.04  -0.03  -0.05
  50   6    -0.01   0.01  -0.01     0.01  -0.03  -0.02    -0.02  -0.04  -0.05
  51   6    -0.01   0.00   0.00    -0.03   0.07   0.00     0.02   0.04   0.02
  52   6     0.00   0.00  -0.01    -0.01   0.06   0.00     0.00   0.05   0.03
  53   6     0.01   0.00  -0.01    -0.05  -0.03   0.04     0.04   0.02  -0.03
  54   6     0.00   0.00   0.01    -0.03   0.00   0.03     0.01   0.02   0.01
  55   1     0.00  -0.01   0.01     0.03  -0.05   0.01     0.02  -0.01   0.00
  56   1    -0.01   0.01   0.00     0.00   0.00  -0.01     0.00   0.00  -0.01
  57   1     0.00   0.00   0.01     0.00   0.01   0.00     0.01   0.00  -0.01
  58   1     0.00   0.00   0.00     0.00   0.00  -0.02     0.00   0.00  -0.02
  59   1     0.00   0.00   0.00    -0.01  -0.01  -0.02     0.00  -0.02  -0.01
  60   1     0.00   0.00   0.00     0.02   0.01  -0.01     0.00   0.00   0.00
  61   1    -0.04   0.00  -0.01     0.01   0.01   0.00    -0.04   0.00   0.02
  62   1     0.00  -0.02   0.02     0.01   0.00  -0.01    -0.01   0.02   0.00
  63   1    -0.22   0.07  -0.17     0.05  -0.01   0.04     0.01  -0.01   0.03
  64   1     0.41  -0.06  -0.16    -0.10   0.03   0.04     0.02   0.01   0.02
  65   1     0.06   0.02   0.36    -0.01   0.01  -0.08     0.01  -0.02   0.03
  66   1    -0.02  -0.03  -0.02    -0.02   0.00  -0.05     0.00  -0.01  -0.01
  67   1     0.00  -0.01   0.02     0.03   0.02   0.03     0.02   0.01  -0.01
  68   1     0.02  -0.03  -0.01     0.06  -0.05  -0.02     0.02   0.01  -0.01
  69   1    -0.01   0.00   0.02     0.01   0.00  -0.03     0.02   0.00  -0.04
  70   1     0.00   0.01   0.00     0.00  -0.01   0.00     0.01  -0.01   0.00
  71   1    -0.01   0.02   0.01     0.02  -0.02  -0.01     0.04  -0.03  -0.01
  72   1    -0.01   0.01   0.01     0.01  -0.05   0.00     0.03  -0.04  -0.02
  73   1     0.00  -0.03   0.00    -0.01   0.05   0.00     0.02   0.09   0.01
  74   1     0.02   0.00  -0.02    -0.08  -0.01   0.03    -0.07   0.00   0.05
  75   1    -0.03  -0.04   0.01    -0.02  -0.11  -0.03     0.02   0.04   0.00
  76   1     0.01  -0.05  -0.01     0.11  -0.13   0.04    -0.05   0.06   0.02
  77   1     0.04  -0.02   0.01     0.17  -0.03  -0.02    -0.08   0.00   0.03
  78   1    -0.01  -0.02   0.02     0.02  -0.08  -0.03     0.00   0.00   0.00
  79   1     0.01  -0.02   0.00     0.06  -0.03  -0.03    -0.05   0.04   0.02
  80   1     0.01   0.00  -0.01     0.02  -0.09  -0.01     0.03  -0.11  -0.03
  81   1     0.00   0.00   0.00     0.05  -0.06   0.06     0.09  -0.07   0.04
  82   1     0.00   0.00  -0.01     0.05   0.01   0.06     0.06   0.03   0.08
  83   1     0.00   0.00   0.00     0.02  -0.03   0.00     0.04  -0.07   0.02
  84   1     0.00   0.00  -0.01     0.04  -0.01   0.03     0.02   0.00   0.02
  85   1    -0.17   0.05  -0.32     0.03  -0.03   0.00    -0.14  -0.02  -0.11
  86   1     0.29   0.35   0.06     0.15  -0.03   0.02     0.10   0.07   0.02
  87   1    -0.02  -0.19   0.28     0.04  -0.06   0.11    -0.02  -0.17   0.12
  88   1    -0.11   0.04   0.05     0.03  -0.02  -0.01    -0.04   0.02   0.03
  89   1     0.08  -0.08  -0.05     0.06  -0.03  -0.07     0.00  -0.01   0.00
  90   1     0.10   0.14   0.04     0.08   0.00   0.00     0.01   0.05  -0.01
  91   1     0.01  -0.01   0.00    -0.15   0.01   0.25     0.02   0.01  -0.06
  92   1    -0.01  -0.05  -0.04    -0.22   0.21   0.08     0.07   0.02   0.06
  93   1    -0.03  -0.05   0.02    -0.19   0.18   0.06     0.10   0.02  -0.04
  94   1     0.00   0.00  -0.01    -0.13   0.15  -0.18     0.03  -0.02   0.05
  95   1    -0.04  -0.03   0.02    -0.25   0.13   0.10     0.12   0.03  -0.04
  96   1     0.02  -0.04   0.04    -0.02   0.02   0.07    -0.02   0.05  -0.08
  97   1     0.01   0.03   0.00     0.00  -0.07  -0.01     0.10   0.30  -0.15
  98   1     0.00  -0.01  -0.01     0.02  -0.05   0.00    -0.24  -0.26  -0.33
  99   1     0.02  -0.01   0.02    -0.04  -0.03   0.00    -0.01  -0.19   0.31
 100   1    -0.01   0.00  -0.01    -0.02  -0.03   0.00    -0.07   0.00   0.01
 101   1    -0.01   0.02  -0.02    -0.02  -0.06  -0.04    -0.08  -0.11  -0.11
 102   1    -0.01   0.01  -0.01     0.04  -0.02  -0.05     0.08  -0.04  -0.09
 103   1     0.02   0.02   0.02    -0.16   0.00   0.03    -0.08  -0.02   0.02
 104   1    -0.01  -0.03  -0.02    -0.04   0.24   0.04     0.02   0.17   0.10
 105   1    -0.05   0.02   0.00     0.10   0.05  -0.04     0.16   0.02  -0.02
 106   1     0.00   0.00  -0.01     0.03   0.06  -0.06     0.04   0.07   0.02
 107   1     0.00   0.00  -0.01    -0.04   0.04   0.05    -0.06   0.05   0.07
 108   1    -0.01   0.00  -0.01    -0.01   0.13   0.02     0.02   0.09   0.05
 109   1     0.02  -0.02  -0.02    -0.03  -0.04   0.10     0.02   0.05  -0.08
 110   1     0.01   0.00  -0.01    -0.11  -0.03   0.04     0.09   0.04  -0.02
 111   1     0.03   0.01   0.00    -0.05  -0.02   0.01     0.02   0.01  -0.03
 112   1     0.00   0.00   0.01    -0.05   0.00   0.04     0.02   0.01  -0.02
 113   1     0.00   0.00   0.01    -0.04   0.01   0.05    -0.02   0.03   0.05
 114   1     0.00   0.01   0.00    -0.01   0.02   0.03     0.05   0.00   0.03
                    64                     65                     66
                     A                      A                      A
 Frequencies --   288.3293               294.7838               300.4191
 Red. masses --     2.5593                 2.7999                 2.4680
 Frc consts  --     0.1254                 0.1434                 0.1312
 IR Inten    --     1.0019                 1.2864                 4.0616
 Atom AN      X      Y      Z        X      Y      Z        X      Y      Z
   1   8     0.00   0.00   0.00     0.00   0.00  -0.01    -0.01   0.00   0.00
   2  12     0.03   0.01   0.02     0.00   0.02  -0.05     0.02  -0.04   0.01
   3   8     0.00   0.01  -0.02    -0.01  -0.02   0.05     0.00   0.01  -0.02
   4   6     0.00   0.00   0.00     0.00   0.00  -0.01     0.00   0.00   0.00
   5   7    -0.04   0.05   0.01    -0.03   0.08   0.02    -0.05   0.08  -0.05
   6   7     0.01  -0.03  -0.02    -0.01   0.02  -0.01    -0.04   0.03   0.01
   7   8     0.00   0.00   0.01     0.01   0.00  -0.02    -0.01   0.00   0.00
   8   6     0.00   0.05   0.02     0.01   0.02   0.04    -0.03   0.00  -0.04
   9   6     0.02   0.02   0.00     0.04  -0.03   0.03     0.00  -0.05   0.01
  10   6     0.03   0.01  -0.01     0.03   0.01   0.00    -0.04  -0.02   0.01
  11   8     0.00   0.00   0.00    -0.01   0.01   0.01     0.01  -0.01   0.00
  12   6     0.00   0.00   0.00    -0.02   0.01   0.00     0.02  -0.01   0.01
  13   6     0.00   0.00  -0.01     0.00   0.01   0.02     0.00   0.00   0.00
  14   6     0.00   0.00   0.00    -0.01   0.00   0.00     0.00  -0.01   0.00
  15   8     0.00   0.00   0.00    -0.02  -0.01  -0.03     0.03   0.00   0.01
  16   6     0.00   0.00   0.00    -0.01   0.00   0.02     0.00  -0.01   0.00
  17   8     0.00  -0.02   0.05    -0.02   0.02  -0.09     0.04  -0.01   0.03
  18   6     0.00   0.00  -0.02     0.02   0.00   0.02    -0.02   0.01   0.00
  19   8    -0.02  -0.05   0.01     0.09   0.12  -0.04    -0.06  -0.06   0.04
  20   8    -0.01   0.02   0.00     0.02  -0.04   0.01    -0.03   0.03   0.00
  21   6     0.00   0.02   0.01     0.01  -0.04  -0.01    -0.01   0.02  -0.01
  22   6    -0.01   0.01   0.03     0.01  -0.02  -0.06    -0.01   0.00   0.02
  23   6     0.00   0.02  -0.02    -0.01  -0.04   0.03    -0.01   0.03   0.00
  24   8     0.02   0.04  -0.01    -0.03  -0.07   0.02     0.02   0.05   0.00
  25   6    -0.04   0.01  -0.01     0.07  -0.04  -0.03    -0.05   0.02   0.05
  26   6     0.03  -0.01  -0.02    -0.08   0.02   0.05     0.05  -0.02  -0.03
  27   6     0.01  -0.01  -0.01    -0.03   0.02   0.03     0.02  -0.01  -0.03
  28   6    -0.01   0.00   0.00     0.02   0.01  -0.01     0.01   0.01   0.00
  29   6    -0.04   0.01   0.00    -0.01   0.03   0.01    -0.01   0.04  -0.02
  30   6    -0.01  -0.04  -0.02    -0.02   0.00   0.00    -0.01   0.03   0.01
  31   6    -0.05   0.00   0.01    -0.03   0.01   0.02    -0.02   0.02   0.03
  32   6    -0.06   0.00   0.00    -0.03  -0.01   0.00    -0.02  -0.01   0.00
  33   6    -0.03  -0.01   0.02     0.01  -0.01   0.01     0.03  -0.02  -0.03
  34   6    -0.01   0.00   0.03     0.03   0.01   0.00     0.06   0.01  -0.01
  35   6    -0.02  -0.01   0.00     0.02   0.01  -0.02     0.05   0.03  -0.02
  36   6    -0.03   0.01   0.03    -0.01   0.00   0.01    -0.01   0.02   0.03
  37   6    -0.01  -0.03   0.00     0.01  -0.02  -0.02     0.03  -0.01   0.00
  38   6    -0.02  -0.04  -0.05    -0.01  -0.03  -0.01     0.00   0.02   0.01
  39   6     0.00  -0.08  -0.02     0.02  -0.03  -0.02     0.01   0.02   0.00
  40   6     0.01  -0.07   0.00     0.02  -0.03   0.01     0.02   0.03   0.01
  41   6     0.02  -0.05  -0.01     0.00  -0.01   0.03     0.00   0.03   0.02
  42   6     0.01  -0.04  -0.01    -0.01   0.00   0.01    -0.01   0.04   0.02
  43   6    -0.02  -0.01  -0.04    -0.01  -0.02   0.00     0.00   0.01   0.01
  44   6     0.01  -0.02   0.00     0.00   0.00  -0.01     0.00   0.01   0.00
  45   6     0.01   0.09   0.00     0.03   0.07  -0.01     0.02   0.10  -0.01
  46   6     0.01  -0.01   0.02     0.00  -0.03   0.00     0.00  -0.05   0.02
  47   6     0.02  -0.07  -0.05    -0.02  -0.05  -0.03    -0.01  -0.07  -0.02
  48   6     0.05  -0.09   0.01     0.02  -0.07   0.01     0.00  -0.06   0.04
  49   6     0.03  -0.01   0.04    -0.01  -0.01  -0.02    -0.03  -0.02  -0.03
  50   6     0.03   0.00   0.03    -0.02  -0.01  -0.03    -0.01  -0.01  -0.03
  51   6    -0.08   0.11  -0.01     0.01   0.02   0.02     0.04  -0.03   0.01
  52   6    -0.03   0.10  -0.04    -0.01   0.03   0.01     0.01  -0.03   0.03
  53   6     0.06   0.04  -0.01    -0.05   0.00   0.08     0.01   0.01  -0.08
  54   6     0.03   0.05   0.03     0.02   0.05   0.04    -0.05  -0.05  -0.05
  55   1     0.00   0.00  -0.01     0.04  -0.06   0.03     0.04  -0.06   0.03
  56   1     0.00   0.00   0.00     0.01   0.00   0.00    -0.01   0.01   0.01
  57   1     0.00   0.00   0.00    -0.02   0.00   0.00     0.00  -0.01  -0.01
  58   1     0.00   0.00  -0.01    -0.02   0.00   0.03     0.01   0.00  -0.01
  59   1     0.00   0.00   0.00     0.01   0.02   0.03     0.00  -0.01   0.00
  60   1     0.00   0.00   0.00    -0.02   0.00   0.03    -0.01  -0.01   0.00
  61   1    -0.01   0.03   0.03     0.02  -0.06  -0.07    -0.03   0.01   0.03
  62   1     0.01   0.02  -0.02    -0.01  -0.05   0.03    -0.02   0.04   0.00
  63   1     0.04   0.00   0.05     0.11  -0.02  -0.02    -0.14  -0.01   0.02
  64   1    -0.16   0.02   0.05     0.11   0.00  -0.03     0.00   0.01   0.02
  65   1    -0.04   0.02  -0.12     0.08  -0.11  -0.02    -0.05   0.09   0.12
  66   1     0.00  -0.02  -0.05    -0.02   0.10   0.07     0.03  -0.10  -0.01
  67   1     0.06   0.03   0.02    -0.16  -0.03   0.04     0.11   0.00  -0.06
  68   1     0.08  -0.05  -0.03    -0.15   0.08   0.07     0.07  -0.04  -0.04
  69   1     0.02   0.00  -0.03    -0.04  -0.01   0.08     0.03   0.01  -0.06
  70   1     0.00  -0.01   0.00    -0.01   0.03   0.00     0.02  -0.02  -0.02
  71   1     0.03  -0.03  -0.01    -0.08   0.07   0.02     0.04  -0.06  -0.03
  72   1    -0.01  -0.01   0.01     0.03   0.00  -0.05     0.01   0.01  -0.01
  73   1    -0.02   0.00   0.00     0.05   0.03   0.01     0.01   0.02   0.00
  74   1    -0.02   0.00   0.01     0.01   0.01  -0.01     0.00   0.01   0.02
  75   1    -0.06   0.00  -0.01    -0.04  -0.01  -0.01    -0.03  -0.02   0.00
  76   1    -0.02  -0.02   0.02     0.03  -0.04   0.00     0.03  -0.05  -0.05
  77   1     0.00   0.00   0.06     0.04   0.01   0.00     0.08   0.01   0.00
  78   1    -0.02  -0.03   0.03     0.00  -0.03   0.00     0.00  -0.01   0.02
  79   1    -0.02  -0.02  -0.01     0.02  -0.04  -0.03     0.05  -0.05  -0.02
  80   1    -0.01  -0.10  -0.02     0.03  -0.05  -0.03     0.03   0.02  -0.01
  81   1     0.01  -0.08   0.02     0.04  -0.04   0.01     0.03   0.02   0.01
  82   1     0.03  -0.05   0.01     0.00   0.00   0.05     0.00   0.04   0.03
  83   1     0.02  -0.05  -0.02     0.01  -0.04   0.02     0.00   0.01   0.00
  84   1    -0.01  -0.01  -0.01     0.00   0.00  -0.01     0.02   0.00   0.02
  85   1     0.11   0.07  -0.01     0.26   0.05   0.20     0.25   0.07   0.18
  86   1    -0.03   0.10   0.00    -0.19  -0.13  -0.04    -0.21  -0.07  -0.03
  87   1     0.00   0.17  -0.03     0.04   0.32  -0.21     0.03   0.34  -0.21
  88   1    -0.02  -0.01   0.00     0.01  -0.03  -0.03     0.00  -0.05  -0.04
  89   1     0.03  -0.05  -0.01     0.00  -0.03   0.00     0.00  -0.07   0.03
  90   1     0.04   0.00   0.05     0.00  -0.05   0.01     0.00  -0.08   0.04
  91   1     0.01  -0.05  -0.12    -0.02  -0.05  -0.04    -0.01  -0.05  -0.03
  92   1     0.03  -0.09  -0.06    -0.03  -0.05  -0.07    -0.04  -0.08  -0.10
  93   1     0.05  -0.12  -0.03    -0.02  -0.09   0.00    -0.04  -0.13   0.04
  94   1     0.10  -0.07   0.07     0.05  -0.05   0.02     0.01  -0.03   0.02
  95   1     0.04  -0.15  -0.04    -0.03  -0.12  -0.02    -0.07  -0.10   0.04
  96   1     0.08  -0.13   0.01     0.06  -0.11   0.04     0.05  -0.09   0.11
  97   1    -0.07  -0.24   0.11     0.06   0.20  -0.08     0.06   0.20  -0.09
  98   1     0.18   0.14   0.23    -0.12  -0.14  -0.19    -0.15  -0.17  -0.21
  99   1     0.00   0.10  -0.20     0.03  -0.11   0.19    -0.01  -0.12   0.21
 100   1     0.07  -0.02  -0.01    -0.05   0.00   0.00    -0.05   0.00   0.01
 101   1     0.07   0.04   0.08    -0.04  -0.02  -0.06    -0.05  -0.06  -0.07
 102   1    -0.03   0.00   0.05     0.01  -0.01  -0.05     0.04  -0.01  -0.05
 103   1    -0.24   0.04   0.07    -0.05  -0.02   0.01     0.10  -0.01  -0.02
 104   1    -0.11   0.29  -0.02     0.01   0.09   0.06     0.05  -0.10   0.02
 105   1     0.02   0.10  -0.06     0.09   0.00  -0.01     0.00  -0.03   0.02
 106   1     0.05   0.11  -0.14     0.02   0.04  -0.02    -0.02  -0.04   0.08
 107   1    -0.08   0.07   0.02    -0.04   0.03   0.03     0.02  -0.02   0.01
 108   1    -0.07   0.21  -0.02    -0.02   0.07   0.02     0.04  -0.08   0.02
 109   1     0.05   0.04  -0.06    -0.04   0.02   0.15     0.00   0.02  -0.13
 110   1     0.10   0.03  -0.01    -0.08  -0.01   0.07     0.06   0.03  -0.06
 111   1     0.08   0.04   0.03    -0.08  -0.01   0.07     0.02   0.01  -0.06
 112   1     0.01   0.05   0.05    -0.02   0.05   0.07    -0.05  -0.05  -0.04
 113   1     0.01   0.06   0.06     0.00   0.07   0.06    -0.02  -0.06  -0.09
 114   1     0.07   0.08   0.03     0.06   0.09   0.04    -0.11  -0.06  -0.06
                    67                     68                     69
                     A                      A                      A
 Frequencies --   305.8186               311.3158               316.7208
 Red. masses --     3.8970                 3.1870                 3.6672
 Frc consts  --     0.2147                 0.1820                 0.2167
 IR Inten    --     1.8407                 6.5203                 8.5613
 Atom AN      X      Y      Z        X      Y      Z        X      Y      Z
   1   8     0.06  -0.03   0.05    -0.08   0.01  -0.08     0.03   0.00   0.01
   2  12     0.03  -0.05   0.05     0.00   0.01   0.00     0.11   0.10  -0.07
   3   8     0.00  -0.02  -0.03    -0.05  -0.01   0.04    -0.01  -0.02   0.04
   4   6     0.02   0.04   0.03    -0.03  -0.05  -0.04     0.01   0.01   0.00
   5   7    -0.01   0.01  -0.02     0.00   0.00   0.00     0.00  -0.02  -0.04
   6   7     0.00   0.00   0.01     0.01  -0.01   0.01    -0.11   0.06  -0.04
   7   8     0.04  -0.01   0.05     0.01   0.02  -0.08     0.02   0.00   0.01
   8   6    -0.01   0.01  -0.02     0.00   0.00   0.00     0.00  -0.07  -0.04
   9   6    -0.02   0.01   0.00     0.00   0.01   0.00     0.03  -0.08  -0.01
  10   6    -0.02   0.00   0.00     0.00   0.00   0.00    -0.06  -0.01   0.00
  11   8    -0.05   0.06  -0.04     0.04   0.01   0.07    -0.02  -0.02  -0.01
  12   6    -0.08   0.02  -0.04     0.02   0.02   0.03    -0.03  -0.01  -0.03
  13   6    -0.03  -0.02  -0.03     0.00   0.03   0.04    -0.02  -0.01  -0.01
  14   6    -0.02   0.07  -0.01    -0.01  -0.05   0.03     0.00   0.02  -0.01
  15   8    -0.07   0.05  -0.01    -0.02  -0.04  -0.05     0.03  -0.02  -0.05
  16   6     0.05   0.03  -0.04    -0.09  -0.02   0.09     0.03   0.02  -0.01
  17   8    -0.08   0.00   0.05    -0.04   0.01   0.00     0.02  -0.03  -0.01
  18   6     0.03  -0.06  -0.09    -0.01  -0.04  -0.05     0.02   0.02   0.00
  19   8     0.17  -0.10  -0.12     0.14  -0.08  -0.07     0.08   0.00   0.00
  20   8     0.06   0.02   0.10    -0.04   0.03   0.07    -0.04   0.02   0.04
  21   6     0.02   0.02   0.06     0.02   0.01   0.04    -0.02   0.00  -0.01
  22   6     0.01   0.04   0.07     0.01  -0.01   0.04    -0.02  -0.03  -0.02
  23   6     0.05  -0.05  -0.06    -0.03  -0.02  -0.05    -0.01   0.02   0.00
  24   8    -0.02  -0.03  -0.04     0.08   0.06  -0.04     0.02   0.04   0.01
  25   6     0.00   0.03   0.01    -0.08   0.02   0.03    -0.06  -0.01   0.03
  26   6    -0.05   0.06   0.03     0.00  -0.02   0.04    -0.01   0.02   0.01
  27   6    -0.06   0.01   0.07    -0.01   0.03  -0.03    -0.01  -0.02   0.02
  28   6    -0.12  -0.06   0.01     0.15   0.06  -0.01    -0.05   0.00   0.01
  29   6     0.00   0.01  -0.01     0.00   0.00   0.00     0.00   0.00   0.00
  30   6     0.00   0.01   0.00     0.00  -0.01   0.00    -0.04   0.01  -0.01
  31   6     0.00   0.01   0.01     0.00   0.00  -0.01     0.00   0.00   0.01
  32   6     0.00   0.01   0.00     0.01   0.00   0.02    -0.01  -0.01  -0.02
  33   6     0.00   0.01  -0.01     0.00   0.00   0.00     0.00  -0.01   0.00
  34   6     0.00   0.01   0.01    -0.01   0.00  -0.02     0.01   0.00   0.02
  35   6     0.00   0.00   0.00     0.00   0.00   0.00     0.00   0.00   0.00
  36   6     0.00   0.00   0.01     0.00  -0.01  -0.02    -0.01   0.00   0.02
  37   6     0.01   0.00   0.00     0.00   0.00   0.01     0.00   0.00  -0.01
  38   6     0.00   0.00   0.00     0.00   0.00   0.00    -0.02   0.00  -0.02
  39   6     0.01   0.00   0.01     0.01   0.00   0.00    -0.08   0.02  -0.02
  40   6     0.01   0.00   0.01     0.01  -0.01   0.00    -0.06   0.03  -0.04
  41   6     0.01   0.01   0.01     0.01  -0.01   0.00    -0.02   0.03  -0.07
  42   6     0.00   0.01   0.01     0.00  -0.01   0.00    -0.01   0.00  -0.01
  43   6     0.00   0.00   0.00     0.00   0.00  -0.01     0.02   0.01  -0.02
  44   6     0.00   0.01   0.00     0.00   0.00   0.00     0.01  -0.03   0.00
  45   6     0.00   0.00   0.00     0.01  -0.02   0.00    -0.01   0.03   0.00
  46   6     0.00  -0.01   0.01     0.00   0.01  -0.01     0.00  -0.01   0.01
  47   6     0.02  -0.01  -0.01     0.00   0.00   0.01     0.00   0.01   0.00
  48   6     0.01  -0.01   0.01    -0.01   0.02   0.01     0.01   0.00  -0.01
  49   6    -0.02   0.00  -0.02     0.00   0.01  -0.01     0.05  -0.05   0.11
  50   6    -0.02   0.00  -0.01    -0.01   0.01   0.00     0.11  -0.05   0.04
  51   6     0.00   0.00   0.00    -0.01   0.02   0.00     0.07  -0.01  -0.01
  52   6     0.00   0.00   0.00     0.00   0.00  -0.01     0.04  -0.08   0.05
  53   6     0.04   0.01  -0.06     0.00   0.00   0.00    -0.06  -0.02  -0.04
  54   6    -0.01  -0.05  -0.05     0.00   0.00   0.00    -0.05   0.06   0.13
  55   1    -0.01   0.01   0.00    -0.01   0.01   0.00     0.08  -0.09   0.01
  56   1     0.00  -0.02  -0.08    -0.02   0.04   0.07    -0.01  -0.02  -0.04
  57   1     0.01   0.07   0.02    -0.06  -0.07   0.04     0.01   0.02  -0.02
  58   1     0.02   0.03  -0.08    -0.10  -0.05   0.16     0.02   0.01  -0.02
  59   1    -0.01   0.01  -0.07     0.01   0.05   0.14     0.01   0.02  -0.02
  60   1     0.12   0.08  -0.06    -0.18  -0.09   0.12     0.05   0.03  -0.02
  61   1     0.04   0.05   0.05     0.06  -0.01   0.02    -0.04  -0.03  -0.01
  62   1     0.16  -0.12  -0.10     0.03  -0.05  -0.08    -0.01   0.02   0.00
  63   1    -0.09   0.07  -0.07    -0.37   0.04  -0.13    -0.23  -0.04  -0.03
  64   1     0.08  -0.04  -0.05     0.13  -0.12  -0.11     0.06  -0.04  -0.03
  65   1     0.00   0.07   0.09    -0.08   0.17   0.28    -0.06   0.07   0.18
  66   1    -0.13   0.30  -0.16    -0.01   0.04   0.00     0.00   0.03   0.01
  67   1    -0.17   0.12   0.31     0.04   0.06   0.14    -0.01   0.03   0.01
  68   1     0.04  -0.09   0.03     0.02  -0.15   0.08    -0.01   0.01   0.01
  69   1    -0.06  -0.04   0.19    -0.04   0.03  -0.10     0.01  -0.02   0.07
  70   1    -0.04  -0.04   0.06    -0.02   0.09  -0.03     0.00  -0.05   0.02
  71   1    -0.09   0.14   0.08     0.00  -0.04  -0.03    -0.03   0.03   0.03
  72   1    -0.13  -0.07   0.19     0.17   0.06  -0.26    -0.02  -0.04   0.04
  73   1    -0.22  -0.17  -0.04     0.30   0.17   0.08    -0.06   0.04  -0.01
  74   1    -0.12  -0.07  -0.10     0.15   0.07   0.07    -0.10  -0.01   0.02
  75   1     0.00   0.01  -0.01     0.02   0.00   0.04    -0.02  -0.01  -0.03
  76   1    -0.01   0.01  -0.02     0.00   0.00   0.01     0.00  -0.01   0.00
  77   1     0.00   0.01   0.01    -0.02   0.00  -0.04     0.02  -0.01   0.04
  78   1     0.00   0.00   0.01     0.00  -0.01  -0.02    -0.01   0.00   0.02
  79   1     0.00   0.01   0.00     0.01   0.00   0.02     0.00   0.00   0.00
  80   1     0.01   0.00   0.00     0.01   0.00  -0.01    -0.09   0.04   0.00
  81   1     0.02   0.00   0.01     0.01   0.00  -0.01    -0.06   0.03  -0.04
  82   1     0.01   0.01   0.02     0.01  -0.01   0.00     0.00   0.03  -0.12
  83   1     0.00   0.00   0.00     0.00   0.00   0.00     0.02   0.00  -0.01
  84   1     0.01   0.00   0.01     0.00   0.00  -0.01    -0.01  -0.02   0.00
  85   1     0.02   0.00   0.04     0.00  -0.02   0.02    -0.01   0.02  -0.04
  86   1    -0.04  -0.03   0.00     0.01  -0.04   0.00    -0.01   0.06   0.01
  87   1     0.00   0.04  -0.04     0.00  -0.02   0.00    -0.01   0.02   0.01
  88   1     0.00  -0.02  -0.01     0.00   0.01   0.01     0.00  -0.01   0.00
  89   1     0.00  -0.02   0.01     0.01   0.02  -0.02     0.00  -0.01   0.02
  90   1     0.00  -0.02   0.01     0.01   0.02  -0.02     0.00  -0.02   0.02
  91   1     0.02   0.00  -0.02    -0.01   0.00   0.01    -0.01  -0.01  -0.01
  92   1     0.02  -0.03  -0.03    -0.01   0.01   0.03    -0.01   0.02   0.01
  93   1     0.01  -0.03   0.01     0.01   0.00   0.00     0.01   0.01  -0.01
  94   1     0.01  -0.01   0.02    -0.02   0.02  -0.01     0.01  -0.01   0.01
  95   1     0.00  -0.02   0.01    -0.01   0.04   0.02     0.02  -0.01  -0.02
  96   1     0.01  -0.01   0.02    -0.02   0.02   0.00     0.00   0.00  -0.01
  97   1     0.02   0.06  -0.05     0.00   0.01  -0.01    -0.08  -0.18   0.21
  98   1    -0.06  -0.04  -0.08    -0.01   0.01   0.00     0.21   0.00   0.22
  99   1    -0.02  -0.03   0.04     0.01   0.01  -0.01     0.04   0.00  -0.01
 100   1    -0.04   0.00   0.01    -0.02   0.01   0.00     0.20  -0.02  -0.04
 101   1    -0.03  -0.01  -0.03    -0.01   0.02  -0.01     0.15  -0.09   0.14
 102   1     0.00   0.00  -0.02    -0.02   0.01   0.00     0.13  -0.05   0.05
 103   1     0.01   0.00   0.00    -0.02   0.01   0.01     0.12   0.01  -0.04
 104   1     0.00  -0.01   0.01    -0.01   0.03  -0.01     0.08  -0.05   0.03
 105   1     0.00  -0.01   0.01     0.00   0.02  -0.01     0.08   0.00  -0.03
 106   1     0.01   0.01   0.02    -0.01  -0.02  -0.06    -0.05  -0.12   0.09
 107   1     0.00   0.01  -0.01     0.02  -0.04   0.03     0.06  -0.11   0.08
 108   1     0.00  -0.01   0.00    -0.01   0.05   0.00     0.14  -0.10   0.06
 109   1     0.03   0.00  -0.12     0.00  -0.01   0.00    -0.07   0.03  -0.01
 110   1     0.09   0.02  -0.05     0.00   0.00   0.00    -0.05   0.00  -0.02
 111   1     0.07   0.02  -0.03     0.01   0.00   0.00    -0.12  -0.04  -0.08
 112   1     0.01  -0.04  -0.07     0.00   0.00   0.00    -0.10   0.06   0.18
 113   1     0.01  -0.06  -0.08     0.00   0.00   0.00    -0.12   0.08   0.22
 114   1    -0.06  -0.08  -0.05     0.00   0.00   0.00     0.07   0.14   0.13
                    70                     71                     72
                     A                      A                      A
 Frequencies --   321.7684               325.0306               331.5333
 Red. masses --     2.9055                 3.0592                 3.7875
 Frc consts  --     0.1772                 0.1904                 0.2453
 IR Inten    --     8.7435                 2.3431                10.7641
 Atom AN      X      Y      Z        X      Y      Z        X      Y      Z
   1   8     0.05   0.00   0.04     0.03   0.00   0.02     0.02  -0.01   0.00
   2  12    -0.07  -0.02  -0.04     0.00   0.02  -0.03    -0.01   0.02   0.00
   3   8     0.00   0.00   0.04     0.00  -0.01   0.03    -0.05  -0.03   0.07
   4   6     0.01   0.02   0.01     0.01   0.02   0.01     0.01   0.02   0.00
   5   7     0.01   0.01   0.01    -0.03   0.00   0.01     0.01  -0.02  -0.01
   6   7     0.06  -0.03   0.01     0.01  -0.01   0.01     0.02  -0.02   0.02
   7   8    -0.02  -0.02   0.04     0.00  -0.01   0.02     0.05   0.02  -0.01
   8   6     0.02   0.01   0.01    -0.01   0.01   0.02     0.00  -0.01  -0.02
   9   6     0.02   0.01  -0.01    -0.01   0.01   0.02    -0.01   0.00  -0.01
  10   6     0.05   0.00   0.00     0.01   0.00   0.01     0.00  -0.02   0.01
  11   8    -0.02  -0.03  -0.04    -0.01  -0.02  -0.02    -0.04  -0.04  -0.02
  12   6     0.00  -0.02  -0.02    -0.01  -0.01  -0.02    -0.03  -0.01  -0.06
  13   6    -0.01  -0.01   0.00    -0.01  -0.01  -0.01    -0.05   0.01  -0.04
  14   6     0.00   0.02  -0.03     0.00   0.02  -0.02     0.00   0.01   0.00
  15   8     0.04  -0.01  -0.01     0.03   0.00  -0.02     0.11  -0.01  -0.11
  16   6     0.06   0.02  -0.05     0.03   0.01  -0.03     0.01   0.01   0.01
  17   8    -0.05  -0.02  -0.05     0.00  -0.01  -0.02     0.03   0.02   0.00
  18   6     0.01   0.03   0.03     0.01   0.02   0.03    -0.02  -0.02   0.04
  19   8     0.03   0.01   0.04     0.02   0.01   0.02     0.06  -0.04   0.03
  20   8    -0.05   0.01  -0.03    -0.03   0.00  -0.01    -0.05   0.01   0.00
  21   6     0.02  -0.01   0.01     0.00   0.00  -0.01    -0.01   0.02  -0.01
  22   6     0.01  -0.06   0.01     0.00  -0.02  -0.01     0.00   0.02  -0.01
  23   6    -0.04   0.03   0.01    -0.02   0.01   0.01    -0.05   0.00   0.01
  24   8     0.12   0.07  -0.02     0.04   0.03   0.00     0.02   0.04   0.00
  25   6    -0.12  -0.01   0.06    -0.04  -0.01   0.02     0.00   0.02  -0.02
  26   6     0.01  -0.01   0.01     0.01  -0.01   0.00     0.02  -0.07   0.02
  27   6     0.00  -0.01   0.01    -0.01  -0.01   0.01    -0.03   0.02   0.04
  28   6    -0.07  -0.02  -0.01    -0.05  -0.01   0.00    -0.05   0.02   0.02
  29   6     0.01   0.01   0.01    -0.02  -0.02   0.00     0.01   0.00   0.00
  30   6     0.02  -0.01   0.01     0.00  -0.01   0.00     0.01  -0.01   0.01
  31   6     0.01   0.01   0.00    -0.03  -0.02  -0.01     0.01   0.00   0.00
  32   6    -0.02   0.02  -0.05     0.06  -0.06   0.17     0.00   0.00  -0.03
  33   6     0.00   0.03   0.01     0.00  -0.07  -0.01     0.00   0.01   0.00
  34   6     0.01   0.02   0.05    -0.07  -0.05  -0.18     0.01   0.00   0.03
  35   6     0.00   0.01   0.00     0.00  -0.02   0.02     0.00   0.00   0.00
  36   6     0.01   0.00   0.01    -0.01  -0.02  -0.08     0.00   0.00   0.01
  37   6    -0.02   0.00  -0.03     0.04   0.00   0.08    -0.01   0.00  -0.01
  38   6     0.01   0.01   0.01     0.00  -0.01   0.00     0.00   0.00   0.02
  39   6    -0.01  -0.01   0.05     0.01  -0.02   0.00     0.15   0.05  -0.13
  40   6     0.04   0.00   0.01     0.01  -0.02  -0.01     0.01   0.01   0.00
  41   6     0.06   0.00  -0.02     0.00  -0.02   0.00    -0.14  -0.05   0.13
  42   6     0.00  -0.01   0.01    -0.01  -0.01   0.00     0.01  -0.01  -0.01
  43   6     0.02   0.01  -0.01     0.00  -0.01   0.00    -0.05  -0.02   0.07
  44   6    -0.02   0.00   0.01    -0.01   0.00  -0.01     0.06   0.02  -0.05
  45   6    -0.01  -0.03   0.02     0.05   0.03  -0.05    -0.01   0.00   0.00
  46   6     0.01  -0.04   0.01    -0.02   0.13  -0.06     0.00  -0.01   0.01
  47   6    -0.02   0.02  -0.02     0.08  -0.05   0.03    -0.01   0.02   0.00
  48   6     0.02  -0.03  -0.03    -0.06   0.10   0.07     0.01  -0.01  -0.02
  49   6    -0.04   0.02  -0.06     0.00   0.01  -0.01     0.10   0.00   0.03
  50   6    -0.04   0.01   0.01    -0.01   0.01   0.00    -0.04   0.04  -0.09
  51   6    -0.04   0.03  -0.02    -0.02   0.01   0.00    -0.01  -0.09   0.06
  52   6     0.01   0.01  -0.03     0.00   0.02  -0.01    -0.08   0.08  -0.01
  53   6    -0.05  -0.02   0.07     0.03   0.01   0.01    -0.01  -0.01  -0.02
  54   6     0.04   0.02  -0.01     0.01   0.00   0.00    -0.01  -0.01   0.01
  55   1     0.00   0.01  -0.01    -0.02   0.00   0.02    -0.01   0.02  -0.01
  56   1     0.00  -0.01  -0.02     0.00  -0.01  -0.03    -0.02   0.03  -0.08
  57   1     0.03   0.03  -0.05     0.02   0.02  -0.03     0.02   0.02  -0.02
  58   1     0.08   0.03  -0.09     0.04   0.02  -0.05     0.00   0.01   0.00
  59   1     0.00  -0.02  -0.08     0.00  -0.01  -0.04     0.02   0.01   0.01
  60   1     0.12   0.05  -0.07     0.06   0.03  -0.04     0.01   0.02   0.01
  61   1     0.06  -0.09  -0.02     0.01  -0.03  -0.01    -0.02   0.03   0.00
  62   1    -0.07   0.06   0.02    -0.04   0.03   0.02    -0.06   0.01   0.01
  63   1    -0.48  -0.04  -0.10    -0.13  -0.03  -0.01     0.06   0.02   0.01
  64   1     0.10  -0.14  -0.08     0.01  -0.03  -0.01    -0.05   0.04   0.01
  65   1    -0.12   0.18   0.35    -0.04   0.04   0.09     0.00   0.00  -0.08
  66   1     0.05  -0.08   0.08     0.02  -0.04   0.03     0.04  -0.16   0.08
  67   1     0.07  -0.01  -0.08     0.03  -0.01  -0.03     0.12  -0.03  -0.04
  68   1    -0.03   0.02   0.03    -0.01   0.01   0.00     0.01  -0.10   0.04
  69   1     0.02  -0.01   0.03     0.01  -0.01   0.06    -0.02   0.00   0.12
  70   1     0.01  -0.03  -0.01     0.01  -0.04  -0.01    -0.02  -0.04   0.04
  71   1    -0.01   0.00   0.00    -0.04   0.03   0.00    -0.05   0.11   0.04
  72   1    -0.07  -0.04   0.09    -0.06  -0.01   0.08    -0.01  -0.04   0.04
  73   1    -0.13  -0.05  -0.05    -0.11  -0.04  -0.03    -0.06   0.08   0.00
  74   1    -0.09  -0.03  -0.03    -0.06  -0.01  -0.02    -0.11   0.00   0.06
  75   1    -0.03   0.03  -0.11     0.11  -0.07   0.33    -0.01   0.00  -0.06
  76   1    -0.01   0.04   0.00     0.00  -0.08  -0.01     0.00   0.01  -0.01
  77   1     0.02   0.02   0.09    -0.11  -0.05  -0.32     0.02   0.00   0.05
  78   1     0.00   0.02   0.02     0.00  -0.06  -0.09     0.00   0.02   0.01
  79   1    -0.02   0.01  -0.03     0.03   0.00   0.08    -0.01   0.00  -0.02
  80   1    -0.02  -0.02   0.06     0.01  -0.01  -0.01     0.26   0.09  -0.24
  81   1     0.05   0.00  -0.01     0.01  -0.02  -0.01     0.00   0.01  -0.01
  82   1     0.09   0.01  -0.04     0.01  -0.01   0.00    -0.27  -0.08   0.24
  83   1     0.01   0.02  -0.01     0.01  -0.01   0.00    -0.05  -0.01   0.06
  84   1    -0.01   0.00   0.01    -0.01   0.00  -0.01     0.05   0.02  -0.06
  85   1    -0.06  -0.02   0.01     0.19   0.02   0.06    -0.05   0.00  -0.05
  86   1     0.02  -0.02   0.02    -0.04  -0.07  -0.07     0.01   0.05   0.01
  87   1    -0.01  -0.07   0.04     0.04   0.19  -0.13    -0.01  -0.05   0.03
  88   1     0.04  -0.05  -0.04    -0.08   0.16   0.10     0.00  -0.01   0.00
  89   1     0.00  -0.03   0.03     0.01   0.13  -0.12    -0.01  -0.01   0.02
  90   1    -0.01  -0.10   0.02     0.03   0.27  -0.11    -0.01  -0.02   0.01
  91   1    -0.03   0.00  -0.01     0.11   0.01  -0.01    -0.02   0.00   0.02
  92   1    -0.02   0.04   0.00     0.11  -0.12   0.00    -0.02   0.04   0.02
  93   1    -0.01   0.04  -0.03     0.06  -0.09   0.07     0.00   0.04  -0.01
  94   1     0.06  -0.02   0.01    -0.15   0.04  -0.01     0.01   0.00  -0.01
  95   1     0.03  -0.07  -0.06    -0.03   0.18   0.13     0.01  -0.01  -0.02
  96   1     0.04  -0.05  -0.03    -0.11   0.17   0.07     0.01  -0.01  -0.02
  97   1     0.03   0.09  -0.13     0.00   0.02  -0.02     0.03   0.00   0.10
  98   1    -0.14   0.01  -0.11    -0.01   0.01  -0.01     0.17   0.01   0.07
  99   1    -0.04   0.00  -0.01     0.01   0.01  -0.01     0.13   0.01   0.02
 100   1    -0.06   0.02   0.04    -0.02   0.01   0.00    -0.10  -0.04  -0.04
 101   1    -0.05   0.02  -0.02    -0.01   0.02  -0.01    -0.04   0.11  -0.14
 102   1    -0.03   0.01   0.02    -0.02   0.01   0.01    -0.11   0.06  -0.12
 103   1    -0.07   0.02   0.03    -0.04   0.00   0.02     0.00  -0.10  -0.03
 104   1    -0.05   0.07  -0.07    -0.02   0.04  -0.01     0.00  -0.11   0.08
 105   1    -0.06   0.04  -0.01    -0.01   0.01  -0.01     0.01  -0.14   0.10
 106   1     0.02   0.01  -0.04     0.02   0.03  -0.02     0.03   0.14  -0.01
 107   1     0.03   0.01  -0.04    -0.01   0.02  -0.01    -0.12   0.15  -0.08
 108   1    -0.01   0.01  -0.03    -0.02   0.02  -0.01    -0.18   0.05  -0.03
 109   1    -0.04  -0.01   0.16     0.03  -0.02  -0.02    -0.01  -0.01  -0.02
 110   1    -0.12  -0.05   0.04     0.03   0.02   0.02    -0.01  -0.01  -0.02
 111   1    -0.08  -0.03   0.06     0.07   0.03   0.01    -0.01  -0.01  -0.02
 112   1     0.02   0.02   0.00     0.00   0.00   0.00    -0.01  -0.01   0.02
 113   1     0.05   0.03  -0.02     0.01   0.01  -0.01    -0.01  -0.01   0.02
 114   1     0.04   0.04  -0.02     0.00   0.00   0.00     0.00  -0.01   0.01
                    73                     74                     75
                     A                      A                      A
 Frequencies --   334.2993               342.4983               345.3753
 Red. masses --     3.7441                 3.8722                 4.1938
 Frc consts  --     0.2465                 0.2676                 0.2947
 IR Inten    --     8.7875                 8.2752                15.7252
 Atom AN      X      Y      Z        X      Y      Z        X      Y      Z
   1   8    -0.01   0.00   0.01    -0.02  -0.02  -0.02    -0.05  -0.04  -0.04
   2  12     0.04   0.01  -0.05     0.08   0.06  -0.04    -0.04  -0.04  -0.03
   3   8     0.08   0.05  -0.08     0.01  -0.01  -0.01     0.05   0.00  -0.05
   4   6    -0.01  -0.01   0.01     0.01   0.00   0.00     0.01   0.01   0.01
   5   7     0.00  -0.01  -0.03    -0.05   0.06  -0.08     0.05  -0.10   0.03
   6   7     0.02  -0.01   0.00     0.09  -0.09   0.08     0.02   0.00  -0.02
   7   8    -0.04  -0.02   0.02     0.08   0.03  -0.03     0.20   0.09  -0.06
   8   6     0.00  -0.02  -0.03    -0.05  -0.03  -0.08     0.03  -0.02   0.01
   9   6     0.01  -0.02  -0.02    -0.01  -0.05  -0.01     0.00   0.03  -0.01
  10   6     0.01  -0.02  -0.01     0.00  -0.09   0.05     0.02   0.03  -0.02
  11   8     0.02   0.03   0.00    -0.04   0.00   0.00    -0.10  -0.02  -0.03
  12   6     0.02   0.00   0.07    -0.03   0.00  -0.03    -0.08   0.00  -0.06
  13   6     0.05  -0.02   0.04    -0.03  -0.01  -0.03    -0.05  -0.04  -0.08
  14   6     0.00   0.00  -0.01     0.00   0.00   0.03     0.00   0.00   0.07
  15   8    -0.13   0.01   0.14     0.04   0.02  -0.02     0.04   0.05  -0.02
  16   6     0.00  -0.01  -0.02    -0.04   0.00   0.05    -0.10   0.00   0.12
  17   8    -0.03  -0.06   0.00     0.07  -0.03   0.04    -0.01  -0.04   0.00
  18   6     0.04   0.05  -0.06     0.01   0.01  -0.01     0.03   0.04   0.00
  19   8    -0.06   0.04  -0.03    -0.01  -0.02   0.01    -0.04  -0.01   0.03
  20   8     0.03   0.00   0.00     0.01   0.01   0.03     0.05   0.00  -0.01
  21   6     0.01  -0.03   0.02    -0.03   0.01  -0.02     0.01  -0.01   0.00
  22   6     0.00  -0.05   0.03    -0.02   0.00  -0.02     0.00  -0.03   0.00
  23   6     0.07   0.02  -0.01     0.03   0.02   0.00     0.06   0.03   0.01
  24   8     0.02  -0.02   0.00    -0.06  -0.02   0.02    -0.01  -0.03   0.01
  25   6    -0.11  -0.03   0.05     0.02   0.00   0.02    -0.05  -0.01   0.05
  26   6    -0.03   0.12  -0.03     0.01   0.04  -0.02     0.00   0.08  -0.04
  27   6     0.05  -0.04  -0.05     0.00  -0.02   0.01     0.02  -0.05   0.02
  28   6     0.03  -0.03  -0.03    -0.01   0.01   0.04    -0.01   0.01   0.09
  29   6    -0.01   0.00  -0.01    -0.02   0.02  -0.04     0.01  -0.03   0.03
  30   6     0.01   0.00   0.01     0.04  -0.02   0.03     0.00   0.00   0.00
  31   6     0.00   0.00   0.00     0.00   0.01  -0.02     0.01  -0.01   0.03
  32   6     0.00  -0.01   0.01     0.01   0.03   0.03    -0.01  -0.05  -0.03
  33   6    -0.01  -0.01   0.00    -0.01   0.04  -0.01     0.01  -0.06   0.00
  34   6    -0.01  -0.01  -0.01    -0.02   0.04  -0.02     0.02  -0.06   0.03
  35   6    -0.01   0.00   0.01     0.00   0.02   0.00     0.00  -0.03   0.01
  36   6    -0.01   0.00   0.00     0.01  -0.01  -0.02    -0.01   0.02   0.04
  37   6     0.00   0.00   0.01     0.01   0.01   0.02    -0.01  -0.01  -0.03
  38   6     0.00   0.01   0.01     0.04   0.03   0.04     0.00   0.00   0.00
  39   6     0.11   0.04  -0.09     0.01   0.01   0.08    -0.01   0.00   0.01
  40   6     0.02   0.01  -0.01     0.02   0.01   0.03     0.01   0.00   0.00
  41   6    -0.09  -0.03   0.09     0.06  -0.03  -0.01     0.01   0.00  -0.01
  42   6     0.01   0.00   0.00     0.02  -0.03   0.01     0.00   0.00   0.00
  43   6    -0.03  -0.01   0.05     0.02   0.03   0.00     0.00   0.00  -0.01
  44   6     0.04   0.01  -0.03    -0.01  -0.01   0.02    -0.01   0.00   0.00
  45   6     0.00   0.01   0.00     0.01  -0.09   0.04    -0.01   0.15  -0.06
  46   6     0.00   0.00   0.00     0.03  -0.04  -0.03    -0.05   0.05   0.05
  47   6     0.01  -0.01   0.00     0.02  -0.03  -0.02    -0.02   0.05   0.03
  48   6     0.00   0.01   0.00     0.01   0.01   0.03    -0.01   0.02  -0.04
  49   6     0.07   0.00   0.02    -0.03   0.06  -0.09    -0.02   0.00  -0.01
  50   6    -0.02   0.03  -0.06    -0.08   0.03   0.02     0.00   0.00   0.01
  51   6     0.00  -0.06   0.04    -0.09   0.03  -0.02     0.00   0.01  -0.01
  52   6    -0.05   0.05  -0.01     0.01   0.01  -0.08     0.00  -0.02   0.00
  53   6    -0.06  -0.04   0.01    -0.09  -0.07  -0.06     0.01   0.00   0.03
  54   6     0.01   0.04   0.06    -0.05   0.02   0.11     0.04   0.01  -0.02
  55   1     0.03  -0.02  -0.02     0.04  -0.02   0.00    -0.02   0.04  -0.03
  56   1     0.03  -0.05   0.08    -0.01  -0.01  -0.06     0.00  -0.04  -0.15
  57   1    -0.01   0.00   0.02     0.00   0.00   0.03     0.02   0.01   0.07
  58   1     0.02   0.00  -0.04    -0.08  -0.02   0.09    -0.18  -0.04   0.19
  59   1    -0.02  -0.04  -0.03     0.00   0.06   0.07     0.00   0.10   0.17
  60   1     0.00   0.00  -0.02    -0.06  -0.01   0.06    -0.16  -0.03   0.15
  61   1     0.03  -0.06   0.01    -0.08   0.02   0.02     0.00  -0.04   0.00
  62   1     0.07   0.02  -0.02     0.04   0.01   0.00     0.05   0.03   0.02
  63   1    -0.32  -0.07  -0.01     0.12  -0.04   0.10    -0.16  -0.06   0.03
  64   1    -0.03  -0.10   0.00    -0.05   0.08   0.08    -0.01  -0.01   0.03
  65   1    -0.12   0.13   0.19     0.02  -0.05  -0.06    -0.05   0.07   0.12
  66   1    -0.04   0.23  -0.10    -0.02   0.06  -0.06    -0.02   0.12  -0.08
  67   1    -0.16   0.06   0.04    -0.03   0.02   0.00    -0.08   0.03  -0.03
  68   1    -0.01   0.16  -0.06     0.04   0.05  -0.05     0.03   0.14  -0.08
  69   1     0.05   0.00  -0.16     0.02  -0.01   0.05     0.07  -0.03   0.06
  70   1     0.04   0.01  -0.05     0.00  -0.07   0.03     0.01  -0.17   0.06
  71   1     0.07  -0.16  -0.06     0.01   0.03   0.02     0.06   0.01   0.03
  72   1    -0.01   0.03   0.00     0.00  -0.01   0.03     0.01  -0.02   0.09
  73   1     0.02  -0.11  -0.01    -0.01   0.04   0.03    -0.02   0.07   0.06
  74   1     0.10  -0.01  -0.08    -0.02   0.01   0.06    -0.05   0.01   0.14
  75   1     0.01   0.00   0.03     0.03   0.04   0.07    -0.03  -0.05  -0.08
  76   1    -0.01  -0.01   0.00    -0.01   0.04  -0.01     0.00  -0.05  -0.01
  77   1    -0.01  -0.01  -0.01    -0.03   0.04  -0.02     0.04  -0.06   0.04
  78   1    -0.01  -0.01   0.00     0.01  -0.01  -0.02    -0.01   0.01   0.03
  79   1     0.00   0.01   0.02     0.01   0.01   0.03    -0.01  -0.01  -0.02
  80   1     0.19   0.07  -0.17    -0.02   0.01   0.11    -0.01  -0.01   0.02
  81   1     0.03   0.02  -0.03     0.00   0.03   0.01     0.02   0.00  -0.01
  82   1    -0.17  -0.05   0.16     0.08  -0.02  -0.04     0.03   0.01  -0.02
  83   1    -0.03   0.00   0.04     0.00   0.05  -0.01    -0.01   0.00  -0.01
  84   1     0.04   0.01  -0.03    -0.01  -0.01   0.01     0.00   0.00   0.00
  85   1     0.01   0.00  -0.01    -0.08  -0.07   0.07     0.14   0.11  -0.09
  86   1    -0.01   0.01   0.00     0.09  -0.13   0.03    -0.16   0.19  -0.04
  87   1     0.00   0.02  -0.01     0.00  -0.16   0.10     0.01   0.26  -0.17
  88   1     0.00   0.00   0.01     0.06  -0.05  -0.06    -0.10   0.06   0.09
  89   1     0.00   0.00   0.00     0.03  -0.02  -0.03    -0.05   0.03   0.07
  90   1     0.00   0.01   0.00     0.03  -0.08   0.00    -0.05   0.10   0.00
  91   1     0.01   0.00  -0.01     0.01  -0.02  -0.08    -0.03   0.01   0.09
  92   1     0.02  -0.02   0.00     0.03  -0.05  -0.04    -0.03   0.10   0.09
  93   1     0.01  -0.01   0.00     0.05  -0.09   0.01    -0.02   0.12  -0.02
  94   1    -0.01   0.00   0.00     0.00  -0.01   0.05    -0.02   0.02  -0.07
  95   1     0.01   0.02   0.00     0.02  -0.01   0.02     0.00   0.05  -0.02
  96   1    -0.01   0.03  -0.01     0.00   0.03   0.05    -0.02   0.02  -0.07
  97   1     0.03   0.01   0.06     0.07   0.12  -0.18     0.01   0.03  -0.03
  98   1     0.11  -0.01   0.04    -0.18   0.09  -0.13    -0.04  -0.02  -0.04
  99   1     0.09   0.00   0.02     0.00   0.05  -0.07    -0.01  -0.02   0.02
 100   1    -0.06  -0.03  -0.03    -0.13   0.03   0.07     0.00   0.00   0.01
 101   1    -0.03   0.07  -0.10    -0.09   0.09  -0.06    -0.01  -0.01   0.01
 102   1    -0.06   0.04  -0.08    -0.10   0.02   0.05     0.00   0.00   0.01
 103   1    -0.01  -0.08  -0.03    -0.12   0.02   0.04     0.01   0.02   0.00
 104   1     0.00  -0.06   0.06    -0.11   0.05  -0.14     0.00   0.01  -0.01
 105   1     0.03  -0.11   0.07    -0.16   0.03   0.02     0.00   0.02  -0.01
 106   1     0.02   0.10   0.01     0.01  -0.01  -0.16    -0.03  -0.05  -0.04
 107   1    -0.07   0.11  -0.06     0.07  -0.02  -0.08     0.03  -0.07   0.04
 108   1    -0.11   0.02  -0.02    -0.08   0.05  -0.08     0.02   0.03   0.01
 109   1    -0.05  -0.03   0.08    -0.08  -0.08   0.00     0.01   0.01   0.05
 110   1    -0.11  -0.05  -0.01    -0.15  -0.09  -0.08    -0.01   0.00   0.03
 111   1    -0.09  -0.04  -0.02    -0.10  -0.07  -0.07    -0.01   0.00   0.01
 112   1    -0.03   0.03   0.09    -0.15   0.01   0.18     0.06   0.01  -0.04
 113   1    -0.02   0.05   0.10    -0.07   0.06   0.14     0.03   0.00  -0.01
 114   1     0.08   0.08   0.06     0.03   0.12   0.09     0.04  -0.01  -0.01
                    76                     77                     78
                     A                      A                      A
 Frequencies --   347.8881               352.7893               368.2975
 Red. masses --     3.5566                 5.3390                 4.5858
 Frc consts  --     0.2536                 0.3915                 0.3665
 IR Inten    --     9.3567                 6.9562                15.3996
 Atom AN      X      Y      Z        X      Y      Z        X      Y      Z
   1   8    -0.02  -0.02  -0.01     0.01   0.01   0.01     0.01   0.00   0.00
   2  12    -0.04  -0.08   0.01    -0.12  -0.10  -0.05    -0.02   0.04  -0.07
   3   8     0.02   0.00  -0.02    -0.03  -0.01   0.00     0.02   0.02  -0.01
   4   6     0.01   0.01   0.01    -0.01  -0.01  -0.01     0.00   0.00   0.00
   5   7    -0.06   0.13   0.01     0.01  -0.01  -0.02    -0.01   0.01   0.09
   6   7    -0.05   0.05  -0.05     0.04   0.02  -0.08    -0.04   0.00   0.08
   7   8     0.09   0.04  -0.02    -0.07  -0.03   0.02     0.01   0.00   0.00
   8   6     0.01   0.06   0.04     0.06   0.00  -0.01    -0.03   0.05   0.10
   9   6     0.05  -0.02   0.02     0.09  -0.02  -0.05    -0.08   0.05   0.11
  10   6     0.03   0.03  -0.02     0.10   0.03  -0.07    -0.06   0.01   0.08
  11   8    -0.05  -0.01  -0.02     0.04   0.02   0.02    -0.02  -0.01  -0.01
  12   6    -0.04   0.00  -0.03     0.03   0.02   0.01     0.00  -0.01   0.02
  13   6    -0.02  -0.02  -0.04     0.00   0.01   0.01     0.01  -0.01   0.02
  14   6     0.00   0.01   0.03     0.00   0.00  -0.02     0.00   0.00   0.00
  15   8     0.03   0.03  -0.01     0.01   0.00  -0.01    -0.03  -0.01   0.03
  16   6    -0.04   0.00   0.05     0.02   0.00  -0.03     0.00   0.00   0.00
  17   8    -0.02  -0.01  -0.01     0.24  -0.04   0.07     0.18  -0.04  -0.07
  18   6     0.01   0.02   0.01     0.00  -0.03  -0.05     0.03   0.03  -0.04
  19   8    -0.03  -0.01   0.03     0.04  -0.14  -0.03     0.04  -0.02  -0.02
  20   8     0.02   0.00  -0.02    -0.05   0.06   0.15    -0.07   0.03   0.12
  21   6     0.01  -0.01   0.00    -0.07   0.04  -0.07    -0.05  -0.02  -0.10
  22   6     0.00  -0.01   0.00    -0.05   0.01  -0.08    -0.05  -0.08  -0.14
  23   6     0.03   0.02   0.01     0.01   0.02  -0.03     0.02   0.03  -0.01
  24   8     0.00  -0.01  -0.01    -0.10   0.03   0.05    -0.02   0.02   0.05
  25   6    -0.03   0.01   0.02     0.00   0.02   0.05    -0.05  -0.06   0.04
  26   6     0.01   0.03  -0.02     0.01   0.03  -0.01    -0.01   0.08  -0.01
  27   6     0.01  -0.03   0.01    -0.02   0.02   0.01     0.01  -0.01  -0.02
  28   6    -0.01   0.00   0.04     0.01   0.00  -0.03     0.00  -0.01  -0.01
  29   6    -0.02   0.04  -0.03    -0.01  -0.01  -0.02     0.03   0.00   0.05
  30   6    -0.03   0.02  -0.02     0.01   0.02  -0.02    -0.03  -0.02   0.04
  31   6    -0.03   0.01  -0.03    -0.02  -0.02   0.00     0.04   0.02   0.01
  32   6     0.00   0.05   0.05    -0.02  -0.03   0.02     0.02   0.03  -0.04
  33   6    -0.02   0.06   0.01    -0.03  -0.03   0.01     0.05   0.03  -0.01
  34   6    -0.04   0.07  -0.05    -0.03  -0.02   0.00     0.05   0.02   0.01
  35   6    -0.01   0.04  -0.01    -0.03  -0.01   0.01     0.04   0.01   0.00
  36   6     0.01  -0.03  -0.06    -0.02  -0.01   0.00     0.04   0.02  -0.01
  37   6     0.01   0.02   0.03    -0.01   0.00   0.02     0.02  -0.01  -0.03
  38   6    -0.03  -0.01  -0.03    -0.01   0.02   0.00     0.00  -0.03   0.00
  39   6    -0.01   0.00  -0.05    -0.01   0.02   0.01     0.01  -0.03  -0.02
  40   6    -0.01   0.00  -0.01     0.02   0.03   0.01    -0.02  -0.05  -0.02
  41   6    -0.03   0.02   0.01     0.01   0.04   0.02    -0.02  -0.04  -0.02
  42   6    -0.01   0.03  -0.01     0.00   0.03   0.02    -0.02  -0.04  -0.02
  43   6    -0.02  -0.01  -0.01    -0.01   0.01   0.00     0.01  -0.02  -0.01
  44   6     0.01   0.02  -0.01     0.00   0.02   0.02     0.00  -0.02  -0.03
  45   6     0.02  -0.17   0.08     0.01   0.04  -0.01    -0.01  -0.06   0.00
  46   6     0.06  -0.05  -0.07    -0.01   0.01   0.01     0.00   0.00  -0.01
  47   6     0.03  -0.06  -0.04     0.01   0.01   0.01    -0.03   0.02   0.00
  48   6     0.02  -0.02   0.06     0.00   0.03   0.00     0.00  -0.03  -0.01
  49   6     0.02  -0.03   0.06    -0.02  -0.01   0.00     0.03   0.01   0.01
  50   6     0.06  -0.02  -0.02     0.02  -0.02   0.00    -0.01   0.02  -0.01
  51   6     0.06  -0.01   0.01     0.01  -0.02   0.00    -0.02   0.02   0.00
  52   6    -0.01  -0.02   0.05    -0.01  -0.01   0.02     0.01   0.01  -0.01
  53   6     0.00   0.03   0.08    -0.11  -0.04   0.10     0.13   0.08   0.03
  54   6     0.03   0.02  -0.06     0.12   0.11  -0.01    -0.09  -0.11  -0.06
  55   1     0.04  -0.08   0.02     0.06  -0.05  -0.06    -0.10   0.06   0.10
  56   1     0.00  -0.02  -0.07    -0.02   0.02   0.04     0.01  -0.01   0.02
  57   1     0.01   0.01   0.03    -0.01  -0.01  -0.02     0.01   0.01   0.00
  58   1    -0.08  -0.02   0.08     0.05   0.01  -0.06     0.00   0.00   0.00
  59   1     0.00   0.04   0.07     0.00  -0.04  -0.05     0.00   0.01   0.00
  60   1    -0.07  -0.01   0.06     0.04   0.00  -0.04     0.01   0.01   0.00
  61   1     0.02  -0.01  -0.01    -0.22   0.05   0.01    -0.16  -0.10  -0.09
  62   1     0.01   0.02   0.02     0.08  -0.04  -0.06     0.05   0.01  -0.02
  63   1    -0.11  -0.02   0.00     0.14  -0.09   0.21    -0.08  -0.19   0.14
  64   1     0.01  -0.01   0.00    -0.09   0.22   0.15    -0.03   0.10   0.09
  65   1    -0.03   0.06   0.08     0.00  -0.05  -0.06    -0.05  -0.05   0.08
  66   1     0.00   0.03  -0.03    -0.03   0.09  -0.08    -0.03   0.15  -0.06
  67   1    -0.02   0.01  -0.03    -0.01   0.06   0.07    -0.08   0.06   0.04
  68   1     0.02   0.06  -0.04     0.05  -0.03  -0.02     0.00   0.09  -0.03
  69   1     0.04  -0.01   0.04    -0.05   0.00   0.01     0.01   0.00  -0.05
  70   1     0.01  -0.09   0.02    -0.03   0.05   0.02     0.01   0.00  -0.02
  71   1     0.02   0.01   0.01    -0.02   0.04   0.01     0.02  -0.05  -0.02
  72   1    -0.01  -0.01   0.06     0.01   0.00  -0.04    -0.01   0.01   0.01
  73   1    -0.03   0.02   0.02     0.02   0.00  -0.01    -0.01  -0.03  -0.01
  74   1    -0.03   0.00   0.05     0.01   0.00  -0.03     0.01   0.00  -0.02
  75   1     0.03   0.06   0.11    -0.01  -0.02   0.03     0.00   0.02  -0.08
  76   1    -0.01   0.05   0.03    -0.03  -0.03   0.01     0.04   0.04  -0.02
  77   1    -0.06   0.07  -0.08    -0.02  -0.03  -0.01     0.03   0.02   0.01
  78   1     0.00  -0.03  -0.05    -0.01  -0.03   0.00     0.03   0.06  -0.02
  79   1     0.00   0.02   0.03    -0.02   0.02   0.03     0.03  -0.03  -0.05
  80   1     0.01  -0.01  -0.07    -0.02   0.00   0.02     0.03  -0.01  -0.04
  81   1     0.01  -0.01   0.00     0.04   0.03   0.00    -0.03  -0.05  -0.02
  82   1    -0.04   0.02   0.03     0.00   0.04   0.02     0.00  -0.04  -0.03
  83   1    -0.01  -0.03   0.00    -0.02   0.02   0.00     0.03  -0.04  -0.01
  84   1     0.01   0.01   0.00     0.02   0.00   0.04    -0.02   0.00  -0.06
  85   1    -0.15  -0.14   0.12     0.06   0.03  -0.04    -0.10  -0.04   0.01
  86   1     0.21  -0.24   0.05     0.00   0.07   0.00     0.03  -0.06   0.00
  87   1    -0.01  -0.29   0.22     0.01   0.07  -0.01     0.01  -0.14   0.02
  88   1     0.13  -0.06  -0.11    -0.01   0.01   0.04    -0.01   0.00  -0.03
  89   1     0.07  -0.02  -0.11     0.00   0.02   0.00    -0.01   0.00   0.02
  90   1     0.07  -0.11  -0.01     0.00   0.03   0.00    -0.02   0.00  -0.03
  91   1     0.01  -0.03  -0.14     0.02   0.02  -0.01    -0.02  -0.01   0.05
  92   1     0.04  -0.10  -0.09     0.03   0.00   0.03    -0.05   0.04  -0.01
  93   1     0.06  -0.16   0.01     0.03   0.02   0.00    -0.06   0.04   0.00
  94   1     0.03  -0.03   0.09    -0.01   0.01   0.00     0.00  -0.01  -0.03
  95   1     0.01  -0.07   0.02     0.03   0.05   0.00    -0.04  -0.04  -0.01
  96   1     0.03  -0.02   0.09    -0.03   0.04  -0.03     0.02  -0.04   0.02
  97   1    -0.05  -0.10   0.13     0.00  -0.01  -0.02    -0.01   0.02   0.04
  98   1     0.13  -0.04   0.10    -0.02  -0.05  -0.03     0.05   0.04   0.04
  99   1    -0.01  -0.01   0.03    -0.05  -0.02   0.03     0.07   0.02  -0.02
 100   1     0.09  -0.02  -0.05     0.02  -0.02   0.00    -0.01   0.03  -0.01
 101   1     0.06  -0.06   0.03     0.01  -0.05   0.01     0.00   0.05  -0.01
 102   1     0.07  -0.01  -0.05     0.04  -0.01  -0.03    -0.04   0.01   0.02
 103   1     0.10   0.00  -0.03     0.06   0.00  -0.03    -0.06   0.01   0.05
 104   1     0.07  -0.04   0.09     0.02  -0.07   0.01    -0.03   0.07  -0.03
 105   1     0.09  -0.01  -0.02    -0.01  -0.01   0.00    -0.02   0.04  -0.02
 106   1    -0.03  -0.03   0.07    -0.02   0.00   0.06     0.04   0.02  -0.03
 107   1    -0.03  -0.03   0.08    -0.01   0.01   0.00    -0.01   0.01   0.00
 108   1     0.05  -0.01   0.06     0.02  -0.04   0.02     0.00   0.04  -0.01
 109   1     0.01   0.03   0.11    -0.08  -0.01   0.32     0.10   0.05  -0.15
 110   1    -0.02   0.00   0.05    -0.26  -0.08   0.06     0.25   0.11   0.06
 111   1    -0.01   0.02   0.09    -0.20  -0.07   0.04     0.21   0.10   0.09
 112   1     0.04   0.02  -0.06     0.09   0.10   0.02    -0.01  -0.11  -0.13
 113   1     0.06   0.01  -0.09     0.09   0.12   0.03    -0.01  -0.14  -0.17
 114   1    -0.01   0.01  -0.06     0.19   0.15  -0.01    -0.24  -0.22  -0.06
                    79                     80                     81
                     A                      A                      A
 Frequencies --   384.6048               410.0213               427.6177
 Red. masses --     5.3953                 4.5654                 3.7927
 Frc consts  --     0.4702                 0.4522                 0.4086
 IR Inten    --    10.0495                15.6895                15.6391
 Atom AN      X      Y      Z        X      Y      Z        X      Y      Z
   1   8     0.01  -0.04   0.02    -0.05  -0.13   0.07    -0.04  -0.03   0.01
   2  12    -0.01   0.00   0.04    -0.01   0.02  -0.02     0.01  -0.01   0.02
   3   8     0.06   0.14  -0.04    -0.05  -0.06   0.03     0.09   0.04  -0.07
   4   6     0.02   0.06   0.03    -0.06   0.12   0.04    -0.02   0.01   0.01
   5   7     0.00   0.00  -0.02     0.00   0.00   0.00    -0.09   0.16  -0.04
   6   7     0.01   0.00  -0.01     0.00   0.00   0.01     0.02  -0.01   0.00
   7   8     0.20   0.07  -0.01     0.12   0.00   0.06    -0.02  -0.01   0.02
   8   6     0.00  -0.01  -0.02     0.00   0.00   0.01    -0.04   0.06  -0.02
   9   6     0.01  -0.01  -0.02     0.00   0.00   0.01     0.02  -0.03   0.01
  10   6     0.01  -0.01  -0.01     0.00   0.00   0.01     0.03  -0.04   0.01
  11   8    -0.16  -0.15  -0.11     0.11   0.03   0.04     0.09   0.07   0.02
  12   6     0.01  -0.09   0.08     0.10  -0.01   0.06    -0.01   0.00  -0.03
  13   6     0.08   0.04   0.09     0.05   0.01   0.07    -0.04  -0.07  -0.07
  14   6    -0.02   0.05  -0.02    -0.07   0.23  -0.08     0.02   0.03  -0.01
  15   8    -0.09  -0.10   0.12     0.08  -0.10  -0.07     0.01   0.04   0.02
  16   6    -0.02   0.01   0.04    -0.14  -0.03   0.04    -0.06  -0.03   0.01
  17   8     0.07   0.08   0.00    -0.03  -0.04   0.01     0.02   0.04  -0.01
  18   6    -0.02  -0.01  -0.02    -0.02  -0.02  -0.01     0.03   0.00   0.02
  19   8     0.06   0.00  -0.04    -0.07   0.00   0.00     0.04   0.01   0.01
  20   8    -0.11   0.00   0.03     0.04   0.01  -0.01    -0.05  -0.01   0.00
  21   6    -0.02   0.01  -0.01     0.01   0.01   0.00    -0.02   0.00  -0.01
  22   6    -0.01   0.03   0.00     0.00   0.00   0.00    -0.02   0.00   0.00
  23   6    -0.12  -0.07  -0.02     0.04   0.02   0.00    -0.05  -0.03   0.01
  24   8     0.03   0.06  -0.01    -0.02  -0.02   0.00     0.03   0.05   0.00
  25   6     0.05   0.01  -0.05    -0.01   0.01   0.02     0.01  -0.01  -0.01
  26   6    -0.07  -0.10   0.09     0.04   0.03  -0.04    -0.04  -0.05   0.04
  27   6     0.07   0.02  -0.14    -0.03   0.03   0.02     0.00  -0.09   0.04
  28   6    -0.05  -0.03  -0.04    -0.03  -0.03  -0.23     0.01   0.00  -0.01
  29   6     0.00   0.00  -0.01     0.00   0.00   0.00     0.02  -0.03   0.04
  30   6     0.01   0.01  -0.02     0.00   0.00   0.00     0.01   0.01  -0.02
  31   6    -0.01  -0.01   0.00     0.00   0.00   0.00     0.05  -0.04   0.07
  32   6     0.00  -0.01   0.01     0.00   0.00   0.00     0.00   0.02   0.01
  33   6    -0.01  -0.01   0.00     0.00   0.00   0.00    -0.05   0.02  -0.04
  34   6    -0.01   0.00   0.00     0.00   0.00   0.00    -0.01   0.01   0.06
  35   6    -0.01   0.00   0.01     0.00   0.00   0.00     0.01  -0.04   0.04
  36   6    -0.01  -0.01   0.00     0.00   0.00   0.00     0.12  -0.07   0.01
  37   6     0.00   0.01   0.01     0.00  -0.01   0.00    -0.03  -0.07  -0.02
  38   6     0.00   0.01  -0.01     0.00   0.00   0.00    -0.01   0.01  -0.01
  39   6    -0.01   0.01   0.01     0.00   0.00   0.00     0.00   0.00   0.00
  40   6     0.00   0.01   0.01     0.00   0.00   0.00     0.01   0.00   0.01
  41   6     0.01   0.01   0.00     0.00   0.00   0.00     0.01   0.01   0.01
  42   6     0.01   0.01   0.00     0.00   0.00   0.00     0.00   0.01  -0.01
  43   6    -0.01   0.00   0.00     0.00   0.00  -0.01    -0.02   0.00  -0.01
  44   6     0.00   0.01   0.01     0.00   0.00   0.00    -0.01   0.02   0.00
  45   6     0.00   0.01   0.00     0.00   0.00   0.00     0.04  -0.08  -0.14
  46   6     0.00   0.00   0.00     0.00   0.00   0.00    -0.06   0.06   0.07
  47   6     0.01   0.00   0.00     0.00   0.00   0.01     0.02   0.02   0.05
  48   6     0.00   0.01   0.01     0.00   0.00  -0.01    -0.01  -0.01  -0.09
  49   6    -0.01   0.00   0.00     0.00   0.00   0.00    -0.02   0.00   0.01
  50   6     0.01  -0.01   0.01     0.00   0.00   0.00     0.01   0.00  -0.01
  51   6     0.01   0.00   0.00     0.00   0.01   0.00     0.02   0.00  -0.01
  52   6    -0.01  -0.01   0.01     0.00   0.00   0.00    -0.02   0.00   0.02
  53   6    -0.02  -0.01  -0.02     0.00   0.00   0.01     0.00  -0.01  -0.01
  54   6     0.01   0.02   0.01     0.00   0.00   0.00    -0.01   0.01   0.01
  55   1     0.01  -0.01  -0.02    -0.01   0.01   0.00     0.03  -0.06   0.02
  56   1     0.04   0.04   0.15     0.00   0.02   0.14    -0.01  -0.11  -0.10
  57   1     0.09   0.09  -0.05     0.05   0.27  -0.12     0.02   0.03   0.00
  58   1    -0.08   0.00   0.06    -0.24  -0.05   0.04    -0.07  -0.03   0.01
  59   1     0.00   0.06   0.05    -0.14   0.03   0.04    -0.05  -0.01   0.02
  60   1    -0.01   0.04   0.05    -0.08   0.04   0.04    -0.06  -0.02   0.02
  61   1    -0.03   0.03   0.02     0.01   0.00   0.00    -0.03   0.00   0.00
  62   1    -0.11  -0.07  -0.02     0.06   0.02  -0.01    -0.08  -0.02   0.03
  63   1     0.16   0.08  -0.05    -0.05  -0.02   0.02     0.04   0.03  -0.02
  64   1     0.03   0.00  -0.04    -0.01   0.01   0.02     0.01  -0.01  -0.02
  65   1     0.05  -0.10  -0.11    -0.01   0.04   0.03     0.01  -0.05  -0.02
  66   1    -0.01  -0.09   0.15     0.01   0.02  -0.06    -0.02  -0.05   0.07
  67   1     0.02  -0.04   0.09     0.02   0.02  -0.03    -0.02  -0.04   0.03
  68   1    -0.15  -0.20   0.18     0.07   0.05  -0.06    -0.07  -0.07   0.07
  69   1     0.08   0.10  -0.33    -0.09  -0.03   0.02     0.05  -0.06   0.08
  70   1     0.10   0.14  -0.21    -0.03   0.14   0.00    -0.02  -0.21   0.09
  71   1     0.04  -0.26  -0.17    -0.07   0.03   0.01     0.06  -0.02   0.06
  72   1    -0.07  -0.02   0.10     0.03  -0.13  -0.18     0.02  -0.03   0.00
  73   1    -0.12  -0.14  -0.06     0.08  -0.24  -0.08     0.02  -0.02   0.00
  74   1    -0.03  -0.03  -0.13    -0.09  -0.07  -0.56    -0.01  -0.01  -0.05
  75   1     0.00  -0.01   0.02     0.00   0.00   0.00     0.00   0.04  -0.03
  76   1    -0.01  -0.01   0.00     0.01   0.01   0.00    -0.09   0.03  -0.12
  77   1    -0.01  -0.01  -0.01     0.00   0.00   0.01    -0.03   0.01   0.06
  78   1     0.00  -0.01   0.00     0.00   0.01   0.00     0.12  -0.06   0.00
  79   1    -0.01   0.01   0.01     0.00  -0.01   0.00    -0.03  -0.06  -0.03
  80   1    -0.02   0.00   0.02     0.00   0.00   0.00    -0.01  -0.02   0.00
  81   1    -0.01   0.01   0.02     0.00   0.00   0.00     0.00  -0.01   0.02
  82   1     0.00   0.01   0.01     0.00   0.00   0.00     0.00   0.01   0.02
  83   1    -0.02   0.01  -0.01    -0.01   0.00  -0.01    -0.02   0.00  -0.01
  84   1     0.00   0.00   0.02     0.00   0.00   0.00     0.00   0.01   0.01
  85   1     0.01   0.00  -0.01     0.00   0.00  -0.01    -0.02  -0.08  -0.22
  86   1     0.01   0.01   0.00    -0.01   0.00   0.00    -0.08   0.03  -0.10
  87   1     0.00   0.01   0.01     0.00   0.00  -0.01     0.10  -0.18  -0.26
  88   1     0.00   0.00   0.01    -0.01   0.00   0.00    -0.16   0.09   0.22
  89   1     0.00   0.01  -0.01     0.00   0.00   0.01    -0.10   0.07   0.19
  90   1     0.01   0.01   0.00    -0.01   0.00   0.00    -0.13   0.21  -0.15
  91   1     0.01   0.01  -0.01     0.01   0.01   0.02     0.06   0.02   0.12
  92   1     0.02  -0.01  -0.01     0.00  -0.01   0.00     0.05   0.02   0.12
  93   1     0.01   0.00   0.00    -0.01   0.01   0.01    -0.02   0.14  -0.02
  94   1     0.00   0.00   0.02    -0.01   0.00  -0.02     0.00   0.02  -0.12
  95   1     0.01   0.00   0.01     0.00   0.01   0.00     0.03   0.06  -0.05
  96   1     0.00   0.01   0.01     0.00   0.00  -0.01    -0.03  -0.03  -0.18
  97   1     0.00  -0.01  -0.01     0.00   0.00   0.00    -0.02  -0.03   0.01
  98   1    -0.02  -0.01  -0.01     0.00   0.00   0.00     0.01  -0.01   0.01
  99   1    -0.03   0.00   0.01     0.00   0.00   0.00    -0.04   0.00   0.01
 100   1     0.01  -0.01   0.00     0.00   0.00   0.00     0.03  -0.01  -0.02
 101   1     0.00  -0.02   0.01     0.00   0.00   0.00     0.01  -0.03   0.01
 102   1     0.02  -0.01   0.00     0.00   0.00   0.00     0.03   0.00  -0.02
 103   1     0.03   0.00  -0.02     0.01   0.01   0.00     0.05   0.02  -0.02
 104   1     0.02  -0.02   0.01     0.01   0.01   0.01     0.03  -0.02   0.03
 105   1     0.02   0.00  -0.01     0.01   0.01  -0.01     0.03   0.01  -0.03
 106   1    -0.02  -0.01   0.01    -0.01  -0.01  -0.01    -0.03   0.00   0.04
 107   1    -0.01  -0.02   0.02     0.00  -0.02   0.02    -0.04   0.00   0.03
 108   1     0.01   0.00   0.01     0.01   0.01   0.01     0.02   0.00   0.02
 109   1    -0.01  -0.01   0.01     0.00   0.00   0.01     0.00  -0.04  -0.02
 110   1    -0.03  -0.02  -0.02     0.00   0.00   0.01    -0.01  -0.04  -0.04
 111   1    -0.03  -0.02  -0.02     0.00   0.00   0.01     0.04   0.00   0.04
 112   1     0.00   0.02   0.03     0.00   0.00  -0.01    -0.08   0.00   0.05
 113   1     0.00   0.02   0.03     0.00   0.00  -0.01     0.01   0.05  -0.01
 114   1     0.04   0.04   0.01    -0.01  -0.01   0.00    -0.01   0.06  -0.01
                    82                     83                     84
                     A                      A                      A
 Frequencies --   428.3730               439.2317               443.5084
 Red. masses --     4.4641                 3.4117                 3.3541
 Frc consts  --     0.4826                 0.3878                 0.3887
 IR Inten    --    15.0599                 1.2766                 3.7930
 Atom AN      X      Y      Z        X      Y      Z        X      Y      Z
   1   8    -0.06  -0.04   0.02     0.00   0.00   0.00     0.00   0.00   0.00
   2  12    -0.01   0.01   0.03    -0.03  -0.02   0.02     0.00   0.03   0.01
   3   8     0.13   0.05  -0.09    -0.02  -0.01   0.01     0.00  -0.01   0.00
   4   6    -0.03   0.01   0.02     0.00   0.00   0.00     0.00   0.00   0.00
   5   7     0.07  -0.12   0.03     0.03  -0.01   0.02     0.03  -0.05   0.00
   6   7    -0.01   0.01  -0.01     0.00   0.01  -0.03     0.15  -0.14   0.09
   7   8    -0.02  -0.02   0.03     0.00   0.00   0.00    -0.01   0.00   0.00
   8   6     0.03  -0.05   0.01    -0.01  -0.03  -0.02    -0.03   0.01  -0.02
   9   6    -0.02   0.02  -0.02    -0.01  -0.02  -0.03    -0.04   0.04  -0.01
  10   6    -0.03   0.02  -0.02    -0.01  -0.02  -0.02     0.05  -0.07   0.04
  11   8     0.14   0.10   0.03     0.00   0.00   0.00     0.01   0.01   0.00
  12   6    -0.01   0.00  -0.05     0.01   0.00   0.00     0.00   0.01  -0.01
  13   6    -0.04  -0.10  -0.09     0.01   0.01   0.01     0.01   0.00  -0.01
  14   6     0.02   0.05  -0.01     0.00   0.00   0.00     0.00   0.00   0.00
  15   8     0.00   0.05   0.01     0.00   0.00  -0.01     0.00   0.01   0.00
  16   6    -0.09  -0.04   0.02     0.00   0.00   0.00     0.00  -0.01  -0.01
  17   8     0.04   0.06  -0.03     0.01   0.02  -0.02     0.01   0.00  -0.01
  18   6     0.05   0.01   0.02     0.00   0.00  -0.01     0.01   0.00   0.00
  19   8     0.06   0.02   0.02    -0.01   0.00   0.00     0.00   0.01   0.00
  20   8    -0.09  -0.01   0.01     0.00   0.00   0.01    -0.01   0.00   0.01
  21   6    -0.04   0.00  -0.02     0.00  -0.01   0.00     0.00  -0.01  -0.01
  22   6    -0.04  -0.01  -0.01     0.00  -0.02   0.01    -0.01  -0.01  -0.01
  23   6    -0.06  -0.03   0.01     0.02   0.02  -0.01     0.01   0.00   0.00
  24   8     0.05   0.08   0.00     0.00  -0.01   0.00     0.01   0.01   0.00
  25   6     0.00  -0.04  -0.02    -0.01  -0.03   0.00    -0.01  -0.02  -0.01
  26   6    -0.06  -0.05   0.05     0.02   0.03  -0.02     0.00   0.01   0.00
  27   6    -0.01  -0.13   0.06     0.00   0.02   0.00     0.00   0.01   0.00
  28   6     0.01  -0.01  -0.03     0.00   0.00  -0.01     0.00   0.00   0.00
  29   6    -0.01   0.02  -0.02     0.05   0.03   0.18     0.01   0.00   0.02
  30   6     0.03   0.00  -0.01     0.08   0.02  -0.08    -0.06   0.00   0.02
  31   6    -0.04   0.03  -0.05     0.01  -0.01   0.11     0.00   0.01   0.00
  32   6     0.00  -0.02  -0.01    -0.03  -0.06   0.04     0.00  -0.01   0.00
  33   6     0.03  -0.02   0.03    -0.05  -0.06  -0.02     0.01  -0.01   0.00
  34   6     0.00   0.00  -0.05     0.01  -0.02   0.04     0.00  -0.01   0.00
  35   6    -0.01   0.03  -0.03     0.01   0.05   0.10     0.00   0.01   0.01
  36   6    -0.10   0.05  -0.01     0.02  -0.04  -0.06    -0.03   0.01  -0.01
  37   6     0.02   0.05   0.01    -0.02   0.14  -0.04     0.00   0.03   0.00
  38   6     0.02   0.00   0.00     0.04   0.01  -0.04    -0.07   0.03   0.00
  39   6     0.00   0.01   0.00     0.01   0.01  -0.01     0.01  -0.02   0.03
  40   6    -0.01   0.00   0.00    -0.01   0.01   0.01     0.07  -0.01   0.02
  41   6     0.00   0.00  -0.01     0.01   0.01  -0.01     0.02  -0.01   0.05
  42   6     0.02  -0.01  -0.01     0.04   0.02  -0.03    -0.05   0.02   0.02
  43   6     0.01   0.00   0.02    -0.01   0.00   0.03    -0.11   0.02  -0.12
  44   6     0.00  -0.02   0.01    -0.02   0.00   0.03    -0.02   0.10  -0.02
  45   6    -0.03   0.06   0.11     0.05  -0.06  -0.04    -0.01   0.01   0.03
  46   6     0.05  -0.05  -0.06     0.00   0.08  -0.06     0.01   0.00  -0.02
  47   6    -0.02  -0.02  -0.04    -0.11   0.06  -0.13    -0.02   0.01  -0.03
  48   6     0.01   0.01   0.06     0.04  -0.05   0.08     0.01   0.00   0.02
  49   6     0.00   0.01  -0.01    -0.04   0.01  -0.01    -0.05  -0.03   0.06
  50   6    -0.01   0.00   0.02     0.01  -0.02   0.03     0.05   0.02  -0.09
  51   6    -0.02  -0.02   0.02     0.00  -0.03   0.03     0.09   0.07  -0.11
  52   6     0.00   0.01  -0.02    -0.02   0.01  -0.01    -0.09  -0.02   0.10
  53   6     0.00   0.00  -0.01     0.03   0.00  -0.07    -0.01  -0.02  -0.03
  54   6     0.00   0.00   0.01    -0.01   0.02   0.05    -0.01  -0.01   0.01
  55   1    -0.03   0.05  -0.03    -0.02   0.00  -0.04    -0.05   0.09  -0.02
  56   1    -0.01  -0.17  -0.14     0.00   0.02   0.01     0.01   0.00  -0.01
  57   1     0.03   0.05  -0.01     0.00   0.00   0.00     0.00   0.00   0.00
  58   1    -0.11  -0.04   0.03     0.00   0.00   0.00     0.01   0.00  -0.01
  59   1    -0.08  -0.01   0.03     0.00   0.00   0.00     0.00  -0.02   0.00
  60   1    -0.09  -0.03   0.02     0.00   0.00   0.00     0.00   0.00   0.00
  61   1    -0.07  -0.03   0.00     0.00  -0.04   0.00    -0.01  -0.02  -0.01
  62   1    -0.10  -0.01   0.04     0.03   0.02  -0.01     0.01   0.01   0.00
  63   1     0.06   0.02  -0.04    -0.02  -0.02  -0.02     0.00  -0.02  -0.01
  64   1     0.01  -0.05  -0.03    -0.01  -0.06  -0.01    -0.01  -0.01   0.00
  65   1     0.01  -0.11  -0.04    -0.01  -0.02   0.01    -0.01  -0.03  -0.01
  66   1    -0.02  -0.04   0.08     0.01   0.04  -0.03     0.00   0.01  -0.01
  67   1    -0.03  -0.04   0.04     0.00   0.02  -0.01    -0.01   0.00   0.00
  68   1    -0.10  -0.07   0.08     0.03   0.04  -0.03     0.01   0.02  -0.01
  69   1     0.06  -0.10   0.12    -0.02   0.00   0.00    -0.01  -0.01   0.02
  70   1    -0.03  -0.29   0.13     0.00   0.04   0.00    -0.01   0.01   0.01
  71   1     0.07  -0.01   0.08    -0.01   0.01   0.00    -0.01   0.03   0.01
  72   1     0.03  -0.04   0.00     0.01   0.00  -0.01     0.00   0.00   0.01
  73   1     0.02  -0.04  -0.01     0.01   0.01   0.00     0.00   0.00   0.00
  74   1    -0.01  -0.02  -0.09     0.00   0.00   0.00     0.00   0.00   0.01
  75   1    -0.01  -0.03   0.02    -0.08  -0.07  -0.06    -0.01  -0.02  -0.01
  76   1     0.06  -0.03   0.10    -0.10  -0.08  -0.17     0.00  -0.01   0.00
  77   1     0.02  -0.01  -0.05     0.02  -0.03  -0.09     0.01  -0.01  -0.02
  78   1    -0.10   0.04   0.00     0.02  -0.04  -0.09    -0.02   0.02  -0.01
  79   1     0.02   0.05   0.02    -0.03   0.15  -0.05     0.00   0.03   0.00
  80   1    -0.01   0.01   0.02    -0.04   0.00   0.03     0.04  -0.07  -0.01
  81   1    -0.03   0.00   0.02    -0.07  -0.01   0.07     0.13   0.01  -0.03
  82   1    -0.01  -0.01   0.00    -0.04   0.00   0.03     0.06   0.01   0.05
  83   1     0.01   0.00   0.02    -0.02  -0.01   0.04    -0.11   0.04  -0.13
  84   1     0.00  -0.02   0.01    -0.02   0.00   0.04    -0.01   0.09  -0.03
  85   1     0.02   0.06   0.18     0.02  -0.06   0.00     0.00   0.02   0.05
  86   1     0.08  -0.03   0.08     0.06  -0.11  -0.05     0.02  -0.01   0.02
  87   1    -0.08   0.14   0.22     0.04  -0.07  -0.04    -0.02   0.03   0.05
  88   1     0.13  -0.07  -0.18    -0.01   0.10   0.09     0.03   0.00  -0.04
  89   1     0.09  -0.04  -0.17    -0.01   0.13  -0.10     0.02   0.01  -0.06
  90   1     0.12  -0.16   0.12     0.00   0.17  -0.13     0.03  -0.02   0.02
  91   1    -0.05  -0.03  -0.10    -0.17   0.01  -0.16    -0.04   0.00  -0.04
  92   1    -0.04  -0.01  -0.10    -0.20   0.11  -0.24    -0.04   0.02  -0.05
  93   1     0.01  -0.11   0.01    -0.10  -0.08  -0.03    -0.01  -0.03   0.00
  94   1     0.00  -0.02   0.09     0.11  -0.08   0.26     0.01  -0.01   0.05
  95   1    -0.02  -0.05   0.03     0.00  -0.27  -0.09     0.00  -0.04  -0.01
  96   1     0.02   0.02   0.13     0.10  -0.07   0.20     0.02   0.00   0.06
  97   1     0.02   0.03  -0.04     0.00   0.00  -0.05    -0.13  -0.10   0.12
  98   1    -0.04   0.02  -0.02    -0.08   0.01  -0.02     0.10  -0.12   0.05
  99   1     0.01   0.00  -0.01    -0.06   0.01  -0.01    -0.15  -0.03   0.10
 100   1    -0.01   0.00   0.03     0.03   0.00   0.01     0.09  -0.03  -0.13
 101   1    -0.01   0.01   0.01     0.01  -0.04   0.06     0.04  -0.10  -0.02
 102   1    -0.02  -0.01   0.04     0.02  -0.02   0.04     0.11   0.05  -0.21
 103   1    -0.02  -0.02   0.01     0.01  -0.03  -0.01     0.21   0.13  -0.13
 104   1    -0.02  -0.02  -0.01     0.00  -0.06   0.03     0.14   0.00   0.11
 105   1    -0.03  -0.03   0.04    -0.01  -0.06   0.06     0.18   0.15  -0.23
 106   1     0.02   0.01  -0.05     0.01   0.03  -0.03    -0.17  -0.02   0.27
 107   1     0.02   0.00  -0.03    -0.02   0.03  -0.02    -0.21  -0.01   0.18
 108   1    -0.04   0.02  -0.02    -0.07   0.03  -0.01     0.18  -0.07   0.13
 109   1     0.00   0.03  -0.02     0.01   0.01  -0.15     0.00  -0.06  -0.04
 110   1     0.02   0.03   0.02     0.10   0.03  -0.05    -0.02  -0.04  -0.05
 111   1    -0.03   0.00  -0.05     0.04   0.00  -0.07     0.03  -0.01   0.00
 112   1     0.05   0.00  -0.01    -0.03   0.02   0.08    -0.08  -0.02   0.03
 113   1    -0.03  -0.03   0.04    -0.05   0.02   0.10     0.02   0.04  -0.03
 114   1     0.03  -0.03   0.03     0.07   0.07   0.05    -0.02   0.03  -0.01
                    85                     86                     87
                     A                      A                      A
 Frequencies --   445.6346               455.5691               458.2432
 Red. masses --     3.9177                 3.7001                 3.1325
 Frc consts  --     0.4584                 0.4524                 0.3876
 IR Inten    --     8.2294                 4.4250                19.1798
 Atom AN      X      Y      Z        X      Y      Z        X      Y      Z
   1   8     0.01   0.00   0.00     0.04   0.00  -0.01     0.03   0.00   0.00
   2  12    -0.02  -0.02   0.03    -0.01   0.00   0.01     0.00   0.00  -0.06
   3   8    -0.02   0.00   0.02    -0.04   0.10   0.01     0.00   0.10  -0.01
   4   6     0.00   0.00   0.00    -0.01   0.01  -0.03    -0.01   0.01  -0.02
   5   7    -0.03   0.00   0.02     0.00   0.02   0.00     0.00  -0.03  -0.01
   6   7     0.06   0.00   0.03    -0.03   0.00  -0.02     0.03  -0.01   0.03
   7   8     0.00   0.00   0.00    -0.02  -0.02  -0.01    -0.02  -0.02  -0.01
   8   6    -0.03   0.01   0.02     0.01   0.00  -0.01     0.01   0.00   0.00
   9   6    -0.04   0.00   0.03     0.01  -0.01  -0.01     0.00   0.02   0.02
  10   6    -0.01  -0.03   0.03     0.00   0.00  -0.01     0.01   0.01   0.02
  11   8    -0.02  -0.01   0.00    -0.02  -0.01   0.07     0.00   0.00   0.06
  12   6     0.00   0.00   0.00    -0.06  -0.02   0.03    -0.05  -0.02   0.02
  13   6    -0.01   0.01   0.01    -0.14   0.02   0.02    -0.11   0.01   0.02
  14   6    -0.01   0.00   0.00    -0.05   0.03   0.01    -0.04   0.03   0.01
  15   8     0.01   0.00  -0.01     0.06  -0.04  -0.03     0.05  -0.03  -0.01
  16   6     0.01   0.00   0.00     0.05   0.02  -0.01     0.03   0.02  -0.01
  17   8     0.03   0.06  -0.04     0.06   0.13  -0.05     0.01  -0.01   0.03
  18   6     0.00   0.01   0.00    -0.01   0.08  -0.02    -0.01   0.07  -0.01
  19   8     0.00  -0.02   0.01     0.03  -0.06   0.02     0.03  -0.03   0.01
  20   8    -0.02   0.00   0.01    -0.04  -0.01   0.01     0.01  -0.01  -0.01
  21   6    -0.01  -0.02   0.02     0.00  -0.05   0.09     0.02  -0.01   0.04
  22   6     0.00  -0.04   0.04     0.04  -0.04   0.11     0.05   0.03   0.03
  23   6     0.02   0.04  -0.01     0.01   0.07  -0.02    -0.03   0.00   0.00
  24   8     0.00  -0.02   0.00    -0.03  -0.10  -0.01    -0.03  -0.06   0.00
  25   6    -0.02  -0.06   0.00     0.01  -0.09  -0.04     0.03   0.05  -0.01
  26   6     0.02   0.05  -0.03     0.03   0.09  -0.04    -0.01  -0.01   0.01
  27   6     0.00   0.01  -0.01     0.02  -0.08  -0.02     0.02  -0.08  -0.01
  28   6     0.00   0.00   0.00     0.01   0.00  -0.04     0.01   0.00  -0.04
  29   6    -0.02  -0.01  -0.05     0.01   0.00   0.02    -0.01   0.00  -0.03
  30   6     0.17   0.07  -0.17    -0.03  -0.02   0.02    -0.02   0.00   0.03
  31   6     0.00   0.02  -0.04     0.00   0.00   0.01     0.00   0.00  -0.01
  32   6     0.01   0.03  -0.02     0.00   0.00   0.01     0.00   0.00  -0.01
  33   6     0.04   0.03   0.00    -0.01   0.00   0.00     0.01   0.00   0.00
  34   6     0.01   0.01  -0.02     0.00   0.00   0.01     0.00   0.00   0.00
  35   6     0.01  -0.03  -0.04     0.01  -0.01   0.02    -0.01   0.01  -0.01
  36   6    -0.01   0.03   0.02    -0.02   0.01  -0.01     0.03  -0.01   0.01
  37   6     0.02  -0.08   0.01    -0.01  -0.03   0.00     0.01   0.05   0.00
  38   6     0.10   0.02  -0.11    -0.03   0.01   0.01     0.01  -0.03   0.02
  39   6     0.04  -0.02  -0.04    -0.01   0.02   0.00     0.00  -0.02   0.01
  40   6    -0.05  -0.04   0.03     0.01   0.03   0.00     0.00  -0.03  -0.01
  41   6     0.04   0.01  -0.04     0.00   0.00   0.02    -0.01  -0.01  -0.01
  42   6     0.08   0.05  -0.12     0.01  -0.02   0.04    -0.05   0.01  -0.02
  43   6    -0.05  -0.04   0.04    -0.04   0.02  -0.05     0.08  -0.01   0.06
  44   6    -0.09   0.05   0.03     0.06  -0.08   0.02    -0.06   0.12  -0.04
  45   6    -0.02   0.03   0.04    -0.01   0.00   0.02     0.01  -0.01  -0.03
  46   6     0.01  -0.03   0.01     0.01   0.00  -0.02    -0.01   0.00   0.03
  47   6     0.05  -0.03   0.07     0.01   0.00   0.02    -0.03   0.01  -0.04
  48   6    -0.02   0.02  -0.05     0.00  -0.01  -0.03     0.01   0.01   0.05
  49   6    -0.14   0.01   0.02     0.09   0.01  -0.04    -0.10  -0.02   0.07
  50   6     0.06  -0.03   0.03    -0.05  -0.01   0.06     0.07   0.02  -0.11
  51   6     0.02  -0.06   0.06     0.03   0.03  -0.05    -0.05  -0.03   0.05
  52   6    -0.08   0.04   0.01    -0.04  -0.01   0.04     0.08   0.00  -0.06
  53   6     0.01   0.00   0.00     0.00   0.00  -0.01    -0.01   0.00   0.02
  54   6    -0.04   0.01   0.07     0.01   0.00  -0.01     0.00   0.00  -0.01
  55   1    -0.05   0.03   0.02     0.01  -0.01  -0.01     0.00   0.02   0.02
  56   1    -0.01   0.02   0.01    -0.13   0.01   0.02    -0.11  -0.02   0.01
  57   1    -0.01   0.00   0.00    -0.06   0.03   0.01    -0.05   0.03   0.01
  58   1     0.02   0.01  -0.01     0.04   0.02  -0.03     0.02   0.02  -0.01
  59   1     0.01   0.00  -0.01     0.04   0.01  -0.02     0.02   0.02  -0.01
  60   1     0.01   0.01   0.00     0.06   0.03  -0.02     0.04   0.02  -0.01
  61   1     0.02  -0.07   0.02     0.12  -0.09   0.06     0.09   0.05   0.02
  62   1     0.03   0.04  -0.02     0.02   0.08  -0.03    -0.03  -0.01   0.00
  63   1    -0.03   0.00  -0.06     0.06   0.08  -0.16     0.02   0.06  -0.01
  64   1    -0.01  -0.15  -0.04    -0.05  -0.30  -0.09     0.01   0.03  -0.01
  65   1    -0.02  -0.06  -0.01     0.01  -0.12  -0.13     0.02   0.07  -0.02
  66   1     0.01   0.06  -0.05     0.02   0.11  -0.06     0.00   0.00   0.02
  67   1     0.00   0.04  -0.02     0.00   0.07  -0.02     0.00   0.01   0.02
  68   1     0.04   0.08  -0.05     0.04   0.11  -0.05    -0.03  -0.03   0.03
  69   1     0.01   0.02  -0.02     0.18   0.10  -0.12     0.16   0.07  -0.09
  70   1     0.00   0.00  -0.01     0.03  -0.25   0.01     0.03  -0.23   0.01
  71   1     0.00  -0.01  -0.01     0.11  -0.23  -0.01     0.09  -0.20  -0.01
  72   1     0.00   0.01  -0.01     0.01   0.00  -0.11     0.01   0.00  -0.09
  73   1     0.00   0.00   0.00     0.09  -0.04   0.04     0.07  -0.04   0.03
  74   1     0.00   0.00   0.00     0.03   0.00  -0.11     0.03   0.00  -0.10
  75   1     0.02   0.03   0.01    -0.01   0.00  -0.01     0.01   0.00   0.01
  76   1     0.06   0.04   0.06    -0.02   0.00  -0.03     0.01   0.00   0.02
  77   1    -0.01   0.01   0.03    -0.01   0.00  -0.01     0.02   0.00   0.02
  78   1    -0.02   0.04   0.03    -0.02   0.01  -0.02     0.03  -0.02   0.02
  79   1     0.03  -0.09   0.01    -0.01  -0.03  -0.01     0.01   0.06   0.01
  80   1    -0.07  -0.05   0.06     0.01   0.01  -0.02     0.02   0.00   0.01
  81   1    -0.21  -0.10   0.20     0.04   0.04  -0.03     0.02  -0.02  -0.03
  82   1    -0.07  -0.01   0.08     0.00   0.00  -0.01     0.03   0.01   0.00
  83   1    -0.06  -0.06   0.06    -0.05   0.03  -0.06     0.09  -0.03   0.07
  84   1    -0.11   0.04   0.04     0.07  -0.08   0.03    -0.08   0.13  -0.07
  85   1    -0.01   0.03   0.05     0.01   0.00   0.04     0.00  -0.01  -0.05
  86   1    -0.02   0.02   0.03     0.02  -0.02   0.01    -0.03   0.02  -0.02
  87   1    -0.03   0.05   0.04    -0.02   0.03   0.04     0.03  -0.03  -0.07
  88   1     0.02  -0.04  -0.08     0.03   0.00  -0.02    -0.04   0.00   0.04
  89   1     0.01  -0.05   0.01     0.02   0.01  -0.06    -0.03  -0.01   0.07
  90   1     0.01  -0.09   0.06     0.02   0.00   0.01    -0.04   0.02  -0.02
  91   1     0.09  -0.01   0.11     0.02   0.01   0.04    -0.06  -0.01  -0.08
  92   1     0.09  -0.04   0.12     0.02   0.00   0.05    -0.06   0.02  -0.08
  93   1     0.03   0.06   0.02     0.00   0.04  -0.01     0.00  -0.07   0.00
  94   1    -0.06   0.03  -0.15     0.01   0.01  -0.04     0.00  -0.01   0.08
  95   1    -0.01   0.13   0.03     0.01   0.02  -0.02    -0.02  -0.05   0.01
  96   1    -0.05   0.02  -0.11    -0.01  -0.02  -0.07     0.02   0.02   0.11
  97   1    -0.11  -0.02  -0.01     0.14   0.06  -0.08    -0.19  -0.10   0.15
  98   1    -0.14  -0.05  -0.02    -0.02   0.09  -0.03     0.09  -0.13   0.06
  99   1    -0.23   0.00   0.06     0.18   0.01  -0.08    -0.22  -0.02   0.12
 100   1     0.18   0.01  -0.08    -0.13   0.00   0.13     0.15  -0.01  -0.19
 101   1     0.08  -0.15   0.18    -0.06   0.11  -0.05     0.07  -0.13   0.02
 102   1     0.13  -0.04   0.01    -0.11  -0.02   0.13     0.15   0.06  -0.23
 103   1     0.08  -0.04  -0.01     0.08   0.06  -0.06    -0.14  -0.07   0.09
 104   1     0.04  -0.12   0.12     0.05   0.01   0.03    -0.08   0.03  -0.09
 105   1     0.03  -0.07   0.06     0.06   0.07  -0.10    -0.10  -0.07   0.12
 106   1     0.03   0.09  -0.02    -0.08  -0.01   0.11     0.10  -0.01  -0.14
 107   1    -0.15   0.08   0.01    -0.08   0.00   0.07     0.16  -0.01  -0.10
 108   1    -0.14   0.08   0.01     0.07  -0.03   0.05    -0.05   0.02  -0.08
 109   1     0.01  -0.02  -0.04     0.00   0.01  -0.01     0.00   0.00   0.05
 110   1     0.03   0.00   0.00     0.00   0.00   0.00    -0.03  -0.01   0.01
 111   1     0.05   0.02   0.02     0.00   0.00  -0.01    -0.02  -0.01   0.02
 112   1    -0.09   0.01   0.11     0.01   0.00  -0.01     0.01  -0.01  -0.03
 113   1    -0.06   0.03   0.10     0.01  -0.01  -0.01     0.02   0.00  -0.04
 114   1     0.01   0.06   0.06     0.01   0.00  -0.01    -0.03  -0.03  -0.01
                    88                     89                     90
                     A                      A                      A
 Frequencies --   459.5198               462.1571               494.6290
 Red. masses --     2.9848                 3.6748                 5.3276
 Frc consts  --     0.3713                 0.4625                 0.7680
 IR Inten    --     5.3635                21.8622                23.4374
 Atom AN      X      Y      Z        X      Y      Z        X      Y      Z
   1   8     0.01   0.00   0.00     0.02   0.00   0.00     0.04   0.01  -0.01
   2  12    -0.01  -0.01  -0.03     0.00  -0.02  -0.11    -0.04   0.07   0.23
   3   8     0.00   0.02  -0.01     0.02   0.07  -0.01     0.00   0.08  -0.01
   4   6     0.00   0.00   0.00    -0.01   0.00  -0.01    -0.01   0.01  -0.03
   5   7     0.00   0.05   0.00    -0.02  -0.04   0.01     0.05   0.05   0.05
   6   7     0.00  -0.01  -0.01     0.02   0.02   0.02    -0.02  -0.07  -0.07
   7   8     0.00   0.00   0.00    -0.02  -0.01  -0.01    -0.01  -0.02  -0.02
   8   6    -0.01   0.00  -0.01    -0.02   0.00   0.03     0.00  -0.01   0.01
   9   6     0.00  -0.02  -0.02    -0.03   0.01   0.05    -0.01  -0.03  -0.12
  10   6     0.01  -0.02  -0.01     0.00   0.00   0.03    -0.02  -0.07  -0.08
  11   8     0.00   0.00   0.01     0.00   0.00   0.04    -0.04  -0.01   0.08
  12   6    -0.01   0.00   0.01    -0.03  -0.01   0.02    -0.06   0.00   0.03
  13   6    -0.02   0.00   0.00    -0.07   0.00   0.01    -0.08   0.02   0.02
  14   6    -0.01   0.00   0.00    -0.03   0.02   0.01    -0.07   0.03   0.03
  15   8     0.01   0.00   0.00     0.02  -0.01   0.00     0.04  -0.03  -0.03
  16   6     0.01   0.00   0.00     0.02   0.01  -0.01     0.05   0.02  -0.01
  17   8    -0.02  -0.05   0.02    -0.05  -0.13   0.07    -0.04  -0.11  -0.06
  18   6    -0.01   0.01   0.00    -0.01   0.04  -0.01    -0.01   0.00   0.00
  19   8     0.00   0.00   0.00     0.02   0.00   0.00     0.02   0.02  -0.01
  20   8     0.02   0.00  -0.01     0.06   0.01  -0.03     0.06  -0.02   0.03
  21   6     0.01   0.01  -0.01     0.04   0.03  -0.02     0.04  -0.04  -0.15
  22   6     0.01   0.03  -0.03     0.04   0.08  -0.05    -0.03  -0.02  -0.21
  23   6    -0.01  -0.02   0.00    -0.04  -0.05   0.01     0.04  -0.02   0.02
  24   8    -0.01  -0.01   0.00    -0.02  -0.02   0.01     0.06  -0.01   0.04
  25   6     0.01   0.06   0.01     0.03   0.16   0.04    -0.02   0.03   0.03
  26   6    -0.01  -0.03   0.02    -0.04  -0.08   0.05     0.00   0.01  -0.01
  27   6     0.01  -0.01   0.00     0.01  -0.05  -0.01     0.01  -0.04  -0.01
  28   6     0.00   0.00  -0.01     0.01   0.00  -0.02     0.01   0.00  -0.03
  29   6     0.04   0.00   0.15    -0.02  -0.01   0.00     0.03   0.02  -0.01
  30   6    -0.01  -0.01   0.01     0.07   0.03  -0.05     0.00  -0.04  -0.05
  31   6     0.01   0.03   0.09     0.01   0.01   0.00    -0.03  -0.04  -0.06
  32   6     0.00   0.00   0.05     0.01   0.01  -0.01    -0.04   0.00  -0.04
  33   6    -0.02  -0.01  -0.04     0.02   0.00  -0.01     0.00   0.01   0.08
  34   6     0.01  -0.01   0.03     0.02  -0.01   0.00    -0.03   0.04  -0.05
  35   6     0.05  -0.03   0.09     0.00   0.00  -0.01    -0.02   0.02  -0.04
  36   6    -0.11   0.06  -0.08     0.02   0.01   0.00     0.00  -0.05   0.02
  37   6    -0.04  -0.12  -0.03     0.02   0.03  -0.01    -0.01  -0.02   0.02
  38   6     0.00   0.00   0.01     0.03   0.02  -0.06    -0.01   0.03  -0.01
  39   6     0.00   0.00   0.01     0.02  -0.01  -0.03    -0.02   0.03   0.01
  40   6     0.01   0.01   0.00    -0.03  -0.02   0.02     0.03   0.06   0.02
  41   6     0.00   0.00   0.01     0.01   0.00  -0.02     0.01   0.01   0.03
  42   6    -0.02   0.00   0.01     0.05   0.00  -0.04     0.02   0.00   0.02
  43   6     0.03   0.01   0.02    -0.09  -0.02  -0.06     0.01   0.05   0.03
  44   6    -0.01   0.04  -0.01     0.01  -0.09   0.02     0.03   0.03   0.04
  45   6    -0.03   0.03   0.10     0.00  -0.01   0.00     0.01   0.00  -0.02
  46   6     0.05   0.03  -0.13     0.00   0.00   0.00    -0.01  -0.01   0.05
  47   6     0.03   0.01   0.07    -0.02   0.00  -0.02     0.03  -0.02   0.02
  48   6    -0.01  -0.05  -0.14     0.00   0.00   0.03     0.00   0.01   0.00
  49   6    -0.02  -0.01   0.02     0.04   0.02  -0.04    -0.01   0.00  -0.01
  50   6     0.02   0.01  -0.03    -0.04  -0.03   0.09     0.00   0.00   0.00
  51   6    -0.02  -0.01   0.01     0.05   0.02  -0.04     0.00  -0.01   0.01
  52   6     0.03   0.00  -0.02    -0.10   0.02   0.06     0.01  -0.01  -0.01
  53   6     0.01   0.01  -0.04     0.01   0.01   0.02     0.04   0.02  -0.03
  54   6     0.00   0.01   0.01    -0.01   0.00   0.02    -0.02   0.00   0.03
  55   1     0.00  -0.02  -0.02    -0.03   0.01   0.05    -0.07   0.00  -0.14
  56   1    -0.02   0.00   0.00    -0.06  -0.02   0.00    -0.07   0.00   0.01
  57   1    -0.01   0.00   0.00    -0.03   0.02   0.01    -0.08   0.02   0.04
  58   1     0.00   0.00   0.00     0.02   0.01  -0.02     0.05   0.02  -0.02
  59   1     0.00   0.01   0.00     0.02   0.00  -0.01     0.04   0.02  -0.02
  60   1     0.01   0.00   0.00     0.03   0.01  -0.01     0.06   0.03  -0.02
  61   1     0.00   0.05  -0.02     0.03   0.14  -0.03    -0.10  -0.02  -0.17
  62   1    -0.01  -0.03   0.01    -0.05  -0.08   0.03     0.07  -0.04   0.01
  63   1    -0.01  -0.01   0.06    -0.04   0.01   0.14    -0.11  -0.22   0.19
  64   1     0.02   0.13   0.03     0.07   0.32   0.08     0.07   0.30   0.09
  65   1     0.01   0.08   0.04     0.03   0.23   0.12    -0.02   0.07   0.16
  66   1     0.00  -0.03   0.03    -0.02  -0.10   0.08     0.00   0.04  -0.03
  67   1     0.00  -0.02   0.02     0.01  -0.05   0.04    -0.05  -0.02   0.01
  68   1    -0.02  -0.04   0.03    -0.07  -0.13   0.09     0.02   0.05  -0.03
  69   1     0.03   0.02  -0.02     0.11   0.04  -0.05     0.11   0.07  -0.08
  70   1     0.00  -0.04   0.00     0.02  -0.15   0.01     0.02  -0.14   0.00
  71   1     0.02  -0.04   0.00     0.06  -0.13   0.00     0.06  -0.15  -0.01
  72   1     0.00   0.00  -0.02     0.01   0.00  -0.05     0.01   0.01  -0.11
  73   1     0.02   0.00   0.01     0.05  -0.02   0.02     0.10  -0.05   0.07
  74   1     0.00   0.00  -0.02     0.02   0.00  -0.05     0.04   0.01  -0.10
  75   1    -0.05  -0.02  -0.04     0.00  -0.01   0.00    -0.02   0.03  -0.04
  76   1    -0.08  -0.01  -0.18     0.03   0.01   0.00     0.06  -0.01   0.19
  77   1    -0.05  -0.01  -0.08     0.02  -0.01   0.01    -0.02   0.04  -0.05
  78   1    -0.11   0.10  -0.10     0.01   0.03   0.00     0.00  -0.09   0.04
  79   1    -0.03  -0.13  -0.06     0.02   0.03  -0.01    -0.01  -0.02   0.03
  80   1     0.00   0.00   0.00    -0.02  -0.02   0.01    -0.01   0.00   0.00
  81   1     0.03   0.01  -0.02    -0.10  -0.04   0.09     0.05   0.06   0.01
  82   1     0.01   0.00   0.00    -0.03  -0.02   0.02    -0.01  -0.01   0.01
  83   1     0.03   0.00   0.02    -0.10  -0.02  -0.05     0.00   0.05   0.02
  84   1    -0.01   0.04  -0.01     0.01  -0.10   0.04     0.04   0.02   0.05
  85   1     0.01   0.04   0.23    -0.02   0.00   0.01     0.04  -0.02  -0.10
  86   1     0.13  -0.12   0.06    -0.01  -0.02   0.00    -0.02   0.07   0.00
  87   1    -0.09   0.12   0.25     0.01  -0.03  -0.02     0.01   0.01  -0.03
  88   1     0.16   0.02  -0.15    -0.01  -0.01  -0.02    -0.03  -0.01   0.08
  89   1     0.09   0.08  -0.31    -0.01  -0.01   0.03    -0.01  -0.02   0.06
  90   1     0.13  -0.03   0.02    -0.01  -0.01  -0.01    -0.01   0.01   0.02
  91   1     0.10   0.03   0.19    -0.04  -0.02  -0.03     0.03   0.01  -0.02
  92   1     0.09   0.00   0.18    -0.05   0.03  -0.05     0.06  -0.05   0.04
  93   1    -0.03   0.19  -0.03    -0.01  -0.03   0.00     0.04  -0.02   0.01
  94   1     0.02   0.01  -0.17    -0.01  -0.01   0.03     0.00   0.02  -0.02
  95   1     0.05   0.06  -0.08    -0.02  -0.03   0.01     0.01   0.04   0.03
  96   1    -0.04  -0.09  -0.28     0.01   0.02   0.08    -0.01   0.00  -0.03
  97   1    -0.04  -0.03   0.03     0.10   0.09  -0.10     0.03  -0.03  -0.05
  98   1     0.02  -0.04   0.01    -0.10   0.10  -0.04    -0.02  -0.02  -0.03
  99   1    -0.06  -0.01   0.04     0.13   0.02  -0.08    -0.07   0.00   0.00
 100   1     0.03  -0.01  -0.05    -0.05   0.03   0.11    -0.03  -0.04   0.02
 101   1     0.01  -0.03  -0.01    -0.02   0.07   0.05    -0.02  -0.02  -0.02
 102   1     0.04   0.02  -0.08    -0.08  -0.06   0.21     0.00   0.02  -0.06
 103   1    -0.05  -0.02   0.02     0.14   0.06  -0.07     0.00  -0.02  -0.05
 104   1    -0.03   0.01  -0.04     0.09  -0.04   0.13     0.00  -0.04  -0.02
 105   1    -0.04  -0.03   0.05     0.12   0.07  -0.13    -0.02  -0.06   0.06
 106   1     0.02  -0.02  -0.05    -0.07   0.06   0.14    -0.04  -0.03  -0.01
 107   1     0.07  -0.01  -0.04    -0.23   0.05   0.11     0.08  -0.02  -0.03
 108   1    -0.01   0.00  -0.03     0.02   0.02   0.08    -0.01  -0.03  -0.02
 109   1     0.00   0.01  -0.08     0.01   0.00   0.00     0.02   0.01  -0.13
 110   1     0.05   0.02  -0.03     0.02   0.01   0.03     0.10   0.05   0.00
 111   1     0.02   0.01  -0.03     0.02   0.01   0.03     0.07   0.04  -0.03
 112   1    -0.02   0.00   0.02    -0.02   0.00   0.03    -0.06   0.00   0.09
 113   1    -0.01   0.02   0.02    -0.01   0.00   0.02    -0.09   0.00   0.12
 114   1     0.03   0.03   0.00    -0.02   0.00   0.02     0.10   0.08   0.03
                    91                     92                     93
                     A                      A                      A
 Frequencies --   509.3734               531.2105               533.8397
 Red. masses --     3.5849                 4.9586                 3.7071
 Frc consts  --     0.5480                 0.8244                 0.6225
 IR Inten    --     3.4045                19.4350                 0.9252
 Atom AN      X      Y      Z        X      Y      Z        X      Y      Z
   1   8     0.01   0.00   0.00     0.03   0.01  -0.01     0.00   0.00   0.00
   2  12     0.02   0.04   0.07     0.00   0.02   0.13     0.01   0.01  -0.01
   3   8     0.00   0.01   0.00     0.02   0.01  -0.02     0.00   0.00   0.00
   4   6     0.00   0.00  -0.01    -0.01   0.00  -0.02     0.00   0.00   0.00
   5   7     0.09   0.06  -0.11    -0.13  -0.07  -0.04     0.02  -0.03   0.01
   6   7    -0.04   0.05   0.12     0.06   0.08   0.01    -0.04  -0.03  -0.02
   7   8     0.00   0.00   0.00     0.00  -0.01  -0.02     0.00   0.00   0.00
   8   6     0.11   0.04  -0.12    -0.07  -0.04   0.01    -0.10   0.22  -0.03
   9   6     0.11   0.07   0.02    -0.02  -0.02   0.11     0.00   0.01  -0.02
  10   6     0.01   0.04   0.13     0.03   0.08   0.01     0.15  -0.20   0.07
  11   8    -0.01   0.00   0.02    -0.05   0.00   0.06     0.00   0.00   0.00
  12   6    -0.01   0.00   0.01    -0.03   0.01   0.02     0.00   0.00   0.00
  13   6    -0.01   0.00   0.00     0.00   0.00   0.02     0.00   0.00   0.00
  14   6    -0.02   0.00   0.01    -0.06   0.02   0.03     0.00   0.00   0.00
  15   8     0.01  -0.01  -0.01     0.03  -0.01  -0.03     0.00   0.00   0.00
  16   6     0.01   0.01   0.00     0.04   0.02  -0.01     0.00   0.00   0.00
  17   8    -0.01  -0.01  -0.02    -0.02   0.01  -0.02     0.00   0.00   0.00
  18   6     0.00  -0.01   0.00     0.00  -0.04   0.01     0.00   0.00   0.00
  19   8     0.00   0.01   0.00    -0.01   0.02  -0.01     0.00   0.00   0.00
  20   8     0.01  -0.01   0.01     0.03  -0.02   0.01     0.00   0.00   0.00
  21   6     0.00  -0.01  -0.04    -0.01  -0.01  -0.07     0.00   0.00   0.00
  22   6    -0.02  -0.01  -0.05    -0.06  -0.01  -0.06     0.00   0.00   0.00
  23   6     0.02   0.00   0.01     0.05  -0.03   0.01     0.00   0.00   0.00
  24   8     0.02   0.01   0.01     0.05   0.04   0.01     0.00   0.00   0.00
  25   6    -0.01  -0.01   0.00    -0.02  -0.03   0.00     0.00   0.00   0.00
  26   6     0.00   0.01   0.00     0.01   0.00  -0.01     0.00   0.00   0.00
  27   6     0.00  -0.01   0.00     0.00  -0.02   0.00     0.00   0.00   0.00
  28   6     0.00   0.00  -0.01     0.00   0.00  -0.01     0.00   0.00   0.00
  29   6     0.07   0.02  -0.04    -0.13  -0.04  -0.12     0.00  -0.03  -0.02
  30   6    -0.02   0.03   0.06     0.04   0.06  -0.01    -0.05  -0.01  -0.02
  31   6     0.02  -0.05  -0.01     0.05   0.08   0.05     0.06   0.02  -0.03
  32   6     0.02  -0.05   0.03     0.10   0.00   0.07     0.09  -0.04  -0.04
  33   6    -0.09  -0.04   0.00     0.01  -0.02  -0.17     0.02  -0.03  -0.01
  34   6    -0.04  -0.01   0.04     0.06  -0.11   0.11    -0.03  -0.09   0.02
  35   6    -0.03   0.02   0.05    -0.01  -0.06   0.02    -0.05  -0.03   0.02
  36   6    -0.06  -0.04  -0.01     0.06   0.12  -0.02     0.01   0.06   0.00
  37   6    -0.08   0.01   0.02     0.03   0.03  -0.02    -0.04   0.03   0.02
  38   6     0.05  -0.01  -0.02     0.00  -0.04   0.02    -0.03  -0.05  -0.06
  39   6     0.06  -0.01  -0.04    -0.04  -0.04   0.03    -0.08  -0.01  -0.10
  40   6    -0.08  -0.07   0.03     0.03  -0.03  -0.08    -0.04   0.05   0.00
  41   6     0.03   0.00  -0.07    -0.06   0.01   0.01    -0.01   0.12   0.00
  42   6     0.01   0.01  -0.05    -0.04   0.02   0.00     0.02   0.07   0.05
  43   6    -0.02  -0.05  -0.01     0.01  -0.05  -0.02     0.03  -0.03   0.02
  44   6    -0.04  -0.03  -0.03    -0.01  -0.04  -0.04     0.06   0.02   0.07
  45   6     0.00   0.03   0.01    -0.02   0.00   0.03    -0.02   0.03   0.03
  46   6     0.01   0.01  -0.01     0.01   0.01  -0.06     0.01  -0.01  -0.02
  47   6     0.00   0.01  -0.01    -0.03   0.02  -0.02    -0.02   0.02  -0.02
  48   6     0.01  -0.01  -0.01     0.00   0.00   0.01     0.00   0.01   0.03
  49   6    -0.02   0.01   0.00     0.03   0.00   0.00     0.03  -0.01  -0.01
  50   6     0.00  -0.01   0.02     0.00   0.00   0.00    -0.01  -0.01   0.03
  51   6     0.01   0.00   0.01    -0.01   0.01   0.00    -0.01  -0.03   0.04
  52   6    -0.03   0.01   0.01     0.02   0.00  -0.01     0.04  -0.01  -0.02
  53   6    -0.07  -0.04   0.00    -0.06  -0.04  -0.05     0.02   0.01   0.04
  54   6    -0.03  -0.06  -0.07     0.10   0.07  -0.02    -0.03  -0.02   0.00
  55   1     0.21   0.14   0.05     0.02  -0.10   0.13    -0.02   0.00  -0.03
  56   1    -0.01   0.00   0.00     0.00  -0.02   0.01     0.00   0.00   0.00
  57   1    -0.02   0.00   0.01    -0.08   0.01   0.04     0.00   0.00   0.00
  58   1     0.01   0.01  -0.01     0.04   0.02  -0.01     0.00   0.00   0.00
  59   1     0.01   0.00   0.00     0.03   0.01  -0.01     0.00   0.00   0.00
  60   1     0.02   0.01   0.00     0.05   0.02  -0.01     0.00   0.00   0.00
  61   1    -0.04  -0.01  -0.04    -0.12  -0.02  -0.03     0.00   0.00   0.00
  62   1     0.02  -0.01   0.00     0.06  -0.03   0.00     0.00   0.00   0.00
  63   1    -0.02  -0.05   0.03     0.00  -0.06   0.03     0.00   0.00   0.00
  64   1     0.02   0.05   0.02     0.02   0.03   0.01     0.01   0.00   0.00
  65   1    -0.01  -0.01   0.03    -0.01  -0.09   0.02     0.00   0.00   0.00
  66   1     0.00   0.02  -0.01     0.00   0.03  -0.03     0.00   0.00   0.00
  67   1    -0.02  -0.01   0.00    -0.05  -0.03   0.00     0.00   0.00   0.00
  68   1     0.01   0.02  -0.01     0.01   0.04  -0.03     0.00   0.00   0.00
  69   1     0.02   0.01  -0.01     0.01   0.00  -0.02     0.00   0.00   0.00
  70   1     0.00  -0.02   0.00     0.00  -0.02   0.00     0.00   0.00   0.00
  71   1     0.01  -0.02   0.00     0.01  -0.05   0.00     0.00   0.00   0.00
  72   1     0.00   0.00  -0.03     0.01   0.01  -0.09     0.00   0.00   0.00
  73   1     0.03   0.00   0.02     0.09  -0.03   0.07     0.00   0.00   0.00
  74   1     0.01   0.00  -0.02     0.03   0.01  -0.07     0.00   0.00   0.00
  75   1     0.06   0.00   0.02     0.09  -0.06   0.17     0.09  -0.04  -0.02
  76   1    -0.12  -0.02  -0.06    -0.08   0.04  -0.31    -0.01   0.05   0.01
  77   1     0.00  -0.01   0.00     0.08  -0.11   0.24    -0.02  -0.09   0.02
  78   1    -0.06  -0.05  -0.01     0.05   0.18  -0.05     0.00   0.10   0.00
  79   1    -0.09   0.03   0.03     0.01   0.05  -0.02    -0.06   0.07   0.04
  80   1     0.07   0.03  -0.04    -0.06  -0.01   0.05    -0.08  -0.02  -0.10
  81   1    -0.17  -0.09   0.12     0.11  -0.02  -0.14     0.03  -0.02   0.07
  82   1     0.06   0.02  -0.05    -0.06   0.02   0.06    -0.01   0.12  -0.04
  83   1    -0.02  -0.05  -0.01     0.03  -0.06  -0.02     0.07  -0.08   0.05
  84   1    -0.05  -0.03  -0.03     0.00  -0.03  -0.04     0.10  -0.01   0.11
  85   1     0.09   0.01  -0.02    -0.14   0.04   0.14    -0.04   0.04   0.06
  86   1     0.03   0.05   0.01    -0.02  -0.11   0.00    -0.02   0.00   0.02
  87   1    -0.03   0.11   0.06     0.01  -0.09  -0.01    -0.02   0.03   0.03
  88   1     0.05   0.01   0.05    -0.01   0.00  -0.17     0.01  -0.02  -0.10
  89   1     0.02   0.05  -0.10    -0.01  -0.04   0.02     0.01  -0.03   0.00
  90   1     0.04   0.02   0.03    -0.02  -0.05  -0.04     0.01  -0.05   0.02
  91   1     0.01   0.06  -0.07    -0.05  -0.02   0.02    -0.03   0.03  -0.07
  92   1     0.05  -0.03   0.03    -0.08   0.07  -0.05    -0.01   0.01  -0.02
  93   1     0.03   0.02  -0.03    -0.04   0.01   0.00     0.01  -0.01  -0.01
  94   1     0.08   0.03   0.06    -0.03  -0.03   0.01     0.02   0.01   0.07
  95   1     0.05  -0.03  -0.04    -0.02  -0.03   0.00     0.01  -0.02   0.00
  96   1     0.01  -0.05  -0.08     0.00   0.03   0.07     0.01   0.00   0.02
  97   1    -0.03   0.03   0.02    -0.02   0.04   0.05     0.09  -0.02  -0.07
  98   1    -0.02   0.03   0.02     0.04   0.02   0.02    -0.02  -0.01  -0.04
  99   1     0.03   0.01  -0.01     0.10  -0.01   0.00    -0.02   0.00   0.00
 100   1     0.05   0.05  -0.02     0.01   0.04  -0.01    -0.07  -0.06   0.08
 101   1     0.02   0.00   0.06     0.01   0.03   0.00    -0.04  -0.01  -0.04
 102   1     0.00  -0.03   0.08    -0.01  -0.02   0.06    -0.01   0.00  -0.02
 103   1     0.01   0.01   0.04    -0.03   0.01   0.08    -0.05  -0.05   0.05
 104   1     0.01   0.00   0.05    -0.01   0.05  -0.01    -0.02   0.00   0.00
 105   1     0.02   0.03  -0.04     0.00   0.05  -0.04    -0.02  -0.04   0.06
 106   1     0.04   0.05   0.01     0.06   0.02  -0.01     0.06   0.00  -0.06
 107   1    -0.10   0.04   0.03    -0.03   0.01   0.01     0.06  -0.01  -0.03
 108   1    -0.03   0.04   0.02     0.02   0.03   0.00    -0.02   0.01  -0.02
 109   1    -0.03   0.00   0.29    -0.06  -0.04  -0.07     0.07  -0.18   0.03
 110   1    -0.26  -0.12  -0.08    -0.05  -0.03  -0.04    -0.05  -0.19  -0.14
 111   1    -0.18  -0.09  -0.03    -0.06  -0.04  -0.06     0.24   0.03   0.32
 112   1     0.02  -0.06  -0.16     0.14   0.08  -0.04    -0.38  -0.07   0.14
 113   1     0.12  -0.05  -0.26     0.08   0.05  -0.01     0.11   0.19  -0.16
 114   1    -0.27  -0.19  -0.07     0.10   0.05  -0.01    -0.10   0.16  -0.10
                    94                     95                     96
                     A                      A                      A
 Frequencies --   547.5115               548.7338               557.5765
 Red. masses --     4.2613                 5.4260                 4.7749
 Frc consts  --     0.7526                 0.9626                 0.8746
 IR Inten    --     0.4401                10.7822                 0.3510
 Atom AN      X      Y      Z        X      Y      Z        X      Y      Z
   1   8     0.00   0.00   0.00    -0.07  -0.02   0.01     0.00   0.00   0.00
   2  12     0.02   0.02  -0.01     0.00   0.04   0.11     0.00  -0.02  -0.02
   3   8     0.01   0.00   0.00    -0.13   0.05   0.06     0.01   0.00   0.00
   4   6     0.00   0.00   0.00     0.03  -0.01   0.04     0.00   0.00   0.00
   5   7    -0.05   0.01   0.01    -0.03   0.01  -0.01     0.02   0.11  -0.01
   6   7    -0.07  -0.11  -0.05     0.01   0.01   0.00    -0.08   0.07  -0.05
   7   8     0.00   0.00   0.00    -0.01   0.02   0.05     0.00   0.00   0.00
   8   6     0.03  -0.01   0.06    -0.01  -0.02   0.00     0.03   0.08   0.00
   9   6     0.01  -0.01  -0.06     0.00  -0.01   0.01     0.04  -0.03  -0.04
  10   6    -0.04   0.02  -0.09    -0.01   0.02  -0.01    -0.06  -0.03  -0.01
  11   8    -0.01   0.00   0.01     0.15  -0.03  -0.14    -0.01   0.00   0.00
  12   6     0.00   0.01   0.00     0.03  -0.08  -0.07     0.00   0.00   0.00
  13   6     0.01  -0.01   0.00    -0.10   0.05  -0.06     0.01   0.00   0.01
  14   6    -0.01   0.00   0.01     0.19  -0.04  -0.11    -0.01   0.00   0.00
  15   8     0.00   0.00  -0.01    -0.06   0.02   0.11     0.00   0.00  -0.01
  16   6     0.01   0.00   0.00    -0.11  -0.05   0.02     0.00   0.00   0.00
  17   8     0.00   0.00   0.00    -0.01  -0.08  -0.04     0.00   0.00   0.00
  18   6     0.01  -0.01   0.00    -0.05   0.10   0.01     0.00   0.00   0.00
  19   8    -0.01   0.00   0.00     0.09  -0.05   0.03    -0.01   0.00   0.00
  20   8     0.00   0.00   0.00    -0.06   0.02   0.02     0.00   0.00   0.00
  21   6    -0.01   0.00   0.00     0.06  -0.06   0.01     0.00   0.01   0.01
  22   6    -0.01   0.00   0.01     0.12  -0.01  -0.08     0.00   0.00   0.01
  23   6     0.00  -0.01   0.00    -0.07   0.10   0.00     0.00   0.00   0.00
  24   8     0.00   0.01   0.00    -0.02  -0.16   0.02    -0.01   0.01   0.00
  25   6     0.00  -0.01   0.00     0.04   0.07   0.00     0.00   0.00   0.00
  26   6     0.00   0.00   0.00     0.03   0.06  -0.02     0.00  -0.01   0.00
  27   6     0.00  -0.01   0.00     0.01   0.06  -0.02     0.00   0.00   0.00
  28   6     0.00   0.00   0.00     0.00  -0.01   0.00     0.00   0.00   0.00
  29   6    -0.07  -0.01  -0.11    -0.03  -0.01  -0.06     0.04   0.00  -0.04
  30   6    -0.13  -0.12   0.07     0.01   0.01   0.00     0.12   0.02  -0.10
  31   6     0.03   0.04   0.02     0.02   0.02   0.00     0.09   0.02  -0.04
  32   6     0.07  -0.01   0.06     0.04  -0.01   0.02     0.12  -0.08  -0.07
  33   6    -0.02  -0.03  -0.11    -0.01  -0.02  -0.05     0.00  -0.07   0.01
  34   6     0.03  -0.07   0.09     0.01  -0.04   0.04    -0.06  -0.12   0.02
  35   6    -0.02  -0.02   0.01    -0.02  -0.02   0.00    -0.10  -0.01   0.02
  36   6     0.04   0.06  -0.01     0.02   0.04   0.00     0.03   0.07   0.01
  37   6    -0.01   0.01   0.00    -0.01   0.01   0.00    -0.12   0.03   0.06
  38   6     0.01   0.08  -0.02     0.00   0.00   0.00     0.01   0.08   0.06
  39   6     0.13   0.08  -0.07     0.00   0.00   0.01     0.03   0.00   0.18
  40   6    -0.09   0.01   0.18     0.00   0.00  -0.01     0.14  -0.01  -0.05
  41   6     0.16  -0.05  -0.07    -0.01   0.00   0.00    -0.03  -0.16   0.08
  42   6     0.06  -0.06  -0.02     0.00   0.00   0.00    -0.03  -0.08  -0.05
  43   6    -0.03   0.11   0.03     0.00  -0.01   0.00    -0.02   0.11   0.01
  44   6     0.00   0.05   0.04     0.00  -0.01  -0.01    -0.06  -0.03  -0.08
  45   6     0.00   0.00   0.01    -0.01   0.01   0.01    -0.02   0.04   0.02
  46   6     0.00   0.01  -0.03     0.00   0.00  -0.01     0.01   0.00  -0.01
  47   6    -0.01   0.01  -0.01    -0.01   0.01  -0.01    -0.01   0.01  -0.02
  48   6     0.00   0.00   0.01     0.00   0.00   0.01     0.00   0.01   0.03
  49   6    -0.05   0.00   0.00     0.00   0.00   0.00    -0.02   0.00   0.01
  50   6     0.00   0.00   0.00     0.00   0.00   0.00     0.01   0.01  -0.03
  51   6     0.01  -0.01   0.00     0.00   0.00   0.00     0.01   0.02  -0.04
  52   6    -0.04   0.00   0.01     0.00   0.00   0.00    -0.01   0.00   0.01
  53   6     0.04   0.04   0.08    -0.01  -0.01  -0.01     0.04   0.05   0.08
  54   6     0.01   0.00  -0.02     0.02   0.01  -0.01    -0.10  -0.05   0.05
  55   1    -0.05  -0.04  -0.08     0.01  -0.03   0.02     0.02   0.00  -0.05
  56   1     0.01  -0.01   0.00    -0.12   0.12  -0.04     0.01  -0.01   0.01
  57   1    -0.02   0.00   0.01     0.25  -0.02  -0.15    -0.01   0.00   0.01
  58   1     0.01   0.00   0.00    -0.12  -0.06   0.03     0.01   0.00   0.00
  59   1     0.01   0.00   0.00    -0.08  -0.03   0.03     0.00   0.00   0.00
  60   1     0.01   0.00   0.00    -0.13  -0.06   0.03     0.00   0.00   0.00
  61   1    -0.01   0.00   0.01     0.21   0.01  -0.12     0.00   0.00   0.01
  62   1     0.00  -0.01   0.00    -0.07   0.12   0.00     0.00  -0.01   0.00
  63   1     0.00   0.01  -0.01    -0.08  -0.09   0.08     0.01   0.01   0.00
  64   1    -0.01  -0.01   0.00     0.04   0.17   0.04    -0.01  -0.01   0.00
  65   1     0.00  -0.01  -0.01     0.03   0.21   0.07     0.00   0.00  -0.01
  66   1     0.00   0.00   0.00     0.00  -0.03  -0.01     0.00   0.00   0.01
  67   1    -0.01  -0.01   0.00     0.11   0.09  -0.06     0.00   0.00   0.00
  68   1     0.00   0.00   0.00     0.06   0.04  -0.03    -0.01  -0.01   0.01
  69   1    -0.01  -0.01   0.00     0.11   0.15  -0.03    -0.01  -0.01   0.00
  70   1     0.00   0.01   0.00     0.02  -0.07   0.00     0.00   0.01   0.00
  71   1     0.00   0.00   0.00     0.05   0.02  -0.01     0.00   0.00   0.00
  72   1     0.00   0.00  -0.02    -0.02  -0.03   0.24     0.00   0.00  -0.01
  73   1     0.02   0.00   0.02    -0.23   0.07  -0.22     0.01   0.00   0.01
  74   1     0.01   0.00  -0.01    -0.08  -0.01   0.15     0.00   0.00   0.00
  75   1     0.08  -0.04   0.15     0.05  -0.02   0.07     0.13  -0.08  -0.06
  76   1    -0.08   0.02  -0.20    -0.04   0.02  -0.09    -0.03   0.05   0.05
  77   1     0.07  -0.07   0.18     0.03  -0.05   0.09     0.00  -0.13   0.01
  78   1     0.03   0.09  -0.02     0.02   0.05  -0.01     0.01   0.11   0.00
  79   1    -0.02   0.03   0.00    -0.02   0.02   0.01    -0.14   0.07   0.08
  80   1     0.22   0.04  -0.16     0.00   0.00   0.01    -0.05  -0.05   0.25
  81   1    -0.29   0.00   0.29     0.01   0.00  -0.02     0.14   0.09  -0.21
  82   1     0.20  -0.06  -0.18    -0.01   0.00   0.01    -0.11  -0.18   0.19
  83   1    -0.05   0.13   0.03     0.00  -0.01   0.00    -0.05   0.15  -0.02
  84   1    -0.02   0.06   0.03     0.00  -0.01  -0.01    -0.10  -0.01  -0.12
  85   1    -0.06   0.02   0.07    -0.03   0.02   0.04    -0.04   0.05   0.06
  86   1    -0.01  -0.05   0.00    -0.01  -0.02   0.00    -0.02   0.00   0.02
  87   1     0.01  -0.04  -0.02     0.00  -0.02  -0.01    -0.01   0.02   0.01
  88   1    -0.01   0.00  -0.09     0.00   0.00  -0.05     0.00  -0.02  -0.11
  89   1    -0.01  -0.02   0.02     0.00  -0.01   0.01     0.00  -0.04   0.03
  90   1    -0.01  -0.03  -0.03    -0.01  -0.02  -0.01    -0.01  -0.06   0.01
  91   1    -0.02   0.01  -0.02    -0.01   0.00  -0.02    -0.01   0.09  -0.15
  92   1    -0.02   0.02  -0.01     0.00   0.00  -0.01     0.07  -0.07   0.04
  93   1    -0.01   0.00  -0.01     0.00   0.00   0.00     0.06  -0.01  -0.03
  94   1     0.01   0.00   0.02     0.01   0.00   0.02     0.09   0.06   0.12
  95   1     0.00  -0.02  -0.01     0.00  -0.01   0.00     0.06  -0.01  -0.01
  96   1     0.01  -0.01   0.01     0.00   0.00   0.01     0.01  -0.04  -0.07
  97   1     0.00  -0.05  -0.06    -0.01   0.01   0.01    -0.09   0.04   0.08
  98   1    -0.07  -0.03  -0.03     0.00   0.00   0.00     0.03   0.01   0.04
  99   1    -0.15   0.01   0.01     0.01   0.00   0.00     0.06  -0.01   0.01
 100   1     0.00  -0.05   0.00     0.01   0.01   0.00     0.07   0.07  -0.08
 101   1    -0.01  -0.05   0.02     0.00   0.00   0.00     0.04   0.02   0.02
 102   1     0.02   0.02  -0.08     0.00   0.00   0.01     0.00  -0.01   0.04
 103   1     0.06  -0.01  -0.16    -0.01   0.00   0.01     0.05   0.03  -0.13
 104   1     0.02  -0.09   0.01     0.00   0.01   0.00     0.02  -0.03  -0.03
 105   1     0.00  -0.09   0.09     0.01   0.00   0.00    -0.01  -0.03   0.02
 106   1    -0.13  -0.04   0.03     0.01   0.00   0.00    -0.12  -0.05   0.05
 107   1     0.06  -0.02  -0.03    -0.01   0.00   0.00     0.06  -0.03  -0.01
 108   1    -0.04  -0.06   0.00     0.00   0.01   0.00     0.02  -0.06   0.00
 109   1     0.03   0.07   0.06    -0.02   0.00  -0.01     0.06   0.02   0.11
 110   1     0.08   0.08   0.11    -0.01   0.00   0.00     0.02   0.00   0.03
 111   1     0.02   0.04   0.05    -0.03  -0.01  -0.03     0.07   0.04   0.14
 112   1     0.10   0.02  -0.03     0.05   0.02  -0.02    -0.12  -0.06   0.07
 113   1    -0.05  -0.06   0.06     0.01   0.00   0.01    -0.12  -0.06   0.07
 114   1     0.07  -0.02   0.01     0.03   0.00   0.00    -0.07  -0.02   0.04
                    97                     98                     99
                     A                      A                      A
 Frequencies --   565.7308               573.1338               593.2462
 Red. masses --     4.0554                 3.9373                 5.6913
 Frc consts  --     0.7647                 0.7620                 1.1801
 IR Inten    --     0.5567                 0.9933                12.3997
 Atom AN      X      Y      Z        X      Y      Z        X      Y      Z
   1   8     0.00   0.00   0.00     0.00   0.00   0.00     0.00  -0.03  -0.02
   2  12    -0.01   0.00   0.02     0.00  -0.01  -0.02     0.00   0.00  -0.01
   3   8    -0.01   0.00   0.00     0.01  -0.01   0.00    -0.06   0.04  -0.02
   4   6     0.00   0.00   0.00     0.00   0.00   0.00    -0.01   0.04  -0.02
   5   7    -0.06   0.04   0.00    -0.03   0.14  -0.02     0.00   0.00   0.00
   6   7    -0.01   0.05  -0.01     0.12  -0.10   0.07     0.00   0.00   0.00
   7   8     0.00   0.00   0.00     0.00   0.00   0.00    -0.02  -0.03   0.01
   8   6    -0.09   0.00  -0.03     0.10  -0.14   0.03     0.00   0.00   0.00
   9   6     0.00  -0.04   0.07     0.00   0.02  -0.02     0.00   0.00   0.00
  10   6     0.06   0.04   0.00    -0.11   0.09  -0.04     0.00   0.00   0.00
  11   8     0.00   0.00   0.00    -0.01   0.00   0.00     0.06  -0.05   0.04
  12   6     0.00   0.00   0.00     0.00   0.01   0.00    -0.10  -0.10  -0.04
  13   6     0.00   0.00   0.00     0.01   0.00   0.00    -0.10   0.07  -0.10
  14   6     0.00   0.00   0.00    -0.01   0.00   0.00     0.03   0.04  -0.01
  15   8     0.00   0.00   0.00     0.00   0.00   0.00    -0.01   0.00   0.12
  16   6     0.00   0.00   0.00     0.00   0.00   0.00    -0.02  -0.01   0.00
  17   8     0.00   0.00   0.00     0.00   0.00   0.00     0.04   0.01  -0.03
  18   6     0.00   0.00   0.00     0.00   0.00   0.00    -0.06  -0.08   0.07
  19   8     0.00   0.00   0.00    -0.01   0.00   0.00     0.08   0.03   0.00
  20   8     0.00  -0.01   0.00     0.00   0.00   0.00     0.28   0.12  -0.06
  21   6     0.00  -0.01  -0.01     0.00   0.01   0.01     0.02   0.19  -0.03
  22   6     0.00   0.00  -0.01     0.00   0.00   0.01    -0.01  -0.09   0.02
  23   6     0.00   0.00   0.00     0.00   0.00   0.00     0.01  -0.03   0.07
  24   8     0.01   0.00   0.00    -0.01   0.00   0.00    -0.14   0.09  -0.01
  25   6     0.00   0.00   0.00     0.00   0.00   0.00    -0.09  -0.21   0.03
  26   6     0.00   0.01   0.00     0.00  -0.01   0.00    -0.03  -0.10   0.04
  27   6     0.00   0.00   0.00     0.00   0.00   0.00     0.03   0.10  -0.05
  28   6     0.00   0.00   0.00     0.00   0.00   0.00     0.02   0.00   0.00
  29   6     0.03  -0.01   0.17     0.02   0.03   0.01     0.00   0.00   0.00
  30   6    -0.07   0.00   0.09     0.01  -0.02   0.00     0.00   0.00   0.00
  31   6     0.04   0.06   0.02     0.05   0.04   0.01     0.00   0.00   0.00
  32   6     0.00  -0.03  -0.17     0.06  -0.07  -0.07     0.00   0.00   0.00
  33   6     0.12  -0.04   0.15     0.02  -0.07   0.03     0.00   0.00   0.00
  34   6    -0.07  -0.09  -0.12    -0.04  -0.09  -0.01     0.00   0.00   0.00
  35   6    -0.06  -0.02  -0.04    -0.08   0.01  -0.01     0.00   0.00   0.00
  36   6     0.08   0.09   0.01     0.06   0.08   0.00     0.00   0.00   0.00
  37   6    -0.03   0.00   0.03    -0.11   0.00   0.06     0.00   0.00   0.00
  38   6     0.02   0.02   0.02    -0.01  -0.07  -0.03     0.00   0.00   0.00
  39   6     0.10   0.01  -0.01    -0.10  -0.01  -0.08     0.00   0.00   0.00
  40   6    -0.06  -0.05   0.07    -0.04   0.05  -0.05     0.00   0.00   0.00
  41   6     0.07  -0.03  -0.05    -0.05   0.11   0.00     0.00   0.00   0.00
  42   6    -0.02  -0.01  -0.03     0.04   0.04   0.05     0.00   0.00   0.00
  43   6    -0.01   0.02   0.00     0.01  -0.11  -0.03     0.00   0.00   0.00
  44   6    -0.04  -0.03  -0.04     0.07   0.06   0.09     0.00   0.00   0.00
  45   6    -0.01   0.00   0.01     0.00   0.00   0.00     0.00   0.00   0.00
  46   6     0.00   0.00  -0.01     0.00   0.00  -0.02     0.00   0.00   0.00
  47   6     0.01  -0.02   0.01     0.01  -0.01   0.00     0.00   0.00   0.00
  48   6     0.00   0.02   0.03     0.00   0.01   0.01     0.00   0.00   0.00
  49   6    -0.01   0.00   0.00     0.01   0.00   0.00     0.00   0.00   0.00
  50   6     0.00   0.00   0.00    -0.01   0.00   0.01     0.00   0.00   0.00
  51   6     0.00   0.00   0.00     0.00   0.00   0.01     0.00   0.00   0.00
  52   6    -0.01   0.00   0.00     0.01   0.00  -0.01     0.00   0.00   0.00
  53   6    -0.06  -0.05  -0.12     0.02   0.02   0.02     0.00   0.00   0.00
  54   6     0.10   0.07  -0.05    -0.04  -0.03   0.02     0.00   0.00   0.00
  55   1     0.05  -0.14   0.09    -0.03   0.07  -0.03     0.00   0.00   0.00
  56   1    -0.01   0.01   0.00     0.01  -0.01   0.00    -0.06   0.13  -0.17
  57   1     0.00   0.00   0.00    -0.01   0.00   0.01     0.11   0.06  -0.04
  58   1     0.00   0.00   0.00     0.01   0.00   0.00    -0.05  -0.02   0.01
  59   1     0.00   0.00   0.00     0.00   0.00   0.00     0.00   0.02   0.01
  60   1     0.00   0.00   0.00     0.00   0.00   0.00    -0.02   0.00   0.01
  61   1    -0.01   0.00   0.00     0.00   0.00   0.01    -0.15  -0.21   0.05
  62   1     0.01   0.01   0.00    -0.01   0.00   0.00     0.03  -0.15   0.11
  63   1     0.00  -0.01   0.00    -0.01   0.01  -0.01    -0.18  -0.19  -0.03
  64   1     0.00   0.01   0.00     0.00  -0.02   0.00    -0.23  -0.37   0.02
  65   1     0.00   0.00   0.00     0.00   0.01   0.00    -0.11  -0.04  -0.04
  66   1     0.00   0.01  -0.01     0.00   0.00   0.01    -0.05  -0.23   0.08
  67   1     0.00   0.00   0.00     0.00   0.00   0.00     0.09  -0.05   0.00
  68   1     0.01   0.01  -0.01    -0.01  -0.01   0.01     0.01  -0.15   0.04
  69   1     0.01   0.01   0.00    -0.01  -0.01   0.01     0.13   0.20  -0.06
  70   1     0.00   0.00   0.00     0.00   0.00   0.00     0.04  -0.03  -0.03
  71   1     0.00   0.00   0.00     0.00   0.00   0.00     0.08   0.07  -0.04
  72   1     0.00   0.00   0.00     0.00   0.00  -0.01     0.02  -0.01   0.02
  73   1     0.00   0.00   0.00     0.01   0.00   0.01     0.01  -0.03   0.01
  74   1     0.00   0.00   0.00     0.00   0.00   0.00     0.01   0.00  -0.05
  75   1    -0.11  -0.08  -0.33     0.02  -0.10  -0.10     0.00   0.00   0.00
  76   1     0.17   0.03   0.32     0.02   0.00   0.09     0.00   0.00   0.00
  77   1    -0.11  -0.09  -0.21     0.03  -0.10  -0.03     0.00   0.00  -0.01
  78   1     0.07   0.12   0.00     0.05   0.10  -0.01     0.00   0.00   0.00
  79   1    -0.04   0.02   0.05    -0.11   0.01   0.07     0.00   0.00   0.00
  80   1     0.16   0.04  -0.07    -0.11   0.03  -0.07     0.00   0.00   0.00
  81   1    -0.15  -0.04   0.11     0.05  -0.01   0.00     0.00   0.00   0.00
  82   1     0.15   0.00  -0.09    -0.09   0.08  -0.04     0.00  -0.01  -0.01
  83   1    -0.02   0.03   0.00     0.03  -0.12  -0.02     0.00   0.00   0.00
  84   1    -0.05  -0.03  -0.05     0.09   0.05   0.10     0.00   0.01   0.00
  85   1    -0.12   0.03   0.07    -0.08   0.03   0.06     0.00   0.00   0.00
  86   1    -0.03  -0.05   0.00    -0.02  -0.05  -0.01     0.00   0.00   0.00
  87   1     0.03  -0.10  -0.04     0.03  -0.07  -0.04     0.00   0.00   0.00
  88   1    -0.04  -0.01  -0.12    -0.02  -0.01  -0.10     0.00   0.00   0.00
  89   1    -0.02  -0.06   0.10    -0.02  -0.04   0.07     0.00   0.00   0.00
  90   1    -0.03  -0.05  -0.02    -0.03  -0.04  -0.03     0.00   0.00   0.00
  91   1     0.01   0.01  -0.05     0.02   0.08  -0.13     0.00   0.00   0.00
  92   1     0.04  -0.05   0.03     0.11  -0.10   0.07     0.00   0.00   0.00
  93   1     0.05  -0.04   0.01     0.08  -0.02  -0.02     0.00   0.00   0.00
  94   1     0.00   0.02   0.03     0.08   0.07   0.08     0.00   0.00   0.00
  95   1     0.01   0.04   0.03     0.06   0.01   0.00     0.00   0.00   0.00
  96   1    -0.01   0.02   0.00     0.00  -0.05  -0.10     0.00   0.00   0.00
  97   1    -0.05   0.03   0.05     0.10  -0.06  -0.10     0.00  -0.01   0.00
  98   1     0.00   0.02   0.03    -0.04  -0.04  -0.06     0.00   0.00   0.00
  99   1     0.05  -0.01   0.00    -0.12   0.01   0.02    -0.01   0.00   0.00
 100   1     0.05   0.05  -0.04    -0.08  -0.10   0.07     0.00  -0.01   0.00
 101   1     0.02   0.01   0.03    -0.04  -0.03  -0.04     0.00   0.00   0.00
 102   1     0.00  -0.02   0.06     0.00   0.04  -0.11     0.00   0.00  -0.01
 103   1     0.01   0.00  -0.02    -0.04   0.00   0.12     0.00   0.00   0.00
 104   1     0.00  -0.01   0.01    -0.01   0.06   0.02     0.00   0.00  -0.01
 105   1     0.00   0.00   0.01     0.01   0.07  -0.08     0.00   0.00   0.00
 106   1    -0.02   0.00   0.01     0.11   0.05  -0.02     0.00   0.00   0.00
 107   1    -0.01   0.01   0.00    -0.09   0.03   0.03     0.00   0.00   0.00
 108   1    -0.01   0.00   0.00     0.01   0.05   0.01     0.00   0.00   0.00
 109   1    -0.06  -0.08  -0.18    -0.02   0.17   0.05     0.00   0.00   0.00
 110   1    -0.03  -0.05  -0.12     0.06   0.18   0.16     0.00   0.00   0.00
 111   1    -0.01  -0.04  -0.08    -0.16   0.00  -0.20     0.00   0.00   0.00
 112   1     0.08   0.07  -0.04     0.21   0.01  -0.07     0.01   0.00   0.00
 113   1     0.13   0.09  -0.08    -0.14  -0.17   0.15     0.00   0.00   0.00
 114   1     0.07   0.07  -0.06     0.02  -0.14   0.10     0.00  -0.01   0.00
                   100                    101                    102
                     A                      A                      A
 Frequencies --   604.6727               605.1662               614.8612
 Red. masses --     4.6257                 3.6375                 4.9160
 Frc consts  --     0.9965                 0.7849                 1.0950
 IR Inten    --    14.3313                 5.3456                17.4357
 Atom AN      X      Y      Z        X      Y      Z        X      Y      Z
   1   8    -0.02   0.04   0.04    -0.01   0.01   0.01     0.06  -0.09  -0.11
   2  12    -0.01   0.02   0.05     0.00   0.00   0.02    -0.01   0.01   0.04
   3   8     0.06   0.05   0.00     0.02   0.02   0.00     0.07  -0.05  -0.03
   4   6     0.04  -0.09   0.05     0.01  -0.02   0.01    -0.08   0.18  -0.13
   5   7     0.03  -0.04   0.01    -0.08   0.10  -0.01     0.00   0.01   0.00
   6   7    -0.01   0.01   0.00     0.02  -0.01   0.00     0.01   0.00   0.01
   7   8     0.04   0.06  -0.01     0.01   0.02   0.00    -0.10  -0.14   0.01
   8   6     0.00   0.00  -0.01    -0.03  -0.01   0.02     0.00  -0.01   0.00
   9   6    -0.01   0.02  -0.01     0.00  -0.04   0.03     0.00   0.01   0.00
  10   6     0.02  -0.02   0.02    -0.03   0.04  -0.03     0.00   0.00   0.00
  11   8    -0.04   0.07  -0.06    -0.02   0.02  -0.02    -0.07  -0.01  -0.01
  12   6     0.12   0.12   0.04     0.04   0.04   0.01    -0.04  -0.02   0.00
  13   6     0.05  -0.06   0.12     0.02  -0.02   0.04     0.10  -0.04  -0.02
  14   6    -0.02  -0.09  -0.03     0.00  -0.02  -0.01     0.03   0.20   0.12
  15   8    -0.01   0.00  -0.12     0.00   0.00  -0.04     0.02  -0.02   0.00
  16   6     0.01   0.00   0.00     0.00   0.00   0.00     0.00   0.00   0.00
  17   8     0.03  -0.05  -0.06     0.01  -0.01  -0.02     0.02  -0.05  -0.04
  18   6    -0.02  -0.02  -0.01    -0.01  -0.01   0.00     0.02  -0.03   0.00
  19   8    -0.02   0.03  -0.02    -0.01   0.01  -0.01    -0.02   0.02   0.00
  20   8     0.04   0.13  -0.01     0.01   0.04   0.00    -0.10   0.06   0.01
  21   6     0.03   0.12   0.05     0.01   0.04   0.02     0.01   0.04   0.08
  22   6     0.15  -0.07  -0.02     0.05  -0.02  -0.01     0.15  -0.04  -0.02
  23   6    -0.09   0.02  -0.05    -0.03   0.01  -0.02    -0.08   0.05  -0.05
  24   8    -0.15  -0.03  -0.01    -0.05  -0.01   0.00    -0.09  -0.05  -0.01
  25   6    -0.01  -0.06   0.01     0.00  -0.02   0.00     0.03   0.03   0.00
  26   6    -0.02  -0.04   0.02    -0.01  -0.01   0.00     0.00   0.01   0.00
  27   6    -0.05  -0.14   0.06    -0.02  -0.05   0.02     0.01   0.02  -0.01
  28   6    -0.04   0.00  -0.03    -0.01   0.00   0.00     0.10   0.00   0.18
  29   6    -0.03   0.05  -0.02     0.07  -0.13   0.02     0.00   0.00  -0.01
  30   6     0.00   0.01   0.00     0.00  -0.02   0.02    -0.01   0.01  -0.01
  31   6    -0.03   0.04   0.05     0.08  -0.09  -0.13     0.00   0.00   0.00
  32   6    -0.05  -0.02   0.02     0.13   0.05  -0.04     0.00   0.00   0.00
  33   6    -0.01  -0.04  -0.01     0.01   0.09   0.01     0.00   0.00   0.00
  34   6     0.04   0.02   0.00    -0.09  -0.04   0.00     0.00   0.00   0.00
  35   6    -0.01   0.05  -0.04     0.04  -0.13   0.10    -0.01   0.00   0.00
  36   6     0.04   0.03   0.00    -0.11  -0.09   0.01     0.00   0.00   0.00
  37   6    -0.04  -0.02   0.02     0.10   0.05  -0.06     0.00   0.00   0.00
  38   6     0.00   0.00  -0.01     0.01  -0.01   0.01    -0.01   0.00  -0.01
  39   6     0.00  -0.01   0.00     0.00   0.01  -0.01     0.00  -0.01   0.00
  40   6     0.01  -0.01   0.00    -0.02   0.01   0.00     0.01  -0.01   0.01
  41   6     0.00   0.00   0.00     0.00   0.00  -0.01     0.00   0.01   0.01
  42   6    -0.01   0.01   0.00     0.01  -0.01   0.01    -0.01   0.02   0.00
  43   6     0.00   0.01   0.01     0.00  -0.02  -0.01     0.00   0.02   0.01
  44   6    -0.01  -0.01  -0.01     0.01   0.02   0.02    -0.01  -0.02  -0.02
  45   6     0.02  -0.02  -0.01    -0.04   0.06   0.04     0.00   0.00   0.00
  46   6     0.00   0.01  -0.01     0.00  -0.02   0.04     0.00   0.00   0.00
  47   6     0.02  -0.02   0.02    -0.04   0.06  -0.05     0.00   0.00   0.00
  48   6     0.00  -0.01  -0.01     0.01   0.01   0.03     0.00   0.00   0.00
  49   6     0.00   0.00   0.00    -0.01   0.00   0.00     0.01   0.00   0.00
  50   6     0.00   0.00   0.00     0.00   0.00   0.00     0.00   0.00   0.00
  51   6     0.00   0.00   0.00     0.00   0.00  -0.01     0.00   0.00   0.01
  52   6     0.00   0.00   0.00    -0.01   0.00   0.00     0.01   0.00   0.00
  53   6    -0.01  -0.01  -0.02    -0.01   0.00  -0.01     0.00   0.00  -0.01
  54   6     0.01   0.00   0.00     0.01   0.02   0.00     0.00   0.00   0.00
  55   1     0.01   0.02  -0.01    -0.01  -0.07   0.03     0.00   0.00   0.00
  56   1    -0.02  -0.15   0.24     0.00  -0.05   0.08     0.14  -0.02  -0.08
  57   1    -0.14  -0.13  -0.01    -0.04  -0.03   0.00     0.25   0.27   0.17
  58   1     0.07   0.02  -0.01     0.02   0.00   0.00    -0.14  -0.03   0.03
  59   1    -0.03  -0.04  -0.02    -0.01  -0.01   0.00     0.10   0.11   0.04
  60   1     0.01  -0.02  -0.01     0.00   0.00   0.00    -0.02   0.03   0.04
  61   1     0.18  -0.16  -0.06     0.06  -0.05  -0.02     0.25  -0.06  -0.08
  62   1    -0.09  -0.04  -0.02    -0.03  -0.01  -0.01    -0.11   0.07  -0.04
  63   1    -0.20  -0.18   0.02    -0.06  -0.06   0.01    -0.11  -0.09   0.03
  64   1    -0.15  -0.15   0.04    -0.05  -0.05   0.01    -0.05   0.01   0.02
  65   1    -0.04   0.23  -0.01    -0.01   0.07   0.00     0.01   0.24   0.01
  66   1     0.01  -0.12   0.09     0.01  -0.04   0.03     0.02  -0.05   0.04
  67   1     0.15   0.07   0.01     0.05   0.02   0.00     0.12   0.08  -0.02
  68   1    -0.06  -0.19   0.10    -0.02  -0.06   0.03    -0.02  -0.08   0.04
  69   1    -0.05  -0.15   0.03    -0.02  -0.05   0.01    -0.11  -0.10   0.03
  70   1    -0.04  -0.11   0.05    -0.01  -0.03   0.02     0.01   0.16  -0.03
  71   1    -0.05  -0.19   0.06    -0.02  -0.06   0.02    -0.05   0.09  -0.02
  72   1    -0.05   0.02  -0.03    -0.01   0.00   0.00     0.13  -0.05   0.20
  73   1    -0.08   0.07  -0.09    -0.02   0.02  -0.02     0.16  -0.10   0.26
  74   1    -0.04   0.00   0.08    -0.01   0.00   0.02     0.08  -0.02   0.01
  75   1    -0.08  -0.06   0.04     0.22   0.16  -0.06     0.01   0.00   0.01
  76   1     0.02  -0.09  -0.01    -0.05   0.22   0.00    -0.01   0.00   0.00
  77   1     0.12   0.01   0.04    -0.27  -0.02  -0.07     0.01   0.00   0.01
  78   1     0.05   0.02  -0.02    -0.13  -0.05   0.04     0.00   0.00   0.00
  79   1    -0.02  -0.05   0.02     0.05   0.13  -0.05     0.00  -0.01   0.00
  80   1     0.00  -0.02   0.00     0.01   0.03  -0.02     0.00  -0.03  -0.01
  81   1     0.01  -0.01   0.00    -0.02   0.01   0.00     0.02  -0.02   0.01
  82   1     0.01   0.01   0.02    -0.01  -0.01  -0.04     0.02   0.02   0.02
  83   1     0.01   0.01   0.01    -0.01  -0.02  -0.02     0.01   0.01   0.02
  84   1     0.00  -0.02  -0.01     0.00   0.03   0.01     0.00  -0.02  -0.01
  85   1    -0.07   0.00   0.03     0.17   0.00  -0.09     0.00   0.00   0.00
  86   1     0.00  -0.07  -0.02     0.01   0.17   0.06     0.00   0.00   0.00
  87   1     0.04  -0.10  -0.05    -0.11   0.25   0.13     0.00   0.00   0.00
  88   1    -0.03   0.01  -0.04     0.07  -0.02   0.10     0.00   0.00   0.00
  89   1    -0.01  -0.01   0.04     0.03   0.03  -0.10     0.00   0.00   0.00
  90   1    -0.02   0.01  -0.04     0.06  -0.02   0.11     0.00   0.00   0.00
  91   1     0.03   0.03  -0.04    -0.08  -0.06   0.10     0.00   0.00  -0.01
  92   1     0.08  -0.08   0.06    -0.19   0.19  -0.17     0.01   0.00   0.01
  93   1     0.05  -0.02   0.00    -0.12   0.04   0.00     0.01   0.00   0.00
  94   1     0.03   0.03   0.00    -0.07  -0.07   0.01     0.00   0.00   0.00
  95   1     0.02   0.02   0.00    -0.06  -0.05   0.01     0.00   0.00   0.00
  96   1    -0.01  -0.04  -0.08     0.01   0.09   0.19     0.00   0.00   0.00
  97   1    -0.01   0.01   0.02     0.02  -0.02  -0.02    -0.01   0.02   0.02
  98   1     0.01   0.01   0.01    -0.01  -0.01  -0.01     0.01   0.01   0.01
  99   1     0.03   0.00   0.00    -0.05   0.01   0.01     0.05  -0.01  -0.01
 100   1     0.01   0.02  -0.01    -0.01  -0.03   0.01     0.01   0.02  -0.01
 101   1     0.01   0.01   0.01    -0.01  -0.01  -0.01     0.01   0.01   0.01
 102   1     0.00  -0.01   0.03     0.00   0.02  -0.04    -0.01  -0.02   0.04
 103   1    -0.01  -0.01  -0.01    -0.01   0.01   0.03    -0.01  -0.01  -0.02
 104   1     0.00   0.00   0.00     0.00   0.02   0.00     0.00  -0.01   0.00
 105   1     0.00  -0.02   0.02     0.01   0.03  -0.03     0.00  -0.02   0.03
 106   1    -0.01  -0.01   0.00     0.02   0.01   0.00    -0.01  -0.01  -0.01
 107   1     0.02   0.00  -0.01    -0.04   0.01   0.01     0.03  -0.01  -0.01
 108   1     0.00  -0.01   0.00     0.00   0.01   0.01     0.00   0.00   0.00
 109   1     0.00  -0.02  -0.01    -0.02   0.02  -0.05    -0.01   0.00  -0.01
 110   1    -0.02  -0.02  -0.02     0.03   0.03   0.02     0.00   0.01   0.00
 111   1     0.00  -0.01  -0.01    -0.02   0.00  -0.04    -0.01   0.00  -0.02
 112   1    -0.04  -0.01   0.00     0.10   0.03  -0.02     0.00   0.00   0.00
 113   1     0.03   0.03  -0.04    -0.03  -0.04   0.06     0.01   0.01   0.00
 114   1    -0.01   0.02  -0.02     0.05  -0.01   0.02     0.00   0.00   0.00
                   103                    104                    105
                     A                      A                      A
 Frequencies --   618.5095               620.7517               639.3442
 Red. masses --     3.0785                 4.3632                 3.5668
 Frc consts  --     0.6939                 0.9906                 0.8590
 IR Inten    --     1.7296                 3.4661                 6.2697
 Atom AN      X      Y      Z        X      Y      Z        X      Y      Z
   1   8     0.00   0.01   0.01     0.00   0.05   0.07     0.00   0.00   0.00
   2  12     0.00   0.00  -0.01     0.00   0.01   0.02     0.02   0.00   0.01
   3   8    -0.01   0.00   0.00     0.05  -0.10  -0.07     0.00  -0.01   0.00
   4   6     0.00  -0.01   0.01    -0.01  -0.07   0.04     0.00   0.00   0.00
   5   7    -0.02   0.05   0.00     0.00   0.00   0.01    -0.06   0.07  -0.04
   6   7     0.09  -0.06   0.05     0.01   0.00   0.00    -0.10   0.03  -0.01
   7   8     0.01   0.01   0.00     0.08   0.06  -0.03     0.00   0.00   0.00
   8   6     0.04  -0.07   0.02    -0.01   0.00   0.00     0.12  -0.15   0.02
   9   6    -0.03   0.04  -0.01     0.00  -0.01   0.00    -0.05   0.16  -0.08
  10   6     0.00  -0.01   0.01     0.00   0.00   0.00     0.12  -0.12   0.08
  11   8     0.01   0.00   0.00     0.04  -0.04   0.17     0.00   0.00   0.01
  12   6     0.00   0.00   0.00    -0.09  -0.06  -0.03     0.00   0.00   0.00
  13   6    -0.01   0.00   0.00     0.06  -0.01  -0.16     0.00   0.00  -0.01
  14   6     0.00  -0.01  -0.01    -0.17  -0.08   0.02    -0.01   0.00   0.00
  15   8     0.00   0.00   0.00    -0.01   0.03   0.10     0.00   0.00   0.01
  16   6     0.00   0.00   0.00     0.06   0.03   0.00     0.00   0.00   0.00
  17   8     0.00   0.01   0.00     0.01  -0.05  -0.03     0.00   0.00   0.00
  18   6     0.00   0.00   0.00     0.02  -0.03   0.03     0.00   0.00   0.00
  19   8     0.00   0.00   0.00     0.03   0.01   0.02     0.00   0.00   0.00
  20   8     0.01  -0.01   0.00    -0.11   0.04   0.00     0.00   0.00   0.00
  21   6     0.00   0.00   0.00     0.00   0.02   0.07     0.00   0.00   0.00
  22   6    -0.01   0.00   0.00     0.12  -0.03  -0.02     0.01   0.00   0.00
  23   6     0.01  -0.01   0.00    -0.07   0.06  -0.01     0.00   0.00   0.00
  24   8     0.01   0.01   0.00    -0.06  -0.04  -0.01     0.00   0.00   0.00
  25   6     0.00   0.00   0.00     0.03   0.04   0.00     0.00   0.00   0.00
  26   6     0.00   0.00   0.00     0.00   0.02  -0.01     0.00   0.00   0.00
  27   6     0.00   0.00   0.00     0.04   0.10  -0.05     0.00   0.01   0.00
  28   6    -0.01   0.00  -0.01    -0.07   0.00  -0.12     0.00   0.00  -0.01
  29   6     0.01  -0.01   0.00     0.00   0.00  -0.01    -0.02  -0.06   0.01
  30   6    -0.10   0.08  -0.07     0.00   0.00   0.00     0.03  -0.02  -0.01
  31   6     0.01  -0.01  -0.02     0.00   0.00  -0.02     0.04   0.00   0.14
  32   6     0.02   0.00  -0.01     0.01   0.00   0.00    -0.05   0.03  -0.02
  33   6     0.00   0.01   0.00     0.00   0.00  -0.01    -0.02   0.01   0.03
  34   6    -0.01  -0.01   0.00     0.00   0.00   0.00    -0.05  -0.04   0.03
  35   6     0.00  -0.01   0.01     0.01   0.00   0.01    -0.05  -0.08  -0.13
  36   6    -0.01  -0.01   0.00     0.00   0.00   0.00     0.00   0.02  -0.02
  37   6     0.00   0.01   0.00    -0.01   0.00   0.00     0.13   0.01  -0.04
  38   6    -0.09   0.03  -0.10     0.00   0.00   0.00     0.03   0.01  -0.02
  39   6    -0.02  -0.09  -0.05     0.00   0.00   0.00    -0.02   0.01   0.02
  40   6     0.05  -0.05   0.05     0.00   0.00   0.00     0.01   0.01  -0.02
  41   6     0.04   0.08   0.05     0.00   0.00   0.00    -0.01  -0.03   0.00
  42   6    -0.08   0.11  -0.03     0.00   0.00   0.00     0.00  -0.03   0.01
  43   6     0.02   0.15   0.07     0.00   0.00   0.00    -0.01   0.01   0.00
  44   6    -0.06  -0.11  -0.10     0.00   0.00  -0.01     0.01   0.02   0.02
  45   6     0.00   0.01   0.00     0.00   0.00   0.00    -0.01   0.00   0.01
  46   6     0.00   0.00   0.00     0.00   0.00   0.01     0.00   0.02  -0.05
  47   6     0.00   0.01  -0.01     0.00   0.00   0.00     0.01  -0.01   0.01
  48   6     0.00   0.00   0.00     0.00   0.00   0.00     0.01   0.03   0.04
  49   6     0.05  -0.02  -0.01     0.00   0.00   0.00    -0.01   0.00   0.00
  50   6    -0.01  -0.03   0.04     0.00   0.00   0.00     0.00   0.01  -0.01
  51   6     0.00  -0.02   0.05     0.00   0.00   0.00     0.00   0.00   0.00
  52   6     0.05   0.00  -0.01     0.00   0.00   0.00    -0.01   0.00   0.00
  53   6     0.01   0.00   0.00     0.00   0.00  -0.01     0.02  -0.01   0.02
  54   6    -0.01  -0.01   0.01     0.00   0.00   0.00     0.01  -0.02  -0.01
  55   1    -0.04   0.06  -0.01    -0.01   0.00   0.00    -0.05   0.21  -0.08
  56   1    -0.01   0.00   0.00     0.13   0.04  -0.28     0.01   0.00  -0.01
  57   1    -0.01  -0.02  -0.01    -0.28  -0.11  -0.06    -0.02  -0.01  -0.01
  58   1     0.01   0.00   0.00     0.14   0.05  -0.04     0.01   0.00   0.00
  59   1    -0.01  -0.01   0.00    -0.03  -0.05  -0.05     0.00   0.00   0.00
  60   1     0.00   0.00   0.00     0.11   0.03  -0.04     0.00   0.00   0.00
  61   1    -0.02   0.01   0.01     0.22  -0.03  -0.06     0.01   0.00   0.00
  62   1     0.01  -0.01   0.00    -0.11   0.11   0.00    -0.01   0.01   0.00
  63   1     0.01   0.01   0.00    -0.07  -0.06   0.02    -0.01  -0.01   0.00
  64   1     0.00   0.00   0.00    -0.02   0.03   0.02     0.00   0.00   0.00
  65   1     0.00  -0.03  -0.01     0.02   0.19   0.01     0.00   0.01   0.00
  66   1     0.00   0.00   0.00    -0.01  -0.07   0.02     0.00  -0.01   0.00
  67   1    -0.01  -0.01   0.00     0.09   0.06  -0.04     0.01   0.00   0.00
  68   1     0.00   0.00   0.00     0.02  -0.01   0.00     0.00   0.00   0.00
  69   1     0.01   0.01   0.00    -0.07  -0.04   0.05     0.00   0.00   0.00
  70   1     0.00  -0.01   0.00     0.00   0.16   0.00     0.00   0.01   0.00
  71   1     0.00  -0.01   0.00     0.04   0.30  -0.03     0.00   0.02   0.00
  72   1    -0.01   0.00  -0.01    -0.07   0.06  -0.37     0.00   0.00  -0.02
  73   1    -0.01   0.01  -0.02     0.14  -0.05   0.06     0.00   0.00   0.00
  74   1     0.00   0.00   0.00     0.05   0.03  -0.21     0.00   0.00  -0.01
  75   1     0.04   0.01  -0.01     0.02   0.00   0.02    -0.10   0.03  -0.15
  76   1    -0.01   0.03   0.00     0.00   0.00  -0.01    -0.02   0.03   0.05
  77   1    -0.02  -0.01   0.00     0.00   0.00  -0.01    -0.07  -0.03   0.16
  78   1    -0.02   0.00   0.01     0.00  -0.01   0.01    -0.01   0.08  -0.05
  79   1    -0.01   0.01   0.00    -0.01   0.00   0.00     0.11   0.05  -0.01
  80   1     0.00  -0.23  -0.08     0.01   0.00   0.00    -0.06   0.00   0.06
  81   1     0.13  -0.12   0.12     0.00   0.00   0.00     0.00   0.02  -0.03
  82   1     0.14   0.15   0.14     0.01   0.01   0.00    -0.04  -0.04   0.00
  83   1     0.08   0.07   0.12     0.00   0.00   0.00    -0.01   0.01   0.00
  84   1     0.01  -0.16  -0.04     0.00  -0.01   0.00     0.00   0.02   0.01
  85   1     0.02   0.00  -0.01     0.01   0.00  -0.01    -0.03   0.01   0.05
  86   1     0.00   0.02   0.01     0.00   0.01   0.00     0.02  -0.03   0.00
  87   1    -0.01   0.03   0.02     0.00   0.01   0.00    -0.01   0.00   0.03
  88   1     0.01   0.00   0.01     0.00   0.00   0.00     0.02   0.03  -0.01
  89   1     0.00   0.00  -0.01     0.00   0.00   0.01     0.00   0.05  -0.08
  90   1     0.01   0.00   0.01     0.00   0.00   0.01     0.01   0.04  -0.04
  91   1    -0.01   0.00  -0.01     0.00   0.01   0.00    -0.02  -0.11   0.10
  92   1    -0.01   0.01  -0.01     0.00   0.00   0.00    -0.10   0.08  -0.08
  93   1    -0.01   0.00   0.00     0.00   0.00   0.00    -0.03  -0.05   0.05
  94   1     0.00   0.00   0.01     0.01   0.00   0.01    -0.14  -0.08  -0.10
  95   1     0.00  -0.01   0.00     0.01   0.00  -0.01    -0.08   0.05   0.09
  96   1     0.00   0.00   0.01     0.00  -0.01  -0.01    -0.01   0.14   0.21
  97   1    -0.06   0.12   0.11    -0.01   0.00   0.01     0.01  -0.02  -0.01
  98   1     0.08   0.06   0.07     0.00   0.00   0.00    -0.01  -0.01  -0.01
  99   1     0.31  -0.04  -0.05     0.01   0.00   0.00    -0.05   0.01   0.01
 100   1     0.07   0.15  -0.03     0.00   0.01   0.00    -0.02  -0.03   0.01
 101   1     0.04   0.06   0.07     0.00   0.00   0.00    -0.01  -0.01  -0.02
 102   1    -0.04  -0.11   0.26     0.00   0.00   0.01     0.01   0.02  -0.05
 103   1     0.01  -0.06  -0.17     0.00   0.00   0.00     0.01   0.00  -0.02
 104   1    -0.01  -0.11  -0.02     0.00   0.00   0.00     0.00  -0.01   0.01
 105   1    -0.04  -0.19   0.24     0.00   0.00   0.00     0.00   0.00   0.00
 106   1    -0.13  -0.11  -0.03     0.00   0.00   0.00    -0.01   0.00   0.00
 107   1     0.28  -0.07  -0.08     0.00   0.00   0.00    -0.02   0.00   0.00
 108   1    -0.01  -0.09  -0.04     0.00   0.00   0.00    -0.02   0.00   0.00
 109   1    -0.01   0.07   0.01     0.00  -0.01  -0.02    -0.01   0.17   0.13
 110   1     0.03   0.08   0.08     0.00  -0.01  -0.01     0.01   0.17   0.18
 111   1    -0.08  -0.01  -0.11     0.01   0.00   0.00    -0.21  -0.03  -0.27
 112   1     0.02   0.00   0.00     0.01   0.01   0.00    -0.27  -0.07   0.04
 113   1    -0.02  -0.03   0.03     0.00   0.00   0.01     0.15   0.17  -0.18
 114   1     0.00  -0.02   0.02     0.01   0.00   0.00    -0.10   0.06  -0.08
                   106                    107                    108
                     A                      A                      A
 Frequencies --   644.4238               651.6924               657.4325
 Red. masses --     3.6649                 4.1748                 3.6030
 Frc consts  --     0.8967                 1.0446                 0.9175
 IR Inten    --     8.3143                 0.4204                 3.4604
 Atom AN      X      Y      Z        X      Y      Z        X      Y      Z
   1   8     0.00   0.00   0.00     0.00   0.00   0.00     0.00   0.00   0.00
   2  12     0.01   0.01   0.01     0.01   0.01   0.00    -0.01  -0.01   0.00
   3   8     0.00   0.00   0.00     0.00   0.00   0.00     0.00   0.00   0.00
   4   6     0.00   0.00   0.00     0.00   0.00   0.00     0.00   0.00   0.00
   5   7     0.02  -0.05  -0.05    -0.02   0.00  -0.01     0.01   0.03   0.04
   6   7     0.04  -0.06   0.05    -0.05   0.02   0.02     0.04   0.02  -0.05
   7   8     0.00   0.00   0.00     0.00   0.00   0.00     0.00   0.00   0.00
   8   6    -0.03   0.15  -0.06     0.03  -0.07   0.00    -0.03  -0.01   0.03
   9   6     0.12  -0.08   0.06    -0.03   0.08   0.03    -0.05  -0.04  -0.06
  10   6    -0.10   0.12  -0.02     0.06  -0.02   0.07     0.01  -0.06  -0.05
  11   8     0.00   0.00   0.00     0.00   0.00   0.00     0.00   0.00   0.00
  12   6     0.00   0.00   0.00     0.00   0.00   0.00     0.00   0.00   0.00
  13   6     0.00   0.00   0.00     0.00   0.00   0.00     0.00   0.00   0.00
  14   6     0.00   0.00   0.00     0.00   0.00   0.00     0.00   0.00   0.00
  15   8     0.00   0.00   0.00     0.00   0.00   0.00     0.00   0.00   0.00
  16   6     0.00   0.00   0.00     0.00   0.00   0.00     0.00   0.00   0.00
  17   8     0.00   0.00   0.00     0.00   0.00   0.00     0.00   0.00   0.00
  18   6     0.00   0.00   0.00     0.00   0.00   0.00     0.00   0.01   0.00
  19   8     0.00   0.00   0.00     0.00   0.00   0.00     0.00   0.00   0.00
  20   8     0.00   0.00   0.00     0.00   0.00   0.00     0.00   0.00   0.00
  21   6     0.00   0.00   0.00     0.00   0.00   0.00     0.00   0.00   0.00
  22   6     0.01   0.00   0.00     0.00   0.00   0.00     0.00   0.00   0.00
  23   6    -0.01   0.00   0.00     0.00   0.00   0.00     0.00   0.00   0.00
  24   8     0.00   0.00   0.00     0.00   0.00   0.00     0.00   0.00   0.00
  25   6     0.00   0.00   0.00     0.00   0.00   0.00     0.00   0.00   0.00
  26   6     0.00   0.00   0.00     0.00   0.00   0.00     0.00   0.00   0.00
  27   6     0.00   0.00   0.00     0.00   0.00   0.00     0.00   0.00   0.00
  28   6     0.00   0.00   0.00     0.00   0.00   0.00     0.00   0.00   0.00
  29   6     0.00  -0.04   0.01    -0.02   0.02   0.02     0.03  -0.01  -0.04
  30   6    -0.01  -0.02  -0.06     0.00  -0.03  -0.04    -0.02   0.05   0.06
  31   6     0.06  -0.01   0.18    -0.06   0.02  -0.11     0.08  -0.04   0.08
  32   6    -0.06   0.01  -0.03     0.00   0.00   0.02     0.04  -0.01  -0.01
  33   6    -0.03   0.01   0.04     0.03   0.00   0.00    -0.02   0.01  -0.03
  34   6    -0.03  -0.01   0.02     0.00  -0.01  -0.04     0.02   0.03   0.04
  35   6    -0.06  -0.05  -0.15     0.05   0.01   0.13    -0.06   0.02  -0.13
  36   6    -0.02   0.00  -0.02     0.04   0.03   0.02    -0.06  -0.06  -0.01
  37   6     0.11   0.00  -0.02    -0.03   0.00   0.00    -0.03   0.00   0.03
  38   6    -0.10  -0.01   0.00    -0.22  -0.05   0.14    -0.11  -0.06   0.20
  39   6    -0.05  -0.03  -0.04    -0.01  -0.02  -0.06     0.10   0.04   0.01
  40   6     0.02  -0.01  -0.03     0.01  -0.02  -0.04    -0.03   0.01   0.05
  41   6    -0.02  -0.03   0.03    -0.05  -0.06   0.04    -0.01   0.08   0.00
  42   6     0.09   0.00  -0.07     0.23   0.02  -0.19     0.08   0.09  -0.12
  43   6     0.00   0.09   0.02     0.01   0.10   0.01     0.02  -0.12  -0.05
  44   6     0.03   0.03   0.05     0.02   0.04   0.08    -0.08  -0.07  -0.07
  45   6    -0.01   0.00   0.01     0.00   0.00   0.00     0.00   0.00   0.00
  46   6     0.00   0.03  -0.05     0.00  -0.01   0.03     0.00   0.01  -0.02
  47   6     0.02  -0.02   0.02    -0.01   0.02  -0.01     0.01  -0.01   0.01
  48   6     0.01   0.03   0.03     0.00  -0.02  -0.03     0.00   0.02   0.03
  49   6    -0.01   0.00   0.00    -0.05   0.02   0.01    -0.04   0.01   0.01
  50   6    -0.01  -0.02   0.03     0.00  -0.03   0.06     0.00  -0.02   0.02
  51   6     0.00   0.01  -0.01     0.00   0.03  -0.05    -0.01   0.01  -0.03
  52   6     0.02   0.00   0.00     0.06  -0.01   0.00     0.05  -0.01  -0.01
  53   6    -0.01   0.01   0.02    -0.02  -0.02  -0.03     0.02   0.01   0.02
  54   6    -0.03   0.00   0.00     0.04   0.02  -0.02    -0.02  -0.01   0.02
  55   1     0.15  -0.06   0.07     0.02   0.05   0.06    -0.11  -0.03  -0.08
  56   1     0.00   0.00   0.00     0.00   0.00   0.00     0.00   0.00   0.00
  57   1    -0.01   0.00   0.00     0.00   0.00   0.00     0.00   0.00   0.00
  58   1     0.00   0.00   0.00     0.00   0.00   0.00     0.00   0.00   0.00
  59   1     0.00   0.00   0.00     0.00   0.00   0.00     0.00   0.00   0.00
  60   1     0.00   0.00   0.00     0.00   0.00   0.00     0.00   0.00   0.00
  61   1     0.01   0.00  -0.01     0.00   0.00   0.00    -0.01   0.00   0.00
  62   1    -0.01   0.01   0.00     0.00   0.00   0.00     0.00   0.00   0.00
  63   1    -0.01  -0.01   0.01     0.00   0.00   0.00     0.01   0.00   0.00
  64   1     0.00   0.00   0.00     0.00   0.00   0.00    -0.01  -0.01   0.00
  65   1     0.00   0.01   0.00     0.00   0.00   0.00     0.00  -0.01  -0.01
  66   1     0.00  -0.01   0.00     0.00   0.00   0.00     0.00   0.00   0.00
  67   1     0.01   0.01   0.00     0.00   0.00   0.00    -0.01  -0.01   0.00
  68   1     0.00   0.00   0.00     0.00   0.00   0.00     0.00   0.00   0.00
  69   1     0.00   0.00   0.00     0.00   0.00   0.00     0.00   0.00   0.00
  70   1     0.00   0.00   0.00     0.00   0.00   0.00     0.00   0.00   0.00
  71   1     0.00   0.00   0.00     0.00   0.00   0.00     0.00   0.00   0.00
  72   1     0.00   0.00   0.00     0.00   0.00   0.00     0.00   0.00   0.00
  73   1     0.00  -0.01   0.00     0.00   0.00   0.00     0.00   0.00   0.00
  74   1     0.00   0.00  -0.01     0.00   0.00   0.00     0.00   0.00   0.00
  75   1    -0.13   0.02  -0.21     0.02  -0.03   0.12     0.05   0.04  -0.09
  76   1    -0.02   0.00   0.05     0.03  -0.01   0.00    -0.02   0.02  -0.03
  77   1    -0.03  -0.01   0.15    -0.05  -0.01  -0.17     0.11   0.02   0.19
  78   1    -0.03   0.07  -0.06     0.05  -0.03   0.05    -0.08   0.01  -0.04
  79   1     0.09   0.04   0.01    -0.03  -0.02  -0.03    -0.02   0.00   0.05
  80   1    -0.02  -0.09  -0.08     0.12  -0.02  -0.19     0.27   0.16  -0.15
  81   1     0.04  -0.03  -0.01     0.01  -0.03  -0.03    -0.02   0.02   0.04
  82   1    -0.13  -0.07   0.11    -0.28  -0.14   0.21    -0.03   0.09   0.10
  83   1     0.04   0.07   0.03     0.07   0.08  -0.01     0.01  -0.07  -0.09
  84   1     0.01   0.03   0.06    -0.02   0.04   0.10    -0.06  -0.09  -0.02
  85   1     0.00   0.00   0.03    -0.05   0.01   0.01     0.11  -0.03  -0.04
  86   1     0.03  -0.03   0.00    -0.03  -0.01   0.00     0.04   0.03   0.00
  87   1    -0.02   0.02   0.04     0.03  -0.06  -0.05    -0.04   0.11   0.07
  88   1     0.04   0.04   0.03    -0.04  -0.03  -0.07     0.06   0.02   0.11
  89   1     0.01   0.08  -0.13    -0.01  -0.08   0.13     0.02   0.09  -0.15
  90   1     0.02   0.06  -0.06    -0.03  -0.06   0.02     0.04   0.06   0.00
  91   1    -0.01  -0.08   0.07     0.00   0.02   0.02     0.00   0.03  -0.08
  92   1    -0.05   0.04  -0.05    -0.01   0.02   0.00     0.06  -0.06   0.03
  93   1     0.00  -0.06   0.05    -0.03   0.05  -0.02     0.06  -0.04   0.00
  94   1    -0.13  -0.06  -0.09     0.05   0.01   0.03     0.01   0.03   0.02
  95   1    -0.07   0.06   0.09     0.02  -0.04  -0.06     0.01   0.04   0.05
  96   1    -0.01   0.12   0.17     0.00  -0.06  -0.07     0.00   0.02   0.01
  97   1     0.07  -0.04  -0.09     0.10  -0.06  -0.15    -0.09   0.09   0.06
  98   1    -0.06  -0.01  -0.04    -0.16   0.00  -0.07    -0.05   0.06   0.04
  99   1    -0.10   0.02   0.00    -0.21   0.04   0.00     0.09   0.00  -0.01
 100   1    -0.02  -0.06   0.04     0.01  -0.06   0.04     0.12   0.14  -0.08
 101   1    -0.02  -0.04   0.03    -0.01  -0.08   0.09     0.05   0.00   0.12
 102   1     0.00   0.00  -0.02     0.02  -0.02   0.01     0.01  -0.09   0.20
 103   1     0.00  -0.01  -0.11    -0.03   0.01  -0.08    -0.07   0.02   0.22
 104   1     0.00  -0.03  -0.05    -0.01   0.05  -0.11    -0.02   0.15  -0.03
 105   1    -0.02  -0.07   0.08    -0.02  -0.01   0.00     0.00   0.16  -0.18
 106   1    -0.12  -0.08   0.01    -0.15  -0.11   0.03     0.13   0.04   0.01
 107   1     0.16  -0.05  -0.04     0.22  -0.08  -0.03    -0.06   0.02   0.03
 108   1     0.03  -0.07  -0.02     0.10  -0.10  -0.02     0.10   0.03   0.01
 109   1     0.04  -0.09   0.12    -0.03   0.04   0.01     0.00  -0.01  -0.09
 110   1    -0.12  -0.17  -0.15    -0.02   0.04   0.03     0.09   0.05   0.06
 111   1     0.08   0.00   0.21    -0.11  -0.04  -0.14     0.07   0.04   0.02
 112   1     0.25   0.04  -0.11    -0.05   0.00  -0.02    -0.10  -0.02   0.11
 113   1    -0.08  -0.17   0.06     0.14   0.09  -0.14    -0.07   0.01   0.09
 114   1    -0.06  -0.16   0.06    -0.08   0.02  -0.05     0.10   0.10   0.00
                   109                    110                    111
                     A                      A                      A
 Frequencies --   665.1320               688.1394               718.5598
 Red. masses --     3.1820                 4.5384                 6.3409
 Frc consts  --     0.8294                 1.2662                 1.9290
 IR Inten    --     3.9492                38.5890                42.4186
 Atom AN      X      Y      Z        X      Y      Z        X      Y      Z
   1   8     0.00   0.00   0.00     0.00   0.00   0.00     0.01  -0.01   0.02
   2  12     0.00   0.01   0.01     0.00   0.01   0.04     0.00   0.01   0.02
   3   8     0.00   0.00   0.00     0.03  -0.06   0.17    -0.12  -0.13  -0.17
   4   6     0.00   0.00   0.00     0.01  -0.01   0.01    -0.07   0.06  -0.04
   5   7     0.03   0.00  -0.03     0.01   0.01   0.01     0.01   0.00   0.01
   6   7     0.02  -0.03   0.00    -0.01   0.00   0.00     0.00   0.00   0.00
   7   8     0.00   0.00   0.00     0.00   0.00   0.00     0.03  -0.03  -0.02
   8   6     0.06   0.05  -0.04     0.00   0.00   0.00     0.00   0.00   0.00
   9   6     0.09  -0.03  -0.10     0.00   0.00   0.00     0.00   0.00   0.00
  10   6    -0.05  -0.01  -0.04     0.00   0.00   0.00     0.00   0.00   0.00
  11   8     0.00   0.00   0.00     0.04  -0.01   0.03    -0.06  -0.04  -0.01
  12   6     0.00   0.00   0.00    -0.10  -0.05  -0.05     0.25   0.11   0.09
  13   6     0.00   0.00   0.00     0.03  -0.01  -0.01     0.03  -0.03  -0.11
  14   6     0.00   0.00   0.00     0.01  -0.01  -0.01    -0.08   0.00   0.05
  15   8     0.00   0.00   0.00     0.03   0.02   0.02    -0.08  -0.02  -0.02
  16   6     0.00   0.00   0.00    -0.01   0.00   0.00     0.03   0.02   0.00
  17   8     0.00   0.00   0.00     0.01   0.03  -0.05    -0.01   0.04  -0.02
  18   6     0.00  -0.01   0.00     0.16   0.28  -0.14     0.06   0.33  -0.09
  19   8     0.00   0.00   0.00    -0.15  -0.06   0.05     0.09  -0.13   0.05
  20   8     0.00   0.00   0.00     0.06   0.04   0.03     0.08   0.04  -0.04
  21   6     0.00   0.00   0.00     0.01   0.01  -0.02     0.05  -0.03  -0.09
  22   6     0.00   0.00   0.00    -0.02   0.01   0.01    -0.05   0.02   0.02
  23   6     0.00   0.00   0.00     0.00  -0.12  -0.21    -0.07   0.08   0.18
  24   8     0.00   0.00   0.00    -0.01   0.00   0.00     0.02  -0.06   0.03
  25   6     0.00   0.00   0.00    -0.01  -0.01   0.00    -0.02  -0.03   0.01
  26   6     0.00   0.00   0.00    -0.07  -0.09   0.02    -0.09  -0.07   0.07
[truncated: 1,517,696 more chars]
