# Supplementary material
Source: publisher figshare collection journal article supplement (https://acs.figshare.com/ndownloader/files/5127205)
Supplement: Supplementary file 1 [file 5127205 › supporting_ja043819b/SSSS_fm-5-ts2.mol]

  MacMolPlt                       

114118  0  0  0  0  0  0  0  0  0 v2000
    4.9930   -2.4978   -1.2228 O   0  0  0  0  0  0  0  0  0  0  0  0
   -0.2609    0.1960    0.0441 Mg  0  0  0  0  0  0  0  0  0  0  0  0
    0.1015   -1.5429    3.0757 O   0  0  0  0  0  0  0  0  0  0  0  0
    4.1844   -2.5583   -0.1529 C   0  0  0  0  0  0  0  0  0  0  0  0
   -1.1324   -0.4667   -1.6910 N   0  0  0  0  0  0  0  0  0  0  0  0
    0.9780    1.4496   -1.0228 N   0  0  0  0  0  0  0  0  0  0  0  0
    4.4293   -2.0784    0.9299 O   0  0  0  0  0  0  0  0  0  0  0  0
   -0.5608   -0.3865   -2.8822 C   0  0  0  0  0  0  0  0  0  0  0  0
    0.6860    0.2515   -3.1075 C   0  0  0  0  0  0  0  0  0  0  0  0
    1.3487    1.1751   -2.2709 C   0  0  0  0  0  0  0  0  0  0  0  0
    2.0904   -3.4121    0.6872 O   0  0  0  0  0  0  0  0  0  0  0  0
    1.3905   -2.3397    1.0796 C   0  0  0  0  0  0  0  0  0  0  0  0
    0.9353   -2.5650    2.5272 C   0  0  0  0  0  0  0  0  0  0  0  0
    2.9409   -3.3902   -0.4824 C   0  0  0  0  0  0  0  0  0  0  0  0
    1.2417   -1.3394    0.4033 O   0  0  0  0  0  0  0  0  0  0  0  0
    6.2371   -1.7951   -1.0300 C   0  0  0  0  0  0  0  0  0  0  0  0
   -0.4686    0.8615    1.8099 O   0  0  0  0  0  0  0  0  0  0  0  0
   -1.0626   -1.2046    2.4408 C   0  0  0  0  0  0  0  0  0  0  0  0
   -1.3557   -1.6334    1.3328 O   0  0  0  0  0  0  0  0  0  0  0  0
   -2.8963    0.3829    2.9901 O   0  0  0  0  0  0  0  0  0  0  0  0
   -2.4101    1.6636    2.8577 C   0  0  0  0  0  0  0  0  0  0  0  0
   -0.8849    1.7893    2.7522 C   0  0  0  0  0  0  0  0  0  0  0  0
   -2.0536   -0.6604    3.4732 C   0  0  0  0  0  0  0  0  0  0  0  0
   -3.2106    2.5620    2.7573 O   0  0  0  0  0  0  0  0  0  0  0  0
   -0.4666    3.2327    2.4809 C   0  0  0  0  0  0  0  0  0  0  0  0
   -2.9922   -1.8000    3.8767 C   0  0  0  0  0  0  0  0  0  0  0  0
    0.3374   -3.9514    2.7933 C   0  0  0  0  0  0  0  0  0  0  0  0
    2.2607   -3.0383   -1.8048 C   0  0  0  0  0  0  0  0  0  0  0  0
   -2.4331   -1.0611   -1.4356 C   0  0  0  0  0  0  0  0  0  0  0  0
    1.4750    2.6479   -0.3662 C   0  0  0  0  0  0  0  0  0  0  0  0
   -3.4842   -0.1762   -1.0094 C   0  0  0  0  0  0  0  0  0  0  0  0
   -4.6688   -0.7416   -0.4811 C   0  0  0  0  0  0  0  0  0  0  0  0
   -4.8308   -2.1383   -0.3892 C   0  0  0  0  0  0  0  0  0  0  0  0
   -3.8272   -2.9924   -0.8744 C   0  0  0  0  0  0  0  0  0  0  0  0
   -2.6166   -2.4808   -1.4025 C   0  0  0  0  0  0  0  0  0  0  0  0
   -3.3673    1.3567   -1.2325 C   0  0  0  0  0  0  0  0  0  0  0  0
   -1.5524   -3.4811   -1.9227 C   0  0  0  0  0  0  0  0  0  0  0  0
    2.4854    2.5522    0.6448 C   0  0  0  0  0  0  0  0  0  0  0  0
    2.8304    3.7172    1.3795 C   0  0  0  0  0  0  0  0  0  0  0  0
    2.2162    4.9563    1.1119 C   0  0  0  0  0  0  0  0  0  0  0  0
    1.2503    5.0481    0.0936 C   0  0  0  0  0  0  0  0  0  0  0  0
    0.8586    3.9136   -0.6558 C   0  0  0  0  0  0  0  0  0  0  0  0
    3.2418    1.2345    0.9395 C   0  0  0  0  0  0  0  0  0  0  0  0
   -0.2222    4.0893   -1.7558 C   0  0  0  0  0  0  0  0  0  0  0  0
   -4.3845    2.1899   -0.3940 C   0  0  0  0  0  0  0  0  0  0  0  0
   -3.5340    1.6930   -2.7530 C   0  0  0  0  0  0  0  0  0  0  0  0
   -1.0810   -4.4509   -0.7929 C   0  0  0  0  0  0  0  0  0  0  0  0
   -2.0918   -4.3024   -3.1437 C   0  0  0  0  0  0  0  0  0  0  0  0
   -1.5531    4.6429   -1.1523 C   0  0  0  0  0  0  0  0  0  0  0  0
    0.2706    5.0368   -2.9023 C   0  0  0  0  0  0  0  0  0  0  0  0
    3.0055    0.7512    2.4036 C   0  0  0  0  0  0  0  0  0  0  0  0
    4.7727    1.3919    0.6502 C   0  0  0  0  0  0  0  0  0  0  0  0
   -1.2286   -0.9655   -4.1251 C   0  0  0  0  0  0  0  0  0  0  0  0
    2.5379    1.9112   -2.8768 C   0  0  0  0  0  0  0  0  0  0  0  0
    1.0818    0.1582   -4.1142 H   0  0  0  0  0  0  0  0  0  0  0  0
    1.8661   -2.4626    3.0972 H   0  0  0  0  0  0  0  0  0  0  0  0
    3.2787   -4.4312   -0.5328 H   0  0  0  0  0  0  0  0  0  0  0  0
    6.0443   -0.7610   -0.7400 H   0  0  0  0  0  0  0  0  0  0  0  0
    6.7470   -1.8418   -1.9921 H   0  0  0  0  0  0  0  0  0  0  0  0
    6.8320   -2.2846   -0.2541 H   0  0  0  0  0  0  0  0  0  0  0  0
   -0.4671    1.5196    3.7451 H   0  0  0  0  0  0  0  0  0  0  0  0
   -1.4836   -0.3126    4.3401 H   0  0  0  0  0  0  0  0  0  0  0  0
   -0.8539    3.8867    3.2708 H   0  0  0  0  0  0  0  0  0  0  0  0
   -0.8590    3.5856    1.5268 H   0  0  0  0  0  0  0  0  0  0  0  0
    0.6202    3.3166    2.4436 H   0  0  0  0  0  0  0  0  0  0  0  0
   -3.7007   -1.4420    4.6289 H   0  0  0  0  0  0  0  0  0  0  0  0
   -2.4275   -2.6404    4.2941 H   0  0  0  0  0  0  0  0  0  0  0  0
   -3.5453   -2.1405    2.9962 H   0  0  0  0  0  0  0  0  0  0  0  0
    1.0444   -4.7352    2.5137 H   0  0  0  0  0  0  0  0  0  0  0  0
   -0.5869   -4.0896    2.2288 H   0  0  0  0  0  0  0  0  0  0  0  0
    0.1200   -4.0374    3.8619 H   0  0  0  0  0  0  0  0  0  0  0  0
    1.3465   -3.6260   -1.9044 H   0  0  0  0  0  0  0  0  0  0  0  0
    2.9400   -3.3096   -2.6180 H   0  0  0  0  0  0  0  0  0  0  0  0
    2.0112   -1.9800   -1.8909 H   0  0  0  0  0  0  0  0  0  0  0  0
   -5.4830   -0.0844   -0.1535 H   0  0  0  0  0  0  0  0  0  0  0  0
   -5.7570   -2.5562    0.0281 H   0  0  0  0  0  0  0  0  0  0  0  0
   -3.9798   -4.0791   -0.8424 H   0  0  0  0  0  0  0  0  0  0  0  0
   -2.3400    1.6730   -0.9430 H   0  0  0  0  0  0  0  0  0  0  0  0
   -0.6736   -2.8985   -2.2585 H   0  0  0  0  0  0  0  0  0  0  0  0
    3.6055    3.6530    2.1547 H   0  0  0  0  0  0  0  0  0  0  0  0
    2.5013    5.8484    1.6861 H   0  0  0  0  0  0  0  0  0  0  0  0
    0.7886    6.0197   -0.1247 H   0  0  0  0  0  0  0  0  0  0  0  0
    2.8457    0.4606    0.2542 H   0  0  0  0  0  0  0  0  0  0  0  0
   -0.4329    3.0946   -2.1971 H   0  0  0  0  0  0  0  0  0  0  0  0
   -4.1775    3.2611   -0.5288 H   0  0  0  0  0  0  0  0  0  0  0  0
   -4.3096    1.9565    0.6797 H   0  0  0  0  0  0  0  0  0  0  0  0
   -5.4163    1.9997   -0.7269 H   0  0  0  0  0  0  0  0  0  0  0  0
   -3.4762    2.7814   -2.9034 H   0  0  0  0  0  0  0  0  0  0  0  0
   -4.5101    1.3391   -3.1209 H   0  0  0  0  0  0  0  0  0  0  0  0
   -2.7404    1.2184   -3.3529 H   0  0  0  0  0  0  0  0  0  0  0  0
   -0.2911   -5.1280   -1.1609 H   0  0  0  0  0  0  0  0  0  0  0  0
   -1.9162   -5.0669   -0.4251 H   0  0  0  0  0  0  0  0  0  0  0  0
   -0.6829   -3.8665    0.0534 H   0  0  0  0  0  0  0  0  0  0  0  0
   -1.2972   -4.9529   -3.5409 H   0  0  0  0  0  0  0  0  0  0  0  0
   -2.4324   -3.6360   -3.9503 H   0  0  0  0  0  0  0  0  0  0  0  0
   -2.9383   -4.9363   -2.8385 H   0  0  0  0  0  0  0  0  0  0  0  0
   -2.3222    4.7180   -1.9369 H   0  0  0  0  0  0  0  0  0  0  0  0
   -1.9301    3.9737   -0.3592 H   0  0  0  0  0  0  0  0  0  0  0  0
   -1.4042    5.6418   -0.7151 H   0  0  0  0  0  0  0  0  0  0  0  0
   -0.4967    5.0999   -3.6891 H   0  0  0  0  0  0  0  0  0  0  0  0
    1.2009    4.6643   -3.3566 H   0  0  0  0  0  0  0  0  0  0  0  0
    0.4555    6.0508   -2.5159 H   0  0  0  0  0  0  0  0  0  0  0  0
    3.5207   -0.2096    2.5677 H   0  0  0  0  0  0  0  0  0  0  0  0
    1.9234    0.6176    2.5822 H   0  0  0  0  0  0  0  0  0  0  0  0
    3.3917    1.4815    3.1313 H   0  0  0  0  0  0  0  0  0  0  0  0
    5.2894    0.4506    0.9041 H   0  0  0  0  0  0  0  0  0  0  0  0
    5.2156    2.1952    1.2597 H   0  0  0  0  0  0  0  0  0  0  0  0
    4.9482    1.6287   -0.4126 H   0  0  0  0  0  0  0  0  0  0  0  0
   -2.2713   -1.2366   -3.9404 H   0  0  0  0  0  0  0  0  0  0  0  0
   -1.1972   -0.2369   -4.9441 H   0  0  0  0  0  0  0  0  0  0  0  0
   -0.6958   -1.8614   -4.4685 H   0  0  0  0  0  0  0  0  0  0  0  0
    2.3084    2.9675   -3.0526 H   0  0  0  0  0  0  0  0  0  0  0  0
    3.4010    1.8728   -2.2016 H   0  0  0  0  0  0  0  0  0  0  0  0
    2.8278    1.4676   -3.8355 H   0  0  0  0  0  0  0  0  0  0  0  0
  1  4  1  0  0  0  0
  1 16  1  0  0  0  0
  2  5  1  0  0  0  0
  2  6  1  0  0  0  0
  2 15  1  0  0  0  0
  2 17  2  0  0  0  0
  2 19  1  0  0  0  0
  3 13  1  0  0  0  0
  3 18  1  0  0  0  0
  4  7  2  0  0  0  0
  4 14  1  0  0  0  0
  5  8  1  0  0  0  0
  5 29  1  0  0  0  0
  6 10  1  0  0  0  0
  6 30  1  0  0  0  0
  8  9  1  0  0  0  0
  8 53  1  0  0  0  0
  9 10  1  0  0  0  0
  9 55  1  0  0  0  0
 10 54  1  0  0  0  0
 11 12  1  0  0  0  0
 11 14  1  0  0  0  0
 12 13  1  0  0  0  0
 12 15  2  0  0  0  0
 13 27  1  0  0  0  0
 13 56  1  0  0  0  0
 14 28  1  0  0  0  0
 14 57  1  0  0  0  0
 16 58  1  0  0  0  0
 16 59  1  0  0  0  0
 16 60  1  0  0  0  0
 17 22  1  0  0  0  0
 18 19  2  0  0  0  0
 18 23  1  0  0  0  0
 20 21  1  0  0  0  0
 20 23  1  0  0  0  0
 21 22  1  0  0  0  0
 21 24  2  0  0  0  0
 22 25  1  0  0  0  0
 22 61  1  0  0  0  0
 23 26  1  0  0  0  0
 23 62  1  0  0  0  0
 25 63  1  0  0  0  0
 25 64  1  0  0  0  0
 25 65  1  0  0  0  0
 26 66  1  0  0  0  0
 26 67  1  0  0  0  0
 26 68  1  0  0  0  0
 27 69  1  0  0  0  0
 27 70  1  0  0  0  0
 27 71  1  0  0  0  0
 28 72  1  0  0  0  0
 28 73  1  0  0  0  0
 28 74  1  0  0  0  0
 29 31  1  0  0  0  0
 29 35  1  0  0  0  0
 30 38  1  0  0  0  0
 30 42  1  0  0  0  0
 31 32  1  0  0  0  0
 31 36  1  0  0  0  0
 32 33  1  0  0  0  0
 32 75  1  0  0  0  0
 33 34  1  0  0  0  0
 33 76  1  0  0  0  0
 34 35  1  0  0  0  0
 34 77  1  0  0  0  0
 35 37  1  0  0  0  0
 36 45  1  0  0  0  0
 36 46  1  0  0  0  0
 36 78  1  0  0  0  0
 37 47  1  0  0  0  0
 37 48  1  0  0  0  0
 37 79  1  0  0  0  0
 38 39  1  0  0  0  0
 38 43  1  0  0  0  0
 39 40  1  0  0  0  0
 39 80  1  0  0  0  0
 40 41  1  0  0  0  0
 40 81  1  0  0  0  0
 41 42  1  0  0  0  0
 41 82  1  0  0  0  0
 42 44  1  0  0  0  0
 43 51  1  0  0  0  0
 43 52  1  0  0  0  0
 43 83  1  0  0  0  0
 44 49  1  0  0  0  0
 44 50  1  0  0  0  0
 44 84  1  0  0  0  0
 45 85  1  0  0  0  0
 45 86  1  0  0  0  0
 45 87  1  0  0  0  0
 46 88  1  0  0  0  0
 46 89  1  0  0  0  0
 46 90  1  0  0  0  0
 47 91  1  0  0  0  0
 47 92  1  0  0  0  0
 47 93  1  0  0  0  0
 48 94  1  0  0  0  0
 48 95  1  0  0  0  0
 48 96  1  0  0  0  0
 49 97  1  0  0  0  0
 49 98  1  0  0  0  0
 49 99  1  0  0  0  0
 50100  1  0  0  0  0
 50101  1  0  0  0  0
 50102  1  0  0  0  0
 51103  1  0  0  0  0
 51104  1  0  0  0  0
 51105  1  0  0  0  0
 52106  1  0  0  0  0
 52107  1  0  0  0  0
 52108  1  0  0  0  0
 53109  1  0  0  0  0
 53110  1  0  0  0  0
 53111  1  0  0  0  0
 54112  1  0  0  0  0
 54113  1  0  0  0  0
 54114  1  0  0  0  0
M  END
