# Supplementary material
Source: publisher figshare collection journal article supplement (https://acs.figshare.com/ndownloader/files/5127205)
Supplement: Supplementary file 1 [file 5127205 › supporting_ja043819b/table1.html]

Table S1


| 3. Table S1. Commentary on the Stationary points on the potential surfacea for the overall mechanism, illustrated using the RR,SS stereoisomer. | |
| --- | --- |
| **Storyboard:**  1. In this terminology, RR (of RR,SS) refers to the    configuration of the two chiral centres of the    previously ring-opened lactide unit          whilst SS refers to the newly    co-ordinated lactide unit          which is about to be ring-opened (see    Int1 window). 2. The lowest energy of the first lactide (RR) is    that of a 5-ring coordinated species:         . 3. The reactant is solved by one molecule of THF     , but the solvent is then displaced by a    second (SS) lactide monomer.          The coordination of the THF solvent is    closer to equatorial rather than axial. 4. The geometry of the resulting intermediate (Int1)    is mediated by a weak O...C=O electrostatic    interaction         (3.01Å). 5. The first transition state involves O...C=O bond    formation          in which the weak O...C=O electrostatic    interaction is strengthened         (2.88Å). 6. The geometry of this transition state is    controlled by the stereoelectronic antiperiplanar    orientation of the incoming O...C bond and the C-C    bond 7. The original alkyl-oxygen coordination to Mg is    preserved in this transition state 8. as it also is in the resulting tetrahedral    intermediate. 9. The tetrahedral intermediate undergoes a    (rocker-switch like) reorganisation of the Mg-O    coordination, accompanied by a conformational change.    Thus the original alkyl-oxygen...Mg bond breaks      and a new alkyl-oxygen...Mg bond forms 10. This change in conformation now sets up the final     C-O bond cleavage 11. which after further Mg...O de-coordination,      and re-coordination by the terminal C=O     group 12. results in the product with extruded polymer     chain 13. The rate-determining transition state has an     imaginary normal mode                    Enable Java 1.4.2\_5 or later      which reveals both O-C cleavage and     concomitant C=O...Mg de-coordination           with a computed wave number of 49     cm-1. This unusually low value for a     transition mode arises in part because of the highly     correlated nature of the vibration, in which most     atoms of the reaction centre participate, and hence     the relatively large mass-weighting of this     vibration. 14. TS2 has Wiberg bond indices in the NAO     basisb; C-Oacyl 0.15          , Oacyl-Mg 0.09          , Ocarbonyl-Mg 0.03         , Ocarbonyl-C 1.65)           with considerable ionic nature (natural     charge on Mg +1.68)          . 15. The product re-coordinates a solvent THF molecule       in such a manner as to minimise repulsions     to the methyl group          . This means in effect that the THF solvent     and the polymer chain have to be coordinated     di-equatorial to the Mg. This methyl group thus     avoids clashing with the isopropyl group          . The extruding (and conformationally     flexible) polymer chain folds back across the same     face as the THF solvent. The energy reported here is     considered an upper bound, since not all the     conformational space of this chain has been explored.     Alternative modes of coordination such as having the     THF and the polymer chain effectively di-axial at the     Mg centre are significantly higher in energy          . 16. The thermochemistry of the overall mechanism is     (respectively, as difference in total energy gas     phase, with IEFPCM solvation correction for     THF,b and for ΔG gas phase):     1. (TS2,THF) - (RR-reactant+THF,lactide): 17.1,        16.5, 18.9 kcal mol-1.     2. TS2 - Int1(RR-reactant+lactide): 18.3, 13.7,        20.2 kcal mol-1     3. (RR-reactant,lactide) - (Product): -16.9,        -7.7c, -0.9,     4. (RR-reactant+thf,lactide) - (Product+thf):        -11.4, -2.6, +2.3 | | Total energies (Hartree)/Relative energies (kcal-1)  [Corrected for ΔG298 (Hartree)/relative ΔG298, kcal-1], {IEFPCM solvation model}b | | | --- | --- | | RR-Reactant | SS-Lactide | | -2077.83601 [-2077.06000] {-2077.78925} | -534.35128 [-534.24493] {-534.35364} | | Total: 2612.18729 [2611.30493] {2612.14289} | | |  | Enable Java 1.4.2\_5 or later | | RR-Reactant+THF | THF | | -2310.29905 [-2309.40424] {-2310.25064} | -232.44540 [-232.35690] {-232.44402} | | Total: 2612.18729 [2611.30493] {2612.14289} | | |  | Enable Java 1.4.2\_5 or later | | Int1 (=Reactant + lactide - thf) | TS1 | | -2612.20735/0.0 [-2611.29448/0.0] {-2612.155852} | -2612.18938/11.3 [-2611.27550/11.9] | |  | Enable Java 1.4.2\_5 or later | | TI1 | TI2 | | -2612.18950 [-2611.27569] | -2612.19235 [-2611.27650] | |  |  | | TS2 | Product | | -2612.17810/18.4 [-2611.26220/20.2] {-2612.134079} | -2612.21424 [-2611.30626/-7.4] {-2612.155228} | |  |  | | Product.thf | Product.thf isomer | | -2844.66852 [-2843.645407] | 2844.65185 [-2843.63036] | |  |  | |

aThese calculations are all based on the B3LYP
density functional procedure, employing a 6-311G(3d) basis for
Mg, 6-31G(d) for the lactide and core ligand units, and STO-3G
for the 2,6-di-isopropyl aryl ligand substituents. The Gaussian
98 and 03 programs were used; a) Gaussian 03, Revision C.02,
Frisch, M. J.; Trucks, G. W.; Schlegel, H. B.; Scuseria, G. E.;
Robb, M. A.; Cheeseman, J. R.; Montgomery, Jr., J. A.; Vreven,
T.; Kudin, K. N.; Burant, J. C.; Millam, J. M.; Iyengar, S. S.;
Tomasi, J.; Barone, V.; Mennucci, B.; Cossi, M.; Scalmani, G.;
Rega, N.; Petersson, G. A.; Nakatsuji, H.; Hada, M.; Ehara, M.;
Toyota, K.; Fukuda, R.; Hasegawa, J.; Ishida, M.; Nakajima, T.;
Honda, Y.; Kitao, O.; Nakai, H.; Klene, M.; Li, X.; Knox, J.
E.; Hratchian, H. P.; Cross, J. B.; Bakken, V.; Adamo, C.;
Jaramillo, J.; Gomperts, R.; Stratmann, R. E.; Yazyev, O.;
Austin, A. J.; Cammi, R.; Pomelli, C.; Ochterski, J. W.; Ayala,
P. Y.; Morokuma, K.; Voth, G. A.; Salvador, P.; Dannenberg, J.
J.; Zakrzewski, V. G.; Dapprich, S.; Daniels, A. D.; Strain, M.
C.; Farkas, O.; Malick, D. K.; Rabuck, A. D.; Raghavachari, K.;
Foresman, J. B.; Ortiz, J. V.; Cui, Q.; Baboul, A. G.;
Clifford, S.; Cioslowski, J.; Stefanov, B. B.; Liu, G.;
Liashenko, A.; Piskorz, P.; Komaromi, I.; Martin, R. L.; Fox,
D. J.; Keith, T.; Al-Laham, M. A.; Peng, C. Y.; Nanayakkara,
A.; Challacombe, M.; Gill, P. M. W.; Johnson, B.; Chen, W.;
Wong, M. W.; Gonzalez, C.; and Pople, J. A.; Gaussian, Inc.,
Wallingford CT, 2004. b Reed, A. E.; Curtiss, L. A.;
Weinhold, F., *Chem. Rev.*, 1988, **88**, 899 - 926.
b M. T. Cances, B. Mennucci, and J. Tomasi, *J.
Chem. Phys.*, 1997, **107**, 3032. c Errors in
convergence may render this value suspect.
