# Supplementary material
Source: publisher figshare collection journal article supplement (https://acs.figshare.com/ndownloader/files/5127205)
Supplement: Supplementary file 1 [file 5127205 › supporting_ja043819b/table2.html]

Table S2


| 4. Table S2. Commentary on the Four diasteromeric Stationary points of TS2 | |
| --- | --- |
| **Storyboard:**  1. We seek to explain why RR,SS diasteromer is the    lowest of the four transition states involving    final ring opening (TS2) and corresponding to the    rate limiting step in the overall mechanism. 2. The SS component (of RR,SS) comprises two    equatorial methyl groups. One of these exhibits a    close (attractive?) contact to the face of one aryl    ring:          . Crystallographically, many examples are    known of approaches to within about 3.2Å    (measured between the ring centroid and the carbon    atom of the methyl), which matches the predicted    distance for this transition state. The other    S-methyl group of this lactide unit also approaches    the face of the other aryl ring, although here the    predicted contact is not so close (4.1Å): 3. This di-equatorial arrangement also minimises    steric interactions between the two SS methyl    groups. In contrast, a RR configuration for these    methyls places them di-axial:         . The difference in (total) energy between    the RRSS and RRRR diasteromers (4.0    kcal-1) quantifies the difference in the    sum of these two effects. The free energy    difference (ΔG298) of 1.4    kcal-1 agrees better with experiment. We    also note at this stage that a similar energy    difference occurs for the SSSS/SSRR pair (4.0    kcal-1 in total energy, 2.7 in    ΔG298). 4. The stereochemistry of the RR lactide ring (of    RR,SS) is mediated by different interactions.    Firstly, steric repulsion between the two RR methyl    groups:         . is avoided, whereas in the SS,SS isomer,    the repulsion is rather greater         . 5. Secondly, the RR configuration (of RR,SS) also    avoids a close contact between a methyl and an    isopropyl group:         . whereas such contact cannot be avoided    with the SS configuration (of SS,SS):         . These effects cumulatively amount to a    difference in the total energy of 6.2    kcal-1 (RRSS vs SSSS or RRRR vs SSRR)    and of 6.6 (RRSS vs SSSS) or 7.9 kcal-1    (RRRR vs SSRR) in ΔG298. 6. In total energy, the various effects are almost    exactly additive, which means that the SS,RR isomer    is doubly disfavoured (10.2 kcal-1)    compared to the RR,SS configuration:         . The additivity is not so precise in    ΔG298 due to non-additivity in the    Rigid-Rotor-Harmonic-Oscillator approximation in    dealing with very low frequency contributions to    the entropy. 7. Overall therefore, the tacticity is induced by a    possible attractive interaction between one methyl    and the face of any aryl ring, and avoidance of    repulsion between the two methyls of one lactide,    and between another methyl and one of the (four)    isopropyl substituents on one of the (two) aryl    rings. | | Total energies (Hartree)  [Corrected for ΔG298 (Hartree)] {C-O cleaving bond length,Å} | | | --- | --- | | RRSS           Enable Java 1.4.2\_5 or later | RRRR           Enable Java 1.4.2\_5 or later | | -2612.17812 [-2611.26219] {2.289} | -2612.17174 [-2611.26002] {2.179} | |  | Enable Java 1.4.2\_5 or later | | SSRR           Enable Java 1.4.2\_5 or later | SSSS           Enable Java 1.4.2\_5 or later | | -2612.16180 [-2611.24743] {2.154} | -2612.16815 [-2611.25173] {2.240} | |  |  | |
