# Supplementary material
Source: publisher figshare collection journal article supplement (https://acs.figshare.com/ndownloader/files/5127205)
Supplement: Supplementary file 1 [file 5127205 › supporting_ja043819b/table3.html]

Table S3


| 5. Table S3. Commentary on the Four diasteromeric Stationary points of TS1 | |
| --- | --- |
| **Storyboard:**  1. The SS,SS diasteromer is the lowest of the four    for TS1, here the forming O-C bond          is antiperiplanar to the C-Me bond.     . One of the methyl groups of the lactide    interacts with the adjacent aryl ring in a presumed    weak π interaction. 2. The difference between SS,SS and SS,RR amounts to    4.6 (total) or 5.8 (ΔG). In the SS,RR isomer,    the antiperiplanar interaction          is between the forming O-C bond and another    C-O bond. 3. The analogous difference between RR,SS and RR,RR    is 3.7 (total) or 2.9 (ΔG) with identical    antiperiplanar arrangements. 4. The difference between SS,SS/RR,SS amounts to 2.1    (total) or 3.8 (ΔG); and SS,RR/RR,RR is 1.2 and    1.0 respectively. The additivity of these effects is    relatively poor compared to TS2, which suggests that    non-local stereoelectronic effects may be more    significant here. 5. Steric factors are also important, in particular    the separation between the two methyls of the    coordinated lactide monomer, and the methyl group    of the lactate chelate. In the energetically    preferred (SS,SS) isomer, these three substituents    are orientated on opposing faces         , whereas a much closer approach is    observed in the highest energy isomer, (RR,RR)     . | | Total energies (Hartree)  [Corrected for ΔG298 (Hartree)] {C-O forming bond length,Å} | | | --- | --- | | RRSS           Enable Java 1.4.2\_5 or later | RRRR           Enable Java 1.4.2\_5 or later | | -2612.18938[-2611.2755] {1.737} | -2612.18356[-2611.2708] {2.157} | |  | Enable Java 1.4.2\_5 or later | | SSRR           Enable Java 1.4.2\_5 or later | SSSS           Enable Java 1.4.2\_5 or later | | -2612.18541[-2611.2724] {2.003} | -2612.1928[-2611.2816] {1.941} | |  |  | |
