# Supplementary material
Source: publisher figshare collection journal article supplement (https://acs.figshare.com/ndownloader/files/5127205)
Supplement: Supplementary file 1 [file 5127205 › supporting_ja043819b/thf-freq.log]

 Entering Gaussian System, Link 0=g03
 Input=thf-gen.gjf
 Output=thf-gen.log
 Initial command:
 /usr/local/g03/l1.exe /home/rzepa/Gau-23802.inp -scrdir=/home/rzepa/
 Entering Link 1 = /usr/local/g03/l1.exe PID=     23803.
  
 Copyright (c) 1988,1990,1992,1993,1995,1998,2003, Gaussian, Inc.
                  All Rights Reserved.
  
 This is the Gaussian(R) 03 program.  It is based on the
 the Gaussian(R) 98 system (copyright 1998, Gaussian, Inc.),
 the Gaussian(R) 94 system (copyright 1995, Gaussian, Inc.),
 the Gaussian 92(TM) system (copyright 1992, Gaussian, Inc.),
 the Gaussian 90(TM) system (copyright 1990, Gaussian, Inc.),
 the Gaussian 88(TM) system (copyright 1988, Gaussian, Inc.),
 the Gaussian 86(TM) system (copyright 1986, Carnegie Mellon
 University), and the Gaussian 82(TM) system (copyright 1983,
 Carnegie Mellon University). Gaussian is a federally registered
 trademark of Gaussian, Inc.
  
 This software contains proprietary and confidential information,
 including trade secrets, belonging to Gaussian, Inc.
  
 This software is provided under written license and may be
 used, copied, transmitted, or stored only in accord with that
 written license.
  
 The following legend is applicable only to US Government
 contracts under DFARS:
  
                    RESTRICTED RIGHTS LEGEND
  
 Use, duplication or disclosure by the US Government is subject
 to restrictions as set forth in subparagraph (c)(1)(ii) of the
 Rights in Technical Data and Computer Software clause at DFARS
 252.227-7013.
  
 Gaussian, Inc.
 Carnegie Office Park, Building 6, Pittsburgh, PA 15106 USA
  
 The following legend is applicable only to US Government
 contracts under FAR:
  
                    RESTRICTED RIGHTS LEGEND
  
 Use, reproduction and disclosure by the US Government is subject
 to restrictions as set forth in subparagraph (c) of the
 Commercial Computer Software - Restricted Rights clause at FAR
 52.227-19.
  
 Gaussian, Inc.
 Carnegie Office Park, Building 6, Pittsburgh, PA 15106 USA
  
  
 ---------------------------------------------------------------
 Warning -- This program may not be used in any manner that
 competes with the business of Gaussian, Inc. or will provide
 assistance to any competitor of Gaussian, Inc.  The licensee
 of this program is prohibited from giving any competitor of
 Gaussian, Inc. access to this program.  By using this program,
 the user acknowledges that Gaussian, Inc. is engaged in the
 business of creating and licensing software in the field of
 computational chemistry and represents and warrants to the
 licensee that it is not a competitor of Gaussian, Inc. and that
 it will not use this program in any manner prohibited above.
 ---------------------------------------------------------------
  

 Cite this work as:
 Gaussian 03, Revision B.04,
 M. J. Frisch, G. W. Trucks, H. B. Schlegel, G. E. Scuseria, 
 M. A. Robb, J. R. Cheeseman, J. A. Montgomery, Jr., T. Vreven, 
 K. N. Kudin, J. C. Burant, J. M. Millam, S. S. Iyengar, J. Tomasi, 
 V. Barone, B. Mennucci, M. Cossi, G. Scalmani, N. Rega, 
 G. A. Petersson, H. Nakatsuji, M. Hada, M. Ehara, K. Toyota, 
 R. Fukuda, J. Hasegawa, M. Ishida, T. Nakajima, Y. Honda, O. Kitao, 
 H. Nakai, M. Klene, X. Li, J. E. Knox, H. P. Hratchian, J. B. Cross, 
 C. Adamo, J. Jaramillo, R. Gomperts, R. E. Stratmann, O. Yazyev, 
 A. J. Austin, R. Cammi, C. Pomelli, J. W. Ochterski, P. Y. Ayala, 
 K. Morokuma, G. A. Voth, P. Salvador, J. J. Dannenberg, 
 V. G. Zakrzewski, S. Dapprich, A. D. Daniels, M. C. Strain, 
 O. Farkas, D. K. Malick, A. D. Rabuck, K. Raghavachari, 
 J. B. Foresman, J. V. Ortiz, Q. Cui, A. G. Baboul, S. Clifford, 
 J. Cioslowski, B. B. Stefanov, G. Liu, A. Liashenko, P. Piskorz, 
 I. Komaromi, R. L. Martin, D. J. Fox, T. Keith, M. A. Al-Laham, 
 C. Y. Peng, A. Nanayakkara, M. Challacombe, P. M. W. Gill, 
 B. Johnson, W. Chen, M. W. Wong, C. Gonzalez, and J. A. Pople, 
 Gaussian, Inc., Pittsburgh PA, 2003.
 
 *********************************************
 Gaussian 03:  x86-Linux-G03RevB.04 2-Jun-2003
                  27-Nov-2004 
 *********************************************
 %mem=800MB
 %nproc=2
 Will use up to    2 processors via shared memory.
 %chk=thf-gen.chk
 ---------------------
 # RB3LYP/Gen opt freq
 ---------------------
 1/14=-1,18=20,26=3,38=1/1,3;
 2/9=110,17=6,18=5,40=1/2;
 3/5=7,11=2,16=1,25=1,30=1,74=-5/1,2,3;
 4/7=1/1;
 5/5=2,38=5/2;
 6/7=2,8=2,9=2,10=2,28=1/1;
 7//1,2,3,16;
 1/14=-1,18=20/3(1);
 99//99;
 2/9=110/2;
 3/5=7,6=1,11=2,16=1,25=1,30=1,74=-5,82=7/1,2,3;
 4/5=5,7=1,16=3/1;
 5/5=2,38=5/2;
 7//1,2,3,16;
 1/14=-1,18=20/3(-5);
 2/9=110/2;
 6/7=2,8=2,9=2,10=2,19=2,28=1/1;
 99/9=1/99;
 -----------
 from SS.mol
 -----------
 Symbolic Z-matrix:
 Charge =  0 Multiplicity = 1
 C                    0    -0.11113  -0.0717    1.30937 
 C                    0    -1.46448  -0.62112   0.87106 
 C                    0    -1.4519   -0.58586  -0.65109 
 C                    0    -0.09021  -0.02078  -1.04105 
 O                    0     0.54807   0.43646   0.14743 
 H                    0     0.48467  -0.82398   1.88736 
 H                    0    -0.21091   0.86874   1.90993 
 H                    0    -2.2957    0.00392   1.28015 
 H                    0    -1.60841  -1.66354   1.24735 
 H                    0    -2.27484   0.06     -1.04437 
 H                    0    -1.59203  -1.60941  -1.07742 
 H                    0    -0.17798   0.94444  -1.60297 
 H                    0     0.51505  -0.74928  -1.63942 
 

 GradGradGradGradGradGradGradGradGradGradGradGradGradGradGradGradGradGrad
 Berny optimization.
 Initialization pass.
                           ----------------------------
                           !    Initial Parameters    !
                           ! (Angstroms and Degrees)  !
 --------------------------                            --------------------------
 ! Name  Definition              Value          Derivative Info.                !
 --------------------------------------------------------------------------------
 ! R1    R(1,2)                  1.525          estimate D2E/DX2                !
 ! R2    R(1,5)                  1.4293         estimate D2E/DX2                !
 ! R3    R(1,6)                  1.1202         estimate D2E/DX2                !
 ! R4    R(1,7)                  1.1203         estimate D2E/DX2                !
 ! R5    R(2,3)                  1.5226         estimate D2E/DX2                !
 ! R6    R(2,8)                  1.1176         estimate D2E/DX2                !
 ! R7    R(2,9)                  1.1176         estimate D2E/DX2                !
 ! R8    R(3,4)                  1.525          estimate D2E/DX2                !
 ! R9    R(3,10)                 1.1176         estimate D2E/DX2                !
 ! R10   R(3,11)                 1.1176         estimate D2E/DX2                !
 ! R11   R(4,5)                  1.4244         estimate D2E/DX2                !
 ! R12   R(4,12)                 1.1203         estimate D2E/DX2                !
 ! R13   R(4,13)                 1.1203         estimate D2E/DX2                !
 ! A1    A(2,1,5)              107.682          estimate D2E/DX2                !
 ! A2    A(2,1,6)              112.2309         estimate D2E/DX2                !
 ! A3    A(2,1,7)              112.1779         estimate D2E/DX2                !
 ! A4    A(5,1,6)              114.3872         estimate D2E/DX2                !
 ! A5    A(5,1,7)              100.2775         estimate D2E/DX2                !
 ! A6    A(6,1,7)              109.5424         estimate D2E/DX2                !
 ! A7    A(1,2,3)              105.7632         estimate D2E/DX2                !
 ! A8    A(1,2,8)              110.6927         estimate D2E/DX2                !
 ! A9    A(1,2,9)              110.7068         estimate D2E/DX2                !
 ! A10   A(3,2,8)              111.0468         estimate D2E/DX2                !
 ! A11   A(3,2,9)              111.0549         estimate D2E/DX2                !
 ! A12   A(8,2,9)              107.6163         estimate D2E/DX2                !
 ! A13   A(2,3,4)              105.7587         estimate D2E/DX2                !
 ! A14   A(2,3,10)             111.0445         estimate D2E/DX2                !
 ! A15   A(2,3,11)             111.0454         estimate D2E/DX2                !
 ! A16   A(4,3,10)             110.6939         estimate D2E/DX2                !
 ! A17   A(4,3,11)             110.718          estimate D2E/DX2                !
 ! A18   A(10,3,11)            107.6201         estimate D2E/DX2                !
 ! A19   A(3,4,5)              107.8009         estimate D2E/DX2                !
 ! A20   A(3,4,12)             112.1821         estimate D2E/DX2                !
 ! A21   A(3,4,13)             112.2117         estimate D2E/DX2                !
 ! A22   A(5,4,12)             100.1969         estimate D2E/DX2                !
 ! A23   A(5,4,13)             114.3492         estimate D2E/DX2                !
 ! A24   A(12,4,13)            109.5527         estimate D2E/DX2                !
 ! A25   A(1,5,4)              110.9469         estimate D2E/DX2                !
 ! D1    D(5,1,2,3)              8.3273         estimate D2E/DX2                !
 ! D2    D(5,1,2,8)           -112.0385         estimate D2E/DX2                !
 ! D3    D(5,1,2,9)            128.7107         estimate D2E/DX2                !
 ! D4    D(6,1,2,3)           -118.4334         estimate D2E/DX2                !
 ! D5    D(6,1,2,8)            121.2008         estimate D2E/DX2                !
 ! D6    D(6,1,2,9)              1.95           estimate D2E/DX2                !
 ! D7    D(7,1,2,3)            117.7283         estimate D2E/DX2                !
 ! D8    D(7,1,2,8)             -2.6375         estimate D2E/DX2                !
 ! D9    D(7,1,2,9)           -121.8883         estimate D2E/DX2                !
 ! D10   D(2,1,5,4)            -14.4296         estimate D2E/DX2                !
 ! D11   D(6,1,5,4)            111.0581         estimate D2E/DX2                !
 ! D12   D(7,1,5,4)           -131.847          estimate D2E/DX2                !
 ! D13   D(1,2,3,4)              0.1499         estimate D2E/DX2                !
 ! D14   D(1,2,3,10)          -119.982          estimate D2E/DX2                !
 ! D15   D(1,2,3,11)           120.3112         estimate D2E/DX2                !
 ! D16   D(8,2,3,4)            120.2842         estimate D2E/DX2                !
 ! D17   D(8,2,3,10)             0.1523         estimate D2E/DX2                !
 ! D18   D(8,2,3,11)          -119.5545         estimate D2E/DX2                !
 ! D19   D(9,2,3,4)           -120.006          estimate D2E/DX2                !
 ! D20   D(9,2,3,10)           119.8621         estimate D2E/DX2                !
 ! D21   D(9,2,3,11)             0.1554         estimate D2E/DX2                !
 ! D22   D(2,3,4,5)             -8.6131         estimate D2E/DX2                !
 ! D23   D(2,3,4,12)          -117.9856         estimate D2E/DX2                !
 ! D24   D(2,3,4,13)           118.1741         estimate D2E/DX2                !
 ! D25   D(10,3,4,5)           111.748          estimate D2E/DX2                !
 ! D26   D(10,3,4,12)            2.3756         estimate D2E/DX2                !
 ! D27   D(10,3,4,13)         -121.4648         estimate D2E/DX2                !
 ! D28   D(11,3,4,5)          -128.9885         estimate D2E/DX2                !
 ! D29   D(11,3,4,12)          121.6391         estimate D2E/DX2                !
 ! D30   D(11,3,4,13)           -2.2013         estimate D2E/DX2                !
 ! D31   D(3,4,5,1)             14.5378         estimate D2E/DX2                !
 ! D32   D(12,4,5,1)           131.967          estimate D2E/DX2                !
 ! D33   D(13,4,5,1)          -110.9908         estimate D2E/DX2                !
 --------------------------------------------------------------------------------
 Trust Radius=3.00D-01 FncErr=1.00D-07 GrdErr=1.00D-06
 Number of steps in this run=  81 maximum allowed number of steps= 100.
 GradGradGradGradGradGradGradGradGradGradGradGradGradGradGradGradGradGrad

                          Input orientation:                          
 ---------------------------------------------------------------------
 Center     Atomic     Atomic              Coordinates (Angstroms)
 Number     Number      Type              X           Y           Z
 ---------------------------------------------------------------------
    1          6             0       -0.111130   -0.071700    1.309372
    2          6             0       -1.464478   -0.621124    0.871063
    3          6             0       -1.451904   -0.585861   -0.651093
    4          6             0       -0.090210   -0.020782   -1.041046
    5          8             0        0.548065    0.436462    0.147430
    6          1             0        0.484665   -0.823975    1.887360
    7          1             0       -0.210907    0.868744    1.909927
    8          1             0       -2.295700    0.003922    1.280151
    9          1             0       -1.608414   -1.663544    1.247345
   10          1             0       -2.274841    0.059998   -1.044373
   11          1             0       -1.592026   -1.609406   -1.077423
   12          1             0       -0.177979    0.944443   -1.602966
   13          1             0        0.515045   -0.749283   -1.639420
 ---------------------------------------------------------------------
                    Distance matrix (angstroms):
                    1          2          3          4          5
     1  C    0.000000
     2  C    1.524970   0.000000
     3  C    2.430115   1.522616   0.000000
     4  C    2.351063   2.430058   1.524988   0.000000
     5  O    1.429292   2.385888   2.383833   1.424409   0.000000
     6  H    1.120250   2.207525   3.201678   3.090495   2.149437
     7  H    1.120293   2.206895   3.196056   3.084488   1.967054
     8  H    2.186074   1.117571   2.188502   3.201992   3.091464
     9  H    2.186247   1.117562   2.188598   3.200054   3.204721
    10  H    3.199860   2.188495   1.117599   2.186127   3.087218
    11  H    3.202247   2.188508   1.117603   2.186436   3.204033
    12  H    3.085244   3.197952   2.206984   1.120320   1.961905
    13  H    3.089755   3.199603   2.207348   1.120312   2.144741
                    6          7          8          9         10
     6  H    0.000000
     7  H    1.830199   0.000000
     8  H    2.963873   2.343266   0.000000
     9  H    2.344243   2.967242   1.803852   0.000000
    10  H    4.122055   3.693478   2.325294   2.943925   0.000000
    11  H    3.703982   4.119827   2.942132   2.325456   1.803951
    12  H    3.968473   3.513863   3.698876   4.119710   2.343309
    13  H    3.527702   3.967730   4.122075   3.698427   2.965212
                   11         12         13
    11  H    0.000000
    12  H    2.966120   0.000000
    13  H    2.344227   1.830388   0.000000
 Stoichiometry    C4H8O
 Framework group  C1[X(C4H8O)]
 Deg. of freedom    33
 Full point group                 C1      NOp   1
 Largest Abelian subgroup         C1      NOp   1
 Largest concise Abelian subgroup C1      NOp   1
                         Standard orientation:                         
 ---------------------------------------------------------------------
 Center     Atomic     Atomic              Coordinates (Angstroms)
 Number     Number      Type              X           Y           Z
 ---------------------------------------------------------------------
    1          6             0        1.170887   -0.465357    0.067929
    2          6             0        0.773471    1.004164   -0.022074
    3          6             0       -0.749045    1.021557   -0.023761
    4          6             0       -1.180020   -0.438311    0.069159
    5          8             0       -0.016748   -1.246253   -0.082406
    6          1             0        1.757651   -0.689692    0.995475
    7          1             0        1.747477   -0.803340   -0.831164
    8          1             0        1.181171    1.467149   -0.953949
    9          1             0        1.180584    1.577527    0.846522
   10          1             0       -1.143994    1.491249   -0.957802
   11          1             0       -1.144688    1.606500    0.842463
   12          1             0       -1.766167   -0.764236   -0.828238
   13          1             0       -1.769797   -0.647456    0.998417
 ---------------------------------------------------------------------
 Rotational constants (GHZ):      7.0271961      6.9423268      3.8605869
 General basis read from cards:  (5D, 7F)
 There are    86 symmetry adapted basis functions of A   symmetry.
 Integral buffers will be    262144 words long.
 Raffenetti 2 integral format.
 Two-electron integral symmetry is turned on.
    86 basis functions,   172 primitive gaussians,    91 cartesian basis functions
    20 alpha electrons       20 beta electrons
       nuclear repulsion energy       189.1872330125 Hartrees.
 NAtoms=   13 NActive=   13 NUniq=   13 SFac= 1.00D+00 NAtFMM=   60 Big=F
 One-electron integrals computed using PRISM.
 NBasis=    86 RedAO= T  NBF=    86
 NBsUse=    86 1.00D-06 NBFU=    86
 Harris functional with IExCor=  402 diagonalized for initial guess.
 ExpMin= 1.61D-01 ExpMax= 5.48D+03 ExpMxC= 8.25D+02 IAcc=1 IRadAn=         1 AccDes= 1.00D-06
 HarFok:  IExCor= 402 AccDes= 1.00D-06 IRadAn=         1 IDoV=1
 ScaDFX=  1.000000  1.000000  1.000000  1.000000
 Initial guess orbital symmetries:
       Occupied  (A) (A) (A) (A) (A) (A) (A) (A) (A) (A) (A) (A)
                 (A) (A) (A) (A) (A) (A) (A) (A)
       Virtual   (A) (A) (A) (A) (A) (A) (A) (A) (A) (A) (A) (A)
                 (A) (A) (A) (A) (A) (A) (A) (A) (A) (A) (A) (A)
                 (A) (A) (A) (A) (A) (A) (A) (A) (A) (A) (A) (A)
                 (A) (A) (A) (A) (A) (A) (A) (A) (A) (A) (A) (A)
                 (A) (A) (A) (A) (A) (A) (A) (A) (A) (A) (A) (A)
                 (A) (A) (A) (A) (A) (A)
 The electronic state of the initial guess is 1-A.
 Requested convergence on RMS density matrix=1.00D-08 within 128 cycles.
 Requested convergence on MAX density matrix=1.00D-06.
 Requested convergence on             energy=1.00D-06.
 No special actions if energy rises.
 Keep R1 integrals in memory in canonical form, NReq=     9728516.
 Integral accuracy reduced to 1.0D-05 until final iterations.
 Initial convergence to 1.0D-05 achieved.  Increase integral accuracy.
 SCF Done:  E(RB+HF-LYP) =  -232.432530268     A.U. after   12 cycles
             Convg  =    0.8612D-08             -V/T =  2.0067
             S**2   =   0.0000

 **********************************************************************

            Population analysis using the SCF density.

 **********************************************************************

 Orbital symmetries:
       Occupied  (A) (A) (A) (A) (A) (A) (A) (A) (A) (A) (A) (A)
                 (A) (A) (A) (A) (A) (A) (A) (A)
       Virtual   (A) (A) (A) (A) (A) (A) (A) (A) (A) (A) (A) (A)
                 (A) (A) (A) (A) (A) (A) (A) (A) (A) (A) (A) (A)
                 (A) (A) (A) (A) (A) (A) (A) (A) (A) (A) (A) (A)
                 (A) (A) (A) (A) (A) (A) (A) (A) (A) (A) (A) (A)
                 (A) (A) (A) (A) (A) (A) (A) (A) (A) (A) (A) (A)
                 (A) (A) (A) (A) (A) (A)
 The electronic state is 1-A.
 Alpha  occ. eigenvalues --  -19.12658 -10.21977 -10.21929 -10.18288 -10.18266
 Alpha  occ. eigenvalues --   -1.02020  -0.77914  -0.73202  -0.58591  -0.58293
 Alpha  occ. eigenvalues --   -0.49352  -0.48026  -0.43729  -0.40388  -0.40131
 Alpha  occ. eigenvalues --   -0.35670  -0.34448  -0.31729  -0.30922  -0.23551
 Alpha virt. eigenvalues --    0.06995   0.08871   0.12864   0.14604   0.14870
 Alpha virt. eigenvalues --    0.15333   0.16271   0.19070   0.20452   0.23369
 Alpha virt. eigenvalues --    0.25440   0.30746   0.34736   0.50991   0.54849
 Alpha virt. eigenvalues --    0.56207   0.57417   0.57938   0.59182   0.64235
 Alpha virt. eigenvalues --    0.65889   0.69939   0.72136   0.74661   0.78967
 Alpha virt. eigenvalues --    0.83425   0.84313   0.84775   0.85095   0.89050
 Alpha virt. eigenvalues --    0.90657   0.93087   0.93478   1.03291   1.05723
 Alpha virt. eigenvalues --    1.06632   1.18049   1.27663   1.34843   1.38585
 Alpha virt. eigenvalues --    1.49651   1.70574   1.73592   1.78303   1.80606
 Alpha virt. eigenvalues --    1.84796   1.85063   1.88282   1.97503   1.98266
 Alpha virt. eigenvalues --    2.00261   2.03359   2.10200   2.11033   2.19227
 Alpha virt. eigenvalues --    2.22375   2.37238   2.40170   2.42957   2.48993
 Alpha virt. eigenvalues --    2.53161   2.63168   2.64295   2.68698   2.76458
 Alpha virt. eigenvalues --    2.99761
          Condensed to atoms (all electrons):
              1          2          3          4          5          6
     1  C    4.804132   0.358854  -0.070128  -0.070541   0.281733   0.359233
     2  C    0.358854   5.081616   0.375871  -0.069728  -0.050581  -0.047021
     3  C   -0.070128   0.375871   5.082516   0.358937  -0.050739   0.001723
     4  C   -0.070541  -0.069728   0.358937   4.801504   0.282375   0.002884
     5  O    0.281733  -0.050581  -0.050739   0.282375   8.194624  -0.036526
     6  H    0.359233  -0.047021   0.001723   0.002884  -0.036526   0.647193
     7  H    0.382006  -0.031699   0.003549   0.006240  -0.051876  -0.050906
     8  H   -0.030142   0.373281  -0.031223   0.003756   0.002326   0.004420
     9  H   -0.030048   0.369631  -0.032607   0.004504   0.002194  -0.006631
    10  H    0.003756  -0.031315   0.373248  -0.030118   0.002330  -0.000105
    11  H    0.004544  -0.032599   0.369397  -0.029935   0.002216   0.000068
    12  H    0.006322   0.003581  -0.031721   0.382274  -0.052557  -0.000489
    13  H    0.002889   0.001651  -0.047283   0.359339  -0.037019   0.001423
              7          8          9         10         11         12
     1  C    0.382006  -0.030142  -0.030048   0.003756   0.004544   0.006322
     2  C   -0.031699   0.373281   0.369631  -0.031315  -0.032599   0.003581
     3  C    0.003549  -0.031223  -0.032607   0.373248   0.369397  -0.031721
     4  C    0.006240   0.003756   0.004504  -0.030118  -0.029935   0.382274
     5  O   -0.051876   0.002326   0.002194   0.002330   0.002216  -0.052557
     6  H   -0.050906   0.004420  -0.006631  -0.000105   0.000068  -0.000489
     7  H    0.615959  -0.009803   0.003670  -0.000036  -0.000177   0.000084
     8  H   -0.009803   0.580346  -0.033490  -0.010985   0.004133  -0.000036
     9  H    0.003670  -0.033490   0.585886   0.004147  -0.010124  -0.000176
    10  H   -0.000036  -0.010985   0.004147   0.580469  -0.033432  -0.009825
    11  H   -0.000177   0.004133  -0.010124  -0.033432   0.585977   0.003650
    12  H    0.000084  -0.000036  -0.000176  -0.009825   0.003650   0.617106
    13  H   -0.000488  -0.000105   0.000074   0.004438  -0.006581  -0.051089
             13
     1  C    0.002889
     2  C    0.001651
     3  C   -0.047283
     4  C    0.359339
     5  O   -0.037019
     6  H    0.001423
     7  H   -0.000488
     8  H   -0.000105
     9  H    0.000074
    10  H    0.004438
    11  H   -0.006581
    12  H   -0.051089
    13  H    0.648933
 Mulliken atomic charges:
              1
     1  C   -0.002610
     2  C   -0.301542
     3  C   -0.301542
     4  C   -0.001490
     5  O   -0.488502
     6  H    0.124734
     7  H    0.133477
     8  H    0.147523
     9  H    0.142970
    10  H    0.147428
    11  H    0.142861
    12  H    0.132874
    13  H    0.123818
 Sum of Mulliken charges=   0.00000
 Atomic charges with hydrogens summed into heavy atoms:
              1
     1  C    0.255602
     2  C   -0.011049
     3  C   -0.011252
     4  C    0.255202
     5  O   -0.488502
     6  H    0.000000
     7  H    0.000000
     8  H    0.000000
     9  H    0.000000
    10  H    0.000000
    11  H    0.000000
    12  H    0.000000
    13  H    0.000000
 Sum of Mulliken charges=   0.00000
 Electronic spatial extent (au):  <R**2>=   380.5203
 Charge=     0.0000 electrons
 Dipole moment (field-independent basis, Debye):
    X=     0.0357    Y=     1.7700    Z=     0.1451  Tot=     1.7763
 Quadrupole moment (field-independent basis, Debye-Ang):
   XX=   -29.6415   YY=   -34.6402   ZZ=   -30.4426
   XY=    -0.0661   XZ=     0.0013   YZ=    -0.1221
 Traceless Quadrupole moment (field-independent basis, Debye-Ang):
   XX=     1.9333   YY=    -3.0654   ZZ=     1.1321
   XY=    -0.0661   XZ=     0.0013   YZ=    -0.1221
 Octapole moment (field-independent basis, Debye-Ang**2):
  XXX=    -0.0509  YYY=     0.0836  ZZZ=    -0.7275  XYY=     0.0803
  XXY=    -3.0773  XXZ=    -0.1089  XZZ=     0.0092  YZZ=    -0.5819
  YYZ=     0.0182  XYZ=    -0.0048
 Hexadecapole moment (field-independent basis, Debye-Ang**3):
 XXXX=  -233.6316 YYYY=  -219.4469 ZZZZ=   -59.1979 XXXY=     0.0994
 XXXZ=     0.0397 YYYX=    -0.0978 YYYZ=     0.8625 ZZZX=     0.0153
 ZZZY=     0.2621 XXYY=   -72.2327 XXZZ=   -45.0302 YYZZ=   -42.7493
 XXYZ=     0.5799 YYXZ=    -0.0080 ZZXY=    -0.0022
 N-N= 1.891872330125D+02 E-N=-9.199271240957D+02  KE= 2.308786990097D+02
 ***** Axes restored to original set *****
 -------------------------------------------------------------------
 Center     Atomic                   Forces (Hartrees/Bohr)
 Number     Number              X              Y              Z
 -------------------------------------------------------------------
    1          6           0.009371159    0.025768831    0.012125212
    2          6          -0.018684202   -0.009685231    0.020023947
    3          6          -0.018637248   -0.008832030   -0.020810438
    4          6           0.008936235    0.025814620   -0.012674208
    5          8           0.007467945   -0.019541420    0.002224932
    6          1          -0.002279437    0.008923453   -0.010065893
    7          1          -0.001104504   -0.019358745    0.004969677
    8          1           0.009727467   -0.009672002   -0.004186679
    9          1          -0.000274548    0.013715638   -0.003116454
   10          1           0.009634034   -0.009883890    0.003911931
   11          1          -0.000324968    0.013599640    0.003714005
   12          1          -0.001277966   -0.019223704   -0.006265786
   13          1          -0.002553967    0.008374840    0.010149751
 -------------------------------------------------------------------
 Cartesian Forces:  Max     0.025814620 RMS     0.012336984

 GradGradGradGradGradGradGradGradGradGradGradGradGradGradGradGradGradGrad
 Berny optimization.
 Internal  Forces:  Max     0.015142530 RMS     0.006129672
 Search for a local minimum.
 Step number   1 out of a maximum of  81
 All quantities printed in internal units (Hartrees-Bohrs-Radians)
 Second derivative matrix not updated -- first step.
     Eigenvalues ---    0.00476   0.00877   0.02772   0.03203   0.04546
     Eigenvalues ---    0.05034   0.05158   0.05557   0.05794   0.05824
     Eigenvalues ---    0.07265   0.07265   0.07847   0.10117   0.11080
     Eigenvalues ---    0.11471   0.11767   0.12608   0.21736   0.22633
     Eigenvalues ---    0.28518   0.29314   0.29929   0.31531   0.31532
     Eigenvalues ---    0.31534   0.31538   0.31808   0.31808   0.31811
     Eigenvalues ---    0.31812   0.39525   0.404621000.000001000.00000
     Eigenvalues --- 1000.000001000.000001000.000001000.000001000.00000
     Eigenvalues --- 1000.000001000.000001000.000001000.000001000.00000
     Eigenvalues --- 1000.000001000.000001000.000001000.000001000.00000
     Eigenvalues --- 1000.000001000.000001000.000001000.000001000.00000
     Eigenvalues --- 1000.000001000.000001000.000001000.000001000.00000
     Eigenvalues --- 1000.000001000.000001000.000001000.000001000.00000
     Eigenvalues --- 1000.000001000.000001000.000001000.000001000.00000
     Eigenvalues --- 1000.00000
 RFO step:  Lambda=-1.56033392D-02.
 Linear search not attempted -- first point.
 Maximum step size (   0.300) exceeded in Quadratic search.
    -- Step size scaled by   0.715
 Iteration  1 RMS(Cart)=  0.03497916 RMS(Int)=  0.00140791
 Iteration  2 RMS(Cart)=  0.00129540 RMS(Int)=  0.00037010
 Iteration  3 RMS(Cart)=  0.00000097 RMS(Int)=  0.00037010
 Variable       Old X    -DE/DX   Delta X   Delta X   Delta X     New X
                                 (Linear)    (Quad)   (Total)
    R1        2.88177   0.01082   0.00000   0.02429   0.02427   2.90605
    R2        2.70097   0.00170   0.00000   0.00327   0.00331   2.70428
    R3        2.11697  -0.01240   0.00000  -0.02677  -0.02677   2.09020
    R4        2.11705  -0.01349   0.00000  -0.02914  -0.02914   2.08791
    R5        2.87733   0.01514   0.00000   0.03341   0.03336   2.91069
    R6        2.11190  -0.01417   0.00000  -0.03036  -0.03036   2.08154
    R7        2.11189  -0.01381   0.00000  -0.02958  -0.02958   2.08231
    R8        2.88181   0.01083   0.00000   0.02450   0.02449   2.90630
    R9        2.11196  -0.01418   0.00000  -0.03037  -0.03037   2.08158
   R10        2.11196  -0.01383   0.00000  -0.02963  -0.02963   2.08233
   R11        2.69174   0.00452   0.00000   0.00795   0.00800   2.69974
   R12        2.11710  -0.01332   0.00000  -0.02877  -0.02877   2.08832
   R13        2.11708  -0.01225   0.00000  -0.02645  -0.02645   2.09063
    A1        1.87941  -0.00114   0.00000   0.00023  -0.00028   1.87913
    A2        1.95880   0.00193   0.00000  -0.00810  -0.00877   1.95003
    A3        1.95787  -0.00128   0.00000   0.00394   0.00297   1.96085
    A4        1.99643  -0.00518   0.00000  -0.04788  -0.04817   1.94826
    A5        1.75017   0.00934   0.00000   0.08399   0.08366   1.83383
    A6        1.91188  -0.00311   0.00000  -0.02335  -0.02276   1.88912
    A7        1.84592  -0.00105   0.00000  -0.00289  -0.00273   1.84319
    A8        1.93195   0.00049   0.00000   0.00664   0.00654   1.93849
    A9        1.93220   0.00070   0.00000   0.00049   0.00042   1.93262
   A10        1.93813   0.00277   0.00000   0.01385   0.01375   1.95188
   A11        1.93827  -0.00130   0.00000  -0.00443  -0.00446   1.93382
   A12        1.87826  -0.00154   0.00000  -0.01309  -0.01302   1.86524
   A13        1.84584  -0.00136   0.00000  -0.00356  -0.00339   1.84245
   A14        1.93809   0.00283   0.00000   0.01397   0.01387   1.95196
   A15        1.93811  -0.00116   0.00000  -0.00416  -0.00420   1.93391
   A16        1.93197   0.00064   0.00000   0.00681   0.00671   1.93868
   A17        1.93239   0.00074   0.00000   0.00066   0.00059   1.93298
   A18        1.87832  -0.00160   0.00000  -0.01313  -0.01306   1.86526
   A19        1.88148  -0.00166   0.00000  -0.00060  -0.00110   1.88038
   A20        1.95795  -0.00145   0.00000   0.00284   0.00184   1.95979
   A21        1.95846   0.00193   0.00000  -0.00896  -0.00966   1.94880
   A22        1.74877   0.00985   0.00000   0.08671   0.08640   1.83516
   A23        1.99577  -0.00489   0.00000  -0.04667  -0.04699   1.94878
   A24        1.91206  -0.00319   0.00000  -0.02415  -0.02359   1.88846
   A25        1.93639   0.00603   0.00000   0.01278   0.01323   1.94962
    D1        0.14534  -0.00201   0.00000  -0.01283  -0.01288   0.13245
    D2       -1.95544  -0.00498   0.00000  -0.03137  -0.03143  -1.98687
    D3        2.24642  -0.00383   0.00000  -0.01963  -0.01964   2.22678
    D4       -2.06705   0.00416   0.00000   0.05441   0.05433  -2.01273
    D5        2.11535   0.00119   0.00000   0.03587   0.03579   2.15114
    D6        0.03403   0.00234   0.00000   0.04761   0.04757   0.08160
    D7        2.05475   0.00779   0.00000   0.08850   0.08855   2.14329
    D8       -0.04603   0.00482   0.00000   0.06996   0.07000   0.02397
    D9       -2.12735   0.00597   0.00000   0.08170   0.08179  -2.04556
   D10       -0.25184   0.00237   0.00000   0.01982   0.02001  -0.23184
   D11        1.93833   0.00030   0.00000  -0.02483  -0.02390   1.91443
   D12       -2.30116  -0.00001   0.00000  -0.02271  -0.02395  -2.32511
   D13        0.00262   0.00004   0.00000   0.00006   0.00006   0.00267
   D14       -2.09408  -0.00145   0.00000  -0.01365  -0.01368  -2.10776
   D15        2.09983  -0.00053   0.00000  -0.00360  -0.00357   2.09626
   D16        2.09936   0.00152   0.00000   0.01392   0.01394   2.11330
   D17        0.00266   0.00003   0.00000   0.00020   0.00020   0.00286
   D18       -2.08662   0.00094   0.00000   0.01025   0.01032  -2.07630
   D19       -2.09450   0.00056   0.00000   0.00367   0.00364  -2.09086
   D20        2.09199  -0.00093   0.00000  -0.01004  -0.01010   2.08189
   D21        0.00271  -0.00002   0.00000   0.00001   0.00001   0.00272
   D22       -0.15033   0.00213   0.00000   0.01307   0.01311  -0.13722
   D23       -2.05924  -0.00792   0.00000  -0.09058  -0.09061  -2.14985
   D24        2.06253  -0.00407   0.00000  -0.05393  -0.05385   2.00868
   D25        1.95037   0.00505   0.00000   0.03144   0.03147   1.98185
   D26        0.04146  -0.00500   0.00000  -0.07221  -0.07225  -0.03078
   D27       -2.11996  -0.00115   0.00000  -0.03557  -0.03548  -2.15544
   D28       -2.25127   0.00394   0.00000   0.01986   0.01986  -2.23141
   D29        2.12300  -0.00611   0.00000  -0.08379  -0.08386   2.03914
   D30       -0.03842  -0.00226   0.00000  -0.04714  -0.04710  -0.08551
   D31        0.25373  -0.00237   0.00000  -0.01983  -0.02002   0.23372
   D32        2.30326  -0.00011   0.00000   0.02257   0.02382   2.32708
   D33       -1.93716  -0.00008   0.00000   0.02588   0.02496  -1.91220
         Item               Value     Threshold  Converged?
 Maximum Force            0.015143     0.000450     NO 
 RMS     Force            0.006130     0.000300     NO 
 Maximum Displacement     0.144915     0.001800     NO 
 RMS     Displacement     0.034723     0.001200     NO 
 Predicted change in Energy=-7.874634D-03
 GradGradGradGradGradGradGradGradGradGradGradGradGradGradGradGradGradGrad

                          Input orientation:                          
 ---------------------------------------------------------------------
 Center     Atomic     Atomic              Coordinates (Angstroms)
 Number     Number      Type              X           Y           Z
 ---------------------------------------------------------------------
    1          6             0       -0.110531   -0.052345    1.317802
    2          6             0       -1.474488   -0.611539    0.879858
    3          6             0       -1.461944   -0.575785   -0.659947
    4          6             0       -0.089340   -0.000902   -1.048206
    5          8             0        0.551738    0.441654    0.149366
    6          1             0        0.496993   -0.815966    1.838588
    7          1             0       -0.209840    0.823680    1.983733
    8          1             0       -2.300056   -0.013303    1.296828
    9          1             0       -1.609448   -1.641954    1.246241
   10          1             0       -2.279085    0.043815   -1.062109
   11          1             0       -1.593306   -1.587644   -1.076020
   12          1             0       -0.176439    0.901828   -1.679652
   13          1             0        0.525930   -0.743644   -1.590156
 ---------------------------------------------------------------------
                    Distance matrix (angstroms):
                    1          2          3          4          5
     1  C    0.000000
     2  C    1.537813   0.000000
     3  C    2.451896   1.540271   0.000000
     4  C    2.366662   2.451314   1.537946   0.000000
     5  O    1.431042   2.397587   2.396891   1.428641   0.000000
     6  H    1.106084   2.201747   3.183991   3.056419   2.106675
     7  H    1.104874   2.208558   3.242732   3.144377   2.022585
     8  H    2.189973   1.101505   2.201769   3.222825   3.107472
     9  H    2.186030   1.101910   2.189070   3.204414   3.196136
    10  H    3.221157   2.201841   1.101526   2.190245   3.104755
    11  H    3.207203   2.189145   1.101922   2.186422   3.197004
    12  H    3.146350   3.244426   2.208090   1.105093   2.021709
    13  H    3.056010   3.181209   2.201161   1.106316   2.105121
                    6          7          8          9         10
     6  H    0.000000
     7  H    1.791402   0.000000
     8  H    2.959942   2.354014   0.000000
     9  H    2.338851   2.929531   1.769746   0.000000
    10  H    4.106078   3.763924   2.359722   2.935765   0.000000
    11  H    3.668757   4.134072   2.934017   2.322952   1.769787
    12  H    3.972699   3.664370   3.769170   4.133424   2.353436
    13  H    3.429629   3.971215   4.105395   3.662233   2.960918
                   11         12         13
    11  H    0.000000
    12  H    2.927346   0.000000
    13  H    2.338340   1.791343   0.000000
 Stoichiometry    C4H8O
 Framework group  C1[X(C4H8O)]
 Deg. of freedom    33
 Full point group                 C1      NOp   1
 Largest Abelian subgroup         C1      NOp   1
 Largest concise Abelian subgroup C1      NOp   1
                         Standard orientation:                         
 ---------------------------------------------------------------------
 Center     Atomic     Atomic              Coordinates (Angstroms)
 Number     Number      Type              X           Y           Z
 ---------------------------------------------------------------------
    1          6             0        1.182890   -0.461697    0.055743
    2          6             0        0.772308    1.018341   -0.020278
    3          6             0       -0.767959    1.021518   -0.022089
    4          6             0       -1.183767   -0.457041    0.056939
    5          8             0       -0.003515   -1.249313   -0.085621
    6          1             0        1.714717   -0.691223    0.998027
    7          1             0        1.829468   -0.762194   -0.788286
    8          1             0        1.184039    1.497624   -0.922540
    9          1             0        1.163733    1.576666    0.845324
   10          1             0       -1.175678    1.499899   -0.926675
   11          1             0       -1.159205    1.583795    0.841046
   12          1             0       -1.834893   -0.754869   -0.784823
   13          1             0       -1.714898   -0.681916    1.001007
 ---------------------------------------------------------------------
 Rotational constants (GHZ):      6.9536441      6.9095628      3.8118172
 Basis read from rwf:  (5D, 7F)
 There are    86 symmetry adapted basis functions of A   symmetry.
 Integral buffers will be    262144 words long.
 Raffenetti 2 integral format.
 Two-electron integral symmetry is turned on.
    86 basis functions,   172 primitive gaussians,    91 cartesian basis functions
    20 alpha electrons       20 beta electrons
       nuclear repulsion energy       188.6731116153 Hartrees.
 NAtoms=   13 NActive=   13 NUniq=   13 SFac= 1.00D+00 NAtFMM=   60 Big=F
 One-electron integrals computed using PRISM.
 NBasis=    86 RedAO= T  NBF=    86
 NBsUse=    86 1.00D-06 NBFU=    86
 Initial guess read from the read-write file:
 Initial guess orbital symmetries:
       Occupied  (A) (A) (A) (A) (A) (A) (A) (A) (A) (A) (A) (A)
                 (A) (A) (A) (A) (A) (A) (A) (A)
       Virtual   (A) (A) (A) (A) (A) (A) (A) (A) (A) (A) (A) (A)
                 (A) (A) (A) (A) (A) (A) (A) (A) (A) (A) (A) (A)
                 (A) (A) (A) (A) (A) (A) (A) (A) (A) (A) (A) (A)
                 (A) (A) (A) (A) (A) (A) (A) (A) (A) (A) (A) (A)
                 (A) (A) (A) (A) (A) (A) (A) (A) (A) (A) (A) (A)
                 (A) (A) (A) (A) (A) (A)
 Harris functional with IExCor=  402 diagonalized for initial guess.
 ExpMin= 1.61D-01 ExpMax= 5.48D+03 ExpMxC= 8.25D+02 IAcc=1 IRadAn=         1 AccDes= 1.00D-06
 HarFok:  IExCor= 402 AccDes= 1.00D-06 IRadAn=         1 IDoV=1
 ScaDFX=  1.000000  1.000000  1.000000  1.000000
 Requested convergence on RMS density matrix=1.00D-08 within 128 cycles.
 Requested convergence on MAX density matrix=1.00D-06.
 Requested convergence on             energy=1.00D-06.
 No special actions if energy rises.
 Keep R1 integrals in memory in canonical form, NReq=     9728516.
 Integral accuracy reduced to 1.0D-05 until final iterations.
 Initial convergence to 1.0D-05 achieved.  Increase integral accuracy.
 SCF Done:  E(RB+HF-LYP) =  -232.439934022     A.U. after   11 cycles
             Convg  =    0.8409D-08             -V/T =  2.0065
             S**2   =   0.0000
 ***** Axes restored to original set *****
 -------------------------------------------------------------------
 Center     Atomic                   Forces (Hartrees/Bohr)
 Number     Number              X              Y              Z
 -------------------------------------------------------------------
    1          6           0.003978717    0.009882567   -0.000638603
    2          6          -0.006768410   -0.004595596    0.007403088
    3          6          -0.006628023   -0.004191312   -0.007606197
    4          6           0.003545335    0.009407436   -0.000035879
    5          8           0.000787236   -0.006186556    0.000845573
    6          1          -0.000217691    0.002752719   -0.003914406
    7          1          -0.000153186   -0.007113258    0.000995899
    8          1           0.003134438   -0.002330248   -0.002570804
    9          1          -0.000196006    0.004651217   -0.000635337
   10          1           0.003101458   -0.002436061    0.002541931
   11          1          -0.000200018    0.004638392    0.000839099
   12          1          -0.000090566   -0.007092634   -0.001234283
   13          1          -0.000293284    0.002613335    0.004009918
 -------------------------------------------------------------------
 Cartesian Forces:  Max     0.009882567 RMS     0.004336124

 GradGradGradGradGradGradGradGradGradGradGradGradGradGradGradGradGradGrad
 Berny optimization.
 Internal  Forces:  Max     0.005083001 RMS     0.002103896
 Search for a local minimum.
 Step number   2 out of a maximum of  81
 All quantities printed in internal units (Hartrees-Bohrs-Radians)
 Update second derivatives using D2CorX and points  1  2
 Trust test= 9.40D-01 RLast= 3.00D-01 DXMaxT set to 4.24D-01
     Eigenvalues ---    0.00476   0.00881   0.02772   0.03172   0.04551
     Eigenvalues ---    0.05139   0.05514   0.05531   0.05923   0.06309
     Eigenvalues ---    0.07262   0.07285   0.07819   0.10116   0.11233
     Eigenvalues ---    0.11404   0.11538   0.12487   0.21707   0.23072
     Eigenvalues ---    0.28377   0.28526   0.29800   0.30527   0.31533
     Eigenvalues ---    0.31535   0.31572   0.31719   0.31809   0.31810
     Eigenvalues ---    0.31812   0.40222   0.412151000.000001000.00000
     Eigenvalues --- 1000.000001000.000001000.000001000.000001000.00000
     Eigenvalues --- 1000.000001000.000001000.000001000.000001000.00000
     Eigenvalues --- 1000.000001000.000001000.000001000.000001000.00000
     Eigenvalues --- 1000.000001000.000001000.000001000.000001000.00000
     Eigenvalues --- 1000.000001000.000001000.000001000.000001000.00000
     Eigenvalues --- 1000.000001000.000001000.000001000.000001000.00000
     Eigenvalues --- 1000.000001000.000001000.000001000.000001000.00000
     Eigenvalues --- 1000.00000
 RFO step:  Lambda=-1.11106434D-03.
 Quartic linear search produced a step of  0.49847.
 Iteration  1 RMS(Cart)=  0.03644141 RMS(Int)=  0.00136755
 Iteration  2 RMS(Cart)=  0.00141845 RMS(Int)=  0.00032377
 Iteration  3 RMS(Cart)=  0.00000134 RMS(Int)=  0.00032377
 Iteration  4 RMS(Cart)=  0.00000000 RMS(Int)=  0.00032377
 Variable       Old X    -DE/DX   Delta X   Delta X   Delta X     New X
                                 (Linear)    (Quad)   (Total)
    R1        2.90605   0.00394   0.01210   0.00308   0.01519   2.92124
    R2        2.70428  -0.00331   0.00165  -0.01514  -0.01351   2.69076
    R3        2.09020  -0.00386  -0.01334   0.00025  -0.01309   2.07710
    R4        2.08791  -0.00503  -0.01452  -0.00363  -0.01815   2.06976
    R5        2.91069   0.00340   0.01663  -0.00491   0.01175   2.92244
    R6        2.08154  -0.00459  -0.01513  -0.00052  -0.01565   2.06589
    R7        2.08231  -0.00454  -0.01474  -0.00083  -0.01558   2.06673
    R8        2.90630   0.00392   0.01221   0.00305   0.01526   2.92156
    R9        2.08158  -0.00460  -0.01514  -0.00056  -0.01570   2.06588
   R10        2.08233  -0.00455  -0.01477  -0.00087  -0.01564   2.06669
   R11        2.69974  -0.00223   0.00399  -0.01414  -0.01018   2.68956
   R12        2.08832  -0.00508  -0.01434  -0.00414  -0.01848   2.06984
   R13        2.09063  -0.00388  -0.01318  -0.00007  -0.01325   2.07738
    A1        1.87913   0.00173  -0.00014   0.01151   0.01073   1.88986
    A2        1.95003   0.00040  -0.00437   0.00236  -0.00240   1.94763
    A3        1.96085  -0.00096   0.00148  -0.00364  -0.00310   1.95775
    A4        1.94826  -0.00267  -0.02401  -0.01311  -0.03714   1.91112
    A5        1.83383   0.00218   0.04170   0.00120   0.04265   1.87648
    A6        1.88912  -0.00066  -0.01135   0.00120  -0.00964   1.87947
    A7        1.84319  -0.00171  -0.00136  -0.00934  -0.01064   1.83254
    A8        1.93849   0.00075   0.00326  -0.00023   0.00288   1.94137
    A9        1.93262   0.00062   0.00021   0.00691   0.00710   1.93972
   A10        1.95188   0.00086   0.00685  -0.01472  -0.00795   1.94393
   A11        1.93382   0.00003  -0.00222   0.01017   0.00799   1.94181
   A12        1.86524  -0.00050  -0.00649   0.00730   0.00085   1.86608
   A13        1.84245  -0.00170  -0.00169  -0.00848  -0.01013   1.83232
   A14        1.95196   0.00083   0.00691  -0.01509  -0.00825   1.94372
   A15        1.93391   0.00005  -0.00209   0.01001   0.00796   1.94187
   A16        1.93868   0.00078   0.00334  -0.00035   0.00286   1.94155
   A17        1.93298   0.00058   0.00029   0.00655   0.00682   1.93981
   A18        1.86526  -0.00049  -0.00651   0.00741   0.00093   1.86619
   A19        1.88038   0.00147  -0.00055   0.01057   0.00938   1.88976
   A20        1.95979  -0.00088   0.00092  -0.00263  -0.00259   1.95720
   A21        1.94880   0.00048  -0.00482   0.00409  -0.00114   1.94766
   A22        1.83516   0.00223   0.04307  -0.00174   0.04111   1.87627
   A23        1.94878  -0.00256  -0.02342  -0.01301  -0.03646   1.91232
   A24        1.88846  -0.00070  -0.01176   0.00197  -0.00931   1.87915
   A25        1.94962   0.00036   0.00660  -0.01904  -0.01251   1.93711
    D1        0.13245  -0.00036  -0.00642   0.03277   0.02628   0.15873
    D2       -1.98687  -0.00076  -0.01566   0.05653   0.04083  -1.94604
    D3        2.22678  -0.00102  -0.00979   0.04311   0.03327   2.26006
    D4       -2.01273   0.00154   0.02708   0.03983   0.06687  -1.94585
    D5        2.15114   0.00114   0.01784   0.06360   0.08142   2.23256
    D6        0.08160   0.00089   0.02371   0.05017   0.07387   0.15547
    D7        2.14329   0.00281   0.04414   0.03919   0.08332   2.22661
    D8        0.02397   0.00241   0.03490   0.06295   0.09787   0.12184
    D9       -2.04556   0.00215   0.04077   0.04953   0.09032  -1.95525
   D10       -0.23184   0.00045   0.00997  -0.05609  -0.04578  -0.27761
   D11        1.91443   0.00043  -0.01191  -0.05368  -0.06489   1.84954
   D12       -2.32511  -0.00043  -0.01194  -0.05818  -0.07131  -2.39643
   D13        0.00267   0.00004   0.00003   0.00132   0.00136   0.00403
   D14       -2.10776  -0.00030  -0.00682   0.01564   0.00876  -2.09900
   D15        2.09626  -0.00026  -0.00178   0.00950   0.00772   2.10398
   D16        2.11330   0.00035   0.00695  -0.01322  -0.00620   2.10710
   D17        0.00286   0.00001   0.00010   0.00110   0.00121   0.00407
   D18       -2.07630   0.00005   0.00514  -0.00503   0.00017  -2.07613
   D19       -2.09086   0.00030   0.00181  -0.00687  -0.00505  -2.09591
   D20        2.08189  -0.00004  -0.00504   0.00745   0.00236   2.08424
   D21        0.00272   0.00000   0.00000   0.00131   0.00132   0.00404
   D22       -0.13722   0.00035   0.00653  -0.03504  -0.02844  -0.16565
   D23       -2.14985  -0.00276  -0.04517  -0.03787  -0.08303  -2.23287
   D24        2.00868  -0.00155  -0.02684  -0.04151  -0.06831   1.94037
   D25        1.98185   0.00074   0.01569  -0.05876  -0.04303   1.93881
   D26       -0.03078  -0.00237  -0.03601  -0.06159  -0.09762  -0.12841
   D27       -2.15544  -0.00117  -0.01769  -0.06523  -0.08291  -2.23835
   D28       -2.23141   0.00100   0.00990  -0.04550  -0.03556  -2.26697
   D29        2.03914  -0.00211  -0.04180  -0.04833  -0.09015   1.94899
   D30       -0.08551  -0.00090  -0.02348  -0.05197  -0.07543  -0.16095
   D31        0.23372  -0.00044  -0.00998   0.05692   0.04659   0.28031
   D32        2.32708   0.00043   0.01188   0.05819   0.07120   2.39828
   D33       -1.91220  -0.00040   0.01244   0.05292   0.06464  -1.84755
         Item               Value     Threshold  Converged?
 Maximum Force            0.005083     0.000450     NO 
 RMS     Force            0.002104     0.000300     NO 
 Maximum Displacement     0.147267     0.001800     NO 
 RMS     Displacement     0.036479     0.001200     NO 
 Predicted change in Energy=-1.480653D-03
 GradGradGradGradGradGradGradGradGradGradGradGradGradGradGradGradGradGrad

                          Input orientation:                          
 ---------------------------------------------------------------------
 Center     Atomic     Atomic              Coordinates (Angstroms)
 Number     Number      Type              X           Y           Z
 ---------------------------------------------------------------------
    1          6             0       -0.110461   -0.040650    1.307453
    2          6             0       -1.483114   -0.610971    0.882926
    3          6             0       -1.470781   -0.574550   -0.663086
    4          6             0       -0.089191    0.009153   -1.038160
    5          8             0        0.531707    0.485509    0.150629
    6          1             0        0.526012   -0.813661    1.760770
    7          1             0       -0.208015    0.776199    2.030541
    8          1             0       -2.303113   -0.012855    1.289121
    9          1             0       -1.618506   -1.630645    1.254464
   10          1             0       -2.282011    0.045699   -1.053367
   11          1             0       -1.603922   -1.574956   -1.084414
   12          1             0       -0.172268    0.855605   -1.728324
   13          1             0        0.553849   -0.745984   -1.512226
 ---------------------------------------------------------------------
                    Distance matrix (angstroms):
                    1          2          3          4          5
     1  C    0.000000
     2  C    1.545854   0.000000
     3  C    2.453272   1.546490   0.000000
     4  C    2.346238   2.453192   1.546021   0.000000
     5  O    1.423891   2.407910   2.407449   1.423252   0.000000
     6  H    1.099155   2.201881   3.149513   2.981528   2.068920
     7  H    1.095269   2.206159   3.267220   3.165344   2.041019
     8  H    2.192905   1.093222   2.195311   3.212192   3.095276
     9  H    2.192052   1.093667   2.194119   3.206848   3.212472
    10  H    3.208824   2.195150   1.093217   2.193178   3.091932
    11  H    3.210226   2.194149   1.093643   2.192248   3.214305
    12  H    3.165917   3.269218   2.205949   1.095312   2.040346
    13  H    2.981508   3.147094   2.202170   1.099304   2.069335
                    6          7          8          9         10
     6  H    0.000000
     7  H    1.771786   0.000000
     8  H    2.977867   2.358336   0.000000
     9  H    2.350057   2.895631   1.757023   0.000000
    10  H    4.067291   3.787555   2.343314   2.928558   0.000000
    11  H    3.634730   4.144807   2.926208   2.339587   1.757069
    12  H    3.930371   3.759873   3.794693   4.143678   2.358502
    13  H    3.273814   3.930480   4.067832   3.627165   2.979835
                   11         12         13
    11  H    0.000000
    12  H    2.893420   0.000000
    13  H    2.350786   1.771731   0.000000
 Stoichiometry    C4H8O
 Framework group  C1[X(C4H8O)]
 Deg. of freedom    33
 Full point group                 C1      NOp   1
 Largest Abelian subgroup         C1      NOp   1
 Largest concise Abelian subgroup C1      NOp   1
                         Standard orientation:                         
 ---------------------------------------------------------------------
 Center     Atomic     Atomic              Coordinates (Angstroms)
 Number     Number      Type              X           Y           Z
 ---------------------------------------------------------------------
    1          6             0        1.172408   -0.466311    0.061400
    2          6             0        0.775166    1.025384   -0.020512
    3          6             0       -0.771319    1.028110   -0.023299
    4          6             0       -1.173825   -0.462088    0.063195
    5          8             0       -0.002646   -1.251608   -0.111864
    6          1             0        1.636547   -0.708788    1.027796
    7          1             0        1.877736   -0.750098   -0.727011
    8          1             0        1.176142    1.492849   -0.923746
    9          1             0        1.171139    1.586282    0.830784
   10          1             0       -1.167164    1.493332   -0.929940
   11          1             0       -1.168427    1.593809    0.824253
   12          1             0       -1.882131   -0.744646   -0.723045
   13          1             0       -1.637255   -0.700444    1.031125
 ---------------------------------------------------------------------
 Rotational constants (GHZ):      7.0157633      6.8562411      3.8132354
 Basis read from rwf:  (5D, 7F)
 There are    86 symmetry adapted basis functions of A   symmetry.
 Integral buffers will be    262144 words long.
 Raffenetti 2 integral format.
 Two-electron integral symmetry is turned on.
    86 basis functions,   172 primitive gaussians,    91 cartesian basis functions
    20 alpha electrons       20 beta electrons
       nuclear repulsion energy       188.8873974165 Hartrees.
 NAtoms=   13 NActive=   13 NUniq=   13 SFac= 1.00D+00 NAtFMM=   60 Big=F
 One-electron integrals computed using PRISM.
 NBasis=    86 RedAO= T  NBF=    86
 NBsUse=    86 1.00D-06 NBFU=    86
 Initial guess read from the read-write file:
 Initial guess orbital symmetries:
       Occupied  (A) (A) (A) (A) (A) (A) (A) (A) (A) (A) (A) (A)
                 (A) (A) (A) (A) (A) (A) (A) (A)
       Virtual   (A) (A) (A) (A) (A) (A) (A) (A) (A) (A) (A) (A)
                 (A) (A) (A) (A) (A) (A) (A) (A) (A) (A) (A) (A)
                 (A) (A) (A) (A) (A) (A) (A) (A) (A) (A) (A) (A)
                 (A) (A) (A) (A) (A) (A) (A) (A) (A) (A) (A) (A)
                 (A) (A) (A) (A) (A) (A) (A) (A) (A) (A) (A) (A)
                 (A) (A) (A) (A) (A) (A)
 Harris functional with IExCor=  402 diagonalized for initial guess.
 ExpMin= 1.61D-01 ExpMax= 5.48D+03 ExpMxC= 8.25D+02 IAcc=1 IRadAn=         1 AccDes= 1.00D-06
 HarFok:  IExCor= 402 AccDes= 1.00D-06 IRadAn=         1 IDoV=1
 ScaDFX=  1.000000  1.000000  1.000000  1.000000
 Requested convergence on RMS density matrix=1.00D-08 within 128 cycles.
 Requested convergence on MAX density matrix=1.00D-06.
 Requested convergence on             energy=1.00D-06.
 No special actions if energy rises.
 Keep R1 integrals in memory in canonical form, NReq=     9728516.
 Integral accuracy reduced to 1.0D-05 until final iterations.
 Initial convergence to 1.0D-05 achieved.  Increase integral accuracy.
 SCF Done:  E(RB+HF-LYP) =  -232.441623323     A.U. after   11 cycles
             Convg  =    0.8093D-08             -V/T =  2.0062
             S**2   =   0.0000
 ***** Axes restored to original set *****
 -------------------------------------------------------------------
 Center     Atomic                   Forces (Hartrees/Bohr)
 Number     Number              X              Y              Z
 -------------------------------------------------------------------
    1          6           0.001715839   -0.000554755   -0.000934986
    2          6           0.000656387   -0.000357150    0.000556856
    3          6           0.000737771   -0.000342765   -0.000548743
    4          6           0.001411957   -0.000596919    0.000649947
    5          8          -0.004439985    0.003295137    0.000259177
    6          1          -0.000227017   -0.001560727    0.000512669
    7          1           0.000381216    0.000112829    0.001149558
    8          1          -0.000321665    0.000910995   -0.000212525
    9          1           0.000102619   -0.000239775    0.000836512
   10          1          -0.000292048    0.000942406    0.000237101
   11          1           0.000084678   -0.000201680   -0.000869295
   12          1           0.000412094    0.000124325   -0.001171091
   13          1          -0.000221845   -0.001531922   -0.000465182
 -------------------------------------------------------------------
 Cartesian Forces:  Max     0.004439985 RMS     0.001147425

 GradGradGradGradGradGradGradGradGradGradGradGradGradGradGradGradGradGrad
 Berny optimization.
 Internal  Forces:  Max     0.001450642 RMS     0.000595189
 Search for a local minimum.
 Step number   3 out of a maximum of  81
 All quantities printed in internal units (Hartrees-Bohrs-Radians)
 Update second derivatives using D2CorX and points  2  3
 Trust test= 1.14D+00 RLast= 3.52D-01 DXMaxT set to 6.00D-01
     Eigenvalues ---    0.00477   0.00540   0.02756   0.03347   0.04578
     Eigenvalues ---    0.05159   0.05507   0.05843   0.05957   0.06552
     Eigenvalues ---    0.07173   0.07220   0.07724   0.10106   0.11373
     Eigenvalues ---    0.11465   0.11491   0.13246   0.21637   0.23724
     Eigenvalues ---    0.28474   0.28703   0.30105   0.31482   0.31533
     Eigenvalues ---    0.31535   0.31693   0.31806   0.31810   0.31811
     Eigenvalues ---    0.33924   0.40154   0.412461000.000001000.00000
     Eigenvalues --- 1000.000001000.000001000.000001000.000001000.00000
     Eigenvalues --- 1000.000001000.000001000.000001000.000001000.00000
     Eigenvalues --- 1000.000001000.000001000.000001000.000001000.00000
     Eigenvalues --- 1000.000001000.000001000.000001000.000001000.00000
     Eigenvalues --- 1000.000001000.000001000.000001000.000001000.00000
     Eigenvalues --- 1000.000001000.000001000.000001000.000001000.00000
     Eigenvalues --- 1000.000001000.000001000.000001000.000001000.00000
     Eigenvalues --- 1000.00000
 RFO step:  Lambda=-9.24015046D-04.
 Quartic linear search produced a step of  0.18812.
 Iteration  1 RMS(Cart)=  0.03455183 RMS(Int)=  0.00129435
 Iteration  2 RMS(Cart)=  0.00152438 RMS(Int)=  0.00034790
 Iteration  3 RMS(Cart)=  0.00000180 RMS(Int)=  0.00034789
 Iteration  4 RMS(Cart)=  0.00000000 RMS(Int)=  0.00034789
 Variable       Old X    -DE/DX   Delta X   Delta X   Delta X     New X
                                 (Linear)    (Quad)   (Total)
    R1        2.92124  -0.00046   0.00286  -0.00011   0.00281   2.92405
    R2        2.69076   0.00001  -0.00254  -0.00207  -0.00480   2.68596
    R3        2.07710   0.00118  -0.00246   0.00318   0.00071   2.07782
    R4        2.06976   0.00081  -0.00341   0.00133  -0.00208   2.06768
    R5        2.92244   0.00137   0.00221   0.00719   0.00963   2.93208
    R6        2.06589   0.00066  -0.00294   0.00105  -0.00190   2.06399
    R7        2.06673   0.00050  -0.00293   0.00045  -0.00248   2.06425
    R8        2.92156  -0.00058   0.00287  -0.00057   0.00236   2.92391
    R9        2.06588   0.00067  -0.00295   0.00106  -0.00189   2.06399
   R10        2.06669   0.00051  -0.00294   0.00049  -0.00245   2.06424
   R11        2.68956   0.00028  -0.00192  -0.00103  -0.00315   2.68641
   R12        2.06984   0.00080  -0.00348   0.00127  -0.00221   2.06763
   R13        2.07738   0.00112  -0.00249   0.00296   0.00047   2.07785
    A1        1.88986  -0.00099   0.00202  -0.00874  -0.00784   1.88202
    A2        1.94763  -0.00054  -0.00045  -0.00465  -0.00492   1.94271
    A3        1.95775   0.00025  -0.00058   0.00029  -0.00011   1.95764
    A4        1.91112   0.00121  -0.00699   0.00912   0.00240   1.91352
    A5        1.87648   0.00023   0.00802   0.00654   0.01496   1.89144
    A6        1.87947  -0.00009  -0.00181  -0.00172  -0.00363   1.87585
    A7        1.83254   0.00022  -0.00200  -0.00272  -0.00533   1.82721
    A8        1.94137  -0.00014   0.00054  -0.00281  -0.00215   1.93922
    A9        1.93972  -0.00033   0.00134  -0.00123   0.00030   1.94002
   A10        1.94393  -0.00018  -0.00150  -0.00348  -0.00489   1.93905
   A11        1.94181   0.00026   0.00150   0.00717   0.00893   1.95073
   A12        1.86608   0.00016   0.00016   0.00295   0.00301   1.86910
   A13        1.83232   0.00019  -0.00191  -0.00278  -0.00531   1.82701
   A14        1.94372  -0.00016  -0.00155  -0.00335  -0.00483   1.93888
   A15        1.94187   0.00027   0.00150   0.00739   0.00915   1.95102
   A16        1.94155  -0.00016   0.00054  -0.00328  -0.00260   1.93895
   A17        1.93981  -0.00031   0.00128  -0.00106   0.00041   1.94021
   A18        1.86619   0.00016   0.00017   0.00297   0.00305   1.86924
   A19        1.88976  -0.00099   0.00176  -0.00897  -0.00834   1.88141
   A20        1.95720   0.00026  -0.00049   0.00055   0.00027   1.95747
   A21        1.94766  -0.00054  -0.00021  -0.00456  -0.00459   1.94308
   A22        1.87627   0.00027   0.00773   0.00700   0.01515   1.89141
   A23        1.91232   0.00116  -0.00686   0.00822   0.00162   1.91394
   A24        1.87915  -0.00008  -0.00175  -0.00143  -0.00328   1.87587
   A25        1.93711   0.00132  -0.00235  -0.00388  -0.00821   1.92890
    D1        0.15873   0.00037   0.00494   0.04954   0.05433   0.21306
    D2       -1.94604   0.00053   0.00768   0.05689   0.06454  -1.88150
    D3        2.26006   0.00064   0.00626   0.05584   0.06197   2.32202
    D4       -1.94585  -0.00016   0.01258   0.04683   0.05944  -1.88641
    D5        2.23256   0.00001   0.01532   0.05418   0.06966   2.30222
    D6        0.15547   0.00012   0.01390   0.05313   0.06708   0.22255
    D7        2.22661   0.00016   0.01567   0.05216   0.06766   2.29427
    D8        0.12184   0.00033   0.01841   0.05951   0.07788   0.19972
    D9       -1.95525   0.00044   0.01699   0.05846   0.07530  -1.87995
   D10       -0.27761  -0.00088  -0.00861  -0.08684  -0.09533  -0.37295
   D11        1.84954  -0.00141  -0.01221  -0.09242  -0.10474   1.74479
   D12       -2.39643  -0.00075  -0.01342  -0.08599  -0.09935  -2.49578
   D13        0.00403   0.00000   0.00026   0.00068   0.00095   0.00498
   D14       -2.09900   0.00016   0.00165   0.00813   0.00984  -2.08916
   D15        2.10398  -0.00012   0.00145   0.00169   0.00311   2.10709
   D16        2.10710  -0.00014  -0.00117  -0.00624  -0.00745   2.09965
   D17        0.00407   0.00002   0.00023   0.00121   0.00144   0.00551
   D18       -2.07613  -0.00026   0.00003  -0.00523  -0.00529  -2.08142
   D19       -2.09591   0.00012  -0.00095  -0.00005  -0.00096  -2.09687
   D20        2.08424   0.00028   0.00044   0.00740   0.00794   2.09218
   D21        0.00404   0.00000   0.00025   0.00096   0.00120   0.00524
   D22       -0.16565  -0.00034  -0.00535  -0.05063  -0.05581  -0.22147
   D23       -2.23287  -0.00019  -0.01562  -0.05384  -0.06928  -2.30215
   D24        1.94037   0.00011  -0.01285  -0.04913  -0.06201   1.87836
   D25        1.93881  -0.00050  -0.00810  -0.05812  -0.06618   1.87263
   D26       -0.12841  -0.00035  -0.01837  -0.06133  -0.07965  -0.20806
   D27       -2.23835  -0.00005  -0.01560  -0.05663  -0.07238  -2.31073
   D28       -2.26697  -0.00061  -0.00669  -0.05724  -0.06378  -2.33076
   D29        1.94899  -0.00046  -0.01696  -0.06044  -0.07725   1.87174
   D30       -0.16095  -0.00016  -0.01419  -0.05574  -0.06998  -0.23093
   D31        0.28031   0.00088   0.00877   0.08730   0.09595   0.37626
   D32        2.39828   0.00078   0.01339   0.08690   0.10023   2.49851
   D33       -1.84755   0.00145   0.01216   0.09346   0.10574  -1.74181
         Item               Value     Threshold  Converged?
 Maximum Force            0.001451     0.000450     NO 
 RMS     Force            0.000595     0.000300     NO 
 Maximum Displacement     0.121439     0.001800     NO 
 RMS     Displacement     0.034667     0.001200     NO 
 Predicted change in Energy=-5.479834D-04
 GradGradGradGradGradGradGradGradGradGradGradGradGradGradGradGradGradGrad

                          Input orientation:                          
 ---------------------------------------------------------------------
 Center     Atomic     Atomic              Coordinates (Angstroms)
 Number     Number      Type              X           Y           Z
 ---------------------------------------------------------------------
    1          6             0       -0.110318   -0.036212    1.302361
    2          6             0       -1.485674   -0.609644    0.885422
    3          6             0       -1.473662   -0.572501   -0.665675
    4          6             0       -0.089338    0.012849   -1.033170
    5          8             0        0.483848    0.549754    0.151777
    6          1             0        0.547633   -0.823505    1.697637
    7          1             0       -0.201049    0.734290    2.073916
    8          1             0       -2.301966   -0.005131    1.286883
    9          1             0       -1.621087   -1.624824    1.265306
   10          1             0       -2.280521    0.055343   -1.050027
   11          1             0       -1.608054   -1.567447   -1.096074
   12          1             0       -0.163827    0.814522   -1.774065
   13          1             0        0.574200   -0.759601   -1.447963
 ---------------------------------------------------------------------
                    Distance matrix (angstroms):
                    1          2          3          4          5
     1  C    0.000000
     2  C    1.547342   0.000000
     3  C    2.453462   1.551588   0.000000
     4  C    2.336141   2.453212   1.547268   0.000000
     5  O    1.421350   2.400304   2.399902   1.421587   0.000000
     6  H    1.099533   2.199946   3.119916   2.926180   2.068718
     7  H    1.094167   2.206567   3.291292   3.191699   2.048843
     8  H    2.191923   1.092218   2.195559   3.206040   3.058942
     9  H    2.192597   1.092354   2.204042   3.211109   3.224824
    10  H    3.201858   2.195439   1.092217   2.191659   3.054588
    11  H    3.215647   2.204243   1.092347   2.192668   3.227341
    12  H    3.192336   3.293691   2.206361   1.094145   2.049012
    13  H    2.925088   3.116128   2.200163   1.099552   2.069237
                    6          7          8          9         10
     6  H    0.000000
     7  H    1.768852   0.000000
     8  H    2.993103   2.362206   0.000000
     9  H    2.352098   2.869804   1.757119   0.000000
    10  H    4.039862   3.813685   2.337791   2.935742   0.000000
    11  H    3.606280   4.162511   2.932717   2.362113   1.757208
    12  H    3.904103   3.848997   3.822678   4.160744   2.362409
    13  H    3.146361   3.903377   4.039918   3.595792   2.995316
                   11         12         13
    11  H    0.000000
    12  H    2.866922   0.000000
    13  H    2.353439   1.768866   0.000000
 Stoichiometry    C4H8O
 Framework group  C1[X(C4H8O)]
 Deg. of freedom    33
 Full point group                 C1      NOp   1
 Largest Abelian subgroup         C1      NOp   1
 Largest concise Abelian subgroup C1      NOp   1
                         Standard orientation:                         
 ---------------------------------------------------------------------
 Center     Atomic     Atomic              Coordinates (Angstroms)
 Number     Number      Type              X           Y           Z
 ---------------------------------------------------------------------
    1          6             0        1.168503   -0.466336    0.081262
    2          6             0        0.774906    1.026267   -0.025900
    3          6             0       -0.776677    1.024812   -0.029337
    4          6             0       -1.167637   -0.467989    0.083518
    5          8             0        0.000898   -1.242260   -0.152998
    6          1             0        1.575426   -0.701889    1.075194
    7          1             0        1.923975   -0.748154   -0.658360
    8          1             0        1.169698    1.472434   -0.941332
    9          1             0        1.177628    1.601228    0.811043
   10          1             0       -1.168069    1.465210   -0.949010
   11          1             0       -1.184469    1.603317    0.802685
   12          1             0       -1.925015   -0.752972   -0.652903
   13          1             0       -1.570932   -0.701624    1.079401
 ---------------------------------------------------------------------
 Rotational constants (GHZ):      7.0121978      6.8719886      3.8318548
 Basis read from rwf:  (5D, 7F)
 There are    86 symmetry adapted basis functions of A   symmetry.
 Integral buffers will be    262144 words long.
 Raffenetti 2 integral format.
 Two-electron integral symmetry is turned on.
    86 basis functions,   172 primitive gaussians,    91 cartesian basis functions
    20 alpha electrons       20 beta electrons
       nuclear repulsion energy       189.0269159294 Hartrees.
 NAtoms=   13 NActive=   13 NUniq=   13 SFac= 1.00D+00 NAtFMM=   60 Big=F
 One-electron integrals computed using PRISM.
 NBasis=    86 RedAO= T  NBF=    86
 NBsUse=    86 1.00D-06 NBFU=    86
 Initial guess read from the read-write file:
 Initial guess orbital symmetries:
       Occupied  (A) (A) (A) (A) (A) (A) (A) (A) (A) (A) (A) (A)
                 (A) (A) (A) (A) (A) (A) (A) (A)
       Virtual   (A) (A) (A) (A) (A) (A) (A) (A) (A) (A) (A) (A)
                 (A) (A) (A) (A) (A) (A) (A) (A) (A) (A) (A) (A)
                 (A) (A) (A) (A) (A) (A) (A) (A) (A) (A) (A) (A)
                 (A) (A) (A) (A) (A) (A) (A) (A) (A) (A) (A) (A)
                 (A) (A) (A) (A) (A) (A) (A) (A) (A) (A) (A) (A)
                 (A) (A) (A) (A) (A) (A)
 Harris functional with IExCor=  402 diagonalized for initial guess.
 ExpMin= 1.61D-01 ExpMax= 5.48D+03 ExpMxC= 8.25D+02 IAcc=1 IRadAn=         1 AccDes= 1.00D-06
 HarFok:  IExCor= 402 AccDes= 1.00D-06 IRadAn=         1 IDoV=1
 ScaDFX=  1.000000  1.000000  1.000000  1.000000
 Requested convergence on RMS density matrix=1.00D-08 within 128 cycles.
 Requested convergence on MAX density matrix=1.00D-06.
 Requested convergence on             energy=1.00D-06.
 No special actions if energy rises.
 Keep R1 integrals in memory in canonical form, NReq=     9728516.
 Integral accuracy reduced to 1.0D-05 until final iterations.
 Initial convergence to 1.0D-05 achieved.  Increase integral accuracy.
 SCF Done:  E(RB+HF-LYP) =  -232.442596142     A.U. after   11 cycles
             Convg  =    0.6070D-08             -V/T =  2.0062
             S**2   =   0.0000
 ***** Axes restored to original set *****
 -------------------------------------------------------------------
 Center     Atomic                   Forces (Hartrees/Bohr)
 Number     Number              X              Y              Z
 -------------------------------------------------------------------
    1          6           0.000175534   -0.003846390   -0.001413069
    2          6           0.001659545    0.000580897   -0.001717790
    3          6           0.001717970    0.000520423    0.001754813
    4          6           0.000087667   -0.003827247    0.001404511
    5          8          -0.003764781    0.007232702   -0.000056296
    6          1          -0.000039390   -0.001967032    0.000425979
    7          1           0.001147090    0.001625541   -0.000023677
    8          1          -0.000902950    0.001111962    0.000041120
    9          1          -0.000159461   -0.001134172    0.000661256
   10          1          -0.000884412    0.001149408   -0.000000282
   11          1          -0.000180074   -0.001095107   -0.000729196
   12          1           0.001175393    0.001617360    0.000108170
   13          1          -0.000032132   -0.001968344   -0.000455540
 -------------------------------------------------------------------
 Cartesian Forces:  Max     0.007232702 RMS     0.001867779

 GradGradGradGradGradGradGradGradGradGradGradGradGradGradGradGradGradGrad
 Berny optimization.
 Internal  Forces:  Max     0.001661295 RMS     0.000808720
 Search for a local minimum.
 Step number   4 out of a maximum of  81
 All quantities printed in internal units (Hartrees-Bohrs-Radians)
 Update second derivatives using D2CorX and points  3  4
 Trust test= 1.78D+00 RLast= 3.80D-01 DXMaxT set to 8.49D-01
     Eigenvalues ---    0.00013   0.00481   0.02769   0.03532   0.04616
     Eigenvalues ---    0.05179   0.05666   0.05851   0.06004   0.07083
     Eigenvalues ---    0.07120   0.07682   0.08183   0.10149   0.11318
     Eigenvalues ---    0.11402   0.12148   0.13907   0.21509   0.26275
     Eigenvalues ---    0.28410   0.29917   0.31452   0.31533   0.31534
     Eigenvalues ---    0.31585   0.31800   0.31810   0.31810   0.32551
     Eigenvalues ---    0.39971   0.40356   0.704801000.000001000.00000
     Eigenvalues --- 1000.000001000.000001000.000001000.000001000.00000
     Eigenvalues --- 1000.000001000.000001000.000001000.000001000.00000
     Eigenvalues --- 1000.000001000.000001000.000001000.000001000.00000
     Eigenvalues --- 1000.000001000.000001000.000001000.000001000.00000
     Eigenvalues --- 1000.000001000.000001000.000001000.000001000.00000
     Eigenvalues --- 1000.000001000.000001000.000001000.000001000.00000
     Eigenvalues --- 1000.000001000.000001000.000001000.000001000.00000
     Eigenvalues --- 1000.00000
 RFO step:  Lambda=-7.55805368D-04.
 Quartic linear search produced a step of  1.95306.
 Iteration  1 RMS(Cart)=  0.08768422 RMS(Int)=  0.03870840
 Iteration  2 RMS(Cart)=  0.03402673 RMS(Int)=  0.00488993
 Iteration  3 RMS(Cart)=  0.00155329 RMS(Int)=  0.00473652
 Iteration  4 RMS(Cart)=  0.00000311 RMS(Int)=  0.00473652
 Iteration  5 RMS(Cart)=  0.00000001 RMS(Int)=  0.00473652
 Variable       Old X    -DE/DX   Delta X   Delta X   Delta X     New X
                                 (Linear)    (Quad)   (Total)
    R1        2.92405  -0.00081   0.00549   0.00173   0.00802   2.93208
    R2        2.68596   0.00014  -0.00938  -0.00496  -0.01691   2.66905
    R3        2.07782   0.00154   0.00140   0.00428   0.00568   2.08349
    R4        2.06768   0.00103  -0.00407  -0.00038  -0.00444   2.06323
    R5        2.93208  -0.00132   0.01881   0.00828   0.03039   2.96247
    R6        2.06399   0.00130  -0.00371   0.00059  -0.00312   2.06088
    R7        2.06425   0.00130  -0.00484   0.00003  -0.00481   2.05944
    R8        2.92391  -0.00088   0.00460   0.00097   0.00627   2.93019
    R9        2.06399   0.00131  -0.00369   0.00063  -0.00307   2.06092
   R10        2.06424   0.00131  -0.00478   0.00007  -0.00471   2.05953
   R11        2.68641  -0.00004  -0.00615  -0.00348  -0.01237   2.67404
   R12        2.06763   0.00103  -0.00431  -0.00048  -0.00479   2.06284
   R13        2.07785   0.00153   0.00091   0.00404   0.00495   2.08281
    A1        1.88202   0.00027  -0.01532  -0.01159  -0.04136   1.84066
    A2        1.94271  -0.00076  -0.00961  -0.00682  -0.01456   1.92815
    A3        1.95764   0.00079  -0.00021   0.00552   0.01033   1.96798
    A4        1.91352   0.00105   0.00469   0.01504   0.02304   1.93657
    A5        1.89144  -0.00163   0.02921  -0.00006   0.03476   1.92620
    A6        1.87585   0.00026  -0.00709  -0.00136  -0.01018   1.86566
    A7        1.82721  -0.00001  -0.01041  -0.00760  -0.02656   1.80066
    A8        1.93922  -0.00002  -0.00419  -0.00019  -0.00235   1.93687
    A9        1.94002  -0.00002   0.00059  -0.00065   0.00278   1.94279
   A10        1.93905  -0.00014  -0.00954  -0.00160  -0.00987   1.92918
   A11        1.95073   0.00007   0.01744   0.00603   0.02686   1.97759
   A12        1.86910   0.00012   0.00588   0.00385   0.00831   1.87741
   A13        1.82701   0.00002  -0.01036  -0.00759  -0.02659   1.80042
   A14        1.93888  -0.00014  -0.00944  -0.00143  -0.00973   1.92915
   A15        1.95102   0.00005   0.01787   0.00619   0.02761   1.97864
   A16        1.93895  -0.00004  -0.00508  -0.00069  -0.00358   1.93537
   A17        1.94021  -0.00001   0.00079  -0.00056   0.00297   1.94318
   A18        1.86924   0.00012   0.00596   0.00389   0.00842   1.87767
   A19        1.88141   0.00033  -0.01630  -0.01200  -0.04292   1.83849
   A20        1.95747   0.00080   0.00053   0.00600   0.01157   1.96904
   A21        1.94308  -0.00078  -0.00896  -0.00669  -0.01377   1.92931
   A22        1.89141  -0.00166   0.02958   0.00025   0.03565   1.92706
   A23        1.91394   0.00103   0.00317   0.01412   0.02048   1.93442
   A24        1.87587   0.00027  -0.00640  -0.00097  -0.00908   1.86679
   A25        1.92890  -0.00118  -0.01603  -0.01767  -0.05987   1.86903
    D1        0.21306   0.00088   0.10611   0.07652   0.18036   0.39342
    D2       -1.88150   0.00107   0.12606   0.08307   0.20858  -1.67291
    D3        2.32202   0.00095   0.12103   0.07879   0.19783   2.51985
    D4       -1.88641  -0.00013   0.11609   0.06953   0.18612  -1.70029
    D5        2.30222   0.00005   0.13604   0.07608   0.21435   2.51657
    D6        0.22255  -0.00007   0.13101   0.07180   0.20360   0.42615
    D7        2.29427  -0.00048   0.13215   0.07224   0.20227   2.49655
    D8        0.19972  -0.00029   0.15210   0.07879   0.23050   0.43021
    D9       -1.87995  -0.00041   0.14707   0.07450   0.21974  -1.66020
   D10       -0.37295  -0.00124  -0.18619  -0.13298  -0.31582  -0.68877
   D11        1.74479  -0.00138  -0.20457  -0.13946  -0.34542   1.39938
   D12       -2.49578  -0.00141  -0.19404  -0.13277  -0.32329  -2.81907
   D13        0.00498   0.00000   0.00185   0.00089   0.00285   0.00783
   D14       -2.08916   0.00011   0.01922   0.00698   0.02720  -2.06196
   D15        2.10709   0.00002   0.00607  -0.00114   0.00443   2.11151
   D16        2.09965  -0.00011  -0.01456  -0.00472  -0.02013   2.07952
   D17        0.00551   0.00001   0.00281   0.00138   0.00422   0.00973
   D18       -2.08142  -0.00009  -0.01033  -0.00674  -0.01856  -2.09998
   D19       -2.09687  -0.00001  -0.00187   0.00312   0.00188  -2.09499
   D20        2.09218   0.00010   0.01550   0.00921   0.02623   2.11841
   D21        0.00524   0.00001   0.00235   0.00109   0.00345   0.00870
   D22       -0.22147  -0.00090  -0.10900  -0.07788  -0.18439  -0.40586
   D23       -2.30215   0.00046  -0.13530  -0.07401  -0.20708  -2.50924
   D24        1.87836   0.00011  -0.12111  -0.07221  -0.19372   1.68463
   D25        1.87263  -0.00107  -0.12926  -0.08447  -0.21304   1.65959
   D26       -0.20806   0.00029  -0.15555  -0.08060  -0.23573  -0.44379
   D27       -2.31073  -0.00007  -0.14136  -0.07881  -0.22237  -2.53310
   D28       -2.33076  -0.00096  -0.12457  -0.08040  -0.20284  -2.53359
   D29        1.87174   0.00040  -0.15087  -0.07653  -0.22553   1.64621
   D30       -0.23093   0.00005  -0.13668  -0.07473  -0.21217  -0.44310
   D31        0.37626   0.00125   0.18739   0.13357   0.31770   0.69396
   D32        2.49851   0.00144   0.19575   0.13389   0.32619   2.82470
   D33       -1.74181   0.00139   0.20651   0.14070   0.34867  -1.39314
         Item               Value     Threshold  Converged?
 Maximum Force            0.001661     0.000450     NO 
 RMS     Force            0.000809     0.000300     NO 
 Maximum Displacement     0.431043     0.001800     NO 
 RMS     Displacement     0.112182     0.001200     NO 
 Predicted change in Energy=-2.850348D-03
 GradGradGradGradGradGradGradGradGradGradGradGradGradGradGradGradGradGrad

                          Input orientation:                          
 ---------------------------------------------------------------------
 Center     Atomic     Atomic              Coordinates (Angstroms)
 Number     Number      Type              X           Y           Z
 ---------------------------------------------------------------------
    1          6             0       -0.109605   -0.024062    1.271212
    2          6             0       -1.497343   -0.606036    0.893172
    3          6             0       -1.486307   -0.566639   -0.673963
    4          6             0       -0.089831    0.021849   -1.002381
    5          8             0        0.295160    0.740075    0.154459
    6          1             0        0.607310   -0.836864    1.473637
    7          1             0       -0.142975    0.599888    2.166553
    8          1             0       -2.301927    0.016707    1.285823
    9          1             0       -1.630012   -1.608978    1.298372
   10          1             0       -2.279342    0.083123   -1.045850
   11          1             0       -1.621468   -1.546311   -1.131956
   12          1             0       -0.102026    0.680393   -1.872887
   13          1             0        0.628552   -0.785252   -1.219865
 ---------------------------------------------------------------------
                    Distance matrix (angstroms):
                    1          2          3          4          5
     1  C    0.000000
     2  C    1.551588   0.000000
     3  C    2.444055   1.567669   0.000000
     4  C    2.274143   2.443041   1.550588   0.000000
     5  O    1.412402   2.360250   2.359536   1.415042   0.000000
     6  H    1.102538   2.195400   3.011385   2.711837   2.079521
     7  H    1.091816   2.215867   3.351695   3.221660   2.064011
     8  H    2.192750   1.090569   2.201429   3.182651   2.923714
     9  H    2.196436   1.089807   2.235448   3.213288   3.245439
    10  H    3.176165   2.201425   1.090594   2.190799   2.915543
    11  H    3.221520   2.236218   1.089855   2.195866   3.248983
    12  H    3.222061   3.354533   2.215568   1.091609   2.066748
    13  H    2.707351   3.002744   2.195092   1.102173   2.080033
                    6          7          8          9         10
     6  H    0.000000
     7  H    1.762758   0.000000
     8  H    3.037683   2.403510   0.000000
     9  H    2.373286   2.800733   1.759113   0.000000
    10  H    3.940425   3.892383   2.332728   2.963142   0.000000
    11  H    3.501412   4.203841   2.958328   2.431151   1.759338
    12  H    3.742252   4.040450   3.906083   4.199148   2.404460
    13  H    2.694081   3.739210   3.938186   3.481545   3.039770
                   11         12         13
    11  H    0.000000
    12  H    2.795692   0.000000
    13  H    2.376874   1.763036   0.000000
 Stoichiometry    C4H8O
 Framework group  C1[X(C4H8O)]
 Deg. of freedom    33
 Full point group                 C1      NOp   1
 Largest Abelian subgroup         C1      NOp   1
 Largest concise Abelian subgroup C1      NOp   1
                         Standard orientation:                         
 ---------------------------------------------------------------------
 Center     Atomic     Atomic              Coordinates (Angstroms)
 Number     Number      Type              X           Y           Z
 ---------------------------------------------------------------------
    1          6             0        1.140917   -0.470831    0.148008
    2          6             0        0.774977    1.024836   -0.043024
    3          6             0       -0.792623    1.011145   -0.048406
    4          6             0       -1.133156   -0.488279    0.151808
    5          8             0        0.010267   -1.194225   -0.291552
    6          1             0        1.356872   -0.682657    1.208235
    7          1             0        2.025071   -0.765293   -0.420874
    8          1             0        1.157487    1.402177   -0.992044
    9          1             0        1.198095    1.640622    0.750360
   10          1             0       -1.175024    1.372552   -1.003681
   11          1             0       -1.232972    1.626002    0.736340
   12          1             0       -2.015210   -0.800782   -0.410271
   13          1             0       -1.337146   -0.700042    1.214037
 ---------------------------------------------------------------------
 Rotational constants (GHZ):      7.0477684      6.9331295      3.9500247
 Basis read from rwf:  (5D, 7F)
 There are    86 symmetry adapted basis functions of A   symmetry.
 Integral buffers will be    262144 words long.
 Raffenetti 2 integral format.
 Two-electron integral symmetry is turned on.
    86 basis functions,   172 primitive gaussians,    91 cartesian basis functions
    20 alpha electrons       20 beta electrons
       nuclear repulsion energy       189.9356055507 Hartrees.
 NAtoms=   13 NActive=   13 NUniq=   13 SFac= 1.00D+00 NAtFMM=   60 Big=F
 One-electron integrals computed using PRISM.
 NBasis=    86 RedAO= T  NBF=    86
 NBsUse=    86 1.00D-06 NBFU=    86
 Initial guess read from the read-write file:
 Initial guess orbital symmetries:
       Occupied  (A) (A) (A) (A) (A) (A) (A) (A) (A) (A) (A) (A)
                 (A) (A) (A) (A) (A) (A) (A) (A)
       Virtual   (A) (A) (A) (A) (A) (A) (A) (A) (A) (A) (A) (A)
                 (A) (A) (A) (A) (A) (A) (A) (A) (A) (A) (A) (A)
                 (A) (A) (A) (A) (A) (A) (A) (A) (A) (A) (A) (A)
                 (A) (A) (A) (A) (A) (A) (A) (A) (A) (A) (A) (A)
                 (A) (A) (A) (A) (A) (A) (A) (A) (A) (A) (A) (A)
                 (A) (A) (A) (A) (A) (A)
 Harris functional with IExCor=  402 diagonalized for initial guess.
 ExpMin= 1.61D-01 ExpMax= 5.48D+03 ExpMxC= 8.25D+02 IAcc=1 IRadAn=         1 AccDes= 1.00D-06
 HarFok:  IExCor= 402 AccDes= 1.00D-06 IRadAn=         1 IDoV=1
 ScaDFX=  1.000000  1.000000  1.000000  1.000000
 Requested convergence on RMS density matrix=1.00D-08 within 128 cycles.
 Requested convergence on MAX density matrix=1.00D-06.
 Requested convergence on             energy=1.00D-06.
 No special actions if energy rises.
 Keep R1 integrals in memory in canonical form, NReq=     9728516.
 Integral accuracy reduced to 1.0D-05 until final iterations.
 Initial convergence to 1.0D-05 achieved.  Increase integral accuracy.
 SCF Done:  E(RB+HF-LYP) =  -232.444508966     A.U. after   12 cycles
             Convg  =    0.8019D-08             -V/T =  2.0063
             S**2   =   0.0000
 ***** Axes restored to original set *****
 -------------------------------------------------------------------
 Center     Atomic                   Forces (Hartrees/Bohr)
 Number     Number              X              Y              Z
 -------------------------------------------------------------------
    1          6          -0.007316253   -0.008665373    0.000325339
    2          6           0.004236534    0.000828960   -0.007005301
    3          6           0.004225738    0.000442945    0.007027555
    4          6          -0.006871621   -0.007988281    0.000578784
    5          8           0.006286305    0.010588932   -0.000976854
    6          1           0.000861264   -0.001185509   -0.001881207
    7          1           0.001274541    0.005252338   -0.001891486
    8          1          -0.001430772    0.001675087    0.000686884
    9          1          -0.000963257   -0.003291741   -0.000179897
   10          1          -0.001419342    0.001712730   -0.000597380
   11          1          -0.001016827   -0.003278598    0.000052665
   12          1           0.001292216    0.005292613    0.002151341
   13          1           0.000841475   -0.001384103    0.001709559
 -------------------------------------------------------------------
 Cartesian Forces:  Max     0.010588932 RMS     0.004052155

 GradGradGradGradGradGradGradGradGradGradGradGradGradGradGradGradGradGrad
 Berny optimization.
 Internal  Forces:  Max     0.007496960 RMS     0.002073241
 Search for a local minimum.
 Step number   5 out of a maximum of  81
 All quantities printed in internal units (Hartrees-Bohrs-Radians)
 Update second derivatives using D2CorX and points  4  5
 Trust test= 6.71D-01 RLast= 1.21D+00 DXMaxT set to 8.49D-01
     Eigenvalues ---    0.00250   0.00500   0.02826   0.03511   0.04763
     Eigenvalues ---    0.05274   0.05750   0.05880   0.06131   0.06825
     Eigenvalues ---    0.06871   0.07517   0.08071   0.09770   0.10968
     Eigenvalues ---    0.11076   0.11971   0.13146   0.20828   0.26351
     Eigenvalues ---    0.28124   0.29782   0.31468   0.31527   0.31533
     Eigenvalues ---    0.31562   0.31597   0.31810   0.31810   0.31833
     Eigenvalues ---    0.39097   0.39987   0.682891000.000001000.00000
     Eigenvalues --- 1000.000001000.000001000.000001000.000001000.00000
     Eigenvalues --- 1000.000001000.000001000.000001000.000001000.00000
     Eigenvalues --- 1000.000001000.000001000.000001000.000001000.00000
     Eigenvalues --- 1000.000001000.000001000.000001000.000001000.00000
     Eigenvalues --- 1000.000001000.000001000.000001000.000001000.00000
     Eigenvalues --- 1000.000001000.000001000.000001000.000001000.00000
     Eigenvalues --- 1000.000001000.000001000.000001000.000001000.00000
     Eigenvalues --- 1000.00000
 RFO step:  Lambda=-5.42791538D-04.
 Quartic linear search produced a step of -0.10459.
 Iteration  1 RMS(Cart)=  0.00604334 RMS(Int)=  0.00044862
 Iteration  2 RMS(Cart)=  0.00003718 RMS(Int)=  0.00044738
 Iteration  3 RMS(Cart)=  0.00000000 RMS(Int)=  0.00044738
 Variable       Old X    -DE/DX   Delta X   Delta X   Delta X     New X
                                 (Linear)    (Quad)   (Total)
    R1        2.93208  -0.00153  -0.00084  -0.00275  -0.00367   2.92841
    R2        2.66905   0.00187   0.00177   0.00331   0.00533   2.67438
    R3        2.08349   0.00109  -0.00059   0.00266   0.00206   2.08556
    R4        2.06323   0.00141   0.00046   0.00333   0.00379   2.06703
    R5        2.96247  -0.00735  -0.00318  -0.00468  -0.00818   2.95429
    R6        2.06088   0.00226   0.00033   0.00341   0.00373   2.06461
    R7        2.05944   0.00308   0.00050   0.00459   0.00510   2.06454
    R8        2.93019  -0.00140  -0.00066  -0.00293  -0.00366   2.92653
    R9        2.06092   0.00226   0.00032   0.00339   0.00372   2.06464
   R10        2.05953   0.00305   0.00049   0.00459   0.00508   2.06461
   R11        2.67404   0.00048   0.00129   0.00238   0.00393   2.67797
   R12        2.06284   0.00146   0.00050   0.00343   0.00393   2.06677
   R13        2.08281   0.00122  -0.00052   0.00268   0.00216   2.08497
    A1        1.84066   0.00386   0.00433   0.00112   0.00682   1.84748
    A2        1.92815  -0.00157   0.00152  -0.00712  -0.00576   1.92238
    A3        1.96798   0.00214  -0.00108   0.01100   0.00942   1.97739
    A4        1.93657  -0.00094  -0.00241  -0.00912  -0.01186   1.92471
    A5        1.92620  -0.00520  -0.00364  -0.00461  -0.00882   1.91739
    A6        1.86566   0.00157   0.00106   0.00809   0.00929   1.87495
    A7        1.80066  -0.00041   0.00278  -0.00309   0.00050   1.80115
    A8        1.93687  -0.00027   0.00025  -0.00682  -0.00677   1.93010
    A9        1.94279   0.00110  -0.00029   0.00631   0.00574   1.94854
   A10        1.92918   0.00051   0.00103  -0.00384  -0.00296   1.92622
   A11        1.97759  -0.00109  -0.00281   0.00279  -0.00033   1.97726
   A12        1.87741   0.00014  -0.00087   0.00404   0.00332   1.88073
   A13        1.80042  -0.00029   0.00278  -0.00298   0.00061   1.80103
   A14        1.92915   0.00051   0.00102  -0.00387  -0.00299   1.92616
   A15        1.97864  -0.00120  -0.00289   0.00273  -0.00049   1.97815
   A16        1.93537  -0.00036   0.00037  -0.00724  -0.00707   1.92829
   A17        1.94318   0.00116  -0.00031   0.00672   0.00614   1.94932
   A18        1.87767   0.00017  -0.00088   0.00401   0.00329   1.88095
   A19        1.83849   0.00403   0.00449   0.00118   0.00707   1.84556
   A20        1.96904   0.00216  -0.00121   0.01116   0.00944   1.97848
   A21        1.92931  -0.00167   0.00144  -0.00734  -0.00607   1.92324
   A22        1.92706  -0.00542  -0.00373  -0.00467  -0.00899   1.91807
   A23        1.93442  -0.00082  -0.00214  -0.00914  -0.01160   1.92282
   A24        1.86679   0.00158   0.00095   0.00812   0.00921   1.87600
   A25        1.86903  -0.00750   0.00626  -0.01755  -0.00886   1.86017
    D1        0.39342   0.00151  -0.01886   0.01638  -0.00233   0.39109
    D2       -1.67291   0.00127  -0.02182   0.02584   0.00403  -1.66888
    D3        2.51985   0.00054  -0.02069   0.02111   0.00057   2.52043
    D4       -1.70029   0.00120  -0.01947   0.03041   0.01088  -1.68940
    D5        2.51657   0.00096  -0.02242   0.03987   0.01724   2.53381
    D6        0.42615   0.00023  -0.02129   0.03514   0.01378   0.43993
    D7        2.49655  -0.00113  -0.02116   0.01771  -0.00326   2.49329
    D8        0.43021  -0.00137  -0.02411   0.02717   0.00310   0.43332
    D9       -1.66020  -0.00211  -0.02298   0.02244  -0.00036  -1.66056
   D10       -0.68877   0.00099   0.03303  -0.02330   0.00937  -0.67940
   D11        1.39938   0.00091   0.03613  -0.03605   0.00018   1.39956
   D12       -2.81907  -0.00103   0.03381  -0.03466  -0.00118  -2.82025
   D13        0.00783  -0.00006  -0.00030   0.00023  -0.00008   0.00775
   D14       -2.06196   0.00027  -0.00285   0.01215   0.00922  -2.05274
   D15        2.11151   0.00052  -0.00046   0.00788   0.00749   2.11900
   D16        2.07952  -0.00036   0.00211  -0.01127  -0.00909   2.07043
   D17        0.00973  -0.00003  -0.00044   0.00065   0.00021   0.00994
   D18       -2.09998   0.00022   0.00194  -0.00361  -0.00152  -2.10150
   D19       -2.09499  -0.00056  -0.00020  -0.00690  -0.00717  -2.10216
   D20        2.11841  -0.00023  -0.00274   0.00502   0.00212   2.12054
   D21        0.00870   0.00002  -0.00036   0.00076   0.00040   0.00909
   D22       -0.40586  -0.00168   0.01929  -0.01694   0.00217  -0.40368
   D23       -2.50924   0.00112   0.02166  -0.01831   0.00316  -2.50608
   D24        1.68463  -0.00118   0.02026  -0.03104  -0.01072   1.67391
   D25        1.65959  -0.00141   0.02228  -0.02655  -0.00428   1.65531
   D26       -0.44379   0.00139   0.02465  -0.02791  -0.00330  -0.44709
   D27       -2.53310  -0.00091   0.02326  -0.04065  -0.01718  -2.55028
   D28       -2.53359  -0.00067   0.02121  -0.02187  -0.00082  -2.53442
   D29        1.64621   0.00212   0.02359  -0.02324   0.00016   1.64637
   D30       -0.44310  -0.00017   0.02219  -0.03597  -0.01372  -0.45682
   D31        0.69396  -0.00102  -0.03323   0.02349  -0.00939   0.68457
   D32        2.82470   0.00102  -0.03412   0.03504   0.00125   2.82595
   D33       -1.39314  -0.00097  -0.03647   0.03642  -0.00016  -1.39330
         Item               Value     Threshold  Converged?
 Maximum Force            0.007497     0.000450     NO 
 RMS     Force            0.002073     0.000300     NO 
 Maximum Displacement     0.025197     0.001800     NO 
 RMS     Displacement     0.006060     0.001200     NO 
 Predicted change in Energy=-2.921848D-04
 GradGradGradGradGradGradGradGradGradGradGradGradGradGradGradGradGradGrad

                          Input orientation:                          
 ---------------------------------------------------------------------
 Center     Atomic     Atomic              Coordinates (Angstroms)
 Number     Number      Type              X           Y           Z
 ---------------------------------------------------------------------
    1          6             0       -0.113122   -0.023118    1.269483
    2          6             0       -1.496587   -0.609756    0.890954
    3          6             0       -1.485485   -0.570447   -0.671854
    4          6             0       -0.093272    0.022863   -1.000571
    5          8             0        0.299711    0.744119    0.154241
    6          1             0        0.606032   -0.838226    1.460304
    7          1             0       -0.140057    0.606035    2.163849
    8          1             0       -2.300304    0.018938    1.281382
    9          1             0       -1.632746   -1.614907    1.296785
   10          1             0       -2.277449    0.085318   -1.041250
   11          1             0       -1.624492   -1.552256   -1.130527
   12          1             0       -0.098989    0.686502   -1.869886
   13          1             0        0.626947   -0.787170   -1.206583
 ---------------------------------------------------------------------
                    Distance matrix (angstroms):
                    1          2          3          4          5
     1  C    0.000000
     2  C    1.549646   0.000000
     3  C    2.439619   1.563342   0.000000
     4  C    2.270607   2.438722   1.548653   0.000000
     5  O    1.415221   2.366941   2.365891   1.417123   0.000000
     6  H    1.103629   2.190289   2.998708   2.699335   2.074475
     7  H    1.093823   2.222292   3.351939   3.218048   2.061792
     8  H    2.187619   1.092543   2.196916   3.174636   2.925135
     9  H    2.200862   1.092505   2.233411   3.214050   3.256501
    10  H    3.167894   2.196881   1.092560   2.185448   2.916328
    11  H    3.222196   2.234066   1.092544   2.200573   3.259835
    12  H    3.218602   3.354967   2.222065   1.093690   2.063825
    13  H    2.694881   2.990073   2.189811   1.103319   2.074553
                    6          7          8          9         10
     6  H    0.000000
     7  H    1.771304   0.000000
     8  H    3.035381   2.406262   0.000000
     9  H    2.375310   2.812917   1.765027   0.000000
    10  H    3.927489   3.887447   2.323693   2.961894   0.000000
    11  H    3.492489   4.208881   2.956802   2.428134   1.765212
    12  H    3.729882   4.034746   3.901528   4.204367   2.407020
    13  H    2.667457   3.726812   3.925377   3.472494   3.037118
                   11         12         13
    11  H    0.000000
    12  H    2.808176   0.000000
    13  H    2.379101   1.771628   0.000000
 Stoichiometry    C4H8O
 Framework group  C1[X(C4H8O)]
 Deg. of freedom    33
 Full point group                 C1      NOp   1
 Largest Abelian subgroup         C1      NOp   1
 Largest concise Abelian subgroup C1      NOp   1
                         Standard orientation:                         
 ---------------------------------------------------------------------
 Center     Atomic     Atomic              Coordinates (Angstroms)
 Number     Number      Type              X           Y           Z
 ---------------------------------------------------------------------
    1          6             0        1.138615   -0.469009    0.147294
    2          6             0        0.774190    1.025022   -0.043671
    3          6             0       -0.789099    1.013272   -0.048927
    4          6             0       -1.131942   -0.483647    0.151126
    5          8             0        0.008459   -1.201282   -0.287877
    6          1             0        1.342753   -0.677393    1.211672
    7          1             0        2.021290   -0.775116   -0.421592
    8          1             0        1.154834    1.394234   -0.998890
    9          1             0        1.198799    1.647631    0.747299
   10          1             0       -1.168674    1.367256   -1.010335
   11          1             0       -1.229268    1.636316    0.733198
   12          1             0       -2.013328   -0.805492   -0.410774
   13          1             0       -1.324663   -0.691014    1.217507
 ---------------------------------------------------------------------
 Rotational constants (GHZ):      7.0775137      6.9073100      3.9508800
 Basis read from rwf:  (5D, 7F)
 There are    86 symmetry adapted basis functions of A   symmetry.
 Integral buffers will be    262144 words long.
 Raffenetti 2 integral format.
 Two-electron integral symmetry is turned on.
    86 basis functions,   172 primitive gaussians,    91 cartesian basis functions
    20 alpha electrons       20 beta electrons
       nuclear repulsion energy       189.9169343992 Hartrees.
 NAtoms=   13 NActive=   13 NUniq=   13 SFac= 1.00D+00 NAtFMM=   60 Big=F
 One-electron integrals computed using PRISM.
 NBasis=    86 RedAO= T  NBF=    86
 NBsUse=    86 1.00D-06 NBFU=    86
 Initial guess read from the read-write file:
 Initial guess orbital symmetries:
       Occupied  (A) (A) (A) (A) (A) (A) (A) (A) (A) (A) (A) (A)
                 (A) (A) (A) (A) (A) (A) (A) (A)
       Virtual   (A) (A) (A) (A) (A) (A) (A) (A) (A) (A) (A) (A)
                 (A) (A) (A) (A) (A) (A) (A) (A) (A) (A) (A) (A)
                 (A) (A) (A) (A) (A) (A) (A) (A) (A) (A) (A) (A)
                 (A) (A) (A) (A) (A) (A) (A) (A) (A) (A) (A) (A)
                 (A) (A) (A) (A) (A) (A) (A) (A) (A) (A) (A) (A)
                 (A) (A) (A) (A) (A) (A)
 Harris functional with IExCor=  402 diagonalized for initial guess.
 ExpMin= 1.61D-01 ExpMax= 5.48D+03 ExpMxC= 8.25D+02 IAcc=1 IRadAn=         1 AccDes= 1.00D-06
 HarFok:  IExCor= 402 AccDes= 1.00D-06 IRadAn=         1 IDoV=1
 ScaDFX=  1.000000  1.000000  1.000000  1.000000
 Requested convergence on RMS density matrix=1.00D-08 within 128 cycles.
 Requested convergence on MAX density matrix=1.00D-06.
 Requested convergence on             energy=1.00D-06.
 No special actions if energy rises.
 Keep R1 integrals in memory in canonical form, NReq=     9728516.
 Integral accuracy reduced to 1.0D-05 until final iterations.
 Initial convergence to 1.0D-05 achieved.  Increase integral accuracy.
 SCF Done:  E(RB+HF-LYP) =  -232.444941945     A.U. after   10 cycles
             Convg  =    0.4985D-08             -V/T =  2.0063
             S**2   =   0.0000
 ***** Axes restored to original set *****
 -------------------------------------------------------------------
 Center     Atomic                   Forces (Hartrees/Bohr)
 Number     Number              X              Y              Z
 -------------------------------------------------------------------
    1          6          -0.003341182   -0.007909867    0.000736434
    2          6           0.002320410    0.001838653   -0.004612542
    3          6           0.002270156    0.001601955    0.004637221
    4          6          -0.002947597   -0.007433850   -0.000070181
    5          8           0.002056006    0.008435592   -0.000694030
    6          1           0.000348749   -0.000425062   -0.000559011
    7          1           0.000890133    0.003262836   -0.002390779
    8          1          -0.000996894    0.000289231    0.000450803
    9          1          -0.000394248   -0.001316693   -0.000390981
   10          1          -0.001031136    0.000307451   -0.000416642
   11          1          -0.000412224   -0.001318331    0.000349798
   12          1           0.000868706    0.003235257    0.002568236
   13          1           0.000369121   -0.000567173    0.000391675
 -------------------------------------------------------------------
 Cartesian Forces:  Max     0.008435592 RMS     0.002847588

 GradGradGradGradGradGradGradGradGradGradGradGradGradGradGradGradGradGrad
 Berny optimization.
 Internal  Forces:  Max     0.005086508 RMS     0.001309558
 Search for a local minimum.
 Step number   6 out of a maximum of  81
 All quantities printed in internal units (Hartrees-Bohrs-Radians)
 Update second derivatives using D2CorX and points  5  6
 Trust test= 1.48D+00 RLast= 5.69D-02 DXMaxT set to 8.49D-01
     Eigenvalues ---    0.00243   0.00499   0.02818   0.03846   0.04738
     Eigenvalues ---    0.05287   0.05478   0.05951   0.06102   0.06841
     Eigenvalues ---    0.06865   0.07532   0.08495   0.10391   0.11013
     Eigenvalues ---    0.11146   0.12105   0.12844   0.20852   0.24029
     Eigenvalues ---    0.27129   0.28126   0.31315   0.31521   0.31534
     Eigenvalues ---    0.31541   0.31754   0.31810   0.31810   0.32315
     Eigenvalues ---    0.33291   0.39108   0.451671000.000001000.00000
     Eigenvalues --- 1000.000001000.000001000.000001000.000001000.00000
     Eigenvalues --- 1000.000001000.000001000.000001000.000001000.00000
     Eigenvalues --- 1000.000001000.000001000.000001000.000001000.00000
     Eigenvalues --- 1000.000001000.000001000.000001000.000001000.00000
     Eigenvalues --- 1000.000001000.000001000.000001000.000001000.00000
     Eigenvalues --- 1000.000001000.000001000.000001000.000001000.00000
     Eigenvalues --- 1000.000001000.000001000.000001000.000001000.00000
     Eigenvalues --- 1000.00000
 RFO step:  Lambda=-3.57219817D-04.
 Quartic linear search produced a step of  0.86099.
 Iteration  1 RMS(Cart)=  0.00846670 RMS(Int)=  0.00007567
 Iteration  2 RMS(Cart)=  0.00008350 RMS(Int)=  0.00003601
 Iteration  3 RMS(Cart)=  0.00000000 RMS(Int)=  0.00003601
 Variable       Old X    -DE/DX   Delta X   Delta X   Delta X     New X
                                 (Linear)    (Quad)   (Total)
    R1        2.92841  -0.00124  -0.00316  -0.00413  -0.00729   2.92112
    R2        2.67438   0.00136   0.00459   0.00506   0.00964   2.68402
    R3        2.08556   0.00044   0.00178  -0.00001   0.00177   2.08733
    R4        2.06703  -0.00010   0.00327  -0.00284   0.00042   2.06745
    R5        2.95429  -0.00509  -0.00704  -0.00479  -0.01184   2.94245
    R6        2.06461   0.00106   0.00321   0.00023   0.00344   2.06805
    R7        2.06454   0.00112   0.00439  -0.00134   0.00304   2.06758
    R8        2.92653  -0.00111  -0.00315  -0.00395  -0.00710   2.91943
    R9        2.06464   0.00107   0.00320   0.00029   0.00349   2.06813
   R10        2.06461   0.00109   0.00438  -0.00138   0.00299   2.06760
   R11        2.67797   0.00040   0.00339   0.00388   0.00727   2.68525
   R12        2.06677  -0.00008   0.00339  -0.00280   0.00059   2.06736
   R13        2.08497   0.00058   0.00186   0.00032   0.00218   2.08715
    A1        1.84748   0.00195   0.00587  -0.00420   0.00166   1.84914
    A2        1.92238  -0.00036  -0.00496   0.00590   0.00090   1.92328
    A3        1.97739   0.00126   0.00811   0.00320   0.01128   1.98867
    A4        1.92471  -0.00012  -0.01021   0.00472  -0.00548   1.91922
    A5        1.91739  -0.00360  -0.00759  -0.01412  -0.02172   1.89567
    A6        1.87495   0.00079   0.00800   0.00442   0.01225   1.88720
    A7        1.80115  -0.00011   0.00043  -0.00006   0.00031   1.80146
    A8        1.93010   0.00018  -0.00583   0.00474  -0.00108   1.92902
    A9        1.94854   0.00041   0.00494  -0.00250   0.00246   1.95100
   A10        1.92622   0.00022  -0.00255   0.00333   0.00078   1.92701
   A11        1.97726  -0.00064  -0.00029  -0.00277  -0.00305   1.97421
   A12        1.88073  -0.00005   0.00286  -0.00232   0.00055   1.88128
   A13        1.80103  -0.00005   0.00053  -0.00024   0.00024   1.80127
   A14        1.92616   0.00020  -0.00258   0.00309   0.00052   1.92668
   A15        1.97815  -0.00070  -0.00042  -0.00281  -0.00323   1.97492
   A16        1.92829   0.00016  -0.00609   0.00513  -0.00095   1.92735
   A17        1.94932   0.00044   0.00529  -0.00242   0.00289   1.95221
   A18        1.88095  -0.00003   0.00283  -0.00233   0.00051   1.88146
   A19        1.84556   0.00207   0.00608  -0.00402   0.00205   1.84761
   A20        1.97848   0.00126   0.00813   0.00272   0.01082   1.98930
   A21        1.92324  -0.00042  -0.00522   0.00575   0.00049   1.92373
   A22        1.91807  -0.00376  -0.00774  -0.01436  -0.02212   1.89596
   A23        1.92282   0.00001  -0.00999   0.00585  -0.00414   1.91869
   A24        1.87600   0.00078   0.00793   0.00404   0.01181   1.88782
   A25        1.86017  -0.00470  -0.00763  -0.00916  -0.01681   1.84336
    D1        0.39109   0.00134  -0.00200   0.01274   0.01073   0.40183
    D2       -1.66888   0.00107   0.00347   0.00669   0.01015  -1.65873
    D3        2.52043   0.00073   0.00049   0.00807   0.00856   2.52899
    D4       -1.68940   0.00054   0.00937   0.00642   0.01582  -1.67358
    D5        2.53381   0.00026   0.01485   0.00037   0.01525   2.54906
    D6        0.43993  -0.00008   0.01187   0.00175   0.01365   0.45358
    D7        2.49329  -0.00107  -0.00280  -0.00563  -0.00846   2.48483
    D8        0.43332  -0.00135   0.00267  -0.01168  -0.00904   0.42428
    D9       -1.66056  -0.00168  -0.00031  -0.01029  -0.01063  -1.67119
   D10       -0.67940  -0.00019   0.00807  -0.02009  -0.01201  -0.69141
   D11        1.39956   0.00046   0.00016  -0.01300  -0.01289   1.38667
   D12       -2.82025  -0.00085  -0.00101  -0.01336  -0.01431  -2.83455
   D13        0.00775  -0.00003  -0.00007   0.00020   0.00013   0.00788
   D14       -2.05274  -0.00028   0.00793  -0.00707   0.00086  -2.05188
   D15        2.11900   0.00010   0.00645  -0.00437   0.00206   2.12106
   D16        2.07043   0.00023  -0.00782   0.00723  -0.00059   2.06984
   D17        0.00994  -0.00003   0.00018  -0.00004   0.00014   0.01008
   D18       -2.10150   0.00035  -0.00131   0.00265   0.00134  -2.10016
   D19       -2.10216  -0.00012  -0.00617   0.00474  -0.00143  -2.10359
   D20        2.12054  -0.00037   0.00183  -0.00253  -0.00070   2.11984
   D21        0.00909   0.00001   0.00034   0.00016   0.00051   0.00960
   D22       -0.40368  -0.00148   0.00187  -0.01326  -0.01139  -0.41507
   D23       -2.50608   0.00106   0.00272   0.00557   0.00831  -2.49777
   D24        1.67391  -0.00050  -0.00923  -0.00560  -0.01486   1.65905
   D25        1.65531  -0.00119  -0.00369  -0.00741  -0.01109   1.64421
   D26       -0.44709   0.00134  -0.00284   0.01142   0.00861  -0.43848
   D27       -2.55028  -0.00022  -0.01479   0.00025  -0.01457  -2.56485
   D28       -2.53442  -0.00084  -0.00071  -0.00848  -0.00919  -2.54361
   D29        1.64637   0.00170   0.00014   0.01035   0.01051   1.65688
   D30       -0.45682   0.00014  -0.01181  -0.00082  -0.01266  -0.46948
   D31        0.68457   0.00018  -0.00808   0.02028   0.01218   0.69676
   D32        2.82595   0.00083   0.00107   0.01295   0.01396   2.83991
   D33       -1.39330  -0.00051  -0.00013   0.01268   0.01260  -1.38070
         Item               Value     Threshold  Converged?
 Maximum Force            0.005087     0.000450     NO 
 RMS     Force            0.001310     0.000300     NO 
 Maximum Displacement     0.035604     0.001800     NO 
 RMS     Displacement     0.008518     0.001200     NO 
 Predicted change in Energy=-2.985990D-04
 GradGradGradGradGradGradGradGradGradGradGradGradGradGradGradGradGradGrad

                          Input orientation:                          
 ---------------------------------------------------------------------
 Center     Atomic     Atomic              Coordinates (Angstroms)
 Number     Number      Type              X           Y           Z
 ---------------------------------------------------------------------
    1          6             0       -0.116477   -0.026303    1.266009
    2          6             0       -1.496581   -0.610880    0.887794
    3          6             0       -1.485365   -0.571632   -0.668749
    4          6             0       -0.096275    0.019530   -0.996866
    5          8             0        0.293988    0.756085    0.153936
    6          1             0        0.607862   -0.841541    1.441463
    7          1             0       -0.132925    0.611572    2.154708
    8          1             0       -2.300746    0.019513    1.279657
    9          1             0       -1.635064   -1.618503    1.291040
   10          1             0       -2.277670    0.086138   -1.039314
   11          1             0       -1.627177   -1.555947   -1.124962
   12          1             0       -0.091731    0.691588   -1.860090
   13          1             0        0.628347   -0.791727   -1.188300
 ---------------------------------------------------------------------
                    Distance matrix (angstroms):
                    1          2          3          4          5
     1  C    0.000000
     2  C    1.545789   0.000000
     3  C    2.431980   1.557078   0.000000
     4  C    2.263430   2.431094   1.544896   0.000000
     5  O    1.420324   2.369236   2.367645   1.420973   0.000000
     6  H    1.104565   2.188248   2.984534   2.680057   2.075729
     7  H    1.094048   2.226885   3.346786   3.206911   2.050909
     8  H    2.184792   1.094365   2.193305   3.168951   2.922744
     9  H    2.200417   1.094116   2.226909   3.207108   3.263881
    10  H    3.161948   2.193098   1.094408   2.182825   2.913091
    11  H    3.215396   2.227419   1.094128   2.200500   3.266795
    12  H    3.207565   3.349760   2.226485   1.094000   2.051643
    13  H    2.676615   2.976271   2.187728   1.104474   2.075840
                    6          7          8          9         10
     6  H    0.000000
     7  H    1.780174   0.000000
     8  H    3.037696   2.411576   0.000000
     9  H    2.378447   2.824106   1.768152   0.000000
    10  H    3.916776   3.883013   2.320042   2.957921   0.000000
    11  H    3.477400   4.205611   2.952620   2.416825   1.768310
    12  H    3.706773   4.015806   3.897363   4.200954   2.412172
    13  H    2.630314   3.704657   3.915164   3.457415   3.039372
                   11         12         13
    11  H    0.000000
    12  H    2.819472   0.000000
    13  H    2.382317   1.780460   0.000000
 Stoichiometry    C4H8O
 Framework group  C1[X(C4H8O)]
 Deg. of freedom    33
 Full point group                 C1      NOp   1
 Largest Abelian subgroup         C1      NOp   1
 Largest concise Abelian subgroup C1      NOp   1
                         Standard orientation:                         
 ---------------------------------------------------------------------
 Center     Atomic     Atomic              Coordinates (Angstroms)
 Number     Number      Type              X           Y           Z
 ---------------------------------------------------------------------
    1          6             0        1.133817   -0.468189    0.152600
    2          6             0        0.774231    1.022002   -0.046118
    3          6             0       -0.782822    1.014852   -0.051386
    4          6             0       -1.129595   -0.476189    0.156578
    5          8             0        0.004321   -1.204991   -0.293138
    6          1             0        1.321884   -0.675885    1.221037
    7          1             0        2.009684   -0.793306   -0.416694
    8          1             0        1.157446    1.384626   -1.004911
    9          1             0        1.198186    1.650666    0.742636
   10          1             0       -1.162478    1.364333   -1.016503
   11          1             0       -1.218593    1.646910    0.728180
   12          1             0       -2.006067   -0.811431   -0.405780
   13          1             0       -1.308418   -0.680847    1.227092
 ---------------------------------------------------------------------
 Rotational constants (GHZ):      7.1156346      6.8897004      3.9657387
 Basis read from rwf:  (5D, 7F)
 There are    86 symmetry adapted basis functions of A   symmetry.
 Integral buffers will be    262144 words long.
 Raffenetti 2 integral format.
 Two-electron integral symmetry is turned on.
    86 basis functions,   172 primitive gaussians,    91 cartesian basis functions
    20 alpha electrons       20 beta electrons
       nuclear repulsion energy       190.0238875333 Hartrees.
 NAtoms=   13 NActive=   13 NUniq=   13 SFac= 1.00D+00 NAtFMM=   60 Big=F
 One-electron integrals computed using PRISM.
 NBasis=    86 RedAO= T  NBF=    86
 NBsUse=    86 1.00D-06 NBFU=    86
 Initial guess read from the read-write file:
 Initial guess orbital symmetries:
       Occupied  (A) (A) (A) (A) (A) (A) (A) (A) (A) (A) (A) (A)
                 (A) (A) (A) (A) (A) (A) (A) (A)
       Virtual   (A) (A) (A) (A) (A) (A) (A) (A) (A) (A) (A) (A)
                 (A) (A) (A) (A) (A) (A) (A) (A) (A) (A) (A) (A)
                 (A) (A) (A) (A) (A) (A) (A) (A) (A) (A) (A) (A)
                 (A) (A) (A) (A) (A) (A) (A) (A) (A) (A) (A) (A)
                 (A) (A) (A) (A) (A) (A) (A) (A) (A) (A) (A) (A)
                 (A) (A) (A) (A) (A) (A)
 Harris functional with IExCor=  402 diagonalized for initial guess.
 ExpMin= 1.61D-01 ExpMax= 5.48D+03 ExpMxC= 8.25D+02 IAcc=1 IRadAn=         1 AccDes= 1.00D-06
 HarFok:  IExCor= 402 AccDes= 1.00D-06 IRadAn=         1 IDoV=1
 ScaDFX=  1.000000  1.000000  1.000000  1.000000
 Requested convergence on RMS density matrix=1.00D-08 within 128 cycles.
 Requested convergence on MAX density matrix=1.00D-06.
 Requested convergence on             energy=1.00D-06.
 No special actions if energy rises.
 Keep R1 integrals in memory in canonical form, NReq=     9728516.
 Integral accuracy reduced to 1.0D-05 until final iterations.
 Initial convergence to 1.0D-05 achieved.  Increase integral accuracy.
 SCF Done:  E(RB+HF-LYP) =  -232.445319348     A.U. after   10 cycles
             Convg  =    0.6154D-08             -V/T =  2.0063
             S**2   =   0.0000
 ***** Axes restored to original set *****
 -------------------------------------------------------------------
 Center     Atomic                   Forces (Hartrees/Bohr)
 Number     Number              X              Y              Z
 -------------------------------------------------------------------
    1          6           0.000484536   -0.003482012    0.000494229
    2          6           0.000218211    0.001614713   -0.001353074
    3          6           0.000133538    0.001546396    0.001382782
    4          6           0.000670132   -0.003290703   -0.000225605
    5          8          -0.000838190    0.002587802   -0.000270448
    6          1          -0.000210864    0.000345530    0.000228197
    7          1           0.000267339    0.000960044   -0.001159774
    8          1          -0.000254193   -0.000558484    0.000176837
    9          1          -0.000136437   -0.000192512   -0.000308949
   10          1          -0.000278729   -0.000559443   -0.000185127
   11          1          -0.000127224   -0.000203113    0.000303198
   12          1           0.000251070    0.000926750    0.001210612
   13          1          -0.000179189    0.000305031   -0.000292878
 -------------------------------------------------------------------
 Cartesian Forces:  Max     0.003482012 RMS     0.001091897

 GradGradGradGradGradGradGradGradGradGradGradGradGradGradGradGradGradGrad
 Berny optimization.
 Internal  Forces:  Max     0.001494838 RMS     0.000404977
 Search for a local minimum.
 Step number   7 out of a maximum of  81
 All quantities printed in internal units (Hartrees-Bohrs-Radians)
 Update second derivatives using D2CorX and points  5  6  7
 Trust test= 1.26D+00 RLast= 7.58D-02 DXMaxT set to 8.49D-01
     Eigenvalues ---    0.00249   0.00500   0.02820   0.03845   0.04739
     Eigenvalues ---    0.04979   0.05275   0.06023   0.06107   0.06830
     Eigenvalues ---    0.06866   0.07541   0.07843   0.10747   0.11002
     Eigenvalues ---    0.11222   0.11504   0.12513   0.20818   0.24206
     Eigenvalues ---    0.26764   0.28107   0.30984   0.31533   0.31534
     Eigenvalues ---    0.31605   0.31658   0.31810   0.31810   0.31881
     Eigenvalues ---    0.34261   0.39024   0.447261000.000001000.00000
     Eigenvalues --- 1000.000001000.000001000.000001000.000001000.00000
     Eigenvalues --- 1000.000001000.000001000.000001000.000001000.00000
     Eigenvalues --- 1000.000001000.000001000.000001000.000001000.00000
     Eigenvalues --- 1000.000001000.000001000.000001000.000001000.00000
     Eigenvalues --- 1000.000001000.000001000.000001000.000001000.00000
     Eigenvalues --- 1000.000001000.000001000.000001000.000001000.00000
     Eigenvalues --- 1000.000001000.000001000.000001000.000001000.00000
     Eigenvalues --- 1000.00000
 RFO step:  Lambda=-7.15588866D-05.
 Quartic linear search produced a step of  0.36404.
 Iteration  1 RMS(Cart)=  0.00694328 RMS(Int)=  0.00005804
 Iteration  2 RMS(Cart)=  0.00005802 RMS(Int)=  0.00001884
 Iteration  3 RMS(Cart)=  0.00000000 RMS(Int)=  0.00001884
 Variable       Old X    -DE/DX   Delta X   Delta X   Delta X     New X
                                 (Linear)    (Quad)   (Total)
    R1        2.92112  -0.00016  -0.00265   0.00028  -0.00238   2.91874
    R2        2.68402   0.00029   0.00351   0.00102   0.00453   2.68855
    R3        2.08733  -0.00036   0.00064  -0.00212  -0.00147   2.08585
    R4        2.06745  -0.00039   0.00015  -0.00065  -0.00049   2.06696
    R5        2.94245  -0.00149  -0.00431  -0.00139  -0.00570   2.93675
    R6        2.06805  -0.00007   0.00125  -0.00109   0.00016   2.06821
    R7        2.06758   0.00008   0.00111  -0.00020   0.00091   2.06849
    R8        2.91943  -0.00007  -0.00258   0.00058  -0.00200   2.91743
    R9        2.06813  -0.00007   0.00127  -0.00111   0.00016   2.06829
   R10        2.06760   0.00007   0.00109  -0.00021   0.00088   2.06849
   R11        2.68525  -0.00005   0.00265   0.00055   0.00320   2.68845
   R12        2.06736  -0.00038   0.00021  -0.00062  -0.00041   2.06695
   R13        2.08715  -0.00029   0.00079  -0.00199  -0.00120   2.08595
    A1        1.84914   0.00006   0.00060  -0.00076  -0.00016   1.84898
    A2        1.92328   0.00036   0.00033   0.00485   0.00514   1.92842
    A3        1.98867   0.00029   0.00411  -0.00181   0.00224   1.99091
    A4        1.91922   0.00023  -0.00200   0.00342   0.00142   1.92064
    A5        1.89567  -0.00100  -0.00791  -0.00540  -0.01330   1.88237
    A6        1.88720   0.00004   0.00446  -0.00024   0.00414   1.89134
    A7        1.80146   0.00006   0.00011   0.00238   0.00247   1.80393
    A8        1.92902   0.00025  -0.00039   0.00399   0.00358   1.93260
    A9        1.95100   0.00005   0.00090  -0.00123  -0.00033   1.95066
   A10        1.92701   0.00001   0.00028   0.00334   0.00361   1.93061
   A11        1.97421  -0.00022  -0.00111  -0.00483  -0.00594   1.96827
   A12        1.88128  -0.00014   0.00020  -0.00314  -0.00294   1.87834
   A13        1.80127   0.00006   0.00009   0.00225   0.00232   1.80359
   A14        1.92668   0.00001   0.00019   0.00328   0.00345   1.93013
   A15        1.97492  -0.00023  -0.00117  -0.00485  -0.00602   1.96890
   A16        1.92735   0.00026  -0.00034   0.00426   0.00390   1.93125
   A17        1.95221   0.00006   0.00105  -0.00136  -0.00030   1.95191
   A18        1.88146  -0.00013   0.00018  -0.00307  -0.00288   1.87857
   A19        1.84761   0.00009   0.00075  -0.00062   0.00011   1.84772
   A20        1.98930   0.00028   0.00394  -0.00199   0.00190   1.99120
   A21        1.92373   0.00035   0.00018   0.00483   0.00498   1.92871
   A22        1.89596  -0.00106  -0.00805  -0.00541  -0.01345   1.88251
   A23        1.91869   0.00028  -0.00151   0.00373   0.00221   1.92090
   A24        1.88782   0.00003   0.00430  -0.00045   0.00378   1.89160
   A25        1.84336  -0.00087  -0.00612   0.00660   0.00047   1.84383
    D1        0.40183   0.00051   0.00391  -0.00732  -0.00341   0.39842
    D2       -1.65873   0.00034   0.00370  -0.01437  -0.01068  -1.66940
    D3        2.52899   0.00031   0.00312  -0.01229  -0.00917   2.51982
    D4       -1.67358   0.00001   0.00576  -0.01352  -0.00774  -1.68132
    D5        2.54906  -0.00016   0.00555  -0.02057  -0.01501   2.53405
    D6        0.45358  -0.00019   0.00497  -0.01849  -0.01350   0.44008
    D7        2.48483  -0.00053  -0.00308  -0.01556  -0.01866   2.46617
    D8        0.42428  -0.00069  -0.00329  -0.02261  -0.02592   0.39835
    D9       -1.67119  -0.00072  -0.00387  -0.02053  -0.02442  -1.69561
   D10       -0.69141  -0.00055  -0.00437   0.01104   0.00669  -0.68472
   D11        1.38667   0.00004  -0.00469   0.01817   0.01346   1.40013
   D12       -2.83455  -0.00036  -0.00521   0.01666   0.01144  -2.82311
   D13        0.00788   0.00000   0.00005  -0.00015  -0.00010   0.00777
   D14       -2.05188  -0.00034   0.00031  -0.00786  -0.00755  -2.05943
   D15        2.12106  -0.00002   0.00075  -0.00293  -0.00218   2.11889
   D16        2.06984   0.00033  -0.00022   0.00735   0.00714   2.07697
   D17        0.01008  -0.00001   0.00005  -0.00036  -0.00031   0.00977
   D18       -2.10016   0.00031   0.00049   0.00457   0.00506  -2.09510
   D19       -2.10359   0.00001  -0.00052   0.00238   0.00187  -2.10172
   D20        2.11984  -0.00033  -0.00025  -0.00532  -0.00558   2.11426
   D21        0.00960   0.00000   0.00018  -0.00039  -0.00021   0.00939
   D22       -0.41507  -0.00056  -0.00415   0.00752   0.00337  -0.41171
   D23       -2.49777   0.00052   0.00303   0.01577   0.01881  -2.47896
   D24        1.65905   0.00001  -0.00541   0.01414   0.00871   1.66776
   D25        1.64421  -0.00040  -0.00404   0.01454   0.01050   1.65471
   D26       -0.43848   0.00068   0.00313   0.02279   0.02594  -0.41254
   D27       -2.56485   0.00018  -0.00530   0.02115   0.01584  -2.54901
   D28       -2.54361  -0.00035  -0.00334   0.01265   0.00930  -2.53430
   D29        1.65688   0.00073   0.00383   0.02090   0.02475   1.68163
   D30       -0.46948   0.00022  -0.00461   0.01927   0.01464  -0.45484
   D31        0.69676   0.00054   0.00443  -0.01115  -0.00673   0.69002
   D32        2.83991   0.00035   0.00508  -0.01689  -0.01179   2.82812
   D33       -1.38070  -0.00007   0.00459  -0.01849  -0.01389  -1.39459
         Item               Value     Threshold  Converged?
 Maximum Force            0.001495     0.000450     NO 
 RMS     Force            0.000405     0.000300     NO 
 Maximum Displacement     0.022850     0.001800     NO 
 RMS     Displacement     0.006948     0.001200     NO 
 Predicted change in Energy=-6.476666D-05
 GradGradGradGradGradGradGradGradGradGradGradGradGradGradGradGradGradGrad

                          Input orientation:                          
 ---------------------------------------------------------------------
 Center     Atomic     Atomic              Coordinates (Angstroms)
 Number     Number      Type              X           Y           Z
 ---------------------------------------------------------------------
    1          6             0       -0.116374   -0.029774    1.267903
    2          6             0       -1.496242   -0.609382    0.886339
    3          6             0       -1.484957   -0.570296   -0.667191
    4          6             0       -0.095885    0.016272   -0.998625
    5          8             0        0.301529    0.749943    0.153663
    6          1             0        0.606558   -0.843074    1.452980
    7          1             0       -0.133711    0.622333    2.145870
    8          1             0       -2.302177    0.016686    1.281727
    9          1             0       -1.636086   -1.619651    1.283759
   10          1             0       -2.279222    0.083101   -1.041527
   11          1             0       -1.627987   -1.557639   -1.117564
   12          1             0       -0.092668    0.702177   -1.850615
   13          1             0        0.627410   -0.792799   -1.200391
 ---------------------------------------------------------------------
                    Distance matrix (angstroms):
                    1          2          3          4          5
     1  C    0.000000
     2  C    1.544530   0.000000
     3  C    2.431003   1.554063   0.000000
     4  C    2.267088   2.430130   1.543837   0.000000
     5  O    1.422721   2.369928   2.368198   1.422666   0.000000
     6  H    1.103785   2.190311   2.990647   2.691146   2.078214
     7  H    1.093786   2.227113   3.340889   3.202590   2.043185
     8  H    2.186340   1.094451   2.193326   3.172968   2.930781
     9  H    2.199428   1.094597   2.220404   3.202771   3.262889
    10  H    3.166089   2.193002   1.094491   2.184781   2.921204
    11  H    3.210888   2.220850   1.094596   2.199700   3.265576
    12  H    3.203353   3.343819   2.226690   1.093784   2.043233
    13  H    2.688476   2.982949   2.189955   1.103839   2.078392
                    6          7          8          9         10
     6  H    0.000000
     7  H    1.781997   0.000000
     8  H    3.037968   2.411596   0.000000
     9  H    2.379319   2.833171   1.766714   0.000000
    10  H    3.925314   3.879882   2.324317   2.952955   0.000000
    11  H    3.480157   4.199421   2.947817   2.402137   1.766894
    12  H    3.713550   3.997493   3.894020   4.194917   2.412239
    13  H    2.653930   3.712057   3.924112   3.460940   3.039893
                   11         12         13
    11  H    0.000000
    12  H    2.828664   0.000000
    13  H    2.382993   1.782206   0.000000
 Stoichiometry    C4H8O
 Framework group  C1[X(C4H8O)]
 Deg. of freedom    33
 Full point group                 C1      NOp   1
 Largest Abelian subgroup         C1      NOp   1
 Largest concise Abelian subgroup C1      NOp   1
                         Standard orientation:                         
 ---------------------------------------------------------------------
 Center     Atomic     Atomic              Coordinates (Angstroms)
 Number     Number      Type              X           Y           Z
 ---------------------------------------------------------------------
    1          6             0        1.134556   -0.469405    0.152326
    2          6             0        0.775388    1.019551   -0.046629
    3          6             0       -0.778663    1.016425   -0.051824
    4          6             0       -1.132528   -0.471836    0.156243
    5          8             0        0.001003   -1.207113   -0.289238
    6          1             0        1.331639   -0.680309    1.217698
    7          1             0        1.998568   -0.801612   -0.430332
    8          1             0        1.163202    1.387337   -1.001698
    9          1             0        1.195189    1.647675    0.745437
   10          1             0       -1.161044    1.373378   -1.013219
   11          1             0       -1.206905    1.650071    0.731273
   12          1             0       -1.998903   -0.809441   -0.419761
   13          1             0       -1.322283   -0.678609    1.223810
 ---------------------------------------------------------------------
 Rotational constants (GHZ):      7.1182751      6.8863506      3.9634060
 Basis read from rwf:  (5D, 7F)
 There are    86 symmetry adapted basis functions of A   symmetry.
 Integral buffers will be    262144 words long.
 Raffenetti 2 integral format.
 Two-electron integral symmetry is turned on.
    86 basis functions,   172 primitive gaussians,    91 cartesian basis functions
    20 alpha electrons       20 beta electrons
       nuclear repulsion energy       190.0015841040 Hartrees.
 NAtoms=   13 NActive=   13 NUniq=   13 SFac= 1.00D+00 NAtFMM=   60 Big=F
 One-electron integrals computed using PRISM.
 NBasis=    86 RedAO= T  NBF=    86
 NBsUse=    86 1.00D-06 NBFU=    86
 Initial guess read from the read-write file:
 Initial guess orbital symmetries:
       Occupied  (A) (A) (A) (A) (A) (A) (A) (A) (A) (A) (A) (A)
                 (A) (A) (A) (A) (A) (A) (A) (A)
       Virtual   (A) (A) (A) (A) (A) (A) (A) (A) (A) (A) (A) (A)
                 (A) (A) (A) (A) (A) (A) (A) (A) (A) (A) (A) (A)
                 (A) (A) (A) (A) (A) (A) (A) (A) (A) (A) (A) (A)
                 (A) (A) (A) (A) (A) (A) (A) (A) (A) (A) (A) (A)
                 (A) (A) (A) (A) (A) (A) (A) (A) (A) (A) (A) (A)
                 (A) (A) (A) (A) (A) (A)
 Harris functional with IExCor=  402 diagonalized for initial guess.
 ExpMin= 1.61D-01 ExpMax= 5.48D+03 ExpMxC= 8.25D+02 IAcc=1 IRadAn=         1 AccDes= 1.00D-06
 HarFok:  IExCor= 402 AccDes= 1.00D-06 IRadAn=         1 IDoV=1
 ScaDFX=  1.000000  1.000000  1.000000  1.000000
 Requested convergence on RMS density matrix=1.00D-08 within 128 cycles.
 Requested convergence on MAX density matrix=1.00D-06.
 Requested convergence on             energy=1.00D-06.
 No special actions if energy rises.
 Keep R1 integrals in memory in canonical form, NReq=     9728516.
 Integral accuracy reduced to 1.0D-05 until final iterations.
 Initial convergence to 1.0D-05 achieved.  Increase integral accuracy.
 SCF Done:  E(RB+HF-LYP) =  -232.445387219     A.U. after   10 cycles
             Convg  =    0.7622D-08             -V/T =  2.0063
             S**2   =   0.0000
 ***** Axes restored to original set *****
 -------------------------------------------------------------------
 Center     Atomic                   Forces (Hartrees/Bohr)
 Number     Number              X              Y              Z
 -------------------------------------------------------------------
    1          6           0.001108524   -0.000525942   -0.000269555
    2          6          -0.000282049    0.000511785    0.000061671
    3          6          -0.000330100    0.000515449   -0.000055029
    4          6           0.001137290   -0.000519562    0.000308195
    5          8          -0.001359761    0.000261915   -0.000022816
    6          1          -0.000177624    0.000072453    0.000245884
    7          1           0.000045767   -0.000022668   -0.000195178
    8          1          -0.000003540   -0.000262728    0.000037728
    9          1          -0.000005219    0.000099473   -0.000074152
   10          1          -0.000006625   -0.000262031   -0.000046936
   11          1           0.000005077    0.000096313    0.000075600
   12          1           0.000039958   -0.000040241    0.000191574
   13          1          -0.000171697    0.000075784   -0.000256988
 -------------------------------------------------------------------
 Cartesian Forces:  Max     0.001359761 RMS     0.000402825

 GradGradGradGradGradGradGradGradGradGradGradGradGradGradGradGradGradGrad
 Berny optimization.
 Internal  Forces:  Max     0.000420769 RMS     0.000149040
 Search for a local minimum.
 Step number   8 out of a maximum of  81
 All quantities printed in internal units (Hartrees-Bohrs-Radians)
 Update second derivatives using D2CorX and points  5  6  7  8
 Trust test= 1.05D+00 RLast= 7.92D-02 DXMaxT set to 8.49D-01
     Eigenvalues ---    0.00297   0.00500   0.02826   0.03259   0.04744
     Eigenvalues ---    0.05089   0.05250   0.05981   0.06186   0.06592
     Eigenvalues ---    0.06895   0.07004   0.07559   0.10473   0.10994
     Eigenvalues ---    0.11260   0.11533   0.12550   0.20841   0.26157
     Eigenvalues ---    0.26857   0.28116   0.30949   0.31533   0.31534
     Eigenvalues ---    0.31584   0.31656   0.31810   0.31810   0.31871
     Eigenvalues ---    0.34154   0.39036   0.443211000.000001000.00000
     Eigenvalues --- 1000.000001000.000001000.000001000.000001000.00000
     Eigenvalues --- 1000.000001000.000001000.000001000.000001000.00000
     Eigenvalues --- 1000.000001000.000001000.000001000.000001000.00000
     Eigenvalues --- 1000.000001000.000001000.000001000.000001000.00000
     Eigenvalues --- 1000.000001000.000001000.000001000.000001000.00000
     Eigenvalues --- 1000.000001000.000001000.000001000.000001000.00000
     Eigenvalues --- 1000.000001000.000001000.000001000.000001000.00000
     Eigenvalues --- 1000.00000
 RFO step:  Lambda=-3.50407256D-05.
 Quartic linear search produced a step of  0.05900.
 Iteration  1 RMS(Cart)=  0.00814148 RMS(Int)=  0.00008059
 Iteration  2 RMS(Cart)=  0.00009018 RMS(Int)=  0.00002835
 Iteration  3 RMS(Cart)=  0.00000001 RMS(Int)=  0.00002835
 Variable       Old X    -DE/DX   Delta X   Delta X   Delta X     New X
                                 (Linear)    (Quad)   (Total)
    R1        2.91874   0.00013  -0.00014   0.00030   0.00016   2.91890
    R2        2.68855  -0.00029   0.00027  -0.00057  -0.00032   2.68824
    R3        2.08585  -0.00013  -0.00009   0.00002  -0.00007   2.08578
    R4        2.06696  -0.00017  -0.00003  -0.00016  -0.00019   2.06677
    R5        2.93675   0.00001  -0.00034   0.00079   0.00047   2.93723
    R6        2.06821  -0.00013   0.00001  -0.00005  -0.00004   2.06818
    R7        2.06849  -0.00012   0.00005   0.00039   0.00044   2.06893
    R8        2.91743   0.00015  -0.00012   0.00029   0.00017   2.91760
    R9        2.06829  -0.00014   0.00001  -0.00006  -0.00005   2.06824
   R10        2.06849  -0.00012   0.00005   0.00039   0.00044   2.06893
   R11        2.68845  -0.00030   0.00019  -0.00068  -0.00051   2.68794
   R12        2.06695  -0.00017  -0.00002  -0.00015  -0.00017   2.06678
   R13        2.08595  -0.00012  -0.00007   0.00003  -0.00004   2.08592
    A1        1.84898  -0.00024  -0.00001  -0.00448  -0.00458   1.84440
    A2        1.92842   0.00019   0.00030   0.00005   0.00036   1.92878
    A3        1.99091  -0.00009   0.00013   0.00221   0.00236   1.99327
    A4        1.92064   0.00024   0.00008   0.00273   0.00284   1.92348
    A5        1.88237  -0.00001  -0.00078  -0.00140  -0.00215   1.88022
    A6        1.89134  -0.00008   0.00024   0.00087   0.00111   1.89245
    A7        1.80393  -0.00002   0.00015  -0.00239  -0.00230   1.80164
    A8        1.93260   0.00010   0.00021   0.00073   0.00096   1.93356
    A9        1.95066  -0.00002  -0.00002   0.00095   0.00095   1.95161
   A10        1.93061   0.00002   0.00021   0.00116   0.00138   1.93199
   A11        1.96827  -0.00001  -0.00035  -0.00028  -0.00060   1.96767
   A12        1.87834  -0.00007  -0.00017  -0.00016  -0.00034   1.87800
   A13        1.80359  -0.00004   0.00014  -0.00249  -0.00241   1.80118
   A14        1.93013   0.00002   0.00020   0.00116   0.00138   1.93150
   A15        1.96890   0.00000  -0.00035  -0.00023  -0.00056   1.96834
   A16        1.93125   0.00011   0.00023   0.00070   0.00095   1.93220
   A17        1.95191  -0.00002  -0.00002   0.00096   0.00096   1.95287
   A18        1.87857  -0.00007  -0.00017  -0.00010  -0.00028   1.87829
   A19        1.84772  -0.00024   0.00001  -0.00450  -0.00458   1.84314
   A20        1.99120  -0.00010   0.00011   0.00220   0.00233   1.99353
   A21        1.92871   0.00019   0.00029  -0.00002   0.00028   1.92900
   A22        1.88251  -0.00001  -0.00079  -0.00129  -0.00205   1.88046
   A23        1.92090   0.00024   0.00013   0.00277   0.00293   1.92383
   A24        1.89160  -0.00008   0.00022   0.00083   0.00104   1.89264
   A25        1.84383   0.00023   0.00003  -0.00734  -0.00746   1.83637
    D1        0.39842   0.00015  -0.00020   0.01468   0.01447   0.41289
    D2       -1.66940   0.00009  -0.00063   0.01431   0.01368  -1.65572
    D3        2.51982   0.00012  -0.00054   0.01338   0.01283   2.53265
    D4       -1.68132  -0.00010  -0.00046   0.01402   0.01357  -1.66774
    D5        2.53405  -0.00015  -0.00089   0.01365   0.01279   2.54683
    D6        0.44008  -0.00013  -0.00080   0.01273   0.01193   0.45202
    D7        2.46617  -0.00007  -0.00110   0.01124   0.01013   2.47630
    D8        0.39835  -0.00013  -0.00153   0.01087   0.00934   0.40769
    D9       -1.69561  -0.00010  -0.00144   0.00994   0.00849  -1.68713
   D10       -0.68472  -0.00042   0.00039  -0.02480  -0.02438  -0.70910
   D11        1.40013  -0.00020   0.00079  -0.02589  -0.02510   1.37503
   D12       -2.82311  -0.00017   0.00067  -0.02413  -0.02344  -2.84655
   D13        0.00777   0.00000  -0.00001   0.00013   0.00013   0.00790
   D14       -2.05943  -0.00011  -0.00045   0.00015  -0.00029  -2.05972
   D15        2.11889  -0.00004  -0.00013  -0.00040  -0.00053   2.11836
   D16        2.07697   0.00012   0.00042   0.00021   0.00062   2.07760
   D17        0.00977   0.00000  -0.00002   0.00022   0.00020   0.00998
   D18       -2.09510   0.00007   0.00030  -0.00032  -0.00003  -2.09513
   D19       -2.10172   0.00004   0.00011   0.00064   0.00075  -2.10097
   D20        2.11426  -0.00008  -0.00033   0.00065   0.00033   2.11459
   D21        0.00939  -0.00001  -0.00001   0.00011   0.00009   0.00948
   D22       -0.41171  -0.00016   0.00020  -0.01494  -0.01473  -0.42644
   D23       -2.47896   0.00007   0.00111  -0.01161  -0.01048  -2.48944
   D24        1.66776   0.00010   0.00051  -0.01428  -0.01377   1.65398
   D25        1.65471  -0.00010   0.00062  -0.01463  -0.01401   1.64070
   D26       -0.41254   0.00012   0.00153  -0.01130  -0.00977  -0.42230
   D27       -2.54901   0.00016   0.00093  -0.01397  -0.01305  -2.56206
   D28       -2.53430  -0.00012   0.00055  -0.01364  -0.01308  -2.54738
   D29        1.68163   0.00010   0.00146  -0.01031  -0.00883   1.67280
   D30       -0.45484   0.00013   0.00086  -0.01298  -0.01212  -0.46696
   D31        0.69002   0.00042  -0.00040   0.02492   0.02449   0.71451
   D32        2.82812   0.00017  -0.00070   0.02428   0.02357   2.85169
   D33       -1.39459   0.00020  -0.00082   0.02607   0.02526  -1.36934
         Item               Value     Threshold  Converged?
 Maximum Force            0.000421     0.000450     YES
 RMS     Force            0.000149     0.000300     YES
 Maximum Displacement     0.033910     0.001800     NO 
 RMS     Displacement     0.008179     0.001200     NO 
 Predicted change in Energy=-1.791514D-05
 GradGradGradGradGradGradGradGradGradGradGradGradGradGradGradGradGradGrad

                          Input orientation:                          
 ---------------------------------------------------------------------
 Center     Atomic     Atomic              Coordinates (Angstroms)
 Number     Number      Type              X           Y           Z
 ---------------------------------------------------------------------
    1          6             0       -0.116080   -0.029995    1.264543
    2          6             0       -1.497365   -0.608725    0.886446
    3          6             0       -1.486146   -0.569531   -0.667334
    4          6             0       -0.095632    0.015860   -0.995210
    5          8             0        0.285697    0.762676    0.153730
    6          1             0        0.610393   -0.843237    1.435231
    7          1             0       -0.126649    0.615165    2.147612
    8          1             0       -2.302582    0.017289    1.283323
    9          1             0       -1.637562   -1.619430    1.283272
   10          1             0       -2.279572    0.084087   -1.042986
   11          1             0       -1.629667   -1.557244   -1.117304
   12          1             0       -0.085439    0.694851   -1.852550
   13          1             0        0.630792   -0.793872   -1.182447
 ---------------------------------------------------------------------
                    Distance matrix (angstroms):
                    1          2          3          4          5
     1  C    0.000000
     2  C    1.544615   0.000000
     3  C    2.429059   1.554314   0.000000
     4  C    2.260311   2.428083   1.543927   0.000000
     5  O    1.422553   2.365781   2.363968   1.422395   0.000000
     6  H    1.103748   2.190618   2.981806   2.672744   2.080055
     7  H    1.093688   2.228746   3.343001   3.199603   2.041410
     8  H    2.187094   1.094431   2.194536   3.172119   2.920748
     9  H    2.200355   1.094830   2.220378   3.200500   3.263314
    10  H    3.165186   2.194206   1.094466   2.185528   2.910879
    11  H    3.208836   2.220856   1.094828   2.200642   3.265911
    12  H    3.200408   3.345885   2.228313   1.093694   2.041446
    13  H    2.670035   2.973828   2.190228   1.103819   2.080217
                    6          7          8          9         10
     6  H    0.000000
     7  H    1.782598   0.000000
     8  H    3.041218   2.416430   0.000000
     9  H    2.383038   2.832553   1.766664   0.000000
    10  H    3.918340   3.885490   2.327381   2.953917   0.000000
    11  H    3.470318   4.199774   2.948725   2.401394   1.766881
    12  H    3.695863   4.001168   3.899810   4.195040   2.417157
    13  H    2.618223   3.694374   3.916975   3.450616   3.043104
                   11         12         13
    11  H    0.000000
    12  H    2.827925   0.000000
    13  H    2.386767   1.782785   0.000000
 Stoichiometry    C4H8O
 Framework group  C1[X(C4H8O)]
 Deg. of freedom    33
 Full point group                 C1      NOp   1
 Largest Abelian subgroup         C1      NOp   1
 Largest concise Abelian subgroup C1      NOp   1
                         Standard orientation:                         
 ---------------------------------------------------------------------
 Center     Atomic     Atomic              Coordinates (Angstroms)
 Number     Number      Type              X           Y           Z
 ---------------------------------------------------------------------
    1          6             0        1.131303   -0.470045    0.158079
    2          6             0        0.775312    1.018753   -0.048283
    3          6             0       -0.778989    1.015324   -0.053558
    4          6             0       -1.129002   -0.472862    0.162093
    5          8             0        0.001145   -1.202560   -0.299985
    6          1             0        1.314034   -0.679527    1.226249
    7          1             0        2.000567   -0.806725   -0.413918
    8          1             0        1.164525    1.382222   -1.004412
    9          1             0        1.194429    1.650617    0.741490
   10          1             0       -1.162780    1.367593   -1.016089
   11          1             0       -1.206921    1.652585    0.727097
   12          1             0       -2.000577   -0.815254   -0.402964
   13          1             0       -1.304182   -0.678045    1.232434
 ---------------------------------------------------------------------
 Rotational constants (GHZ):      7.1277192      6.8897262      3.9774458
 Basis read from rwf:  (5D, 7F)
 There are    86 symmetry adapted basis functions of A   symmetry.
 Integral buffers will be    262144 words long.
 Raffenetti 2 integral format.
 Two-electron integral symmetry is turned on.
    86 basis functions,   172 primitive gaussians,    91 cartesian basis functions
    20 alpha electrons       20 beta electrons
       nuclear repulsion energy       190.1105985732 Hartrees.
 NAtoms=   13 NActive=   13 NUniq=   13 SFac= 1.00D+00 NAtFMM=   60 Big=F
 One-electron integrals computed using PRISM.
 NBasis=    86 RedAO= T  NBF=    86
 NBsUse=    86 1.00D-06 NBFU=    86
 Initial guess read from the read-write file:
 Initial guess orbital symmetries:
       Occupied  (A) (A) (A) (A) (A) (A) (A) (A) (A) (A) (A) (A)
                 (A) (A) (A) (A) (A) (A) (A) (A)
       Virtual   (A) (A) (A) (A) (A) (A) (A) (A) (A) (A) (A) (A)
                 (A) (A) (A) (A) (A) (A) (A) (A) (A) (A) (A) (A)
                 (A) (A) (A) (A) (A) (A) (A) (A) (A) (A) (A) (A)
                 (A) (A) (A) (A) (A) (A) (A) (A) (A) (A) (A) (A)
                 (A) (A) (A) (A) (A) (A) (A) (A) (A) (A) (A) (A)
                 (A) (A) (A) (A) (A) (A)
 Harris functional with IExCor=  402 diagonalized for initial guess.
 ExpMin= 1.61D-01 ExpMax= 5.48D+03 ExpMxC= 8.25D+02 IAcc=1 IRadAn=         1 AccDes= 1.00D-06
 HarFok:  IExCor= 402 AccDes= 1.00D-06 IRadAn=         1 IDoV=1
 ScaDFX=  1.000000  1.000000  1.000000  1.000000
 Requested convergence on RMS density matrix=1.00D-08 within 128 cycles.
 Requested convergence on MAX density matrix=1.00D-06.
 Requested convergence on             energy=1.00D-06.
 No special actions if energy rises.
 Keep R1 integrals in memory in canonical form, NReq=     9728516.
 Integral accuracy reduced to 1.0D-05 until final iterations.
 Initial convergence to 1.0D-05 achieved.  Increase integral accuracy.
 SCF Done:  E(RB+HF-LYP) =  -232.445390626     A.U. after   10 cycles
             Convg  =    0.6616D-08             -V/T =  2.0063
             S**2   =   0.0000
 ***** Axes restored to original set *****
 -------------------------------------------------------------------
 Center     Atomic                   Forces (Hartrees/Bohr)
 Number     Number              X              Y              Z
 -------------------------------------------------------------------
    1          6           0.000257870    0.000553105    0.000225983
    2          6          -0.000245889   -0.000073880    0.000245571
    3          6          -0.000266879   -0.000068573   -0.000256046
    4          6           0.000274834    0.000551918   -0.000217681
    5          8           0.000079283   -0.000917527    0.000007582
    6          1          -0.000046274    0.000162573    0.000081480
    7          1          -0.000128793   -0.000232721   -0.000001180
    8          1           0.000091024   -0.000142141    0.000000103
    9          1           0.000032079    0.000194227   -0.000079485
   10          1           0.000087654   -0.000145590   -0.000005504
   11          1           0.000039170    0.000189852    0.000089803
   12          1          -0.000131456   -0.000235580   -0.000007324
   13          1          -0.000042621    0.000164337   -0.000083304
 -------------------------------------------------------------------
 Cartesian Forces:  Max     0.000917527 RMS     0.000244404

 GradGradGradGradGradGradGradGradGradGradGradGradGradGradGradGradGradGrad
 Berny optimization.
 Internal  Forces:  Max     0.000441060 RMS     0.000121576
 Search for a local minimum.
 Step number   9 out of a maximum of  81
 All quantities printed in internal units (Hartrees-Bohrs-Radians)
 Update second derivatives using D2CorX and points  5  6  7  8  9

 Trust test= 1.90D-01 RLast= 8.01D-02 DXMaxT set to 4.24D-01
     Eigenvalues ---    0.00501   0.00527   0.02833   0.03151   0.04759
     Eigenvalues ---    0.04773   0.05248   0.05967   0.06010   0.06638
     Eigenvalues ---    0.06876   0.06915   0.07546   0.10340   0.10950
     Eigenvalues ---    0.11243   0.11424   0.12535   0.20772   0.24086
     Eigenvalues ---    0.26691   0.28088   0.30613   0.31532   0.31534
     Eigenvalues ---    0.31544   0.31638   0.31810   0.31810   0.31828
     Eigenvalues ---    0.33339   0.38928   0.441611000.000001000.00000
     Eigenvalues --- 1000.000001000.000001000.000001000.000001000.00000
     Eigenvalues --- 1000.000001000.000001000.000001000.000001000.00000
     Eigenvalues --- 1000.000001000.000001000.000001000.000001000.00000
     Eigenvalues --- 1000.000001000.000001000.000001000.000001000.00000
     Eigenvalues --- 1000.000001000.000001000.000001000.000001000.00000
     Eigenvalues --- 1000.000001000.000001000.000001000.000001000.00000
     Eigenvalues --- 1000.000001000.000001000.000001000.000001000.00000
     Eigenvalues --- 1000.00000
 RFO step:  Lambda=-4.95641858D-06.
 Quartic linear search produced a step of -0.44161.
 Iteration  1 RMS(Cart)=  0.00479386 RMS(Int)=  0.00002354
 Iteration  2 RMS(Cart)=  0.00002595 RMS(Int)=  0.00000628
 Iteration  3 RMS(Cart)=  0.00000000 RMS(Int)=  0.00000628
 Variable       Old X    -DE/DX   Delta X   Delta X   Delta X     New X
                                 (Linear)    (Quad)   (Total)
    R1        2.91890   0.00015  -0.00007   0.00062   0.00055   2.91945
    R2        2.68824  -0.00009   0.00014  -0.00065  -0.00051   2.68772
    R3        2.08578  -0.00014   0.00003  -0.00045  -0.00042   2.08536
    R4        2.06677  -0.00014   0.00008  -0.00034  -0.00026   2.06651
    R5        2.93723   0.00027  -0.00021   0.00044   0.00023   2.93745
    R6        2.06818  -0.00015   0.00002  -0.00041  -0.00039   2.06778
    R7        2.06893  -0.00021  -0.00019  -0.00038  -0.00057   2.06836
    R8        2.91760   0.00016  -0.00008   0.00069   0.00061   2.91821
    R9        2.06824  -0.00015   0.00002  -0.00041  -0.00039   2.06785
   R10        2.06893  -0.00021  -0.00019  -0.00038  -0.00057   2.06835
   R11        2.68794  -0.00006   0.00023  -0.00064  -0.00041   2.68753
   R12        2.06678  -0.00014   0.00008  -0.00035  -0.00028   2.06650
   R13        2.08592  -0.00014   0.00002  -0.00044  -0.00042   2.08549
    A1        1.84440  -0.00020   0.00202  -0.00065   0.00138   1.84578
    A2        1.92878   0.00010  -0.00016   0.00085   0.00068   1.92946
    A3        1.99327  -0.00010  -0.00104  -0.00101  -0.00206   1.99122
    A4        1.92348  -0.00003  -0.00125   0.00149   0.00023   1.92371
    A5        1.88022   0.00029   0.00095   0.00005   0.00099   1.88122
    A6        1.89245  -0.00006  -0.00049  -0.00062  -0.00111   1.89134
    A7        1.80164   0.00005   0.00101   0.00022   0.00125   1.80288
    A8        1.93356   0.00000  -0.00042   0.00089   0.00046   1.93402
    A9        1.95161  -0.00003  -0.00042  -0.00031  -0.00073   1.95088
   A10        1.93199  -0.00004  -0.00061   0.00091   0.00029   1.93229
   A11        1.96767   0.00003   0.00027  -0.00093  -0.00067   1.96699
   A12        1.87800  -0.00001   0.00015  -0.00068  -0.00052   1.87748
   A13        1.80118   0.00004   0.00106   0.00016   0.00124   1.80242
   A14        1.93150  -0.00004  -0.00061   0.00092   0.00031   1.93181
   A15        1.96834   0.00004   0.00025  -0.00092  -0.00068   1.96767
   A16        1.93220   0.00001  -0.00042   0.00095   0.00053   1.93272
   A17        1.95287  -0.00003  -0.00042  -0.00038  -0.00081   1.95206
   A18        1.87829  -0.00001   0.00012  -0.00064  -0.00051   1.87778
   A19        1.84314  -0.00020   0.00202  -0.00064   0.00140   1.84454
   A20        1.99353  -0.00010  -0.00103  -0.00105  -0.00208   1.99145
   A21        1.92900   0.00010  -0.00013   0.00083   0.00070   1.92970
   A22        1.88046   0.00029   0.00090   0.00007   0.00097   1.88143
   A23        1.92383  -0.00002  -0.00129   0.00155   0.00025   1.92408
   A24        1.89264  -0.00006  -0.00046  -0.00066  -0.00112   1.89152
   A25        1.83637   0.00044   0.00329   0.00175   0.00508   1.84145
    D1        0.41289  -0.00016  -0.00639  -0.00082  -0.00720   0.40569
    D2       -1.65572  -0.00014  -0.00604  -0.00242  -0.00846  -1.66418
    D3        2.53265  -0.00011  -0.00567  -0.00196  -0.00762   2.52503
    D4       -1.66774  -0.00006  -0.00599  -0.00266  -0.00865  -1.67639
    D5        2.54683  -0.00005  -0.00565  -0.00426  -0.00991   2.53692
    D6        0.45202  -0.00001  -0.00527  -0.00380  -0.00907   0.44295
    D7        2.47630   0.00001  -0.00447  -0.00175  -0.00621   2.47008
    D8        0.40769   0.00002  -0.00412  -0.00335  -0.00748   0.40021
    D9       -1.68713   0.00006  -0.00375  -0.00289  -0.00664  -1.69377
   D10       -0.70910   0.00007   0.01076   0.00068   0.01144  -0.69766
   D11        1.37503   0.00006   0.01108   0.00209   0.01318   1.38821
   D12       -2.84655   0.00015   0.01035   0.00221   0.01256  -2.83399
   D13        0.00790   0.00000  -0.00006  -0.00003  -0.00009   0.00781
   D14       -2.05972  -0.00001   0.00013  -0.00166  -0.00154  -2.06126
   D15        2.11836   0.00001   0.00023  -0.00087  -0.00063   2.11772
   D16        2.07760   0.00001  -0.00028   0.00156   0.00129   2.07889
   D17        0.00998   0.00000  -0.00009  -0.00007  -0.00016   0.00981
   D18       -2.09513   0.00002   0.00001   0.00072   0.00074  -2.09439
   D19       -2.10097  -0.00001  -0.00033   0.00070   0.00036  -2.10061
   D20        2.11459  -0.00002  -0.00015  -0.00094  -0.00109   2.11351
   D21        0.00948   0.00000  -0.00004  -0.00014  -0.00018   0.00930
   D22       -0.42644   0.00016   0.00650   0.00088   0.00737  -0.41906
   D23       -2.48944   0.00000   0.00463   0.00179   0.00642  -2.48302
   D24        1.65398   0.00007   0.00608   0.00279   0.00887   1.66286
   D25        1.64070   0.00014   0.00619   0.00249   0.00867   1.64937
   D26       -0.42230  -0.00003   0.00431   0.00341   0.00772  -0.41458
   D27       -2.56206   0.00005   0.00577   0.00440   0.01017  -2.55189
   D28       -2.54738   0.00011   0.00578   0.00207   0.00784  -2.53954
   D29        1.67280  -0.00006   0.00390   0.00299   0.00689   1.67969
   D30       -0.46696   0.00002   0.00535   0.00399   0.00934  -0.45762
   D31        0.71451  -0.00007  -0.01081  -0.00070  -0.01151   0.70300
   D32        2.85169  -0.00015  -0.01041  -0.00225  -0.01266   2.83903
   D33       -1.36934  -0.00006  -0.01115  -0.00214  -0.01330  -1.38263
         Item               Value     Threshold  Converged?
 Maximum Force            0.000441     0.000450     YES
 RMS     Force            0.000122     0.000300     YES
 Maximum Displacement     0.021522     0.001800     NO 
 RMS     Displacement     0.004789     0.001200     NO 
 Predicted change in Energy=-9.717424D-06
 GradGradGradGradGradGradGradGradGradGradGradGradGradGradGradGradGradGrad

                          Input orientation:                          
 ---------------------------------------------------------------------
 Center     Atomic     Atomic              Coordinates (Angstroms)
 Number     Number      Type              X           Y           Z
 ---------------------------------------------------------------------
    1          6             0       -0.115662   -0.030150    1.266540
    2          6             0       -1.496914   -0.608484    0.886524
    3          6             0       -1.485675   -0.569361   -0.667377
    4          6             0       -0.095180    0.015830   -0.997204
    5          8             0        0.293574    0.755345    0.153702
    6          1             0        0.608506   -0.843157    1.446461
    7          1             0       -0.130366    0.619134    2.146350
    8          1             0       -2.302629    0.016427    1.283559
    9          1             0       -1.636878   -1.619187    1.282602
   10          1             0       -2.279699    0.082999   -1.043348
   11          1             0       -1.628786   -1.557183   -1.116500
   12          1             0       -0.089278    0.698906   -1.851146
   13          1             0        0.629174   -0.793225   -1.193836
 ---------------------------------------------------------------------
                    Distance matrix (angstroms):
                    1          2          3          4          5
     1  C    0.000000
     2  C    1.544907   0.000000
     3  C    2.430580   1.554434   0.000000
     4  C    2.264303   2.429621   1.544252   0.000000
     5  O    1.422282   2.367045   2.365321   1.422180   0.000000
     6  H    1.103527   2.191208   2.988121   2.684125   2.079812
     7  H    1.093550   2.227478   3.341623   3.201116   2.041795
     8  H    2.187529   1.094225   2.194701   3.174069   2.926235
     9  H    2.199863   1.094527   2.219778   3.201192   3.261819
    10  H    3.167245   2.194381   1.094259   2.186039   2.916627
    11  H    3.209400   2.220253   1.094524   2.200125   3.264455
    12  H    3.201903   3.344480   2.227047   1.093546   2.041856
    13  H    2.681513   2.980315   2.190859   1.103595   2.080037
                    6          7          8          9         10
     6  H    0.000000
     7  H    1.781593   0.000000
     8  H    3.039758   2.413792   0.000000
     9  H    2.381349   2.832971   1.765916   0.000000
    10  H    3.924110   3.883458   2.327972   2.953083   0.000000
    11  H    3.476215   4.198548   2.947982   2.399916   1.766136
    12  H    3.706625   3.998503   3.897573   4.193924   2.414503
    13  H    2.640849   3.705199   3.922817   3.456870   3.041704
                   11         12         13
    11  H    0.000000
    12  H    2.828379   0.000000
    13  H    2.384952   1.781764   0.000000
 Stoichiometry    C4H8O
 Framework group  C1[X(C4H8O)]
 Deg. of freedom    33
 Full point group                 C1      NOp   1
 Largest Abelian subgroup         C1      NOp   1
 Largest concise Abelian subgroup C1      NOp   1
                         Standard orientation:                         
 ---------------------------------------------------------------------
 Center     Atomic     Atomic              Coordinates (Angstroms)
 Number     Number      Type              X           Y           Z
 ---------------------------------------------------------------------
    1          6             0        1.133362   -0.469842    0.155285
    2          6             0        0.775196    1.019232   -0.047481
    3          6             0       -0.779225    1.015576   -0.052713
    4          6             0       -1.130936   -0.473079    0.159229
    5          8             0        0.001409   -1.204063   -0.294702
    6          1             0        1.325355   -0.680379    1.221391
    7          1             0        1.999374   -0.803373   -0.423189
    8          1             0        1.164544    1.386256   -1.001959
    9          1             0        1.193445    1.648911    0.744076
   10          1             0       -1.163352    1.371458   -1.013545
   11          1             0       -1.206429    1.650407    0.729891
   12          1             0       -1.999104   -0.812592   -0.412487
   13          1             0       -1.315487   -0.679499    1.227524
 ---------------------------------------------------------------------
 Rotational constants (GHZ):      7.1202138      6.8903263      3.9701275
 Basis read from rwf:  (5D, 7F)
 There are    86 symmetry adapted basis functions of A   symmetry.
 Integral buffers will be    262144 words long.
 Raffenetti 2 integral format.
 Two-electron integral symmetry is turned on.
    86 basis functions,   172 primitive gaussians,    91 cartesian basis functions
    20 alpha electrons       20 beta electrons
       nuclear repulsion energy       190.0574279676 Hartrees.
 NAtoms=   13 NActive=   13 NUniq=   13 SFac= 1.00D+00 NAtFMM=   60 Big=F
 One-electron integrals computed using PRISM.
 NBasis=    86 RedAO= T  NBF=    86
 NBsUse=    86 1.00D-06 NBFU=    86
 Initial guess read from the read-write file:
 Initial guess orbital symmetries:
       Occupied  (A) (A) (A) (A) (A) (A) (A) (A) (A) (A) (A) (A)
                 (A) (A) (A) (A) (A) (A) (A) (A)
       Virtual   (A) (A) (A) (A) (A) (A) (A) (A) (A) (A) (A) (A)
                 (A) (A) (A) (A) (A) (A) (A) (A) (A) (A) (A) (A)
                 (A) (A) (A) (A) (A) (A) (A) (A) (A) (A) (A) (A)
                 (A) (A) (A) (A) (A) (A) (A) (A) (A) (A) (A) (A)
                 (A) (A) (A) (A) (A) (A) (A) (A) (A) (A) (A) (A)
                 (A) (A) (A) (A) (A) (A)
 Harris functional with IExCor=  402 diagonalized for initial guess.
 ExpMin= 1.61D-01 ExpMax= 5.48D+03 ExpMxC= 8.25D+02 IAcc=1 IRadAn=         1 AccDes= 1.00D-06
 HarFok:  IExCor= 402 AccDes= 1.00D-06 IRadAn=         1 IDoV=1
 ScaDFX=  1.000000  1.000000  1.000000  1.000000
 Requested convergence on RMS density matrix=1.00D-08 within 128 cycles.
 Requested convergence on MAX density matrix=1.00D-06.
 Requested convergence on             energy=1.00D-06.
 No special actions if energy rises.
 Keep R1 integrals in memory in canonical form, NReq=     9728516.
 Integral accuracy reduced to 1.0D-05 until final iterations.
 Initial convergence to 1.0D-05 achieved.  Increase integral accuracy.
 SCF Done:  E(RB+HF-LYP) =  -232.445400183     A.U. after    9 cycles
             Convg  =    0.7871D-08             -V/T =  2.0063
             S**2   =   0.0000
 ***** Axes restored to original set *****
 -------------------------------------------------------------------
 Center     Atomic                   Forces (Hartrees/Bohr)
 Number     Number              X              Y              Z
 -------------------------------------------------------------------
    1          6           0.000137254    0.000087388   -0.000071020
    2          6          -0.000061360    0.000009244    0.000005450
    3          6          -0.000071428    0.000008644   -0.000007332
    4          6           0.000143274    0.000089421    0.000080764
    5          8          -0.000117195   -0.000145377   -0.000006894
    6          1          -0.000014404   -0.000000447    0.000025978
    7          1          -0.000013417   -0.000020591    0.000000343
    8          1           0.000008267   -0.000016789    0.000008779
    9          1           0.000001879    0.000013761   -0.000012552
   10          1           0.000008885   -0.000017447   -0.000009616
   11          1           0.000004842    0.000012864    0.000013662
   12          1          -0.000012945   -0.000020905   -0.000001658
   13          1          -0.000013651    0.000000234   -0.000025905
 -------------------------------------------------------------------
 Cartesian Forces:  Max     0.000145377 RMS     0.000054343

 GradGradGradGradGradGradGradGradGradGradGradGradGradGradGradGradGradGrad
 Berny optimization.
 Internal  Forces:  Max     0.000094689 RMS     0.000022073
 Search for a local minimum.
 Step number  10 out of a maximum of  81
 All quantities printed in internal units (Hartrees-Bohrs-Radians)
 Update second derivatives using D2CorX and points  5  6  7  8  9
                                                       10
 Trust test= 9.83D-01 RLast= 4.66D-02 DXMaxT set to 4.24D-01
     Eigenvalues ---    0.00501   0.00594   0.02832   0.03312   0.04757
     Eigenvalues ---    0.05077   0.05245   0.05855   0.05982   0.06711
     Eigenvalues ---    0.06888   0.06977   0.07552   0.10341   0.10966
     Eigenvalues ---    0.11246   0.11516   0.12509   0.20806   0.22765
     Eigenvalues ---    0.26763   0.28100   0.30917   0.31532   0.31534
     Eigenvalues ---    0.31549   0.31657   0.31802   0.31810   0.31811
     Eigenvalues ---    0.32975   0.38983   0.450001000.000001000.00000
     Eigenvalues --- 1000.000001000.000001000.000001000.000001000.00000
     Eigenvalues --- 1000.000001000.000001000.000001000.000001000.00000
     Eigenvalues --- 1000.000001000.000001000.000001000.000001000.00000
     Eigenvalues --- 1000.000001000.000001000.000001000.000001000.00000
     Eigenvalues --- 1000.000001000.000001000.000001000.000001000.00000
     Eigenvalues --- 1000.000001000.000001000.000001000.000001000.00000
     Eigenvalues --- 1000.000001000.000001000.000001000.000001000.00000
     Eigenvalues --- 1000.00000
 RFO step:  Lambda=-1.74891887D-07.
 Quartic linear search produced a step of  0.06296.
 Iteration  1 RMS(Cart)=  0.00030238 RMS(Int)=  0.00000044
 Iteration  2 RMS(Cart)=  0.00000009 RMS(Int)=  0.00000043
 Variable       Old X    -DE/DX   Delta X   Delta X   Delta X     New X
                                 (Linear)    (Quad)   (Total)
    R1        2.91945   0.00004   0.00003   0.00019   0.00023   2.91968
    R2        2.68772  -0.00009  -0.00003  -0.00030  -0.00034   2.68739
    R3        2.08536  -0.00001  -0.00003  -0.00001  -0.00004   2.08533
    R4        2.06651  -0.00001  -0.00002  -0.00002  -0.00003   2.06648
    R5        2.93745   0.00000   0.00001   0.00004   0.00006   2.93751
    R6        2.06778  -0.00001  -0.00002  -0.00004  -0.00006   2.06772
    R7        2.06836  -0.00002  -0.00004  -0.00002  -0.00006   2.06830
    R8        2.91821   0.00005   0.00004   0.00021   0.00025   2.91846
    R9        2.06785  -0.00001  -0.00002  -0.00004  -0.00007   2.06778
   R10        2.06835  -0.00002  -0.00004  -0.00002  -0.00006   2.06829
   R11        2.68753  -0.00009  -0.00003  -0.00031  -0.00034   2.68719
   R12        2.06650  -0.00001  -0.00002  -0.00001  -0.00003   2.06647
   R13        2.08549  -0.00001  -0.00003  -0.00001  -0.00004   2.08545
    A1        1.84578  -0.00002   0.00009  -0.00014  -0.00005   1.84573
    A2        1.92946   0.00001   0.00004   0.00000   0.00005   1.92951
    A3        1.99122  -0.00002  -0.00013  -0.00017  -0.00030   1.99092
    A4        1.92371   0.00001   0.00001   0.00033   0.00035   1.92406
    A5        1.88122   0.00003   0.00006   0.00010   0.00016   1.88138
    A6        1.89134  -0.00001  -0.00007  -0.00010  -0.00017   1.89117
    A7        1.80288  -0.00001   0.00008  -0.00007   0.00000   1.80289
    A8        1.93402   0.00000   0.00003   0.00008   0.00011   1.93413
    A9        1.95088   0.00000  -0.00005  -0.00002  -0.00007   1.95081
   A10        1.93229   0.00000   0.00002   0.00021   0.00023   1.93252
   A11        1.96699   0.00001  -0.00004  -0.00015  -0.00019   1.96680
   A12        1.87748  -0.00001  -0.00003  -0.00004  -0.00007   1.87741
   A13        1.80242  -0.00001   0.00008  -0.00008  -0.00001   1.80241
   A14        1.93181   0.00001   0.00002   0.00022   0.00024   1.93205
   A15        1.96767   0.00001  -0.00004  -0.00015  -0.00019   1.96747
   A16        1.93272   0.00001   0.00003   0.00009   0.00012   1.93285
   A17        1.95206   0.00000  -0.00005  -0.00004  -0.00009   1.95197
   A18        1.87778   0.00000  -0.00003  -0.00003  -0.00006   1.87772
   A19        1.84454  -0.00002   0.00009  -0.00013  -0.00004   1.84450
   A20        1.99145  -0.00002  -0.00013  -0.00017  -0.00030   1.99114
   A21        1.92970   0.00001   0.00004  -0.00001   0.00004   1.92974
   A22        1.88143   0.00003   0.00006   0.00011   0.00017   1.88160
   A23        1.92408   0.00001   0.00002   0.00032   0.00034   1.92442
   A24        1.89152  -0.00001  -0.00007  -0.00010  -0.00017   1.89135
   A25        1.84145   0.00006   0.00032   0.00011   0.00043   1.84187
    D1        0.40569  -0.00001  -0.00045   0.00020  -0.00025   0.40544
    D2       -1.66418  -0.00001  -0.00053  -0.00005  -0.00058  -1.66476
    D3        2.52503  -0.00001  -0.00048  -0.00003  -0.00051   2.52451
    D4       -1.67639  -0.00002  -0.00054  -0.00012  -0.00066  -1.67705
    D5        2.53692  -0.00002  -0.00062  -0.00037  -0.00099   2.53593
    D6        0.44295  -0.00002  -0.00057  -0.00036  -0.00093   0.44202
    D7        2.47008   0.00000  -0.00039   0.00013  -0.00026   2.46983
    D8        0.40021   0.00000  -0.00047  -0.00011  -0.00058   0.39963
    D9       -1.69377   0.00000  -0.00042  -0.00010  -0.00052  -1.69429
   D10       -0.69766  -0.00002   0.00072  -0.00042   0.00030  -0.69736
   D11        1.38821  -0.00002   0.00083  -0.00032   0.00051   1.38872
   D12       -2.83399   0.00000   0.00079  -0.00020   0.00060  -2.83340
   D13        0.00781   0.00000  -0.00001  -0.00003  -0.00004   0.00778
   D14       -2.06126   0.00000  -0.00010  -0.00019  -0.00029  -2.06155
   D15        2.11772   0.00000  -0.00004  -0.00021  -0.00025   2.11747
   D16        2.07889   0.00000   0.00008   0.00012   0.00020   2.07909
   D17        0.00981   0.00000  -0.00001  -0.00004  -0.00005   0.00977
   D18       -2.09439   0.00000   0.00005  -0.00006  -0.00001  -2.09440
   D19       -2.10061   0.00000   0.00002   0.00012   0.00015  -2.10046
   D20        2.11351   0.00000  -0.00007  -0.00004  -0.00011   2.11340
   D21        0.00930   0.00000  -0.00001  -0.00006  -0.00007   0.00923
   D22       -0.41906   0.00001   0.00046  -0.00015   0.00031  -0.41875
   D23       -2.48302   0.00000   0.00040  -0.00010   0.00030  -2.48272
   D24        1.66286   0.00002   0.00056   0.00016   0.00071   1.66357
   D25        1.64937   0.00001   0.00055   0.00010   0.00065   1.65002
   D26       -0.41458   0.00000   0.00049   0.00015   0.00063  -0.41395
   D27       -2.55189   0.00002   0.00064   0.00041   0.00105  -2.55084
   D28       -2.53954   0.00001   0.00049   0.00010   0.00060  -2.53894
   D29        1.67969   0.00000   0.00043   0.00015   0.00058   1.68027
   D30       -0.45762   0.00002   0.00059   0.00041   0.00100  -0.45662
   D31        0.70300   0.00002  -0.00072   0.00040  -0.00032   0.70268
   D32        2.83903   0.00000  -0.00080   0.00019  -0.00061   2.83842
   D33       -1.38263   0.00002  -0.00084   0.00032  -0.00052  -1.38315
         Item               Value     Threshold  Converged?
 Maximum Force            0.000095     0.000450     YES
 RMS     Force            0.000022     0.000300     YES
 Maximum Displacement     0.001413     0.001800     YES
 RMS     Displacement     0.000302     0.001200     YES
 Predicted change in Energy=-1.158712D-07
 Optimization completed.
    -- Stationary point found.
                           ----------------------------
                           !   Optimized Parameters   !
                           ! (Angstroms and Degrees)  !
 --------------------------                            --------------------------
 ! Name  Definition              Value          Derivative Info.                !
 --------------------------------------------------------------------------------
 ! R1    R(1,2)                  1.5449         -DE/DX =    0.0                 !
 ! R2    R(1,5)                  1.4223         -DE/DX =   -0.0001              !
 ! R3    R(1,6)                  1.1035         -DE/DX =    0.0                 !
 ! R4    R(1,7)                  1.0936         -DE/DX =    0.0                 !
 ! R5    R(2,3)                  1.5544         -DE/DX =    0.0                 !
 ! R6    R(2,8)                  1.0942         -DE/DX =    0.0                 !
 ! R7    R(2,9)                  1.0945         -DE/DX =    0.0                 !
 ! R8    R(3,4)                  1.5443         -DE/DX =    0.0                 !
 ! R9    R(3,10)                 1.0943         -DE/DX =    0.0                 !
 ! R10   R(3,11)                 1.0945         -DE/DX =    0.0                 !
 ! R11   R(4,5)                  1.4222         -DE/DX =   -0.0001              !
 ! R12   R(4,12)                 1.0935         -DE/DX =    0.0                 !
 ! R13   R(4,13)                 1.1036         -DE/DX =    0.0                 !
 ! A1    A(2,1,5)              105.7556         -DE/DX =    0.0                 !
 ! A2    A(2,1,6)              110.55           -DE/DX =    0.0                 !
 ! A3    A(2,1,7)              114.0884         -DE/DX =    0.0                 !
 ! A4    A(5,1,6)              110.2204         -DE/DX =    0.0                 !
 ! A5    A(5,1,7)              107.7859         -DE/DX =    0.0                 !
 ! A6    A(6,1,7)              108.3656         -DE/DX =    0.0                 !
 ! A7    A(1,2,3)              103.2976         -DE/DX =    0.0                 !
 ! A8    A(1,2,8)              110.8113         -DE/DX =    0.0                 !
 ! A9    A(1,2,9)              111.7771         -DE/DX =    0.0                 !
 ! A10   A(3,2,8)              110.712          -DE/DX =    0.0                 !
 ! A11   A(3,2,9)              112.7004         -DE/DX =    0.0                 !
 ! A12   A(8,2,9)              107.5717         -DE/DX =    0.0                 !
 ! A13   A(2,3,4)              103.2711         -DE/DX =    0.0                 !
 ! A14   A(2,3,10)             110.6847         -DE/DX =    0.0                 !
 ! A15   A(2,3,11)             112.7391         -DE/DX =    0.0                 !
 ! A16   A(4,3,10)             110.737          -DE/DX =    0.0                 !
 ! A17   A(4,3,11)             111.845          -DE/DX =    0.0                 !
 ! A18   A(10,3,11)            107.5889         -DE/DX =    0.0                 !
 ! A19   A(3,4,5)              105.6844         -DE/DX =    0.0                 !
 ! A20   A(3,4,12)             114.1014         -DE/DX =    0.0                 !
 ! A21   A(3,4,13)             110.5639         -DE/DX =    0.0                 !
 ! A22   A(5,4,12)             107.7979         -DE/DX =    0.0                 !
 ! A23   A(5,4,13)             110.2416         -DE/DX =    0.0                 !
 ! A24   A(12,4,13)            108.3761         -DE/DX =    0.0                 !
 ! A25   A(1,5,4)              105.5071         -DE/DX =    0.0001              !
 ! D1    D(5,1,2,3)             23.2443         -DE/DX =    0.0                 !
 ! D2    D(5,1,2,8)            -95.3505         -DE/DX =    0.0                 !
 ! D3    D(5,1,2,9)            144.6733         -DE/DX =    0.0                 !
 ! D4    D(6,1,2,3)            -96.0501         -DE/DX =    0.0                 !
 ! D5    D(6,1,2,8)            145.355          -DE/DX =    0.0                 !
 ! D6    D(6,1,2,9)             25.3789         -DE/DX =    0.0                 !
 ! D7    D(7,1,2,3)            141.5254         -DE/DX =    0.0                 !
 ! D8    D(7,1,2,8)             22.9305         -DE/DX =    0.0                 !
 ! D9    D(7,1,2,9)            -97.0457         -DE/DX =    0.0                 !
 ! D10   D(2,1,5,4)            -39.9729         -DE/DX =    0.0                 !
 ! D11   D(6,1,5,4)             79.5388         -DE/DX =    0.0                 !
 ! D12   D(7,1,5,4)           -162.3759         -DE/DX =    0.0                 !
 ! D13   D(1,2,3,4)              0.4476         -DE/DX =    0.0                 !
 ! D14   D(1,2,3,10)          -118.1015         -DE/DX =    0.0                 !
 ! D15   D(1,2,3,11)           121.3366         -DE/DX =    0.0                 !
 ! D16   D(8,2,3,4)            119.1114         -DE/DX =    0.0                 !
 ! D17   D(8,2,3,10)             0.5623         -DE/DX =    0.0                 !
 ! D18   D(8,2,3,11)          -119.9996         -DE/DX =    0.0                 !
 ! D19   D(9,2,3,4)           -120.356          -DE/DX =    0.0                 !
 ! D20   D(9,2,3,10)           121.095          -DE/DX =    0.0                 !
 ! D21   D(9,2,3,11)             0.533          -DE/DX =    0.0                 !
 ! D22   D(2,3,4,5)            -24.0105         -DE/DX =    0.0                 !
 ! D23   D(2,3,4,12)          -142.2667         -DE/DX =    0.0                 !
 ! D24   D(2,3,4,13)            95.2747         -DE/DX =    0.0                 !
 ! D25   D(10,3,4,5)            94.5022         -DE/DX =    0.0                 !
 ! D26   D(10,3,4,12)          -23.7539         -DE/DX =    0.0                 !
 ! D27   D(10,3,4,13)         -146.2126         -DE/DX =    0.0                 !
 ! D28   D(11,3,4,5)          -145.5049         -DE/DX =    0.0                 !
 ! D29   D(11,3,4,12)           96.2389         -DE/DX =    0.0                 !
 ! D30   D(11,3,4,13)          -26.2197         -DE/DX =    0.0                 !
 ! D31   D(3,4,5,1)             40.2791         -DE/DX =    0.0                 !
 ! D32   D(12,4,5,1)           162.6642         -DE/DX =    0.0                 !
 ! D33   D(13,4,5,1)           -79.2189         -DE/DX =    0.0                 !
 --------------------------------------------------------------------------------
 GradGradGradGradGradGradGradGradGradGradGradGradGradGradGradGradGradGrad

                          Input orientation:                          
 ---------------------------------------------------------------------
 Center     Atomic     Atomic              Coordinates (Angstroms)
 Number     Number      Type              X           Y           Z
 ---------------------------------------------------------------------
    1          6             0       -0.115662   -0.030150    1.266540
    2          6             0       -1.496914   -0.608484    0.886524
    3          6             0       -1.485675   -0.569361   -0.667377
    4          6             0       -0.095180    0.015830   -0.997204
    5          8             0        0.293574    0.755345    0.153702
    6          1             0        0.608506   -0.843157    1.446461
    7          1             0       -0.130366    0.619134    2.146350
    8          1             0       -2.302629    0.016427    1.283559
    9          1             0       -1.636878   -1.619187    1.282602
   10          1             0       -2.279699    0.082999   -1.043348
   11          1             0       -1.628786   -1.557183   -1.116500
   12          1             0       -0.089278    0.698906   -1.851146
   13          1             0        0.629174   -0.793225   -1.193836
 ---------------------------------------------------------------------
                    Distance matrix (angstroms):
                    1          2          3          4          5
     1  C    0.000000
     2  C    1.544907   0.000000
     3  C    2.430580   1.554434   0.000000
     4  C    2.264303   2.429621   1.544252   0.000000
     5  O    1.422282   2.367045   2.365321   1.422180   0.000000
     6  H    1.103527   2.191208   2.988121   2.684125   2.079812
     7  H    1.093550   2.227478   3.341623   3.201116   2.041795
     8  H    2.187529   1.094225   2.194701   3.174069   2.926235
     9  H    2.199863   1.094527   2.219778   3.201192   3.261819
    10  H    3.167245   2.194381   1.094259   2.186039   2.916627
    11  H    3.209400   2.220253   1.094524   2.200125   3.264455
    12  H    3.201903   3.344480   2.227047   1.093546   2.041856
    13  H    2.681513   2.980315   2.190859   1.103595   2.080037
                    6          7          8          9         10
     6  H    0.000000
     7  H    1.781593   0.000000
     8  H    3.039758   2.413792   0.000000
     9  H    2.381349   2.832971   1.765916   0.000000
    10  H    3.924110   3.883458   2.327972   2.953083   0.000000
    11  H    3.476215   4.198548   2.947982   2.399916   1.766136
    12  H    3.706625   3.998503   3.897573   4.193924   2.414503
    13  H    2.640849   3.705199   3.922817   3.456870   3.041704
                   11         12         13
    11  H    0.000000
    12  H    2.828379   0.000000
    13  H    2.384952   1.781764   0.000000
 Stoichiometry    C4H8O
 Framework group  C1[X(C4H8O)]
 Deg. of freedom    33
 Full point group                 C1      NOp   1
 Largest Abelian subgroup         C1      NOp   1
 Largest concise Abelian subgroup C1      NOp   1
                         Standard orientation:                         
 ---------------------------------------------------------------------
 Center     Atomic     Atomic              Coordinates (Angstroms)
 Number     Number      Type              X           Y           Z
 ---------------------------------------------------------------------
    1          6             0        1.133362   -0.469842    0.155285
    2          6             0        0.775196    1.019232   -0.047481
    3          6             0       -0.779225    1.015576   -0.052713
    4          6             0       -1.130936   -0.473079    0.159229
    5          8             0        0.001409   -1.204063   -0.294702
    6          1             0        1.325355   -0.680379    1.221391
    7          1             0        1.999374   -0.803373   -0.423189
    8          1             0        1.164544    1.386256   -1.001959
    9          1             0        1.193445    1.648911    0.744076
   10          1             0       -1.163352    1.371458   -1.013545
   11          1             0       -1.206429    1.650407    0.729891
   12          1             0       -1.999104   -0.812592   -0.412487
   13          1             0       -1.315487   -0.679499    1.227524
 ---------------------------------------------------------------------
 Rotational constants (GHZ):      7.1202138      6.8903263      3.9701275

 **********************************************************************

            Population analysis using the SCF density.

 **********************************************************************

 Orbital symmetries:
       Occupied  (A) (A) (A) (A) (A) (A) (A) (A) (A) (A) (A) (A)
                 (A) (A) (A) (A) (A) (A) (A) (A)
       Virtual   (A) (A) (A) (A) (A) (A) (A) (A) (A) (A) (A) (A)
                 (A) (A) (A) (A) (A) (A) (A) (A) (A) (A) (A) (A)
                 (A) (A) (A) (A) (A) (A) (A) (A) (A) (A) (A) (A)
                 (A) (A) (A) (A) (A) (A) (A) (A) (A) (A) (A) (A)
                 (A) (A) (A) (A) (A) (A) (A) (A) (A) (A) (A) (A)
                 (A) (A) (A) (A) (A) (A)
 The electronic state is 1-A.
 Alpha  occ. eigenvalues --  -19.13261 -10.21746 -10.21743 -10.17730 -10.17720
 Alpha  occ. eigenvalues --   -1.02827  -0.77190  -0.72923  -0.59381  -0.58692
 Alpha  occ. eigenvalues --   -0.49498  -0.47980  -0.44712  -0.41090  -0.39320
 Alpha  occ. eigenvalues --   -0.35005  -0.34557  -0.32504  -0.31205  -0.24690
 Alpha virt. eigenvalues --    0.08368   0.10381   0.14117   0.14658   0.15513
 Alpha virt. eigenvalues --    0.15985   0.17376   0.19391   0.19730   0.21794
 Alpha virt. eigenvalues --    0.24911   0.28995   0.32408   0.51754   0.54361
 Alpha virt. eigenvalues --    0.54452   0.57993   0.58728   0.58885   0.63118
 Alpha virt. eigenvalues --    0.64432   0.68902   0.70931   0.77363   0.81775
 Alpha virt. eigenvalues --    0.83270   0.86076   0.86510   0.86800   0.90542
 Alpha virt. eigenvalues --    0.92346   0.94731   0.95697   1.02678   1.04400
 Alpha virt. eigenvalues --    1.07181   1.29472   1.33800   1.33957   1.40445
 Alpha virt. eigenvalues --    1.43871   1.64747   1.70624   1.77652   1.82611
 Alpha virt. eigenvalues --    1.85568   1.86035   1.89493   1.94720   1.97386
 Alpha virt. eigenvalues --    2.06004   2.06805   2.12047   2.12468   2.20438
 Alpha virt. eigenvalues --    2.25407   2.29327   2.37744   2.43521   2.47794
 Alpha virt. eigenvalues --    2.54725   2.64869   2.66499   2.70091   2.71252
 Alpha virt. eigenvalues --    2.97685
          Condensed to atoms (all electrons):
              1          2          3          4          5          6
     1  C    4.804480   0.366184  -0.068641  -0.070701   0.289589   0.365140
     2  C    0.366184   5.086576   0.381063  -0.068466  -0.059179  -0.055826
     3  C   -0.068641   0.381063   5.085055   0.366760  -0.059095  -0.002663
     4  C   -0.070701  -0.068466   0.366760   4.804769   0.289271  -0.002705
     5  O    0.289589  -0.059179  -0.059095   0.289271   8.155654  -0.045130
     6  H    0.365140  -0.055826  -0.002663  -0.002705  -0.045130   0.657875
     7  H    0.378237  -0.028165   0.004249   0.006996  -0.032450  -0.048009
     8  H   -0.029938   0.373977  -0.030979   0.002703   0.002374   0.005187
     9  H   -0.026078   0.359781  -0.030101   0.003998   0.002978  -0.003242
    10  H    0.002635  -0.031209   0.374148  -0.030099   0.002364   0.000010
    11  H    0.004069  -0.030058   0.359366  -0.025980   0.003016   0.000620
    12  H    0.006984   0.004311  -0.028210   0.378281  -0.032411  -0.000453
    13  H   -0.002663  -0.002894  -0.055795   0.364901  -0.045075   0.009584
              7          8          9         10         11         12
     1  C    0.378237  -0.029938  -0.026078   0.002635   0.004069   0.006984
     2  C   -0.028165   0.373977   0.359781  -0.031209  -0.030058   0.004311
     3  C    0.004249  -0.030979  -0.030101   0.374148   0.359366  -0.028210
     4  C    0.006996   0.002703   0.003998  -0.030099  -0.025980   0.378281
     5  O   -0.032450   0.002374   0.002978   0.002364   0.003016  -0.032411
     6  H   -0.048009   0.005187  -0.003242   0.000010   0.000620  -0.000453
     7  H    0.582716  -0.007954   0.002795  -0.000149  -0.000147  -0.000235
     8  H   -0.007954   0.577483  -0.035486  -0.009818   0.003919  -0.000151
     9  H    0.002795  -0.035486   0.587317   0.003958  -0.006762  -0.000147
    10  H   -0.000149  -0.009818   0.003958   0.577629  -0.035430  -0.007950
    11  H   -0.000147   0.003919  -0.006762  -0.035430   0.587529   0.002749
    12  H   -0.000235  -0.000151  -0.000147  -0.007950   0.002749   0.582546
    13  H   -0.000454   0.000009   0.000653   0.005213  -0.003095  -0.047932
             13
     1  C   -0.002663
     2  C   -0.002894
     3  C   -0.055795
     4  C    0.364901
     5  O   -0.045075
     6  H    0.009584
     7  H   -0.000454
     8  H    0.000009
     9  H    0.000653
    10  H    0.005213
    11  H   -0.003095
    12  H   -0.047932
    13  H    0.658083
 Mulliken atomic charges:
              1
     1  C   -0.019296
     2  C   -0.296095
     3  C   -0.295156
     4  C   -0.019727
     5  O   -0.471906
     6  H    0.119612
     7  H    0.142571
     8  H    0.148674
     9  H    0.140336
    10  H    0.148697
    11  H    0.140204
    12  H    0.142620
    13  H    0.119465
 Sum of Mulliken charges=   0.00000
 Atomic charges with hydrogens summed into heavy atoms:
              1
     1  C    0.242888
     2  C   -0.007085
     3  C   -0.006255
     4  C    0.242358
     5  O   -0.471906
     6  H    0.000000
     7  H    0.000000
     8  H    0.000000
     9  H    0.000000
    10  H    0.000000
    11  H    0.000000
    12  H    0.000000
    13  H    0.000000
 Sum of Mulliken charges=   0.00000
 Electronic spatial extent (au):  <R**2>=   374.7319
 Charge=     0.0000 electrons
 Dipole moment (field-independent basis, Debye):
    X=    -0.0016    Y=     1.4737    Z=     0.5625  Tot=     1.5774
 Quadrupole moment (field-independent basis, Debye-Ang):
   XX=   -28.8675   YY=   -34.1679   ZZ=   -31.0386
   XY=     0.0083   XZ=    -0.0042   YZ=    -0.7714
 Traceless Quadrupole moment (field-independent basis, Debye-Ang):
   XX=     2.4905   YY=    -2.8099   ZZ=     0.3194
   XY=     0.0083   XZ=    -0.0042   YZ=    -0.7714
 Octapole moment (field-independent basis, Debye-Ang**2):
  XXX=     0.0034  YYY=    -0.4169  ZZZ=    -1.1886  XYY=    -0.0168
  XXY=    -3.7581  XXZ=    -1.7564  XZZ=     0.0121  YZZ=    -0.3025
  YYZ=     0.7509  XYZ=    -0.0091
 Hexadecapole moment (field-independent basis, Debye-Ang**3):
 XXXX=  -216.5826 YYYY=  -215.1664 ZZZZ=   -63.1043 XXXY=     0.0136
 XXXZ=    -0.0352 YYYX=     0.0147 YYYZ=     1.4151 ZZZX=     0.0136
 ZZZY=     0.1129 XXYY=   -68.8764 XXZZ=   -45.4871 YYZZ=   -43.6723
 XXYZ=     2.2002 YYXZ=    -0.0201 ZZXY=    -0.0011
 N-N= 1.900574279676D+02 E-N=-9.217346772767D+02  KE= 2.309935352665D+02
 1\1\GINC-KETIDE\FOpt\RB3LYP\Gen\C4H8O1\RZEPA\27-Nov-2004\0\\# RB3LYP/G
 EN OPT FREQ\\from SS.mol\\0,1\C,0.4753866028,0.0824876796,1.1386735976
 \C,-0.9058649734,-0.4958456166,0.7586578641\C,-0.8946265773,-0.4567234
 255,-0.7952431757\C,0.49586917,0.1284681439,-1.1250703224\O,0.88462267
 08,0.8679827964,0.0258351523\H,1.1995544033,-0.7305192868,1.3185941751
 \H,0.4606826679,0.7317720458,2.0184835052\H,-1.7115806151,0.1290650578
 ,1.155692646\H,-1.0458297061,-1.5065495077,1.1547355445\H,-1.688650504
 1,0.1956372521,-1.1712143756\H,-1.0377371323,-1.4445451415,-1.24436589
 2\H,0.5017711727,0.8115435434,-1.9790124006\H,1.2202230149,-0.68058702
 2,-1.3217022025\\Version=x86-Linux-G03RevB.04\State=1-A\HF=-232.445400
 2\RMSD=7.871e-09\RMSF=5.434e-05\Dipole=-0.3854248,-0.4862085,-0.013549
 2\PG=C01 [X(C4H8O1)]\\@


 YOU ARE IN A MAZE OF TWISTY LITTLE PASSAGES.
 Job cpu time:  0 days  0 hours 11 minutes 14.3 seconds.
 File lengths (MBytes):  RWF=     11 Int=      0 D2E=      0 Chk=      5 Scr=      1
 Normal termination of Gaussian 03 at Sat Nov 27 17:27:27 2004.
 Link1:  Proceeding to internal job step number  2.
 ----------------------------------------------------------------
 #N Geom=AllCheck Guess=Read SCRF=Check GenChk RB3LYP/ChkBas Freq
 ----------------------------------------------------------------
 1/10=4,29=7,30=1,38=1,40=1,46=1/1,3;
 2/40=1/2;
 3/5=7,6=2,11=2,16=1,25=1,30=1,67=1,70=2,71=2,74=-5,82=7/1,2,3;
 4/5=1,7=1/1;
 5/5=2,38=6/2;
 8/6=4,10=90,11=11/1;
 11/6=1,8=1,9=11,15=111,16=1/1,2,10;
 10/6=1/2;
 6/7=2,8=2,9=2,10=2,18=1,28=1/1;
 7/8=1,10=1,25=1/1,2,3,16;
 1/10=4,30=1,46=1/3;
 99//99;
 -----------
 from SS.mol
 -----------
 Redundant internal coordinates taken from checkpoint file:
 thf-gen.chk
 Charge =  0 Multiplicity = 1
 C,0,0.4753866028,0.0824876796,1.1386735976
 C,0,-0.9058649734,-0.4958456166,0.7586578641
 C,0,-0.8946265773,-0.4567234255,-0.7952431757
 C,0,0.49586917,0.1284681439,-1.1250703224
 O,0,0.8846226708,0.8679827964,0.0258351523
 H,0,1.1995544033,-0.7305192868,1.3185941751
 H,0,0.4606826679,0.7317720458,2.0184835052
 H,0,-1.7115806151,0.1290650578,1.155692646
 H,0,-1.0458297061,-1.5065495077,1.1547355445
 H,0,-1.6886505041,0.1956372521,-1.1712143756
 H,0,-1.0377371323,-1.4445451415,-1.244365892
 H,0,0.5017711727,0.8115435434,-1.9790124006
 H,0,1.2202230149,-0.680587022,-1.3217022025
 Recover connectivity data from disk.

 GradGradGradGradGradGradGradGradGradGradGradGradGradGradGradGradGradGrad
 Berny optimization.
 Initialization pass.
                           ----------------------------
                           !    Initial Parameters    !
                           ! (Angstroms and Degrees)  !
 --------------------------                            --------------------------
 ! Name  Definition              Value          Derivative Info.                !
 --------------------------------------------------------------------------------
 ! R1    R(1,2)                  1.5449         calculate D2E/DX2 analytically  !
 ! R2    R(1,5)                  1.4223         calculate D2E/DX2 analytically  !
 ! R3    R(1,6)                  1.1035         calculate D2E/DX2 analytically  !
 ! R4    R(1,7)                  1.0936         calculate D2E/DX2 analytically  !
 ! R5    R(2,3)                  1.5544         calculate D2E/DX2 analytically  !
 ! R6    R(2,8)                  1.0942         calculate D2E/DX2 analytically  !
 ! R7    R(2,9)                  1.0945         calculate D2E/DX2 analytically  !
 ! R8    R(3,4)                  1.5443         calculate D2E/DX2 analytically  !
 ! R9    R(3,10)                 1.0943         calculate D2E/DX2 analytically  !
 ! R10   R(3,11)                 1.0945         calculate D2E/DX2 analytically  !
 ! R11   R(4,5)                  1.4222         calculate D2E/DX2 analytically  !
 ! R12   R(4,12)                 1.0935         calculate D2E/DX2 analytically  !
 ! R13   R(4,13)                 1.1036         calculate D2E/DX2 analytically  !
 ! A1    A(2,1,5)              105.7556         calculate D2E/DX2 analytically  !
 ! A2    A(2,1,6)              110.55           calculate D2E/DX2 analytically  !
 ! A3    A(2,1,7)              114.0884         calculate D2E/DX2 analytically  !
 ! A4    A(5,1,6)              110.2204         calculate D2E/DX2 analytically  !
 ! A5    A(5,1,7)              107.7859         calculate D2E/DX2 analytically  !
 ! A6    A(6,1,7)              108.3656         calculate D2E/DX2 analytically  !
 ! A7    A(1,2,3)              103.2976         calculate D2E/DX2 analytically  !
 ! A8    A(1,2,8)              110.8113         calculate D2E/DX2 analytically  !
 ! A9    A(1,2,9)              111.7771         calculate D2E/DX2 analytically  !
 ! A10   A(3,2,8)              110.712          calculate D2E/DX2 analytically  !
 ! A11   A(3,2,9)              112.7004         calculate D2E/DX2 analytically  !
 ! A12   A(8,2,9)              107.5717         calculate D2E/DX2 analytically  !
 ! A13   A(2,3,4)              103.2711         calculate D2E/DX2 analytically  !
 ! A14   A(2,3,10)             110.6847         calculate D2E/DX2 analytically  !
 ! A15   A(2,3,11)             112.7391         calculate D2E/DX2 analytically  !
 ! A16   A(4,3,10)             110.737          calculate D2E/DX2 analytically  !
 ! A17   A(4,3,11)             111.845          calculate D2E/DX2 analytically  !
 ! A18   A(10,3,11)            107.5889         calculate D2E/DX2 analytically  !
 ! A19   A(3,4,5)              105.6844         calculate D2E/DX2 analytically  !
 ! A20   A(3,4,12)             114.1014         calculate D2E/DX2 analytically  !
 ! A21   A(3,4,13)             110.5639         calculate D2E/DX2 analytically  !
 ! A22   A(5,4,12)             107.7979         calculate D2E/DX2 analytically  !
 ! A23   A(5,4,13)             110.2416         calculate D2E/DX2 analytically  !
 ! A24   A(12,4,13)            108.3761         calculate D2E/DX2 analytically  !
 ! A25   A(1,5,4)              105.5071         calculate D2E/DX2 analytically  !
 ! D1    D(5,1,2,3)             23.2443         calculate D2E/DX2 analytically  !
 ! D2    D(5,1,2,8)            -95.3505         calculate D2E/DX2 analytically  !
 ! D3    D(5,1,2,9)            144.6733         calculate D2E/DX2 analytically  !
 ! D4    D(6,1,2,3)            -96.0501         calculate D2E/DX2 analytically  !
 ! D5    D(6,1,2,8)            145.355          calculate D2E/DX2 analytically  !
 ! D6    D(6,1,2,9)             25.3789         calculate D2E/DX2 analytically  !
 ! D7    D(7,1,2,3)            141.5254         calculate D2E/DX2 analytically  !
 ! D8    D(7,1,2,8)             22.9305         calculate D2E/DX2 analytically  !
 ! D9    D(7,1,2,9)            -97.0457         calculate D2E/DX2 analytically  !
 ! D10   D(2,1,5,4)            -39.9729         calculate D2E/DX2 analytically  !
 ! D11   D(6,1,5,4)             79.5388         calculate D2E/DX2 analytically  !
 ! D12   D(7,1,5,4)           -162.3759         calculate D2E/DX2 analytically  !
 ! D13   D(1,2,3,4)              0.4476         calculate D2E/DX2 analytically  !
 ! D14   D(1,2,3,10)          -118.1015         calculate D2E/DX2 analytically  !
 ! D15   D(1,2,3,11)           121.3366         calculate D2E/DX2 analytically  !
 ! D16   D(8,2,3,4)            119.1114         calculate D2E/DX2 analytically  !
 ! D17   D(8,2,3,10)             0.5623         calculate D2E/DX2 analytically  !
 ! D18   D(8,2,3,11)          -119.9996         calculate D2E/DX2 analytically  !
 ! D19   D(9,2,3,4)           -120.356          calculate D2E/DX2 analytically  !
 ! D20   D(9,2,3,10)           121.095          calculate D2E/DX2 analytically  !
 ! D21   D(9,2,3,11)             0.533          calculate D2E/DX2 analytically  !
 ! D22   D(2,3,4,5)            -24.0105         calculate D2E/DX2 analytically  !
 ! D23   D(2,3,4,12)          -142.2667         calculate D2E/DX2 analytically  !
 ! D24   D(2,3,4,13)            95.2747         calculate D2E/DX2 analytically  !
 ! D25   D(10,3,4,5)            94.5022         calculate D2E/DX2 analytically  !
 ! D26   D(10,3,4,12)          -23.7539         calculate D2E/DX2 analytically  !
 ! D27   D(10,3,4,13)         -146.2126         calculate D2E/DX2 analytically  !
 ! D28   D(11,3,4,5)          -145.5049         calculate D2E/DX2 analytically  !
 ! D29   D(11,3,4,12)           96.2389         calculate D2E/DX2 analytically  !
 ! D30   D(11,3,4,13)          -26.2197         calculate D2E/DX2 analytically  !
 ! D31   D(3,4,5,1)             40.2791         calculate D2E/DX2 analytically  !
 ! D32   D(12,4,5,1)           162.6642         calculate D2E/DX2 analytically  !
 ! D33   D(13,4,5,1)           -79.2189         calculate D2E/DX2 analytically  !
 --------------------------------------------------------------------------------
 Trust Radius=3.00D-01 FncErr=1.00D-07 GrdErr=1.00D-07
 Number of steps in this run=   2 maximum allowed number of steps=   2.
 GradGradGradGradGradGradGradGradGradGradGradGradGradGradGradGradGradGrad

                          Input orientation:                          
 ---------------------------------------------------------------------
 Center     Atomic     Atomic              Coordinates (Angstroms)
 Number     Number      Type              X           Y           Z
 ---------------------------------------------------------------------
    1          6             0        0.475387    0.082488    1.138674
    2          6             0       -0.905865   -0.495846    0.758658
    3          6             0       -0.894627   -0.456723   -0.795243
    4          6             0        0.495869    0.128468   -1.125070
    5          8             0        0.884623    0.867983    0.025835
    6          1             0        1.199554   -0.730519    1.318594
    7          1             0        0.460683    0.731772    2.018484
    8          1             0       -1.711581    0.129065    1.155693
    9          1             0       -1.045830   -1.506550    1.154736
   10          1             0       -1.688651    0.195637   -1.171214
   11          1             0       -1.037737   -1.444545   -1.244366
   12          1             0        0.501771    0.811544   -1.979012
   13          1             0        1.220223   -0.680587   -1.321702
 ---------------------------------------------------------------------
                    Distance matrix (angstroms):
                    1          2          3          4          5
     1  C    0.000000
     2  C    1.544907   0.000000
     3  C    2.430580   1.554434   0.000000
     4  C    2.264303   2.429621   1.544252   0.000000
     5  O    1.422282   2.367045   2.365321   1.422180   0.000000
     6  H    1.103527   2.191208   2.988121   2.684125   2.079812
     7  H    1.093550   2.227478   3.341623   3.201116   2.041795
     8  H    2.187529   1.094225   2.194701   3.174069   2.926235
     9  H    2.199863   1.094527   2.219778   3.201192   3.261819
    10  H    3.167245   2.194381   1.094259   2.186039   2.916627
    11  H    3.209400   2.220253   1.094524   2.200125   3.264455
    12  H    3.201903   3.344480   2.227047   1.093546   2.041856
    13  H    2.681513   2.980315   2.190859   1.103595   2.080037
                    6          7          8          9         10
     6  H    0.000000
     7  H    1.781593   0.000000
     8  H    3.039758   2.413792   0.000000
     9  H    2.381349   2.832971   1.765916   0.000000
    10  H    3.924110   3.883458   2.327972   2.953083   0.000000
    11  H    3.476215   4.198548   2.947982   2.399916   1.766136
    12  H    3.706625   3.998503   3.897573   4.193924   2.414503
    13  H    2.640849   3.705199   3.922817   3.456870   3.041704
                   11         12         13
    11  H    0.000000
    12  H    2.828379   0.000000
    13  H    2.384952   1.781764   0.000000
 Stoichiometry    C4H8O
 Framework group  C1[X(C4H8O)]
 Deg. of freedom    33
 Full point group                 C1      NOp   1
 Largest Abelian subgroup         C1      NOp   1
 Largest concise Abelian subgroup C1      NOp   1
                         Standard orientation:                         
 ---------------------------------------------------------------------
 Center     Atomic     Atomic              Coordinates (Angstroms)
 Number     Number      Type              X           Y           Z
 ---------------------------------------------------------------------
    1          6             0        1.133362   -0.469842    0.155285
    2          6             0        0.775196    1.019232   -0.047481
    3          6             0       -0.779225    1.015576   -0.052713
    4          6             0       -1.130936   -0.473079    0.159229
    5          8             0        0.001409   -1.204063   -0.294702
    6          1             0        1.325355   -0.680379    1.221391
    7          1             0        1.999374   -0.803373   -0.423189
    8          1             0        1.164544    1.386256   -1.001959
    9          1             0        1.193445    1.648911    0.744076
   10          1             0       -1.163352    1.371458   -1.013545
   11          1             0       -1.206429    1.650407    0.729891
   12          1             0       -1.999104   -0.812592   -0.412487
   13          1             0       -1.315487   -0.679499    1.227524
 ---------------------------------------------------------------------
 Rotational constants (GHZ):      7.1202138      6.8903263      3.9701275
 Basis read from chk: thf-gen.chk (5D, 7F)
 There are    86 symmetry adapted basis functions of A   symmetry.
 Integral buffers will be    262144 words long.
 Raffenetti 2 integral format.
 Two-electron integral symmetry is turned on.
    86 basis functions,   172 primitive gaussians,    91 cartesian basis functions
    20 alpha electrons       20 beta electrons
       nuclear repulsion energy       190.0574279676 Hartrees.
 NAtoms=   13 NActive=   13 NUniq=   13 SFac= 1.00D+00 NAtFMM=   60 Big=F
 One-electron integrals computed using PRISM.
 NBasis=    86 RedAO= T  NBF=    86
 NBsUse=    86 1.00D-06 NBFU=    86
 Initial guess read from the checkpoint file:
 thf-gen.chk
 Initial guess orbital symmetries:
       Occupied  (A) (A) (A) (A) (A) (A) (A) (A) (A) (A) (A) (A)
                 (A) (A) (A) (A) (A) (A) (A) (A)
       Virtual   (A) (A) (A) (A) (A) (A) (A) (A) (A) (A) (A) (A)
                 (A) (A) (A) (A) (A) (A) (A) (A) (A) (A) (A) (A)
                 (A) (A) (A) (A) (A) (A) (A) (A) (A) (A) (A) (A)
                 (A) (A) (A) (A) (A) (A) (A) (A) (A) (A) (A) (A)
                 (A) (A) (A) (A) (A) (A) (A) (A) (A) (A) (A) (A)
                 (A) (A) (A) (A) (A) (A)
 Requested convergence on RMS density matrix=1.00D-08 within 128 cycles.
 Requested convergence on MAX density matrix=1.00D-06.
 Requested convergence on             energy=1.00D-06.
 No special actions if energy rises.
 Keep R1 integrals in memory in canonical form, NReq=     9728516.
 SCF Done:  E(RB+HF-LYP) =  -232.445400183     A.U. after    1 cycles
             Convg  =    0.1553D-08             -V/T =  2.0063
             S**2   =   0.0000
 Range of M.O.s used for correlation:     1    86
 NBasis=    86 NAE=    20 NBE=    20 NFC=     0 NFV=     0
 NROrb=     86 NOA=    20 NOB=    20 NVA=    66 NVB=    66
 Symmetrizing basis deriv contribution to polar:
 IMax=3 JMax=2 DiffMx= 0.00D+00
 G2DrvN: will do   14 centers at a time, making    1 passes doing MaxLOS=2.
 FoFDir/FoFCou used for L=0 through L=2.
          Differentiating once with respect to electric field.
                with respect to dipole field.
          Differentiating once with respect to nuclear coordinates.
          Store integrals in memory, NReq=     9197494.
          There are  42 degrees of freedom in the 1st order CPHF.
    39 vectors were produced by pass  0.
 AX will form  39 AO Fock derivatives at one time.
    39 vectors were produced by pass  1.
    39 vectors were produced by pass  2.
    39 vectors were produced by pass  3.
    39 vectors were produced by pass  4.
    17 vectors were produced by pass  5.
     3 vectors were produced by pass  6.
 Inv2:  IOpt= 1 Iter= 1 AM= 2.28D-15 Conv= 1.00D-12.
 Inverted reduced A of dimension  215 with in-core refinement.
 Isotropic polarizability for W=    0.000000       43.16 Bohr**3.
 End of Minotr Frequency-dependent properties file   721 does not exist.

 **********************************************************************

            Population analysis using the SCF density.

 **********************************************************************

 Orbital symmetries:
       Occupied  (A) (A) (A) (A) (A) (A) (A) (A) (A) (A) (A) (A)
                 (A) (A) (A) (A) (A) (A) (A) (A)
       Virtual   (A) (A) (A) (A) (A) (A) (A) (A) (A) (A) (A) (A)
                 (A) (A) (A) (A) (A) (A) (A) (A) (A) (A) (A) (A)
                 (A) (A) (A) (A) (A) (A) (A) (A) (A) (A) (A) (A)
                 (A) (A) (A) (A) (A) (A) (A) (A) (A) (A) (A) (A)
                 (A) (A) (A) (A) (A) (A) (A) (A) (A) (A) (A) (A)
                 (A) (A) (A) (A) (A) (A)
 The electronic state is 1-A.
 Alpha  occ. eigenvalues --  -19.13261 -10.21746 -10.21743 -10.17730 -10.17720
 Alpha  occ. eigenvalues --   -1.02827  -0.77190  -0.72923  -0.59381  -0.58692
 Alpha  occ. eigenvalues --   -0.49498  -0.47980  -0.44712  -0.41090  -0.39320
 Alpha  occ. eigenvalues --   -0.35005  -0.34557  -0.32504  -0.31205  -0.24690
 Alpha virt. eigenvalues --    0.08368   0.10381   0.14117   0.14658   0.15513
 Alpha virt. eigenvalues --    0.15985   0.17376   0.19391   0.19730   0.21794
 Alpha virt. eigenvalues --    0.24911   0.28995   0.32408   0.51754   0.54361
 Alpha virt. eigenvalues --    0.54452   0.57993   0.58728   0.58885   0.63118
 Alpha virt. eigenvalues --    0.64432   0.68902   0.70931   0.77363   0.81775
 Alpha virt. eigenvalues --    0.83270   0.86076   0.86510   0.86800   0.90542
 Alpha virt. eigenvalues --    0.92346   0.94731   0.95697   1.02678   1.04400
 Alpha virt. eigenvalues --    1.07181   1.29472   1.33800   1.33957   1.40445
 Alpha virt. eigenvalues --    1.43871   1.64747   1.70624   1.77652   1.82611
 Alpha virt. eigenvalues --    1.85568   1.86035   1.89493   1.94720   1.97386
 Alpha virt. eigenvalues --    2.06004   2.06805   2.12047   2.12468   2.20438
 Alpha virt. eigenvalues --    2.25407   2.29327   2.37744   2.43521   2.47794
 Alpha virt. eigenvalues --    2.54725   2.64869   2.66499   2.70091   2.71252
 Alpha virt. eigenvalues --    2.97685
          Condensed to atoms (all electrons):
              1          2          3          4          5          6
     1  C    4.804480   0.366184  -0.068641  -0.070701   0.289589   0.365140
     2  C    0.366184   5.086576   0.381063  -0.068466  -0.059179  -0.055826
     3  C   -0.068641   0.381063   5.085055   0.366760  -0.059095  -0.002663
     4  C   -0.070701  -0.068466   0.366760   4.804769   0.289271  -0.002705
     5  O    0.289589  -0.059179  -0.059095   0.289271   8.155654  -0.045130
     6  H    0.365140  -0.055826  -0.002663  -0.002705  -0.045130   0.657875
     7  H    0.378237  -0.028165   0.004249   0.006996  -0.032450  -0.048009
     8  H   -0.029938   0.373977  -0.030979   0.002703   0.002374   0.005187
     9  H   -0.026078   0.359781  -0.030101   0.003998   0.002978  -0.003242
    10  H    0.002635  -0.031209   0.374148  -0.030099   0.002364   0.000010
    11  H    0.004069  -0.030058   0.359366  -0.025980   0.003016   0.000620
    12  H    0.006984   0.004311  -0.028210   0.378281  -0.032411  -0.000453
    13  H   -0.002663  -0.002894  -0.055795   0.364901  -0.045075   0.009584
              7          8          9         10         11         12
     1  C    0.378237  -0.029938  -0.026078   0.002635   0.004069   0.006984
     2  C   -0.028165   0.373977   0.359781  -0.031209  -0.030058   0.004311
     3  C    0.004249  -0.030979  -0.030101   0.374148   0.359366  -0.028210
     4  C    0.006996   0.002703   0.003998  -0.030099  -0.025980   0.378281
     5  O   -0.032450   0.002374   0.002978   0.002364   0.003016  -0.032411
     6  H   -0.048009   0.005187  -0.003242   0.000010   0.000620  -0.000453
     7  H    0.582716  -0.007954   0.002795  -0.000149  -0.000147  -0.000235
     8  H   -0.007954   0.577483  -0.035486  -0.009818   0.003919  -0.000151
     9  H    0.002795  -0.035486   0.587317   0.003958  -0.006762  -0.000147
    10  H   -0.000149  -0.009818   0.003958   0.577629  -0.035430  -0.007950
    11  H   -0.000147   0.003919  -0.006762  -0.035430   0.587529   0.002749
    12  H   -0.000235  -0.000151  -0.000147  -0.007950   0.002749   0.582546
    13  H   -0.000454   0.000009   0.000653   0.005213  -0.003095  -0.047932
             13
     1  C   -0.002663
     2  C   -0.002894
     3  C   -0.055795
     4  C    0.364901
     5  O   -0.045075
     6  H    0.009584
     7  H   -0.000454
     8  H    0.000009
     9  H    0.000653
    10  H    0.005213
    11  H   -0.003095
    12  H   -0.047932
    13  H    0.658083
 Mulliken atomic charges:
              1
     1  C   -0.019296
     2  C   -0.296095
     3  C   -0.295156
     4  C   -0.019727
     5  O   -0.471906
     6  H    0.119612
     7  H    0.142571
     8  H    0.148674
     9  H    0.140336
    10  H    0.148697
    11  H    0.140204
    12  H    0.142620
    13  H    0.119465
 Sum of Mulliken charges=   0.00000
 Atomic charges with hydrogens summed into heavy atoms:
              1
     1  C    0.242888
     2  C   -0.007085
     3  C   -0.006255
     4  C    0.242358
     5  O   -0.471906
     6  H    0.000000
     7  H    0.000000
     8  H    0.000000
     9  H    0.000000
    10  H    0.000000
    11  H    0.000000
    12  H    0.000000
    13  H    0.000000
 Sum of Mulliken charges=   0.00000
 APT atomic charges:
              1
     1  C    0.502357
     2  C    0.051583
     3  C    0.052215
     4  C    0.502560
     5  O   -0.678666
     6  H   -0.097899
     7  H   -0.042110
     8  H   -0.040695
     9  H   -0.034398
    10  H   -0.040903
    11  H   -0.034223
    12  H   -0.041870
    13  H   -0.097951
 Sum of APT charges=   0.00000
 APT Atomic charges with hydrogens summed into heavy atoms:
              1
     1  C    0.362348
     2  C   -0.023510
     3  C   -0.022911
     4  C    0.362739
     5  O   -0.678666
     6  H    0.000000
     7  H    0.000000
     8  H    0.000000
     9  H    0.000000
    10  H    0.000000
    11  H    0.000000
    12  H    0.000000
    13  H    0.000000
 Sum of APT charges=   0.00000
 Electronic spatial extent (au):  <R**2>=   374.7319
 Charge=     0.0000 electrons
 Dipole moment (field-independent basis, Debye):
    X=    -0.0016    Y=     1.4737    Z=     0.5625  Tot=     1.5774
 Quadrupole moment (field-independent basis, Debye-Ang):
   XX=   -28.8675   YY=   -34.1679   ZZ=   -31.0386
   XY=     0.0083   XZ=    -0.0042   YZ=    -0.7714
 Traceless Quadrupole moment (field-independent basis, Debye-Ang):
   XX=     2.4905   YY=    -2.8099   ZZ=     0.3194
   XY=     0.0083   XZ=    -0.0042   YZ=    -0.7714
 Octapole moment (field-independent basis, Debye-Ang**2):
  XXX=     0.0034  YYY=    -0.4169  ZZZ=    -1.1886  XYY=    -0.0168
  XXY=    -3.7581  XXZ=    -1.7564  XZZ=     0.0121  YZZ=    -0.3025
  YYZ=     0.7509  XYZ=    -0.0091
 Hexadecapole moment (field-independent basis, Debye-Ang**3):
 XXXX=  -216.5826 YYYY=  -215.1664 ZZZZ=   -63.1043 XXXY=     0.0136
 XXXZ=    -0.0352 YYYX=     0.0147 YYYZ=     1.4151 ZZZX=     0.0136
 ZZZY=     0.1129 XXYY=   -68.8764 XXZZ=   -45.4871 YYZZ=   -43.6723
 XXYZ=     2.2002 YYXZ=    -0.0201 ZZXY=    -0.0011
 N-N= 1.900574279676D+02 E-N=-9.217346789808D+02  KE= 2.309935357280D+02
  Exact polarizability:  47.837   0.008  41.314  -0.004  -0.522  40.327
 Approx polarizability:  60.699   0.011  54.732  -0.010   1.514  57.648
 Full mass-weighted force constant matrix:
 Low frequencies ---  -15.6990  -13.2629   -0.0005    0.0008    0.0009   16.5440
 Low frequencies ---   23.3304  278.2253  646.5560
 Diagonal vibrational polarizability:
        6.1925603       2.9713484       2.5434558
 Harmonic frequencies (cm**-1), IR intensities (KM/Mole), Raman scattering
 activities (A**4/AMU), depolarization ratios for plane and unpolarized
 incident light, reduced masses (AMU), force constants (mDyne/A),
 and normal coordinates:
                     1                      2                      3
                     A                      A                      A
 Frequencies --    21.6423               278.2220               646.5560
 Red. masses --     1.5934                 2.0877                 2.4095
 Frc consts  --     0.0004                 0.0952                 0.5935
 IR Inten    --     0.0611                 7.4170                 4.7397
 Atom AN      X      Y      Z        X      Y      Z        X      Y      Z
   1   6    -0.02   0.02   0.09     0.07   0.01  -0.12     0.10   0.01   0.03
   2   6     0.01  -0.02  -0.13     0.00   0.02   0.03     0.05  -0.08   0.01
   3   6     0.01   0.02   0.13     0.00   0.02   0.03     0.00  -0.13   0.03
   4   6    -0.02  -0.02  -0.09    -0.07   0.01  -0.12    -0.13  -0.03   0.05
   5   8     0.03   0.00   0.00     0.00  -0.07   0.19    -0.01   0.22  -0.01
   6   1    -0.18   0.13   0.14     0.44  -0.01  -0.19     0.27  -0.15  -0.03
   7   1     0.06  -0.05   0.25    -0.09   0.08  -0.40    -0.04  -0.01  -0.17
   8   1    -0.15  -0.26  -0.29    -0.01   0.16   0.08    -0.11  -0.29  -0.14
   9   1     0.17   0.14  -0.35    -0.02  -0.06   0.10     0.11   0.15  -0.21
  10   1    -0.16   0.25   0.28     0.01   0.17   0.08     0.16  -0.41  -0.15
  11   1     0.17  -0.14   0.35     0.03  -0.07   0.11    -0.09   0.16  -0.25
  12   1     0.06   0.05  -0.24     0.09   0.08  -0.41     0.02   0.03  -0.23
  13   1    -0.17  -0.14  -0.14    -0.44  -0.01  -0.19    -0.37  -0.25  -0.03
                     4                      5                      6
                     A                      A                      A
 Frequencies --   653.4759               806.7714               875.9780
 Red. masses --     2.6542                 1.4737                 1.5312
 Frc consts  --     0.6678                 0.5651                 0.6923
 IR Inten    --     0.1512                 5.2347                 3.9226
 Atom AN      X      Y      Z        X      Y      Z        X      Y      Z
   1   6    -0.11   0.13  -0.06    -0.04   0.02   0.00     0.03  -0.05  -0.05
   2   6     0.14   0.16  -0.05    -0.04   0.06   0.07    -0.06  -0.08  -0.07
   3   6     0.15  -0.12   0.04     0.03   0.06   0.07    -0.06   0.08   0.07
   4   6    -0.07  -0.12   0.04     0.04   0.02   0.00     0.03   0.05   0.05
   5   8    -0.07  -0.04   0.00     0.00  -0.12  -0.03     0.07   0.00   0.00
   6   1    -0.35   0.35   0.03     0.03  -0.10  -0.04    -0.21   0.22   0.05
   7   1    -0.04  -0.12   0.20    -0.02   0.21  -0.09     0.17  -0.19   0.24
   8   1     0.17   0.43   0.07    -0.32  -0.27  -0.17    -0.03   0.27   0.08
   9   1     0.06  -0.06   0.17     0.32   0.24  -0.26    -0.07  -0.37   0.17
  10   1     0.14  -0.31  -0.02     0.32  -0.26  -0.17    -0.01  -0.28  -0.09
  11   1     0.09   0.01  -0.10    -0.32   0.22  -0.26    -0.07   0.37  -0.18
  12   1    -0.05   0.12  -0.13     0.01   0.20  -0.08     0.17   0.20  -0.25
  13   1    -0.23  -0.28  -0.02    -0.02  -0.09  -0.04    -0.21  -0.22  -0.05
                     7                      8                      9
                     A                      A                      A
 Frequencies --   910.1632               941.0055               952.9679
 Red. masses --     3.2356                 2.3326                 2.0442
 Frc consts  --     1.5792                 1.2170                 1.0938
 IR Inten    --     4.8832                 1.6985                17.4320
 Atom AN      X      Y      Z        X      Y      Z        X      Y      Z
   1   6     0.08  -0.14   0.01    -0.10   0.14  -0.03     0.13  -0.01   0.10
   2   6     0.21   0.18   0.00     0.02  -0.15   0.02    -0.05   0.06  -0.04
   3   6    -0.21   0.17   0.00     0.02   0.16  -0.02     0.05   0.06  -0.04
   4   6    -0.07  -0.14   0.01    -0.10  -0.15   0.03    -0.12  -0.01   0.10
   5   8     0.00  -0.01   0.00     0.07   0.00   0.00     0.00  -0.11  -0.10
   6   1     0.00  -0.13   0.02     0.03   0.10  -0.06     0.22  -0.19   0.03
   7   1     0.00  -0.43   0.05    -0.04   0.40  -0.09     0.12   0.21  -0.04
   8   1     0.16   0.11  -0.06     0.18  -0.24   0.05     0.23   0.02   0.06
   9   1     0.36   0.15  -0.05     0.22  -0.32   0.05    -0.43   0.26   0.02
  10   1    -0.15   0.10  -0.06     0.17   0.24  -0.05    -0.24   0.01   0.06
  11   1    -0.36   0.16  -0.06     0.23   0.34  -0.05     0.43   0.25   0.02
  12   1     0.00  -0.42   0.05    -0.04  -0.40   0.09    -0.12   0.22  -0.04
  13   1    -0.01  -0.13   0.02     0.02  -0.11   0.06    -0.21  -0.19   0.03
                    10                     11                     12
                     A                      A                      A
 Frequencies --   973.0943              1057.3246              1120.5569
 Red. masses --     2.5618                 1.8389                 7.3137
 Frc consts  --     1.4292                 1.2112                 5.4107
 IR Inten    --    18.6428                 5.1637                87.9539
 Atom AN      X      Y      Z        X      Y      Z        X      Y      Z
   1   6     0.17   0.12  -0.03    -0.08   0.08   0.03     0.29   0.22   0.12
   2   6     0.09  -0.08   0.03     0.14  -0.04  -0.01    -0.04  -0.13  -0.06
   3   6    -0.09  -0.08   0.03    -0.14  -0.04  -0.01    -0.04   0.13   0.06
   4   6    -0.17   0.12  -0.03     0.08   0.08   0.03     0.29  -0.22  -0.12
   5   8     0.00  -0.10  -0.05     0.00  -0.04  -0.02    -0.41   0.00   0.00
   6   1    -0.10   0.34   0.06     0.09  -0.13  -0.04     0.19   0.21   0.10
   7   1     0.34   0.03   0.27    -0.10   0.35  -0.15     0.07  -0.14   0.02
   8   1    -0.20   0.10  -0.02     0.45  -0.21   0.05     0.19   0.00   0.09
   9   1     0.21  -0.13   0.01     0.12  -0.12   0.06    -0.21  -0.18   0.07
  10   1     0.20   0.10  -0.02    -0.45  -0.21   0.04     0.20   0.00  -0.09
  11   1    -0.21  -0.13   0.01    -0.13  -0.12   0.06    -0.21   0.19  -0.08
  12   1    -0.33   0.02   0.27     0.09   0.35  -0.15     0.07   0.13  -0.01
  13   1     0.10   0.34   0.06    -0.09  -0.13  -0.04     0.19  -0.21  -0.10
                    13                     14                     15
                     A                      A                      A
 Frequencies --  1163.3453              1231.5089              1240.7254
 Red. masses --     1.7800                 1.3574                 1.1439
 Frc consts  --     1.4194                 1.2129                 1.0375
 IR Inten    --     2.8542                 6.1779                 6.1642
 Atom AN      X      Y      Z        X      Y      Z        X      Y      Z
   1   6    -0.05  -0.02   0.12    -0.02   0.03  -0.08    -0.01   0.02   0.00
   2   6     0.01   0.01  -0.13     0.06  -0.03   0.06    -0.01  -0.02   0.06
   3   6     0.01  -0.01   0.13    -0.06  -0.03   0.06     0.00   0.02  -0.07
   4   6    -0.05   0.02  -0.12     0.02   0.03  -0.08    -0.01  -0.02   0.00
   5   8     0.05   0.00   0.00     0.00  -0.01   0.03     0.04   0.00   0.00
   6   1     0.39  -0.03   0.04    -0.19   0.03  -0.05     0.22   0.36   0.04
   7   1    -0.28   0.03  -0.25    -0.02  -0.20   0.05    -0.25  -0.45  -0.08
   8   1     0.17   0.26   0.03     0.07  -0.20   0.00    -0.16  -0.06  -0.01
   9   1    -0.16  -0.18   0.11    -0.39   0.44  -0.07     0.11   0.02  -0.03
  10   1     0.17  -0.25  -0.03    -0.08  -0.20   0.01    -0.16   0.06   0.01
  11   1    -0.16   0.18  -0.12     0.41   0.44  -0.07     0.09  -0.03   0.03
  12   1    -0.28  -0.03   0.26     0.02  -0.18   0.05    -0.25   0.45   0.07
  13   1     0.39   0.03  -0.04     0.20   0.01  -0.05     0.22  -0.36  -0.04
                    16                     17                     18
                     A                      A                      A
 Frequencies --  1275.7597              1282.3982              1326.1787
 Red. masses --     1.1395                 1.3725                 1.1825
 Frc consts  --     1.0927                 1.3299                 1.2253
 IR Inten    --     5.0659                 4.0984                 0.9283
 Atom AN      X      Y      Z        X      Y      Z        X      Y      Z
   1   6    -0.01   0.01  -0.05     0.05  -0.04  -0.06     0.02   0.01  -0.01
   2   6     0.01  -0.04  -0.03    -0.05   0.03   0.01    -0.07   0.03   0.03
   3   6     0.02   0.04   0.03     0.05   0.03   0.00     0.06   0.02   0.03
   4   6    -0.02  -0.01   0.04    -0.04  -0.03  -0.07    -0.02   0.01  -0.01
   5   8     0.03   0.00   0.01     0.00   0.04   0.07     0.00  -0.02  -0.04
   6   1    -0.08   0.06  -0.03    -0.26  -0.21  -0.04     0.16   0.35   0.04
   7   1    -0.01  -0.12   0.03     0.34   0.26   0.18    -0.11  -0.29  -0.03
   8   1     0.35  -0.23   0.04     0.25  -0.22   0.03     0.33  -0.35   0.05
   9   1    -0.48   0.28  -0.03     0.18  -0.11   0.00     0.14  -0.09   0.01
  10   1     0.29   0.17  -0.03    -0.31  -0.26   0.04    -0.31  -0.33   0.05
  11   1    -0.49  -0.28   0.02    -0.08  -0.05  -0.01    -0.11  -0.07   0.01
  12   1    -0.07   0.15   0.01    -0.33   0.23   0.19     0.11  -0.28  -0.03
  13   1    -0.03  -0.08   0.02     0.28  -0.19  -0.05    -0.16   0.36   0.04
                    19                     20                     21
                     A                      A                      A
 Frequencies --  1331.8111              1377.1196              1419.9559
 Red. masses --     1.3427                 1.2677                 1.3423
 Frc consts  --     1.4032                 1.4164                 1.5946
 IR Inten    --     0.5855                 2.4451                10.2601
 Atom AN      X      Y      Z        X      Y      Z        X      Y      Z
   1   6    -0.02  -0.03   0.01     0.00   0.08   0.01     0.03   0.11   0.01
   2   6     0.08  -0.08   0.02     0.03  -0.05   0.00    -0.04   0.00  -0.02
   3   6     0.08   0.08  -0.02     0.03   0.06   0.00     0.04   0.00  -0.02
   4   6    -0.02   0.03  -0.01     0.00  -0.08  -0.01    -0.03   0.11   0.01
   5   8    -0.03   0.00   0.00     0.04   0.00   0.00     0.00  -0.03   0.01
   6   1     0.10   0.24   0.04    -0.20  -0.49  -0.08    -0.14  -0.51  -0.08
   7   1     0.09   0.27   0.00    -0.16  -0.26  -0.04    -0.16  -0.39   0.01
   8   1    -0.38   0.26  -0.03    -0.25   0.19  -0.02     0.01  -0.02   0.00
   9   1    -0.24   0.20  -0.03    -0.09   0.02   0.00     0.08  -0.14   0.03
  10   1    -0.41  -0.28   0.04    -0.26  -0.20   0.02     0.00  -0.02   0.00
  11   1    -0.26  -0.21   0.03    -0.09  -0.02   0.00    -0.08  -0.14   0.03
  12   1     0.09  -0.29   0.00    -0.16   0.26   0.04     0.16  -0.38   0.01
  13   1     0.09  -0.21  -0.04    -0.20   0.49   0.07     0.14  -0.51  -0.08
                    22                     23                     24
                     A                      A                      A
 Frequencies --  1518.0128              1535.0480              1538.0457
 Red. masses --     1.0812                 1.0940                 1.0842
 Frc consts  --     1.4679                 1.5188                 1.5111
 IR Inten    --     0.4074                 2.2939                 0.6507
 Atom AN      X      Y      Z        X      Y      Z        X      Y      Z
   1   6     0.00  -0.01   0.00     0.02   0.00   0.01     0.05  -0.03   0.02
   2   6    -0.04  -0.04   0.01    -0.03  -0.05   0.01     0.01   0.01   0.00
   3   6    -0.04   0.04  -0.01     0.03  -0.05   0.01     0.01  -0.01   0.00
   4   6     0.00   0.01   0.00    -0.02   0.00   0.01     0.05   0.03  -0.02
   5   8     0.01   0.00   0.00     0.00   0.00   0.00     0.01   0.00   0.00
   6   1    -0.09   0.04   0.03    -0.23   0.05   0.06    -0.44   0.17   0.12
   7   1    -0.05   0.02  -0.09    -0.12   0.03  -0.21    -0.21   0.11  -0.42
   8   1     0.24   0.34   0.25     0.22   0.30   0.23    -0.05  -0.08  -0.05
   9   1     0.23   0.25  -0.35     0.22   0.21  -0.31    -0.04  -0.06   0.07
  10   1     0.25  -0.34  -0.25    -0.22   0.30   0.22    -0.05   0.08   0.05
  11   1     0.23  -0.25   0.35    -0.21   0.21  -0.31    -0.04   0.06  -0.07
  12   1    -0.05  -0.02   0.09     0.12   0.03  -0.21    -0.21  -0.11   0.42
  13   1    -0.09  -0.04  -0.03     0.23   0.05   0.06    -0.45  -0.17  -0.12
                    25                     26                     27
                     A                      A                      A
 Frequencies --  1556.9682              2979.4572              2986.7819
 Red. masses --     1.1091                 1.0727                 1.0741
 Frc consts  --     1.5841                 5.6104                 5.6455
 IR Inten    --     0.8943                43.8936               112.7108
 Atom AN      X      Y      Z        X      Y      Z        X      Y      Z
   1   6    -0.06   0.02  -0.02    -0.01   0.02  -0.05    -0.02   0.02  -0.05
   2   6    -0.01  -0.03   0.01     0.00   0.00   0.00     0.00   0.00   0.01
   3   6     0.01  -0.03   0.01     0.00   0.00   0.00     0.00   0.00   0.00
   4   6     0.06   0.02  -0.02    -0.01  -0.02   0.05     0.01   0.01  -0.05
   5   8     0.00   0.00  -0.01     0.00   0.00   0.00     0.00   0.00   0.00
   6   1     0.41  -0.11  -0.11     0.10  -0.13   0.65     0.12  -0.14   0.70
   7   1     0.18  -0.09   0.38     0.08  -0.03  -0.07     0.08  -0.02  -0.07
   8   1     0.11   0.17   0.12     0.01   0.01  -0.02     0.01   0.01  -0.02
   9   1     0.10   0.14  -0.18    -0.02  -0.02  -0.03    -0.02  -0.03  -0.04
  10   1    -0.11   0.17   0.12     0.01  -0.01   0.03    -0.01   0.01  -0.02
  11   1    -0.10   0.13  -0.18    -0.02   0.02   0.03     0.02  -0.03  -0.04
  12   1    -0.18  -0.09   0.38     0.09   0.03   0.08    -0.07  -0.02  -0.06
  13   1    -0.41  -0.11  -0.11     0.10   0.14  -0.70    -0.10  -0.12   0.65
                    28                     29                     30
                     A                      A                      A
 Frequencies --  3072.8559              3083.1232              3105.3787
 Red. masses --     1.0597                 1.0615                 1.1020
 Frc consts  --     5.8955                 5.9449                 6.2613
 IR Inten    --    22.7996                37.7320                21.2523
 Atom AN      X      Y      Z        X      Y      Z        X      Y      Z
   1   6     0.00   0.00   0.00    -0.01   0.00   0.01    -0.02   0.01   0.02
   2   6    -0.03  -0.04   0.01     0.03   0.04  -0.01     0.00  -0.01  -0.06
   3   6    -0.03   0.04  -0.01    -0.03   0.04  -0.01     0.00   0.01   0.06
   4   6     0.00   0.00   0.00     0.01   0.00   0.01    -0.02  -0.01  -0.02
   5   8     0.00   0.00   0.00     0.00   0.00   0.00     0.00   0.00   0.00
   6   1     0.00   0.00   0.01    -0.01   0.01  -0.03     0.00   0.00  -0.01
   7   1    -0.04   0.01   0.03     0.09  -0.03  -0.06     0.28  -0.11  -0.19
   8   1     0.18   0.16  -0.46    -0.17  -0.16   0.45    -0.14  -0.13   0.34
   9   1     0.17   0.26   0.34    -0.18  -0.27  -0.36     0.18   0.28   0.35
  10   1     0.18  -0.16   0.47     0.17  -0.15   0.45    -0.13   0.12  -0.33
  11   1     0.17  -0.26  -0.35     0.17  -0.26  -0.34     0.18  -0.28  -0.34
  12   1    -0.05  -0.02  -0.03    -0.09  -0.03  -0.06     0.27   0.11   0.18
  13   1     0.00   0.00  -0.01     0.01   0.01  -0.03     0.00   0.00   0.00
                    31                     32                     33
                     A                      A                      A
 Frequencies --  3116.9898              3119.8426              3132.3660
 Red. masses --     1.0940                 1.0969                 1.1058
 Frc consts  --     6.2623                 6.2907                 6.3926
 IR Inten    --     1.6522                33.7881                76.8336
 Atom AN      X      Y      Z        X      Y      Z        X      Y      Z
   1   6    -0.04   0.02   0.03    -0.04   0.01   0.04    -0.02   0.01   0.02
   2   6    -0.01  -0.01  -0.03     0.00   0.00   0.03     0.00   0.01   0.06
   3   6     0.01  -0.01  -0.03     0.00   0.00  -0.03     0.00   0.01   0.06
   4   6     0.04   0.02   0.03    -0.04  -0.01  -0.04     0.02   0.01   0.02
   5   8     0.00   0.00   0.00     0.00   0.00   0.00     0.00   0.00   0.00
   6   1    -0.01   0.02  -0.05    -0.02   0.03  -0.10    -0.02   0.02  -0.08
   7   1     0.50  -0.19  -0.34     0.46  -0.18  -0.32     0.24  -0.09  -0.16
   8   1    -0.05  -0.04   0.11     0.09   0.09  -0.23     0.17   0.16  -0.41
   9   1     0.11   0.17   0.21    -0.09  -0.13  -0.17    -0.16  -0.25  -0.31
  10   1     0.05  -0.05   0.12     0.09  -0.09   0.23    -0.16   0.15  -0.41
  11   1    -0.12   0.18   0.22    -0.08   0.13   0.16     0.17  -0.25  -0.30
  12   1    -0.48  -0.19  -0.33     0.49   0.19   0.33    -0.24  -0.09  -0.16
  13   1     0.01   0.01  -0.04    -0.02  -0.03   0.10     0.02   0.02  -0.08

 -------------------
 - Thermochemistry -
 -------------------
 Temperature   298.150 Kelvin.  Pressure   1.00000 Atm.
 Atom  1 has atomic number  6 and mass  12.00000
 Atom  2 has atomic number  6 and mass  12.00000
 Atom  3 has atomic number  6 and mass  12.00000
 Atom  4 has atomic number  6 and mass  12.00000
 Atom  5 has atomic number  8 and mass  15.99491
 Atom  6 has atomic number  1 and mass   1.00783
 Atom  7 has atomic number  1 and mass   1.00783
 Atom  8 has atomic number  1 and mass   1.00783
 Atom  9 has atomic number  1 and mass   1.00783
 Atom 10 has atomic number  1 and mass   1.00783
 Atom 11 has atomic number  1 and mass   1.00783
 Atom 12 has atomic number  1 and mass   1.00783
 Atom 13 has atomic number  1 and mass   1.00783
 Molecular mass:    72.05751 amu.
 Principal axes and moments of inertia in atomic units:
                           1         2         3
     EIGENVALUES --   253.46728 261.92391 454.58017
           X           -0.00250   1.00000   0.00004
           Y            0.99974   0.00250  -0.02274
           Z            0.02274   0.00002   0.99974
 This molecule is an asymmetric top.
 Rotational symmetry number  1.
 Rotational temperatures (Kelvin)      0.34172     0.33068     0.19054
 Rotational constants (GHZ):           7.12021     6.89033     3.97013
 Zero-point vibrational energy     308824.5 (Joules/Mol)
                                   73.81084 (Kcal/Mol)
 Warning -- explicit consideration of   2 degrees of freedom as
           vibrations may cause significant error
 Vibrational temperatures:     31.14   400.30   930.25   940.20  1160.76
          (Kelvin)           1260.34  1309.52  1353.90  1371.11  1400.06
                             1521.25  1612.23  1673.79  1771.86  1785.13
                             1835.53  1845.08  1908.07  1916.18  1981.37
                             2043.00  2184.08  2208.59  2212.90  2240.13
                             4286.77  4297.31  4421.15  4435.92  4467.94
                             4484.65  4488.75  4506.77
 
 Zero-point correction=                           0.117625 (Hartree/Particle)
 Thermal correction to Energy=                    0.122566
 Thermal correction to Enthalpy=                  0.123510
 Thermal correction to Gibbs Free Energy=         0.088502
 Sum of electronic and zero-point Energies=           -232.327775
 Sum of electronic and thermal Energies=              -232.322834
 Sum of electronic and thermal Enthalpies=            -232.321890
 Sum of electronic and thermal Free Energies=         -232.356899
 
                     E (Thermal)             CV                S
                      KCal/Mol        Cal/Mol-Kelvin    Cal/Mol-Kelvin
 Total                   76.911             16.702             73.682
 Electronic               0.000              0.000              0.000
 Translational            0.889              2.981             38.741
 Rotational               0.889              2.981             24.915
 Vibrational             75.134             10.741             10.025
 Vibration  1             0.593              1.985              6.478
 Vibration  2             0.679              1.714              1.545
                       Q            Log10(Q)             Ln(Q)
 Total Bot       0.195955D-40        -40.707845        -93.733276
 Total V=0       0.248778D+14         13.395811         30.844995
 Vib (Bot)       0.131063D-52        -52.882519       -121.766499
 Vib (Bot)  1    0.957064D+01          0.980941          2.258700
 Vib (Bot)  2    0.691684D+00         -0.160092         -0.368626
 Vib (V=0)       0.166394D+02          1.221137          2.811772
 Vib (V=0)  1    0.100837D+02          1.003619          2.310919
 Vib (V=0)  2    0.135348D+01          0.131452          0.302678
 Electronic      0.100000D+01          0.000000          0.000000
 Translational   0.240422D+08          7.380974         16.995321
 Rotational      0.621871D+05          4.793700         11.037902
 ***** Axes restored to original set *****
 -------------------------------------------------------------------
 Center     Atomic                   Forces (Hartrees/Bohr)
 Number     Number              X              Y              Z
 -------------------------------------------------------------------
    1          6           0.000137264    0.000087379   -0.000071014
    2          6          -0.000061363    0.000009223    0.000005465
    3          6          -0.000071430    0.000008626   -0.000007351
    4          6           0.000143282    0.000089413    0.000080758
    5          8          -0.000117190   -0.000145367   -0.000006894
    6          1          -0.000014408   -0.000000445    0.000025977
    7          1          -0.000013420   -0.000020587    0.000000345
    8          1           0.000008262   -0.000016782    0.000008781
    9          1           0.000001881    0.000013773   -0.000012558
   10          1           0.000008881   -0.000017441   -0.000009616
   11          1           0.000004844    0.000012875    0.000013669
   12          1          -0.000012948   -0.000020902   -0.000001658
   13          1          -0.000013655    0.000000236   -0.000025903
 -------------------------------------------------------------------
 Cartesian Forces:  Max     0.000145367 RMS     0.000054342

 GradGradGradGradGradGradGradGradGradGradGradGradGradGradGradGradGradGrad
 Berny optimization.
 Internal  Forces:  Max     0.000094681 RMS     0.000022072
 Search for a local minimum.
 Step number   1 out of a maximum of   2
 All quantities printed in internal units (Hartrees-Bohrs-Radians)
 Second derivative matrix not updated -- analytic derivatives used.
     Eigenvalues ---    0.00002   0.00578   0.02321   0.03004   0.04127
     Eigenvalues ---    0.04469   0.04856   0.05057   0.05663   0.05999
     Eigenvalues ---    0.06185   0.06475   0.08039   0.09464   0.09761
     Eigenvalues ---    0.10128   0.10553   0.11083   0.22125   0.22604
     Eigenvalues ---    0.24623   0.24764   0.29285   0.30117   0.31624
     Eigenvalues ---    0.33057   0.33553   0.33566   0.33840   0.34285
     Eigenvalues ---    0.34549   0.35244   0.362901000.000001000.00000
     Eigenvalues --- 1000.000001000.000001000.000001000.000001000.00000
     Eigenvalues --- 1000.000001000.000001000.000001000.000001000.00000
     Eigenvalues --- 1000.000001000.000001000.000001000.000001000.00000
     Eigenvalues --- 1000.000001000.000001000.000001000.000001000.00000
     Eigenvalues --- 1000.000001000.000001000.000001000.000001000.00000
     Eigenvalues --- 1000.000001000.000001000.000001000.000001000.00000
     Eigenvalues --- 1000.000001000.000001000.000001000.000001000.00000
     Eigenvalues --- 1000.00000
 Angle between quadratic step and forces=  87.04 degrees.
 Linear search not attempted -- first point.
 Iteration  1 RMS(Cart)=  0.00339664 RMS(Int)=  0.00000559
 Iteration  2 RMS(Cart)=  0.00000653 RMS(Int)=  0.00000139
 Iteration  3 RMS(Cart)=  0.00000000 RMS(Int)=  0.00000139
 Variable       Old X    -DE/DX   Delta X   Delta X   Delta X     New X
                                 (Linear)    (Quad)   (Total)
    R1        2.91945   0.00004   0.00000  -0.00012  -0.00012   2.91933
    R2        2.68772  -0.00009   0.00000  -0.00052  -0.00052   2.68721
    R3        2.08536  -0.00001   0.00000   0.00004   0.00004   2.08540
    R4        2.06651  -0.00001   0.00000  -0.00002  -0.00002   2.06649
    R5        2.93745   0.00000   0.00000  -0.00001  -0.00001   2.93745
    R6        2.06778  -0.00001   0.00000  -0.00002  -0.00002   2.06776
    R7        2.06836  -0.00002   0.00000  -0.00005  -0.00005   2.06831
    R8        2.91821   0.00005   0.00000   0.00077   0.00077   2.91898
    R9        2.06785  -0.00001   0.00000  -0.00007  -0.00007   2.06778
   R10        2.06835  -0.00002   0.00000  -0.00004  -0.00004   2.06831
   R11        2.68753  -0.00009   0.00000  -0.00039  -0.00039   2.68714
   R12        2.06650  -0.00001   0.00000  -0.00002  -0.00002   2.06649
   R13        2.08549  -0.00001   0.00000  -0.00006  -0.00006   2.08544
    A1        1.84578  -0.00002   0.00000  -0.00051  -0.00051   1.84527
    A2        1.92946   0.00001   0.00000   0.00006   0.00006   1.92952
    A3        1.99122  -0.00002   0.00000  -0.00020  -0.00020   1.99102
    A4        1.92371   0.00001   0.00000   0.00048   0.00049   1.92420
    A5        1.88122   0.00003   0.00000   0.00025   0.00025   1.88147
    A6        1.89134  -0.00001   0.00000  -0.00006  -0.00006   1.89128
    A7        1.80288  -0.00001   0.00000  -0.00018  -0.00018   1.80270
    A8        1.93402   0.00000   0.00000  -0.00041  -0.00041   1.93361
    A9        1.95088   0.00000   0.00000   0.00034   0.00035   1.95122
   A10        1.93229   0.00000   0.00000   0.00008   0.00008   1.93237
   A11        1.96699   0.00001   0.00000   0.00008   0.00008   1.96708
   A12        1.87748  -0.00001   0.00000   0.00007   0.00007   1.87755
   A13        1.80242  -0.00001   0.00000   0.00015   0.00014   1.80256
   A14        1.93181   0.00001   0.00000   0.00043   0.00043   1.93224
   A15        1.96767   0.00001   0.00000  -0.00042  -0.00042   1.96725
   A16        1.93272   0.00001   0.00000   0.00055   0.00055   1.93327
   A17        1.95206   0.00000   0.00000  -0.00053  -0.00053   1.95154
   A18        1.87778   0.00000   0.00000  -0.00014  -0.00014   1.87764
   A19        1.84454  -0.00002   0.00000   0.00041   0.00040   1.84494
   A20        1.99145  -0.00002   0.00000  -0.00037  -0.00037   1.99108
   A21        1.92970   0.00001   0.00000  -0.00012  -0.00012   1.92958
   A22        1.88143   0.00003   0.00000   0.00010   0.00010   1.88153
   A23        1.92408   0.00001   0.00000   0.00022   0.00023   1.92430
   A24        1.89152  -0.00001   0.00000  -0.00019  -0.00019   1.89133
   A25        1.84145   0.00006   0.00000   0.00043   0.00043   1.84187
    D1        0.40569  -0.00001   0.00000   0.00463   0.00463   0.41032
    D2       -1.66418  -0.00001   0.00000   0.00484   0.00484  -1.65934
    D3        2.52503  -0.00001   0.00000   0.00480   0.00480   2.52983
    D4       -1.67639  -0.00002   0.00000   0.00432   0.00432  -1.67207
    D5        2.53692  -0.00002   0.00000   0.00453   0.00453   2.54145
    D6        0.44295  -0.00002   0.00000   0.00449   0.00449   0.44743
    D7        2.47008   0.00000   0.00000   0.00449   0.00449   2.47458
    D8        0.40021   0.00000   0.00000   0.00470   0.00470   0.40491
    D9       -1.69377   0.00000   0.00000   0.00466   0.00466  -1.68911
   D10       -0.69766  -0.00002   0.00000  -0.00174  -0.00174  -0.69940
   D11        1.38821  -0.00002   0.00000  -0.00171  -0.00171   1.38651
   D12       -2.83399   0.00000   0.00000  -0.00136  -0.00136  -2.83535
   D13        0.00781   0.00000   0.00000  -0.00569  -0.00569   0.00213
   D14       -2.06126   0.00000   0.00000  -0.00661  -0.00661  -2.06787
   D15        2.11772   0.00000   0.00000  -0.00645  -0.00645   2.11127
   D16        2.07889   0.00000   0.00000  -0.00623  -0.00623   2.07265
   D17        0.00981   0.00000   0.00000  -0.00716  -0.00716   0.00266
   D18       -2.09439   0.00000   0.00000  -0.00699  -0.00700  -2.10138
   D19       -2.10061   0.00000   0.00000  -0.00603  -0.00603  -2.10664
   D20        2.11351   0.00000   0.00000  -0.00696  -0.00696   2.10655
   D21        0.00930   0.00000   0.00000  -0.00680  -0.00680   0.00251
   D22       -0.41906   0.00001   0.00000   0.00510   0.00510  -0.41397
   D23       -2.48302   0.00000   0.00000   0.00492   0.00492  -2.47811
   D24        1.66286   0.00002   0.00000   0.00554   0.00554   1.66839
   D25        1.64937   0.00001   0.00000   0.00594   0.00594   1.65532
   D26       -0.41458   0.00000   0.00000   0.00576   0.00576  -0.40882
   D27       -2.55189   0.00002   0.00000   0.00638   0.00638  -2.54551
   D28       -2.53954   0.00001   0.00000   0.00578   0.00578  -2.53376
   D29        1.67969   0.00000   0.00000   0.00560   0.00560   1.68529
   D30       -0.45762   0.00002   0.00000   0.00623   0.00623  -0.45139
   D31        0.70300   0.00002   0.00000  -0.00214  -0.00215   0.70086
   D32        2.83903   0.00000   0.00000  -0.00230  -0.00230   2.83672
   D33       -1.38263   0.00002   0.00000  -0.00235  -0.00235  -1.38498
         Item               Value     Threshold  Converged?
 Maximum Force            0.000095     0.000450     YES
 RMS     Force            0.000022     0.000300     YES
 Maximum Displacement     0.010336     0.001800     NO 
 RMS     Displacement     0.003397     0.001200     NO 
 Predicted change in Energy=-1.440273D-07
 GradGradGradGradGradGradGradGradGradGradGradGradGradGradGradGradGradGrad

 1\1\GINC-KETIDE\Freq\RB3LYP\Gen\C4H8O1\RZEPA\27-Nov-2004\0\\#N GEOM=AL
 LCHECK GUESS=READ SCRF=CHECK GENCHK RB3LYP/CHKBAS FREQ\\from SS.mol\\0
 ,1\C,0.4753866028,0.0824876796,1.1386735976\C,-0.9058649734,-0.4958456
 166,0.7586578641\C,-0.8946265773,-0.4567234255,-0.7952431757\C,0.49586
 917,0.1284681439,-1.1250703224\O,0.8846226708,0.8679827964,0.025835152
 3\H,1.1995544033,-0.7305192868,1.3185941751\H,0.4606826679,0.731772045
 8,2.0184835052\H,-1.7115806151,0.1290650578,1.155692646\H,-1.045829706
 1,-1.5065495077,1.1547355445\H,-1.6886505041,0.1956372521,-1.171214375
 6\H,-1.0377371323,-1.4445451415,-1.244365892\H,0.5017711727,0.81154354
 34,-1.9790124006\H,1.2202230149,-0.680587022,-1.3217022025\\Version=x8
 6-Linux-G03RevB.04\State=1-A\HF=-232.4454002\RMSD=1.553e-09\RMSF=5.434
 e-05\Dipole=-0.3854247,-0.4862088,-0.0135492\DipoleDeriv=0.4530817,0.0
 300223,-0.0693389,-0.0427357,0.4441121,-0.2523961,-0.0106516,-0.089869
 3,0.6098759,-0.0171482,-0.0599741,-0.0305452,-0.0376452,0.1358103,0.02
 30072,-0.0907715,-0.0397322,0.0360872,-0.0192722,-0.0607454,0.0267905,
 -0.041394,0.1355713,-0.0200879,0.0882628,0.0438548,0.0403468,0.4520998
 ,0.0267059,0.0677718,-0.0474232,0.4315498,0.2449576,0.0066854,0.083078
 3,0.6240307,-0.5428151,-0.2076604,-0.0008846,-0.0836762,-0.5726483,0.0
 063779,0.0005668,0.0045502,-0.9205343,-0.1288983,0.0924172,-0.0394161,
 0.1131123,-0.1303849,0.1128971,-0.007602,0.0069257,-0.0344133,0.026483
 5,0.0011574,-0.0055972,-0.0236368,-0.0284391,-0.1004925,-0.0131856,-0.
 0799477,-0.1243747,-0.0888557,0.0579204,0.0546128,0.0850826,-0.0106377
 ,-0.0542558,0.0475929,-0.0237504,-0.0225915,0.0270275,-0.0154658,0.014
 1359,-0.049505,-0.1176424,0.0914744,0.021807,0.0635263,-0.0125785,-0.0
 86107,0.0610224,-0.0518214,0.0874822,-0.0164297,0.0565146,-0.0430136,0
 .0255342,-0.0201732,0.0273818,-0.0154371,-0.0155361,-0.0480294,-0.1088
 508,-0.0969975,-0.0247252,-0.0687631,-0.0212003,0.0262153,-0.0011784,0
 .0093535,-0.0265614,-0.0353803,0.1036122,0.015295,0.0833042,-0.1164448
 ,-0.1291932,0.0912155,0.0404748,0.1149298,-0.1266303,-0.114611,0.00973
 96,-0.0087111,-0.03803\Polar=41.5152186,0.1847344,40.1297238,-0.048688
 ,-0.1615101,47.8328182\PG=C01 [X(C4H8O1)]\NImag=0\\0.46913522,-0.06912
 445,0.54468762,0.03362847,0.08531736,0.58632295,-0.15314550,-0.0186968
 2,-0.02312023,0.51084581,-0.01738502,-0.08576236,-0.00981794,-0.037876
 02,0.59547247,-0.02333438,-0.01314197,-0.07839435,-0.07653799,-0.03830
 766,0.44439796,-0.00075207,-0.00188667,-0.02652081,-0.07449233,0.00384
 947,-0.00568456,0.50817717,-0.00316742,-0.00285527,-0.00748926,0.00340
 252,-0.07419962,0.00294357,-0.04110603,0.59266347,-0.02110309,-0.01448
 977,-0.01696240,0.00709071,0.00154309,-0.15720865,0.07545748,0.0446288
 1,0.45083247,0.00261798,0.00429308,-0.00052823,-0.00148955,-0.00422693
 ,0.02116413,-0.15487480,-0.01801552,0.02148713,0.47048775,0.00412610,0
 .01073879,0.00985855,-0.00352822,-0.00386811,0.01492505,-0.01969628,-0
 .08643303,0.01250908,-0.06544677,0.55228507,0.00209424,-0.00650717,-0.
 06874199,0.02679195,0.00770582,-0.01531545,0.02108270,0.00908549,-0.07
 660335,-0.03885583,-0.08815587,0.57832579,-0.07949434,-0.02589572,0.01
 385907,-0.01581848,-0.03233697,0.01849066,-0.01540040,-0.03155609,-0.0
 2011700,-0.07863511,-0.02414937,-0.01361195,0.16903799,-0.02561912,-0.
 12962362,0.03498926,-0.01958535,-0.01722530,0.00817465,-0.01893953,-0.
 01625960,-0.00880246,-0.02359644,-0.12541991,-0.03434103,0.10785136,0.
 29834696,0.03602239,0.07278300,-0.15262401,0.01281120,0.01378508,-0.00
 916592,-0.01371948,-0.01478143,-0.01097160,-0.03589055,-0.07219086,-0.
 15785870,0.00012776,-0.00154891,0.42740983,-0.16084848,0.11874977,-0.0
 2044349,-0.02182915,0.01930565,-0.00138790,-0.00093137,0.00006104,0.00
 104623,0.00046788,-0.00113597,-0.00063367,0.01442985,-0.01028832,0.002
 49511,0.17139363,0.11816224,-0.17476725,0.01425460,-0.00990152,0.00897
 429,-0.00196723,-0.00021143,0.00007915,0.00043027,-0.00152182,-0.00190
 017,-0.00389280,0.00552531,-0.02032636,0.02048819,-0.12520442,0.197648
 64,-0.01959558,0.01260392,-0.05935656,-0.00630294,0.00539445,0.0011743
 2,0.00047911,-0.00062666,-0.00002990,-0.00046788,0.00518400,0.00502864
 ,-0.01463030,0.03089167,-0.01724353,0.02280565,-0.03158946,0.06366921,
 -0.05138781,0.00413750,0.00121893,0.00202205,-0.01526130,-0.02239691,-
 0.00306363,-0.00191717,-0.00161121,-0.00241887,-0.00253000,0.00014196,
 0.00088111,0.00471168,0.01251097,0.00054119,0.01480968,0.01726005,0.05
 237525,0.00513890,-0.15835114,-0.13776110,0.00192307,-0.00366123,-0.00
 700957,-0.00130300,-0.00079911,0.00079956,-0.00197980,-0.00135341,0.00
 335607,-0.00038555,0.01438695,0.02245882,0.00057536,-0.01363286,-0.019
 22499,-0.00352897,0.16130081,0.00274363,-0.12614131,-0.21082137,0.0003
 8991,-0.00359867,-0.00064536,0.00074852,0.00059943,-0.00034700,0.00295
 402,0.00352478,-0.00211138,0.00004452,-0.01047441,-0.03091426,-0.00014
 003,0.00099606,0.00588884,-0.00515821,0.13620601,0.24062042,-0.0221505
 1,0.02011187,0.00715981,-0.19126498,0.11217605,0.07239328,0.00277454,-
 0.00111139,-0.00297804,-0.00091995,-0.00114990,-0.00093136,0.00118509,
 -0.00154202,0.00159693,-0.00438021,-0.00273546,-0.00105291,0.00176746,
 -0.00010788,-0.00016906,0.20693039,-0.01064352,0.00863342,0.00496913,0
 .11377927,-0.14311914,-0.05451986,-0.00154498,0.00053911,0.00158528,-0
 .00058975,-0.00042880,0.00048059,0.00045770,-0.00035071,-0.00033880,-0
 .00227634,0.00038082,-0.00033264,0.00037903,0.00121201,0.00043947,-0.1
 2235919,0.14866345,-0.00969875,0.00695732,0.00181808,0.07203218,-0.054
 40597,-0.07880394,0.02239674,-0.01747126,-0.01461428,-0.00183787,-0.00
 130339,-0.00434706,0.00033226,0.00032383,0.00141751,-0.00287065,-0.000
 96118,0.00019657,0.00019801,0.00054956,0.00065549,-0.07330309,0.059346
 32,0.09070370,0.00009546,-0.02547903,0.01172799,-0.05309639,-0.0266517
 1,0.01197685,-0.00077718,0.00145059,-0.00149678,-0.00114725,-0.0014122
 7,-0.00190469,-0.00634719,-0.00348023,0.00257096,0.00114531,0.00052714
 ,0.00060607,-0.00132995,-0.00065830,-0.00083208,0.00435286,0.02353546,
 -0.00930753,0.05610469,0.00251003,-0.00855742,0.00391512,-0.02904842,-
 0.28027723,0.08763943,0.00123889,0.00333530,-0.00258001,0.00007559,-0.
 00075953,-0.00169372,-0.00264937,0.00014978,0.00043774,-0.00017819,0.0
 0167756,-0.00004828,-0.00101008,-0.00014777,-0.00008637,-0.00245121,-0
 .01780126,0.00639984,0.03200266,0.29996348,-0.00030130,-0.00905033,0.0
 0351139,0.01285889,0.08633116,-0.07981548,0.00253479,0.02796984,-0.010
 50678,-0.00032964,0.00092462,-0.00309120,-0.00167573,-0.00087562,-0.00
 050048,0.00053729,0.00018542,0.00082013,-0.00036669,-0.00022075,-0.000
 58065,-0.00234097,-0.01163345,0.00495618,-0.01280152,-0.09422679,0.087
 12011,-0.00094098,-0.00117279,0.00087688,0.00298673,-0.00155769,0.0031
 7622,-0.18699559,0.11529907,-0.06771609,-0.02229283,0.02090512,-0.0065
 4531,0.00131553,-0.00146856,-0.00159448,0.00025813,0.00011481,-0.00002
 145,-0.00009238,-0.00002863,-0.00015177,0.00137714,-0.00056434,-0.0000
 5707,0.00020377,-0.00037956,0.00066719,0.20254458,-0.00063163,-0.00046
 681,-0.00031164,-0.00041658,-0.00030328,-0.00082499,0.11688307,-0.1507
 9802,0.05318367,-0.01079206,0.00910893,-0.00469867,0.00049042,-0.00028
 215,0.00033878,-0.00005832,-0.00003956,-0.00001438,-0.00001987,0.00001
 384,-0.00002564,-0.00055537,0.00166706,-0.00027301,0.00000684,0.000676
 09,0.00054454,-0.12556002,0.15700038,0.00183556,0.00149319,-0.00414421
 ,-0.02193549,0.01846713,-0.01408352,-0.06727446,0.05308831,-0.07537884
 ,0.00878712,-0.00640318,0.00130027,-0.00035419,-0.00043455,0.00139226,
 -0.00020938,-0.00012398,0.00015422,-0.00079607,-0.00030108,-0.00004437
 ,0.00003534,0.00028067,0.00173370,-0.00105745,-0.00021947,-0.00397349,
 0.06802426,-0.05853514,0.08678142,-0.00123559,-0.00151061,0.00188125,-
 0.00072660,0.00180028,0.00171909,-0.05326201,-0.02672870,-0.01366406,0
 .00019516,-0.02497991,-0.01316021,-0.00639796,-0.00339405,-0.00287792,
 -0.00005337,0.00026058,-0.00021924,-0.00000440,0.00005571,-0.00019004,
 0.00017599,-0.00003711,0.00109350,0.00088845,-0.00014392,-0.00013322,0
 .00437272,0.02265861,0.01040630,0.05618624,0.00003157,-0.00078229,0.00
 185034,0.00138598,0.00456636,0.00338681,-0.02911048,-0.27036063,-0.097
 71633,0.00251936,-0.00858816,-0.00440905,-0.00271412,0.00016760,-0.000
 45759,0.00007839,0.00017749,-0.00010200,0.00003834,0.00002100,-0.00009
 763,-0.00035284,0.00065337,0.00041926,-0.00013773,0.00157282,-0.000274
 52,-0.00268435,-0.01817634,-0.00769316,0.03209039,0.28925138,0.0003814
 1,-0.00083657,-0.00313556,-0.00271745,-0.02705842,-0.01173441,-0.01464
 994,-0.09636343,-0.08956735,0.00036524,0.00807247,0.00356194,0.0015269
 9,0.00086058,-0.00045634,-0.00035680,0.00000282,-0.00003755,-0.0009996
 2,-0.00033657,-0.00002858,-0.00059204,-0.00031346,-0.00387227,0.000093
 54,0.00024918,0.00207759,0.00230806,0.01074572,0.00532648,0.01491807,0
 .10490964,0.09763260,-0.00235077,-0.00246414,-0.00026460,-0.00314599,-
 0.00194549,0.00147771,0.00155681,-0.01621744,0.02193344,-0.05136113,0.
 00102113,0.00263438,0.00109588,0.00502557,-0.01176174,0.00017792,-0.00
 010814,0.00037992,0.00053017,0.00027775,-0.00033088,-0.00010561,-0.000
 06312,0.00082090,-0.00002224,-0.00001892,0.00098549,0.00177030,0.00040
 147,-0.00016232,-0.00130904,-0.00099055,0.00027383,0.05220749,-0.00177
 871,-0.00106854,-0.00336051,-0.00129763,-0.00068585,-0.00086293,0.0018
 2186,-0.00402455,0.00687629,0.00182910,-0.16872788,0.13946589,0.000102
 57,0.01474425,-0.02059237,0.00003586,0.00037918,-0.00062695,0.00027444
 ,0.00063252,-0.00074317,-0.00003650,-0.00000359,0.00031539,0.00004528,
 -0.00000390,0.00031937,-0.00010824,0.00124961,-0.00053618,-0.00066416,
 -0.00015581,0.00020837,-0.00033423,0.17203900,-0.00299578,-0.00352726,
 -0.00245391,-0.00086092,-0.00065252,-0.00039684,-0.00022768,0.00311436
 ,0.00020682,0.00108785,0.12781365,-0.20051817,0.00065529,0.01242548,-0
 .03149602,-0.00008151,0.00062709,-0.00041267,0.00037147,0.00082384,-0.
 00125744,0.00014972,0.00003051,-0.00000922,0.00019034,0.00009965,0.000
 00983,0.00018684,-0.00040554,0.00059260,0.00079031,0.00009428,-0.00054
 701,0.00069834,-0.13896470,0.23005572,0.00045738,-0.00106200,0.0005249
 4,-0.00084561,0.00010967,-0.00105620,-0.02195914,0.01960654,0.00167127
 ,-0.16062929,0.11797633,0.02289778,0.01414802,-0.00967498,-0.00229116,
 -0.00037133,0.00028304,0.00075949,0.00017981,0.00002134,0.00009146,0.0
 0025780,-0.00007311,0.00020137,-0.00007032,0.00005252,0.00036542,-0.00
 450710,-0.00240655,0.00270079,0.00117042,-0.00015396,-0.00055130,0.000
 95621,0.00011035,0.00003572,0.17121314,-0.00161898,-0.00182514,0.00358
 609,-0.00014028,0.00008902,-0.00043531,-0.00999489,0.00911281,0.002032
 52,0.11745195,-0.17465376,-0.01639554,0.00525982,-0.01830789,-0.020381
 64,0.00033549,0.00134906,-0.00150869,-0.00008327,0.00037840,-0.0005985
 5,0.00011384,-0.00004574,0.00010330,0.00025132,0.00017209,0.00000653,-
 0.00279482,0.00035025,0.00091744,0.00059289,0.00165321,-0.00014034,0.0
 1541612,-0.01437444,-0.00147884,-0.12478919,0.19610214,0.00032315,-0.0
 0546043,0.00498196,-0.00049982,0.00061447,-0.00000836,0.00537757,-0.00
 469777,0.00115087,0.02206451,-0.01475890,-0.05962935,0.01535262,-0.031
 18850,-0.01898872,-0.00076086,0.00155020,0.00014828,-0.00037269,0.0006
 6022,-0.00041434,0.00003240,0.00000624,0.00016555,0.00023431,0.0001136
 8,-0.00002715,0.00084672,0.00027630,0.00034348,-0.00056383,0.00008996,
 0.00078046,-0.01668448,0.01850152,0.00622631,-0.02534960,0.03429302,0.
 06527103\\-0.00013726,-0.00008738,0.00007101,0.00006136,-0.00000922,-0
 .00000547,0.00007143,-0.00000863,0.00000735,-0.00014328,-0.00008941,-0
 .00008076,0.00011719,0.00014537,0.00000689,0.00001441,0.00000044,-0.00
 002598,0.00001342,0.00002059,-0.00000034,-0.00000826,0.00001678,-0.000
 00878,-0.00000188,-0.00001377,0.00001256,-0.00000888,0.00001744,0.0000
 0962,-0.00000484,-0.00001288,-0.00001367,0.00001295,0.00002090,0.00000
 166,0.00001365,-0.00000024,0.00002590\\\@


 IN THE LONG RUN, DIGGING FOR TRUTH HAS ALWAYS PROVED NOT ONLY 
 MORE INTERESTING BUT MORE PROFITABLE THAN DIGGING FOR GOLD.

                             -- GEORGE R. HARRISON
 Job cpu time:  0 days  0 hours  8 minutes 37.2 seconds.
 File lengths (MBytes):  RWF=     18 Int=      0 D2E=      0 Chk=      5 Scr=      1
 Normal termination of Gaussian 03 at Sat Nov 27 17:36:06 2004.
