# Supplementary material
Source: publisher figshare collection journal article supplement (https://acs.figshare.com/ndownloader/files/5127205)
Supplement: Supplementary file 1 [file 5127205 › supporting_ja043819b/thf-solv.log]

 Entering Gaussian System, Link 0=g03
 Input=thf-gen.gjf
 Output=thf-gen.log
 Initial command:
 /usr/local/g03/l1.exe /home/rzepa/Gau-2929.inp -scrdir=/home/rzepa/
 Entering Link 1 = /usr/local/g03/l1.exe PID=      2930.
  
 Copyright (c) 1988,1990,1992,1993,1995,1998,2003, Gaussian, Inc.
                  All Rights Reserved.
  
 This is the Gaussian(R) 03 program.  It is based on the
 the Gaussian(R) 98 system (copyright 1998, Gaussian, Inc.),
 the Gaussian(R) 94 system (copyright 1995, Gaussian, Inc.),
 the Gaussian 92(TM) system (copyright 1992, Gaussian, Inc.),
 the Gaussian 90(TM) system (copyright 1990, Gaussian, Inc.),
 the Gaussian 88(TM) system (copyright 1988, Gaussian, Inc.),
 the Gaussian 86(TM) system (copyright 1986, Carnegie Mellon
 University), and the Gaussian 82(TM) system (copyright 1983,
 Carnegie Mellon University). Gaussian is a federally registered
 trademark of Gaussian, Inc.
  
 This software contains proprietary and confidential information,
 including trade secrets, belonging to Gaussian, Inc.
  
 This software is provided under written license and may be
 used, copied, transmitted, or stored only in accord with that
 written license.
  
 The following legend is applicable only to US Government
 contracts under DFARS:
  
                    RESTRICTED RIGHTS LEGEND
  
 Use, duplication or disclosure by the US Government is subject
 to restrictions as set forth in subparagraph (c)(1)(ii) of the
 Rights in Technical Data and Computer Software clause at DFARS
 252.227-7013.
  
 Gaussian, Inc.
 Carnegie Office Park, Building 6, Pittsburgh, PA 15106 USA
  
 The following legend is applicable only to US Government
 contracts under FAR:
  
                    RESTRICTED RIGHTS LEGEND
  
 Use, reproduction and disclosure by the US Government is subject
 to restrictions as set forth in subparagraph (c) of the
 Commercial Computer Software - Restricted Rights clause at FAR
 52.227-19.
  
 Gaussian, Inc.
 Carnegie Office Park, Building 6, Pittsburgh, PA 15106 USA
  
  
 ---------------------------------------------------------------
 Warning -- This program may not be used in any manner that
 competes with the business of Gaussian, Inc. or will provide
 assistance to any competitor of Gaussian, Inc.  The licensee
 of this program is prohibited from giving any competitor of
 Gaussian, Inc. access to this program.  By using this program,
 the user acknowledges that Gaussian, Inc. is engaged in the
 business of creating and licensing software in the field of
 computational chemistry and represents and warrants to the
 licensee that it is not a competitor of Gaussian, Inc. and that
 it will not use this program in any manner prohibited above.
 ---------------------------------------------------------------
  

 Cite this work as:
 Gaussian 03, Revision B.04,
 M. J. Frisch, G. W. Trucks, H. B. Schlegel, G. E. Scuseria, 
 M. A. Robb, J. R. Cheeseman, J. A. Montgomery, Jr., T. Vreven, 
 K. N. Kudin, J. C. Burant, J. M. Millam, S. S. Iyengar, J. Tomasi, 
 V. Barone, B. Mennucci, M. Cossi, G. Scalmani, N. Rega, 
 G. A. Petersson, H. Nakatsuji, M. Hada, M. Ehara, K. Toyota, 
 R. Fukuda, J. Hasegawa, M. Ishida, T. Nakajima, Y. Honda, O. Kitao, 
 H. Nakai, M. Klene, X. Li, J. E. Knox, H. P. Hratchian, J. B. Cross, 
 C. Adamo, J. Jaramillo, R. Gomperts, R. E. Stratmann, O. Yazyev, 
 A. J. Austin, R. Cammi, C. Pomelli, J. W. Ochterski, P. Y. Ayala, 
 K. Morokuma, G. A. Voth, P. Salvador, J. J. Dannenberg, 
 V. G. Zakrzewski, S. Dapprich, A. D. Daniels, M. C. Strain, 
 O. Farkas, D. K. Malick, A. D. Rabuck, K. Raghavachari, 
 J. B. Foresman, J. V. Ortiz, Q. Cui, A. G. Baboul, S. Clifford, 
 J. Cioslowski, B. B. Stefanov, G. Liu, A. Liashenko, P. Piskorz, 
 I. Komaromi, R. L. Martin, D. J. Fox, T. Keith, M. A. Al-Laham, 
 C. Y. Peng, A. Nanayakkara, M. Challacombe, P. M. W. Gill, 
 B. Johnson, W. Chen, M. W. Wong, C. Gonzalez, and J. A. Pople, 
 Gaussian, Inc., Pittsburgh PA, 2003.
 
 *********************************************
 Gaussian 03:  x86-Linux-G03RevB.04 2-Jun-2003
                  28-Nov-2004 
 *********************************************
 %mem=800MB
 %nproc=2
 Will use up to    2 processors via shared memory.
 %chk=thf-gen.chk
 -----------------------------------------------------
 # RB3LYP/Gen geom=checkpoint scrf(IEFPCM,solvent=thf)
 -----------------------------------------------------
 1/29=2,38=1/1;
 2/40=1/2;
 3/5=7,11=2,16=1,25=1,30=1,70=2201,72=20,74=-5/1,2,3;
 4/7=1/1;
 5/5=2,32=1,38=5,53=20/2;
 6/7=2,8=2,9=2,10=2,28=1/1;
 99/5=1,9=1/99;
 -----------
 from SS.mol
 -----------
 Redundant internal coordinates taken from checkpoint file:
 thf-gen.chk
 Charge =  0 Multiplicity = 1
 C,0,0.4753866028,0.0824876796,1.1386735976
 C,0,-0.9058649734,-0.4958456166,0.7586578641
 C,0,-0.8946265773,-0.4567234255,-0.7952431757
 C,0,0.49586917,0.1284681439,-1.1250703224
 O,0,0.8846226708,0.8679827964,0.0258351523
 H,0,1.1995544033,-0.7305192868,1.3185941751
 H,0,0.4606826679,0.7317720458,2.0184835052
 H,0,-1.7115806151,0.1290650578,1.155692646
 H,0,-1.0458297061,-1.5065495077,1.1547355445
 H,0,-1.6886505041,0.1956372521,-1.1712143756
 H,0,-1.0377371323,-1.4445451415,-1.244365892
 H,0,0.5017711727,0.8115435434,-1.9790124006
 H,0,1.2202230149,-0.680587022,-1.3217022025
 Recover connectivity data from disk.
                          Input orientation:                          
 ---------------------------------------------------------------------
 Center     Atomic     Atomic              Coordinates (Angstroms)
 Number     Number      Type              X           Y           Z
 ---------------------------------------------------------------------
    1          6             0        0.475387    0.082488    1.138674
    2          6             0       -0.905865   -0.495846    0.758658
    3          6             0       -0.894627   -0.456723   -0.795243
    4          6             0        0.495869    0.128468   -1.125070
    5          8             0        0.884623    0.867983    0.025835
    6          1             0        1.199554   -0.730519    1.318594
    7          1             0        0.460683    0.731772    2.018484
    8          1             0       -1.711581    0.129065    1.155693
    9          1             0       -1.045830   -1.506550    1.154736
   10          1             0       -1.688651    0.195637   -1.171214
   11          1             0       -1.037737   -1.444545   -1.244366
   12          1             0        0.501771    0.811544   -1.979012
   13          1             0        1.220223   -0.680587   -1.321702
 ---------------------------------------------------------------------
                    Distance matrix (angstroms):
                    1          2          3          4          5
     1  C    0.000000
     2  C    1.544907   0.000000
     3  C    2.430580   1.554434   0.000000
     4  C    2.264303   2.429621   1.544252   0.000000
     5  O    1.422282   2.367045   2.365321   1.422180   0.000000
     6  H    1.103527   2.191208   2.988121   2.684125   2.079812
     7  H    1.093550   2.227478   3.341623   3.201116   2.041795
     8  H    2.187529   1.094225   2.194701   3.174069   2.926235
     9  H    2.199863   1.094527   2.219778   3.201192   3.261819
    10  H    3.167245   2.194381   1.094259   2.186039   2.916627
    11  H    3.209400   2.220253   1.094524   2.200125   3.264455
    12  H    3.201903   3.344480   2.227047   1.093546   2.041856
    13  H    2.681513   2.980315   2.190859   1.103595   2.080037
                    6          7          8          9         10
     6  H    0.000000
     7  H    1.781593   0.000000
     8  H    3.039758   2.413792   0.000000
     9  H    2.381349   2.832971   1.765916   0.000000
    10  H    3.924110   3.883458   2.327972   2.953083   0.000000
    11  H    3.476215   4.198548   2.947982   2.399916   1.766136
    12  H    3.706625   3.998503   3.897573   4.193924   2.414503
    13  H    2.640849   3.705199   3.922817   3.456870   3.041704
                   11         12         13
    11  H    0.000000
    12  H    2.828379   0.000000
    13  H    2.384952   1.781764   0.000000
 Stoichiometry    C4H8O
 Framework group  C1[X(C4H8O)]
 Deg. of freedom    33
 Full point group                 C1      NOp   1
 Largest Abelian subgroup         C1      NOp   1
 Largest concise Abelian subgroup C1      NOp   1
                         Standard orientation:                         
 ---------------------------------------------------------------------
 Center     Atomic     Atomic              Coordinates (Angstroms)
 Number     Number      Type              X           Y           Z
 ---------------------------------------------------------------------
    1          6             0        1.133362   -0.469842    0.155285
    2          6             0        0.775196    1.019232   -0.047481
    3          6             0       -0.779225    1.015576   -0.052713
    4          6             0       -1.130936   -0.473079    0.159229
    5          8             0        0.001409   -1.204063   -0.294702
    6          1             0        1.325355   -0.680379    1.221391
    7          1             0        1.999374   -0.803373   -0.423189
    8          1             0        1.164544    1.386256   -1.001959
    9          1             0        1.193445    1.648911    0.744076
   10          1             0       -1.163352    1.371458   -1.013545
   11          1             0       -1.206429    1.650407    0.729891
   12          1             0       -1.999104   -0.812592   -0.412487
   13          1             0       -1.315487   -0.679499    1.227524
 ---------------------------------------------------------------------
 Rotational constants (GHZ):      7.1202138      6.8903263      3.9701275
 General basis read from cards:  (5D, 7F)
 There are    86 symmetry adapted basis functions of A   symmetry.
 Integral buffers will be    262144 words long.
 Raffenetti 2 integral format.
 Two-electron integral symmetry is turned on.
    86 basis functions,   172 primitive gaussians,    91 cartesian basis functions
    20 alpha electrons       20 beta electrons
       nuclear repulsion energy       190.0574279676 Hartrees.
 NAtoms=   13 NActive=   13 NUniq=   13 SFac= 1.00D+00 NAtFMM=   60 Big=F
 ------------------------------------------------------------------------------
 United Atom Topological Model (UA0  parameters set).
  Nord Group  Hybr  Charge Alpha Radius          Bonded to
    1   CH2   *     0.00   1.00  2.325   C2   [s]  O5   [s]
    2   CH2   *     0.00   1.00  2.325   C1   [s]  C3   [s]
    3   CH2   *     0.00   1.00  2.325   C2   [s]  C4   [s]
    4   CH2   *     0.00   1.00  2.325   C3   [s]  O5   [s]
    5   O     *     0.00   1.00  1.750   C1   [s]  C4   [s]
 ------------------------------------------------------------------------------
 Polarizable Continuum Model (PCM)
 =================================
 Model                : PCM.
 Atomic radii         : UA0 (Simple United Atom Topological Model).
 Polarization charges : Total charges.
 Charge compensation  : None.
 Solution method      : Matrix inversion.
 Cavity               : GePol (RMin=0.200 OFac=0.890).
                        Default sphere list used, NSphG=    5.
                        Tesserae with average area of 0.200 Ang**2.
 Solvent              : THF, Eps=   7.580000.
 ------------------------------------------------------------------------------
 One-electron integrals computed using PRISM.
 NBasis=    86 RedAO= T  NBF=    86
 NBsUse=    86 1.00D-06 NBFU=    86
 Harris functional with IExCor=  402 diagonalized for initial guess.
 ExpMin= 1.61D-01 ExpMax= 5.48D+03 ExpMxC= 8.25D+02 IAcc=1 IRadAn=         1 AccDes= 1.00D-06
 HarFok:  IExCor= 402 AccDes= 1.00D-06 IRadAn=         1 IDoV=1
 ScaDFX=  1.000000  1.000000  1.000000  1.000000
 Initial guess orbital symmetries:
       Occupied  (A) (A) (A) (A) (A) (A) (A) (A) (A) (A) (A) (A)
                 (A) (A) (A) (A) (A) (A) (A) (A)
       Virtual   (A) (A) (A) (A) (A) (A) (A) (A) (A) (A) (A) (A)
                 (A) (A) (A) (A) (A) (A) (A) (A) (A) (A) (A) (A)
                 (A) (A) (A) (A) (A) (A) (A) (A) (A) (A) (A) (A)
                 (A) (A) (A) (A) (A) (A) (A) (A) (A) (A) (A) (A)
                 (A) (A) (A) (A) (A) (A) (A) (A) (A) (A) (A) (A)
                 (A) (A) (A) (A) (A) (A)
 The electronic state of the initial guess is 1-A.
 Warning!  Cutoffs for single-point calculations used.
 Requested convergence on RMS density matrix=1.00D-04 within 128 cycles.
 Requested convergence on MAX density matrix=1.00D-02.
 Requested convergence on             energy=5.00D-05.
 No special actions if energy rises.
 Keep R1 integrals in memory in canonical form, NReq=    10105516.
 Error on total polarization charges =  0.00864
 SCF Done:  E(RB+HF-LYP) =  -232.448770469     A.U. after    6 cycles
             Convg  =    0.5484D-05             -V/T =  2.0063
             S**2   =   0.0000
 --------------------------------------------------------------------
 Variational PCM results
 =======================
 <psi(f)|   H    |psi(f)>                     (a.u.) =    -232.444982
 <psi(f)|H+V(f)/2|psi(f)>                     (a.u.) =    -232.448770
 Total free energy in solution:
  with all non electrostatic terms            (a.u.) =    -232.444015
 --------------------------------------------------------------------
 (Polarized solute)-Solvent               (kcal/mol) =      -2.38
 --------------------------------------------------------------------
 Cavitation energy                        (kcal/mol) =      11.90
 Dispersion energy                        (kcal/mol) =      -9.43
 Repulsion energy                         (kcal/mol) =       0.51
 Total non electrostatic                  (kcal/mol) =       2.98
 --------------------------------------------------------------------
 Partition over spheres:
 Sphere  on Atom  Surface  Charge   GEl     GCav    GDR
    1      C1      28.15  -0.019   -0.32    3.00   -2.27
    2      C2      23.64  -0.027   -0.16    2.59   -1.94
    3      C3      23.65  -0.027   -0.16    2.59   -1.94
    4      C4      28.69  -0.018   -0.33    3.00   -2.27
    5      O5       6.48   0.075   -1.30    0.73   -0.51
 Added spheres:    13.90   0.008   -0.11    0.00    0.00
 --------------------------------------------------------------------

 **********************************************************************

            Population analysis using the SCF density.

 **********************************************************************

 Orbital symmetries:
       Occupied  (A) (A) (A) (A) (A) (A) (A) (A) (A) (A) (A) (A)
                 (A) (A) (A) (A) (A) (A) (A) (A)
       Virtual   (A) (A) (A) (A) (A) (A) (A) (A) (A) (A) (A) (A)
                 (A) (A) (A) (A) (A) (A) (A) (A) (A) (A) (A) (A)
                 (A) (A) (A) (A) (A) (A) (A) (A) (A) (A) (A) (A)
                 (A) (A) (A) (A) (A) (A) (A) (A) (A) (A) (A) (A)
                 (A) (A) (A) (A) (A) (A) (A) (A) (A) (A) (A) (A)
                 (A) (A) (A) (A) (A) (A)
 The electronic state is 1-A.
 Alpha  occ. eigenvalues --  -19.13716 -10.21664 -10.21662 -10.17313 -10.17302
 Alpha  occ. eigenvalues --   -1.03174  -0.76909  -0.72840  -0.59241  -0.58462
 Alpha  occ. eigenvalues --   -0.49414  -0.47878  -0.44671  -0.40893  -0.39205
 Alpha  occ. eigenvalues --   -0.34749  -0.34300  -0.32119  -0.31551  -0.25055
 Alpha virt. eigenvalues --    0.08780   0.10853   0.14598   0.15035   0.15633
 Alpha virt. eigenvalues --    0.16246   0.17754   0.19802   0.20105   0.21962
 Alpha virt. eigenvalues --    0.25471   0.29132   0.32598   0.52002   0.54449
 Alpha virt. eigenvalues --    0.54562   0.58066   0.58826   0.59117   0.63174
 Alpha virt. eigenvalues --    0.64768   0.69147   0.70995   0.77694   0.81976
 Alpha virt. eigenvalues --    0.83484   0.86551   0.86928   0.87019   0.90759
 Alpha virt. eigenvalues --    0.92599   0.94843   0.96203   1.02539   1.03842
 Alpha virt. eigenvalues --    1.06532   1.29565   1.33650   1.34024   1.40046
 Alpha virt. eigenvalues --    1.43696   1.64844   1.70255   1.77895   1.82526
 Alpha virt. eigenvalues --    1.85735   1.86144   1.89630   1.94881   1.97693
 Alpha virt. eigenvalues --    2.06015   2.07085   2.12160   2.12431   2.20550
 Alpha virt. eigenvalues --    2.25476   2.29329   2.38032   2.43355   2.47814
 Alpha virt. eigenvalues --    2.55033   2.64711   2.66696   2.69796   2.71418
 Alpha virt. eigenvalues --    2.97358
          Condensed to atoms (all electrons):
              1          2          3          4          5          6
     1  C    4.817985   0.368249  -0.067370  -0.072304   0.283898   0.368521
     2  C    0.368249   5.083368   0.379491  -0.067194  -0.059668  -0.053976
     3  C   -0.067370   0.379491   5.081947   0.368802  -0.059626  -0.002637
     4  C   -0.072304  -0.067194   0.368802   4.818238   0.283613  -0.002060
     5  O    0.283898  -0.059668  -0.059626   0.283613   8.194023  -0.044804
     6  H    0.368521  -0.053976  -0.002637  -0.002060  -0.044804   0.641313
     7  H    0.378561  -0.027513   0.004225   0.006722  -0.032182  -0.046110
     8  H   -0.030276   0.375210  -0.031071   0.002708   0.002363   0.005012
     9  H   -0.025856   0.363220  -0.029468   0.003873   0.002913  -0.003344
    10  H    0.002643  -0.031306   0.375364  -0.030435   0.002355   0.000010
    11  H    0.003943  -0.029416   0.362826  -0.025754   0.002950   0.000567
    12  H    0.006712   0.004284  -0.027559   0.378588  -0.032146  -0.000419
    13  H   -0.002019  -0.002861  -0.053945   0.368316  -0.044752   0.009038
              7          8          9         10         11         12
     1  C    0.378561  -0.030276  -0.025856   0.002643   0.003943   0.006712
     2  C   -0.027513   0.375210   0.363220  -0.031306  -0.029416   0.004284
     3  C    0.004225  -0.031071  -0.029468   0.375364   0.362826  -0.027559
     4  C    0.006722   0.002708   0.003873  -0.030435  -0.025754   0.378588
     5  O   -0.032182   0.002363   0.002913   0.002355   0.002950  -0.032146
     6  H   -0.046110   0.005012  -0.003344   0.000010   0.000567  -0.000419
     7  H    0.572115  -0.007651   0.002675  -0.000149  -0.000140  -0.000235
     8  H   -0.007651   0.569427  -0.034347  -0.009531   0.003777  -0.000151
     9  H    0.002675  -0.034347   0.572254   0.003816  -0.006613  -0.000140
    10  H   -0.000149  -0.009531   0.003816   0.569627  -0.034289  -0.007650
    11  H   -0.000140   0.003777  -0.006613  -0.034289   0.572466   0.002630
    12  H   -0.000235  -0.000151  -0.000140  -0.007650   0.002630   0.572023
    13  H   -0.000419   0.000009   0.000599   0.005039  -0.003205  -0.046041
             13
     1  C   -0.002019
     2  C   -0.002861
     3  C   -0.053945
     4  C    0.368316
     5  O   -0.044752
     6  H    0.009038
     7  H   -0.000419
     8  H    0.000009
     9  H    0.000599
    10  H    0.005039
    11  H   -0.003205
    12  H   -0.046041
    13  H    0.641428
 Mulliken atomic charges:
              1
     1  C   -0.032687
     2  C   -0.301888
     3  C   -0.300979
     4  C   -0.033113
     5  O   -0.498937
     6  H    0.128889
     7  H    0.150101
     8  H    0.154519
     9  H    0.150418
    10  H    0.154505
    11  H    0.150257
    12  H    0.150102
    13  H    0.128812
 Sum of Mulliken charges=   0.00000
 Atomic charges with hydrogens summed into heavy atoms:
              1
     1  C    0.246303
     2  C    0.003049
     3  C    0.003783
     4  C    0.245801
     5  O   -0.498937
     6  H    0.000000
     7  H    0.000000
     8  H    0.000000
     9  H    0.000000
    10  H    0.000000
    11  H    0.000000
    12  H    0.000000
    13  H    0.000000
 Sum of Mulliken charges=   0.00000
 Electronic spatial extent (au):  <R**2>=   374.3746
 Charge=     0.0000 electrons
 Dipole moment (field-independent basis, Debye):
    X=    -0.0017    Y=     1.7605    Z=     0.7010  Tot=     1.8949
 Quadrupole moment (field-independent basis, Debye-Ang):
   XX=   -28.5132   YY=   -34.2075   ZZ=   -30.8726
   XY=     0.0086   XZ=    -0.0046   YZ=    -0.8322
 Traceless Quadrupole moment (field-independent basis, Debye-Ang):
   XX=     2.6846   YY=    -3.0098   ZZ=     0.3252
   XY=     0.0086   XZ=    -0.0046   YZ=    -0.8322
 Octapole moment (field-independent basis, Debye-Ang**2):
  XXX=     0.0040  YYY=     0.7378  ZZZ=    -0.8665  XYY=    -0.0179
  XXY=    -3.5403  XXZ=    -1.5865  XZZ=     0.0123  YZZ=    -0.1044
  YYZ=     0.9936  XYZ=    -0.0091
 Hexadecapole moment (field-independent basis, Debye-Ang**3):
 XXXX=  -214.4502 YYYY=  -214.9874 ZZZZ=   -62.3998 XXXY=     0.0126
 XXXZ=    -0.0384 YYYX=     0.0154 YYYZ=     1.3641 ZZZX=     0.0133
 ZZZY=    -0.0694 XXYY=   -68.3586 XXZZ=   -44.9072 YYZZ=   -43.3855
 XXYZ=     2.2288 YYXZ=    -0.0203 ZZXY=     0.0000
 N-N= 1.900574279676D+02 E-N=-9.218368221902D+02  KE= 2.309964344067D+02
 1\1\GINC-KETIDE\SP\RB3LYP\Gen\C4H8O1\RZEPA\28-Nov-2004\0\\# RB3LYP/GEN
  GEOM=CHECKPOINT SCRF(IEFPCM,SOLVENT=THF)\\from SS.mol\\0,1\C,0,0.4753
 866028,0.0824876796,1.1386735976\C,0,-0.9058649734,-0.4958456166,0.758
 6578641\C,0,-0.8946265773,-0.4567234255,-0.7952431757\C,0,0.49586917,0
 .1284681439,-1.1250703224\O,0,0.8846226708,0.8679827964,0.0258351523\H
 ,0,1.1995544033,-0.7305192868,1.3185941751\H,0,0.4606826679,0.73177204
 58,2.0184835052\H,0,-1.7115806151,0.1290650578,1.155692646\H,0,-1.0458
 297061,-1.5065495077,1.1547355445\H,0,-1.6886505041,0.1956372521,-1.17
 12143756\H,0,-1.0377371323,-1.4445451415,-1.244365892\H,0,0.5017711727
 ,0.8115435434,-1.9790124006\H,0,1.2202230149,-0.680587022,-1.321702202
 5\\Version=x86-Linux-G03RevB.04\State=1-A\HF=-232.4487705\RMSD=5.484e-
 06\Dipole=-0.4545959,-0.5906619,-0.0162856\PG=C01 [X(C4H8O1)]\\@


 THERE IS SOMETHING FASCINATING ABOUT SCIENCE.
 ONE GETS SUCH WHOLESALE CONJECTURE OUT OF SUCH TRIFLING INVESTMENTS.

                                                       -- MARK TWAIN
 Job cpu time:  0 days  0 hours  0 minutes 47.8 seconds.
 File lengths (MBytes):  RWF=     30 Int=      0 D2E=      0 Chk=      7 Scr=      1
 Normal termination of Gaussian 03 at Sun Nov 28 16:49:06 2004.
