# Supplementary material
Source: publisher figshare collection journal article supplement (https://acs.figshare.com/ndownloader/files/5127205)
Supplement: Supplementary file 1 [file 5127205 › supporting_ja043819b/thf.xml]

<cml:molecule xmlns:cml="http://www.xml-cml.org/schema/cml2/core"
>
<cml:metadataList title="generated automatically from Openbabel">
<cml:metadata name="dc:creator" content="OpenBabel version 1-100.1"/>
<cml:metadata name="dc:description" content="Conversion of legacy filetype to CML"/>
<cml:metadata name="dc:identifier" content="Unknown"/>
<cml:metadata name="dc:content"/>
<cml:metadata name="dc:rights" content="unknown"/>
<cml:metadata name="dc:type" content="chemistry"/>
<cml:metadata name="dc:contributor" content="unknown"/>
<cml:metadata name="dc:creator" content="Openbabel V1-100.1"/>
<cml:metadata name="dc:date" content="Fri Dec 17 11:10:54 GMT 2004"/>
<cml:metadata name="cmlm:structure" content="yes"/>
</cml:metadataList>
<cml:identifier>
<cml:inchi>
1.12Beta/C4H8O/c1-2-4-5-3-1/h1-4H2
</cml:inchi>
</cml:identifier>
<cml:atomArray atomID="a1 a2 a3 a4 a5 a6 a7 a8 a9 a10 a11 a12 a13" elementType="C C C C O H H H H H H H H" formalCharge="0 0 0 0 0 0 0 0 0 0 0 0 0" x3="1.133400 0.775200 -0.779200 -1.130900 0.001400 1.325400 1.999400 1.164500 1.193400 -1.163400 -1.206400 -1.999100 -1.315500" y3="-0.469800 1.019200 1.015600 -0.473100 -1.204100 -0.680400 -0.803400 1.386300 1.648900 1.371500 1.650400 -0.812600 -0.679500" z3="0.155300 -0.047500 -0.052700 0.159200 -0.294700 1.221400 -0.423200 -1.002000 0.744100 -1.013500 0.729900 -0.412500 1.227500"/>
<cml:bondArray atomRef1="a1 a1 a1 a1 a2 a2 a2 a3 a3 a3 a4 a4 a4" atomRef2="a2 a5 a6 a7 a3 a8 a9 a4 a10 a11 a5 a12 a13" order="1 1 1 1 1 1 1 1 1 1 1 1 1"/>
</cml:molecule>
