# Supplementary material
Source: publisher figshare collection journal article supplement (https://acs.figshare.com/ndownloader/files/5127205)

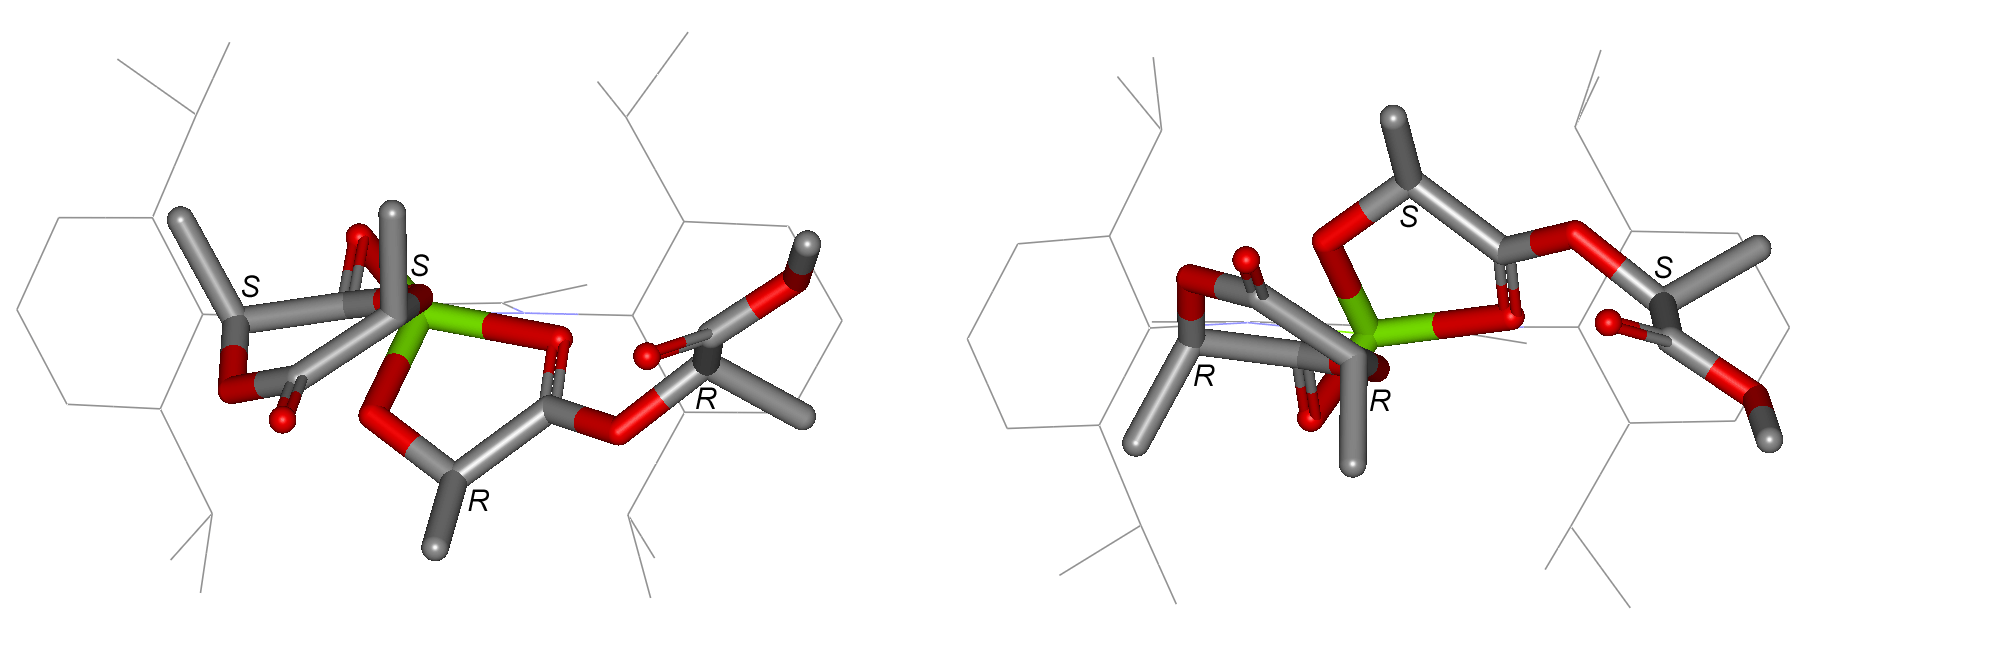

Supplement: Supplementary file 1 [file 5127205 › supporting_ja043819b/Figure1S.gif]

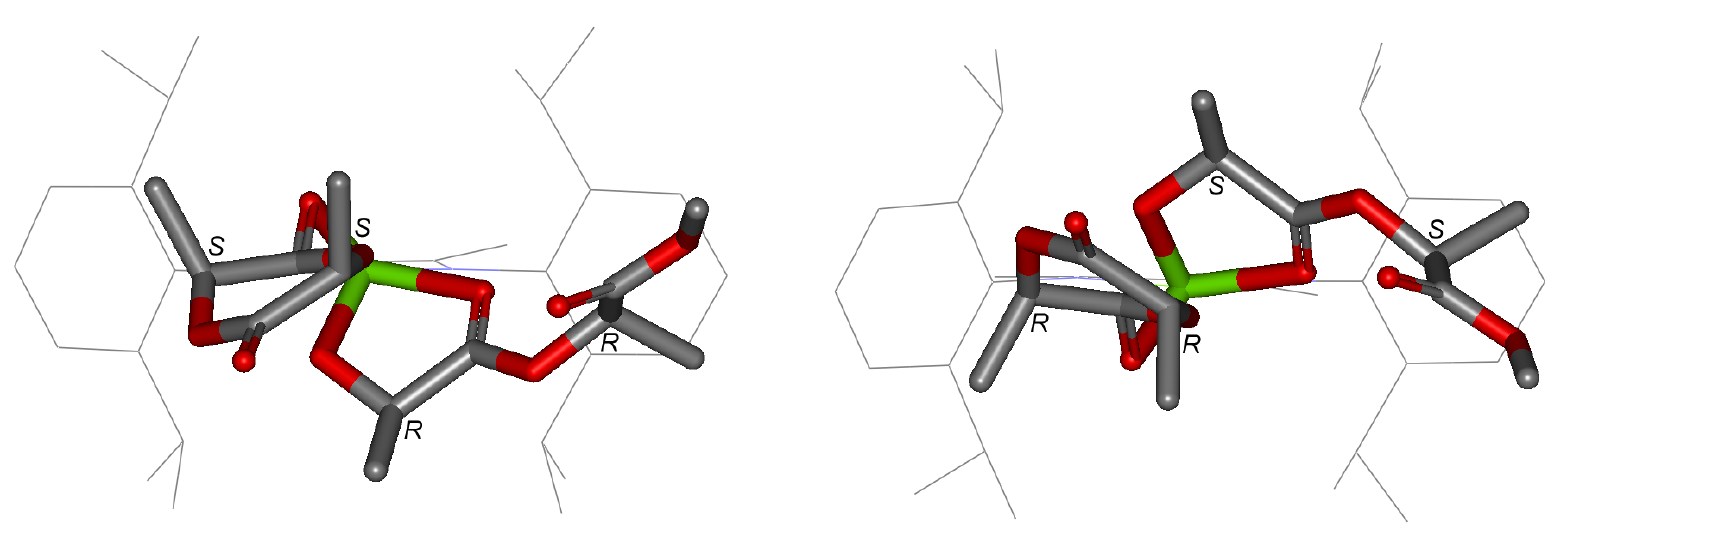

Supplement: Supplementary file 1 [file 5127205 › supporting_ja043819b/Figure1S.jpg]

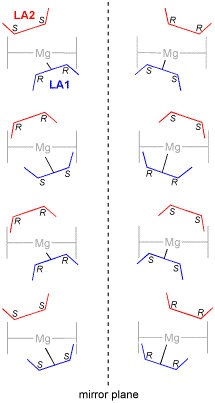

Supplement: Supplementary file 1 [file 5127205 › supporting_ja043819b/Figure2S.gif]

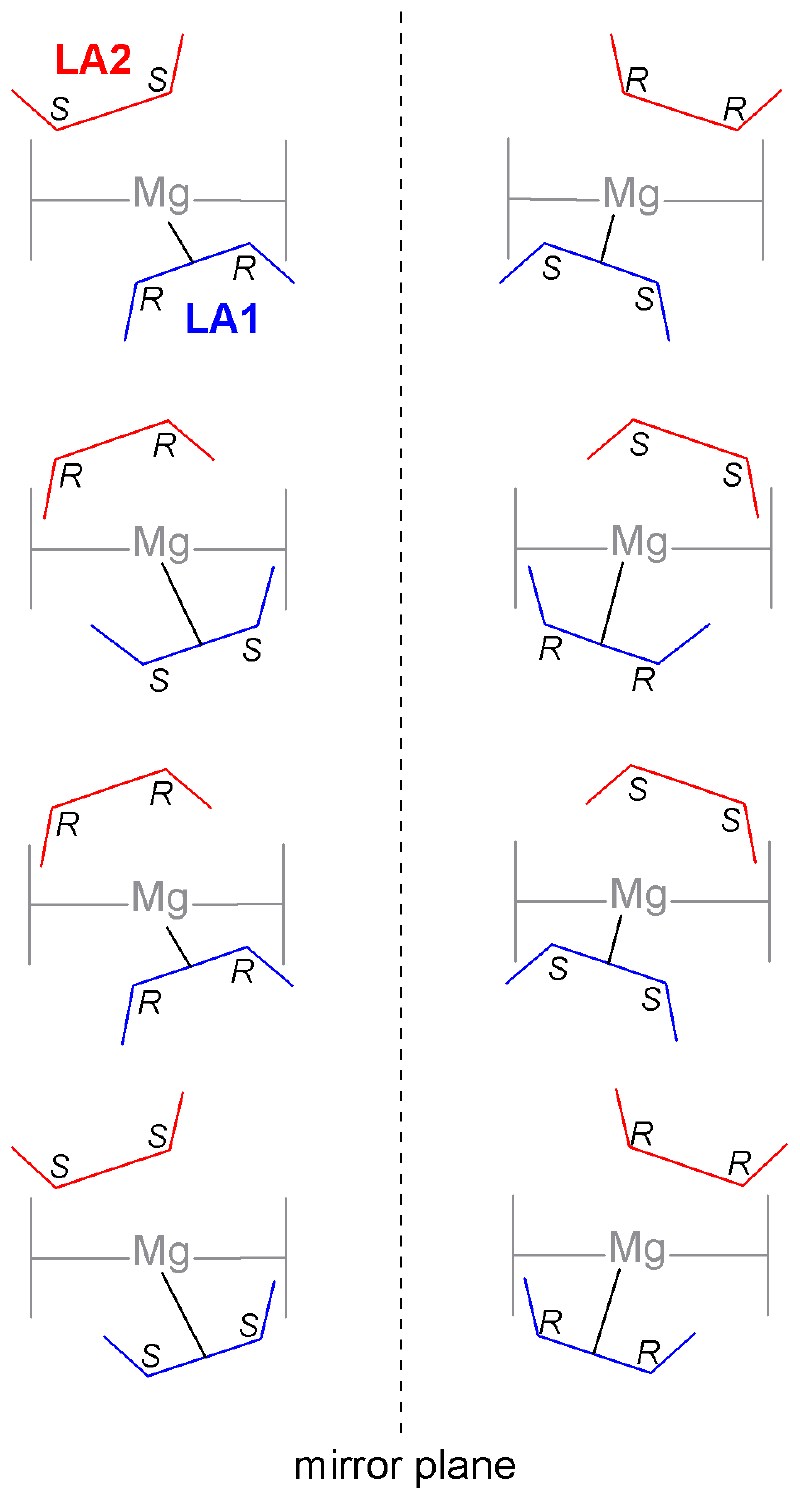

Supplement: Supplementary file 1 [file 5127205 › supporting_ja043819b/Figure2S.jpg]

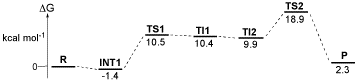

Supplement: Supplementary file 1 [file 5127205 › supporting_ja043819b/Scheme.gif]

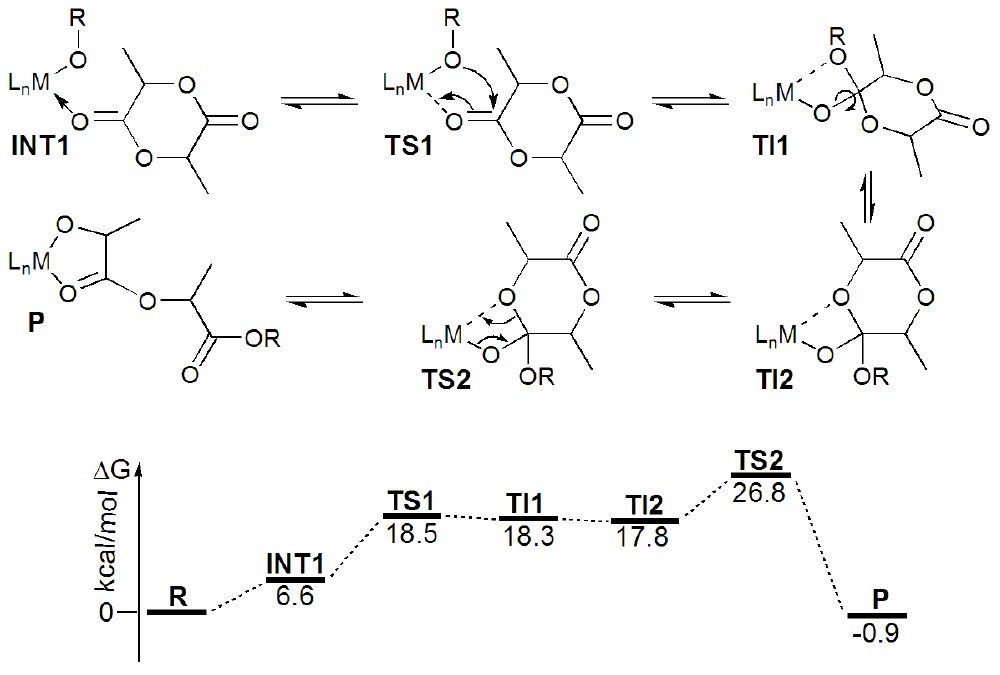

Supplement: Supplementary file 1 [file 5127205 › supporting_ja043819b/Scheme.jpg]
